# Supplementary material for: Discovery of several thousand highly diverse circular DNA viruses
Source: eLife journal article supplement (doi:10.7554/elife.51971), 2020-02-03
Supplement: fig2-data2 [file elife-51971-fig2-data2-v1.cys]

Archive with 83 entries (83 files):
- CytoscapeSession-2019_08_02-17_43/3.0.0.version
- CytoscapeSession-2019_08_02-17_43/networks/46-all_my_seqs_genbank_ssDNA1_domains_CRESS_capsid_fasta+Full+Network.xgmml
- CytoscapeSession-2019_08_02-17_43/views/62-305870-all_my_seqs_genbank_ssDNA1_domains_CRESS_capsid_fasta+Full+Network.xgmml
- CytoscapeSession-2019_08_02-17_43/views/305829-611629-all_my_seqs_genbank_ssDNA1_domains_CRESS_capsid_fasta+Full+Network%2D%2Dclustered.xgmml
- CytoscapeSession-2019_08_02-17_43/tables/62-all_my_seqs_genbank_ssDNA1_domains_CRESS_capsid_fasta+Full+Network/HIDDEN-org.cytoscape.model.CyEdge-62+hidden+edge.cytable
- CytoscapeSession-2019_08_02-17_43/tables/305829-all_my_seqs_genbank_ssDNA1_domains_CRESS_capsid_fasta+Full+Network%2D%2Dclustered/HIDDEN-org.cytoscape.model.CyNode-305829+hidden+node.cytable
- CytoscapeSession-2019_08_02-17_43/tables/46-all_my_seqs_genbank_ssDNA1_domains_CRESS_capsid_fasta+Full+Network/HIDDEN-org.cytoscape.model.CyNetwork-46+hidden+network.cytable
- CytoscapeSession-2019_08_02-17_43/tables/46-all_my_seqs_genbank_ssDNA1_domains_CRESS_capsid_fasta+Full+Network/LOCAL_ATTRS-org.cytoscape.model.CyNetwork-46+default+network.cytable
- CytoscapeSession-2019_08_02-17_43/tables/305829-all_my_seqs_genbank_ssDNA1_domains_CRESS_capsid_fasta+Full+Network%2D%2Dclustered/HIDDEN-org.cytoscape.model.CyNetwork-305829+hidden+network.cytable
- CytoscapeSession-2019_08_02-17_43/tables/305829-all_my_seqs_genbank_ssDNA1_domains_CRESS_capsid_fasta+Full+Network%2D%2Dclustered/org.baderlab.autoannotate.cluster-org.cytoscape.model.CyNetwork-org.baderlab.autoannotate.cluster.cytable
- CytoscapeSession-2019_08_02-17_43/tables/305829-all_my_seqs_genbank_ssDNA1_domains_CRESS_capsid_fasta+Full+Network%2D%2Dclustered/org.baderlab.autoannotate.annotationSet-org.cytoscape.model.CyNetwork-org.baderlab.autoannotate.annotationSet.cytable
- CytoscapeSession-2019_08_02-17_43/tables/global/305858-Properties.cytable
- CytoscapeSession-2019_08_02-17_43/tables/global/305840-EdgeProperties.cytable
- CytoscapeSession-2019_08_02-17_43/tables/305829-all_my_seqs_genbank_ssDNA1_domains_CRESS_capsid_fasta+Full+Network%2D%2Dclustered/LOCAL_ATTRS-org.cytoscape.model.CyEdge-all_my_seqs_genbank_ssDNA1_domains_CRESS_capsid_fasta+Full+Network%2D%2Dclustered+default+edge.cytable
- CytoscapeSession-2019_08_02-17_43/tables/46-all_my_seqs_genbank_ssDNA1_domains_CRESS_capsid_fasta+Full+Network/LOCAL_ATTRS-org.cytoscape.model.CyEdge-46+default+edge.cytable
- CytoscapeSession-2019_08_02-17_43/tables/46-all_my_seqs_genbank_ssDNA1_domains_CRESS_capsid_fasta+Full+Network/HIDDEN-org.cytoscape.model.CyEdge-46+hidden+edge.cytable
- CytoscapeSession-2019_08_02-17_43/tables/global/305842-NodeProperties.cytable
- CytoscapeSession-2019_08_02-17_43/tables/62-all_my_seqs_genbank_ssDNA1_domains_CRESS_capsid_fasta+Full+Network/HIDDEN-org.cytoscape.model.CyNode-62+hidden+node.cytable
- CytoscapeSession-2019_08_02-17_43/tables/62-all_my_seqs_genbank_ssDNA1_domains_CRESS_capsid_fasta+Full+Network/LOCAL_ATTRS-org.cytoscape.model.CyEdge-all_my_seqs_genbank_ssDNA1_domains_CRESS_capsid_fasta+Full+Network+default+edge.cytable
- CytoscapeSession-2019_08_02-17_43/tables/global/305847-Keywords.cytable
- CytoscapeSession-2019_08_02-17_43/tables/46-all_my_seqs_genbank_ssDNA1_domains_CRESS_capsid_fasta+Full+Network/SHARED_ATTRS-org.cytoscape.model.CyNode-46+shared+node.cytable
- CytoscapeSession-2019_08_02-17_43/tables/305829-all_my_seqs_genbank_ssDNA1_domains_CRESS_capsid_fasta+Full+Network%2D%2Dclustered/LOCAL_ATTRS-org.cytoscape.model.CyNode-all_my_seqs_genbank_ssDNA1_domains_CRESS_capsid_fasta+Full+Network%2D%2Dclustered+default+node.cytable
- CytoscapeSession-2019_08_02-17_43/tables/global/305848-NetworkMappings.cytable
- CytoscapeSession-2019_08_02-17_43/tables/62-all_my_seqs_genbank_ssDNA1_domains_CRESS_capsid_fasta+Full+Network/org.baderlab.autoannotate.annotationSet-org.cytoscape.model.CyNetwork-org.baderlab.autoannotate.annotationSet.cytable
- CytoscapeSession-2019_08_02-17_43/tables/62-all_my_seqs_genbank_ssDNA1_domains_CRESS_capsid_fasta+Full+Network/org.baderlab.autoannotate.cluster-org.cytoscape.model.CyNetwork-org.baderlab.autoannotate.cluster.cytable
- CytoscapeSession-2019_08_02-17_43/tables/305829-all_my_seqs_genbank_ssDNA1_domains_CRESS_capsid_fasta+Full+Network%2D%2Dclustered/HIDDEN-org.cytoscape.model.CyEdge-305829+hidden+edge.cytable
- CytoscapeSession-2019_08_02-17_43/tables/46-all_my_seqs_genbank_ssDNA1_domains_CRESS_capsid_fasta+Full+Network/HIDDEN-org.cytoscape.model.CyNode-46+hidden+node.cytable
- CytoscapeSession-2019_08_02-17_43/tables/global/898299-GeneMANIA.Views.cytable
- CytoscapeSession-2019_08_02-17_43/tables/62-all_my_seqs_genbank_ssDNA1_domains_CRESS_capsid_fasta+Full+Network/HIDDEN-org.cytoscape.model.CyNetwork-62+hidden+network.cytable
- CytoscapeSession-2019_08_02-17_43/tables/62-all_my_seqs_genbank_ssDNA1_domains_CRESS_capsid_fasta+Full+Network/LOCAL_ATTRS-org.cytoscape.model.CyNetwork-all_my_seqs_genbank_ssDNA1_domains_CRESS_capsid_fasta+Full+Network+default+network.cytable
- CytoscapeSession-2019_08_02-17_43/tables/305829-all_my_seqs_genbank_ssDNA1_domains_CRESS_capsid_fasta+Full+Network%2D%2Dclustered/LOCAL_ATTRS-org.cytoscape.model.CyNetwork-all_my_seqs_genbank_ssDNA1_domains_CRESS_capsid_fasta+Full+Network%2D%2Dclustered+default+network.cytable
- CytoscapeSession-2019_08_02-17_43/tables/46-all_my_seqs_genbank_ssDNA1_domains_CRESS_capsid_fasta+Full+Network/SHARED_ATTRS-org.cytoscape.model.CyEdge-46+shared+edge.cytable
- CytoscapeSession-2019_08_02-17_43/tables/62-all_my_seqs_genbank_ssDNA1_domains_CRESS_capsid_fasta+Full+Network/LOCAL_ATTRS-org.cytoscape.model.CyNode-all_my_seqs_genbank_ssDNA1_domains_CRESS_capsid_fasta+Full+Network+default+node.cytable
- CytoscapeSession-2019_08_02-17_43/tables/46-all_my_seqs_genbank_ssDNA1_domains_CRESS_capsid_fasta+Full+Network/LOCAL_ATTRS-org.cytoscape.model.CyNode-46+default+node.cytable
- CytoscapeSession-2019_08_02-17_43/tables/46-all_my_seqs_genbank_ssDNA1_domains_CRESS_capsid_fasta+Full+Network/SHARED_ATTRS-org.cytoscape.model.CyNetwork-46+shared+network.cytable
- CytoscapeSession-2019_08_02-17_43/tables/cytables.xml
- CytoscapeSession-2019_08_02-17_43/session_vizmap.xml
- CytoscapeSession-2019_08_02-17_43/properties/groupSettings.props
- CytoscapeSession-2019_08_02-17_43/properties/session_bookmarks.xml
- CytoscapeSession-2019_08_02-17_43/session_thumbnail.png
- CytoscapeSession-2019_08_02-17_43/apps/org.cytoscape.ding.customgraphicsmgr/1.png
- CytoscapeSession-2019_08_02-17_43/apps/org.cytoscape.ding.customgraphicsmgr/10.png
- CytoscapeSession-2019_08_02-17_43/apps/org.cytoscape.ding.customgraphicsmgr/11.png
- CytoscapeSession-2019_08_02-17_43/apps/org.cytoscape.ding.customgraphicsmgr/12.png
- CytoscapeSession-2019_08_02-17_43/apps/org.cytoscape.ding.customgraphicsmgr/13.png
- CytoscapeSession-2019_08_02-17_43/apps/org.cytoscape.ding.customgraphicsmgr/14.png
- CytoscapeSession-2019_08_02-17_43/apps/org.cytoscape.ding.customgraphicsmgr/15.png
- CytoscapeSession-2019_08_02-17_43/apps/org.cytoscape.ding.customgraphicsmgr/16.png
- CytoscapeSession-2019_08_02-17_43/apps/org.cytoscape.ding.customgraphicsmgr/17.png
- CytoscapeSession-2019_08_02-17_43/apps/org.cytoscape.ding.customgraphicsmgr/18.png
- CytoscapeSession-2019_08_02-17_43/apps/org.cytoscape.ding.customgraphicsmgr/19.png
- CytoscapeSession-2019_08_02-17_43/apps/org.cytoscape.ding.customgraphicsmgr/2.png
- CytoscapeSession-2019_08_02-17_43/apps/org.cytoscape.ding.customgraphicsmgr/20.png
- CytoscapeSession-2019_08_02-17_43/apps/org.cytoscape.ding.customgraphicsmgr/21.png
- CytoscapeSession-2019_08_02-17_43/apps/org.cytoscape.ding.customgraphicsmgr/22.png
- CytoscapeSession-2019_08_02-17_43/apps/org.cytoscape.ding.customgraphicsmgr/23.png
- CytoscapeSession-2019_08_02-17_43/apps/org.cytoscape.ding.customgraphicsmgr/24.png
- CytoscapeSession-2019_08_02-17_43/apps/org.cytoscape.ding.customgraphicsmgr/25.png
- CytoscapeSession-2019_08_02-17_43/apps/org.cytoscape.ding.customgraphicsmgr/26.png
- CytoscapeSession-2019_08_02-17_43/apps/org.cytoscape.ding.customgraphicsmgr/27.png
- CytoscapeSession-2019_08_02-17_43/apps/org.cytoscape.ding.customgraphicsmgr/28.png
- CytoscapeSession-2019_08_02-17_43/apps/org.cytoscape.ding.customgraphicsmgr/29.png
- CytoscapeSession-2019_08_02-17_43/apps/org.cytoscape.ding.customgraphicsmgr/3.png
- CytoscapeSession-2019_08_02-17_43/apps/org.cytoscape.ding.customgraphicsmgr/30.png
- CytoscapeSession-2019_08_02-17_43/apps/org.cytoscape.ding.customgraphicsmgr/31.png
- CytoscapeSession-2019_08_02-17_43/apps/org.cytoscape.ding.customgraphicsmgr/32.png
- CytoscapeSession-2019_08_02-17_43/apps/org.cytoscape.ding.customgraphicsmgr/4.png
- CytoscapeSession-2019_08_02-17_43/apps/org.cytoscape.ding.customgraphicsmgr/42.png
- CytoscapeSession-2019_08_02-17_43/apps/org.cytoscape.ding.customgraphicsmgr/43.png
- CytoscapeSession-2019_08_02-17_43/apps/org.cytoscape.ding.customgraphicsmgr/5.png
- CytoscapeSession-2019_08_02-17_43/apps/org.cytoscape.ding.customgraphicsmgr/6.png
- CytoscapeSession-2019_08_02-17_43/apps/org.cytoscape.ding.customgraphicsmgr/7.png
- CytoscapeSession-2019_08_02-17_43/apps/org.cytoscape.ding.customgraphicsmgr/8.png
- CytoscapeSession-2019_08_02-17_43/apps/org.cytoscape.ding.customgraphicsmgr/9.png
- CytoscapeSession-2019_08_02-17_43/apps/org.cytoscape.ding.customgraphicsmgr/image_metadata.props
- CytoscapeSession-2019_08_02-17_43/apps/org.cytoscape.swing-application/session_state.xml
- CytoscapeSession-2019_08_02-17_43/apps/org.cytoscape.swing-application/network_list.xml
- CytoscapeSession-2019_08_02-17_43/apps/org.cytoscape.filter/filters.json
- CytoscapeSession-2019_08_02-17_43/apps/org.cytoscape.filter/filterChains.json
- CytoscapeSession-2019_08_02-17_43/apps/org.cytoscape.browser/UnassignedTables.props
- CytoscapeSession-2019_08_02-17_43/apps/org.cytoscape.browser/EdgeTable.props
- CytoscapeSession-2019_08_02-17_43/apps/org.cytoscape.browser/NetworkTable.props
- CytoscapeSession-2019_08_02-17_43/apps/org.cytoscape.browser/NodeTable.props
