# Supplementary material for: Discovery of several thousand highly diverse circular DNA viruses
Source: eLife journal article supplement (doi:10.7554/elife.51971), 2020-02-03
Supplement: fig2-data2 [file elife-51971-fig2-data2-v1.cys › CytoscapeSession-2019_08_02-17_43/apps/org.cytoscape.browser/NodeTable.props]

all_my_seqs_genbank_ssDNA1_domains_CRESS_capsid_fasta Full Network default node	0	SUID	false
all_my_seqs_genbank_ssDNA1_domains_CRESS_capsid_fasta Full Network default node	1	selected	false
all_my_seqs_genbank_ssDNA1_domains_CRESS_capsid_fasta Full Network default node	2	shared name	true
all_my_seqs_genbank_ssDNA1_domains_CRESS_capsid_fasta Full Network default node	3	name	true
all_my_seqs_genbank_ssDNA1_domains_CRESS_capsid_fasta Full Network default node	4	__mclCluster	true
all_my_seqs_genbank_ssDNA1_domains_CRESS_capsid_fasta Full Network default node	5	Sequence Source	true
all_my_seqs_genbank_ssDNA1_domains_CRESS_capsid_fasta Full Network default node	6	Description	true
all_my_seqs_genbank_ssDNA1_domains_CRESS_capsid_fasta Full Network default node	7	Sequence Length	true
all_my_seqs_genbank_ssDNA1_domains_CRESS_capsid_fasta Full Network default node	8	Sequence	true
all_my_seqs_genbank_ssDNA1_domains_CRESS_capsid_fasta Full Network default node	9	seq_source	true
all_my_seqs_genbank_ssDNA1_domains_CRESS_capsid_fasta Full Network default node	10	domain	true
all_my_seqs_genbank_ssDNA1_domains_CRESS_capsid_fasta Full Network default node	11	bel.function	true
