# Supplementary material for: Discovery of several thousand highly diverse circular DNA viruses
Source: eLife journal article supplement (doi:10.7554/elife.51971), 2020-02-03
Supplement: fig2-data2 [file elife-51971-fig2-data2-v1.cys › CytoscapeSession-2019_08_02-17_43/apps/org.cytoscape.swing-application/network_list.xml]

<?xml version="1.0" encoding="UTF-8" standalone="yes"?>
<networkList>
    <network id="305829" order="1"/>
    <network id="62" order="0"/>
</networkList>
