# Supplementary material for: Discovery of several thousand highly diverse circular DNA viruses
Source: eLife journal article supplement (doi:10.7554/elife.51971), 2020-02-03
Supplement: fig2-data2 [file elife-51971-fig2-data2-v1.cys › CytoscapeSession-2019_08_02-17_43/networks/46-all_my_seqs_genbank_ssDNA1_domains_CRESS_capsid_fasta+Full+Network.xgmml]

<?xml version="1.0" encoding="UTF-8" standalone="yes"?>
<graph id="46" label="all_my_seqs_genbank_ssDNA1_domains_CRESS_capsid_fasta Full Network" cy:view="0" cy:registered="0" cy:documentVersion="3.0" xmlns:dc="http://purl.org/dc/elements/1.1/" xmlns:xlink="http://www.w3.org/1999/xlink" xmlns:rdf="http://www.w3.org/1999/02/22-rdf-syntax-ns#" xmlns:cy="http://www.cytoscape.org" xmlns="http://www.cs.rpi.edu/XGMML">
  <att>
    <graph id="62" label="all_my_seqs_genbank_ssDNA1_domains_CRESS_capsid_fasta Full Network" cy:registered="1">
      <node id="2109" label="zzz1000"/>
      <node id="2108" label="zzz1002"/>
      <node id="2107" label="zzz1003"/>
      <node id="2106" label="zzz1004"/>
      <node id="2105" label="zzz1008"/>
      <node id="2104" label="zzz1009"/>
      <node id="2103" label="zzz1010"/>
      <node id="2102" label="zzz1011"/>
      <node id="2101" label="zzz1012"/>
      <node id="2100" label="zzz1013"/>
      <node id="2099" label="zzz1015"/>
      <node id="2098" label="zzz1016"/>
      <node id="2097" label="zzz1017"/>
      <node id="2096" label="zzz1018"/>
      <node id="2095" label="zzz1019"/>
      <node id="2094" label="zzz1021"/>
      <node id="2093" label="zzz1022"/>
      <node id="2092" label="zzz1023"/>
      <node id="2091" label="zzz1025"/>
      <node id="2090" label="zzz1026"/>
      <node id="2089" label="zzz1027"/>
      <node id="2088" label="zzz1028"/>
      <node id="2087" label="zzz1030"/>
      <node id="2086" label="zzz1033"/>
      <node id="2085" label="zzz1034"/>
      <node id="2084" label="zzz1038"/>
      <node id="2083" label="zzz1041"/>
      <node id="2082" label="zzz1043"/>
      <node id="2081" label="zzz1044"/>
      <node id="2080" label="zzz1048"/>
      <node id="2079" label="zzz1052"/>
      <node id="2078" label="zzz1053"/>
      <node id="2077" label="zzz1054"/>
      <node id="2076" label="zzz1055"/>
      <node id="2075" label="zzz1056"/>
      <node id="2074" label="zzz1057"/>
      <node id="2073" label="zzz1058"/>
      <node id="2072" label="zzz1059"/>
      <node id="2071" label="zzz1060"/>
      <node id="2070" label="zzz1062"/>
      <node id="2069" label="zzz1063"/>
      <node id="2068" label="zzz1064"/>
      <node id="2067" label="zzz1065"/>
      <node id="2066" label="zzz1067"/>
      <node id="2065" label="zzz1068"/>
      <node id="2064" label="zzz1069"/>
      <node id="2063" label="zzz1070"/>
      <node id="2062" label="zzz1098"/>
      <node id="2061" label="zzz1099"/>
      <node id="2060" label="zzz1100"/>
      <node id="2059" label="zzz1106"/>
      <node id="2058" label="zzz1109"/>
      <node id="2057" label="zzz1110"/>
      <node id="2056" label="zzz1111"/>
      <node id="2055" label="zzz1112"/>
      <node id="2054" label="zzz1113"/>
      <node id="2053" label="zzz1115"/>
      <node id="2052" label="zzz1118"/>
      <node id="2051" label="zzz1119"/>
      <node id="2050" label="zzz1120"/>
      <node id="2049" label="zzz1122"/>
      <node id="2048" label="zzz1123"/>
      <node id="2047" label="zzz1128"/>
      <node id="2046" label="zzz1129"/>
      <node id="2045" label="zzz1130"/>
      <node id="2044" label="zzz1132"/>
      <node id="2043" label="zzz1133"/>
      <node id="2042" label="zzz1135"/>
      <node id="2041" label="zzz1136"/>
      <node id="2040" label="zzz1137"/>
      <node id="2039" label="zzz1139"/>
      <node id="2038" label="zzz1141"/>
      <node id="2037" label="zzz1143"/>
      <node id="2036" label="zzz1144"/>
      <node id="2035" label="zzz1146"/>
      <node id="2034" label="zzz1147"/>
      <node id="2033" label="zzz1152"/>
      <node id="2032" label="zzz1153"/>
      <node id="2031" label="zzz1156"/>
      <node id="2030" label="zzz1157"/>
      <node id="2029" label="zzz1159"/>
      <node id="2028" label="zzz1160"/>
      <node id="2027" label="zzz1162"/>
      <node id="2026" label="zzz1165"/>
      <node id="2025" label="zzz1168"/>
      <node id="2024" label="zzz1169"/>
      <node id="2023" label="zzz1171"/>
      <node id="2022" label="zzz1172"/>
      <node id="2021" label="zzz1175"/>
      <node id="2020" label="zzz1176"/>
      <node id="2019" label="zzz1178"/>
      <node id="2018" label="zzz1180"/>
      <node id="2017" label="zzz1182"/>
      <node id="2016" label="zzz1184"/>
      <node id="2015" label="zzz1185"/>
      <node id="2014" label="zzz1189"/>
      <node id="2013" label="zzz1190"/>
      <node id="2012" label="zzz1192"/>
      <node id="2011" label="zzz1194"/>
      <node id="2010" label="zzz1195"/>
      <node id="2009" label="zzz1196"/>
      <node id="2008" label="zzz1197"/>
      <node id="2007" label="zzz1198"/>
      <node id="2006" label="zzz1199"/>
      <node id="2005" label="zzz1200"/>
      <node id="2004" label="zzz1201"/>
      <node id="2003" label="zzz1202"/>
      <node id="2002" label="zzz1203"/>
      <node id="2001" label="zzz1204"/>
      <node id="2000" label="zzz1205"/>
      <node id="1999" label="zzz1207"/>
      <node id="1998" label="zzz1208"/>
      <node id="1997" label="zzz1209"/>
      <node id="1996" label="zzz1210"/>
      <node id="1995" label="zzz1214"/>
      <node id="1994" label="zzz1215"/>
      <node id="1993" label="zzz1216"/>
      <node id="1992" label="zzz1217"/>
      <node id="1991" label="zzz1218"/>
      <node id="1990" label="zzz1219"/>
      <node id="1989" label="zzz1221"/>
      <node id="1988" label="zzz1223"/>
      <node id="1987" label="zzz1225"/>
      <node id="1986" label="zzz1226"/>
      <node id="1985" label="zzz1227"/>
      <node id="1984" label="zzz1228"/>
      <node id="1983" label="zzz1230"/>
      <node id="1982" label="zzz1233"/>
      <node id="1981" label="zzz1234"/>
      <node id="1980" label="zzz1235"/>
      <node id="1979" label="zzz1236"/>
      <node id="1978" label="zzz1237"/>
      <node id="1977" label="zzz1240"/>
      <node id="1976" label="zzz1242"/>
      <node id="1975" label="zzz1244"/>
      <node id="1974" label="zzz1245"/>
      <node id="1973" label="zzz1247"/>
      <node id="1972" label="zzz1248"/>
      <node id="1971" label="zzz1249"/>
      <node id="1970" label="zzz1250"/>
      <node id="1969" label="zzz1251"/>
      <node id="1968" label="zzz1254"/>
      <node id="1967" label="zzz1255"/>
      <node id="1966" label="zzz1257"/>
      <node id="1965" label="zzz1258"/>
      <node id="1964" label="zzz1260"/>
      <node id="1963" label="zzz1261"/>
      <node id="1962" label="zzz1265"/>
      <node id="1961" label="zzz1266"/>
      <node id="1960" label="zzz1268"/>
      <node id="1959" label="zzz1269"/>
      <node id="1958" label="zzz1272"/>
      <node id="1957" label="zzz1273"/>
      <node id="1956" label="zzz1274"/>
      <node id="1955" label="zzz1275"/>
      <node id="1954" label="zzz1276"/>
      <node id="1953" label="zzz1277"/>
      <node id="1952" label="zzz1278"/>
      <node id="1951" label="zzz1279"/>
      <node id="1950" label="zzz1280"/>
      <node id="1949" label="zzz1283"/>
      <node id="1948" label="zzz1284"/>
      <node id="1947" label="zzz1285"/>
      <node id="1946" label="zzz1288"/>
      <node id="1945" label="zzz1289"/>
      <node id="1944" label="zzz1292"/>
      <node id="1943" label="zzz1293"/>
      <node id="1942" label="zzz1294"/>
      <node id="1941" label="zzz1296"/>
      <node id="1940" label="zzz1298"/>
      <node id="1939" label="zzz1303"/>
      <node id="1938" label="zzz1304"/>
      <node id="1937" label="zzz1307"/>
      <node id="1936" label="zzz1309"/>
      <node id="1935" label="zzz1311"/>
      <node id="1934" label="zzz1312"/>
      <node id="1933" label="zzz1314"/>
      <node id="1932" label="zzz1316"/>
      <node id="1931" label="zzz1318"/>
      <node id="1930" label="zzz1319"/>
      <node id="1929" label="zzz1322"/>
      <node id="1928" label="zzz1324"/>
      <node id="1927" label="zzz1325"/>
      <node id="1926" label="zzz1326"/>
      <node id="1925" label="zzz1327"/>
      <node id="1924" label="zzz1329"/>
      <node id="1923" label="zzz1330"/>
      <node id="1922" label="zzz1331"/>
      <node id="1921" label="zzz1332"/>
      <node id="1920" label="zzz1333"/>
      <node id="1919" label="zzz1334"/>
      <node id="1918" label="zzz1335"/>
      <node id="1917" label="zzz1338"/>
      <node id="1916" label="zzz1339"/>
      <node id="1915" label="zzz1341"/>
      <node id="1914" label="zzz1343"/>
      <node id="1913" label="zzz1344"/>
      <node id="1912" label="zzz1346"/>
      <node id="1911" label="zzz1347"/>
      <node id="1910" label="zzz1348"/>
      <node id="1909" label="zzz1349"/>
      <node id="1908" label="zzz1350"/>
      <node id="1907" label="zzz1352"/>
      <node id="1906" label="zzz1354"/>
      <node id="1905" label="zzz1355"/>
      <node id="1904" label="zzz1356"/>
      <node id="1903" label="zzz1357"/>
      <node id="1902" label="zzz1358"/>
      <node id="1901" label="zzz1359"/>
      <node id="1900" label="zzz1360"/>
      <node id="1899" label="zzz1361"/>
      <node id="1898" label="zzz1363"/>
      <node id="1897" label="zzz1365"/>
      <node id="1896" label="zzz1368"/>
      <node id="1895" label="zzz1371"/>
      <node id="1894" label="zzz1372"/>
      <node id="1893" label="zzz1373"/>
      <node id="1892" label="zzz1374"/>
      <node id="1891" label="zzz1376"/>
      <node id="1890" label="zzz1377"/>
      <node id="1889" label="zzz1378"/>
      <node id="1888" label="zzz1379"/>
      <node id="1887" label="zzz1381"/>
      <node id="1886" label="zzz1383"/>
      <node id="1885" label="zzz1385"/>
      <node id="1884" label="zzz1386"/>
      <node id="1883" label="zzz1387"/>
      <node id="1882" label="zzz1388"/>
      <node id="1881" label="zzz1390"/>
      <node id="1880" label="zzz1391"/>
      <node id="1879" label="zzz1392"/>
      <node id="1878" label="zzz1393"/>
      <node id="1877" label="zzz1395"/>
      <node id="1876" label="zzz1396"/>
      <node id="1875" label="zzz1397"/>
      <node id="1874" label="zzz1398"/>
      <node id="1873" label="zzz1399"/>
      <node id="1872" label="zzz1400"/>
      <node id="1871" label="zzz1401"/>
      <node id="1870" label="zzz1402"/>
      <node id="1869" label="zzz1403"/>
      <node id="1868" label="zzz1406"/>
      <node id="1867" label="zzz1407"/>
      <node id="1866" label="zzz1409"/>
      <node id="1865" label="zzz1411"/>
      <node id="1864" label="zzz1413"/>
      <node id="1863" label="zzz1414"/>
      <node id="1862" label="zzz1415"/>
      <node id="1861" label="zzz1416"/>
      <node id="1860" label="zzz1417"/>
      <node id="1859" label="zzz1418"/>
      <node id="1858" label="zzz1419"/>
      <node id="1857" label="zzz1420"/>
      <node id="1856" label="zzz1421"/>
      <node id="1855" label="zzz1422"/>
      <node id="1854" label="zzz1424"/>
      <node id="1853" label="zzz1425"/>
      <node id="1852" label="zzz1427"/>
      <node id="1851" label="zzz1428"/>
      <node id="1850" label="zzz1429"/>
      <node id="1849" label="zzz1430"/>
      <node id="1848" label="zzz1431"/>
      <node id="1847" label="zzz1435"/>
      <node id="1846" label="zzz1436"/>
      <node id="1845" label="zzz1437"/>
      <node id="1844" label="zzz1438"/>
      <node id="1843" label="zzz1439"/>
      <node id="1842" label="zzz1440"/>
      <node id="1841" label="zzz1441"/>
      <node id="1840" label="zzz1442"/>
      <node id="1839" label="zzz1443"/>
      <node id="1838" label="zzz1444"/>
      <node id="1837" label="zzz1445"/>
      <node id="1836" label="zzz1446"/>
      <node id="1835" label="zzz1447"/>
      <node id="1834" label="zzz1448"/>
      <node id="1833" label="zzz1449"/>
      <node id="1832" label="zzz1450"/>
      <node id="1831" label="zzz1451"/>
      <node id="1830" label="zzz1452"/>
      <node id="1829" label="zzz1453"/>
      <node id="1828" label="zzz1454"/>
      <node id="1827" label="zzz1455"/>
      <node id="1826" label="zzz1456"/>
      <node id="1825" label="zzz1457"/>
      <node id="1824" label="zzz1458"/>
      <node id="1823" label="zzz1459"/>
      <node id="1822" label="zzz1460"/>
      <node id="1821" label="zzz1462"/>
      <node id="1820" label="zzz1464"/>
      <node id="1819" label="zzz1466"/>
      <node id="1818" label="zzz1469"/>
      <node id="1817" label="zzz1471"/>
      <node id="1816" label="zzz1475"/>
      <node id="1815" label="zzz1476"/>
      <node id="1814" label="zzz1477"/>
      <node id="1813" label="zzz1478"/>
      <node id="1812" label="zzz1480"/>
      <node id="1811" label="zzz1481"/>
      <node id="1810" label="zzz1482"/>
      <node id="1809" label="zzz1483"/>
      <node id="1808" label="zzz1484"/>
      <node id="1807" label="zzz1485"/>
      <node id="1806" label="zzz1486"/>
      <node id="1805" label="zzz1487"/>
      <node id="1804" label="zzz1488"/>
      <node id="1803" label="zzz1489"/>
      <node id="1802" label="zzz1490"/>
      <node id="1801" label="zzz1491"/>
      <node id="1800" label="zzz1492"/>
      <node id="1799" label="zzz1493"/>
      <node id="1798" label="zzz1494"/>
      <node id="1797" label="zzz1495"/>
      <node id="1796" label="zzz1496"/>
      <node id="1795" label="zzz1497"/>
      <node id="1794" label="zzz1498"/>
      <node id="1793" label="zzz1499"/>
      <node id="1792" label="zzz1500"/>
      <node id="1791" label="zzz1501"/>
      <node id="1790" label="zzz1502"/>
      <node id="1789" label="zzz1503"/>
      <node id="1788" label="zzz1504"/>
      <node id="1787" label="zzz1516"/>
      <node id="1786" label="zzz1517"/>
      <node id="1785" label="zzz1518"/>
      <node id="1784" label="zzz1519"/>
      <node id="1783" label="zzz1520"/>
      <node id="1782" label="zzz1521"/>
      <node id="1781" label="zzz1522"/>
      <node id="1780" label="zzz1523"/>
      <node id="1779" label="zzz1524"/>
      <node id="1778" label="zzz1525"/>
      <node id="1777" label="zzz1526"/>
      <node id="1776" label="zzz1527"/>
      <node id="1775" label="zzz1529"/>
      <node id="1774" label="zzz1530"/>
      <node id="1773" label="zzz1532"/>
      <node id="1772" label="zzz1533"/>
      <node id="1771" label="zzz1535"/>
      <node id="1770" label="zzz1536"/>
      <node id="1769" label="zzz1540"/>
      <node id="1768" label="zzz1541"/>
      <node id="1767" label="zzz1542"/>
      <node id="1766" label="zzz1543"/>
      <node id="1765" label="zzz1545"/>
      <node id="1764" label="zzz1546"/>
      <node id="1763" label="zzz1548"/>
      <node id="1762" label="zzz1551"/>
      <node id="1761" label="zzz1552"/>
      <node id="1760" label="zzz1553"/>
      <node id="1759" label="zzz1554"/>
      <node id="1758" label="zzz1555"/>
      <node id="1757" label="zzz1556"/>
      <node id="1756" label="zzz1557"/>
      <node id="1755" label="zzz1558"/>
      <node id="1754" label="zzz1559"/>
      <node id="1753" label="zzz1560"/>
      <node id="1752" label="zzz1561"/>
      <node id="1751" label="zzz1562"/>
      <node id="1750" label="zzz1563"/>
      <node id="1749" label="zzz1564"/>
      <node id="1748" label="zzz1565"/>
      <node id="1747" label="zzz1566"/>
      <node id="1746" label="zzz1567"/>
      <node id="1745" label="zzz1568"/>
      <node id="1744" label="zzz1569"/>
      <node id="1743" label="zzz1570"/>
      <node id="1742" label="zzz1571"/>
      <node id="1741" label="zzz1572"/>
      <node id="1740" label="zzz1573"/>
      <node id="1739" label="zzz1574"/>
      <node id="1738" label="zzz1575"/>
      <node id="1737" label="zzz1576"/>
      <node id="1736" label="zzz1577"/>
      <node id="1735" label="zzz1578"/>
      <node id="1734" label="zzz1579"/>
      <node id="1733" label="zzz1580"/>
      <node id="1732" label="zzz1581"/>
      <node id="1731" label="zzz1582"/>
      <node id="1730" label="zzz1583"/>
      <node id="1729" label="zzz1584"/>
      <node id="1728" label="zzz1585"/>
      <node id="1727" label="zzz1586"/>
      <node id="1726" label="zzz1587"/>
      <node id="1725" label="zzz1588"/>
      <node id="1724" label="zzz1589"/>
      <node id="1723" label="zzz1590"/>
      <node id="1722" label="zzz1591"/>
      <node id="1721" label="zzz1592"/>
      <node id="1720" label="zzz1593"/>
      <node id="1719" label="zzz1594"/>
      <node id="1718" label="zzz1595"/>
      <node id="1717" label="zzz1596"/>
      <node id="1716" label="zzz1597"/>
      <node id="1715" label="zzz1598"/>
      <node id="1714" label="zzz1599"/>
      <node id="1713" label="zzz1600"/>
      <node id="1712" label="zzz1601"/>
      <node id="1711" label="zzz1602"/>
      <node id="1710" label="zzz1603"/>
      <node id="1709" label="zzz1604"/>
      <node id="1708" label="zzz1605"/>
      <node id="1707" label="zzz1606"/>
      <node id="1706" label="zzz1607"/>
      <node id="1705" label="zzz1608"/>
      <node id="1704" label="zzz1609"/>
      <node id="1703" label="zzz1610"/>
      <node id="1702" label="zzz1611"/>
      <node id="1701" label="zzz1612"/>
      <node id="1700" label="zzz1613"/>
      <node id="1699" label="zzz1614"/>
      <node id="1698" label="zzz1615"/>
      <node id="1697" label="zzz1616"/>
      <node id="1696" label="zzz1617"/>
      <node id="1695" label="zzz1618"/>
      <node id="1694" label="zzz1619"/>
      <node id="1693" label="zzz1620"/>
      <node id="1692" label="zzz1621"/>
      <node id="1691" label="zzz1622"/>
      <node id="1690" label="zzz1623"/>
      <node id="1689" label="zzz1624"/>
      <node id="1688" label="zzz1625"/>
      <node id="1687" label="zzz1626"/>
      <node id="1686" label="zzz1627"/>
      <node id="1685" label="zzz1628"/>
      <node id="1684" label="zzz1629"/>
      <node id="1683" label="zzz1630"/>
      <node id="1682" label="zzz1631"/>
      <node id="1681" label="zzz1632"/>
      <node id="1680" label="zzz1633"/>
      <node id="1679" label="zzz1634"/>
      <node id="1678" label="zzz1635"/>
      <node id="1677" label="zzz1636"/>
      <node id="1676" label="zzz1637"/>
      <node id="1675" label="zzz1638"/>
      <node id="1674" label="zzz1639"/>
      <node id="1673" label="zzz1640"/>
      <node id="1672" label="zzz1641"/>
      <node id="1671" label="zzz1642"/>
      <node id="1670" label="zzz1643"/>
      <node id="1669" label="zzz1644"/>
      <node id="1668" label="zzz1645"/>
      <node id="1667" label="zzz1646"/>
      <node id="1666" label="zzz1647"/>
      <node id="1665" label="zzz1648"/>
      <node id="1664" label="zzz1649"/>
      <node id="1663" label="zzz1650"/>
      <node id="1662" label="zzz1651"/>
      <node id="1661" label="zzz1652"/>
      <node id="1660" label="zzz1653"/>
      <node id="1659" label="zzz1654"/>
      <node id="1658" label="zzz1655"/>
      <node id="1657" label="zzz1656"/>
      <node id="1656" label="zzz1657"/>
      <node id="1655" label="zzz1658"/>
      <node id="1654" label="zzz1659"/>
      <node id="1653" label="zzz1660"/>
      <node id="1652" label="zzz1661"/>
      <node id="1651" label="zzz1662"/>
      <node id="1650" label="zzz1663"/>
      <node id="1649" label="zzz1664"/>
      <node id="1648" label="zzz1665"/>
      <node id="1647" label="zzz1666"/>
      <node id="1646" label="zzz1667"/>
      <node id="1645" label="zzz1668"/>
      <node id="1644" label="zzz1669"/>
      <node id="1643" label="zzz1670"/>
      <node id="1642" label="zzz1671"/>
      <node id="1641" label="zzz1672"/>
      <node id="1640" label="zzz1673"/>
      <node id="1639" label="zzz1674"/>
      <node id="1638" label="zzz1675"/>
      <node id="1637" label="zzz1676"/>
      <node id="1636" label="zzz1677"/>
      <node id="1635" label="zzz1678"/>
      <node id="1634" label="zzz1679"/>
      <node id="1633" label="zzz1680"/>
      <node id="1632" label="zzz1681"/>
      <node id="1631" label="zzz1682"/>
      <node id="1630" label="zzz1683"/>
      <node id="1629" label="zzz1684"/>
      <node id="1628" label="zzz1685"/>
      <node id="1627" label="zzz1686"/>
      <node id="1626" label="zzz1687"/>
      <node id="1625" label="zzz1688"/>
      <node id="1624" label="zzz1689"/>
      <node id="1623" label="zzz1690"/>
      <node id="1622" label="zzz1691"/>
      <node id="1621" label="zzz1692"/>
      <node id="1620" label="zzz1693"/>
      <node id="1619" label="zzz1694"/>
      <node id="1618" label="zzz1695"/>
      <node id="1617" label="zzz1696"/>
      <node id="1616" label="zzz1697"/>
      <node id="1615" label="zzz1698"/>
      <node id="1614" label="zzz1699"/>
      <node id="1613" label="zzz1700"/>
      <node id="1612" label="zzz1701"/>
      <node id="1611" label="zzz1702"/>
      <node id="1610" label="zzz1703"/>
      <node id="1609" label="zzz1704"/>
      <node id="1608" label="zzz1705"/>
      <node id="1607" label="zzz1706"/>
      <node id="1606" label="zzz1707"/>
      <node id="1605" label="zzz1708"/>
      <node id="1604" label="zzz1709"/>
      <node id="1603" label="zzz1710"/>
      <node id="1602" label="zzz1711"/>
      <node id="1601" label="zzz1712"/>
      <node id="1600" label="zzz1713"/>
      <node id="1599" label="zzz1714"/>
      <node id="1598" label="zzz1715"/>
      <node id="1597" label="zzz1716"/>
      <node id="1596" label="zzz1717"/>
      <node id="1595" label="zzz1718"/>
      <node id="1594" label="zzz1719"/>
      <node id="1593" label="zzz1720"/>
      <node id="1592" label="zzz1721"/>
      <node id="1591" label="zzz1722"/>
      <node id="1590" label="zzz1723"/>
      <node id="1589" label="zzz1724"/>
      <node id="1588" label="zzz1725"/>
      <node id="1587" label="zzz1726"/>
      <node id="1586" label="zzz1727"/>
      <node id="1585" label="zzz1728"/>
      <node id="1584" label="zzz1729"/>
      <node id="1583" label="zzz1730"/>
      <node id="1582" label="zzz1731"/>
      <node id="1581" label="zzz1732"/>
      <node id="1580" label="zzz1733"/>
      <node id="1579" label="zzz1734"/>
      <node id="1578" label="zzz1735"/>
      <node id="1577" label="zzz1736"/>
      <node id="1576" label="zzz1737"/>
      <node id="1575" label="zzz1738"/>
      <node id="1574" label="zzz1739"/>
      <node id="1573" label="zzz1740"/>
      <node id="1572" label="zzz1741"/>
      <node id="1571" label="zzz1742"/>
      <node id="1570" label="zzz1743"/>
      <node id="1569" label="zzz1744"/>
      <node id="1568" label="zzz1745"/>
      <node id="1567" label="zzz1746"/>
      <node id="1566" label="zzz1747"/>
      <node id="1565" label="zzz1748"/>
      <node id="1564" label="zzz1749"/>
      <node id="1563" label="zzz1750"/>
      <node id="1562" label="zzz1751"/>
      <node id="1561" label="zzz1752"/>
      <node id="1560" label="zzz1753"/>
      <node id="1559" label="zzz1754"/>
      <node id="1558" label="zzz1755"/>
      <node id="1557" label="zzz1756"/>
      <node id="1556" label="zzz1757"/>
      <node id="1555" label="zzz1758"/>
      <node id="1554" label="zzz1759"/>
      <node id="1553" label="zzz1760"/>
      <node id="1552" label="zzz1761"/>
      <node id="1551" label="zzz1762"/>
      <node id="1550" label="zzz1763"/>
      <node id="1549" label="zzz1764"/>
      <node id="1548" label="zzz1765"/>
      <node id="1547" label="zzz1766"/>
      <node id="1546" label="zzz1767"/>
      <node id="1545" label="zzz1768"/>
      <node id="1544" label="zzz1769"/>
      <node id="1543" label="zzz1770"/>
      <node id="1542" label="zzz1771"/>
      <node id="1541" label="zzz1772"/>
      <node id="1540" label="zzz1773"/>
      <node id="1539" label="zzz1774"/>
      <node id="1538" label="zzz1775"/>
      <node id="1537" label="zzz1776"/>
      <node id="1536" label="zzz1777"/>
      <node id="1535" label="zzz1778"/>
      <node id="1534" label="zzz1779"/>
      <node id="1533" label="zzz1780"/>
      <node id="1532" label="zzz1781"/>
      <node id="1531" label="zzz1782"/>
      <node id="1530" label="zzz1783"/>
      <node id="1529" label="zzz1784"/>
      <node id="1528" label="zzz1785"/>
      <node id="1527" label="zzz1786"/>
      <node id="1526" label="zzz1787"/>
      <node id="1525" label="zzz1788"/>
      <node id="1524" label="zzz1789"/>
      <node id="1523" label="zzz1790"/>
      <node id="1522" label="zzz1791"/>
      <node id="1521" label="zzz1792"/>
      <node id="1520" label="zzz1793"/>
      <node id="1519" label="zzz1794"/>
      <node id="1518" label="zzz1795"/>
      <node id="1517" label="zzz1796"/>
      <node id="1516" label="zzz1797"/>
      <node id="1515" label="zzz1798"/>
      <node id="1514" label="zzz1799"/>
      <node id="1513" label="zzz1800"/>
      <node id="1512" label="zzz1801"/>
      <node id="1511" label="zzz1802"/>
      <node id="1510" label="zzz1803"/>
      <node id="1509" label="zzz1804"/>
      <node id="1508" label="zzz1805"/>
      <node id="1507" label="zzz1806"/>
      <node id="1506" label="zzz1807"/>
      <node id="1505" label="zzz1808"/>
      <node id="1504" label="zzz1809"/>
      <node id="1503" label="zzz1810"/>
      <node id="1502" label="zzz1811"/>
      <node id="1501" label="zzz1812"/>
      <node id="1500" label="zzz1813"/>
      <node id="1499" label="zzz1814"/>
      <node id="1498" label="zzz1815"/>
      <node id="1497" label="zzz1816"/>
      <node id="1496" label="zzz1817"/>
      <node id="1495" label="zzz1818"/>
      <node id="1494" label="zzz1819"/>
      <node id="1493" label="zzz1820"/>
      <node id="1492" label="zzz1821"/>
      <node id="1491" label="zzz1822"/>
      <node id="1490" label="zzz1823"/>
      <node id="1489" label="zzz1824"/>
      <node id="1488" label="zzz1825"/>
      <node id="1487" label="zzz1826"/>
      <node id="1486" label="zzz1827"/>
      <node id="1485" label="zzz1828"/>
      <node id="1484" label="zzz1829"/>
      <node id="1483" label="zzz1830"/>
      <node id="1482" label="zzz1831"/>
      <node id="1481" label="zzz1832"/>
      <node id="1480" label="zzz1833"/>
      <node id="1479" label="zzz1834"/>
      <node id="1478" label="zzz1835"/>
      <node id="1477" label="zzz1836"/>
      <node id="1476" label="zzz1837"/>
      <node id="1475" label="zzz1838"/>
      <node id="1474" label="zzz1839"/>
      <node id="1473" label="zzz1840"/>
      <node id="1472" label="zzz1841"/>
      <node id="1471" label="zzz1842"/>
      <node id="1470" label="zzz1843"/>
      <node id="1469" label="zzz1844"/>
      <node id="1468" label="zzz1845"/>
      <node id="1467" label="zzz1846"/>
      <node id="1466" label="zzz1847"/>
      <node id="1465" label="zzz1848"/>
      <node id="1464" label="zzz1849"/>
      <node id="1463" label="zzz1850"/>
      <node id="1462" label="zzz1851"/>
      <node id="1461" label="zzz1852"/>
      <node id="1460" label="zzz1853"/>
      <node id="1459" label="zzz1854"/>
      <node id="1458" label="zzz1855"/>
      <node id="1457" label="zzz1856"/>
      <node id="1456" label="zzz1857"/>
      <node id="1455" label="zzz1858"/>
      <node id="1454" label="zzz1859"/>
      <node id="1453" label="zzz1860"/>
      <node id="1452" label="zzz1861"/>
      <node id="1451" label="zzz1862"/>
      <node id="1450" label="zzz1863"/>
      <node id="1449" label="zzz1864"/>
      <node id="1448" label="zzz1865"/>
      <node id="1447" label="zzz1866"/>
      <node id="1446" label="zzz1867"/>
      <node id="1445" label="zzz1868"/>
      <node id="1444" label="zzz1869"/>
      <node id="1443" label="zzz1870"/>
      <node id="1442" label="zzz1871"/>
      <node id="1441" label="zzz1872"/>
      <node id="1440" label="zzz1873"/>
      <node id="1439" label="zzz1874"/>
      <node id="1438" label="zzz1875"/>
      <node id="1437" label="zzz1876"/>
      <node id="1436" label="zzz1877"/>
      <node id="1435" label="zzz1878"/>
      <node id="1434" label="zzz1879"/>
      <node id="1433" label="zzz1880"/>
      <node id="1432" label="zzz1881"/>
      <node id="1431" label="zzz1882"/>
      <node id="1430" label="zzz1883"/>
      <node id="1429" label="zzz1884"/>
      <node id="1428" label="zzz1885"/>
      <node id="1427" label="zzz1886"/>
      <node id="1426" label="zzz1887"/>
      <node id="1425" label="zzz1888"/>
      <node id="1424" label="zzz1889"/>
      <node id="1423" label="zzz1890"/>
      <node id="1422" label="zzz1891"/>
      <node id="1421" label="zzz1892"/>
      <node id="1420" label="zzz1893"/>
      <node id="1419" label="zzz1894"/>
      <node id="1418" label="zzz1895"/>
      <node id="1417" label="zzz1896"/>
      <node id="1416" label="zzz1897"/>
      <node id="1415" label="zzz1898"/>
      <node id="1414" label="zzz1899"/>
      <node id="1413" label="zzz1900"/>
      <node id="1412" label="zzz1901"/>
      <node id="1411" label="zzz1902"/>
      <node id="1410" label="zzz1903"/>
      <node id="1409" label="zzz1904"/>
      <node id="1408" label="zzz1905"/>
      <node id="1407" label="zzz1906"/>
      <node id="1406" label="zzz1907"/>
      <node id="1405" label="zzz1908"/>
      <node id="1404" label="zzz1909"/>
      <node id="1403" label="zzz1910"/>
      <node id="1402" label="zzz1911"/>
      <node id="1401" label="zzz1912"/>
      <node id="1400" label="zzz1913"/>
      <node id="1399" label="zzz1914"/>
      <node id="1398" label="zzz1915"/>
      <node id="1397" label="zzz1916"/>
      <node id="1396" label="zzz1917"/>
      <node id="1395" label="zzz1918"/>
      <node id="1394" label="zzz1919"/>
      <node id="1393" label="zzz1920"/>
      <node id="1392" label="zzz1921"/>
      <node id="1391" label="zzz1922"/>
      <node id="1390" label="zzz1923"/>
      <node id="1389" label="zzz1924"/>
      <node id="1388" label="zzz1925"/>
      <node id="1387" label="zzz1926"/>
      <node id="1386" label="zzz1927"/>
      <node id="1385" label="zzz1928"/>
      <node id="1384" label="zzz1929"/>
      <node id="1383" label="zzz1930"/>
      <node id="1382" label="zzz1931"/>
      <node id="1381" label="zzz1932"/>
      <node id="1380" label="zzz1933"/>
      <node id="1379" label="zzz1934"/>
      <node id="1378" label="zzz1935"/>
      <node id="1377" label="zzz1936"/>
      <node id="1376" label="zzz1937"/>
      <node id="1375" label="zzz1938"/>
      <node id="1374" label="zzz1939"/>
      <node id="1373" label="zzz1940"/>
      <node id="1372" label="zzz1941"/>
      <node id="1371" label="zzz1942"/>
      <node id="1370" label="zzz1943"/>
      <node id="1369" label="zzz1944"/>
      <node id="1368" label="zzz1945"/>
      <node id="1367" label="zzz1946"/>
      <node id="1366" label="zzz1947"/>
      <node id="1365" label="zzz1948"/>
      <node id="1364" label="zzz1949"/>
      <node id="1363" label="zzz1950"/>
      <node id="1362" label="zzz1951"/>
      <node id="1361" label="zzz1952"/>
      <node id="1360" label="zzz1953"/>
      <node id="1359" label="zzz1954"/>
      <node id="1358" label="zzz1955"/>
      <node id="1357" label="zzz1956"/>
      <node id="1356" label="zzz1957"/>
      <node id="1355" label="zzz1958"/>
      <node id="1354" label="zzz1959"/>
      <node id="1353" label="zzz1960"/>
      <node id="1352" label="zzz1961"/>
      <node id="1351" label="zzz1962"/>
      <node id="1350" label="zzz1963"/>
      <node id="1349" label="zzz1964"/>
      <node id="1348" label="zzz1965"/>
      <node id="1347" label="zzz1966"/>
      <node id="1346" label="zzz1967"/>
      <node id="1345" label="zzz1968"/>
      <node id="1344" label="zzz1969"/>
      <node id="1343" label="zzz1970"/>
      <node id="1342" label="zzz1971"/>
      <node id="1341" label="zzz1972"/>
      <node id="1340" label="zzz1973"/>
      <node id="1339" label="zzz1974"/>
      <node id="1338" label="zzz1975"/>
      <node id="1337" label="zzz1976"/>
      <node id="1336" label="zzz1977"/>
      <node id="1335" label="zzz1978"/>
      <node id="1334" label="zzz1979"/>
      <node id="1333" label="zzz1980"/>
      <node id="1332" label="zzz1981"/>
      <node id="1331" label="zzz1982"/>
      <node id="1330" label="zzz1983"/>
      <node id="1329" label="zzz1984"/>
      <node id="1328" label="zzz1985"/>
      <node id="1327" label="zzz1986"/>
      <node id="1326" label="zzz1987"/>
      <node id="1325" label="zzz1988"/>
      <node id="1324" label="zzz1989"/>
      <node id="1323" label="zzz1990"/>
      <node id="1322" label="zzz1991"/>
      <node id="1321" label="zzz1992"/>
      <node id="1320" label="zzz1993"/>
      <node id="1319" label="zzz1994"/>
      <node id="1318" label="zzz1995"/>
      <node id="1317" label="zzz1996"/>
      <node id="1316" label="zzz1997"/>
      <node id="1315" label="zzz1998"/>
      <node id="1314" label="zzz1999"/>
      <node id="1313" label="zzz2000"/>
      <node id="1312" label="zzz2001"/>
      <node id="1311" label="zzz2002"/>
      <node id="1310" label="zzz2003"/>
      <node id="1309" label="zzz2004"/>
      <node id="1308" label="zzz2005"/>
      <node id="1307" label="zzz2006"/>
      <node id="1306" label="zzz2007"/>
      <node id="1305" label="zzz2008"/>
      <node id="1304" label="zzz2009"/>
      <node id="1303" label="zzz2010"/>
      <node id="1302" label="zzz2011"/>
      <node id="1301" label="zzz2012"/>
      <node id="1300" label="zzz2013"/>
      <node id="1299" label="zzz2014"/>
      <node id="1298" label="zzz2015"/>
      <node id="1297" label="zzz2016"/>
      <node id="1296" label="zzz2017"/>
      <node id="1295" label="zzz2018"/>
      <node id="1294" label="zzz2019"/>
      <node id="1293" label="zzz2020"/>
      <node id="1292" label="zzz2021"/>
      <node id="1291" label="zzz2022"/>
      <node id="1290" label="zzz2023"/>
      <node id="1289" label="zzz2024"/>
      <node id="1288" label="zzz2025"/>
      <node id="1287" label="zzz2026"/>
      <node id="1286" label="zzz2027"/>
      <node id="1285" label="zzz2028"/>
      <node id="1284" label="zzz2029"/>
      <node id="1283" label="zzz2030"/>
      <node id="1282" label="zzz2031"/>
      <node id="1281" label="zzz2032"/>
      <node id="1280" label="zzz2033"/>
      <node id="1279" label="zzz2034"/>
      <node id="1278" label="zzz2035"/>
      <node id="1277" label="zzz2036"/>
      <node id="1276" label="zzz2037"/>
      <node id="1275" label="zzz2038"/>
      <node id="1274" label="zzz2039"/>
      <node id="1273" label="zzz2040"/>
      <node id="1272" label="zzz2041"/>
      <node id="1271" label="zzz2042"/>
      <node id="1270" label="zzz2043"/>
      <node id="1269" label="zzz2044"/>
      <node id="1268" label="zzz2045"/>
      <node id="1267" label="zzz2046"/>
      <node id="1266" label="zzz2047"/>
      <node id="1265" label="zzz2048"/>
      <node id="1264" label="zzz2049"/>
      <node id="1263" label="zzz2050"/>
      <node id="1262" label="zzz2051"/>
      <node id="1261" label="zzz2052"/>
      <node id="1260" label="zzz2053"/>
      <node id="1259" label="zzz2054"/>
      <node id="1258" label="zzz2055"/>
      <node id="1257" label="zzz2056"/>
      <node id="1256" label="zzz2057"/>
      <node id="1255" label="zzz2058"/>
      <node id="1254" label="zzz2059"/>
      <node id="1253" label="zzz2060"/>
      <node id="1252" label="zzz2061"/>
      <node id="1251" label="zzz2062"/>
      <node id="1250" label="zzz2063"/>
      <node id="1249" label="zzz2064"/>
      <node id="1248" label="zzz2065"/>
      <node id="1247" label="zzz2066"/>
      <node id="1246" label="zzz2067"/>
      <node id="1245" label="zzz2068"/>
      <node id="1244" label="zzz2069"/>
      <node id="1243" label="zzz2070"/>
      <node id="1242" label="zzz2071"/>
      <node id="1241" label="zzz2072"/>
      <node id="1240" label="zzz2073"/>
      <node id="1239" label="zzz2074"/>
      <node id="1238" label="zzz2075"/>
      <node id="1237" label="zzz2076"/>
      <node id="1236" label="zzz2077"/>
      <node id="1235" label="zzz2078"/>
      <node id="1234" label="zzz2079"/>
      <node id="1233" label="zzz2080"/>
      <node id="1232" label="zzz2081"/>
      <node id="1231" label="zzz2082"/>
      <node id="1230" label="zzz2083"/>
      <node id="1229" label="zzz2084"/>
      <node id="1228" label="zzz2085"/>
      <node id="1227" label="zzz2086"/>
      <node id="1226" label="zzz2087"/>
      <node id="1225" label="zzz2088"/>
      <node id="1224" label="zzz2089"/>
      <node id="1223" label="zzz2090"/>
      <node id="1222" label="zzz2091"/>
      <node id="1221" label="zzz2092"/>
      <node id="1220" label="zzz2093"/>
      <node id="1219" label="zzz2094"/>
      <node id="1218" label="zzz2095"/>
      <node id="1217" label="zzz2096"/>
      <node id="1216" label="zzz2097"/>
      <node id="1215" label="zzz2098"/>
      <node id="1214" label="zzz2099"/>
      <node id="1213" label="zzz2100"/>
      <node id="1212" label="zzz2101"/>
      <node id="1211" label="zzz2102"/>
      <node id="1210" label="zzz2103"/>
      <node id="1209" label="zzz2104"/>
      <node id="1208" label="zzz2105"/>
      <node id="1207" label="zzz2106"/>
      <node id="1206" label="zzz2107"/>
      <node id="1205" label="zzz2108"/>
      <node id="1204" label="zzz2109"/>
      <node id="1203" label="zzz2110"/>
      <node id="1202" label="zzz2111"/>
      <node id="1201" label="zzz2112"/>
      <node id="1200" label="zzz2113"/>
      <node id="1199" label="zzz2114"/>
      <node id="1198" label="zzz2115"/>
      <node id="1197" label="zzz2116"/>
      <node id="1196" label="zzz2117"/>
      <node id="1195" label="zzz2118"/>
      <node id="1194" label="zzz2119"/>
      <node id="1193" label="zzz2120"/>
      <node id="1192" label="zzz2121"/>
      <node id="1191" label="zzz2122"/>
      <node id="1190" label="zzz2123"/>
      <node id="1189" label="zzz2124"/>
      <node id="1188" label="zzz2125"/>
      <node id="1187" label="zzz2126"/>
      <node id="1186" label="zzz2127"/>
      <node id="1185" label="zzz2128"/>
      <node id="1184" label="zzz2129"/>
      <node id="1183" label="zzz2130"/>
      <node id="1182" label="zzz2131"/>
      <node id="1181" label="zzz2132"/>
      <node id="1180" label="zzz2133"/>
      <node id="1179" label="zzz2134"/>
      <node id="1178" label="zzz2135"/>
      <node id="1177" label="zzz2136"/>
      <node id="1176" label="zzz2137"/>
      <node id="1175" label="zzz2138"/>
      <node id="1174" label="zzz2139"/>
      <node id="1173" label="zzz2140"/>
      <node id="1172" label="zzz2141"/>
      <node id="1171" label="zzz2142"/>
      <node id="1170" label="zzz2143"/>
      <node id="1169" label="zzz2144"/>
      <node id="1168" label="zzz2145"/>
      <node id="1167" label="zzz2146"/>
      <node id="1166" label="zzz2147"/>
      <node id="1165" label="zzz2148"/>
      <node id="1164" label="zzz2149"/>
      <node id="1163" label="zzz2150"/>
      <node id="1162" label="zzz2151"/>
      <node id="1161" label="zzz2152"/>
      <node id="1160" label="zzz2153"/>
      <node id="1159" label="zzz2154"/>
      <node id="1158" label="zzz2155"/>
      <node id="1157" label="zzz2156"/>
      <node id="1156" label="zzz2157"/>
      <node id="1155" label="zzz2158"/>
      <node id="1154" label="zzz2159"/>
      <node id="1153" label="zzz2160"/>
      <node id="1152" label="zzz2161"/>
      <node id="1151" label="zzz2162"/>
      <node id="1150" label="zzz2163"/>
      <node id="1149" label="zzz2164"/>
      <node id="1148" label="zzz2165"/>
      <node id="1147" label="zzz2166"/>
      <node id="1146" label="zzz2167"/>
      <node id="1145" label="zzz2168"/>
      <node id="1144" label="zzz2169"/>
      <node id="1143" label="zzz2170"/>
      <node id="1142" label="zzz2171"/>
      <node id="1141" label="zzz2172"/>
      <node id="1140" label="zzz2173"/>
      <node id="1139" label="zzz2174"/>
      <node id="1138" label="zzz2175"/>
      <node id="1137" label="zzz2176"/>
      <node id="1136" label="zzz2177"/>
      <node id="1135" label="zzz2178"/>
      <node id="1134" label="zzz2179"/>
      <node id="1133" label="zzz2180"/>
      <node id="1132" label="zzz2181"/>
      <node id="1131" label="zzz2182"/>
      <node id="1130" label="zzz2183"/>
      <node id="1129" label="zzz2184"/>
      <node id="1128" label="zzz2185"/>
      <node id="1127" label="zzz2186"/>
      <node id="1126" label="zzz2187"/>
      <node id="1125" label="zzz2188"/>
      <node id="1124" label="zzz2189"/>
      <node id="1123" label="zzz2190"/>
      <node id="1122" label="zzz2191"/>
      <node id="1121" label="zzz2192"/>
      <node id="1120" label="zzz2193"/>
      <node id="1119" label="zzz2194"/>
      <node id="1118" label="zzz2195"/>
      <node id="1117" label="zzz2196"/>
      <node id="1116" label="zzz2197"/>
      <node id="1115" label="zzz2198"/>
      <node id="1114" label="zzz2199"/>
      <node id="1113" label="zzz2200"/>
      <node id="1112" label="zzz2201"/>
      <node id="1111" label="zzz2202"/>
      <node id="1110" label="zzz2203"/>
      <node id="1109" label="zzz2204"/>
      <node id="1108" label="zzz2205"/>
      <node id="1107" label="zzz2206"/>
      <node id="1106" label="zzz2207"/>
      <node id="1105" label="zzz2208"/>
      <node id="1104" label="zzz2209"/>
      <node id="1103" label="zzz2210"/>
      <node id="1102" label="zzz2211"/>
      <node id="1101" label="zzz2212"/>
      <node id="1100" label="zzz2213"/>
      <node id="1099" label="zzz2214"/>
      <node id="1098" label="zzz2215"/>
      <node id="1097" label="zzz2216"/>
      <node id="1096" label="zzz2217"/>
      <node id="1095" label="zzz2218"/>
      <node id="1094" label="zzz2219"/>
      <node id="1093" label="zzz2220"/>
      <node id="1092" label="zzz2221"/>
      <node id="1091" label="zzz2222"/>
      <node id="1090" label="zzz2223"/>
      <node id="1089" label="zzz2224"/>
      <node id="1088" label="zzz2225"/>
      <node id="1087" label="zzz2226"/>
      <node id="1086" label="zzz2227"/>
      <node id="1085" label="zzz2228"/>
      <node id="1084" label="zzz2229"/>
      <node id="1083" label="zzz2230"/>
      <node id="1082" label="zzz2231"/>
      <node id="1081" label="zzz2232"/>
      <node id="1080" label="zzz2233"/>
      <node id="1079" label="zzz2234"/>
      <node id="1078" label="zzz2235"/>
      <node id="1077" label="zzz2236"/>
      <node id="1076" label="zzz2237"/>
      <node id="1075" label="zzz2238"/>
      <node id="1074" label="zzz2239"/>
      <node id="1073" label="zzz2240"/>
      <node id="1072" label="zzz2241"/>
      <node id="1071" label="zzz2242"/>
      <node id="1070" label="zzz2243"/>
      <node id="1069" label="zzz2244"/>
      <node id="1068" label="zzz2245"/>
      <node id="1067" label="zzz2246"/>
      <node id="1066" label="zzz2247"/>
      <node id="1065" label="zzz2248"/>
      <node id="1064" label="zzz2249"/>
      <node id="1063" label="zzz2250"/>
      <node id="1062" label="zzz2251"/>
      <node id="1061" label="zzz2252"/>
      <node id="1060" label="zzz2253"/>
      <node id="1059" label="zzz2254"/>
      <node id="1058" label="zzz2255"/>
      <node id="1057" label="zzz2256"/>
      <node id="1056" label="zzz2257"/>
      <node id="1055" label="zzz2258"/>
      <node id="1054" label="zzz2259"/>
      <node id="1053" label="zzz2260"/>
      <node id="1052" label="zzz2261"/>
      <node id="1051" label="zzz2262"/>
      <node id="1050" label="zzz2263"/>
      <node id="1049" label="zzz2264"/>
      <node id="1048" label="zzz2265"/>
      <node id="1047" label="zzz2266"/>
      <node id="1046" label="zzz2267"/>
      <node id="1045" label="zzz2268"/>
      <node id="1044" label="zzz2269"/>
      <node id="1043" label="zzz2270"/>
      <node id="1042" label="zzz2271"/>
      <node id="1041" label="zzz2272"/>
      <node id="1040" label="zzz2273"/>
      <node id="1039" label="zzz2274"/>
      <node id="1038" label="zzz2275"/>
      <node id="1037" label="zzz2276"/>
      <node id="1036" label="zzz2277"/>
      <node id="1035" label="zzz2278"/>
      <node id="1034" label="zzz2279"/>
      <node id="1033" label="zzz2280"/>
      <node id="1032" label="zzz2281"/>
      <node id="1031" label="zzz2282"/>
      <node id="1030" label="zzz2283"/>
      <node id="1029" label="zzz2284"/>
      <node id="1028" label="zzz2285"/>
      <node id="1027" label="zzz2286"/>
      <node id="1026" label="zzz2287"/>
      <node id="1025" label="zzz2288"/>
      <node id="1024" label="zzz2289"/>
      <node id="1023" label="zzz2290"/>
      <node id="1022" label="zzz2291"/>
      <node id="1021" label="zzz2292"/>
      <node id="1020" label="zzz2293"/>
      <node id="1019" label="zzz2294"/>
      <node id="1018" label="zzz2295"/>
      <node id="1017" label="zzz2296"/>
      <node id="1016" label="zzz2297"/>
      <node id="1015" label="zzz2298"/>
      <node id="1014" label="zzz2299"/>
      <node id="1013" label="zzz2300"/>
      <node id="1012" label="zzz2301"/>
      <node id="1011" label="zzz2302"/>
      <node id="1010" label="zzz2303"/>
      <node id="1009" label="zzz2304"/>
      <node id="1008" label="zzz2305"/>
      <node id="1007" label="zzz2306"/>
      <node id="1006" label="zzz2307"/>
      <node id="1005" label="zzz2308"/>
      <node id="1004" label="zzz2309"/>
      <node id="1003" label="zzz2310"/>
      <node id="1002" label="zzz2311"/>
      <node id="1001" label="zzz2312"/>
      <node id="1000" label="zzz2313"/>
      <node id="999" label="zzz2314"/>
      <node id="998" label="zzz2315"/>
      <node id="997" label="zzz2316"/>
      <node id="996" label="zzz2317"/>
      <node id="995" label="zzz2318"/>
      <node id="994" label="zzz2319"/>
      <node id="993" label="zzz2320"/>
      <node id="992" label="zzz2321"/>
      <node id="991" label="zzz2322"/>
      <node id="990" label="zzz2323"/>
      <node id="989" label="zzz2324"/>
      <node id="988" label="zzz2325"/>
      <node id="987" label="zzz2326"/>
      <node id="986" label="zzz2327"/>
      <node id="985" label="zzz2328"/>
      <node id="984" label="zzz2329"/>
      <node id="983" label="zzz2330"/>
      <node id="982" label="zzz2331"/>
      <node id="981" label="zzz2332"/>
      <node id="980" label="zzz2333"/>
      <node id="979" label="zzz2334"/>
      <node id="978" label="zzz2335"/>
      <node id="977" label="zzz2336"/>
      <node id="976" label="zzz2337"/>
      <node id="975" label="zzz2338"/>
      <node id="974" label="zzz2339"/>
      <node id="973" label="zzz2340"/>
      <node id="972" label="zzz2341"/>
      <node id="971" label="zzz2342"/>
      <node id="970" label="zzz2343"/>
      <node id="969" label="zzz2344"/>
      <node id="968" label="zzz2345"/>
      <node id="967" label="zzz2346"/>
      <node id="966" label="zzz2347"/>
      <node id="965" label="zzz2348"/>
      <node id="964" label="zzz2349"/>
      <node id="963" label="zzz2350"/>
      <node id="962" label="zzz2351"/>
      <node id="961" label="zzz2352"/>
      <node id="960" label="zzz2353"/>
      <node id="959" label="zzz2354"/>
      <node id="958" label="zzz2355"/>
      <node id="957" label="zzz2356"/>
      <node id="956" label="zzz2357"/>
      <node id="955" label="zzz2358"/>
      <node id="954" label="zzz2359"/>
      <node id="953" label="zzz2360"/>
      <node id="952" label="zzz2361"/>
      <node id="951" label="zzz2362"/>
      <node id="950" label="zzz2363"/>
      <node id="949" label="zzz2364"/>
      <node id="948" label="zzz2365"/>
      <node id="947" label="zzz2366"/>
      <node id="946" label="zzz2367"/>
      <node id="945" label="zzz2368"/>
      <node id="944" label="zzz2369"/>
      <node id="943" label="zzz2370"/>
      <node id="942" label="zzz2371"/>
      <node id="941" label="zzz2372"/>
      <node id="940" label="zzz2373"/>
      <node id="939" label="zzz2374"/>
      <node id="938" label="zzz2375"/>
      <node id="937" label="zzz2376"/>
      <node id="936" label="zzz2377"/>
      <node id="935" label="zzz2378"/>
      <node id="934" label="zzz2379"/>
      <node id="933" label="zzz2380"/>
      <node id="932" label="zzz2381"/>
      <node id="931" label="zzz2382"/>
      <node id="930" label="zzz2383"/>
      <node id="929" label="zzz2384"/>
      <node id="928" label="zzz2385"/>
      <node id="927" label="zzz2386"/>
      <node id="926" label="zzz2387"/>
      <node id="925" label="zzz2388"/>
      <node id="924" label="zzz2389"/>
      <node id="923" label="zzz2390"/>
      <node id="922" label="zzz2391"/>
      <node id="921" label="zzz2392"/>
      <node id="920" label="zzz2393"/>
      <node id="919" label="zzz2394"/>
      <node id="918" label="zzz2395"/>
      <node id="917" label="zzz2396"/>
      <node id="916" label="zzz2397"/>
      <node id="915" label="zzz2398"/>
      <node id="914" label="zzz2399"/>
      <node id="913" label="zzz2400"/>
      <node id="912" label="zzz2401"/>
      <node id="911" label="zzz2402"/>
      <node id="910" label="zzz2403"/>
      <node id="909" label="zzz2404"/>
      <node id="908" label="zzz2405"/>
      <node id="907" label="zzz2406"/>
      <node id="906" label="zzz2407"/>
      <node id="905" label="zzz2408"/>
      <node id="904" label="zzz2409"/>
      <node id="903" label="zzz2410"/>
      <node id="902" label="zzz2411"/>
      <node id="901" label="zzz2412"/>
      <node id="900" label="zzz2413"/>
      <node id="899" label="zzz2414"/>
      <node id="898" label="zzz2415"/>
      <node id="897" label="zzz2416"/>
      <node id="896" label="zzz2417"/>
      <node id="895" label="zzz2418"/>
      <node id="894" label="zzz2419"/>
      <node id="893" label="zzz2420"/>
      <node id="892" label="zzz2421"/>
      <node id="891" label="zzz2422"/>
      <node id="890" label="zzz2423"/>
      <node id="889" label="zzz2424"/>
      <node id="888" label="zzz2425"/>
      <node id="887" label="zzz2426"/>
      <node id="886" label="zzz2427"/>
      <node id="885" label="zzz2428"/>
      <node id="884" label="zzz2429"/>
      <node id="883" label="zzz2430"/>
      <node id="882" label="zzz2431"/>
      <node id="881" label="zzz2432"/>
      <node id="880" label="zzz2433"/>
      <node id="879" label="zzz2434"/>
      <node id="878" label="zzz2435"/>
      <node id="877" label="zzz2436"/>
      <node id="876" label="zzz2437"/>
      <node id="875" label="zzz2438"/>
      <node id="874" label="zzz2439"/>
      <node id="873" label="zzz2440"/>
      <node id="872" label="zzz2441"/>
      <node id="871" label="zzz2442"/>
      <node id="870" label="zzz2443"/>
      <node id="869" label="zzz2444"/>
      <node id="868" label="zzzz100"/>
      <node id="867" label="zzzz101"/>
      <node id="866" label="zzzz102"/>
      <node id="865" label="zzzz103"/>
      <node id="864" label="zzzz104"/>
      <node id="863" label="zzzz105"/>
      <node id="862" label="zzzz106"/>
      <node id="861" label="zzzz107"/>
      <node id="860" label="zzzz108"/>
      <node id="859" label="zzzz109"/>
      <node id="858" label="zzzz110"/>
      <node id="857" label="zzzz111"/>
      <node id="856" label="zzzz112"/>
      <node id="855" label="zzzz113"/>
      <node id="854" label="zzzz114"/>
      <node id="853" label="zzzz115"/>
      <node id="852" label="zzzz116"/>
      <node id="851" label="zzzz117"/>
      <node id="850" label="zzzz118"/>
      <node id="849" label="zzzz119"/>
      <node id="848" label="zzzz120"/>
      <node id="847" label="zzzz121"/>
      <node id="846" label="zzzz122"/>
      <node id="845" label="zzzz123"/>
      <node id="844" label="zzzz124"/>
      <node id="843" label="zzzz125"/>
      <node id="842" label="zzzz126"/>
      <node id="841" label="zzzz127"/>
      <node id="840" label="zzzz128"/>
      <node id="839" label="zzzz129"/>
      <node id="838" label="zzzz130"/>
      <node id="837" label="zzzz131"/>
      <node id="836" label="zzzz132"/>
      <node id="835" label="zzzz133"/>
      <node id="834" label="zzzz134"/>
      <node id="833" label="zzzz135"/>
      <node id="832" label="zzzz136"/>
      <node id="831" label="zzzz137"/>
      <node id="830" label="zzzz138"/>
      <node id="829" label="zzzz139"/>
      <node id="828" label="zzzz140"/>
      <node id="827" label="zzzz141"/>
      <node id="826" label="zzzz142"/>
      <node id="825" label="zzzz143"/>
      <node id="824" label="zzzz144"/>
      <node id="823" label="zzzz145"/>
      <node id="822" label="zzzz146"/>
      <node id="821" label="zzzz147"/>
      <node id="820" label="zzzz148"/>
      <node id="819" label="zzzz149"/>
      <node id="818" label="zzzz150"/>
      <node id="817" label="zzzz151"/>
      <node id="816" label="zzzz152"/>
      <node id="815" label="zzzz153"/>
      <node id="814" label="zzzz154"/>
      <node id="813" label="zzzz155"/>
      <node id="812" label="zzzz156"/>
      <node id="811" label="zzzz157"/>
      <node id="810" label="zzzz158"/>
      <node id="809" label="zzzz159"/>
      <node id="808" label="zzzz160"/>
      <node id="807" label="zzzz161"/>
      <node id="806" label="zzzz162"/>
      <node id="805" label="zzzz163"/>
      <node id="804" label="zzzz164"/>
      <node id="803" label="zzzz165"/>
      <node id="802" label="zzzz166"/>
      <node id="801" label="zzzz167"/>
      <node id="800" label="zzzz168"/>
      <node id="799" label="zzzz169"/>
      <node id="798" label="zzzz170"/>
      <node id="797" label="zzzz171"/>
      <node id="796" label="zzzz172"/>
      <node id="795" label="zzzz173"/>
      <node id="794" label="zzzz174"/>
      <node id="793" label="zzzz175"/>
      <node id="792" label="zzzz176"/>
      <node id="791" label="zzzz177"/>
      <node id="790" label="zzzz178"/>
      <node id="789" label="zzzz179"/>
      <node id="788" label="zzzz180"/>
      <node id="787" label="zzzz181"/>
      <node id="786" label="zzzz182"/>
      <node id="785" label="zzzz183"/>
      <node id="784" label="zzzz184"/>
      <node id="783" label="zzzz185"/>
      <node id="782" label="zzzz186"/>
      <node id="781" label="zzzz187"/>
      <node id="780" label="zzzz188"/>
      <node id="779" label="zzzz189"/>
      <node id="778" label="zzzz190"/>
      <node id="777" label="zzzz191"/>
      <node id="776" label="zzzz192"/>
      <node id="775" label="zzzz193"/>
      <node id="774" label="zzzz194"/>
      <node id="773" label="zzzz195"/>
      <node id="772" label="zzzz196"/>
      <node id="771" label="zzzz197"/>
      <node id="770" label="zzzz198"/>
      <node id="769" label="zzzz199"/>
      <node id="768" label="zzzz200"/>
      <node id="767" label="zzzz201"/>
      <node id="766" label="zzzz202"/>
      <node id="765" label="zzzz203"/>
      <node id="764" label="zzzz204"/>
      <node id="763" label="zzzz205"/>
      <node id="762" label="zzzz206"/>
      <node id="761" label="zzzz207"/>
      <node id="760" label="zzzz208"/>
      <node id="759" label="zzzz209"/>
      <node id="758" label="zzzz210"/>
      <node id="757" label="zzzz211"/>
      <node id="756" label="zzzz212"/>
      <node id="755" label="zzzz213"/>
      <node id="754" label="zzzz214"/>
      <node id="753" label="zzzz215"/>
      <node id="752" label="zzzz216"/>
      <node id="751" label="zzzz217"/>
      <node id="750" label="zzzz218"/>
      <node id="749" label="zzzz219"/>
      <node id="748" label="zzzz220"/>
      <node id="747" label="zzzz221"/>
      <node id="746" label="zzzz222"/>
      <node id="745" label="zzzz223"/>
      <node id="744" label="zzzz224"/>
      <node id="743" label="zzzz225"/>
      <node id="742" label="zzzz226"/>
      <node id="741" label="zzzz227"/>
      <node id="740" label="zzzz228"/>
      <node id="739" label="zzzz229"/>
      <node id="738" label="zzzz230"/>
      <node id="737" label="zzzz231"/>
      <node id="736" label="zzzz232"/>
      <node id="735" label="zzzz233"/>
      <node id="734" label="zzzz234"/>
      <node id="733" label="zzzz235"/>
      <node id="732" label="zzzz236"/>
      <node id="731" label="zzzz237"/>
      <node id="730" label="zzzz238"/>
      <node id="729" label="zzzz239"/>
      <node id="728" label="zzzz240"/>
      <node id="727" label="zzzz241"/>
      <node id="726" label="zzzz242"/>
      <node id="725" label="zzzz243"/>
      <node id="724" label="zzzz244"/>
      <node id="723" label="zzzz245"/>
      <node id="722" label="zzzz246"/>
      <node id="721" label="zzzz247"/>
      <node id="720" label="zzzz248"/>
      <node id="719" label="zzzz249"/>
      <node id="718" label="zzzz250"/>
      <node id="717" label="zzzz251"/>
      <node id="716" label="zzzz252"/>
      <node id="715" label="zzzz253"/>
      <node id="714" label="zzzz254"/>
      <node id="713" label="zzzz255"/>
      <node id="712" label="zzzz256"/>
      <node id="711" label="zzzz257"/>
      <node id="710" label="zzzz258"/>
      <node id="709" label="zzzz259"/>
      <node id="708" label="zzzz260"/>
      <node id="707" label="zzzz261"/>
      <node id="706" label="zzzz262"/>
      <node id="705" label="zzzz263"/>
      <node id="704" label="zzzz264"/>
      <node id="703" label="zzzz265"/>
      <node id="702" label="zzzz266"/>
      <node id="701" label="zzzz267"/>
      <node id="700" label="zzzz268"/>
      <node id="699" label="zzzz269"/>
      <node id="698" label="zzzz270"/>
      <node id="697" label="zzzz271"/>
      <node id="696" label="zzzz272"/>
      <node id="695" label="zzzz273"/>
      <node id="694" label="zzzz274"/>
      <node id="693" label="zzzz275"/>
      <node id="692" label="zzzz276"/>
      <node id="691" label="zzzz277"/>
      <node id="690" label="zzzz278"/>
      <node id="689" label="zzzz279"/>
      <node id="688" label="zzzz280"/>
      <node id="687" label="zzzz281"/>
      <node id="686" label="zzzz282"/>
      <node id="685" label="zzzz283"/>
      <node id="684" label="zzzz284"/>
      <node id="683" label="zzzz285"/>
      <node id="682" label="zzzz286"/>
      <node id="681" label="zzzz287"/>
      <node id="680" label="zzzz288"/>
      <node id="679" label="zzzz289"/>
      <node id="678" label="zzzz290"/>
      <node id="677" label="zzzz291"/>
      <node id="676" label="zzzz292"/>
      <node id="675" label="zzzz293"/>
      <node id="674" label="zzzz294"/>
      <node id="673" label="zzzz295"/>
      <node id="672" label="zzzz296"/>
      <node id="671" label="zzzz297"/>
      <node id="670" label="zzzz298"/>
      <node id="669" label="zzzz299"/>
      <node id="668" label="zzzz300"/>
      <node id="667" label="zzzz301"/>
      <node id="666" label="zzzz302"/>
      <node id="665" label="zzzz303"/>
      <node id="664" label="zzzz304"/>
      <node id="663" label="zzzz305"/>
      <node id="662" label="zzzz306"/>
      <node id="661" label="zzzz307"/>
      <node id="660" label="zzzz308"/>
      <node id="659" label="zzzz309"/>
      <node id="658" label="zzzz310"/>
      <node id="657" label="zzzz311"/>
      <node id="656" label="zzzz312"/>
      <node id="655" label="zzzz313"/>
      <node id="654" label="zzzz314"/>
      <node id="653" label="zzzz315"/>
      <node id="652" label="zzzz316"/>
      <node id="651" label="zzzz317"/>
      <node id="650" label="zzzz318"/>
      <node id="649" label="zzzz319"/>
      <node id="648" label="zzzz320"/>
      <node id="647" label="zzzz321"/>
      <node id="646" label="zzzz322"/>
      <node id="645" label="zzzz323"/>
      <node id="644" label="zzzz324"/>
      <node id="643" label="zzzz325"/>
      <node id="642" label="zzzz326"/>
      <node id="641" label="zzzz327"/>
      <node id="640" label="zzzz328"/>
      <node id="639" label="zzzz329"/>
      <node id="638" label="zzzz330"/>
      <node id="637" label="zzzz331"/>
      <node id="636" label="zzzz332"/>
      <node id="635" label="zzzz333"/>
      <node id="634" label="zzzz334"/>
      <node id="633" label="zzzz335"/>
      <node id="632" label="zzzz336"/>
      <node id="631" label="zzzz337"/>
      <node id="630" label="zzzz338"/>
      <node id="629" label="zzzz339"/>
      <node id="628" label="zzzz340"/>
      <node id="627" label="zzzz341"/>
      <node id="626" label="zzzz342"/>
      <node id="625" label="zzzz343"/>
      <node id="624" label="zzzz344"/>
      <node id="623" label="zzzz345"/>
      <node id="622" label="zzzz346"/>
      <node id="621" label="zzzz347"/>
      <node id="620" label="zzzz348"/>
      <node id="619" label="zzzz349"/>
      <node id="618" label="zzzz350"/>
      <node id="617" label="zzzz351"/>
      <node id="616" label="zzzz352"/>
      <node id="615" label="zzzz353"/>
      <node id="614" label="zzzz354"/>
      <node id="613" label="zzzz355"/>
      <node id="612" label="zzzz356"/>
      <node id="611" label="zzzz357"/>
      <node id="610" label="zzzz358"/>
      <node id="609" label="zzzz359"/>
      <node id="608" label="zzzz360"/>
      <node id="607" label="zzzz361"/>
      <node id="606" label="zzzz362"/>
      <node id="605" label="zzzz363"/>
      <node id="604" label="zzzz364"/>
      <node id="603" label="zzzz365"/>
      <node id="602" label="zzzz366"/>
      <node id="601" label="zzzz367"/>
      <node id="600" label="zzzz368"/>
      <node id="599" label="zzzz369"/>
      <node id="598" label="zzzz370"/>
      <node id="597" label="zzzz371"/>
      <node id="596" label="zzzz372"/>
      <node id="595" label="zzzz373"/>
      <node id="594" label="zzzz374"/>
      <node id="593" label="zzzz375"/>
      <node id="592" label="zzzz376"/>
      <node id="591" label="zzzz377"/>
      <node id="590" label="zzzz378"/>
      <node id="589" label="zzzz379"/>
      <node id="588" label="zzzz380"/>
      <node id="587" label="zzzz381"/>
      <node id="586" label="zzzz382"/>
      <node id="585" label="zzzz383"/>
      <node id="584" label="zzzz384"/>
      <node id="583" label="zzzz385"/>
      <node id="582" label="zzzz386"/>
      <node id="581" label="zzzz387"/>
      <node id="580" label="zzzz388"/>
      <node id="579" label="zzzz389"/>
      <node id="578" label="zzzz390"/>
      <node id="577" label="zzzz391"/>
      <node id="576" label="zzzz392"/>
      <node id="575" label="zzzz393"/>
      <node id="574" label="zzzz394"/>
      <node id="573" label="zzzz395"/>
      <node id="572" label="zzzz396"/>
      <node id="571" label="zzzz397"/>
      <node id="570" label="zzzz398"/>
      <node id="569" label="zzzz401"/>
      <node id="568" label="zzzz404"/>
      <node id="567" label="zzzz405"/>
      <node id="566" label="zzzz406"/>
      <node id="565" label="zzzz407"/>
      <node id="564" label="zzzz408"/>
      <node id="563" label="zzzz409"/>
      <node id="562" label="zzzz410"/>
      <node id="561" label="zzzz411"/>
      <node id="560" label="zzzz412"/>
      <node id="559" label="zzzz413"/>
      <node id="558" label="zzzz415"/>
      <node id="557" label="zzzz416"/>
      <node id="556" label="zzzz417"/>
      <node id="555" label="zzzz418"/>
      <node id="554" label="zzzz419"/>
      <node id="553" label="zzzz420"/>
      <node id="552" label="zzzz425"/>
      <node id="551" label="zzzz426"/>
      <node id="550" label="zzzz429"/>
      <node id="549" label="zzzz431"/>
      <node id="548" label="zzzz432"/>
      <node id="547" label="zzzz433"/>
      <node id="546" label="zzzz434"/>
      <node id="545" label="zzzz435"/>
      <node id="544" label="zzzz436"/>
      <node id="543" label="zzzz442"/>
      <node id="542" label="zzzz444"/>
      <node id="541" label="zzzz445"/>
      <node id="540" label="zzzz446"/>
      <node id="539" label="zzzz447"/>
      <node id="538" label="zzzz449"/>
      <node id="537" label="zzzz451"/>
      <node id="536" label="zzzz452"/>
      <node id="535" label="zzzz454"/>
      <node id="534" label="zzzz456"/>
      <node id="533" label="zzzz457"/>
      <node id="532" label="zzzz458"/>
      <node id="531" label="zzzz459"/>
      <node id="530" label="zzzz460"/>
      <node id="529" label="zzzz462"/>
      <node id="528" label="zzzz464"/>
      <node id="527" label="zzzz466"/>
      <node id="526" label="zzzz467"/>
      <node id="525" label="zzzz468"/>
      <node id="524" label="zzzz469"/>
      <node id="523" label="zzzz472"/>
      <node id="522" label="zzzz473"/>
      <node id="521" label="zzzz474"/>
      <node id="520" label="zzzz475"/>
      <node id="519" label="zzzz476"/>
      <node id="518" label="zzzz477"/>
      <node id="517" label="zzzz478"/>
      <node id="516" label="zzzz479"/>
      <node id="515" label="zzzz480"/>
      <node id="514" label="zzzz481"/>
      <node id="513" label="zzzz482"/>
      <node id="512" label="zzzz483"/>
      <node id="511" label="zzzz484"/>
      <node id="510" label="zzzz485"/>
      <node id="509" label="zzzz486"/>
      <node id="508" label="zzzz487"/>
      <node id="507" label="zzzz488"/>
      <node id="506" label="zzzz489"/>
      <node id="505" label="zzzz490"/>
      <node id="504" label="zzzz491"/>
      <node id="503" label="zzzz493"/>
      <node id="502" label="zzzz494"/>
      <node id="501" label="zzzz495"/>
      <node id="500" label="zzzz497"/>
      <node id="499" label="zzzz498"/>
      <node id="498" label="zzzz500"/>
      <node id="497" label="zzzz502"/>
      <node id="496" label="zzzz503"/>
      <node id="495" label="zzzz504"/>
      <node id="494" label="zzzz505"/>
      <node id="493" label="zzzz506"/>
      <node id="492" label="zzzz507"/>
      <node id="491" label="zzzz508"/>
      <node id="490" label="zzzz509"/>
      <node id="489" label="zzzz510"/>
      <node id="488" label="zzzz511"/>
      <node id="487" label="zzzz512"/>
      <node id="486" label="zzzz517"/>
      <node id="485" label="zzzz518"/>
      <node id="484" label="zzzz519"/>
      <node id="483" label="zzzz520"/>
      <node id="482" label="zzzz521"/>
      <node id="481" label="zzzz522"/>
      <node id="480" label="zzzz523"/>
      <node id="479" label="zzzz526"/>
      <node id="478" label="zzzz527"/>
      <node id="477" label="zzzz528"/>
      <node id="476" label="zzzz529"/>
      <node id="475" label="zzzz530"/>
      <node id="474" label="zzzz531"/>
      <node id="473" label="zzzz532"/>
      <node id="472" label="zzzz533"/>
      <node id="471" label="zzzz536"/>
      <node id="470" label="zzzz537"/>
      <node id="469" label="zzzz538"/>
      <node id="468" label="zzzz539"/>
      <node id="467" label="zzzz540"/>
      <node id="466" label="zzzz541"/>
      <node id="465" label="zzzz542"/>
      <node id="464" label="zzzz543"/>
      <node id="463" label="zzzz544"/>
      <node id="462" label="zzzz548"/>
      <node id="461" label="zzzz549"/>
      <node id="460" label="zzzz551"/>
      <node id="459" label="zzzz553"/>
      <node id="458" label="zzzz555"/>
      <node id="457" label="zzzz556"/>
      <node id="456" label="zzzz557"/>
      <node id="455" label="zzzz565"/>
      <node id="454" label="zzzz566"/>
      <node id="453" label="zzzz567"/>
      <node id="452" label="zzzz568"/>
      <node id="451" label="zzzz569"/>
      <node id="450" label="zzzz574"/>
      <node id="449" label="zzzz575"/>
      <node id="448" label="zzzz581"/>
      <node id="447" label="zzzz582"/>
      <node id="446" label="zzzz583"/>
      <node id="445" label="zzzz584"/>
      <node id="444" label="zzzz585"/>
      <node id="443" label="zzzz586"/>
      <node id="442" label="zzzz588"/>
      <node id="441" label="zzzz589"/>
      <node id="440" label="zzzz590"/>
      <node id="439" label="zzzz591"/>
      <node id="438" label="zzzz592"/>
      <node id="437" label="zzzz593"/>
      <node id="436" label="zzzz594"/>
      <node id="435" label="zzzz595"/>
      <node id="434" label="zzzz596"/>
      <node id="433" label="zzzz597"/>
      <node id="432" label="zzzz598"/>
      <node id="431" label="zzzz599"/>
      <node id="430" label="zzzz600"/>
      <node id="429" label="zzzz601"/>
      <node id="428" label="zzzz602"/>
      <node id="427" label="zzzz603"/>
      <node id="426" label="zzzz604"/>
      <node id="425" label="zzzz605"/>
      <node id="424" label="zzzz606"/>
      <node id="423" label="zzzz607"/>
      <node id="422" label="zzzz608"/>
      <node id="421" label="zzzz609"/>
      <node id="420" label="zzzz610"/>
      <node id="419" label="zzzz611"/>
      <node id="418" label="zzzz612"/>
      <node id="417" label="zzzz613"/>
      <node id="416" label="zzzz618"/>
      <node id="415" label="zzzz619"/>
      <node id="414" label="zzzz620"/>
      <node id="413" label="zzzz622"/>
      <node id="412" label="zzzz623"/>
      <node id="411" label="zzzz624"/>
      <node id="410" label="zzzz625"/>
      <node id="409" label="zzzz626"/>
      <node id="408" label="zzzz627"/>
      <node id="407" label="zzzz628"/>
      <node id="406" label="zzzz630"/>
      <node id="405" label="zzzz631"/>
      <node id="404" label="zzzz632"/>
      <node id="403" label="zzzz636"/>
      <node id="402" label="zzzz638"/>
      <node id="401" label="zzzz640"/>
      <node id="400" label="zzzz642"/>
      <node id="399" label="zzzz644"/>
      <node id="398" label="zzzz647"/>
      <node id="397" label="zzzz649"/>
      <node id="396" label="zzzz650"/>
      <node id="395" label="zzzz651"/>
      <node id="394" label="zzzz652"/>
      <node id="393" label="zzzz653"/>
      <node id="392" label="zzzz655"/>
      <node id="391" label="zzzz656"/>
      <node id="390" label="zzzz657"/>
      <node id="389" label="zzzz658"/>
      <node id="388" label="zzzz659"/>
      <node id="387" label="zzzz660"/>
      <node id="386" label="zzzz661"/>
      <node id="385" label="zzzz662"/>
      <node id="384" label="zzzz663"/>
      <node id="383" label="zzzz664"/>
      <node id="382" label="zzzz665"/>
      <node id="381" label="zzzz666"/>
      <node id="380" label="zzzz667"/>
      <node id="379" label="zzzz668"/>
      <node id="378" label="zzzz669"/>
      <node id="377" label="zzzz670"/>
      <node id="376" label="zzzz671"/>
      <node id="375" label="zzzz672"/>
      <node id="374" label="zzzz680"/>
      <node id="373" label="zzzz682"/>
      <node id="372" label="zzzz683"/>
      <node id="371" label="zzzz684"/>
      <node id="370" label="zzzz685"/>
      <node id="369" label="zzzz686"/>
      <node id="368" label="zzzz689"/>
      <node id="367" label="zzzz691"/>
      <node id="366" label="zzzz692"/>
      <node id="365" label="zzzz694"/>
      <node id="364" label="zzzz695"/>
      <node id="363" label="zzzz696"/>
      <node id="362" label="zzzz697"/>
      <node id="361" label="zzzz698"/>
      <node id="360" label="zzzz699"/>
      <node id="359" label="zzzz702"/>
      <node id="358" label="zzzz703"/>
      <node id="357" label="zzzz704"/>
      <node id="356" label="zzzz705"/>
      <node id="355" label="zzzz706"/>
      <node id="354" label="zzzz707"/>
      <node id="353" label="zzzz708"/>
      <node id="352" label="zzzz709"/>
      <node id="351" label="zzzz710"/>
      <node id="350" label="zzzz711"/>
      <node id="349" label="zzzz715"/>
      <node id="348" label="zzzz716"/>
      <node id="347" label="zzzz717"/>
      <node id="346" label="zzzz720"/>
      <node id="345" label="zzzz721"/>
      <node id="344" label="zzzz722"/>
      <node id="343" label="zzzz725"/>
      <node id="342" label="zzzz730"/>
      <node id="341" label="zzzz731"/>
      <node id="340" label="zzzz732"/>
      <node id="339" label="zzzz737"/>
      <node id="338" label="zzzz738"/>
      <node id="337" label="zzzz739"/>
      <node id="336" label="zzzz740"/>
      <node id="335" label="zzzz750"/>
      <node id="334" label="zzzz751"/>
      <node id="333" label="zzzz752"/>
      <node id="332" label="zzzz753"/>
      <node id="331" label="zzzz754"/>
      <node id="330" label="zzzz755"/>
      <node id="329" label="zzzz756"/>
      <node id="328" label="zzzz757"/>
      <node id="327" label="zzzz760"/>
      <node id="326" label="zzzz761"/>
      <node id="325" label="zzzz762"/>
      <node id="324" label="zzzz763"/>
      <node id="323" label="zzzz764"/>
      <node id="322" label="zzzz765"/>
      <node id="321" label="zzzz766"/>
      <node id="320" label="zzzz767"/>
      <node id="319" label="zzzz768"/>
      <node id="318" label="zzzz769"/>
      <node id="317" label="zzzz770"/>
      <node id="316" label="zzzz771"/>
      <node id="315" label="zzzz772"/>
      <node id="314" label="zzzz773"/>
      <node id="313" label="zzzz774"/>
      <node id="312" label="zzzz775"/>
      <node id="311" label="zzzz776"/>
      <node id="310" label="zzzz777"/>
      <node id="309" label="zzzz778"/>
      <node id="308" label="zzzz779"/>
      <node id="307" label="zzzz780"/>
      <node id="306" label="zzzz781"/>
      <node id="305" label="zzzz782"/>
      <node id="304" label="zzzz783"/>
      <node id="303" label="zzzz784"/>
      <node id="302" label="zzzz785"/>
      <node id="301" label="zzzz786"/>
      <node id="300" label="zzzz787"/>
      <node id="299" label="zzzz789"/>
      <node id="298" label="zzzz790"/>
      <node id="297" label="zzzz791"/>
      <node id="296" label="zzzz792"/>
      <node id="295" label="zzzz793"/>
      <node id="294" label="zzzz794"/>
      <node id="293" label="zzzz795"/>
      <node id="292" label="zzzz797"/>
      <node id="291" label="zzzz798"/>
      <node id="290" label="zzzz802"/>
      <node id="289" label="zzzz803"/>
      <node id="288" label="zzzz804"/>
      <node id="287" label="zzzz805"/>
      <node id="286" label="zzzz806"/>
      <node id="285" label="zzzz807"/>
      <node id="284" label="zzzz808"/>
      <node id="283" label="zzzz809"/>
      <node id="282" label="zzzz810"/>
      <node id="281" label="zzzz811"/>
      <node id="280" label="zzzz812"/>
      <node id="279" label="zzzz813"/>
      <node id="278" label="zzzz814"/>
      <node id="277" label="zzzz815"/>
      <node id="276" label="zzzz816"/>
      <node id="275" label="zzzz820"/>
      <node id="274" label="zzzz821"/>
      <node id="273" label="zzzz822"/>
      <node id="272" label="zzzz831"/>
      <node id="271" label="zzzz832"/>
      <node id="270" label="zzzz833"/>
      <node id="269" label="zzzz834"/>
      <node id="268" label="zzzz835"/>
      <node id="267" label="zzzz836"/>
      <node id="266" label="zzzz837"/>
      <node id="265" label="zzzz838"/>
      <node id="264" label="zzzz840"/>
      <node id="263" label="zzzz841"/>
      <node id="262" label="zzzz843"/>
      <node id="261" label="zzzz844"/>
      <node id="260" label="zzzz845"/>
      <node id="259" label="zzzz846"/>
      <node id="258" label="zzzz847"/>
      <node id="257" label="zzzz855"/>
      <node id="256" label="zzzz856"/>
      <node id="255" label="zzzz857"/>
      <node id="254" label="zzzz858"/>
      <node id="253" label="zzzz859"/>
      <node id="252" label="zzzz860"/>
      <node id="251" label="zzzz861"/>
      <node id="250" label="zzzz862"/>
      <node id="249" label="zzzz864"/>
      <node id="248" label="zzzz865"/>
      <node id="247" label="zzzz867"/>
      <node id="246" label="zzzz869"/>
      <node id="245" label="zzzz870"/>
      <node id="244" label="zzzz873"/>
      <node id="243" label="zzzz874"/>
      <node id="242" label="zzzz875"/>
      <node id="241" label="zzzz877"/>
      <node id="240" label="zzzz879"/>
      <node id="239" label="zzzz881"/>
      <node id="238" label="zzzz882"/>
      <node id="237" label="zzzz883"/>
      <node id="236" label="zzzz885"/>
      <node id="235" label="zzzz886"/>
      <node id="234" label="zzzz887"/>
      <node id="233" label="zzzz888"/>
      <node id="232" label="zzzz889"/>
      <node id="231" label="zzzz902"/>
      <node id="230" label="zzzz903"/>
      <node id="229" label="zzzz905"/>
      <node id="228" label="zzzz909"/>
      <node id="227" label="zzzz910"/>
      <node id="226" label="zzzz912"/>
      <node id="225" label="zzzz913"/>
      <node id="224" label="zzzz914"/>
      <node id="223" label="zzzz921"/>
      <node id="222" label="zzzz922"/>
      <node id="221" label="zzzz923"/>
      <node id="220" label="zzzz924"/>
      <node id="219" label="zzzz931"/>
      <node id="218" label="zzzz932"/>
      <node id="217" label="zzzz933"/>
      <node id="216" label="zzzz934"/>
      <node id="215" label="zzzz935"/>
      <node id="214" label="zzzz936"/>
      <node id="213" label="zzzz940"/>
      <node id="212" label="zzzz941"/>
      <node id="211" label="zzzz942"/>
      <node id="210" label="zzzz944"/>
      <node id="209" label="zzzz946"/>
      <node id="208" label="zzzz948"/>
      <node id="207" label="zzzz950"/>
      <node id="206" label="zzzz953"/>
      <node id="205" label="zzzz955"/>
      <node id="204" label="zzzz956"/>
      <node id="203" label="zzzz957"/>
      <node id="202" label="zzzz958"/>
      <node id="201" label="zzzz960"/>
      <node id="200" label="zzzz961"/>
      <node id="199" label="zzzz965"/>
      <node id="198" label="zzzz966"/>
      <node id="197" label="zzzz967"/>
      <node id="196" label="zzzz968"/>
      <node id="195" label="zzzz969"/>
      <node id="194" label="zzzz970"/>
      <node id="193" label="zzzz971"/>
      <node id="192" label="zzzz972"/>
      <node id="191" label="zzzz973"/>
      <node id="190" label="zzzz974"/>
      <node id="189" label="zzzz975"/>
      <node id="188" label="zzzz976"/>
      <node id="187" label="zzzz977"/>
      <node id="186" label="zzzz978"/>
      <node id="185" label="zzzz981"/>
      <node id="184" label="zzzz982"/>
      <node id="183" label="zzzz983"/>
      <node id="182" label="zzzz984"/>
      <node id="181" label="zzzz985"/>
      <node id="180" label="zzzz986"/>
      <node id="179" label="zzzz987"/>
      <node id="178" label="zzzz988"/>
      <node id="177" label="zzzz992"/>
      <node id="176" label="zzzz993"/>
      <node id="175" label="zzzz994"/>
      <node id="174" label="zzzz996"/>
      <node id="173" label="zzzz998"/>
      <node id="172" label="zzzz999"/>
      <node id="171" label="zzzzz10"/>
      <node id="170" label="zzzzz11"/>
      <node id="169" label="zzzzz12"/>
      <node id="168" label="zzzzz13"/>
      <node id="167" label="zzzzz14"/>
      <node id="166" label="zzzzz15"/>
      <node id="165" label="zzzzz16"/>
      <node id="164" label="zzzzz17"/>
      <node id="163" label="zzzzz18"/>
      <node id="162" label="zzzzz19"/>
      <node id="161" label="zzzzz20"/>
      <node id="160" label="zzzzz21"/>
      <node id="159" label="zzzzz22"/>
      <node id="158" label="zzzzz23"/>
      <node id="157" label="zzzzz24"/>
      <node id="156" label="zzzzz25"/>
      <node id="155" label="zzzzz26"/>
      <node id="154" label="zzzzz27"/>
      <node id="153" label="zzzzz28"/>
      <node id="152" label="zzzzz29"/>
      <node id="151" label="zzzzz30"/>
      <node id="150" label="zzzzz31"/>
      <node id="149" label="zzzzz32"/>
      <node id="148" label="zzzzz33"/>
      <node id="147" label="zzzzz34"/>
      <node id="146" label="zzzzz35"/>
      <node id="145" label="zzzzz36"/>
      <node id="144" label="zzzzz37"/>
      <node id="143" label="zzzzz38"/>
      <node id="142" label="zzzzz39"/>
      <node id="141" label="zzzzz40"/>
      <node id="140" label="zzzzz41"/>
      <node id="139" label="zzzzz42"/>
      <node id="138" label="zzzzz43"/>
      <node id="137" label="zzzzz44"/>
      <node id="136" label="zzzzz45"/>
      <node id="135" label="zzzzz46"/>
      <node id="134" label="zzzzz47"/>
      <node id="133" label="zzzzz48"/>
      <node id="132" label="zzzzz49"/>
      <node id="131" label="zzzzz50"/>
      <node id="130" label="zzzzz51"/>
      <node id="129" label="zzzzz52"/>
      <node id="128" label="zzzzz53"/>
      <node id="127" label="zzzzz54"/>
      <node id="126" label="zzzzz55"/>
      <node id="125" label="zzzzz56"/>
      <node id="124" label="zzzzz57"/>
      <node id="123" label="zzzzz58"/>
      <node id="122" label="zzzzz59"/>
      <node id="121" label="zzzzz60"/>
      <node id="120" label="zzzzz61"/>
      <node id="119" label="zzzzz62"/>
      <node id="118" label="zzzzz63"/>
      <node id="117" label="zzzzz64"/>
      <node id="116" label="zzzzz65"/>
      <node id="115" label="zzzzz66"/>
      <node id="114" label="zzzzz67"/>
      <node id="113" label="zzzzz68"/>
      <node id="112" label="zzzzz69"/>
      <node id="111" label="zzzzz70"/>
      <node id="110" label="zzzzz71"/>
      <node id="109" label="zzzzz72"/>
      <node id="108" label="zzzzz73"/>
      <node id="107" label="zzzzz74"/>
      <node id="106" label="zzzzz75"/>
      <node id="105" label="zzzzz76"/>
      <node id="104" label="zzzzz77"/>
      <node id="103" label="zzzzz78"/>
      <node id="102" label="zzzzz79"/>
      <node id="101" label="zzzzz80"/>
      <node id="100" label="zzzzz81"/>
      <node id="99" label="zzzzz82"/>
      <node id="98" label="zzzzz83"/>
      <node id="97" label="zzzzz84"/>
      <node id="96" label="zzzzz85"/>
      <node id="95" label="zzzzz86"/>
      <node id="94" label="zzzzz87"/>
      <node id="93" label="zzzzz88"/>
      <node id="92" label="zzzzz89"/>
      <node id="91" label="zzzzz90"/>
      <node id="90" label="zzzzz91"/>
      <node id="89" label="zzzzz92"/>
      <node id="88" label="zzzzz93"/>
      <node id="87" label="zzzzz94"/>
      <node id="86" label="zzzzz95"/>
      <node id="85" label="zzzzz96"/>
      <node id="84" label="zzzzz97"/>
      <node id="83" label="zzzzz98"/>
      <node id="82" label="zzzzz99"/>
      <node id="81" label="zzzzzz0"/>
      <node id="80" label="zzzzzz1"/>
      <node id="79" label="zzzzzz2"/>
      <node id="78" label="zzzzzz3"/>
      <node id="77" label="zzzzzz4"/>
      <node id="76" label="zzzzzz5"/>
      <node id="75" label="zzzzzz6"/>
      <node id="74" label="zzzzzz7"/>
      <node id="73" label="zzzzzz8"/>
      <node id="72" label="zzzzzz9"/>
      <edge id="305828" label="zzz1000,zzzz811" source="2109" target="281" cy:directed="1"/>
      <edge id="305827" label="zzz1000,zzzz487" source="2109" target="508" cy:directed="1"/>
      <edge id="305826" label="zzz1000,zzzz971" source="2109" target="193" cy:directed="1"/>
      <edge id="305825" label="zzz1000,zzzz480" source="2109" target="515" cy:directed="1"/>
      <edge id="305824" label="zzz1000,zzzz970" source="2109" target="194" cy:directed="1"/>
      <edge id="305823" label="zzz1000,zzzz477" source="2109" target="518" cy:directed="1"/>
      <edge id="305822" label="zzz1000,zzzz739" source="2109" target="337" cy:directed="1"/>
      <edge id="305821" label="zzz1000,zzzz961" source="2109" target="200" cy:directed="1"/>
      <edge id="305820" label="zzz1000,zzzz642" source="2109" target="400" cy:directed="1"/>
      <edge id="305819" label="zzz1000,zzzz932" source="2109" target="218" cy:directed="1"/>
      <edge id="305818" label="zzz1000,zzzz532" source="2109" target="473" cy:directed="1"/>
      <edge id="305817" label="zzz1000,zzz1242" source="2109" target="1976" cy:directed="1"/>
      <edge id="305816" label="zzz1000,zzzz585" source="2109" target="444" cy:directed="1"/>
      <edge id="305815" label="zzz1000,zzzz711" source="2109" target="350" cy:directed="1"/>
      <edge id="305814" label="zzz1000,zzzz967" source="2109" target="197" cy:directed="1"/>
      <edge id="305813" label="zzz1000,zzzz691" source="2109" target="367" cy:directed="1"/>
      <edge id="305812" label="zzz1000,zzzz838" source="2109" target="265" cy:directed="1"/>
      <edge id="305811" label="zzz1000,zzzz867" source="2109" target="247" cy:directed="1"/>
      <edge id="305810" label="zzz1000,zzzz968" source="2109" target="196" cy:directed="1"/>
      <edge id="305809" label="zzz1000,zzzz973" source="2109" target="191" cy:directed="1"/>
      <edge id="305808" label="zzz1000,zzz1248" source="2109" target="1972" cy:directed="1"/>
      <edge id="305807" label="zzz1000,zzzz504" source="2109" target="495" cy:directed="1"/>
      <edge id="305806" label="zzz1000,zzzz738" source="2109" target="338" cy:directed="1"/>
      <edge id="305805" label="zzz1000,zzz1064" source="2109" target="2068" cy:directed="1"/>
      <edge id="305804" label="zzz1000,zzzz529" source="2109" target="476" cy:directed="1"/>
      <edge id="305803" label="zzz1000,zzz1495" source="2109" target="1797" cy:directed="1"/>
      <edge id="305802" label="zzz1000,zzzz812" source="2109" target="280" cy:directed="1"/>
      <edge id="305801" label="zzz1000,zzzz708" source="2109" target="353" cy:directed="1"/>
      <edge id="305800" label="zzz1000,zzzz821" source="2109" target="274" cy:directed="1"/>
      <edge id="305799" label="zzz1000,zzzz921" source="2109" target="223" cy:directed="1"/>
      <edge id="305798" label="zzz1000,zzzz598" source="2109" target="432" cy:directed="1"/>
      <edge id="305797" label="zzz1000,zzzz603" source="2109" target="427" cy:directed="1"/>
      <edge id="305796" label="zzz1000,zzzz606" source="2109" target="424" cy:directed="1"/>
      <edge id="305795" label="zzz1000,zzzz533" source="2109" target="472" cy:directed="1"/>
      <edge id="305794" label="zzz1000,zzzz972" source="2109" target="192" cy:directed="1"/>
      <edge id="305793" label="zzz1000,zzz1010" source="2109" target="2103" cy:directed="1"/>
      <edge id="305792" label="zzz1000,zzzz956" source="2109" target="204" cy:directed="1"/>
      <edge id="305791" label="zzz1000,zzzz999" source="2109" target="172" cy:directed="1"/>
      <edge id="305790" label="zzz1000,zzzz542" source="2109" target="465" cy:directed="1"/>
      <edge id="305789" label="zzz1000,zzz1365" source="2109" target="1897" cy:directed="1"/>
      <edge id="305788" label="zzz1000,zzzz456" source="2109" target="534" cy:directed="1"/>
      <edge id="305787" label="zzz1000,zzzz531" source="2109" target="474" cy:directed="1"/>
      <edge id="305786" label="zzz1000,zzzz924" source="2109" target="220" cy:directed="1"/>
      <edge id="305785" label="zzz1000,zzzz540" source="2109" target="467" cy:directed="1"/>
      <edge id="305784" label="zzz1000,zzzz910" source="2109" target="227" cy:directed="1"/>
      <edge id="305783" label="zzz1000,zzzz931" source="2109" target="219" cy:directed="1"/>
      <edge id="305782" label="zzz1000,zzz1233" source="2109" target="1982" cy:directed="1"/>
      <edge id="305781" label="zzz1000,zzzz604" source="2109" target="426" cy:directed="1"/>
      <edge id="305780" label="zzz1000,zzzz935" source="2109" target="215" cy:directed="1"/>
      <edge id="305779" label="zzz1000,zzzz474" source="2109" target="521" cy:directed="1"/>
      <edge id="305778" label="zzz1000,zzzz611" source="2109" target="419" cy:directed="1"/>
      <edge id="305777" label="zzz1000,zzz1205" source="2109" target="2000" cy:directed="1"/>
      <edge id="305776" label="zzz1000,zzzz601" source="2109" target="429" cy:directed="1"/>
      <edge id="305775" label="zzz1000,zzzz602" source="2109" target="428" cy:directed="1"/>
      <edge id="305774" label="zzz1000,zzz1119" source="2109" target="2051" cy:directed="1"/>
      <edge id="305773" label="zzz1000,zzzz605" source="2109" target="425" cy:directed="1"/>
      <edge id="305772" label="zzz1000,zzz1411" source="2109" target="1865" cy:directed="1"/>
      <edge id="305771" label="zzz1000,zzzz583" source="2109" target="446" cy:directed="1"/>
      <edge id="305770" label="zzz1000,zzz1397" source="2109" target="1875" cy:directed="1"/>
      <edge id="305769" label="zzz1000,zzz1100" source="2109" target="2060" cy:directed="1"/>
      <edge id="305768" label="zzz1000,zzzz574" source="2109" target="450" cy:directed="1"/>
      <edge id="305767" label="zzz1000,zzzz623" source="2109" target="412" cy:directed="1"/>
      <edge id="305766" label="zzz1000,zzzz740" source="2109" target="336" cy:directed="1"/>
      <edge id="305765" label="zzz1000,zzzz790" source="2109" target="298" cy:directed="1"/>
      <edge id="305764" label="zzz1000,zzzz584" source="2109" target="445" cy:directed="1"/>
      <edge id="305763" label="zzz1000,zzzz709" source="2109" target="352" cy:directed="1"/>
      <edge id="305762" label="zzz1000,zzzz640" source="2109" target="401" cy:directed="1"/>
      <edge id="305761" label="zzz1000,zzzz934" source="2109" target="216" cy:directed="1"/>
      <edge id="305760" label="zzz1000,zzzz537" source="2109" target="470" cy:directed="1"/>
      <edge id="305759" label="zzz1000,zzzz810" source="2109" target="282" cy:directed="1"/>
      <edge id="305758" label="zzz1000,zzzz966" source="2109" target="198" cy:directed="1"/>
      <edge id="305757" label="zzz1000,zzz1132" source="2109" target="2044" cy:directed="1"/>
      <edge id="305756" label="zzz1000,zzz1033" source="2109" target="2086" cy:directed="1"/>
      <edge id="305755" label="zzz1000,zzzz479" source="2109" target="516" cy:directed="1"/>
      <edge id="305754" label="zzz1000,zzzz538" source="2109" target="469" cy:directed="1"/>
      <edge id="305753" label="zzz1000,zzzz607" source="2109" target="423" cy:directed="1"/>
      <edge id="305752" label="zzz1000,zzz1488" source="2109" target="1804" cy:directed="1"/>
      <edge id="305751" label="zzz1000,zzz1442" source="2109" target="1840" cy:directed="1"/>
      <edge id="305750" label="zzz1000,zzzz528" source="2109" target="477" cy:directed="1"/>
      <edge id="305749" label="zzz1000,zzzz608" source="2109" target="422" cy:directed="1"/>
      <edge id="305748" label="zzz1000,zzzz805" source="2109" target="287" cy:directed="1"/>
      <edge id="305747" label="zzz1000,zzzz969" source="2109" target="195" cy:directed="1"/>
      <edge id="305746" label="zzz1000,zzzz539" source="2109" target="468" cy:directed="1"/>
      <edge id="305745" label="zzz1000,zzzz597" source="2109" target="433" cy:directed="1"/>
      <edge id="305744" label="zzz1000,zzzz762" source="2109" target="325" cy:directed="1"/>
      <edge id="305743" label="zzz1000,zzz1234" source="2109" target="1981" cy:directed="1"/>
      <edge id="305742" label="zzz1000,zzz1368" source="2109" target="1896" cy:directed="1"/>
      <edge id="305741" label="zzz1000,zzzz703" source="2109" target="358" cy:directed="1"/>
      <edge id="305740" label="zzz1000,zzz1017" source="2109" target="2097" cy:directed="1"/>
      <edge id="305739" label="zzz1000,zzzz600" source="2109" target="430" cy:directed="1"/>
      <edge id="305738" label="zzz1000,zzz1325" source="2109" target="1927" cy:directed="1"/>
      <edge id="305737" label="zzz1000,zzzz865" source="2109" target="248" cy:directed="1"/>
      <edge id="305736" label="zzz1000,zzzz589" source="2109" target="441" cy:directed="1"/>
      <edge id="305735" label="zzz1000,zzzz765" source="2109" target="322" cy:directed="1"/>
      <edge id="305734" label="zzz1000,zzz1015" source="2109" target="2099" cy:directed="1"/>
      <edge id="305733" label="zzz1000,zzzz527" source="2109" target="478" cy:directed="1"/>
      <edge id="305732" label="zzz1000,zzzz609" source="2109" target="421" cy:directed="1"/>
      <edge id="305731" label="zzz1000,zzzz720" source="2109" target="346" cy:directed="1"/>
      <edge id="305730" label="zzz1000,zzz1535" source="2109" target="1771" cy:directed="1"/>
      <edge id="305729" label="zzz1000,zzzz599" source="2109" target="431" cy:directed="1"/>
      <edge id="305728" label="zzz1000,zzzz814" source="2109" target="278" cy:directed="1"/>
      <edge id="305727" label="zzz1000,zzz1319" source="2109" target="1930" cy:directed="1"/>
      <edge id="305726" label="zzz1000,zzz1399" source="2109" target="1873" cy:directed="1"/>
      <edge id="305725" label="zzz1000,zzzz536" source="2109" target="471" cy:directed="1"/>
      <edge id="305724" label="zzz1000,zzzz657" source="2109" target="390" cy:directed="1"/>
      <edge id="305723" label="zzz1000,zzzz710" source="2109" target="351" cy:directed="1"/>
      <edge id="305722" label="zzz1000,zzzz530" source="2109" target="475" cy:directed="1"/>
      <edge id="305721" label="zzz1000,zzz1008" source="2109" target="2105" cy:directed="1"/>
      <edge id="305720" label="zzz1000,zzz1156" source="2109" target="2031" cy:directed="1"/>
      <edge id="305719" label="zzz1000,zzzz478" source="2109" target="517" cy:directed="1"/>
      <edge id="305718" label="zzz1000,zzzz888" source="2109" target="233" cy:directed="1"/>
      <edge id="305717" label="zzz1000,zzzz913" source="2109" target="225" cy:directed="1"/>
      <edge id="305716" label="zzz1000,zzzz960" source="2109" target="201" cy:directed="1"/>
      <edge id="305715" label="zzz1000,zzzz521" source="2109" target="482" cy:directed="1"/>
      <edge id="305714" label="zzz1000,zzzz612" source="2109" target="418" cy:directed="1"/>
      <edge id="305713" label="zzz1000,zzzz763" source="2109" target="324" cy:directed="1"/>
      <edge id="305712" label="zzz1000,zzz1169" source="2109" target="2024" cy:directed="1"/>
      <edge id="305711" label="zzz1000,zzz1274" source="2109" target="1956" cy:directed="1"/>
      <edge id="305710" label="zzz1000,zzz1476" source="2109" target="1815" cy:directed="1"/>
      <edge id="305709" label="zzz1000,zzz1245" source="2109" target="1974" cy:directed="1"/>
      <edge id="305708" label="zzz1000,zzz1378" source="2109" target="1889" cy:directed="1"/>
      <edge id="305707" label="zzz1000,zzzz862" source="2109" target="250" cy:directed="1"/>
      <edge id="305706" label="zzz1000,zzz1346" source="2109" target="1912" cy:directed="1"/>
      <edge id="305705" label="zzz1000,zzz1396" source="2109" target="1876" cy:directed="1"/>
      <edge id="305704" label="zzz1000,zzzz457" source="2109" target="533" cy:directed="1"/>
      <edge id="305703" label="zzz1000,zzz1009" source="2109" target="2104" cy:directed="1"/>
      <edge id="305702" label="zzz1000,zzz1013" source="2109" target="2100" cy:directed="1"/>
      <edge id="305701" label="zzz1000,zzz1385" source="2109" target="1885" cy:directed="1"/>
      <edge id="305700" label="zzz1000,zzzz410" source="2109" target="562" cy:directed="1"/>
      <edge id="305699" label="zzz1000,zzzz518" source="2109" target="485" cy:directed="1"/>
      <edge id="305698" label="zzz1000,zzzz588" source="2109" target="442" cy:directed="1"/>
      <edge id="305697" label="zzz1000,zzz1250" source="2109" target="1970" cy:directed="1"/>
      <edge id="305696" label="zzz1000,zzz1530" source="2109" target="1774" cy:directed="1"/>
      <edge id="305695" label="zzz1000,zzzz459" source="2109" target="531" cy:directed="1"/>
      <edge id="305694" label="zzz1000,zzzz503" source="2109" target="496" cy:directed="1"/>
      <edge id="305693" label="zzz1000,zzz1372" source="2109" target="1894" cy:directed="1"/>
      <edge id="305692" label="zzz1000,zzzz792" source="2109" target="296" cy:directed="1"/>
      <edge id="305691" label="zzz1000,zzz1185" source="2109" target="2015" cy:directed="1"/>
      <edge id="305690" label="zzz1000,zzz1358" source="2109" target="1902" cy:directed="1"/>
      <edge id="305689" label="zzz1000,zzzz454" source="2109" target="535" cy:directed="1"/>
      <edge id="305688" label="zzz1000,zzzz656" source="2109" target="391" cy:directed="1"/>
      <edge id="305687" label="zzz1000,zzzz837" source="2109" target="266" cy:directed="1"/>
      <edge id="305686" label="zzz1000,zzzz705" source="2109" target="356" cy:directed="1"/>
      <edge id="305685" label="zzz1000,zzz1235" source="2109" target="1980" cy:directed="1"/>
      <edge id="305684" label="zzz1000,zzzz568" source="2109" target="452" cy:directed="1"/>
      <edge id="305683" label="zzz1000,zzz1221" source="2109" target="1989" cy:directed="1"/>
      <edge id="305682" label="zzz1000,zzzz569" source="2109" target="451" cy:directed="1"/>
      <edge id="305681" label="zzz1000,zzzz619" source="2109" target="415" cy:directed="1"/>
      <edge id="305680" label="zzz1000,zzz1354" source="2109" target="1906" cy:directed="1"/>
      <edge id="305679" label="zzz1000,zzzz523" source="2109" target="480" cy:directed="1"/>
      <edge id="305678" label="zzz1000,zzzz981" source="2109" target="185" cy:directed="1"/>
      <edge id="305677" label="zzz1000,zzz1208" source="2109" target="1998" cy:directed="1"/>
      <edge id="305676" label="zzz1000,zzz1284" source="2109" target="1948" cy:directed="1"/>
      <edge id="305675" label="zzz1000,zzzz468" source="2109" target="525" cy:directed="1"/>
      <edge id="305674" label="zzz1000,zzzz882" source="2109" target="238" cy:directed="1"/>
      <edge id="305673" label="zzz1000,zzz1184" source="2109" target="2016" cy:directed="1"/>
      <edge id="305672" label="zzz1000,zzzz864" source="2109" target="249" cy:directed="1"/>
      <edge id="305671" label="zzz1000,zzz1218" source="2109" target="1991" cy:directed="1"/>
      <edge id="305670" label="zzz1000,zzz1545" source="2109" target="1765" cy:directed="1"/>
      <edge id="305669" label="zzz1000,zzzz847" source="2109" target="258" cy:directed="1"/>
      <edge id="305668" label="zzz1000,zzzz965" source="2109" target="199" cy:directed="1"/>
      <edge id="305667" label="zzz1000,zzzz996" source="2109" target="174" cy:directed="1"/>
      <edge id="305666" label="zzz1000,zzz1175" source="2109" target="2021" cy:directed="1"/>
      <edge id="305665" label="zzz1000,zzzz507" source="2109" target="492" cy:directed="1"/>
      <edge id="305664" label="zzz1000,zzzz548" source="2109" target="462" cy:directed="1"/>
      <edge id="305663" label="zzz1000,zzzz816" source="2109" target="276" cy:directed="1"/>
      <edge id="305662" label="zzz1000,zzz1038" source="2109" target="2084" cy:directed="1"/>
      <edge id="305661" label="zzz1000,zzzz707" source="2109" target="354" cy:directed="1"/>
      <edge id="305660" label="zzz1000,zzz1523" source="2109" target="1780" cy:directed="1"/>
      <edge id="305659" label="zzz1000,zzzz756" source="2109" target="329" cy:directed="1"/>
      <edge id="305658" label="zzz1000,zzz1215" source="2109" target="1994" cy:directed="1"/>
      <edge id="305657" label="zzz1000,zzz1441" source="2109" target="1841" cy:directed="1"/>
      <edge id="305656" label="zzz1000,zzz1445" source="2109" target="1837" cy:directed="1"/>
      <edge id="305655" label="zzz1000,zzzz764" source="2109" target="323" cy:directed="1"/>
      <edge id="305654" label="zzz1000,zzz1067" source="2109" target="2066" cy:directed="1"/>
      <edge id="305653" label="zzz1000,zzz1223" source="2109" target="1988" cy:directed="1"/>
      <edge id="305652" label="zzz1000,zzzz692" source="2109" target="366" cy:directed="1"/>
      <edge id="305651" label="zzz1000,zzz1541" source="2109" target="1768" cy:directed="1"/>
      <edge id="305650" label="zzz1000,zzz1168" source="2109" target="2025" cy:directed="1"/>
      <edge id="305649" label="zzz1000,zzzz489" source="2109" target="506" cy:directed="1"/>
      <edge id="305648" label="zzz1000,zzzz626" source="2109" target="409" cy:directed="1"/>
      <edge id="305647" label="zzz1000,zzz1398" source="2109" target="1874" cy:directed="1"/>
      <edge id="305646" label="zzz1000,zzz1159" source="2109" target="2029" cy:directed="1"/>
      <edge id="305645" label="zzz1000,zzz1504" source="2109" target="1788" cy:directed="1"/>
      <edge id="305644" label="zzz1000,zzzz409" source="2109" target="563" cy:directed="1"/>
      <edge id="305643" label="zzz1000,zzzz473" source="2109" target="522" cy:directed="1"/>
      <edge id="305642" label="zzz1000,zzzz755" source="2109" target="330" cy:directed="1"/>
      <edge id="305641" label="zzz1000,zzzz813" source="2109" target="279" cy:directed="1"/>
      <edge id="305640" label="zzz1000,zzzz731" source="2109" target="341" cy:directed="1"/>
      <edge id="305639" label="zzz1000,zzzz887" source="2109" target="234" cy:directed="1"/>
      <edge id="305638" label="zzz1000,zzzz553" source="2109" target="459" cy:directed="1"/>
      <edge id="305637" label="zzz1000,zzzz624" source="2109" target="411" cy:directed="1"/>
      <edge id="305636" label="zzz1000,zzzz683" source="2109" target="372" cy:directed="1"/>
      <edge id="305635" label="zzz1000,zzz1018" source="2109" target="2096" cy:directed="1"/>
      <edge id="305634" label="zzz1000,zzz1098" source="2109" target="2062" cy:directed="1"/>
      <edge id="305633" label="zzz1000,zzz1324" source="2109" target="1928" cy:directed="1"/>
      <edge id="305632" label="zzz1000,zzz1446" source="2109" target="1836" cy:directed="1"/>
      <edge id="305631" label="zzz1000,zzzz685" source="2109" target="370" cy:directed="1"/>
      <edge id="305630" label="zzz1000,zzzz803" source="2109" target="289" cy:directed="1"/>
      <edge id="305629" label="zzz1000,zzzz856" source="2109" target="256" cy:directed="1"/>
      <edge id="305628" label="zzz1000,zzz1128" source="2109" target="2047" cy:directed="1"/>
      <edge id="305627" label="zzz1000,zzz1190" source="2109" target="2013" cy:directed="1"/>
      <edge id="305626" label="zzz1000,zzz1390" source="2109" target="1881" cy:directed="1"/>
      <edge id="305625" label="zzz1000,zzz1447" source="2109" target="1835" cy:directed="1"/>
      <edge id="305624" label="zzz1000,zzzz472" source="2109" target="523" cy:directed="1"/>
      <edge id="305623" label="zzz1000,zzzz753" source="2109" target="332" cy:directed="1"/>
      <edge id="305622" label="zzz1000,zzz1062" source="2109" target="2070" cy:directed="1"/>
      <edge id="305621" label="zzz1000,zzzz469" source="2109" target="524" cy:directed="1"/>
      <edge id="305620" label="zzz1000,zzz1070" source="2109" target="2063" cy:directed="1"/>
      <edge id="305619" label="zzz1000,zzz1199" source="2109" target="2006" cy:directed="1"/>
      <edge id="305618" label="zzz1000,zzz1044" source="2109" target="2081" cy:directed="1"/>
      <edge id="305617" label="zzz1000,zzz1349" source="2109" target="1909" cy:directed="1"/>
      <edge id="305616" label="zzz1000,zzzz808" source="2109" target="284" cy:directed="1"/>
      <edge id="305615" label="zzz1000,zzz1003" source="2109" target="2107" cy:directed="1"/>
      <edge id="305614" label="zzz1000,zzz1249" source="2109" target="1971" cy:directed="1"/>
      <edge id="305613" label="zzz1000,zzz1443" source="2109" target="1839" cy:directed="1"/>
      <edge id="305612" label="zzz1000,zzzz555" source="2109" target="458" cy:directed="1"/>
      <edge id="305611" label="zzz1000,zzzz793" source="2109" target="295" cy:directed="1"/>
      <edge id="305610" label="zzz1000,zzz1160" source="2109" target="2028" cy:directed="1"/>
      <edge id="305609" label="zzz1000,zzz1180" source="2109" target="2018" cy:directed="1"/>
      <edge id="305608" label="zzz1000,zzz1207" source="2109" target="1999" cy:directed="1"/>
      <edge id="305607" label="zzz1000,zzz1478" source="2109" target="1813" cy:directed="1"/>
      <edge id="305606" label="zzz1000,zzz1482" source="2109" target="1810" cy:directed="1"/>
      <edge id="305605" label="zzz1000,zzzz426" source="2109" target="551" cy:directed="1"/>
      <edge id="305604" label="zzz1000,zzzz435" source="2109" target="545" cy:directed="1"/>
      <edge id="305603" label="zzz1000,zzzz556" source="2109" target="457" cy:directed="1"/>
      <edge id="305602" label="zzz1000,zzz1542" source="2109" target="1767" cy:directed="1"/>
      <edge id="305601" label="zzz1000,zzzz791" source="2109" target="297" cy:directed="1"/>
      <edge id="305600" label="zzz1000,zzzz933" source="2109" target="217" cy:directed="1"/>
      <edge id="305599" label="zzz1000,zzz1483" source="2109" target="1809" cy:directed="1"/>
      <edge id="305598" label="zzz1000,zzzz660" source="2109" target="387" cy:directed="1"/>
      <edge id="305597" label="zzz1000,zzzz665" source="2109" target="382" cy:directed="1"/>
      <edge id="305596" label="zzz1000,zzz1496" source="2109" target="1796" cy:directed="1"/>
      <edge id="305595" label="zzz1000,zzz1546" source="2109" target="1764" cy:directed="1"/>
      <edge id="305594" label="zzz1000,zzzz549" source="2109" target="461" cy:directed="1"/>
      <edge id="305593" label="zzz1000,zzz1189" source="2109" target="2014" cy:directed="1"/>
      <edge id="305592" label="zzz1000,zzz1195" source="2109" target="2010" cy:directed="1"/>
      <edge id="305591" label="zzz1000,zzz1202" source="2109" target="2003" cy:directed="1"/>
      <edge id="305590" label="zzz1000,zzz1244" source="2109" target="1975" cy:directed="1"/>
      <edge id="305589" label="zzz1000,zzz1395" source="2109" target="1877" cy:directed="1"/>
      <edge id="305588" label="zzz1000,zzz1439" source="2109" target="1843" cy:directed="1"/>
      <edge id="305587" label="zzz1000,zzz1458" source="2109" target="1824" cy:directed="1"/>
      <edge id="305586" label="zzz1000,zzzz500" source="2109" target="498" cy:directed="1"/>
      <edge id="305585" label="zzz1000,zzzz669" source="2109" target="378" cy:directed="1"/>
      <edge id="305584" label="zzz1000,zzzz706" source="2109" target="355" cy:directed="1"/>
      <edge id="305583" label="zzz1000,zzz1034" source="2109" target="2085" cy:directed="1"/>
      <edge id="305582" label="zzz1000,zzz1484" source="2109" target="1808" cy:directed="1"/>
      <edge id="305581" label="zzz1000,zzz1485" source="2109" target="1807" cy:directed="1"/>
      <edge id="305580" label="zzz1000,zzz1486" source="2109" target="1806" cy:directed="1"/>
      <edge id="305579" label="zzz1000,zzzz659" source="2109" target="388" cy:directed="1"/>
      <edge id="305578" label="zzz1000,zzzz667" source="2109" target="380" cy:directed="1"/>
      <edge id="305577" label="zzz1000,zzzz732" source="2109" target="340" cy:directed="1"/>
      <edge id="305576" label="zzz1000,zzzz754" source="2109" target="331" cy:directed="1"/>
      <edge id="305575" label="zzz1000,zzz1139" source="2109" target="2039" cy:directed="1"/>
      <edge id="305574" label="zzz1000,zzz1251" source="2109" target="1969" cy:directed="1"/>
      <edge id="305573" label="zzz1000,zzz1477" source="2109" target="1814" cy:directed="1"/>
      <edge id="305572" label="zzz1000,zzzz978" source="2109" target="186" cy:directed="1"/>
      <edge id="305571" label="zzz1000,zzzz993" source="2109" target="176" cy:directed="1"/>
      <edge id="305570" label="zzz1000,zzz1030" source="2109" target="2087" cy:directed="1"/>
      <edge id="305569" label="zzz1000,zzz1144" source="2109" target="2036" cy:directed="1"/>
      <edge id="305568" label="zzz1000,zzzz519" source="2109" target="484" cy:directed="1"/>
      <edge id="305567" label="zzz1000,zzzz668" source="2109" target="379" cy:directed="1"/>
      <edge id="305566" label="zzz1000,zzzz846" source="2109" target="259" cy:directed="1"/>
      <edge id="305565" label="zzz1000,zzzz944" source="2109" target="210" cy:directed="1"/>
      <edge id="305564" label="zzz1000,zzz1457" source="2109" target="1825" cy:directed="1"/>
      <edge id="305563" label="zzz1000,zzz1494" source="2109" target="1798" cy:directed="1"/>
      <edge id="305562" label="zzz1000,zzzz627" source="2109" target="408" cy:directed="1"/>
      <edge id="305561" label="zzz1000,zzzz658" source="2109" target="389" cy:directed="1"/>
      <edge id="305560" label="zzz1000,zzz1304" source="2109" target="1938" cy:directed="1"/>
      <edge id="305559" label="zzz1000,zzzz436" source="2109" target="544" cy:directed="1"/>
      <edge id="305558" label="zzz1000,zzzz663" source="2109" target="384" cy:directed="1"/>
      <edge id="305557" label="zzz1000,zzzz670" source="2109" target="377" cy:directed="1"/>
      <edge id="305556" label="zzz1000,zzzz757" source="2109" target="328" cy:directed="1"/>
      <edge id="305555" label="zzz1000,zzz1002" source="2109" target="2108" cy:directed="1"/>
      <edge id="305554" label="zzz1000,zzz1196" source="2109" target="2009" cy:directed="1"/>
      <edge id="305553" label="zzz1000,zzz1214" source="2109" target="1995" cy:directed="1"/>
      <edge id="305552" label="zzz1000,zzz1386" source="2109" target="1884" cy:directed="1"/>
      <edge id="305551" label="zzz1000,zzzz662" source="2109" target="385" cy:directed="1"/>
      <edge id="305550" label="zzz1000,zzzz802" source="2109" target="290" cy:directed="1"/>
      <edge id="305549" label="zzz1000,zzz1201" source="2109" target="2004" cy:directed="1"/>
      <edge id="305548" label="zzz1000,zzz1203" source="2109" target="2002" cy:directed="1"/>
      <edge id="305547" label="zzz1000,zzz1210" source="2109" target="1996" cy:directed="1"/>
      <edge id="305546" label="zzz1000,zzz1363" source="2109" target="1898" cy:directed="1"/>
      <edge id="305545" label="zzz1000,zzz1471" source="2109" target="1817" cy:directed="1"/>
      <edge id="305544" label="zzz1000,zzz1529" source="2109" target="1775" cy:directed="1"/>
      <edge id="305543" label="zzz1000,zzzz815" source="2109" target="277" cy:directed="1"/>
      <edge id="305542" label="zzz1000,zzzz845" source="2109" target="260" cy:directed="1"/>
      <edge id="305541" label="zzz1000,zzzz902" source="2109" target="231" cy:directed="1"/>
      <edge id="305540" label="zzz1000,zzzz806" source="2109" target="286" cy:directed="1"/>
      <edge id="305539" label="zzz1000,zzz1023" source="2109" target="2092" cy:directed="1"/>
      <edge id="305538" label="zzz1000,zzz1452" source="2109" target="1830" cy:directed="1"/>
      <edge id="305537" label="zzz1000,zzz1521" source="2109" target="1782" cy:directed="1"/>
      <edge id="305536" label="zzz1000,zzzz974" source="2109" target="190" cy:directed="1"/>
      <edge id="305535" label="zzz1000,zzzz992" source="2109" target="177" cy:directed="1"/>
      <edge id="305534" label="zzz1000,zzz1152" source="2109" target="2033" cy:directed="1"/>
      <edge id="305533" label="zzz1000,zzzz672" source="2109" target="375" cy:directed="1"/>
      <edge id="305532" label="zzz1000,zzzz773" source="2109" target="314" cy:directed="1"/>
      <edge id="305531" label="zzz1000,zzz1352" source="2109" target="1907" cy:directed="1"/>
      <edge id="305530" label="zzz1000,zzz1379" source="2109" target="1888" cy:directed="1"/>
      <edge id="305529" label="zzz1000,zzz1455" source="2109" target="1827" cy:directed="1"/>
      <edge id="305528" label="zzz1000,zzz1524" source="2109" target="1779" cy:directed="1"/>
      <edge id="305527" label="zzz1000,zzzz407" source="2109" target="565" cy:directed="1"/>
      <edge id="305526" label="zzz1000,zzzz686" source="2109" target="369" cy:directed="1"/>
      <edge id="305525" label="zzz1000,zzzz789" source="2109" target="299" cy:directed="1"/>
      <edge id="305524" label="zzz1000,zzz1230" source="2109" target="1983" cy:directed="1"/>
      <edge id="305523" label="zzz1000,zzz1289" source="2109" target="1945" cy:directed="1"/>
      <edge id="305522" label="zzz1000,zzz1347" source="2109" target="1911" cy:directed="1"/>
      <edge id="305521" label="zzz1000,zzz1450" source="2109" target="1832" cy:directed="1"/>
      <edge id="305520" label="zzz1000,zzzz488" source="2109" target="507" cy:directed="1"/>
      <edge id="305519" label="zzz1000,zzzz661" source="2109" target="386" cy:directed="1"/>
      <edge id="305518" label="zzz1000,zzzz975" source="2109" target="189" cy:directed="1"/>
      <edge id="305517" label="zzz1000,zzz1228" source="2109" target="1984" cy:directed="1"/>
      <edge id="305516" label="zzz1000,zzz1265" source="2109" target="1962" cy:directed="1"/>
      <edge id="305515" label="zzz1000,zzzz858" source="2109" target="254" cy:directed="1"/>
      <edge id="305514" label="zzz1000,zzzz946" source="2109" target="209" cy:directed="1"/>
      <edge id="305513" label="zzz1000,zzz1048" source="2109" target="2080" cy:directed="1"/>
      <edge id="305512" label="zzz1000,zzz1162" source="2109" target="2027" cy:directed="1"/>
      <edge id="305511" label="zzz1000,zzz1240" source="2109" target="1977" cy:directed="1"/>
      <edge id="305510" label="zzz1000,zzz1293" source="2109" target="1943" cy:directed="1"/>
      <edge id="305509" label="zzz1000,zzz1391" source="2109" target="1880" cy:directed="1"/>
      <edge id="305508" label="zzz1000,zzz1413" source="2109" target="1864" cy:directed="1"/>
      <edge id="305507" label="zzz1000,zzz1421" source="2109" target="1856" cy:directed="1"/>
      <edge id="305506" label="zzz1000,zzz1422" source="2109" target="1855" cy:directed="1"/>
      <edge id="305505" label="zzz1000,zzz1480" source="2109" target="1812" cy:directed="1"/>
      <edge id="305504" label="zzz1000,zzz1501" source="2109" target="1791" cy:directed="1"/>
      <edge id="305503" label="zzz1000,zzzz442" source="2109" target="543" cy:directed="1"/>
      <edge id="305502" label="zzz1000,zzzz652" source="2109" target="394" cy:directed="1"/>
      <edge id="305501" label="zzz1000,zzzz671" source="2109" target="376" cy:directed="1"/>
      <edge id="305500" label="zzz1000,zzzz905" source="2109" target="229" cy:directed="1"/>
      <edge id="305499" label="zzz1000,zzz1054" source="2109" target="2077" cy:directed="1"/>
      <edge id="305498" label="zzz1000,zzz1106" source="2109" target="2059" cy:directed="1"/>
      <edge id="305497" label="zzz1000,zzz1294" source="2109" target="1942" cy:directed="1"/>
      <edge id="305496" label="zzz1000,zzz1303" source="2109" target="1939" cy:directed="1"/>
      <edge id="305495" label="zzz1000,zzz1403" source="2109" target="1869" cy:directed="1"/>
      <edge id="305494" label="zzz1000,zzz1415" source="2109" target="1862" cy:directed="1"/>
      <edge id="305493" label="zzz1000,zzz1453" source="2109" target="1829" cy:directed="1"/>
      <edge id="305492" label="zzz1000,zzz1525" source="2109" target="1778" cy:directed="1"/>
      <edge id="305491" label="zzz1000,zzzz485" source="2109" target="510" cy:directed="1"/>
      <edge id="305490" label="zzz1000,zzzz655" source="2109" target="392" cy:directed="1"/>
      <edge id="305489" label="zzz1000,zzzz768" source="2109" target="319" cy:directed="1"/>
      <edge id="305488" label="zzz1000,zzz1296" source="2109" target="1941" cy:directed="1"/>
      <edge id="305487" label="zzz1000,zzz1311" source="2109" target="1935" cy:directed="1"/>
      <edge id="305486" label="zzz1000,zzz1329" source="2109" target="1924" cy:directed="1"/>
      <edge id="305485" label="zzz1000,zzz1407" source="2109" target="1867" cy:directed="1"/>
      <edge id="305484" label="zzz1000,zzz1532" source="2109" target="1773" cy:directed="1"/>
      <edge id="305483" label="zzz1000,zzzz804" source="2109" target="288" cy:directed="1"/>
      <edge id="305482" label="zzz1000,zzz1122" source="2109" target="2049" cy:directed="1"/>
      <edge id="305481" label="zzz1000,zzz1130" source="2109" target="2045" cy:directed="1"/>
      <edge id="305480" label="zzz1000,zzz1137" source="2109" target="2040" cy:directed="1"/>
      <edge id="305479" label="zzz1000,zzz1172" source="2109" target="2022" cy:directed="1"/>
      <edge id="305478" label="zzz1000,zzz1361" source="2109" target="1899" cy:directed="1"/>
      <edge id="305477" label="zzz1000,zzz1402" source="2109" target="1870" cy:directed="1"/>
      <edge id="305476" label="zzz1000,zzz1462" source="2109" target="1821" cy:directed="1"/>
      <edge id="305475" label="zzz1000,zzz1493" source="2109" target="1799" cy:directed="1"/>
      <edge id="305474" label="zzz1000,zzz1500" source="2109" target="1792" cy:directed="1"/>
      <edge id="305473" label="zzz1000,zzzz433" source="2109" target="547" cy:directed="1"/>
      <edge id="305472" label="zzz1000,zzzz610" source="2109" target="420" cy:directed="1"/>
      <edge id="305471" label="zzz1000,zzzz689" source="2109" target="368" cy:directed="1"/>
      <edge id="305470" label="zzz1000,zzzz752" source="2109" target="333" cy:directed="1"/>
      <edge id="305469" label="zzz1000,zzzz948" source="2109" target="208" cy:directed="1"/>
      <edge id="305468" label="zzz1000,zzzz998" source="2109" target="173" cy:directed="1"/>
      <edge id="305467" label="zzz1000,zzz1133" source="2109" target="2043" cy:directed="1"/>
      <edge id="305466" label="zzz1000,zzz1157" source="2109" target="2030" cy:directed="1"/>
      <edge id="305465" label="zzz1000,zzz1209" source="2109" target="1997" cy:directed="1"/>
      <edge id="305464" label="zzz1000,zzz1236" source="2109" target="1979" cy:directed="1"/>
      <edge id="305463" label="zzz1000,zzz1436" source="2109" target="1846" cy:directed="1"/>
      <edge id="305462" label="zzz1000,zzz1449" source="2109" target="1833" cy:directed="1"/>
      <edge id="305461" label="zzz1000,zzzz481" source="2109" target="514" cy:directed="1"/>
      <edge id="305460" label="zzz1000,zzzz497" source="2109" target="500" cy:directed="1"/>
      <edge id="305459" label="zzz1000,zzzz575" source="2109" target="449" cy:directed="1"/>
      <edge id="305458" label="zzz1000,zzzz666" source="2109" target="381" cy:directed="1"/>
      <edge id="305457" label="zzz1000,zzzz682" source="2109" target="373" cy:directed="1"/>
      <edge id="305456" label="zzz1000,zzzz772" source="2109" target="315" cy:directed="1"/>
      <edge id="305455" label="zzz1000,zzzz807" source="2109" target="285" cy:directed="1"/>
      <edge id="305454" label="zzz1000,zzz1112" source="2109" target="2055" cy:directed="1"/>
      <edge id="305453" label="zzz1000,zzz1165" source="2109" target="2026" cy:directed="1"/>
      <edge id="305452" label="zzz1000,zzz1335" source="2109" target="1918" cy:directed="1"/>
      <edge id="305451" label="zzz1000,zzz1348" source="2109" target="1910" cy:directed="1"/>
      <edge id="305450" label="zzz1000,zzz1406" source="2109" target="1868" cy:directed="1"/>
      <edge id="305449" label="zzz1000,zzz1437" source="2109" target="1845" cy:directed="1"/>
      <edge id="305448" label="zzz1000,zzz1444" source="2109" target="1838" cy:directed="1"/>
      <edge id="305447" label="zzz1000,zzz1492" source="2109" target="1800" cy:directed="1"/>
      <edge id="305446" label="zzz1000,zzz1527" source="2109" target="1776" cy:directed="1"/>
      <edge id="305445" label="zzz1000,zzzz467" source="2109" target="526" cy:directed="1"/>
      <edge id="305444" label="zzz1000,zzzz520" source="2109" target="483" cy:directed="1"/>
      <edge id="305443" label="zzz1000,zzzz750" source="2109" target="335" cy:directed="1"/>
      <edge id="305442" label="zzz1000,zzzz751" source="2109" target="334" cy:directed="1"/>
      <edge id="305441" label="zzz1000,zzzz976" source="2109" target="188" cy:directed="1"/>
      <edge id="305440" label="zzz1000,zzz1118" source="2109" target="2052" cy:directed="1"/>
      <edge id="305439" label="zzz1000,zzz1120" source="2109" target="2050" cy:directed="1"/>
      <edge id="305438" label="zzz1000,zzz1200" source="2109" target="2005" cy:directed="1"/>
      <edge id="305437" label="zzz1000,zzz1272" source="2109" target="1958" cy:directed="1"/>
      <edge id="305436" label="zzz1000,zzz1279" source="2109" target="1951" cy:directed="1"/>
      <edge id="305435" label="zzz1000,zzz1288" source="2109" target="1946" cy:directed="1"/>
      <edge id="305434" label="zzz1000,zzz1416" source="2109" target="1861" cy:directed="1"/>
      <edge id="305433" label="zzz1000,zzz1543" source="2109" target="1766" cy:directed="1"/>
      <edge id="305432" label="zzz1000,zzzz446" source="2109" target="540" cy:directed="1"/>
      <edge id="305431" label="zzz1000,zzzz664" source="2109" target="383" cy:directed="1"/>
      <edge id="305430" label="zzz1000,zzzz809" source="2109" target="283" cy:directed="1"/>
      <edge id="305429" label="zzz1000,zzzz822" source="2109" target="273" cy:directed="1"/>
      <edge id="305428" label="zzz1000,zzz1099" source="2109" target="2061" cy:directed="1"/>
      <edge id="305427" label="zzz1000,zzz1141" source="2109" target="2038" cy:directed="1"/>
      <edge id="305426" label="zzz1000,zzz1176" source="2109" target="2020" cy:directed="1"/>
      <edge id="305425" label="zzz1000,zzz1280" source="2109" target="1950" cy:directed="1"/>
      <edge id="305424" label="zzz1000,zzz1425" source="2109" target="1853" cy:directed="1"/>
      <edge id="305423" label="zzz1000,zzz1469" source="2109" target="1818" cy:directed="1"/>
      <edge id="305422" label="zzz1000,zzz1481" source="2109" target="1811" cy:directed="1"/>
      <edge id="305421" label="zzz1000,zzzz557" source="2109" target="456" cy:directed="1"/>
      <edge id="305420" label="zzz1000,zzzz877" source="2109" target="241" cy:directed="1"/>
      <edge id="305419" label="zzz1000,zzz1053" source="2109" target="2078" cy:directed="1"/>
      <edge id="305418" label="zzz1000,zzz1227" source="2109" target="1985" cy:directed="1"/>
      <edge id="305417" label="zzz1000,zzz1322" source="2109" target="1929" cy:directed="1"/>
      <edge id="305416" label="zzz1000,zzz1343" source="2109" target="1914" cy:directed="1"/>
      <edge id="305415" label="zzz1000,zzz1448" source="2109" target="1834" cy:directed="1"/>
      <edge id="305414" label="zzz1000,zzz1533" source="2109" target="1772" cy:directed="1"/>
      <edge id="305413" label="zzz1000,zzz1540" source="2109" target="1769" cy:directed="1"/>
      <edge id="305412" label="zzz1000,zzz1548" source="2109" target="1763" cy:directed="1"/>
      <edge id="305411" label="zzz1000,zzzz431" source="2109" target="549" cy:directed="1"/>
      <edge id="305410" label="zzz1000,zzzz432" source="2109" target="548" cy:directed="1"/>
      <edge id="305409" label="zzz1000,zzzz444" source="2109" target="542" cy:directed="1"/>
      <edge id="305408" label="zzz1000,zzzz988" source="2109" target="178" cy:directed="1"/>
      <edge id="305407" label="zzz1000,zzz1004" source="2109" target="2106" cy:directed="1"/>
      <edge id="305406" label="zzz1000,zzz1219" source="2109" target="1990" cy:directed="1"/>
      <edge id="305405" label="zzz1000,zzz1237" source="2109" target="1978" cy:directed="1"/>
      <edge id="305404" label="zzz1000,zzz1258" source="2109" target="1965" cy:directed="1"/>
      <edge id="305403" label="zzz1000,zzz1266" source="2109" target="1961" cy:directed="1"/>
      <edge id="305402" label="zzz1000,zzz1307" source="2109" target="1937" cy:directed="1"/>
      <edge id="305401" label="zzz1000,zzz1338" source="2109" target="1917" cy:directed="1"/>
      <edge id="305400" label="zzz1000,zzz1387" source="2109" target="1883" cy:directed="1"/>
      <edge id="305399" label="zzz1000,zzz1536" source="2109" target="1770" cy:directed="1"/>
      <edge id="305398" label="zzz1000,zzzz412" source="2109" target="560" cy:directed="1"/>
      <edge id="305397" label="zzz1000,zzzz425" source="2109" target="552" cy:directed="1"/>
      <edge id="305396" label="zzz1000,zzzz613" source="2109" target="417" cy:directed="1"/>
      <edge id="305395" label="zzz1000,zzzz923" source="2109" target="221" cy:directed="1"/>
      <edge id="305394" label="zzz1000,zzz1055" source="2109" target="2076" cy:directed="1"/>
      <edge id="305393" label="zzz1000,zzz1285" source="2109" target="1947" cy:directed="1"/>
      <edge id="305392" label="zzz1000,zzz1312" source="2109" target="1934" cy:directed="1"/>
      <edge id="305391" label="zzz1000,zzz1344" source="2109" target="1913" cy:directed="1"/>
      <edge id="305390" label="zzz1000,zzz1409" source="2109" target="1866" cy:directed="1"/>
      <edge id="305389" label="zzz1000,zzzz415" source="2109" target="558" cy:directed="1"/>
      <edge id="305388" label="zzz1000,zzzz636" source="2109" target="403" cy:directed="1"/>
      <edge id="305387" label="zzz1000,zzzz704" source="2109" target="357" cy:directed="1"/>
      <edge id="305386" label="zzz1000,zzzz769" source="2109" target="318" cy:directed="1"/>
      <edge id="305385" label="zzz1000,zzz1115" source="2109" target="2053" cy:directed="1"/>
      <edge id="305384" label="zzz1000,zzz1374" source="2109" target="1892" cy:directed="1"/>
      <edge id="305383" label="zzz1000,zzz1381" source="2109" target="1887" cy:directed="1"/>
      <edge id="305382" label="zzz1000,zzz1393" source="2109" target="1878" cy:directed="1"/>
      <edge id="305381" label="zzz1000,zzz1466" source="2109" target="1819" cy:directed="1"/>
      <edge id="305380" label="zzz1000,zzz1490" source="2109" target="1802" cy:directed="1"/>
      <edge id="305379" label="zzz1000,zzzz452" source="2109" target="536" cy:directed="1"/>
      <edge id="305378" label="zzz1000,zzzz498" source="2109" target="499" cy:directed="1"/>
      <edge id="305377" label="zzz1000,zzzz767" source="2109" target="320" cy:directed="1"/>
      <edge id="305376" label="zzz1000,zzzz774" source="2109" target="313" cy:directed="1"/>
      <edge id="305375" label="zzz1000,zzz1068" source="2109" target="2065" cy:directed="1"/>
      <edge id="305374" label="zzz1000,zzz1123" source="2109" target="2048" cy:directed="1"/>
      <edge id="305373" label="zzz1000,zzz1178" source="2109" target="2019" cy:directed="1"/>
      <edge id="305372" label="zzz1000,zzz1255" source="2109" target="1967" cy:directed="1"/>
      <edge id="305371" label="zzz1000,zzz1440" source="2109" target="1842" cy:directed="1"/>
      <edge id="305370" label="zzz1000,zzz1464" source="2109" target="1820" cy:directed="1"/>
      <edge id="305369" label="zzz1000,zzz1487" source="2109" target="1805" cy:directed="1"/>
      <edge id="305368" label="zzz1000,zzz1497" source="2109" target="1795" cy:directed="1"/>
      <edge id="305367" label="zzz1000,zzzz451" source="2109" target="537" cy:directed="1"/>
      <edge id="305366" label="zzz1000,zzzz502" source="2109" target="497" cy:directed="1"/>
      <edge id="305365" label="zzz1000,zzzz775" source="2109" target="312" cy:directed="1"/>
      <edge id="305364" label="zzz1000,zzz1057" source="2109" target="2074" cy:directed="1"/>
      <edge id="305363" label="zzz1000,zzz1069" source="2109" target="2064" cy:directed="1"/>
      <edge id="305362" label="zzz1000,zzz1247" source="2109" target="1973" cy:directed="1"/>
      <edge id="305361" label="zzz1000,zzz1309" source="2109" target="1936" cy:directed="1"/>
      <edge id="305360" label="zzz1000,zzz1318" source="2109" target="1931" cy:directed="1"/>
      <edge id="305359" label="zzz1000,zzz1339" source="2109" target="1916" cy:directed="1"/>
      <edge id="305358" label="zzz1000,zzz1491" source="2109" target="1801" cy:directed="1"/>
      <edge id="305357" label="zzz1000,zzz1498" source="2109" target="1794" cy:directed="1"/>
      <edge id="305356" label="zzz1000,zzz1153" source="2109" target="2032" cy:directed="1"/>
      <edge id="305355" label="zzz1000,zzz1269" source="2109" target="1959" cy:directed="1"/>
      <edge id="305354" label="zzz1000,zzz1276" source="2109" target="1954" cy:directed="1"/>
      <edge id="305353" label="zzz1000,zzz1435" source="2109" target="1847" cy:directed="1"/>
      <edge id="305352" label="zzz1000,zzzz770" source="2109" target="317" cy:directed="1"/>
      <edge id="305351" label="zzz1000,zzzz771" source="2109" target="316" cy:directed="1"/>
      <edge id="305350" label="zzz1000,zzz1489" source="2109" target="1803" cy:directed="1"/>
      <edge id="305349" label="zzz1000,zzzz566" source="2109" target="454" cy:directed="1"/>
      <edge id="305348" label="zzz1000,zzz1499" source="2109" target="1793" cy:directed="1"/>
      <edge id="305347" label="zzz1000,zzzz449" source="2109" target="538" cy:directed="1"/>
      <edge id="305346" label="zzz1000,zzzz950" source="2109" target="207" cy:directed="1"/>
      <edge id="305345" label="zzz1000,zzzz653" source="2109" target="393" cy:directed="1"/>
      <edge id="305344" label="zzz1000,zzz1456" source="2109" target="1826" cy:directed="1"/>
      <edge id="305343" label="zzz1000,zzzz632" source="2109" target="404" cy:directed="1"/>
      <edge id="305342" label="zzz1000,zzzz783" source="2109" target="304" cy:directed="1"/>
      <edge id="305341" label="zzz1000,zzz1056" source="2109" target="2075" cy:directed="1"/>
      <edge id="305340" label="zzz1000,zzzz401" source="2109" target="569" cy:directed="1"/>
      <edge id="305339" label="zzz1000,zzzz766" source="2109" target="321" cy:directed="1"/>
      <edge id="305338" label="zzz1000,zzzz836" source="2109" target="267" cy:directed="1"/>
      <edge id="305337" label="zzz1000,zzz1503" source="2109" target="1789" cy:directed="1"/>
      <edge id="305336" label="zzz1000,zzzz620" source="2109" target="414" cy:directed="1"/>
      <edge id="305335" label="zzz1000,zzzz841" source="2109" target="263" cy:directed="1"/>
      <edge id="305334" label="zzz1000,zzz1475" source="2109" target="1816" cy:directed="1"/>
      <edge id="305333" label="zzz1000,zzz1356" source="2109" target="1904" cy:directed="1"/>
      <edge id="305332" label="zzz1000,zzz1454" source="2109" target="1828" cy:directed="1"/>
      <edge id="305331" label="zzz1000,zzzz447" source="2109" target="539" cy:directed="1"/>
      <edge id="305330" label="zzz1000,zzzz875" source="2109" target="242" cy:directed="1"/>
      <edge id="305329" label="zzz1000,zzz1401" source="2109" target="1871" cy:directed="1"/>
      <edge id="305328" label="zzz1000,zzzz445" source="2109" target="541" cy:directed="1"/>
      <edge id="305327" label="zzz1000,zzzz582" source="2109" target="447" cy:directed="1"/>
      <edge id="305326" label="zzz1000,zzz1016" source="2109" target="2098" cy:directed="1"/>
      <edge id="305325" label="zzz1000,zzzz625" source="2109" target="410" cy:directed="1"/>
      <edge id="305324" label="zzz1000,zzz1063" source="2109" target="2069" cy:directed="1"/>
      <edge id="305323" label="zzz1000,zzzz581" source="2109" target="448" cy:directed="1"/>
      <edge id="305322" label="zzz1000,zzzz567" source="2109" target="453" cy:directed="1"/>
      <edge id="305321" label="zzz1000,zzzz857" source="2109" target="255" cy:directed="1"/>
      <edge id="305320" label="zzz1000,zzz1171" source="2109" target="2023" cy:directed="1"/>
      <edge id="305319" label="zzz1000,zzzz903" source="2109" target="230" cy:directed="1"/>
      <edge id="305318" label="zzz1000,zzz1012" source="2109" target="2101" cy:directed="1"/>
      <edge id="305317" label="zzz1000,zzz1028" source="2109" target="2088" cy:directed="1"/>
      <edge id="305316" label="zzz1000,zzz1314" source="2109" target="1933" cy:directed="1"/>
      <edge id="305315" label="zzz1000,zzzz544" source="2109" target="463" cy:directed="1"/>
      <edge id="305314" label="zzz1000,zzzz798" source="2109" target="291" cy:directed="1"/>
      <edge id="305313" label="zzz1000,zzzz590" source="2109" target="440" cy:directed="1"/>
      <edge id="305312" label="zzz1000,zzz1043" source="2109" target="2082" cy:directed="1"/>
      <edge id="305311" label="zzz1000,zzzz475" source="2109" target="520" cy:directed="1"/>
      <edge id="305310" label="zzz1000,zzzz517" source="2109" target="486" cy:directed="1"/>
      <edge id="305309" label="zzz1000,zzzz628" source="2109" target="407" cy:directed="1"/>
      <edge id="305308" label="zzz1000,zzzz622" source="2109" target="413" cy:directed="1"/>
      <edge id="305307" label="zzz1000,zzzz785" source="2109" target="302" cy:directed="1"/>
      <edge id="305306" label="zzz1000,zzzz647" source="2109" target="398" cy:directed="1"/>
      <edge id="305305" label="zzz1000,zzzz786" source="2109" target="301" cy:directed="1"/>
      <edge id="305304" label="zzz1000,zzzz784" source="2109" target="303" cy:directed="1"/>
      <edge id="305303" label="zzz1000,zzzz404" source="2109" target="568" cy:directed="1"/>
      <edge id="305302" label="zzz1000,zzz1011" source="2109" target="2102" cy:directed="1"/>
      <edge id="305301" label="zzz1000,zzzz420" source="2109" target="553" cy:directed="1"/>
      <edge id="305300" label="zzz1000,zzz1027" source="2109" target="2089" cy:directed="1"/>
      <edge id="305299" label="zzz1000,zzzz429" source="2109" target="550" cy:directed="1"/>
      <edge id="305298" label="zzz1000,zzzz482" source="2109" target="513" cy:directed="1"/>
      <edge id="305297" label="zzz1000,zzzz684" source="2109" target="371" cy:directed="1"/>
      <edge id="305296" label="zzz1000,zzzz716" source="2109" target="348" cy:directed="1"/>
      <edge id="305295" label="zzz1000,zzzz630" source="2109" target="406" cy:directed="1"/>
      <edge id="305294" label="zzz1000,zzzz883" source="2109" target="237" cy:directed="1"/>
      <edge id="305293" label="zzz1000,zzzz889" source="2109" target="232" cy:directed="1"/>
      <edge id="305292" label="zzz1000,zzz1383" source="2109" target="1886" cy:directed="1"/>
      <edge id="305291" label="zzz1000,zzzz541" source="2109" target="466" cy:directed="1"/>
      <edge id="305290" label="zzz1000,zzzz869" source="2109" target="246" cy:directed="1"/>
      <edge id="305289" label="zzz1000,zzz1357" source="2109" target="1903" cy:directed="1"/>
      <edge id="305288" label="zzz1000,zzzz680" source="2109" target="374" cy:directed="1"/>
      <edge id="305287" label="zzz1000,zzz1021" source="2109" target="2094" cy:directed="1"/>
      <edge id="305286" label="zzz1000,zzzz512" source="2109" target="487" cy:directed="1"/>
      <edge id="305285" label="zzz1000,zzz1026" source="2109" target="2090" cy:directed="1"/>
      <edge id="305284" label="zzz1000,zzzz870" source="2109" target="245" cy:directed="1"/>
      <edge id="305283" label="zzz1000,zzzz694" source="2109" target="365" cy:directed="1"/>
      <edge id="305282" label="zzz1000,zzzz565" source="2109" target="455" cy:directed="1"/>
      <edge id="305281" label="zzz1000,zzzz644" source="2109" target="399" cy:directed="1"/>
      <edge id="305280" label="zzz1000,zzz1059" source="2109" target="2072" cy:directed="1"/>
      <edge id="305279" label="zzz1000,zzz1438" source="2109" target="1844" cy:directed="1"/>
      <edge id="305278" label="zzz1000,zzzz936" source="2109" target="214" cy:directed="1"/>
      <edge id="305277" label="zzz1000,zzzz795" source="2109" target="293" cy:directed="1"/>
      <edge id="305276" label="zzz1000,zzzz405" source="2109" target="567" cy:directed="1"/>
      <edge id="305275" label="zzz1000,zzzz464" source="2109" target="528" cy:directed="1"/>
      <edge id="305274" label="zzz1000,zzzz406" source="2109" target="566" cy:directed="1"/>
      <edge id="305273" label="zzz1000,zzzz957" source="2109" target="203" cy:directed="1"/>
      <edge id="305272" label="zzz1000,zzz1058" source="2109" target="2073" cy:directed="1"/>
      <edge id="305271" label="zzz1000,zzz1060" source="2109" target="2071" cy:directed="1"/>
      <edge id="305270" label="zzz1000,zzz1041" source="2109" target="2083" cy:directed="1"/>
      <edge id="305269" label="zzz1000,zzz1204" source="2109" target="2001" cy:directed="1"/>
      <edge id="305268" label="zzz1000,zzz1052" source="2109" target="2079" cy:directed="1"/>
      <edge id="305267" label="zzz1000,zzz1522" source="2109" target="1781" cy:directed="1"/>
      <edge id="305266" label="zzz1000,zzz1431" source="2109" target="1848" cy:directed="1"/>
      <edge id="305265" label="zzz1000,zzzz702" source="2109" target="359" cy:directed="1"/>
      <edge id="305264" label="zzz1000,zzzz721" source="2109" target="345" cy:directed="1"/>
      <edge id="305263" label="zzz1000,zzzz730" source="2109" target="342" cy:directed="1"/>
      <edge id="305262" label="zzz1000,zzz1257" source="2109" target="1966" cy:directed="1"/>
      <edge id="305261" label="zzz1000,zzzz551" source="2109" target="460" cy:directed="1"/>
      <edge id="305260" label="zzz1000,zzzz462" source="2109" target="529" cy:directed="1"/>
      <edge id="305259" label="zzz1000,zzzz506" source="2109" target="493" cy:directed="1"/>
      <edge id="305258" label="zzz1000,zzz1261" source="2109" target="1963" cy:directed="1"/>
      <edge id="305257" label="zzz1000,zzz1417" source="2109" target="1860" cy:directed="1"/>
      <edge id="305256" label="zzz1000,zzzz860" source="2109" target="252" cy:directed="1"/>
      <edge id="305255" label="zzz1000,zzzz914" source="2109" target="224" cy:directed="1"/>
      <edge id="305254" label="zzz1000,zzzz953" source="2109" target="206" cy:directed="1"/>
      <edge id="305253" label="zzz1000,zzzz737" source="2109" target="339" cy:directed="1"/>
      <edge id="305252" label="zzz1000,zzzz861" source="2109" target="251" cy:directed="1"/>
      <edge id="305251" label="zzz1000,zzz1025" source="2109" target="2091" cy:directed="1"/>
      <edge id="305250" label="zzz1000,zzzz631" source="2109" target="405" cy:directed="1"/>
      <edge id="305249" label="zzz1000,zzzz466" source="2109" target="527" cy:directed="1"/>
      <edge id="305248" label="zzz1000,zzzz722" source="2109" target="344" cy:directed="1"/>
      <edge id="305247" label="zzz1000,zzz1022" source="2109" target="2093" cy:directed="1"/>
      <edge id="305246" label="zzz1000,zzzz526" source="2109" target="479" cy:directed="1"/>
      <edge id="305245" label="zzz1000,zzz1451" source="2109" target="1831" cy:directed="1"/>
      <edge id="305244" label="zzz1000,zzzz595" source="2109" target="435" cy:directed="1"/>
      <edge id="305243" label="zzz1000,zzz1019" source="2109" target="2095" cy:directed="1"/>
      <edge id="305242" label="zzz1000,zzzz596" source="2109" target="434" cy:directed="1"/>
      <edge id="305241" label="zzz1000,zzzz505" source="2109" target="494" cy:directed="1"/>
      <edge id="305240" label="zzz1000,zzzz982" source="2109" target="184" cy:directed="1"/>
      <edge id="305239" label="zzz1000,zzzz419" source="2109" target="554" cy:directed="1"/>
      <edge id="305238" label="zzz1000,zzzz983" source="2109" target="183" cy:directed="1"/>
      <edge id="305237" label="zzz1000,zzzz794" source="2109" target="294" cy:directed="1"/>
      <edge id="305236" label="zzz1000,zzzz460" source="2109" target="530" cy:directed="1"/>
      <edge id="305235" label="zzz1000,zzzz413" source="2109" target="559" cy:directed="1"/>
      <edge id="305234" label="zzz1000,zzzz586" source="2109" target="443" cy:directed="1"/>
      <edge id="305233" label="zzz1000,zzzz594" source="2109" target="436" cy:directed="1"/>
      <edge id="305232" label="zzz1000,zzzz593" source="2109" target="437" cy:directed="1"/>
      <edge id="305231" label="zzz1000,zzzz797" source="2109" target="292" cy:directed="1"/>
      <edge id="305230" label="zzz1000,zzzz408" source="2109" target="564" cy:directed="1"/>
      <edge id="305229" label="zzz1000,zzzz418" source="2109" target="555" cy:directed="1"/>
      <edge id="305228" label="zzz1000,zzzz986" source="2109" target="180" cy:directed="1"/>
      <edge id="305227" label="zzz1000,zzzz591" source="2109" target="439" cy:directed="1"/>
      <edge id="305226" label="zzz1000,zzzz984" source="2109" target="182" cy:directed="1"/>
      <edge id="305225" label="zzz1000,zzzz987" source="2109" target="179" cy:directed="1"/>
      <edge id="305224" label="zzz1000,zzzz522" source="2109" target="481" cy:directed="1"/>
      <edge id="305223" label="zzz1000,zzzz411" source="2109" target="561" cy:directed="1"/>
      <edge id="305222" label="zzz1000,zzzz985" source="2109" target="181" cy:directed="1"/>
      <edge id="305221" label="zzz1000,zzzz458" source="2109" target="532" cy:directed="1"/>
      <edge id="305220" label="zzz1000,zzzz490" source="2109" target="505" cy:directed="1"/>
      <edge id="305219" label="zzz1000,zzzz417" source="2109" target="556" cy:directed="1"/>
      <edge id="305218" label="zzz1000,zzzz840" source="2109" target="264" cy:directed="1"/>
      <edge id="305217" label="zzz1000,zzzz434" source="2109" target="546" cy:directed="1"/>
      <edge id="305216" label="zzz1000,zzz1520" source="2109" target="1783" cy:directed="1"/>
      <edge id="305215" label="zzz1000,zzz1326" source="2109" target="1926" cy:directed="1"/>
      <edge id="305214" label="zzz1000,zzzz958" source="2109" target="202" cy:directed="1"/>
      <edge id="305213" label="zzz1000,zzzz977" source="2109" target="187" cy:directed="1"/>
      <edge id="305212" label="zzz1000,zzz1518" source="2109" target="1785" cy:directed="1"/>
      <edge id="305211" label="zzz1000,zzzz491" source="2109" target="504" cy:directed="1"/>
      <edge id="305210" label="zzz1000,zzz1377" source="2109" target="1890" cy:directed="1"/>
      <edge id="305209" label="zzz1000,zzz1327" source="2109" target="1925" cy:directed="1"/>
      <edge id="305208" label="zzz1000,zzz2358" source="2109" target="955" cy:directed="1"/>
      <edge id="305207" label="zzz1000,zzzz909" source="2109" target="228" cy:directed="1"/>
      <edge id="305206" label="zzz1000,zzz1392" source="2109" target="1879" cy:directed="1"/>
      <edge id="305205" label="zzz1000,zzz1459" source="2109" target="1823" cy:directed="1"/>
      <edge id="305204" label="zzz1002,zzz1524" source="2108" target="1779" cy:directed="1"/>
      <edge id="305203" label="zzz1002,zzz1455" source="2108" target="1827" cy:directed="1"/>
      <edge id="305202" label="zzz1002,zzz1347" source="2108" target="1911" cy:directed="1"/>
      <edge id="305201" label="zzz1002,zzz1214" source="2108" target="1995" cy:directed="1"/>
      <edge id="305200" label="zzz1002,zzzz433" source="2108" target="547" cy:directed="1"/>
      <edge id="305199" label="zzz1002,zzz1296" source="2108" target="1941" cy:directed="1"/>
      <edge id="305198" label="zzz1002,zzz1444" source="2108" target="1838" cy:directed="1"/>
      <edge id="305197" label="zzz1002,zzz1415" source="2108" target="1862" cy:directed="1"/>
      <edge id="305196" label="zzz1002,zzz1303" source="2108" target="1939" cy:directed="1"/>
      <edge id="305195" label="zzz1002,zzz1329" source="2108" target="1924" cy:directed="1"/>
      <edge id="305194" label="zzz1002,zzzz652" source="2108" target="394" cy:directed="1"/>
      <edge id="305193" label="zzz1002,zzz1054" source="2108" target="2077" cy:directed="1"/>
      <edge id="305192" label="zzz1002,zzz1462" source="2108" target="1821" cy:directed="1"/>
      <edge id="305191" label="zzz1002,zzz1122" source="2108" target="2049" cy:directed="1"/>
      <edge id="305190" label="zzz1002,zzz1343" source="2108" target="1914" cy:directed="1"/>
      <edge id="305189" label="zzz1002,zzz1450" source="2108" target="1832" cy:directed="1"/>
      <edge id="305188" label="zzz1002,zzz1130" source="2108" target="2045" cy:directed="1"/>
      <edge id="305187" label="zzz1002,zzz1230" source="2108" target="1983" cy:directed="1"/>
      <edge id="305186" label="zzz1002,zzz1294" source="2108" target="1942" cy:directed="1"/>
      <edge id="305185" label="zzz1002,zzz1425" source="2108" target="1853" cy:directed="1"/>
      <edge id="305184" label="zzz1002,zzz1449" source="2108" target="1833" cy:directed="1"/>
      <edge id="305183" label="zzz1002,zzz1480" source="2108" target="1812" cy:directed="1"/>
      <edge id="305182" label="zzz1002,zzz1543" source="2108" target="1766" cy:directed="1"/>
      <edge id="305181" label="zzz1002,zzzz442" source="2108" target="543" cy:directed="1"/>
      <edge id="305180" label="zzz1002,zzzz948" source="2108" target="208" cy:directed="1"/>
      <edge id="305179" label="zzz1002,zzz1048" source="2108" target="2080" cy:directed="1"/>
      <edge id="305178" label="zzz1002,zzzz446" source="2108" target="540" cy:directed="1"/>
      <edge id="305177" label="zzz1002,zzzz575" source="2108" target="449" cy:directed="1"/>
      <edge id="305176" label="zzz1002,zzzz877" source="2108" target="241" cy:directed="1"/>
      <edge id="305175" label="zzz1002,zzz1118" source="2108" target="2052" cy:directed="1"/>
      <edge id="305174" label="zzz1002,zzz1152" source="2108" target="2033" cy:directed="1"/>
      <edge id="305173" label="zzz1002,zzz1162" source="2108" target="2027" cy:directed="1"/>
      <edge id="305172" label="zzz1002,zzz1165" source="2108" target="2026" cy:directed="1"/>
      <edge id="305171" label="zzz1002,zzz1361" source="2108" target="1899" cy:directed="1"/>
      <edge id="305170" label="zzz1002,zzz1403" source="2108" target="1869" cy:directed="1"/>
      <edge id="305169" label="zzz1002,zzz1493" source="2108" target="1799" cy:directed="1"/>
      <edge id="305168" label="zzz1002,zzz1176" source="2108" target="2020" cy:directed="1"/>
      <edge id="305167" label="zzz1002,zzz1004" source="2108" target="2106" cy:directed="1"/>
      <edge id="305166" label="zzz1002,zzz1106" source="2108" target="2059" cy:directed="1"/>
      <edge id="305165" label="zzz1002,zzz1293" source="2108" target="1943" cy:directed="1"/>
      <edge id="305164" label="zzz1002,zzz1422" source="2108" target="1855" cy:directed="1"/>
      <edge id="305163" label="zzz1002,zzz1548" source="2108" target="1763" cy:directed="1"/>
      <edge id="305162" label="zzz1002,zzzz998" source="2108" target="173" cy:directed="1"/>
      <edge id="305161" label="zzz1002,zzz1280" source="2108" target="1950" cy:directed="1"/>
      <edge id="305160" label="zzz1002,zzz1413" source="2108" target="1864" cy:directed="1"/>
      <edge id="305159" label="zzz1002,zzz1471" source="2108" target="1817" cy:directed="1"/>
      <edge id="305158" label="zzz1002,zzz1172" source="2108" target="2022" cy:directed="1"/>
      <edge id="305157" label="zzz1002,zzz1335" source="2108" target="1918" cy:directed="1"/>
      <edge id="305156" label="zzz1002,zzz1402" source="2108" target="1870" cy:directed="1"/>
      <edge id="305155" label="zzz1002,zzz1492" source="2108" target="1800" cy:directed="1"/>
      <edge id="305154" label="zzz1002,zzz1120" source="2108" target="2050" cy:directed="1"/>
      <edge id="305153" label="zzz1002,zzz1289" source="2108" target="1945" cy:directed="1"/>
      <edge id="305152" label="zzz1002,zzz1352" source="2108" target="1907" cy:directed="1"/>
      <edge id="305151" label="zzz1002,zzz1374" source="2108" target="1892" cy:directed="1"/>
      <edge id="305150" label="zzz1002,zzz1453" source="2108" target="1829" cy:directed="1"/>
      <edge id="305149" label="zzz1002,zzzz407" source="2108" target="565" cy:directed="1"/>
      <edge id="305148" label="zzz1002,zzz1236" source="2108" target="1979" cy:directed="1"/>
      <edge id="305147" label="zzz1002,zzz1157" source="2108" target="2030" cy:directed="1"/>
      <edge id="305146" label="zzz1002,zzz1178" source="2108" target="2019" cy:directed="1"/>
      <edge id="305145" label="zzz1002,zzz1407" source="2108" target="1867" cy:directed="1"/>
      <edge id="305144" label="zzz1002,zzz1421" source="2108" target="1856" cy:directed="1"/>
      <edge id="305143" label="zzz1002,zzzz415" source="2108" target="558" cy:directed="1"/>
      <edge id="305142" label="zzz1002,zzzz613" source="2108" target="417" cy:directed="1"/>
      <edge id="305141" label="zzz1002,zzz1409" source="2108" target="1866" cy:directed="1"/>
      <edge id="305140" label="zzz1002,zzz1437" source="2108" target="1845" cy:directed="1"/>
      <edge id="305139" label="zzz1002,zzz1452" source="2108" target="1830" cy:directed="1"/>
      <edge id="305138" label="zzz1002,zzz1500" source="2108" target="1792" cy:directed="1"/>
      <edge id="305137" label="zzz1002,zzzz444" source="2108" target="542" cy:directed="1"/>
      <edge id="305136" label="zzz1002,zzzz822" source="2108" target="273" cy:directed="1"/>
      <edge id="305135" label="zzz1002,zzz1240" source="2108" target="1977" cy:directed="1"/>
      <edge id="305134" label="zzz1002,zzz1288" source="2108" target="1946" cy:directed="1"/>
      <edge id="305133" label="zzz1002,zzz1338" source="2108" target="1917" cy:directed="1"/>
      <edge id="305132" label="zzz1002,zzz1381" source="2108" target="1887" cy:directed="1"/>
      <edge id="305131" label="zzz1002,zzz1469" source="2108" target="1818" cy:directed="1"/>
      <edge id="305130" label="zzz1002,zzzz412" source="2108" target="560" cy:directed="1"/>
      <edge id="305129" label="zzz1002,zzz1112" source="2108" target="2055" cy:directed="1"/>
      <edge id="305128" label="zzz1002,zzz1153" source="2108" target="2032" cy:directed="1"/>
      <edge id="305127" label="zzz1002,zzz1228" source="2108" target="1984" cy:directed="1"/>
      <edge id="305126" label="zzz1002,zzz1269" source="2108" target="1959" cy:directed="1"/>
      <edge id="305125" label="zzz1002,zzz1272" source="2108" target="1958" cy:directed="1"/>
      <edge id="305124" label="zzz1002,zzz1322" source="2108" target="1929" cy:directed="1"/>
      <edge id="305123" label="zzz1002,zzz1344" source="2108" target="1913" cy:directed="1"/>
      <edge id="305122" label="zzz1002,zzz1436" source="2108" target="1846" cy:directed="1"/>
      <edge id="305121" label="zzz1002,zzz1487" source="2108" target="1805" cy:directed="1"/>
      <edge id="305120" label="zzz1002,zzz1491" source="2108" target="1801" cy:directed="1"/>
      <edge id="305119" label="zzz1002,zzzz452" source="2108" target="536" cy:directed="1"/>
      <edge id="305118" label="zzz1002,zzzz481" source="2108" target="514" cy:directed="1"/>
      <edge id="305117" label="zzz1002,zzz1209" source="2108" target="1997" cy:directed="1"/>
      <edge id="305116" label="zzz1002,zzz1219" source="2108" target="1990" cy:directed="1"/>
      <edge id="305115" label="zzz1002,zzz1312" source="2108" target="1934" cy:directed="1"/>
      <edge id="305114" label="zzz1002,zzz1115" source="2108" target="2053" cy:directed="1"/>
      <edge id="305113" label="zzz1002,zzz1137" source="2108" target="2040" cy:directed="1"/>
      <edge id="305112" label="zzz1002,zzz1466" source="2108" target="1819" cy:directed="1"/>
      <edge id="305111" label="zzz1002,zzz1525" source="2108" target="1778" cy:directed="1"/>
      <edge id="305110" label="zzz1002,zzz1540" source="2108" target="1769" cy:directed="1"/>
      <edge id="305109" label="zzz1002,zzzz946" source="2108" target="209" cy:directed="1"/>
      <edge id="305108" label="zzz1002,zzz1501" source="2108" target="1791" cy:directed="1"/>
      <edge id="305107" label="zzz1002,zzz1123" source="2108" target="2048" cy:directed="1"/>
      <edge id="305106" label="zzz1002,zzz1133" source="2108" target="2043" cy:directed="1"/>
      <edge id="305105" label="zzz1002,zzz1311" source="2108" target="1935" cy:directed="1"/>
      <edge id="305104" label="zzz1002,zzz1435" source="2108" target="1847" cy:directed="1"/>
      <edge id="305103" label="zzz1002,zzz1497" source="2108" target="1795" cy:directed="1"/>
      <edge id="305102" label="zzz1002,zzz1536" source="2108" target="1770" cy:directed="1"/>
      <edge id="305101" label="zzz1002,zzzz449" source="2108" target="538" cy:directed="1"/>
      <edge id="305100" label="zzz1002,zzz1307" source="2108" target="1937" cy:directed="1"/>
      <edge id="305099" label="zzz1002,zzzz923" source="2108" target="221" cy:directed="1"/>
      <edge id="305098" label="zzz1002,zzz1227" source="2108" target="1985" cy:directed="1"/>
      <edge id="305097" label="zzz1002,zzz1247" source="2108" target="1973" cy:directed="1"/>
      <edge id="305096" label="zzz1002,zzzz988" source="2108" target="178" cy:directed="1"/>
      <edge id="305095" label="zzz1002,zzz1527" source="2108" target="1776" cy:directed="1"/>
      <edge id="305094" label="zzz1002,zzzz401" source="2108" target="569" cy:directed="1"/>
      <edge id="305093" label="zzz1002,zzz1464" source="2108" target="1820" cy:directed="1"/>
      <edge id="305092" label="zzz1002,zzz1481" source="2108" target="1811" cy:directed="1"/>
      <edge id="305091" label="zzz1002,zzz1489" source="2108" target="1803" cy:directed="1"/>
      <edge id="305090" label="zzz1002,zzz1237" source="2108" target="1978" cy:directed="1"/>
      <edge id="305089" label="zzz1002,zzz1055" source="2108" target="2076" cy:directed="1"/>
      <edge id="305088" label="zzz1002,zzz1387" source="2108" target="1883" cy:directed="1"/>
      <edge id="305087" label="zzz1002,zzz1348" source="2108" target="1910" cy:directed="1"/>
      <edge id="305086" label="zzz1002,zzz1255" source="2108" target="1967" cy:directed="1"/>
      <edge id="305085" label="zzz1002,zzz1406" source="2108" target="1868" cy:directed="1"/>
      <edge id="305084" label="zzz1002,zzz1490" source="2108" target="1802" cy:directed="1"/>
      <edge id="305083" label="zzz1002,zzz1057" source="2108" target="2074" cy:directed="1"/>
      <edge id="305082" label="zzz1002,zzz1053" source="2108" target="2078" cy:directed="1"/>
      <edge id="305081" label="zzz1002,zzz1498" source="2108" target="1794" cy:directed="1"/>
      <edge id="305080" label="zzz1002,zzz1401" source="2108" target="1871" cy:directed="1"/>
      <edge id="305079" label="zzz1002,zzzz950" source="2108" target="207" cy:directed="1"/>
      <edge id="305078" label="zzz1002,zzz1056" source="2108" target="2075" cy:directed="1"/>
      <edge id="305077" label="zzz1002,zzz1454" source="2108" target="1828" cy:directed="1"/>
      <edge id="305076" label="zzz1002,zzzz451" source="2108" target="537" cy:directed="1"/>
      <edge id="305075" label="zzz1002,zzz1475" source="2108" target="1816" cy:directed="1"/>
      <edge id="305074" label="zzz1002,zzz1318" source="2108" target="1931" cy:directed="1"/>
      <edge id="305073" label="zzz1002,zzz1171" source="2108" target="2023" cy:directed="1"/>
      <edge id="305072" label="zzz1002,zzzz857" source="2108" target="255" cy:directed="1"/>
      <edge id="305071" label="zzz1002,zzz1169" source="2108" target="2024" cy:directed="1"/>
      <edge id="305070" label="zzz1002,zzz1448" source="2108" target="1834" cy:directed="1"/>
      <edge id="305069" label="zzz1002,zzzz447" source="2108" target="539" cy:directed="1"/>
      <edge id="305068" label="zzz1002,zzz1245" source="2108" target="1974" cy:directed="1"/>
      <edge id="305067" label="zzz1002,zzzz716" source="2108" target="348" cy:directed="1"/>
      <edge id="305066" label="zzz1002,zzzz544" source="2108" target="463" cy:directed="1"/>
      <edge id="305065" label="zzz1002,zzz1008" source="2108" target="2105" cy:directed="1"/>
      <edge id="305064" label="zzz1002,zzzz792" source="2108" target="296" cy:directed="1"/>
      <edge id="305063" label="zzz1002,zzz1218" source="2108" target="1991" cy:directed="1"/>
      <edge id="305062" label="zzz1002,zzz1446" source="2108" target="1836" cy:directed="1"/>
      <edge id="305061" label="zzz1002,zzz1476" source="2108" target="1815" cy:directed="1"/>
      <edge id="305060" label="zzz1002,zzz1530" source="2108" target="1774" cy:directed="1"/>
      <edge id="305059" label="zzz1002,zzz1274" source="2108" target="1956" cy:directed="1"/>
      <edge id="305058" label="zzz1002,zzz1175" source="2108" target="2021" cy:directed="1"/>
      <edge id="305057" label="zzz1002,zzz1319" source="2108" target="1930" cy:directed="1"/>
      <edge id="305056" label="zzz1002,zzz1396" source="2108" target="1876" cy:directed="1"/>
      <edge id="305055" label="zzz1002,zzz1354" source="2108" target="1906" cy:directed="1"/>
      <edge id="305054" label="zzz1002,zzzz619" source="2108" target="415" cy:directed="1"/>
      <edge id="305053" label="zzz1002,zzz1441" source="2108" target="1841" cy:directed="1"/>
      <edge id="305052" label="zzz1002,zzz1156" source="2108" target="2031" cy:directed="1"/>
      <edge id="305051" label="zzz1002,zzz1309" source="2108" target="1936" cy:directed="1"/>
      <edge id="305050" label="zzz1002,zzzz445" source="2108" target="541" cy:directed="1"/>
      <edge id="305049" label="zzz1002,zzzz588" source="2108" target="442" cy:directed="1"/>
      <edge id="305048" label="zzz1002,zzzz707" source="2108" target="354" cy:directed="1"/>
      <edge id="305047" label="zzz1002,zzz1184" source="2108" target="2016" cy:directed="1"/>
      <edge id="305046" label="zzz1002,zzz1535" source="2108" target="1771" cy:directed="1"/>
      <edge id="305045" label="zzz1002,zzz1221" source="2108" target="1989" cy:directed="1"/>
      <edge id="305044" label="zzz1002,zzz1545" source="2108" target="1765" cy:directed="1"/>
      <edge id="305043" label="zzz1002,zzz1445" source="2108" target="1837" cy:directed="1"/>
      <edge id="305042" label="zzz1002,zzzz647" source="2108" target="398" cy:directed="1"/>
      <edge id="305041" label="zzz1002,zzzz847" source="2108" target="258" cy:directed="1"/>
      <edge id="305040" label="zzz1002,zzz1478" source="2108" target="1813" cy:directed="1"/>
      <edge id="305039" label="zzz1002,zzzz582" source="2108" target="447" cy:directed="1"/>
      <edge id="305038" label="zzz1002,zzzz653" source="2108" target="393" cy:directed="1"/>
      <edge id="305037" label="zzz1002,zzz1235" source="2108" target="1980" cy:directed="1"/>
      <edge id="305036" label="zzz1002,zzzz583" source="2108" target="446" cy:directed="1"/>
      <edge id="305035" label="zzz1002,zzzz548" source="2108" target="462" cy:directed="1"/>
      <edge id="305034" label="zzz1002,zzzz692" source="2108" target="366" cy:directed="1"/>
      <edge id="305033" label="zzz1002,zzz1210" source="2108" target="1996" cy:directed="1"/>
      <edge id="305032" label="zzz1002,zzz1458" source="2108" target="1824" cy:directed="1"/>
      <edge id="305031" label="zzz1002,zzzz636" source="2108" target="403" cy:directed="1"/>
      <edge id="305030" label="zzz1002,zzz1223" source="2108" target="1988" cy:directed="1"/>
      <edge id="305029" label="zzz1002,zzz1349" source="2108" target="1909" cy:directed="1"/>
      <edge id="305028" label="zzz1002,zzzz864" source="2108" target="249" cy:directed="1"/>
      <edge id="305027" label="zzz1002,zzz1009" source="2108" target="2104" cy:directed="1"/>
      <edge id="305026" label="zzz1002,zzzz459" source="2108" target="531" cy:directed="1"/>
      <edge id="305025" label="zzz1002,zzz1383" source="2108" target="1886" cy:directed="1"/>
      <edge id="305024" label="zzz1002,zzz1541" source="2108" target="1768" cy:directed="1"/>
      <edge id="305023" label="zzz1002,zzzz426" source="2108" target="551" cy:directed="1"/>
      <edge id="305022" label="zzz1002,zzzz838" source="2108" target="265" cy:directed="1"/>
      <edge id="305021" label="zzz1002,zzz1159" source="2108" target="2029" cy:directed="1"/>
      <edge id="305020" label="zzz1002,zzzz479" source="2108" target="516" cy:directed="1"/>
      <edge id="305019" label="zzz1002,zzzz542" source="2108" target="465" cy:directed="1"/>
      <edge id="305018" label="zzz1002,zzzz683" source="2108" target="372" cy:directed="1"/>
      <edge id="305017" label="zzz1002,zzzz856" source="2108" target="256" cy:directed="1"/>
      <edge id="305016" label="zzz1002,zzzz887" source="2108" target="234" cy:directed="1"/>
      <edge id="305015" label="zzz1002,zzzz720" source="2108" target="346" cy:directed="1"/>
      <edge id="305014" label="zzz1002,zzz1477" source="2108" target="1814" cy:directed="1"/>
      <edge id="305013" label="zzz1002,zzz1495" source="2108" target="1797" cy:directed="1"/>
      <edge id="305012" label="zzz1002,zzz1496" source="2108" target="1796" cy:directed="1"/>
      <edge id="305011" label="zzz1002,zzzz409" source="2108" target="563" cy:directed="1"/>
      <edge id="305010" label="zzz1002,zzzz655" source="2108" target="392" cy:directed="1"/>
      <edge id="305009" label="zzz1002,zzzz934" source="2108" target="216" cy:directed="1"/>
      <edge id="305008" label="zzz1002,zzz1185" source="2108" target="2015" cy:directed="1"/>
      <edge id="305007" label="zzz1002,zzz1215" source="2108" target="1994" cy:directed="1"/>
      <edge id="305006" label="zzz1002,zzz1258" source="2108" target="1965" cy:directed="1"/>
      <edge id="305005" label="zzz1002,zzz1363" source="2108" target="1898" cy:directed="1"/>
      <edge id="305004" label="zzz1002,zzzz457" source="2108" target="533" cy:directed="1"/>
      <edge id="305003" label="zzz1002,zzzz468" source="2108" target="525" cy:directed="1"/>
      <edge id="305002" label="zzz1002,zzzz488" source="2108" target="507" cy:directed="1"/>
      <edge id="305001" label="zzz1002,zzzz507" source="2108" target="492" cy:directed="1"/>
      <edge id="305000" label="zzz1002,zzzz790" source="2108" target="298" cy:directed="1"/>
      <edge id="304999" label="zzz1002,zzzz956" source="2108" target="204" cy:directed="1"/>
      <edge id="304998" label="zzz1002,zzzz961" source="2108" target="200" cy:directed="1"/>
      <edge id="304997" label="zzz1002,zzz1003" source="2108" target="2107" cy:directed="1"/>
      <edge id="304996" label="zzz1002,zzz1062" source="2108" target="2070" cy:directed="1"/>
      <edge id="304995" label="zzz1002,zzz1207" source="2108" target="1999" cy:directed="1"/>
      <edge id="304994" label="zzz1002,zzz1358" source="2108" target="1902" cy:directed="1"/>
      <edge id="304993" label="zzz1002,zzz1504" source="2108" target="1788" cy:directed="1"/>
      <edge id="304992" label="zzz1002,zzzz472" source="2108" target="523" cy:directed="1"/>
      <edge id="304991" label="zzz1002,zzzz837" source="2108" target="266" cy:directed="1"/>
      <edge id="304990" label="zzz1002,zzzz967" source="2108" target="197" cy:directed="1"/>
      <edge id="304989" label="zzz1002,zzz1100" source="2108" target="2060" cy:directed="1"/>
      <edge id="304988" label="zzz1002,zzz1202" source="2108" target="2003" cy:directed="1"/>
      <edge id="304987" label="zzz1002,zzz1368" source="2108" target="1896" cy:directed="1"/>
      <edge id="304986" label="zzz1002,zzz1457" source="2108" target="1825" cy:directed="1"/>
      <edge id="304985" label="zzz1002,zzzz611" source="2108" target="419" cy:directed="1"/>
      <edge id="304984" label="zzz1002,zzzz754" source="2108" target="331" cy:directed="1"/>
      <edge id="304983" label="zzz1002,zzzz756" source="2108" target="329" cy:directed="1"/>
      <edge id="304982" label="zzz1002,zzzz862" source="2108" target="250" cy:directed="1"/>
      <edge id="304981" label="zzz1002,zzzz910" source="2108" target="227" cy:directed="1"/>
      <edge id="304980" label="zzz1002,zzz1233" source="2108" target="1982" cy:directed="1"/>
      <edge id="304979" label="zzz1002,zzz1325" source="2108" target="1927" cy:directed="1"/>
      <edge id="304978" label="zzz1002,zzz1443" source="2108" target="1839" cy:directed="1"/>
      <edge id="304977" label="zzz1002,zzz1484" source="2108" target="1808" cy:directed="1"/>
      <edge id="304976" label="zzz1002,zzz1499" source="2108" target="1793" cy:directed="1"/>
      <edge id="304975" label="zzz1002,zzzz504" source="2108" target="495" cy:directed="1"/>
      <edge id="304974" label="zzz1002,zzzz581" source="2108" target="448" cy:directed="1"/>
      <edge id="304973" label="zzz1002,zzzz867" source="2108" target="247" cy:directed="1"/>
      <edge id="304972" label="zzz1002,zzzz870" source="2108" target="245" cy:directed="1"/>
      <edge id="304971" label="zzz1002,zzz1098" source="2108" target="2062" cy:directed="1"/>
      <edge id="304970" label="zzz1002,zzz1119" source="2108" target="2051" cy:directed="1"/>
      <edge id="304969" label="zzz1002,zzz1144" source="2108" target="2036" cy:directed="1"/>
      <edge id="304968" label="zzz1002,zzz1199" source="2108" target="2006" cy:directed="1"/>
      <edge id="304967" label="zzz1002,zzz1285" source="2108" target="1947" cy:directed="1"/>
      <edge id="304966" label="zzz1002,zzzz585" source="2108" target="444" cy:directed="1"/>
      <edge id="304965" label="zzz1002,zzzz965" source="2108" target="199" cy:directed="1"/>
      <edge id="304964" label="zzz1002,zzz1038" source="2108" target="2084" cy:directed="1"/>
      <edge id="304963" label="zzz1002,zzz1447" source="2108" target="1835" cy:directed="1"/>
      <edge id="304962" label="zzz1002,zzz1523" source="2108" target="1780" cy:directed="1"/>
      <edge id="304961" label="zzz1002,zzzz487" source="2108" target="508" cy:directed="1"/>
      <edge id="304960" label="zzz1002,zzzz765" source="2108" target="322" cy:directed="1"/>
      <edge id="304959" label="zzz1002,zzzz821" source="2108" target="274" cy:directed="1"/>
      <edge id="304958" label="zzz1002,zzzz865" source="2108" target="248" cy:directed="1"/>
      <edge id="304957" label="zzz1002,zzzz932" source="2108" target="218" cy:directed="1"/>
      <edge id="304956" label="zzz1002,zzz1399" source="2108" target="1873" cy:directed="1"/>
      <edge id="304955" label="zzz1002,zzz1485" source="2108" target="1807" cy:directed="1"/>
      <edge id="304954" label="zzz1002,zzzz489" source="2108" target="506" cy:directed="1"/>
      <edge id="304953" label="zzz1002,zzzz606" source="2108" target="424" cy:directed="1"/>
      <edge id="304952" label="zzz1002,zzzz624" source="2108" target="411" cy:directed="1"/>
      <edge id="304951" label="zzz1002,zzzz755" source="2108" target="330" cy:directed="1"/>
      <edge id="304950" label="zzz1002,zzzz972" source="2108" target="192" cy:directed="1"/>
      <edge id="304949" label="zzz1002,zzz1391" source="2108" target="1880" cy:directed="1"/>
      <edge id="304948" label="zzz1002,zzz1488" source="2108" target="1804" cy:directed="1"/>
      <edge id="304947" label="zzz1002,zzzz474" source="2108" target="521" cy:directed="1"/>
      <edge id="304946" label="zzz1002,zzzz537" source="2108" target="470" cy:directed="1"/>
      <edge id="304945" label="zzz1002,zzzz607" source="2108" target="423" cy:directed="1"/>
      <edge id="304944" label="zzz1002,zzzz738" source="2108" target="338" cy:directed="1"/>
      <edge id="304943" label="zzz1002,zzzz999" source="2108" target="172" cy:directed="1"/>
      <edge id="304942" label="zzz1002,zzz1030" source="2108" target="2087" cy:directed="1"/>
      <edge id="304941" label="zzz1002,zzz1132" source="2108" target="2044" cy:directed="1"/>
      <edge id="304940" label="zzz1002,zzz1324" source="2108" target="1928" cy:directed="1"/>
      <edge id="304939" label="zzz1002,zzz1346" source="2108" target="1912" cy:directed="1"/>
      <edge id="304938" label="zzz1002,zzz1521" source="2108" target="1782" cy:directed="1"/>
      <edge id="304937" label="zzz1002,zzzz711" source="2108" target="350" cy:directed="1"/>
      <edge id="304936" label="zzz1002,zzzz960" source="2108" target="201" cy:directed="1"/>
      <edge id="304935" label="zzz1002,zzz1196" source="2108" target="2009" cy:directed="1"/>
      <edge id="304934" label="zzz1002,zzz1251" source="2108" target="1969" cy:directed="1"/>
      <edge id="304933" label="zzz1002,zzzz469" source="2108" target="524" cy:directed="1"/>
      <edge id="304932" label="zzz1002,zzzz574" source="2108" target="450" cy:directed="1"/>
      <edge id="304931" label="zzz1002,zzzz601" source="2108" target="429" cy:directed="1"/>
      <edge id="304930" label="zzz1002,zzzz805" source="2108" target="287" cy:directed="1"/>
      <edge id="304929" label="zzz1002,zzzz931" source="2108" target="219" cy:directed="1"/>
      <edge id="304928" label="zzz1002,zzz1139" source="2108" target="2039" cy:directed="1"/>
      <edge id="304927" label="zzz1002,zzz1160" source="2108" target="2028" cy:directed="1"/>
      <edge id="304926" label="zzz1002,zzz1234" source="2108" target="1981" cy:directed="1"/>
      <edge id="304925" label="zzz1002,zzz1242" source="2108" target="1976" cy:directed="1"/>
      <edge id="304924" label="zzz1002,zzz1244" source="2108" target="1975" cy:directed="1"/>
      <edge id="304923" label="zzz1002,zzz1339" source="2108" target="1916" cy:directed="1"/>
      <edge id="304922" label="zzz1002,zzz1397" source="2108" target="1875" cy:directed="1"/>
      <edge id="304921" label="zzz1002,zzz1398" source="2108" target="1874" cy:directed="1"/>
      <edge id="304920" label="zzz1002,zzz1442" source="2108" target="1840" cy:directed="1"/>
      <edge id="304919" label="zzz1002,zzz1482" source="2108" target="1810" cy:directed="1"/>
      <edge id="304918" label="zzz1002,zzz1529" source="2108" target="1775" cy:directed="1"/>
      <edge id="304917" label="zzz1002,zzz1542" source="2108" target="1767" cy:directed="1"/>
      <edge id="304916" label="zzz1002,zzzz436" source="2108" target="544" cy:directed="1"/>
      <edge id="304915" label="zzz1002,zzzz531" source="2108" target="474" cy:directed="1"/>
      <edge id="304914" label="zzz1002,zzzz533" source="2108" target="472" cy:directed="1"/>
      <edge id="304913" label="zzz1002,zzzz584" source="2108" target="445" cy:directed="1"/>
      <edge id="304912" label="zzz1002,zzzz603" source="2108" target="427" cy:directed="1"/>
      <edge id="304911" label="zzz1002,zzzz640" source="2108" target="401" cy:directed="1"/>
      <edge id="304910" label="zzz1002,zzzz882" source="2108" target="238" cy:directed="1"/>
      <edge id="304909" label="zzz1002,zzzz978" source="2108" target="186" cy:directed="1"/>
      <edge id="304908" label="zzz1002,zzz1033" source="2108" target="2086" cy:directed="1"/>
      <edge id="304907" label="zzz1002,zzz1189" source="2108" target="2014" cy:directed="1"/>
      <edge id="304906" label="zzz1002,zzz1201" source="2108" target="2004" cy:directed="1"/>
      <edge id="304905" label="zzz1002,zzz1205" source="2108" target="2000" cy:directed="1"/>
      <edge id="304904" label="zzz1002,zzz1356" source="2108" target="1904" cy:directed="1"/>
      <edge id="304903" label="zzz1002,zzz1486" source="2108" target="1806" cy:directed="1"/>
      <edge id="304902" label="zzz1002,zzzz528" source="2108" target="477" cy:directed="1"/>
      <edge id="304901" label="zzz1002,zzzz598" source="2108" target="432" cy:directed="1"/>
      <edge id="304900" label="zzz1002,zzzz642" source="2108" target="400" cy:directed="1"/>
      <edge id="304899" label="zzz1002,zzzz708" source="2108" target="353" cy:directed="1"/>
      <edge id="304898" label="zzz1002,zzzz753" source="2108" target="332" cy:directed="1"/>
      <edge id="304897" label="zzz1002,zzzz902" source="2108" target="231" cy:directed="1"/>
      <edge id="304896" label="zzz1002,zzzz971" source="2108" target="193" cy:directed="1"/>
      <edge id="304895" label="zzz1002,zzz1180" source="2108" target="2018" cy:directed="1"/>
      <edge id="304894" label="zzz1002,zzz1248" source="2108" target="1972" cy:directed="1"/>
      <edge id="304893" label="zzz1002,zzzz456" source="2108" target="534" cy:directed="1"/>
      <edge id="304892" label="zzz1002,zzzz691" source="2108" target="367" cy:directed="1"/>
      <edge id="304891" label="zzz1002,zzzz845" source="2108" target="260" cy:directed="1"/>
      <edge id="304890" label="zzz1002,zzzz974" source="2108" target="190" cy:directed="1"/>
      <edge id="304889" label="zzz1002,zzz1250" source="2108" target="1970" cy:directed="1"/>
      <edge id="304888" label="zzz1002,zzz1390" source="2108" target="1881" cy:directed="1"/>
      <edge id="304887" label="zzz1002,zzz1532" source="2108" target="1773" cy:directed="1"/>
      <edge id="304886" label="zzz1002,zzzz478" source="2108" target="517" cy:directed="1"/>
      <edge id="304885" label="zzz1002,zzzz814" source="2108" target="278" cy:directed="1"/>
      <edge id="304884" label="zzz1002,zzzz935" source="2108" target="215" cy:directed="1"/>
      <edge id="304883" label="zzz1002,zzzz420" source="2108" target="553" cy:directed="1"/>
      <edge id="304882" label="zzz1002,zzzz889" source="2108" target="232" cy:directed="1"/>
      <edge id="304881" label="zzz1002,zzzz921" source="2108" target="223" cy:directed="1"/>
      <edge id="304880" label="zzz1002,zzzz924" source="2108" target="220" cy:directed="1"/>
      <edge id="304879" label="zzz1002,zzz1439" source="2108" target="1843" cy:directed="1"/>
      <edge id="304878" label="zzz1002,zzzz539" source="2108" target="468" cy:directed="1"/>
      <edge id="304877" label="zzz1002,zzzz665" source="2108" target="382" cy:directed="1"/>
      <edge id="304876" label="zzz1002,zzzz710" source="2108" target="351" cy:directed="1"/>
      <edge id="304875" label="zzz1002,zzzz810" source="2108" target="282" cy:directed="1"/>
      <edge id="304874" label="zzz1002,zzz1044" source="2108" target="2081" cy:directed="1"/>
      <edge id="304873" label="zzz1002,zzz1168" source="2108" target="2025" cy:directed="1"/>
      <edge id="304872" label="zzz1002,zzz1483" source="2108" target="1809" cy:directed="1"/>
      <edge id="304871" label="zzz1002,zzzz477" source="2108" target="518" cy:directed="1"/>
      <edge id="304870" label="zzz1002,zzzz626" source="2108" target="409" cy:directed="1"/>
      <edge id="304869" label="zzz1002,zzzz538" source="2108" target="469" cy:directed="1"/>
      <edge id="304868" label="zzz1002,zzzz968" source="2108" target="196" cy:directed="1"/>
      <edge id="304867" label="zzz1002,zzzz975" source="2108" target="189" cy:directed="1"/>
      <edge id="304866" label="zzz1002,zzz1010" source="2108" target="2103" cy:directed="1"/>
      <edge id="304865" label="zzz1002,zzz1128" source="2108" target="2047" cy:directed="1"/>
      <edge id="304864" label="zzz1002,zzz1190" source="2108" target="2013" cy:directed="1"/>
      <edge id="304863" label="zzz1002,zzz1386" source="2108" target="1884" cy:directed="1"/>
      <edge id="304862" label="zzz1002,zzzz473" source="2108" target="522" cy:directed="1"/>
      <edge id="304861" label="zzz1002,zzzz540" source="2108" target="467" cy:directed="1"/>
      <edge id="304860" label="zzz1002,zzzz602" source="2108" target="428" cy:directed="1"/>
      <edge id="304859" label="zzz1002,zzzz667" source="2108" target="380" cy:directed="1"/>
      <edge id="304858" label="zzz1002,zzzz668" source="2108" target="379" cy:directed="1"/>
      <edge id="304857" label="zzz1002,zzzz763" source="2108" target="324" cy:directed="1"/>
      <edge id="304856" label="zzz1002,zzzz808" source="2108" target="284" cy:directed="1"/>
      <edge id="304855" label="zzz1002,zzzz933" source="2108" target="217" cy:directed="1"/>
      <edge id="304854" label="zzz1002,zzzz973" source="2108" target="191" cy:directed="1"/>
      <edge id="304853" label="zzz1002,zzzz976" source="2108" target="188" cy:directed="1"/>
      <edge id="304852" label="zzz1002,zzz1195" source="2108" target="2010" cy:directed="1"/>
      <edge id="304851" label="zzz1002,zzz1365" source="2108" target="1897" cy:directed="1"/>
      <edge id="304850" label="zzz1002,zzzz589" source="2108" target="441" cy:directed="1"/>
      <edge id="304849" label="zzz1002,zzzz604" source="2108" target="426" cy:directed="1"/>
      <edge id="304848" label="zzz1002,zzzz666" source="2108" target="381" cy:directed="1"/>
      <edge id="304847" label="zzz1002,zzzz791" source="2108" target="297" cy:directed="1"/>
      <edge id="304846" label="zzz1002,zzzz811" source="2108" target="281" cy:directed="1"/>
      <edge id="304845" label="zzz1002,zzzz846" source="2108" target="259" cy:directed="1"/>
      <edge id="304844" label="zzz1002,zzz1034" source="2108" target="2085" cy:directed="1"/>
      <edge id="304843" label="zzz1002,zzz1208" source="2108" target="1998" cy:directed="1"/>
      <edge id="304842" label="zzz1002,zzzz435" source="2108" target="545" cy:directed="1"/>
      <edge id="304841" label="zzz1002,zzzz658" source="2108" target="389" cy:directed="1"/>
      <edge id="304840" label="zzz1002,zzzz660" source="2108" target="387" cy:directed="1"/>
      <edge id="304839" label="zzz1002,zzzz685" source="2108" target="370" cy:directed="1"/>
      <edge id="304838" label="zzz1002,zzzz731" source="2108" target="341" cy:directed="1"/>
      <edge id="304837" label="zzz1002,zzz1070" source="2108" target="2063" cy:directed="1"/>
      <edge id="304836" label="zzz1002,zzz1438" source="2108" target="1844" cy:directed="1"/>
      <edge id="304835" label="zzz1002,zzzz532" source="2108" target="473" cy:directed="1"/>
      <edge id="304834" label="zzz1002,zzzz555" source="2108" target="458" cy:directed="1"/>
      <edge id="304833" label="zzz1002,zzzz600" source="2108" target="430" cy:directed="1"/>
      <edge id="304832" label="zzz1002,zzzz659" source="2108" target="388" cy:directed="1"/>
      <edge id="304831" label="zzz1002,zzzz663" source="2108" target="384" cy:directed="1"/>
      <edge id="304830" label="zzz1002,zzzz682" source="2108" target="373" cy:directed="1"/>
      <edge id="304829" label="zzz1002,zzzz706" source="2108" target="355" cy:directed="1"/>
      <edge id="304828" label="zzz1002,zzzz739" source="2108" target="337" cy:directed="1"/>
      <edge id="304827" label="zzz1002,zzzz773" source="2108" target="314" cy:directed="1"/>
      <edge id="304826" label="zzz1002,zzz1018" source="2108" target="2096" cy:directed="1"/>
      <edge id="304825" label="zzz1002,zzz1265" source="2108" target="1962" cy:directed="1"/>
      <edge id="304824" label="zzz1002,zzz1385" source="2108" target="1885" cy:directed="1"/>
      <edge id="304823" label="zzz1002,zzz1546" source="2108" target="1764" cy:directed="1"/>
      <edge id="304822" label="zzz1002,zzzz529" source="2108" target="476" cy:directed="1"/>
      <edge id="304821" label="zzz1002,zzzz605" source="2108" target="425" cy:directed="1"/>
      <edge id="304820" label="zzz1002,zzzz656" source="2108" target="391" cy:directed="1"/>
      <edge id="304819" label="zzz1002,zzzz789" source="2108" target="299" cy:directed="1"/>
      <edge id="304818" label="zzz1002,zzz1378" source="2108" target="1889" cy:directed="1"/>
      <edge id="304817" label="zzz1002,zzzz553" source="2108" target="459" cy:directed="1"/>
      <edge id="304816" label="zzz1002,zzzz518" source="2108" target="485" cy:directed="1"/>
      <edge id="304815" label="zzz1002,zzzz608" source="2108" target="422" cy:directed="1"/>
      <edge id="304814" label="zzz1002,zzzz632" source="2108" target="404" cy:directed="1"/>
      <edge id="304813" label="zzz1002,zzzz689" source="2108" target="368" cy:directed="1"/>
      <edge id="304812" label="zzz1002,zzzz992" source="2108" target="177" cy:directed="1"/>
      <edge id="304811" label="zzz1002,zzzz556" source="2108" target="457" cy:directed="1"/>
      <edge id="304810" label="zzz1002,zzzz597" source="2108" target="433" cy:directed="1"/>
      <edge id="304809" label="zzz1002,zzzz661" source="2108" target="386" cy:directed="1"/>
      <edge id="304808" label="zzz1002,zzzz662" source="2108" target="385" cy:directed="1"/>
      <edge id="304807" label="zzz1002,zzzz671" source="2108" target="376" cy:directed="1"/>
      <edge id="304806" label="zzz1002,zzzz812" source="2108" target="280" cy:directed="1"/>
      <edge id="304805" label="zzz1002,zzzz913" source="2108" target="225" cy:directed="1"/>
      <edge id="304804" label="zzz1002,zzz1099" source="2108" target="2061" cy:directed="1"/>
      <edge id="304803" label="zzz1002,zzz1494" source="2108" target="1798" cy:directed="1"/>
      <edge id="304802" label="zzz1002,zzzz657" source="2108" target="390" cy:directed="1"/>
      <edge id="304801" label="zzz1002,zzzz669" source="2108" target="378" cy:directed="1"/>
      <edge id="304800" label="zzz1002,zzzz703" source="2108" target="358" cy:directed="1"/>
      <edge id="304799" label="zzz1002,zzzz664" source="2108" target="383" cy:directed="1"/>
      <edge id="304798" label="zzz1002,zzzz686" source="2108" target="369" cy:directed="1"/>
      <edge id="304797" label="zzz1002,zzzz762" source="2108" target="325" cy:directed="1"/>
      <edge id="304796" label="zzz1002,zzz1304" source="2108" target="1938" cy:directed="1"/>
      <edge id="304795" label="zzz1002,zzzz454" source="2108" target="535" cy:directed="1"/>
      <edge id="304794" label="zzz1002,zzzz709" source="2108" target="352" cy:directed="1"/>
      <edge id="304793" label="zzz1002,zzzz751" source="2108" target="334" cy:directed="1"/>
      <edge id="304792" label="zzz1002,zzzz767" source="2108" target="320" cy:directed="1"/>
      <edge id="304791" label="zzz1002,zzzz993" source="2108" target="176" cy:directed="1"/>
      <edge id="304790" label="zzz1002,zzz1141" source="2108" target="2038" cy:directed="1"/>
      <edge id="304789" label="zzz1002,zzz1200" source="2108" target="2005" cy:directed="1"/>
      <edge id="304788" label="zzz1002,zzzz970" source="2108" target="194" cy:directed="1"/>
      <edge id="304787" label="zzz1002,zzzz485" source="2108" target="510" cy:directed="1"/>
      <edge id="304786" label="zzz1002,zzzz705" source="2108" target="356" cy:directed="1"/>
      <edge id="304785" label="zzz1002,zzzz981" source="2108" target="185" cy:directed="1"/>
      <edge id="304784" label="zzz1002,zzzz467" source="2108" target="526" cy:directed="1"/>
      <edge id="304783" label="zzz1002,zzzz623" source="2108" target="412" cy:directed="1"/>
      <edge id="304782" label="zzz1002,zzzz627" source="2108" target="408" cy:directed="1"/>
      <edge id="304781" label="zzz1002,zzzz771" source="2108" target="316" cy:directed="1"/>
      <edge id="304780" label="zzz1002,zzzz888" source="2108" target="233" cy:directed="1"/>
      <edge id="304779" label="zzz1002,zzz1064" source="2108" target="2068" cy:directed="1"/>
      <edge id="304778" label="zzz1002,zzz1279" source="2108" target="1951" cy:directed="1"/>
      <edge id="304777" label="zzz1002,zzz1416" source="2108" target="1861" cy:directed="1"/>
      <edge id="304776" label="zzz1002,zzzz432" source="2108" target="548" cy:directed="1"/>
      <edge id="304775" label="zzz1002,zzzz480" source="2108" target="515" cy:directed="1"/>
      <edge id="304774" label="zzz1002,zzzz670" source="2108" target="377" cy:directed="1"/>
      <edge id="304773" label="zzz1002,zzzz672" source="2108" target="375" cy:directed="1"/>
      <edge id="304772" label="zzz1002,zzzz732" source="2108" target="340" cy:directed="1"/>
      <edge id="304771" label="zzz1002,zzzz740" source="2108" target="336" cy:directed="1"/>
      <edge id="304770" label="zzz1002,zzzz768" source="2108" target="319" cy:directed="1"/>
      <edge id="304769" label="zzz1002,zzzz521" source="2108" target="482" cy:directed="1"/>
      <edge id="304768" label="zzz1002,zzz1395" source="2108" target="1877" cy:directed="1"/>
      <edge id="304767" label="zzz1002,zzzz599" source="2108" target="431" cy:directed="1"/>
      <edge id="304766" label="zzz1002,zzzz752" source="2108" target="333" cy:directed="1"/>
      <edge id="304765" label="zzz1002,zzzz858" source="2108" target="254" cy:directed="1"/>
      <edge id="304764" label="zzz1002,zzzz523" source="2108" target="480" cy:directed="1"/>
      <edge id="304763" label="zzz1002,zzzz772" source="2108" target="315" cy:directed="1"/>
      <edge id="304762" label="zzz1002,zzz1372" source="2108" target="1894" cy:directed="1"/>
      <edge id="304761" label="zzz1002,zzz1503" source="2108" target="1789" cy:directed="1"/>
      <edge id="304760" label="zzz1002,zzzz431" source="2108" target="549" cy:directed="1"/>
      <edge id="304759" label="zzz1002,zzzz757" source="2108" target="328" cy:directed="1"/>
      <edge id="304758" label="zzz1002,zzzz766" source="2108" target="321" cy:directed="1"/>
      <edge id="304757" label="zzz1002,zzzz774" source="2108" target="313" cy:directed="1"/>
      <edge id="304756" label="zzz1002,zzzz806" source="2108" target="286" cy:directed="1"/>
      <edge id="304755" label="zzz1002,zzzz815" source="2108" target="277" cy:directed="1"/>
      <edge id="304754" label="zzz1002,zzzz612" source="2108" target="418" cy:directed="1"/>
      <edge id="304753" label="zzz1002,zzzz803" source="2108" target="289" cy:directed="1"/>
      <edge id="304752" label="zzz1002,zzz1067" source="2108" target="2066" cy:directed="1"/>
      <edge id="304751" label="zzz1002,zzz1266" source="2108" target="1961" cy:directed="1"/>
      <edge id="304750" label="zzz1002,zzz1393" source="2108" target="1878" cy:directed="1"/>
      <edge id="304749" label="zzz1002,zzzz549" source="2108" target="461" cy:directed="1"/>
      <edge id="304748" label="zzz1002,zzzz775" source="2108" target="312" cy:directed="1"/>
      <edge id="304747" label="zzz1002,zzzz804" source="2108" target="288" cy:directed="1"/>
      <edge id="304746" label="zzz1002,zzz1284" source="2108" target="1948" cy:directed="1"/>
      <edge id="304745" label="zzz1002,zzz1411" source="2108" target="1865" cy:directed="1"/>
      <edge id="304744" label="zzz1002,zzzz770" source="2108" target="317" cy:directed="1"/>
      <edge id="304743" label="zzz1002,zzzz905" source="2108" target="229" cy:directed="1"/>
      <edge id="304742" label="zzz1002,zzzz410" source="2108" target="562" cy:directed="1"/>
      <edge id="304741" label="zzz1002,zzzz769" source="2108" target="318" cy:directed="1"/>
      <edge id="304740" label="zzz1002,zzzz816" source="2108" target="276" cy:directed="1"/>
      <edge id="304739" label="zzz1002,zzz1276" source="2108" target="1954" cy:directed="1"/>
      <edge id="304738" label="zzz1002,zzzz841" source="2108" target="263" cy:directed="1"/>
      <edge id="304737" label="zzz1002,zzzz809" source="2108" target="283" cy:directed="1"/>
      <edge id="304736" label="zzz1002,zzz1069" source="2108" target="2064" cy:directed="1"/>
      <edge id="304735" label="zzz1002,zzzz536" source="2108" target="471" cy:directed="1"/>
      <edge id="304734" label="zzz1002,zzzz404" source="2108" target="568" cy:directed="1"/>
      <edge id="304733" label="zzz1002,zzzz475" source="2108" target="520" cy:directed="1"/>
      <edge id="304732" label="zzz1002,zzzz568" source="2108" target="452" cy:directed="1"/>
      <edge id="304731" label="zzz1002,zzzz793" source="2108" target="295" cy:directed="1"/>
      <edge id="304730" label="zzz1002,zzz1440" source="2108" target="1842" cy:directed="1"/>
      <edge id="304729" label="zzz1002,zzzz527" source="2108" target="478" cy:directed="1"/>
      <edge id="304728" label="zzz1002,zzz1012" source="2108" target="2101" cy:directed="1"/>
      <edge id="304727" label="zzz1002,zzzz482" source="2108" target="513" cy:directed="1"/>
      <edge id="304726" label="zzz1002,zzzz609" source="2108" target="421" cy:directed="1"/>
      <edge id="304725" label="zzz1002,zzz1013" source="2108" target="2100" cy:directed="1"/>
      <edge id="304724" label="zzz1002,zzz1015" source="2108" target="2099" cy:directed="1"/>
      <edge id="304723" label="zzz1002,zzzz764" source="2108" target="323" cy:directed="1"/>
      <edge id="304722" label="zzz1002,zzz1011" source="2108" target="2102" cy:directed="1"/>
      <edge id="304721" label="zzz1002,zzz1017" source="2108" target="2097" cy:directed="1"/>
      <edge id="304720" label="zzz1002,zzzz807" source="2108" target="285" cy:directed="1"/>
      <edge id="304719" label="zzz1002,zzzz944" source="2108" target="210" cy:directed="1"/>
      <edge id="304718" label="zzz1002,zzzz802" source="2108" target="290" cy:directed="1"/>
      <edge id="304717" label="zzz1002,zzzz620" source="2108" target="414" cy:directed="1"/>
      <edge id="304716" label="zzz1002,zzzz750" source="2108" target="335" cy:directed="1"/>
      <edge id="304715" label="zzz1002,zzzz567" source="2108" target="453" cy:directed="1"/>
      <edge id="304714" label="zzz1002,zzz1249" source="2108" target="1971" cy:directed="1"/>
      <edge id="304713" label="zzz1002,zzz1203" source="2108" target="2002" cy:directed="1"/>
      <edge id="304712" label="zzz1002,zzzz425" source="2108" target="552" cy:directed="1"/>
      <edge id="304711" label="zzz1002,zzzz786" source="2108" target="301" cy:directed="1"/>
      <edge id="304710" label="zzz1002,zzzz498" source="2108" target="499" cy:directed="1"/>
      <edge id="304709" label="zzz1002,zzzz519" source="2108" target="484" cy:directed="1"/>
      <edge id="304708" label="zzz1002,zzzz966" source="2108" target="198" cy:directed="1"/>
      <edge id="304707" label="zzz1002,zzz1028" source="2108" target="2088" cy:directed="1"/>
      <edge id="304706" label="zzz1002,zzzz520" source="2108" target="483" cy:directed="1"/>
      <edge id="304705" label="zzz1002,zzzz783" source="2108" target="304" cy:directed="1"/>
      <edge id="304704" label="zzz1002,zzzz569" source="2108" target="451" cy:directed="1"/>
      <edge id="304703" label="zzz1002,zzzz784" source="2108" target="303" cy:directed="1"/>
      <edge id="304702" label="zzz1002,zzzz704" source="2108" target="357" cy:directed="1"/>
      <edge id="304701" label="zzz1002,zzzz785" source="2108" target="302" cy:directed="1"/>
      <edge id="304700" label="zzz1002,zzzz813" source="2108" target="279" cy:directed="1"/>
      <edge id="304699" label="zzz1002,zzzz969" source="2108" target="195" cy:directed="1"/>
      <edge id="304698" label="zzz1002,zzz1059" source="2108" target="2072" cy:directed="1"/>
      <edge id="304697" label="zzz1002,zzz1456" source="2108" target="1826" cy:directed="1"/>
      <edge id="304696" label="zzz1002,zzzz875" source="2108" target="242" cy:directed="1"/>
      <edge id="304695" label="zzz1002,zzzz500" source="2108" target="498" cy:directed="1"/>
      <edge id="304694" label="zzz1002,zzzz530" source="2108" target="475" cy:directed="1"/>
      <edge id="304693" label="zzz1002,zzz1379" source="2108" target="1888" cy:directed="1"/>
      <edge id="304692" label="zzz1002,zzzz429" source="2108" target="550" cy:directed="1"/>
      <edge id="304691" label="zzz1002,zzzz557" source="2108" target="456" cy:directed="1"/>
      <edge id="304690" label="zzz1002,zzzz684" source="2108" target="371" cy:directed="1"/>
      <edge id="304689" label="zzz1002,zzzz405" source="2108" target="567" cy:directed="1"/>
      <edge id="304688" label="zzz1002,zzzz625" source="2108" target="410" cy:directed="1"/>
      <edge id="304687" label="zzz1002,zzzz512" source="2108" target="487" cy:directed="1"/>
      <edge id="304686" label="zzz1002,zzzz566" source="2108" target="454" cy:directed="1"/>
      <edge id="304685" label="zzz1002,zzzz883" source="2108" target="237" cy:directed="1"/>
      <edge id="304684" label="zzz1002,zzzz406" source="2108" target="566" cy:directed="1"/>
      <edge id="304683" label="zzz1002,zzz1058" source="2108" target="2073" cy:directed="1"/>
      <edge id="304682" label="zzz1002,zzz1060" source="2108" target="2071" cy:directed="1"/>
      <edge id="304681" label="zzz1002,zzzz464" source="2108" target="528" cy:directed="1"/>
      <edge id="304680" label="zzz1002,zzz1533" source="2108" target="1772" cy:directed="1"/>
      <edge id="304679" label="zzz1002,zzzz836" source="2108" target="267" cy:directed="1"/>
      <edge id="304678" label="zzz1002,zzz1027" source="2108" target="2089" cy:directed="1"/>
      <edge id="304677" label="zzz1002,zzzz798" source="2108" target="291" cy:directed="1"/>
      <edge id="304676" label="zzz1002,zzzz497" source="2108" target="500" cy:directed="1"/>
      <edge id="304675" label="zzz1002,zzzz503" source="2108" target="496" cy:directed="1"/>
      <edge id="304674" label="zzz1002,zzzz903" source="2108" target="230" cy:directed="1"/>
      <edge id="304673" label="zzz1002,zzzz694" source="2108" target="365" cy:directed="1"/>
      <edge id="304672" label="zzz1002,zzzz996" source="2108" target="174" cy:directed="1"/>
      <edge id="304671" label="zzz1002,zzz1026" source="2108" target="2090" cy:directed="1"/>
      <edge id="304670" label="zzz1002,zzzz502" source="2108" target="497" cy:directed="1"/>
      <edge id="304669" label="zzz1002,zzz1021" source="2108" target="2094" cy:directed="1"/>
      <edge id="304668" label="zzz1002,zzzz610" source="2108" target="420" cy:directed="1"/>
      <edge id="304667" label="zzz1002,zzzz628" source="2108" target="407" cy:directed="1"/>
      <edge id="304666" label="zzz1002,zzz1068" source="2108" target="2065" cy:directed="1"/>
      <edge id="304665" label="zzz1002,zzzz630" source="2108" target="406" cy:directed="1"/>
      <edge id="304664" label="zzz1002,zzzz869" source="2108" target="246" cy:directed="1"/>
      <edge id="304663" label="zzz1002,zzzz526" source="2108" target="479" cy:directed="1"/>
      <edge id="304662" label="zzz1002,zzzz517" source="2108" target="486" cy:directed="1"/>
      <edge id="304661" label="zzz1002,zzzz795" source="2108" target="293" cy:directed="1"/>
      <edge id="304660" label="zzz1002,zzz1052" source="2108" target="2079" cy:directed="1"/>
      <edge id="304659" label="zzz1002,zzz1314" source="2108" target="1933" cy:directed="1"/>
      <edge id="304658" label="zzz1002,zzzz622" source="2108" target="413" cy:directed="1"/>
      <edge id="304657" label="zzz1002,zzz1063" source="2108" target="2069" cy:directed="1"/>
      <edge id="304656" label="zzz1002,zzz1522" source="2108" target="1781" cy:directed="1"/>
      <edge id="304655" label="zzz1002,zzzz590" source="2108" target="440" cy:directed="1"/>
      <edge id="304654" label="zzz1002,zzz1023" source="2108" target="2092" cy:directed="1"/>
      <edge id="304653" label="zzz1002,zzzz680" source="2108" target="374" cy:directed="1"/>
      <edge id="304652" label="zzz1002,zzzz936" source="2108" target="214" cy:directed="1"/>
      <edge id="304651" label="zzz1002,zzzz953" source="2108" target="206" cy:directed="1"/>
      <edge id="304650" label="zzz1002,zzz1043" source="2108" target="2082" cy:directed="1"/>
      <edge id="304649" label="zzz1002,zzz1257" source="2108" target="1966" cy:directed="1"/>
      <edge id="304648" label="zzz1002,zzzz721" source="2108" target="345" cy:directed="1"/>
      <edge id="304647" label="zzz1002,zzzz462" source="2108" target="529" cy:directed="1"/>
      <edge id="304646" label="zzz1002,zzzz551" source="2108" target="460" cy:directed="1"/>
      <edge id="304645" label="zzz1002,zzz1417" source="2108" target="1860" cy:directed="1"/>
      <edge id="304644" label="zzz1002,zzzz506" source="2108" target="493" cy:directed="1"/>
      <edge id="304643" label="zzz1002,zzzz702" source="2108" target="359" cy:directed="1"/>
      <edge id="304642" label="zzz1002,zzz1261" source="2108" target="1963" cy:directed="1"/>
      <edge id="304641" label="zzz1002,zzz1357" source="2108" target="1903" cy:directed="1"/>
      <edge id="304640" label="zzz1002,zzzz860" source="2108" target="252" cy:directed="1"/>
      <edge id="304639" label="zzz1002,zzzz722" source="2108" target="344" cy:directed="1"/>
      <edge id="304638" label="zzz1002,zzzz861" source="2108" target="251" cy:directed="1"/>
      <edge id="304637" label="zzz1002,zzz1451" source="2108" target="1831" cy:directed="1"/>
      <edge id="304636" label="zzz1002,zzz1431" source="2108" target="1848" cy:directed="1"/>
      <edge id="304635" label="zzz1002,zzzz565" source="2108" target="455" cy:directed="1"/>
      <edge id="304634" label="zzz1002,zzzz586" source="2108" target="443" cy:directed="1"/>
      <edge id="304633" label="zzz1002,zzzz631" source="2108" target="405" cy:directed="1"/>
      <edge id="304632" label="zzz1002,zzz1016" source="2108" target="2098" cy:directed="1"/>
      <edge id="304631" label="zzz1002,zzzz730" source="2108" target="342" cy:directed="1"/>
      <edge id="304630" label="zzz1002,zzz1204" source="2108" target="2001" cy:directed="1"/>
      <edge id="304629" label="zzz1002,zzzz737" source="2108" target="339" cy:directed="1"/>
      <edge id="304628" label="zzz1002,zzzz957" source="2108" target="203" cy:directed="1"/>
      <edge id="304627" label="zzz1002,zzzz419" source="2108" target="554" cy:directed="1"/>
      <edge id="304626" label="zzz1002,zzzz591" source="2108" target="439" cy:directed="1"/>
      <edge id="304625" label="zzz1002,zzzz541" source="2108" target="466" cy:directed="1"/>
      <edge id="304624" label="zzz1002,zzzz644" source="2108" target="399" cy:directed="1"/>
      <edge id="304623" label="zzz1002,zzzz460" source="2108" target="530" cy:directed="1"/>
      <edge id="304622" label="zzz1002,zzz1041" source="2108" target="2083" cy:directed="1"/>
      <edge id="304621" label="zzz1002,zzzz983" source="2108" target="183" cy:directed="1"/>
      <edge id="304620" label="zzz1002,zzzz413" source="2108" target="559" cy:directed="1"/>
      <edge id="304619" label="zzz1002,zzzz522" source="2108" target="481" cy:directed="1"/>
      <edge id="304618" label="zzz1002,zzz1025" source="2108" target="2091" cy:directed="1"/>
      <edge id="304617" label="zzz1002,zzzz418" source="2108" target="555" cy:directed="1"/>
      <edge id="304616" label="zzz1002,zzzz417" source="2108" target="556" cy:directed="1"/>
      <edge id="304615" label="zzz1002,zzzz458" source="2108" target="532" cy:directed="1"/>
      <edge id="304614" label="zzz1002,zzzz408" source="2108" target="564" cy:directed="1"/>
      <edge id="304613" label="zzz1002,zzzz596" source="2108" target="434" cy:directed="1"/>
      <edge id="304612" label="zzz1002,zzzz411" source="2108" target="561" cy:directed="1"/>
      <edge id="304611" label="zzz1002,zzzz490" source="2108" target="505" cy:directed="1"/>
      <edge id="304610" label="zzz1002,zzzz984" source="2108" target="182" cy:directed="1"/>
      <edge id="304609" label="zzz1002,zzzz982" source="2108" target="184" cy:directed="1"/>
      <edge id="304608" label="zzz1002,zzzz595" source="2108" target="435" cy:directed="1"/>
      <edge id="304607" label="zzz1002,zzzz794" source="2108" target="294" cy:directed="1"/>
      <edge id="304606" label="zzz1002,zzzz434" source="2108" target="546" cy:directed="1"/>
      <edge id="304605" label="zzz1002,zzz1022" source="2108" target="2093" cy:directed="1"/>
      <edge id="304604" label="zzz1002,zzzz840" source="2108" target="264" cy:directed="1"/>
      <edge id="304603" label="zzz1002,zzzz594" source="2108" target="436" cy:directed="1"/>
      <edge id="304602" label="zzz1002,zzzz914" source="2108" target="224" cy:directed="1"/>
      <edge id="304601" label="zzz1002,zzzz466" source="2108" target="527" cy:directed="1"/>
      <edge id="304600" label="zzz1002,zzzz797" source="2108" target="292" cy:directed="1"/>
      <edge id="304599" label="zzz1002,zzzz593" source="2108" target="437" cy:directed="1"/>
      <edge id="304598" label="zzz1002,zzz1019" source="2108" target="2095" cy:directed="1"/>
      <edge id="304597" label="zzz1002,zzzz986" source="2108" target="180" cy:directed="1"/>
      <edge id="304596" label="zzz1002,zzzz987" source="2108" target="179" cy:directed="1"/>
      <edge id="304595" label="zzz1002,zzzz985" source="2108" target="181" cy:directed="1"/>
      <edge id="304594" label="zzz1002,zzz1326" source="2108" target="1926" cy:directed="1"/>
      <edge id="304593" label="zzz1002,zzz1520" source="2108" target="1783" cy:directed="1"/>
      <edge id="304592" label="zzz1002,zzz1518" source="2108" target="1785" cy:directed="1"/>
      <edge id="304591" label="zzz1002,zzzz505" source="2108" target="494" cy:directed="1"/>
      <edge id="304590" label="zzz1002,zzz1377" source="2108" target="1890" cy:directed="1"/>
      <edge id="304589" label="zzz1002,zzzz977" source="2108" target="187" cy:directed="1"/>
      <edge id="304588" label="zzz1002,zzzz491" source="2108" target="504" cy:directed="1"/>
      <edge id="304587" label="zzz1002,zzzz958" source="2108" target="202" cy:directed="1"/>
      <edge id="304586" label="zzz1002,zzz2358" source="2108" target="955" cy:directed="1"/>
      <edge id="304585" label="zzz1002,zzz1217" source="2108" target="1992" cy:directed="1"/>
      <edge id="304584" label="zzz1002,zzz1327" source="2108" target="1925" cy:directed="1"/>
      <edge id="304583" label="zzz1002,zzzz651" source="2108" target="395" cy:directed="1"/>
      <edge id="304582" label="zzz1003,zzz1185" source="2107" target="2015" cy:directed="1"/>
      <edge id="304581" label="zzz1003,zzzz457" source="2107" target="533" cy:directed="1"/>
      <edge id="304580" label="zzz1003,zzz1346" source="2107" target="1912" cy:directed="1"/>
      <edge id="304579" label="zzz1003,zzz1038" source="2107" target="2084" cy:directed="1"/>
      <edge id="304578" label="zzz1003,zzz1398" source="2107" target="1874" cy:directed="1"/>
      <edge id="304577" label="zzz1003,zzzz965" source="2107" target="199" cy:directed="1"/>
      <edge id="304576" label="zzz1003,zzz1098" source="2107" target="2062" cy:directed="1"/>
      <edge id="304575" label="zzz1003,zzzz489" source="2107" target="506" cy:directed="1"/>
      <edge id="304574" label="zzz1003,zzz1399" source="2107" target="1873" cy:directed="1"/>
      <edge id="304573" label="zzz1003,zzz1504" source="2107" target="1788" cy:directed="1"/>
      <edge id="304572" label="zzz1003,zzzz882" source="2107" target="238" cy:directed="1"/>
      <edge id="304571" label="zzz1003,zzzz837" source="2107" target="266" cy:directed="1"/>
      <edge id="304570" label="zzz1003,zzzz808" source="2107" target="284" cy:directed="1"/>
      <edge id="304569" label="zzz1003,zzzz846" source="2107" target="259" cy:directed="1"/>
      <edge id="304568" label="zzz1003,zzzz805" source="2107" target="287" cy:directed="1"/>
      <edge id="304567" label="zzz1003,zzzz960" source="2107" target="201" cy:directed="1"/>
      <edge id="304566" label="zzz1003,zzz1532" source="2107" target="1773" cy:directed="1"/>
      <edge id="304565" label="zzz1003,zzzz862" source="2107" target="250" cy:directed="1"/>
      <edge id="304564" label="zzz1003,zzz1250" source="2107" target="1970" cy:directed="1"/>
      <edge id="304563" label="zzz1003,zzzz806" source="2107" target="286" cy:directed="1"/>
      <edge id="304562" label="zzz1003,zzzz533" source="2107" target="472" cy:directed="1"/>
      <edge id="304561" label="zzz1003,zzzz814" source="2107" target="278" cy:directed="1"/>
      <edge id="304560" label="zzz1003,zzzz815" source="2107" target="277" cy:directed="1"/>
      <edge id="304559" label="zzz1003,zzzz810" source="2107" target="282" cy:directed="1"/>
      <edge id="304558" label="zzz1003,zzzz933" source="2107" target="217" cy:directed="1"/>
      <edge id="304557" label="zzz1003,zzz1325" source="2107" target="1927" cy:directed="1"/>
      <edge id="304556" label="zzz1003,zzz1099" source="2107" target="2061" cy:directed="1"/>
      <edge id="304555" label="zzz1003,zzzz803" source="2107" target="289" cy:directed="1"/>
      <edge id="304554" label="zzz1003,zzz1397" source="2107" target="1875" cy:directed="1"/>
      <edge id="304553" label="zzz1003,zzzz793" source="2107" target="295" cy:directed="1"/>
      <edge id="304552" label="zzz1003,zzzz537" source="2107" target="470" cy:directed="1"/>
      <edge id="304551" label="zzz1003,zzzz804" source="2107" target="288" cy:directed="1"/>
      <edge id="304550" label="zzz1003,zzzz809" source="2107" target="283" cy:directed="1"/>
      <edge id="304549" label="zzz1003,zzz1245" source="2107" target="1974" cy:directed="1"/>
      <edge id="304548" label="zzz1003,zzz1446" source="2107" target="1836" cy:directed="1"/>
      <edge id="304547" label="zzz1003,zzz1208" source="2107" target="1998" cy:directed="1"/>
      <edge id="304546" label="zzz1003,zzz1175" source="2107" target="2021" cy:directed="1"/>
      <edge id="304545" label="zzz1003,zzz1274" source="2107" target="1956" cy:directed="1"/>
      <edge id="304544" label="zzz1003,zzz1319" source="2107" target="1930" cy:directed="1"/>
      <edge id="304543" label="zzz1003,zzz1530" source="2107" target="1774" cy:directed="1"/>
      <edge id="304542" label="zzz1003,zzz1221" source="2107" target="1989" cy:directed="1"/>
      <edge id="304541" label="zzz1003,zzzz707" source="2107" target="354" cy:directed="1"/>
      <edge id="304540" label="zzz1003,zzzz583" source="2107" target="446" cy:directed="1"/>
      <edge id="304539" label="zzz1003,zzz1184" source="2107" target="2016" cy:directed="1"/>
      <edge id="304538" label="zzz1003,zzz1218" source="2107" target="1991" cy:directed="1"/>
      <edge id="304537" label="zzz1003,zzz1354" source="2107" target="1906" cy:directed="1"/>
      <edge id="304536" label="zzz1003,zzz1396" source="2107" target="1876" cy:directed="1"/>
      <edge id="304535" label="zzz1003,zzz1476" source="2107" target="1815" cy:directed="1"/>
      <edge id="304534" label="zzz1003,zzz1535" source="2107" target="1771" cy:directed="1"/>
      <edge id="304533" label="zzz1003,zzzz459" source="2107" target="531" cy:directed="1"/>
      <edge id="304532" label="zzz1003,zzzz792" source="2107" target="296" cy:directed="1"/>
      <edge id="304531" label="zzz1003,zzzz847" source="2107" target="258" cy:directed="1"/>
      <edge id="304530" label="zzz1003,zzz1008" source="2107" target="2105" cy:directed="1"/>
      <edge id="304529" label="zzz1003,zzz1169" source="2107" target="2024" cy:directed="1"/>
      <edge id="304528" label="zzz1003,zzz1545" source="2107" target="1765" cy:directed="1"/>
      <edge id="304527" label="zzz1003,zzzz655" source="2107" target="392" cy:directed="1"/>
      <edge id="304526" label="zzz1003,zzzz838" source="2107" target="265" cy:directed="1"/>
      <edge id="304525" label="zzz1003,zzz1199" source="2107" target="2006" cy:directed="1"/>
      <edge id="304524" label="zzz1003,zzzz720" source="2107" target="346" cy:directed="1"/>
      <edge id="304523" label="zzz1003,zzzz934" source="2107" target="216" cy:directed="1"/>
      <edge id="304522" label="zzz1003,zzz1156" source="2107" target="2031" cy:directed="1"/>
      <edge id="304521" label="zzz1003,zzz1541" source="2107" target="1768" cy:directed="1"/>
      <edge id="304520" label="zzz1003,zzzz479" source="2107" target="516" cy:directed="1"/>
      <edge id="304519" label="zzz1003,zzzz619" source="2107" target="415" cy:directed="1"/>
      <edge id="304518" label="zzz1003,zzzz802" source="2107" target="290" cy:directed="1"/>
      <edge id="304517" label="zzz1003,zzz1349" source="2107" target="1909" cy:directed="1"/>
      <edge id="304516" label="zzz1003,zzz1478" source="2107" target="1813" cy:directed="1"/>
      <edge id="304515" label="zzz1003,zzz1223" source="2107" target="1988" cy:directed="1"/>
      <edge id="304514" label="zzz1003,zzz1441" source="2107" target="1841" cy:directed="1"/>
      <edge id="304513" label="zzz1003,zzzz588" source="2107" target="442" cy:directed="1"/>
      <edge id="304512" label="zzz1003,zzz1324" source="2107" target="1928" cy:directed="1"/>
      <edge id="304511" label="zzz1003,zzz1488" source="2107" target="1804" cy:directed="1"/>
      <edge id="304510" label="zzz1003,zzzz585" source="2107" target="444" cy:directed="1"/>
      <edge id="304509" label="zzz1003,zzzz765" source="2107" target="322" cy:directed="1"/>
      <edge id="304508" label="zzz1003,zzzz790" source="2107" target="298" cy:directed="1"/>
      <edge id="304507" label="zzz1003,zzzz864" source="2107" target="249" cy:directed="1"/>
      <edge id="304506" label="zzz1003,zzzz887" source="2107" target="234" cy:directed="1"/>
      <edge id="304505" label="zzz1003,zzz1009" source="2107" target="2104" cy:directed="1"/>
      <edge id="304504" label="zzz1003,zzz1139" source="2107" target="2039" cy:directed="1"/>
      <edge id="304503" label="zzz1003,zzz1445" source="2107" target="1837" cy:directed="1"/>
      <edge id="304502" label="zzz1003,zzz1495" source="2107" target="1797" cy:directed="1"/>
      <edge id="304501" label="zzz1003,zzzz738" source="2107" target="338" cy:directed="1"/>
      <edge id="304500" label="zzz1003,zzzz856" source="2107" target="256" cy:directed="1"/>
      <edge id="304499" label="zzz1003,zzzz956" source="2107" target="204" cy:directed="1"/>
      <edge id="304498" label="zzz1003,zzzz961" source="2107" target="200" cy:directed="1"/>
      <edge id="304497" label="zzz1003,zzz1234" source="2107" target="1981" cy:directed="1"/>
      <edge id="304496" label="zzz1003,zzz1368" source="2107" target="1896" cy:directed="1"/>
      <edge id="304495" label="zzz1003,zzzz620" source="2107" target="414" cy:directed="1"/>
      <edge id="304494" label="zzz1003,zzz1100" source="2107" target="2060" cy:directed="1"/>
      <edge id="304493" label="zzz1003,zzz1119" source="2107" target="2051" cy:directed="1"/>
      <edge id="304492" label="zzz1003,zzz1159" source="2107" target="2029" cy:directed="1"/>
      <edge id="304491" label="zzz1003,zzz1203" source="2107" target="2002" cy:directed="1"/>
      <edge id="304490" label="zzz1003,zzzz542" source="2107" target="465" cy:directed="1"/>
      <edge id="304489" label="zzz1003,zzzz807" source="2107" target="285" cy:directed="1"/>
      <edge id="304488" label="zzz1003,zzzz910" source="2107" target="227" cy:directed="1"/>
      <edge id="304487" label="zzz1003,zzzz967" source="2107" target="197" cy:directed="1"/>
      <edge id="304486" label="zzz1003,zzz1062" source="2107" target="2070" cy:directed="1"/>
      <edge id="304485" label="zzz1003,zzz1235" source="2107" target="1980" cy:directed="1"/>
      <edge id="304484" label="zzz1003,zzz1363" source="2107" target="1898" cy:directed="1"/>
      <edge id="304483" label="zzz1003,zzzz636" source="2107" target="403" cy:directed="1"/>
      <edge id="304482" label="zzz1003,zzzz692" source="2107" target="366" cy:directed="1"/>
      <edge id="304481" label="zzz1003,zzzz504" source="2107" target="495" cy:directed="1"/>
      <edge id="304480" label="zzz1003,zzz1391" source="2107" target="1880" cy:directed="1"/>
      <edge id="304479" label="zzz1003,zzzz426" source="2107" target="551" cy:directed="1"/>
      <edge id="304478" label="zzz1003,zzzz472" source="2107" target="523" cy:directed="1"/>
      <edge id="304477" label="zzz1003,zzz1233" source="2107" target="1982" cy:directed="1"/>
      <edge id="304476" label="zzz1003,zzzz474" source="2107" target="521" cy:directed="1"/>
      <edge id="304475" label="zzz1003,zzzz507" source="2107" target="492" cy:directed="1"/>
      <edge id="304474" label="zzz1003,zzz1496" source="2107" target="1796" cy:directed="1"/>
      <edge id="304473" label="zzz1003,zzz1521" source="2107" target="1782" cy:directed="1"/>
      <edge id="304472" label="zzz1003,zzzz487" source="2107" target="508" cy:directed="1"/>
      <edge id="304471" label="zzz1003,zzzz640" source="2107" target="401" cy:directed="1"/>
      <edge id="304470" label="zzz1003,zzzz711" source="2107" target="350" cy:directed="1"/>
      <edge id="304469" label="zzz1003,zzzz865" source="2107" target="248" cy:directed="1"/>
      <edge id="304468" label="zzz1003,zzzz975" source="2107" target="189" cy:directed="1"/>
      <edge id="304467" label="zzz1003,zzzz574" source="2107" target="450" cy:directed="1"/>
      <edge id="304466" label="zzz1003,zzzz584" source="2107" target="445" cy:directed="1"/>
      <edge id="304465" label="zzz1003,zzzz821" source="2107" target="274" cy:directed="1"/>
      <edge id="304464" label="zzz1003,zzzz932" source="2107" target="218" cy:directed="1"/>
      <edge id="304463" label="zzz1003,zzz1443" source="2107" target="1839" cy:directed="1"/>
      <edge id="304462" label="zzz1003,zzz1447" source="2107" target="1835" cy:directed="1"/>
      <edge id="304461" label="zzz1003,zzzz409" source="2107" target="563" cy:directed="1"/>
      <edge id="304460" label="zzz1003,zzzz456" source="2107" target="534" cy:directed="1"/>
      <edge id="304459" label="zzz1003,zzzz468" source="2107" target="525" cy:directed="1"/>
      <edge id="304458" label="zzz1003,zzzz478" source="2107" target="517" cy:directed="1"/>
      <edge id="304457" label="zzz1003,zzzz710" source="2107" target="351" cy:directed="1"/>
      <edge id="304456" label="zzz1003,zzzz935" source="2107" target="215" cy:directed="1"/>
      <edge id="304455" label="zzz1003,zzz1106" source="2107" target="2059" cy:directed="1"/>
      <edge id="304454" label="zzz1003,zzz1207" source="2107" target="1999" cy:directed="1"/>
      <edge id="304453" label="zzz1003,zzz1285" source="2107" target="1947" cy:directed="1"/>
      <edge id="304452" label="zzz1003,zzzz539" source="2107" target="468" cy:directed="1"/>
      <edge id="304451" label="zzz1003,zzzz548" source="2107" target="462" cy:directed="1"/>
      <edge id="304450" label="zzz1003,zzzz867" source="2107" target="247" cy:directed="1"/>
      <edge id="304449" label="zzz1003,zzz1293" source="2107" target="1943" cy:directed="1"/>
      <edge id="304448" label="zzz1003,zzz1442" source="2107" target="1840" cy:directed="1"/>
      <edge id="304447" label="zzz1003,zzz1499" source="2107" target="1793" cy:directed="1"/>
      <edge id="304446" label="zzz1003,zzz1523" source="2107" target="1780" cy:directed="1"/>
      <edge id="304445" label="zzz1003,zzzz606" source="2107" target="424" cy:directed="1"/>
      <edge id="304444" label="zzz1003,zzzz611" source="2107" target="419" cy:directed="1"/>
      <edge id="304443" label="zzz1003,zzzz708" source="2107" target="353" cy:directed="1"/>
      <edge id="304442" label="zzz1003,zzzz976" source="2107" target="188" cy:directed="1"/>
      <edge id="304441" label="zzz1003,zzzz999" source="2107" target="172" cy:directed="1"/>
      <edge id="304440" label="zzz1003,zzz1258" source="2107" target="1965" cy:directed="1"/>
      <edge id="304439" label="zzz1003,zzz1457" source="2107" target="1825" cy:directed="1"/>
      <edge id="304438" label="zzz1003,zzz1525" source="2107" target="1778" cy:directed="1"/>
      <edge id="304437" label="zzz1003,zzzz473" source="2107" target="522" cy:directed="1"/>
      <edge id="304436" label="zzz1003,zzzz754" source="2107" target="331" cy:directed="1"/>
      <edge id="304435" label="zzz1003,zzz1033" source="2107" target="2086" cy:directed="1"/>
      <edge id="304434" label="zzz1003,zzz1054" source="2107" target="2077" cy:directed="1"/>
      <edge id="304433" label="zzz1003,zzz1215" source="2107" target="1994" cy:directed="1"/>
      <edge id="304432" label="zzz1003,zzz1242" source="2107" target="1976" cy:directed="1"/>
      <edge id="304431" label="zzz1003,zzz1358" source="2107" target="1902" cy:directed="1"/>
      <edge id="304430" label="zzz1003,zzz1462" source="2107" target="1821" cy:directed="1"/>
      <edge id="304429" label="zzz1003,zzz1477" source="2107" target="1814" cy:directed="1"/>
      <edge id="304428" label="zzz1003,zzz1482" source="2107" target="1810" cy:directed="1"/>
      <edge id="304427" label="zzz1003,zzzz529" source="2107" target="476" cy:directed="1"/>
      <edge id="304426" label="zzz1003,zzzz601" source="2107" target="429" cy:directed="1"/>
      <edge id="304425" label="zzz1003,zzzz603" source="2107" target="427" cy:directed="1"/>
      <edge id="304424" label="zzz1003,zzzz607" source="2107" target="423" cy:directed="1"/>
      <edge id="304423" label="zzz1003,zzzz642" source="2107" target="400" cy:directed="1"/>
      <edge id="304422" label="zzz1003,zzzz921" source="2107" target="223" cy:directed="1"/>
      <edge id="304421" label="zzz1003,zzzz971" source="2107" target="193" cy:directed="1"/>
      <edge id="304420" label="zzz1003,zzz1132" source="2107" target="2044" cy:directed="1"/>
      <edge id="304419" label="zzz1003,zzz1189" source="2107" target="2014" cy:directed="1"/>
      <edge id="304418" label="zzz1003,zzz1529" source="2107" target="1775" cy:directed="1"/>
      <edge id="304417" label="zzz1003,zzzz528" source="2107" target="477" cy:directed="1"/>
      <edge id="304416" label="zzz1003,zzzz531" source="2107" target="474" cy:directed="1"/>
      <edge id="304415" label="zzz1003,zzzz811" source="2107" target="281" cy:directed="1"/>
      <edge id="304414" label="zzz1003,zzzz972" source="2107" target="192" cy:directed="1"/>
      <edge id="304413" label="zzz1003,zzzz978" source="2107" target="186" cy:directed="1"/>
      <edge id="304412" label="zzz1003,zzz1311" source="2107" target="1935" cy:directed="1"/>
      <edge id="304411" label="zzz1003,zzz1422" source="2107" target="1855" cy:directed="1"/>
      <edge id="304410" label="zzz1003,zzz1458" source="2107" target="1824" cy:directed="1"/>
      <edge id="304409" label="zzz1003,zzz1546" source="2107" target="1764" cy:directed="1"/>
      <edge id="304408" label="zzz1003,zzzz604" source="2107" target="426" cy:directed="1"/>
      <edge id="304407" label="zzz1003,zzzz682" source="2107" target="373" cy:directed="1"/>
      <edge id="304406" label="zzz1003,zzzz683" source="2107" target="372" cy:directed="1"/>
      <edge id="304405" label="zzz1003,zzzz756" source="2107" target="329" cy:directed="1"/>
      <edge id="304404" label="zzz1003,zzzz763" source="2107" target="324" cy:directed="1"/>
      <edge id="304403" label="zzz1003,zzz1144" source="2107" target="2036" cy:directed="1"/>
      <edge id="304402" label="zzz1003,zzz1201" source="2107" target="2004" cy:directed="1"/>
      <edge id="304401" label="zzz1003,zzz1248" source="2107" target="1972" cy:directed="1"/>
      <edge id="304400" label="zzz1003,zzz1251" source="2107" target="1969" cy:directed="1"/>
      <edge id="304399" label="zzz1003,zzz1484" source="2107" target="1808" cy:directed="1"/>
      <edge id="304398" label="zzz1003,zzz1527" source="2107" target="1776" cy:directed="1"/>
      <edge id="304397" label="zzz1003,zzzz407" source="2107" target="565" cy:directed="1"/>
      <edge id="304396" label="zzz1003,zzzz598" source="2107" target="432" cy:directed="1"/>
      <edge id="304395" label="zzz1003,zzzz691" source="2107" target="367" cy:directed="1"/>
      <edge id="304394" label="zzz1003,zzzz845" source="2107" target="260" cy:directed="1"/>
      <edge id="304393" label="zzz1003,zzzz924" source="2107" target="220" cy:directed="1"/>
      <edge id="304392" label="zzz1003,zzz1205" source="2107" target="2000" cy:directed="1"/>
      <edge id="304391" label="zzz1003,zzzz981" source="2107" target="185" cy:directed="1"/>
      <edge id="304390" label="zzz1003,zzz1010" source="2107" target="2103" cy:directed="1"/>
      <edge id="304389" label="zzz1003,zzz1030" source="2107" target="2087" cy:directed="1"/>
      <edge id="304388" label="zzz1003,zzz1210" source="2107" target="1996" cy:directed="1"/>
      <edge id="304387" label="zzz1003,zzz1214" source="2107" target="1995" cy:directed="1"/>
      <edge id="304386" label="zzz1003,zzz1284" source="2107" target="1948" cy:directed="1"/>
      <edge id="304385" label="zzz1003,zzz1352" source="2107" target="1907" cy:directed="1"/>
      <edge id="304384" label="zzz1003,zzz1365" source="2107" target="1897" cy:directed="1"/>
      <edge id="304383" label="zzz1003,zzz1466" source="2107" target="1819" cy:directed="1"/>
      <edge id="304382" label="zzz1003,zzz1501" source="2107" target="1791" cy:directed="1"/>
      <edge id="304381" label="zzz1003,zzz1542" source="2107" target="1767" cy:directed="1"/>
      <edge id="304380" label="zzz1003,zzzz442" source="2107" target="543" cy:directed="1"/>
      <edge id="304379" label="zzz1003,zzzz518" source="2107" target="485" cy:directed="1"/>
      <edge id="304378" label="zzz1003,zzzz538" source="2107" target="469" cy:directed="1"/>
      <edge id="304377" label="zzz1003,zzzz589" source="2107" target="441" cy:directed="1"/>
      <edge id="304376" label="zzz1003,zzzz755" source="2107" target="330" cy:directed="1"/>
      <edge id="304375" label="zzz1003,zzzz946" source="2107" target="209" cy:directed="1"/>
      <edge id="304374" label="zzz1003,zzz1053" source="2107" target="2078" cy:directed="1"/>
      <edge id="304373" label="zzz1003,zzz1279" source="2107" target="1951" cy:directed="1"/>
      <edge id="304372" label="zzz1003,zzz1543" source="2107" target="1766" cy:directed="1"/>
      <edge id="304371" label="zzz1003,zzzz477" source="2107" target="518" cy:directed="1"/>
      <edge id="304370" label="zzz1003,zzz1055" source="2107" target="2076" cy:directed="1"/>
      <edge id="304369" label="zzz1003,zzz1122" source="2107" target="2049" cy:directed="1"/>
      <edge id="304368" label="zzz1003,zzz1162" source="2107" target="2027" cy:directed="1"/>
      <edge id="304367" label="zzz1003,zzz1244" source="2107" target="1975" cy:directed="1"/>
      <edge id="304366" label="zzz1003,zzz1322" source="2107" target="1929" cy:directed="1"/>
      <edge id="304365" label="zzz1003,zzz1385" source="2107" target="1885" cy:directed="1"/>
      <edge id="304364" label="zzz1003,zzz1415" source="2107" target="1862" cy:directed="1"/>
      <edge id="304363" label="zzz1003,zzz1471" source="2107" target="1817" cy:directed="1"/>
      <edge id="304362" label="zzz1003,zzz1536" source="2107" target="1770" cy:directed="1"/>
      <edge id="304361" label="zzz1003,zzzz481" source="2107" target="514" cy:directed="1"/>
      <edge id="304360" label="zzz1003,zzzz488" source="2107" target="507" cy:directed="1"/>
      <edge id="304359" label="zzz1003,zzzz602" source="2107" target="428" cy:directed="1"/>
      <edge id="304358" label="zzz1003,zzzz968" source="2107" target="196" cy:directed="1"/>
      <edge id="304357" label="zzz1003,zzzz973" source="2107" target="191" cy:directed="1"/>
      <edge id="304356" label="zzz1003,zzz1128" source="2107" target="2047" cy:directed="1"/>
      <edge id="304355" label="zzz1003,zzz1228" source="2107" target="1984" cy:directed="1"/>
      <edge id="304354" label="zzz1003,zzz1329" source="2107" target="1924" cy:directed="1"/>
      <edge id="304353" label="zzz1003,zzz1335" source="2107" target="1918" cy:directed="1"/>
      <edge id="304352" label="zzz1003,zzz1444" source="2107" target="1838" cy:directed="1"/>
      <edge id="304351" label="zzz1003,zzz1455" source="2107" target="1827" cy:directed="1"/>
      <edge id="304350" label="zzz1003,zzz1483" source="2107" target="1809" cy:directed="1"/>
      <edge id="304349" label="zzz1003,zzz1485" source="2107" target="1807" cy:directed="1"/>
      <edge id="304348" label="zzz1003,zzz1487" source="2107" target="1805" cy:directed="1"/>
      <edge id="304347" label="zzz1003,zzzz469" source="2107" target="524" cy:directed="1"/>
      <edge id="304346" label="zzz1003,zzzz605" source="2107" target="425" cy:directed="1"/>
      <edge id="304345" label="zzz1003,zzzz656" source="2107" target="391" cy:directed="1"/>
      <edge id="304344" label="zzz1003,zzzz753" source="2107" target="332" cy:directed="1"/>
      <edge id="304343" label="zzz1003,zzzz762" source="2107" target="325" cy:directed="1"/>
      <edge id="304342" label="zzz1003,zzzz822" source="2107" target="273" cy:directed="1"/>
      <edge id="304341" label="zzz1003,zzzz875" source="2107" target="242" cy:directed="1"/>
      <edge id="304340" label="zzz1003,zzzz902" source="2107" target="231" cy:directed="1"/>
      <edge id="304339" label="zzz1003,zzzz988" source="2107" target="178" cy:directed="1"/>
      <edge id="304338" label="zzz1003,zzzz998" source="2107" target="173" cy:directed="1"/>
      <edge id="304337" label="zzz1003,zzz1130" source="2107" target="2045" cy:directed="1"/>
      <edge id="304336" label="zzz1003,zzz1152" source="2107" target="2033" cy:directed="1"/>
      <edge id="304335" label="zzz1003,zzz1200" source="2107" target="2005" cy:directed="1"/>
      <edge id="304334" label="zzz1003,zzz1240" source="2107" target="1977" cy:directed="1"/>
      <edge id="304333" label="zzz1003,zzz1403" source="2107" target="1869" cy:directed="1"/>
      <edge id="304332" label="zzz1003,zzz1425" source="2107" target="1853" cy:directed="1"/>
      <edge id="304331" label="zzz1003,zzz1437" source="2107" target="1845" cy:directed="1"/>
      <edge id="304330" label="zzz1003,zzzz540" source="2107" target="467" cy:directed="1"/>
      <edge id="304329" label="zzz1003,zzzz652" source="2107" target="394" cy:directed="1"/>
      <edge id="304328" label="zzz1003,zzzz703" source="2107" target="358" cy:directed="1"/>
      <edge id="304327" label="zzz1003,zzzz705" source="2107" target="356" cy:directed="1"/>
      <edge id="304326" label="zzz1003,zzz1160" source="2107" target="2028" cy:directed="1"/>
      <edge id="304325" label="zzz1003,zzz1180" source="2107" target="2018" cy:directed="1"/>
      <edge id="304324" label="zzz1003,zzz1202" source="2107" target="2003" cy:directed="1"/>
      <edge id="304323" label="zzz1003,zzz1230" source="2107" target="1983" cy:directed="1"/>
      <edge id="304322" label="zzz1003,zzz1272" source="2107" target="1958" cy:directed="1"/>
      <edge id="304321" label="zzz1003,zzz1339" source="2107" target="1916" cy:directed="1"/>
      <edge id="304320" label="zzz1003,zzz1348" source="2107" target="1910" cy:directed="1"/>
      <edge id="304319" label="zzz1003,zzz1361" source="2107" target="1899" cy:directed="1"/>
      <edge id="304318" label="zzz1003,zzz1395" source="2107" target="1877" cy:directed="1"/>
      <edge id="304317" label="zzz1003,zzz1413" source="2107" target="1864" cy:directed="1"/>
      <edge id="304316" label="zzz1003,zzz1449" source="2107" target="1833" cy:directed="1"/>
      <edge id="304315" label="zzz1003,zzz1450" source="2107" target="1832" cy:directed="1"/>
      <edge id="304314" label="zzz1003,zzz1453" source="2107" target="1829" cy:directed="1"/>
      <edge id="304313" label="zzz1003,zzz1524" source="2107" target="1779" cy:directed="1"/>
      <edge id="304312" label="zzz1003,zzzz532" source="2107" target="473" cy:directed="1"/>
      <edge id="304311" label="zzz1003,zzzz931" source="2107" target="219" cy:directed="1"/>
      <edge id="304310" label="zzz1003,zzz1133" source="2107" target="2043" cy:directed="1"/>
      <edge id="304309" label="zzz1003,zzz1168" source="2107" target="2025" cy:directed="1"/>
      <edge id="304308" label="zzz1003,zzz1265" source="2107" target="1962" cy:directed="1"/>
      <edge id="304307" label="zzz1003,zzz1452" source="2107" target="1830" cy:directed="1"/>
      <edge id="304306" label="zzz1003,zzz1048" source="2107" target="2080" cy:directed="1"/>
      <edge id="304305" label="zzz1003,zzz1120" source="2107" target="2050" cy:directed="1"/>
      <edge id="304304" label="zzz1003,zzz1190" source="2107" target="2013" cy:directed="1"/>
      <edge id="304303" label="zzz1003,zzz1219" source="2107" target="1990" cy:directed="1"/>
      <edge id="304302" label="zzz1003,zzz1296" source="2107" target="1941" cy:directed="1"/>
      <edge id="304301" label="zzz1003,zzz1312" source="2107" target="1934" cy:directed="1"/>
      <edge id="304300" label="zzz1003,zzz1343" source="2107" target="1914" cy:directed="1"/>
      <edge id="304299" label="zzz1003,zzz1344" source="2107" target="1913" cy:directed="1"/>
      <edge id="304298" label="zzz1003,zzz1390" source="2107" target="1881" cy:directed="1"/>
      <edge id="304297" label="zzz1003,zzz1402" source="2107" target="1870" cy:directed="1"/>
      <edge id="304296" label="zzz1003,zzz1436" source="2107" target="1846" cy:directed="1"/>
      <edge id="304295" label="zzz1003,zzz1480" source="2107" target="1812" cy:directed="1"/>
      <edge id="304294" label="zzz1003,zzz1492" source="2107" target="1800" cy:directed="1"/>
      <edge id="304293" label="zzz1003,zzz1494" source="2107" target="1798" cy:directed="1"/>
      <edge id="304292" label="zzz1003,zzzz575" source="2107" target="449" cy:directed="1"/>
      <edge id="304291" label="zzz1003,zzzz667" source="2107" target="380" cy:directed="1"/>
      <edge id="304290" label="zzz1003,zzzz739" source="2107" target="337" cy:directed="1"/>
      <edge id="304289" label="zzz1003,zzzz913" source="2107" target="225" cy:directed="1"/>
      <edge id="304288" label="zzz1003,zzz1004" source="2107" target="2106" cy:directed="1"/>
      <edge id="304287" label="zzz1003,zzz1112" source="2107" target="2055" cy:directed="1"/>
      <edge id="304286" label="zzz1003,zzz1172" source="2107" target="2022" cy:directed="1"/>
      <edge id="304285" label="zzz1003,zzz1196" source="2107" target="2009" cy:directed="1"/>
      <edge id="304284" label="zzz1003,zzz1209" source="2107" target="1997" cy:directed="1"/>
      <edge id="304283" label="zzz1003,zzz1227" source="2107" target="1985" cy:directed="1"/>
      <edge id="304282" label="zzz1003,zzz1237" source="2107" target="1978" cy:directed="1"/>
      <edge id="304281" label="zzz1003,zzz1381" source="2107" target="1887" cy:directed="1"/>
      <edge id="304280" label="zzz1003,zzz1407" source="2107" target="1867" cy:directed="1"/>
      <edge id="304279" label="zzz1003,zzz1469" source="2107" target="1818" cy:directed="1"/>
      <edge id="304278" label="zzz1003,zzz1486" source="2107" target="1806" cy:directed="1"/>
      <edge id="304277" label="zzz1003,zzz1490" source="2107" target="1802" cy:directed="1"/>
      <edge id="304276" label="zzz1003,zzz1540" source="2107" target="1769" cy:directed="1"/>
      <edge id="304275" label="zzz1003,zzzz446" source="2107" target="540" cy:directed="1"/>
      <edge id="304274" label="zzz1003,zzzz597" source="2107" target="433" cy:directed="1"/>
      <edge id="304273" label="zzz1003,zzzz877" source="2107" target="241" cy:directed="1"/>
      <edge id="304272" label="zzz1003,zzzz948" source="2107" target="208" cy:directed="1"/>
      <edge id="304271" label="zzz1003,zzz1070" source="2107" target="2063" cy:directed="1"/>
      <edge id="304270" label="zzz1003,zzz1157" source="2107" target="2030" cy:directed="1"/>
      <edge id="304269" label="zzz1003,zzz1269" source="2107" target="1959" cy:directed="1"/>
      <edge id="304268" label="zzz1003,zzz1303" source="2107" target="1939" cy:directed="1"/>
      <edge id="304267" label="zzz1003,zzz1421" source="2107" target="1856" cy:directed="1"/>
      <edge id="304266" label="zzz1003,zzzz415" source="2107" target="558" cy:directed="1"/>
      <edge id="304265" label="zzz1003,zzzz669" source="2107" target="378" cy:directed="1"/>
      <edge id="304264" label="zzz1003,zzz1018" source="2107" target="2096" cy:directed="1"/>
      <edge id="304263" label="zzz1003,zzz1034" source="2107" target="2085" cy:directed="1"/>
      <edge id="304262" label="zzz1003,zzz1118" source="2107" target="2052" cy:directed="1"/>
      <edge id="304261" label="zzz1003,zzz1137" source="2107" target="2040" cy:directed="1"/>
      <edge id="304260" label="zzz1003,zzz1288" source="2107" target="1946" cy:directed="1"/>
      <edge id="304259" label="zzz1003,zzz1439" source="2107" target="1843" cy:directed="1"/>
      <edge id="304258" label="zzz1003,zzzz444" source="2107" target="542" cy:directed="1"/>
      <edge id="304257" label="zzz1003,zzzz624" source="2107" target="411" cy:directed="1"/>
      <edge id="304256" label="zzz1003,zzzz660" source="2107" target="387" cy:directed="1"/>
      <edge id="304255" label="zzz1003,zzz1294" source="2107" target="1942" cy:directed="1"/>
      <edge id="304254" label="zzz1003,zzz1304" source="2107" target="1938" cy:directed="1"/>
      <edge id="304253" label="zzz1003,zzz1307" source="2107" target="1937" cy:directed="1"/>
      <edge id="304252" label="zzz1003,zzz1481" source="2107" target="1811" cy:directed="1"/>
      <edge id="304251" label="zzz1003,zzz1500" source="2107" target="1792" cy:directed="1"/>
      <edge id="304250" label="zzz1003,zzzz433" source="2107" target="547" cy:directed="1"/>
      <edge id="304249" label="zzz1003,zzzz600" source="2107" target="430" cy:directed="1"/>
      <edge id="304248" label="zzz1003,zzzz992" source="2107" target="177" cy:directed="1"/>
      <edge id="304247" label="zzz1003,zzz1176" source="2107" target="2020" cy:directed="1"/>
      <edge id="304246" label="zzz1003,zzz1236" source="2107" target="1979" cy:directed="1"/>
      <edge id="304245" label="zzz1003,zzz1280" source="2107" target="1950" cy:directed="1"/>
      <edge id="304244" label="zzz1003,zzz1338" source="2107" target="1917" cy:directed="1"/>
      <edge id="304243" label="zzz1003,zzz1347" source="2107" target="1911" cy:directed="1"/>
      <edge id="304242" label="zzz1003,zzz1378" source="2107" target="1889" cy:directed="1"/>
      <edge id="304241" label="zzz1003,zzz1393" source="2107" target="1878" cy:directed="1"/>
      <edge id="304240" label="zzz1003,zzz1406" source="2107" target="1868" cy:directed="1"/>
      <edge id="304239" label="zzz1003,zzz1409" source="2107" target="1866" cy:directed="1"/>
      <edge id="304238" label="zzz1003,zzz1493" source="2107" target="1799" cy:directed="1"/>
      <edge id="304237" label="zzz1003,zzzz623" source="2107" target="412" cy:directed="1"/>
      <edge id="304236" label="zzz1003,zzzz665" source="2107" target="382" cy:directed="1"/>
      <edge id="304235" label="zzz1003,zzzz888" source="2107" target="233" cy:directed="1"/>
      <edge id="304234" label="zzz1003,zzzz970" source="2107" target="194" cy:directed="1"/>
      <edge id="304233" label="zzz1003,zzzz974" source="2107" target="190" cy:directed="1"/>
      <edge id="304232" label="zzz1003,zzz1056" source="2107" target="2075" cy:directed="1"/>
      <edge id="304231" label="zzz1003,zzz1057" source="2107" target="2074" cy:directed="1"/>
      <edge id="304230" label="zzz1003,zzz1064" source="2107" target="2068" cy:directed="1"/>
      <edge id="304229" label="zzz1003,zzz1165" source="2107" target="2026" cy:directed="1"/>
      <edge id="304228" label="zzz1003,zzz1289" source="2107" target="1945" cy:directed="1"/>
      <edge id="304227" label="zzz1003,zzz1386" source="2107" target="1884" cy:directed="1"/>
      <edge id="304226" label="zzz1003,zzzz612" source="2107" target="418" cy:directed="1"/>
      <edge id="304225" label="zzz1003,zzzz666" source="2107" target="381" cy:directed="1"/>
      <edge id="304224" label="zzz1003,zzz1374" source="2107" target="1892" cy:directed="1"/>
      <edge id="304223" label="zzz1003,zzz1387" source="2107" target="1883" cy:directed="1"/>
      <edge id="304222" label="zzz1003,zzz1491" source="2107" target="1801" cy:directed="1"/>
      <edge id="304221" label="zzz1003,zzzz521" source="2107" target="482" cy:directed="1"/>
      <edge id="304220" label="zzz1003,zzzz668" source="2107" target="379" cy:directed="1"/>
      <edge id="304219" label="zzz1003,zzzz751" source="2107" target="334" cy:directed="1"/>
      <edge id="304218" label="zzz1003,zzz1044" source="2107" target="2081" cy:directed="1"/>
      <edge id="304217" label="zzz1003,zzz1115" source="2107" target="2053" cy:directed="1"/>
      <edge id="304216" label="zzz1003,zzz1123" source="2107" target="2048" cy:directed="1"/>
      <edge id="304215" label="zzz1003,zzz1195" source="2107" target="2010" cy:directed="1"/>
      <edge id="304214" label="zzz1003,zzz1372" source="2107" target="1894" cy:directed="1"/>
      <edge id="304213" label="zzz1003,zzz1454" source="2107" target="1828" cy:directed="1"/>
      <edge id="304212" label="zzz1003,zzz1464" source="2107" target="1820" cy:directed="1"/>
      <edge id="304211" label="zzz1003,zzz1548" source="2107" target="1763" cy:directed="1"/>
      <edge id="304210" label="zzz1003,zzzz480" source="2107" target="515" cy:directed="1"/>
      <edge id="304209" label="zzz1003,zzzz553" source="2107" target="459" cy:directed="1"/>
      <edge id="304208" label="zzz1003,zzzz555" source="2107" target="458" cy:directed="1"/>
      <edge id="304207" label="zzz1003,zzzz626" source="2107" target="409" cy:directed="1"/>
      <edge id="304206" label="zzz1003,zzzz658" source="2107" target="389" cy:directed="1"/>
      <edge id="304205" label="zzz1003,zzzz659" source="2107" target="388" cy:directed="1"/>
      <edge id="304204" label="zzz1003,zzzz663" source="2107" target="384" cy:directed="1"/>
      <edge id="304203" label="zzz1003,zzzz664" source="2107" target="383" cy:directed="1"/>
      <edge id="304202" label="zzz1003,zzzz740" source="2107" target="336" cy:directed="1"/>
      <edge id="304201" label="zzz1003,zzz1416" source="2107" target="1861" cy:directed="1"/>
      <edge id="304200" label="zzz1003,zzzz412" source="2107" target="560" cy:directed="1"/>
      <edge id="304199" label="zzz1003,zzzz523" source="2107" target="480" cy:directed="1"/>
      <edge id="304198" label="zzz1003,zzzz613" source="2107" target="417" cy:directed="1"/>
      <edge id="304197" label="zzz1003,zzzz812" source="2107" target="280" cy:directed="1"/>
      <edge id="304196" label="zzz1003,zzzz923" source="2107" target="221" cy:directed="1"/>
      <edge id="304195" label="zzz1003,zzz1141" source="2107" target="2038" cy:directed="1"/>
      <edge id="304194" label="zzz1003,zzz1255" source="2107" target="1967" cy:directed="1"/>
      <edge id="304193" label="zzz1003,zzz1435" source="2107" target="1847" cy:directed="1"/>
      <edge id="304192" label="zzz1003,zzz1489" source="2107" target="1803" cy:directed="1"/>
      <edge id="304191" label="zzz1003,zzzz454" source="2107" target="535" cy:directed="1"/>
      <edge id="304190" label="zzz1003,zzzz599" source="2107" target="431" cy:directed="1"/>
      <edge id="304189" label="zzz1003,zzz1266" source="2107" target="1961" cy:directed="1"/>
      <edge id="304188" label="zzz1003,zzz1497" source="2107" target="1795" cy:directed="1"/>
      <edge id="304187" label="zzz1003,zzzz436" source="2107" target="544" cy:directed="1"/>
      <edge id="304186" label="zzz1003,zzzz451" source="2107" target="537" cy:directed="1"/>
      <edge id="304185" label="zzz1003,zzzz685" source="2107" target="370" cy:directed="1"/>
      <edge id="304184" label="zzz1003,zzz1153" source="2107" target="2032" cy:directed="1"/>
      <edge id="304183" label="zzz1003,zzz1178" source="2107" target="2019" cy:directed="1"/>
      <edge id="304182" label="zzz1003,zzz1533" source="2107" target="1772" cy:directed="1"/>
      <edge id="304181" label="zzz1003,zzzz452" source="2107" target="536" cy:directed="1"/>
      <edge id="304180" label="zzz1003,zzzz632" source="2107" target="404" cy:directed="1"/>
      <edge id="304179" label="zzz1003,zzzz706" source="2107" target="355" cy:directed="1"/>
      <edge id="304178" label="zzz1003,zzz1498" source="2107" target="1794" cy:directed="1"/>
      <edge id="304177" label="zzz1003,zzzz435" source="2107" target="545" cy:directed="1"/>
      <edge id="304176" label="zzz1003,zzzz661" source="2107" target="386" cy:directed="1"/>
      <edge id="304175" label="zzz1003,zzzz671" source="2107" target="376" cy:directed="1"/>
      <edge id="304174" label="zzz1003,zzzz709" source="2107" target="352" cy:directed="1"/>
      <edge id="304173" label="zzz1003,zzzz950" source="2107" target="207" cy:directed="1"/>
      <edge id="304172" label="zzz1003,zzzz449" source="2107" target="538" cy:directed="1"/>
      <edge id="304171" label="zzz1003,zzzz662" source="2107" target="385" cy:directed="1"/>
      <edge id="304170" label="zzz1003,zzzz689" source="2107" target="368" cy:directed="1"/>
      <edge id="304169" label="zzz1003,zzzz731" source="2107" target="341" cy:directed="1"/>
      <edge id="304168" label="zzz1003,zzzz556" source="2107" target="457" cy:directed="1"/>
      <edge id="304167" label="zzz1003,zzzz608" source="2107" target="422" cy:directed="1"/>
      <edge id="304166" label="zzz1003,zzzz657" source="2107" target="390" cy:directed="1"/>
      <edge id="304165" label="zzz1003,zzzz672" source="2107" target="375" cy:directed="1"/>
      <edge id="304164" label="zzz1003,zzzz816" source="2107" target="276" cy:directed="1"/>
      <edge id="304163" label="zzz1003,zzz1247" source="2107" target="1973" cy:directed="1"/>
      <edge id="304162" label="zzz1003,zzz1318" source="2107" target="1931" cy:directed="1"/>
      <edge id="304161" label="zzz1003,zzz1475" source="2107" target="1816" cy:directed="1"/>
      <edge id="304160" label="zzz1003,zzzz432" source="2107" target="548" cy:directed="1"/>
      <edge id="304159" label="zzz1003,zzzz653" source="2107" target="393" cy:directed="1"/>
      <edge id="304158" label="zzz1003,zzzz686" source="2107" target="369" cy:directed="1"/>
      <edge id="304157" label="zzz1003,zzzz757" source="2107" target="328" cy:directed="1"/>
      <edge id="304156" label="zzz1003,zzzz767" source="2107" target="320" cy:directed="1"/>
      <edge id="304155" label="zzz1003,zzzz791" source="2107" target="297" cy:directed="1"/>
      <edge id="304154" label="zzz1003,zzz1276" source="2107" target="1954" cy:directed="1"/>
      <edge id="304153" label="zzz1003,zzzz401" source="2107" target="569" cy:directed="1"/>
      <edge id="304152" label="zzz1003,zzzz732" source="2107" target="340" cy:directed="1"/>
      <edge id="304151" label="zzz1003,zzzz993" source="2107" target="176" cy:directed="1"/>
      <edge id="304150" label="zzz1003,zzzz431" source="2107" target="549" cy:directed="1"/>
      <edge id="304149" label="zzz1003,zzzz485" source="2107" target="510" cy:directed="1"/>
      <edge id="304148" label="zzz1003,zzzz582" source="2107" target="447" cy:directed="1"/>
      <edge id="304147" label="zzz1003,zzzz670" source="2107" target="377" cy:directed="1"/>
      <edge id="304146" label="zzz1003,zzzz752" source="2107" target="333" cy:directed="1"/>
      <edge id="304145" label="zzz1003,zzzz773" source="2107" target="314" cy:directed="1"/>
      <edge id="304144" label="zzz1003,zzzz789" source="2107" target="299" cy:directed="1"/>
      <edge id="304143" label="zzz1003,zzz1503" source="2107" target="1789" cy:directed="1"/>
      <edge id="304142" label="zzz1003,zzzz536" source="2107" target="471" cy:directed="1"/>
      <edge id="304141" label="zzz1003,zzzz768" source="2107" target="319" cy:directed="1"/>
      <edge id="304140" label="zzz1003,zzzz858" source="2107" target="254" cy:directed="1"/>
      <edge id="304139" label="zzz1003,zzzz944" source="2107" target="210" cy:directed="1"/>
      <edge id="304138" label="zzz1003,zzz1015" source="2107" target="2099" cy:directed="1"/>
      <edge id="304137" label="zzz1003,zzzz841" source="2107" target="263" cy:directed="1"/>
      <edge id="304136" label="zzz1003,zzz1356" source="2107" target="1904" cy:directed="1"/>
      <edge id="304135" label="zzz1003,zzz1401" source="2107" target="1871" cy:directed="1"/>
      <edge id="304134" label="zzz1003,zzzz772" source="2107" target="315" cy:directed="1"/>
      <edge id="304133" label="zzz1003,zzzz549" source="2107" target="461" cy:directed="1"/>
      <edge id="304132" label="zzz1003,zzzz770" source="2107" target="317" cy:directed="1"/>
      <edge id="304131" label="zzz1003,zzzz769" source="2107" target="318" cy:directed="1"/>
      <edge id="304130" label="zzz1003,zzzz527" source="2107" target="478" cy:directed="1"/>
      <edge id="304129" label="zzz1003,zzzz771" source="2107" target="316" cy:directed="1"/>
      <edge id="304128" label="zzz1003,zzzz766" source="2107" target="321" cy:directed="1"/>
      <edge id="304127" label="zzz1003,zzz1013" source="2107" target="2100" cy:directed="1"/>
      <edge id="304126" label="zzz1003,zzz1068" source="2107" target="2065" cy:directed="1"/>
      <edge id="304125" label="zzz1003,zzzz410" source="2107" target="562" cy:directed="1"/>
      <edge id="304124" label="zzz1003,zzzz467" source="2107" target="526" cy:directed="1"/>
      <edge id="304123" label="zzz1003,zzzz568" source="2107" target="452" cy:directed="1"/>
      <edge id="304122" label="zzz1003,zzzz774" source="2107" target="313" cy:directed="1"/>
      <edge id="304121" label="zzz1003,zzz1411" source="2107" target="1865" cy:directed="1"/>
      <edge id="304120" label="zzz1003,zzz1028" source="2107" target="2088" cy:directed="1"/>
      <edge id="304119" label="zzz1003,zzzz627" source="2107" target="408" cy:directed="1"/>
      <edge id="304118" label="zzz1003,zzzz905" source="2107" target="229" cy:directed="1"/>
      <edge id="304117" label="zzz1003,zzzz764" source="2107" target="323" cy:directed="1"/>
      <edge id="304116" label="zzz1003,zzzz609" source="2107" target="421" cy:directed="1"/>
      <edge id="304115" label="zzz1003,zzzz813" source="2107" target="279" cy:directed="1"/>
      <edge id="304114" label="zzz1003,zzz1017" source="2107" target="2097" cy:directed="1"/>
      <edge id="304113" label="zzz1003,zzz1249" source="2107" target="1971" cy:directed="1"/>
      <edge id="304112" label="zzz1003,zzzz445" source="2107" target="541" cy:directed="1"/>
      <edge id="304111" label="zzz1003,zzzz775" source="2107" target="312" cy:directed="1"/>
      <edge id="304110" label="zzz1003,zzzz857" source="2107" target="255" cy:directed="1"/>
      <edge id="304109" label="zzz1003,zzz1069" source="2107" target="2064" cy:directed="1"/>
      <edge id="304108" label="zzz1003,zzz1171" source="2107" target="2023" cy:directed="1"/>
      <edge id="304107" label="zzz1003,zzz1440" source="2107" target="1842" cy:directed="1"/>
      <edge id="304106" label="zzz1003,zzz1448" source="2107" target="1834" cy:directed="1"/>
      <edge id="304105" label="zzz1003,zzzz519" source="2107" target="484" cy:directed="1"/>
      <edge id="304104" label="zzz1003,zzzz750" source="2107" target="335" cy:directed="1"/>
      <edge id="304103" label="zzz1003,zzz1067" source="2107" target="2066" cy:directed="1"/>
      <edge id="304102" label="zzz1003,zzzz544" source="2107" target="463" cy:directed="1"/>
      <edge id="304101" label="zzz1003,zzzz567" source="2107" target="453" cy:directed="1"/>
      <edge id="304100" label="zzz1003,zzzz447" source="2107" target="539" cy:directed="1"/>
      <edge id="304099" label="zzz1003,zzzz704" source="2107" target="357" cy:directed="1"/>
      <edge id="304098" label="zzz1003,zzzz425" source="2107" target="552" cy:directed="1"/>
      <edge id="304097" label="zzz1003,zzzz569" source="2107" target="451" cy:directed="1"/>
      <edge id="304096" label="zzz1003,zzzz966" source="2107" target="198" cy:directed="1"/>
      <edge id="304095" label="zzz1003,zzz1309" source="2107" target="1936" cy:directed="1"/>
      <edge id="304094" label="zzz1003,zzzz716" source="2107" target="348" cy:directed="1"/>
      <edge id="304093" label="zzz1003,zzzz783" source="2107" target="304" cy:directed="1"/>
      <edge id="304092" label="zzz1003,zzzz969" source="2107" target="195" cy:directed="1"/>
      <edge id="304091" label="zzz1003,zzzz420" source="2107" target="553" cy:directed="1"/>
      <edge id="304090" label="zzz1003,zzzz630" source="2107" target="406" cy:directed="1"/>
      <edge id="304089" label="zzz1003,zzz1456" source="2107" target="1826" cy:directed="1"/>
      <edge id="304088" label="zzz1003,zzzz500" source="2107" target="498" cy:directed="1"/>
      <edge id="304087" label="zzz1003,zzzz647" source="2107" target="398" cy:directed="1"/>
      <edge id="304086" label="zzz1003,zzzz498" source="2107" target="499" cy:directed="1"/>
      <edge id="304085" label="zzz1003,zzzz694" source="2107" target="365" cy:directed="1"/>
      <edge id="304084" label="zzz1003,zzzz590" source="2107" target="440" cy:directed="1"/>
      <edge id="304083" label="zzz1003,zzzz530" source="2107" target="475" cy:directed="1"/>
      <edge id="304082" label="zzz1003,zzzz889" source="2107" target="232" cy:directed="1"/>
      <edge id="304081" label="zzz1003,zzzz520" source="2107" target="483" cy:directed="1"/>
      <edge id="304080" label="zzz1003,zzz1379" source="2107" target="1888" cy:directed="1"/>
      <edge id="304079" label="zzz1003,zzzz512" source="2107" target="487" cy:directed="1"/>
      <edge id="304078" label="zzz1003,zzzz870" source="2107" target="245" cy:directed="1"/>
      <edge id="304077" label="zzz1003,zzzz497" source="2107" target="500" cy:directed="1"/>
      <edge id="304076" label="zzz1003,zzzz581" source="2107" target="448" cy:directed="1"/>
      <edge id="304075" label="zzz1003,zzz1383" source="2107" target="1886" cy:directed="1"/>
      <edge id="304074" label="zzz1003,zzzz836" source="2107" target="267" cy:directed="1"/>
      <edge id="304073" label="zzz1003,zzzz503" source="2107" target="496" cy:directed="1"/>
      <edge id="304072" label="zzz1003,zzzz557" source="2107" target="456" cy:directed="1"/>
      <edge id="304071" label="zzz1003,zzzz786" source="2107" target="301" cy:directed="1"/>
      <edge id="304070" label="zzz1003,zzzz610" source="2107" target="420" cy:directed="1"/>
      <edge id="304069" label="zzz1003,zzzz784" source="2107" target="303" cy:directed="1"/>
      <edge id="304068" label="zzz1003,zzz1438" source="2107" target="1844" cy:directed="1"/>
      <edge id="304067" label="zzz1003,zzzz785" source="2107" target="302" cy:directed="1"/>
      <edge id="304066" label="zzz1003,zzzz517" source="2107" target="486" cy:directed="1"/>
      <edge id="304065" label="zzz1003,zzzz502" source="2107" target="497" cy:directed="1"/>
      <edge id="304064" label="zzz1003,zzzz798" source="2107" target="291" cy:directed="1"/>
      <edge id="304063" label="zzz1003,zzzz996" source="2107" target="174" cy:directed="1"/>
      <edge id="304062" label="zzz1003,zzzz625" source="2107" target="410" cy:directed="1"/>
      <edge id="304061" label="zzz1003,zzz1011" source="2107" target="2102" cy:directed="1"/>
      <edge id="304060" label="zzz1003,zzz1012" source="2107" target="2101" cy:directed="1"/>
      <edge id="304059" label="zzz1003,zzzz482" source="2107" target="513" cy:directed="1"/>
      <edge id="304058" label="zzz1003,zzzz903" source="2107" target="230" cy:directed="1"/>
      <edge id="304057" label="zzz1003,zzzz475" source="2107" target="520" cy:directed="1"/>
      <edge id="304056" label="zzz1003,zzzz404" source="2107" target="568" cy:directed="1"/>
      <edge id="304055" label="zzz1003,zzzz566" source="2107" target="454" cy:directed="1"/>
      <edge id="304054" label="zzz1003,zzzz622" source="2107" target="413" cy:directed="1"/>
      <edge id="304053" label="zzz1003,zzzz684" source="2107" target="371" cy:directed="1"/>
      <edge id="304052" label="zzz1003,zzzz429" source="2107" target="550" cy:directed="1"/>
      <edge id="304051" label="zzz1003,zzz1027" source="2107" target="2089" cy:directed="1"/>
      <edge id="304050" label="zzz1003,zzzz869" source="2107" target="246" cy:directed="1"/>
      <edge id="304049" label="zzz1003,zzz1314" source="2107" target="1933" cy:directed="1"/>
      <edge id="304048" label="zzz1003,zzzz628" source="2107" target="407" cy:directed="1"/>
      <edge id="304047" label="zzz1003,zzz1063" source="2107" target="2069" cy:directed="1"/>
      <edge id="304046" label="zzz1003,zzzz883" source="2107" target="237" cy:directed="1"/>
      <edge id="304045" label="zzz1003,zzz1043" source="2107" target="2082" cy:directed="1"/>
      <edge id="304044" label="zzz1003,zzz1204" source="2107" target="2001" cy:directed="1"/>
      <edge id="304043" label="zzz1003,zzz1026" source="2107" target="2090" cy:directed="1"/>
      <edge id="304042" label="zzz1003,zzz1059" source="2107" target="2072" cy:directed="1"/>
      <edge id="304041" label="zzz1003,zzz1021" source="2107" target="2094" cy:directed="1"/>
      <edge id="304040" label="zzz1003,zzz1023" source="2107" target="2092" cy:directed="1"/>
      <edge id="304039" label="zzz1003,zzz1357" source="2107" target="1903" cy:directed="1"/>
      <edge id="304038" label="zzz1003,zzz1522" source="2107" target="1781" cy:directed="1"/>
      <edge id="304037" label="zzz1003,zzzz464" source="2107" target="528" cy:directed="1"/>
      <edge id="304036" label="zzz1003,zzz1257" source="2107" target="1966" cy:directed="1"/>
      <edge id="304035" label="zzz1003,zzzz953" source="2107" target="206" cy:directed="1"/>
      <edge id="304034" label="zzz1003,zzz1060" source="2107" target="2071" cy:directed="1"/>
      <edge id="304033" label="zzz1003,zzzz462" source="2107" target="529" cy:directed="1"/>
      <edge id="304032" label="zzz1003,zzzz551" source="2107" target="460" cy:directed="1"/>
      <edge id="304031" label="zzz1003,zzzz721" source="2107" target="345" cy:directed="1"/>
      <edge id="304030" label="zzz1003,zzzz405" source="2107" target="567" cy:directed="1"/>
      <edge id="304029" label="zzz1003,zzz1058" source="2107" target="2073" cy:directed="1"/>
      <edge id="304028" label="zzz1003,zzz1417" source="2107" target="1860" cy:directed="1"/>
      <edge id="304027" label="zzz1003,zzzz795" source="2107" target="293" cy:directed="1"/>
      <edge id="304026" label="zzz1003,zzzz506" source="2107" target="493" cy:directed="1"/>
      <edge id="304025" label="zzz1003,zzzz860" source="2107" target="252" cy:directed="1"/>
      <edge id="304024" label="zzz1003,zzzz702" source="2107" target="359" cy:directed="1"/>
      <edge id="304023" label="zzz1003,zzzz861" source="2107" target="251" cy:directed="1"/>
      <edge id="304022" label="zzz1003,zzzz722" source="2107" target="344" cy:directed="1"/>
      <edge id="304021" label="zzz1003,zzz1261" source="2107" target="1963" cy:directed="1"/>
      <edge id="304020" label="zzz1003,zzz1016" source="2107" target="2098" cy:directed="1"/>
      <edge id="304019" label="zzz1003,zzzz936" source="2107" target="214" cy:directed="1"/>
      <edge id="304018" label="zzz1003,zzzz680" source="2107" target="374" cy:directed="1"/>
      <edge id="304017" label="zzz1003,zzz1431" source="2107" target="1848" cy:directed="1"/>
      <edge id="304016" label="zzz1003,zzzz406" source="2107" target="566" cy:directed="1"/>
      <edge id="304015" label="zzz1003,zzzz631" source="2107" target="405" cy:directed="1"/>
      <edge id="304014" label="zzz1003,zzzz983" source="2107" target="183" cy:directed="1"/>
      <edge id="304013" label="zzz1003,zzzz730" source="2107" target="342" cy:directed="1"/>
      <edge id="304012" label="zzz1003,zzzz957" source="2107" target="203" cy:directed="1"/>
      <edge id="304011" label="zzz1003,zzzz541" source="2107" target="466" cy:directed="1"/>
      <edge id="304010" label="zzz1003,zzz1052" source="2107" target="2079" cy:directed="1"/>
      <edge id="304009" label="zzz1003,zzzz565" source="2107" target="455" cy:directed="1"/>
      <edge id="304008" label="zzz1003,zzzz737" source="2107" target="339" cy:directed="1"/>
      <edge id="304007" label="zzz1003,zzzz644" source="2107" target="399" cy:directed="1"/>
      <edge id="304006" label="zzz1003,zzz1041" source="2107" target="2083" cy:directed="1"/>
      <edge id="304005" label="zzz1003,zzzz984" source="2107" target="182" cy:directed="1"/>
      <edge id="304004" label="zzz1003,zzzz586" source="2107" target="443" cy:directed="1"/>
      <edge id="304003" label="zzz1003,zzzz526" source="2107" target="479" cy:directed="1"/>
      <edge id="304002" label="zzz1003,zzzz466" source="2107" target="527" cy:directed="1"/>
      <edge id="304001" label="zzz1003,zzzz591" source="2107" target="439" cy:directed="1"/>
      <edge id="304000" label="zzz1003,zzz1022" source="2107" target="2093" cy:directed="1"/>
      <edge id="303999" label="zzz1003,zzz1451" source="2107" target="1831" cy:directed="1"/>
      <edge id="303998" label="zzz1003,zzz1025" source="2107" target="2091" cy:directed="1"/>
      <edge id="303997" label="zzz1003,zzzz596" source="2107" target="434" cy:directed="1"/>
      <edge id="303996" label="zzz1003,zzzz982" source="2107" target="184" cy:directed="1"/>
      <edge id="303995" label="zzz1003,zzzz914" source="2107" target="224" cy:directed="1"/>
      <edge id="303994" label="zzz1003,zzzz595" source="2107" target="435" cy:directed="1"/>
      <edge id="303993" label="zzz1003,zzzz419" source="2107" target="554" cy:directed="1"/>
      <edge id="303992" label="zzz1003,zzzz594" source="2107" target="436" cy:directed="1"/>
      <edge id="303991" label="zzz1003,zzzz797" source="2107" target="292" cy:directed="1"/>
      <edge id="303990" label="zzz1003,zzz1019" source="2107" target="2095" cy:directed="1"/>
      <edge id="303989" label="zzz1003,zzzz418" source="2107" target="555" cy:directed="1"/>
      <edge id="303988" label="zzz1003,zzzz460" source="2107" target="530" cy:directed="1"/>
      <edge id="303987" label="zzz1003,zzzz794" source="2107" target="294" cy:directed="1"/>
      <edge id="303986" label="zzz1003,zzzz593" source="2107" target="437" cy:directed="1"/>
      <edge id="303985" label="zzz1003,zzzz413" source="2107" target="559" cy:directed="1"/>
      <edge id="303984" label="zzz1003,zzzz408" source="2107" target="564" cy:directed="1"/>
      <edge id="303983" label="zzz1003,zzzz986" source="2107" target="180" cy:directed="1"/>
      <edge id="303982" label="zzz1003,zzzz987" source="2107" target="179" cy:directed="1"/>
      <edge id="303981" label="zzz1003,zzzz840" source="2107" target="264" cy:directed="1"/>
      <edge id="303980" label="zzz1003,zzzz985" source="2107" target="181" cy:directed="1"/>
      <edge id="303979" label="zzz1003,zzzz522" source="2107" target="481" cy:directed="1"/>
      <edge id="303978" label="zzz1003,zzzz411" source="2107" target="561" cy:directed="1"/>
      <edge id="303977" label="zzz1003,zzzz417" source="2107" target="556" cy:directed="1"/>
      <edge id="303976" label="zzz1003,zzzz458" source="2107" target="532" cy:directed="1"/>
      <edge id="303975" label="zzz1003,zzzz490" source="2107" target="505" cy:directed="1"/>
      <edge id="303974" label="zzz1003,zzzz434" source="2107" target="546" cy:directed="1"/>
      <edge id="303973" label="zzz1003,zzzz505" source="2107" target="494" cy:directed="1"/>
      <edge id="303972" label="zzz1003,zzz1518" source="2107" target="1785" cy:directed="1"/>
      <edge id="303971" label="zzz1003,zzz1520" source="2107" target="1783" cy:directed="1"/>
      <edge id="303970" label="zzz1003,zzz1326" source="2107" target="1926" cy:directed="1"/>
      <edge id="303969" label="zzz1003,zzz1377" source="2107" target="1890" cy:directed="1"/>
      <edge id="303968" label="zzz1003,zzzz977" source="2107" target="187" cy:directed="1"/>
      <edge id="303967" label="zzz1003,zzzz958" source="2107" target="202" cy:directed="1"/>
      <edge id="303966" label="zzz1003,zzzz491" source="2107" target="504" cy:directed="1"/>
      <edge id="303965" label="zzz1003,zzz2358" source="2107" target="955" cy:directed="1"/>
      <edge id="303964" label="zzz1003,zzz1327" source="2107" target="1925" cy:directed="1"/>
      <edge id="303963" label="zzz1003,zzz1526" source="2107" target="1777" cy:directed="1"/>
      <edge id="303962" label="zzz1003,zzz1217" source="2107" target="1992" cy:directed="1"/>
      <edge id="303961" label="zzz1003,zzzz651" source="2107" target="395" cy:directed="1"/>
      <edge id="303960" label="zzz1003,zzz1194" source="2107" target="2011" cy:directed="1"/>
      <edge id="303959" label="zzz1003,zzz1428" source="2107" target="1851" cy:directed="1"/>
      <edge id="303958" label="zzz1003,zzz1350" source="2107" target="1908" cy:directed="1"/>
      <edge id="303957" label="zzz1003,zzzz855" source="2107" target="257" cy:directed="1"/>
      <edge id="303956" label="zzz1003,zzzz638" source="2107" target="402" cy:directed="1"/>
      <edge id="303955" label="zzz1003,zzz1392" source="2107" target="1879" cy:directed="1"/>
      <edge id="303954" label="zzz1003,zzzz843" source="2107" target="262" cy:directed="1"/>
      <edge id="303953" label="zzz1003,zzzz909" source="2107" target="228" cy:directed="1"/>
      <edge id="303952" label="zzz1003,zzz1129" source="2107" target="2046" cy:directed="1"/>
      <edge id="303951" label="zzz1003,zzzz649" source="2107" target="397" cy:directed="1"/>
      <edge id="303950" label="zzz1003,zzz1292" source="2107" target="1944" cy:directed="1"/>
      <edge id="303949" label="zzz1003,zzz1429" source="2107" target="1850" cy:directed="1"/>
      <edge id="303948" label="zzz1003,zzzz844" source="2107" target="261" cy:directed="1"/>
      <edge id="303947" label="zzz1003,zzzz922" source="2107" target="222" cy:directed="1"/>
      <edge id="303946" label="zzz1003,zzzz493" source="2107" target="503" cy:directed="1"/>
      <edge id="303945" label="zzz1003,zzzz650" source="2107" target="396" cy:directed="1"/>
      <edge id="303944" label="zzz1003,zzzz715" source="2107" target="349" cy:directed="1"/>
      <edge id="303943" label="zzz1003,zzz1418" source="2107" target="1859" cy:directed="1"/>
      <edge id="303942" label="zzz1004,zzz1444" source="2106" target="1838" cy:directed="1"/>
      <edge id="303941" label="zzz1004,zzz1449" source="2106" target="1833" cy:directed="1"/>
      <edge id="303940" label="zzz1004,zzz1450" source="2106" target="1832" cy:directed="1"/>
      <edge id="303939" label="zzz1004,zzz1347" source="2106" target="1911" cy:directed="1"/>
      <edge id="303938" label="zzz1004,zzzz433" source="2106" target="547" cy:directed="1"/>
      <edge id="303937" label="zzz1004,zzz1048" source="2106" target="2080" cy:directed="1"/>
      <edge id="303936" label="zzz1004,zzz1120" source="2106" target="2050" cy:directed="1"/>
      <edge id="303935" label="zzz1004,zzzz446" source="2106" target="540" cy:directed="1"/>
      <edge id="303934" label="zzz1004,zzz1352" source="2106" target="1907" cy:directed="1"/>
      <edge id="303933" label="zzz1004,zzz1425" source="2106" target="1853" cy:directed="1"/>
      <edge id="303932" label="zzz1004,zzz1118" source="2106" target="2052" cy:directed="1"/>
      <edge id="303931" label="zzz1004,zzz1122" source="2106" target="2049" cy:directed="1"/>
      <edge id="303930" label="zzz1004,zzz1361" source="2106" target="1899" cy:directed="1"/>
      <edge id="303929" label="zzz1004,zzz1480" source="2106" target="1812" cy:directed="1"/>
      <edge id="303928" label="zzz1004,zzz1236" source="2106" target="1979" cy:directed="1"/>
      <edge id="303927" label="zzz1004,zzz1280" source="2106" target="1950" cy:directed="1"/>
      <edge id="303926" label="zzz1004,zzz1294" source="2106" target="1942" cy:directed="1"/>
      <edge id="303925" label="zzz1004,zzz1343" source="2106" target="1914" cy:directed="1"/>
      <edge id="303924" label="zzz1004,zzz1524" source="2106" target="1779" cy:directed="1"/>
      <edge id="303923" label="zzz1004,zzz1152" source="2106" target="2033" cy:directed="1"/>
      <edge id="303922" label="zzz1004,zzz1178" source="2106" target="2019" cy:directed="1"/>
      <edge id="303921" label="zzz1004,zzz1491" source="2106" target="1801" cy:directed="1"/>
      <edge id="303920" label="zzz1004,zzz1493" source="2106" target="1799" cy:directed="1"/>
      <edge id="303919" label="zzz1004,zzzz652" source="2106" target="394" cy:directed="1"/>
      <edge id="303918" label="zzz1004,zzz1165" source="2106" target="2026" cy:directed="1"/>
      <edge id="303917" label="zzz1004,zzz1543" source="2106" target="1766" cy:directed="1"/>
      <edge id="303916" label="zzz1004,zzz1335" source="2106" target="1918" cy:directed="1"/>
      <edge id="303915" label="zzz1004,zzz1403" source="2106" target="1869" cy:directed="1"/>
      <edge id="303914" label="zzz1004,zzz1455" source="2106" target="1827" cy:directed="1"/>
      <edge id="303913" label="zzz1004,zzz1492" source="2106" target="1800" cy:directed="1"/>
      <edge id="303912" label="zzz1004,zzz1157" source="2106" target="2030" cy:directed="1"/>
      <edge id="303911" label="zzz1004,zzz1329" source="2106" target="1924" cy:directed="1"/>
      <edge id="303910" label="zzz1004,zzzz442" source="2106" target="543" cy:directed="1"/>
      <edge id="303909" label="zzz1004,zzz1123" source="2106" target="2048" cy:directed="1"/>
      <edge id="303908" label="zzz1004,zzz1176" source="2106" target="2020" cy:directed="1"/>
      <edge id="303907" label="zzz1004,zzz1415" source="2106" target="1862" cy:directed="1"/>
      <edge id="303906" label="zzz1004,zzz1421" source="2106" target="1856" cy:directed="1"/>
      <edge id="303905" label="zzz1004,zzzz575" source="2106" target="449" cy:directed="1"/>
      <edge id="303904" label="zzz1004,zzzz948" source="2106" target="208" cy:directed="1"/>
      <edge id="303903" label="zzz1004,zzz1115" source="2106" target="2053" cy:directed="1"/>
      <edge id="303902" label="zzz1004,zzz1133" source="2106" target="2043" cy:directed="1"/>
      <edge id="303901" label="zzz1004,zzz1137" source="2106" target="2040" cy:directed="1"/>
      <edge id="303900" label="zzz1004,zzz1230" source="2106" target="1983" cy:directed="1"/>
      <edge id="303899" label="zzz1004,zzz1240" source="2106" target="1977" cy:directed="1"/>
      <edge id="303898" label="zzz1004,zzz1269" source="2106" target="1959" cy:directed="1"/>
      <edge id="303897" label="zzz1004,zzz1374" source="2106" target="1892" cy:directed="1"/>
      <edge id="303896" label="zzz1004,zzz1409" source="2106" target="1866" cy:directed="1"/>
      <edge id="303895" label="zzz1004,zzz1471" source="2106" target="1817" cy:directed="1"/>
      <edge id="303894" label="zzz1004,zzz1548" source="2106" target="1763" cy:directed="1"/>
      <edge id="303893" label="zzz1004,zzzz415" source="2106" target="558" cy:directed="1"/>
      <edge id="303892" label="zzz1004,zzz1112" source="2106" target="2055" cy:directed="1"/>
      <edge id="303891" label="zzz1004,zzz1303" source="2106" target="1939" cy:directed="1"/>
      <edge id="303890" label="zzz1004,zzzz613" source="2106" target="417" cy:directed="1"/>
      <edge id="303889" label="zzz1004,zzzz822" source="2106" target="273" cy:directed="1"/>
      <edge id="303888" label="zzz1004,zzz1407" source="2106" target="1867" cy:directed="1"/>
      <edge id="303887" label="zzz1004,zzz1437" source="2106" target="1845" cy:directed="1"/>
      <edge id="303886" label="zzz1004,zzzz407" source="2106" target="565" cy:directed="1"/>
      <edge id="303885" label="zzz1004,zzzz444" source="2106" target="542" cy:directed="1"/>
      <edge id="303884" label="zzz1004,zzzz452" source="2106" target="536" cy:directed="1"/>
      <edge id="303883" label="zzz1004,zzz1153" source="2106" target="2032" cy:directed="1"/>
      <edge id="303882" label="zzz1004,zzz1209" source="2106" target="1997" cy:directed="1"/>
      <edge id="303881" label="zzz1004,zzz1435" source="2106" target="1847" cy:directed="1"/>
      <edge id="303880" label="zzz1004,zzz1453" source="2106" target="1829" cy:directed="1"/>
      <edge id="303879" label="zzz1004,zzz1462" source="2106" target="1821" cy:directed="1"/>
      <edge id="303878" label="zzz1004,zzzz877" source="2106" target="241" cy:directed="1"/>
      <edge id="303877" label="zzz1004,zzz1130" source="2106" target="2045" cy:directed="1"/>
      <edge id="303876" label="zzz1004,zzz1381" source="2106" target="1887" cy:directed="1"/>
      <edge id="303875" label="zzz1004,zzz1481" source="2106" target="1811" cy:directed="1"/>
      <edge id="303874" label="zzz1004,zzz1054" source="2106" target="2077" cy:directed="1"/>
      <edge id="303873" label="zzz1004,zzz1172" source="2106" target="2022" cy:directed="1"/>
      <edge id="303872" label="zzz1004,zzz1228" source="2106" target="1984" cy:directed="1"/>
      <edge id="303871" label="zzz1004,zzz1272" source="2106" target="1958" cy:directed="1"/>
      <edge id="303870" label="zzz1004,zzz1322" source="2106" target="1929" cy:directed="1"/>
      <edge id="303869" label="zzz1004,zzz1338" source="2106" target="1917" cy:directed="1"/>
      <edge id="303868" label="zzz1004,zzz1402" source="2106" target="1870" cy:directed="1"/>
      <edge id="303867" label="zzz1004,zzz1289" source="2106" target="1945" cy:directed="1"/>
      <edge id="303866" label="zzz1004,zzz1296" source="2106" target="1941" cy:directed="1"/>
      <edge id="303865" label="zzz1004,zzz1466" source="2106" target="1819" cy:directed="1"/>
      <edge id="303864" label="zzz1004,zzzz481" source="2106" target="514" cy:directed="1"/>
      <edge id="303863" label="zzz1004,zzz1487" source="2106" target="1805" cy:directed="1"/>
      <edge id="303862" label="zzz1004,zzz1106" source="2106" target="2059" cy:directed="1"/>
      <edge id="303861" label="zzz1004,zzz1288" source="2106" target="1946" cy:directed="1"/>
      <edge id="303860" label="zzz1004,zzz1501" source="2106" target="1791" cy:directed="1"/>
      <edge id="303859" label="zzz1004,zzz1162" source="2106" target="2027" cy:directed="1"/>
      <edge id="303858" label="zzz1004,zzz1344" source="2106" target="1913" cy:directed="1"/>
      <edge id="303857" label="zzz1004,zzz1525" source="2106" target="1778" cy:directed="1"/>
      <edge id="303856" label="zzz1004,zzz1540" source="2106" target="1769" cy:directed="1"/>
      <edge id="303855" label="zzz1004,zzz1247" source="2106" target="1973" cy:directed="1"/>
      <edge id="303854" label="zzz1004,zzz1422" source="2106" target="1855" cy:directed="1"/>
      <edge id="303853" label="zzz1004,zzz1489" source="2106" target="1803" cy:directed="1"/>
      <edge id="303852" label="zzz1004,zzz1497" source="2106" target="1795" cy:directed="1"/>
      <edge id="303851" label="zzz1004,zzz1500" source="2106" target="1792" cy:directed="1"/>
      <edge id="303850" label="zzz1004,zzz1536" source="2106" target="1770" cy:directed="1"/>
      <edge id="303849" label="zzz1004,zzzz998" source="2106" target="173" cy:directed="1"/>
      <edge id="303848" label="zzz1004,zzzz401" source="2106" target="569" cy:directed="1"/>
      <edge id="303847" label="zzz1004,zzzz988" source="2106" target="178" cy:directed="1"/>
      <edge id="303846" label="zzz1004,zzz1227" source="2106" target="1985" cy:directed="1"/>
      <edge id="303845" label="zzz1004,zzz1293" source="2106" target="1943" cy:directed="1"/>
      <edge id="303844" label="zzz1004,zzz1312" source="2106" target="1934" cy:directed="1"/>
      <edge id="303843" label="zzz1004,zzz1406" source="2106" target="1868" cy:directed="1"/>
      <edge id="303842" label="zzz1004,zzz1452" source="2106" target="1830" cy:directed="1"/>
      <edge id="303841" label="zzz1004,zzzz923" source="2106" target="221" cy:directed="1"/>
      <edge id="303840" label="zzz1004,zzzz950" source="2106" target="207" cy:directed="1"/>
      <edge id="303839" label="zzz1004,zzz1214" source="2106" target="1995" cy:directed="1"/>
      <edge id="303838" label="zzz1004,zzz1237" source="2106" target="1978" cy:directed="1"/>
      <edge id="303837" label="zzz1004,zzz1527" source="2106" target="1776" cy:directed="1"/>
      <edge id="303836" label="zzz1004,zzzz449" source="2106" target="538" cy:directed="1"/>
      <edge id="303835" label="zzz1004,zzzz946" source="2106" target="209" cy:directed="1"/>
      <edge id="303834" label="zzz1004,zzz1387" source="2106" target="1883" cy:directed="1"/>
      <edge id="303833" label="zzz1004,zzz1436" source="2106" target="1846" cy:directed="1"/>
      <edge id="303832" label="zzz1004,zzz1464" source="2106" target="1820" cy:directed="1"/>
      <edge id="303831" label="zzz1004,zzz1401" source="2106" target="1871" cy:directed="1"/>
      <edge id="303830" label="zzz1004,zzz1454" source="2106" target="1828" cy:directed="1"/>
      <edge id="303829" label="zzz1004,zzz1469" source="2106" target="1818" cy:directed="1"/>
      <edge id="303828" label="zzz1004,zzz1219" source="2106" target="1990" cy:directed="1"/>
      <edge id="303827" label="zzz1004,zzz1307" source="2106" target="1937" cy:directed="1"/>
      <edge id="303826" label="zzz1004,zzz1490" source="2106" target="1802" cy:directed="1"/>
      <edge id="303825" label="zzz1004,zzzz412" source="2106" target="560" cy:directed="1"/>
      <edge id="303824" label="zzz1004,zzz1311" source="2106" target="1935" cy:directed="1"/>
      <edge id="303823" label="zzz1004,zzz1413" source="2106" target="1864" cy:directed="1"/>
      <edge id="303822" label="zzz1004,zzz1055" source="2106" target="2076" cy:directed="1"/>
      <edge id="303821" label="zzz1004,zzz1255" source="2106" target="1967" cy:directed="1"/>
      <edge id="303820" label="zzz1004,zzz1348" source="2106" target="1910" cy:directed="1"/>
      <edge id="303819" label="zzz1004,zzz1498" source="2106" target="1794" cy:directed="1"/>
      <edge id="303818" label="zzz1004,zzz1475" source="2106" target="1816" cy:directed="1"/>
      <edge id="303817" label="zzz1004,zzz1057" source="2106" target="2074" cy:directed="1"/>
      <edge id="303816" label="zzz1004,zzzz451" source="2106" target="537" cy:directed="1"/>
      <edge id="303815" label="zzz1004,zzzz857" source="2106" target="255" cy:directed="1"/>
      <edge id="303814" label="zzz1004,zzz1053" source="2106" target="2078" cy:directed="1"/>
      <edge id="303813" label="zzz1004,zzz1171" source="2106" target="2023" cy:directed="1"/>
      <edge id="303812" label="zzz1004,zzz1056" source="2106" target="2075" cy:directed="1"/>
      <edge id="303811" label="zzz1004,zzz1318" source="2106" target="1931" cy:directed="1"/>
      <edge id="303810" label="zzz1004,zzz1448" source="2106" target="1834" cy:directed="1"/>
      <edge id="303809" label="zzz1004,zzzz447" source="2106" target="539" cy:directed="1"/>
      <edge id="303808" label="zzz1004,zzzz716" source="2106" target="348" cy:directed="1"/>
      <edge id="303807" label="zzz1004,zzzz544" source="2106" target="463" cy:directed="1"/>
      <edge id="303806" label="zzz1004,zzz1245" source="2106" target="1974" cy:directed="1"/>
      <edge id="303805" label="zzz1004,zzz1008" source="2106" target="2105" cy:directed="1"/>
      <edge id="303804" label="zzz1004,zzz1175" source="2106" target="2021" cy:directed="1"/>
      <edge id="303803" label="zzz1004,zzz1354" source="2106" target="1906" cy:directed="1"/>
      <edge id="303802" label="zzz1004,zzzz647" source="2106" target="398" cy:directed="1"/>
      <edge id="303801" label="zzz1004,zzz1169" source="2106" target="2024" cy:directed="1"/>
      <edge id="303800" label="zzz1004,zzzz792" source="2106" target="296" cy:directed="1"/>
      <edge id="303799" label="zzz1004,zzz1319" source="2106" target="1930" cy:directed="1"/>
      <edge id="303798" label="zzz1004,zzz1218" source="2106" target="1991" cy:directed="1"/>
      <edge id="303797" label="zzz1004,zzz1274" source="2106" target="1956" cy:directed="1"/>
      <edge id="303796" label="zzz1004,zzz1441" source="2106" target="1841" cy:directed="1"/>
      <edge id="303795" label="zzz1004,zzz1446" source="2106" target="1836" cy:directed="1"/>
      <edge id="303794" label="zzz1004,zzz1530" source="2106" target="1774" cy:directed="1"/>
      <edge id="303793" label="zzz1004,zzzz445" source="2106" target="541" cy:directed="1"/>
      <edge id="303792" label="zzz1004,zzz1535" source="2106" target="1771" cy:directed="1"/>
      <edge id="303791" label="zzz1004,zzz1156" source="2106" target="2031" cy:directed="1"/>
      <edge id="303790" label="zzz1004,zzzz588" source="2106" target="442" cy:directed="1"/>
      <edge id="303789" label="zzz1004,zzzz619" source="2106" target="415" cy:directed="1"/>
      <edge id="303788" label="zzz1004,zzzz653" source="2106" target="393" cy:directed="1"/>
      <edge id="303787" label="zzz1004,zzzz870" source="2106" target="245" cy:directed="1"/>
      <edge id="303786" label="zzz1004,zzz1210" source="2106" target="1996" cy:directed="1"/>
      <edge id="303785" label="zzz1004,zzz1396" source="2106" target="1876" cy:directed="1"/>
      <edge id="303784" label="zzz1004,zzz1476" source="2106" target="1815" cy:directed="1"/>
      <edge id="303783" label="zzz1004,zzz1496" source="2106" target="1796" cy:directed="1"/>
      <edge id="303782" label="zzz1004,zzzz692" source="2106" target="366" cy:directed="1"/>
      <edge id="303781" label="zzz1004,zzz1309" source="2106" target="1936" cy:directed="1"/>
      <edge id="303780" label="zzz1004,zzz1383" source="2106" target="1886" cy:directed="1"/>
      <edge id="303779" label="zzz1004,zzz1478" source="2106" target="1813" cy:directed="1"/>
      <edge id="303778" label="zzz1004,zzz1545" source="2106" target="1765" cy:directed="1"/>
      <edge id="303777" label="zzz1004,zzz1235" source="2106" target="1980" cy:directed="1"/>
      <edge id="303776" label="zzz1004,zzz1258" source="2106" target="1965" cy:directed="1"/>
      <edge id="303775" label="zzz1004,zzzz582" source="2106" target="447" cy:directed="1"/>
      <edge id="303774" label="zzz1004,zzz1445" source="2106" target="1837" cy:directed="1"/>
      <edge id="303773" label="zzz1004,zzzz583" source="2106" target="446" cy:directed="1"/>
      <edge id="303772" label="zzz1004,zzzz707" source="2106" target="354" cy:directed="1"/>
      <edge id="303771" label="zzz1004,zzzz847" source="2106" target="258" cy:directed="1"/>
      <edge id="303770" label="zzz1004,zzz1221" source="2106" target="1989" cy:directed="1"/>
      <edge id="303769" label="zzz1004,zzzz720" source="2106" target="346" cy:directed="1"/>
      <edge id="303768" label="zzz1004,zzz1523" source="2106" target="1780" cy:directed="1"/>
      <edge id="303767" label="zzz1004,zzzz683" source="2106" target="372" cy:directed="1"/>
      <edge id="303766" label="zzz1004,zzz1184" source="2106" target="2016" cy:directed="1"/>
      <edge id="303765" label="zzz1004,zzzz409" source="2106" target="563" cy:directed="1"/>
      <edge id="303764" label="zzz1004,zzzz636" source="2106" target="403" cy:directed="1"/>
      <edge id="303763" label="zzz1004,zzzz548" source="2106" target="462" cy:directed="1"/>
      <edge id="303762" label="zzz1004,zzz1223" source="2106" target="1988" cy:directed="1"/>
      <edge id="303761" label="zzz1004,zzzz426" source="2106" target="551" cy:directed="1"/>
      <edge id="303760" label="zzz1004,zzz1504" source="2106" target="1788" cy:directed="1"/>
      <edge id="303759" label="zzz1004,zzzz934" source="2106" target="216" cy:directed="1"/>
      <edge id="303758" label="zzz1004,zzzz479" source="2106" target="516" cy:directed="1"/>
      <edge id="303757" label="zzz1004,zzz1159" source="2106" target="2029" cy:directed="1"/>
      <edge id="303756" label="zzz1004,zzz1215" source="2106" target="1994" cy:directed="1"/>
      <edge id="303755" label="zzz1004,zzz1541" source="2106" target="1768" cy:directed="1"/>
      <edge id="303754" label="zzz1004,zzz1542" source="2106" target="1767" cy:directed="1"/>
      <edge id="303753" label="zzz1004,zzzz864" source="2106" target="249" cy:directed="1"/>
      <edge id="303752" label="zzz1004,zzz1062" source="2106" target="2070" cy:directed="1"/>
      <edge id="303751" label="zzz1004,zzz1233" source="2106" target="1982" cy:directed="1"/>
      <edge id="303750" label="zzz1004,zzzz468" source="2106" target="525" cy:directed="1"/>
      <edge id="303749" label="zzz1004,zzz1009" source="2106" target="2104" cy:directed="1"/>
      <edge id="303748" label="zzz1004,zzz1144" source="2106" target="2036" cy:directed="1"/>
      <edge id="303747" label="zzz1004,zzz1244" source="2106" target="1975" cy:directed="1"/>
      <edge id="303746" label="zzz1004,zzz1363" source="2106" target="1898" cy:directed="1"/>
      <edge id="303745" label="zzz1004,zzzz457" source="2106" target="533" cy:directed="1"/>
      <edge id="303744" label="zzz1004,zzzz459" source="2106" target="531" cy:directed="1"/>
      <edge id="303743" label="zzz1004,zzzz838" source="2106" target="265" cy:directed="1"/>
      <edge id="303742" label="zzz1004,zzzz856" source="2106" target="256" cy:directed="1"/>
      <edge id="303741" label="zzz1004,zzz1185" source="2106" target="2015" cy:directed="1"/>
      <edge id="303740" label="zzz1004,zzz1477" source="2106" target="1814" cy:directed="1"/>
      <edge id="303739" label="zzz1004,zzz1499" source="2106" target="1793" cy:directed="1"/>
      <edge id="303738" label="zzz1004,zzzz488" source="2106" target="507" cy:directed="1"/>
      <edge id="303737" label="zzz1004,zzzz507" source="2106" target="492" cy:directed="1"/>
      <edge id="303736" label="zzz1004,zzzz542" source="2106" target="465" cy:directed="1"/>
      <edge id="303735" label="zzz1004,zzzz655" source="2106" target="392" cy:directed="1"/>
      <edge id="303734" label="zzz1004,zzzz837" source="2106" target="266" cy:directed="1"/>
      <edge id="303733" label="zzz1004,zzzz887" source="2106" target="234" cy:directed="1"/>
      <edge id="303732" label="zzz1004,zzzz956" source="2106" target="204" cy:directed="1"/>
      <edge id="303731" label="zzz1004,zzz1349" source="2106" target="1909" cy:directed="1"/>
      <edge id="303730" label="zzz1004,zzz1443" source="2106" target="1839" cy:directed="1"/>
      <edge id="303729" label="zzz1004,zzzz581" source="2106" target="448" cy:directed="1"/>
      <edge id="303728" label="zzz1004,zzz1100" source="2106" target="2060" cy:directed="1"/>
      <edge id="303727" label="zzz1004,zzz1189" source="2106" target="2014" cy:directed="1"/>
      <edge id="303726" label="zzz1004,zzz1251" source="2106" target="1969" cy:directed="1"/>
      <edge id="303725" label="zzz1004,zzz1285" source="2106" target="1947" cy:directed="1"/>
      <edge id="303724" label="zzz1004,zzz1324" source="2106" target="1928" cy:directed="1"/>
      <edge id="303723" label="zzz1004,zzz1447" source="2106" target="1835" cy:directed="1"/>
      <edge id="303722" label="zzz1004,zzzz420" source="2106" target="553" cy:directed="1"/>
      <edge id="303721" label="zzz1004,zzzz489" source="2106" target="506" cy:directed="1"/>
      <edge id="303720" label="zzz1004,zzzz533" source="2106" target="472" cy:directed="1"/>
      <edge id="303719" label="zzz1004,zzzz756" source="2106" target="329" cy:directed="1"/>
      <edge id="303718" label="zzz1004,zzzz765" source="2106" target="322" cy:directed="1"/>
      <edge id="303717" label="zzz1004,zzzz882" source="2106" target="238" cy:directed="1"/>
      <edge id="303716" label="zzz1004,zzzz961" source="2106" target="200" cy:directed="1"/>
      <edge id="303715" label="zzz1004,zzzz965" source="2106" target="199" cy:directed="1"/>
      <edge id="303714" label="zzz1004,zzzz967" source="2106" target="197" cy:directed="1"/>
      <edge id="303713" label="zzz1004,zzz1139" source="2106" target="2039" cy:directed="1"/>
      <edge id="303712" label="zzz1004,zzz1199" source="2106" target="2006" cy:directed="1"/>
      <edge id="303711" label="zzz1004,zzz1358" source="2106" target="1902" cy:directed="1"/>
      <edge id="303710" label="zzz1004,zzz1399" source="2106" target="1873" cy:directed="1"/>
      <edge id="303709" label="zzz1004,zzz1458" source="2106" target="1824" cy:directed="1"/>
      <edge id="303708" label="zzz1004,zzz1495" source="2106" target="1797" cy:directed="1"/>
      <edge id="303707" label="zzz1004,zzzz472" source="2106" target="523" cy:directed="1"/>
      <edge id="303706" label="zzz1004,zzzz537" source="2106" target="470" cy:directed="1"/>
      <edge id="303705" label="zzz1004,zzzz585" source="2106" target="444" cy:directed="1"/>
      <edge id="303704" label="zzz1004,zzzz867" source="2106" target="247" cy:directed="1"/>
      <edge id="303703" label="zzz1004,zzz1038" source="2106" target="2084" cy:directed="1"/>
      <edge id="303702" label="zzz1004,zzz1325" source="2106" target="1927" cy:directed="1"/>
      <edge id="303701" label="zzz1004,zzz1368" source="2106" target="1896" cy:directed="1"/>
      <edge id="303700" label="zzz1004,zzzz790" source="2106" target="298" cy:directed="1"/>
      <edge id="303699" label="zzz1004,zzzz910" source="2106" target="227" cy:directed="1"/>
      <edge id="303698" label="zzz1004,zzzz960" source="2106" target="201" cy:directed="1"/>
      <edge id="303697" label="zzz1004,zzz1030" source="2106" target="2087" cy:directed="1"/>
      <edge id="303696" label="zzz1004,zzz1098" source="2106" target="2062" cy:directed="1"/>
      <edge id="303695" label="zzz1004,zzz1207" source="2106" target="1999" cy:directed="1"/>
      <edge id="303694" label="zzz1004,zzz1398" source="2106" target="1874" cy:directed="1"/>
      <edge id="303693" label="zzz1004,zzzz474" source="2106" target="521" cy:directed="1"/>
      <edge id="303692" label="zzz1004,zzzz478" source="2106" target="517" cy:directed="1"/>
      <edge id="303691" label="zzz1004,zzzz611" source="2106" target="419" cy:directed="1"/>
      <edge id="303690" label="zzz1004,zzzz624" source="2106" target="411" cy:directed="1"/>
      <edge id="303689" label="zzz1004,zzzz755" source="2106" target="330" cy:directed="1"/>
      <edge id="303688" label="zzz1004,zzzz805" source="2106" target="287" cy:directed="1"/>
      <edge id="303687" label="zzz1004,zzzz862" source="2106" target="250" cy:directed="1"/>
      <edge id="303686" label="zzz1004,zzzz889" source="2106" target="232" cy:directed="1"/>
      <edge id="303685" label="zzz1004,zzz1346" source="2106" target="1912" cy:directed="1"/>
      <edge id="303684" label="zzz1004,zzz1356" source="2106" target="1904" cy:directed="1"/>
      <edge id="303683" label="zzz1004,zzz1442" source="2106" target="1840" cy:directed="1"/>
      <edge id="303682" label="zzz1004,zzzz504" source="2106" target="495" cy:directed="1"/>
      <edge id="303681" label="zzz1004,zzzz606" source="2106" target="424" cy:directed="1"/>
      <edge id="303680" label="zzz1004,zzzz738" source="2106" target="338" cy:directed="1"/>
      <edge id="303679" label="zzz1004,zzz1119" source="2106" target="2051" cy:directed="1"/>
      <edge id="303678" label="zzz1004,zzz1202" source="2106" target="2003" cy:directed="1"/>
      <edge id="303677" label="zzz1004,zzz1234" source="2106" target="1981" cy:directed="1"/>
      <edge id="303676" label="zzz1004,zzz1532" source="2106" target="1773" cy:directed="1"/>
      <edge id="303675" label="zzz1004,zzzz487" source="2106" target="508" cy:directed="1"/>
      <edge id="303674" label="zzz1004,zzzz640" source="2106" target="401" cy:directed="1"/>
      <edge id="303673" label="zzz1004,zzzz932" source="2106" target="218" cy:directed="1"/>
      <edge id="303672" label="zzz1004,zzzz935" source="2106" target="215" cy:directed="1"/>
      <edge id="303671" label="zzz1004,zzz1132" source="2106" target="2044" cy:directed="1"/>
      <edge id="303670" label="zzz1004,zzz1339" source="2106" target="1916" cy:directed="1"/>
      <edge id="303669" label="zzz1004,zzz1482" source="2106" target="1810" cy:directed="1"/>
      <edge id="303668" label="zzz1004,zzzz708" source="2106" target="353" cy:directed="1"/>
      <edge id="303667" label="zzz1004,zzzz710" source="2106" target="351" cy:directed="1"/>
      <edge id="303666" label="zzz1004,zzzz711" source="2106" target="350" cy:directed="1"/>
      <edge id="303665" label="zzz1004,zzzz731" source="2106" target="341" cy:directed="1"/>
      <edge id="303664" label="zzz1004,zzzz754" source="2106" target="331" cy:directed="1"/>
      <edge id="303663" label="zzz1004,zzzz814" source="2106" target="278" cy:directed="1"/>
      <edge id="303662" label="zzz1004,zzzz865" source="2106" target="248" cy:directed="1"/>
      <edge id="303661" label="zzz1004,zzzz931" source="2106" target="219" cy:directed="1"/>
      <edge id="303660" label="zzz1004,zzzz933" source="2106" target="217" cy:directed="1"/>
      <edge id="303659" label="zzz1004,zzzz972" source="2106" target="192" cy:directed="1"/>
      <edge id="303658" label="zzz1004,zzz1205" source="2106" target="2000" cy:directed="1"/>
      <edge id="303657" label="zzz1004,zzzz531" source="2106" target="474" cy:directed="1"/>
      <edge id="303656" label="zzz1004,zzzz821" source="2106" target="274" cy:directed="1"/>
      <edge id="303655" label="zzz1004,zzz1033" source="2106" target="2086" cy:directed="1"/>
      <edge id="303654" label="zzz1004,zzz1397" source="2106" target="1875" cy:directed="1"/>
      <edge id="303653" label="zzz1004,zzz1457" source="2106" target="1825" cy:directed="1"/>
      <edge id="303652" label="zzz1004,zzz1488" source="2106" target="1804" cy:directed="1"/>
      <edge id="303651" label="zzz1004,zzzz456" source="2106" target="534" cy:directed="1"/>
      <edge id="303650" label="zzz1004,zzzz473" source="2106" target="522" cy:directed="1"/>
      <edge id="303649" label="zzz1004,zzzz607" source="2106" target="423" cy:directed="1"/>
      <edge id="303648" label="zzz1004,zzz1250" source="2106" target="1970" cy:directed="1"/>
      <edge id="303647" label="zzz1004,zzz1484" source="2106" target="1808" cy:directed="1"/>
      <edge id="303646" label="zzz1004,zzzz539" source="2106" target="468" cy:directed="1"/>
      <edge id="303645" label="zzz1004,zzzz574" source="2106" target="450" cy:directed="1"/>
      <edge id="303644" label="zzz1004,zzzz626" source="2106" target="409" cy:directed="1"/>
      <edge id="303643" label="zzz1004,zzzz753" source="2106" target="332" cy:directed="1"/>
      <edge id="303642" label="zzz1004,zzz1242" source="2106" target="1976" cy:directed="1"/>
      <edge id="303641" label="zzz1004,zzz1485" source="2106" target="1807" cy:directed="1"/>
      <edge id="303640" label="zzz1004,zzzz436" source="2106" target="544" cy:directed="1"/>
      <edge id="303639" label="zzz1004,zzzz469" source="2106" target="524" cy:directed="1"/>
      <edge id="303638" label="zzz1004,zzzz538" source="2106" target="469" cy:directed="1"/>
      <edge id="303637" label="zzz1004,zzzz665" source="2106" target="382" cy:directed="1"/>
      <edge id="303636" label="zzz1004,zzzz691" source="2106" target="367" cy:directed="1"/>
      <edge id="303635" label="zzz1004,zzzz808" source="2106" target="284" cy:directed="1"/>
      <edge id="303634" label="zzz1004,zzzz810" source="2106" target="282" cy:directed="1"/>
      <edge id="303633" label="zzz1004,zzzz974" source="2106" target="190" cy:directed="1"/>
      <edge id="303632" label="zzz1004,zzzz978" source="2106" target="186" cy:directed="1"/>
      <edge id="303631" label="zzz1004,zzzz999" source="2106" target="172" cy:directed="1"/>
      <edge id="303630" label="zzz1004,zzz1160" source="2106" target="2028" cy:directed="1"/>
      <edge id="303629" label="zzz1004,zzz1201" source="2106" target="2004" cy:directed="1"/>
      <edge id="303628" label="zzz1004,zzz1391" source="2106" target="1880" cy:directed="1"/>
      <edge id="303627" label="zzz1004,zzzz584" source="2106" target="445" cy:directed="1"/>
      <edge id="303626" label="zzz1004,zzzz603" source="2106" target="427" cy:directed="1"/>
      <edge id="303625" label="zzz1004,zzzz656" source="2106" target="391" cy:directed="1"/>
      <edge id="303624" label="zzz1004,zzzz902" source="2106" target="231" cy:directed="1"/>
      <edge id="303623" label="zzz1004,zzz1378" source="2106" target="1889" cy:directed="1"/>
      <edge id="303622" label="zzz1004,zzzz601" source="2106" target="429" cy:directed="1"/>
      <edge id="303621" label="zzz1004,zzzz642" source="2106" target="400" cy:directed="1"/>
      <edge id="303620" label="zzz1004,zzzz791" source="2106" target="297" cy:directed="1"/>
      <edge id="303619" label="zzz1004,zzzz971" source="2106" target="193" cy:directed="1"/>
      <edge id="303618" label="zzz1004,zzz1196" source="2106" target="2009" cy:directed="1"/>
      <edge id="303617" label="zzz1004,zzz1208" source="2106" target="1998" cy:directed="1"/>
      <edge id="303616" label="zzz1004,zzz1390" source="2106" target="1881" cy:directed="1"/>
      <edge id="303615" label="zzz1004,zzz1486" source="2106" target="1806" cy:directed="1"/>
      <edge id="303614" label="zzz1004,zzzz528" source="2106" target="477" cy:directed="1"/>
      <edge id="303613" label="zzz1004,zzzz598" source="2106" target="432" cy:directed="1"/>
      <edge id="303612" label="zzz1004,zzzz846" source="2106" target="259" cy:directed="1"/>
      <edge id="303611" label="zzz1004,zzz1034" source="2106" target="2085" cy:directed="1"/>
      <edge id="303610" label="zzz1004,zzz1044" source="2106" target="2081" cy:directed="1"/>
      <edge id="303609" label="zzz1004,zzzz763" source="2106" target="324" cy:directed="1"/>
      <edge id="303608" label="zzz1004,zzzz789" source="2106" target="299" cy:directed="1"/>
      <edge id="303607" label="zzz1004,zzz1168" source="2106" target="2025" cy:directed="1"/>
      <edge id="303606" label="zzz1004,zzz1248" source="2106" target="1972" cy:directed="1"/>
      <edge id="303605" label="zzz1004,zzz1546" source="2106" target="1764" cy:directed="1"/>
      <edge id="303604" label="zzz1004,zzzz454" source="2106" target="535" cy:directed="1"/>
      <edge id="303603" label="zzz1004,zzzz668" source="2106" target="379" cy:directed="1"/>
      <edge id="303602" label="zzz1004,zzzz975" source="2106" target="189" cy:directed="1"/>
      <edge id="303601" label="zzz1004,zzz1070" source="2106" target="2063" cy:directed="1"/>
      <edge id="303600" label="zzz1004,zzz1128" source="2106" target="2047" cy:directed="1"/>
      <edge id="303599" label="zzz1004,zzz1180" source="2106" target="2018" cy:directed="1"/>
      <edge id="303598" label="zzz1004,zzz1195" source="2106" target="2010" cy:directed="1"/>
      <edge id="303597" label="zzz1004,zzz1304" source="2106" target="1938" cy:directed="1"/>
      <edge id="303596" label="zzz1004,zzz1483" source="2106" target="1809" cy:directed="1"/>
      <edge id="303595" label="zzz1004,zzz1494" source="2106" target="1798" cy:directed="1"/>
      <edge id="303594" label="zzz1004,zzz1529" source="2106" target="1775" cy:directed="1"/>
      <edge id="303593" label="zzz1004,zzzz602" source="2106" target="428" cy:directed="1"/>
      <edge id="303592" label="zzz1004,zzzz666" source="2106" target="381" cy:directed="1"/>
      <edge id="303591" label="zzz1004,zzzz845" source="2106" target="260" cy:directed="1"/>
      <edge id="303590" label="zzz1004,zzzz921" source="2106" target="223" cy:directed="1"/>
      <edge id="303589" label="zzz1004,zzzz976" source="2106" target="188" cy:directed="1"/>
      <edge id="303588" label="zzz1004,zzz1099" source="2106" target="2061" cy:directed="1"/>
      <edge id="303587" label="zzz1004,zzz1521" source="2106" target="1782" cy:directed="1"/>
      <edge id="303586" label="zzz1004,zzzz518" source="2106" target="485" cy:directed="1"/>
      <edge id="303585" label="zzz1004,zzzz540" source="2106" target="467" cy:directed="1"/>
      <edge id="303584" label="zzz1004,zzzz667" source="2106" target="380" cy:directed="1"/>
      <edge id="303583" label="zzz1004,zzzz811" source="2106" target="281" cy:directed="1"/>
      <edge id="303582" label="zzz1004,zzz1265" source="2106" target="1962" cy:directed="1"/>
      <edge id="303581" label="zzz1004,zzz1439" source="2106" target="1843" cy:directed="1"/>
      <edge id="303580" label="zzz1004,zzzz435" source="2106" target="545" cy:directed="1"/>
      <edge id="303579" label="zzz1004,zzzz553" source="2106" target="459" cy:directed="1"/>
      <edge id="303578" label="zzz1004,zzzz555" source="2106" target="458" cy:directed="1"/>
      <edge id="303577" label="zzz1004,zzzz658" source="2106" target="389" cy:directed="1"/>
      <edge id="303576" label="zzz1004,zzzz706" source="2106" target="355" cy:directed="1"/>
      <edge id="303575" label="zzz1004,zzzz924" source="2106" target="220" cy:directed="1"/>
      <edge id="303574" label="zzz1004,zzzz973" source="2106" target="191" cy:directed="1"/>
      <edge id="303573" label="zzz1004,zzz1018" source="2106" target="2096" cy:directed="1"/>
      <edge id="303572" label="zzz1004,zzzz477" source="2106" target="518" cy:directed="1"/>
      <edge id="303571" label="zzz1004,zzzz659" source="2106" target="388" cy:directed="1"/>
      <edge id="303570" label="zzz1004,zzzz663" source="2106" target="384" cy:directed="1"/>
      <edge id="303569" label="zzz1004,zzz1190" source="2106" target="2013" cy:directed="1"/>
      <edge id="303568" label="zzz1004,zzz1365" source="2106" target="1897" cy:directed="1"/>
      <edge id="303567" label="zzz1004,zzz1386" source="2106" target="1884" cy:directed="1"/>
      <edge id="303566" label="zzz1004,zzzz556" source="2106" target="457" cy:directed="1"/>
      <edge id="303565" label="zzz1004,zzzz589" source="2106" target="441" cy:directed="1"/>
      <edge id="303564" label="zzz1004,zzzz604" source="2106" target="426" cy:directed="1"/>
      <edge id="303563" label="zzz1004,zzzz605" source="2106" target="425" cy:directed="1"/>
      <edge id="303562" label="zzz1004,zzzz657" source="2106" target="390" cy:directed="1"/>
      <edge id="303561" label="zzz1004,zzzz660" source="2106" target="387" cy:directed="1"/>
      <edge id="303560" label="zzz1004,zzzz968" source="2106" target="196" cy:directed="1"/>
      <edge id="303559" label="zzz1004,zzz1010" source="2106" target="2103" cy:directed="1"/>
      <edge id="303558" label="zzz1004,zzzz703" source="2106" target="358" cy:directed="1"/>
      <edge id="303557" label="zzz1004,zzzz529" source="2106" target="476" cy:directed="1"/>
      <edge id="303556" label="zzz1004,zzzz532" source="2106" target="473" cy:directed="1"/>
      <edge id="303555" label="zzz1004,zzzz600" source="2106" target="430" cy:directed="1"/>
      <edge id="303554" label="zzz1004,zzzz773" source="2106" target="314" cy:directed="1"/>
      <edge id="303553" label="zzz1004,zzzz913" source="2106" target="225" cy:directed="1"/>
      <edge id="303552" label="zzz1004,zzzz993" source="2106" target="176" cy:directed="1"/>
      <edge id="303551" label="zzz1004,zzz1438" source="2106" target="1844" cy:directed="1"/>
      <edge id="303550" label="zzz1004,zzzz671" source="2106" target="376" cy:directed="1"/>
      <edge id="303549" label="zzz1004,zzzz682" source="2106" target="373" cy:directed="1"/>
      <edge id="303548" label="zzz1004,zzzz689" source="2106" target="368" cy:directed="1"/>
      <edge id="303547" label="zzz1004,zzzz739" source="2106" target="337" cy:directed="1"/>
      <edge id="303546" label="zzz1004,zzzz762" source="2106" target="325" cy:directed="1"/>
      <edge id="303545" label="zzz1004,zzzz812" source="2106" target="280" cy:directed="1"/>
      <edge id="303544" label="zzz1004,zzzz597" source="2106" target="433" cy:directed="1"/>
      <edge id="303543" label="zzz1004,zzzz608" source="2106" target="422" cy:directed="1"/>
      <edge id="303542" label="zzz1004,zzzz664" source="2106" target="383" cy:directed="1"/>
      <edge id="303541" label="zzz1004,zzzz685" source="2106" target="370" cy:directed="1"/>
      <edge id="303540" label="zzz1004,zzzz766" source="2106" target="321" cy:directed="1"/>
      <edge id="303539" label="zzz1004,zzzz992" source="2106" target="177" cy:directed="1"/>
      <edge id="303538" label="zzz1004,zzzz661" source="2106" target="386" cy:directed="1"/>
      <edge id="303537" label="zzz1004,zzzz669" source="2106" target="378" cy:directed="1"/>
      <edge id="303536" label="zzz1004,zzzz767" source="2106" target="320" cy:directed="1"/>
      <edge id="303535" label="zzz1004,zzzz467" source="2106" target="526" cy:directed="1"/>
      <edge id="303534" label="zzz1004,zzzz705" source="2106" target="356" cy:directed="1"/>
      <edge id="303533" label="zzz1004,zzz1141" source="2106" target="2038" cy:directed="1"/>
      <edge id="303532" label="zzz1004,zzz1200" source="2106" target="2005" cy:directed="1"/>
      <edge id="303531" label="zzz1004,zzz1279" source="2106" target="1951" cy:directed="1"/>
      <edge id="303530" label="zzz1004,zzz1385" source="2106" target="1885" cy:directed="1"/>
      <edge id="303529" label="zzz1004,zzz1416" source="2106" target="1861" cy:directed="1"/>
      <edge id="303528" label="zzz1004,zzz1503" source="2106" target="1789" cy:directed="1"/>
      <edge id="303527" label="zzz1004,zzzz521" source="2106" target="482" cy:directed="1"/>
      <edge id="303526" label="zzz1004,zzzz632" source="2106" target="404" cy:directed="1"/>
      <edge id="303525" label="zzz1004,zzzz662" source="2106" target="385" cy:directed="1"/>
      <edge id="303524" label="zzz1004,zzzz686" source="2106" target="369" cy:directed="1"/>
      <edge id="303523" label="zzz1004,zzzz732" source="2106" target="340" cy:directed="1"/>
      <edge id="303522" label="zzz1004,zzzz815" source="2106" target="277" cy:directed="1"/>
      <edge id="303521" label="zzz1004,zzzz858" source="2106" target="254" cy:directed="1"/>
      <edge id="303520" label="zzz1004,zzzz981" source="2106" target="185" cy:directed="1"/>
      <edge id="303519" label="zzz1004,zzzz410" source="2106" target="562" cy:directed="1"/>
      <edge id="303518" label="zzz1004,zzzz751" source="2106" target="334" cy:directed="1"/>
      <edge id="303517" label="zzz1004,zzzz803" source="2106" target="289" cy:directed="1"/>
      <edge id="303516" label="zzz1004,zzzz709" source="2106" target="352" cy:directed="1"/>
      <edge id="303515" label="zzz1004,zzzz806" source="2106" target="286" cy:directed="1"/>
      <edge id="303514" label="zzz1004,zzzz888" source="2106" target="233" cy:directed="1"/>
      <edge id="303513" label="zzz1004,zzzz485" source="2106" target="510" cy:directed="1"/>
      <edge id="303512" label="zzz1004,zzzz672" source="2106" target="375" cy:directed="1"/>
      <edge id="303511" label="zzz1004,zzzz771" source="2106" target="316" cy:directed="1"/>
      <edge id="303510" label="zzz1004,zzzz404" source="2106" target="568" cy:directed="1"/>
      <edge id="303509" label="zzz1004,zzzz523" source="2106" target="480" cy:directed="1"/>
      <edge id="303508" label="zzz1004,zzzz612" source="2106" target="418" cy:directed="1"/>
      <edge id="303507" label="zzz1004,zzzz623" source="2106" target="412" cy:directed="1"/>
      <edge id="303506" label="zzz1004,zzzz970" source="2106" target="194" cy:directed="1"/>
      <edge id="303505" label="zzz1004,zzzz627" source="2106" target="408" cy:directed="1"/>
      <edge id="303504" label="zzz1004,zzzz772" source="2106" target="315" cy:directed="1"/>
      <edge id="303503" label="zzz1004,zzz1266" source="2106" target="1961" cy:directed="1"/>
      <edge id="303502" label="zzz1004,zzzz432" source="2106" target="548" cy:directed="1"/>
      <edge id="303501" label="zzz1004,zzzz599" source="2106" target="431" cy:directed="1"/>
      <edge id="303500" label="zzz1004,zzzz670" source="2106" target="377" cy:directed="1"/>
      <edge id="303499" label="zzz1004,zzzz768" source="2106" target="319" cy:directed="1"/>
      <edge id="303498" label="zzz1004,zzzz804" source="2106" target="288" cy:directed="1"/>
      <edge id="303497" label="zzz1004,zzz1067" source="2106" target="2066" cy:directed="1"/>
      <edge id="303496" label="zzz1004,zzz1372" source="2106" target="1894" cy:directed="1"/>
      <edge id="303495" label="zzz1004,zzzz774" source="2106" target="313" cy:directed="1"/>
      <edge id="303494" label="zzz1004,zzz1064" source="2106" target="2068" cy:directed="1"/>
      <edge id="303493" label="zzz1004,zzzz480" source="2106" target="515" cy:directed="1"/>
      <edge id="303492" label="zzz1004,zzzz775" source="2106" target="312" cy:directed="1"/>
      <edge id="303491" label="zzz1004,zzz1276" source="2106" target="1954" cy:directed="1"/>
      <edge id="303490" label="zzz1004,zzz1284" source="2106" target="1948" cy:directed="1"/>
      <edge id="303489" label="zzz1004,zzz1395" source="2106" target="1877" cy:directed="1"/>
      <edge id="303488" label="zzz1004,zzzz482" source="2106" target="513" cy:directed="1"/>
      <edge id="303487" label="zzz1004,zzzz431" source="2106" target="549" cy:directed="1"/>
      <edge id="303486" label="zzz1004,zzzz752" source="2106" target="333" cy:directed="1"/>
      <edge id="303485" label="zzz1004,zzzz757" source="2106" target="328" cy:directed="1"/>
      <edge id="303484" label="zzz1004,zzz1012" source="2106" target="2101" cy:directed="1"/>
      <edge id="303483" label="zzz1004,zzzz740" source="2106" target="336" cy:directed="1"/>
      <edge id="303482" label="zzz1004,zzzz549" source="2106" target="461" cy:directed="1"/>
      <edge id="303481" label="zzz1004,zzzz841" source="2106" target="263" cy:directed="1"/>
      <edge id="303480" label="zzz1004,zzz1393" source="2106" target="1878" cy:directed="1"/>
      <edge id="303479" label="zzz1004,zzzz475" source="2106" target="520" cy:directed="1"/>
      <edge id="303478" label="zzz1004,zzzz770" source="2106" target="317" cy:directed="1"/>
      <edge id="303477" label="zzz1004,zzzz809" source="2106" target="283" cy:directed="1"/>
      <edge id="303476" label="zzz1004,zzz1011" source="2106" target="2102" cy:directed="1"/>
      <edge id="303475" label="zzz1004,zzz1440" source="2106" target="1842" cy:directed="1"/>
      <edge id="303474" label="zzz1004,zzzz905" source="2106" target="229" cy:directed="1"/>
      <edge id="303473" label="zzz1004,zzzz816" source="2106" target="276" cy:directed="1"/>
      <edge id="303472" label="zzz1004,zzzz769" source="2106" target="318" cy:directed="1"/>
      <edge id="303471" label="zzz1004,zzzz793" source="2106" target="295" cy:directed="1"/>
      <edge id="303470" label="zzz1004,zzz1069" source="2106" target="2064" cy:directed="1"/>
      <edge id="303469" label="zzz1004,zzz1411" source="2106" target="1865" cy:directed="1"/>
      <edge id="303468" label="zzz1004,zzzz527" source="2106" target="478" cy:directed="1"/>
      <edge id="303467" label="zzz1004,zzz1013" source="2106" target="2100" cy:directed="1"/>
      <edge id="303466" label="zzz1004,zzzz764" source="2106" target="323" cy:directed="1"/>
      <edge id="303465" label="zzz1004,zzzz807" source="2106" target="285" cy:directed="1"/>
      <edge id="303464" label="zzz1004,zzzz536" source="2106" target="471" cy:directed="1"/>
      <edge id="303463" label="zzz1004,zzzz568" source="2106" target="452" cy:directed="1"/>
      <edge id="303462" label="zzz1004,zzzz609" source="2106" target="421" cy:directed="1"/>
      <edge id="303461" label="zzz1004,zzzz802" source="2106" target="290" cy:directed="1"/>
      <edge id="303460" label="zzz1004,zzz1015" source="2106" target="2099" cy:directed="1"/>
      <edge id="303459" label="zzz1004,zzz1017" source="2106" target="2097" cy:directed="1"/>
      <edge id="303458" label="zzz1004,zzzz944" source="2106" target="210" cy:directed="1"/>
      <edge id="303457" label="zzz1004,zzzz620" source="2106" target="414" cy:directed="1"/>
      <edge id="303456" label="zzz1004,zzz1203" source="2106" target="2002" cy:directed="1"/>
      <edge id="303455" label="zzz1004,zzz1249" source="2106" target="1971" cy:directed="1"/>
      <edge id="303454" label="zzz1004,zzzz519" source="2106" target="484" cy:directed="1"/>
      <edge id="303453" label="zzz1004,zzzz786" source="2106" target="301" cy:directed="1"/>
      <edge id="303452" label="zzz1004,zzz1059" source="2106" target="2072" cy:directed="1"/>
      <edge id="303451" label="zzz1004,zzzz813" source="2106" target="279" cy:directed="1"/>
      <edge id="303450" label="zzz1004,zzzz520" source="2106" target="483" cy:directed="1"/>
      <edge id="303449" label="zzz1004,zzzz567" source="2106" target="453" cy:directed="1"/>
      <edge id="303448" label="zzz1004,zzzz750" source="2106" target="335" cy:directed="1"/>
      <edge id="303447" label="zzz1004,zzzz785" source="2106" target="302" cy:directed="1"/>
      <edge id="303446" label="zzz1004,zzzz783" source="2106" target="304" cy:directed="1"/>
      <edge id="303445" label="zzz1004,zzzz784" source="2106" target="303" cy:directed="1"/>
      <edge id="303444" label="zzz1004,zzzz704" source="2106" target="357" cy:directed="1"/>
      <edge id="303443" label="zzz1004,zzzz875" source="2106" target="242" cy:directed="1"/>
      <edge id="303442" label="zzz1004,zzz1028" source="2106" target="2088" cy:directed="1"/>
      <edge id="303441" label="zzz1004,zzzz425" source="2106" target="552" cy:directed="1"/>
      <edge id="303440" label="zzz1004,zzzz405" source="2106" target="567" cy:directed="1"/>
      <edge id="303439" label="zzz1004,zzzz966" source="2106" target="198" cy:directed="1"/>
      <edge id="303438" label="zzz1004,zzzz464" source="2106" target="528" cy:directed="1"/>
      <edge id="303437" label="zzz1004,zzz1456" source="2106" target="1826" cy:directed="1"/>
      <edge id="303436" label="zzz1004,zzzz569" source="2106" target="451" cy:directed="1"/>
      <edge id="303435" label="zzz1004,zzz1058" source="2106" target="2073" cy:directed="1"/>
      <edge id="303434" label="zzz1004,zzz1060" source="2106" target="2071" cy:directed="1"/>
      <edge id="303433" label="zzz1004,zzzz498" source="2106" target="499" cy:directed="1"/>
      <edge id="303432" label="zzz1004,zzz1379" source="2106" target="1888" cy:directed="1"/>
      <edge id="303431" label="zzz1004,zzzz429" source="2106" target="550" cy:directed="1"/>
      <edge id="303430" label="zzz1004,zzzz406" source="2106" target="566" cy:directed="1"/>
      <edge id="303429" label="zzz1004,zzzz500" source="2106" target="498" cy:directed="1"/>
      <edge id="303428" label="zzz1004,zzzz684" source="2106" target="371" cy:directed="1"/>
      <edge id="303427" label="zzz1004,zzzz969" source="2106" target="195" cy:directed="1"/>
      <edge id="303426" label="zzz1004,zzzz883" source="2106" target="237" cy:directed="1"/>
      <edge id="303425" label="zzz1004,zzzz530" source="2106" target="475" cy:directed="1"/>
      <edge id="303424" label="zzz1004,zzzz625" source="2106" target="410" cy:directed="1"/>
      <edge id="303423" label="zzz1004,zzzz557" source="2106" target="456" cy:directed="1"/>
      <edge id="303422" label="zzz1004,zzz1027" source="2106" target="2089" cy:directed="1"/>
      <edge id="303421" label="zzz1004,zzzz566" source="2106" target="454" cy:directed="1"/>
      <edge id="303420" label="zzz1004,zzzz512" source="2106" target="487" cy:directed="1"/>
      <edge id="303419" label="zzz1004,zzzz798" source="2106" target="291" cy:directed="1"/>
      <edge id="303418" label="zzz1004,zzz1026" source="2106" target="2090" cy:directed="1"/>
      <edge id="303417" label="zzz1004,zzzz497" source="2106" target="500" cy:directed="1"/>
      <edge id="303416" label="zzz1004,zzzz903" source="2106" target="230" cy:directed="1"/>
      <edge id="303415" label="zzz1004,zzz1533" source="2106" target="1772" cy:directed="1"/>
      <edge id="303414" label="zzz1004,zzzz836" source="2106" target="267" cy:directed="1"/>
      <edge id="303413" label="zzz1004,zzzz694" source="2106" target="365" cy:directed="1"/>
      <edge id="303412" label="zzz1004,zzz1021" source="2106" target="2094" cy:directed="1"/>
      <edge id="303411" label="zzz1004,zzzz630" source="2106" target="406" cy:directed="1"/>
      <edge id="303410" label="zzz1004,zzzz502" source="2106" target="497" cy:directed="1"/>
      <edge id="303409" label="zzz1004,zzzz503" source="2106" target="496" cy:directed="1"/>
      <edge id="303408" label="zzz1004,zzzz610" source="2106" target="420" cy:directed="1"/>
      <edge id="303407" label="zzz1004,zzzz869" source="2106" target="246" cy:directed="1"/>
      <edge id="303406" label="zzz1004,zzz1052" source="2106" target="2079" cy:directed="1"/>
      <edge id="303405" label="zzz1004,zzz1068" source="2106" target="2065" cy:directed="1"/>
      <edge id="303404" label="zzz1004,zzzz628" source="2106" target="407" cy:directed="1"/>
      <edge id="303403" label="zzz1004,zzzz795" source="2106" target="293" cy:directed="1"/>
      <edge id="303402" label="zzz1004,zzzz996" source="2106" target="174" cy:directed="1"/>
      <edge id="303401" label="zzz1004,zzzz517" source="2106" target="486" cy:directed="1"/>
      <edge id="303400" label="zzz1004,zzzz526" source="2106" target="479" cy:directed="1"/>
      <edge id="303399" label="zzz1004,zzz1314" source="2106" target="1933" cy:directed="1"/>
      <edge id="303398" label="zzz1004,zzz1522" source="2106" target="1781" cy:directed="1"/>
      <edge id="303397" label="zzz1004,zzzz622" source="2106" target="413" cy:directed="1"/>
      <edge id="303396" label="zzz1004,zzz1063" source="2106" target="2069" cy:directed="1"/>
      <edge id="303395" label="zzz1004,zzzz680" source="2106" target="374" cy:directed="1"/>
      <edge id="303394" label="zzz1004,zzzz953" source="2106" target="206" cy:directed="1"/>
      <edge id="303393" label="zzz1004,zzz1417" source="2106" target="1860" cy:directed="1"/>
      <edge id="303392" label="zzz1004,zzzz462" source="2106" target="529" cy:directed="1"/>
      <edge id="303391" label="zzz1004,zzzz936" source="2106" target="214" cy:directed="1"/>
      <edge id="303390" label="zzz1004,zzz1043" source="2106" target="2082" cy:directed="1"/>
      <edge id="303389" label="zzz1004,zzz1451" source="2106" target="1831" cy:directed="1"/>
      <edge id="303388" label="zzz1004,zzzz721" source="2106" target="345" cy:directed="1"/>
      <edge id="303387" label="zzz1004,zzz1257" source="2106" target="1966" cy:directed="1"/>
      <edge id="303386" label="zzz1004,zzzz702" source="2106" target="359" cy:directed="1"/>
      <edge id="303385" label="zzz1004,zzzz860" source="2106" target="252" cy:directed="1"/>
      <edge id="303384" label="zzz1004,zzzz551" source="2106" target="460" cy:directed="1"/>
      <edge id="303383" label="zzz1004,zzz1261" source="2106" target="1963" cy:directed="1"/>
      <edge id="303382" label="zzz1004,zzz1431" source="2106" target="1848" cy:directed="1"/>
      <edge id="303381" label="zzz1004,zzzz506" source="2106" target="493" cy:directed="1"/>
      <edge id="303380" label="zzz1004,zzzz861" source="2106" target="251" cy:directed="1"/>
      <edge id="303379" label="zzz1004,zzz1023" source="2106" target="2092" cy:directed="1"/>
      <edge id="303378" label="zzz1004,zzzz590" source="2106" target="440" cy:directed="1"/>
      <edge id="303377" label="zzz1004,zzzz722" source="2106" target="344" cy:directed="1"/>
      <edge id="303376" label="zzz1004,zzz1357" source="2106" target="1903" cy:directed="1"/>
      <edge id="303375" label="zzz1004,zzzz586" source="2106" target="443" cy:directed="1"/>
      <edge id="303374" label="zzz1004,zzzz565" source="2106" target="455" cy:directed="1"/>
      <edge id="303373" label="zzz1004,zzzz631" source="2106" target="405" cy:directed="1"/>
      <edge id="303372" label="zzz1004,zzzz730" source="2106" target="342" cy:directed="1"/>
      <edge id="303371" label="zzz1004,zzzz591" source="2106" target="439" cy:directed="1"/>
      <edge id="303370" label="zzz1004,zzzz737" source="2106" target="339" cy:directed="1"/>
      <edge id="303369" label="zzz1004,zzz1016" source="2106" target="2098" cy:directed="1"/>
      <edge id="303368" label="zzz1004,zzz1204" source="2106" target="2001" cy:directed="1"/>
      <edge id="303367" label="zzz1004,zzzz957" source="2106" target="203" cy:directed="1"/>
      <edge id="303366" label="zzz1004,zzzz460" source="2106" target="530" cy:directed="1"/>
      <edge id="303365" label="zzz1004,zzzz983" source="2106" target="183" cy:directed="1"/>
      <edge id="303364" label="zzz1004,zzzz413" source="2106" target="559" cy:directed="1"/>
      <edge id="303363" label="zzz1004,zzz1041" source="2106" target="2083" cy:directed="1"/>
      <edge id="303362" label="zzz1004,zzzz541" source="2106" target="466" cy:directed="1"/>
      <edge id="303361" label="zzz1004,zzzz644" source="2106" target="399" cy:directed="1"/>
      <edge id="303360" label="zzz1004,zzzz418" source="2106" target="555" cy:directed="1"/>
      <edge id="303359" label="zzz1004,zzzz419" source="2106" target="554" cy:directed="1"/>
      <edge id="303358" label="zzz1004,zzz1025" source="2106" target="2091" cy:directed="1"/>
      <edge id="303357" label="zzz1004,zzzz408" source="2106" target="564" cy:directed="1"/>
      <edge id="303356" label="zzz1004,zzzz458" source="2106" target="532" cy:directed="1"/>
      <edge id="303355" label="zzz1004,zzzz490" source="2106" target="505" cy:directed="1"/>
      <edge id="303354" label="zzz1004,zzzz984" source="2106" target="182" cy:directed="1"/>
      <edge id="303353" label="zzz1004,zzzz417" source="2106" target="556" cy:directed="1"/>
      <edge id="303352" label="zzz1004,zzzz596" source="2106" target="434" cy:directed="1"/>
      <edge id="303351" label="zzz1004,zzzz522" source="2106" target="481" cy:directed="1"/>
      <edge id="303350" label="zzz1004,zzzz434" source="2106" target="546" cy:directed="1"/>
      <edge id="303349" label="zzz1004,zzzz794" source="2106" target="294" cy:directed="1"/>
      <edge id="303348" label="zzz1004,zzzz595" source="2106" target="435" cy:directed="1"/>
      <edge id="303347" label="zzz1004,zzzz982" source="2106" target="184" cy:directed="1"/>
      <edge id="303346" label="zzz1004,zzzz411" source="2106" target="561" cy:directed="1"/>
      <edge id="303345" label="zzz1004,zzzz840" source="2106" target="264" cy:directed="1"/>
      <edge id="303344" label="zzz1004,zzzz594" source="2106" target="436" cy:directed="1"/>
      <edge id="303343" label="zzz1004,zzz1022" source="2106" target="2093" cy:directed="1"/>
      <edge id="303342" label="zzz1004,zzzz797" source="2106" target="292" cy:directed="1"/>
      <edge id="303341" label="zzz1004,zzzz593" source="2106" target="437" cy:directed="1"/>
      <edge id="303340" label="zzz1004,zzzz914" source="2106" target="224" cy:directed="1"/>
      <edge id="303339" label="zzz1004,zzzz466" source="2106" target="527" cy:directed="1"/>
      <edge id="303338" label="zzz1004,zzz1019" source="2106" target="2095" cy:directed="1"/>
      <edge id="303337" label="zzz1004,zzzz986" source="2106" target="180" cy:directed="1"/>
      <edge id="303336" label="zzz1004,zzzz987" source="2106" target="179" cy:directed="1"/>
      <edge id="303335" label="zzz1004,zzzz985" source="2106" target="181" cy:directed="1"/>
      <edge id="303334" label="zzz1004,zzz1326" source="2106" target="1926" cy:directed="1"/>
      <edge id="303333" label="zzz1004,zzz1520" source="2106" target="1783" cy:directed="1"/>
      <edge id="303332" label="zzz1004,zzz1518" source="2106" target="1785" cy:directed="1"/>
      <edge id="303331" label="zzz1004,zzz1377" source="2106" target="1890" cy:directed="1"/>
      <edge id="303330" label="zzz1004,zzzz505" source="2106" target="494" cy:directed="1"/>
      <edge id="303329" label="zzz1004,zzzz977" source="2106" target="187" cy:directed="1"/>
      <edge id="303328" label="zzz1004,zzzz491" source="2106" target="504" cy:directed="1"/>
      <edge id="303327" label="zzz1004,zzz2358" source="2106" target="955" cy:directed="1"/>
      <edge id="303326" label="zzz1004,zzzz958" source="2106" target="202" cy:directed="1"/>
      <edge id="303325" label="zzz1004,zzz1327" source="2106" target="1925" cy:directed="1"/>
      <edge id="303324" label="zzz1004,zzz1428" source="2106" target="1851" cy:directed="1"/>
      <edge id="303323" label="zzz1004,zzz1217" source="2106" target="1992" cy:directed="1"/>
      <edge id="303322" label="zzz1008,zzz1218" source="2105" target="1991" cy:directed="1"/>
      <edge id="303321" label="zzz1008,zzz1274" source="2105" target="1956" cy:directed="1"/>
      <edge id="303320" label="zzz1008,zzz1169" source="2105" target="2024" cy:directed="1"/>
      <edge id="303319" label="zzz1008,zzz1175" source="2105" target="2021" cy:directed="1"/>
      <edge id="303318" label="zzz1008,zzzz588" source="2105" target="442" cy:directed="1"/>
      <edge id="303317" label="zzz1008,zzzz792" source="2105" target="296" cy:directed="1"/>
      <edge id="303316" label="zzz1008,zzzz847" source="2105" target="258" cy:directed="1"/>
      <edge id="303315" label="zzz1008,zzz1319" source="2105" target="1930" cy:directed="1"/>
      <edge id="303314" label="zzz1008,zzz1545" source="2105" target="1765" cy:directed="1"/>
      <edge id="303313" label="zzz1008,zzzz707" source="2105" target="354" cy:directed="1"/>
      <edge id="303312" label="zzz1008,zzz1156" source="2105" target="2031" cy:directed="1"/>
      <edge id="303311" label="zzz1008,zzz1476" source="2105" target="1815" cy:directed="1"/>
      <edge id="303310" label="zzz1008,zzzz548" source="2105" target="462" cy:directed="1"/>
      <edge id="303309" label="zzz1008,zzz1396" source="2105" target="1876" cy:directed="1"/>
      <edge id="303308" label="zzz1008,zzzz583" source="2105" target="446" cy:directed="1"/>
      <edge id="303307" label="zzz1008,zzz1446" source="2105" target="1836" cy:directed="1"/>
      <edge id="303306" label="zzz1008,zzzz864" source="2105" target="249" cy:directed="1"/>
      <edge id="303305" label="zzz1008,zzz1184" source="2105" target="2016" cy:directed="1"/>
      <edge id="303304" label="zzz1008,zzz1441" source="2105" target="1841" cy:directed="1"/>
      <edge id="303303" label="zzz1008,zzz1530" source="2105" target="1774" cy:directed="1"/>
      <edge id="303302" label="zzz1008,zzz1235" source="2105" target="1980" cy:directed="1"/>
      <edge id="303301" label="zzz1008,zzz1445" source="2105" target="1837" cy:directed="1"/>
      <edge id="303300" label="zzz1008,zzzz692" source="2105" target="366" cy:directed="1"/>
      <edge id="303299" label="zzz1008,zzz1009" source="2105" target="2104" cy:directed="1"/>
      <edge id="303298" label="zzz1008,zzz1223" source="2105" target="1988" cy:directed="1"/>
      <edge id="303297" label="zzz1008,zzz1535" source="2105" target="1771" cy:directed="1"/>
      <edge id="303296" label="zzz1008,zzz1349" source="2105" target="1909" cy:directed="1"/>
      <edge id="303295" label="zzz1008,zzzz720" source="2105" target="346" cy:directed="1"/>
      <edge id="303294" label="zzz1008,zzz1245" source="2105" target="1974" cy:directed="1"/>
      <edge id="303293" label="zzz1008,zzz1128" source="2105" target="2047" cy:directed="1"/>
      <edge id="303292" label="zzz1008,zzzz473" source="2105" target="522" cy:directed="1"/>
      <edge id="303291" label="zzz1008,zzz1504" source="2105" target="1788" cy:directed="1"/>
      <edge id="303290" label="zzz1008,zzz1207" source="2105" target="1999" cy:directed="1"/>
      <edge id="303289" label="zzz1008,zzz1354" source="2105" target="1906" cy:directed="1"/>
      <edge id="303288" label="zzz1008,zzz1215" source="2105" target="1994" cy:directed="1"/>
      <edge id="303287" label="zzz1008,zzzz619" source="2105" target="415" cy:directed="1"/>
      <edge id="303286" label="zzz1008,zzz1447" source="2105" target="1835" cy:directed="1"/>
      <edge id="303285" label="zzz1008,zzz1486" source="2105" target="1806" cy:directed="1"/>
      <edge id="303284" label="zzz1008,zzzz542" source="2105" target="465" cy:directed="1"/>
      <edge id="303283" label="zzz1008,zzzz683" source="2105" target="372" cy:directed="1"/>
      <edge id="303282" label="zzz1008,zzz1185" source="2105" target="2015" cy:directed="1"/>
      <edge id="303281" label="zzz1008,zzzz624" source="2105" target="411" cy:directed="1"/>
      <edge id="303280" label="zzz1008,zzzz838" source="2105" target="265" cy:directed="1"/>
      <edge id="303279" label="zzz1008,zzzz856" source="2105" target="256" cy:directed="1"/>
      <edge id="303278" label="zzz1008,zzzz755" source="2105" target="330" cy:directed="1"/>
      <edge id="303277" label="zzz1008,zzz1477" source="2105" target="1814" cy:directed="1"/>
      <edge id="303276" label="zzz1008,zzz1521" source="2105" target="1782" cy:directed="1"/>
      <edge id="303275" label="zzz1008,zzzz626" source="2105" target="409" cy:directed="1"/>
      <edge id="303274" label="zzz1008,zzz1144" source="2105" target="2036" cy:directed="1"/>
      <edge id="303273" label="zzz1008,zzz1159" source="2105" target="2029" cy:directed="1"/>
      <edge id="303272" label="zzz1008,zzz1457" source="2105" target="1825" cy:directed="1"/>
      <edge id="303271" label="zzz1008,zzz1523" source="2105" target="1780" cy:directed="1"/>
      <edge id="303270" label="zzz1008,zzz1062" source="2105" target="2070" cy:directed="1"/>
      <edge id="303269" label="zzz1008,zzzz459" source="2105" target="531" cy:directed="1"/>
      <edge id="303268" label="zzz1008,zzzz887" source="2105" target="234" cy:directed="1"/>
      <edge id="303267" label="zzz1008,zzz1202" source="2105" target="2003" cy:directed="1"/>
      <edge id="303266" label="zzz1008,zzz1251" source="2105" target="1969" cy:directed="1"/>
      <edge id="303265" label="zzz1008,zzz1399" source="2105" target="1873" cy:directed="1"/>
      <edge id="303264" label="zzz1008,zzz1488" source="2105" target="1804" cy:directed="1"/>
      <edge id="303263" label="zzz1008,zzzz507" source="2105" target="492" cy:directed="1"/>
      <edge id="303262" label="zzz1008,zzzz932" source="2105" target="218" cy:directed="1"/>
      <edge id="303261" label="zzz1008,zzzz956" source="2105" target="204" cy:directed="1"/>
      <edge id="303260" label="zzz1008,zzz1119" source="2105" target="2051" cy:directed="1"/>
      <edge id="303259" label="zzz1008,zzzz469" source="2105" target="524" cy:directed="1"/>
      <edge id="303258" label="zzz1008,zzzz487" source="2105" target="508" cy:directed="1"/>
      <edge id="303257" label="zzz1008,zzzz862" source="2105" target="250" cy:directed="1"/>
      <edge id="303256" label="zzz1008,zzzz961" source="2105" target="200" cy:directed="1"/>
      <edge id="303255" label="zzz1008,zzz1038" source="2105" target="2084" cy:directed="1"/>
      <edge id="303254" label="zzz1008,zzz1368" source="2105" target="1896" cy:directed="1"/>
      <edge id="303253" label="zzz1008,zzz1458" source="2105" target="1824" cy:directed="1"/>
      <edge id="303252" label="zzz1008,zzzz468" source="2105" target="525" cy:directed="1"/>
      <edge id="303251" label="zzz1008,zzz1324" source="2105" target="1928" cy:directed="1"/>
      <edge id="303250" label="zzz1008,zzzz489" source="2105" target="506" cy:directed="1"/>
      <edge id="303249" label="zzz1008,zzzz585" source="2105" target="444" cy:directed="1"/>
      <edge id="303248" label="zzz1008,zzzz756" source="2105" target="329" cy:directed="1"/>
      <edge id="303247" label="zzz1008,zzzz934" source="2105" target="216" cy:directed="1"/>
      <edge id="303246" label="zzz1008,zzz1160" source="2105" target="2028" cy:directed="1"/>
      <edge id="303245" label="zzz1008,zzz1205" source="2105" target="2000" cy:directed="1"/>
      <edge id="303244" label="zzz1008,zzz1242" source="2105" target="1976" cy:directed="1"/>
      <edge id="303243" label="zzz1008,zzz1478" source="2105" target="1813" cy:directed="1"/>
      <edge id="303242" label="zzz1008,zzz1484" source="2105" target="1808" cy:directed="1"/>
      <edge id="303241" label="zzz1008,zzzz472" source="2105" target="523" cy:directed="1"/>
      <edge id="303240" label="zzz1008,zzzz479" source="2105" target="516" cy:directed="1"/>
      <edge id="303239" label="zzz1008,zzzz539" source="2105" target="468" cy:directed="1"/>
      <edge id="303238" label="zzz1008,zzzz574" source="2105" target="450" cy:directed="1"/>
      <edge id="303237" label="zzz1008,zzzz606" source="2105" target="424" cy:directed="1"/>
      <edge id="303236" label="zzz1008,zzzz967" source="2105" target="197" cy:directed="1"/>
      <edge id="303235" label="zzz1008,zzz1358" source="2105" target="1902" cy:directed="1"/>
      <edge id="303234" label="zzz1008,zzz1541" source="2105" target="1768" cy:directed="1"/>
      <edge id="303233" label="zzz1008,zzzz533" source="2105" target="472" cy:directed="1"/>
      <edge id="303232" label="zzz1008,zzzz754" source="2105" target="331" cy:directed="1"/>
      <edge id="303231" label="zzz1008,zzzz846" source="2105" target="259" cy:directed="1"/>
      <edge id="303230" label="zzz1008,zzzz910" source="2105" target="227" cy:directed="1"/>
      <edge id="303229" label="zzz1008,zzz1234" source="2105" target="1981" cy:directed="1"/>
      <edge id="303228" label="zzz1008,zzz1485" source="2105" target="1807" cy:directed="1"/>
      <edge id="303227" label="zzz1008,zzz1546" source="2105" target="1764" cy:directed="1"/>
      <edge id="303226" label="zzz1008,zzzz409" source="2105" target="563" cy:directed="1"/>
      <edge id="303225" label="zzz1008,zzzz584" source="2105" target="445" cy:directed="1"/>
      <edge id="303224" label="zzz1008,zzzz753" source="2105" target="332" cy:directed="1"/>
      <edge id="303223" label="zzz1008,zzzz865" source="2105" target="248" cy:directed="1"/>
      <edge id="303222" label="zzz1008,zzz1132" source="2105" target="2044" cy:directed="1"/>
      <edge id="303221" label="zzz1008,zzz1180" source="2105" target="2018" cy:directed="1"/>
      <edge id="303220" label="zzz1008,zzzz504" source="2105" target="495" cy:directed="1"/>
      <edge id="303219" label="zzz1008,zzzz642" source="2105" target="400" cy:directed="1"/>
      <edge id="303218" label="zzz1008,zzzz711" source="2105" target="350" cy:directed="1"/>
      <edge id="303217" label="zzz1008,zzzz790" source="2105" target="298" cy:directed="1"/>
      <edge id="303216" label="zzz1008,zzz1100" source="2105" target="2060" cy:directed="1"/>
      <edge id="303215" label="zzz1008,zzz1201" source="2105" target="2004" cy:directed="1"/>
      <edge id="303214" label="zzz1008,zzz1346" source="2105" target="1912" cy:directed="1"/>
      <edge id="303213" label="zzz1008,zzz1483" source="2105" target="1809" cy:directed="1"/>
      <edge id="303212" label="zzz1008,zzzz474" source="2105" target="521" cy:directed="1"/>
      <edge id="303211" label="zzz1008,zzzz607" source="2105" target="423" cy:directed="1"/>
      <edge id="303210" label="zzz1008,zzzz640" source="2105" target="401" cy:directed="1"/>
      <edge id="303209" label="zzz1008,zzzz867" source="2105" target="247" cy:directed="1"/>
      <edge id="303208" label="zzz1008,zzzz902" source="2105" target="231" cy:directed="1"/>
      <edge id="303207" label="zzz1008,zzz1030" source="2105" target="2087" cy:directed="1"/>
      <edge id="303206" label="zzz1008,zzz1250" source="2105" target="1970" cy:directed="1"/>
      <edge id="303205" label="zzz1008,zzz1443" source="2105" target="1839" cy:directed="1"/>
      <edge id="303204" label="zzz1008,zzz1482" source="2105" target="1810" cy:directed="1"/>
      <edge id="303203" label="zzz1008,zzz1495" source="2105" target="1797" cy:directed="1"/>
      <edge id="303202" label="zzz1008,zzzz528" source="2105" target="477" cy:directed="1"/>
      <edge id="303201" label="zzz1008,zzzz538" source="2105" target="469" cy:directed="1"/>
      <edge id="303200" label="zzz1008,zzzz603" source="2105" target="427" cy:directed="1"/>
      <edge id="303199" label="zzz1008,zzzz814" source="2105" target="278" cy:directed="1"/>
      <edge id="303198" label="zzz1008,zzzz845" source="2105" target="260" cy:directed="1"/>
      <edge id="303197" label="zzz1008,zzz1233" source="2105" target="1982" cy:directed="1"/>
      <edge id="303196" label="zzz1008,zzz1439" source="2105" target="1843" cy:directed="1"/>
      <edge id="303195" label="zzz1008,zzzz691" source="2105" target="367" cy:directed="1"/>
      <edge id="303194" label="zzz1008,zzzz765" source="2105" target="322" cy:directed="1"/>
      <edge id="303193" label="zzz1008,zzz1010" source="2105" target="2103" cy:directed="1"/>
      <edge id="303192" label="zzz1008,zzz1199" source="2105" target="2006" cy:directed="1"/>
      <edge id="303191" label="zzz1008,zzz1221" source="2105" target="1989" cy:directed="1"/>
      <edge id="303190" label="zzz1008,zzz1390" source="2105" target="1881" cy:directed="1"/>
      <edge id="303189" label="zzz1008,zzz1442" source="2105" target="1840" cy:directed="1"/>
      <edge id="303188" label="zzz1008,zzzz426" source="2105" target="551" cy:directed="1"/>
      <edge id="303187" label="zzz1008,zzzz611" source="2105" target="419" cy:directed="1"/>
      <edge id="303186" label="zzz1008,zzzz708" source="2105" target="353" cy:directed="1"/>
      <edge id="303185" label="zzz1008,zzzz821" source="2105" target="274" cy:directed="1"/>
      <edge id="303184" label="zzz1008,zzzz837" source="2105" target="266" cy:directed="1"/>
      <edge id="303183" label="zzz1008,zzzz960" source="2105" target="201" cy:directed="1"/>
      <edge id="303182" label="zzz1008,zzzz999" source="2105" target="172" cy:directed="1"/>
      <edge id="303181" label="zzz1008,zzz1386" source="2105" target="1884" cy:directed="1"/>
      <edge id="303180" label="zzz1008,zzz1529" source="2105" target="1775" cy:directed="1"/>
      <edge id="303179" label="zzz1008,zzzz456" source="2105" target="534" cy:directed="1"/>
      <edge id="303178" label="zzz1008,zzzz457" source="2105" target="533" cy:directed="1"/>
      <edge id="303177" label="zzz1008,zzzz971" source="2105" target="193" cy:directed="1"/>
      <edge id="303176" label="zzz1008,zzz1033" source="2105" target="2086" cy:directed="1"/>
      <edge id="303175" label="zzz1008,zzz1190" source="2105" target="2013" cy:directed="1"/>
      <edge id="303174" label="zzz1008,zzzz655" source="2105" target="392" cy:directed="1"/>
      <edge id="303173" label="zzz1008,zzzz805" source="2105" target="287" cy:directed="1"/>
      <edge id="303172" label="zzz1008,zzzz972" source="2105" target="192" cy:directed="1"/>
      <edge id="303171" label="zzz1008,zzz1208" source="2105" target="1998" cy:directed="1"/>
      <edge id="303170" label="zzz1008,zzz1365" source="2105" target="1897" cy:directed="1"/>
      <edge id="303169" label="zzz1008,zzzz601" source="2105" target="429" cy:directed="1"/>
      <edge id="303168" label="zzz1008,zzzz602" source="2105" target="428" cy:directed="1"/>
      <edge id="303167" label="zzz1008,zzzz808" source="2105" target="284" cy:directed="1"/>
      <edge id="303166" label="zzz1008,zzzz882" source="2105" target="238" cy:directed="1"/>
      <edge id="303165" label="zzz1008,zzzz921" source="2105" target="223" cy:directed="1"/>
      <edge id="303164" label="zzz1008,zzzz935" source="2105" target="215" cy:directed="1"/>
      <edge id="303163" label="zzz1008,zzz1098" source="2105" target="2062" cy:directed="1"/>
      <edge id="303162" label="zzz1008,zzz1391" source="2105" target="1880" cy:directed="1"/>
      <edge id="303161" label="zzz1008,zzzz598" source="2105" target="432" cy:directed="1"/>
      <edge id="303160" label="zzz1008,zzzz738" source="2105" target="338" cy:directed="1"/>
      <edge id="303159" label="zzz1008,zzzz976" source="2105" target="188" cy:directed="1"/>
      <edge id="303158" label="zzz1008,zzz1325" source="2105" target="1927" cy:directed="1"/>
      <edge id="303157" label="zzz1008,zzz1398" source="2105" target="1874" cy:directed="1"/>
      <edge id="303156" label="zzz1008,zzz1070" source="2105" target="2063" cy:directed="1"/>
      <edge id="303155" label="zzz1008,zzz1196" source="2105" target="2009" cy:directed="1"/>
      <edge id="303154" label="zzz1008,zzz1248" source="2105" target="1972" cy:directed="1"/>
      <edge id="303153" label="zzz1008,zzzz537" source="2105" target="470" cy:directed="1"/>
      <edge id="303152" label="zzz1008,zzzz604" source="2105" target="426" cy:directed="1"/>
      <edge id="303151" label="zzz1008,zzzz965" source="2105" target="199" cy:directed="1"/>
      <edge id="303150" label="zzz1008,zzz1195" source="2105" target="2010" cy:directed="1"/>
      <edge id="303149" label="zzz1008,zzzz589" source="2105" target="441" cy:directed="1"/>
      <edge id="303148" label="zzz1008,zzzz660" source="2105" target="387" cy:directed="1"/>
      <edge id="303147" label="zzz1008,zzzz665" source="2105" target="382" cy:directed="1"/>
      <edge id="303146" label="zzz1008,zzzz810" source="2105" target="282" cy:directed="1"/>
      <edge id="303145" label="zzz1008,zzzz973" source="2105" target="191" cy:directed="1"/>
      <edge id="303144" label="zzz1008,zzz1034" source="2105" target="2085" cy:directed="1"/>
      <edge id="303143" label="zzz1008,zzz1279" source="2105" target="1951" cy:directed="1"/>
      <edge id="303142" label="zzz1008,zzz1397" source="2105" target="1875" cy:directed="1"/>
      <edge id="303141" label="zzz1008,zzzz666" source="2105" target="381" cy:directed="1"/>
      <edge id="303140" label="zzz1008,zzzz968" source="2105" target="196" cy:directed="1"/>
      <edge id="303139" label="zzz1008,zzz1168" source="2105" target="2025" cy:directed="1"/>
      <edge id="303138" label="zzz1008,zzzz477" source="2105" target="518" cy:directed="1"/>
      <edge id="303137" label="zzz1008,zzzz531" source="2105" target="474" cy:directed="1"/>
      <edge id="303136" label="zzz1008,zzzz553" source="2105" target="459" cy:directed="1"/>
      <edge id="303135" label="zzz1008,zzzz659" source="2105" target="388" cy:directed="1"/>
      <edge id="303134" label="zzz1008,zzzz706" source="2105" target="355" cy:directed="1"/>
      <edge id="303133" label="zzz1008,zzzz767" source="2105" target="320" cy:directed="1"/>
      <edge id="303132" label="zzz1008,zzzz924" source="2105" target="220" cy:directed="1"/>
      <edge id="303131" label="zzz1008,zzzz978" source="2105" target="186" cy:directed="1"/>
      <edge id="303130" label="zzz1008,zzzz992" source="2105" target="177" cy:directed="1"/>
      <edge id="303129" label="zzz1008,zzz1139" source="2105" target="2039" cy:directed="1"/>
      <edge id="303128" label="zzz1008,zzzz532" source="2105" target="473" cy:directed="1"/>
      <edge id="303127" label="zzz1008,zzzz540" source="2105" target="467" cy:directed="1"/>
      <edge id="303126" label="zzz1008,zzzz597" source="2105" target="433" cy:directed="1"/>
      <edge id="303125" label="zzz1008,zzzz605" source="2105" target="425" cy:directed="1"/>
      <edge id="303124" label="zzz1008,zzzz627" source="2105" target="408" cy:directed="1"/>
      <edge id="303123" label="zzz1008,zzzz682" source="2105" target="373" cy:directed="1"/>
      <edge id="303122" label="zzz1008,zzzz435" source="2105" target="545" cy:directed="1"/>
      <edge id="303121" label="zzz1008,zzzz478" source="2105" target="517" cy:directed="1"/>
      <edge id="303120" label="zzz1008,zzzz658" source="2105" target="389" cy:directed="1"/>
      <edge id="303119" label="zzz1008,zzzz667" source="2105" target="380" cy:directed="1"/>
      <edge id="303118" label="zzz1008,zzzz710" source="2105" target="351" cy:directed="1"/>
      <edge id="303117" label="zzz1008,zzzz739" source="2105" target="337" cy:directed="1"/>
      <edge id="303116" label="zzz1008,zzz1141" source="2105" target="2038" cy:directed="1"/>
      <edge id="303115" label="zzz1008,zzz1363" source="2105" target="1898" cy:directed="1"/>
      <edge id="303114" label="zzz1008,zzzz485" source="2105" target="510" cy:directed="1"/>
      <edge id="303113" label="zzz1008,zzzz555" source="2105" target="458" cy:directed="1"/>
      <edge id="303112" label="zzz1008,zzzz636" source="2105" target="403" cy:directed="1"/>
      <edge id="303111" label="zzz1008,zzzz685" source="2105" target="370" cy:directed="1"/>
      <edge id="303110" label="zzz1008,zzzz763" source="2105" target="324" cy:directed="1"/>
      <edge id="303109" label="zzz1008,zzzz931" source="2105" target="219" cy:directed="1"/>
      <edge id="303108" label="zzz1008,zzz1210" source="2105" target="1996" cy:directed="1"/>
      <edge id="303107" label="zzz1008,zzz1258" source="2105" target="1965" cy:directed="1"/>
      <edge id="303106" label="zzz1008,zzz1494" source="2105" target="1798" cy:directed="1"/>
      <edge id="303105" label="zzz1008,zzz1499" source="2105" target="1793" cy:directed="1"/>
      <edge id="303104" label="zzz1008,zzzz529" source="2105" target="476" cy:directed="1"/>
      <edge id="303103" label="zzz1008,zzzz669" source="2105" target="378" cy:directed="1"/>
      <edge id="303102" label="zzz1008,zzzz709" source="2105" target="352" cy:directed="1"/>
      <edge id="303101" label="zzz1008,zzzz811" source="2105" target="281" cy:directed="1"/>
      <edge id="303100" label="zzz1008,zzz1044" source="2105" target="2081" cy:directed="1"/>
      <edge id="303099" label="zzz1008,zzz1496" source="2105" target="1796" cy:directed="1"/>
      <edge id="303098" label="zzz1008,zzzz662" source="2105" target="385" cy:directed="1"/>
      <edge id="303097" label="zzz1008,zzzz668" source="2105" target="379" cy:directed="1"/>
      <edge id="303096" label="zzz1008,zzz1385" source="2105" target="1885" cy:directed="1"/>
      <edge id="303095" label="zzz1008,zzzz518" source="2105" target="485" cy:directed="1"/>
      <edge id="303094" label="zzz1008,zzzz623" source="2105" target="412" cy:directed="1"/>
      <edge id="303093" label="zzz1008,zzzz751" source="2105" target="334" cy:directed="1"/>
      <edge id="303092" label="zzz1008,zzz1276" source="2105" target="1954" cy:directed="1"/>
      <edge id="303091" label="zzz1008,zzz1372" source="2105" target="1894" cy:directed="1"/>
      <edge id="303090" label="zzz1008,zzzz812" source="2105" target="280" cy:directed="1"/>
      <edge id="303089" label="zzz1008,zzzz521" source="2105" target="482" cy:directed="1"/>
      <edge id="303088" label="zzz1008,zzzz663" source="2105" target="384" cy:directed="1"/>
      <edge id="303087" label="zzz1008,zzzz671" source="2105" target="376" cy:directed="1"/>
      <edge id="303086" label="zzz1008,zzzz703" source="2105" target="358" cy:directed="1"/>
      <edge id="303085" label="zzz1008,zzzz752" source="2105" target="333" cy:directed="1"/>
      <edge id="303084" label="zzz1008,zzz1018" source="2105" target="2096" cy:directed="1"/>
      <edge id="303083" label="zzz1008,zzz1285" source="2105" target="1947" cy:directed="1"/>
      <edge id="303082" label="zzz1008,zzzz432" source="2105" target="548" cy:directed="1"/>
      <edge id="303081" label="zzz1008,zzzz600" source="2105" target="430" cy:directed="1"/>
      <edge id="303080" label="zzz1008,zzzz664" source="2105" target="383" cy:directed="1"/>
      <edge id="303079" label="zzz1008,zzzz757" source="2105" target="328" cy:directed="1"/>
      <edge id="303078" label="zzz1008,zzzz815" source="2105" target="277" cy:directed="1"/>
      <edge id="303077" label="zzz1008,zzzz970" source="2105" target="194" cy:directed="1"/>
      <edge id="303076" label="zzz1008,zzzz975" source="2105" target="189" cy:directed="1"/>
      <edge id="303075" label="zzz1008,zzz1311" source="2105" target="1935" cy:directed="1"/>
      <edge id="303074" label="zzz1008,zzzz431" source="2105" target="549" cy:directed="1"/>
      <edge id="303073" label="zzz1008,zzzz556" source="2105" target="457" cy:directed="1"/>
      <edge id="303072" label="zzz1008,zzzz672" source="2105" target="375" cy:directed="1"/>
      <edge id="303071" label="zzz1008,zzzz689" source="2105" target="368" cy:directed="1"/>
      <edge id="303070" label="zzz1008,zzzz740" source="2105" target="336" cy:directed="1"/>
      <edge id="303069" label="zzz1008,zzzz762" source="2105" target="325" cy:directed="1"/>
      <edge id="303068" label="zzz1008,zzz1395" source="2105" target="1877" cy:directed="1"/>
      <edge id="303067" label="zzz1008,zzzz608" source="2105" target="422" cy:directed="1"/>
      <edge id="303066" label="zzz1008,zzzz661" source="2105" target="386" cy:directed="1"/>
      <edge id="303065" label="zzz1008,zzzz913" source="2105" target="225" cy:directed="1"/>
      <edge id="303064" label="zzz1008,zzzz436" source="2105" target="544" cy:directed="1"/>
      <edge id="303063" label="zzz1008,zzzz481" source="2105" target="514" cy:directed="1"/>
      <edge id="303062" label="zzz1008,zzzz858" source="2105" target="254" cy:directed="1"/>
      <edge id="303061" label="zzz1008,zzz1189" source="2105" target="2014" cy:directed="1"/>
      <edge id="303060" label="zzz1008,zzz1230" source="2105" target="1983" cy:directed="1"/>
      <edge id="303059" label="zzz1008,zzz1304" source="2105" target="1938" cy:directed="1"/>
      <edge id="303058" label="zzz1008,zzz1356" source="2105" target="1904" cy:directed="1"/>
      <edge id="303057" label="zzz1008,zzz1444" source="2105" target="1838" cy:directed="1"/>
      <edge id="303056" label="zzz1008,zzzz488" source="2105" target="507" cy:directed="1"/>
      <edge id="303055" label="zzz1008,zzzz670" source="2105" target="377" cy:directed="1"/>
      <edge id="303054" label="zzz1008,zzzz705" source="2105" target="356" cy:directed="1"/>
      <edge id="303053" label="zzz1008,zzzz768" source="2105" target="319" cy:directed="1"/>
      <edge id="303052" label="zzz1008,zzzz771" source="2105" target="316" cy:directed="1"/>
      <edge id="303051" label="zzz1008,zzzz773" source="2105" target="314" cy:directed="1"/>
      <edge id="303050" label="zzz1008,zzzz806" source="2105" target="286" cy:directed="1"/>
      <edge id="303049" label="zzz1008,zzz1112" source="2105" target="2055" cy:directed="1"/>
      <edge id="303048" label="zzz1008,zzz1339" source="2105" target="1916" cy:directed="1"/>
      <edge id="303047" label="zzz1008,zzz1450" source="2105" target="1832" cy:directed="1"/>
      <edge id="303046" label="zzz1008,zzzz988" source="2105" target="178" cy:directed="1"/>
      <edge id="303045" label="zzz1008,zzz1064" source="2105" target="2068" cy:directed="1"/>
      <edge id="303044" label="zzz1008,zzz1421" source="2105" target="1856" cy:directed="1"/>
      <edge id="303043" label="zzz1008,zzz1542" source="2105" target="1767" cy:directed="1"/>
      <edge id="303042" label="zzz1008,zzzz656" source="2105" target="391" cy:directed="1"/>
      <edge id="303041" label="zzz1008,zzzz686" source="2105" target="369" cy:directed="1"/>
      <edge id="303040" label="zzz1008,zzzz981" source="2105" target="185" cy:directed="1"/>
      <edge id="303039" label="zzz1008,zzz1054" source="2105" target="2077" cy:directed="1"/>
      <edge id="303038" label="zzz1008,zzz1284" source="2105" target="1948" cy:directed="1"/>
      <edge id="303037" label="zzz1008,zzz1296" source="2105" target="1941" cy:directed="1"/>
      <edge id="303036" label="zzz1008,zzz1347" source="2105" target="1911" cy:directed="1"/>
      <edge id="303035" label="zzz1008,zzzz480" source="2105" target="515" cy:directed="1"/>
      <edge id="303034" label="zzz1008,zzzz789" source="2105" target="299" cy:directed="1"/>
      <edge id="303033" label="zzz1008,zzzz888" source="2105" target="233" cy:directed="1"/>
      <edge id="303032" label="zzz1008,zzz1236" source="2105" target="1979" cy:directed="1"/>
      <edge id="303031" label="zzz1008,zzz1449" source="2105" target="1833" cy:directed="1"/>
      <edge id="303030" label="zzz1008,zzz1452" source="2105" target="1830" cy:directed="1"/>
      <edge id="303029" label="zzz1008,zzz1500" source="2105" target="1792" cy:directed="1"/>
      <edge id="303028" label="zzz1008,zzz1524" source="2105" target="1779" cy:directed="1"/>
      <edge id="303027" label="zzz1008,zzzz803" source="2105" target="289" cy:directed="1"/>
      <edge id="303026" label="zzz1008,zzzz804" source="2105" target="288" cy:directed="1"/>
      <edge id="303025" label="zzz1008,zzz1048" source="2105" target="2080" cy:directed="1"/>
      <edge id="303024" label="zzz1008,zzz1106" source="2105" target="2059" cy:directed="1"/>
      <edge id="303023" label="zzz1008,zzz1214" source="2105" target="1995" cy:directed="1"/>
      <edge id="303022" label="zzz1008,zzz1240" source="2105" target="1977" cy:directed="1"/>
      <edge id="303021" label="zzz1008,zzz1293" source="2105" target="1943" cy:directed="1"/>
      <edge id="303020" label="zzz1008,zzz1329" source="2105" target="1924" cy:directed="1"/>
      <edge id="303019" label="zzz1008,zzz1348" source="2105" target="1910" cy:directed="1"/>
      <edge id="303018" label="zzz1008,zzz1378" source="2105" target="1889" cy:directed="1"/>
      <edge id="303017" label="zzz1008,zzz1393" source="2105" target="1878" cy:directed="1"/>
      <edge id="303016" label="zzz1008,zzz1407" source="2105" target="1867" cy:directed="1"/>
      <edge id="303015" label="zzz1008,zzz1462" source="2105" target="1821" cy:directed="1"/>
      <edge id="303014" label="zzz1008,zzz1480" source="2105" target="1812" cy:directed="1"/>
      <edge id="303013" label="zzz1008,zzzz433" source="2105" target="547" cy:directed="1"/>
      <edge id="303012" label="zzz1008,zzzz974" source="2105" target="190" cy:directed="1"/>
      <edge id="303011" label="zzz1008,zzz1122" source="2105" target="2049" cy:directed="1"/>
      <edge id="303010" label="zzz1008,zzz1244" source="2105" target="1975" cy:directed="1"/>
      <edge id="303009" label="zzz1008,zzz1280" source="2105" target="1950" cy:directed="1"/>
      <edge id="303008" label="zzz1008,zzz1422" source="2105" target="1855" cy:directed="1"/>
      <edge id="303007" label="zzz1008,zzz1455" source="2105" target="1827" cy:directed="1"/>
      <edge id="303006" label="zzz1008,zzz1469" source="2105" target="1818" cy:directed="1"/>
      <edge id="303005" label="zzz1008,zzz1527" source="2105" target="1776" cy:directed="1"/>
      <edge id="303004" label="zzz1008,zzz1130" source="2105" target="2045" cy:directed="1"/>
      <edge id="303003" label="zzz1008,zzz1228" source="2105" target="1984" cy:directed="1"/>
      <edge id="303002" label="zzz1008,zzz1289" source="2105" target="1945" cy:directed="1"/>
      <edge id="303001" label="zzz1008,zzz1303" source="2105" target="1939" cy:directed="1"/>
      <edge id="303000" label="zzz1008,zzz1437" source="2105" target="1845" cy:directed="1"/>
      <edge id="302999" label="zzz1008,zzz1453" source="2105" target="1829" cy:directed="1"/>
      <edge id="302998" label="zzz1008,zzz1532" source="2105" target="1773" cy:directed="1"/>
      <edge id="302997" label="zzz1008,zzzz407" source="2105" target="565" cy:directed="1"/>
      <edge id="302996" label="zzz1008,zzzz766" source="2105" target="321" cy:directed="1"/>
      <edge id="302995" label="zzz1008,zzzz841" source="2105" target="263" cy:directed="1"/>
      <edge id="302994" label="zzz1008,zzz1200" source="2105" target="2005" cy:directed="1"/>
      <edge id="302993" label="zzz1008,zzz1343" source="2105" target="1914" cy:directed="1"/>
      <edge id="302992" label="zzz1008,zzz1361" source="2105" target="1899" cy:directed="1"/>
      <edge id="302991" label="zzz1008,zzz1413" source="2105" target="1864" cy:directed="1"/>
      <edge id="302990" label="zzz1008,zzzz446" source="2105" target="540" cy:directed="1"/>
      <edge id="302989" label="zzz1008,zzzz772" source="2105" target="315" cy:directed="1"/>
      <edge id="302988" label="zzz1008,zzz1069" source="2105" target="2064" cy:directed="1"/>
      <edge id="302987" label="zzz1008,zzz1162" source="2105" target="2027" cy:directed="1"/>
      <edge id="302986" label="zzz1008,zzz1312" source="2105" target="1934" cy:directed="1"/>
      <edge id="302985" label="zzz1008,zzz1322" source="2105" target="1929" cy:directed="1"/>
      <edge id="302984" label="zzz1008,zzz1344" source="2105" target="1913" cy:directed="1"/>
      <edge id="302983" label="zzz1008,zzz1402" source="2105" target="1870" cy:directed="1"/>
      <edge id="302982" label="zzz1008,zzz1415" source="2105" target="1862" cy:directed="1"/>
      <edge id="302981" label="zzz1008,zzz1471" source="2105" target="1817" cy:directed="1"/>
      <edge id="302980" label="zzz1008,zzz1492" source="2105" target="1800" cy:directed="1"/>
      <edge id="302979" label="zzz1008,zzz1525" source="2105" target="1778" cy:directed="1"/>
      <edge id="302978" label="zzz1008,zzz1543" source="2105" target="1766" cy:directed="1"/>
      <edge id="302977" label="zzz1008,zzzz442" source="2105" target="543" cy:directed="1"/>
      <edge id="302976" label="zzz1008,zzzz816" source="2105" target="276" cy:directed="1"/>
      <edge id="302975" label="zzz1008,zzzz905" source="2105" target="229" cy:directed="1"/>
      <edge id="302974" label="zzz1008,zzzz948" source="2105" target="208" cy:directed="1"/>
      <edge id="302973" label="zzz1008,zzzz998" source="2105" target="173" cy:directed="1"/>
      <edge id="302972" label="zzz1008,zzz1152" source="2105" target="2033" cy:directed="1"/>
      <edge id="302971" label="zzz1008,zzz1409" source="2105" target="1866" cy:directed="1"/>
      <edge id="302970" label="zzz1008,zzz1425" source="2105" target="1853" cy:directed="1"/>
      <edge id="302969" label="zzz1008,zzzz412" source="2105" target="560" cy:directed="1"/>
      <edge id="302968" label="zzz1008,zzzz632" source="2105" target="404" cy:directed="1"/>
      <edge id="302967" label="zzz1008,zzzz652" source="2105" target="394" cy:directed="1"/>
      <edge id="302966" label="zzz1008,zzzz775" source="2105" target="312" cy:directed="1"/>
      <edge id="302965" label="zzz1008,zzzz809" source="2105" target="283" cy:directed="1"/>
      <edge id="302964" label="zzz1008,zzz1165" source="2105" target="2026" cy:directed="1"/>
      <edge id="302963" label="zzz1008,zzz1172" source="2105" target="2022" cy:directed="1"/>
      <edge id="302962" label="zzz1008,zzz1352" source="2105" target="1907" cy:directed="1"/>
      <edge id="302961" label="zzz1008,zzz1411" source="2105" target="1865" cy:directed="1"/>
      <edge id="302960" label="zzz1008,zzz1493" source="2105" target="1799" cy:directed="1"/>
      <edge id="302959" label="zzz1008,zzz1176" source="2105" target="2020" cy:directed="1"/>
      <edge id="302958" label="zzz1008,zzz1288" source="2105" target="1946" cy:directed="1"/>
      <edge id="302957" label="zzz1008,zzz1294" source="2105" target="1942" cy:directed="1"/>
      <edge id="302956" label="zzz1008,zzz1307" source="2105" target="1937" cy:directed="1"/>
      <edge id="302955" label="zzz1008,zzz1403" source="2105" target="1869" cy:directed="1"/>
      <edge id="302954" label="zzz1008,zzz1464" source="2105" target="1820" cy:directed="1"/>
      <edge id="302953" label="zzz1008,zzzz454" source="2105" target="535" cy:directed="1"/>
      <edge id="302952" label="zzz1008,zzzz549" source="2105" target="461" cy:directed="1"/>
      <edge id="302951" label="zzz1008,zzzz612" source="2105" target="418" cy:directed="1"/>
      <edge id="302950" label="zzz1008,zzzz793" source="2105" target="295" cy:directed="1"/>
      <edge id="302949" label="zzz1008,zzzz933" source="2105" target="217" cy:directed="1"/>
      <edge id="302948" label="zzz1008,zzz1157" source="2105" target="2030" cy:directed="1"/>
      <edge id="302947" label="zzz1008,zzz1209" source="2105" target="1997" cy:directed="1"/>
      <edge id="302946" label="zzz1008,zzz1406" source="2105" target="1868" cy:directed="1"/>
      <edge id="302945" label="zzz1008,zzz1436" source="2105" target="1846" cy:directed="1"/>
      <edge id="302944" label="zzz1008,zzz1501" source="2105" target="1791" cy:directed="1"/>
      <edge id="302943" label="zzz1008,zzzz523" source="2105" target="480" cy:directed="1"/>
      <edge id="302942" label="zzz1008,zzzz527" source="2105" target="478" cy:directed="1"/>
      <edge id="302941" label="zzz1008,zzzz575" source="2105" target="449" cy:directed="1"/>
      <edge id="302940" label="zzz1008,zzzz769" source="2105" target="318" cy:directed="1"/>
      <edge id="302939" label="zzz1008,zzzz877" source="2105" target="241" cy:directed="1"/>
      <edge id="302938" label="zzz1008,zzz1118" source="2105" target="2052" cy:directed="1"/>
      <edge id="302937" label="zzz1008,zzz1120" source="2105" target="2050" cy:directed="1"/>
      <edge id="302936" label="zzz1008,zzz1227" source="2105" target="1985" cy:directed="1"/>
      <edge id="302935" label="zzz1008,zzz1338" source="2105" target="1917" cy:directed="1"/>
      <edge id="302934" label="zzz1008,zzz1548" source="2105" target="1763" cy:directed="1"/>
      <edge id="302933" label="zzz1008,zzzz536" source="2105" target="471" cy:directed="1"/>
      <edge id="302932" label="zzz1008,zzzz609" source="2105" target="421" cy:directed="1"/>
      <edge id="302931" label="zzz1008,zzzz822" source="2105" target="273" cy:directed="1"/>
      <edge id="302930" label="zzz1008,zzzz923" source="2105" target="221" cy:directed="1"/>
      <edge id="302929" label="zzz1008,zzzz946" source="2105" target="209" cy:directed="1"/>
      <edge id="302928" label="zzz1008,zzz1055" source="2105" target="2076" cy:directed="1"/>
      <edge id="302927" label="zzz1008,zzz1133" source="2105" target="2043" cy:directed="1"/>
      <edge id="302926" label="zzz1008,zzz1219" source="2105" target="1990" cy:directed="1"/>
      <edge id="302925" label="zzz1008,zzz1335" source="2105" target="1918" cy:directed="1"/>
      <edge id="302924" label="zzz1008,zzz1374" source="2105" target="1892" cy:directed="1"/>
      <edge id="302923" label="zzz1008,zzz1481" source="2105" target="1811" cy:directed="1"/>
      <edge id="302922" label="zzz1008,zzz1487" source="2105" target="1805" cy:directed="1"/>
      <edge id="302921" label="zzz1008,zzz1490" source="2105" target="1802" cy:directed="1"/>
      <edge id="302920" label="zzz1008,zzzz599" source="2105" target="431" cy:directed="1"/>
      <edge id="302919" label="zzz1008,zzzz613" source="2105" target="417" cy:directed="1"/>
      <edge id="302918" label="zzz1008,zzzz770" source="2105" target="317" cy:directed="1"/>
      <edge id="302917" label="zzz1008,zzzz774" source="2105" target="313" cy:directed="1"/>
      <edge id="302916" label="zzz1008,zzz1137" source="2105" target="2040" cy:directed="1"/>
      <edge id="302915" label="zzz1008,zzz1153" source="2105" target="2032" cy:directed="1"/>
      <edge id="302914" label="zzz1008,zzz1381" source="2105" target="1887" cy:directed="1"/>
      <edge id="302913" label="zzz1008,zzz1466" source="2105" target="1819" cy:directed="1"/>
      <edge id="302912" label="zzz1008,zzz1540" source="2105" target="1769" cy:directed="1"/>
      <edge id="302911" label="zzz1008,zzzz444" source="2105" target="542" cy:directed="1"/>
      <edge id="302910" label="zzz1008,zzz1178" source="2105" target="2019" cy:directed="1"/>
      <edge id="302909" label="zzz1008,zzz1237" source="2105" target="1978" cy:directed="1"/>
      <edge id="302908" label="zzz1008,zzz1265" source="2105" target="1962" cy:directed="1"/>
      <edge id="302907" label="zzz1008,zzz1269" source="2105" target="1959" cy:directed="1"/>
      <edge id="302906" label="zzz1008,zzz1435" source="2105" target="1847" cy:directed="1"/>
      <edge id="302905" label="zzz1008,zzz1491" source="2105" target="1801" cy:directed="1"/>
      <edge id="302904" label="zzz1008,zzzz452" source="2105" target="536" cy:directed="1"/>
      <edge id="302903" label="zzz1008,zzzz732" source="2105" target="340" cy:directed="1"/>
      <edge id="302902" label="zzz1008,zzzz950" source="2105" target="207" cy:directed="1"/>
      <edge id="302901" label="zzz1008,zzz1416" source="2105" target="1861" cy:directed="1"/>
      <edge id="302900" label="zzz1008,zzz1536" source="2105" target="1770" cy:directed="1"/>
      <edge id="302899" label="zzz1008,zzzz657" source="2105" target="390" cy:directed="1"/>
      <edge id="302898" label="zzz1008,zzz1053" source="2105" target="2078" cy:directed="1"/>
      <edge id="302897" label="zzz1008,zzzz451" source="2105" target="537" cy:directed="1"/>
      <edge id="302896" label="zzz1008,zzzz467" source="2105" target="526" cy:directed="1"/>
      <edge id="302895" label="zzz1008,zzzz568" source="2105" target="452" cy:directed="1"/>
      <edge id="302894" label="zzz1008,zzz1115" source="2105" target="2053" cy:directed="1"/>
      <edge id="302893" label="zzz1008,zzzz415" source="2105" target="558" cy:directed="1"/>
      <edge id="302892" label="zzz1008,zzz1247" source="2105" target="1973" cy:directed="1"/>
      <edge id="302891" label="zzz1008,zzz1255" source="2105" target="1967" cy:directed="1"/>
      <edge id="302890" label="zzz1008,zzz1387" source="2105" target="1883" cy:directed="1"/>
      <edge id="302889" label="zzz1008,zzz1454" source="2105" target="1828" cy:directed="1"/>
      <edge id="302888" label="zzz1008,zzz1497" source="2105" target="1795" cy:directed="1"/>
      <edge id="302887" label="zzz1008,zzzz731" source="2105" target="341" cy:directed="1"/>
      <edge id="302886" label="zzz1008,zzz1266" source="2105" target="1961" cy:directed="1"/>
      <edge id="302885" label="zzz1008,zzz1272" source="2105" target="1958" cy:directed="1"/>
      <edge id="302884" label="zzz1008,zzz1498" source="2105" target="1794" cy:directed="1"/>
      <edge id="302883" label="zzz1008,zzz1028" source="2105" target="2088" cy:directed="1"/>
      <edge id="302882" label="zzz1008,zzz1123" source="2105" target="2048" cy:directed="1"/>
      <edge id="302881" label="zzz1008,zzz1489" source="2105" target="1803" cy:directed="1"/>
      <edge id="302880" label="zzz1008,zzzz802" source="2105" target="290" cy:directed="1"/>
      <edge id="302879" label="zzz1008,zzz1475" source="2105" target="1816" cy:directed="1"/>
      <edge id="302878" label="zzz1008,zzzz449" source="2105" target="538" cy:directed="1"/>
      <edge id="302877" label="zzz1008,zzzz582" source="2105" target="447" cy:directed="1"/>
      <edge id="302876" label="zzz1008,zzzz653" source="2105" target="393" cy:directed="1"/>
      <edge id="302875" label="zzz1008,zzzz750" source="2105" target="335" cy:directed="1"/>
      <edge id="302874" label="zzz1008,zzzz807" source="2105" target="285" cy:directed="1"/>
      <edge id="302873" label="zzz1008,zzz1503" source="2105" target="1789" cy:directed="1"/>
      <edge id="302872" label="zzz1008,zzzz791" source="2105" target="297" cy:directed="1"/>
      <edge id="302871" label="zzz1008,zzz1015" source="2105" target="2099" cy:directed="1"/>
      <edge id="302870" label="zzz1008,zzzz401" source="2105" target="569" cy:directed="1"/>
      <edge id="302869" label="zzz1008,zzzz567" source="2105" target="453" cy:directed="1"/>
      <edge id="302868" label="zzz1008,zzzz620" source="2105" target="414" cy:directed="1"/>
      <edge id="302867" label="zzz1008,zzz1057" source="2105" target="2074" cy:directed="1"/>
      <edge id="302866" label="zzz1008,zzz1401" source="2105" target="1871" cy:directed="1"/>
      <edge id="302865" label="zzz1008,zzz1056" source="2105" target="2075" cy:directed="1"/>
      <edge id="302864" label="zzz1008,zzz1203" source="2105" target="2002" cy:directed="1"/>
      <edge id="302863" label="zzz1008,zzzz410" source="2105" target="562" cy:directed="1"/>
      <edge id="302862" label="zzz1008,zzz1017" source="2105" target="2097" cy:directed="1"/>
      <edge id="302861" label="zzz1008,zzzz425" source="2105" target="552" cy:directed="1"/>
      <edge id="302860" label="zzz1008,zzzz944" source="2105" target="210" cy:directed="1"/>
      <edge id="302859" label="zzz1008,zzz1318" source="2105" target="1931" cy:directed="1"/>
      <edge id="302858" label="zzz1008,zzzz966" source="2105" target="198" cy:directed="1"/>
      <edge id="302857" label="zzz1008,zzzz993" source="2105" target="176" cy:directed="1"/>
      <edge id="302856" label="zzz1008,zzzz783" source="2105" target="304" cy:directed="1"/>
      <edge id="302855" label="zzz1008,zzzz764" source="2105" target="323" cy:directed="1"/>
      <edge id="302854" label="zzz1008,zzzz445" source="2105" target="541" cy:directed="1"/>
      <edge id="302853" label="zzz1008,zzzz498" source="2105" target="499" cy:directed="1"/>
      <edge id="302852" label="zzz1008,zzzz569" source="2105" target="451" cy:directed="1"/>
      <edge id="302851" label="zzz1008,zzz1249" source="2105" target="1971" cy:directed="1"/>
      <edge id="302850" label="zzz1008,zzz1013" source="2105" target="2100" cy:directed="1"/>
      <edge id="302849" label="zzz1008,zzz1099" source="2105" target="2061" cy:directed="1"/>
      <edge id="302848" label="zzz1008,zzzz625" source="2105" target="410" cy:directed="1"/>
      <edge id="302847" label="zzz1008,zzzz813" source="2105" target="279" cy:directed="1"/>
      <edge id="302846" label="zzz1008,zzzz857" source="2105" target="255" cy:directed="1"/>
      <edge id="302845" label="zzz1008,zzzz969" source="2105" target="195" cy:directed="1"/>
      <edge id="302844" label="zzz1008,zzzz875" source="2105" target="242" cy:directed="1"/>
      <edge id="302843" label="zzz1008,zzz1533" source="2105" target="1772" cy:directed="1"/>
      <edge id="302842" label="zzz1008,zzz1171" source="2105" target="2023" cy:directed="1"/>
      <edge id="302841" label="zzz1008,zzzz530" source="2105" target="475" cy:directed="1"/>
      <edge id="302840" label="zzz1008,zzzz544" source="2105" target="463" cy:directed="1"/>
      <edge id="302839" label="zzz1008,zzz1440" source="2105" target="1842" cy:directed="1"/>
      <edge id="302838" label="zzz1008,zzz1448" source="2105" target="1834" cy:directed="1"/>
      <edge id="302837" label="zzz1008,zzzz512" source="2105" target="487" cy:directed="1"/>
      <edge id="302836" label="zzz1008,zzzz704" source="2105" target="357" cy:directed="1"/>
      <edge id="302835" label="zzz1008,zzz1067" source="2105" target="2066" cy:directed="1"/>
      <edge id="302834" label="zzz1008,zzzz836" source="2105" target="267" cy:directed="1"/>
      <edge id="302833" label="zzz1008,zzzz716" source="2105" target="348" cy:directed="1"/>
      <edge id="302832" label="zzz1008,zzzz447" source="2105" target="539" cy:directed="1"/>
      <edge id="302831" label="zzz1008,zzzz557" source="2105" target="456" cy:directed="1"/>
      <edge id="302830" label="zzz1008,zzzz519" source="2105" target="484" cy:directed="1"/>
      <edge id="302829" label="zzz1008,zzzz503" source="2105" target="496" cy:directed="1"/>
      <edge id="302828" label="zzz1008,zzz1379" source="2105" target="1888" cy:directed="1"/>
      <edge id="302827" label="zzz1008,zzzz420" source="2105" target="553" cy:directed="1"/>
      <edge id="302826" label="zzz1008,zzzz500" source="2105" target="498" cy:directed="1"/>
      <edge id="302825" label="zzz1008,zzzz497" source="2105" target="500" cy:directed="1"/>
      <edge id="302824" label="zzz1008,zzzz520" source="2105" target="483" cy:directed="1"/>
      <edge id="302823" label="zzz1008,zzzz610" source="2105" target="420" cy:directed="1"/>
      <edge id="302822" label="zzz1008,zzzz628" source="2105" target="407" cy:directed="1"/>
      <edge id="302821" label="zzz1008,zzzz889" source="2105" target="232" cy:directed="1"/>
      <edge id="302820" label="zzz1008,zzzz996" source="2105" target="174" cy:directed="1"/>
      <edge id="302819" label="zzz1008,zzz1309" source="2105" target="1936" cy:directed="1"/>
      <edge id="302818" label="zzz1008,zzz1068" source="2105" target="2065" cy:directed="1"/>
      <edge id="302817" label="zzz1008,zzzz647" source="2105" target="398" cy:directed="1"/>
      <edge id="302816" label="zzz1008,zzz1456" source="2105" target="1826" cy:directed="1"/>
      <edge id="302815" label="zzz1008,zzzz694" source="2105" target="365" cy:directed="1"/>
      <edge id="302814" label="zzz1008,zzzz517" source="2105" target="486" cy:directed="1"/>
      <edge id="302813" label="zzz1008,zzzz581" source="2105" target="448" cy:directed="1"/>
      <edge id="302812" label="zzz1008,zzzz784" source="2105" target="303" cy:directed="1"/>
      <edge id="302811" label="zzz1008,zzzz870" source="2105" target="245" cy:directed="1"/>
      <edge id="302810" label="zzz1008,zzzz798" source="2105" target="291" cy:directed="1"/>
      <edge id="302809" label="zzz1008,zzzz903" source="2105" target="230" cy:directed="1"/>
      <edge id="302808" label="zzz1008,zzz1314" source="2105" target="1933" cy:directed="1"/>
      <edge id="302807" label="zzz1008,zzz1383" source="2105" target="1886" cy:directed="1"/>
      <edge id="302806" label="zzz1008,zzzz502" source="2105" target="497" cy:directed="1"/>
      <edge id="302805" label="zzz1008,zzz1438" source="2105" target="1844" cy:directed="1"/>
      <edge id="302804" label="zzz1008,zzzz785" source="2105" target="302" cy:directed="1"/>
      <edge id="302803" label="zzz1008,zzzz786" source="2105" target="301" cy:directed="1"/>
      <edge id="302802" label="zzz1008,zzz1043" source="2105" target="2082" cy:directed="1"/>
      <edge id="302801" label="zzz1008,zzzz622" source="2105" target="413" cy:directed="1"/>
      <edge id="302800" label="zzz1008,zzz1012" source="2105" target="2101" cy:directed="1"/>
      <edge id="302799" label="zzz1008,zzzz475" source="2105" target="520" cy:directed="1"/>
      <edge id="302798" label="zzz1008,zzzz404" source="2105" target="568" cy:directed="1"/>
      <edge id="302797" label="zzz1008,zzzz482" source="2105" target="513" cy:directed="1"/>
      <edge id="302796" label="zzz1008,zzz1011" source="2105" target="2102" cy:directed="1"/>
      <edge id="302795" label="zzz1008,zzzz590" source="2105" target="440" cy:directed="1"/>
      <edge id="302794" label="zzz1008,zzzz429" source="2105" target="550" cy:directed="1"/>
      <edge id="302793" label="zzz1008,zzzz566" source="2105" target="454" cy:directed="1"/>
      <edge id="302792" label="zzz1008,zzzz684" source="2105" target="371" cy:directed="1"/>
      <edge id="302791" label="zzz1008,zzz1027" source="2105" target="2089" cy:directed="1"/>
      <edge id="302790" label="zzz1008,zzz1023" source="2105" target="2092" cy:directed="1"/>
      <edge id="302789" label="zzz1008,zzzz883" source="2105" target="237" cy:directed="1"/>
      <edge id="302788" label="zzz1008,zzz1357" source="2105" target="1903" cy:directed="1"/>
      <edge id="302787" label="zzz1008,zzzz869" source="2105" target="246" cy:directed="1"/>
      <edge id="302786" label="zzz1008,zzz1026" source="2105" target="2090" cy:directed="1"/>
      <edge id="302785" label="zzz1008,zzz1063" source="2105" target="2069" cy:directed="1"/>
      <edge id="302784" label="zzz1008,zzz1021" source="2105" target="2094" cy:directed="1"/>
      <edge id="302783" label="zzz1008,zzzz630" source="2105" target="406" cy:directed="1"/>
      <edge id="302782" label="zzz1008,zzz1059" source="2105" target="2072" cy:directed="1"/>
      <edge id="302781" label="zzz1008,zzz1016" source="2105" target="2098" cy:directed="1"/>
      <edge id="302780" label="zzz1008,zzzz957" source="2105" target="203" cy:directed="1"/>
      <edge id="302779" label="zzz1008,zzzz405" source="2105" target="567" cy:directed="1"/>
      <edge id="302778" label="zzz1008,zzzz464" source="2105" target="528" cy:directed="1"/>
      <edge id="302777" label="zzz1008,zzzz795" source="2105" target="293" cy:directed="1"/>
      <edge id="302776" label="zzz1008,zzz1060" source="2105" target="2071" cy:directed="1"/>
      <edge id="302775" label="zzz1008,zzzz406" source="2105" target="566" cy:directed="1"/>
      <edge id="302774" label="zzz1008,zzz1058" source="2105" target="2073" cy:directed="1"/>
      <edge id="302773" label="zzz1008,zzz1522" source="2105" target="1781" cy:directed="1"/>
      <edge id="302772" label="zzz1008,zzz1041" source="2105" target="2083" cy:directed="1"/>
      <edge id="302771" label="zzz1008,zzzz953" source="2105" target="206" cy:directed="1"/>
      <edge id="302770" label="zzz1008,zzzz721" source="2105" target="345" cy:directed="1"/>
      <edge id="302769" label="zzz1008,zzz1257" source="2105" target="1966" cy:directed="1"/>
      <edge id="302768" label="zzz1008,zzzz462" source="2105" target="529" cy:directed="1"/>
      <edge id="302767" label="zzz1008,zzz1417" source="2105" target="1860" cy:directed="1"/>
      <edge id="302766" label="zzz1008,zzzz551" source="2105" target="460" cy:directed="1"/>
      <edge id="302765" label="zzz1008,zzzz702" source="2105" target="359" cy:directed="1"/>
      <edge id="302764" label="zzz1008,zzz1261" source="2105" target="1963" cy:directed="1"/>
      <edge id="302763" label="zzz1008,zzzz860" source="2105" target="252" cy:directed="1"/>
      <edge id="302762" label="zzz1008,zzzz506" source="2105" target="493" cy:directed="1"/>
      <edge id="302761" label="zzz1008,zzzz541" source="2105" target="466" cy:directed="1"/>
      <edge id="302760" label="zzz1008,zzzz680" source="2105" target="374" cy:directed="1"/>
      <edge id="302759" label="zzz1008,zzzz861" source="2105" target="251" cy:directed="1"/>
      <edge id="302758" label="zzz1008,zzzz936" source="2105" target="214" cy:directed="1"/>
      <edge id="302757" label="zzz1008,zzzz722" source="2105" target="344" cy:directed="1"/>
      <edge id="302756" label="zzz1008,zzz1052" source="2105" target="2079" cy:directed="1"/>
      <edge id="302755" label="zzz1008,zzz1204" source="2105" target="2001" cy:directed="1"/>
      <edge id="302754" label="zzz1008,zzzz565" source="2105" target="455" cy:directed="1"/>
      <edge id="302753" label="zzz1008,zzzz730" source="2105" target="342" cy:directed="1"/>
      <edge id="302752" label="zzz1008,zzz1431" source="2105" target="1848" cy:directed="1"/>
      <edge id="302751" label="zzz1008,zzzz631" source="2105" target="405" cy:directed="1"/>
      <edge id="302750" label="zzz1008,zzzz737" source="2105" target="339" cy:directed="1"/>
      <edge id="302749" label="zzz1008,zzzz644" source="2105" target="399" cy:directed="1"/>
      <edge id="302748" label="zzz1008,zzz1022" source="2105" target="2093" cy:directed="1"/>
      <edge id="302747" label="zzz1008,zzzz526" source="2105" target="479" cy:directed="1"/>
      <edge id="302746" label="zzz1008,zzzz586" source="2105" target="443" cy:directed="1"/>
      <edge id="302745" label="zzz1008,zzzz983" source="2105" target="183" cy:directed="1"/>
      <edge id="302744" label="zzz1008,zzzz591" source="2105" target="439" cy:directed="1"/>
      <edge id="302743" label="zzz1008,zzzz914" source="2105" target="224" cy:directed="1"/>
      <edge id="302742" label="zzz1008,zzz1451" source="2105" target="1831" cy:directed="1"/>
      <edge id="302741" label="zzz1008,zzzz466" source="2105" target="527" cy:directed="1"/>
      <edge id="302740" label="zzz1008,zzz1025" source="2105" target="2091" cy:directed="1"/>
      <edge id="302739" label="zzz1008,zzz1019" source="2105" target="2095" cy:directed="1"/>
      <edge id="302738" label="zzz1008,zzzz984" source="2105" target="182" cy:directed="1"/>
      <edge id="302737" label="zzz1008,zzzz596" source="2105" target="434" cy:directed="1"/>
      <edge id="302736" label="zzz1008,zzzz982" source="2105" target="184" cy:directed="1"/>
      <edge id="302735" label="zzz1008,zzzz794" source="2105" target="294" cy:directed="1"/>
      <edge id="302734" label="zzz1008,zzzz595" source="2105" target="435" cy:directed="1"/>
      <edge id="302733" label="zzz1008,zzzz460" source="2105" target="530" cy:directed="1"/>
      <edge id="302732" label="zzz1008,zzzz419" source="2105" target="554" cy:directed="1"/>
      <edge id="302731" label="zzz1008,zzzz594" source="2105" target="436" cy:directed="1"/>
      <edge id="302730" label="zzz1008,zzzz413" source="2105" target="559" cy:directed="1"/>
      <edge id="302729" label="zzz1008,zzzz797" source="2105" target="292" cy:directed="1"/>
      <edge id="302728" label="zzz1008,zzzz505" source="2105" target="494" cy:directed="1"/>
      <edge id="302727" label="zzz1008,zzzz593" source="2105" target="437" cy:directed="1"/>
      <edge id="302726" label="zzz1008,zzzz986" source="2105" target="180" cy:directed="1"/>
      <edge id="302725" label="zzz1008,zzzz408" source="2105" target="564" cy:directed="1"/>
      <edge id="302724" label="zzz1008,zzzz418" source="2105" target="555" cy:directed="1"/>
      <edge id="302723" label="zzz1008,zzzz985" source="2105" target="181" cy:directed="1"/>
      <edge id="302722" label="zzz1008,zzzz987" source="2105" target="179" cy:directed="1"/>
      <edge id="302721" label="zzz1008,zzzz522" source="2105" target="481" cy:directed="1"/>
      <edge id="302720" label="zzz1008,zzzz840" source="2105" target="264" cy:directed="1"/>
      <edge id="302719" label="zzz1008,zzzz411" source="2105" target="561" cy:directed="1"/>
      <edge id="302718" label="zzz1008,zzzz458" source="2105" target="532" cy:directed="1"/>
      <edge id="302717" label="zzz1008,zzzz490" source="2105" target="505" cy:directed="1"/>
      <edge id="302716" label="zzz1008,zzzz417" source="2105" target="556" cy:directed="1"/>
      <edge id="302715" label="zzz1008,zzzz434" source="2105" target="546" cy:directed="1"/>
      <edge id="302714" label="zzz1008,zzz1520" source="2105" target="1783" cy:directed="1"/>
      <edge id="302713" label="zzz1008,zzz1326" source="2105" target="1926" cy:directed="1"/>
      <edge id="302712" label="zzz1008,zzz1518" source="2105" target="1785" cy:directed="1"/>
      <edge id="302711" label="zzz1008,zzzz958" source="2105" target="202" cy:directed="1"/>
      <edge id="302710" label="zzz1008,zzzz977" source="2105" target="187" cy:directed="1"/>
      <edge id="302709" label="zzz1008,zzz1377" source="2105" target="1890" cy:directed="1"/>
      <edge id="302708" label="zzz1008,zzzz491" source="2105" target="504" cy:directed="1"/>
      <edge id="302707" label="zzz1008,zzz2358" source="2105" target="955" cy:directed="1"/>
      <edge id="302706" label="zzz1008,zzz1327" source="2105" target="1925" cy:directed="1"/>
      <edge id="302705" label="zzz1008,zzz1428" source="2105" target="1851" cy:directed="1"/>
      <edge id="302704" label="zzz1008,zzzz855" source="2105" target="257" cy:directed="1"/>
      <edge id="302703" label="zzz1008,zzzz909" source="2105" target="228" cy:directed="1"/>
      <edge id="302702" label="zzz1008,zzz1392" source="2105" target="1879" cy:directed="1"/>
      <edge id="302701" label="zzz1009,zzzz720" source="2104" target="346" cy:directed="1"/>
      <edge id="302700" label="zzz1009,zzz1156" source="2104" target="2031" cy:directed="1"/>
      <edge id="302699" label="zzz1009,zzz1545" source="2104" target="1765" cy:directed="1"/>
      <edge id="302698" label="zzz1009,zzzz847" source="2104" target="258" cy:directed="1"/>
      <edge id="302697" label="zzz1009,zzz1319" source="2104" target="1930" cy:directed="1"/>
      <edge id="302696" label="zzz1009,zzzz707" source="2104" target="354" cy:directed="1"/>
      <edge id="302695" label="zzz1009,zzz1169" source="2104" target="2024" cy:directed="1"/>
      <edge id="302694" label="zzz1009,zzz1396" source="2104" target="1876" cy:directed="1"/>
      <edge id="302693" label="zzz1009,zzz1274" source="2104" target="1956" cy:directed="1"/>
      <edge id="302692" label="zzz1009,zzz1175" source="2104" target="2021" cy:directed="1"/>
      <edge id="302691" label="zzz1009,zzz1445" source="2104" target="1837" cy:directed="1"/>
      <edge id="302690" label="zzz1009,zzz1476" source="2104" target="1815" cy:directed="1"/>
      <edge id="302689" label="zzz1009,zzz1218" source="2104" target="1991" cy:directed="1"/>
      <edge id="302688" label="zzz1009,zzz1223" source="2104" target="1988" cy:directed="1"/>
      <edge id="302687" label="zzz1009,zzz1446" source="2104" target="1836" cy:directed="1"/>
      <edge id="302686" label="zzz1009,zzz1184" source="2104" target="2016" cy:directed="1"/>
      <edge id="302685" label="zzz1009,zzzz588" source="2104" target="442" cy:directed="1"/>
      <edge id="302684" label="zzz1009,zzzz583" source="2104" target="446" cy:directed="1"/>
      <edge id="302683" label="zzz1009,zzzz792" source="2104" target="296" cy:directed="1"/>
      <edge id="302682" label="zzz1009,zzz1530" source="2104" target="1774" cy:directed="1"/>
      <edge id="302681" label="zzz1009,zzz1128" source="2104" target="2047" cy:directed="1"/>
      <edge id="302680" label="zzz1009,zzz1441" source="2104" target="1841" cy:directed="1"/>
      <edge id="302679" label="zzz1009,zzzz473" source="2104" target="522" cy:directed="1"/>
      <edge id="302678" label="zzz1009,zzzz548" source="2104" target="462" cy:directed="1"/>
      <edge id="302677" label="zzz1009,zzzz864" source="2104" target="249" cy:directed="1"/>
      <edge id="302676" label="zzz1009,zzz1185" source="2104" target="2015" cy:directed="1"/>
      <edge id="302675" label="zzz1009,zzz1443" source="2104" target="1839" cy:directed="1"/>
      <edge id="302674" label="zzz1009,zzz1235" source="2104" target="1980" cy:directed="1"/>
      <edge id="302673" label="zzz1009,zzz1349" source="2104" target="1909" cy:directed="1"/>
      <edge id="302672" label="zzz1009,zzz1447" source="2104" target="1835" cy:directed="1"/>
      <edge id="302671" label="zzz1009,zzz1535" source="2104" target="1771" cy:directed="1"/>
      <edge id="302670" label="zzz1009,zzzz956" source="2104" target="204" cy:directed="1"/>
      <edge id="302669" label="zzz1009,zzz1504" source="2104" target="1788" cy:directed="1"/>
      <edge id="302668" label="zzz1009,zzzz459" source="2104" target="531" cy:directed="1"/>
      <edge id="302667" label="zzz1009,zzzz692" source="2104" target="366" cy:directed="1"/>
      <edge id="302666" label="zzz1009,zzz1245" source="2104" target="1974" cy:directed="1"/>
      <edge id="302665" label="zzz1009,zzzz542" source="2104" target="465" cy:directed="1"/>
      <edge id="302664" label="zzz1009,zzzz409" source="2104" target="563" cy:directed="1"/>
      <edge id="302663" label="zzz1009,zzz1354" source="2104" target="1906" cy:directed="1"/>
      <edge id="302662" label="zzz1009,zzzz479" source="2104" target="516" cy:directed="1"/>
      <edge id="302661" label="zzz1009,zzzz856" source="2104" target="256" cy:directed="1"/>
      <edge id="302660" label="zzz1009,zzz1251" source="2104" target="1969" cy:directed="1"/>
      <edge id="302659" label="zzz1009,zzzz932" source="2104" target="218" cy:directed="1"/>
      <edge id="302658" label="zzz1009,zzz1207" source="2104" target="1999" cy:directed="1"/>
      <edge id="302657" label="zzz1009,zzzz469" source="2104" target="524" cy:directed="1"/>
      <edge id="302656" label="zzz1009,zzzz838" source="2104" target="265" cy:directed="1"/>
      <edge id="302655" label="zzz1009,zzz1119" source="2104" target="2051" cy:directed="1"/>
      <edge id="302654" label="zzz1009,zzz1399" source="2104" target="1873" cy:directed="1"/>
      <edge id="302653" label="zzz1009,zzz1477" source="2104" target="1814" cy:directed="1"/>
      <edge id="302652" label="zzz1009,zzz1159" source="2104" target="2029" cy:directed="1"/>
      <edge id="302651" label="zzz1009,zzz1457" source="2104" target="1825" cy:directed="1"/>
      <edge id="302650" label="zzz1009,zzz1541" source="2104" target="1768" cy:directed="1"/>
      <edge id="302649" label="zzz1009,zzzz533" source="2104" target="472" cy:directed="1"/>
      <edge id="302648" label="zzz1009,zzzz683" source="2104" target="372" cy:directed="1"/>
      <edge id="302647" label="zzz1009,zzzz814" source="2104" target="278" cy:directed="1"/>
      <edge id="302646" label="zzz1009,zzzz934" source="2104" target="216" cy:directed="1"/>
      <edge id="302645" label="zzz1009,zzz1160" source="2104" target="2028" cy:directed="1"/>
      <edge id="302644" label="zzz1009,zzz1202" source="2104" target="2003" cy:directed="1"/>
      <edge id="302643" label="zzz1009,zzz1484" source="2104" target="1808" cy:directed="1"/>
      <edge id="302642" label="zzz1009,zzz1486" source="2104" target="1806" cy:directed="1"/>
      <edge id="302641" label="zzz1009,zzzz619" source="2104" target="415" cy:directed="1"/>
      <edge id="302640" label="zzz1009,zzzz755" source="2104" target="330" cy:directed="1"/>
      <edge id="302639" label="zzz1009,zzzz805" source="2104" target="287" cy:directed="1"/>
      <edge id="302638" label="zzz1009,zzzz821" source="2104" target="274" cy:directed="1"/>
      <edge id="302637" label="zzz1009,zzzz862" source="2104" target="250" cy:directed="1"/>
      <edge id="302636" label="zzz1009,zzzz887" source="2104" target="234" cy:directed="1"/>
      <edge id="302635" label="zzz1009,zzzz961" source="2104" target="200" cy:directed="1"/>
      <edge id="302634" label="zzz1009,zzz1346" source="2104" target="1912" cy:directed="1"/>
      <edge id="302633" label="zzz1009,zzz1368" source="2104" target="1896" cy:directed="1"/>
      <edge id="302632" label="zzz1009,zzz1495" source="2104" target="1797" cy:directed="1"/>
      <edge id="302631" label="zzz1009,zzzz574" source="2104" target="450" cy:directed="1"/>
      <edge id="302630" label="zzz1009,zzz1144" source="2104" target="2036" cy:directed="1"/>
      <edge id="302629" label="zzz1009,zzz1358" source="2104" target="1902" cy:directed="1"/>
      <edge id="302628" label="zzz1009,zzzz487" source="2104" target="508" cy:directed="1"/>
      <edge id="302627" label="zzz1009,zzzz507" source="2104" target="492" cy:directed="1"/>
      <edge id="302626" label="zzz1009,zzz1485" source="2104" target="1807" cy:directed="1"/>
      <edge id="302625" label="zzz1009,zzzz489" source="2104" target="506" cy:directed="1"/>
      <edge id="302624" label="zzz1009,zzzz504" source="2104" target="495" cy:directed="1"/>
      <edge id="302623" label="zzz1009,zzzz640" source="2104" target="401" cy:directed="1"/>
      <edge id="302622" label="zzz1009,zzzz910" source="2104" target="227" cy:directed="1"/>
      <edge id="302621" label="zzz1009,zzz1521" source="2104" target="1782" cy:directed="1"/>
      <edge id="302620" label="zzz1009,zzzz468" source="2104" target="525" cy:directed="1"/>
      <edge id="302619" label="zzz1009,zzzz585" source="2104" target="444" cy:directed="1"/>
      <edge id="302618" label="zzz1009,zzzz711" source="2104" target="350" cy:directed="1"/>
      <edge id="302617" label="zzz1009,zzzz754" source="2104" target="331" cy:directed="1"/>
      <edge id="302616" label="zzz1009,zzz1038" source="2104" target="2084" cy:directed="1"/>
      <edge id="302615" label="zzz1009,zzz1234" source="2104" target="1981" cy:directed="1"/>
      <edge id="302614" label="zzz1009,zzz1279" source="2104" target="1951" cy:directed="1"/>
      <edge id="302613" label="zzz1009,zzz1390" source="2104" target="1881" cy:directed="1"/>
      <edge id="302612" label="zzz1009,zzz1439" source="2104" target="1843" cy:directed="1"/>
      <edge id="302611" label="zzz1009,zzz1483" source="2104" target="1809" cy:directed="1"/>
      <edge id="302610" label="zzz1009,zzz1488" source="2104" target="1804" cy:directed="1"/>
      <edge id="302609" label="zzz1009,zzzz584" source="2104" target="445" cy:directed="1"/>
      <edge id="302608" label="zzz1009,zzzz935" source="2104" target="215" cy:directed="1"/>
      <edge id="302607" label="zzz1009,zzz1030" source="2104" target="2087" cy:directed="1"/>
      <edge id="302606" label="zzz1009,zzz1132" source="2104" target="2044" cy:directed="1"/>
      <edge id="302605" label="zzz1009,zzz1201" source="2104" target="2004" cy:directed="1"/>
      <edge id="302604" label="zzz1009,zzz1215" source="2104" target="1994" cy:directed="1"/>
      <edge id="302603" label="zzz1009,zzz1250" source="2104" target="1970" cy:directed="1"/>
      <edge id="302602" label="zzz1009,zzz1062" source="2104" target="2070" cy:directed="1"/>
      <edge id="302601" label="zzz1009,zzz1205" source="2104" target="2000" cy:directed="1"/>
      <edge id="302600" label="zzz1009,zzz1529" source="2104" target="1775" cy:directed="1"/>
      <edge id="302599" label="zzz1009,zzzz472" source="2104" target="523" cy:directed="1"/>
      <edge id="302598" label="zzz1009,zzzz765" source="2104" target="322" cy:directed="1"/>
      <edge id="302597" label="zzz1009,zzz1100" source="2104" target="2060" cy:directed="1"/>
      <edge id="302596" label="zzz1009,zzz1180" source="2104" target="2018" cy:directed="1"/>
      <edge id="302595" label="zzz1009,zzz1242" source="2104" target="1976" cy:directed="1"/>
      <edge id="302594" label="zzz1009,zzz1395" source="2104" target="1877" cy:directed="1"/>
      <edge id="302593" label="zzz1009,zzz1458" source="2104" target="1824" cy:directed="1"/>
      <edge id="302592" label="zzz1009,zzzz642" source="2104" target="400" cy:directed="1"/>
      <edge id="302591" label="zzz1009,zzzz756" source="2104" target="329" cy:directed="1"/>
      <edge id="302590" label="zzz1009,zzzz810" source="2104" target="282" cy:directed="1"/>
      <edge id="302589" label="zzz1009,zzzz867" source="2104" target="247" cy:directed="1"/>
      <edge id="302588" label="zzz1009,zzzz967" source="2104" target="197" cy:directed="1"/>
      <edge id="302587" label="zzz1009,zzz1221" source="2104" target="1989" cy:directed="1"/>
      <edge id="302586" label="zzz1009,zzz1324" source="2104" target="1928" cy:directed="1"/>
      <edge id="302585" label="zzz1009,zzz1398" source="2104" target="1874" cy:directed="1"/>
      <edge id="302584" label="zzz1009,zzz1482" source="2104" target="1810" cy:directed="1"/>
      <edge id="302583" label="zzz1009,zzzz607" source="2104" target="423" cy:directed="1"/>
      <edge id="302582" label="zzz1009,zzzz624" source="2104" target="411" cy:directed="1"/>
      <edge id="302581" label="zzz1009,zzzz960" source="2104" target="201" cy:directed="1"/>
      <edge id="302580" label="zzz1009,zzz1208" source="2104" target="1998" cy:directed="1"/>
      <edge id="302579" label="zzz1009,zzz1442" source="2104" target="1840" cy:directed="1"/>
      <edge id="302578" label="zzz1009,zzzz528" source="2104" target="477" cy:directed="1"/>
      <edge id="302577" label="zzz1009,zzzz538" source="2104" target="469" cy:directed="1"/>
      <edge id="302576" label="zzz1009,zzzz603" source="2104" target="427" cy:directed="1"/>
      <edge id="302575" label="zzz1009,zzzz753" source="2104" target="332" cy:directed="1"/>
      <edge id="302574" label="zzz1009,zzzz808" source="2104" target="284" cy:directed="1"/>
      <edge id="302573" label="zzz1009,zzzz865" source="2104" target="248" cy:directed="1"/>
      <edge id="302572" label="zzz1009,zzz1033" source="2104" target="2086" cy:directed="1"/>
      <edge id="302571" label="zzz1009,zzz1248" source="2104" target="1972" cy:directed="1"/>
      <edge id="302570" label="zzz1009,zzzz606" source="2104" target="424" cy:directed="1"/>
      <edge id="302569" label="zzz1009,zzzz611" source="2104" target="419" cy:directed="1"/>
      <edge id="302568" label="zzz1009,zzzz738" source="2104" target="338" cy:directed="1"/>
      <edge id="302567" label="zzz1009,zzzz790" source="2104" target="298" cy:directed="1"/>
      <edge id="302566" label="zzz1009,zzz1010" source="2104" target="2103" cy:directed="1"/>
      <edge id="302565" label="zzz1009,zzz1233" source="2104" target="1982" cy:directed="1"/>
      <edge id="302564" label="zzz1009,zzz1386" source="2104" target="1884" cy:directed="1"/>
      <edge id="302563" label="zzz1009,zzz1523" source="2104" target="1780" cy:directed="1"/>
      <edge id="302562" label="zzz1009,zzzz598" source="2104" target="432" cy:directed="1"/>
      <edge id="302561" label="zzz1009,zzzz691" source="2104" target="367" cy:directed="1"/>
      <edge id="302560" label="zzz1009,zzzz931" source="2104" target="219" cy:directed="1"/>
      <edge id="302559" label="zzz1009,zzzz972" source="2104" target="192" cy:directed="1"/>
      <edge id="302558" label="zzz1009,zzzz456" source="2104" target="534" cy:directed="1"/>
      <edge id="302557" label="zzz1009,zzzz457" source="2104" target="533" cy:directed="1"/>
      <edge id="302556" label="zzz1009,zzzz474" source="2104" target="521" cy:directed="1"/>
      <edge id="302555" label="zzz1009,zzzz529" source="2104" target="476" cy:directed="1"/>
      <edge id="302554" label="zzz1009,zzzz539" source="2104" target="468" cy:directed="1"/>
      <edge id="302553" label="zzz1009,zzzz601" source="2104" target="429" cy:directed="1"/>
      <edge id="302552" label="zzz1009,zzzz655" source="2104" target="392" cy:directed="1"/>
      <edge id="302551" label="zzz1009,zzzz708" source="2104" target="353" cy:directed="1"/>
      <edge id="302550" label="zzz1009,zzzz837" source="2104" target="266" cy:directed="1"/>
      <edge id="302549" label="zzz1009,zzzz846" source="2104" target="259" cy:directed="1"/>
      <edge id="302548" label="zzz1009,zzzz882" source="2104" target="238" cy:directed="1"/>
      <edge id="302547" label="zzz1009,zzzz999" source="2104" target="172" cy:directed="1"/>
      <edge id="302546" label="zzz1009,zzz1034" source="2104" target="2085" cy:directed="1"/>
      <edge id="302545" label="zzz1009,zzz1190" source="2104" target="2013" cy:directed="1"/>
      <edge id="302544" label="zzz1009,zzz1365" source="2104" target="1897" cy:directed="1"/>
      <edge id="302543" label="zzz1009,zzz1195" source="2104" target="2010" cy:directed="1"/>
      <edge id="302542" label="zzz1009,zzzz426" source="2104" target="551" cy:directed="1"/>
      <edge id="302541" label="zzz1009,zzzz537" source="2104" target="470" cy:directed="1"/>
      <edge id="302540" label="zzz1009,zzzz665" source="2104" target="382" cy:directed="1"/>
      <edge id="302539" label="zzz1009,zzzz902" source="2104" target="231" cy:directed="1"/>
      <edge id="302538" label="zzz1009,zzzz971" source="2104" target="193" cy:directed="1"/>
      <edge id="302537" label="zzz1009,zzz1325" source="2104" target="1927" cy:directed="1"/>
      <edge id="302536" label="zzz1009,zzzz589" source="2104" target="441" cy:directed="1"/>
      <edge id="302535" label="zzz1009,zzzz660" source="2104" target="387" cy:directed="1"/>
      <edge id="302534" label="zzz1009,zzzz921" source="2104" target="223" cy:directed="1"/>
      <edge id="302533" label="zzz1009,zzz1168" source="2104" target="2025" cy:directed="1"/>
      <edge id="302532" label="zzz1009,zzz1397" source="2104" target="1875" cy:directed="1"/>
      <edge id="302531" label="zzz1009,zzz1546" source="2104" target="1764" cy:directed="1"/>
      <edge id="302530" label="zzz1009,zzzz477" source="2104" target="518" cy:directed="1"/>
      <edge id="302529" label="zzz1009,zzzz531" source="2104" target="474" cy:directed="1"/>
      <edge id="302528" label="zzz1009,zzzz666" source="2104" target="381" cy:directed="1"/>
      <edge id="302527" label="zzz1009,zzzz845" source="2104" target="260" cy:directed="1"/>
      <edge id="302526" label="zzz1009,zzz1098" source="2104" target="2062" cy:directed="1"/>
      <edge id="302525" label="zzz1009,zzz1199" source="2104" target="2006" cy:directed="1"/>
      <edge id="302524" label="zzz1009,zzzz540" source="2104" target="467" cy:directed="1"/>
      <edge id="302523" label="zzz1009,zzzz659" source="2104" target="388" cy:directed="1"/>
      <edge id="302522" label="zzz1009,zzzz924" source="2104" target="220" cy:directed="1"/>
      <edge id="302521" label="zzz1009,zzzz973" source="2104" target="191" cy:directed="1"/>
      <edge id="302520" label="zzz1009,zzz1196" source="2104" target="2009" cy:directed="1"/>
      <edge id="302519" label="zzz1009,zzzz602" source="2104" target="428" cy:directed="1"/>
      <edge id="302518" label="zzz1009,zzzz604" source="2104" target="426" cy:directed="1"/>
      <edge id="302517" label="zzz1009,zzzz706" source="2104" target="355" cy:directed="1"/>
      <edge id="302516" label="zzz1009,zzzz710" source="2104" target="351" cy:directed="1"/>
      <edge id="302515" label="zzz1009,zzzz763" source="2104" target="324" cy:directed="1"/>
      <edge id="302514" label="zzz1009,zzzz811" source="2104" target="281" cy:directed="1"/>
      <edge id="302513" label="zzz1009,zzzz965" source="2104" target="199" cy:directed="1"/>
      <edge id="302512" label="zzz1009,zzzz992" source="2104" target="177" cy:directed="1"/>
      <edge id="302511" label="zzz1009,zzz1391" source="2104" target="1880" cy:directed="1"/>
      <edge id="302510" label="zzz1009,zzz1494" source="2104" target="1798" cy:directed="1"/>
      <edge id="302509" label="zzz1009,zzzz478" source="2104" target="517" cy:directed="1"/>
      <edge id="302508" label="zzz1009,zzzz553" source="2104" target="459" cy:directed="1"/>
      <edge id="302507" label="zzz1009,zzzz667" source="2104" target="380" cy:directed="1"/>
      <edge id="302506" label="zzz1009,zzzz767" source="2104" target="320" cy:directed="1"/>
      <edge id="302505" label="zzz1009,zzzz532" source="2104" target="473" cy:directed="1"/>
      <edge id="302504" label="zzz1009,zzzz626" source="2104" target="409" cy:directed="1"/>
      <edge id="302503" label="zzz1009,zzzz669" source="2104" target="378" cy:directed="1"/>
      <edge id="302502" label="zzz1009,zzzz739" source="2104" target="337" cy:directed="1"/>
      <edge id="302501" label="zzz1009,zzzz762" source="2104" target="325" cy:directed="1"/>
      <edge id="302500" label="zzz1009,zzzz812" source="2104" target="280" cy:directed="1"/>
      <edge id="302499" label="zzz1009,zzzz435" source="2104" target="545" cy:directed="1"/>
      <edge id="302498" label="zzz1009,zzzz658" source="2104" target="389" cy:directed="1"/>
      <edge id="302497" label="zzz1009,zzzz685" source="2104" target="370" cy:directed="1"/>
      <edge id="302496" label="zzz1009,zzzz968" source="2104" target="196" cy:directed="1"/>
      <edge id="302495" label="zzz1009,zzz1070" source="2104" target="2063" cy:directed="1"/>
      <edge id="302494" label="zzz1009,zzzz518" source="2104" target="485" cy:directed="1"/>
      <edge id="302493" label="zzz1009,zzzz597" source="2104" target="433" cy:directed="1"/>
      <edge id="302492" label="zzz1009,zzzz605" source="2104" target="425" cy:directed="1"/>
      <edge id="302491" label="zzz1009,zzzz661" source="2104" target="386" cy:directed="1"/>
      <edge id="302490" label="zzz1009,zzzz703" source="2104" target="358" cy:directed="1"/>
      <edge id="302489" label="zzz1009,zzzz751" source="2104" target="334" cy:directed="1"/>
      <edge id="302488" label="zzz1009,zzzz978" source="2104" target="186" cy:directed="1"/>
      <edge id="302487" label="zzz1009,zzz1478" source="2104" target="1813" cy:directed="1"/>
      <edge id="302486" label="zzz1009,zzzz664" source="2104" target="383" cy:directed="1"/>
      <edge id="302485" label="zzz1009,zzzz672" source="2104" target="375" cy:directed="1"/>
      <edge id="302484" label="zzz1009,zzzz600" source="2104" target="430" cy:directed="1"/>
      <edge id="302483" label="zzz1009,zzzz623" source="2104" target="412" cy:directed="1"/>
      <edge id="302482" label="zzz1009,zzzz668" source="2104" target="379" cy:directed="1"/>
      <edge id="302481" label="zzz1009,zzz1210" source="2104" target="1996" cy:directed="1"/>
      <edge id="302480" label="zzz1009,zzzz485" source="2104" target="510" cy:directed="1"/>
      <edge id="302479" label="zzz1009,zzzz662" source="2104" target="385" cy:directed="1"/>
      <edge id="302478" label="zzz1009,zzzz709" source="2104" target="352" cy:directed="1"/>
      <edge id="302477" label="zzz1009,zzz1393" source="2104" target="1878" cy:directed="1"/>
      <edge id="302476" label="zzz1009,zzz1499" source="2104" target="1793" cy:directed="1"/>
      <edge id="302475" label="zzz1009,zzzz555" source="2104" target="458" cy:directed="1"/>
      <edge id="302474" label="zzz1009,zzzz740" source="2104" target="336" cy:directed="1"/>
      <edge id="302473" label="zzz1009,zzzz976" source="2104" target="188" cy:directed="1"/>
      <edge id="302472" label="zzz1009,zzz1018" source="2104" target="2096" cy:directed="1"/>
      <edge id="302471" label="zzz1009,zzz1044" source="2104" target="2081" cy:directed="1"/>
      <edge id="302470" label="zzz1009,zzz1276" source="2104" target="1954" cy:directed="1"/>
      <edge id="302469" label="zzz1009,zzzz682" source="2104" target="373" cy:directed="1"/>
      <edge id="302468" label="zzz1009,zzzz705" source="2104" target="356" cy:directed="1"/>
      <edge id="302467" label="zzz1009,zzzz841" source="2104" target="263" cy:directed="1"/>
      <edge id="302466" label="zzz1009,zzzz913" source="2104" target="225" cy:directed="1"/>
      <edge id="302465" label="zzz1009,zzz1139" source="2104" target="2039" cy:directed="1"/>
      <edge id="302464" label="zzz1009,zzz1285" source="2104" target="1947" cy:directed="1"/>
      <edge id="302463" label="zzz1009,zzzz670" source="2104" target="377" cy:directed="1"/>
      <edge id="302462" label="zzz1009,zzzz689" source="2104" target="368" cy:directed="1"/>
      <edge id="302461" label="zzz1009,zzzz806" source="2104" target="286" cy:directed="1"/>
      <edge id="302460" label="zzz1009,zzz1141" source="2104" target="2038" cy:directed="1"/>
      <edge id="302459" label="zzz1009,zzzz656" source="2104" target="391" cy:directed="1"/>
      <edge id="302458" label="zzz1009,zzzz752" source="2104" target="333" cy:directed="1"/>
      <edge id="302457" label="zzz1009,zzzz771" source="2104" target="316" cy:directed="1"/>
      <edge id="302456" label="zzz1009,zzzz815" source="2104" target="277" cy:directed="1"/>
      <edge id="302455" label="zzz1009,zzzz431" source="2104" target="549" cy:directed="1"/>
      <edge id="302454" label="zzz1009,zzzz521" source="2104" target="482" cy:directed="1"/>
      <edge id="302453" label="zzz1009,zzzz671" source="2104" target="376" cy:directed="1"/>
      <edge id="302452" label="zzz1009,zzzz888" source="2104" target="233" cy:directed="1"/>
      <edge id="302451" label="zzz1009,zzz1356" source="2104" target="1904" cy:directed="1"/>
      <edge id="302450" label="zzz1009,zzz1372" source="2104" target="1894" cy:directed="1"/>
      <edge id="302449" label="zzz1009,zzzz432" source="2104" target="548" cy:directed="1"/>
      <edge id="302448" label="zzz1009,zzzz480" source="2104" target="515" cy:directed="1"/>
      <edge id="302447" label="zzz1009,zzzz663" source="2104" target="384" cy:directed="1"/>
      <edge id="302446" label="zzz1009,zzzz757" source="2104" target="328" cy:directed="1"/>
      <edge id="302445" label="zzz1009,zzzz858" source="2104" target="254" cy:directed="1"/>
      <edge id="302444" label="zzz1009,zzzz970" source="2104" target="194" cy:directed="1"/>
      <edge id="302443" label="zzz1009,zzzz975" source="2104" target="189" cy:directed="1"/>
      <edge id="302442" label="zzz1009,zzzz981" source="2104" target="185" cy:directed="1"/>
      <edge id="302441" label="zzz1009,zzz1363" source="2104" target="1898" cy:directed="1"/>
      <edge id="302440" label="zzz1009,zzzz488" source="2104" target="507" cy:directed="1"/>
      <edge id="302439" label="zzz1009,zzzz804" source="2104" target="288" cy:directed="1"/>
      <edge id="302438" label="zzz1009,zzz1258" source="2104" target="1965" cy:directed="1"/>
      <edge id="302437" label="zzz1009,zzz1311" source="2104" target="1935" cy:directed="1"/>
      <edge id="302436" label="zzz1009,zzz1385" source="2104" target="1885" cy:directed="1"/>
      <edge id="302435" label="zzz1009,zzzz803" source="2104" target="289" cy:directed="1"/>
      <edge id="302434" label="zzz1009,zzz1304" source="2104" target="1938" cy:directed="1"/>
      <edge id="302433" label="zzz1009,zzz1378" source="2104" target="1889" cy:directed="1"/>
      <edge id="302432" label="zzz1009,zzz1532" source="2104" target="1773" cy:directed="1"/>
      <edge id="302431" label="zzz1009,zzzz768" source="2104" target="319" cy:directed="1"/>
      <edge id="302430" label="zzz1009,zzz1284" source="2104" target="1948" cy:directed="1"/>
      <edge id="302429" label="zzz1009,zzz1339" source="2104" target="1916" cy:directed="1"/>
      <edge id="302428" label="zzz1009,zzzz556" source="2104" target="457" cy:directed="1"/>
      <edge id="302427" label="zzz1009,zzzz608" source="2104" target="422" cy:directed="1"/>
      <edge id="302426" label="zzz1009,zzzz686" source="2104" target="369" cy:directed="1"/>
      <edge id="302425" label="zzz1009,zzzz789" source="2104" target="299" cy:directed="1"/>
      <edge id="302424" label="zzz1009,zzz1064" source="2104" target="2068" cy:directed="1"/>
      <edge id="302423" label="zzz1009,zzzz436" source="2104" target="544" cy:directed="1"/>
      <edge id="302422" label="zzz1009,zzzz627" source="2104" target="408" cy:directed="1"/>
      <edge id="302421" label="zzz1009,zzzz772" source="2104" target="315" cy:directed="1"/>
      <edge id="302420" label="zzz1009,zzz1244" source="2104" target="1975" cy:directed="1"/>
      <edge id="302419" label="zzz1009,zzzz523" source="2104" target="480" cy:directed="1"/>
      <edge id="302418" label="zzz1009,zzzz766" source="2104" target="321" cy:directed="1"/>
      <edge id="302417" label="zzz1009,zzzz933" source="2104" target="217" cy:directed="1"/>
[truncated: 37,779,170 more chars]
