# Supplementary material for: Discovery of several thousand highly diverse circular DNA viruses
Source: eLife journal article supplement (doi:10.7554/elife.51971), 2020-02-03
Supplement: fig2-data2 [file elife-51971-fig2-data2-v1.cys › CytoscapeSession-2019_08_02-17_43/properties/groupSettings.props]

#Written by: Cytoscape's PropertiesWriterImpl
#Fri Aug 02 17:43:58 MST 2019
defaultDoubleListAggregation=Average
groupViewType=Compound Node
aggregationEnabled=false
defaultIntegerListAggregation=Average
defaultStringAggregation=Comma-separated Values
defaultLongAggregation=None
doubleClickAction=Expand/Contract
defaultFloatAggregation=Average
overrideColumnAggregations=
defaultIntegerAggregation=Average
defaultLongListAggregation=Average
defaultListAggregation=Unique Values
defaultDoubleAggregation=Average
defaultStringListAggregation=Unique Values
defaultBooleanAggregation=None
useNestedNetworks=false
