# Supplementary material for: Discovery of several thousand highly diverse circular DNA viruses
Source: eLife journal article supplement (doi:10.7554/elife.51971), 2020-02-03
Supplement: fig2-data2 [file elife-51971-fig2-data2-v1.cys › CytoscapeSession-2019_08_02-17_43/tables/46-all_my_seqs_genbank_ssDNA1_domains_CRESS_capsid_fasta+Full+Network/LOCAL_ATTRS-org.cytoscape.model.CyNode-46+default+node.cytable]

CyCSV-Version	1
SUID	name	selected
java.lang.Long	java.lang.String	java.lang.Boolean
46 default node
2109	zzz1000	false
2108	zzz1002	false
2107	zzz1003	false
2106	zzz1004	false
2105	zzz1008	false
2104	zzz1009	false
2103	zzz1010	false
2102	zzz1011	false
2101	zzz1012	false
2100	zzz1013	false
2099	zzz1015	false
2098	zzz1016	false
2097	zzz1017	false
2096	zzz1018	false
2095	zzz1019	false
2094	zzz1021	false
2093	zzz1022	false
2092	zzz1023	false
2091	zzz1025	false
2090	zzz1026	false
2089	zzz1027	false
2088	zzz1028	false
2087	zzz1030	false
2086	zzz1033	false
2085	zzz1034	false
2084	zzz1038	false
2083	zzz1041	false
2082	zzz1043	false
2081	zzz1044	false
2080	zzz1048	false
2079	zzz1052	false
2078	zzz1053	false
2077	zzz1054	false
2076	zzz1055	false
2075	zzz1056	false
2074	zzz1057	false
2073	zzz1058	false
2072	zzz1059	false
2071	zzz1060	false
2070	zzz1062	false
2069	zzz1063	false
2068	zzz1064	false
2067	zzz1065	false
2066	zzz1067	false
2065	zzz1068	false
2064	zzz1069	false
2063	zzz1070	false
2062	zzz1098	false
2061	zzz1099	false
2060	zzz1100	false
2059	zzz1106	false
2058	zzz1109	false
2057	zzz1110	false
2056	zzz1111	false
2055	zzz1112	false
2054	zzz1113	false
2053	zzz1115	false
2052	zzz1118	false
2051	zzz1119	false
2050	zzz1120	false
2049	zzz1122	false
2048	zzz1123	false
2047	zzz1128	false
2046	zzz1129	false
2045	zzz1130	false
2044	zzz1132	false
2043	zzz1133	false
2042	zzz1135	false
2041	zzz1136	false
2040	zzz1137	false
2039	zzz1139	false
2038	zzz1141	false
2037	zzz1143	false
2036	zzz1144	false
2035	zzz1146	false
2034	zzz1147	false
2033	zzz1152	false
2032	zzz1153	false
2031	zzz1156	false
2030	zzz1157	false
2029	zzz1159	false
2028	zzz1160	false
2027	zzz1162	false
2026	zzz1165	false
2025	zzz1168	false
2024	zzz1169	false
2023	zzz1171	false
2022	zzz1172	false
2021	zzz1175	false
2020	zzz1176	false
2019	zzz1178	false
2018	zzz1180	false
2017	zzz1182	false
2016	zzz1184	false
2015	zzz1185	false
2014	zzz1189	false
2013	zzz1190	false
2012	zzz1192	false
2011	zzz1194	false
2010	zzz1195	false
2009	zzz1196	false
2008	zzz1197	false
2007	zzz1198	false
2006	zzz1199	false
2005	zzz1200	false
2004	zzz1201	false
2003	zzz1202	false
2002	zzz1203	false
2001	zzz1204	false
2000	zzz1205	false
1999	zzz1207	false
1998	zzz1208	false
1997	zzz1209	false
1996	zzz1210	false
1995	zzz1214	false
1994	zzz1215	false
1993	zzz1216	false
1992	zzz1217	false
1991	zzz1218	false
1990	zzz1219	false
1989	zzz1221	false
1988	zzz1223	false
1987	zzz1225	false
1986	zzz1226	false
1985	zzz1227	false
1984	zzz1228	false
1983	zzz1230	false
1982	zzz1233	false
1981	zzz1234	false
1980	zzz1235	false
1979	zzz1236	false
1978	zzz1237	false
1977	zzz1240	false
1976	zzz1242	false
1975	zzz1244	false
1974	zzz1245	false
1973	zzz1247	false
1972	zzz1248	false
1971	zzz1249	false
1970	zzz1250	false
1969	zzz1251	false
1968	zzz1254	false
1967	zzz1255	false
1966	zzz1257	false
1965	zzz1258	false
1964	zzz1260	false
1963	zzz1261	false
1962	zzz1265	false
1961	zzz1266	false
1960	zzz1268	false
1959	zzz1269	false
1958	zzz1272	false
1957	zzz1273	false
1956	zzz1274	false
1955	zzz1275	false
1954	zzz1276	false
1953	zzz1277	false
1952	zzz1278	false
1951	zzz1279	false
1950	zzz1280	false
1949	zzz1283	false
1948	zzz1284	false
1947	zzz1285	false
1946	zzz1288	false
1945	zzz1289	false
1944	zzz1292	false
1943	zzz1293	false
1942	zzz1294	false
1941	zzz1296	false
1940	zzz1298	false
1939	zzz1303	false
1938	zzz1304	false
1937	zzz1307	false
1936	zzz1309	false
1935	zzz1311	false
1934	zzz1312	false
1933	zzz1314	false
1932	zzz1316	false
1931	zzz1318	false
1930	zzz1319	false
1929	zzz1322	false
1928	zzz1324	false
1927	zzz1325	false
1926	zzz1326	false
1925	zzz1327	false
1924	zzz1329	false
1923	zzz1330	false
1922	zzz1331	false
1921	zzz1332	false
1920	zzz1333	false
1919	zzz1334	false
1918	zzz1335	false
1917	zzz1338	false
1916	zzz1339	false
1915	zzz1341	false
1914	zzz1343	false
1913	zzz1344	false
1912	zzz1346	false
1911	zzz1347	false
1910	zzz1348	false
1909	zzz1349	false
1908	zzz1350	false
1907	zzz1352	false
1906	zzz1354	false
1905	zzz1355	false
1904	zzz1356	false
1903	zzz1357	false
1902	zzz1358	false
1901	zzz1359	false
1900	zzz1360	false
1899	zzz1361	false
1898	zzz1363	false
1897	zzz1365	false
1896	zzz1368	false
1895	zzz1371	false
1894	zzz1372	false
1893	zzz1373	false
1892	zzz1374	false
1891	zzz1376	false
1890	zzz1377	false
1889	zzz1378	false
1888	zzz1379	false
1887	zzz1381	false
1886	zzz1383	false
1885	zzz1385	false
1884	zzz1386	false
1883	zzz1387	false
1882	zzz1388	false
1881	zzz1390	false
1880	zzz1391	false
1879	zzz1392	false
1878	zzz1393	false
1877	zzz1395	false
1876	zzz1396	false
1875	zzz1397	false
1874	zzz1398	false
1873	zzz1399	false
1872	zzz1400	false
1871	zzz1401	false
1870	zzz1402	false
1869	zzz1403	false
1868	zzz1406	false
1867	zzz1407	false
1866	zzz1409	false
1865	zzz1411	false
1864	zzz1413	false
1863	zzz1414	false
1862	zzz1415	false
1861	zzz1416	false
1860	zzz1417	false
1859	zzz1418	false
1858	zzz1419	false
1857	zzz1420	false
1856	zzz1421	false
1855	zzz1422	false
1854	zzz1424	false
1853	zzz1425	false
1852	zzz1427	false
1851	zzz1428	false
1850	zzz1429	false
1849	zzz1430	false
1848	zzz1431	false
1847	zzz1435	false
1846	zzz1436	false
1845	zzz1437	false
1844	zzz1438	false
1843	zzz1439	false
1842	zzz1440	false
1841	zzz1441	false
1840	zzz1442	false
1839	zzz1443	false
1838	zzz1444	false
1837	zzz1445	false
1836	zzz1446	false
1835	zzz1447	false
1834	zzz1448	false
1833	zzz1449	false
1832	zzz1450	false
1831	zzz1451	false
1830	zzz1452	false
1829	zzz1453	false
1828	zzz1454	false
1827	zzz1455	false
1826	zzz1456	false
1825	zzz1457	false
1824	zzz1458	false
1823	zzz1459	false
1822	zzz1460	false
1821	zzz1462	false
1820	zzz1464	false
1819	zzz1466	false
1818	zzz1469	false
1817	zzz1471	false
1816	zzz1475	false
1815	zzz1476	false
1814	zzz1477	false
1813	zzz1478	false
1812	zzz1480	false
1811	zzz1481	false
1810	zzz1482	false
1809	zzz1483	false
1808	zzz1484	false
1807	zzz1485	false
1806	zzz1486	false
1805	zzz1487	false
1804	zzz1488	false
1803	zzz1489	false
1802	zzz1490	false
1801	zzz1491	false
1800	zzz1492	false
1799	zzz1493	false
1798	zzz1494	false
1797	zzz1495	false
1796	zzz1496	false
1795	zzz1497	false
1794	zzz1498	false
1793	zzz1499	false
1792	zzz1500	false
1791	zzz1501	false
1790	zzz1502	false
1789	zzz1503	false
1788	zzz1504	false
1787	zzz1516	false
1786	zzz1517	false
1785	zzz1518	false
1784	zzz1519	false
1783	zzz1520	false
1782	zzz1521	false
1781	zzz1522	false
1780	zzz1523	false
1779	zzz1524	false
1778	zzz1525	false
1777	zzz1526	false
1776	zzz1527	false
1775	zzz1529	false
1774	zzz1530	false
1773	zzz1532	false
1772	zzz1533	false
1771	zzz1535	false
1770	zzz1536	false
1769	zzz1540	false
1768	zzz1541	false
1767	zzz1542	false
1766	zzz1543	false
1765	zzz1545	false
1764	zzz1546	false
1763	zzz1548	false
1762	zzz1551	false
1761	zzz1552	false
1760	zzz1553	false
1759	zzz1554	false
1758	zzz1555	false
1757	zzz1556	false
1756	zzz1557	false
1755	zzz1558	false
1754	zzz1559	false
1753	zzz1560	false
1752	zzz1561	false
1751	zzz1562	false
1750	zzz1563	false
1749	zzz1564	false
1748	zzz1565	false
1747	zzz1566	false
1746	zzz1567	false
1745	zzz1568	false
1744	zzz1569	false
1743	zzz1570	false
1742	zzz1571	false
1741	zzz1572	false
1740	zzz1573	false
1739	zzz1574	false
1738	zzz1575	false
1737	zzz1576	false
1736	zzz1577	false
1735	zzz1578	false
1734	zzz1579	false
1733	zzz1580	false
1732	zzz1581	false
1731	zzz1582	false
1730	zzz1583	false
1729	zzz1584	false
1728	zzz1585	false
1727	zzz1586	false
1726	zzz1587	false
1725	zzz1588	false
1724	zzz1589	false
1723	zzz1590	false
1722	zzz1591	false
1721	zzz1592	false
1720	zzz1593	false
1719	zzz1594	false
1718	zzz1595	false
1717	zzz1596	false
1716	zzz1597	false
1715	zzz1598	false
1714	zzz1599	false
1713	zzz1600	false
1712	zzz1601	false
1711	zzz1602	false
1710	zzz1603	false
1709	zzz1604	false
1708	zzz1605	false
1707	zzz1606	false
1706	zzz1607	false
1705	zzz1608	false
1704	zzz1609	false
1703	zzz1610	false
1702	zzz1611	false
1701	zzz1612	false
1700	zzz1613	false
1699	zzz1614	false
1698	zzz1615	false
1697	zzz1616	false
1696	zzz1617	false
1695	zzz1618	false
1694	zzz1619	false
1693	zzz1620	false
1692	zzz1621	false
1691	zzz1622	false
1690	zzz1623	false
1689	zzz1624	false
1688	zzz1625	false
1687	zzz1626	false
1686	zzz1627	false
1685	zzz1628	false
1684	zzz1629	false
1683	zzz1630	false
1682	zzz1631	false
1681	zzz1632	false
1680	zzz1633	false
1679	zzz1634	false
1678	zzz1635	false
1677	zzz1636	false
1676	zzz1637	false
1675	zzz1638	false
1674	zzz1639	false
1673	zzz1640	false
1672	zzz1641	false
1671	zzz1642	false
1670	zzz1643	false
1669	zzz1644	false
1668	zzz1645	false
1667	zzz1646	false
1666	zzz1647	false
1665	zzz1648	false
1664	zzz1649	false
1663	zzz1650	false
1662	zzz1651	false
1661	zzz1652	false
1660	zzz1653	false
1659	zzz1654	false
1658	zzz1655	false
1657	zzz1656	false
1656	zzz1657	false
1655	zzz1658	false
1654	zzz1659	false
1653	zzz1660	false
1652	zzz1661	false
1651	zzz1662	false
1650	zzz1663	false
1649	zzz1664	false
1648	zzz1665	false
1647	zzz1666	false
1646	zzz1667	false
1645	zzz1668	false
1644	zzz1669	false
1643	zzz1670	false
1642	zzz1671	false
1641	zzz1672	false
1640	zzz1673	false
1639	zzz1674	false
1638	zzz1675	false
1637	zzz1676	false
1636	zzz1677	false
1635	zzz1678	false
1634	zzz1679	false
1633	zzz1680	false
1632	zzz1681	false
1631	zzz1682	false
1630	zzz1683	false
1629	zzz1684	false
1628	zzz1685	false
1627	zzz1686	false
1626	zzz1687	false
1625	zzz1688	false
1624	zzz1689	false
1623	zzz1690	false
1622	zzz1691	false
1621	zzz1692	false
1620	zzz1693	false
1619	zzz1694	false
1618	zzz1695	false
1617	zzz1696	false
1616	zzz1697	false
1615	zzz1698	false
1614	zzz1699	false
1613	zzz1700	false
1612	zzz1701	false
1611	zzz1702	false
1610	zzz1703	false
1609	zzz1704	false
1608	zzz1705	false
1607	zzz1706	false
1606	zzz1707	false
1605	zzz1708	false
1604	zzz1709	false
1603	zzz1710	false
1602	zzz1711	false
1601	zzz1712	false
1600	zzz1713	false
1599	zzz1714	false
1598	zzz1715	false
1597	zzz1716	false
1596	zzz1717	false
1595	zzz1718	false
1594	zzz1719	false
1593	zzz1720	false
1592	zzz1721	false
1591	zzz1722	false
1590	zzz1723	false
1589	zzz1724	false
1588	zzz1725	false
1587	zzz1726	false
1586	zzz1727	false
1585	zzz1728	false
1584	zzz1729	false
1583	zzz1730	false
1582	zzz1731	false
1581	zzz1732	false
1580	zzz1733	false
1579	zzz1734	false
1578	zzz1735	false
1577	zzz1736	false
1576	zzz1737	false
1575	zzz1738	false
1574	zzz1739	false
1573	zzz1740	false
1572	zzz1741	false
1571	zzz1742	false
1570	zzz1743	false
1569	zzz1744	false
1568	zzz1745	false
1567	zzz1746	false
1566	zzz1747	false
1565	zzz1748	false
1564	zzz1749	false
1563	zzz1750	false
1562	zzz1751	false
1561	zzz1752	false
1560	zzz1753	false
1559	zzz1754	false
1558	zzz1755	false
1557	zzz1756	false
1556	zzz1757	false
1555	zzz1758	false
1554	zzz1759	false
1553	zzz1760	false
1552	zzz1761	false
1551	zzz1762	false
1550	zzz1763	false
1549	zzz1764	false
1548	zzz1765	false
1547	zzz1766	false
1546	zzz1767	false
1545	zzz1768	false
1544	zzz1769	false
1543	zzz1770	false
1542	zzz1771	false
1541	zzz1772	false
1540	zzz1773	false
1539	zzz1774	false
1538	zzz1775	false
1537	zzz1776	false
1536	zzz1777	false
1535	zzz1778	false
1534	zzz1779	false
1533	zzz1780	false
1532	zzz1781	false
1531	zzz1782	false
1530	zzz1783	false
1529	zzz1784	false
1528	zzz1785	false
1527	zzz1786	false
1526	zzz1787	false
1525	zzz1788	false
1524	zzz1789	false
1523	zzz1790	false
1522	zzz1791	false
1521	zzz1792	false
1520	zzz1793	false
1519	zzz1794	false
1518	zzz1795	false
1517	zzz1796	false
1516	zzz1797	false
1515	zzz1798	false
1514	zzz1799	false
1513	zzz1800	false
1512	zzz1801	false
1511	zzz1802	false
1510	zzz1803	false
1509	zzz1804	false
1508	zzz1805	false
1507	zzz1806	false
1506	zzz1807	false
1505	zzz1808	false
1504	zzz1809	false
1503	zzz1810	false
1502	zzz1811	false
1501	zzz1812	false
1500	zzz1813	false
1499	zzz1814	false
1498	zzz1815	false
1497	zzz1816	false
1496	zzz1817	false
1495	zzz1818	false
1494	zzz1819	false
1493	zzz1820	false
1492	zzz1821	false
1491	zzz1822	false
1490	zzz1823	false
1489	zzz1824	false
1488	zzz1825	false
1487	zzz1826	false
1486	zzz1827	false
1485	zzz1828	false
1484	zzz1829	false
1483	zzz1830	false
1482	zzz1831	false
1481	zzz1832	false
1480	zzz1833	false
1479	zzz1834	false
1478	zzz1835	false
1477	zzz1836	false
1476	zzz1837	false
1475	zzz1838	false
1474	zzz1839	false
1473	zzz1840	false
1472	zzz1841	false
1471	zzz1842	false
1470	zzz1843	false
1469	zzz1844	false
1468	zzz1845	false
1467	zzz1846	false
1466	zzz1847	false
1465	zzz1848	false
1464	zzz1849	false
1463	zzz1850	false
1462	zzz1851	false
1461	zzz1852	false
1460	zzz1853	false
1459	zzz1854	false
1458	zzz1855	false
1457	zzz1856	false
1456	zzz1857	false
1455	zzz1858	false
1454	zzz1859	false
1453	zzz1860	false
1452	zzz1861	false
1451	zzz1862	false
1450	zzz1863	false
1449	zzz1864	false
1448	zzz1865	false
1447	zzz1866	false
1446	zzz1867	false
1445	zzz1868	false
1444	zzz1869	false
1443	zzz1870	false
1442	zzz1871	false
1441	zzz1872	false
1440	zzz1873	false
1439	zzz1874	false
1438	zzz1875	false
1437	zzz1876	false
1436	zzz1877	false
1435	zzz1878	false
1434	zzz1879	false
1433	zzz1880	false
1432	zzz1881	false
1431	zzz1882	false
1430	zzz1883	false
1429	zzz1884	false
1428	zzz1885	false
1427	zzz1886	false
1426	zzz1887	false
1425	zzz1888	false
1424	zzz1889	false
1423	zzz1890	false
1422	zzz1891	false
1421	zzz1892	false
1420	zzz1893	false
1419	zzz1894	false
1418	zzz1895	false
1417	zzz1896	false
1416	zzz1897	false
1415	zzz1898	false
1414	zzz1899	false
1413	zzz1900	false
1412	zzz1901	false
1411	zzz1902	false
1410	zzz1903	false
1409	zzz1904	false
1408	zzz1905	false
1407	zzz1906	false
1406	zzz1907	false
1405	zzz1908	false
1404	zzz1909	false
1403	zzz1910	false
1402	zzz1911	false
1401	zzz1912	false
1400	zzz1913	false
1399	zzz1914	false
1398	zzz1915	false
1397	zzz1916	false
1396	zzz1917	false
1395	zzz1918	false
1394	zzz1919	false
1393	zzz1920	false
1392	zzz1921	false
1391	zzz1922	false
1390	zzz1923	false
1389	zzz1924	false
1388	zzz1925	false
1387	zzz1926	false
1386	zzz1927	false
1385	zzz1928	false
1384	zzz1929	false
1383	zzz1930	false
1382	zzz1931	false
1381	zzz1932	false
1380	zzz1933	false
1379	zzz1934	false
1378	zzz1935	false
1377	zzz1936	false
1376	zzz1937	false
1375	zzz1938	false
1374	zzz1939	false
1373	zzz1940	false
1372	zzz1941	false
1371	zzz1942	false
1370	zzz1943	false
1369	zzz1944	false
1368	zzz1945	false
1367	zzz1946	false
1366	zzz1947	false
1365	zzz1948	false
1364	zzz1949	false
1363	zzz1950	false
1362	zzz1951	false
1361	zzz1952	false
1360	zzz1953	false
1359	zzz1954	false
1358	zzz1955	false
1357	zzz1956	false
1356	zzz1957	false
1355	zzz1958	false
1354	zzz1959	false
1353	zzz1960	false
1352	zzz1961	false
1351	zzz1962	false
1350	zzz1963	false
1349	zzz1964	false
1348	zzz1965	false
1347	zzz1966	false
1346	zzz1967	false
1345	zzz1968	false
1344	zzz1969	false
1343	zzz1970	false
1342	zzz1971	false
1341	zzz1972	false
1340	zzz1973	false
1339	zzz1974	false
1338	zzz1975	false
1337	zzz1976	false
1336	zzz1977	false
1335	zzz1978	false
1334	zzz1979	false
1333	zzz1980	false
1332	zzz1981	false
1331	zzz1982	false
1330	zzz1983	false
1329	zzz1984	false
1328	zzz1985	false
1327	zzz1986	false
1326	zzz1987	false
1325	zzz1988	false
1324	zzz1989	false
1323	zzz1990	false
1322	zzz1991	false
1321	zzz1992	false
1320	zzz1993	false
1319	zzz1994	false
1318	zzz1995	false
1317	zzz1996	false
1316	zzz1997	false
1315	zzz1998	false
1314	zzz1999	false
1313	zzz2000	false
1312	zzz2001	false
1311	zzz2002	false
1310	zzz2003	false
1309	zzz2004	false
1308	zzz2005	false
1307	zzz2006	false
1306	zzz2007	false
1305	zzz2008	false
1304	zzz2009	false
1303	zzz2010	false
1302	zzz2011	false
1301	zzz2012	false
1300	zzz2013	false
1299	zzz2014	false
1298	zzz2015	false
1297	zzz2016	false
1296	zzz2017	false
1295	zzz2018	false
1294	zzz2019	false
1293	zzz2020	false
1292	zzz2021	false
1291	zzz2022	false
1290	zzz2023	false
1289	zzz2024	false
1288	zzz2025	false
1287	zzz2026	false
1286	zzz2027	false
1285	zzz2028	false
1284	zzz2029	false
1283	zzz2030	false
1282	zzz2031	false
1281	zzz2032	false
1280	zzz2033	false
1279	zzz2034	false
1278	zzz2035	false
1277	zzz2036	false
1276	zzz2037	false
1275	zzz2038	false
1274	zzz2039	false
1273	zzz2040	false
1272	zzz2041	false
1271	zzz2042	false
1270	zzz2043	false
1269	zzz2044	false
1268	zzz2045	false
1267	zzz2046	false
1266	zzz2047	false
1265	zzz2048	false
1264	zzz2049	false
1263	zzz2050	false
1262	zzz2051	false
1261	zzz2052	false
1260	zzz2053	false
1259	zzz2054	false
1258	zzz2055	false
1257	zzz2056	false
1256	zzz2057	false
1255	zzz2058	false
1254	zzz2059	false
1253	zzz2060	false
1252	zzz2061	false
1251	zzz2062	false
1250	zzz2063	false
1249	zzz2064	false
1248	zzz2065	false
1247	zzz2066	false
1246	zzz2067	false
1245	zzz2068	false
1244	zzz2069	false
1243	zzz2070	false
1242	zzz2071	false
1241	zzz2072	false
1240	zzz2073	false
1239	zzz2074	false
1238	zzz2075	false
1237	zzz2076	false
1236	zzz2077	false
1235	zzz2078	false
1234	zzz2079	false
1233	zzz2080	false
1232	zzz2081	false
1231	zzz2082	false
1230	zzz2083	false
1229	zzz2084	false
1228	zzz2085	false
1227	zzz2086	false
1226	zzz2087	false
1225	zzz2088	false
1224	zzz2089	false
1223	zzz2090	false
1222	zzz2091	false
1221	zzz2092	false
1220	zzz2093	false
1219	zzz2094	false
1218	zzz2095	false
1217	zzz2096	false
1216	zzz2097	false
1215	zzz2098	false
1214	zzz2099	false
1213	zzz2100	false
1212	zzz2101	false
1211	zzz2102	false
1210	zzz2103	false
1209	zzz2104	false
1208	zzz2105	false
1207	zzz2106	false
1206	zzz2107	false
1205	zzz2108	false
1204	zzz2109	false
1203	zzz2110	false
1202	zzz2111	false
1201	zzz2112	false
1200	zzz2113	false
1199	zzz2114	false
1198	zzz2115	false
1197	zzz2116	false
1196	zzz2117	false
1195	zzz2118	false
1194	zzz2119	false
1193	zzz2120	false
1192	zzz2121	false
1191	zzz2122	false
1190	zzz2123	false
1189	zzz2124	false
1188	zzz2125	false
1187	zzz2126	false
1186	zzz2127	false
1185	zzz2128	false
1184	zzz2129	false
1183	zzz2130	false
1182	zzz2131	false
1181	zzz2132	false
1180	zzz2133	false
1179	zzz2134	false
1178	zzz2135	false
1177	zzz2136	false
1176	zzz2137	false
1175	zzz2138	false
1174	zzz2139	false
1173	zzz2140	false
1172	zzz2141	false
1171	zzz2142	false
1170	zzz2143	false
1169	zzz2144	false
1168	zzz2145	false
1167	zzz2146	false
1166	zzz2147	false
1165	zzz2148	false
1164	zzz2149	false
1163	zzz2150	false
1162	zzz2151	false
1161	zzz2152	false
1160	zzz2153	false
1159	zzz2154	false
1158	zzz2155	false
1157	zzz2156	false
1156	zzz2157	false
1155	zzz2158	false
1154	zzz2159	false
1153	zzz2160	false
1152	zzz2161	false
1151	zzz2162	false
1150	zzz2163	false
1149	zzz2164	false
1148	zzz2165	false
1147	zzz2166	false
1146	zzz2167	false
1145	zzz2168	false
1144	zzz2169	false
1143	zzz2170	false
1142	zzz2171	false
1141	zzz2172	false
1140	zzz2173	false
1139	zzz2174	false
1138	zzz2175	false
1137	zzz2176	false
1136	zzz2177	false
1135	zzz2178	false
1134	zzz2179	false
1133	zzz2180	false
1132	zzz2181	false
1131	zzz2182	false
1130	zzz2183	false
1129	zzz2184	false
1128	zzz2185	false
1127	zzz2186	false
1126	zzz2187	false
1125	zzz2188	false
1124	zzz2189	false
1123	zzz2190	false
1122	zzz2191	false
1121	zzz2192	false
1120	zzz2193	false
1119	zzz2194	false
1118	zzz2195	false
1117	zzz2196	false
1116	zzz2197	false
1115	zzz2198	false
1114	zzz2199	false
1113	zzz2200	false
1112	zzz2201	false
1111	zzz2202	false
1110	zzz2203	false
1109	zzz2204	false
1108	zzz2205	false
1107	zzz2206	false
1106	zzz2207	false
1105	zzz2208	false
1104	zzz2209	false
1103	zzz2210	false
1102	zzz2211	false
1101	zzz2212	false
1100	zzz2213	false
1099	zzz2214	false
1098	zzz2215	false
1097	zzz2216	false
1096	zzz2217	false
1095	zzz2218	false
1094	zzz2219	false
1093	zzz2220	false
1092	zzz2221	false
1091	zzz2222	false
1090	zzz2223	false
1089	zzz2224	false
1088	zzz2225	false
1087	zzz2226	false
1086	zzz2227	false
1085	zzz2228	false
1084	zzz2229	false
1083	zzz2230	false
1082	zzz2231	false
1081	zzz2232	false
1080	zzz2233	false
1079	zzz2234	false
1078	zzz2235	false
1077	zzz2236	false
1076	zzz2237	false
1075	zzz2238	false
1074	zzz2239	false
1073	zzz2240	false
1072	zzz2241	false
1071	zzz2242	false
1070	zzz2243	false
1069	zzz2244	false
1068	zzz2245	false
1067	zzz2246	false
1066	zzz2247	false
1065	zzz2248	false
1064	zzz2249	false
1063	zzz2250	false
1062	zzz2251	false
1061	zzz2252	false
1060	zzz2253	false
1059	zzz2254	false
1058	zzz2255	false
1057	zzz2256	false
1056	zzz2257	false
1055	zzz2258	false
1054	zzz2259	false
1053	zzz2260	false
1052	zzz2261	false
1051	zzz2262	false
1050	zzz2263	false
1049	zzz2264	false
1048	zzz2265	false
1047	zzz2266	false
1046	zzz2267	false
1045	zzz2268	false
1044	zzz2269	false
1043	zzz2270	false
1042	zzz2271	false
1041	zzz2272	false
1040	zzz2273	false
1039	zzz2274	false
1038	zzz2275	false
1037	zzz2276	false
1036	zzz2277	false
1035	zzz2278	false
1034	zzz2279	false
1033	zzz2280	false
1032	zzz2281	false
1031	zzz2282	false
1030	zzz2283	false
1029	zzz2284	false
1028	zzz2285	false
1027	zzz2286	false
1026	zzz2287	false
1025	zzz2288	false
1024	zzz2289	false
1023	zzz2290	false
1022	zzz2291	false
1021	zzz2292	false
1020	zzz2293	false
1019	zzz2294	false
1018	zzz2295	false
1017	zzz2296	false
1016	zzz2297	false
1015	zzz2298	false
1014	zzz2299	false
1013	zzz2300	false
1012	zzz2301	false
1011	zzz2302	false
1010	zzz2303	false
1009	zzz2304	false
1008	zzz2305	false
1007	zzz2306	false
1006	zzz2307	false
1005	zzz2308	false
1004	zzz2309	false
1003	zzz2310	false
1002	zzz2311	false
1001	zzz2312	false
1000	zzz2313	false
999	zzz2314	false
998	zzz2315	false
997	zzz2316	false
996	zzz2317	false
995	zzz2318	false
994	zzz2319	false
993	zzz2320	false
992	zzz2321	false
991	zzz2322	false
990	zzz2323	false
989	zzz2324	false
988	zzz2325	false
987	zzz2326	false
986	zzz2327	false
985	zzz2328	false
984	zzz2329	false
983	zzz2330	false
982	zzz2331	false
981	zzz2332	false
980	zzz2333	false
979	zzz2334	false
978	zzz2335	false
977	zzz2336	false
976	zzz2337	false
975	zzz2338	false
974	zzz2339	false
973	zzz2340	false
972	zzz2341	false
971	zzz2342	false
970	zzz2343	false
969	zzz2344	false
968	zzz2345	false
967	zzz2346	false
966	zzz2347	false
965	zzz2348	false
964	zzz2349	false
963	zzz2350	false
962	zzz2351	false
961	zzz2352	false
960	zzz2353	false
959	zzz2354	false
958	zzz2355	false
957	zzz2356	false
956	zzz2357	false
955	zzz2358	false
954	zzz2359	false
953	zzz2360	false
952	zzz2361	false
951	zzz2362	false
950	zzz2363	false
949	zzz2364	false
948	zzz2365	false
947	zzz2366	false
946	zzz2367	false
945	zzz2368	false
944	zzz2369	false
943	zzz2370	false
942	zzz2371	false
941	zzz2372	false
940	zzz2373	false
939	zzz2374	false
938	zzz2375	false
937	zzz2376	false
936	zzz2377	false
935	zzz2378	false
934	zzz2379	false
933	zzz2380	false
932	zzz2381	false
931	zzz2382	false
930	zzz2383	false
929	zzz2384	false
928	zzz2385	false
927	zzz2386	false
926	zzz2387	false
925	zzz2388	false
924	zzz2389	false
923	zzz2390	false
922	zzz2391	false
921	zzz2392	false
920	zzz2393	false
919	zzz2394	false
918	zzz2395	false
917	zzz2396	false
916	zzz2397	false
915	zzz2398	false
914	zzz2399	false
913	zzz2400	false
912	zzz2401	false
911	zzz2402	false
910	zzz2403	false
909	zzz2404	false
908	zzz2405	false
907	zzz2406	false
906	zzz2407	false
905	zzz2408	false
904	zzz2409	false
903	zzz2410	false
902	zzz2411	false
901	zzz2412	false
900	zzz2413	false
899	zzz2414	false
898	zzz2415	false
897	zzz2416	false
896	zzz2417	false
895	zzz2418	false
894	zzz2419	false
893	zzz2420	false
892	zzz2421	false
891	zzz2422	false
890	zzz2423	false
889	zzz2424	false
888	zzz2425	false
887	zzz2426	false
886	zzz2427	false
885	zzz2428	false
884	zzz2429	false
883	zzz2430	false
882	zzz2431	false
881	zzz2432	false
880	zzz2433	false
879	zzz2434	false
878	zzz2435	false
877	zzz2436	false
876	zzz2437	false
875	zzz2438	false
874	zzz2439	false
873	zzz2440	false
872	zzz2441	false
871	zzz2442	false
870	zzz2443	false
869	zzz2444	false
868	zzzz100	false
867	zzzz101	false
866	zzzz102	false
865	zzzz103	false
864	zzzz104	false
863	zzzz105	false
862	zzzz106	false
861	zzzz107	false
860	zzzz108	false
859	zzzz109	false
858	zzzz110	false
857	zzzz111	false
856	zzzz112	false
855	zzzz113	false
854	zzzz114	false
853	zzzz115	false
852	zzzz116	false
851	zzzz117	false
850	zzzz118	false
849	zzzz119	false
848	zzzz120	false
847	zzzz121	false
846	zzzz122	false
845	zzzz123	false
844	zzzz124	false
843	zzzz125	false
842	zzzz126	false
841	zzzz127	false
840	zzzz128	false
839	zzzz129	false
838	zzzz130	false
837	zzzz131	false
836	zzzz132	false
835	zzzz133	false
834	zzzz134	false
833	zzzz135	false
832	zzzz136	false
831	zzzz137	false
830	zzzz138	false
829	zzzz139	false
828	zzzz140	false
827	zzzz141	false
826	zzzz142	false
825	zzzz143	false
824	zzzz144	false
823	zzzz145	false
822	zzzz146	false
821	zzzz147	false
820	zzzz148	false
819	zzzz149	false
818	zzzz150	false
817	zzzz151	false
816	zzzz152	false
815	zzzz153	false
814	zzzz154	false
813	zzzz155	false
812	zzzz156	false
811	zzzz157	false
810	zzzz158	false
809	zzzz159	false
808	zzzz160	false
807	zzzz161	false
806	zzzz162	false
805	zzzz163	false
804	zzzz164	false
803	zzzz165	false
802	zzzz166	false
801	zzzz167	false
800	zzzz168	false
799	zzzz169	false
798	zzzz170	false
797	zzzz171	false
796	zzzz172	false
795	zzzz173	false
794	zzzz174	false
793	zzzz175	false
792	zzzz176	false
791	zzzz177	false
790	zzzz178	false
789	zzzz179	false
788	zzzz180	false
787	zzzz181	false
786	zzzz182	false
785	zzzz183	false
784	zzzz184	false
783	zzzz185	false
782	zzzz186	false
781	zzzz187	false
780	zzzz188	false
779	zzzz189	false
778	zzzz190	false
777	zzzz191	false
776	zzzz192	false
775	zzzz193	false
774	zzzz194	false
773	zzzz195	false
772	zzzz196	false
771	zzzz197	false
770	zzzz198	false
769	zzzz199	false
768	zzzz200	false
767	zzzz201	false
766	zzzz202	false
765	zzzz203	false
764	zzzz204	false
763	zzzz205	false
762	zzzz206	false
761	zzzz207	false
760	zzzz208	false
759	zzzz209	false
758	zzzz210	false
757	zzzz211	false
756	zzzz212	false
755	zzzz213	false
754	zzzz214	false
753	zzzz215	false
752	zzzz216	false
751	zzzz217	false
750	zzzz218	false
749	zzzz219	false
748	zzzz220	false
747	zzzz221	false
746	zzzz222	false
745	zzzz223	false
744	zzzz224	false
743	zzzz225	false
742	zzzz226	false
741	zzzz227	false
740	zzzz228	false
739	zzzz229	false
738	zzzz230	false
737	zzzz231	false
736	zzzz232	false
735	zzzz233	false
734	zzzz234	false
733	zzzz235	false
732	zzzz236	false
731	zzzz237	false
730	zzzz238	false
729	zzzz239	false
728	zzzz240	false
727	zzzz241	false
726	zzzz242	false
725	zzzz243	false
724	zzzz244	false
723	zzzz245	false
722	zzzz246	false
721	zzzz247	false
720	zzzz248	false
719	zzzz249	false
718	zzzz250	false
717	zzzz251	false
716	zzzz252	false
715	zzzz253	false
714	zzzz254	false
713	zzzz255	false
712	zzzz256	false
711	zzzz257	false
710	zzzz258	false
709	zzzz259	false
708	zzzz260	false
707	zzzz261	false
706	zzzz262	false
705	zzzz263	false
704	zzzz264	false
703	zzzz265	false
702	zzzz266	false
701	zzzz267	false
700	zzzz268	false
699	zzzz269	false
698	zzzz270	false
697	zzzz271	false
696	zzzz272	false
695	zzzz273	false
694	zzzz274	false
693	zzzz275	false
692	zzzz276	false
691	zzzz277	false
690	zzzz278	false
689	zzzz279	false
688	zzzz280	false
687	zzzz281	false
686	zzzz282	false
685	zzzz283	false
684	zzzz284	false
683	zzzz285	false
682	zzzz286	false
681	zzzz287	false
680	zzzz288	false
679	zzzz289	false
678	zzzz290	false
677	zzzz291	false
676	zzzz292	false
675	zzzz293	false
674	zzzz294	false
673	zzzz295	false
672	zzzz296	false
671	zzzz297	false
670	zzzz298	false
669	zzzz299	false
668	zzzz300	false
667	zzzz301	false
666	zzzz302	false
665	zzzz303	false
664	zzzz304	false
663	zzzz305	false
662	zzzz306	false
661	zzzz307	false
660	zzzz308	false
659	zzzz309	false
658	zzzz310	false
657	zzzz311	false
656	zzzz312	false
655	zzzz313	false
654	zzzz314	false
653	zzzz315	false
652	zzzz316	false
651	zzzz317	false
650	zzzz318	false
649	zzzz319	false
648	zzzz320	false
647	zzzz321	false
646	zzzz322	false
645	zzzz323	false
644	zzzz324	false
643	zzzz325	false
642	zzzz326	false
641	zzzz327	false
640	zzzz328	false
639	zzzz329	false
638	zzzz330	false
637	zzzz331	false
636	zzzz332	false
635	zzzz333	false
634	zzzz334	false
633	zzzz335	false
632	zzzz336	false
631	zzzz337	false
630	zzzz338	false
629	zzzz339	false
628	zzzz340	false
627	zzzz341	false
626	zzzz342	false
625	zzzz343	false
624	zzzz344	false
623	zzzz345	false
622	zzzz346	false
621	zzzz347	false
620	zzzz348	false
619	zzzz349	false
618	zzzz350	false
617	zzzz351	false
616	zzzz352	false
615	zzzz353	false
614	zzzz354	false
613	zzzz355	false
612	zzzz356	false
611	zzzz357	false
610	zzzz358	false
609	zzzz359	false
608	zzzz360	false
607	zzzz361	false
606	zzzz362	false
605	zzzz363	false
604	zzzz364	false
603	zzzz365	false
602	zzzz366	false
601	zzzz367	false
600	zzzz368	false
599	zzzz369	false
598	zzzz370	false
597	zzzz371	false
596	zzzz372	false
595	zzzz373	false
594	zzzz374	false
593	zzzz375	false
592	zzzz376	false
591	zzzz377	false
590	zzzz378	false
589	zzzz379	false
588	zzzz380	false
587	zzzz381	false
586	zzzz382	false
585	zzzz383	false
584	zzzz384	false
583	zzzz385	false
582	zzzz386	false
581	zzzz387	false
580	zzzz388	false
579	zzzz389	false
578	zzzz390	false
577	zzzz391	false
576	zzzz392	false
575	zzzz393	false
574	zzzz394	false
573	zzzz395	false
572	zzzz396	false
571	zzzz397	false
570	zzzz398	false
569	zzzz401	false
568	zzzz404	false
567	zzzz405	false
566	zzzz406	false
565	zzzz407	false
564	zzzz408	false
563	zzzz409	false
562	zzzz410	false
561	zzzz411	false
560	zzzz412	false
559	zzzz413	false
558	zzzz415	false
557	zzzz416	false
556	zzzz417	false
555	zzzz418	false
554	zzzz419	false
553	zzzz420	false
552	zzzz425	false
551	zzzz426	false
550	zzzz429	false
549	zzzz431	false
548	zzzz432	false
547	zzzz433	false
546	zzzz434	false
545	zzzz435	false
544	zzzz436	false
543	zzzz442	false
542	zzzz444	false
541	zzzz445	false
540	zzzz446	false
539	zzzz447	false
538	zzzz449	false
537	zzzz451	false
536	zzzz452	false
535	zzzz454	false
534	zzzz456	false
533	zzzz457	false
532	zzzz458	false
531	zzzz459	false
530	zzzz460	false
529	zzzz462	false
528	zzzz464	false
527	zzzz466	false
526	zzzz467	false
525	zzzz468	false
524	zzzz469	false
523	zzzz472	false
522	zzzz473	false
521	zzzz474	false
520	zzzz475	false
519	zzzz476	false
518	zzzz477	false
517	zzzz478	false
516	zzzz479	false
515	zzzz480	false
514	zzzz481	false
513	zzzz482	false
512	zzzz483	false
511	zzzz484	false
510	zzzz485	false
509	zzzz486	false
508	zzzz487	false
507	zzzz488	false
506	zzzz489	false
505	zzzz490	false
504	zzzz491	false
503	zzzz493	false
502	zzzz494	false
501	zzzz495	false
500	zzzz497	false
499	zzzz498	false
498	zzzz500	false
497	zzzz502	false
496	zzzz503	false
495	zzzz504	false
494	zzzz505	false
493	zzzz506	false
492	zzzz507	false
491	zzzz508	false
490	zzzz509	false
489	zzzz510	false
488	zzzz511	false
487	zzzz512	false
486	zzzz517	false
485	zzzz518	false
484	zzzz519	false
483	zzzz520	false
482	zzzz521	false
481	zzzz522	false
480	zzzz523	false
479	zzzz526	false
478	zzzz527	false
477	zzzz528	false
476	zzzz529	false
475	zzzz530	false
474	zzzz531	false
473	zzzz532	false
472	zzzz533	false
471	zzzz536	false
470	zzzz537	false
469	zzzz538	false
468	zzzz539	false
467	zzzz540	false
466	zzzz541	false
465	zzzz542	false
464	zzzz543	false
463	zzzz544	false
462	zzzz548	false
461	zzzz549	false
460	zzzz551	false
459	zzzz553	false
458	zzzz555	false
457	zzzz556	false
456	zzzz557	false
455	zzzz565	false
454	zzzz566	false
453	zzzz567	false
452	zzzz568	false
451	zzzz569	false
450	zzzz574	false
449	zzzz575	false
448	zzzz581	false
447	zzzz582	false
446	zzzz583	false
445	zzzz584	false
444	zzzz585	false
443	zzzz586	false
442	zzzz588	false
441	zzzz589	false
440	zzzz590	false
439	zzzz591	false
438	zzzz592	false
437	zzzz593	false
436	zzzz594	false
435	zzzz595	false
434	zzzz596	false
433	zzzz597	false
432	zzzz598	false
431	zzzz599	false
430	zzzz600	false
429	zzzz601	false
428	zzzz602	false
427	zzzz603	false
426	zzzz604	false
425	zzzz605	false
424	zzzz606	false
423	zzzz607	false
422	zzzz608	false
421	zzzz609	false
420	zzzz610	false
419	zzzz611	false
418	zzzz612	false
417	zzzz613	false
416	zzzz618	false
415	zzzz619	false
414	zzzz620	false
413	zzzz622	false
412	zzzz623	false
411	zzzz624	false
410	zzzz625	false
409	zzzz626	false
408	zzzz627	false
407	zzzz628	false
406	zzzz630	false
405	zzzz631	false
404	zzzz632	false
403	zzzz636	false
402	zzzz638	false
401	zzzz640	false
400	zzzz642	false
399	zzzz644	false
398	zzzz647	false
397	zzzz649	false
396	zzzz650	false
395	zzzz651	false
394	zzzz652	false
393	zzzz653	false
392	zzzz655	false
391	zzzz656	false
390	zzzz657	false
389	zzzz658	false
388	zzzz659	false
387	zzzz660	false
386	zzzz661	false
385	zzzz662	false
384	zzzz663	false
383	zzzz664	false
382	zzzz665	false
381	zzzz666	false
380	zzzz667	false
379	zzzz668	false
378	zzzz669	false
377	zzzz670	false
376	zzzz671	false
375	zzzz672	false
374	zzzz680	false
373	zzzz682	false
372	zzzz683	false
371	zzzz684	false
370	zzzz685	false
369	zzzz686	false
368	zzzz689	false
367	zzzz691	false
366	zzzz692	false
365	zzzz694	false
364	zzzz695	false
363	zzzz696	false
362	zzzz697	false
361	zzzz698	false
360	zzzz699	false
359	zzzz702	false
358	zzzz703	false
357	zzzz704	false
356	zzzz705	false
355	zzzz706	false
354	zzzz707	false
353	zzzz708	false
352	zzzz709	false
351	zzzz710	false
350	zzzz711	false
349	zzzz715	false
348	zzzz716	false
347	zzzz717	false
346	zzzz720	false
345	zzzz721	false
344	zzzz722	false
343	zzzz725	false
342	zzzz730	false
341	zzzz731	false
340	zzzz732	false
339	zzzz737	false
338	zzzz738	false
337	zzzz739	false
336	zzzz740	false
335	zzzz750	false
334	zzzz751	false
333	zzzz752	false
332	zzzz753	false
331	zzzz754	false
330	zzzz755	false
329	zzzz756	false
328	zzzz757	false
327	zzzz760	false
326	zzzz761	false
325	zzzz762	false
324	zzzz763	false
323	zzzz764	false
322	zzzz765	false
321	zzzz766	false
320	zzzz767	false
319	zzzz768	false
318	zzzz769	false
317	zzzz770	false
316	zzzz771	false
315	zzzz772	false
314	zzzz773	false
313	zzzz774	false
312	zzzz775	false
311	zzzz776	false
310	zzzz777	false
309	zzzz778	false
308	zzzz779	false
307	zzzz780	false
306	zzzz781	false
305	zzzz782	false
304	zzzz783	false
303	zzzz784	false
302	zzzz785	false
301	zzzz786	false
300	zzzz787	false
299	zzzz789	false
298	zzzz790	false
297	zzzz791	false
296	zzzz792	false
295	zzzz793	false
294	zzzz794	false
293	zzzz795	false
292	zzzz797	false
291	zzzz798	false
290	zzzz802	false
289	zzzz803	false
288	zzzz804	false
287	zzzz805	false
286	zzzz806	false
285	zzzz807	false
284	zzzz808	false
283	zzzz809	false
282	zzzz810	false
281	zzzz811	false
280	zzzz812	false
279	zzzz813	false
278	zzzz814	false
277	zzzz815	false
276	zzzz816	false
275	zzzz820	false
274	zzzz821	false
273	zzzz822	false
272	zzzz831	false
271	zzzz832	false
270	zzzz833	false
269	zzzz834	false
268	zzzz835	false
267	zzzz836	false
266	zzzz837	false
265	zzzz838	false
264	zzzz840	false
263	zzzz841	false
262	zzzz843	false
261	zzzz844	false
260	zzzz845	false
259	zzzz846	false
258	zzzz847	false
257	zzzz855	false
256	zzzz856	false
255	zzzz857	false
254	zzzz858	false
253	zzzz859	false
252	zzzz860	false
251	zzzz861	false
250	zzzz862	false
249	zzzz864	false
248	zzzz865	false
247	zzzz867	false
246	zzzz869	false
245	zzzz870	false
244	zzzz873	false
243	zzzz874	false
242	zzzz875	false
241	zzzz877	false
240	zzzz879	false
239	zzzz881	false
238	zzzz882	false
237	zzzz883	false
236	zzzz885	false
235	zzzz886	false
234	zzzz887	false
233	zzzz888	false
232	zzzz889	false
231	zzzz902	false
230	zzzz903	false
229	zzzz905	false
228	zzzz909	false
227	zzzz910	false
226	zzzz912	false
225	zzzz913	false
224	zzzz914	false
223	zzzz921	false
222	zzzz922	false
221	zzzz923	false
220	zzzz924	false
219	zzzz931	false
218	zzzz932	false
217	zzzz933	false
216	zzzz934	false
215	zzzz935	false
214	zzzz936	false
213	zzzz940	false
212	zzzz941	false
211	zzzz942	false
210	zzzz944	false
209	zzzz946	false
208	zzzz948	false
207	zzzz950	false
206	zzzz953	false
205	zzzz955	false
204	zzzz956	false
203	zzzz957	false
202	zzzz958	false
201	zzzz960	false
200	zzzz961	false
199	zzzz965	false
198	zzzz966	false
197	zzzz967	false
196	zzzz968	false
195	zzzz969	false
194	zzzz970	false
193	zzzz971	false
192	zzzz972	false
191	zzzz973	false
190	zzzz974	false
189	zzzz975	false
188	zzzz976	false
187	zzzz977	false
186	zzzz978	false
185	zzzz981	false
184	zzzz982	false
183	zzzz983	false
182	zzzz984	false
181	zzzz985	false
180	zzzz986	false
179	zzzz987	false
178	zzzz988	false
177	zzzz992	false
176	zzzz993	false
175	zzzz994	false
174	zzzz996	false
173	zzzz998	false
172	zzzz999	false
171	zzzzz10	false
170	zzzzz11	false
169	zzzzz12	false
168	zzzzz13	false
167	zzzzz14	false
166	zzzzz15	false
165	zzzzz16	false
164	zzzzz17	false
163	zzzzz18	false
162	zzzzz19	false
161	zzzzz20	false
160	zzzzz21	false
159	zzzzz22	false
158	zzzzz23	false
157	zzzzz24	false
156	zzzzz25	false
155	zzzzz26	false
154	zzzzz27	false
153	zzzzz28	false
152	zzzzz29	false
151	zzzzz30	false
150	zzzzz31	false
149	zzzzz32	false
148	zzzzz33	false
147	zzzzz34	false
146	zzzzz35	false
145	zzzzz36	false
144	zzzzz37	false
143	zzzzz38	false
142	zzzzz39	false
141	zzzzz40	false
140	zzzzz41	false
139	zzzzz42	false
138	zzzzz43	false
137	zzzzz44	false
136	zzzzz45	false
135	zzzzz46	false
134	zzzzz47	false
133	zzzzz48	false
132	zzzzz49	false
131	zzzzz50	false
130	zzzzz51	false
129	zzzzz52	false
128	zzzzz53	false
127	zzzzz54	false
126	zzzzz55	false
125	zzzzz56	false
124	zzzzz57	false
123	zzzzz58	false
122	zzzzz59	false
121	zzzzz60	false
120	zzzzz61	false
119	zzzzz62	false
118	zzzzz63	false
117	zzzzz64	false
116	zzzzz65	false
115	zzzzz66	false
114	zzzzz67	false
[truncated: 42 more rows]
