# Supplementary material for: Discovery of several thousand highly diverse circular DNA viruses
Source: eLife journal article supplement (doi:10.7554/elife.51971), 2020-02-03
Supplement: fig2-data2 [file elife-51971-fig2-data2-v1.cys › CytoscapeSession-2019_08_02-17_43/tables/46-all_my_seqs_genbank_ssDNA1_domains_CRESS_capsid_fasta+Full+Network/SHARED_ATTRS-org.cytoscape.model.CyEdge-46+shared+edge.cytable]

CyCSV-Version	1
SUID	%id	alignment_len	alignment_score	shared interaction	shared name
java.lang.Long	java.lang.Double	java.lang.Integer	java.lang.Double	java.lang.String	java.lang.String
	mutable	mutable	mutable
46 shared edge
305828	95.32	235	137.0		zzz1000,zzzz811
305827	92.34	235	135.0		zzz1000,zzzz487
305826	90.12	243	135.0		zzz1000,zzzz971
305825	94.89	235	135.0		zzz1000,zzzz480
305824	92.37	236	135.0		zzz1000,zzzz970
305823	97.48	238	134.0		zzz1000,zzzz477
305822	91.1	236	134.0		zzz1000,zzzz739
305821	91.49	235	133.0		zzz1000,zzzz961
305820	91.91	235	133.0		zzz1000,zzzz642
305819	91.06	235	133.0		zzz1000,zzzz932
305818	93.62	235	133.0		zzz1000,zzzz532
305817	90.0	240	133.0		zzz1000,zzz1242
305816	90.25	236	133.0		zzz1000,zzzz585
305815	91.49	235	133.0		zzz1000,zzzz711
305814	91.49	235	133.0		zzz1000,zzzz967
305813	90.72	237	132.0		zzz1000,zzzz691
305812	90.68	236	132.0		zzz1000,zzzz838
305811	91.06	235	132.0		zzz1000,zzzz867
305810	91.49	235	132.0		zzz1000,zzzz968
305809	92.8	236	132.0		zzz1000,zzzz973
305808	97.02	235	132.0		zzz1000,zzz1248
305807	96.6	235	132.0		zzz1000,zzzz504
305806	97.02	235	132.0		zzz1000,zzzz738
305805	90.25	236	132.0		zzz1000,zzz1064
305804	91.49	235	132.0		zzz1000,zzzz529
305803	90.21	235	131.0		zzz1000,zzz1495
305802	91.91	235	131.0		zzz1000,zzzz812
305801	90.21	235	131.0		zzz1000,zzzz708
305800	95.32	235	131.0		zzz1000,zzzz821
305799	90.21	235	130.0		zzz1000,zzzz921
305798	95.32	235	130.0		zzz1000,zzzz598
305797	88.98	236	130.0		zzz1000,zzzz603
305796	89.36	235	130.0		zzz1000,zzzz606
305795	88.51	235	130.0		zzz1000,zzzz533
305794	94.92	236	130.0		zzz1000,zzzz972
305793	89.79	235	129.0		zzz1000,zzz1010
305792	88.51	235	129.0		zzz1000,zzzz956
305791	95.74	235	129.0		zzz1000,zzzz999
305790	94.47	235	129.0		zzz1000,zzzz542
305789	89.36	235	129.0		zzz1000,zzz1365
305788	87.29	236	129.0		zzz1000,zzzz456
305787	94.07	236	129.0		zzz1000,zzzz531
305786	95.34	236	128.0		zzz1000,zzzz924
305785	88.51	235	128.0		zzz1000,zzzz540
305784	93.62	235	128.0		zzz1000,zzzz910
305783	88.51	235	128.0		zzz1000,zzzz931
305782	88.09	235	127.0		zzz1000,zzz1233
305781	88.09	235	127.0		zzz1000,zzzz604
305780	86.38	235	127.0		zzz1000,zzzz935
305779	87.23	235	127.0		zzz1000,zzzz474
305778	93.19	235	127.0		zzz1000,zzzz611
305777	85.96	235	127.0		zzz1000,zzz1205
305776	93.19	235	127.0		zzz1000,zzzz601
305775	87.23	235	126.0		zzz1000,zzzz602
305774	90.64	235	125.0		zzz1000,zzz1119
305773	86.81	235	125.0		zzz1000,zzzz605
305772	90.39	229	125.0		zzz1000,zzz1411
305771	84.32	236	125.0		zzz1000,zzzz583
305770	86.92	237	125.0		zzz1000,zzz1397
305769	91.1	236	124.0		zzz1000,zzz1100
305768	90.64	235	124.0		zzz1000,zzzz574
305767	85.53	235	124.0		zzz1000,zzzz623
305766	86.86	236	124.0		zzz1000,zzzz740
305765	90.25	236	124.0		zzz1000,zzzz790
305764	90.68	236	124.0		zzz1000,zzzz584
305763	86.44	236	124.0		zzz1000,zzzz709
305762	90.21	235	123.0		zzz1000,zzzz640
305761	89.79	235	123.0		zzz1000,zzzz934
305760	87.34	237	123.0		zzz1000,zzzz537
305759	85.53	235	123.0		zzz1000,zzzz810
305758	82.73	249	123.0		zzz1000,zzzz966
305757	89.36	235	123.0		zzz1000,zzz1132
305756	90.21	235	122.0		zzz1000,zzz1033
305755	89.41	236	122.0		zzz1000,zzzz479
305754	88.94	235	122.0		zzz1000,zzzz538
305753	90.21	235	122.0		zzz1000,zzzz607
305752	88.51	235	122.0		zzz1000,zzz1488
305751	89.79	235	122.0		zzz1000,zzz1442
305750	87.92	240	122.0		zzz1000,zzzz528
305749	85.11	235	122.0		zzz1000,zzzz608
305748	82.2	236	122.0		zzz1000,zzzz805
305747	92.59	216	122.0		zzz1000,zzzz969
305746	87.66	235	121.0		zzz1000,zzzz539
305745	87.08	240	121.0		zzz1000,zzzz597
305744	84.75	236	121.0		zzz1000,zzzz762
305743	88.09	235	121.0		zzz1000,zzz1234
305742	88.14	236	121.0		zzz1000,zzz1368
305741	83.83	235	121.0		zzz1000,zzzz703
305740	86.4	228	121.0		zzz1000,zzz1017
305739	88.56	236	121.0		zzz1000,zzzz600
305738	88.98	236	121.0		zzz1000,zzz1325
305737	87.71	236	121.0		zzz1000,zzzz865
305736	89.54	239	120.0		zzz1000,zzzz589
305735	87.71	236	120.0		zzz1000,zzzz765
305734	88.36	232	119.0		zzz1000,zzz1015
305733	82.55	235	119.0		zzz1000,zzzz527
305732	83.4	235	119.0		zzz1000,zzzz609
305731	78.39	236	119.0		zzz1000,zzzz720
305730	80.0	235	118.0		zzz1000,zzz1535
305729	89.36	235	118.0		zzz1000,zzzz599
305728	80.93	236	118.0		zzz1000,zzzz814
305727	79.75	237	118.0		zzz1000,zzz1319
305726	77.97	236	118.0		zzz1000,zzz1399
305725	84.32	236	118.0		zzz1000,zzzz536
305724	90.67	225	118.0		zzz1000,zzzz657
305723	86.44	236	118.0		zzz1000,zzzz710
305722	83.76	234	118.0		zzz1000,zzzz530
305721	79.66	236	117.0		zzz1000,zzz1008
305720	78.48	237	117.0		zzz1000,zzz1156
305719	87.29	236	117.0		zzz1000,zzzz478
305718	81.36	236	117.0		zzz1000,zzzz888
305717	85.53	235	117.0		zzz1000,zzzz913
305716	79.24	236	117.0		zzz1000,zzzz960
305715	86.81	235	117.0		zzz1000,zzzz521
305714	82.13	235	117.0		zzz1000,zzzz612
305713	85.11	235	117.0		zzz1000,zzzz763
305712	79.24	236	117.0		zzz1000,zzz1169
305711	79.24	236	117.0		zzz1000,zzz1274
305710	78.06	237	116.0		zzz1000,zzz1476
305709	78.72	235	116.0		zzz1000,zzz1245
305708	87.23	235	116.0		zzz1000,zzz1378
305707	83.9	236	116.0		zzz1000,zzzz862
305706	76.6	235	116.0		zzz1000,zzz1346
305705	78.81	236	116.0		zzz1000,zzz1396
305704	77.45	235	115.0		zzz1000,zzzz457
305703	77.64	237	115.0		zzz1000,zzz1009
305702	86.09	230	115.0		zzz1000,zzz1013
305701	83.47	236	115.0		zzz1000,zzz1385
305700	85.17	236	115.0		zzz1000,zzzz410
305699	83.83	235	115.0		zzz1000,zzzz518
305698	78.39	236	115.0		zzz1000,zzzz588
305697	81.36	236	115.0		zzz1000,zzz1250
305696	75.85	236	115.0		zzz1000,zzz1530
305695	78.3	235	115.0		zzz1000,zzzz459
305694	78.49	251	115.0		zzz1000,zzzz503
305693	85.9	234	115.0		zzz1000,zzz1372
305692	81.7	235	115.0		zzz1000,zzzz792
305691	76.37	237	114.0		zzz1000,zzz1185
305690	77.64	237	114.0		zzz1000,zzz1358
305689	85.11	235	114.0		zzz1000,zzzz454
305688	84.68	235	114.0		zzz1000,zzzz656
305687	77.12	236	114.0		zzz1000,zzzz837
305686	84.75	236	114.0		zzz1000,zzzz705
305685	78.06	237	114.0		zzz1000,zzz1235
305684	85.11	235	114.0		zzz1000,zzzz568
305683	75.74	235	113.0		zzz1000,zzz1221
305682	90.27	226	113.0		zzz1000,zzzz569
305681	76.17	235	113.0		zzz1000,zzzz619
305680	78.81	236	113.0		zzz1000,zzz1354
305679	81.78	236	113.0		zzz1000,zzzz523
305678	84.75	236	113.0		zzz1000,zzzz981
305677	76.17	235	113.0		zzz1000,zzz1208
305676	82.55	235	113.0		zzz1000,zzz1284
305675	75.74	235	113.0		zzz1000,zzzz468
305674	74.89	235	113.0		zzz1000,zzzz882
305673	81.78	236	112.0		zzz1000,zzz1184
305672	77.97	236	112.0		zzz1000,zzzz864
305671	80.93	236	112.0		zzz1000,zzz1218
305670	79.32	237	112.0		zzz1000,zzz1545
305669	80.59	237	112.0		zzz1000,zzzz847
305668	74.47	235	112.0		zzz1000,zzzz965
305667	90.73	205	112.0		zzz1000,zzzz996
305666	80.93	236	111.0		zzz1000,zzz1175
305665	76.17	235	111.0		zzz1000,zzzz507
305664	76.27	236	111.0		zzz1000,zzzz548
305663	81.7	235	111.0		zzz1000,zzzz816
305662	78.72	235	111.0		zzz1000,zzz1038
305661	78.39	236	111.0		zzz1000,zzzz707
305660	75.32	235	111.0		zzz1000,zzz1523
305659	75.85	236	111.0		zzz1000,zzzz756
305658	78.3	235	111.0		zzz1000,zzz1215
305657	75.11	237	111.0		zzz1000,zzz1441
305656	75.11	237	111.0		zzz1000,zzz1445
305655	77.12	236	111.0		zzz1000,zzzz764
305654	94.15	188	110.0		zzz1000,zzz1067
305653	80.51	236	110.0		zzz1000,zzz1223
305652	79.66	236	110.0		zzz1000,zzzz692
305651	74.26	237	110.0		zzz1000,zzz1541
305650	74.15	236	109.0		zzz1000,zzz1168
305649	77.97	236	109.0		zzz1000,zzzz489
305648	77.78	225	109.0		zzz1000,zzzz626
305647	73.84	237	109.0		zzz1000,zzz1398
305646	78.3	235	109.0		zzz1000,zzz1159
305645	77.97	236	109.0		zzz1000,zzz1504
305644	73.84	237	109.0		zzz1000,zzzz409
305643	74.26	237	108.0		zzz1000,zzzz473
305642	75.63	238	108.0		zzz1000,zzzz755
305641	78.3	235	108.0		zzz1000,zzzz813
305640	79.66	236	108.0		zzz1000,zzzz731
305639	77.45	235	108.0		zzz1000,zzzz887
305638	73.53	238	108.0		zzz1000,zzzz553
305637	75.66	226	108.0		zzz1000,zzzz624
305636	74.26	237	108.0		zzz1000,zzzz683
305635	72.15	237	108.0		zzz1000,zzz1018
305634	73.0	237	108.0		zzz1000,zzz1098
305633	71.31	237	108.0		zzz1000,zzz1324
305632	79.24	236	108.0		zzz1000,zzz1446
305631	70.63	252	108.0		zzz1000,zzzz685
305630	73.31	236	108.0		zzz1000,zzzz803
305629	77.45	235	108.0		zzz1000,zzzz856
305628	74.68	237	107.0		zzz1000,zzz1128
305627	72.69	238	107.0		zzz1000,zzz1190
305626	74.68	237	107.0		zzz1000,zzz1390
305625	73.0	237	107.0		zzz1000,zzz1447
305624	77.02	235	107.0		zzz1000,zzzz472
305623	75.11	237	107.0		zzz1000,zzzz753
305622	76.6	235	107.0		zzz1000,zzz1062
305621	74.37	238	107.0		zzz1000,zzzz469
305620	74.17	240	107.0		zzz1000,zzz1070
305619	73.84	237	107.0		zzz1000,zzz1199
305618	73.31	236	106.0		zzz1000,zzz1044
305617	77.12	236	106.0		zzz1000,zzz1349
305616	76.47	238	106.0		zzz1000,zzzz808
305615	71.31	237	106.0		zzz1000,zzz1003
305614	81.43	237	106.0		zzz1000,zzz1249
305613	72.15	237	106.0		zzz1000,zzz1443
305612	72.88	236	106.0		zzz1000,zzzz555
305611	69.92	236	105.0		zzz1000,zzzz793
305610	72.69	238	105.0		zzz1000,zzz1160
305609	73.53	238	105.0		zzz1000,zzz1180
305608	76.37	237	105.0		zzz1000,zzz1207
305607	73.42	237	105.0		zzz1000,zzz1478
305606	71.43	238	105.0		zzz1000,zzz1482
305605	73.0	237	105.0		zzz1000,zzzz426
305604	72.57	237	105.0		zzz1000,zzzz435
305603	72.88	236	105.0		zzz1000,zzzz556
305602	72.27	238	105.0		zzz1000,zzz1542
305601	79.24	236	105.0		zzz1000,zzzz791
305600	71.49	235	105.0		zzz1000,zzzz933
305599	72.27	238	104.0		zzz1000,zzz1483
305598	71.85	238	104.0		zzz1000,zzzz660
305597	71.43	238	104.0		zzz1000,zzzz665
305596	71.43	238	104.0		zzz1000,zzz1496
305595	70.71	239	104.0		zzz1000,zzz1546
305594	70.46	237	104.0		zzz1000,zzzz549
305593	72.27	238	104.0		zzz1000,zzz1189
305592	72.38	239	104.0		zzz1000,zzz1195
305591	73.95	238	104.0		zzz1000,zzz1202
305590	73.33	240	104.0		zzz1000,zzz1244
305589	71.43	238	104.0		zzz1000,zzz1395
305588	71.43	238	104.0		zzz1000,zzz1439
305587	73.84	237	104.0		zzz1000,zzz1458
305586	83.47	236	104.0		zzz1000,zzzz500
305585	71.85	238	104.0		zzz1000,zzzz669
305584	71.85	238	104.0		zzz1000,zzzz706
305583	71.73	237	103.0		zzz1000,zzz1034
305582	75.53	237	103.0		zzz1000,zzz1484
305581	75.21	238	103.0		zzz1000,zzz1485
305580	75.95	237	103.0		zzz1000,zzz1486
305579	71.85	238	103.0		zzz1000,zzzz659
305578	71.43	238	103.0		zzz1000,zzzz667
305577	73.08	234	103.0		zzz1000,zzzz732
305576	76.37	237	103.0		zzz1000,zzzz754
305575	70.46	237	103.0		zzz1000,zzz1139
305574	73.73	236	103.0		zzz1000,zzz1251
305573	75.53	237	103.0		zzz1000,zzz1477
305572	70.46	237	103.0		zzz1000,zzzz978
305571	87.75	204	103.0		zzz1000,zzzz993
305570	75.53	237	103.0		zzz1000,zzz1030
305569	75.11	237	103.0		zzz1000,zzz1144
305568	71.78	241	103.0		zzz1000,zzzz519
305567	70.59	238	103.0		zzz1000,zzzz668
305566	75.0	236	103.0		zzz1000,zzzz846
305565	77.12	236	103.0		zzz1000,zzzz944
305564	75.63	238	102.0		zzz1000,zzz1457
305563	71.13	239	102.0		zzz1000,zzz1494
305562	74.11	224	103.0		zzz1000,zzzz627
305561	70.71	239	102.0		zzz1000,zzzz658
305560	72.03	236	102.0		zzz1000,zzz1304
305559	71.31	237	102.0		zzz1000,zzzz436
305558	68.92	251	102.0		zzz1000,zzzz663
305557	71.43	238	102.0		zzz1000,zzzz670
305556	72.69	238	102.0		zzz1000,zzzz757
305555	72.03	236	102.0		zzz1000,zzz1002
305554	74.15	236	102.0		zzz1000,zzz1196
305553	71.61	236	102.0		zzz1000,zzz1214
305552	70.59	238	102.0		zzz1000,zzz1386
305551	71.01	238	102.0		zzz1000,zzzz662
305550	69.92	236	102.0		zzz1000,zzzz802
305549	75.53	237	102.0		zzz1000,zzz1201
305548	75.11	233	102.0		zzz1000,zzz1203
305547	69.2	237	102.0		zzz1000,zzz1210
305546	70.89	237	102.0		zzz1000,zzz1363
305545	74.26	237	102.0		zzz1000,zzz1471
305544	74.26	237	102.0		zzz1000,zzz1529
305543	74.47	235	102.0		zzz1000,zzzz815
305542	75.11	237	102.0		zzz1000,zzzz845
305541	73.84	237	102.0		zzz1000,zzzz902
305540	73.19	235	101.0		zzz1000,zzzz806
305539	92.22	180	101.0		zzz1000,zzz1023
305538	72.03	236	101.0		zzz1000,zzz1452
305537	73.84	237	101.0		zzz1000,zzz1521
305536	70.46	237	101.0		zzz1000,zzzz974
305535	72.27	238	101.0		zzz1000,zzzz992
305534	72.03	236	101.0		zzz1000,zzz1152
305533	70.59	238	101.0		zzz1000,zzzz672
305532	69.75	238	101.0		zzz1000,zzzz773
305531	72.03	236	100.0		zzz1000,zzz1352
305530	77.45	235	100.0		zzz1000,zzz1379
305529	72.03	236	100.0		zzz1000,zzz1455
305528	71.61	236	100.0		zzz1000,zzz1524
305527	71.19	236	100.0		zzz1000,zzzz407
305526	70.89	237	100.0		zzz1000,zzzz686
305525	70.89	237	100.0		zzz1000,zzzz789
305524	71.61	236	100.0		zzz1000,zzz1230
305523	71.19	236	100.0		zzz1000,zzz1289
305522	71.61	236	100.0		zzz1000,zzz1347
305521	71.61	236	100.0		zzz1000,zzz1450
305520	72.46	236	100.0		zzz1000,zzzz488
305519	70.46	237	100.0		zzz1000,zzzz661
305518	67.51	237	100.0		zzz1000,zzzz975
305517	71.19	236	100.0		zzz1000,zzz1228
305516	68.78	237	100.0		zzz1000,zzz1265
305515	68.91	238	100.0		zzz1000,zzzz858
305514	69.92	236	100.0		zzz1000,zzzz946
305513	70.34	236	99.0		zzz1000,zzz1048
305512	69.92	236	99.0		zzz1000,zzz1162
305511	74.34	226	99.0		zzz1000,zzz1240
305510	70.34	236	99.0		zzz1000,zzz1293
305509	71.31	237	99.0		zzz1000,zzz1391
305508	70.76	236	99.0		zzz1000,zzz1413
305507	70.76	236	99.0		zzz1000,zzz1421
305506	70.76	236	99.0		zzz1000,zzz1422
305505	71.19	236	99.0		zzz1000,zzz1480
305504	71.19	236	99.0		zzz1000,zzz1501
305503	71.19	236	99.0		zzz1000,zzzz442
305502	71.61	236	99.0		zzz1000,zzzz652
305501	70.17	238	99.0		zzz1000,zzzz671
305500	70.04	237	99.0		zzz1000,zzzz905
305499	69.71	241	99.0		zzz1000,zzz1054
305498	70.64	235	99.0		zzz1000,zzz1106
305497	74.44	223	99.0		zzz1000,zzz1294
305496	71.19	236	99.0		zzz1000,zzz1303
305495	72.03	236	99.0		zzz1000,zzz1403
305494	71.19	236	99.0		zzz1000,zzz1415
305493	71.19	236	99.0		zzz1000,zzz1453
305492	70.76	236	99.0		zzz1000,zzz1525
305491	71.01	238	99.0		zzz1000,zzzz485
305490	71.31	237	99.0		zzz1000,zzzz655
305489	69.75	238	99.0		zzz1000,zzzz768
305488	70.76	236	99.0		zzz1000,zzz1296
305487	69.36	235	99.0		zzz1000,zzz1311
305486	69.71	241	99.0		zzz1000,zzz1329
305485	70.34	236	99.0		zzz1000,zzz1407
305484	70.76	236	99.0		zzz1000,zzz1532
305483	72.38	239	99.0		zzz1000,zzzz804
305482	70.34	236	99.0		zzz1000,zzz1122
305481	70.76	236	99.0		zzz1000,zzz1130
305480	71.19	236	99.0		zzz1000,zzz1137
305479	73.09	223	99.0		zzz1000,zzz1172
305478	69.92	236	99.0		zzz1000,zzz1361
305477	71.93	228	99.0		zzz1000,zzz1402
305476	78.0	200	99.0		zzz1000,zzz1462
305475	73.87	222	99.0		zzz1000,zzz1493
305474	70.34	236	99.0		zzz1000,zzz1500
305473	70.76	236	99.0		zzz1000,zzzz433
305472	73.71	232	99.0		zzz1000,zzzz610
305471	72.46	236	99.0		zzz1000,zzzz689
305470	71.55	239	99.0		zzz1000,zzzz752
305469	74.44	223	99.0		zzz1000,zzzz948
305468	69.49	236	99.0		zzz1000,zzzz998
305467	69.92	236	98.0		zzz1000,zzz1133
305466	70.76	236	98.0		zzz1000,zzz1157
305465	69.49	236	98.0		zzz1000,zzz1209
305464	69.49	236	98.0		zzz1000,zzz1236
305463	69.49	236	98.0		zzz1000,zzz1436
305462	68.88	241	98.0		zzz1000,zzz1449
305461	69.07	236	98.0		zzz1000,zzzz481
305460	76.61	248	98.0		zzz1000,zzzz497
305459	73.54	223	98.0		zzz1000,zzzz575
305458	71.01	238	98.0		zzz1000,zzzz666
305457	70.04	237	98.0		zzz1000,zzzz682
305456	68.07	238	98.0		zzz1000,zzzz772
305455	70.64	235	98.0		zzz1000,zzzz807
305454	72.65	223	98.0		zzz1000,zzz1112
305453	71.19	236	98.0		zzz1000,zzz1165
305452	78.0	200	98.0		zzz1000,zzz1335
305451	69.49	236	98.0		zzz1000,zzz1348
305450	70.34	236	98.0		zzz1000,zzz1406
305449	70.34	236	98.0		zzz1000,zzz1437
305448	70.04	237	98.0		zzz1000,zzz1444
305447	69.49	236	98.0		zzz1000,zzz1492
305446	69.04	239	98.0		zzz1000,zzz1527
305445	71.43	224	98.0		zzz1000,zzzz467
305444	72.5	240	98.0		zzz1000,zzzz520
305443	70.29	239	98.0		zzz1000,zzzz750
305442	70.17	238	98.0		zzz1000,zzzz751
305441	69.62	237	98.0		zzz1000,zzzz976
305440	68.46	241	98.0		zzz1000,zzz1118
305439	69.92	236	98.0		zzz1000,zzz1120
305438	67.93	237	98.0		zzz1000,zzz1200
305437	69.92	236	98.0		zzz1000,zzz1272
305436	69.75	238	98.0		zzz1000,zzz1279
305435	70.34	236	98.0		zzz1000,zzz1288
305434	68.78	237	98.0		zzz1000,zzz1416
305433	70.34	236	98.0		zzz1000,zzz1543
305432	72.65	223	98.0		zzz1000,zzzz446
305431	70.76	236	98.0		zzz1000,zzzz664
305430	71.91	235	98.0		zzz1000,zzzz809
305429	69.49	236	98.0		zzz1000,zzzz822
305428	73.53	204	97.0		zzz1000,zzz1099
305427	73.0	237	97.0		zzz1000,zzz1141
305426	73.09	223	97.0		zzz1000,zzz1176
305425	68.88	241	97.0		zzz1000,zzz1280
305424	69.62	237	97.0		zzz1000,zzz1425
305423	68.62	239	97.0		zzz1000,zzz1469
305422	72.81	228	97.0		zzz1000,zzz1481
305421	70.09	234	97.0		zzz1000,zzzz557
305420	70.76	236	97.0		zzz1000,zzzz877
305419	67.07	246	97.0		zzz1000,zzz1053
305418	69.07	236	97.0		zzz1000,zzz1227
305417	71.82	220	97.0		zzz1000,zzz1322
305416	80.73	192	97.0		zzz1000,zzz1343
305415	69.92	236	97.0		zzz1000,zzz1448
305414	68.53	232	97.0		zzz1000,zzz1533
305413	70.34	236	97.0		zzz1000,zzz1540
305412	69.62	237	97.0		zzz1000,zzz1548
305411	69.75	238	97.0		zzz1000,zzzz431
305410	69.75	238	97.0		zzz1000,zzzz432
305409	71.3	223	97.0		zzz1000,zzzz444
305408	68.22	236	97.0		zzz1000,zzzz988
305407	68.64	236	97.0		zzz1000,zzz1004
305406	68.22	236	97.0		zzz1000,zzz1219
305405	67.08	240	97.0		zzz1000,zzz1237
305404	71.43	238	97.0		zzz1000,zzz1258
305403	70.94	234	97.0		zzz1000,zzz1266
305402	67.37	236	97.0		zzz1000,zzz1307
305401	69.49	236	97.0		zzz1000,zzz1338
305400	69.92	236	97.0		zzz1000,zzz1387
305399	69.07	236	97.0		zzz1000,zzz1536
305398	68.62	239	97.0		zzz1000,zzzz412
305397	72.93	229	97.0		zzz1000,zzzz425
305396	69.49	236	97.0		zzz1000,zzzz613
305395	67.8	236	97.0		zzz1000,zzzz923
305394	78.17	197	96.0		zzz1000,zzz1055
305393	71.73	237	96.0		zzz1000,zzz1285
305392	69.92	236	96.0		zzz1000,zzz1312
305391	69.49	236	96.0		zzz1000,zzz1344
305390	69.82	222	96.0		zzz1000,zzz1409
305389	69.62	237	96.0		zzz1000,zzzz415
305388	77.66	197	96.0		zzz1000,zzzz636
305387	72.34	235	96.0		zzz1000,zzzz704
305386	66.26	243	96.0		zzz1000,zzzz769
305385	77.5	200	96.0		zzz1000,zzz1115
305384	72.2	223	96.0		zzz1000,zzz1374
305383	68.64	236	96.0		zzz1000,zzz1381
305382	69.33	238	96.0		zzz1000,zzz1393
305381	69.2	237	96.0		zzz1000,zzz1466
305380	66.1	236	96.0		zzz1000,zzz1490
305379	72.2	223	96.0		zzz1000,zzzz452
305378	69.26	231	96.0		zzz1000,zzzz498
305377	70.17	238	96.0		zzz1000,zzzz767
305376	65.7	242	96.0		zzz1000,zzzz774
305375	76.47	204	96.0		zzz1000,zzz1068
305374	73.21	224	96.0		zzz1000,zzz1123
305373	71.3	223	96.0		zzz1000,zzz1178
305372	75.49	204	96.0		zzz1000,zzz1255
305371	67.23	235	96.0		zzz1000,zzz1440
305370	66.95	236	96.0		zzz1000,zzz1464
305369	68.22	236	96.0		zzz1000,zzz1487
305368	69.07	236	96.0		zzz1000,zzz1497
305367	71.56	218	96.0		zzz1000,zzzz451
305366	69.92	236	95.0		zzz1000,zzzz502
305365	66.11	239	95.0		zzz1000,zzzz775
305364	68.09	235	95.0		zzz1000,zzz1057
305363	68.05	241	95.0		zzz1000,zzz1069
305362	71.3	223	95.0		zzz1000,zzz1247
305361	70.31	229	95.0		zzz1000,zzz1309
305360	70.85	223	95.0		zzz1000,zzz1318
305359	70.34	236	95.0		zzz1000,zzz1339
305358	68.35	237	95.0		zzz1000,zzz1491
305357	74.15	205	95.0		zzz1000,zzz1498
305356	76.0	200	95.0		zzz1000,zzz1153
305355	66.67	237	95.0		zzz1000,zzz1269
305354	70.76	236	95.0		zzz1000,zzz1276
305353	71.3	223	95.0		zzz1000,zzz1435
305352	69.07	236	95.0		zzz1000,zzzz770
305351	69.75	238	95.0		zzz1000,zzzz771
305350	66.95	236	94.0		zzz1000,zzz1489
305349	92.78	180	94.0		zzz1000,zzzz566
305348	71.31	237	94.0		zzz1000,zzz1499
305347	66.67	240	94.0		zzz1000,zzzz449
305346	67.8	236	94.0		zzz1000,zzzz950
305345	76.84	190	94.0		zzz1000,zzzz653
305344	73.19	235	93.0		zzz1000,zzz1456
305343	69.75	238	93.0		zzz1000,zzzz632
305342	68.51	235	93.0		zzz1000,zzzz783
305341	75.0	204	93.0		zzz1000,zzz1056
305340	70.09	224	93.0		zzz1000,zzzz401
305339	69.33	238	93.0		zzz1000,zzzz766
305338	69.79	235	93.0		zzz1000,zzzz836
305337	67.09	237	93.0		zzz1000,zzz1503
305336	68.94	235	93.0		zzz1000,zzzz620
305335	68.64	236	93.0		zzz1000,zzzz841
305334	67.51	237	92.0		zzz1000,zzz1475
305333	69.87	239	92.0		zzz1000,zzz1356
305332	73.5	200	92.0		zzz1000,zzz1454
305331	72.09	215	92.0		zzz1000,zzzz447
305330	66.24	237	92.0		zzz1000,zzzz875
305329	64.41	236	91.0		zzz1000,zzz1401
305328	69.55	220	91.0		zzz1000,zzzz445
305327	75.66	189	91.0		zzz1000,zzzz582
305326	89.22	167	91.0		zzz1000,zzz1016
305325	76.17	193	91.0		zzz1000,zzzz625
305324	70.76	236	90.0		zzz1000,zzz1063
305323	64.94	231	89.0		zzz1000,zzzz581
305322	66.39	241	88.0		zzz1000,zzzz567
305321	66.67	222	88.0		zzz1000,zzzz857
305320	67.26	223	87.0		zzz1000,zzz1171
305319	61.63	245	87.0		zzz1000,zzzz903
305318	79.66	177	87.0		zzz1000,zzz1012
305317	63.29	237	87.0		zzz1000,zzz1028
305316	72.2	205	87.0		zzz1000,zzz1314
305315	67.57	222	87.0		zzz1000,zzzz544
305314	70.39	206	87.0		zzz1000,zzzz798
305313	75.53	188	86.0		zzz1000,zzzz590
305312	72.08	197	86.0		zzz1000,zzz1043
305311	81.66	169	86.0		zzz1000,zzzz475
305310	69.07	236	86.0		zzz1000,zzzz517
305309	75.53	188	86.0		zzz1000,zzzz628
305308	69.36	235	85.0		zzz1000,zzzz622
305307	68.34	199	85.0		zzz1000,zzzz785
305306	63.14	236	85.0		zzz1000,zzzz647
305305	71.64	201	85.0		zzz1000,zzzz786
305304	68.87	212	84.0		zzz1000,zzzz784
305303	75.71	177	84.0		zzz1000,zzzz404
305302	76.84	177	84.0		zzz1000,zzz1011
305301	79.07	172	83.0		zzz1000,zzzz420
305300	72.32	177	83.0		zzz1000,zzz1027
305299	75.0	180	83.0		zzz1000,zzzz429
305298	76.14	176	83.0		zzz1000,zzzz482
305297	71.35	185	82.0		zzz1000,zzzz684
305296	61.86	236	82.0		zzz1000,zzzz716
305295	68.21	195	82.0		zzz1000,zzzz630
305294	73.74	179	82.0		zzz1000,zzzz883
305293	79.39	165	81.0		zzz1000,zzzz889
305292	59.59	245	81.0		zzz1000,zzz1383
305291	83.23	161	81.0		zzz1000,zzzz541
305290	69.61	204	81.0		zzz1000,zzzz869
305289	63.31	248	80.0		zzz1000,zzz1357
305288	96.03	151	81.0		zzz1000,zzzz680
305287	71.91	178	80.0		zzz1000,zzz1021
305286	63.03	238	80.0		zzz1000,zzzz512
305285	73.1	171	79.0		zzz1000,zzz1026
305284	59.32	236	78.0		zzz1000,zzzz870
305283	61.48	244	78.0		zzz1000,zzzz694
305282	93.96	149	77.0		zzz1000,zzzz565
305281	85.62	153	76.0		zzz1000,zzzz644
305280	75.61	164	76.0		zzz1000,zzz1059
305279	58.47	236	75.0		zzz1000,zzz1438
305278	69.4	183	75.0		zzz1000,zzzz936
305277	69.94	173	74.0		zzz1000,zzzz795
305276	77.22	158	74.0		zzz1000,zzzz405
305275	78.06	155	74.0		zzz1000,zzzz464
305274	77.27	154	73.0		zzz1000,zzzz406
305273	72.73	165	72.0		zzz1000,zzzz957
305272	72.39	163	72.0		zzz1000,zzz1058
305271	73.17	164	72.0		zzz1000,zzz1060
305270	70.18	171	69.0		zzz1000,zzz1041
305269	65.24	164	67.0		zzz1000,zzz1204
305268	69.51	164	66.0		zzz1000,zzz1052
305267	52.68	224	65.0		zzz1000,zzz1522
305266	49.06	212	64.0		zzz1000,zzz1431
305265	51.34	224	63.0		zzz1000,zzzz702
305264	50.89	224	63.0		zzz1000,zzzz721
305263	50.87	230	63.0		zzz1000,zzzz730
305262	50.22	225	62.0		zzz1000,zzz1257
305261	50.89	224	62.0		zzz1000,zzzz551
305260	50.0	224	62.0		zzz1000,zzzz462
305259	51.79	224	62.0		zzz1000,zzzz506
305258	49.55	224	62.0		zzz1000,zzz1261
305257	50.22	229	62.0		zzz1000,zzz1417
305256	49.55	224	62.0		zzz1000,zzzz860
305255	66.09	174	62.0		zzz1000,zzzz914
305254	50.22	225	61.0		zzz1000,zzzz953
305253	49.78	227	61.0		zzz1000,zzzz737
305252	49.55	224	59.0		zzz1000,zzzz861
305251	75.57	131	59.0		zzz1000,zzz1025
305250	48.21	224	59.0		zzz1000,zzzz631
305249	73.85	130	59.0		zzz1000,zzzz466
305248	49.78	223	59.0		zzz1000,zzzz722
305247	68.79	141	58.0		zzz1000,zzz1022
305246	72.79	136	56.0		zzz1000,zzzz526
305245	70.45	132	53.0		zzz1000,zzz1451
305244	87.38	103	51.0		zzz1000,zzzz595
305243	72.41	116	51.0		zzz1000,zzz1019
305242	80.19	106	50.0		zzz1000,zzzz596
305241	61.49	161	49.0		zzz1000,zzzz505
305240	96.47	85	48.0		zzz1000,zzzz982
305239	66.15	130	47.0		zzz1000,zzzz419
305238	76.24	101	46.0		zzz1000,zzzz983
305237	69.91	113	46.0		zzz1000,zzzz794
305236	64.57	127	45.0		zzz1000,zzzz460
305235	61.36	132	45.0		zzz1000,zzzz413
305234	71.57	102	44.0		zzz1000,zzzz586
305233	78.35	97	44.0		zzz1000,zzzz594
305232	73.53	102	43.0		zzz1000,zzzz593
305231	80.65	93	43.0		zzz1000,zzzz797
305230	68.1	116	43.0		zzz1000,zzzz408
305229	62.2	127	43.0		zzz1000,zzzz418
305228	67.86	112	43.0		zzz1000,zzzz986
305227	68.87	106	42.0		zzz1000,zzzz591
305226	70.87	103	42.0		zzz1000,zzzz984
305225	65.18	112	41.0		zzz1000,zzzz987
305224	60.0	120	40.0		zzz1000,zzzz522
305223	64.17	120	40.0		zzz1000,zzzz411
305222	66.36	110	40.0		zzz1000,zzzz985
305221	67.29	107	39.0		zzz1000,zzzz458
305220	71.58	95	39.0		zzz1000,zzzz490
305219	61.16	121	38.0		zzz1000,zzzz417
305218	76.25	80	36.0		zzz1000,zzzz840
305217	66.67	99	36.0		zzz1000,zzzz434
305216	29.78	178	27.0		zzz1000,zzz1520
305215	30.17	179	26.0		zzz1000,zzz1326
305214	66.25	80	27.0		zzz1000,zzzz958
305213	62.07	87	27.0		zzz1000,zzzz977
305212	28.57	196	26.0		zzz1000,zzz1518
305211	50.0	106	22.0		zzz1000,zzzz491
305210	34.65	101	18.0		zzz1000,zzz1377
305204	92.83	251	145.0		zzz1002,zzz1524
305203	91.63	251	144.0		zzz1002,zzz1455
305202	92.03	251	144.0		zzz1002,zzz1347
305201	90.04	251	143.0		zzz1002,zzz1214
305200	91.63	251	143.0		zzz1002,zzzz433
305199	91.63	251	143.0		zzz1002,zzz1296
305198	90.84	251	143.0		zzz1002,zzz1444
305197	90.04	251	142.0		zzz1002,zzz1415
305196	91.63	251	142.0		zzz1002,zzz1303
305195	91.24	251	142.0		zzz1002,zzz1329
305194	91.63	251	142.0		zzz1002,zzzz652
305193	90.04	251	142.0		zzz1002,zzz1054
305192	90.84	251	142.0		zzz1002,zzz1462
305191	90.04	251	142.0		zzz1002,zzz1122
305190	91.63	251	142.0		zzz1002,zzz1343
305189	91.24	251	141.0		zzz1002,zzz1450
305188	89.64	251	141.0		zzz1002,zzz1130
305187	89.24	251	141.0		zzz1002,zzz1230
305186	90.04	251	141.0		zzz1002,zzz1294
305185	90.04	251	141.0		zzz1002,zzz1425
305184	90.44	251	141.0		zzz1002,zzz1449
305183	90.44	251	141.0		zzz1002,zzz1480
305182	90.44	251	141.0		zzz1002,zzz1543
305181	89.64	251	141.0		zzz1002,zzzz442
305180	91.63	251	141.0		zzz1002,zzzz948
305179	90.04	251	140.0		zzz1002,zzz1048
305178	90.44	251	140.0		zzz1002,zzzz446
305177	91.63	251	140.0		zzz1002,zzzz575
305176	91.24	251	140.0		zzz1002,zzzz877
305175	89.64	251	140.0		zzz1002,zzz1118
305174	89.64	251	140.0		zzz1002,zzz1152
305173	88.84	251	140.0		zzz1002,zzz1162
305172	90.04	251	140.0		zzz1002,zzz1165
305171	89.24	251	140.0		zzz1002,zzz1361
305170	89.24	251	140.0		zzz1002,zzz1403
305169	89.64	251	140.0		zzz1002,zzz1493
305168	90.84	251	140.0		zzz1002,zzz1176
305167	88.84	251	139.0		zzz1002,zzz1004
305166	88.84	251	139.0		zzz1002,zzz1106
305165	88.05	251	139.0		zzz1002,zzz1293
305164	88.84	251	139.0		zzz1002,zzz1422
305163	89.64	251	139.0		zzz1002,zzz1548
305162	89.24	251	139.0		zzz1002,zzzz998
305161	90.04	251	139.0		zzz1002,zzz1280
305160	89.24	251	139.0		zzz1002,zzz1413
305159	88.45	251	139.0		zzz1002,zzz1471
305158	88.84	251	139.0		zzz1002,zzz1172
305157	90.04	251	139.0		zzz1002,zzz1335
305156	87.65	251	139.0		zzz1002,zzz1402
305155	88.84	251	139.0		zzz1002,zzz1492
305154	88.05	251	139.0		zzz1002,zzz1120
305153	86.85	251	139.0		zzz1002,zzz1289
305152	88.05	251	139.0		zzz1002,zzz1352
305151	89.24	251	139.0		zzz1002,zzz1374
305150	88.45	251	139.0		zzz1002,zzz1453
305149	87.25	251	139.0		zzz1002,zzzz407
305148	88.45	251	138.0		zzz1002,zzz1236
305147	88.84	251	138.0		zzz1002,zzz1157
305146	89.24	251	138.0		zzz1002,zzz1178
305145	89.24	251	138.0		zzz1002,zzz1407
305144	88.05	251	138.0		zzz1002,zzz1421
305143	87.65	251	138.0		zzz1002,zzzz415
305142	87.25	251	138.0		zzz1002,zzzz613
305141	86.45	251	138.0		zzz1002,zzz1409
305140	87.65	251	138.0		zzz1002,zzz1437
305139	89.24	251	138.0		zzz1002,zzz1452
305138	87.65	251	138.0		zzz1002,zzz1500
305137	87.25	251	138.0		zzz1002,zzzz444
305136	86.85	251	138.0		zzz1002,zzzz822
305135	88.45	251	137.0		zzz1002,zzz1240
305134	86.85	251	137.0		zzz1002,zzz1288
305133	86.85	251	137.0		zzz1002,zzz1338
305132	88.05	251	137.0		zzz1002,zzz1381
305131	88.05	251	137.0		zzz1002,zzz1469
305130	87.65	251	137.0		zzz1002,zzzz412
305129	87.65	251	137.0		zzz1002,zzz1112
305128	88.45	251	137.0		zzz1002,zzz1153
305127	87.65	251	137.0		zzz1002,zzz1228
305126	86.85	251	137.0		zzz1002,zzz1269
305125	86.85	251	137.0		zzz1002,zzz1272
305124	87.65	251	137.0		zzz1002,zzz1322
305123	87.65	251	137.0		zzz1002,zzz1344
305122	87.25	251	137.0		zzz1002,zzz1436
305121	86.85	251	137.0		zzz1002,zzz1487
305120	87.25	251	137.0		zzz1002,zzz1491
305119	88.05	251	137.0		zzz1002,zzzz452
305118	86.45	251	137.0		zzz1002,zzzz481
305117	86.45	251	137.0		zzz1002,zzz1209
305116	87.65	251	137.0		zzz1002,zzz1219
305115	86.85	251	137.0		zzz1002,zzz1312
305114	87.65	251	136.0		zzz1002,zzz1115
305113	88.45	251	136.0		zzz1002,zzz1137
305112	87.25	251	136.0		zzz1002,zzz1466
305111	87.7	252	136.0		zzz1002,zzz1525
305110	88.05	251	136.0		zzz1002,zzz1540
305109	87.65	251	136.0		zzz1002,zzzz946
305108	87.25	251	136.0		zzz1002,zzz1501
305107	87.25	251	136.0		zzz1002,zzz1123
305106	86.85	251	136.0		zzz1002,zzz1133
305105	86.61	254	136.0		zzz1002,zzz1311
305104	88.45	251	136.0		zzz1002,zzz1435
305103	85.66	251	136.0		zzz1002,zzz1497
305102	87.25	251	136.0		zzz1002,zzz1536
305101	86.85	251	136.0		zzz1002,zzzz449
305100	83.67	251	135.0		zzz1002,zzz1307
305099	84.46	251	135.0		zzz1002,zzzz923
305098	86.06	251	135.0		zzz1002,zzz1227
305097	85.26	251	135.0		zzz1002,zzz1247
305096	85.26	251	135.0		zzz1002,zzzz988
305095	84.11	258	135.0		zzz1002,zzz1527
305094	86.06	251	135.0		zzz1002,zzzz401
305093	84.86	251	134.0		zzz1002,zzz1464
305092	86.61	254	134.0		zzz1002,zzz1481
305091	85.66	251	134.0		zzz1002,zzz1489
305090	86.06	251	134.0		zzz1002,zzz1237
305089	85.26	251	133.0		zzz1002,zzz1055
305088	84.86	251	133.0		zzz1002,zzz1387
305087	84.06	251	133.0		zzz1002,zzz1348
305086	82.88	257	132.0		zzz1002,zzz1255
305085	84.06	251	132.0		zzz1002,zzz1406
305084	82.47	251	132.0		zzz1002,zzz1490
305083	83.67	251	131.0		zzz1002,zzz1057
305082	84.06	251	131.0		zzz1002,zzz1053
305081	81.32	257	130.0		zzz1002,zzz1498
305080	81.27	251	130.0		zzz1002,zzz1401
305079	84.13	252	130.0		zzz1002,zzzz950
305078	84.06	251	129.0		zzz1002,zzz1056
305077	82.07	251	129.0		zzz1002,zzz1454
305076	84.92	252	129.0		zzz1002,zzzz451
305075	84.13	252	129.0		zzz1002,zzz1475
305074	80.48	251	128.0		zzz1002,zzz1318
305073	84.06	251	128.0		zzz1002,zzz1171
305072	84.46	251	128.0		zzz1002,zzzz857
305071	78.21	257	124.0		zzz1002,zzz1169
305070	86.81	235	124.0		zzz1002,zzz1448
305069	81.75	252	124.0		zzz1002,zzzz447
305068	78.52	256	124.0		zzz1002,zzz1245
305067	81.75	252	124.0		zzz1002,zzzz716
305066	80.31	259	123.0		zzz1002,zzzz544
305065	77.43	257	123.0		zzz1002,zzz1008
305064	77.73	256	122.0		zzz1002,zzzz792
305063	77.43	257	122.0		zzz1002,zzz1218
305062	76.65	257	122.0		zzz1002,zzz1446
305061	77.04	257	122.0		zzz1002,zzz1476
305060	77.82	257	122.0		zzz1002,zzz1530
305059	76.65	257	122.0		zzz1002,zzz1274
305058	77.43	257	121.0		zzz1002,zzz1175
305057	77.04	257	121.0		zzz1002,zzz1319
305056	76.65	257	121.0		zzz1002,zzz1396
305055	78.21	257	121.0		zzz1002,zzz1354
305054	76.56	256	121.0		zzz1002,zzzz619
305053	77.04	257	121.0		zzz1002,zzz1441
305052	75.1	257	120.0		zzz1002,zzz1156
305051	87.5	224	120.0		zzz1002,zzz1309
305050	94.15	205	120.0		zzz1002,zzzz445
305049	75.49	257	120.0		zzz1002,zzzz588
305048	74.32	257	120.0		zzz1002,zzzz707
305047	75.1	257	120.0		zzz1002,zzz1184
305046	75.78	256	120.0		zzz1002,zzz1535
305045	76.17	256	119.0		zzz1002,zzz1221
305044	75.49	257	119.0		zzz1002,zzz1545
305043	74.71	257	119.0		zzz1002,zzz1445
305042	78.71	249	119.0		zzz1002,zzzz647
305041	75.58	258	119.0		zzz1002,zzzz847
305040	80.25	243	119.0		zzz1002,zzz1478
305039	88.04	209	119.0		zzz1002,zzzz582
305038	88.57	210	119.0		zzz1002,zzzz653
305037	75.68	259	118.0		zzz1002,zzz1235
305036	75.39	256	118.0		zzz1002,zzzz583
305035	74.32	257	118.0		zzz1002,zzzz548
305034	76.56	256	118.0		zzz1002,zzzz692
305033	83.56	219	118.0		zzz1002,zzz1210
305032	73.93	257	118.0		zzz1002,zzz1458
305031	78.99	238	118.0		zzz1002,zzzz636
305030	73.93	257	117.0		zzz1002,zzz1223
305029	75.49	257	117.0		zzz1002,zzz1349
305028	75.1	257	117.0		zzz1002,zzzz864
305027	74.32	257	117.0		zzz1002,zzz1009
305026	75.78	256	117.0		zzz1002,zzzz459
305025	76.95	256	117.0		zzz1002,zzz1383
305024	77.24	246	117.0		zzz1002,zzz1541
305023	77.78	243	117.0		zzz1002,zzzz426
305022	75.78	256	117.0		zzz1002,zzzz838
305021	75.0	256	116.0		zzz1002,zzz1159
305020	74.61	256	116.0		zzz1002,zzzz479
305019	75.39	256	116.0		zzz1002,zzzz542
305018	72.76	257	116.0		zzz1002,zzzz683
305017	75.0	256	116.0		zzz1002,zzzz856
305016	74.61	256	116.0		zzz1002,zzzz887
305015	73.83	256	116.0		zzz1002,zzzz720
305014	74.42	258	116.0		zzz1002,zzz1477
305013	75.0	256	116.0		zzz1002,zzz1495
305012	73.26	258	116.0		zzz1002,zzz1496
305011	73.64	258	116.0		zzz1002,zzzz409
305010	73.15	257	116.0		zzz1002,zzzz655
305009	73.83	256	115.0		zzz1002,zzzz934
305008	72.37	257	115.0		zzz1002,zzz1185
305007	75.5	249	115.0		zzz1002,zzz1215
305006	73.64	258	115.0		zzz1002,zzz1258
305005	74.71	257	115.0		zzz1002,zzz1363
305004	72.66	256	115.0		zzz1002,zzzz457
305003	72.27	256	115.0		zzz1002,zzzz468
305002	74.22	256	115.0		zzz1002,zzzz488
305001	73.83	256	115.0		zzz1002,zzzz507
305000	74.22	256	115.0		zzz1002,zzzz790
304999	75.39	256	115.0		zzz1002,zzzz956
304998	75.78	256	115.0		zzz1002,zzzz961
304997	71.98	257	115.0		zzz1002,zzz1003
304996	74.61	256	115.0		zzz1002,zzz1062
304995	71.6	257	115.0		zzz1002,zzz1207
304994	74.32	257	115.0		zzz1002,zzz1358
304993	71.98	257	115.0		zzz1002,zzz1504
304992	73.83	256	115.0		zzz1002,zzzz472
304991	72.27	256	115.0		zzz1002,zzzz837
304990	74.22	256	115.0		zzz1002,zzzz967
304989	74.8	254	114.0		zzz1002,zzz1100
304988	73.64	258	114.0		zzz1002,zzz1202
304987	73.83	256	114.0		zzz1002,zzz1368
304986	75.19	258	114.0		zzz1002,zzz1457
304985	74.32	257	114.0		zzz1002,zzzz611
304984	74.03	258	114.0		zzz1002,zzzz754
304983	73.93	257	114.0		zzz1002,zzzz756
304982	73.83	256	114.0		zzz1002,zzzz862
304981	74.61	256	114.0		zzz1002,zzzz910
304980	74.61	256	114.0		zzz1002,zzz1233
304979	74.71	257	114.0		zzz1002,zzz1325
304978	70.43	257	114.0		zzz1002,zzz1443
304977	75.58	258	114.0		zzz1002,zzz1484
304976	73.54	257	114.0		zzz1002,zzz1499
304975	73.83	256	114.0		zzz1002,zzzz504
304974	79.65	226	114.0		zzz1002,zzzz581
304973	74.61	256	114.0		zzz1002,zzzz867
304972	75.3	251	114.0		zzz1002,zzzz870
304971	72.76	257	114.0		zzz1002,zzz1098
304970	75.0	256	114.0		zzz1002,zzz1119
304969	72.87	258	114.0		zzz1002,zzz1144
304968	73.15	257	114.0		zzz1002,zzz1199
304967	73.93	257	114.0		zzz1002,zzz1285
304966	74.22	256	114.0		zzz1002,zzzz585
304965	71.48	256	114.0		zzz1002,zzzz965
304964	72.44	254	114.0		zzz1002,zzz1038
304963	69.65	257	114.0		zzz1002,zzz1447
304962	72.66	256	114.0		zzz1002,zzz1523
304961	73.44	256	114.0		zzz1002,zzzz487
304960	73.44	256	114.0		zzz1002,zzzz765
304959	73.93	257	114.0		zzz1002,zzzz821
304958	73.44	256	114.0		zzz1002,zzzz865
304957	74.61	256	114.0		zzz1002,zzzz932
304956	70.7	256	113.0		zzz1002,zzz1399
304955	74.03	258	113.0		zzz1002,zzz1485
304954	71.88	256	113.0		zzz1002,zzzz489
304953	73.44	256	113.0		zzz1002,zzzz606
304952	78.02	232	113.0		zzz1002,zzzz624
304951	72.87	258	113.0		zzz1002,zzzz755
304950	73.83	256	113.0		zzz1002,zzzz972
304949	69.65	257	113.0		zzz1002,zzz1391
304948	73.44	256	113.0		zzz1002,zzz1488
304947	73.44	256	113.0		zzz1002,zzzz474
304946	73.54	257	113.0		zzz1002,zzzz537
304945	73.44	256	113.0		zzz1002,zzzz607
304944	73.44	256	113.0		zzz1002,zzzz738
304943	73.83	256	113.0		zzz1002,zzzz999
304942	73.26	258	113.0		zzz1002,zzz1030
304941	73.44	256	113.0		zzz1002,zzz1132
304940	69.65	257	113.0		zzz1002,zzz1324
304939	71.48	256	113.0		zzz1002,zzz1346
304938	70.43	257	113.0		zzz1002,zzz1521
304937	72.66	256	113.0		zzz1002,zzzz711
304936	71.88	256	113.0		zzz1002,zzzz960
304935	73.54	257	112.0		zzz1002,zzz1196
304934	71.98	257	112.0		zzz1002,zzz1251
304933	71.71	258	112.0		zzz1002,zzzz469
304932	72.66	256	112.0		zzz1002,zzzz574
304931	73.15	257	112.0		zzz1002,zzzz601
304930	70.31	256	112.0		zzz1002,zzzz805
304929	73.44	256	112.0		zzz1002,zzzz931
304928	68.87	257	112.0		zzz1002,zzz1139
304927	72.09	258	112.0		zzz1002,zzz1160
304926	72.27	256	112.0		zzz1002,zzz1234
304925	73.83	256	112.0		zzz1002,zzz1242
304924	73.71	251	112.0		zzz1002,zzz1244
304923	75.41	244	112.0		zzz1002,zzz1339
304922	76.45	242	112.0		zzz1002,zzz1397
304921	70.43	257	112.0		zzz1002,zzz1398
304920	73.05	256	112.0		zzz1002,zzz1442
304919	72.87	258	112.0		zzz1002,zzz1482
304918	72.48	258	112.0		zzz1002,zzz1529
304917	71.32	258	112.0		zzz1002,zzz1542
304916	73.05	256	112.0		zzz1002,zzzz436
304915	72.27	256	112.0		zzz1002,zzzz531
304914	70.7	256	112.0		zzz1002,zzzz533
304913	73.44	256	112.0		zzz1002,zzzz584
304912	72.66	256	112.0		zzz1002,zzzz603
304911	73.44	256	112.0		zzz1002,zzzz640
304910	70.7	256	112.0		zzz1002,zzzz882
304909	70.43	257	112.0		zzz1002,zzzz978
304908	72.83	254	112.0		zzz1002,zzz1033
304907	70.16	258	112.0		zzz1002,zzz1189
304906	72.87	258	112.0		zzz1002,zzz1201
304905	74.22	256	112.0		zzz1002,zzz1205
304904	80.45	220	112.0		zzz1002,zzz1356
304903	72.09	258	112.0		zzz1002,zzz1486
304902	73.44	256	112.0		zzz1002,zzzz528
304901	71.88	256	112.0		zzz1002,zzzz598
304900	73.81	252	112.0		zzz1002,zzzz642
304899	72.27	256	112.0		zzz1002,zzzz708
304898	72.09	258	112.0		zzz1002,zzzz753
304897	71.65	261	112.0		zzz1002,zzzz902
304896	71.88	256	112.0		zzz1002,zzzz971
304895	71.71	258	111.0		zzz1002,zzz1180
304894	73.44	256	111.0		zzz1002,zzz1248
304893	72.52	262	111.0		zzz1002,zzzz456
304892	73.44	256	111.0		zzz1002,zzzz691
304891	72.52	262	111.0		zzz1002,zzzz845
304890	70.82	257	111.0		zzz1002,zzzz974
304889	70.31	256	111.0		zzz1002,zzz1250
304888	72.48	258	111.0		zzz1002,zzz1390
304887	70.31	256	111.0		zzz1002,zzz1532
304886	75.1	241	111.0		zzz1002,zzzz478
304885	71.88	256	111.0		zzz1002,zzzz814
304884	71.88	256	111.0		zzz1002,zzzz935
304883	92.71	192	111.0		zzz1002,zzzz420
304882	96.77	186	111.0		zzz1002,zzzz889
304881	71.48	256	111.0		zzz1002,zzzz921
304880	73.05	256	111.0		zzz1002,zzzz924
304879	70.93	258	111.0		zzz1002,zzz1439
304878	71.88	256	111.0		zzz1002,zzzz539
304877	72.09	258	111.0		zzz1002,zzzz665
304876	72.27	256	111.0		zzz1002,zzzz710
304875	69.92	256	111.0		zzz1002,zzzz810
304874	71.21	257	110.0		zzz1002,zzz1044
304873	71.21	257	110.0		zzz1002,zzz1168
304872	69.38	258	110.0		zzz1002,zzz1483
304871	71.88	256	110.0		zzz1002,zzzz477
304870	76.62	231	110.0		zzz1002,zzzz626
304869	72.27	256	110.0		zzz1002,zzzz538
304868	74.0	250	110.0		zzz1002,zzzz968
304867	67.32	257	110.0		zzz1002,zzzz975
304866	71.09	256	110.0		zzz1002,zzz1010
304865	71.21	257	110.0		zzz1002,zzz1128
304864	70.93	258	110.0		zzz1002,zzz1190
304863	70.93	258	110.0		zzz1002,zzz1386
304862	70.43	257	110.0		zzz1002,zzzz473
304861	71.09	256	110.0		zzz1002,zzzz540
304860	71.71	258	110.0		zzz1002,zzzz602
304859	72.09	258	110.0		zzz1002,zzzz667
304858	71.71	258	110.0		zzz1002,zzzz668
304857	70.31	256	110.0		zzz1002,zzzz763
304856	70.27	259	110.0		zzz1002,zzzz808
304855	68.87	257	110.0		zzz1002,zzzz933
304854	71.88	256	110.0		zzz1002,zzzz973
304853	66.93	257	110.0		zzz1002,zzzz976
304852	72.69	260	109.0		zzz1002,zzz1195
304851	72.66	256	109.0		zzz1002,zzz1365
304850	72.59	259	109.0		zzz1002,zzzz589
304849	71.48	256	109.0		zzz1002,zzzz604
304848	71.71	258	109.0		zzz1002,zzzz666
304847	82.38	210	109.0		zzz1002,zzzz791
304846	70.7	256	109.0		zzz1002,zzzz811
304845	69.26	257	109.0		zzz1002,zzzz846
304844	71.71	258	109.0		zzz1002,zzz1034
304843	68.36	256	109.0		zzz1002,zzz1208
304842	70.11	261	109.0		zzz1002,zzzz435
304841	71.32	258	109.0		zzz1002,zzzz658
304840	72.09	258	109.0		zzz1002,zzzz660
304839	68.63	271	109.0		zzz1002,zzzz685
304838	69.53	256	109.0		zzz1002,zzzz731
304837	70.0	260	109.0		zzz1002,zzz1070
304836	73.36	259	109.0		zzz1002,zzz1438
304835	71.09	256	109.0		zzz1002,zzzz532
304834	71.6	257	109.0		zzz1002,zzzz555
304833	70.27	259	109.0		zzz1002,zzzz600
304832	71.32	258	109.0		zzz1002,zzzz659
304831	72.48	258	109.0		zzz1002,zzzz663
304830	68.09	257	109.0		zzz1002,zzzz682
304829	72.09	258	109.0		zzz1002,zzzz706
304828	71.54	253	109.0		zzz1002,zzzz739
304827	71.32	258	109.0		zzz1002,zzzz773
304826	70.43	257	108.0		zzz1002,zzz1018
304825	69.65	257	108.0		zzz1002,zzz1265
304824	70.7	256	108.0		zzz1002,zzz1385
304823	67.43	261	108.0		zzz1002,zzz1546
304822	72.76	257	108.0		zzz1002,zzzz529
304821	71.88	256	108.0		zzz1002,zzzz605
304820	77.38	221	108.0		zzz1002,zzzz656
304819	72.05	254	108.0		zzz1002,zzzz789
304818	72.44	254	108.0		zzz1002,zzz1378
304817	72.09	258	108.0		zzz1002,zzzz553
304816	69.14	256	108.0		zzz1002,zzzz518
304815	71.09	256	108.0		zzz1002,zzzz608
304814	70.88	261	108.0		zzz1002,zzzz632
304813	71.6	257	108.0		zzz1002,zzzz689
304812	70.16	258	108.0		zzz1002,zzzz992
304811	71.6	257	108.0		zzz1002,zzzz556
304810	69.53	256	108.0		zzz1002,zzzz597
304809	70.54	258	108.0		zzz1002,zzzz661
304808	70.93	258	108.0		zzz1002,zzzz662
304807	71.32	258	108.0		zzz1002,zzzz671
304806	70.7	256	108.0		zzz1002,zzzz812
304805	70.31	256	108.0		zzz1002,zzzz913
304804	76.71	219	107.0		zzz1002,zzz1099
304803	69.5	259	107.0		zzz1002,zzz1494
304802	81.04	211	107.0		zzz1002,zzzz657
304801	70.54	258	107.0		zzz1002,zzzz669
304800	68.75	256	107.0		zzz1002,zzzz703
304799	69.77	258	107.0		zzz1002,zzzz664
304798	70.04	257	107.0		zzz1002,zzzz686
304797	69.53	256	107.0		zzz1002,zzzz762
304796	69.96	253	107.0		zzz1002,zzz1304
304795	71.21	257	107.0		zzz1002,zzzz454
304794	70.31	256	107.0		zzz1002,zzzz709
304793	69.38	258	107.0		zzz1002,zzzz751
304792	70.54	258	107.0		zzz1002,zzzz767
304791	77.63	219	107.0		zzz1002,zzzz993
304790	70.11	261	106.0		zzz1002,zzz1141
304789	66.54	257	106.0		zzz1002,zzz1200
304788	73.64	239	106.0		zzz1002,zzzz970
304787	70.16	258	106.0		zzz1002,zzzz485
304786	69.14	256	106.0		zzz1002,zzzz705
304785	70.04	257	106.0		zzz1002,zzzz981
304784	71.72	244	106.0		zzz1002,zzzz467
304783	69.14	256	105.0		zzz1002,zzzz623
304782	75.77	227	106.0		zzz1002,zzzz627
304781	69.77	258	105.0		zzz1002,zzzz771
304780	68.75	256	105.0		zzz1002,zzzz888
304779	71.84	245	105.0		zzz1002,zzz1064
304778	67.31	260	105.0		zzz1002,zzz1279
304777	70.78	243	105.0		zzz1002,zzz1416
304776	68.6	258	105.0		zzz1002,zzzz432
304775	69.53	256	105.0		zzz1002,zzzz480
304774	70.16	258	105.0		zzz1002,zzzz670
304773	69.38	258	105.0		zzz1002,zzzz672
304772	76.34	224	105.0		zzz1002,zzzz732
304771	71.09	256	105.0		zzz1002,zzzz740
304770	69.38	258	105.0		zzz1002,zzzz768
304769	69.92	256	105.0		zzz1002,zzzz521
304768	65.89	258	105.0		zzz1002,zzz1395
304767	78.5	214	105.0		zzz1002,zzzz599
304766	69.11	259	105.0		zzz1002,zzzz752
304765	69.38	258	105.0		zzz1002,zzzz858
304764	67.7	257	104.0		zzz1002,zzzz523
304763	68.22	258	104.0		zzz1002,zzzz772
304762	69.92	256	104.0		zzz1002,zzz1372
304761	66.93	257	104.0		zzz1002,zzz1503
304760	67.83	258	104.0		zzz1002,zzzz431
304759	67.95	259	104.0		zzz1002,zzzz757
304758	68.6	258	104.0		zzz1002,zzzz766
304757	68.22	258	104.0		zzz1002,zzzz774
304756	66.41	256	104.0		zzz1002,zzzz806
304755	67.19	256	104.0		zzz1002,zzzz815
304754	70.7	256	104.0		zzz1002,zzzz612
304753	66.41	256	104.0		zzz1002,zzzz803
304752	83.0	200	103.0		zzz1002,zzz1067
304751	65.48	252	103.0		zzz1002,zzz1266
304750	65.5	258	103.0		zzz1002,zzz1393
304749	67.44	258	102.0		zzz1002,zzzz549
304748	67.83	258	102.0		zzz1002,zzzz775
304747	66.92	260	102.0		zzz1002,zzzz804
304746	67.97	256	102.0		zzz1002,zzz1284
304745	68.36	256	102.0		zzz1002,zzz1411
304744	69.77	258	102.0		zzz1002,zzzz770
304743	69.44	252	102.0		zzz1002,zzzz905
304742	71.98	257	102.0		zzz1002,zzzz410
304741	67.05	258	102.0		zzz1002,zzzz769
304740	67.58	256	101.0		zzz1002,zzzz816
304739	67.32	257	101.0		zzz1002,zzz1276
304738	66.54	257	101.0		zzz1002,zzzz841
304737	64.45	256	100.0		zzz1002,zzzz809
304736	69.77	258	100.0		zzz1002,zzz1069
304735	68.48	257	100.0		zzz1002,zzzz536
304734	90.96	177	100.0		zzz1002,zzzz404
304733	95.27	169	100.0		zzz1002,zzzz475
304732	65.62	256	100.0		zzz1002,zzzz568
304731	63.67	256	100.0		zzz1002,zzzz793
304730	67.36	242	99.0		zzz1002,zzz1440
304729	66.8	256	99.0		zzz1002,zzzz527
304728	88.7	177	99.0		zzz1002,zzz1012
304727	89.33	178	99.0		zzz1002,zzzz482
304726	66.41	256	99.0		zzz1002,zzzz609
304725	72.81	217	99.0		zzz1002,zzz1013
304724	69.07	236	99.0		zzz1002,zzz1015
304723	64.84	256	98.0		zzz1002,zzzz764
304722	89.27	177	98.0		zzz1002,zzz1011
304721	72.37	228	98.0		zzz1002,zzz1017
304720	64.06	256	98.0		zzz1002,zzzz807
304719	65.62	256	98.0		zzz1002,zzzz944
304718	62.89	256	96.0		zzz1002,zzzz802
304717	62.89	256	96.0		zzz1002,zzzz620
304716	66.26	243	96.0		zzz1002,zzzz750
304715	64.75	261	95.0		zzz1002,zzzz567
304714	64.98	257	95.0		zzz1002,zzz1249
304713	69.51	223	94.0		zzz1002,zzz1203
304712	62.79	258	94.0		zzz1002,zzzz425
304711	73.53	204	94.0		zzz1002,zzzz786
304710	62.21	262	94.0		zzz1002,zzzz498
304709	69.27	218	94.0		zzz1002,zzzz519
304708	62.89	256	93.0		zzz1002,zzzz966
304707	61.48	257	93.0		zzz1002,zzz1028
304706	64.37	261	93.0		zzz1002,zzzz520
304705	67.53	231	93.0		zzz1002,zzzz783
304704	72.12	226	93.0		zzz1002,zzzz569
304703	71.5	207	93.0		zzz1002,zzzz784
304702	62.06	253	93.0		zzz1002,zzzz704
304701	70.87	206	93.0		zzz1002,zzzz785
304700	63.67	256	93.0		zzz1002,zzzz813
304699	71.76	216	92.0		zzz1002,zzzz969
304698	89.63	164	91.0		zzz1002,zzz1059
304697	62.89	256	90.0		zzz1002,zzz1456
304696	61.0	259	90.0		zzz1002,zzzz875
304695	62.69	260	90.0		zzz1002,zzzz500
304694	61.33	256	90.0		zzz1002,zzzz530
304693	62.11	256	90.0		zzz1002,zzz1379
304692	81.11	180	90.0		zzz1002,zzzz429
304691	67.09	234	90.0		zzz1002,zzzz557
304690	76.06	188	90.0		zzz1002,zzzz684
304689	91.77	158	89.0		zzz1002,zzzz405
304688	75.0	192	89.0		zzz1002,zzzz625
304687	61.69	261	88.0		zzz1002,zzzz512
304686	79.44	180	88.0		zzz1002,zzzz566
304685	79.89	179	88.0		zzz1002,zzzz883
304684	93.51	154	88.0		zzz1002,zzzz406
304683	87.12	163	87.0		zzz1002,zzz1058
304682	86.59	164	87.0		zzz1002,zzz1060
304681	90.32	155	87.0		zzz1002,zzzz464
304680	57.65	255	86.0		zzz1002,zzz1533
304679	60.16	256	86.0		zzz1002,zzzz836
304678	74.01	177	86.0		zzz1002,zzz1027
304677	72.92	192	86.0		zzz1002,zzzz798
304676	60.15	266	85.0		zzz1002,zzzz497
304675	70.0	210	85.0		zzz1002,zzzz503
304674	72.02	193	85.0		zzz1002,zzzz903
304673	61.36	264	84.0		zzz1002,zzzz694
304672	69.76	205	84.0		zzz1002,zzzz996
304671	76.02	171	83.0		zzz1002,zzz1026
304670	59.38	256	83.0		zzz1002,zzzz502
304669	74.16	178	83.0		zzz1002,zzz1021
304668	60.16	256	83.0		zzz1002,zzzz610
304667	72.58	186	82.0		zzz1002,zzzz628
304666	65.53	206	82.0		zzz1002,zzz1068
304665	74.12	170	81.0		zzz1002,zzzz630
304664	70.77	195	80.0		zzz1002,zzzz869
304663	63.71	237	80.0		zzz1002,zzzz526
304662	57.42	256	79.0		zzz1002,zzzz517
304661	73.18	179	79.0		zzz1002,zzzz795
304660	81.1	164	79.0		zzz1002,zzz1052
304659	67.65	204	79.0		zzz1002,zzz1314
304658	56.25	256	77.0		zzz1002,zzzz622
304657	59.01	222	75.0		zzz1002,zzz1063
304656	53.12	256	75.0		zzz1002,zzz1522
304655	52.69	260	74.0		zzz1002,zzzz590
304654	70.39	179	74.0		zzz1002,zzz1023
304653	80.13	151	74.0		zzz1002,zzzz680
304652	61.95	205	74.0		zzz1002,zzzz936
304651	53.11	241	74.0		zzz1002,zzzz953
304650	63.96	197	73.0		zzz1002,zzz1043
304649	52.46	244	73.0		zzz1002,zzz1257
304648	51.95	256	73.0		zzz1002,zzzz721
304647	50.58	257	72.0		zzz1002,zzzz462
304646	53.11	241	72.0		zzz1002,zzzz551
304645	52.7	241	72.0		zzz1002,zzz1417
304644	53.94	241	72.0		zzz1002,zzzz506
304643	51.19	252	72.0		zzz1002,zzzz702
304642	50.0	256	71.0		zzz1002,zzz1261
304641	55.98	259	71.0		zzz1002,zzz1357
304640	50.59	253	71.0		zzz1002,zzzz860
304639	51.87	241	71.0		zzz1002,zzzz722
304638	51.38	253	71.0		zzz1002,zzzz861
304637	52.69	260	70.0		zzz1002,zzz1451
304636	49.07	216	70.0		zzz1002,zzz1431
304635	78.52	149	70.0		zzz1002,zzzz565
304634	89.34	122	68.0		zzz1002,zzzz586
304633	50.62	241	68.0		zzz1002,zzzz631
304632	68.86	167	67.0		zzz1002,zzz1016
304631	50.42	238	67.0		zzz1002,zzzz730
304630	66.46	164	66.0		zzz1002,zzz1204
304629	51.53	229	65.0		zzz1002,zzzz737
304628	68.82	170	65.0		zzz1002,zzzz957
304627	83.2	125	64.0		zzz1002,zzzz419
304626	84.92	126	64.0		zzz1002,zzzz591
304625	65.22	161	62.0		zzz1002,zzzz541
304624	70.59	153	62.0		zzz1002,zzzz644
304623	82.93	123	61.0		zzz1002,zzzz460
304622	64.37	174	61.0		zzz1002,zzz1041
304621	82.64	121	61.0		zzz1002,zzzz983
304620	78.74	127	61.0		zzz1002,zzzz413
304619	82.61	115	59.0		zzz1002,zzzz522
304618	72.52	131	58.0		zzz1002,zzz1025
304617	76.86	121	58.0		zzz1002,zzzz418
304616	81.74	115	55.0		zzz1002,zzzz417
304615	81.74	115	55.0		zzz1002,zzzz458
304614	77.69	121	55.0		zzz1002,zzzz408
304613	73.23	127	54.0		zzz1002,zzzz596
304612	77.39	115	53.0		zzz1002,zzzz411
304611	77.39	115	53.0		zzz1002,zzzz490
304610	72.36	123	53.0		zzz1002,zzzz984
304609	84.91	106	52.0		zzz1002,zzzz982
304608	72.58	124	52.0		zzz1002,zzzz595
304607	76.99	113	51.0		zzz1002,zzzz794
304606	79.63	108	51.0		zzz1002,zzzz434
304605	59.57	141	48.0		zzz1002,zzz1022
304604	94.05	84	47.0		zzz1002,zzzz840
304603	69.49	118	47.0		zzz1002,zzzz594
304602	51.69	178	45.0		zzz1002,zzzz914
304601	61.54	130	44.0		zzz1002,zzzz466
304600	79.57	93	44.0		zzz1002,zzzz797
304599	58.91	129	44.0		zzz1002,zzzz593
304598	64.66	116	40.0		zzz1002,zzz1019
304597	67.35	98	38.0		zzz1002,zzzz986
304596	65.31	98	37.0		zzz1002,zzzz987
304595	66.67	96	36.0		zzz1002,zzzz985
304594	32.99	194	34.0		zzz1002,zzz1326
304593	30.41	217	34.0		zzz1002,zzz1520
304592	30.93	194	32.0		zzz1002,zzz1518
304591	44.44	162	30.0		zzz1002,zzzz505
304590	31.22	205	28.0		zzz1002,zzz1377
304589	54.79	73	19.0		zzz1002,zzzz977
304588	46.53	101	19.0		zzz1002,zzzz491
304587	54.29	70	15.0		zzz1002,zzzz958
304582	89.88	257	141.0		zzz1003,zzz1185
304581	90.27	257	140.0		zzz1003,zzzz457
304580	89.88	257	139.0		zzz1003,zzz1346
304579	89.45	256	139.0		zzz1003,zzz1038
304578	87.94	257	139.0		zzz1003,zzz1398
304577	89.19	259	139.0		zzz1003,zzzz965
304576	88.72	257	138.0		zzz1003,zzz1098
304575	87.64	259	138.0		zzz1003,zzzz489
304574	87.55	257	138.0		zzz1003,zzz1399
304573	86.77	257	137.0		zzz1003,zzz1504
304572	88.33	257	137.0		zzz1003,zzzz882
304571	86.77	257	135.0		zzz1003,zzzz837
304570	85.5	262	134.0		zzz1003,zzzz808
304569	86.38	257	134.0		zzz1003,zzzz846
304568	85.21	257	134.0		zzz1003,zzzz805
304567	85.21	257	133.0		zzz1003,zzzz960
304566	83.66	257	131.0		zzz1003,zzz1532
304565	82.1	257	130.0		zzz1003,zzzz862
304564	82.88	257	130.0		zzz1003,zzz1250
304563	83.01	259	129.0		zzz1003,zzzz806
304562	81.08	259	129.0		zzz1003,zzzz533
304561	82.24	259	129.0		zzz1003,zzzz814
304560	82.63	259	128.0		zzz1003,zzzz815
304559	81.32	257	128.0		zzz1003,zzzz810
304558	83.01	259	128.0		zzz1003,zzzz933
304557	78.6	257	127.0		zzz1003,zzz1325
304556	93.21	221	127.0		zzz1003,zzz1099
304555	81.08	259	126.0		zzz1003,zzzz803
304554	78.21	257	126.0		zzz1003,zzz1397
304553	81.08	259	126.0		zzz1003,zzzz793
304552	78.21	257	126.0		zzz1003,zzzz537
304551	81.37	263	125.0		zzz1003,zzzz804
304550	80.31	259	124.0		zzz1003,zzzz809
304549	76.26	257	124.0		zzz1003,zzz1245
304548	75.88	257	124.0		zzz1003,zzz1446
304547	76.65	257	124.0		zzz1003,zzz1208
304546	76.26	257	123.0		zzz1003,zzz1175
304545	75.88	257	123.0		zzz1003,zzz1274
304544	75.1	257	123.0		zzz1003,zzz1319
304543	74.71	257	123.0		zzz1003,zzz1530
304542	75.49	257	123.0		zzz1003,zzz1221
304541	75.29	259	123.0		zzz1003,zzzz707
304540	76.65	257	123.0		zzz1003,zzzz583
304539	73.93	257	122.0		zzz1003,zzz1184
304538	74.71	257	122.0		zzz1003,zzz1218
304537	73.93	257	122.0		zzz1003,zzz1354
304536	74.32	257	122.0		zzz1003,zzz1396
304535	73.93	257	122.0		zzz1003,zzz1476
304534	77.04	257	122.0		zzz1003,zzz1535
304533	77.43	257	122.0		zzz1003,zzzz459
304532	75.49	257	122.0		zzz1003,zzzz792
304531	75.58	258	122.0		zzz1003,zzzz847
304530	74.71	257	122.0		zzz1003,zzz1008
304529	73.93	257	122.0		zzz1003,zzz1169
304528	74.71	257	122.0		zzz1003,zzz1545
304527	75.88	257	122.0		zzz1003,zzzz655
304526	75.88	257	122.0		zzz1003,zzzz838
304525	75.88	257	122.0		zzz1003,zzz1199
304524	75.1	257	122.0		zzz1003,zzzz720
304523	75.88	257	122.0		zzz1003,zzzz934
304522	74.32	257	121.0		zzz1003,zzz1156
304521	73.15	257	121.0		zzz1003,zzz1541
304520	75.1	257	121.0		zzz1003,zzzz479
304519	74.71	257	121.0		zzz1003,zzzz619
304518	78.76	259	121.0		zzz1003,zzzz802
304517	74.71	257	121.0		zzz1003,zzz1349
304516	75.1	257	121.0		zzz1003,zzz1478
304515	73.93	257	121.0		zzz1003,zzz1223
304514	74.71	257	121.0		zzz1003,zzz1441
304513	73.54	257	121.0		zzz1003,zzzz588
304512	72.76	257	120.0		zzz1003,zzz1324
304511	75.29	259	120.0		zzz1003,zzz1488
304510	74.71	257	120.0		zzz1003,zzzz585
304509	74.32	257	120.0		zzz1003,zzzz765
304508	75.1	257	120.0		zzz1003,zzzz790
304507	74.71	257	120.0		zzz1003,zzzz864
304506	75.29	259	120.0		zzz1003,zzzz887
304505	73.15	257	120.0		zzz1003,zzz1009
304504	72.37	257	120.0		zzz1003,zzz1139
304503	73.54	257	120.0		zzz1003,zzz1445
304502	74.71	257	120.0		zzz1003,zzz1495
304501	73.93	257	120.0		zzz1003,zzzz738
304500	75.68	259	120.0		zzz1003,zzzz856
304499	74.71	257	120.0		zzz1003,zzzz956
304498	75.29	259	120.0		zzz1003,zzzz961
304497	74.32	257	120.0		zzz1003,zzz1234
304496	73.93	257	120.0		zzz1003,zzz1368
304495	78.6	257	120.0		zzz1003,zzzz620
304494	75.78	256	119.0		zzz1003,zzz1100
304493	74.71	257	119.0		zzz1003,zzz1119
304492	74.9	259	119.0		zzz1003,zzz1159
304491	87.61	226	119.0		zzz1003,zzz1203
304490	74.13	259	119.0		zzz1003,zzzz542
304489	77.99	259	119.0		zzz1003,zzzz807
304488	74.71	257	119.0		zzz1003,zzzz910
304487	74.71	257	119.0		zzz1003,zzzz967
304486	74.32	257	119.0		zzz1003,zzz1062
304485	73.54	257	119.0		zzz1003,zzz1235
304484	75.1	257	119.0		zzz1003,zzz1363
304483	73.15	257	119.0		zzz1003,zzzz636
304482	74.71	257	119.0		zzz1003,zzzz692
304481	73.54	257	119.0		zzz1003,zzzz504
304480	72.76	257	118.0		zzz1003,zzz1391
304479	73.15	257	118.0		zzz1003,zzzz426
304478	74.71	257	118.0		zzz1003,zzzz472
304477	73.54	257	118.0		zzz1003,zzz1233
304476	73.54	257	118.0		zzz1003,zzzz474
304475	74.32	257	118.0		zzz1003,zzzz507
304474	73.26	258	118.0		zzz1003,zzz1496
304473	71.6	257	118.0		zzz1003,zzz1521
304472	73.15	257	118.0		zzz1003,zzzz487
304471	74.32	257	118.0		zzz1003,zzzz640
304470	73.54	257	118.0		zzz1003,zzzz711
304469	72.76	257	118.0		zzz1003,zzzz865
304468	71.21	257	118.0		zzz1003,zzzz975
304467	73.54	257	118.0		zzz1003,zzzz574
304466	73.93	257	118.0		zzz1003,zzzz584
304465	72.59	259	118.0		zzz1003,zzzz821
304464	72.97	259	118.0		zzz1003,zzzz932
304463	70.43	257	117.0		zzz1003,zzz1443
304462	70.43	257	117.0		zzz1003,zzz1447
304461	72.87	258	117.0		zzz1003,zzzz409
304460	73.15	257	117.0		zzz1003,zzzz456
304459	72.76	257	117.0		zzz1003,zzzz468
304458	73.93	257	117.0		zzz1003,zzzz478
304457	73.93	257	117.0		zzz1003,zzzz710
304456	73.54	257	117.0		zzz1003,zzzz935
304455	73.15	257	117.0		zzz1003,zzz1106
304454	70.82	257	117.0		zzz1003,zzz1207
304453	75.49	257	117.0		zzz1003,zzz1285
304452	72.37	257	117.0		zzz1003,zzzz539
304451	72.37	257	117.0		zzz1003,zzzz548
304450	74.32	257	117.0		zzz1003,zzzz867
304449	73.93	257	117.0		zzz1003,zzz1293
304448	72.76	257	117.0		zzz1003,zzz1442
304447	73.54	257	117.0		zzz1003,zzz1499
304446	73.54	257	117.0		zzz1003,zzz1523
304445	73.54	257	117.0		zzz1003,zzzz606
304444	72.97	259	117.0		zzz1003,zzzz611
304443	72.37	257	116.0		zzz1003,zzzz708
304442	69.65	257	116.0		zzz1003,zzzz976
304441	71.98	257	116.0		zzz1003,zzzz999
304440	72.87	258	116.0		zzz1003,zzz1258
304439	72.09	258	116.0		zzz1003,zzz1457
304438	74.03	258	116.0		zzz1003,zzz1525
304437	72.37	257	116.0		zzz1003,zzzz473
304436	72.87	258	116.0		zzz1003,zzzz754
304435	72.27	256	116.0		zzz1003,zzz1033
304434	73.15	257	116.0		zzz1003,zzz1054
304433	74.0	250	116.0		zzz1003,zzz1215
304432	73.15	257	116.0		zzz1003,zzz1242
304431	72.48	258	116.0		zzz1003,zzz1358
304430	72.76	257	116.0		zzz1003,zzz1462
304429	71.71	258	116.0		zzz1003,zzz1477
304428	71.32	258	116.0		zzz1003,zzz1482
304427	73.75	259	116.0		zzz1003,zzzz529
304426	72.37	257	116.0		zzz1003,zzzz601
304425	72.76	257	116.0		zzz1003,zzzz603
304424	73.15	257	116.0		zzz1003,zzzz607
304423	73.26	258	116.0		zzz1003,zzzz642
304422	71.98	257	116.0		zzz1003,zzzz921
304421	71.98	257	116.0		zzz1003,zzzz971
304420	71.98	257	115.0		zzz1003,zzz1132
304419	72.09	258	115.0		zzz1003,zzz1189
304418	71.71	258	115.0		zzz1003,zzz1529
304417	72.37	257	115.0		zzz1003,zzzz528
304416	71.21	257	115.0		zzz1003,zzzz531
304415	71.98	257	115.0		zzz1003,zzzz811
304414	73.15	257	115.0		zzz1003,zzzz972
304413	69.65	257	115.0		zzz1003,zzzz978
304412	74.6	248	115.0		zzz1003,zzz1311
304411	71.98	257	115.0		zzz1003,zzz1422
304410	69.26	257	115.0		zzz1003,zzz1458
304409	71.26	254	115.0		zzz1003,zzz1546
304408	72.76	257	115.0		zzz1003,zzzz604
304407	70.43	257	115.0		zzz1003,zzzz682
304406	69.26	257	115.0		zzz1003,zzzz683
304405	72.31	260	115.0		zzz1003,zzzz756
304404	71.6	257	115.0		zzz1003,zzzz763
304403	70.93	258	115.0		zzz1003,zzz1144
304402	71.32	258	115.0		zzz1003,zzz1201
304401	71.81	259	115.0		zzz1003,zzz1248
304400	69.26	257	115.0		zzz1003,zzz1251
304399	71.32	258	115.0		zzz1003,zzz1484
304398	72.87	258	115.0		zzz1003,zzz1527
304397	71.98	257	115.0		zzz1003,zzzz407
304396	70.82	257	115.0		zzz1003,zzzz598
304395	72.76	257	115.0		zzz1003,zzzz691
304394	71.71	258	115.0		zzz1003,zzzz845
304393	72.37	257	115.0		zzz1003,zzzz924
304392	72.59	259	114.0		zzz1003,zzz1205
304391	72.87	258	114.0		zzz1003,zzzz981
304390	71.6	257	114.0		zzz1003,zzz1010
304389	71.32	258	114.0		zzz1003,zzz1030
304388	71.98	257	114.0		zzz1003,zzz1210
304387	70.82	257	114.0		zzz1003,zzz1214
304386	73.36	259	114.0		zzz1003,zzz1284
304385	71.21	257	114.0		zzz1003,zzz1352
304384	72.37	257	114.0		zzz1003,zzz1365
304383	74.03	258	114.0		zzz1003,zzz1466
304382	71.98	257	114.0		zzz1003,zzz1501
304381	71.71	258	114.0		zzz1003,zzz1542
304380	71.21	257	114.0		zzz1003,zzzz442
304379	71.6	257	114.0		zzz1003,zzzz518
304378	71.21	257	114.0		zzz1003,zzzz538
304377	72.31	260	114.0		zzz1003,zzzz589
304376	71.71	258	114.0		zzz1003,zzzz755
304375	71.21	257	114.0		zzz1003,zzzz946
304374	71.6	257	114.0		zzz1003,zzz1053
304373	70.16	258	114.0		zzz1003,zzz1279
304372	71.6	257	114.0		zzz1003,zzz1543
304371	71.21	257	114.0		zzz1003,zzzz477
304370	72.37	257	114.0		zzz1003,zzz1055
304369	71.6	257	114.0		zzz1003,zzz1122
304368	71.21	257	114.0		zzz1003,zzz1162
304367	72.09	258	114.0		zzz1003,zzz1244
304366	71.6	257	114.0		zzz1003,zzz1322
304365	71.21	257	114.0		zzz1003,zzz1385
304364	71.6	257	114.0		zzz1003,zzz1415
304363	71.21	257	114.0		zzz1003,zzz1471
304362	72.76	257	114.0		zzz1003,zzz1536
304361	70.82	257	114.0		zzz1003,zzzz481
304360	73.54	257	114.0		zzz1003,zzzz488
304359	72.37	257	114.0		zzz1003,zzzz602
304358	73.31	251	114.0		zzz1003,zzzz968
304357	71.98	257	114.0		zzz1003,zzzz973
304356	71.6	257	113.0		zzz1003,zzz1128
304355	70.82	257	113.0		zzz1003,zzz1228
304354	75.21	242	113.0		zzz1003,zzz1329
304353	72.37	257	113.0		zzz1003,zzz1335
304352	73.39	248	113.0		zzz1003,zzz1444
304351	71.21	257	113.0		zzz1003,zzz1455
304350	70.77	260	113.0		zzz1003,zzz1483
304349	69.77	258	113.0		zzz1003,zzz1485
304348	72.87	258	113.0		zzz1003,zzz1487
304347	70.38	260	113.0		zzz1003,zzzz469
304346	73.15	257	113.0		zzz1003,zzzz605
304345	71.98	257	113.0		zzz1003,zzzz656
304344	70.93	258	113.0		zzz1003,zzzz753
304343	70.82	257	113.0		zzz1003,zzzz762
304342	71.98	257	113.0		zzz1003,zzzz822
304341	75.19	262	113.0		zzz1003,zzzz875
304340	70.93	258	113.0		zzz1003,zzzz902
304339	71.21	257	113.0		zzz1003,zzzz988
304338	71.6	257	113.0		zzz1003,zzzz998
304337	70.82	257	113.0		zzz1003,zzz1130
304336	71.21	257	113.0		zzz1003,zzz1152
304335	68.87	257	113.0		zzz1003,zzz1200
304334	71.21	257	113.0		zzz1003,zzz1240
304333	73.97	242	113.0		zzz1003,zzz1403
304332	71.6	257	113.0		zzz1003,zzz1425
304331	70.43	257	113.0		zzz1003,zzz1437
304330	70.66	259	113.0		zzz1003,zzzz540
304329	71.21	257	113.0		zzz1003,zzzz652
304328	70.43	257	113.0		zzz1003,zzzz703
304327	72.37	257	113.0		zzz1003,zzzz705
304326	70.38	260	113.0		zzz1003,zzz1160
304325	69.38	258	113.0		zzz1003,zzz1180
304324	68.99	258	113.0		zzz1003,zzz1202
304323	69.65	257	113.0		zzz1003,zzz1230
304322	70.82	257	113.0		zzz1003,zzz1272
304321	70.31	256	113.0		zzz1003,zzz1339
304320	70.82	257	113.0		zzz1003,zzz1348
304319	71.98	257	113.0		zzz1003,zzz1361
304318	69.77	258	113.0		zzz1003,zzz1395
304317	70.04	257	113.0		zzz1003,zzz1413
304316	74.38	242	113.0		zzz1003,zzz1449
304315	71.71	258	113.0		zzz1003,zzz1450
304314	74.79	242	113.0		zzz1003,zzz1453
304313	73.97	242	113.0		zzz1003,zzz1524
304312	70.43	257	113.0		zzz1003,zzzz532
304311	70.82	257	113.0		zzz1003,zzzz931
304310	70.82	257	112.0		zzz1003,zzz1133
304309	69.62	260	112.0		zzz1003,zzz1168
304308	70.04	257	112.0		zzz1003,zzz1265
304307	71.21	257	112.0		zzz1003,zzz1452
304306	72.31	242	112.0		zzz1003,zzz1048
304305	71.6	257	112.0		zzz1003,zzz1120
304304	68.22	258	112.0		zzz1003,zzz1190
304303	70.82	257	112.0		zzz1003,zzz1219
304302	70.43	257	112.0		zzz1003,zzz1296
304301	70.43	257	112.0		zzz1003,zzz1312
304300	70.82	257	112.0		zzz1003,zzz1343
304299	69.65	257	112.0		zzz1003,zzz1344
304298	69.38	258	112.0		zzz1003,zzz1390
304297	70.43	257	112.0		zzz1003,zzz1402
304296	70.04	257	112.0		zzz1003,zzz1436
304295	73.97	242	112.0		zzz1003,zzz1480
304294	71.21	257	112.0		zzz1003,zzz1492
304293	70.66	259	112.0		zzz1003,zzz1494
304292	72.2	259	112.0		zzz1003,zzzz575
304291	68.99	258	112.0		zzz1003,zzzz667
304290	71.09	256	112.0		zzz1003,zzzz739
304289	70.66	259	112.0		zzz1003,zzzz913
304288	70.43	257	112.0		zzz1003,zzz1004
304287	70.43	257	112.0		zzz1003,zzz1112
304286	71.21	257	112.0		zzz1003,zzz1172
304285	70.0	260	112.0		zzz1003,zzz1196
304284	70.43	257	112.0		zzz1003,zzz1209
304283	70.43	257	112.0		zzz1003,zzz1227
304282	71.21	257	112.0		zzz1003,zzz1237
304281	70.04	257	112.0		zzz1003,zzz1381
304280	69.65	257	112.0		zzz1003,zzz1407
304279	70.04	257	112.0		zzz1003,zzz1469
304278	68.6	258	112.0		zzz1003,zzz1486
304277	69.77	258	112.0		zzz1003,zzz1490
304276	71.21	257	112.0		zzz1003,zzz1540
304275	71.21	257	112.0		zzz1003,zzzz446
304274	70.04	257	112.0		zzz1003,zzzz597
304273	70.04	257	112.0		zzz1003,zzzz877
304272	70.82	257	112.0		zzz1003,zzzz948
304271	69.23	260	111.0		zzz1003,zzz1070
304270	70.04	257	111.0		zzz1003,zzz1157
304269	70.04	257	111.0		zzz1003,zzz1269
304268	70.04	257	111.0		zzz1003,zzz1303
304267	72.31	242	111.0		zzz1003,zzz1421
304266	70.43	257	111.0		zzz1003,zzzz415
304265	68.99	258	111.0		zzz1003,zzzz669
304264	68.85	260	111.0		zzz1003,zzz1018
304263	69.38	258	111.0		zzz1003,zzz1034
304262	69.65	257	111.0		zzz1003,zzz1118
304261	70.04	257	111.0		zzz1003,zzz1137
304260	71.98	257	111.0		zzz1003,zzz1288
304259	68.85	260	111.0		zzz1003,zzz1439
304258	70.04	257	111.0		zzz1003,zzzz444
304257	73.5	234	111.0		zzz1003,zzzz624
304256	68.99	258	111.0		zzz1003,zzzz660
304255	70.54	258	111.0		zzz1003,zzz1294
304254	70.82	257	111.0		zzz1003,zzz1304
304253	69.65	257	111.0		zzz1003,zzz1307
304252	70.11	261	111.0		zzz1003,zzz1481
304251	68.09	257	111.0		zzz1003,zzz1500
304250	70.04	257	111.0		zzz1003,zzzz433
304249	70.27	259	111.0		zzz1003,zzzz600
304248	67.83	258	111.0		zzz1003,zzzz992
304247	70.43	257	111.0		zzz1003,zzz1176
304246	73.55	242	111.0		zzz1003,zzz1236
304245	72.73	242	111.0		zzz1003,zzz1280
304244	71.49	242	111.0		zzz1003,zzz1338
304243	71.9	242	111.0		zzz1003,zzz1347
304242	71.76	255	111.0		zzz1003,zzz1378
304241	68.6	258	111.0		zzz1003,zzz1393
304240	68.48	257	111.0		zzz1003,zzz1406
304239	69.77	258	111.0		zzz1003,zzz1409
304238	69.77	258	111.0		zzz1003,zzz1493
304237	69.88	259	111.0		zzz1003,zzzz623
304236	68.22	258	111.0		zzz1003,zzzz665
304235	70.04	257	111.0		zzz1003,zzzz888
304234	73.75	240	111.0		zzz1003,zzzz970
304233	70.82	257	111.0		zzz1003,zzzz974
304232	70.93	258	110.0		zzz1003,zzz1056
304231	69.26	257	110.0		zzz1003,zzz1057
304230	72.76	246	110.0		zzz1003,zzz1064
304229	68.22	258	110.0		zzz1003,zzz1165
304228	68.09	257	110.0		zzz1003,zzz1289
304227	69.23	260	110.0		zzz1003,zzz1386
304226	71.21	257	110.0		zzz1003,zzzz612
304225	68.22	258	110.0		zzz1003,zzzz666
304224	69.26	257	110.0		zzz1003,zzz1374
304223	69.65	257	110.0		zzz1003,zzz1387
304222	70.43	257	110.0		zzz1003,zzz1491
304221	69.65	257	110.0		zzz1003,zzzz521
304220	68.6	258	110.0		zzz1003,zzzz668
304219	67.83	258	110.0		zzz1003,zzzz751
304218	70.0	260	110.0		zzz1003,zzz1044
304217	70.27	259	110.0		zzz1003,zzz1115
304216	70.66	259	110.0		zzz1003,zzz1123
304215	68.46	260	110.0		zzz1003,zzz1195
304214	70.66	259	110.0		zzz1003,zzz1372
304213	69.26	257	110.0		zzz1003,zzz1454
304212	67.32	257	110.0		zzz1003,zzz1464
304211	69.65	257	110.0		zzz1003,zzz1548
304210	69.26	257	110.0		zzz1003,zzzz480
304209	67.83	258	110.0		zzz1003,zzzz553
304208	69.23	260	110.0		zzz1003,zzzz555
304207	72.96	233	110.0		zzz1003,zzzz626
304206	67.83	258	110.0		zzz1003,zzzz658
304205	68.22	258	110.0		zzz1003,zzzz659
304204	67.83	258	110.0		zzz1003,zzzz663
304203	67.05	258	110.0		zzz1003,zzzz664
304202	70.04	257	110.0		zzz1003,zzzz740
304201	69.5	259	109.0		zzz1003,zzz1416
304200	67.32	257	109.0		zzz1003,zzzz412
304199	68.48	257	109.0		zzz1003,zzzz523
304198	77.06	218	109.0		zzz1003,zzzz613
304197	68.34	259	109.0		zzz1003,zzzz812
304196	69.42	242	109.0		zzz1003,zzzz923
304195	68.99	258	109.0		zzz1003,zzz1141
304194	66.93	257	109.0		zzz1003,zzz1255
304193	70.54	258	109.0		zzz1003,zzz1435
304192	68.87	257	109.0		zzz1003,zzz1489
304191	70.04	257	109.0		zzz1003,zzzz454
304190	69.26	257	109.0		zzz1003,zzzz599
304189	69.02	255	109.0		zzz1003,zzz1266
304188	68.87	257	109.0		zzz1003,zzz1497
304187	68.85	260	109.0		zzz1003,zzzz436
304186	77.27	220	109.0		zzz1003,zzzz451
304185	70.33	246	109.0		zzz1003,zzzz685
304184	69.77	258	108.0		zzz1003,zzz1153
304183	69.77	258	108.0		zzz1003,zzz1178
304182	72.16	255	108.0		zzz1003,zzz1533
304181	69.77	258	108.0		zzz1003,zzzz452
304180	68.6	258	108.0		zzz1003,zzzz632
304179	67.83	258	108.0		zzz1003,zzzz706
304178	66.54	260	108.0		zzz1003,zzz1498
304177	68.2	261	108.0		zzz1003,zzzz435
304176	67.44	258	108.0		zzz1003,zzzz661
304175	67.44	258	108.0		zzz1003,zzzz671
304174	68.73	259	108.0		zzz1003,zzzz709
304173	70.04	257	108.0		zzz1003,zzzz950
304172	68.09	257	108.0		zzz1003,zzzz449
304171	67.83	258	108.0		zzz1003,zzzz662
304170	68.46	260	108.0		zzz1003,zzzz689
304169	67.7	257	108.0		zzz1003,zzzz731
304168	69.23	260	108.0		zzz1003,zzzz556
304167	68.87	257	108.0		zzz1003,zzzz608
304166	74.35	230	108.0		zzz1003,zzzz657
304165	67.44	258	108.0		zzz1003,zzzz672
304164	68.87	257	108.0		zzz1003,zzzz816
304163	67.83	258	107.0		zzz1003,zzz1247
304162	67.7	257	107.0		zzz1003,zzz1318
304161	69.77	258	107.0		zzz1003,zzz1475
304160	66.28	258	107.0		zzz1003,zzzz432
304159	78.1	210	107.0		zzz1003,zzzz653
304158	68.08	260	107.0		zzz1003,zzzz686
304157	66.41	259	107.0		zzz1003,zzzz757
304156	67.05	258	107.0		zzz1003,zzzz767
304155	79.05	210	107.0		zzz1003,zzzz791
304154	66.93	257	107.0		zzz1003,zzz1276
304153	70.16	248	107.0		zzz1003,zzzz401
304152	70.16	248	107.0		zzz1003,zzzz732
304151	75.57	221	107.0		zzz1003,zzzz993
304150	65.89	258	107.0		zzz1003,zzzz431
304149	65.89	258	107.0		zzz1003,zzzz485
304148	78.47	209	107.0		zzz1003,zzzz582
304147	67.05	258	107.0		zzz1003,zzzz670
304146	66.02	259	107.0		zzz1003,zzzz752
304145	66.28	258	107.0		zzz1003,zzzz773
304144	68.22	258	107.0		zzz1003,zzzz789
304143	69.65	257	106.0		zzz1003,zzz1503
304142	69.77	258	106.0		zzz1003,zzzz536
304141	66.28	258	106.0		zzz1003,zzzz768
304140	66.28	258	106.0		zzz1003,zzzz858
304139	68.87	257	106.0		zzz1003,zzzz944
304138	71.73	237	106.0		zzz1003,zzz1015
304137	66.15	257	106.0		zzz1003,zzzz841
304136	66.79	265	105.0		zzz1003,zzz1356
304135	66.15	257	105.0		zzz1003,zzz1401
304134	66.28	258	105.0		zzz1003,zzzz772
304133	65.9	261	105.0		zzz1003,zzzz549
304132	66.67	258	105.0		zzz1003,zzzz770
304131	65.5	258	105.0		zzz1003,zzzz769
304130	66.54	257	105.0		zzz1003,zzzz527
304129	66.28	258	105.0		zzz1003,zzzz771
304128	65.5	258	104.0		zzz1003,zzzz766
304127	70.87	230	104.0		zzz1003,zzz1013
304126	83.57	207	104.0		zzz1003,zzz1068
304125	70.82	257	104.0		zzz1003,zzzz410
304124	67.08	243	104.0		zzz1003,zzzz467
304123	65.76	257	104.0		zzz1003,zzzz568
304122	65.12	258	104.0		zzz1003,zzzz774
304121	66.15	257	103.0		zzz1003,zzz1411
304120	64.98	257	103.0		zzz1003,zzz1028
304119	72.12	226	103.0		zzz1003,zzzz627
304118	66.27	252	103.0		zzz1003,zzzz905
304117	65.37	257	103.0		zzz1003,zzzz764
304116	65.76	257	102.0		zzz1003,zzzz609
304115	68.48	257	102.0		zzz1003,zzzz813
304114	70.74	229	102.0		zzz1003,zzz1017
304113	67.44	258	102.0		zzz1003,zzz1249
304112	76.59	205	102.0		zzz1003,zzzz445
304111	63.95	258	102.0		zzz1003,zzzz775
304110	64.59	257	101.0		zzz1003,zzzz857
304109	64.73	258	100.0		zzz1003,zzz1069
304108	64.59	257	100.0		zzz1003,zzz1171
304107	64.45	256	100.0		zzz1003,zzz1440
304106	69.29	241	100.0		zzz1003,zzz1448
304105	63.81	257	100.0		zzz1003,zzzz519
304104	65.02	243	100.0		zzz1003,zzzz750
304103	78.0	200	100.0		zzz1003,zzz1067
304102	63.77	265	99.0		zzz1003,zzzz544
304101	63.22	261	99.0		zzz1003,zzzz567
304100	64.86	259	98.0		zzz1003,zzzz447
304099	64.17	254	98.0		zzz1003,zzzz704
304098	60.85	258	98.0		zzz1003,zzzz425
304097	71.18	229	97.0		zzz1003,zzzz569
304096	63.42	257	97.0		zzz1003,zzzz966
304095	69.57	230	97.0		zzz1003,zzz1309
304094	65.89	258	96.0		zzz1003,zzzz716
304093	64.88	242	96.0		zzz1003,zzzz783
304092	72.35	217	96.0		zzz1003,zzzz969
304091	69.91	226	96.0		zzz1003,zzzz420
304090	90.59	170	96.0		zzz1003,zzzz630
304089	64.59	257	95.0		zzz1003,zzz1456
304088	64.09	259	95.0		zzz1003,zzzz500
304087	62.5	256	95.0		zzz1003,zzzz647
304086	63.86	249	95.0		zzz1003,zzzz498
304085	64.77	264	94.0		zzz1003,zzzz694
304084	66.14	254	93.0		zzz1003,zzzz590
304083	59.53	257	93.0		zzz1003,zzzz530
304082	76.88	186	93.0		zzz1003,zzzz889
304081	61.74	264	93.0		zzz1003,zzzz520
304080	61.09	257	92.0		zzz1003,zzz1379
304079	61.07	262	92.0		zzz1003,zzzz512
304078	61.09	257	91.0		zzz1003,zzzz870
304077	60.0	270	91.0		zzz1003,zzzz497
304076	65.09	232	91.0		zzz1003,zzzz581
304075	59.54	262	90.0		zzz1003,zzz1383
304074	59.92	257	90.0		zzz1003,zzzz836
304073	70.14	211	90.0		zzz1003,zzzz503
304072	64.14	237	90.0		zzz1003,zzzz557
304071	69.12	204	90.0		zzz1003,zzzz786
304070	62.55	259	90.0		zzz1003,zzzz610
304069	67.96	206	90.0		zzz1003,zzzz784
304068	73.58	193	89.0		zzz1003,zzz1438
304067	66.5	206	89.0		zzz1003,zzzz785
304066	61.48	257	89.0		zzz1003,zzzz517
304065	59.92	257	88.0		zzz1003,zzzz502
304064	68.45	206	88.0		zzz1003,zzzz798
304063	69.9	206	88.0		zzz1003,zzzz996
304062	72.25	191	88.0		zzz1003,zzzz625
304061	77.97	177	87.0		zzz1003,zzz1011
304060	76.27	177	87.0		zzz1003,zzz1012
304059	76.4	178	87.0		zzz1003,zzzz482
304058	67.96	206	86.0		zzz1003,zzzz903
304057	77.51	169	85.0		zzz1003,zzzz475
304056	72.88	177	85.0		zzz1003,zzzz404
304055	73.89	180	85.0		zzz1003,zzzz566
304054	57.59	257	84.0		zzz1003,zzzz622
304053	69.15	188	84.0		zzz1003,zzzz684
304052	72.78	180	83.0		zzz1003,zzzz429
304051	70.62	177	82.0		zzz1003,zzz1027
304050	68.81	202	82.0		zzz1003,zzzz869
304049	66.67	204	82.0		zzz1003,zzz1314
304048	68.62	188	82.0		zzz1003,zzzz628
304047	58.97	234	81.0		zzz1003,zzz1063
304046	72.07	179	82.0		zzz1003,zzzz883
304045	65.48	197	79.0		zzz1003,zzz1043
304044	77.58	165	78.0		zzz1003,zzz1204
304043	68.6	172	78.0		zzz1003,zzz1026
304042	75.61	164	78.0		zzz1003,zzz1059
304041	67.98	178	78.0		zzz1003,zzz1021
304040	68.85	183	77.0		zzz1003,zzz1023
304039	55.76	269	77.0		zzz1003,zzz1357
304038	51.61	248	75.0		zzz1003,zzz1522
304037	76.13	155	75.0		zzz1003,zzzz464
304036	50.81	248	74.0		zzz1003,zzz1257
304035	50.81	248	74.0		zzz1003,zzzz953
304034	72.56	164	74.0		zzz1003,zzz1060
304033	48.63	255	74.0		zzz1003,zzzz462
304032	51.21	248	74.0		zzz1003,zzzz551
304031	50.81	248	74.0		zzz1003,zzzz721
304030	72.15	158	73.0		zzz1003,zzzz405
304029	71.17	163	73.0		zzz1003,zzz1058
304028	48.24	255	73.0		zzz1003,zzz1417
304027	66.48	179	73.0		zzz1003,zzzz795
304026	50.81	248	73.0		zzz1003,zzzz506
304025	49.19	248	73.0		zzz1003,zzzz860
304024	50.4	248	72.0		zzz1003,zzzz702
304023	50.81	248	72.0		zzz1003,zzzz861
304022	50.2	245	71.0		zzz1003,zzzz722
304021	48.79	248	71.0		zzz1003,zzz1261
304020	70.24	168	71.0		zzz1003,zzz1016
304019	58.05	205	71.0		zzz1003,zzzz936
304018	74.17	151	70.0		zzz1003,zzzz680
304017	46.69	242	70.0		zzz1003,zzz1431
304016	70.78	154	70.0		zzz1003,zzzz406
304015	47.58	248	68.0		zzz1003,zzzz631
304014	91.74	121	68.0		zzz1003,zzzz983
304013	47.93	242	67.0		zzz1003,zzzz730
304012	67.27	165	67.0		zzz1003,zzzz957
304011	67.9	162	67.0		zzz1003,zzzz541
304010	67.07	164	67.0		zzz1003,zzz1052
304009	71.14	149	66.0		zzz1003,zzzz565
304008	49.36	233	66.0		zzz1003,zzzz737
304007	71.43	154	64.0		zzz1003,zzzz644
304006	64.33	171	63.0		zzz1003,zzz1041
304005	88.62	123	62.0		zzz1003,zzzz984
304004	77.05	122	59.0		zzz1003,zzzz586
304003	70.59	136	58.0		zzz1003,zzzz526
304002	77.86	131	58.0		zzz1003,zzzz466
304001	75.4	126	57.0		zzz1003,zzzz591
304000	64.54	141	56.0		zzz1003,zzz1022
303999	44.19	267	55.0		zzz1003,zzz1451
303998	67.94	131	55.0		zzz1003,zzz1025
303997	69.29	127	54.0		zzz1003,zzzz596
303996	81.31	107	53.0		zzz1003,zzzz982
303995	56.25	176	50.0		zzz1003,zzzz914
303994	66.94	124	49.0		zzz1003,zzzz595
303993	63.36	131	47.0		zzz1003,zzzz419
303992	68.64	118	47.0		zzz1003,zzzz594
303991	82.8	93	46.0		zzz1003,zzzz797
303990	66.39	119	45.0		zzz1003,zzz1019
303989	60.63	127	44.0		zzz1003,zzzz418
303988	64.91	114	44.0		zzz1003,zzzz460
303987	66.37	113	44.0		zzz1003,zzzz794
303986	61.6	125	44.0		zzz1003,zzzz593
303985	57.89	133	44.0		zzz1003,zzzz413
303984	59.84	127	42.0		zzz1003,zzzz408
303983	62.5	112	42.0		zzz1003,zzzz986
303982	61.61	112	41.0		zzz1003,zzzz987
303981	79.76	84	40.0		zzz1003,zzzz840
303980	62.73	110	40.0		zzz1003,zzzz985
303979	58.68	121	40.0		zzz1003,zzzz522
303978	66.04	106	40.0		zzz1003,zzzz411
303977	61.16	121	40.0		zzz1003,zzzz417
303976	59.5	121	39.0		zzz1003,zzzz458
303975	70.11	87	38.0		zzz1003,zzzz490
303974	63.48	115	37.0		zzz1003,zzzz434
303973	56.59	129	35.0		zzz1003,zzzz505
303972	31.82	198	34.0		zzz1003,zzz1518
303971	31.44	194	34.0		zzz1003,zzz1520
303970	32.34	201	33.0		zzz1003,zzz1326
303969	31.41	191	28.0		zzz1003,zzz1377
303968	57.47	87	24.0		zzz1003,zzzz977
303967	63.51	74	23.0		zzz1003,zzzz958
303966	44.76	105	21.0		zzz1003,zzzz491
303942	94.82	251	147.0		zzz1004,zzz1444
303941	92.43	251	144.0		zzz1004,zzz1449
303940	90.44	251	143.0		zzz1004,zzz1450
303939	89.64	251	142.0		zzz1004,zzz1347
303938	90.04	251	142.0		zzz1004,zzzz433
303937	89.64	251	142.0		zzz1004,zzz1048
303936	90.04	251	141.0		zzz1004,zzz1120
303935	89.64	251	141.0		zzz1004,zzzz446
303934	88.84	251	140.0		zzz1004,zzz1352
303933	89.24	251	140.0		zzz1004,zzz1425
303932	88.84	251	140.0		zzz1004,zzz1118
303931	89.24	251	140.0		zzz1004,zzz1122
303930	88.84	251	140.0		zzz1004,zzz1361
303929	89.24	251	140.0		zzz1004,zzz1480
303928	89.24	251	139.0		zzz1004,zzz1236
303927	89.24	251	139.0		zzz1004,zzz1280
303926	88.84	251	139.0		zzz1004,zzz1294
303925	88.84	251	139.0		zzz1004,zzz1343
303924	88.84	251	139.0		zzz1004,zzz1524
303923	88.45	251	139.0		zzz1004,zzz1152
303922	90.04	251	139.0		zzz1004,zzz1178
303921	88.45	251	139.0		zzz1004,zzz1491
303920	88.45	251	139.0		zzz1004,zzz1493
303919	88.84	251	139.0		zzz1004,zzzz652
303918	88.45	251	139.0		zzz1004,zzz1165
303917	88.45	251	139.0		zzz1004,zzz1543
303916	88.84	251	139.0		zzz1004,zzz1335
303915	86.85	251	139.0		zzz1004,zzz1403
303914	88.05	251	139.0		zzz1004,zzz1455
303913	87.25	251	139.0		zzz1004,zzz1492
303912	88.05	251	138.0		zzz1004,zzz1157
303911	88.05	251	138.0		zzz1004,zzz1329
303910	87.25	251	138.0		zzz1004,zzzz442
303909	88.05	251	138.0		zzz1004,zzz1123
303908	88.84	251	138.0		zzz1004,zzz1176
303907	86.45	251	138.0		zzz1004,zzz1415
303906	86.06	251	138.0		zzz1004,zzz1421
303905	88.05	251	138.0		zzz1004,zzzz575
303904	88.45	251	138.0		zzz1004,zzzz948
303903	86.85	251	137.0		zzz1004,zzz1115
303902	87.25	251	137.0		zzz1004,zzz1133
303901	88.05	251	137.0		zzz1004,zzz1137
303900	86.06	251	137.0		zzz1004,zzz1230
303899	88.05	251	137.0		zzz1004,zzz1240
303898	88.05	251	137.0		zzz1004,zzz1269
303897	86.85	251	137.0		zzz1004,zzz1374
303896	86.06	251	137.0		zzz1004,zzz1409
303895	86.45	251	137.0		zzz1004,zzz1471
303894	87.65	251	137.0		zzz1004,zzz1548
303893	87.25	251	137.0		zzz1004,zzzz415
303892	88.84	251	137.0		zzz1004,zzz1112
303891	88.05	251	137.0		zzz1004,zzz1303
303890	86.06	251	137.0		zzz1004,zzzz613
303889	86.85	251	137.0		zzz1004,zzzz822
303888	87.65	251	137.0		zzz1004,zzz1407
303887	87.25	251	137.0		zzz1004,zzz1437
303886	87.65	251	137.0		zzz1004,zzzz407
303885	86.06	251	137.0		zzz1004,zzzz444
303884	87.65	251	137.0		zzz1004,zzzz452
303883	87.65	251	136.0		zzz1004,zzz1153
303882	86.06	251	136.0		zzz1004,zzz1209
303881	88.45	251	136.0		zzz1004,zzz1435
303880	86.45	251	136.0		zzz1004,zzz1453
303879	87.65	251	136.0		zzz1004,zzz1462
303878	87.25	251	136.0		zzz1004,zzzz877
303877	86.45	251	136.0		zzz1004,zzz1130
303876	86.06	251	136.0		zzz1004,zzz1381
303875	87.01	254	136.0		zzz1004,zzz1481
303874	87.25	251	136.0		zzz1004,zzz1054
303873	86.85	251	136.0		zzz1004,zzz1172
303872	86.85	251	136.0		zzz1004,zzz1228
303871	86.45	251	136.0		zzz1004,zzz1272
303870	86.45	251	136.0		zzz1004,zzz1322
303869	85.66	251	136.0		zzz1004,zzz1338
303868	86.45	251	136.0		zzz1004,zzz1402
303867	84.86	251	136.0		zzz1004,zzz1289
303866	86.45	251	136.0		zzz1004,zzz1296
303865	86.85	251	136.0		zzz1004,zzz1466
303864	86.45	251	135.0		zzz1004,zzzz481
303863	86.06	251	135.0		zzz1004,zzz1487
303862	86.06	251	135.0		zzz1004,zzz1106
303861	84.86	251	135.0		zzz1004,zzz1288
303860	84.86	251	135.0		zzz1004,zzz1501
303859	86.06	251	134.0		zzz1004,zzz1162
303858	85.66	251	134.0		zzz1004,zzz1344
303857	86.51	252	134.0		zzz1004,zzz1525
303856	86.85	251	134.0		zzz1004,zzz1540
303855	84.46	251	134.0		zzz1004,zzz1247
303854	86.06	251	134.0		zzz1004,zzz1422
303853	84.86	251	134.0		zzz1004,zzz1489
303852	84.06	251	134.0		zzz1004,zzz1497
303851	84.86	251	134.0		zzz1004,zzz1500
303850	86.45	251	134.0		zzz1004,zzz1536
303849	86.06	251	134.0		zzz1004,zzzz998
303848	84.86	251	134.0		zzz1004,zzzz401
303847	84.86	251	134.0		zzz1004,zzzz988
303846	83.67	251	133.0		zzz1004,zzz1227
303845	84.46	251	133.0		zzz1004,zzz1293
303844	84.46	251	133.0		zzz1004,zzz1312
303843	84.46	251	133.0		zzz1004,zzz1406
303842	86.06	251	133.0		zzz1004,zzz1452
303841	82.07	251	133.0		zzz1004,zzzz923
303840	85.71	252	133.0		zzz1004,zzzz950
303839	82.87	251	133.0		zzz1004,zzz1214
303838	86.06	251	133.0		zzz1004,zzz1237
303837	82.17	258	133.0		zzz1004,zzz1527
303836	83.67	251	133.0		zzz1004,zzzz449
303835	83.67	251	132.0		zzz1004,zzzz946
303834	82.87	251	132.0		zzz1004,zzz1387
303833	83.67	251	132.0		zzz1004,zzz1436
303832	84.46	251	132.0		zzz1004,zzz1464
303831	82.87	251	131.0		zzz1004,zzz1401
303830	84.06	251	131.0		zzz1004,zzz1454
303829	83.27	251	131.0		zzz1004,zzz1469
303828	84.86	251	131.0		zzz1004,zzz1219
303827	81.67	251	131.0		zzz1004,zzz1307
303826	81.67	251	131.0		zzz1004,zzz1490
303825	84.06	251	131.0		zzz1004,zzzz412
303824	81.5	254	131.0		zzz1004,zzz1311
303823	83.27	251	131.0		zzz1004,zzz1413
303822	83.67	251	130.0		zzz1004,zzz1055
303821	80.16	257	130.0		zzz1004,zzz1255
303820	80.48	251	129.0		zzz1004,zzz1348
303819	80.93	257	129.0		zzz1004,zzz1498
303818	84.13	252	128.0		zzz1004,zzz1475
303817	82.07	251	128.0		zzz1004,zzz1057
303816	84.52	252	128.0		zzz1004,zzzz451
303815	82.87	251	127.0		zzz1004,zzzz857
303814	82.07	251	127.0		zzz1004,zzz1053
303813	81.27	251	126.0		zzz1004,zzz1171
303812	81.67	251	125.0		zzz1004,zzz1056
303811	78.49	251	125.0		zzz1004,zzz1318
303810	85.53	235	124.0		zzz1004,zzz1448
303809	81.35	252	124.0		zzz1004,zzzz447
303808	80.95	252	123.0		zzz1004,zzzz716
303807	79.69	256	122.0		zzz1004,zzzz544
303806	75.39	256	119.0		zzz1004,zzz1245
303805	77.43	257	119.0		zzz1004,zzz1008
303804	76.65	257	119.0		zzz1004,zzz1175
303803	76.65	257	118.0		zzz1004,zzz1354
303802	78.0	250	118.0		zzz1004,zzzz647
[truncated: 301,724 more rows]
