# Supplementary material for: Discovery of several thousand highly diverse circular DNA viruses
Source: eLife journal article supplement (doi:10.7554/elife.51971), 2020-02-03
Supplement: fig2-data2 [file elife-51971-fig2-data2-v1.cys › CytoscapeSession-2019_08_02-17_43/tables/46-all_my_seqs_genbank_ssDNA1_domains_CRESS_capsid_fasta+Full+Network/SHARED_ATTRS-org.cytoscape.model.CyNode-46+shared+node.cytable]

CyCSV-Version	1
SUID	bel.function	Description	domain	seq_source	Sequence	Sequence Length	Sequence Source	shared name
java.lang.Long	java.lang.String	java.util.List<java.lang.String>	java.lang.String	java.lang.String	java.lang.String	java.lang.Integer	java.lang.String	java.lang.String
	mutable	mutable	mutable	mutable	mutable	mutable	mutable
46 shared node
2109		genbank_geminiviridae_CAD43029.1_@pfam00844	geminivirus_cap	genbank	MWKRAADIVIFTPASKVRRRLNFGSPYTSRAAAPIVRVTKQQAWTNRPMNRKPRMYRMYRSPDVPRGCEGPCKVQSFESRHDVVHIGKVMCISDVTRGVGLTHRIGKRFCVKSVYVLGKIWMDENIKTKNHTNSVMFFLVRDRRPVDKPQDFGEVFNMFDNEPSTATVKNSHRDRYQVLRKWHATVTGGQYASKEQALVKKFVRVNNYVVYNQQEAGKYENHTENALMLYMACTHVVTSMLLWNWNCF	248	USER	zzz1000
2108		genbank_geminiviridae_CAD79312.1_@pfam00844	geminivirus_cap	genbank	MSKRDAPWRMMVGPSKVRRTLNFSPGAGLGSKSNRASSWVNRPMYRKPRIYRMYRTPDVPKGCEGPCKVQSYEQRHDISHVGKVMCISDVTRGNGITHRVGKRFCVKSVYILGKIWMDENIKLKNHTNSVMFWVVRDRRPYGTPMDFGQVFNMFDNEPSTATVKNDLRDRYQVMHKFYAKVTGGQYASNEQALVKRFWKVNNHVVYNHQEAGKYENHTENALLLYMACTHASNPVYATLKIRIYFYDSIMNLIKFEFYFMIF	262	USER	zzz1002
2107		genbank_geminiviridae_CAD90075.1_@pfam00844	geminivirus_cap	genbank	MPKRLADMSISMPGWKVRRRLNFDSPSAARAPVLIAPAMSKSKAWANRPMYRKPRIYRMYRSPDVPKGCEGPCKVQSFDAKNDIGHMGKVICLSDVTRGNGLTHRVGKRFCVKSLYFVGKIWMDENIKVKNHTNTVLFWIVRDRRPSGTPSDFQQVFNVYDNEPSTATVKNDQRDRYQVIRRFQATVTGGQYAAKEQAIIRRFYRVNNYVVYNHQEAGKYENHTENALLLYMACTHASNPVYATLKVRSYFYDSVTN	257	USER	zzz1003
2106		genbank_geminiviridae_CAE12051.1_@pfam00844	geminivirus_cap	genbank	MSKREAPWRSIAGVLKARRTLNYSPRAVLGRKINKAAEWVNRPMYRKPLIYRTLRTPDVPRGCEGPCKVQSYEQRHDISHVGKVMCISDVTRGNGITHRVGKRFCVKSVYTLGKIWMDENIKLKNHTNSVMFWLVRDRRPYGTPMDFGQVFNMYDNEPSTATIKNDLRDRYQVMHRFYGKVTGGQYASNEQALVRRFWKINNHVVYNHQEAGKYENHTENALLLYMACTHASNPVYATLKIRIYFYDSITN	251	USER	zzz1004
2105		genbank_geminiviridae_CAH17659.1_@pfam00844	geminivirus_cap	genbank	MSKRPADIVISTPASKVRRRLNFDSPYVSRAAAPTVLVTNKRRSWVNRPMYRKPKTYRMYKSPDVPRGCEGPCKVQSYEQRHDISHVGKVLCVSDVTRGSGLTHRVGKRFCVKSVYVLGKIWMDENIKTKNHTNTVMFYLVRDRRPFGTAMDFGQVFNMYDNEPSTATIKNDLRDRYQVLRKFTSTVTGGQYASKEQAIVRKFMKVNNHVVYNHQEAAKYENHTENALLLYMACTHASNPVYATLKIRIYFYDSVQN	257	USER	zzz1008
2104		genbank_geminiviridae_CAH17788.1_@pfam00844	geminivirus_cap	genbank	MSKRPADIVISTPASKVRRRLNFDSPGMTRVAAPTVLVTNRKRSWTYRPTNRKPRMYRMYRSPDVPRGCEGPCKVQSYEARHDVAHVGKVLCVSDVTRGNGLTHRVGKRFCIKSIYVLGKVWMDENIKKKNHTNTVMFFLVRDRRPFGTPQDFGQVFNMYDNEPSTATVKNDNRDRFQVLRRFQATVTGGDYACKEQALVRKFMKVNNHVTYNHQEAAKYDNHTENALLLYMACTHASNPVYATLKIRIYFYDSVQN	257	USER	zzz1009
2103		genbank_geminiviridae_CAH18508.1_@pfam00844	geminivirus_cap	genbank	MRKRPGDIIISTPASKVRRRLNFDSPYVSRAAAPIVRVTKARAWANRPMNRKPRMYRMYRSPDVPRGCEGPCKVQSFESRHDIQHIGKVMCVSDVTRGTGLTHRVGKRFCVKSFYVLGKIWMDENIKAKNHTNSVMFFLVRDRRPVDKGQDFGEVFNMFDNEPSTATVKNVHRDRYQVLRKWHATVTGGQYASKEQALVKKFVRVNNYVRYNQQEAGKYENHSENALMCILACTHASNPVYATLKIRIYFYDTVIN	256	USER	zzz1010
2102		genbank_geminiviridae_CAH57029.1_@pfam00844	geminivirus_cap	genbank	IYRTYERPDVLSVCEGPCKVQAFQLRHDISHVGKVMCISDVTRGNGITHRVGKRFCVKSAYVLGKIWMDENIKLKNHTNSVMFWLVRDRRPYGTPMDFGQVFNMYDNEPSTATVKNDLRDRFQVMHRFSAKVTGGQYASNEQALVRRFWKVNNYVVYNHQEAGKYENHTENALLLYM	177	USER	zzz1011
2101		genbank_geminiviridae_CAH57031.1_@pfam00844	geminivirus_cap	genbank	IYRTYRSPDVPRGCEGPCKVQSFEQRHDISHVGKVMCISDVTRGNGITHRVGKRFCVKSAYVLGKIWMDENIKLKNHTNSVMFWLVRDRRPYGTPMDFGQVFNMYDNEPSTATVKNDLRDRFQVMHRFHAKVTGGQYASNEQTLVKRFWRVNHRVTYNNQEAARYENHTENALMLYM	177	USER	zzz1012
2100		genbank_geminiviridae_CAH69602.2_@pfam00844	geminivirus_cap	genbank	YRRQASQAASSIHFQRPHRTSRRRLNFDSPYGARAVVPIARVTKTKAWTNRPMNRKPRMYRMYRSPDVPRGCEGPCKVQSFESRHDVSHIGKVMCVSDVTRGTGLTHRVGKRFCVKSVYVLGKIWMDENIKTKNHTNSVMFFLVRDRRPTGSPQDFGEVFNMFDNEPSTATVKNMHRDRYQVLRKWHATVTGGTYASREQALVRKFVRVNNYVVYNQQEAGKYENHTENALMLYISCSLRH	241	USER	zzz1013
2099		genbank_geminiviridae_CAI64372.1_@pfam00844	geminivirus_cap	genbank	MTKRTGDIIISTPASMVRRRLNFDSPYGARAVVPIARVTKAKAWTNRPMNRKPRMYRMYRSPDVPRGCEGPCKVQSFESRHDVSHIGKVMCVSDVTRGTGLTHRVGKRFCVKSVYVLGKIWMDENIKTKNHTNSVMFFLVRDRRPTGSPQDFGEVFNMSDNEPSTATVKNMHRDRYQVLRKWHATVTGGTYASKEQALVGKFVRVNNYVVYNQQEAGKYENHTENALMLYISGSLA	236	USER	zzz1015
2098		genbank_geminiviridae_CAJ09957.1_@pfam00844	geminivirus_cap	genbank	MTRRTADIIISTPASKVRRRLNFDSPYASRAAAPIVRVTKAKAWANRPMNRKPRMYRMYRSPDVPRGCEGPCKVQSFESRHDIQHIGKVMCVVDVTRGIGLTHRVGKRFCVKSVYVLGKIWMYENIKTKNHTNSVMFFLVRDRTPVDKPQDFGEVFNMFDNEPSTAT	167	USER	zzz1016
2097		genbank_geminiviridae_CAJ19548.1_@pfam00844	geminivirus_cap	genbank	MSKRPGDIHISTPASKTRRRLNFDSPYAVRAAVPIVRATKAREWVNRPMNRKPRLYRMYRSSDVPRGCEGPCKVQSFESRHDVSHIGKVMCISDVTRGTGLTHRVGKRFCVKSVYVLGKIWMDENIKTKNHTNSVMFFLVRDRRPTGAPQDFGEVFNMFDNEPSTATVKNMHRDRYQVLKKWHSTVTGGTYTSKEQALVKRFIRVNNYVVYNQQEAGKYENHTENALIDCISPGRFLI	238	USER	zzz1017
2096		genbank_geminiviridae_CAJ77951.1_@pfam00844	geminivirus_cap	genbank	MSKRTGDIIISTPVSKVRRRLNFDSPYTNRVVAPTVRVTRSKIWANRPMYRKPKMYRLYRSPDVPKGCEGPCKVQSFEQRDDAKHLGICKVISDVTRGPGLTYRVGKRFCIKSIYILGKIWMDENIKKQNHTNNVMFYLLRDRRPYGNAPQDFGQIFNMFDNEPSTATIKNDLRDRFQVLRKFHATVVGGPSGMKEQALVKRFYKLNHHVTYNHQEAGKYENHTENALLLYMACTHASNPVYATLKIRIYFYDEVTN	257	USER	zzz1018
2095		genbank_geminiviridae_CAJ78317.1_@pfam00844	geminivirus_cap	genbank	MSKRPGDIIISTPVSKVRRRLNFDSPYTNRVVAPTVRVTRSKIWANRPMYRKPKMYRMYRSPDVPKGCEGPCKVQSYEQRDDVKHTGMVRCVSDVTRGSGITHRVGKRFCVKSIYIYWARSGWMRMSRSKIIRTMLCSSLFEIEGLMVRVLKILDKCSTCLIMNLLLQL	169	USER	zzz1019
2094		genbank_geminiviridae_CAM84634.1_@pfam00844	geminivirus_cap	genbank	MYRMYRSPDVPQGCEGPCKVQSYEQRDDVNHTGIVRCVSDVTKGTGLTHRTGKRFAIKSIYILGKVWMDENVKKHNHTNNVMFFLVRDRRPYGNSPMDFGQVFNMFDNEPSTATVKNDYRDRFQVMRKFSATVTGGPSGMKEQALVRMFFKINSQIVYNHQEPANYENHTENALLLYM	178	USER	zzz1021
2093		genbank_geminiviridae_CAQ63428.1_@pfam00844	geminivirus_cap	genbank	MSKRPGDIIISTPVSKVRRRLNFDSPYTSRASVPTVLGTSKRRSWTYRPMYRKPRMYRMYKSPDVPRGCEGPCKIQSFDQRDSVTHTGNSRCLSDVTRGNGLTHRTGKRFVIKSVYILGKVWMDENVKKSNHTNTCMFWLVEIDSRFWTGI	151	USER	zzz1022
2092		genbank_geminiviridae_CAR47805.1_@pfam00844	geminivirus_cap	genbank	MSKRAADIVISTPASTVRRRLNFGSPYACRVAAPIVRVTKQQAWTNRPMSRKPRMYRMYRSPDVPRGCEGPCTVQSFESRHDIQHIGKVMCISDVTRGTGLTHRVGKRFCVKSVYVLGKIWMDENIKTKNHTNSVMFFLVRDRRPVDKPQDFGEVFNMFDNEPSTATVQNVHRDRYQVLRNGMQLSPVDYTLQRNRLWSRSLSELTIMLFTINRKQENTRIIRKMR	226	USER	zzz1023
2091		genbank_geminiviridae_CAR64998.2_@pfam00844	geminivirus_cap	genbank	LTHRTGKRFVIKCVYVLGKVWMDENIKQKNHTNNCMMFLVRDRRPSEKPFSFGSVFNMFDNEPSTATVKMDHRDRFQVLRRFYATVTGGQYASKEQALVKRFWRVNHHVIYNNQEGAEYKNHQENALLLYM	131	USER	zzz1025
2090		genbank_geminiviridae_CAR65017.1_@pfam00844	geminivirus_cap	genbank	NVQGCTEAPDVPRGCEGPCKIQSFEQRDDVKHVGIVRCVSDVTRGSGLTHRVGKRFCIKSIYILGKVWMDENIKKQNHTNNVMFFLVRDRRPYGSPSDFGQIFNMFDNEPSTATIKNDLRDRCQVLRKFSATVIGGPSGCKEQTLVKRFFKLNNHVVYNHQEEAKYANHTENALLLYM	178	USER	zzz1026
2089		genbank_geminiviridae_CAR65021.1_@pfam00844	geminivirus_cap	genbank	MYRMYRSPDIPRGCEGPCKIQSFEQRDDVKHVGIVRCVSDVTRGSGLTHRVGKRFCIKCIYILGKVWMDDNIKKQNHTSNVMFFLVRDRRPYGSPSDFGQIFNMFDNEPSTATIKNDLRDRYQVLRKFSATVIGGPSGCKEQALIRRFYKLNNHVVYNHQEEAKYANHTENALLLYM	177	USER	zzz1027
2088		genbank_geminiviridae_CAR65229.1_@pfam00844	geminivirus_cap	genbank	MSKRPGDIIISTPVSKVRRRLNFDSPYTSRASVPTVLGTSKRRSWTYRPMYRKPRMYRMYKSPDVPRGCEGPCKIQSFDQRDSVTHTGNSRCLSDVTRGNGLTHRTGKRFVIKSVYILGKVWMDENVKKSNHTNTVYVLASSVFNMFDNEPSTATVMNDKRDRYQVLKRFQATVTGGPSGCKESAIVRRFFKINHHVTYNHQEAAKYENHTENALLLFMACTHASNPVYASLKIRMYFYDSVSN	244	USER	zzz1028
2087		genbank_geminiviridae_CAS97472.1_@pfam00844	geminivirus_cap	genbank	MSKRPGDIIISTPVSKVRRRLNFDSPYSSRAVVPIAQGTNKRRSWTYRPMYRKPRMYRMFRSPDVPRGCEGPCKVQSYEQRDDVKHTGIVRCVSDVTRGPGITHRVGKRFCIKCIYILGKIWMDENIKKQNHTNQVMFFLVRDRRPYGTSPQDFGQVFNMFDNEPSTATVKNDLRDRYQVLRKFHATVVGGPSGMKEQALVKRFFRVNTHVVYNHQEAAKYENHTENALLLYMACTHASNPVYATLKIRIYFYDAVTN	258	USER	zzz1030
2086		genbank_geminiviridae_CAX51843.1_@pfam00844	geminivirus_cap	genbank	MAKRPADIIISTPASKVRRRRTSTSPYACRAAAPIVRVTKAKAWTNRPMNRKPRMYRMYRSADVPRGCEGPCKVQSFESRHDVSHIGKVMCVSDVTRGTGLTHRVGKRFCVKSVYVLGKIWMDENIKTKNHTNSVMFFLVRDRRPTGSPQDFGEVFNMFDNEPSTATVKNMHRDRYQVLRKWHSTVTGGTYASKEQALVKKFVRVNNYVVYNQQEAGKYENHTENALMLYMACTHPSNPVYATLKIRIYFYDSVT	255	USER	zzz1033
2085		genbank_geminiviridae_CAX53742.1_@pfam00844	geminivirus_cap	genbank	MSKRPGDIIISTPVSKVRRRLNFDSPYSSRAAVPIVQGTNKRRSWTYRPMYRKPRIYRMYRSPDVPRGCEGPCKVQSYEQRVDIKHTGVVRCVSDVTRGSGITHRVGKRFCVKSIYFLGKVWMDENIKKQNHTNEVVCFLVRDERPYGNSPMVFGQVFSMFDNEPSTATVKNDLRDRFQVMRRFHATVIGGPSGMKEQALVKRFFRINSHVTYNHQEAAKYENHTENALLLYMACTHASNPVYATMKIRIYFYDSISN	258	USER	zzz1034
2084		genbank_geminiviridae_CBJ17673.1_@pfam00844	geminivirus_cap	genbank	MSKRPADIIISTPASKVRRRLNFDSPYVNRAAAPIVRVTKAKAWANRPMYRKPRMYRMYRSPDVPKGCEGPCKVQSFDAKNDIGHMGKVICLSDVTRGIGLTHRVGKRFCVKSLYFVGKIWMDENIKTKNHTNTVMFWIVRDRRPSGTPNDFQQVFNVYDNEPSTATVKNDQRDRFQVLRRFQATVTGGQYAAKEQAIIRKFYRVNNYVVYNHQEAGKYENHTENALLLYMACTHASNPVYATLKVRSYFYDSVTININKD	261	USER	zzz1038
2083		genbank_geminiviridae_CCE21603.1_@pfam00844	geminivirus_cap	genbank	MSKRPGDIIISTPVSKVRRRLNFDSPYSSRAAVPIVQGTNKRRSWTYRPMYRKPPKYRKDRSPDVPPGCEGPCKVQSYEQRGDIKHTRIGRCVSDVTRGSGITHRVGKRFCVKSIYFLGKVWMDENIKKQNHTNQVMFFLVRDRRPHGSSPMDFGQVFNMFDNEPSTPPPKKRIA	175	USER	zzz1041
2082		genbank_geminiviridae_CCF77725.1_@pfam00844	geminivirus_cap	genbank	MSKRPGDIIISTPVSKVRRRLNFDSPYTSRAVVPTVRGISKRRSWTYRPMYRKPRMYRMYRSPDIPRGCEGPCKIQSFEQRDDVKHLGVVRCVSDVTRGSGLTHRVGKRFCIKSICILGKVWMDENIKKQNHTNNVMFFLVRDLDRPYGSPSDFGQIFNMFDNEPSTATIKNDLRDRYQVLRKFSATVIGGPSGCKE	197	USER	zzz1043
2081		genbank_geminiviridae_CCH63256.1_@pfam00844	geminivirus_cap	genbank	MSKRPGDIIISTPVSKVRRRLNFDSPYTNPVVAPTVRVTTSKIWANRPMYRKPKMYRMYRSPDVPKGCEGPCKVQSYEQRDDVKHTGMVRCVSDVTRGSGITHRVGKRFCVKSIYILCKIWMDENIKKQNHTNHVMFFLVRDRRPYGLSPQDFGQVFNMFDNEPTTATVNNDLRDRYQVLRKFYATVVGGPSGMKEQALVNRFFRINNHVVYNHQEQARYENHTENALLLYMACTHASNPVYATLKIRIYVYDAVTN	257	USER	zzz1044
2080		genbank_geminiviridae_CCH63321.1_@pfam00844	geminivirus_cap	genbank	MSKRDGSWRSIAGMAKVKRNMNFSPRGGGGPKITRAAEWVNRPMYRKPRIYRTLRTPDIPRGCEGPCKVQSYEQRHDISHVGKVMCISDVTRGNGITHRVGKRFCVKSVYILGKVWMDENIKLKNHTNSVMFWLVRDRRPYGTPMDFGQVFNMFDNEPSTATVKNDLRDRYQVMHKFYAKVTGGQYASNEQALVKRFWKVNNHVVYNHQEAGKYENHTENALLLYMACTHASNPVYATLKIRIYFYDSITN	251	USER	zzz1048
2079		genbank_geminiviridae_CCJ67959.1_@pfam00844	geminivirus_cap	genbank	CEGPCKVQSFEQRHDISHVGKVMCISDVTRGNGITHRVGKRFCVKSAYVLGKIWMDENIKLKNHTNSVMFWLVRDRRPYGTPMDFGQVFNMYDNEPSTATGKNDLPDPFQVMHKISAKVTWGQNANNQQALVRRFWKGNNYFGDHPPETWKYENPPENSLVLDM	164	USER	zzz1052
2078		genbank_geminiviridae_CCJ67981.1_@pfam00844	geminivirus_cap	genbank	MPKRDAPSDLTAGTAKISRTGNSSRALFMAPTTSRASAWVNRPMYRKPRIYRMYRSPDVPKGCEGPCKVQSFEQRHDVSHVGKVICISDVTRGNGITHRVGKRFCVKSVYILGKIWMDENIKLKNHTNSVMFWLVRDRRPYGTPMDFGQVFNMYDNEPSTATVKNDLRDRYQVMHRFYAKVTGGQYASNEQALVRRFWKVNNHVGYNHQEAGQFENPPENALLLYMACTHASNPVIPTLKIRAYFYDSITN	251	USER	zzz1053
2077		genbank_geminiviridae_CCJ67982.1_@pfam00844	geminivirus_cap	genbank	MPKRDAPWRLMAGTSKFSRTCNYSRVPGLGPTTNRAAAWVNRPMYRKPRIYRMYRTPDVPKGCEGPCKVQSFEQRHDVSHVGKVICVSDVTRGNGITHRVGKRFCVKSVYILGKIWMDENIKLKNHTNSVMFWLVRDRRPYGTPMDFGQVFNMYDNEPSTATVKNDLRDRYQVMHRFYAKVTGGQYASNEQALVRRFWKVNNHVVYNHQEAGKYENHTENALLLYMACTHASNPVYATLKIRVYFYDSIMN	251	USER	zzz1054
2076		genbank_geminiviridae_CCJ67983.1_@pfam00844	geminivirus_cap	genbank	MPKREAAWRLTGGREGLRRTGNSLRALIMGQTARRSSAWVNRPVYRKPRIYRMYRSPDVPKSFEGPCKVQSFEQRHDVSHVGKVICISDVTRGNGITHRVGKRFCVKSVYILGKIWMDENIKLKNHTNSVMFWLVRDRRPYGTPMDFGQVFNMYDNEPSTATVKNDLRDRYQVMHRFYAKVTGGQYASNEQALVRRFWKVNNHVVYNHQEAGKYENHTENALLLYMACTHASNPVYATLKIRVYFYDSITN	251	USER	zzz1055
2075		genbank_geminiviridae_CCJ67984.1_@pfam00844	geminivirus_cap	genbank	MPKRDAPWRLRGGTAKDSRTCNNSRVLFMAPTTRRPSAWVSPPRSGKLRIYRMYRSPDVPKVCKGPCKVQSFEQRHDVSHVGKVICISDVTRGNGITHRVGKRFCVKSVYILGKIWMDENIKLKNHTNSVMFWLVRDRRPYGTPMDFGQVFNMYDNEPSTATVKNDLRDRYQVMHRFYAKVTGGQYASNEQALVRRFWKVNNHVVYNHQEAGKYENHTENALLLYMACTHASNPVYATLKIRVYFYDSITN	251	USER	zzz1056
2074		genbank_geminiviridae_CCJ68004.1_@pfam00844	geminivirus_cap	genbank	MPKREAPWRLTAGTTKISRTGNSSRALIMGPTTSRASVWVNRPMYRKPRIYRMYRSPDVPKGCEGPCKGQSFEQRHDVSHVGKGICISDVTRGNGITHRVGKRFCVKSVYILGKIWMDENIKLKNHTNSVMFWLVRDRRPYGTPMDFGQVFNMYDNEPSTATVKNDLRDRYQVMHRFYAKVTGGQYASNEQALVRRFWKVNNHFFYNHQEAGKNKNHTENALLLYMACTHPSNPLYPTLKIPVYFYDSIIN	251	USER	zzz1057
2073		genbank_geminiviridae_CCJ68067.1_@pfam00844	geminivirus_cap	genbank	CEGPCKVQSFEQRHDVSHVGKVICISDVTRGNGITHRVGKRFCVKSVYILGKIWMDENIKLKNHTNSVMFWLVRDRRPYGTPMDFGQVFNMYDNEPSTATVKNDLRDRYQVMHRFYAKVTGGQYASNKQALVGRSWKEGNHVFYNPQEASKYKNNTKKKMLFYS	164	USER	zzz1058
2072		genbank_geminiviridae_CCJ68072.1_@pfam00844	geminivirus_cap	genbank	CEGPCKVQSFEQRHDVSHVGKVICISDVTRGNGITHRVGKRFCVKSVYILGKIWMDENIKLKNHTNSVMFWLVRDRRPYGTPMDFGQVFNMYDTEPSTPPVKNDLRDRYQVMHRYYAKVTGGQYATNKQALVRRFWKVNNPVGYNHQEAGKYKNHPENALLLYM	164	USER	zzz1059
2071		genbank_geminiviridae_CCJ68076.1_@pfam00844	geminivirus_cap	genbank	CEGPCKVQSFEQRHDVSHVGKVICISDVTRGKEITHRVGKRSCVKSVYILGKIWMDENIKLKNHTNSVMFWLVGDRRPYGTPMNFGQLFNMYDNELRTATVKNDLRDRYQVMHRIYARVTGVQYANNEQALVRRFWKVTNHVWYNHQEAGKYEDHTENALLLYM	164	USER	zzz1060
2070		genbank_geminiviridae_CCQ77474.1_@pfam00844	geminivirus_cap	genbank	MSKRPADIVISTPASKARRRLNFDSPYTRRAAVPTVRVTRRQIWNNRPMYRKPMMYRMYRSPDVPKGCEGPCKVQSYEARHDVSHTGKVICVTDVTRGNGITHRVGKRFCVKSIYVIGKIWMDENIKLKNHTNTVMFFLVRDRRPSGTPMDFQQVFNCYDNEPSTGTVKNDLRDRFQVIRKFNYMVTGGQYASKEQAVVKKFLRVNTHVVYNHQEQAKYENHTENALLLYMVCTHASNPVYATLKVRIYFYDSQMN	256	USER	zzz1062
2069		genbank_geminiviridae_CCV01315.1_@pfam00844	geminivirus_cap	genbank	YRRQASQAASSIHFQRPHRTSRRRLNFDSPYGARAVVPIARVTKTKAWTNRPMNRKPRMYRMYRSPDVPRGCEGPCKVQSFESRHDVSHIGKVMCVSDVTRGTGLTHRVGKRFCVKSVYVLGKIWMDENIKTKNHTNSVMFVTVVLQDLHKILGKFLTCLTMNRAQQRRTCIVIVILRKWHATVTGGTYASREQALVRKFVRVNNYVVYNQQEAGKYENHTENALMLYISCSRIR	235	USER	zzz1063
2068		genbank_geminiviridae_CCW43189.1_@pfam00844	geminivirus_cap	genbank	MSKRPADIIISTPASKVRRRLNFDSPYACRAAAPIVRVTKAKAWANRPMNRKPRMCRMYRSPDVPRGCEGPCKVQSFDSRHDIQHIGKVMCVSDVTRGTGLTHRVGKRFCVKSVYVLGKIWMDENIKTKNHTNSVMFFLVRDRRPVDKPQDLGEVFNMFDNEPSTATVKNVHRDRYQVLRKWYATVTGGQYASKEQALVKKFIRVNNYVVYNQQEAGKYENHSENALMLYMACTHASNPSVCYLEDTDLLL	251	USER	zzz1064
2067		genbank_geminiviridae_CDG49315.1_@pfam00844	geminivirus_cap	genbank	MVTNKDSRGKGKRKLEEGESSGRWKGQVYKRRTRPYKVVPVRPPALCVYRYNWLNSDKTNIVAGNTPRIDLITCFAAGKADNNRHTNQTILYKFNLQGTCYVSDSSCMFITPIRVYHWLVYDAEPKQATPDSTDIFTMPWNLLPSSWTVQRAWSHRFVVKRKWCVNLVSDGRKVGSKTVDSRYNYVVGKNIVDASKFVKGLRVTTEWMNTGDGKIGDIKKGALYLVTCTRGGITGDSASISFEVVCAYTHACYFKSIGIQ	260	USER	zzz1065
2066		genbank_geminiviridae_CDK13234.2_@pfam00844	geminivirus_cap	genbank	PMYRKPRMYRIYRSPDVPRGCEGPCKVQSFESRHDIQHIGKVMCVSDVTRGIGLTHRVGKRFCVKSVYVLGKIWMDENIKTKNHTYSVMFFLVRDRRPVDKPQDFGEVFNMFDNEPSTATVKNVHRDRYQVLRKWYATVTGGQYASKEQALVKKFIRVNNYVVYNQQEAGKYENHTENALMLYMACTHASNPVYATLKIRYRINKYLSN	209	USER	zzz1067
2065		genbank_geminiviridae_CDN67523.1_@pfam00844	geminivirus_cap	genbank	MSKRPADIVISTPASKVRRRLNFDSPYACRAAAPIVRVTKSRMWANRPMYRKPRMYRMYRSPDVPRGCEGPCKVQSFDAKNDIGHMGKVICLSDVTRGMGLTHRVGKRFCVKSLYFVGKIWMDENIKTKNHTNTVMFWIVRDRRPTGTPYDFQQVFNVYDNEPSTATVKNDQRDRFQVLRRFQATVTGGQYACKEQVPIRKFYRITITWCIITRKLGSMKITLRMLCCCIWHVLMPLTLCMLL	243	USER	zzz1068
2064		genbank_geminiviridae_CDN72749.1_@pfam00844	geminivirus_cap	genbank	MSKRPGDIIISTPVSKVRRRLNFDSPYSSRAAAPIVQGINKRRSWTYRPMYRKPRIYRMYRSPDVPRGCEGPCKVQSYEQRDDIKHTGIVRCVSDVTRGSGITHRVGKRFCVKSIYFLGKVWMDENIKKQNHTNQVMFFLVRDRRPYGNSPMDFGQVFNMFDNEPSTATVKNDLRDRFQVMRKFMLPFWWASGMKEHALVKDFLNYSHVTYNHQEGAKHKNHTENASLLYMACTLASNPVHATLKIRIYFYDSISN	256	USER	zzz1069
2063		genbank_geminiviridae_CDW92212.1_@pfam00844	geminivirus_cap	genbank	MLKRPADILISTPASKVRRKLNFDSPYSSRAVVPTVRGTSKRQLWTYRPMYRKPKFYKMYRSPDVPRGCEGPCKIQSYEQRDDVKHTGIVRCVSDITRGPGLTHRTGKRFCIKSMYILGKIWMDENIKKTNHTNNVMFYLVRDRRPYGKSPMDFGQVFNMFDNEPSTATVKNDLRDRYRYQVLRKFHATVTGGPSGVKEQALVKRFYRLNSHVVYNHQEEAKYENHTENALLLYMACTHASNPVYATLKIRIYFYDAVTN	260	USER	zzz1070
2062		genbank_geminiviridae_CUH74558.1_@pfam00844	geminivirus_cap	genbank	MSKRPADMLIFTPASKVRRRLNFDSPYVSSCSCPHCAASPKQRRWANRPMYRKPRIYRMYRSPDVPKGCEGPCKVQSFDAKNDIGHMGKVICLSDVTRGIGLTHRVGKRFCVKSLYFVGKIWMDENIKVKNHTNTVMFWIVRDRRPSGTPSDFQQVFNVYDNEPSTATVKNDQRDRFQVLRRFQATVTGGQYAAKEQAIIRRFFRVNNYVVYNHREAGKYENHTENALLLYMACTHASNPVYATLKVRSYFYDSVTN	257	USER	zzz1098
2061		genbank_geminiviridae_CUH74563.1_@pfam00844	geminivirus_cap	genbank	MELVQLSPLPASPKQRRWANRPMYRKPRIYRMYRSPDVPKGCEGPCKVQSFDAKNDIGHMGKVICLSDVTRGIGLTHRVGKRFCVKSLYFVGKIWMDENIKVKNHTNTVMFWIVRDRRPSGTPSDFQQVFNVYDNEPSTATVKNDQRDRFQVLRRFQATVTGGQYAAKEQAIIRRFFRVNNYVVYNHREAGKYENHTENALLLYMACTHASNPVYATLNGGGYFYDSVTN	230	USER	zzz1099
2060		genbank_geminiviridae_CUH74568.1_@pfam00844	geminivirus_cap	genbank	MSKRPADIIISTPASKVRRRLNFDSPYGARAVVPIARVTKAKAWANRPMNRKPRMYRMYRSPDVPRGCEGPCKVQSFESRHDIQHIGKVMCISDVTRGTGLTHRWGKRFCVKSVYVLGKIWMDENIKTKNHTNSVMFFLVRDRRPVDKPQDFGEVFNMFDNEPSTATVKNVHRDRYQVLRKWYATVTGGQYASKEQALVKKFVRVNNYVVYNQQEAGKYENHSENALMLYMACTHASNPVYATLKIRIYFYDSVTINKY	259	USER	zzz1100
2059		genbank_geminiviridae_NP_040320.1_@pfam00844	geminivirus_cap	genbank	MPKRDAPWRLTAGTAKISRTGNNSRALIMGPSTSRASAWVNRPMYRKPRIYRMYRTPDVPKGCEGPCKVQSFEQRHDVSHVGKVICISDVTRGNGITHRVGKRFCVKSVYILGKIWMDENIKLKNHTNSVMFWLVRDRRPYGTPMDFGQVFNMYDNEPSTATVKNDLRDRYQVMHRFYAKVTGGQYASNEQALVRRFWKVNNHVVYNHQEAGKYENHTENALLLYMACTHASNPVYATLKIRVYFYDSIMN	251	USER	zzz1106
2058		genbank_geminiviridae_NP_040952.1_@pfam00844	geminivirus_cap	genbank	MSPASSWKRKRPSSSSAQASKKRRVYRPAVSRSLARREPLQVQDFVWDTDVAFNRGGGCYLLTSYARGSAENQRKTAETITYKVAVNLGCAISGTMQQYCISSRPVCWIVYDAAPTGSAVTPKDIFGYPEGLVNWPTTWKVARAVSHRFIVKRRWVFTMESNGSRFDRDYTNLPAAIPQSLPVLNKFAKQLGVRTEWKNAEGGDFGDIKSGALYLVMAPANGAVFVARGNVRVYFKSVGNQ	241	USER	zzz1109
2057		genbank_geminiviridae_NP_040963.1_@pfam00844	geminivirus_cap	genbank	MSSSMKRKRTDEGSGSRRFTKKKSAAKGRTSSSRAIRPALQIQSFVSAGAATIAVPTGGVCHLLSSYSRGSGEGDRHTNETVTYKAAFDYHFSANAGPCAYSSIGVGVLWLVYDAQPSGQVPAVTDIFPHDTTLQSFPYTWKVGREVCHRFVVKRRWCFTMETNGRIGSDKPPSNAVWPPCKRSIYFHKFATGLGVKTEWKNTTDGGVGSIKKGALYFVIAPGSGIDFTLFGTCRMYFKSVGNQ	244	USER	zzz1110
2056		genbank_geminiviridae_NP_042589.1_@pfam00844	geminivirus_cap	genbank	MSGALKRKRSDEVAWSRRKPVKKQDTGFPLPRAGPSVRRGLPALQIQTLTAAGDTMITVPSGGICSLIGTYARGSDEGNRHTNETLTYKVALDYHFVATAAACKYSSIGVGVMWLVYDAQPTGNSPEVKDIFPHSDTLSAFPYTWKVGREVCHRFVVKRRWCFTMETNGRIGSDVPPANTAWPPCKKDIYFHKFCTGLGVKTEWKNVTDGKVGAIKKGALYIVIAPGNGLEFTVHGQCRLYFKSVGNQ	248	USER	zzz1111
2055		genbank_geminiviridae_NP_044922.1_@pfam00844	geminivirus_cap	genbank	MPKRDRTWRSIAGTSKVSRNANYSPRTGSGPIGNKASEWVNRPMYRKPKIYRMMRTPDVPRGCEGPCKVQSYEQRHDISHVGKVMCVSDVTRGNGITHRVGKRFCVKSVYILGKIWMDENIKLKNHTNSVMFWLVRDRRPYGTPMDFGQVFNMYDNEPSTATVKNDLRDRYQVMHRFHTKVTGGQYASNEQALVRRFWKVNNHVVYNHQEAAKYENHTENALLLYMACTHASNPVYATLKIRIYFYDSILN	251	USER	zzz1112
2054		genbank_geminiviridae_NP_045943.1_@pfam00844	geminivirus_cap	genbank	MPLAGSKRKRADEVAWSKRGTKKKPERTSAARAGPSRRIRPPLQIATFVAAGQSMVSVPSGGVCELLGSYARGADEANRHTNETVTYKVALDYHFVATAAACKYSSIGTGVAWLVYDAQPTGNTPTTKDIFGYSDSLVAFPYTWKVSREVCHRFVVKRRCTFTMETDGRIGSDVPPANTSWSPCKRAIYFHKFFTGLGVKTEWKNLTDGGVGAIKKGALYLVIAPGNGLEFTCHGQARLYFKSVGNQ	247	USER	zzz1113
2053		genbank_geminiviridae_NP_047215.2_@pfam00844	geminivirus_cap	genbank	MPKRDLPWRSMPGTSKTSRNANYSPRARIGPRVDKASEWVHRPMYRKPRIYRTLRTADVPRGCEGPCKVQSYEQRHDISHVGKVMCISDVTRGNGITHRVGKRFCVKSVYILGKIWMDENIKLQNHTNSVMFWLVRDRRPYGTPMDFGHVFNMFDNEPSTATVKNDLRDRYQVLHKFYGKVTGGQYASNEQAIVKRFWKVNNHVVYNHQEAGKYENHTENALLLYMACTHASNPVYATLKIRIYFYDSLMN	251	USER	zzz1115
2052		genbank_geminiviridae_NP_047224.1_@pfam00844	geminivirus_cap	genbank	MPKRDAPWRSMAGTTKVSRNANYSPRGGIGPKMTRAAEWVNRPMYRKPRIYRTLRTPDVPRGCEGPCKVQSYEQRHDISHVGKVMCISDVTRGNGITHRVGKRFCVKSVYILGKIWMDENIKLKNHTNSVMFWLVRDRRPYGTPMDFGQLFNMFDNEPSTATVKNDLRDRFQVMHKFYGKVTGGQYASNEQAIVKRFWKVNNHVVYNHQEAGKYENHTENALLLYMACTHASNSVYATLKIRIYFYDSIMN	251	USER	zzz1118
2051		genbank_geminiviridae_NP_047230.1_@pfam00844	geminivirus_cap	genbank	MSKRPADIIISTPGSKVRRRLNFDSPYSSRAAVPTVRVTKRQSWTNRPINRKPRWYRMYRSPDVPKGCEGPCKVQSFESRHDVVHIGKVMCISDVTRGIGLTHRVGKRFCVKSIYILGKIWMDENIKTKNHTNSVMFFLVRDRRPVDKPQDFGEVFNMFDNEPSTATVKNMHRDRYQVLRKWHATVTGGQYASKEQALVRRFFRVNNYVVYNQQEAGKYENHTENALMLYMACTHASNPVYATLKIRIYFYDSVSN	256	USER	zzz1119
2050		genbank_geminiviridae_NP_047238.1_@pfam00844	geminivirus_cap	genbank	MPKRDAPWRSMAGTSKVSRNANYSPRSGIGPRINKAAEWVNRPMYRKPRIYRTLRTPDVPRGCEGPCKVQSFEQRHDILHTGKVMCISDVTRGNGITHRVGKRFCVKSVYILGKIWMDENIKLKNHTNSVMFWLVRDRRPYGTPMDFGQVFNMFDNEPSTATVKNDLRDRYQVMHRFYGKVTGGQYASNEHAIVRRFWKVNNHVVYNHQEAGKYENHTENALLLYMACTHASNPVYATLKIRIYFYDSILN	251	USER	zzz1120
2049		genbank_geminiviridae_NP_047244.1_@pfam00844	geminivirus_cap	genbank	MVKRDAPWRLMAGTSKVSRSANFSPREGMGPKFNKAAAWVNRPMYRKPRIYRTMRGPDIPKGCEGPCKVQSYEQRHDISHLGKVMCISDVTRGNGITHRVGKRFCVKSVYILGKIWMDENIKLKNHTNSVMFWLVRDRRPYGTPMDFGQVFNMFDNEPSTATIKNDLRDRYQVMHRFYAKVTGGQYASNEQALVRRFWKVNNHVVYNHQEAGKYENHTENALLLYMACTHASNPVYATLKIRIYFYDSITN	251	USER	zzz1122
2048		genbank_geminiviridae_NP_047250.1_@pfam00844	geminivirus_cap	genbank	MPKRDLPWRSMAGTSKVSRNANYSPRAGIGPRINKAAEWVNRPMYRKPRMYRTLRTTDVARGCEGPCKVQSFEQRHDISHIGKVMCISDVTRGNGITHRVGKRFCVKSVYILGKIWMDENIKLKNHTNSVMFWLVRDRRPYGTPMDIWTVFNMFDNEPSTATVKNDLRDRYQVMHKFYGKVTGGQYASNEQAIVKRFWKVNNHVVYNHQEAGKYENHTENALLLYMACTHASNPVYATLKIRIYFYDSITN	251	USER	zzz1123
2047		genbank_geminiviridae_NP_050014.1_@pfam00844	geminivirus_cap	genbank	MSKRPADIVISTPASKVRRRLNFDSPYVSRAAAPTVLVTNKRRSWANRTMYRKPRIYRMYKSPDVPRGCEGPCKVQSYEQRHDVAHVGKVICVSDVTRGNGLTHRVGKGPVIKSVYVWGRIWMDEISSQESHQSVMFFLVRDRRPFGTPQDFGQVFNMYDNEPSTATVKNDNRDRFQVLRRFQATVTGGQYASKEQAIVRKFMKVNNHVTYNHQEAAKYDNHTENALLLYMACTHASNPVYATLKIRIYFYDSVQN	256	USER	zzz1128
2046		genbank_geminiviridae_NP_066183.1_@pfam00844	geminivirus_cap	genbank	MRRYTRNTYQMGQKRKAPYQPSWSKKRKTGPMRKYQWKRPARKTKALKLKMYDDMLGAGGLGSTISNNGMITMLNNYVQGIGDSQRSTNTTITKHMKFDMALMGSSSFWDTPNYMTQYHWIIIDKDVGSVFPVKLDDIFDIPSNGQAMPSTFRIRRDSNERFIVKRKWTTHLMSTGAAYGSKDIYKGPSMPNYKKGMNINIRNLNVKTIWKDTGGGKYEDVKENAILYIVVNDNADNTNMYATLFGNCRCYFY	253	USER	zzz1129
2045		genbank_geminiviridae_NP_066373.1_@pfam00844	geminivirus_cap	genbank	MPKRDAPWRHMASTSKISRGVNNSPRAGVGPRSNKATDWVNRPMYRKPKIYRMYRTPDVPRGCEGPCKVQSFEQRHDISHTGKVMCVSDVTRGNGITHRVGKRFCVKSVYILGKIWMDENIKLKNHTNSAMFWLVRDRRPYGTPMDFGQVFNMFDNEPSTATVKNDLRDRFQVMHKFYAKVTGGQYASNEQALVKRFWKVNNHVVYNHQEAGKYENHTENALLLYMACTHASNPVYATLKIRIYFYDSITN	251	USER	zzz1130
2044		genbank_geminiviridae_NP_148952.1_@pfam00844	geminivirus_cap	genbank	MSKRPADIIISTPASKVRRRLNFETPYTSRVAVPTVRVTKSRAWANRPMNRKPRIYRMYRSPDVPRGCEGPCKVQSFESRHDISHIGKVMCISDVTRGIGLTHRVGKRFCVKSVYVLGKVWMDESIKTKNHTNSVMFFLCRDRRPVDKPQDFGEVFNMFDNEPSTATVKNVFRDRYQVLRKWHATVTGGTYASKEQALVKKFVRVNNYVVYNQQEAGKYENHSENALMLYMASTHASNPVYATLKIRIYFYDSVSN	256	USER	zzz1132
2043		genbank_geminiviridae_NP_148985.1_@pfam00844	geminivirus_cap	genbank	MPKRDAPWRSLAGTSKVSRSANYTPRGGPKLDKAAVWVNRPMYRKPRIYRTFKSPDVPKGCEGPCKVQSFEQRHDISHVGKVMCISDVTRGNGITHRVGKRFCVKSVYILGKIWMDENIKLKNHTNSVIFWLVRDRRPYSSPMDFGQVFNMFDNEPSTATVKNDLRDRFQVMHRFYAKVTGGQYASNEQALVRRFWKVNNHVVYNHQEAGKYENHTENALLLYMACTHASNPVYATLKIRIYFYDSITN	249	USER	zzz1133
2042		genbank_geminiviridae_NP_569145.1_@pfam00844	geminivirus_cap	genbank	MVQKRKDLRRSDAGSAVRAKLHKASTGKAFPVGKRAPLQIRSYAWETPATATTPSGPISITDGTIFMCNTIDPGTGDDQRSRHTTMLYKMSLNVVLWPGATTAQIVGPFRVNFWLVYDAAPTGVVPKLTDIFDVAYPKWGNTWQVSRSNVHRFIVKRKWKVDYQSSGVPVGKRQSSGVEYAPVNNVVECNKFFEKLRVKTEWANTSTGAIGDVKKGALYLCANTRQMPAGDSVTTSCTTMMQGSTRLYFKVLGNQ	255	USER	zzz1135
2041		genbank_geminiviridae_NP_612220.1_@pfam00844	geminivirus_cap	genbank	MSTVTWGKKRKRSGGDSKAKSRGSSSYIPRSVSSRRESLQVATFSWTSSGSGIKFSPGGAAYLVSNFPQGANDNCRHTNKTVLYKFMAKNTIYLDSSHYMKVFRAPFHFWLVYDKSPGANVPSTGDIFEGPSLFPHNPWTWTVSRAACHRFVVKKTWSCVVESNGIDPTKGQGATYYGPGPCNQVKSCNKFFKRLGVSTEWKNSATGDVGDIKEGALYIVGAPSQKSDVYVNGYFRVYFKSVGNQ	245	USER	zzz1136
2040		genbank_geminiviridae_NP_612594.1_@pfam00844	geminivirus_cap	genbank	MPKRDAPWRNMAGTSKVTRSSNYSPRGGPKFNKADAWVNRPMYRKPRIYRTLRGPDVPRGCEGPCKVQSYEQRHDVSHVGKVMCISDITRGNGITHRVGKRFCVKSVYILGKIWMDENIKLKNHTNSVMFWLVRDRRPYGTPLDFGQVFNMFDNEPSTATVKNDLRDRFQVMHKFYGKVTGGQYASNEQALVKRFWKVNNYVVYNHQEAGKYENHTENALLLYMACTHASNPVYATLKIRIYFYDSITN	249	USER	zzz1137
2039		genbank_geminiviridae_NP_619679.1_@pfam00844	geminivirus_cap	genbank	MSKRPADIGIFTPAFRARRRLNFDGPYVSRVNVPIAQGTSKERSWAQRPMYRKPRIYRMYRSPDVPKGCEGPCKVQSFEKKDDVGHSGKMLCISDITRGNGLTHRVGKRFCIKSVYIIGKIWMDENIKLKNHTNNVIFWLVRDRRPVSVPYGFQEAFNMYENEPSTATIKQDLRDRLQVLHKFTGTVTGGQYASKEQAMIKRFWRLNHHVTYNHQEAAKYENHTENALLLYMACTHASNPVYATLKIRVYFYDSVQN	257	USER	zzz1139
2038		genbank_geminiviridae_NP_620294.1_@pfam00844	geminivirus_cap	genbank	MAKRTGDILISTPVSKVRRKLNFDSPYMSRAVAPTVLVTSKRRQWANRPMYRKPRMYRMYRSPDVPKGCEGPCKVQSYEQRDDVKHTGIVRCVSDVTRGSGITHRVGKRFCVKSIYILGKIWMDENIKKQNHTNQVMFFLVRDRRPNGSSPLDFGQVFNMFDNEPSTATVKNDLRDRFQVMRKFHATVVGGPSGMKEQVLVKRFFRVYNHVVYNHQEAAKYENHTENAMYVYGVTHFSNPVYATLKIRIYFYDSVTN	257	USER	zzz1141
2037		genbank_geminiviridae_NP_620491.1_@pfam00844	geminivirus_cap	genbank	MPLSGMKRKRSDETGRRKRSSGVKQGRTSAARAGSAVRRTRPSLQIQTLQAAGTSMIEVPSGGVCDLLGSFSRGSDEGNRHTNETVIYKVALDYHFIATAAACKYSSIGTGVVWLVYDAQPSGNPPTVKDIFPHPDTLTAFPYTWKVGREVCHRFVVKRRWTFTMEVNGRIGSDIPPSTSCWPPCRKNIYFHKFVTGLGVKTEWKNTTGGEVGDIKKGALYIVIAPGNGLDFTVHGNARLYFKSVGNQ	248	USER	zzz1143
2036		genbank_geminiviridae_NP_620662.1_@pfam00844	geminivirus_cap	genbank	MSKRPADIIISTPVSKVRRRLNFDSPFSSRAAVPIVQGTNKRRSWTFRPMYRKPRMYRMFKSPDVPRGCEGPCKVQSYEQRDDVKHTGSVRCVSDVTRGSGITHRVGKRFCIKSIYVLGKIWMDENIKKQNHTNQVMFFLVRDRRPYGNSPMDFGQVFNMFDNEPSTATVKNDLRDRYRVMRKFHATVVGGPSGMKEQALVRRFFRINNHVVYNHQEAAKYENHTENALLLYMACTHASNPVYATLKIRIYFYDAVTN	258	USER	zzz1144
2035		genbank_geminiviridae_NP_620725.1_@pfam00844	geminivirus_cap	genbank	MAGRYKGLVYSRKRGRYGKTYQALGVKSQRELEQLVNQPGRPVSNRRPALQVAEYLWTTNKTGMTFSPGGSTFLITNFPQGANENCRHTNRTITYKMAVKTWVALDGSMFSRVSKFPIYFWLVYDKNPGESNPSPSAIFDSLYQDQPGTWTVTRNVCHRFVVKKTWSCMLESNGVDPNAKQGSSYYGPGPCYQWRHVTKFFKRLGVSTEWKNSSTGDVADIKEGALYLVCAPGGGATVRVGGRFRMYFKSVGNQ	254	USER	zzz1146
2034		genbank_geminiviridae_NP_620732.1_@pfam00844	geminivirus_cap	genbank	MPYKRKLTSYFPQSKRFRGAKSGMAVVKTSASRRLYKKGKRKPDRIKTYTYAFSSICTDKGTIVYMNSWSLGLGPQQRSSDIEILKSMYIRLTVALSENAASQVKTYVVKWALIVDQVPGETLVGVADVYKTCPSPYPYVQCAYIADDNHSRFQVLRSGFLSLSGNGLAVGSSTRTGCPAMKNMASINKFCKNLNVRCVYDADSATGDIASIKRGAVYLVIWPDVEIRYGFSCTMYHRNGNA	242	USER	zzz1147
2033		genbank_geminiviridae_NP_620885.1_@pfam00844	geminivirus_cap	genbank	MPKRDAPWRSMAGTSKVSRNANYSPRAGMIHKFDKAAAWVNRPMYRKPRIYRTFRSPDVPRGCEGPCKVQSYEQRHDISHVGKVMCISDITRGNGITHRVGKRFCVKSVYILGKIWMDENIKLKNHTNSVMFWLVRDRRPYGTPMEFGQVFNMFDNEPSTATVKNDLRDRYQVMHKFYAKVTGGQYASNEQALVKRFWKVNNYVVYNHQEAGKYENHTENALLLYMACTHASNPVYATLKIRIYFYDSITN	251	USER	zzz1152
2032		genbank_geminiviridae_NP_620889.1_@pfam00844	geminivirus_cap	genbank	MPKRDLPWRSMAVTSKVSRNANCSPRSGIGPKYNKAAEWVNRPMYRKPRIYRTLKSPDVARGCESPCKVQSYEQRHDISHVGKVMCISDGTRGNGITHRVGKRFCVKSVYILGKIWMDENIKLKNHTNSVMFWLVRDRRPYGTPMDFGQVFNMFDNEPSTATVKNDLRDRYQVMHKFYGKVTGGQYASNEQAIVKRFWKVNNHVVYNHQEAGKYENHTENALLLYMACTHASNPVYATLKIRIYFYDSIMN	251	USER	zzz1153
2031		genbank_geminiviridae_NP_632015.1_@pfam00844	geminivirus_cap	genbank	MSKRPADIVISTPASKVRRRLNFASPYGNRVAAPTVLVTNKKSSWVNRPLFRKPKMYRMYKSPDVPRGCEGPCKVQSFEQRHDIAHVGKVICVSDVTRGNGLTHRVGKRFCVKSIYVLGKIWMDENIKTKNHTNTVMFFLVRDRRPFGTPQDFGQVFNMYDNEPSTATVKNDNRDRFQVLRRFQATVTGGQYACKEQALVRKFMKINNHVTYNHQEAAKYDNHTENALLLYMACTHASNPVYATLKIRIYFYDSVQN	257	USER	zzz1156
2030		genbank_geminiviridae_NP_660082.1_@pfam00844	geminivirus_cap	genbank	MPKRDAQWRHMGGTSKISRSANFSPRGGNGPKYNKAAEWVNRPMYRKPRIYRTLRGPDVPRGCEGPCKVQSYEQRHDVSHVGKVMCVSDVTRGNGITHRVGKRFCVKSVYILGKIWMDENIKLKNHTNSVMFWLVRDRRPYGTPMDFGQVFNMFDNEPSTATVKNDLRDRFQVMHKFYGKVTGGQYASNEQALVKRFWKVNNYVVYNHQEAGKYENHTENALLLYMACTHASNPVYATLKIRIYFYDSITN	251	USER	zzz1157
2029		genbank_geminiviridae_NP_660165.1_@pfam00844	geminivirus_cap	genbank	MAKRPADIVISTPASKVRRRLNFDSPYTGRVAAPTVRVTRRQMWSNRPMYRKPMMYRMYRSPDVPRGCEGPCKVQSCEARHDVSHTGKVICVSDVTRGNGITHRVGKRFCVKSIYVIGKIWMDENIKFKNHTNTVMFFLVRDRRPSGTPMDFQQVFNCYDNEPSTATVKNDLRDRFQVRRKFYSTVTGGQYACKEQALVKRFIRLNTHVVYNHQEQAKYENHTENALLLYMACTHASNPVYATLKVRIYFYDSQMN	256	USER	zzz1159
2028		genbank_geminiviridae_NP_665671.1_@pfam00844	geminivirus_cap	genbank	MSKRPADIIISTPASKVRRRLNFDSPMQSGVRAPTVLVTNKRRAWSNRPNYRKPRMYRMYRSPDVPKGCEGPCKVQSYEQRDDVKHTGIVRCVSDVTKGTGLTHRTGKRFTVKSIYILGKIWMDENIKKQNHTNNVMFFLVRDRRPYGNSPMDFGQVFNMFDNEPSTATIKNDYRDRFQVMRKFSATVTGGPSGMKEQALVRRFFKINSHTVYNHQEAAKYENHTENALLLYMACTHASNPVYATLKIRIYFYDSVSN	258	USER	zzz1160
2027		genbank_geminiviridae_NP_671465.1_@pfam00844	geminivirus_cap	genbank	MPKRDAPWRLMAGTSKVSRTGNYSSNGGLGQRSNKANNWVNRPMYRKPRIYRMYRSSDVPKGCEGPCKVQSYEQRHDISHVGKVMCISDITRGNGITHRVGKRFCVKSVYILGKIWMDENIKLKNHTNSVIFWLVRDRRPIGTPMDFGQVFNMFDDEPSTATVKNDLRDRYQVMHRFHSKVTGGQYASNEQALVRRFWRVNNHVVYNHQEAGKYENHTENALLLYMACTHASNPVYATLKIRIYFYDSITN	251	USER	zzz1162
2026		genbank_geminiviridae_NP_795337.1_@pfam00844	geminivirus_cap	genbank	MPKRDAPWRLLAGTSKVSRNANYSPLRVLGPKVNKASEWVYRPMYRKPRIYRTLRTPDIPRGCEGPCKVQSYEQRHDVSHVGKVMCISDVTRGNGITHRVGKRFCVKSVYILGKIWMDENIKLKNHTNSVIFWLVRDRRPYGTPMDFGQVFNMFDNEPSTATVKNDLRDRLQVMHKFYAKVTGGQYASNEQALVKRFWKVNNHVVYNHQEAGKYENHTENALLLYMACTHASNPVYATLKIRIYFYDSIMN	251	USER	zzz1165
2025		genbank_geminiviridae_NP_803533.1_@pfam00844	geminivirus_cap	genbank	MAKRPGDIIISTPVSKVRRRLNFDSPYTNRVVAPTVRVTRSKIWANRPMYRKPKMYRMYRSPDVPKGCEGPCKVQSYEQRDDVKHTGIVRCVSEVTRGSGITHRVGKRLCVKSIYILGKIWMDENIKKQNHTNHVMFFLVRDRRPYGPSPQDFGQVFNMFDNEPTTATVKNDYRDRFQVLRKFHATVVGGPSGMKEQALVKRFFRINNHIVYNHQEQAKYENHTENALLLYMACTHASNPVYATLKIRIYFYDAVTN	257	USER	zzz1168
2024		genbank_geminiviridae_NP_803540.1_@pfam00844	geminivirus_cap	genbank	MSKRPADIVISTPASKVRRRLNFDTPVMSRAAAPTVLVTNRRRTWTNRPMYRKPRLYRMYRTPDVPKGCEGPCKVQSYEQRHDISHVGKVLCVSDVTRGNGLTHRVGKRFCVKSVYVLGKIWMDENIKTKNHTNTVMFYLVRDRRPFGTAMDFGQVFNMYDNEPSTATIKNDLRDRYQVLRKFTSTVTGGQYASKEQALVKKFMKINNYVVYNHQEAAKYDNHTENALLLYMACTHASNPVYATLKIRIYFYDSVQN	257	USER	zzz1169
2023		genbank_geminiviridae_NP_808761.1_@pfam00844	geminivirus_cap	genbank	MPKRDPSWRQMAGTSKVSRSSNFSPRGGGGPKPTRAFEWVNRPMYRKPRIYRTIRTPDVPRGCEGPCKVQSYEQRHDISHVGKVMCISDVTRGNGITHRVGKRFCVKSVLYFRQDMDGRKYQAQEHTNSCMFWLVRDRRPYGTPMDFGQVFNMFDNEPSTATVKNDLRDRFQVMHKFYAKVTGGQYASNEQALVKRFWKVNNHVVYNHQEAGKYENHTENALLLYMACTHASNPVYATLKIRIYFYDSITN	251	USER	zzz1171
2022		genbank_geminiviridae_NP_808780.1_@pfam00844	geminivirus_cap	genbank	MPKRDAPWRLMAGTPKVSRSSNQSPRTGTGPKFDKAHAWVNRPMYRKPRIYRAWRTPDVPRGCEGPCKVQSYEQRHDISHVGKVMCISDVTRGNGITHRVGKRFCVKSVYILGKIWMDENIKLKNHTNSVMFWLVRDRRPYGTPMDFGQVFNMFDNEPSTATVKTDLRDRYQVMHKFYGKVTGGQYASNEQAIVKRFWRVNNHVVYNHQEAGKYENHTENALLLYMACTHASNPVYATLKIRIYFYDSVLN	251	USER	zzz1172
2021		genbank_geminiviridae_NP_808829.1_@pfam00844	geminivirus_cap	genbank	MSKRPADIVISTPVSKVRRRLNFDTPYSSRAVAPTVLVTNKRRAWTQRPMYRKPRMYRMYRSPDVPKGCEGPCKVQSYEQRHDISHVGKVLCVSDVTRGNGFTHRVGKRFCVKSIYVLGKIWMDENIKTKNHTNTVMFFLVRDRRPFGTAMDFGQVFNMYDNEPSTATVKNDMRDRYQVLRKFTATVTGGQYASKEQALVRKFMKVNNYVVYNHQEAAKYENHTENALLLYMACTHASNPVYATLKIRIYFYDSVQN	257	USER	zzz1175
2020		genbank_geminiviridae_NP_808891.1_@pfam00844	geminivirus_cap	genbank	MPKRDVPWRNIAGTSKVSRSSNDSPRAGSGPKFYKAARWVDRPMYRKPRIYRILRTPDVPRGCEGPCKVQSYEQRHDISHVGKVMCISDVTRGNGITHRVGKRFCVKSVYILGKIWMDENIKLKNHTNSVMFWLVRDRRPYGTPMDFGQVFNMFDNEPSTATVKNDLRDRYQVMHKFYAKVTGGQYASNEQALVKRFWKVNNHVVYNHQEAGKYENHTENALLLYMACTHASNPVYATLKIRIYFYDSIMN	251	USER	zzz1176
2019		genbank_geminiviridae_NP_808894.1_@pfam00844	geminivirus_cap	genbank	MPKRDLPWRSIAGTSKVSRNANYSPRAGSGPKINKASEWVNRPMYRKPRIYRTLRTPGVPRGCEGPCKVQSYEQRHDISHVGKDMCISDVTRGNGITHRVGKRFCVKSVYILGKIWMDENIKLKNHTNSVMFWLVRDRRPYGTPMDFGQVFNMFDNEPSTATIKNDLRDRYQVMHKFYGKVTGGQYASNEQAIVKRFWNVYNHVVYNHQEAGKYENHTENALLLYMACTHASNPVYATLKIRIYFYDSIMN	251	USER	zzz1178
2018		genbank_geminiviridae_NP_817116.1_@pfam00844	geminivirus_cap	genbank	MSKRPADIIISTPASKVRRRLNFDSPFTSRAVVPIAPGTNKRRSWTYRPMYRKPKMYRMYRSPDVPRGCEGPCKIQSYEQRDDVKHTGIVRCISDITKGPGLTHRTGKRFVVKSVYILGKVWMDENIKKQNHTTNVMFFLVRDRRPYGTSPMDFGQVFNMFDNEPSTATVKNDLRDRFQVLRKFTATVVGGPSGLKEQALVKRFFRLNSHVTYNHQEAAKYENHTENALLLYMACTHASNPVYATLKIRVYFYDSVMN	258	USER	zzz1180
2017		genbank_geminiviridae_NP_840051.1_@pfam00844	geminivirus_cap	genbank	MPTTAGKRKRTDDAAWSKRARPKAGRTSAARPGTAVRRVRPALQIQTLQAAGTSMITVPSGGVCDILGSYSRGSDECNRHTNETVTYKVALDYHFVASAAACKYSSIGTGVVWLVYDAQPQGNCPTVKDIFPHPDTLSAFPYTWKVGREVCHRFVVKRRWTFTMEVNGRIGSDMPPATAVWPPCRKNIYFHKFVTGLGVKTEWKNTTGGEVGDIKKGALYIVIAPGNGLDFTVHGNARLYFKSVGNQ	247	USER	zzz1182
2016		genbank_geminiviridae_NP_871717.1_@pfam00844	geminivirus_cap	genbank	MSKRPADIVISTPASKVRRRLNFDTPAMSRAAAPTVLVTNKRRTWTNRPMYRKPRMYRMYRSPDVPKGCEGPCKVQSFESRHDVSHVGKVCCITDVTRGLGLTHRTGKRFCVKSVYIMGKVWMDENIKTKNHTNTVMFFLVRDRRPYSSPQDFGQVFNMYDNEPSTATVKNDMRDRFQVLRKFTSTVTGGQYACKEQSLVKRFFRVNNHVVYNHQEAGKYENHTENALLLYMACTHASNPVYATLKIRIYFYDSVQN	257	USER	zzz1184
2015		genbank_geminiviridae_NP_955738.1_@pfam00844	geminivirus_cap	genbank	MSKRPADIVISTPASKVRRRLNFDSPYASRAAVPTVLVTNRKRSWTNRPMNRKPKMYRMYRSPDVPRGCEGPCKVQSFDAKNDIGHMGKVICLSDVTRGNGLTHRVGKRFCVKSLYFVGKIWMDENIKVKNHTNTVLFWIVRDRRPSGTPSDFQQVFNVYDNEPSTATVKNDQRDRYQVIRRFQATVTGGQYAAKEQAIIRRFYRVNNYVVYNHQEAGKYENHTENALLLYMACTHASNPVYATLKVRSYFYDSVTN	257	USER	zzz1185
2014		genbank_geminiviridae_NP_995303.1_@pfam00844	geminivirus_cap	genbank	MPKRSIDTVTSLPMSITRRRLNFGSQYSLPASAPTAPGMSYKRRAWKNRPMYTKPRFYRWRRSSDVPRGCEGPCKVQSFEQRHDITHTGKVLCVSDVTRGNGITHRIGKRFCVKSVYVMGKIWMDENIKLKNHTNTVMFWLVRDRRPVTTPYGFGELFNMYDNEPSTATIKNDLRDRVQVLHRFSASLTGGQYASKEQAVIKKFFRVNNYVVYNHQEAAKYENHTENALLLYMACTHASNPVYATLKIRIYFYDNVTN	258	USER	zzz1189
2013		genbank_geminiviridae_P03561.1_@pfam00844	geminivirus_cap	genbank	MSKRPGDIIISTPGSKVRRRLNFDSPYRNRATAPTVHVTNRKRAWVNRPMYRKPTMYRMYRSPDIPRGCEGPCKVQSFEQRDDVKHLGICKVISDVTRGPGLTHRVGKRFCIKSIYILGKIWLDETIKKQNHTNNVIFYLLRDRRPYGNAPQDFGQIFNMFDNEPSTATIKNDLRDRFQVLRKFHATVVGGPYGMKEQALVKRFYRLNHHVTYNHQEAGKYENHTENALLLYMACTHASNPVYATLKIRIYFYDSIGN	258	USER	zzz1190
2012		genbank_geminiviridae_P06946.1_@pfam00844	geminivirus_cap	genbank	MVTNKDSRGKGKRKMEEGESSGRWKGAVYKRRKQAYKVVPVKPPALCVFRYNWLNSDRTNIVVGNTPRVDLITCFAQGKADNNRHTNQTVLYKFNIQGTCYMSDASAPFIGPVRLYHWLVYDAEPKQAMPDATDIFTMPWNLLPSTWTVQRAWSHRFVVKRKWTVNLVTDGRKVGSKTVDQRYNWVVGKNIVDANKFFKGLRVTTEWMNTGDGKIGDIKKGALYLISSTRGGVTGDSASTAFDVVCAYTHACYFKAIGIQ	260	USER	zzz1192
2011		genbank_geminiviridae_P14984.2_@pfam00844	geminivirus_cap	genbank	MRKYTRNTYTMSQKRKVNPQSAWPKKRRTSTTSRKYQWRRPVTKNRTLKLKMYDDMLGAGGIGSTISNNGMITMLNNYVQGIGDSQRARNVTVTKHLKFDMALMGSSQFWETPNYMTQYHWIIIDKDVGSVFPTKLSSIFDIPDNGQAMPSTYRIRRDMNERFIVKKKWRTHLMSTGTGYGGKETYKAPSMPNYKKPMNINVRNLNMRTIWKDTGGGKYEDVKENALLYVVVNDNTDNTNMYATLFGNCRCYFY	254	USER	zzz1194
2010		genbank_geminiviridae_P27256.1_@pfam00844	geminivirus_cap	genbank	MSKRPGDIIISTPVSKVRRRLNFDSPYSSRAAVPIVQGTNKRRSWTYRPMYRKPRIYRMYRSPDVPRGCEGPCKVQSYEQRDDIKHTGIVRCVSDVTRGSGITHRVGKRFCVKSIYFLGKVWMDENIKKQNHTNQVMFFLVRDRRPYGNSPMDFGQVFNMFDNEPSTATVKNDLRDRFQVMRKFHATVIGGPSGMKEQALVKRFFKINSHVTLFIFIQEAAKYENHTENALLLYMACTHASNPVYATMKIRIYFYDSISN	260	USER	zzz1195
2009		genbank_geminiviridae_P38608.1_@pfam00844	geminivirus_cap	genbank	MPKRTGDILISTPVSKVRRKLNFDSPYTSRAAAPTVQGIKRRSWTYRPMYRKPRMYRMYRSPDVPFGCEGPCKVQSYEQRDDVKHTGVVRCVSDVTRGSGITHRVGKRFCIKSIYILGKIWMDENIKKQNHTNQVMFFLVRDRRPYGTSPMDFGQVFNMFDNEPSTATVKNDLRDRYQVMRKFHATVVGGPSGMKEQCLLKRFFKVNTHVVYNHQEQAKYENHTENALLLYMACTHASNPVYATLKIRIYFYDAVTN	257	USER	zzz1196
2008		genbank_geminiviridae_Q91MF9.1_@pfam00844	geminivirus_cap	genbank	MSTSKRKRADEAQWNKRSTKKKGSAPQAKKPGGKGERPSLQIQTLLHSGDTMITVPSGGVCDLINTYARGSDEGNRHTSETLTYKVGVDYHFVADAASCKYSNRGTGVMWLVYDTTPGGNAPTTQDIFAYPSALKAWPTTWKVSRELCHRFVVKRRWLFTMETDGRIGSDTPPSNQSWPPCKRNVDFHKFTSGLGVRTQWKNVTDGGVGAIQRGALYLVIAPGNGITFTAHGQTRLYFKSVGNQ	244	USER	zzz1197
2007		genbank_geminiviridae_Q91MG3.1_@pfam00844	geminivirus_cap	genbank	MSTSKRKRADEVQWNKRSTKKKASAPPVKKTGGKADRPSLQIQTLLHSGDTMITVPSGGGCDLISTYARGSDEGNRHTSETLTYKVGVDYHFVADAGACRYSNRGTGVMWLVYDTTPGGNSPSTKDIFAYPDALVAWPTTWKVSRELCHRFVVKRRWLFTMETDGRIGSDIPPTNQSWPPCKRNIDFHKFTSGLGVRTQWKNVTDGGVGAIQRGALYMVIAPGNGVTFTAHGQTRLYFKSVGNQ	244	USER	zzz1198
2006		genbank_geminiviridae_Q9YPS5.1_@pfam00844	geminivirus_cap	genbank	MPKRNYDTAFSTPMSNVRRRLTFDTPLSLPATAGSVPASAKRRRWTNRPMWRKPRYYRLYRSPDVPRGCEGPCKVQSFEAKHDISHVGKVICVTDVTRGMGITHRVGKRFCVKSIWVTGKIWMDENIKTKNHTNTVMFKLVRDRRPFGTPQDFGQVFNMYDNEPSTATVKNDLRDRYQVVRKFQATVTGGQYASKEQAIVSKFYRVNNYVVYNHQEAAKYENHTENALLLYMACTHASNPVYATLKIRIYFYDSISN	257	USER	zzz1199
2005		genbank_geminiviridae_YP_001004141.1_@pfam00844	geminivirus_cap	genbank	MSKRPADIGIFTPAFRARRRLNFDGPYVSRVNVPIAQGTSKKRSWAQRPMYRKPRVYRMYRSSDVPKGCEGPCKVQSFEKKDDVGHSGKMLCISDITRGYGLTHRVGKRFTIKSVYIIGKIWMEENIKLKNHTNNVLFWLVRDRRPVSTLYAFQEAFNMFEMEPSTATIKQDLRDRLQVLHKFSATVTGGQYASREQALIKRFWRLNHHVTYNHDEQAKYENPTENALLLYMACTHASNPVYATLKIRVYFYDSVQN	257	USER	zzz1200
2004		genbank_geminiviridae_YP_001040009.1_@pfam00844	geminivirus_cap	genbank	MSKRPADIIISTPASKVRRRLNFDSPYSSRAAVPIVPGTSKRRSWTYRPMYRKPRMYRMFRSPDVPRGCEGPCKVQSYEQRDDVKHTGIVRCVSDVTRGNGITHGVGKRFCIKSIYILGKIWMDENIKKQNHTNQVMFFLVRDRRPYGPSPMDFGQVFNMFDNEPSTATVKNDLRDRYQVLRKFHATVVGVPSGMKEQALLKRFFRINNHVVYNHQETAKYENHTENALLLYMACTHASNPVYATLKIRIYFYDSVGN	258	USER	zzz1201
2003		genbank_geminiviridae_YP_001040015.1_@pfam00844	geminivirus_cap	genbank	MSKRPGDIIISTPVSKVRRRLNFDSPYTSRVAAPIAQGTSRRRSWTYRPMYRKPRMYRMYKSPDVPRGCEGPCKVQSYEQRDDVKHTGIVRCVSDVTRGSGITHRVGKRFCIKSIYILGKIWMDDNIKKQNHTNQVMFFLVRDRRPYGSAPMDFGQVFNMFDNEPSTATVKNDLRDRYQVMRKFHSTVVGGPSGSKEQALVKRFFRINSHVTYNHQEAAKYENHTENALLLYMACTHASNPVYATLKIRIYFYDSVSN	258	USER	zzz1202
2002		genbank_geminiviridae_YP_001086459.1_@pfam00844	geminivirus_cap	genbank	MSKRPADIVISTPASKVRRRLNFDSPYATRAVAPTVRVTKSRMWANRPMYRKPRMYRMYRSPDVPKGCEGPCKVQSFDAKNDIGHMGKVICLSDVTRGIGLTHRVGKRFCVKSLYFVGKIWMDENIKTKNHTNTVMFWIVRDRRPSGTPNDFQQVFNVYDNEPSTATVKNDQRDRFQVLRRFQATVTGGQYAAKEQAIIRKFYRVNNYVVYNHQEAGKYENHTVLMPLTLCMLL	234	USER	zzz1203
2001		genbank_geminiviridae_YP_001144445.1_@pfam00844	geminivirus_cap	genbank	MFKRPASMAFSSPISSARRRFNFDSPRPSIAAALTAPGTRRRRWTNRPMYRKPRFYRMYRTPDVPKGCEGPCKVQSFDAKDDIGHMGKVICLSDVTRGTGLTHRVGKRFCVKSIYFVGKIWIDENIKVKNHTNTVMFWVVRDRRPTGTPLDFQQVFNVYDNEPAMLLSRTTSVIVFRFYEGFMQRSPEGNMQLRSRRLSESSIVLTIMLFTTTRRRQSMRTTPRMLCYCTWHVLMPLTQCMRLLNVEVISTILSAIKINKV	261	USER	zzz1204
2000		genbank_geminiviridae_YP_001210300.1_@pfam00844	geminivirus_cap	genbank	MSKRPGDIIISTPASKVRRRLNFESPFANRAIAPIVGVTRRQAWVNRPTNRKPKWYRIYKSPDVPRGCEGPCKVQSFESRHDISHIGKVMCVSDVTRGIGLTHRVGKRFCVKSVYVLGKIWMDENIKTKNHTNSVMFFLVRDRRPIDKPQDFGDVFNMFDNEPSTATVKNVNRDRYQVLRKWYRTVTGGQYASKEQALVRRFIRVNNYVVYNQQEAGKYENHTENALMLYMACTHASNPVYATLKIRIYFYDSVSN	256	USER	zzz1205
1999		genbank_geminiviridae_YP_001285755.1_@pfam00844	geminivirus_cap	genbank	MSKRPADIVISTPSSKVRRRLNFDSPYASRAAAPTVLVTSKKRSWASRPMYRKPRMYRMYRSPDVPRGCEGPCKVQSFEKRHDVSHTGTGLCVSDVTRGTGLTHRTGKRFCIKSVYILGKIWMDENIKTKNHTNTVLFWLVRDRRPVTTPYGFAEAFNMYDNEPSTATIKNDLRDRLQVLHKFGVTVTGGQYASKEQAMVKKFWKINNHVTYNHQEKAAYENHTENALILYMACTHASNPVYATLKIRIYFYDSVNN	257	USER	zzz1207
1998		genbank_geminiviridae_YP_001285761.1_@pfam00844	geminivirus_cap	genbank	MSKRPASIVISTPSSKVRRRLNFDSPYANRASAPIVRVTKGQVWTNRPMFRKPRMYRMFRSPDVPRGCEGPCKVQSYDSKHDIGHLGKVLCVSDVTRGNGLTHRTGKRFCVKSLYVIGKIWMDEKIKNKNHTNTVMFWLVRDRRPSGVPQDFQQVFNVYDNEPATATVKNDSRDRYQVLRRFQSTVTGGQYASKEQAIIRKFIRVNTHVTYNHQEDAKYANHTENALLLYMCCTHHENPVYGTLKIRSYFYDSVSN	256	USER	zzz1208
1997		genbank_geminiviridae_YP_001294914.1_@pfam00844	geminivirus_cap	genbank	MPKRDAPWRSFAATSKVSRNANYSPRTGMGPKVDKATAWVNRPMYRKPRIYRVMRGPDVPKGCEGPCKVQSYEQRHDISHVGKVMCISDVTRGNGLTHRVGKRFCVKSVYILGKVWMDDNIKLKNHTNSVMFWLVRDRRPYGIPMDFGQVFNMFDNEPSTATIKNDLRDRFQVMHRFYAKVTGGQYASNEQAIVRRFWKVNNHVVYNHQEAGKYDNHTENALLLYMACTHASNPVYATLKIRIYFYDSIAN	251	USER	zzz1209
1996		genbank_geminiviridae_YP_001333677.1_@pfam00844	geminivirus_cap	genbank	MTKRNFETAFSSPISSARRRLSYGTPLALPAPAASAQGTRRRRSWTNRPMYRKPRLYRMYRSPDVPRGCEGPCKVQSFEQRHDISHVGKVLCVSDVTRGGGITHRVGKRFCIKSIYVSGKVWVDENIKLKNHTNSVLFWLTRDRRPFGTPMDFGQVFNMYDNEPSTATVKNDLRDRYQVLHRWNATVTGGQYACKEQALIRRFYKVYNHVVYNHQEAAKYENHTENALLLYMACTHASNPVYATLKIRIYFYDSISN	257	USER	zzz1210
1995		genbank_geminiviridae_YP_001655005.1_@pfam00844	geminivirus_cap	genbank	MPKRDAPWRLMAGTSKVSRSANYSPGAGTGPKSNRASAWVNRPMYRKPRIYRMYRSPDVPKGCEGPCKVQSFESRHDVTHVGKVLCISDITRGSGITHRVGKRFCVKSVYILGKVWMDENIKLKNHTNSVMFWLVRDRRPYGTPMDFGQVFNMFDNEPSTATVKNDLRDRFQVMHKFYAKVTGGQYASNEQALVKRFWKVNNYVVYNHQEAAKYENHTENALLLYMACTHASNPVYATLKIRVYFYDSIMN	251	USER	zzz1214
1994		genbank_geminiviridae_YP_001661458.1_@pfam00844	geminivirus_cap	genbank	MAKRPGDIVISTPVSKVRRRLNFDSPYTRRAAVPTVRVTRRQIWTNRPMYRKPKIYRMTRSPDVPRGCEGPCKVQSFEQRHDIAHTGKVICISDITRGNGLTHRVGKRFCIKSTYILGKVWMDENIKTKNHTNTVMFYVVRDRRPFGTPMDFGQVFNMYDNEPSTATIKNDLRDRYQVLRKFWATVTGGQYASKEQAMVAKFMKLNNYVCYNHQEAAKYENHTENALLLYMACTHASNPVYATLKIRIYSMIRYQINKN	259	USER	zzz1215
1993		genbank_geminiviridae_YP_001686793.1_@pfam00844	geminivirus_cap	genbank	MPLTAGKRKRSGDASSSKVARPKLGRSSAARAGKPSTRARPSLQIQTLQAAGQSMISVPSGGVCDLLGSFARGSDEGNRHTNETVTYKVALDYHFVATAGACKYSSIGTGVVWLVYDAQPQGNCPQVKDIFPHPDSLSAFPYTWKVGREVCHRFVVKRRWLFTMETNGRIGSDTPGPTSCWPPCRKNIYFHKFEAGLGVKTEWKNTTGGDVGDIKKGALYIVIAPGNGLEFTVHGNARLYFKSVGNQ	247	USER	zzz1216
1992		genbank_geminiviridae_YP_001715619.1_@pfam00844	geminivirus_cap	genbank	MAVQSQKRKYTPPASWTRKRKTTGGRTVWKKYQWKRPVRSNRAVKLKMYDDMLGASGVGSTISNDGMITMLNNYVQGIGDSQRSNNLTVTRHLKFDMSLMASGAFWASPNYMTQYHWVIVDRDVGSTFPTQLSTIFDIPTGGQAMPSTYRIRRDANERFIVKKKWQTHLMSTGTDYGGKQTYKAPSMPNYKKAMNINIRNINVKTLWKDTGGGKYEDVKENAILYVVVNDNTDNTNMYATLFGNCRAYFY	250	USER	zzz1217
1991		genbank_geminiviridae_YP_001718625.1_@pfam00844	geminivirus_cap	genbank	MSKRPADIVISTPASKVRRRLNFDSPYTSRAAAPTVLVTNKRRTWSNRPMYRKPRMYRMYRSPDVPKGCEGPCKVQSYEQRHDISHVGKVLCVSDVTRGSGLTHRVGKRFCVKSVYVLGKIWMDENIKTKNHTNTVMFYLVRDRRPYGTAMEFGQVFNMYDNEPSTATIKNDLRDRYQVLRKFTSTVTGGQYASKEQALVRKFMKVNNYVVYNHQEAAKYDNHTENALLLYMACTHASNPVYATLKIRIYFYDSLQN	257	USER	zzz1218
1990		genbank_geminiviridae_YP_001876449.1_@pfam00844	geminivirus_cap	genbank	MPKRDAPWRLMAGTSKVSRTGNYSRNGGLGQSSNKNAWVNRPMYRKPRIYRMYRSSAVPKGCEGPCKVQSYEQRHDISHVGKVICISDITRGNGITHRVGKRFCVKSVYILGKIWMDENIKLKNHTNSVIFWLVRDRRPYGTPMDFGQVFNMFDNEPSTATVKNDLRDRFRVIHRFHAKVTGGQYASNEQALVRRFWKVNNHVVYNHQESGKYENHTENALLLYMACTHASNPVYATLKIRIYFYDSITN	250	USER	zzz1219
1989		genbank_geminiviridae_YP_001911129.1_@pfam00844	geminivirus_cap	genbank	MAKRAGDIIISTPASKVRRRLNFDSPYQNRVPVLTARGTRKQLWANRPMYRKPRIFKLYRGLDVPRGCEGPCKVQSFEQRHDVAHVGKVICISDVTRGNGITHRVGKRFCIKSVYVLGKVWMDENIKVKNHTNSVMFFVVRDRRPYGTPQEFGQVFNTYDNEPSTATVKNDLRDRFQVIRKFYATVTGGQYASREQTLVRRFIRVNNYVVYNHQEAAKYENHTENALLLYMACTHASNPVYATLKIRIYFYDSVTN	256	USER	zzz1221
1988		genbank_geminiviridae_YP_001936686.1_@pfam00844	geminivirus_cap	genbank	MSKRPADIVISTPASKERRRLNFDSPGISRAAAPTVLVTNRRRAWTYRPMYRKPRMYRMFKSPDVPRGCEGPCKVQSFEARHDVAHTGKVICISDVTRGGGLTHRTGKRFCVKSVYVLGKIWMDENIKVKNHTNTVMFFLVRDRRPYGTPQDFGQVFNMYDNEPSTATVKNDLRDRFQVIRRFTSTVTGGQYASKEQALVKKYMKVNAQVVYNHQEGGKYENHTENALLLYMACTHSSNPVYATLKIRIYFYDSVSN	257	USER	zzz1223
1987		genbank_geminiviridae_YP_001941154.1_@pfam00844	geminivirus_cap	genbank	MSSSLGKRKRSDEGAWSKGKSKKKAMRGSSSRRPGPVRGPRPALQIAQYIAAGTSMVTVPSGGVCELLATYARGSDEGNRHTNETVTYKVALDYHFVLTAEACRYSSIGVGVAWLVYDAQPTGNAPQVSDIFPHGDTLAAFPYTWKVGREVCHRFVVKRRWTFTMESDGRIGSDIPRTTDAWPPCKRSIYFHKFVTGLGVKTEWKNVADGGVGAIKKGALYLVIAPGNGLTFTAHGIARLYFKSVGNQ	248	USER	zzz1225
1986		genbank_geminiviridae_YP_001941161.1_@pfam00844	geminivirus_cap	genbank	MTDLKSKGKRKRDEGESSGRWKGAVYKRRKTQYKVVPVRPPALCVLRQQWITPDKQSVVVTNTPRIDLITCFAAGKGDDNRHTNQTIMYKFHLQGSVYVADASSKFVTPLRLYHWLVYDAEPKQAMPGIEDIFTMPWNVLPSTWTIWRAWAHRFVVKRKWHVDLVSDGKKVGSSTADTRYNYVVGKNIVDCNKFIKGLRVSTEWMNTGDGKIGDIKKGALYLVTCTRAGVTGDSASTGFSVVCNLTHACYFKSIGLQ	257	USER	zzz1226
1985		genbank_geminiviridae_YP_001960945.1_@pfam00844	geminivirus_cap	genbank	MPKRDAPWRLMAGTSKVSRSVNYSPRGGPKFNKASEWVNRPMYRKPRIYRTLRSPDVPKGCEGPCKVQSFEARHDVSHVGKVICVSDVTRGNGITHRVGKRFCVKSVYILGKIWMDEAIKLKNHTNSVMFWLVRDRRPYGTPMDFGQVFNLFDNEPSTATVKSDLRDRFQVMRKFYAKVTGGQYASNEQALVKRFWKVNNHVVYNHQEAAKYENHTENAMLLYMACTHASNPVYASLKIRIYFYDSVLN	249	USER	zzz1227
1984		genbank_geminiviridae_YP_001960952.1_@pfam00844	geminivirus_cap	genbank	MPKRDAPWPHRAPSTKISRSANFSPRSGTGPGPSKAAEWVNRPMYRKPRIYRTMRTPDVPRGCEGPCKVQSYEQRHDISHTGKVMCISDVTRGNGITHRVGKRFCVKSVYILGKIWMDENIKLKNHTNSAMFWLVRDRRPYGTPMDFGQVFNMFDNEPSTATVKNDLRDRFQVMHKFYAKVTGGQYASNEQALVKRFWRVNNHVVYNHQEAGKYENHTENALLLYMACTHASNPVYATLKIRIYFYDSITN	251	USER	zzz1228
1983		genbank_geminiviridae_YP_001960959.1_@pfam00844	geminivirus_cap	genbank	MPKRDAPWRHMTGTSKISRSVNFSPRSSVGPRSNKANDWVNRPMYRKPKIYRMYRNPDVPRGCEGPCKVQSYEQRHDVSHVGKVMCVSDVTRGNGITHRVGKRFCVKSVYIIGKIWMDENIKLKNHTNSVMFWLVRDRRPYGTPMDFGQVFNMFDNEPSTATVKNDLRDRFQVMHKFYGKVTGGQYASNEQALVKRFWKVNNHVVYNHQEAGKYENHTENALLLYMACTHASNPVYATLKIRIYFYDSISN	251	USER	zzz1230
1982		genbank_geminiviridae_YP_001960969.1_@pfam00844	geminivirus_cap	genbank	MVKRPADIYISTPASKARRRLNFDSPYAVRAAVPIVRATKAREWVNRPMNRKPRFYRMYRSSDVPRGCEGPCKVQSFESRHDVSHIGKVMCISDVTRGTGLTHRVGKRFCVKSVYVLGKIWMDENIKTKNHTNSVMFFLVRDRRPTGAPQDFGEVFNMFDNEPSTATVKNMHRDRYQVLKKWHSTVTGGTYASKEQALVKRFIRVNNYVVYNQQEAGKYENHTENALMLYMACTHPSNPVYATLKIRIYFYDSVTN	256	USER	zzz1233
1981		genbank_geminiviridae_YP_001974388.1_@pfam00844	geminivirus_cap	genbank	MSKRPADIIISTPASKVRRRLNFDSPYVSRAVVPIARVTKGKAWTNRPMNRKPKMYRMYRSPDVPRGCEGPCKVQSFESRHDVSHIGKVLCISDVTRGTGLTHRVGKRFCVKSVFVLGKIWVDENIKTKNHTNSVILFLVRDRRPTRTPQDFGEVFNMFDNEPSTATVKNMHRDRYQVIRKWHATVTGGTYASREQALVRKFVRVNNYVVYNQQEAGKYENHTENALMLYMACTHASNPVYATLKIRIYFYDSVTN	256	USER	zzz1234
1980		genbank_geminiviridae_YP_001974394.1_@pfam00844	geminivirus_cap	genbank	MSKRPADIVISTPASKVRRRLNFDSPYTSRAVAPTVLVTKKRRLWANRPMYRKPRLYRMYRSPDVPRGCEGPCKVQSFEQRHDIAHTGKVLCISDVTRGNGITHRVGKRFCIKSVYILGKVWMDENIKTKNHTNSVMFFIVRDRRPFGTPMDFGQVFNMYDNEPSTATIKNDLRDRYQVLHPFVYTVTGGQYASKEQALVRKFYRIYQRVTYNHQEDAKYENHTENALLLYMACTHASNPVYATLKIRIYFYDSTQN	257	USER	zzz1235
1979		genbank_geminiviridae_YP_001974399.1_@pfam00844	geminivirus_cap	genbank	MSKRDGSWRSIAGTAKVRRILNFSPRGGGGLKPTRAQEWVNRPMYRKPKIYRTLRTPDIPRGCEGPCKVQSYEQRQDISHVGKVMCISDVTRGNGITHRVGKRFCVKSVYILGKIWMDENIKLKNHTNSVMFWLVRDRRPYGTPMDFGQVFNMFDNEPSTATVKNDLRDRYQVMHRFYGKVTGGQYASNEQAIVRRFWKVNNHVVYNHQEAGKYENHTENALLLYMACTHAFNPVYATLKIRIYFYDSVMN	251	USER	zzz1236
1978		genbank_geminiviridae_YP_001974404.1_@pfam00844	geminivirus_cap	genbank	MPKRDAPWRIMAGTTKVSRSSNYSPRGGISKRDAWVNRPMYRKPRIYRTLRGPDVPKGCEGPCKVQSYEQRHDISHLGKVMCISDITRGNCITHRVGKRFCVKSVYILGKIWMDENIKLKNHTNSVIFWLVRDRRPYGTPMDFGQVFNMFDNEPSTATVKNDLRDRFQVMHRFNAKVTGGQYASNEQALVRRFWKVNNHVVYNHQEAGKYENHTENALLLYMACTHASNPLYATLKIRIYFYDSITN	247	USER	zzz1237
1977		genbank_geminiviridae_YP_001974413.1_@pfam00844	geminivirus_cap	genbank	MPKRDGSWRTTPGVAKVSRRLNYSPRGGYGPKSNKAQEWVNRPMYRKPRIYRTLTSPDVPRGCEGPCKVQSYEQRHDISHVGKVMCISDVTRGNGITHRVGKRFCVKSVYILGKIWMDENIKLKNHTNSVMFWLVRDRRPYGTPMDFGQVFNMFDNEPSTATVKNDLRDRYQVLHKFYGKVTGGQYASNEQAIVKRFWKVNNYVVYNHQEAGKYENHTENALLLYMACTHASNPVYATLKIRIYFYDSILN	251	USER	zzz1240
1976		genbank_geminiviridae_YP_002124295.1_@pfam00844	geminivirus_cap	genbank	MSKRPADIIISTPASKVRRRLNFDSPYVSRAAAPIVRVTKSRAWANRPMNRKPRMYRMYRSPDVPRGCEGPCKVQSFEQRHDISHIGKVMCISDVTRGIGLTHRVGKRFCVKSVYVLGKIWMDENIKTKNHTNSVMFFLVRDRRPVDKPQDFGEVFNMFDNEPSTATVKNVHRDRYHVLRKWHATVTGGQYASKEQALVKKFVNVIIYVVYNQQEAGKYENHSENALMLYMACTHASNSVYATLKIRIYFYDSVTN	256	USER	zzz1242
1975		genbank_geminiviridae_YP_002224029.1_@pfam00844	geminivirus_cap	genbank	MAKRLFDMVGSSPLRITRRKLNFGSPSRLIASAVTAPDMGFKRRAWTWRPANRKPWIYRRRRAPDVPRGCEGPCKVQSFEKRHDVTHTGGVLCISDVTRGNGITHRVGKRFCVKSVYVLGKIWMDENIKTKNHTNSVIFWLVRDRRPFGSPMDLGQVFNMYDNEPSTATIKNDLRDRYQVLHKWHASVTGGVYASKEQAIIKKFYRVNNYVVYNHQEAAKYENHTENALLLYMACTHASNPVYATLKIRIYFYDSVSN	258	USER	zzz1244
1974		genbank_geminiviridae_YP_002268195.1_@pfam00844	geminivirus_cap	genbank	MSKRPGDIIISTPASKVRRRLNFDSPYQSRVPVLTARGTRKQLWANRPMYRKPRLYRLFRSPDVPRGCEGPCKVQSFEQRHDIAHTGKVICISDVTRGNGITHRVGKRFCVKSVYVLGKVWMDENIKTKNHTNTVMFYVVRDRRPFGTPMDFGQVFNMYDNEPSTATVKNDLRDRYQVLRKFYSTVTGGQYASKEQALVKKFMRVNNHVVYNHQEAAKYENHTENALLLYMACTHASNPVYATLKIRIYFYDSVSN	256	USER	zzz1245
1973		genbank_geminiviridae_YP_002268202.1_@pfam00844	geminivirus_cap	genbank	MPKRDLPWRSIAGTSKVSRNANYSPRGGMGPKFNKAQAWVDRPMFKKPRIYRTLTSPDVPRGCEGPCKIQSFEQRHDISHVGKVMCISDVTRGNGITHRVGKRFCVKSVYILVKVWMDENIKLKNHTNSVMFWLVRDRRPYGTPMDFGQVFNMFDNEPSTATVKNDLRDRFQVLHKFYSKVTGGQYASNEQALVKRFWKVNTRVVYNHQEAAKYENHTENALLLYMACTHASNPVYATLKIRIYFYDSIMN	251	USER	zzz1247
1972		genbank_geminiviridae_YP_002455909.1_@pfam00844	geminivirus_cap	genbank	MSKRAADIVISTPASKVRRRLNFGSPYTNRVAAPIVRVTKQQAWTNRPMNRKPRMYRMYRSPDVPKGCEGPCKVQSFESRHDVVHIGKVMCISDVMRGVGLTHRIGKRFCVKSVYVLGKIWMDENIKTKNHTNSVMFFLVRDRRPVDKPHDFGEVFNMFDNEPSTATVKNSHRDRYQVLRKWHATVTGGQYASKEQALVKKFVRVNNYVVYNQQEAGKYENHTENALMLYMACTHASNPVYATLKSPIYFYDYVAN	256	USER	zzz1248
1971		genbank_geminiviridae_YP_002519377.1_@pfam00844	geminivirus_cap	genbank	MAKRPADIIISTPASKVRRRLNFDSPYGARAVVPIARVTKAKAWTNRPMNRKPRMYRMYRSPDVPRGCEGPCKVQSVESTARCMLISVKSCVISDVTRGSRTHTSCREAILCEICLSLGKIWMDENIKTKNHTNSVMFFLVRDRRPVDKPQDFGEVFNMFDNEPSTATVKNMHRDRYQVLRKWHATVTGGQYASKEQALVKKFVRVNNYVVYNQQEAGKYENHTENALMLYMACTHASNPVYATLKIRIYFYDSVTN	257	USER	zzz1249
1970		genbank_geminiviridae_YP_002576167.1_@pfam00844	geminivirus_cap	genbank	MSKRPADIIISTPASKVRRRLNFDSPYVNRAAAPIVRVTKAKAWANRPMYRKPRMYRMYRSPDVPRGCEGPCKVQSFDAKNDIGHMGKVICLSDVTRGIGLTHRVGKRFCVKSLYVLGKIWMDENMRYKKDTNLVMFFLVRDRRPTDKPQDFGEVFNMFDNEPSTATVKNDQRDRFQVLRRFQATVTGGQYAAKEQAIIRKFYRVNNYVVYNHQEAGKYENHTENALLLYMACTHASNPVYATLKVRSYFYDSVTN	256	USER	zzz1250
1969		genbank_geminiviridae_YP_002643046.1_@pfam00844	geminivirus_cap	genbank	MSKRPGDIIISTPVSKVRRRLNFDSPYTSRAAVPTVRGISKRRSWTYRPMYRKPRMYRMFRTPDIPRGCEGPCKVQSYEQRDDVKHVGIVRCVSDVTRGSGLTHRVGKRFCIKSIYILGKVWMDENIKKQNHTNNVMFFLVRDRRPYGSPSDFGQIFNMFDNEPSTATIKNDLRDRYQVLRKFSATVIGGPSGCKEQALVKRFFKVNNHVVYNHQEEAKYANHTENALLLYMACTHASNPVYATLKIRIYFYDAVTN	257	USER	zzz1251
1968		genbank_geminiviridae_YP_002875758.1_@pfam00844	geminivirus_cap	genbank	MKRKRNEAVPAGRRYPQRRRMYYRPRKPFFPRPVYTRSSSVKRPALQISGLVYGNSSTGAVKINTGALSLVTAFKAGTAEECRHSNQTIVKSFDISGTLYVQSPTSSNCGPVVVYFWLIYDSEPRQAIPNITDVFSMPWTSVPSSWRISRSSSHRFVVKRKWHYELMSDGVLPQSNTKVQTHNPVSRNMMDFSKYINNLGVPTEWMSTGDGTIGDIKKGALYLAAACRQGIVGDATKITIEVEFIGQSRTYFKSIGYQ	258	USER	zzz1254
1967		genbank_geminiviridae_YP_002941852.1_@pfam00844	geminivirus_cap	genbank	MPKRDAPWRLMAGTSKVSRGVSSSPRGGMAFTSPIVRKFNRSAAWVNRPMYKKPRIYKVLRTPDVPYGCEGPCKVQSFESRHDVSHVGKVLCISDVTRGNGITHRVGKRFCVKSVYILGKVWMDDNIKLKNHTNIVMFWLVRDRRPYGTPMDFGQVFNMFDNEPTTATVKNDLRDRFQVMHKFNAKVTGGQYASNEQAAVKRFWKVNNHVVYNNQEAGKYENHTENALLLYMACTHASNPVYATLKIRIYFYDAITN	257	USER	zzz1255
1966		genbank_geminiviridae_YP_003084277.1_@pfam00844	geminivirus_cap	genbank	MTGRMRVSPRFHPYGGRQVRRRLNFETAIVPYTGNAVPIAARSYVPISRSVQMKRRRGDRIPKGCVGPCKVQDYEFKMEVPHSGTFICVSDFIRGTGLTHRLGKRVCIKSMGIDGKVWMDDNVAKRDHTNIITFWLIRDRRPNKDPLTFTQAFTMYDNEPTTAKIRMDLRDRMQVLKKFSVTVSGGPYNHKEQALVRKFFKSLYNHVTYNHKEEAKYENHLENALMLYSASSHASNPVYQTLRCRSYFYDSLKN	254	USER	zzz1257
1965		genbank_geminiviridae_YP_003254630.1_@pfam00844	geminivirus_cap	genbank	MPKRSIDTVSSLPMSITRRRLNYGSQFSLPAAVPTAPGMSYKRRAWTGRPMYRKPRFYRARRSSDVPRGCEGPCKVQSYEQRHDISHVGKVLCVSDVTRGGGITHRVGKRFCVKSVYILGKVWMDENIKTKNHTNNCTFWLVRDRRPYGTPQDFGQVFNMYDNEPSTATVKNDLRDRFQVLHRFSAMVTGGQYASKEQAIVKKFYKVNNYVVYNHQEAAKYENHTENALLLYMACTHASNPVYATLKIRIYFYDNVTN	258	USER	zzz1258
1964		genbank_geminiviridae_YP_003288767.1_@pfam00844	geminivirus_cap	genbank	MSSSLGKRKRSNGGDWSKRSAKKKPAGTPSRRAGPGRGPRPALQIATYQAAGTSMVTVPSGGVCELLATYARGSDEGNRHTNETITYKVALDYHFVASSAACRYSSIGVGVVWLVYDAQPSGNAPQVTDIFPHPDSLAAFPYTWKVGREVCHRFVVKRRWTFTMETDGRIGSDIPRSTDSWPPCKRSIYFHKFATGLGVKTEWKNLADGGVGSIKKGALYIVIAPGNGLEFTAHGNARLYFKSVGNQ	247	USER	zzz1260
1963		genbank_geminiviridae_YP_003560500.1_@pfam00844	geminivirus_cap	genbank	MTGRIPVSRRFHPYGGRPVRRRLNFETAIVPYTGNAVPIAARSYVPVSRSVQMKRRKGDRIPKGCVGPCKVQDYEFKMDVPHTGTFGCVSDFTRGTGLTHRLGKRACIKSMGIDGKVWMDDNVAKRDHTNIITYWLIRDRRPNKDPLTFAQAFTMYDNEPTTAKIRMDLRDRMQVLKKFSVTVSGGPYSHKEQALVRKFFKSLSKHVTFNHKEEAKYENHLENALMLYSASSHASNPVYQTLRCRAYFCDSPKN	254	USER	zzz1261
1962		genbank_geminiviridae_YP_003622549.1_@pfam00844	geminivirus_cap	genbank	MTKRSFDTAFSSPMSNVRRRLSFATPMALPAPAVSVPNTYKRRAWRNRPMYRKPRIYRMYRSRDVPKGCEGPCKVQSYDQRFDCKHTGSVLCVSDITRGTGLTHRVGKRFCIKSMMFKGKVWMDDNIKAKSHTNHVMFFLVRDRRPYGSPMDFGQVFNMFDNEPSTATVKQDYRDRFQVMRRWYVGVTGGQYASKEQALVNKFFYCNNYVVYNHQEAGKYENHTENALLLYMACTHASNPVYATLKIRVYFYDSISN	257	USER	zzz1265
1961		genbank_geminiviridae_YP_003622555.1_@pfam00844	geminivirus_cap	genbank	MKRNADIVISTPLSKVRRRLNFDSPRAMPTAIPRTNKKRAWENRPMYRKPMMYRMWRSPDVPFGCEGPCKVQSYDAKHDVSHTGTVLCCSDITRGSGLTHRVGKRFTIKSILLMGKIWMDDNIKLKNHTNIVTFFLVRDRRPSDKPYSFGSVFNMFDNEPTTATVKQDNRDRSQVIRKFHATVTGGQYASKEQALVKKFFKINHKVVYNNQEGAEYKNHQENALLLYMACSHASNPVYATIKARVYFYDSVTN	253	USER	zzz1266
1960		genbank_geminiviridae_YP_003778175.1_@pfam00844	geminivirus_cap	genbank	MSGTWSLKRPRWHSPGYDLAPKTPVKRPAVRRALFNNQAQFSRVAARRRWSKFPVRGNKPYRYRKLKASDYQIYKDKIGGDNGWTVTFSGDCTMLNNYVRGIGRDQRDSVMTKTAHMHFNGVLMANDAFWEAPNYMTMYSWIILDNDPGGTFPKPSDIFDMEYKEFPSMYEVAESVKSRFIVKRKTEHYLRSTGVAFGEKQNYKAPNVGPVKKPIRMKFRNIWQPSEWKDTAGGKYEDLKKGALLYVCICDNKATQFSFNLKGQWTMYFINRDLMY	276	USER	zzz1268
1959		genbank_geminiviridae_YP_003828904.1_@pfam00844	geminivirus_cap	genbank	MVKRDAPWRMMAGTAKVSRSANYSPRAGLGPKFDKAHAWVNRPMYRKPRIYRTLRGADVPKGCEGPCKVQSYEQRHDISHVGKVMCISDVTRGNGITHRVGKRFCVKSVYIIGKVWMDDNIKLKNHTNSVMFWLVRDRRPYGTPMEFGQVFNMYDNEPSTATIKNDLRDRFQVMHRFYSKVTGGQYASNEQALVRRFWKVNNYVVYNHQEAAKYENHTENALLLYMACTHASNPVYATLKIRIYFYDSITN	251	USER	zzz1269
1958		genbank_geminiviridae_YP_003896041.2_@pfam00844	geminivirus_cap	genbank	MPKRDAPWRLMAGTSKISRTSNYSPRGGMGPKFDKNAAWVNRPMYRKPRVYRVLRGPDVPKGCEGPCKVQSFEQRHDISRIGKVMCISDVTRGNGITHRVGKRFCVKSVYILGKIWMDENIKLKNHTNSVMFWLVRDRRPYSSPMDFGQVFNMFDNEPSTATVKNDLRDRFQVMHRFYAKVTGGQYASNEQALVRRFWKVNNHVVYNHQEAGKYENHTENALLLYMACTHASNPVYATLKIRSYFYDSITN	251	USER	zzz1272
1957		genbank_geminiviridae_YP_003915158.1_@pfam00844	geminivirus_cap	genbank	MSPAGSYKRKRSAASSSATPKRRRVYKQAVSRPLSRREPLQVQDFTWEQDSAFNAGGSAYLLTSYARGSAENQRKTAETITYKVAINLGVAISGTMQQYCVSSRPVCWLVYDAAPSGTAVTAQEIFGFPDGLKNWPTTWKVARSVSHRFIVKRRWVFTLESNGSNFATGYSSNPCAIPQSLPVLNKFAKQLGVRTEWKNTAGGDFGDIKSGALYLVLAPANGLTFVARGNIRMYFKSVGNQ	241	USER	zzz1273
1956		genbank_geminiviridae_YP_003934911.1_@pfam00844	geminivirus_cap	genbank	MSKRPADIVISTPASKVRRRLNFDSPYVSRAAAPTVLVTNKRRTWVNRPMYKKPKIYRMYRSPDVPKGCEGPCKVQSYEQRHDIAHTGKVICVSDVTRGNGLTHRVGKRFCVKSIYVLGKIWMDENIKTKNHTNTVMFYLVRDRRPFGTAMDFGQVFNMYDNEPSTATVKNDLRDRFQVLRKFTATVTGGQYASKEQALVRKFMKINNYVVYNHQEAAKYDNHTENALLLYMACTHASNPVYATLKIRIYFYDSVQNYKY	260	USER	zzz1274
1955		genbank_geminiviridae_YP_003966135.1_@pfam00844	geminivirus_cap	genbank	MSQKRKMQSQAAGKKKKKTVYGKKYQWKRSVRKNRKIKLKMYDDMLGAGGVGSAITNDGMITMLNNYVQGIGDSQRSSNVTVTRHLKYDMALMGSTGFWEAPNYMTQYHWIIVDRDVGSVFPDKLSMIFDIPSNGQAMPSTYRIRRDMNERFIVKKKWTTHLMSTGTDYGGKQTYKAPSMPNYKKPLNVNVRNINVKTVWKDTGGGKYEDVKENAILYVVVNDNTDNTNMYATLYGNCRCYFY	243	USER	zzz1275
1954		genbank_geminiviridae_YP_003987451.1_@pfam00844	geminivirus_cap	genbank	MSKRPGDIIISTPVSKVRRRLNFDSPYTSRAVVPTVRGISKRRSWTYRPMYRKPRMYRMYRTPDIPRGCEGSCKVQSYEQRDDVKHVGIVRCVSDVTRGSGLTHRVGKRFCIKSIYILGKVWMDENIKKQNHTNNVMFFLVRDRRPIWQKISWHEFFNSYNEPSTATIKNDLRDRYQVLRKFSATVIGGPSGCKEQTLVKRFFRVNNHVVYNHQEEAKYANHTENALLLYMACTHASNPVYATLKIRIYFYDAVTN	256	USER	zzz1276
1953		genbank_geminiviridae_YP_004046662.1_@pfam00844	geminivirus_cap	genbank	MPGTWGGKKKRSERKVVPNSKYASGRIPRNPSAKRDALQVATFSWTSSGSGVKFSAGGGVFLMTNYPQGANDNCRHTNSTITYKLMTKNTVFLDSSVWPLVCRVPVVFWLVYDKFPGASLPSTGDIFDGPVPFKNNPWVWTVSRAVCHRFVVKKTWTVILESNGVDPTKKQSSSYYGPGPCNQWRVSNKFFKRLGVSTEWKNSSTGDVGDIKEGALYIVVAPSQSCDVYVNGYFRVYFKSVGNQ	244	USER	zzz1277
1952		genbank_geminiviridae_YP_004046666.1_@pfam00844	geminivirus_cap	genbank	MSGRFKGQVYSRKRGRNAKAYQALGVKSQRELEQLVNQPGRPIGNRRPSLQVAEYLWTTNKAGVTFSPGGGTYLFTNYPQGANENCRHTNRTITYKMAIKCWVALDGSMVARVAKFPVHFWLVYDKNPGDTNPSPSAIFDSLYQDQPGTWTVTRNVCHRFVVKKSWSVMLESNGIDPSKSQSTSYYGPGPCYNWRHMTKFFKRLGVSTEWKNSSTGDVADIKEGALYLVCAPGGGVTVRVGGRFRMYFKSVGNQ	254	USER	zzz1278
1951		genbank_geminiviridae_YP_004046689.1_@pfam00844	geminivirus_cap	genbank	MSKRPGDIIISTPVSKVRRRLNFDSPYTSRAAVPTVLGTSKRRSWTYRPMYRKPRMYRMYKSPDVPRGCEGPCKIQSFDQRDSVTHTGNSRCLSDVTRGNGLTHRTGKRFVIKSVYILGKVWMDENVKKSNHTNTCMFWLVRDRRPYGNSPQDFGQVFNMFDNEPSTATVMNDKRDRYQVLKRFQATVTGGPSGCKESAIVRRFFRINHHVTYNHQEAAKYENHTENALLLYMACTHASNPVYASLKIRMYFYDSVSN	258	USER	zzz1279
1950		genbank_geminiviridae_YP_004063987.1_@pfam00844	geminivirus_cap	genbank	MSKRDGSWRSIAGMSKVKRTLNFSPRGGGGPTSSRAAEWVNRPMYRKPRIYRTLKTPGVPRGCEGPCKVQSYEQRHDISHVGKVMCISDVTRGNGITHRVGKRFCVKSVYILGKIWMDENIKLKNHTNSVMFWLVRDRRPYGTPMDFGQVFNMFDNEPSTATVKNDLRDRYQVMHKFYGKVTGGQYASNEQAIVKRFWKVYNHVVYNHQEAGKYENHTENALLLYMACTHASNPVYATLKIRIYFYDSITN	251	USER	zzz1280
1949		genbank_geminiviridae_YP_004089626.1_@pfam00844	geminivirus_cap	genbank	MTSSSKRKRGSGKTKTRKKARYTKWTSSRTTSAADSLQVQTFLWAEDQSFNTGGGCRLLTSFTRGSGENQRKSQETITYKVAVNLGISASTTVQKYCLTSHPICWLVYDKTPGIADLTPTDIFDVPTGLNNWPSTWKVKREASHRFVVKRRWPFRLSVNGSTFSADYTKLPVPNTDNLCTINRFAKGLGVRTEWKDTVSADASDIKGGALYIVLAPANGLVFTARGVIKVYFKSVGNQ	238	USER	zzz1283
1948		genbank_geminiviridae_YP_004123089.1_@pfam00844	geminivirus_cap	genbank	MSKRPADIVISTPASKVRRRLNFDSPYSTRAVAPTVRVTKSRMWANRPMYRKPRMYRIYRSPDVPRGCEGPCKVQSFDAKNDIGHMGKVICLSDVTRGIGLTHRVGKRFCVKSLICQENIKTKNHTNSVMFFLVRDRRPVDKPQDFGEVFNMFDNEPSTATVKNSHRDRYQVLRKWHATVTGGQYASKEQALVKKFVKVNNYVVYDQREARKYDNHTQNALMLYMACTHASNPVYATLKIRIYFYDSVTN	250	USER	zzz1284
1947		genbank_geminiviridae_YP_004123933.1_@pfam00844	geminivirus_cap	genbank	MPKRNYDTAFSSPLSVVRRRLNFDSPMALPAPASSAQGTTRRRRWTNRPMWRKPRFYRLYRTPDVPRGCEGPCKVQSFEQRHDIAHTGKVICISDVTRGNGITHRVGKRFCVKSVYITGKVWMDENIKSKNHTNTVMFKLCRDRRPFGTPMDFGQVFNMYDNEPSTATVKNDLRDRFQVLRRFNATVTGGQYACKEQAMVNRFYRVNNHVVYNHQEAAKYENHTENALLLYMACTHASNPVYATLKIRIYFYDSVGN	257	USER	zzz1285
1946		genbank_geminiviridae_YP_004207819.1_@pfam00844	geminivirus_cap	genbank	MPKRDAPWRSMAGTSKVSRANNFSPRGGMVSKPNKAALWVNRPMYRKPRIYRTLRSPDVPKGCEGPCKVQSFEQRHDISHVGKVICVSDVTRGNGITHRVGKRFCVKSVYILGKIWMDENIKLKNHTNSVMFWLVRDRRPYGTPMDFGQVFNMFDNEPSTATVKNDIRDRFQVLHKFYAKVTGGQYASNEQALVRRFWRINNYVVYNHQDAAKYENHTENAVLLYMACTHASNPVYATLKIRIYFYDSLMN	251	USER	zzz1288
1945		genbank_geminiviridae_YP_004207824.1_@pfam00844	geminivirus_cap	genbank	MSKREAPWRSMAGTSKVSRSLNFSPRGGVGSRSNKASAWVNRPMYRKPKFYRVFRSPDVPKGCEGPCKVQSYEQRHDISHTGKVMCISDVTRGSGITHRVGKRFCVKSVYILGKIWMDENIKLKNHTNSVMFWLVRDRRPTGTPMDFGHLFNMFDNEPSTATIKNDLRDRFQVLHRFHAKVTGGQYASNEQALVKRFWKVNNHVVYNNQEAARYENHTENALMLYMACTHASNPVYATLKIRIYFYDSITN	251	USER	zzz1289
1944		genbank_geminiviridae_YP_004207923.1_@pfam00844	geminivirus_cap	genbank	MSQKRKTKSQTSWPKKRKTTSGKNYQWKRPVQKNRALKLKMYDDMLGAGGIGSTISNDGLITMLNNYVQGIGDSQRSTNVTVTRHMKFDMALMASSGFWEAPNYMTQYHWIIVDRDVGSVFPTKLDMIFDIPSNGQAMPSTYRIRRDSNERFIVKKKWTTHMMSTGTDYGGKQTYKAPSQPNYKKAMNINVRNINVKTIWKDTGGGKYEDVKENALLYVVVNDNTDNTNMYATLFGNCRCYFY	243	USER	zzz1292
1943		genbank_geminiviridae_YP_004376206.1_@pfam00844	geminivirus_cap	genbank	MPKRDAPWRLSAGTTKVSRNANYSPGGATGPRPSRASAWVNRPMYRKPRIYRMYRSPDVPKGCEGPCKVQSYEQRHDISHTGKVLCISDVTRGNGITHRVGKRFCVKSVYILGKIWMDENIKLKNHTNSVMFWLVRDRRPYGTPMDFGQVFNLFDNEPSTATVKNDLRDRFQVMHRFYAKVTGGQYASNEQALVRRFWRVNNYVVYNHQEAAKYENHTENALLLYMACTHASNPVYATLKIRIYFYDSISN	251	USER	zzz1293
1942		genbank_geminiviridae_YP_004429232.1_@pfam00844	geminivirus_cap	genbank	MPKRDLPWRSIAGTSKVSRNVNYSPRGGSGPRTTKASEWVNRPMYRKPRIYRTLRTPDVPRGCEGPCKVQSYEQRHDISHTGKVMCISDVTRGNGITHRVGKRFCVKSVYILGKVWMDENIKLKNHTNSVMFWLVRDRRPYGTPMDFGQVFNMFDNEPSTATVKNDLRDRYQVMHKFYAKVTGGQYASNEQALVKRFWKVNNHVVYNHQEAGKYENHTENALLLYMACTHASNPVYATLKIRIYFYDSIMN	251	USER	zzz1294
1941		genbank_geminiviridae_YP_004429242.1_@pfam00844	geminivirus_cap	genbank	MPKRDAPWRSMAGTSKVSRNANYSPGGSSGPKSNRANTWVNRPMYRKPRIYRMYRTPDVPRGCEGPCKVQSFEQRHDISHVGKVMCISDVTRGNGITHRVGKRFCVKSVYILGKIWMDENIKLKNHTNSVMFWLVRDRRPYGTPMDFGQVFNMFDNEPSTATVKNDLRDRFQVMHKFYAKVTGGQYASNEQAIVKRFWKVNSHVVYNHQEAAKYENHTENALLLYMACTHASNPVYATLKIRIYFYDSIMN	251	USER	zzz1296
1940		genbank_geminiviridae_YP_004465363.1_@pfam00844	geminivirus_cap	genbank	MVYERKRKDPRRSDESAGSARKRPRAPAGRSMVSAVRRPALQIREYPWQTLTQLPIKITDGVIFMVNTIDPGTGDDQRSKHQTMLYKMSFNCVLWPDETTALIVAPFRVNFWLVYDAAPQGKLPALSDIFSVPYTKWGNTWNVSRTNVHRFVVKRKWHVDYNSSGTAVGKKQSPGSEDFPVKNVVECNKFFEKLRVKTEWLNTTDGTIGSVKKGALYLVANTRQMPAGDAVTTTCTTYMQGSTRLYFKSLGYQ	253	USER	zzz1298
1939		genbank_geminiviridae_YP_004958224.1_@pfam00844	geminivirus_cap	genbank	MPKRDAPWRLMAGTSKVGRLSNTAPRGGSGPRSNKANEWVNRPMYRKPRIYRAFRTPDVPRGCEGPCKVQSYEQRHDISHVGKVMCISDVTRGNGITHRVGKRFCVKSVYILGKIWMDENIKLKNHTNSVMFWLVRDRRPYGTPMDFGQVFNMFDNEPSTATVKNDLRDRYQVMHKFYAKVTGGQYASNEQALVKRFWKVNNHVVYNHQEAGKYENHTENALLLYMACTHASNPVYATLKIRIYFYDSIMN	251	USER	zzz1303
1938		genbank_geminiviridae_YP_004958230.1_@pfam00844	geminivirus_cap	genbank	MSKRPADIVISTPASKVRRRLNFDSPRASVPNVRVTRRRVWANRPMYRKPALYRKYTSRDVPRGCEGPCKVQSFDQRDDVKHLGVVRCLSDVTRGPGITHRVGKRFCIKSVLFTGKIWMDDNIKKQNHTNIVLFFLVRDRRPYGSPQDFGDVFNMFDNEPSTATVKNDLRDRYQVLRRFSTSVTGGPSACKEQALVRRFFTINHNVVYNHQEAAKYENHTENALLLYMACTHASNPVYASLKVRIYFYDSVGN	253	USER	zzz1304
1937		genbank_geminiviridae_YP_004958239.1_@pfam00844	geminivirus_cap	genbank	MPKRDAPWRTVSGTTKVSRNANYSPRGGTGSRPSRAAAWVNRPMYRKPRIYRMYRSPDVPRGCEGPCKVQSYEQRHDISHVGKVMCVSDITRGNGITHRVGKRFCVKSMYILGKVWMDENIKLKNHTNTVMLWLVRDRRPYGTPMEFGQVFNLFDNEPSTATVKNDLRDRFQVLNRFHVKVTGGQYASNEQALVRRFWRVNTHVTYNHQEAAKYENHTENALLLYMACTHASNPVYATLKIRIYFYDSILN	251	USER	zzz1307
1936		genbank_geminiviridae_YP_004958246.1_@pfam00844	geminivirus_cap	genbank	MPKRDAPWRLMAGTTKVSRSTNYSPGGANSKRDAWVNRPMYRKPRIYRTLRGPDVPKGCEGPCKVQSYEQRHDISHVGKVMCISDITRGNGITHRVGKRFCVKSVYILGKIWMDENIKLKNHTNSVMFWLVRDRRPYGTPMDFGQVFNMFDNEPSTATVKNDLRDRYQVLHKFYAKVTGGQYASNEQALVKRFWRVNNYVVYNHQEAGKYENHTENALFIVYGMYTCL	228	USER	zzz1309
1935		genbank_geminiviridae_YP_005352890.1_@pfam00844	geminivirus_cap	genbank	MSKRDGSWRSMAGISKVSRSLNFSPRGGIGPMGPKYNRASAWVNRPMYRKPRIYRMYRSPDVPKGCEGPCKVQSYEQRHDIAHTGKVLCISDVTRGSGITHRVGKRFCVKSVYILGKIWMDDNIKLKNHTNNVMFWLVRDRRPYGTPMDFGQVFNLYDNEPSTATVKNDLRDRFQVMHKFNATVTGGQYAAKEQALVKRFWKVNNHVTYNHQEAAKYENHTENALLLYMACTHASNPVYATLKIRIYFYDSISN	254	USER	zzz1311
1934		genbank_geminiviridae_YP_005352900.1_@pfam00844	geminivirus_cap	genbank	MPKRDAPWRHMAGTSKVSRSGNFSPRGGNGPKFDKGSAWVNRPMYRKPRIYRMWRTPDVPRGCEGPCKVQSFEQRHDVSHIGKVLCISDVTRGNGITHRVGKRFCVKSVYILGKIWMDDNIKLKNHTNSVMFWLVRDRRPYGTPMDFGQVFNLFDNEPSTATVKNDLRDRFQVMHRFSTKVTGGQYASNEQALVRRFWKVNNHVTYNHQEAAKYENHTENALLLYMACTHASNPVYATLKIRIYFYDSISN	251	USER	zzz1312
1933		genbank_geminiviridae_YP_005352914.1_@pfam00844	geminivirus_cap	genbank	MSKRPADIIIATPASKVRRKLNFDSPYSSRAVVPIVPGTSKFKSWKFRPMYRKPRMYRMFKSPDVPRGCEGPCKVQSYEQRDDVKHTGTVRCVSDVTRGPGITHRVGKRFCIKSIYVLGKIWMDENIKKQNHTNQVMFFLVRDRRPYGTSPMDFGQVFNMFDNEPSTATVKNDLRDRYQVMRKFHATVVGGPSGMKEQLWLGDFLGLIIMWCIITRRQLSMRIIQRMRYCCIWHVRMPLIQCMLRLKYASIFMMQ	255	USER	zzz1314
1932		genbank_geminiviridae_YP_006273069.1_@pfam00844	geminivirus_cap	genbank	MSQVKKRTRRGDEVEWSKRKRLRSSGSKGSATKLRKLPVRPSLQIQSLYYTLTTYVDFKTGGESYLMASYARGSDEGERHTNETMTYKAALNLHLSASSDACKYSNTGTGCIWLIYDAQPTGNKPSPKDIFGYSDSLNSWPTTWMVSREQCHRFVVKRRWTFTLETNGRLASDVPPSNVVWPPCKKSINFHKFAKGLGVRTEWKNKTDGGIGSIKKGALYFVIAPGNGVEGRMFGTIRMYFKSIGNQ	247	USER	zzz1316
1931		genbank_geminiviridae_YP_006428.1_@pfam00844	geminivirus_cap	genbank	MPKRDAPWRLMSGTPKVSRSSNYVPPDGLGRKFDKSSAWANRPMYRKPRIYRTVRSADVPRGCEGPCKIQSFEQRHDISHTGKVMCISDVTRGNGITHRVGKRFCVKSVYILGKIWMDDNIKLKNHTNSVMFWLVRDRRPSGTAMDFGHLFNMFDNEPSTATVKNDLRDRFQVLHRFHAKVTGGQYASNEQTLVKRFRRVNQRVTYNNQEAARYENHTENALMLYMACTHASNPVYATLKIRIYFYDSVLN	251	USER	zzz1318
1930		genbank_geminiviridae_YP_006434.1_@pfam00844	geminivirus_cap	genbank	MSKRPADIVISTPASKVRRRLNFDSPYSSRAAAPTVLVTNTRRTWVNRPMYRKPRIYRMYRSPDVPRGCEGPCKVQSYEQRHDIAHVGKVLCVSDVTRGNGLTHRVGKRFCVKSVYVLGKIWMDENIKTKNHTNTVMFFLVRDRRPFGTPQDFGQVFNMYDNEPSTATVKNDNRDRFQVLRRFQATVTGGQYASKEQALVRKFMKINNHVTYNHQEAAKYENHTEECLLLYMACTHASNPVYATLKIRIYFYDSIQN	257	USER	zzz1319
1929		genbank_geminiviridae_YP_006456.1_@pfam00844	geminivirus_cap	genbank	MPKRDAPWRLSAGTTKVSRSSNYSPRSNMGPKASAWVNRPMYRKPRIYRTLRGPDIPKGCEGPCKVQSFEQRHDISHVGKVLCVSDVTRGNGITHRVGKRFCVKSVYILGKVWMDENIKLKNHTNSVMFWLVRDRRPYGTPMDFGQVFNMFDNEPSTATVKNDLRDRFQVMHKFYAKVTGGQYASNEQALVRRFWKVNNHVVYNHQEAGKYENHTENALLLYMACTHASNPVYATLKIRIYFYDSITN	248	USER	zzz1322
1928		genbank_geminiviridae_YP_006466.1_@pfam00844	geminivirus_cap	genbank	MSKRPGDIVISTPVSKVRRRLNFDSPYSSRAAVPIVQGTNKRRSWTYRPMYRKPRIYRMYRSPDVPRGCEGPCKVQSFDKRHDLKHTGEVLCVSDVTRGNGLTHRVGKRFCIKSIYIVGKVWMDENIKVKNHTNTCMFWLVRDRRPVTTPYGFGELFNMYDNEPSTATIKNDLRDRCQVLKRFTASLSGGQYASKEQCVIRRFYKIYNHIVYNHQEQGKYENHTENALLLYMACTHASNPVYATLKIRVYFYDSISN	257	USER	zzz1324
1927		genbank_geminiviridae_YP_006491262.1_@pfam00844	geminivirus_cap	genbank	MPKRQADMPISVPGWKVRRRLNFDSPYAARAVVPIVTGISKSRAWANRPMNRKPRIYRMYRSPDVPKGCEGPCKVQSFESRHDVVHIGKVMCISDVTRGTGLTHRVGKRFCVKSVYVLGKIWMDENIKTKNHTNSVMFFLVRDRRPVDKPQDFGEVFNMFDNEPSTATVKNMHRDRYQVLRKWHATVTGGQYASKEQALVKKFVRVNNYVVYNQQEAGKYENHSENALMLYMACTHASNPVYATLKIRIYFYDSVTN	257	USER	zzz1325
1926		genbank_geminiviridae_YP_006522419.1_@pfam00844	geminivirus_cap	genbank	MVSTRSGGQYGTSRVTTVETLPMWATKRRRRPRWPRKEKKPKIAGAVFVKARPRRKSSKGVPPGCKGPCKTHTVDVIKTIYHDGRGSGMISNIDRGDELGQREGRKIRVSRMIIRGKIWLDVNNASVPGSNLAKIWIFKDRRPGTEPVAFNALMDMSDSEPLSAFVKVDYRDRFIALHTMTVDLHGGKDFRVDELDLDELVEINSDVLFSHEDDGSVAHTIQNGIFIYYACSDPRQTVQITAQARLYFYDSTSN	254	USER	zzz1326
1925		genbank_geminiviridae_YP_006590004.1_@pfam00844	geminivirus_cap	genbank	MARTRSGRQYSAQAPSWGRKKTRTPRSRPTLIGPIRRPNYQIKTRYAPHRPQTKIHSLSAARVVSGSDNGYGWHISDVPIGSGFEDRHSDKIRILNFNFKLQMRTSQQGQNTSCWHNVYLFLVRDNSGGTAVPKFNSICMMDNSNPSTAEIDHDSKDRFTIMRRWRFQFKGNSTSGSVAYDCARNTYDFRKFVKLSSITEFKSATSGSYANTQKNAWVLYFVPQTYDMTVDGHCTIKYVSIV	242	USER	zzz1327
1924		genbank_geminiviridae_YP_006590061.1_@pfam00844	geminivirus_cap	genbank	MVKRDAPWRHMAGTSKVSRSSNFSPRGGGGPKNNRASEWVNRPMYRKPRIYRMYRTPDVPRGCEGPCKVQSFEQRHDISHVGKVICVSDVTRGNGITHRVGKRFCVKSVYILGKIWMDENIKLKNHTNSVMFWLVRDRRPYGTPMDFGQVFNMFDNEPSTATVKNDLRDRFQVMHRFYAKVTGGQYASNEQALVRRFWKVNNHVVYNHQEAGKYENHTENALLLYMACTHASNPVYATLKIRIYFYDSITN	251	USER	zzz1329
1923		genbank_geminiviridae_YP_006659973.1_@pfam00844	geminivirus_cap	genbank	MAASSKRKRGSTSATKRRKKPRYTKWTSARSSNRDALQVQTFTWGEDQAFNAGGRAILLTAFTRGSAENQRKSQETITYKVSINLGVSASATVLKYCCKSQPLCWLVYDKSPTGITDLTPSDIFDVPSGLQNWPSTWKVKREASHRFVVKRRWPFTLSCNGSTFQKDYTNLPVCNTDNLVSVTRFAKGLGVRTEWKDTTTADASDIKGGALYLVVAPANGLVFTARGVIKVYFKSVGNQ	239	USER	zzz1330
1922		genbank_geminiviridae_YP_006666522.1_@pfam00844	geminivirus_cap	genbank	MPSSSKRKRGSTSGTKRRKKPRTTKWTGSRSASREALQVQTFTWSEDQAFNAGGRAILLSAYTRGSGENQRKSQETITYKVALNLGVSASATVLKYCCSSQPICWLVYDKTPTGITDLTPSDIFDVPSGLQNWPSTWKVKREASHRFVVKRRWPFKLECNGSTFQKDYTNLPVCNTQNLVSVTRFAKGLGVRTEWKDTTTAESSDIKGGALYLVIAPANGLVFTARGVIKCYFKSVGNQ	239	USER	zzz1331
1921		genbank_geminiviridae_YP_006666526.1_@pfam00844	geminivirus_cap	genbank	MRPVRPFVAVMKYTWTPNGAGVQVAAPGAVYLMTNLPRGSSEDQRHTGETLAYKLGIDLEVQVVSAQFAYANKSTHVMWLVYDAQPSGRLPATSDIFDYVEGFQYIPHVWKVRRDLCHRYIVKRKWMINLETNGASFGVDFSSRPVTAPKYRASFHKFVKRLGVRTEWKNSDTGEIGDIQRGALYLVVAPGNNVPINIRGYFRLYFKSVGNQ	212	USER	zzz1332
1920		genbank_geminiviridae_YP_006666530.1_@pfam00844	geminivirus_cap	genbank	MPPPAKKKKGSDSGAGGSRSVYQRRYYGPRSSSGRAVRRPPLQFIQYTWTSNGSPITVGPNGYVALLTSFPRGSDEDKRHTGETVTYKVGLDLFCVRDTNRYKEIGSAIHCCWLVYDAQPTGTIPGLGTIFDLVDNFTEYPTTWKVNRDMGHRFVIKRRWTFTLQSDGHLGSNDYSRAPAAPCKYMIAFNKFVKRLGVRTEWRNTTTGDIGDVSRGALYIVMARGNAWSYEVRGRIRVYFKSVGNQ	246	USER	zzz1333
1919		genbank_geminiviridae_YP_006666534.1_@pfam00844	geminivirus_cap	genbank	MPASSKRKRGSSSAGKRRKKPRYTKWTGSRSSASQDALQVQTFQYAEDQAFNAGGRALLLTAFTRGSAENQRKSQETITYKVSVSLGVSASSTVQKYCVKSQPICWLVYDKTPTGIADLVPSDIFDVPSGLTNWPCTWKVKREVSHRFVVKRRWPFTLSCNGSTFTADYTKLPVPNTDNLVSVNRFAKGLGVRTEWKDTVSAEASDIKGGALYIVLAPANGVVFTARGVIKVYFKSVGNQ	240	USER	zzz1334
1918		genbank_geminiviridae_YP_006860596.1_@pfam00844	geminivirus_cap	genbank	MPKRDIPWRSMAGTSKVSRSVNRSPRGGSGPKFDKASAWVNRPMYRKPRIYRTLRGPDVPKGCEGPCKVQSYEQRHDISHVGKVMCISDVTRGNGITHRVGKRFCVKSVYILGKIWMDENIKLKNHTNSVMFWLVRDRRPYGTPMDFGQVFNMFDNEPSTATVKNDLRDRYQVMHRFYAKVTGGQYASNEQALVRRFWKVNNYVVYNHQEAGKYENHTENALLLYMACTHASNPVYATLKIRIYFYDSITN	251	USER	zzz1335
1917		genbank_geminiviridae_YP_006905830.1_@pfam00844	geminivirus_cap	genbank	MLKRDAPWRSIAGASKVRRSLNFSPRGGMGPKSDKAYAWVNRPMYRKPRIYRTLRTPDVPRGCEGPCKVQSYESRHDVSHVGKVICISDVTRGNGITHRVGKRFCVKSVYILGKVWMDDTIKLRNHTNSVMFWLVRDRRPYGTPMDFGQVFNMFDNEPSTATVKNDLRDRFQVMHKFSTKVTGGQYAANEQSLVKRFWKVNTHVVYNHQEAAKYENHTENALLLYMACTHASNPVYATLKIRIYFYDSITN	251	USER	zzz1338
1916		genbank_geminiviridae_YP_006905836.1_@pfam00844	geminivirus_cap	genbank	MKRTYDMAFSSPVSNVRRRLNFGSPLALPAPASTAPGTSRRRAWRNRPMNRKPRFYRTFRSPDVPRGCEGPCKVQSYEQRDDVKHTGVVRCVSDVTRGSGITHRVGKRFCIKSIYILGKIWMDENIKKQNHTNQVMFYLVRDRRPYGTSPMDFGQVFNMFDNEPSTATVKNDLRDRFQVLRKFYATVTGGPSGMKEQALVKRFFRINNHVVYNHQEQAKYENHTENALLLYLACTHASNPVYATLKIRIYFYDAVTN	257	USER	zzz1339
1915		genbank_geminiviridae_YP_007004037.1_@pfam00844	geminivirus_cap	genbank	MKRPSEGRYKGNVYKRVKPGTSGGNTSGGSVVARRRRSGWRPSPLQFIQYTWTTGGSPITVGAGGYVALLTSYPRGSDEDKRHTGETLTYKVGLDLVFNYNSKMATGRIARTHFCVWLVYDSQPSGTLPAAHGIFDLIDSFTDYPATWKINRDMGHRFVIKRRWVNWLEADGSISTSNYSGAPSAPAKSSVVFNKFVKRLGVRTEWKNTTTGGIGDVSKGALYIVVARQLYDIDVRGRLRVYFKSVGNQ	249	USER	zzz1341
1914		genbank_geminiviridae_YP_007024780.1_@pfam00844	geminivirus_cap	genbank	MPKRDLPWRSMAGTSKVSRNVNYSPRGGGGPKSSRASEWVNRPMYRKPRIYRMIRTPDVPRGCEGPCKVQSYEQRHDISHVGKVMCISDVTRGNGITHRVGKRFCVKSVYILGKIWMDENIKLKNHTNSVMFWLVRDRRPYGTPMDFGQVFNMFDNEPSTATVKNDLRDRYQVMHKFYGKVTGGQYASNEQAIVKRFWKVNNHVVYNHQEAGKYENHTENALLLYMACTHASNPVYATLKIRIYFYDSITN	251	USER	zzz1343
1913		genbank_geminiviridae_YP_007250558.1_@pfam00844	geminivirus_cap	genbank	MPKRDAPWRLSAGTTKVSRSSNYSPNGGMGPKATSWVNRPMYRKPRIYRTLRGPDVPKGCEGPCKVQSYEQRHDVSHVGKVMCISDITRGGGITHRVGKRFCVKSVYILGKVWMDDNIKLKNHTNSVMFWLVRDRRPYGTPMDFGQVFNMYDNEPSTATVKNDLRDRFQVLHKFYAKVTGGQYASNEQALVKRFWKVNNHVVYNHQEAGKYENHTENALLLYMACTHASNPVYATLKIRIYFYDSITN	248	USER	zzz1344
1912		genbank_geminiviridae_YP_007419080.1_@pfam00844	geminivirus_cap	genbank	MSKRPADIVISTPGSKVRRRLNFDSPYSTRAAVPTVRVTKSRSWANRPMNRKPRMYRMYRSPDVPKGCEGPCKVQSFDAKNDIGHMGKVICLSDVTRGIGLTHRVGKRFCVKSLYFVGKIWMDENIKVKNHTNTVLFWIVRDRRPTGTPYDFQQVFNVYDNEPSTATVKNDQRDRFQVIRRFQATVTGGQYAAKEQAIIRKFYRVNNYVVYNHQEAGKYENHTENALLLYMACTHASNPVYATLKVRSYFYDSVTN	256	USER	zzz1346
1911		genbank_geminiviridae_YP_007438875.1_@pfam00844	geminivirus_cap	genbank	MSKREAPWRSMAGVSKVRRSLNFSPRGGLGSRSNKAMEWVNRPMYKKPRIYRAFRTSDVPRGCEGPCKVQSYEQRHDISHVGKVMCISDVTRGNGITHRVGKRFCVKSVYILGKVWMDENIKLKNHTNSVMFWLVRDRRPYGTPMDFGQVFNMFDNEPSTATVKNDLRDRYQVMHKFYAKVTGGQYASNEQALVKRFWKVNNHVVYNHQEAGKYENHTENALLLYMACTHASKPVYATLKIRIYFYDSISN	251	USER	zzz1347
1910		genbank_geminiviridae_YP_007438885.1_@pfam00844	geminivirus_cap	genbank	MPKRDGSWRSIAGTSKVRRSLNFSPRGGIGPKASAWVNRPMYRKPSIYRAYRSPDVPKGCEGPCKVQSYEQRHDIAHTGKVLCISDVTRGSGITHRVGKRFCVKSVYILGKVWMDDNIKLRNHTNNVMFWLVRDRRPYGTPMDFGQVFNLFDNEPSTATVKNDLRDRFQVMHKFHTTVTGGQYAAKEQAMVKRFWRVNNHVTYNHQEAAKYENHTENALLLYMACTHASNPVYATLKIRIYFYDSISN	248	USER	zzz1348
1909		genbank_geminiviridae_YP_007974222.1_@pfam00844	geminivirus_cap	genbank	MSKRPADIVISTPASKVRRRLNFDSPYVSRAAAPTVLVTNKRRSWVNRPMYRKPRMYRMYRSPDVPKGCEGPCKVQSYEARHDVSHTGKVICVTDVTRGNGITHRVGKRFCVKSIYVIGKIWMDENIKLKNHTNTVMFFLVRDRRPSGTPMDFQQVFNCYDNEPSTGTVKNDLRDRFQVIRKFNYMVTGGQYASKEQALVKKFMRVNTHVVYNHQEQAKYENHTENALLLYMVSTHASNPVYATLKVRIYFYDSQMN	257	USER	zzz1349
1908		genbank_geminiviridae_YP_008400114.1_@pfam00844	geminivirus_cap	genbank	MVMKKRSRQRKQRRRRRTTGRSSAVRRRARPRSRPCQFAFHGNSFGGTPSLFFLTPIALGTGAEDRTGPVLTVSSMYLKGVVLPSDNVTDGLHDIYFWIILDRFPTGTDPSVSDIFTGSDNSGSMIETLTRNRLNRKRFRILGSKKLVVGVNKKPQESLPHSRAAFNIFQRRRLVVAFKNDVSGGGRNDVERNRIYLSAASASGHTFRLYLNGIVNFYNGVIFQ	224	USER	zzz1350
1907		genbank_geminiviridae_YP_008400128.1_@pfam00844	geminivirus_cap	genbank	MPKRDAPWRLMAGTSKASRSANYTPRGVVGPKIDKAAAWVNRPMYRKPRIYRTLRSPDVPRGCEGPCKVQSFEQRHDISHVGKVLCISDVTRGNGITHRVGKRFCVKSVYILGKIWMDENIKLKNHTNSVMFWLVRDRRPYGTPMDFGQVFNMFDNEPSTATVKNDLRDRFQVMHKFYAKVTGGQYASNEQALVKRFWKVNNYVVYNHQEAGKYENHTENALLLYMACTHASNPVYATLKIRIYFYDSITN	251	USER	zzz1352
1906		genbank_geminiviridae_YP_008411022.1_@pfam00844	geminivirus_cap	genbank	MSKRVADIGVFTPASKVRRRLNFDSPYKSRAAVPIVPVTRRRRSWVYRPSYRKPWMYRMFRSPDVPRGCEGPCKVQSFEQRHDIAHTGKVICISDVTRGGGITHRVGKRFCVKSVYIIGKIWMDKNIKVKNHTNSVMFWLVRDRRPFGSPMDFGQVFNMYDNEPSTATVKNDLRDRYQVLHRFSATVTGGQYASKEQALVKKFWKINNYVVYNHQEAAKYENHTENALLLYMACTHASNPVYATLKIRIYFYDSISN	257	USER	zzz1354
1905		genbank_geminiviridae_YP_008472703.1_@pfam00844	geminivirus_cap	genbank	MSGRYKGQVYRRKKGQYAKAYSALGVNSKRELEQLVNQPGRPLQLRRPALQVAEYLWTSNKAGVTFSPGGSTFLFTNFPQGANENCRHTNRTITYKMAIKAWVALDGSMVNRVCKFPVYFWLVYDKNPGDSNPGPSAIFDTLYQDQPGTWTVTRNVCHRFVVKKQWSVMLEANGVDPSVKQGSTYYGPGPCYGWRQMNKFFKRLGVSTEWKNSSTGDVADIKEGALYLVCAPAGGATVRVGGRFRMYFKSVGNQ	254	USER	zzz1355
1904		genbank_geminiviridae_YP_008719945.1_@pfam00844	geminivirus_cap	genbank	MSKRPADIIISTPASKCVEAALRQPVQQPCCCPHCPRHTNKRRSWTFRPMYRKPRMYRMYRSPDVPRGCEGPCKVQSYEQRDDVKHTGAVRCVSDVTRGSGITHRVGKRFCVKSIYVLGKIWMDENIKKQNHTNQVMFFLVRDRRPYGTSPMDFGQVFNMFDNEPSTATIKNDLRDRFQVLRKFHATVVGGPSGMKEQALIKRFFKVNNHVVYNHQEAAKYENHTENALLLYMACTHASNPVYATLKIRIYFYDAVTN	258	USER	zzz1356
1903		genbank_geminiviridae_YP_008888539.1_@pfam00844	geminivirus_cap	genbank	MSKRPADIIISTPASKVRRRLNFDSPYVSRVAAPIVRVRFCVKSVYVLGKIWMDENIKYRSPDVPRGCEGPCKVQSFESRHDIQHIGKVMCVSDVTRGKPQDFGEVFNMFDNEPSTATKIWMDENIKTKNHTNSVMFFGGQYASKEQALVKKFIRVNNYVVYNQQEAGKYEHRDRYQVLRKWYATVTGGQYASKEQALVKKFIRVNNYVVYNQQEAGKYENHSENALMLYMACTHASNPVYATLKIRIYFYDSVTN	256	USER	zzz1357
1902		genbank_geminiviridae_YP_008997811.1_@pfam00844	geminivirus_cap	genbank	MSKRPADIIISTPASKVRRRLNFDSPYASRAAAPIVRVTKAKAWANRPMNRKPRMYRMYRSPDVPRGCEGPCKVQSYEQRDDIKHTGIVRCVSDVTRGSGITHRVGKRFCVKSIYFLGKVWMDENIKKQNHTNQVMFFLVRDRRPYGSSPMDFGQVFNMFDNEPSTATVKNDLRDRFQVMRKFHATVIGGPSGMKEQALVKRFFRINSHVTYNHQEAAKYENHTENALLLYMACTHASNPVYATLKIRIYFYDSVSN	257	USER	zzz1358
1901		genbank_geminiviridae_YP_009021762.1_@pfam00844	geminivirus_cap	genbank	MPSTSAPRRRRRNDDWAWDSATRRRVRPRTGYVPRGPRRNKLPSLQVDQDVYAAATAIDVNTHGADVSLLTNFLRGTSEDARHTNETILYKLSLDLYIMVDDVHQVYSGKSVCCCWLVYDAQPTGALPDGSSIFSYNADLLSQPAVWKVGREVCHRFVVKRRWVFTLETNGCKAGTLFTNTAGTMGIPPCNRSIYFHKFCKRLGVRTEWKNSSGGTIGDIKTGAFVSCVCTWQRHGP	237	USER	zzz1359
1900		genbank_geminiviridae_YP_009026387.1_@pfam00844	geminivirus_cap	genbank	MAGPMRRKPARSSRRIVPWPAEALRRGYTPRNSVLRGTRSGRSDRRPSLQVINYRWSGQSAPIFKTGGATYLSSTFARGNGEDQRRGAETIIYKIAFKLVFAVTSSQLKYVSRGMCVLWLVYDAQPTGIKPEPKDIFDYDTGLSQSPMTWSVQRALCNRFVVKRRWKFELSVNGVSAADDSSDAQLSGKTIPYSRRGFDKFCKRLATRTEWKNTEGGDIGDIQKGALYVIAAPGNAMEFQAIGNIRVYFKSVGLQ	255	USER	zzz1360
1899		genbank_geminiviridae_YP_009026400.1_@pfam00844	geminivirus_cap	genbank	MPKRDAPWRSMAGTSKVSRNANYSPRSGITQKSSKAQEWVNRPMYRKPRIYRTLRTPDVPRGCEGPCKVQSYEQRHDISHVGKVMCISDVTRGSGITHRVGKRFCVKSVYILGKIWMDENIKLKNHTNCVMFWLVRDRRPYGTPMDFGQVFNMFDNEPSTATVKNDLRDRYQVMHRFYAKVTGGQYASNEQAIVKRFWKVNNHVVYNHQEAGKYENHTENALLLYMACTHASNPVYATLKIRIYFYDSVTN	251	USER	zzz1361
1898		genbank_geminiviridae_YP_009029989.1_@pfam00844	geminivirus_cap	genbank	MPKRNFDMAFSTPRPSVRRRLNFDTPSATPMSVRRTPSTSRRRAWTNRPMNRKPRIYRLYRSRDVPYGCEGPCKVQSFEQRHDISHTGKVLCVSDVTRGNNLTHRVGKRFCVKSVYIIGKIWMDENIKTKNHTNTVMFWLVRDRRPFGTPMDLGQVFNMYDNEPSTATIKNDLRDRYQVLRKFDSTVTGGQYASREANVIKRFWRVNNYVVYNHQEAAKYENHTENALLLYMACTHASNPVYATLKIRIYFYDSISN	257	USER	zzz1363
1897		genbank_geminiviridae_YP_009051688.1_@pfam00844	geminivirus_cap	genbank	MSKRPADIIISTPASKVRPRLNFDSPYASRAAPPIVRVTKARAWANRPMNRKPRMYRMYRSPDVPRGCKGPCKVQSFESRHDIQHIGKVMCVSDVTRGIGLTHRVGKRFCVKSVYVLGKIWMDENNKTKNHTNSVMFFLVRDRRPVDKPQVFGEVFNMFDNEPSTGTVKNVHRDRYQVLRKWDATVTGGLYASKEQALVKKFIRVNNYFVYNQQEAGKYENHTENALMLYMACTHASNPVYATLKIRIYFYDSVSN	256	USER	zzz1365
1896		genbank_geminiviridae_YP_009056855.1_@pfam00844	geminivirus_cap	genbank	MSKRPADIIISTPASKVRRRLNFDSPYAVRAAVPIVRGTKARAWANRPMNRKPRMYRMYRSPDVPRGCEGPCKVQSFESRHDVSHIGKVLCVSDVTRGTGLTHRVGKRFCVKSVYVLGKIWMDENIKTKNHTNSVIFFLVRDRRPTGSPQDFGEVFNMFDSEPSTATVKNVHRDRYQVLRKWYSTVTGGTYASKEQALVKKFVRVNNYVVYNQQEPGKYENHTENALMLYMACTHASNPVYATLKIRIYFYDSVSN	256	USER	zzz1368
1895		genbank_geminiviridae_YP_009104362.1_@pfam00844	geminivirus_cap	genbank	MPGPFSGKTYSRKKGKYAKAYKALGVKNQKELEELVNAPACPVTPRPALQVAEYFWTTDKNGMIFRSGGGTAHFTMYPQGSNENCRHSNQTNTYKMAIKCWVALDPTFYKKVACVPVHFWLVYDKDPGNTLPGCSTIFDTLYQDYPGTWTVSRNVSRRFVVKKHWHIILASNGTNPTQDQDPAKYAGPGPVFQWKHMNKFFKRLGVRTDWKNSATGEVADIKSGALYLVCAPSGGAVVRVGGRFRMYFKSVGNQ	254	USER	zzz1371
1894		genbank_geminiviridae_YP_009109704.1_@pfam00844	geminivirus_cap	genbank	MSKRPADIIISTPGSKVRRRLNLDSPYTSRASAPTVRVTRRQAWTNRPRNRKPKWYRIYRSPDVPKGCEGPCKVQSFESRHDVVHIGKVMCISDVTRGNGFTHREGKRFCVKSVYMGGKPPPDENIKTKNHTNTVMFFLVRDRRPVDKPQDFGEVFNMFDNEPSTATVKNMYRDRYQVLRKWSSTVTGGQYASKEQAIVRRFFRVNNYVVYNQQEAGKYENHTENALMLYMACTPPFNPVYATLKIRIYFFDSVSN	256	USER	zzz1372
1893		genbank_geminiviridae_YP_009111308.1_@pfam00844	geminivirus_cap	genbank	MPSRSRYTYKRKRPAKRARVEPWPPELTRLGYTPRDTVLRGTRRRDGRPSLQVINYTWKNDGSAVTIGNGGGVYLLTEFPRGDAEDQRHTGETLTYKVSLNLQFAVQEDYRKYCNRAQNMVFLVYDAQPTGTNPKITDIFHIAASQFFPIPATWMVSRENSHRFVIKRKWMFITEVNGSGTAKDYTNAPCYPAHFSLIFKRFVQRLGVRTEWKNSTEGGIGAISKGAMYLIIAPGNGMPLEARGNIRLYFKSIGNQ	256	USER	zzz1373
1892		genbank_geminiviridae_YP_009116885.1_@pfam00844	geminivirus_cap	genbank	MDYFEMPKRDPSWRQMAGTSKVSRSSNFSPRGGGGPKFNKASEWVNRPMYRKPRIYRTLRTPDVPRGCEGPCKVQSYEQRHDISHTGKVMCVSDVTRGNGITHRVGKRFCVKSVYILGKVWMDENIKLKNHTNSCMFWLVRDRRPYGTPMDFGQVFNMFDNEPSTATVKNDLRDRFQVMHKFYAKVTGGQYASNEQALVKRFWKVNNHVVYNHQEVGKYENHTENALLLYMACTHASNPVYATLKIRIYFYDSITN	256	USER	zzz1374
1891		genbank_geminiviridae_YP_009129269.1_@pfam00844	geminivirus_cap	genbank	MDSRGRKRPSFGPLTPAQLSRRVRWRQTTMAGAMRRLQYGNVYRPNLMKARRTGSSLYPDKGYHDDEDSLDPFGVAGVRRHIDMPALGQGKNQRHTSKIKVWSLNIKGVLHLAQVSTTETVVAEFFLLWSYRPNGAVLPDFNEIYTSGSTMTEVSNSLIARMKHEKLAEYKQLARKKITLVKPTNSSAGSNRKTFTVQLKFRGRNAKYLTFQENATLGNWTDLKSGGFFYFIRFVSSDGNARMEGHVSSRMIYFH	255	USER	zzz1376
1890		genbank_geminiviridae_YP_009129320.1_@pfam00844	geminivirus_cap	genbank	MVITRSSALRSRRGWNPGTIPRRPRTVRVTRVASAMRTPWRRRGPRSSLARRKRRPINALGPVKRGTFGIKLASINHTGGNGYHLTHFDHGDDTNQRTGRKIKINGINIRGKLYLNNPRTNSYHIVRLWIIRDTRPGSEPVSFSSFMDMHDNEPMTAMVKKDWGERFQVLKDLTFHLVGANGLSFNEDVVEEYFKFKGYVLYNHEDSGSLANVLENGIFLYAATSHPSENVTLTANCRVYFYDAE	245	USER	zzz1377
1889		genbank_geminiviridae_YP_009170677.1_@pfam00844	geminivirus_cap	genbank	MSKRPADMIISAPVSKYRRLLTSTSPYSKRAAVRIVRATKGKEWVNRPTNRKPMFYRMYRSPDVPTGCEGPCKVQSFESRHDVVHIGKVMCISDVTRGTGLTHRVGKRFCVKSVYVLGKIWMDENIKTKNHTNSVMFFLVRDRRPVDKPQDFGEVFNMFDNEPSTATVKNMHRGYQVLRKWHATVTGGQYASKEQALVKKFVRVNNYVVYNQQEAGKYENHTENALMLYMACTHASNPVYATLKIRIYFYDSVQRN	256	USER	zzz1378
1888		genbank_geminiviridae_YP_009175009.1_@pfam00844	geminivirus_cap	genbank	MSKRPVDIIKTTPASMVRCRLFFDSSYVSRVAAAIVRGTKAFASAFRSMNRERRMSRIYRSRDVARGFEGLCKVESLESRHDMGHIGFVMCVSENPRPVGLTHRVGKRFCVKSVYVLGLFWTDQFNKSKKHRNSLMLFLVRDRRPVDKPQDFGEVFNMFDNEPSTATVKNVHRDRYQVLRKWHATVTGGQYASKEQALVKKFIRVNNYVVYNQQEAGKYENHTENALMLYMACTHASNPVYATLKIRIYFYDSVTN	256	USER	zzz1379
1887		genbank_geminiviridae_YP_009175075.1_@pfam00844	geminivirus_cap	genbank	MPKREAPWRAMAGSSKVSRNLNYSPRGGMRPKFDKASAWVNRPMYRKPRIYRTMRGPDVPKGCEGPCKVQSYEQRHDVSHVGKVICVSDVTRGNGITHRVGKRFCVKSVYILGKIWMDENIKLKNHTNSVMFWLVRDRRPYGTPMDFGQVFNMFDNEPSTATVKNDLRDRFQVMHKFYAKVTGGQYASNEQALVRRFWKVNNHVTYNHQERGIYENHTENALLLYMACTHASNPVYATLKIRIYFYDSISN	251	USER	zzz1381
1886		genbank_geminiviridae_YP_009175082.1_@pfam00844	geminivirus_cap	genbank	MPKREAPWRAMAGSSKVSRALNYSPRGGIRPKFDKASAWVNRPMYRKPRIYRTMRGPDIPKGCEGPCKVQSYEQRHDVSHVGKVMCISDITRGNGITHRVGKRFCVKSVYILGKVWMDDNIKLKNHTNSVMFWLVRDRRPYGTPMDFGQVFNMFDNEPSTATVKNDLRDRFQVMHKFYAKVTGGQYASNEQALVRRFWKVNNPCDLQPSGGREIREPYGERLVIVYGMYSCVYPVYATLKIRIYFYDSISN	251	USER	zzz1383
1885		genbank_geminiviridae_YP_009177710.1_@pfam00844	geminivirus_cap	genbank	MTKRPGDTIISMPASKVRRRLSFDSPFASRAYAPTARATRERAWANRPMVGKPKIYRLYRSPDVPRGCEGPCKVQSLESRTDIQHIGKVMCVSDVTRGVGLTHRVGKRFCVKSVYVLGKIWMDENIKTRIHTNSVMFFLVSDSKPVDKPPDFGEVFNMFDNEPSTATVKNMHRDRYQVLRKWHATVTGGQYASKEQALVKKFVRVNNYVVYNQQEAGKYENHSENALMLYMACTHASNPVYATLKIRIYFYDSVSN	256	USER	zzz1385
1884		genbank_geminiviridae_YP_009216260.1_@pfam00844	geminivirus_cap	genbank	MSKRPADIIISTPASKVRRRLNFDSPGLSSARAPTVLVTNKRRAWNNRPLYRKPRIYRIYRSPDVPKGCEGPCKVQSYEQRDDVKHTGIVRCVSDVTKGVGLTHRTGKRFTIKSIYILGKVWMDDNIKKQNHTNNVMFFLVRDRRPYGNSPMDFGQVFHMFDNEPSTATVKNDLRDRFQVMRKFSATVTGGPSGMKEQVPVRRFFKLNSQTVYNHQEAAKYENHTENALLLYMACTHASNPVYATLKIRIYFYDSVSN	258	USER	zzz1386
1883		genbank_geminiviridae_YP_009226414.1_@pfam00844	geminivirus_cap	genbank	MPKRDAPWRSMAGTSKVSRALNYSPRGGMVSKPSKATLWVNRPMYRKPMIYRTLRSPDVPKGCEGPCKVQSFEQRHDVSHTGKVICISDVTRGNGITHRVGKRFCVKSVYILGKIWMDENIKLKNHTNSVMFWLVRDRKPTGTPTDFGHLFNMFDNEPSTATVKNDLRDRFQVMRTFYAKVTGGQYASNEQALVKRFWKVNNHVVYNNQEAARYENHTENALLLYMACTHASNPVYATLKIRIYFYDSVRN	251	USER	zzz1387
1882		genbank_geminiviridae_YP_009226624.1_@pfam00844	geminivirus_cap	genbank	MSGTWSLKRSRWNSPGYDLAPKTPAKRPAIRRALFQSPSQYVARRPWRRTFTRTNKGVSKKKLKASDYQIYEDRVGGDNGWTVTSTGDCTMLNNYVRGIGRDQRDSTLTKTVHMHFSGVLMANDAFWEAPNYMTMYSWIILDNDPGGSFPKPADIFDMTDKDFPSMYEVAESVKPRFIVKRKTRHYLRSCGVAFGEKQNYKAPTLGPIKKPISMVFRNMWQMTEWKDTAGGKYEDLKKGALLFVCMSDNKASQFSFSLRGKWKMYFINRDRFQ	273	USER	zzz1388
1881		genbank_geminiviridae_YP_009241410.1_@pfam00844	geminivirus_cap	genbank	MSKRPGDIIISTPASKVRRKLNFDSPYASRVAVPIVQGTNRRRAWTYRPMYRKPKMYRMFRSLDVPRGCEGPCKVQSYEQRDDVKHTGIVRCVSDVTRGPGITHRVGKRFCVKSIYILGKVWMDDNIKKQNHTNQVMFFLVRDRRPYGTSPQDFGQVFNMFDNEPSTATVKNDLRDRYQVLRKFHATVVGGPSGMKEQSLVKRFFRVNSHVVYNHQEAAKYENHTENALLLYMACTHASNPVYATLKIRIYFYDAVTN	258	USER	zzz1390
1880		genbank_geminiviridae_YP_009249828.1_@pfam00844	geminivirus_cap	genbank	MSKRPADIGIFTPVSKVRRRLNFDSQYANRASAPIALVTNKRRSWAQRPMYRKPRMYRMYRSPDVPKGCEGPCKVQSFEKKNDVGHSGTLLCVSDITRGNGLTHRVGKRFCIKSVYIIGKIWMDENIKTKNHTNNVLFWLVRDRRPGSTPYGFQEAFNMFENEPSTATVKQELRDRLQVLHRFSATVTGGQYASKEQAVIKRFWKLNHHVTYNHQEQAKYENHTENALLLYMAATHASNPVYATLKIRVYFYDSVQN	257	USER	zzz1391
1879		genbank_geminiviridae_YP_009255246.1_@pfam00844	geminivirus_cap	genbank	MVTTRSGRNYQALVPTWARKKRRSTLARSTIVGPIRRPNYQYKTRYTPHRPQHKIHSLSQTRVVSGSDNGYGWHVSGVNIGSGFEDRHSDKIKIINLKFMMQLKTSDAGQQASCYHNLYMFLVKDNSGGAQVPKFNSIVMMDNSNPATAEVDHDSKDRFTIVRRWKFSFKGNSSKNGTAYDCARNLIDFNRNVKINSVSEFKSATDGSYANTQKNAWVLYIVPQIYDCTVDGHVKIKYVSIV	242	USER	zzz1392
1878		genbank_geminiviridae_YP_009256560.1_@pfam00844	geminivirus_cap	genbank	MSKRPGDIIISTPVSKVRRRLNFDSPYTNRAAVPTVPGTSKRRSWTYRPMYRKPRMYRMYRSPDVPRGCEGPCKIQSFDQRDSVVHTGNVRCLSDVTRGNGLTHRTGKRFCIKTVYILGKVWMDENVKKSNHTNTCMFWLVRDRRPYGPSPQDFGQVFNMFDNEPSTATVQSDKRDRYQVLKRFHYTVTGGPSGCKEAVIVRRKYNLYHNVIYNHQEAAKYENHTENALLLYMACTHASNPVYASLKIRMYFYDSLMN	258	USER	zzz1393
1877		genbank_geminiviridae_YP_009259493.1_@pfam00844	geminivirus_cap	genbank	MSKRPGDIIISTPVSKVRRRLNFDSPYTNRVAVPIVQGTSKRRSWTYRPSYRKPRMYRMYRSPDVPRGCEGPCKIQSFDQRDSVVHTGNVRCLSDVTRGGGLTHRTGKRFCIKSIYVLGKVWMDENVKKSNHTNTCMFWLVRDRRPYGNSPQDFGQVFNMFDNEPSTATVMNDKRDRYQVLRRFQVTVTGGPSGCKEAAIVKRFFRLNHHVTYNHQEGAKYENHTENALLLYMACTHASNPVYASLKIRMYFYDSVLN	258	USER	zzz1395
1876		genbank_geminiviridae_YP_009269402.1_@pfam00844	geminivirus_cap	genbank	MSKRPADIVISTPASKVRRRLNFDSPVSSRATAPTVLVTNRKRSWTYRPMYRKPKIYRMYRSPDIPRGCEGPCKVQSFEQRHDIAHTGKVLCISDVTRGGGLTHRTGKRFCVKSVYVLGKVWMDENIKVKNHTNTVMFFVVRDRRPYGTPQDFGQVFNMYDNEPSTATVKNDLRDRFQVIRRFNSTVTGGQYASKEQALVKKYMKVNNHVVYNHQEAAKYENHTENALLLYMACTHASNPVYATLKIRIYFYDSVAN	257	USER	zzz1396
1875		genbank_geminiviridae_YP_009270637.1_@pfam00844	geminivirus_cap	genbank	MPKRPLDMSISTPGWKVRRRLNFDSPYARAAVPQIVPVISKSRAWANRPMNRKPRIYRMYRSPDVPKGCEGPCKVQSFESRHDVVHIGKVMCISDVTRGTGLTHRVGKRFCVKSVYVLGKIWMDENIKTKNHTNNVMFFLVRDRRPVDKPQDFGEVFNMFDNEPSTATVKNVHRDRYQVLRKWHATVTGGQYAAKEQALVKKFIRVNNYVVYNQQEAGKYENHSENALMLYMACTHASNPVYATLKIRIYFYDSVTN	257	USER	zzz1397
1874		genbank_geminiviridae_YP_009270644.1_@pfam00844	geminivirus_cap	genbank	MSKRPADIVISTPASKVRRRLNFDSPYSTRVVTVPTVRATKSRMWANRPMNRKPRMYRMYKSPDVPRGCEGPCKVQSFDAKNDIGHMGKVVCLSDVTRGMGLTHRVGKRFCVKSLYFVGKIWMDENIKVKNHTNTVLFWIVRDRRPTGTPNDFQQVFNVYDNEPSTATVKNDQRDRYQVLRRFQATVTGGQYAAKEQAIIRRFYRVNNYVVYNHQEAGKYENHTENALLLYMACTHASNPVYATLKVRSYFYDSVTN	257	USER	zzz1398
1873		genbank_geminiviridae_YP_009305124.1_@pfam00844	geminivirus_cap	genbank	MSKRPADIIISTPASKVRRRLNFDSPYVSRAAAPIVRVTKARSWTNRPMNRKPKMYRMYRSPDVPRGCEGPCKVQSFDAKNDIGHMGKVLCLSDVTRGTGLTHRVGKRFCVKSLYFVGKIWMDENIKVKNHTNTVLFWIVRDRRPTGTPNDFQQVFNVYDNEPSTATVKNDQRDRFQVIRRFQATVTGGQYAAKEQAIIRKFYRVNNYVVYNHQEAGKYENHTENALLLYMACTHASNPVYATLKVRSYFYDSVTN	256	USER	zzz1399
1872		genbank_geminiviridae_YP_009305425.1_@pfam00844	geminivirus_cap	genbank	MDFNPRKRKSFAPLTPAQLARQRRWRALVAQGAKRRLTYPSLYRPQLMNVRRSSQSVYPDKGYHDDEDHWEGFTMSEGKATYVSMPHLGQGASQRHTSKIKLWSISVRGSLHVLNCTNPETISAQVILVWAHRPEGGSVPGFYDLFTGGGSMNDQHNPTCAKLKHSMTKSYHVLSRRTFQLTPYTTYSSGRNRVNFQIYKVFRGRNTKYVTFGEDSTGGSYSDIKYGGLFYFIRFISSDAGAKLEGDWNCRIIYYH	256	USER	zzz1400
1871		genbank_geminiviridae_YP_009310057.1_@pfam00844	geminivirus_cap	genbank	MPKRDAPWRSMAGTSKVSRNANYSPRGGYGLKFNKAAEWVNRPMYRKPRIYRTLRTPDVPRGCEGPCKIQSYDQRHDIAHTGKVMCISDVSRGNGIAQRVGKRFCVKSVYIIGKVWMDDNIKLKNHTNSVMFWLVRDRRPNGNAMDFGHLFNMYDNEPSTATVKNDLRDRFQVLHRFNAKVTGGQYASNEQALVRRFWKVNNHVTYNNQEAARYENHTENALLLYMACTHASNPVYATLKIRIYFYDSVLN	251	USER	zzz1401
1870		genbank_geminiviridae_YP_009310062.1_@pfam00844	geminivirus_cap	genbank	MPKRDVPWRHMAGTSKISRSSNFSPRGGGGPKTTRAAEWVNRPMYRKPRIYRMYRTPDVPRGCEGPCKVQSFEQRHDISHTGKVICISDVTRGNGITHRVGKRFCVKSVYVLGKIWMDENIKLKNHTNSVMFWLVRDRRPYGSPMDFGQVFNLFDNEPSTATIKNDLRDRFQVMHRFYAKVTGGQYASNEQALVRRFWKVNNHVVYNHQEAAKYENHTENALLLYMACTHASNPVYATLKIRIYFYDSISN	251	USER	zzz1402
1869		genbank_geminiviridae_YP_009310067.1_@pfam00844	geminivirus_cap	genbank	MVKRDAPWRHMAGTSKISRSSNFSPRSGIGPKFNKASEWVNRPMYRKPRIYRTLRSPDVPRGCEGPCKVQSFEQRHDVSHVGKVICVSDVTRGNGITHRVGKRFCVKSVYILGKIWMDENIKLKNHTNSVMFWLVRDRRPYGTPMDFGQVFNMFDNEPSTATVKNDLRDRFQVMHKFYAKVTGGQYASNEQALVKRFWKVNNYVVYNHQEAGKYENHTENALLLYMACTHASNPVYATLKIRIYFYDSISN	251	USER	zzz1403
1868		genbank_geminiviridae_YP_009310077.1_@pfam00844	geminivirus_cap	genbank	MPKREAPWRLMAGTTKVSRSTGYSSRLASQPRVNKAQEWVNRPMYRKPRIYRAMRTPDVPRGCEGPCKVQSYEQRHDISHAGKVICISDVTRGSGITHRVGKRFCVKSVYILGKIWMDENIKLKNHTNSVMFWLVRDRRPNGTPMDFGHLFNMFDNEPSTATVKNDLRDRFQVLHRFYAKVTGGQYASNEQALVKRFWKVNNHVVYNNQEAARYENHTENALLLYMACTHASNPVYATLKIRIYFYDSITN	251	USER	zzz1406
1867		genbank_geminiviridae_YP_009310082.1_@pfam00844	geminivirus_cap	genbank	MPKREARWRLLAGTSKVSRSANYSPRGGLKFNKATEWVNRPMYRKPRVYRAYRSADVPKGCEGPCKVQSYEQRHDISHVGKVMCISDVTRGNGITHRVGKRFCVKSVYILGKIWMDENIKLKNHTNSVMFWLVRDRRPYGTPMDFGQVFNMFDNEPSTATVKNDLRDRYQVMHKFYGKVTGGQYASNEQAIVKRFWKVNNHVVYNHQEAGKYENHTENALLLYMACTHASNPVYATLKIRIYFYDSISN	249	USER	zzz1407
1866		genbank_geminiviridae_YP_009310090.1_@pfam00844	geminivirus_cap	genbank	MPKRDLPWRSIAGTSKVSRNANYSPRAGSGPKVNRAAEWVNRPMYRKPRIYRLMRSPDVPKGCEGPCKVQSYEQRHDISHVGKVMCVSDITRGNGLTHRVGKRFCVKSMYILGKVWMDDNIKLKNHTNSVMFWLVRDRRPYGNPMDFGQVFNMFDNEPSTATIKNDLRDRFQVMHKFYAKVTGGQYASNEQAIVRRFWKLNNHVVYNHQEAGKYDNHTENALLLYMACTHASNPVYATLKIRIYFYDSIQN	251	USER	zzz1409
1865		genbank_geminiviridae_YP_009316017.1_@pfam00844	geminivirus_cap	genbank	MSKRAADIVISTPASKVRRRLNFGSPYTSRAAAPIVRVTKQQAWTNRPMNRKPRMYRMYRSPDVPRGCEGPCKVQSFESRHDIQHIGKVMCISDVTRGTGLTHRVGKRFCVKSVYVLGKIWMDENIKTKNHTNSVMFFLVRDRRPVDKPQDFGEVFNMFDNEPSTATVKNVHRDRYQVLRKWYATVTGGQYASKEQALVKKFVKKLITLCVTITRCKKYENHTENALMLIWLVLTLANPVYATLKIRIYFYDSVTN	256	USER	zzz1411
1864		genbank_geminiviridae_YP_009325421.1_@pfam00844	geminivirus_cap	genbank	MPKRDAPWRYTAGTSKVSRNANYSPGGGPKSNRTNAWVNRPMYRKPRIYRMYRSPDVPKGCEGPCKIQSFEQRHDVSHVGKVMCISDVTRGNGITHRVGKRFCVKSVYILGKVWMDDNIKLKNHTNSVMFWLVRDRRPYGTPMDFGQVFNMFDNEPSTATVKNDLRDRFQVMHKFYAKVTGGQYASNEQSLVKRFWKVNNYVVYNHQEAAKYENHTENALLLYMACTHASNPVYATLKIRIYFYDSIMN	249	USER	zzz1413
1863		genbank_geminiviridae_YP_009325924.1_@pfam00844	geminivirus_cap	genbank	MSSSGAKRKRSDEGSWSKRKSGKKQPRVSSSRRAGPARGPRPALQIANYQAAGTTMVTVPSGGVCELLATYARGSDEGNRHTNETVTYKVAMDYHFVLTAAACRYSSIGVGVAWLVYDAQPTGNAPQVTDIFPHPDSLVAFPYTWKVGREVCHRFVVKRRWTFTMESDGRIGSDIPRSTDAWPPCKRSIYFHKFVTGLGVKTEWKNVADGGVGAIKKGALYFVIAPGNGQEFTVHGNARLYFKSVGNQ	248	USER	zzz1414
1862		genbank_geminiviridae_YP_009325934.1_@pfam00844	geminivirus_cap	genbank	MPKRDAPWRSMAGTSKVSRSANYSPRGGIGSKSDKAQAWVNRPMYRKPRIYRMYRTPDVPKGCEGPCKVQSYEQRHDVSHTGKVMCISDVTRGNGITHRVGKRFCVKSVYILGKVWMDDNIKLKNHTNSVMFWLVRDRRPYGTPMDFGQVFNMFDNEPSTATVKNDLRDRYQVLHRFYAKVTGGQYASNEQAIVKRFWKVSNHVVYNHQEAGKYENHTENALLLYMACTHASNPVYATLKIRIYFYDSITN	251	USER	zzz1415
1861		genbank_geminiviridae_YP_009329829.1_@pfam00844	geminivirus_cap	genbank	MKRPINIPISSPSLVSKVRRRLNFDSPASARPISPYVRSARAQWQNRPMFRKPRIYRMYRSSDVPRGCEGPCKIQSFDQRDSVVHTGNVRCLSDVTRGSGLTHRTGKRLCIKSIYIIGKIWMDENVKKSNHTNTCMFWLVRDRRPYGTSPQDFGQVFNMFDNEPSTATVKNDMRDRYQVLRKFKVTVTGGPYACKESAIVNKFLNLYHHVTYNHQEAAKYENHTENALLLYMACTHASNPVYASLKIRMYFYDSVTN	257	USER	zzz1416
1860		genbank_geminiviridae_YP_009338000.1_@pfam00844	geminivirus_cap	genbank	MTGRMRVTRRFHPYGGTPARRRLNFETAIVPYTGNAVPIAARSYVPISRSVQMKRKKGDRIPKGCVGPCKVQDYEFKMDVPHSGTFVCVSDFTRGTGLTHRLGKRVCIKSMGIDGKVWMDDNVAKRDHTNIITYWLIRDRRPNKDPLTFVQVFTMYDNEPTTAKIRMDLRDRMQVLKKFSVNVSGGPYNHKEQALVRKFFKGLYNHVTYNHKEEAKYENHLENALMLYSASSHASNPVYQTLRCRAYFYDSHNN	254	USER	zzz1417
1859		genbank_geminiviridae_YP_009362975.1_@pfam00844	geminivirus_cap	genbank	MRRYTGNTYQMSQKRKGKFQSVWPKKRKSSTTSRKYQWKRPVTKNRSLKLKMYDDMLGAGGIGSTISNNGMITMLNNYVQGIGDSQRSTNVTLTKHLKFDMALMGSSAFWETPNYMTQYHWIIIDKDVGSVFPDKLDSIFDIPSNGQAMPSTYRVRRDMNERFIVKKKWTTHLMSTGTAYGGRDTYKGPSMPNYKKAMNINVRNLNVRTIWKDTGGGKYEDVKENAIIYVVVNDNTDNTNMYATLFGNCRCYFY	254	USER	zzz1418
1858		genbank_geminiviridae_YP_009362981.1_@pfam00844	geminivirus_cap	genbank	MSTRGKRIVTYKRDPERQKRQRIKKALGVSTWDDVARLAATPAISLRDRPSLQVAQFTWTQNKVPVVFNPGGTVYLMTMYPFGGSEAQRHANTTMTYKMSIGQEVQLDKAFYASCGMYYMQWWLVYDKASTGTLPATSTIFDTFYQNFPNTWTVARDVCHRFIVKRKWKTILTSNGVDIGKPGQICAPAKQRVGVNKFFKKLGVKTEWKNSSTGDIGDIKSGALYLIGAPSHGVVCNVYGRFRVYFKSVGNQ	252	USER	zzz1419
1857		genbank_geminiviridae_YP_009389275.1_@pfam00844	geminivirus_cap	genbank	MSSRGPSRKRPRSSTRVVKWPSEALRKGYTPYNSYLRGTKSGRSDKRPNLQVQTFYACGPTQVQVKKGGIVNLLNGYTRGSDDNQRHTCETITYKLSLDLHINIATDLFKNCARGTGVIWLIYDTSPTGTQLTTQQIFAYPDALSLYPYTWKVARDQCHRFIIKRRWTFRLESNGTLGSSDYSSKPIAPCNNNVYFSKFVKRLGVRTEWKNTTGGDAGDMKSGGLFLAFAAGNGMLFNVDGTTRLYFKSTGNQ	253	USER	zzz1420
1856		genbank_geminiviridae_YP_009408629.1_@pfam00844	geminivirus_cap	genbank	MSKRAAPWRSFAGMSKVQRSLNFSPRSGTGPKLDSRSAWVNRPMYRKPRIYRTLRSPDVPKGCEGPCKVQSYEQRHDISHVGKVMCISDVTRGNGITHRVGKRFCVKSVYILGKVWMDENIKLKNHTNSVMFWLVRDRRPYGTPMDFGQVFNMFDNEPSTATVKNDLRDRFQVLHKFYSKVTGGQYASNEQALVRRFWRVNTHVTYNHQEAAKYENHTENALLLYMACTHASNPVYATLKIRIYFYDSISN	251	USER	zzz1421
1855		genbank_geminiviridae_YP_009408642.1_@pfam00844	geminivirus_cap	genbank	MPKRDAPWRLMAGTSKVSRTGSYSSHGGMGPKPNKANAWVNRPMYRKPRIYRMYRSPDVPKGCEGPCKVQSYEQRHDISHVGKVMCISDITRGNGITHRVGKRFCVKSVYILGKIWMDENIKLKNHTNSVIFWLVRDRRPYGTPMDFGQVFNMFDNEPSTATVKNDLRDRFQVMHRFHAKVTGGQYASNEQALVRRFWKVNNYVVYNHQEAAKYENHTENALLLYMACTHASNPVYATLKIRIYFYDSITN	251	USER	zzz1422
1854		genbank_geminiviridae_YP_009417306.1_@pfam00844	geminivirus_cap	genbank	MAERKRKMEWSKANRKRSRTTLPRNSRVYARKRPILRGPKLTSRDKVYTYTKYETLTTAGAVYHLNSFSQGLANNQRATSVDIVHNVQLRFSVELPTGAMVFCRRYKMSWAVVQDMMPGDSMPAVSDIFSMTSPPIEGLEYIADDNHRRFQVKKFGILYLESGGADYSVNTGKQTYNVQDALKRVFVKCNTRGVYDSNSSAGSISAMNSGALYFVVNPTFAGYLGFNITVYHNSPV	236	USER	zzz1424
1853		genbank_geminiviridae_YP_009428561.1_@pfam00844	geminivirus_cap	genbank	MPKRDAPWRPMAGTSKVSRNANYSPRAGIGPRMNRASEWVNRPMYRKPRIYRTLRTPDIPRGCEGPCKVQSYEQRHDISHVGKVMCISDVTRGNGITHRVGKRFCVKSVYILGKIWMDENIKLKNHTNSVMFWLVRDRRPYGTPMDFGQVFNMFDNEPSTATVKNDLRDRYQVMHRFYGKVTGGQYASNEQAIVRRFWKVNNYVVYNHQEAAKYENHTENALLLYMACTHASNPVYATLKIRIYFYDSIMN	251	USER	zzz1425
1852		genbank_geminiviridae_YP_009448199.1_@pfam00844	geminivirus_cap	genbank	MGANQALISWGAKKKRSTPNRSSWTRRVRRRLSYYPRYIPRGPKKNTRDKVYTFTSYKAFSDLGGVWLLNGFAQGLGNNQRNGSVEIIRALNLRLGVAIAEGATALNFARDWNCTWYVIADQSPGTTIPAFTDIFTTGSAAVDGLEYIPDDMHLRFQIKMKGKLKFITSGVSYSTAVTSKTGYNKCHDIVRKFKSKLNVRTDYDSNSSGGAITDIKKGALYLVINPEFSCYAGVNCTIYHSGPYYK	246	USER	zzz1427
1851		genbank_geminiviridae_YP_009465969.1_@pfam00844	geminivirus_cap	genbank	MAQVKKRKWSGMTSWPNRKRTAGKTAQKKYQWRKPVRKDKAVKLKMYDDTFGNQGIGSAVSNDGMITMVNNYVQGIGDSQRSSNTTVTRHLKFDMALMASSGFWQAPNYMTQYHWLLVDRDATGPFPDKLSTIFDIPNNGQACPSTYRIRRDCNERFIVKRKWTTHLMSTGTDYGVKQTYKAPSMPNYKKAMNHNFRNINVKTTWKDTGGGKYEDVKENALLYVVVNDNVDNTNIYAQLFGNIRAYFH	248	USER	zzz1428
1850		genbank_geminiviridae_YP_009465980.1_@pfam00844	geminivirus_cap	genbank	MAAQNLKRKSQSGTPWMRRKKTKSGKSQWKKYPVKRPVNRSRAVKLKMYDDTFGGSGIGSTVSNDGMITMLNNYVQGIGDSQRSTNVTVTKRLKFDMALMASSGFWSAPNYMAQYHWVIVDRDVGSTFPDKLDTIFDIPSQGQGMPSTYRIRRDMNERFIVKRKWTTHMMSTGTDYGGKQTYKAPSMPNYKKAMNINIRNINVKTMWKDTGGGKYEDVKENAILYVVVNDNTDNTNMYATLFGNCRMYFY	250	USER	zzz1429
1849		genbank_geminiviridae_YP_009465984.1_@pfam00844	geminivirus_cap	genbank	MDYSGRKRRYSGPSTPVQIAKRMMTIRKRFNSGSVRRALFQSPYYRPNLMGFRRRSKSIFPDKGYHDDEDHWGDFSSSAGVTNYVSMPYLGQAKNQRHTNKIKIWSISANGALHIKTAGANPDTIIATVFLMWAHNPNGGSNPPAFNDVFTTSTNMDDQHNPSCAKIKHPMLAYYKCLARKHIVLIPYTNYCAGENRALFNINIKFRGRNAKYVEFGESSSGGSYSDIKSGGLFYYVRYYSPDPAARLEGDWNCRVIYYH	260	USER	zzz1430
1848		genbank_geminiviridae_YP_009465995.1_@pfam00844	geminivirus_cap	genbank	MTKGRVSIVPFVRRLGPRLKGNSPRRGPRYVVARTAPVISAVTEWKRRPRNRNPKSSKKDVVPFGCEGPCKVESFSDRYEVKHTGTVCCLSQISRGNGLKQRIGKRITIKSIYLLGKVWLDGSNRISNHTNVCIFFVVRDRRPSVTPINFGSLFDMFDGEPATASVKSDHRDRFQVLYRFQVSVSGGQYSSRDQTVFQKFVNLNHRVVFDNQDDGVYGNHDQNALLVYMACCHSTNWLYSSMKAKVYFYDSAMN	254	USER	zzz1431
1847		genbank_geminiviridae_YP_009506369.1_@pfam00844	geminivirus_cap	genbank	MPKRDLPWRSIAGTSKVSRNANYSPRAGSGPRNKAFEWVITPMYRKPRIYRMIRTPNVPRGCEGPCKVQSYEQRHDISHVGKVMCISDVTRGNGITHRVGKRFCVKSVYILGKIWMDENIKLKNHTNSVMFWLVRDRRPYGTPMDFGQVFNMFDNEPSTATVKNDLRDRYQVMHKFYGKVTGGQYASNEQSIVQRFWKVNNHVVYNHQEAGKYENHTENALLLYMACTHASNPVYATLKIRIYFYDSITN	250	USER	zzz1435
1846		genbank_geminiviridae_YP_009506374.1_@pfam00844	geminivirus_cap	genbank	MPKRDAPWRLMAGPSKVSRNVNYSPRAGPKADKPSIWANRPMYRKPRFYRLFRTPDVPKGCEGPCKVQSFEQRHDISHVGKVMCISDVTRGNGITHRVGKRFCVKSVYILGKVWMDDNIKLKNHTNIVMFWLVRDRRPYGTPMDFGQVFNMFDNEPSTATVKNDLRDRFQVMHKFHAKVTGGQYASNEQSLVKRFWRVNNHVVYNHQEAAKYENHTENALLLYMACSHASNPVYATLKIRIYFYDSITN	249	USER	zzz1436
1845		genbank_geminiviridae_YP_009506379.1_@pfam00844	geminivirus_cap	genbank	MPKREAPWRLLAGTSKVSRNAKYSTRLGSGPTFNKATEWVNRPMYRKPRIYRMIRTPDVPRGCEGPCKVQSFEQRHDVSHTGKVICISDVTRGNGITHRVGKRFCVKSVYILGKIWMDENIKLKNHTNSVMFWLVRDRRPYGTPMDFGQVFNMFDNEPSTATVKNDLRDRYQVMHRFYGKVTGGQYASNEQAIVKRFWKVNNHVVYNHQEAGKYENHTENALLLYMACTHASNPVYATLKIRIYFYDSIMN	251	USER	zzz1437
1844		genbank_geminiviridae_YP_009506396.1_@pfam00844	geminivirus_cap	genbank	MSKCRSAISHGARWREPLRSAAMSTPRLVQVSAQNSTRPLNGSTGPCIGSPGSIARSDLPMCLEGVKGRVRSSPYEPGATNISHVGKVMCISDVTRGNGITHRVGKRFCVKSVYILGKIWMDENIKLKNHTNSVMFWLVRDRRPYGTPMDFGQVFNMFDNEPSTATIKNDLRDRYQVMHRFYGKVTGGQYASNEQAIVRRFWKVNNHVVYNHQEAGKYENHTENALLLYMACTHASNPVYATLKIRIYFYDSGFKLIKFEFYLMIL	266	USER	zzz1438
1843		genbank_geminiviridae_YP_009506401.1_@pfam00844	geminivirus_cap	genbank	MSKRPADIIISTPASKVRRRLNFDSPGLSSARAPTVLVTNKRRSWTNRPTYRKPRMYRMYRSPDVPKGCEGPCKVQSYEQRDDIKHTGIVRCVSDVTKGVGITHRTGKRFTIKSIYILGKVWMDDNIKKQNHTNNVMFFLVRDRRPYGNSPLDFGQVFNMFDNEPSTATVKNDLRDHFQVLRKFTATVIGGPSGMKEQALVRRFFRINSQIVYNHQEAGKFENHTENAILLYMACTHASNPVYATLKIRIYFYDSVSN	258	USER	zzz1439
1842		genbank_geminiviridae_YP_009506406.1_@pfam00844	geminivirus_cap	genbank	MKRSADTIYSTPSKARRRLTFDTPRATPASLGRSNKRRAWENRPMNRKPMMYRLWRSPDVPYGCEGPCKVQSFEARHDVKHTGTFQCCSDVTRGMGLTHRVGKRFTIKTIGIWGKIWMDDNIKLKNHTNIVIFFLVRDRRPSGEPVSFGSLFNMFDNEPTTATVKQEYRDRFQVMRRFHASVTGGQYASKEQALVKRFFRNINHRVVYNQQEGAEYKNHHENALMLYMACSHASNPVYATIKVRIYFYDSITN	253	USER	zzz1440
1841		genbank_geminiviridae_YP_009506415.1_@pfam00844	geminivirus_cap	genbank	MSKRPADMVFSTPVSRVRRRLNFDTPGVTRVAAPTVRATNRRRMWINRPMYRKPRIYRMYRSPDVPYGCEGPCKVQSFEQRHDIAHTGKVICVSDVTRGNGLTHRVGKRFCVKSVYVLGKVWMDENIKTKNHTNTVMFFVVRDRRPFGTPMDFGQVFNMYDNEPSTATVKNDLRGRYQVLRRFTAMATGGQYASKEQALVRKFMKLNNHVCYNHQEAAKYENHTENALLLYMACTHASNPVYATLKIRIYFYDSVSN	257	USER	zzz1441
1840		genbank_geminiviridae_YP_009506423.1_@pfam00844	geminivirus_cap	genbank	MSKRPGDIIISTPASKVRRRLIFDSLYSSRASVFTVRVTKRQAWTNRPMNRKPRWYRMFRSPDVPRGCEGPCKVQSFESRHDVVHIGKVMCISDVTRGVGLTHRVGKRFCVKSVYILGKVWMDENIKTKNHTNSVMFFLVRDRRPVDKPQDFGEVFNMFDNEPSTATVKNMHRDRYQVLRKWSATVTGGQYASKEQALVRRFFRVNNYVVYNQQEAGKYENHTENALMLYMACTHASNPVYATLKIRIYFYDSVSN	256	USER	zzz1442
1839		genbank_geminiviridae_YP_009506432.1_@pfam00844	geminivirus_cap	genbank	MSKRPADIVISTPVSKVRRRLNFDSPGVSRVAARTVLGITRKNAWTYRPTYRKPRLYRMYRSPDVPRGCEGPCKVQSFEKKHDVGHTGTLLCVSDVTRGNGLTHRTGKRFCIKSIYILGKLWMDENIKTKNHTNTVMFWLVRDRRPVTTPYGFGEAFNMYDNEPSTATIKNDLRDRLQVLHRFQATLTGGQYACKEQVMVKRFWKINNHVVYNHQEKAAYENHTENALILYMACTHASNPVYATLKIRIYFYDSVQN	257	USER	zzz1443
1838		genbank_geminiviridae_YP_009506437.1_@pfam00844	geminivirus_cap	genbank	MSKRDAPWRSMAGMSKVRRTLNYSPRAGLGPRNNKAAEWVNRPMYRKPKIYRTLRTPDVPRGCEGPCKVQSYEQRHDISHVGKVMCISDVTRGNGITHRVGKRFCVKSVYILGKIWMDENIKLKNHTNSVMFWLVRDRRPYGTPMDFGQVFNMYDNEPSTATIKNDLRDRFQVMHRFYGKVTGGQYASNEQALVRRFWKVNNHVVYNHQEAGKYENHTENALLLYMACTHASNPVYATLKIRIYFYDSITN	251	USER	zzz1444
1837		genbank_geminiviridae_YP_009506443.1_@pfam00844	geminivirus_cap	genbank	MTKRPADIVISTPASKVRRRLNYDTPGVNRATVPTVLVTNRKKAWTYRPSYRKPKMYRMYKSPDVPRGCEGPCKVQSYEQRHDIAHTGKVICISDVTRGGGLTHRTGKRFCVKSVYIIGKVWMDENIKTKNHTNTVMFFLVRDRRPYGTPMDFGQVFNMYDNEPSTATVKNDLRDRYQVMRRFSASVTGGQYACKEQAIVRKFFTVNNHVVYNHQEAAKYDNHTENAMLLYMACTHASNPVYATLKIRIYFYDSIQN	257	USER	zzz1445
1836		genbank_geminiviridae_YP_009506450.1_@pfam00844	geminivirus_cap	genbank	MSKRPADIVISTPASKVRRRLNFESPGMSRATVPTVLVTNRRRMWANRPMYRKPRMYRMYRSPDVPKGCEGPCKVQSFEQRHDVAHTGKVICISDVTRGNGLTHRVGKRFCIKSVYVLGKIWMDENIKVKNHTNTCMFFVVRDRRPYGTPMDFGQVFNMYDNEPSTATVKNDLRDRFQVLRRFAGTVTGGQYASKEQALVRKFMRVNNHVVYNHQETAKYENHTENALLLYMACTHASNPLYATMKIRIYFYDSVQN	257	USER	zzz1446
1835		genbank_geminiviridae_YP_009506456.1_@pfam00844	geminivirus_cap	genbank	MSKRPADIVISTPASKVRRRLNFDTPVMSRAAAPTVLVTNKKRIWTNRPMYRKPRFYRVYKSPDVPRGCEGPCKVQSFEKKHDVGHTGTLLCVSDVTRGNGLTHRVGKRFCIKSIYILGKLWMDENIKTKNHTNTVMFWLVRDRRPMTTPYGFGEAFNMYDNEPSTATIKNDLRDRLQVLHRFQATLTGGQYACKEQVMVKRFWKINNHVVYNHQEKAAYENHNENALILYMACTHASNPVYATLKIRIYFYDSVQN	257	USER	zzz1447
1834		genbank_geminiviridae_YP_009506461.1_@pfam00844	geminivirus_cap	genbank	MPKREAPWRSMEGTSKVSRNXNDSPRAGIGGPKITRASEWVNRPRDRKPRIFRTLRTSDVPRGCEGPCKVQSFEQRHDISHVGKVMCISDVTRGNGITHRVGKRFCVKSVYILGKIWMDENIKLKNHTNSVMFWLVRDRRPYGTPMDFGQVFNMFDNEPSTATVKNDLRDRFQVMHKFYGKVTGGQYASNEQAIVKRFWKVNNYVVYNHQEAAKYENHTENALLLYMACTHASKPCVCNA	240	USER	zzz1448
1833		genbank_geminiviridae_YP_009506471.1_@pfam00844	geminivirus_cap	genbank	MTKRDSSWRSIAGTSKVRRTLNFSPRGGGGPKQTRASEWVNRPMYRKPLIYRTLRTPDVPRGCEGPCKVQSYEQRHDISHVGKVMCISDVTRGNGITHRVGKRFCVKSVYILGKIWMDENIKLKNHTNSVMFWLVRDRRPYGTPMDFGQVFNMYDNEPSTATVKNDLRDRYQVMHRFYGKVTGGQYASNEQALVRRFWKVNNHVVYNHQEAGKYENHTENALLLYMACTHASNPVYATLKIRIYFYDSITN	251	USER	zzz1449
1832		genbank_geminiviridae_YP_009506476.1_@pfam00844	geminivirus_cap	genbank	MTKRDASWRSMAGISKVRRTLNFSPRGVGGPKLNKASEWVNRPMYRKPMIYRTLRTPDVPRGCEGPCKVQSYEQRHDISHVGKVMCISDVTRGNGITHRVGKRFCVKSVYILGKVWMDENIKLKNHTNSVMFWLVRDRRPYGTPMDFGQVFNMFDNEPSTATVKNDLRDRYQVMHKFHAKVTGGQYASNEQAIVKRFWKINNHVVYNHQEAGKYENHTENALLLYMACTHASNPVYATLKIRIYFYDSIMN	251	USER	zzz1450
1831		genbank_geminiviridae_YP_009506486.1_@pfam00844	geminivirus_cap	genbank	MIYLKMPKRDPSWRSMAGTSKVSRSSNFSPRGGPKVNKASEWVNRPMYRKPRIYRTLRTPDVPRGCEGPCKVQSYEQRNDISHAGKVICISDVTRGSGITHRVGKRFCVKSVYILGKIWMDENIKLKNHTNSVMFWLVRDRRPNGTSPWTLVICSTCSTMSLVLQLLRMISEIVIRFNTDSMPRSLVVNMPAMSRPWSGGFGRSILMSCITTRKLLDTRTIRRMPSVVHGHVLMPLIPCMQLFKIRIYFYDSISI	255	USER	zzz1451
1830		genbank_geminiviridae_YP_009506489.1_@pfam00844	geminivirus_cap	genbank	MPKRDAPWRLMAGTSKVSRTTNYSPRGGMPKRDAWVNRPMYRKPRIYRIWRGPDVPRGCEGPCKVQSYEQRHDISHVGKVMCVSDVTRGNGITHRVGKRFCVKSVYILGKIWMDENIKLKNHTNSVMFWLVRDRRPYGTPMDFGQVFNMFDNEPSTATVKNDLRDRYQVMHKFYAKVTGGQYASNEQALVKRFWKVNNYVVYNHQEAGKYENHTENALLLYMACTHASNPVYATLKIRIYFYDSISN	247	USER	zzz1452
1829		genbank_geminiviridae_YP_009506513.1_@pfam00844	geminivirus_cap	genbank	MSKRGATWRSLEGISKARRSINFSPRGGNGPRSNKAAEWVNRPMYRKPRIYRMYRTPDVPRGCEGPCKVQSFEQRHDISHXGKVICVSDVTRGNGITHRVGKRFCVKSVYILGKVWMDENIKLKNHTNSVMFWLVRDRRPYGTPMDFGQVFNMFDNEPSTATVKNDLRDRYQVMHKFYAKVTGGQYASNEQAIVKRFWRVNIHVVYNHQEAGKYENHTENALLLYMACTYASNPVYATLKIRIYFYDSITN	251	USER	zzz1453
1828		genbank_geminiviridae_YP_009506517.1_@pfam00844	geminivirus_cap	genbank	MPKRYPPFRTTAGISKISRSSNMSPRGGIRPKFDKAAEWVNRPMYRKPRIYRTLRSPDIPRGCEGPCKVQSFEQRHDVSHVGKVLCISDVTRGNGITHRVGKRFCVKSVYILGKVWMDDNIKLKNHTNSVLFWLVRDRRPYGTPMDFGQVFNMYDNEPSTATVKNDLRDRIQVMHRFSAKVTGGQYASNEQAVVRRFWKVYNHVVYNHQEAAKYEIHTENALLLYMACTHASNPVYATLKIRIYFYDSILN	251	USER	zzz1454
1827		genbank_geminiviridae_YP_009506521.1_@pfam00844	geminivirus_cap	genbank	MPKRDAPWRHMAGTSKISRVANYSPRAGVGPRSNKASEWVNRPMYRKPRIYRMYRTPDVPRGCEGPCKVQSYEQRHDISHVGKVMCVSDVTRGNGITHRVGKRFCVKSVYILGKVWMDENIKLKNHTNSVMFWLVRDRRPYGTPMDFGQVFNMFDNEPSTATVKNDLRDRYQVMHKFYAKVTGGQYASNEQALVKRFWRVNNHVVYNHQEAGKYENHTENALLLYMACTHASNPVYATLKIRIYFYDSIIN	251	USER	zzz1455
1826		genbank_geminiviridae_YP_009506533.1_@pfam00844	geminivirus_cap	genbank	MKNRPADIIISKPPSKVYRYVKFDSPKGASAVVPIARVTEAKAWTNRPMNRKPRIYRTHRSPDVPRGREGQRKLHSIESRLDVYRTGKIKGVIHVTREIGLTHSVGKRFGVNSVYVLEKRGIDETIKPKSHTYRVMFFLVRDRRPTGTPQDFGDVFNMFDNEPSTATVKNMHRDRYQVLRKWHATVTGGTYASKEQALVSKFVRVNNYVVYNQQEAGKYENHTENALMLYMACTHASNPVYATLKIRIYFYDSVTN	256	USER	zzz1456
1825		genbank_geminiviridae_YP_009506547.1_@pfam00844	geminivirus_cap	genbank	MSKRPGDIIISTPASKVRRRLNFDSPYTSRAAVPTAPGTSRRRSWTYRPMYRKPRMYRMYRSPDVPRGCEGPCKVQSYEQRDDVKHTGVVRCVSDVTRGSGITHRVGKRFCVKSIYIIGKIWMDENIKKQNHTNQVMFFLVRDRRPYGTSPMDFGQVFNMFDNEPSTATVKNDLRDRYQVLRKFHATVVGGPSGMKEHALVKRFFKVNNHVVYNHQEAAKYENHTENALLLYMACTHASNPVYATLKIRIYFYDSVGN	258	USER	zzz1457
1824		genbank_geminiviridae_YP_009506564.1_@pfam00844	geminivirus_cap	genbank	MSKRPADTLISLPASKVRRRLNFDSPYASRAIVPIALGTNRRRAWVNRPMYRKPRMYRMYRSPDVPRGCEGPCKVQSYEQRDDVSHIGKVRCISDVTKGGGLTHRTGKRFCIKSIYILGKVWMDDDIKKQNHTNHAMFFVVRDRRPYGSPMDFGQVFNMFDNEPSTATVKNDLRDRFQVMRKFHAAVTGGPSGTKEQALVKKFMKLNTHVMYNHQEAGKYENHTENALLLYMACTHANNPLYATLKIRVYFYDSVLN	257	USER	zzz1458
1823		genbank_geminiviridae_YP_009506571.1_@pfam00844	geminivirus_cap	genbank	MVKRKRSTGVTTTYAKRSRVGSGYRRRWSRRRRIVRRKGVYARHRSQSVLHSLSNATATKGKAGYGWHLNEIPLGSSYPERHSDKVKVKSFRFRMQFRDGANGGTNAANVHNLYLYLVKDNSGGTEVPSFDKIAMMDYGNVATAIIDHDSEKRFTIVRQWKYTFTGSCNSQYPGKDRIDFNDVVYINVDTEFKSATDGKYANTQKNAWVLYIIPQSYDCVIDGHVNVRFESLV	233	USER	zzz1459
1822		genbank_geminiviridae_YP_009506576.1_@pfam00844	geminivirus_cap	genbank	MNTSWGRKRTRTGWNKGKASNQKQGANNRRTAPPPVPRRDSLQVATFSWTSTGAGIKFSPGGSVYLINTYPQGANDNCRHTNSTLTYKLMTKNTVFLDANFWPYVCKIPVVFWLVYDKSPGASVPNTGDIFDGTSIFKNNPSVWTVSRAVCHRFVVKKTWTVILEANGVDPTKKVSASYYGPGPCNQWKSSNKFFKRLGVSTEWKNSASGDVADIKEGALYIVCAPSQGFDIYVNGYFRVYFKSVGNQ	248	USER	zzz1460
1821		genbank_geminiviridae_YP_009507975.1_@pfam00844	geminivirus_cap	genbank	MHAHSTCKSRMPKRDAPWRNNAGTYKVSRSGNYSPGGGMGSKSNKANAWVNRPMYRKPRIYRMYRSPDVPKGCEGPCKVQSYEQRHDISHVGKVMCISDITRGNGITHRVGKRFCVKSVYILGKIWMDENIKLKNHTNSVIFWLVRDRRPYGTPMDFGQVFNMFDNEPSTATVKNDLRDRYQVMHRFNAKVTGGQYASNEQALVRRFWKVNNHVVYNHQEAGKYENHTENALLLYMACTHASNPVYATLKIRIYFYDSITN	261	USER	zzz1462
1820		genbank_geminiviridae_YP_009507985.1_@pfam00844	geminivirus_cap	genbank	MPKREAPWRLMAGTSKISRSTNLNSRRGNGSTFNKADAWVNRPMYRKPKIYRIMRTPDVPRGCEGPCKVQSYEQRHDISHAGKVICVSDVTRGNGITHRVGKRFCVKSVYILGKIWMDENIKLKNHTNSVMFWLVRDRRPNGTPMDFGHLFNMFDNEPSTATIKNDLRDRFQVMHRFYAKVTGGQYASNEQALVKRFWKVNNHVVYNNQEAARYENHTENALLLYMACTHASNPVYATLKIRIYFYDSISN	251	USER	zzz1464
1819		genbank_geminiviridae_YP_009507992.1_@pfam00844	geminivirus_cap	genbank	MPKRDAPWRSHPGTAKVSRNANYSPRGAMGPKYDKTSAWVYRPMYRKPRVYRLLRGPDVPKGCEGPCKVQSYEQKHDISHVGKVICISDVTRGNGITHRVGKRFCVKSVYILGKIWMDENIKLKNHTNSVMFWLVRDRRPYGTPMDFGQVFNMYDNEPSTATVKNDLRDRYQVMHRFYAKVTGGQYASNEQALVRRFWKVNNYVVYNHQEAGKYENHTENALLLYMACTHASNPVYATLKIRIYFYDSIMN	251	USER	zzz1466
1818		genbank_geminiviridae_YP_009508006.1_@pfam00844	geminivirus_cap	genbank	MPKRDGSWRSMAGTSKVSRNANYSPRSGPTSNRANAWVNRPMYRKPRIYRMYRSPDVPKGCEGPCKIQSFEQRHDISHTGKVMCISDVTRGNGITHRVGKRFCVKSVYILGKVWMDDNIKLKNHTNSVMFWLVRDRRPYGTPMDFGQVFNMFDNEPSTATVKNDLRDRFQVMHKFYSKVTGGQYASNEQAIVKRFWKVNNNVVYNHQEAAKYENHTENALLLYMACTHASNPVYATLKIRIYFYDSIMN	249	USER	zzz1469
1817		genbank_geminiviridae_YP_009508013.1_@pfam00844	geminivirus_cap	genbank	MVKRDAPWRLSAGTSKVSRSTNYTPRAGMGPKFDKASAWVNRPMYRKPRIYRTLRSPDVPRGCEGPCKVQSFESRHDVTHVGKVMCISDVTRGNGITHRVGKRFCVKSVYILGKIWMDENIKLKNHTNSVMFWLVRDRRPYGTPMDFGQVFNMFDNEPSTATVKNDLRDRYQVMHKFYAKVTGGQYASNEQALVKRFWKVNNYVVYNHQEAAKYENHTENALLLYMACTHASNPVYATLKIRIYFYDSISN	251	USER	zzz1471
1816		genbank_geminiviridae_YP_009508029.1_@pfam00844	geminivirus_cap	genbank	MPKRDAPWRIVAGTTKVSRSSNYSPRGGIPKRDAWVNRPMYRKPRIYRTLRGPDVPKGCEGPCKVQSYEQRHDISHLGKVMCISDVTRGNGITHRVGKRFCVKSVYILGKIWMDENIKLKNHTNSVIFWLVRDRRPYGTPMDFGQVFNMFDNEPSTATVKNDLRDRYQVIHRFNAKVTGGQYASNEQALVRRFWKVNNHVVYNHQEASEVRESIPENALLLYMACTHASNPVYATLKIRIYFYDSISN	248	USER	zzz1475
1815		genbank_geminiviridae_YP_009508114.1_@pfam00844	geminivirus_cap	genbank	MSKRPADIVISTPASKVRRRLNFDSPYSSRAAAPTVLVTNRRRSWAQRPMYRKPKLYRMYRSPDVPKGCEGPCKVQSFEQRHDIAHTGKVICISDVTRGGGITHRVGKRFCVKSVYVLGKVWMDENIKVKNHTNTVMFFVVRDRRPYGTPQDFGQVFNMYDNEPSTATVKNDMRDRFQVLRKFSSTVTGGQYASKEQALVRKFMKINNHVTYNHQEAAKYENHTENAVLLYMACTHASNPVYATLKIRIYFYDSTMN	257	USER	zzz1476
1814		genbank_geminiviridae_YP_009508120.1_@pfam00844	geminivirus_cap	genbank	MSKRPADIIISTPVSKVRRRLNFDSPFSSRAAVPIVQGTNKRRSWTFRPMYRKPRMYRMYRSPDVPRGCEGPCKVQSYEQRDDVKHTGAVRCVSDVTRGSGITHRVGKRFCVKSIYVLGKIWMDENIKKQNHTNQVMFFVVRDRRPYGTSPMDFGQVFNMFDNEPSTASIKNDLRDRFQVLRKFHATVVGGPSGMKEQALIKRFFKVNNHVVYNHQEAAKYENHTENALLLYMACTHASNPVYATLKIRIYFYDAVTN	258	USER	zzz1477
1813		genbank_geminiviridae_YP_009508135.1_@pfam00844	geminivirus_cap	genbank	MRKRSYDTAFSSPMSSARRRLTFDSPLALPAPALRAPTTVKRRSWANRPMNRKPRYYRLYRTPDVPRGCEGPCKVQSFEQRHDISHVGKVICISDVTRGNGITHRVGKRFCIKSVYITGKIWMDENIKTKNHTNSVMFKLVRDRRPFGTAMDFGQVFNMYDNEPSTATVKNDLRDRYQVLRKFHHTVTGGQYASKEQAIVNRFYRVNNHVVYNHQEAAKYENHTENALLLYMACTHASNPVYATLKIRIYFYDSISN	257	USER	zzz1478
1812		genbank_geminiviridae_YP_009508160.1_@pfam00844	geminivirus_cap	genbank	MVKRDAPWRSMAGPSKVSRNANYSPRGVSGPRVNKAQAWVNRPMYRKPMIYRMLRGPDIPKGCEGPCKVQSYEQRHDISHVGKVMCISDVTRGNGITHRVGKRFCVKSVYILGKIWMDENIKLKNHTNSVMFWLVRDRRPYGTPMDFGQVFNMFDNEPSTATVKNDLRDRYQVMHRFYAKVTGGQYASNEQALVRRFWKVNNHVVYNHQEAGKYENHTENALLLYMACTHASNPVYATLKIRIYFYDSIMN	251	USER	zzz1480
1811		genbank_geminiviridae_YP_009508169.1_@pfam00844	geminivirus_cap	genbank	MPKRDLPWRPYAKISKVSRNANYSPRTRVGPIVDKAAEWVNRPMYRKPRIYRTVRTPDVPRGCEGPCKVQSYEQRHDISHVGKVMCISDVTRGNGITHRVGKRFCVKSVYILGKIGKIWMDENIKLKNHTNSVMFWLVRDRRPYGTPMDFGQVFNMFDNEPSTATVKNDLRDRYQVMHRFHAKVTGGQYASNEQAIVRRFWKVNNHVVYNHQEAGKYENHTENALLLYMACTHASNPVYATLKIRIYFYDSVMN	254	USER	zzz1481
1810		genbank_geminiviridae_YP_009508175.1_@pfam00844	geminivirus_cap	genbank	MSKRPGDILISTPVSKVRRRLNFDSPFTSRAVVPTAPGISRRRAWTYRPMYRKPKIYRMYKSPDVPKGCEGPCKVQSYEQRDDVKHTGIVRCVSDVTRGSGITHRVGKRFCIKSIYFLGKIWMDENIKKQNHTNQVMFFLVRDRRPYGSAPMDFGQVFNMFDNEPSTATVKNDLRDRFQVMRKFHATVVGGPSGMKEQALVKRFFRINSHVTYNHQEAAKYENHTENALLLYMACTHASNPVYATLKIRIYFYDSVSN	258	USER	zzz1482
1809		genbank_geminiviridae_YP_009508186.1_@pfam00844	geminivirus_cap	genbank	MSKRPADIIISTPASKVRRRLNFDSPVQSSARAPTVLVTNKRRAWTNRPNYRKPRMYRMYRSPDVPKGCEGPCKVQSYDQRDDVKHTGIVRCVSDVTKGPGLTHRIGKRFTIKSIYILGKIWMDENIKKQNHTNTVMFFLVRDRRPYGNSPLDFGQVFNMFDNEPSTATVKNDLRDHFQVIRKFTATVTGGPSGCKEQALVRRFFKINSQIVYNHQDAGKFENHTENAILLYMACTHASNPVYATLKIRIYFYDSVSN	258	USER	zzz1483
1808		genbank_geminiviridae_YP_009508192.1_@pfam00844	geminivirus_cap	genbank	MSKRPADIIISTPASKVRRRLNFDSPFTSRAVVPIVPGTSRRRSWTYRPMYRKPRMYRMYRSPDVPKGCEGPCKVQSYEQRDDVKHTGIVRCVSDVTRGPGITHRVGKRFCVKSIYILGKIWMDENIKKQNHTNQVMFFLVRDRRPYGAAPMDFGQVFNMFDNEPSTATVKNDLRDRYQVLRKFHATVVGGPSGMKEQALVKRFFKINSHVTYNHQEAAKYENHTENALLLYMACTHASNPVYATLKIRIYFYDSIGN	258	USER	zzz1484
1807		genbank_geminiviridae_YP_009508200.1_@pfam00844	geminivirus_cap	genbank	MSKRPGDIIISTPVSKVRRRLNFDSPYTSRAAAPIVPGTNRRRSWTYRPMYRKPRMYRMYRSPDVPRGCEGPCKVQSFEQRDDVKHTGIVRCVSDVTRGSGITHRVGKRFCVKSIYILGKIWMDENIKKQNHTNQVMFFLVRDRRPYGPSPMDFGQVFNMFDNEPSTATVKNDLRDRYQVMRKFHATVVGGPSGMREQTLVKRFFRINSHVTYNHQEQAKYENHTENALLLYMACTHASNPVYATLKIRIYFYDSVSN	258	USER	zzz1485
1806		genbank_geminiviridae_YP_009508207.1_@pfam00844	geminivirus_cap	genbank	MSKRPADIVISTPASKVRRRLNFDSPYLSRAAAPTVLVTNKRRAWVNRPMYRKPRMYRMYKNPDVPRGCEGPCKIQSYEQRDDVKHVGVVRCISDITKGPGLTHRTGKRFVVKSVYILGKVWMDENIKKQNHTNNVMFFLVRDRRPYGPSPMDFGQVFNMFDNEPSTATVKNDFRDRFQVLRKFTATVVGGPSGLKEQALVKRFFRLNSHVTYNHQEAAKYENHTENALLLYMACTHASNPVYATLKIRVYFYDSVTN	258	USER	zzz1486
1805		genbank_geminiviridae_YP_009508293.1_@pfam00844	geminivirus_cap	genbank	MPKRDAPWRSHPGTAKVSRNLNYSPRGGYGPKYDKASAWVTRPMYRKPRIYRLYRSPDVPKGCEGPCKVQSYEQRHDVSHVGKVICISDVTRGNGLTHRVGKRFCVKAVYIMGKIWMDENIKLKNHTNSVMFWLVKDRRPYGTPMDFGQVFNMYDNEPSTATVKQDLRDRYQVMHRFYGKVTGGQYAINEQALVRRFWKVNNHVVYNHQEAGKYENHTENALLLYMACTHASNPVYATLKIRIYFYDSIMN	251	USER	zzz1487
1804		genbank_geminiviridae_YP_009508300.1_@pfam00844	geminivirus_cap	genbank	MPKRPADIIISTPGSKVRRRLNFDSPYASRAAAPTVRVTRSQAWTNRPMNRKPKWYRIYRSPDVPKGCEGPCKVQSFESRHDVVHIGKVMCISDVTRGTGFTHRVGKRFCVKSVYILGKIWMDENIKTKNHTNTVMFFLVRDRRPVDKPQDFGEVFNMFDNEPSTATVKNMYRDRYQVLRKWSSTVTGGQYASKEQAIVRRFFRVNNYVVYNQQEAGKYENHTENALMLYMACTHASNPVYATLKIRIYFYDSVSN	256	USER	zzz1488
1803		genbank_geminiviridae_YP_009508312.1_@pfam00844	geminivirus_cap	genbank	MPKRDAPWRNMAGTSKISRTSNYSPRSGPKYNKANDWVNRPMYRKPRIYRVLRTADVPRGCEGPCKVQSFEQRHDIAHTGKVICVSDVTRGNGITHRVGKRFCIKSVYILGKIWMDDNIKLKNHTNSVMFWLVRDRRPYGSPMDFGQIFNMFDNEPSTATVKNDLRDRFQVMHRFYAKVTGGQYASNEQAIVKRFWKVYNHVVYNHQEAGKYENHTENALLLYMACTHASNPVYATLKIRIYFYDSISN	249	USER	zzz1489
1802		genbank_geminiviridae_YP_009508323.1_@pfam00844	geminivirus_cap	genbank	MPKREAPWRLVETLPKVSRNANYSPLRISGPKPDKRSAWVNRPMYRKPRIYRMMRGPDIPKGCEGPCKVQSYEQRHDISHVGKVLCVSDITRGNGLTHRVGKRFCIKSIYILGKVWMDDNIKLKNHTNSVMFWLVRDRRPYGTPLDFGQVFNMFDNEPSTATVKNDLRDRFQVMHRFYAKVTGGQYASNEQAIVRRFWKINNYVVYNHQEAGKYDNHTENALLLYMASTHASNPVYATLKIRIYFYDSISN	251	USER	zzz1490
1801		genbank_geminiviridae_YP_009508328.1_@pfam00844	geminivirus_cap	genbank	MPKRSAPWRPMAGTSKVSRSANYSPRAGIGPKVNKAAEWVNRPMYRKPRIYRTLRSPDVPRGCEGPCKVQSYEQRHDISHVGKVMCISDVTRGNGITHRVGKRFCVKSVYILGKIWMDENIKLKNHTNSVMFWLVRDRRPYGTPMDFGQVFNMFDNEPSTATVKNDLRDRFQVMHRFYGKVTGGQYASNEQAIVRRFWKVNTHVVYNHQADGTYANHTENALLLYMACTHASNPVYATLKIRIYFYDSVMN	251	USER	zzz1491
1800		genbank_geminiviridae_YP_009508333.1_@pfam00844	geminivirus_cap	genbank	MPKRDAPWRTMAGTSKVSRNANYSPRGGSGPKVSRASEWVNRPMYRKPRIYRTMRTPDVPRGCEGPCKVQSYEQRHDISHVGKVMCISDVTRGNGITHRVGKRFCVKSVYILGKIWMDENIKLKNHTNSVMFWLVRDRRPYGTPMDFGQVFNMFDNEPSTATVKNDLRDRFQVMHKFYGKVTGGQYASNEQAIIRRFWRVNNYVVYNHQEAAKYENHTENALLLYMACTHASNPVYATLKIRIYFYDSILN	251	USER	zzz1492
1799		genbank_geminiviridae_YP_009508343.1_@pfam00844	geminivirus_cap	genbank	MPKRDLPWRSMAGPSKVSRNANYSPRSGSGPRINKASEWVNRPMYRKPRIYRTLRSPDVPRGCEGPCKVQSYEQRHDISHVGKVMCISDVTRGNGITHRVGKRFCVKSVYILGKIWMDENIKLKNHTNSVMFWLVRDRRPYSSPMDFGQVFNMFDNEPSTATVKNDLRDRFQVMHKFYGKVTGGQYASNEQAIVKRFWKVNNHVVYNHQEAGKYENHTENALLLYMACTHASNPVYATLKIRIYFYDSIMN	251	USER	zzz1493
1798		genbank_geminiviridae_YP_009508349.1_@pfam00844	geminivirus_cap	genbank	MSKRPGDIIISTPVSKVRRKLNFDSPYTSRAAARTAPGTSRRRSWTYRPMYRKPLIYRKYRSPDVPRGCEGPCKVQSFDQRDDVKHLGIVRCLSDVTRGNGITHRVGKRFCIKSIYVMGKIWMDENIKKQNHTNNVIFFLVRDRRPYGKGPMDFGQVFNMFDNEPSTATVKNDLRDRFQVMRRFHLTVTGGPSGMKEQSLIRKFVRGINHHVVYNHQEEAKYENHTENALLLYMACTHASNPVYASLKIRIYFYDSVSN	259	USER	zzz1494
1797		genbank_geminiviridae_YP_009508358.1_@pfam00844	geminivirus_cap	genbank	MSKRKADIIISTPGSKVRRRLNFDSPGSSRAYVPTVRVTKSSLWANRPMNRKPRMYRMYRSPDVPRGCEGPCKVQSFESRHDIQHIGKVMCVSDVTRGTGLTHRVGKRFCVKSVYVLGKIWMDENIKTKNHTNSVMFFLVRDRRPVDKPQDFGEVFNMFDNEPSTATVKNVHRDRYQVLRKWHATVTGGQYASKEQALVKKFIRVNNYVVYNQQEAGKYENHSENALMLYMACTHASNPVYATLKIRIYFYDSVSN	256	USER	zzz1495
1796		genbank_geminiviridae_YP_009508368.1_@pfam00844	geminivirus_cap	genbank	MPKRSIDTVSSLPMSITRRRLNYGSQYSLPAAASTAPGMSYKRRSWVNRPMYRKPRFYRGRRSSDVPRGCEGPCKVQSFEQRHDILHTGKVLCITDVTRGGGITHRVGKRFCVKSVYVIGKVWMDDNIKTKNHTNNVMFWLVRDRRPYGTPQDFGQVFNMYDNEPSTATIKNDLRDRFQVIHRFTASVTGGQYGSKEQAIVKRFFRVNNYVVYNHQEAGKYENHTENALLLYMACTHASNPVYATLKIRIYFYDSVTN	258	USER	zzz1496
1795		genbank_geminiviridae_YP_009508384.1_@pfam00844	geminivirus_cap	genbank	MPKRDAPWRSMAGTSKVSRALNYSPRGGFGSKFDKAAAWTNRPMYRKPRIYRTLRSPDVPKGCEGPCKVQSYEQRHDVSHTGKVICISDVTRGNGITHRVGKRFCVKSVYILGKIWMDENIKLKNHTNSVMFWLVRDRKPTGTAMDFGHLFNMFDNEPSTATVKNDLRDRFQVMHRFYAKVTGGQYASNEQALVKRFWKVNTHVVYNNQEAARYENHTENALLLYMACTHASNPVYATLKIRIYFYDSVRN	251	USER	zzz1497
1794		genbank_geminiviridae_YP_009508389.1_@pfam00844	geminivirus_cap	genbank	MPKRDAPWRLMAGTSKVSRGVSSSPRGGMALMSPIVRKFNKTAAWVNRPMYKKPRIYKVLRTPDVPYGCEGPCKVQSYESRHDVSHSGKVICISDVTRGSGITHRVGKRFCIKSVYILGKIWMDDNIKLKNHTNSVMFWLVRDRRPNGTPMDFGHLFNMFDNEPSTATIKNDLRDRFQVMHRFYAKVTGGQYASNEQALVKRFWKVNNHVVYNNQEAARYENHTENALLLYMACTHASNPVYATLKIRIYFYDSITN	257	USER	zzz1498
1793		genbank_geminiviridae_YP_009508401.1_@pfam00844	geminivirus_cap	genbank	MPKRNYDTAFSTPLSATRRRLNFDTPMALPAPASNAQGTTRRRRWTYRPMWRKPRFYRLYRSPDVPRGCEGPCKVQSFEQRHDIAHTGKVLCISDVTRGNGITHRVGKRFCIKSVYITGKVWMDENIKSKNHTNTVMFKLVRDRRPFGTPMDFGQVFNMYDNEPSTATVKNDLRDRYQVLRRFNSTVTGGQYACKEQAMVNRFFRVNNHVVYNHQEAAKYENHTENALLLYMACTHASNPVYATLKIRIYFYDSIGN	257	USER	zzz1499
1792		genbank_geminiviridae_YP_009508412.1_@pfam00844	geminivirus_cap	genbank	MPKRDAPWRSNAGTSKVSRNLNYSPRGGPKSNKANDWVNRPMYRKPRFYRMYRTPDVPRGCEGPCKIQSFEQRHDVSHLGKVMCISDVTRGNGITHRVGKRFCIKSVYILGKVWMDDNIKLKNHTNSVMFWLVRDRRPYGTPMDFGQVFNMFDNEPSTATVKNDLRDRFQVLHKFYSKVTGGQYASNEQSLVKRFWKVNNHVVYNHQEAAKYENHTENALLLYMACTHASNPVYATLKIRIYFYDSIMN	249	USER	zzz1500
1791		genbank_geminiviridae_YP_009508418.1_@pfam00844	geminivirus_cap	genbank	MPKRDAPWRIMAGTSKVSRSVNYSPRGGPKLDKASAWVNRPMYRKPRIYRTLRSPDVPKGCEGPCKVQSYESRHDVSHVGKVICVSDVTRGNGITHRVGKRFCVKSVYILGKIWMDETIKLKNHTNSVMFWLVRDRRPYGTPMDFGQVFNMFDNEPSTATVKNDLRDRFQVLHKFYAKVTGGQYASNEQAIVKRFWKVNNYVVYNHQEAGKYENHTENGLLLYMACTHASNPVYATLKIRIYFYDSITN	249	USER	zzz1501
1790		genbank_geminiviridae_YP_009508429.1_@pfam00844	geminivirus_cap	genbank	MDFRRKRKASFTPLTPYQMAKRFRQIQQRSTARRRLNFGYPSPYASQVPVKSRGLTDRFRLTNACNCYGGPTYKNNQGQMILLPARGQGVDQRRGSTIKVWSINIKSVWSFTMPSSGSGGDLGNVFFRWVILVDRTPGKDVPSWSDVYQTPSIDSDTQTMINCHMKQDSLGRFQILSDVKRSMQPFQKDTHSRDHVLVDLDLRPRMRKMGQYSGSKNMRPILVDYHANNTSNAWTDIKKNGLFMLAMAHCDVDGSFVLGSCDVSVTGYS	269	USER	zzz1502
1789		genbank_geminiviridae_YP_009508450.1_@pfam00844	geminivirus_cap	genbank	MTKRSYDTAFSTPMSSARRRLTFATPLALPAPAGAAPNTYKRRAWRNRPMYRKPKIYRVYRSSDVPKGCEGPCKVQSYDQRFDCKHTGSVLCVSDITRGSGLTHRVGKRFCVKSIMFRGKVWMDDNIKSKSHTNHVMFFLVRDRRPYGTPPDFGQVFNMFDNEPTTATVKQDFRDRFQVKRRWWVGVTGGQYASKEQAIVNKFVYLNNYVVYNHQEAGKYENHTENAMLLYMACTHASNPVYATLKIRVYFYDSIGN	257	USER	zzz1503
1788		genbank_geminiviridae_YP_009508903.1_@pfam00844	geminivirus_cap	genbank	MSKRPADIVTSTPASKVRRRLNFDSPYTSRAAAPTVLVTNKRKSWVNRPMYRKPRMYRMFRSPDVPRGCEGPCKVQSFDAKNDIGHMGKVICLSDVTRGVGLTHRVGKRFCVKSLYFVGKIWMDENIKVKNHTNTVMFWIVRDRRPSGTPNDFQQVFNVYDNEPSTATVKNDHRDRFQVLRRFQATVTGGQYAAKEQAIIRKFYRVNNHVVYNHQEAGKYENHTENALLLYMACTHASNPVYATLKVRSYFYDSVTN	257	USER	zzz1504
1787		genbank_geminiviridae_YP_009551799.1_@pfam00844	geminivirus_cap	genbank	MPARTGSARRKRKDDWAWDSATRRRVRPRTSYVPRGGPRVRRPSLQYVNPGLLGSTAVHVADTNGEVRIITGYSRGSDEQSRHTNETITYKLSLDLYVTVDTECQKYVGKGVAVAWLVYDAQPTGEMPAASTIFPHVADMATAPCTWKVGREVCHRFVVKRRWVITLETNGRVAGTVFQGANGVPPCNRTVYFHKFCKRLGVRTEWKNTSGGSIGDIKTGAPVHSVRGREPD	232	USER	zzz1516
1786		genbank_geminiviridae_YP_009551896.1_@pfam00844	geminivirus_cap	genbank	MRPMTGKRKRTAGSSSVNRRKSRRVLPRTVAPYSQLPSRLPSLQVQTFASQGSAVVEVKKGGNCLMVTSYSRGSDESQRHTNETMTYKMSLDHVMVLRAELCKYSFKATHCGWVVYDAKPTGNQVTCKTIFGYPDGLVDYPTTWKVARDVAHRFVVKKRWTYRMESNGSNSSKDWSNGTGIPPCNRSVYVKQFVSKLNCRTEWKNTTGGDYGDIKGGALYVVLAAGQGMEHMAYGTTRMYFKSIGNQ	247	USER	zzz1517
1785		genbank_geminiviridae_YP_009553194.1_@pfam00844	geminivirus_cap	genbank	MVTTRSGRTYGPPTAQTRRRFPPMRRRPAMDRVIGPSKKTVKRMKKGKSGGIPVGCKGPCKTHTVDVIATVTHDGKGPGLVSNISKGDDFGQREGRRIRVTKLLLRGKVWLPQDKATIAGSNIMRLWVMKDRRPGSQHVAFEALFDMADKEPSTALVKMDYRDRFIVIKDMEIDLHGGRDFRVDEETFDIMVPINCDVLFDHNDEGSLTTTLENGIIVYYAVTDPAQVMQLTAQCRLYFFDSTSN	245	USER	zzz1518
1784		genbank_geminiviridae_YP_009553474.1_@pfam00844	geminivirus_cap	genbank	MPGGSKRASSGKDGSRPKRRKGEPEAAFRARILGWASSQFGRRVYGGVGSSQSAPLQVRTYKWENPDKSAIAIDTGSIWIVNTLDAGNGDDQRHTHKTIIYKMLFQGTMWINDATSAVCGPLTVHFWLVYDAAPKGVLPALTDIFEEGFSGLGSTWVVNRDNVHRFVVKRRWQMRLMTNGQKPYYTNRSGNGDPTSVTIRDFRKFFTKLRTATEWKNSATGGIGDIKKGALYLCAMCSQAPEGSARAINLGVKFRGQSRIYFKCTGNQ	268	USER	zzz1519
1783		genbank_geminiviridae_YP_009553590.1_@pfam00844	geminivirus_cap	genbank	MATTRSGRVSGTVTDRLPMWRSRRKRSARSRGSATSAARRSRSAGVSIRRTGWKGKVPDGCKGPCKTHSVDLIKTVYHDGRGAGFIGNIDKGEDLGNRDGRRIRITKVLLRGKVWLDVTNAALPGSNVCKVWVIKDRRPGNEIVNFTSLMDMTDSEPMSALIKMDYRDRFIVLRDMQFDLHGGKDFRVDEASMDEMISVNCESLFSHEDEGNLSHCLENGILVYFACSDPRNAMQITAQCRVYFFDSTVN	250	USER	zzz1520
1782		genbank_geminiviridae_YP_009664855.1_@pfam00844	geminivirus_cap	genbank	MSKRPADIVISTPASKVRRRLNFDSPYVSRANAPTVLVTNRRRTWAQRPMYRKPRMYRMYRSPDVPKGCEGPCKVQSFEKKNDVGHSGTLLCVSDVTRGNGLTHRSGKRFCIKSCYIIGKIWMDENIKTKNHTNTVLFWLVRDRRPVTTPYGFQEAFNMFDNEPSTATIKQDLRDRLQVLHKFSATVTGGQYASKEQAIVKKFWKINHHVTYNHQESAKYENHTENALILYMASTHASNPVYATLKIRIYFYDSVQN	257	USER	zzz1521
1781		genbank_geminiviridae_YP_009666108.1_@pfam00844	geminivirus_cap	genbank	MTGRIPVSRRFHPYGGRPVRRRLNFETAIVPYTGSAVPIAARSYVPVSRGVRMKRKRGDRIPKGCVGPCKVQDYEFKMDVPHTGTFVCVSDFTRGTGLTHRLGKRVCVKSMGIDGKVWMDDNVAKRDHTNIITYWLIRDRRPNKDPLNFGQVFTMYDNEPTTAKIRMDLRDRMQVLKKFSVTVSGGPYSHKEQALVRKFFKGLYNHVTYNHKEEAKYENHLENALMLYSASSHASNPVYQTLRCRAYFYDSHNN	254	USER	zzz1522
1780		genbank_geminiviridae_YP_009666346.1_@pfam00844	geminivirus_cap	genbank	MSKRAGDIVISTPVSKVRRRLNFDSPYSRRVAVPTVRVTKRDMWTNRPMYRKPKIYKIKRSKDVPAGCEGPCKVQSFEQRHDISHTGKVICVSDVTRGNGITHRVGKRFCIKSLYVLGKVWMDENIKVKNHTNTVMFYLVRDRRPFGSPMDFGQVFNMYDNEPSTATIKNDLRDRYQVIRRFWTTVTGGQYASKEQAMVNKFMRVYNRVVYNHQEAAKYENHTENALLLYMACTHNANPVYATLKIRIYFYDSITN	256	USER	zzz1523
1779		genbank_geminiviridae_YP_009666506.1_@pfam00844	geminivirus_cap	genbank	MVKRDAPWRNMAGTSKVSRNVNYSPRSGLGFQSNKAAAWVNRPMYRKPRIYRMYRTPDVPKGCEGPCKVQSYEQRHDISHVGKVMCISDVTRGNGITHRVGKRFCVKSVYILGKIWMDENIKLKNHTNSVMFWLVRDRRPYGTPMEFGQVFNMFDNEPSTATVKNDLRDRYQVMHKFYAKVTGGQYASNEQALVKRFWKVNNHVVYNHQEAGKYENHTENALLLYMACTHASNPVYATLKIRIYFYDSITN	251	USER	zzz1524
1778		genbank_geminiviridae_YP_009666517.1_@pfam00844	geminivirus_cap	genbank	MPKRDAPWRSHPGTSKVSRNLRYSSPRGGLGPNYDKAQAWVNRPMYRKPRIYRLMRGPDVPKGCEGPCKVQSFEQRHDVSHVGKVICISDVTRGNGITHRVGKRFCVKSVYIMGKIWMDENIKLKNHTNSVMFWLVRDRRPYGTPMDFGQVFNMYDNEPSTATVKNDLRDRYQVMHRFYAKVTGGQYASNEQALVRRFWRVNNHVVYNHQEAGKYENHTENALLLYMACTHASNPVYATLKIRIYFYDSIMN	252	USER	zzz1525
1777		genbank_geminiviridae_YP_009666819.1_@pfam00844	geminivirus_cap	genbank	MVLKRRPSRRYRRATKKRSGRSSQRKRRARPRSRPCQFSFHGNAFGGTPTLFFLTPIALGNGAEDRTGSVLTVSSMYLKGVVVPTDNVTDGLHDIYFWIILDRFPTGTDPAVSDIFTGSDTGGSMIETLTRNRLNRKRFRILGSKKLVIGVNRKPQESLPHTRAAFNIFQRRRLVVAFKNDVSGGGRNDVERNRIYMACASATGHSFRLYLNGIVNFYNGVIFS	224	USER	zzz1526
1776		genbank_geminiviridae_YP_115508.1_@pfam00844	geminivirus_cap	genbank	MPKRDAPWRLMAGTSKVSRSSNYSPRGGVSDSGSYLPRRFSRASLWANRPMYRKPRIYRTYRSPDVPKGCEGPCKVQSFEQRHDIAHTGKVICLSDVTRGNGITHRVGKRFCVKSVYILGKIWMDENIKVKNHTNSVMFWLVRDRRPFGSPMDFGQVFNMYDNEPSTATVKNDLRDRYQVMHRFSAKVTGGQYASNEQALVRRFWKVNNHVVYNHQEAAKYENHTENALLLYMACTHASNPVYATLKIRIYFYDSISN	258	USER	zzz1527
1775		genbank_geminiviridae_YP_213932.1_@pfam00844	geminivirus_cap	genbank	MSKRPGDIIISTPVSKVRRRLNFDSPYTNRVAVPIAPATNRRRSWTYRPMYRKPRMYRMYRSPDVPKGCEGPCKVQSFEQRDDVKHTGIARCVSDVTRGSGITHRVGKRFCIKSIYILGKVWMDENIKKQNHTNNVMFFLVRDRRPSGSAPMDFGQVFNMFDNEPSTATVKNDLRDRLQVLRKFHATVVGGPSGMKEQALVKRFYRINNHVVYNHQEAAKYENHTENALLLYMACTHYSNPVYATLKIRIYFYDAVTN	258	USER	zzz1529
1774		genbank_geminiviridae_YP_232875.1_@pfam00844	geminivirus_cap	genbank	MSKRPGDIIISTPASKVRRRLNFDSPYSSRAVAPTVLGISRKRTWVQRPMYRKPRLYRMYRSPDVPRGCEGPCKVQSFEQRHDIAHTGKVICISDVTRGNGITHRVGKRFCVKSVYILGKVWMDENIKVKNHTNTVMFYVVRDRRPYGTPQDFGQVFNMYDNEPSTATVKNDMRDRFQVLRKFSATVTGGQYASKEQAIVKRFMKINNHVTYNHQEAAKYENHTENAVLLYMACTHASNPVYATLKIRIYFYDSTMN	257	USER	zzz1530
1773		genbank_geminiviridae_YP_425030.1_@pfam00844	geminivirus_cap	genbank	MSKRPASMAYSSPISSARRRLNFDSPRPSVAAALTAPGIRRRRWTNRPMNRKPRFYRMYRTPDVPKGCEGPCKVQSFDAKDDIGHMGKVICLSDVTRGIGLTHRVGKRFCVKSLYFVGKIWMDENIKVKNHTNTVMFWIVRDRRPTGTPLDFQQVFNVYDNEPATATVKNDKRDRFQVLRRFHATVTGGQYAAKESAIIRKFYRVNNYVVYNHQEAGKYENHTENALLLYMACTHASNPVYATLKCRSYFYDTVTN	256	USER	zzz1532
1772		genbank_geminiviridae_YP_459908.1_@pfam00844	geminivirus_cap	genbank	MSKRPADIVISTPASKVRRRLNFDSPYASRAAVPTVLVTNRKRSWTHRPMNRKPKMYRMYRSPDVPRGCEGPCKVQSFDAKNDIGHMGKVICLSDVTRGTGLTHRVGKRFCVKSLYFVGKIWMDENIKVKNHTNTVLFWIVRDRRPTGTPNDFQQVFNVYDNEPSTATVKNDQRDRFQVLRRFQATVTGGQYAAKEQAIIRKFYRVNNSCSLQSPRSWEVRESHRECSSLVYGMHSCLKSRVCYFESKELFL	252	USER	zzz1533
1771		genbank_geminiviridae_YP_459926.1_@pfam00844	geminivirus_cap	genbank	MSKRPADIVISTPVSKVRRRLNFDSPYSRRAAVPTVRVTKRQMWTNRPMYRKPRLYRMYKSNDVPKGCEGPCKVQSFEQRHDIAHTGKVICVSDVTRGNGLTHRVGKRFCVKSMYVLGKVWMDENIKTKNHTNTVMFYIVRDRRPFGTPMDFGQVFNMYDNEPSTATVKNDLRDRYQVLRKFYATVTGGQYASKEQAMVQKFMRLNNYVVYNHQEAAKYDNHTENALLLYMACTHASNPVYATLKIRIYFYDSVSN	256	USER	zzz1535
1770		genbank_geminiviridae_YP_579167.1_@pfam00844	geminivirus_cap	genbank	MVKRDAPWRLMAGTTKVSRNANFSPRGGMGPKAAAWVNRPMYRKPRIYRTLRGPDVPKGCEGPCKVQSFEQRHDISHVGKVICISDVTRGNGITHRVGKRFCVKSVYILGKIWMDENIKLKNHTNSVMFWLIRDRRPYGTPMDFGQVFNMYDNEPSTATVKNDLRDRFQVMHRFYAKVTGGQYASNEQALVRRFWKVNNYVVYNHQEAGKYENHTENALLLYMASTHASNPVYATLKIRSYFYDSISN	248	USER	zzz1536
1769		genbank_geminiviridae_YP_619880.1_@pfam00844	geminivirus_cap	genbank	MPKRDAPWRLMGGTSKVSRSSNQSPRTGTGPKFDKAHAWVNRPMYRKPRIYRAWRTPDVPRGCEGPCKVQSFEQRHDISHVGKVMCISDVTRGNGITHRVGKRFCVKSVYILGKIWMDDNIKLKNHTNSVMFWLVRDRRPYGTPMDFGQVFNMYDNEPSTATVKNDLRDCYQVVHRFYAKVTGGQYASNEQALVRRFWKVNNHVVYNHQEAGKYENHTENALLLYMACTHAFNPVYATLKIRIYFYDSISN	251	USER	zzz1540
1768		genbank_geminiviridae_YP_699990.1_@pfam00844	geminivirus_cap	genbank	MLKRAGDIAFSGPVSKVRRRLNYDSPGTSRAAVLTALGINRKKSWTSRPMYRKPRIYRMYRTADVPRGCEGPCKIQSFESRHDIAHTGKVMCVTDVTRGGGLTHRTGKRFCVKSLYILGKIWMDENIKTKNHTNTVMFYVVRDRRPYGTPQDFGQVFNMFDNEPSTATVKNDLRDRFQVLRKFTATVVGGQYACKEQTLVRKFMRLNNYVVYNHQETAKYENHTENALLLYMASTHASNPVYATLKIRIYFYDSITN	257	USER	zzz1541
1767		genbank_geminiviridae_YP_717091.1_@pfam00844	geminivirus_cap	genbank	MPKRSIDTVSSLPMSITRRRLNYASQYSLPAAAPTAPGMSYKRRAWVNRPMNRKPRFYRGRRTSDVPRGCEGPCKVQSFEQRHDVTHTGKVLCVSDVTRGNGITHRVGKRFCVKSVYIIGKVWMDENIKSKNHTNNVMFWLVRDRRPVTTPYGFGELFNMYDNEPSTATIKNDLRDRVQVLHRFSATVTGGQYASKEQAIVKRFFRVNNYVVYNHQEAAKYENHTENALLLYMACTHASNPVYATLKIRIYFYDNVTN	258	USER	zzz1542
1766		genbank_geminiviridae_YP_717927.1_@pfam00844	geminivirus_cap	genbank	MVKRDAPWRLSAGTFKVSRSSNYSPRGGMGPKLDKAAAWVNRPMYRKPRIYRTLRGPDVPKGCEGPCKVQSYEQRHDISHVGKVICISDVTRGNGITHRVGKRFCVKSVYILGKIWMDENIKLKNHTNSVMFWLVRDRRPYGTPMDFGQVFNMFDNEPSTATVKNDLRDRYQVMHKFYAKVTGGQYASNEQALVKRFWKVNNHVVYNHQEAGKYENHTENALLLYMACTHASNPVYATLKIRIYFYDSIMN	251	USER	zzz1543
1765		genbank_geminiviridae_YP_729211.1_@pfam00844	geminivirus_cap	genbank	MSKRPADIVISTPASKVRRRLNFDSPYNNRAAAPTVLVTNKRRTWVNRPMYRKPRMYRMYQSPNVPRGCEGPCKVQSYEQRHDIAHVGKVLCVSDVTRGNGLTHRTGKRFCVKSVYVLGKIWMDENIKTKNHTNTVMFYLVRDRRPFGTPQDFGQVFNMYDNEPSTATVKNDNRDRFQVLRRFQATVTGGQYACKEQALVRKFMRINNHVTYNHQEAAKYDNHTENALLLYMACTHASNPVYATLKIRIYFYDSIQN	257	USER	zzz1545
1764		genbank_geminiviridae_YP_729217.1_@pfam00844	geminivirus_cap	genbank	MAMRPAAADIVISTPASKVRRRLNFDSPYRSSAAAPTVLVTNNRSRRGWAQRPMYRKPRIYRMFRTPDVPRGCEGPCKVQSYEKKNDVNHTGTYLCVSDVTRGNGLTHRTGKRFCIKNIYIMGKIWMDENIKTKNHTNTVMFWLVRDRRPVTTPYGFGEAFNMYDNEPSTATIKNDLRDRLQVIRRFTSTVTGGQYASKEQAIVKKFYKIYHHVTYNHQEQAKYENHTENALLLYMASTHASNPVYATLKIRIYFYDSVQN	261	USER	zzz1546
1763		genbank_geminiviridae_YP_794168.1_@pfam00844	geminivirus_cap	genbank	MPKRDAPWRSMAGTSKVSRAANYSPRAGNGPKLNRASEWVNRPMYRKPRIYRTLRSPDVPRGCEGPCKVQSYEQRHDISHVGKVMCISDVTRGNGITHRVGKRFCVKSVYILGKVWMDENIKLKNHTNSVMFWLVRDRRPYGTPMDFGQVFNMFDNEPSTATVKNDLRDRYRVMHKFYAKVTGGQYASNEQAIVKRFWRINTHVVYNHQEAAKYENHTENALLLYMACTHASNLVYATLKIRIYFYDSIMN	251	USER	zzz1548
1762		genbank_nanoviridae_NP_619570.1_@PF04660.11	nanovirus_cap	genbank	MASKWNWSGTKGRRTPRRPYGRPYKSSVPTTRVVVHQSAVLKKDEVVGTEIKPEGDVARYKMKKVMLTCTLRMAPGELVNYLIVKCNSPISSWSAAFTSPALLVKESCQDMITIIAKGKVESNGVAGTDCTKSFNRFIKLGAGITQTQHLYVVLYTSVALKAVLEHRVYVEV	172	USER	zzz1551
1761		genbank_nanoviridae_NP_604477.1_@PF04660.11	nanovirus_cap	genbank	MFRQEMARYPKKSIKKRRVGRRKYGSKAATSHDYSSSGSILVPENTVKVFRIEPTDKTLPRYFIWKMFMLLVCKVKPGRILHWAMIKSSWEINQPTTCLEAPGLFIKPEHSHLVKLVCSGELEAGVATGTSDVECLLRKTTVLRKNVTEVDYLYLAFYCSSGVSINYQNRITYHV	175	USER	zzz1552
1760		genbank_nanoviridae_NP_620699.1_@PF04660.11	nanovirus_cap	genbank	MVAVRWGRKGLRSQRRKYSRIAYKPPSSKVVSHVESVLNKRDVTGAEVKPFADGSRYSMKKVMLIATLTMAPGELVNYLIVKSNSPIANWSSSFSNPSLMVKESVQDTVTIVGGGKLESSGTAGKDVTKSFRKFVKLGSGISQTQHLYLIIYSSDAMKITLETRMYIDV	169	USER	zzz1553
1759		genbank_nanoviridae_Q87019.1_@PF04660.11	nanovirus_cap	genbank	MAQLRWGRKGVRSQRRKYSRPVAYKPPSSKVVSHVETVLNKKDVTGAEMKPFNDGSRYSMKKIMVSATLTMAPGELLNYLIVKSNSPIANWSSSFSNPSLMVKESVQDTVTILRRGKLESSGTAGKDVTKSFSRFVNLGLGISQTQHLYLIIYSSDAMKITLETRMYIDV	170	USER	zzz1554
1758		genbank_nanoviridae_AHC72272.1_@PF04660.11	nanovirus_cap	genbank	MAPFAQWAVKKRRTPRGGARRYSKAVAPTTKVAFHQSTVLNKEDIVGFEIKPPDITRYKIRRVVLFCTFRMPPGELLNYLIVKTNSPLLNWGAVFTAPGLMVKEQFQDMVTIVTGGKLEGSGVAGSTSLKAMRKVVSLGAGVAQTQHMYVVFFSSDSMKAILEGRVYVAI	170	USER	zzz1555
1757		genbank_nanoviridae_YP_009553299.1_@PF04660.11	nanovirus_cap	genbank	MVSNWSSSGRKWRHSGRKGGGRPFKPIVPTTRLVVHSTALLNKDDVVGCEIRPKDISRYKMRKVMLTCTVRMPPGELLNYLVVKCSSPLVNWGAAFSSPALLVKEDCQDMITILGKGKIESSGVAGSDCTKSFSRFVKLGSGVTQTQHLYVILYTSVSMKSVLEHRMYVEV	171	USER	zzz1556
1756		genbank_nanoviridae_AHC72229.1_@PF04660.11	nanovirus_cap	genbank	MASTWNWSGKKGRRTLRRPYGRPYKSYVPTTRVVVHQSAVLKKDEVAGTEIKPEGDVVRYKMKKVMLTCTLRMAPGELVNYLIVKCNSPIASWSAAFTSPALLVKESCQDMITIVAKGKVESNGVAGTDCTKSFNRFIKLGSGITQTQHLYVVLYTSVALKAVLEHRVYVEV	172	USER	zzz1557
1755		genbank_nanoviridae_YP_009508036.1_@PF04660.11	nanovirus_cap	genbank	MARFPKRSVKKRRPVRRKYGSKAAVSHDYAADVSFIVPENTIKLFRIEPTDKTLPRYFIWKMFMSLVCKIRPGKLLHWAMIKSTWNILDPSTVLDAPGLFIKPVNSHLVKLVCSGEVLAPVGTGASEIECLIRKTTVLRRNVTEVDFLYLAFYCTSGVSINYQNRITYHV	170	USER	zzz1558
1754		genbank_nanoviridae_YP_009508220.1_@PF04660.11	nanovirus_cap	genbank	MVSNWNWSGKKGRRTPRRGYSRPYKSAVPTTRVVVHQSAVLKKDEVSGSEIKPEGDVARYKMKKVMLTCTLRMPPGELVNYLIVKCNSPIVNWSAAFTSPALLVKESCQDMITIIGKGKVESNGVAGTDCTKSFNRFIKLGVGVSQTRHVYVVLYTSVACKAVLEHRMYIEV	172	USER	zzz1559
1753		genbank_nanoviridae_YP_008997802.1_@PF04660.11	nanovirus_cap	genbank	MVRTNWPMRRRAVGKRSSRRGYGRFYPNTPTSRVLYHSSAVLQKDSITGTEIKPDGEVGRYNMKRIMLTCTVKIPPGELMNFLVVKSSSPLVNWANLFTTPALLVKESAQDMVSIIAKGKIESSGAGVSEVTKSFNKFVKLGSGVSQTQHVYIIMYTSASAKVVLEHRMYIEV	173	USER	zzz1560
1752		genbank_nanoviridae_YP_008997806.1_@PF04660.11	nanovirus_cap	genbank	MTSAWNWNGAKGMRSRRRPRGRPFRPLPPTSKLLLHESTVFNKDDIVGKEIKPSESVRYKMRKVMVTCTVRMPPGELLNFIIVKCSSPLVNWAGSFTQPALLVKENSQDMITILARGKIETTGLSGHDCAKSFSRFVRLGSGVSQSQHLYLVIFTSEAMKAVLEHRMYLDV	171	USER	zzz1561
1751		genbank_nanoviridae_YP_003104738.1_@PF04660.11	nanovirus_cap	genbank	MVSNWNWSGKKGRRTPRRGYTRPFKSAVPTTRVVVHQSAVLKKDDVSGSEIKPEGDVARYKIRKVMLSCTLRMRPGELVNYLIVKCSSPIVNWSAAFTAPALMVKESCQDMITIIGKGKVESNGVAGSDCTKSFNKFIRLGAGISQTQHLYVVMYTSEAVKTVLEHRVYIEV	172	USER	zzz1562
1750		genbank_nanoviridae_YP_001661657.1_@PF04660.11	nanovirus_cap	genbank	MARYPKKALKKRKAVRRKYGSKATTSHDYAVDTSFIVPENTIKLYRIEPTDKTLPRYFIWKMFMLLVCKVRPGRILHWAMIKSSWDVKDPTVVLEAPGLFIKPANSHLVKLVCSGELEAPVGGGTSEVECLLRKTTLLRRNVTELDFLYLAFYCSSGVTINYQNRITYHV	170	USER	zzz1563
1749		genbank_nanoviridae_AWB36046.1_@PF04660.11	nanovirus_cap	genbank	MAMANWGIRRRRSYRRPVRTLISKVPSTKVLWSTSAVLTKGTIAGVEIRPAGEGVRYKMNKVMLCGTLTINPGQLLNYIIVKSNAKITDWQSSFSAPSLFIKEAMQDVVTIVGQGKVEPSGYSGSEITRSFRRSVRLSAGISQTQHLYGIFYPSSDMKMILEARDVHTSVIVTIIVNE	178	USER	zzz1564
1748		genbank_nanoviridae_AVX29451.1_@cd00259	STNV	genbank	MASIRRRKGARRTRRRTYGRRSMTSNSLTSWRANTTTFNATVKRTTCGLLPIVNIARGPGDDQRVGDSVYLASITVRGKVSISENMLEGKGCGYALALVLDKSPTGVNPSLSTIFGKRELASDWATAYIEQRQRQRFRVLLWKTGFICRRNNVHEEVMVHKYVPVRRVMKYSGDTAGLGSVLTHAVYLCYFCHGTGQEQTNVIDIDVSVQSIFKT	215	USER	zzz1565
1747		genbank_nanoviridae_AVX29445.1_@cd00259	STNV	genbank	MASIRRRKGSGRAKRRTYARRRMTSKMNALTSWRANTTTFNATVKRTTCGLLPIVNIGRGPGDDQRVGDSVYLASIAVRGKVSISENMLEGKGCGYALAFVLDRAPTGVNPSLSTIFGKRELASDWATAYIEQRNRHRFRLLMWKTGFICRRNNVHEEVMVHKYVPVRRVITYSGDTSGLGSVLTHAVYMCYFCHGMGQEQSNVIDIDVSVQSIFKT	217	USER	zzz1566
1746		genbank_nanoviridae_AVG18918.1_@PF04660.11	nanovirus_cap	genbank	MVGNWNWNGMKRRRTPRRGYARPFKPVVPITRVVVHQSALLKKDEVVGCEIKPDGDVARYKMKKVMLTCTLRMPPGELVNYIIVKSSSPIVNWSAAFTAPALLVKESCQDMISIIGKGTVESDGVAGTDCTKSFNKFIRLGAGISQTQHLYVVMYTSVALKAVLEHRVYIEL	172	USER	zzz1567
1745		genbank_nanoviridae_ASU43922.1_@PF04660.11	nanovirus_cap	genbank	MARFPKKSIKKRRVGRRKYGSKAATSHDYSSLGSILVPENTVKVFRIEPTDKTLPRYFIWKMFMLLVSQQDINQPTTCLEAPGLFIKPEHSHLVKLVCSGELQAGLATGTSSRTRNRDIKQDSAGLATGTSDVECLLRKTTVLRKNVTEVDYLYLAFYCSAGVSINYQNRITYHV	175	USER	zzz1568
1744		genbank_nanoviridae_ASU43932.1_@PF04660.11	nanovirus_cap	genbank	MARFPKKSIKKRRVGRRKYGSKAATSHDYSSLGSILVPENTVKVFRIEPTDKTLPRYFIWKMFMLLVCKVKPGRILHWAMIKSSWEINQPTTCLETPGLFIKPEHSQLVKLVCSGELLEAGVATGTSDVECPLRKXTVLRKNVTEADYLYLAFYCSAGVSINYQNRITYHV	171	USER	zzz1569
1743		genbank_nanoviridae_ARI50276.1_@PF04660.11	nanovirus_cap	genbank	MAMANWGIRRRRSSRRPVRTFISKVPSTKVLWSTSAVLTKGTIAGVEIRPAGEGVRYKMNKVMLCGTLTMNPGQLLNYIIVKSNAKITDWQSSFSSPSLFIKEAMQDVVTIVGQGKVEPSGYSGSEVTRSFRRSVRLSAGISQTQHLYGIFYPSSDMKMILEARMYIQV	169	USER	zzz1570
1742		genbank_nanoviridae_AAC98792.1_@PF04660.11	nanovirus_cap	genbank	MFKQQMVRFRRKSIKKRRFGGGNNASKAATSHDYLSLGSILVRENTVKVFRIEPTDKTLPRYFIWKMFMLLVCKVKPGRILHWAMIKSSWEINQPTTCPEAPGLFIKPEHSHLVKLVCSGELEAGVATGTSDVECLLRKTTVLRKNVTEVDYLYLAFYCSSGV	163	USER	zzz1571
1741		genbank_nanoviridae_BAV00140.1_@PF04660.11	nanovirus_cap	genbank	MVSNWNWNGMKRRRTPRRGYGRPYKPVVPITRVVVHQSALLKKDEVVGCEIKPDGDVARYKMRKVMLTCTLRMPPGELVNYIIVKSSSPIANWSAAFTAPALLVKESCQDMISIIAKGKVESNGVAGTDCTKSFNKFIRLGAGISQTQHLYVVMYTSTSVALKVVLEHRVYIEL	174	USER	zzz1572
1740		genbank_nanoviridae_AKO71180.1_@PF04660.11	nanovirus_cap	genbank	MARYPKKSIKKRRVGRRKYGSKAATSHDYSSLGSILVPENTVKVFRIEPTDKTLPRYFIWKMFMLLVCKVKPGRILHWAIIKGSWEINQPTNCLEAPGLFIKPEHSQLVKLVCSGGLEARIATGTSDVECLLRKETRLRKEVTEGDYLYLAFHLSFGVSINYQNRITNQV	170	USER	zzz1573
1739		genbank_nanoviridae_AHF47849.1_@PF04660.11	nanovirus_cap	genbank	MARFPKRSVKKRRPXXXXXXXXXXXXXXXXXXXXXXXXXXXIKLFRIEPTDKTLPRYFIWKMFMSLVCKIRPGKLLHWAMIKSTWNILDPSTVLDAPGLFIKPVNSHLVKLVCSGEVLAPVGTGASEIECLIRKTTVLRRNVTEVDFLYLAFYCTSGVSINYQNRITYHV	170	USER	zzz1574
1738		genbank_nanoviridae_AHC72221.1_@PF04660.11	nanovirus_cap	genbank	MVNKWNWSGMKQRRTPRRYSRPFKPVVPTTRVVVHQSAVLKKDEVSGSEIKPEGDVARYKIRKVMLSCTLRMRPGELVNYLVVKCSSPIVNWSAAFTAPALMVKESCQDMITIIAKGKVESNGVAGSDCTKSFNKFIRLGAGISQTQHLYVVMYTSEAVKAVLEHRVYIEV	171	USER	zzz1575
1737		genbank_nanoviridae_AHC72178.1_@PF04660.11	nanovirus_cap	genbank	MVRTNWPLRRRAVGKRSNRRGYGRFYPNTPTSRVLYHSSAVLQKESITGTEIKPDGEVGRYKMKKIMLTCTVKIPPGELMNFLVVKSSSPLVNWANIFTTPALLVKESAQDMVTIIAKGKIESSGAGVSEVTKSFNKFIYLGSGVSQTQHVYIIMYSSASVKVVLEHRMYIEV	173	USER	zzz1576
1736		genbank_nanoviridae_AHC72168.1_@PF04660.11	nanovirus_cap	genbank	MVRTNWPLRRRAVGKRSRRRGYGRFYPNTPTSRVLYHSTAVLQKDTITGTEIKPDGEVGRYKMKRVMLTCTVRIAPGELMNFLVVKSSSPLVNWANIFTTPALLVKESAQDMVAIIASGKIESSGAGVSEVAKSFNRFVNLGSGVSQTQHVYIIMYTSASAKVVLEHRMYIEV	173	USER	zzz1577
1735		genbank_nanoviridae_ADO85406.1_@PF04660.11	nanovirus_cap	genbank	MFRQQMARYPKKSIKKGGFGRRKYGSKAATSHDYSSLGSILVPENTVKVFRIEPTDKTLPRYFIWKMFMILVCNVKPGRILHWAMIKSSWEINQPTTCLEAPGLFIKPEHSHLVKLVCSGELEAGVATGTSDVECLLRKTTVLRKNVTEVDYLYLAFYFNSGVSKNYQNRITYHV	175	USER	zzz1578
1734		genbank_nanoviridae_CAL90982.1_@PF04660.11	nanovirus_cap	genbank	MFKQQMARYPKKSIKKRRVGRRKYGSKAATSHDYSSLGSILVPENTVKVFRIEPTDKTLPRYFIWKMFMLLVCKVKPGRILHWAMIKSSWDLXQPTTCLEAPGLFIKPEHSHLVKLVCSGELEAGVAXGTSDVECLLRKTTVXRKNVTEVDYLYLAFYCSSGVSIHYQNRITYHV	175	USER	zzz1579
1733		genbank_nanoviridae_ABP96957.1_@PF04660.11	nanovirus_cap	genbank	MARYPKKSLKKRKAVRRKYGSKATTSHDYAIDTSFIVPETTIKLYRIEPTDKTLPRYFIWKMFMLLVCKVRPGRILHWAMIKSSWDIHQPEAVLEAPGLFIKPANSHLVKLVCSGELEAPVGGGTTDVECLLRKTTLLRRNVTELDFLYLAFYCTSGVTINYQNRITYHV	170	USER	zzz1580
1732		genbank_nanoviridae_AAK15067.1_@PF04660.11	nanovirus_cap	genbank	MARYPKKSINKRRVGMRKYGSKAATSHDCSSLGSILVPENTVKAFRIEPTDKTLPRYFIWKMFMLLVCKVKPGRILHWAMIKSSWEINQPTTCLEASGLFIKPEHSHLAKLVCSGELEAGVATGTSDVECLLRKTTVLRENLTEVDYLYLAFYCSAGVSINYQNRITYHV	170	USER	zzz1581
1731		genbank_parvoviridae_YP_680426.1_@3KIC_N	parvovirus_cap	genbank	MAADGYLPDWLEDTLSEGIRQWWKLKPGPPPPKPAERHKDDSRGLVLPGYKYLGPFNGLDKGEPVNEADAAALEHDKAYDRQLDSGDNPYLKYNHADAEFQERLKEDTSFGGNLGRAVFQAKKRVLEPLGLVEEPVKTAPGKKRPVEHSPVEPDSSSGTGKAGQQPARKRLNFGQTGDADSVPDPQPLGQPPAAPSGLGTNTMATGSGAPMADNNEGADGVGNSSGNWHCDSTWMGDRVITTSTRTWALPTYNNHLYKQISSQSGASNDNHYFGYSTPWGYFDFNRFHCHFSPRDWQRLINNNWGFRPKRLNFKLFNIQVKEVTQNDGTTTIANNLTSTVQVFTDSEYQLPYVLGSAHQGCLPPFPADVFMVPQYGYLTLNNGSQAVGRSSFYCLEYFP…	735	USER	zzz1582
1730		genbank_parvoviridae_AFU93180.1_@3NTT_A	parvovirus_cap	genbank	MSFSGYSKNLPPGLEEVTFPFWVDFLLARIADFINWCGYYNIKCPEAEKVFSIGQSTQVLLKWPGAQGKENRVKNFTEAAFPYMKVPVRPDNIEWIKIHEMLHNYDRQITPQTTENDLLAAITADFDQREIIHPVTGEKWVFGKKTEAFATDLEEAVDEEDPDTEKKQPTDKTQSNNKKGEIGEKKEEGDTPTSNEEHHQSRKLLEHDSSEEQPEEAGHREQKELEDNIEDIKHGAGEDQTGTGINWPGHRYTGPGNPLPHGAPRNEIDLSAAKHDIRYKQYSRYGHWPYIWAPYIDKKMQEDIREIVKKGLGLEGKLLGNLISALWQAKYRLGAPIYEILKTILPPKSMPTKESVEKHLPKPLPIDPPQTSLPGASPPRTPDLGGETGMNEEPPAKRR…	991	USER	zzz1583
1729		genbank_parvoviridae_ADF59551.1_@1K3V_A	parvovirus_cap	genbank	MQKHGHWPHLWAPFVDRQMSQEIQQVLKGSTKLSQKLLANFIIALWRAKEKIGAPIYEIVKGVFPSVDKKTVESLLPHPDPIPAPPSSPQRGSKRASPPQSPNAHDEDTMSGHKRQKTMEVESECDKSLLCPTQNAGADFELCGTGGGATNEKGTWVGGTQFTDTSIRTFGTRRCVLSAFPDTYCSMMSGDAIPSIIFNTPWYYYDLNIMSCHFSPSAFQTLIEDYDAFRPRSLTVHLKELVIKDVCQQQGLQAEQVSDNNSATLLAFEDVNYELPYVLGGGQVSVPGHLPGQPYQLPKYSYRTVGKPDPNSGFVPGRNTHPDQGPGHPKASKTIWYSQYLETQDTEFYILENHKATILHSGNTFSQNYNFPDLPFEQLTQYMWDARRQDNPLIDQRIQ…	728	USER	zzz1584
1728		genbank_parvoviridae_YP_009507369.1_@1S58_A	parvovirus_cap	genbank	MSEPASKKQKWWDEENAYSDAWLSEFKDIIKDAISLIGEEEEVPVLALKFLQSHLKLDLKYGVDALSGSDALRFLTEHALPLNAVNKDTKGDSTLGIYLKQHLQDYIDNPDKYTLDLSHGPLPDFRETEAEHKSFNEPRGDDAVLTKEDLHEGGGVSLTLPFSNYIGPGNQLQAGNPQSVVDAAARIHDFRYSELIKLGINPYTHWSVADDELLHNIKNEEGFQAQVVRDFFTLKGLFTSTAHFKGELPAVPEYSASENYPNMASVTSTEGTTGAGGGGSNPVHGVWREGAVFSDSSVTCTFSRVFVVPYTAEHAYRVFSPPAENCHSAATGESKVCAVSPVMAYATPWHYIDVNCASLYFSPLEFQRLLENYGSIKPSSMSVTLSEVCIKDVTDKPGG…	818	USER	zzz1585
1727		genbank_parvoviridae_4IOV_A_@4IOV_A	parvovirus_cap	genbank	MAADGYLPDWLEDNLSEGIREWWDLKPGAPKPKANQQKQDDGRGLVLPGYKYLGPFNGLDKGEPVNAADAAALEHDKAYDQQLKAGDNPYLRYNHADAEFQERLQEDTSFGGNLGRAVFQAKKRVLEPLGLVEEGAKTAPGKKRPLESPQEPDSSSGIGKKGKQPAKKRLNFEEDTGAGDGPPEGSDTSAMSSDIEMRAAPGGNAVDAGQGSDGVGNASGDWHCDSTWSEGKVTTTSTRTWVLPTYNNHLYLRLGTTSNSNTYNGFSTPWGYFDFNRFHCHFSPRDWQRLINNNWGLRPKAMRVKIFNIQVKEVTTSNGETTVANNLTSTVQIFADSSYELPYVMDAGQEGSLPPFPNDVFMVPQYGYCGIVTGENQNQTDRNAFYCLEYFPSQMLRTG…	733	USER	zzz1586
1726		genbank_parvoviridae_ACB55315.1_@3KIC_N	parvovirus_cap	genbank	MAADGYLPDWLEDNLSEGIREWWDLKPGAPKPKANQQKQDDGRGLVLPGYKYLGPFNGLDKGEPVNAADAAALEHDKAYDQQLKAGDNPYLRYNHADAEFQERLQEDTSFGGNLGRAVFQAKKRVLEPLGLVEEAAKTAPGKKRPVEPSPQRSPDSSTGIGKKGQQPARKRLNFGQTGDSESVPDPQPIGEPPAGPSGLGSGTMAAGGGAPMADNNEGADGVGNASGNWHCDSTWLGDRVITTSTRTWALPTYNNHLYKQISSQSAGSTNDNVYFGYSTPWGYFDFNRFHCHFSPRDWQRLINNNWGFRPKKLNFKLFNIQVKEVTTNDGVTTIANNLTSTVQVFSDSEYQLPYVLGSAHQGCLPPFPADVFMIPQYGYLTLNNGSQSVGRSSFYCLEY…	737	USER	zzz1587
1725		genbank_parvoviridae_ACB55314.1_@3KIC_N	parvovirus_cap	genbank	MAADGYLPDWLEDNLSEGIREWWDLKPGAPKPKANQQKQDDGRGLVLPGYKYLGPFNGLDKGEPVNAADAAALEHDKAYDQQLKAGDNPYLRYNHADAEFQERLQEDTSFGGNLGRAVFQAKKRVLEPLGLVEEGAKTAPGKKRPVEPSPQRSPDSSTGIGKKGQQPARKRLNFGQTGDSESVPDPQPIGEPPAAPSSVGSGTMAAGGGAPMADNNEGADGVGSSSGNWHCDSTWLGDRVITTSTRTWALPTYNNHLYKQISNGTSGGSTNDNTYFGYSTPWGYFDFNRFHCHFSPRDWQRLINNNWGFRPKRLSFKLFNIQVKEVTQNEGTKTIANNLTSTIQVFTDSEYQLPYVLGSAHQGCLPPFPADVFMIPQYGYLTLNNGSQAVGRSSFYCLE…	738	USER	zzz1588
1724		genbank_parvoviridae_ACB55304.1_@3KIC_N	parvovirus_cap	genbank	MAADGYLPDWLEDTLSEGIRQWWKLKPGPPPPKPNQQHRDDSRGLVLPGYKYLGPFNGLDKGEPVNEADAAALEHDKAYDHQLKQGDNPYLKYNHADAEFQERLQEDTSFGGNLGRAVFQAKKRVLEPLGLVEEAVKTAPGKKRPIEQSPAEPDSSSGIGKSGQQPAKKRLNFGQTGDTESVPDPQPIGEPPAAPSGVGSNTMASGGGAPMADNNEGADGVGNSSGNWHCDSTWMGDRVITTSTRTWALPTYNNHLYKQISSESGATNDNHYFGYSTPWGYFDFNRFHCHFSPRDWQRLINNNWGFRPKKLNFKLFNIQVKEVTQNDGTTTIANNLTSTVQVFTDSEYQLPYVLGSAHQGCLPPFPADVFMIPQYGYLTLNNGSQAVGRSSFYCLEYFP…	735	USER	zzz1589
1723		genbank_parvoviridae_AAS99291.1_@3NG9_A	parvovirus_cap	genbank	MAADGYLPDWLEDNLSEGIREWWDLKPGAPKPKANQQKQDDGRGLVLPGYKYLGPFNGLDKGEPVNAADAAALEHDKAYDQQLKAGDNPYPRYNHADAEFQERLQEDTPFGGNLGRAVFQAKKRVLEPLGLVEEAAKTAPGKKRPVEPSPQRSPDSSTGIGKKGQQPAKKRLNFGQTGDSESVPDPQPIGEPPAGPSGLGSGTMAAGGGAPMADNNEGADGVGNASGNWHCDSTWLGDRVITTSTRTWALPTYNNHLYKQISSASTGASNDNHYFGYSTPWGYFDFNRFHCHFSPRDWQRLINNNWGFRPKRLNFKLFNIQVKEVTTNDGVTTIANNLTSTVQVFSDSEYQLPYVLGSAHQGCLPPFPADVFMIPQYGYLTLNNGSQAVGRSSFYCLEY…	737	USER	zzz1590
1722		genbank_parvoviridae_AAS99282.1_@3KIC_N	parvovirus_cap	genbank	MAADGYLPDWLEDTLSEGIRQWWKLKPGPPPPKPAERHKDDSRGLVLPGYKYLGPGNGLDKGEPVNAADAAALEHDKAYDQQLKAGDNPYLKYNHADAEFQERLKEDTSFGGNLGRAVFQAKKRLLEPLGLVEEAAKTAPGKKRPVEQSPQEPDSSAGIGKSGSQPAKKKLNFGQTGDTESVPDPQPIGEPPAAPSGVGSLTMASGGGAPVADNNEGADGVGSSSGNWHCDSQWLGDRVITTSTRTWALPTYNNHLYKQISNSTSGGSSNDNAYFGYSTPWGYFDFNRFHCHFSPRDWQRLINNNWGFRPKRLNFKLFNIQVKEVTDNNGVKTIANNLTSTVQVFTDSDYQLPYVLGSAHEGCLPPFPADVFMIPQYGYLTLNDGSQAVGRSSFYCLEY…	736	USER	zzz1591
1721		genbank_parvoviridae_AAS99240.1_@3KIC_N	parvovirus_cap	genbank	MAADGYLPDWLEDNLSEGIREWWALKPGAPQPKANQQKQDDGRGLVLPGYKYLGPFNGLDKGEPVNEADAAALEHDKAYDQQLKAGDNPYLRYNHADAEFQERLQEDTSFGGNLGRAVFQAKKRVLEPLGLVEEGAKTAPGKKRPVEPDSSSGIGKSGQQPAKKRLNFGPTGDSESVPDPQPLSEPPAGPSGLGSGTMAAGGGAPMADNNEGADGVGNVSGNWHCDSTWLGDRVITTSTRTWALPTYNNHLYKQISNGTSGGSSNDNTYFGYSTPWGYFDFNRFHCHFSPRDWQRLINNNWGFRPKKLNFKLFNIQVKEVTQNEGTKTTANNLTSTVQVFTDSEYQLPYVLGSAHQGCLPPFPADVFMIPQYGYLTLNNGSQAVGRSSFYCLEYFPSQM…	731	USER	zzz1592
1720		genbank_parvoviridae_AAS99294.1_@3NG9_A	parvovirus_cap	genbank	MAADGYLPDWLEDTLSEGIRQWWKLKPGPPPPKPAERHKDDSRGLVLPGYKYLGPFNGLDKGEPVNEADAAALEHDKAYDRQLDSGDNPYLKYNHADAEFQERLKEDTSFGGNLGRAVFQAKKRVLEPLGLVEEGAKTAPGKKRPVEQSPQEPDSPSGIGKTGQQPAKKRLNFGQTGDSESVPDPQPLGEPPATPAAVGPTTMASGGGAPMADNNEGADGVGNASGNWHCDSTWLGDRVITTSTRTWALPTYNNHLYKQISSASTGASNDNHYFGYSTPWGYFDFNRFHCHFSPRDWQRLINNNWGFRPKRLNFKLFNIQVKEVTTNDGVTTIANNLTSTVQVFSDSEYQLPYVLGSAHQGRLPPFPADVFMIPQYGYLTLNNGSQAVGRSSSYCLEYF…	736	USER	zzz1593
1719		genbank_parvoviridae_AAS99280.1_@3KIC_N	parvovirus_cap	genbank	MAADGYLPDWLEDTLSEGIRQWWKLKPGPPPPKPAERHKDDSRGLVLPGYKYLGPFNGLDKGEPVNEADAAALEHDKAYDRQLDSGDNPYLKYNHADAEFQERLKEDTSFGGNLGRAVFQAKKRVLEPLRPGLRKPVKTAPGKKRPVEHSPVEPDSSSGTGKAGQQPARKRLNFGQTGDADSVPDPQPLGQPPAAPSGLGSTTMATGSGAPMADNNEGADGVGNSSGNWHCDSQWLDDRVIATSTRTWALPTYNNHLYKQISSQSGACNDNHYFGYSTPWGYFDFNRFHCHFSPRDWQRLINSNWGFRPKRLNFKLFNIQVKEVTQNDGTTTIANNLTSTVQVFTDSEYQLPYVPGSAHQGCLPPFPADVFMVPQYGYLTLNNGSQAVGRSSFYCLEYF…	736	USER	zzz1594
1718		genbank_parvoviridae_AAS99256.1_@3KIC_N	parvovirus_cap	genbank	MAADGYLPDWLEDNLSEGIHEWWDPKPGAPKPKANQQKQDDGRGLVLPGYKYLGPFNGLDKGEPVNAADAAALEHDKAYDQQLKAGDNPYLRYNHADAEFQERLQEDTSFGGNLGRAVFQAKKRVLEPLGLVEEGAKTAPGKKRPVEPSPQRSPDSSTGIGKKGQQPARKRLNFGQTGDSESVPDPQPIGEPPAAPSSVGSGTMAAGGGAPMADNNEGADGVGSSSGNWHCDSTWLGDRVITTSTRTWALPTHNNHLYKQISNGTSGGSTNDNVYFGYSTPWGYFDFNRFHCHFSPRDRQRLINNNWGFRPKRLSFKLFNIQVKEVTQNEGTKTIANNLTSTIQVFTDSEYQLPYVLGSAHQGCLPPFPADVFMIPQYGYLTLNNGSQAVGRSSFYCLE…	735	USER	zzz1595
1717		genbank_parvoviridae_NP_043941.1_@3KIC_N	parvovirus_cap	genbank	MAADGYLPDWLEDNLSEGIREWWALKPGVPQPKANQQHQDNRRGLVLPGYKYLGPGNGLDKGEPVNEADAAALEHDKAYDQQLKAGDNPYLKYNHADAEFQERLQEDTSFGGNLGRAVFQAKKRILEPLGLVEEAAKTAPGKKGAVDQSPQEPDSSSGVGKSGKQPARKRLNFGQTGDSESVPDPQPLGEPPAAPTSLGSNTMASGGGAPMADNNEGADGVGNSSGNWHCDSQWLGDRVITTSTRTWALPTYNNHLYKQISSQSGASNDNHYFGYSTPWGYFDFNRFHCHFSPRDWQRLINNNWGFRPKKLSFKLFNIQVRGVTQNDGTTTIANNLTSTVQVFTDSEYQLPYVLGSAHQGCLPPFPADVFMVPQYGYLTLNNGSQAVGRSSFYCLEYFP…	736	USER	zzz1596
1716		genbank_parvoviridae_YP_068409.1_@3NTT_A	parvovirus_cap	genbank	MSFVDHPPDWLEEVGEGLREFLGLEAGPPKPKPNQQHQDQARGLVLPGYNYLGPGNGLDRGEPVNRADEVAREHDISYNEQLEAGDNPYLKYNHADAEFQEKLADDTSFGGNLGKAVFQAKKRVLEPFGLVEEGAKTAPTGKRIDDHFPKRKKARTEEDSKPSTSSDAEAGPSGSQQLQIPAQPASSLGADTMSAGGGGPLGDNNQGADGVGNASGDWHCDSTWMGDRVVTKSTRTWVLPSYNNHQYREIKSGSVDGSNANAYFGYSTPWGYFDFNRFHSHWSPRDWQRLINNYWGFRPRSLRVKIFNIQVKEVTVQDSTTTIANNLTSTVQVFTDDDYQLPYVVGNGTEGCLPAFPPQVFTLPQYGYATLNRDNTENPTERSSFFCLEYFPSKMLRTG…	724	USER	zzz1597
1715		genbank_parvoviridae_AAO88184.1_@3KIC_N	parvovirus_cap	genbank	MAADGYLPDWLEDNLSEGIREWWDLKPGAPKPKANQQKQDDGRGLVLPGYKYLGPFNGLDKGEPVNAADAAALEHDKAYDQQLKAGDNPYLRYNHADAEFQERLQEDTSFGGNLGRAVFQAKKRVLEPLGLVEEGAKTAPGKKRPIDSPDSSTGIGKKGQQPAKKKLNFGQTGDSESVPDPQPLGEPPAAPSSVGSGTMAAGGGAPTADNNEGADGVGNASGNWHCDSTWLGDRVITTSTRTWALPTYNNHLYKQISSSSSGATNDNHYFGYSTPWGYFDFNRFHCHFSPRDWQRLINNNWGFRPKKLRFKLFNIQVKEVTTNDGVTTIANNLTSTVQVFSDSEYQLPYVLGSAHQGCLPPFPADVFMIPQYGYLTLNNGSQSVGRSSFYCLEYFPSQM…	729	USER	zzz1598
1714		genbank_parvoviridae_NP_044927.1_@4IOV_A	parvovirus_cap	genbank	MTDGYLPDWLEDNLSEGVREWWALQPGAPKPKANQQHQDNARGLVLPGYKYLGPGNGLDKGEPVNAADAAALEHDKAYDQQLKAGDNPYLKYNHADAEFQQRLQGDTSFGGNLGRAVFQAKKRVLEPLGLVEQAGETAPGKKRPLIESPQQPDSSTGIGKKGKQPAKKKLVFEDETGAGDGPPEGSTSGAMSDDSEMRAAAGGAAVEGGQGADGVGNASGDWHCDSTWSEGHVTTTSTRTWVLPTYNNHLYKRLGESLQSNTYNGFSTPWGYFDFNRFHCHFSPRDWQRLINNNWGMRPKAMRVKIFNIQVKEVTTSNGETTVANNLTSTVQIFADSSYELPYVMDAGQEGSLPPFPNDVFMVPQYGYCGLVTGNTSQQQTDRNAFYCLEYFPSQMLRT…	734	USER	zzz1599
1713		genbank_parvoviridae_YP_077180.1_@3KIC_N	parvovirus_cap	genbank	MAADGYLPDWLEDNLSEGIREWWALKPGAPKPKANQQKQDDGRGLVLPGYKYLGPFNGLDKGEPVNAADAAALEHDKAYDQQLQAGDNPYLRYNHADAEFQERLQEDTSFGGNLGRAVFQAKKRVLEPLGLVEEGAKTAPGKKRPVEPSPQRSPDSSTGIGKKGQQPARKRLNFGQTGDSESVPDPQPLGEPPAAPSGVGPNTMAAGGGAPMADNNEGADGVGSSSGNWHCDSTWLGDRVITTSTRTWALPTYNNHLYKQISNGTSGGATNDNTYFGYSTPWGYFDFNRFHCHFSPRDWQRLINNNWGFRPKRLSFKLFNIQVKEVTQNEGTKTIANNLTSTIQVFTDSEYQLPYVLGSAHQGCLPPFPADVFMIPQYGYLTLNNGSQAVGRSSFYCLE…	738	USER	zzz1600
1712		genbank_parvoviridae_YP_002916062.1_@3KIC_N	parvovirus_cap	genbank	MPPIKRQPGGWVLPGYKYLGPFNPLENGEPVNKADRAAQAHDKSYSELIKSGKNPYLYFNKADEKFIDDLKDDWSLGGIIGSSFFKLKRAVAPALGNKERAQKRHFYFANSNKGAKKTKNNEPKPGTSKMSENEIQDQQPSDSMDGQRGGGGGATGSVGGGKGSGVGISTGGWVGGSYFTDSYVITKNTRQFLVKIQNNHQYKTELISPSTSQGKSQRCVSTPWSYFNFNQYSSHFSPQDWQRLTNEYKRFRPKGMHVKIYNLQIKQILSNGADTTYNNDLTAGVHIFCDGEHAYPNATHPWDEDVMPELPYQTWYLFQYGYIPVIHELAEMEDSNAVEKAICLQIPFFMLENSDHEVLRTGESTEFTFNFDCEWINNERAYIPPGLMFNPLVPTRRAQ…	670	USER	zzz1601
1711		genbank_parvoviridae_P36310.2_@4G0R_A	parvovirus_cap	genbank	MAPPAKRAKRGWVPPGYKYLGPGNSLNQGEPTNPSDAAAKEHDEAYDQYIKSGKNPYLYFSPADQRFIDQTKDAKDWGGKVGHYFFRTKRAFAPKLSTDSEPGTSGVSTAGKRTKPPAHIFINQARAKKKRTSLAAQQRTQTMSDGTDQSDSGNAVQSAARVERAADGPGGSGGGGSGGGGVGVSTGSYDNQTHYKFLGDGWVEITAYSTRMVHLNMPKSENYCRVRVHNTNDTGTASHMAMDDAHEQIWTPWSLVDANAWGVWFQPSDWQYISNNMIHINLHSLDQELFNVVIKTVTEQNTGAEAIKVYNNDLTAAMMVALDSNNILPYTPAIDNQETLGFYPWKPTIPSPYRYYFSCDRNLSVTYKDEAGTITDTMGLASGLNSQFFTIENTQRINL…	729	USER	zzz1602
1710		genbank_parvoviridae_NP_046815.1_@1DNV_A	parvovirus_cap	genbank	MSFYARALTHRARPGYRIIPENTVTEDIELGAIGEETPLLSEGIITAAEETAAVGLPELGVGAVGAVGTHADVLYRNRNAFKSVLTGNYTDLKGNPLKQRNAISEKTKQLGKQIFQGDFNRAFPDNLKLETEQEKTDLLRYYNHNRRLAGLSEAYPQGKGYAYAKSQKVLEAEKRGLTVPGYKYLGPGNSLNRGPPTNEIDADAKEHDEAYSQSKTAQEVSKADNTFVNKALDHVVNAINLKESPSNTVGAIIGATGIGTKQAIEKHTGVIYPSVSGMSREINPKYLNSWSDWIKENKPNNFAGIQLPEDFYTEEQTLSDSPMSESTKRKADTPAEETPSKKGAHNTDSSSQSADPQNPSSSGATTDLDVTMAMSLPGTGSGTSSGGGNTTGQEIYEIP…	809	USER	zzz1603
1709		genbank_parvoviridae_NP_694830.1_@1DNV_A	parvovirus_cap	genbank	MSFFKNQLIHRARPGYRIIPESTVTEDIELGTIGEETPLLSEGVITAVEEGAIGLPEVAIGVAGAIGTHAHEWWRDRYAFKSVLTGNYTDLKGNPLKPRNAIPEKIKQLGKKIFQGDFNRAFPDNLKLETEKEKADLLRYYNHNRRLAGLSEAYPQGKGYAYAKSQKVLEAERRGLTVPGYKYLGPGNSLNRGQPINQIDEDAKEHDEAYDKVKTSQEVSRADNTFVNKALDHVVNAINFKETPGNAFGAAIGAIGIGTKQAIEKYSGVIYPSVSGMSRHINPRYINQPNWKDYIAEGNSKNWVGYSNLPDDFFQEETLSDSPMQEATKRKADSPAVETPAKKGTTGVNVNSQSTDPQNPSSSGATTDLDVTMAMSLPGTGSGTSSGGGNTQGQDVYII…	811	USER	zzz1604
1708		genbank_parvoviridae_NP_041404.1_@4QC8_A	parvovirus_cap	genbank	MPPTNKANSKKGLTLPGYNYLGPFNSLFAGAPVNKADAAARKHDFGYSDLLKEGKNPYLYFNTHDQNLIDELKDDTSFGGKLARGVFQIKKALAPALPGTSKGGDRALKRKLYFARSNKGAKKANREPAPSTSNQQNMEVSNDIPNDEAGNQPIELATRSVVGSGSVGGGGRGGSGVGYSTGGWTGGTIFSENIVVTKNTRQFICDIKNGHLYKSEVLNTGDTAHRQYAITTPWSYFNFNQYSSHFSPNDWQHLVNDYERFRPKAMIVRVYNLQIKQIMTDGAMGTVYNNDLTAGMHIFCDGDHRYPYVQHPWDDQCMPELPNSIWELPQYAYIPAPISVVDNNTTNTVEEHLLKGVPLYMLENSDHEVLRNGRIYRIYIQLWRLRMDRKQHHIQHASD…	673	USER	zzz1605
1707		genbank_parvoviridae_P05842.1_@3P0S_A	parvovirus_cap	genbank	MPIWGAISSNDLLNTYYTIEESQQIVEELLDFQMHNDQLEYFDSIEDAKKRFITDLYEILEKKHQKTNTFQIVSPPSAGKNFFIETVLAFYWNTGVIQNFNRYNNFPLMEAVNRRVNYWDEPNFEPDATETLKKLFAGTSLKATVKFQKEANVQKTPVIITANYDKFTKEVWDDRIIKYYWYPCPKLKEYNKRLHPFAWVYLIDKYVTDLLILIKMYNHRVMGNKICNLIKMYKYRVMVINIFSAFICLILIFLTNNYLGPGLYTCKSIDETTLSEAVVIWPSDKVTNHKEVFQADKQARDEFFTSFVHIGNVHSLIGGIGLGTKNLVEEHVLGKPLYGMGKRKSTEKDWAKIKRINRARAARRENQENQPDIREFGHVAGQNINADQEVNLADFPDFL…	885	USER	zzz1606
1706		genbank_parvoviridae_NP_041244.1_@4G0R_A	parvovirus_cap	genbank	MAPPAKRAKRGWVPPGYKYLGPGNSLDQGEPTNPSDAAAKEHDEAYDQYIKSGKNPYLYFSAADQRFIDQTKDAKDWGGKVGHYFFRTKRAFAPKLATDSEPGTSGVSRAGKRTRPPAYIFINQARAKKKLTSSAAQQSSQTMSDGTSQPDSGNAVHSAARVERAADGPGGSGGGGSGGGGVGVSTGSYDNQTHYRFLGDGWVEITALATRLVHLNMPKSENYCRIRVHNTTDTSVKGNMAKDDAHEQIWTPWSLVDANAWGVWLQPSDWQYICNTMSQLNLVSLDQEIFNVVLKTVTEQDLGGQAIKIYNNDLTACMMVAVDSNNILPYTPAANSMETLGFYPWKPTIASPYRYYFCVDRDLSVTYENQEGTVEHNVMGTPKGMNSQFFTIENTQQIT…	729	USER	zzz1607
1705		genbank_parvoviridae_P07299.1_@1S58_A	parvovirus_cap	genbank	MSKKSGKWWESDDKFAKAVYQQFVEFYEKVTGTDLELIQILKDHYNISLDNPLENPSSLFDLVARIKNNLKNSPDLYSHHFQSHGQLSDHPHALSSSSSHAEPRGENAVLSSEDLHKPGQVSVQLPGTNYVGPGNELQAGPPQSAVDSAARIHDFRYSQLAKLGINPYTHWTVADEELLKNIKNETGFQAQVVKDYFTLKGAAAPVAHFQGSLPEVPAYNASEKYPSMTSVNSAEASTGAGGGGSNSVKSMWSEGATFSANSVTCTFSRQFLIPYDPEHHYKVFSPAASSCHNASGKEAKVCTISPIMGYSTPWRYLDFNALNLFFSPLEFQHLIENYGSIAPDALTVTISEIAVKDVTDKTGGGVQVTDSTTGRLCMLVDHEYKYPYVLGQGQDTLAP…	781	USER	zzz1608
1704		genbank_parvoviridae_NP_694823.1_@1DNV_A	parvovirus_cap	genbank	MSFYTAGLIHRARPGYRIIPESTATEDIELGAIGEETPLLSEGAVTAVEESAAVGLPELGAGLAGAIGTHADVLYRNRNVFKSVLTGNYTDLKGNPLKQRNAISEKTKQLGRGIFQGDFNRAFPDDLKLETEQEKKDLLRYYNHNRRLAGLSEAYPQGKGYAYAKSQKVLEAERRGLTVPGYKYLGPGNSLNRGQPTNQIDEDAKEHDEAYDKAKTSQEVSQADNTFVNKALDHIVNAINLKETPGNAFGAAIGAIGIGTKQAIEKHSGVIYPSVSGMSRQINSKYLNSWHDWIEQNKHNNFEGIQLPEDFYTEEQTLSDSPMSEGTKRKADTPVEEGPSKKGAHNAPHNSQGTDPQNPSSSGATTSXDVEMAMSLPGTGSGTSSGGGNTSGQEVYVIP…	810	USER	zzz1609
1703		genbank_parvoviridae_YP_009508791.1_@3KIC_N	parvovirus_cap	genbank	MAPTNRKPGGWVIPGYKYLGPFNDLDNGEPVNAADKAARDHDFAHQSYIEKGQNPYLNFNKADLQFIDDLRNDWSFGAIVGSAAFKAKQAIAPSLSNDNERPGTSKQAAAADRAAKRKLYFARSNKGSKVSKMDNPGGDNNEPQDNGSGPSSGQDRAGGGGGGGGGGANPGGGSGGHGVGVSTGGWKAGCVFTDRYIITTNTRQWYCPIYNGHKYTKMTSDDAGQNGFTMWEGIATPWGHFNFNAYTSHFSPQDWQRLTNEYKKWRPVKMRVKIYNLQIKQIVNLGMDTLYNNDLTAGVHIFCDGSHQFPYSQHPWDEGTMPELPNEIWRLTQYAYYQDNRDLVDQSQDQVTPLDVEKLLRVNTPLFILESASHQVLRTGEETSFDFDFNSGWVFNDRA…	704	USER	zzz1610
1702		genbank_parvoviridae_YP_009508795.1_@4IOV_A	parvovirus_cap	genbank	MAPTNRKPGGWVIPGYRYLGPFNSLDNGEPINEADKAARNHDFAYQSYIDKGQNPYLNFNKADLQFISDLRNDWSFGTIVGSAVFKAKQAIAPSLSNDNERPGTSKQAIAADRAAKRKLYFARSNRKSKVPKMDNTNDNNDQPDGGDDVISRQPRAAGSGGGGQSGANSGGGSGGHGVGVSTGGWKAGCVFTDRYIITTNTRQWFCPIYNGHKYTKMASEKNNQNGFSMWEGIATPWGHFNFNAYSSHFSPQDWQRLTNEYKRWRLVKMNVKIYNLQIKQIVTLGADTLYNNDLTAGVHIFCDGSHQFPYSQHPWDDGTMPELPNNVWKLTQYAYYQDNRELVDESKDEVTPLDVEKMLRLDSPLFILESATHQVLRTGEETSFNFDFNCGWVYNDRAY…	702	USER	zzz1611
1701		genbank_parvoviridae_YP_009507386.1_@3NTT_A	parvovirus_cap	genbank	MTAADAFKPGQPFPLDTLMEKLTPDVGPEPSSWSRRMGGGYLASLGTGLVFKQAFSHVDKFIRKLPAKVYPVKQFAQQLMNYWRKSTDIKTIGRFFMDLVRLLILVAPEPAKAKLRQSALNLGDFHRPPNPAVLLDLHKFAKDAVVPSAEDIKIFFEESVSPWSEEDKKILKQIEGQFQEIFHPPTDTEDGADSYGGNSDQGTGSLSEPDLERPPERPGILVPGYNYVGPGNPLDNAPAKGPVDEAAKHHDERYDEMLRHGDLPYIHGRGADRLMNKEIERAEQEGKIDNPVDALVGNAIRGIWEAKETLGDIADVQLSQVLPPDPPTSQVLPGSSEDAPSPKRQRAGTPDSVPTPGNPSPAPIADPATIMAAPVTGATGGGIKVKAQWLGGTHFSDNT…	925	USER	zzz1612
1700		genbank_parvoviridae_YP_009508197.1_@3NTT_A	parvovirus_cap	genbank	MSAADAYRPGDRLPLDTLMSKITYDVGFEPTRHGGRGGGGYLGELTTGLLFTKAFHELSRYASNLPYELFPIRQLVNQLINKRRETNNIHKVMRFFMDVIRLLLTVSHGPAEQRLRQAMAPVADFFYEPSRHQFAIGPNVSPLQDLARYAHTAQKPTREAIEAFFQGMLSPIKPEDRPILDTIQKQFEEFFYPPIVEHAGPGDYSRDGDTGAGTPSESDLERPANRGLLVPGYNYVGPGNPLDNGPPQGPVDEAAKHHDERYDEMLSHGDLPYVHGHGADRLMNKEIERAEKEGRVTGVGDKLLGNVIRGIWEAKETIGDVADVQISQVLPPAPPPQVPGVDSSDGLPSSKRARPGIPEDPVATDFDLASPDPIVAPDMASEATGGAGGGIKVKAQWIG…	931	USER	zzz1613
1699		genbank_parvoviridae_ABC67802.1_@5URF_n	parvovirus_cap	genbank	MPPIKRQPRGWVLPGYRYLGPFNPLDNGEPVNNADRAAQLHDHAYSELIKSGKNPYLYFNKADEKFIDDLKDDWSIGGIIGSSFFKIKRAVAPALGNKERAQKRHFYFANSNKGAKKTKKSEPKPGTSKMSDTDIQDQQPDTVDAPQNTSGGGTGSIGGGKGSGVGISTGGWVGGSHFSDKYVVTKNTRQFITTIQNGHLYKTEAIETTNQSGKSQRCVTTPWTYFNFNQYSCHFSPQDWQRLTNEYKRFRPKAMQVKIYNLQIKQILSNGADTTYNNDLTAGVHIFCDGEHAYPNASHPWDEDVMPDLPYKTWKLFQYGYIPIENELADLDGNAAGGNATEKALLYQMPFFLLENSDHQVLRTGESTEFTFNFDCEWVNNERAYIPPGLMFNPKVPTR…	671	USER	zzz1614
1698		genbank_parvoviridae_JAV14100.1_@4G0R_A	parvovirus_cap	genbank	MPEFTLIGYKYLGPGNSLDKGEPINKADSIAREHDIAYDRAKTKEDIYKADREAIIQFKDDFLKNPHLGNIAGFAGLGAKHIVERSLNKVIYPKLSGAQPPEKKPRHESVSDIPLPPDLDPAQIPLPPSNEMDTNNINDVDMSSIDDAASSSGNSSTAGSSGAARVIGGSMSSSSAGGLRGTALLPRGIRQEGMRSIRKFRKQYLLRLQNEVVEISHKHEPVFSTNNNEAQATGNLNSSNYGSFGIIRYPYHDLPVHMLGFYLTKQEINSLRYYSEARVVNCQVDVYNKTGVLNFETGASVSTIGNNNVGIYLIELSKDIGRKRTGKLPDQAILLDEVFWGEKLYEVKKSDNEFTKTDVAKLGSRYVRRTLNNKFEYWTPMNQAMDKVPNNTYMSFSQN…	687	USER	zzz1615
1697		genbank_parvoviridae_3J1Q_A_@3KIC_N	parvovirus_cap	genbank	MAADGYLPDWLEDTLSEGIRQWWKLKPGPPPPKPAERHKDDSRGLVLPGYKYLGPFNGLDKGEPVNEADAAALEHDKAYDRQLDSGDNPYLKYNHADAEFQERLKEDTSFGGNLGRAVFQAKKRLLEPLGLVEEAAKTAPGKKRPVEHSPVEPDSSSGTGKAGQQPARKRLNFGQTGDADSVPDPQPIGEPPAAPSGVGSLTMAAGGGAPMADNNEGADGVGNSSGNWHCDSTWMGDRVITTSTRTWALPTYNNHLYKQISNSTSGGSSNDNAYFGYSTPWGYFDFNRFHCHFSPRDWQRLINNNWGFRPKRLSFKLFNIQVKEVTQNEGTKTIANNLTSTIQVFTDSEYQLPYVLGSAHQGCLPPFPADVFMIPQYGYLTLNNGSQAVGRSSFYCLEY…	737	USER	zzz1616
1696		genbank_parvoviridae_ALK02475.1_@3NTT_A	parvovirus_cap	genbank	MSTFLDSFEEWYETAAASWRNLKAGAPQPKPNQQSQSVSPDREPERRDNNRGFVLPGYKYLGPGNGLDKGPPVNKADSVALEHDKAYDLQLKAGDNPYIKFNHADQDFIDSLQHDHSFGGNLGKAVFQAKKRILEPFGLVEEPINTAPAKKNTGKLTDHYPVVKKPKLTEEVSAGGGSSVVQDGGATAEGTEPVAASEMAEGGGGAMGDSSGGADGVGNASGNWHCDSQWMGNTVITKTTRTWVLPSYNNHIYKAITSGTSQDANVQYAGYSTPWGYFDFNRFHCHFSPRDWQRLINNHWGIRPKSLKFKIFNVQVKEVTTQDQTKTIANNLTSTIQVFTDDEHQLPYVLGSATEGTMPPFPSDVYALPQYGYCTMHTNQNGARFNDRSAFYCLEYFPS…	732	USER	zzz1617
1695		genbank_parvoviridae_YP_009552710.1_@1DNV_A	parvovirus_cap	genbank	MNWYGHKYLGPGNKLRNGKPVDEDDEIAEIHDHLYNQAKTQEDIREADRDAIKHFLDLNSAHGYLGAAGLAAKYGLESLTGVLYPRNMKRKPSAAQLKQREKYAKVQRRLADLSRETGLSFREIQQAHSRDAWRDLASPAEAGPSNQHKEHGESDSKEQRYIARPDTPPPEGQDELDENHFALFQDLEEMQVDMPPTQSSQNIQRNEATALAGNGPSGASGRSSGTTGVGHIVSIPRSLPPAPMTYTFRKTRIFFSYGIATKRINLNSDDYYTTPLALVPVDLAGFYLSPSEFREISNDAWAKECRVRITPLGIRTAFEFGGAVTGHTTNEFVPIGMKAVGLNLNTEISNVTYRDYDDMLPSGIQDINPTDIMDRYYINDDAHVNLVSRHAIGYACFVS…	677	USER	zzz1618
1694		genbank_parvoviridae_YP_009552128.1_@5URF_n	parvovirus_cap	genbank	MSRQVRQMGKWTQADYDAYNNTVYWLNKYLKGPKINNAKKPQRQLSDKQKADRKRYFITQANKAKKEGIKFGIPSKKDHESFFKNHQGAGKKATQKTKHLDPTPDSDPDEGPAPKVPKTDLGGGYTADDLEEAMDPRNDVEMAAADSSADAAVPMSDSPSGGGGGGGGGGIGESTGNWTCNTVWGKNSIITNASRHCVCLTRDLDMYKAIGNKDNGLVFGTENKTAWVGWSTPWNYIDYNQMCVHFSPRDWQRLINTASKWRPRSVHIKIFNIQVIQKTTVSDGTQYSNDLTGTIQIFADAQGRYPKLLYPCQTTMMGPFPNHIYYLPQYAYTTACDGPTSNQDINALLNTNSAFYCLDESPSAMLRTGNEWSCHYTFDDDTGWVHNTRSTIPIFERAN…	672	USER	zzz1619
1693		genbank_parvoviridae_YP_009552827.1_@5URF_n	parvovirus_cap	genbank	MSRQVRQMGKWTQADYDAYNNTVYWLNKYLKGPKINNAKKPQRQLSDKQKADRKRYFITQANKAKKEGIKFGIPSKKDHESFFKNHQGAGKKATQKTKHLDPTPDSDPDEGPAPKVPKTDLGGGYTADDLEAAMDPRNDVEMAAADSSADAAVPMSDSPSGGGGGGGGGGIGESTGNWTCETIWGSNSIITNASRHCVCLTRDFDKYTAIGNNSFTDRYDNENATPWVGWSTPWNYIDFNQMCIHFSPRDWQRLINGASRWRPKSVHVRIFNIQVIQKTTTADGVQYSNDLTGTIQIFADSAGRYPRLMYPCQTTMMGPFPNQVYYLPQYAYTTACDGPQSNQQINALLNQYSAFYCLDESASAMLRTGNEWSCHYTFGADTDWVLNRRSTIPINERVN…	672	USER	zzz1620
1692		genbank_parvoviridae_YP_009553049.1_@4IOV_A	parvovirus_cap	genbank	MAPINRRPGGWVVPGYKYLGPFNQLDAGEPVNKSDQAAQKHDFAYDQYIKSGKNPYLYFNKADQDFIEDLESDRSFGGWIGKTVFGIKRAIAPSLGEPDEKRARLERAQKRKLYFARSNRDYSKKSKMSSADAADTNNEAGEGTSSDASRAGAQNQGGGGGGAGGRGVGVSTGGWKGGTIFSDSVVVTRITRQWYAPIYDGHRYKSFGAKQENTNANSYWMGIVTPWGYFDFNCYAGHFSPQDWQRLTNEYKKWRPKAMRVKLYNLQIKQVVTLGADTLYNNDLTAGVHIFCDGSHQYPYPQNPWNEGVIPELPNDVWKLPQYGYYQRDWLVTQNIPSQGDDVAAKECRVNAPLFMLENSSHEVLRTGEETEFNFEFNCGWVMNDRAYAPPQQDYNAKI…	685	USER	zzz1621
1691		genbank_parvoviridae_YP_009552697.1_@3NTT_A	parvovirus_cap	genbank	MAPIRRPGGWVVPGYKYLGPFNPLDNGKPVNKADEAAQRHDQAYDNYLANNQNPYLYFNKADQAFLEDLESDRSFGGWIGKTVFGLKRAIAPALGEPDAKRQKLERAQKRKLYFARSNRGSKQAKMDQQNSSEGDQANQQTGSETARAGGAASAGGGGGGGAGRSVGISTGGWRGGTLFSDSVVVTRVTRQWYCPIYNGHRYKSLGSQDDSGQRNKYWGGMRTPWGYFDFNNYSGHFSPQDWQRLTNEYKKWRPKAMHIKLYNLQIKQVVTLGADTLYNNDLTAGVHVFCDGSHQYPYPQTPWNEGVIPELPNDVWKLPQYGYYQRNDYLHSIAEEQFDVATASALGAPLFMLESSSHEVLRTGEETEFHFQFECGWVMNDRAYANPQCDFNAAVGTRR…	681	USER	zzz1622
1690		genbank_parvoviridae_YP_009551695.1_@3NTT_A	parvovirus_cap	genbank	MAPLRPPKGWTLNGYNYLGPFNPLNNGTPVNKADAAAQKHDQAYNDYLKSGKNPYLYFNKADQKFLDDLRGDWSAGGLVGKGFFGLKKAIAPTLNEPELAGDKKERATKRKLYFARSNKPSKSAKMSAPEAEGAGDGPQEEQAQGEPAIMSRAGGGGGGGGGGMGGGGSIGISTGGWEGGEIFSDHTVITTVTRQWYVPIYNGHQYRKLLQQNPTSTQNYPIPWQGISTPWGYFNLNCYNSHFTPLGWQRLLNEYKRWRPKRMRVKLYNLQIKQVVQLGADTLYNNDLTAGVHVFCDGSHQFPYTQHPWDEQTLPELPNDIYKLPQYAYFQIQGDLIDNPGLSDTEQTLVGNMPLYLLETATHQVLRTGESTGFQFEFDSGWVHNDRNYAPPQADFNPL…	695	USER	zzz1623
1689		genbank_parvoviridae_YP_009552824.1_@3NTT_A	parvovirus_cap	genbank	MSAADSVPDWLENFVRKHIVNPVAEFAHLEAGAPQPKPNQQHQDRGGTKDDSRGLVLPGYKYLGPFNGLDKGEPVNAADAAALEHDKAYDQQLQAGDNPYLKYNHADAEFQEALKDDTSFGGNLGKAVFQAKKRVLEPFGLAEDGKTAPTNERRKENIDDYYPKRKKAKAGEEKPPSTDAVEGAGDGEPSTSTGGETPSGTQSNTMSAGGGAPMGDDQQGADGVGNSSGNWHCDSTWLDNLVITKSTRTWVLPSYNNHIYKRVSNTGGDNSYFGFSTPWGYFDFNRFHCHFSPRDWQRLINNNWGIRPKALKFKLFNIQVKEVTTQDSTKTVANNLTSTIQVFADSEYQLPYVVGNASEGCLPPFPADVFVLPQYGYLTLDNNGNSVDRSAFYCLEYFP…	738	USER	zzz1624
1688		genbank_parvoviridae_YP_009553052.1_@4IOV_A	parvovirus_cap	genbank	MAPVNRKPAGWVVPGYKYLGPFNDLDKGEPVNAADRAAQVHDHAYNKYLQSGKNPYLHFNKADQQFLDDLESDRSFGGWIGKTVFGIKRAIAPSLNEPSPKKSKTEAALKRKLYFARSAKASKQAKMEPAADSTNNQQNQPNQPAPANTGSSAGQTNAGGGSGGHGVGVSTGGWEGGTWFGDDTIVTTVTRQWYTGILNGHKYSLLKQNIASGVPNIWTGIQTPWAYFNFNCYHSHFSPGDWQRLINEYKSWRPKRMHVKIYNLQIKQVVILGTDTLYNNDLTAGVHIMCDGSHQYPYAQHPWDELTLPELPYNVWQLPQYAYFQRQGDLVDDTNHADLGNIENIIRVGAPLFMLENSNHQVLRTGEATEVNFSFDCGWVHNDRAYCAPQQDFNPMVAS…	690	USER	zzz1625
1687		genbank_parvoviridae_AGG53768.1_@3NTT_A	parvovirus_cap	genbank	MSTFLEKFEDWYETAAASWRHLKAGAPKPKSNQQSQSVSTDRKPQRKDNNRGFVLPGYKYLGPGNGLDKGPPVNKADSVALEHDKAYDQQLKAGDNPYIKFNHADQEFIDNLQGDTSFGGNLGKAVFQAKKRILEPLGLVEEPVNTAPAKKSSGKLTDHYPIVKKPKLSEENSPSPSNSGGEASAAATEGSEPVAAPNMAEGGSGAMGDSAGGADGVGNASGNWHCDSQWLGDTVITKTTRTWVLPSYNNHIYKAITSGTSQDANVQYAGYSTPWGYFDFNRFHCHFSPRDWQRLINNHWGIRPKSLKFKIFNVQVKEVTTQDQTKTIANNLTSTIQVFTDDEHQLPYVLGSATEGTMPPFPSDVYALPQYGYCTMHTNQNGARFNDRSAFYCLEYFPS…	732	USER	zzz1626
1686		genbank_parvoviridae_AKU89603.1_@3KIC_N	parvovirus_cap	genbank	MAADGYLPDWLEDNLSEGIREWWDLKPGAPQPKANQQHQDDGRGLVLPGYKYLGPFNGLDKGEPVNEADAAALEHDKAYDQQLKAGDNPYLKYNHADAEFQERLQEDTSFGGNLGRAVFQAKKRVLEPLGLVEEAAKTAPGKKRPVEQSPQEPDSSSGIGKSGQQPARKRLNFGQTGDSESVPDPQPLGEPPAAPSGVGSNTMASGGGAPMADNNEGADGVGNSSGNWHCDSTWLGDRVITTSTRTWALPTYNNHLYKQISSQSGASNDNHYFGYSTPWGYFDFNRFHCHFSPRDWQRLINNNWGFRPKKLNFKLFNIQVKEVTQNDGTTTIANNLTSTVQVFTDSEYQLPYVLGSAHQGCLPPFPADVFMIPQYGYLTLNNGSQAVGRSSFYCLEYFP…	735	USER	zzz1627
1685		genbank_parvoviridae_AKU89596.1_@3KIC_N	parvovirus_cap	genbank	MAADGYLPDWLEDNLSEGIREWWDLKPGAPKPKANQQKQDDGRGLVLPGYKYLGPFNGLDKGEPVNAADAAALEHDKAYDQQLKAGDNPYLRYNHADAEFQERLQEDTSFGGNLGRAVFQAKKRVLEPLGLVEEGAKTAPGKKRPVEQSPQEPDSSTGIGKKGQQPAKKRLNFGQTGDSESVPDPQPLGEPPAAPSGVGSNTMAAGGGAPMADNNEGADGVGNASGNWHCDSTWLGDRVITTSTRTWALPTYNNHLYKQISNSQSGGSTNDNTYFGYSTPWGYFDFNRFHCHFSPRDWQRLINNNWGFRPKRLNFKLFNIQVKEVTTNDGTTTIANNLTSTVQVFTDSEYQLPYVLGSAHQGCLPPFPADVFMIPQYGYLTLNNGSQAVGRSSFYCLEY…	737	USER	zzz1628
1684		genbank_parvoviridae_ATY47677.1_@3NG9_A	parvovirus_cap	genbank	MAPVNRKPGGWVLPGYKYLGPFNPLRNGKPVNKADAAARRHDKHYDRYIKSGKNPYLHFNKADQQFLDELKGDYSIGALLGKGVFHIKKAIAPVLPELSKGGSKQPSQKKQVAAKKRALYFARQNRDSKRARMDGAGPSNEQPIEPVQAPQARAAGGGGGGGGGGPGGVGGSGVGVSTGGWTGGTHFGEDFVVTNVTRQWYAPIYNQHLYKKLDSPAAISSEWQGISTPWGYFNFNCYNSHFTPNDWQRLVNEYKKWRPKRMQVQIYNLQIKQIVQMGADTLYNNDLTAGVHIFCDGSHQYPYAQHPWDENQLPEFPNDVYKLPNYAYYQMTDDLTDNRQNYQFNMEKWLKLAAPLFMLENSSHEVLRTGEETSFSFTFDCGWVHNDRAFCPPQCDFNP…	630	USER	zzz1629
1683		genbank_parvoviridae_ATY47687.1_@5URF_n	parvovirus_cap	genbank	KMETQIHESPNFNLQIKQIITNGADKQYNNDLTAGVHILVDGSHQFPYSQHPWDDSYLSELPYQIYKTPQYAYFQRMDKMAAPVGSSNINRMAAANAPLYLLETHSHEVLRTGEDTGFSFEMDCGWAHNDRAFCPTQADFNPLVQTRRCYLRYQNNQATYLNYSPYRKPSNWVPGPGSNYYGDTIPTQKQHAACVTNIRFNQTVTNNSGVDGYQPQDQTLYIPTQETYDRAGLATAPMHGCCQNMDQNQTAYDVSDRENPDLITTDKYDTDMTRWNNVSFQYTDAQGVKVDRPRIHYMYPMQAWNSGNFTRYNPIWDKRPNTDWNTIAASSDGT	334	USER	zzz1630
1682		genbank_parvoviridae_ATY47682.1_@5URF_n	parvovirus_cap	genbank	WQRMVNEYKRWRPKKMKVQIYNLQIKQIISNGADRQYNNDLTAGVHIFCDGSHQYPYAQHPWDDSLVPELPNGVYKLPQYAYFQMDKNLQNFQQGGLYQKWFQLGAPLFMLETSSHEVLRTGEETSFEFTLESGWVHNDKAYCPPQLDFNPLTQTRRYKPYWNPQENRYGYTRYSNWDKPSNWMPGPGTTQWGDLRGGVDRSAQGAVATLLQPPGTKPPTTTGTRFGEALVDASGVRNQGFSTEPCNAACSKRDGPRLAYDAGNDRTDDLVAGPDIDFDLTRWGTVAYQTSSLTTVGQPAVTVQGSLPGIVFQYPMQAWNGTPMDRNTPIWDKQPNTDYHTTLASSDGTLPMSNPPGTIFVKVAKIPVPTENDADSYLNIYSQTV	385	USER	zzz1631
1681		genbank_parvoviridae_ATY47676.1_@1K3V_A	parvovirus_cap	genbank	MSDGADQPDSGSAVHSAARVERAADGPGGSGGGGSGGGGVGVSTGSFDNQTHYRFLADGWVEITAYASRLVHLNMPKNENYCRVKVNNTADTHTKGQMAYDDSHVQIWTPWSLVDANAWGVWFQPSDWQYICNTMSHINLDTLEQEIFNVVLKTVTEQNPGPDAIKVYNNDLTACMLVALDSNNTLPWTPAAQCSETLGFYPWKPTIPTPYRYYFYSSRRLNATYENEADKQIVDTMGNPSALCSQFYTIENTLPISLLRTGDEFSTGTYKFNTEPIKLTHTWQTNRHLGLPPQLAALPDNDGQGGTLITQGTRHGQTQVFGSNRVSEALRNRPAQVGFCQPHDNFEAGRGGPFKVPVVPAEITESSDHDANGSIRFSYGRQHGANYANANETERYTYD…	533	USER	zzz1632
1680		genbank_parvoviridae_ATY47688.1_@5URF_n	parvovirus_cap	genbank	MNQHFPVVKQPQRGKNKSKEQSNKRQNPEPEIPQEVGDLQLVGEKKDCKKQQRSFYFARQAQGAKRARMGDAPQGEIEDIVDSGVGRAGSSGGGGGGGGGNGNIGMATGGWVGGTYFGKNKVVTNITRQWFVPIYNGHKYTKETEADNSGFWTGIRTPWGYINMNSYSCHFSPNDWQRLLNNYKKWRPSKMRVQLYNLQIKQVVKLGTDTLYNNDLTAGVHIMCDGSHQYPYSQSGWDSELIPELPGTVYKLPNYCYFQELGDIGDGNTDIRETWLGTACPLFFLENTSHEVLRTGEDTTFEFDFDCGWVFNDRAFCPPQCDFNPLVKTRRSRFIWGTSGNSSEPYYNYKKPSNWMPGPGTRINGNMGGTNLKTSSGAFNTSWAPPGVQQSATSTTYMG…	504	USER	zzz1633
1679		genbank_parvoviridae_ATY47689.1_@3KIC_N	parvovirus_cap	genbank	RVGSAWLQVPGAIYPLNNGKPVNKADAAARRHDKHYDRYIKSGKNPYLNFNKADQQFLDELKGDYSFGALLGKGVFQIKKAIAPVLPELSRGGGKRPSQKKQEAAKKRALYFARQNRDAKRARMDGAGPSNEQPIEPAQAPQTRAAGGGGGGGGGGPGGVGGSGVGVSTGGWTGGTHFGENFVVTNVTRQWYAPIYNQHLYKKLDSPASISSEWQGISTPWGYFNFNCYNSHFTPNDWQRLVNEYKRWRPKKMQVQIYNLQIKQIVQMGADTLYNNDLTAGVHIFCDGSHQYPYAQHPWDENQLPEFPNDVYKLPNYAYYQMTDDLTDNNQNYRFNMEKWLKLAAPLFMLENSSHEVLRTGEETSFSFSFDSGWVHNDRAFCPPQCDFNPLVKTRRYRP…	599	USER	zzz1634
1678		genbank_parvoviridae_ATY47681.1_@3NTT_A	parvovirus_cap	genbank	MSFFDYIGKKYAQGAADWWNAEAGPPPPKKAKGKGFVFPGHNYLGPGNDLDNGNPVDEDDAAAKKHDEAYDEQLKQGDNPYVKYNHADAQLQEDLKDVNTFEANLAKGIFQAKKRVLEPFGLVEELAGKKRPHTEQESPDSSAGVGKKGEQPAKRRLDFSDAEAPQDGAAAAPSGVEDITMSGGGGAPMDGNQQGADGVGNASGNWHCDSQWMGNRVVTHSTRTWVLPSYNDHIYRQISSGAQTDHSKQYFGYSTPWGYFDFNRFHCHFSPRDWQRLVNNHWGFRPKKLHVKLFNIQVKEWVTQDGTNVVSNNLTSTVQVFTDDEYQLPYVLGNATEGCLPAFPPTVFTLPQYGYATLNDPGDDAPTNRSSFFCLEYFPSQMLRTGNNFEFSYSFEDVP…	675	USER	zzz1635
1677		genbank_parvoviridae_ATY47686.1_@3NTT_A	parvovirus_cap	genbank	MSFFDWLGKKYAQGAAEYWDLKAGPPAPKKARKDGSAGFNFPGHKYLGPGNSLNRGDPVDADDAAAQKHDQAYQEQLDAGDNPYLKYNHADREFQEALKDDTSFEGNLAKGLFEAKKLIAEPLGLAEPELAPPRGKKRPAPVDLPESAAHSDDEELVARQQAAQSGAEGVGSSADLVPGTMSGGGGAPMDDNQQGADGVGNSSGDWHCDSKWMGDRVITRTTRTWCLPSYNNHLYQQISSGSTGPFSQNGNRYFGYSTPWGYFDFNRFHCHFSPRDWQRLINNHWGFRPKRLHVKLFNIQVKEVTTQDSTTVVSNNLTSTVQVFTDDEYQLPYVLGNATEGCLPAFPPDVFTLPQYGYATLNDPTTGASVDRSAFFCLEYFPSKMLRTGNNFEFTFTFE…	444	USER	zzz1636
1676		genbank_parvoviridae_ATY47685.1_@4IOV_A	parvovirus_cap	genbank	MSFSDYIGQLFASGAAEWVDLESGPPKPKANQQHQDQKKDDARGLVLPGYKYLGPGNGLDKGEPVNEADAAALEHDKAYDQQLKAGDNPYLKYNHADKEFQERLQGDTSFGGNLARGVFQAKKRILEPLGLVEEDEPELAPGKKRPRPISPPPSAEHSVDEELLKRQKTDKAGSNDTATDTNSLTGAMSQSTDGRAAPGGDAGDAGQGADGVGNASGNWHCDSAWSDSSVVTTSTRTWVLPAYDNHLYKRLGSSNGNNTYNGFSTPWGYFDFNRFHCHFSPRDWQRLINNHWGIRPKRMHVKIFNIQVKEVTVQDATTTISNNLTSTIQVFADKEYALPYVMDSGQEGSMPPFPNDVFMVPQYAYCGLVNGVTQDQTDRNAFYCLEYFPSQMLRTGNNF…	598	USER	zzz1637
1675		genbank_parvoviridae_ATY47680.1_@3KIC_N	parvovirus_cap	genbank	MAPPNRKPGGWVLPGYRYLGPFNPIDNGEPVNKADRAAKKHDLAYDQYLKSGKNPYLYYNKADSDFVKELEGDYSAGGIVGRLAFGIKRAIAPKLQEAEPPSKKTAGGAGGPPSNKRPRNEAAHKRHLYFARGNRDSKRARMEAGEGTSDQNNQEAPAPGGGPSVGARAGAGGGGGGVGGVGGSGVGISTGGWTAGTHFGDNYVVTNVTRQWYAPVYNNHIYKALAPPNGNSSKWKGIETPWGYFNFNCYNCHFSPQDWQRLLNEYKKWRPKKMRVQLYNLQIKQIVTLGADTLYNNDLTAGVHIFCDGSHQLPYSQHGWDDSCLPELPNDVYRLPQYAYFQYQEGLKEIVDTPGFNIVDWLKQDAPLFMLEHSSHEVLRTGEETHFEFDFESGWVHND…	670	USER	zzz1638
1674		genbank_parvoviridae_ATY47684.1_@4G0R_A	parvovirus_cap	genbank	MGGWCICKYLILIIVLFTGWVPPGYKYLGPGNDLDQGEPSNPSDAAAKEHDEAYDRYLRSGRNPYLYYNPADADFIDKTKDAKDWGGTLGHYFFRVKRAIAPSLPDQPGPSGARRRKAPAHIFINRAKKARQARANLDGQAADNVQHQPGQSANAAAATAVSAGSSGGGGGGGGARSGGVGVSTGSYLNTTQFKYVGDGLVEITAHSTRLIHLNMPESESYKAVVVNNAGDTAGVNAKGWMIKDDSHYQMVTPWSLVDCNAWGVWFNPGDWQLIINSMESLELVSLEQDIFNVVLKTVTQQSTDPNAIKLYNNDLTASLLVALDSNNVLPYTPAAIRGETLGFYPWKPTIAAPWRYYMHCEHTVTPSYSTQEASPTNQFNRGAESLQFFPVESLVPIEL…	644	USER	zzz1639
1673		genbank_parvoviridae_ANG60950.1_@3NTT_A	parvovirus_cap	genbank	MSTFLEKFEDWYETAAASWRHLKAGAPKPKSNQQSQSVSTDRKPQRKDNNRGFVLPGYKYLGPGNGLDKGPPVNKADSVALEHDKAYDQQLKAGDNPYIKFNHADQEFIDNLQGDTSFGGNLGKAVFQAKKRILEPLGLVEEPVNTAPAKKSSGKLTDHDPIVKKPKLSEENSPSPSNSGGEASAAATEGSEPVAAPNMAEGGSGAMGDSAGGADGVGNASGNWHCDSQWLGDTVITKTTGTWVLPSYNNHIYQAITSGTSQDANVQYAGYSTPWGYFDFNRFHCHFSPRDWQRLINNHWGIRPKSLKFKIFNVQVKEVTTQDQTKTIANNLTSTIQVFTDDEHQLPYVLGSATEGTMPPFPSDVYALPQYGYCTMHTNQNGARFNDRSAFYCLEYFPS…	732	USER	zzz1640
1672		genbank_parvoviridae_AQR59121.1_@5URF_n	parvovirus_cap	genbank	MKYKAPKGYVPSLPTTDEEAYHHTRWWLDHVENYGKNKSIGRGKGKARKELTPQQKAERKRFFITQAQKNKKPNYGIPSSSQHREFFKNHQGAQGGKAKQKTKHLESQAPQRQEDPEEGPAPKQPRVEEHPFNQEELEEMMADENEPDQSGIPMEMSDGPGTVGGGGGGGIGHSTGNWNCDTIWSGNTCTTYASRHCVCLMRDMDKYLAIGNTNGQHGLDSENQTQYFGFSTPWNYIDFNQYSVHFSPRDWQHLVNNYSRWRPRAVHVKIFNLQVIQKTVTDSGTQYSNDLTGTIQIFADQEGKYPRLLYPNQTTLMGPFPSSIYYLPQYAYMTSMYNSGGATPTTWWGFPTRESAFYCLDESPSQMLRTGNEWETTFVFPPSTQWCNNKISTVSITQR…	675	USER	zzz1641
1671		genbank_parvoviridae_ABZ10812.1_@3KIC_N	parvovirus_cap	genbank	MTDGYLPDWLEDNLSEGVREWWALQPGAPKPKANQQHQDNARGLVLPGYKYLGPGNGLDKGEPVNAADAAALEHDKAYDQQLKAGDNPYLKYNHADAEFQERLQEDTSFGGNLGRAVFQAKKRILEPLGLVEEAAKTAPGKKRPVEQSPAEPDSSSGIGKSGQQPARKRLNFGQTGDTESVPDPQPLGQPPAAPSGVGSTTMASGGGAPMADNNEGADGVGNSSGNWHCDSQWLGDRVITTSTRTWALPTYNNHLYKQISSQSGATNDNHYFGYSTPWGYFDFNRFHCHFSPRDWQRLINNNWGFRPKRLNFKLFNIQVKEVTQNDGTTTIANNLTSTVQVFTDSEYQLPYVLGSAHQGCLPPFPADVFMVPQYGYLTLNNGSQAVGRSSFYCLEYFPS…	733	USER	zzz1642
1670		genbank_parvoviridae_ABI16639.1_@4IOV_A	parvovirus_cap	genbank	MAADGYLPDWLEDNLSEGIREWWALKPGAPQPKANQQHQDNGRGLVLPGYKYLGPFNGLDKGEPVNEADAAALEHDKAYDKQLEQGDNPYLKYNHADAEFQQRLATDTSFGGNLGRAVFQAKKRILEPLGLVEEGVKTAPGKKRPLEKTPNRPTNPDSGKAPAKKKQKDGEPADSARRTLDFEDSGAGDGPPEGSSSGEMSHDAEMRAAPGGNAVEAGQGADGVGNASGDWHCDSTWSEGRVTTTSTRTWVLPTYNNHLYLRIGTTANSNTYNGFSTPWGYFDFNRFHCHFSPRDWQRLINNNWGLRPKSMRVKIFNIQVKEVTTSNGETTVANNLTSTVQIFADSTYELPYVMDAGQEGSFPPFPNDVFMVPQYGYCGVVTGKNQNQTDRNAFYCLEY…	742	USER	zzz1643
1669		genbank_parvoviridae_YP_024971.1_@4IOV_A	parvovirus_cap	genbank	MSFVDHPPDWLESIGDGFREFLGLEAGPPKPKANQQKQDNARGLVLPGYKYLGPGNGLDKGDPVNFADEVAREHDLSYQKQLEAGDNPYLKYNHADAEFQEKLASDTSFGGNLGKAVFQAKKRILEPLGLVETPDKTAPAAKKRPLEQSPQEPDSSSGVGKKGKQPARKRLNFDDEPGAGDGPPPEGPSSGAMSTETEMRAAAGGNGGDAGQGAEGVGNASGDWHCDSTWSESHVTTTSTRTWVLPTYNNHLYLRLGSSNASDTFNGFSTPWGYFDFNRFHCHFSPRDWQRLINNHWGLRPKSMQVRIFNIQVKEVTTSNGETTVSNNLTSTVQIFADSTYELPYVMDAGQEGSLPPFPNDVFMVPQYGYCGLVTGGSSQNQTDRNAFYCLEYFPSQML…	736	USER	zzz1644
1668		genbank_parvoviridae_NP_852781.1_@3KIC_N	parvovirus_cap	genbank	MSLISDAIPDWLERLVKKGVNAAADFYHLESGPPRPKANQQTQESLEKDDSRGLVFPGYNYLGPFNGLDKGEPVNEADAAALEHDKAYDLEIKDGHNPYFEYNEADRRFQERLKDDTSFGGNLGKAIFQAKKRVLEPFGLVEDSKTAPTGDKRKGEDEPRLPDTSSQTPKKNKKPRKERPSGGAEDPGEGTSSNAGAAAPASSVGSSIMAEGGGGPVGDAGQGADGVGNSSGNWHCDSQWLENGVVTRTTRTWVLPSYNNHLYKRIQGPSGGDNNNKFFGFSTPWGYFDYNRFHCHFSPRDWQRLINNNWGIRPKAMRFRLFNIQVKEVTVQDFNTTIGNNLTSTVQVFADKDYQLPYVLGSATEGTFPPFPADIYTIPQYGYCTLNYNNEAVDRSAFY…	743	USER	zzz1645
1667		genbank_parvoviridae_AAO88191.1_@3KIC_N	parvovirus_cap	genbank	MAADGYLPDWLEDNLSEGIREWWDLKPGAPKPKANQQKQDDGRGLVLPGYKYLGPFNGLDKGEPVNEADAAALEHDKAYDKQLEQGDNPYLKYNHADAEFQERLQEDTSFGGNLGRAVFQAKKRVLEPLGLVEEGAKTAPGKKRPVEPSPQRSPDSSTGIGKTGQQPAKKRLNFGQTGDSESVPDPQPIGEPPAGPSGLGSGTMAAGGGAPMADNNEGADGVGSSSGNWHCDSTWLGDRVITTSTRTWALPTYNNHLYKQISNGTSGGSTNDNTYFGYSTPWGYFDFNRFHCHFSPRDWQRLINNNWGFRPKRLNFKLFNIQVKEVTQNEGTKTIANNLTSTIQVFTDSEYQLPYVLGSAHQGCLPPFPADVFMIPQYGYLTLNNGSQAVGRSSFYCLE…	685	USER	zzz1646
1666		genbank_parvoviridae_AAO88196.1_@3KIC_N	parvovirus_cap	genbank	MAADGYLPDWLEDNLSEGIREWWDLKPGAPKPKANQQKQDDGRGLVLPGYKYLGPFNGLDKGEPVNEADAAALEHDKAYDKQLEQGDNPYLKYNHADAEFQERLQEDTSFGGNLGRAVFRAKKRVLEPLGLVEEGAKTAPGKKRPIESPDSSTGIGKKGQQPAKKKLNFGQTGDSESVPDPQPLGEPPAAPSGLGSGTMAAGGGAPMADNNEGADGVGNASGNWHCDSTWLGDRVITTSTRTWALPTYNNHLYKQISSQSGATNDNHFFGYSTPWGYFDFNRFHCHFSPRDWQRLINNNRGFRPRKLRFKLFNIQVKEVTTNDGVTTIANNLTSTIQVFSDSEYQLPYVLGSAHQGCLPPFPADVFMIPQYGYLTLNNGSQSVGRSSFYCLEYFPSQML…	731	USER	zzz1647
1665		genbank_parvoviridae_AAO88194.1_@3KIC_N	parvovirus_cap	genbank	MAADGYLPDWLEDNLSEGIREWWDLKPGAPKPKANQQKQDDGRGLVLPGYKYLGPFNGLDKGEPVNEADAAALEHDKAYDKQLEQGDNPYLKYNHADAEFQERLQEDTSFGGNLGRAVFQAKKRVLEPLGLVEEGAKTAPGKKRPVEPSPQRSPDSSTGIGKTGQQPAKKRLNFGQTGDSESVPDPQPIGEPPAGPSGLGSGTMAAGGGAPMADNNEGADGVGSSSGNWHCDSTWLGDRVITTSTRTWALPTYNNHLYKQISNGTSGGSTNDNTYFGYSTPWGYFDFNRFHCHFSPRDWQRLINNNWGFRPRKLRFKLFNIQVKEVTTDDGVTTIANNLTSTIQVFSDSEYQLPYVLGSAHQGCLPPFPADVFMIPQYGYLTLNNGSQSVGRSSFYCLE…	735	USER	zzz1648
1664		genbank_parvoviridae_AUF34953.1_@5URF_n	parvovirus_cap	genbank	MPPIKRQPGGWVLPGYKYLGPFNPLENGEPVNKADRAAQAHDKSXXXXXXXXXXXXXXXXXXXXXXXXXXXXXXXXXXXXXXXXXXXXXXXXXALGNKERAQKRHFYFANSNKGAKKPKNNEPKPGTSKMSENEIQDQQPSGSMEERGGGGGAVGSVGGGKGSGVGISTGGWVGGSYFTDSYVITKNTRQFLVKIQNDHKYRTENIIPSNAGGKSQRCVSTPWSYFNFNQYSSHFSPQDWQRILHEYKRFKPRKMHVKIYNLQIKQILSNGADTTYNNDLTAGVHIFCDGEHAYPXXXXXXXXXXXXXXXXXXXXXXXXXXXXXXXXXXXXXXXXXXXXXIALQIPFFMLENSDHEVLRTGESTEFTFDFDCEWINNERAYIPPGLMFNPKVPTRRAQY…	667	USER	zzz1649
1663		genbank_parvoviridae_AUF34942.1_@5URF_n	parvovirus_cap	genbank	MPPIKRQPGGWVLPGYKYHGPXXXXXXXXXXXXXXXXXXXXXXXXXXXXXXXXXXXXXXXXXXXXXXXXXXXXXXXXXXXXXXXXXXXXXXXXXXXXXXXXXXXXXXXXXXXXXXXXXXXXXXXXXXXXXXXXXXXXXXXXXXXXXXXVGGGGAVGSVGGGKGSGVGISTGGWVGGSYFTDSYVITKNTRQFLVKIQNDHKYRTENIIPSNAGGKSQRCVSTPWSYFNFNQYSSHFSPQDWQRLTNEYKRFKPRKMHVKIYNLQIKQILSNGADTTYNNDLTAGVHIFCDGEHAYPNATHPWDEDVMPELPYETWYLFQYGYIPTIHELAEMEDSNAVEKAIALQIPFFMLENSDHEVLRTGESAEFNFNFDCEWINNERAFIPPGLMFNPLVPTRRAQ…	668	USER	zzz1650
1662		genbank_parvoviridae_YP_009361880.1_@6BX1_F	parvovirus_cap	genbank	MSKIPQHYPGKKRSAPRHVFIQQAKKKKQTNPAVYHGPDTIEEMDPAEPEQMDTEQATNQTAEAGGGVGNSTGSFNNTTEFKVINGEVYITCHSTRMVHINQADTDEYLVFNAGRTTDTTTTHDKLDLEFFVYDDFHQQVMTPWFLVDSNAWGVWMSPKDFQQMKTLCSEISLVTLEQEIDNVTIKTVTETNQGNASIKQYNNDLTASLQVALDTNNILPYTPAAPLGETLGFVPWRATKPTQYRYYHPCYIYNRYPNIQKAAQTELKWTGTQADYLSVEEQYFNFITVENNIPIQILRTGDNFHSGLYEFKSKPCKLTLSYQSTRCLGLPPLCKPKTDTTHKVTSLDNGGEIQYIQGGDHIRLGHFWGEERGKKNAELNRVRPYNIGYQYPEWIIPAG…	677	USER	zzz1651
1661		genbank_parvoviridae_YP_009362132.1_@3KIC_N	parvovirus_cap	genbank	MLGLSWSLNRAPQQIQQFPTASLTNRQQAQQKIDKEYAGAKNTGGLTWPGSQFTGPGNRLVDENNKSNFTELPKTDLDWVTMEHDVDYFNAANPTKDKVWEMDKKAIKAAWDVNDPYYGAAATIVGLVAKNIAERTDEAITGDPFAIYPQSKKSSYEIPWFKPRPQIRKKELREYHASSLSRSPSTTKA	189	USER	zzz1652
1660		genbank_parvoviridae_YP_009362131.1_@1DNV_A	parvovirus_cap	genbank	MPHRYQGPPPPQRPNWSKLNSSQRAYAIRQYNIGRTRRNLPIFVLGGGGDRIDSSASEQSSEHSSGSSVQASQNSDPADDTDSLRTPSVDWSEDSVFGDNADSDFDHIISADDVVAGTSAAGGITDKELWPHIPDSDLHMATNVSSTKRGSEEPSSSSGDSKKQKKNGMELPGTGESGGSDPDTGNPSPENSIIPRPLQSTSGYKLVFRKNHSLLSYGLAWKISKLDGTSKSYLTTTSLMSLPVEQPYFYMSPAEFDWLPRGAMCKHVKVTAVMRNPRTAFETNSSSTTLATLNQNKFIAIGEGLNLKTRGIDRAMKFGSSTAAMVNQGTEEYVKSHHEKFILAAYGSLTKTPTFQEGFKALPCSSLMLPMMLNRYFCTVATNDPINKDIGWPNLSQHI…	617	USER	zzz1653
1659		genbank_parvoviridae_YP_009508800.1_@3NG9_A	parvovirus_cap	genbank	MAPIRRPGGWVVPGYKYLGPFNPLDNGEPVNKADRAAQKHDQAYNQYLSEGKNPYLYFNKADQDFLEDLESDRSFGGWIGKTVFGAKRAIAPSLGEPSAKQAKLDRAQKRKLYFARSNQKAKQPKMADTANNQENPEGGEAAPAGSRSGQAANAGGGGGGAGRSVGISTGGWRGGTLFSDTTVVTRVTRQWYCPIYNGHLYKAFGAQDDADSQKSYWQGISTPWGYFDFNCYAGHFSPQDWQRLTNEYRKWRPKAMHIKIYNLQIKQVVTLGADTLYNNDLTAGVHIFCDGSHQYPYPQNPWNEHVIPELPNDVWKLPQYGYYQYDKWLTSDQPNDNNGVSKALRVMAPLFMLESSSHEVLRTGEETEFNFEFDSAWVMNDRAYASPQTDYNAIVGTRR…	682	USER	zzz1654
1658		genbank_parvoviridae_YP_009508805.1_@6BX1_F	parvovirus_cap	genbank	MPAIRKARGWVPPGYNFLGPFNQDFNKEPTNPSDNAAKQHDLEYNKLINQGHNPYWYYNKADEDFIKATDQAPDWGGKFGNFIFRAKKHIAPELAPPAKKKSKTKHSEPEFSHKHIKPGTKRGKPFHIFVNLARKRARMSEPANDTNEQPDNSPVEQGAGQIGGGGGGGGSGVGHSTGDYNNRTEFIYHGDEVTIICHSTRLVHINMSDREDYIIYETDRGPLFPTTQDLQGRDTLNDSYHAKVETPWKLLHANSWGCWFSPADFQQMITTCRDIAPIKMHQKIENIVIKTVSKTGTGETETTNYNNDLTALLQIAQDNSNLLPWAADNFYIDSVGYVPWRACKLPTYCYHVDTWNTIDINQADTPNQWREIKKGIQWDNIQFTPLETMINIDLLRTGD…	707	USER	zzz1655
1657		genbank_parvoviridae_YP_009507339.1_@4MGU_A	parvovirus_cap	genbank	MSGEVFARIREGLRLRNPISYRRLLRLQQSGGRAGFIRVGENLYLAGDEGSITNFVDPNEVESYEDVIYENQGVAQESIEQIQLDEIEINDSSPLLEEFSATPGLAEAGGFAGAGSVAAAPSAATVITSVGITAGIITIGTGVTLLSSDTDTVDHEDPVVSLPDHRYIGPGNTIDDTEPVDLDDDIAREHDINYEKAKTQEDVQEADREGAGEFLTDVIHNSNPHSIAGYIGLKAKEKVESVIGVQYPANLPISSSGMATHHVSRRALGKYDIDRDPSRHPDFPQSHGQQQYAWAQWNRARQRHNLPRVDPPPRFGWNVTQRPRIEGTGPGRMRPSSNSISFRDWKNGRRGASGPLIDGFNRQREQQNARNDHLLNTVVASELSESERMEVDELFRQAT…	922	USER	zzz1656
1656		genbank_parvoviridae_YP_009508783.1_@4IOV_A	parvovirus_cap	genbank	MAPTNRRPGGWTVPGFKYLGPFNPLNNGEPINEVDKVAQTHDRAYQAYIDSGVNPYLNFNKADSDFIDSLSSDSSVAGWLGKSAFKLKRLLAPHLTKEKETANKGSGAGGKRPRLDPVRAQKRKYYFARQNQGKNSKQQKMENEVETAGDGQEGAPASDSRAGGSGNGGTGMGGGGHGVGISTGGWKAGTMFSDTKIITTSTRQFYAPIYNEHLYKKVVGDKNWIGITTPWAYFNFNEYDSHFTPNDWQRLTNEYAKWRPVRMHVKIYNLQIKQKVTLGSDTLYNNDLTAGVHIFCDGSHQFPYSQAPWDHGTMPELPYDTWKLPQYAYFQFQADITYVDTSSLEADSVKKNMARAGPFFILESATHEVLRTGEETEFNFSFESGWVDNTRAYVLPQAD…	711	USER	zzz1657
1655		genbank_parvoviridae_YP_009507380.1_@6BX1_F	parvovirus_cap	genbank	MPAIRKARGWVPPGYNYLGPFNQDFSKKPTNPSDNAARKHDLEYNKLIKQGHNPYWNYNHADEDFIKETDQATDWGGKFGNFVFRAKRALAPELAPPAKKKTKTKHTEPEYSHKHIKAGTKRGKPFYLFVNLARKKARMTDTQDVSEQQSDQPSVASTSAKAGGGGGGGGSGVGHSTGNYNNRTEFYYHGDEVTIVCHSSRHIHLNMSESEEYKIYDTDRGPRFPTDQTLQGRDTINDSYHAQVETPWFLINPNSWGTWMNPADFQQLTTTCREVTLEHLDQTLDNIVIKTVSKQGSGAEETTQYNNDLTALLQVALDESNQLPWVADNMYLDSLGYIPWRPCKLKQYSYHVNFWNTIDIISGPQQNQWQQVKKEIKWDDLQFTPIETTTEIDLLRTGD…	707	USER	zzz1658
1654		genbank_parvoviridae_YP_009508803.1_@6BX1_F	parvovirus_cap	genbank	MLIWALFIWLFYFHEGTIEQLNIYHNGNSLQLLHHSSSLTGWVPPGYNYLGPKKFKLQKKPTNPSDAAARKHDLEYNKLIQQGHNPYFYYNHADEDFIKETNQAKDWGGKFGNYIFRAKRALAPELAPPKKKSKTEKGEPSYSYKNIKPGTKRGKPFYLFVNLAKKKRMSAPAAENNDQQPDAAEPSVAGAKATGGGGGGGSGVGHSTGSFNNRTEFIYHGSEVTIICHATRHIHLNMPDSEEYKIYETNRGPRFPTDQTLQGRDTINDSYHAKVQTPWQLLHANCWGCWFSPADWQQMITTCREFKVEHLEQAIDNIVIKTVTKQGTGAEEITQYNNDLTALLQVAEDKSNLMPWAADNMYIDSIGYVPWRPSKLPTYCYHVNFWNTIDINAGAQQNQ…	737	USER	zzz1659
1653		genbank_parvoviridae_YP_009508787.1_@3KIC_N	parvovirus_cap	genbank	MPPLKKNQRGWVLPGYKYLGPFNSLTQGKPTNKADEAARRHDLHYNDLINKGHNPYLNFNEADVNLIKDLETDNSIGGFIARNVFKAKQAIAPALPGTSSGGDRATKRKLYFARSQKSAKQPKMSDQVDAPAEGAVRGDLSSMATHSRSARAIGGGGGGGGGGGTGIRAGGGVGISTGGWEAGTFFYDNHIVTANTRQFMAEIQNSHLYKLETATIENTVPDANYTYVTTPWQYFDFNCWASHFSPQDWQRVMNEYKSIKPIEMEVKIYNLQIKQIQLLGAEQDIVYNNDLTAALHVFCDGEHQYPDASQPWDEGTMPELPHAIWKLPQYAYFQTISGWAANPTFGAQVPLYFIENSSHAVLRTGEDATFSFTFSCNKLTLDKCATAPVHLKNPKVKTR…	659	USER	zzz1660
1652		genbank_parvoviridae_YP_009507391.1_@3NTT_A	parvovirus_cap	genbank	MSATDSFRPGGKMPLDTLMRKLTVSAGTEPSRSRWGLPGGYIADLTVGVQYEKAFTELARYARSLPLQLFPVKQLAEQLVKKRRDSSDIHFVMRVYMDLVRLLIMVAPEAVADRLRRATDGVREFFQEPSAHQYSRAPRLPVLYDLYRSAHEGKVPSKEEIDAFFNGMLTPFDSDQRPVVEQIHQQFLDIFHPPPVHGHGGGVDTSDSGTGTTPIGEPDLERPPEGRFLVPGYNYVGPGNPLDNGPAKGPVDEAAKHHDERYDEMLSHGDVPYIHGHGADRLMNREIEQAEAEGRLTDPVDRVLGNVIRGLWQAKETLGDVADVQISQVLPPAPPGERPDQDSSDGPPSPKRARTGIPDEAVPPITEPAQTLPHTDPPPTATMASNPAGGAGGGVKVKA…	933	USER	zzz1661
1651		genbank_parvoviridae_YP_009507344.1_@6BX1_F	parvovirus_cap	genbank	MSKIPQHYPGKKRSAPRHVFIQQAKKKKQHSNPAVSHQEDTIEEMDSNETEQMDISEQQQVAEHGGGVGKSTGGFNNTTEFKVTNNEVIITCNATRVVHINQASTDEYLIFNAGREIDKTPKGSLNLEFFMFDDFHQQVMTPWFLVDSNAWGVWMSPKDFQQMKVLCSEIELVSLEQEIDNVVIKTVTETTQGGTSVIQYNNDLTASLQVALDTNNILPYTPAAPLQETLGFVPWRATKPTQYRYYHPSYIYNRYPNIQKKSQEQSTYTAIQDDYFSVDQDYFNFITIENNIPIEILRTGDNFHTGRYEFKSKPCKLTMSYQSTRCLGLPPLCKPKTDTKLVTSLENGGEMDCYVEGQQHTRKGHFWGEEKAEKNTEINRVRPYNIGYQFPEWIVPAGL…	674	USER	zzz1662
1650		genbank_parvoviridae_YP_009507367.1_@4IOV_A	parvovirus_cap	genbank	MSSLFKEYLQSTGLVGIQSGAPKPKAGQQKQDTGSFEWKKKEDTARGLVLPGYKYLGPFNGLERGEPVNAADAAAQRHDRQYDRILQQGGNPYLTYNHADREFQEELQSDESFGGNLGKAVFQAKKRILEPLGLVEEDPSQPDSSSDNTAPPVKKSRLEEAQPIQSPDVSSSTGGGIADVMSGDAEMAAVGGGAPGVDGQGAEGVGTSSGNWHCDSQWSEGHVRTTSTRTWVLPSYNNHLYKRLGSSAQSNTYNGFSTPWGYLDFNRWHCHFSPRNWQRLINNNWGIRPKRLNVKLFNIQVKEVTTEGGTTTVANNLTSTIQVFADNAYELPYVVDAGHEGALPPFPNDVFMIPQYGYCGLVSGQSQNQSDLCSFYCLEYFPSQMLRTGNNFEMNFRFE…	718	USER	zzz1663
1649		genbank_parvoviridae_YP_009507356.1_@3NG9_A	parvovirus_cap	genbank	MAPTNRKPGGWVVPGFKYLGPFNPLNNGEPVNFVDAAAKAHDQAYQDIIDSGQNPYFSFNKADADFIETLSHDSSVGSWLGRSAFHLKKVLAPHLPQDGGEQPGPSGAKKPRLDPKQDRAQKRKLYFARSNKQAKQPRMSAGAEPTEDVAGSADPAAEGRAGGANGGGGGMGGGGGHGVGVSTGGWQAGTVFTDSAIITTGTRQWYAPIYNGHLYKLLKPDSGLHSNWTGISTPWGYFNFNEYDAHFSPQDWQRLLNEYKRWRPKSMHVKIYNLQIKQVVTLGADTLYNNDLTAGVHIFCDGSHQFPYSQHPWDTGVMPELPNKVWKLSQYAYFQALNDLIDTNAGSNADVGNIEKHIMKAAPFYILESASHQVLRTGEETSFTFEFDCGWVTNDRVYC…	719	USER	zzz1664
1648		genbank_parvoviridae_YP_009507352.1_@3KIC_N	parvovirus_cap	genbank	MAPTNRKPGGWVVPGFRYLGPFNPLNNGEPVNFVDAAAKAHDQAYQDIIDSGQNPYFSFNKADADFLETLSHDSSVGSWLGRSAFHLKKVLAPHLPQDGGDKPGPSGAKKPRLDPKADRAQKRKLYFARSNRPAKQQKMSNAAEPTDDVAGPSDPAAEGRAGGANGGGGGMGGGGGHGVGVSTGGWQAGTVFTDNAIVTTGTRQWYAPIYNGHLYKKLAPDTGVSSNWTGISTPWGYFNFNEYDAHFSPQDWQRLLNEYKRWRPKSMKVKIYNLQIKQVVTLGTDTLYNNDLTAGVHIFCDGSHQFPYSQHPWDTGVMPELPNKVWKLSQYAYFQALGDLTDTRPGTGPDVGNIEKHLMKAAPFYILESASHQVLRTGEETSFTFNFECGWVNNDRVYC…	719	USER	zzz1665
1647		genbank_parvoviridae_YP_009507360.1_@5URF_n	parvovirus_cap	genbank	MNQLFPVVRSKKNDGKRGHGKKAEKRPSELKDPEKPTGELELVGERSNCSKTQRHFYFACQNQGAKRAKMSAQGGENIEEVEVDTGAGSGRSGGGGGGGGGGGSTNGGIGMATGGWVGGTYFGKNKIVTNITRQWYVPIYNGHKYTKQTETDNTNFWNGIRTPWGYINMNSYSCHFSPNDWQRLLNNYKRWKPKKMRLQLYNLQIKQVVQLGTDTLYNNDLTAGVHIMYDGSHQYPYSQSGWDSELIPELPGMIYKLPNYCYFQELGDIGDTGSDLRESWLGTACPLFFLESSSHEVLRTGEETGFEFDFDCGWVHNDRAFCPPQCDFNPLIKTRRSRIIMGSSGNTSEPYYDYKKPSNWMPGPGTRLNGHQSGNNLKTSSGPFNTSWAPPGVTQGSDT…	623	USER	zzz1666
1646		genbank_parvoviridae_YP_009507348.1_@5URF_n	parvovirus_cap	genbank	MKYKAPKGYVPSLPTTDEEAYHHTRWWLDHVENYGKNKAIGRGKGKARKELTPQQKAERKRFFITQAQKNKKPNYGIPSSSQHKEFFKNHQGAQGGKAKQKTKHIENQAPQRQEDPEEGPAPKQPRVEENPYNQEELEEMMADENEPDQSGIPMELSDGPGTVGGGGGGGIGHSTGNWNCDTIWAENTCKTYASRHCVCLMRDMDQYKAIGNANGQHGLDTENQTQYFGFSTPWNYIDFNQYSVHFSPRDWQQLVNNYSRWRPRAVHVKIFNLQVIQKTVTDSGTQYSNDLTGTIQIFADQEGRYPRLLYPNQTTLMGPFPSNIYYLPQYAYMTSMFNSGGPTVSSWWGFPTRESAFYCLDESPSQMLRTGNEWETTFVFPSSTQWCNNKISTVSITQR…	675	USER	zzz1667
1645		genbank_parvoviridae_YP_009508183.1_@4QC8_A	parvovirus_cap	genbank	MPPTNKANSKKGLTLPGYNYLGPFNSLFAGAPVNKADAAARKHDFGYSDLLKEGKNPYLYFNTHDQNLIDELKDDTSFGGKLARGVFQIKKALAPALPGTSKGGDKALKRKLYFARSNKGAKKANREPAPSTSNQQNMEVSNDIPNDEAGNQPIELATRSVGGSGSVGGGGRGGSGVGYSTGGWTGGTIFSENIVVTKNTRQFICDIKNGHLYKSEVLNTGDTAHRQYAITTPWSYFNFNQYSSHFSPNDWQHLVNDYERFRPKAMIVRVYNLQIKQIMTDGAMGTVYNNDLTAGMHIFCDGDHRYPYVQHPWDDQCMPELPNSIWELPQYAYIPAPISVVDNNTTNTVEEHLLKGVPLYMLENSDHEVLRTGESTEFTFNFGDCEWIENNITFSMPQM…	673	USER	zzz1668
1644		genbank_parvoviridae_YP_009507374.1_@1S58_A	parvovirus_cap	genbank	MTDEKPKEKKWWETGDPFREAWYNQFVKIFTDLVGNDLDLAEILWRHYGINLDNPFSNPAALPDLVNRIKKNLKDNPDIYTDSLSHGALPDFRESKAEHEKSNEPRGADAILTSKDLHDGGSISLTLPLTHYIGPGNPLQAGSPTDVVDAAARIHDYRYSELIKLGINPYTHWTVADDELLHNVQNVGGFEAQVVKDFFTLKGLFTSTAHFKGELPPVPSYSATEQYPNMATVTATEGTSGSGGGGSNPVHGVWREGAVFSEDSVSCTFSRVFVVPYAAEHSYRVFSPPAENCHSAAAGESRVCAVSPVMGYATPWHYIDVNCASLYFSPLEFQRLLENYGSIKPSSMSVTLSEICVKDVTDKPGGGVQVTDSTTGRLCFLVDDTYQYPYVLGQGQDTL…	785	USER	zzz1669
1643		genbank_parvoviridae_YP_009507372.1_@1S58_A	parvovirus_cap	genbank	MTSSPAKKKPRKWWDDEDAYSEAWFAEFKDILNDVVFAATSEDEGLVFVLKLLQQYYKLDLTHGLDALSMSDAVDFLTNNALGVSSVNKKSDNTSVLGEYLQKQIENYKNNPNKYTLQLSHGPLPDFRESEAKHESSNEPRGDDAVLSKKDLHEGGGFSVQLPFSHYIGPGNELQAGAPESVVDAAARSHDFRYSELIKLGINPYTQWTVADDELLHNIKNEHGFQAQVVRDYFTLKGLFTSTAHFKGELPAVPQYSSSENYPSMASVTATEGATGSGGGGSNAVQAVWREGAIFTDSSVTCTFSRIFVVPYTAEHAYRFFLLLLKNCHSAATGESKVCAVSPVMGYATPWHYIDVNCASLYFSPLEFQRLIENYGSIKPSSMQVTLSEICIKDVTDKP…	820	USER	zzz1670
1642		genbank_parvoviridae_YP_009507377.1_@4IOV_A	parvovirus_cap	genbank	MPKRKGAGEAFRVLLDELFGGILSVGGDAFDDPVSELAEHLTLSGIGDADTFKKWQEKDLRHIAQLVAEFETQYNKKELDTLVVDEVKKVANKVVPGLGETGAAVANTAKRLKTDEDPLSFGAPPLTENAPVPVAEPDVAIVSEPNRDTAAEQLERGLAEPDHGGIHLPADRYLGPGNPLENGPPVDPVDAVARIHDFRYADLEKQGINPYTTYTIADEELLKNLEHKTGGRAAIARAFFNFKKLTFPHAHLQGPLPAVKSWKTEQLGLAGMQQASAVSGAGGDHTPAALWAQGAKFSGDSVTCFMTRRCYLPFDEDPTYRAIAHSESDRSNFTKIMVNTGTHTVMGYTTPWHYVDYNNMALFFSPQEFQYLLENYEEIAPKSLTTVLSDLVVKDVSIQ…	829	USER	zzz1671
1641		genbank_parvoviridae_NP_542611.1_@3P0S_A	parvovirus_cap	genbank	MPRIHFPYHNYLGPGTDNFEKNPIDEDDAIARSHDLAYDKVTNHKEVFQADKQARDEFFTSFVHTGNVHSLIGGIGLGTKNLVEEHVLGKPLYGMGKRKSTEKDWAKIKRINRARAARRENQENQPDIREFGHVAGQNINADQEVNLADFPDFLQDFVAEAGPSGTQPVETAQQSPPTMSEDIQPMETVGATDTGAGAQVDPRTGGQAAGGSGGMGAGGSANDGRQDIFSGAPQPNQHHTLVYGKSYHFTITNGLPEFRHLATTNSGYYAQQRFKHIHGIPWERLLMYVSEGELLRMFRDYTSLKVEEVVCEVYSLGVRLPFVTSATTSSVANANAQYPIGCFHFDEAYETNYGINNVADIINKALGTEWKNATRPTAAVTTAWSEQFPNISASSTSRD…	672	USER	zzz1672
1640		genbank_parvoviridae_YP_009227293.1_@3NG9_A	parvovirus_cap	genbank	MAPVNRKPKGWVLPGFKYLGPFNPIRSGKAKNRVDQAALRHDYAYDRYINNKVNPYFKFNKADQTFLNDLESDSSVAGYLAKGAFKLKKYLAPDLKEPELGPGKGKTPARKTAAAQKRHLYFARLAGGKKAKTSQMADGGESSNANAGEGTSGGGGSGPLALTGGSRAGGTIGGGGAGSVGFSTGGWTAGTYFSDNKVVTNQTRQFLTPIYNGHTYKALQADDLTNENDKSKWNGITTPWGYFNFNCYASHFSPQDWQRMCNEYKRWRPKRLRVQIYNLQLKTIQSNGADTQYNNDLTAAVHILVDGSHQFPWAQHPWDDTCAPELPYVIYKTPQYAYFQNLAGLANNVGTNSANKFLKMNTPLYVLETMSHEVLRTGEDTSFEFEMSSGWVDNQTNFC…	702	USER	zzz1673
1639		genbank_parvoviridae_YP_009465714.1_@1S58_A	parvovirus_cap	genbank	MAFNPLTMSSRLLVPVTPVSKLDLLKKKWFAFPDVSKILLEALSHSGFGDPKKWKEADADIIEALLDEALRLGPRLEKPAWFYDLQRAIGLARFSASLEQTVFLNEMLIKLTRGPVVPKYPEPDIVIRDPAPLTPEVEAPTSTPENSPDQSSVASDPVEMEEGSSTPIPDPVPQSEDMETEETTIPDQPPPPSPQIVDEVEDMAMGVEDLSIVEDASEQHQSPAGEPTPDITSSVGNRDDESREESREADLQDLSAGLGAAGGSAIAALGSGLIPAATVATAYPRPDQFLRDYLARYDQMYPSGSRYPPRWEQLKSLYDKGMTVKEVWDLLNKNSNNSNLQAKDTDKKQTAPSSSSAPQESAAAMASGDKSGVNPSGGSAPLSATVWASGAQFEADHVI…	947	USER	zzz1674
1638		genbank_parvoviridae_YP_009389291.1_@5URF_n	parvovirus_cap	genbank	MDAVDAGENAQETTAVEGRAASSSGPGGGGGGGNSGVGYATGSWKGGTIFGDKYIVTRNTRQWMADIKNNHIYTKETWGGPTATRPVGIKTPWCYFNFNEYSSHFSPRDWQRLMNEYGRFRPKHMKVQLYNIQIKQKLITAGDTIYNNDLTAGIHVFCDGSHQYPYTQHPWDEDTMPEMPTTIWDLPQYAYLLAYDSYINTDGNQFEIDFQRTLPLYILENSDHAMIRTGENIEFNFEFNCGWVNNNFTNMTVGQMFNPMVGYKRTTEDTVDTNRKYNVASFCKYSNWNGGPGMRALRTGNTQDAENQAGGAGLLQTSLLYGAELGTGGVPSRAWGTQPNTYGQGSTHNKDHYQFVTGTEEATTQNTITELNYNMASNNVTYFKNDSYVDTELNPVWMF…	533	USER	zzz1675
1637		genbank_parvoviridae_NP_874379.2_@4MGU_A	parvovirus_cap	genbank	MSTSGLESVPLLPVNSATVEYGGIEPKVHSGYGASRLPVKPTSAAGGAGAQYDKIFQSQLGRAASSGNPLNVFKSRDEYYNSVPWELRRLPFAERDRLIKPYGVKWDKVSKAQYAQHWKLVNPRAGQKRIQQGIVLPFSNNIGPGNTIQDAKTGSDFIAQGHDIHYSEAKSDIDIQRADTEAIGQFIQEATHSHNPISQTQGVIGAVGLAGKQLVEKLTGKVQYGSPQQSQGGTSNSDQPVAGPSSRPDPVPAQLPVQPSTIQEPAQTMSAPEAIVTGKRGAEEPDSASTPTKKNKPSEHSGSALPGTSGNTDGSMGSSTMLDLDASRGIMPISRGIHVEKFEWTFTKKWKFLSFGVADVILPDDIGTTTAPAKRWALTTSLVNIPWEYAFMYMSFAEF…	778	USER	zzz1676
1636		genbank_parvoviridae_YP_009325418.1_@1S58_A	parvovirus_cap	genbank	MEHGEWPYIYDESDDVLAADISHYGQDKTFLGNLIKAIMRLKKNLGELPRNMLRSVWPLNPLDHPQKQELAGKRLSPPPPQIKEEPISPQKPPTTGDDSKAKRFKQDMSHQTAPDQHMGHGGMDSNMGSDSVTIGDGGGGGSKSECEKHWWGGTRWEGNTVTTFGTRRCVVKPFPDNYYAVKSWDNIPGICVVTPWYYPDLNIMSAHWSPANWQTLLETEDQXVXCSSDLNIMSAHWSPANWQTLLETEDQIRPKSLTLKIHTLIFKDVTKNSEGGSSIQDINSGILLVHRDNDYTYPYPMGGGQLTVPGSMPGSFYTLPRYSYRTLGTIDTDKTPTGIHHASADDFHYKITQNSELFLLEDSPSRMLFSGDCYSYSYDFPALPFANLTQYPWNTRRQD…	730	USER	zzz1677
1635		genbank_parvoviridae_YP_009389294.1_@3KIC_N	parvovirus_cap	genbank	MPPAKQRGEFRGILFPGYNYLGPFNPLDNGEPVNKADKAAKRHDLAYNQYLNKGLNPYLKFNKADQQLIDDLSDDSSLGGKFARGVFSIKRALAPSLNEKQLAPGRSAEQKQARKLYFARSNKGAKRQRLNPPTDKPTSNPDNPNMEAEQPVEEETAPQEAAAGSRAGAGGGPANAGTGGVGMSTGQWIGGGIITPTRFVTRNTRQWWCEIKNEHKYKRYDAGTGARFYGFSTPWSYFNFNQYNGHFSPKEWQTLLNIAKRFRPVRMHVKVYNIQIKQIVDNSGSGGNTLFQNDLTAGLHIFCDGEHAFPYTQNPWDRGTMPELPTEPWELQQYAYVTCPYEAIDDTQTNNYERDFLAQEPFYMLENADHMIVRTGEAVEFHHEFSCGWVDNTRSAQTP…	680	USER	zzz1678
1634		genbank_parvoviridae_YP_009315887.1_@3NTT_A	parvovirus_cap	genbank	MSAADAFRPGDPPPLETLMRKLTYNSGPEPSRRRWGLPGGFIADITVGSIYERAFAELQKYSRSLPMKVYPVKQLAEQLFTLRRSTSKLHHIMRFYVDIVRLLILVAPESIANRLRESTEAVRQFFEEPVSFQYLRSPKIPVLYDLHRSAWDTRIPSAEEIEAYFDGMLSPIPVEQHPIVEQIKAQFLNIFHPPPIAGDGVGGDGGDGIGGADSPSEPNLERPPEGRFLVPGYRYVGPGNPLDNGPPEGPVDEAAKHHDERYADMLSHGDVPYLHGHGADRLMNREIARAEEGGQLTNPVDQLVGNAIRGIWSAKETVGDLVDAQISQVLPPDPIPGTPAQPSSAVTPAPKKPRTGSPEEDLSPGIVSAEPSARAETSDTTVMAATPTGGAGGGVKVKA…	933	USER	zzz1679
1633		genbank_parvoviridae_YP_009310056.1_@3NG9_A	parvovirus_cap	genbank	MRRLFPVSMSEYIELSTITPSSSEESVFNQPSTSTGVRRRGGYVSIPINSSNSSISSAGSDSKLRVPNTPRVGGAVIGAGSQYQPIFEGQLGRAAADPNNPLSRAIFGNRDDYYAAVPWELRRLGLKERQEKIKPYGDPWNKDTKAKYPEHWRLVNPRRGLNKAKKQEQREAQARRDSANRARGEPPRNGLVLPFSNNIGPGNSIRPATNRADLIAQGHDLHYQQAKSNSDVLSADREAISQFAHEAIQGQDPISRVHAAVGGIGLGVKHAVEHLSGKVYYGKQCLELDRWVRVLRIVLIGIV	303	USER	zzz1680
1632		genbank_parvoviridae_YP_009310055.1_@1DNV_A	parvovirus_cap	genbank	MPRVRPLGPSPQDRPNWDSMNEGQRRYAMEQWNLARVRRGEYFDPPGDDDLPLTQADAIDNFDLDLLGSPQEAEQPSQQSEDGVDDFLQQVRDRQDLRDAGPSNAPQPNMADIEMSQVSSSSGGSKRGSGGGGPPSKVSKSGTSLPGTGGNLDGMVRGGSGEGGATAILRPIGLHVEKFQQTYRKKWRFLTSANANVILAEAASGERPARWALTTGMASIPWEYLFFYMSPAEYNRMKNYPGTFAKSASVRIRTWNTRVAFQTGDTQTANATLNQNKFLQVAKGIRSIPFICSTNRKYTYSDTEPMQPTGFATLTSYQYRDGLKIAMYGYDNDSADFAKKPPADATGAEIYLQDYLTIYTNDARATTGTKILAGFPPYKNFIEEFDASACINTDVVAMD…	593	USER	zzz1681
1631		genbank_parvoviridae_YP_009272915.1_@3KIC_N	parvovirus_cap	genbank	MPPHNRKPGGWVLPGFKYLGPFNPLNNGEPVNDVDKAAQAHDQEYQKLIDSGINPYFNFNKADSDFIENLSRDNSFAGWLGKSAFRLKSILAPHLPNDGAGPSPAKRGRFDAERAAKRKLYFARSNRKGGAAKKPRLDPMEGPSDQIEGGGDGPEQKTASTSNGGGGGGSGGHGVGVSTGGWEGGCYFADNVVVTKNTRQWYAPIYNGHKDTRNDGMAGRQWKGINTPWGYFNFNIYDAHFSPQDWQRLTNEYRRWRPKSMFVKIYNLQIKQVVTLGADTLYNNDLTAGVHFFCDGSHQFPYSQHPWDTGTMPELPNRIWKLPQYAYFTHQGDLVNAQENTGITNATNQEKMIAASYPTYILEHATHQVLRTGEETSFQFNFECGWVNNDTAYAIPQAD…	716	USER	zzz1682
1630		genbank_parvoviridae_YP_009272691.1_@6BX1_F	parvovirus_cap	genbank	MPVLNRERNGWTLPGYNYLGPGNNNFKKKPTNPSDKAARKHDLEYSKLIQQGHNPYIYFNQADDDFIKNTDQAPDWGGKFGNFAFRLKKAIAPELAPPAKKPKTDKGEPSYSWKNIKPGTKRGKPFYLFVNQARAKKQKLSNQMTDQNASDQPNEPATAAAPGGNPTGGGGGGSGVGHSTGSFNNRVEFHYHNGEVTIICHATRQVHINMSDQEEYLLYDTDHGPSFPRPNDQSVQGLDIINDSYHAKVETPWHVLHANSWGCWFSPSEFQHMTTICSEVEIIGFEQSIDNIVIKTVTQQGTGEAQTTQYNNDLTALIEIAEDKSNVLPWVSDNMYIDSIGYIPWRPSKLPIYSYHTNFLNTIKLSPRTTVQGQPVDGRWDQIKQGIMWGDIQFTTVEN…	716	USER	zzz1683
1629		genbank_parvoviridae_YP_009259491.1_@3KIC_N	parvovirus_cap	genbank	MPPINKAKKSGLTLPGYKYLGPFNSLFAGKPVNKADEAARRHDLGYTDLLDKGHNPYIYFNEHDEQLIQDLQTDRTFGGILAKSVFGIKKAVAPALPNTKTKQAERAAKRKLYFARSNKHSKQAKMEDPNMDHDTDAQAPDQPDGVARSGGGGAVGSSGRGGSGVGYSTGGWTGGSIFTDDIVITKNTRQFICEIKNGHLYKTETLNTGAQHAAQYACTTPWSYFNFNQYSSHFSPHDWQKLINEYTAFRPVKMQVRIYNLQIKQIVTDGAQGNTYNNDLTAGLHIMCDGSHAYPYVQHPWDDECMPELPNQIWKLPQYAYLYGPIESIDEPTNGAEADIKKGIPLYILENTDHEVLRTGEATEFTFNFGNCEWVENNISSILPQMMYNPLVKNRKVYN…	654	USER	zzz1684
1628		genbank_parvoviridae_YP_009256213.1_@3NTT_A	parvovirus_cap	genbank	MSSVNNSAQIKAIKKPSSGKAKPKKTNVKRVEKPVAFGSVTTMSTTSSLVNPYSVPDKRYKTWQTNKGPYVLMGLHRASTQQQRRRRGGFLWPGHNYMGPGNPLDNGEPTTNADKVAQQHDYAYAHAWTEDHIKEADAEARHQFLEHPTEFSSLVGYTGLGLKSLLESVTGTVYPAPSKLRASTAQRSAMAGIKRKKNNDGTEEA	205	USER	zzz1685
1627		genbank_parvoviridae_YP_009241377.1_@6BX1_F	parvovirus_cap	genbank	MPVIGRERRVSLLTGWVPPGYNYLGPGNTNFKKQPTNPSDKAARNHDLEYNKILKEGQNPYIYFNHADEDFIKATDQASDWGGKFGNFIFRAKKSLAPELAPAKKKAKTNATKPTNNIKRGRPAPFYLFVNRAREAKKQKLMSDNGTDEPDQPAATETAARGSGASGGGGGGGVGHSTGSYSNRTNFIYEGDTVHIICNATRQIHLNMASTEEYKIYETEHGSEFPTDPSKDSGRGTYQDSYHAKVETPWRLIHANAWGCWFSPADWQQVLTTCRDLEIVSFEQSIENIVIKTVATQGTGIEETKTYNNDLTALLEVAQDNSNILPWVSDNMYMDSIGYVPWRACRIPEYCYHVDFTNTIDLGGQAGWPQAQAPGKTLQRLQQINWRNIQFITVENTVD…	719	USER	zzz1686
1626		genbank_parvoviridae_YP_009229910.1_@3NG9_A	parvovirus_cap	genbank	MAPINRKPRGWVLPGYKYLRPFNPLENGEPVNKADEAARKHDIAYNQYLEKGQNPYLNFNKADQTFIDDLRHDNSFGGAIGKTYFSIKKTLFPHLAGEGEPPAKRSKPGERAAKRKQYFARSNRQAKQQRMEQPDAAAADETSTTPHSRSARSAGGGGGGPGGSGGSGGGGNSVGFSTGGWDAGSIFTDNIIITTNTRQWYAPIYDGHKYKKHKAGDNGGTDSDWSGISTPWGVFNFNCYASHFSPQDWQRLTNEYVKWRPKSMTVKIYNLQIKQIVKLGADTLYNNDLTAGVHVFCDGSHRYPYSQHPWDKDTMPELPDEIWKLPQYAYYQIQDDLAEKASGDNVINPDDMSKNLIRDAPLYILETSTHEVLRTGEDTSFNFTFSSGWVMNDRAFCPP…	693	USER	zzz1687
1625		genbank_parvoviridae_YP_009256212.1_@4MGU_A	parvovirus_cap	genbank	MAPRKRKPPGPKPTVKRPKEYYQYRYSVVQRALSAEYKRSGSTLPYALWCASEDAVRVRENTSAECDRLHDTEYGRSAPGNLTESSTANPASESATRKRGVSNSENNDPNLDNPSASKLPRSDTNSETMPADERMDTTQYGDPPTGGSGQQPRTSRGGGPSAVPLNNSHGSQQWTASFSKSRIWYSYGYSQVTSYLDTKQSLLGTVTPLSFIPVDYLPFYLDSAEYATVPPNTWVKRVTCQVRVLGVRSGFDIGATVTGVATSEYCPILLTAIGLNNNVHIMNKKIKSESTAPMIPTGLEDISLTDYMDKWYVDPASGVTCVPRSNSVYAVPYRNTSMAKPDWDDATKKDVLLHDAGNFRLDKFVKSHLLHSTVGETVVDYEYEPHMGVIKEPDPLCIP…	588	USER	zzz1688
1624		genbank_parvoviridae_YP_009215303.1_@3NTT_A	parvovirus_cap	genbank	MPPIRQPKGWLFPGYRYLGPFNPSDNGEPVNAADKAAQKHDQSYNHYINQGHNPYLYFNKADQQFLDDLRGDWSAGALAGKAVFGVKKAIAPALGEKKTAPGAGGGPPAKQAKVQAAKRKLYFARSNKGAKQAKMADSNEVEGAGDGPPEEQPSTSGGAPAPSMVDARSGSGGGGGGGMGGGGSVGVSTGGWEGGTHFHANGVTTVVTRQWYARAFNNHTYSTLSSNNLSLNNDPAWIGIQTPWGYFNFNCYRCHFSPNDWQRLTNEYVRWRPTSMHVKIYNLQIKQIVSLGNDTLYNNDLTAGVHIMCDGSGQYPDSANGWDEQLLPEIPTDIYTLPQYAYYQANGDLVSDGGANTVNNSTERHILANVPLFMLETSHHQVLRTGESTEMRFSFSCGW…	724	USER	zzz1689
1623		genbank_parvoviridae_YP_009154713.1_@3KIC_N	parvovirus_cap	genbank	MDFLDFLLGEKYEETAKELGKPINPPPVQQISHADSRRGLVVPGYKYLGPFNGLDKGEPVNAADAAALEHDKAYNELLEAGDNPYIKYNHADAVFQERLQGDTSLGGNAANAVFQFKKRLLEPFGAVEQPQPEKTAEKRKTPEEWLAQEKTPTKQRFQIPAPGQSGSDSPSTSGSGGTAGSSSSASNTMAQGGGGPMADDNQGAEGVGNASGDWHCDTQWLGDHVITKSTRTWVLPSYGNHLYSPINFDGTTGNGTQAAYCGYATPWAYFDFNRFHCHFSPRDWQRLINNHTGIRPVGLKFKLFNIQVKEITVQDSTKTIANNLTSTVQVFADTEHQLPYVLGNATQGTFPPFPAEVFQLPQYGYCTIQGPQGKFTDRSAFYCLEYFPSKMLRTGNNFE…	725	USER	zzz1690
1622		genbank_parvoviridae_YP_009134734.1_@4MGU_A	parvovirus_cap	genbank	MAEEAFELIRRTGGSRIQYSVRTAGGLFKTVPNYTYSQAVGLAERNIPIDIREGAVNLNEYINFEHNFSQLNSGEQIPLDNIELNTTELSSSVEEGLSLGTTASETTPLLSSTGGVGAAAAGTGSAVASGGSTALAVGGGLIGSAIIGGLIGGLTTKSTDSVEEPNHIDPVVSLPDHHYIGPGNTLSGIKPVDTDDHIALDHDKAYEQAKTQQDIQNADKKSAGEFLTDIIENSNPHSIAGYIGLKAKETVEGLVGVKYPANLPISSDPGMGREIRALNKYPIHRDPSRHDDFPSSKSQQRYVWDAWNRARQNHGLPRVDPPPRLGLGVTFRPPTNPRTGLRQPSTSISYRQWKDTRKSGSSGPLFDVLSKSVADDLTPDEQSEITDILSQIEGGSISI…	944	USER	zzz1691
1621		genbank_parvoviridae_YP_009186841.1_@6BX1_F	parvovirus_cap	genbank	MPTLKDFKNGLTLPGYNYLGPGNTDFTKKPTNPSDEAARRHDLAYGSYIKKGHNPYFNFNKADKSFIKETDQAKDYGGKLGNLFFRFKEKIAPTLPEEPPAKKPKPSTSKPISYSWKNLKQGVTKGKPFYIFVNRARKQRLMDGGTSNDIQDESNQPNADAANAGPSGGGGGGGAGVGHSTGNFDNRTEFVYENGEVTIICRATRLVHLKMSDSEEYRIYQTTNGDQFPVDYEDAGKTTYDSFHAECMTPWFLVNANAWGCWMSPADFQHMSTICTELSIETLEQQIDNIVVKTVTTQGTGQEQIQLYNNDLTALVQLALDKSNMLPWTSDNGYCESLGFFPWRPSVPKPFRYYVNYYNTMVISPPRGPQTSGGWVRTRQGVDYDNVQFITVENHVPID…	726	USER	zzz1692
1620		genbank_parvoviridae_YP_009130651.1_@6BX1_F	parvovirus_cap	genbank	MPLLKGFKDGLTLPGYNYLGPGNSDFTKKPTNASDAAARKHDLAYGSYLKKGHNPYINFNNADKTFIKDTNQAKDWGGWLGNKFFKIKEHIAPKLPEEPPTKKPRPSTSKDPKYSWRHLKEGTKKPKPFWLFVNKARQKKSMDGGTSTDTQDEPNDAAATASNTGTTGGGGGGGSGVGHSTGNFDNRTDFRYENGEVTIICRATRLVHVKMSDSEEYRIFQTNNGDQFPPSTTRNEAGITINDSYHAECLTPWNLVNCNSWGCWMSPADFQHMSTICTEIDIQSLEQQIDNIVIKTVTTQGTGQEQIQLYNNDLTALLELALDKSNILPWTSDNGYLECLGYFPWRPSVPRPFRYYVNYFNAILIRPPTGPTTSGDYVRQRQGIQFDNVQFITVENHIP…	728	USER	zzz1693
1619		genbank_parvoviridae_YP_009111340.1_@3KIC_N	parvovirus_cap	genbank	MSLSDAMRITHYLQSDDFGKDEWDVTGPNSYYSRLNSRRKQVSDRLSERDGERADTDSTTTGPSTGGVVSEVRVPESDTSSGRKLQSIEEEHGSETEEAPQAGDSKRSGFVVPGYKYMGPGNDPDVGPPVNAADTAARDHDLRYAQMQNAGINPYVKYNKADEKMIEELKSNPEADSDLAGNAARAIWKGKERLTDVLDPLLQKVAPDIPAKPLKQSERPPPVQPIPPPPTSPSKRPSSPILDGVPPDKKPKVSIPSSQQEQPSSIVSGVGGSGMTEFASLPGSGGTTHAVDNWNAGCHFGDDFVITTQSRVCLLECREDKYVSIHPSSTEIKNFFCYGYKTPWSYIDLNRIDIHFTPHDWQTLTENYDSIKPVSLSWHIFHVNVKDVSTHSGDTTLAD…	822	USER	zzz1694
1618		genbank_parvoviridae_YP_009116877.1_@4IOV_A	parvovirus_cap	genbank	MVEWDPTRVIEWQKKAVWEEQMRTKYNTELERNRLTQQIKADEDTNATPWLGFPKFQHWYYFSSQSIWRSQRARHKMPYSARQVYRAYQLWTKIATYYKWRYDNTQDIKYLREYNDMVREQFKDSFETYINDMQKSVRLTLNLADPDDKEASDILLKTLEAPNKYTDRKWPGFPLKDYYLKRKQKAEEEAAKPPDPPPPPPQIIEEVKKAIQKEEDERTRAEEGEGRDAGGGLTVPGTSYVGPGNPVPAGPPSGPVDQAALEHDQRYSWLLSLGDWPYLLANEADKIMSDDLEEKAHTMTSSEKVLANLVRSVWHIKETLSDMFPDLAKTLLHGTKTGTETKKRPYIEPETDAPAFKLPKREDESVSYDGEGSTVVVTGQTEGGMSSSTETAAGDSSVN…	964	USER	zzz1695
1617		genbank_parvoviridae_YP_009058895.1_@6BX1_F	parvovirus_cap	genbank	MPAIRKARGWVPPGYNYLGPFNQDFSKKPTNPSDKAARKHDLEYNKLIKQGHNPYWNYNHADEDFIKETDQATDWGGKFGNFIFRAKKALAPELAPPTKKKTKTKHTEPEYSHKHIKAGTKRGKPFYLFVNLARKKARMSESNEIDEQPAEQQPLAATAAKAGGGGGGGGSGVGHSTGNYNNRTIFHYHGDEVTIICHATRHIHLNMSPTEEYKIYDTNHGPEFPNTGDQTQQGRNTVNDSYHAKVETPWYLINPNSWGIWFNPADFQQLITTCTHVTIETLTQEIDNIVIKTVSKQGSGAEETTQYNNDLTALLEVALDKSNMLPWVADNMYLNSLGYIPWRPCKLTQFCYHTNFYNTINLLEGTQQNQWSQIKEGIQYDNLQFTPIETSAEIDLLRT…	710	USER	zzz1696
1616		genbank_parvoviridae_YP_009021038.1_@3P0S_A	parvovirus_cap	genbank	MPRIHFPYHNYLGPGSDNFNQQPVDEDDAIARSHDLDYNKASSDNDIFKADKQARDEFFSSFVHSGNVHSLIGGLGLGGKNLIEEHVLGKSVYGMGKRKSTEKDWAKIKRINRARTARRENEENQPDIRNFGHVAGENINPDAEVNLADFPDFLQDFVAEAGPSGTQPIESAQELPPMSQDEVPMDTAGATDVGGGAQVDPRSGGQTAGGMGAGGAANDGRQDIYAGAPQPNQHHELVYGKSYHFTLTNGLPDFRHALVQTNHYVAEQRFKHIHGIPWERLLMYISEGELVRLFRDYTAVKVEEVVCEVYSLGVRLPFVTSATTSSVANANAQYPIGCFHFDKAYQTQYDSTNVQDIINKALGSEWKNFNRPSQPVTTEWSENFPNISASTTSRDINNP…	677	USER	zzz1697
1615		genbank_parvoviridae_YP_008802582.1_@3KIC_N	parvovirus_cap	genbank	MAPTNRRPGGWTVPGFKYLGPFNPLDNGDPVNEVDKTAQTHDRAYQSYIDAGINPYLNFNKADSDFIESLSKDSSVAGWLGKSAFKLKRVLLPHLDKQRELAGGRGGKKPKLTPEQAQKRKYYFSRQYPRKPKEAKTNNTDMGDAAELNGVDGGDGGGQARAGGGGGSGVGGSGGGGHGVGVSTGGWKAGTVFSGNKIITTSTRQFYAPIYNDHLYKRIWESAPSSTNKTWVGISTPWGFFNFNEYDAHFSPGDWQTLVNTYAKWRPVHMHVKIYNLQIKQKVILGADTLYNNDLTAGVHIFCDGSHQFPYSQHPWDHGTMPELPYDTWKIPQYAYFQMYADLEPDDSGNQNLNADNVEKNLTRNAPFFVLESATHEVLRTGEETEFNFDFECGWVNNT…	719	USER	zzz1698
1614		genbank_parvoviridae_YP_009021567.1_@3KIC_N	parvovirus_cap	genbank	MSRSTQRDLWSLLRERLETYKDRVKYYGILVPERPSTFASYFSKDPPPDPPTVKFDKPYQDVDRFWFPTDDYTDWYVWHGEDRPPRFTEHSGVQGFKTRCEGGLPLIPSDPKFCPIQNFWDQFANFNEGSPSPQIGESVSWSDHFGSPDPSHHQEVRDADEVVSERQQYKNRIVTLLRKVYWAKQWSGKLQINVPSLESLYEQIPYMLAYMDADNWRQNLLAAKTLRTTLEAFSCVPDPSTCDVTISTPLSGETDPASFAKYLCSLVCNRSQEKEQAQTPSLSPSKQEGQMSSPDSASISQPPPESHKDRLLPKTDPLQEAGPLPAPPTAQKPIISKGAGGGGSSGFIIPPKPPSPDHTKDPPPPPPPSPIPPPTSAPDAEEHELERAKQEKQEEDELM…	1189	USER	zzz1699
1613		genbank_parvoviridae_YP_008766863.1_@4MGU_A	parvovirus_cap	genbank	MVWKNIKPEDRPNWHKLNEGQRRYAYEQYKLALVRRGLDIDHDRPDVSESESEAEELPQVSQNSQQSQYDTASEGDQYETADDASDTDTIVPDSFENDMAPPVSMDKSTSGASTSGTSNKGGKGIKRQKTSDSGIAEGGRADDGFSLPGTGAEEQADNGFGSEAPRSLALPRPTLRLNNYVRYYSKFHKFITWGISYQILPEETGDRSYRHISTPFAQVPWDRLYLYLTNSEYATLPLESYVTSVSITIKPRNVRVAFPTNSTSTDLATLNQNKDVSYAVGLRQNLNCVNVQYTKFLDGQSMIPQDWEIDTLVKHQDLNKDLYGKEWALAPPTVPRHQMGIPTPLPTYCMIPYPKQDPEPGYPCFQHFYRDFDADGVSGRAICKQHYKPTMGLIKLQKP…	567	USER	zzz1700
1612		genbank_parvoviridae_YP_008766864.1_@4G0R_A	parvovirus_cap	genbank	MNQPGSAISRVERSGRGSGRGLNKIVDRIFSSGTGVRRRNRPNVRYTPIGTQLNQVNRVAVNKSTPTTRSQWSKTFNTTPKGIDPVITGGTGAAVGALLGGGIEALTNKRLGGVTLPGSDYIGPGNKIGIDAPRSAADQIGKFHDITYAELLEAARRGVITKKEFLYGINHTDKKHADLFDKEWKESGSWQAFIGKYGLNFKNYIEEKTGVLYPSYPNRKYFFRWFGKI	229	USER	zzz1701
1611		genbank_parvoviridae_YP_009010976.1_@3KIC_N	parvovirus_cap	genbank	MSLKRGQFRGLLFPGYNYLGPFNPLENGDPVNKADEAAKKHDQAYNNYINKGLNPYLKFNKGDQDFIDSLQSDSSVGGNFAHAVFHLKKQIAPALNEPKDTGEPPAKKDKRAGNKRHLYFARLNKGAKKAKADPNNMDGDMDNNEQGAGEAPAAEGGARAAGGAGGGGGGGPSGNHGVGISTGGWIGGSILGQNRIITKNTRQWWCPIRNEHKYKRYQGIADYKMEGYTTPWNMFNFNQYSSHFNPNEWQWLLNRAARFKPVKMEIKIYNLQIKQESNQDTTAQYTNDLTAGLHVLCDGEHAFPWTQLPWDKGCMPELPHDIWTLQQYAYITCASEAQDTTSNGNELNIRGAVPMYLLEETDHAVIRTGESIAFHHSFDCGWVDNTRSSVMPQMACINP…	682	USER	zzz1702
1610		genbank_parvoviridae_YP_008431134.1_@4G0R_A	parvovirus_cap	genbank	MPRLRSGGYKKREEYVVRRLRADNYVPNKGMTIHGYEWFGPGNEITYNPARNQVDQDGKDHDLTNDYKKKGAFYTYNAADKILLRKLEKEHSIPAKIGKAWFGTKRYLAEHGFLPTTVGSGGVYVTPHKKRRFEAPNISGKKRKPDPREFAQLKRSSVSNTPATATMAMQVDTGTRRPIGNANAQGLSETPIDDVYDVHRGPPDYTFASLPYAAQLNYEGGAYSLDTVFRMTSPNDVRVDTGITDFNSGAGVAQISTVPSDPDVANAQDIARWWDYYAGIYKYYHVLGCRWHLTFENLSNDLVYLHKMFYNDVLPNPGATNEDMLQWRDCESHLVGSHAVGVNTVGINAFENEPGSGNGAMNLESSAVNITTNWKTGDNVARVNGPSPIIQLSGEYKPG…	491	USER	zzz1703
1609		genbank_parvoviridae_YP_008658570.1_@4MGU_A	parvovirus_cap	genbank	MAPVLVVPGHKYLGPGNKLHSGKPVNSADKIAQRHDWFYNFDRTASEVRNSDFNAIREFWQNWQKTGEIDNLVGAAGLGAKYVAESVVGVQYPQMSTPSSSVKTPQKRLRVTTPKDWARIRKINQANRLKRLRLAAEAAGDRQEASHEPSSNPEPGPSVERPPSTNQQQDHFQAFDLIDNDLNRILDEVDAAENMNNEEEWENMDEDLADQDIGSATARTGGVTPGTSGQLPRAETHDITLYKTPFTPARRKVFYNDFTWQLWGNSFCDTISTAGTSPVRANTARLFSLGYIPWEQVSMYMSPAEFLSLAPDARIVKVGIRATIRGFTTSFETNSALTGIASSHHWIQGLKAVGLNNKFHIRPRIPEYAANSLRVTKSNEYFGSELEDILWGSNALQTE…	682	USER	zzz1704
1608		genbank_parvoviridae_YP_007003825.1_@1DNV_A	parvovirus_cap	genbank	MSFYTRGLIHRARPGYRIIPESTASEDIELGTLGERTPLLSESAVTAAEEGASIGIPEVAAGLAGAVGTHADLLYRNRHVFKSVLTGKYTDLEGKPLKEKRPISERVKQIGRGIFQGDFHRAFPEDLKVESEQEKSDLLRYYNHNRRLAGLSEAYPQGKGYSYAKSQKVLDAEKRGLTVPGYKYLGPGNSLDRGEPVNQIDADAKEHDEAYDKAKTSQEVSDADSKFVSKALDHIVNAINLKETPGNTFGAAIGAIGIGTKQAIEKHSGVIYPSVSGMSRQINPKYLSSWSDWIRENQASNFAGIQLPEDFYTEEKTLSDSSMSEGTKRKADSPVEEGPSKKGAHNAPVSSQSTSAQVPSSAGATTALDSTMAMSLPGTGQGTSSGGGNTQGQEVYAIP…	805	USER	zzz1705
1607		genbank_parvoviridae_YP_006589930.1_@3P0S_A	parvovirus_cap	genbank	MPRIHFPKHNYLGPGSGNFNVPPVDEDDAIARQHDLAYQQAENHKDIFKADKTARDEFFSSFIHSGNVHSLIGGLGLGAKNILEENVLNHSVYGMGKRKSNEKDWATIKRINRARAARRENQENQQDIRNFGHVAGENIEPDHEANLADFPDFLQDFVAEAGPSGSQPVEGAYENNMTNNNVEMETQGEASPVAGGSAQVDPRTGGQAAGGMGAGGAANDGRQDIFSGAPQPNQHHQLIYGKSYHFTLTNGLPDYRHFVASGNNYIAQQRFKHIHGIPWERLLMYVSEGELARLFRDYTALKVEEVVCEIYSLGVRLPFVTSATTSSVANANAQYPIGCFHFDEAYETNYSPTNVSDIINKALGAEWKNENRPAQIVTTNWSETFPNITASATSRDISN…	673	USER	zzz1706
1606		genbank_parvoviridae_YP_006576514.1_@3P0S_A	parvovirus_cap	genbank	MPRIHLPYHNYFGPGTDNFEQHPVDEDDAIARLHDLDYGKAKTDKDIFKADKEARDEFLTSFIHTGNVHSLIGGIGLGAKNLVEEHVLGKTVYGMGKRKPNEDNIEKDWAKIKRINRARANRRANQENQENQEDIRNYGHVPGRDIHPDQEVNLEDFPDFLQEFVAEAGPSGVQPVETAQQSPTMSDEEVPMDTAAAAAGATDIGGGPQVDPRSGGQAAGGMGAGGAANDGRQDIFAGAPQPNQHHKLVYGKSYHFTVSNGLPDFRHFLNTISNNYSAQLRFKHIHGIPWERLLMYLSEGELLRLRRDYTAVKAEEVVCEVYSLGVRLPFVTSATTSSVANANAQYPIGCFHFDQAYETIYDSNNVADVINKALGAEWKNTTRPAQPVTTAWSETFPNI…	681	USER	zzz1707
1605		genbank_parvoviridae_YP_005097852.1_@3KIC_N	parvovirus_cap	genbank	MTIKKTKGQVPDETTWVDHLMWFLRRLFAQGRGGLDATESLENRDGTFDTFIDDIQAKDRANHQRWLKEKADRDRIKAIKARDRERLRGTLITQKISEQNWEDIKHIFPELEKHEEAGKHAYKTFEYLLHHPSLQSILESQNPRELWETERERDKLAMEDIIKKQEEAAALTDRDRYEPLSGFRTREWPDDYTDRVDLEKQERDLEDARRAEDARREAELHFVPGKGDGGGDTEADFQAPESQPSIPHGDDLEDRRGLVLPGHRYTGPGNSDDRGEPLGPVDELAREHDRGYADLIKEGINPYVKYNRHDKDFTDALAEGPGGQTWAGNFAQSLFHLKRKITEVLDPQAVRDADAQSKKARISQEKTVNEPGPVGAPPENASVAAGGGMSGDTEVDHSA…	876	USER	zzz1708
1604		genbank_parvoviridae_YP_006272946.1_@4IOV_A	parvovirus_cap	genbank	MAPTNRRPGGWTLPGFRYLGPFNPLNNGKPVNEVDKVAQKHDKAYDSYIKAGVNPYLHFNKADSDFIDSLSTDSSVAGWLGKSAFKLKRLLAPHLSKEKEAAGNKGGTGGKRAKLDPVRAQKRKYYFARQNQGKNPKQQKMENEVETAGDGQEGAPAGTARAGGGGNGAGMGGGGHGVGVSTGGWRAGTIFSDNVIITTSTRQWYVPIYNGHLYKEIFANGSVREWVGISTPWGYFNFNEYDAHFTPNDWQRLTNEYAKWRPKRMHVKIYNLQIKQKVTLGVDTLYNNDLTAGVHIFCDGSHQFPYSQKPWDFGTMPELPYDVWKLPQYGYFQFQNDLSDQSSNSLAADNVEKNIVRNAPFFVLESASHEVLRTGEETEFNFEFECGWVTNTRAYAPPQ…	712	USER	zzz1709
1603		genbank_parvoviridae_YP_005090505.1_@3NTT_A	parvovirus_cap	genbank	MASGGVAFFMPTGEGGKAISKLYDGAVTGWSQSHLRHGHYRATALSGLVYQKAFENLDAFAKHLPPSLRLVQTLYNNISKQRNKTANTEWWWRVYTDCTRLLLTVAQPQAADALRRAWNGTSPLRPPAQQVLQNVYMLAYNSHIPSEEDLNTFFDESVLGSVSGDPENFAFVKQAVVSAFHPADGGAATEQRSDVPESPSPPSESDHSQPSGGGLLVPGYNYVGPGNPLDNGPPKGPVDEAARNHDRRYDEMLSHGDVPYLDSQGVDQLMTKEIEDAEKKEPLGPIDALVANAARALWKGKETLASVIGDQGHQVLPPNPPSVDQGSHLGSKRPLEESEENSDSLAKKFRPGSSPKSDLEPSGGTAPTAPPKGATMSTEAEGSGGGIKVKALWTGGTEF…	919	USER	zzz1710
1602		genbank_parvoviridae_YP_005086950.1_@3KIC_N	parvovirus_cap	genbank	MSLKRGQFRGVLFPGYNYLGPFNPLENGDPVNKADEAAKKHDQAYNKYINKGLNPYLKFNKGDQDFIDSLQSDSSVGGNFARAVFHIKKQIAPALNEPKDTGEPPAKKDKRAGNKRHLYFARLNKGAKKAKADPNNMDGDMGDNEQGAGEAPAAEGGARAAGGISGGGGGGPSGNHGVGISTGGWIGGSILGHNRIITKNTRQWVCTIKNDHKYKQYTQWTQGNTNMGMQGFTTPWNMFNFNQYSSHFNPNEWQWLVNRAKRFRPVRMEIKIYNIQIKQESNQDVTAQYTNDLTAGLHVLCDGEHAFPWTQLPWDKGCMPELPHDIWTLQQYAYITCASEAQDTTSNGNELNIRGAVPMYLLEETDHAVIRTGESIAFHHTFDCGWVDNTRSSVMPQMA…	684	USER	zzz1711
1601		genbank_parvoviridae_YP_007518456.1_@3KIC_N	parvovirus_cap	genbank	MAPANRKPGGWVVPGYRYLGPFNPADNGEPVNSADEAARSHDLAYQSYLDAGVNPYFSYNKADSDFIESLAHDSSFGGWLGRSAFGLKKLLAPHLADTKGNPDAPSTSRGGSSVSKSERAQKRKLYFARSNKQAKQQKMSAPEAPTEDVAEPGPSGSDPRAGGNGGGGGMGGGGGHGVGVSTGGWKAGTVFGNDFVITTNTRQWFAPIFNGHEYKRMAPNENSEPATNRHWVGISTPWGYFNFNEYSSHFSPQDWQRLTNEYKRWRPKAMRVKVYNLQIKQVVTLGSDTLYNNDLTAGVHIFCDGSHQFPYSQHPWDTGTMPELPHRIWRISQYGYFQLQADLTNGGVSSETPDVGNQEKQLLKSAPLYMLETASHQVLRTGEESSFSFSFDSGWVIND…	712	USER	zzz1712
1600		genbank_parvoviridae_YP_004869647.1_@3KIC_N	parvovirus_cap	genbank	MSLKRGQFRGLLFPGYNYLGPFNPLENGDPVNKADEAAKKHDQAYNNYINKGLNPYLKFNKGDQDFIDSLQSDSSVGGNFARAVFHLKKQIAPALNEPKDTGEPPAKKDKRAGNKRHLYFARLNKGAKKAKADPNNMDGDMGDNEQGAGEAPAAEGGARSGGGGGAIGGGGGGGNHGVGISTGGWIGGSILGKNKIITRNTRQWVCTIRDSHRYKQYTQWRQGNTNVKMQGYTTPWNMFNFNQYSSHFNPNEWQWLVNRASRFRPVRMEVKIYNLQIKQESTQDTTAQYTNDLTAGLHVLCDGEHAFPWTQLPWDQGCMPELPHDVWKLQQYAYITVAPYAQDTTDDGDELDIRGGVPMYLLEETDHAVIRTGESITFHHTFDCGWVDNTRSSVMPQAA…	684	USER	zzz1713
1599		genbank_parvoviridae_YP_004869643.1_@3KIC_N	parvovirus_cap	genbank	MSLKRGQFRGVLFPGYNYLGPFNPLENGDPVNKADEAAKKHDQAYNNYINKGLNPYLKFNKGDQDFIDSLQSDSSVGGNFARAVFHLKKQIAPALNEPKDTGEPPAKKDKRAGNKRHLYFARLNKGAKKSKADNTDMDGDMDNNEQGAGEAPAAAGGERAAGGAGAIGGGGGGNNHGVGISTGGWIGGSILGNNKIITKNTRQWWCPIRNEHKYKRYTQWHQSGTDYKMEGYTTPWNMFNFNQYSSHFNPNEWQWLVNRASRFRPVKMEIKIYNLQIKQESTQDQTAQYTNDLTAGLHVLCDGEHAFPWTQLPWDKGCMPELPHDIWELPQYAYITMPSQAQDTDNAEERAFRCAVPMYLLEETDHSVIRTGESVIFHHSFDCGWVNNTRCSNMPQLAF…	683	USER	zzz1714
1598		genbank_parvoviridae_YP_004678721.1_@3P0S_A	parvovirus_cap	genbank	MPFHWPRHNYLGPGTKDFTKEPVDEDDEIARRHDLAYANATSHQDIYKADKEASKEFFDSFKKTWHPEAFVGSAALKVKNFTEEKIVGRPLYGMPTKDWGRIKKINEARARRRQAEESVDDLRREYGPPNIYDADTDPEAAMGSQSTDVPDNAGEAMDMVADQPRAGGAPSGGSSSGGTGSNMGDVYAGSCQNPNKHIKTFKKSYHFTISNKLPEWKRNVENGHVEYLARYNSIHGIPWELVGMYLSEGEIGQLFENYSLVRVEEVNCKVYSLGVRLPFVTGQSVTTVANANAQYPIAKFNFDNDFFTSYEPENVYNVLEKCWGSEWKNMDTTNTNWSTQFPNLTASTTSRDMNNPILVHYPRYSWITSGTREQFPKDVGIYDYCSIKNGSTVFGLAWE…	659	USER	zzz1715
1597		genbank_parvoviridae_YP_003799998.1_@5URF_n	parvovirus_cap	genbank	MPPIKRQPGGWVLPGYRYLGPFNPLDNGKPINNADRAAQAHDKSYSELIKSGKNPYLYFNKADEKFINDLKDDWSIGGIIGSTFFKLKRAVAPALGNKERAQKRHFYFANSNKGAKKSKSSEPKPRTSKMSENEIQDQQPSDAVDGQRGGSSAAGSIGGGKGSGVGISTGGWVGGSHFADKYVITKNTRQFITSIQNGHLYKTEIINPSNGNGKSQRCVTTPWTYFNFNQYSCHFSPQDWQRLTNEYKRFRPKAMLVKIYNLQIKQILSNGADTTYNNDLTAGVHIFCDGEHAYPNASHPWDEDVMPDLPYKTWKLFQYGYIPILNELADLDGTTAGGTATEKAILYQMPFFMLENSDHEVLRTGESSEFTFNFDCEWVNNERAYIPPGLMFNPKVPTR…	671	USER	zzz1716
1596		genbank_parvoviridae_YP_009046828.1_@5URF_n	parvovirus_cap	genbank	MVKYKPPPGYVPSLPTTDEEAYHYTRWWLNHVENYGKDKHITKGKGKQKKELTAQQKADRKRFFITQAQKNKNPKFGIPTSSQHKDFFKNHQGAKKEGKAKQKTKHLEPQAPQREEDPEEGPAPKQARIEEAPFNEQELEEAMADENEPDQSGIPMELSDAPGGGGGGGGGGVGHSTGNWNCDTIWEGNTCTTYASRHCVCLMRDLDKYQAIGNQNGRHGLDAENQTQYFGFTTPWNYLDFNKYSIHFSPRDWQHLVNNFSRWRPRAVHIKIFNLQVIQKTVTGDGTQYSNDLTGTIQIFADQEGRYPRILYPNQVTQMGSFPNQIYYLPQYAYLSAITSNNTTTTVTFWNYLNELTAFYCLDESPSQMLRTGNEWQTSYEFPDSTPWCNNRVSTVSIT…	677	USER	zzz1717
1595		genbank_parvoviridae_YP_003858572.1_@4IOV_A	parvovirus_cap	genbank	MSFVDHPPDWLEEIGEGLSEFIGLEAGPPKPKPGYQDRARGLVVPGYKYLGPFNGLDRGEPVNAADAAAKKHDEEYDRLLKAGDNPYLAYNHADAEFQKDLSGDSSLAGNAANALFQAKKRVLEPFGLVEGEPEPKKTPSVKRPHASPDSSSGVGKKGDQPARKRLDFGTEPAGQDGAGRAAQAAGDMASAEVAAGGGGPVGDDAQGADGVGNASGNWHYDSVWMDGAVITKSTRTWSLPAYNNHLYRQIQSSGTGDGTYFGYSTPWGYFDFNRFHCHFSPRDWQRLINNHWGIRPKRLHFKLFNIQVKEVTTTDGTTTIANNLTSTIQVFADTEYQLPYVLGNAHEGCLPPFPADVFMLPQYAYLTLNANPTNQGAAALSLPQSAFYCLEYFPSQMLR…	724	USER	zzz1718
1594		genbank_parvoviridae_YP_002887627.1_@1DNV_A	parvovirus_cap	genbank	MSSTLRRRIPFSERTPLLETFEVEEAEEVAAEGLFASIEEAAASLDLTPLAPVGLWVGGLAGLGYGAYEIYEHLLKSKPKITLRKVEREHKKAVKALEKEKFDLETLEDQHGDVDIVPIEQQNIEGERAGLVPAPYKYAGPGNSLNRGPAYDLVDESARQHDIAYDKAKSPEDIHKADRQFLTEAGNYVAEGIAGKGSISQTLGGIVTGAGIGIKHLAEKATGNIIYPPMAPPKRGVADSSTGGTPAKQAITQIPGPSSADAGMTLTGTGKEQASGGASSDGLAEYHIERPISLFGSKISTYRKVHKFMTFGFAPKIITSDSNSNSRWLTTYLAEVPWHLPCFYLTPSEFNLMPIGSRVKDVSIQVIYRGSTIQFETASSATSLATLNQINDIAVATAL…	730	USER	zzz1719
1593		genbank_parvoviridae_YP_227602.1_@4MGU_A	parvovirus_cap	genbank	MTPPLKPHPQERDNWEYLNEGQRRYAVEQWQLARVRRGLPIDHPIPEPPRAEEEEVAPATPTADDILDELPEGNPEDIDDFDVDQLPSTTQEHHPTTDLAAQPGRSTDPDPEPVSNPVDSTPPDEGDSSSMSAPLTPPITPDKTQDKGKGKRGGGGRPPKSSGGKRSRMAGTSLPGAGADIAGEGGGQAIIPIPRPITTPHNNFIIFNKVHRFLTYGLANVVIPITRTVNDVTYVDNFVITSLGRLPVDRPFLYMNPNEFAQLPPGSCIEECNVRVTAFTPRIAFQTNSSNTGLATLNQNQFILHATGLNIKTQGIDVRPKEFQANEPMVVSSIDELGAIRDENLFEDYVKEFYGDKSVPNHVPRHQFGIPYPLKNYFALVLQQNGTADNPGYECLQSH…	597	USER	zzz1720
1592		genbank_parvoviridae_YP_238483.1_@3NTT_A	parvovirus_cap	genbank	MSAADAYRPGGKLPLDELMQRMNRAIPVGPEPSSQANRGGGPYQTHFAIGIMYSKAFQGLLRFANALPPELSPVKQLVNQLENYRRKTSDTRVWYRVYLDMTRLLISVAPPGAANKLRQAAAGITHSKAPNAESLRGIVRFAAAAFVPTVENIDRFFEDSLTNFAKEDLDTWQQLHEQFIKLFHPPDVGVHLVSDSRDEGADSLVEPDLERPAGGGLTLPGYNYVGPGNPLDSGPPQGPVDEAAKHHDERYAEMIEHGDIPYLHGHGADRLMNKELEEKERRGDITHLADVVVGNAIRGLWQAKETVGDIADVQLSQVLPPAPPSSDQQPAYSAGEPSAKKARIGTPDESDPALLLQPHTNTMSVEPAGGGGGVKVKAQWIGGTSFSDSVVITSHTRTS…	914	USER	zzz1721
1591		genbank_parvoviridae_YP_164341.1_@3P0S_A	parvovirus_cap	genbank	MPHLPGHKYIGPGTSDFKPIPIDSDDAIAREHDLAYLNADNNKDIYKADKTARDEFFSDFVHNNNYHSLIGGIGLGAKNLIEEHVLGNSLYGMGKRKNTEKDWATIKRINRARAARRERENDLNQPDIRNFGHVAGENINPDEEVNLADFPDFLQDFVAEAGPSGTQPLETAQESPPVMSQENVPMDTEGATDVGGGAQVDPRSGGQAAGGMGGGGAANDGRQDIFAGAPQPNQNHELIYGKSYHFTLTNGLPDFRHAITNNAYSAQLRFKHIHGIPWERLLMYVSEGELLRLMRDYTALKVEEVVCEVYSLGVRLPFVTSATTSSVANANAQYPIGCFHFDNAYEIQYDATQVNDVINKALGAEWKNSTRPDTPVSTQWSETFPNISASSTSRDISNP…	668	USER	zzz1722
1590		genbank_parvoviridae_YP_077183.1_@3NTT_A	parvovirus_cap	genbank	MSLISDAIPDWLERLVKKGVNAAADFYHLESGPPHPKANQQTQESPEKDDSRGLVFPGYKYLGPFNGLDKGKPVNEADAAALEHDKAYDLELKDGHNPYFEYNEADRRFQERLKDDTSFGGNLGKAIFQAKKRVLEPFGLIEQPDNTAGTGEKRPERVDDFFPKKKKAKTEQGKAPAQTGEDPGEGTSSNAGSSAPSSVGSSVMAEGGGGPMGDAGQGADGVGNSSGNWHCDSQWLDNGVVTRTTRTWVLPSYNNHLYKRIQGPGGTDPNNKFFGFSTPWGYFDYNRFHCHFSPRDWQRLINNNWGIRPKAMRFRLFNIQVKEVTVQDSNTTIANNLTSTVQVFADKDYQLPYVLGSATEGTFPPFPADIYTIPQYGYCTLNYNNEAVDRSAFYCLDYF…	738	USER	zzz1723
1589		genbank_parvoviridae_NP_958101.1_@1DNV_A	parvovirus_cap	genbank	MSFYTSGLTHRARPGYRIIPESTATEDIELGTIGEETPLLSESAITAVEEGAIGVPEVAVGLAGAIGTHADVLYRNRNVFKSVLTGNYTDLKGNPIKQRNSIPEKTKQLGKGIFQGDFNRAFPEDLKTETEQEKNDLLRYYNHNRRLAGLSEAYPQGKGYAYAKSQKVLEAERRGLTVPGYKYLGPGNSLNRGQPTNQIDEDAKEHDEAYDKAKTSQEVSEADNTFVNKALDHVVNAINFKETPGNAFGAAIGAIGIGTKQAIEKHSGVIYPSVSGMSRHINPKYANQPNWKDYITEGNSKNWEGYSNLPDDFFQEETLSDSPMQEPTKRKAGSSAAETPAKKGATNSNVNSQSTDPQNPSSAGATTDLDVTMAMSLPGTGSGTSSGGGNTQGQEVYVI…	811	USER	zzz1724
1588		genbank_parvoviridae_YP_068094.1_@3NTT_A	parvovirus_cap	genbank	MDFLDDFFADKYKETVNELGKPVNPKPVKHISEAHSQPGSRRGFVVPGYRYLGPGNSLDRGKPVNKADEAAKKHDQEYDQQLKAGDNPYIKYNHADEQFQKDLQGDTSLAGNAANALFQGKKTLLAPLGLVETPVGKTSEKHKLDEYYPKAKKAKQGLQIPAPPKGGEEEATSSQSGGSPAGSDTSGTSVMATGGGGPMADDNQGAEGVGNSSGDWHCDTKWMGDHVITKSTRTWVLPTYGNHLYGPINFDGTTGSGANAAYAGYKTPWGYFDFNRFHCHFSPRDWQRLINNHTGIRPKGLKIKVFNVQVKEVTTQDSTKTIANNLTSTVQIFADENYDLPYVLGSATQGTFPPFPNDVFMLPQYAYCTLQGNSGKFVDRSAFYCLEYFPSQMLRTGNN…	726	USER	zzz1725
1587		genbank_parvoviridae_NP_041400.1_@1K3V_A	parvovirus_cap	genbank	MAPPAKRARRGKGVLVKWGEGKDLITXLSMCFFIGLVPPGYKYLGPGNSLDQGEPTNPSDAAAKEHDEAYAAYLRSGKNPYLYFSPADQRFIDQTKDAKDWGGKIGHYFFRAKKAIAPVLTDTPDHPSTSRPTKPTKRSKPPPHIFINLAKKKKAGAGQVKRDNLAPMSDGAVQPDGGQPAVRNERATGSGNGSGGGGGGGSGGVGISTGTFNNQTEFKFLENGWVEITANSSRLVHLNMPESENYRRVVVNNMDKTAVNGNMALDDIHAQIVTPWSLVDANAWGVWFNPGDWQLIVNTMSELHLVSFEQEIFNVVLKTVSESATQPPTKVYNNDLTASLMVALDSNNTMPFTPAAMRSETLGFYPWKPTIPTPWRYYFQWDRTLIPSHTGTSGTPTNI…	751	USER	zzz1726
1586		genbank_parvoviridae_NP_758523.1_@3NG9_A	parvovirus_cap	genbank	MAPPNRKPGGWVVPGYKYLGPFNPLDNGTPINKVDKAAQKHDFAYQSYINKGENPYLNFNKADSDFIEDLKNDSSFAGWLGKSAFRLKRILAPHLKENTPPAKRVAGNSRQDRAQKRKLYFARSNKNSKQARMEPQETENTIEADAGIAGRAGGGGGPGGGGSGGGSGVGVSTGGWEGGTLFGDNRVITVNTRQWYAPIYNGHRYTKLEGTGNTFWKGIKTPWGYFNFNAYDSHFSPQDWQRLTNEYRRWRPKKMMVKIYNLQIKQVVTLQGDTLYNNDLTAGVHIFCDGSHQYPYSQHPWDAGTMPELPYKVWLLENYGYFQFQGDLIDTSVDGGSPDVENVEKEIAKSAPFYILENANHEVLRTGEETNFHFNFDCGWVNNDRAYCPLQADFNPLVK…	703	USER	zzz1727
1585		genbank_parvoviridae_NP_694842.1_@4MGU_A	parvovirus_cap	genbank	MAPKRIPPLKAPPNERPNWERLNEGQRRYAWEQYNLARVRRGEKFTSPVISEQQSAPTAPIEHPVNNADDSDDEVGGPIEVQAEVHEHPPDIESEDEGLEYLDDFDFDLQNELMAQVPGTGTAMEVGSTTGNASSAKRKAESAGGIGKKRPGTGHDTEDSGASISGDTGIMMGPIQRPIVNRDGDSDIRVYRKVHRFTTFGLAYKPIQISRGLESNTWTDVFMTTPLAEIPWNRLFMYMNPSEYSLLPSGSSVIDLHIKIRQRNVRVAFQTNSTTSELATLNQNKNAIFADGLLQYAGGENVAPTAFAANQAMIPTAITTELTNSAYNQFVDQFYGVQNTNAGFLTGSPRHQFGIPYILPFYYAMQNSVNDSSLSGWPCLQEYYHEFNADETSNTVFLE…	623	USER	zzz1728
1584		genbank_parvoviridae_NP_874380.1_@4MGU_A	parvovirus_cap	genbank	MPVNYNKPPPYERPNWERMNEGQRRYAMEQYNLALVRRGQYFEPPIAARPPSPAPNNAIQDLDELDRLLDNFPIGSPQQSQGGTSNSDQPVAGPSSRPDPVPAQLPVQPSTIQEPAQTMSAPEAIVTGKRGAEEPDSASTPTKKNKPSEHSGSALPGTSGNTDGSMGSSTMLDLDASRGIMPISRGIHVEKFEWTFTKKWKFLSFGVADVILPDDIGTTTAPAKRWALTTSLVNIPWEYAFMYMSFAEFNRLREMTGVFATDCDIKIYQYNPRVAFQTADTNSTQATLNQNKFTRIAKGLRNNPHLFGSDRDYTFSSDEPMKPLGFETNADQYTGQKFRDRLSKEMYGTTTRTTNTPTVPAISTGKEMGLLRYYTVYASQTIDSGFPQYNKYCSEFNSM…	628	USER	zzz1729
1583		genbank_parvoviridae_YP_077176.1_@3KIC_N	parvovirus_cap	genbank	MAAKLGGGLVGEAAIHRIESLSGKVHYKDKYWFPDNYVYTTGNQEEEDKIVAKLLLDPNAPVKEWGNGRWSFEYGPEWRRLGFIPHTDDINYRGLSYHKAPGTQLLEGIHEIPPEQKQGPESITQIAPPTQDSVLLEPMTNDPHYKKPKPPGDLGDIPKPLTPWQLANKIGPDYARQLLTMSGHDFTGRTPPVQIPDPGIREGLKELEEQSKLMERVQAGEGDEKPRGGLTLPKHRYVGPGGDLPAGRPMSKLDEIAARHDIGYHTEIKHKHNPYYWYNFYDEQMVKEINENMDQIAEEGESWLANFILATWKAKASFTNPLGILLEHLQPDWATYYDPANTHHKQWIAFQRALTQHGTASTERPRTPPTPDNEMFPHLAKRPRLDEPNKSASCSTDMS…	1038	USER	zzz1730
1582		genbank_parvoviridae_NP_694840.1_@3P0S_A	parvovirus_cap	genbank	MPRIHFPYHNYLGPGSDNFKKQPVDEDDAIARAHDLDYDKASSDKDIFKADKQARDEFFSSFVHSGNLHSLIGGLGLGAKNLVEEHVLGKSLYGMGKRKSTEKDWAKIKRINTARAARRNNEENQRDIRNFGHVGGENINPDAEVNLADFPDFLQDFVAEAGPSGSQPTETAQESPPGMSQDEVPMDTVGATDVGGGAQVDPRSGGQAAGGMGAGGAANDGRQDIYAGAPQPNQHHEFVYGKSYHFTLTNGLPDFRHFINTISNNYSAQLRFKHIHGIPWERLLMYLSEGEYLRLMRDYTAVKVEEVVCEVYSLGVRLPFVTSATTSSVANANAQYPIGCFHFDKAYETQYDVNNINDINDIINKALGSEWKNTTRPAQPVTTSWSETFPNITASATSR…	678	USER	zzz1731
1581		genbank_parvoviridae_AWF28737.1_@6BX1_F	parvovirus_cap	genbank	MPPTNRPRKGWVPPGYNYLGPGNTDFSIEETNQSDKAAKAHDLEYNKLLQKGQNPYIYFNHADEDFIQATNQASDWGGKFGNFIFKAKKAIAPELGPPKKKSKEEPGPSYSWRNIKPGTKRGKPFHIFVNRARAAKKQRLEQMSDQAAEDGQQQPAVGAAGGHASGGGGGGGSGVGHSTGAFNNRTEFHYHNGEVTIVCHATRQVHLNMPGSEEYLLYQTDHGPRFPKPGDQQLQGRDTINDSYHAKVETPWSLLHANCWGVWFNPADFQHMTAICNELEIIGFEQEIDNIVIKTVTKQGTGQEETTQYNNDLTALLEIAEDKSNLLPWASDNMYIDSLGYVPWRPCKLPRYCYHVNFWNSIDIRAGPQGNQWNQVHKGIKFDDIQFITVENCVPIELL…	710	USER	zzz1732
1580		genbank_parvoviridae_AVI59254.1_@3KIC_N	parvovirus_cap	genbank	MPPIKRQPGGWVLPGYKYLGPFNPLENGEPVNKADRAAQAHDKSYSELIKSGKNPYLYFNKADEKFIDDLKNDWSLGGIIGSSFFKLKRAVAPALGNKERAQKRHFYFANSNKGAKKPKNNEPKPGTSKMSENEIQDQQPSGSMDEQRGGGGGAVGSVGGGKGSGVGISTGGWVGGSYFTDSYVITKNTRQFLVKIQNDHKYRTENIIPSNAGGKSQRCVSTPWSYFNFNQYSSHFSPQDWQRLTNEYKRFKPRKMHVKIYNLQIKQILSNGADTTYNNDLTAGVHIFCDGEHAYPNATHPWDEDIMPELPYETWYLFQYGYIPVIHELAEMEDANAVEKAIALQIPFFMLENSDHEVLRTGESTEFTFDFDCEWINNERAYIPPGLMFNPKVPTRRAQ…	668	USER	zzz1733
1579		genbank_parvoviridae_AWB14638.1_@4IOV_A	parvovirus_cap	genbank	MSFFDWIGKQYAQGAAEFWDLKSGPPAPKKARKDGSAGFNFPGHKYLGPGNSLDRGDPVDADDAAAQKHDQSYQEQLEAGDNPYLKYNHADREFQEALKGDTSFEGNLARGLFEAKKLVAEPLGLVEPELAPPSGRKRPVQSSQESGYSSSQDKRPNLDLDEEDRELAAAAAETETGSAPPTGNLGPGTMAGGGSAPIDDGSYGADGVGNASGDWHCDSIWMDDRVVTRTTRTWNLPTYNNHVYKRLNGNTEQTTGDGSYFGFSTPWGYFDFNRFHCHFSPRDWQRLINNNWGLRPKSLRFKIFNIQVKEVTVQDQTTIISNNLTSTVQVFADTDYQLPYVIGSAHEGCLPPFPADVFMLPQYAYCTRQDTNSSNPTPRSAFYCLEYFPSKMLRTGNNF…	743	USER	zzz1734
1578		genbank_parvoviridae_AWB14640.1_@3KIC_N	parvovirus_cap	genbank	MSFFDWVGKKYAQGAAEFWDLKSGPPAPKKARKDGSAGFNFPGHKYLGPGNSLDRGDPVDADDAAAQKHDQAYQEQLEAGDNPYLKYNHADREFQEALKDDTSFEGNLARGLFEAKKLVAEPLGLVEPELAPGKKRPAASPVQSPDSSSGIGKKGAQPSRRRLDFDQADRETAAEAGATGTGSLPPASNLGPVTMSAGGGAPMDDNQQGADGVGNASGNWHCDSQWLGDRVITKSTRTWSLPTYNNHLYKKISSNEASGDKTWFGFSTPWGYFDFNRFHCHFSPRDWQRLINNHWGIRPKKMHVKLFNIQVKEVTTQDSTTTIANNLTSTVQVFADSEYQLPYVAGNAHEGCLPPFPADVFMLPQYGYCTLQNSASNDPVAQSAFYCLEYFPSQMLRTG…	723	USER	zzz1735
1577		genbank_parvoviridae_AWB14636.1_@4G0R_A	parvovirus_cap	genbank	MAPPAKRAKRGWVPPGYKYLGPGNSLDQGEPTNPSDAAAKEHDEAYDQYIKSGKNPYLYFSAADQRFIDQTKDAKDWGGKVGHYFFRTKRAFAPRLASSSEPGTSGVSIAGKRTKPPAHIFINQARAKKKRASLAAQQRTQTMSDGAEQSDSGSAVQSAARVERAADGPGGSGGGGSXGGXVGVSTGSYDNQTHYKFLGDGWVEITAYSTRIVHLNMPKSENYCRVRVHNKNDTDVAGQMSLDDAHEQIWTPWSLIDSNAWGVWFQPSDWQFLCNNMSHMNLHSLDQELFNVVIKTVTEQNPGPDAIKVYNNDLTASMMVALDSNNILPYTPATDNQETLGFYPWKPTMPSPYRYYFNCDRDLSVTYANQTGTITNRMAGASGMSSQFFTIENTQRIQL…	729	USER	zzz1736
1576		genbank_parvoviridae_AWB14592.1_@3KIC_N	parvovirus_cap	genbank	MAPVNRKPGGWVLPGYKYLGPFNPLNNGKPINKADRAARRHDISYNKYIKSGKNPYLNFNKADQAFLDELKNDYSFGGLLGKGVFQIKKAIAPTLNEASRGGGQTSQKKQIANRKRALYFARQNRDAKKARMDSGGASNSDEQPSQSSAAQENRAGGGGGAGGGGGGGGIGGSGVGVSTGGWTGGTHFGDNFVVTNVTRQWYAPIYNQHMYKKIKADNTVDTEWEGISTPWGFFNFNRYASHFSPQDWQRMCNEYKRWRPKKMQVQIYNLQIKQIVNMGADTLYNNDLTAGMHIYCDGSHQYPYAQHPWDEQTLPELPNDVYKLPNYGYYQMTGDLVNNEQNSQYNLEKWLKLAAPLFMLENSSHEVLRTGEETSFEFVFDCGWVHNDRAFCPPQADFN…	697	USER	zzz1737
1575		genbank_parvoviridae_AWB14579.1_@5URF_n	parvovirus_cap	genbank	MNQHFPVVRQPKREKNKPKEQGGKRQNPEPEIPQEVGGLQLVGEKKDCKKQQRSFYFSRLAQGAKRARMGDAPQGEVEDVVDSGVGRAGGNGGGGGGGGGTGNIGMATGGWVGGTYFGKNKVVTNITRQWFVPIYNGHKYTKETETDNSGFWTGIRTPWGYINMNSYSCHFSPNDWQRLLNNYKRWRPSKMRVQLYNLQIKQVVKLGTDTLYNNDLTAGVHIMCDGSHQYPYSQSGWDSELIPELPGTVYKLPNYCYFQELGDIGDGNTDIRETWLGTACPLFFLENTSHEVLRTGEDTTFEFDFDCGWIFNDRAFCPPQCDFNPLVKTRRSRFIWGSSGNSSEPYYNYKKPSNWMPGPGTRLNGNMGGTNLKTSSGAFNTSWAPPGTQQAATSTTYMG…	616	USER	zzz1738
1574		genbank_parvoviridae_AWA28232.1_@3P0S_A	parvovirus_cap	genbank	MPRIHFPYHNYLGPGTDNFNQKPIDEDDAIARLHDLEYNKANTDNDIFKADKQARDEFFNSFVHSGNLHSLIGGIGLGTKNLVEEHVLGKSLYGMGKRKSTEKDWAKIKRINRARAARRENEENQRDIRNFGHIAGENINADAEVNIADFPDFLQDFVAEAGPSGSQPIESAQESPKTMSQDELPMDTGTPTEVGEGGQVDPRSGGQAAGGMGAGGAANDGRQDIYAGAPQPNQHHELVYGKSYHFTLTNGLADFRHILATPSGQYIAQQRFKHIHGIPWERLLMYISEGELLRLYRDYTALKVEEVICEVYSLGVRLPFVTSATTSSVANANAQYPIGCFHFDQAYQTQYQGVLVQDIINKALGAEWKNLNRPAQPVTTEWSENFPNISASSTSRDIS…	679	USER	zzz1739
1573		genbank_parvoviridae_AVW82254.1_@5URF_n	parvovirus_cap	genbank	MNQHFHVVKQPKRERVKPKDHGNKRQNPEPEIPQEVGGLQLTGEKKDCKKQQRSFYFARQAQGAKRARMGDTPQGETDDVVDSGVGRSGGAGGGGGGGGGSGNIGMATGGWVGGTYFGKNKVVTNITRQWFVPIYNGHKYTKETETDNSGFWTGIRTPWGYINMNSYSCHFSPNDWQRLLNNYKKWRPQKMRVQLYNLQIKQVVKLGTDTLYNNDLTAGVHVMCDGSHQYPYSQSGWDSELIPELPGTVYKLPNYCYFQELGDIGDGNTDIRETWLGTACPLYFLENTSHEVLRTGEDTTFEFDFDCGWIFNDRAFCPPQCDFNPLVKTRRNRFIWGSSGNSAEPYYNYKKPSNWMPGPGTRLNGNMGGTNLKTSAGAFNTTWAPPGAQQSTTSTTYMG…	616	USER	zzz1740
1572		genbank_parvoviridae_ATU31553.1_@3J1S_A	parvovirus_cap	genbank	GVGQSSGNWHCDSLWMGDRVITKSTRTWSLPTYNNHLYKQINGTATGDSVYFGYSTPWAYFDFNRFHCHFSPRDWQRLINNHWGIRPKSLNFKLFNIQVKEVTTTDGTKTIANNLTSTVQVFADTEHQLPYILGSAHEGCLPPFPADVFMLPQYGYLTLNGNTTG	165	USER	zzz1741
1571		genbank_parvoviridae_ATU31552.1_@3J1S_A	parvovirus_cap	genbank	LYRQINGTGTGDGVYFGYSTPWGYFDFNRFHCHFSPRDWQRLINNHWGIRPKALHFKIFNIQVKEVTTTDGTKTIANNLTSTVQVFADTEHQLPYVLGNAHEGCMPPFPADVFMLPQYGYLTLNGNGT	128	USER	zzz1742
1570		genbank_parvoviridae_BBA54071.1_@6BX1_F	parvovirus_cap	genbank	MNFEYSNGGPFLTPIVPTADTQYNDDEPNGAIRFTMGYQHGQITTSSQELERYTSIPQRKCGRAPKQQINQQAPLNLENTNNGTLLPSDPIGGKTNMHFMNTLNTYGPLTALNNTAPVFPNGQIWDKELDTDLKPRLHVTAPFVCKNNPPGQLFVKIAPNLTDDFNADSPQQPRIITYSNFWWKGTLTFTAKMRSSNMWNPIQQHTTTAENIGNYIPTNIGGMVMFPEDSRLIPRYLY	238	USER	zzz1743
1569		genbank_parvoviridae_ASU54292.1_@3KIC_N	parvovirus_cap	genbank	EPDKAFAPQLDRGDNPYLKYNPADAEFQERLKEDTSFGGNLGRAFFQAKKRVLEPLGLVEEPVKTAPGKKRPVEHSPVEPDSSSGTGKAGQQPARKRLNFGQTGDADSVPDPQPLGQPPAAPSGLGTNSMATGSGAPMAD	140	USER	zzz1744
1568		genbank_parvoviridae_ASU54291.1_@3KIC_N	parvovirus_cap	genbank	DAAALEHDKAYDQQLKAGDNPYLRYKPPGGGFPERPQEDSSFWGKLGRAVFPGKKRVFEPLGLVEEGGKTAPGKKRPVEQSPQEPDSSSGIGKAGQQPAKKRLNFGQTGDSESVPDPQPLGEPPATPAGVGTNTMASGGGAP	142	USER	zzz1745
1567		genbank_parvoviridae_AOW68485.1_@3KIC_N	parvovirus_cap	genbank	ILWTPFSDSTRESPVNEADAAALEHDKAYDRQLDSGDNPYLKYNHADAEFQERLKEDTSFGGNLGRAVFQAKKRVLEPLGLVEEPVKTAPGKKRPVEHSPVEPDSSSGTGKAGQQPARKRLNFGQTGDADSVPDPQPLGQPPAAPSGLGTNTMATGSGAPMQTITSPDRS	170	USER	zzz1746
1566		genbank_parvoviridae_AOW68486.1_@3KIC_N	parvovirus_cap	genbank	LLCPFNGLDKGEPVNEADAAALEHDKAYDRQLDSGDNPYLKYNHADAEFQERLKEDTSFGGNLGRAFFQAKKRVLEPLGLVEEPVKTAPGKKRPVEHSPVEPDSSSGTGKAGQQPARKRLNFGQTGDADSVPDPQPLGQPPAAPSGLGTNTMATGSGAPMQTIIEAPTRVR	171	USER	zzz1747
1565		genbank_parvoviridae_AVD96860.1_@3KIC_N	parvovirus_cap	genbank	MAPANRKPGGWVVPGYKYLGPFNPADNGEPVNSADEAARSHDLAYQSYLDAGVNPYFSYNKADSDFIESLAHDSSFGGWLGRSAFGLKKLLAPHLADTKGNPDAPSTSRAGSSVSKSDRAQKRKLYFARSNKQAKQQKMSAPEAPTEDVAEPGPSGSDPRAGGNGGGGGMGGGGGHGVGVSTGGWKAGTVFGNDFVITTNTRQWYAPIFNGHEYKRLHPDVDRNWVGISTPWGYFNFNEYSSHFSPQDWQRLTNEYKRWRPKAMRVKVYNLQIKQVVNLGSDTLYNNDLTAGVHIFCDGSHQFPYSQHPWDTGTMPELPHRIWRISQYGYFQLQSDLTDGGNSSSSPDVQNQEKQLLKSAPLFMLETASHQVLRTGEESSFSFSFDCGWAINDKAYAIP…	705	USER	zzz1748
1564		genbank_parvoviridae_AUW64491.1_@3KIC_N	parvovirus_cap	genbank	MGNVSGHLKEQRRADRKIFYKDMPPFEKATAQDFSDYYVSDGMPFQTLYDNYDVTRYRWFMFKTELAKRLVELQGQKLFADQARNTLAALNDDKFPEGPEGDWTAVQNVAFGLKDVGNVKNPVKAMLAKALQDRFSLRGPNFENGLYVAPDLKWMNFKIESDEEXAERKAKDLAKKELRKENEMLVKLEQSVMSKDAAGLLFPGTHYLGPGNPVPNGPPVDKLDAAAAKHDIRYDAMLKHGDIPYLKHNWADEAMSRDLEKDEPKSWVGNAARGLWQVKKTTTKVVAPLLGPVLPVKPIPSESSKVSKAEADSTSNSTLSSPQKSSRASVEKGTPTSKEAKSKKKKRLRLKVSSESSGPVNHNMASSGNGNGLDSDMGDGGGGEHVDKEAAGGGGGAPE…	974	USER	zzz1749
1563		genbank_parvoviridae_4G0R_A_@4G0R_A	parvovirus_cap	genbank	MAPPAKRAKRGWVPPGYKYLGPGNSLDQGEPTNPSDAAAKEHDEAYDQYIKSGKNPYLYFSPADQRFIDQTKDAKDWGGKVGHYFFRTKRAFAPKLSTDSEPGTSGVSRPGKRTKPPAHIFVNQARAKKKRASLAAQQRTLTMSDGTETNQPDTGIANARVERSADGGGSSGGGGSGGGGIGVSTGTYDNQTTYKFLGDGWVEITAHASRLLHLGMPPSENYCRVTVHNNQTTGHGTKVKGNMAYDDTHQQIWTPWSLVDANAWGVWFQPSDWQFIQNSMESLNLDSLSQELFNVVVKTVTEQQGAGQDAIKVYNNDLTACMMVALDSNNILPYTPAAQTSETLGFYPWKPTAPAPYRYYFFMPRQLSVTSSNSAEGTQITDTIGEPQALNSQFFTIEN…	735	USER	zzz1750
1562		genbank_parvoviridae_AUS83810.1_@3KIC_N	parvovirus_cap	genbank	MIQGLGGAAGINLRQELEGKRLYLDKYKYPDNYIFREANQEQEMKKIRQLMAETNTDITETPDHKWYFNKYPVEGPLKHSDDVNYHGLSYVRLPSRDLIEGKHLVPPEQRMGGEQLIGLGGMPESHDLILEPMTNDPRFHKPKPPGDDIPKPLTHWQLANKIGPDYARQLAEMSGKDFTGRQPPIQIPDPGIRAGLQELEEQSKMLERVQAGEGENEPRGGLTLPKHRYVGPGGELPAGRPMSKLDEIAARHDIGYHTEIKHGHNPYYWYNFYDEQMIKDIKDNMDTIANEGESWLANFILSTWKAKASFMNPLGILLEHIQPDWNTYYDPTNTHHKQWVAFQRALTQHGTVSTERPATPPPADPDTSPPPAKKQRTESPNKSASCSAEMTSSCEISST…	1031	USER	zzz1751
1561		genbank_parvoviridae_AUQ23250.1_@6BX1_F	parvovirus_cap	genbank	MDSTEPEQMDTEQATNQTAEAVYNGGGGGGGVGNSTGGFNNTTEFKVTNNEVFITCHATRMVHINQADTDEYLVFNAGRTTDKTKTQKKLDLEFFVYDDFHQQVMTPWFLVDSNAWGVWMSPKDFQQMKTLCSEIELVSLEQEIDNVTIKTVTETNQGNATTKQYNNDLTASLQVALDTNNILPYTPAAPLGETLGFVPWRATKPTQYRYYHPCYIYNRYPNIQQNATERLVWEATQDDYFSVDEQYFNFITVENNIPINILRTGDNFHTGLYEFKSKSCKLTLSYQSTRCLGLPPLCKPKTDGTHKVTDLQNGGDLIYIQGTTNTKLGHYWGEEKGHKNAEMNRVRPYNIGYQFPEWVIPAGLQGSYFVGGPRQWSDTTKGAGHSESAQVQQNFSTRF…	642	USER	zzz1752
1560		genbank_parvoviridae_AUO17268.1_@6BX1_F	parvovirus_cap	genbank	VEITANSSRLVXLNMPESEXYRRVVVNNLDKTAVNGNMALDDTHAQIVTPWSLVDANAWGVWFNPGDWQLIVNTMSELHLVSFXQEIFNVVLKTVSESATQPPTKVYNNDLTASLMVALDSNNTMPFTPAAMRSETLGFYPWKPTIPTPWRYYFQWDRTLIPSHTGTSGTPTNIYHGTDPDDVQFYTIENSVPVHLLRTGDEFATGTFFFDCKPCRLTHTWQTNRALGLPPFLNSLPQAEGGTNFGYIGVQQDKRRGVTQMGKTNYIXEAXXMRPGEVGXXXPYXSFEASTQGXFXXLXXAGRGGAQTDENQAADGDPRYAFGRQHGQKTTTTGETPERFTYIAHQDTGRYPEGNWIQNINFNLPVTDDNVLLPTDPIGGKTGINYTNIFNTYGPLTAL…	526	USER	zzz1753
1559		genbank_parvoviridae_AUD40073.1_@5URF_n	parvovirus_cap	genbank	MNQVFPVVRTNKDKKGKGSQKRKDPVQLPEDPQEIGNLELAGERSNCKKTQRHFYFARQNQSSKRPKMSTSGEQTEEGTTEVDGTVGRSSGGAGGGGGGGANSGIGIATGGWVGGTYFGKNRVVTNVTRQWYVPIYNGHKYTKQTETDNGGFWTGIKTPWGYINLNAYSCHFSPNDWQRLLNEYKRWRPRKMRVQLYNLQIKQVVQLGTDTLYNNDLTAGVHVMCDGSHQYPYSQNGWDEELLPELPGSIYKLPNYCYFQELGDVGDTNTDTREFWLGTACPLFFLESSSHEVLRTGEETSFEFDFDCGWVHNDRAFCPPQCDFNPLIKSRRYRLIMGASSNTAEPYYNYKKPSNWMPGPGTRLNGDMSGSNLKTASGAFNTSWAPPGIQQTSADTTYL…	617	USER	zzz1754
1558		genbank_parvoviridae_AUD40077.1_@3NG9_A	parvovirus_cap	genbank	MAPLNKKGLTLPGYNYLGPFNDLDNGEPTNKADAAARKHDFAYDQLIKEGFNPYLSFNKADQDLLDELQSDSSFGGNLAKAVFHVKKQFAPELGGTGKGKGKAPASSAAKERAAKRKFYFARSNKGSKQQKMSNADTNEVDEGAGEGPSDYAQPSAQNNGGGGGGGGGGAHGVGVSTGGWSGGCYFSDTTVITTVTRQWYAPIYNGHMYRQIKYDGTVSKQWQGISTPWGYFNFNYYASHFSPQDWQRLLNEYKRWRPKAMKVKIYNLQIKQVVTLGADTLYNNDLTAGVHIFCDGSHQFPYAQHAWDQENLPELPNEIYKLPQYAYYQQPLGLVQDDVVPGENVPNTLKQCAPLFMLENATHEVLRTGEQTEFTFSFDCEWVHNDRSYCPPQAGFNPL…	629	USER	zzz1755
1557		genbank_parvoviridae_ATY47678.1_@3J1S_A	parvovirus_cap	genbank	WFYRFHCHFSPRDWQRLVNNNWGIRPRSMRFKLFNIQVKEVTTQDTVTSITNNLTSTIQVFADSEYQLPYVLGSAQEGALPPFPADVFMLPQYGYCTKQDRNNPNPVPQSAFYCLEYFPSQMLRTGNCFEFVYHFEKVPFHSMWSHNQSLDRLMNPLIDQYLWYLDKTQVSGTAQLSFAKSTKGNLPEQERNWLPGPGFRTHQFNTGAGQNYATTGTWAQSNKYRLDGRTSKIAPGPAMADPLATIFNGNGLIFAKSPSTSTSNAGINDVIITKESEIDSTIRK	284	USER	zzz1756
1556		genbank_parvoviridae_ATY36112.1_@3KIC_N	parvovirus_cap	genbank	MQNRFRAFNYLGPGNTIDRGDPYNQVDADALEHDKAYENSQSTFDVRKADKKFLTQVGDHIAESIQGKSSISDSVASVAGGIGIGSKYIAESGIGVQYPSISGIYLGIFT	110	USER	zzz1757
1555		genbank_parvoviridae_ATV81503.1_@3KIC_N	parvovirus_cap	genbank	MSRVVMSFVDHPPDWLKEAAGGLREFLDLEPGAPKPKPNQQKQDQRGLVLPGYKYLGPFNGLDKGQPVNKADEVAREHDLEYNKLLEAGDNPYLKYNHADQEFQEKLEGDTSFGGNLGRAVFQAKKRVLEPFGLAEEAPAKTAPGKKRPRPIEPPPSSENSVDEDLVERQAQRQRLGFQDGPGNSANQVQQQPAANMASAEVAAGSGGPMGDNAQGADGVGSSSGNWHCDSLWMGDRVMRFPWMGDRVITKSTRTWSLPTYNNHLYKQINSNSDVTDEKYFGYSTPWGYFDFNRFHCHFSPRDWQRLINNHWGMRPKRLNFKLFNIQVKEVTTNDGTTTIANNLTSTVQIFADSEYQLPYVLGNAHEGCLPPFPADVFMLPQYGYLTLNDGNQVIPQSS…	736	USER	zzz1758
1554		genbank_parvoviridae_ATV81496.1_@5URF_n	parvovirus_cap	genbank	MDGDMDNNEQGAGEAPAAAGGERSAGGGGAIGGGGGGNNHGVGISTGGWIGGSILGHNTIITRNTRQWWCPIRDNHLYKRYTTYNKNGADFKMEGYTTPWNMFNFNQYSSHFNPNEWQWLVNRAKRFRPKRMEVKIYNLQIKQESTQDQTAQYTNDLTAGLHVLCDGEHAFPWTQLPWDKGCMPELPHEIWELPQYAYITMPMQAQDTDNADERAFRCAVPMYLLEETDHSVIRTGESVIFHHAFDCGWVNNTRCSNMPQLAFTNPLIDSRLVKTRYTSGNSGSLTEEQCRPYQKNPPWWPGPGWRTNQTTNGQNNNTILGPFSTALSPAGINYATGPISYGAATGPYVGGQTPEAGTGFPNRNNNGNYLKFTPGDGAGGLNVGNAYIKRESILTGTRD…	550	USER	zzz1759
1553		genbank_parvoviridae_ATV81501.1_@4IOV_A	parvovirus_cap	genbank	MIRVVMSFVDYPPDWLKEVAGGLKEFIDLKPGAPKPKANQQKQDQRGLVLPGYKYLGPFNGLDKGQPVNKADEVAREHDIEYDKLLKEGDNPYVKYNHADQEFQEKLEGDESFGGNLGRAVFQAKKRLLEPFGLSEETPPRKRPASENNQSDVPAKRRLILDPEDNGAAEGEPIEQQQPANDMASAEMAAGGGGPVGDDAQGADGVGSASGNWHCDSIWMGDRVITKSTRTWSLPTYNNHLYKQINSNTTDAKETYFGYSTPWGYFDFNRFHCHFSPRDWQRLINNHWGMRPKRLNFKLFNIQVKEVTTNDGTKTIANNLTSTVQVFADSEYQLPYVLGNAHEGCFPPFPADVFMLPQYGYLTLNSNDNKAMPQSSFYCLEYFPSQMLRTGNNFTFSYE…	713	USER	zzz1760
1552		genbank_parvoviridae_ATI09459.1_@3KIC_N	parvovirus_cap	genbank	MAPIARKPKGWLFPGYRYLGPFNPLDNGEPVNKADSVAREHDIAYNKYLTAGHNPYLNFNKADQKFIDDLKGDSSIGGFVGKSVFTLKKHLFPHLKEVAPPAKKPKTDTRAEKRKLYFARS	121	USER	zzz1761
1551		genbank_parvoviridae_AAU84890.1_@3NTT_A	parvovirus_cap	genbank	MSFVDHPPDWLEEVGEGLREFLGLEAGPPKPKPNQQHQDQARGLVLPGYNYLGPGNGLDRGEPVNRADEVAREHDISYNEQLEAGDNPYLKYNHADAEFQEKLADDTSFGGNLGKAVFQAKKRVLEPFGLVEEGAKTAPTGKRIDDHFPKRKKARTEEDSKPSTSSDAEAGPSGSQQLQIPAQPASSLGADTMSAGGGGPLGDNNQGADGVGNASGDWHCDSTWMGDRVVTKSTRTWVLPSYNNHQYREIKSGSVDGSNANAYFGYSTPWGYFDFNRFHSHWSPRDWQRLINNYWGFRPRSLRVKIFNIQVKEVTVQDSTTTIANNLTSTVQVFTDDDYQLPYVVGNGTEGCLPAFPPQVFTLPQYGYATLNRDNGDNPTERSSFFCLEYFPSKMLRTG…	726	USER	zzz1762
1550		genbank_parvoviridae_ASY04026.1_@3KIC_N	parvovirus_cap	genbank	MSGFSSGDGHWVWNGRRWKHTSELTSDQVHILNENNREIWEGLHEDEPLEAIELDEIELSQPGEDTPLLESAFSDTLALAEAGGESAASAAAAPGVGTILTGLGTTTLAIGGGTLGTVLLSGSGGNSDSHEDPVVSLPGHRYIGPGNTVDNTVPVDHDDSIAREHDIAYERAQTQEDIQEADRHGASEFLTDAIHNYNPHSVAGYIGLKAKEKVESVIGVQYPPNLPSVSGMSHRVPRALGKYPIDKDPREHPDFPKRSEYSPGAFVNRVRYIWDAWNRARQNHGLPRVDPPARLGINVTPKPPIDRRTGNRPSSNSISYREWRDRKRGLTGPLIDGFNRQREQSNARNDHLLNTVVANEIGAEEAREIEEIIRQVDNGGSISIADFDNADGAGPSNAQ…	495	USER	zzz1763
1549		genbank_parvoviridae_ARI46488.1_@4MGU_A	parvovirus_cap	genbank	PWEYMFMYCSPEDFKLIPAGSYVHTANIEITQLVASTAFPTGGTESTTVTANHPKIGCLAIDLENKIRGGIDKTITIDENMIPTSATNSAQSMFDDFIKYQWGTDQTVENQIPPGGGFGIPFYNHCHYCIYNPNVAQAAARGFTAETAPGYEYFKNCIQEYNANDTTYSKVLGMSYKFENAPIGQQFPPVEIYTTNFQQSTGNSRYYNAQRTATANNIGGNTTLTESFVPSTKNTLPLVTYSSSMIEKGAHFTRGDAAGKPCRQPTIHIGMRAIDKNDPTVGTARAEQFVQAIIDFEIKCTLSINLPTYPNRFVRAKYYNTSIENFVGGIGRYEVPANGSSRVVTFGLGNDSADAPPVDEVDQIDDEPTESGMSIPGRKQRPRRALPYVPKARPVTRSV…	409	USER	zzz1764
1548		genbank_parvoviridae_ARI46484.1_@4MGU_A	parvovirus_cap	genbank	MNKKDLFWRQIFIMSEDWFVRVREGLRFRGKNVLSARNISRVGARLTRLDNNLWLHGSQEELNQILIDPVYESLDDVIQFQQSTTADVIEEVELNDLDEINLSEEAPLLEETSFSATPALAEAGGVLGTSAAASGPGTGAVVTGVAIGAGIITVGTTVGVLSNRNSDSSESSSTHKDPIVSIPDHRFIGPGNTVDDTPPVDVDDDIALEHDIRYENAQSQQDIQDADRDAANDFLTDAIHNNNPHSVVGYIGLKGKEKIESIIGVQYPPNLPVHSSAGMSVYRTSESYDNIHHVTRRALPKFPVNSDPRRSPSWRKRNSFSSAEAWKNWAKYTWGQWNVARQNRGLRRVEPPSRMGIAVTQRPRTGQPNNAMSFNDFRNSPEFEVRDFNDYEDEDLIEI…	999	USER	zzz1765
1547		genbank_parvoviridae_ASM94084.1_@3KIC_N	parvovirus_cap	genbank	MPCRKKRPAKSQLNKHYKDQRVDESDSGSEETENFLTNKLHVPTQHFTGPGTSNDNIRNVEPTDEADRISRHHDIDYGIGHSRDDADNHFIGEQMTRGDNPWASAFGAIGIGIAKLARHYDVDIQDLLTKSKKRITHPRSRVPYERFKHDHGNKQDTHQTRAQYLAYRRITDAAYNNNIKHDKALAAQERGEPVRMEDFIDRPLREIPLPMHFSSEHLNNIAELSDTSPETSTDGSETPSDS	242	USER	zzz1766
1546		genbank_parvoviridae_ASP44144.1_@3J1S_A	parvovirus_cap	genbank	QPSRGTSSTPAAVGPTTMASGGGAPMADNNEGADGVGNASGNWHCDSTWLGDRVITTSTRTWALPTYNNHLYKQISSASTGASNDNHYFGYSTPWGYFDFNRFHCHFSPRDWQRLINNKWGFRPKRLNFKLFNIQVKEVT	140	USER	zzz1767
1545		genbank_parvoviridae_ASM94079.1_@3KIC_N	parvovirus_cap	genbank	MAPKRPAKGQINKDYKFSKHPISDSEEEDETTVFTDKLHVPTQHFTGPQTSRHNIENVEPADNSDRISRHHDIDYANNHGRDDADNHFVGEQMTRGDNPWAATLGAIGIGLAQLSRHYGVDLSEAFSKSKKTSMHRNSMQPYQRFIGKHAKGVDNQATRMQYYAMRQIQNEHYQNNIKHDKALAAQARGEPVRQEQFLTLDRRTIPETNIFSTEHLEHLAELDAESDETDTANTDQLDTDREDTTDEQETDTEVEQETEQGDQEPPAEPEPEAGGDGPPEDNEEPPPKVYKATETMAEEETITPVDAAQEGQEPMDTNRSRGGGSGGGGGLGNFNFPDSYQESYKRGDRQFKVSAGKQVFTKEFWHSIPENKNPSLKRASRDQETHDAAFGHDLPIIQY…	983	USER	zzz1768
1544		genbank_parvoviridae_ASP44145.1_@3KIC_N	parvovirus_cap	genbank	AGETRTSVHHADAEFQERLQEDTSFGGNLGRAVFQAKKRILEPLGLVEEAAKTAPGKKRPVDQSPQEPDSSSGVGKSGKQPARKRLNFGQTGDSESVPDPQPLGEPPAAPTSLGSNTMASGGGAPMADNNEGADGVGNASGNWHCDSQWLGDRVITTST	159	USER	zzz1769
1543		genbank_parvoviridae_ASM93488.1_@4MGU_A	parvovirus_cap	genbank	MSFHLPGHNYLGPGSKLDGNKAPVDEDDEIAYVHDRSYEQSASADDIRKADREALYSFGQSALRGNFHSAIGFVGIGAKYLSESVVGVQYPRMPPSKRKKEDTSDNESPQTDIEEASMEISSSSEGERVGIREPQTGGSTPGGTGSSVVATIICNPQIDTIRHKYRKTFQVYTGGFQYSKNGPDVLPHTLQPILSKNVYVWITPMACVDPNALFWYMDRSQWSQLPPWTFAKTARIKIIPVGIRLPFGTNDPASTYANSQTLVQCVSSVGINNQHNCCYAPYTFDTSDSTKVSGMQESYDFEALLYGSDDSIPCCMGVPRHLNNYLSLITDTNTKYAPNGLSIYCVQNVLDCKGVPIINYKYDFKNGLLFYPNTNFSVLQRSVLNTEIPNGLETNSFGT…	563	USER	zzz1770
1542		genbank_parvoviridae_ASM94081.1_@3NG9_A	parvovirus_cap	genbank	MAPKRPQKSQKNKDYKFSRHEISPSASEDEEETTAFTDKLHVPTQHFTGPQTSTHNIRHQEPTDESDRISRHHDIDYAINHGRDDADNHFVGEQLTRGDNPWAASLGAVGIGLAQLGRHYGVDLSELFSKSKRPITHRSSKTPYQRFIHKHAKGEDNQAARFQYLAYRKITNEHYQNNIKHDKALAAQARGERVRQEDFLTLDKRTIPEQNLFSTNHLEHIASLDDASTDTTDTETTDTEATTDHDSPDTPNEQEADQAAEQETEQRDKEPAADAPDASDHDVPEEDEEPPPKISKTTENMVEEEITPVEAEEQGAGRSARDVSGGSGGGGGGGGLGNFNFPDSYQEAYTRGNRQLKITAGKQIFKKEFLHSIPENKNPSLVSVTRDTTHHDNAFPHNL…	988	USER	zzz1771
1541		genbank_parvoviridae_ASM93490.1_@1DNV_A	parvovirus_cap	genbank	MTDANDLHRLDKNTFKYLSLLYKIDTMPRLPGRRYIGPGNEVNLNYEGDPNSRAEYIAWRHDLAYKYGKTEEEIRHADLDAIQDFAINPETYEDVLGALGLSAKYLYESAAGVQYPSMPKALKSKTYRNRLAKERQAKRKKHFLHDQDFADVELQDIPEEPEQPEADLIPELNFEAQIEQPGPSHQRQYQLPETPAESRMASPLNLGGALDPPGSSMDTSGEALAPPVTGNAAAGGGHPAQPAAERTVLRCPVNKPWTRTFSNEFDFRTFGYPQKRNLALEYGAPVCKAVDATSYWYVPYNSVALYMSPAEFYSLPPGTEAVSCHVEIIPWYQRVPFETNVSVSGNANSHMESILMKAKGLDQHYDMVHHLGYNTSATDPTPTLARVGDDLRRKLWGRE…	690	USER	zzz1772
1540		genbank_parvoviridae_AIF74246.1_@4G0R_A	parvovirus_cap	genbank	MFLCSILLRTMGWVLPGYRYLGPGNSLDRGEPVNESDAAAQVHDHKYNNYLKQGKNPYLNFNKADQEFLDKTKGAKDWGGKLGHFVFKVKKRFLPHLTEPDLAPPAKRQKAPSYVFVNQARKRKAGYSKEGPPSKQRSMENTGEVEGAGDGPADVTPAAAGGGGGSGGGGGAGGPGGVGHSTGKYDNRTLWRFIGNGEVEITCYSSRLIHQNMPEEEVYRTIAMQTTNQDSFNTAGFGYRDDTHSQVTTPWSLLDCNAWGVWFCPSDWQHLITTCDKLEIIDLQQEIFNVVVKTVTEIGPADARVKQYANDLTACMMIAEDSNNILPYTPAAMRNATLGFFPWRPCNLPTYRYYSDWTSWVRPTSANATRGSIEHSISTTAEMHRENQPNQVTITNNFK…	744	USER	zzz1773
1539		genbank_parvoviridae_AIF74243.1_@1K3V_A	parvovirus_cap	genbank	YNSADEQFIKRTDGATDWGGRLGNLYFRGKRLIAPRLEEPAVASPLAAPRPKKPRRPPPSHIFVNLARKRKGEQPDRGDHSYAKQPRNQPNRASERDDMDGDSGEQGAGDGPAEQPQPFAASGGGGGGGGGGGARSGGVGHSTGRYDNRTLWNFLPGGWVEITCYSSRLIHQNMPANELYRMVKLATRGNGFNLNGFGYRDDAHVQFVTPWELIDCNAWGVWFCPSDFQHLVNTCEDLQIISLEQDIFNVVLKTVTEVGPQDARVKQYANDLTASLMVAMDSNNTLPYTPAAMRMATLGFFPWKPTTLPSYSYYGDWFGIVRPTSLNGQRAVSEKTSSRKVHTSHGEETLVTEELTFGGSSGDSGRQIQPRVTQQAFHQNRVDCQFFCVETQLPIDLIR…	691	USER	zzz1774
1538		genbank_parvoviridae_AIF74241.1_@3KIC_N	parvovirus_cap	genbank	MPPLKKDKSGWVLPGYKYLGPFNSLTHGKPTSKADEAARRHDLHYNDLIREGHNPYINFNEADVNLIKDLETDNSIGGFLARNVFKAKRAIAPALPGTSKGGDRAAKRKLYFARSNKGAKQSKMADQPDAPGGTGEVRGDLQGIAGGAHSRATRAIAGGGGGGGGGGTGIRAGGGVGISTGGWEAGTYFHDDHIVTINTRQFMAEIQNSHLYKLETANIQNDIADANYTYITTPWQYFDFNCWASHFSPQDWQRVMNEYKSIRPAEMEVKIYNLQIKQIQLLGAEQDIVYNNDLTAALHVFCDGEHQYPDASQPWDEGIMPELPHAIWKLPQYSYFQTIAGWAANPTFGAQVPLYFIENSSHAVLRTGEDATFNFTFSCNKLPLDKCATAPVHLKNPKI…	621	USER	zzz1775
1537		genbank_parvoviridae_AIF74238.1_@3KIC_N	parvovirus_cap	genbank	MAPVNRKPRGWVVPGYKYLGPFNPLDNGEPVNKADEAARTHDFAYSAYLKSGINPYFKFNKADQKFIDDLRHDNSFGGAIGRGFFSLKRTLFPHLKEPQVPGEGEPPSKKSKTLSRAEKRKLYFARCNRPSKQAKMSETGPDLSADETGGGGARSRAPRSAGGGGGGGGGGGGGGGGSVGFSTGGWEAGTVFTDNLIITTNTRQWYAPIYDGHMYKKILAAENGAADSDWQGISTPWGVFNFNCYASHFSPQDWQRLTNEYVRWRPKKMTVKLYNLQIKQIVQLGADTLYNNDLTAGVHILCDGSHRFPYAQHPWDADVMPELPHSIWKIPQYAYYQLQTDLVEKSSGDAIPAPVDAAKNIRRAAPLYILETAEHEVLRTGEDTGFTFSFSSGWAINDR…	688	USER	zzz1776
1536		genbank_parvoviridae_AIF74221.1_@1K3V_A	parvovirus_cap	genbank	MPRPPSPVTNHRYRYLGPGNDLDSGEPTNQSDKAARDHDHQYAKYLANNQNPYLYYNSADEQFIKRTDGATDWGGRLGNLIFRGKRLIAPRLEEPAVASPLAAPGPKKPRRPPPSHIFVNLARKRKGDQPDRGDHSYAKQPRDQPNRTSERDNMDGDSGEQGAGDGPAEQPQPFAAGGGSGGGGGGGGARSGGVGHSTGRYDNRTLWNFLPGGWVEITCYSSRLIHQNMPSNELYRMVKLATRGDGFHLNGFGYKDDAHVQFVTPWELIDCNAWGVWFCPSDFQHLVNTCEDLQIISLEQDIFNVVLKTVTEVGPQDARVKQYANDLTASLMVAMDSNNALPYTPAAMRMATLGFFPWKPTTLPSYSYYGDWFGIVRPTSLNGQRANAERTSSRKVHTN…	748	USER	zzz1777
1535		genbank_parvoviridae_AIF74215.1_@3NG9_A	parvovirus_cap	genbank	MAPTRRPGGWVLPGYKYLGPFNPLDNGKPVNKADEAAQRHDRAYDQYLSENKNPYLYFNKADSDFLEDLESDKSFGGWIGRTVFGVKRAIAPSLGEPGGKRGKYQAEKRKLYFARSQKGAKQAKMADTAGPSDQGSTSAEVSHDGARASGAQNAGGGGGGAGRSVGISTGGWKGGSLFGDTVVVTRITRQWYCPIYDGHKYKQFYSANDAASQYAVYNGMRTPWGYFDFNCYAGHFSPQDWQRLTNEYKRWRPKRMHVKLYNLQIKQVVTLGADTLYNNDLTAGVHVFCDGSHQYPYPQTPWNEGIVPELPNDVWKLPQYGYYQYDSWLTSDTPNASNGTSKALRLSAPLFMLENSSHEVLRTGEETEFNFTFECGWVNNDRAYVSPQNDFNAIVGTRR…	636	USER	zzz1778
1534		genbank_parvoviridae_AIF74210.1_@4G0R_A	parvovirus_cap	genbank	MAPPAKRAKRGWVPPGYKYLGPGNSLDQGEPTNPSDAAAKEHDEAYDQYIKSGKNPYLYFSPADQRFIDQTKDAKDWGGKVGHYFFRTKRAFAPKLSTDSNLETSDISRAGKRSKPPAHIFINQARAKKKRASLAAQQRTLTMSDGGAQQDNAAQSAAKVERAADGSGGSGGSGGGGGGGVGVSTGSFDNQTHYDFLGGGWVRITAYASRLVHINMPASEEYHRIFVRNSSDTSQKGKMSLDDTHTQIWTPWSLVDANAWGCWFQPSDWQFIQNSMAELNVETFEQEIFNVVLKTVTEQNSGGAEAIKVYNNDLTASLMVALDSNNSLPYTPAAATSETLGFYPWKPTIPAPYRYYFYVPRNLSVTFTDDTAAVTDTVGHTDAYHSRFLTIENTTPITL…	730	USER	zzz1779
1533		genbank_parvoviridae_AIF74202.1_@4G0R_A	parvovirus_cap	genbank	MPPTNRHKGGWVPPGYNYLGPGNTDFSKEPTNLSDQAARDHDVEYNKLIQQGHNPYLYFNHADQDFIDQTNQASDWGGKFGNFIFKAKKAVAPELAGKAKGKTKHTEPSFSHKNIKAGVKRGKPFYIFVNQARKRARMGDAADATVDEPDAGAAPGGGGGKNGGVSGGAGGGGVGHSTGGFRNRTYFHYEGDTVTITCHATRLVHLKMSESEDYKIFQTDRGPKFPAPGNQDLDGRDTINDSYHAKVWTPWFHLHANSWGCWFTPAEWQQLTATCRTLKPISFEQSIDNVVIKTVSTQGTGDQQTHVYNNDLTAILEIAMDNSNQMPWVADNGYMTSVGYVPWRACTIPTYTYHVNYWNTILKFNNSSTKKINWKEVQKGIKWEDLQFTPIETTLDIEM…	575	USER	zzz1780
1532		genbank_parvoviridae_AIF74206.1_@6BX1_F	parvovirus_cap	genbank	MPPTNRHRQGWVPPGYNYLGPGNTDFSKEPTNLSDQAARDHDLEYNKLIQQGHNPYWNFNQADQDFIDKTNQASDWGGKVGNFVFKTKKLIAPDLAGKAKEKKKNTEPSFSGKHLKAGVKRGKPFYLFVNLARKRARMGDVATEQPDGDATAEGAAPGGAKSGGISGGAGGGGVGHSTGNFRNRTYFHYQGDEVTIVCHATRLVHLKMSDSEEYKIFETDRGKKFPTGQELHGRDTINDSYHAVVWTPWFHLHANSWGCWFSPSEWQQLTATCRTLKPVTFEQSIDNVVIKTVTTQNVGELQTNAFNNDLTAILEVAMDNSNQMPWTADNGYMHSVGYVPWRACTIPSYTYHVNFWNTILRPGDGQGQRTWKEVKKGIQWEDVQFTPLETTIDIEMLRT…	681	USER	zzz1781
1531		genbank_parvoviridae_AIF74199.1_@6BX1_F	parvovirus_cap	genbank	MNKITNYAQKRKPPRHIFIQQAKKRRSNPAVSFEKDKIEEMEAEPAPAEEAAMDIAEQPGGGGGGGGGGGGGGVGNSTGGFNNTVEFKVHGNEVYIVCNSTRLCHLTQADSDEYLIFNAGRHEVQGLEPKEGVPAEFLIWDDMHQQVATPWYLVDANAWGCWMSPQDFQRITTLCSEINLVSLEQEIDNIVVKTVTETNQGNAKSKVYNNDLTASLQLAVDTNNTMPYTPAAPLGETLGFVPWRPTTLTQYRYYHPIYLWQRYPNKKKDQSQVEKLVEEHYFKMLQDQCNFITVENNIPIEILRTGDNFHCGTYHFNTKATKLTMSYQSSRTLGLPPKCTPVLGKVKIIDDKDGADLNCYLAAGPGTDEYTRTGLFWGEDKGKLNSEVTRVRPYNIGYN…	686	USER	zzz1782
1530		genbank_parvoviridae_AGU69466.1_@6BX1_F	parvovirus_cap	genbank	MPPTNRHRQGWVPPGYNYLGPGNTDFSKEPTNLSDQAARDHDLEYNKLIQQGHNPYWNFNQADQDFIDRTNQATDWGGKVGNFVFKTKKLIAPDLAGKAKEKKKNTEPSFSGKHLKAGVKRGKPFYLFVNLARKRARMGDAATDQPDGDAAAQAAAPGGAKASGVSGGAGGGGVGHSTGNFRNRTYFHYQGDEVTIVCHATRLVHLKMSESEEYKIFETDRGRKFPTDQTLHGRDTINDSYHAVVWTPWFHLHANSWGCWFSPSEWQQLTATCRTLKPITFEQSIENVVIKTVTTQNVGELQTNAFNNDLTAILEVAMDNSNQMPWTADNGYMHSVGYVPWRACTIPSYTYHVNFWNTILRPSQPGGQRKWQEVKKGIQWEDVQFTPLETTIDIEMLRT…	668	USER	zzz1783
1529		genbank_parvoviridae_AGU69470.1_@6BX1_F	parvovirus_cap	genbank	MPPTNRHKGGWVPPGYNYLGPGNTDFSKEPTNLSDQAARDHDLEYNKLIQQGHNPYWNFNQADQNFIDQTNQASDWGGKVGNFVFKAKKLVTPELAGKSKGKTKHTEPSFSHKNIKAGVKRGKPFYIFVNQARKRARMGDAADATVDEPDAGPTQGGGGGGRSGGVSGGAGGGGVGHSTGNFRNRTYFHYEGDEVTITCHTTRLVHLNMSESEEYKIFATERGPKFPSGATEQQFEGRDTINDSYHAKVWTPWFHLHANSWGCWFSPSEWQQLTATCRTLKPISFEQSIDNVVIKTVSTQGAGEQQIHVYNNDLTAILEVAMDNSNQMPWVAENAYMTSIGYIPWRACTIPSYTYHVNFWNTILKTSQPGNKWKWQEYKKEIKWEDLQFTPIETTLDIE…	714	USER	zzz1784
1528		genbank_parvoviridae_ASH89413.1_@5URF_n	parvovirus_cap	genbank	MNQHFPVVKQPKREKNKSKEHGSKRPNPEPEIPEEVGGLQLVGEKRDCKKQQRSFYFARQAQGAKRARMSDVPQGETEDAVDSGVGRAGSSGGGGGGGGGTGNIGMATGGWVGGTYFGKNKVVTNITRQWFVPIYNGHKYTKETETDNNGFWTGIRTPWGYINMNSYSCHFSPNDWQRLLNNYKRWRPSKMRVQLYNLQIKQVVKLGSDTLYNNDLTAGVHIMCDGSHQYPYSQSGWDSELIPELPGTVYKLPNYCYFQELGDIGDGNPDVRNTWLGTACPLFFLENTSHEVLRTGEDTTFEFDFDCGWVFNDRAFCPPQCDFNPLVKTRRSRFVWGTSANSSEPYYNYKKPSNWMPGPGTRLNGNMGGTNLKTSSGAFNTSWTPPGTQQTSTSTTYMG…	616	USER	zzz1785
1527		genbank_parvoviridae_ARV85907.1_@4MGU_A	parvovirus_cap	genbank	MSDQVVPDVPTFTALASVKGGSKDAFWQSNQNWKKELESREGHPHGHPLNPKDGFWNWYRKYQFVNNLNDKGQPRVSKKPRISKKKAEVSGYKYFDAWRKENREKLDEVYKQYLEKFPKRPNRSNPTLHKLSKSVPYTSGIERVADLVSGDSPGTVLLGHDYIGPGNPIYRGDDKELTSTDRIAKEHDVQYGLISEYAQTKEEVRALTDKADTEGIKKFWNDSRIGEQIFSGNIPDFGSLFGAAGLLGKRTFERTFGQQYPSPDIKKQQSAPIAPIEHPVNNADDSDDEVGGPIEVQAEVHEHPPDIESEDEGLEYLDDFDFDLQNELMAQVPGTGTAMEVGSTTGNASSAKRKAESAGGIGKKRPGTGHDTEDSGASISGDTGIMMGPIQRPIVNRDG…	838	USER	zzz1786
1526		genbank_parvoviridae_ARV85895.1_@4MGU_A	parvovirus_cap	genbank	MAPKRIPPLKAPPNERPNWERLNEGQRRYAWEQYNLARVRRGEKFTSPVISEQQSAPIAPIEHPVNNADDSDDEVGGPIEVQAEVHEHPPDIESEDEGLEYLDDFDFDLQNELMAQVPGTGTAMEVGSTTGNASSAKRKAESAGGIGKKRPGTGHDTEDSGASISAEIPWNRLFMYMNPSEYSLLPSGSSVIDLHIKIRQRNVRVAFQTNSTTSELATLNQNKNAIFADGLLQYAGGENVAPTAFAANQAMIPTAITTELTNSAYNQFVDQFYGVQNTNDGFLTGSPRHQFGIPYILPFYYAMQNSVNDSSLSGWPCLQEYYHEFNADETSNTVFLERHYKPKMGLITTPIDAIINAYPQYGASTGTVQIAKGTGLSNANTLTNYSNVLGAPTQLALRD…	561	USER	zzz1787
1525		genbank_parvoviridae_ARV85905.1_@4MGU_A	parvovirus_cap	genbank	MSDQVVPDVPTFTALASVKGGSKDAFWQSNQNWKKELESREGHPHGHPLNPKDGFWNWYRKYQFVNNLNDKGQPRVSKKPRISKKKAEVSGYKYFDAWRKENREKLDEVYKQYLEKFPKRPNRSNPTLHKLSKSVPYTSGIERVADLVSGDSPGTVLLGHDYIGPGNPIYRGDDKELTSTDRIAKEHDVQYGLISEYAQTKEEVRALTDKADTEGIKKFWNDSRIGEQIFSGNIPDFGSLFGAAGLLGKRTFERTFGQQYPSPDIKKQQSAPIAPIEHPPDIESEDEGLEYLDDFDFDLQNELMAQVPGTGTAMEVGSTTGNASSAKRKAESAGGIGKKRPGTGHDTEDSGASISGDTGIMMGPIQRPIVNRDGDSDIRVYRKVHRFTTFGLAYKPIQI…	813	USER	zzz1788
1524		genbank_parvoviridae_ARV85910.1_@3KIC_N	parvovirus_cap	genbank	MSDQVVPDVPTFTALASVKGGSKDAFWQSNQNWKKELESREGHPHGHPLNPKDGFWNWYRKYQFVNNLNDKGQPRVSKKPRISKKKAEVSGYKYFDAWRKENREKLDEVYKQYLEKFPKRPNRSNPTLHKLSKSVPYTSGIERVADLVSGDSPGTVLLGHDYIGPGNPIYRGDDKELTSTDRIAKEHDVQYGLISEYAQTKEEVRALTDKADTEGIKKFWNDSRIGEQIFSGNIPDFGSLFGAAGLLGKRTFERTFGQQYPSPDIKKVKNLHLLLFQNNNLLPLLLSNIRLITQTIVTTK	300	USER	zzz1789
1523		genbank_parvoviridae_ARV85921.1_@4MGU_A	parvovirus_cap	genbank	MSDVFTDLTLRDFSLGTNNLPLANTPKLRNRFGRWWNRSHPYDRLPTNEPEPLRETSFQEAAGPEETRIDIAEDEINAGEGAAQAETSFSTGVEETALELGEAATETTGLLGGATAGSAAAGTAGTLGTVAATAAGGAALAGIGIGIKKLIDHTSSKGAVLPGTDFVGPGNPIDPKPARSETDQIAKEHDLGYEDLLHRAKSQYFTEEDFKTEVYKLDDEAIHRFSEEYQKSGTWQAFVGKYGLKAKRLIEDVIGGPVYPQQPKKQPPRAEEEEVAPATPTADDILDELPEGNPEDIDDFDVDQLPSTTQEHHPTTDLAAQPGRSTDPDPEPVSNPIDSTPPDEGDSSSMSAPLTPPITPDKTQDKGKGKRGGGGRPPKSSGGKRSRMAGTSLPGAGAD…	816	USER	zzz1790
1522		genbank_parvoviridae_ARV85894.1_@4MGU_A	parvovirus_cap	genbank	MAPKRIPPLKAPPNERPNWERLNEGQRRYAWEQYNLARVRRGEKFTSPVISEQQSAPIAPIEHPVNNADDSDDEVGGPIEVQAEVHEHPPDIESEDEGLEYLDDFDFDLQNELMAQVPGTGTAMEVGSTTGNASSAKRKAESAGGIGKKRPGTGHDTEDSGASISGDTGIMMGPIQRPIVNRDGDSDIRVYRKVHRFTTFGLAYKPIQISRGFESNTWTDVFMTTPLAEIPWNRLFMYMNPSEYSLLPSGSSVIDLHIKIRQRNVRVAFQTNSTTSELATLNQNKNAIFADGLLQYAGGENVAPTAFAANQAMIPTAITTELTNSAYNQFVDQFYGVQNTNDGFLTGSPRHQFGIPYILPFYYAMQNSVNDSSLSGWPCLQEYYHEFNADETSNTVFLE…	596	USER	zzz1791
1521		genbank_parvoviridae_ARV85904.1_@3NG9_A	parvovirus_cap	genbank	MSDQVVPDVPTFTALASVKGGSKDAFWQSNQNWKKELESREGHPHGHPLNPKDGFWNWYRKYQFVNNLNDKGQPRVSKKPRISKKKAEVSGYKYFDAWRKENREKLDEVYKQYLEKFPKRPNRSDSPGTVLLGHDYIGPGNPIYRGDDKELTSTDRIAKEHDVQYGLISEYAQTKEEVRALTDKADTEGIKKFWNDSRIGEQIFSGNIPDFGSLFGAAGLLGKRTFERTFGQQYPSPDIKSKFYLFTDGT	250	USER	zzz1792
1520		genbank_parvoviridae_ARV85919.1_@4MGU_A	parvovirus_cap	genbank	MSDVFTDLTLRDFSLGTNNLPLANTPKLRNRFGRWWNRSHPYDRLPTNEPEPLRETSFQEAAGPEETRIDIAEDEINAGEGAAQAETSFSTGVEETALELGEAATETTGLLGGATAGSAAAGTAGTLGTVAATAAGGAALAGIGIGIKKLIDHTSSKGAVLPGTDFVGPGNPIDPKPARSETDQIAKEHDLGYEDLLHRAKSQYFTEEDFKTEVYKLDDEAIHRFSEEYQKSEEEEVAPATPTADDILDELPEGNPEDIDDFDVDQLPSTTQEHHPTTDLAAQPGRSTDPDPEPVSNPIDSTPPDEGDSSSMSAPLTPPITPDKTQDKGKGKRGGGGRPPKSSGGKRSRMAGTSLPGAGADIAGEGGGQAIIPIPRPITTPHNNFIIFNKVHRFLTYGL…	778	USER	zzz1793
1519		genbank_parvoviridae_ARV85896.1_@4MGU_A	parvovirus_cap	genbank	MAPKRIPPLKAPPNERPNWERLNEGQRRYAWEQYNLARVRRGEKFTSPVISEQQSAPIAPIEHPPDIESEDEGLEYLDDFDFDLQNELMAQVPGTGTAMEVGSTTGNASSAKRKAESAGGIGKKRPGTGHDTEDSGASISGDTGIMMGPIQRPIVNRDGDSDIRVYRKVHRFTTFGLAYKPIQISRGFESNTWTDVFMTTPLAEIPWNRLFMYMNPSEYSLLPSGSSVIDLHIKIRQRNVRVAFQTNSTTSELATLNQNKNAIFADGLLQYAGGENVAPTAFAANQAMIPTAITTELTNSAYNQFVDQFYGVQNTNDGFLTGSPRHQFGIPYILPFYYAMQNSVNDSSLSGWPCLQEYYHEFNADETSNTVFLERHYKPKMGLITTPIDAIINAYPQYG…	598	USER	zzz1794
1518		genbank_parvoviridae_ARV85897.1_@4MGU_A	parvovirus_cap	genbank	MAPKRIPPLKAPPNERPNWERLNEGQRRYAWEQYNLARVRRGEKFTSPVISEQQSAPIAPIEHPVNNADDSDDEVGGPIEVQAEVHEHPPDIESEDEGLEYLDDFDFDLQNELMAQVPGTGTAMEVGSTTGNASSAKRKAESAGGIGKKRPGTGHDTEDSGASISGDTGIMMGPIQRPIVNRDGDSDIRVYRKVHRFTTFGLAYKPIQISRGFESNTWTDVFMTTPLAEIPWNRLFMYMNPSEYSLLPSGSSVIDLHIKIRQRNVRVAFQTNSTTSELATLNQNKNAIFADGLLQYAGGENVAPTAFAANQAMIPTAITTELTNSAYNQFVDQFYGVQNTNDGFLTGSPRHQFGIPYILPFYYAMQNSVNDSSLSGWPCLQEYYHEFNADETSNTVFLE…	566	USER	zzz1795
1517		genbank_parvoviridae_ASC49386.1_@5URF_n	parvovirus_cap	genbank	MDAVDAGENGQENPAVEGRAASSSGPGGGGGGGNSGVGYATGSWKGGAIFGDKYVVTRNTRQWMAEIKNNHIYTKDTWGNSGTTRPVGIKTPWCYFNFNEYSSHFSPRDWQRLLNEYGRFRPKHMKVQLYNIQIKQKLITAGDTIYNNDLTAGIHVFCDGSHQYPYTQHPWDEDTMPEMPTTIWDLPQYAYLLAYDPYINSEGNQFEIDFARTLPLYILENSDHAMIRTGENIEFNFEFQSGWVNNNFTNMTVGQMFNPMVGYKRTTEDSYDSNRRYNVASYCKYSNWNGGPGIRGLLTGNNSDAENQAGGAGLLQTSLLYGAEIGTGGVPARAWGTQPNTYGQGSTHNRDHYQFVTGTEAATPQNTITELNYNMASNNVTYHKADNYSVNEMNPIWMF…	533	USER	zzz1796
1516		genbank_parvoviridae_ASC49395.1_@5URF_n	parvovirus_cap	genbank	MDAVDAGENAQETPAVEGRAASSSGPGGGGGGGNSGVGYATGSWKGGAIFGDKYVVTRNTRQWMAQIENNHIYTKNTWGIDGTTRQIGIKTPWCYFNFNEYSGHFSPRDWQRMLNEYGRFRPKHMKVQLYNIQIKQKLVTAGDTIYNNDLTAGIHVFCDGSHQYPYTQHPWDEDTMPEMPTTIWKLPQYAYLLAYHPYVNTEGNEFEVDFAKTLPLYILENSDHAMIRTGENIEFNFEFNCGWVNNNYTNMSVGQMFNPEVGYKRATENSSNSSQRLNVASYCKYSNWNGGPGWRGLLTGNNADDENRAGGAGLLQTSYLYGSELGTGGVPARSWGTQPNTYGQGSTHHRDHYQFVTGTEGATEQNTLMELNYNMASNNVTYNRATNYDIKEVNPIWMF…	533	USER	zzz1797
1515		genbank_parvoviridae_ASC49364.1_@3KIC_N	parvovirus_cap	genbank	MPPAKQRGQFRGILFPGYRYLGPFNPLDNGEPVNKADEAAKRHDLAYNQYLNKGLNPYLKFNKADQQLIDDLSDDSSLGGKFARGVFSIKRALAPSLNEKQLAPGRSAEQKQARKLYFARSNKGAKRQRLNPPTDKPTSNPDNPNMEAEQSMEEETAPQEAAAGSRAGAGGGPANAGTGGVGMSTGQWIGGGIITPNRFITRNTRQWWCEIKNEHKYKRYDAGRGARFYGFSTPWSYFNFNQYNGHFSPKEWQTLLNIAKRFRPVRMTVKIYNIQIKQIVDNSSAGNTLFQNDLTAGLHIFCDGEHAFPYTQNPWDRGTMPELPTEPWELQQYAYVTCPYEAIDDQGTGVEKDFLTQEPFYMLEQADHMIVRTGEAVQFHHEFSCGWVDNTRSAQTPAS…	679	USER	zzz1798
1514		genbank_parvoviridae_ASC49377.1_@5URF_n	parvovirus_cap	genbank	MDAVDAGENVQENPAVEGRAASSSGPGGGGGGGNSGVGYATGSWKGGAIFGDKYVVTRNTRQWMAEIKNNHIYTKATWGNSGTTRPVGIKTPWCYFNFNEYSSHFSPRDWQRLLNEYGRFRPKHMKVQLYNIQIKQKLITAGDTIYNNDLTAGIHVFCDGSHQYPYTQHPWDEDTMPEMPTTIWDLPQYAYLLAYDPYINSDGNQFEIDFERALPLYILENSDHAMIRTGENIEFNFEFNCGWVNNNYTNMTVGQMFNPEVGYKRAVQSSHNNTKMYNVASFCKYSNWNGGPGMRDLRTGNVDDAENRAGAAGLLQTAFLNGAEIGTGGVPARAWGTQPNAYGQGSVHSRDHYQFVTGTEEATTQNTITELNYNMASNNVTYVKNNNYEEIELNPIWMF…	533	USER	zzz1799
1513		genbank_parvoviridae_ASC49344.1_@3KIC_N	parvovirus_cap	genbank	MPPAKQRGQFRGILFPGYRYLGPFNPLDNGEPVNKADEAAKRHDLAYNQYLNKGLNPYLKFNKADQQLIDDLSDDSSLGGKFARGVFSIKRALAPSLDEKQLAPGRSAEQKQARKLYFARSNKGAKRQRLNPPTDKPTSNPDNPNMEAEQPMEEEAAPQEAAAGSRAGAGGGPANAGTGGVGMSTGQWIGGTIITPTKFITRNTRQWWCEIKNEHKYKRFDDGRGARFYGFSTPWSYFNFNQYNGHFSPKEWQTLLNIAKRFRPVRMHVKVYNIQIKQIVDNSGAGGNTLFQNDLTAGLHIFCDGEHAFPYTQNPWDRGTMPELPTEPWELQQYAYITCPYETIDDQGTGVEKDFLTQEPFYMLEQSDHMIVRTGEAVEFHHEFSCGWVDNTRSAQTPA…	679	USER	zzz1800
1512		genbank_parvoviridae_ASC49332.1_@3KIC_N	parvovirus_cap	genbank	MPPAKQRGQFRGILFPGYRYLGPFNPLDNGEPVNKADEAAKRHDLAYNQYLNKGLNPYLKFNKADQQLIDDLSNDSSLGGKFARGVFSVKRALAPSLNEKQLAPGRSAEQKQQRKLYFARSNKGAKRQRLNPPTDKPNSNPDNPNMETEQPMEEEAAPQEAAAGSRAGAGGGPANAGTGGVGMSTGQWIGGGIITPNRFITRNTRQWWCEIKNEHKYKRYDAGRGARFYGFSTPWSYFNFNQYNGHFSPKEWQTLLNIAKRFRPVRMTVKIYNIQIKQIVDNSGAGGNTLFQNDLTAGLHIFCDGEHAFPYTQNPWDTGTMPELPTEPWELKQYAYITCPYEAIDDPSTNSYEEDYLAQEPFYMLEQADHMIVRTGEAVQFHHEFNCGWVDNTRSAQTP…	681	USER	zzz1801
1511		genbank_parvoviridae_ASC49360.1_@3KIC_N	parvovirus_cap	genbank	MPPAKQRGQFRGILFPGYRYLGPFNPLDNGEPVNKADEAAKRHDLAYNQYLNKGLNPYLNFNKADQQLIDDLSNDSSLGGKFARGVFSIKRALAPSLNEKQLAPGRSAEQKQARKLYFARSNKGAKRQRLNPPTDKPTSNPDNPNMETEQPMEEEAAPQEAAAGSRAGAGGGPANAGTGGVGMSTGQWIGGTIITPTKFITRNTRQWWCEIKNNHKYQRITNDSGARLYGFSTPWSYFNFNQYNGHFSPKEWQTLLNVAEKFRPVRMTVKIYNIQIKQIVNNLASGDTLYQNDLTAGLHIFCDGEHAFPYTQNPWDRGTMPELPTEPWELQQYAYVTCPVEAIDDPSTNTYENDFLRQEPLYFLEQADHMIVRTGEAVQFHHEFDCGWVYNTRSAQTPA…	680	USER	zzz1802
1510		genbank_parvoviridae_ASC49398.1_@5URF_n	parvovirus_cap	genbank	MDAVDAGETAQETPAVEGRAASGSGQGGGGGGGNSGVGYATGSWKGGAIFGDKYVVTRNTRQWMAEIKNNHIYTKNIWGNSGTTRPVGIRTPWCYFNFNEYSSHFSPRDWQRLLNEYGRFRPKHMKVQLYNIQIKQKLITAGDTIYNNDLTAGIHVFCDGSHQYPYTQHPWDEDTMPEMPTTIWDLPQYAYLLAYDPYVNSDGNQFEIDFARALPLYILENSDHAMLRTGENIEFNFKFSCGWVNNNYTNMTVGQMFNPEVGYKRAVESSNDTTKIYNVASFCKYSNWNGGPGMRDLKTGNVDDAENRAGAAGLLQTSFLNGADIGAGGVPARAWGTQPNAYGQGSVHNRDHYQFVTGTEEATTQNTITELNYNMASNNVTYVKNANYVDTELNPIWMF…	533	USER	zzz1803
1509		genbank_parvoviridae_ASC49324.1_@3KIC_N	parvovirus_cap	genbank	MPPVRQRGQFRGILFPGYRYLGPFNPLDNGEPVNKADEAAKRHDLAYNQYLNKGLNPYLKFNKADQQLIDDLSDDSSLGGKFARGVFSVKRALAPSLDEKQLAPGRSAEQKQERKLYFARLNKGAKRQRLNPPTEKPTSNPDNSNMEAEQPMEEEAAPQMAAARSGGGSGGGPANAGTGGVGMSTGQWIGGTIITPNKFITRNTRQWWCDIKNDHKYQRITNDSGARLYGFSTPWSYFNFNQYNGHFSPKEWQTLLNVAEKFRPVRMTVKIYNIQIKQIVNNLASGDTLYQNDLTAGLHIFCDGEHAFPYTQNPWDRGTMPELPTEPWELQQYAYVTCPVEAIDDSGTNTYETNFLRQEPLYFLEQADHMIVRTGEAVQFHHEFDCGWVYNTRSSQTPA…	680	USER	zzz1804
1508		genbank_parvoviridae_ASC49304.1_@3KIC_N	parvovirus_cap	genbank	MPPAKQRGQFRGILFPGYRYLGPFNPLDNGEPVNKADEAAKRHDIAYNKYLNKGLNPYLNFNKADQQLIDDLSDDSSLGGKFARGVFSIKRALAPSLNEKQLAPGRSAEQKQQRKLYFARSNKGAKRQRLNPPTDKPTSNPDNPNMETEQPMEEEAAPQEAAAGSRAGAGGGPANAGTGGVGMSTGQWIGGGILTPNRFITRNTRQWYCEIKNEHMYKRYDNGRGARFYGFSTPWSYFNFNQYNGHFSPKEWQTLLNIASRFRPVRMTVKVYNIQIKQIVNNTSSGDTLFQNDLTAGLHIFCDGEHAFPYTQNPWDRGTMPELPTEPWELQQYAYVTCPYEAIDDQGTGVEKDFLTQEPFYMLEQADHMIVRTGEAVQFHHEFSCGWVDNTRSAQTPAS…	679	USER	zzz1805
1507		genbank_parvoviridae_ASC49308.1_@3KIC_N	parvovirus_cap	genbank	MPPAKQRGQFRGILFPGYRYLGPFNPLDNGEPVNKADEAAKRHDLAYNQYLNKGLNPYLKFNKADQQLIDDLSDDSSLGGKFARGVFSIKRALAPSLNEKQLAPGRSAEQKQARKLYFARSNKGAKRQRLNPPTDKPTSNPDNPNMETEQPMEEEAAPQEAAAGSRAGAGGGPANAGSGGVGMSTGQWIGGSIITPNKFVTRNTRQWWCDIKNDHMYKRYDTGTGARLYGFSTPWSYFNFNQYNGHFSPKEWQTLLNIASRFRPVRMQVKIYNIQIKQIVDNTSSGDTLYQNDLTAGLHIFCDGEHAFPYTQNPWDRGTMPELPTEPWELQQYAYITCPYEAIDDPSTNAFEEDCLAQEPFYMLESADHMIVRTGEAVQFHHEFSCGWVDNTRSAQTPA…	683	USER	zzz1806
1506		genbank_parvoviridae_ASC49288.1_@3KIC_N	parvovirus_cap	genbank	MPPAKQRGQFRGILFPGYNYLGPFNPLDNGEPVNKADEAAKRHDLAYNQYLNKGLNPYLKFNKADQQLIDDLSDDSSLGGKFARGVFSIKRALAPSLNEKQLAPGRSAEQKQARKLYFARSNKGAKRQRLNPPTDKPTSNPDNPNMETEQPMEEEAAPQEAAAGSRAGAGGGPANAGTGGVGMSTGQWIGGGIITPNRFITRNTRQWYCDIKNEHKYKRYDKGTGARFYGFSTPWSYFNFNQYNGHFSPKEWQTLLNIAKRFRPVRMTVKVYNIQIKQIVENSSSGDTLFQNDLTAGLHIFCDGEHAFPYTQNPWDTGTMPELPTEPWELKQYAYITCPYEAIDDAGTSGNSYEEDYLAQEPFYMLEQADHMIVRTGEAVQFHHEFNCGWVDNTRSAQT…	682	USER	zzz1807
1505		genbank_parvoviridae_ASC49356.1_@3KIC_N	parvovirus_cap	genbank	MPPVKQRGQFRGILFPGYNYLGPFNPLDNGEPVNKADEAAKRHDLAYNQYLNKGLNPYLKFNKADQQLIDDLSNDSSLGGKFARGVFSIKRALAPSLDEKQLAPKRSAEQKQARKLYFARSNKGAKRQRLNPPTDKPTSNPDNPNMEVEQPIEEEAAPQMAAARSGTSAGGGPANAGTGGVGMSTGQWIGGGIITPNRFVTRNTRQWWCDIKNEHKYKRYDSGTGARFYGFSTPWSYFNFNQYNGHFSPKEWQTLLNIAKRFRPVRMTVKIYNIQIKQIVENTNSGDTLFQNDLTAGLHIFCDGEHAFPYTQNPWDSGTMPELPTEPWELKQYAYITCPYEAIDDSGTSGNTYEEDFLAQEPLYMLEQADHMIVRTGEAVEFHHEFNCGWVDNTRSAQT…	681	USER	zzz1808
1504		genbank_parvoviridae_ASC49340.1_@3KIC_N	parvovirus_cap	genbank	MPPAKQRGQFRGILFPGYRYLGPFNPLDNGEPVNKADEAAKRHDLAYNQYLNKGLNPYLKFNKADQQLIDDLSNDSSLGGKFARGVFSIKRALAPSLNEKQLAPGRSAEQKQARKLYFARSNKGAKRQRLNPPTDKPTSNPDNPNMEAEQPMEEEAAPQEAAAGSRAGTSGGAANAGTGGVGMSTGQWIGGGIITPNRFITRNTRQWYCDIKNEHKYKRYDKGTGARFYGFSTPWSYFNFNQYNGHFSPKEWQTLLNIAKRFRPVRMTVKIYNIQIKQIVENSSSGDTLFQNDLTAGLHIFCDGEHAFPYTQNPWDTGTMPELPTEPWELKQYAYITCPYEAIDDAGTSGNAYEEDYLAQEPFYMLEQADHMIVRTGEAVQFHHEFNCGWVDNTRSAQT…	681	USER	zzz1809
1503		genbank_parvoviridae_ASC49352.1_@3KIC_N	parvovirus_cap	genbank	MPPAKQRGQFRGILFPGYRYLGPFNPLDNGEPVNKADEAAKRHDLAYNQYLNKGLNPYLKFNKADQQLIDDLSDDSSLGGKFARGVFSVKRALAPSLNEKQLAPGRSAEQKQARKLYFARSNKGAKRQRLNPPTDKPTSNPDNPNMETEQPMEEEAAPQEATAGSRAGAGGSPANAGTGGVGMSTGQWIGGGIITPNRFITRNTRQWYCDIKNEHKYKRYDAGTGARFYGFSTPWSYFNFNQYNGHFSPKEWQTLLNIAKRFRPVRMTVKVYNIQIKQIVENSSSGETLFQNDLTAGLHIFCDGEHAFPYTQNPWDSGTMPELPTEPWELKQYAYITCPYEAIDDSGTNGNPYEEDYLAQEPFYMLEQSDHMIVRTGEAVQFHHEFNCGWVDNTRSAQT…	682	USER	zzz1810
1502		genbank_parvoviridae_ASC49336.1_@3KIC_N	parvovirus_cap	genbank	MPPAKQRGQFRGILFPGYNYLGPFNPLDNGEPVNKADEAAKRHDLAYNQYLNKGLNPYLKFNKADQQLIDDLSDDSSLGGKFARGVFSIKRALAPSLDEKQLAPGRSAEQKQARKLYFARNNKGAKRQRLNPPTDKQTKKPDNPNMETEQPMEDESAPQEAAAGGRAGAGGGPANAGTGGVGMSTGQWIGGTIITPNKIVTRNTRQWWCNIKNEHRYKRITNESGARLYGFSTPWSYFNFNQYNGHFSPKEWQTLLNVAEKFRPVRMTVKIYNIQIKQIVNNLASGDTLYQNDLTAGLHIFCDGEHAFPYTQNPWDRGTMPELPTETWELQQYAYVTCPVEAIDDAGTNAYENDLLRQEPLYFLEQADHMIVRTGEAVQFHHEFDCGWVYNTRSAQTPA…	680	USER	zzz1811
1501		genbank_parvoviridae_ASC49316.1_@3KIC_N	parvovirus_cap	genbank	MPPAKQRGQFRGILFPGYKYLGPFNPLDNGEPVNKADEAAKRHDLAYNQYLNKGLNPYLKFNKADQQLIDDLSDDSSLGGKFARGVFSIKRALAPSLNEKQLAPGRSAEQKQARKLYFARSNKGAKRQRLNPPTDKPTSNPDNPNMETEQPMEEEAAPQEAAAGSRAGAGGGPANAGTGGVGMSTGQWIGGGILTPNKFITRNTRQWYCEIHNEHMYKRYDDGLGARFYGFSTPWSYFNFNQYNGHFSPKEWQTLLNIASRFRPVRMHVKVYNIQIKQIVNNTSSGDTLYQNDLTAGLHIFCDGEHAFPYTQNPWDRGTMPELPTEPWELQQYAYITCPYEAIDDQGTGVEKDFLTQEPFYMLEQADHMIVRTGEAVEFHHEFSCGWVDNTRSAQTPAS…	678	USER	zzz1812
1500		genbank_parvoviridae_ASC49312.1_@3KIC_N	parvovirus_cap	genbank	MPPAKQRGQFRGILFPGYNYLGPFNPLDNGEPVNKADEAAKRHDLAYNQYLNKGLNPYLKFNKADQQLIDDLSNDSSLGGKFARGVFSVKRALAPSLNEKQLAPGRSAEQKQARKLYFARSNKGAKRQRLNPPTDKPTSNPDNPNMEAEQPMEEEAAPQEAAAGSRAGAGGGPANAGTGGVGMSTGQWIGGGIITPNRFVTRNTRQWWCDIKNEHKYKRYDAGTGARFYGFSTPCPYFNFNQYNGHFSPKEWQTLLNIAKRFRPVRMTVKVYNIQIKQIVTNAANETLFQNDLTAGLHIFCDGEHAFPYTQNPWDTGTMPELPTEPWELKQYAYITCPYEAIDDSGSSGNAFEEDYLAQEPFYMLEQADHMIVRTGEAVEFHHEFNCGWVDNTRSAQTP…	680	USER	zzz1813
1499		genbank_parvoviridae_ASC49320.1_@3KIC_N	parvovirus_cap	genbank	MPPAKQRGQFRGILFPGYRYLGPFNPLDNGEPVNKADEAAKRHDLAYNQYLNKGLNPYLKFNKADQQLIDDLSNDSSLGGKFARGVFSIKRALAPSLNEKQLAPGRSAEQKQARKLYFARSNKGAKRQRLNPPTDKPTSNPDNPNMETEQPMEEEAAPQEAAAGSRAGAGGGPANAGTGGVGMSTGQWIGGGIITPNRFITRNTRQWYCDIKNEHMYKRYDKGTGARFYGFSTPWSYFNFNQYNGHFSPKEWQTLLNIAKRFRPVRMTVKVYNIQIKQIVENSSSGDTLYQNDLTAGLHIFCDGEHAFPYTQNPWDTGTMPELPTEPWELKQYAYITCPYEAIDDPSAAGVEEDFLAQEPFYMLEQADHMIVRTGEAVEFHHEFNCGWVDNTRSAQTPA…	680	USER	zzz1814
1498		genbank_parvoviridae_ASC49292.1_@3KIC_N	parvovirus_cap	genbank	MPPAKQRGQFRGILFPGYKYLGPFNPLDNGEPVNKADEAAKRHDLAYNQYLNKGLNPYLKFNKADQQLIDDLSDDSSLGGKFARGVFSIKRALAPSLNEKQLAPGRSAEQKQARKLYFARSNKGAKRQRLNPPTDKPTSNPDNPNMETEQPMEEEAAPQEAAAGSRAGAGGGPANAGSGGVGMSTGQWIGGTIITSNKFVTRNTRQWWCDIKNNHMYKRYDAGTGTRLYGFSTPWTYFNFNQYNGHFSPKEWQTLLNIASRFRPVRMTVKIYNIQIKQIVDNSSGDTLYQNDLTAGLHIFCDGEHAFPYTQNPWDIGTMPELPTEPWELQQYAYVTCPYEAIDDPGTNAFEEDILAQEPFYMLEQADHMIVRTGEAVQFHHEFSCGWVDNTRSAQTPAM…	685	USER	zzz1815
1497		genbank_parvoviridae_ASA45777.1_@5URF_n	parvovirus_cap	genbank	MLRDQLLYKGNQTTYNLVGDIWMFPNQVWDRFPITRENPIWCKKPRADKHTIMDPFDGSIAMDHPPGTIFIKMAKIPVPTATNADSYLNIYCTGQVSCEIVWEVERYATKNCVQKRHP	118	USER	zzz1816
1496		genbank_parvoviridae_ARJ58623.1_@3KIC_N	parvovirus_cap	genbank	MAPANRKLGGWVVPGYKYLGPFNPADNGEPVNSADEAARSRDLAYQSYLDAGVDPYFSYNKADSDFIETLAHDSSFGGWLGRSAFGLKKLLAPHLADTKGNPDAPSTSRAGSSISKSDRAQKRKLYFARSNKQAKQQKMSAPEAPTEDVAEPGPSGSDPRAGGNGSGGGMGGGGGHGVGVSTGGWKAGTVFGNDFVITTNTRQWYAPIFNGHEYKRMAPGENSEQATNRHWVGISTPWGYFNFNEYSSHFSPQDWQRLTNEYKRWRPKAMRIKVYNLQIKQVVTLGADTLYNNDLTAGVHIFCDGSHQFPYSQHPWDTGTMPELPHRIWRISQYGYFQLQSDLTDGGASSERPDVENQEKQLLKSAPLYMLETASHQVLRTGEESSFSFSFDSGWVIND…	712	USER	zzz1817
1495		genbank_parvoviridae_ARQ18924.1_@3NG9_A	parvovirus_cap	genbank	MPPIKRQPGGWVLPGYKYLGPFNPLNNGKPINHADRAAQAHDKAYDKLIKSGKNPYLYFNKADEKFIDDLKNDWSIGGIIGSSVFKLKRAVAPALGNKERAKKRHFYFANSNKSAKKAKKSEPQPNTSKMSENDIQDQQPSDSVDGQRSSSGGVGSIGGGKGSGVGISTGGWVGGSYFSDSYIITKNTRQFLVKIQNEHQYKTENIIPNNAGGKSQRCVSTPWSYFNFNQYSSHFSPQDWQRLTNEYKRFRPKAMNIKIYNLQIKQILSNGADTTYNNDLTAGVHIFCDGEHAYPNATHPWDEDVMPELPYQTWFLFQYGYIPTIHELTEMENANAVEKAICLQMPFFMLENSDHEVLRTGESTEFNFNFDCEWINNERAFIPPGLMFNPLIPTRRAQY…	667	USER	zzz1818
1494		genbank_parvoviridae_APC23172.1_@6BX1_F	parvovirus_cap	genbank	NNRTEFHYNGDEVYIICHATRHIHLNMPESEEYKIFQTDHGPLFPAGQTLQGRDTINDSYHAKVETPWQLLHANSWGCWFSPADFQQVITTCRDLEPIHFEQSIDNIVIKTVTKQGTGAEETTQYNNDLTALLEVAQDNSNIMPWVSDNFYIDSIGYVPWRPSKLPTYCYHVDFWNTITINANPATWTQTKTGIQWDNIQFTPIENMVAIDLLRTGDSWHSGPYTFKTKPTSLEFHWQSTRHTGSCHPSTTPSTIGGIGNNNNSINSWQWGDRNNPSSASTRVSNFHIGYSWPEWQFHYSTGGPVVNPGSAFSQAPWGSEVGQTRLTQGASEKAIFDWNHGDDTTGARETWWQNNEHMTGQTNWAPRNIHQKELNNNVAGADAFWTEGYHNTFGPFTAV…	452	USER	zzz1819
1493		genbank_parvoviridae_APC23165.1_@1S58_A	parvovirus_cap	genbank	MSEPAAKKQKVWWNEENAYTDAWVSEFKDIVKDAISLIGEEAEGPVLALKFLQSHLKLDLKYGVDALTSSDALKFLTDNALSVNAINKDSEGKSTLGTYLQTHLENYKNSPDRYTLDLSHGPLPDFRETQSEHESSNEPRADNAVLTEKDLHEGGGLSLVLPFSNYIGPGNQLQAGNPQSVVDAAARIHDFRYSELIKLGINPYTHWSVADDELLHNIKNESGFQAQVVRDFFTLKGLFTSTAHFKGELPAVPQYSPSENYPNMASVTSTEGTTGAGGGGSNPVHGVWREGAVFTDSSVTCTFSRVFVVPYTAEHAYRVFSPPAENCHKAATGESNVCAISPVMGYATPWHYIDVNCAALYFSPLEFQRLLENYGSIKPSSMSVTLSEVCIKDVTDKPG…	819	USER	zzz1820
1492		genbank_parvoviridae_AQX45761.1_@3NG9_A	parvovirus_cap	genbank	MAPTRRPGGWVLPGYKYLGPFNPLDNGEPVNGADRAAKKHDEAYERYLSQNKNPYLYFNKADSDFLEDLESDKSFGGWIGRTVFGAKRAIAPSLGEPGGKRGKYQAEKRKLYFARSQKGAKQAKMADSAGPSDQGSTSTDVSHEGARASGAQNAGGGGGGGAGRSVGISTGGWKGGSLFGDKVVVTRITRQWYCPIYDGHKYKQFYSADDAGSQHAVYNGMRTPWGYFDFNCYAGHFSPQDWQRLTNEYKRWRPRTMHVKLYNLQIKQVVTLGADTLYNNDLTAGVHVFCDGSHQYPYPQTPWNEGIVPELPNDVWKLPQYGYYQYDSWLTSDTPNASNGTSRGLRVAAPLFMLENSSHEVLRTGEETEFNFTFECGWVNNDRAYVSPQNDFNAIVGTR…	681	USER	zzz1821
1491		genbank_parvoviridae_AQR59084.1_@5URF_n	parvovirus_cap	genbank	MKYKAPAGYVPSLPTNDEEAYHLTRWWLNHVENYGKNKAIGRGRGKARKELTPQQKAERKRFFIAQAQKNKKPNYGIPSSSQHKEFFKNHQGAQGGKAKQKTKHLENQAPQRQEDPEEGPAPKQPRVEENPYNQEELEEMMADENEPDQSGIPMELSDGPGTVGGGGGGGIGHSTGNWNCDTIWAGNTCTTYASRHCVCLMRDFDKYQAIGNQNGRHGLDAENETQYFGFTTPWNYLDFNKYSIHFSPRDWQHLVNNFSRWRPKAVHIKIFNLQVIQKTVTGDGTQYSNDLTGTIQIFADQEGRYPRILYPNQVTQMGSFPNQIYYLPQYAYLSAITSNNTTTTVTFWNYLNELTAFYCLDESPSQMLRTGNEWQTSYEFPDSTPWCNNRVSTVSITQR…	675	USER	zzz1822
1490		genbank_parvoviridae_AQR59127.1_@5URF_n	parvovirus_cap	genbank	MKYKAPKGYVPSLPTTDEEAYHHTRWWLDHVENYGKNKAIGRGKGKARKELTPQQKAERKRFFITQAQKNKKPNYGIPSSSQHKEFFKNHQGAQGGKAKQKTKHLENQAPQRQEDPEEGPAPKQPRVEENPYNQEELEEMMADENEPDQSGIPMELSDGPGTVGGGGGGGIGHSTGNWNCDTIWAENTCKTYASRHCVCLMRDMDQYKAIGNANGQHGLDTENQTQYFGFSTPWNYIDFNQYSIHFSPRDWQQLVNNYSRWRPRSVHVKIFNLQVIQKTATDSGTQYSNDLTGTIQIFADQEGKYPRILYPNQTTLMGPFPSNIYYLPQYAYLTSMYNSGGQTPSTWWGFPTRESAFYCLDESPSQMLRTGNEWETTFIFPSSTQWCNNRISTISITQR…	675	USER	zzz1823
1489		genbank_parvoviridae_AQN78651.1_@3P0S_A	parvovirus_cap	genbank	MVGQDEDLDPVANSSNADGTAGSRNVRSTGGNASASGGGNSGMRGIAPLYQGIRYNIQSGVRTYTKQYRLRIHNLAIDAKSVTNGTESFSVIRYPYHDLPVHMLGFYLTKDEISMLMGQTSARVKQVGVEIHHKTAVLTFETNSSTTNIGNNNIGAYLCHISEDIGPKRFGLTADNIGLIENTFWGNHATNITSEDWTEELGDLGCEFITKNYDHRFHYYSPKVGSEYTSSIPSLEYNYNFFNIHPFVDYRVNASMNEGLFCQYQYVPEHGLVAGKYLAGKKNFAEAVTYYRKNPKSVISGLEGEESIRLPVPEASGVNQENIDENYQYLRLPYRNYKETEYSSLQIDDRAYPMHSGKQQPPLVIGLESLWSSIGNKNTVVPCHVDIIVNTYCEIECDI…	463	USER	zzz1824
1488		genbank_parvoviridae_AQN78647.1_@1DNV_A	parvovirus_cap	genbank	MAPPLRFTQKFLQQYPQYANADEAWKRKAIKTHPQYFETDEHPSTSRAAAQAAKRPATSSGDTVGKKPTRLTPVQSQPVQQQAVVGSTSDVSSDVQMDLPGTGKPSGDNGSPGCDEYYLPIKRTDFGRRNTTYSKTFQVVSNNFHSTLLVLEEFHTMFITSELLEIPWHLPCMYMTPSEYALLQPGARATNLHCKVTFRGCTIKFETNSSATQIATLNTVQTLRAAVGLNKTGWGNNFFYNSLNTNDSMIPTSVVPSNYTNAYGRNSTLTEELYGSGDRTNVPGCYNTGEFWIGRNYWCESSPYPTANGSIGWPTSRTQKCKTWDAKTMIDKVIIDESYTPKMAPLNDTLKHYRDTLRPYGTGATSWTVNTGGSLPDARTTRVASVSGVTGIQEGTVNP…	520	USER	zzz1825
1487		genbank_parvoviridae_AQN78646.1_@4G0R_A	parvovirus_cap	genbank	MAGNVLRQRIPWGSATESTSLLSSEAEAAGIELETIASEGGALAAFESAEAAGAALDSTGIAAPVGIAIGALAAIGYGGYEIYEHFIKSGVPEHKIPSPQQINRNIRVNKPKIEQHKQHLENQKGIDYTETETPEEVNDVETIEKQVQSGLTLPFSNNIGPGNTPQVPKTIADSIALDHDLAYGKAHHPNDVFSADDAFLNQQKTNFLFNGNPIEKVQSAIGYAGIKLKNTFEKHAGVKYPSNLSGKQWPRHSDSRKSFYSSTLNMRMLMKLGNGKLLKLTPNILKQTNTLRPRELQRKRLKDLLRVVETL	311	USER	zzz1826
1486		genbank_parvoviridae_AQH32575.1_@6BX1_F	parvovirus_cap	genbank	ALGVPPFLNSLPQADGGTNLGNMGVHHDKRRGVTQMGNTNIITEATIMRPAEVGYSAPFYSCEASTQGPFKTPIAAGRVGAQTDENRAADGDPRYAFGRQHGQKTTTTGETPERFTYIAHQDTGRYPEGDWIQNINFNLPVTEDNVLLPTDPIGGKTGINYTNIFNTYGPLTALNNVPPVYPNGQI	186	USER	zzz1827
1485		genbank_parvoviridae_ANG55948.1_@3P0S_A	parvovirus_cap	genbank	MSDYKKVKYTPFDEGEEVELFTLKHYQDGYFYEPPTVRQRNAWTHDDYESGGHTAETAAGEEEELLDTVRTTEQVGSSLSKSGAKAVADLRKANYGTIKKGRNTSKGGKGRGLQKLVTWVGAGIAAAAGIGAVVHSQTKEEELNTSAYELAKSMEIGKNPHADNKGAKLPWEQTYGVKAYNDRVKSTDKQKQFEDNLQYIEKDKEWQYKNSKILQIESEKGLKWDGRQYQIDPNYKPPEDRPGYTLPGHKFIGPGNPVDTEVPVDEDDAIAKEHDEAYATAKNQKDIAIADEQAADKFLSDWQTNANTHSLLGGLGLIGKKHVEQTIGSIYPMGVLGRRTGESTPEKQPDSSSGPTPDKRPRTEDPAPGEATPSKPGTNPASPVTSDDPMQGGDDGGGG…	840	USER	zzz1828
1484		genbank_parvoviridae_ANW48428.1_@1K3V_A	parvovirus_cap	genbank	MAPPAKRARGLTLPGYKYLGPGNSLDQGEPTNPSDAAAKEHDEAYDKYIKSGKNPYFYFSAADEKFIKETEHAKDYGGKIGHYFFRAKRAFAPKLSETDSPTTSQQPEVRRSPRKHPGSKPPGKRPAPRHIFINLAKKKAKGTSNTNSNSMSENVEQHNAINAGTELSATGNESGGGGGGGGGRGAGGVGVSTGSFNNQTEFQYLGEGLVRITAHASRLIHLNMPEHETYKRIHVLNSESGVAGQMVQDDGHTQMVTPWSLIDANAWGVWFNPADWQLISNNMTEINLVSFEQEIFNVVLKTITESATSPPTKIYNNDLTASLMVALDTNNTLPYTPAAPRSETLGFYPWLPTKPTQYRYYLSCVRNLDPPTYTGQSQQITDTIQTGPHSDIMFYTIEN…	730	USER	zzz1829
1483		genbank_parvoviridae_ACJ66591.1_@3KIC_N	parvovirus_cap	genbank	MDFVDNFFTDKYKETYKELSKPVNPPPVQHISEKHSEPGSRGLVVPGYKYLGPGNSLDRGEPVNQADAAAKEHDISYDKQLKVGDNPYVKYNHADEQFQQKLEGDTSLAGNAANAVFQAKKRLLEPFGLVEAPLPAKTDSKKVDDYFPKAKKAKQSFQIPAPSKSDPGEGTSAQSGGSPAGSDTSGSSIMAEGGGGPMASDQQGAEGVGNSS	212	USER	zzz1830
1482		genbank_parvoviridae_AEM37605.1_@5URF_n	parvovirus_cap	genbank	KKPRLDPKQDRAQKRKLYFARSNKQAKQPRMSAGAEPTEDVAGSADPAAEGRAGGANGGGGGMGGGGGHGVGVSTGGWQAGTIFTDNIVVTTGTRQWYAPIYNGHLYKKLEPEGNIASNWTGISTPWGYFNFNEYDAHFSPQDWQRLLNEYKRWRPKSMHVKIYNLQIKQVVQLGADTLYNNDLTAGVHIFCDGSHQFPYSQHPWDTGVMPELPNKVWKLSQYAYFQALKDLVDPTAGTSPDLGNIEKTILKAAPFYILESASHQVLRTGEETSFTFEFNCGWVNNDRVYCPPQADFNPLVNTRRYFATRQPRTGSAENKFTYHRYNPYNKPSIWMPGPSLGYIGSTQTSANPEKARGPITVVYQPPYTRATGANSTDQQTILPQMSEQTMQDSGYDVA…	607	USER	zzz1831
1481		genbank_parvoviridae_AEI99220.1_@5URF_n	parvovirus_cap	genbank	STNNNIPTRNLDIDMTRWYRVHEPVRSGNGSTYYNVDDVWMYPNQVWNSTPICRDNPIRDKVPRTDHHTLLDSSDGTLPMKHPPGNIFIKCAKIPIPTSNNTDSYLNIYVTGQVTYTVEWEVQRYQTKNWRPELRTSAGSYNQHE	145	USER	zzz1832
1480		genbank_parvoviridae_AEI99210.1_@5URF_n	parvovirus_cap	genbank	STNNNIPTRNLDIDMTRWYRVHEAVRGASGSTYYNVDDIWMYPNQAWNSTPICRDNPIWDKVPRTDKHTLLDSSDGTLPMKHPPGNIFIKCAEIPVPTSNNTDSYLNIYVTGQVTYTVEWEVQRYQTKNWRPELRTSAGSYNQHE	145	USER	zzz1833
1479		genbank_parvoviridae_AEF33729.1_@4QC8_A	parvovirus_cap	genbank	MDGDMDNNEQGAGEAPAAAGGARSAGGGGGAIGGGGGGNNHGVGISTGGWIGGSILGHNTIITRNTRQWWCPIRDNHLYKRYQGFNKNGADFKMEGYTTPWNMFNFNQYSSHFNPNEWQWLMNRAKRFRPKRMEVKIYNLQIKQESTQDTNAQYTNDLTAGLHVLCDGEHAFPWTQLPWDKGCMPELPHEIWELTQYAYLTMPSQAQDSESNTTEMDIRCAIPMYLLEETDHAVIRTGESI	241	USER	zzz1834
1478		genbank_parvoviridae_AEF33724.1_@3KIC_N	parvovirus_cap	genbank	MSLKRGQFRGLLFPGYNYLGPFNPLENGDPVNKADEAAKKHDQAYNNYINKGLNPYLKFNKGDQDFIDSLQSDSSVGGNFARAVFHLKKQIAPALNEPKDTGEPPAKKDKRAGNKRHLYFARLNKGAKKAKADNNNMDGDLGDNEQGAGEAPTAAGGERAGGGGGAIGGGGGGNNHGVGISTGGWIGGSILSNNRIITRNTRQWWCPIRNSHKYKQYTQFAQGNTQMHMMGYTTPWNMFNFNQYSSHFNPNEWQWLINRAKRFRPVKMEVKIYNLQIKQESSQDTTAQYTNDLTAGLHVLCDGEHAFPWTQLPWDKGCMPELPHEIWELTQYAYIIVPSQTQDSSSTSEDEAIIRSMCPMYLLEETDHAVIRTGESIIFHHNFDCGWVDNTHCSNMPQL…	661	USER	zzz1835
1477		genbank_parvoviridae_ADM26655.1_@5URF_n	parvovirus_cap	genbank	PGLLSAQRVGPQSSDTAPFMVCTNPEGAHINTGAAGFGSGLDPPSGCLAPTNLEYKLQWYQTPEGTGNNGNIIANPSLSMLRDQLLYKGNQTTYNLVSDVWMFPXQVWDRYPITREHPIWCKKPRADKHTIVDPFDGSIAMDHPPGTIFIKMAKIPVPSASN	162	USER	zzz1836
1476		genbank_parvoviridae_ADM24814.1_@3J1S_A	parvovirus_cap	genbank	LPTYNNHLYKQIQSSQQGDGTYYGYSTPWGYFDFNRFHCHFSPRDWQRLINNHWGIRPKRLNFKLFNIQAKEVTTNDGTTTIANNLTSTVQVFADAEYQLPYVLGNAHEGCLPPFPADVFMLPQYGYLTLNSNPTGSQTAAFSLPQSAFYCLEY	154	USER	zzz1837
1475		genbank_parvoviridae_ADM24812.1_@3J1S_A	parvovirus_cap	genbank	LPTYNNHLYKQINGTGTGDAGYFGYSTPWGYFDFNRFHCHFSPRDWQRLVNNHWGIRPRRLNFKLFNIQVKEVTTTDGTKTIANNLTSTVQVFADTEHQLPYILGSAHEGCMPPFPADVFMLPQYGYLTLNGPGTNNNNLSTPSSAFYCLEY	152	USER	zzz1838
1474		genbank_parvoviridae_ADI60249.1_@3KIC_N	parvovirus_cap	genbank	MSHKRGQFRGLLFPGYNYLGPFNPLENGDPVNKADEAAKKHDQAYNKYINKGLNPYLKFNKGDQDFIDSLQSDSSVGGNFARAVFHLKKQIAPALNEPKDTGEPPVKKDKRAGNKRHLYFARLNKGAKKAKADPNNMDGDMDNNEQGAGEAPAAEGGARAAGGAGGGGGGGPSGNHGVGISTGGWIGGSILGQNRIITKNTRQWWCPIRNEHKYKRYQGIAEYKMEGYTTPWNMFNFNQYSSHFNPNEWQWLLNRAARFKPVKMEIKIYNIQIKQESNQDVTAQYTNDLTAGLHVLCDGEHAFPWTQLPWDKGCMPELPHDIWTLQQYAYITCASEAQDTTGNGNELNIRGAVPMYLLEETDHAVIRTGESIVFHHSFDCGWVDNTRSSAMHQLACINP…	680	USER	zzz1839
1473		genbank_parvoviridae_ADI60246.1_@3KIC_N	parvovirus_cap	genbank	MSLKRGQFRGLLFPGYNYLGPFNPLENGDPVNKADEAAKKHDQAYNNYINKGLNPYLKFNKGDQDFIDSLQSDSSVGGNFARAVFHLKKQIAPALNEPKDTGEPPAKKDKRAGNKRHLYFARLNKGAKKSKADNNNMDGDLGDNEQGAGEAPAAEGGARAAGGGGAIGGGGGGNNHGVGISTGGWIGGSILGNNKIITKNTRQWWCPIRNEHKYKRYTQWHQSGTDYKMEGYTTPWNMFNFNQYSSHFNPNEWQWLVNRASRFRPVKMEIKIYNIQIKQESNQDVTAQYTNDLTAGLHVLCDGEHAFPWTQLPWDKGCMPELPHDIWTLQQYAYITCASEAQDTTGNGNELNIRGAVPMYLLEETDHAVIRTGESIVFHHSFDCGWVDNTRSSAMHQLA…	684	USER	zzz1840
1472		genbank_parvoviridae_ADI48256.1_@3J1S_A	parvovirus_cap	genbank	TLALSQLTQDGSESAAGAAGGSAQAPNMATSEMAAAGGGAVGDVGQGADGVGSASGDWHCDSTWMGDRVITKSTRTWALPTYNNHLYKKINNSTNSNTDNQYFGYSTPWGYFDFNRFHCHFSPRDWQRLVNNNWGFRPRSLNFKLFNIQVKEVTQTDGTTTIANNLT	167	USER	zzz1841
1471		genbank_parvoviridae_ADM24815.1_@3J1S_A	parvovirus_cap	genbank	LPTYNNHRYKQINSSSEGVDEAYFGYSTPWGYFDFNRFHCHFSPRDWQRLINNHWGIRPKSLNFKLFNIQVKEVTTNDGTTTIANNLTSTVQVFADTEYQLPYILGNAHEGCLPPFPADVFMLPQYGYLTLNKSHNALAQGSFYCLEY	148	USER	zzz1842
1470		genbank_parvoviridae_ADM24816.1_@3J1S_A	parvovirus_cap	genbank	LPTYNNHQYKRIDSKGATSKDNFYSYSTPWGYFDFNRFQYYFSPRNWQCFVKYNWGLWSKRLSFKLFNVQVKEVTTQEGATTITNNLTSTIQVFADSDYQFLHVLGNAHEGTLPPFPAHVFTVPQYAYDTLNNGDNAAASSTFYCLEY	148	USER	zzz1843
1469		genbank_parvoviridae_ADM24809.1_@3J1S_A	parvovirus_cap	genbank	LPTYNNHLYKQINSTNQTNDETYFGYTTPWGYFDFNRFHCHFSPRDWQRLINNHWGMRPKRLNFKIFNIQVKEVTTNDGTTTIANNLTSTIQVFADTDYQLPYVLGNAHEGCLPPFPADVFMLPQYGYLTLNEGHKAMPQSSFYCLEY	148	USER	zzz1844
1468		genbank_parvoviridae_ADD26626.1_@3J1S_A	parvovirus_cap	genbank	LPTYNNRQYKRIDSNGATSKDRFYSYSTPWGYFDFNDFRYHFSPRDWQCFVNNNWGIWPKGPSFKLFNIQVKELTTQEGATAITNSLTSTIQVFADSDYQFPHVLGNAHEGTLPPFPADVFTVPQYAYYTLNHGDSATARSTFYCLEY	148	USER	zzz1845
1467		genbank_parvoviridae_ADD26624.1_@3J1S_A	parvovirus_cap	genbank	LPTYNNHIYRQIQSSGTGDGTYFGYSTPWGYFDFNRFHCHFSPRDWQRLINNHWGIRPKRLNFKLFNIQVKEVTTNDGTTTIANNLTSTVQVFADSDYQLPYVLGNAHEGCFPPFPADVFMLPQFGYLTLNATPPTQGQAALSMPQSAFYCLEY	154	USER	zzz1846
1466		genbank_parvoviridae_ADD26625.1_@3J1S_A	parvovirus_cap	genbank	LPTYNNHQYKPIDSKGATSKDNFYSYSTPWGYFDFNRFRYHFSPRDWQCFFNTNWGIRPKRPSFKLFNVQVKEVTRQEGATTITNNLTSTIQVFVDSDYQFPPVLGTAHEGMLPPFPADVFTVPQYAYYTLNNGDNTAARSTFYCLEY	148	USER	zzz1847
1465		genbank_parvoviridae_ADD26621.1_@3J1S_A	parvovirus_cap	genbank	LPTYNNQQYKRMDSKGATSKDNFYSYSTPWGYFDFNRFQYHFSPRDWQCFVNNNWGIWPKRLLFKLFNVQVKEVTTQEGTTTITNNLTSTIQVFADSDYQFPHVLGHAHEGTLPSFPAHVFTVPQFAYYTFNNGDNTAARSTFYCLEY	148	USER	zzz1848
1464		genbank_parvoviridae_ADD26617.1_@3J1S_A	parvovirus_cap	genbank	LPTYNNHVYQQINSTTGGNGTYFGYSTPWGYFDFNRFHCHFSPRDWQRLINNHWGMRPKRLNFKLFNIQVKEVTTNDGTTSIANNLTSTVQVFADSEYQLPYVLGNAQEGTFPPFPADVFMLPQYGYLTLNDNTQNGARALPQSAFYCLEY	151	USER	zzz1849
1463		genbank_parvoviridae_ADD26610.1_@3J1S_A	parvovirus_cap	genbank	LPTYNNHLYKQMQSTGTGDGTYYGYSTPWGYFDFNRFHCHFSPRDWQRLINNHWGIRPKKLNFKLFNIQVKEVTTTDGTTTIANNLTSTVQVFADQEYQLPYVLGNAHEGCLPPFPADVFMLPQYGYLTLNSNPTAQGQNALSLPQSAFYCLEY	154	USER	zzz1850
1462		genbank_parvoviridae_ADC79820.1_@5URF_n	parvovirus_cap	genbank	FANSNKGAKKSKNSEPKPGNSKMSENEIQDQQPSESMDGQREGGGAAAGSVGGGKGSGVGISTGGWVGGSYFTDSYVITKNSRQFLVKILKDHKYRTENIIPSNAGGKSQRCVNTPWSYFNFNQYSSHFSPQVWQRLTNEYKRFKPRKMHVK	152	USER	zzz1851
1461		genbank_parvoviridae_ADC79808.1_@5URF_n	parvovirus_cap	genbank	FANSNKGAKKSKNSEPKPGTSKMSENEIQDQQPSDCMDGQRGGGGGAAGSVGGGKGFGVGISTVGWVGGSYFTDSYVLTKNTRQFLVKIQNDHKYRTENIIPSNAGGKSQRCVSTPWSYFNFNQYSSHFSPQDWQGLTNEYKRFKPRKMYVK	152	USER	zzz1852
1460		genbank_parvoviridae_ADC79807.1_@5URF_n	parvovirus_cap	genbank	FANSNKGDKKSKNSEPEPGTSKMSENEIQDQQPSDSMDGQRGGGRGAAGSVGGGKGSGVGTSTGGWVGGSYFTDSYVITKNTRQFLVKIQNDHKYRTENIIPSNAGGKSQRCVSTPWSYFNFNQYSSHFSPQDWQRLTNEYKRFKPRKMHVK	152	USER	zzz1853
1459		genbank_parvoviridae_ADC79790.1_@5URF_n	parvovirus_cap	genbank	FAIFNKGAKKSKNSEPKPGTSKMSENEIQDQQPSDSMDGQPGGGGGAAGSVGGGKSSGVGISTGGWVGGSYFTDSYVITKNTRQFLVKIQNDHKYRTENIIPSNAGGKSQRCVSTPWSYFNFNQYSSHFSPQDWQRLTNEYKRFKPRKMHV	151	USER	zzz1854
1458		genbank_parvoviridae_ADC79771.1_@5URF_n	parvovirus_cap	genbank	FANSNKGAKKSKNSEPKPGTSKMSENEIQDQQPSDSMVGQRGSGGGAAGSVGGGKGPGVGISTGGWVGGSYFSDSCVITKNTRQFLVKIQNDHKYRTENIIPSNAGGKSQRCVSTPWSYFNFNQYSSHFSPQDWQRLTNEYKRFKPRKMHVK	152	USER	zzz1855
1457		genbank_parvoviridae_ADC79735.1_@5URF_n	parvovirus_cap	genbank	FANSNKGAKKSKNSEPKPGISKMSENEIKDQQPSDSMDGQRGGGGGAAGSVRGGKGSGVGISTGGWVGGSYFTDSYVITKNSRQFLVKIQNDHKYRTENIIPSNAGGKSQRCVSTPWSYFNFNQYSSHFSPQDWQRLTNEYKRFKPRKMHVK	152	USER	zzz1856
1456		genbank_parvoviridae_ACY68168.1_@4IOV_A	parvovirus_cap	genbank	RAQKRHFYFANSNKGAKKPKNNEPKPGTSKMSENEIQDQQPSDSMEEQGGGKDTTGNVEGEKSSGMGISTNGWVGGSYFTDSYVITKNTRQFLVKIQNDHKYRTENIIPSNAGGKSQRCVSTPWSYFNFNQYSSHFSPQDWQRLTNEYKRFKPRKMHVKIYNLQIKQILSNGADT	175	USER	zzz1857
1455		genbank_parvoviridae_ACS74527.1_@6BX1_F	parvovirus_cap	genbank	DWIQNINFNLPVTDDNVLLPTDPIGGETGIDYTNVSNTYGPLTALNNEPQVYPNAQIWDKELDTDLKTRLHVNAPFVCQNNCPGQLFVKVAPNLTNEYDPDASANMARMVTYPDFWWKRKLIFKAKLRASHTWNPIQQMSINVDNQFNYVPNNIGGMKIVYEKSHLAPRK	170	USER	zzz1858
1454		genbank_parvoviridae_ACS94983.1_@5URF_n	parvovirus_cap	genbank	RADKHTIIDPFDGTLAMDHPPGTIFIKMAKIPVPSNNNADSYLNIYCTGQVSCEIVWEVERYATKNWRPERRHTALGLGIGGEQNVNPTYHVDINGKYIQPTTWGMCYPIKTNINKVL	118	USER	zzz1859
1453		genbank_parvoviridae_ACR15791.1_@5URF_n	parvovirus_cap	genbank	MPPIKRQPGGWVLPGYKYLGPFNPLDNGEPVNKADRAAQAHDKSYSELIKKWKKILTCIFNKADEKFIDDLKNDWSLGGIIGSNFFKLKRAVAPALGNKERAQKRHFYFANSNKGAKKSKNNEPKPSTSKMSENEIQDQQPSEPNDGQRGGGGGTTGSVGGGKGSGVGISTGGWVGGSYFTDSYVITKNTRQFLVKIQNNHQYKTENIIPSNGGGKSQRCVSTPWSYFNFNQYSSHFSPQDWQRLTNEYKRFRPKGMHVKIYNLQIKQILSNGADVTYNNDLTAGVHIFCDGEHAYPNATHPWDEDVMPELPYQTWYLFQYGYIPTIHELAEMEDSNAVEKAIALQIPFFMLENSDHEVLRTGESAEFNFNFDCEWINNERAFIPPGLMFNPLVPTRRA…	669	USER	zzz1860
1452		genbank_parvoviridae_ACN42940.1_@3NTT_A	parvovirus_cap	genbank	MSFVDHPPDWLEEIGEGLKEFLGLEPGPPKPKPNQQKQDDARGLVLPGYNYLGPGNGLDRGEPVNRADEVAREHDISYNEQLQAGDNPYLKYNHADAEFQEKLADDTSFGGNLGKAVFQAKKRVLEPFGLVEEPVKTAAKGERIDDHYPKKKKARIEETEAGTSGAQQLQIPAQPASSLGADTMSAGGGSPLGDNNQGADGVGNASGDWHCDSTWMGDRVITKSTRTWVLPSYNNHQYLEIHSGSVDGSNANAYFGYSTPWGYFDFNRFHSHWSPRDWQRLVNNYWGFRPRSLKVKIFNIQVKEVTTQDGTTTIANNLTSTVQVFTDNDYQLPYVIGNGTEGCLPAFPPQVFTLPQYGYATLNRNNTDDPTERSSFFCLEYFPSKMLRTGNNFEFTYSF…	716	USER	zzz1861
1451		genbank_parvoviridae_ACN42939.1_@3J1S_A	parvovirus_cap	genbank	DSTWLDKRVITKSTRTWSLPTYNNHLYNKITSTAANGDGTWFGFSTPWGYFDFNRFHCHFSPRDWQRLINNNWGIRPKKMHVKLFNIQVKEVTTQDSTTTITNNLTSTIQVFADTEYQLPYVASNAHEGCLPPFPADVFMLPQYGYCTLQRENSNDPVAQSSFYCLEYFPSQMLGTGNNYSISYTFEDVPFHSMYMHNQSLDRLMNPLIDQYLWFLNNTVATNNTNTFTKSTKDDLPRQNRNWLPGPAFQTAAFNLNGQNHFFTSNHWGLVNKYLMNGRNVAIGPGPVVAPKSTTFQADGMIFAKSAATATSAAAQDTVNITSESETSTVNPMMGTNPLIINSSNTPSTSAPTMSNQAVNPIMPGSVWQDRDIYLQGPIWAKIPRTDGTFHPSPLMGGF…	499	USER	zzz1862
1450		genbank_parvoviridae_BAC22745.1_@5URF_n	parvovirus_cap	genbank	RYTKLEGTGNTFWKGIKTPWGYFNFNGYDSHFSPQDWQRLTNEYKRWRPKKMMVKIYNLQIKQVVTLQGDTLYNNDLTAGVHIFCDGSHQYPYSQHPWDAGTMPELPYKVWLLENYGYFQFQGDLIDTSVDGGSPDVENVEKEIAKSAPFYILENANHEVLRTGEETNFHFNFDCGWVNNDRHTAHYKRTLIHWLKPDATSLHETTTTTQENSCTRDTVHITSHHSGCQDHRLDTLETHKARLLRNKPSDR	251	USER	zzz1863
1449		genbank_parvoviridae_ABP88826.1_@PF02443.14	circovirus_cap	genbank	MTWPRRRYRRRRTRPRSHLGNILRRRPYLAHPAFRNRYRWRRKTGIFNSRLSREFVLTIKGGYSQPSWNVNYLKFNISQFLPPSGGTNPLPLPFQYYRIRKAKYEFYPRDPITSNERGVGSTVVILDANFVTPST	135	USER	zzz1864
1448		genbank_parvoviridae_ABG54470.1_@6BX1_F	parvovirus_cap	genbank	NSLPQSEGATNFGDIGVQQDKRRGVTQMGNTDYITEATIMSPAEVGYSAPYYSFEASTQGPFKTPIAAGRGGAQTDENQAADGDPRYAFGRQHGQKTTTTGETPERFTYIAHQDTGRYPEGDWIQNINFNLPEQMIMY	138	USER	zzz1865
1447		genbank_parvoviridae_CAA94449.1_@3KIC_N	parvovirus_cap	genbank	SHGQLSDHHHALSSSSSHAEPRGGNSVLSSEDLHKPGQVSVQLPGTNYVGPGNELQAGPPQSTDDSAARNHDFRYSQLAKLGINPYTHWTVSDEELLKNIKN	102	USER	zzz1866
1446		genbank_parvoviridae_CAA94468.1_@3KIC_N	parvovirus_cap	genbank	MSKESGKWWESDDKSDKAEYQQSVEFYEKGTGTDLELMQILKDHYNISIDNPLENPSSLFDLAARIKNNLKNSPDLYSHHFQSHGQLSDHPHALSSSSSHAEPRGENAVLSSEDLHKPGQVSVQLPGTNYVGPGNDLQAGPPQSAVDSAARNHDFRYSQLAKLGIIPYNQWTVADAELLKNI	182	USER	zzz1867
1445		genbank_parvoviridae_AND83052.1_@3KIC_N	parvovirus_cap	genbank	APGLGNKKRAKKRHFYFANSNKGAKKSKNNEPKPGTSKMSENEIQDQQPSDANDGQRGGGGGATGSVGGGKGSGVGISTGGWVGGSYFTDSYVITKNTRQFLVKIQNNHQYKTENIIPSNGGGKSQRCVSTPWSYFNFNQYSSHFSPQDWQRLTNEYKRFRPKGMHVKIYNLQIQQILTNGADTTYNNDLTAG	193	USER	zzz1868
1444		genbank_parvoviridae_ALN66861.1_@3KIC_N	parvovirus_cap	genbank	MAWRLGGGLVGEAAIHRIESLSGKVHYKDKYWYPDNYVYTTGNQEEEEKIVAKLLLDPNAQVKEWGNGRWSFEYGPEWRRLGFTPHSDDINYRGLGYHKAPGTQLLEGIHELPPEQKQGPETIMGVNPPTQDSVLLEPMTNDPHYKKPKPPGDLGDIPKPLTPWQLANKIGPDYARQLLTMSGHDFTGRTPPVNIPDPGIREGLKELEEQTNLMERVQAGEGDDKPRGGLTLPTHRYVGPGGDLPAGRPMSKLDEIAARHDIGYHTEISHKHNPYYWYNFYDEQMIKEINEHKDQIAKEGESWLANFILATWQAKASFMNPLGILLEHVAPDWSTYYDPANTHHKQWVAFQRALTQHGTVSTERPSTPPPADPDTSPHLAKKPRTDSPNKSASCSADMT…	1038	USER	zzz1869
1443		genbank_parvoviridae_ANF99492.1_@5URF_n	parvovirus_cap	genbank	GDIWMFPYRIWDRFPITRENPIWCKKPRADKHTIMDPFDGSIAMDHPPSTIFIKMAKIPIPTATNANSYLNIYCTEQVICEIVWEEEKYPTYNCRPERTHT	101	USER	zzz1870
1442		genbank_parvoviridae_AMY15609.1_@6BX1_F	parvovirus_cap	genbank	VNYWNTIDMTAGAQQNEWRQVKKEIKWEDLQFTTIENSVPIDLLRTGDKWESGSYRFNTKPTKLVYHWQSSRHIGSCHPTTSPDAIGQQGQNLQNVNAWQWGDRSNPASASTNVRNYHIGNSWAR	125	USER	zzz1871
1441		genbank_parvoviridae_AMY15606.1_@6BX1_F	parvovirus_cap	genbank	MPPTNRERKGWVPPGYNYLGPGNTNFNKEPTNLSDKAARKHDLEYNKLLKQGHNPYLYYNHADEDFIKETNQATDWGGKFGNFIFKTKKHLAPQLAPPKKDKPSTSKEEPRYSFRHIKGGTKRGKPFYIFVNKARAAKRARMSEGTDATQQDDQPNQPVGATGGKGGGGGGGGGSGVGHSTGAFNNRVEYHFEGDEVIIVCHATRQIHLNMSEREEYIIYETDRGPRFPTTQSLQGRDTINDSYHAKVETPWHLIHANSWGCWFSPADWQHVTTTVRDLVPIQLDQEIDNIVIKTVTKQGTGAEETTQYNNDLTALLEIAEDKSNILPWVSDNQYIDSIGYIPWRPSKIPTYCYHVNYWNTIDMTAGQQQNEWKQIKKEIKWEDLQFTTVENSIPIDLL…	679	USER	zzz1872
1440		genbank_parvoviridae_AKO22258.1_@4G0R_A	parvovirus_cap	genbank	DRGDPTNESDAAAQRHDHWYQAYQDSGHNPYWHHNKADEQFIKDTNHAKDWGGKVGNFVFKVKRALAPSLDAAAEASAKTRVPAQFGGTLAGSKKRPPQHIWWNLAAKKRKAQAAKRTNQPEDPEEGPAPKQPNMNNGDQPDGMDT	146	USER	zzz1873
1439		genbank_parvoviridae_AKO22259.1_@6BX1_F	parvovirus_cap	genbank	VPEATTTFNRGTIAFITIENFIPISMLRTGDDYQTSIFHFHTNKMPTHYHLQCTRQLGAPPTAEPPQTATHAGNIVPNELQNRTGWAYGQNGHALAEITLCRPFTAG	107	USER	zzz1874
1438		genbank_parvoviridae_AKI82158.1_@4G0R_A	parvovirus_cap	genbank	TKEQHNGHNQADEQFIKDTANAKDWGGKVGNLVFRAKKLIAPSLDAAAEASAKSRVPTQFGGSLAGGKKRPPPHIWWNLAKKKKTQANKRPNQPEDPEEGPAPKLPNMSNDQPDGPQPMDAAPAADNAGGSGIGGSGGGRGGGVGLSTGGFDNRTLWNFEGDFVTITCHASRQIHIDEPTTNEYQCFPCDTTRPTQGKMFEDDY	204	USER	zzz1875
1437		genbank_parvoviridae_AKI82159.1_@4G0R_A	parvovirus_cap	genbank	KYLGPGNSLDQGEPTNPSDAAAQVHDHHYSAYQAAGYNPYWHFNEADQNFIEHTKDAADWGGKFGNFVFRAKRALAPSLDAAAEASAKTRVDPRFGGSLAGRGKRRPPEHIWYNLA	116	USER	zzz1876
1436		genbank_parvoviridae_AKI82154.1_@6BX1_F	parvovirus_cap	genbank	ADFQQLIIMCKDIQLVSLEQGINNITIKTVTETGAEPRIKVYNNDLTALVMIAEDTNNRLPYTPQATRQNTLGFVPWRTCKLPTWSYYLPCQMYYTPKTDGELVPAYQNYNSGDMAFLTIEHLLPIQLLRTGDDYETQHFKFHCNNMPTHYHIQSTRMLGAPPQANPPDQDTNPGQIQPTDASQRKGWCYGQAGNRPHEITTVRPFQVGYQHPEWTFISEKAGPALHPALPGSRQTSTHPAEAEVSNLETKVQYDYAHGNRTQNHVERVTNLNENMPNQSYQRTTQWTQSRMTDSEAITAAQFFASENTSRVTNTYSDFAATDGPAGYFPWGQIWDKSPSTDLKPRIHTQAPFICQDTAPGQLFIKLAPNLTDDYNDQLSMNAQPKIKTYADFYWTGKL…	450	USER	zzz1877
1435		genbank_parvoviridae_AKI82149.1_@6BX1_F	parvovirus_cap	genbank	IDCNAWGVWLTAADFQQLIIMCKDIQLVSLEQGINNITIKTVTETGAEPRIKVYNNDLTALVMIAEDTNNRLPYTPQATRQNTLGFVPWRTCKLPTWSYYLPCQMYYTPKTDGELVPAYQNYNSGDMAFLTIEHLLPIQLLRTGDDYETQHFKFHCNNMPTHYHIQSTRMLGAPPQANPPDQDTNPGQIQPTDASQRKGWCYGQA	205	USER	zzz1878
1434		genbank_parvoviridae_ADI60258.1_@3NG9_A	parvovirus_cap	genbank	MAPTNRKPGGWVLPGHRYLGPFNPIENGEPVNAADAAARRHDLKYDQYLKEGKNPYLYFNKADSDFLEDLESDRSFGGWIGKGVFGLKRAIAPTLDESSGKQNTGGPSAAKKPRVDPQRAQKRKLYFARQAKEAKKQKMSSGGDPSEDTGAGDGEQGGESSAMAGRSGGGAGGGGGGGGGGGSVGFSTGGWEGGTYFSDHTVTTTNTRQWYTGILNGHRYSKLAQATGSNQSTSNPWTGIQTPWAYLNLNCYHCHFSPQDWQRLLNEYKAWRPKKMHVRIYNLQIKQITTLGADTLYQNDLTAGVHIFCDGSHQYPYAQHPWDEGASPELPNEVWKLPQYAYFQYQADLTDHTTVNTAQNVERMLRSNIPLFLLENSNHEVLRTGEMTEFTSTFQSGWV…	709	USER	zzz1879
1433		genbank_parvoviridae_AMK37380.1_@1K3V_A	parvovirus_cap	genbank	MSDGPFHPNGGHPAVKNEKPTGSGNGSGGGGGGGSGGGGISTGTFNNQTEFKFLENGWGEITANSTKFVLLNMPKRENYKKVVVNNLDKIAFNGNMALNDPHAQIVTPWSLVDANAWGVWFNPGDWQLIVNTMSELHLVSFEQEIFNVVLKTVSESATQPPTKVYNNDLTASLMVALDSNNTMPFTPAAMRSETLGFYPWKPTIPTPWRYYFQWDRTLIPSHTGTSGTPTNIYHGTDPDDVQFYTIENSVPVHLLRTGDEFATGTFYFDCKPCRLTHTWQTNRALGLPPFLNSLPQAEGGTNFGYIGVQQDKRRGVTQMGNTNIITEATIMRPAEVGYSAPYYSFEASTQGPFKTPIAAGRGGAQTDENQAADGDPRYAFGRQHGQKTTTTGETPERFT…	584	USER	zzz1880
1432		genbank_parvoviridae_AMH38322.1_@3KIC_N	parvovirus_cap	genbank	MSLKRGQFRGLLFPGYNYLGPFNPLENGDPVNKADEAAKKHDQAYNKYINKGLNPYLKFNKGDQDFIDSLQSDSSVGGNFARAVFHIKKQIAPALNEPKDTGEPPVKKDKRAGNKRHLYFARLNKGAKKAKADPNNMDGDMGDNEQGAGEAPAAEGGARAAGGPGGGGGGGGPSGNHGVGISTGGWIGGSILGNNRIITKNTRQWVCTIKNDHKYKQYTQWTQGSTNMGMQGYTTPWNMFNFNQYSSHFNPNEWQWLLNRAKRSRPVKMEVKIYNIQIKQRTVTGSDVQYTNDLTAGLHVLCDGEHAFPWTQLPWDKGCMPELPHQIWELPQYAYLTVASQTQDTENNQDEMHIRCMVPMYLLEETDHAVIRTGENIFFHHTFDCGWVDNTHSSNMHQL…	685	USER	zzz1881
1431		genbank_parvoviridae_ALS31343.1_@3KIC_N	parvovirus_cap	genbank	MPPIKRQPGGWVLPGYKYLGPFNPLDNGEPVNNADRAAQAHDKAYSDLIKSGKNPYLYFNKADEKFIDDLKNDWSAGGIIGSSFFKLKRAVAPALGNKERAQKRHFYFANSNKSAKKPKNNEPKPSTSKMSENEIQDQQPSDSIDGQRSGGGGVGSIGGGKGSGVGISTGGWVGGSHFSDSYVITKNTRQFITTIQNGHLYKTEIINPSNGSGKSQRCVTTPWTYFNFNQYSCHFSPQDWQRLTNEYKRFRPKAMQIKIYNLQIKQILSNGADTTYNNDLTAGVHIFCDGEHAHPNASHPWDEDVMPDLPYKTWKLFQYGYIPILNELADLDGSEAGGTATEKAILYQMPFFMLENSDHQVLRTGESTEFNFNFDCEWVNNERAYIPPGLMFNPKVPTR…	538	USER	zzz1882
1430		genbank_parvoviridae_ALF08315.1_@3J1S_A	parvovirus_cap	genbank	LINNNVGFRPRAMRVKIFNIQVKEVTIQDSQTTIANNLTSTVQVFADEGYLLPYVMDGASEGTMPPFPADVYQLPQYGYLTFHKKGSNNAADFTDRSAFYCLEYFKSNMLRTGNNFEFTFEFEDVP	126	USER	zzz1883
1429		genbank_parvoviridae_ALF08306.1_@3J1S_A	parvovirus_cap	genbank	LINNHWGFRPKNLRVKLFNIQVKEVTTVDSTTTVANNLTSTVQVFTDDEYQLPYVCGNATEGCLPPFPPDVFTLPQYGYATLNNPANGDPTERSSFFCLEYFPSKMLRTGNNFEFIFKFEDVP	123	USER	zzz1884
1428		genbank_parvoviridae_ALF08311.1_@3J1S_A	parvovirus_cap	genbank	LINNHWGIRPKAMHVKLFNIQVKEVTTQDSTTSIANNLTSTVQVFADTEYQLPYVTSNAHEGCLPPFPADVFMLPQYAYCTLQKGNTNDPIAQSAFYCLEYFPSQMLRTGNNYTFSYKFEDVP	123	USER	zzz1885
1427		genbank_parvoviridae_ALF08305.1_@3J1S_A	parvovirus_cap	genbank	LINNHWGFRPKNLRVKLFNIQVKEVTTVDSTTPVANNLTSTVQVFTDDEYQLPYVLGNATEGCLPAFPPDVFTLPQYGYATPNNISDGNPTERSSFFCLEYFPSKMLRTGNNFEFIYQFEDVP	123	USER	zzz1886
1426		genbank_parvoviridae_ALF08314.1_@3J1S_A	parvovirus_cap	genbank	LINNNWGIRPKALKFKLFNIQVKEVTTQDSTTTIANNLTSTVQVFADSQYQLPYVLGSATQGTLPPFPADVYRIPQYGYCTLNTGNNPVERSAFYCLDYFTSEMLRTGNNFEFSYDFEDVP	121	USER	zzz1887
1425		genbank_parvoviridae_ALL74044.1_@4MGU_A	parvovirus_cap	genbank	MREFRYLGPPPPERPNWQNLNSSQQRYSLEQYNKALARRSLPPYVLGGVEEDPDLDWDYDGNGNPNSGEASGDHVANTSAPDNSTSNGNGGSSSGSMASSSGSGSKRPADSSGSEPAPKRAGGTSLPGTAAANDGDPDTGNPSSENAVIPRPIGHTGGYTMVYRKVHTFISYGCGWKVLRYLNTDNAYLGTTSLMSVPVDQPWFYMSPSEFKFLPRGAICTEVKCKGVMRNPRTAFETNSSTSSLATLNQNKFMVKADALNLKTRGFNRKLTFGNSSEPMDPTNTENDQSSMKEFVRKLYGQDLDGSFSAKEGYELPASYMNLPLMYNSYFCNFVNRNHNSGKLGWERFNEHITKVDASFTVGTTVLNYSYKPHVGILTLPHDPIFDACVSVQEPNSSK…	721	USER	zzz1888
1424		genbank_parvoviridae_AKU61111.1_@6BX1_F	parvovirus_cap	genbank	VEITANSSRLVHLNMPESENYKRVVVNNMDKTAVKGNMALDDTHVQIVTPWSLVDANAWGVWFNPGDWQLIVNTMSELHLVSFEQEIFNVVLKTVSESATQPPTKVYNNDLTASLMVALDSNNTMPFTXXXXXXXXXXXXXXXXXXXXXXXXXXXXXXXXXXXXXXXSGTPTNVYHGTDPDDVQFYTIENSVPVHLLRTGDEFATGTFFFDCKPCRLTHTWQTNRALGLPPFLNSLPQSEGATNFGDIGVQQDKRRGVTQMGNTDYITEATIMRPAEVGYSAPYYSFEASTQGPFKTP	298	USER	zzz1889
1423		genbank_parvoviridae_AKG54776.1_@3KIC_N	parvovirus_cap	genbank	MAPANRKPGGWVVPGYRYLGPFNPADNGEPVNSADEAARPHDLAYQSYLDAGVNPYFSYNKADSDFIESLAHDSSFGGWLGRSAFGLKKLLAPHLADTKGNPDAPSTSRGGSSVSKSDRAQKRKLYFARSNKQAKQQKMSAPEAPTEDVAEPGPSGSDPRAGGNGGGGGMGGGGGHGVGVSTGGWKAGTVFGNDFVITTNTRQWFAPIFNGHEYKRMSPGENSEQATNRHWVGISTPWGYFNFNEYSSHFSPQDWQRLTNEYKRWRPKAMRVKVYNLQIKQVVTLGSDTLYNNDLTAGVHIFCGGSHQFPYSQHPWDTGTMPELPHRIWRISQYGYFQLQADLTDGGASSETPDVQNQEKQLLKSAPLYMLETASHQVLRTGEESSFSFSFDSGWVIND…	714	USER	zzz1890
1422		genbank_parvoviridae_ALA65285.1_@5URF_n	parvovirus_cap	genbank	MSAPEAPTEDVAEPGPSGSDPRAGGNGGGGGMGGGGGHGVGVSTGGWKAGTVFGNDFVITTNTRQWYAPIFNGHEYKRLSPGVDSEQATNRNWVGISTPWGYFNFNEYSCHFSPQDWQRLTNEYKRWRPKAMRIKVYNLQIKQVVTLGSDTLYNNDLTAGVHIFCDGSHQFPYSQHPWDTGTMPELPHRIWRISQYGYFQLQADLTDGGASSSRPDVQNQEKQLLKSAPLFMLETASHQVLRTGEESSFSFSFDCGWAINDKAYAIPQADFNPLIPTRRYFPTRNSTTGASGGLMFYHRYNPYNKPSNWMPGPSLGYFRSTQTSQNPQYARGPITVVTQPPGTEAEDSTRDEQSRTHVPSENTMHYSGYDVNPVNCGSSRLDGHSLAYDSAPESRNQPI…	574	USER	zzz1891
1421		genbank_parvoviridae_AKT74662.1_@6BX1_F	parvovirus_cap	genbank	GGVGISTGTFNNQTEFKFLENGWVEITANSSRLVHLNMPESENYRRVVVNNLDKTAVNGNMALDDTHAQIVTPWSLVDANAWGVWFNPGDWQLIVNTMSELHLVSFEQEIFNVVLKTVSESATQPPTKVYNNDLTASLMVALDSNNTMPFTPAAMRSETLGFYPWKPTIPTPWRYYFQWDRTLIPSHTGTSGTPTNIYHGTDPDDVQFYTIENSVPVHLLRTGDEFATGTFFFDCKPCRLTHTWQTNRALGLPPFLNSLPQAEGGTNFGYIGIQQDKRRGVTQMGNXXXXXXXXXXXXXXXXXXXXXXXXXXXXXXXXXXXIAAGRGGAQTDENQAADGDPRYAFGRQHGQKTTTTGETPERFTYIAHQDTGRYPEGDWIQNINFNLPVTNDNVLLPTD…	549	USER	zzz1892
1420		genbank_parvoviridae_AKT74654.1_@1K3V_A	parvovirus_cap	genbank	SGNGSGGGGGGGSGGVGISTGTFNNQTEFKFLENGWVEITANSSRLVHLNMPESENYRRVVVNNLDKTAVNGNMALDDTHAQIVTPWSLVDANAWGVWFNPGDWQLIVNTMSELHLVSFEQEIFNVVLKTVSESATQPPTKVYNNDLTASLMVALDSNNTMPFTPAAMRSETLGFYPWKPTIPTPWRYYFQWDRTLIPSHTGTSGTPTNIYHGTDPDDVQFYTIENSVPVHLLRTGDEFATGTFFFDCKPCRLTHTWQTNRALGLPPFLNSLPQAEGGTNFGYIGVQQDKRRGVTQXXXXXXXXXXXXXXXXXXXXXXXXXXXXXXXXXXXXXXXXXXXXXXXXXXXXXXXXXXXXXXGRQHGQKTTTTGETPERFTYIAHQDTGRYPEGDWIQNINFN…	562	USER	zzz1893
1419		genbank_parvoviridae_AKT74636.1_@6BX1_F	parvovirus_cap	genbank	LNMPESENYRRVVVNNLDKTAVNGNMALDDTHAQIVTPWSLVDANAWGVWFNPGDWQLIVNTMSELHLVSFEQEIFNVVLKTVSESATQPPTKVYNNDLTASLMVALDSNNTMPFTPAAMRSETLGFYPWKPTIPTPWRYYFQWDRTLIPSHTGTSGTPTNIYHGTDPDDVQFYTIENSVPVHLLRTGDEFATGTFFFDCKPCRLTHTWQTNRALGXXXXXXXXXXXXXXXXXXXXXXXXXXXXXXXXXXXXXXXXXXXXXXXXXXXXXXXXXXXXXXXXXXXXXXXXXXXXXXXXXXXXXXXXXXXXXXXXXXXXXXXXXXXXXXXXXXXAHQDTGRYPEGDWIQNINFNLPVTNDNVLLPTDPIGGKTGINYTNIFNTYGPLTALNNVPPVYPNGQI…	514	USER	zzz1894
1418		genbank_parvoviridae_AKT74614.1_@6BX1_F	parvovirus_cap	genbank	TANSSRLVHLNMPESENYRRVVVNNLDKTAVNGNMALDDTHAQIVTPWSLVDANAWGVWFNPGDWQLIVNTMSELHLVSFEQEIFNVVLKTVSESATQPPTKVYNNDLTASLMVALDSNNTMPFTPAAMRSETLGFYPWKPTIPTPWRYYFQWDRTLIPSHTGTSGTPTNIYHGTDPDDVQFYTIENSVPVHLLRTGDEFATGTFFFDCKPCRLTHTWQTNRALGLPPFLNSLPQAEGXXXXXXXXXXXXXXXXXXXXXXXXXXXXXXXXXPAEVGYSAPYYSFEASTQGPFKTPIAAGRGGAQTDENQAADGDPRYAFGRQHGQKTTTTGETPERFTYIAHQDTGRYPEGDWIQNINFNLPVTNDNVLLPTDPIGGKTGINYTNIFNTYGPLTALNNV…	523	USER	zzz1895
1417		genbank_parvoviridae_AKT74568.1_@6BX1_F	parvovirus_cap	genbank	VNNLDKTAVNGNMALDDTHAQIVTPWSLVDANAWGVWFNPGDWQLIVNTMSELHLVSFEQEIFNVVLKTVSESATQPPTKVYNNDLTASLMVALDSNNTMPFTPAAMRSETLGFYPWKPTIPTPWRYYFQWDRTLIPSHTGTSGTPTNIYHGTDPDDVQFYTIENSVPVHLLRTGDEFATGTFFFDCKPCRLTHTWQTNRALGLPPFLNSLPQAEGGTNFGYIGVQQDKRRXXXXXXXXXXXXXXXXXXXXXXXXXXXXXXXXXXXXXXXXXXXXXXXXXXXXXXXXXXXXXXXXXXXXXXXXXXXXXXXXXXXXXXXXXQDTGRYPEGDWIQNINFNLPVTNDNVLLPTDPIGGKTGINYTNIFNTYGPLTALNNVPPVYPNGQIWDKEFDTDLKPRL…	501	USER	zzz1896
1416		genbank_parvoviridae_AKT74548.1_@6BX1_F	parvovirus_cap	genbank	VGISTGTFNNQTEFKFLENGWVEITANSSRLVHLNMPESENYKRVVVNNMDKTAVKGNMALDDTHVQIVTPWSLVDANAWGVWFNPGDWQLIVNTMSELHLVSFEQEIFNVVLKTVSESATQPPTKVYNNDLTASLMVALDSNNTMPFTPAAMRSETLGFYPWKPTIPTPWRYYFQWDRTLIPSHTGTSGTPTNVYHGTDPDDVQFYTIENSVPVHLLRTGDEFATGTFFFDCKPCRLTHTWQTNRALGLPPFLNSLPQSEGATNFGDIGVQQDKRRGVTQMGNTNYITEATIMRPAEVGXXXXXXXXXXXXXXXXXXXXXXXXXXXXXXXXXXXXXXXXXXXXRQHGQKTTTTGETPERFTYIAHQDTGRYPQGDWIQNINFNLPVTNDNVLLPTDPI…	547	USER	zzz1897
1415		genbank_parvoviridae_AKN50610.1_@3NG9_A	parvovirus_cap	genbank	MGDKDWVGDVEEGWTAHWDHSWTQRHWSLWTMEKGSHTPLFKFNFPDYDKWDPWPQYREIPPPGPDAYWGGKHRGWLHGDGTPYTDEPHEKSHEERGKEGHPDWGKYVGDKIAKKAPDTYTKPPDTPRRRTPPEPEETEGMREERRQKEEAEMLKKIEKHIEEEKKKADQQREEIAKREKMKQDAEKLKQQMQSIGIGFLDQTKEAMDDFIISHCLGAHVEAAGESLLLDPKLGPGAAVRADCEDPHKEDHHDDYLHWHMRPISPDRDMPGSQPRPLSPPSPPPMPEPNTPEKEEEAPKTPPPSRHLDSPGTPPDAPKRQVPGTDGRLESCEKRLLEALRKHKPEGECGGWTWPGKKYCGPGNKVPCGPPKDKVDECSALHDIGYEKLIKEGKWPYGCE…	1077	USER	zzz1898
1414		genbank_parvoviridae_AKM49970.1_@3KIC_N	parvovirus_cap	genbank	MDFLDDFFSNKYKETVEELSKPVNPPPVQHGSRGLVVPGYRYLGPGNSLDRGEPVNQADAAAKKHDIEYDKQLQAGDNPYIKYNHADAEFQKDLQGDTSLAGNAANALFQAKKTLLEPLGLVEHPGGNTSDKRKPPPGLLTPPKTPKKQKFQIPAPPNQAGTSSAGSDTSGTSIMASGGGGPMADDNQGAEGVGNSSGDWHCDTQWLGDHVITKSTRTWVLPTYGNHLYGPINFDGTSGAGANAAYAGYKTPWGYFDFNRFHCHFSPRDWQRLINNHTGIRPKGLKVKVFNVQVKEVTTQDSTKTIANNLTSTVQVFADENYDLPYVLGGATQGTFPPFPNDVFMLPQYAYCTLQGAQGKFVDRSAFYCLEYFPSQM	377	USER	zzz1899
1413		genbank_parvoviridae_AKM49967.1_@3KIC_N	parvovirus_cap	genbank	MDFVDDFFTDKYKETYKELSKPVNPKPVQQISEKHSEPGSRGLVLPGYRYLGPGNSLDRGEPVNEADAAAREHDISYNKQLEVGDNPYVKYNHADEKLQSDLQGDVSFGGNAANAVFQAKKRLLEPFGLVEAPLPAKTDKGKVDDYFPKAKKAKQTFQIPPPAKEDPGEGSSAQSGGSPAGSDTSGSSVMAEGGGGPLASDQQGAEGVGNSSGDWHCDTQWLGDHVITKSTRTWVLPSYGNHLYKPITFDGTTGGGSDAAYAGYSTPWGYFDFNRFHCHFSPRDWQRLVNNHVGIRPKGLKFKLFNVQVKEVTQQDSTKTIANNLTSTVQVFADENYELPYVLGSATQGTFPPFPNDIFMLPQYGYCTLQGTQGKFVDRSA	381	USER	zzz1900
1412		genbank_parvoviridae_AKM21313.1_@6BX1_F	parvovirus_cap	genbank	MPPTNRHKGLHYFSWLGWVPPGYNYLGPGNTDFDKEPTNLSDQAAKDHDLEYNKLIQQGHNPYWHFNQADQDFIDKTNHAEDWGGKVGNFIFKAKKLLAPELAGKSKGKTKHTEPSFSHKNIKAGVKRGKPFYIFVNQARKRARMGDNADQPAVDEPDAGPAGGGGGGGKAGGVSGGAGGGGVGHSTGNFRNRTYFHYEGDEVTITCHATRLVHLKMSDSEDYKIFQTNRGPKFPNPGDQSLDGRDTINDSYHAKVWTPWFHLHANSWGCWFTPAEWQQLTATCRTLVPISLNQSIDNVVIKTVSTQGTGEQQIHVYNNDLTAILEVAMDNSNQLPWVAENSYMSSVGYVPWRACTIPTYTYHVNFWNTILKFQNSSTKKNNWKEIKKGIQWEDVQFTP…	681	USER	zzz1901
1411		genbank_parvoviridae_AKM20836.1_@1K3V_A	parvovirus_cap	genbank	GQPAVRNERATGSGNGSGGGGGGGSGGVGIXXXXFNXQTEFKFLENGWVEITANSSRLVHLNMPESENYXRVVVNNWNKTPXNXTMXLBDTHAQIVTPXXLXDANAWGVWFNPGBWQLIVXTMSELHLVSFEQXIFNVVLKTVXXSATXPPTKXYNNDLTASLMVALDXNNTMPFTPAAXXSETLGFYPWKPTIPTPWRYYFQWDRTLIPSHTGTSGTPXHIYHGTDPDDVQFYTIENSVPVHLLRTGDEFATGTFFFDCKPCRLTHTWQTNRALGLPPFLNSLPQSEGATNFGDIGVQQDKRRGVTQMGNTNYITEATIMRPAEVGYSAPYYSFEASTQGPFKTPIAAGRGGAQTDENQAADGDPRYAFGRQHGQKTTTTGETPERFTYIAHQDTGRY…	570	USER	zzz1902
1410		genbank_parvoviridae_AJE25860.1_@3KIC_N	parvovirus_cap	genbank	MAFRLGGGLTGDAGIHRLESLTGKTHYKDKYWYPDDYVYTTGNQKEEEKIVAKLLLDPNAQVIEHGNSKWSFRYGPEWRALGYLPHTDDINYTGLSYYKGPGLELLHGTQELPPDQKRGPETLMGVKTDTEDSTLLEPMTNDPHFKKPKPPTDTSDTPKPLTPWQLANKIGPDYTRQLLTLSGHDFTGRTPPVHIPDPGIREGLSELEQQSKLLERVQAGEGDEKPRGGLTLPGHRYVGPGGELPAGRPMSKLDEIAARHDIGYHTEIKHGHNPYYWYNFYDEQMIEDINENLDQIAKEGESWLANFILATWKTKATFMNPLGILLEHIQPDWATYYDPNNTHHQQWVAFQRAFTQHGTVSTDRPKTPPPPDPETAPSPAKKPRTESPNKSASCSADMS…	1040	USER	zzz1903
1409		genbank_parvoviridae_AKG49710.1_@6BX1_F	parvovirus_cap	genbank	FWLTDPIGGKAGINYTNIFNTYGPLTALNNVPPVYPNGQIWDKEFDTDLKPRLHVNAPFVCQNNCPGQLFVKVAPNLTNEYDPDASANMSRIVTYSDFWWKGKLVFKAKLRASHTWNPIQQMSINVDNLFGFMRVK	136	USER	zzz1904
1408		genbank_parvoviridae_AKG49708.1_@6BX1_F	parvovirus_cap	genbank	NYTNIFNTYGPLTALNNVPPVYPNGQIWDKEFDTDLKPRLHVNAPFVCQNNCPGQLFVKVAPNLTNGYDPDGSAKKSRIVTYSEFWGKGKLIFKGKIRASLTLET	105	USER	zzz1905
1407		genbank_parvoviridae_AKA44560.1_@5URF_n	parvovirus_cap	genbank	MVKYKPPKGYVPSLPTTEEEAYHHTRWWLNHVENYGQDKHITKGKGKQKKELTAQQKADRKRFFITQAQKNKNPKYGIPTSSQHKEFFKNHQGAKKGGKAKEKTKHLEPQAPQREEDPEEGPAPKQARIEEAPFNEQELEEAMADENEPDQSGIPMELSDAPGGGGGGGGGGVGHSTGNWNCDTIWEGNTCTTYASRHCVCLMRDFDKYQAIGNQNGRHHLDSENETQYFGFSTPWNYIDFNQYSVHFSPRDWQQLVNNYSRWRPRAVHVKIFNLQVIQKTVTDSGTQYSNDLTGTIQIFADQEGRYPRLLYPNQTTLMGPFPSNIYYLPQYAYMTSMYNSGGATPTTWWGFPTRESAFYCLDESPSQMLRTGNEWETTFVFPPSTQWCNNKISTVSIT…	677	USER	zzz1906
1406		genbank_parvoviridae_AJT39533.1_@3KIC_N	parvovirus_cap	genbank	MSAADAWKPGDRPPLENLMDAMDRSIWGNRRNNSGGRRGINALLRPGYDPRMRQALLQLYKFFISINKHGGFWDKIKEVAKQWWMAGHQTSKGDELARTVLDLGRLFMAVVDDYREDPEIDSVRRSMIDFLYGDNDATRAFFGLQRFADKVRLPQRDVMRVWITGGYRPKPPKGSPWGTWAELDLDIRNSLDASYKAEEEDRPKEIQVARIDNPGSAAGERSRPAPEERPAESAEAVGPGSDGQSGRADTGAERERDPTSTEVGGSDGAESDGKGGGLTLPGYRYVGPGNPLDAGEPRGPVDAIAKKHDERYDELIKHGHIPYIHGRGADSLMGKELADAEEAGKILDSYDQLVANAARGLWRAKDTLADLIGGELDKVLPPDPPVQSEGEESQKRPRE…	1032	USER	zzz1907
1405		genbank_parvoviridae_AJT39532.1_@4IOV_A	parvovirus_cap	genbank	MSAADAWKPGDRPPLENLMDAMDRSIWGDRRNNSGGRRGINALLRPGYDPRMRQALLQLYKFFISIKKQGGFWDKIKEVAKQWWMAGHQTSKGDELARTVLDLGRLFMVVVDDYREDPEIDSVRRSMIDFLYGDNDATRAFFGLQRFADKVHLPQRDVMRVWITGGYRPQPPKGSPWGTWAELDLDIRNSLDASYKAEEEDRSKAIQVPRINDPGPESGEQPQPAPEERPAEGAEAAGPGSDGQSGRADTGAGRERDSPSTEVGGSDGPKSDGKGGGLTLPGYRYVGPGNPLDAGEPRGPVDAIAKKHDERYDELIKHGHIPYIHGRGADSLMGKELADAEEAGKILDRYDQLVANAARGLWRAKDTLADLIGGELDKVLPPDPPVQSEGEESQKRPRE…	1037	USER	zzz1908
1404		genbank_parvoviridae_AJM71463.1_@4G0R_A	parvovirus_cap	genbank	MAPPAKRAKRGWVPPGYKYLGPGNSLDQGEPTNPSDAAAKEHDEAYDQYIKSGKNPYLYFSPADQRFIDQTKDAKDWGGKVGHYFFRTKRAFAPKLSTDFEPGTSGVSRAGKRTKPPAHIFVNLAKKKRASLAAQQRTQTMSNDANTNQPDAGIANARVERSADGSGGSGGGGSGGGGVGVSTGTYDNQTTYRFLGDGWVEITANASRLLHLNMPKSENYCRVKVHNTTDTGQKGKMALDDTHEQIWTPWSLVDANAWGVWFQPSDWQFIQNSMESLNLDSLSQELFNVVVKTVTEQQGAGQDAIKVYNNDLTACMMVALDSNNILPYTPAAQTSETLGFYPWKPTAPAPYRYYFYMPRDLSVTYDSDTVQVTDNAGGNVATGLNSQFFTIENTVPITL…	723	USER	zzz1909
1403		genbank_parvoviridae_AIT71974.1_@3P0S_A	parvovirus_cap	genbank	MPRIHFPYHNYLGPGSDNFKKQPIDEDDAIARSHDLDYNKASSDNDIFKADKQARDEFFGSFVHSGNLHSLVGGLGLGAKNLVEEHVLGKSVYGMGKRKSTEKDWAKIKRINRARAARRENDVDNQRDIRDFGHVAGENINPDAEVNLADFPDFLQDFVAEAGPSNTQPVESAQQSPPTMNNNEVEMDTAVASDTGGAQVDPRTGGQAAGGMGAGGAANDGRQDIFTGAPQPNQHHELIYGKSYHFTLTNGLPDFRHFAGSGLNYIAQQRFKHIHGIPWERLLMYVSEGELIRLFRDYTAVKVEEVVCEVYSLGVRLPFVTSATTSSVANANAQYPIGCFHFDEAYETNYAPDNVADIINKALGAEWKNENRTASIITTNWSETFPNITASSTSRDISN…	669	USER	zzz1910
1402		genbank_parvoviridae_AJF39886.1_@5URF_n	parvovirus_cap	genbank	FYFANSNKGAKKTKKSEPKPGTSKMSDTDIQNQQPDTGDAPQNTSGGGTGSIGGGKGSGGGISTGGGVGGSHFSNKYGVTKNTKQFITTIQNGHLYKTKAIETTNQRGKSQRCVTTPWTYFNFNQYSCHFSPQDWQRLTNEYKRFKPKAMQVKIYNLQIKQILSNGADTTYNN	173	USER	zzz1911
1401		genbank_parvoviridae_AIY54362.1_@5URF_n	parvovirus_cap	genbank	FYFAHSYKGAKKTKKSKPKPGTSKMSDTDIQDQQPDTGDAPQNTSGGGTGSIGGKKGSGGGISTGGGVGGSHFSNKYGVTKNTRHFITTIQNGHLYKTEAIKTTNQREKSQRCVTTPWTYFNFNQYSCHFSPQDWQRLTNEYKRFKPKAMQVKIYNLQIKQILSKGGDTTYNND	174	USER	zzz1912
1400		genbank_parvoviridae_AIY27467.1_@3NG9_A	parvovirus_cap	genbank	MAPTNRKPGGWVLPGHRYLGPFNPIENGEPVNAADAAARGHDLKYDQYLKEGKNPYLYFNKADSDFLEDLESDRSFGGWIGKGVFGLKRAIAPTLDESSGKQNTGGPSAAKKPRVDPQRAQKRKLYFARQAKEAKKQKMSSGGDPSEDTGAGDGEQGGESSAMAGRSGGGAGGGGGGGGGGGSVGFSTGGWEGGTYFSDHTVTTTNTRQWYTGILNGHRYSKLAQNTGGSGQTPATHPWTGIQTPWAYLNLNCYHCHFSPQDWQRLLNEYKAWRPKRMHVRIYNLQIKQITTLGQDTLYQNDLTAGVHIFCDGSHQYPYAQHPWDEGASPELPNEIWKLPQYAYFQYQGDLTDDTTVQTAQNVERMLRSNIPLFLLENSNHEVLRTGEMTEFSFTFQSG…	711	USER	zzz1913
1399		genbank_parvoviridae_AIY27464.1_@3KIC_N	parvovirus_cap	genbank	MSHKRGQFRGLLFPGYNYLGPFNPLDNGDPVNKADEAAKKHDLAYNKYINKGLNPYLNFNKGDQDFIDSLQSDSSLGGNFAKAVFHIKKQIAPALNEPKDTGEPPAKKDKRAGNKRHLYFARLNKGAKKAKADNNNMDGDMDNNEQGAGEGPAPAGGGGARSGGGGGGAAGGGGGGGNHGVGVSTGGWIGGSVLGQNSIVTRNTRQWLCTIRDNHRYKQYTSWKLGNTTMHMQGYTTPWNMFNFNQYSSHFNPNEWQWLVNRAKRFRPVRMEVKIYNIQIKQESNQDVTAQYTNDLTAGLHVLCDGEHAFPWTQLPWDKGCMPELPHDIWTLQQYAYITCASEAQDTTSNGNELNIRGAVPMYLLEETDHAVIRTGESIAFHHSFDCGWVDNTRSSVMP…	687	USER	zzz1914
1398		genbank_parvoviridae_AIY27461.1_@3KIC_N	parvovirus_cap	genbank	MSLKRGQFRGLLFPGYNYLGPFNPLENGDPVNKADEAAKKHDQAYNNYINKGLNPYLKFNKGDQDFIDSLQSDSSVGGNFARAVFHIKKQIAPALNEPKDTGEPPAKKDKRAGNKRHLYFARLNKGAKKAKADPNNMDGDMDNNEQGAGEAPAAAGGERSAGGGSAIGGGGGGNNHGVGISTGGWIGGSILGHNTIITRNTRQWWCPIRDNHLYKRYQGYNKGGSDYKMEGYTTPWNMFNFNQYSSHFNPNEWQWLMNRAKRFRPKRMEVKIYNLQIKQESTQDTNAQYTNDLTAGLHVLCDGEHAFPWTQLPWDKGCMPELPHQIWELTQYAYLTMPSQAQDTETNNVELDMRCAIPMYLLEETDHAVIRTGESIVFHHDFDCGWVDNTRCSNMPQLA…	684	USER	zzz1915
1397		genbank_parvoviridae_AIU56933.1_@3KIC_N	parvovirus_cap	genbank	MSFVDHPPDWLEEVGEGLHEFLELEAGPPKPKPNQQKQDNARGLVLPGYNYLGPFNGLDKGEPVNRADAVAREHDISYNEQLQAGDNPYLKYNHADAEFQEKLADDTSFGGNLGKAIFQAKKRVLEPFGLVEEPVKTAPAKKRPVEQSPAEPGPSSGIGKAGDQPARKRLNFGQTGDADSEPDPQPLGEAPAANPNLGSATMSGGGGAPMADDQQGADGVGTSSGNRHCDSTWLDKRIITKSTRTWSLPTYNNHLYNKIMSTNANGDSAWFGFSTPWGYFDFNRFHCHFSPRDWQRLINNNWGIRPKKMHVNLFNIQVKEVTTQDSTTTTTNNLTSTIQVFADTEYQLPYVASNAHEGCLPPFPADVFMLPQYGYCTLQRENSNDPVAQSSFYCLEYFP…	728	USER	zzz1916
1396		genbank_parvoviridae_AIU56932.1_@3KIC_N	parvovirus_cap	genbank	MSFVDHPPDWLEEVGEDLHEFLELEAGPPKPKPNQQKQDNARGLVLPGYNYLGPFNGLDKGEPVNRADAVAREHDISYNEQLQAGDNPYLKYNHADAEFQEKLKDDTSFGGNLGKAIFQAKKRVLEPFGLVEAPDKTAPAKKRPVEQSPAEPGSSSGIGKAGNQPARKRLNFGQTGDADSEPDPQPLGEAPAANPDLGSATMSGGGGAPMADDQQGADGVGTSSGNWHCDSTWLDKRVITKSTRTWSLPTYNNHLYNKIISTNANGDSAWFGFSTPWGYFDFNRFHCHFSPRDWQRLINNNWGFRPKRLNFKLFNIQVKEVTDTEGTKTIANNLTSTVQVFADSEYQLPYVLGSAHQGCFPPFPADVFMIPQYGYLTLNNGSQAMGRSSFYCLEYFPSQ…	725	USER	zzz1917
1395		genbank_parvoviridae_AIU47684.1_@6BX1_F	parvovirus_cap	genbank	MPAIRKARGWVPPGYNYLGPFNQDFNKKPTNPSDKAARKHDLEYNKLIKQGHNPYWNYNHADEDFIKETDQATDWGGKFGNFVFRAKRALAPELAPPAKKKTKTKHTEPEYSHKHIKAGTKRGKPFYLFVNLAKKKARMTDTQDVSEQQSDQPSVASTGAKAGGGGGGGGSGVGHSTGNYNNRTEFYYHGDEVTIVCHSSRHIHLNMSESEEYKIYDTDRGPRFPTDQTLQGRDTINDSYHAQVETPWFLINPNSWGTWMNPADFQQLTTTCREVTLEHLDQTLDNIVIKTVSKQGTGAEETTQYNNDLTALLQVALDKSNQLPWVADNMYLDSLGYIPWRPCKLKQYSYHVNFWNTIDIISGPQQNQWQQVKKEIKWDDLQFTPIETTTEIDLLRTGD…	704	USER	zzz1918
1394		genbank_parvoviridae_AIT18930.1_@6BX1_F	parvovirus_cap	genbank	MAPAARPRKGWVPPGYNYLGPGNDLDAGEPTNKSDAAARKHDFAYSAYLKQGLDPYWNFNKADEKFIRDTEGATDWGGRLGHWIFRAKKHILPHLKEPTLAGRKRPAPAHIFVNLANKRKKGLPTRKDQQKDTLDSNAQQPVREADQPDGMAASSSDSGPSSSGGGARAGGVGVSTGDFDNTTLWDFHEDGTATITCNSTRLVHLTRPDSLDYKIIPTQNNTAVQTVGHMMDDDNHTQVLTPWSLVDCNAWGVWLSPHDWQHIMNIGEELELLSLEQEVFNVTLKTATETGPPESRITMYNNDLTAVMMITTDTNNQLPYTPAAIRSETLGFYPWRPTVVPRWRYYFDWDRFLSVTSSSDQSTSIINHSSTQSAIGQFFVIETQLPIALLRTGDSYATG…	715	USER	zzz1919
1393		genbank_parvoviridae_AIL27682.1_@1S58_A	parvovirus_cap	genbank	SSALGSDTGEVPTTAKISRVPDDTECAKQGGGSNTLFQVGKLGANGFTEQMKNMTVPLMPGSVWQNRALHYESQIWAKIPDTDGQFMCERPALGGWGMSKPPPQIFLKMQPVPAPAAVNAESERTLPSEHYLHQYAYCVLTVRMTWKVTPRTGPTRWNPQPTSGPPEASDHIPYILYD	178	USER	zzz1920
1392		genbank_parvoviridae_AIC77179.1_@4G0R_A	parvovirus_cap	genbank	MAPPAKRARRGWVPPGYKYLGPGNDLDQGEPTNPSDAAAKQHDEAYDQYIKSGKNPYFYFSPADQRFIDQTKDAKDWGGKVGHYFFRTKKAFAPKLATDSEPDTSSTSSQSNSGVSRAGKRTKPPAHIFINLAKKKRASLAAQQRTQTMSNDANTNQQNAGIANARVERSADGSGGSGGGGSGGGGIGVSTGTYDNQTTYRFLGDGWVEITAHASRLLHLNMPKSENYCRVKVHNTTDTRQKGRMALDDTHEQIWTPWSLVDANAWGVWFQPSDWQFIQNSMESLNLESFSQELFNIVVKMVTEQDIAGATTKVYNNDLTACMMVALDSNNILPYTPAAQTGETLGFYPWKPTAPAPYRYYFYMPRDLSVTYDPGDTVEVSDHAGYNIATALNSQFFTI…	730	USER	zzz1921
1391		genbank_parvoviridae_AIH14831.1_@4IOV_A	parvovirus_cap	genbank	MAPTNRKPGGWVLPGHRYLGPFNPIENGEPVNAADAAARRHDLKYDQYLKEGKNPYLYFNKADSDFLEYLESDRSFGGWIGKGVFGLKRAIAPTLDESSGKQNTGGPSAAKKPRVDPQRAQKRKLYFARQAKEAKKQKMSSGGDPSEDTGAGDGEQGGESSAMAGRSGGGAGGGGGGGGGGGSVGFSTGGWEGGTYFSDHTVTTTNTRQWYTGILNGHRYSKLAQPSVGDNATPPWVGIQTPWAYLNVNCYHCHFSPQDWQRLLNEYKAWRPKRMHIRIYNLQIKQITTMGADTLYQNDLTAGVHIFCDGSHQYPYAQHPWDEGASPELPNEIWKLPQYAYFQYQGDLTDHTTNQTAQNVERMLRSNVPLFLLENSNHEVLRTGEMTQFSFTFQSGWVT…	708	USER	zzz1922
1390		genbank_parvoviridae_AIG15534.1_@3NTT_A	parvovirus_cap	genbank	RPVVGTMPPFPSDVYALPQYGYCTMHTNQNGARFNDRSAFYCLEYFPSQMLRTGNNFEFTFDFEEVPFHSMFAHSQDLDRLMNPLVDQYLWNFNEVDSSRNAQFKKAVKGAYGTMGRNWLPGPKLLDQRVRAYTGGTDNYANWNIWSNGNKGE	153	USER	zzz1923
1389		genbank_parvoviridae_ADM26646.1_@3NTT_A	parvovirus_cap	genbank	MSAADAYRPGGKLPLDELMQKMNRAVPVGPEPSQPANRGGGSYQTHFAIGIVYSKAFQGLLRFANALPAELSPVKQLVNQLEVYRRKTSDTRVWYRVYLDMTRLLISVAPPGAANKLRQAAANISHTKAPNAETLRGIVRFAAAATVPTVADIDSFFQDSLTDFSNEDLDTWQQLHEQFIQLFHPPDVGVHLVSDSRDEGPDSIVEPDLERPAGGGLTLPGYNYVGPGNPLDSGPPQGPVDEAAKHHDERYAEMIEHGDIPYLHGHGADRLMNKELEEKERRGDISHLADVVVGNAIRGLWQAKETVGDIADVQLSQVLPPAPPTSDQQPAYSAGEPSPKKARTGTPEESETPVLLQPNTNTMSVEPAGGGGGVKVKAQWVGGTSFSDSLVITSHTRTS…	914	USER	zzz1924
1388		genbank_parvoviridae_AHZ86981.1_@3J1S_A	parvovirus_cap	genbank	GDWHCDTQWLGDHVITKSTRTWVLPSYRNHQYKPITFDDSIGAGADAAYCGYATPWGYFDFNRFHCHFSPRDWQRLINNHTGIRPKAIKFKLFNVQVKEVTTQDATKTIANNLTSTVQVFVDQEYQLPYVLGSTTRGTFPPFPADVFMLPQYGYCTLQGQNGNFVDRSAFYCLEYFPSQ	179	USER	zzz1925
1387		genbank_parvoviridae_AFU34410.1_@1K3V_A	parvovirus_cap	genbank	RLTHTWQTNRALGLPPFLNSLPQAEGGTNFGYIGVQQDKRRGVTQMGNTNIITEATIMRPAEVGYSAPYYSFEASTQGPFKTPIAAGRGGAQTDENQAADGDPRYAFGRQHGQKTTTTGETPERFTYIAHQDTGRYPEGDWIQNINFNLPVTNDNVLPPPPFIERGSGVKFYPTVSH	177	USER	zzz1926
1386		genbank_parvoviridae_AFU34409.1_@1K3V_A	parvovirus_cap	genbank	GTFYFDCKPCRLTHTWQTNRALGLPPFLNSLPQAEGGTNFGYIGVQQDKRRGVTQMGNTNIITEATIMRPAEVGYSAPYYSFEASTQGPFKTPIAAGRGGAQTDENQAADGDPRYAFGRQHGQKTTTTGETPERFTYIAHQDTGRYPEGDWIQNINFNLPVTNDNVLLPPPSFGGSAGVNLYPTISH	187	USER	zzz1927
1385		genbank_parvoviridae_AGI62174.1_@4G0R_A	parvovirus_cap	genbank	MAPPAKRAKRGWVPPGYKYLGPGNALDQGEPTNPSDAAAKEHDEAYDQYIKSGKNPYLYFSPADQRFIDQTKDAKDWGGKVGHYFFRTKRAFAPKLSTDSEPGTSGVSRAGKRTGPPAHIFVNLARAKKKRASLAAQQRTQTMSDGANQSDSGSAVQPAARVERSADGPGGSGGGGSGGGGVGVSTGTFDNQTHYRFLGDGWVEITAYSSRLLHLNMPTTENYCRIRVNNTDQTRLPGRMAYDDSHEQIWTPWNLVDCNAWGVWFQPSDWQFIQNTMSHFNLDTLDQEIFNVVVKTVTEQGVGEQAMKVYNNDLTASMMVALDSNNILPYTPAAQTGETLGFYPWKPTVPTPYRYYFFCSRDLSVTYDNDTTQIADNMGQPNGLNSQFYTIENTLPITL…	729	USER	zzz1928
1384		genbank_parvoviridae_AHN52203.1_@5URF_n	parvovirus_cap	genbank	NSNKGAKKTKKSEPKPGTSKMSDTDIQDQQPDTVDAPQNNSGGGTGSIGGGKGSGVGISTGGWVGGSHFSDKYVVTKNTRQFITTFQNGHLYKTKAFETTNQSEKSHRCVTTPWTYFNFNQYTCHFSPQDWQR	133	USER	zzz1929
1383		genbank_parvoviridae_AHN52199.1_@5URF_n	parvovirus_cap	genbank	NSNKGAKKTKKSEPKPGTSKMSDTDIQNQQPDTVDAPQNNSGGGTGSIGGGKGSGVGISTGGWVGGSHFSNKYAVPKNTKQFITTIQNGPLYKTKAIETTNQSGKSQRCVTTPWTYFNFNQYSCHFSPQDWQR	133	USER	zzz1930
1382		genbank_parvoviridae_AHN52186.1_@5URF_n	parvovirus_cap	genbank	YSNKGAKKTKKSEPKPGTSKMSDTDIQDQQPDTVDAPQNNSGGGTGSIGGGKGSGVGISTGGWVGGSHFSNKYLVTQNPKQFITPIQNGHLYKTKAFETTNQSGKSQRCVTTPWTYFNFNQYTCHFSPQDWQR	133	USER	zzz1931
1381		genbank_parvoviridae_AHN52172.1_@5URF_n	parvovirus_cap	genbank	YSNKGAKKTKKSEPNPGTSKMSDPDIQNQQPDTVDAPQNNSGGGTGSIEGGKGSGVGISTGGWVEGSHFSNKYVVTKNTRQFITTFQNGHLYKTEAIETTNQSEKSQRCVTTPWTYFTFNQYSCHFSPQDWQR	133	USER	zzz1932
1380		genbank_parvoviridae_AHN52163.1_@5URF_n	parvovirus_cap	genbank	NSNKGAKKTKKSEPKPGTSKMSDTDIQDQQPDTVDAPQNNSGGGTGSIGGGKGSGVGISTGGWVGGSHFSNKYVVPKNPRQFITPIQNGPLYKTKAIETTNQSGKSQRCVPTPWTYFNFNQYSCHFPPQDWQR	133	USER	zzz1933
1379		genbank_parvoviridae_AHN52162.1_@5URF_n	parvovirus_cap	genbank	NSYKGAKKTKKSEPKPGTSKMSDTDIQNQQPDTVDAPQNNSGGGTGIIGGGKGSGVGISTGGWVGGSHFSNKYVVTKNTRQFITTIQNGHLYKTKAIETTNQSGKSRRCVTPPWTYFNFNQYSCHFSPQDWHR	133	USER	zzz1934
1378		genbank_parvoviridae_AHK27121.1_@3KIC_N	parvovirus_cap	genbank	MSLKRGQFRGLLFPGYNYLGPFNPLENGDPVNKADEAAKKHDQAYNNYINKGLNPYLKFNKGDQDFIDSLQSDSSVGGNFARAVFHLKKQIAPALNEPKDTGEPPAKKDKRAGNKRHLYFARLNKGAKKAKADPNNMDGDLGDNEQGAGEAPAAAGGARSGGGGGAAIGGGGGGNNHGVGISTGGWIGGSILGSNKIITKNTRQWWCPIRNEHKYKRYTGFNQGGADYKMEGYTTPWNMFNFNQYSSHFNPNEWQWLLNRASRFRPVKMEIKIYNLQIKQESTVDQNAQYTNDLTAGLHVLCDGEHAFPWTQLPWDKGCMPELPHDIWELPQYAYITMPSQSQDTDNEEERTFRCAIPMYLLEETDHSVIRTGESVIFHHSFDCGWVNNTRCSNMPQLA…	680	USER	zzz1935
1377		genbank_parvoviridae_AHK27122.1_@3KIC_N	parvovirus_cap	genbank	MSHKRGQFRGLLFPGYNYLGPFNPLENGDPVNKADEAAKKHDQAYNTYINKGLNPYLNFNKGDQDFIDSLQSDSSVGGNFARAVFHLKKQIAPALNEPKDTGEPPAKKDKRAGNKRHLYFARLNKGAKKAKADPNNMDGDMGDNEQGAGEAPVEGGDARSAGGIGGGGGGGPSGNHGVGISTGGWIGGSILGNNKIITKNTRQWWCPIRNEHKYKRYQGISEYKMEGYTTPWNMFNFNQYSSHFNPNEWQWLLNRAARFRPKRMEIKIYNLQIKQESNQDTTAQYTNDLTAGLHVLCDGEHAFPWTQLPWDKRCMPELPHEIWELTQYAY	330	USER	zzz1936
1376		genbank_parvoviridae_AHK27120.1_@3KIC_N	parvovirus_cap	genbank	MSLKRGQFRGVLFPGYNYLGPFNPLENGDPVNKDDEAAKKHDQAYNKYINKGLNPYLKFNKGDQDFIDSLQSDSSVGGNFARAVFHLKKQIAPALNEPKDTGEPPAKKDKRAGNKRHLYFARLNKGAKKAKADPNNMDGDMGDNEQGAGEAPVERGDARSAGGAGGGGGGGGGGGNHGVGISTGGWIGGSILGKNKIITRNTRQWWCPIRDQHKYKQYTSYNHGGYTFNMTGYTTPWNMFNFNQYSSHFNPNEWQWLLNRAKRFRPVRMEVKIYNLQIKQESSQDTTAQYTNDLTAGLHVLCDGEHAFPWTQLPWDKGCMPELPHEIWELTQYAYLIVASPTQDADNNENEKAIRAMCPMYLLEETDHAVIRTGESIVFHHTFDCGWVDNTHSTNMPQL…	685	USER	zzz1937
1375		genbank_parvoviridae_AHK27119.1_@3KIC_N	parvovirus_cap	genbank	MSLKRGQFRGFLFPGYNYLGPFNPLENGDPVNKADEAAKKHDQAYNKYIEKGLNPYLKFNKGDQDFIDSLQSDSSVGGNFARAVFHLKKQIAPALNEPKDTGEPPAKKDKRAGNKRHLYFARLNKGAKKAKADSNNMDGNMDDNEQGAGEAPAAEGGARAAGGPGGGGGGGGGGGNHGVGISTGGWIGGSILDKNKIITRNTRQWWCPIRNGHRYTQHQRYGTGSGFHMQGYTTPWNMFNFNQYSSHFNPNEWQWLLNRASRFRPVRMEVKIYNLQIKQESTQDQTAQYTNDLTAGLHVLCDGEHAFPWTQLPWDKGCMPELPHEVWELTQYAYLTVASQAQDTSGN	347	USER	zzz1938
1374		genbank_parvoviridae_AHK27116.1_@3KIC_N	parvovirus_cap	genbank	MSLKRGQFRGLLFPGYNYLGPFNPLENGNPVNKADEAAKKHDQAYNNYINKGLNPYLKFNKGDQDFIDSLQSDSSVGGNFARAVFHLKKQIAPALNEPKDTGEPPAKKDKRAGNKRHLYFARLNKGAKKTKADPNNMDGDMDNNEQGAGEAPVEGGGERSAGGGGAAGGGGGGGNHGVGISTGGWIGGSILGKNKIITRNTRQWWCPIRDGHKYKQHQRYGQSGSGFNMQGYTTPWNMFNFNQYSSHFNPNEWQWLLNRASRFRPVKMEVKIYNLQIKQESTQDTTAQYTNDLTAGLHVLCDGEHAFPWTQLPWDKGCMPELPHEVWELTQYAYLT	336	USER	zzz1939
1373		genbank_parvoviridae_AHK27109.1_@3KIC_N	parvovirus_cap	genbank	MSHKRGQFRGLLFPGYNYLGPFNPLDNGDPVNKADEAAKKHDLAYNKYINKGLNPYLNFNKGDQDFIDSLQSDSSLGGNFAKAVFHIKKQIAPVLNEPKDTGEPPAKKDKRAGNKRHLYFARLNKGAKKAKADNNNMDGDLDNNEQGAGEGPAPAGGGGERSGGGGGGAAGGGGGGGNHGVGVSTGGWIGGSILGKNRIITRNTRQWLCTIKDNHRYKEYTTWTRGNTNMHMQGYTTPWSMFNFNQYSSHFNPNEWQWLVNRAKRFRPVRMEVKIYNIQIKQESNQDVTAQYTNDLTAGLHVLCDGEHAFPWTQLPWDKGCMPELPHDIWMLQQYAYLVVASQAQDTTNNENELNIRGGMPMYLLEETDHAVIRTGESIAFHHTFDCGWVDNTRSSVMP…	679	USER	zzz1940
1372		genbank_parvoviridae_AHK27108.1_@3KIC_N	parvovirus_cap	genbank	MSHKRGQFRGLLFPGYNYLGPFNPLDNGDPVNKADEAAKKHDLAYNKYINKGLNPYLKFNKGDQDFIDSLQSDSSVGGNFARAVFHLKKQIAPALNEPKDTGEPPAKKDKRAGNKRHLYFARLNKGAKKSKADPNNMDGDMGDNEQGAGEAPAAEGGARSAGGPGGGGGGGGPSGNHGVGISTGGWIGGSILGHNRIVTRNTRQWVCTIKNDHKYKQYTQWTQGTTNIGMQGFTTPWNMFNFNQYSSHFNPNEWQWLVNRAARFRPVKMEVKIYNLQIKQESTQDATAQYTNDLTAGLHVLCDGEHAFPWTQLPWDQGCMPELPHDIWKLQQYAYITVVAGAQDTTNNGDELNIRCATPMYLLEETDHAVIRTGESIVFHHTFDCGWVDNTRSSVTPQL…	677	USER	zzz1941
1371		genbank_parvoviridae_AHK27107.1_@3KIC_N	parvovirus_cap	genbank	MSNKRGQFRGLLFPGYNYLGPFNPLENGDPVNKADEAAKKHDQAYNNYINKGLNPYLKFNKGDQDFIDSLQSDSSVGGNFARAVFHLKKQIAPALNEPKDTGEPPAKKDKRAGNKRHLYFARLNKGAKKAKADPNNMDGDMDNNEQGAGEAPAAEGGARAAGGPGGGGGGGGGGGNHGVGISTGGWIGGSILGQNRIVTRNTRQWWCPIRNGHKYMQYNKWEQSGAAIHMMGYTTPWNMFNFNQYSSHFNPNEWQWLLNRAKRFRPVKMEVKIYNLQIKQETTVASETTYTNDLTAGLHVLCDGEHAFPWTQLPWDKGCMPELPHEVWALPQYAYITVSSQTQDTDSSGDEMAIRRMVPMYLLEETDHAVIRTGESIVFHHSFECGWVDNTHSSNMPQL…	676	USER	zzz1942
1370		genbank_parvoviridae_AHK27106.1_@3KIC_N	parvovirus_cap	genbank	MSLKRGQFRGLLFPGYNYLGPFNPLENGGPVNKADEAAKKHDQAYNNYINKGLNPYLKFNKGDQDFIDSLQSDSSVGGNFARAVFHLKKQIAPALNEPKDTGEPPAKKDKRAGNKRHLYFARLNKGAKKAKADPNNMDGDMDNNEQGAGEAPAEGGAAALTSLTGGAGGGGGGGGNHGVGISTGGWIGGSILGRNKIITRNTRQWWCPIRNNHKYTQYQRWEGQNANIHMQGYTTPWNMFNFNQYSSHFNPNEWQWLLNRAGRFRPVKMEVKIYNLQIKQETTTAAGDTTYTNDLTAGLHVLCDGEHAFPWTQLPWDKGCMPELPHEVWALQQYAYITVSSQSQDTSSSGDEMAIRKMVPMYLLEETDHAVIRTGESIVFHHSFDCGWVDNTHSSNMPQ…	689	USER	zzz1943
1369		genbank_parvoviridae_AHK27105.1_@3KIC_N	parvovirus_cap	genbank	MSLKRGQFRGVLFPGYNYLGPFNPLENGDPVNKADEAAKKHDQAYNKYINKGLNPYLKFNKGDQDFIDSLQSDSSVGGNFARAVFHLKKQIAPALNEPKDTGEPPAKKDKRAGNKRHLYFARLNKGAKKAKADPNNMDGDMGDNEQGAGEGPAEGGAAALTSRAGGAGGGGGGPSGNHGVGISTGGWIGGSILGHNKIITRNTRQWVCGIRDSRKYKQYTQWSQGNTNIKMQGYTTPWNMFNFNQYSSHFNPNEWQWLVNRASRFRPVRMEVKIYNLQIKQESTQDATAQYTNDLTAGLHVLCDGEHAFPWTQLPWDQGCMPELPHDVWTLQQYAYITVAPHTQDSTDNGNELNIRGGVPMYLLEETDHAVIRTGESITFHHTFDCGWVDNTRSSVMPQ…	686	USER	zzz1944
1368		genbank_parvoviridae_AHK27104.1_@3KIC_N	parvovirus_cap	genbank	MSLKRGQFRGLLFPGYNYLGPFNPLENGDPVNKADEAAKKHDQAYNKYINKGLNPYLKFNKGDQDFIDSLQSDSSVGGNFARAVFHLKKQIAPALNEPRDTGEPPAKKDKRAGNKRHLYFARLNKGAKKAKADSNNMDGDMDNNEQGAGEAPAAAGGATYAGGAGAIGGGGGGPSGNHGVGISTGGWIGGSILANNKIITKNTRQWWCPIRNEHKYKRYTGFNQGGAEYKMEGYTTPWNMFNFNQYSSHFNPNEWQWLVNRAARFRPVKMEIKIYNLQIKQESTQDQTAQYTNDLTAGLHVLCDGEHAFPWTQLPWDKGCMPELPHDIWELPQYAYIT	338	USER	zzz1945
1367		genbank_parvoviridae_AHK27102.1_@3KIC_N	parvovirus_cap	genbank	MSLKRGQFRGLLFPDYNYLGPFNPLENGDPVNKADEAAKKHDQAYNNYINKGLNPYLKFNKGDQDFIDSLQSDSSVGGNFARAVFHLKKQIAPALNEPKDTGEPPAKKDKRAGNKRHLYFARLNKGAKKAKADPNNMDGDLGDNEQGAGEAPAAAGGERSAGGGGGGGGGGGGGGNHGVGISTGGWIGGSILGNNRIITRNTRQWWCPIRNGHKYMQYNKWGTGNNEMHMMGYTTPWSMFNFNQYSSHFNPNEWQWLLNRAGRFRPVKMEVKIYNLQIKQESTQDTTAQYTNDLAAGLHVLCDGEHAFPWTQLPWDKGCMPELPHEIWALPQYAYIT	337	USER	zzz1946
1366		genbank_parvoviridae_AHK27100.1_@3KIC_N	parvovirus_cap	genbank	MSLKRGQFRGLLFPGYNYLGPFNPLENGDPVNKADEAAKKHDQAYNNYINKGLNPYLKFNKGDQDFIDSLQSDSSVGGNFARAVFHLKKQIAPALNEPKDTGEPPAKKDKRAGNKRHLYFARLNKGAKKAKADPNNMDGNLGDNEQGAGEAPVEGGGERSAGGGGAIGGGGGGGGNHGVGISTGGWIGGSILGKNKIITRNTRQWWCPIRDQHKYKRYTGFNHGGNSFIMEGYTTPWNVFNFNQYSSHFNPNEWQWLVNRAARFRPVKMEVKIYNLQIKQESNQTTDAQYTNDLTAGLHVLCDGEHAFPWTQLPWDKGCMPELPHEIWELPQYAYIT	337	USER	zzz1947
1365		genbank_parvoviridae_AHK27094.1_@3KIC_N	parvovirus_cap	genbank	MSLKRGQFRGLLFPGYNYLGPFNPLENGDPVNKADEAAKKHDQAYNDYINKGLNPYLKFNKGDQDFIDSLQSDSSVGGNFARAVFHLKKQIAPALNEPKDTGEPPAKKDKRAGNKRHLYFARLNKGAKKAKADPNNMDGDMDNNEQGAGEAPAAEGGARAAGGPGGGGGGGGGGGNHGVGISTGGWIGGSILGQNRIITRNTRQWVCTIKNEHKYKQYTQWQGSGATVHMQGYSTPWNMFNFNQYSSHFNPNEWQWLLNRAKRFRPVKMEIKIYNLQIKQETTVAGETTYTNDLTAGLHVLCDGEHAFPWTQLPWDKGCMPELPHDIWTLPQYAYIT	337	USER	zzz1948
1364		genbank_parvoviridae_AHK27096.1_@3KIC_N	parvovirus_cap	genbank	MSLKRGQFRGLLFPGYNYLGPFNPLENGDPVNKADEAAKKHDQAYNNYINKGLNPYLKFNKGDQDFIDSLQSDSSVGGNFARAVLHLKKQIAPALNEPKDTGEPPAKKDKRAGNKRHLYFARLNKGAKKAKADPNNMDGDMGDNEQGAGEAPVEGGDARSASGAAGGGGGGGGGNHGVGISTGGWIGGSILGKNRIITRNTRQWWCPIRDNHQYKEYRQWQQGGTSINMQGYTTPWNMFNFNQYSSHFNPNEWQWLMNRAKRFKPVRMEVKIYNLQIKQESTMDNNAQYTNDLTAGLHVLCDGEHAFPWTQLPWDKGCMPELPHEIWALPQYAYIT	336	USER	zzz1949
1363		genbank_parvoviridae_AHK27083.1_@3KIC_N	parvovirus_cap	genbank	MSHKRGQFRGLLFPGYNYLGPFNPLDNGDPVNKADEAAKKHDLAYNNYINKGLNPYLKFNKGDQDFIDSLQSDSSLGGNFAKAVFHIKKQIAPALNEPKDTGEPPAKKDKRAGNKRHLYFARLNKGAKKAKADNNNMDGDMADNEQGAGEEPTPGGGARAGGGGGGAAGGGGGGGNHGVGISTGGWIGGSILGQNKIITRNTRQWWCPIRDQHKYKRYTQYQQGSTNYHMEGYTTPWNMFNFNQYSSHFNPNEWQWLVNRAKRFRPVRMEVKIYNIQIKQESNQDVSAQYTNDLTAGLHVLCDGEHAFPWTQLPWDKGCMPELPHEIWELQQYAYIT	337	USER	zzz1950
1362		genbank_parvoviridae_AHK27080.1_@3KIC_N	parvovirus_cap	genbank	MSLKRGQFRGLLFPGYNYLGPFNPLENGDPVNKADEAAKKHDQAYNNYINKGLNPYLKFNKGDQDFIDSLQSDSSVGGNFARAVFHLKKQIAPALNEPKDTGEPPAKKDKRAGNKRHLYFARLNKGAKKAKADPNNMDGDMDNNEQGAGEAPVEGGGERSAGGAGGGGGGGGGGGNHGVGISTGGWIGGSILGKNKIITRNTRQWWCPIRNEHKYKQYNQFSQGGTTFNMMGYSTPWSMFNFNQYSSHFNPNEWQWLLNRAKRFRPVRMEVKIYNIQIKQESTQDQNAQYTNDLTAGLHVLCDGEHAFPWTQLPWDKGCMPELPHEVWQLTQYAYIT	337	USER	zzz1951
1361		genbank_parvoviridae_AHK27068.1_@5URF_n	parvovirus_cap	genbank	GLHVLCDGEHAFPWTQLPWDKGCMPELPHEIWELPQYAYITMPMQAQDTDNADERAFRCAVPMYLLEETDHSVIRTGESVIFHHAFDCGWVNNTRCSNMPQLAFTNPLIDSRLVKTRYTSGNSGNLTEEQCRPYQKNPPWWPGPGWRTNQTTNGQNNNTILGPFSTALSPAGINYATGPISYGAATGPYVGGQTPEAGSGFPNRNNNGNYLKFTPGDGAGGLNVGNAYIKRESILTGTRDQSLWQANGNNATEQQNVFMMPNQVWDSAQISRYNPIWVKAPRTNRHTMVDTEDGTIPMAHPPGTIYVKLAHIPTPGNNGRDFLNIYATGQVSCEIEWEYEENYTKNWRPERMIDGNKMRADVYKINADGGYVLPNSYYETMPT	383	USER	zzz1952
1360		genbank_parvoviridae_AHK27062.1_@5URF_n	parvovirus_cap	genbank	GLHVLCDGEHAFPWTQLPWDKGCMPELPHDVWTLPQYAYITVASQTQDSTDNPRELDIRGAVPMYLLEETDHAVIRTGESIVFHHSFDCGWVDNARSSVMHQMACINPLVDSRLVGTWLNNNNEQEAQLRPYQKRSQWWPGPGYRDNRNTSQNGTNGETVLGPYVSTMSPEGLTYQSSVLTYGAATGPYLGGQSAKVTGGTETNNANYIRFTPGDGPAGTNTGNSFIKRTSIQTGTRDQILNRATGTSTTEVPNVYMMPNQMWDSAPISRYNPIWVKIPRVDRHTMLDTEDGTLPMTHPPGTIYVKLANIPAPTTGNYSFLNIYATGQVSCEIEWEFEENFNKNWRPERRIDADKMRADVYKINAEGNYILPENFYETMPT	381	USER	zzz1953
1359		genbank_parvoviridae_AHK27066.1_@5URF_n	parvovirus_cap	genbank	GLHVLCDGEHAFPWTQLPWDKGCMPELPHEIWELTQYAYLTMHSQAQDSESNRTEMDVRCALPMYLLEETDHAVIRTGESIVFHHDFDCGWVDNTRCSNMPQLAFTNPLVDSRLVKISYQPGQSQGTTVNQQCLPYQKNPPWWPGPGYRENKATTGPGNNTVLGPYTTAFFPANMTYDTGAISYGAPTGPYVGGESARQDGVDINNNYLRFTPGDGPVTSITNNAITRDSVLTGTRDQMLSRATGSSASEIKNVYMMPNQVWDSAPISRYNPIWVKTPRTNRHTMIDTEDGTIPMSHPPGTIYVKLAHIPTPGNNGRDFLNIYATGQVSCEIEWEYEENYNKNWRPERRIDGNKMRADVYKINDQGNYILPNNYYETMPT	380	USER	zzz1954
1358		genbank_parvoviridae_AHK27060.1_@5URF_n	parvovirus_cap	genbank	GLHVLCDGEHAFPWTQLPWDKGCMPELPHEIWELPQYAYITMPSQAQDTGDNQEELAFRCAIPMYLLEETDHAVIRTGESVVFHHAFDCGWVNNTRCSNMPQLAFTNPLIDSRLVKTRYTSGNSGPTTEEQCRPYQKNPPWWPGPGWRTNQTTNGQNNNTILGPFSTTLSPAGMTYATGPISYGAPTGPYVGGQSAEPTNQAANNNNYLKFTPGDGPGGLNQGNAYIRRESILTGTRDQKLYQANGNNATERYDVWMMPNQVWDSAQISRYNPIWVKTPRVDRHTLTDTEDGTLPMSHPPGTIYVKLAHIPTPQSGNNSYLNIYATGQVSCEIEWEYEEHFNKNWRPERMIDAQTMRADCYKLNADGGYNLPQSYYETMPT	381	USER	zzz1955
1357		genbank_parvoviridae_AHK27059.1_@5URF_n	parvovirus_cap	genbank	GLHVLCDEEHAFPWTQLPWDKGCMPELPHAIWALPQYAYITVSSQSQDTESNGDERAIRCAVPMYLLEETDHAVIRTGESITFHHSFDCGWVDNTHSSNMHQLACINPLVDSRLVARWVTSGTNESEAQMRPYQKHGQWWPGPGYRDNRITSNNGTNNQTVFGPYISVHNPEGLTYQSSIVQYGVPTGPYVGGQSAKNSTAPPEGNANYLRFTPGDGIGGDAQGNNFIERDSVLTGTRDQILYKATGQSTAEQQNVYMMPNQMWDSAPISRYNPIWTKVPRVDRHTMIDTEDGTLPMTHPPGTIYVKLAHIPTPNGTGHLNIYATGQVSCEIEWEFEENYNKNWRPERRIDANKMRADVYKINQDGAYILPNSYYETMPT	380	USER	zzz1956
1356		genbank_parvoviridae_AHK27052.1_@5URF_n	parvovirus_cap	genbank	GLHVLCDGEHAFPWTQLPWDQGCMPELPHDIWKLQQYAYITVVAGAQDTTNNGDELNIRCATPMYLLEETDHAVIRTGESIVFHHSFDCGWVDNTRSSAMHQLACINPLIDSRLVGVWLNSAGNGTNEDQMRPYQKHGPWWPGPGYRDNRNTSEGGTNGNTGLGPYFSVWKPEGVRYTSSAVKYGVPTGPYTGGQSSDNVGGSVHNNANVTRFTPGDGPGGANNSNFFIQRGSVQTGTRDQALYKATGTTTSEEARVGMMPNQMWDSAQICRYNPIWTKIPRVDRHTLLDTEDGTLPMTHPPGTIYVKLANIPTPNGTGHLNIYATGQVSCEIEWEYEENYNKNWRPERRIDANKMRADVYKINADGGYDLPQNYYETMPT	381	USER	zzz1957
1355		genbank_parvoviridae_AHK27048.1_@5URF_n	parvovirus_cap	genbank	GLHVLCDGEHAFPWTQLPWDKGCMPELPHEVWELTQYAYLTVASQAQDTSGNADEQAIRRQLPMYLLEETDHAVIRTGESIVFHHAFSCGWVDNTHCTNMHQLACINPLVDSRLVKKYYASGQSNPTNGQCKSYQKNGPWWPGPGYRGNQTTGAGTGATVLGPYVSLFNPPGMTYQSSVHENGAATGPYVGSQSATATNVTGNSNLNGNFLRFTPGDGDMANDVNNNIERQSVLTGTRDQTLFQCTGSGTAEIKDVYMMPNQMWDSAPISRYNPIWVKIPRVDRHTMLDTEDGTLPMAHPPGTIYVKLAHIPTPQQGNNSFLNIYATGQVSCEIEWEFEEHFNKNWRPERRVDIMQMNPDVYKIDGNGAYQLPRSYYEAMPTRLGQEKVL	390	USER	zzz1958
1354		genbank_parvoviridae_AHK27053.1_@5URF_n	parvovirus_cap	genbank	GLHVLCDGEHAFPWTQLPWDKGCMPELPHEIWALPQYAYITVNSQAQDTTDSGDENAIRCMVPMYLLEETDHAVIRTGESIVFHHSFSCGWVDNTHSSNMHQLACINPLVDSRLAVRYLNNQNNAEIEDQLRPYQKHGPWWPGPGYRNNKVTSAQGTNNKTVFGPFVSTFAPEGMNYQVSVLQHGVATGPHTGGQTARATGNTGTGGTLNNASFIRFTPGDGLPQNNVNQFIQRHSTLTATRDQALHQSTGTSTNEITNVYMMPNQMWDSAQISRYNPIWCKIPRVDRHTMLDTEDGTLPMSHPPGTIYVKLAHIPTPQNGGSDYLNIYATGQVSCEIEWEFEEHFNKNWRPERRIDVMQMDSDVYKIDDNGAYRLPRSYYETMPT	386	USER	zzz1959
1353		genbank_parvoviridae_AHK27046.1_@5URF_n	parvovirus_cap	genbank	GLHVLCDGEHAFPWTQLPWDKGCMPELPHEIWELTQYAYLTMPAQAQDSDSNTNELDMRCAIPMYLLEETDHAVIRTGESITFHHSFDCGWVDNTRCSNMPQLAFTNPLVDSRLVKLSYQNGQSSGTVVEQQCLPYQKNPPWWPGPGYRENRTTTGQGGNSVLGPYATVLGPEGLSYGTGPISYGAATGPYVGGESARQEGTDINNNYLRFTPGDGAGGENNRNNFIRRESILSGTRDQMLYRANGRTSDEIKNVYMMPNQVWDSAPISRYNPIWVKTPRTNRHTMIDTEDGTLPMSHPPGTIYVKLAHIPTPQSGNNSYLNIYATGQVSCEIEWEFEENYTKNWRPERMIDGNKMRADVYKIDDQGRYILPNSYYETMPTRWGREKVL	389	USER	zzz1960
1352		genbank_parvoviridae_AHK27042.1_@5URF_n	parvovirus_cap	genbank	GLHVLCDGEHAFPWTQLPWDKGCMPELPHEIWELPQYAYITMPSQAQDTDNAEERAFRCAVPMYLLEETDHSVIRTGESVIFHHAFDCGWVNNTRCSNMPQLAFTNPLIDSRLVKTRYTSGSSGALTEEQCRSYQKNPPWWPGPGWRTNQTTNGTGNNTILGPFATGLNPAGLTYNTGPISYGAATGPYVGGQTAEASGSTFPNRNNNNNYLKFTPGDGAGGLNVGNAYIKRESILTGTRDQSLWQANGNNATEQQNVFMMPNQVWDSAQISRYNPIWVKTPRVDRHTMIDTEDGTLPMSHPPGTIYVKLAHIPTPQSGNNSYLNIYATGQVSCEIEWEYEEHFNKNWRPERRIDAQHMRADCYKVNENGVYNLPQSYYETMPTRWGQEKVL	392	USER	zzz1961
1351		genbank_parvoviridae_AHK27039.1_@5URF_n	parvovirus_cap	genbank	GLHVLCDGEHAFPWTQLPWDKGCMPELPHDIWELPQYAYITMPAQAQDTSNNEELAFRCAIPMYLLEETDHAVIRTGESVIFHHSFDCGWVNNTRCSNMPQLAFTNPLIDSRLVKTYYTSGTSNPTEGQCKPYQKNPPWWPGPGWRTNQCTQGSNGNTVLGPFITALNPAGMTYNTGVISYGAATGPYVGGQSAMPQGNNNINGNYLKFTPGDGTGGLAQNNAYITRNSILTGTRDQTLWQANGSNSTEQRDVMMMPNQVWDSAPISRYNPIWVKTPRVDRHTLIDTEDGTLPMSHPPGTIYVKLAHIPTPQSGNNSYLNIYATGQVSCEIEWEYEEHFNKNWRPERMIDAQHMRADCYKLDANGGYNLPQSYYETMPTRWGREKVL	387	USER	zzz1962
1350		genbank_parvoviridae_AHK27040.1_@5URF_n	parvovirus_cap	genbank	GLHVLCDGEHAFPWTQLPWDKGCMPELPHEIWELTQYAYLTMPSQAQDTGNSQDELAFRCAIPMYLLEETDHSVIHTGESVSFHHAFSCGWVNNTRCSNMPQLAFTNPLVDSRLVKQRFQSGTSGATVEEQCKPYQKNPPWWPGPGWRTNRTTNGANNNTILGPFSTTLSPAGMSYQTGPISYGAATGPYVGGQSAEPAASNRTNNNNYLRFTPGDGPGGQNNRNTFITRQSILTGTRDQMLWQANGSNVDERTDVWMMPNQVWDSAPISRYNPIWVKTPRVDRHTMIDTEDGTLPMSHPPGTIYVKLAHIPTPQSGNNSYLNIYATGQVSCEIEWEYEEHFNKNWRPERMIDAQHMRADCYKVDAEGRYDLPQTYYETMPTRWGREKVL	390	USER	zzz1963
1349		genbank_parvoviridae_AHK27024.1_@5URF_n	parvovirus_cap	genbank	CYHCHFSPQDWQRLLNEYKAWRPKRMHVRIYNLQIKQITTLGADTLYQNDLTAGVHIFCDGSHQYPYAQHPWDEGASPELPNEIWKLPQYAYFQYQADLTDQTTVATAQNVERMLRSNVPLFLLENSNHEVLRTGEMTEFSFTFQSGWVTNDRAYCCPQSDFNPLVPSRRYYPTWNGSTNSYSYTRYGPYKKPSNWMPGPGLAYKGATHTNQNPNDARGPIVTTIAPLGTISSGSTPSNDAPNDGENTISSDGVKQAGWQTAPVNGACARTDYPTLAFDPSDRSNNQNIPTRNLDIDMTRWYRVHEPVRSTSGSTYYNVDDVWMYPNQAWNSTPICRDNPIWDKVPRTDRHTLLDSSDGTLPMQHPPGNIFIKCAKIPVPTSNNADSYLNIYVTGQVTY…	436	USER	zzz1964
1348		genbank_parvoviridae_AHK27017.1_@3KIC_N	parvovirus_cap	genbank	MSNKRGQFRGLLFPGYNYLGPFNPLENGDPVNKADEAAKKHDQAYNNYINKGLNPYLKFNKGDQDFIDSLQSDSSVGGNFARAVFHLKKQIAPALNEPKDTGEPPAKKDKRAGNKRHLYFARLNKGAKKAKADPNNMDDNLGDNEQGAGEAPVEGGGEKICWRRWRRWWRRRWEITASASPPEDGSEDPSWVKNKIITRNTRQWWCPIRDNHLYKQYNQFSGGGTTFNMMGYTTPWNMFNFNQYSSHFNPNEWQWLLNRAKRFRPVKMEVKIYNLQIKQESNQDSTAQYTNDLTAGLHVLCDGEHAFPWTQLPWDKGCMPELPHEVWALQQYAYLTVVSAAQDSNATNADEEAIRSMVPMYLLEETDHAVIRTGESIAFHHVFSCGWVDNTHSSNMPQL…	674	USER	zzz1965
1347		genbank_parvoviridae_AHK27016.1_@3KIC_N	parvovirus_cap	genbank	MSHKRGQFRGLLFPGYNYLGPFNPLDNGNPVNKADEAAKKHDLAYNNYINKGLNPYLKFNKGDQDFIDSLQSDSSLGGNFAKAVFHIKKQIAPALNEPKDTGEPPAKKDKRAGNKRHLYFARLNKGAKKAKADNNNMDGDMDNNEQGAGEGPAPAGGGGATYASGRGGAAGGGGGGGNHGVGVSTGGWIGGSVLGQNRIITRNTRQWLCTIRDNHKYKQYTQWTMGNTNIHMQGYTTPWNMFNFNQYSSHFNPNEWQWLVNRAKRFRPVRMEVKIYNIQIKQESNQDVTAQYTNDLTAGLHVLCDGEHAFPWTQLPWDKGCMPELPHDIWTLQQYAYITCASEAQDTTDNANELNIRGAIPMYLLEETDHAVIRTGESIVFHHSFDCGWVDNTRSSAMH…	679	USER	zzz1966
1346		genbank_parvoviridae_AHK27010.1_@3NG9_A	parvovirus_cap	genbank	MAPTNRKTGGWVLPGHRYLGPFNPIENGEPVNAADAAARRHDLKYDQYLKEGKNPYLYFNKADSDFLEDLESDRSFGGWIGKGVFGLKRAIAPTLDESSGKQNTGGPSAAKKPRVDPQRAQKRKLYFARQAKEAKKQKMSSGGDPSEDTGAGDGEQGGESSTMTGRSGGGAGGGGGGGGSVGFSTGGWEGGTYFSDHTVTTTNTRQWYTGILNGHRYSKLSQGTSSQQETHPWTGIQTPWAYLNVNCYHCHFSPQDWQRLLNEYKAWRPKKMHIRIYNLQIKQITTVGADTLYQNDLTAGVHIFCDGSHHYPYAQHPWDEGASPELPNEIWKLPQYAYFQYQGDLTDNTTVQTAQNVERMLRSNVPLFLLENSNHEVLRTGEMTEFTFNFKCGWVTNDR…	683	USER	zzz1967
1345		genbank_parvoviridae_AHK27001.1_@3KIC_N	parvovirus_cap	genbank	MSLKRGQFRGLLFPGYNYLGPFNPLENGDPVNKADEAAKKHDQAYNKYINKGLNPYLKFNKGDQDFIDSLQSDSSVGGNFARAVFHLKKQIAPALNEPKDTGEPPAKKDKRAGNKRHLYFARLNKGAKKAKADPNNMDGDMDNNEQGAGEAPAAAGGERSAGGGGAVGGGGGGNNHGVGISTGGWIGGSILGHNRIITRNTRQWLCTIRDSHKYKHYTQWNQGSTNVKMEGYTTPWNMFNFNQYSSHFNPNEWQWLINRAARFRPVRMEIKIYNLQIKQESNQTTDAQYTNDLTAGLHVLCDGEHAFPWTQLPWDQGCMPELPHDIWTLQQYAYITVAPHTQDTTDDGDELNIRSAVPMYLLEEMDHAVIRTGESITFHHTFDCGWVDNTRSSVMPQAA…	684	USER	zzz1968
1344		genbank_parvoviridae_AHK26998.1_@3KIC_N	parvovirus_cap	genbank	MSLKRGQFRGLLFPGYNYLGPFNPLENGDPVNKADEAAKKHDQAYNNYINKGLNPYLKFNKGDQDFIDSLQSDSSVGGNFARAVFHLKKQIAPALNEPKDTGEPPAKKDKRAGNKRHLYFARLNKGAKKAKADPNNMDGDLGDNEQGAGEAPAAEGGARSAGGLGGGGGGGGGGGNHGVGISTGGWIGGSILGKNKIITRNTRQWWCPIRNDHKYKQYNQFNQSGTTFNMMGYSTPWNMFNFNQYSSHFNPNEWQWLLNRAKRFRPVRMEVKIYNLQIKQETDISGTTTYTNDLTAGLHVFCDGEHAYPWTQLPWDKGCMPELPHEVWQLPQYAYLTVCSAAQDSYDQNANEKAMRSQVPMYLLEETDHAVIRTGESIVFHHAFECGWVDNTHCSNMVQ…	688	USER	zzz1969
1343		genbank_parvoviridae_AHK26995.1_@3NG9_A	parvovirus_cap	genbank	MSHKRGQFRGLLFPGYNYLGPFNPLDNGDPVNKADEAAKKHDLAYNKYINKGLNPYLNFNKGDQDFIDSLQSDSSLGGNLARAVFHIKKQIAPALNEPKDAGEPPAKKDKRAGNKRHLYFARLNKGAKKSKADNDNMDGDMDNNEIGAGEGPAPAGEGGARSAGGAGAGGGGGGGNHGVGISTGGWIGGTIMGKNTIVTRNTRQWWCPIRDNHKYKQHNTYGNNEFHMMGYKTPWNMFNFNQYSSHFSPNEWQWLLNRAKRFRPKRMQVKIYNIQIKQKSVIGGETQYTNDLTAGLHVLCDGEHAFPWTQLPWDKGCMPELPHEVWELQQYAYLTVASQTQDAGDNAAELMIRSMVPMYLLEETDHAVIRTGENISFHHEFDCGWVDNTHSTNMHELCM…	676	USER	zzz1970
1342		genbank_parvoviridae_AHK26992.1_@3KIC_N	parvovirus_cap	genbank	MSLKRGQFRGLLFPGYNYLGPFNPLENGDPVNKADEAAKKHDQAYNNYINKGLNPYLKFNKGDQDFIDSLQSDSSVGGNFARAVFHLKKQIAPALNEPKDTGEPPAKKDKRAGNKRHLYFARLNKGAKKAKADPSNMDGDMDNNEQGAGEAPAAEGGARAAGGAGGGGGGGPSGNHGVGISTGGWIGGSILGQNRIITRNTRQWWCPIRDQHKYKRYTGFNKNGNSYNMEGYTTPWNMFNFNQYSSHFNPNEWQWLVNRAARFRPVKMEVKIYNLQIKQESTVDQNAQYTNDLTAGLHVLCDGEHAFPWTQLPWDKGCMPELPHDIWELPQYAYITVPAQAQDSATGQDELAIRCAVPMYLLEETDHAVIRTGESVVFHHAFDCGWVNNTHCSNMPQLA…	679	USER	zzz1971
1341		genbank_parvoviridae_AHK26989.1_@3KIC_N	parvovirus_cap	genbank	MSHKRGQFRGLLFPGYNYLGPFNPLENGDPVNKADEAAKKHDQAYNNYINKGLNPYLKFNKGDQDFIDSLQSDSSVGGNFARAVFHLKKQIAPALNEPKDTGEPPAKKDKRAGNKRHLYFARLNKGAKKAKADPNNMDGDMDNNEQGAGEAPVEGGGERSAGGGGAIGGGGGGGNNHGVGISTGGWIGGSILGKNRIITRNTRQWWCPIRNNHLYKQYTGYSSGGKSYNMIGFTTPWNMFNFNQYSSHFNPNEWQWLINRAKRFRPVKMEVKIYNLQIKQESTQDQTAQYTNDLTAGLHVLCDGEHAFPWTQLPWDKGCMPELPHEIWELTQYAYLTMPAQGQDSDTNNVELDFRCAIPMYLLEETDHAVIRTGESIVFHHAFDCGWVDNTRCSNMPQL…	684	USER	zzz1972
1340		genbank_parvoviridae_AHK26980.1_@3KIC_N	parvovirus_cap	genbank	MSLKRGQFRGLLFPGYNYLGPFNPLENGDPVNKADEAAKKHDQAYNNYINKGLNPYLKFNKGDQDFIDSLQSDSSVGGNFARAVFHLKKQIAPALNEPKDTGEPPAKKDKRAGNKRHLYFARLNKGAKKAKADPNNMDGDMDNNEQGAGEAPAAEGGARAAGGPGGGGGGGGGGGNHGVGISTGRWIGGSILDKNKIITRNTRQWWCPIRDNHKYKQYTKWEQSGTTIHMQGYTTPWNMFNFNQYSSHFNPNEWQWLLNRAKRFRPVKMEVKIYNLQIKQETTVASETTYTNDLTAGLHVLCDGEHAFPWTQLPWDKGCMPELPHDVWALPQYAYITVSLQSQDSETNTNELDIRCAVPMYLLEETDHAVIRTGESIVFHHVFDCGWVDNTRSSNMHQL…	686	USER	zzz1973
1339		genbank_parvoviridae_AHK26974.1_@4IOV_A	parvovirus_cap	genbank	MSLKRGQFRGLLFPGYNYLGPFNPLENGDPVNKADEAAKKHDQAYNNYINKGLNPYLKFNKGDQDFIDSLQSDSSVGGNFARAVFHLKKQIAPALNEPKDTGEPPAKKDKRAGNKRHLYFARLNKGAKKAKADPNNMDGDLGDNEQGAGEAPVEGGGERSAGGGGAIGGGGGAATTTESASPPEDGSEDPSWDITPSSPKTHVNGGVLYEANTNTNNTPDTIRMENEYTMMGYTTPWNMFNFNQYSSHFNPNEWQWLVNRAKRFRPKRMEVKIYNLQIKQESTQDSTAQYTNDLTAGLHVLCDGEHAFPWTQLPWDKGCMPELPHEIWGLTQYAYLTMPSQSQDSESNVNELDLRCAIPMYLLEETDHAVIRTGESIVFHHTFECGWVDXTRCSNMPQL…	685	USER	zzz1974
1338		genbank_parvoviridae_AHK26977.1_@3KIC_N	parvovirus_cap	genbank	MSLKRGQFRGVLFPGYNYLGPFNPLENGDPVNKADEAAKKHDQAYNKYINKGLNPYLNFNKGDQDFIDSLQSDSSVGGNFARAVFHIKKQIAPALNEPKDTGEPPAKKDKRAGNKRHLYFARLNKSAKKAKADPNNMDGDMGDNEQGAGEAPAAESRAGYAGGAGGGGGGGGGSGNHGVGISTGGWIGGSILGHNRIITRNTRQWVCTIKNDHKYKQYTQWQGSGATIHMQGYSTPWNMFNFNQYSSHFNPNEWQWLLNRAKRFRPVKMEVKIYNLQIKQETNIAGETTYTNDLTAGLHVLCDGEHAFPWTQLPWDKGCMPELPHDVWTLPQYAYITVASQTQDSTDNPRELDIRGAVPMYLLEETDHAVIRTGESIVFHHSFDCGWVDNTRSSVMHQM…	686	USER	zzz1975
1337		genbank_parvoviridae_AHK26968.1_@3KIC_N	parvovirus_cap	genbank	MSLKRSQFRGLLFPGYNYLGPFNPLENGDPVNKADEAAKKHDQAYNKYINKGLNPYLKFNKGDQDFIDSLQSDSSVGGNFARAVFHLKKQIAPALNEPKDTGEPPAKKDKRAGNKRHLYFARLNKGAKKAKADSNNMDGDMDNNEQGAGEAPAAAGGATYAGGAGAVGGGGGGNNHGVGISTGGWIGGSILGHNTIITRNTRQWWCPIRDNHLYKRYTSYNKNGADFKMEGYTTPWNMFNFNQYSSHFNPNEWQWLVNRAKRFRPKRMEVKIYNLQIKQESAQDTNAQYTNDLTAGLHVLCDGEHAFPWTQLPWDKGCMPELPHEIWELTQYAYLTIPSQAQDTEDNNTELNIRCAVPMYLLEETDHAVIRTGESIVFHHDFDCGWVDNTRCSNMPQLA…	684	USER	zzz1976
1336		genbank_parvoviridae_AHH24686.1_@5URF_n	parvovirus_cap	genbank	MDGDMDDNEQGAGEGPAPGGGGGARAGGGAGGAAGGGGGGGNHGVGVSTGGWIGGSVLGQNRIITRNTRQWLCTIRDNHKYKQYTSWKLGNTTMHMQGYTTPWNMFNFNQYSSHFNPNEWQWLVNRAKRFRPVRMEVKIYNIQIKQESNQDVTAQYTNDLTAGLHVLCDGEHAFPWTQLPWDKGCMPELPHDIWTLQQYAYITCASEAQDTTSNGNELNIRGAVPMYLLEETDHAVIRTGENIVFHHSFDCGWVDNTRSSVMPQMACINPLTDSRLVGVWLNQAGNGTNEDQMRPYQKHGPWWPGPGYRNNRNTSENGTNGHTVLGPYITAWKPEGMTYASSPVRYGTATGPYTGGQSTEVVSGGANNNANPMRFTPGDGPGGANNSNFFIQRGSVQTG…	551	USER	zzz1977
1335		genbank_parvoviridae_AHF20149.1_@3NTT_A	parvovirus_cap	genbank	MAAPVTGATGGGVKVKAQWLGGTHFSDNTIVTSHTRTSMLADRGGYVPVYRSGSHVSDRQPVMGMRTPYSYIDVNAISAHLTPRDFQQLLDEYEEIRPKKLVIGISGIVIKDVSVTTTGTTVSDSASGGITVFSDDAYDYPYVLGHNQDTLPGHLPGENYVLPQYGYLTRGREFDKGTDIVGIADHRSEXXXXXXXXXXXXXXXXXXXXXXXXXXXXXXXXXXXXXXSLYARHNPIPPSRLAIMTGVDNSGVPKWKRPAGEDVGKHPLNYVPGPSVMMPTDSQIRNTDFRVPLAIGNPVTGDRYSVGPLVHQPWSIRTEEGKSPPNNFAVHSYLGGVAYTRRRHEESYTGHTEEMDGSVTNPSRVVVNEVDMAAPHVGHTFMVPGHTRVDGSGSGSDTV…	534	USER	zzz1978
1334		genbank_parvoviridae_AHA86836.1_@4IOV_A	parvovirus_cap	genbank	MALPGSKKRHRDGRPVIASEEWEWEEHYFGSSLVDARAGIVDVLIKLFSKPREAVLEGGVLVSDIEKELETHDEAVRFFADHLGLMGLKDANGLRNFIKGDGNLRAKVLLDAWRHYGSSKEQGAAPPADPRHIAGPPLTSQGPVLGEHVPITEQVVAGDLEPPRKRPADDGHRGLTLPGTHYVGPGNRLEEGPPTTRLDAEARIHDFRYSELQKLGINPYTHFTSADQELLSAAAREKGFQAAMVEAVFELKKQLAPHADFQGTLPAISSYATQEEMEDGEGSGQTLGGGGGAPAGPTIWSNESAFEGGKVISTMSRQVIIPFDPQQRYKPFSLPSGTAGGEHSYAATLSHPIIGYETPWRYLDLNCAELWFSPSEWQRLLESSGGIRPKSMEIFISNI…	843	USER	zzz1979
1333		genbank_parvoviridae_AGV22423.1_@4G0R_A	parvovirus_cap	genbank	MPRLRSGGYKKREEYVVRRLRADNYVPNKGMTIHGYEWFGPGNEITYNPARNQVDQDGKDHDLTNDYKKKGAFYTYNAADKILLRKLEKEHSIPAKIGKAWFGTKRYLAEHGFLPTTVGSGGVYVTPQKKRRFEAPNISGKKRKPDPREFAQLKRSSVSNTPATATMAMQVDTATRRPIGNANAQGXXXXXXXXXXXXXXXXXXXXXXXXXYAAQLNYEGFMYSMDTVFRMTSPNDVRVDQGTVDFNTGAGVAGISTVPSDPDAVNAQDIARWWDYYAGIYKYYHVLGCRWHLTFENLYNDLVYLHKMFYNDVLPNPGATNEDMLQWRDCESHLVGSHAVGVNTVGINAFENEPGSSTGAMNLESSAVNTTTNFRTTDNVARVNGPSPIIKLSGEYKPG…	491	USER	zzz1980
1332		genbank_parvoviridae_AGW95845.1_@5URF_n	parvovirus_cap	genbank	MTKDKKLPTWIGPDGLPYDEFGVVPTHDYLDPEMARRARALREGAKLSPNKKGGDGKRVIKKRTPEQAKQRKIFFMAQAKKAKKAGVPLADYLSGNKPTPANGGNSGRYGTHQISSSSESDPEEGPAPTKRPRTDFSQPSASDDEMAALVDQANSQVAEAAMDGGMDDRAGEAPGGGGSVGSGGGGGVGQSTGNWSCETAFGSSSIKTIASRHCLCVVRNGHAYKAITNATSTNNPAQGDTSRWLGMSTPWNYIDFNQLDIFFSPQQFQYLVNNSRRFRPRGFTVELFNLQIIQRTYNAGTGDWQFTNDLTSTIQVFYDAGKRYPILSYPNQSTVMSPFPYDIYRCPQYAYLTDQTWTNSNTNNLSALITNYSKFYVLDEHESAMLRTGNNWSCQFEFG…	696	USER	zzz1981
1331		genbank_parvoviridae_AGM20581.1_@4IOV_A	parvovirus_cap	genbank	MSAADAWKPGDRPPLENLMDAMDRSIWGNRRNNSGGQRGINALLRPGYDPRMRQALLQLYKFFISIKKHGGFWHKIKEAAKQWWMAGHETSKGDELARTVLDLGRLFMAVVDDNREDPEIDSVRRSMIDFLYGDNDATRAYFGLQRFADRVRLPQRDLMRVWITGGYRPKPPKGSPWGTWAELDLDIRNSLDASYKAAEEDRSKAIQVPPIDHPGPESGEQPQPAPEERPAESAEAVGPRSDGQSGPTDTGAGRERDSPSTEVGRSDGPESDGAGGGLTLPAYRYVGPGNPLDSGEPRGPVDAIAKKHDEQYDELIKHGHIPYLHRRGADTLMGKELADAEEAGKILDRYDQLVANAARGLWRAKDTLADLIGGELDKVLPPDPPVQSEGEESQKRPRE…	1031	USER	zzz1982
1330		genbank_parvoviridae_AGT28165.1_@1S58_A	parvovirus_cap	genbank	MSKTTDRWWESNDTFAQDVYKQFVQFYEKVTGTDLELIQILKDHYNISLDNPLENPSSLFDLVARIKSNLKNSPDLYSHHFQSHGQLSDHPHALSSSDSSTEPRGENAVLSSEDLHKPGQVSIQLPGTNYVGPGNELQAGPPQNAVDSAARIHDFRYSQLAKLGINPYTHWTVADEELLKNIKNETGFQAQAVKDYFTLKGAAAPVAHFQGSLPEVPAYNASEKYPSMTSVNSAEASTGAGGGGSNPTKSMWSEGATFTANSVTCTFSRQFLIPYDPEHHYKVFSPAASSCHNASGKEAKVCTISPIMGYSTPWRYLDFNALNLFFSPLEFQHLIENYGSIAPDALTVTISEIAVKDVTDKTGGGVQVTDSTTGRLCMLVDHEYKYPYVLGQGQDTLAP…	759	USER	zzz1983
1329		genbank_parvoviridae_AGS15095.1_@3KIC_N	parvovirus_cap	genbank	MSLKRGQFRGLLFPGYNYLGPFNPLENGDPVNKADEAAKKHDQAYNTYINKGLNPYLKFNKGDQDFIDSLQSDSSVGGNFARAVFHLKKQIAPALNEPKDTGEPPAKKDKRAGNKRHLYFARLNKGAKKAKADPNNMDGDMDNNEQGAGEAPAAEGGARAAGGAGGGGGGGPSGNHGVGISTGGWIGGSILNNNRIITKNTRQWWCPIRNQHKYKRYTGYNEGGTSYTMEGYTTPWNMFNFNQYSSHFNPHEWQWLVNRAARFRPVKMEVKIYNLQIKQESTLDNNAQYTNDLTAGLHVLCDGQHAFPWTQLPWDKGCMPELPHEVWALQQYAYITVSSQSQDTSSSGDEMAIRKMVPMYLLEETDHAVIRTGESIVFHHSFDCGWVDNTHSSNMPQLA…	687	USER	zzz1984
1328		genbank_parvoviridae_AGS15087.1_@3KIC_N	parvovirus_cap	genbank	MSLKRGQFRGLLFPGYNYLGPFNPLENGDPVFNADEAAQNHDQAYNKYINKGLNPYLKFNKGDQDFIDSLQSDSSVGGNFARAVFHLKKQIAPALNEPKDTGEPPAKKDKRAGNKRHLYFARLNKGAKKSKADNNNMDGDLGDNEQGAGEAPAAAGGERAGGGGGAIGGGGGGNNHGVGISTGGWIGGSILGHNTIITRNTRQWWCPIRDNHLYKRYTTHNKNGTDFKLEGYTTPWNMFNFNQYSSHFNPNEWQWLINRAKRFRPKRTQIKIYNLQIKQESTQDATAQYTNDLTAGLHVLCDGEHAFPWTQLPWDQGCMPELPHDIWKLQQYAYITVVAGAQDSVNNGDELNIRCAVPMYLLEETDHAVIRTGESIVFHHTFDCGWVDNTRSSITPQMA…	684	USER	zzz1985
1327		genbank_parvoviridae_AGS15071.1_@3KIC_N	parvovirus_cap	genbank	MSLKRGQFRGLLFPGYNYLGPFNPLENGDPVNKADEAAKKHDQAYNNYINKGLNPYLKFNKGDQDFIDSLQSDSSVGGNFARAVFHIKKQIAPALNEPKDTGEPPAKKDKRAGNKRHLYFARLNKGAKKAKADPNNMDGDLGDNEQGAGEAPVDGGGERSAGGGGAAGGGGGGGNHGVGISTGGWIGGSILGNNKIITRNTRQWWCPIRNEHKYKQYNACNTGGATFNMEGYSTPWNMFNFNQYSSHFNPHEWQWLVNRASRFRPVRMEVKIYNLQIKQESTQDANAQYTNDLTAGLHVLCDGEHAFPWTQLPWDQGCMPELPHEVWELPQYAYLTVSSQSQDTKNSGDEPAIRKMVPMYLLEETDHAVIRTGESIVFHHAFDCGWVDNTHCSNMPQLA…	687	USER	zzz1986
1326		genbank_parvoviridae_AGS15079.1_@3KIC_N	parvovirus_cap	genbank	MSLKRGQFRGLLFPGYNYLGPFNPLENGDPVNKADEAAKKHDQAYNNYINKGLNPYLKFNKGDQDFIDSLQSDSSVGGNFARAVFHLKKQIAPALNEPKDTGEPPAKKDKRAGNKRHLYFARLNKGAKKAKADPNNMDGDLGDNEQGAGEAPVEGGGERSAGGPGGGGGGGGGGGNHGVGISTGGWIGGSILGNNKIITRNTRQWWCPIRDGHKYKQYNKWEQSGAAIHMMGYTTPWNMFNFNQYSSHFNPNEWQWLLNRAKRFRPVKMEVKIYNLQIKQESNRGPVKQYTNDLTAGLHVLCDGEHAFPWTQLPWDKGCMPELPHEVWALPQYAYLTVASQTQDTTTNGDEVAIRSAVPMYLLEETDHAVIRTGESIVFHHSFSCGWVDNTRSSNMHQL…	686	USER	zzz1987
1325		genbank_parvoviridae_AGS15068.1_@5URF_n	parvovirus_cap	genbank	MSSGGDPSEDTGAGDGEQGGESSTMGGRSGGGMGGGGGGGGSVGFSTGGWEGGTYFSDHTVTTTNTRQWYTGILNGHRYSKLAQTTGSNLQAAKPWVGIQTPWAYLNLNCYHCHFSPQDWQRLLKEYKAWRPKRMHVRIYNLQIKQITTVGADTLYQNDLTAGVHIFCDGSHQYPYAQHPWDEGASPELPNEIWKLPQYAYFQYQGDLTDHATANTPQNVESMLRSNIPLFLLENSNHEVLRTGEMTEFSFTFQSGWVTNDRAYCCPQADFNPLVQTRRYYPTWNGSSNSYSYNRYGPYKKPSNWMPGPGLAYKGATHTNQNPDDARGPIVTTIAPRGTISVGSTPSNDAPNDGDNAISSDGVKQGGWQTAPVNGACSRTNYPTLAFDPSDRSTNQNIP…	567	USER	zzz1988
1324		genbank_parvoviridae_AGS15063.1_@4IOV_A	parvovirus_cap	genbank	MAPTNRKPGGWVLPGHRYLGPFNPIENGEPVNAADAAARRHDLKYDQYLKEGKNPYLYFNKADSDFLEDLESDRSFGGWIGKGVFGLKRAIAPTLDESSGKQNTGGPSAAKKPRVDPQRAQKRKLYFARQAKEAKKQKMSSGGDPSEDTGAGDGEQGGESSTMGERSGGGTSGGGGGGGGGSVGFSTGGWEGGTYFSDHTVTTTNTRQWYTGILNGHRYSKLAQTTGSNLQATKPWVGIQTPWAYLNLNCYHCHFSPQDWQRLLNEYKAWRPKRMHVRLYNLQIKQITTVGADTLYQNDLTAGVHIFCDGSHQYPYAQHPWDEGASPELPNEIWKLPQYAYFQYQGDLTDHATANTPQNVESMLRSNIPLFLLENSNHEVLRTGEMTQFSFTFQSGWVT…	706	USER	zzz1989
1323		genbank_parvoviridae_AGS15059.1_@3KIC_N	parvovirus_cap	genbank	MSLKRGQFRGVLFPGYNYLGPFNPLENGDPVNKADEAAKKHDQAYNKYINKGLNPYLKFNKGDQDFIDSLQSDSSVGGNFARAVFHIKKQIAPALNEPKDTGEPPAKKDKRAGNKRHLYFARLNKGAKKAKADPNNMDGDMGDNEQGAGEAPAAEGGARAAGGPGGGGGGGGPSGNHGVGISTGGWIGGSILGHNRIITKNTRQWVCTIQNEHRYKQYTQWSQGSTNVKMQGYTTPWNMFNFNQYSSHFNPNEWQWLVNRASRFRPVRMEVKIYNLQIKQESTQDATAQYTNDLTAGLHVLCDGEHAFPWTQLPWDKGCMPELPHDIWELPQYAYITMPSQAQDTDNEEERTFRCAIPMYLLEETDHSVIRTGESVIFHHSFDCGWVNNTRCSNMPQLA…	688	USER	zzz1990
1322		genbank_parvoviridae_AGS15055.1_@3KIC_N	parvovirus_cap	genbank	MSLKRGQFRGLLFPGYNYLGPFNPLENGDPVNKADEAAKKHDQAYNNYINKGLNPYLKFNKGDQDFIDSLQSDSSVGGNFARAVFHLKKQIAPALNEPKDTGEPPAKKDKRAGNKRHLYFARLNKGAKKAKADPNNMDGDLGDNEQGAGEAPVEGGGARSAGGGGAIGGGGGGGNHGVGISTGGWIGGSILGKNKIITRNTRQWWCPIRDGHQYKQYTQYDPGGTSFSMMGYTTPWNMFNFNQYSSHFNPNEWQWLLNRAGRFRPVKMEVKIYNLQIKQESTMDNNAQYTNDLTAGLHVLCDGEHAFPWTQLPWDKGCMPELPHEVWALPQYAYITVASQTQDTTNNPDEVAIRCMNPMYLLEETDHAVIRTGESVTFHHNFDCGWVDNTHSSNMHQLA…	682	USER	zzz1991
1321		genbank_parvoviridae_AGS15051.1_@4IOV_A	parvovirus_cap	genbank	MAPTNRKPGGWVLPGHRYLGPFNPIENGEPVNAADAAARRHDLKYDQYLKEGKNPYLYFNKADSDFLEDLESDRSFGGWIGKGVFGLKRAIAPALDESSGKQNTGGPSAAKKPRVDPQRAQKRKLYFARQAKEAKKQKMSSGGDPSEDTGAGDGEQGGESSAMAGRSGGGAGGGGGGGGGGGSVGFSTGGWEGGTYFSDHTVTTTNTRQWYTGILNGHKYSKLAQATSSDTQAALPWTGIQTPWAYLNLNCYHCHFSPQDWQRLLNEYKAWRPKRMHVRIYNLQIKQITTLGADTLYQNDLTAGVHIFCDGSHQYPYAQHPWDEGASPELPNEIWKLPQYAYFQYQGDLTDHTTVQTAQNVERMLRSNVPLFLLENSNHEVLRTGEMTEFTFNFKCGWV…	708	USER	zzz1992
1320		genbank_parvoviridae_AGS15040.1_@3KIC_N	parvovirus_cap	genbank	MSLKRGQFRGLLFPGYNYLGPFNPLENGDPVNKADEAAKKHDQAYNNYINKGLNPYLKFNKGDQDFIDSLQSDSSVGGNFARAVFHLKKQIAPALNEPKDTGEPPAKKDKRAGNKRHLYFARLNKGAKKAKADPNNMDGDMDNNEQGAGEAPAAAGGERSAGGRGAIGGGGGGNNHGVGISTGGWIGGSILGHNTIITRNTRQWWCPIRDNHLYKRYQGFNKNGSDYKMEGYTTPWNMFNFNQYSSHFNPNEWQWLINRAKRFRPKRMEVKIYNLQIKQESTQDATAQYTNDLTAGLHVLCDGEHAFPWTQLPWDQGCMPELPHDIWMLQQYAYITVAAHTQDSTENGNELNIRGGVPMYLLEEMDHAVIRTGESITFHHTFDCGWVDNTRSSVMPQAA…	684	USER	zzz1993
1319		genbank_parvoviridae_AGK45557.1_@3J1S_A	parvovirus_cap	genbank	DDEDLVARQQAAQSGAEGTGSSAPAANPDLGPTTMSGGGGAPMADDQQGADGVGTSSGNWHCDSTWLDNRVITKSTRTWSLPTYNNHLYNKIASTTTSGNGTWFGFSTPWGYFDFNRFHCHFSPRDWQRLINNNWGIRPKKMHVKLFNIQVKEVTTQDSTTTITNNLTSTIQVFADTEYQLPYVAGNAHEGCLPPFPADVFMLPQYGYCTLQNENTNEPVPQSAFYCLEYFPSQMLRTGNNYAISYSFEDVPFHSMYMHNQSLDRLMNPLIDQYLWYLTSTTNNANTFGKSTKEDLPRQNRNWLPGPAFQTAAYNLNGQGNFASSTHWNYLNKYSLNGRQAAIGPGPVVAPNDATFQSNGMIFAKNADTPATSAPQDTVNITSESETSTVNPRMGINPL…	559	USER	zzz1994
1318		genbank_parvoviridae_AGK45553.1_@5URF_n	parvovirus_cap	genbank	TGNTTEVYYDYKKPSNWMPGPGTRFNGNQSGSNLKTAAGPFNTSWAPPGVNQGSDTTYMGSAALQQSQWGAKSMPTTPANAACSQVDGNQLAFNEPLQIGQTGDNNLRYNNISNDLSRWGTVWSQSQASYAAQPTQTRLDTVWQYPMQAWNGQEVTRYAPIWDKQPNTDFHTTLSSSDGTLPMKHPPGNIFIKVAKIPIPTESNEDSYLNIYCTGQISIEIEWDAEEYETKNWRPELRITSSNIGRGVYNISSTGEYNTTGNQYSNMPTR	270	USER	zzz1995
1317		genbank_parvoviridae_AGK45550.1_@4G0R_A	parvovirus_cap	genbank	MAPPAKRARRGWVPPGYKYLGPGNALDQGEPTNPSDAAAKEHDEAYSKYLESGKNPYLYYNPADATFIDKTKDAKDWGGRLGHYFFRVKRAIAPSLPDQPGPSSGKRRKPPAHIFINRARKRKTKPDWRTRDKMFNKTLDSLLMQSGASISGGGSSGGGGGGGSRGGGVGVSTGSYLNTTQFKYVGNGMVEITAHSTRLVHLNMPDSEKYRAVVVNNNDVTAGAAGKGNMVKDDAHYQMVTPWSLVDCNAWGVWFNPGDWQLIVNQLESLELVSLEQDVFNVVLKTVTQQSSDPNAIKLYNNDLTASLLVALDSNNVLPFTPAAIRSETLGFLPWQPTIPTQWRYYLHAEHQVVPSYSTQTNNPTQTFNRGAESVQFYPVESLVPIEMLRTGDEFSTGT…	716	USER	zzz1996
1316		genbank_parvoviridae_AGJ52193.1_@3KIC_N	parvovirus_cap	genbank	MSHKRGQFHGLLFPGYNYLGPFNPLENGDPVNKADEAAKKHDQAYNNYINKGLNPYLNFNKGDQDFIDSLQSDSSVGGNFARAVFHLKKQIAPALNEPKDTGEPPAKKDKRAGNKRHLYFARLNKGAKKAKTDPNDMDGDMGDNEQGAGEGPAEAGAAAPASLTGGGGGGGGGGGNHGVGISTGGWIGGSILGNNTIITRNTRQWWCPIRNEHKYKQYNQWQSGNTNMHMMGYTTPWNMFNFNQYSSHFNPNEWQWLLNRAKRFRPKRMEIKIYNLQIKQESSQDTTAQYTNDLTAGLHVLCDGEHTFPWTQLPWDKGCMPELPHEVWQLQQYAYLTVASQTQDSESTNPDEAAIRCTVPMYLLEETDHAVIRTGESIVFHHSFDCGWVDNTHSTNMHQ…	685	USER	zzz1997
1315		genbank_parvoviridae_AGI97022.1_@1K3V_A	parvovirus_cap	genbank	MSDGAEQSDSGSAVQSAARVERAADGPGGSGGGGSGGGGVGVSTGSYDNQTHYRFLSDGWVEITAYSTRMVHLNMPKSENYCRVRVHNTADTHTAGQMALDDAHEQIWTPWSLIDSNAWGVWFQPSDWQFICNNMSHVNLHSLDQELFNVVIKTVTEQNTGAEAIKVYNNDLTASMMVALDSNNILPYTPATDNQETLGFYPWKPTMPSPYRYYFNCDRSLSVTYADQTGQITDTMANASGMSSQFFTIENTQRIQLLRTGDEFATGTYYFETEPIKLSHTWQTNRQLGQPPQITDLPSTDNENATLVARGDRSGVTQIFGSNDVTEATRIRPAQVGFCQPHDNFETGRAGPFKVPVVPANITQGQAHDANGSLRYTYDKQHGQNWGSNNTKERFTWDA…	587	USER	zzz1998
1314		genbank_parvoviridae_AFX61310.1_@3KIC_N	parvovirus_cap	genbank	MSKKSGKWWESDDKFAKDVYKQFVEFYEKVTGTDLELIQILKDHYNISLDNPLENPSSLFDLVARIKSNLKDSPDLYSHHFQSHGQLSDHPHALSPSSSHTEPRGEBAVLSSEDLHKPGKLGNKLHGTNYVKPGNELQAGPPQSAVDSAARIHDF	155	USER	zzz1999
1313		genbank_parvoviridae_AGI97017.1_@1K3V_A	parvovirus_cap	genbank	MSDGAEQSDSGSAVQSAARVERAADGPGGSGGGGSGGGGVGVSTGSYDNQTHYKFLGDGWVEITAYSTRIVHLNMPKSENYCRVRVHNKNDTDVAGQMALDDAHEQIWTPWSLIDSNAWGVWFQPSDWQFLCNNMSHMNLHSLDQELFNVVIKTVTEQNPGPDAIKVYNNDLTASMMVALDSNNILPYTPATDNQETLGFYPWKPTLPSPYRYYFNCDRDLSVTYANQTGTITNRMAAASGMSSQFFTIENTQRIQLLRTGDEFATGTYYFETEPIKLSHTWQSNRQLGQPPQITELPTSDNDTATLVARGGRSGVTQIYGSNAVTEATRVRPAQVGFCQPHDNFGTSRAGPFKVPVVPANVTQGNEHDANGSLRYTYDKQHGQDWGSNNSKERFTWDA…	587	USER	zzz2000
1312		genbank_parvoviridae_AGA15927.1_@3KIC_N	parvovirus_cap	genbank	MSFVDHPPDWLEEVGEGLHEFLELEAGPPKPKPNQQKQDNARGLVLPGYNYLGPFNGLDKGEPVNRADAVAREHDISYNEQLQAGDNPYLKYNHADAEFQEKLKDDTSFGGNLGKAIFQAKKRVLEPFGLVEAPVKTAPAKKRPIEKSPAEPSSSKGIGKAGQQPARKRLNFGQTGDTDSAADPQPLGEPPAAPSGLGTGTMASGGGAPMADNNEGADGVGNASGNWHCDSTWLGDRVITTSTRTWALPTYNNHLYKQISSSNYGANNDNHYFGYSTPWGYFDFNRFHCHFSPRDWQRLINNNWGFRPKRLNFKLFNIQVKEVTETDGTKTIANNLTSTVQVFADSEYQLPYVLGSAHQGCFPPFPADVFMIPQYGYLTLNNGSQAMGRSSFYCLEYFP…	727	USER	zzz2001
1311		genbank_parvoviridae_AGA15925.1_@3KIC_N	parvovirus_cap	genbank	MSFVDHPPDWLEEVGEGLHEFLELEAGPPKPKPNQQKQDNARGLVLPGYNYLGPFNGLDKGEPVNRADAVAREHDISYNEQLQAGDNPYLKYNHADAEFQEKLKDDTSFGGNLGKAIFQAKKRVLEPFGLVEAPVKTAPAKKRPIEKSPAEPSSSKGIGKAGQQPARKRLNFGQTGDTDSAADPQPLGEPPAAPSGLGTGTMASGSGAPMADNNEGADGVGNASGNWHCDSTWLGDRVITTSTRTWALPTYNNHLYKQISSQSGANNDNHYFGYSTPWGYFDFNRFHCHFSPRDWQRLINNNWGFRPKRLNFKLFNIQVKEVTQTDGTKTIANNLTSTVQVFADSEYQLPYVLGSAHQGCFPPFPADVFMVPQYGYLTLNNGSQAMGRSSFYCLEYFPS…	726	USER	zzz2002
1310		genbank_parvoviridae_AGA15926.1_@3NTT_A	parvovirus_cap	genbank	MSFVDHPPDWLEEIGEGLKEFLGLEPGPPKPKPNQQKQDNARGLVLPGYNYLGPGNGLDRGEPVNRADEVAREHDISYNEQLQAGDNPYLKYNHADAEFQEKLADDTSFGGNLGKAVFQAKKRVLEPFGLVEDPVKTAAKGERIDDHYPKKKKARVEETEAGTSGAQQLQIPAQPASSLGADTMSAGGGSPLGDNNQGADGVGNASGDWHCDSTWMGDRVITKSTRTWVLPSYNNHLYKEIHNNGVDGSTANAYFGYSTPWGYFDFNRFHSHWSPRDWQRLINNYWGFRPRSLKVKIFNIQVKEVTVQDNTTTIANNLTSTVQVFTDNDYQLPYVIGNGTEGCLPAFPPQVFTLPQYGYATLNRNNSENPTERSSFFCLEYFPSKMLRTGNNFEFTYSF…	716	USER	zzz2003
1309		genbank_parvoviridae_AGF85785.1_@4IOV_A	parvovirus_cap	genbank	MAPIARKPKGWLFPGYKYLGPFNPLDNGEPVNKADSVAREHDLAYSKYLEAGKNPYLNFNKADQKFIDDLKGDSSIGGFVGKSVFTLKKHLFPHLKEVAPPSKKPRTDSRAEKRKLYFARSNKPAKQPKMSNDGSSMEGASDQTEGAGRSRVARSAGGGYGGHGVGVSTGGWVAGSIFTDTVVITTNTRQWYAPIYDGHKYKQIIASDNGATGSDWLGMATPWGFFNFNCYASHFSPQDWQRLTNEYKKWRPVKMTVKLYNLQIKQIVNLGNDILYNNDLTAGVHILCDGSHKFPYSQHAWDTSTMPELPYEIWKLPQYAYYQTNADLDTKTGSDAVTNPHLVAKNIKFAQPLYILESEEHAVLRTGEDASFNFSFECGWVHNDRCYCPPQADFNPLTN…	689	USER	zzz2004
1308		genbank_parvoviridae_AGA19594.1_@5URF_n	parvovirus_cap	genbank	STNNKTVTNENQMRPYQKHGPWWPGPGYRDNRNTSENGTQGNTVLGPYISVWKPDGVAYDGSTVKYGTATGPYTGGQSSDITSGNSHNNANQFRFTPGDGPGGSNNHNYFIRRSSAQTGTRDQALYRATGTSTTEEARVYMMPNQMWDSAPINRYNPIWVKVPRVDRHTLLDTEDGTLPMTHPP	184	USER	zzz2005
1307		genbank_parvoviridae_AGA19588.1_@4G0R_A	parvovirus_cap	genbank	MAPTNRKPGGWVLPGHRYLGPFNPIENGEPVNAADAAARRHDLKYDQYLKEGKNPYLYFNKADSDFLEDFESDRFSAGGSERACLDSNERSHRRSTSPRANRTRGDLRRPRSRGSILRGRRSASSTLPDRPKRPRNKR	138	USER	zzz2006
1306		genbank_parvoviridae_AFV25463.1_@4G0R_A	parvovirus_cap	genbank	MAPPAKRARGLTLPGYKYLGPGNSLDQGEPTNPSDAAAKEHDEAYDKYIKSGKNPYFYFSAADEKFIKETEHAKDYGGKIGHYFFRAKRAFAPKLSETDSPSTSQQPEVRRSPRKHPGSKPPGKRPAPRHIFINLAKKKAKGTSNTNSNSMSENVEQHNPINAGTELSAAGNESGGGGGSLIDANAWGVWFNPADWQSISNNMTEINLVSFEQEIFNVVLKTITKSATSPPTKIYNNDLTASLMVALDTNNTLPYTPAAPRSETLGFYPWLPTKPTQYRYYLSCTRNLNPPTYTGQSQQITDTIQTGLHSDIMFYTIENAVPIHLLRTGDEFSTGIYHFDTKPLKLTHSWQTNRSLGLPPKLLTEPTTEGDQHTGTLPAANTRKGYHQTTNNSYTEATA…	562	USER	zzz2007
1305		genbank_parvoviridae_AFV67812.1_@4G0R_A	parvovirus_cap	genbank	MAPPAKRARRGWVPPGYKYLGPGNDLDQGEPTNPSDAAAKEHDEAYSKYQASGKNPYLYFSPADQRFIDQTQDAKDWGGRIGHYFFRAKKAIAPTLTDSAGKSGPSGVARPGKRSKPPAHIFVNLAKAKKKRASLAAQQRTQTMSDGGEQQQDNAAQSAARVERAADGSGGSGGGGGGGNGGVGVSTGSFDNQTHYDFLGGGWVRITAYASRLVHINMPASEEYHRIFVRNNTDTGQKGKMSLDDVHTQIWTPWSLVDANAWGCWFQPSDWQFIQNSMAELNLETFEQEIFNVVLKTVTEQNSGGADAIKVYNNDLTASLMVALDSNNSLPYTPAAATSETLGFYPWKPTAPAPYRYYFYVPRNLSVTYTNDTDAVVDQVNQTDPYNSRFLTIENTTPI…	732	USER	zzz2008
1304		genbank_parvoviridae_AET35105.1_@3NTT_A	parvovirus_cap	genbank	DVGVHLVSDSRDEGADSLVEPDLERPAGGGLTLPGYNYVGPGNPLDSGPPQGPVDEAAKHHDEXXXXXXXXXXXXXXXXXXXXXXXXXXXXXXXXXXXXXXXXXXXXXXXXXXXXXXXXXXXXXXXXXXXXXXXXXXXXXXXXXXXXXXXXXXXXXXXXXXXXXXXXXXXXXXXXXXXXXXXXXXXXXXXXXXXXXXXXXXXXXXXXXXXXXXXXXXXXXXXXXXXXXXXXXXXXXXXXXXXXXXXXXXXXXXXXXXXRDFQQLLDEYDEIKPKSLTIAISAIVIKDVATNQTGTTVSDSASGGITVFADDSYDYPYVLGHNQDTLPGHLPGENYVLPQYGYITRGREIDQQNSIVAISDHKTELFFLEHHDAECLGTGDHWSHHYEFPDDLPWRKLST…	423	USER	zzz2009
1303		genbank_parvoviridae_AET35081.1_@3KIC_N	parvovirus_cap	genbank	IPVGPEPSSQANRGGGPYQTHFAIGIMYSKAFQGLLRFANALPSELSPVKQLVNQLENYRRKTSDTRVWYRVYLDMTRLLISVAPPGAANKLRQAAAGITHSKAPNAESLRGIVRFAAAAFVPTVENIDRFFEDSLTNFAKEDLDTWQQLHEQFIKLFHPPXXXXXXXXXXXXXXXXXXXXXXXXXXXXXXXXXXXXXXXXXXXXXXXXXXXGPVDEAAKHHDERYAEMIEYGDIPYLHGHGADRLMNKELEEKERRGDISHLADVVVGNA	271	USER	zzz2010
1302		genbank_parvoviridae_AFS68725.1_@5URF_n	parvovirus_cap	genbank	FANSNKGAKKTNTCECKLRTSQMSNSDIEDQQPDTVDAPQNTSGGGTGSIGGGKGSGVGISTGGWVGGSHFSDKYVVTKNTRQFITTIQNGHLYKTEAIETTNQSGKSQRCVTTPWTYFNFNQYSCHFSPQDWQRLTNEYKRFRPKAMQVKIYNLQIKQILSNGADT	167	USER	zzz2011
1301		genbank_parvoviridae_AFN44278.1_@6BX1_F	parvovirus_cap	genbank	MPAIRKARGWVPPGYNYLGPFNQDFSKKPTNPSDKAARKHDLEYNKLIKQGHNPYWNYNHADEDFIKETDQATDWGGKFGNFVFRAKRALAPELAPPAKKKTKTKHTEPEYSHKHIKAGTKRGKPFYLFVNLARKKARMSESNEIGEPEPDATPLEGGAGKGSGGGGGGGSGVGHSTGDYNNRTEFIYHGEKVTIICHSTRLIHINMSDMEEYRIYDTDRGPLFPTTQDLQGRDTINDSYHAKVETPWKLLHANCWGVWFSPADFQQLITTCREIKPSEFEQKIENIVIKTVSKTGAGEQETTQYNNDLTALLQVAQDNSNLMPWAADNFYIDSVGYVPWRASKLPTYCYHVDTWNTIDINQADRPNQWREIRKGIQWDNIQFTPLETMINIDLLRTGD…	707	USER	zzz2012
1300		genbank_parvoviridae_AEZ53135.1_@3KIC_N	parvovirus_cap	genbank	MSHKRGQFRGLLFPGYNYLGPFNPLDNGDPVNKADEAAKKHDLAYNKYINKGLNPYLNFNKGDQDFIDSLQSDSSLGGNFAKAVFHIKKQVAPALNEPKDTGEPPAKKDKRAGNKRHLYFARLNKGAKKAKADNNNMDGDMDNNEQGAGEGPAPDGGGGARAGGGAGGAAGGGGGGGNHGVGVSTGGWIGGSILGQNRIVTRNTRQWLCTIKDNHLYKQYTNWNLGNTNVHMQGYTTPWSMFNFNQYSSHFNPNEWQWLVNRAKRFRPVRMTVKIYNIQIKQESNQDVTAQYTNDLTAGLHVLCDGEHAFPWTQLPWDKGCMPELPHSIWNLQQYAYITVASQAQDTTDNANELNIRCAVPMYLLEETDHAVIRTGESIAFHHEFDCGWVDNTRSAAMH…	687	USER	zzz2013
1299		genbank_parvoviridae_AFM30850.1_@3NTT_A	parvovirus_cap	genbank	MTAADAFKPGQPFPLDTLMEKLTPDVGPEPSSWSRRMGGGYLASLGTALVFKQAFCHVDKFISKLPAKVYPVKQFAQQLMNYRRKSTDIKTIGRLFMDQVRLLILVAPEPAKAKLRQSALNLGDLHRPPNPAVLLDLHKFAKDAVVPSAEDIKIFFEESVSPWSEEDNKILKQIEGQFQEIFHPPTDTEDGADSYGGNSGQGTGSLSEPDLERAPERAGILVRGYNYVGPGNPMDNAPAKGPVDDAAKHHDEGYDEMLRHGDLPYIHGRGADRLMNKEIERPEQEGYIDNPVDALVGNAIRGIWEAKETLGDIADVQLSQVLPRDPPTSQLLPGSSEDAASPKRQRAGTPDSVPTPGNPSPAPIADPATIMAAAVTGATGRGIKVKAQWLGGTHFSDNT…	925	USER	zzz2014
1298		genbank_parvoviridae_AFK91983.1_@1DNV_A	parvovirus_cap	genbank	MSSYTSGLRYRGRTGYRIIPESSTTEDIELGTIGEETPLLNESAAIAAEEGAAIGAPELAVGLVGALGTHANVLYRNRNAFKSVLTGNYTDLKGNPIKQKNPIPEKIKQLGKGIFQGDFNRAFPDDLKLESEQEKNDLLRYYNHNRRLAGLSEAYPQGKGYAYAKSQKVLEAEKRGLTVPGYKYLGPGNSLNRGQPTNQIDEDAKEHDEAYDRAKTSQEVSDADNTFVNKALDHIVNAINLKETPGNAFGAAIGAIGIGTKQAIEKHSGVIYPSVSGMSRQINPYYLNTWADWIKENQHNNFEGIQLPKDFYTEDQPLSDSSMSEATKRKADTPAEEGPSKKGAHNTNINSQNTNPQNPSSSGATTDLDVTMAMSLPGTGSGSSSGGGNTQGQEVYVIP…	811	USER	zzz2015
1297		genbank_parvoviridae_AEW46974.1_@5URF_n	parvovirus_cap	genbank	SYDVQTMPLTLTPKGSGYRDHRNTIENGTNGNTGLGPYFNVWKPEGVSYTSSAVKYGVPTGPYTGGQSSDNVGGSANNNANVTRFTPGDGPGGANNSNFFIQRSSVQTGTRDQALYKATGQTTSEEARVGMMPNQMWDSAQICRYNPIWTKIPRVDRHTLLDTEDGTLP	169	USER	zzz2016
1296		genbank_parvoviridae_AFD01618.1_@3NTT_A	parvovirus_cap	genbank	MTAVDAVRPGEKLPLDTLMMKMQKAFNVGPEPSKPGIRGGGGYQSELALGIVYSKAFAALQRYAGALPTHLFPVKQLAXQLENMRRQTTDMRKWYRIYLDMTRLLITVSSEPARKKLRAAATNXAHNKAPNAEILRGITRFSGTAHAPXIEDTINFXQDSVTPTTKEEHEIWQQVMGQFMDIFHLSTADGGVSDISDLRGEGADPISEPDLERPPGGGLTVPGYNYVGPGNPLDSGPPQGPVDEAAKHHDERYAEMLEHGDIPYLHGHGADRLMNKELEEKERRGDISHLADVVLGNAIRGLWQAKETAGDVADVQLSQVLPPDPPTSHQQQAYSGGEPPSKKAKTGTPSDSQHSLPVSNKEQEQPLLLPTHTNQMSVENGGTGGGGGGVKVKAQWIGG…	889	USER	zzz2017
1295		genbank_parvoviridae_AFD01611.1_@3NTT_A	parvovirus_cap	genbank	DSGPPQGPVDEAAKHHDERYDEMLKHGDLPYIHGHGADRLMNKEIEEKEKKGEVTDLSDKLLGNAIRGIWQAKETVGDIADVQISQVLPPDPPSSHQPAAYSGGEPPAKKARTGTLDDSESSLLLQAHPATMSVEAGGGAGGGVKVKAQWIGGTSFSDTFIITSHTRTSMLADRGGYVPVYKQGSHLDSTQPVMGMKTPYSYIDVNALSAHLTPRDFQQLLDEYDEIRPKSLTISISAIVIKDVATNTTGTTVSDSASGGITIFADDSYDYPYVLGHNQDTLPGHLPGENYVLPQYGYITRGREIEQNGNIVAISDHKTELFFLEHHDAECLGTGDSWSHSYNFPSDLPFRKLSTPNQTLYARHNPIPASRLAIMTGVDTEGKAIWRRPGGLDVGRLPL…	666	USER	zzz2018
1294		genbank_parvoviridae_AFD01603.1_@3KIC_N	parvovirus_cap	genbank	MSAADAYRPGGKLPLDELMQKMNRAVPVGPEPSQPANRGGGSYQTHFAIGIVYSKAFQGLLRFANALPPELSPVKQLVNQLEVYRRKTSDTRVWYRVYLDMTRLLISVAPPGAANKLRQAAANISHTKAPNAETLRGIVRFAAAATVPTVADIDSFFQDSLTDFSNEDLDTWQQLHEQFIQLFHPPDVGVHLVSDSRDEGPDSIVEPDLERPAGGGLTLPGYNYVGPGNPLDSGPPQGPVDEAAKHHDERYAEMIEHGDIPYLHGHGADRLMNKELEEKERRGDITHLADVVVGNAIRGLWQAKETVGDIADVQLSQVLPPAPPTSDQQPAYSAGEPSPKKARTGTPEESETPVLLQPNTNTMSVEPAGGGGGVKVKAQWVGGTSFSDSLVITSHTRTS…	704	USER	zzz2019
1293		genbank_parvoviridae_AFH02760.1_@1DNV_A	parvovirus_cap	genbank	EATSIMTNVSTQLPNFEIYTPIEKSQFGRSGFWDLPEPHIQPSLHVGVQPVPALSTSATLLEDAQFNNWTDTRAYWEVIATMIVDEHTPTEWPLASTANVPAGETVQWLPLNNRPVVNIDPRNDGATFAGLYTTSVLPIS	140	USER	zzz2020
1292		genbank_parvoviridae_AFH02758.1_@1DNV_A	parvovirus_cap	genbank	APAEASEPVGEADLPSGSGTAGPAPVIEDIEMNLPGTAKGTASGGASSDGQVVHYIERPLSNFGKKISVYKKSHKFMTFGLASVFLPGSDELNQNVFLSTHLAEIPWHCPALYLNQSEFDLIPVGSQIKEVRVMAIYRGSAIQFETNQTATSLATL	156	USER	zzz2021
1291		genbank_parvoviridae_AFH02757.1_@3P0S_A	parvovirus_cap	genbank	QPNSFLLHFKKSYHFMFKPGLPQRRAVSLPVNVNEKGRGFEEWRGSIYAIPWHDIRMYCSLREYEMLRTQFTNVKVESCRVVTTNMGVRLPFVTGQTVSTVANANAQYPIADFYNVNKDYACKLYQDGIDDFLKKCVGTPEIVTGDVPSSAAPAAWTNEFTNL	163	USER	zzz2022
1290		genbank_parvoviridae_AFH02755.1_@4MGU_A	parvovirus_cap	genbank	QTHHFLTYGIAPKILPIPGQTVQDPPIPKGVALVTSLAEIPWDRVFFYLSPGEQNAIVAQCPGARISKVEVTISQLNARVAFESNSTDASLATLNQNKFSVYAKGLNNRNGIKFTSMGVNITASGGDNAMIPSSIEFPDYAALDKNLYGVANNDVAFSNTIPASELGMPLALDKYACLWNYDQSAAGTTPL	191	USER	zzz2023
1289		genbank_parvoviridae_AFH02753.1_@4MGU_A	parvovirus_cap	genbank	GTSLPGTGGQLDGMAKGGSGGSSGGPTNVFRPIGLHVGKIERTYIKKWRFLTSANANVILSEKLVSPARERWVLTTGMANIPWEYLFFYMSPAEYERMKDYPGTFATQCNVKIKSWNTRVAFQTGDTQTANATLNQNKFLQIAKGIRSISYIQSANRKYNYSTTEPMLPTGMSSETSHKYRQNLTKAMYGLSNENADFSKNVPAHVTGAEIYLQDYLSIYTPKTTTKAEYGFPAIKDYIEEYDASALVDTDILNMSYDFGYAPLTPNFNHVPLNANETVNKVAMGTGVEQIGIKKLTVDGTAVPEQQLDSEKQFV	315	USER	zzz2024
1288		genbank_parvoviridae_AFH02752.1_@1DNV_A	parvovirus_cap	genbank	TLVNTYKKVHKFMTFGFAPSWILDGTLADGNHFLSSYLAEIPWHIPAFYMNPSEFALLGRGSKCLEVSVSVVYRGATIQFETNASTTGLATLNQINDIGVAYALNKTGWGQNVRYTGFKTVGGAQPMIPVSVEAPVYDANSTYRGMIRDYYGSNNDDTNSLNDIPKHQVGRQTFLYNYWANSTRTGTTVPNDSKMYGGVPCLAEKIEQMDGKTVVNQVVAQMTYKPKMAPIKAPLSYYSHGLPWPARNEALTVPCNGNIPELRSASLTAVDAATSKVTPSAAVVQEFA	288	USER	zzz2025
1287		genbank_parvoviridae_AFH02751.1_@1DNV_A	parvovirus_cap	genbank	MKPKPKNPFKNKNKSDKPVDQTRERLKSILGVGISQEFVEWYRQDVGSKGFTTPFMKYQGPGNATNIGEPANEADRFALKHDLQYAHASYKLHKGMITQEQFQNRIKKIDEEFLKNNAMNVTSSMNPGEQIASTIGTVGIGIKYAAERVIGQQYPSTDPTTTYTGVKKQTNTNLTNKLMKILKGNVSKSSDVDQGSSSMEVDKTPVKRPGEPAEGDTPTKKGTATAATPAADPNLPEDMATLTGTGEEQASGGASSEGLVVHYIEKPISIFGHKTTTYKKSHKFMTFGLAPNIIPTTTIEQANFALTSYLAEIPWHIPALYLNPSEFKLIPDGSKIVEVSVEVIYRGSTIQFETNASSTGLATLNQINDIAVAHGLNRTGWGSNIRYSAFNATQPMIPT…	544	USER	zzz2026
1286		genbank_parvoviridae_AFH02750.1_@4G0R_A	parvovirus_cap	genbank	DQAALIHDFGYNQLQKEGVNPYLVYNEHDEQFLKDLEGDKSYAGWGAKKLFELKKYIAPHRPAKEAAKERITDHFKATKRGGPSKDKDQARRGHFANEAIKRRRLNEDENNQRDRDNMDDGNNAEMQDANVDATAGGGDAGGGGG	145	USER	zzz2027
1285		genbank_parvoviridae_AFH02748.1_@3J1S_A	parvovirus_cap	genbank	FMLPQYGYLTLNGPGTNNNNLSTPSSAFYCLEYFPSQMLRTGNNFVFTYEFEKVPFHSMFMHNQALDRLMNPLVDQYLWYLDATNGNNLTFRKAGAKNFPEYFRNWIPGPGCRNQQWNKVGTK	123	USER	zzz2028
1284		genbank_parvoviridae_AFH02735.1_@4MGU_A	parvovirus_cap	genbank	LPGTSGNTDGSMGSSSMVDLEASRGIMPISRGIHVEKFEWTFTKKWKFLSFGVADVILTDDIGTTTAPAKRWALTTSLVNIPWEYAFMYMSVAEFTRLREMTGVFATDCDIRVFQYNPRVAFQTADTTSTQATLNQNKFTRVAKGLRNNPHLFGSDRDYVFAKDEPMKPEGFETNADQYTGQKFRDRLAKQMYGTTTISTNPPTVPAISTGKEMGLLRYYTVYASQTIDSGFPQYNKYCSEFNSMDLVGKQVLSA	255	USER	zzz2029
1283		genbank_parvoviridae_ADH81847.1_@6BX1_F	parvovirus_cap	genbank	DNVLLRTSIHLEVKSGINYTNIFNTYGPLTALNNVPPVYPNGQIWDKEFDTDLKPRLHVNAPFVCQNNCPGQLFVKVAPNLTNEYDPDASANMSRIVTYSDFWWKGKLVFKAKLRASHTWNPIQQMSINVDNQFNY	136	USER	zzz2030
1282		genbank_parvoviridae_ADH81848.1_@6BX1_F	parvovirus_cap	genbank	RIDLLPTDPIGGKTGINYTNIFNTYGPLTALNNVPPVYPNGQIWDKEFDTDLKPRLHVNAPFVCQNNCPGQLFVKVAPNLTNEYDPDASANMSRIVTYSDFWWKGKLVFKAKLRASHTWNPIHQLSINVIP	131	USER	zzz2031
1281		genbank_parvoviridae_ADH81840.1_@6BX1_F	parvovirus_cap	genbank	MPIGGKTGINYTNIFNTYGPLTALNNVPPVYPNGQIWDKEFDTDLKPRLHVNAPFVCQNNCPGQLFVKVAPNLTNEYDPDASANMSRIVTYSDFGWKVISI	101	USER	zzz2032
1280		genbank_parvoviridae_AEW49401.1_@5URF_n	parvovirus_cap	genbank	SPNDWQRLLNNYKKWRPSKMRVQLYNLQIKQVVKLGTDTLYNNDLTAGVHIMCDGSHQYPYSQSGWDSELIPELPGTVYKLPNYCYFQELGDVGDGNADIRETWLGTACPLFFLENTSHEVLRTGEDTTFEFDFDCGWIFNDRAFCPPQCDFNPLVKTRRSRFIWNTSGNSSEPYYNYKKPSNWMPGPGTRLNGNMGGTNLKTSAGAFNTSWAPPGVQQSSGDTAYMGSPALQPVNWPAKSMPTAPANAACSQVDPQRLIYDEPTQTGQTPDASLKYNNISNDLTRWGTVWSQSQTSSSGGTSNNRLDTVWQYPMQAWNGQEVTRYAAIWDKQPNTDFHTTLSSSDGTI	349	USER	zzz2033
1279		genbank_parvoviridae_AEY68759.1_@3KIC_N	parvovirus_cap	genbank	MSLKRGQFRGVLFPGYNYLGPFNPLENGDPVNKADEAAKKHDQAYNKYINKGLNPYLKFNKGDQDFIDSLQSDSSVGGNFARAVFHIKKQIAPALNEPKDTGEPPAKKDKRAGNKRHLYFARLNKGAKKSKADPNNMDGDMGDNEQGAGEAPAAEGGARAAGGPGGGGGGGGPSGNHGVGISTGGWIGGSILGNNRIITRNTRQWVCTIKNDHRYKQYTEWNQGNTRMKMQGYTTPWNMFNFNQYSSHFNPNEWQWLINRAARFRPVRMEVKIYNLQIKQESTQDQTAQYTNDLTAGLHVLCDGEHAFPWTQLPWDQGCMPELPHDVWTLQQYAYITVANHTQDSTDNGNELNIRGGVPMYLLEETDHAVIRTGESITFHHTFDCGWVDNTRSSVMPQA…	660	USER	zzz2034
1278		genbank_parvoviridae_AER30016.1_@3KIC_N	parvovirus_cap	genbank	MSHKRGQFRGLLFPGYNYLGPFNPLENGDPVNKADEAAKKHDQAYNKYINKGLNPYLKFNKGDQDFIDSLQSDSSVGGNFARAVFHLKKQIAPALNEPKDTGEPPAKKDKRAGNKRHLYFARLNKGAKKAKADPNNMDGDMGDNEQGAGEAPAAEGRAGYAGGPGAIGGGGGGNNHGVGISTGGWIGGSILGHNTIITRNTRQWWCPIRDNHLYKRYTSYNKNGADFKMEGYTTPWNMFNFNQYSSHFNPNEWQWLVNRAARFRPVKMEIKIYNLQIKQESTQDQTAQYTNDLTAGLHVLCDGEHAFPWTQLPWDKGCMPELPHDIWELPQYAYITMPMQAQDTDNADERAFRCAVPMYLLEETDHSVIRTGESVVFHHSFDCGWVNNTRCSNMPQLAF…	686	USER	zzz2035
1277		genbank_parvoviridae_AER30012.1_@4IOV_A	parvovirus_cap	genbank	MSLKRGQFRGVLFPGYNYLGPFNPLENGDPVNKADEAAKKHDQAYNNYINKGLNPYLKFNKGDQDFIDSLQSDSSVGGNFARAVFHLKKQIAPALNEPKDTGEPPAKKDKRAGNKRHLYFARLNKGAKKAKADPNNMDGDLGDNEQGAGEAPVEGGGERAAGGGGAIGGGGGGGNHGVGISTGGWIGGSILGQNKIITKNTRQWWCPIRNEHKYKQHHGSTFNLMGYTTPWNMFNFNQYSSHFNPNEWQWLLNRAKRFRPVKMEIKIYNIQIKQESTQETTTAQYTNDLTAGLHVFCDGEHAFPWTQLPWDKGCMPELPHEIWELQQYAYLVVPSATQDTNASNENEKAIRALCPMYLLEETDHAVIRTGESIVFHHTFDCGWVDNTHSTNMTQLAFIN…	683	USER	zzz2036
1276		genbank_parvoviridae_AEM05829.1_@3NTT_A	parvovirus_cap	genbank	TQFWNTVTNANNQAGVTASSTSNTVQIQGQGFMSRPEPAGMTNNTDNSNWVGLDNSMIFNNQTAAPGEGSLLQVNNMLITKENETDPVNPQADKVAGKVASNNQANTVAPTATTVDHQGVLPGAVWMDKDVYLHGPIWAK	140	USER	zzz2037
1275		genbank_parvoviridae_AEM37612.1_@3KIC_N	parvovirus_cap	genbank	MAPTNRKPGGWVVPGFRYLGPFNPLNNGEPVNFVDAAAKAHDQAYQDIIDSGQNPYFSFNKADADFLETLSHDSSVGSWLGRSAFHLKKVLAPHLPQDGGDKPGPSGAKKPRLDPKADRAQKRKLYFARSNRPAKQQKMSNTAETADDVAGPSDPAAEGRAGGANGGGGGMGGGGGHGVGVSTGGWQAGTVFTDNAIITTGTRQWYAPIYNGHLYKRIVPESGVNSNWTGISTPWGYFNFNEYDAHFSPQDWQRLLNEYKRWRPKSMHIKIYNLQIKQVVTLGTDTLYNNDLTAGVHIFCDGSHQFPYSQHPWDVGVMPELPNKVWKLSQYAYFQALNDLIDINPGTSPDVGNLEKHIMKAAPFYVLESASHQVLRTGEETSFTFEFDCGWVTNDRVYC…	718	USER	zzz2038
1274		genbank_parvoviridae_ACJ63472.1_@4G0R_A	parvovirus_cap	genbank	MAPPAKRAKRGWVPPGYKYLGPGNSLDQGEPTNPSDAAAKEHDEAYDQYIKSGKNPYLYFSAADQRFIDQTKDAKDWGGKVGHYFFRTKRAFAPRLASSSEPGTSGVSIAGKRTKPPAHIFINQARAKKKRASLAAQQRTLTMSDGAEQPDSGSAVQSAARVERAADGPGGSGGGGSGGGGVGVSTGSYDNQTHYRFLNDGWVEITAYSTRMVHLNMPKSENYCRVRVHNTNDTSTAGNMTLDDAHEQIWTPWSLIDSNAWGVWFQPSDWQFICNNMSHINLHSLDQELFNVVIKTVTEQNPGTEAIKVYNNDLTASMMVALDSNNILPYTPATDNQETLGFYPWKPTIPSPYRYYFNCDRSLSVTYTNQAGAITDTMATASGLSSQFFTIENTQRIQL…	729	USER	zzz2039
1273		genbank_parvoviridae_ACJ63466.1_@4G0R_A	parvovirus_cap	genbank	MAPPAKRAKRGWVPPGYKYLGPGNSLDQGEPTNPSDAAAKEHDEAYDKYIKSGKNPYLYFSAADQRFIDQTKDAKDWGGKVGHYFFRTKRAFAPRLASSSEPGTSGVSIAGKRTKPPAHIFINQARAKKKRASLAAQQRTQTMSDGAEQPDSGNAVQSAARVERAADGPGGSGGGGSGGGGVGVSTGSYDNQTHYKFLGDGWVEVTAYSTRIVHLNMPKSENYCRVRVHNKNDTSVAGQMALDDAHEQIWTPWSLIDSNAWGVWFQPSDWQFICNNMSHMNLHSLDQELFNVVIKTVTEQNTGPEAIKVYNNDLTASMMVALDSNNILPYTPATDNQETLGFYPWKPTMPSPYRYYFNCDRNLSVTYATETGTITDTMAAASGMSSQFFTIENTQRIQL…	729	USER	zzz2040
1272		genbank_parvoviridae_ABX54669.1_@3KIC_N	parvovirus_cap	genbank	MSKESGKWWESNDKFAKDVYKQFVEFYEKVTGTDLELIQILKDHYNISLDNPLENPSSLFDLVARIKSNLKDSPDLYSHHFQSHGQLSDHPHALSPSSSHTEPRGENAVLSSEDLHKPGQVSIQLPGTNYVGPGNELQAGPPQSAVDSAARIHDFRYSQLAKLGINPYTHWTVADEELLKNIKNETGFQAQA	192	USER	zzz2041
1271		genbank_parvoviridae_ABU50791.1_@3KIC_N	parvovirus_cap	genbank	MSTFLDSFEEWYETAAASWRNLKAGAPHPKPNQQTQSVSPAREPERRDNNRGFVLPGYRYLGPGNGLDKGPPVNKADSVALEHDKAYDQQLKAGDNPYIKFNHADQDFIDSLQDDQSFGGNLGKAVFQAKKRILEPFGLVEDPVNTAPAKKNTGKLTDHYPVVKKPKLTEEVSAGGGSSAVQDGGATAEGTEPVAASE	198	USER	zzz2042
1270		genbank_parvoviridae_ABI74615.1_@4G0R_A	parvovirus_cap	genbank	MAPPAKRAKRGWVPPGYKYLGPGNSLDQGEPTNPSDAAAKEHDEAYDKYIKSGKNPYLYFSAADQRFIDQTKDAKDWGGKVGHYFFRTKRAFAPRLASSSEPGTSGVSIAGKRTKPPAHIFINQARAKKKRASLAAQQRTQTMSDGAEQPDSGSAVQSAARVERAADGPGGSGGGGSGGGGVGVSTGSYDNQTHYRFLSDGWVEITAYSTRMVHLNMPKSENYCRVRVHNTNDTRTAGNMAKDDAHEQIWTPWSLIDSNAWGVWFQPSDWQFICNNMSHVNLHSLDQELFNVVIKTVTEQNTGAEAVKVYNNDLTASMMVALDSNNILPYTPATDNQETLGFYPWKPTMPSPYRYYFNCDRSLSVTYADQTGNIVDTMANASGLSSQFFTIENTQRIQL…	729	USER	zzz2043
1269		genbank_parvoviridae_AAZ79672.1_@4IOV_A	parvovirus_cap	genbank	MSFFDWLGKQYAQGAAEFWDLKSGPPAPKKARKDGSAGFNFPGHKYLGPGNSLDRGDPVDADDAAAQKHDQSYQEQLEAGDNPYLKYNHADREFQEALKDDTSFEGNLARGLFEAKKLVAEPLGLVEPELAPPSGRKRPVQSSQESGYSSSQDKRPNLDVDEEDREFAAAAAETETGSAPPTGNLGPGTMAGGGSAPIDDGSYGADGVGNASGDWHCDSTWLDNCVITRTTRTWNLPTYNNHIYKRLNGTTSGDQSYFGFSTPWGYFDFNRFHCHFSPRDWQRLINNNWGLRPKSLRFKIFNIQVKEVTTQDSTKIISNNLTSTVQVFADTEYQLPYVIGSAHEGCLPPFPADVFMLPQYGYCTRQDGNSNNPTPRSAFYCLEYFPSKMLRTGNSFEFT…	713	USER	zzz2044
1268		genbank_parvoviridae_AAZ79676.1_@3NTT_A	parvovirus_cap	genbank	MSFFDWIGRKYANGAAEFWDLEPGPPKPKKARVDDSAGFNFPGHKYLGPGNGLDRGEPVDADDAAAQKHDQEYQALLESGENPYLTFNHADRQLQKDLAEDQSFEGNLARGLFEAKKLAAQVVGVEEPELAPPVKRPHSPEKTPENQKGQPRPDPRTPAKKRLEFSDQPGSSADLPASSQQSQPPAGVPGVVPGTMSAGGGAPVDDAQQGADGVGNASGDWHCDSKWLGNRVLTRSTRTWVLPSYNNHLYKQISDASGVHSLPGSRYFGYSTPWGYFDFNRFHCHFSPRDWQRLVNNHWGFRPKRLRVKLFNIQVKEVTTTDSTTTVSNNLTSTVQVFTDDEYQLPYVCGNATEGCLPPFPPDVFTLPQYGYATLNDSNNGNPTNRSSFFCLEYFPSKM…	734	USER	zzz2045
1267		genbank_parvoviridae_ABB01360.1_@4G0R_A	parvovirus_cap	genbank	MAPPAKRAKRGWVPPGYKYLGPGNSLDQGEPTNPSDAAAKEHDEAYDQYIKSGKNPYLYFSAADQRFIDQTKDAKDWGGKVGHYFFRVKRAFTSKLPDTDSQPGTSTGGVTRAGKRSKPPAHIFVNQARAKKKRASLAAQQRTQTMSDGAEQSDSGNAVQSAARVERAADGPGGSGGGGSGGGGVGVSTGSYDNQTHYRFLTDGWVEITAYSTRIVHLNMPKSENYCRVRVHNTNDTQTAGNMAKDDAHEQIWTPWSLIDSNAWGVWFQPSDWQFICNNMSHVNLHSLDQELFNVVIKTVTEQNTGAEAIKVYNNDLTASMMVALDSNNILPYTPATDNQETLGFYPWKPTMPSPYRYYFNCDRSLSVTYAEQTGNIVDTMANASGMSSQFFTIENTQR…	732	USER	zzz2046
1266		genbank_parvoviridae_AAT67240.1_@1S58_A	parvovirus_cap	genbank	MSNATDKWWESNDTFAQDVYKQFVQFYEKVTGTDLELIQILKDHYNISLDNPLENPSSLFDLVARIKSNLKNSPDLYSHHFQSHGQLSDHPHALSSSDSSTEPRGENAVLSSEDLHKPGQVSIQLPGTNYVGPGNELQAGPPQNAVDSAARIHDFRYSQLAKLGINPYTHWTVADEELLKNIKNETGFQAQAVKDYFTLKGAAAPVAHFQGSLPEVPAYNASEKYPSMTSVNSAKASTGAGGGGSNPTKSMWNEGATFTANSVTCTFSRQFLIPYDPEHHYKVFSPAASSCHNASGKEAKVCTISPIMGYSTPWRYLDFNALNLFFSPLEFQHLIENYGSIAPDALTVTISEIAVKDVTDKTGGGVQVTDSTTGRLCMLVDHEYKYPYVLGQGQDTLAP…	781	USER	zzz2047
1265		genbank_parvoviridae_AAS99241.1_@3KIC_N	parvovirus_cap	genbank	MAADGYLPDWLEDNLSEGIREWWALKPGAPKPKANQQKQDDGRGLVLPGYKYLGPFNGLDKGEPVNAADAAALEHGKAYDQQLQAGDNPYLRYNHADAEFQERLQEDTSFGGNLGRAVFQAKKRVLEPLGLVEEGAKTAPGKKRPVEPSPQRSPDSSTGIGKKGQQPARKRLNFGQTGDSESVPDPQPLGEPPAAPSGVGPNTMAAGGGAPMADNNEGADGVGNSSGNWHCDSTWLGDRVITTSTRTWALPTYNNHLYKQISNGTSGGSTNDNTYFGYSTPWGYFDFNRFHCHFSPRDWQRLINNNWGFRPKRLNFKLFNIQVKEVTTNEGTKTIANNLTSTVQVFTDSEYQLPYVLGSAHQGCLPPFPADVFMVPQYGYLTLNNGSQALGRSSFYCLE…	737	USER	zzz2048
1264		genbank_parvoviridae_AAD45176.1_@3J1S_A	parvovirus_cap	genbank	PSYNNHIYKAITSGTNPDTNTQYAGYSTPWGYFDFNRFHCHFSPRDWQRLINNHWGIRPKALKFKIFNMQVKEVTTQDQTKTIANNFTSTIQIFTDNEHQLPYVLGSATEGTMPPFPSDVYALPQYGYCTMHTNQSGARFNDRSAFYCLEYFPSQMLRTGNNFEFSFEFEEVPFHSMFA	179	USER	zzz2049
1263		genbank_parvoviridae_AAO47720.1_@1S58_A	parvovirus_cap	genbank	ADEELLKNIKNETGFQAQVVKDYFTLKGAAAPVAHFQGSLPEVPAYNASEKYPSMTSVNSAEASTGAGGGGSNPAKSMWSEGATFTANSVTCTFSRQFLIPYDPEHHYKVFSPAASSCHNASGKEAKVCTISPIMGYSTPWRYLDFNGFKFIFF	154	USER	zzz2050
1262		genbank_parvoviridae_BAA00502.1_@1K3V_A	parvovirus_cap	genbank	MAPPAKRARGKGSFKGVVAYILQIIFLYITGLTLPGTILGPGNSLDQGEPTNPSDAAAKEHDEAYDKYIKSGKNPTFYFSAADEKFIKETEHAKDYGGKIGHYFFRAKRAFAPKLSETDSPTTSQQPEVRRSPRKHPGSKPPGKRPAPRHIFINLAKKKAKGTSNTNSNSMSENVEQHNPINAGTELSATGNESGGGGGGGGGRGAGGVGVSTGSFNNQTEFQYLGEGLVRITAHASRLIHLNMPEHETYKRIHVLNSESGSAGQMVQDDAHTQMVTPWSLIDANAWGVWFNPADWQLISNNMTEINLVSFEQAIFNVVLKTITESATSPPTKIYNNDLTASLMVALDTNNTLPYTPAAPRSETLGFYPWLPTKPTQYRYYLSCIRNLNPPTYTGQSQQ…	749	USER	zzz2051
1261		genbank_parvoviridae_BAA82965.1_@3NTT_A	parvovirus_cap	genbank	MAFGRVHGVVVVVVVGYSEAMAKHQGEGVTEGGGGSEDIKERAQSGSVSMGSELRPLISEVQQERFSTDTNRIYNAGYSEIREPNWGLRNRISGWSERVRELTRPNNYSVIEGSDIELPISVDDDVHIPIEEETSFSVSVPEATETTGLLGTSVISAGTGVAGGAATGLAASDIGLGAGAVIGSGIVGYLGHKIISGLTYPFHHYLGPGNPLDNNEPVDRDDAIAEEHDKAYANAKSSIDVINADKKAIDHFSEDFEKNGNLHSLIGKTGLQIKTAIEQRFGVIYPSVSGT	291	USER	zzz2052
1260		genbank_parvoviridae_AAA42376.1_@3J1S_A	parvovirus_cap	genbank	MATGSGAPMADNNEGADGVGNSSGNWHCDSTWMGDRVITTSTRTWALPTYNNHLYKQISSQSGASNDNHYFGYSTPWGYFDFNRFHCHFSPRDWQRLINNNWGFRPKRLNFKLFNIQVKEVTQNDGTTTIANNLTSTVQVFTDSEYQLPYVLGSAHQGCLPPFPADVFMVPQYGYLTLNNGSQAVGRSSFYCLEYFPSQMLRTGNNFTFSYTFEDVPFHSSYAHSQSLDRLMNPLIDQYLYYLSRTNTPSGTTTQSRLQFSQAGASDIRDQSRNWLPGPCYRQQRVSKTSADNNNSEYSWTGATKYHLNGRDSLVNPAMASHKDDEEKFFPQSGVLIFGKQGSEKTNVNIEKVMITDEEEIGTTNPVATEQYGSVSTNLQRGNRQAATADVNTQGVLPG…	504	USER	zzz2053
1259		genbank_satellites_YP_009115507.1_@PF03898.12	STNV	genbank	MSSRKRAYSTSGPSATFKRIKGSFARQAVASSRMSGRFNARNSARSRATGETGFVDIASANYAVDTTGTVTLLNTVPQGASVNQRVGKKIMLKSLQARGLMQNGSAATANDVAFLIVYDKRPTGALPSVTDILAISSAQSMNNDANSGRFVIMKRVDTYLIGNLTAATNYTEVAVRDCDFFLPLKGMPTVYKAATTGAIADIEEGALYLVTIGGTAAGTGAASLSITMRLRFVDV	235	USER	zzz2054
1258		genbank_satellites_YP_009115506.1_@cd00259	STNV	genbank	MVQIIPNISQGTGDNARIGDQIRLQSLLIRGYIKLDINTSGASVSDLSAVYCRLMVLSLKTKQNYTDASSSATPLSNLLKKGGTTTSFSGVLSDIYAPVNTDLFTVHAERRFYLNQSMLQNFNSTTNAIVPIDIKNTVKFFRIPLKVKGKLIKYDSGISGGVLPTNYGAFLVLGYSFLNGASPDTLSMRVGMQFDTIMNYEDM	203	USER	zzz2055
1257		genbank_satellites_AJD07573.1_@5J09_C	circovirus_cap	genbank	MEAEEVYSQPSRKRGRDQRAPRRKKFMRHVLRKLPASMSMHSFTRKSTQALAVTNAVGIVNYANAFTLAQLPNYSEFTALFDMYKIRKIEITWIYDHNSGEVATSAGVAANANMGVPNLVVVTDYDDASALSVINDYLQYEPCRICRLDKPVRHTLYPHSAVAVYNGAFAGYGNDRARWIDCDSSAAEHYGCKWAVDATMCNIAASAAVRIGTLNVYYKFFVDFRSTK	228	USER	zzz2056
1256		genbank_satellites_AJD07570.1_@5J37_A	circovirus_cap	genbank	MSTSMSDVFSPSISPSSQNWRSQKRARPKSMEVIQSTPISQTVRTITRLSGSRRNRRYTSTIHSFKRTYDYGAYGIVTDGINPTYSAFNFSMNDMPGYTELTTLYDFYKLTGVLFHVIPYKQTDSNSVGTTNNTFQTPIFYAIDRRYSAAPTSVGEILEYNDHKISTVWKGFKIYISNPKFADATSAIRGGWVATSNASLNWYGLKIAIPPTNVATTFYVVITYYVKCKDPK	232	USER	zzz2057
1255		genbank_satellites_AJD07569.1_@3R0R_A	circovirus_cap	genbank	MVYTRSMKRSGKPASRYGKRTKTYTPYRPRTWTKSLLPMSRFGGGTYNFKRNYNFGDLPGNAAYNPYLAGNSFSFSQLPNATEFGVLFDQYKITSIKLRFYLTVDPAAQTAATAVFPRMWWAQDNDDDSAPASINDLRERSDVTTEILHPDKPVEVFLKPSVLSAVYRSAVSSSYIPKWGQFIDMSAQNVPHYGLKYGIDNLTNTNYTVRVEGTMWFQCRGLR	223	USER	zzz2058
1254		genbank_unclassified_ssDNA_viruses_YP_009553354.1_@4BCU_A	STNV	genbank	MVRSRSRSRTSYRKKVSVKRRVPRTRKGVTVPVKKYVQKAIHRQIENKCVQFNGAFTMVNYADDNTMRGFALSPGTSISIAQGTGSADRTGNRIKIIKGKLVYWMVPTAYNGLLNPQPKPLMVRLWIGYSKTNPTLIPPAGDQAVLFQNGNTASPPNGFINDMLRSVNKDKFVIFRDIKHKLGYESITGTGFVAGSQYFANNDFKFNIMRTIDITKYLINNVIYNDTTAIPTSRGLFCWVQIVYADNNVTTGTIPANFNYFVDLTYEDA	269	USER	zzz2059
1253		genbank_unclassified_ssDNA_viruses_YP_009551675.1_@4V4M_R	STNV	genbank	MAKRYKKKSYRKSSRKRPRNSVSKKAKRCLNRAIRRSIETKRVHISPTIAVYSNTITDANVFSYLPSSSSGIDNTIRTRNVVRLRNRIFHVSGSAFAKNIYANWFDIYIFKEHQEGGPPNAAEMNFFSDTATTAVAYAGISLDGLRPINSDMFTICYHKRIVLTSVQSNVASKSVFGSVKPSFNLTKHITSFFKKTWVYDDSALVTPNNDNLLLAIGATQTDGVSLGASQIGKYECLGWLAYEDA	245	USER	zzz2060
1252		genbank_unclassified_ssDNA_viruses_YP_009553351.1_@4V4M_R	STNV	genbank	MAYRKKKTFKRKRSFKRPSTRVSKKVKRFVKKYVDRQIEDKRVQTTQTEVTYSNTLTNAQVFSLMPSIGQGVDDSSRTGNVVRLRKAILRLSASAFDNNIHAHWNDLYIFKKQAGIVAPTAAEMNLFLDNGSTAVAYAGQPLGGLRPVNPFTFIKKLHKRTMMASVQSGGASGSAIGSVKPCFTMTKDITSFFKKRWVYEDSTLSTPNNDNVFIGMGGSDMTGQIAANYGEYSYSVDFFYEDA	243	USER	zzz2061
1251		genbank_unclassified_ssDNA_viruses_YP_009552096.1_@cd00259	STNV	genbank	MCYGRSKFKRRRFIRRYKKTGTRFMARAVKRTMYRQSETKFFIVNVNSTITNAANYESGWANGINQGTGNEQRIGNQIAVKNIGFNFTFNFNTGNSGASGSFVRVLVVWPRKGVSTTSLIGYFTGTNPGIAARPDPKLMLTLYDQKFMLAANTAGNGLAFKTCRFTKYCKMAKWNYDSNGICDSQPVVYFATDASAVTTANISIRGYATISYKDV	215	USER	zzz2062
1250		genbank_unclassified_ssDNA_viruses_YP_009552809.1_@cd00259	STNV	genbank	MVIFLEPSFSLVKMSQTQIVDYVFYSCYMAYGRRSTYRRKGRRGNRSLTTRRIFNNKGAKAQAKQIYALKRAVNRVRAQCKPEVKYVKSETQNRALGLEHQGASFLQYYAQLPMPGISAGTGDGNRIGDNVRLLPMKLGINIRYEEYMNSLTKTYPVDIPLNSTGGQVRIIAVQAITAHSNEPQLVDLMNANEYNMGAIGAAGMMNMSFKRGITSHYKILMNKVVTVSKDRPIVNKRYLIRPAIKHLKVGRRTDST	256	USER	zzz2063
1249		genbank_unclassified_ssDNA_viruses_YP_009552094.1_@5J09_C	circovirus_cap	genbank	MVKLVRRRRVLRKRKSVPKRRMMRRGVGRASVKRTSDYAKCVEIQETKMTAVNDATLDSVGGVINFCLQDFQRPQEIAHAYKYYRAAKCEITFIPYFNIAQTANAAATQLPQLYMTVDRLSNRWIAPTESEMLSRGVSPRLFTKKMRLSFKPNLLQGISLETQQSVNYPSGSPPGGNPAGISNLGYQKAIAVFNKGLPTQQSYGYSNNSTTGALQAGQVLAPLGVNPYDIRYHGAAFVPAIEVLAANTPVAVGDIQVKITWESKRPRALMTNSPLNELIPYVSSCCQGNTNAVLNTQPTSYPSGAIGAAMTVL	313	USER	zzz2064
1248		genbank_unclassified_ssDNA_viruses_YP_009552807.1_@4BCU_A	STNV	genbank	MPYNRRRTYRRKRNYRRKTSRASIYGRAGRQLWKDVKTLKNLINVEWKVQNHVTTSTSVPNTGTVMLLNHLALGEDYNNRSGRQVRWKSLQWRCTTQKHASATSSRVRMLIVIDRQCKQALPSASEILDSSVAPLIDGFRQLDARKRFVILKDVMFLLNNDRPELTKTGYFKMDMKTVYDASDNGDITDIYSNSLYMVMIGDEATNQPTHETNVRLRYIDN	221	USER	zzz2065
1247		genbank_unclassified_ssDNA_viruses_YP_009226566.1_@PF03898.12	STNV	genbank	MPIGRKRKSYATAPYIKRRKTPYRRKSFMSRNVSRIARQVVMRAAETKTKVINYGKTELYHNSLSVTHKLNFTAHMPAQGDGKDGRSGDSIIGKGWKLRMTLANKGDRPNVTYRLVVFAAKAGVTPTYSNTFVNVTGNGLLDGINTDRCTILYQKWLKPNKGMVGTSETGVREYVSTKSIWIKREKVMKFNGLEVNDRDVYFCMLAYDAYGTLTADNIGYMQMWGEFKYKDP	232	USER	zzz2066
1246		genbank_unclassified_ssDNA_viruses_YP_009259556.1_@cd00259	STNV	genbank	MSVSRSRTRSPSAARAGDYAPWGPGVRGGGGFYAPTPGETKYFDTSFSQTISAAADWSGSEVPCTNYIQSDGTTVGAYTDSALIPSSVGAGYGQVVGSKFFLKKLRVRGNVASAVGSDQADVPLPQSCRLTLVQDTRPNGAQAQGEEVFTDMGAISQVHHSFLAMGAGQGSRFRILSDEFVDLQPAVAGTDGTNTNSVSRTGYTFSMVYKPKKPIQVFLKANSSTPTIASLST	233	USER	zzz2067
1245		genbank_unclassified_ssDNA_viruses_YP_009226568.1_@cd00259	STNV	genbank	MVRKTKKKGKQLVTKQYLNAKLNKAIETKYYYTLGASSPDTGGSLVTVSNGIAQGDAYNERLGDRITPIHCHIKGTVTLADTTNWVRIVLIRWKQDYGDLTDANQIFEATGATTSPYSLFVKEPDNRARFDVLADRLFNLHSNEPQKAFDIRVSSRKLHSRPVSFTAGGSGGNGQLVMVTISDSAAVAHPSISYYLMLKYKDA	203	USER	zzz2068
1244		genbank_unclassified_ssDNA_viruses_YP_009226562.1_@cd00259	STNV	genbank	MKRKRSSSQTRTVKVRKKAAPKTMTAQRRLIRRMILKTTETKYKTIALDKEEIYHNKLYNFSKNLLEVFPSQGTGDGAREGDEIVTTGMKVRMILGQKSDRPNVSYKVWVVHYDDSTSGNAITYGNFFHNVTGNGMLDAVQNKRFKVLKAFTIKSKGTTIEAGETSKEFVRPVKFWIPFKKKLKFVSDASNKASNILPQMNVIVLPYDAYGTLGTDNIAYMQGSCTLYYKDP	232	USER	zzz2069
1243		genbank_unclassified_ssDNA_viruses_YP_009117081.1_@cd00259	STNV	genbank	MSSKRKRNGQGEGRLVFSKSRRKGEWDSYVPSSSHSAMVAAKARQRRGYGSVARTRGAAVQGETKYFDTELQPTAISAVTTTWVAGTLVDPTTTINLGDAAIATPGCLFAPKVSAALNGRIGRKVLIKKVKLTGVINVPTHSAQATGDAGTKIRVMLVLDQQTNASAMTSAQLLNDAGNALTTISSFQNPNNFGRFKVLKDKTFFLGDLAMTGAATAIEQSGTVIPFKMSYVFKRGLRVDFNATNGGTVADIIDNSLHVVCGANNVQLIPSLSYYSRVSYVD	282	USER	zzz2070
1242		genbank_unclassified_ssDNA_viruses_YP_009117080.1_@cd00259	STNV	genbank	MSLVKYRISKPKYTKKKSEKKFTSKRSINTMLSRLPETKYYDVYHTTTITQNGALDLLTGMTTLGTGEGQRVGSKVFVKYIQVNGLIMRNASSTIDNLRIIIFMDKQGMNTPAVTDIMEPAYLGSGFSPVGRINEYRIPRYKILYDKLTHVSTQKDGFNFKANLRINMPVYYVSTSTFKNQVYILFLGDNGNVLTLPYCNYTARVSYTDQ	210	USER	zzz2071
1241		genbank_unclassified_ssDNA_viruses_YP_009117073.1_@cd00259	STNV	genbank	MYGKFRGSKGASSRRTNGITANNIARALKKVGGKYTSKKYSAPRFATVGFARNVEKKYFDKQYISNSLEALTGITGNSASNGVTYISNVWGSYNFGAQVASTAISNDMCKGLDTGTTARTRIGNKLKVSYIKGAFTFTAAQSNGMNNTPQNGENQVVPLAANTKQDYLRTTYRFVIVKDLQVNSTDAQVTWAQVFDTTGSQAGVHAELNVDNMGRFIVIQDKYFTLDAQNPQQTCPFQVKGSSVGNVRYNGPGAAALTDKGIYVVWAAYVMGVDGVGTANVQCPSPVGHSRLCFTDD	297	USER	zzz2072
1240		genbank_unclassified_ssDNA_viruses_YP_009117071.1_@5MJF_Ba	geminivirus_cap	genbank	MAYPRGRRTPLKRRATYGRGTRTFARTKFRRAYFNRRRGVGRKEKKGCDVSFATAGIIASTSTNGGIYLLNGIQEGVGSWNRIGRYMWNKSIELDLTLRYTSSYGALDTDITSGEWVRAVLVWDKQPNGGTIPTFDTIFGQTSQAGVESASVMDHLRYDNMFRFKVLMDECINPTLTNAAVSTPINPASASLVNNTYFRFHKYVKLRNMPTNFSGTANPMTTANISTGALYLILRTQSATLTELWGH	247	USER	zzz2073
1239		genbank_unclassified_ssDNA_viruses_YP_009117068.1_@cd00259	STNV	genbank	MFNYQRFQQDERELKFCYTNIGVSSLSWVGQRFPVNRIPRGYDNVNQRTGRVITQHFCKLRGFLQLQKTEDIPWTGPNGDFSPSQITRLMIIEDLQPTGAGFTLTDLFQETPSQYALPSDFKFSNINRFRIWFDKSYPFDAFAYKTGVIEGFVNRTIYWIDEDIDLHGLQTVYGASPGVDILTSSLTFVAVSTANTPPVGGTQNGTSGSFRCTIGFYDD	219	USER	zzz2074
1238		genbank_unclassified_ssDNA_viruses_YP_009117069.1_@PF03898.12	STNV	genbank	MSRQVGQKWKAPKQLQAPRNAFTNNNRNPKANGRSAPLATRGFGDMGILKNREKKFFDRSTLGAPTGVSTTPVAYLLHNPAQGADYNQRIGRKTVVKSIYIRGRMFVEPVGLTPLPADQWCPGQQARLIVFIDYQPNGATPALTDLLNSADPASQLNADNRDRFKVVKDKVFTFGPVCVSNSDLVSSERSYQDFKFFKKLNLECINNSTSTNAIADIQSGALFAYFIGTNVAGSTDLVSVWTSRTRYEDM	250	USER	zzz2075
1237		genbank_unclassified_ssDNA_viruses_YP_009117059.1_@PF03898.12	STNV	genbank	MSYKSKLWVGKRNAPRTKSQRYANQVRTNLLRKIVGNRVPRPMPMRRSIKTGEIKCLDQTFLATYNATWVPDAFPQKVLNADSNGAFQAINLIQQGNGISQRIGNKINLKSVRLRFSLDPTTVTTASPTDTRVMLVYDRQPNGLYPSLNDFLNGVSQSNALLNPSGLALCSSNINPNNFERFTVLMDKSITLPSSQASSNFGPTGDGQNSPWWIDEYIKCKGLPVTYKANSAPSVIGDIATGTLFLFCVGENVALGTSWSYRGQARLRYYDA	272	USER	zzz2076
1236		genbank_unclassified_ssDNA_viruses_YP_009117065.1_@cd00259	STNV	genbank	MSYLGKRKMTSYPTARKVSRQRSPLTLQYGVPVTIPAGARGYVRNQGRFGRTARMQRGDSMPEMKYLDTSLTWSCDTTGEVSAPYLNIIPQGVGENQRVGRKVVVRSIGIKGLVVPLNTSVDASLIKIQVVLDTQANGTAPTFGGSADSIWESNSIHSWRNPDNAARFKVIKEFDLKPTVTAAYYNSTTTTEKRLTNILRVEWFKKCFIPIEYDSVLTTGALTTVRSNNLLITCINSANDDQYNFTGMQRIRYTDA	256	USER	zzz2077
1235		genbank_unclassified_ssDNA_viruses_YP_009117056.1_@cd00259	STNV	genbank	MGDVRFINELLPGLIPIPLVHLSQYILDKGREFAFSENPAKEESKEKEVLPKTTTHPEYAQRRYQYKTSVHPYRPVPINTSRAYKFYDIQLELYYALEEISNLSYTEPYSYINGYTLINFVPHGLTSKQRVNNNVVIKSINIRFVCLLDVTSIYPDPITIRWLLIYDRDTNKAAPATTDIFEQNSAYKLTFNSPLNHVFTSRFSVIRDKYLILDPKTSSSVVVNEYIKGEWPTAYDLSFSQIPSIVIIKSGALFFLIFCDNSANTLTIAHDINIRLRFADTTTKN	285	USER	zzz2078
1234		genbank_unclassified_ssDNA_viruses_YP_009117055.1_@PF03898.12	STNV	genbank	MARYKRPSILSRLKTTKKTTRGKRTKYRLGSLGGAPKAEVKSFDTYVLSNATGLPHEDSAGFAEPTSNFAGYTCLNEVSQGAAFYARIGSKISIKSIQVDFDLYTLSITTTAGTARCILIYDRQTNGAAPSFVDMFNAYPAAINAFGTGINMTNRSRFSIIRDKYYEFGPGESTTKHVHMYAKGRWDTEYKSSTPSVGDITTGAIYLSVISNISLAYSPGKICMNEITARIRYLD	235	USER	zzz2079
1233		genbank_unclassified_ssDNA_viruses_YP_009116904.1_@cd00259	STNV	genbank	MRRKSSKARKPLRNNRVKRAISRKSLRRQIATQIRRQAETKEQKITAERYLLWGPTAAAFNTRNIFATSDILATISQGTGQGDRIGNKVSLVNFFFSFIVWARATNLGGPSLPIDLCMYVFSDKLNPTSQLSLNIQNSIAGITQPYFYEAGNATTGANLTITDQLLRVNGDRFTLHKKKIFKISTSTVANWSNNDYKASRKFKINLAKYMPKLVQWNDAGVLTSRQVWVMFLPVIANDDTSTVFANSDLVGIGFDYQVKWKDM	263	USER	zzz2080
1232		genbank_unclassified_ssDNA_viruses_YP_009116899.1_@cd00259	STNV	genbank	MRGPTKRNYKGSSRKIAAARAAVGRANAVLASRSSMSSGSYGPPASRGFYGQYSLRGRAELKFVDATSTNAAVTTTWQGALINGIAQGADFNQRIGRKAQMKSVLFNGNFFPGTTAAENASQGVYLRVVIVYDSQPNSGTFPGGTDFLGANDPNTPLNLNNRDRFSILIDVRKQIGSYLFNGTPALTAGSPQNAYWNKYKKCNKETIFSGTAATLGSISTGAMYIFFVGDFNGVGMIDFYTRVRYTDM	248	USER	zzz2081
1231		genbank_unclassified_ssDNA_viruses_YP_009116895.1_@PF03898.12	STNV	genbank	MPKRKSSSKRSSSSKRRSRKSSMSKKAIKRSVLQAVLGMSETKYRQFADENVNIFHNTTTITGNAINMLQTSQGASDNQRIGDTIRAKSLNIKMQLFNKQDRPNVTYRVLILAPLTTGVTPAPTIWKGESGNKMLDNIDTGSYKIIYQKFVKWSSQTTTFSGPTTLPNYSRETSKIISINIPLKNKKLQYSTNSAVVPKSSKLNWTLYVTPYDAFGTLITDNIASYAYNARLYFKDF	237	USER	zzz2082
1230		genbank_unclassified_ssDNA_viruses_YP_009047143.1_@4V4M_R	STNV	genbank	MVFKRKFSSKRMGRGSIRKPFIKRGTRRVGSAIRNLAKKVRRITSTIETKSGVEQITDNINLRHNNQVTVSSAVLETQTGTLDNENSRGMRIGDKITLSNVQFTMMFELNEAYTDVTLRLMVVRAAKNDIPNITDMFHGASGNKMLDTFNNERYSMLYQKYVRLRSNPTAAVPSGTQFPGSGTYQGPNQIMSRATKIVKFSVPGRKFSRSGIIQYQNNDVQPKFFDYYFIVYAYSNFATVDSGPVVYNVAHINDCIIRMHYKDA	264	USER	zzz2083
1229		genbank_unclassified_ssDNA_viruses_YP_009047140.1_@4V4M_R	STNV	genbank	MSYKRKLSKSARYNRRPLKVISVAQKAKLQRARSGIPKVIVAASDPMMKQLRGLLAAKTRDALDVYRNATAGGGVSRVSLLTSSSPFTTAAAATGILDADADEVLINSVRIAGYHDNQFQADTDPVGNFPTFVRVLVVWMTKPLLIASAAGTLPTVTEVLTAASIDAMPIQSQQNGGRFTILSDRRWNLGLATTSASVSTTSAQSMRQFFDYTIKVGRRCKFVTPAASGAATAGGHYGTGAATGQLSTGLLLMYSMAVGPAGLNTNVNFATRVNYTG	277	USER	zzz2084
1228		genbank_unclassified_ssDNA_viruses_YP_009001754.1_@PF02443.14	circovirus_cap	genbank	MSHFRYRRRATRRRRFYKRKFKRYTRRHARRPLSRPYRRAFFKCRASYEVKGSNGPAFVAYTDNPVNIGDFNSIQNLYAQYRVAGMQLRWIPSFNKNDMIPVEQGEQLGEWLLIKQDDALTDKAFPNTVQNYLNRDNGLRRRPLVRSWSIYFKMSKMVPLNVASVNVVNLRGGYISTVQPTATQTVRAMLSSIPVNAGEVLLGTFHVTWYVSAMQRRXIKYIIYLKKKIIFIVYYINFYIRTLIRGERERAAVPGVSRHFLQILRNFF	268	USER	zzz2085
1227		genbank_unclassified_ssDNA_viruses_YP_009001748.1_@5J37_A	circovirus_cap	genbank	MPFRKRAVRRRRPFKRTRTYRRRRIMRPGRSLMVHSFKRKVNYGSFDFDSGTNGYKSGALTFRLSDVPGYAEFGPMYDKFRIDYVKLYFCCRYNTNSYAETASATYQVGSIHGLVVVDTDDETPVTQDESGMNDMRQHPRAKSHIFGNGKSQILSMGCKPRILSEVYRSGIATSYNPIRAPFLSYGSNGFSIPHYGVKFCFRLPTTGSALNPFKVPMDVFATFYLSMRDPK	231	USER	zzz2086
1226		genbank_unclassified_ssDNA_viruses_YP_009001746.1_@5J09_C	circovirus_cap	genbank	MVFRRRRVSRRRASRRRVRRTSRRRPRARRGRRNGGNSIMSSSIRMPHKYSEIFGLTFTGGSGVAGIYQFYLNYLEHPGYTGAGHQPMGFDQISALFNRYRVIGMSYHIALTNISGVYVAEYAVYYRPNMTVTNDFTAIMEGTGVLAKGHLGITSSGSDTRTHRGYVSVARARGVPRRNVMTESDYQAILGVAPNFLPSFNIAVVNQDASASVTLRVRVDLKFYTIWSDRKVMGTS	236	USER	zzz2087
1225		genbank_unclassified_ssDNA_viruses_YP_009001741.1_@cd00259	STNV	genbank	MVLGKRGRPGSMKYVPRYAKRITRGPYVPRGLTLRPNNASVARQVEMKFVDISPTFALDFATPYHINLLNGIATGSDLYQRVGRSVYMKNLHIDFQCQNINTGSSTPDLEMRVLVVLDKAPNGAALPVLADFLREINAAGAATTNLNSHQNTNNRQRFKFLFDKKIGIPPWNVGATTTGAPALNMVDVYWRKHIKCTTRCSSLEKGHRCQKSRTMVYT	218	USER	zzz2088
1224		genbank_unclassified_ssDNA_viruses_YP_009021887.1_@5J09_C	circovirus_cap	genbank	MGRKRAAPWAGKSYGKRRRVIRRRRWPVPARKRRVPKRRSRRTRKTTRDNARVYRQGLFARFIGPTYTLSAAANEDAVYTLNFNYGTLGQNDFAKQMEGYARMFEQMKCYKAKLTYWLNDNDELAKPETKWTEVVTSYDPRNYARNMTFQGALSRGNSKRVILKPGRKYTATITPKWGVNLAAADVPAPSDPSVVQVGGRSGYVNMSRVALATDISINSLCMVFHGMPAETDFLSCYNTFYCHFKDRVQMNPYKL	255	USER	zzz2089
1223		genbank_unclassified_ssDNA_viruses_YP_009021246.1_@PF03898.12	STNV	genbank	MPKKTSTRKNGRRTAKRRPTVKRVMRMVKQLKPEVKEITYAFNALPTASLASVSFGSGAAMSTLASGITQGTGRSQRVGNMVRVIGIQIRLAISGADSTNNFRIMLVKPKSSPFNTGSALIQNILSGTPSGTTQWLAPIDTDRYHVLFDKMKFFRTMPLDGNSSSTTLPVWIFKKFIKTRSTIQWDAENNPDPRDWILAAISDSNLVPNPGAIAGHVKLYYTDA	224	USER	zzz2090
1222		genbank_unclassified_ssDNA_viruses_YP_009021244.1_@5J37_A	circovirus_cap	genbank	MSLRRRGRKRRYIRRRRYGRSRRSKRSCFPRLNNFYSKMCIKEVTQFTATSNATHVHSISLANVNSYVLQFLQNFKYYRMYAMSVLLMPRMNAIGATQSYYQPQNDAHLINTAPNLWTLFEPETGEVNDVVALHLHPRSRLHSFNKTVRRFIKLQPSLRVNTADLSNVDIHGGVFRKTWVAMADFKASFGKFVMAFSEDTKSDQNIHTEYDVVFKYYIMLKGSAPNLWSGEVVTQQLPAPETVPLASSKGGSVKKKSGDIPVIKVRQVDTGPVPDSHGLGQKSSAIEKVLEEEMGL	296	USER	zzz2091
1221		genbank_unclassified_ssDNA_viruses_YP_003084144.1_@4BCU_A	STNV	genbank	MCFSNISHINTKCHHENTQKKNFTKKVQNVVRRMAETKIQDYSINEDVLISNFDTPYVQDLTQIERGGASNQRIGNEILMSGVKWRLLFHCRNNPNYEDVVIRSLWCRIAIIEMKNTGTTDVVLLEDFFRKGANSMDFDAVTEAERYYLPVDLTNKKTLYQTTFKIGVKNQVDTADYLSNKIIKNYRKVSRSINFESSDISNSASTKLYFVCWIGNNDLDANNATTNNAGACELSGLLSTYYKDF	245	USER	zzz2092
1220		genbank_unclassified_ssDNA_viruses_YP_003084288.1_@5J09_C	circovirus_cap	genbank	MPYYRKKRVYRKKRPMRRNRRKYSRLPRRSLGNPNQKVYYFKRFTTLGTIVVTSSSANAYGASVFSLDQLPGYTEFTNLFDFYKIKAIKLSFIPTSNVTLQTGNSSTTVANSIYNNRIFTVIDYNDAGIPTSVNELREYSNCKWSPNNKIHKRYIVPNPLADATDDSTISLMNKPWVPTTNYAMDYYAIKWAIENTAAGVGVELYKMEAKFYIACKSPK	219	USER	zzz2093
1219		genbank_unclassified_ssDNA_viruses_YP_003084286.1_@PF03898.12	STNV	genbank	MSKRTNPYQRASLPPKKRYRADQQPAIPRLRLPYHLGGPLYVSRPLPMARRGAPTGRYASNPRMGELKTVDYQFSAAYAVPYVGDSQPFPLLNCTNATGNIQCVNLVQQGTGVAQRIGNKICMRSLRIRLRFVEAGTDDNQAPYFARIMLIYDRNPNSLYIATNNILANALQNNTLGNGTLDSSLNPTYYDRFVVLRDWYQTIPTFQESTSNVAPNWIIDDFVNLKNLETTYNGTANPMTINQVSVGALLLFVISDQVAATSDAVALGGNLRLRFHDQ	278	USER	zzz2094
1218		genbank_unclassified_ssDNA_viruses_YP_003084283.1_@5J37_A	circovirus_cap	genbank	MGKYTKRRSYGRKSRLKRRRSVKQRRIRRIKRRSGIYTKRTRFPAKNPFGDKAYVKLRFNRASYISGDGASSQTTTTYRTINNLADTWLSFESVSKGFLTYPKLFRRYKVNGVMVKFTVYQLKNSTGSGEFPSLAWILPYSTLDGTPTVFAQNAIALKSQRHTAWANVANWGNGGRSTTVKKFFKMKSLVGANYPSTDIDYSGTTDVLANPYNAPAIEWRFLAGISSVAEVALPTTQSYHYNLEMTYYVEFWEQTWEAQGL	261	USER	zzz2095
1217		genbank_unclassified_ssDNA_viruses_YP_002600776.1_@PF02443.14	circovirus_cap	genbank	MAYRRRFYRRRHHWRRRYRWHRRRYHWRRRYRRPYRRRRLLPRSFVSQSRISVPVRYRPPSNIFILKGRGFRSWTSNKVTFNENSAYLDVDWMNIQLLSFFDLNGLNERGNIEWSHPYINQNLLQTNFNVGKHIKTKCYMWPKPQFKRLTATTSTDPTLYTNENAMGTVSLATHQSSAWPTAKFISAMQMVTLGGSIQLTGRHNKLHQHTFTVPTDHDAQTGWIPVQNLLTTNANFGTLHGAGFRVDAWSQTTQAPSQYGWTAHSMVQPQSGLNPAGAGWGGFFFKTVWAFGLINPTQWSQNKSYMHSAK	310	USER	zzz2096
1216		genbank_unclassified_ssDNA_viruses_APG55829.1_@PF02443.14	circovirus_cap	genbank	MAYSTFYKNRFSAYRRARSSRRWYSGSRRRAWGNARAARQQRDAATVTISRIATTQVTISAGTKSNAEIINHWNSLRLSTYFNNYAPMYDQMKLDKIKIKVTGSQAGSAQTGNWSPSVVLAFDRNGLSTGQQLTSDVVSSYSSAQLKQWSSGNSFTMWQTIYPSTIMEKGMYIPTESLQDPTSFSYGSNPCYNYSYSTLPFKPLTLLAVDMGANLAADNTFAFTIEYEYTVTFRGMRKPSLT	242	USER	zzz2097
1215		genbank_unclassified_ssDNA_viruses_AQU11750.1_@3JB8_A	RNA_virus_cap	genbank	MPRKASGPAPRRKVTSRSYKPTAASGMVRSYGSLRGHGAYTYAKPGPWGRYGRAIGSSVGGVFGGGIAGPVGRALGSVAGGKLGSYAHYIGKIFGSGDYVTSPNQVKYNVLVNESQIPQFSSNSSKNTVRIRHREFLGDIISSGTAGAFQIQSYSLNPGLASFVPWLSQVCGSTFQQYRNNGVVFEFRSMSGDALTSANTALGSVVIATDYDSADNAFTSKSQMENTEFGVSCKPSSCMIHAIECARSQTTATELYVRAGNNPANTDIRLYDWGKTYVATVGFQGTSVNCGELWVSYDITLFKAIQQPPGYLIPSFHMNLAGTNAATPLLPDTSVNATQPVFDTIGIVSKSNTSIVLPLNIPVNSNWMVLLAVRGASTASVVAPIISSSNGLVTGWGVG…	471	USER	zzz2098
1214		genbank_unclassified_ssDNA_viruses_AQU11732.1_@3JB8_A	RNA_virus_cap	genbank	MSKVVIVKKPRKRTHRPVAPRRAAYTGYGDYKKRTPRRARAPRAAPASSSASIGSTIGGHIGSFLGNGIQQVIKSLTGFGDYEISCNSFMPDKLSGDPPVIMNSPHNAGHIVRHREYIGDVYASTAFALTSYPINPGLIGTFPWLSQSADSYEQYKMRGLVFEFKSMSSDAVLSTASSSALGTVIFSTQYNALDTPFTDKRTMENYEFATSCKPSVSMLHPVECKASQTANVDYYIRNAPASGDQRLYDLGVFSVAVQGMQGAASNQVIGELWATFEVELLKPKLLIGGGMLLTDHFTSVAGSTFNLANPFGTTANNLLLTSGSNIGCVLYPQTLGSIPAGSIEFPSFVVDGFYKVDYYLVCSVATANSPSYTALGQTVNIDVVSSAVNILGNKLVSYE…	458	USER	zzz2099
1213		genbank_unclassified_ssDNA_viruses_AQU11725.1_@3JB8_A	RNA_virus_cap	genbank	MYKRASASVQLARMRKALAAKKRGVGRIKGRGDYVTTGGKNITWPVQDDFSGPVYGPPNRKGATGSYYAGPDQGRTDNLFKGVGARIGGSLLGTPGKFLGAGAHYLFKKLTGFGDYKVRSNTLTSGASPPMFAGKGRGTIIRHREFITDIQGSIAFTIQSYNINAGLPATFPWLAQVAGNYEQYCIRGCVFEFKSTSSDSLNSTNTALGTVIMATEYNSLNPNFTSKAQMENHEFCTAIKPSMSMIHPIECARGETPISCLYTRTGSVPANADQRMYDLGKFQIATVGMQAAAVIGELWVTYDIELLKPQLYNALGSACACDHYQLNVTGISNAAWFGTTLVSPTSGSNLGTSLSNSLSTSGSIIFPLSSTVQYYWITYAQVGTTGTITTAMSTTGGGQ…	563	USER	zzz2100
1212		genbank_unclassified_ssDNA_viruses_AQU11716.1_@2ZAH_A	RNA_virus_cap	genbank	MSSRVYKRRTYVRRAAPSSSRRFANPATTAAMLRNLIQGAGAYKKRVYKRRAPVKPRASKMGLGESMGRSIGAGLGKIFGKVTGLGDYQINRNSLLQHGSSSDQVPFMHSSKDGVRIRHREYIQDVSSSILFTNNTFSLNPGVSATFPWLSAIAQNFEQYRMEGFICEFKSTSADALNSTNTALGTVVIAAEYNTTAPAYVNKQQMENSMWCVSGKPSVDICMPVECSPSLNPLSNLYIRTGAVPSGQDQRLYDLCNIQVATVGSQAAAVIGELWVSYDVILLKPQLFSSVGEDLKSAHYSLVAPAVTTAYFGTSATAVGTDSIGLVLTGTVCTLPIGLSGFFQLTYSANGASTAITSPTFTFANSSLVTGQFNNLTSNSFGSTSGETTVSYSKTLWFK…	435	USER	zzz2101
1211		genbank_unclassified_ssDNA_viruses_AQU11713.1_@2ZAH_A	RNA_virus_cap	genbank	MPSSRYSLAARKRRKVAPRRAPARRIKRRRAPYRSSRGGWMSSIGRGIGHVAGSLAGGVARGIGYNYGIGKSVLPSSVTDIASSAYNYGSRILGMGDYKLARNSLMTSKGQVPFMHSSKDGVRVRHREFLQDVSSSVTFVNTVYDVNPGLSSCFPWLSALAQNFEEYRLEGMVFEFKSTAANLVSGTNNALGTVIMAADYNSAAPNFVNKAQMENAMWSNSTSTIEGMCMPIECAPSLNPLSNMYIRTGAVPSGQDQRMYDLCNLQIATVGSQAAAVIGELWVTYDVVLLKPVLDSGLALASQSSHFSLTAPAVTTAYFGTSRVNLYDSIGILLSGTVLTFPLGSNGTYQIVYAAYGASTSVSAPTHTLVNCTNVADTFDNASLTVLNNSGATDTKYCE…	445	USER	zzz2102
1210		genbank_unclassified_ssDNA_viruses_AQU11745.1_@3JB8_A	RNA_virus_cap	genbank	MPSYKFNPLIAAKMKKMFPKKKKAVKKNYIYRTKRSKIYDNIPVENVPALIPSKREALINAMESGGKYVGKFLPYGESYMPYVGKFLGGGISAIAGHGDYKIKHNTLLPSGDAPPQFGTGINAREVRVRHREYITDIFSSTGFNITGFSINPGLLATFPWLSNVAENFECYRLNGMVFHFKSMSSDVIASNTTNNTLGQVIMSTQYNAFNPPFVNKLQMEQYEFTNSSKPSCDFYHYIECARSANPLSELYIRTATLPTGQDPQFYDIGQFFIATNGMQASNINLGELWVTYDITLMKQKLIAGEIGDEILYFHQAAALPATVTTSKYFGSSNGVITPASNLPLILNNTTITFPSYITGGNYLLQYFVAGTGGSPVTPNIALTSGCAPLNIFYNDTQNF…	449	USER	zzz2103
1209		genbank_unclassified_ssDNA_viruses_AQU11772.1_@2IZW_C	RNA_virus_cap	genbank	MELAAPPRKKRARAASTAPKVYAKGPIPYQVSAANRYWRIKKDLPADQYWKKRYWRRRITGKGDYVMNPRKSFGQRWGGYAGSRVGEFLGGAASRLLGLGDYKVKRNVLAGRLPEVTNVSSGGGTVIRFQEYLGDVITSATAGQFLINTYLINAANPNTFPFLSQIAANYEQYEFEGLVFEFRSTSADALNSINTALGSVMMATQYDTFDTPFASKTEMLNYEYSTSAKPSCNTLHMVECEPRQTAQPLYYTLFNSAVPTGADPRLYHLGVFTIGTTGFQGTSVNIGELHVTYQVRLLKPKLYMALGDEIRTYNAVTPIQTGAYNNTNPLGLVPLQGPFAGSLPVNTAGIIVNQTNMTITFPATNALLYWRVEMIWQAANAVAVALPAITTTTNLTLVS…	459	USER	zzz2104
1208		genbank_unclassified_ssDNA_viruses_AQU11735.1_@3JB8_A	RNA_virus_cap	genbank	MQDAQNMLKKYGESVGTQKYRIKKRQGKFDSPEAYKSKRTAAKASGTYAPNGTGEAIGNAIGGGLGSMFGPLGTKIGSFLGGKLGHLGAAITGFGDYELNSNSIMTGGLNPAQVINTVNKGGIVIRHREYLGDLNATTAFTIQSYPLNPGLPGTFPWLSQVAIAYEQYKWRGILFEFKSMSSDSILSSSTSSALGTVMMATQYNALLPAFTDKRTMDNYEYANSTKPSCDMIHPVECKPDVTPIPQLFVRQGVPATGDLRLYDIGNFYIATQGMQAASGVCGEIWCTYEIEFYKPRFTIDADDIADHWNLQGATNTAPLGALPPVISSGSNIGGTWSGGNTYSFPTNIVDGVYLITWHFSGSSAVTVSYGSTNMSPTLTNCIGTLSYNTGANSVICGPN…	464	USER	zzz2105
1207		genbank_unclassified_ssDNA_viruses_AQU11742.1_@2ZAH_A	RNA_virus_cap	genbank	MPVRKYTKRFNNFKKSSKRASSSKRSYSKMRRPYSSYKTPYKAIPFGMGNQMLPGEFKANAFTKGMDSLAKAAGIPAVFGHGDYTINMGGKLASGTSPPQFGSSKGSKSVRVQHREYIQDVVSSPTAGAFLIQGFGINPGNPALMPWLSSVASNFEVYRLHGMIFEFKTMSADALSSVQTALGTVIMATSYNSANPTFFSKQQMENYEFAQSAKPSESMCHYVECSKNGIPLGELYTRDNAVPTGQPSQFYDVGTFNIATVGLPGTNVLVGELWVTYDVELFKPKLYIGGATSGGTAFFHASFTAPVGTNLFSGTQTTKYNSFPSGLTLGTTPNGSTSIQFNSPVAPVGSTYIVNIQVNGSGAATTVAPSAVTYANAQGVNIFGNSTQATFGSSQTTTN…	445	USER	zzz2106
1206		genbank_unclassified_ssDNA_viruses_AQU11775.1_@2IZW_C	RNA_virus_cap	genbank	MELAAPPRKKRARAASTAPKVYQKGAIPYQVSAANRYWRIKKDLPADQYWKKRYWRRRITGKGDYVMNKKHSFGQRWGGYAGSRFGEWAGGALQRLVGLGDYKVRKNVLAGTLPEVFNMPTGGGTIIRFQEFLGDVITSATPGLFNIQQYLINAGNANSFPFLSQIAANYEQYEFEGLVFEFRSTSADALNSVNTALGSVMMATQYDTFDTPFASKTELLNYEYSTSAKPSSNTLHMIECDPRQTAQNLYYTLYNNSVPTGADPRLYHLGVFTIGTTGFQGTSVNIGELHVTYQVRLLKPKLYVALGDEIRMYAATTTVQSGAYTNPLPLGIVPLIGFGGNPILNSAGLTVNQTTNVITFPATNALLFWRIELIWIATNTVVIAIPSLTLSSNMTNVSQ…	458	USER	zzz2107
1205		genbank_unclassified_ssDNA_viruses_AQU11739.1_@3JB8_A	RNA_virus_cap	genbank	MSTVAKRTYRRRKPVAKPSVRRAAPRRTYRRRAVRGRGAYEWAPAVLGAVGNALVPGVGGAIGTALGGAISGKGLYKVKHNVLMESNDPPIVVNKSGKHGVTFRHREYLRDILSSGIDVNGGVGTPSSQFNLSALPINPGQVITFPWFASVASNFEEYSIEGMIFEYRSMSGDAITGTNTSLGSVIMAVQYNVTNPLFGSKTEMENYEFASSCRPSSNMICPVECSKFQTPMNELYVRFGNQSANTDLRLYDLGIFEIATVGCQGLSTNLGELWCSYQICCYKPKLFSGLGYSNLFTHLYANDYTNAFPFGVATYSPVLPTPISNYVTYDNIGFYNYNSVNGAPRKPFPAPGRSNIAVDVVTSTIAFAPSGFNIKWKITMIWSSNGAGACVYGLNNLVF…	478	USER	zzz2108
1204		genbank_unclassified_ssDNA_viruses_ALE29846.1_@PF03898.12	STNV	genbank	MAYRRRRFRGRRKAFRKFRGRARVKSMKRIARRVVNSAIETKMIEASLGPFGSVTTTPSTGFFAPAAGTARDQRVGRVITPTYFKLRGLLHGAQSNVAVDDSHNIFRILLLVTDYDWTYGTSIATNNYIDPGKGVHHKIKQVLYDRTMSLCSPGRDSTGYLAVQKEINIKASLRRMGKMVWDDSGNPSKLLYLVMVSDSVISVNPGFTDGQYRFYYKDG	219	USER	zzz2109
1203		genbank_unclassified_ssDNA_viruses_ALE29836.1_@PF02443.14	circovirus_cap	genbank	MIKANRVGRGGIATTQLSVVTMAPYRYRTRGRYSVKRRYRPRRKTYARTRFSKRRFGMRRNRYRRRTNYRHKANYQVLKIVHRWTGDGQFSTGVHSDCLSFNANDINSLPAWDKLNIIYDEWKPGKKYMKQYIPFEKYGNDVDANSANIIRWSAYDPDARARKFLLSGAVADMKLMQGSKWKMVRPRQVISTSFQPKFSSGRDKVNLTGIKAVDNPWRDCVVTVPAEACTNGVQVVWTCNTGTTLTIKTQYTQVYYFRGLRDGNPVWR	268	USER	zzz2110
1202		genbank_unclassified_ssDNA_viruses_ALE29690.1_@cd00259	STNV	genbank	MMVLGKRGRPGSMKYVPRYAKRITRGPYVPRGLTLRPNNASVARQVEMKFVDISPTFALDFATPYHINLLNGIATGSDLYQRVGRSVYMKNLHIDFQCQNINTGSSTPDLEMRVLVVLDKAPNGAALPVLADFLREINAAGAATTNLNSHQNTNNRQRFKFLFDKKIGIPPWNVGATTTGAPALNMADVYWRKHIKCNHKMQFSGTGSAVSDIQTNALYVIMAHDQAAVIAAPWQLKIQARVDFTDI	247	USER	zzz2111
1201		genbank_unclassified_ssDNA_viruses_AKR53305.1_@5MJF_V	geminivirus_cap	genbank	MAIRYPLKRRRPLKRRRRIFRRRKKRYSTARRKYEAPQYIRLYSNPLVINSGGSMVMQSVFPMGTGQTSRLSNRTAVTGIMVRVASAVMANLVTATLQELQELVIHNWFILDKAPTGNDIPGPSIIFDGVSPWNYSVEHDRKKRFSVLKKWHTKLTTGGTWTANSSCQVLPRSVTGKSFMWRPKKPVITYWKNNATANYSDVESNALLWVMIVSSSIPQQTAANCTCNIYYDNTVYFKCL	240	USER	zzz2112
1200		genbank_unclassified_ssDNA_viruses_ACJ54479.1_@PF02443.14	circovirus_cap	genbank	MAYRRRFYRRRHHWRRRYRWHRRRYHWRRRYRRPYRRRRLLPRSFVSQSRISLPVRYRPPSNILILKGRGFRSWTSNKVTFNENSAYLDVDWMNIQLLSFFDLNGLNERGNIEWSHPYINQNLLQTNFNVGKHIKTKCYMWPKPQFKRLTATTSTAPPPKKTIHSSFHLALCM	173	USER	zzz2113
1199		genbank_unclassified_ssDNA_viruses_ACJ54470.1_@PF02443.14	circovirus_cap	genbank	MAYRRRFYRRRHHWRRRYRWHRRRYHWRRRYRRPYRRRRLLPRSFVSQSRISLPVRYRPPSNIFILKGRGFRSWTSNKVTFNENSAYLDVDWMNIQLLSFFDLNGLNERGNIEWSHPYINQNLLQTNFNVGKHIKTKCYMWPKPQFKRLTATTSTDPTLYTNENAMGTVSLATHQSSAWPTAKFISAMQMVTLGGSIQLTGRHNKLHQHTFTVPTDHDAQTGWIPVQNLLTTNANFGTLHGAGFRVDAWSQTTQAPSQYGWTAHSMVQPQSGLNPAGGSGLCRGGSIQCYHVH	293	USER	zzz2114
1198		my_seqs_16minnow_6_2ct1288.1@PF04162.11	gyrovirus_cap	my_seqs	MAFRSRRRGFRRRFRRRFRKKRTGRRRFARSVKRVIFRTLEPRKIATSFAQGFAEADAVNRLVYVNCPPSALVQGTAGTQDDQVDGNKVFLRGMVLRGQVAMDNTTPTANGVIFRVTACFTKEQGSGFQGGFVVYNSTTTSAANPAQVPPDTNPRFFDAVVPQAFIGGGNVIPFDRTNVKVLKQWTYLVNPGADTIASELSLPTIIKCYLPINKMIQFEDAGQLGLTTAPRRFKKGNYFFVVQVIASSGAPFTTDTLVNGSFRTEVFWKDI	271	USER	zzz2115
1197		my_seqs_18minnow1_2ct1355.1@cd00259	STNV	my_seqs	MKRRFDIETEDLPNSRREKNYKLVHSPSPQTNLLKQAQFISRATELKNRDYWVNSYGISNAQSWSTALILNEGIGLGTQADQRVGRKVTMTKLQFRYQFEPNMSGNGATRYRILIVYDKQANSTTPLIADVLTLNAGNPGSLAFNNLGNAHRFVTVADVLTEESLSFYQNPTGLISRNINLEIIYNGDATTGNYDNINTGSMWVFFCQSLVGLVSATTVSFNVRIRPNAKLPFKIMNPISKGSTNQQAIRTGGWANPSKGGELKFCDTGLSTAITFGSSAWSTPQLVNAIAQGTDASNRIGRKIILKSLLIRYAIKLGSTSTFGSQVRILVVYDKQANATAPAITDILTLDEYFAPNNLSNRDRFVTIFDHTTEAISAGSNAQVGDTLYKRINLETIYN…	442	USER	zzz2116
1196		my_seqs_abalone_6_2ct157.1@4V4M_R	STNV	my_seqs	MAYKRKRSYGGRASKRRRVTTRRRKSGFVKAVKAIAIKSMETKSYYYNIATTSLLHMSLVSYNLNYYISQGTSDQTRIGDEVYMRGVSVRLWFTDTVASGTHRYTVMVIRAKADIFATSLAYTDVFKSITADSMTDPIDTEKVTVLGKREIAIENKIASGSLARSVRFWVNMKNSRFKYSGDNAGYGKTYNYFLVVVPYANKGTIGTTAAGDVKGHAQIYFKDG	224	USER	zzz2117
1195		my_seqs_crucian1_2ct104.1@PF02443.14	circovirus_cap	my_seqs	MPRTLASIRAKNSTIRRRKAQRMKYSRVSSLSAISSKFHKFTRTAASGAGGGGTSIISMNANGLFYLNGVSQGSANMQIQFSLASLNILFGGVLSTQIPLPSYTELSNLYDQYRIDYVEVQLIFSSSNSSTASPNTALPTLYLAKDYDDSNDANIPALCQYDNMQVIQLGQRNNSNGVYKLNLRPSLDVTVYNTGTTTGLARGKPMFVDTAYPAVPHFGLKMSFDANTPQGAAAAVLGELMIITKYHLTMSHTK	254	USER	zzz2118
1194		my_seqs_crucian1_2ct20.3@3JB8_A	RNA_virus_cap	my_seqs	MPARKSVSIRVPKKKKTMVTVTRARVAKPKARASYKTKSGSKRGLFGTAGGTVGGMIGTALGGPAGGMLGSTLGRLGGAALSSIFGHGDYEATNAGQIKNNNIVLSNSAQAPQFGSGKVACKFVHREYLGDVFSSSTANSFKIDSYPINPGQGKTFPWLSGVVGAKFQQYRINGMAFEFRSMSSDALNSTNTALGSVIMSTDYDSADSTFASKQEMENTEYGVSCKPSSNMMHGIECERFQTPVSELYIRAFDVPSGKDIRLYDLGRFSIASTGCQGTNVNLGELWVAYDIDCFKAIEQVPGYLIPFSQYGLFTASATAPLGVTRSQLLTTGADNSIDLTLTENKISWPIDIEIGSVYHVQLCALSNEAQAVTLPAITAGNGMYINANTIWKTPGTAGV…	488	USER	zzz2119
1193		my_seqs_crucian1_2ct24.3@3JB8_A	RNA_virus_cap	my_seqs	MPRAAAAYKPSASRKVAARRVAAPARRAPARASRAAPVRRVAVRRPASRGGSMFSSAGSGLGGLAGGALGGPAGAAIGTILGKLGGGMIGKIFGHGDYTVSNVDAIKKNNLITNGAQIPQFGTGKVAVNFTHREFLGDVISSATPGAFRITDYAINPGIVSTFPWLSQVVGASFQQYRINGMTFEYRSMSADALNSTNTALGSVIMSTDYDSADLTFGSKQEMENTEYGVSCKPSVNMMHGIECARAQTPMSELYIRPFAVPNNKDIRMYDMGRFSIATVGLQAASVNLGELWVSYDIDAFKAIEQVPLYIAPIAQYNLNSVDATHAFGLTQSVKLDNQGTSLDRVGLTFVNSGSYNQVQFPYNIEVNSIWQFTYYLYGASTAVVPYAPVTVSNGFVVI…	467	USER	zzz2120
1192		my_seqs_crucian1_2ct26.3@3JB8_A	RNA_virus_cap	my_seqs	MSIFARVKEEFQNKHPRVDYSIFDIDDAVASSSSSSSSSAVPGVAFPNIINNSNMSKSMGEDDYYQPYALKSYGPRRLKGKRLRSANKFSRLQSFGTHGAARLKRGSEFTLGTFGPTWADATNEQKMARELSGWRGKGLYHGRGFYKGFGGDVGQWIGNKVGLGGLGRALGTAGAKFTGFGDYVGNDAVGGAGVEHTVPSFAPVNDGMGNTVVTYREYMCDIYGPDTAFGIQTFALNPGIEATFPFLSQIACNYEEYEMKQCMFTFKSNIAPIGSSTSGQVGEVIMATNYNAAAPAFRDKSTMLQSALSMSARATESQVHGVECDPTKLSGSVGKYVRNGPVTVDEDLKTYDHGLFQVAVTGIPSEYKNQPIGELWCSYTVHLRKPRKYSALGFAIGRD…	589	USER	zzz2121
1191		my_seqs_crucian1_2ct27.2@3JB8_A	RNA_virus_cap	my_seqs	MPRSAAPKVVYVAAPRKKAPKKKPGIGRLRGHGDYTYDKPGPWGRIGSTTGAMIGSAMGSPYGLGKAGSAIGKKIGSYAHYIGKIFGSGDYVTSSGQVKHNTLVNDSQIPSFGGTKSEIRVRHREFLGDVISSSTIGAFSLQSYPINPGLNRSFPWLSSVCGASFQQYRLNGMVFEYRSMSADALNSTNTALGSVVMATDYDSADASFTNKQQMENTEFGVSCKPSSCMIHGIECARSQTAVSELYVRAFAVPSGKDPRLSDMGNFQIATVGCQAASVNLGELWVSYDVSLIKSIEQVPLFLATAAGYTPVSSSPTVPLGTSQTLASDSIGLTFTANKVQFPYDTSVGTVYQMLLFYNLTSGAVTAPAVTAGNGMTILSSWAPAAGETASRLSVTVYCW…	437	USER	zzz2122
1190		my_seqs_crucian1_2ct28.1@3JB8_A	RNA_virus_cap	my_seqs	MPRAAVKPARAPRKRAPAKKPAAYAGRLRGHGDYTYDQPGPWGRIGRSLGEHAGGMIGGQYGLGKAASKIGGKLGSYAHYIGKLFGSGDYVTSSDEIKANTVMNQAQIPSFGHGKNVIKVRHREFLGDVYSSATIGAFSVKEYPINPGIASSLPWLSQVCGSSFQQYRINGMVFEFRSMSADALNSTNTALGSVVMATDYDSKDGSFTSKQQMENTEFGVSCKPSSCMIHGIECARNQTSVSELYIRAFSVPSGADIRLYDMGRFSIATVGMQAASVNVGELWVSYDIDLFKAIDKEPGYLAPVAQFTLVNANINSTSALGLSTTTSSPTVVVDQIGLTLRRTSGTDTVVFPVDMPIGSKFVVNYGISGTSTASVAYQAITLSGGLVALGSDTANPNFA…	457	USER	zzz2123
1189		my_seqs_crucian1_2ct31.2@3JB8_A	RNA_virus_cap	my_seqs	MAGGRLAAQPKRRVVKDARAKAPARRAGPAAAKPRKQKSESGNMFRSGGAGLGTILGTALGGPAGGALGGIIGKGAGSVLSKIFGHGDYDISNVGHIKQNALINASQAPAFGSGRVAVNLKHREFLGDVISSATAGQFTIKDYAINPGLVATFPWMSDVVGASFQQYRINGMTFEFRSMSSDALNSTNTALGSVVMCTDYDSKDVPFTSKQQMENTEFGVSCKPSQNMMHAIECQRNMTAVSELYIRAYAVPSGADIRLYDLGRFSVATVGCQGTSVNLGELWVSYDVDVFKAIEQVPYYLCPFAQYAITGATASAPLGTAQAVPAGVTNSADQIGLTFTSANRVTWPSDIQVGTTYKVLLGYIGAAAAAFTAPVVTCGNGFWMNSYDDWVGPAPTAVV…	459	USER	zzz2124
1188		my_seqs_crucian1_2ct32.3@3JB8_A	RNA_virus_cap	my_seqs	MPRANAYRQGNNPYYDVDYGPPVKRKPRKKAAPKAVRKAKAPTGARPSTIGKNIRAGGASLGQFLGSGLAGPAGGVAGSMLGKAGGAMISKLFGHGDYSVSNADALKENSIALSNAAQMPQFGTGKVACNFTHREFLGDVISASTASTFKIDSYPINPGLSTTFPWLSGVVGAKFQQYRINGCCFEFRSMSGDSLTASNTALGSVIMSTDYDSADATFSSKQEMENTEYGVSCKPSVNMIHGIECARAQTPVSELYIRAFDVPSGKDIRLYDLGRFSIASTGCQGTNVNLGELWISYSVDVFKAVEQVPGYLIPFSQYALVGTLPASAPLGTSQPQLLTQAANSINLTFSANKISWPIDVQVGSIYHVSLNWDRASSAVTAPVITTGNGMYVNSNTVWY…	463	USER	zzz2125
1187		my_seqs_crucian1_2ct34.1@4V4M_R	STNV	my_seqs	MSGRFKRTRDPTPAYRLTKRRLNPARRTTNFAYRMARMQRYGSIIQRGPAVQHSAKILKSCDVGGPQSRSLDSRTVVAVAQVLGAGGAGAGGWPITGAGIFNRIGNRITLKSLHIVGLLKQTGTATGLQEYIRIMVVYDKMPNGTVPVAGDILGDQDSTGAITTNSWSNMRIDNRDRFKILMDDRIGVVNNAATGLQSGEAMVIDYKGEININRFIKLNDMETMFKASTNGQLSDVAVGNLWLFCLGNIAAGSEGYSLVYNARLRYHDC	269	USER	zzz2126
1186		my_seqs_crucian1_2ct39.2@3JB8_A	RNA_virus_cap	my_seqs	MPRVAADGPQRRPMVRAAGSTRRAAAQKAKSGTLRTVSQTVPAKRISPKVYSYSNPGPVGRFGRLAGRALGSYLGGPMGGALGDSLGGMAHYIGKVFGSGDYVTNADRVKQNVLVNDAQIPQFGSGPNTVHIRHREFLGDIISSSTPGAFNVQQFPLNPGQNSTFPWLSNVVGTNFQQYRINGMLFEFRTMSADALNSTNTALGSVVMATDYDSADSAFTNKAQMENTEFGISCKPSCSAVHAIECARSQTAVSELYVRPAAVPANADIRLYDLGQFYIATVGMQAASVNIGELWVTYDITFFKAIQLTPGLSIRSAHYKLALGSVATLPLTPVLPASFDNIPLSFPAGGLSFSFPANIPIGSVWVLMANYQTNAAGEAAATSQSSFTLTNGLTRLNIW…	467	USER	zzz2127
1185		my_seqs_crucian1_2ct50.1@cd00259	STNV	my_seqs	MPRTRSSMNVVAVPRRRPTALRGMAQRYADQHIRRIAKQAVVSVGEKKLWSITAGATTVPASGTILGLSDVTQGTTTSTDVVRVGDQIRPTSLQIRLMLYNSSAVSPDSMRVLVVKWHGRFSLNPISMAQLFLATPYDTAVYQTDTGPGRQGLYTILYDKLYSIPILSGLYPCPDSYRSVVINVKTQGTINWAASSATDSTGGYYLVTTTEQGVGAYHGASLMRFNDS	228	USER	zzz2128
1184		my_seqs_crucian1_2ct58.1@PF02443.14	circovirus_cap	my_seqs	MARTLNRSNMGRGSRRRSTTARRPASYKRRNTGMARTGRGLQKSFVTSFVGPTLALVSGVNQFPVLTVAESQLVQASAFAQIYDEFTITKFEVKFIPQYNVAGASDVIDVSVGGSVQPIANGIARMHSEVNKSVNCQAATQENDILACNDARTDRLNDIVVLKCLKPTPWLFSGATGGGPTAVAARTSGVTWLDVSSGSGIQWGGIRTAMIPPGLGVGALATTQYFHVVYKVWVTYREQI	240	USER	zzz2129
1183		my_seqs_crucian1_2ct59.1@4V4M_R	STNV	my_seqs	MVKRKASGQYVRIRKKAKKQTWTVTPKSTPSMVSVRKAILGMSETKRYSTNLQVGATNMFTNTIYWGNLLWWIQTGSSESQRIGDSIHITGISVRVNILRSYIYQAAMTYRVMILESDQETHDGTVSPGPMAAGLLSDYRYGGYGTTSNPVIDTNFYTVKANKSGIINGGQGPISGAATQGSDMQMLDFYCPINRKFQYKSTASGYEKAKNLYVSFACDSSVGGTIPIGSADVTYCVHFKDM	242	USER	zzz2130
1182		my_seqs_crucian1_2ct64.1@cd00259	STNV	my_seqs	MAYKRKRVVKRRWSKKKKAAPKRKVSTIRKIARQVAISTAEPKSKSTSVGKTEVFHNVLTGIAHVNAPLATYMPGLGTQDNQRVGDRILVRNFQIRCLFGQKFDRPNVTWRVMCVAQRPGLGVLTYNLLFETSTNNGMLDKINTDRVTVLWEKWIKPQRSTLFTTEPTVTGAPQYTANAVTREYTFVRRFWVTRKKTYKFESDGGAQHDDKDIWMYVLPYDAFGTLQTDNIGYVQPWVDINYKDL	245	USER	zzz2131
1181		my_seqs_crucian1_2ct65.1@cd00259	STNV	my_seqs	MYAKRFGKRKAVRARRPYKRVPRKRSGGRQAITKIVKSVLSRQAENKAWFDYGANQSITCVASGPFISKNLIPVLSQGVGKSQRVGNEVRVKSGFVRGHVNILPFENTTNNLPVPCYVKMWVCSYKTLNSNGVSGTNQGTAFFDIVNGSIGPQGNMLDIDFTVNKDSWVLHGTKTVKLGSAYPSATGPVGSSGYYDNSPMSAPFSFNFGKYIKTLKYDDATTVATNRNMFLSFQVVPANGATGSGQIMAEFHYTTRVEYEDA	262	USER	zzz2132
1180		my_seqs_crucian1_2ct78.2@3R0R_A	circovirus_cap	my_seqs	MPRTKNYQKKKSKTYKPRRYAKKHATGVQNAQAVSEFPPAVMTAATTTKFYVSGVSSNPRISTIASCYQEYRIMKVAFKFMPLTNTYGTAGGTGGYIHQLYLKTVNQPPPPGIDATGLASMGAKVHELTQKDFTYTFKPAVDMLAATGGVDAFSGVMIKKSPWLSTSDNADIGGVWAADSTPHWGLLARIQTPGGDGNEQQGVGYTAKVYYEFRKPIVTGGTSNVTEYSKSI	232	USER	zzz2133
1179		my_seqs_crucian1_2ct81.3@PF02443.14	circovirus_cap	my_seqs	MAFKRKRTTSSAKTARKRIRYAPRSRIGKRVDMSTSLVRTTYIGATTFSSATTSGFWQYRVIAASVLPSFAELAAVFDEYKIGAIKYTFRPRYDGFDANDPVTSGSTSPLTMCTAHVINDPGSSMVPVGTYTSATLNTFLENGKVKSYPLNKPFSVYFRPKIAMGALGGATGTIPVAPKWIKTLDDGVTHRGFHMFLQNNNMGATNGAIILDTFVTFYMKVRGAK	225	USER	zzz2134
1178		my_seqs_crucian1_2ct82.2@cd00259	STNV	my_seqs	MYDSTKTKYKRSASKYAGRKTGSKALVKAKTRPAELDTKATPLMRKIVKEIIQRGEEKKIGQIVGQLSLCAYNTGNPYTSQNILPMTPYAVSGMTIAPGTNQNQRIGNRITVVKARLKGIMWPVPYGANNANPVPQNVRCWFFTPKASNLLPSSLPSFLQGSNGNSNSPQGVILDLVQHVNSDAYRYLAHYDFKVAPATYSATPGIPSQSWYYANNDYKWNCEFDIDMTKFFPKHIDFNDSDNTPYSRLVCCYWEAVDADGGTSNITDTTVYLQYNNYLTYTDA	284	USER	zzz2135
1177		my_seqs_haddock_1_2ct124.2@PF03898.12	STNV	my_seqs	MTEIQKGYAARNRANAMLKLRNRNAVMTIPRQMPNQYQSQLRRATPQEVNYVDFAAANYNADSTGSLRLVATIAQGASVNQRIGKRAMYKSFLIRGLLKSGTTTTISDAGLMLVYDKRPTGALPLITDILTGASTQAFMNDNNTGRFQVIRRWDKTLIGNSTTPSTGMEAHNIDEYVKFKAPITFESAGTGAIGDIDMGAVYLLSFGNQLPGTTAGIFDLSVRTRFTEY	229	USER	zzz2136
1176		my_seqs_lamb_2_2ct274.2@5J37_A	circovirus_cap	my_seqs	MPRYSRYRYRRGYSRRRASYRRRYPYSRYRRWRRKSVANSGTRASTFIQIKQCGNIALTLAPGQTNTNMAIISPLTQNTTAAGTRVNTLFPFSARANPLWTTYSNLYDEFKIVSVGAKIVGVDTIGNGGQIGACKIITYWDRSTHHHDFYTNEVIQPAQLVNMPGARMHTFTNNSQIKLYTSQKASDLQERITFQDVSPSTVALNAADTGLPNNQVVVAPRSFGPGGAQAFMPALYCMIYSPIANGGAAGIPLNLMVDVYCTIQFRNPKYTVQATTSTSSKMATEFEIEAREAERLANNAAVRQDKADAIESSDYAELNGQSVTKVHFEEPMS	333	USER	zzz2137
1175		my_seqs_lamb_2_2ct384.1@PF02443.14	circovirus_cap	my_seqs	MAWSYRSKRTYSRSARRSFRRRRLARPRYHRRYRRLRRAPKGTYSSVVTLTQDAEWTLFTPATGSTGRTWKPFFFNPATVPGFLEYKATYSHFRILKARLYISRAINGETGSNYNYLVVGSRPFAAVQTVTSSSASPLVFVPEQLEADLRQTKWQKVRYPNTTKNVVTLGFYPYTIVQTFGPSSTGGTGNFWQRIWEGKRWMPLAWTRDRLGVNPASGIAFYGPYVVVDSSTGEIPDPTPGQDTGTVQCTLRLSVQFKGQK	261	USER	zzz2138
1174		my_seqs_raccoonskin1_2ct37.1@PF02443.14	circovirus_cap	my_seqs	MVYQRKTRRTMRKRKTRTVRRRYVKKRYNKRGQKLYNFTRHIDLGLLNADSVNPTLVAINFNLNNLPSSTEFTSLYDSYKINAVKIQFIPQMTENVSLSTVNNPANARFFSVIDYNDSTAPTSINELREYQNCKMTTLLRTHTRYIYKPKILDTSSYTISPWIATSSPSSIYRGIKVALEPMLSTITTSLAFRIEAKYYLSFKMVK	206	USER	zzz2139
1173		my_seqs_raccoonskin1_2ct40.1@PF03898.12	STNV	my_seqs	MAYPRSYKRSYNKRSYNKKQPWYRKKYDAMDIATKAAKGVWYLKGLVNSEMLHNQSTGNTTTSSTGTVTLLNGMAQNDTSSGRTGNSILMRNIFLRLGFQQHPSATSTTYRVMLVLDTQQVGDTSPAISDILETVNVYAPLATANTGRFKIMKNWFFNTNNASNTFKQLNLYKDVRFHTRYNGPANTDITKNGLYLVALSDQATNLPTFAYTWKVGYHDN	220	USER	zzz2140
1172		my_seqs_raccoonskin1_2ct42.2@cd00259	STNV	my_seqs	MPYKKQQMRKRPTYRKRVYQNRTKKLVTGQGPTLLEKIASYAGPVATLAKAIVPVVAAINTEAKYIDSSAGLAPTLASPSIVCLSQVAQGLTDKTRIGNSLLAKSIQWRIRIIQNLDQGGTYGPPFGSIRMLLFIDKLQGGTAPTLAQVMESTANNISMANKNYTDRFTILKDKIYSTTLNYAIPATTPAQSVIDFKGFKRLDFHMRFLGTGASSSDNGPNALYLMCWPQHSLGTSFTYYTRLNFTDN	248	USER	zzz2141
1171		my_seqs_raccoonskin1_2ct61.2@4V4M_R	STNV	my_seqs	MPKRSREDAPVKGPKFGKKMRTSPAKSTHRVKHGELKGVDVLLTQTAIVATTNDSSNSVVLNLVPSGATSYNRVGKKIYNQSVRLKGVAIHQVGATTTTSNTLYTPLRMVVVWDKQPSSGAVPNWDAIFGYTPQNGTEASTVLSPPRYDNMDRFTVLRDIELEPKSIATPFAGVGGTELDGYFYVPFDEYIKLNGRETVFSGQTAAMTIADVSTGALYVYFRALVNAAGTSVWTVDSSSVARLRYTD	247	USER	zzz2142
1170		my_seqs_redsnapper1_2ct34.4@PF03898.12	STNV	my_seqs	MPRKYGKKKNMKKKKKRTTAIPKSLRGYVRTSGYYSTASPGQELKYWDVSVVDAVVAATGAIFPSMNLIPQGTTQIQRDGRKCVVRAIGWKFALSVPAAATTGDTIRVILYVDKQCNGAAATAADLLDGAVGAQYQNFNNLANSGRFRTLMDRSYDVNPPAGIATAVVEPSISDSFYMKCNLPLEFSSTTGAITEIRSNNIGVLLISRAGVGGFESTMRVRFVG	224	USER	zzz2143
1169		my_seqs_redsnapper1_2ct34.5@cd00259	STNV	my_seqs	MVLYFVGVPSSFLEPLNGARFDQSSVLLFLYLCECNMLSSSVKAYRSYERGHIKNRGRQLRKRGKASAKATLRERRSGLLEELIAERAMAAPSRPGVEKKWKDVFLGQSLGAAGTIVRTSINLIAQGTGESERLGRKVTLTQISVRYTLEIPETTAIADASDTIRLIVYLDRQTNGATAGITDILQDDHYLSFNNLDNNQRFLTLMDRTHDLNPQAGYGNGTTNETAAYNYTDSWYKSVDIPVEFSGTAGLIGEITSNNVGILALTREGLVDITMRTRVRFLG	283	USER	zzz2144
1168		my_seqs_turkey_2ct70.1@cd00259	STNV	my_seqs	MFYRKRRYQRKPVKGKKRVARKGAKRVAVSKAVKTYVKAQIHRQVENKVITDYQINQTIVTANSVTAPYYVPLTPMIAQGVASNGRIGNVVTVVKGWIKGYVNLLPYNVTTNPTLPLRVKLWLCSERSSNAAATLNQLPGVSDFFQNVNGLNGNFQGNMLDILRSPNTDNWIIHATKTMELGLTAQYGTFGGYADNSKFQLPYFFNFKKHLGKCKFDDGSNYITNRNLFLIIQCVAADGSLAAYQSAENHYTIRWEYEDA	260	USER	zzz2145
1167		my_seqs_abalone_6_2ct33.1@3KIC_N	parvovirus_cap	my_seqs	MPRYVPPYDAKEKHLPGMNYAGPGTNVTRRLANKVQPMNALDRAALAHDLDTETRGPQRASTKAQVRASDKRLERAAFKIATAPRTSRTERKLAWVVYYAMRGNRWRPSRRD	112	USER	zzz2146
1166		my_seqs_abalone_6_2ct44.3@4BCU_A	STNV	my_seqs	MPKMLIAKTEPGLRVVNRRNIGKRRSYTKRNSGWPKGGAKYAKIPTGARYAPIHIEQKCIDTPINTAIQQGGGVDLEGTFASGNSQLLFEVPRGSTSYQRIGNRVTLKKFQFNGTLSFGDRSPALSELRIIFYIDMEPEATKPVAADLLDLRGGLQNDESIDALRCFRKLPEINRFKILYDKLHFFNPSGRETFDVTDPTSITKYPAKQMKIKCYKNLNNLQAIYQEEAAGGTYEECTQAAIMCMFITDVQGVSDQIRVHAAARLRYTDL	270	USER	zzz2147
1165		my_seqs_apo2_7_2ct29.3@cd00259	STNV	my_seqs	MFRRRLSYRRSSVRRRSLKQQGVTTFSARKASATIQPRLRRGPMLQRVKFLTIEGDGMGTPSRFQPGVMVASRNNHSINTSFQGQYNMHFLNPIDPGNANSERLGLRTMMASIVIRGSFYYSPFRIGTPPIEHVMGDYTIDSGGAPINMNPSIFDRSMTCMLCYYPRTKFGAIGLPDLGALLEAPVSTFSPQNEVNEQGVKIIFRKNFRLTLEAISAVPVAGVEDGYRPITGIGRGSRRDVNWKINLGLPVEYISMTGGTGVSDVRSGHLFLICLANVSSASALPASSNNTAAFPKFSYRARLAFADA	308	USER	zzz2148
1164		my_seqs_apo2_7_2ct56.2@PF03898.12	STNV	my_seqs	MRPSNIKRINPSQLRGNWVKDPVGTKKDQIQDKQIKNIKKKIKKIEYNEEVLYVDVSSIGAVAIPETGLQLAGGGIAQAIERGDDPDQRQGNEITTTSLLFKANIQSNTAKLTPSRVRCVVYWDSQANGAVNVTSGTANSLMEASGSVDGTLDMRNQETIDRFTILMDKVYTLNPQLELTTTAGTVTANQPVSINISKRFRLGRKIQYSGSGNGIVDLVKNNICVVLISDSNSNPPTCTSSLRLYFKDT	249	USER	zzz2149
1163		my_seqs_apo2_7_2ct73.1@PF03898.12	STNV	my_seqs	MWTPRRPVKRQLFFTPASTVKRARTGTFKAGAQTNRFRFLNKRTVPGPRTNGTLTQQVKALQRFVKTLAPEIKYIDNTVFTSDIPATGAVAHITNIAQGDGQGTRTGNSINVTGIDISGHFISVSTDFVATAFLRVALVQDREQVADTNPTVANIFATGDPTQALPNLDTLERFRILWLSPVMSAWQMVLDSDRLVGGAVPTHKGTFNHSWKGNLKVSYNGTTGNDIQKNGLYFAYLTSSGVTTFDANGNARICYTDV	258	USER	zzz2150
1162		my_seqs_apo2_7_2ct79.1@cd00259	STNV	my_seqs	MYTSRKRKAANTLVRKAATLLRTKGKTTLGPYTRSGYSGMGGRRGSYPELKVVDTALTTTIIPTTASITLLNGIATGTDYTNRIGRKIMIKSILFRTTLVPNTSSNTPAGDTTRHMIIYDNQSNGAAPVIADILQNSGINDPMNLNNRDRFRVLFDKYVTMEAAQYAAGTLTAGSPGARQVKLYKKCNLDQVFNNTGSTVASIQTGALYYVVLSGFNNQSTSLWTCRIRFIDN	233	USER	zzz2151
1161		my_seqs_apo2_7_2ct93.1@PF03898.12	STNV	my_seqs	MSRNLKAKSSARTPTGRMQAKLLSANRRKTTFITHRTAYKSKYVAGELHALDLAAATYNIDTTGSVTALNLIAQGDDINNRQGRQIFNQSIRVHGNIAPIDTTTVPTYCRIMLVWDSQSNSGTIPTIAQILTASSSVSNTNLDNRERFTVLRDWKQTLGGTSTTATSSYAQSPTVSELDWYVPLKGAKTTYSATTGVIGAVATGTLLLVTIGNQATSDAFQFQCTTRLRFTDN	233	USER	zzz2152
1160		my_seqs_16minnow_6_2ct1037.3@cd00259	STNV	my_seqs	MGLTPGLRVTILVAFASSKRHRNFRYRVSMAARKRARPSSAVAPSKRFFKRSARAMVRAPRAFARRSVTTKRRALSMLANQRSAGFLGIETKFYDTGLAPLNIAAVRDWSSSEFDPAGLGCISAPAQGDGPSDRDGKKCVIKSVQIQGNITGSTWEAFANPLAGCAVFVALVLDTQTNGAQLSSEQVYTNPADADLTIADPLRNMQYSSRFRVLKTWDLNLDAKTMSESQVGPVSQFSGTGRHAEFSCYLDGLNIPVNFTGTTSVVANVVDNSLHLIANAANANLGWAPAISYNARIRFQG	301	USER	zzz2153
1159		my_seqs_16minnow_6_2ct1037.4@5MJF_V	geminivirus_cap	my_seqs	MSSRGSWAYPGVRRRLLPLAGRRTPPPSPAGSRGRRAVLDLLNERTEGLLGQETKFYDSWRTGFVAESVNMTGIEFDPVVGCLSAPSQGDGAQQRNGDRITVKSVQLKGNIYVTNNFQANRPANQSRAMVALVWDKQSNGAQLNSEDVFTNPTGGGNIATMPLRQMEYSSRFTVLKTWELDLTPVSLTQNGANWAWNARSASFECFLPLSLVVNFSAPAEGVASCVDNSLHVLVNSNGTNTRTACYYLSRIRFE	254	USER	zzz2154
1158		my_seqs_16minnow_6_2ct1049.3@PF08398.9	parvovirus_cap	my_seqs	MKRKREINYYGPNKFRFPRTSYCGPGWSDNKWQNSVCGYSTARSHLDQNCKEHDCSYYHGDEEAADWRFARNVRNPLIGYGPLFVHKINNIMAPHKKYNSPPYTPRTHQNNRNSNYTRTAPLSIQRGITRAVSRAVGAVSGARNSTISYGVGSMRNIKGRKIKRNGTKKGVVYQHETGGTAQEAAVATQPISQVLYIGHTTHQRSRESVAIWSALFKALMQKAGFDVPNLTESFLSSTSANNDYSWTLSFQIDDQASLTTTSGAIGPIDTMANAVVSTLNGLTNPRRILFKLFTLNDTNDVTQVKPNSFMNLERTLIHLKSTSMLTIQNVTPNEGDSGPLGQSFTDKSGTNPLKGKLFVCNYASFQLATGSKVPDPMFGLANLGKGAANQLIQLYNEAG…	520	USER	zzz2155
1157		my_seqs_16minnow_6_2ct1059.2@PF03898.12	STNV	my_seqs	MSTLKRKRSEAMNYDNRPFKRVVSTARKPYVQTPVPRGTTTPSTGNTRIDNFAVSSTVATKAPKGELKRVDIWSDWNVADIDESTGVPFILLNGVQSGSGTYQRLGRKITMKSLELRALWRLNNNSGQPDVWNGKDWPEYSVRIMVVYDKEVDGTTFPPIADLLQDLNQAGTQSTYPLSFPNLYQSERFLILRDWTFFMPSGTGANVNGWLNNSQAASTTDHSISINKQAGLPGVDNIHDYIKLNKLQTSFKSTNDPVTTGDIASGGLYIFGWSTLDLAGEYQHPLIFKFDARLKYYDD	299	USER	zzz2156
1156		my_seqs_16minnow_6_2ct1122.4@cd00259	STNV	my_seqs	MPPLRSRTLCISSPIKKNLKKYHFKGVFSLFTQKNMDRRGVKGRRQNPTLSRGRAAQQLVRAQRAQFVSRVPVGIAAVRRAQLGEKKGVDTDLALTGVLNTTSTNANIFVANLIQQGAGSWNRIGRKTFLKSLRIKGHVQIQATPVIATGVMLNNALRMVVVWDKQPSGAAIPNWDAIFGITAQDGVESCPDFTCPPRYDNMDRFRVLLDRPIVANPNFVTSTGSAPSNIQYVPVDEYLKLGGLECVYSGQSNPMTIADISTGALYIGFRSQNNSAGNTINTDMVARLRFTD	292	USER	zzz2157
1155		my_seqs_16minnow_6_2ct1194.1@4BCU_A	STNV	my_seqs	MPTGQKSRGIRKRTPGTLNLKKAAKRQLVFPGRSPQSAKVTVRKALLGLAETKRINGATIFTTVLQNQQNGVIASALNVNASNTTRNLTYTSEGTAPENRVGDKIYGKDIHLKMHFQMPDTVAIGITNDAYTKTTAIRVIVFETDRDRMLNANYSTDLLAPPYLFADTQKIMADLDNQRYRILKDHRLSMANPELVWQGQLTDEYNWMPEQLMYETTVSLNKNITYSAGGNEPDRMVGVIWLAQQDQSLGNGVALGVVRVSWTFTFKDV	269	USER	zzz2158
1154		my_seqs_16minnow_6_2ct1219.1@5J37_A	circovirus_cap	my_seqs	MVRSFRRRSFKRRSFKRKSYGYRKRPAYRRKRFSSYRKKRFSRRRSGVMKPVYIWRKTTTAYVTCPIAGTNSATTYVTVNLLDFTDYSTWTALYDEYKINKVTVKWHCPQWNRTGSGATTSTTTGTINEYQLFNPNMLSVIDKDGTYTKTLPSDMMLDPSCRTWAVGNGRGTRRSWFPKYTVMGPPDGENDTWIGRRGWLSTDYMSIDHYGMNFIVDNTEGPVDWSDVQLFYEVWMQVGFRKLSKGRVFPNYTAQQHG	258	USER	zzz2159
1153		my_seqs_16minnow_6_2ct1234.1@4BCU_A	STNV	my_seqs	MSVSAHPATFYGKVSYNSLKKVGQGLLGGLGGKGLFSTIVRPQKVGTLPQKTNMPRTVGTRRVKKTVKKSNKLLTVGAAKRMLQGVLEKKQMIIYPQITAIAQGSIYTYNLTAQLTQGNADGTRVGDVVDLKNLEFNLQWYTHPAAAYYRLRVLVFWSGEEYNPGASNFGSASLSTGQLFIGAATFTTQNICNTKSINVLYDQLAEINSAVPAYEDGMTLRANITSGIAGKYTYQEAGSVYGKTKNLYMVVIGNWSSTNATLPNNVGTCYVTAALKYTDA	280	USER	zzz2160
1152		my_seqs_16minnow_6_2ct1362.2@cd00259	STNV	my_seqs	MARKFVKRRYRRRGNVAKRHPTMKAVAKRVVKTALSRQVERKSRIIQLADKQIKGTVVHWLNPLYYIPKGDQSYERLGDKLTNPRLELSLSYFHEGLPYGTTTDSSWLGSKLRVVVFKTRQQLTPDDADGWTDSIPGIGAVKNLFLNDYQGSFSHLNRHDYTIMYDRTVSSMKPFYTSYPSFGPPGQLRTVISLGKEFRYTGMGANDIAGTAWGTHSNIYLAVVASGVNSSDVDKMGRLQCTYRISWTDA	250	USER	zzz2161
1151		my_seqs_16minnow_6_2ct1364.1@PF03898.12	STNV	my_seqs	MLENFTDVLQYLNDFRNLKNIRMVYSRKRKYSSMSRGSRGGRMASKYKSTGYRKYGKKIRTLSGYKGGAIGARLARIERTIETKEGLRTFGSTNIALAHNNVVAIMNSMLFTTTGAADPMAGNGQRIGDRISLKGVAIRLFLQNQAQRPRVFYRVMVLKCAKGDVPTRATLFKGLTGNKMIDQINTERFTILAQKILTVTAQGSMAWTTASVPAGVPQTDNGATAIGGVGTRIVNMWIPGVKFARNGVIQYENESDQPKFFDYRLFIMAYDWFGTPQDTNNVGALSDGFVKMYYKDA	297	USER	zzz2162
1150		my_seqs_16minnow_6_2ct1371.2@PF03898.12	STNV	my_seqs	MAFKRKRITPRYNKKKRIQKRRRTDSKAGAKKMIQNIIDMNLETKNACLSSTDGVEIAHNNFVLLYDKNLIATTQGVFDPQGLDTQCRIGDKITLKGVSIKLMLELNERYSDVTFRMLVVKHAKGDTPTRATLFNNLAGNKMLDTINRERYTILYQKYVQMKSPNFNAGRTGGVLVGEEPFVSIPVQASLIPNFQSAGAYKADSQPGMTRATKLVSIWIPGKKFGRGGVVQYENQSAQPKFFDYSFLIYAYANFSTYQDIFFVGRVNDSVKMMYYKDG	278	USER	zzz2163
1149		my_seqs_16minnow_6_2ct1377.2@PF03898.12	STNV	my_seqs	MALGKRKYSSMSRGSRGGRMSSKYKTSGFRKYGKKLRSLGGYKASAIGARVARIERTIETKEGSRIFSGTNLAIQHNNILLLTSSLLFTTNGTNDPMGSAEGQRVGDRITLKGVAVSLFLQNQAQRPKVFYRVMVIKCAKGDTPTRATLFKGIVGNKMIDQMNTERYTIVQQKVFTITAQGAMAWTSANVPAGYPLTINGADAIGGVGTKICKMWIPGSKLARNGVVQYENASGQPKFFDYHLAILAYDWFGTPQDANNVGAVSDGWVKMYYKDA	275	USER	zzz2164
1148		my_seqs_16minnow_6_2ct1429.2@cd00259	STNV	my_seqs	MPYTKKKPSKTGKKLYKSLKKAIVPQSIKTYVNKTIHRQIENKIADFHYNGDVMYNITNNPTQWTGNNIIYLSPNSASLNGVAIIQGTGQDERIGNKIRIMKAMLSAVIYPVDELAVDKPLDVNFYICNFKQANTNTDVSTICTNKFFQDGSTSLGLSGTLADNVLRVNNDLVRCYRKFTKKLGPAMNDTNQKFINNDYKYHQQFTLDVTKYLKSVYTFNDTDQPPIDPFVCLIVSPVPCDNVLDGPDENRCFITYTVELTYEDA	265	USER	zzz2165
1147		my_seqs_16minnow_6_2ct1466.1@cd00259	STNV	my_seqs	MQWINYFFFKNTFSWLIIMNKKSGVTQKEFTKSVEKIATRVARKVNAKVEETKMQSFAIVASAIPKNTLYSWNIAYYMSQGIDDHQFLGGKVNLRGIKVNMVLQASINEPVHFDVAIVTADVYAAAVNMANSDIIDSNKIDAPHLEVDSSKANVVWSKRFSLSPQFTSAVTQKAICEYIKIGKVIEYRDWTVDWNLKKQNYYLVVRAMSTSGTAGSTATASTSGRISVYFKDP	233	USER	zzz2166
1146		my_seqs_16minnow_6_2ct1485.2@4V4M_R	STNV	my_seqs	MKTQKRQFKSKKLPMATKKIDFAQNKKIVNLEKKIKKIEGEPELKYSNKPIQETAVAGLGVVGFPLNDTIAQGLEPNQRIGNKITATSLSFKGILVTDQGRLGYSIFRVMVYWYSDQIAASPVIIGDDLTGTRCMLTVADGLVSSPSFALPYSRAYVPKTFKVLYDKTYVLNANTYYTDDTAGTVTRYAPVSKNIQFKIPLNRVIQFDNDGIGLASMAGNSLYIAVIADNTNSPGILSGCTRFNYRDM	248	USER	zzz2167
1145		my_seqs_16minnow_6_2ct1507.2@cd00259	STNV	my_seqs	MAITITKKEIRKARKRVSTKKVSEPVKSYIKKAISNEIELKQVATAENANTTASFTSIANGTWTLYAPGGVYELAYIAQDAKSNQRIGDQVKVKSMKVNGFISFPSYLNSDTANVDYAGQTMRVVIFQLKKNATTTLLTAALQAGPLVSTVPEFGSTDDIANWSNIKNLAYVLYDKLFVRDQKAVGMMYDSDLDDYISIIGTDARVVKAHLKPKIAFKWKYDSSSGTPDEQGDIVMYHYYARLGFTSAHVPANPIHYRYGRQINYTDA	268	USER	zzz2168
1144		my_seqs_16minnow_6_2ct1526.2@cd00259	STNV	my_seqs	MAGFRKSRKPRRGVTMGKKSIDAIQSKDIAILKKKVKSIKPKVLTPAAVIANSSIIYSSPYILGLNPLSLGTGETNRVGSKAKMEYLKMGLAFQSTADLGNKGSVRVLIVQQKQNRGNTTVLLDGSHSADTYGLGLFNNYASGSSAYNNTNWLFNETIDFSNLYKIIYDTNFYLDVGTHGLTHVIKINKKLGFVTDYSYDNDGDMEDILYNGLYLIVLVDSINASVISLRTDYMLTFTDA	240	USER	zzz2169
1143		my_seqs_16minnow_6_2ct1647.1@5J09_C	circovirus_cap	my_seqs	MINLIYNSLIQQNMPYRKSYRKSSRSIKKQMNFKRKKSRYDGINYVKIVDVTNFTYTVNAGLGYNLAAFTSQWGSRDVLANSYARISDADEWVNLCTKYRYYKIVGMRVEYTPIVAVNSTTNTFIIRG	128	USER	zzz2170
1142		my_seqs_16minnow_6_2ct1744.1@cd00259	STNV	my_seqs	MVRRQFGTLNMPKRQRLALNVPARSRSKSPWRSSAPAITTMSKFQPSRGIEKKYIDTTVTSGWPATTAATWSITMLNGVAQGQTDSTRIGQRTQMKSVQLRLTSPATVNQPVRVRVVYDKSTNLTAPVTGELFENDVQNAMNQNSTAGRFITLWDEILFVDNSNDAIHVEKFIKIDLPTVYGGTGATVGSIASGGLFLCLNHGGQSWASQPLASYSRVRFTDQ	223	USER	zzz2171
1141		my_seqs_16minnow_6_2ct1753.1@cd00259	STNV	my_seqs	MAKTSKTAAGRSMKRSREDYMSNMFDGSGTKKVRKVVQSEIRKREIRTTELKEYTDSFGGTLFPSLTGSVISVTDAIAQGEDMFERNGRYIYMKMIRIKFSVAAGVTNWADCGRFYLVYDKQPNAGTSAFSDIFQTASGATAGSAFKNTLVNGDRYVIVREVKWDCSYNGDQYKNYDIFYKVPDKLAHTVYPGSSTTEAQTGAWLICYGADRNTTTSTQMIANVKLQFTDK	231	USER	zzz2172
1140		my_seqs_16minnow_6_2ct1759.2@5J37_A	circovirus_cap	my_seqs	MQLSLAVIMFDRTGIRPWLVAGAAAQAAYSVYSRSRGPLVSAPSMAYSRKRSSRGRSAPKRKRSAGYRLTRPVRPVWETMTRWSAPLPLPMTLGVASGVGDVSLNALYTTDLLAAYDTYRIKKVTAVLMPAAPLGNGAAAAAASHVSVACACDQAGENLTVPSSTFVASYDNARIKHLTEDDEKFYYTFYPKVINDVDNAGTSTAVGNYGPTNPWLNLSTQGIAIPHKRLLYHIQYGATATVTNFILTYIVTFDVRRNR	259	USER	zzz2173
1139		my_seqs_16minnow_6_2ct1764.1@cd00259	STNV	my_seqs	MPVTRKRTTTTTTAGNARRRYVARSSTRASRATAYANTRLGWSMANPEQPLPGPRRSYQRPELKYFDTVLASTWDGSNGPSTVTIVNKPPQGAGSTNRIGNAISLRSLEVVGEIFAGTAQVTNQCCRMIICWDHQPDSAGIPTPITPQLLINATPDGLFNVNNTDRYTILYDKIFYVSASAANPNWMKPIHLYLSLKNVEARYPLAPGNFPVSNSLCIYTMGDTAVGVNTNPTWIAQSRIRFIDA	245	USER	zzz2174
1138		my_seqs_16minnow_6_2ct1799.1@PF03898.12	STNV	my_seqs	MFTIGKPPVKKQQVQKRKRPTQFSNVPQIYRRGPRMEIKYVDNAATDDNFNLVGGTPWILVNGIVQGAGNNQRIGNKVSLKALRMKGQIINLATAVQTYGRLLVIYDKQPNGALPTYAAVMQTRDSAGAATNTAFSDPNFDNKERFTILRDTTIVFPSVTNTVGVLTNVGFDQQSKSDINIFNVDMYIKLKGLHTAYTGATAGIADISTGSLLFAVMIHQGAATWTFRNVERLTYYDN	238	USER	zzz2175
1137		my_seqs_16minnow_6_2ct933.2@cd00259	STNV	my_seqs	MFLMNKKVTFFIGKRGSILFHKMPKKAYKKSSSKRKSKSKSRKGSSSKRVKPSGSRSFSAIASNMEKKFHDMSITSANNGGQVDVGGEAWYLHVLKQGNGAVQREGGKVTVCNVNIHGVVYAASSQNLGAGTRSACRLMLVIDTQTNGVKMTTADILQQYLDQDGAIIAGTQPDWKSFRNTFSGSRFIILKEKWYTFVPENVVWGAAAIVGNGLMQHRVSLSWKGAVPVHFSGSSGDFDTCRQNAFYLFAIGMGDPATSYHPILDVTARVKYYDN	275	USER	zzz2176
1136		my_seqs_16minnow_6_2ct940.6@3JB8_A	RNA_virus_cap	my_seqs	MARRSKRKRSEPQATLSDLVSEPESVSKPEPLYHTPMSSDFPQGSIGPANWVDPVTYRALKAKFSKKKKTTPKKTTKKKKSSRKGYYRNYGGSLAGMGPIVITGRGGYFTDKLKTGASAAYRALQRGVPAGTFSRLGTAAGGAMFGAPGASVGSFLGQGVSNVLGFGDYAIRKNDLLQVHEGMPVPTFNDLNQGIVVCHREYIADISVASTAFQNRAFALQPGDNTTFPWLSQIAAQFEQYELLGCLIQFRSTSSDFGTTTNLAMGTVIMATEYDVVDANYASKLEMENAQYSMSGKPSHDMIHPIECDPSLVGPYGLKYIRSGPVPSGKDPRLYDHGTFQLATQGITTAAGSVIGELWVTYKIAFYKPQFNLGTDIRTDYYIGTTASAGSPWGIVLPQ…	507	USER	zzz2177
1135		my_seqs_18minnow1_2ct2059.2@cd00259	STNV	my_seqs	MPSMRKRKPRVARAGAYARSAYRTTTGGSSGQRRRRGGGYQSAANIASRVGALYSMIETKEGTISTNVNIALPHNNVYVLQSGGVDLNPFLIGYGSGDPMAGTGNRVGDRITVRGISLSLFLENALQRARVYYRIMLIKKAKGDTLDRSTLYKGDCNNKMLDQVNTERFKIVAQKIINVNCTNNAPVTVGVTGVPSGGTLAGISSKIVRFWIPGRKFGKNGNVQFENGSGGQCKYFDYRWVIVAYDWYGTPQDANNVGNINEAYAKVYFKDA	272	USER	zzz2178
1134		my_seqs_18minnow1_2ct2067.2@PF02443.14	circovirus_cap	my_seqs	MALGKRKRYTPKTGRNKRRRRFRRKLAISPRERYTPFIMPNKWKCKLRYFEIFSLNPGAGTADHRVFSATGLYDPDITGAGHQPRGFDQIMQFYNHYVVIGSKATLRFMPIGATNANTSLFGISLNDSATAMTSSTLEDFMETKFASKRKGIAGLVYQGSYTKDAMVTKTFSHKKFFRKPANDTEFQGTASSNPTDQAYFTCSAYSPDEATDSGAVNYHVVIDYICLFTEPKLVPVS	237	USER	zzz2179
1133		my_seqs_18minnow1_2ct2133.2@PF03898.12	STNV	my_seqs	MPVRRTRKGKTRGYRRGKKAQVGLIKKVINSQHEKHVHTVSVNGTFSSTGTVQDLSAIAVGDAVNNREGDRITLKSIIFRFGLIAADTTNFVRVMLVQWLQNDAATAPTIAGIYNSTFTAQPYATFAPFNKSAAGYQWVPLYDKTFALSLNGNACSKHIAKITPRHFKKKAKAMIQYNAGATTGVGKIYVILISDSGVAADPTITGVMQIRFLSS	215	USER	zzz2180
1132		my_seqs_18minnow1_2ct2152.1@5J37_A	circovirus_cap	my_seqs	MPYLIRRRVAGRRYPKRKILRKPRPSMAMRQVRRLIPTNTIKLVRKGITAHVYNNAAGTDFATNSTWLTIGAKSAVQSTMPNYYNLPFSATFRVGDVYNWIELQPIAEKFKLNYVKIYCYATSTTAAVNGLGLCPTVLWDEKGVDDDTVPTYSAFKEQMGIKRKFLAQGKVAVMKPKLCVLANVLSGTAGVNSVRVQKPVWLDTNSVSATTEHYGLNGVFEDLFLGPQASSAYDIKFDIEYGFSLRNVK	249	USER	zzz2181
1131		my_seqs_18minnow1_2ct2163.1@cd00259	STNV	my_seqs	MPRQFSRSRRRGASRRRATSWYNKKYSTMQLAKKAWAATRYLKGLVNSEMLHKDTDITLGAVQSRLLQIVDITQNDLDSGRTGNSLLLKSIYFRGQLTINSSVTSNTRVCLALVKDKQQIADTAPGLGDIFTSSTDPDTLLNLNTQGRFKILWRKTYTLSPVGGGRNCFDITKYWKLYDHVRYNGPASTDIQKNGYYLAVITSEAANFPTIDLNCRVGYHDN	222	USER	zzz2182
1130		my_seqs_18minnow1_2ct2166.2@3R0R_A	circovirus_cap	my_seqs	MRRFRRRYPKRSRKVFNVRSAHRAISTFSFPTRVSRTVRIRMKTHHFKQVYFPSATSLVFQAGNSGNTYTASSGILTGPDNGGVGTTDGAWALMFRVTDLPQITSFAGLFDAYRINKVVVRFEPLVNMIQYGAGGAAGNAGQTEFLSTVIDKDDNSPLTAYSQLLEYESFKETPGYRRHIRSMVPSVAAVMFKTSGTTVGFGQRIKPWIDITNTDVEHYGLKGYTQKNGSANLQMVWKVFVTMYISFKQVR	251	USER	zzz2183
1129		my_seqs_18minnow1_2ct2199.2@4BCU_A	STNV	my_seqs	MPYRSYPKRRFKKKAKPALSKREKKDVKKIVKKEINNVVETKQAAYKITNQVISSASGNKYIVNAANGLSDGVTRTPGQQGVGGYQHIGNELLIKMAEFRCSFYSNANTQVANSVRIMVVWDKKAQGLLVATNELLYDAGSGNSYLSPLKYNSHPTYKVLYDQTVTLMPSGTINEEAAEGAWLQAQYRYNFHWKKYFPKGLKTTYYPDTSATDTTTIQDNALYVLLIANTENVRVENGYMNMLYQDA	247	USER	zzz2184
1128		my_seqs_18minnow1_2ct2233.2@cd00259	STNV	my_seqs	MPKYNDGKTSQVRRKTKRVKYAFKAKQVADIKRIAKKVAEAVPEVKNFDQPLSSLQIQRAVASPIVQDISAMSQGLTENTRVGNHIQPTYVGGRYTIHGIVGSSNVQTIVRVMLIQFLENSADAGNPTWGTLLQDPSRPFDWAQSNKTGTYKVLYDARHIISNYAQNEAFNVYGEFNISRKSLKVIDYVDNNTTGQNKLYFMAVSNEATLGQTPVLNADIRMKYTDC	227	USER	zzz2185
1127		my_seqs_18minnow1_2ct2272.1@PF03898.12	STNV	my_seqs	MGFRKFARVVKTFARPTAKAGMLMSRWGFRGAKNAARLASLAYNGVKKLRGLVNSELYKLDTAWASAAITNGFCSHRTAIQLGDGDDSRTGNSVFVRSYNFKGILSRNAAGANTQTVRVSIIIDTQQVSDTVPTYTDIYESLSPFAHLNSNTVGRYKILFTRTYVLDSVQKDSALVNINLAMRHHVRYNGVNSSDIQKGGIYMCVACDEPSANMPSIAGEHRLSYHDN	228	USER	zzz2186
1126		my_seqs_18minnow1_2ct2275.2@cd00259	STNV	my_seqs	MPSGSLSKAKPKGKPLNKRQKKQVRRLATIGKELKFAITFSANGVAVTSAGTIYDLTNVAQGTTDTSRVGDRLTLCGKMELFLQFVGPESLTGLVNDIYNTIRIVVFQLKEKAVAGTNPITTDIFLNGPTGAADVLSLYNHDNRQIYTILKDVVINLVNNQNSTVGGTGFTTAQSNHIWTKKLMIPMGKKVRKDIQYISGGNNGYNKIFMMVFSDSGAAPNPTMTGNSKVFFRDA	235	USER	zzz2187
1125		my_seqs_18minnow1_2ct2368.2@PF03898.12	STNV	my_seqs	MHRRSKYGKKPLKKAAPKRAIVATVKSVIERQTEKKHYYNDFGASYSSASPDSNFVNLTPITQGAGDTQRIGDTTKPYSLYLSFGGGYTGTNAAVRILVFQWNQVTSPSISEILYSVTDGQDLVNSPISQDGLHAKKFRILMDKRIITHQYDPKISFVKRMSLKGCRQIGFMGGSTTAAGHIYMWIISDSGATTPPFITCNHLAILSDF	209	USER	zzz2188
1124		my_seqs_18minnow1_2ct2754.1@4BCU_A	STNV	my_seqs	MVFCIICLCTRPRHVVLCIKEITKVRSNEAMPQPKKTSKKRSGSKKKSPSTKLIRPEAKAVDVLFSLALVNTTVGSGHTGLLNLVVPGTGPSNRIGRKISMSHVHFECVLSANPAAITNSDTIVCILYLDRDISTALPGLDDLMRSTLSTGLEATSVISPQNLNTTKRFKILRRKVIHYNASAAGAPLAPTNFSDNLAHWEWSVPMSEVVLFNATNGGTIADIENNGLLFGAWGSNNAVAQAQLNCSSRVSYFDA	255	USER	zzz2189
1123		my_seqs_18minnow1_2ct2764.1@PF03898.12	STNV	my_seqs	MPPTKRSYAYVGQGGRMYTSKPRLAGPYKPVGLSIKKALLKASEQKATAFAITTQHADTTGEVRLITAPANGADANMRVGKKCQVNMVELNLKIVASAVTAGATPGYQWWLVYDKHPNGALPALADIIVGTFPSIVLPPAEPRFTVLGNGYGFLAKPVNYETGSSAKVITKKIRCNKQMVFTGDTGAIASISEGAIYLVTSGDTANASPHPTMTGEAAIYFKDV	224	USER	zzz2190
1122		my_seqs_abalone_6_2ct100.2@cd00259	STNV	my_seqs	MPTQLTIKESLARPKSARKAKKRVVKRAASKRGLNTVEKKQVKDIISAKKEFKYCPNFINYDYYDPALQTAFQQPITVGQTTLPNVYSQANNTCTIVGFQMGKYANTASQQLDAALTAAGTVPCMNQLGGIGMENGIDQTNIIGDYALLHSSKVNFQINTSPAGGNADNVQDAVSPMIFRVIHVSCKQDQAGITPSLSGDLFRDMTNENKGLMSDMTLKQLMTDYSLNRERFHVHKDFKFKLSEPTEPDYAGTTANQSQRNISYPTQKNFSLWMPKPKKKLRFSDSDNGSTNAFEWLNADFVSYVFVLCCREQNTSGNYSSTLKRWTCSTQGQTKYRDV	339	USER	zzz2191
1121		my_seqs_abalone_6_2ct119.1@cd00259	STNV	my_seqs	MVRRRRSTKGMSKRISKLEKELTPLLKTFEQRFVDISPANSQAQSVDIGGWYYGMGTYAPTIDATVGGAAGNIALPDNLRIGNKITVKSIHFRGNLEVAQSLPVIPTETDNQIRLLAVLFPDYDSSNTLTPAQIVKQVLQQYDGGATGSPLAPYTTMYSPYKARIDQTNAQPMVKYKVLYDKKFDLFNNRQATNANGAYSKQNWRLDFNIKLKFKKGLVVTYDKPLSTEPSINNIVLMAVSDSAAPPHPAIRVVSRMKYMDA	262	USER	zzz2192
1120		my_seqs_abalone_6_2ct124.1@cd00259	STNV	my_seqs	MPLNFRNMRKKLAAKGRAIRGRRRRAPPARFNFSKKRYNANKALSKKASQMSETKLIACTQFEEKAPKPIALGAIAYYSSFIMTNLPPGWDTSFNVLNGIATAQGTAGNTRVGDYIYLKKTHINFQIDINETSGFTAPIEFRMVVAKARTGVLPVGYTYTPSTTLFLNTVGLPIGHGTQGVTGTDLMLQPVNKRDWTVFKDMKFTLSSPDTGGGGMNYFYPSRKNVLLNLPYYGKCRVNTSTGLPEDLDTHYIVMIYASSVGKDRSAADWEVSTRGTTSFTDN	283	USER	zzz2193
1119		my_seqs_abalone_6_2ct126.1@4V4M_R	STNV	my_seqs	MPYASKRKRSSSRGRMVKRFNRGRTFRTVRRRVPAAPRGLSNMRKMIKNVQLSQAETNYKSLAVTSSGMNHDKIYAFPLWGPLASIFPTQGTGDDQRVGDRITASSVKIRLCMDVPWDRKNVKVKLYYLPYNSDQGDPTSYSSLFNNITGNSLLDPINFKRWKGIKYLGMYRPQDKDASVYQTLANQQGAPGATHLATNTASIVINKTLKMNRKCWFQDGSDQQPSNLRENGTLLVLPYATTNTAITDTIIEKMEGAYTLYYKDL	265	USER	zzz2194
1118		my_seqs_abalone_6_2ct127.1@cd00259	STNV	my_seqs	MGNFRKNKRTASMARGRVDKAQNQLLKSMKKDIDELKSDVEAKYNVSNGQIKVDAYDGSTDATRSRNILSVPTGENQGTTDVTRIGDSVSLKHIDFNYHIIMPFTLSGQVVQEATRVRVLMLWDNQPNAITTTGAVNVNKVYWPQLLQNAKLNMSPPTIAEQKLIPISEKDWDNRKRFSIIYDKTHTFACAYSPGQATGGSATDGGLGPRSATGIVKFNKNYKGQKIRYTAGGSIPQNRQLYMAFISDRAYSSSIDARIPVCTYTVRTIYDDL	273	USER	zzz2195
1117		my_seqs_abalone_6_2ct129.1@cd00259	STNV	my_seqs	MATFKQKRKGWMRTKRNKRTGTVTRRLVNLERTLRAGREQKVARVSGEQNISAVIGTSQLINLMPDIPQNVEEGGRIGQEIRLKRLIVKSWVQYAPTDANNRVPRNEANVMCRHFILKQKDQMSSAGLLLAGVFVNDELLESGEFNQGNEFRNIMSPVNRDIFTVRSDRKKRITNAVDIVADPNTDADANPGNFIQFNKTLTFGKMGKKLTFAKDAGTVQPVQFPYIMTAGYCNTNGTAAPFSAARIFYDITAYYTDA	258	USER	zzz2196
1116		my_seqs_abalone_6_2ct133.1@3KIC_N	parvovirus_cap	my_seqs	MPRYVPPYDQEEKHYPGFNYCGPGTNVWRRMTNKVRPMDDLDAACYTHDIATEPRGPYTSQGDGSKLRSADRTLRDKALKLSMPWSNYPKKSAAVSVAAAMELLLTTGARGRGLKD	116	USER	zzz2197
1115		my_seqs_abalone_6_2ct136.1@PF08398.9	parvovirus_cap	my_seqs	MPRYVPPYDSQEIHYPGFNYCGPGTDVWRRMRNKVKPMDDLDAACYQHDLVTEPRGPYTSGGSGPKLRVADRNLRDVALRLSLPGSRYRRKWAARQVAAAMEALLATGARGRGLKN	116	USER	zzz2198
1114		my_seqs_abalone_6_2ct140.1@cd00259	STNV	my_seqs	MVKKFKRRTKVRKDKKQDSRIKNLEEFVYKTIENKQIQYQNQTTVSSSGFTASSYLLPILATGADDGNVNNDTARIGNTISLMRTCLTGNVKVASADGFNRIRLMLVASKDGAQEITASDVLSYHDYTIHGDLVFSSQYTTKSATNKNYNVLMDKVIDLNVYGPAYKSFKFVKRWKSGKELMYDGVGASAPTNYKLSLIGVSDSGSVLHPELNYMIRNTYKDA	223	USER	zzz2199
1113		my_seqs_abalone_6_2ct142.2@PF03898.12	STNV	my_seqs	MPARKYTRKAKSGMRRYKRADHFAASKIQAAIRAALNKNIETKNGLQTISDGTEITHNNFVLLGNNPLATIGGVKDESDSMGNRIGDKINLKGMAIKFMVELNERYSDVTFRMFVVRSAKGDTPTRATMFNGISGNKMIDTLNRERFTFLATKTFKIRSNAPTAAMTGTTRMNDELTLAGGSAFAASGIYNANGTANPAATSRYTKIVKTWIDGKKFSRSGVIQYEDNSTQVKFFDYHLILYAYSNYSTYQDIWNVARLNDCVVQLYYKDA	271	USER	zzz2200
1112		my_seqs_abalone_6_2ct147.1@cd00259	STNV	my_seqs	MGVDKTNRRPAKFRNRKAKTKNGRQDQRLAKLEKTVFTALERKVKDWQNGTWNVTTTPTVLNNSNILSLELAEGTSASDRLGQEICLLNQTVRFNVSIPDGGDTFNQMRFIICESTDGSTPLGLGDILEYGNHVLHSTKMIMCSPYKTKVAQDNKGYKVHYDKVFELNAYDSRCITAEAKIKYGKNGRKVQYPALTASEQPVNHNLHIMMVSDSGSVLHPGVAINIRSRFFDA	233	USER	zzz2201
1111		my_seqs_abalone_6_2ct148.2@cd00259	STNV	my_seqs	MVDRGRSMRGVKKTIYKKKSYKKRNYGNKKLVNLIKSVNIRQSESKYKSTSYTWGALTHDNTYHKDLWSSTVNLFPGQGTSDVNRIGDRIICQGIMLRAVFDVPWDRKNVKLKMFYVPWNSDQGTPATYSNFFHNITGNARLDPVQKKRYPGVKYLGTYQIEVERAPYYTYSAGDQVPSASVISANTGSICIKKWIPMYNKKLFFRSDATFQPSNLPEQGSILVVPYSTINTNAGGGVIPGDNIILSGEMSATLYFKDL	259	USER	zzz2202
1110		my_seqs_abalone_6_2ct153.2@4V4M_R	STNV	my_seqs	MGRIKRSKRNANKARGSVDKAQNVLMRSMDTRIKSLESVVEKKYSYTQAELVGIRGWNPTSQATRADQMLNLQVGTSQNVTDNNGRIGDVITVKSLDFRYSLGIEGSASGNPGQPVTKVRVFCFWDNEPVLTSTGGTYQVNPPEWQQLLQGIQLTTPANTSLFACSPKDHDTGKRFTVIHDEVHTLAPLEGTNGGSRSATNLTKMYKSYKLGKKLRYAGGGSMPINRALYIAFLSDNTQGPYPYISYSIKSNYEDA	256	USER	zzz2203
1109		my_seqs_abalone_6_2ct155.2@5J09_C	circovirus_cap	my_seqs	MPRKYVPKRNRRSVPYRRKRFSRQMFKPKKGLSRSIIPFTRERETYFHLSDLTGNTTAPFSNMQHTNDGGVVGQINIRLNDFPSASDFTNLFRQYKLNYIKITMIPAANTVLSGATRDDEGNYSNNQILIRTMLNRTGIAIGAGNTISEWSQVQAKKQWVLARDKPTTITCKLNQLVPCGNAEAADLVPTVVKPRYVSTNNTDVNHYGLNLRFDSLDGTALAQTDKIWPQFRIICKCYFTCKGVA	245	USER	zzz2204
1108		my_seqs_abalone_6_2ct159.1@PF03898.12	STNV	my_seqs	MLLQKYLLQISKKAQNYHRERILNKNWRNNSQFLLMLYIIMAKTKGKIDRRQNKEIKTLKKKVKALEAPIERKFLDTPLTGEVGAAPLSIEGYCLNNVLPMKADGTVVATNDAMSQRLGKAIHMNRLRLKGFVEIQGDPTIATPDFGDYIGRCRVMVVRWPQNDLANSSSPKDFLKPAAYGAGYSVADTFIDGYKLKFPALRYEVLYDRTHNLQTATQLSATTLAAGTGYGITSVYPSRAKVDIDIKLKHDANWANVESLNNPSQNPLMLYVICGNGATNEGEQRYTLLVNSRLNYTDE	299	USER	zzz2205
1107		my_seqs_abalone_6_2ct160.1@cd00259	STNV	my_seqs	MPRFFNKKRKYKSRRPRKKKSSTLAKTNRSKINKLISADKTFLDSQYSESITNTGSFINVGLTSIATGTGEGEKQGDKIVVKSLQMRLRFSVLNSSLVDSDAFNNIRVILVQFPQPNLTGSPVTATDVLEVSNWNSFYKKRGNIQYKILMDKKIYLDNQQLGGTPRWNSNTIHQRYCDVNFRFPKGITVTYVPTQSTVIKNDLKLFVISDSAIPGHPTMDGYMRLNFLS	229	USER	zzz2206
1106		my_seqs_abalone_6_2ct164.1@5J09_C	circovirus_cap	my_seqs	MPRRRKPARRTRRKRYRRRRRRRAGVPKGILPNTRKVNMTYCDKDIWLNPGVGGQPANHVFRINSIYDTDFTALGHQPLGYDEMSALYGKYTVIGVKATYQFNSQDSSYSNVVGMGLSTTSAGVTNIENMVENGKCRWKLVPPASHSNNLGKDSLSLRINPNKFLGVSHPMSEDTVQADTSSNPEQLCYLKLTCGPQTADDAYGVRGVLKLDFTVIWSEPKTLTVS	226	USER	zzz2207
1105		my_seqs_abalone_6_2ct166.1@cd00259	STNV	my_seqs	MGKIRRAKRNASKARSSADKGQNVLLRNVDRRLKSLESVVEQKYSYANQELLGIRGWSAASATTRQQQIVNIQVGTAQNTTDNNGRIGDMITVKNIDFRYSLGIEGSASGNPGQPVTKVRVMAFWDNEPVYTNTSGAGAGAYLTSVPEWQQILQGIQMSTPDNTSLFSVSPLDHDKRKRFTLIHDEVHTLCPLEGTNGGSRSATNLTRKYKSYKVGKKLRYSGGGIIPINRALYVAYISDNTQGPYPYITYSVKTQYEDA	260	USER	zzz2208
1104		my_seqs_abalone_6_2ct172.1@PF03898.12	STNV	my_seqs	MLYIEQLKMVAIRGGYQKKPTKTKRVYKKKSNNKTMVSLIKDINIRQAETKYKSISYDWGSIVQNNLAITNLWDSSTNLFPGQNSTDSGRIGDRIICQGIKIRAIFDIPWDRKNIKLKAFYVPWNSDQGTPATYTNFFHNITGEARLDPVQKKRYPGLKYLGTYQIEPERAPYYTYGSGTGSPDSDVISANTGTICIKTFIPMNDKKLFFRSDATNQPSNLKEQGSILLVPYASLNTAKDGVLLPGDTIVLNGKMSATCYYKDL	264	USER	zzz2209
1103		my_seqs_abalone_6_2ct186.2@PF03898.12	STNV	my_seqs	MPMNRRYGKSSKKTFRRKRYTKKTTSVAYKALSLARTMRRQIEYKFHSNQPTRTLTTNGTVDNLSQIAEGDTSLTRTGLKVSPTSLLLKIRIRHGDDGATPPVLDPRGVVSRVIIVRDLQQEADTAPAVTDLLVHGTSLVMSPYSRLYRNRFEVLMDKTYKTCPNASNSVVYDTQYLKLSSKRPIYYNGGGSADLQKNGIYMFQLCDDAVYSPTSYIWWRMRFADL	226	USER	zzz2210
1102		my_seqs_abalone_6_2ct187.2@5J37_A	circovirus_cap	my_seqs	MPIVRRRKRVKRKQHPISTRRRVANSKIGRPMKPATFRFKRTFEQVVDLASIPSASGWIPSGNGIYKQFVYDLSLLPNASDFTNLFSEYKLTGVAVKMYFSNNVSGAAPSGSGHSNSQLLMRISPNPNGSSDTLTEQFFNESQSTKKRLCLNTLGKPVSIYQPLKQLNYAYNNSIGSNSYTAQKPRFISTNDQTVEHYGLNCRIDRVDGQGLTTGSTNNQYVRIQHTVYLTTKQVS	236	USER	zzz2211
1101		my_seqs_abalone_6_2ct188.1@cd00259	STNV	my_seqs	MAYKKTARQVEKKVFGTGGFKRRYGIGKGKGGIKIDAIAKDLMMIKSRLNSEKKEKREVEITSGKVGQVFGDLNGYWFQDITPTLGQGTGADERVGNSLKMTGCNLNFQFMGQQNTLTGRKIKIGLYRVRDPSLGPTDGSTDIVTDVFDSNPLTGLFDFNAAKAYRNSKNDGIACIREKTVYLPKIQQLGTQTDRANIDYEKAYKTLNFPVKLNDLLRYEQDNDNLPNGFRYVIVVRADVGNSSTTANSNIQNIPVVSGHSGVEFRMGQRWWYVDN	276	USER	zzz2212
1100		my_seqs_abalone_6_2ct189.1@5J37_A	circovirus_cap	my_seqs	MPFKKKKPYGKRTFRRNTRKMARRGRQSIARPLKPAVYYFKRTVAVTFPINDAGQYPNWLAPVTLVGDNGAAGARVVNLSEISDHTDYTNLFKMYKIMAIKDQWYTTSTISTQGSTVGAQGQIQVLYQPNLTGVIPADMTEEYFLKGQTFKMRNLVNGGRPVTIYTRCKQQSLKYGGSVTNPIDYAVSSPKWISTTEDTCPHYGNDIRLQPVWSGGDITQLNVHVKIVSTYYIACKQVQ	239	USER	zzz2213
1099		my_seqs_abalone_6_2ct190.2@PF02443.14	circovirus_cap	my_seqs	MPVRRRKNNLRIRRANAARKKRKGIGKPTGGLNQAVYLFKRRKQDIVKLDGTSESGGFIVNATNTEAYRQWTFKLEDLVTSTDFVALFRRYKINGVKVELAFSNTGSDAQGYNFNCNRQLQIMTTKNSSGKTEVLTNEKMLDTQAMKKRLALNGGKPITFYMPVTQLSQMYASAINTDYATTKPKYVSTAENTIQHYGLNMVLSRLDGEAFNYQGSSISAQSIRVTTTYYMSFKGVE	237	USER	zzz2214
1098		my_seqs_abalone_6_2ct191.1@3JCI_A	circovirus_cap	my_seqs	MWYGKKKRTRRSLKKKTFKRRRYTKIPRKVNQNHMSVCLRTPDTLVSNNNLSEQYETYRFGLSNCLNYTAYVAMWDQYMIEKIVITWRPIRTQAVVSQNEAVAPSSFTNIPSVVYARDHDDLSPVTYADTKTRYGAVEKLATKGHAMKVYPATLTEIYKSPVTTGYSPQFKTWLDTADATIPHYGVRLAMEQAEPLGQYTLECKTKVYVRFKNRVI	216	USER	zzz2215
1097		my_seqs_abalone_6_2ct193.1@5J09_C	circovirus_cap	my_seqs	MPYVRRKSRMSRRPRRTTKNRRPSNARVPRGLAPSVYRFKRDIEQTLALSQSTPPEGWTADSANNGLYSVFGWSLGALGDSGDFTSLFRDYRIKGARVKMFFSNTQSSTDNPDTFANSQILVRMVRLQDGGDTALSLPFFQQTQAKKYKLAINGGKPLDIYMPLKQANEVTSSTGTANTMMTPKFVSTAANNVQHYGMGIRMERVDGQPFTSGYNNKQYCKMITTLYLETRQVQ	234	USER	zzz2216
1096		my_seqs_abalone_6_2ct194.3@4V4M_R	STNV	my_seqs	MSKKFMIRKDKAKDHTQDRRIKKLEDMVLKTMENKQINYSNSNLAISSSGVNDNQFLQVRVGPDDGALQGDNARIGNSLTLYRQQYRFNFVGLNPDDLTGDRWNQVRVIVAEALDGNQALLLADILQYPSYFTSNNLVFTSPYTTKTATNRRYKIHMDKTFELNANAKGATRVIKHDVKWKSGKVIEFDGPGTEQVPTNHNMSILFISDSGSVQHPSCSYSVRSTYKDA	229	USER	zzz2217
1095		my_seqs_abalone_6_2ct201.2@4V4M_R	STNV	my_seqs	MPKGSSKKPMSKKMTKQVENIVSKALSEELEEKRAIQQQDNVGLPATIASGNVAAINNFQPLMPPIKQVLANTKTGLITPGQEGAYGFRIGDEINLKSVKIKGYVSMRDVTTDDNRQAKIGVRVMILKQKDKESYAGFLADAHTDRLLLDQVNAAGQQGPGVFDGSPLDLIKDINRNEFAVRYDKLFYISRDLITGSGSTRVGVSTKNSLKFFEHELTFGNGKKLNFTDGASTTPNNFPYVMVVGAADLCDPLTTIPNGLVNLTYNSVAVYTDA	274	USER	zzz2218
1094		my_seqs_abalone_6_2ct202.2@5J37_A	circovirus_cap	my_seqs	MPYRKRAPGYKRMPRRARRAPRMVRSLRSMNPRPIFTETYELTGQGAGQPGFQVFPNTGNVFRFNMDHLPQLGQYTALYQKYRILKASIHILPEYTGAEQNRAEANQALTQSNFGQSRMALVVNNSPNVVVPVNELAVLQDNGSFIRSLTPRGIKVSCRPVPNVSIDSLTPGVGNQPITLGRKFLNLQAVNGNIDHYGISWWLTQFVSPGGAPATKNLGIVYVKLTFQLADPR	233	USER	zzz2219
1093		my_seqs_abalone_6_2ct206.1@cd00259	STNV	my_seqs	MSSVDKVYKRPRKFRSKRKKTKNARQDQRLKMLEKTVFTALERKELNWQDGTWNVSTGGTIINNSNSNLLYQAQGVSNEDRIGNEIMLKDIILNFNLSIPDLGDAFNQVRMIVVEPKEGNVNLVLGDVLQYADMTIWDVGQVMCSPYRSANDLNNKKYKVHYDKVFELNAYGRRCETGQVRIKYGKYGKKVEFAENESTGDGITGDPVNHNLHVMIISDSTQTLHPQFALNSRAHYFDA	239	USER	zzz2220
1092		my_seqs_abalone_6_2ct208.1@PF02443.14	circovirus_cap	my_seqs	MPYRKRARGYKRKPRKMRVGRTLRAANPAPVFTEMYELTRSPAPGFQVFPNTGNVFRFSMDHIPQLAQYTSLYQKYRILKASLLILPEYTGSEQNRAEANSALTQSNFGQSRMALAVNNSPSVAPPANELDVLKDNGAKVKSLTPSGIRVSCRPVPNVSIDSNQPGVGNQSITLRKKYLNLNAQNGNIDHYGISWWHTQKINGAAPAVQNVAIVYVKLTFQLSDPR	226	USER	zzz2221
1091		my_seqs_abalone_6_2ct215.2@cd00259	STNV	my_seqs	MKKKIYGIIIMPSAAQMRARALKNMTLGGTRNRPKSTAKKALNLAKKNKRFIDKTIENKQVAALRPSIFVSNTGYSSNVAGDFVNPTMKIGPEDGILTVGSSSRIGNSITLMRSQIDFCFDVAVSTEPYNKFRLIVVESTEGAEQLALDDILLFPAQPMSSVYTTKSLTNKRYNILLDKKFTVCNGNTGARFIKFKHKYGKEGRVINYDGAAVDPVDYKLTILCVSDSTVAPHPSMEYTLRHSYKDA	247	USER	zzz2222
1090		my_seqs_abalone_6_2ct217.1@PF03898.12	STNV	my_seqs	MPRKVIRGRTKGARRRLNSMLSKKQQKGVKAITRAVLRGTMETKTVGKSIENVQLFHNKPLYVGGLLATSQGVTDPNNQSGNAARIGDEILLRNCNIRFWLSNKLDRPNCMYKFFLYWYTEGQTLSDQLCFFTQGNKMLDRINNENISIVDQKTVFSKNMYLNGTEKFEHSQLCTLNGNWKGKKIIYEQGGSTPRKRNLGLCVVVYDAYGTLQTDNIASVAYDYVTRFQDP	231	USER	zzz2223
1089		my_seqs_abalone_6_2ct219.2@cd00259	STNV	my_seqs	MPSKITKSYRKIFGHKSPYRRVYGSRTPGQAIGVTYRTGFGVAKDLASLRKDVKEMKKRQNVEKNYVDTDVASVDLGQCNHNADGIYARDVTPAISQGDGQGNRHGNSLKLTGLSFPMSFVGHPNTHSSRKIVVSLMRVRDNNNNTSADDLITQYWDVNPLNGLRDSNAPKNYRNSKHDGIQCIRQKTYMLKATGQSIGNDSEQSHFTAKFNVSLQDVLRYEENGHSSPDGLRYFLVFQLDAGNKHGSTDATIDIPVKTAASGVTARISQRAWYVDN	277	USER	zzz2224
1088		my_seqs_abalone_6_2ct224.2@5J09_C	circovirus_cap	my_seqs	MAKLMYPVRYKRKPRYYATVRKMGVYRPRRYKTRVPRNPLRSSNRTVTSLHRIEQYNGGTGQYSIDLVSGVLDIHKHIAPLVSEFPGTGPYKALYRQYRVTKVILEFFPVNFQGAHNEGTEEDFCQLYTPTLYTAINRTATDFADNITKMCSTNNMRSVLATRYHKRVFKPSTLDQVYESAATTAYNPEFDQWITTDDTATPQFGMDVLLSSTSSPKCSFKYKMRTTIICQWKNRKPNTDLS	242	USER	zzz2225
1087		my_seqs_abalone_6_2ct237.1@cd00259	STNV	my_seqs	MPVKRKSKRKSNIKKIVKSMIAGSQETKTFIQELANTPLTNVGQNYDITSLAQGVGQNQRLGNSYKVTSFKLKGAVFNGGTDDLCRVIIYIPKNPQVLMPTDTSMQSTDPVDLDKFTVLSDRLIPVSDHGPGCRLYNKVCLFNKGRRNGLHVQFSDALATSITKNRLMVYMCSFSSAAPHPSFKGWWRVYFKDA	194	USER	zzz2226
1086		my_seqs_abalone_6_2ct240.1@cd00259	STNV	my_seqs	MPYSRKSQPKKKTAPRRKAPSFAAKVKAVVKQQSETKYKITSQTENGTSYGNTVTSPANWANLNDIAEGSSENQRVGNRISPTFLNVRGSLQSNTLKPVISKLLILETNRSNDPTLDLLEDNAGSINPATRDLYAISARINTTKYKVLKTITFKTGTYANHVGDFGGTHLFNCNIKLSGVMHYDDGVSVCQKRNIILVPIYREAQNDAGLGETMELTFNSKFYYKDL	227	USER	zzz2227
1085		my_seqs_abalone_6_2ct241.1@PF02443.14	circovirus_cap	my_seqs	MPFRGKRSNRGPKSKRTTRSKQKRNYNRGRGKAGVPRHLASNNFWTTQVFRMDSISPILISNKTSDSNDHLAFRLSQVAGAGPFKALYHFYRVLKVKFEFIPCNNVLKDSTNTTFRPSLYTSINRAAETFADNVVKQMSTPSCRYTLAGKYHCRMYTPAVLDQLYDSAATTGYAQNYGQWISTSDTAVPHFGLDVTLAAATGDDNTSYKYRLVTTAICQFKARKANIDLALSDSVVAKPDIEEISEA	247	USER	zzz2228
1084		my_seqs_abalone_6_2ct248.2@PF03898.12	STNV	my_seqs	MPARKRMTRKRRSTLSKSQKREVKRIAEKAVDAEIEDKQYVYIAENVQLVHNIPGYSSKLLQLITQGTADGDQSTGGTTKPTCRVGDQISLRNVNIRMWLSNKLDRPNVMYKGVLYWYPVNNAPSNAQVYKTQTNKMLDRYNDKDIQIIDTFILQSGPMYLNGTEKFEHSYLATLNKSYKNKKITYDGLTGVPKGKDLGFSVVCYDAYGTLQTDNIASFAWNMQLTFQDA	230	USER	zzz2229
1083		my_seqs_abalone_6_2ct253.2@cd00259	STNV	my_seqs	MKPQSRYNVSKLKWNAPPSGTKKDQMQDKQISNIKKKIKKIEYNEEVKYADVSSIGAVPIPETGLQLSGGGIAQVIERGDDPDQRDGNEIVTTSLLFKADIRTNTAKLTPSRVRCVVYWDSQANGAVNVTSGTANSLMEASASVDGTLDMRNQETIDRFTILMDKVYTLNPQLELTTTAGTVTANQPVSLSISKRFRLGRKIQYSGTGNGMVDLVKNNICVVLISDSNTNPPTCSSILRLYFKDT	245	USER	zzz2230
1082		my_seqs_abalone_6_2ct278.3@4BCU_A	STNV	my_seqs	MPYVRKTAKASSYKRKAYPKRKSVRSTVMQRAKTMEYAADPVPPVYPVSRTNKEQKFLDMPPITKDCHQDPGPADIELLNQIGQGSSVNTRIGMRYNITGVHIRGHMYQKGPQQTDPCIAGYYVVYDSEPHGNLATSAEMFNLRSTDMTYAFPNGSEGQKGGRFKYITRKEFTLGNLGSGSSPVPMDGVVPGLRLINDYIPLNKLPVQCMRLNTGSTVSTIQKGALLIVPFGRQGAVVTGTAESPQMSFAWRLYFNESN	259	USER	zzz2231
1081		my_seqs_abalone_6_2ct301.1@5MJF_Ba	geminivirus_cap	my_seqs	MPNRILATPAELGRMARKSYVKKAGRRGRAAVLQGKRTGFAAPAPSRVPVGSIETKVKRNNLLQLTPSNLGQIVTMNTNINQGTAIYNRIGHRFRNTACRIKGHFYADANGPRAAICGYAWVWDKIPYGATPGVGEIFTLDSVQPGFDMSNTMLVDDNSDRFTVLKSTRRVIGKLMSTGGTPATTMNNCPNIVLVDDLIKLPAWCVSGFKKGQIPGTTANHLSGALYLVPFVSNTSGETANTVKFDFTSELFFAEA	256	USER	zzz2232
1080		my_seqs_abalone_6_2ct308.1@PF03898.12	STNV	my_seqs	MPLTRQNAFSGKAAYQKRRAATMSRQSSARMARTTSYRQSGFPQPFPSRAPQGSLETKSIQYRRIVSQPDNLGTTMYHVNVVSQGTAANERLGNRFRCTALSVKGTAYEGAIAAGTTGFYVVWDKAPNGAIPPATDIFAIDSASGNILPEVGLKPARSRRFTVLGKWGAVGIGDADSNLPSVIPINKYVKIPKWCVCTMERATTSGAIAGTVEGSLLLVPFSNKAADLPILNLTCELFFEEA	242	USER	zzz2233
1079		my_seqs_abalone_6_2ct310.1@cd00259	STNV	my_seqs	MKRASTYNARAPPAKRRRTSAKSSKVNLSLLQRKVNQLSRGVETKVKQFIESGPMLVSGSGPTWQTTVGLSDIAQGAGDQERIGSKVMATGISFSFLITPDRRNLKPFTYRVVVFRDKQHSNSASLAAQGPYGGQTAPFQTMTLGNEEVAVMPYNWDMRGRYQFYRDKTHTLNPVVALDYDPTNGNTSEIIPEAYVEHFDIKFPSPIPIYYTGAGGTNAEVSTNMFQIGIYASQNNVAFQPDISIGGYLYFTD	253	USER	zzz2234
1078		my_seqs_abalone_6_2ct311.2@4BCU_A	STNV	my_seqs	MSLRRQNAFKGKAGYAASKRRNAAITLQRAARARATTSRRMAGFPEPLASTNPQGSLEVKSAQYANVSQTPSALAGTSNHVNAIVQGAGANNRLGNRYRCKAVAVRGLVTRGNATSGVVGYYLIWDKQPNQALAAADKIFTIDAANGLYPYNSGLNRGRKHRFQILAKYCVTVGDTQSNLPQMVPVNSYHKLPASCITSCEQGMTSGSISNIDTGALILIPFSNATVAGAEPHTHLAWELYFEEA	245	USER	zzz2235
[truncated: 1,006 more rows]
