# Supplementary material for: Discovery of several thousand highly diverse circular DNA viruses
Source: eLife journal article supplement (doi:10.7554/elife.51971), 2020-02-03
Supplement: fig2-data2 [file elife-51971-fig2-data2-v1.cys › CytoscapeSession-2019_08_02-17_43/tables/62-all_my_seqs_genbank_ssDNA1_domains_CRESS_capsid_fasta+Full+Network/HIDDEN-org.cytoscape.model.CyEdge-62+hidden+edge.cytable]

"CyCSV-Version","1"
"SUID"
"java.lang.Long"
""
"62 hidden edge",""
"92741"
