# Supplementary material for: Discovery of several thousand highly diverse circular DNA viruses
Source: eLife journal article supplement (doi:10.7554/elife.51971), 2020-02-03
Supplement: fig2-data2 [file elife-51971-fig2-data2-v1.cys › CytoscapeSession-2019_08_02-17_43/tables/62-all_my_seqs_genbank_ssDNA1_domains_CRESS_capsid_fasta+Full+Network/LOCAL_ATTRS-org.cytoscape.model.CyEdge-all_my_seqs_genbank_ssDNA1_domains_CRESS_capsid_fasta+Full+Network+default+edge.cytable]

CyCSV-Version	1
SUID	__mclCluster	interaction	name	selected
java.lang.Long	java.lang.Integer	java.lang.String	java.lang.String	java.lang.Boolean
	mutable
all_my_seqs_genbank_ssDNA1_domains_CRESS_capsid_fasta Full Network default edge
2110	1		zzzzzz8,zzzzzz9	false
2111	1		zzzzzz7,zzzzzz8	false
2112	1		zzzzzz7,zzzzzz9	false
2113	1		zzzzzz6,zzzzzz7	false
2114	1		zzzzzz6,zzzzzz9	false
2115	1		zzzzzz6,zzzzzz8	false
2116	1		zzzzzz5,zzzzzz8	false
2117	1		zzzzzz5,zzzzzz9	false
2118	1		zzzzzz5,zzzzzz6	false
2119	1		zzzzzz5,zzzzzz7	false
2120	1		zzzzzz4,zzzzzz7	false
2121	1		zzzzzz4,zzzzzz5	false
2122	1		zzzzzz4,zzzzzz9	false
2123	1		zzzzzz4,zzzzzz8	false
2124	1		zzzzzz4,zzzzzz6	false
2125	1		zzzzzz3,zzzzzz8	false
2126	1		zzzzzz3,zzzzzz5	false
2127	1		zzzzzz3,zzzzzz9	false
2128	1		zzzzzz3,zzzzzz7	false
2129	1		zzzzzz3,zzzzzz6	false
2130	1		zzzzzz3,zzzzzz4	false
2131	1		zzzzzz1,zzzzzz5	false
2132	1		zzzzzz1,zzzzzz7	false
2133	1		zzzzzz1,zzzzzz9	false
2134	1		zzzzzz1,zzzzzz8	false
2135	1		zzzzzz1,zzzzzz3	false
2136	1		zzzzzz1,zzzzzz4	false
2137	1		zzzzzz1,zzzzzz6	false
2138	1		zzzzzz0,zzzzzz5	false
2139	1		zzzzzz0,zzzzzz7	false
2140	1		zzzzzz0,zzzzzz3	false
2141	1		zzzzzz0,zzzzzz1	false
2142	1		zzzzzz0,zzzzzz4	false
2143	1		zzzzzz0,zzzzzz6	false
2144	1		zzzzzz0,zzzzzz9	false
2145	1		zzzzzz0,zzzzzz8	false
2146			zzzzz95,zzzzz96	false
2147	1		zzzzz84,zzzzz86	false
2148			zzzzz81,zzzzz90	false
2149	1		zzzzz81,zzzzz83	false
2150			zzzzz77,zzzzz90	false
2151	1		zzzzz76,zzzzz89	false
2152	1		zzzzz75,zzzzz89	false
2153	1		zzzzz75,zzzzz76	false
2154	1		zzzzz74,zzzzz89	false
2155	1		zzzzz74,zzzzz75	false
2156	1		zzzzz74,zzzzz76	false
2157			zzzzz73,zzzzz77	false
2158			zzzzz73,zzzzz81	false
2159	1		zzzzz73,zzzzz90	false
2160	1		zzzzz72,zzzzz76	false
2161	1		zzzzz72,zzzzz74	false
2162	1		zzzzz72,zzzzz75	false
2163	1		zzzzz72,zzzzz89	false
2164	1		zzzzz71,zzzzz76	false
2165	1		zzzzz71,zzzzz75	false
2166	1		zzzzz71,zzzzz72	false
2167	1		zzzzz71,zzzzz74	false
2168	1		zzzzz71,zzzzz82	false
2169	1		zzzzz71,zzzzz89	false
2170	1		zzzzz70,zzzzz71	false
2171	1		zzzzz70,zzzzz72	false
2172	1		zzzzz70,zzzzz89	false
2173	1		zzzzz70,zzzzz74	false
2174	1		zzzzz70,zzzzz75	false
2175	1		zzzzz70,zzzzz76	false
2176			zzzzz69,zzzzz81	false
2177	1		zzzzz68,zzzzz70	false
2178	1		zzzzz68,zzzzz76	false
2179	1		zzzzz68,zzzzz75	false
2180	1		zzzzz68,zzzzz72	false
2181	1		zzzzz68,zzzzz74	false
2182	1		zzzzz68,zzzzz82	false
2183	1		zzzzz68,zzzzz89	false
2184	1		zzzzz68,zzzzz71	false
2185	1		zzzzz67,zzzzz82	false
2186	1		zzzzz67,zzzzz68	false
2187	1		zzzzz67,zzzzz71	false
2188	1		zzzzz67,zzzzz70	false
2189	1		zzzzz67,zzzzz89	false
2190	1		zzzzz67,zzzzz72	false
2191	1		zzzzz67,zzzzz75	false
2192	1		zzzzz67,zzzzz76	false
2193	1		zzzzz67,zzzzz74	false
2194	1		zzzzz66,zzzzz71	false
2195	1		zzzzz66,zzzzz70	false
2196	1		zzzzz66,zzzzz89	false
2197	1		zzzzz66,zzzzz72	false
2198	1		zzzzz66,zzzzz75	false
2199	1		zzzzz66,zzzzz76	false
2200	1		zzzzz66,zzzzz67	false
2201	1		zzzzz66,zzzzz74	false
2202	1		zzzzz65,zzzzz81	false
2203	1		zzzzz65,zzzzz83	false
2204	1		zzzzz64,zzzzz82	false
2205	1		zzzzz64,zzzzz68	false
2206	1		zzzzz64,zzzzz71	false
2207	1		zzzzz64,zzzzz66	false
2208	1		zzzzz64,zzzzz76	false
2209	1		zzzzz64,zzzzz70	false
2210	1		zzzzz64,zzzzz72	false
2211	1		zzzzz64,zzzzz74	false
2212	1		zzzzz64,zzzzz67	false
2213	1		zzzzz64,zzzzz75	false
2214	1		zzzzz64,zzzzz89	false
2215	1		zzzzz63,zzzzz68	false
2216	1		zzzzz63,zzzzz66	false
2217	1		zzzzz63,zzzzz70	false
2218	1		zzzzz63,zzzzz76	false
2219	1		zzzzz63,zzzzz71	false
2220	1		zzzzz63,zzzzz74	false
2221	1		zzzzz63,zzzzz72	false
2222	1		zzzzz63,zzzzz67	false
2223	1		zzzzz63,zzzzz75	false
2224	1		zzzzz63,zzzzz64	false
2225	1		zzzzz63,zzzzz89	false
2226	1		zzzzz62,zzzzz68	false
2227	1		zzzzz62,zzzzz71	false
2228	1		zzzzz62,zzzzz66	false
2229	1		zzzzz62,zzzzz70	false
2230	1		zzzzz62,zzzzz74	false
2231	1		zzzzz62,zzzzz76	false
2232	1		zzzzz62,zzzzz63	false
2233	1		zzzzz62,zzzzz75	false
2234	1		zzzzz62,zzzzz67	false
2235	1		zzzzz62,zzzzz89	false
2236	1		zzzzz62,zzzzz64	false
2237	1		zzzzz62,zzzzz72	false
2238	1		zzzzz61,zzzzz65	false
2239	1		zzzzz61,zzzzz83	false
2240	1		zzzzz61,zzzzz81	false
2241	1		zzzzz60,zzzzz76	false
2242	1		zzzzz60,zzzzz72	false
2243	1		zzzzz60,zzzzz74	false
2244	1		zzzzz60,zzzzz67	false
2245	1		zzzzz60,zzzzz82	false
2246	1		zzzzz60,zzzzz75	false
2247	1		zzzzz60,zzzzz89	false
2248	1		zzzzz60,zzzzz62	false
2249	1		zzzzz60,zzzzz63	false
2250	1		zzzzz60,zzzzz64	false
2251	1		zzzzz60,zzzzz68	false
2252	1		zzzzz60,zzzzz71	false
2253	1		zzzzz59,zzzzz68	false
2254	1		zzzzz59,zzzzz71	false
2255	1		zzzzz59,zzzzz70	false
2256	1		zzzzz59,zzzzz74	false
2257	1		zzzzz59,zzzzz76	false
2258	1		zzzzz59,zzzzz62	false
2259	1		zzzzz59,zzzzz63	false
2260	1		zzzzz59,zzzzz72	false
2261	1		zzzzz59,zzzzz66	false
2262	1		zzzzz59,zzzzz89	false
2263	1		zzzzz59,zzzzz75	false
2264	1		zzzzz59,zzzzz64	false
2265	1		zzzzz59,zzzzz67	false
2266	1		zzzzz58,zzzzz80	false
2267	1		zzzzz56,zzzzz57	false
2268	1		zzzzz55,zzzzz59	false
2269	1		zzzzz55,zzzzz72	false
2270	1		zzzzz55,zzzzz62	false
2271	1		zzzzz55,zzzzz75	false
2272	1		zzzzz55,zzzzz67	false
2273	1		zzzzz55,zzzzz82	false
2274	1		zzzzz55,zzzzz74	false
2275	1		zzzzz55,zzzzz76	false
2276	1		zzzzz55,zzzzz64	false
2277	1		zzzzz55,zzzzz63	false
2278	1		zzzzz55,zzzzz89	false
2279	1		zzzzz55,zzzzz60	false
2280	1		zzzzz55,zzzzz68	false
2281	1		zzzzz55,zzzzz71	false
2282			zzzzz54,zzzzz96	false
2283	1		zzzzz54,zzzzz95	false
2284			zzzzz53,zzzzz85	false
2285	1		zzzzz52,zzzzz93	false
2286	1		zzzzz48,zzzzz92	false
2287			zzzzz47,zzzzz79	false
2288			zzzzz45,zzzzz77	false
2289			zzzzz45,zzzzz90	false
2290			zzzzz45,zzzzz73	false
2291	1		zzzzz45,zzzzz65	false
2292	1		zzzzz45,zzzzz83	false
2293	1		zzzzz45,zzzzz81	false
2294	1		zzzzz45,zzzzz61	false
2295			zzzzz44,zzzzz77	false
2296			zzzzz44,zzzzz73	false
2297			zzzzz44,zzzzz90	false
2298	1		zzzzz44,zzzzz65	false
2299	1		zzzzz44,zzzzz83	false
2300	1		zzzzz44,zzzzz61	false
2301	1		zzzzz44,zzzzz81	false
2302	1		zzzzz44,zzzzz45	false
2303			zzzzz43,zzzzz81	false
2304	1		zzzzz43,zzzzz77	false
2305			zzzzz39,zzzzz42	false
2306			zzzzz38,zzzzz77	false
2307			zzzzz38,zzzzz90	false
2308	1		zzzzz38,zzzzz65	false
2309			zzzzz38,zzzzz73	false
2310	1		zzzzz38,zzzzz83	false
2311	1		zzzzz38,zzzzz81	false
2312	1		zzzzz38,zzzzz61	false
2313	1		zzzzz38,zzzzz44	false
2314	1		zzzzz38,zzzzz45	false
2315			zzzzz37,zzzzz90	false
2316	1		zzzzz37,zzzzz65	false
2317			zzzzz37,zzzzz73	false
2318	1		zzzzz37,zzzzz83	false
2319	1		zzzzz37,zzzzz81	false
2320	1		zzzzz37,zzzzz61	false
2321	1		zzzzz37,zzzzz44	false
2322	1		zzzzz37,zzzzz45	false
2323	1		zzzzz37,zzzzz38	false
2324			zzzzz36,zzzzz77	false
2325			zzzzz36,zzzzz90	false
2326			zzzzz36,zzzzz73	false
2327	1		zzzzz36,zzzzz65	false
2328	1		zzzzz36,zzzzz83	false
2329	1		zzzzz36,zzzzz81	false
2330	1		zzzzz36,zzzzz61	false
2331	1		zzzzz36,zzzzz44	false
2332	1		zzzzz36,zzzzz45	false
2333	1		zzzzz36,zzzzz37	false
2334	1		zzzzz36,zzzzz38	false
2335			zzzzz35,zzzzz90	false
2336	1		zzzzz35,zzzzz65	false
2337			zzzzz35,zzzzz73	false
2338	1		zzzzz35,zzzzz83	false
2339	1		zzzzz35,zzzzz81	false
2340	1		zzzzz35,zzzzz61	false
2341	1		zzzzz35,zzzzz44	false
2342	1		zzzzz35,zzzzz37	false
2343	1		zzzzz35,zzzzz45	false
2344	1		zzzzz35,zzzzz38	false
2345	1		zzzzz35,zzzzz36	false
2346			zzzzz34,zzzzz90	false
2347			zzzzz34,zzzzz73	false
2348	1		zzzzz34,zzzzz65	false
2349	1		zzzzz34,zzzzz83	false
2350	1		zzzzz34,zzzzz81	false
2351	1		zzzzz34,zzzzz61	false
2352	1		zzzzz34,zzzzz44	false
2353	1		zzzzz34,zzzzz35	false
2354	1		zzzzz34,zzzzz45	false
2355	1		zzzzz34,zzzzz36	false
2356	1		zzzzz34,zzzzz38	false
2357	1		zzzzz34,zzzzz37	false
2358	1		zzzzz33,zzzzz55	false
2359	1		zzzzz33,zzzzz60	false
2360	1		zzzzz33,zzzzz71	false
2361	1		zzzzz33,zzzzz68	false
2362	1		zzzzz33,zzzzz70	false
2363	1		zzzzz33,zzzzz72	false
2364	1		zzzzz33,zzzzz62	false
2365	1		zzzzz33,zzzzz63	false
2366	1		zzzzz33,zzzzz59	false
2367	1		zzzzz33,zzzzz89	false
2368	1		zzzzz33,zzzzz64	false
2369	1		zzzzz33,zzzzz76	false
2370	1		zzzzz33,zzzzz75	false
2371	1		zzzzz33,zzzzz66	false
2372	1		zzzzz33,zzzzz67	false
2373	1		zzzzz33,zzzzz74	false
2374	1		zzzzz32,zzzzz82	false
2375	1		zzzzz32,zzzzz68	false
2376	1		zzzzz32,zzzzz55	false
2377	1		zzzzz32,zzzzz60	false
2378	1		zzzzz32,zzzzz71	false
2379	1		zzzzz32,zzzzz72	false
2380	1		zzzzz32,zzzzz70	false
2381	1		zzzzz32,zzzzz89	false
2382	1		zzzzz32,zzzzz63	false
2383	1		zzzzz32,zzzzz62	false
2384	1		zzzzz32,zzzzz59	false
2385	1		zzzzz32,zzzzz64	false
2386	1		zzzzz32,zzzzz66	false
2387	1		zzzzz32,zzzzz33	false
2388	1		zzzzz32,zzzzz75	false
2389	1		zzzzz32,zzzzz74	false
2390	1		zzzzz32,zzzzz76	false
2391	1		zzzzz32,zzzzz67	false
2392	1		zzzzz31,zzzzz71	false
2393	1		zzzzz31,zzzzz68	false
2394	1		zzzzz31,zzzzz32	false
2395	1		zzzzz31,zzzzz33	false
2396	1		zzzzz31,zzzzz76	false
2397	1		zzzzz31,zzzzz66	false
2398	1		zzzzz31,zzzzz75	false
2399	1		zzzzz31,zzzzz72	false
2400	1		zzzzz31,zzzzz67	false
2401	1		zzzzz31,zzzzz62	false
2402	1		zzzzz31,zzzzz63	false
2403	1		zzzzz31,zzzzz64	false
2404	1		zzzzz31,zzzzz89	false
2405	1		zzzzz31,zzzzz74	false
2406	1		zzzzz31,zzzzz59	false
2407	1		zzzzz31,zzzzz70	false
2408	1		zzzzz30,zzzzz61	false
2409			zzzzz30,zzzzz73	false
2410	1		zzzzz30,zzzzz44	false
2411	1		zzzzz30,zzzzz81	false
2412	1		zzzzz30,zzzzz37	false
2413	1		zzzzz30,zzzzz34	false
2414	1		zzzzz30,zzzzz35	false
2415	1		zzzzz30,zzzzz83	false
2416	1		zzzzz30,zzzzz65	false
2417	1		zzzzz30,zzzzz45	false
2418	1		zzzzz30,zzzzz36	false
2419	1		zzzzz30,zzzzz38	false
2420	1		zzzzz29,zzzzz82	false
2421	1		zzzzz29,zzzzz55	false
2422	1		zzzzz29,zzzzz60	false
2423	1		zzzzz29,zzzzz68	false
2424	1		zzzzz29,zzzzz71	false
2425	1		zzzzz29,zzzzz66	false
2426	1		zzzzz29,zzzzz74	false
2427	1		zzzzz29,zzzzz32	false
2428	1		zzzzz29,zzzzz31	false
2429	1		zzzzz29,zzzzz70	false
2430	1		zzzzz29,zzzzz76	false
2431	1		zzzzz29,zzzzz72	false
2432	1		zzzzz29,zzzzz67	false
2433	1		zzzzz29,zzzzz59	false
2434	1		zzzzz29,zzzzz33	false
2435	1		zzzzz29,zzzzz62	false
2436	1		zzzzz29,zzzzz75	false
2437	1		zzzzz29,zzzzz63	false
2438	1		zzzzz29,zzzzz89	false
2439	1		zzzzz29,zzzzz64	false
2440	1		zzzzz28,zzzzz44	false
2441			zzzzz28,zzzzz73	false
2442	1		zzzzz28,zzzzz35	false
2443	1		zzzzz28,zzzzz34	false
2444	1		zzzzz28,zzzzz37	false
2445	1		zzzzz28,zzzzz38	false
2446	1		zzzzz28,zzzzz36	false
2447	1		zzzzz28,zzzzz83	false
2448	1		zzzzz28,zzzzz45	false
2449	1		zzzzz28,zzzzz65	false
2450	1		zzzzz28,zzzzz81	false
2451	1		zzzzz28,zzzzz30	false
2452			zzzzz27,zzzzz73	false
2453	1		zzzzz27,zzzzz35	false
2454	1		zzzzz27,zzzzz34	false
2455	1		zzzzz27,zzzzz37	false
2456	1		zzzzz27,zzzzz38	false
2457	1		zzzzz27,zzzzz36	false
2458	1		zzzzz27,zzzzz45	false
2459	1		zzzzz27,zzzzz83	false
2460	1		zzzzz27,zzzzz65	false
2461	1		zzzzz27,zzzzz81	false
2462	1		zzzzz27,zzzzz30	false
2463	1		zzzzz27,zzzzz28	false
2464	1		zzzzz26,zzzzz44	false
2465	1		zzzzz26,zzzzz35	false
2466	1		zzzzz26,zzzzz34	false
2467	1		zzzzz26,zzzzz37	false
2468	1		zzzzz26,zzzzz83	false
2469	1		zzzzz26,zzzzz38	false
2470	1		zzzzz26,zzzzz36	false
2471	1		zzzzz26,zzzzz45	false
2472	1		zzzzz26,zzzzz65	false
2473	1		zzzzz26,zzzzz81	false
2474	1		zzzzz26,zzzzz30	false
2475	1		zzzzz26,zzzzz27	false
2476	1		zzzzz26,zzzzz28	false
2477			zzzzz25,zzzzz65	false
2478			zzzzz25,zzzzz44	false
2479			zzzzz25,zzzzz81	false
2480			zzzzz25,zzzzz35	false
2481			zzzzz25,zzzzz30	false
2482			zzzzz25,zzzzz37	false
2483			zzzzz25,zzzzz34	false
2484			zzzzz25,zzzzz38	false
2485			zzzzz25,zzzzz45	false
2486			zzzzz25,zzzzz36	false
2487			zzzzz25,zzzzz27	false
2488			zzzzz25,zzzzz28	false
2489			zzzzz25,zzzzz26	false
2490			zzzzz24,zzzzz83	false
2491			zzzzz24,zzzzz34	false
2492			zzzzz24,zzzzz28	false
2493			zzzzz24,zzzzz27	false
2494			zzzzz24,zzzzz77	false
2495			zzzzz24,zzzzz37	false
2496			zzzzz24,zzzzz65	false
2497			zzzzz24,zzzzz45	false
2498			zzzzz24,zzzzz35	false
2499			zzzzz24,zzzzz81	false
2500			zzzzz24,zzzzz30	false
2501			zzzzz24,zzzzz36	false
2502			zzzzz24,zzzzz38	false
2503	1		zzzzz24,zzzzz90	false
2504	1		zzzzz24,zzzzz73	false
2505			zzzzz23,zzzzz77	false
2506			zzzzz23,zzzzz28	false
2507			zzzzz23,zzzzz30	false
2508			zzzzz23,zzzzz44	false
2509			zzzzz23,zzzzz35	false
2510			zzzzz23,zzzzz81	false
2511			zzzzz23,zzzzz34	false
2512			zzzzz23,zzzzz45	false
2513			zzzzz23,zzzzz38	false
2514			zzzzz23,zzzzz36	false
2515			zzzzz23,zzzzz37	false
2516	1		zzzzz23,zzzzz24	false
2517	1		zzzzz23,zzzzz73	false
2518	1		zzzzz23,zzzzz90	false
2519	1		zzzzz22,zzzzzz7	false
2520	1		zzzzz22,zzzzzz5	false
2521	1		zzzzz22,zzzzzz3	false
2522	1		zzzzz22,zzzzzz6	false
2523	1		zzzzz22,zzzzzz1	false
2524	1		zzzzz22,zzzzzz4	false
2525	1		zzzzz22,zzzzzz8	false
2526	1		zzzzz22,zzzzzz9	false
2527	1		zzzzz22,zzzzzz0	false
2528	1		zzzzz21,zzzzzz7	false
2529	1		zzzzz21,zzzzzz5	false
2530	1		zzzzz21,zzzzzz3	false
2531	1		zzzzz21,zzzzzz4	false
2532	1		zzzzz21,zzzzzz6	false
2533	1		zzzzz21,zzzzzz1	false
2534	1		zzzzz21,zzzzz22	false
2535	1		zzzzz21,zzzzzz0	false
2536	1		zzzzz20,zzzzzz7	false
2537	1		zzzzz20,zzzzzz5	false
2538	1		zzzzz20,zzzzzz3	false
2539	1		zzzzz20,zzzzz22	false
2540	1		zzzzz20,zzzzzz4	false
2541	1		zzzzz20,zzzzzz1	false
2542	1		zzzzz20,zzzzzz6	false
2543	1		zzzzz20,zzzzz21	false
2544	1		zzzzz20,zzzzzz9	false
2545	1		zzzzz20,zzzzzz8	false
2546	1		zzzzz20,zzzzzz0	false
2547	1		zzzzz19,zzzzzz5	false
2548	1		zzzzz19,zzzzzz7	false
2549	1		zzzzz19,zzzzzz3	false
2550	1		zzzzz19,zzzzz22	false
2551	1		zzzzz19,zzzzzz4	false
2552	1		zzzzz19,zzzzzz1	false
2553	1		zzzzz19,zzzzzz6	false
2554	1		zzzzz19,zzzzz21	false
2555	1		zzzzz19,zzzzzz9	false
2556	1		zzzzz19,zzzzzz8	false
2557	1		zzzzz19,zzzzz20	false
2558	1		zzzzz19,zzzzzz0	false
2559	1		zzzzz18,zzzzzz7	false
2560	1		zzzzz18,zzzzzz5	false
2561	1		zzzzz18,zzzzzz3	false
2562	1		zzzzz18,zzzzz22	false
2563	1		zzzzz18,zzzzzz1	false
2564	1		zzzzz18,zzzzzz4	false
2565	1		zzzzz18,zzzzzz6	false
2566	1		zzzzz18,zzzzzz9	false
2567	1		zzzzz18,zzzzzz8	false
2568	1		zzzzz18,zzzzz21	false
2569	1		zzzzz18,zzzzz20	false
2570	1		zzzzz18,zzzzz19	false
2571	1		zzzzz18,zzzzzz0	false
2572	1		zzzzz17,zzzzz21	false
2573	1		zzzzz16,zzzzzz7	false
2574	1		zzzzz16,zzzzzz5	false
2575	1		zzzzz16,zzzzzz3	false
2576	1		zzzzz16,zzzzz22	false
2577	1		zzzzz16,zzzzzz4	false
2578	1		zzzzz16,zzzzzz1	false
2579	1		zzzzz16,zzzzzz6	false
2580	1		zzzzz16,zzzzz21	false
2581	1		zzzzz16,zzzzzz9	false
2582	1		zzzzz16,zzzzzz8	false
2583	1		zzzzz16,zzzzz20	false
2584	1		zzzzz16,zzzzz18	false
2585	1		zzzzz16,zzzzz19	false
2586	1		zzzzz16,zzzzzz0	false
2587	1		zzzzz15,zzzzzz7	false
2588	1		zzzzz15,zzzzzz5	false
2589	1		zzzzz15,zzzzz22	false
2590	1		zzzzz15,zzzzzz3	false
2591	1		zzzzz15,zzzzz21	false
2592	1		zzzzz15,zzzzzz1	false
2593	1		zzzzz15,zzzzzz4	false
2594	1		zzzzz15,zzzzzz6	false
2595	1		zzzzz15,zzzzzz9	false
2596	1		zzzzz15,zzzzzz8	false
2597	1		zzzzz15,zzzzz20	false
2598	1		zzzzz15,zzzzz16	false
2599	1		zzzzz15,zzzzz18	false
2600	1		zzzzz15,zzzzz19	false
2601	1		zzzzz15,zzzzzz0	false
2602	1		zzzzz14,zzzzzz2	false
2603	1		zzzzz13,zzzzzz8	false
2604	1		zzzzz13,zzzzz22	false
2605	1		zzzzz13,zzzzzz9	false
2606	1		zzzzz13,zzzzzz1	false
2607	1		zzzzz13,zzzzz15	false
2608	1		zzzzz13,zzzzz21	false
2609	1		zzzzz13,zzzzz20	false
2610	1		zzzzz13,zzzzzz6	false
2611	1		zzzzz13,zzzzz19	false
2612	1		zzzzz13,zzzzz16	false
2613	1		zzzzz13,zzzzzz0	false
2614	1		zzzzz13,zzzzz18	false
2615	1		zzzzz13,zzzzzz3	false
2616	1		zzzzz13,zzzzzz4	false
2617	1		zzzzz13,zzzzzz7	false
2618	1		zzzzz13,zzzzzz5	false
2619	1		zzzzz12,zzzzzz7	false
2620	1		zzzzz12,zzzzz13	false
2621	1		zzzzz12,zzzzzz5	false
2622	1		zzzzz12,zzzzz22	false
2623	1		zzzzz12,zzzzzz9	false
2624	1		zzzzz12,zzzzzz8	false
2625	1		zzzzz12,zzzzz21	false
2626	1		zzzzz12,zzzzzz3	false
2627	1		zzzzz12,zzzzz15	false
2628	1		zzzzz12,zzzzz18	false
2629	1		zzzzz12,zzzzz20	false
2630	1		zzzzz12,zzzzz16	false
2631	1		zzzzz12,zzzzzz0	false
2632	1		zzzzz12,zzzzz19	false
2633	1		zzzzz12,zzzzzz4	false
2634	1		zzzzz12,zzzzzz6	false
2635	1		zzzzz12,zzzzzz1	false
2636	1		zzzzz11,zzzzz13	false
2637	1		zzzzz11,zzzzzz7	false
2638	1		zzzzz11,zzzzzz5	false
2639	1		zzzzz11,zzzzz22	false
2640	1		zzzzz11,zzzzzz9	false
2641	1		zzzzz11,zzzzzz8	false
2642	1		zzzzz11,zzzzz21	false
2643	1		zzzzz11,zzzzz15	false
2644	1		zzzzz11,zzzzz20	false
2645	1		zzzzz11,zzzzz18	false
2646	1		zzzzz11,zzzzzz3	false
2647	1		zzzzz11,zzzzz16	false
2648	1		zzzzz11,zzzzz19	false
2649	1		zzzzz11,zzzzzz4	false
2650	1		zzzzz11,zzzzzz0	false
2651	1		zzzzz11,zzzzzz6	false
2652	1		zzzzz11,zzzzzz1	false
2653	1		zzzzz11,zzzzz12	false
2654	1		zzzzz10,zzzzzz7	false
2655	1		zzzzz10,zzzzz13	false
2656	1		zzzzz10,zzzzzz5	false
2657	1		zzzzz10,zzzzz22	false
2658	1		zzzzz10,zzzzz21	false
2659	1		zzzzz10,zzzzzz9	false
2660	1		zzzzz10,zzzzzz8	false
2661	1		zzzzz10,zzzzzz3	false
2662	1		zzzzz10,zzzzz18	false
2663	1		zzzzz10,zzzzz15	false
2664	1		zzzzz10,zzzzz20	false
2665	1		zzzzz10,zzzzz16	false
2666	1		zzzzz10,zzzzz11	false
2667	1		zzzzz10,zzzzz19	false
2668	1		zzzzz10,zzzzzz4	false
2669	1		zzzzz10,zzzzzz0	false
2670	1		zzzzz10,zzzzzz6	false
2671	1		zzzzz10,zzzzz12	false
2672	1		zzzzz10,zzzzzz1	false
2673	1		zzzz998,zzzz999	false
2674	1		zzzz996,zzzz998	false
2675	1		zzzz996,zzzz999	false
2676	1		zzzz993,zzzz996	false
2677	1		zzzz993,zzzz998	false
2678	1		zzzz993,zzzz999	false
2679	1		zzzz992,zzzz996	false
2680	1		zzzz992,zzzz993	false
2681	1		zzzz992,zzzz999	false
2682	1		zzzz992,zzzz998	false
2683	1		zzzz988,zzzz996	false
2684	1		zzzz988,zzzz993	false
2685	1		zzzz988,zzzz992	false
2686	1		zzzz988,zzzz999	false
2687	1		zzzz988,zzzz998	false
2688	1		zzzz987,zzzz993	false
2689	1		zzzz987,zzzz998	false
2690	1		zzzz987,zzzz992	false
2691	1		zzzz987,zzzz988	false
2692	1		zzzz987,zzzz999	false
2693	1		zzzz987,zzzz996	false
2694	1		zzzz986,zzzz993	false
2695	1		zzzz986,zzzz998	false
2696	1		zzzz986,zzzz988	false
2697	1		zzzz986,zzzz992	false
2698	1		zzzz986,zzzz999	false
2699	1		zzzz986,zzzz996	false
2700	1		zzzz986,zzzz987	false
2701	1		zzzz985,zzzz993	false
2702	1		zzzz985,zzzz998	false
2703	1		zzzz985,zzzz988	false
2704	1		zzzz985,zzzz992	false
2705	1		zzzz985,zzzz999	false
2706	1		zzzz985,zzzz996	false
2707	1		zzzz985,zzzz986	false
2708	1		zzzz985,zzzz987	false
2709	1		zzzz984,zzzz996	false
2710	1		zzzz984,zzzz992	false
2711	1		zzzz984,zzzz999	false
2712	1		zzzz984,zzzz988	false
2713	1		zzzz984,zzzz998	false
2714	1		zzzz984,zzzz993	false
2715	1		zzzz983,zzzz996	false
2716	1		zzzz983,zzzz992	false
2717	1		zzzz983,zzzz999	false
2718	1		zzzz983,zzzz993	false
2719	1		zzzz983,zzzz988	false
2720	1		zzzz983,zzzz998	false
2721	1		zzzz983,zzzz984	false
2722	1		zzzz982,zzzz996	false
2723	1		zzzz982,zzzz988	false
2724	1		zzzz982,zzzz992	false
2725	1		zzzz982,zzzz998	false
2726	1		zzzz982,zzzz983	false
2727	1		zzzz982,zzzz984	false
2728	1		zzzz982,zzzz999	false
2729	1		zzzz982,zzzz993	false
2730	1		zzzz981,zzzz985	false
2731	1		zzzz981,zzzz987	false
2732	1		zzzz981,zzzz986	false
2733	1		zzzz981,zzzz984	false
2734	1		zzzz981,zzzz983	false
2735	1		zzzz981,zzzz982	false
2736	1		zzzz981,zzzz996	false
2737	1		zzzz981,zzzz988	false
2738	1		zzzz981,zzzz998	false
2739	1		zzzz981,zzzz992	false
2740	1		zzzz981,zzzz993	false
2741	1		zzzz981,zzzz999	false
2742	1		zzzz978,zzzz987	false
2743	1		zzzz978,zzzz986	false
2744	1		zzzz978,zzzz985	false
2745	1		zzzz978,zzzz982	false
2746	1		zzzz978,zzzz984	false
2747	1		zzzz978,zzzz983	false
2748	1		zzzz978,zzzz996	false
2749	1		zzzz978,zzzz993	false
2750	1		zzzz978,zzzz981	false
2751	1		zzzz978,zzzz998	false
2752	1		zzzz978,zzzz988	false
2753	1		zzzz978,zzzz999	false
2754	1		zzzz978,zzzz992	false
2755	1		zzzz977,zzzz998	false
2756	1		zzzz977,zzzz993	false
2757	1		zzzz977,zzzz988	false
2758	1		zzzz977,zzzz978	false
2759	1		zzzz977,zzzz992	false
2760	1		zzzz977,zzzz981	false
2761	1		zzzz977,zzzz999	false
2762	1		zzzz977,zzzz996	false
2763	1		zzzz977,zzzz987	false
2764	1		zzzz977,zzzz986	false
2765	1		zzzz977,zzzz985	false
2766	1		zzzz976,zzzz977	false
2767	1		zzzz976,zzzz987	false
2768	1		zzzz976,zzzz985	false
2769	1		zzzz976,zzzz986	false
2770	1		zzzz976,zzzz982	false
2771	1		zzzz976,zzzz984	false
2772	1		zzzz976,zzzz983	false
2773	1		zzzz976,zzzz996	false
2774	1		zzzz976,zzzz993	false
2775	1		zzzz976,zzzz999	false
2776	1		zzzz976,zzzz981	false
2777	1		zzzz976,zzzz992	false
2778	1		zzzz976,zzzz998	false
2779	1		zzzz976,zzzz988	false
2780	1		zzzz976,zzzz978	false
2781	1		zzzz975,zzzz977	false
2782	1		zzzz975,zzzz987	false
2783	1		zzzz975,zzzz985	false
2784	1		zzzz975,zzzz986	false
2785	1		zzzz975,zzzz982	false
2786	1		zzzz975,zzzz984	false
2787	1		zzzz975,zzzz983	false
2788	1		zzzz975,zzzz996	false
2789	1		zzzz975,zzzz993	false
2790	1		zzzz975,zzzz981	false
2791	1		zzzz975,zzzz988	false
2792	1		zzzz975,zzzz998	false
2793	1		zzzz975,zzzz999	false
2794	1		zzzz975,zzzz992	false
2795	1		zzzz975,zzzz978	false
2796	1		zzzz975,zzzz976	false
2797	1		zzzz974,zzzz977	false
2798	1		zzzz974,zzzz985	false
2799	1		zzzz974,zzzz987	false
2800	1		zzzz974,zzzz986	false
2801	1		zzzz974,zzzz982	false
2802	1		zzzz974,zzzz984	false
2803	1		zzzz974,zzzz983	false
2804	1		zzzz974,zzzz996	false
2805	1		zzzz974,zzzz993	false
2806	1		zzzz974,zzzz981	false
2807	1		zzzz974,zzzz992	false
2808	1		zzzz974,zzzz998	false
2809	1		zzzz974,zzzz988	false
2810	1		zzzz974,zzzz999	false
2811	1		zzzz974,zzzz978	false
2812	1		zzzz974,zzzz975	false
2813	1		zzzz974,zzzz976	false
2814	1		zzzz973,zzzz977	false
2815	1		zzzz973,zzzz987	false
2816	1		zzzz973,zzzz985	false
2817	1		zzzz973,zzzz986	false
2818	1		zzzz973,zzzz984	false
2819	1		zzzz973,zzzz983	false
2820	1		zzzz973,zzzz982	false
2821	1		zzzz973,zzzz988	false
2822	1		zzzz973,zzzz998	false
2823	1		zzzz973,zzzz974	false
2824	1		zzzz973,zzzz975	false
2825	1		zzzz973,zzzz996	false
2826	1		zzzz973,zzzz976	false
2827	1		zzzz973,zzzz978	false
2828	1		zzzz973,zzzz992	false
2829	1		zzzz973,zzzz993	false
2830	1		zzzz973,zzzz981	false
2831	1		zzzz973,zzzz999	false
2832	1		zzzz972,zzzz977	false
2833	1		zzzz972,zzzz987	false
2834	1		zzzz972,zzzz985	false
2835	1		zzzz972,zzzz986	false
2836	1		zzzz972,zzzz984	false
2837	1		zzzz972,zzzz983	false
2838	1		zzzz972,zzzz982	false
2839	1		zzzz972,zzzz976	false
2840	1		zzzz972,zzzz988	false
2841	1		zzzz972,zzzz975	false
2842	1		zzzz972,zzzz998	false
2843	1		zzzz972,zzzz992	false
2844	1		zzzz972,zzzz974	false
2845	1		zzzz972,zzzz978	false
2846	1		zzzz972,zzzz993	false
2847	1		zzzz972,zzzz996	false
2848	1		zzzz972,zzzz981	false
2849	1		zzzz972,zzzz999	false
2850	1		zzzz972,zzzz973	false
2851	1		zzzz971,zzzz977	false
2852	1		zzzz971,zzzz985	false
2853	1		zzzz971,zzzz987	false
2854	1		zzzz971,zzzz986	false
2855	1		zzzz971,zzzz984	false
2856	1		zzzz971,zzzz983	false
2857	1		zzzz971,zzzz982	false
2858	1		zzzz971,zzzz988	false
2859	1		zzzz971,zzzz998	false
2860	1		zzzz971,zzzz975	false
2861	1		zzzz971,zzzz974	false
2862	1		zzzz971,zzzz978	false
2863	1		zzzz971,zzzz976	false
2864	1		zzzz971,zzzz992	false
2865	1		zzzz971,zzzz996	false
2866	1		zzzz971,zzzz993	false
2867	1		zzzz971,zzzz981	false
2868	1		zzzz971,zzzz999	false
2869	1		zzzz971,zzzz973	false
2870	1		zzzz971,zzzz972	false
2871	1		zzzz970,zzzz977	false
2872	1		zzzz970,zzzz985	false
2873	1		zzzz970,zzzz987	false
2874	1		zzzz970,zzzz986	false
2875	1		zzzz970,zzzz984	false
2876	1		zzzz970,zzzz983	false
2877	1		zzzz970,zzzz982	false
2878	1		zzzz970,zzzz998	false
2879	1		zzzz970,zzzz988	false
2880	1		zzzz970,zzzz975	false
2881	1		zzzz970,zzzz974	false
2882	1		zzzz970,zzzz978	false
2883	1		zzzz970,zzzz976	false
2884	1		zzzz970,zzzz992	false
2885	1		zzzz970,zzzz993	false
2886	1		zzzz970,zzzz996	false
2887	1		zzzz970,zzzz981	false
2888	1		zzzz970,zzzz999	false
2889	1		zzzz970,zzzz973	false
2890	1		zzzz970,zzzz972	false
2891	1		zzzz970,zzzz971	false
2892	1		zzzz969,zzzz977	false
2893	1		zzzz969,zzzz984	false
2894	1		zzzz969,zzzz983	false
2895	1		zzzz969,zzzz982	false
2896	1		zzzz969,zzzz985	false
2897	1		zzzz969,zzzz987	false
2898	1		zzzz969,zzzz986	false
2899	1		zzzz969,zzzz998	false
2900	1		zzzz969,zzzz988	false
2901	1		zzzz969,zzzz975	false
2902	1		zzzz969,zzzz974	false
2903	1		zzzz969,zzzz978	false
2904	1		zzzz969,zzzz976	false
2905	1		zzzz969,zzzz992	false
2906	1		zzzz969,zzzz993	false
2907	1		zzzz969,zzzz981	false
2908	1		zzzz969,zzzz996	false
2909	1		zzzz969,zzzz999	false
2910	1		zzzz969,zzzz973	false
2911	1		zzzz969,zzzz972	false
2912	1		zzzz969,zzzz970	false
2913	1		zzzz969,zzzz971	false
2914	1		zzzz968,zzzz977	false
2915	1		zzzz968,zzzz985	false
2916	1		zzzz968,zzzz987	false
2917	1		zzzz968,zzzz986	false
2918	1		zzzz968,zzzz984	false
2919	1		zzzz968,zzzz983	false
2920	1		zzzz968,zzzz982	false
2921	1		zzzz968,zzzz998	false
2922	1		zzzz968,zzzz988	false
2923	1		zzzz968,zzzz975	false
2924	1		zzzz968,zzzz974	false
2925	1		zzzz968,zzzz976	false
2926	1		zzzz968,zzzz978	false
2927	1		zzzz968,zzzz992	false
2928	1		zzzz968,zzzz993	false
2929	1		zzzz968,zzzz996	false
2930	1		zzzz968,zzzz981	false
2931	1		zzzz968,zzzz969	false
2932	1		zzzz968,zzzz973	false
2933	1		zzzz968,zzzz999	false
2934	1		zzzz968,zzzz970	false
2935	1		zzzz968,zzzz972	false
2936	1		zzzz968,zzzz971	false
2937	1		zzzz967,zzzz977	false
2938	1		zzzz967,zzzz985	false
2939	1		zzzz967,zzzz986	false
2940	1		zzzz967,zzzz987	false
2941	1		zzzz967,zzzz984	false
2942	1		zzzz967,zzzz983	false
2943	1		zzzz967,zzzz982	false
2944	1		zzzz967,zzzz988	false
2945	1		zzzz967,zzzz998	false
2946	1		zzzz967,zzzz975	false
2947	1		zzzz967,zzzz978	false
2948	1		zzzz967,zzzz974	false
2949	1		zzzz967,zzzz976	false
2950	1		zzzz967,zzzz996	false
2951	1		zzzz967,zzzz992	false
2952	1		zzzz967,zzzz993	false
2953	1		zzzz967,zzzz969	false
2954	1		zzzz967,zzzz981	false
2955	1		zzzz967,zzzz999	false
2956	1		zzzz967,zzzz973	false
2957	1		zzzz967,zzzz970	false
2958	1		zzzz967,zzzz968	false
2959	1		zzzz967,zzzz972	false
2960	1		zzzz967,zzzz971	false
2961	1		zzzz966,zzzz977	false
2962	1		zzzz966,zzzz984	false
2963	1		zzzz966,zzzz983	false
2964	1		zzzz966,zzzz982	false
2965	1		zzzz966,zzzz985	false
2966	1		zzzz966,zzzz987	false
2967	1		zzzz966,zzzz986	false
2968	1		zzzz966,zzzz998	false
2969	1		zzzz966,zzzz988	false
2970	1		zzzz966,zzzz975	false
2971	1		zzzz966,zzzz974	false
2972	1		zzzz966,zzzz978	false
2973	1		zzzz966,zzzz976	false
2974	1		zzzz966,zzzz992	false
2975	1		zzzz966,zzzz993	false
2976	1		zzzz966,zzzz981	false
2977	1		zzzz966,zzzz996	false
2978	1		zzzz966,zzzz999	false
2979	1		zzzz966,zzzz973	false
2980	1		zzzz966,zzzz972	false
2981	1		zzzz966,zzzz968	false
2982	1		zzzz966,zzzz967	false
2983	1		zzzz966,zzzz970	false
2984	1		zzzz966,zzzz971	false
2985	1		zzzz966,zzzz969	false
2986	1		zzzz965,zzzz977	false
2987	1		zzzz965,zzzz987	false
2988	1		zzzz965,zzzz985	false
2989	1		zzzz965,zzzz986	false
2990	1		zzzz965,zzzz982	false
2991	1		zzzz965,zzzz984	false
2992	1		zzzz965,zzzz983	false
2993	1		zzzz965,zzzz996	false
2994	1		zzzz965,zzzz969	false
2995	1		zzzz965,zzzz966	false
2996	1		zzzz965,zzzz993	false
2997	1		zzzz965,zzzz998	false
2998	1		zzzz965,zzzz988	false
2999	1		zzzz965,zzzz974	false
3000	1		zzzz965,zzzz992	false
3001	1		zzzz965,zzzz978	false
3002	1		zzzz965,zzzz975	false
3003	1		zzzz965,zzzz970	false
3004	1		zzzz965,zzzz976	false
3005	1		zzzz965,zzzz981	false
3006	1		zzzz965,zzzz973	false
3007	1		zzzz965,zzzz972	false
3008	1		zzzz965,zzzz968	false
3009	1		zzzz965,zzzz971	false
3010	1		zzzz965,zzzz999	false
3011	1		zzzz965,zzzz967	false
3012	1		zzzz961,zzzz977	false
3013	1		zzzz961,zzzz985	false
3014	1		zzzz961,zzzz987	false
3015	1		zzzz961,zzzz986	false
3016	1		zzzz961,zzzz984	false
3017	1		zzzz961,zzzz983	false
3018	1		zzzz961,zzzz982	false
3019	1		zzzz961,zzzz988	false
3020	1		zzzz961,zzzz998	false
3021	1		zzzz961,zzzz974	false
3022	1		zzzz961,zzzz975	false
3023	1		zzzz961,zzzz996	false
3024	1		zzzz961,zzzz978	false
3025	1		zzzz961,zzzz976	false
3026	1		zzzz961,zzzz992	false
3027	1		zzzz961,zzzz993	false
3028	1		zzzz961,zzzz969	false
3029	1		zzzz961,zzzz965	false
3030	1		zzzz961,zzzz966	false
3031	1		zzzz961,zzzz981	false
3032	1		zzzz961,zzzz970	false
3033	1		zzzz961,zzzz968	false
3034	1		zzzz961,zzzz999	false
3035	1		zzzz961,zzzz973	false
3036	1		zzzz961,zzzz972	false
3037	1		zzzz961,zzzz971	false
3038	1		zzzz961,zzzz967	false
3039	1		zzzz960,zzzz977	false
3040	1		zzzz960,zzzz985	false
3041	1		zzzz960,zzzz987	false
3042	1		zzzz960,zzzz986	false
3043	1		zzzz960,zzzz982	false
3044	1		zzzz960,zzzz984	false
3045	1		zzzz960,zzzz983	false
3046	1		zzzz960,zzzz996	false
3047	1		zzzz960,zzzz969	false
3048	1		zzzz960,zzzz993	false
3049	1		zzzz960,zzzz998	false
3050	1		zzzz960,zzzz966	false
3051	1		zzzz960,zzzz988	false
3052	1		zzzz960,zzzz974	false
3053	1		zzzz960,zzzz975	false
3054	1		zzzz960,zzzz978	false
3055	1		zzzz960,zzzz992	false
3056	1		zzzz960,zzzz976	false
3057	1		zzzz960,zzzz981	false
3058	1		zzzz960,zzzz970	false
3059	1		zzzz960,zzzz999	false
3060	1		zzzz960,zzzz968	false
3061	1		zzzz960,zzzz973	false
3062	1		zzzz960,zzzz972	false
3063	1		zzzz960,zzzz971	false
3064	1		zzzz960,zzzz967	false
3065	1		zzzz960,zzzz961	false
3066	1		zzzz960,zzzz965	false
3067	1		zzzz958,zzzz988	false
3068	1		zzzz958,zzzz993	false
3069	1		zzzz958,zzzz998	false
3070	1		zzzz958,zzzz977	false
3071	1		zzzz958,zzzz987	false
3072	1		zzzz958,zzzz974	false
3073	1		zzzz958,zzzz986	false
3074	1		zzzz958,zzzz985	false
3075	1		zzzz958,zzzz967	false
3076	1		zzzz958,zzzz965	false
3077	1		zzzz958,zzzz960	false
3078	1		zzzz958,zzzz981	false
3079	1		zzzz958,zzzz968	false
3080	1		zzzz958,zzzz972	false
3081	1		zzzz958,zzzz971	false
3082	1		zzzz958,zzzz970	false
3083	1		zzzz958,zzzz969	false
3084	1		zzzz958,zzzz966	false
3085	1		zzzz958,zzzz973	false
3086	1		zzzz958,zzzz961	false
3087	1		zzzz958,zzzz996	false
3088	1		zzzz958,zzzz978	false
3089	1		zzzz958,zzzz976	false
3090	1		zzzz958,zzzz975	false
3091	1		zzzz958,zzzz999	false
3092	1		zzzz958,zzzz992	false
3093	1		zzzz957,zzzz983	false
3094	1		zzzz957,zzzz977	false
3095	1		zzzz957,zzzz958	false
3096	1		zzzz957,zzzz987	false
3097	1		zzzz957,zzzz985	false
3098	1		zzzz957,zzzz986	false
3099	1		zzzz957,zzzz993	false
3100	1		zzzz957,zzzz988	false
3101	1		zzzz957,zzzz998	false
3102	1		zzzz957,zzzz974	false
3103	1		zzzz957,zzzz978	false
3104	1		zzzz957,zzzz981	false
3105	1		zzzz957,zzzz965	false
3106	1		zzzz957,zzzz999	false
3107	1		zzzz957,zzzz960	false
3108	1		zzzz957,zzzz973	false
3109	1		zzzz957,zzzz996	false
3110	1		zzzz957,zzzz972	false
3111	1		zzzz957,zzzz967	false
3112	1		zzzz957,zzzz976	false
3113	1		zzzz957,zzzz975	false
3114	1		zzzz957,zzzz969	false
3115	1		zzzz957,zzzz970	false
3116	1		zzzz957,zzzz968	false
3117	1		zzzz957,zzzz961	false
3118	1		zzzz957,zzzz971	false
3119	1		zzzz957,zzzz966	false
3120	1		zzzz957,zzzz992	false
3121	1		zzzz956,zzzz977	false
3122	1		zzzz956,zzzz958	false
3123	1		zzzz956,zzzz987	false
3124	1		zzzz956,zzzz985	false
3125	1		zzzz956,zzzz986	false
3126	1		zzzz956,zzzz984	false
3127	1		zzzz956,zzzz983	false
3128	1		zzzz956,zzzz982	false
3129	1		zzzz956,zzzz957	false
3130	1		zzzz956,zzzz988	false
3131	1		zzzz956,zzzz996	false
3132	1		zzzz956,zzzz998	false
3133	1		zzzz956,zzzz974	false
3134	1		zzzz956,zzzz978	false
3135	1		zzzz956,zzzz975	false
3136	1		zzzz956,zzzz976	false
3137	1		zzzz956,zzzz992	false
3138	1		zzzz956,zzzz969	false
3139	1		zzzz956,zzzz993	false
3140	1		zzzz956,zzzz966	false
3141	1		zzzz956,zzzz965	false
3142	1		zzzz956,zzzz960	false
3143	1		zzzz956,zzzz981	false
3144	1		zzzz956,zzzz970	false
3145	1		zzzz956,zzzz968	false
3146	1		zzzz956,zzzz973	false
3147	1		zzzz956,zzzz999	false
3148	1		zzzz956,zzzz972	false
3149	1		zzzz956,zzzz971	false
3150	1		zzzz956,zzzz967	false
3151	1		zzzz956,zzzz961	false
3152	1		zzzz953,zzzz977	false
3153	1		zzzz953,zzzz987	false
3154	1		zzzz953,zzzz985	false
3155	1		zzzz953,zzzz986	false
3156	1		zzzz953,zzzz982	false
3157	1		zzzz953,zzzz984	false
3158	1		zzzz953,zzzz957	false
3159	1		zzzz953,zzzz983	false
3160	1		zzzz953,zzzz996	false
3161	1		zzzz953,zzzz969	false
3162	1		zzzz953,zzzz966	false
3163	1		zzzz953,zzzz981	false
3164	1		zzzz953,zzzz993	false
3165	1		zzzz953,zzzz970	false
3166	1		zzzz953,zzzz999	false
3167	1		zzzz953,zzzz972	false
3168	1		zzzz953,zzzz973	false
3169	1		zzzz953,zzzz971	false
3170	1		zzzz953,zzzz968	false
3171	1		zzzz953,zzzz992	false
3172	1		zzzz953,zzzz967	false
3173	1		zzzz953,zzzz961	false
3174	1		zzzz953,zzzz998	false
3175	1		zzzz953,zzzz956	false
3176	1		zzzz953,zzzz974	false
3177	1		zzzz953,zzzz965	false
3178	1		zzzz953,zzzz978	false
3179	1		zzzz953,zzzz976	false
3180	1		zzzz953,zzzz960	false
3181	1		zzzz953,zzzz988	false
3182	1		zzzz953,zzzz975	false
3183	1		zzzz950,zzzz958	false
3184	1		zzzz950,zzzz977	false
3185	1		zzzz950,zzzz985	false
3186	1		zzzz950,zzzz986	false
3187	1		zzzz950,zzzz987	false
3188	1		zzzz950,zzzz982	false
3189	1		zzzz950,zzzz984	false
3190	1		zzzz950,zzzz957	false
3191	1		zzzz950,zzzz983	false
3192	1		zzzz950,zzzz953	false
3193	1		zzzz950,zzzz996	false
3194	1		zzzz950,zzzz969	false
3195	1		zzzz950,zzzz966	false
3196	1		zzzz950,zzzz970	false
3197	1		zzzz950,zzzz981	false
3198	1		zzzz950,zzzz968	false
3199	1		zzzz950,zzzz973	false
3200	1		zzzz950,zzzz992	false
3201	1		zzzz950,zzzz971	false
3202	1		zzzz950,zzzz999	false
3203	1		zzzz950,zzzz993	false
3204	1		zzzz950,zzzz976	false
3205	1		zzzz950,zzzz975	false
3206	1		zzzz950,zzzz978	false
3207	1		zzzz950,zzzz972	false
3208	1		zzzz950,zzzz961	false
3209	1		zzzz950,zzzz956	false
3210	1		zzzz950,zzzz965	false
3211	1		zzzz950,zzzz960	false
3212	1		zzzz950,zzzz967	false
3213	1		zzzz950,zzzz974	false
3214	1		zzzz950,zzzz988	false
3215	1		zzzz950,zzzz998	false
3216	1		zzzz948,zzzz958	false
3217	1		zzzz948,zzzz977	false
3218	1		zzzz948,zzzz985	false
3219	1		zzzz948,zzzz986	false
3220	1		zzzz948,zzzz987	false
3221	1		zzzz948,zzzz982	false
3222	1		zzzz948,zzzz984	false
3223	1		zzzz948,zzzz983	false
3224	1		zzzz948,zzzz957	false
3225	1		zzzz948,zzzz953	false
3226	1		zzzz948,zzzz996	false
3227	1		zzzz948,zzzz969	false
3228	1		zzzz948,zzzz966	false
3229	1		zzzz948,zzzz970	false
3230	1		zzzz948,zzzz981	false
3231	1		zzzz948,zzzz992	false
3232	1		zzzz948,zzzz976	false
3233	1		zzzz948,zzzz968	false
3234	1		zzzz948,zzzz975	false
3235	1		zzzz948,zzzz973	false
3236	1		zzzz948,zzzz993	false
3237	1		zzzz948,zzzz978	false
3238	1		zzzz948,zzzz971	false
3239	1		zzzz948,zzzz999	false
3240	1		zzzz948,zzzz974	false
3241	1		zzzz948,zzzz960	false
3242	1		zzzz948,zzzz965	false
3243	1		zzzz948,zzzz972	false
3244	1		zzzz948,zzzz961	false
3245	1		zzzz948,zzzz956	false
3246	1		zzzz948,zzzz967	false
3247	1		zzzz948,zzzz950	false
3248	1		zzzz948,zzzz988	false
3249	1		zzzz948,zzzz998	false
3250	1		zzzz946,zzzz958	false
3251	1		zzzz946,zzzz977	false
3252	1		zzzz946,zzzz985	false
3253	1		zzzz946,zzzz987	false
3254	1		zzzz946,zzzz986	false
3255	1		zzzz946,zzzz984	false
3256	1		zzzz946,zzzz982	false
3257	1		zzzz946,zzzz983	false
3258	1		zzzz946,zzzz957	false
3259	1		zzzz946,zzzz953	false
3260	1		zzzz946,zzzz996	false
3261	1		zzzz946,zzzz969	false
3262	1		zzzz946,zzzz966	false
3263	1		zzzz946,zzzz992	false
3264	1		zzzz946,zzzz970	false
3265	1		zzzz946,zzzz981	false
3266	1		zzzz946,zzzz993	false
3267	1		zzzz946,zzzz975	false
3268	1		zzzz946,zzzz973	false
3269	1		zzzz946,zzzz978	false
3270	1		zzzz946,zzzz976	false
3271	1		zzzz946,zzzz968	false
3272	1		zzzz946,zzzz974	false
3273	1		zzzz946,zzzz971	false
3274	1		zzzz946,zzzz972	false
3275	1		zzzz946,zzzz960	false
3276	1		zzzz946,zzzz999	false
3277	1		zzzz946,zzzz956	false
3278	1		zzzz946,zzzz965	false
3279	1		zzzz946,zzzz961	false
3280	1		zzzz946,zzzz967	false
3281	1		zzzz946,zzzz950	false
3282	1		zzzz946,zzzz988	false
3283	1		zzzz946,zzzz998	false
3284	1		zzzz946,zzzz948	false
3285	1		zzzz944,zzzz977	false
3286	1		zzzz944,zzzz958	false
3287	1		zzzz944,zzzz985	false
3288	1		zzzz944,zzzz986	false
3289	1		zzzz944,zzzz987	false
3290	1		zzzz944,zzzz984	false
3291	1		zzzz944,zzzz983	false
3292	1		zzzz944,zzzz957	false
3293	1		zzzz944,zzzz982	false
3294	1		zzzz944,zzzz953	false
3295	1		zzzz944,zzzz996	false
3296	1		zzzz944,zzzz976	false
3297	1		zzzz944,zzzz950	false
3298	1		zzzz944,zzzz988	false
3299	1		zzzz944,zzzz948	false
3300	1		zzzz944,zzzz998	false
3301	1		zzzz944,zzzz974	false
3302	1		zzzz944,zzzz946	false
3303	1		zzzz944,zzzz978	false
3304	1		zzzz944,zzzz975	false
3305	1		zzzz944,zzzz992	false
3306	1		zzzz944,zzzz969	false
3307	1		zzzz944,zzzz966	false
3308	1		zzzz944,zzzz993	false
3309	1		zzzz944,zzzz965	false
3310	1		zzzz944,zzzz972	false
3311	1		zzzz944,zzzz960	false
3312	1		zzzz944,zzzz970	false
3313	1		zzzz944,zzzz999	false
3314	1		zzzz944,zzzz968	false
3315	1		zzzz944,zzzz973	false
3316	1		zzzz944,zzzz971	false
3317	1		zzzz944,zzzz981	false
3318	1		zzzz944,zzzz956	false
3319	1		zzzz944,zzzz961	false
3320	1		zzzz944,zzzz967	false
3321	1		zzzz942,zzzz994	false
3322	1		zzzz941,zzzz942	false
3323	1		zzzz941,zzzz994	false
3324	1		zzzz940,zzzz942	false
3325	1		zzzz940,zzzz994	false
3326	1		zzzz940,zzzz941	false
3327	1		zzzz936,zzzz985	false
3328	1		zzzz936,zzzz987	false
3329	1		zzzz936,zzzz986	false
3330	1		zzzz936,zzzz957	false
3331	1		zzzz936,zzzz984	false
3332	1		zzzz936,zzzz983	false
3333	1		zzzz936,zzzz982	false
3334	1		zzzz936,zzzz953	false
3335	1		zzzz936,zzzz996	false
3336	1		zzzz936,zzzz969	false
3337	1		zzzz936,zzzz966	false
3338	1		zzzz936,zzzz975	false
3339	1		zzzz936,zzzz978	false
3340	1		zzzz936,zzzz976	false
3341	1		zzzz936,zzzz992	false
3342	1		zzzz936,zzzz988	false
3343	1		zzzz936,zzzz965	false
3344	1		zzzz936,zzzz950	false
3345	1		zzzz936,zzzz944	false
3346	1		zzzz936,zzzz974	false
3347	1		zzzz936,zzzz998	false
3348	1		zzzz936,zzzz960	false
3349	1		zzzz936,zzzz946	false
3350	1		zzzz936,zzzz948	false
3351	1		zzzz936,zzzz970	false
3352	1		zzzz936,zzzz981	false
3353	1		zzzz936,zzzz993	false
3354	1		zzzz936,zzzz971	false
3355	1		zzzz936,zzzz968	false
3356	1		zzzz936,zzzz973	false
3357	1		zzzz936,zzzz972	false
3358	1		zzzz936,zzzz967	false
3359	1		zzzz936,zzzz956	false
3360	1		zzzz936,zzzz961	false
3361	1		zzzz936,zzzz999	false
3362	1		zzzz935,zzzz977	false
3363	1		zzzz935,zzzz958	false
3364	1		zzzz935,zzzz985	false
3365	1		zzzz935,zzzz987	false
3366	1		zzzz935,zzzz986	false
3367	1		zzzz935,zzzz984	false
3368	1		zzzz935,zzzz983	false
3369	1		zzzz935,zzzz982	false
3370	1		zzzz935,zzzz953	false
3371	1		zzzz935,zzzz957	false
3372	1		zzzz935,zzzz936	false
3373	1		zzzz935,zzzz950	false
3374	1		zzzz935,zzzz988	false
3375	1		zzzz935,zzzz948	false
3376	1		zzzz935,zzzz998	false
3377	1		zzzz935,zzzz946	false
3378	1		zzzz935,zzzz996	false
3379	1		zzzz935,zzzz974	false
3380	1		zzzz935,zzzz978	false
3381	1		zzzz935,zzzz976	false
3382	1		zzzz935,zzzz975	false
3383	1		zzzz935,zzzz992	false
3384	1		zzzz935,zzzz969	false
3385	1		zzzz935,zzzz966	false
3386	1		zzzz935,zzzz993	false
3387	1		zzzz935,zzzz965	false
3388	1		zzzz935,zzzz944	false
3389	1		zzzz935,zzzz960	false
3390	1		zzzz935,zzzz970	false
3391	1		zzzz935,zzzz981	false
3392	1		zzzz935,zzzz973	false
3393	1		zzzz935,zzzz968	false
3394	1		zzzz935,zzzz999	false
3395	1		zzzz935,zzzz972	false
3396	1		zzzz935,zzzz971	false
3397	1		zzzz935,zzzz956	false
3398	1		zzzz935,zzzz967	false
3399	1		zzzz935,zzzz961	false
3400	1		zzzz934,zzzz977	false
3401	1		zzzz934,zzzz958	false
3402	1		zzzz934,zzzz985	false
3403	1		zzzz934,zzzz987	false
3404	1		zzzz934,zzzz986	false
3405	1		zzzz934,zzzz984	false
3406	1		zzzz934,zzzz983	false
3407	1		zzzz934,zzzz982	false
3408	1		zzzz934,zzzz953	false
3409	1		zzzz934,zzzz957	false
3410	1		zzzz934,zzzz936	false
3411	1		zzzz934,zzzz950	false
3412	1		zzzz934,zzzz976	false
3413	1		zzzz934,zzzz996	false
3414	1		zzzz934,zzzz988	false
3415	1		zzzz934,zzzz974	false
3416	1		zzzz934,zzzz975	false
3417	1		zzzz934,zzzz998	false
3418	1		zzzz934,zzzz948	false
3419	1		zzzz934,zzzz992	false
3420	1		zzzz934,zzzz946	false
3421	1		zzzz934,zzzz978	false
3422	1		zzzz934,zzzz993	false
3423	1		zzzz934,zzzz969	false
3424	1		zzzz934,zzzz966	false
3425	1		zzzz934,zzzz944	false
3426	1		zzzz934,zzzz965	false
3427	1		zzzz934,zzzz999	false
3428	1		zzzz934,zzzz960	false
3429	1		zzzz934,zzzz972	false
3430	1		zzzz934,zzzz970	false
3431	1		zzzz934,zzzz981	false
3432	1		zzzz934,zzzz968	false
3433	1		zzzz934,zzzz973	false
3434	1		zzzz934,zzzz971	false
3435	1		zzzz934,zzzz967	false
3436	1		zzzz934,zzzz956	false
3437	1		zzzz934,zzzz935	false
3438	1		zzzz934,zzzz961	false
3439	1		zzzz933,zzzz958	false
3440	1		zzzz933,zzzz977	false
3441	1		zzzz933,zzzz985	false
3442	1		zzzz933,zzzz986	false
3443	1		zzzz933,zzzz987	false
3444	1		zzzz933,zzzz982	false
3445	1		zzzz933,zzzz984	false
3446	1		zzzz933,zzzz957	false
3447	1		zzzz933,zzzz983	false
3448	1		zzzz933,zzzz936	false
3449	1		zzzz933,zzzz953	false
3450	1		zzzz933,zzzz996	false
3451	1		zzzz933,zzzz969	false
3452	1		zzzz933,zzzz966	false
3453	1		zzzz933,zzzz944	false
3454	1		zzzz933,zzzz950	false
3455	1		zzzz933,zzzz993	false
3456	1		zzzz933,zzzz998	false
3457	1		zzzz933,zzzz948	false
3458	1		zzzz933,zzzz992	false
3459	1		zzzz933,zzzz988	false
3460	1		zzzz933,zzzz975	false
3461	1		zzzz933,zzzz946	false
3462	1		zzzz933,zzzz981	false
3463	1		zzzz933,zzzz970	false
3464	1		zzzz933,zzzz974	false
3465	1		zzzz933,zzzz978	false
3466	1		zzzz933,zzzz976	false
3467	1		zzzz933,zzzz968	false
3468	1		zzzz933,zzzz973	false
3469	1		zzzz933,zzzz971	false
3470	1		zzzz933,zzzz972	false
3471	1		zzzz933,zzzz999	false
3472	1		zzzz933,zzzz935	false
3473	1		zzzz933,zzzz934	false
3474	1		zzzz933,zzzz961	false
3475	1		zzzz933,zzzz956	false
3476	1		zzzz933,zzzz967	false
3477	1		zzzz933,zzzz960	false
3478	1		zzzz933,zzzz965	false
3479	1		zzzz932,zzzz977	false
3480	1		zzzz932,zzzz958	false
3481	1		zzzz932,zzzz985	false
3482	1		zzzz932,zzzz987	false
3483	1		zzzz932,zzzz986	false
3484	1		zzzz932,zzzz984	false
3485	1		zzzz932,zzzz983	false
3486	1		zzzz932,zzzz982	false
3487	1		zzzz932,zzzz953	false
3488	1		zzzz932,zzzz957	false
3489	1		zzzz932,zzzz936	false
3490	1		zzzz932,zzzz950	false
3491	1		zzzz932,zzzz998	false
3492	1		zzzz932,zzzz988	false
3493	1		zzzz932,zzzz948	false
3494	1		zzzz932,zzzz946	false
3495	1		zzzz932,zzzz974	false
3496	1		zzzz932,zzzz975	false
3497	1		zzzz932,zzzz978	false
3498	1		zzzz932,zzzz996	false
3499	1		zzzz932,zzzz976	false
3500	1		zzzz932,zzzz933	false
3501	1		zzzz932,zzzz992	false
3502	1		zzzz932,zzzz993	false
3503	1		zzzz932,zzzz969	false
3504	1		zzzz932,zzzz944	false
3505	1		zzzz932,zzzz966	false
3506	1		zzzz932,zzzz965	false
3507	1		zzzz932,zzzz960	false
3508	1		zzzz932,zzzz981	false
3509	1		zzzz932,zzzz970	false
3510	1		zzzz932,zzzz968	false
3511	1		zzzz932,zzzz999	false
3512	1		zzzz932,zzzz973	false
3513	1		zzzz932,zzzz956	false
3514	1		zzzz932,zzzz935	false
3515	1		zzzz932,zzzz971	false
3516	1		zzzz932,zzzz972	false
3517	1		zzzz932,zzzz934	false
3518	1		zzzz932,zzzz967	false
3519	1		zzzz932,zzzz961	false
3520	1		zzzz931,zzzz977	false
3521	1		zzzz931,zzzz958	false
3522	1		zzzz931,zzzz987	false
3523	1		zzzz931,zzzz985	false
3524	1		zzzz931,zzzz986	false
3525	1		zzzz931,zzzz984	false
3526	1		zzzz931,zzzz983	false
3527	1		zzzz931,zzzz982	false
3528	1		zzzz931,zzzz957	false
3529	1		zzzz931,zzzz953	false
3530	1		zzzz931,zzzz936	false
3531	1		zzzz931,zzzz950	false
3532	1		zzzz931,zzzz974	false
3533	1		zzzz931,zzzz988	false
3534	1		zzzz931,zzzz978	false
3535	1		zzzz931,zzzz975	false
3536	1		zzzz931,zzzz998	false
3537	1		zzzz931,zzzz976	false
3538	1		zzzz931,zzzz996	false
3539	1		zzzz931,zzzz948	false
3540	1		zzzz931,zzzz946	false
3541	1		zzzz931,zzzz992	false
3542	1		zzzz931,zzzz933	false
3543	1		zzzz931,zzzz969	false
3544	1		zzzz931,zzzz966	false
3545	1		zzzz931,zzzz944	false
3546	1		zzzz931,zzzz965	false
3547	1		zzzz931,zzzz993	false
3548	1		zzzz931,zzzz960	false
3549	1		zzzz931,zzzz981	false
3550	1		zzzz931,zzzz970	false
3551	1		zzzz931,zzzz968	false
3552	1		zzzz931,zzzz973	false
3553	1		zzzz931,zzzz999	false
3554	1		zzzz931,zzzz956	false
3555	1		zzzz931,zzzz971	false
3556	1		zzzz931,zzzz972	false
3557	1		zzzz931,zzzz935	false
3558	1		zzzz931,zzzz934	false
3559	1		zzzz931,zzzz967	false
3560	1		zzzz931,zzzz961	false
3561	1		zzzz931,zzzz932	false
3562	1		zzzz924,zzzz977	false
3563	1		zzzz924,zzzz958	false
3564	1		zzzz924,zzzz985	false
3565	1		zzzz924,zzzz987	false
3566	1		zzzz924,zzzz986	false
3567	1		zzzz924,zzzz984	false
3568	1		zzzz924,zzzz983	false
3569	1		zzzz924,zzzz982	false
3570	1		zzzz924,zzzz957	false
3571	1		zzzz924,zzzz953	false
3572	1		zzzz924,zzzz936	false
3573	1		zzzz924,zzzz950	false
3574	1		zzzz924,zzzz988	false
3575	1		zzzz924,zzzz976	false
3576	1		zzzz924,zzzz948	false
3577	1		zzzz924,zzzz975	false
3578	1		zzzz924,zzzz998	false
3579	1		zzzz924,zzzz946	false
3580	1		zzzz924,zzzz996	false
3581	1		zzzz924,zzzz974	false
3582	1		zzzz924,zzzz992	false
3583	1		zzzz924,zzzz978	false
3584	1		zzzz924,zzzz993	false
3585	1		zzzz924,zzzz933	false
3586	1		zzzz924,zzzz944	false
3587	1		zzzz924,zzzz969	false
3588	1		zzzz924,zzzz965	false
3589	1		zzzz924,zzzz966	false
3590	1		zzzz924,zzzz981	false
3591	1		zzzz924,zzzz960	false
3592	1		zzzz924,zzzz934	false
3593	1		zzzz924,zzzz970	false
3594	1		zzzz924,zzzz935	false
3595	1		zzzz924,zzzz968	false
3596	1		zzzz924,zzzz931	false
3597	1		zzzz924,zzzz956	false
3598	1		zzzz924,zzzz972	false
3599	1		zzzz924,zzzz999	false
3600	1		zzzz924,zzzz971	false
3601	1		zzzz924,zzzz973	false
3602	1		zzzz924,zzzz967	false
3603	1		zzzz924,zzzz932	false
3604	1		zzzz924,zzzz961	false
3605	1		zzzz923,zzzz958	false
3606	1		zzzz923,zzzz977	false
3607	1		zzzz923,zzzz987	false
3608	1		zzzz923,zzzz985	false
3609	1		zzzz923,zzzz986	false
3610	1		zzzz923,zzzz982	false
3611	1		zzzz923,zzzz984	false
3612	1		zzzz923,zzzz983	false
3613	1		zzzz923,zzzz957	false
3614	1		zzzz923,zzzz936	false
3615	1		zzzz923,zzzz953	false
3616	1		zzzz923,zzzz996	false
3617	1		zzzz923,zzzz969	false
3618	1		zzzz923,zzzz966	false
3619	1		zzzz923,zzzz944	false
3620	1		zzzz923,zzzz970	false
3621	1		zzzz923,zzzz981	false
3622	1		zzzz923,zzzz993	false
3623	1		zzzz923,zzzz968	false
3624	1		zzzz923,zzzz973	false
3625	1		zzzz923,zzzz992	false
3626	1		zzzz923,zzzz924	false
3627	1		zzzz923,zzzz971	false
3628	1		zzzz923,zzzz935	false
3629	1		zzzz923,zzzz999	false
3630	1		zzzz923,zzzz933	false
3631	1		zzzz923,zzzz975	false
3632	1		zzzz923,zzzz972	false
3633	1		zzzz923,zzzz931	false
3634	1		zzzz923,zzzz956	false
3635	1		zzzz923,zzzz961	false
3636	1		zzzz923,zzzz960	false
3637	1		zzzz923,zzzz932	false
3638	1		zzzz923,zzzz976	false
3639	1		zzzz923,zzzz967	false
3640	1		zzzz923,zzzz978	false
3641	1		zzzz923,zzzz965	false
3642	1		zzzz923,zzzz974	false
3643	1		zzzz923,zzzz934	false
3644	1		zzzz923,zzzz950	false
3645	1		zzzz923,zzzz998	false
3646	1		zzzz923,zzzz946	false
3647	1		zzzz923,zzzz948	false
3648	1		zzzz923,zzzz988	false
3649			zzzz922,zzzz950	false
3650			zzzz922,zzzz998	false
3651			zzzz922,zzzz960	false
3652			zzzz922,zzzz988	false
3653			zzzz922,zzzz946	false
3654			zzzz922,zzzz923	false
3655			zzzz922,zzzz933	false
3656	1		zzzz921,zzzz977	false
3657	1		zzzz921,zzzz958	false
3658	1		zzzz921,zzzz985	false
3659	1		zzzz921,zzzz987	false
3660	1		zzzz921,zzzz986	false
3661	1		zzzz921,zzzz984	false
3662	1		zzzz921,zzzz983	false
3663	1		zzzz921,zzzz982	false
3664	1		zzzz921,zzzz953	false
3665	1		zzzz921,zzzz957	false
3666	1		zzzz921,zzzz936	false
3667	1		zzzz921,zzzz950	false
3668	1		zzzz921,zzzz923	false
3669	1		zzzz921,zzzz988	false
3670	1		zzzz921,zzzz998	false
3671	1		zzzz921,zzzz948	false
3672	1		zzzz921,zzzz946	false
3673	1		zzzz921,zzzz974	false
3674	1		zzzz921,zzzz975	false
3675	1		zzzz921,zzzz996	false
3676	1		zzzz921,zzzz978	false
3677	1		zzzz921,zzzz933	false
3678	1		zzzz921,zzzz992	false
3679	1		zzzz921,zzzz976	false
3680	1		zzzz921,zzzz993	false
3681	1		zzzz921,zzzz944	false
3682	1		zzzz921,zzzz965	false
3683	1		zzzz921,zzzz969	false
3684	1		zzzz921,zzzz966	false
3685	1		zzzz921,zzzz981	false
3686	1		zzzz921,zzzz960	false
3687	1		zzzz921,zzzz935	false
3688	1		zzzz921,zzzz931	false
3689	1		zzzz921,zzzz970	false
3690	1		zzzz921,zzzz934	false
3691	1		zzzz921,zzzz956	false
3692	1		zzzz921,zzzz924	false
3693	1		zzzz921,zzzz999	false
3694	1		zzzz921,zzzz968	false
3695	1		zzzz921,zzzz973	false
3696	1		zzzz921,zzzz932	false
3697	1		zzzz921,zzzz971	false
3698	1		zzzz921,zzzz972	false
3699	1		zzzz921,zzzz961	false
3700	1		zzzz921,zzzz967	false
3701	1		zzzz914,zzzz953	false
3702	1		zzzz914,zzzz977	false
3703	1		zzzz914,zzzz936	false
3704	1		zzzz914,zzzz958	false
3705	1		zzzz914,zzzz987	false
3706	1		zzzz914,zzzz986	false
3707	1		zzzz914,zzzz985	false
3708	1		zzzz914,zzzz950	false
3709	1		zzzz914,zzzz923	false
3710	1		zzzz914,zzzz998	false
3711	1		zzzz914,zzzz948	false
3712	1		zzzz914,zzzz988	false
3713	1		zzzz914,zzzz993	false
3714	1		zzzz914,zzzz946	false
3715	1		zzzz914,zzzz933	false
3716	1		zzzz914,zzzz974	false
3717	1		zzzz914,zzzz944	false
3718	1		zzzz914,zzzz975	false
3719	1		zzzz914,zzzz978	false
3720	1		zzzz914,zzzz992	false
3721	1		zzzz914,zzzz976	false
3722	1		zzzz914,zzzz957	false
3723	1		zzzz914,zzzz965	false
3724	1		zzzz914,zzzz924	false
3725	1		zzzz914,zzzz981	false
3726	1		zzzz914,zzzz960	false
3727	1		zzzz914,zzzz931	false
3728	1		zzzz914,zzzz999	false
3729	1		zzzz914,zzzz972	false
3730	1		zzzz914,zzzz956	false
3731	1		zzzz914,zzzz973	false
3732	1		zzzz914,zzzz967	false
3733	1		zzzz914,zzzz935	false
3734	1		zzzz914,zzzz996	false
3735	1		zzzz914,zzzz921	false
3736	1		zzzz914,zzzz969	false
3737	1		zzzz914,zzzz968	false
3738	1		zzzz914,zzzz961	false
3739	1		zzzz914,zzzz970	false
3740	1		zzzz914,zzzz932	false
3741	1		zzzz914,zzzz971	false
3742	1		zzzz914,zzzz966	false
3743	1		zzzz914,zzzz934	false
3744	1		zzzz913,zzzz977	false
3745	1		zzzz913,zzzz958	false
3746	1		zzzz913,zzzz985	false
3747	1		zzzz913,zzzz987	false
3748	1		zzzz913,zzzz986	false
3749	1		zzzz913,zzzz984	false
3750	1		zzzz913,zzzz914	false
3751	1		zzzz913,zzzz983	false
3752	1		zzzz913,zzzz982	false
3753	1		zzzz913,zzzz953	false
3754	1		zzzz913,zzzz957	false
3755	1		zzzz913,zzzz936	false
3756	1		zzzz913,zzzz976	false
3757	1		zzzz913,zzzz950	false
3758	1		zzzz913,zzzz923	false
3759	1		zzzz913,zzzz988	false
3760	1		zzzz913,zzzz992	false
3761	1		zzzz913,zzzz998	false
3762	1		zzzz913,zzzz996	false
3763	1		zzzz913,zzzz974	false
3764	1		zzzz913,zzzz978	false
3765	1		zzzz913,zzzz948	false
3766	1		zzzz913,zzzz975	false
3767	1		zzzz913,zzzz946	false
3768	1		zzzz913,zzzz993	false
3769	1		zzzz913,zzzz933	false
3770	1		zzzz913,zzzz944	false
3771	1		zzzz913,zzzz969	false
3772	1		zzzz913,zzzz966	false
3773	1		zzzz913,zzzz965	false
3774	1		zzzz913,zzzz981	false
3775	1		zzzz913,zzzz960	false
3776	1		zzzz913,zzzz924	false
3777	1		zzzz913,zzzz999	false
3778	1		zzzz913,zzzz934	false
3779	1		zzzz913,zzzz972	false
3780	1		zzzz913,zzzz970	false
3781	1		zzzz913,zzzz968	false
3782	1		zzzz913,zzzz973	false
3783	1		zzzz913,zzzz935	false
3784	1		zzzz913,zzzz931	false
3785	1		zzzz913,zzzz921	false
3786	1		zzzz913,zzzz971	false
3787	1		zzzz913,zzzz956	false
3788	1		zzzz913,zzzz932	false
3789	1		zzzz913,zzzz967	false
3790	1		zzzz913,zzzz961	false
3791	1		zzzz912,zzzz942	false
3792	1		zzzz912,zzzz994	false
3793	1		zzzz912,zzzz941	false
3794	1		zzzz912,zzzz940	false
3795	1		zzzz910,zzzz977	false
3796	1		zzzz910,zzzz958	false
3797	1		zzzz910,zzzz985	false
3798	1		zzzz910,zzzz987	false
3799	1		zzzz910,zzzz986	false
3800	1		zzzz910,zzzz984	false
3801	1		zzzz910,zzzz983	false
3802	1		zzzz910,zzzz982	false
3803	1		zzzz910,zzzz914	false
3804	1		zzzz910,zzzz953	false
3805	1		zzzz910,zzzz957	false
3806	1		zzzz910,zzzz936	false
3807	1		zzzz910,zzzz950	false
3808	1		zzzz910,zzzz923	false
3809	1		zzzz910,zzzz976	false
3810	1		zzzz910,zzzz988	false
3811	1		zzzz910,zzzz998	false
3812	1		zzzz910,zzzz975	false
3813	1		zzzz910,zzzz948	false
3814	1		zzzz910,zzzz992	false
3815	1		zzzz910,zzzz946	false
3816	1		zzzz910,zzzz978	false
3817	1		zzzz910,zzzz974	false
3818	1		zzzz910,zzzz996	false
3819	1		zzzz910,zzzz993	false
3820	1		zzzz910,zzzz933	false
3821	1		zzzz910,zzzz944	false
3822	1		zzzz910,zzzz965	false
3823	1		zzzz910,zzzz969	false
3824	1		zzzz910,zzzz981	false
3825	1		zzzz910,zzzz966	false
3826	1		zzzz910,zzzz960	false
3827	1		zzzz910,zzzz913	false
3828	1		zzzz910,zzzz934	false
3829	1		zzzz910,zzzz924	false
3830	1		zzzz910,zzzz999	false
3831	1		zzzz910,zzzz931	false
3832	1		zzzz910,zzzz970	false
3833	1		zzzz910,zzzz972	false
3834	1		zzzz910,zzzz935	false
3835	1		zzzz910,zzzz968	false
3836	1		zzzz910,zzzz973	false
3837	1		zzzz910,zzzz956	false
3838	1		zzzz910,zzzz921	false
3839	1		zzzz910,zzzz971	false
3840	1		zzzz910,zzzz932	false
3841	1		zzzz910,zzzz967	false
3842	1		zzzz910,zzzz961	false
3843			zzzz909,zzzz982	false
3844			zzzz909,zzzz983	false
3845			zzzz909,zzzz921	false
3846			zzzz909,zzzz972	false
3847			zzzz909,zzzz981	false
3848			zzzz909,zzzz992	false
3849			zzzz909,zzzz910	false
3850			zzzz909,zzzz976	false
3851			zzzz909,zzzz934	false
3852			zzzz909,zzzz999	false
3853			zzzz909,zzzz973	false
3854			zzzz909,zzzz944	false
3855			zzzz909,zzzz924	false
3856			zzzz909,zzzz993	false
3857			zzzz909,zzzz970	false
3858			zzzz909,zzzz913	false
3859			zzzz909,zzzz968	false
3860			zzzz909,zzzz961	false
3861			zzzz909,zzzz960	false
3862			zzzz909,zzzz967	false
3863			zzzz909,zzzz932	false
3864			zzzz909,zzzz931	false
3865			zzzz909,zzzz971	false
3866			zzzz909,zzzz956	false
3867			zzzz909,zzzz935	false
3868			zzzz909,zzzz933	false
3869			zzzz909,zzzz965	false
3870	1		zzzz905,zzzz977	false
3871	1		zzzz905,zzzz984	false
3872	1		zzzz905,zzzz958	false
3873	1		zzzz905,zzzz982	false
3874	1		zzzz905,zzzz987	false
3875	1		zzzz905,zzzz985	false
3876	1		zzzz905,zzzz986	false
3877	1		zzzz905,zzzz983	false
3878	1		zzzz905,zzzz914	false
3879	1		zzzz905,zzzz936	false
3880	1		zzzz905,zzzz953	false
3881	1		zzzz905,zzzz996	false
3882	1		zzzz905,zzzz993	false
3883	1		zzzz905,zzzz944	false
3884	1		zzzz905,zzzz933	false
3885	1		zzzz905,zzzz950	false
3886	1		zzzz905,zzzz988	false
3887	1		zzzz905,zzzz957	false
3888	1		zzzz905,zzzz969	false
3889	1		zzzz905,zzzz946	false
3890	1		zzzz905,zzzz923	false
3891	1		zzzz905,zzzz966	false
3892	1		zzzz905,zzzz948	false
3893	1		zzzz905,zzzz998	false
3894	1		zzzz905,zzzz974	false
3895	1		zzzz905,zzzz913	false
3896	1		zzzz905,zzzz970	false
3897	1		zzzz905,zzzz981	false
3898	1		zzzz905,zzzz921	false
3899	1		zzzz905,zzzz973	false
3900	1		zzzz905,zzzz931	false
3901	1		zzzz905,zzzz924	false
3902	1		zzzz905,zzzz965	false
3903	1		zzzz905,zzzz978	false
3904	1		zzzz905,zzzz971	false
3905	1		zzzz905,zzzz968	false
3906	1		zzzz905,zzzz976	false
3907	1		zzzz905,zzzz975	false
3908	1		zzzz905,zzzz972	false
3909	1		zzzz905,zzzz999	false
3910	1		zzzz905,zzzz960	false
3911	1		zzzz905,zzzz967	false
3912	1		zzzz905,zzzz910	false
3913	1		zzzz905,zzzz961	false
3914	1		zzzz905,zzzz956	false
3915	1		zzzz905,zzzz935	false
3916	1		zzzz905,zzzz932	false
3917	1		zzzz905,zzzz934	false
3918	1		zzzz905,zzzz992	false
3919	1		zzzz903,zzzz958	false
3920	1		zzzz903,zzzz982	false
3921	1		zzzz903,zzzz984	false
3922	1		zzzz903,zzzz983	false
3923	1		zzzz903,zzzz977	false
3924	1		zzzz903,zzzz914	false
3925	1		zzzz903,zzzz936	false
3926	1		zzzz903,zzzz953	false
3927	1		zzzz903,zzzz987	false
3928	1		zzzz903,zzzz986	false
3929	1		zzzz903,zzzz985	false
3930	1		zzzz903,zzzz944	false
3931	1		zzzz903,zzzz957	false
3932	1		zzzz903,zzzz981	false
3933	1		zzzz903,zzzz993	false
3934	1		zzzz903,zzzz913	false
3935	1		zzzz903,zzzz975	false
3936	1		zzzz903,zzzz950	false
3937	1		zzzz903,zzzz992	false
3938	1		zzzz903,zzzz976	false
3939	1		zzzz903,zzzz923	false
3940	1		zzzz903,zzzz946	false
3941	1		zzzz903,zzzz921	false
3942	1		zzzz903,zzzz933	false
3943	1		zzzz903,zzzz931	false
3944	1		zzzz903,zzzz978	false
3945	1		zzzz903,zzzz998	false
3946	1		zzzz903,zzzz974	false
3947	1		zzzz903,zzzz960	false
3948	1		zzzz903,zzzz924	false
3949	1		zzzz903,zzzz948	false
3950	1		zzzz903,zzzz988	false
3951	1		zzzz903,zzzz965	false
3952	1		zzzz903,zzzz967	false
3953	1		zzzz903,zzzz910	false
3954	1		zzzz903,zzzz999	false
3955	1		zzzz903,zzzz973	false
3956	1		zzzz903,zzzz961	false
3957	1		zzzz903,zzzz956	false
3958	1		zzzz903,zzzz932	false
3959	1		zzzz903,zzzz971	false
3960	1		zzzz903,zzzz969	false
3961	1		zzzz903,zzzz968	false
3962	1		zzzz903,zzzz934	false
3963	1		zzzz903,zzzz972	false
3964	1		zzzz903,zzzz970	false
3965	1		zzzz903,zzzz935	false
3966	1		zzzz903,zzzz996	false
3967	1		zzzz903,zzzz905	false
3968	1		zzzz903,zzzz966	false
3969	1		zzzz902,zzzz977	false
3970	1		zzzz902,zzzz958	false
3971	1		zzzz902,zzzz987	false
3972	1		zzzz902,zzzz986	false
3973	1		zzzz902,zzzz985	false
3974	1		zzzz902,zzzz984	false
3975	1		zzzz902,zzzz982	false
3976	1		zzzz902,zzzz983	false
3977	1		zzzz902,zzzz914	false
3978	1		zzzz902,zzzz936	false
3979	1		zzzz902,zzzz953	false
3980	1		zzzz902,zzzz903	false
3981	1		zzzz902,zzzz957	false
3982	1		zzzz902,zzzz996	false
3983	1		zzzz902,zzzz969	false
3984	1		zzzz902,zzzz993	false
3985	1		zzzz902,zzzz944	false
3986	1		zzzz902,zzzz966	false
3987	1		zzzz902,zzzz913	false
3988	1		zzzz902,zzzz950	false
3989	1		zzzz902,zzzz976	false
3990	1		zzzz902,zzzz999	false
3991	1		zzzz902,zzzz923	false
3992	1		zzzz902,zzzz981	false
3993	1		zzzz902,zzzz933	false
3994	1		zzzz902,zzzz948	false
3995	1		zzzz902,zzzz988	false
3996	1		zzzz902,zzzz946	false
3997	1		zzzz902,zzzz998	false
3998	1		zzzz902,zzzz970	false
3999	1		zzzz902,zzzz972	false
4000	1		zzzz902,zzzz924	false
4001	1		zzzz902,zzzz974	false
4002	1		zzzz902,zzzz931	false
4003	1		zzzz902,zzzz968	false
4004	1		zzzz902,zzzz973	false
4005	1		zzzz902,zzzz975	false
4006	1		zzzz902,zzzz910	false
4007	1		zzzz902,zzzz978	false
4008	1		zzzz902,zzzz921	false
4009	1		zzzz902,zzzz965	false
4010	1		zzzz902,zzzz935	false
4011	1		zzzz902,zzzz934	false
4012	1		zzzz902,zzzz971	false
4013	1		zzzz902,zzzz960	false
4014	1		zzzz902,zzzz967	false
4015	1		zzzz902,zzzz932	false
4016	1		zzzz902,zzzz961	false
4017	1		zzzz902,zzzz956	false
4018	1		zzzz902,zzzz992	false
4019	1		zzzz902,zzzz905	false
4020			zzzz889,zzzz922	false
4021	1		zzzz889,zzzz985	false
4022	1		zzzz889,zzzz986	false
4023	1		zzzz889,zzzz987	false
4024	1		zzzz889,zzzz914	false
4025	1		zzzz889,zzzz957	false
4026	1		zzzz889,zzzz984	false
4027	1		zzzz889,zzzz982	false
4028	1		zzzz889,zzzz983	false
4029	1		zzzz889,zzzz996	false
4030	1		zzzz889,zzzz936	false
4031	1		zzzz889,zzzz903	false
4032	1		zzzz889,zzzz953	false
4033	1		zzzz889,zzzz969	false
4034	1		zzzz889,zzzz966	false
4035	1		zzzz889,zzzz905	false
4036	1		zzzz889,zzzz970	false
4037	1		zzzz889,zzzz981	false
4038	1		zzzz889,zzzz944	false
4039	1		zzzz889,zzzz968	false
4040	1		zzzz889,zzzz992	false
4041	1		zzzz889,zzzz976	false
4042	1		zzzz889,zzzz993	false
4043	1		zzzz889,zzzz973	false
4044	1		zzzz889,zzzz921	false
4045	1		zzzz889,zzzz971	false
4046	1		zzzz889,zzzz933	false
4047	1		zzzz889,zzzz975	false
4048	1		zzzz889,zzzz999	false
4049	1		zzzz889,zzzz978	false
4050	1		zzzz889,zzzz935	false
4051	1		zzzz889,zzzz924	false
4052	1		zzzz889,zzzz972	false
4053	1		zzzz889,zzzz965	false
4054	1		zzzz889,zzzz902	false
4055	1		zzzz889,zzzz913	false
4056	1		zzzz889,zzzz932	false
4057	1		zzzz889,zzzz931	false
4058	1		zzzz889,zzzz974	false
4059	1		zzzz889,zzzz960	false
4060	1		zzzz889,zzzz961	false
4061	1		zzzz889,zzzz934	false
4062	1		zzzz889,zzzz910	false
4063	1		zzzz889,zzzz967	false
4064	1		zzzz889,zzzz956	false
4065	1		zzzz889,zzzz923	false
4066	1		zzzz889,zzzz988	false
4067	1		zzzz889,zzzz946	false
4068	1		zzzz889,zzzz950	false
4069	1		zzzz889,zzzz998	false
4070	1		zzzz889,zzzz948	false
4071	1		zzzz888,zzzz977	false
4072	1		zzzz888,zzzz958	false
4073	1		zzzz888,zzzz985	false
4074	1		zzzz888,zzzz987	false
4075	1		zzzz888,zzzz986	false
4076	1		zzzz888,zzzz984	false
4077	1		zzzz888,zzzz982	false
4078	1		zzzz888,zzzz983	false
4079	1		zzzz888,zzzz953	false
4080	1		zzzz888,zzzz914	false
4081	1		zzzz888,zzzz957	false
4082	1		zzzz888,zzzz936	false
4083	1		zzzz888,zzzz903	false
4084	1		zzzz888,zzzz889	false
4085	1		zzzz888,zzzz950	false
4086	1		zzzz888,zzzz923	false
4087	1		zzzz888,zzzz988	false
4088	1		zzzz888,zzzz998	false
4089	1		zzzz888,zzzz948	false
4090	1		zzzz888,zzzz946	false
4091	1		zzzz888,zzzz996	false
4092	1		zzzz888,zzzz974	false
4093	1		zzzz888,zzzz905	false
4094	1		zzzz888,zzzz975	false
4095	1		zzzz888,zzzz933	false
4096	1		zzzz888,zzzz978	false
4097	1		zzzz888,zzzz976	false
4098	1		zzzz888,zzzz992	false
4099	1		zzzz888,zzzz969	false
4100	1		zzzz888,zzzz902	false
4101	1		zzzz888,zzzz966	false
4102	1		zzzz888,zzzz993	false
4103	1		zzzz888,zzzz965	false
4104	1		zzzz888,zzzz944	false
[truncated: 301,724 more rows]
