# Supplementary material for: Discovery of several thousand highly diverse circular DNA viruses
Source: eLife journal article supplement (doi:10.7554/elife.51971), 2020-02-03
Supplement: fig2-data2 [file elife-51971-fig2-data2-v1.cys › CytoscapeSession-2019_08_02-17_43/tables/62-all_my_seqs_genbank_ssDNA1_domains_CRESS_capsid_fasta+Full+Network/LOCAL_ATTRS-org.cytoscape.model.CyNode-all_my_seqs_genbank_ssDNA1_domains_CRESS_capsid_fasta+Full+Network+default+node.cytable]

CyCSV-Version	1
SUID	__mclCluster	name	selected
java.lang.Long	java.lang.Integer	java.lang.String	java.lang.Boolean
	mutable
all_my_seqs_genbank_ssDNA1_domains_CRESS_capsid_fasta Full Network default node
72	12	zzzzzz9	false
73	12	zzzzzz8	false
74	12	zzzzzz7	false
75	12	zzzzzz6	false
76	12	zzzzzz5	false
77	12	zzzzzz4	false
78	12	zzzzzz3	false
79	62	zzzzzz2	false
80	12	zzzzzz1	false
81	12	zzzzzz0	false
82	48	zzzzz99	false
83		zzzzz98	false
84	30	zzzzz97	false
85	6	zzzzz96	false
86	19	zzzzz95	false
87	41	zzzzz94	false
88	2	zzzzz93	false
89	21	zzzzz92	false
90	14	zzzzz91	false
91	3	zzzzz90	false
92	7	zzzzz89	false
93		zzzzz88	false
94		zzzzz87	false
95	49	zzzzz86	false
96	9	zzzzz85	false
97	49	zzzzz84	false
98	4	zzzzz83	false
99	7	zzzzz82	false
100	4	zzzzz81	false
101	63	zzzzz80	false
102	64	zzzzz79	false
103		zzzzz78	false
104	23	zzzzz77	false
105	7	zzzzz76	false
106	7	zzzzz75	false
107	7	zzzzz74	false
108	3	zzzzz73	false
109	7	zzzzz72	false
110	7	zzzzz71	false
111	7	zzzzz70	false
112	50	zzzzz69	false
113	7	zzzzz68	false
114	7	zzzzz67	false
115	7	zzzzz66	false
116	4	zzzzz65	false
117	7	zzzzz64	false
118	7	zzzzz63	false
119	7	zzzzz62	false
120	4	zzzzz61	false
121	7	zzzzz60	false
122	7	zzzzz59	false
123	63	zzzzz58	false
124	65	zzzzz57	false
125	65	zzzzz56	false
126	7	zzzzz55	false
127	19	zzzzz54	false
128	27	zzzzz53	false
129	2	zzzzz52	false
130	24	zzzzz51	false
131	66	zzzzz50	false
132	30	zzzzz49	false
133	21	zzzzz48	false
134	51	zzzzz47	false
135		zzzzz46	false
136	4	zzzzz45	false
137	4	zzzzz44	false
138	23	zzzzz43	false
139	25	zzzzz42	false
140	11	zzzzz41	false
141	52	zzzzz40	false
142	31	zzzzz39	false
143	4	zzzzz38	false
144	4	zzzzz37	false
145	4	zzzzz36	false
146	4	zzzzz35	false
147	4	zzzzz34	false
148	7	zzzzz33	false
149	7	zzzzz32	false
150	7	zzzzz31	false
151	4	zzzzz30	false
152	7	zzzzz29	false
153	4	zzzzz28	false
154	4	zzzzz27	false
155	4	zzzzz26	false
156	42	zzzzz25	false
157	3	zzzzz24	false
158	3	zzzzz23	false
159	12	zzzzz22	false
160	12	zzzzz21	false
161	12	zzzzz20	false
162	12	zzzzz19	false
163	12	zzzzz18	false
164	12	zzzzz17	false
165	12	zzzzz16	false
166	12	zzzzz15	false
167	62	zzzzz14	false
168	12	zzzzz13	false
169	12	zzzzz12	false
170	12	zzzzz11	false
171	12	zzzzz10	false
172	1	zzzz999	false
173	1	zzzz998	false
174	1	zzzz996	false
175	5	zzzz994	false
176	1	zzzz993	false
177	1	zzzz992	false
178	1	zzzz988	false
179	1	zzzz987	false
180	1	zzzz986	false
181	1	zzzz985	false
182	1	zzzz984	false
183	1	zzzz983	false
184	1	zzzz982	false
185	1	zzzz981	false
186	1	zzzz978	false
187	1	zzzz977	false
188	1	zzzz976	false
189	1	zzzz975	false
190	1	zzzz974	false
191	1	zzzz973	false
192	1	zzzz972	false
193	1	zzzz971	false
194	1	zzzz970	false
195	1	zzzz969	false
196	1	zzzz968	false
197	1	zzzz967	false
198	1	zzzz966	false
199	1	zzzz965	false
200	1	zzzz961	false
201	1	zzzz960	false
202	1	zzzz958	false
203	1	zzzz957	false
204	1	zzzz956	false
205	5	zzzz955	false
206	1	zzzz953	false
207	1	zzzz950	false
208	1	zzzz948	false
209	1	zzzz946	false
210	1	zzzz944	false
211	5	zzzz942	false
212	5	zzzz941	false
213	5	zzzz940	false
214	1	zzzz936	false
215	1	zzzz935	false
216	1	zzzz934	false
217	1	zzzz933	false
218	1	zzzz932	false
219	1	zzzz931	false
220	1	zzzz924	false
221	1	zzzz923	false
222	35	zzzz922	false
223	1	zzzz921	false
224	1	zzzz914	false
225	1	zzzz913	false
226	5	zzzz912	false
227	1	zzzz910	false
228	36	zzzz909	false
229	1	zzzz905	false
230	1	zzzz903	false
231	1	zzzz902	false
232	1	zzzz889	false
233	1	zzzz888	false
234	1	zzzz887	false
235	5	zzzz886	false
236	5	zzzz885	false
237	1	zzzz883	false
238	1	zzzz882	false
239	5	zzzz881	false
240	5	zzzz879	false
241	1	zzzz877	false
242	1	zzzz875	false
243	5	zzzz874	false
244	5	zzzz873	false
245	1	zzzz870	false
246	1	zzzz869	false
247	1	zzzz867	false
248	1	zzzz865	false
249	1	zzzz864	false
250	1	zzzz862	false
251	1	zzzz861	false
252	1	zzzz860	false
253	5	zzzz859	false
254	1	zzzz858	false
255	1	zzzz857	false
256	1	zzzz856	false
257	36	zzzz855	false
258	1	zzzz847	false
259	1	zzzz846	false
260	1	zzzz845	false
261	5	zzzz844	false
262	5	zzzz843	false
263	1	zzzz841	false
264	1	zzzz840	false
265	1	zzzz838	false
266	1	zzzz837	false
267	1	zzzz836	false
268	5	zzzz835	false
269	5	zzzz834	false
270	5	zzzz833	false
271	5	zzzz832	false
272	5	zzzz831	false
273	1	zzzz822	false
274	1	zzzz821	false
275	5	zzzz820	false
276	1	zzzz816	false
277	1	zzzz815	false
278	1	zzzz814	false
279	1	zzzz813	false
280	1	zzzz812	false
281	1	zzzz811	false
282	1	zzzz810	false
283	1	zzzz809	false
284	1	zzzz808	false
285	1	zzzz807	false
286	1	zzzz806	false
287	1	zzzz805	false
288	1	zzzz804	false
289	1	zzzz803	false
290	1	zzzz802	false
291	1	zzzz798	false
292	1	zzzz797	false
293	1	zzzz795	false
294	1	zzzz794	false
295	1	zzzz793	false
296	1	zzzz792	false
297	1	zzzz791	false
298	1	zzzz790	false
299	1	zzzz789	false
300	5	zzzz787	false
301	1	zzzz786	false
302	1	zzzz785	false
303	1	zzzz784	false
304	1	zzzz783	false
305	5	zzzz782	false
306	5	zzzz781	false
307	5	zzzz780	false
308	5	zzzz779	false
309	5	zzzz778	false
310	5	zzzz777	false
311	5	zzzz776	false
312	1	zzzz775	false
313	1	zzzz774	false
314	1	zzzz773	false
315	1	zzzz772	false
316	1	zzzz771	false
317	1	zzzz770	false
318	1	zzzz769	false
319	1	zzzz768	false
320	1	zzzz767	false
321	1	zzzz766	false
322	1	zzzz765	false
323	1	zzzz764	false
324	1	zzzz763	false
325	1	zzzz762	false
326	5	zzzz761	false
327	5	zzzz760	false
328	1	zzzz757	false
329	1	zzzz756	false
330	1	zzzz755	false
331	1	zzzz754	false
332	1	zzzz753	false
333	1	zzzz752	false
334	1	zzzz751	false
335	1	zzzz750	false
336	1	zzzz740	false
337	1	zzzz739	false
338	1	zzzz738	false
339	1	zzzz737	false
340	1	zzzz732	false
341	1	zzzz731	false
342	1	zzzz730	false
343	5	zzzz725	false
344	1	zzzz722	false
345	1	zzzz721	false
346	1	zzzz720	false
347	5	zzzz717	false
348	1	zzzz716	false
349	5	zzzz715	false
350	1	zzzz711	false
351	1	zzzz710	false
352	1	zzzz709	false
353	1	zzzz708	false
354	1	zzzz707	false
355	1	zzzz706	false
356	1	zzzz705	false
357	1	zzzz704	false
358	1	zzzz703	false
359	1	zzzz702	false
360	5	zzzz699	false
361	5	zzzz698	false
362	5	zzzz697	false
363	5	zzzz696	false
364	5	zzzz695	false
365	1	zzzz694	false
366	1	zzzz692	false
367	1	zzzz691	false
368	1	zzzz689	false
369	1	zzzz686	false
370	1	zzzz685	false
371	1	zzzz684	false
372	1	zzzz683	false
373	1	zzzz682	false
374	1	zzzz680	false
375	1	zzzz672	false
376	1	zzzz671	false
377	1	zzzz670	false
378	1	zzzz669	false
379	1	zzzz668	false
380	1	zzzz667	false
381	1	zzzz666	false
382	1	zzzz665	false
383	1	zzzz664	false
384	1	zzzz663	false
385	1	zzzz662	false
386	1	zzzz661	false
387	1	zzzz660	false
388	1	zzzz659	false
389	1	zzzz658	false
390	1	zzzz657	false
391	1	zzzz656	false
392	1	zzzz655	false
393	1	zzzz653	false
394	1	zzzz652	false
395	5	zzzz651	false
396	5	zzzz650	false
397	5	zzzz649	false
398	1	zzzz647	false
399	1	zzzz644	false
400	1	zzzz642	false
401	1	zzzz640	false
402	5	zzzz638	false
403	1	zzzz636	false
404	1	zzzz632	false
405	1	zzzz631	false
406	1	zzzz630	false
407	1	zzzz628	false
408	1	zzzz627	false
409	1	zzzz626	false
410	1	zzzz625	false
411	1	zzzz624	false
412	1	zzzz623	false
413	1	zzzz622	false
414	1	zzzz620	false
415	1	zzzz619	false
416	5	zzzz618	false
417	1	zzzz613	false
418	1	zzzz612	false
419	1	zzzz611	false
420	1	zzzz610	false
421	1	zzzz609	false
422	1	zzzz608	false
423	1	zzzz607	false
424	1	zzzz606	false
425	1	zzzz605	false
426	1	zzzz604	false
427	1	zzzz603	false
428	1	zzzz602	false
429	1	zzzz601	false
430	1	zzzz600	false
431	1	zzzz599	false
432	1	zzzz598	false
433	1	zzzz597	false
434	1	zzzz596	false
435	1	zzzz595	false
436	1	zzzz594	false
437	1	zzzz593	false
438	5	zzzz592	false
439	1	zzzz591	false
440	1	zzzz590	false
441	1	zzzz589	false
442	1	zzzz588	false
443	1	zzzz586	false
444	1	zzzz585	false
445	1	zzzz584	false
446	1	zzzz583	false
447	1	zzzz582	false
448	1	zzzz581	false
449	1	zzzz575	false
450	1	zzzz574	false
451	1	zzzz569	false
452	1	zzzz568	false
453	1	zzzz567	false
454	1	zzzz566	false
455	1	zzzz565	false
456	1	zzzz557	false
457	1	zzzz556	false
458	1	zzzz555	false
459	1	zzzz553	false
460	1	zzzz551	false
461	1	zzzz549	false
462	1	zzzz548	false
463	1	zzzz544	false
464	5	zzzz543	false
465	1	zzzz542	false
466	1	zzzz541	false
467	1	zzzz540	false
468	1	zzzz539	false
469	1	zzzz538	false
470	1	zzzz537	false
471	1	zzzz536	false
472	1	zzzz533	false
473	1	zzzz532	false
474	1	zzzz531	false
475	1	zzzz530	false
476	1	zzzz529	false
477	1	zzzz528	false
478	1	zzzz527	false
479	1	zzzz526	false
480	1	zzzz523	false
481	1	zzzz522	false
482	1	zzzz521	false
483	1	zzzz520	false
484	1	zzzz519	false
485	1	zzzz518	false
486	1	zzzz517	false
487	1	zzzz512	false
488	5	zzzz511	false
489	5	zzzz510	false
490	5	zzzz509	false
491	5	zzzz508	false
492	1	zzzz507	false
493	1	zzzz506	false
494	1	zzzz505	false
495	1	zzzz504	false
496	1	zzzz503	false
497	1	zzzz502	false
498	1	zzzz500	false
499	1	zzzz498	false
500	1	zzzz497	false
501	5	zzzz495	false
502	5	zzzz494	false
503	5	zzzz493	false
504	1	zzzz491	false
505	1	zzzz490	false
506	1	zzzz489	false
507	1	zzzz488	false
508	1	zzzz487	false
509	5	zzzz486	false
510	1	zzzz485	false
511	5	zzzz484	false
512	5	zzzz483	false
513	1	zzzz482	false
514	1	zzzz481	false
515	1	zzzz480	false
516	1	zzzz479	false
517	1	zzzz478	false
518	1	zzzz477	false
519	5	zzzz476	false
520	1	zzzz475	false
521	1	zzzz474	false
522	1	zzzz473	false
523	1	zzzz472	false
524	1	zzzz469	false
525	1	zzzz468	false
526	1	zzzz467	false
527	1	zzzz466	false
528	1	zzzz464	false
529	1	zzzz462	false
530	1	zzzz460	false
531	1	zzzz459	false
532	1	zzzz458	false
533	1	zzzz457	false
534	1	zzzz456	false
535	1	zzzz454	false
536	1	zzzz452	false
537	1	zzzz451	false
538	1	zzzz449	false
539	1	zzzz447	false
540	1	zzzz446	false
541	1	zzzz445	false
542	1	zzzz444	false
543	1	zzzz442	false
544	1	zzzz436	false
545	1	zzzz435	false
546	1	zzzz434	false
547	1	zzzz433	false
548	1	zzzz432	false
549	1	zzzz431	false
550	1	zzzz429	false
551	1	zzzz426	false
552	1	zzzz425	false
553	1	zzzz420	false
554	1	zzzz419	false
555	1	zzzz418	false
556	1	zzzz417	false
557	5	zzzz416	false
558	1	zzzz415	false
559	1	zzzz413	false
560	1	zzzz412	false
561	1	zzzz411	false
562	1	zzzz410	false
563	1	zzzz409	false
564	1	zzzz408	false
565	1	zzzz407	false
566	1	zzzz406	false
567	1	zzzz405	false
568	1	zzzz404	false
569	1	zzzz401	false
570	3	zzzz398	false
571	3	zzzz397	false
572	3	zzzz396	false
573	4	zzzz395	false
574	4	zzzz394	false
575	3	zzzz393	false
576	3	zzzz392	false
577	3	zzzz391	false
578	3	zzzz390	false
579	4	zzzz389	false
580	3	zzzz388	false
581	3	zzzz387	false
582	4	zzzz386	false
583	4	zzzz385	false
584	4	zzzz384	false
585	4	zzzz383	false
586	4	zzzz382	false
587	4	zzzz381	false
588	3	zzzz380	false
589	4	zzzz379	false
590	4	zzzz378	false
591	4	zzzz377	false
592	3	zzzz376	false
593	3	zzzz375	false
594	3	zzzz374	false
595	3	zzzz373	false
596	4	zzzz372	false
597	4	zzzz371	false
598	4	zzzz370	false
599	4	zzzz369	false
600	4	zzzz368	false
601	3	zzzz367	false
602	4	zzzz366	false
603	22	zzzz365	false
604	3	zzzz364	false
605	3	zzzz363	false
606	3	zzzz362	false
607	4	zzzz361	false
608	4	zzzz360	false
609	4	zzzz359	false
610	4	zzzz358	false
611	4	zzzz357	false
612	4	zzzz356	false
613	4	zzzz355	false
614	4	zzzz354	false
615	4	zzzz353	false
616	22	zzzz352	false
617	4	zzzz351	false
618	4	zzzz350	false
619	4	zzzz349	false
620	3	zzzz348	false
621	3	zzzz347	false
622	4	zzzz346	false
623	4	zzzz345	false
624	3	zzzz344	false
625	4	zzzz343	false
626	3	zzzz342	false
627	3	zzzz341	false
628	3	zzzz340	false
629	4	zzzz339	false
630	4	zzzz338	false
631	4	zzzz337	false
632	4	zzzz336	false
633	4	zzzz335	false
634	4	zzzz334	false
635	7	zzzz333	false
636	7	zzzz332	false
637	12	zzzz331	false
638	4	zzzz330	false
639	4	zzzz329	false
640	4	zzzz328	false
641	3	zzzz327	false
642	23	zzzz326	false
643	3	zzzz325	false
644	3	zzzz324	false
645	3	zzzz323	false
646	3	zzzz322	false
647	3	zzzz321	false
648	3	zzzz320	false
649	3	zzzz319	false
650	4	zzzz318	false
651	4	zzzz317	false
652	4	zzzz316	false
653	4	zzzz315	false
654	4	zzzz314	false
655	4	zzzz313	false
656	4	zzzz312	false
657	4	zzzz311	false
658	4	zzzz310	false
659	4	zzzz309	false
660	4	zzzz308	false
661	3	zzzz307	false
662	3	zzzz306	false
663	3	zzzz305	false
664	3	zzzz304	false
665	4	zzzz303	false
666	4	zzzz302	false
667	4	zzzz301	false
668	3	zzzz300	false
669	3	zzzz299	false
670	3	zzzz298	false
671	3	zzzz297	false
672	3	zzzz296	false
673	3	zzzz295	false
674	3	zzzz294	false
675	3	zzzz293	false
676	3	zzzz292	false
677	3	zzzz291	false
678	3	zzzz290	false
679	3	zzzz289	false
680	3	zzzz288	false
681	3	zzzz287	false
682	3	zzzz286	false
683	4	zzzz285	false
684	4	zzzz284	false
685	3	zzzz283	false
686	67	zzzz282	false
687	68	zzzz281	false
688	68	zzzz280	false
689	7	zzzz279	false
690	22	zzzz278	false
691	22	zzzz277	false
692	19	zzzz276	false
693	41	zzzz275	false
694	4	zzzz274	false
695	4	zzzz273	false
696	7	zzzz272	false
697	7	zzzz271	false
698	7	zzzz270	false
699	7	zzzz269	false
700	7	zzzz268	false
701	23	zzzz267	false
702	4	zzzz266	false
703	4	zzzz265	false
704	4	zzzz264	false
705	6	zzzz263	false
706	4	zzzz262	false
707	3	zzzz261	false
708	4	zzzz260	false
709	3	zzzz259	false
710	3	zzzz258	false
711	4	zzzz257	false
712	4	zzzz256	false
713	3	zzzz255	false
714	3	zzzz254	false
715	3	zzzz253	false
716	3	zzzz252	false
717	3	zzzz251	false
718	3	zzzz250	false
719	3	zzzz249	false
720	4	zzzz248	false
721	3	zzzz247	false
722	3	zzzz246	false
723	3	zzzz245	false
724	3	zzzz244	false
725	3	zzzz243	false
726	3	zzzz242	false
727	3	zzzz241	false
728	4	zzzz240	false
729	4	zzzz239	false
730	4	zzzz238	false
731	4	zzzz237	false
732	4	zzzz236	false
733	3	zzzz235	false
734	3	zzzz234	false
735	3	zzzz233	false
736	3	zzzz232	false
737	3	zzzz231	false
738	3	zzzz230	false
739	3	zzzz229	false
740	3	zzzz228	false
741	3	zzzz227	false
742	3	zzzz226	false
743	3	zzzz225	false
744	3	zzzz224	false
745	3	zzzz223	false
746	3	zzzz222	false
747	4	zzzz221	false
748	4	zzzz220	false
749	3	zzzz219	false
750	3	zzzz218	false
751	3	zzzz217	false
752	3	zzzz216	false
753	4	zzzz215	false
754	3	zzzz214	false
755	3	zzzz213	false
756	4	zzzz212	false
757	3	zzzz211	false
758	3	zzzz210	false
759	3	zzzz209	false
760	3	zzzz208	false
761	42	zzzz207	false
762	3	zzzz206	false
763	4	zzzz205	false
764	4	zzzz204	false
765	21	zzzz203	false
766	50	zzzz202	false
767	4	zzzz201	false
768	4	zzzz200	false
769	3	zzzz199	false
770	3	zzzz198	false
771	3	zzzz197	false
772	3	zzzz196	false
773	4	zzzz195	false
774	4	zzzz194	false
775	4	zzzz193	false
776	4	zzzz192	false
777	3	zzzz191	false
778	3	zzzz190	false
779	3	zzzz189	false
780	23	zzzz188	false
781	4	zzzz187	false
782	4	zzzz186	false
783	4	zzzz185	false
784	4	zzzz184	false
785	4	zzzz183	false
786	4	zzzz182	false
787	4	zzzz181	false
788	4	zzzz180	false
789	3	zzzz179	false
790	4	zzzz178	false
791	4	zzzz177	false
792	3	zzzz176	false
793	3	zzzz175	false
794	3	zzzz174	false
795	3	zzzz173	false
796	3	zzzz172	false
797	3	zzzz171	false
798	3	zzzz170	false
799	3	zzzz169	false
800	3	zzzz168	false
801	3	zzzz167	false
802	3	zzzz166	false
803	3	zzzz165	false
804	3	zzzz164	false
805	4	zzzz163	false
806	4	zzzz162	false
807	7	zzzz161	false
808	3	zzzz160	false
809	42	zzzz159	false
810	3	zzzz158	false
811	3	zzzz157	false
812	3	zzzz156	false
813	3	zzzz155	false
814	3	zzzz154	false
815	4	zzzz153	false
816		zzzz152	false
817	43	zzzz151	false
818	3	zzzz150	false
819	4	zzzz149	false
820	4	zzzz148	false
821	4	zzzz147	false
822	7	zzzz146	false
823	4	zzzz145	false
824	4	zzzz144	false
825	4	zzzz143	false
826	42	zzzz142	false
827	22	zzzz141	false
828	7	zzzz140	false
829	7	zzzz139	false
830	7	zzzz138	false
831	22	zzzz137	false
832	4	zzzz136	false
833	4	zzzz135	false
834	4	zzzz134	false
835	23	zzzz133	false
836	23	zzzz132	false
837	3	zzzz131	false
838	3	zzzz130	false
839	3	zzzz129	false
840	3	zzzz128	false
841	4	zzzz127	false
842	7	zzzz126	false
843	7	zzzz125	false
844	7	zzzz124	false
845	7	zzzz123	false
846	7	zzzz122	false
847	25	zzzz121	false
848	7	zzzz120	false
849	7	zzzz119	false
850	7	zzzz118	false
851	4	zzzz117	false
852	23	zzzz116	false
853	7	zzzz115	false
854	6	zzzz114	false
855	19	zzzz113	false
856	6	zzzz112	false
857	6	zzzz111	false
858	6	zzzz110	false
859	6	zzzz109	false
860	50	zzzz108	false
861	7	zzzz107	false
862	4	zzzz106	false
863	69	zzzz105	false
864	7	zzzz104	false
865	7	zzzz103	false
866	7	zzzz102	false
867	7	zzzz101	false
868	22	zzzz100	false
869	31	zzz2444	false
870	9	zzz2443	false
871	9	zzz2442	false
872	21	zzz2441	false
873	16	zzz2440	false
874	14	zzz2439	false
875	9	zzz2438	false
876	16	zzz2437	false
877	16	zzz2436	false
878	9	zzz2435	false
879	70	zzz2434	false
880	44	zzz2433	false
881	37	zzz2432	false
882	41	zzz2431	false
883		zzz2430	false
884	44	zzz2429	false
885	44	zzz2428	false
886	16	zzz2427	false
887	28	zzz2426	false
888	20	zzz2425	false
889	10	zzz2424	false
890	10	zzz2423	false
891	29	zzz2422	false
892	38	zzz2421	false
893		zzz2420	false
894	20	zzz2419	false
895	71	zzz2418	false
896	10	zzz2417	false
897	41	zzz2416	false
898	20	zzz2415	false
899	53	zzz2414	false
900	10	zzz2413	false
901	14	zzz2412	false
902	45	zzz2411	false
903	14	zzz2410	false
904	45	zzz2409	false
905	14	zzz2408	false
906	45	zzz2407	false
907	28	zzz2406	false
908	28	zzz2405	false
909	39	zzz2404	false
910	28	zzz2403	false
911	72	zzz2402	false
912	28	zzz2401	false
913	28	zzz2400	false
914	19	zzz2399	false
915	54	zzz2398	false
916	73	zzz2397	false
917	31	zzz2396	false
918	17	zzz2395	false
919	43	zzz2394	false
920	17	zzz2393	false
921	17	zzz2392	false
922	38	zzz2391	false
923	14	zzz2390	false
924	74	zzz2389	false
925	55	zzz2388	false
926	6	zzz2387	false
927		zzz2386	false
928	31	zzz2385	false
929	21	zzz2384	false
930	6	zzz2383	false
931	6	zzz2382	false
932	6	zzz2381	false
933	6	zzz2380	false
934	9	zzz2379	false
935	6	zzz2378	false
936	56	zzz2377	false
937	54	zzz2376	false
938	6	zzz2375	false
939	6	zzz2374	false
940	6	zzz2373	false
941	44	zzz2372	false
942	10	zzz2371	false
943	21	zzz2370	false
944	52	zzz2369	false
945	4	zzz2368	false
946	17	zzz2367	false
947	38	zzz2366	false
948	16	zzz2365	false
949		zzz2364	false
950	29	zzz2363	false
951	10	zzz2362	false
952	26	zzz2361	false
953	14	zzz2360	false
954	27	zzz2359	false
955	26	zzz2358	false
956	40	zzz2357	false
957	9	zzz2356	false
958	37	zzz2355	false
959	9	zzz2354	false
960	10	zzz2353	false
961	37	zzz2352	false
962	32	zzz2351	false
963	32	zzz2350	false
964	10	zzz2349	false
965	10	zzz2348	false
966	14	zzz2347	false
967	33	zzz2346	false
968	45	zzz2345	false
969	10	zzz2344	false
970	17	zzz2343	false
971	6	zzz2342	false
972	17	zzz2341	false
973	30	zzz2340	false
974	6	zzz2339	false
975	9	zzz2338	false
976	73	zzz2337	false
977	6	zzz2336	false
978	9	zzz2335	false
979	70	zzz2334	false
980	37	zzz2333	false
981	16	zzz2332	false
982	10	zzz2331	false
983	14	zzz2330	false
984	64	zzz2329	false
985	10	zzz2328	false
986	14	zzz2327	false
987	14	zzz2326	false
988	10	zzz2325	false
989	30	zzz2324	false
990	10	zzz2323	false
991	14	zzz2322	false
992	29	zzz2321	false
993	24	zzz2320	false
994	48	zzz2319	false
995	20	zzz2318	false
996	27	zzz2317	false
997	29	zzz2316	false
998		zzz2315	false
999	20	zzz2314	false
1000	10	zzz2313	false
1001	72	zzz2312	false
1002		zzz2311	false
1003	10	zzz2310	false
1004	53	zzz2309	false
1005		zzz2308	false
1006	46	zzz2307	false
1007	75	zzz2306	false
1008	6	zzz2305	false
1009	17	zzz2304	false
1010	17	zzz2303	false
1011	17	zzz2302	false
1012	6	zzz2301	false
1013	19	zzz2300	false
1014	17	zzz2299	false
1015	55	zzz2298	false
1016	11	zzz2297	false
1017	55	zzz2296	false
1018	6	zzz2295	false
1019		zzz2294	false
1020		zzz2293	false
1021	74	zzz2292	false
1022		zzz2291	false
1023	17	zzz2290	false
1024	6	zzz2289	false
1025	11	zzz2288	false
1026		zzz2287	false
1027	26	zzz2286	false
1028	17	zzz2285	false
1029		zzz2284	false
1030		zzz2283	false
1031		zzz2282	false
1032	10	zzz2281	false
1033	69	zzz2280	false
1034	26	zzz2279	false
1035	33	zzz2278	false
1036	32	zzz2277	false
1037	9	zzz2276	false
1038	16	zzz2275	false
1039	9	zzz2274	false
1040	16	zzz2273	false
1041	32	zzz2272	false
1042	9	zzz2271	false
1043	16	zzz2270	false
1044	48	zzz2269	false
1045	32	zzz2268	false
1046	14	zzz2267	false
1047	34	zzz2266	false
1048	32	zzz2265	false
1049	24	zzz2264	false
1050	29	zzz2263	false
1051	57	zzz2262	false
1052	17	zzz2261	false
1053	10	zzz2260	false
1054	71	zzz2259	false
1055	20	zzz2258	false
1056	10	zzz2257	false
1057	10	zzz2256	false
1058	10	zzz2255	false
1059	33	zzz2254	false
1060	29	zzz2253	false
1061	27	zzz2252	false
1062		zzz2251	false
1063	75	zzz2250	false
1064	6	zzz2249	false
1065	40	zzz2248	false
1066	40	zzz2247	false
1067	39	zzz2246	false
1068	6	zzz2245	false
1069	6	zzz2244	false
1070	22	zzz2243	false
1071		zzz2242	false
1072	7	zzz2241	false
1073	57	zzz2240	false
1074	33	zzz2239	false
1075	10	zzz2238	false
1076		zzz2237	false
1077	6	zzz2236	false
1078	26	zzz2235	false
1079	20	zzz2234	false
1080	26	zzz2233	false
1081	26	zzz2232	false
1082	26	zzz2231	false
1083	58	zzz2230	false
1084	9	zzz2229	false
1085	38	zzz2228	false
1086	53	zzz2227	false
1087	76	zzz2226	false
1088	38	zzz2225	false
1089	30	zzz2224	false
1090	9	zzz2223	false
1091	14	zzz2222	false
1092	77	zzz2221	false
1093	14	zzz2220	false
1094	77	zzz2219	false
1095	10	zzz2218	false
1096	14	zzz2217	false
1097	16	zzz2216	false
1098	31	zzz2215	false
1099	16	zzz2214	false
1100	16	zzz2213	false
1101	30	zzz2212	false
1102	16	zzz2211	false
1103	34	zzz2210	false
1104	27	zzz2209	false
1105	20	zzz2208	false
1106	46	zzz2207	false
1107	37	zzz2206	false
1108	29	zzz2205	false
1109	16	zzz2204	false
1110	20	zzz2203	false
1111	27	zzz2202	false
1112	14	zzz2201	false
1113	9	zzz2200	false
1114	14	zzz2199	false
1115	39	zzz2198	false
1116	39	zzz2197	false
1117	10	zzz2196	false
1118	20	zzz2195	false
1119	27	zzz2194	false
1120	28	zzz2193	false
1121	14	zzz2192	false
1122		zzz2191	false
1123	6	zzz2190	false
1124	6	zzz2189	false
1125	56	zzz2188	false
1126	43	zzz2187	false
1127	34	zzz2186	false
1128		zzz2185	false
1129	6	zzz2184	false
1130	25	zzz2183	false
1131	34	zzz2182	false
1132	21	zzz2181	false
1133		zzz2180	false
1134	46	zzz2179	false
1135	9	zzz2178	false
1136	11	zzz2177	false
1137	19	zzz2176	false
1138	6	zzz2175	false
1139	6	zzz2174	false
1140		zzz2173	false
1141	59	zzz2172	false
1142	6	zzz2171	false
1143		zzz2170	false
1144		zzz2169	false
1145		zzz2168	false
1146	58	zzz2167	false
1147	51	zzz2166	false
1148	24	zzz2165	false
1149	9	zzz2164	false
1150	9	zzz2163	false
1151	9	zzz2162	false
1152		zzz2161	false
1153		zzz2160	false
1154		zzz2159	false
1155	43	zzz2158	false
1156	6	zzz2157	false
1157	6	zzz2156	false
1158		zzz2155	false
1159	19	zzz2154	false
1160	19	zzz2153	false
1161	59	zzz2152	false
1162	6	zzz2151	false
1163	34	zzz2150	false
1164	58	zzz2149	false
1165		zzz2148	false
1166	40	zzz2147	false
1167	39	zzz2146	false
1168	24	zzz2145	false
1169	6	zzz2144	false
1170	6	zzz2143	false
1171	6	zzz2142	false
1172	6	zzz2141	false
1173	34	zzz2140	false
1174	25	zzz2139	false
1175		zzz2138	false
1176	67	zzz2137	false
1177	6	zzz2136	false
1178	24	zzz2135	false
1179	25	zzz2134	false
1180	52	zzz2133	false
1181	76	zzz2132	false
1182	9	zzz2131	false
1183	66	zzz2130	false
1184		zzz2129	false
1185	54	zzz2128	false
1186	11	zzz2127	false
1187	6	zzz2126	false
1188	11	zzz2125	false
1189	11	zzz2124	false
1190	11	zzz2123	false
1191	11	zzz2122	false
1192	11	zzz2121	false
1193	11	zzz2120	false
1194	11	zzz2119	false
1195	31	zzz2118	false
1196	51	zzz2117	false
1197	6	zzz2116	false
1198		zzz2115	false
1199	60	zzz2114	false
1200	60	zzz2113	false
1201	5	zzz2112	false
1202	6	zzz2111	false
1203	49	zzz2110	false
1204	78	zzz2109	false
1205	11	zzz2108	false
1206	11	zzz2107	false
1207	11	zzz2106	false
1208	11	zzz2105	false
1209	11	zzz2104	true
1210	11	zzz2103	false
1211	11	zzz2102	false
1212	11	zzz2101	false
1213	11	zzz2100	false
1214	11	zzz2099	false
1215	11	zzz2098	false
1216		zzz2097	false
1217	60	zzz2096	false
1218		zzz2095	false
1219	6	zzz2094	false
1220	25	zzz2093	false
1221		zzz2092	false
1222		zzz2091	false
1223	78	zzz2090	false
1224		zzz2089	false
1225	6	zzz2088	false
1226	46	zzz2087	false
1227	21	zzz2086	false
1228	22	zzz2085	false
1229	59	zzz2084	false
1230	9	zzz2083	false
1231	9	zzz2082	false
1232	6	zzz2081	false
1233	24	zzz2080	false
1234	6	zzz2079	false
1235	6	zzz2078	false
1236	6	zzz2077	false
1237	6	zzz2076	false
1238	6	zzz2075	false
1239	6	zzz2074	false
1240	6	zzz2073	false
1241	17	zzz2072	false
1242	40	zzz2071	false
1243	19	zzz2070	false
1244	9	zzz2069	false
1245	56	zzz2068	false
1246	19	zzz2067	false
1247	9	zzz2066	false
1248	6	zzz2065	false
1249		zzz2064	false
1250		zzz2063	false
1251	57	zzz2062	false
1252	33	zzz2061	false
1253	33	zzz2060	false
1254	24	zzz2059	false
1255	21	zzz2058	false
1256	25	zzz2057	false
1257	25	zzz2056	false
1258	10	zzz2055	false
1259	6	zzz2054	false
1260	2	zzz2053	false
1261	13	zzz2052	false
1262	2	zzz2051	false
1263	2	zzz2050	false
1264	2	zzz2049	false
1265	2	zzz2048	false
1266	2	zzz2047	false
1267	2	zzz2046	false
1268	2	zzz2045	false
1269	2	zzz2044	false
1270	2	zzz2043	false
1271	2	zzz2042	false
1272	2	zzz2041	false
1273	2	zzz2040	false
1274	2	zzz2039	false
1275	2	zzz2038	false
1276	2	zzz2037	false
1277	2	zzz2036	false
1278	2	zzz2035	false
1279	2	zzz2034	false
1280	2	zzz2033	false
1281	2	zzz2032	false
1282	2	zzz2031	false
1283	2	zzz2030	false
1284	8	zzz2029	false
1285	2	zzz2028	false
1286	2	zzz2027	false
1287	8	zzz2026	false
1288	8	zzz2025	false
1289	8	zzz2024	false
1290	8	zzz2023	false
1291	13	zzz2022	false
1292	8	zzz2021	false
1293	8	zzz2020	false
1294	2	zzz2019	false
1295	2	zzz2018	false
1296	2	zzz2017	false
1297	2	zzz2016	false
1298	2	zzz2015	false
1299	2	zzz2014	false
1300	2	zzz2013	false
1301	2	zzz2012	false
1302	2	zzz2011	false
1303	2	zzz2010	false
1304	2	zzz2009	false
1305	2	zzz2008	false
1306	2	zzz2007	false
1307	2	zzz2006	false
1308	2	zzz2005	false
1309	2	zzz2004	false
1310	2	zzz2003	false
1311	2	zzz2002	false
1312	2	zzz2001	false
1313	2	zzz2000	false
1314	2	zzz1999	false
1315	2	zzz1998	false
1316	2	zzz1997	false
1317	2	zzz1996	false
1318	2	zzz1995	false
1319	2	zzz1994	false
1320	2	zzz1993	false
1321	2	zzz1992	false
1322	2	zzz1991	false
1323	2	zzz1990	false
1324	2	zzz1989	false
1325	2	zzz1988	false
1326	2	zzz1987	false
1327	2	zzz1986	false
1328	2	zzz1985	false
1329	2	zzz1984	false
1330	2	zzz1983	false
1331	2	zzz1982	false
1332	2	zzz1981	false
1333	2	zzz1980	false
1334	2	zzz1979	false
1335	2	zzz1978	false
1336	2	zzz1977	false
1337	2	zzz1976	false
1338	2	zzz1975	false
1339	2	zzz1974	false
1340	2	zzz1973	false
1341	2	zzz1972	false
1342	2	zzz1971	false
1343	2	zzz1970	false
1344	2	zzz1969	false
1345	2	zzz1968	false
1346	2	zzz1967	false
1347	2	zzz1966	false
1348	2	zzz1965	false
1349	2	zzz1964	false
1350	2	zzz1963	false
1351	2	zzz1962	false
1352	2	zzz1961	false
1353	2	zzz1960	false
1354	2	zzz1959	false
1355	2	zzz1958	false
1356	2	zzz1957	false
1357	2	zzz1956	false
1358	2	zzz1955	false
1359	2	zzz1954	false
1360	2	zzz1953	false
1361	2	zzz1952	false
1362	2	zzz1951	false
1363	2	zzz1950	false
1364	2	zzz1949	false
1365	2	zzz1948	false
1366	2	zzz1947	false
1367	2	zzz1946	false
1368	2	zzz1945	false
1369	2	zzz1944	false
1370	2	zzz1943	false
1371	2	zzz1942	false
1372	2	zzz1941	false
1373	2	zzz1940	false
1374	2	zzz1939	false
1375	2	zzz1938	false
1376	2	zzz1937	false
1377	2	zzz1936	false
1378	2	zzz1935	false
1379	2	zzz1934	false
1380	2	zzz1933	false
1381	2	zzz1932	false
1382	2	zzz1931	false
1383	2	zzz1930	false
1384	2	zzz1929	false
1385	2	zzz1928	false
1386	2	zzz1927	false
1387	2	zzz1926	false
1388	2	zzz1925	false
1389	2	zzz1924	false
1390	2	zzz1923	false
1391	2	zzz1922	false
1392	2	zzz1921	false
1393	2	zzz1920	false
1394	2	zzz1919	false
1395	2	zzz1918	false
1396	2	zzz1917	false
1397	2	zzz1916	false
1398	2	zzz1915	false
1399	2	zzz1914	false
1400	2	zzz1913	false
1401	2	zzz1912	false
1402	2	zzz1911	false
1403	13	zzz1910	false
1404	2	zzz1909	false
1405	2	zzz1908	false
1406	2	zzz1907	false
1407	2	zzz1906	false
1408	2	zzz1905	false
1409	2	zzz1904	false
1410	2	zzz1903	false
1411	2	zzz1902	false
1412	2	zzz1901	false
1413	2	zzz1900	false
1414	2	zzz1899	false
1415	2	zzz1898	false
1416	2	zzz1897	false
1417	2	zzz1896	false
1418	2	zzz1895	false
1419	2	zzz1894	false
1420	2	zzz1893	false
1421	2	zzz1892	false
1422	2	zzz1891	false
1423	2	zzz1890	false
1424	2	zzz1889	false
1425	8	zzz1888	false
1426	2	zzz1887	false
1427	2	zzz1886	false
1428	2	zzz1885	false
1429	2	zzz1884	false
1430	2	zzz1883	false
1431	2	zzz1882	false
1432	2	zzz1881	false
1433	2	zzz1880	false
1434	2	zzz1879	false
1435	2	zzz1878	false
1436	2	zzz1877	false
1437	2	zzz1876	false
1438	2	zzz1875	false
1439	2	zzz1874	false
1440	2	zzz1873	false
1441	2	zzz1872	false
1442	2	zzz1871	false
1443	2	zzz1870	false
1444	2	zzz1869	false
1445	2	zzz1868	false
1446	2	zzz1867	false
1447	2	zzz1866	false
1448	2	zzz1865	false
1449	4	zzz1864	false
1450	2	zzz1863	false
1451	2	zzz1862	false
1452	2	zzz1861	false
1453	2	zzz1860	false
1454	2	zzz1859	false
1455	2	zzz1858	false
1456	2	zzz1857	false
1457	2	zzz1856	false
1458	2	zzz1855	false
1459	2	zzz1854	false
1460	2	zzz1853	false
1461	2	zzz1852	false
1462	2	zzz1851	false
1463	2	zzz1850	false
1464	2	zzz1849	false
1465	2	zzz1848	false
1466	2	zzz1847	false
1467	2	zzz1846	false
1468	2	zzz1845	false
1469	2	zzz1844	false
1470	2	zzz1843	false
1471	2	zzz1842	false
1472	2	zzz1841	false
1473	2	zzz1840	false
1474	2	zzz1839	false
1475	2	zzz1838	false
1476	2	zzz1837	false
1477	2	zzz1836	false
1478	2	zzz1835	false
1479	2	zzz1834	false
1480	2	zzz1833	false
1481	2	zzz1832	false
1482	2	zzz1831	false
1483	2	zzz1830	false
1484	2	zzz1829	false
1485	2	zzz1828	false
1486	2	zzz1827	false
1487	13	zzz1826	false
1488	8	zzz1825	false
1489	2	zzz1824	false
1490	2	zzz1823	false
1491	2	zzz1822	false
1492	2	zzz1821	false
1493	2	zzz1820	false
1494	2	zzz1819	false
1495	2	zzz1818	false
1496	2	zzz1817	false
1497	2	zzz1816	false
1498	2	zzz1815	false
1499	2	zzz1814	false
1500	2	zzz1813	false
1501	2	zzz1812	false
1502	2	zzz1811	false
1503	2	zzz1810	false
1504	2	zzz1809	false
1505	2	zzz1808	false
1506	2	zzz1807	false
1507	2	zzz1806	false
1508	2	zzz1805	false
1509	2	zzz1804	false
1510	2	zzz1803	false
1511	2	zzz1802	false
1512	2	zzz1801	false
1513	2	zzz1800	false
1514	2	zzz1799	false
1515	2	zzz1798	false
1516	2	zzz1797	false
1517	2	zzz1796	false
1518	8	zzz1795	false
1519	8	zzz1794	false
1520	8	zzz1793	false
1521	8	zzz1792	false
1522	8	zzz1791	false
1523	8	zzz1790	false
1524	8	zzz1789	false
1525	8	zzz1788	false
1526	8	zzz1787	false
1527	8	zzz1786	false
1528	2	zzz1785	false
1529	2	zzz1784	false
1530	2	zzz1783	false
1531	2	zzz1782	false
1532	2	zzz1781	false
1533	2	zzz1780	false
1534	2	zzz1779	false
1535	2	zzz1778	false
1536	2	zzz1777	false
1537	2	zzz1776	false
1538	2	zzz1775	false
1539	2	zzz1774	false
1540	2	zzz1773	false
1541	13	zzz1772	false
1542	61	zzz1771	false
1543	13	zzz1770	false
1544	2	zzz1769	false
1545	61	zzz1768	false
1546	2	zzz1767	false
1547	61	zzz1766	false
1548	13	zzz1765	false
1549	8	zzz1764	false
1550	13	zzz1763	false
1551	2	zzz1762	false
1552	2	zzz1761	false
1553	2	zzz1760	false
1554	2	zzz1759	false
1555	2	zzz1758	false
1556	2	zzz1757	false
1557	2	zzz1756	false
1558	2	zzz1755	false
1559	2	zzz1754	false
1560	2	zzz1753	false
1561	2	zzz1752	false
1562	2	zzz1751	false
1563	2	zzz1750	false
1564	2	zzz1749	false
1565	2	zzz1748	false
1566	2	zzz1747	false
1567	2	zzz1746	false
1568	2	zzz1745	false
1569	2	zzz1744	false
1570	2	zzz1743	false
1571	2	zzz1742	false
1572	2	zzz1741	false
1573	2	zzz1740	false
1574	13	zzz1739	false
1575	2	zzz1738	false
1576	2	zzz1737	false
1577	2	zzz1736	false
1578	2	zzz1735	false
1579	2	zzz1734	false
1580	2	zzz1733	false
1581	2	zzz1732	false
1582	13	zzz1731	false
1583	2	zzz1730	false
1584	8	zzz1729	false
1585	8	zzz1728	false
1586	2	zzz1727	false
1587	2	zzz1726	false
1588	2	zzz1725	false
1589	2	zzz1724	false
1590	2	zzz1723	false
1591	13	zzz1722	false
1592	2	zzz1721	false
1593	8	zzz1720	false
1594	8	zzz1719	false
1595	2	zzz1718	false
1596	2	zzz1717	false
1597	2	zzz1716	false
1598	13	zzz1715	false
1599	2	zzz1714	false
1600	2	zzz1713	false
1601	2	zzz1712	false
1602	2	zzz1711	false
1603	2	zzz1710	false
1604	2	zzz1709	false
1605	2	zzz1708	false
1606	13	zzz1707	false
1607	13	zzz1706	false
1608	2	zzz1705	false
1609	2	zzz1704	false
1610	2	zzz1703	false
1611	2	zzz1702	false
1612	8	zzz1701	false
1613	8	zzz1700	false
1614	2	zzz1699	false
1615	2	zzz1698	false
1616	13	zzz1697	false
1617	2	zzz1696	false
1618	2	zzz1695	false
1619	2	zzz1694	false
1620	2	zzz1693	false
1621	2	zzz1692	false
1622	13	zzz1691	false
1623	2	zzz1690	false
1624	2	zzz1689	false
1625	8	zzz1688	false
1626	2	zzz1687	false
1627	2	zzz1686	false
1628	2	zzz1685	false
1629	2	zzz1684	false
1630	2	zzz1683	false
1631	2	zzz1682	false
1632	8	zzz1681	false
1633	13	zzz1680	false
1634	2	zzz1679	false
1635	2	zzz1678	false
1636	2	zzz1677	false
1637	8	zzz1676	false
1638	2	zzz1675	false
1639	2	zzz1674	false
1640	2	zzz1673	false
1641	13	zzz1672	false
1642	2	zzz1671	false
1643	2	zzz1670	false
1644	2	zzz1669	false
1645	2	zzz1668	false
1646	2	zzz1667	false
1647	2	zzz1666	false
1648	2	zzz1665	false
1649	2	zzz1664	false
1650	2	zzz1663	false
1651	2	zzz1662	false
1652	2	zzz1661	false
1653	2	zzz1660	false
1654	2	zzz1659	false
1655	2	zzz1658	false
1656	2	zzz1657	false
1657	13	zzz1656	false
1658	2	zzz1655	false
1659	2	zzz1654	false
1660	8	zzz1653	false
1661	13	zzz1652	false
1662	2	zzz1651	false
1663	2	zzz1650	false
1664	2	zzz1649	false
1665	2	zzz1648	false
1666	2	zzz1647	false
1667	2	zzz1646	false
1668	2	zzz1645	false
1669	2	zzz1644	false
1670	2	zzz1643	false
1671	2	zzz1642	false
1672	2	zzz1641	false
1673	2	zzz1640	false
1674	2	zzz1639	false
1675	2	zzz1638	false
1676	2	zzz1637	false
1677	2	zzz1636	false
1678	2	zzz1635	false
1679	2	zzz1634	false
1680	2	zzz1633	false
1681	2	zzz1632	false
1682	2	zzz1631	false
1683	2	zzz1630	false
1684	2	zzz1629	false
1685	2	zzz1628	false
1686	2	zzz1627	false
1687	2	zzz1626	false
1688	2	zzz1625	false
1689	2	zzz1624	false
1690	2	zzz1623	false
1691	2	zzz1622	false
1692	2	zzz1621	false
1693	2	zzz1620	false
1694	2	zzz1619	false
1695	13	zzz1618	false
1696	2	zzz1617	false
1697	2	zzz1616	false
1698	2	zzz1615	false
1699	2	zzz1614	false
1700	2	zzz1613	false
1701	2	zzz1612	false
1702	2	zzz1611	false
1703	2	zzz1610	false
1704	2	zzz1609	false
1705	2	zzz1608	false
1706	2	zzz1607	false
1707	13	zzz1606	false
1708	2	zzz1605	false
1709	2	zzz1604	false
1710	2	zzz1603	false
1711	2	zzz1602	false
1712	2	zzz1601	false
1713	2	zzz1600	false
1714	2	zzz1599	false
1715	2	zzz1598	false
1716	2	zzz1597	false
1717	2	zzz1596	false
1718	2	zzz1595	false
1719	2	zzz1594	false
1720	2	zzz1593	false
1721	2	zzz1592	false
1722	2	zzz1591	false
1723	2	zzz1590	false
1724	2	zzz1589	false
1725	2	zzz1588	false
1726	2	zzz1587	false
1727	2	zzz1586	false
1728	2	zzz1585	false
1729	2	zzz1584	false
1730	2	zzz1583	false
1731	2	zzz1582	false
1732	18	zzz1581	false
1733	18	zzz1580	false
1734	18	zzz1579	false
1735	18	zzz1578	false
1736	15	zzz1577	false
1737	15	zzz1576	false
1738	15	zzz1575	false
1739	18	zzz1574	false
1740	18	zzz1573	false
1741	15	zzz1572	false
1742	18	zzz1571	false
1743	15	zzz1570	false
1744	18	zzz1569	false
1745	18	zzz1568	false
1746	15	zzz1567	false
1747	35	zzz1566	false
1748	35	zzz1565	false
1749	15	zzz1564	false
1750	18	zzz1563	false
1751	15	zzz1562	false
1752	15	zzz1561	false
1753	15	zzz1560	false
1754	15	zzz1559	false
1755	18	zzz1558	false
1756	15	zzz1557	false
1757	15	zzz1556	false
1758	15	zzz1555	false
1759	15	zzz1554	false
1760	15	zzz1553	false
1761	18	zzz1552	false
1762	15	zzz1551	false
1763	1	zzz1548	false
1764	1	zzz1546	false
1765	1	zzz1545	false
1766	1	zzz1543	false
1767	1	zzz1542	false
1768	1	zzz1541	false
1769	1	zzz1540	false
1770	1	zzz1536	false
1771	1	zzz1535	false
1772	1	zzz1533	false
1773	1	zzz1532	false
1774	1	zzz1530	false
1775	1	zzz1529	false
1776	1	zzz1527	false
1777	35	zzz1526	false
1778	1	zzz1525	false
1779	1	zzz1524	false
1780	1	zzz1523	false
1781	1	zzz1522	false
1782	1	zzz1521	false
1783	1	zzz1520	false
1784	5	zzz1519	false
1785	1	zzz1518	false
1786	5	zzz1517	false
1787	5	zzz1516	false
1788	1	zzz1504	false
1789	1	zzz1503	false
1790	47	zzz1502	false
1791	1	zzz1501	false
1792	1	zzz1500	false
1793	1	zzz1499	false
1794	1	zzz1498	false
1795	1	zzz1497	false
1796	1	zzz1496	false
1797	1	zzz1495	false
1798	1	zzz1494	false
1799	1	zzz1493	false
1800	1	zzz1492	false
1801	1	zzz1491	false
1802	1	zzz1490	false
1803	1	zzz1489	false
1804	1	zzz1488	false
1805	1	zzz1487	false
1806	1	zzz1486	false
1807	1	zzz1485	false
1808	1	zzz1484	false
1809	1	zzz1483	false
1810	1	zzz1482	false
1811	1	zzz1481	false
1812	1	zzz1480	false
1813	1	zzz1478	false
1814	1	zzz1477	false
1815	1	zzz1476	false
1816	1	zzz1475	false
1817	1	zzz1471	false
1818	1	zzz1469	false
1819	1	zzz1466	false
1820	1	zzz1464	false
1821	1	zzz1462	false
1822	5	zzz1460	false
1823	36	zzz1459	false
1824	1	zzz1458	false
1825	1	zzz1457	false
1826	1	zzz1456	false
1827	1	zzz1455	false
1828	1	zzz1454	false
1829	1	zzz1453	false
1830	1	zzz1452	false
1831	1	zzz1451	false
1832	1	zzz1450	false
1833	1	zzz1449	false
1834	1	zzz1448	false
1835	1	zzz1447	false
1836	1	zzz1446	false
1837	1	zzz1445	false
1838	1	zzz1444	false
1839	1	zzz1443	false
1840	1	zzz1442	false
1841	1	zzz1441	false
1842	1	zzz1440	false
1843	1	zzz1439	false
1844	1	zzz1438	false
1845	1	zzz1437	false
1846	1	zzz1436	false
1847	1	zzz1435	false
1848	1	zzz1431	false
1849	47	zzz1430	false
1850	5	zzz1429	false
1851	5	zzz1428	false
1852	5	zzz1427	false
1853	1	zzz1425	false
1854	5	zzz1424	false
1855	1	zzz1422	false
1856	1	zzz1421	false
1857	5	zzz1420	false
1858	5	zzz1419	false
1859	5	zzz1418	false
1860	1	zzz1417	false
1861	1	zzz1416	false
1862	1	zzz1415	false
1863	5	zzz1414	false
1864	1	zzz1413	false
1865	1	zzz1411	false
1866	1	zzz1409	false
1867	1	zzz1407	false
1868	1	zzz1406	false
1869	1	zzz1403	false
1870	1	zzz1402	false
1871	1	zzz1401	false
1872	47	zzz1400	false
1873	1	zzz1399	false
1874	1	zzz1398	false
1875	1	zzz1397	false
1876	1	zzz1396	false
1877	1	zzz1395	false
1878	1	zzz1393	false
1879	36	zzz1392	false
1880	1	zzz1391	false
1881	1	zzz1390	false
1882	5	zzz1388	false
1883	1	zzz1387	false
1884	1	zzz1386	false
1885	1	zzz1385	false
1886	1	zzz1383	false
1887	1	zzz1381	false
1888	1	zzz1379	false
1889	1	zzz1378	false
1890	1	zzz1377	false
1891	47	zzz1376	false
1892	1	zzz1374	false
1893	5	zzz1373	false
1894	1	zzz1372	false
1895	5	zzz1371	false
1896	1	zzz1368	false
1897	1	zzz1365	false
1898	1	zzz1363	false
1899	1	zzz1361	false
1900	5	zzz1360	false
1901	5	zzz1359	false
1902	1	zzz1358	false
1903	1	zzz1357	false
1904	1	zzz1356	false
1905	5	zzz1355	false
1906	1	zzz1354	false
1907	1	zzz1352	false
1908	35	zzz1350	false
1909	1	zzz1349	false
1910	1	zzz1348	false
1911	1	zzz1347	false
1912	1	zzz1346	false
1913	1	zzz1344	false
1914	1	zzz1343	false
1915	5	zzz1341	false
1916	1	zzz1339	false
1917	1	zzz1338	false
1918	1	zzz1335	false
1919	5	zzz1334	false
1920	5	zzz1333	false
1921	5	zzz1332	false
1922	5	zzz1331	false
1923	5	zzz1330	false
1924	1	zzz1329	false
1925	36	zzz1327	false
1926	1	zzz1326	false
1927	1	zzz1325	false
1928	1	zzz1324	false
1929	1	zzz1322	false
1930	1	zzz1319	false
1931	1	zzz1318	false
1932	5	zzz1316	false
1933	1	zzz1314	false
1934	1	zzz1312	false
1935	1	zzz1311	false
1936	1	zzz1309	false
1937	1	zzz1307	false
1938	1	zzz1304	false
1939	1	zzz1303	false
1940	5	zzz1298	false
1941	1	zzz1296	false
1942	1	zzz1294	false
1943	1	zzz1293	false
1944	5	zzz1292	false
1945	1	zzz1289	false
1946	1	zzz1288	false
1947	1	zzz1285	false
1948	1	zzz1284	false
1949	5	zzz1283	false
1950	1	zzz1280	false
1951	1	zzz1279	false
1952	5	zzz1278	false
1953	5	zzz1277	false
1954	1	zzz1276	false
1955	5	zzz1275	false
1956	1	zzz1274	false
1957	5	zzz1273	false
1958	1	zzz1272	false
1959	1	zzz1269	false
1960	5	zzz1268	false
1961	1	zzz1266	false
1962	1	zzz1265	false
1963	1	zzz1261	false
1964	5	zzz1260	false
1965	1	zzz1258	false
1966	1	zzz1257	false
1967	1	zzz1255	false
1968	5	zzz1254	false
1969	1	zzz1251	false
1970	1	zzz1250	false
1971	1	zzz1249	false
1972	1	zzz1248	false
1973	1	zzz1247	false
1974	1	zzz1245	false
1975	1	zzz1244	false
1976	1	zzz1242	false
1977	1	zzz1240	false
1978	1	zzz1237	false
1979	1	zzz1236	false
1980	1	zzz1235	false
1981	1	zzz1234	false
1982	1	zzz1233	false
1983	1	zzz1230	false
1984	1	zzz1228	false
1985	1	zzz1227	false
1986	5	zzz1226	false
1987	5	zzz1225	false
1988	1	zzz1223	false
1989	1	zzz1221	false
1990	1	zzz1219	false
1991	1	zzz1218	false
1992	5	zzz1217	false
1993	5	zzz1216	false
1994	1	zzz1215	false
1995	1	zzz1214	false
1996	1	zzz1210	false
1997	1	zzz1209	false
1998	1	zzz1208	false
1999	1	zzz1207	false
2000	1	zzz1205	false
2001	1	zzz1204	false
2002	1	zzz1203	false
2003	1	zzz1202	false
2004	1	zzz1201	false
2005	1	zzz1200	false
2006	1	zzz1199	false
2007	5	zzz1198	false
2008	5	zzz1197	false
2009	1	zzz1196	false
2010	1	zzz1195	false
2011	5	zzz1194	false
2012	5	zzz1192	false
2013	1	zzz1190	false
2014	1	zzz1189	false
2015	1	zzz1185	false
2016	1	zzz1184	false
2017	5	zzz1182	false
2018	1	zzz1180	false
2019	1	zzz1178	false
2020	1	zzz1176	false
2021	1	zzz1175	false
2022	1	zzz1172	false
2023	1	zzz1171	false
2024	1	zzz1169	false
2025	1	zzz1168	false
2026	1	zzz1165	false
2027	1	zzz1162	false
2028	1	zzz1160	false
2029	1	zzz1159	false
2030	1	zzz1157	false
2031	1	zzz1156	false
2032	1	zzz1153	false
2033	1	zzz1152	false
2034	5	zzz1147	false
2035	5	zzz1146	false
2036	1	zzz1144	false
2037	5	zzz1143	false
2038	1	zzz1141	false
2039	1	zzz1139	false
2040	1	zzz1137	false
2041	5	zzz1136	false
2042	5	zzz1135	false
2043	1	zzz1133	false
2044	1	zzz1132	false
2045	1	zzz1130	false
2046	5	zzz1129	false
2047	1	zzz1128	false
2048	1	zzz1123	false
2049	1	zzz1122	false
2050	1	zzz1120	false
2051	1	zzz1119	false
2052	1	zzz1118	false
2053	1	zzz1115	false
2054	5	zzz1113	false
2055	1	zzz1112	false
2056	5	zzz1111	false
2057	5	zzz1110	false
2058	5	zzz1109	false
2059	1	zzz1106	false
2060	1	zzz1100	false
2061	1	zzz1099	false
2062	1	zzz1098	false
2063	1	zzz1070	false
2064	1	zzz1069	false
2065	1	zzz1068	false
2066	1	zzz1067	false
[truncated: 43 more rows]
