# Supplementary material for: Discovery of several thousand highly diverse circular DNA viruses
Source: eLife journal article supplement (doi:10.7554/elife.51971), 2020-02-03
Supplement: fig2-data2 [file elife-51971-fig2-data2-v1.cys › CytoscapeSession-2019_08_02-17_43/tables/305829-all_my_seqs_genbank_ssDNA1_domains_CRESS_capsid_fasta+Full+Network%2D%2Dclustered/LOCAL_ATTRS-org.cytoscape.model.CyEdge-all_my_seqs_genbank_ssDNA1_domains_CRESS_capsid_fasta+Full+Network%2D%2Dclustered+default+edge.cytable]

CyCSV-Version	1
SUID	interaction	name	selected
java.lang.Long	java.lang.String	java.lang.String	java.lang.Boolean
all_my_seqs_genbank_ssDNA1_domains_CRESS_capsid_fasta Full Network--clustered default edge
305828		zzz1000,zzzz811	false
305827		zzz1000,zzzz487	false
305826		zzz1000,zzzz971	false
305825		zzz1000,zzzz480	false
305824		zzz1000,zzzz970	false
305823		zzz1000,zzzz477	false
305822		zzz1000,zzzz739	false
305821		zzz1000,zzzz961	false
305820		zzz1000,zzzz642	false
305819		zzz1000,zzzz932	false
305818		zzz1000,zzzz532	false
305817		zzz1000,zzz1242	false
305816		zzz1000,zzzz585	false
305815		zzz1000,zzzz711	false
305814		zzz1000,zzzz967	false
305813		zzz1000,zzzz691	false
305812		zzz1000,zzzz838	false
305811		zzz1000,zzzz867	false
305810		zzz1000,zzzz968	false
305809		zzz1000,zzzz973	false
305808		zzz1000,zzz1248	false
305807		zzz1000,zzzz504	false
305806		zzz1000,zzzz738	false
305805		zzz1000,zzz1064	false
305804		zzz1000,zzzz529	false
305803		zzz1000,zzz1495	false
305802		zzz1000,zzzz812	false
305801		zzz1000,zzzz708	false
305800		zzz1000,zzzz821	false
305799		zzz1000,zzzz921	false
305798		zzz1000,zzzz598	false
305797		zzz1000,zzzz603	false
305796		zzz1000,zzzz606	false
305795		zzz1000,zzzz533	false
305794		zzz1000,zzzz972	false
305793		zzz1000,zzz1010	false
305792		zzz1000,zzzz956	false
305791		zzz1000,zzzz999	false
305790		zzz1000,zzzz542	false
305789		zzz1000,zzz1365	false
305788		zzz1000,zzzz456	false
305787		zzz1000,zzzz531	false
305786		zzz1000,zzzz924	false
305785		zzz1000,zzzz540	false
305784		zzz1000,zzzz910	false
305783		zzz1000,zzzz931	false
305782		zzz1000,zzz1233	false
305781		zzz1000,zzzz604	false
305780		zzz1000,zzzz935	false
305779		zzz1000,zzzz474	false
305778		zzz1000,zzzz611	false
305777		zzz1000,zzz1205	false
305776		zzz1000,zzzz601	false
305775		zzz1000,zzzz602	false
305774		zzz1000,zzz1119	false
305773		zzz1000,zzzz605	false
305772		zzz1000,zzz1411	false
305771		zzz1000,zzzz583	false
305770		zzz1000,zzz1397	false
305769		zzz1000,zzz1100	false
305768		zzz1000,zzzz574	false
305767		zzz1000,zzzz623	false
305766		zzz1000,zzzz740	false
305765		zzz1000,zzzz790	false
305764		zzz1000,zzzz584	false
305763		zzz1000,zzzz709	false
305762		zzz1000,zzzz640	false
305761		zzz1000,zzzz934	false
305760		zzz1000,zzzz537	false
305759		zzz1000,zzzz810	false
305758		zzz1000,zzzz966	false
305757		zzz1000,zzz1132	false
305756		zzz1000,zzz1033	false
305755		zzz1000,zzzz479	false
305754		zzz1000,zzzz538	false
305753		zzz1000,zzzz607	false
305752		zzz1000,zzz1488	false
305751		zzz1000,zzz1442	false
305750		zzz1000,zzzz528	false
305749		zzz1000,zzzz608	false
305748		zzz1000,zzzz805	false
305747		zzz1000,zzzz969	false
305746		zzz1000,zzzz539	false
305745		zzz1000,zzzz597	false
305744		zzz1000,zzzz762	false
305743		zzz1000,zzz1234	false
305742		zzz1000,zzz1368	false
305741		zzz1000,zzzz703	false
305740		zzz1000,zzz1017	false
305739		zzz1000,zzzz600	false
305738		zzz1000,zzz1325	false
305737		zzz1000,zzzz865	false
305736		zzz1000,zzzz589	false
305735		zzz1000,zzzz765	false
305734		zzz1000,zzz1015	false
305733		zzz1000,zzzz527	false
305732		zzz1000,zzzz609	false
305731		zzz1000,zzzz720	false
305730		zzz1000,zzz1535	false
305729		zzz1000,zzzz599	false
305728		zzz1000,zzzz814	false
305727		zzz1000,zzz1319	false
305726		zzz1000,zzz1399	false
305725		zzz1000,zzzz536	false
305724		zzz1000,zzzz657	false
305723		zzz1000,zzzz710	false
305722		zzz1000,zzzz530	false
305721		zzz1000,zzz1008	false
305720		zzz1000,zzz1156	false
305719		zzz1000,zzzz478	false
305718		zzz1000,zzzz888	false
305717		zzz1000,zzzz913	false
305716		zzz1000,zzzz960	false
305715		zzz1000,zzzz521	false
305714		zzz1000,zzzz612	false
305713		zzz1000,zzzz763	false
305712		zzz1000,zzz1169	false
305711		zzz1000,zzz1274	false
305710		zzz1000,zzz1476	false
305709		zzz1000,zzz1245	false
305708		zzz1000,zzz1378	false
305707		zzz1000,zzzz862	false
305706		zzz1000,zzz1346	false
305705		zzz1000,zzz1396	false
305704		zzz1000,zzzz457	false
305703		zzz1000,zzz1009	false
305702		zzz1000,zzz1013	false
305701		zzz1000,zzz1385	false
305700		zzz1000,zzzz410	false
305699		zzz1000,zzzz518	false
305698		zzz1000,zzzz588	false
305697		zzz1000,zzz1250	false
305696		zzz1000,zzz1530	false
305695		zzz1000,zzzz459	false
305694		zzz1000,zzzz503	false
305693		zzz1000,zzz1372	false
305692		zzz1000,zzzz792	false
305691		zzz1000,zzz1185	false
305690		zzz1000,zzz1358	false
305689		zzz1000,zzzz454	false
305688		zzz1000,zzzz656	false
305687		zzz1000,zzzz837	false
305686		zzz1000,zzzz705	false
305685		zzz1000,zzz1235	false
305684		zzz1000,zzzz568	false
305683		zzz1000,zzz1221	false
305682		zzz1000,zzzz569	false
305681		zzz1000,zzzz619	false
305680		zzz1000,zzz1354	false
305679		zzz1000,zzzz523	false
305678		zzz1000,zzzz981	false
305677		zzz1000,zzz1208	false
305676		zzz1000,zzz1284	false
305675		zzz1000,zzzz468	false
305674		zzz1000,zzzz882	false
305673		zzz1000,zzz1184	false
305672		zzz1000,zzzz864	false
305671		zzz1000,zzz1218	false
305670		zzz1000,zzz1545	false
305669		zzz1000,zzzz847	false
305668		zzz1000,zzzz965	false
305667		zzz1000,zzzz996	false
305666		zzz1000,zzz1175	false
305665		zzz1000,zzzz507	false
305664		zzz1000,zzzz548	false
305663		zzz1000,zzzz816	false
305662		zzz1000,zzz1038	false
305661		zzz1000,zzzz707	false
305660		zzz1000,zzz1523	false
305659		zzz1000,zzzz756	false
305658		zzz1000,zzz1215	false
305657		zzz1000,zzz1441	false
305656		zzz1000,zzz1445	false
305655		zzz1000,zzzz764	false
305654		zzz1000,zzz1067	false
305653		zzz1000,zzz1223	false
305652		zzz1000,zzzz692	false
305651		zzz1000,zzz1541	false
305650		zzz1000,zzz1168	false
305649		zzz1000,zzzz489	false
305648		zzz1000,zzzz626	false
305647		zzz1000,zzz1398	false
305646		zzz1000,zzz1159	false
305645		zzz1000,zzz1504	false
305644		zzz1000,zzzz409	false
305643		zzz1000,zzzz473	false
305642		zzz1000,zzzz755	false
305641		zzz1000,zzzz813	false
305640		zzz1000,zzzz731	false
305639		zzz1000,zzzz887	false
305638		zzz1000,zzzz553	false
305637		zzz1000,zzzz624	false
305636		zzz1000,zzzz683	false
305635		zzz1000,zzz1018	false
305634		zzz1000,zzz1098	false
305633		zzz1000,zzz1324	false
305632		zzz1000,zzz1446	false
305631		zzz1000,zzzz685	false
305630		zzz1000,zzzz803	false
305629		zzz1000,zzzz856	false
305628		zzz1000,zzz1128	false
305627		zzz1000,zzz1190	false
305626		zzz1000,zzz1390	false
305625		zzz1000,zzz1447	false
305624		zzz1000,zzzz472	false
305623		zzz1000,zzzz753	false
305622		zzz1000,zzz1062	false
305621		zzz1000,zzzz469	false
305620		zzz1000,zzz1070	false
305619		zzz1000,zzz1199	false
305618		zzz1000,zzz1044	false
305617		zzz1000,zzz1349	false
305616		zzz1000,zzzz808	false
305615		zzz1000,zzz1003	false
305614		zzz1000,zzz1249	false
305613		zzz1000,zzz1443	false
305612		zzz1000,zzzz555	false
305611		zzz1000,zzzz793	false
305610		zzz1000,zzz1160	false
305609		zzz1000,zzz1180	false
305608		zzz1000,zzz1207	false
305607		zzz1000,zzz1478	false
305606		zzz1000,zzz1482	false
305605		zzz1000,zzzz426	false
305604		zzz1000,zzzz435	false
305603		zzz1000,zzzz556	false
305602		zzz1000,zzz1542	false
305601		zzz1000,zzzz791	false
305600		zzz1000,zzzz933	false
305599		zzz1000,zzz1483	false
305598		zzz1000,zzzz660	false
305597		zzz1000,zzzz665	false
305596		zzz1000,zzz1496	false
305595		zzz1000,zzz1546	false
305594		zzz1000,zzzz549	false
305593		zzz1000,zzz1189	false
305592		zzz1000,zzz1195	false
305591		zzz1000,zzz1202	false
305590		zzz1000,zzz1244	false
305589		zzz1000,zzz1395	false
305588		zzz1000,zzz1439	false
305587		zzz1000,zzz1458	false
305586		zzz1000,zzzz500	false
305585		zzz1000,zzzz669	false
305584		zzz1000,zzzz706	false
305583		zzz1000,zzz1034	false
305582		zzz1000,zzz1484	false
305581		zzz1000,zzz1485	false
305580		zzz1000,zzz1486	false
305579		zzz1000,zzzz659	false
305578		zzz1000,zzzz667	false
305577		zzz1000,zzzz732	false
305576		zzz1000,zzzz754	false
305575		zzz1000,zzz1139	false
305574		zzz1000,zzz1251	false
305573		zzz1000,zzz1477	false
305572		zzz1000,zzzz978	false
305571		zzz1000,zzzz993	false
305570		zzz1000,zzz1030	false
305569		zzz1000,zzz1144	false
305568		zzz1000,zzzz519	false
305567		zzz1000,zzzz668	false
305566		zzz1000,zzzz846	false
305565		zzz1000,zzzz944	false
305564		zzz1000,zzz1457	false
305563		zzz1000,zzz1494	false
305562		zzz1000,zzzz627	false
305561		zzz1000,zzzz658	false
305560		zzz1000,zzz1304	false
305559		zzz1000,zzzz436	false
305558		zzz1000,zzzz663	false
305557		zzz1000,zzzz670	false
305556		zzz1000,zzzz757	false
305555		zzz1000,zzz1002	false
305554		zzz1000,zzz1196	false
305553		zzz1000,zzz1214	false
305552		zzz1000,zzz1386	false
305551		zzz1000,zzzz662	false
305550		zzz1000,zzzz802	false
305549		zzz1000,zzz1201	false
305548		zzz1000,zzz1203	false
305547		zzz1000,zzz1210	false
305546		zzz1000,zzz1363	false
305545		zzz1000,zzz1471	false
305544		zzz1000,zzz1529	false
305543		zzz1000,zzzz815	false
305542		zzz1000,zzzz845	false
305541		zzz1000,zzzz902	false
305540		zzz1000,zzzz806	false
305539		zzz1000,zzz1023	false
305538		zzz1000,zzz1452	false
305537		zzz1000,zzz1521	false
305536		zzz1000,zzzz974	false
305535		zzz1000,zzzz992	false
305534		zzz1000,zzz1152	false
305533		zzz1000,zzzz672	false
305532		zzz1000,zzzz773	false
305531		zzz1000,zzz1352	false
305530		zzz1000,zzz1379	false
305529		zzz1000,zzz1455	false
305528		zzz1000,zzz1524	false
305527		zzz1000,zzzz407	false
305526		zzz1000,zzzz686	false
305525		zzz1000,zzzz789	false
305524		zzz1000,zzz1230	false
305523		zzz1000,zzz1289	false
305522		zzz1000,zzz1347	false
305521		zzz1000,zzz1450	false
305520		zzz1000,zzzz488	false
305519		zzz1000,zzzz661	false
305518		zzz1000,zzzz975	false
305517		zzz1000,zzz1228	false
305516		zzz1000,zzz1265	false
305515		zzz1000,zzzz858	false
305514		zzz1000,zzzz946	false
305513		zzz1000,zzz1048	false
305512		zzz1000,zzz1162	false
305511		zzz1000,zzz1240	false
305510		zzz1000,zzz1293	false
305509		zzz1000,zzz1391	false
305508		zzz1000,zzz1413	false
305507		zzz1000,zzz1421	false
305506		zzz1000,zzz1422	false
305505		zzz1000,zzz1480	false
305504		zzz1000,zzz1501	false
305503		zzz1000,zzzz442	false
305502		zzz1000,zzzz652	false
305501		zzz1000,zzzz671	false
305500		zzz1000,zzzz905	false
305499		zzz1000,zzz1054	false
305498		zzz1000,zzz1106	false
305497		zzz1000,zzz1294	false
305496		zzz1000,zzz1303	false
305495		zzz1000,zzz1403	false
305494		zzz1000,zzz1415	false
305493		zzz1000,zzz1453	false
305492		zzz1000,zzz1525	false
305491		zzz1000,zzzz485	false
305490		zzz1000,zzzz655	false
305489		zzz1000,zzzz768	false
305488		zzz1000,zzz1296	false
305487		zzz1000,zzz1311	false
305486		zzz1000,zzz1329	false
305485		zzz1000,zzz1407	false
305484		zzz1000,zzz1532	false
305483		zzz1000,zzzz804	false
305482		zzz1000,zzz1122	false
305481		zzz1000,zzz1130	false
305480		zzz1000,zzz1137	false
305479		zzz1000,zzz1172	false
305478		zzz1000,zzz1361	false
305477		zzz1000,zzz1402	false
305476		zzz1000,zzz1462	false
305475		zzz1000,zzz1493	false
305474		zzz1000,zzz1500	false
305473		zzz1000,zzzz433	false
305472		zzz1000,zzzz610	false
305471		zzz1000,zzzz689	false
305470		zzz1000,zzzz752	false
305469		zzz1000,zzzz948	false
305468		zzz1000,zzzz998	false
305467		zzz1000,zzz1133	false
305466		zzz1000,zzz1157	false
305465		zzz1000,zzz1209	false
305464		zzz1000,zzz1236	false
305463		zzz1000,zzz1436	false
305462		zzz1000,zzz1449	false
305461		zzz1000,zzzz481	false
305460		zzz1000,zzzz497	false
305459		zzz1000,zzzz575	false
305458		zzz1000,zzzz666	false
305457		zzz1000,zzzz682	false
305456		zzz1000,zzzz772	false
305455		zzz1000,zzzz807	false
305454		zzz1000,zzz1112	false
305453		zzz1000,zzz1165	false
305452		zzz1000,zzz1335	false
305451		zzz1000,zzz1348	false
305450		zzz1000,zzz1406	false
305449		zzz1000,zzz1437	false
305448		zzz1000,zzz1444	false
305447		zzz1000,zzz1492	false
305446		zzz1000,zzz1527	false
305445		zzz1000,zzzz467	false
305444		zzz1000,zzzz520	false
305443		zzz1000,zzzz750	false
305442		zzz1000,zzzz751	false
305441		zzz1000,zzzz976	false
305440		zzz1000,zzz1118	false
305439		zzz1000,zzz1120	false
305438		zzz1000,zzz1200	false
305437		zzz1000,zzz1272	false
305436		zzz1000,zzz1279	false
305435		zzz1000,zzz1288	false
305434		zzz1000,zzz1416	false
305433		zzz1000,zzz1543	false
305432		zzz1000,zzzz446	false
305431		zzz1000,zzzz664	false
305430		zzz1000,zzzz809	false
305429		zzz1000,zzzz822	false
305428		zzz1000,zzz1099	false
305427		zzz1000,zzz1141	false
305426		zzz1000,zzz1176	false
305425		zzz1000,zzz1280	false
305424		zzz1000,zzz1425	false
305423		zzz1000,zzz1469	false
305422		zzz1000,zzz1481	false
305421		zzz1000,zzzz557	false
305420		zzz1000,zzzz877	false
305419		zzz1000,zzz1053	false
305418		zzz1000,zzz1227	false
305417		zzz1000,zzz1322	false
305416		zzz1000,zzz1343	false
305415		zzz1000,zzz1448	false
305414		zzz1000,zzz1533	false
305413		zzz1000,zzz1540	false
305412		zzz1000,zzz1548	false
305411		zzz1000,zzzz431	false
305410		zzz1000,zzzz432	false
305409		zzz1000,zzzz444	false
305408		zzz1000,zzzz988	false
305407		zzz1000,zzz1004	false
305406		zzz1000,zzz1219	false
305405		zzz1000,zzz1237	false
305404		zzz1000,zzz1258	false
305403		zzz1000,zzz1266	false
305402		zzz1000,zzz1307	false
305401		zzz1000,zzz1338	false
305400		zzz1000,zzz1387	false
305399		zzz1000,zzz1536	false
305398		zzz1000,zzzz412	false
305397		zzz1000,zzzz425	false
305396		zzz1000,zzzz613	false
305395		zzz1000,zzzz923	false
305394		zzz1000,zzz1055	false
305393		zzz1000,zzz1285	false
305392		zzz1000,zzz1312	false
305391		zzz1000,zzz1344	false
305390		zzz1000,zzz1409	false
305389		zzz1000,zzzz415	false
305388		zzz1000,zzzz636	false
305387		zzz1000,zzzz704	false
305386		zzz1000,zzzz769	false
305385		zzz1000,zzz1115	false
305384		zzz1000,zzz1374	false
305383		zzz1000,zzz1381	false
305382		zzz1000,zzz1393	false
305381		zzz1000,zzz1466	false
305380		zzz1000,zzz1490	false
305379		zzz1000,zzzz452	false
305378		zzz1000,zzzz498	false
305377		zzz1000,zzzz767	false
305376		zzz1000,zzzz774	false
305375		zzz1000,zzz1068	false
305374		zzz1000,zzz1123	false
305373		zzz1000,zzz1178	false
305372		zzz1000,zzz1255	false
305371		zzz1000,zzz1440	false
305370		zzz1000,zzz1464	false
305369		zzz1000,zzz1487	false
305368		zzz1000,zzz1497	false
305367		zzz1000,zzzz451	false
305366		zzz1000,zzzz502	false
305365		zzz1000,zzzz775	false
305364		zzz1000,zzz1057	false
305363		zzz1000,zzz1069	false
305362		zzz1000,zzz1247	false
305361		zzz1000,zzz1309	false
305360		zzz1000,zzz1318	false
305359		zzz1000,zzz1339	false
305358		zzz1000,zzz1491	false
305357		zzz1000,zzz1498	false
305356		zzz1000,zzz1153	false
305355		zzz1000,zzz1269	false
305354		zzz1000,zzz1276	false
305353		zzz1000,zzz1435	false
305352		zzz1000,zzzz770	false
305351		zzz1000,zzzz771	false
305350		zzz1000,zzz1489	false
305349		zzz1000,zzzz566	false
305348		zzz1000,zzz1499	false
305347		zzz1000,zzzz449	false
305346		zzz1000,zzzz950	false
305345		zzz1000,zzzz653	false
305344		zzz1000,zzz1456	false
305343		zzz1000,zzzz632	false
305342		zzz1000,zzzz783	false
305341		zzz1000,zzz1056	false
305340		zzz1000,zzzz401	false
305339		zzz1000,zzzz766	false
305338		zzz1000,zzzz836	false
305337		zzz1000,zzz1503	false
305336		zzz1000,zzzz620	false
305335		zzz1000,zzzz841	false
305334		zzz1000,zzz1475	false
305333		zzz1000,zzz1356	false
305332		zzz1000,zzz1454	false
305331		zzz1000,zzzz447	false
305330		zzz1000,zzzz875	false
305329		zzz1000,zzz1401	false
305328		zzz1000,zzzz445	false
305327		zzz1000,zzzz582	false
305326		zzz1000,zzz1016	false
305325		zzz1000,zzzz625	false
305324		zzz1000,zzz1063	false
305323		zzz1000,zzzz581	false
305322		zzz1000,zzzz567	false
305321		zzz1000,zzzz857	false
305320		zzz1000,zzz1171	false
305319		zzz1000,zzzz903	false
305318		zzz1000,zzz1012	false
305317		zzz1000,zzz1028	false
305316		zzz1000,zzz1314	false
305315		zzz1000,zzzz544	false
305314		zzz1000,zzzz798	false
305313		zzz1000,zzzz590	false
305312		zzz1000,zzz1043	false
305311		zzz1000,zzzz475	false
305310		zzz1000,zzzz517	false
305309		zzz1000,zzzz628	false
305308		zzz1000,zzzz622	false
305307		zzz1000,zzzz785	false
305306		zzz1000,zzzz647	false
305305		zzz1000,zzzz786	false
305304		zzz1000,zzzz784	false
305303		zzz1000,zzzz404	false
305302		zzz1000,zzz1011	false
305301		zzz1000,zzzz420	false
305300		zzz1000,zzz1027	false
305299		zzz1000,zzzz429	false
305298		zzz1000,zzzz482	false
305297		zzz1000,zzzz684	false
305296		zzz1000,zzzz716	false
305295		zzz1000,zzzz630	false
305294		zzz1000,zzzz883	false
305293		zzz1000,zzzz889	false
305292		zzz1000,zzz1383	false
305291		zzz1000,zzzz541	false
305290		zzz1000,zzzz869	false
305289		zzz1000,zzz1357	false
305288		zzz1000,zzzz680	false
305287		zzz1000,zzz1021	false
305286		zzz1000,zzzz512	false
305285		zzz1000,zzz1026	false
305284		zzz1000,zzzz870	false
305283		zzz1000,zzzz694	false
305282		zzz1000,zzzz565	false
305281		zzz1000,zzzz644	false
305280		zzz1000,zzz1059	false
305279		zzz1000,zzz1438	false
305278		zzz1000,zzzz936	false
305277		zzz1000,zzzz795	false
305276		zzz1000,zzzz405	false
305275		zzz1000,zzzz464	false
305274		zzz1000,zzzz406	false
305273		zzz1000,zzzz957	false
305272		zzz1000,zzz1058	false
305271		zzz1000,zzz1060	false
305270		zzz1000,zzz1041	false
305269		zzz1000,zzz1204	false
305268		zzz1000,zzz1052	false
305267		zzz1000,zzz1522	false
305266		zzz1000,zzz1431	false
305265		zzz1000,zzzz702	false
305264		zzz1000,zzzz721	false
305263		zzz1000,zzzz730	false
305262		zzz1000,zzz1257	false
305261		zzz1000,zzzz551	false
305260		zzz1000,zzzz462	false
305259		zzz1000,zzzz506	false
305258		zzz1000,zzz1261	false
305257		zzz1000,zzz1417	false
305256		zzz1000,zzzz860	false
305255		zzz1000,zzzz914	false
305254		zzz1000,zzzz953	false
305253		zzz1000,zzzz737	false
305252		zzz1000,zzzz861	false
305251		zzz1000,zzz1025	false
305250		zzz1000,zzzz631	false
305249		zzz1000,zzzz466	false
305248		zzz1000,zzzz722	false
305247		zzz1000,zzz1022	false
305246		zzz1000,zzzz526	false
305245		zzz1000,zzz1451	false
305244		zzz1000,zzzz595	false
305243		zzz1000,zzz1019	false
305242		zzz1000,zzzz596	false
305241		zzz1000,zzzz505	false
305240		zzz1000,zzzz982	false
305239		zzz1000,zzzz419	false
305238		zzz1000,zzzz983	false
305237		zzz1000,zzzz794	false
305236		zzz1000,zzzz460	false
305235		zzz1000,zzzz413	false
305234		zzz1000,zzzz586	false
305233		zzz1000,zzzz594	false
305232		zzz1000,zzzz593	false
305231		zzz1000,zzzz797	false
305230		zzz1000,zzzz408	false
305229		zzz1000,zzzz418	false
305228		zzz1000,zzzz986	false
305227		zzz1000,zzzz591	false
305226		zzz1000,zzzz984	false
305225		zzz1000,zzzz987	false
305224		zzz1000,zzzz522	false
305223		zzz1000,zzzz411	false
305222		zzz1000,zzzz985	false
305221		zzz1000,zzzz458	false
305220		zzz1000,zzzz490	false
305219		zzz1000,zzzz417	false
305218		zzz1000,zzzz840	false
305217		zzz1000,zzzz434	false
305216		zzz1000,zzz1520	false
305215		zzz1000,zzz1326	false
305214		zzz1000,zzzz958	false
305213		zzz1000,zzzz977	false
305212		zzz1000,zzz1518	false
305211		zzz1000,zzzz491	false
305210		zzz1000,zzz1377	false
305204		zzz1002,zzz1524	false
305203		zzz1002,zzz1455	false
305202		zzz1002,zzz1347	false
305201		zzz1002,zzz1214	false
305200		zzz1002,zzzz433	false
305199		zzz1002,zzz1296	false
305198		zzz1002,zzz1444	false
305197		zzz1002,zzz1415	false
305196		zzz1002,zzz1303	false
305195		zzz1002,zzz1329	false
305194		zzz1002,zzzz652	false
305193		zzz1002,zzz1054	false
305192		zzz1002,zzz1462	false
305191		zzz1002,zzz1122	false
305190		zzz1002,zzz1343	false
305189		zzz1002,zzz1450	false
305188		zzz1002,zzz1130	false
305187		zzz1002,zzz1230	false
305186		zzz1002,zzz1294	false
305185		zzz1002,zzz1425	false
305184		zzz1002,zzz1449	false
305183		zzz1002,zzz1480	false
305182		zzz1002,zzz1543	false
305181		zzz1002,zzzz442	false
305180		zzz1002,zzzz948	false
305179		zzz1002,zzz1048	false
305178		zzz1002,zzzz446	false
305177		zzz1002,zzzz575	false
305176		zzz1002,zzzz877	false
305175		zzz1002,zzz1118	false
305174		zzz1002,zzz1152	false
305173		zzz1002,zzz1162	false
305172		zzz1002,zzz1165	false
305171		zzz1002,zzz1361	false
305170		zzz1002,zzz1403	false
305169		zzz1002,zzz1493	false
305168		zzz1002,zzz1176	false
305167		zzz1002,zzz1004	false
305166		zzz1002,zzz1106	false
305165		zzz1002,zzz1293	false
305164		zzz1002,zzz1422	false
305163		zzz1002,zzz1548	false
305162		zzz1002,zzzz998	false
305161		zzz1002,zzz1280	false
305160		zzz1002,zzz1413	false
305159		zzz1002,zzz1471	false
305158		zzz1002,zzz1172	false
305157		zzz1002,zzz1335	false
305156		zzz1002,zzz1402	false
305155		zzz1002,zzz1492	false
305154		zzz1002,zzz1120	false
305153		zzz1002,zzz1289	false
305152		zzz1002,zzz1352	false
305151		zzz1002,zzz1374	false
305150		zzz1002,zzz1453	false
305149		zzz1002,zzzz407	false
305148		zzz1002,zzz1236	false
305147		zzz1002,zzz1157	false
305146		zzz1002,zzz1178	false
305145		zzz1002,zzz1407	false
305144		zzz1002,zzz1421	false
305143		zzz1002,zzzz415	false
305142		zzz1002,zzzz613	false
305141		zzz1002,zzz1409	false
305140		zzz1002,zzz1437	false
305139		zzz1002,zzz1452	false
305138		zzz1002,zzz1500	false
305137		zzz1002,zzzz444	false
305136		zzz1002,zzzz822	false
305135		zzz1002,zzz1240	false
305134		zzz1002,zzz1288	false
305133		zzz1002,zzz1338	false
305132		zzz1002,zzz1381	false
305131		zzz1002,zzz1469	false
305130		zzz1002,zzzz412	false
305129		zzz1002,zzz1112	false
305128		zzz1002,zzz1153	false
305127		zzz1002,zzz1228	false
305126		zzz1002,zzz1269	false
305125		zzz1002,zzz1272	false
305124		zzz1002,zzz1322	false
305123		zzz1002,zzz1344	false
305122		zzz1002,zzz1436	false
305121		zzz1002,zzz1487	false
305120		zzz1002,zzz1491	false
305119		zzz1002,zzzz452	false
305118		zzz1002,zzzz481	false
305117		zzz1002,zzz1209	false
305116		zzz1002,zzz1219	false
305115		zzz1002,zzz1312	false
305114		zzz1002,zzz1115	false
305113		zzz1002,zzz1137	false
305112		zzz1002,zzz1466	false
305111		zzz1002,zzz1525	false
305110		zzz1002,zzz1540	false
305109		zzz1002,zzzz946	false
305108		zzz1002,zzz1501	false
305107		zzz1002,zzz1123	false
305106		zzz1002,zzz1133	false
305105		zzz1002,zzz1311	false
305104		zzz1002,zzz1435	false
305103		zzz1002,zzz1497	false
305102		zzz1002,zzz1536	false
305101		zzz1002,zzzz449	false
305100		zzz1002,zzz1307	false
305099		zzz1002,zzzz923	false
305098		zzz1002,zzz1227	false
305097		zzz1002,zzz1247	false
305096		zzz1002,zzzz988	false
305095		zzz1002,zzz1527	false
305094		zzz1002,zzzz401	false
305093		zzz1002,zzz1464	false
305092		zzz1002,zzz1481	false
305091		zzz1002,zzz1489	false
305090		zzz1002,zzz1237	false
305089		zzz1002,zzz1055	false
305088		zzz1002,zzz1387	false
305087		zzz1002,zzz1348	false
305086		zzz1002,zzz1255	false
305085		zzz1002,zzz1406	false
305084		zzz1002,zzz1490	false
305083		zzz1002,zzz1057	false
305082		zzz1002,zzz1053	false
305081		zzz1002,zzz1498	false
305080		zzz1002,zzz1401	false
305079		zzz1002,zzzz950	false
305078		zzz1002,zzz1056	false
305077		zzz1002,zzz1454	false
305076		zzz1002,zzzz451	false
305075		zzz1002,zzz1475	false
305074		zzz1002,zzz1318	false
305073		zzz1002,zzz1171	false
305072		zzz1002,zzzz857	false
305071		zzz1002,zzz1169	false
305070		zzz1002,zzz1448	false
305069		zzz1002,zzzz447	false
305068		zzz1002,zzz1245	false
305067		zzz1002,zzzz716	false
305066		zzz1002,zzzz544	false
305065		zzz1002,zzz1008	false
305064		zzz1002,zzzz792	false
305063		zzz1002,zzz1218	false
305062		zzz1002,zzz1446	false
305061		zzz1002,zzz1476	false
305060		zzz1002,zzz1530	false
305059		zzz1002,zzz1274	false
305058		zzz1002,zzz1175	false
305057		zzz1002,zzz1319	false
305056		zzz1002,zzz1396	false
305055		zzz1002,zzz1354	false
305054		zzz1002,zzzz619	false
305053		zzz1002,zzz1441	false
305052		zzz1002,zzz1156	false
305051		zzz1002,zzz1309	false
305050		zzz1002,zzzz445	false
305049		zzz1002,zzzz588	false
305048		zzz1002,zzzz707	false
305047		zzz1002,zzz1184	false
305046		zzz1002,zzz1535	false
305045		zzz1002,zzz1221	false
305044		zzz1002,zzz1545	false
305043		zzz1002,zzz1445	false
305042		zzz1002,zzzz647	false
305041		zzz1002,zzzz847	false
305040		zzz1002,zzz1478	false
305039		zzz1002,zzzz582	false
305038		zzz1002,zzzz653	false
305037		zzz1002,zzz1235	false
305036		zzz1002,zzzz583	false
305035		zzz1002,zzzz548	false
305034		zzz1002,zzzz692	false
305033		zzz1002,zzz1210	false
305032		zzz1002,zzz1458	false
305031		zzz1002,zzzz636	false
305030		zzz1002,zzz1223	false
305029		zzz1002,zzz1349	false
305028		zzz1002,zzzz864	false
305027		zzz1002,zzz1009	false
305026		zzz1002,zzzz459	false
305025		zzz1002,zzz1383	false
305024		zzz1002,zzz1541	false
305023		zzz1002,zzzz426	false
305022		zzz1002,zzzz838	false
305021		zzz1002,zzz1159	false
305020		zzz1002,zzzz479	false
305019		zzz1002,zzzz542	false
305018		zzz1002,zzzz683	false
305017		zzz1002,zzzz856	false
305016		zzz1002,zzzz887	false
305015		zzz1002,zzzz720	false
305014		zzz1002,zzz1477	false
305013		zzz1002,zzz1495	false
305012		zzz1002,zzz1496	false
305011		zzz1002,zzzz409	false
305010		zzz1002,zzzz655	false
305009		zzz1002,zzzz934	false
305008		zzz1002,zzz1185	false
305007		zzz1002,zzz1215	false
305006		zzz1002,zzz1258	false
305005		zzz1002,zzz1363	false
305004		zzz1002,zzzz457	false
305003		zzz1002,zzzz468	false
305002		zzz1002,zzzz488	false
305001		zzz1002,zzzz507	false
305000		zzz1002,zzzz790	false
304999		zzz1002,zzzz956	false
304998		zzz1002,zzzz961	false
304997		zzz1002,zzz1003	false
304996		zzz1002,zzz1062	false
304995		zzz1002,zzz1207	false
304994		zzz1002,zzz1358	false
304993		zzz1002,zzz1504	false
304992		zzz1002,zzzz472	false
304991		zzz1002,zzzz837	false
304990		zzz1002,zzzz967	false
304989		zzz1002,zzz1100	false
304988		zzz1002,zzz1202	false
304987		zzz1002,zzz1368	false
304986		zzz1002,zzz1457	false
304985		zzz1002,zzzz611	false
304984		zzz1002,zzzz754	false
304983		zzz1002,zzzz756	false
304982		zzz1002,zzzz862	false
304981		zzz1002,zzzz910	false
304980		zzz1002,zzz1233	false
304979		zzz1002,zzz1325	false
304978		zzz1002,zzz1443	false
304977		zzz1002,zzz1484	false
304976		zzz1002,zzz1499	false
304975		zzz1002,zzzz504	false
304974		zzz1002,zzzz581	false
304973		zzz1002,zzzz867	false
304972		zzz1002,zzzz870	false
304971		zzz1002,zzz1098	false
304970		zzz1002,zzz1119	false
304969		zzz1002,zzz1144	false
304968		zzz1002,zzz1199	false
304967		zzz1002,zzz1285	false
304966		zzz1002,zzzz585	false
304965		zzz1002,zzzz965	false
304964		zzz1002,zzz1038	false
304963		zzz1002,zzz1447	false
304962		zzz1002,zzz1523	false
304961		zzz1002,zzzz487	false
304960		zzz1002,zzzz765	false
304959		zzz1002,zzzz821	false
304958		zzz1002,zzzz865	false
304957		zzz1002,zzzz932	false
304956		zzz1002,zzz1399	false
304955		zzz1002,zzz1485	false
304954		zzz1002,zzzz489	false
304953		zzz1002,zzzz606	false
304952		zzz1002,zzzz624	false
304951		zzz1002,zzzz755	false
304950		zzz1002,zzzz972	false
304949		zzz1002,zzz1391	false
304948		zzz1002,zzz1488	false
304947		zzz1002,zzzz474	false
304946		zzz1002,zzzz537	false
304945		zzz1002,zzzz607	false
304944		zzz1002,zzzz738	false
304943		zzz1002,zzzz999	false
304942		zzz1002,zzz1030	false
304941		zzz1002,zzz1132	false
304940		zzz1002,zzz1324	false
304939		zzz1002,zzz1346	false
304938		zzz1002,zzz1521	false
304937		zzz1002,zzzz711	false
304936		zzz1002,zzzz960	false
304935		zzz1002,zzz1196	false
304934		zzz1002,zzz1251	false
304933		zzz1002,zzzz469	false
304932		zzz1002,zzzz574	false
304931		zzz1002,zzzz601	false
304930		zzz1002,zzzz805	false
304929		zzz1002,zzzz931	false
304928		zzz1002,zzz1139	false
304927		zzz1002,zzz1160	false
304926		zzz1002,zzz1234	false
304925		zzz1002,zzz1242	false
304924		zzz1002,zzz1244	false
304923		zzz1002,zzz1339	false
304922		zzz1002,zzz1397	false
304921		zzz1002,zzz1398	false
304920		zzz1002,zzz1442	false
304919		zzz1002,zzz1482	false
304918		zzz1002,zzz1529	false
304917		zzz1002,zzz1542	false
304916		zzz1002,zzzz436	false
304915		zzz1002,zzzz531	false
304914		zzz1002,zzzz533	false
304913		zzz1002,zzzz584	false
304912		zzz1002,zzzz603	false
304911		zzz1002,zzzz640	false
304910		zzz1002,zzzz882	false
304909		zzz1002,zzzz978	false
304908		zzz1002,zzz1033	false
304907		zzz1002,zzz1189	false
304906		zzz1002,zzz1201	false
304905		zzz1002,zzz1205	false
304904		zzz1002,zzz1356	false
304903		zzz1002,zzz1486	false
304902		zzz1002,zzzz528	false
304901		zzz1002,zzzz598	false
304900		zzz1002,zzzz642	false
304899		zzz1002,zzzz708	false
304898		zzz1002,zzzz753	false
304897		zzz1002,zzzz902	false
304896		zzz1002,zzzz971	false
304895		zzz1002,zzz1180	false
304894		zzz1002,zzz1248	false
304893		zzz1002,zzzz456	false
304892		zzz1002,zzzz691	false
304891		zzz1002,zzzz845	false
304890		zzz1002,zzzz974	false
304889		zzz1002,zzz1250	false
304888		zzz1002,zzz1390	false
304887		zzz1002,zzz1532	false
304886		zzz1002,zzzz478	false
304885		zzz1002,zzzz814	false
304884		zzz1002,zzzz935	false
304883		zzz1002,zzzz420	false
304882		zzz1002,zzzz889	false
304881		zzz1002,zzzz921	false
304880		zzz1002,zzzz924	false
304879		zzz1002,zzz1439	false
304878		zzz1002,zzzz539	false
304877		zzz1002,zzzz665	false
304876		zzz1002,zzzz710	false
304875		zzz1002,zzzz810	false
304874		zzz1002,zzz1044	false
304873		zzz1002,zzz1168	false
304872		zzz1002,zzz1483	false
304871		zzz1002,zzzz477	false
304870		zzz1002,zzzz626	false
304869		zzz1002,zzzz538	false
304868		zzz1002,zzzz968	false
304867		zzz1002,zzzz975	false
304866		zzz1002,zzz1010	false
304865		zzz1002,zzz1128	false
304864		zzz1002,zzz1190	false
304863		zzz1002,zzz1386	false
304862		zzz1002,zzzz473	false
304861		zzz1002,zzzz540	false
304860		zzz1002,zzzz602	false
304859		zzz1002,zzzz667	false
304858		zzz1002,zzzz668	false
304857		zzz1002,zzzz763	false
304856		zzz1002,zzzz808	false
304855		zzz1002,zzzz933	false
304854		zzz1002,zzzz973	false
304853		zzz1002,zzzz976	false
304852		zzz1002,zzz1195	false
304851		zzz1002,zzz1365	false
304850		zzz1002,zzzz589	false
304849		zzz1002,zzzz604	false
304848		zzz1002,zzzz666	false
304847		zzz1002,zzzz791	false
304846		zzz1002,zzzz811	false
304845		zzz1002,zzzz846	false
304844		zzz1002,zzz1034	false
304843		zzz1002,zzz1208	false
304842		zzz1002,zzzz435	false
304841		zzz1002,zzzz658	false
304840		zzz1002,zzzz660	false
304839		zzz1002,zzzz685	false
304838		zzz1002,zzzz731	false
304837		zzz1002,zzz1070	false
304836		zzz1002,zzz1438	false
304835		zzz1002,zzzz532	false
304834		zzz1002,zzzz555	false
304833		zzz1002,zzzz600	false
304832		zzz1002,zzzz659	false
304831		zzz1002,zzzz663	false
304830		zzz1002,zzzz682	false
304829		zzz1002,zzzz706	false
304828		zzz1002,zzzz739	false
304827		zzz1002,zzzz773	false
304826		zzz1002,zzz1018	false
304825		zzz1002,zzz1265	false
304824		zzz1002,zzz1385	false
304823		zzz1002,zzz1546	false
304822		zzz1002,zzzz529	false
304821		zzz1002,zzzz605	false
304820		zzz1002,zzzz656	false
304819		zzz1002,zzzz789	false
304818		zzz1002,zzz1378	false
304817		zzz1002,zzzz553	false
304816		zzz1002,zzzz518	false
304815		zzz1002,zzzz608	false
304814		zzz1002,zzzz632	false
304813		zzz1002,zzzz689	false
304812		zzz1002,zzzz992	false
304811		zzz1002,zzzz556	false
304810		zzz1002,zzzz597	false
304809		zzz1002,zzzz661	false
304808		zzz1002,zzzz662	false
304807		zzz1002,zzzz671	false
304806		zzz1002,zzzz812	false
304805		zzz1002,zzzz913	false
304804		zzz1002,zzz1099	false
304803		zzz1002,zzz1494	false
304802		zzz1002,zzzz657	false
304801		zzz1002,zzzz669	false
304800		zzz1002,zzzz703	false
304799		zzz1002,zzzz664	false
304798		zzz1002,zzzz686	false
304797		zzz1002,zzzz762	false
304796		zzz1002,zzz1304	false
304795		zzz1002,zzzz454	false
304794		zzz1002,zzzz709	false
304793		zzz1002,zzzz751	false
304792		zzz1002,zzzz767	false
304791		zzz1002,zzzz993	false
304790		zzz1002,zzz1141	false
304789		zzz1002,zzz1200	false
304788		zzz1002,zzzz970	false
304787		zzz1002,zzzz485	false
304786		zzz1002,zzzz705	false
304785		zzz1002,zzzz981	false
304784		zzz1002,zzzz467	false
304783		zzz1002,zzzz623	false
304782		zzz1002,zzzz627	false
304781		zzz1002,zzzz771	false
304780		zzz1002,zzzz888	false
304779		zzz1002,zzz1064	false
304778		zzz1002,zzz1279	false
304777		zzz1002,zzz1416	false
304776		zzz1002,zzzz432	false
304775		zzz1002,zzzz480	false
304774		zzz1002,zzzz670	false
304773		zzz1002,zzzz672	false
304772		zzz1002,zzzz732	false
304771		zzz1002,zzzz740	false
304770		zzz1002,zzzz768	false
304769		zzz1002,zzzz521	false
304768		zzz1002,zzz1395	false
304767		zzz1002,zzzz599	false
304766		zzz1002,zzzz752	false
304765		zzz1002,zzzz858	false
304764		zzz1002,zzzz523	false
304763		zzz1002,zzzz772	false
304762		zzz1002,zzz1372	false
304761		zzz1002,zzz1503	false
304760		zzz1002,zzzz431	false
304759		zzz1002,zzzz757	false
304758		zzz1002,zzzz766	false
304757		zzz1002,zzzz774	false
304756		zzz1002,zzzz806	false
304755		zzz1002,zzzz815	false
304754		zzz1002,zzzz612	false
304753		zzz1002,zzzz803	false
304752		zzz1002,zzz1067	false
304751		zzz1002,zzz1266	false
304750		zzz1002,zzz1393	false
304749		zzz1002,zzzz549	false
304748		zzz1002,zzzz775	false
304747		zzz1002,zzzz804	false
304746		zzz1002,zzz1284	false
304745		zzz1002,zzz1411	false
304744		zzz1002,zzzz770	false
304743		zzz1002,zzzz905	false
304742		zzz1002,zzzz410	false
304741		zzz1002,zzzz769	false
304740		zzz1002,zzzz816	false
304739		zzz1002,zzz1276	false
304738		zzz1002,zzzz841	false
304737		zzz1002,zzzz809	false
304736		zzz1002,zzz1069	false
304735		zzz1002,zzzz536	false
304734		zzz1002,zzzz404	false
304733		zzz1002,zzzz475	false
304732		zzz1002,zzzz568	false
304731		zzz1002,zzzz793	false
304730		zzz1002,zzz1440	false
304729		zzz1002,zzzz527	false
304728		zzz1002,zzz1012	false
304727		zzz1002,zzzz482	false
304726		zzz1002,zzzz609	false
304725		zzz1002,zzz1013	false
304724		zzz1002,zzz1015	false
304723		zzz1002,zzzz764	false
304722		zzz1002,zzz1011	false
304721		zzz1002,zzz1017	false
304720		zzz1002,zzzz807	false
304719		zzz1002,zzzz944	false
304718		zzz1002,zzzz802	false
304717		zzz1002,zzzz620	false
304716		zzz1002,zzzz750	false
304715		zzz1002,zzzz567	false
304714		zzz1002,zzz1249	false
304713		zzz1002,zzz1203	false
304712		zzz1002,zzzz425	false
304711		zzz1002,zzzz786	false
304710		zzz1002,zzzz498	false
304709		zzz1002,zzzz519	false
304708		zzz1002,zzzz966	false
304707		zzz1002,zzz1028	false
304706		zzz1002,zzzz520	false
304705		zzz1002,zzzz783	false
304704		zzz1002,zzzz569	false
304703		zzz1002,zzzz784	false
304702		zzz1002,zzzz704	false
304701		zzz1002,zzzz785	false
304700		zzz1002,zzzz813	false
304699		zzz1002,zzzz969	false
304698		zzz1002,zzz1059	false
304697		zzz1002,zzz1456	false
304696		zzz1002,zzzz875	false
304695		zzz1002,zzzz500	false
304694		zzz1002,zzzz530	false
304693		zzz1002,zzz1379	false
304692		zzz1002,zzzz429	false
304691		zzz1002,zzzz557	false
304690		zzz1002,zzzz684	false
304689		zzz1002,zzzz405	false
304688		zzz1002,zzzz625	false
304687		zzz1002,zzzz512	false
304686		zzz1002,zzzz566	false
304685		zzz1002,zzzz883	false
304684		zzz1002,zzzz406	false
304683		zzz1002,zzz1058	false
304682		zzz1002,zzz1060	false
304681		zzz1002,zzzz464	false
304680		zzz1002,zzz1533	false
304679		zzz1002,zzzz836	false
304678		zzz1002,zzz1027	false
304677		zzz1002,zzzz798	false
304676		zzz1002,zzzz497	false
304675		zzz1002,zzzz503	false
304674		zzz1002,zzzz903	false
304673		zzz1002,zzzz694	false
304672		zzz1002,zzzz996	false
304671		zzz1002,zzz1026	false
304670		zzz1002,zzzz502	false
304669		zzz1002,zzz1021	false
304668		zzz1002,zzzz610	false
304667		zzz1002,zzzz628	false
304666		zzz1002,zzz1068	false
304665		zzz1002,zzzz630	false
304664		zzz1002,zzzz869	false
304663		zzz1002,zzzz526	false
304662		zzz1002,zzzz517	false
304661		zzz1002,zzzz795	false
304660		zzz1002,zzz1052	false
304659		zzz1002,zzz1314	false
304658		zzz1002,zzzz622	false
304657		zzz1002,zzz1063	false
304656		zzz1002,zzz1522	false
304655		zzz1002,zzzz590	false
304654		zzz1002,zzz1023	false
304653		zzz1002,zzzz680	false
304652		zzz1002,zzzz936	false
304651		zzz1002,zzzz953	false
304650		zzz1002,zzz1043	false
304649		zzz1002,zzz1257	false
304648		zzz1002,zzzz721	false
304647		zzz1002,zzzz462	false
304646		zzz1002,zzzz551	false
304645		zzz1002,zzz1417	false
304644		zzz1002,zzzz506	false
304643		zzz1002,zzzz702	false
304642		zzz1002,zzz1261	false
304641		zzz1002,zzz1357	false
304640		zzz1002,zzzz860	false
304639		zzz1002,zzzz722	false
304638		zzz1002,zzzz861	false
304637		zzz1002,zzz1451	false
304636		zzz1002,zzz1431	false
304635		zzz1002,zzzz565	false
304634		zzz1002,zzzz586	false
304633		zzz1002,zzzz631	false
304632		zzz1002,zzz1016	false
304631		zzz1002,zzzz730	false
304630		zzz1002,zzz1204	false
304629		zzz1002,zzzz737	false
304628		zzz1002,zzzz957	false
304627		zzz1002,zzzz419	false
304626		zzz1002,zzzz591	false
304625		zzz1002,zzzz541	false
304624		zzz1002,zzzz644	false
304623		zzz1002,zzzz460	false
304622		zzz1002,zzz1041	false
304621		zzz1002,zzzz983	false
304620		zzz1002,zzzz413	false
304619		zzz1002,zzzz522	false
304618		zzz1002,zzz1025	false
304617		zzz1002,zzzz418	false
304616		zzz1002,zzzz417	false
304615		zzz1002,zzzz458	false
304614		zzz1002,zzzz408	false
304613		zzz1002,zzzz596	false
304612		zzz1002,zzzz411	false
304611		zzz1002,zzzz490	false
304610		zzz1002,zzzz984	false
304609		zzz1002,zzzz982	false
304608		zzz1002,zzzz595	false
304607		zzz1002,zzzz794	false
304606		zzz1002,zzzz434	false
304605		zzz1002,zzz1022	false
304604		zzz1002,zzzz840	false
304603		zzz1002,zzzz594	false
304602		zzz1002,zzzz914	false
304601		zzz1002,zzzz466	false
304600		zzz1002,zzzz797	false
304599		zzz1002,zzzz593	false
304598		zzz1002,zzz1019	false
304597		zzz1002,zzzz986	false
304596		zzz1002,zzzz987	false
304595		zzz1002,zzzz985	false
304594		zzz1002,zzz1326	false
304593		zzz1002,zzz1520	false
304592		zzz1002,zzz1518	false
304591		zzz1002,zzzz505	false
304590		zzz1002,zzz1377	false
304589		zzz1002,zzzz977	false
304588		zzz1002,zzzz491	false
304587		zzz1002,zzzz958	false
304582		zzz1003,zzz1185	false
304581		zzz1003,zzzz457	false
304580		zzz1003,zzz1346	false
304579		zzz1003,zzz1038	false
304578		zzz1003,zzz1398	false
304577		zzz1003,zzzz965	false
304576		zzz1003,zzz1098	false
304575		zzz1003,zzzz489	false
304574		zzz1003,zzz1399	false
304573		zzz1003,zzz1504	false
304572		zzz1003,zzzz882	false
304571		zzz1003,zzzz837	false
304570		zzz1003,zzzz808	false
304569		zzz1003,zzzz846	false
304568		zzz1003,zzzz805	false
304567		zzz1003,zzzz960	false
304566		zzz1003,zzz1532	false
304565		zzz1003,zzzz862	false
304564		zzz1003,zzz1250	false
304563		zzz1003,zzzz806	false
304562		zzz1003,zzzz533	false
304561		zzz1003,zzzz814	false
304560		zzz1003,zzzz815	false
304559		zzz1003,zzzz810	false
304558		zzz1003,zzzz933	false
304557		zzz1003,zzz1325	false
304556		zzz1003,zzz1099	false
304555		zzz1003,zzzz803	false
304554		zzz1003,zzz1397	false
304553		zzz1003,zzzz793	false
304552		zzz1003,zzzz537	false
304551		zzz1003,zzzz804	false
304550		zzz1003,zzzz809	false
304549		zzz1003,zzz1245	false
304548		zzz1003,zzz1446	false
304547		zzz1003,zzz1208	false
304546		zzz1003,zzz1175	false
304545		zzz1003,zzz1274	false
304544		zzz1003,zzz1319	false
304543		zzz1003,zzz1530	false
304542		zzz1003,zzz1221	false
304541		zzz1003,zzzz707	false
304540		zzz1003,zzzz583	false
304539		zzz1003,zzz1184	false
304538		zzz1003,zzz1218	false
304537		zzz1003,zzz1354	false
304536		zzz1003,zzz1396	false
304535		zzz1003,zzz1476	false
304534		zzz1003,zzz1535	false
304533		zzz1003,zzzz459	false
304532		zzz1003,zzzz792	false
304531		zzz1003,zzzz847	false
304530		zzz1003,zzz1008	false
304529		zzz1003,zzz1169	false
304528		zzz1003,zzz1545	false
304527		zzz1003,zzzz655	false
304526		zzz1003,zzzz838	false
304525		zzz1003,zzz1199	false
304524		zzz1003,zzzz720	false
304523		zzz1003,zzzz934	false
304522		zzz1003,zzz1156	false
304521		zzz1003,zzz1541	false
304520		zzz1003,zzzz479	false
304519		zzz1003,zzzz619	false
304518		zzz1003,zzzz802	false
304517		zzz1003,zzz1349	false
304516		zzz1003,zzz1478	false
304515		zzz1003,zzz1223	false
304514		zzz1003,zzz1441	false
304513		zzz1003,zzzz588	false
304512		zzz1003,zzz1324	false
304511		zzz1003,zzz1488	false
304510		zzz1003,zzzz585	false
304509		zzz1003,zzzz765	false
304508		zzz1003,zzzz790	false
304507		zzz1003,zzzz864	false
304506		zzz1003,zzzz887	false
304505		zzz1003,zzz1009	false
304504		zzz1003,zzz1139	false
304503		zzz1003,zzz1445	false
304502		zzz1003,zzz1495	false
304501		zzz1003,zzzz738	false
304500		zzz1003,zzzz856	false
304499		zzz1003,zzzz956	false
304498		zzz1003,zzzz961	false
304497		zzz1003,zzz1234	false
304496		zzz1003,zzz1368	false
304495		zzz1003,zzzz620	false
304494		zzz1003,zzz1100	false
304493		zzz1003,zzz1119	false
304492		zzz1003,zzz1159	false
304491		zzz1003,zzz1203	false
304490		zzz1003,zzzz542	false
304489		zzz1003,zzzz807	false
304488		zzz1003,zzzz910	false
304487		zzz1003,zzzz967	false
304486		zzz1003,zzz1062	false
304485		zzz1003,zzz1235	false
304484		zzz1003,zzz1363	false
304483		zzz1003,zzzz636	false
304482		zzz1003,zzzz692	false
304481		zzz1003,zzzz504	false
304480		zzz1003,zzz1391	false
304479		zzz1003,zzzz426	false
304478		zzz1003,zzzz472	false
304477		zzz1003,zzz1233	false
304476		zzz1003,zzzz474	false
304475		zzz1003,zzzz507	false
304474		zzz1003,zzz1496	false
304473		zzz1003,zzz1521	false
304472		zzz1003,zzzz487	false
304471		zzz1003,zzzz640	false
304470		zzz1003,zzzz711	false
304469		zzz1003,zzzz865	false
304468		zzz1003,zzzz975	false
304467		zzz1003,zzzz574	false
304466		zzz1003,zzzz584	false
304465		zzz1003,zzzz821	false
304464		zzz1003,zzzz932	false
304463		zzz1003,zzz1443	false
304462		zzz1003,zzz1447	false
304461		zzz1003,zzzz409	false
304460		zzz1003,zzzz456	false
304459		zzz1003,zzzz468	false
304458		zzz1003,zzzz478	false
304457		zzz1003,zzzz710	false
304456		zzz1003,zzzz935	false
304455		zzz1003,zzz1106	false
304454		zzz1003,zzz1207	false
304453		zzz1003,zzz1285	false
304452		zzz1003,zzzz539	false
304451		zzz1003,zzzz548	false
304450		zzz1003,zzzz867	false
304449		zzz1003,zzz1293	false
304448		zzz1003,zzz1442	false
304447		zzz1003,zzz1499	false
304446		zzz1003,zzz1523	false
304445		zzz1003,zzzz606	false
304444		zzz1003,zzzz611	false
304443		zzz1003,zzzz708	false
304442		zzz1003,zzzz976	false
304441		zzz1003,zzzz999	false
304440		zzz1003,zzz1258	false
304439		zzz1003,zzz1457	false
304438		zzz1003,zzz1525	false
304437		zzz1003,zzzz473	false
304436		zzz1003,zzzz754	false
304435		zzz1003,zzz1033	false
304434		zzz1003,zzz1054	false
304433		zzz1003,zzz1215	false
304432		zzz1003,zzz1242	false
304431		zzz1003,zzz1358	false
304430		zzz1003,zzz1462	false
304429		zzz1003,zzz1477	false
304428		zzz1003,zzz1482	false
304427		zzz1003,zzzz529	false
304426		zzz1003,zzzz601	false
304425		zzz1003,zzzz603	false
304424		zzz1003,zzzz607	false
304423		zzz1003,zzzz642	false
304422		zzz1003,zzzz921	false
304421		zzz1003,zzzz971	false
304420		zzz1003,zzz1132	false
304419		zzz1003,zzz1189	false
304418		zzz1003,zzz1529	false
304417		zzz1003,zzzz528	false
304416		zzz1003,zzzz531	false
304415		zzz1003,zzzz811	false
304414		zzz1003,zzzz972	false
304413		zzz1003,zzzz978	false
304412		zzz1003,zzz1311	false
304411		zzz1003,zzz1422	false
304410		zzz1003,zzz1458	false
304409		zzz1003,zzz1546	false
304408		zzz1003,zzzz604	false
304407		zzz1003,zzzz682	false
304406		zzz1003,zzzz683	false
304405		zzz1003,zzzz756	false
304404		zzz1003,zzzz763	false
304403		zzz1003,zzz1144	false
304402		zzz1003,zzz1201	false
304401		zzz1003,zzz1248	false
304400		zzz1003,zzz1251	false
304399		zzz1003,zzz1484	false
304398		zzz1003,zzz1527	false
304397		zzz1003,zzzz407	false
304396		zzz1003,zzzz598	false
304395		zzz1003,zzzz691	false
304394		zzz1003,zzzz845	false
304393		zzz1003,zzzz924	false
304392		zzz1003,zzz1205	false
304391		zzz1003,zzzz981	false
304390		zzz1003,zzz1010	false
304389		zzz1003,zzz1030	false
304388		zzz1003,zzz1210	false
304387		zzz1003,zzz1214	false
304386		zzz1003,zzz1284	false
304385		zzz1003,zzz1352	false
304384		zzz1003,zzz1365	false
304383		zzz1003,zzz1466	false
304382		zzz1003,zzz1501	false
304381		zzz1003,zzz1542	false
304380		zzz1003,zzzz442	false
304379		zzz1003,zzzz518	false
304378		zzz1003,zzzz538	false
304377		zzz1003,zzzz589	false
304376		zzz1003,zzzz755	false
304375		zzz1003,zzzz946	false
304374		zzz1003,zzz1053	false
304373		zzz1003,zzz1279	false
304372		zzz1003,zzz1543	false
304371		zzz1003,zzzz477	false
304370		zzz1003,zzz1055	false
304369		zzz1003,zzz1122	false
304368		zzz1003,zzz1162	false
304367		zzz1003,zzz1244	false
304366		zzz1003,zzz1322	false
304365		zzz1003,zzz1385	false
304364		zzz1003,zzz1415	false
304363		zzz1003,zzz1471	false
304362		zzz1003,zzz1536	false
304361		zzz1003,zzzz481	false
304360		zzz1003,zzzz488	false
304359		zzz1003,zzzz602	false
304358		zzz1003,zzzz968	false
304357		zzz1003,zzzz973	false
304356		zzz1003,zzz1128	false
304355		zzz1003,zzz1228	false
304354		zzz1003,zzz1329	false
304353		zzz1003,zzz1335	false
304352		zzz1003,zzz1444	false
304351		zzz1003,zzz1455	false
304350		zzz1003,zzz1483	false
304349		zzz1003,zzz1485	false
304348		zzz1003,zzz1487	false
304347		zzz1003,zzzz469	false
304346		zzz1003,zzzz605	false
304345		zzz1003,zzzz656	false
304344		zzz1003,zzzz753	false
304343		zzz1003,zzzz762	false
304342		zzz1003,zzzz822	false
304341		zzz1003,zzzz875	false
304340		zzz1003,zzzz902	false
304339		zzz1003,zzzz988	false
304338		zzz1003,zzzz998	false
304337		zzz1003,zzz1130	false
304336		zzz1003,zzz1152	false
304335		zzz1003,zzz1200	false
304334		zzz1003,zzz1240	false
304333		zzz1003,zzz1403	false
304332		zzz1003,zzz1425	false
304331		zzz1003,zzz1437	false
304330		zzz1003,zzzz540	false
304329		zzz1003,zzzz652	false
304328		zzz1003,zzzz703	false
304327		zzz1003,zzzz705	false
304326		zzz1003,zzz1160	false
304325		zzz1003,zzz1180	false
304324		zzz1003,zzz1202	false
304323		zzz1003,zzz1230	false
304322		zzz1003,zzz1272	false
304321		zzz1003,zzz1339	false
304320		zzz1003,zzz1348	false
304319		zzz1003,zzz1361	false
304318		zzz1003,zzz1395	false
304317		zzz1003,zzz1413	false
304316		zzz1003,zzz1449	false
304315		zzz1003,zzz1450	false
304314		zzz1003,zzz1453	false
304313		zzz1003,zzz1524	false
304312		zzz1003,zzzz532	false
304311		zzz1003,zzzz931	false
304310		zzz1003,zzz1133	false
304309		zzz1003,zzz1168	false
304308		zzz1003,zzz1265	false
304307		zzz1003,zzz1452	false
304306		zzz1003,zzz1048	false
304305		zzz1003,zzz1120	false
304304		zzz1003,zzz1190	false
304303		zzz1003,zzz1219	false
304302		zzz1003,zzz1296	false
304301		zzz1003,zzz1312	false
304300		zzz1003,zzz1343	false
304299		zzz1003,zzz1344	false
304298		zzz1003,zzz1390	false
304297		zzz1003,zzz1402	false
304296		zzz1003,zzz1436	false
304295		zzz1003,zzz1480	false
304294		zzz1003,zzz1492	false
304293		zzz1003,zzz1494	false
304292		zzz1003,zzzz575	false
304291		zzz1003,zzzz667	false
304290		zzz1003,zzzz739	false
304289		zzz1003,zzzz913	false
304288		zzz1003,zzz1004	false
304287		zzz1003,zzz1112	false
304286		zzz1003,zzz1172	false
304285		zzz1003,zzz1196	false
304284		zzz1003,zzz1209	false
304283		zzz1003,zzz1227	false
304282		zzz1003,zzz1237	false
304281		zzz1003,zzz1381	false
304280		zzz1003,zzz1407	false
304279		zzz1003,zzz1469	false
304278		zzz1003,zzz1486	false
304277		zzz1003,zzz1490	false
304276		zzz1003,zzz1540	false
304275		zzz1003,zzzz446	false
304274		zzz1003,zzzz597	false
304273		zzz1003,zzzz877	false
304272		zzz1003,zzzz948	false
304271		zzz1003,zzz1070	false
304270		zzz1003,zzz1157	false
304269		zzz1003,zzz1269	false
304268		zzz1003,zzz1303	false
304267		zzz1003,zzz1421	false
304266		zzz1003,zzzz415	false
304265		zzz1003,zzzz669	false
304264		zzz1003,zzz1018	false
304263		zzz1003,zzz1034	false
304262		zzz1003,zzz1118	false
304261		zzz1003,zzz1137	false
304260		zzz1003,zzz1288	false
304259		zzz1003,zzz1439	false
304258		zzz1003,zzzz444	false
304257		zzz1003,zzzz624	false
304256		zzz1003,zzzz660	false
304255		zzz1003,zzz1294	false
304254		zzz1003,zzz1304	false
304253		zzz1003,zzz1307	false
304252		zzz1003,zzz1481	false
304251		zzz1003,zzz1500	false
304250		zzz1003,zzzz433	false
304249		zzz1003,zzzz600	false
304248		zzz1003,zzzz992	false
304247		zzz1003,zzz1176	false
304246		zzz1003,zzz1236	false
304245		zzz1003,zzz1280	false
304244		zzz1003,zzz1338	false
304243		zzz1003,zzz1347	false
304242		zzz1003,zzz1378	false
304241		zzz1003,zzz1393	false
304240		zzz1003,zzz1406	false
304239		zzz1003,zzz1409	false
304238		zzz1003,zzz1493	false
304237		zzz1003,zzzz623	false
304236		zzz1003,zzzz665	false
304235		zzz1003,zzzz888	false
304234		zzz1003,zzzz970	false
304233		zzz1003,zzzz974	false
304232		zzz1003,zzz1056	false
304231		zzz1003,zzz1057	false
304230		zzz1003,zzz1064	false
304229		zzz1003,zzz1165	false
304228		zzz1003,zzz1289	false
304227		zzz1003,zzz1386	false
304226		zzz1003,zzzz612	false
304225		zzz1003,zzzz666	false
304224		zzz1003,zzz1374	false
304223		zzz1003,zzz1387	false
304222		zzz1003,zzz1491	false
304221		zzz1003,zzzz521	false
304220		zzz1003,zzzz668	false
304219		zzz1003,zzzz751	false
304218		zzz1003,zzz1044	false
304217		zzz1003,zzz1115	false
304216		zzz1003,zzz1123	false
304215		zzz1003,zzz1195	false
304214		zzz1003,zzz1372	false
304213		zzz1003,zzz1454	false
304212		zzz1003,zzz1464	false
304211		zzz1003,zzz1548	false
304210		zzz1003,zzzz480	false
304209		zzz1003,zzzz553	false
304208		zzz1003,zzzz555	false
304207		zzz1003,zzzz626	false
304206		zzz1003,zzzz658	false
304205		zzz1003,zzzz659	false
304204		zzz1003,zzzz663	false
304203		zzz1003,zzzz664	false
304202		zzz1003,zzzz740	false
304201		zzz1003,zzz1416	false
304200		zzz1003,zzzz412	false
304199		zzz1003,zzzz523	false
304198		zzz1003,zzzz613	false
304197		zzz1003,zzzz812	false
304196		zzz1003,zzzz923	false
304195		zzz1003,zzz1141	false
304194		zzz1003,zzz1255	false
304193		zzz1003,zzz1435	false
304192		zzz1003,zzz1489	false
304191		zzz1003,zzzz454	false
304190		zzz1003,zzzz599	false
304189		zzz1003,zzz1266	false
304188		zzz1003,zzz1497	false
304187		zzz1003,zzzz436	false
304186		zzz1003,zzzz451	false
304185		zzz1003,zzzz685	false
304184		zzz1003,zzz1153	false
304183		zzz1003,zzz1178	false
304182		zzz1003,zzz1533	false
304181		zzz1003,zzzz452	false
304180		zzz1003,zzzz632	false
304179		zzz1003,zzzz706	false
304178		zzz1003,zzz1498	false
304177		zzz1003,zzzz435	false
304176		zzz1003,zzzz661	false
304175		zzz1003,zzzz671	false
304174		zzz1003,zzzz709	false
304173		zzz1003,zzzz950	false
304172		zzz1003,zzzz449	false
304171		zzz1003,zzzz662	false
304170		zzz1003,zzzz689	false
304169		zzz1003,zzzz731	false
304168		zzz1003,zzzz556	false
304167		zzz1003,zzzz608	false
304166		zzz1003,zzzz657	false
304165		zzz1003,zzzz672	false
304164		zzz1003,zzzz816	false
304163		zzz1003,zzz1247	false
304162		zzz1003,zzz1318	false
304161		zzz1003,zzz1475	false
304160		zzz1003,zzzz432	false
304159		zzz1003,zzzz653	false
304158		zzz1003,zzzz686	false
304157		zzz1003,zzzz757	false
304156		zzz1003,zzzz767	false
304155		zzz1003,zzzz791	false
304154		zzz1003,zzz1276	false
304153		zzz1003,zzzz401	false
304152		zzz1003,zzzz732	false
304151		zzz1003,zzzz993	false
304150		zzz1003,zzzz431	false
304149		zzz1003,zzzz485	false
304148		zzz1003,zzzz582	false
304147		zzz1003,zzzz670	false
304146		zzz1003,zzzz752	false
304145		zzz1003,zzzz773	false
304144		zzz1003,zzzz789	false
304143		zzz1003,zzz1503	false
304142		zzz1003,zzzz536	false
304141		zzz1003,zzzz768	false
304140		zzz1003,zzzz858	false
304139		zzz1003,zzzz944	false
304138		zzz1003,zzz1015	false
304137		zzz1003,zzzz841	false
304136		zzz1003,zzz1356	false
304135		zzz1003,zzz1401	false
304134		zzz1003,zzzz772	false
304133		zzz1003,zzzz549	false
304132		zzz1003,zzzz770	false
304131		zzz1003,zzzz769	false
304130		zzz1003,zzzz527	false
304129		zzz1003,zzzz771	false
304128		zzz1003,zzzz766	false
304127		zzz1003,zzz1013	false
304126		zzz1003,zzz1068	false
304125		zzz1003,zzzz410	false
304124		zzz1003,zzzz467	false
304123		zzz1003,zzzz568	false
304122		zzz1003,zzzz774	false
304121		zzz1003,zzz1411	false
304120		zzz1003,zzz1028	false
304119		zzz1003,zzzz627	false
304118		zzz1003,zzzz905	false
304117		zzz1003,zzzz764	false
304116		zzz1003,zzzz609	false
304115		zzz1003,zzzz813	false
304114		zzz1003,zzz1017	false
304113		zzz1003,zzz1249	false
304112		zzz1003,zzzz445	false
304111		zzz1003,zzzz775	false
304110		zzz1003,zzzz857	false
304109		zzz1003,zzz1069	false
304108		zzz1003,zzz1171	false
304107		zzz1003,zzz1440	false
304106		zzz1003,zzz1448	false
304105		zzz1003,zzzz519	false
304104		zzz1003,zzzz750	false
304103		zzz1003,zzz1067	false
304102		zzz1003,zzzz544	false
304101		zzz1003,zzzz567	false
304100		zzz1003,zzzz447	false
304099		zzz1003,zzzz704	false
304098		zzz1003,zzzz425	false
304097		zzz1003,zzzz569	false
304096		zzz1003,zzzz966	false
304095		zzz1003,zzz1309	false
304094		zzz1003,zzzz716	false
304093		zzz1003,zzzz783	false
304092		zzz1003,zzzz969	false
304091		zzz1003,zzzz420	false
304090		zzz1003,zzzz630	false
304089		zzz1003,zzz1456	false
304088		zzz1003,zzzz500	false
304087		zzz1003,zzzz647	false
304086		zzz1003,zzzz498	false
304085		zzz1003,zzzz694	false
304084		zzz1003,zzzz590	false
304083		zzz1003,zzzz530	false
304082		zzz1003,zzzz889	false
304081		zzz1003,zzzz520	false
304080		zzz1003,zzz1379	false
304079		zzz1003,zzzz512	false
304078		zzz1003,zzzz870	false
304077		zzz1003,zzzz497	false
304076		zzz1003,zzzz581	false
304075		zzz1003,zzz1383	false
304074		zzz1003,zzzz836	false
304073		zzz1003,zzzz503	false
304072		zzz1003,zzzz557	false
304071		zzz1003,zzzz786	false
304070		zzz1003,zzzz610	false
304069		zzz1003,zzzz784	false
304068		zzz1003,zzz1438	false
304067		zzz1003,zzzz785	false
304066		zzz1003,zzzz517	false
304065		zzz1003,zzzz502	false
304064		zzz1003,zzzz798	false
304063		zzz1003,zzzz996	false
304062		zzz1003,zzzz625	false
304061		zzz1003,zzz1011	false
304060		zzz1003,zzz1012	false
304059		zzz1003,zzzz482	false
304058		zzz1003,zzzz903	false
304057		zzz1003,zzzz475	false
304056		zzz1003,zzzz404	false
304055		zzz1003,zzzz566	false
304054		zzz1003,zzzz622	false
304053		zzz1003,zzzz684	false
304052		zzz1003,zzzz429	false
304051		zzz1003,zzz1027	false
304050		zzz1003,zzzz869	false
304049		zzz1003,zzz1314	false
304048		zzz1003,zzzz628	false
304047		zzz1003,zzz1063	false
304046		zzz1003,zzzz883	false
304045		zzz1003,zzz1043	false
304044		zzz1003,zzz1204	false
304043		zzz1003,zzz1026	false
304042		zzz1003,zzz1059	false
304041		zzz1003,zzz1021	false
304040		zzz1003,zzz1023	false
304039		zzz1003,zzz1357	false
304038		zzz1003,zzz1522	false
304037		zzz1003,zzzz464	false
304036		zzz1003,zzz1257	false
304035		zzz1003,zzzz953	false
304034		zzz1003,zzz1060	false
304033		zzz1003,zzzz462	false
304032		zzz1003,zzzz551	false
304031		zzz1003,zzzz721	false
304030		zzz1003,zzzz405	false
304029		zzz1003,zzz1058	false
304028		zzz1003,zzz1417	false
304027		zzz1003,zzzz795	false
304026		zzz1003,zzzz506	false
304025		zzz1003,zzzz860	false
304024		zzz1003,zzzz702	false
304023		zzz1003,zzzz861	false
304022		zzz1003,zzzz722	false
304021		zzz1003,zzz1261	false
304020		zzz1003,zzz1016	false
304019		zzz1003,zzzz936	false
304018		zzz1003,zzzz680	false
304017		zzz1003,zzz1431	false
304016		zzz1003,zzzz406	false
304015		zzz1003,zzzz631	false
304014		zzz1003,zzzz983	false
304013		zzz1003,zzzz730	false
304012		zzz1003,zzzz957	false
304011		zzz1003,zzzz541	false
304010		zzz1003,zzz1052	false
304009		zzz1003,zzzz565	false
304008		zzz1003,zzzz737	false
304007		zzz1003,zzzz644	false
304006		zzz1003,zzz1041	false
304005		zzz1003,zzzz984	false
304004		zzz1003,zzzz586	false
304003		zzz1003,zzzz526	false
304002		zzz1003,zzzz466	false
304001		zzz1003,zzzz591	false
304000		zzz1003,zzz1022	false
303999		zzz1003,zzz1451	false
303998		zzz1003,zzz1025	false
303997		zzz1003,zzzz596	false
303996		zzz1003,zzzz982	false
303995		zzz1003,zzzz914	false
303994		zzz1003,zzzz595	false
303993		zzz1003,zzzz419	false
303992		zzz1003,zzzz594	false
303991		zzz1003,zzzz797	false
303990		zzz1003,zzz1019	false
303989		zzz1003,zzzz418	false
303988		zzz1003,zzzz460	false
303987		zzz1003,zzzz794	false
303986		zzz1003,zzzz593	false
303985		zzz1003,zzzz413	false
303984		zzz1003,zzzz408	false
303983		zzz1003,zzzz986	false
303982		zzz1003,zzzz987	false
303981		zzz1003,zzzz840	false
303980		zzz1003,zzzz985	false
303979		zzz1003,zzzz522	false
303978		zzz1003,zzzz411	false
303977		zzz1003,zzzz417	false
303976		zzz1003,zzzz458	false
303975		zzz1003,zzzz490	false
303974		zzz1003,zzzz434	false
303973		zzz1003,zzzz505	false
303972		zzz1003,zzz1518	false
303971		zzz1003,zzz1520	false
303970		zzz1003,zzz1326	false
303969		zzz1003,zzz1377	false
303968		zzz1003,zzzz977	false
303967		zzz1003,zzzz958	false
303966		zzz1003,zzzz491	false
303942		zzz1004,zzz1444	false
303941		zzz1004,zzz1449	false
303940		zzz1004,zzz1450	false
303939		zzz1004,zzz1347	false
303938		zzz1004,zzzz433	false
303937		zzz1004,zzz1048	false
303936		zzz1004,zzz1120	false
303935		zzz1004,zzzz446	false
303934		zzz1004,zzz1352	false
303933		zzz1004,zzz1425	false
303932		zzz1004,zzz1118	false
303931		zzz1004,zzz1122	false
303930		zzz1004,zzz1361	false
303929		zzz1004,zzz1480	false
303928		zzz1004,zzz1236	false
303927		zzz1004,zzz1280	false
303926		zzz1004,zzz1294	false
303925		zzz1004,zzz1343	false
303924		zzz1004,zzz1524	false
303923		zzz1004,zzz1152	false
303922		zzz1004,zzz1178	false
303921		zzz1004,zzz1491	false
303920		zzz1004,zzz1493	false
303919		zzz1004,zzzz652	false
303918		zzz1004,zzz1165	false
303917		zzz1004,zzz1543	false
303916		zzz1004,zzz1335	false
303915		zzz1004,zzz1403	false
303914		zzz1004,zzz1455	false
303913		zzz1004,zzz1492	false
303912		zzz1004,zzz1157	false
303911		zzz1004,zzz1329	false
303910		zzz1004,zzzz442	false
303909		zzz1004,zzz1123	false
303908		zzz1004,zzz1176	false
303907		zzz1004,zzz1415	false
303906		zzz1004,zzz1421	false
303905		zzz1004,zzzz575	false
303904		zzz1004,zzzz948	false
303903		zzz1004,zzz1115	false
303902		zzz1004,zzz1133	false
303901		zzz1004,zzz1137	false
303900		zzz1004,zzz1230	false
303899		zzz1004,zzz1240	false
303898		zzz1004,zzz1269	false
303897		zzz1004,zzz1374	false
303896		zzz1004,zzz1409	false
303895		zzz1004,zzz1471	false
303894		zzz1004,zzz1548	false
303893		zzz1004,zzzz415	false
303892		zzz1004,zzz1112	false
303891		zzz1004,zzz1303	false
303890		zzz1004,zzzz613	false
303889		zzz1004,zzzz822	false
303888		zzz1004,zzz1407	false
303887		zzz1004,zzz1437	false
303886		zzz1004,zzzz407	false
303885		zzz1004,zzzz444	false
303884		zzz1004,zzzz452	false
303883		zzz1004,zzz1153	false
303882		zzz1004,zzz1209	false
303881		zzz1004,zzz1435	false
303880		zzz1004,zzz1453	false
303879		zzz1004,zzz1462	false
303878		zzz1004,zzzz877	false
303877		zzz1004,zzz1130	false
303876		zzz1004,zzz1381	false
303875		zzz1004,zzz1481	false
303874		zzz1004,zzz1054	false
303873		zzz1004,zzz1172	false
303872		zzz1004,zzz1228	false
303871		zzz1004,zzz1272	false
303870		zzz1004,zzz1322	false
303869		zzz1004,zzz1338	false
303868		zzz1004,zzz1402	false
303867		zzz1004,zzz1289	false
303866		zzz1004,zzz1296	false
303865		zzz1004,zzz1466	false
303864		zzz1004,zzzz481	false
303863		zzz1004,zzz1487	false
303862		zzz1004,zzz1106	false
303861		zzz1004,zzz1288	false
303860		zzz1004,zzz1501	false
303859		zzz1004,zzz1162	false
303858		zzz1004,zzz1344	false
303857		zzz1004,zzz1525	false
303856		zzz1004,zzz1540	false
303855		zzz1004,zzz1247	false
303854		zzz1004,zzz1422	false
303853		zzz1004,zzz1489	false
303852		zzz1004,zzz1497	false
303851		zzz1004,zzz1500	false
303850		zzz1004,zzz1536	false
303849		zzz1004,zzzz998	false
303848		zzz1004,zzzz401	false
303847		zzz1004,zzzz988	false
303846		zzz1004,zzz1227	false
303845		zzz1004,zzz1293	false
303844		zzz1004,zzz1312	false
303843		zzz1004,zzz1406	false
303842		zzz1004,zzz1452	false
303841		zzz1004,zzzz923	false
303840		zzz1004,zzzz950	false
303839		zzz1004,zzz1214	false
303838		zzz1004,zzz1237	false
303837		zzz1004,zzz1527	false
303836		zzz1004,zzzz449	false
303835		zzz1004,zzzz946	false
303834		zzz1004,zzz1387	false
303833		zzz1004,zzz1436	false
303832		zzz1004,zzz1464	false
303831		zzz1004,zzz1401	false
303830		zzz1004,zzz1454	false
303829		zzz1004,zzz1469	false
303828		zzz1004,zzz1219	false
303827		zzz1004,zzz1307	false
303826		zzz1004,zzz1490	false
303825		zzz1004,zzzz412	false
303824		zzz1004,zzz1311	false
303823		zzz1004,zzz1413	false
303822		zzz1004,zzz1055	false
303821		zzz1004,zzz1255	false
303820		zzz1004,zzz1348	false
303819		zzz1004,zzz1498	false
303818		zzz1004,zzz1475	false
303817		zzz1004,zzz1057	false
303816		zzz1004,zzzz451	false
303815		zzz1004,zzzz857	false
303814		zzz1004,zzz1053	false
303813		zzz1004,zzz1171	false
303812		zzz1004,zzz1056	false
303811		zzz1004,zzz1318	false
303810		zzz1004,zzz1448	false
303809		zzz1004,zzzz447	false
303808		zzz1004,zzzz716	false
303807		zzz1004,zzzz544	false
303806		zzz1004,zzz1245	false
303805		zzz1004,zzz1008	false
303804		zzz1004,zzz1175	false
303803		zzz1004,zzz1354	false
303802		zzz1004,zzzz647	false
303801		zzz1004,zzz1169	false
[truncated: 282,585 more rows]
