# Supplementary material for: Discovery of several thousand highly diverse circular DNA viruses
Source: eLife journal article supplement (doi:10.7554/elife.51971), 2020-02-03
Supplement: fig2-data2 [file elife-51971-fig2-data2-v1.cys › CytoscapeSession-2019_08_02-17_43/tables/305829-all_my_seqs_genbank_ssDNA1_domains_CRESS_capsid_fasta+Full+Network%2D%2Dclustered/LOCAL_ATTRS-org.cytoscape.model.CyNetwork-all_my_seqs_genbank_ssDNA1_domains_CRESS_capsid_fasta+Full+Network%2D%2Dclustered+default+network.cytable]

"CyCSV-Version","1"
"SUID","__Annotations","__clusterAttribute","__clusterParams","__clusterType","name","selected"
"java.lang.Long","java.util.List<java.lang.String>","java.lang.String","java.util.List<java.lang.String>","java.lang.String","java.lang.String","java.lang.Boolean"
"","mutable","mutable","mutable","mutable","",""
"all_my_seqs_genbank_ssDNA1_domains_CRESS_capsid_fasta Full Network--clustered default network",""
"305829","","__mclCluster","adjustLoops
edgeCutOff=25.68422
undirectedEdges
converter=None
dataAttribute=%id","mcl","all_my_seqs_genbank_ssDNA1_domains_CRESS_capsid_fasta Full Network--clustered","false"
