# Supplementary material for: Discovery of several thousand highly diverse circular DNA viruses
Source: eLife journal article supplement (doi:10.7554/elife.51971), 2020-02-03
Supplement: fig2-data2 [file elife-51971-fig2-data2-v1.cys › CytoscapeSession-2019_08_02-17_43/tables/305829-all_my_seqs_genbank_ssDNA1_domains_CRESS_capsid_fasta+Full+Network%2D%2Dclustered/org.baderlab.autoannotate.cluster-org.cytoscape.model.CyNetwork-org.baderlab.autoannotate.cluster.cytable]

"CyCSV-Version","1"
"clusterID","annotationSetID","collapsed","label","nodes.SUID","shapeID","textID","textID_additional"
"java.lang.Long","java.lang.Long","java.lang.Boolean","java.lang.String","java.util.List<java.lang.Long>","java.lang.String","java.lang.String","java.util.List<java.lang.String>"
"","","","","","","",""
"org.baderlab.autoannotate.cluster","public,mutable"
