# Supplementary material for: Discovery of several thousand highly diverse circular DNA viruses
Source: eLife journal article supplement (doi:10.7554/elife.51971), 2020-02-03
Supplement: fig2-data2 [file elife-51971-fig2-data2-v1.cys › CytoscapeSession-2019_08_02-17_43/tables/global/305842-NodeProperties.cytable]

"CyCSV-Version","1"
"ID","Comments","Description","EndPosition","Residue","SharedNodeName","Source","StartPosition","Status","Type"
"java.lang.Integer","java.lang.String","java.lang.String","java.lang.Integer","java.lang.String","java.lang.String","java.lang.String","java.lang.Integer","java.lang.String","java.lang.String"
"","mutable","mutable","mutable","mutable","mutable","mutable","mutable","mutable","mutable"
"NodeProperties","mutable"
