# Supplementary material for: Discovery of several thousand highly diverse circular DNA viruses
Source: eLife journal article supplement (doi:10.7554/elife.51971), 2020-02-03
Supplement: fig2-data2 [file elife-51971-fig2-data2-v1.cys › CytoscapeSession-2019_08_02-17_43/tables/global/305847-Keywords.cytable]

"CyCSV-Version","1"
"ID","Color","Keyword","RegexPattern","Type"
"java.lang.Integer","java.lang.String","java.lang.String","java.lang.String","java.lang.String"
"","mutable","mutable","mutable","mutable"
"Keywords","mutable"
"0","N/A","Sequence",".*","Sequence"
"1","#B2182B","Phosphorylation","[Pp]hospho","PTM"
"2","#2166AC","Acetylation","[Aa]cetyl","PTM"
"3","#525252","Methylation","[Mm]ethyl","PTM"
"4","#C51B7D","Lipidation","[Pp]al|[Gg]er|[Ff]arn|[Mm]yris|[Ll]ipo","PTM"
"5","#BF812D","N-linked Glycosylation","[Nn]-linked","PTM"
"6","#35978F","O-linked Glycosylation","[Oo]-linked","PTM"
"7","#1B7837","Ubiquitination","[Uu]biquit[iy]","PTM"
"8","#762A83","Sumoylation","[Ss][Uu][Mm][Oo][Yy][Ll]","PTM"
"9","N/A","Motif",".*","Motif"
"10","N/A","Domain",".*","Domain"
"11","N/A","Disordered",".*","Disordered"
