# Supplementary material for: Discovery of several thousand highly diverse circular DNA viruses
Source: eLife journal article supplement (doi:10.7554/elife.51971), 2020-02-03
Supplement: fig2-data2 [file elife-51971-fig2-data2-v1.cys › CytoscapeSession-2019_08_02-17_43/tables/global/305858-Properties.cytable]

"CyCSV-Version","1"
"Type","Color","ColumnName","isDefault","isInterval","isList","isMergable","isNodeProperty"
"java.lang.String","java.lang.String","java.lang.String","java.lang.Boolean","java.lang.Boolean","java.lang.Boolean","java.lang.Boolean","java.lang.Boolean"
"","mutable","mutable","mutable","mutable","mutable","mutable","mutable"
"Properties","mutable"
"Sequence","#000000","HasSequence","true","false","false","false","true"
"PTM","#e31a1c","UniqueModTypes","true","false","true","false","true"
"Motif","#1f78b4","UniqueMotifs","true","true","true","false","true"
"Domain","#33a02c","UniqueDomains","true","true","true","false","true"
"Disordered","#6a3d9a","HasDisorderRegions","true","true","false","true","true"
