# Supplementary material for: Discovery of several thousand highly diverse circular DNA viruses
Source: eLife journal article supplement (doi:10.7554/elife.51971), 2020-02-03
Supplement: fig2-data2 [file elife-51971-fig2-data2-v1.cys › CytoscapeSession-2019_08_02-17_43/views/62-305870-all_my_seqs_genbank_ssDNA1_domains_CRESS_capsid_fasta+Full+Network.xgmml]

<?xml version="1.0" encoding="UTF-8" standalone="yes"?>
<graph id="305870" label="all_my_seqs_genbank_ssDNA1_domains_CRESS_capsid_fasta Full Network" cy:view="1" cy:networkId="62" cy:visualStyle="Sample1" cy:rendererId="org.cytoscape.ding" cy:documentVersion="3.0" xmlns:dc="http://purl.org/dc/elements/1.1/" xmlns:xlink="http://www.w3.org/1999/xlink" xmlns:rdf="http://www.w3.org/1999/02/22-rdf-syntax-ns#" xmlns:cy="http://www.cytoscape.org" xmlns="http://www.cs.rpi.edu/XGMML">
  <graphics>
    <att name="NETWORK_EDGE_SELECTION" value="true" type="string" cy:type="String"/>
    <att name="NETWORK_WIDTH" value="1988.0" type="string" cy:type="String"/>
    <att name="NETWORK_TITLE" value="all_my_seqs_genbank_ssDNA1_domains_CRESS_capsid_fasta Full Network" type="string" cy:type="String"/>
    <att name="NETWORK_CENTER_X_LOCATION" value="658.9634174381484" type="string" cy:type="String"/>
    <att name="NETWORK_SCALE_FACTOR" value="0.21740519247559048" type="string" cy:type="String"/>
    <att name="NETWORK_HEIGHT" value="1043.0" type="string" cy:type="String"/>
    <att name="NETWORK_CENTER_Y_LOCATION" value="748.6896990912935" type="string" cy:type="String"/>
    <att name="NETWORK_DEPTH" value="0.0" type="string" cy:type="String"/>
    <att name="NETWORK_CENTER_Z_LOCATION" value="0.0" type="string" cy:type="String"/>
    <att name="NETWORK_NODE_SELECTION" value="true" type="string" cy:type="String"/>
    <att name="NETWORK_ANNOTATION_SELECTION" value="false" type="string" cy:type="String"/>
  </graphics>
  <node id="307909" label="zzzzzz9" cy:nodeId="72">
    <graphics x="-511.4132080078125" y="2235.850830078125" z="0.0"/>
  </node>
  <node id="307908" label="zzzzzz8" cy:nodeId="73">
    <graphics x="-473.3753662109375" y="2220.257568359375" z="0.0"/>
  </node>
  <node id="307907" label="zzzzzz7" cy:nodeId="74">
    <graphics x="-220.68838500976562" y="2245.807373046875" z="0.0"/>
  </node>
  <node id="307906" label="zzzzzz6" cy:nodeId="75">
    <graphics x="-429.87042236328125" y="2326.4599609375" z="0.0"/>
  </node>
  <node id="307905" label="zzzzzz5" cy:nodeId="76">
    <graphics x="-293.04779052734375" y="2115.548095703125" z="0.0"/>
  </node>
  <node id="307904" label="zzzzzz4" cy:nodeId="77">
    <graphics x="-515.6212158203125" y="2302.174560546875" z="0.0"/>
  </node>
  <node id="307903" label="zzzzzz3" cy:nodeId="78">
    <graphics x="-511.00653076171875" y="2357.355224609375" z="0.0"/>
  </node>
  <node id="307902" label="zzzzzz2" cy:nodeId="79">
    <graphics x="-2031.291926575941" y="2637.4485094716583" z="0.0"/>
  </node>
  <node id="307901" label="zzzzzz1" cy:nodeId="80">
    <graphics x="-360.9032287597656" y="2351.7431640625" z="0.0"/>
  </node>
  <node id="307900" label="zzzzzz0" cy:nodeId="81">
    <graphics x="-436.03302001953125" y="2211.676513671875" z="0.0"/>
  </node>
  <node id="307899" label="zzzzz99" cy:nodeId="82">
    <graphics x="469.87006072874647" y="577.314354198221" z="0.0"/>
  </node>
  <node id="307898" label="zzzzz98" cy:nodeId="83">
    <graphics x="1819.5317867266713" y="2637.4485094716583" z="0.0"/>
  </node>
  <node id="307897" label="zzzzz97" cy:nodeId="84">
    <graphics x="-809.2103778851451" y="1916.881248729471" z="0.0"/>
  </node>
  <node id="307896" label="zzzzz96" cy:nodeId="85">
    <graphics x="-285.93365020875353" y="195.4016955068148" z="0.0"/>
  </node>
  <node id="307895" label="zzzzz95" cy:nodeId="86">
    <graphics x="-604.579508973402" y="51.443077342752304" z="0.0"/>
  </node>
  <node id="307894" label="zzzzz94" cy:nodeId="87">
    <graphics x="108.96814422484019" y="484.66274287009605" z="0.0"/>
  </node>
  <node id="307893" label="zzzzz93" cy:nodeId="88">
    <graphics x="998.449772642809" y="-222.12470219826332" z="0.0"/>
  </node>
  <node id="307892" label="zzzzz92" cy:nodeId="89">
    <graphics x="2303.913426207262" y="192.77883173728355" z="0.0"/>
  </node>
  <node id="307891" label="zzzzz91" cy:nodeId="90">
    <graphics x="-268.3017532360973" y="870.967430370096" z="0.0"/>
  </node>
  <node id="307890" label="zzzzz90" cy:nodeId="91">
    <graphics x="2474.312725828844" y="-368.7005994150602" z="0.0"/>
  </node>
  <node id="307889" label="zzzzz89" cy:nodeId="92">
    <graphics x="-1833.616358948988" y="2324.3726694753204" z="0.0"/>
  </node>
  <node id="307888" label="zzzzz88" cy:nodeId="93">
    <graphics x="1719.5317867266713" y="2637.4485094716583" z="0.0"/>
  </node>
  <node id="307887" label="zzzzz87" cy:nodeId="94">
    <graphics x="19.220158384996438" y="481.6237414052523" z="0.0"/>
  </node>
  <node id="307886" label="zzzzz86" cy:nodeId="95">
    <graphics x="816.1704528796254" y="2294.334549205545" z="0.0"/>
  </node>
  <node id="307885" label="zzzzz85" cy:nodeId="96">
    <graphics x="-949.7496215832653" y="835.612694041971" z="0.0"/>
  </node>
  <node id="307884" label="zzzzz84" cy:nodeId="97">
    <graphics x="624.0210693347035" y="2115.547996776346" z="0.0"/>
  </node>
  <node id="307883" label="zzzzz83" cy:nodeId="98">
    <graphics x="2588.1459701525746" y="-547.3346326181852" z="0.0"/>
  </node>
  <node id="307882" label="zzzzz82" cy:nodeId="99">
    <graphics x="-2031.291926575941" y="2242.4338762929474" z="0.0"/>
  </node>
  <node id="307881" label="zzzzz81" cy:nodeId="100">
    <graphics x="2624.631943510729" y="-542.3734509775602" z="0.0"/>
  </node>
  <node id="307880" label="zzzzz80" cy:nodeId="101">
    <graphics x="-1657.171788407606" y="2637.4485094716583" z="0.0"/>
  </node>
  <node id="307879" label="zzzzz79" cy:nodeId="102">
    <graphics x="-460.6561233532848" y="1061.349266307596" z="0.0"/>
  </node>
  <node id="307878" label="zzzzz78" cy:nodeId="103">
    <graphics x="1619.5317867266713" y="2637.4485094716583" z="0.0"/>
  </node>
  <node id="307877" label="zzzzz77" cy:nodeId="104">
    <graphics x="2559.7807834612904" y="-585.3486096689664" z="0.0"/>
  </node>
  <node id="307876" label="zzzzz76" cy:nodeId="105">
    <graphics x="-1633.9089462292613" y="2281.702423351053" z="0.0"/>
  </node>
  <node id="307875" label="zzzzz75" cy:nodeId="106">
    <graphics x="-1719.0920249951305" y="2259.5182192494904" z="0.0"/>
  </node>
  <node id="307874" label="zzzzz74" cy:nodeId="107">
    <graphics x="-1662.4491416943492" y="2311.651787059549" z="0.0"/>
  </node>
  <node id="307873" label="zzzzz73" cy:nodeId="108">
    <graphics x="2613.4558952319203" y="-235.30937360024086" z="0.0"/>
  </node>
  <node id="307872" label="zzzzz72" cy:nodeId="109">
    <graphics x="-1786.9568283093395" y="2443.7164232900177" z="0.0"/>
  </node>
  <node id="307871" label="zzzzz71" cy:nodeId="110">
    <graphics x="-1834.668620301527" y="2217.927208202127" z="0.0"/>
  </node>
  <node id="307870" label="zzzzz70" cy:nodeId="111">
    <graphics x="-1674.8838684094371" y="2517.833977000955" z="0.0"/>
  </node>
  <node id="307869" label="zzzzz69" cy:nodeId="112">
    <graphics x="2335.9312942492543" y="-104.08930180763832" z="0.0"/>
  </node>
  <node id="307868" label="zzzzz68" cy:nodeId="113">
    <graphics x="-1886.0869857800426" y="2209.2562334706818" z="0.0"/>
  </node>
  <node id="307867" label="zzzzz67" cy:nodeId="114">
    <graphics x="-1705.9404356015148" y="2329.620411174539" z="0.0"/>
  </node>
  <node id="307866" label="zzzzz66" cy:nodeId="115">
    <graphics x="-1588.75052185182" y="2400.969995754007" z="0.0"/>
  </node>
  <node id="307865" label="zzzzz65" cy:nodeId="116">
    <graphics x="2789.5606887805043" y="-264.58335660194984" z="0.0"/>
  </node>
  <node id="307864" label="zzzzz64" cy:nodeId="117">
    <graphics x="-1766.2480422985973" y="2358.5117724111115" z="0.0"/>
  </node>
  <node id="307863" label="zzzzz63" cy:nodeId="118">
    <graphics x="-1893.8086654675426" y="2369.408138530496" z="0.0"/>
  </node>
  <node id="307862" label="zzzzz62" cy:nodeId="119">
    <graphics x="-1734.694384766859" y="2405.4703524282013" z="0.0"/>
  </node>
  <node id="307861" label="zzzzz61" cy:nodeId="120">
    <graphics x="2584.633770750719" y="-407.5363690683805" z="0.0"/>
  </node>
  <node id="307860" label="zzzzz60" cy:nodeId="121">
    <graphics x="-1866.5916549694957" y="2157.8833391835724" z="0.0"/>
  </node>
  <node id="307859" label="zzzzz59" cy:nodeId="122">
    <graphics x="-1673.1087772381725" y="2445.99991633201" z="0.0"/>
  </node>
  <node id="307858" label="zzzzz58" cy:nodeId="123">
    <graphics x="-1380.4682132733287" y="2661.401359813455" z="0.0"/>
  </node>
  <node id="307857" label="zzzzz57" cy:nodeId="124">
    <graphics x="-1757.171788407606" y="2644.5776598622833" z="0.0"/>
  </node>
  <node id="307856" label="zzzzz56" cy:nodeId="125">
    <graphics x="-1854.3752271664562" y="2637.4485094716583" z="0.0"/>
  </node>
  <node id="307855" label="zzzzz55" cy:nodeId="126">
    <graphics x="-1923.068553162855" y="2245.254371898416" z="0.0"/>
  </node>
  <node id="307854" label="zzzzz54" cy:nodeId="127">
    <graphics x="-554.2572891247692" y="134.62307001853355" z="0.0"/>
  </node>
  <node id="307853" label="zzzzz53" cy:nodeId="128">
    <graphics x="-1060.8539993298473" y="757.0947497060336" z="0.0"/>
  </node>
  <node id="307852" label="zzzzz52" cy:nodeId="129">
    <graphics x="1255.796482847887" y="-379.22793553566567" z="0.0"/>
  </node>
  <node id="307851" label="zzzzz51" cy:nodeId="130">
    <graphics x="-10.407832337659812" y="809.4841540029086" z="0.0"/>
  </node>
  <node id="307850" label="zzzzz50" cy:nodeId="131">
    <graphics x="-861.7226459515514" y="1255.6423571279086" z="0.0"/>
  </node>
  <node id="307849" label="zzzzz49" cy:nodeId="132">
    <graphics x="-751.3224365246715" y="1412.408592479471" z="0.0"/>
  </node>
  <node id="307848" label="zzzzz48" cy:nodeId="133">
    <graphics x="2551.765057371813" y="366.77355219626793" z="0.0"/>
  </node>
  <node id="307847" label="zzzzz47" cy:nodeId="134">
    <graphics x="-725.4866363537731" y="986.1748278310336" z="0.0"/>
  </node>
  <node id="307846" label="zzzzz46" cy:nodeId="135">
    <graphics x="1519.5317867266713" y="2637.4485094716583" z="0.0"/>
  </node>
  <node id="307845" label="zzzzz45" cy:nodeId="136">
    <graphics x="2711.9647567736683" y="-408.2603223154508" z="0.0"/>
  </node>
  <node id="307844" label="zzzzz44" cy:nodeId="137">
    <graphics x="2793.427265928942" y="-456.16443608498207" z="0.0"/>
  </node>
  <node id="307843" label="zzzzz43" cy:nodeId="138">
    <graphics x="2405.457142637926" y="-514.4477002451383" z="0.0"/>
  </node>
  <node id="307842" label="zzzzz42" cy:nodeId="139">
    <graphics x="2216.438298033434" y="484.1356737782992" z="0.0"/>
  </node>
  <node id="307841" label="zzzzz41" cy:nodeId="140">
    <graphics x="-750.7409851086559" y="2435.97989680076" z="0.0"/>
  </node>
  <node id="307840" label="zzzzz40" cy:nodeId="141">
    <graphics x="1064.3256042468129" y="2307.3845446279083" z="0.0"/>
  </node>
  <node id="307839" label="zzzzz39" cy:nodeId="142">
    <graphics x="2585.3727591502247" y="532.1806566884554" z="0.0"/>
  </node>
  <node id="307838" label="zzzzz38" cy:nodeId="143">
    <graphics x="2613.7191551196156" y="-453.5440137217008" z="0.0"/>
  </node>
  <node id="307837" label="zzzzz37" cy:nodeId="144">
    <graphics x="2760.992985533434" y="-450.20537541603676" z="0.0"/>
  </node>
  <node id="307836" label="zzzzz36" cy:nodeId="145">
    <graphics x="2666.013996885973" y="-438.87802861427895" z="0.0"/>
  </node>
  <node id="307835" label="zzzzz35" cy:nodeId="146">
    <graphics x="2729.71863250609" y="-435.75266240334145" z="0.0"/>
  </node>
  <node id="307834" label="zzzzz34" cy:nodeId="147">
    <graphics x="2720.5414627062855" y="-415.891227466818" z="0.0"/>
  </node>
  <node id="307833" label="zzzzz33" cy:nodeId="148">
    <graphics x="-1633.52973480348" y="2249.611320750955" z="0.0"/>
  </node>
  <node id="307832" label="zzzzz32" cy:nodeId="149">
    <graphics x="-1645.8703910839977" y="2378.8558151891266" z="0.0"/>
  </node>
  <node id="307831" label="zzzzz31" cy:nodeId="150">
    <graphics x="-1715.6869804394664" y="2537.4485094716583" z="0.0"/>
  </node>
  <node id="307830" label="zzzzz30" cy:nodeId="151">
    <graphics x="2521.2308700549183" y="-520.7858655283414" z="0.0"/>
  </node>
  <node id="307829" label="zzzzz29" cy:nodeId="152">
    <graphics x="-1823.1232635510387" y="2434.860012309793" z="0.0"/>
  </node>
  <node id="307828" label="zzzzz28" cy:nodeId="153">
    <graphics x="2779.3581588732777" y="-233.15725205635658" z="0.0"/>
  </node>
  <node id="307827" label="zzzzz27" cy:nodeId="154">
    <graphics x="2814.425312803942" y="-307.6169812509977" z="0.0"/>
  </node>
  <node id="307826" label="zzzzz26" cy:nodeId="155">
    <graphics x="2828.836216734606" y="-261.33804295754067" z="0.0"/>
  </node>
  <node id="307825" label="zzzzz25" cy:nodeId="156">
    <graphics x="2630.043492125231" y="-325.5988385508024" z="0.0"/>
  </node>
  <node id="307824" label="zzzzz24" cy:nodeId="157">
    <graphics x="2567.7814081179677" y="-200.4865224192106" z="0.0"/>
  </node>
  <node id="307823" label="zzzzz23" cy:nodeId="158">
    <graphics x="2477.1875045764027" y="-410.02019475197426" z="0.0"/>
  </node>
  <node id="307822" label="zzzzz22" cy:nodeId="159">
    <graphics x="-382.0556640625" y="2225.08203125" z="0.0"/>
  </node>
  <node id="307821" label="zzzzz21" cy:nodeId="160">
    <graphics x="-371.0699157714844" y="2182.157958984375" z="0.0"/>
  </node>
  <node id="307820" label="zzzzz20" cy:nodeId="161">
    <graphics x="-403.3243103027344" y="2189.6494140625" z="0.0"/>
  </node>
  <node id="307819" label="zzzzz19" cy:nodeId="162">
    <graphics x="-430.22967529296875" y="2276.877197265625" z="0.0"/>
  </node>
  <node id="307818" label="zzzzz18" cy:nodeId="163">
    <graphics x="-364.2821350097656" y="2220.158447265625" z="0.0"/>
  </node>
  <node id="307817" label="zzzzz17" cy:nodeId="164">
    <graphics x="-281.23443603515625" y="2249.425048828125" z="0.0"/>
  </node>
  <node id="307816" label="zzzzz16" cy:nodeId="165">
    <graphics x="-419.1210021972656" y="2164.29833984375" z="0.0"/>
  </node>
  <node id="307815" label="zzzzz15" cy:nodeId="166">
    <graphics x="-483.724609375" y="2152.41357421875" z="0.0"/>
  </node>
  <node id="307814" label="zzzzz14" cy:nodeId="167">
    <graphics x="-1954.3752271664562" y="2714.476036327127" z="0.0"/>
  </node>
  <node id="307813" label="zzzzz13" cy:nodeId="168">
    <graphics x="-267.3592834472656" y="2152.07275390625" z="0.0"/>
  </node>
  <node id="307812" label="zzzzz12" cy:nodeId="169">
    <graphics x="-369.7623596191406" y="2307.812255859375" z="0.0"/>
  </node>
  <node id="307811" label="zzzzz11" cy:nodeId="170">
    <graphics x="-399.3861999511719" y="2371.780517578125" z="0.0"/>
  </node>
  <node id="307810" label="zzzzz10" cy:nodeId="171">
    <graphics x="-321.2831726074219" y="2308.973388671875" z="0.0"/>
  </node>
  <node id="307809" label="zzzz999" cy:nodeId="172">
    <graphics x="-509.7747802734375" y="-632.019287109375" z="0.0"/>
  </node>
  <node id="307808" label="zzzz998" cy:nodeId="173">
    <graphics x="-494.7733154296875" y="-644.8322143554688" z="0.0"/>
  </node>
  <node id="307807" label="zzzz996" cy:nodeId="174">
    <graphics x="-462.8409729003906" y="-696.8316040039062" z="0.0"/>
  </node>
  <node id="307806" label="zzzz994" cy:nodeId="175">
    <graphics x="-38.9818115234375" y="-435.47369384765625" z="0.0"/>
  </node>
  <node id="307805" label="zzzz993" cy:nodeId="176">
    <graphics x="-451.9049377441406" y="-696.0930786132812" z="0.0"/>
  </node>
  <node id="307804" label="zzzz992" cy:nodeId="177">
    <graphics x="-452.6272277832031" y="-681.91015625" z="0.0"/>
  </node>
  <node id="307803" label="zzzz988" cy:nodeId="178">
    <graphics x="-499.81329345703125" y="-718.1174926757812" z="0.0"/>
  </node>
  <node id="307802" label="zzzz987" cy:nodeId="179">
    <graphics x="-554.2969360351562" y="-625.7315063476562" z="0.0"/>
  </node>
  <node id="307801" label="zzzz986" cy:nodeId="180">
    <graphics x="-556.6658935546875" y="-777.43017578125" z="0.0"/>
  </node>
  <node id="307800" label="zzzz985" cy:nodeId="181">
    <graphics x="-489.3116455078125" y="-763.18017578125" z="0.0"/>
  </node>
  <node id="307799" label="zzzz984" cy:nodeId="182">
    <graphics x="-470.0036315917969" y="-699.2483520507812" z="0.0"/>
  </node>
  <node id="307798" label="zzzz983" cy:nodeId="183">
    <graphics x="-539.6784057617188" y="-690.110595703125" z="0.0"/>
  </node>
  <node id="307797" label="zzzz982" cy:nodeId="184">
    <graphics x="-530.9326171875" y="-619.3859252929688" z="0.0"/>
  </node>
  <node id="307796" label="zzzz981" cy:nodeId="185">
    <graphics x="-530.41943359375" y="-651.4356079101562" z="0.0"/>
  </node>
  <node id="307795" label="zzzz978" cy:nodeId="186">
    <graphics x="-478.9518127441406" y="-655.5650634765625" z="0.0"/>
  </node>
  <node id="307794" label="zzzz977" cy:nodeId="187">
    <graphics x="-606.7825317382812" y="-645.8568725585938" z="0.0"/>
  </node>
  <node id="307793" label="zzzz976" cy:nodeId="188">
    <graphics x="-518.2636108398438" y="-679.1244506835938" z="0.0"/>
  </node>
  <node id="307792" label="zzzz975" cy:nodeId="189">
    <graphics x="-551.6856079101562" y="-727.74462890625" z="0.0"/>
  </node>
  <node id="307791" label="zzzz974" cy:nodeId="190">
    <graphics x="-490.545166015625" y="-733.5945434570312" z="0.0"/>
  </node>
  <node id="307790" label="zzzz973" cy:nodeId="191">
    <graphics x="-526.1317138671875" y="-664.6482543945312" z="0.0"/>
  </node>
  <node id="307789" label="zzzz972" cy:nodeId="192">
    <graphics x="-511.2354736328125" y="-684.39892578125" z="0.0"/>
  </node>
  <node id="307788" label="zzzz971" cy:nodeId="193">
    <graphics x="-469.5494689941406" y="-693.3880004882812" z="0.0"/>
  </node>
  <node id="307787" label="zzzz970" cy:nodeId="194">
    <graphics x="-481.3695983886719" y="-701.0590209960938" z="0.0"/>
  </node>
  <node id="307786" label="zzzz969" cy:nodeId="195">
    <graphics x="-462.1768493652344" y="-693.6900024414062" z="0.0"/>
  </node>
  <node id="307785" label="zzzz968" cy:nodeId="196">
    <graphics x="-593.6389770507812" y="-677.593017578125" z="0.0"/>
  </node>
  <node id="307784" label="zzzz967" cy:nodeId="197">
    <graphics x="-494.70941162109375" y="-688.9098510742188" z="0.0"/>
  </node>
  <node id="307783" label="zzzz966" cy:nodeId="198">
    <graphics x="-535.693603515625" y="-642.9202270507812" z="0.0"/>
  </node>
  <node id="307782" label="zzzz965" cy:nodeId="199">
    <graphics x="-457.1613464355469" y="-658.4712524414062" z="0.0"/>
  </node>
  <node id="307781" label="zzzz961" cy:nodeId="200">
    <graphics x="-488.05084228515625" y="-730.1463012695312" z="0.0"/>
  </node>
  <node id="307780" label="zzzz960" cy:nodeId="201">
    <graphics x="-559.697265625" y="-693.7566528320312" z="0.0"/>
  </node>
  <node id="307779" label="zzzz958" cy:nodeId="202">
    <graphics x="-499.90997314453125" y="-598.7612915039062" z="0.0"/>
  </node>
  <node id="307778" label="zzzz957" cy:nodeId="203">
    <graphics x="-557.6077880859375" y="-651.6358032226562" z="0.0"/>
  </node>
  <node id="307777" label="zzzz956" cy:nodeId="204">
    <graphics x="-514.6341552734375" y="-706.6239624023438" z="0.0"/>
  </node>
  <node id="307776" label="zzzz955" cy:nodeId="205">
    <graphics x="-171.8909912109375" y="-516.9732055664062" z="0.0"/>
  </node>
  <node id="307775" label="zzzz953" cy:nodeId="206">
    <graphics x="-601.653076171875" y="-611.5440673828125" z="0.0"/>
  </node>
  <node id="307774" label="zzzz950" cy:nodeId="207">
    <graphics x="-542.74658203125" y="-637.3637084960938" z="0.0"/>
  </node>
  <node id="307773" label="zzzz948" cy:nodeId="208">
    <graphics x="-578.0046997070312" y="-692.0545654296875" z="0.0"/>
  </node>
  <node id="307772" label="zzzz946" cy:nodeId="209">
    <graphics x="-527.041259765625" y="-583.3545532226562" z="0.0"/>
  </node>
  <node id="307771" label="zzzz944" cy:nodeId="210">
    <graphics x="-554.6663818359375" y="-719.7410278320312" z="0.0"/>
  </node>
  <node id="307770" label="zzzz942" cy:nodeId="211">
    <graphics x="-70.39251251344106" y="-326.89734624123207" z="0.0"/>
  </node>
  <node id="307769" label="zzzz941" cy:nodeId="212">
    <graphics x="21.863162994384766" y="-596.7910766601562" z="0.0"/>
  </node>
  <node id="307768" label="zzzz940" cy:nodeId="213">
    <graphics x="-50.72960662841797" y="-609.2880249023438" z="0.0"/>
  </node>
  <node id="307767" label="zzzz936" cy:nodeId="214">
    <graphics x="-443.3454895019531" y="-647.9357299804688" z="0.0"/>
  </node>
  <node id="307766" label="zzzz935" cy:nodeId="215">
    <graphics x="-481.23876953125" y="-729.56396484375" z="0.0"/>
  </node>
  <node id="307765" label="zzzz934" cy:nodeId="216">
    <graphics x="-467.44964599609375" y="-688.1572265625" z="0.0"/>
  </node>
  <node id="307764" label="zzzz933" cy:nodeId="217">
    <graphics x="-573.681396484375" y="-625.8488159179688" z="0.0"/>
  </node>
  <node id="307763" label="zzzz932" cy:nodeId="218">
    <graphics x="-534.18505859375" y="-690.6822509765625" z="0.0"/>
  </node>
  <node id="307762" label="zzzz931" cy:nodeId="219">
    <graphics x="-589.6439819335938" y="-678.80126953125" z="0.0"/>
  </node>
  <node id="307761" label="zzzz924" cy:nodeId="220">
    <graphics x="-546.8150024414062" y="-735.4146118164062" z="0.0"/>
  </node>
  <node id="307760" label="zzzz923" cy:nodeId="221">
    <graphics x="-574.001708984375" y="-679.18505859375" z="0.0"/>
  </node>
  <node id="307759" label="zzzz922" cy:nodeId="222">
    <graphics x="-366.4691162109375" y="-486.6661376953125" z="0.0"/>
  </node>
  <node id="307758" label="zzzz921" cy:nodeId="223">
    <graphics x="-493.5155029296875" y="-682.8117065429688" z="0.0"/>
  </node>
  <node id="307757" label="zzzz914" cy:nodeId="224">
    <graphics x="-448.08795166015625" y="-747.4931030273438" z="0.0"/>
  </node>
  <node id="307756" label="zzzz913" cy:nodeId="225">
    <graphics x="-463.0386657714844" y="-687.5506591796875" z="0.0"/>
  </node>
  <node id="307755" label="zzzz912" cy:nodeId="226">
    <graphics x="-51.64464569091797" y="-547.235107421875" z="0.0"/>
  </node>
  <node id="307754" label="zzzz910" cy:nodeId="227">
    <graphics x="-515.5055541992188" y="-714.0447998046875" z="0.0"/>
  </node>
  <node id="307753" label="zzzz909" cy:nodeId="228">
    <graphics x="-240.44097442750356" y="-686.0495068857633" z="0.0"/>
  </node>
  <node id="307752" label="zzzz905" cy:nodeId="229">
    <graphics x="-565.8057250976562" y="-717.2047119140625" z="0.0"/>
  </node>
  <node id="307751" label="zzzz903" cy:nodeId="230">
    <graphics x="-535.3928833007812" y="-755.8748779296875" z="0.0"/>
  </node>
  <node id="307750" label="zzzz902" cy:nodeId="231">
    <graphics x="-500.69366455078125" y="-683.0822143554688" z="0.0"/>
  </node>
  <node id="307749" label="zzzz889" cy:nodeId="232">
    <graphics x="-524.1810913085938" y="-614.6382446289062" z="0.0"/>
  </node>
  <node id="307748" label="zzzz888" cy:nodeId="233">
    <graphics x="-540.2031860351562" y="-703.8931884765625" z="0.0"/>
  </node>
  <node id="307747" label="zzzz887" cy:nodeId="234">
    <graphics x="-458.73968505859375" y="-620.8378295898438" z="0.0"/>
  </node>
  <node id="307746" label="zzzz886" cy:nodeId="235">
    <graphics x="39.9332275390625" y="-420.2866516113281" z="0.0"/>
  </node>
  <node id="307745" label="zzzz885" cy:nodeId="236">
    <graphics x="72.77545928955078" y="-399.9316711425781" z="0.0"/>
  </node>
  <node id="307744" label="zzzz883" cy:nodeId="237">
    <graphics x="-543.3907470703125" y="-719.1468505859375" z="0.0"/>
  </node>
  <node id="307743" label="zzzz882" cy:nodeId="238">
    <graphics x="-534.9033203125" y="-667.1009521484375" z="0.0"/>
  </node>
  <node id="307742" label="zzzz881" cy:nodeId="239">
    <graphics x="7.995670318603516" y="-554.10009765625" z="0.0"/>
  </node>
  <node id="307741" label="zzzz879" cy:nodeId="240">
    <graphics x="-49.01036834716797" y="-361.35400390625" z="0.0"/>
  </node>
  <node id="307740" label="zzzz877" cy:nodeId="241">
    <graphics x="-546.1923217773438" y="-646.3546752929688" z="0.0"/>
  </node>
  <node id="307739" label="zzzz875" cy:nodeId="242">
    <graphics x="-451.1478271484375" y="-701.0852661132812" z="0.0"/>
  </node>
  <node id="307738" label="zzzz874" cy:nodeId="243">
    <graphics x="-54.74889679078481" y="-342.92925236916176" z="0.0"/>
  </node>
  <node id="307737" label="zzzz873" cy:nodeId="244">
    <graphics x="-83.66307830810547" y="-376.81353759765625" z="0.0"/>
  </node>
  <node id="307736" label="zzzz870" cy:nodeId="245">
    <graphics x="-498.50732421875" y="-654.5397338867188" z="0.0"/>
  </node>
  <node id="307735" label="zzzz869" cy:nodeId="246">
    <graphics x="-577.910888671875" y="-683.3238525390625" z="0.0"/>
  </node>
  <node id="307734" label="zzzz867" cy:nodeId="247">
    <graphics x="-488.6905517578125" y="-640.0823974609375" z="0.0"/>
  </node>
  <node id="307733" label="zzzz865" cy:nodeId="248">
    <graphics x="-505.4127197265625" y="-707.0587158203125" z="0.0"/>
  </node>
  <node id="307732" label="zzzz864" cy:nodeId="249">
    <graphics x="-469.85296630859375" y="-705.0112915039062" z="0.0"/>
  </node>
  <node id="307731" label="zzzz862" cy:nodeId="250">
    <graphics x="-539.74658203125" y="-610.8491821289062" z="0.0"/>
  </node>
  <node id="307730" label="zzzz861" cy:nodeId="251">
    <graphics x="-590.2646484375" y="-607.04443359375" z="0.0"/>
  </node>
  <node id="307729" label="zzzz860" cy:nodeId="252">
    <graphics x="-565.8355712890625" y="-583.9391479492188" z="0.0"/>
  </node>
  <node id="307728" label="zzzz859" cy:nodeId="253">
    <graphics x="1.6712074279785156" y="-434.463134765625" z="0.0"/>
  </node>
  <node id="307727" label="zzzz858" cy:nodeId="254">
    <graphics x="-462.7089538574219" y="-623.6809692382812" z="0.0"/>
  </node>
  <node id="307726" label="zzzz857" cy:nodeId="255">
    <graphics x="-518.0184936523438" y="-662.5088500976562" z="0.0"/>
  </node>
  <node id="307725" label="zzzz856" cy:nodeId="256">
    <graphics x="-512.1516723632812" y="-625.5431518554688" z="0.0"/>
  </node>
  <node id="307724" label="zzzz855" cy:nodeId="257">
    <graphics x="-229.7110549939098" y="-656.3964917490446" z="0.0"/>
  </node>
  <node id="307723" label="zzzz847" cy:nodeId="258">
    <graphics x="-550.560546875" y="-718.498291015625" z="0.0"/>
  </node>
  <node id="307722" label="zzzz846" cy:nodeId="259">
    <graphics x="-504.145263671875" y="-652.6273193359375" z="0.0"/>
  </node>
  <node id="307721" label="zzzz845" cy:nodeId="260">
    <graphics x="-457.26873779296875" y="-663.6239013671875" z="0.0"/>
  </node>
  <node id="307720" label="zzzz844" cy:nodeId="261">
    <graphics x="-259.49102783203125" y="-487.0555419921875" z="0.0"/>
  </node>
  <node id="307719" label="zzzz843" cy:nodeId="262">
    <graphics x="-238.6729736328125" y="-609.0211791992188" z="0.0"/>
  </node>
  <node id="307718" label="zzzz841" cy:nodeId="263">
    <graphics x="-473.94647216796875" y="-661.8695068359375" z="0.0"/>
  </node>
  <node id="307717" label="zzzz840" cy:nodeId="264">
    <graphics x="-536.7323608398438" y="-628.7445678710938" z="0.0"/>
  </node>
  <node id="307716" label="zzzz838" cy:nodeId="265">
    <graphics x="-494.435546875" y="-655.0823364257812" z="0.0"/>
  </node>
  <node id="307715" label="zzzz837" cy:nodeId="266">
    <graphics x="-503.1214599609375" y="-683.8770141601562" z="0.0"/>
  </node>
  <node id="307714" label="zzzz836" cy:nodeId="267">
    <graphics x="-498.25042724609375" y="-750.1390991210938" z="0.0"/>
  </node>
  <node id="307713" label="zzzz835" cy:nodeId="268">
    <graphics x="-219.42449951171875" y="-384.9775695800781" z="0.0"/>
  </node>
  <node id="307712" label="zzzz834" cy:nodeId="269">
    <graphics x="-229.14044189453125" y="-461.3687438964844" z="0.0"/>
  </node>
  <node id="307711" label="zzzz833" cy:nodeId="270">
    <graphics x="-236.1353759765625" y="-374.9398193359375" z="0.0"/>
  </node>
  <node id="307710" label="zzzz832" cy:nodeId="271">
    <graphics x="-255.2115478515625" y="-387.66497802734375" z="0.0"/>
  </node>
  <node id="307709" label="zzzz831" cy:nodeId="272">
    <graphics x="-215.5003662109375" y="-430.556396484375" z="0.0"/>
  </node>
  <node id="307708" label="zzzz822" cy:nodeId="273">
    <graphics x="-581.4530029296875" y="-637.6629028320312" z="0.0"/>
  </node>
  <node id="307707" label="zzzz821" cy:nodeId="274">
    <graphics x="-509.8980712890625" y="-630.7181396484375" z="0.0"/>
  </node>
  <node id="307706" label="zzzz820" cy:nodeId="275">
    <graphics x="-64.02581024169922" y="-502.83929443359375" z="0.0"/>
  </node>
  <node id="307705" label="zzzz816" cy:nodeId="276">
    <graphics x="-489.4462890625" y="-673.1980590820312" z="0.0"/>
  </node>
  <node id="307704" label="zzzz815" cy:nodeId="277">
    <graphics x="-584.055908203125" y="-752.21435546875" z="0.0"/>
  </node>
  <node id="307703" label="zzzz814" cy:nodeId="278">
    <graphics x="-529.400634765625" y="-760.16552734375" z="0.0"/>
  </node>
  <node id="307702" label="zzzz813" cy:nodeId="279">
    <graphics x="-505.15228271484375" y="-772.9899291992188" z="0.0"/>
  </node>
  <node id="307701" label="zzzz812" cy:nodeId="280">
    <graphics x="-473.692626953125" y="-712.3872680664062" z="0.0"/>
  </node>
  <node id="307700" label="zzzz811" cy:nodeId="281">
    <graphics x="-519.6543579101562" y="-705.7737426757812" z="0.0"/>
  </node>
  <node id="307699" label="zzzz810" cy:nodeId="282">
    <graphics x="-544.2682495117188" y="-664.60009765625" z="0.0"/>
  </node>
  <node id="307698" label="zzzz809" cy:nodeId="283">
    <graphics x="-570.5499267578125" y="-614.3707885742188" z="0.0"/>
  </node>
  <node id="307697" label="zzzz808" cy:nodeId="284">
    <graphics x="-478.13238525390625" y="-726.9987182617188" z="0.0"/>
  </node>
  <node id="307696" label="zzzz807" cy:nodeId="285">
    <graphics x="-449.5150451660156" y="-672.347412109375" z="0.0"/>
  </node>
  <node id="307695" label="zzzz806" cy:nodeId="286">
    <graphics x="-468.79791259765625" y="-653.144287109375" z="0.0"/>
  </node>
  <node id="307694" label="zzzz805" cy:nodeId="287">
    <graphics x="-506.48388671875" y="-627.1421508789062" z="0.0"/>
  </node>
  <node id="307693" label="zzzz804" cy:nodeId="288">
    <graphics x="-521.47705078125" y="-608.9163208007812" z="0.0"/>
  </node>
  <node id="307692" label="zzzz803" cy:nodeId="289">
    <graphics x="-540.6720581054688" y="-655.4381103515625" z="0.0"/>
  </node>
  <node id="307691" label="zzzz802" cy:nodeId="290">
    <graphics x="-467.3021240234375" y="-590.5904541015625" z="0.0"/>
  </node>
  <node id="307690" label="zzzz798" cy:nodeId="291">
    <graphics x="-578.2733154296875" y="-662.4993896484375" z="0.0"/>
  </node>
  <node id="307689" label="zzzz797" cy:nodeId="292">
    <graphics x="-519.123779296875" y="-701.1387329101562" z="0.0"/>
  </node>
  <node id="307688" label="zzzz795" cy:nodeId="293">
    <graphics x="-534.9555053710938" y="-737.4901733398438" z="0.0"/>
  </node>
  <node id="307687" label="zzzz794" cy:nodeId="294">
    <graphics x="-545.6934814453125" y="-645.0010375976562" z="0.0"/>
  </node>
  <node id="307686" label="zzzz793" cy:nodeId="295">
    <graphics x="-543.5660400390625" y="-735.5963745117188" z="0.0"/>
  </node>
  <node id="307685" label="zzzz792" cy:nodeId="296">
    <graphics x="-490.55841064453125" y="-716.4835205078125" z="0.0"/>
  </node>
  <node id="307684" label="zzzz791" cy:nodeId="297">
    <graphics x="-562.10302734375" y="-704.5582275390625" z="0.0"/>
  </node>
  <node id="307683" label="zzzz790" cy:nodeId="298">
    <graphics x="-561.5665283203125" y="-720.5711059570312" z="0.0"/>
  </node>
  <node id="307682" label="zzzz789" cy:nodeId="299">
    <graphics x="-474.2553405761719" y="-664.5307006835938" z="0.0"/>
  </node>
  <node id="307681" label="zzzz787" cy:nodeId="300">
    <graphics x="-235.238525390625" y="-531.7267456054688" z="0.0"/>
  </node>
  <node id="307680" label="zzzz786" cy:nodeId="301">
    <graphics x="-564.2929077148438" y="-649.7709350585938" z="0.0"/>
  </node>
  <node id="307679" label="zzzz785" cy:nodeId="302">
    <graphics x="-533.275146484375" y="-680.999755859375" z="0.0"/>
  </node>
  <node id="307678" label="zzzz784" cy:nodeId="303">
    <graphics x="-488.2666015625" y="-607.2044677734375" z="0.0"/>
  </node>
  <node id="307677" label="zzzz783" cy:nodeId="304">
    <graphics x="-595.094970703125" y="-722.36572265625" z="0.0"/>
  </node>
  <node id="307676" label="zzzz782" cy:nodeId="305">
    <graphics x="91.35218048095703" y="-459.3695068359375" z="0.0"/>
  </node>
  <node id="307675" label="zzzz781" cy:nodeId="306">
    <graphics x="71.23261260986328" y="-400.836181640625" z="0.0"/>
  </node>
  <node id="307674" label="zzzz780" cy:nodeId="307">
    <graphics x="-44.552734375" y="-554.5050659179688" z="0.0"/>
  </node>
  <node id="307673" label="zzzz779" cy:nodeId="308">
    <graphics x="13.619205474853516" y="-579.4833374023438" z="0.0"/>
  </node>
  <node id="307672" label="zzzz778" cy:nodeId="309">
    <graphics x="-9.186702728271484" y="-539.3845825195312" z="0.0"/>
  </node>
  <node id="307671" label="zzzz777" cy:nodeId="310">
    <graphics x="-5.055782318115234" y="-579.2005615234375" z="0.0"/>
  </node>
  <node id="307670" label="zzzz776" cy:nodeId="311">
    <graphics x="2.4566078186035156" y="-521.4143676757812" z="0.0"/>
  </node>
  <node id="307669" label="zzzz775" cy:nodeId="312">
    <graphics x="-569.9319458007812" y="-636.010498046875" z="0.0"/>
  </node>
  <node id="307668" label="zzzz774" cy:nodeId="313">
    <graphics x="-603.2097778320312" y="-681.7003173828125" z="0.0"/>
  </node>
  <node id="307667" label="zzzz773" cy:nodeId="314">
    <graphics x="-441.8629455566406" y="-719.3941040039062" z="0.0"/>
  </node>
  <node id="307666" label="zzzz772" cy:nodeId="315">
    <graphics x="-594.5573120117188" y="-669.379638671875" z="0.0"/>
  </node>
  <node id="307665" label="zzzz771" cy:nodeId="316">
    <graphics x="-561.0308837890625" y="-618.964599609375" z="0.0"/>
  </node>
  <node id="307664" label="zzzz770" cy:nodeId="317">
    <graphics x="-533.2447509765625" y="-759.9421997070312" z="0.0"/>
  </node>
  <node id="307663" label="zzzz769" cy:nodeId="318">
    <graphics x="-453.1882629394531" y="-614.4510498046875" z="0.0"/>
  </node>
  <node id="307662" label="zzzz768" cy:nodeId="319">
    <graphics x="-506.19622802734375" y="-771.390625" z="0.0"/>
  </node>
  <node id="307661" label="zzzz767" cy:nodeId="320">
    <graphics x="-448.83837890625" y="-689.4458618164062" z="0.0"/>
  </node>
  <node id="307660" label="zzzz766" cy:nodeId="321">
    <graphics x="-497.5858154296875" y="-661.50341796875" z="0.0"/>
  </node>
  <node id="307659" label="zzzz765" cy:nodeId="322">
    <graphics x="-492.1087646484375" y="-698.5895385742188" z="0.0"/>
  </node>
  <node id="307658" label="zzzz764" cy:nodeId="323">
    <graphics x="-483.2801513671875" y="-745.1091918945312" z="0.0"/>
  </node>
  <node id="307657" label="zzzz763" cy:nodeId="324">
    <graphics x="-472.0214538574219" y="-719.2637329101562" z="0.0"/>
  </node>
  <node id="307656" label="zzzz762" cy:nodeId="325">
    <graphics x="-481.66400146484375" y="-657.1617431640625" z="0.0"/>
  </node>
  <node id="307655" label="zzzz761" cy:nodeId="326">
    <graphics x="103.3099365234375" y="-552.3605346679688" z="0.0"/>
  </node>
  <node id="307654" label="zzzz760" cy:nodeId="327">
    <graphics x="88.86988067626953" y="-432.6358947753906" z="0.0"/>
  </node>
  <node id="307653" label="zzzz757" cy:nodeId="328">
    <graphics x="-493.2559814453125" y="-636.9739990234375" z="0.0"/>
  </node>
  <node id="307652" label="zzzz756" cy:nodeId="329">
    <graphics x="-557.9647216796875" y="-671.6356811523438" z="0.0"/>
  </node>
  <node id="307651" label="zzzz755" cy:nodeId="330">
    <graphics x="-437.2420959472656" y="-652.8530883789062" z="0.0"/>
  </node>
  <node id="307650" label="zzzz754" cy:nodeId="331">
    <graphics x="-532.7534790039062" y="-749.971435546875" z="0.0"/>
  </node>
  <node id="307649" label="zzzz753" cy:nodeId="332">
    <graphics x="-542.9533081054688" y="-713.0210571289062" z="0.0"/>
  </node>
  <node id="307648" label="zzzz752" cy:nodeId="333">
    <graphics x="-470.24053955078125" y="-713.7392578125" z="0.0"/>
  </node>
  <node id="307647" label="zzzz751" cy:nodeId="334">
    <graphics x="-443.2898864746094" y="-662.8104248046875" z="0.0"/>
  </node>
  <node id="307646" label="zzzz750" cy:nodeId="335">
    <graphics x="-482.470947265625" y="-733.6265258789062" z="0.0"/>
  </node>
  <node id="307645" label="zzzz740" cy:nodeId="336">
    <graphics x="-548.2140502929688" y="-625.21240234375" z="0.0"/>
  </node>
  <node id="307644" label="zzzz739" cy:nodeId="337">
    <graphics x="-493.496826171875" y="-615.795166015625" z="0.0"/>
  </node>
  <node id="307643" label="zzzz738" cy:nodeId="338">
    <graphics x="-530.022216796875" y="-722.5597534179688" z="0.0"/>
  </node>
  <node id="307642" label="zzzz737" cy:nodeId="339">
    <graphics x="-622.491943359375" y="-680.8191528320312" z="0.0"/>
  </node>
  <node id="307641" label="zzzz732" cy:nodeId="340">
    <graphics x="-565.2477416992188" y="-661.7052001953125" z="0.0"/>
  </node>
  <node id="307640" label="zzzz731" cy:nodeId="341">
    <graphics x="-454.4945068359375" y="-691.0846557617188" z="0.0"/>
  </node>
  <node id="307639" label="zzzz730" cy:nodeId="342">
    <graphics x="-620.0713500976562" y="-708.1436157226562" z="0.0"/>
  </node>
  <node id="307638" label="zzzz725" cy:nodeId="343">
    <graphics x="16.693851470947266" y="-444.55609130859375" z="0.0"/>
  </node>
  <node id="307637" label="zzzz722" cy:nodeId="344">
    <graphics x="-568.691162109375" y="-775.7631225585938" z="0.0"/>
  </node>
  <node id="307636" label="zzzz721" cy:nodeId="345">
    <graphics x="-581.9127197265625" y="-592.9248046875" z="0.0"/>
  </node>
  <node id="307635" label="zzzz720" cy:nodeId="346">
    <graphics x="-557.8429565429688" y="-644.3471069335938" z="0.0"/>
  </node>
  <node id="307634" label="zzzz717" cy:nodeId="347">
    <graphics x="-32.704586029052734" y="-558.5548706054688" z="0.0"/>
  </node>
  <node id="307633" label="zzzz716" cy:nodeId="348">
    <graphics x="-611.4865112304688" y="-666.3936157226562" z="0.0"/>
  </node>
  <node id="307632" label="zzzz715" cy:nodeId="349">
    <graphics x="-246.9564208984375" y="-508.798828125" z="0.0"/>
  </node>
  <node id="307631" label="zzzz711" cy:nodeId="350">
    <graphics x="-563.4141235351562" y="-651.7366943359375" z="0.0"/>
  </node>
  <node id="307630" label="zzzz710" cy:nodeId="351">
    <graphics x="-506.4517822265625" y="-667.03662109375" z="0.0"/>
  </node>
  <node id="307629" label="zzzz709" cy:nodeId="352">
    <graphics x="-517.286865234375" y="-643.3040161132812" z="0.0"/>
  </node>
  <node id="307628" label="zzzz708" cy:nodeId="353">
    <graphics x="-579.8840942382812" y="-624.2808837890625" z="0.0"/>
  </node>
  <node id="307627" label="zzzz707" cy:nodeId="354">
    <graphics x="-521.1958618164062" y="-641.9674072265625" z="0.0"/>
  </node>
  <node id="307626" label="zzzz706" cy:nodeId="355">
    <graphics x="-501.4010009765625" y="-636.5609741210938" z="0.0"/>
  </node>
  <node id="307625" label="zzzz705" cy:nodeId="356">
    <graphics x="-612.6541748046875" y="-722.5258178710938" z="0.0"/>
  </node>
  <node id="307624" label="zzzz704" cy:nodeId="357">
    <graphics x="-607.426025390625" y="-709.909912109375" z="0.0"/>
  </node>
  <node id="307623" label="zzzz703" cy:nodeId="358">
    <graphics x="-457.521484375" y="-723.6401977539062" z="0.0"/>
  </node>
  <node id="307622" label="zzzz702" cy:nodeId="359">
    <graphics x="-552.4586791992188" y="-772.3301391601562" z="0.0"/>
  </node>
  <node id="307621" label="zzzz699" cy:nodeId="360">
    <graphics x="23.053470611572266" y="-559.3078002929688" z="0.0"/>
  </node>
  <node id="307620" label="zzzz698" cy:nodeId="361">
    <graphics x="-37.28851318359375" y="-582.3580932617188" z="0.0"/>
  </node>
  <node id="307619" label="zzzz697" cy:nodeId="362">
    <graphics x="-9.094783782958984" y="-603.216796875" z="0.0"/>
  </node>
  <node id="307618" label="zzzz696" cy:nodeId="363">
    <graphics x="-22.680965423583984" y="-561.73095703125" z="0.0"/>
  </node>
  <node id="307617" label="zzzz695" cy:nodeId="364">
    <graphics x="-42.78448486328125" y="-594.0725708007812" z="0.0"/>
  </node>
  <node id="307616" label="zzzz694" cy:nodeId="365">
    <graphics x="-502.13897705078125" y="-603.2974853515625" z="0.0"/>
  </node>
  <node id="307615" label="zzzz692" cy:nodeId="366">
    <graphics x="-551.682861328125" y="-674.9658203125" z="0.0"/>
  </node>
  <node id="307614" label="zzzz691" cy:nodeId="367">
    <graphics x="-538.0346069335938" y="-724.0687866210938" z="0.0"/>
  </node>
  <node id="307613" label="zzzz689" cy:nodeId="368">
    <graphics x="-444.5586853027344" y="-692.1171875" z="0.0"/>
  </node>
  <node id="307612" label="zzzz686" cy:nodeId="369">
    <graphics x="-583.5875244140625" y="-716.7986450195312" z="0.0"/>
  </node>
  <node id="307611" label="zzzz685" cy:nodeId="370">
    <graphics x="-543.349853515625" y="-622.844482421875" z="0.0"/>
  </node>
  <node id="307610" label="zzzz684" cy:nodeId="371">
    <graphics x="-510.63873291015625" y="-697.3922729492188" z="0.0"/>
  </node>
  <node id="307609" label="zzzz683" cy:nodeId="372">
    <graphics x="-577.776611328125" y="-654.9995727539062" z="0.0"/>
  </node>
  <node id="307608" label="zzzz682" cy:nodeId="373">
    <graphics x="-502.6796875" y="-778.79296875" z="0.0"/>
  </node>
  <node id="307607" label="zzzz680" cy:nodeId="374">
    <graphics x="-593.7369995117188" y="-642.2333984375" z="0.0"/>
  </node>
  <node id="307606" label="zzzz672" cy:nodeId="375">
    <graphics x="-498.51953125" y="-686.4434814453125" z="0.0"/>
  </node>
  <node id="307605" label="zzzz671" cy:nodeId="376">
    <graphics x="-558.8546752929688" y="-723.72802734375" z="0.0"/>
  </node>
  <node id="307604" label="zzzz670" cy:nodeId="377">
    <graphics x="-480.9750061035156" y="-704.9658813476562" z="0.0"/>
  </node>
  <node id="307603" label="zzzz669" cy:nodeId="378">
    <graphics x="-521.8278198242188" y="-703.873291015625" z="0.0"/>
  </node>
  <node id="307602" label="zzzz668" cy:nodeId="379">
    <graphics x="-585.3048095703125" y="-704.8394165039062" z="0.0"/>
  </node>
  <node id="307601" label="zzzz667" cy:nodeId="380">
    <graphics x="-597.8223266601562" y="-702.6514282226562" z="0.0"/>
  </node>
  <node id="307600" label="zzzz666" cy:nodeId="381">
    <graphics x="-574.0279541015625" y="-646.916015625" z="0.0"/>
  </node>
  <node id="307599" label="zzzz665" cy:nodeId="382">
    <graphics x="-498.2938232421875" y="-617.3693237304688" z="0.0"/>
  </node>
  <node id="307598" label="zzzz664" cy:nodeId="383">
    <graphics x="-456.74493408203125" y="-658.1445922851562" z="0.0"/>
  </node>
  <node id="307597" label="zzzz663" cy:nodeId="384">
    <graphics x="-543.84619140625" y="-689.2186279296875" z="0.0"/>
  </node>
  <node id="307596" label="zzzz662" cy:nodeId="385">
    <graphics x="-460.940185546875" y="-707.3131713867188" z="0.0"/>
  </node>
  <node id="307595" label="zzzz661" cy:nodeId="386">
    <graphics x="-569.0482177734375" y="-713.3818359375" z="0.0"/>
  </node>
  <node id="307594" label="zzzz660" cy:nodeId="387">
    <graphics x="-490.85498046875" y="-706.2769775390625" z="0.0"/>
  </node>
  <node id="307593" label="zzzz659" cy:nodeId="388">
    <graphics x="-456.13250732421875" y="-720.6007080078125" z="0.0"/>
  </node>
  <node id="307592" label="zzzz658" cy:nodeId="389">
    <graphics x="-494.1539306640625" y="-753.7078247070312" z="0.0"/>
  </node>
  <node id="307591" label="zzzz657" cy:nodeId="390">
    <graphics x="-511.72705078125" y="-677.55126953125" z="0.0"/>
  </node>
  <node id="307590" label="zzzz656" cy:nodeId="391">
    <graphics x="-482.736572265625" y="-748.5386962890625" z="0.0"/>
  </node>
  <node id="307589" label="zzzz655" cy:nodeId="392">
    <graphics x="-488.5675048828125" y="-727.0506591796875" z="0.0"/>
  </node>
  <node id="307588" label="zzzz653" cy:nodeId="393">
    <graphics x="-466.2456970214844" y="-641.2090454101562" z="0.0"/>
  </node>
  <node id="307587" label="zzzz652" cy:nodeId="394">
    <graphics x="-558.2307739257812" y="-678.3079223632812" z="0.0"/>
  </node>
  <node id="307586" label="zzzz651" cy:nodeId="395">
    <graphics x="-221.6248779296875" y="-579.261962890625" z="0.0"/>
  </node>
  <node id="307585" label="zzzz650" cy:nodeId="396">
    <graphics x="-212.93194580078125" y="-553.9468383789062" z="0.0"/>
  </node>
  <node id="307584" label="zzzz649" cy:nodeId="397">
    <graphics x="-275.35400390625" y="-456.7950134277344" z="0.0"/>
  </node>
  <node id="307583" label="zzzz647" cy:nodeId="398">
    <graphics x="-555.9121704101562" y="-666.9732055664062" z="0.0"/>
  </node>
  <node id="307582" label="zzzz644" cy:nodeId="399">
    <graphics x="-577.9719848632812" y="-733.76318359375" z="0.0"/>
  </node>
  <node id="307581" label="zzzz642" cy:nodeId="400">
    <graphics x="-513.9389038085938" y="-754.7343139648438" z="0.0"/>
  </node>
  <node id="307580" label="zzzz640" cy:nodeId="401">
    <graphics x="-563.9900512695312" y="-667.0161743164062" z="0.0"/>
  </node>
  <node id="307579" label="zzzz638" cy:nodeId="402">
    <graphics x="-270.726318359375" y="-503.36505126953125" z="0.0"/>
  </node>
  <node id="307578" label="zzzz636" cy:nodeId="403">
    <graphics x="-575.8457641601562" y="-706.6236572265625" z="0.0"/>
  </node>
  <node id="307577" label="zzzz632" cy:nodeId="404">
    <graphics x="-567.1557006835938" y="-748.5772094726562" z="0.0"/>
  </node>
  <node id="307576" label="zzzz631" cy:nodeId="405">
    <graphics x="-624.0126953125" y="-723.3623046875" z="0.0"/>
  </node>
  <node id="307575" label="zzzz630" cy:nodeId="406">
    <graphics x="-546.1843872070312" y="-666.939453125" z="0.0"/>
  </node>
  <node id="307574" label="zzzz628" cy:nodeId="407">
    <graphics x="-490.81494140625" y="-738.6790771484375" z="0.0"/>
  </node>
  <node id="307573" label="zzzz627" cy:nodeId="408">
    <graphics x="-522.9931030273438" y="-644.6619873046875" z="0.0"/>
  </node>
  <node id="307572" label="zzzz626" cy:nodeId="409">
    <graphics x="-560.1193237304688" y="-718.6287231445312" z="0.0"/>
  </node>
  <node id="307571" label="zzzz625" cy:nodeId="410">
    <graphics x="-526.1756591796875" y="-688.25634765625" z="0.0"/>
  </node>
  <node id="307570" label="zzzz624" cy:nodeId="411">
    <graphics x="-511.26641845703125" y="-680.7362670898438" z="0.0"/>
  </node>
  <node id="307569" label="zzzz623" cy:nodeId="412">
    <graphics x="-542.4495849609375" y="-719.7616577148438" z="0.0"/>
  </node>
  <node id="307568" label="zzzz622" cy:nodeId="413">
    <graphics x="-436.2543029785156" y="-714.817626953125" z="0.0"/>
  </node>
  <node id="307567" label="zzzz620" cy:nodeId="414">
    <graphics x="-548.436279296875" y="-594.8441162109375" z="0.0"/>
  </node>
  <node id="307566" label="zzzz619" cy:nodeId="415">
    <graphics x="-529.7108154296875" y="-629.1415405273438" z="0.0"/>
  </node>
  <node id="307565" label="zzzz618" cy:nodeId="416">
    <graphics x="-66.85308074951172" y="-613.8143920898438" z="0.0"/>
  </node>
  <node id="307564" label="zzzz613" cy:nodeId="417">
    <graphics x="-543.6917724609375" y="-682.091064453125" z="0.0"/>
  </node>
  <node id="307563" label="zzzz612" cy:nodeId="418">
    <graphics x="-468.2969055175781" y="-705.3396606445312" z="0.0"/>
  </node>
  <node id="307562" label="zzzz611" cy:nodeId="419">
    <graphics x="-470.6961669921875" y="-698.3419189453125" z="0.0"/>
  </node>
  <node id="307561" label="zzzz610" cy:nodeId="420">
    <graphics x="-453.6266174316406" y="-630.4581298828125" z="0.0"/>
  </node>
  <node id="307560" label="zzzz609" cy:nodeId="421">
    <graphics x="-433.4660339355469" y="-643.8717041015625" z="0.0"/>
  </node>
  <node id="307559" label="zzzz608" cy:nodeId="422">
    <graphics x="-478.74017333984375" y="-627.59033203125" z="0.0"/>
  </node>
  <node id="307558" label="zzzz607" cy:nodeId="423">
    <graphics x="-460.92913818359375" y="-641.9757080078125" z="0.0"/>
  </node>
  <node id="307557" label="zzzz606" cy:nodeId="424">
    <graphics x="-552.228759765625" y="-607.2669677734375" z="0.0"/>
  </node>
  <node id="307556" label="zzzz605" cy:nodeId="425">
    <graphics x="-524.1777954101562" y="-703.0933227539062" z="0.0"/>
  </node>
  <node id="307555" label="zzzz604" cy:nodeId="426">
    <graphics x="-489.42034912109375" y="-694.9822387695312" z="0.0"/>
  </node>
  <node id="307554" label="zzzz603" cy:nodeId="427">
    <graphics x="-488.256103515625" y="-680.1484375" z="0.0"/>
  </node>
  <node id="307553" label="zzzz602" cy:nodeId="428">
    <graphics x="-555.42431640625" y="-653.1411743164062" z="0.0"/>
  </node>
  <node id="307552" label="zzzz601" cy:nodeId="429">
    <graphics x="-558.5238037109375" y="-673.8714599609375" z="0.0"/>
  </node>
  <node id="307551" label="zzzz600" cy:nodeId="430">
    <graphics x="-576.3057250976562" y="-639.632568359375" z="0.0"/>
  </node>
  <node id="307550" label="zzzz599" cy:nodeId="431">
    <graphics x="-482.54486083984375" y="-743.7946166992188" z="0.0"/>
  </node>
  <node id="307549" label="zzzz598" cy:nodeId="432">
    <graphics x="-520.3209838867188" y="-655.4462280273438" z="0.0"/>
  </node>
  <node id="307548" label="zzzz597" cy:nodeId="433">
    <graphics x="-492.186279296875" y="-640.3736572265625" z="0.0"/>
  </node>
  <node id="307547" label="zzzz596" cy:nodeId="434">
    <graphics x="-479.6547546386719" y="-705.6156616210938" z="0.0"/>
  </node>
  <node id="307546" label="zzzz595" cy:nodeId="435">
    <graphics x="-585.3258666992188" y="-631.0352783203125" z="0.0"/>
  </node>
  <node id="307545" label="zzzz594" cy:nodeId="436">
    <graphics x="-526.7994384765625" y="-661.2298583984375" z="0.0"/>
  </node>
  <node id="307544" label="zzzz593" cy:nodeId="437">
    <graphics x="-454.95172119140625" y="-748.062255859375" z="0.0"/>
  </node>
  <node id="307543" label="zzzz592" cy:nodeId="438">
    <graphics x="-53.71623992919922" y="-365.3088684082031" z="0.0"/>
  </node>
  <node id="307542" label="zzzz591" cy:nodeId="439">
    <graphics x="-506.64349365234375" y="-666.972900390625" z="0.0"/>
  </node>
  <node id="307541" label="zzzz590" cy:nodeId="440">
    <graphics x="-472.6964416503906" y="-736.404052734375" z="0.0"/>
  </node>
  <node id="307540" label="zzzz589" cy:nodeId="441">
    <graphics x="-478.0168151855469" y="-680.1345825195312" z="0.0"/>
  </node>
  <node id="307539" label="zzzz588" cy:nodeId="442">
    <graphics x="-551.778076171875" y="-655.6408081054688" z="0.0"/>
  </node>
  <node id="307538" label="zzzz586" cy:nodeId="443">
    <graphics x="-507.33935546875" y="-611.333251953125" z="0.0"/>
  </node>
  <node id="307537" label="zzzz585" cy:nodeId="444">
    <graphics x="-458.3206787109375" y="-677.2647094726562" z="0.0"/>
  </node>
  <node id="307536" label="zzzz584" cy:nodeId="445">
    <graphics x="-524.1803588867188" y="-716.4029541015625" z="0.0"/>
  </node>
  <node id="307535" label="zzzz583" cy:nodeId="446">
    <graphics x="-502.76812744140625" y="-712.2437744140625" z="0.0"/>
  </node>
  <node id="307534" label="zzzz582" cy:nodeId="447">
    <graphics x="-515.9476928710938" y="-701.8479614257812" z="0.0"/>
  </node>
  <node id="307533" label="zzzz581" cy:nodeId="448">
    <graphics x="-577.50390625" y="-693.4097900390625" z="0.0"/>
  </node>
  <node id="307532" label="zzzz575" cy:nodeId="449">
    <graphics x="-555.0285034179688" y="-708.8502807617188" z="0.0"/>
  </node>
  <node id="307531" label="zzzz574" cy:nodeId="450">
    <graphics x="-485.98291015625" y="-622.0873413085938" z="0.0"/>
  </node>
  <node id="307530" label="zzzz569" cy:nodeId="451">
    <graphics x="-466.41754150390625" y="-600.9715576171875" z="0.0"/>
  </node>
  <node id="307529" label="zzzz568" cy:nodeId="452">
    <graphics x="-516.9856567382812" y="-778.3366088867188" z="0.0"/>
  </node>
  <node id="307528" label="zzzz567" cy:nodeId="453">
    <graphics x="-435.387451171875" y="-690.6295776367188" z="0.0"/>
  </node>
  <node id="307527" label="zzzz566" cy:nodeId="454">
    <graphics x="-552.659912109375" y="-647.9874877929688" z="0.0"/>
  </node>
  <node id="307526" label="zzzz565" cy:nodeId="455">
    <graphics x="-557.5654907226562" y="-721.4515991210938" z="0.0"/>
  </node>
  <node id="307525" label="zzzz557" cy:nodeId="456">
    <graphics x="-539.4692993164062" y="-727.5194702148438" z="0.0"/>
  </node>
  <node id="307524" label="zzzz556" cy:nodeId="457">
    <graphics x="-553.9943237304688" y="-651.8438720703125" z="0.0"/>
  </node>
  <node id="307523" label="zzzz555" cy:nodeId="458">
    <graphics x="-553.1188354492188" y="-739.3775024414062" z="0.0"/>
  </node>
  <node id="307522" label="zzzz553" cy:nodeId="459">
    <graphics x="-526.310302734375" y="-750.4589233398438" z="0.0"/>
  </node>
  <node id="307521" label="zzzz551" cy:nodeId="460">
    <graphics x="-546.6834106445312" y="-583.7470092773438" z="0.0"/>
  </node>
  <node id="307520" label="zzzz549" cy:nodeId="461">
    <graphics x="-465.474853515625" y="-680.697021484375" z="0.0"/>
  </node>
  <node id="307519" label="zzzz548" cy:nodeId="462">
    <graphics x="-585.5128784179688" y="-711.4417114257812" z="0.0"/>
  </node>
  <node id="307518" label="zzzz544" cy:nodeId="463">
    <graphics x="-513.9288940429688" y="-700.8919677734375" z="0.0"/>
  </node>
  <node id="307517" label="zzzz543" cy:nodeId="464">
    <graphics x="-9.314815521240234" y="-563.2696533203125" z="0.0"/>
  </node>
  <node id="307516" label="zzzz542" cy:nodeId="465">
    <graphics x="-549.5955810546875" y="-672.8682250976562" z="0.0"/>
  </node>
  <node id="307515" label="zzzz541" cy:nodeId="466">
    <graphics x="-503.1201171875" y="-768.2628173828125" z="0.0"/>
  </node>
  <node id="307514" label="zzzz540" cy:nodeId="467">
    <graphics x="-497.8243408203125" y="-682.174560546875" z="0.0"/>
  </node>
  <node id="307513" label="zzzz539" cy:nodeId="468">
    <graphics x="-534.329833984375" y="-692.9315795898438" z="0.0"/>
  </node>
  <node id="307512" label="zzzz538" cy:nodeId="469">
    <graphics x="-499.3656005859375" y="-715.6736450195312" z="0.0"/>
  </node>
  <node id="307511" label="zzzz537" cy:nodeId="470">
    <graphics x="-587.8742065429688" y="-686.990478515625" z="0.0"/>
  </node>
  <node id="307510" label="zzzz536" cy:nodeId="471">
    <graphics x="-439.6870422363281" y="-669.1803588867188" z="0.0"/>
  </node>
  <node id="307509" label="zzzz533" cy:nodeId="472">
    <graphics x="-454.3604736328125" y="-626.0159912109375" z="0.0"/>
  </node>
  <node id="307508" label="zzzz532" cy:nodeId="473">
    <graphics x="-515.6608276367188" y="-691.8826904296875" z="0.0"/>
  </node>
  <node id="307507" label="zzzz531" cy:nodeId="474">
    <graphics x="-531.9920043945312" y="-756.4521484375" z="0.0"/>
  </node>
  <node id="307506" label="zzzz530" cy:nodeId="475">
    <graphics x="-431.2708435058594" y="-637.7543334960938" z="0.0"/>
  </node>
  <node id="307505" label="zzzz529" cy:nodeId="476">
    <graphics x="-542.3401489257812" y="-720.5868530273438" z="0.0"/>
  </node>
  <node id="307504" label="zzzz528" cy:nodeId="477">
    <graphics x="-491.526123046875" y="-675.9751586914062" z="0.0"/>
  </node>
  <node id="307503" label="zzzz527" cy:nodeId="478">
    <graphics x="-484.98486328125" y="-682.0491943359375" z="0.0"/>
  </node>
  <node id="307502" label="zzzz526" cy:nodeId="479">
    <graphics x="-575.1314086914062" y="-697.2612915039062" z="0.0"/>
  </node>
  <node id="307501" label="zzzz523" cy:nodeId="480">
    <graphics x="-540.7239990234375" y="-691.6846923828125" z="0.0"/>
  </node>
  <node id="307500" label="zzzz522" cy:nodeId="481">
    <graphics x="-559.3681030273438" y="-608.3611450195312" z="0.0"/>
  </node>
  <node id="307499" label="zzzz521" cy:nodeId="482">
    <graphics x="-511.75860595703125" y="-727.5037841796875" z="0.0"/>
  </node>
  <node id="307498" label="zzzz520" cy:nodeId="483">
    <graphics x="-503.72021484375" y="-682.8924560546875" z="0.0"/>
  </node>
  <node id="307497" label="zzzz519" cy:nodeId="484">
    <graphics x="-515.2105102539062" y="-621.583740234375" z="0.0"/>
  </node>
  <node id="307496" label="zzzz518" cy:nodeId="485">
    <graphics x="-468.0786437988281" y="-645.1309204101562" z="0.0"/>
  </node>
  <node id="307495" label="zzzz517" cy:nodeId="486">
    <graphics x="-483.8118896484375" y="-766.0446166992188" z="0.0"/>
  </node>
  <node id="307494" label="zzzz512" cy:nodeId="487">
    <graphics x="-580.7997436523438" y="-656.434326171875" z="0.0"/>
  </node>
  <node id="307493" label="zzzz511" cy:nodeId="488">
    <graphics x="54.23029327392578" y="-438.1514587402344" z="0.0"/>
  </node>
  <node id="307492" label="zzzz510" cy:nodeId="489">
    <graphics x="45.76141357421875" y="-387.012451171875" z="0.0"/>
  </node>
  <node id="307491" label="zzzz509" cy:nodeId="490">
    <graphics x="-16.001094818115234" y="-401.41864013671875" z="0.0"/>
  </node>
  <node id="307490" label="zzzz508" cy:nodeId="491">
    <graphics x="28.605777740478516" y="-428.5855712890625" z="0.0"/>
  </node>
  <node id="307489" label="zzzz507" cy:nodeId="492">
    <graphics x="-544.1340942382812" y="-599.9387817382812" z="0.0"/>
  </node>
  <node id="307488" label="zzzz506" cy:nodeId="493">
    <graphics x="-577.8392333984375" y="-581.6338500976562" z="0.0"/>
  </node>
  <node id="307487" label="zzzz505" cy:nodeId="494">
    <graphics x="-401.83935546875" y="-649.665283203125" z="0.0"/>
  </node>
  <node id="307486" label="zzzz504" cy:nodeId="495">
    <graphics x="-440.5462646484375" y="-710.4732055664062" z="0.0"/>
  </node>
  <node id="307485" label="zzzz503" cy:nodeId="496">
    <graphics x="-523.2891235351562" y="-705.7758178710938" z="0.0"/>
  </node>
  <node id="307484" label="zzzz502" cy:nodeId="497">
    <graphics x="-612.2457275390625" y="-670.1895141601562" z="0.0"/>
  </node>
  <node id="307483" label="zzzz500" cy:nodeId="498">
    <graphics x="-481.5293884277344" y="-645.8606567382812" z="0.0"/>
  </node>
  <node id="307482" label="zzzz498" cy:nodeId="499">
    <graphics x="-601.347900390625" y="-695.5061645507812" z="0.0"/>
  </node>
  <node id="307481" label="zzzz497" cy:nodeId="500">
    <graphics x="-466.31524658203125" y="-741.8428344726562" z="0.0"/>
  </node>
  <node id="307480" label="zzzz495" cy:nodeId="501">
    <graphics x="-96.61730194091797" y="-557.2381591796875" z="0.0"/>
  </node>
  <node id="307479" label="zzzz494" cy:nodeId="502">
    <graphics x="-53.33953399781606" y="-325.9824597666227" z="0.0"/>
  </node>
  <node id="307478" label="zzzz493" cy:nodeId="503">
    <graphics x="-255.45166015625" y="-550.4722900390625" z="0.0"/>
  </node>
  <node id="307477" label="zzzz491" cy:nodeId="504">
    <graphics x="-640.1640014648438" y="-638.0350952148438" z="0.0"/>
  </node>
  <node id="307476" label="zzzz490" cy:nodeId="505">
    <graphics x="-571.6790771484375" y="-635.4021606445312" z="0.0"/>
  </node>
  <node id="307475" label="zzzz489" cy:nodeId="506">
    <graphics x="-495.7584228515625" y="-650.567626953125" z="0.0"/>
  </node>
  <node id="307474" label="zzzz488" cy:nodeId="507">
    <graphics x="-563.9397583007812" y="-668.9236450195312" z="0.0"/>
  </node>
  <node id="307473" label="zzzz487" cy:nodeId="508">
    <graphics x="-460.4126281738281" y="-718.9240112304688" z="0.0"/>
  </node>
  <node id="307472" label="zzzz486" cy:nodeId="509">
    <graphics x="-232.18157958984375" y="-524.5429077148438" z="0.0"/>
  </node>
  <node id="307471" label="zzzz485" cy:nodeId="510">
    <graphics x="-539.6688232421875" y="-666.9688720703125" z="0.0"/>
  </node>
  <node id="307470" label="zzzz484" cy:nodeId="511">
    <graphics x="70.31415557861328" y="-427.3919982910156" z="0.0"/>
  </node>
  <node id="307469" label="zzzz483" cy:nodeId="512">
    <graphics x="30.663822174072266" y="-392.26116943359375" z="0.0"/>
  </node>
  <node id="307468" label="zzzz482" cy:nodeId="513">
    <graphics x="-485.4219970703125" y="-646.7036743164062" z="0.0"/>
  </node>
  <node id="307467" label="zzzz481" cy:nodeId="514">
    <graphics x="-512.1892700195312" y="-618.6047973632812" z="0.0"/>
  </node>
  <node id="307466" label="zzzz480" cy:nodeId="515">
    <graphics x="-486.72747802734375" y="-690.3676147460938" z="0.0"/>
  </node>
  <node id="307465" label="zzzz479" cy:nodeId="516">
    <graphics x="-511.89129638671875" y="-674.2083129882812" z="0.0"/>
  </node>
  <node id="307464" label="zzzz478" cy:nodeId="517">
    <graphics x="-530.4083251953125" y="-655.8441772460938" z="0.0"/>
  </node>
  <node id="307463" label="zzzz477" cy:nodeId="518">
    <graphics x="-483.69378662109375" y="-649.85595703125" z="0.0"/>
  </node>
  <node id="307462" label="zzzz476" cy:nodeId="519">
    <graphics x="69.06366729736328" y="-506.86407470703125" z="0.0"/>
  </node>
  <node id="307461" label="zzzz475" cy:nodeId="520">
    <graphics x="-528.3800048828125" y="-704.4557495117188" z="0.0"/>
  </node>
  <node id="307460" label="zzzz474" cy:nodeId="521">
    <graphics x="-560.4397583007812" y="-746.9176635742188" z="0.0"/>
  </node>
  <node id="307459" label="zzzz473" cy:nodeId="522">
    <graphics x="-484.479736328125" y="-629.5637817382812" z="0.0"/>
  </node>
  <node id="307458" label="zzzz472" cy:nodeId="523">
    <graphics x="-472.9860534667969" y="-673.1522216796875" z="0.0"/>
  </node>
  <node id="307457" label="zzzz469" cy:nodeId="524">
    <graphics x="-495.3358154296875" y="-646.6273193359375" z="0.0"/>
  </node>
  <node id="307456" label="zzzz468" cy:nodeId="525">
    <graphics x="-490.5185546875" y="-660.4851684570312" z="0.0"/>
  </node>
  <node id="307455" label="zzzz467" cy:nodeId="526">
    <graphics x="-477.4682312011719" y="-698.261962890625" z="0.0"/>
  </node>
  <node id="307454" label="zzzz466" cy:nodeId="527">
    <graphics x="-452.0165100097656" y="-668.4894409179688" z="0.0"/>
  </node>
  <node id="307453" label="zzzz464" cy:nodeId="528">
    <graphics x="-535.654052734375" y="-638.95263671875" z="0.0"/>
  </node>
  <node id="307452" label="zzzz462" cy:nodeId="529">
    <graphics x="-537.1991577148438" y="-582.5478515625" z="0.0"/>
  </node>
  <node id="307451" label="zzzz460" cy:nodeId="530">
    <graphics x="-564.115478515625" y="-760.1986694335938" z="0.0"/>
  </node>
  <node id="307450" label="zzzz459" cy:nodeId="531">
    <graphics x="-578.0628662109375" y="-688.7606811523438" z="0.0"/>
  </node>
  <node id="307449" label="zzzz458" cy:nodeId="532">
    <graphics x="-469.7696228027344" y="-662.6791381835938" z="0.0"/>
  </node>
  <node id="307448" label="zzzz457" cy:nodeId="533">
    <graphics x="-480.8804931640625" y="-740.5166625976562" z="0.0"/>
  </node>
  <node id="307447" label="zzzz456" cy:nodeId="534">
    <graphics x="-565.391357421875" y="-630.230224609375" z="0.0"/>
  </node>
  <node id="307446" label="zzzz454" cy:nodeId="535">
    <graphics x="-467.44635009765625" y="-726.5993041992188" z="0.0"/>
  </node>
  <node id="307445" label="zzzz452" cy:nodeId="536">
    <graphics x="-561.99072265625" y="-664.3889770507812" z="0.0"/>
  </node>
  <node id="307444" label="zzzz451" cy:nodeId="537">
    <graphics x="-556.7434692382812" y="-718.8263549804688" z="0.0"/>
  </node>
  <node id="307443" label="zzzz449" cy:nodeId="538">
    <graphics x="-563.9183959960938" y="-653.7855224609375" z="0.0"/>
  </node>
  <node id="307442" label="zzzz447" cy:nodeId="539">
    <graphics x="-503.24053955078125" y="-713.4298095703125" z="0.0"/>
  </node>
  <node id="307441" label="zzzz446" cy:nodeId="540">
    <graphics x="-525.3058471679688" y="-753.5164184570312" z="0.0"/>
  </node>
  <node id="307440" label="zzzz445" cy:nodeId="541">
    <graphics x="-511.67462158203125" y="-691.5943603515625" z="0.0"/>
  </node>
  <node id="307439" label="zzzz444" cy:nodeId="542">
    <graphics x="-496.9158935546875" y="-670.88818359375" z="0.0"/>
  </node>
  <node id="307438" label="zzzz442" cy:nodeId="543">
    <graphics x="-544.68603515625" y="-719.9505004882812" z="0.0"/>
  </node>
  <node id="307437" label="zzzz436" cy:nodeId="544">
    <graphics x="-569.7079467773438" y="-688.227294921875" z="0.0"/>
  </node>
  <node id="307436" label="zzzz435" cy:nodeId="545">
    <graphics x="-477.18853759765625" y="-720.7603149414062" z="0.0"/>
  </node>
  <node id="307435" label="zzzz434" cy:nodeId="546">
    <graphics x="-505.22674560546875" y="-645.5879516601562" z="0.0"/>
  </node>
  <node id="307434" label="zzzz433" cy:nodeId="547">
    <graphics x="-504.92449951171875" y="-732.835205078125" z="0.0"/>
  </node>
  <node id="307433" label="zzzz432" cy:nodeId="548">
    <graphics x="-476.43487548828125" y="-670.962890625" z="0.0"/>
  </node>
  <node id="307432" label="zzzz431" cy:nodeId="549">
    <graphics x="-461.8943176269531" y="-618.2835083007812" z="0.0"/>
  </node>
  <node id="307431" label="zzzz429" cy:nodeId="550">
    <graphics x="-505.8974609375" y="-737.59375" z="0.0"/>
  </node>
  <node id="307430" label="zzzz426" cy:nodeId="551">
    <graphics x="-563.513671875" y="-724.3157348632812" z="0.0"/>
  </node>
  <node id="307429" label="zzzz425" cy:nodeId="552">
    <graphics x="-517.5969848632812" y="-729.7388305664062" z="0.0"/>
  </node>
  <node id="307428" label="zzzz420" cy:nodeId="553">
    <graphics x="-530.0675659179688" y="-670.2813720703125" z="0.0"/>
  </node>
  <node id="307427" label="zzzz419" cy:nodeId="554">
    <graphics x="-562.4359130859375" y="-761.9163818359375" z="0.0"/>
  </node>
  <node id="307426" label="zzzz418" cy:nodeId="555">
    <graphics x="-543.3626708984375" y="-750.6810913085938" z="0.0"/>
  </node>
  <node id="307425" label="zzzz417" cy:nodeId="556">
    <graphics x="-570.9129028320312" y="-739.1210327148438" z="0.0"/>
  </node>
  <node id="307424" label="zzzz416" cy:nodeId="557">
    <graphics x="55.54425811767578" y="-399.040771484375" z="0.0"/>
  </node>
  <node id="307423" label="zzzz415" cy:nodeId="558">
    <graphics x="-542.604248046875" y="-697.3096313476562" z="0.0"/>
  </node>
  <node id="307422" label="zzzz413" cy:nodeId="559">
    <graphics x="-596.384765625" y="-678.9827270507812" z="0.0"/>
  </node>
  <node id="307421" label="zzzz412" cy:nodeId="560">
    <graphics x="-550.9115600585938" y="-615.388427734375" z="0.0"/>
  </node>
  <node id="307420" label="zzzz411" cy:nodeId="561">
    <graphics x="-511.7774658203125" y="-608.5892944335938" z="0.0"/>
  </node>
  <node id="307419" label="zzzz410" cy:nodeId="562">
    <graphics x="-489.780517578125" y="-727.7975463867188" z="0.0"/>
  </node>
  <node id="307418" label="zzzz409" cy:nodeId="563">
    <graphics x="-579.0283203125" y="-680.7667846679688" z="0.0"/>
  </node>
  <node id="307417" label="zzzz408" cy:nodeId="564">
    <graphics x="-547.0747680664062" y="-708.4579467773438" z="0.0"/>
  </node>
  <node id="307416" label="zzzz407" cy:nodeId="565">
    <graphics x="-529.0878295898438" y="-679.8465576171875" z="0.0"/>
  </node>
  <node id="307415" label="zzzz406" cy:nodeId="566">
    <graphics x="-548.3057250976562" y="-670.0888671875" z="0.0"/>
  </node>
  <node id="307414" label="zzzz405" cy:nodeId="567">
    <graphics x="-533.5947875976562" y="-759.2681274414062" z="0.0"/>
  </node>
  <node id="307413" label="zzzz404" cy:nodeId="568">
    <graphics x="-504.16650390625" y="-733.940185546875" z="0.0"/>
  </node>
  <node id="307412" label="zzzz401" cy:nodeId="569">
    <graphics x="-543.9480590820312" y="-620.00390625" z="0.0"/>
  </node>
  <node id="307411" label="zzzz398" cy:nodeId="570">
    <graphics x="2477.663151549059" y="-273.4115788767301" z="0.0"/>
  </node>
  <node id="307410" label="zzzz397" cy:nodeId="571">
    <graphics x="2576.0412519442616" y="-250.39454243874184" z="0.0"/>
  </node>
  <node id="307409" label="zzzz396" cy:nodeId="572">
    <graphics x="2570.602727698046" y="-266.9693410227262" z="0.0"/>
  </node>
  <node id="307408" label="zzzz395" cy:nodeId="573">
    <graphics x="2712.499363707262" y="-485.51930974220863" z="0.0"/>
  </node>
  <node id="307407" label="zzzz394" cy:nodeId="574">
    <graphics x="2690.227391051012" y="-432.56589482521645" z="0.0"/>
  </node>
  <node id="307406" label="zzzz393" cy:nodeId="575">
    <graphics x="2505.9188735949574" y="-342.47182439064613" z="0.0"/>
  </node>
  <node id="307405" label="zzzz392" cy:nodeId="576">
    <graphics x="2517.1578338610707" y="-333.7901303598844" z="0.0"/>
  </node>
  <node id="307404" label="zzzz391" cy:nodeId="577">
    <graphics x="2543.609730528551" y="-275.61647771095863" z="0.0"/>
  </node>
  <node id="307403" label="zzzz390" cy:nodeId="578">
    <graphics x="2555.405510710436" y="-262.58535168861977" z="0.0"/>
  </node>
  <node id="307402" label="zzzz389" cy:nodeId="579">
    <graphics x="2748.415394591051" y="-437.6585309336149" z="0.0"/>
  </node>
  <node id="307401" label="zzzz388" cy:nodeId="580">
    <graphics x="2614.4662521349965" y="-230.60763715004555" z="0.0"/>
  </node>
  <node id="307400" label="zzzz387" cy:nodeId="581">
    <graphics x="2527.2227180468617" y="-251.1932809183561" z="0.0"/>
  </node>
  <node id="307399" label="zzzz386" cy:nodeId="582">
    <graphics x="2650.2208602892933" y="-494.84265874123207" z="0.0"/>
  </node>
  <node id="307398" label="zzzz385" cy:nodeId="583">
    <graphics x="2725.317692564684" y="-425.052604419943" z="0.0"/>
  </node>
  <node id="307397" label="zzzz384" cy:nodeId="584">
    <graphics x="2680.148060606676" y="-494.628043873068" z="0.0"/>
  </node>
  <node id="307396" label="zzzz383" cy:nodeId="585">
    <graphics x="2719.118428038317" y="-406.6453015634977" z="0.0"/>
  </node>
  <node id="307395" label="zzzz382" cy:nodeId="586">
    <graphics x="2670.1469619738637" y="-460.22083256935707" z="0.0"/>
  </node>
  <node id="307394" label="zzzz381" cy:nodeId="587">
    <graphics x="2776.544026182848" y="-266.28824780678383" z="0.0"/>
  </node>
  <node id="307393" label="zzzz380" cy:nodeId="588">
    <graphics x="2503.6615341174183" y="-250.11608956551186" z="0.0"/>
  </node>
  <node id="307392" label="zzzz379" cy:nodeId="589">
    <graphics x="2744.312336729723" y="-466.6226270029508" z="0.0"/>
  </node>
  <node id="307391" label="zzzz378" cy:nodeId="590">
    <graphics x="2656.835873411852" y="-466.39392827248207" z="0.0"/>
  </node>
  <node id="307390" label="zzzz377" cy:nodeId="591">
    <graphics x="2670.4993103015004" y="-444.74744389748207" z="0.0"/>
  </node>
  <node id="307389" label="zzzz376" cy:nodeId="592">
    <graphics x="2497.29187469359" y="-342.6287305185758" z="0.0"/>
  </node>
  <node id="307388" label="zzzz375" cy:nodeId="593">
    <graphics x="2534.994652556139" y="-345.5679395029508" z="0.0"/>
  </node>
  <node id="307387" label="zzzz374" cy:nodeId="594">
    <graphics x="2501.636959837633" y="-311.24658177590004" z="0.0"/>
  </node>
  <node id="307386" label="zzzz373" cy:nodeId="595">
    <graphics x="2615.2344062792836" y="-230.51239464974037" z="0.0"/>
  </node>
  <node id="307385" label="zzzz372" cy:nodeId="596">
    <graphics x="2724.153401182848" y="-470.93003056740395" z="0.0"/>
  </node>
  <node id="307384" label="zzzz371" cy:nodeId="597">
    <graphics x="2682.874981688219" y="-394.68531010841957" z="0.0"/>
  </node>
  <node id="307383" label="zzzz370" cy:nodeId="598">
    <graphics x="2746.214680479723" y="-379.536979419943" z="0.0"/>
  </node>
  <node id="307382" label="zzzz369" cy:nodeId="599">
    <graphics x="2717.9618423449574" y="-397.54054997658363" z="0.0"/>
  </node>
  <node id="307381" label="zzzz368" cy:nodeId="600">
    <graphics x="2648.7340286242543" y="-450.59592412209145" z="0.0"/>
  </node>
  <node id="307380" label="zzzz367" cy:nodeId="601">
    <graphics x="2507.1057708727894" y="-293.8933713266813" z="0.0"/>
  </node>
  <node id="307379" label="zzzz366" cy:nodeId="602">
    <graphics x="2734.241322325426" y="-408.28113530373207" z="0.0"/>
  </node>
  <node id="307378" label="zzzz365" cy:nodeId="603">
    <graphics x="1718.0317123400746" y="-255.20395634865395" z="0.0"/>
  </node>
  <node id="307377" label="zzzz364" cy:nodeId="604">
    <graphics x="2531.319645689684" y="-286.30891392922035" z="0.0"/>
  </node>
  <node id="307376" label="zzzz363" cy:nodeId="605">
    <graphics x="2488.460202025133" y="-268.0855748484098" z="0.0"/>
  </node>
  <node id="307375" label="zzzz362" cy:nodeId="606">
    <graphics x="2498.09265594359" y="-329.12564061379067" z="0.0"/>
  </node>
  <node id="307374" label="zzzz361" cy:nodeId="607">
    <graphics x="2756.506459044176" y="-444.93125127052895" z="0.0"/>
  </node>
  <node id="307373" label="zzzz360" cy:nodeId="608">
    <graphics x="2673.7701766955433" y="-430.3928906748258" z="0.0"/>
  </node>
  <node id="307372" label="zzzz359" cy:nodeId="609">
    <graphics x="2708.2826126086293" y="-462.7425000498258" z="0.0"/>
  </node>
  <node id="307371" label="zzzz358" cy:nodeId="610">
    <graphics x="2678.6424377429066" y="-447.37660954689613" z="0.0"/>
  </node>
  <node id="307370" label="zzzz357" cy:nodeId="611">
    <graphics x="2685.1350830065785" y="-201.5278928110563" z="0.0"/>
  </node>
  <node id="307369" label="zzzz356" cy:nodeId="612">
    <graphics x="2686.1885040270863" y="-447.8751904795133" z="0.0"/>
  </node>
  <node id="307368" label="zzzz355" cy:nodeId="613">
    <graphics x="2530.556450651842" y="-523.5067517588102" z="0.0"/>
  </node>
  <node id="307367" label="zzzz354" cy:nodeId="614">
    <graphics x="2696.0717361437855" y="-492.70302556252113" z="0.0"/>
  </node>
  <node id="307366" label="zzzz353" cy:nodeId="615">
    <graphics x="2713.7518966662465" y="-441.25904057716957" z="0.0"/>
  </node>
  <node id="307365" label="zzzz352" cy:nodeId="616">
    <graphics x="1808.766209410387" y="55.827354686502304" z="0.0"/>
  </node>
  <node id="307364" label="zzzz351" cy:nodeId="617">
    <graphics x="2694.820591734606" y="-459.8323437998258" z="0.0"/>
  </node>
  <node id="307363" label="zzzz350" cy:nodeId="618">
    <graphics x="2711.6965225207387" y="-434.40332768654457" z="0.0"/>
  </node>
  <node id="307362" label="zzzz349" cy:nodeId="619">
    <graphics x="2644.881329344469" y="-431.5932080576383" z="0.0"/>
  </node>
  <node id="307361" label="zzzz348" cy:nodeId="620">
    <graphics x="2533.4740951525746" y="-262.82312558388344" z="0.0"/>
  </node>
  <node id="307360" label="zzzz347" cy:nodeId="621">
    <graphics x="2555.8997619616566" y="-309.7384412119352" z="0.0"/>
  </node>
  <node id="307359" label="zzzz346" cy:nodeId="622">
    <graphics x="2670.599758909899" y="-423.4018170664274" z="0.0"/>
  </node>
  <node id="307358" label="zzzz345" cy:nodeId="623">
    <graphics x="2658.7381713854847" y="-460.8216931650602" z="0.0"/>
  </node>
  <node id="307357" label="zzzz344" cy:nodeId="624">
    <graphics x="2553.226498411852" y="-277.50753377174965" z="0.0"/>
  </node>
  <node id="307356" label="zzzz343" cy:nodeId="625">
    <graphics x="2631.6472442614613" y="-446.15923283791176" z="0.0"/>
  </node>
  <node id="307355" label="zzzz342" cy:nodeId="626">
    <graphics x="2567.733660505968" y="-309.45234654640785" z="0.0"/>
  </node>
  <node id="307354" label="zzzz341" cy:nodeId="627">
    <graphics x="2516.323448942858" y="-293.9884831736051" z="0.0"/>
  </node>
  <node id="307353" label="zzzz340" cy:nodeId="628">
    <graphics x="2569.42122058745" y="-300.7317502329313" z="0.0"/>
  </node>
  <node id="307352" label="zzzz339" cy:nodeId="629">
    <graphics x="2648.217953489977" y="-409.1105573008024" z="0.0"/>
  </node>
  <node id="307351" label="zzzz338" cy:nodeId="630">
    <graphics x="2694.482342528063" y="-500.5418164560758" z="0.0"/>
  </node>
  <node id="307350" label="zzzz337" cy:nodeId="631">
    <graphics x="2715.9625747668324" y="-540.8913647959196" z="0.0"/>
  </node>
  <node id="307349" label="zzzz336" cy:nodeId="632">
    <graphics x="2670.473049925524" y="-509.5417859384977" z="0.0"/>
  </node>
  <node id="307348" label="zzzz335" cy:nodeId="633">
    <graphics x="2723.446903990465" y="-495.67588017677895" z="0.0"/>
  </node>
  <node id="307347" label="zzzz334" cy:nodeId="634">
    <graphics x="2743.1395462023793" y="-504.2204968759977" z="0.0"/>
  </node>
  <node id="307346" label="zzzz333" cy:nodeId="635">
    <graphics x="-1775.2274963391246" y="2327.63996912742" z="0.0"/>
  </node>
  <node id="307345" label="zzzz332" cy:nodeId="636">
    <graphics x="-1695.0192038548412" y="2178.0630419423615" z="0.0"/>
  </node>
  <node id="307344" label="zzzz331" cy:nodeId="637">
    <graphics x="-466.4980163574219" y="2176.580322265625" z="0.0"/>
  </node>
  <node id="307343" label="zzzz330" cy:nodeId="638">
    <graphics x="2737.944645689684" y="-407.50693486427895" z="0.0"/>
  </node>
  <node id="307342" label="zzzz329" cy:nodeId="639">
    <graphics x="2672.4250915515004" y="-433.9848553965055" z="0.0"/>
  </node>
  <node id="307341" label="zzzz328" cy:nodeId="640">
    <graphics x="2745.5751846301137" y="-383.2833936045133" z="0.0"/>
  </node>
  <node id="307340" label="zzzz327" cy:nodeId="641">
    <graphics x="2604.257588194567" y="-201.60255025124184" z="0.0"/>
  </node>
  <node id="307339" label="zzzz326" cy:nodeId="642">
    <graphics x="2413.7253005969105" y="-557.764259083029" z="0.0"/>
  </node>
  <node id="307338" label="zzzz325" cy:nodeId="643">
    <graphics x="2532.6564987170277" y="-279.5136411020719" z="0.0"/>
  </node>
  <node id="307337" label="zzzz324" cy:nodeId="644">
    <graphics x="2492.516339110094" y="-336.97773717140785" z="0.0"/>
  </node>
  <node id="307336" label="zzzz323" cy:nodeId="645">
    <graphics x="2502.4563262927113" y="-310.925651294943" z="0.0"/>
  </node>
  <node id="307335" label="zzzz322" cy:nodeId="646">
    <graphics x="2541.4814918505726" y="-287.633113605734" z="0.0"/>
  </node>
  <node id="307334" label="zzzz321" cy:nodeId="647">
    <graphics x="2543.9219062792836" y="-288.54297612404457" z="0.0"/>
  </node>
  <node id="307333" label="zzzz320" cy:nodeId="648">
    <graphics x="2481.3925064074574" y="-317.69714329933754" z="0.0"/>
  </node>
  <node id="307332" label="zzzz319" cy:nodeId="649">
    <graphics x="2538.9949882494984" y="-324.47683690285317" z="0.0"/>
  </node>
  <node id="307331" label="zzzz318" cy:nodeId="650">
    <graphics x="2722.2472885119496" y="-414.8016736338102" z="0.0"/>
  </node>
  <node id="307330" label="zzzz317" cy:nodeId="651">
    <graphics x="2660.6980102526722" y="-457.82732365822426" z="0.0"/>
  </node>
  <node id="307329" label="zzzz316" cy:nodeId="652">
    <graphics x="2657.3545654284535" y="-466.8240582773649" z="0.0"/>
  </node>
  <node id="307328" label="zzzz315" cy:nodeId="653">
    <graphics x="2752.7836196887074" y="-408.76804326271645" z="0.0"/>
  </node>
  <node id="307327" label="zzzz314" cy:nodeId="654">
    <graphics x="2708.770146177965" y="-458.99436162209145" z="0.0"/>
  </node>
  <node id="307326" label="zzzz313" cy:nodeId="655">
    <graphics x="2754.1615798937855" y="-539.5560376474821" z="0.0"/>
  </node>
  <node id="307325" label="zzzz312" cy:nodeId="656">
    <graphics x="2718.6449478137074" y="-523.2749707529508" z="0.0"/>
  </node>
  <node id="307324" label="zzzz311" cy:nodeId="657">
    <graphics x="2759.217137144762" y="-496.47832463478676" z="0.0"/>
  </node>
  <node id="307323" label="zzzz310" cy:nodeId="658">
    <graphics x="2660.1514099108754" y="-405.44565556740395" z="0.0"/>
  </node>
  <node id="307322" label="zzzz309" cy:nodeId="659">
    <graphics x="2764.4760635363637" y="-459.83850835060707" z="0.0"/>
  </node>
  <node id="307321" label="zzzz308" cy:nodeId="660">
    <graphics x="2783.4826705920277" y="-420.98064397072426" z="0.0"/>
  </node>
  <node id="307320" label="zzzz307" cy:nodeId="661">
    <graphics x="2582.113364504534" y="-270.6106107065641" z="0.0"/>
  </node>
  <node id="307319" label="zzzz306" cy:nodeId="662">
    <graphics x="2540.8120010363637" y="-324.8538281748258" z="0.0"/>
  </node>
  <node id="307318" label="zzzz305" cy:nodeId="663">
    <graphics x="2526.6948135363637" y="-298.6606900522672" z="0.0"/>
  </node>
  <node id="307317" label="zzzz304" cy:nodeId="664">
    <graphics x="2553.7321670519887" y="-318.957015735861" z="0.0"/>
  </node>
  <node id="307316" label="zzzz303" cy:nodeId="665">
    <graphics x="2702.0630615222035" y="-475.19077275490395" z="0.0"/>
  </node>
  <node id="307315" label="zzzz302" cy:nodeId="666">
    <graphics x="2518.3878982531605" y="-513.2335278818571" z="0.0"/>
  </node>
  <node id="307314" label="zzzz301" cy:nodeId="667">
    <graphics x="2708.39099578734" y="-468.828239185568" z="0.0"/>
  </node>
  <node id="307313" label="zzzz300" cy:nodeId="668">
    <graphics x="2598.5446269976674" y="-190.06228993630043" z="0.0"/>
  </node>
  <node id="307312" label="zzzz299" cy:nodeId="669">
    <graphics x="2549.280121611315" y="-178.21970341896645" z="0.0"/>
  </node>
  <node id="307311" label="zzzz298" cy:nodeId="670">
    <graphics x="2587.69581584807" y="-186.69802830910317" z="0.0"/>
  </node>
  <node id="307310" label="zzzz297" cy:nodeId="671">
    <graphics x="2580.6761472689686" y="-224.05943654274574" z="0.0"/>
  </node>
  <node id="307309" label="zzzz296" cy:nodeId="672">
    <graphics x="2506.534992979723" y="-267.818099720236" z="0.0"/>
  </node>
  <node id="307308" label="zzzz295" cy:nodeId="673">
    <graphics x="2523.6785400378285" y="-337.6890713999235" z="0.0"/>
  </node>
  <node id="307307" label="zzzz294" cy:nodeId="674">
    <graphics x="2595.3945587145863" y="-268.16338322853676" z="0.0"/>
  </node>
  <node id="307306" label="zzzz293" cy:nodeId="675">
    <graphics x="2564.9849575030385" y="-305.2306287119352" z="0.0"/>
  </node>
  <node id="307305" label="zzzz292" cy:nodeId="676">
    <graphics x="2479.3920486437855" y="-310.8835065195524" z="0.0"/>
  </node>
  <node id="307304" label="zzzz291" cy:nodeId="677">
    <graphics x="2533.811459349352" y="-269.2095048258268" z="0.0"/>
  </node>
  <node id="307303" label="zzzz290" cy:nodeId="678">
    <graphics x="2586.0189435946522" y="-318.02529118752113" z="0.0"/>
  </node>
  <node id="307302" label="zzzz289" cy:nodeId="679">
    <graphics x="2536.66052703734" y="-286.7196500132047" z="0.0"/>
  </node>
  <node id="307301" label="zzzz288" cy:nodeId="680">
    <graphics x="2518.465527342516" y="-284.94716237282387" z="0.0"/>
  </node>
  <node id="307300" label="zzzz287" cy:nodeId="681">
    <graphics x="2513.7754486071644" y="-280.8476521799528" z="0.0"/>
  </node>
  <node id="307299" label="zzzz286" cy:nodeId="682">
    <graphics x="2540.533985899645" y="-262.2494637796842" z="0.0"/>
  </node>
  <node id="307298" label="zzzz285" cy:nodeId="683">
    <graphics x="2755.9930923449574" y="-497.56951115822426" z="0.0"/>
  </node>
  <node id="307297" label="zzzz284" cy:nodeId="684">
    <graphics x="2731.5121505724965" y="-391.7237927744352" z="0.0"/>
  </node>
  <node id="307296" label="zzzz283" cy:nodeId="685">
    <graphics x="2555.0004623400746" y="-266.2435757944547" z="0.0"/>
  </node>
  <node id="307295" label="zzzz282" cy:nodeId="686">
    <graphics x="1722.7866523730336" y="2115.547996776346" z="0.0"/>
  </node>
  <node id="307294" label="zzzz281" cy:nodeId="687">
    <graphics x="-1104.4438735974254" y="-587.2738568613493" z="0.0"/>
  </node>
  <node id="307293" label="zzzz280" cy:nodeId="688">
    <graphics x="-1371.0900833142223" y="-795.1767041513883" z="0.0"/>
  </node>
  <node id="307292" label="zzzz279" cy:nodeId="689">
    <graphics x="-1828.411784364027" y="2145.766502635721" z="0.0"/>
  </node>
  <node id="307291" label="zzzz278" cy:nodeId="690">
    <graphics x="1669.225193785387" y="-25.60681889748207" z="0.0"/>
  </node>
  <node id="307290" label="zzzz277" cy:nodeId="691">
    <graphics x="1668.2189681994496" y="26.192161815408554" z="0.0"/>
  </node>
  <node id="307289" label="zzzz276" cy:nodeId="692">
    <graphics x="-571.2430374157848" y="59.896202342752304" z="0.0"/>
  </node>
  <node id="307288" label="zzzz275" cy:nodeId="693">
    <graphics x="214.11578826780894" y="590.155906932596" z="0.0"/>
  </node>
  <node id="307287" label="zzzz274" cy:nodeId="694">
    <graphics x="2692.078923033434" y="-433.14153264259926" z="0.0"/>
  </node>
  <node id="307286" label="zzzz273" cy:nodeId="695">
    <graphics x="2795.451756285387" y="-269.2287633249723" z="0.0"/>
  </node>
  <node id="307285" label="zzzz272" cy:nodeId="696">
    <graphics x="-1833.1095993054332" y="2115.547996776346" z="0.0"/>
  </node>
  <node id="307284" label="zzzz271" cy:nodeId="697">
    <graphics x="-1778.0965530407848" y="2144.811973827127" z="0.0"/>
  </node>
  <node id="307283" label="zzzz270" cy:nodeId="698">
    <graphics x="-1804.5107376110973" y="2144.967018382791" z="0.0"/>
  </node>
  <node id="307282" label="zzzz269" cy:nodeId="699">
    <graphics x="-1810.90384216432" y="2182.234352367166" z="0.0"/>
  </node>
  <node id="307281" label="zzzz268" cy:nodeId="700">
    <graphics x="-1841.4985916150035" y="2181.72501398826" z="0.0"/>
  </node>
  <node id="307280" label="zzzz267" cy:nodeId="701">
    <graphics x="2446.9818923937855" y="-577.7426526377164" z="0.0"/>
  </node>
  <node id="307279" label="zzzz266" cy:nodeId="702">
    <graphics x="2671.1925857531605" y="-453.63928960060707" z="0.0"/>
  </node>
  <node id="307278" label="zzzz265" cy:nodeId="703">
    <graphics x="2685.326382445055" y="-497.0243298838102" z="0.0"/>
  </node>
  <node id="307277" label="zzzz264" cy:nodeId="704">
    <graphics x="2793.6292922961293" y="-230.2810208628141" z="0.0"/>
  </node>
  <node id="307276" label="zzzz263" cy:nodeId="705">
    <graphics x="-374.9261428845348" y="0.4332201650179286" z="0.0"/>
  </node>
  <node id="307275" label="zzzz262" cy:nodeId="706">
    <graphics x="2532.2407806384144" y="-558.3967358896696" z="0.0"/>
  </node>
  <node id="307274" label="zzzz261" cy:nodeId="707">
    <graphics x="2624.8030975329457" y="-220.18136571144692" z="0.0"/>
  </node>
  <node id="307273" label="zzzz260" cy:nodeId="708">
    <graphics x="2717.6784408556996" y="-471.6091992685758" z="0.0"/>
  </node>
  <node id="307272" label="zzzz259" cy:nodeId="709">
    <graphics x="2488.90222625609" y="-322.7526013681852" z="0.0"/>
  </node>
  <node id="307271" label="zzzz258" cy:nodeId="710">
    <graphics x="2539.621220396715" y="-294.0378873178922" z="0.0"/>
  </node>
  <node id="307270" label="zzzz257" cy:nodeId="711">
    <graphics x="2706.2935989367543" y="-427.12834904884926" z="0.0"/>
  </node>
  <node id="307269" label="zzzz256" cy:nodeId="712">
    <graphics x="2639.844647215563" y="-467.72002385353676" z="0.0"/>
  </node>
  <node id="307268" label="zzzz255" cy:nodeId="713">
    <graphics x="2525.0812309252797" y="-375.93349431252113" z="0.0"/>
  </node>
  <node id="307267" label="zzzz254" cy:nodeId="714">
    <graphics x="2566.2632148730336" y="-262.9554230997526" z="0.0"/>
  </node>
  <node id="307266" label="zzzz253" cy:nodeId="715">
    <graphics x="2520.6382720934926" y="-303.44961903786293" z="0.0"/>
  </node>
  <node id="307265" label="zzzz252" cy:nodeId="716">
    <graphics x="2557.4532802569447" y="-274.40336201881996" z="0.0"/>
  </node>
  <node id="307264" label="zzzz251" cy:nodeId="717">
    <graphics x="2483.977330015856" y="-397.59555791115395" z="0.0"/>
  </node>
  <node id="307263" label="zzzz250" cy:nodeId="718">
    <graphics x="2448.117955015856" y="-382.73915837502113" z="0.0"/>
  </node>
  <node id="307262" label="zzzz249" cy:nodeId="719">
    <graphics x="2453.325146483141" y="-371.26039860939613" z="0.0"/>
  </node>
  <node id="307261" label="zzzz248" cy:nodeId="720">
    <graphics x="2717.157307432848" y="-405.55532048439613" z="0.0"/>
  </node>
  <node id="307260" label="zzzz247" cy:nodeId="721">
    <graphics x="2489.8794372546254" y="-308.3243558237516" z="0.0"/>
  </node>
  <node id="307259" label="zzzz246" cy:nodeId="722">
    <graphics x="2580.851504133898" y="-223.69700978493324" z="0.0"/>
  </node>
  <node id="307258" label="zzzz245" cy:nodeId="723">
    <graphics x="2550.0236461627064" y="-314.6084668467008" z="0.0"/>
  </node>
  <node id="307257" label="zzzz244" cy:nodeId="724">
    <graphics x="2524.504246519762" y="-328.59099553322426" z="0.0"/>
  </node>
  <node id="307256" label="zzzz243" cy:nodeId="725">
    <graphics x="2514.636658476549" y="-232.70763753151527" z="0.0"/>
  </node>
  <node id="307255" label="zzzz242" cy:nodeId="726">
    <graphics x="2577.021107481676" y="-272.6184346506559" z="0.0"/>
  </node>
  <node id="307254" label="zzzz241" cy:nodeId="727">
    <graphics x="2503.0557067858754" y="-324.31182072853676" z="0.0"/>
  </node>
  <node id="307253" label="zzzz240" cy:nodeId="728">
    <graphics x="2724.2901809680043" y="-416.85205815529457" z="0.0"/>
  </node>
  <node id="307252" label="zzzz239" cy:nodeId="729">
    <graphics x="2662.780010985094" y="-481.08151982521645" z="0.0"/>
  </node>
  <node id="307251" label="zzzz238" cy:nodeId="730">
    <graphics x="2722.5650985705433" y="-437.0812451670133" z="0.0"/>
  </node>
  <node id="307250" label="zzzz237" cy:nodeId="731">
    <graphics x="2650.3963821398793" y="-474.80910466408363" z="0.0"/>
  </node>
  <node id="307249" label="zzzz236" cy:nodeId="732">
    <graphics x="2727.24011688109" y="-401.37119267677895" z="0.0"/>
  </node>
  <node id="307248" label="zzzz235" cy:nodeId="733">
    <graphics x="2640.673695372301" y="-176.67400334572426" z="0.0"/>
  </node>
  <node id="307247" label="zzzz234" cy:nodeId="734">
    <graphics x="2490.01762847777" y="-349.7588574717008" z="0.0"/>
  </node>
  <node id="307246" label="zzzz233" cy:nodeId="735">
    <graphics x="2520.3917167651234" y="-316.0559766123258" z="0.0"/>
  </node>
  <node id="307245" label="zzzz232" cy:nodeId="736">
    <graphics x="2500.5153091418324" y="-348.16411565041176" z="0.0"/>
  </node>
  <node id="307244" label="zzzz231" cy:nodeId="737">
    <graphics x="2529.1169174181996" y="-321.8305127451383" z="0.0"/>
  </node>
  <node id="307243" label="zzzz230" cy:nodeId="738">
    <graphics x="2507.0055129992543" y="-350.6774518320524" z="0.0"/>
  </node>
  <node id="307242" label="zzzz229" cy:nodeId="739">
    <graphics x="2516.7818687426625" y="-292.6805569956266" z="0.0"/>
  </node>
  <node id="307241" label="zzzz228" cy:nodeId="740">
    <graphics x="2536.17086486693" y="-328.00595830177895" z="0.0"/>
  </node>
  <node id="307240" label="zzzz227" cy:nodeId="741">
    <graphics x="2550.803499983507" y="-271.50484822487465" z="0.0"/>
  </node>
  <node id="307239" label="zzzz226" cy:nodeId="742">
    <graphics x="2496.350209044176" y="-277.46181081032387" z="0.0"/>
  </node>
  <node id="307238" label="zzzz225" cy:nodeId="743">
    <graphics x="2550.9566257464467" y="-240.52670477127663" z="0.0"/>
  </node>
  <node id="307237" label="zzzz224" cy:nodeId="744">
    <graphics x="2553.0131576525746" y="-323.3598553965055" z="0.0"/>
  </node>
  <node id="307236" label="zzzz223" cy:nodeId="745">
    <graphics x="2509.2983520495472" y="-342.07705662941567" z="0.0"/>
  </node>
  <node id="307235" label="zzzz222" cy:nodeId="746">
    <graphics x="2622.492295073229" y="-292.43460438942543" z="0.0"/>
  </node>
  <node id="307234" label="zzzz221" cy:nodeId="747">
    <graphics x="2722.819355772692" y="-474.0249707529508" z="0.0"/>
  </node>
  <node id="307233" label="zzzz220" cy:nodeId="748">
    <graphics x="2733.240254210192" y="-407.57903264259926" z="0.0"/>
  </node>
  <node id="307232" label="zzzz219" cy:nodeId="749">
    <graphics x="2582.656098173815" y="-330.820426685568" z="0.0"/>
  </node>
  <node id="307231" label="zzzz218" cy:nodeId="750">
    <graphics x="2552.497067259508" y="-335.34272740578285" z="0.0"/>
  </node>
  <node id="307230" label="zzzz217" cy:nodeId="751">
    <graphics x="2592.5842168795643" y="-320.13967107033363" z="0.0"/>
  </node>
  <node id="307229" label="zzzz216" cy:nodeId="752">
    <graphics x="2474.0366256701527" y="-305.01013920998207" z="0.0"/>
  </node>
  <node id="307228" label="zzzz215" cy:nodeId="753">
    <graphics x="2706.823063658434" y="-432.4530713388883" z="0.0"/>
  </node>
  <node id="307227" label="zzzz214" cy:nodeId="754">
    <graphics x="2524.6372955309926" y="-272.4939477274381" z="0.0"/>
  </node>
  <node id="307226" label="zzzz213" cy:nodeId="755">
    <graphics x="2578.2662895190297" y="-281.3280637094938" z="0.0"/>
  </node>
  <node id="307225" label="zzzz212" cy:nodeId="756">
    <graphics x="2715.176853941637" y="-418.653434498068" z="0.0"/>
  </node>
  <node id="307224" label="zzzz211" cy:nodeId="757">
    <graphics x="2513.3284118640004" y="-269.7101781198942" z="0.0"/>
  </node>
  <node id="307223" label="zzzz210" cy:nodeId="758">
    <graphics x="2533.4983032214222" y="-317.20864842629067" z="0.0"/>
  </node>
  <node id="307222" label="zzzz209" cy:nodeId="759">
    <graphics x="2557.133412169176" y="-297.4029996225797" z="0.0"/>
  </node>
  <node id="307221" label="zzzz208" cy:nodeId="760">
    <graphics x="2485.876141356188" y="-295.4848248789274" z="0.0"/>
  </node>
  <node id="307220" label="zzzz207" cy:nodeId="761">
    <graphics x="2944.5383346545277" y="-455.67763493752113" z="0.0"/>
  </node>
  <node id="307219" label="zzzz206" cy:nodeId="762">
    <graphics x="2525.822071837145" y="-303.67939732765785" z="0.0"/>
  </node>
  <node id="307218" label="zzzz205" cy:nodeId="763">
    <graphics x="2691.0244720446644" y="-391.76758549904457" z="0.0"/>
  </node>
  <node id="307217" label="zzzz204" cy:nodeId="764">
    <graphics x="2762.6147048937855" y="-386.53911565041176" z="0.0"/>
  </node>
  <node id="307216" label="zzzz203" cy:nodeId="765">
    <graphics x="2145.736454771715" y="464.97069575095543" z="0.0"/>
  </node>
  <node id="307215" label="zzzz202" cy:nodeId="766">
    <graphics x="2114.971287535387" y="-35.15605900978676" z="0.0"/>
  </node>
  <node id="307214" label="zzzz201" cy:nodeId="767">
    <graphics x="2643.659176634508" y="-498.3376385996305" z="0.0"/>
  </node>
  <node id="307213" label="zzzz200" cy:nodeId="768">
    <graphics x="2673.436390684801" y="-514.4881665537321" z="0.0"/>
  </node>
  <node id="307212" label="zzzz199" cy:nodeId="769">
    <graphics x="2537.4178016650258" y="-281.27756474709145" z="0.0"/>
  </node>
  <node id="307211" label="zzzz198" cy:nodeId="770">
    <graphics x="2408.0097244250355" y="-281.9430539438688" z="0.0"/>
  </node>
  <node id="307210" label="zzzz197" cy:nodeId="771">
    <graphics x="2449.0001571642933" y="-247.58052418923012" z="0.0"/>
  </node>
  <node id="307209" label="zzzz196" cy:nodeId="772">
    <graphics x="2560.91295509215" y="-274.34138463234535" z="0.0"/>
  </node>
  <node id="307208" label="zzzz195" cy:nodeId="773">
    <graphics x="2677.1904342639027" y="-453.7168805429899" z="0.0"/>
  </node>
  <node id="307207" label="zzzz194" cy:nodeId="774">
    <graphics x="2718.737110899645" y="-392.42612431740395" z="0.0"/>
  </node>
  <node id="307206" label="zzzz193" cy:nodeId="775">
    <graphics x="2698.5468185412465" y="-422.66626713966957" z="0.0"/>
  </node>
  <node id="307205" label="zzzz192" cy:nodeId="776">
    <graphics x="2746.920216368395" y="-385.2219922373258" z="0.0"/>
  </node>
  <node id="307204" label="zzzz191" cy:nodeId="777">
    <graphics x="2525.9347427355824" y="-237.0793835947477" z="0.0"/>
  </node>
  <node id="307203" label="zzzz190" cy:nodeId="778">
    <graphics x="2489.3642471301137" y="-323.1985776255094" z="0.0"/>
  </node>
  <node id="307202" label="zzzz189" cy:nodeId="779">
    <graphics x="2504.9892318713246" y="-303.34155247902504" z="0.0"/>
  </node>
  <node id="307201" label="zzzz188" cy:nodeId="780">
    <graphics x="2422.750294493395" y="-601.4787061045133" z="0.0"/>
  </node>
  <node id="307200" label="zzzz187" cy:nodeId="781">
    <graphics x="2657.964680479723" y="-492.84734318947426" z="0.0"/>
  </node>
  <node id="307199" label="zzzz186" cy:nodeId="782">
    <graphics x="2758.6254470812855" y="-424.32231877541176" z="0.0"/>
  </node>
  <node id="307198" label="zzzz185" cy:nodeId="783">
    <graphics x="2668.1686599719105" y="-447.83232854103676" z="0.0"/>
  </node>
  <node id="307197" label="zzzz184" cy:nodeId="784">
    <graphics x="2664.2667434680043" y="-418.6437604258024" z="0.0"/>
  </node>
  <node id="307196" label="zzzz183" cy:nodeId="785">
    <graphics x="2697.946797178942" y="-450.58310673927895" z="0.0"/>
  </node>
  <node id="307195" label="zzzz182" cy:nodeId="786">
    <graphics x="2709.4056900012074" y="-462.503288013693" z="0.0"/>
  </node>
  <node id="307194" label="zzzz181" cy:nodeId="787">
    <graphics x="2672.410237120348" y="-464.4734570810758" z="0.0"/>
  </node>
  <node id="307193" label="zzzz180" cy:nodeId="788">
    <graphics x="2749.3754623400746" y="-257.0294921228849" z="0.0"/>
  </node>
  <node id="307192" label="zzzz179" cy:nodeId="789">
    <graphics x="2568.706623839098" y="-212.46395848488442" z="0.0"/>
  </node>
  <node id="307191" label="zzzz178" cy:nodeId="790">
    <graphics x="2762.540165709215" y="-221.37102864479652" z="0.0"/>
  </node>
  <node id="307190" label="zzzz177" cy:nodeId="791">
    <graphics x="2745.0824783312855" y="-215.07136510109535" z="0.0"/>
  </node>
  <node id="307189" label="zzzz176" cy:nodeId="792">
    <graphics x="2596.870758818346" y="-174.94647954201332" z="0.0"/>
  </node>
  <node id="307188" label="zzzz175" cy:nodeId="793">
    <graphics x="2549.590834425646" y="-199.7476308176481" z="0.0"/>
  </node>
  <node id="307187" label="zzzz174" cy:nodeId="794">
    <graphics x="2615.0887229907094" y="-186.67076085304848" z="0.0"/>
  </node>
  <node id="307186" label="zzzz173" cy:nodeId="795">
    <graphics x="2612.692677305895" y="-205.02131627297035" z="0.0"/>
  </node>
  <node id="307185" label="zzzz172" cy:nodeId="796">
    <graphics x="2554.0567100512562" y="-213.11808369850746" z="0.0"/>
  </node>
  <node id="307184" label="zzzz171" cy:nodeId="797">
    <graphics x="2546.005400465685" y="-209.34183095192543" z="0.0"/>
  </node>
  <node id="307183" label="zzzz170" cy:nodeId="798">
    <graphics x="2518.861149595934" y="-224.40415166115395" z="0.0"/>
  </node>
  <node id="307182" label="zzzz169" cy:nodeId="799">
    <graphics x="2626.2608726489125" y="-240.34802983498207" z="0.0"/>
  </node>
  <node id="307181" label="zzzz168" cy:nodeId="800">
    <graphics x="2571.9273317324696" y="-209.7307851145231" z="0.0"/>
  </node>
  <node id="307180" label="zzzz167" cy:nodeId="801">
    <graphics x="2568.046163366991" y="-213.9215237925016" z="0.0"/>
  </node>
  <node id="307179" label="zzzz166" cy:nodeId="802">
    <graphics x="2642.416050718981" y="-225.6455457041227" z="0.0"/>
  </node>
  <node id="307178" label="zzzz165" cy:nodeId="803">
    <graphics x="2590.418076323229" y="-213.5254990885221" z="0.0"/>
  </node>
  <node id="307177" label="zzzz164" cy:nodeId="804">
    <graphics x="2608.206669615465" y="-202.2556531259977" z="0.0"/>
  </node>
  <node id="307176" label="zzzz163" cy:nodeId="805">
    <graphics x="2759.249333189684" y="-509.7712781259977" z="0.0"/>
  </node>
  <node id="307175" label="zzzz162" cy:nodeId="806">
    <graphics x="2702.7529342639027" y="-460.49988530373207" z="0.0"/>
  </node>
  <node id="307174" label="zzzz161" cy:nodeId="807">
    <graphics x="-1813.95022888307" y="2382.03685786033" z="0.0"/>
  </node>
  <node id="307173" label="zzzz160" cy:nodeId="808">
    <graphics x="2564.4797008502064" y="-197.7393185923063" z="0.0"/>
  </node>
  <node id="307172" label="zzzz159" cy:nodeId="809">
    <graphics x="2825.318867491442" y="-495.8383252451383" z="0.0"/>
  </node>
  <node id="307171" label="zzzz158" cy:nodeId="810">
    <graphics x="2485.435383604723" y="-352.984603626486" z="0.0"/>
  </node>
  <node id="307170" label="zzzz157" cy:nodeId="811">
    <graphics x="2508.1320083605824" y="-302.05226872658363" z="0.0"/>
  </node>
  <node id="307169" label="zzzz156" cy:nodeId="812">
    <graphics x="2477.3041580187855" y="-255.8556115457975" z="0.0"/>
  </node>
  <node id="307168" label="zzzz155" cy:nodeId="813">
    <graphics x="2506.091435240465" y="-362.74158452248207" z="0.0"/>
  </node>
  <node id="307167" label="zzzz154" cy:nodeId="814">
    <graphics x="2478.878742979723" y="-242.5426633188688" z="0.0"/>
  </node>
  <node id="307166" label="zzzz153" cy:nodeId="815">
    <graphics x="2743.598957823473" y="-407.4568707773649" z="0.0"/>
  </node>
  <node id="307165" label="zzzz152" cy:nodeId="816">
    <graphics x="2446.9281356799183" y="351.79723383689293" z="0.0"/>
  </node>
  <node id="307164" label="zzzz151" cy:nodeId="817">
    <graphics x="-127.75365753297231" y="28.59294916892418" z="0.0"/>
  </node>
  <node id="307163" label="zzzz150" cy:nodeId="818">
    <graphics x="2565.68430690642" y="-188.95626805519692" z="0.0"/>
  </node>
  <node id="307162" label="zzzz149" cy:nodeId="819">
    <graphics x="2657.883091734606" y="-457.09123967384926" z="0.0"/>
  </node>
  <node id="307161" label="zzzz148" cy:nodeId="820">
    <graphics x="2706.7296646105824" y="-408.5020215342008" z="0.0"/>
  </node>
  <node id="307160" label="zzzz147" cy:nodeId="821">
    <graphics x="2716.0983016955433" y="-444.38393376564613" z="0.0"/>
  </node>
  <node id="307159" label="zzzz146" cy:nodeId="822">
    <graphics x="-1612.3079864514293" y="2332.628109233621" z="0.0"/>
  </node>
  <node id="307158" label="zzzz145" cy:nodeId="823">
    <graphics x="2704.1808517443715" y="-394.5189587900602" z="0.0"/>
  </node>
  <node id="307157" label="zzzz144" cy:nodeId="824">
    <graphics x="2706.025959776598" y="-441.7921521494352" z="0.0"/>
  </node>
  <node id="307156" label="zzzz143" cy:nodeId="825">
    <graphics x="2676.4697158801137" y="-431.73918889259926" z="0.0"/>
  </node>
  <node id="307155" label="zzzz142" cy:nodeId="826">
    <graphics x="2941.2038009631215" y="-390.73012517189613" z="0.0"/>
  </node>
  <node id="307154" label="zzzz141" cy:nodeId="827">
    <graphics x="1620.8996932971058" y="221.0855333974398" z="0.0"/>
  </node>
  <node id="307153" label="zzzz140" cy:nodeId="828">
    <graphics x="-1835.8451950085582" y="2339.700802104715" z="0.0"/>
  </node>
  <node id="307152" label="zzzz139" cy:nodeId="829">
    <graphics x="-1602.7265502942028" y="2229.276832835916" z="0.0"/>
  </node>
  <node id="307151" label="zzzz138" cy:nodeId="830">
    <graphics x="-1787.6381942761363" y="2367.9304077794586" z="0.0"/>
  </node>
  <node id="307150" label="zzzz137" cy:nodeId="831">
    <graphics x="1523.537937926012" y="19.287559764627304" z="0.0"/>
  </node>
  <node id="307149" label="zzzz136" cy:nodeId="832">
    <graphics x="2730.315937803942" y="-429.4715955088102" z="0.0"/>
  </node>
  <node id="307148" label="zzzz135" cy:nodeId="833">
    <graphics x="2644.730534361559" y="-459.55567143654457" z="0.0"/>
  </node>
  <node id="307147" label="zzzz134" cy:nodeId="834">
    <graphics x="2656.1816833483754" y="-528.2529370615446" z="0.0"/>
  </node>
  <node id="307146" label="zzzz133" cy:nodeId="835">
    <graphics x="2371.141468809801" y="-615.8740002939664" z="0.0"/>
  </node>
  <node id="307145" label="zzzz132" cy:nodeId="836">
    <graphics x="2386.557713316637" y="-543.918311817404" z="0.0"/>
  </node>
  <node id="307144" label="zzzz131" cy:nodeId="837">
    <graphics x="2428.2911575305043" y="-328.71437810158363" z="0.0"/>
  </node>
  <node id="307143" label="zzzz130" cy:nodeId="838">
    <graphics x="2620.3960655200062" y="-243.61958430504433" z="0.0"/>
  </node>
  <node id="307142" label="zzzz129" cy:nodeId="839">
    <graphics x="2475.862858580309" y="-413.13652775978676" z="0.0"/>
  </node>
  <node id="307141" label="zzzz128" cy:nodeId="840">
    <graphics x="2495.959065245348" y="-377.4999921152555" z="0.0"/>
  </node>
  <node id="307140" label="zzzz127" cy:nodeId="841">
    <graphics x="2748.1754806506215" y="-244.96282313561073" z="0.0"/>
  </node>
  <node id="307139" label="zzzz126" cy:nodeId="842">
    <graphics x="-1698.1916548741283" y="2437.781429546121" z="0.0"/>
  </node>
  <node id="307138" label="zzzz125" cy:nodeId="843">
    <graphics x="-1751.338500214857" y="2526.9102099111115" z="0.0"/>
  </node>
  <node id="307137" label="zzzz124" cy:nodeId="844">
    <graphics x="-1602.9542572033824" y="2372.2083122899567" z="0.0"/>
  </node>
  <node id="307136" label="zzzz123" cy:nodeId="845">
    <graphics x="-1587.3637344372692" y="2297.1672060658966" z="0.0"/>
  </node>
  <node id="307135" label="zzzz122" cy:nodeId="846">
    <graphics x="-1863.8986770642223" y="2362.5917151143585" z="0.0"/>
  </node>
  <node id="307134" label="zzzz121" cy:nodeId="847">
    <graphics x="2488.708447264391" y="-46.36516545509926" z="0.0"/>
  </node>
  <node id="307133" label="zzzz120" cy:nodeId="848">
    <graphics x="-1677.0136978161754" y="2388.7383682897125" z="0.0"/>
  </node>
  <node id="307132" label="zzzz119" cy:nodeId="849">
    <graphics x="-1732.276374055189" y="2225.5444567372833" z="0.0"/>
  </node>
  <node id="307131" label="zzzz118" cy:nodeId="850">
    <graphics x="-1770.073420716566" y="2438.4387591054474" z="0.0"/>
  </node>
  <node id="307130" label="zzzz117" cy:nodeId="851">
    <graphics x="2737.274021910387" y="-357.8784558603727" z="0.0"/>
  </node>
  <node id="307129" label="zzzz116" cy:nodeId="852">
    <graphics x="2352.6200912463246" y="-543.1306226084196" z="0.0"/>
  </node>
  <node id="307128" label="zzzz115" cy:nodeId="853">
    <graphics x="-1924.635661317152" y="2290.196480052713" z="0.0"/>
  </node>
  <node id="307127" label="zzzz114" cy:nodeId="854">
    <graphics x="-337.1915542614879" y="266.34816767478355" z="0.0"/>
  </node>
  <node id="307126" label="zzzz113" cy:nodeId="855">
    <graphics x="-550.1029922497692" y="-90.21311162209145" z="0.0"/>
  </node>
  <node id="307125" label="zzzz112" cy:nodeId="856">
    <graphics x="-124.68358917359731" y="-60.483924610372696" z="0.0"/>
  </node>
  <node id="307124" label="zzzz111" cy:nodeId="857">
    <graphics x="-336.9661819470348" y="36.789695995096054" z="0.0"/>
  </node>
  <node id="307123" label="zzzz110" cy:nodeId="858">
    <graphics x="-460.61065216187853" y="231.4837267568148" z="0.0"/>
  </node>
  <node id="307122" label="zzzz109" cy:nodeId="859">
    <graphics x="-288.8936721814098" y="82.58962275290855" z="0.0"/>
  </node>
  <node id="307121" label="zzzz108" cy:nodeId="860">
    <graphics x="2344.2582443224965" y="218.73247553611168" z="0.0"/>
  </node>
  <node id="307120" label="zzzz107" cy:nodeId="861">
    <graphics x="-1896.804850770277" y="2434.053699748758" z="0.0"/>
  </node>
  <node id="307119" label="zzzz106" cy:nodeId="862">
    <graphics x="2783.842808531481" y="-376.8042371103727" z="0.0"/>
  </node>
  <node id="307118" label="zzzz105" cy:nodeId="863">
    <graphics x="2445.76656799193" y="2115.547996776346" z="0.0"/>
  </node>
  <node id="307117" label="zzzz104" cy:nodeId="864">
    <graphics x="-1719.0074035656871" y="2502.8141482045685" z="0.0"/>
  </node>
  <node id="307116" label="zzzz103" cy:nodeId="865">
    <graphics x="-1994.7828323376598" y="2318.0647967031036" z="0.0"/>
  </node>
  <node id="307115" label="zzzz102" cy:nodeId="866">
    <graphics x="-1643.2606422436656" y="2342.1926272084747" z="0.0"/>
  </node>
  <node id="307114" label="zzzz101" cy:nodeId="867">
    <graphics x="-1815.6105529797496" y="2459.91837336326" z="0.0"/>
  </node>
  <node id="307113" label="zzzz100" cy:nodeId="868">
    <graphics x="1442.8547103869496" y="91.34435297751793" z="0.0"/>
  </node>
  <node id="307112" label="zzz2444" cy:nodeId="869">
    <graphics x="2100.366337584215" y="411.2105028798617" z="0.0"/>
  </node>
  <node id="307111" label="zzz2443" cy:nodeId="870">
    <graphics x="-807.7079040539684" y="942.784813182596" z="0.0"/>
  </node>
  <node id="307110" label="zzz2442" cy:nodeId="871">
    <graphics x="-876.5525924694957" y="1001.8784411122836" z="0.0"/>
  </node>
  <node id="307109" label="zzz2441" cy:nodeId="872">
    <graphics x="2127.59558563109" y="196.98952509665855" z="0.0"/>
  </node>
  <node id="307108" label="zzz2440" cy:nodeId="873">
    <graphics x="2335.208576964098" y="655.1308520009554" z="0.0"/>
  </node>
  <node id="307107" label="zzz2439" cy:nodeId="874">
    <graphics x="-539.3928482068004" y="701.999412791971" z="0.0"/>
  </node>
  <node id="307106" label="zzz2438" cy:nodeId="875">
    <graphics x="-776.0552322400035" y="878.6787340810336" z="0.0"/>
  </node>
  <node id="307105" label="zzz2437" cy:nodeId="876">
    <graphics x="2355.7018630969105" y="684.1464770009554" z="0.0"/>
  </node>
  <node id="307104" label="zzz2436" cy:nodeId="877">
    <graphics x="2505.9940307604847" y="540.9929125478304" z="0.0"/>
  </node>
  <node id="307103" label="zzz2435" cy:nodeId="878">
    <graphics x="-811.3742572796764" y="968.800194041971" z="0.0"/>
  </node>
  <node id="307102" label="zzz2434" cy:nodeId="879">
    <graphics x="2452.475941466051" y="577.3477709462679" z="0.0"/>
  </node>
  <node id="307101" label="zzz2433" cy:nodeId="880">
    <graphics x="2407.48442535277" y="472.6543505361117" z="0.0"/>
  </node>
  <node id="307100" label="zzz2432" cy:nodeId="881">
    <graphics x="-347.7522232068004" y="454.5569689443148" z="0.0"/>
  </node>
  <node id="307099" label="zzz2431" cy:nodeId="882">
    <graphics x="-172.85760040406606" y="204.52138544822105" z="0.0"/>
  </node>
  <node id="307098" label="zzz2430" cy:nodeId="883">
    <graphics x="1419.5317867266713" y="2637.4485094716583" z="0.0"/>
  </node>
  <node id="307097" label="zzz2429" cy:nodeId="884">
    <graphics x="2451.4015853869496" y="456.9658739736117" z="0.0"/>
  </node>
  <node id="307096" label="zzz2428" cy:nodeId="885">
    <graphics x="2494.0605056750355" y="492.4918749501742" z="0.0"/>
  </node>
  <node id="307095" label="zzz2427" cy:nodeId="886">
    <graphics x="2245.5448654162465" y="676.9418261220492" z="0.0"/>
  </node>
  <node id="307094" label="zzz2426" cy:nodeId="887">
    <graphics x="-1226.550929261488" y="1607.218651073221" z="0.0"/>
  </node>
  <node id="307093" label="zzz2425" cy:nodeId="888">
    <graphics x="-626.5091354382457" y="496.38173701072105" z="0.0"/>
  </node>
  <node id="307092" label="zzz2424" cy:nodeId="889">
    <graphics x="-138.60381622437856" y="908.038231151346" z="0.0"/>
  </node>
  <node id="307091" label="zzz2423" cy:nodeId="890">
    <graphics x="-447.77276153687853" y="997.188377635721" z="0.0"/>
  </node>
  <node id="307090" label="zzz2422" cy:nodeId="891">
    <graphics x="-121.01366729859731" y="628.4150622060336" z="0.0"/>
  </node>
  <node id="307089" label="zzz2421" cy:nodeId="892">
    <graphics x="2770.139469908434" y="259.91835810447105" z="0.0"/>
  </node>
  <node id="307088" label="zzz2420" cy:nodeId="893">
    <graphics x="1319.5317867266713" y="2637.4485094716583" z="0.0"/>
  </node>
  <node id="307087" label="zzz2419" cy:nodeId="894">
    <graphics x="-480.90642852906603" y="449.82155634665855" z="0.0"/>
  </node>
  <node id="307086" label="zzz2418" cy:nodeId="895">
    <graphics x="2267.8137329089222" y="2115.547996776346" z="0.0"/>
  </node>
  <node id="307085" label="zzz2417" cy:nodeId="896">
    <graphics x="-135.2510940564098" y="975.832908885721" z="0.0"/>
  </node>
  <node id="307084" label="zzz2416" cy:nodeId="897">
    <graphics x="-37.11785431031606" y="715.9250719716586" z="0.0"/>
  </node>
  <node id="307083" label="zzz2415" cy:nodeId="898">
    <graphics x="-570.2264358532848" y="449.13979365134605" z="0.0"/>
  </node>
  <node id="307082" label="zzz2414" cy:nodeId="899">
    <graphics x="71.35614471312144" y="915.980858104471" z="0.0"/>
  </node>
  <node id="307081" label="zzz2413" cy:nodeId="900">
    <graphics x="-208.4918167126598" y="940.7776110341586" z="0.0"/>
  </node>
  <node id="307080" label="zzz2412" cy:nodeId="901">
    <graphics x="-479.3711196911754" y="765.768944041971" z="0.0"/>
  </node>
  <node id="307079" label="zzz2411" cy:nodeId="902">
    <graphics x="2097.8375595080433" y="664.8090136220492" z="0.0"/>
  </node>
  <node id="307078" label="zzz2410" cy:nodeId="903">
    <graphics x="-305.74065704469103" y="931.6872790029086" z="0.0"/>
  </node>
  <node id="307077" label="zzz2409" cy:nodeId="904">
    <graphics x="2100.270146177965" y="717.3969652822054" z="0.0"/>
  </node>
  <node id="307076" label="zzz2408" cy:nodeId="905">
    <graphics x="-497.3066665661754" y="803.5627672841586" z="0.0"/>
  </node>
  <node id="307075" label="zzz2407" cy:nodeId="906">
    <graphics x="2047.356541441637" y="627.4841845204867" z="0.0"/>
  </node>
  <node id="307074" label="zzz2406" cy:nodeId="907">
    <graphics x="-1166.4192764294567" y="1359.5605700185336" z="0.0"/>
  </node>
  <node id="307073" label="zzz2405" cy:nodeId="908">
    <graphics x="-1130.658381654066" y="1519.076561229471" z="0.0"/>
  </node>
  <node id="307072" label="zzz2404" cy:nodeId="909">
    <graphics x="719.7319946289062" y="-677.15625" z="0.0"/>
  </node>
  <node id="307071" label="zzz2403" cy:nodeId="910">
    <graphics x="-1016.6818496716442" y="1302.014061229471" z="0.0"/>
  </node>
  <node id="307070" label="zzz2402" cy:nodeId="911">
    <graphics x="-782.965308381361" y="1476.3069079091586" z="0.0"/>
  </node>
  <node id="307069" label="zzz2401" cy:nodeId="912">
    <graphics x="-1192.372950745863" y="1293.540672557596" z="0.0"/>
  </node>
  <node id="307068" label="zzz2400" cy:nodeId="913">
    <graphics x="-1348.1668655407848" y="1482.0210192372836" z="0.0"/>
  </node>
  <node id="307067" label="zzz2399" cy:nodeId="914">
    <graphics x="-638.6417190564098" y="112.5978624990023" z="0.0"/>
  </node>
  <node id="307066" label="zzz2398" cy:nodeId="915">
    <graphics x="24.264286802965188" y="111.06899287009605" z="0.0"/>
  </node>
  <node id="307065" label="zzz2397" cy:nodeId="916">
    <graphics x="-87.48559112672231" y="598.5066149404086" z="0.0"/>
  </node>
  <node id="307064" label="zzz2396" cy:nodeId="917">
    <graphics x="2369.9984939562855" y="624.1641161611117" z="0.0"/>
  </node>
  <node id="307063" label="zzz2395" cy:nodeId="918">
    <graphics x="-594.3499252331676" y="1118.9551012685336" z="0.0"/>
  </node>
  <node id="307062" label="zzz2394" cy:nodeId="919">
    <graphics x="2.911381529527688" y="243.8843615224398" z="0.0"/>
  </node>
  <node id="307061" label="zzz2393" cy:nodeId="920">
    <graphics x="-600.6451522839488" y="1159.623436229471" z="0.0"/>
  </node>
  <node id="307060" label="zzz2392" cy:nodeId="921">
    <graphics x="-646.2900039685192" y="1122.430809276346" z="0.0"/>
  </node>
  <node id="307059" label="zzz2391" cy:nodeId="922">
    <graphics x="2715.7724044787465" y="269.0762560536898" z="0.0"/>
  </node>
  <node id="307058" label="zzz2390" cy:nodeId="923">
    <graphics x="-391.03472442750353" y="981.352684276346" z="0.0"/>
  </node>
  <node id="307057" label="zzz2389" cy:nodeId="924">
    <graphics x="2967.8229568469105" y="2135.0093310048615" z="0.0"/>
  </node>
  <node id="307056" label="zzz2388" cy:nodeId="925">
    <graphics x="1481.784912109375" y="2115.548095703125" z="0.0"/>
  </node>
  <node id="307055" label="zzz2387" cy:nodeId="926">
    <graphics x="-413.8161575329723" y="112.51638056540855" z="0.0"/>
  </node>
  <node id="307054" label="zzz2386" cy:nodeId="927">
    <graphics x="1219.5317867266713" y="2637.4485094716583" z="0.0"/>
  </node>
  <node id="307053" label="zzz2385" cy:nodeId="928">
    <graphics x="2412.023747252184" y="646.8858568837679" z="0.0"/>
  </node>
  <node id="307052" label="zzz2384" cy:nodeId="929">
    <graphics x="2418.335072325426" y="160.1420519521273" z="0.0"/>
  </node>
  <node id="307051" label="zzz2383" cy:nodeId="930">
    <graphics x="-437.82833404664416" y="68.1215441396273" z="0.0"/>
  </node>
  <node id="307050" label="zzz2382" cy:nodeId="931">
    <graphics x="-307.1784622204723" y="-236.09479497170082" z="0.0"/>
  </node>
  <node id="307049" label="zzz2381" cy:nodeId="932">
    <graphics x="-348.2807571423473" y="75.90590693259605" z="0.0"/>
  </node>
  <node id="307048" label="zzz2380" cy:nodeId="933">
    <graphics x="-260.77666778687853" y="64.4804308583773" z="0.0"/>
  </node>
  <node id="307047" label="zzz2379" cy:nodeId="934">
    <graphics x="-1089.306834412855" y="968.994774120096" z="0.0"/>
  </node>
  <node id="307046" label="zzz2378" cy:nodeId="935">
    <graphics x="-111.62255401734731" y="-14.276740772482071" z="0.0"/>
  </node>
  <node id="307045" label="zzz2377" cy:nodeId="936">
    <graphics x="26.819828795152688" y="353.33229853415855" z="0.0"/>
  </node>
  <node id="307044" label="zzz2376" cy:nodeId="937">
    <graphics x="37.12976531859019" y="289.13417841697105" z="0.0"/>
  </node>
  <node id="307043" label="zzz2375" cy:nodeId="938">
    <graphics x="-325.76055450562853" y="-125.3650281259977" z="0.0"/>
  </node>
  <node id="307042" label="zzz2374" cy:nodeId="939">
    <graphics x="-148.57659454469106" y="3.5641100575960536" z="0.0"/>
  </node>
  <node id="307041" label="zzz2373" cy:nodeId="940">
    <graphics x="-158.21563263062856" y="162.34682490134605" z="0.0"/>
  </node>
  <node id="307040" label="zzz2372" cy:nodeId="941">
    <graphics x="2511.2253463732777" y="211.29454829001793" z="0.0"/>
  </node>
  <node id="307039" label="zzz2371" cy:nodeId="942">
    <graphics x="-404.46102447633166" y="1181.938621776346" z="0.0"/>
  </node>
  <node id="307038" label="zzz2370" cy:nodeId="943">
    <graphics x="2216.3712814318715" y="344.2112353017367" z="0.0"/>
  </node>
  <node id="307037" label="zzz2369" cy:nodeId="944">
    <graphics x="1277.1478271484375" y="2297.108154296875" z="0.0"/>
  </node>
  <node id="307036" label="zzz2368" cy:nodeId="945">
    <graphics x="2863.4884384142933" y="-372.2981793711149" z="0.0"/>
  </node>
  <node id="307035" label="zzz2367" cy:nodeId="946">
    <graphics x="-628.7899276745738" y="945.5400622060336" z="0.0"/>
  </node>
  <node id="307034" label="zzz2366" cy:nodeId="947">
    <graphics x="2728.8751876818715" y="165.41014887595543" z="0.0"/>
  </node>
  <node id="307033" label="zzz2365" cy:nodeId="948">
    <graphics x="2330.23637847777" y="775.1379931142367" z="0.0"/>
  </node>
  <node id="307032" label="zzz2364" cy:nodeId="949">
    <graphics x="1119.5317867266713" y="2637.4485094716583" z="0.0"/>
  </node>
  <node id="307031" label="zzz2363" cy:nodeId="950">
    <graphics x="-227.5350296032848" y="510.5583117177523" z="0.0"/>
  </node>
  <node id="307030" label="zzz2362" cy:nodeId="951">
    <graphics x="-358.45687408570666" y="886.137352245096" z="0.0"/>
  </node>
  <node id="307029" label="zzz2361" cy:nodeId="952">
    <graphics x="-146.81707306031606" y="-105.80210087990395" z="0.0"/>
  </node>
  <node id="307028" label="zzz2360" cy:nodeId="953">
    <graphics x="-450.82137603883166" y="911.2051012685336" z="0.0"/>
  </node>
  <node id="307027" label="zzz2359" cy:nodeId="954">
    <graphics x="-989.2209732068004" y="1021.2673571279086" z="0.0"/>
  </node>
  <node id="307026" label="zzz2358" cy:nodeId="955">
    <graphics x="-472.5249282849254" y="-424.8648640940153" z="0.0"/>
  </node>
  <node id="307025" label="zzz2357" cy:nodeId="956">
    <graphics x="-23.321284486097312" y="-8.871406299825821" z="0.0"/>
  </node>
  <node id="307024" label="zzz2356" cy:nodeId="957">
    <graphics x="-818.0020076764049" y="1040.132469432596" z="0.0"/>
  </node>
  <node id="307023" label="zzz2355" cy:nodeId="958">
    <graphics x="-163.31853790406606" y="449.97084833884605" z="0.0"/>
  </node>
  <node id="307022" label="zzz2354" cy:nodeId="959">
    <graphics x="-903.5460464489879" y="1051.350731151346" z="0.0"/>
  </node>
  <node id="307021" label="zzz2353" cy:nodeId="960">
    <graphics x="-409.3346206677379" y="903.9905016591586" z="0.0"/>
  </node>
  <node id="307020" label="zzz2352" cy:nodeId="961">
    <graphics x="-287.88030548219103" y="462.2950060536898" z="0.0"/>
  </node>
  <node id="307019" label="zzz2351" cy:nodeId="962">
    <graphics x="2765.033512877184" y="378.67321039939293" z="0.0"/>
  </node>
  <node id="307018" label="zzz2350" cy:nodeId="963">
    <graphics x="2716.3657272326527" y="441.2993700673617" z="0.0"/>
  </node>
  <node id="307017" label="zzz2349" cy:nodeId="964">
    <graphics x="-321.93535919312853" y="879.1958239247836" z="0.0"/>
  </node>
  <node id="307016" label="zzz2348" cy:nodeId="965">
    <graphics x="-351.3488723767223" y="952.9438707997836" z="0.0"/>
  </node>
  <node id="307015" label="zzz2347" cy:nodeId="966">
    <graphics x="-400.67791290406603" y="657.9707262685336" z="0.0"/>
  </node>
  <node id="307014" label="zzz2346" cy:nodeId="967">
    <graphics x="-68.78234405640981" y="1251.341942088846" z="0.0"/>
  </node>
  <node id="307013" label="zzz2345" cy:nodeId="968">
    <graphics x="2197.2162826525746" y="562.1877978017367" z="0.0"/>
  </node>
  <node id="307012" label="zzz2344" cy:nodeId="969">
    <graphics x="-144.69463653687856" y="1138.332176463846" z="0.0"/>
  </node>
  <node id="307011" label="zzz2343" cy:nodeId="970">
    <graphics x="-720.6821243298473" y="1286.323387401346" z="0.0"/>
  </node>
  <node id="307010" label="zzz2342" cy:nodeId="971">
    <graphics x="-234.3002883923473" y="20.07256342673668" z="0.0"/>
  </node>
  <node id="307009" label="zzz2341" cy:nodeId="972">
    <graphics x="-530.0777542126598" y="1008.7907946279086" z="0.0"/>
  </node>
  <node id="307008" label="zzz2340" cy:nodeId="973">
    <graphics x="-781.0631401074352" y="2015.547996776346" z="0.0"/>
  </node>
  <node id="307007" label="zzz2339" cy:nodeId="974">
    <graphics x="-661.890071107191" y="428.2864611318148" z="0.0"/>
  </node>
  <node id="307006" label="zzz2338" cy:nodeId="975">
    <graphics x="-952.4298202526988" y="1046.3581774404086" z="0.0"/>
  </node>
  <node id="307005" label="zzz2337" cy:nodeId="976">
    <graphics x="149.5739791857777" y="788.788475291971" z="0.0"/>
  </node>
  <node id="307004" label="zzz2336" cy:nodeId="977">
    <graphics x="-60.78979034547231" y="342.2765734365023" z="0.0"/>
  </node>
  <node id="307003" label="zzz2335" cy:nodeId="978">
    <graphics x="-887.7821380627574" y="951.455223338846" z="0.0"/>
  </node>
  <node id="307002" label="zzz2334" cy:nodeId="979">
    <graphics x="2595.5600498187123" y="758.2418749501742" z="0.0"/>
  </node>
  <node id="307001" label="zzz2333" cy:nodeId="980">
    <graphics x="-483.60262603883166" y="399.82936884665855" z="0.0"/>
  </node>
  <node id="307000" label="zzz2332" cy:nodeId="981">
    <graphics x="2506.3326080309926" y="772.4559252431429" z="0.0"/>
  </node>
  <node id="306999" label="zzz2331" cy:nodeId="982">
    <graphics x="-380.5395767224254" y="821.451317088846" z="0.0"/>
  </node>
  <node id="306998" label="zzz2330" cy:nodeId="983">
    <graphics x="-486.33797760133166" y="969.7580797841586" z="0.0"/>
  </node>
  <node id="306997" label="zzz2329" cy:nodeId="984">
    <graphics x="-215.42754669312856" y="1093.277977245096" z="0.0"/>
  </node>
  <node id="306996" label="zzz2328" cy:nodeId="985">
    <graphics x="-427.8827163708629" y="953.6538317372836" z="0.0"/>
  </node>
  <node id="306995" label="zzz2327" cy:nodeId="986">
    <graphics x="-432.86211700562853" y="695.5654528310336" z="0.0"/>
  </node>
  <node id="306994" label="zzz2326" cy:nodeId="987">
    <graphics x="-397.2238723767223" y="738.6330797841586" z="0.0"/>
  </node>
  <node id="306993" label="zzz2325" cy:nodeId="988">
    <graphics x="-289.14812774781603" y="1110.974510448221" z="0.0"/>
  </node>
  <node id="306992" label="zzz2324" cy:nodeId="989">
    <graphics x="-684.3775741589488" y="1716.143211620096" z="0.0"/>
  </node>
  <node id="306991" label="zzz2323" cy:nodeId="990">
    <graphics x="-163.3469192517223" y="1072.753807323221" z="0.0"/>
  </node>
  <node id="306990" label="zzz2322" cy:nodeId="991">
    <graphics x="-347.2195999157848" y="991.4028551747836" z="0.0"/>
  </node>
  <node id="306989" label="zzz2321" cy:nodeId="992">
    <graphics x="-314.3730422985973" y="641.4961168935336" z="0.0"/>
  </node>
  <node id="306988" label="zzz2320" cy:nodeId="993">
    <graphics x="-26.786433411878562" y="930.4148180654086" z="0.0"/>
  </node>
  <node id="306987" label="zzz2319" cy:nodeId="994">
    <graphics x="255.96747283812144" y="502.22658564353355" z="0.0"/>
  </node>
  <node id="306986" label="zzz2318" cy:nodeId="995">
    <graphics x="-411.66375274781603" y="505.8677599599398" z="0.0"/>
  </node>
  <node id="306985" label="zzz2317" cy:nodeId="996">
    <graphics x="-940.3631317151012" y="1082.8806383779086" z="0.0"/>
  </node>
  <node id="306984" label="zzz2316" cy:nodeId="997">
    <graphics x="-267.4591018689098" y="649.9660875966586" z="0.0"/>
  </node>
  <node id="306983" label="zzz2315" cy:nodeId="998">
    <graphics x="1019.5317867266713" y="2637.4485094716583" z="0.0"/>
  </node>
  <node id="306982" label="zzz2314" cy:nodeId="999">
    <graphics x="-506.29497833375353" y="562.4782946279086" z="0.0"/>
  </node>
  <node id="306981" label="zzz2313" cy:nodeId="1000">
    <graphics x="-184.03277130250356" y="987.905418651346" z="0.0"/>
  </node>
  <node id="306980" label="zzz2312" cy:nodeId="1001">
    <graphics x="-636.8486892712535" y="1211.8657457997836" z="0.0"/>
  </node>
  <node id="306979" label="zzz2311" cy:nodeId="1002">
    <graphics x="919.5317867266713" y="2637.4485094716583" z="0.0"/>
  </node>
  <node id="306978" label="zzz2310" cy:nodeId="1003">
    <graphics x="-50.08550567750356" y="1049.0471422841586" z="0.0"/>
  </node>
  <node id="306977" label="zzz2309" cy:nodeId="1004">
    <graphics x="-52.05291290406606" y="1198.7016832997836" z="0.0"/>
  </node>
  <node id="306976" label="zzz2308" cy:nodeId="1005">
    <graphics x="819.5317867266713" y="2637.4485094716583" z="0.0"/>
  </node>
  <node id="306975" label="zzz2307" cy:nodeId="1006">
    <graphics x="1.9935119616565942" y="2378.036194103006" z="0.0"/>
  </node>
  <node id="306974" label="zzz2306" cy:nodeId="1007">
    <graphics x="-1030.255534364027" y="1716.439354198221" z="0.0"/>
  </node>
  <node id="306973" label="zzz2305" cy:nodeId="1008">
    <graphics x="-404.76616974000353" y="0.5449145009554286" z="0.0"/>
  </node>
  <node id="306972" label="zzz2304" cy:nodeId="1009">
    <graphics x="-782.9992134106578" y="1211.290184276346" z="0.0"/>
  </node>
  <node id="306971" label="zzz2303" cy:nodeId="1010">
    <graphics x="-666.3848983776988" y="1057.9187243154086" z="0.0"/>
  </node>
  <node id="306970" label="zzz2302" cy:nodeId="1011">
    <graphics x="-771.0792724621715" y="1130.942772166971" z="0.0"/>
  </node>
  <node id="306969" label="zzz2301" cy:nodeId="1012">
    <graphics x="-327.34615631226916" y="86.01223017478355" z="0.0"/>
  </node>
  <node id="306968" label="zzz2300" cy:nodeId="1013">
    <graphics x="-564.1857559216442" y="282.74379755759605" z="0.0"/>
  </node>
  <node id="306967" label="zzz2299" cy:nodeId="1014">
    <graphics x="-491.36724395875353" y="1107.9460680654086" z="0.0"/>
  </node>
  <node id="306966" label="zzz2298" cy:nodeId="1015">
    <graphics x="1377.1478271484375" y="2133.45361328125" z="0.0"/>
  </node>
  <node id="306965" label="zzz2297" cy:nodeId="1016">
    <graphics x="-622.8310729992809" y="2125.087421672586" z="0.0"/>
  </node>
  <node id="306964" label="zzz2296" cy:nodeId="1017">
    <graphics x="1393.452880859375" y="2277.1943359375" z="0.0"/>
  </node>
  <node id="306963" label="zzz2295" cy:nodeId="1018">
    <graphics x="-290.45928497437853" y="139.6785509755648" z="0.0"/>
  </node>
  <node id="306962" label="zzz2294" cy:nodeId="1019">
    <graphics x="719.5317867266713" y="2637.4485094716583" z="0.0"/>
  </node>
  <node id="306961" label="zzz2293" cy:nodeId="1020">
    <graphics x="619.5317867266713" y="2637.4485094716583" z="0.0"/>
  </node>
  <node id="306960" label="zzz2292" cy:nodeId="1021">
    <graphics x="2759.7670753466664" y="2115.547996776346" z="0.0"/>
  </node>
  <node id="306959" label="zzz2291" cy:nodeId="1022">
    <graphics x="519.5317867266713" y="2637.4485094716583" z="0.0"/>
  </node>
  <node id="306958" label="zzz2290" cy:nodeId="1023">
    <graphics x="-670.210368348402" y="1003.6198961904086" z="0.0"/>
  </node>
  <node id="306957" label="zzz2289" cy:nodeId="1024">
    <graphics x="-302.52654571656603" y="8.678673045877304" z="0.0"/>
  </node>
  <node id="306956" label="zzz2288" cy:nodeId="1025">
    <graphics x="-717.7693054211559" y="2231.3967516591583" z="0.0"/>
  </node>
  <node id="306955" label="zzz2287" cy:nodeId="1026">
    <graphics x="419.53178672667127" y="2637.4485094716583" z="0.0"/>
  </node>
  <node id="306954" label="zzz2286" cy:nodeId="1027">
    <graphics x="-64.35509796265981" y="-196.0596082041227" z="0.0"/>
  </node>
  <node id="306953" label="zzz2285" cy:nodeId="1028">
    <graphics x="-575.9421340954723" y="920.962791698221" z="0.0"/>
  </node>
  <node id="306952" label="zzz2284" cy:nodeId="1029">
    <graphics x="-154.6793167126598" y="370.10353876853355" z="0.0"/>
  </node>
  <node id="306951" label="zzz2283" cy:nodeId="1030">
    <graphics x="319.53178672667127" y="2637.4485094716583" z="0.0"/>
  </node>
  <node id="306950" label="zzz2282" cy:nodeId="1031">
    <graphics x="-344.6415969860973" y="200.26308466697105" z="0.0"/>
  </node>
  <node id="306949" label="zzz2281" cy:nodeId="1032">
    <graphics x="-305.20513458375353" y="1161.3686754872836" z="0.0"/>
  </node>
  <node id="306948" label="zzz2280" cy:nodeId="1033">
    <graphics x="2659.7670753466664" y="2135.523369090799" z="0.0"/>
  </node>
  <node id="306947" label="zzz2279" cy:nodeId="1034">
    <graphics x="-114.28893585328481" y="-140.85675786232582" z="0.0"/>
  </node>
  <node id="306946" label="zzz2278" cy:nodeId="1035">
    <graphics x="60.42029266234019" y="1410.9587633779086" z="0.0"/>
  </node>
  <node id="306945" label="zzz2277" cy:nodeId="1036">
    <graphics x="2695.091458128649" y="235.13115717673668" z="0.0"/>
  </node>
  <node id="306944" label="zzz2276" cy:nodeId="1037">
    <graphics x="-872.6083442700328" y="909.811912791971" z="0.0"/>
  </node>
  <node id="306943" label="zzz2275" cy:nodeId="1038">
    <graphics x="2544.9019897448597" y="688.6841967275179" z="0.0"/>
  </node>
  <node id="306942" label="zzz2274" cy:nodeId="1039">
    <graphics x="-822.48228092317" y="997.150779979471" z="0.0"/>
  </node>
  <node id="306941" label="zzz2273" cy:nodeId="1040">
    <graphics x="2474.2428100573597" y="645.4757616689242" z="0.0"/>
  </node>
  <node id="306940" label="zzz2272" cy:nodeId="1041">
    <graphics x="2744.551091002184" y="487.53624750876793" z="0.0"/>
  </node>
  <node id="306939" label="zzz2271" cy:nodeId="1042">
    <graphics x="-787.7454940808238" y="929.2358629872836" z="0.0"/>
  </node>
  <node id="306938" label="zzz2270" cy:nodeId="1043">
    <graphics x="2370.1383712756215" y="840.5580980947054" z="0.0"/>
  </node>
  <node id="306937" label="zzz2269" cy:nodeId="1044">
    <graphics x="331.23920135374647" y="651.791404979471" z="0.0"/>
  </node>
  <node id="306936" label="zzz2268" cy:nodeId="1045">
    <graphics x="2763.045719908434" y="433.5950243642367" z="0.0"/>
  </node>
  <node id="306935" label="zzz2267" cy:nodeId="1046">
    <graphics x="-485.42864532594103" y="510.0031359365023" z="0.0"/>
  </node>
  <node id="306934" label="zzz2266" cy:nodeId="1047">
    <graphics x="-213.1531936657848" y="53.057274120096054" z="0.0"/>
  </node>
  <node id="306933" label="zzz2265" cy:nodeId="1048">
    <graphics x="2638.972374724108" y="334.65538813376793" z="0.0"/>
  </node>
  <node id="306932" label="zzz2264" cy:nodeId="1049">
    <graphics x="48.62341766234019" y="1118.156639354471" z="0.0"/>
  </node>
  <node id="306931" label="zzz2263" cy:nodeId="1050">
    <graphics x="-228.7010452282848" y="769.350242870096" z="0.0"/>
  </node>
  <node id="306930" label="zzz2262" cy:nodeId="1051">
    <graphics x="274.17816619749647" y="868.6860582997836" z="0.0"/>
  </node>
  <node id="306929" label="zzz2261" cy:nodeId="1052">
    <graphics x="-501.5212661755504" y="1226.931053416971" z="0.0"/>
  </node>
  <node id="306928" label="zzz2260" cy:nodeId="1053">
    <graphics x="-145.6368362439098" y="869.287987010721" z="0.0"/>
  </node>
  <node id="306927" label="zzz2259" cy:nodeId="1054">
    <graphics x="2345.76656799193" y="2118.2887041738068" z="0.0"/>
  </node>
  <node id="306926" label="zzz2258" cy:nodeId="1055">
    <graphics x="-421.9567825329723" y="587.478172557596" z="0.0"/>
  </node>
  <node id="306925" label="zzz2257" cy:nodeId="1056">
    <graphics x="-356.5326187146129" y="914.156883495096" z="0.0"/>
  </node>
  <node id="306924" label="zzz2256" cy:nodeId="1057">
    <graphics x="-77.63250274781606" y="968.618065135721" z="0.0"/>
  </node>
  <node id="306923" label="zzz2255" cy:nodeId="1058">
    <graphics x="-224.7353469860973" y="1014.1230700185336" z="0.0"/>
  </node>
  <node id="306922" label="zzz2254" cy:nodeId="1059">
    <graphics x="19.412358092027688" y="1260.9099352529086" z="0.0"/>
  </node>
  <node id="306921" label="zzz2253" cy:nodeId="1060">
    <graphics x="-459.2582962048473" y="636.3017809560336" z="0.0"/>
  </node>
  <node id="306920" label="zzz2252" cy:nodeId="1061">
    <graphics x="-881.570418549818" y="975.4463122060336" z="0.0"/>
  </node>
  <node id="306919" label="zzz2251" cy:nodeId="1062">
    <graphics x="219.53178672667124" y="2637.4485094716583" z="0.0"/>
  </node>
  <node id="306918" label="zzz2250" cy:nodeId="1063">
    <graphics x="-966.3980819714488" y="1762.942528026346" z="0.0"/>
  </node>
  <node id="306917" label="zzz2249" cy:nodeId="1064">
    <graphics x="-327.1204788220348" y="-18.035682422872696" z="0.0"/>
  </node>
  <node id="306916" label="zzz2248" cy:nodeId="1065">
    <graphics x="-81.20885772828481" y="-30.03595708107582" z="0.0"/>
  </node>
  <node id="306915" label="zzz2247" cy:nodeId="1066">
    <graphics x="-94.04430694703481" y="139.35402704978355" z="0.0"/>
  </node>
  <node id="306914" label="zzz2246" cy:nodeId="1067">
    <graphics x="605.7683715820312" y="-734.3756103515625" z="0.0"/>
  </node>
  <node id="306913" label="zzz2245" cy:nodeId="1068">
    <graphics x="-411.7636978161754" y="-178.93650029396645" z="0.0"/>
  </node>
  <node id="306912" label="zzz2244" cy:nodeId="1069">
    <graphics x="-361.36092682008166" y="-260.9267499277555" z="0.0"/>
  </node>
  <node id="306911" label="zzz2243" cy:nodeId="1070">
    <graphics x="1436.8949935900746" y="-453.93210576271645" z="0.0"/>
  </node>
  <node id="306910" label="zzz2242" cy:nodeId="1071">
    <graphics x="1355.796482847887" y="-795.1767041513883" z="0.0"/>
  </node>
  <node id="306909" label="zzz2241" cy:nodeId="1072">
    <graphics x="-1759.1035415661754" y="2367.85952116752" z="0.0"/>
  </node>
  <node id="306908" label="zzz2240" cy:nodeId="1073">
    <graphics x="53.62585906859019" y="1019.3918688466586" z="0.0"/>
  </node>
  <node id="306907" label="zzz2239" cy:nodeId="1074">
    <graphics x="-55.32299347047231" y="1365.7988512685336" z="0.0"/>
  </node>
  <node id="306906" label="zzz2238" cy:nodeId="1075">
    <graphics x="-169.48931427125356" y="941.159813182596" z="0.0"/>
  </node>
  <node id="306905" label="zzz2237" cy:nodeId="1076">
    <graphics x="1822.78662109375" y="2337.5927734375" z="0.0"/>
  </node>
  <node id="306904" label="zzz2236" cy:nodeId="1077">
    <graphics x="-406.0389358532848" y="-121.42136357521645" z="0.0"/>
  </node>
  <node id="306903" label="zzz2235" cy:nodeId="1078">
    <graphics x="-192.8424072265625" y="-363.2113037109375" z="0.0"/>
  </node>
  <node id="306902" label="zzz2234" cy:nodeId="1079">
    <graphics x="-180.9775344860973" y="533.002342479471" z="0.0"/>
  </node>
  <node id="306901" label="zzz2233" cy:nodeId="1080">
    <graphics x="-371.3402359021129" y="-196.5672986338102" z="0.0"/>
  </node>
  <node id="306900" label="zzz2232" cy:nodeId="1081">
    <graphics x="-320.4846145642223" y="-277.46286748146645" z="0.0"/>
  </node>
  <node id="306899" label="zzz2231" cy:nodeId="1082">
    <graphics x="-106.83904571656606" y="-79.0029675791227" z="0.0"/>
  </node>
  <node id="306898" label="zzz2230" cy:nodeId="1083">
    <graphics x="-495.1794387829723" y="191.6390001943148" z="0.0"/>
  </node>
  <node id="306897" label="zzz2229" cy:nodeId="1084">
    <graphics x="-871.3288909924449" y="1036.6513903310336" z="0.0"/>
  </node>
  <node id="306896" label="zzz2228" cy:nodeId="1085">
    <graphics x="2628.24695281859" y="278.10619379783043" z="0.0"/>
  </node>
  <node id="306895" label="zzz2227" cy:nodeId="1086">
    <graphics x="120.37176971312144" y="418.36733271384605" z="0.0"/>
  </node>
  <node id="306894" label="zzz2226" cy:nodeId="1087">
    <graphics x="-260.7589065564098" y="723.1330797841586" z="0.0"/>
  </node>
  <node id="306893" label="zzz2225" cy:nodeId="1088">
    <graphics x="2630.974934385973" y="188.92076899314293" z="0.0"/>
  </node>
  <node id="306892" label="zzz2224" cy:nodeId="1089">
    <graphics x="-492.8677932751598" y="1646.750633495096" z="0.0"/>
  </node>
  <node id="306891" label="zzz2223" cy:nodeId="1090">
    <graphics x="-837.0567314160289" y="934.988670604471" z="0.0"/>
  </node>
  <node id="306890" label="zzz2222" cy:nodeId="1091">
    <graphics x="-536.1582290661754" y="747.836815135721" z="0.0"/>
  </node>
  <node id="306889" label="zzz2221" cy:nodeId="1092">
    <graphics x="2164.7918251025258" y="2204.3465655019318" z="0.0"/>
  </node>
  <node id="306888" label="zzz2220" cy:nodeId="1093">
    <graphics x="-319.4162551892223" y="567.482567088846" z="0.0"/>
  </node>
  <node id="306887" label="zzz2219" cy:nodeId="1094">
    <graphics x="2167.8137329089222" y="2115.547996776346" z="0.0"/>
  </node>
  <node id="306886" label="zzz2218" cy:nodeId="1095">
    <graphics x="-382.41964264039416" y="1047.6616442372836" z="0.0"/>
  </node>
  <node id="306885" label="zzz2217" cy:nodeId="1096">
    <graphics x="-370.3977005017223" y="712.975242870096" z="0.0"/>
  </node>
  <node id="306884" label="zzz2216" cy:nodeId="1097">
    <graphics x="2452.709782408434" y="818.0878832509554" z="0.0"/>
  </node>
  <node id="306883" label="zzz2215" cy:nodeId="1098">
    <graphics x="2434.134373472887" y="287.72032954001793" z="0.0"/>
  </node>
  <node id="306882" label="zzz2214" cy:nodeId="1099">
    <graphics x="2564.7423999774037" y="624.3293993642367" z="0.0"/>
  </node>
  <node id="306881" label="zzz2213" cy:nodeId="1100">
    <graphics x="2266.690708922106" y="564.2698900868929" z="0.0"/>
  </node>
  <node id="306880" label="zzz2212" cy:nodeId="1101">
    <graphics x="-403.9433853161754" y="1509.9704821279086" z="0.0"/>
  </node>
  <node id="306879" label="zzz2211" cy:nodeId="1102">
    <graphics x="2429.5871170031605" y="711.6467211415804" z="0.0"/>
  </node>
  <node id="306878" label="zzz2210" cy:nodeId="1103">
    <graphics x="-364.4752151501598" y="222.0343859365023" z="0.0"/>
  </node>
  <node id="306877" label="zzz2209" cy:nodeId="1104">
    <graphics x="-1105.007228089613" y="925.645408885721" z="0.0"/>
  </node>
  <node id="306876" label="zzz2208" cy:nodeId="1105">
    <graphics x="-548.8627883923473" y="381.93752314353355" z="0.0"/>
  </node>
  <node id="306875" label="zzz2207" cy:nodeId="1106">
    <graphics x="-120.68838806275747" y="2115.547996776346" z="0.0"/>
  </node>
  <node id="306874" label="zzz2206" cy:nodeId="1107">
    <graphics x="-326.17913360719103" y="397.6326525380648" z="0.0"/>
  </node>
  <node id="306873" label="zzz2205" cy:nodeId="1108">
    <graphics x="-262.8714553845348" y="574.921776073221" z="0.0"/>
  </node>
  <node id="306872" label="zzz2204" cy:nodeId="1109">
    <graphics x="2372.9166610705433" y="494.8731005361117" z="0.0"/>
  </node>
  <node id="306871" label="zzz2203" cy:nodeId="1110">
    <graphics x="-588.2769729626598" y="499.04250361228355" z="0.0"/>
  </node>
  <node id="306870" label="zzz2202" cy:nodeId="1111">
    <graphics x="-1012.4139205944957" y="918.8642809560336" z="0.0"/>
  </node>
  <node id="306869" label="zzz2201" cy:nodeId="1112">
    <graphics x="-272.34185333375353" y="765.259422557596" z="0.0"/>
  </node>
  <node id="306868" label="zzz2200" cy:nodeId="1113">
    <graphics x="-1000.132243348402" y="989.773094432596" z="0.0"/>
  </node>
  <node id="306867" label="zzz2199" cy:nodeId="1114">
    <graphics x="-336.30465240601916" y="695.935447948221" z="0.0"/>
  </node>
  <node id="306866" label="zzz2198" cy:nodeId="1115">
    <graphics x="711.1764526367188" y="-611.5084838867188" z="0.0"/>
  </node>
  <node id="306865" label="zzz2197" cy:nodeId="1116">
    <graphics x="766.5142211914062" y="-657.8707275390625" z="0.0"/>
  </node>
  <node id="306864" label="zzz2196" cy:nodeId="1117">
    <graphics x="-375.88131256226916" y="1124.0254137685336" z="0.0"/>
  </node>
  <node id="306863" label="zzz2195" cy:nodeId="1118">
    <graphics x="-557.1126968396129" y="645.318260448221" z="0.0"/>
  </node>
  <node id="306862" label="zzz2194" cy:nodeId="1119">
    <graphics x="-1044.1911575329723" y="1022.6689684560336" z="0.0"/>
  </node>
  <node id="306861" label="zzz2193" cy:nodeId="1120">
    <graphics x="-1375.6519729626598" y="1388.496727245096" z="0.0"/>
  </node>
  <node id="306860" label="zzz2192" cy:nodeId="1121">
    <graphics x="-206.6281692517223" y="636.285545604471" z="0.0"/>
  </node>
  <node id="306859" label="zzz2191" cy:nodeId="1122">
    <graphics x="-1715.8475296032848" y="1458.2016832997836" z="0.0"/>
  </node>
  <node id="306858" label="zzz2190" cy:nodeId="1123">
    <graphics x="-79.12493438844106" y="-139.52783940529457" z="0.0"/>
  </node>
  <node id="306857" label="zzz2189" cy:nodeId="1124">
    <graphics x="-451.32674713258166" y="17.507957713846054" z="0.0"/>
  </node>
  <node id="306856" label="zzz2188" cy:nodeId="1125">
    <graphics x="-11.558833314222312" y="587.049217479471" z="0.0"/>
  </node>
  <node id="306855" label="zzz2187" cy:nodeId="1126">
    <graphics x="-267.3850051892223" y="224.44387079978355" z="0.0"/>
  </node>
  <node id="306854" label="zzz2186" cy:nodeId="1127">
    <graphics x="-478.0792190564098" y="89.0556261708773" z="0.0"/>
  </node>
  <node id="306853" label="zzz2185" cy:nodeId="1128">
    <graphics x="-82.24907989625356" y="529.304832713846" z="0.0"/>
  </node>
  <node id="306852" label="zzz2184" cy:nodeId="1129">
    <graphics x="-582.4536849987926" y="-1.2406995127164464" z="0.0"/>
  </node>
  <node id="306851" label="zzz2183" cy:nodeId="1130">
    <graphics x="2495.9548385607777" y="122.79836298728355" z="0.0"/>
  </node>
  <node id="306850" label="zzz2182" cy:nodeId="1131">
    <graphics x="-455.84636993531603" y="-302.6432568857633" z="0.0"/>
  </node>
  <node id="306849" label="zzz2181" cy:nodeId="1132">
    <graphics x="1916.888523863512" y="445.0570604970492" z="0.0"/>
  </node>
  <node id="306848" label="zzz2180" cy:nodeId="1133">
    <graphics x="-104.52300567750356" y="250.69582392478355" z="0.0"/>
  </node>
  <node id="306847" label="zzz2179" cy:nodeId="1134">
    <graphics x="77.12223510618784" y="2228.7192232778107" z="0.0"/>
  </node>
  <node id="306846" label="zzz2178" cy:nodeId="1135">
    <graphics x="-1066.2354537976207" y="914.4370348622836" z="0.0"/>
  </node>
  <node id="306845" label="zzz2177" cy:nodeId="1136">
    <graphics x="-853.2146942151012" y="2187.682974117044" z="0.0"/>
  </node>
  <node id="306844" label="zzz2176" cy:nodeId="1137">
    <graphics x="-499.32223053101916" y="241.34291865134605" z="0.0"/>
  </node>
  <node id="306843" label="zzz2175" cy:nodeId="1138">
    <graphics x="-168.2860061657848" y="-31.920753223653946" z="0.0"/>
  </node>
  <node id="306842" label="zzz2174" cy:nodeId="1139">
    <graphics x="-226.5042678845348" y="85.24257685447105" z="0.0"/>
  </node>
  <node id="306841" label="zzz2173" cy:nodeId="1140">
    <graphics x="119.53178672667124" y="2637.4485094716583" z="0.0"/>
  </node>
  <node id="306840" label="zzz2172" cy:nodeId="1141">
    <graphics x="-44.22497100953481" y="-125.6207654306852" z="0.0"/>
  </node>
  <node id="306839" label="zzz2171" cy:nodeId="1142">
    <graphics x="-167.0988723767223" y="-125.06421635841957" z="0.0"/>
  </node>
  <node id="306838" label="zzz2170" cy:nodeId="1143">
    <graphics x="19.531786726671243" y="2637.4485094716583" z="0.0"/>
  </node>
  <node id="306837" label="zzz2169" cy:nodeId="1144">
    <graphics x="-80.46821327332876" y="2637.4485094716583" z="0.0"/>
  </node>
  <node id="306836" label="zzz2168" cy:nodeId="1145">
    <graphics x="-180.46821327332876" y="2637.4485094716583" z="0.0"/>
  </node>
  <node id="306835" label="zzz2167" cy:nodeId="1146">
    <graphics x="-289.3749954235973" y="318.26369501853355" z="0.0"/>
  </node>
  <node id="306834" label="zzz2166" cy:nodeId="1147">
    <graphics x="-755.1040679943981" y="1034.5171129872836" z="0.0"/>
  </node>
  <node id="306833" label="zzz2165" cy:nodeId="1148">
    <graphics x="139.8310592639027" y="1111.6882555654086" z="0.0"/>
  </node>
  <node id="306832" label="zzz2164" cy:nodeId="1149">
    <graphics x="-1105.2982131970348" y="870.558494823221" z="0.0"/>
  </node>
  <node id="306831" label="zzz2163" cy:nodeId="1150">
    <graphics x="-865.373318864149" y="736.302879588846" z="0.0"/>
  </node>
  <node id="306830" label="zzz2162" cy:nodeId="1151">
    <graphics x="-1063.94819183473" y="853.6198961904086" z="0.0"/>
  </node>
  <node id="306829" label="zzz2161" cy:nodeId="1152">
    <graphics x="-1380.9949905407848" y="1269.6108629872836" z="0.0"/>
  </node>
  <node id="306828" label="zzz2160" cy:nodeId="1153">
    <graphics x="-1125.7668716443004" y="1014.731590526346" z="0.0"/>
  </node>
  <node id="306827" label="zzz2159" cy:nodeId="1154">
    <graphics x="2184.5404708849965" y="773.8496630361117" z="0.0"/>
  </node>
  <node id="306826" label="zzz2158" cy:nodeId="1155">
    <graphics x="-465.8666946423473" y="572.0215075185336" z="0.0"/>
  </node>
  <node id="306825" label="zzz2157" cy:nodeId="1156">
    <graphics x="-225.12676544312856" y="-113.07709477638832" z="0.0"/>
  </node>
  <node id="306824" label="zzz2156" cy:nodeId="1157">
    <graphics x="-468.02276153687853" y="-47.84766362404457" z="0.0"/>
  </node>
  <node id="306823" label="zzz2155" cy:nodeId="1158">
    <graphics x="2064.791748046875" y="2115.548095703125" z="0.0"/>
  </node>
  <node id="306822" label="zzz2154" cy:nodeId="1159">
    <graphics x="-532.518000794691" y="-313.46717045998207" z="0.0"/>
  </node>
  <node id="306821" label="zzz2153" cy:nodeId="1160">
    <graphics x="-538.7864639294567" y="-37.00928471779457" z="0.0"/>
  </node>
  <node id="306820" label="zzz2152" cy:nodeId="1161">
    <graphics x="-220.2424270642223" y="-51.147987110372696" z="0.0"/>
  </node>
  <node id="306819" label="zzz2151" cy:nodeId="1162">
    <graphics x="-331.27035064820666" y="-73.60886357521645" z="0.0"/>
  </node>
  <node id="306818" label="zzz2150" cy:nodeId="1163">
    <graphics x="-292.4572708142223" y="-151.88642094826332" z="0.0"/>
  </node>
  <node id="306817" label="zzz2149" cy:nodeId="1164">
    <graphics x="-516.8793899548473" y="158.7620470693148" z="0.0"/>
  </node>
  <node id="306816" label="zzz2148" cy:nodeId="1165">
    <graphics x="-280.46821327332873" y="2637.4485094716583" z="0.0"/>
  </node>
  <node id="306815" label="zzz2147" cy:nodeId="1166">
    <graphics x="-65.12298126344106" y="104.33107783103355" z="0.0"/>
  </node>
  <node id="306814" label="zzz2146" cy:nodeId="1167">
    <graphics x="651.2679443359375" y="-795.1766967773438" z="0.0"/>
  </node>
  <node id="306813" label="zzz2145" cy:nodeId="1168">
    <graphics x="-145.0331985485973" y="1231.7964098622836" z="0.0"/>
  </node>
  <node id="306812" label="zzz2144" cy:nodeId="1169">
    <graphics x="-321.37603302125353" y="161.2458117177523" z="0.0"/>
  </node>
  <node id="306811" label="zzz2143" cy:nodeId="1170">
    <graphics x="-353.34673614625353" y="122.99001337790855" z="0.0"/>
  </node>
  <node id="306810" label="zzz2142" cy:nodeId="1171">
    <graphics x="-141.2705032360973" y="-157.37128422951332" z="0.0"/>
  </node>
  <node id="306809" label="zzz2141" cy:nodeId="1172">
    <graphics x="-499.8472854626598" y="-12.976875049825821" z="0.0"/>
  </node>
  <node id="306808" label="zzz2140" cy:nodeId="1173">
    <graphics x="-385.00408477906603" y="95.2353136708773" z="0.0"/>
  </node>
  <node id="306807" label="zzz2139" cy:nodeId="1174">
    <graphics x="2333.416584776598" y="275.1838915517367" z="0.0"/>
  </node>
  <node id="306806" label="zzz2138" cy:nodeId="1175">
    <graphics x="-380.46821327332873" y="2637.4485094716583" z="0.0"/>
  </node>
  <node id="306805" label="zzz2137" cy:nodeId="1176">
    <graphics x="1581.784863280016" y="2326.926445262674" z="0.0"/>
  </node>
  <node id="306804" label="zzz2136" cy:nodeId="1177">
    <graphics x="-351.35650634765625" y="-389.3126220703125" z="0.0"/>
  </node>
  <node id="306803" label="zzz2135" cy:nodeId="1178">
    <graphics x="58.30334930296519" y="1237.971336620096" z="0.0"/>
  </node>
  <node id="306802" label="zzz2134" cy:nodeId="1179">
    <graphics x="2054.083042906481" y="342.00096918845543" z="0.0"/>
  </node>
  <node id="306801" label="zzz2133" cy:nodeId="1180">
    <graphics x="1168.7316711413441" y="2115.547996776346" z="0.0"/>
  </node>
  <node id="306800" label="zzz2132" cy:nodeId="1181">
    <graphics x="-248.8372756970348" y="1131.063377635721" z="0.0"/>
  </node>
  <node id="306799" label="zzz2131" cy:nodeId="1182">
    <graphics x="-969.1038162243785" y="732.0251696279086" z="0.0"/>
  </node>
  <node id="306798" label="zzz2130" cy:nodeId="1183">
    <graphics x="-697.8637649548473" y="935.658836620096" z="0.0"/>
  </node>
  <node id="306797" label="zzz2129" cy:nodeId="1184">
    <graphics x="-480.46821327332873" y="2637.4485094716583" z="0.0"/>
  </node>
  <node id="306796" label="zzz2128" cy:nodeId="1185">
    <graphics x="327.83673553343397" y="264.64052607322105" z="0.0"/>
  </node>
  <node id="306795" label="zzz2127" cy:nodeId="1186">
    <graphics x="-672.088183594984" y="2212.667457835916" z="0.0"/>
  </node>
  <node id="306794" label="zzz2126" cy:nodeId="1187">
    <graphics x="-264.5340530407848" y="-216.38147710060707" z="0.0"/>
  </node>
  <node id="306793" label="zzz2125" cy:nodeId="1188">
    <graphics x="-692.969287110609" y="2346.1016314199005" z="0.0"/>
  </node>
  <node id="306792" label="zzz2124" cy:nodeId="1189">
    <graphics x="-729.3219177258434" y="2291.4946520497833" z="0.0"/>
  </node>
  <node id="306791" label="zzz2123" cy:nodeId="1190">
    <graphics x="-686.066943360609" y="2294.535789745096" z="0.0"/>
  </node>
  <node id="306790" label="zzz2122" cy:nodeId="1191">
    <graphics x="-657.2104370129528" y="2261.8982927968536" z="0.0"/>
  </node>
  <node id="306789" label="zzz2121" cy:nodeId="1192">
    <graphics x="-911.1200134289684" y="2234.9437716176544" z="0.0"/>
  </node>
  <node id="306788" label="zzz2120" cy:nodeId="1193">
    <graphics x="-736.7828857434215" y="2333.1049883534943" z="0.0"/>
  </node>
  <node id="306787" label="zzz2119" cy:nodeId="1194">
    <graphics x="-656.0737487805309" y="2326.7657549550568" z="0.0"/>
  </node>
  <node id="306786" label="zzz2118" cy:nodeId="1195">
    <graphics x="2570.188535975176" y="467.3573534657992" z="0.0"/>
  </node>
  <node id="306785" label="zzz2117" cy:nodeId="1196">
    <graphics x="-764.6594497693004" y="660.995262401346" z="0.0"/>
  </node>
  <node id="306784" label="zzz2116" cy:nodeId="1197">
    <graphics x="-277.29302520875353" y="-109.3262097666227" z="0.0"/>
  </node>
  <node id="306783" label="zzz2115" cy:nodeId="1198">
    <graphics x="-580.4682132733287" y="2637.4485094716583" z="0.0"/>
  </node>
  <node id="306782" label="zzz2114" cy:nodeId="1199">
    <graphics x="494.899853514391" y="2115.547996776346" z="0.0"/>
  </node>
  <node id="306781" label="zzz2113" cy:nodeId="1200">
    <graphics x="524.0210693347035" y="2182.582191722635" z="0.0"/>
  </node>
  <node id="306780" label="zzz2112" cy:nodeId="1201">
    <graphics x="-223.13933868531606" y="-751.0390088388883" z="0.0"/>
  </node>
  <node id="306779" label="zzz2111" cy:nodeId="1202">
    <graphics x="-197.35332794312856" y="95.6057970693148" z="0.0"/>
  </node>
  <node id="306778" label="zzz2110" cy:nodeId="1203">
    <graphics x="964.3256042468129" y="2438.427925365213" z="0.0"/>
  </node>
  <node id="306777" label="zzz2109" cy:nodeId="1204">
    <graphics x="-707.5754959118785" y="552.9375231435336" z="0.0"/>
  </node>
  <node id="306776" label="zzz2108" cy:nodeId="1205">
    <graphics x="-615.6212036145153" y="2233.2130434682404" z="0.0"/>
  </node>
  <node id="306775" label="zzz2107" cy:nodeId="1206">
    <graphics x="-835.1456939709606" y="2330.4192736318146" z="0.0"/>
  </node>
  <node id="306774" label="zzz2106" cy:nodeId="1207">
    <graphics x="-785.7015869152965" y="2348.3218157460724" z="0.0"/>
  </node>
  <node id="306773" label="zzz2105" cy:nodeId="1208">
    <graphics x="-700.5098754895153" y="2136.568674342874" z="0.0"/>
  </node>
  <node id="306772" label="zzz2104" cy:nodeId="1209">
    <graphics x="-817.0086242688121" y="2300.4712755849396" z="0.0"/>
  </node>
  <node id="306771" label="zzz2103" cy:nodeId="1210">
    <graphics x="-746.4107849133434" y="2170.4927265813385" z="0.0"/>
  </node>
  <node id="306770" label="zzz2102" cy:nodeId="1211">
    <graphics x="-781.5997802746715" y="2115.547996776346" z="0.0"/>
  </node>
  <node id="306769" label="zzz2101" cy:nodeId="1212">
    <graphics x="-805.9667846692028" y="2160.671711491588" z="0.0"/>
  </node>
  <node id="306768" label="zzz2100" cy:nodeId="1213">
    <graphics x="-769.8881103527965" y="2238.916305797342" z="0.0"/>
  </node>
  <node id="306767" label="zzz2099" cy:nodeId="1214">
    <graphics x="-822.3741027844371" y="2251.2352755239044" z="0.0"/>
  </node>
  <node id="306766" label="zzz2098" cy:nodeId="1215">
    <graphics x="-619.8524353039684" y="2290.306328075174" z="0.0"/>
  </node>
  <node id="306765" label="zzz2097" cy:nodeId="1216">
    <graphics x="-680.4682132733287" y="2637.4485094716583" z="0.0"/>
  </node>
  <node id="306764" label="zzz2096" cy:nodeId="1217">
    <graphics x="450.99757079954725" y="2174.1260607411896" z="0.0"/>
  </node>
  <node id="306763" label="zzz2095" cy:nodeId="1218">
    <graphics x="-780.4682132733287" y="2637.4485094716583" z="0.0"/>
  </node>
  <node id="306762" label="zzz2094" cy:nodeId="1219">
    <graphics x="-434.9484817517223" y="-318.3241803476774" z="0.0"/>
  </node>
  <node id="306761" label="zzz2093" cy:nodeId="1220">
    <graphics x="2266.109959410387" y="218.41869379783043" z="0.0"/>
  </node>
  <node id="306760" label="zzz2092" cy:nodeId="1221">
    <graphics x="-880.4682132733287" y="2637.4485094716583" z="0.0"/>
  </node>
  <node id="306759" label="zzz2091" cy:nodeId="1222">
    <graphics x="-980.4682132733287" y="2637.4485094716583" z="0.0"/>
  </node>
  <node id="306758" label="zzz2090" cy:nodeId="1223">
    <graphics x="-484.86580963258166" y="326.7227404286898" z="0.0"/>
  </node>
  <node id="306757" label="zzz2089" cy:nodeId="1224">
    <graphics x="-1080.4682132733287" y="2637.4485094716583" z="0.0"/>
  </node>
  <node id="306756" label="zzz2088" cy:nodeId="1225">
    <graphics x="-153.12127227906606" y="-67.4994275400602" z="0.0"/>
  </node>
  <node id="306755" label="zzz2087" cy:nodeId="1226">
    <graphics x="162.63850097532847" y="2117.530235545877" z="0.0"/>
  </node>
  <node id="306754" label="zzz2086" cy:nodeId="1227">
    <graphics x="2321.9963424670277" y="579.0331957509554" z="0.0"/>
  </node>
  <node id="306753" label="zzz2085" cy:nodeId="1228">
    <graphics x="1583.1557357775746" y="-168.4592435190641" z="0.0"/>
  </node>
  <node id="306752" label="zzz2084" cy:nodeId="1229">
    <graphics x="92.15057830687144" y="54.246238963846054" z="0.0"/>
  </node>
  <node id="306751" label="zzz2083" cy:nodeId="1230">
    <graphics x="-992.7555801403942" y="1071.0395739247836" z="0.0"/>
  </node>
  <node id="306750" label="zzz2082" cy:nodeId="1231">
    <graphics x="-823.2767641079845" y="820.1269762685336" z="0.0"/>
  </node>
  <node id="306749" label="zzz2081" cy:nodeId="1232">
    <graphics x="-224.8743850720348" y="-163.01380131935707" z="0.0"/>
  </node>
  <node id="306748" label="zzz2080" cy:nodeId="1233">
    <graphics x="-87.98723907594106" y="920.739158885721" z="0.0"/>
  </node>
  <node id="306747" label="zzz2079" cy:nodeId="1234">
    <graphics x="-485.71029205445666" y="-97.40528081154457" z="0.0"/>
  </node>
  <node id="306746" label="zzz2078" cy:nodeId="1235">
    <graphics x="-205.2932083142223" y="-22.41590092873207" z="0.0"/>
  </node>
  <node id="306745" label="zzz2077" cy:nodeId="1236">
    <graphics x="-439.60457916383166" y="-27.106422168966446" z="0.0"/>
  </node>
  <node id="306744" label="zzz2076" cy:nodeId="1237">
    <graphics x="-165.32598419312856" y="59.113060252908554" z="0.0"/>
  </node>
  <node id="306743" label="zzz2075" cy:nodeId="1238">
    <graphics x="-394.01970977906603" y="-64.37656377052895" z="0.0"/>
  </node>
  <node id="306742" label="zzz2074" cy:nodeId="1239">
    <graphics x="72.72809295530894" y="238.10915400290855" z="0.0"/>
  </node>
  <node id="306741" label="zzz2073" cy:nodeId="1240">
    <graphics x="-345.96551056031603" y="-164.37348149513832" z="0.0"/>
  </node>
  <node id="306740" label="zzz2072" cy:nodeId="1241">
    <graphics x="-602.1914321911754" y="1047.3078844716586" z="0.0"/>
  </node>
  <node id="306739" label="zzz2071" cy:nodeId="1242">
    <graphics x="-174.39190216187856" y="315.15871454978355" z="0.0"/>
  </node>
  <node id="306738" label="zzz2070" cy:nodeId="1243">
    <graphics x="-525.6021987927379" y="119.90798212790855" z="0.0"/>
  </node>
  <node id="306737" label="zzz2069" cy:nodeId="1244">
    <graphics x="-930.5238525402965" y="775.701561229471" z="0.0"/>
  </node>
  <node id="306736" label="zzz2068" cy:nodeId="1245">
    <graphics x="-254.51482696656606" y="378.9731066396273" z="0.0"/>
  </node>
  <node id="306735" label="zzz2067" cy:nodeId="1246">
    <graphics x="-404.8071548474254" y="293.5635607411898" z="0.0"/>
  </node>
  <node id="306734" label="zzz2066" cy:nodeId="1247">
    <graphics x="-1004.420832825941" y="779.1892321279086" z="0.0"/>
  </node>
  <node id="306733" label="zzz2065" cy:nodeId="1248">
    <graphics x="-476.2798110974254" y="-132.29636357521645" z="0.0"/>
  </node>
  <node id="306732" label="zzz2064" cy:nodeId="1249">
    <graphics x="-1180.4682132733287" y="2637.4485094716583" z="0.0"/>
  </node>
  <node id="306731" label="zzz2063" cy:nodeId="1250">
    <graphics x="-1280.4682132733287" y="2637.4485094716583" z="0.0"/>
  </node>
  <node id="306730" label="zzz2062" cy:nodeId="1251">
    <graphics x="12.800724791246438" y="650.6404040029086" z="0.0"/>
  </node>
  <node id="306729" label="zzz2061" cy:nodeId="1252">
    <graphics x="-214.8002883923473" y="1359.6167223622836" z="0.0"/>
  </node>
  <node id="306728" label="zzz2060" cy:nodeId="1253">
    <graphics x="-193.09746856812856" y="1510.232322948221" z="0.0"/>
  </node>
  <node id="306727" label="zzz2059" cy:nodeId="1254">
    <graphics x="-47.56573028687856" y="1118.8088610341586" z="0.0"/>
  </node>
  <node id="306726" label="zzz2058" cy:nodeId="1255">
    <graphics x="2293.061375426012" y="409.8916552236117" z="0.0"/>
  </node>
  <node id="306725" label="zzz2057" cy:nodeId="1256">
    <graphics x="2110.3175704943715" y="262.1710741689242" z="0.0"/>
  </node>
  <node id="306724" label="zzz2056" cy:nodeId="1257">
    <graphics x="2353.459049986559" y="457.52001215720543" z="0.0"/>
  </node>
  <node id="306723" label="zzz2055" cy:nodeId="1258">
    <graphics x="-222.77434845094106" y="1203.152977245096" z="0.0"/>
  </node>
  <node id="306722" label="zzz2054" cy:nodeId="1259">
    <graphics x="-212.2966262829723" y="-268.12065861916176" z="0.0"/>
  </node>
  <node id="306721" label="zzz2053" cy:nodeId="1260">
    <graphics x="916.2753799426137" y="-84.81940434670082" z="0.0"/>
  </node>
  <node id="306720" label="zzz2052" cy:nodeId="1261">
    <graphics x="884.2529857623158" y="-248.15198491310707" z="0.0"/>
  </node>
  <node id="306719" label="zzz2051" cy:nodeId="1262">
    <graphics x="918.7923782336293" y="-374.3522412607633" z="0.0"/>
  </node>
  <node id="306718" label="zzz2050" cy:nodeId="1263">
    <graphics x="611.7801254260121" y="-284.18042729591957" z="0.0"/>
  </node>
  <node id="306717" label="zzz2049" cy:nodeId="1264">
    <graphics x="1024.6725662219105" y="-166.95256779884926" z="0.0"/>
  </node>
  <node id="306716" label="zzz2048" cy:nodeId="1265">
    <graphics x="965.6247528063832" y="-125.57758305763832" z="0.0"/>
  </node>
  <node id="306715" label="zzz2047" cy:nodeId="1266">
    <graphics x="799.3330581652699" y="-288.3098981211149" z="0.0"/>
  </node>
  <node id="306714" label="zzz2046" cy:nodeId="1267">
    <graphics x="885.7420852648793" y="-329.2993619272672" z="0.0"/>
  </node>
  <node id="306713" label="zzz2045" cy:nodeId="1268">
    <graphics x="939.6692779528676" y="-125.83335087990395" z="0.0"/>
  </node>
  <node id="306712" label="zzz2044" cy:nodeId="1269">
    <graphics x="935.8773086535512" y="-125.33887456154457" z="0.0"/>
  </node>
  <node id="306711" label="zzz2043" cy:nodeId="1270">
    <graphics x="953.3046310412465" y="-362.4178845713102" z="0.0"/>
  </node>
  <node id="306710" label="zzz2042" cy:nodeId="1271">
    <graphics x="995.253727720934" y="-232.8216931650602" z="0.0"/>
  </node>
  <node id="306709" label="zzz2041" cy:nodeId="1272">
    <graphics x="925.6245391833363" y="-246.21408818459145" z="0.0"/>
  </node>
  <node id="306708" label="zzz2040" cy:nodeId="1273">
    <graphics x="927.3681762682972" y="-361.3227040598356" z="0.0"/>
  </node>
  <node id="306707" label="zzz2039" cy:nodeId="1274">
    <graphics x="935.9148910510121" y="-350.19299290871254" z="0.0"/>
  </node>
  <node id="306706" label="zzz2038" cy:nodeId="1275">
    <graphics x="1071.4901321398793" y="-255.98047612404457" z="0.0"/>
  </node>
  <node id="306705" label="zzz2037" cy:nodeId="1276">
    <graphics x="952.5662124621449" y="52.30406977439293" z="0.0"/>
  </node>
  <node id="306704" label="zzz2036" cy:nodeId="1277">
    <graphics x="1083.8246047961293" y="-329.65603612160317" z="0.0"/>
  </node>
  <node id="306703" label="zzz2035" cy:nodeId="1278">
    <graphics x="1078.4538314806996" y="-329.4917371103727" z="0.0"/>
  </node>
  <node id="306702" label="zzz2034" cy:nodeId="1279">
    <graphics x="1103.9718521105824" y="-346.74147771095863" z="0.0"/>
  </node>
  <node id="306701" label="zzz2033" cy:nodeId="1280">
    <graphics x="988.3860214221058" y="-365.05204365944496" z="0.0"/>
  </node>
  <node id="306700" label="zzz2032" cy:nodeId="1281">
    <graphics x="862.2308757769642" y="-437.7208916971647" z="0.0"/>
  </node>
  <node id="306699" label="zzz2031" cy:nodeId="1282">
    <graphics x="837.3278282153187" y="-400.4909884760343" z="0.0"/>
  </node>
  <node id="306698" label="zzz2030" cy:nodeId="1283">
    <graphics x="812.4176147448597" y="-409.4136254618131" z="0.0"/>
  </node>
  <node id="306697" label="zzz2029" cy:nodeId="1284">
    <graphics x="644.7301834094105" y="-148.75376103615395" z="0.0"/>
  </node>
  <node id="306696" label="zzz2028" cy:nodeId="1285">
    <graphics x="1035.442936705309" y="-99.76160405373207" z="0.0"/>
  </node>
  <node id="306695" label="zzz2027" cy:nodeId="1286">
    <graphics x="967.2385757433949" y="-237.40033696388832" z="0.0"/>
  </node>
  <node id="306694" label="zzz2026" cy:nodeId="1287">
    <graphics x="793.7046516406117" y="-167.11211369728676" z="0.0"/>
  </node>
  <node id="306693" label="zzz2025" cy:nodeId="1288">
    <graphics x="764.9525497424183" y="-360.1620328257047" z="0.0"/>
  </node>
  <node id="306692" label="zzz2024" cy:nodeId="1289">
    <graphics x="574.5246627795277" y="-225.1680066416227" z="0.0"/>
  </node>
  <node id="306691" label="zzz2023" cy:nodeId="1290">
    <graphics x="739.9159133898793" y="-119.09656499123207" z="0.0"/>
  </node>
  <node id="306690" label="zzz2022" cy:nodeId="1291">
    <graphics x="595.4150741564808" y="-135.94467900490395" z="0.0"/>
  </node>
  <node id="306689" label="zzz2021" cy:nodeId="1292">
    <graphics x="762.8501327502308" y="-211.42012761330238" z="0.0"/>
  </node>
  <node id="306688" label="zzz2020" cy:nodeId="1293">
    <graphics x="733.8641632067738" y="-249.14646123146645" z="0.0"/>
  </node>
  <node id="306687" label="zzz2019" cy:nodeId="1294">
    <graphics x="835.9178512560902" y="-314.206901294943" z="0.0"/>
  </node>
  <node id="306686" label="zzz2018" cy:nodeId="1295">
    <graphics x="821.8400314318715" y="-359.18727467751137" z="0.0"/>
  </node>
  <node id="306685" label="zzz2017" cy:nodeId="1296">
    <graphics x="805.3994110095082" y="-347.8374478647672" z="0.0"/>
  </node>
  <node id="306684" label="zzz2016" cy:nodeId="1297">
    <graphics x="1210.8040817248402" y="-335.1647183725797" z="0.0"/>
  </node>
  <node id="306683" label="zzz2015" cy:nodeId="1298">
    <graphics x="952.0678375231801" y="-269.92900822853676" z="0.0"/>
  </node>
  <node id="306682" label="zzz2014" cy:nodeId="1299">
    <graphics x="803.0380142199574" y="-354.49954198097817" z="0.0"/>
  </node>
  <node id="306681" label="zzz2013" cy:nodeId="1300">
    <graphics x="1121.4859664904652" y="-334.2157132456266" z="0.0"/>
  </node>
  <node id="306680" label="zzz2012" cy:nodeId="1301">
    <graphics x="897.978596495348" y="-260.74895451759926" z="0.0"/>
  </node>
  <node id="306679" label="zzz2011" cy:nodeId="1302">
    <graphics x="1065.2331283556996" y="-210.93379948830238" z="0.0"/>
  </node>
  <node id="306678" label="zzz2010" cy:nodeId="1303">
    <graphics x="720.2846115099965" y="-456.24750111794106" z="0.0"/>
  </node>
  <node id="306677" label="zzz2009" cy:nodeId="1304">
    <graphics x="898.6106918322621" y="-299.76716588234535" z="0.0"/>
  </node>
  <node id="306676" label="zzz2008" cy:nodeId="1305">
    <graphics x="935.7283065783558" y="-337.2941357920133" z="0.0"/>
  </node>
  <node id="306675" label="zzz2007" cy:nodeId="1306">
    <graphics x="923.4204605090199" y="-315.4132458994352" z="0.0"/>
  </node>
  <node id="306674" label="zzz2006" cy:nodeId="1307">
    <graphics x="997.3174789416371" y="-247.22888920998207" z="0.0"/>
  </node>
  <node id="306673" label="zzz2005" cy:nodeId="1308">
    <graphics x="1163.4369857775746" y="-424.27082226967445" z="0.0"/>
  </node>
  <node id="306672" label="zzz2004" cy:nodeId="1309">
    <graphics x="1120.0746505724965" y="-235.7856366465055" z="0.0"/>
  </node>
  <node id="306671" label="zzz2003" cy:nodeId="1310">
    <graphics x="941.811360167223" y="-102.19965337013832" z="0.0"/>
  </node>
  <node id="306670" label="zzz2002" cy:nodeId="1311">
    <graphics x="951.7076156603871" y="-125.0530164072477" z="0.0"/>
  </node>
  <node id="306669" label="zzz2001" cy:nodeId="1312">
    <graphics x="969.8220413195668" y="-110.84638188576332" z="0.0"/>
  </node>
  <node id="306668" label="zzz2000" cy:nodeId="1313">
    <graphics x="878.3585975634633" y="-391.1277177164518" z="0.0"/>
  </node>
  <node id="306667" label="zzz1999" cy:nodeId="1314">
    <graphics x="688.2298477160512" y="-329.4918362925016" z="0.0"/>
  </node>
  <node id="306666" label="zzz1998" cy:nodeId="1315">
    <graphics x="846.8264110552846" y="-334.07124303078285" z="0.0"/>
  </node>
  <node id="306665" label="zzz1997" cy:nodeId="1316">
    <graphics x="1121.7417343127308" y="-287.5468213388883" z="0.0"/>
  </node>
  <node id="306664" label="zzz1996" cy:nodeId="1317">
    <graphics x="912.811775969225" y="-272.99770329689613" z="0.0"/>
  </node>
  <node id="306663" label="zzz1995" cy:nodeId="1318">
    <graphics x="1169.4802291857777" y="-171.43125127052895" z="0.0"/>
  </node>
  <node id="306662" label="zzz1994" cy:nodeId="1319">
    <graphics x="1013.3587844836293" y="-99.6343152353727" z="0.0"/>
  </node>
  <node id="306661" label="zzz1993" cy:nodeId="1320">
    <graphics x="1088.6859329211293" y="-355.7022397348844" z="0.0"/>
  </node>
  <node id="306660" label="zzz1992" cy:nodeId="1321">
    <graphics x="1106.6785934435902" y="-302.65901158547035" z="0.0"/>
  </node>
  <node id="306659" label="zzz1991" cy:nodeId="1322">
    <graphics x="1113.0956771838246" y="-302.0370328257047" z="0.0"/>
  </node>
  <node id="306658" label="zzz1990" cy:nodeId="1323">
    <graphics x="1066.9471481310902" y="-332.13125584816567" z="0.0"/>
  </node>
  <node id="306657" label="zzz1989" cy:nodeId="1324">
    <graphics x="1125.2037399279652" y="-246.49581120705238" z="0.0"/>
  </node>
  <node id="306656" label="zzz1988" cy:nodeId="1325">
    <graphics x="1184.3826034533558" y="-244.03984807228676" z="0.0"/>
  </node>
  <node id="306655" label="zzz1987" cy:nodeId="1326">
    <graphics x="1132.1034286486683" y="-271.0482861826383" z="0.0"/>
  </node>
  <node id="306654" label="zzz1986" cy:nodeId="1327">
    <graphics x="1094.1640213000355" y="-320.59378026222817" z="0.0"/>
  </node>
  <node id="306653" label="zzz1985" cy:nodeId="1328">
    <graphics x="1108.185856627184" y="-352.26814244484535" z="0.0"/>
  </node>
  <node id="306652" label="zzz1984" cy:nodeId="1329">
    <graphics x="1115.8190963732777" y="-326.46791814064613" z="0.0"/>
  </node>
  <node id="306651" label="zzz1983" cy:nodeId="1330">
    <graphics x="796.1691902148305" y="-248.1559216806852" z="0.0"/>
  </node>
  <node id="306650" label="zzz1982" cy:nodeId="1331">
    <graphics x="817.328247832018" y="-279.3788220713102" z="0.0"/>
  </node>
  <node id="306649" label="zzz1981" cy:nodeId="1332">
    <graphics x="1108.8364456164418" y="-50.17060063576332" z="0.0"/>
  </node>
  <node id="306648" label="zzz1980" cy:nodeId="1333">
    <graphics x="1191.5600326525746" y="-100.80417607521645" z="0.0"/>
  </node>
  <node id="306647" label="zzz1979" cy:nodeId="1334">
    <graphics x="817.7934196459828" y="-223.4882733652555" z="0.0"/>
  </node>
  <node id="306646" label="zzz1978" cy:nodeId="1335">
    <graphics x="897.2058380114613" y="-311.50330327248207" z="0.0"/>
  </node>
  <node id="306645" label="zzz1977" cy:nodeId="1336">
    <graphics x="1166.079441832262" y="-316.493880970236" z="0.0"/>
  </node>
  <node id="306644" label="zzz1976" cy:nodeId="1337">
    <graphics x="1113.790837095934" y="-338.55376408791176" z="0.0"/>
  </node>
  <node id="306643" label="zzz1975" cy:nodeId="1338">
    <graphics x="1122.3100631701527" y="-318.20654271340004" z="0.0"/>
  </node>
  <node id="306642" label="zzz1974" cy:nodeId="1339">
    <graphics x="1070.5397537219105" y="-342.5038678476774" z="0.0"/>
  </node>
  <node id="306641" label="zzz1973" cy:nodeId="1340">
    <graphics x="1105.5292709338246" y="-327.589225513693" z="0.0"/>
  </node>
  <node id="306640" label="zzz1972" cy:nodeId="1341">
    <graphics x="1044.874592589098" y="-348.2822186777555" z="0.0"/>
  </node>
  <node id="306639" label="zzz1971" cy:nodeId="1342">
    <graphics x="1097.354573057848" y="-346.0056607553922" z="0.0"/>
  </node>
  <node id="306638" label="zzz1970" cy:nodeId="1343">
    <graphics x="1069.0660903918324" y="-330.492545826193" z="0.0"/>
  </node>
  <node id="306637" label="zzz1969" cy:nodeId="1344">
    <graphics x="1081.7782333361683" y="-290.27817509865395" z="0.0"/>
  </node>
  <node id="306636" label="zzz1968" cy:nodeId="1345">
    <graphics x="1072.012272642809" y="-347.84082768654457" z="0.0"/>
  </node>
  <node id="306635" label="zzz1967" cy:nodeId="1346">
    <graphics x="1121.7492416369496" y="-248.7023846933805" z="0.0"/>
  </node>
  <node id="306634" label="zzz1966" cy:nodeId="1347">
    <graphics x="1064.0972030627308" y="-316.8148648569547" z="0.0"/>
  </node>
  <node id="306633" label="zzz1965" cy:nodeId="1348">
    <graphics x="1096.1521041857777" y="-383.5437505075895" z="0.0"/>
  </node>
  <node id="306632" label="zzz1964" cy:nodeId="1349">
    <graphics x="1038.660450743395" y="-337.36299107765785" z="0.0"/>
  </node>
  <node id="306631" label="zzz1963" cy:nodeId="1350">
    <graphics x="1124.4789169299183" y="-409.0046841928922" z="0.0"/>
  </node>
  <node id="306630" label="zzz1962" cy:nodeId="1351">
    <graphics x="1167.106999205309" y="-363.7652737925016" z="0.0"/>
  </node>
  <node id="306629" label="zzz1961" cy:nodeId="1352">
    <graphics x="1039.2232711779652" y="-395.8832528421842" z="0.0"/>
  </node>
  <node id="306628" label="zzz1960" cy:nodeId="1353">
    <graphics x="1076.41557769652" y="-395.7177083322965" z="0.0"/>
  </node>
  <node id="306627" label="zzz1959" cy:nodeId="1354">
    <graphics x="1130.0087326037465" y="-387.1184537241422" z="0.0"/>
  </node>
  <node id="306626" label="zzz1958" cy:nodeId="1355">
    <graphics x="1075.8802993762074" y="-397.7869450876676" z="0.0"/>
  </node>
  <node id="306625" label="zzz1957" cy:nodeId="1356">
    <graphics x="1082.409977720934" y="-393.5659043619596" z="0.0"/>
  </node>
  <node id="306624" label="zzz1956" cy:nodeId="1357">
    <graphics x="1123.5311630236683" y="-392.9912659952604" z="0.0"/>
  </node>
  <node id="306623" label="zzz1955" cy:nodeId="1358">
    <graphics x="1053.6317031848012" y="-385.8048760721647" z="0.0"/>
  </node>
  <node id="306622" label="zzz1954" cy:nodeId="1359">
    <graphics x="1134.8270919787465" y="-392.66870854591957" z="0.0"/>
  </node>
  <node id="306621" label="zzz1953" cy:nodeId="1360">
    <graphics x="1151.7145431506215" y="-339.55266545509926" z="0.0"/>
  </node>
  <node id="306620" label="zzz1952" cy:nodeId="1361">
    <graphics x="1144.6100204455433" y="-353.30214284157387" z="0.0"/>
  </node>
  <node id="306619" label="zzz1951" cy:nodeId="1362">
    <graphics x="1038.6246994006215" y="-314.35908482765785" z="0.0"/>
  </node>
  <node id="306618" label="zzz1950" cy:nodeId="1363">
    <graphics x="1061.6993301379262" y="-310.64717076515785" z="0.0"/>
  </node>
  <node id="306617" label="zzz1949" cy:nodeId="1364">
    <graphics x="1088.6423538195668" y="-279.82385991310707" z="0.0"/>
  </node>
  <node id="306616" label="zzz1948" cy:nodeId="1365">
    <graphics x="1068.9149826037465" y="-286.4059674570524" z="0.0"/>
  </node>
  <node id="306615" label="zzz1947" cy:nodeId="1366">
    <graphics x="1061.77348785277" y="-288.5961377451383" z="0.0"/>
  </node>
  <node id="306614" label="zzz1946" cy:nodeId="1367">
    <graphics x="1057.5870254504262" y="-294.7048947641813" z="0.0"/>
  </node>
  <node id="306613" label="zzz1945" cy:nodeId="1368">
    <graphics x="1076.453678892809" y="-304.9356839487516" z="0.0"/>
  </node>
  <node id="306612" label="zzz1944" cy:nodeId="1369">
    <graphics x="1087.492771910387" y="-343.7937390634977" z="0.0"/>
  </node>
  <node id="306611" label="zzz1943" cy:nodeId="1370">
    <graphics x="1067.918766783434" y="-348.2880551645719" z="0.0"/>
  </node>
  <node id="306610" label="zzz1942" cy:nodeId="1371">
    <graphics x="1065.4655960070668" y="-319.10537694191567" z="0.0"/>
  </node>
  <node id="306609" label="zzz1941" cy:nodeId="1372">
    <graphics x="1099.1447036730824" y="-310.589957935568" z="0.0"/>
  </node>
  <node id="306608" label="zzz1940" cy:nodeId="1373">
    <graphics x="1098.6727645861683" y="-327.8852689096891" z="0.0"/>
  </node>
  <node id="306607" label="zzz1939" cy:nodeId="1374">
    <graphics x="1077.497654722887" y="-291.2568280527555" z="0.0"/>
  </node>
  <node id="306606" label="zzz1938" cy:nodeId="1375">
    <graphics x="1068.4174697863637" y="-310.40344975685707" z="0.0"/>
  </node>
  <node id="306605" label="zzz1937" cy:nodeId="1376">
    <graphics x="1101.7021835314808" y="-341.78150151466957" z="0.0"/>
  </node>
  <node id="306604" label="zzz1936" cy:nodeId="1377">
    <graphics x="1059.7538803088246" y="-297.15405247902504" z="0.0"/>
  </node>
  <node id="306603" label="zzz1935" cy:nodeId="1378">
    <graphics x="1098.4023178088246" y="-321.212272388693" z="0.0"/>
  </node>
  <node id="306602" label="zzz1934" cy:nodeId="1379">
    <graphics x="1106.7291915881215" y="-162.64051030373207" z="0.0"/>
  </node>
  <node id="306601" label="zzz1933" cy:nodeId="1380">
    <graphics x="1130.865818785387" y="-144.31272099709145" z="0.0"/>
  </node>
  <node id="306600" label="zzz1932" cy:nodeId="1381">
    <graphics x="985.6148879992543" y="-244.76264165138832" z="0.0"/>
  </node>
  <node id="306599" label="zzz1931" cy:nodeId="1382">
    <graphics x="1105.8431747424183" y="-142.10895512795082" z="0.0"/>
  </node>
  <node id="306598" label="zzz1930" cy:nodeId="1383">
    <graphics x="999.0099380480824" y="-261.67168400978676" z="0.0"/>
  </node>
  <node id="306597" label="zzz1929" cy:nodeId="1384">
    <graphics x="1094.240330504137" y="-139.01026128029457" z="0.0"/>
  </node>
  <node id="306596" label="zzz1928" cy:nodeId="1385">
    <graphics x="933.7592361437855" y="-347.33552525734535" z="0.0"/>
  </node>
  <node id="306595" label="zzz1927" cy:nodeId="1386">
    <graphics x="816.7841918932972" y="-494.237174732443" z="0.0"/>
  </node>
  <node id="306594" label="zzz1926" cy:nodeId="1387">
    <graphics x="871.0169132220326" y="-504.9973981211149" z="0.0"/>
  </node>
  <node id="306593" label="zzz1925" cy:nodeId="1388">
    <graphics x="983.8870895373402" y="-159.67966435646645" z="0.0"/>
  </node>
  <node id="306592" label="zzz1924" cy:nodeId="1389">
    <graphics x="805.3824432360707" y="-314.54309819435707" z="0.0"/>
  </node>
  <node id="306591" label="zzz1923" cy:nodeId="1390">
    <graphics x="997.1940658556996" y="-78.00495122170082" z="0.0"/>
  </node>
  <node id="306590" label="zzz1922" cy:nodeId="1391">
    <graphics x="1098.6203659045277" y="-208.32268498634926" z="0.0"/>
  </node>
  <node id="306589" label="zzz1921" cy:nodeId="1392">
    <graphics x="921.490788267809" y="-306.4066541025602" z="0.0"/>
  </node>
  <node id="306588" label="zzz1920" cy:nodeId="1393">
    <graphics x="887.1574638354359" y="-259.8398816416227" z="0.0"/>
  </node>
  <node id="306587" label="zzz1919" cy:nodeId="1394">
    <graphics x="953.4342239367543" y="-408.5109155008756" z="0.0"/>
  </node>
  <node id="306586" label="zzz1918" cy:nodeId="1395">
    <graphics x="919.5922744738637" y="-270.9296490976774" z="0.0"/>
  </node>
  <node id="306585" label="zzz1917" cy:nodeId="1396">
    <graphics x="974.9982040392933" y="-97.71875737404457" z="0.0"/>
  </node>
  <node id="306584" label="zzz1916" cy:nodeId="1397">
    <graphics x="980.2503936755238" y="-150.90119145607582" z="0.0"/>
  </node>
  <node id="306583" label="zzz1915" cy:nodeId="1398">
    <graphics x="1094.913670347887" y="-344.9723737070524" z="0.0"/>
  </node>
  <node id="306582" label="zzz1914" cy:nodeId="1399">
    <graphics x="1078.9977920519887" y="-375.1337048838102" z="0.0"/>
  </node>
  <node id="306581" label="zzz1913" cy:nodeId="1400">
    <graphics x="1128.0783431994496" y="-219.35329411720863" z="0.0"/>
  </node>
  <node id="306580" label="zzz1912" cy:nodeId="1401">
    <graphics x="1043.6967819201527" y="-240.30762456154457" z="0.0"/>
  </node>
  <node id="306579" label="zzz1911" cy:nodeId="1402">
    <graphics x="1035.8536422717152" y="-237.39827702736488" z="0.0"/>
  </node>
  <node id="306578" label="zzz1910" cy:nodeId="1403">
    <graphics x="830.0023544299183" y="-123.98447392677895" z="0.0"/>
  </node>
  <node id="306577" label="zzz1909" cy:nodeId="1404">
    <graphics x="867.6395090090809" y="-330.4179150888883" z="0.0"/>
  </node>
  <node id="306576" label="zzz1908" cy:nodeId="1405">
    <graphics x="853.1368355023442" y="-342.87725041603676" z="0.0"/>
  </node>
  <node id="306575" label="zzz1907" cy:nodeId="1406">
    <graphics x="820.2681739794789" y="-283.247428638693" z="0.0"/>
  </node>
  <node id="306574" label="zzz1906" cy:nodeId="1407">
    <graphics x="879.6248977648793" y="-179.0703503916227" z="0.0"/>
  </node>
  <node id="306573" label="zzz1905" cy:nodeId="1408">
    <graphics x="960.3412979113637" y="-437.80979703163734" z="0.0"/>
  </node>
  <node id="306572" label="zzz1904" cy:nodeId="1409">
    <graphics x="920.8098114001332" y="-431.3525006601774" z="0.0"/>
  </node>
  <node id="306571" label="zzz1903" cy:nodeId="1410">
    <graphics x="1013.0292404162465" y="-436.72048924660317" z="0.0"/>
  </node>
  <node id="306570" label="zzz1902" cy:nodeId="1411">
    <graphics x="859.5749328600941" y="-418.0451400110685" z="0.0"/>
  </node>
  <node id="306569" label="zzz1901" cy:nodeId="1412">
    <graphics x="965.5546005236683" y="-387.09570859169594" z="0.0"/>
  </node>
  <node id="306568" label="zzz1900" cy:nodeId="1413">
    <graphics x="969.2919357287465" y="-176.49945805763832" z="0.0"/>
  </node>
  <node id="306567" label="zzz1899" cy:nodeId="1414">
    <graphics x="927.0963790881215" y="-184.85193608498207" z="0.0"/>
  </node>
  <node id="306566" label="zzz1898" cy:nodeId="1415">
    <graphics x="882.8052757250844" y="-445.829818470236" z="0.0"/>
  </node>
  <node id="306565" label="zzz1897" cy:nodeId="1416">
    <graphics x="907.7123458849965" y="-416.5380322763883" z="0.0"/>
  </node>
  <node id="306564" label="zzz1896" cy:nodeId="1417">
    <graphics x="907.4259307848988" y="-420.74134610390297" z="0.0"/>
  </node>
  <node id="306563" label="zzz1895" cy:nodeId="1418">
    <graphics x="877.977339552599" y="-386.7958218882047" z="0.0"/>
  </node>
  <node id="306562" label="zzz1894" cy:nodeId="1419">
    <graphics x="917.3539283740101" y="-397.03952763771645" z="0.0"/>
  </node>
  <node id="306561" label="zzz1893" cy:nodeId="1420">
    <graphics x="879.7866332995472" y="-391.4577729532682" z="0.0"/>
  </node>
  <node id="306560" label="zzz1892" cy:nodeId="1421">
    <graphics x="887.8410194384633" y="-404.6094758341276" z="0.0"/>
  </node>
  <node id="306559" label="zzz1891" cy:nodeId="1422">
    <graphics x="1176.7535751330433" y="-231.58122990822426" z="0.0"/>
  </node>
  <node id="306558" label="zzz1890" cy:nodeId="1423">
    <graphics x="1150.636540220934" y="-237.063102466818" z="0.0"/>
  </node>
  <node id="306557" label="zzz1889" cy:nodeId="1424">
    <graphics x="892.8091400134144" y="-376.1589047739469" z="0.0"/>
  </node>
  <node id="306556" label="zzz1888" cy:nodeId="1425">
    <graphics x="708.7039077746449" y="-25.179420215841446" z="0.0"/>
  </node>
  <node id="306555" label="zzz1887" cy:nodeId="1426">
    <graphics x="922.8203628527699" y="-165.0856854746305" z="0.0"/>
  </node>
  <node id="306554" label="zzz1886" cy:nodeId="1427">
    <graphics x="932.6146743762074" y="-201.91254399513832" z="0.0"/>
  </node>
  <node id="306553" label="zzz1885" cy:nodeId="1428">
    <graphics x="994.2929122912465" y="-139.79990361427895" z="0.0"/>
  </node>
  <node id="306552" label="zzz1884" cy:nodeId="1429">
    <graphics x="971.8718765246449" y="-138.43097661232582" z="0.0"/>
  </node>
  <node id="306551" label="zzz1883" cy:nodeId="1430">
    <graphics x="920.8277862536488" y="-206.51641057228676" z="0.0"/>
  </node>
  <node id="306550" label="zzz1882" cy:nodeId="1431">
    <graphics x="1079.5583694445668" y="-203.34108708595863" z="0.0"/>
  </node>
  <node id="306549" label="zzz1881" cy:nodeId="1432">
    <graphics x="1062.4628341662465" y="-310.7729947397672" z="0.0"/>
  </node>
  <node id="306548" label="zzz1880" cy:nodeId="1433">
    <graphics x="900.2447936999379" y="-441.08930371498695" z="0.0"/>
  </node>
  <node id="306547" label="zzz1879" cy:nodeId="1434">
    <graphics x="1130.3398483264027" y="-227.26731084084145" z="0.0"/>
  </node>
  <node id="306546" label="zzz1878" cy:nodeId="1435">
    <graphics x="1026.8958633410512" y="-443.84608052467934" z="0.0"/>
  </node>
  <node id="306545" label="zzz1877" cy:nodeId="1436">
    <graphics x="783.8413131701527" y="-317.4963757822477" z="0.0"/>
  </node>
  <node id="306544" label="zzz1876" cy:nodeId="1437">
    <graphics x="1010.7342269885121" y="-241.72052739357582" z="0.0"/>
  </node>
  <node id="306543" label="zzz1875" cy:nodeId="1438">
    <graphics x="769.1471450793324" y="-377.2933194467985" z="0.0"/>
  </node>
  <node id="306542" label="zzz1874" cy:nodeId="1439">
    <graphics x="794.9087951647816" y="-511.37427495216957" z="0.0"/>
  </node>
  <node id="306541" label="zzz1873" cy:nodeId="1440">
    <graphics x="981.4635818469105" y="-296.72305272316567" z="0.0"/>
  </node>
  <node id="306540" label="zzz1872" cy:nodeId="1441">
    <graphics x="906.5086448657094" y="-328.6933514902555" z="0.0"/>
  </node>
  <node id="306539" label="zzz1871" cy:nodeId="1442">
    <graphics x="821.6937454211293" y="-447.95095036720863" z="0.0"/>
  </node>
  <node id="306538" label="zzz1870" cy:nodeId="1443">
    <graphics x="1055.9880264269887" y="-300.7475964853727" z="0.0"/>
  </node>
  <node id="306537" label="zzz1869" cy:nodeId="1444">
    <graphics x="980.4787033068715" y="-454.0417630503141" z="0.0"/>
  </node>
  <node id="306536" label="zzz1868" cy:nodeId="1445">
    <graphics x="1027.2170761096058" y="-212.62583134865395" z="0.0"/>
  </node>
  <node id="306535" label="zzz1867" cy:nodeId="1446">
    <graphics x="953.5716903674183" y="-224.84450505470863" z="0.0"/>
  </node>
  <node id="306534" label="zzz1866" cy:nodeId="1447">
    <graphics x="954.2844284045277" y="-253.8622205088102" z="0.0"/>
  </node>
  <node id="306533" label="zzz1865" cy:nodeId="1448">
    <graphics x="894.508740233141" y="-546.2258069345914" z="0.0"/>
  </node>
  <node id="306532" label="zzz1864" cy:nodeId="1449">
    <graphics x="2692.7482192980824" y="-368.79617284035317" z="0.0"/>
  </node>
  <node id="306531" label="zzz1863" cy:nodeId="1450">
    <graphics x="1094.3378036486683" y="-239.72663090920082" z="0.0"/>
  </node>
  <node id="306530" label="zzz1862" cy:nodeId="1451">
    <graphics x="936.5039337145863" y="-175.41123173927895" z="0.0"/>
  </node>
  <node id="306529" label="zzz1861" cy:nodeId="1452">
    <graphics x="956.8586776721058" y="-157.34748051857582" z="0.0"/>
  </node>
  <node id="306528" label="zzz1860" cy:nodeId="1453">
    <graphics x="1123.9184310900746" y="-240.7082898447477" z="0.0"/>
  </node>
  <node id="306527" label="zzz1859" cy:nodeId="1454">
    <graphics x="1076.4228713976918" y="-257.5023572275602" z="0.0"/>
  </node>
  <node id="306526" label="zzz1858" cy:nodeId="1455">
    <graphics x="848.8129890429555" y="-462.44567845558754" z="0.0"/>
  </node>
  <node id="306525" label="zzz1857" cy:nodeId="1456">
    <graphics x="1008.3193405139027" y="-279.3570020029508" z="0.0"/>
  </node>
  <node id="306524" label="zzz1856" cy:nodeId="1457">
    <graphics x="1033.8453567492543" y="-268.908805591818" z="0.0"/>
  </node>
  <node id="306523" label="zzz1855" cy:nodeId="1458">
    <graphics x="1011.8512466418324" y="-280.7283551523649" z="0.0"/>
  </node>
  <node id="306522" label="zzz1854" cy:nodeId="1459">
    <graphics x="1021.1861618029652" y="-268.4806592295133" z="0.0"/>
  </node>
  <node id="306521" label="zzz1853" cy:nodeId="1460">
    <graphics x="1000.4144638049183" y="-267.21167729591957" z="0.0"/>
  </node>
  <node id="306520" label="zzz1852" cy:nodeId="1461">
    <graphics x="1050.862614439684" y="-247.1902234384977" z="0.0"/>
  </node>
  <node id="306519" label="zzz1851" cy:nodeId="1462">
    <graphics x="1020.7238815295277" y="-275.4670331308805" z="0.0"/>
  </node>
  <node id="306518" label="zzz1850" cy:nodeId="1463">
    <graphics x="979.084782408434" y="-148.17768071388832" z="0.0"/>
  </node>
  <node id="306517" label="zzz1849" cy:nodeId="1464">
    <graphics x="987.3031509387074" y="-180.47809575295082" z="0.0"/>
  </node>
  <node id="306516" label="zzz1848" cy:nodeId="1465">
    <graphics x="974.737988280016" y="-132.89459965920082" z="0.0"/>
  </node>
  <node id="306515" label="zzz1847" cy:nodeId="1466">
    <graphics x="957.2292755114613" y="-185.96506474709145" z="0.0"/>
  </node>
  <node id="306514" label="zzz1846" cy:nodeId="1467">
    <graphics x="995.0348556506215" y="-188.67583440041176" z="0.0"/>
  </node>
  <node id="306513" label="zzz1845" cy:nodeId="1468">
    <graphics x="1019.300862120348" y="-140.25144170021645" z="0.0"/>
  </node>
  <node id="306512" label="zzz1844" cy:nodeId="1469">
    <graphics x="994.8247268664418" y="-191.99726079201332" z="0.0"/>
  </node>
  <node id="306511" label="zzz1843" cy:nodeId="1470">
    <graphics x="950.6655014025746" y="-158.16330693459145" z="0.0"/>
  </node>
  <node id="306510" label="zzz1842" cy:nodeId="1471">
    <graphics x="978.3346832263051" y="-179.8879773447477" z="0.0"/>
  </node>
  <node id="306509" label="zzz1841" cy:nodeId="1472">
    <graphics x="976.2759216296254" y="-212.14771245216957" z="0.0"/>
  </node>
  <node id="306508" label="zzz1840" cy:nodeId="1473">
    <graphics x="1064.714909361559" y="-358.1517598459684" z="0.0"/>
  </node>
  <node id="306507" label="zzz1839" cy:nodeId="1474">
    <graphics x="1075.0811965930043" y="-351.8057706186735" z="0.0"/>
  </node>
  <node id="306506" label="zzz1838" cy:nodeId="1475">
    <graphics x="1005.4018295275746" y="-182.9864880869352" z="0.0"/>
  </node>
  <node id="306505" label="zzz1837" cy:nodeId="1476">
    <graphics x="982.1017272936879" y="-172.45021794533363" z="0.0"/>
  </node>
  <node id="306504" label="zzz1836" cy:nodeId="1477">
    <graphics x="1166.3563278185902" y="-177.8301160166227" z="0.0"/>
  </node>
  <node id="306503" label="zzz1835" cy:nodeId="1478">
    <graphics x="1064.287693785387" y="-358.018611652609" z="0.0"/>
  </node>
  <node id="306502" label="zzz1834" cy:nodeId="1479">
    <graphics x="1110.5295150744496" y="-280.832389576193" z="0.0"/>
  </node>
  <node id="306501" label="zzz1833" cy:nodeId="1480">
    <graphics x="1083.7547500598012" y="-238.85840581154457" z="0.0"/>
  </node>
  <node id="306500" label="zzz1832" cy:nodeId="1481">
    <graphics x="1038.5056350695668" y="-285.32041142677895" z="0.0"/>
  </node>
  <node id="306499" label="zzz1831" cy:nodeId="1482">
    <graphics x="1149.7855270373402" y="-228.72266362404457" z="0.0"/>
  </node>
  <node id="306498" label="zzz1830" cy:nodeId="1483">
    <graphics x="982.3558395373402" y="-233.52988408302895" z="0.0"/>
  </node>
  <node id="306497" label="zzz1829" cy:nodeId="1484">
    <graphics x="926.7535675036488" y="-345.6091687509977" z="0.0"/>
  </node>
  <node id="306496" label="zzz1828" cy:nodeId="1485">
    <graphics x="821.6367385851918" y="-210.959830982443" z="0.0"/>
  </node>
  <node id="306495" label="zzz1827" cy:nodeId="1486">
    <graphics x="851.6664569842396" y="-500.1379849741422" z="0.0"/>
  </node>
  <node id="306494" label="zzz1826" cy:nodeId="1487">
    <graphics x="714.0971572863637" y="-207.10768864845863" z="0.0"/>
  </node>
  <node id="306493" label="zzz1825" cy:nodeId="1488">
    <graphics x="916.0193908679066" y="-31.52747319435707" z="0.0"/>
  </node>
  <node id="306492" label="zzz1824" cy:nodeId="1489">
    <graphics x="606.1995742785512" y="-521.555648548361" z="0.0"/>
  </node>
  <node id="306491" label="zzz1823" cy:nodeId="1490">
    <graphics x="1074.302799986559" y="-96.23007939552895" z="0.0"/>
  </node>
  <node id="306490" label="zzz1822" cy:nodeId="1491">
    <graphics x="1041.0787857043324" y="-63.38178227638832" z="0.0"/>
  </node>
  <node id="306489" label="zzz1821" cy:nodeId="1492">
    <graphics x="1071.4610488879262" y="-213.35291264748207" z="0.0"/>
  </node>
  <node id="306488" label="zzz1820" cy:nodeId="1493">
    <graphics x="793.9344757067738" y="-270.21656010841957" z="0.0"/>
  </node>
  <node id="306487" label="zzz1819" cy:nodeId="1494">
    <graphics x="880.6753261553822" y="-327.3389584848844" z="0.0"/>
  </node>
  <node id="306486" label="zzz1818" cy:nodeId="1495">
    <graphics x="1087.1821334826527" y="-271.25444768166176" z="0.0"/>
  </node>
  <node id="306485" label="zzz1817" cy:nodeId="1496">
    <graphics x="1142.0019882189808" y="-306.2826535532438" z="0.0"/>
  </node>
  <node id="306484" label="zzz1816" cy:nodeId="1497">
    <graphics x="1038.0995834338246" y="-279.37351201271645" z="0.0"/>
  </node>
  <node id="306483" label="zzz1815" cy:nodeId="1498">
    <graphics x="1054.7792556750355" y="-346.8472287485563" z="0.0"/>
  </node>
  <node id="306482" label="zzz1814" cy:nodeId="1499">
    <graphics x="1106.140461729723" y="-348.33398411965004" z="0.0"/>
  </node>
  <node id="306481" label="zzz1813" cy:nodeId="1500">
    <graphics x="1103.08305816527" y="-304.6304089853727" z="0.0"/>
  </node>
  <node id="306480" label="zzz1812" cy:nodeId="1501">
    <graphics x="1128.4425399767933" y="-291.0936429331266" z="0.0"/>
  </node>
  <node id="306479" label="zzz1811" cy:nodeId="1502">
    <graphics x="1115.3407638537465" y="-364.07942174172035" z="0.0"/>
  </node>
  <node id="306478" label="zzz1810" cy:nodeId="1503">
    <graphics x="1148.3968551623402" y="-345.73767064308754" z="0.0"/>
  </node>
  <node id="306477" label="zzz1809" cy:nodeId="1504">
    <graphics x="1106.6588180529652" y="-293.48587010597817" z="0.0"/>
  </node>
  <node id="306476" label="zzz1808" cy:nodeId="1505">
    <graphics x="1151.816990660387" y="-314.6723019907438" z="0.0"/>
  </node>
  <node id="306475" label="zzz1807" cy:nodeId="1506">
    <graphics x="1095.5033309924183" y="-336.2156369516813" z="0.0"/>
  </node>
  <node id="306474" label="zzz1806" cy:nodeId="1507">
    <graphics x="1134.8405502306996" y="-311.4182507822477" z="0.0"/>
  </node>
  <node id="306473" label="zzz1805" cy:nodeId="1508">
    <graphics x="1133.1489608752308" y="-328.87561009621254" z="0.0"/>
  </node>
  <node id="306472" label="zzz1804" cy:nodeId="1509">
    <graphics x="1119.7155197131215" y="-306.03847478127113" z="0.0"/>
  </node>
  <node id="306471" label="zzz1803" cy:nodeId="1510">
    <graphics x="1071.3009384142933" y="-186.51609013771645" z="0.0"/>
  </node>
  <node id="306470" label="zzz1802" cy:nodeId="1511">
    <graphics x="1119.1828353869496" y="-331.8658063242399" z="0.0"/>
  </node>
  <node id="306469" label="zzz1801" cy:nodeId="1512">
    <graphics x="1137.9806564318715" y="-299.82097600197426" z="0.0"/>
  </node>
  <node id="306468" label="zzz1800" cy:nodeId="1513">
    <graphics x="1103.4320266711293" y="-282.2554089853727" z="0.0"/>
  </node>
  <node id="306467" label="zzz1799" cy:nodeId="1514">
    <graphics x="1122.3263290392933" y="-261.8925397226774" z="0.0"/>
  </node>
  <node id="306466" label="zzz1798" cy:nodeId="1515">
    <graphics x="1147.0253341662465" y="-277.7240674326383" z="0.0"/>
  </node>
  <node id="306465" label="zzz1797" cy:nodeId="1516">
    <graphics x="1169.5777633654652" y="-308.0432584116422" z="0.0"/>
  </node>
  <node id="306464" label="zzz1796" cy:nodeId="1517">
    <graphics x="1162.3876693713246" y="-273.8233105967008" z="0.0"/>
  </node>
  <node id="306463" label="zzz1795" cy:nodeId="1518">
    <graphics x="665.343586729723" y="-249.05530522560707" z="0.0"/>
  </node>
  <node id="306462" label="zzz1794" cy:nodeId="1519">
    <graphics x="676.1767471301137" y="-276.8293835947477" z="0.0"/>
  </node>
  <node id="306461" label="zzz1793" cy:nodeId="1520">
    <graphics x="849.5511558520375" y="-182.40947697853676" z="0.0"/>
  </node>
  <node id="306460" label="zzz1792" cy:nodeId="1521">
    <graphics x="676.418537901598" y="-144.16416142677895" z="0.0"/>
  </node>
  <node id="306459" label="zzz1791" cy:nodeId="1522">
    <graphics x="671.6061447131215" y="-316.6601483652555" z="0.0"/>
  </node>
  <node id="306458" label="zzz1790" cy:nodeId="1523">
    <graphics x="758.2349594103871" y="-193.4712292978727" z="0.0"/>
  </node>
  <node id="306457" label="zzz1789" cy:nodeId="1524">
    <graphics x="681.8414657580433" y="-87.36878178810707" z="0.0"/>
  </node>
  <node id="306456" label="zzz1788" cy:nodeId="1525">
    <graphics x="700.630192564684" y="-244.48036931252113" z="0.0"/>
  </node>
  <node id="306455" label="zzz1787" cy:nodeId="1526">
    <graphics x="696.7729080187855" y="-270.7329938242399" z="0.0"/>
  </node>
  <node id="306454" label="zzz1786" cy:nodeId="1527">
    <graphics x="680.6186111437855" y="-196.99683354591957" z="0.0"/>
  </node>
  <node id="306453" label="zzz1785" cy:nodeId="1528">
    <graphics x="1155.900944517809" y="-190.77680180763832" z="0.0"/>
  </node>
  <node id="306452" label="zzz1784" cy:nodeId="1529">
    <graphics x="974.0274627673207" y="-395.85586331581703" z="0.0"/>
  </node>
  <node id="306451" label="zzz1783" cy:nodeId="1530">
    <graphics x="965.6108215319691" y="-349.4041211435758" z="0.0"/>
  </node>
  <node id="306450" label="zzz1782" cy:nodeId="1531">
    <graphics x="986.0090225207387" y="-471.49958775734535" z="0.0"/>
  </node>
  <node id="306449" label="zzz1781" cy:nodeId="1532">
    <graphics x="982.053532408434" y="-387.0422150919401" z="0.0"/>
  </node>
  <node id="306448" label="zzz1780" cy:nodeId="1533">
    <graphics x="968.9352081286488" y="-332.35596440529457" z="0.0"/>
  </node>
  <node id="306447" label="zzz1779" cy:nodeId="1534">
    <graphics x="923.3015563952504" y="-338.22756169533363" z="0.0"/>
  </node>
  <node id="306446" label="zzz1778" cy:nodeId="1535">
    <graphics x="1103.752507017809" y="-208.0673749277555" z="0.0"/>
  </node>
  <node id="306445" label="zzz1777" cy:nodeId="1536">
    <graphics x="884.6875350939808" y="-254.19446538185707" z="0.0"/>
  </node>
  <node id="306444" label="zzz1776" cy:nodeId="1537">
    <graphics x="1130.9322555529652" y="-209.40547917580238" z="0.0"/>
  </node>
  <node id="306443" label="zzz1775" cy:nodeId="1538">
    <graphics x="1076.375798033434" y="-375.43535588478676" z="0.0"/>
  </node>
  <node id="306442" label="zzz1774" cy:nodeId="1539">
    <graphics x="840.0741737353383" y="-301.9813077280485" z="0.0"/>
  </node>
  <node id="306441" label="zzz1773" cy:nodeId="1540">
    <graphics x="971.8364150988637" y="-319.3278729746305" z="0.0"/>
  </node>
  <node id="306440" label="zzz1772" cy:nodeId="1541">
    <graphics x="740.8214309680043" y="-409.801703197714" z="0.0"/>
  </node>
  <node id="306439" label="zzz1771" cy:nodeId="1542">
    <graphics x="350.99755859375" y="2170.133056640625" z="0.0"/>
  </node>
  <node id="306438" label="zzz1770" cy:nodeId="1543">
    <graphics x="853.5595756041585" y="8.275749461892929" z="0.0"/>
  </node>
  <node id="306437" label="zzz1769" cy:nodeId="1544">
    <graphics x="1017.7572372424183" y="-61.54804204201332" z="0.0"/>
  </node>
  <node id="306436" label="zzz1768" cy:nodeId="1545">
    <graphics x="274.72381591796875" y="2115.548095703125" z="0.0"/>
  </node>
  <node id="306435" label="zzz1767" cy:nodeId="1546">
    <graphics x="1013.8407180773793" y="-178.07321904396645" z="0.0"/>
  </node>
  <node id="306434" label="zzz1766" cy:nodeId="1547">
    <graphics x="262.63848876953125" y="2221.19287109375" z="0.0"/>
  </node>
  <node id="306433" label="zzz1765" cy:nodeId="1548">
    <graphics x="711.9640548693715" y="-5.516639454122696" z="0.0"/>
  </node>
  <node id="306432" label="zzz1764" cy:nodeId="1549">
    <graphics x="821.2704856860219" y="60.387169139627304" z="0.0"/>
  </node>
  <node id="306431" label="zzz1763" cy:nodeId="1550">
    <graphics x="839.6971614825306" y="-211.0351483652555" z="0.0"/>
  </node>
  <node id="306430" label="zzz1762" cy:nodeId="1551">
    <graphics x="932.9797027575551" y="-108.8876111338102" z="0.0"/>
  </node>
  <node id="306429" label="zzz1761" cy:nodeId="1552">
    <graphics x="1018.3713272082387" y="-275.834586841818" z="0.0"/>
  </node>
  <node id="306428" label="zzz1760" cy:nodeId="1553">
    <graphics x="986.6045425402699" y="-118.6600720713102" z="0.0"/>
  </node>
  <node id="306427" label="zzz1759" cy:nodeId="1554">
    <graphics x="1115.3048751818715" y="-363.11867497658363" z="0.0"/>
  </node>
  <node id="306426" label="zzz1758" cy:nodeId="1555">
    <graphics x="1011.4804122912465" y="-106.65500615334145" z="0.0"/>
  </node>
  <node id="306425" label="zzz1757" cy:nodeId="1556">
    <graphics x="903.3945892321644" y="-231.6157147715055" z="0.0"/>
  </node>
  <node id="306424" label="zzz1756" cy:nodeId="1557">
    <graphics x="950.5335891711293" y="-154.21820805763832" z="0.0"/>
  </node>
  <node id="306423" label="zzz1755" cy:nodeId="1558">
    <graphics x="1095.5406845080433" y="-208.03279851173988" z="0.0"/>
  </node>
  <node id="306422" label="zzz1754" cy:nodeId="1559">
    <graphics x="1136.4941146838246" y="-200.91451237892738" z="0.0"/>
  </node>
  <node id="306421" label="zzz1753" cy:nodeId="1560">
    <graphics x="902.0245216357289" y="-426.712236149069" z="0.0"/>
  </node>
  <node id="306420" label="zzz1752" cy:nodeId="1561">
    <graphics x="992.1218002306996" y="-492.16079686379067" z="0.0"/>
  </node>
  <node id="306419" label="zzz1751" cy:nodeId="1562">
    <graphics x="964.4238327014027" y="-435.99245618080727" z="0.0"/>
  </node>
  <node id="306418" label="zzz1750" cy:nodeId="1563">
    <graphics x="952.3260162341176" y="-333.7651746103727" z="0.0"/>
  </node>
  <node id="306417" label="zzz1749" cy:nodeId="1564">
    <graphics x="785.9220550524769" y="-331.0269238779508" z="0.0"/>
  </node>
  <node id="306416" label="zzz1748" cy:nodeId="1565">
    <graphics x="1083.1700332629262" y="-276.289420826193" z="0.0"/>
  </node>
  <node id="306415" label="zzz1747" cy:nodeId="1566">
    <graphics x="1002.6556289660512" y="-207.6897351572477" z="0.0"/>
  </node>
  <node id="306414" label="zzz1746" cy:nodeId="1567">
    <graphics x="1014.3134353625355" y="-182.5798260996305" z="0.0"/>
  </node>
  <node id="306413" label="zzz1745" cy:nodeId="1568">
    <graphics x="950.1999252306996" y="-224.31307194923988" z="0.0"/>
  </node>
  <node id="306412" label="zzz1744" cy:nodeId="1569">
    <graphics x="1042.792576597887" y="-149.99024174904457" z="0.0"/>
  </node>
  <node id="306411" label="zzz1743" cy:nodeId="1570">
    <graphics x="796.1122367846547" y="-424.51267789101234" z="0.0"/>
  </node>
  <node id="306410" label="zzz1742" cy:nodeId="1571">
    <graphics x="1019.3869369494496" y="-182.78133366798988" z="0.0"/>
  </node>
  <node id="306409" label="zzz1741" cy:nodeId="1572">
    <graphics x="960.8301742541371" y="-202.351432544943" z="0.0"/>
  </node>
  <node id="306408" label="zzz1740" cy:nodeId="1573">
    <graphics x="1143.8674667346058" y="-192.22548650002113" z="0.0"/>
  </node>
  <node id="306407" label="zzz1739" cy:nodeId="1574">
    <graphics x="792.522785948473" y="-109.59845708107582" z="0.0"/>
  </node>
  <node id="306406" label="zzz1738" cy:nodeId="1575">
    <graphics x="1151.7965438830433" y="-254.2815320322477" z="0.0"/>
  </node>
  <node id="306405" label="zzz1737" cy:nodeId="1576">
    <graphics x="1145.131169127184" y="-253.06471989845863" z="0.0"/>
  </node>
  <node id="306404" label="zzz1736" cy:nodeId="1577">
    <graphics x="909.5160415637074" y="-333.1592709848844" z="0.0"/>
  </node>
  <node id="306403" label="zzz1735" cy:nodeId="1578">
    <graphics x="920.0191162097035" y="-118.9068982431852" z="0.0"/>
  </node>
  <node id="306402" label="zzz1734" cy:nodeId="1579">
    <graphics x="941.2480667101918" y="-120.91632817482582" z="0.0"/>
  </node>
  <node id="306401" label="zzz1733" cy:nodeId="1580">
    <graphics x="1146.390476988512" y="-262.47629521584145" z="0.0"/>
  </node>
  <node id="306400" label="zzz1732" cy:nodeId="1581">
    <graphics x="927.7649887072621" y="-261.1796033213102" z="0.0"/>
  </node>
  <node id="306399" label="zzz1731" cy:nodeId="1582">
    <graphics x="812.1945083605824" y="-132.66400883888832" z="0.0"/>
  </node>
  <node id="306398" label="zzz1730" cy:nodeId="1583">
    <graphics x="953.6864822375355" y="-459.0066411325895" z="0.0"/>
  </node>
  <node id="306397" label="zzz1729" cy:nodeId="1584">
    <graphics x="595.826969908434" y="-73.56101201271645" z="0.0"/>
  </node>
  <node id="306396" label="zzz1728" cy:nodeId="1585">
    <graphics x="714.1058395373402" y="-295.0355908701383" z="0.0"/>
  </node>
  <node id="306395" label="zzz1727" cy:nodeId="1586">
    <graphics x="1106.547657774645" y="-201.65242741798988" z="0.0"/>
  </node>
  <node id="306394" label="zzz1726" cy:nodeId="1587">
    <graphics x="961.200505064684" y="-369.2627751657926" z="0.0"/>
  </node>
  <node id="306393" label="zzz1725" cy:nodeId="1588">
    <graphics x="982.8051956164418" y="-109.14231084084145" z="0.0"/>
  </node>
  <node id="306392" label="zzz1724" cy:nodeId="1589">
    <graphics x="953.761051939684" y="-301.3537976572477" z="0.0"/>
  </node>
  <node id="306391" label="zzz1723" cy:nodeId="1590">
    <graphics x="955.1705673205433" y="-122.22605107521645" z="0.0"/>
  </node>
  <node id="306390" label="zzz1722" cy:nodeId="1591">
    <graphics x="787.4713638293324" y="-96.79425786232582" z="0.0"/>
  </node>
  <node id="306389" label="zzz1721" cy:nodeId="1592">
    <graphics x="819.0948532092152" y="-311.3959119150602" z="0.0"/>
  </node>
  <node id="306388" label="zzz1720" cy:nodeId="1593">
    <graphics x="752.6692626940785" y="-155.39752934670082" z="0.0"/>
  </node>
  <node id="306387" label="zzz1719" cy:nodeId="1594">
    <graphics x="862.273217009264" y="-354.6380307505094" z="0.0"/>
  </node>
  <node id="306386" label="zzz1718" cy:nodeId="1595">
    <graphics x="907.163941191393" y="-149.87818120216957" z="0.0"/>
  </node>
  <node id="306385" label="zzz1717" cy:nodeId="1596">
    <graphics x="1062.9786727892933" y="-54.682288868185196" z="0.0"/>
  </node>
  <node id="306384" label="zzz1716" cy:nodeId="1597">
    <graphics x="1101.383610533434" y="-182.7446667978727" z="0.0"/>
  </node>
  <node id="306383" label="zzz1715" cy:nodeId="1598">
    <graphics x="835.4857070910512" y="-232.6113202402555" z="0.0"/>
  </node>
  <node id="306382" label="zzz1714" cy:nodeId="1599">
    <graphics x="1090.1474044787465" y="-348.99106572365395" z="0.0"/>
  </node>
  <node id="306381" label="zzz1713" cy:nodeId="1600">
    <graphics x="1102.6052291857777" y="-302.01055119728676" z="0.0"/>
  </node>
  <node id="306380" label="zzz1712" cy:nodeId="1601">
    <graphics x="1090.554753111559" y="-213.3429333994352" z="0.0"/>
  </node>
  <node id="306379" label="zzz1711" cy:nodeId="1602">
    <graphics x="1093.6415603625355" y="-357.333366138693" z="0.0"/>
  </node>
  <node id="306378" label="zzz1710" cy:nodeId="1603">
    <graphics x="801.8499000536976" y="-299.2083890268766" z="0.0"/>
  </node>
  <node id="306377" label="zzz1709" cy:nodeId="1604">
    <graphics x="1120.5280502306996" y="-243.44130681252113" z="0.0"/>
  </node>
  <node id="306376" label="zzz1708" cy:nodeId="1605">
    <graphics x="825.9202049243031" y="-229.39925358986488" z="0.0"/>
  </node>
  <node id="306375" label="zzz1707" cy:nodeId="1606">
    <graphics x="784.7528121935902" y="-66.45655034279457" z="0.0"/>
  </node>
  <node id="306374" label="zzz1706" cy:nodeId="1607">
    <graphics x="825.6602771746693" y="-68.91126225685707" z="0.0"/>
  </node>
  <node id="306373" label="zzz1705" cy:nodeId="1608">
    <graphics x="963.6318710314808" y="-274.34160588478676" z="0.0"/>
  </node>
  <node id="306372" label="zzz1704" cy:nodeId="1609">
    <graphics x="1056.7025344836293" y="-109.71985600685707" z="0.0"/>
  </node>
  <node id="306371" label="zzz1703" cy:nodeId="1610">
    <graphics x="1212.9829452502308" y="-124.4945447275602" z="0.0"/>
  </node>
  <node id="306370" label="zzz1702" cy:nodeId="1611">
    <graphics x="1122.304753111559" y="-326.75315068459145" z="0.0"/>
  </node>
  <node id="306369" label="zzz1701" cy:nodeId="1612">
    <graphics x="830.4655502306996" y="-106.51206181740395" z="0.0"/>
  </node>
  <node id="306368" label="zzz1700" cy:nodeId="1613">
    <graphics x="699.4308364855824" y="-387.9531876871549" z="0.0"/>
  </node>
  <node id="306367" label="zzz1699" cy:nodeId="1614">
    <graphics x="888.3426177966176" y="-413.8406324217283" z="0.0"/>
  </node>
  <node id="306366" label="zzz1698" cy:nodeId="1615">
    <graphics x="1128.1368759142933" y="-157.90546391701332" z="0.0"/>
  </node>
  <node id="306365" label="zzz1697" cy:nodeId="1616">
    <graphics x="851.1166770922719" y="-84.42041753029457" z="0.0"/>
  </node>
  <node id="306364" label="zzz1696" cy:nodeId="1617">
    <graphics x="937.4736068713246" y="-317.8103940317594" z="0.0"/>
  </node>
  <node id="306363" label="zzz1695" cy:nodeId="1618">
    <graphics x="908.7568901049672" y="-486.9518735239469" z="0.0"/>
  </node>
  <node id="306362" label="zzz1694" cy:nodeId="1619">
    <graphics x="839.0980604159413" y="-213.08452580666176" z="0.0"/>
  </node>
  <node id="306361" label="zzz1693" cy:nodeId="1620">
    <graphics x="959.2480667101918" y="-372.3628995249235" z="0.0"/>
  </node>
  <node id="306360" label="zzz1692" cy:nodeId="1621">
    <graphics x="967.4586685168324" y="-373.59145329689613" z="0.0"/>
  </node>
  <node id="306359" label="zzz1691" cy:nodeId="1622">
    <graphics x="823.6458442675648" y="-27.69660161232582" z="0.0"/>
  </node>
  <node id="306358" label="zzz1690" cy:nodeId="1623">
    <graphics x="916.7323272692738" y="-177.7916638681852" z="0.0"/>
  </node>
  <node id="306357" label="zzz1689" cy:nodeId="1624">
    <graphics x="1131.5678451525746" y="-220.60300420021645" z="0.0"/>
  </node>
  <node id="306356" label="zzz1688" cy:nodeId="1625">
    <graphics x="639.0077865588246" y="-390.9185941050016" z="0.0"/>
  </node>
  <node id="306355" label="zzz1687" cy:nodeId="1626">
    <graphics x="1126.348240660387" y="-191.98004887795082" z="0.0"/>
  </node>
  <node id="306354" label="zzz1686" cy:nodeId="1627">
    <graphics x="906.2914817797719" y="-247.13436101173988" z="0.0"/>
  </node>
  <node id="306353" label="zzz1685" cy:nodeId="1628">
    <graphics x="939.8703964221058" y="-284.20545170998207" z="0.0"/>
  </node>
  <node id="306352" label="zzz1684" cy:nodeId="1629">
    <graphics x="1108.4169357287465" y="-292.15142033791176" z="0.0"/>
  </node>
  <node id="306351" label="zzz1683" cy:nodeId="1630">
    <graphics x="911.9833572375355" y="-248.45740483498207" z="0.0"/>
  </node>
  <node id="306350" label="zzz1682" cy:nodeId="1631">
    <graphics x="1091.2038619982777" y="-219.07224248146645" z="0.0"/>
  </node>
  <node id="306349" label="zzz1681" cy:nodeId="1632">
    <graphics x="584.5193222033558" y="-132.50629399513832" z="0.0"/>
  </node>
  <node id="306348" label="zzz1680" cy:nodeId="1633">
    <graphics x="703.6983535754262" y="-151.09772465920082" z="0.0"/>
  </node>
  <node id="306347" label="zzz1679" cy:nodeId="1634">
    <graphics x="827.1677196490346" y="-372.5289265940153" z="0.0"/>
  </node>
  <node id="306346" label="zzz1678" cy:nodeId="1635">
    <graphics x="1129.1374862658558" y="-293.01382420754067" z="0.0"/>
  </node>
  <node id="306345" label="zzz1677" cy:nodeId="1636">
    <graphics x="864.4808891284047" y="-472.1227643320524" z="0.0"/>
  </node>
  <node id="306344" label="zzz1676" cy:nodeId="1637">
    <graphics x="677.6498001086293" y="-44.02985356545082" z="0.0"/>
  </node>
  <node id="306343" label="zzz1675" cy:nodeId="1638">
    <graphics x="1105.552586363512" y="-246.15753911232582" z="0.0"/>
  </node>
  <node id="306342" label="zzz1674" cy:nodeId="1639">
    <graphics x="805.2615097033558" y="-235.20285771584145" z="0.0"/>
  </node>
  <node id="306341" label="zzz1673" cy:nodeId="1640">
    <graphics x="1181.3829696642933" y="-212.9676892588102" z="0.0"/>
  </node>
  <node id="306340" label="zzz1672" cy:nodeId="1641">
    <graphics x="883.4558532702504" y="-36.09802983498207" z="0.0"/>
  </node>
  <node id="306339" label="zzz1671" cy:nodeId="1642">
    <graphics x="783.6468933093129" y="-177.5937878916227" z="0.0"/>
  </node>
  <node id="306338" label="zzz1670" cy:nodeId="1643">
    <graphics x="772.884358214098" y="-268.1945721933805" z="0.0"/>
  </node>
  <node id="306337" label="zzz1669" cy:nodeId="1644">
    <graphics x="793.567333983141" y="-244.53867314552895" z="0.0"/>
  </node>
  <node id="306336" label="zzz1668" cy:nodeId="1645">
    <graphics x="1113.436863707262" y="-249.58516667580238" z="0.0"/>
  </node>
  <node id="306335" label="zzz1667" cy:nodeId="1646">
    <graphics x="888.7944763171254" y="-136.08075688576332" z="0.0"/>
  </node>
  <node id="306334" label="zzz1666" cy:nodeId="1647">
    <graphics x="1177.4672592150746" y="-203.0065839121305" z="0.0"/>
  </node>
  <node id="306333" label="zzz1665" cy:nodeId="1648">
    <graphics x="1077.9342849719105" y="-238.40830205177895" z="0.0"/>
  </node>
  <node id="306332" label="zzz1664" cy:nodeId="1649">
    <graphics x="1135.3525131213246" y="-218.15071843361488" z="0.0"/>
  </node>
  <node id="306331" label="zzz1663" cy:nodeId="1650">
    <graphics x="911.2129028307972" y="-133.21692631935707" z="0.0"/>
  </node>
  <node id="306330" label="zzz1662" cy:nodeId="1651">
    <graphics x="995.7309463488637" y="-493.74739049172035" z="0.0"/>
  </node>
  <node id="306329" label="zzz1661" cy:nodeId="1652">
    <graphics x="829.3009613024769" y="-370.59748814797035" z="0.0"/>
  </node>
  <node id="306328" label="zzz1660" cy:nodeId="1653">
    <graphics x="1094.6206253039418" y="-245.696159107443" z="0.0"/>
  </node>
  <node id="306327" label="zzz1659" cy:nodeId="1654">
    <graphics x="891.9850700366078" y="-336.3709409067594" z="0.0"/>
  </node>
  <node id="306326" label="zzz1658" cy:nodeId="1655">
    <graphics x="899.6965148913441" y="-285.82334111427895" z="0.0"/>
  </node>
  <node id="306325" label="zzz1657" cy:nodeId="1656">
    <graphics x="1144.6577499377308" y="-245.14328740334145" z="0.0"/>
  </node>
  <node id="306324" label="zzz1656" cy:nodeId="1657">
    <graphics x="913.5254295336781" y="-46.29157231545082" z="0.0"/>
  </node>
  <node id="306323" label="zzz1655" cy:nodeId="1658">
    <graphics x="980.4644821154652" y="-401.49439786171547" z="0.0"/>
  </node>
  <node id="306322" label="zzz1654" cy:nodeId="1659">
    <graphics x="1089.0885665881215" y="-213.7844617197477" z="0.0"/>
  </node>
  <node id="306321" label="zzz1653" cy:nodeId="1660">
    <graphics x="740.2149398791371" y="5.646385448221054" z="0.0"/>
  </node>
  <node id="306320" label="zzz1652" cy:nodeId="1661">
    <graphics x="569.8700607287465" y="56.97454096579918" z="0.0"/>
  </node>
  <node id="306319" label="zzz1651" cy:nodeId="1662">
    <graphics x="973.6168411242543" y="-509.4261090586149" z="0.0"/>
  </node>
  <node id="306318" label="zzz1650" cy:nodeId="1663">
    <graphics x="1156.5875900256215" y="-248.3535535166227" z="0.0"/>
  </node>
  <node id="306317" label="zzz1649" cy:nodeId="1664">
    <graphics x="1000.2977188098012" y="-239.57617924904457" z="0.0"/>
  </node>
  <node id="306316" label="zzz1648" cy:nodeId="1665">
    <graphics x="949.2964218127308" y="-96.02356694435707" z="0.0"/>
  </node>
  <node id="306315" label="zzz1647" cy:nodeId="1666">
    <graphics x="983.947834776598" y="-122.63782475685707" z="0.0"/>
  </node>
  <node id="306314" label="zzz1646" cy:nodeId="1667">
    <graphics x="931.4100692736683" y="-87.89682744240395" z="0.0"/>
  </node>
  <node id="306313" label="zzz1645" cy:nodeId="1668">
    <graphics x="944.4638870226918" y="-109.94052861427895" z="0.0"/>
  </node>
  <node id="306312" label="zzz1644" cy:nodeId="1669">
    <graphics x="946.8132446276722" y="-131.49204228615395" z="0.0"/>
  </node>
  <node id="306311" label="zzz1643" cy:nodeId="1670">
    <graphics x="904.5199516284047" y="-169.34856389259926" z="0.0"/>
  </node>
  <node id="306310" label="zzz1642" cy:nodeId="1671">
    <graphics x="936.1743286120472" y="-148.6842419931852" z="0.0"/>
  </node>
  <node id="306309" label="zzz1641" cy:nodeId="1672">
    <graphics x="914.726399229723" y="-101.3019177744352" z="0.0"/>
  </node>
  <node id="306308" label="zzz1640" cy:nodeId="1673">
    <graphics x="925.2196548449574" y="-166.44297002052895" z="0.0"/>
  </node>
  <node id="306307" label="zzz1639" cy:nodeId="1674">
    <graphics x="932.1093795764027" y="-297.7526776621305" z="0.0"/>
  </node>
  <node id="306306" label="zzz1638" cy:nodeId="1675">
    <graphics x="1080.550862120348" y="-197.36687443947426" z="0.0"/>
  </node>
  <node id="306305" label="zzz1637" cy:nodeId="1676">
    <graphics x="971.3396041857777" y="-164.2889783213102" z="0.0"/>
  </node>
  <node id="306304" label="zzz1636" cy:nodeId="1677">
    <graphics x="1005.2054794299183" y="-143.87934087013832" z="0.0"/>
  </node>
  <node id="306303" label="zzz1635" cy:nodeId="1678">
    <graphics x="939.3590362536488" y="-103.8885876963102" z="0.0"/>
  </node>
  <node id="306302" label="zzz1634" cy:nodeId="1679">
    <graphics x="1161.6603744494496" y="-186.67388127541176" z="0.0"/>
  </node>
  <node id="306301" label="zzz1633" cy:nodeId="1680">
    <graphics x="1126.2635543810902" y="-178.9222791025602" z="0.0"/>
  </node>
  <node id="306300" label="zzz1632" cy:nodeId="1681">
    <graphics x="849.7314804064808" y="-381.0592496225797" z="0.0"/>
  </node>
  <node id="306299" label="zzz1631" cy:nodeId="1682">
    <graphics x="1031.1127059924183" y="-376.3818967173063" z="0.0"/>
  </node>
  <node id="306298" label="zzz1630" cy:nodeId="1683">
    <graphics x="980.4872482287465" y="-390.55912945961586" z="0.0"/>
  </node>
  <node id="306297" label="zzz1629" cy:nodeId="1684">
    <graphics x="1127.9045150744496" y="-206.49953435158363" z="0.0"/>
  </node>
  <node id="306296" label="zzz1628" cy:nodeId="1685">
    <graphics x="978.7763336169301" y="-132.42530034279457" z="0.0"/>
  </node>
  <node id="306295" label="zzz1627" cy:nodeId="1686">
    <graphics x="995.667301939684" y="-101.92688725685707" z="0.0"/>
  </node>
  <node id="306294" label="zzz1626" cy:nodeId="1687">
    <graphics x="911.2161796557484" y="-173.875846607443" z="0.0"/>
  </node>
  <node id="306293" label="zzz1625" cy:nodeId="1688">
    <graphics x="1078.7682540881215" y="-230.70342229103676" z="0.0"/>
  </node>
  <node id="306292" label="zzz1624" cy:nodeId="1689">
    <graphics x="939.0912292468129" y="-137.25608037209145" z="0.0"/>
  </node>
  <node id="306291" label="zzz1623" cy:nodeId="1690">
    <graphics x="1095.88237457152" y="-246.60109685158363" z="0.0"/>
  </node>
  <node id="306290" label="zzz1622" cy:nodeId="1691">
    <graphics x="1075.924137877184" y="-284.516715748068" z="0.0"/>
  </node>
  <node id="306289" label="zzz1621" cy:nodeId="1692">
    <graphics x="1042.016667174059" y="-253.14405034279457" z="0.0"/>
  </node>
  <node id="306288" label="zzz1620" cy:nodeId="1693">
    <graphics x="1077.4901321398793" y="-80.55512212013832" z="0.0"/>
  </node>
  <node id="306287" label="zzz1619" cy:nodeId="1694">
    <graphics x="1008.7481735217152" y="-432.4307877848112" z="0.0"/>
  </node>
  <node id="306286" label="zzz1618" cy:nodeId="1695">
    <graphics x="944.6445816027699" y="-24.950416309591446" z="0.0"/>
  </node>
  <node id="306285" label="zzz1617" cy:nodeId="1696">
    <graphics x="935.8374145495472" y="-141.59003422951332" z="0.0"/>
  </node>
  <node id="306284" label="zzz1616" cy:nodeId="1697">
    <graphics x="1006.8945510851918" y="-112.14292119240395" z="0.0"/>
  </node>
  <node id="306283" label="zzz1615" cy:nodeId="1698">
    <graphics x="911.3066833483754" y="-259.2387311289274" z="0.0"/>
  </node>
  <node id="306282" label="zzz1614" cy:nodeId="1699">
    <graphics x="1101.7275131213246" y="-174.7041394541227" z="0.0"/>
  </node>
  <node id="306281" label="zzz1613" cy:nodeId="1700">
    <graphics x="809.8937881457387" y="-346.1578061411344" z="0.0"/>
  </node>
  <node id="306280" label="zzz1612" cy:nodeId="1701">
    <graphics x="800.2757461535512" y="-328.02632115578285" z="0.0"/>
  </node>
  <node id="306279" label="zzz1611" cy:nodeId="1702">
    <graphics x="1123.8535202014027" y="-280.76108525490395" z="0.0"/>
  </node>
  <node id="306278" label="zzz1610" cy:nodeId="1703">
    <graphics x="1096.6174514758168" y="-244.85434697365395" z="0.0"/>
  </node>
  <node id="306277" label="zzz1609" cy:nodeId="1704">
    <graphics x="963.9263656603871" y="-255.3627087900602" z="0.0"/>
  </node>
  <node id="306276" label="zzz1608" cy:nodeId="1705">
    <graphics x="805.3901756274281" y="-293.67480443215004" z="0.0"/>
  </node>
  <node id="306275" label="zzz1607" cy:nodeId="1706">
    <graphics x="907.6958740222035" y="-320.3652036020719" z="0.0"/>
  </node>
  <node id="306274" label="zzz1606" cy:nodeId="1707">
    <graphics x="870.4877956378041" y="29.70647455954918" z="0.0"/>
  </node>
  <node id="306273" label="zzz1605" cy:nodeId="1708">
    <graphics x="1143.2428329455433" y="-274.95778630470863" z="0.0"/>
  </node>
  <node id="306272" label="zzz1604" cy:nodeId="1709">
    <graphics x="943.0378845202504" y="-268.5858838388883" z="0.0"/>
  </node>
  <node id="306271" label="zzz1603" cy:nodeId="1710">
    <graphics x="958.5243423449574" y="-291.57350896095863" z="0.0"/>
  </node>
  <node id="306270" label="zzz1602" cy:nodeId="1711">
    <graphics x="941.4709442126332" y="-373.17408345436684" z="0.0"/>
  </node>
  <node id="306269" label="zzz1601" cy:nodeId="1712">
    <graphics x="1117.068943785387" y="-231.13079045509926" z="0.0"/>
  </node>
  <node id="306268" label="zzz1600" cy:nodeId="1713">
    <graphics x="980.348095701891" y="-97.04108403420082" z="0.0"/>
  </node>
  <node id="306267" label="zzz1599" cy:nodeId="1714">
    <graphics x="914.3381698596058" y="-171.41992924904457" z="0.0"/>
  </node>
  <node id="306266" label="zzz1598" cy:nodeId="1715">
    <graphics x="975.0817306506215" y="-111.7670056650602" z="0.0"/>
  </node>
  <node id="306265" label="zzz1597" cy:nodeId="1716">
    <graphics x="977.8677871691762" y="-99.45688603615395" z="0.0"/>
  </node>
  <node id="306264" label="zzz1596" cy:nodeId="1717">
    <graphics x="962.0628478991566" y="-94.6697156259977" z="0.0"/>
  </node>
  <node id="306263" label="zzz1595" cy:nodeId="1718">
    <graphics x="1008.7174270617543" y="-101.26999638771645" z="0.0"/>
  </node>
  <node id="306262" label="zzz1594" cy:nodeId="1719">
    <graphics x="1006.8119400012074" y="-114.04477666115395" z="0.0"/>
  </node>
  <node id="306261" label="zzz1593" cy:nodeId="1720">
    <graphics x="940.7106140124379" y="-142.44647954201332" z="0.0"/>
  </node>
  <node id="306260" label="zzz1592" cy:nodeId="1721">
    <graphics x="891.463085936266" y="-130.2316052744352" z="0.0"/>
  </node>
  <node id="306259" label="zzz1591" cy:nodeId="1722">
    <graphics x="988.9310348498402" y="-88.04578374123207" z="0.0"/>
  </node>
  <node id="306258" label="zzz1590" cy:nodeId="1723">
    <graphics x="957.8761337267933" y="-108.04856084084145" z="0.0"/>
  </node>
  <node id="306257" label="zzz1589" cy:nodeId="1724">
    <graphics x="975.0689743029652" y="-104.67295048927895" z="0.0"/>
  </node>
  <node id="306256" label="zzz1588" cy:nodeId="1725">
    <graphics x="929.2682846056996" y="-122.94370244240395" z="0.0"/>
  </node>
  <node id="306255" label="zzz1587" cy:nodeId="1726">
    <graphics x="991.8448684680043" y="-108.91147587990395" z="0.0"/>
  </node>
  <node id="306254" label="zzz1586" cy:nodeId="1727">
    <graphics x="957.4692886340199" y="-89.01984379982582" z="0.0"/>
  </node>
  <node id="306253" label="zzz1585" cy:nodeId="1728">
    <graphics x="764.7499740588246" y="-219.58867619728676" z="0.0"/>
  </node>
  <node id="306252" label="zzz1584" cy:nodeId="1729">
    <graphics x="900.4977767931996" y="-441.3834607431852" z="0.0"/>
  </node>
  <node id="306251" label="zzz1583" cy:nodeId="1730">
    <graphics x="857.4371722209034" y="-402.70877621864906" z="0.0"/>
  </node>
  <node id="306250" label="zzz1582" cy:nodeId="1731">
    <graphics x="925.6436737048207" y="-146.14856694435707" z="0.0"/>
  </node>
  <node id="306249" label="zzz1581" cy:nodeId="1732">
    <graphics x="-1014.18603515625" y="2145.5673828125" z="0.0"/>
  </node>
  <node id="306248" label="zzz1580" cy:nodeId="1733">
    <graphics x="-1011.1199951171875" y="2236.69970703125" z="0.0"/>
  </node>
  <node id="306247" label="zzz1579" cy:nodeId="1734">
    <graphics x="-1066.17236328125" y="2128.439697265625" z="0.0"/>
  </node>
  <node id="306246" label="zzz1578" cy:nodeId="1735">
    <graphics x="-1038.9754638671875" y="2199.78662109375" z="0.0"/>
  </node>
  <node id="306245" label="zzz1577" cy:nodeId="1736">
    <graphics x="-1430.3466796875" y="2273.076416015625" z="0.0"/>
  </node>
  <node id="306244" label="zzz1576" cy:nodeId="1737">
    <graphics x="-1376.4996337890625" y="2272.533447265625" z="0.0"/>
  </node>
  <node id="306243" label="zzz1575" cy:nodeId="1738">
    <graphics x="-1376.871337890625" y="2167.076416015625" z="0.0"/>
  </node>
  <node id="306242" label="zzz1574" cy:nodeId="1739">
    <graphics x="-1031.2938232421875" y="2268.657470703125" z="0.0"/>
  </node>
  <node id="306241" label="zzz1573" cy:nodeId="1740">
    <graphics x="-1112.4456787109375" y="2276.296142578125" z="0.0"/>
  </node>
  <node id="306240" label="zzz1572" cy:nodeId="1741">
    <graphics x="-1376.9586181640625" y="2143.067138671875" z="0.0"/>
  </node>
  <node id="306239" label="zzz1571" cy:nodeId="1742">
    <graphics x="-1092.4552001953125" y="2147.82763671875" z="0.0"/>
  </node>
  <node id="306238" label="zzz1570" cy:nodeId="1743">
    <graphics x="-1321.190185546875" y="2221.864013671875" z="0.0"/>
  </node>
  <node id="306237" label="zzz1569" cy:nodeId="1744">
    <graphics x="-1055.7127685546875" y="2200.420654296875" z="0.0"/>
  </node>
  <node id="306236" label="zzz1568" cy:nodeId="1745">
    <graphics x="-1108.9283447265625" y="2185.237548828125" z="0.0"/>
  </node>
  <node id="306235" label="zzz1567" cy:nodeId="1746">
    <graphics x="-1392.696533203125" y="2143.614501953125" z="0.0"/>
  </node>
  <node id="306234" label="zzz1566" cy:nodeId="1747">
    <graphics x="-594.8193923962535" y="-407.4275281259977" z="0.0"/>
  </node>
  <node id="306233" label="zzz1565" cy:nodeId="1748">
    <graphics x="-656.3519088757457" y="-435.6111867258512" z="0.0"/>
  </node>
  <node id="306232" label="zzz1564" cy:nodeId="1749">
    <graphics x="-1290.5953369140625" y="2200.447021484375" z="0.0"/>
  </node>
  <node id="306231" label="zzz1563" cy:nodeId="1750">
    <graphics x="-1048.1077880859375" y="2235.108154296875" z="0.0"/>
  </node>
  <node id="306230" label="zzz1562" cy:nodeId="1751">
    <graphics x="-1428.4111328125" y="2205.216552734375" z="0.0"/>
  </node>
  <node id="306229" label="zzz1561" cy:nodeId="1752">
    <graphics x="-1464.423828125" y="2187.201171875" z="0.0"/>
  </node>
  <node id="306228" label="zzz1560" cy:nodeId="1753">
    <graphics x="-1409.42333984375" y="2257.741943359375" z="0.0"/>
  </node>
  <node id="306227" label="zzz1559" cy:nodeId="1754">
    <graphics x="-1487.36376953125" y="2249.830078125" z="0.0"/>
  </node>
  <node id="306226" label="zzz1558" cy:nodeId="1755">
    <graphics x="-1055.340087890625" y="2285.0029296875" z="0.0"/>
  </node>
  <node id="306225" label="zzz1557" cy:nodeId="1756">
    <graphics x="-1431.2774658203125" y="2217.852294921875" z="0.0"/>
  </node>
  <node id="306224" label="zzz1556" cy:nodeId="1757">
    <graphics x="-1400.421630859375" y="2169.38134765625" z="0.0"/>
  </node>
  <node id="306223" label="zzz1555" cy:nodeId="1758">
    <graphics x="-1342.492431640625" y="2272.14501953125" z="0.0"/>
  </node>
  <node id="306222" label="zzz1554" cy:nodeId="1759">
    <graphics x="-1346.220947265625" y="2189.09619140625" z="0.0"/>
  </node>
  <node id="306221" label="zzz1553" cy:nodeId="1760">
    <graphics x="-1340.1898193359375" y="2115.548095703125" z="0.0"/>
  </node>
  <node id="306220" label="zzz1552" cy:nodeId="1761">
    <graphics x="-1089.359130859375" y="2238.032958984375" z="0.0"/>
  </node>
  <node id="306219" label="zzz1551" cy:nodeId="1762">
    <graphics x="-1443.8095703125" y="2130.518798828125" z="0.0"/>
  </node>
  <node id="306218" label="zzz1548" cy:nodeId="1763">
    <graphics x="-547.5126953125" y="-747.1708374023438" z="0.0"/>
  </node>
  <node id="306217" label="zzz1546" cy:nodeId="1764">
    <graphics x="-523.5675659179688" y="-621.6195678710938" z="0.0"/>
  </node>
  <node id="306216" label="zzz1545" cy:nodeId="1765">
    <graphics x="-496.76336669921875" y="-678.3595581054688" z="0.0"/>
  </node>
  <node id="306215" label="zzz1543" cy:nodeId="1766">
    <graphics x="-531.9270629882812" y="-658.85888671875" z="0.0"/>
  </node>
  <node id="306214" label="zzz1542" cy:nodeId="1767">
    <graphics x="-527.147216796875" y="-743.8638305664062" z="0.0"/>
  </node>
  <node id="306213" label="zzz1541" cy:nodeId="1768">
    <graphics x="-468.3857116699219" y="-671.6074829101562" z="0.0"/>
  </node>
  <node id="306212" label="zzz1540" cy:nodeId="1769">
    <graphics x="-552.7376708984375" y="-605.9664306640625" z="0.0"/>
  </node>
  <node id="306211" label="zzz1536" cy:nodeId="1770">
    <graphics x="-475.1112060546875" y="-739.129638671875" z="0.0"/>
  </node>
  <node id="306210" label="zzz1535" cy:nodeId="1771">
    <graphics x="-544.089599609375" y="-628.9408569335938" z="0.0"/>
  </node>
  <node id="306209" label="zzz1533" cy:nodeId="1772">
    <graphics x="-447.015869140625" y="-709.941650390625" z="0.0"/>
  </node>
  <node id="306208" label="zzz1532" cy:nodeId="1773">
    <graphics x="-543.6765747070312" y="-665.0943603515625" z="0.0"/>
  </node>
  <node id="306207" label="zzz1530" cy:nodeId="1774">
    <graphics x="-492.09814453125" y="-731.7006225585938" z="0.0"/>
  </node>
  <node id="306206" label="zzz1529" cy:nodeId="1775">
    <graphics x="-493.492919921875" y="-681.688720703125" z="0.0"/>
  </node>
  <node id="306205" label="zzz1527" cy:nodeId="1776">
    <graphics x="-467.2806396484375" y="-692.2367553710938" z="0.0"/>
  </node>
  <node id="306204" label="zzz1526" cy:nodeId="1777">
    <graphics x="-382.56515045289416" y="-445.2689359018766" z="0.0"/>
  </node>
  <node id="306203" label="zzz1525" cy:nodeId="1778">
    <graphics x="-540.3853759765625" y="-742.1403198242188" z="0.0"/>
  </node>
  <node id="306202" label="zzz1524" cy:nodeId="1779">
    <graphics x="-534.4231567382812" y="-664.4028930664062" z="0.0"/>
  </node>
  <node id="306201" label="zzz1523" cy:nodeId="1780">
    <graphics x="-500.60009765625" y="-656.0502319335938" z="0.0"/>
  </node>
  <node id="306200" label="zzz1522" cy:nodeId="1781">
    <graphics x="-613.4590454101562" y="-716.8468017578125" z="0.0"/>
  </node>
  <node id="306199" label="zzz1521" cy:nodeId="1782">
    <graphics x="-528.8296508789062" y="-590.6409301757812" z="0.0"/>
  </node>
  <node id="306198" label="zzz1520" cy:nodeId="1783">
    <graphics x="-642.6670944226207" y="-486.4160668680631" z="0.0"/>
  </node>
  <node id="306197" label="zzz1519" cy:nodeId="1784">
    <graphics x="-112.869873046875" y="-411.4657897949219" z="0.0"/>
  </node>
  <node id="306196" label="zzz1518" cy:nodeId="1785">
    <graphics x="-567.4618789685192" y="-452.48553822731606" z="0.0"/>
  </node>
  <node id="306195" label="zzz1517" cy:nodeId="1786">
    <graphics x="26.683841705322266" y="-490.355224609375" z="0.0"/>
  </node>
  <node id="306194" label="zzz1516" cy:nodeId="1787">
    <graphics x="25.753787994384766" y="-390.1232604980469" z="0.0"/>
  </node>
  <node id="306193" label="zzz1504" cy:nodeId="1788">
    <graphics x="-478.2483215332031" y="-653.6536865234375" z="0.0"/>
  </node>
  <node id="306192" label="zzz1503" cy:nodeId="1789">
    <graphics x="-448.0088195800781" y="-662.392333984375" z="0.0"/>
  </node>
  <node id="306191" label="zzz1502" cy:nodeId="1790">
    <graphics x="183.3258102404652" y="-155.61447880959145" z="0.0"/>
  </node>
  <node id="306190" label="zzz1501" cy:nodeId="1791">
    <graphics x="-509.99859619140625" y="-735.0799560546875" z="0.0"/>
  </node>
  <node id="306189" label="zzz1500" cy:nodeId="1792">
    <graphics x="-521.59716796875" y="-727.6314697265625" z="0.0"/>
  </node>
  <node id="306188" label="zzz1499" cy:nodeId="1793">
    <graphics x="-488.95556640625" y="-732.2222900390625" z="0.0"/>
  </node>
  <node id="306187" label="zzz1498" cy:nodeId="1794">
    <graphics x="-519.6575927734375" y="-615.0458984375" z="0.0"/>
  </node>
  <node id="306186" label="zzz1497" cy:nodeId="1795">
    <graphics x="-505.77093505859375" y="-692.333984375" z="0.0"/>
  </node>
  <node id="306185" label="zzz1496" cy:nodeId="1796">
    <graphics x="-466.5473937988281" y="-690.3489990234375" z="0.0"/>
  </node>
  <node id="306184" label="zzz1495" cy:nodeId="1797">
    <graphics x="-471.9623107910156" y="-626.8837890625" z="0.0"/>
  </node>
  <node id="306183" label="zzz1494" cy:nodeId="1798">
    <graphics x="-515.8359985351562" y="-699.5511474609375" z="0.0"/>
  </node>
  <node id="306182" label="zzz1493" cy:nodeId="1799">
    <graphics x="-560.3993530273438" y="-705.2608032226562" z="0.0"/>
  </node>
  <node id="306181" label="zzz1492" cy:nodeId="1800">
    <graphics x="-470.6969299316406" y="-629.8139038085938" z="0.0"/>
  </node>
  <node id="306180" label="zzz1491" cy:nodeId="1801">
    <graphics x="-545.3499755859375" y="-604.277587890625" z="0.0"/>
  </node>
  <node id="306179" label="zzz1490" cy:nodeId="1802">
    <graphics x="-518.3820190429688" y="-631.4435424804688" z="0.0"/>
  </node>
  <node id="306178" label="zzz1489" cy:nodeId="1803">
    <graphics x="-507.89581298828125" y="-703.5929565429688" z="0.0"/>
  </node>
  <node id="306177" label="zzz1488" cy:nodeId="1804">
    <graphics x="-535.0391235351562" y="-688.4207153320312" z="0.0"/>
  </node>
  <node id="306176" label="zzz1487" cy:nodeId="1805">
    <graphics x="-550.5433349609375" y="-655.214599609375" z="0.0"/>
  </node>
  <node id="306175" label="zzz1486" cy:nodeId="1806">
    <graphics x="-552.0429077148438" y="-682.5985717773438" z="0.0"/>
  </node>
  <node id="306174" label="zzz1485" cy:nodeId="1807">
    <graphics x="-460.9595642089844" y="-667.399169921875" z="0.0"/>
  </node>
  <node id="306173" label="zzz1484" cy:nodeId="1808">
    <graphics x="-522.7169799804688" y="-663.57568359375" z="0.0"/>
  </node>
  <node id="306172" label="zzz1483" cy:nodeId="1809">
    <graphics x="-474.6303405761719" y="-730.5538940429688" z="0.0"/>
  </node>
  <node id="306171" label="zzz1482" cy:nodeId="1810">
    <graphics x="-514.2635498046875" y="-708.3768310546875" z="0.0"/>
  </node>
  <node id="306170" label="zzz1481" cy:nodeId="1811">
    <graphics x="-501.51641845703125" y="-697.5571899414062" z="0.0"/>
  </node>
  <node id="306169" label="zzz1480" cy:nodeId="1812">
    <graphics x="-552.6729125976562" y="-713.1012573242188" z="0.0"/>
  </node>
  <node id="306168" label="zzz1478" cy:nodeId="1813">
    <graphics x="-551.5521850585938" y="-688.2275390625" z="0.0"/>
  </node>
  <node id="306167" label="zzz1477" cy:nodeId="1814">
    <graphics x="-530.9093627929688" y="-708.87890625" z="0.0"/>
  </node>
  <node id="306166" label="zzz1476" cy:nodeId="1815">
    <graphics x="-523.3305053710938" y="-682.8587036132812" z="0.0"/>
  </node>
  <node id="306165" label="zzz1475" cy:nodeId="1816">
    <graphics x="-495.87249755859375" y="-746.544677734375" z="0.0"/>
  </node>
  <node id="306164" label="zzz1471" cy:nodeId="1817">
    <graphics x="-514.1484985351562" y="-715.3345947265625" z="0.0"/>
  </node>
  <node id="306163" label="zzz1469" cy:nodeId="1818">
    <graphics x="-543.9718017578125" y="-648.331787109375" z="0.0"/>
  </node>
  <node id="306162" label="zzz1466" cy:nodeId="1819">
    <graphics x="-570.4414672851562" y="-641.29443359375" z="0.0"/>
  </node>
  <node id="306161" label="zzz1464" cy:nodeId="1820">
    <graphics x="-546.3082885742188" y="-731.9169311523438" z="0.0"/>
  </node>
  <node id="306160" label="zzz1462" cy:nodeId="1821">
    <graphics x="-546.2124633789062" y="-635.332275390625" z="0.0"/>
  </node>
  <node id="306159" label="zzz1460" cy:nodeId="1822">
    <graphics x="-6.903621673583984" y="-606.6693725585938" z="0.0"/>
  </node>
  <node id="306158" label="zzz1459" cy:nodeId="1823">
    <graphics x="-240.8320266735973" y="-777.480323536154" z="0.0"/>
  </node>
  <node id="306157" label="zzz1458" cy:nodeId="1824">
    <graphics x="-590.6200561523438" y="-644.80126953125" z="0.0"/>
  </node>
  <node id="306156" label="zzz1457" cy:nodeId="1825">
    <graphics x="-521.0429077148438" y="-706.3006591796875" z="0.0"/>
  </node>
  <node id="306155" label="zzz1456" cy:nodeId="1826">
    <graphics x="-471.7597351074219" y="-721.7369384765625" z="0.0"/>
  </node>
  <node id="306154" label="zzz1455" cy:nodeId="1827">
    <graphics x="-492.7431640625" y="-643.8494262695312" z="0.0"/>
  </node>
  <node id="306153" label="zzz1454" cy:nodeId="1828">
    <graphics x="-520.5515747070312" y="-640.7822875976562" z="0.0"/>
  </node>
  <node id="306152" label="zzz1453" cy:nodeId="1829">
    <graphics x="-547.3357543945312" y="-736.3070068359375" z="0.0"/>
  </node>
  <node id="306151" label="zzz1452" cy:nodeId="1830">
    <graphics x="-556.2905883789062" y="-718.9649047851562" z="0.0"/>
  </node>
  <node id="306150" label="zzz1451" cy:nodeId="1831">
    <graphics x="-442.6009826660156" y="-722.6715087890625" z="0.0"/>
  </node>
  <node id="306149" label="zzz1450" cy:nodeId="1832">
    <graphics x="-512.990234375" y="-611.023193359375" z="0.0"/>
  </node>
  <node id="306148" label="zzz1449" cy:nodeId="1833">
    <graphics x="-556.2658081054688" y="-658.055908203125" z="0.0"/>
  </node>
  <node id="306147" label="zzz1448" cy:nodeId="1834">
    <graphics x="-567.4756469726562" y="-600.0390014648438" z="0.0"/>
  </node>
  <node id="306146" label="zzz1447" cy:nodeId="1835">
    <graphics x="-556.955810546875" y="-642.7952270507812" z="0.0"/>
  </node>
  <node id="306145" label="zzz1446" cy:nodeId="1836">
    <graphics x="-549.710205078125" y="-656.3986206054688" z="0.0"/>
  </node>
  <node id="306144" label="zzz1445" cy:nodeId="1837">
    <graphics x="-503.23333740234375" y="-674.5136108398438" z="0.0"/>
  </node>
  <node id="306143" label="zzz1444" cy:nodeId="1838">
    <graphics x="-573.6029663085938" y="-713.2017211914062" z="0.0"/>
  </node>
  <node id="306142" label="zzz1443" cy:nodeId="1839">
    <graphics x="-457.6978454589844" y="-675.5408325195312" z="0.0"/>
  </node>
  <node id="306141" label="zzz1442" cy:nodeId="1840">
    <graphics x="-550.0460205078125" y="-671.2935180664062" z="0.0"/>
  </node>
  <node id="306140" label="zzz1441" cy:nodeId="1841">
    <graphics x="-580.0487060546875" y="-699.40625" z="0.0"/>
  </node>
  <node id="306139" label="zzz1440" cy:nodeId="1842">
    <graphics x="-565.7222290039062" y="-622.560546875" z="0.0"/>
  </node>
  <node id="306138" label="zzz1439" cy:nodeId="1843">
    <graphics x="-506.74688720703125" y="-685.7401123046875" z="0.0"/>
  </node>
  <node id="306137" label="zzz1438" cy:nodeId="1844">
    <graphics x="-547.55712890625" y="-690.638916015625" z="0.0"/>
  </node>
  <node id="306136" label="zzz1437" cy:nodeId="1845">
    <graphics x="-576.9689331054688" y="-665.7650756835938" z="0.0"/>
  </node>
  <node id="306135" label="zzz1436" cy:nodeId="1846">
    <graphics x="-588.5326538085938" y="-663.2791137695312" z="0.0"/>
  </node>
  <node id="306134" label="zzz1435" cy:nodeId="1847">
    <graphics x="-527.5482177734375" y="-707.4883422851562" z="0.0"/>
  </node>
  <node id="306133" label="zzz1431" cy:nodeId="1848">
    <graphics x="-639.0767211914062" y="-675.3692016601562" z="0.0"/>
  </node>
  <node id="306132" label="zzz1430" cy:nodeId="1849">
    <graphics x="360.16791229124647" y="-429.27077077126137" z="0.0"/>
  </node>
  <node id="306131" label="zzz1429" cy:nodeId="1850">
    <graphics x="-267.80126953125" y="-509.23345947265625" z="0.0"/>
  </node>
  <node id="306130" label="zzz1428" cy:nodeId="1851">
    <graphics x="-281.8475341796875" y="-525.6777954101562" z="0.0"/>
  </node>
  <node id="306129" label="zzz1427" cy:nodeId="1852">
    <graphics x="-146.45366974000356" y="-280.13832829689613" z="0.0"/>
  </node>
  <node id="306128" label="zzz1425" cy:nodeId="1853">
    <graphics x="-481.2571716308594" y="-666.087646484375" z="0.0"/>
  </node>
  <node id="306127" label="zzz1424" cy:nodeId="1854">
    <graphics x="-77.40038604859731" y="-260.26660893654457" z="0.0"/>
  </node>
  <node id="306126" label="zzz1422" cy:nodeId="1855">
    <graphics x="-560.1134643554688" y="-643.0193481445312" z="0.0"/>
  </node>
  <node id="306125" label="zzz1421" cy:nodeId="1856">
    <graphics x="-497.05657958984375" y="-616.0480346679688" z="0.0"/>
  </node>
  <node id="306124" label="zzz1420" cy:nodeId="1857">
    <graphics x="-21.095394134521484" y="-431.64764404296875" z="0.0"/>
  </node>
  <node id="306123" label="zzz1419" cy:nodeId="1858">
    <graphics x="-51.02336883544922" y="-517.3076782226562" z="0.0"/>
  </node>
  <node id="306122" label="zzz1418" cy:nodeId="1859">
    <graphics x="-205.95941162109375" y="-542.110595703125" z="0.0"/>
  </node>
  <node id="306121" label="zzz1417" cy:nodeId="1860">
    <graphics x="-502.36944580078125" y="-570.9036865234375" z="0.0"/>
  </node>
  <node id="306120" label="zzz1416" cy:nodeId="1861">
    <graphics x="-559.997802734375" y="-662.9655151367188" z="0.0"/>
  </node>
  <node id="306119" label="zzz1415" cy:nodeId="1862">
    <graphics x="-575.9253540039062" y="-756.5772705078125" z="0.0"/>
  </node>
  <node id="306118" label="zzz1414" cy:nodeId="1863">
    <graphics x="-21.242000579833984" y="-477.0325927734375" z="0.0"/>
  </node>
  <node id="306117" label="zzz1413" cy:nodeId="1864">
    <graphics x="-502.3968505859375" y="-684.31298828125" z="0.0"/>
  </node>
  <node id="306116" label="zzz1411" cy:nodeId="1865">
    <graphics x="-508.3994140625" y="-708.0737915039062" z="0.0"/>
  </node>
  <node id="306115" label="zzz1409" cy:nodeId="1866">
    <graphics x="-551.3019409179688" y="-607.4545288085938" z="0.0"/>
  </node>
  <node id="306114" label="zzz1407" cy:nodeId="1867">
    <graphics x="-487.1673583984375" y="-642.5632934570312" z="0.0"/>
  </node>
  <node id="306113" label="zzz1406" cy:nodeId="1868">
    <graphics x="-579.0714721679688" y="-683.289306640625" z="0.0"/>
  </node>
  <node id="306112" label="zzz1403" cy:nodeId="1869">
    <graphics x="-478.6917724609375" y="-613.602783203125" z="0.0"/>
  </node>
  <node id="306111" label="zzz1402" cy:nodeId="1870">
    <graphics x="-487.648681640625" y="-710.110107421875" z="0.0"/>
  </node>
  <node id="306110" label="zzz1401" cy:nodeId="1871">
    <graphics x="-581.6368408203125" y="-750.880859375" z="0.0"/>
  </node>
  <node id="306109" label="zzz1400" cy:nodeId="1872">
    <graphics x="192.23566131468394" y="-500.5694043467008" z="0.0"/>
  </node>
  <node id="306108" label="zzz1399" cy:nodeId="1873">
    <graphics x="-453.269775390625" y="-624.0794067382812" z="0.0"/>
  </node>
  <node id="306107" label="zzz1398" cy:nodeId="1874">
    <graphics x="-484.9290771484375" y="-708.0948486328125" z="0.0"/>
  </node>
  <node id="306106" label="zzz1397" cy:nodeId="1875">
    <graphics x="-497.44091796875" y="-632.4942016601562" z="0.0"/>
  </node>
  <node id="306105" label="zzz1396" cy:nodeId="1876">
    <graphics x="-548.8189697265625" y="-679.047119140625" z="0.0"/>
  </node>
  <node id="306104" label="zzz1395" cy:nodeId="1877">
    <graphics x="-567.9775390625" y="-655.9031982421875" z="0.0"/>
  </node>
  <node id="306103" label="zzz1393" cy:nodeId="1878">
    <graphics x="-485.4139404296875" y="-734.8527221679688" z="0.0"/>
  </node>
  <node id="306102" label="zzz1392" cy:nodeId="1879">
    <graphics x="-194.27959747437856" y="-697.9699017832243" z="0.0"/>
  </node>
  <node id="306101" label="zzz1391" cy:nodeId="1880">
    <graphics x="-572.5375366210938" y="-723.6725463867188" z="0.0"/>
  </node>
  <node id="306100" label="zzz1390" cy:nodeId="1881">
    <graphics x="-560.0435180664062" y="-662.8859252929688" z="0.0"/>
  </node>
  <node id="306099" label="zzz1388" cy:nodeId="1882">
    <graphics x="-232.46002197265625" y="-422.5778503417969" z="0.0"/>
  </node>
  <node id="306098" label="zzz1387" cy:nodeId="1883">
    <graphics x="-575.43212890625" y="-668.7752075195312" z="0.0"/>
  </node>
  <node id="306097" label="zzz1386" cy:nodeId="1884">
    <graphics x="-571.1882934570312" y="-737.16796875" z="0.0"/>
  </node>
  <node id="306096" label="zzz1385" cy:nodeId="1885">
    <graphics x="-464.45635986328125" y="-614.2805786132812" z="0.0"/>
  </node>
  <node id="306095" label="zzz1383" cy:nodeId="1886">
    <graphics x="-512.6414184570312" y="-595.3732299804688" z="0.0"/>
  </node>
  <node id="306094" label="zzz1381" cy:nodeId="1887">
    <graphics x="-575.3704833984375" y="-705.8577880859375" z="0.0"/>
  </node>
  <node id="306093" label="zzz1379" cy:nodeId="1888">
    <graphics x="-456.4417724609375" y="-724.9425048828125" z="0.0"/>
  </node>
  <node id="306092" label="zzz1378" cy:nodeId="1889">
    <graphics x="-532.0262451171875" y="-662.2356567382812" z="0.0"/>
  </node>
  <node id="306091" label="zzz1377" cy:nodeId="1890">
    <graphics x="-474.0044204724254" y="-490.7679135630094" z="0.0"/>
  </node>
  <node id="306090" label="zzz1376" cy:nodeId="1891">
    <graphics x="275.87433318968397" y="-485.5891129801237" z="0.0"/>
  </node>
  <node id="306089" label="zzz1374" cy:nodeId="1892">
    <graphics x="-537.3789672851562" y="-702.9879760742188" z="0.0"/>
  </node>
  <node id="306088" label="zzz1373" cy:nodeId="1893">
    <graphics x="90.02283477783203" y="-523.0806274414062" z="0.0"/>
  </node>
  <node id="306087" label="zzz1372" cy:nodeId="1894">
    <graphics x="-500.28680419921875" y="-625.4384765625" z="0.0"/>
  </node>
  <node id="306086" label="zzz1371" cy:nodeId="1895">
    <graphics x="1.8581581115722656" y="-588.606689453125" z="0.0"/>
  </node>
  <node id="306085" label="zzz1368" cy:nodeId="1896">
    <graphics x="-500.4691162109375" y="-638.3958740234375" z="0.0"/>
  </node>
  <node id="306084" label="zzz1365" cy:nodeId="1897">
    <graphics x="-539.3574829101562" y="-678.2803955078125" z="0.0"/>
  </node>
  <node id="306083" label="zzz1363" cy:nodeId="1898">
    <graphics x="-551.4886474609375" y="-589.3010864257812" z="0.0"/>
  </node>
  <node id="306082" label="zzz1361" cy:nodeId="1899">
    <graphics x="-523.1318969726562" y="-741.05224609375" z="0.0"/>
  </node>
  <node id="306081" label="zzz1360" cy:nodeId="1900">
    <graphics x="65.02326202392578" y="-553.03466796875" z="0.0"/>
  </node>
  <node id="306080" label="zzz1359" cy:nodeId="1901">
    <graphics x="31.234806060791016" y="-358.8581237792969" z="0.0"/>
  </node>
  <node id="306079" label="zzz1358" cy:nodeId="1902">
    <graphics x="-557.82275390625" y="-665.8571166992188" z="0.0"/>
  </node>
  <node id="306078" label="zzz1357" cy:nodeId="1903">
    <graphics x="-528.1190185546875" y="-771.3177490234375" z="0.0"/>
  </node>
  <node id="306077" label="zzz1356" cy:nodeId="1904">
    <graphics x="-563.5693359375" y="-722.5248413085938" z="0.0"/>
  </node>
  <node id="306076" label="zzz1355" cy:nodeId="1905">
    <graphics x="-72.46990203857422" y="-574.2120361328125" z="0.0"/>
  </node>
  <node id="306075" label="zzz1354" cy:nodeId="1906">
    <graphics x="-523.4467163085938" y="-702.7667846679688" z="0.0"/>
  </node>
  <node id="306074" label="zzz1352" cy:nodeId="1907">
    <graphics x="-505.08953857421875" y="-723.691650390625" z="0.0"/>
  </node>
  <node id="306073" label="zzz1350" cy:nodeId="1908">
    <graphics x="-408.9140884411754" y="-454.91692898964516" z="0.0"/>
  </node>
  <node id="306072" label="zzz1349" cy:nodeId="1909">
    <graphics x="-513.6009521484375" y="-690.186767578125" z="0.0"/>
  </node>
  <node id="306071" label="zzz1348" cy:nodeId="1910">
    <graphics x="-528.1624145507812" y="-723.5892333984375" z="0.0"/>
  </node>
  <node id="306070" label="zzz1347" cy:nodeId="1911">
    <graphics x="-455.120849609375" y="-666.1077270507812" z="0.0"/>
  </node>
  <node id="306069" label="zzz1346" cy:nodeId="1912">
    <graphics x="-455.5318298339844" y="-665.5021362304688" z="0.0"/>
  </node>
  <node id="306068" label="zzz1344" cy:nodeId="1913">
    <graphics x="-460.79302978515625" y="-699.3929443359375" z="0.0"/>
  </node>
  <node id="306067" label="zzz1343" cy:nodeId="1914">
    <graphics x="-495.78924560546875" y="-712.2222900390625" z="0.0"/>
  </node>
  <node id="306066" label="zzz1341" cy:nodeId="1915">
    <graphics x="28.327274322509766" y="-431.37664794921875" z="0.0"/>
  </node>
  <node id="306065" label="zzz1339" cy:nodeId="1916">
    <graphics x="-505.36993408203125" y="-603.6784057617188" z="0.0"/>
  </node>
  <node id="306064" label="zzz1338" cy:nodeId="1917">
    <graphics x="-499.14349365234375" y="-644.9812622070312" z="0.0"/>
  </node>
  <node id="306063" label="zzz1335" cy:nodeId="1918">
    <graphics x="-598.6668090820312" y="-712.4334106445312" z="0.0"/>
  </node>
  <node id="306062" label="zzz1334" cy:nodeId="1919">
    <graphics x="66.54370880126953" y="-476.5008850097656" z="0.0"/>
  </node>
  <node id="306061" label="zzz1333" cy:nodeId="1920">
    <graphics x="-46.40960693359375" y="-506.3013916015625" z="0.0"/>
  </node>
  <node id="306060" label="zzz1332" cy:nodeId="1921">
    <graphics x="1.2017860412597656" y="-520.05224609375" z="0.0"/>
  </node>
  <node id="306059" label="zzz1331" cy:nodeId="1922">
    <graphics x="-59.24205780029297" y="-493.4322509765625" z="0.0"/>
  </node>
  <node id="306058" label="zzz1330" cy:nodeId="1923">
    <graphics x="80.21949005126953" y="-533.9437255859375" z="0.0"/>
  </node>
  <node id="306057" label="zzz1329" cy:nodeId="1924">
    <graphics x="-498.96978759765625" y="-674.4384765625" z="0.0"/>
  </node>
  <node id="306056" label="zzz1327" cy:nodeId="1925">
    <graphics x="-266.31427001953125" y="-574.106689453125" z="0.0"/>
  </node>
  <node id="306055" label="zzz1326" cy:nodeId="1926">
    <graphics x="-740.1609069836559" y="-649.7233197519743" z="0.0"/>
  </node>
  <node id="306054" label="zzz1325" cy:nodeId="1927">
    <graphics x="-439.52069091796875" y="-687.5067749023438" z="0.0"/>
  </node>
  <node id="306053" label="zzz1324" cy:nodeId="1928">
    <graphics x="-518.337158203125" y="-750.4458618164062" z="0.0"/>
  </node>
  <node id="306052" label="zzz1322" cy:nodeId="1929">
    <graphics x="-456.3901062011719" y="-670.1900024414062" z="0.0"/>
  </node>
  <node id="306051" label="zzz1319" cy:nodeId="1930">
    <graphics x="-549.794677734375" y="-675.1849975585938" z="0.0"/>
  </node>
  <node id="306050" label="zzz1318" cy:nodeId="1931">
    <graphics x="-507.60015869140625" y="-722.8956909179688" z="0.0"/>
  </node>
  <node id="306049" label="zzz1316" cy:nodeId="1932">
    <graphics x="-7.914119720458984" y="-390.3511047363281" z="0.0"/>
  </node>
  <node id="306048" label="zzz1314" cy:nodeId="1933">
    <graphics x="-428.1109924316406" y="-725.205810546875" z="0.0"/>
  </node>
  <node id="306047" label="zzz1312" cy:nodeId="1934">
    <graphics x="-479.68115234375" y="-635.2799072265625" z="0.0"/>
  </node>
  <node id="306046" label="zzz1311" cy:nodeId="1935">
    <graphics x="-482.10498046875" y="-650.5391235351562" z="0.0"/>
  </node>
  <node id="306045" label="zzz1309" cy:nodeId="1936">
    <graphics x="-516.0379028320312" y="-764.7115478515625" z="0.0"/>
  </node>
  <node id="306044" label="zzz1307" cy:nodeId="1937">
    <graphics x="-577.4439697265625" y="-670.7229614257812" z="0.0"/>
  </node>
  <node id="306043" label="zzz1304" cy:nodeId="1938">
    <graphics x="-531.0975952148438" y="-662.576904296875" z="0.0"/>
  </node>
  <node id="306042" label="zzz1303" cy:nodeId="1939">
    <graphics x="-509.42279052734375" y="-695.2319946289062" z="0.0"/>
  </node>
  <node id="306041" label="zzz1298" cy:nodeId="1940">
    <graphics x="-92.84734344482422" y="-391.0505065917969" z="0.0"/>
  </node>
  <node id="306040" label="zzz1296" cy:nodeId="1941">
    <graphics x="-534.5623779296875" y="-690.4907836914062" z="0.0"/>
  </node>
  <node id="306039" label="zzz1294" cy:nodeId="1942">
    <graphics x="-592.7817993164062" y="-658.6427612304688" z="0.0"/>
  </node>
  <node id="306038" label="zzz1293" cy:nodeId="1943">
    <graphics x="-511.2392578125" y="-733.1204833984375" z="0.0"/>
  </node>
  <node id="306037" label="zzz1292" cy:nodeId="1944">
    <graphics x="-268.02972412109375" y="-504.2581787109375" z="0.0"/>
  </node>
  <node id="306036" label="zzz1289" cy:nodeId="1945">
    <graphics x="-571.056396484375" y="-615.5037841796875" z="0.0"/>
  </node>
  <node id="306035" label="zzz1288" cy:nodeId="1946">
    <graphics x="-535.9771728515625" y="-629.0601196289062" z="0.0"/>
  </node>
  <node id="306034" label="zzz1285" cy:nodeId="1947">
    <graphics x="-582.3338623046875" y="-707.3965454101562" z="0.0"/>
  </node>
  <node id="306033" label="zzz1284" cy:nodeId="1948">
    <graphics x="-558.166015625" y="-676.5732421875" z="0.0"/>
  </node>
  <node id="306032" label="zzz1283" cy:nodeId="1949">
    <graphics x="-75.69982147216797" y="-472.7931823730469" z="0.0"/>
  </node>
  <node id="306031" label="zzz1280" cy:nodeId="1950">
    <graphics x="-428.3381042480469" y="-659.5186157226562" z="0.0"/>
  </node>
  <node id="306030" label="zzz1279" cy:nodeId="1951">
    <graphics x="-591.0340576171875" y="-639.1790771484375" z="0.0"/>
  </node>
  <node id="306029" label="zzz1278" cy:nodeId="1952">
    <graphics x="-48.951904296875" y="-596.94921875" z="0.0"/>
  </node>
  <node id="306028" label="zzz1277" cy:nodeId="1953">
    <graphics x="-18.852108001708984" y="-610.5338745117188" z="0.0"/>
  </node>
  <node id="306027" label="zzz1276" cy:nodeId="1954">
    <graphics x="-589.3558959960938" y="-687.812744140625" z="0.0"/>
  </node>
  <node id="306026" label="zzz1275" cy:nodeId="1955">
    <graphics x="-231.81707763671875" y="-595.1851196289062" z="0.0"/>
  </node>
  <node id="306025" label="zzz1274" cy:nodeId="1956">
    <graphics x="-472.3869934082031" y="-608.390625" z="0.0"/>
  </node>
  <node id="306024" label="zzz1273" cy:nodeId="1957">
    <graphics x="36.102783203125" y="-527.2950439453125" z="0.0"/>
  </node>
  <node id="306023" label="zzz1272" cy:nodeId="1958">
    <graphics x="-554.8527221679688" y="-648.4486083984375" z="0.0"/>
  </node>
  <node id="306022" label="zzz1269" cy:nodeId="1959">
    <graphics x="-506.52044677734375" y="-743.8182373046875" z="0.0"/>
  </node>
  <node id="306021" label="zzz1268" cy:nodeId="1960">
    <graphics x="-242.66815185546875" y="-430.0325927734375" z="0.0"/>
  </node>
  <node id="306020" label="zzz1266" cy:nodeId="1961">
    <graphics x="-488.6851806640625" y="-692.595703125" z="0.0"/>
  </node>
  <node id="306019" label="zzz1265" cy:nodeId="1962">
    <graphics x="-591.0869140625" y="-679.0360107421875" z="0.0"/>
  </node>
  <node id="306018" label="zzz1261" cy:nodeId="1963">
    <graphics x="-624.7715454101562" y="-673.2919921875" z="0.0"/>
  </node>
  <node id="306017" label="zzz1260" cy:nodeId="1964">
    <graphics x="-17.039302825927734" y="-473.3097229003906" z="0.0"/>
  </node>
  <node id="306016" label="zzz1258" cy:nodeId="1965">
    <graphics x="-575.3902587890625" y="-670.1419067382812" z="0.0"/>
  </node>
  <node id="306015" label="zzz1257" cy:nodeId="1966">
    <graphics x="-620.9877319335938" y="-705.4689331054688" z="0.0"/>
  </node>
  <node id="306014" label="zzz1255" cy:nodeId="1967">
    <graphics x="-546.9508666992188" y="-709.4744262695312" z="0.0"/>
  </node>
  <node id="306013" label="zzz1254" cy:nodeId="1968">
    <graphics x="-29.689753724378562" y="-318.0284039804899" z="0.0"/>
  </node>
  <node id="306012" label="zzz1251" cy:nodeId="1969">
    <graphics x="-505.77337646484375" y="-622.441162109375" z="0.0"/>
  </node>
  <node id="306011" label="zzz1250" cy:nodeId="1970">
    <graphics x="-528.3580322265625" y="-670.55419921875" z="0.0"/>
  </node>
  <node id="306010" label="zzz1249" cy:nodeId="1971">
    <graphics x="-452.6203918457031" y="-638.5350341796875" z="0.0"/>
  </node>
  <node id="306009" label="zzz1248" cy:nodeId="1972">
    <graphics x="-516.7185668945312" y="-627.1689453125" z="0.0"/>
  </node>
  <node id="306008" label="zzz1247" cy:nodeId="1973">
    <graphics x="-540.2830810546875" y="-641.1250610351562" z="0.0"/>
  </node>
  <node id="306007" label="zzz1245" cy:nodeId="1974">
    <graphics x="-537.4683837890625" y="-631.7294311523438" z="0.0"/>
  </node>
  <node id="306006" label="zzz1244" cy:nodeId="1975">
    <graphics x="-434.7264709472656" y="-682.3554077148438" z="0.0"/>
  </node>
  <node id="306005" label="zzz1242" cy:nodeId="1976">
    <graphics x="-482.8084716796875" y="-634.1925048828125" z="0.0"/>
  </node>
  <node id="306004" label="zzz1240" cy:nodeId="1977">
    <graphics x="-559.3008422851562" y="-617.797607421875" z="0.0"/>
  </node>
  <node id="306003" label="zzz1237" cy:nodeId="1978">
    <graphics x="-467.2649841308594" y="-682.5346069335938" z="0.0"/>
  </node>
  <node id="306002" label="zzz1236" cy:nodeId="1979">
    <graphics x="-550.9966430664062" y="-707.31982421875" z="0.0"/>
  </node>
  <node id="306001" label="zzz1235" cy:nodeId="1980">
    <graphics x="-483.26611328125" y="-653.1679077148438" z="0.0"/>
  </node>
  <node id="306000" label="zzz1234" cy:nodeId="1981">
    <graphics x="-496.371337890625" y="-664.9222412109375" z="0.0"/>
  </node>
  <node id="305999" label="zzz1233" cy:nodeId="1982">
    <graphics x="-457.05877685546875" y="-725.1171264648438" z="0.0"/>
  </node>
  <node id="305998" label="zzz1230" cy:nodeId="1983">
    <graphics x="-510.1739501953125" y="-622.73681640625" z="0.0"/>
  </node>
  <node id="305997" label="zzz1228" cy:nodeId="1984">
    <graphics x="-547.7449951171875" y="-679.693115234375" z="0.0"/>
  </node>
  <node id="305996" label="zzz1227" cy:nodeId="1985">
    <graphics x="-493.89532470703125" y="-605.102294921875" z="0.0"/>
  </node>
  <node id="305995" label="zzz1226" cy:nodeId="1986">
    <graphics x="-63.57012176513672" y="-356.3893127441406" z="0.0"/>
  </node>
  <node id="305994" label="zzz1225" cy:nodeId="1987">
    <graphics x="25.740238189697266" y="-477.36566162109375" z="0.0"/>
  </node>
  <node id="305993" label="zzz1223" cy:nodeId="1988">
    <graphics x="-503.26947021484375" y="-635.0684814453125" z="0.0"/>
  </node>
  <node id="305992" label="zzz1221" cy:nodeId="1989">
    <graphics x="-445.16448974609375" y="-646.8026123046875" z="0.0"/>
  </node>
  <node id="305991" label="zzz1219" cy:nodeId="1990">
    <graphics x="-549.5240478515625" y="-671.1939086914062" z="0.0"/>
  </node>
  <node id="305990" label="zzz1218" cy:nodeId="1991">
    <graphics x="-513.3020629882812" y="-759.6527099609375" z="0.0"/>
  </node>
  <node id="305989" label="zzz1217" cy:nodeId="1992">
    <graphics x="-237.1881103515625" y="-583.59423828125" z="0.0"/>
  </node>
  <node id="305988" label="zzz1216" cy:nodeId="1993">
    <graphics x="46.114013671875" y="-469.4441223144531" z="0.0"/>
  </node>
  <node id="305987" label="zzz1215" cy:nodeId="1994">
    <graphics x="-512.5884399414062" y="-723.4854125976562" z="0.0"/>
  </node>
  <node id="305986" label="zzz1214" cy:nodeId="1995">
    <graphics x="-573.8615112304688" y="-712.469970703125" z="0.0"/>
  </node>
  <node id="305985" label="zzz1210" cy:nodeId="1996">
    <graphics x="-448.46868896484375" y="-654.337890625" z="0.0"/>
  </node>
  <node id="305984" label="zzz1209" cy:nodeId="1997">
    <graphics x="-535.8018188476562" y="-697.8477783203125" z="0.0"/>
  </node>
  <node id="305983" label="zzz1208" cy:nodeId="1998">
    <graphics x="-496.55865478515625" y="-745.291015625" z="0.0"/>
  </node>
  <node id="305982" label="zzz1207" cy:nodeId="1999">
    <graphics x="-585.0928344726562" y="-694.0762329101562" z="0.0"/>
  </node>
  <node id="305981" label="zzz1205" cy:nodeId="2000">
    <graphics x="-560.6119384765625" y="-735.6652221679688" z="0.0"/>
  </node>
  <node id="305980" label="zzz1204" cy:nodeId="2001">
    <graphics x="-518.0834350585938" y="-606.62158203125" z="0.0"/>
  </node>
  <node id="305979" label="zzz1203" cy:nodeId="2002">
    <graphics x="-481.29876708984375" y="-744.1276245117188" z="0.0"/>
  </node>
  <node id="305978" label="zzz1202" cy:nodeId="2003">
    <graphics x="-541.8922119140625" y="-678.0054931640625" z="0.0"/>
  </node>
  <node id="305977" label="zzz1201" cy:nodeId="2004">
    <graphics x="-449.1338806152344" y="-714.8422241210938" z="0.0"/>
  </node>
  <node id="305976" label="zzz1200" cy:nodeId="2005">
    <graphics x="-497.54296875" y="-703.4989624023438" z="0.0"/>
  </node>
  <node id="305975" label="zzz1199" cy:nodeId="2006">
    <graphics x="-570.0634765625" y="-696.9464721679688" z="0.0"/>
  </node>
  <node id="305974" label="zzz1198" cy:nodeId="2007">
    <graphics x="38.7833251953125" y="-508.36322021484375" z="0.0"/>
  </node>
  <node id="305973" label="zzz1197" cy:nodeId="2008">
    <graphics x="16.163883209228516" y="-500.45587158203125" z="0.0"/>
  </node>
  <node id="305972" label="zzz1196" cy:nodeId="2009">
    <graphics x="-565.118408203125" y="-719.87451171875" z="0.0"/>
  </node>
  <node id="305971" label="zzz1195" cy:nodeId="2010">
    <graphics x="-584.0302734375" y="-665.5670776367188" z="0.0"/>
  </node>
  <node id="305970" label="zzz1194" cy:nodeId="2011">
    <graphics x="-272.5625" y="-555.3560180664062" z="0.0"/>
  </node>
  <node id="305969" label="zzz1192" cy:nodeId="2012">
    <graphics x="-25.710079193115234" y="-365.04388427734375" z="0.0"/>
  </node>
  <node id="305968" label="zzz1190" cy:nodeId="2013">
    <graphics x="-519.670166015625" y="-674.7681274414062" z="0.0"/>
  </node>
  <node id="305967" label="zzz1189" cy:nodeId="2014">
    <graphics x="-437.82562255859375" y="-681.6296997070312" z="0.0"/>
  </node>
  <node id="305966" label="zzz1185" cy:nodeId="2015">
    <graphics x="-521.6964721679688" y="-642.7942504882812" z="0.0"/>
  </node>
  <node id="305965" label="zzz1184" cy:nodeId="2016">
    <graphics x="-502.1435546875" y="-697.2130126953125" z="0.0"/>
  </node>
  <node id="305964" label="zzz1182" cy:nodeId="2017">
    <graphics x="-0.044246673583984375" y="-439.40234375" z="0.0"/>
  </node>
  <node id="305963" label="zzz1180" cy:nodeId="2018">
    <graphics x="-556.0181884765625" y="-743.7933349609375" z="0.0"/>
  </node>
  <node id="305962" label="zzz1178" cy:nodeId="2019">
    <graphics x="-487.1317138671875" y="-670.03857421875" z="0.0"/>
  </node>
  <node id="305961" label="zzz1176" cy:nodeId="2020">
    <graphics x="-475.9128723144531" y="-704.8043823242188" z="0.0"/>
  </node>
  <node id="305960" label="zzz1175" cy:nodeId="2021">
    <graphics x="-546.0121459960938" y="-649.1300659179688" z="0.0"/>
  </node>
  <node id="305959" label="zzz1172" cy:nodeId="2022">
    <graphics x="-475.4740905761719" y="-677.3551025390625" z="0.0"/>
  </node>
  <node id="305958" label="zzz1171" cy:nodeId="2023">
    <graphics x="-521.90771484375" y="-659.08251953125" z="0.0"/>
  </node>
  <node id="305957" label="zzz1169" cy:nodeId="2024">
    <graphics x="-502.19232177734375" y="-753.9181518554688" z="0.0"/>
  </node>
  <node id="305956" label="zzz1168" cy:nodeId="2025">
    <graphics x="-469.1138916015625" y="-718.7787475585938" z="0.0"/>
  </node>
  <node id="305955" label="zzz1165" cy:nodeId="2026">
    <graphics x="-473.46746826171875" y="-719.32568359375" z="0.0"/>
  </node>
  <node id="305954" label="zzz1162" cy:nodeId="2027">
    <graphics x="-592.2555541992188" y="-727.1064453125" z="0.0"/>
  </node>
  <node id="305953" label="zzz1160" cy:nodeId="2028">
    <graphics x="-504.72528076171875" y="-648.3477172851562" z="0.0"/>
  </node>
  <node id="305952" label="zzz1159" cy:nodeId="2029">
    <graphics x="-499.2501220703125" y="-636.2283325195312" z="0.0"/>
  </node>
  <node id="305951" label="zzz1157" cy:nodeId="2030">
    <graphics x="-545.1954956054688" y="-666.1405029296875" z="0.0"/>
  </node>
  <node id="305950" label="zzz1156" cy:nodeId="2031">
    <graphics x="-530.9884033203125" y="-717.9808349609375" z="0.0"/>
  </node>
  <node id="305949" label="zzz1153" cy:nodeId="2032">
    <graphics x="-522.7356567382812" y="-722.7639770507812" z="0.0"/>
  </node>
  <node id="305948" label="zzz1152" cy:nodeId="2033">
    <graphics x="-489.38616943359375" y="-697.4887084960938" z="0.0"/>
  </node>
  <node id="305947" label="zzz1147" cy:nodeId="2034">
    <graphics x="-208.0588333142223" y="-288.74895451759926" z="0.0"/>
  </node>
  <node id="305946" label="zzz1146" cy:nodeId="2035">
    <graphics x="-84.93529510498047" y="-513.7158203125" z="0.0"/>
  </node>
  <node id="305945" label="zzz1144" cy:nodeId="2036">
    <graphics x="-481.5860595703125" y="-652.2068481445312" z="0.0"/>
  </node>
  <node id="305944" label="zzz1143" cy:nodeId="2037">
    <graphics x="30.762088775634766" y="-469.62109375" z="0.0"/>
  </node>
  <node id="305943" label="zzz1141" cy:nodeId="2038">
    <graphics x="-589.8645629882812" y="-689.572998046875" z="0.0"/>
  </node>
  <node id="305942" label="zzz1139" cy:nodeId="2039">
    <graphics x="-480.0278015136719" y="-641.91748046875" z="0.0"/>
  </node>
  <node id="305941" label="zzz1137" cy:nodeId="2040">
    <graphics x="-523.1525268554688" y="-689.05126953125" z="0.0"/>
  </node>
  <node id="305940" label="zzz1136" cy:nodeId="2041">
    <graphics x="-38.970947265625" y="-589.0225830078125" z="0.0"/>
  </node>
  <node id="305939" label="zzz1135" cy:nodeId="2042">
    <graphics x="-124.83721923828125" y="-389.30401611328125" z="0.0"/>
  </node>
  <node id="305938" label="zzz1133" cy:nodeId="2043">
    <graphics x="-550.5734252929688" y="-629.7910766601562" z="0.0"/>
  </node>
  <node id="305937" label="zzz1132" cy:nodeId="2044">
    <graphics x="-518.5949096679688" y="-667.4232177734375" z="0.0"/>
  </node>
  <node id="305936" label="zzz1130" cy:nodeId="2045">
    <graphics x="-622.001220703125" y="-668.892578125" z="0.0"/>
  </node>
  <node id="305935" label="zzz1129" cy:nodeId="2046">
    <graphics x="-241.04937744140625" y="-555.0440063476562" z="0.0"/>
  </node>
  <node id="305934" label="zzz1128" cy:nodeId="2047">
    <graphics x="-532.4371337890625" y="-639.0049438476562" z="0.0"/>
  </node>
  <node id="305933" label="zzz1123" cy:nodeId="2048">
    <graphics x="-580.12939453125" y="-663.6363525390625" z="0.0"/>
  </node>
  <node id="305932" label="zzz1122" cy:nodeId="2049">
    <graphics x="-556.9219360351562" y="-690.5424194335938" z="0.0"/>
  </node>
  <node id="305931" label="zzz1120" cy:nodeId="2050">
    <graphics x="-471.1070861816406" y="-675.8617553710938" z="0.0"/>
  </node>
  <node id="305930" label="zzz1119" cy:nodeId="2051">
    <graphics x="-470.9906311035156" y="-610.18505859375" z="0.0"/>
  </node>
  <node id="305929" label="zzz1118" cy:nodeId="2052">
    <graphics x="-496.9442138671875" y="-687.2566528320312" z="0.0"/>
  </node>
  <node id="305928" label="zzz1115" cy:nodeId="2053">
    <graphics x="-490.1505126953125" y="-646.1123657226562" z="0.0"/>
  </node>
  <node id="305927" label="zzz1113" cy:nodeId="2054">
    <graphics x="66.57099151611328" y="-479.4233703613281" z="0.0"/>
  </node>
  <node id="305926" label="zzz1112" cy:nodeId="2055">
    <graphics x="-509.9241943359375" y="-656.6317138671875" z="0.0"/>
  </node>
  <node id="305925" label="zzz1111" cy:nodeId="2056">
    <graphics x="75.99854278564453" y="-455.3592834472656" z="0.0"/>
  </node>
  <node id="305924" label="zzz1110" cy:nodeId="2057">
    <graphics x="-22.159236907958984" y="-454.63922119140625" z="0.0"/>
  </node>
  <node id="305923" label="zzz1109" cy:nodeId="2058">
    <graphics x="53.95325469970703" y="-453.4645080566406" z="0.0"/>
  </node>
  <node id="305922" label="zzz1106" cy:nodeId="2059">
    <graphics x="-535.7734985351562" y="-638.4063110351562" z="0.0"/>
  </node>
  <node id="305921" label="zzz1100" cy:nodeId="2060">
    <graphics x="-471.7624206542969" y="-687.17626953125" z="0.0"/>
  </node>
  <node id="305920" label="zzz1099" cy:nodeId="2061">
    <graphics x="-577.9945678710938" y="-688.299560546875" z="0.0"/>
  </node>
  <node id="305919" label="zzz1098" cy:nodeId="2062">
    <graphics x="-589.6407470703125" y="-704.4502563476562" z="0.0"/>
  </node>
  <node id="305918" label="zzz1070" cy:nodeId="2063">
    <graphics x="-426.250244140625" y="-702.9850463867188" z="0.0"/>
  </node>
  <node id="305917" label="zzz1069" cy:nodeId="2064">
    <graphics x="-534.2434692382812" y="-673.61474609375" z="0.0"/>
  </node>
  <node id="305916" label="zzz1068" cy:nodeId="2065">
    <graphics x="-439.65716552734375" y="-644.594970703125" z="0.0"/>
  </node>
  <node id="305915" label="zzz1067" cy:nodeId="2066">
    <graphics x="-529.8372192382812" y="-676.614013671875" z="0.0"/>
  </node>
  <node id="305914" label="zzz1065" cy:nodeId="2067">
    <graphics x="-92.89879608154297" y="-369.9029235839844" z="0.0"/>
  </node>
  <node id="305913" label="zzz1064" cy:nodeId="2068">
    <graphics x="-501.38555908203125" y="-630.819091796875" z="0.0"/>
  </node>
  <node id="305912" label="zzz1063" cy:nodeId="2069">
    <graphics x="-462.0881042480469" y="-750.7343139648438" z="0.0"/>
  </node>
  <node id="305911" label="zzz1062" cy:nodeId="2070">
    <graphics x="-476.0249328613281" y="-722.4271850585938" z="0.0"/>
  </node>
  <node id="305910" label="zzz1060" cy:nodeId="2071">
    <graphics x="-565.8938598632812" y="-695.794189453125" z="0.0"/>
  </node>
  <node id="305909" label="zzz1059" cy:nodeId="2072">
    <graphics x="-553.8758544921875" y="-659.7208251953125" z="0.0"/>
  </node>
  <node id="305908" label="zzz1058" cy:nodeId="2073">
    <graphics x="-526.09765625" y="-720.9893188476562" z="0.0"/>
  </node>
  <node id="305907" label="zzz1057" cy:nodeId="2074">
    <graphics x="-520.7044067382812" y="-759.0014038085938" z="0.0"/>
  </node>
  <node id="305906" label="zzz1056" cy:nodeId="2075">
    <graphics x="-497.8067626953125" y="-683.8109741210938" z="0.0"/>
  </node>
  <node id="305905" label="zzz1055" cy:nodeId="2076">
    <graphics x="-561.94140625" y="-678.4606323242188" z="0.0"/>
  </node>
  <node id="305904" label="zzz1054" cy:nodeId="2077">
    <graphics x="-529.6439819335938" y="-645.1290283203125" z="0.0"/>
  </node>
  <node id="305903" label="zzz1053" cy:nodeId="2078">
    <graphics x="-518.2836303710938" y="-607.3483276367188" z="0.0"/>
  </node>
  <node id="305902" label="zzz1052" cy:nodeId="2079">
    <graphics x="-579.2410278320312" y="-747.5714111328125" z="0.0"/>
  </node>
  <node id="305901" label="zzz1048" cy:nodeId="2080">
    <graphics x="-552.2273559570312" y="-659.8466186523438" z="0.0"/>
  </node>
  <node id="305900" label="zzz1044" cy:nodeId="2081">
    <graphics x="-466.67071533203125" y="-615.7584838867188" z="0.0"/>
  </node>
  <node id="305899" label="zzz1043" cy:nodeId="2082">
    <graphics x="-474.0830383300781" y="-652.6397705078125" z="0.0"/>
  </node>
  <node id="305898" label="zzz1041" cy:nodeId="2083">
    <graphics x="-598.2879638671875" y="-731.0508422851562" z="0.0"/>
  </node>
  <node id="305897" label="zzz1038" cy:nodeId="2084">
    <graphics x="-514.1141357421875" y="-690.9627075195312" z="0.0"/>
  </node>
  <node id="305896" label="zzz1034" cy:nodeId="2085">
    <graphics x="-483.8868408203125" y="-615.5443115234375" z="0.0"/>
  </node>
  <node id="305895" label="zzz1033" cy:nodeId="2086">
    <graphics x="-562.6420288085938" y="-719.326171875" z="0.0"/>
  </node>
  <node id="305894" label="zzz1030" cy:nodeId="2087">
    <graphics x="-581.433349609375" y="-759.88037109375" z="0.0"/>
  </node>
  <node id="305893" label="zzz1028" cy:nodeId="2088">
    <graphics x="-536.8433227539062" y="-714.763427734375" z="0.0"/>
  </node>
  <node id="305892" label="zzz1027" cy:nodeId="2089">
    <graphics x="-614.1533203125" y="-681.1317749023438" z="0.0"/>
  </node>
  <node id="305891" label="zzz1026" cy:nodeId="2090">
    <graphics x="-571.888916015625" y="-707.6475219726562" z="0.0"/>
  </node>
  <node id="305890" label="zzz1025" cy:nodeId="2091">
    <graphics x="-461.5180358886719" y="-678.15380859375" z="0.0"/>
  </node>
  <node id="305889" label="zzz1023" cy:nodeId="2092">
    <graphics x="-515.35546875" y="-760.0704345703125" z="0.0"/>
  </node>
  <node id="305888" label="zzz1022" cy:nodeId="2093">
    <graphics x="-509.21624755859375" y="-666.5909423828125" z="0.0"/>
  </node>
  <node id="305887" label="zzz1021" cy:nodeId="2094">
    <graphics x="-505.895751953125" y="-609.4451293945312" z="0.0"/>
  </node>
  <node id="305886" label="zzz1019" cy:nodeId="2095">
    <graphics x="-545.5108642578125" y="-703.6767578125" z="0.0"/>
  </node>
  <node id="305885" label="zzz1018" cy:nodeId="2096">
    <graphics x="-565.9259033203125" y="-717.3392333984375" z="0.0"/>
  </node>
  <node id="305884" label="zzz1017" cy:nodeId="2097">
    <graphics x="-533.1057739257812" y="-745.0386962890625" z="0.0"/>
  </node>
  <node id="305883" label="zzz1016" cy:nodeId="2098">
    <graphics x="-531.4283447265625" y="-669.4583129882812" z="0.0"/>
  </node>
  <node id="305882" label="zzz1015" cy:nodeId="2099">
    <graphics x="-504.2462158203125" y="-694.4822387695312" z="0.0"/>
  </node>
  <node id="305881" label="zzz1013" cy:nodeId="2100">
    <graphics x="-479.61920166015625" y="-700.9126586914062" z="0.0"/>
  </node>
  <node id="305880" label="zzz1012" cy:nodeId="2101">
    <graphics x="-503.768310546875" y="-669.7987670898438" z="0.0"/>
  </node>
  <node id="305879" label="zzz1011" cy:nodeId="2102">
    <graphics x="-494.8856201171875" y="-615.84521484375" z="0.0"/>
  </node>
  <node id="305878" label="zzz1010" cy:nodeId="2103">
    <graphics x="-517.1893310546875" y="-727.36865234375" z="0.0"/>
  </node>
  <node id="305877" label="zzz1009" cy:nodeId="2104">
    <graphics x="-513.3778686523438" y="-703.1041259765625" z="0.0"/>
  </node>
  <node id="305876" label="zzz1008" cy:nodeId="2105">
    <graphics x="-552.73974609375" y="-644.7183227539062" z="0.0"/>
  </node>
  <node id="305875" label="zzz1004" cy:nodeId="2106">
    <graphics x="-550.2105102539062" y="-669.257568359375" z="0.0"/>
  </node>
  <node id="305874" label="zzz1003" cy:nodeId="2107">
    <graphics x="-520.4308471679688" y="-727.6228637695312" z="0.0"/>
  </node>
  <node id="305873" label="zzz1002" cy:nodeId="2108">
    <graphics x="-518.123291015625" y="-724.704345703125" z="0.0"/>
  </node>
  <node id="305872" label="zzz1000" cy:nodeId="2109">
    <graphics x="-555.8402099609375" y="-731.2838745117188" z="0.0"/>
  </node>
</graph>
