# Supplementary material for: Discovery of several thousand highly diverse circular DNA viruses
Source: eLife journal article supplement (doi:10.7554/elife.51971), 2020-02-03
Supplement: fig2-data2 [file elife-51971-fig2-data2-v1.cys › CytoscapeSession-2019_08_02-17_43/views/305829-611629-all_my_seqs_genbank_ssDNA1_domains_CRESS_capsid_fasta+Full+Network%2D%2Dclustered.xgmml]

<?xml version="1.0" encoding="UTF-8" standalone="yes"?>
<graph id="611629" label="611629" cy:view="1" cy:networkId="305829" cy:visualStyle="Sample2" cy:rendererId="org.cytoscape.ding" cy:documentVersion="3.0" xmlns:dc="http://purl.org/dc/elements/1.1/" xmlns:xlink="http://www.w3.org/1999/xlink" xmlns:rdf="http://www.w3.org/1999/02/22-rdf-syntax-ns#" xmlns:cy="http://www.cytoscape.org" xmlns="http://www.cs.rpi.edu/XGMML">
  <graphics>
    <att name="NETWORK_EDGE_SELECTION" value="true" type="string" cy:type="String"/>
    <att name="NETWORK_WIDTH" value="1988.0" type="string" cy:type="String"/>
    <att name="NETWORK_TITLE" value="" type="string" cy:type="String"/>
    <att name="NETWORK_CENTER_X_LOCATION" value="1353.966036146949" type="string" cy:type="String"/>
    <att name="NETWORK_SCALE_FACTOR" value="0.28242953648100017" type="string" cy:type="String"/>
    <att name="NETWORK_HEIGHT" value="1043.0" type="string" cy:type="String"/>
    <att name="NETWORK_CENTER_Y_LOCATION" value="492.8662976769228" type="string" cy:type="String"/>
    <att name="NETWORK_DEPTH" value="0.0" type="string" cy:type="String"/>
    <att name="NETWORK_CENTER_Z_LOCATION" value="0.0" type="string" cy:type="String"/>
    <att name="NETWORK_NODE_SELECTION" value="true" type="string" cy:type="String"/>
    <att name="NETWORK_ANNOTATION_SELECTION" value="false" type="string" cy:type="String"/>
  </graphics>
  <node id="611631" label="zzzzzz9" cy:nodeId="72">
    <graphics x="3212.234270571902" y="-165.24102666452018" z="0.0"/>
  </node>
  <node id="611632" label="zzzzzz8" cy:nodeId="73">
    <graphics x="3336.4886879913356" y="-164.56109502389518" z="0.0"/>
  </node>
  <node id="611633" label="zzzzzz7" cy:nodeId="74">
    <graphics x="3276.1570153228786" y="-142.08026006295768" z="0.0"/>
  </node>
  <node id="611634" label="zzzzzz6" cy:nodeId="75">
    <graphics x="3277.0915551178005" y="-264.3029773481139" z="0.0"/>
  </node>
  <node id="611635" label="zzzzzz5" cy:nodeId="76">
    <graphics x="3321.7041802398708" y="-205.23516728952018" z="0.0"/>
  </node>
  <node id="611636" label="zzzzzz4" cy:nodeId="77">
    <graphics x="3358.931883334353" y="-125.51910283639518" z="0.0"/>
  </node>
  <node id="611637" label="zzzzzz3" cy:nodeId="78">
    <graphics x="3284.3776726715114" y="-77.12295415475455" z="0.0"/>
  </node>
  <node id="611638" label="zzzzzz2" cy:nodeId="79">
    <graphics x="2613.9669442169215" y="1017.9540111772767" z="0.0"/>
  </node>
  <node id="611639" label="zzzzzz1" cy:nodeId="80">
    <graphics x="3209.7615532867458" y="-129.85784795358268" z="0.0"/>
  </node>
  <node id="611640" label="zzzzzz0" cy:nodeId="81">
    <graphics x="3345.121836184695" y="-218.80547978952018" z="0.0"/>
  </node>
  <node id="611641" label="zzzzz99" cy:nodeId="82">
    <graphics x="512.120687960818" y="1124.4410717241517" z="0.0"/>
  </node>
  <node id="611642" label="zzzzz98" cy:nodeId="83">
    <graphics x="2656.907713412478" y="1297.1479732744447" z="0.0"/>
  </node>
  <node id="611643" label="zzzzz97" cy:nodeId="84">
    <graphics x="-758.1347937591527" y="652.4668209306947" z="0.0"/>
  </node>
  <node id="611644" label="zzzzz96" cy:nodeId="85">
    <graphics x="904.8013916015625" y="-97.22406005859375" z="0.0"/>
  </node>
  <node id="611645" label="zzzzz95" cy:nodeId="86">
    <graphics x="299.9690804473903" y="359.4673931352845" z="0.0"/>
  </node>
  <node id="611646" label="zzzzz94" cy:nodeId="87">
    <graphics x="2362.096701621249" y="739.5195476763001" z="0.0"/>
  </node>
  <node id="611647" label="zzzzz93" cy:nodeId="88">
    <graphics x="-557.4281325347874" y="-63.782454276824865" z="0.0"/>
  </node>
  <node id="611648" label="zzzzz92" cy:nodeId="89">
    <graphics x="746.5052056304958" y="465.1153275720826" z="0.0"/>
  </node>
  <node id="611649" label="zzzzz91" cy:nodeId="90">
    <graphics x="-982.7279753692601" y="305.24760553762826" z="0.0"/>
  </node>
  <node id="611650" label="zzzzz90" cy:nodeId="91">
    <graphics x="-175.70784139709212" y="-255.9998290784606" z="0.0"/>
  </node>
  <node id="611651" label="zzzzz89" cy:nodeId="92">
    <graphics x="1426.3921837799098" y="-105.32690312936393" z="0.0"/>
  </node>
  <node id="611652" label="zzzzz88" cy:nodeId="93">
    <graphics x="2556.907713412478" y="1297.1479732744447" z="0.0"/>
  </node>
  <node id="611653" label="zzzzz87" cy:nodeId="94">
    <graphics x="2456.907713412478" y="1297.1479732744447" z="0.0"/>
  </node>
  <node id="611654" label="zzzzz86" cy:nodeId="95">
    <graphics x="-853.3763213165257" y="1079.9869396440736" z="0.0"/>
  </node>
  <node id="611655" label="zzzzz85" cy:nodeId="96">
    <graphics x="2435.9843926422145" y="-62.07497289254752" z="0.0"/>
  </node>
  <node id="611656" label="zzzzz84" cy:nodeId="97">
    <graphics x="-770.4241728790257" y="1148.812257026886" z="0.0"/>
  </node>
  <node id="611657" label="zzzzz83" cy:nodeId="98">
    <graphics x="183.81130456848405" y="-230.8529956586608" z="0.0"/>
  </node>
  <node id="611658" label="zzzzz82" cy:nodeId="99">
    <graphics x="1354.5989708892848" y="-259.1735217817077" z="0.0"/>
  </node>
  <node id="611659" label="zzzzz81" cy:nodeId="100">
    <graphics x="165.42261743469498" y="-118.91892125680533" z="0.0"/>
  </node>
  <node id="611660" label="zzzzz80" cy:nodeId="101">
    <graphics x="2820.001848696902" y="1017.9540111772767" z="0.0"/>
  </node>
  <node id="611661" label="zzzzz79" cy:nodeId="102">
    <graphics x="2201.8971352569606" y="1017.9540111772767" z="0.0"/>
  </node>
  <node id="611662" label="zzzzz78" cy:nodeId="103">
    <graphics x="2356.907713412478" y="1297.1479732744447" z="0.0"/>
  </node>
  <node id="611663" label="zzzzz77" cy:nodeId="104">
    <graphics x="2224.2316498748805" y="328.08757135794076" z="0.0"/>
  </node>
  <node id="611664" label="zzzzz76" cy:nodeId="105">
    <graphics x="1405.969637393191" y="-185.90148809030143" z="0.0"/>
  </node>
  <node id="611665" label="zzzzz75" cy:nodeId="106">
    <graphics x="1430.729158877566" y="-143.66656377389518" z="0.0"/>
  </node>
  <node id="611666" label="zzzzz74" cy:nodeId="107">
    <graphics x="1402.9014611236598" y="-240.86797978952018" z="0.0"/>
  </node>
  <node id="611667" label="zzzzz73" cy:nodeId="108">
    <graphics x="-91.48322916106918" y="-202.71685102059928" z="0.0"/>
  </node>
  <node id="611668" label="zzzzz72" cy:nodeId="109">
    <graphics x="1386.5237755767848" y="-92.24859502389518" z="0.0"/>
  </node>
  <node id="611669" label="zzzzz71" cy:nodeId="110">
    <graphics x="1344.9279808990505" y="-225.56060674264518" z="0.0"/>
  </node>
  <node id="611670" label="zzzzz70" cy:nodeId="111">
    <graphics x="1491.4111809722926" y="-227.76617314889518" z="0.0"/>
  </node>
  <node id="611671" label="zzzzz69" cy:nodeId="112">
    <graphics x="985.753012179568" y="1079.9869396440736" z="0.0"/>
  </node>
  <node id="611672" label="zzzzz68" cy:nodeId="113">
    <graphics x="1394.892946719363" y="-163.92883184030143" z="0.0"/>
  </node>
  <node id="611673" label="zzzzz67" cy:nodeId="114">
    <graphics x="1384.1109337799098" y="-153.82849004342643" z="0.0"/>
  </node>
  <node id="611674" label="zzzzz66" cy:nodeId="115">
    <graphics x="1448.5623192779567" y="-275.4620349653014" z="0.0"/>
  </node>
  <node id="611675" label="zzzzz65" cy:nodeId="116">
    <graphics x="117.58310460968278" y="-192.88554265573111" z="0.0"/>
  </node>
  <node id="611676" label="zzzzz64" cy:nodeId="117">
    <graphics x="1486.520662783816" y="-161.99658086373893" z="0.0"/>
  </node>
  <node id="611677" label="zzzzz63" cy:nodeId="118">
    <graphics x="1447.9618859283473" y="-181.38195684030143" z="0.0"/>
  </node>
  <node id="611678" label="zzzzz62" cy:nodeId="119">
    <graphics x="1390.2950158111598" y="-113.70928838327018" z="0.0"/>
  </node>
  <node id="611679" label="zzzzz61" cy:nodeId="120">
    <graphics x="138.1582894317653" y="-141.365004325653" z="0.0"/>
  </node>
  <node id="611680" label="zzzzz60" cy:nodeId="121">
    <graphics x="1476.722567080691" y="-68.89514043405143" z="0.0"/>
  </node>
  <node id="611681" label="zzzzz59" cy:nodeId="122">
    <graphics x="1513.2504296295192" y="-129.64874150827018" z="0.0"/>
  </node>
  <node id="611682" label="zzzzz58" cy:nodeId="123">
    <graphics x="2816.984396456912" y="1125.6761791460267" z="0.0"/>
  </node>
  <node id="611683" label="zzzzz57" cy:nodeId="124">
    <graphics x="2716.984396456912" y="1017.9540111772767" z="0.0"/>
  </node>
  <node id="611684" label="zzzzz56" cy:nodeId="125">
    <graphics x="2713.9669442169215" y="1125.6761791460267" z="0.0"/>
  </node>
  <node id="611685" label="zzzzz55" cy:nodeId="126">
    <graphics x="1487.200563906863" y="-145.73583867623893" z="0.0"/>
  </node>
  <node id="611686" label="zzzzz54" cy:nodeId="127">
    <graphics x="286.3522591583278" y="446.15800592825326" z="0.0"/>
  </node>
  <node id="611687" label="zzzzz53" cy:nodeId="128">
    <graphics x="2703.0514130584743" y="331.04190370962533" z="0.0"/>
  </node>
  <node id="611688" label="zzzzz52" cy:nodeId="129">
    <graphics x="-542.7409529693577" y="-113.22131230905143" z="0.0"/>
  </node>
  <node id="611689" label="zzzzz51" cy:nodeId="130">
    <graphics x="1881.239584445193" y="340.10621759817514" z="0.0"/>
  </node>
  <node id="611690" label="zzzzz50" cy:nodeId="131">
    <graphics x="1274.7400650970485" y="1017.9540111772767" z="0.0"/>
  </node>
  <node id="611691" label="zzzzz49" cy:nodeId="132">
    <graphics x="-862.9155859954808" y="774.1619465105287" z="0.0"/>
  </node>
  <node id="611692" label="zzzzz48" cy:nodeId="133">
    <graphics x="889.257708071902" y="460.20486853048715" z="0.0"/>
  </node>
  <node id="611693" label="zzzzz47" cy:nodeId="134">
    <graphics x="-670.4241728790257" y="1017.9540111772767" z="0.0"/>
  </node>
  <node id="611694" label="zzzzz46" cy:nodeId="135">
    <graphics x="2256.907713412478" y="1297.1479732744447" z="0.0"/>
  </node>
  <node id="611695" label="zzzzz45" cy:nodeId="136">
    <graphics x="259.69904565735123" y="-154.38848760202018" z="0.0"/>
  </node>
  <node id="611696" label="zzzzz44" cy:nodeId="137">
    <graphics x="80.0761303894069" y="-135.53074529244986" z="0.0"/>
  </node>
  <node id="611697" label="zzzzz43" cy:nodeId="138">
    <graphics x="2367.223715304568" y="347.4032757036439" z="0.0"/>
  </node>
  <node id="611698" label="zzzzz42" cy:nodeId="139">
    <graphics x="1395.866293429568" y="363.97521564886483" z="0.0"/>
  </node>
  <node id="611699" label="zzzzz41" cy:nodeId="140">
    <graphics x="2724.978380679324" y="-234.71678044869986" z="0.0"/>
  </node>
  <node id="611700" label="zzzzz40" cy:nodeId="141">
    <graphics x="-161.1058592803929" y="1124.4410717241517" z="0.0"/>
  </node>
  <node id="611701" label="zzzzz39" cy:nodeId="142">
    <graphics x="3636.4670739166286" y="336.1303398363343" z="0.0"/>
  </node>
  <node id="611702" label="zzzzz38" cy:nodeId="143">
    <graphics x="242.29155969543717" y="-119.5392749555358" z="0.0"/>
  </node>
  <node id="611703" label="zzzzz37" cy:nodeId="144">
    <graphics x="134.50069284363053" y="-206.07739141061393" z="0.0"/>
  </node>
  <node id="611704" label="zzzzz36" cy:nodeId="145">
    <graphics x="213.3307747833278" y="-168.32946660592643" z="0.0"/>
  </node>
  <node id="611705" label="zzzzz35" cy:nodeId="146">
    <graphics x="249.9954018585231" y="-148.04575994088736" z="0.0"/>
  </node>
  <node id="611706" label="zzzzz34" cy:nodeId="147">
    <graphics x="223.74994897766373" y="-157.67455937936393" z="0.0"/>
  </node>
  <node id="611707" label="zzzzz33" cy:nodeId="148">
    <graphics x="1482.8525719635036" y="-152.35497930123893" z="0.0"/>
  </node>
  <node id="611708" label="zzzzz32" cy:nodeId="149">
    <graphics x="1417.4026207916286" y="-78.38055303170768" z="0.0"/>
  </node>
  <node id="611709" label="zzzzz31" cy:nodeId="150">
    <graphics x="1464.100008486941" y="-233.88146855905143" z="0.0"/>
  </node>
  <node id="611710" label="zzzzz30" cy:nodeId="151">
    <graphics x="264.42917871399186" y="-171.9337299115905" z="0.0"/>
  </node>
  <node id="611711" label="zzzzz29" cy:nodeId="152">
    <graphics x="1457.5032372467067" y="-125.07910039498893" z="0.0"/>
  </node>
  <node id="611712" label="zzzzz28" cy:nodeId="153">
    <graphics x="245.2777962677028" y="-254.66055181100455" z="0.0"/>
  </node>
  <node id="611713" label="zzzzz27" cy:nodeId="154">
    <graphics x="136.45587778015397" y="-163.52058293893424" z="0.0"/>
  </node>
  <node id="611714" label="zzzzz26" cy:nodeId="155">
    <graphics x="127.12630510254166" y="-126.81350591256705" z="0.0"/>
  </node>
  <node id="611715" label="zzzzz25" cy:nodeId="156">
    <graphics x="2690.4968976966884" y="684.2185680620423" z="0.0"/>
  </node>
  <node id="611716" label="zzzzz24" cy:nodeId="157">
    <graphics x="-133.20001745300033" y="-183.0346191175231" z="0.0"/>
  </node>
  <node id="611717" label="zzzzz23" cy:nodeId="158">
    <graphics x="-108.06097364501693" y="-117.0474593885192" z="0.0"/>
  </node>
  <node id="611718" label="zzzzz22" cy:nodeId="159">
    <graphics x="3273.3850121490505" y="-126.1529224164733" z="0.0"/>
  </node>
  <node id="611719" label="zzzzz21" cy:nodeId="160">
    <graphics x="3284.4492058746364" y="-230.75964238717643" z="0.0"/>
  </node>
  <node id="611720" label="zzzzz20" cy:nodeId="161">
    <graphics x="3336.8387703887965" y="-186.9604175336608" z="0.0"/>
  </node>
  <node id="611721" label="zzzzz19" cy:nodeId="162">
    <graphics x="3225.329226016238" y="-235.17996099069205" z="0.0"/>
  </node>
  <node id="611722" label="zzzzz18" cy:nodeId="163">
    <graphics x="3254.8193840972926" y="-214.42376592233268" z="0.0"/>
  </node>
  <node id="611723" label="zzzzz17" cy:nodeId="164">
    <graphics x="3436.210733889773" y="-261.4433582074889" z="0.0"/>
  </node>
  <node id="611724" label="zzzzz16" cy:nodeId="165">
    <graphics x="3305.680948733523" y="-130.23504521920768" z="0.0"/>
  </node>
  <node id="611725" label="zzzzz15" cy:nodeId="166">
    <graphics x="3190.8759636871364" y="-201.51580693795768" z="0.0"/>
  </node>
  <node id="611726" label="zzzzz14" cy:nodeId="167">
    <graphics x="2610.9494919769313" y="1125.6761791460267" z="0.0"/>
  </node>
  <node id="611727" label="zzzzz13" cy:nodeId="168">
    <graphics x="3355.1564240448024" y="-275.4620349653014" z="0.0"/>
  </node>
  <node id="611728" label="zzzzz12" cy:nodeId="169">
    <graphics x="3258.3272271148708" y="-130.1852710492858" z="0.0"/>
  </node>
  <node id="611729" label="zzzzz11" cy:nodeId="170">
    <graphics x="3263.69442987366" y="-192.19079473092643" z="0.0"/>
  </node>
  <node id="611730" label="zzzzz10" cy:nodeId="171">
    <graphics x="3302.2267556182887" y="-161.05923345162955" z="0.0"/>
  </node>
  <node id="611731" label="zzzz999" cy:nodeId="172">
    <graphics x="-945.5688109405492" y="-196.37903001382438" z="0.0"/>
  </node>
  <node id="611732" label="zzzz998" cy:nodeId="173">
    <graphics x="-1097.8498320587132" y="-129.0975253827819" z="0.0"/>
  </node>
  <node id="611733" label="zzzz996" cy:nodeId="174">
    <graphics x="-987.1154446609471" y="-101.77702977731315" z="0.0"/>
  </node>
  <node id="611734" label="zzzz994" cy:nodeId="175">
    <graphics x="533.4815392486598" y="-218.86740758493033" z="0.0"/>
  </node>
  <node id="611735" label="zzzz993" cy:nodeId="176">
    <graphics x="-1067.9393019683812" y="-105.07222631051627" z="0.0"/>
  </node>
  <node id="611736" label="zzzz992" cy:nodeId="177">
    <graphics x="-1037.3168883331273" y="-178.23869016244498" z="0.0"/>
  </node>
  <node id="611737" label="zzzz988" cy:nodeId="178">
    <graphics x="-1022.4572882659886" y="-182.52303578927604" z="0.0"/>
  </node>
  <node id="611738" label="zzzz987" cy:nodeId="179">
    <graphics x="-1112.0851759918187" y="-230.5565688855895" z="0.0"/>
  </node>
  <node id="611739" label="zzzz986" cy:nodeId="180">
    <graphics x="-1056.2724165924046" y="-214.69836309030143" z="0.0"/>
  </node>
  <node id="611740" label="zzzz985" cy:nodeId="181">
    <graphics x="-985.8450865753148" y="-154.9211337812194" z="0.0"/>
  </node>
  <node id="611741" label="zzzz984" cy:nodeId="182">
    <graphics x="-1072.217965603635" y="-245.41853215768424" z="0.0"/>
  </node>
  <node id="611742" label="zzzz983" cy:nodeId="183">
    <graphics x="-1003.3900027282689" y="-135.11008336618033" z="0.0"/>
  </node>
  <node id="611743" label="zzzz982" cy:nodeId="184">
    <graphics x="-948.9206557281468" y="-209.71767022683707" z="0.0"/>
  </node>
  <node id="611744" label="zzzz981" cy:nodeId="185">
    <graphics x="-1093.6769957550023" y="-87.18340947702018" z="0.0"/>
  </node>
  <node id="611745" label="zzzz978" cy:nodeId="186">
    <graphics x="-964.8116555221532" y="-98.80185582711783" z="0.0"/>
  </node>
  <node id="611746" label="zzzz977" cy:nodeId="187">
    <graphics x="-1091.8797469146702" y="-89.68271520211783" z="0.0"/>
  </node>
  <node id="611747" label="zzzz976" cy:nodeId="188">
    <graphics x="-996.6405081756566" y="-120.83534123971549" z="0.0"/>
  </node>
  <node id="611748" label="zzzz975" cy:nodeId="189">
    <graphics x="-1062.8760771759007" y="-199.33922269418326" z="0.0"/>
  </node>
  <node id="611749" label="zzzz974" cy:nodeId="190">
    <graphics x="-1033.618554592893" y="-65.56884648873893" z="0.0"/>
  </node>
  <node id="611750" label="zzzz973" cy:nodeId="191">
    <graphics x="-980.4815549858067" y="-92.05641820504752" z="0.0"/>
  </node>
  <node id="611751" label="zzzz972" cy:nodeId="192">
    <graphics x="-1039.6015868194554" y="-128.5872943647155" z="0.0"/>
  </node>
  <node id="611752" label="zzzz971" cy:nodeId="193">
    <graphics x="-985.2982640274022" y="-98.97334935739127" z="0.0"/>
  </node>
  <node id="611753" label="zzzz970" cy:nodeId="194">
    <graphics x="-1039.3550353057835" y="-125.44067266061393" z="0.0"/>
  </node>
  <node id="611754" label="zzzz969" cy:nodeId="195">
    <graphics x="-1011.8652205474827" y="-102.92321660592643" z="0.0"/>
  </node>
  <node id="611755" label="zzzz968" cy:nodeId="196">
    <graphics x="-1035.1979918487523" y="-161.53227498605338" z="0.0"/>
  </node>
  <node id="611756" label="zzzz967" cy:nodeId="197">
    <graphics x="-1046.3860411651585" y="-131.40322759225455" z="0.0"/>
  </node>
  <node id="611757" label="zzzz966" cy:nodeId="198">
    <graphics x="-1057.5246520050023" y="-249.04635884835807" z="0.0"/>
  </node>
  <node id="611758" label="zzzz965" cy:nodeId="199">
    <graphics x="-1097.4314742095921" y="-213.29511907174674" z="0.0"/>
  </node>
  <node id="611759" label="zzzz961" cy:nodeId="200">
    <graphics x="-1015.3228468902562" y="-139.83107259347526" z="0.0"/>
  </node>
  <node id="611760" label="zzzz960" cy:nodeId="201">
    <graphics x="-1085.5324873931859" y="-142.24208715036002" z="0.0"/>
  </node>
  <node id="611761" label="zzzz958" cy:nodeId="202">
    <graphics x="-1090.8709654815648" y="-109.24339177682486" z="0.0"/>
  </node>
  <node id="611762" label="zzzz957" cy:nodeId="203">
    <graphics x="-970.4278044708226" y="-140.17389180734244" z="0.0"/>
  </node>
  <node id="611763" label="zzzz956" cy:nodeId="204">
    <graphics x="-1012.7344298370335" y="-97.79938390328971" z="0.0"/>
  </node>
  <node id="611764" label="zzzz955" cy:nodeId="205">
    <graphics x="645.6577630035426" y="-72.99436833932486" z="0.0"/>
  </node>
  <node id="611765" label="zzzz953" cy:nodeId="206">
    <graphics x="-950.5885691650365" y="-133.3846576459655" z="0.0"/>
  </node>
  <node id="611766" label="zzzz950" cy:nodeId="207">
    <graphics x="-967.4787878997777" y="-161.76740911080924" z="0.0"/>
  </node>
  <node id="611767" label="zzzz948" cy:nodeId="208">
    <graphics x="-1092.5350966461156" y="-120.36387517526236" z="0.0"/>
  </node>
  <node id="611768" label="zzzz946" cy:nodeId="209">
    <graphics x="-1014.9557127960179" y="-80.0000903852233" z="0.0"/>
  </node>
  <node id="611769" label="zzzz944" cy:nodeId="210">
    <graphics x="-1036.9883360870335" y="-87.62321355416861" z="0.0"/>
  </node>
  <node id="611770" label="zzzz942" cy:nodeId="211">
    <graphics x="516.2997307769801" y="-169.00007512643424" z="0.0"/>
  </node>
  <node id="611771" label="zzzz941" cy:nodeId="212">
    <graphics x="570.6200280181911" y="-143.17344548776236" z="0.0"/>
  </node>
  <node id="611772" label="zzzz940" cy:nodeId="213">
    <graphics x="457.6995263092067" y="-129.77874639108268" z="0.0"/>
  </node>
  <node id="611773" label="zzzz936" cy:nodeId="214">
    <graphics x="-1066.8646407134984" y="-189.4105727918395" z="0.0"/>
  </node>
  <node id="611774" label="zzzz935" cy:nodeId="215">
    <graphics x="-1067.2280364044163" y="-122.33537938668815" z="0.0"/>
  </node>
  <node id="611775" label="zzzz934" cy:nodeId="216">
    <graphics x="-1052.4776244171117" y="-197.77615001275626" z="0.0"/>
  </node>
  <node id="611776" label="zzzz933" cy:nodeId="217">
    <graphics x="-1086.3298888214085" y="-184.2627732999572" z="0.0"/>
  </node>
  <node id="611777" label="zzzz932" cy:nodeId="218">
    <graphics x="-1123.9923872955296" y="-143.3148753888854" z="0.0"/>
  </node>
  <node id="611778" label="zzzz931" cy:nodeId="219">
    <graphics x="-1080.9418349273656" y="-154.49753072335807" z="0.0"/>
  </node>
  <node id="611779" label="zzzz924" cy:nodeId="220">
    <graphics x="-1042.1125197418187" y="-65.67469670846549" z="0.0"/>
  </node>
  <node id="611780" label="zzzz923" cy:nodeId="221">
    <graphics x="-1080.2968382842992" y="-107.51623418405143" z="0.0"/>
  </node>
  <node id="611781" label="zzzz922" cy:nodeId="222">
    <graphics x="83.07670688553117" y="675.5577785722962" z="0.0"/>
  </node>
  <node id="611782" label="zzzz921" cy:nodeId="223">
    <graphics x="-1063.876885891721" y="-141.16482427194205" z="0.0"/>
  </node>
  <node id="611783" label="zzzz914" cy:nodeId="224">
    <graphics x="-951.1268019683812" y="-96.75158574655143" z="0.0"/>
  </node>
  <node id="611784" label="zzzz913" cy:nodeId="225">
    <graphics x="-1125.8012404449437" y="-162.1291759259948" z="0.0"/>
  </node>
  <node id="611785" label="zzzz912" cy:nodeId="226">
    <graphics x="554.4641137115505" y="-228.1574619062194" z="0.0"/>
  </node>
  <node id="611786" label="zzzz910" cy:nodeId="227">
    <graphics x="-1012.4912428863499" y="-138.2546069867858" z="0.0"/>
  </node>
  <node id="611787" label="zzzz909" cy:nodeId="228">
    <graphics x="-187.43459081725814" y="749.2104274980775" z="0.0"/>
  </node>
  <node id="611788" label="zzzz905" cy:nodeId="229">
    <graphics x="-1045.234422207639" y="-197.41380169465629" z="0.0"/>
  </node>
  <node id="611789" label="zzzz903" cy:nodeId="230">
    <graphics x="-993.6816000946019" y="-167.29297521188346" z="0.0"/>
  </node>
  <node id="611790" label="zzzz902" cy:nodeId="231">
    <graphics x="-960.1903576858494" y="-147.6222827680358" z="0.0"/>
  </node>
  <node id="611791" label="zzzz889" cy:nodeId="232">
    <graphics x="-1084.8155989654515" y="-242.27787664010611" z="0.0"/>
  </node>
  <node id="611792" label="zzzz888" cy:nodeId="233">
    <graphics x="-1041.3772521026585" y="-144.3848788984069" z="0.0"/>
  </node>
  <node id="611793" label="zzzz887" cy:nodeId="234">
    <graphics x="-1070.9521117217992" y="-85.03867223336783" z="0.0"/>
  </node>
  <node id="611794" label="zzzz886" cy:nodeId="235">
    <graphics x="479.61780023498795" y="-206.99515416696158" z="0.0"/>
  </node>
  <node id="611795" label="zzzz885" cy:nodeId="236">
    <graphics x="556.510149478152" y="-169.77368810250846" z="0.0"/>
  </node>
  <node id="611796" label="zzzz883" cy:nodeId="237">
    <graphics x="-1002.2308783538792" y="-252.69339635446158" z="0.0"/>
  </node>
  <node id="611797" label="zzzz882" cy:nodeId="238">
    <graphics x="-1053.1054854400609" y="-209.2624309308776" z="0.0"/>
  </node>
  <node id="611798" label="zzzz881" cy:nodeId="239">
    <graphics x="457.4062829010036" y="-229.39250829293815" z="0.0"/>
  </node>
  <node id="611799" label="zzzz879" cy:nodeId="240">
    <graphics x="589.4056115142848" y="-89.30049016549674" z="0.0"/>
  </node>
  <node id="611800" label="zzzz877" cy:nodeId="241">
    <graphics x="-1029.711472988889" y="-189.94073846414176" z="0.0"/>
  </node>
  <node id="611801" label="zzzz875" cy:nodeId="242">
    <graphics x="-1095.1947188384984" y="-198.36129453256217" z="0.0"/>
  </node>
  <node id="611802" label="zzzz874" cy:nodeId="243">
    <graphics x="463.6303658477809" y="-165.10711553170768" z="0.0"/>
  </node>
  <node id="611803" label="zzzz873" cy:nodeId="244">
    <graphics x="434.82210016174577" y="-155.302016044403" z="0.0"/>
  </node>
  <node id="611804" label="zzzz870" cy:nodeId="245">
    <graphics x="-1039.453286648557" y="-100.58647801950065" z="0.0"/>
  </node>
  <node id="611805" label="zzzz869" cy:nodeId="246">
    <graphics x="-1060.6382079132054" y="-225.69160535409537" z="0.0"/>
  </node>
  <node id="611806" label="zzzz867" cy:nodeId="247">
    <graphics x="-1025.8091368682835" y="-114.32346990182486" z="0.0"/>
  </node>
  <node id="611807" label="zzzz865" cy:nodeId="248">
    <graphics x="-1066.2911391265843" y="-113.0426929242858" z="0.0"/>
  </node>
  <node id="611808" label="zzzz864" cy:nodeId="249">
    <graphics x="-1093.6817259796117" y="-228.75222089364615" z="0.0"/>
  </node>
  <node id="611809" label="zzzz862" cy:nodeId="250">
    <graphics x="-942.902017117307" y="-199.6761830098876" z="0.0"/>
  </node>
  <node id="611810" label="zzzz861" cy:nodeId="251">
    <graphics x="-1089.0813155181859" y="-195.00212838723746" z="0.0"/>
  </node>
  <node id="611811" label="zzzz860" cy:nodeId="252">
    <graphics x="-1079.707925320432" y="-120.58168675973502" z="0.0"/>
  </node>
  <node id="611812" label="zzzz859" cy:nodeId="253">
    <graphics x="585.0674920074489" y="-167.7189624555358" z="0.0"/>
  </node>
  <node id="611813" label="zzzz858" cy:nodeId="254">
    <graphics x="-1022.5926527984593" y="-221.09867169931022" z="0.0"/>
  </node>
  <node id="611814" label="zzzz857" cy:nodeId="255">
    <graphics x="-1051.1647963531468" y="-161.25136449411002" z="0.0"/>
  </node>
  <node id="611815" label="zzzz856" cy:nodeId="256">
    <graphics x="-1020.0400328643773" y="-219.23002698495475" z="0.0"/>
  </node>
  <node id="611816" label="zzzz855" cy:nodeId="257">
    <graphics x="-311.50635671691634" y="719.9230892412415" z="0.0"/>
  </node>
  <node id="611817" label="zzzz847" cy:nodeId="258">
    <graphics x="-989.6259045608494" y="-215.1325080640563" z="0.0"/>
  </node>
  <node id="611818" label="zzzz846" cy:nodeId="259">
    <graphics x="-1052.613831997678" y="-168.8026092298278" z="0.0"/>
  </node>
  <node id="611819" label="zzzz845" cy:nodeId="260">
    <graphics x="-1043.1533446319554" y="-247.53890492990104" z="0.0"/>
  </node>
  <node id="611820" label="zzzz844" cy:nodeId="261">
    <graphics x="529.2784905426051" y="-88.34911992623893" z="0.0"/>
  </node>
  <node id="611821" label="zzzz843" cy:nodeId="262">
    <graphics x="421.29683160705827" y="-202.93178441598502" z="0.0"/>
  </node>
  <node id="611822" label="zzzz841" cy:nodeId="263">
    <graphics x="-923.7750449188206" y="-150.44245793893424" z="0.0"/>
  </node>
  <node id="611823" label="zzzz840" cy:nodeId="264">
    <graphics x="-1034.3394789703343" y="-189.14030339791861" z="0.0"/>
  </node>
  <node id="611824" label="zzzz838" cy:nodeId="265">
    <graphics x="-1070.9626250274632" y="-129.0568530805358" z="0.0"/>
  </node>
  <node id="611825" label="zzzz837" cy:nodeId="266">
    <graphics x="-1033.76272726135" y="-163.73140981271354" z="0.0"/>
  </node>
  <node id="611826" label="zzzz836" cy:nodeId="267">
    <graphics x="-1039.711244107053" y="-180.94536473825065" z="0.0"/>
  </node>
  <node id="611827" label="zzzz835" cy:nodeId="268">
    <graphics x="560.3965172760036" y="-111.44290044381705" z="0.0"/>
  </node>
  <node id="611828" label="zzzz834" cy:nodeId="269">
    <graphics x="513.7650933258083" y="-129.26957585885611" z="0.0"/>
  </node>
  <node id="611829" label="zzzz833" cy:nodeId="270">
    <graphics x="593.5066704742458" y="-169.07343938424674" z="0.0"/>
  </node>
  <node id="611830" label="zzzz832" cy:nodeId="271">
    <graphics x="496.1692528717067" y="-123.44439580514518" z="0.0"/>
  </node>
  <node id="611831" label="zzzz831" cy:nodeId="272">
    <graphics x="545.7566552154567" y="-98.94416692330924" z="0.0"/>
  </node>
  <node id="611832" label="zzzz822" cy:nodeId="273">
    <graphics x="-1035.542787075803" y="-83.64754369332877" z="0.0"/>
  </node>
  <node id="611833" label="zzzz821" cy:nodeId="274">
    <graphics x="-1030.8164076812718" y="-230.4701125867614" z="0.0"/>
  </node>
  <node id="611834" label="zzzz820" cy:nodeId="275">
    <graphics x="511.10283136291764" y="-211.27056768014518" z="0.0"/>
  </node>
  <node id="611835" label="zzzz816" cy:nodeId="276">
    <graphics x="-1085.537286282346" y="-205.49666049554435" z="0.0"/>
  </node>
  <node id="611836" label="zzzz815" cy:nodeId="277">
    <graphics x="-1016.3890624053929" y="-202.69351270272819" z="0.0"/>
  </node>
  <node id="611837" label="zzzz814" cy:nodeId="278">
    <graphics x="-1004.2079062469456" y="-136.90362813546744" z="0.0"/>
  </node>
  <node id="611838" label="zzzz813" cy:nodeId="279">
    <graphics x="-971.5912845142338" y="-179.99316480233756" z="0.0"/>
  </node>
  <node id="611839" label="zzzz812" cy:nodeId="280">
    <graphics x="-986.6896138198827" y="-174.5212657697448" z="0.0"/>
  </node>
  <node id="611840" label="zzzz811" cy:nodeId="281">
    <graphics x="-1026.2359099395726" y="-232.0945613630065" z="0.0"/>
  </node>
  <node id="611841" label="zzzz810" cy:nodeId="282">
    <graphics x="-1112.1839766509984" y="-176.858111167694" z="0.0"/>
  </node>
  <node id="611842" label="zzzz809" cy:nodeId="283">
    <graphics x="-1072.491990567014" y="-190.6252181775817" z="0.0"/>
  </node>
  <node id="611843" label="zzzz808" cy:nodeId="284">
    <graphics x="-1022.5904746063206" y="-116.70831182077018" z="0.0"/>
  </node>
  <node id="611844" label="zzzz807" cy:nodeId="285">
    <graphics x="-1132.5473952301" y="-162.182875419403" z="0.0"/>
  </node>
  <node id="611845" label="zzzz806" cy:nodeId="286">
    <graphics x="-1015.043691159055" y="-212.0604398496398" z="0.0"/>
  </node>
  <node id="611846" label="zzzz805" cy:nodeId="287">
    <graphics x="-1011.1899275787327" y="-172.89518048837272" z="0.0"/>
  </node>
  <node id="611847" label="zzzz804" cy:nodeId="288">
    <graphics x="-1061.8512053497288" y="-116.10459783151236" z="0.0"/>
  </node>
  <node id="611848" label="zzzz803" cy:nodeId="289">
    <graphics x="-1002.4072089202855" y="-170.5947826154479" z="0.0"/>
  </node>
  <node id="611849" label="zzzz802" cy:nodeId="290">
    <graphics x="-1044.6853804595921" y="-251.24110677316276" z="0.0"/>
  </node>
  <node id="611850" label="zzzz798" cy:nodeId="291">
    <graphics x="-970.1542720802281" y="-153.79608037545768" z="0.0"/>
  </node>
  <node id="611851" label="zzzz797" cy:nodeId="292">
    <graphics x="-1069.3120894439671" y="-127.74955632760611" z="0.0"/>
  </node>
  <node id="611852" label="zzzz795" cy:nodeId="293">
    <graphics x="-988.3766303070042" y="-240.56159474923697" z="0.0"/>
  </node>
  <node id="611853" label="zzzz794" cy:nodeId="294">
    <graphics x="-958.0247874267552" y="-158.69277837350455" z="0.0"/>
  </node>
  <node id="611854" label="zzzz793" cy:nodeId="295">
    <graphics x="-1024.522363186643" y="-198.01065900399772" z="0.0"/>
  </node>
  <node id="611855" label="zzzz792" cy:nodeId="296">
    <graphics x="-1020.1146712310765" y="-188.85280206277457" z="0.0"/>
  </node>
  <node id="611856" label="zzzz791" cy:nodeId="297">
    <graphics x="-1068.2926344879124" y="-161.5807025678405" z="0.0"/>
  </node>
  <node id="611857" label="zzzz790" cy:nodeId="298">
    <graphics x="-1090.9144301422093" y="-146.27007939889518" z="0.0"/>
  </node>
  <node id="611858" label="zzzz789" cy:nodeId="299">
    <graphics x="-1105.5259108551" y="-141.44145467355338" z="0.0"/>
  </node>
  <node id="611859" label="zzzz787" cy:nodeId="300">
    <graphics x="526.2515282623317" y="-128.08518865182486" z="0.0"/>
  </node>
  <node id="611860" label="zzzz786" cy:nodeId="301">
    <graphics x="-1008.6418662078831" y="-106.42297246530143" z="0.0"/>
  </node>
  <node id="611861" label="zzzz785" cy:nodeId="302">
    <graphics x="-1051.2476820953343" y="-178.39993741586295" z="0.0"/>
  </node>
  <node id="611862" label="zzzz784" cy:nodeId="303">
    <graphics x="-977.3073048599217" y="-242.10771825387565" z="0.0"/>
  </node>
  <node id="611863" label="zzzz783" cy:nodeId="304">
    <graphics x="-965.3577952392552" y="-214.7272460706481" z="0.0"/>
  </node>
  <node id="611864" label="zzzz782" cy:nodeId="305">
    <graphics x="520.4324212066676" y="-106.92935063912955" z="0.0"/>
  </node>
  <node id="611865" label="zzzz781" cy:nodeId="306">
    <graphics x="532.8878960601833" y="-77.10964849069205" z="0.0"/>
  </node>
  <node id="611866" label="zzzz780" cy:nodeId="307">
    <graphics x="453.281992434695" y="-168.210219169403" z="0.0"/>
  </node>
  <node id="611867" label="zzzz779" cy:nodeId="308">
    <graphics x="497.05534601135514" y="-82.78135564401236" z="0.0"/>
  </node>
  <node id="611868" label="zzzz778" cy:nodeId="309">
    <graphics x="503.89396905823014" y="-249.3636615522155" z="0.0"/>
  </node>
  <node id="611869" label="zzzz777" cy:nodeId="310">
    <graphics x="640.7069878570583" y="-129.8844897992858" z="0.0"/>
  </node>
  <node id="611870" label="zzzz776" cy:nodeId="311">
    <graphics x="484.9486412994411" y="-180.70989110543815" z="0.0"/>
  </node>
  <node id="611871" label="zzzz775" cy:nodeId="312">
    <graphics x="-1090.04096365051" y="-184.88831021859733" z="0.0"/>
  </node>
  <node id="611872" label="zzzz774" cy:nodeId="313">
    <graphics x="-1054.7158217437718" y="-165.51401021554557" z="0.0"/>
  </node>
  <node id="611873" label="zzzz773" cy:nodeId="314">
    <graphics x="-974.745844126508" y="-156.67997243478385" z="0.0"/>
  </node>
  <node id="611874" label="zzzz772" cy:nodeId="315">
    <graphics x="-1065.6881880767796" y="-177.7429111249694" z="0.0"/>
  </node>
  <node id="611875" label="zzzz771" cy:nodeId="316">
    <graphics x="-1045.7232756622288" y="-245.93829228952018" z="0.0"/>
  </node>
  <node id="611876" label="zzzz770" cy:nodeId="317">
    <graphics x="-1091.6383528717015" y="-107.14807775094596" z="0.0"/>
  </node>
  <node id="611877" label="zzzz769" cy:nodeId="318">
    <graphics x="-1089.283395291135" y="-110.01443364694205" z="0.0"/>
  </node>
  <node id="611878" label="zzzz768" cy:nodeId="319">
    <graphics x="-1060.2072844512913" y="-239.90315129830924" z="0.0"/>
  </node>
  <node id="611879" label="zzzz767" cy:nodeId="320">
    <graphics x="-1051.4843459136937" y="-250.31302526071158" z="0.0"/>
  </node>
  <node id="611880" label="zzzz766" cy:nodeId="321">
    <graphics x="-1005.106378079221" y="-202.04152753427115" z="0.0"/>
  </node>
  <node id="611881" label="zzzz765" cy:nodeId="322">
    <graphics x="-1049.368081570432" y="-53.84527471139518" z="0.0"/>
  </node>
  <node id="611882" label="zzzz764" cy:nodeId="323">
    <graphics x="-1098.4437575347874" y="-148.55008580758658" z="0.0"/>
  </node>
  <node id="611883" label="zzzz763" cy:nodeId="324">
    <graphics x="-1097.733315945432" y="-87.78344609811393" z="0.0"/>
  </node>
  <node id="611884" label="zzzz762" cy:nodeId="325">
    <graphics x="-1032.4907813079808" y="-92.76783635690299" z="0.0"/>
  </node>
  <node id="611885" label="zzzz761" cy:nodeId="326">
    <graphics x="549.5854210845973" y="-212.38205602243033" z="0.0"/>
  </node>
  <node id="611886" label="zzzz760" cy:nodeId="327">
    <graphics x="464.99728631897233" y="-208.485365653778" z="0.0"/>
  </node>
  <node id="611887" label="zzzz757" cy:nodeId="328">
    <graphics x="-1116.052781582639" y="-106.40455510690299" z="0.0"/>
  </node>
  <node id="611888" label="zzzz756" cy:nodeId="329">
    <graphics x="-1063.6269316680882" y="-221.87980153634635" z="0.0"/>
  </node>
  <node id="611889" label="zzzz755" cy:nodeId="330">
    <graphics x="-1080.7963271148656" y="-173.521778846527" z="0.0"/>
  </node>
  <node id="611890" label="zzzz754" cy:nodeId="331">
    <graphics x="-1019.8691687591527" y="-62.8392017133483" z="0.0"/>
  </node>
  <node id="611891" label="zzzz753" cy:nodeId="332">
    <graphics x="-958.8478922851536" y="-143.13312032296744" z="0.0"/>
  </node>
  <node id="611892" label="zzzz752" cy:nodeId="333">
    <graphics x="-1126.7589583404515" y="-159.20514943673697" z="0.0"/>
  </node>
  <node id="611893" label="zzzz751" cy:nodeId="334">
    <graphics x="-1082.5287642486546" y="-172.80215909555045" z="0.0"/>
  </node>
  <node id="611894" label="zzzz750" cy:nodeId="335">
    <graphics x="-1055.3535017974827" y="-62.378645683074865" z="0.0"/>
  </node>
  <node id="611895" label="zzzz740" cy:nodeId="336">
    <graphics x="-978.752374172971" y="-158.79575994088736" z="0.0"/>
  </node>
  <node id="611896" label="zzzz739" cy:nodeId="337">
    <graphics x="-974.4966807373021" y="-232.36424520089713" z="0.0"/>
  </node>
  <node id="611897" label="zzzz738" cy:nodeId="338">
    <graphics x="-1044.0890975006077" y="-182.48364141061393" z="0.0"/>
  </node>
  <node id="611898" label="zzzz737" cy:nodeId="339">
    <graphics x="-1011.6651320465062" y="-125.72025182321158" z="0.0"/>
  </node>
  <node id="611899" label="zzzz732" cy:nodeId="340">
    <graphics x="-971.3197283752415" y="-163.8187930829772" z="0.0"/>
  </node>
  <node id="611900" label="zzzz731" cy:nodeId="341">
    <graphics x="-1061.1356673248265" y="-163.63277318551627" z="0.0"/>
  </node>
  <node id="611901" label="zzzz730" cy:nodeId="342">
    <graphics x="-1076.382714749143" y="-175.01282956674186" z="0.0"/>
  </node>
  <node id="611902" label="zzzz725" cy:nodeId="343">
    <graphics x="527.7294793121364" y="-218.75498845651236" z="0.0"/>
  </node>
  <node id="611903" label="zzzz722" cy:nodeId="344">
    <graphics x="-1105.9281630523656" y="-166.7999179609069" z="0.0"/>
  </node>
  <node id="611904" label="zzzz721" cy:nodeId="345">
    <graphics x="-1036.1968703277562" y="-207.62214162423697" z="0.0"/>
  </node>
  <node id="611905" label="zzzz720" cy:nodeId="346">
    <graphics x="-1109.3431563384984" y="-161.57305791452018" z="0.0"/>
  </node>
  <node id="611906" label="zzzz717" cy:nodeId="347">
    <graphics x="437.8133187286403" y="-139.30239751412955" z="0.0"/>
  </node>
  <node id="611907" label="zzzz716" cy:nodeId="348">
    <graphics x="-1089.6280455596898" y="-229.73554875924674" z="0.0"/>
  </node>
  <node id="611908" label="zzzz715" cy:nodeId="349">
    <graphics x="572.3999047271755" y="-122.39404180123893" z="0.0"/>
  </node>
  <node id="611909" label="zzzz711" cy:nodeId="350">
    <graphics x="-1064.08011007385" y="-156.30927922799674" z="0.0"/>
  </node>
  <node id="611910" label="zzzz710" cy:nodeId="351">
    <graphics x="-991.8341116912816" y="-127.18225743844596" z="0.0"/>
  </node>
  <node id="611911" label="zzzz709" cy:nodeId="352">
    <graphics x="-1022.9323134429906" y="-237.6930072553405" z="0.0"/>
  </node>
  <node id="611912" label="zzzz708" cy:nodeId="353">
    <graphics x="-1006.6433959014867" y="-97.11747624948111" z="0.0"/>
  </node>
  <node id="611913" label="zzzz707" cy:nodeId="354">
    <graphics x="-1030.9825606353734" y="-217.22997548654166" z="0.0"/>
  </node>
  <node id="611914" label="zzzz706" cy:nodeId="355">
    <graphics x="-1044.4117598541234" y="-154.57446172311393" z="0.0"/>
  </node>
  <node id="611915" label="zzzz705" cy:nodeId="356">
    <graphics x="-997.152089596555" y="-172.82103993966666" z="0.0"/>
  </node>
  <node id="611916" label="zzzz704" cy:nodeId="357">
    <graphics x="-964.6997942932103" y="-121.87439611032096" z="0.0"/>
  </node>
  <node id="611917" label="zzzz703" cy:nodeId="358">
    <graphics x="-960.1935505874608" y="-161.38313939645377" z="0.0"/>
  </node>
  <node id="611918" label="zzzz702" cy:nodeId="359">
    <graphics x="-953.7525210388158" y="-193.05969693734733" z="0.0"/>
  </node>
  <node id="611919" label="zzzz699" cy:nodeId="360">
    <graphics x="474.0805077545192" y="-142.89965703561393" z="0.0"/>
  </node>
  <node id="611920" label="zzzz698" cy:nodeId="361">
    <graphics x="500.22432184143327" y="-135.8292377240905" z="0.0"/>
  </node>
  <node id="611921" label="zzzz697" cy:nodeId="362">
    <graphics x="533.4257836334255" y="-68.01135137155143" z="0.0"/>
  </node>
  <node id="611922" label="zzzz696" cy:nodeId="363">
    <graphics x="407.54575586242936" y="-154.91177251412955" z="0.0"/>
  </node>
  <node id="611923" label="zzzz695" cy:nodeId="364">
    <graphics x="570.3432641021755" y="-201.47587468698111" z="0.0"/>
  </node>
  <node id="611924" label="zzzz694" cy:nodeId="365">
    <graphics x="-1066.6076674468968" y="-111.93371465280143" z="0.0"/>
  </node>
  <node id="611925" label="zzzz692" cy:nodeId="366">
    <graphics x="-940.6178107269261" y="-206.49682834222403" z="0.0"/>
  </node>
  <node id="611926" label="zzzz691" cy:nodeId="367">
    <graphics x="-1030.9809355743382" y="-249.299574638153" z="0.0"/>
  </node>
  <node id="611927" label="zzzz689" cy:nodeId="368">
    <graphics x="-1088.4689726837132" y="-133.49507787301627" z="0.0"/>
  </node>
  <node id="611928" label="zzzz686" cy:nodeId="369">
    <graphics x="-1022.3963561065648" y="-106.54298284127799" z="0.0"/>
  </node>
  <node id="611929" label="zzzz685" cy:nodeId="370">
    <graphics x="-1138.4362044342015" y="-137.0368678815612" z="0.0"/>
  </node>
  <node id="611930" label="zzzz684" cy:nodeId="371">
    <graphics x="-929.9915404327367" y="-188.20368363931266" z="0.0"/>
  </node>
  <node id="611931" label="zzzz683" cy:nodeId="372">
    <graphics x="-995.0609698303197" y="-108.2094409711608" z="0.0"/>
  </node>
  <node id="611932" label="zzzz682" cy:nodeId="373">
    <graphics x="-1067.2987837799046" y="-197.27252128198234" z="0.0"/>
  </node>
  <node id="611933" label="zzzz680" cy:nodeId="374">
    <graphics x="-1049.436715603635" y="-115.12266423776236" z="0.0"/>
  </node>
  <node id="611934" label="zzzz672" cy:nodeId="375">
    <graphics x="-966.7511096008275" y="-135.81387593820182" z="0.0"/>
  </node>
  <node id="611935" label="zzzz671" cy:nodeId="376">
    <graphics x="-1063.9616255767796" y="-83.46613195016471" z="0.0"/>
  </node>
  <node id="611936" label="zzzz670" cy:nodeId="377">
    <graphics x="-1030.0341048248265" y="-152.36332967355338" z="0.0"/>
  </node>
  <node id="611937" label="zzzz669" cy:nodeId="378">
    <graphics x="-978.3957495696995" y="-218.15184285714713" z="0.0"/>
  </node>
  <node id="611938" label="zzzz668" cy:nodeId="379">
    <graphics x="-1042.0233016021702" y="-59.43926885202018" z="0.0"/>
  </node>
  <node id="611939" label="zzzz667" cy:nodeId="380">
    <graphics x="-1040.089402676389" y="-210.70571019723502" z="0.0"/>
  </node>
  <node id="611940" label="zzzz666" cy:nodeId="381">
    <graphics x="-962.0735669143651" y="-106.60697057321158" z="0.0"/>
  </node>
  <node id="611941" label="zzzz665" cy:nodeId="382">
    <graphics x="-1056.6395125396702" y="-82.17122533395377" z="0.0"/>
  </node>
  <node id="611942" label="zzzz664" cy:nodeId="383">
    <graphics x="-1060.3803954132054" y="-195.10485770776359" z="0.0"/>
  </node>
  <node id="611943" label="zzzz663" cy:nodeId="384">
    <graphics x="-956.1348166473363" y="-147.16299703195182" z="0.0"/>
  </node>
  <node id="611944" label="zzzz662" cy:nodeId="385">
    <graphics x="-1078.439355374143" y="-157.53410222604361" z="0.0"/>
  </node>
  <node id="611945" label="zzzz661" cy:nodeId="386">
    <graphics x="-990.1892695434544" y="-123.58820226266471" z="0.0"/>
  </node>
  <node id="611946" label="zzzz660" cy:nodeId="387">
    <graphics x="-1000.6717429168675" y="-70.3034351117858" z="0.0"/>
  </node>
  <node id="611947" label="zzzz659" cy:nodeId="388">
    <graphics x="-1058.4247450836156" y="-150.90013005807486" z="0.0"/>
  </node>
  <node id="611948" label="zzzz658" cy:nodeId="389">
    <graphics x="-1015.1708273895238" y="-228.2101505048522" z="0.0"/>
  </node>
  <node id="611949" label="zzzz657" cy:nodeId="390">
    <graphics x="-1021.0966734893773" y="-129.03391149118033" z="0.0"/>
  </node>
  <node id="611950" label="zzzz656" cy:nodeId="391">
    <graphics x="-1103.7072768218968" y="-145.51196935250846" z="0.0"/>
  </node>
  <node id="611951" label="zzzz655" cy:nodeId="392">
    <graphics x="-1079.9979109771702" y="-233.22292211129752" z="0.0"/>
  </node>
  <node id="611952" label="zzzz653" cy:nodeId="393">
    <graphics x="-989.5283827789281" y="-109.48586919381705" z="0.0"/>
  </node>
  <node id="611953" label="zzzz652" cy:nodeId="394">
    <graphics x="-982.5821824081395" y="-219.19916799142447" z="0.0"/>
  </node>
  <node id="611954" label="zzzz651" cy:nodeId="395">
    <graphics x="512.6045250885036" y="-193.90018346383658" z="0.0"/>
  </node>
  <node id="611955" label="zzzz650" cy:nodeId="396">
    <graphics x="502.8682732574489" y="-242.59119298532096" z="0.0"/>
  </node>
  <node id="611956" label="zzzz649" cy:nodeId="397">
    <graphics x="532.2091393463161" y="-194.9544818647155" z="0.0"/>
  </node>
  <node id="611957" label="zzzz647" cy:nodeId="398">
    <graphics x="-979.1360621459935" y="-134.3847568280944" z="0.0"/>
  </node>
  <node id="611958" label="zzzz644" cy:nodeId="399">
    <graphics x="-1051.4495482452367" y="-145.7572925336608" z="0.0"/>
  </node>
  <node id="611959" label="zzzz642" cy:nodeId="400">
    <graphics x="-1107.666291714475" y="-222.5638625867614" z="0.0"/>
  </node>
  <node id="611960" label="zzzz640" cy:nodeId="401">
    <graphics x="-1022.0124602325413" y="-167.966078544403" z="0.0"/>
  </node>
  <node id="611961" label="zzzz638" cy:nodeId="402">
    <graphics x="494.08093500061295" y="-106.43676641061393" z="0.0"/>
  </node>
  <node id="611962" label="zzzz636" cy:nodeId="403">
    <graphics x="-989.4736475952122" y="-114.6216724164733" z="0.0"/>
  </node>
  <node id="611963" label="zzzz632" cy:nodeId="404">
    <graphics x="-1078.063622952268" y="-160.8836467511901" z="0.0"/>
  </node>
  <node id="611964" label="zzzz631" cy:nodeId="405">
    <graphics x="-1043.3418059356663" y="-207.48289372994986" z="0.0"/>
  </node>
  <node id="611965" label="zzzz630" cy:nodeId="406">
    <graphics x="-1007.4575591094945" y="-88.87711217477408" z="0.0"/>
  </node>
  <node id="611966" label="zzzz628" cy:nodeId="407">
    <graphics x="-1043.8346571929906" y="-86.55644109323111" z="0.0"/>
  </node>
  <node id="611967" label="zzzz627" cy:nodeId="408">
    <graphics x="-1056.2875533111546" y="-228.61855199411002" z="0.0"/>
  </node>
  <node id="611968" label="zzzz626" cy:nodeId="409">
    <graphics x="-1095.7184844024632" y="-210.41071584298697" z="0.0"/>
  </node>
  <node id="611969" label="zzzz625" cy:nodeId="410">
    <graphics x="-1002.838706494138" y="-231.7852695234069" z="0.0"/>
  </node>
  <node id="611970" label="zzzz624" cy:nodeId="411">
    <graphics x="-1017.5187354095433" y="-191.1066577680358" z="0.0"/>
  </node>
  <node id="611971" label="zzzz623" cy:nodeId="412">
    <graphics x="-1092.3556914337132" y="-181.25934865548697" z="0.0"/>
  </node>
  <node id="611972" label="zzzz622" cy:nodeId="413">
    <graphics x="-1010.199094296262" y="-227.49755170419303" z="0.0"/>
  </node>
  <node id="611973" label="zzzz620" cy:nodeId="414">
    <graphics x="-939.5634818084691" y="-180.739516044403" z="0.0"/>
  </node>
  <node id="611974" label="zzzz619" cy:nodeId="415">
    <graphics x="-1009.2388663299535" y="-157.4325969465026" z="0.0"/>
  </node>
  <node id="611975" label="zzzz618" cy:nodeId="416">
    <graphics x="478.3732018463161" y="-193.8708408124694" z="0.0"/>
  </node>
  <node id="611976" label="zzzz613" cy:nodeId="417">
    <graphics x="-993.7944502838109" y="-186.4053228147277" z="0.0"/>
  </node>
  <node id="611977" label="zzzz612" cy:nodeId="418">
    <graphics x="-1024.491746426389" y="-112.93813207223502" z="0.0"/>
  </node>
  <node id="611978" label="zzzz611" cy:nodeId="419">
    <graphics x="-1123.0990767486546" y="-181.94863011911002" z="0.0"/>
  </node>
  <node id="611979" label="zzzz610" cy:nodeId="420">
    <graphics x="-955.3659605987523" y="-182.81076886727897" z="0.0"/>
  </node>
  <node id="611980" label="zzzz609" cy:nodeId="421">
    <graphics x="-980.0221362121556" y="-98.93168523385611" z="0.0"/>
  </node>
  <node id="611981" label="zzzz608" cy:nodeId="422">
    <graphics x="-945.3322596557591" y="-184.99972035958854" z="0.0"/>
  </node>
  <node id="611982" label="zzzz607" cy:nodeId="423">
    <graphics x="-963.7928528793309" y="-167.08769490792838" z="0.0"/>
  </node>
  <node id="611983" label="zzzz606" cy:nodeId="424">
    <graphics x="-980.6848955162022" y="-199.02554061486808" z="0.0"/>
  </node>
  <node id="611984" label="zzzz605" cy:nodeId="425">
    <graphics x="-989.8303809173558" y="-157.84682347848502" z="0.0"/>
  </node>
  <node id="611985" label="zzzz604" cy:nodeId="426">
    <graphics x="-1027.3411726959202" y="-117.7575366742858" z="0.0"/>
  </node>
  <node id="611986" label="zzzz603" cy:nodeId="427">
    <graphics x="-984.775079251096" y="-242.57589986398307" z="0.0"/>
  </node>
  <node id="611987" label="zzzz602" cy:nodeId="428">
    <graphics x="-959.7834877975438" y="-156.88992574288932" z="0.0"/>
  </node>
  <node id="611988" label="zzzz601" cy:nodeId="429">
    <graphics x="-1055.588555813596" y="-90.92262151315299" z="0.0"/>
  </node>
  <node id="611989" label="zzzz600" cy:nodeId="430">
    <graphics x="-1113.5380568511937" y="-117.76733281686393" z="0.0"/>
  </node>
  <node id="611990" label="zzzz599" cy:nodeId="431">
    <graphics x="-1087.0299925811742" y="-125.58513524606315" z="0.0"/>
  </node>
  <node id="611991" label="zzzz598" cy:nodeId="432">
    <graphics x="-1078.923257351682" y="-222.9946964032897" z="0.0"/>
  </node>
  <node id="611992" label="zzzz597" cy:nodeId="433">
    <graphics x="-935.0922484405492" y="-141.40819814279166" z="0.0"/>
  </node>
  <node id="611993" label="zzzz596" cy:nodeId="434">
    <graphics x="-1009.0903944976781" y="-98.9223315961608" z="0.0"/>
  </node>
  <node id="611994" label="zzzz595" cy:nodeId="435">
    <graphics x="-1082.8398985870335" y="-124.53625371530143" z="0.0"/>
  </node>
  <node id="611995" label="zzzz594" cy:nodeId="436">
    <graphics x="-1007.278367520139" y="-178.18694379403678" z="0.0"/>
  </node>
  <node id="611996" label="zzzz593" cy:nodeId="437">
    <graphics x="-1011.7032752044652" y="-245.25590398385611" z="0.0"/>
  </node>
  <node id="611997" label="zzzz592" cy:nodeId="438">
    <graphics x="537.639299868777" y="-194.28411748483268" z="0.0"/>
  </node>
  <node id="611998" label="zzzz591" cy:nodeId="439">
    <graphics x="-1061.3294692047093" y="-122.73203923776236" z="0.0"/>
  </node>
  <node id="611999" label="zzzz590" cy:nodeId="440">
    <graphics x="-996.9233450897191" y="-190.36120488717643" z="0.0"/>
  </node>
  <node id="612000" label="zzzz589" cy:nodeId="441">
    <graphics x="-947.3073496826146" y="-185.0821674115905" z="0.0"/>
  </node>
  <node id="612001" label="zzzz588" cy:nodeId="442">
    <graphics x="-987.9508690841649" y="-213.7887170560607" z="0.0"/>
  </node>
  <node id="612002" label="zzzz586" cy:nodeId="443">
    <graphics x="-1069.0887541778538" y="-158.90769078805533" z="0.0"/>
  </node>
  <node id="612003" label="zzzz585" cy:nodeId="444">
    <graphics x="-1117.5767378814671" y="-149.53949239327994" z="0.0"/>
  </node>
  <node id="612004" label="zzzz584" cy:nodeId="445">
    <graphics x="-1038.9888014801" y="-249.38103368356315" z="0.0"/>
  </node>
  <node id="612005" label="zzzz583" cy:nodeId="446">
    <graphics x="-1063.7159590728734" y="-229.27313497140494" z="0.0"/>
  </node>
  <node id="612006" label="zzzz582" cy:nodeId="447">
    <graphics x="-1062.661767483518" y="-133.16927220895377" z="0.0"/>
  </node>
  <node id="612007" label="zzzz581" cy:nodeId="448">
    <graphics x="-1089.2699751861546" y="-185.07841661050406" z="0.0"/>
  </node>
  <node id="612008" label="zzzz575" cy:nodeId="449">
    <graphics x="-1074.1564726837132" y="-140.9805362470397" z="0.0"/>
  </node>
  <node id="612009" label="zzzz574" cy:nodeId="450">
    <graphics x="-1089.5521178253148" y="-85.88404729440299" z="0.0"/>
  </node>
  <node id="612010" label="zzzz569" cy:nodeId="451">
    <graphics x="-1083.7482848175023" y="-204.01406838967887" z="0.0"/>
  </node>
  <node id="612011" label="zzzz568" cy:nodeId="452">
    <graphics x="-1074.656182766721" y="-191.0821731336364" z="0.0"/>
  </node>
  <node id="612012" label="zzzz567" cy:nodeId="453">
    <graphics x="-1103.6679091461156" y="-192.99082353189078" z="0.0"/>
  </node>
  <node id="612013" label="zzzz566" cy:nodeId="454">
    <graphics x="-974.3570475585911" y="-118.25270726754752" z="0.0"/>
  </node>
  <node id="612014" label="zzzz565" cy:nodeId="455">
    <graphics x="-1031.2171797759984" y="-170.21487691476432" z="0.0"/>
  </node>
  <node id="612015" label="zzzz557" cy:nodeId="456">
    <graphics x="-1009.5853285797093" y="-177.64450337960807" z="0.0"/>
  </node>
  <node id="612016" label="zzzz556" cy:nodeId="457">
    <graphics x="-989.4316191680882" y="-238.33235814645377" z="0.0"/>
  </node>
  <node id="612017" label="zzzz555" cy:nodeId="458">
    <graphics x="-1090.9705977447484" y="-153.96341588571158" z="0.0"/>
  </node>
  <node id="612018" label="zzzz553" cy:nodeId="459">
    <graphics x="-963.3261895187352" y="-142.3982951886901" z="0.0"/>
  </node>
  <node id="612019" label="zzzz551" cy:nodeId="460">
    <graphics x="-1066.7760176666234" y="-131.92751195504752" z="0.0"/>
  </node>
  <node id="612020" label="zzzz549" cy:nodeId="461">
    <graphics x="-965.5958018310521" y="-82.90334966256705" z="0.0"/>
  </node>
  <node id="612021" label="zzzz548" cy:nodeId="462">
    <graphics x="-1115.9208540924046" y="-223.560072685028" z="0.0"/>
  </node>
  <node id="612022" label="zzzz544" cy:nodeId="463">
    <graphics x="-1099.729066372678" y="-117.51438024118033" z="0.0"/>
  </node>
  <node id="612023" label="zzzz543" cy:nodeId="464">
    <graphics x="438.42749261780045" y="-230.32680394723502" z="0.0"/>
  </node>
  <node id="612024" label="zzzz542" cy:nodeId="465">
    <graphics x="-909.0143294342015" y="-163.65638997628776" z="0.0"/>
  </node>
  <node id="612025" label="zzzz541" cy:nodeId="466">
    <graphics x="-1092.7188277252171" y="-77.31492497994986" z="0.0"/>
  </node>
  <node id="612026" label="zzzz540" cy:nodeId="467">
    <graphics x="-1054.2530837066624" y="-100.55427434518424" z="0.0"/>
  </node>
  <node id="612027" label="zzzz539" cy:nodeId="468">
    <graphics x="-988.2301898010228" y="-125.09330632760611" z="0.0"/>
  </node>
  <node id="612028" label="zzzz538" cy:nodeId="469">
    <graphics x="-1112.4249587066624" y="-192.9648611791381" z="0.0"/>
  </node>
  <node id="612029" label="zzzz537" cy:nodeId="470">
    <graphics x="-981.535525799558" y="-190.20146825387565" z="0.0"/>
  </node>
  <node id="612030" label="zzzz536" cy:nodeId="471">
    <graphics x="-1128.0104537017796" y="-131.63532903268424" z="0.0"/>
  </node>
  <node id="612031" label="zzzz533" cy:nodeId="472">
    <graphics x="-999.7526526458714" y="-171.66960027291861" z="0.0"/>
  </node>
  <node id="612032" label="zzzz532" cy:nodeId="473">
    <graphics x="-1083.9924407012913" y="-221.82960584237662" z="0.0"/>
  </node>
  <node id="612033" label="zzzz531" cy:nodeId="474">
    <graphics x="-1037.9745802886937" y="-61.821333671356115" z="0.0"/>
  </node>
  <node id="612034" label="zzzz530" cy:nodeId="475">
    <graphics x="-1085.6812758453343" y="-163.17790105416861" z="0.0"/>
  </node>
  <node id="612035" label="zzzz529" cy:nodeId="476">
    <graphics x="-1040.7906432159398" y="-255.61242559030143" z="0.0"/>
  </node>
  <node id="612036" label="zzzz528" cy:nodeId="477">
    <graphics x="-1021.4354033477757" y="-120.85730626657096" z="0.0"/>
  </node>
  <node id="612037" label="zzzz527" cy:nodeId="478">
    <graphics x="-1032.1877303131077" y="-77.25774266793815" z="0.0"/>
  </node>
  <node id="612038" label="zzzz526" cy:nodeId="479">
    <graphics x="-990.6677107818577" y="-218.9859645612487" z="0.0"/>
  </node>
  <node id="612039" label="zzzz523" cy:nodeId="480">
    <graphics x="-998.3657279022191" y="-146.99151494577018" z="0.0"/>
  </node>
  <node id="612040" label="zzzz522" cy:nodeId="481">
    <graphics x="-1041.5889830596898" y="-126.35834386422721" z="0.0"/>
  </node>
  <node id="612041" label="zzzz521" cy:nodeId="482">
    <graphics x="-989.1145606048558" y="-245.48168447091666" z="0.0"/>
  </node>
  <node id="612042" label="zzzz520" cy:nodeId="483">
    <graphics x="-1011.4089522369359" y="-211.08583428933707" z="0.0"/>
  </node>
  <node id="612043" label="zzzz519" cy:nodeId="484">
    <graphics x="-1101.9854292877171" y="-210.2499330289611" z="0.0"/>
  </node>
  <node id="612044" label="zzzz518" cy:nodeId="485">
    <graphics x="-1072.1185240753148" y="-89.82208135202018" z="0.0"/>
  </node>
  <node id="612045" label="zzzz517" cy:nodeId="486">
    <graphics x="-953.3631720550511" y="-190.87115743234244" z="0.0"/>
  </node>
  <node id="612046" label="zzzz512" cy:nodeId="487">
    <graphics x="-1059.4638762481663" y="-179.8281219251403" z="0.0"/>
  </node>
  <node id="612047" label="zzzz511" cy:nodeId="488">
    <graphics x="487.02739190979264" y="-223.08225896432486" z="0.0"/>
  </node>
  <node id="612048" label="zzzz510" cy:nodeId="489">
    <graphics x="536.9309563629176" y="-240.0086925275573" z="0.0"/>
  </node>
  <node id="612049" label="zzzz509" cy:nodeId="490">
    <graphics x="456.23447656555436" y="-175.43179967477408" z="0.0"/>
  </node>
  <node id="612050" label="zzzz508" cy:nodeId="491">
    <graphics x="556.8015770904567" y="-128.49392583444205" z="0.0"/>
  </node>
  <node id="612051" label="zzzz507" cy:nodeId="492">
    <graphics x="-1085.5395674713109" y="-71.92226293161002" z="0.0"/>
  </node>
  <node id="612052" label="zzzz506" cy:nodeId="493">
    <graphics x="-1055.1688857086156" y="-193.3048122174987" z="0.0"/>
  </node>
  <node id="612053" label="zzzz505" cy:nodeId="494">
    <graphics x="-992.2554049499486" y="-65.69911077096549" z="0.0"/>
  </node>
  <node id="612054" label="zzzz504" cy:nodeId="495">
    <graphics x="-980.0978913314793" y="-181.73193814828483" z="0.0"/>
  </node>
  <node id="612055" label="zzzz503" cy:nodeId="496">
    <graphics x="-1098.2769865997288" y="-209.4779947049865" z="0.0"/>
  </node>
  <node id="612056" label="zzzz502" cy:nodeId="497">
    <graphics x="-1078.5305953033421" y="-101.94190862252799" z="0.0"/>
  </node>
  <node id="612057" label="zzzz500" cy:nodeId="498">
    <graphics x="-1042.4310469634984" y="-238.4931667096862" z="0.0"/>
  </node>
  <node id="612058" label="zzzz498" cy:nodeId="499">
    <graphics x="-1034.722589016721" y="-248.6537997968444" z="0.0"/>
  </node>
  <node id="612059" label="zzzz497" cy:nodeId="500">
    <graphics x="-1004.1819205291722" y="-114.81500127389518" z="0.0"/>
  </node>
  <node id="612060" label="zzzz495" cy:nodeId="501">
    <graphics x="540.2682213775661" y="-244.67569234445182" z="0.0"/>
  </node>
  <node id="612061" label="zzzz494" cy:nodeId="502">
    <graphics x="434.4382271759059" y="-147.66587712838736" z="0.0"/>
  </node>
  <node id="612062" label="zzzz493" cy:nodeId="503">
    <graphics x="565.2262444488551" y="-85.91447331979361" z="0.0"/>
  </node>
  <node id="612063" label="zzzz491" cy:nodeId="504">
    <graphics x="-994.9655547149632" y="-220.9287021405944" z="0.0"/>
  </node>
  <node id="612064" label="zzzz490" cy:nodeId="505">
    <graphics x="-984.8288331039403" y="-99.54031255319205" z="0.0"/>
  </node>
  <node id="612065" label="zzzz489" cy:nodeId="506">
    <graphics x="-982.7162089355443" y="-188.74551751687613" z="0.0"/>
  </node>
  <node id="612066" label="zzzz488" cy:nodeId="507">
    <graphics x="-1038.044496060178" y="-119.36431005075065" z="0.0"/>
  </node>
  <node id="612067" label="zzzz487" cy:nodeId="508">
    <graphics x="-974.2275671966527" y="-149.43648412301627" z="0.0"/>
  </node>
  <node id="612068" label="zzzz486" cy:nodeId="509">
    <graphics x="563.5322899810817" y="-219.33132817819205" z="0.0"/>
  </node>
  <node id="612069" label="zzzz485" cy:nodeId="510">
    <graphics x="-1070.5251479156468" y="-254.07462575509635" z="0.0"/>
  </node>
  <node id="612070" label="zzzz484" cy:nodeId="511">
    <graphics x="565.4278283111598" y="-248.3170306928405" z="0.0"/>
  </node>
  <node id="612071" label="zzzz483" cy:nodeId="512">
    <graphics x="535.3639397613551" y="-70.47796514108268" z="0.0"/>
  </node>
  <node id="612072" label="zzzz482" cy:nodeId="513">
    <graphics x="-999.050641537473" y="-131.8574130780944" z="0.0"/>
  </node>
  <node id="612073" label="zzzz481" cy:nodeId="514">
    <graphics x="-1038.4530882842992" y="-194.34602811410514" z="0.0"/>
  </node>
  <node id="612074" label="zzzz480" cy:nodeId="515">
    <graphics x="-992.8860354431126" y="-154.5708797223815" z="0.0"/>
  </node>
  <node id="612075" label="zzzz479" cy:nodeId="516">
    <graphics x="-1002.8526778228734" y="-111.59064366891471" z="0.0"/>
  </node>
  <node id="612076" label="zzzz478" cy:nodeId="517">
    <graphics x="-1030.7820906646702" y="-210.86581113412467" z="0.0"/>
  </node>
  <node id="612077" label="zzzz477" cy:nodeId="518">
    <graphics x="-1123.8223738677952" y="-120.7087314374694" z="0.0"/>
  </node>
  <node id="612078" label="zzzz476" cy:nodeId="519">
    <graphics x="498.42160272522233" y="-231.44499089791861" z="0.0"/>
  </node>
  <node id="612079" label="zzzz475" cy:nodeId="520">
    <graphics x="-1010.5643744476292" y="-99.11504247262565" z="0.0"/>
  </node>
  <node id="612080" label="zzzz474" cy:nodeId="521">
    <graphics x="-1003.1246008880589" y="-168.71982076242057" z="0.0"/>
  </node>
  <node id="612081" label="zzzz473" cy:nodeId="522">
    <graphics x="-1038.703805447385" y="-193.5425527341613" z="0.0"/>
  </node>
  <node id="612082" label="zzzz472" cy:nodeId="523">
    <graphics x="-987.7720294006322" y="-165.89865377023307" z="0.0"/>
  </node>
  <node id="612083" label="zzzz469" cy:nodeId="524">
    <graphics x="-1035.994847775266" y="-162.47466924264518" z="0.0"/>
  </node>
  <node id="612084" label="zzzz468" cy:nodeId="525">
    <graphics x="-999.7249083526585" y="-68.5501392133483" z="0.0"/>
  </node>
  <node id="612085" label="zzzz467" cy:nodeId="526">
    <graphics x="-960.7007775314305" y="-218.90651586129752" z="0.0"/>
  </node>
  <node id="612086" label="zzzz466" cy:nodeId="527">
    <graphics x="-1028.7239699371312" y="-81.7310703046569" z="0.0"/>
  </node>
  <node id="612087" label="zzzz464" cy:nodeId="528">
    <graphics x="-1080.3250517852757" y="-176.25225522592154" z="0.0"/>
  </node>
  <node id="612088" label="zzzz462" cy:nodeId="529">
    <graphics x="-1055.0930876739476" y="-108.84851720407096" z="0.0"/>
  </node>
  <node id="612089" label="zzzz460" cy:nodeId="530">
    <graphics x="-949.5393462188695" y="-190.0616653211364" z="0.0"/>
  </node>
  <node id="612090" label="zzzz459" cy:nodeId="531">
    <graphics x="-1076.5984587676976" y="-136.92349126412955" z="0.0"/>
  </node>
  <node id="612091" label="zzzz458" cy:nodeId="532">
    <graphics x="-1038.889436245725" y="-110.63356664254752" z="0.0"/>
  </node>
  <node id="612092" label="zzzz457" cy:nodeId="533">
    <graphics x="-991.4956946380589" y="-216.78198888375846" z="0.0"/>
  </node>
  <node id="612093" label="zzzz456" cy:nodeId="534">
    <graphics x="-990.3375315673802" y="-99.17689397409049" z="0.0"/>
  </node>
  <node id="612094" label="zzzz454" cy:nodeId="535">
    <graphics x="-1093.3643965728734" y="-240.92244603707877" z="0.0"/>
  </node>
  <node id="612095" label="zzzz452" cy:nodeId="536">
    <graphics x="-962.5859713561986" y="-164.15967443063346" z="0.0"/>
  </node>
  <node id="612096" label="zzzz451" cy:nodeId="537">
    <graphics x="-981.0123062141392" y="-200.0993163831481" z="0.0"/>
  </node>
  <node id="612097" label="zzzz449" cy:nodeId="538">
    <graphics x="-1055.8399138458226" y="-138.47289922311393" z="0.0"/>
  </node>
  <node id="612098" label="zzzz447" cy:nodeId="539">
    <graphics x="-1010.7756590850804" y="-137.43155553414908" z="0.0"/>
  </node>
  <node id="612099" label="zzzz446" cy:nodeId="540">
    <graphics x="-1039.5076537139867" y="-115.3864429242858" z="0.0"/>
  </node>
  <node id="612100" label="zzzz445" cy:nodeId="541">
    <graphics x="-974.2234873779271" y="-110.3420093305358" z="0.0"/>
  </node>
  <node id="612101" label="zzzz444" cy:nodeId="542">
    <graphics x="-1023.7221274383519" y="-233.7973544843444" z="0.0"/>
  </node>
  <node id="612102" label="zzzz442" cy:nodeId="543">
    <graphics x="-1026.824136257932" y="-112.13284947946158" z="0.0"/>
  </node>
  <node id="612103" label="zzzz436" cy:nodeId="544">
    <graphics x="-1022.6732344634984" y="-139.64406087472526" z="0.0"/>
  </node>
  <node id="612104" label="zzzz435" cy:nodeId="545">
    <graphics x="-1114.2156691558812" y="-173.93389585092154" z="0.0"/>
  </node>
  <node id="612105" label="zzzz434" cy:nodeId="546">
    <graphics x="-1046.549478054807" y="-251.433119560028" z="0.0"/>
  </node>
  <node id="612106" label="zzzz433" cy:nodeId="547">
    <graphics x="-965.0821633346532" y="-128.18195989205924" z="0.0"/>
  </node>
  <node id="612107" label="zzzz432" cy:nodeId="548">
    <graphics x="-997.7840952880833" y="-235.07944371774283" z="0.0"/>
  </node>
  <node id="612108" label="zzzz431" cy:nodeId="549">
    <graphics x="-943.8787570007298" y="-107.87592961862174" z="0.0"/>
  </node>
  <node id="612109" label="zzzz429" cy:nodeId="550">
    <graphics x="-992.1308970458958" y="-108.71071508004752" z="0.0"/>
  </node>
  <node id="612110" label="zzzz426" cy:nodeId="551">
    <graphics x="-954.8711829193089" y="-156.29756047799674" z="0.0"/>
  </node>
  <node id="612111" label="zzzz425" cy:nodeId="552">
    <graphics x="-1044.646417141721" y="-89.49583318307486" z="0.0"/>
  </node>
  <node id="612112" label="zzzz420" cy:nodeId="553">
    <graphics x="-998.5656352050755" y="-167.79315641000358" z="0.0"/>
  </node>
  <node id="612113" label="zzzz419" cy:nodeId="554">
    <graphics x="-1097.5523619659398" y="-97.5888583905944" z="0.0"/>
  </node>
  <node id="612114" label="zzzz418" cy:nodeId="555">
    <graphics x="-1066.5024199493382" y="-188.55675103738395" z="0.0"/>
  </node>
  <node id="612115" label="zzzz417" cy:nodeId="556">
    <graphics x="-984.4229836471532" y="-118.79067876412955" z="0.0"/>
  </node>
  <node id="612116" label="zzzz416" cy:nodeId="557">
    <graphics x="473.9786477081325" y="-147.79583623483268" z="0.0"/>
  </node>
  <node id="612117" label="zzzz415" cy:nodeId="558">
    <graphics x="-1068.847947598264" y="-190.28320195748893" z="0.0"/>
  </node>
  <node id="612118" label="zzzz413" cy:nodeId="559">
    <graphics x="-1015.4554610259984" y="-99.33781316354361" z="0.0"/>
  </node>
  <node id="612119" label="zzzz412" cy:nodeId="560">
    <graphics x="-971.6768507965062" y="-130.58432653024283" z="0.0"/>
  </node>
  <node id="612120" label="zzzz411" cy:nodeId="561">
    <graphics x="-1082.838571072385" y="-190.9960677869567" z="0.0"/>
  </node>
  <node id="612121" label="zzzz410" cy:nodeId="562">
    <graphics x="-989.8984045989964" y="-216.79572560861197" z="0.0"/>
  </node>
  <node id="612122" label="zzzz409" cy:nodeId="563">
    <graphics x="-1081.0254607208226" y="-147.23816945626822" z="0.0"/>
  </node>
  <node id="612123" label="zzzz408" cy:nodeId="564">
    <graphics x="-960.8331789978001" y="-177.1834171064147" z="0.0"/>
  </node>
  <node id="612124" label="zzzz407" cy:nodeId="565">
    <graphics x="-998.5155386932347" y="-209.9901798017272" z="0.0"/>
  </node>
  <node id="612125" label="zzzz406" cy:nodeId="566">
    <graphics x="-1055.3164000518773" y="-218.0955264814147" z="0.0"/>
  </node>
  <node id="612126" label="zzzz405" cy:nodeId="567">
    <graphics x="-964.6097912795994" y="-126.8909595258483" z="0.0"/>
  </node>
  <node id="612127" label="zzzz404" cy:nodeId="568">
    <graphics x="-1055.1564803131077" y="-125.06038549020377" z="0.0"/>
  </node>
  <node id="612128" label="zzzz401" cy:nodeId="569">
    <graphics x="-1092.2234816558812" y="-126.27790715768424" z="0.0"/>
  </node>
  <node id="612129" label="zzzz398" cy:nodeId="570">
    <graphics x="-139.89677190856673" y="-85.43254544808951" z="0.0"/>
  </node>
  <node id="612130" label="zzzz397" cy:nodeId="571">
    <graphics x="-168.06483602599837" y="-157.96830442025748" z="0.0"/>
  </node>
  <node id="612131" label="zzzz396" cy:nodeId="572">
    <graphics x="-69.57665014343002" y="-148.1754653699645" z="0.0"/>
  </node>
  <node id="612132" label="zzzz395" cy:nodeId="573">
    <graphics x="161.90266656799577" y="-220.76357915475455" z="0.0"/>
  </node>
  <node id="612133" label="zzzz394" cy:nodeId="574">
    <graphics x="307.54575586242936" y="-165.92321660592643" z="0.0"/>
  </node>
  <node id="612134" label="zzzz393" cy:nodeId="575">
    <graphics x="-79.7656311996434" y="-200.71165921762076" z="0.0"/>
  </node>
  <node id="612135" label="zzzz392" cy:nodeId="576">
    <graphics x="-228.02029562072494" y="-157.38458707406608" z="0.0"/>
  </node>
  <node id="612136" label="zzzz391" cy:nodeId="577">
    <graphics x="-150.5843977935765" y="-205.47490003182975" z="0.0"/>
  </node>
  <node id="612137" label="zzzz390" cy:nodeId="578">
    <graphics x="-103.25933885650375" y="-200.02505948617545" z="0.0"/>
  </node>
  <node id="612138" label="zzzz389" cy:nodeId="579">
    <graphics x="218.15614557190202" y="-224.65936162545768" z="0.0"/>
  </node>
  <node id="612139" label="zzzz388" cy:nodeId="580">
    <graphics x="-135.72986745910384" y="-100.95814969613639" z="0.0"/>
  </node>
  <node id="612140" label="zzzz387" cy:nodeId="581">
    <graphics x="-156.54100179748275" y="-104.5306136853942" z="0.0"/>
  </node>
  <node id="612141" label="zzzz386" cy:nodeId="582">
    <graphics x="140.98089075012467" y="-94.61941411569205" z="0.0"/>
  </node>
  <node id="612142" label="zzzz385" cy:nodeId="583">
    <graphics x="148.4881882659938" y="-160.0766284711608" z="0.0"/>
  </node>
  <node id="612143" label="zzzz384" cy:nodeId="584">
    <graphics x="191.62924432678483" y="-171.61018254830924" z="0.0"/>
  </node>
  <node id="612144" label="zzzz383" cy:nodeId="585">
    <graphics x="147.63146448059342" y="-253.15933110787955" z="0.0"/>
  </node>
  <node id="612145" label="zzzz382" cy:nodeId="586">
    <graphics x="173.79948663635514" y="-97.85628392770377" z="0.0"/>
  </node>
  <node id="612146" label="zzzz381" cy:nodeId="587">
    <graphics x="64.80945444031022" y="-189.1274097211608" z="0.0"/>
  </node>
  <node id="612147" label="zzzz380" cy:nodeId="588">
    <graphics x="-166.36311483459212" y="-145.26450803353873" z="0.0"/>
  </node>
  <node id="612148" label="zzzz379" cy:nodeId="589">
    <graphics x="252.13738489074967" y="-188.173598075653" z="0.0"/>
  </node>
  <node id="612149" label="zzzz378" cy:nodeId="590">
    <graphics x="162.19137811584733" y="-210.5779712445983" z="0.0"/>
  </node>
  <node id="612150" label="zzzz377" cy:nodeId="591">
    <graphics x="135.93531465454362" y="-106.48492314889518" z="0.0"/>
  </node>
  <node id="612151" label="zzzz376" cy:nodeId="592">
    <graphics x="-202.16370534972884" y="-124.72493436410514" z="0.0"/>
  </node>
  <node id="612152" label="zzzz375" cy:nodeId="593">
    <graphics x="-210.80233144836166" y="-162.71470334603873" z="0.0"/>
  </node>
  <node id="612153" label="zzzz374" cy:nodeId="594">
    <graphics x="-162.91124868468978" y="-138.1950881726989" z="0.0"/>
  </node>
  <node id="612154" label="zzzz373" cy:nodeId="595">
    <graphics x="-133.22068929748275" y="-51.23759915902701" z="0.0"/>
  </node>
  <node id="612155" label="zzzz372" cy:nodeId="596">
    <graphics x="118.02790784759782" y="-125.75894048287955" z="0.0"/>
  </node>
  <node id="612156" label="zzzz371" cy:nodeId="597">
    <graphics x="109.9502804271724" y="-239.6917407758483" z="0.0"/>
  </node>
  <node id="612157" label="zzzz370" cy:nodeId="598">
    <graphics x="182.66496515198014" y="-62.17462804391471" z="0.0"/>
  </node>
  <node id="612158" label="zzzz369" cy:nodeId="599">
    <graphics x="137.98015832824967" y="-222.5579517133483" z="0.0"/>
  </node>
  <node id="612159" label="zzzz368" cy:nodeId="600">
    <graphics x="185.33307886047623" y="-227.8645923383483" z="0.0"/>
  </node>
  <node id="612160" label="zzzz367" cy:nodeId="601">
    <graphics x="-35.19054555968978" y="-113.74211576058951" z="0.0"/>
  </node>
  <node id="612161" label="zzzz366" cy:nodeId="602">
    <graphics x="191.60739374084733" y="-78.0825107343444" z="0.0"/>
  </node>
  <node id="612162" label="zzzz365" cy:nodeId="603">
    <graphics x="1182.8017792694118" y="318.7486431352845" z="0.0"/>
  </node>
  <node id="612163" label="zzzz364" cy:nodeId="604">
    <graphics x="-120.88253927306869" y="-233.5286433942565" z="0.0"/>
  </node>
  <node id="612164" label="zzzz363" cy:nodeId="605">
    <graphics x="-125.55764913634994" y="-148.99578549935904" z="0.0"/>
  </node>
  <node id="612165" label="zzzz362" cy:nodeId="606">
    <graphics x="-137.43760442809798" y="-174.96629026010123" z="0.0"/>
  </node>
  <node id="612166" label="zzzz361" cy:nodeId="607">
    <graphics x="87.2997689239528" y="-171.40769841744986" z="0.0"/>
  </node>
  <node id="612167" label="zzzz360" cy:nodeId="608">
    <graphics x="95.20892953796647" y="-188.17022588327018" z="0.0"/>
  </node>
  <node id="612168" label="zzzz359" cy:nodeId="609">
    <graphics x="175.2307763092067" y="-172.18882634713736" z="0.0"/>
  </node>
  <node id="612169" label="zzzz358" cy:nodeId="610">
    <graphics x="190.76621484680436" y="-155.426771903778" z="0.0"/>
  </node>
  <node id="612170" label="zzzz357" cy:nodeId="611">
    <graphics x="240.92023706360123" y="-91.3254306562194" z="0.0"/>
  </node>
  <node id="612171" label="zzzz356" cy:nodeId="612">
    <graphics x="189.1281609527614" y="-204.45876958444205" z="0.0"/>
  </node>
  <node id="612172" label="zzzz355" cy:nodeId="613">
    <graphics x="116.23254394455216" y="-105.68398168161002" z="0.0"/>
  </node>
  <node id="612173" label="zzzz354" cy:nodeId="614">
    <graphics x="219.46400690002702" y="-199.56999089791861" z="0.0"/>
  </node>
  <node id="612174" label="zzzz353" cy:nodeId="615">
    <graphics x="215.9807534210231" y="-222.96562078073111" z="0.0"/>
  </node>
  <node id="612175" label="zzzz352" cy:nodeId="616">
    <graphics x="1146.366537570193" y="400.6932232134095" z="0.0"/>
  </node>
  <node id="612176" label="zzzz351" cy:nodeId="617">
    <graphics x="201.00972223205827" y="-94.59213903024283" z="0.0"/>
  </node>
  <node id="612177" label="zzzz350" cy:nodeId="618">
    <graphics x="152.33029031677506" y="-168.23013188912955" z="0.0"/>
  </node>
  <node id="612178" label="zzzz349" cy:nodeId="619">
    <graphics x="264.76124048157" y="-203.6468189008483" z="0.0"/>
  </node>
  <node id="612179" label="zzzz348" cy:nodeId="620">
    <graphics x="-80.89014005737044" y="-111.15997769906608" z="0.0"/>
  </node>
  <node id="612180" label="zzzz347" cy:nodeId="621">
    <graphics x="-168.91307973937728" y="-243.85432889535514" z="0.0"/>
  </node>
  <node id="612181" label="zzzz346" cy:nodeId="622">
    <graphics x="237.86255884094498" y="-103.8749683149108" z="0.0"/>
  </node>
  <node id="612182" label="zzzz345" cy:nodeId="623">
    <graphics x="229.0219368927028" y="-84.4298999555358" z="0.0"/>
  </node>
  <node id="612183" label="zzzz344" cy:nodeId="624">
    <graphics x="-121.866502285764" y="-243.71988179757682" z="0.0"/>
  </node>
  <node id="612184" label="zzzz343" cy:nodeId="625">
    <graphics x="163.8303093902614" y="-106.99402501657096" z="0.0"/>
  </node>
  <node id="612185" label="zzzz342" cy:nodeId="626">
    <graphics x="-196.48716878967025" y="-187.88130643441764" z="0.0"/>
  </node>
  <node id="612186" label="zzzz341" cy:nodeId="627">
    <graphics x="-211.3583464630101" y="-148.14803006723014" z="0.0"/>
  </node>
  <node id="612187" label="zzzz340" cy:nodeId="628">
    <graphics x="-196.4256606109593" y="-194.8481643445739" z="0.0"/>
  </node>
  <node id="612188" label="zzzz339" cy:nodeId="629">
    <graphics x="118.26308298034928" y="-199.71659734323111" z="0.0"/>
  </node>
  <node id="612189" label="zzzz338" cy:nodeId="630">
    <graphics x="122.19095659179948" y="-187.24487187936393" z="0.0"/>
  </node>
  <node id="612190" label="zzzz337" cy:nodeId="631">
    <graphics x="242.70612573547623" y="-92.28834416940299" z="0.0"/>
  </node>
  <node id="612191" label="zzzz336" cy:nodeId="632">
    <graphics x="77.95150995178483" y="-150.50640752389518" z="0.0"/>
  </node>
  <node id="612192" label="zzzz335" cy:nodeId="633">
    <graphics x="96.49714326782487" y="-152.76565435006705" z="0.0"/>
  </node>
  <node id="612193" label="zzzz334" cy:nodeId="634">
    <graphics x="227.68916559143327" y="-112.08039739205924" z="0.0"/>
  </node>
  <node id="612194" label="zzzz333" cy:nodeId="635">
    <graphics x="1419.8899865142848" y="-204.35113408639518" z="0.0"/>
  </node>
  <node id="612195" label="zzzz332" cy:nodeId="636">
    <graphics x="1319.075808047488" y="-139.09777715280143" z="0.0"/>
  </node>
  <node id="612196" label="zzzz331" cy:nodeId="637">
    <graphics x="3315.2922692291286" y="-81.99706914498893" z="0.0"/>
  </node>
  <node id="612197" label="zzzz330" cy:nodeId="638">
    <graphics x="180.6256737701442" y="-169.10803105905143" z="0.0"/>
  </node>
  <node id="612198" label="zzzz329" cy:nodeId="639">
    <graphics x="279.2568764678981" y="-180.9955737836608" z="0.0"/>
  </node>
  <node id="612199" label="zzzz328" cy:nodeId="640">
    <graphics x="129.7429070465114" y="-233.44317510202018" z="0.0"/>
  </node>
  <node id="612200" label="zzzz327" cy:nodeId="641">
    <graphics x="-100.50998354034164" y="-174.0024154432067" z="0.0"/>
  </node>
  <node id="612201" label="zzzz326" cy:nodeId="642">
    <graphics x="2269.0880341522243" y="286.40837213919076" z="0.0"/>
  </node>
  <node id="612202" label="zzzz325" cy:nodeId="643">
    <graphics x="-130.88667440490462" y="-249.51503255441276" z="0.0"/>
  </node>
  <node id="612203" label="zzzz324" cy:nodeId="644">
    <graphics x="-194.9123244293187" y="-212.36860730722037" z="0.0"/>
  </node>
  <node id="612204" label="zzzz323" cy:nodeId="645">
    <graphics x="-182.89662313537337" y="-200.43481900765983" z="0.0"/>
  </node>
  <node id="612205" label="zzzz322" cy:nodeId="646">
    <graphics x="-67.09920835571029" y="-158.1404998548278" z="0.0"/>
  </node>
  <node id="612206" label="zzzz321" cy:nodeId="647">
    <graphics x="-218.0037550933812" y="-183.59837796762076" z="0.0"/>
  </node>
  <node id="612207" label="zzzz320" cy:nodeId="648">
    <graphics x="-176.3246092803929" y="-161.0876434095153" z="0.0"/>
  </node>
  <node id="612208" label="zzzz319" cy:nodeId="649">
    <graphics x="-160.50869894103744" y="-99.4561507947692" z="0.0"/>
  </node>
  <node id="612209" label="zzzz318" cy:nodeId="650">
    <graphics x="141.33750772400163" y="-221.70023992135611" z="0.0"/>
  </node>
  <node id="612210" label="zzzz317" cy:nodeId="651">
    <graphics x="158.8246254913356" y="-94.49517705514518" z="0.0"/>
  </node>
  <node id="612211" label="zzzz316" cy:nodeId="652">
    <graphics x="178.20647668762467" y="-247.9652240522155" z="0.0"/>
  </node>
  <node id="612212" label="zzzz315" cy:nodeId="653">
    <graphics x="191.7776284210231" y="-102.93263127877799" z="0.0"/>
  </node>
  <node id="612213" label="zzzz314" cy:nodeId="654">
    <graphics x="144.93394327087663" y="-190.05219914987174" z="0.0"/>
  </node>
  <node id="612214" label="zzzz313" cy:nodeId="655">
    <graphics x="276.6616158477809" y="-141.43032720162955" z="0.0"/>
  </node>
  <node id="612215" label="zzzz312" cy:nodeId="656">
    <graphics x="202.95899438781998" y="-66.91787602975455" z="0.0"/>
  </node>
  <node id="612216" label="zzzz311" cy:nodeId="657">
    <graphics x="261.2710518829372" y="-132.27648809030143" z="0.0"/>
  </node>
  <node id="612217" label="zzzz310" cy:nodeId="658">
    <graphics x="256.0694680206325" y="-223.45318486764518" z="0.0"/>
  </node>
  <node id="612218" label="zzzz309" cy:nodeId="659">
    <graphics x="160.55801629944108" y="-122.43752935006705" z="0.0"/>
  </node>
  <node id="612219" label="zzzz308" cy:nodeId="660">
    <graphics x="246.28855371399186" y="-184.7027271039733" z="0.0"/>
  </node>
  <node id="612220" label="zzzz307" cy:nodeId="661">
    <graphics x="-135.56391668395736" y="-164.4711425550231" z="0.0"/>
  </node>
  <node id="612221" label="zzzz306" cy:nodeId="662">
    <graphics x="-143.54600668029525" y="-254.4277379758605" z="0.0"/>
  </node>
  <node id="612222" label="zzzz305" cy:nodeId="663">
    <graphics x="-118.31333303527572" y="-229.16763379647819" z="0.0"/>
  </node>
  <node id="612223" label="zzzz304" cy:nodeId="664">
    <graphics x="-184.85601186828353" y="-192.55263974740592" z="0.0"/>
  </node>
  <node id="612224" label="zzzz303" cy:nodeId="665">
    <graphics x="226.25831842346452" y="-162.29093816354361" z="0.0"/>
  </node>
  <node id="612225" label="zzzz302" cy:nodeId="666">
    <graphics x="167.725538729861" y="-65.29931523873893" z="0.0"/>
  </node>
  <node id="612226" label="zzzz301" cy:nodeId="667">
    <graphics x="204.63833093567155" y="-248.853285575653" z="0.0"/>
  </node>
  <node id="612227" label="zzzz300" cy:nodeId="668">
    <graphics x="-108.84726858215072" y="-252.35796811654654" z="0.0"/>
  </node>
  <node id="612228" label="zzzz299" cy:nodeId="669">
    <graphics x="-100.91793966369369" y="-121.91861417367545" z="0.0"/>
  </node>
  <node id="612229" label="zzzz298" cy:nodeId="670">
    <graphics x="-195.05721426086166" y="-220.97378232553092" z="0.0"/>
  </node>
  <node id="612230" label="zzzz297" cy:nodeId="671">
    <graphics x="-59.268382550046226" y="-196.08231046273795" z="0.0"/>
  </node>
  <node id="612231" label="zzzz296" cy:nodeId="672">
    <graphics x="-54.19997930602767" y="-173.4981887586364" z="0.0"/>
  </node>
  <node id="612232" label="zzzz295" cy:nodeId="673">
    <graphics x="-218.3844923980687" y="-185.99110105111686" z="0.0"/>
  </node>
  <node id="612233" label="zzzz294" cy:nodeId="674">
    <graphics x="-208.67041921691634" y="-127.85854032113639" z="0.0"/>
  </node>
  <node id="612234" label="zzzz293" cy:nodeId="675">
    <graphics x="-171.314256192014" y="-248.33297231271354" z="0.0"/>
  </node>
  <node id="612235" label="zzzz292" cy:nodeId="676">
    <graphics x="-60.98887205199935" y="-151.2526595838317" z="0.0"/>
  </node>
  <node id="612236" label="zzzz291" cy:nodeId="677">
    <graphics x="-75.62876844482162" y="-159.9886977918395" z="0.0"/>
  </node>
  <node id="612237" label="zzzz290" cy:nodeId="678">
    <graphics x="-58.55921316222884" y="-129.666065955902" z="0.0"/>
  </node>
  <node id="612238" label="zzzz289" cy:nodeId="679">
    <graphics x="-150.38694906310775" y="-227.09115293099967" z="0.0"/>
  </node>
  <node id="612239" label="zzzz288" cy:nodeId="680">
    <graphics x="-69.08220434264877" y="-103.7520492322692" z="0.0"/>
  </node>
  <node id="612240" label="zzzz287" cy:nodeId="681">
    <graphics x="-179.31138753967025" y="-159.81296994760123" z="0.0"/>
  </node>
  <node id="612241" label="zzzz286" cy:nodeId="682">
    <graphics x="-70.11027479247787" y="-219.85966184213248" z="0.0"/>
  </node>
  <node id="612242" label="zzzz285" cy:nodeId="683">
    <graphics x="135.39192438049577" y="-201.5010669477233" z="0.0"/>
  </node>
  <node id="612243" label="zzzz284" cy:nodeId="684">
    <graphics x="200.93996667785905" y="-219.32273747994986" z="0.0"/>
  </node>
  <node id="612244" label="zzzz283" cy:nodeId="685">
    <graphics x="-64.48148298339584" y="-234.8810775525817" z="0.0"/>
  </node>
  <node id="612245" label="zzzz282" cy:nodeId="686">
    <graphics x="1480.774969577029" y="1017.9540111772767" z="0.0"/>
  </node>
  <node id="612246" label="zzzz281" cy:nodeId="687">
    <graphics x="2510.9494919769313" y="1017.9540111772767" z="0.0"/>
  </node>
  <node id="612247" label="zzzz280" cy:nodeId="688">
    <graphics x="2507.932039736941" y="1125.6761791460267" z="0.0"/>
  </node>
  <node id="612248" label="zzzz279" cy:nodeId="689">
    <graphics x="1498.9992699615505" y="-69.61242559030143" z="0.0"/>
  </node>
  <node id="612249" label="zzzz278" cy:nodeId="690">
    <graphics x="1109.8506073944118" y="350.972398018097" z="0.0"/>
  </node>
  <node id="612250" label="zzzz277" cy:nodeId="691">
    <graphics x="1100.0090546600368" y="286.40837213919076" z="0.0"/>
  </node>
  <node id="612251" label="zzzz276" cy:nodeId="692">
    <graphics x="218.57714319153092" y="418.79445002005014" z="0.0"/>
  </node>
  <node id="612252" label="zzzz275" cy:nodeId="693">
    <graphics x="2293.1005620948818" y="652.4668209306947" z="0.0"/>
  </node>
  <node id="612253" label="zzzz274" cy:nodeId="694">
    <graphics x="133.89019060058854" y="-101.67202642037955" z="0.0"/>
  </node>
  <node id="612254" label="zzzz273" cy:nodeId="695">
    <graphics x="255.3744301788356" y="-89.06279637887565" z="0.0"/>
  </node>
  <node id="612255" label="zzzz272" cy:nodeId="696">
    <graphics x="1345.0604882232692" y="-161.14031865670768" z="0.0"/>
  </node>
  <node id="612256" label="zzzz271" cy:nodeId="697">
    <graphics x="1296.9307579986598" y="-157.01702764108268" z="0.0"/>
  </node>
  <node id="612257" label="zzzz270" cy:nodeId="698">
    <graphics x="1387.0848107330348" y="-41.48699834420768" z="0.0"/>
  </node>
  <node id="612258" label="zzzz269" cy:nodeId="699">
    <graphics x="1315.229616641238" y="-140.51959111764518" z="0.0"/>
  </node>
  <node id="612259" label="zzzz268" cy:nodeId="700">
    <graphics x="1412.7706933013942" y="-157.03777959420768" z="0.0"/>
  </node>
  <node id="612260" label="zzzz267" cy:nodeId="701">
    <graphics x="2296.6241669647243" y="360.2422420732728" z="0.0"/>
  </node>
  <node id="612261" label="zzzz266" cy:nodeId="702">
    <graphics x="251.61432886047623" y="-193.46685674264518" z="0.0"/>
  </node>
  <node id="612262" label="zzzz265" cy:nodeId="703">
    <graphics x="159.84602594299577" y="-209.38976934030143" z="0.0"/>
  </node>
  <node id="612263" label="zzzz264" cy:nodeId="704">
    <graphics x="159.1091179840114" y="-181.75358464791861" z="0.0"/>
  </node>
  <node id="612264" label="zzzz263" cy:nodeId="705">
    <graphics x="1078.607666015625" y="-160.8470458984375" z="0.0"/>
  </node>
  <node id="612265" label="zzzz262" cy:nodeId="706">
    <graphics x="200.33397912903092" y="-184.86994817330924" z="0.0"/>
  </node>
  <node id="612266" label="zzzz261" cy:nodeId="707">
    <graphics x="-125.72276830749252" y="-259.77158429696647" z="0.0"/>
  </node>
  <node id="612267" label="zzzz260" cy:nodeId="708">
    <graphics x="117.02969598694108" y="-148.9394214399108" z="0.0"/>
  </node>
  <node id="612268" label="zzzz259" cy:nodeId="709">
    <graphics x="-115.60603284911849" y="-85.61084439828483" z="0.0"/>
  </node>
  <node id="612269" label="zzzz258" cy:nodeId="710">
    <graphics x="-93.9147233970616" y="-253.44342973306266" z="0.0"/>
  </node>
  <node id="612270" label="zzzz257" cy:nodeId="711">
    <graphics x="217.3762841217067" y="-102.51589086129752" z="0.0"/>
  </node>
  <node id="612271" label="zzzz256" cy:nodeId="712">
    <graphics x="126.98282480163834" y="-166.74449040963736" z="0.0"/>
  </node>
  <node id="612272" label="zzzz255" cy:nodeId="713">
    <graphics x="-71.77301549987533" y="-189.79443814828483" z="0.0"/>
  </node>
  <node id="612273" label="zzzz254" cy:nodeId="714">
    <graphics x="-74.21527052001693" y="-180.02750089242545" z="0.0"/>
  </node>
  <node id="612274" label="zzzz253" cy:nodeId="715">
    <graphics x="-103.47160577850082" y="-133.78184964730826" z="0.0"/>
  </node>
  <node id="612275" label="zzzz252" cy:nodeId="716">
    <graphics x="-200.8781218536351" y="-116.93541410043326" z="0.0"/>
  </node>
  <node id="612276" label="zzzz251" cy:nodeId="717">
    <graphics x="-149.95385122375228" y="-72.73003079965201" z="0.0"/>
  </node>
  <node id="612277" label="zzzz250" cy:nodeId="718">
    <graphics x="-85.49608469085433" y="-153.9762923963317" z="0.0"/>
  </node>
  <node id="612278" label="zzzz249" cy:nodeId="719">
    <graphics x="-163.9520506866429" y="-200.7825439222106" z="0.0"/>
  </node>
  <node id="612279" label="zzzz248" cy:nodeId="720">
    <graphics x="193.98153924865983" y="-185.9129779584655" z="0.0"/>
  </node>
  <node id="612280" label="zzzz247" cy:nodeId="721">
    <graphics x="-100.4445281036351" y="-76.90991666390983" z="0.0"/>
  </node>
  <node id="612281" label="zzzz246" cy:nodeId="722">
    <graphics x="-56.19687032775619" y="-105.05395963265983" z="0.0"/>
  </node>
  <node id="612282" label="zzzz245" cy:nodeId="723">
    <graphics x="-147.5477538116429" y="-187.97469022348014" z="0.0"/>
  </node>
  <node id="612283" label="zzzz244" cy:nodeId="724">
    <graphics x="-92.70868206100204" y="-100.37759854867545" z="0.0"/>
  </node>
  <node id="612284" label="zzzz243" cy:nodeId="725">
    <graphics x="-243.09797811584212" y="-179.72071530892936" z="0.0"/>
  </node>
  <node id="612285" label="zzzz242" cy:nodeId="726">
    <graphics x="-218.77015829162337" y="-164.8129852063903" z="0.0"/>
  </node>
  <node id="612286" label="zzzz241" cy:nodeId="727">
    <graphics x="-108.58513212280013" y="-204.59030988290397" z="0.0"/>
  </node>
  <node id="612287" label="zzzz240" cy:nodeId="728">
    <graphics x="172.71392297668717" y="-244.91686894967643" z="0.0"/>
  </node>
  <node id="612288" label="zzzz239" cy:nodeId="729">
    <graphics x="130.2761979095485" y="-78.68687322213736" z="0.0"/>
  </node>
  <node id="612289" label="zzzz238" cy:nodeId="730">
    <graphics x="219.23483514709733" y="-124.93851354196158" z="0.0"/>
  </node>
  <node id="612290" label="zzzz237" cy:nodeId="731">
    <graphics x="223.52074670715592" y="-190.12739446237174" z="0.0"/>
  </node>
  <node id="612291" label="zzzz236" cy:nodeId="732">
    <graphics x="154.05741739197038" y="-189.7533862836608" z="0.0"/>
  </node>
  <node id="612292" label="zzzz235" cy:nodeId="733">
    <graphics x="-151.79502630309798" y="-264.9493091352233" z="0.0"/>
  </node>
  <node id="612293" label="zzzz234" cy:nodeId="734">
    <graphics x="-208.77568960265853" y="-200.1444061048278" z="0.0"/>
  </node>
  <node id="612294" label="zzzz233" cy:nodeId="735">
    <graphics x="-70.99205923156478" y="-156.74112393930045" z="0.0"/>
  </node>
  <node id="612295" label="zzzz232" cy:nodeId="736">
    <graphics x="-35.67095327453353" y="-110.08984830453483" z="0.0"/>
  </node>
  <node id="612296" label="zzzz231" cy:nodeId="737">
    <graphics x="-197.03769826965072" y="-145.9934280164489" z="0.0"/>
  </node>
  <node id="612297" label="zzzz230" cy:nodeId="738">
    <graphics x="-230.6650099761937" y="-104.80870511605826" z="0.0"/>
  </node>
  <node id="612298" label="zzzz229" cy:nodeId="739">
    <graphics x="-45.881181240842125" y="-223.3696906812438" z="0.0"/>
  </node>
  <node id="612299" label="zzzz228" cy:nodeId="740">
    <graphics x="-63.403851986691734" y="-157.97929074838248" z="0.0"/>
  </node>
  <node id="612300" label="zzzz227" cy:nodeId="741">
    <graphics x="-237.15493917541244" y="-163.88411405160514" z="0.0"/>
  </node>
  <node id="612301" label="zzzz226" cy:nodeId="742">
    <graphics x="-73.07608175353744" y="-120.36858060433951" z="0.0"/>
  </node>
  <node id="612302" label="zzzz225" cy:nodeId="743">
    <graphics x="-92.09285020904281" y="-121.37164762094108" z="0.0"/>
  </node>
  <node id="612303" label="zzzz224" cy:nodeId="744">
    <graphics x="-116.05111455993392" y="-117.92261197640983" z="0.0"/>
  </node>
  <node id="612304" label="zzzz223" cy:nodeId="745">
    <graphics x="-119.91479063110091" y="-89.19261624887076" z="0.0"/>
  </node>
  <node id="612305" label="zzzz222" cy:nodeId="746">
    <graphics x="-49.89172124938705" y="-94.78674771859733" z="0.0"/>
  </node>
  <node id="612306" label="zzzz221" cy:nodeId="747">
    <graphics x="129.8500161163356" y="-130.10713079049674" z="0.0"/>
  </node>
  <node id="612307" label="zzzz220" cy:nodeId="748">
    <graphics x="106.13737487716935" y="-120.63359716012565" z="0.0"/>
  </node>
  <node id="612308" label="zzzz219" cy:nodeId="749">
    <graphics x="-159.23154592590072" y="-175.71209409310904" z="0.0"/>
  </node>
  <node id="612309" label="zzzz218" cy:nodeId="750">
    <graphics x="-165.1053175933812" y="-98.51019742562858" z="0.0"/>
  </node>
  <node id="612310" label="zzzz217" cy:nodeId="751">
    <graphics x="-102.28273344115951" y="-188.60807492806998" z="0.0"/>
  </node>
  <node id="612311" label="zzzz216" cy:nodeId="752">
    <graphics x="-124.60247182922103" y="-131.1673782117614" z="0.0"/>
  </node>
  <node id="612312" label="zzzz215" cy:nodeId="753">
    <graphics x="159.73361444397233" y="-85.29643132760611" z="0.0"/>
  </node>
  <node id="612313" label="zzzz214" cy:nodeId="754">
    <graphics x="-97.69157648162582" y="-160.75047757699576" z="0.0"/>
  </node>
  <node id="612314" label="zzzz213" cy:nodeId="755">
    <graphics x="-107.50841856078841" y="-148.1537063367614" z="0.0"/>
  </node>
  <node id="612315" label="zzzz212" cy:nodeId="756">
    <graphics x="245.0180306427028" y="-115.96978643014518" z="0.0"/>
  </node>
  <node id="612316" label="zzzz211" cy:nodeId="757">
    <graphics x="-158.80123281554916" y="-125.90086820199576" z="0.0"/>
  </node>
  <node id="612317" label="zzzz210" cy:nodeId="758">
    <graphics x="-147.16724538879134" y="-198.19784238412467" z="0.0"/>
  </node>
  <node id="612318" label="zzzz209" cy:nodeId="759">
    <graphics x="-193.3168196685765" y="-129.42920377328483" z="0.0"/>
  </node>
  <node id="612319" label="zzzz208" cy:nodeId="760">
    <graphics x="-130.1687254913304" y="-108.50938870980826" z="0.0"/>
  </node>
  <node id="612320" label="zzzz207" cy:nodeId="761">
    <graphics x="2571.966361045077" y="739.1866791002503" z="0.0"/>
  </node>
  <node id="612321" label="zzzz206" cy:nodeId="762">
    <graphics x="-132.33242559509017" y="-192.49756314828483" z="0.0"/>
  </node>
  <node id="612322" label="zzzz205" cy:nodeId="763">
    <graphics x="187.36799096985123" y="-140.88276555612174" z="0.0"/>
  </node>
  <node id="612323" label="zzzz204" cy:nodeId="764">
    <graphics x="118.15353059692643" y="-123.7611987836608" z="0.0"/>
  </node>
  <node id="612324" label="zzzz203" cy:nodeId="765">
    <graphics x="789.9990563385036" y="544.3037502519837" z="0.0"/>
  </node>
  <node id="612325" label="zzzz202" cy:nodeId="766">
    <graphics x="1068.705160617068" y="1148.812257026886" z="0.0"/>
  </node>
  <node id="612326" label="zzzz201" cy:nodeId="767">
    <graphics x="185.72568750305436" y="-108.03748967721549" z="0.0"/>
  </node>
  <node id="612327" label="zzzz200" cy:nodeId="768">
    <graphics x="251.39098596496842" y="-247.26994206979361" z="0.0"/>
  </node>
  <node id="612328" label="zzzz199" cy:nodeId="769">
    <graphics x="-210.4295363433812" y="-224.86099698617545" z="0.0"/>
  </node>
  <node id="612329" label="zzzz198" cy:nodeId="770">
    <graphics x="-216.8143553741429" y="-120.21524503305045" z="0.0"/>
  </node>
  <node id="612330" label="zzzz197" cy:nodeId="771">
    <graphics x="-159.0153517730687" y="-140.73175504281608" z="0.0"/>
  </node>
  <node id="612331" label="zzzz196" cy:nodeId="772">
    <graphics x="-88.8339037902806" y="-208.9893882520446" z="0.0"/>
  </node>
  <node id="612332" label="zzzz195" cy:nodeId="773">
    <graphics x="160.3631997100856" y="-100.76526525094596" z="0.0"/>
  </node>
  <node id="612333" label="zzzz194" cy:nodeId="774">
    <graphics x="204.73854303283952" y="-107.97453191354361" z="0.0"/>
  </node>
  <node id="612334" label="zzzz193" cy:nodeId="775">
    <graphics x="169.24183893127702" y="-175.37226750924674" z="0.0"/>
  </node>
  <node id="612335" label="zzzz192" cy:nodeId="776">
    <graphics x="227.34296655578873" y="-230.69230535104361" z="0.0"/>
  </node>
  <node id="612336" label="zzzz191" cy:nodeId="777">
    <graphics x="-179.28745412902572" y="-214.84573056771842" z="0.0"/>
  </node>
  <node id="612337" label="zzzz190" cy:nodeId="778">
    <graphics x="-99.56074476318099" y="-115.09914090707389" z="0.0"/>
  </node>
  <node id="612338" label="zzzz189" cy:nodeId="779">
    <graphics x="-178.16651296691634" y="-143.2655761487731" z="0.0"/>
  </node>
  <node id="612339" label="zzzz188" cy:nodeId="780">
    <graphics x="2330.311850070193" y="292.12248346731576" z="0.0"/>
  </node>
  <node id="612340" label="zzzz187" cy:nodeId="781">
    <graphics x="217.00983667297623" y="-59.07556035592643" z="0.0"/>
  </node>
  <node id="612341" label="zzzz186" cy:nodeId="782">
    <graphics x="198.30681085510514" y="-209.26183965280143" z="0.0"/>
  </node>
  <node id="612342" label="zzzz185" cy:nodeId="783">
    <graphics x="140.17627191467545" y="-146.01129033639518" z="0.0"/>
  </node>
  <node id="612343" label="zzzz184" cy:nodeId="784">
    <graphics x="192.17682886047623" y="-145.43659856393424" z="0.0"/>
  </node>
  <node id="612344" label="zzzz183" cy:nodeId="785">
    <graphics x="240.24573755188248" y="-234.7027728803405" z="0.0"/>
  </node>
  <node id="612345" label="zzzz182" cy:nodeId="786">
    <graphics x="103.04090356750748" y="-81.97694280221549" z="0.0"/>
  </node>
  <node id="612346" label="zzzz181" cy:nodeId="787">
    <graphics x="176.79258203430436" y="-153.70706060006705" z="0.0"/>
  </node>
  <node id="612347" label="zzzz180" cy:nodeId="788">
    <graphics x="119.25272989197038" y="-210.79752996041861" z="0.0"/>
  </node>
  <node id="612348" label="zzzz179" cy:nodeId="789">
    <graphics x="-185.30476522521712" y="-105.38455655648795" z="0.0"/>
  </node>
  <node id="612349" label="zzzz178" cy:nodeId="790">
    <graphics x="240.79229211731217" y="-128.9368579633483" z="0.0"/>
  </node>
  <node id="612350" label="zzzz177" cy:nodeId="791">
    <graphics x="81.46007776184342" y="-103.81669499948111" z="0.0"/>
  </node>
  <node id="612351" label="zzzz176" cy:nodeId="792">
    <graphics x="-69.57544660644271" y="-218.74567105844108" z="0.0"/>
  </node>
  <node id="612352" label="zzzz175" cy:nodeId="793">
    <graphics x="-189.97955465392806" y="-121.63310697152701" z="0.0"/>
  </node>
  <node id="612353" label="zzzz174" cy:nodeId="794">
    <graphics x="-151.27010488586166" y="-175.4715774305114" z="0.0"/>
  </node>
  <node id="612354" label="zzzz173" cy:nodeId="795">
    <graphics x="-140.90247106628158" y="-217.99440839364615" z="0.0"/>
  </node>
  <node id="612355" label="zzzz172" cy:nodeId="796">
    <graphics x="-158.97362661437728" y="-253.2433364637145" z="0.0"/>
  </node>
  <node id="612356" label="zzzz171" cy:nodeId="797">
    <graphics x="-152.944383145139" y="-142.58071591928092" z="0.0"/>
  </node>
  <node id="612357" label="zzzz170" cy:nodeId="798">
    <graphics x="-118.97325468139388" y="-275.4620349653014" z="0.0"/>
  </node>
  <node id="612358" label="zzzz169" cy:nodeId="799">
    <graphics x="-175.8438735015843" y="-91.48035123422233" z="0.0"/>
  </node>
  <node id="612359" label="zzzz168" cy:nodeId="800">
    <graphics x="-198.90809774474837" y="-185.6130569226989" z="0.0"/>
  </node>
  <node id="612360" label="zzzz167" cy:nodeId="801">
    <graphics x="-151.93499136047103" y="-143.38796689584342" z="0.0"/>
  </node>
  <node id="612361" label="zzzz166" cy:nodeId="802">
    <graphics x="-180.78968191222884" y="-231.99781873300162" z="0.0"/>
  </node>
  <node id="612362" label="zzzz165" cy:nodeId="803">
    <graphics x="-117.44172811584212" y="-157.02469327523795" z="0.0"/>
  </node>
  <node id="612363" label="zzzz164" cy:nodeId="804">
    <graphics x="-136.38406515197494" y="-212.63414456918326" z="0.0"/>
  </node>
  <node id="612364" label="zzzz163" cy:nodeId="805">
    <graphics x="156.40531015320084" y="-275.4620349653014" z="0.0"/>
  </node>
  <node id="612365" label="zzzz162" cy:nodeId="806">
    <graphics x="189.00015497131608" y="-137.41934087350455" z="0.0"/>
  </node>
  <node id="612366" label="zzzz161" cy:nodeId="807">
    <graphics x="1399.9262413970973" y="-205.04345586373893" z="0.0"/>
  </node>
  <node id="612367" label="zzzz160" cy:nodeId="808">
    <graphics x="-225.9935774810765" y="-119.94664456918326" z="0.0"/>
  </node>
  <node id="612368" label="zzzz159" cy:nodeId="809">
    <graphics x="2603.7513532630946" y="652.4668209306947" z="0.0"/>
  </node>
  <node id="612369" label="zzzz158" cy:nodeId="810">
    <graphics x="-192.6254897125218" y="-63.8420150525817" z="0.0"/>
  </node>
  <node id="612370" label="zzzz157" cy:nodeId="811">
    <graphics x="-176.0010695465062" y="-93.68443753793326" z="0.0"/>
  </node>
  <node id="612371" label="zzzz156" cy:nodeId="812">
    <graphics x="-191.11656332092025" y="-253.3240354306945" z="0.0"/>
  </node>
  <node id="612372" label="zzzz155" cy:nodeId="813">
    <graphics x="-171.78718710021712" y="-188.8522918470153" z="0.0"/>
  </node>
  <node id="612373" label="zzzz154" cy:nodeId="814">
    <graphics x="-96.52401018218734" y="-205.51273801400748" z="0.0"/>
  </node>
  <node id="612374" label="zzzz153" cy:nodeId="815">
    <graphics x="164.86104440613053" y="-197.01409795358268" z="0.0"/>
  </node>
  <node id="612375" label="zzzz152" cy:nodeId="816">
    <graphics x="2156.907713412478" y="1297.1479732744447" z="0.0"/>
  </node>
  <node id="612376" label="zzzz151" cy:nodeId="817">
    <graphics x="1564.7126169197109" y="917.9540111772767" z="0.0"/>
  </node>
  <node id="612377" label="zzzz150" cy:nodeId="818">
    <graphics x="-243.52008199767806" y="-177.35623624398795" z="0.0"/>
  </node>
  <node id="612378" label="zzzz149" cy:nodeId="819">
    <graphics x="188.52907037658952" y="-220.03388860299674" z="0.0"/>
  </node>
  <node id="612379" label="zzzz148" cy:nodeId="820">
    <graphics x="143.5655808441188" y="-175.8661792524108" z="0.0"/>
  </node>
  <node id="612380" label="zzzz147" cy:nodeId="821">
    <graphics x="244.93091821594498" y="-201.42968633248893" z="0.0"/>
  </node>
  <node id="612381" label="zzzz146" cy:nodeId="822">
    <graphics x="1462.6499047271755" y="-88.47454717233268" z="0.0"/>
  </node>
  <node id="612382" label="zzzz145" cy:nodeId="823">
    <graphics x="248.9893441192653" y="-179.538100028778" z="0.0"/>
  </node>
  <node id="612383" label="zzzz144" cy:nodeId="824">
    <graphics x="152.64600610656998" y="-229.29443242623893" z="0.0"/>
  </node>
  <node id="612384" label="zzzz143" cy:nodeId="825">
    <graphics x="228.46313714905045" y="-193.23161199166861" z="0.0"/>
  </node>
  <node id="612385" label="zzzz142" cy:nodeId="826">
    <graphics x="2658.630496024325" y="771.0286209337464" z="0.0"/>
  </node>
  <node id="612386" label="zzzz141" cy:nodeId="827">
    <graphics x="1032.3061127655055" y="417.5359966509095" z="0.0"/>
  </node>
  <node id="612387" label="zzzz140" cy:nodeId="828">
    <graphics x="1362.6978173248317" y="-119.23480107858268" z="0.0"/>
  </node>
  <node id="612388" label="zzzz139" cy:nodeId="829">
    <graphics x="1362.5214562408473" y="-43.18170049264518" z="0.0"/>
  </node>
  <node id="612389" label="zzzz138" cy:nodeId="830">
    <graphics x="1513.509417056277" y="-167.07372930123893" z="0.0"/>
  </node>
  <node id="612390" label="zzzz137" cy:nodeId="831">
    <graphics x="1043.7956147186305" y="317.5997173540345" z="0.0"/>
  </node>
  <node id="612391" label="zzzz136" cy:nodeId="832">
    <graphics x="101.25263452453873" y="-170.20454289987174" z="0.0"/>
  </node>
  <node id="612392" label="zzzz135" cy:nodeId="833">
    <graphics x="233.4385857574489" y="-121.83911016061393" z="0.0"/>
  </node>
  <node id="612393" label="zzzz134" cy:nodeId="834">
    <graphics x="197.74531793518327" y="-162.39630010202018" z="0.0"/>
  </node>
  <node id="612394" label="zzzz133" cy:nodeId="835">
    <graphics x="2226.606710910037" y="389.84347650930795" z="0.0"/>
  </node>
  <node id="612395" label="zzzz132" cy:nodeId="836">
    <graphics x="2279.648275851443" y="429.95040438101205" z="0.0"/>
  </node>
  <node id="612396" label="zzzz131" cy:nodeId="837">
    <graphics x="-117.66016531066634" y="-204.25466229989615" z="0.0"/>
  </node>
  <node id="612397" label="zzzz130" cy:nodeId="838">
    <graphics x="-125.86911153869369" y="-158.74766995980826" z="0.0"/>
  </node>
  <node id="612398" label="zzzz129" cy:nodeId="839">
    <graphics x="-92.87241506652572" y="-229.9663284070739" z="0.0"/>
  </node>
  <node id="612399" label="zzzz128" cy:nodeId="840">
    <graphics x="-189.7298293121312" y="-76.95149686410514" z="0.0"/>
  </node>
  <node id="612400" label="zzzz127" cy:nodeId="841">
    <graphics x="293.29751062317155" y="-123.18547704293815" z="0.0"/>
  </node>
  <node id="612401" label="zzzz126" cy:nodeId="842">
    <graphics x="1450.8601098053005" y="-119.18798711373893" z="0.0"/>
  </node>
  <node id="612402" label="zzzz125" cy:nodeId="843">
    <graphics x="1456.0391564361598" y="-159.74243047311393" z="0.0"/>
  </node>
  <node id="612403" label="zzzz124" cy:nodeId="844">
    <graphics x="1496.3658013336208" y="-177.77990605905143" z="0.0"/>
  </node>
  <node id="612404" label="zzzz123" cy:nodeId="845">
    <graphics x="1431.064577578738" y="-104.45110967233268" z="0.0"/>
  </node>
  <node id="612405" label="zzzz122" cy:nodeId="846">
    <graphics x="1317.7045922271755" y="-166.46862676217643" z="0.0"/>
  </node>
  <node id="612406" label="zzzz121" cy:nodeId="847">
    <graphics x="1596.6383881561305" y="392.98310444281014" z="0.0"/>
  </node>
  <node id="612407" label="zzzz120" cy:nodeId="848">
    <graphics x="1434.0659203521755" y="-247.07415654733268" z="0.0"/>
  </node>
  <node id="612408" label="zzzz119" cy:nodeId="849">
    <graphics x="1477.8173241607692" y="-209.41363408639518" z="0.0"/>
  </node>
  <node id="612409" label="zzzz118" cy:nodeId="850">
    <graphics x="1382.5487999908473" y="-129.01275518014518" z="0.0"/>
  </node>
  <node id="612410" label="zzzz117" cy:nodeId="851">
    <graphics x="250.77851343078873" y="-120.3738925702819" z="0.0"/>
  </node>
  <node id="612411" label="zzzz116" cy:nodeId="852">
    <graphics x="2342.4286103240993" y="408.7569668047181" z="0.0"/>
  </node>
  <node id="612412" label="zzzz115" cy:nodeId="853">
    <graphics x="1345.5350975982692" y="-130.23876836373893" z="0.0"/>
  </node>
  <node id="612413" label="zzzz114" cy:nodeId="854">
    <graphics x="925.086669921875" y="-136.3698272705078" z="0.0"/>
  </node>
  <node id="612414" label="zzzz113" cy:nodeId="855">
    <graphics x="339.10783624573014" y="416.81442377493295" z="0.0"/>
  </node>
  <node id="612415" label="zzzz112" cy:nodeId="856">
    <graphics x="1036.394287109375" y="-69.85948181152344" z="0.0"/>
  </node>
  <node id="612416" label="zzzz111" cy:nodeId="857">
    <graphics x="962.212890625" y="-129.03829956054688" z="0.0"/>
  </node>
  <node id="612417" label="zzzz110" cy:nodeId="858">
    <graphics x="962.2642822265625" y="-18.047714233398438" z="0.0"/>
  </node>
  <node id="612418" label="zzzz109" cy:nodeId="859">
    <graphics x="1095.8101806640625" y="-184.4554901123047" z="0.0"/>
  </node>
  <node id="612419" label="zzzz108" cy:nodeId="860">
    <graphics x="896.5954804412868" y="1017.9540111772767" z="0.0"/>
  </node>
  <node id="612420" label="zzzz107" cy:nodeId="861">
    <graphics x="1371.212557315066" y="-205.80718877389518" z="0.0"/>
  </node>
  <node id="612421" label="zzzz106" cy:nodeId="862">
    <graphics x="154.55470514221452" y="-89.73189427926627" z="0.0"/>
  </node>
  <node id="612422" label="zzzz105" cy:nodeId="863">
    <graphics x="1892.84477853699" y="1017.9540111772767" z="0.0"/>
  </node>
  <node id="612423" label="zzzz104" cy:nodeId="864">
    <graphics x="1380.3573937408473" y="-209.70538213327018" z="0.0"/>
  </node>
  <node id="612424" label="zzzz103" cy:nodeId="865">
    <graphics x="1417.081423281863" y="-173.13098027780143" z="0.0"/>
  </node>
  <node id="612425" label="zzzz102" cy:nodeId="866">
    <graphics x="1379.1708703033473" y="-230.74328496530143" z="0.0"/>
  </node>
  <node id="612426" label="zzzz101" cy:nodeId="867">
    <graphics x="1333.6936364166286" y="-186.06231572702018" z="0.0"/>
  </node>
  <node id="612427" label="zzzz100" cy:nodeId="868">
    <graphics x="1005.1310639373805" y="347.03312799856576" z="0.0"/>
  </node>
  <node id="612428" label="zzz2444" cy:nodeId="869">
    <graphics x="3409.4786782257106" y="402.14907762930306" z="0.0"/>
  </node>
  <node id="612429" label="zzz2443" cy:nodeId="870">
    <graphics x="2413.3195977203395" y="-275.4620349653014" z="0.0"/>
  </node>
  <node id="612430" label="zzz2442" cy:nodeId="871">
    <graphics x="2288.494081973269" y="-73.0613696820983" z="0.0"/>
  </node>
  <node id="612431" label="zzz2441" cy:nodeId="872">
    <graphics x="706.1973595611598" y="552.4668209306947" z="0.0"/>
  </node>
  <node id="612432" label="zzz2440" cy:nodeId="873">
    <graphics x="-257.29726934509017" y="421.1712047807923" z="0.0"/>
  </node>
  <node id="612433" label="zzz2439" cy:nodeId="874">
    <graphics x="-1049.641485691831" y="286.40837213919076" z="0.0"/>
  </node>
  <node id="612434" label="zzz2438" cy:nodeId="875">
    <graphics x="2281.627626895144" y="-165.18240239694205" z="0.0"/>
  </node>
  <node id="612435" label="zzz2437" cy:nodeId="876">
    <graphics x="-316.8307547576878" y="338.26075861380014" z="0.0"/>
  </node>
  <node id="612436" label="zzz2436" cy:nodeId="877">
    <graphics x="-168.66698217468002" y="366.1224682085267" z="0.0"/>
  </node>
  <node id="612437" label="zzz2435" cy:nodeId="878">
    <graphics x="2365.2835259429958" y="-136.89150884225455" z="0.0"/>
  </node>
  <node id="612438" label="zzz2434" cy:nodeId="879">
    <graphics x="2304.914587496951" y="1017.9540111772767" z="0.0"/>
  </node>
  <node id="612439" label="zzz2433" cy:nodeId="880">
    <graphics x="2193.1005620948818" y="684.2185680620423" z="0.0"/>
  </node>
  <node id="612440" label="zzz2432" cy:nodeId="881">
    <graphics x="757.950081824496" y="749.2104274980775" z="0.0"/>
  </node>
  <node id="612441" label="zzz2431" cy:nodeId="882">
    <graphics x="2471.966361045077" y="746.4034740679017" z="0.0"/>
  </node>
  <node id="612442" label="zzz2430" cy:nodeId="883">
    <graphics x="2056.907713412478" y="1297.1479732744447" z="0.0"/>
  </node>
  <node id="612443" label="zzz2429" cy:nodeId="884">
    <graphics x="2074.5700254432704" y="739.1866791002503" z="0.0"/>
  </node>
  <node id="612444" label="zzz2428" cy:nodeId="885">
    <graphics x="2106.355017661288" y="652.4668209306947" z="0.0"/>
  </node>
  <node id="612445" label="zzz2427" cy:nodeId="886">
    <graphics x="-231.30133581237533" y="286.40837213919076" z="0.0"/>
  </node>
  <node id="612446" label="zzz2426" cy:nodeId="887">
    <graphics x="2467.223715304568" y="331.04190370962533" z="0.0"/>
  </node>
  <node id="612447" label="zzz2425" cy:nodeId="888">
    <graphics x="460.3431954376247" y="366.248032783722" z="0.0"/>
  </node>
  <node id="612448" label="zzz2424" cy:nodeId="889">
    <graphics x="2128.600830078125" y="-197.13339233398438" z="0.0"/>
  </node>
  <node id="612449" label="zzz2423" cy:nodeId="890">
    <graphics x="2051.832763671875" y="-232.32611083984375" z="0.0"/>
  </node>
  <node id="612450" label="zzz2422" cy:nodeId="891">
    <graphics x="2945.7219147674587" y="406.87330744192514" z="0.0"/>
  </node>
  <node id="612451" label="zzz2421" cy:nodeId="892">
    <graphics x="982.0218477241542" y="749.2104274980775" z="0.0"/>
  </node>
  <node id="612452" label="zzz2420" cy:nodeId="893">
    <graphics x="1956.9077134124782" y="1297.1479732744447" z="0.0"/>
  </node>
  <node id="612453" label="zzz2419" cy:nodeId="894">
    <graphics x="606.1973595611598" y="359.51197931692514" z="0.0"/>
  </node>
  <node id="612454" label="zzz2418" cy:nodeId="895">
    <graphics x="1789.8273262969997" y="1017.9540111772767" z="0.0"/>
  </node>
  <node id="612455" label="zzz2417" cy:nodeId="896">
    <graphics x="2012.374755859375" y="-65.47012329101562" z="0.0"/>
  </node>
  <node id="612456" label="zzz2416" cy:nodeId="897">
    <graphics x="2343.588919638827" y="848.0094310991517" z="0.0"/>
  </node>
  <node id="612457" label="zzz2415" cy:nodeId="898">
    <graphics x="477.65908288879655" y="311.32438776419076" z="0.0"/>
  </node>
  <node id="612458" label="zzz2414" cy:nodeId="899">
    <graphics x="312.5264649383571" y="1079.9869396440736" z="0.0"/>
  </node>
  <node id="612459" label="zzz2413" cy:nodeId="900">
    <graphics x="2028.21337890625" y="-148.446533203125" z="0.0"/>
  </node>
  <node id="612460" label="zzz2412" cy:nodeId="901">
    <graphics x="-982.5113654144261" y="349.67875788137826" z="0.0"/>
  </node>
  <node id="612461" label="zzz2411" cy:nodeId="902">
    <graphics x="1974.5700254432704" y="684.2185680620423" z="0.0"/>
  </node>
  <node id="612462" label="zzz2410" cy:nodeId="903">
    <graphics x="-960.0128264434788" y="419.2825329057923" z="0.0"/>
  </node>
  <node id="612463" label="zzz2409" cy:nodeId="904">
    <graphics x="1856.039488791659" y="739.1866791002503" z="0.0"/>
  </node>
  <node id="612464" label="zzz2408" cy:nodeId="905">
    <graphics x="-986.9593405731175" y="392.6088421098939" z="0.0"/>
  </node>
  <node id="612465" label="zzz2407" cy:nodeId="906">
    <graphics x="1887.8244810096767" y="652.4668209306947" z="0.0"/>
  </node>
  <node id="612466" label="zzz2406" cy:nodeId="907">
    <graphics x="2526.556982516482" y="286.40837213919076" z="0.0"/>
  </node>
  <node id="612467" label="zzz2405" cy:nodeId="908">
    <graphics x="2543.6203064910915" y="434.03351137564096" z="0.0"/>
  </node>
  <node id="612468" label="zzz2404" cy:nodeId="909">
    <graphics x="533.8783159248378" y="749.2104274980775" z="0.0"/>
  </node>
  <node id="612469" label="zzz2403" cy:nodeId="910">
    <graphics x="2535.436300753787" y="360.1549331896058" z="0.0"/>
  </node>
  <node id="612470" label="zzz2402" cy:nodeId="911">
    <graphics x="2098.8796830169704" y="1017.9540111772767" z="0.0"/>
  </node>
  <node id="612471" label="zzz2401" cy:nodeId="912">
    <graphics x="2475.72954416199" y="404.7149688951722" z="0.0"/>
  </node>
  <node id="612472" label="zzz2400" cy:nodeId="913">
    <graphics x="2603.0514130584743" y="389.8939010851136" z="0.0"/>
  </node>
  <node id="612473" label="zzz2399" cy:nodeId="914">
    <graphics x="360.3431954376247" y="361.7443401567689" z="0.0"/>
  </node>
  <node id="612474" label="zzz2398" cy:nodeId="915">
    <graphics x="-360.70008230285384" y="1079.9869396440736" z="0.0"/>
  </node>
  <node id="612475" label="zzz2397" cy:nodeId="916">
    <graphics x="2407.932039736941" y="1017.9540111772767" z="0.0"/>
  </node>
  <node id="612476" label="zzz2396" cy:nodeId="917">
    <graphics x="3576.5380616180446" y="286.40837213919076" z="0.0"/>
  </node>
  <node id="612477" label="zzz2395" cy:nodeId="918">
    <graphics x="-588.186814785764" y="363.10385248587045" z="0.0"/>
  </node>
  <node id="612478" label="zzz2394" cy:nodeId="919">
    <graphics x="1639.7705831520107" y="837.4865734331361" z="0.0"/>
  </node>
  <node id="612479" label="zzz2393" cy:nodeId="920">
    <graphics x="-543.735642910764" y="286.40837213919076" z="0.0"/>
  </node>
  <node id="612480" label="zzz2392" cy:nodeId="921">
    <graphics x="-574.5561079986546" y="323.1714489214173" z="0.0"/>
  </node>
  <node id="612481" label="zzz2391" cy:nodeId="922">
    <graphics x="857.950081824496" y="719.9230892412415" z="0.0"/>
  </node>
  <node id="612482" label="zzz2390" cy:nodeId="923">
    <graphics x="-1018.2969336517308" y="450.0128948442689" z="0.0"/>
  </node>
  <node id="612483" label="zzz2389" cy:nodeId="924">
    <graphics x="1995.8622307769801" y="1017.9540111772767" z="0.0"/>
  </node>
  <node id="612484" label="zzz2388" cy:nodeId="925">
    <graphics x="712.6791214935329" y="1124.4410717241517" z="0.0"/>
  </node>
  <node id="612485" label="zzz2387" cy:nodeId="926">
    <graphics x="933.0956420898438" y="-56.335205078125" z="0.0"/>
  </node>
  <node id="612486" label="zzz2386" cy:nodeId="927">
    <graphics x="1856.9077134124782" y="1297.1479732744447" z="0.0"/>
  </node>
  <node id="612487" label="zzz2385" cy:nodeId="928">
    <graphics x="3612.72120809479" y="410.1318809740296" z="0.0"/>
  </node>
  <node id="612488" label="zzz2384" cy:nodeId="929">
    <graphics x="905.1310639373805" y="367.9781124346009" z="0.0"/>
  </node>
  <node id="612489" label="zzz2383" cy:nodeId="930">
    <graphics x="966.2647705078125" y="-88.00483703613281" z="0.0"/>
  </node>
  <node id="612490" label="zzz2382" cy:nodeId="931">
    <graphics x="970.41650390625" y="-23.150909423828125" z="0.0"/>
  </node>
  <node id="612491" label="zzz2381" cy:nodeId="932">
    <graphics x="1090.245361328125" y="-85.68673706054688" z="0.0"/>
  </node>
  <node id="612492" label="zzz2380" cy:nodeId="933">
    <graphics x="982.4065551757812" y="-275.4620361328125" z="0.0"/>
  </node>
  <node id="612493" label="zzz2379" cy:nodeId="934">
    <graphics x="2314.0044274322536" y="-205.66689946725455" z="0.0"/>
  </node>
  <node id="612494" label="zzz2378" cy:nodeId="935">
    <graphics x="983.7113037109375" y="-73.18408203125" z="0.0"/>
  </node>
  <node id="612495" label="zzz2377" cy:nodeId="936">
    <graphics x="3208.255839347079" y="758.9538814775697" z="0.0"/>
  </node>
  <node id="612496" label="zzz2376" cy:nodeId="937">
    <graphics x="-277.74793386535384" y="1148.812257026886" z="0.0"/>
  </node>
  <node id="612497" label="zzz2375" cy:nodeId="938">
    <graphics x="1026.9456787109375" y="-181.50469970703125" z="0.0"/>
  </node>
  <node id="612498" label="zzz2374" cy:nodeId="939">
    <graphics x="908.7635498046875" y="-89.55387878417969" z="0.0"/>
  </node>
  <node id="612499" label="zzz2373" cy:nodeId="940">
    <graphics x="1021.0638427734375" y="34.86094665527344" z="0.0"/>
  </node>
  <node id="612500" label="zzz2372" cy:nodeId="941">
    <graphics x="2161.2341604225185" y="771.0286209337464" z="0.0"/>
  </node>
  <node id="612501" label="zzz2371" cy:nodeId="942">
    <graphics x="2011.2734375" y="-110.15914916992188" z="0.0"/>
  </node>
  <node id="612502" label="zzz2370" cy:nodeId="943">
    <graphics x="811.7458825103786" y="400.398781990265" z="0.0"/>
  </node>
  <node id="612503" label="zzz2369" cy:nodeId="944">
    <graphics x="-77.189500332639" y="1056.7654735796204" z="0.0"/>
  </node>
  <node id="612504" label="zzz2368" cy:nodeId="945">
    <graphics x="173.02338647766373" y="-120.64752080514518" z="0.0"/>
  </node>
  <node id="612505" label="zzz2367" cy:nodeId="946">
    <graphics x="-490.3021712310765" y="377.5107433550111" z="0.0"/>
  </node>
  <node id="612506" label="zzz2366" cy:nodeId="947">
    <graphics x="975.5561723701503" y="670.4288570635072" z="0.0"/>
  </node>
  <node id="612507" label="zzz2365" cy:nodeId="948">
    <graphics x="-191.06386327819564" y="324.17115900442514" z="0.0"/>
  </node>
  <node id="612508" label="zzz2364" cy:nodeId="949">
    <graphics x="1756.9077134124782" y="1297.1479732744447" z="0.0"/>
  </node>
  <node id="612509" label="zzz2363" cy:nodeId="950">
    <graphics x="2994.2399506561305" y="286.40837213919076" z="0.0"/>
  </node>
  <node id="612510" label="zzz2362" cy:nodeId="951">
    <graphics x="1999.79443359375" y="-218.001953125" z="0.0"/>
  </node>
  <node id="612511" label="zzz2361" cy:nodeId="952">
    <graphics x="1981.239584445193" y="328.08757135794076" z="0.0"/>
  </node>
  <node id="612512" label="zzz2360" cy:nodeId="953">
    <graphics x="-948.1023116119359" y="362.1762096636048" z="0.0"/>
  </node>
  <node id="612513" label="zzz2359" cy:nodeId="954">
    <graphics x="2762.3846802703883" y="286.40837213919076" z="0.0"/>
  </node>
  <node id="612514" label="zzz2358" cy:nodeId="955">
    <graphics x="2124.2316498748805" y="347.4032757036439" z="0.0"/>
  </node>
  <node id="612515" label="zzz2357" cy:nodeId="956">
    <graphics x="258.249989031985" y="710.7553646318665" z="0.0"/>
  </node>
  <node id="612516" label="zzz2356" cy:nodeId="957">
    <graphics x="2466.8401360504176" y="-90.49438359811393" z="0.0"/>
  </node>
  <node id="612517" label="zzz2355" cy:nodeId="958">
    <graphics x="633.8783159248378" y="719.9230892412415" z="0.0"/>
  </node>
  <node id="612518" label="zzz2354" cy:nodeId="959">
    <graphics x="2364.945650576785" y="-166.2793872602233" z="0.0"/>
  </node>
  <node id="612519" label="zzz2353" cy:nodeId="960">
    <graphics x="2071.95361328125" y="-183.72030639648438" z="0.0"/>
  </node>
  <node id="612520" label="zzz2352" cy:nodeId="961">
    <graphics x="751.4844064704921" y="670.4288570635072" z="0.0"/>
  </node>
  <node id="612521" label="zzz2351" cy:nodeId="962">
    <graphics x="-480.73781347350814" y="726.4436886064759" z="0.0"/>
  </node>
  <node id="612522" label="zzz2350" cy:nodeId="963">
    <graphics x="-411.50635671691634" y="698.806512092804" z="0.0"/>
  </node>
  <node id="612523" label="zzz2349" cy:nodeId="964">
    <graphics x="2079.87841796875" y="-275.4620361328125" z="0.0"/>
  </node>
  <node id="612524" label="zzz2348" cy:nodeId="965">
    <graphics x="2062.72705078125" y="-102.7535400390625" z="0.0"/>
  </node>
  <node id="612525" label="zzz2347" cy:nodeId="966">
    <graphics x="-1055.060100079343" y="329.48878595755014" z="0.0"/>
  </node>
  <node id="612526" label="zzz2346" cy:nodeId="967">
    <graphics x="3240.247221469119" y="360.385239814972" z="0.0"/>
  </node>
  <node id="612527" label="zzz2345" cy:nodeId="968">
    <graphics x="1942.7036237709071" y="771.0286209337464" z="0.0"/>
  </node>
  <node id="612528" label="zzz2344" cy:nodeId="969">
    <graphics x="2084.68408203125" y="-124.18545532226562" z="0.0"/>
  </node>
  <node id="612529" label="zzz2343" cy:nodeId="970">
    <graphics x="-493.51919698791244" y="292.9580700151673" z="0.0"/>
  </node>
  <node id="612530" label="zzz2342" cy:nodeId="971">
    <graphics x="1048.040283203125" y="-119.90377807617188" z="0.0"/>
  </node>
  <node id="612531" label="zzz2341" cy:nodeId="972">
    <graphics x="-514.349656582639" y="327.563218330597" z="0.0"/>
  </node>
  <node id="612532" label="zzz2340" cy:nodeId="973">
    <graphics x="-652.7046179779027" y="752.9299137346497" z="0.0"/>
  </node>
  <node id="612533" label="zzz2339" cy:nodeId="974">
    <graphics x="745.6577758789062" y="-200.0780029296875" z="0.0"/>
  </node>
  <node id="612534" label="zzz2338" cy:nodeId="975">
    <graphics x="2392.4189934722926" y="-69.33235051705924" z="0.0"/>
  </node>
  <node id="612535" label="zzz2337" cy:nodeId="976">
    <graphics x="2404.914587496951" y="1125.6761791460267" z="0.0"/>
  </node>
  <node id="612536" label="zzz2336" cy:nodeId="977">
    <graphics x="1196.9307861328125" y="-147.34640502929688" z="0.0"/>
  </node>
  <node id="612537" label="zzz2335" cy:nodeId="978">
    <graphics x="2327.0347466461208" y="-75.98074224069205" z="0.0"/>
  </node>
  <node id="612538" label="zzz2334" cy:nodeId="979">
    <graphics x="2301.8971352569606" y="1125.6761791460267" z="0.0"/>
  </node>
  <node id="612539" label="zzz2333" cy:nodeId="980">
    <graphics x="674.6158733360317" y="652.4668209306947" z="0.0"/>
  </node>
  <node id="612540" label="zzz2332" cy:nodeId="981">
    <graphics x="-239.6375327117894" y="339.0223247759095" z="0.0"/>
  </node>
  <node id="612541" label="zzz2331" cy:nodeId="982">
    <graphics x="2113.05029296875" y="-140.12301635742188" z="0.0"/>
  </node>
  <node id="612542" label="zzz2330" cy:nodeId="983">
    <graphics x="-1094.2295699127171" y="322.7847759477845" z="0.0"/>
  </node>
  <node id="612543" label="zzz2329" cy:nodeId="984">
    <graphics x="2198.8796830169704" y="1125.6761791460267" z="0.0"/>
  </node>
  <node id="612544" label="zzz2328" cy:nodeId="985">
    <graphics x="1990.1192626953125" y="-258.67535400390625" z="0.0"/>
  </node>
  <node id="612545" label="zzz2327" cy:nodeId="986">
    <graphics x="-1090.529500485227" y="377.3651134721986" z="0.0"/>
  </node>
  <node id="612546" label="zzz2326" cy:nodeId="987">
    <graphics x="-1087.736546994016" y="414.66000482962045" z="0.0"/>
  </node>
  <node id="612547" label="zzz2325" cy:nodeId="988">
    <graphics x="2041.90283203125" y="-179.2410888671875" z="0.0"/>
  </node>
  <node id="612548" label="zzz2324" cy:nodeId="989">
    <graphics x="-766.3214392669652" y="766.5029957048646" z="0.0"/>
  </node>
  <node id="612549" label="zzz2323" cy:nodeId="990">
    <graphics x="2010.54345703125" y="-225.19720458984375" z="0.0"/>
  </node>
  <node id="612550" label="zzz2322" cy:nodeId="991">
    <graphics x="-1056.927308560178" y="446.15548822805795" z="0.0"/>
  </node>
  <node id="612551" label="zzz2321" cy:nodeId="992">
    <graphics x="3059.933432101443" y="324.755601143097" z="0.0"/>
  </node>
  <node id="612552" label="zzz2320" cy:nodeId="993">
    <graphics x="1696.6383881561305" y="359.10719416067514" z="0.0"/>
  </node>
  <node id="612553" label="zzz2319" cy:nodeId="994">
    <graphics x="596.0370469085719" y="1056.7654735796204" z="0.0"/>
  </node>
  <node id="612554" label="zzz2318" cy:nodeId="995">
    <graphics x="485.2782540313747" y="421.66720697805795" z="0.0"/>
  </node>
  <node id="612555" label="zzz2317" cy:nodeId="996">
    <graphics x="2779.4480042449977" y="434.03351137564096" z="0.0"/>
  </node>
  <node id="612556" label="zzz2316" cy:nodeId="997">
    <graphics x="2938.8791108123805" y="338.5159771196595" z="0.0"/>
  </node>
  <node id="612557" label="zzz2315" cy:nodeId="998">
    <graphics x="1656.9077134124782" y="1297.1479732744447" z="0.0"/>
  </node>
  <node id="612558" label="zzz2314" cy:nodeId="999">
    <graphics x="537.6582207672145" y="426.89486811087045" z="0.0"/>
  </node>
  <node id="612559" label="zzz2313" cy:nodeId="1000">
    <graphics x="2125.147216796875" y="-227.03082275390625" z="0.0"/>
  </node>
  <node id="612560" label="zzz2312" cy:nodeId="1001">
    <graphics x="2095.86223077698" y="1125.6761791460267" z="0.0"/>
  </node>
  <node id="612561" label="zzz2311" cy:nodeId="1002">
    <graphics x="1556.9077134124782" y="1297.1479732744447" z="0.0"/>
  </node>
  <node id="612562" label="zzz2310" cy:nodeId="1003">
    <graphics x="1999.4639892578125" y="-180.68682861328125" z="0.0"/>
  </node>
  <node id="612563" label="zzz2309" cy:nodeId="1004">
    <graphics x="395.4786133758571" y="1148.812257026886" z="0.0"/>
  </node>
  <node id="612564" label="zzz2308" cy:nodeId="1005">
    <graphics x="1456.9077134124782" y="1297.1479732744447" z="0.0"/>
  </node>
  <node id="612565" label="zzz2307" cy:nodeId="1006">
    <graphics x="1300.5523843757655" y="748.5512120477906" z="0.0"/>
  </node>
  <node id="612566" label="zzz2306" cy:nodeId="1007">
    <graphics x="1686.8098740570094" y="1017.9540111772767" z="0.0"/>
  </node>
  <node id="612567" label="zzz2305" cy:nodeId="1008">
    <graphics x="940.3131103515625" y="-137.1544952392578" z="0.0"/>
  </node>
  <node id="612568" label="zzz2304" cy:nodeId="1009">
    <graphics x="-448.4607710845921" y="332.67726252005014" z="0.0"/>
  </node>
  <node id="612569" label="zzz2303" cy:nodeId="1010">
    <graphics x="-487.44802999572494" y="438.84447595999154" z="0.0"/>
  </node>
  <node id="612570" label="zzz2302" cy:nodeId="1011">
    <graphics x="-450.5144972808812" y="294.3556225054017" z="0.0"/>
  </node>
  <node id="612571" label="zzz2301" cy:nodeId="1012">
    <graphics x="973.5490112304688" y="-17.082412719726562" z="0.0"/>
  </node>
  <node id="612572" label="zzz2300" cy:nodeId="1013">
    <graphics x="279.5577492706325" y="286.40837213919076" z="0.0"/>
  </node>
  <node id="612573" label="zzz2299" cy:nodeId="1014">
    <graphics x="-427.92205953674056" y="375.00697443411264" z="0.0"/>
  </node>
  <node id="612574" label="zzz2298" cy:nodeId="1015">
    <graphics x="796.5954804412868" y="1056.7654735796204" z="0.0"/>
  </node>
  <node id="612575" label="zzz2297" cy:nodeId="1016">
    <graphics x="2707.7964348785426" y="-140.61436727120963" z="0.0"/>
  </node>
  <node id="612576" label="zzz2296" cy:nodeId="1017">
    <graphics x="696.0370469085719" y="1017.9540111772767" z="0.0"/>
  </node>
  <node id="612577" label="zzz2295" cy:nodeId="1018">
    <graphics x="1058.7938232421875" y="-219.81112670898438" z="0.0"/>
  </node>
  <node id="612578" label="zzz2294" cy:nodeId="1019">
    <graphics x="1356.9077134124782" y="1297.1479732744447" z="0.0"/>
  </node>
  <node id="612579" label="zzz2293" cy:nodeId="1020">
    <graphics x="1256.9077134124782" y="1297.1479732744447" z="0.0"/>
  </node>
  <node id="612580" label="zzz2292" cy:nodeId="1021">
    <graphics x="1992.84477853699" y="1125.6761791460267" z="0.0"/>
  </node>
  <node id="612581" label="zzz2291" cy:nodeId="1022">
    <graphics x="1156.9077134124782" y="1297.1479732744447" z="0.0"/>
  </node>
  <node id="612582" label="zzz2290" cy:nodeId="1023">
    <graphics x="-526.5984892852757" y="421.39899561331185" z="0.0"/>
  </node>
  <node id="612583" label="zzz2289" cy:nodeId="1024">
    <graphics x="994.1702880859375" y="-178.07574462890625" z="0.0"/>
  </node>
  <node id="612584" label="zzz2288" cy:nodeId="1025">
    <graphics x="2672.557756900027" y="-95.92074182107535" z="0.0"/>
  </node>
  <node id="612585" label="zzz2287" cy:nodeId="1026">
    <graphics x="1056.9077134124782" y="1297.1479732744447" z="0.0"/>
  </node>
  <node id="612586" label="zzz2286" cy:nodeId="1027">
    <graphics x="2026.0959687225368" y="286.40837213919076" z="0.0"/>
  </node>
  <node id="612587" label="zzz2285" cy:nodeId="1028">
    <graphics x="-451.8079848297093" y="413.25409815237435" z="0.0"/>
  </node>
  <node id="612588" label="zzz2284" cy:nodeId="1029">
    <graphics x="956.9077134124782" y="1297.1479732744447" z="0.0"/>
  </node>
  <node id="612589" label="zzz2283" cy:nodeId="1030">
    <graphics x="856.9077134124782" y="1297.1479732744447" z="0.0"/>
  </node>
  <node id="612590" label="zzz2282" cy:nodeId="1031">
    <graphics x="756.9077134124782" y="1297.1479732744447" z="0.0"/>
  </node>
  <node id="612591" label="zzz2281" cy:nodeId="1032">
    <graphics x="2121.1845703125" y="-147.01980590820312" z="0.0"/>
  </node>
  <node id="612592" label="zzz2280" cy:nodeId="1033">
    <graphics x="1889.8273262969997" y="1125.6761791460267" z="0.0"/>
  </node>
  <node id="612593" label="zzz2279" cy:nodeId="1034">
    <graphics x="2053.632101535037" y="360.2422420732728" z="0.0"/>
  </node>
  <node id="612594" label="zzz2278" cy:nodeId="1035">
    <graphics x="3309.4786782257106" y="332.74806330130014" z="0.0"/>
  </node>
  <node id="612595" label="zzz2277" cy:nodeId="1036">
    <graphics x="-552.7046179779027" y="708.6252681963197" z="0.0"/>
  </node>
  <node id="612596" label="zzz2276" cy:nodeId="1037">
    <graphics x="2432.7195610992458" y="-178.06323125436393" z="0.0"/>
  </node>
  <node id="612597" label="zzz2275" cy:nodeId="1038">
    <graphics x="-307.1539549835179" y="428.6634075395814" z="0.0"/>
  </node>
  <node id="612598" label="zzz2274" cy:nodeId="1039">
    <graphics x="2425.6941094390895" y="-93.20341374948111" z="0.0"/>
  </node>
  <node id="612599" label="zzz2273" cy:nodeId="1040">
    <graphics x="-175.51735448913314" y="413.8648540727845" z="0.0"/>
  </node>
  <node id="612600" label="zzz2272" cy:nodeId="1041">
    <graphics x="-485.5423579223607" y="652.4668209306947" z="0.0"/>
  </node>
  <node id="612601" label="zzz2271" cy:nodeId="1042">
    <graphics x="2339.3172173492458" y="-99.36627080514518" z="0.0"/>
  </node>
  <node id="612602" label="zzz2270" cy:nodeId="1043">
    <graphics x="-278.674176693723" y="373.2813579790345" z="0.0"/>
  </node>
  <node id="612603" label="zzz2269" cy:nodeId="1044">
    <graphics x="495.4786133758571" y="1017.9540111772767" z="0.0"/>
  </node>
  <node id="612604" label="zzz2268" cy:nodeId="1045">
    <graphics x="-519.9643976695988" y="789.617058967804" z="0.0"/>
  </node>
  <node id="612605" label="zzz2267" cy:nodeId="1046">
    <graphics x="-989.3218741424535" y="461.2782299272767" z="0.0"/>
  </node>
  <node id="612606" label="zzz2266" cy:nodeId="1047">
    <graphics x="-1011.2666602142308" y="665.1942226640931" z="0.0"/>
  </node>
  <node id="612607" label="zzz2265" cy:nodeId="1048">
    <graphics x="-432.7476515777562" y="783.6922237627259" z="0.0"/>
  </node>
  <node id="612608" label="zzz2264" cy:nodeId="1049">
    <graphics x="1818.8578095428493" y="308.6131145708314" z="0.0"/>
  </node>
  <node id="612609" label="zzz2263" cy:nodeId="1050">
    <graphics x="3068.2804169647243" y="394.338364814972" z="0.0"/>
  </node>
  <node id="612610" label="zzz2262" cy:nodeId="1051">
    <graphics x="3007.697405814364" y="758.9538814775697" z="0.0"/>
  </node>
  <node id="612611" label="zzz2261" cy:nodeId="1052">
    <graphics x="-574.3137755401585" y="424.30558893606576" z="0.0"/>
  </node>
  <node id="612612" label="zzz2260" cy:nodeId="1053">
    <graphics x="2181.627685546875" y="-158.91766357421875" z="0.0"/>
  </node>
  <node id="612613" label="zzz2259" cy:nodeId="1054">
    <graphics x="1786.8098740570094" y="1125.6761791460267" z="0.0"/>
  </node>
  <node id="612614" label="zzz2258" cy:nodeId="1055">
    <graphics x="587.9020943634059" y="415.51954767630014" z="0.0"/>
  </node>
  <node id="612615" label="zzz2257" cy:nodeId="1056">
    <graphics x="2002.770751953125" y="-140.41986083984375" z="0.0"/>
  </node>
  <node id="612616" label="zzz2256" cy:nodeId="1057">
    <graphics x="2079.508056640625" y="-89.23678588867188" z="0.0"/>
  </node>
  <node id="612617" label="zzz2255" cy:nodeId="1058">
    <graphics x="2093.026123046875" y="-223.763671875" z="0.0"/>
  </node>
  <node id="612618" label="zzz2254" cy:nodeId="1059">
    <graphics x="3168.2804169647243" y="342.56681940481576" z="0.0"/>
  </node>
  <node id="612619" label="zzz2253" cy:nodeId="1060">
    <graphics x="3000.5426850311305" y="333.957261299347" z="0.0"/>
  </node>
  <node id="612620" label="zzz2252" cy:nodeId="1061">
    <graphics x="2771.263998507693" y="360.1549331896058" z="0.0"/>
  </node>
  <node id="612621" label="zzz2251" cy:nodeId="1062">
    <graphics x="656.9077134124782" y="1297.1479732744447" z="0.0"/>
  </node>
  <node id="612622" label="zzz2250" cy:nodeId="1063">
    <graphics x="1683.7924218170192" y="1125.6761791460267" z="0.0"/>
  </node>
  <node id="612623" label="zzz2249" cy:nodeId="1064">
    <graphics x="1051.88330078125" y="-9.035750389099121" z="0.0"/>
  </node>
  <node id="612624" label="zzz2248" cy:nodeId="1065">
    <graphics x="225.37407398147843" y="827.1018764726869" z="0.0"/>
  </node>
  <node id="612625" label="zzz2247" cy:nodeId="1066">
    <graphics x="183.07670688553117" y="736.0979778520814" z="0.0"/>
  </node>
  <node id="612626" label="zzz2246" cy:nodeId="1067">
    <graphics x="409.8065500251796" y="719.9230892412415" z="0.0"/>
  </node>
  <node id="612627" label="zzz2245" cy:nodeId="1068">
    <graphics x="971.7943725585938" y="-161.91729736328125" z="0.0"/>
  </node>
  <node id="612628" label="zzz2244" cy:nodeId="1069">
    <graphics x="1105.73974609375" y="-54.06877136230469" z="0.0"/>
  </node>
  <node id="612629" label="zzz2243" cy:nodeId="1070">
    <graphics x="1070.8703217498805" y="547.9337017290345" z="0.0"/>
  </node>
  <node id="612630" label="zzz2242" cy:nodeId="1071">
    <graphics x="556.9077134124782" y="1297.1479732744447" z="0.0"/>
  </node>
  <node id="612631" label="zzz2241" cy:nodeId="1072">
    <graphics x="1368.8205285064723" y="-113.34881475045768" z="0.0"/>
  </node>
  <node id="612632" label="zzz2240" cy:nodeId="1073">
    <graphics x="3091.613764762118" y="691.2782833330384" z="0.0"/>
  </node>
  <node id="612633" label="zzz2239" cy:nodeId="1074">
    <graphics x="3235.4426770202663" y="286.40837213919076" z="0.0"/>
  </node>
  <node id="612634" label="zzz2238" cy:nodeId="1075">
    <graphics x="1974.560302734375" y="-195.00967407226562" z="0.0"/>
  </node>
  <node id="612635" label="zzz2237" cy:nodeId="1076">
    <graphics x="456.9077134124782" y="1297.1479732744447" z="0.0"/>
  </node>
  <node id="612636" label="zzz2236" cy:nodeId="1077">
    <graphics x="1119.9447021484375" y="-218.71923828125" z="0.0"/>
  </node>
  <node id="612637" label="zzz2235" cy:nodeId="1078">
    <graphics x="2087.3197846405055" y="292.12248346731576" z="0.0"/>
  </node>
  <node id="612638" label="zzz2234" cy:nodeId="1079">
    <graphics x="545.0793442718532" y="525.7942211382142" z="0.0"/>
  </node>
  <node id="612639" label="zzz2233" cy:nodeId="1080">
    <graphics x="1983.6146454803493" y="389.84347650930795" z="0.0"/>
  </node>
  <node id="612640" label="zzz2232" cy:nodeId="1081">
    <graphics x="2036.6562104217555" y="429.95040438101205" z="0.0"/>
  </node>
  <node id="612641" label="zzz2231" cy:nodeId="1082">
    <graphics x="2099.436544894412" y="408.7569668047181" z="0.0"/>
  </node>
  <node id="612642" label="zzz2230" cy:nodeId="1083">
    <graphics x="39.45257425232194" y="1124.4410717241517" z="0.0"/>
  </node>
  <node id="612643" label="zzz2229" cy:nodeId="1084">
    <graphics x="2299.7024254791286" y="-50.777449394012365" z="0.0"/>
  </node>
  <node id="612644" label="zzz2228" cy:nodeId="1085">
    <graphics x="898.6876392356899" y="652.4668209306947" z="0.0"/>
  </node>
  <node id="612645" label="zzz2227" cy:nodeId="1086">
    <graphics x="223.36893320007584" y="1017.9540111772767" z="0.0"/>
  </node>
  <node id="612646" label="zzz2226" cy:nodeId="1087">
    <graphics x="1377.7575173370387" y="1017.9540111772767" z="0.0"/>
  </node>
  <node id="612647" label="zzz2225" cy:nodeId="1088">
    <graphics x="909.3717913620021" y="779.5846645586244" z="0.0"/>
  </node>
  <node id="612648" label="zzz2224" cy:nodeId="1089">
    <graphics x="-769.1961951263402" y="863.3829548113099" z="0.0"/>
  </node>
  <node id="612649" label="zzz2223" cy:nodeId="1090">
    <graphics x="2327.9740777008083" y="-144.18720891549674" z="0.0"/>
  </node>
  <node id="612650" label="zzz2222" cy:nodeId="1091">
    <graphics x="-1031.6597990997288" y="404.7817699663392" z="0.0"/>
  </node>
  <node id="612651" label="zzz2221" cy:nodeId="1092">
    <graphics x="1583.7924218170192" y="1017.9540111772767" z="0.0"/>
  </node>
  <node id="612652" label="zzz2220" cy:nodeId="1093">
    <graphics x="-1131.4281477935765" y="339.3600475542298" z="0.0"/>
  </node>
  <node id="612653" label="zzz2219" cy:nodeId="1094">
    <graphics x="1580.774969577029" y="1125.6761791460267" z="0.0"/>
  </node>
  <node id="612654" label="zzz2218" cy:nodeId="1095">
    <graphics x="2151.8330078125" y="-178.2965087890625" z="0.0"/>
  </node>
  <node id="612655" label="zzz2217" cy:nodeId="1096">
    <graphics x="-1045.8234968193028" y="370.25538752005014" z="0.0"/>
  </node>
  <node id="612656" label="zzz2216" cy:nodeId="1097">
    <graphics x="-211.9903922088597" y="444.0878460161439" z="0.0"/>
  </node>
  <node id="612657" label="zzz2215" cy:nodeId="1098">
    <graphics x="3518.2940087310817" y="370.5676948778382" z="0.0"/>
  </node>
  <node id="612658" label="zzz2214" cy:nodeId="1099">
    <graphics x="-217.8109946258519" y="386.7491314165345" z="0.0"/>
  </node>
  <node id="612659" label="zzz2213" cy:nodeId="1100">
    <graphics x="-327.92205953674056" y="385.079331611847" z="0.0"/>
  </node>
  <node id="612660" label="zzz2212" cy:nodeId="1101">
    <graphics x="-860.0235266693089" y="864.8998462908021" z="0.0"/>
  </node>
  <node id="612661" label="zzz2211" cy:nodeId="1102">
    <graphics x="-281.3012061126683" y="309.45741388723764" z="0.0"/>
  </node>
  <node id="612662" label="zzz2210" cy:nodeId="1103">
    <graphics x="-962.9155859954808" y="729.2454693071595" z="0.0"/>
  </node>
  <node id="612663" label="zzz2209" cy:nodeId="1104">
    <graphics x="2711.557241915896" y="404.7149688951722" z="0.0"/>
  </node>
  <node id="612664" label="zzz2208" cy:nodeId="1105">
    <graphics x="532.5365929595973" y="356.3407757036439" z="0.0"/>
  </node>
  <node id="612665" label="zzz2207" cy:nodeId="1106">
    <graphics x="1355.7693643562343" y="654.531473850464" z="0.0"/>
  </node>
  <node id="612666" label="zzz2206" cy:nodeId="1107">
    <graphics x="685.3000254623439" y="779.5846645586244" z="0.0"/>
  </node>
  <node id="612667" label="zzz2205" cy:nodeId="1108">
    <graphics x="3010.5810456268337" y="430.3731243364564" z="0.0"/>
  </node>
  <node id="612668" label="zzz2204" cy:nodeId="1109">
    <graphics x="-263.55949926452377" y="468.4198620073548" z="0.0"/>
  </node>
  <node id="612669" label="zzz2203" cy:nodeId="1110">
    <graphics x="585.2486729614284" y="306.9033977739564" z="0.0"/>
  </node>
  <node id="612670" label="zzz2202" cy:nodeId="1111">
    <graphics x="2838.8791108123805" y="389.8939010851136" z="0.0"/>
  </node>
  <node id="612671" label="zzz2201" cy:nodeId="1112">
    <graphics x="-1143.0922865875218" y="399.9361889116517" z="0.0"/>
  </node>
  <node id="612672" label="zzz2200" cy:nodeId="1113">
    <graphics x="2387.7175774566676" y="-230.4030444867858" z="0.0"/>
  </node>
  <node id="612673" label="zzz2199" cy:nodeId="1114">
    <graphics x="-1017.4228396423314" y="324.83082697317514" z="0.0"/>
  </node>
  <node id="612674" label="zzz2198" cy:nodeId="1115">
    <graphics x="527.4126405708339" y="670.4288570635072" z="0.0"/>
  </node>
  <node id="612675" label="zzz2197" cy:nodeId="1116">
    <graphics x="450.54410743637345" y="652.4668209306947" z="0.0"/>
  </node>
  <node id="612676" label="zzz2196" cy:nodeId="1117">
    <graphics x="2048.74853515625" y="-247.12628173828125" z="0.0"/>
  </node>
  <node id="612677" label="zzz2195" cy:nodeId="1118">
    <graphics x="530.6929116241481" y="286.40837213919076" z="0.0"/>
  </node>
  <node id="612678" label="zzz2194" cy:nodeId="1119">
    <graphics x="2831.0933976165798" y="315.9954635851136" z="0.0"/>
  </node>
  <node id="612679" label="zzz2193" cy:nodeId="1120">
    <graphics x="2595.2656998626735" y="315.9954635851136" z="0.0"/>
  </node>
  <node id="612680" label="zzz2192" cy:nodeId="1121">
    <graphics x="-1089.195203305051" y="464.4717876665345" z="0.0"/>
  </node>
  <node id="612681" label="zzz2191" cy:nodeId="1122">
    <graphics x="356.9077134124782" y="1297.1479732744447" z="0.0"/>
  </node>
  <node id="612682" label="zzz2190" cy:nodeId="1123">
    <graphics x="893.1907958984375" y="-128.66990661621094" z="0.0"/>
  </node>
  <node id="612683" label="zzz2189" cy:nodeId="1124">
    <graphics x="991.201416015625" y="-38.02885437011719" z="0.0"/>
  </node>
  <node id="612684" label="zzz2188" cy:nodeId="1125">
    <graphics x="3292.172198294833" y="691.2782833330384" z="0.0"/>
  </node>
  <node id="612685" label="zzz2187" cy:nodeId="1126">
    <graphics x="1703.079253195956" y="748.7255336992494" z="0.0"/>
  </node>
  <node id="612686" label="zzz2186" cy:nodeId="1127">
    <graphics x="-1033.124715328977" y="768.0702373735658" z="0.0"/>
  </node>
  <node id="612687" label="zzz2185" cy:nodeId="1128">
    <graphics x="256.9077134124782" y="1297.1479732744447" z="0.0"/>
  </node>
  <node id="612688" label="zzz2184" cy:nodeId="1129">
    <graphics x="878.40966796875" y="53.50553894042969" z="0.0"/>
  </node>
  <node id="612689" label="zzz2183" cy:nodeId="1130">
    <graphics x="1529.757620333865" y="309.10008785650643" z="0.0"/>
  </node>
  <node id="612690" label="zzz2182" cy:nodeId="1131">
    <graphics x="-1072.7881712921117" y="652.4668209306947" z="0.0"/>
  </node>
  <node id="612691" label="zzz2181" cy:nodeId="1132">
    <graphics x="777.5021386138942" y="286.40837213919076" z="0.0"/>
  </node>
  <node id="612692" label="zzz2180" cy:nodeId="1133">
    <graphics x="156.9077134124782" y="1297.1479732744447" z="0.0"/>
  </node>
  <node id="612693" label="zzz2179" cy:nodeId="1134">
    <graphics x="1409.5511789314296" y="746.4777714960328" z="0.0"/>
  </node>
  <node id="612694" label="zzz2178" cy:nodeId="1135">
    <graphics x="2487.658373355105" y="-186.21491887643424" z="0.0"/>
  </node>
  <node id="612695" label="zzz2177" cy:nodeId="1136">
    <graphics x="2705.896349429324" y="-271.11704900338736" z="0.0"/>
  </node>
  <node id="612696" label="zzz2176" cy:nodeId="1137">
    <graphics x="239.23623132629655" y="318.56703302786264" z="0.0"/>
  </node>
  <node id="612697" label="zzz2175" cy:nodeId="1138">
    <graphics x="922.0172119140625" y="-143.49696350097656" z="0.0"/>
  </node>
  <node id="612698" label="zzz2174" cy:nodeId="1139">
    <graphics x="927.0479125976562" y="-188.96839904785156" z="0.0"/>
  </node>
  <node id="612699" label="zzz2173" cy:nodeId="1140">
    <graphics x="56.90771341247819" y="1297.1479732744447" z="0.0"/>
  </node>
  <node id="612700" label="zzz2172" cy:nodeId="1141">
    <graphics x="3537.238345145419" y="812.9152157060853" z="0.0"/>
  </node>
  <node id="612701" label="zzz2171" cy:nodeId="1142">
    <graphics x="1084.8363037109375" y="-50.31721496582031" z="0.0"/>
  </node>
  <node id="612702" label="zzz2170" cy:nodeId="1143">
    <graphics x="-43.09228658752181" y="1297.1479732744447" z="0.0"/>
  </node>
  <node id="612703" label="zzz2169" cy:nodeId="1144">
    <graphics x="-143.0922865875218" y="1297.1479732744447" z="0.0"/>
  </node>
  <node id="612704" label="zzz2168" cy:nodeId="1145">
    <graphics x="-243.0922865875218" y="1297.1479732744447" z="0.0"/>
  </node>
  <node id="612705" label="zzz2167" cy:nodeId="1146">
    <graphics x="123.36893320007584" y="1056.7654735796204" z="0.0"/>
  </node>
  <node id="612706" label="zzz2166" cy:nodeId="1147">
    <graphics x="-549.8576140411351" y="1197.1479732744447" z="0.0"/>
  </node>
  <node id="612707" label="zzz2165" cy:nodeId="1148">
    <graphics x="1818.463217257693" y="379.2881633989564" z="0.0"/>
  </node>
  <node id="612708" label="zzz2164" cy:nodeId="1149">
    <graphics x="2338.9115777008083" y="-183.54690435006705" z="0.0"/>
  </node>
  <node id="612709" label="zzz2163" cy:nodeId="1150">
    <graphics x="2333.9601616851833" y="-230.2327564008483" z="0.0"/>
  </node>
  <node id="612710" label="zzz2162" cy:nodeId="1151">
    <graphics x="2451.63225030823" y="-136.79797246530143" z="0.0"/>
  </node>
  <node id="612711" label="zzz2161" cy:nodeId="1152">
    <graphics x="-343.0922865875218" y="1297.1479732744447" z="0.0"/>
  </node>
  <node id="612712" label="zzz2160" cy:nodeId="1153">
    <graphics x="-443.0922865875218" y="1297.1479732744447" z="0.0"/>
  </node>
  <node id="612713" label="zzz2159" cy:nodeId="1154">
    <graphics x="-543.0922865875218" y="1297.1479732744447" z="0.0"/>
  </node>
  <node id="612714" label="zzz2158" cy:nodeId="1155">
    <graphics x="1756.039488791659" y="652.4668209306947" z="0.0"/>
  </node>
  <node id="612715" label="zzz2157" cy:nodeId="1156">
    <graphics x="960.999755859375" y="21.526382446289062" z="0.0"/>
  </node>
  <node id="612716" label="zzz2156" cy:nodeId="1157">
    <graphics x="962.596923828125" y="-102.49453735351562" z="0.0"/>
  </node>
  <node id="612717" label="zzz2155" cy:nodeId="1158">
    <graphics x="-643.0922865875218" y="1297.1479732744447" z="0.0"/>
  </node>
  <node id="612718" label="zzz2154" cy:nodeId="1159">
    <graphics x="205.8017983428981" y="361.7119915239564" z="0.0"/>
  </node>
  <node id="612719" label="zzz2153" cy:nodeId="1160">
    <graphics x="260.1874184600856" y="394.22099420950326" z="0.0"/>
  </node>
  <node id="612720" label="zzz2152" cy:nodeId="1161">
    <graphics x="3462.1518888465907" y="735.5001461260072" z="0.0"/>
  </node>
  <node id="612721" label="zzz2151" cy:nodeId="1162">
    <graphics x="1032.178955078125" y="-51.79290771484375" z="0.0"/>
  </node>
  <node id="612722" label="zzz2150" cy:nodeId="1163">
    <graphics x="-1143.0922865875218" y="689.7869961015931" z="0.0"/>
  </node>
  <node id="612723" label="zzz2149" cy:nodeId="1164">
    <graphics x="22.810499667361" y="1017.9540111772767" z="0.0"/>
  </node>
  <node id="612724" label="zzz2148" cy:nodeId="1165">
    <graphics x="-743.0922865875218" y="1297.1479732744447" z="0.0"/>
  </node>
  <node id="612725" label="zzz2147" cy:nodeId="1166">
    <graphics x="309.8065500251796" y="769.7314388506165" z="0.0"/>
  </node>
  <node id="612726" label="zzz2146" cy:nodeId="1167">
    <graphics x="461.2282595626857" y="779.5846645586244" z="0.0"/>
  </node>
  <node id="612727" label="zzz2145" cy:nodeId="1168">
    <graphics x="1755.3414521209743" y="286.40837213919076" z="0.0"/>
  </node>
  <node id="612728" label="zzz2144" cy:nodeId="1169">
    <graphics x="905.7312622070312" y="-79.80949401855469" z="0.0"/>
  </node>
  <node id="612729" label="zzz2143" cy:nodeId="1170">
    <graphics x="1050.452880859375" y="-17.285614013671875" z="0.0"/>
  </node>
  <node id="612730" label="zzz2142" cy:nodeId="1171">
    <graphics x="911.7708740234375" y="-41.46710205078125" z="0.0"/>
  </node>
  <node id="612731" label="zzz2141" cy:nodeId="1172">
    <graphics x="1005.2994384765625" y="-137.46849060058594" z="0.0"/>
  </node>
  <node id="612732" label="zzz2140" cy:nodeId="1173">
    <graphics x="-1095.4836192138646" y="755.0419323198548" z="0.0"/>
  </node>
  <node id="612733" label="zzz2139" cy:nodeId="1174">
    <graphics x="1500.0282807342555" y="425.53390858099374" z="0.0"/>
  </node>
  <node id="612734" label="zzz2138" cy:nodeId="1175">
    <graphics x="-843.0922865875218" y="1297.1479732744447" z="0.0"/>
  </node>
  <node id="612735" label="zzz2137" cy:nodeId="1176">
    <graphics x="1477.7575173370387" y="1125.6761791460267" z="0.0"/>
  </node>
  <node id="612736" label="zzz2136" cy:nodeId="1177">
    <graphics x="1007.6932373046875" y="-201.6131591796875" z="0.0"/>
  </node>
  <node id="612737" label="zzz2135" cy:nodeId="1178">
    <graphics x="1750.6085419647243" y="371.2393657915345" z="0.0"/>
  </node>
  <node id="612738" label="zzz2134" cy:nodeId="1179">
    <graphics x="1282.8017792694118" y="336.906959270691" z="0.0"/>
  </node>
  <node id="612739" label="zzz2133" cy:nodeId="1180">
    <graphics x="-177.74793386535384" y="1017.9540111772767" z="0.0"/>
  </node>
  <node id="612740" label="zzz2132" cy:nodeId="1181">
    <graphics x="1374.7400650970485" y="1125.6761791460267" z="0.0"/>
  </node>
  <node id="612741" label="zzz2131" cy:nodeId="1182">
    <graphics x="2402.8359246246364" y="-188.03185918405143" z="0.0"/>
  </node>
  <node id="612742" label="zzz2130" cy:nodeId="1183">
    <graphics x="1271.7226128570583" y="1125.6761791460267" z="0.0"/>
  </node>
  <node id="612743" label="zzz2129" cy:nodeId="1184">
    <graphics x="-943.0922865875218" y="1297.1479732744447" z="0.0"/>
  </node>
  <node id="612744" label="zzz2128" cy:nodeId="1185">
    <graphics x="-449.8576140411351" y="1017.9540111772767" z="0.0"/>
  </node>
  <node id="612745" label="zzz2127" cy:nodeId="1186">
    <graphics x="2748.4084038726833" y="-275.4620349653014" z="0.0"/>
  </node>
  <node id="612746" label="zzz2126" cy:nodeId="1187">
    <graphics x="994.3125" y="-86.05621337890625" z="0.0"/>
  </node>
  <node id="612747" label="zzz2125" cy:nodeId="1188">
    <graphics x="2768.9125542633083" y="-140.85678746774283" z="0.0"/>
  </node>
  <node id="612748" label="zzz2124" cy:nodeId="1189">
    <graphics x="2770.496447085574" y="-226.41181829049674" z="0.0"/>
  </node>
  <node id="612749" label="zzz2123" cy:nodeId="1190">
    <graphics x="2775.7155480377223" y="-191.02691533639518" z="0.0"/>
  </node>
  <node id="612750" label="zzz2122" cy:nodeId="1191">
    <graphics x="2732.0166497222926" y="-191.54917028024283" z="0.0"/>
  </node>
  <node id="612751" label="zzz2121" cy:nodeId="1192">
    <graphics x="2684.189806460574" y="-174.93729283883658" z="0.0"/>
  </node>
  <node id="612752" label="zzz2120" cy:nodeId="1193">
    <graphics x="2653.487658023074" y="-227.18083074166861" z="0.0"/>
  </node>
  <node id="612753" label="zzz2119" cy:nodeId="1194">
    <graphics x="2641.0876030914333" y="-215.53802373483268" z="0.0"/>
  </node>
  <node id="612754" label="zzz2118" cy:nodeId="1195">
    <graphics x="3694.6678872100856" y="318.98437426016244" z="0.0"/>
  </node>
  <node id="612755" label="zzz2117" cy:nodeId="1196">
    <graphics x="-604.3693938262913" y="1104.177590584015" z="0.0"/>
  </node>
  <node id="612756" label="zzz2116" cy:nodeId="1197">
    <graphics x="1021.18896484375" y="-60.04203796386719" z="0.0"/>
  </node>
  <node id="612757" label="zzz2115" cy:nodeId="1198">
    <graphics x="-1043.0922865875218" y="1297.1479732744447" z="0.0"/>
  </node>
  <node id="612758" label="zzz2114" cy:nodeId="1199">
    <graphics x="-1126.4502120025609" y="1124.4410717241517" z="0.0"/>
  </node>
  <node id="612759" label="zzz2113" cy:nodeId="1200">
    <graphics x="-1042.533853054807" y="1056.7654735796204" z="0.0"/>
  </node>
  <node id="612760" label="zzz2112" cy:nodeId="1201">
    <graphics x="481.347063540652" y="-72.23448064401236" z="0.0"/>
  </node>
  <node id="612761" label="zzz2111" cy:nodeId="1202">
    <graphics x="988.1524658203125" y="-196.87855529785156" z="0.0"/>
  </node>
  <node id="612762" label="zzz2110" cy:nodeId="1203">
    <graphics x="-942.533853054807" y="1017.9540111772767" z="0.0"/>
  </node>
  <node id="612763" label="zzz2109" cy:nodeId="1204">
    <graphics x="1171.7226128570583" y="1017.9540111772767" z="0.0"/>
  </node>
  <node id="612764" label="zzz2108" cy:nodeId="1205">
    <graphics x="2609.5812859527614" y="-153.77798345162955" z="0.0"/>
  </node>
  <node id="612765" label="zzz2107" cy:nodeId="1206">
    <graphics x="2643.43059015198" y="-176.6927402265319" z="0.0"/>
  </node>
  <node id="612766" label="zzz2106" cy:nodeId="1207">
    <graphics x="2715.594866275027" y="-114.736040855194" z="0.0"/>
  </node>
  <node id="612767" label="zzz2105" cy:nodeId="1208">
    <graphics x="2745.8649468414333" y="-161.98264958932486" z="0.0"/>
  </node>
  <node id="612768" label="zzz2104" cy:nodeId="1209">
    <graphics x="2667.2062554351833" y="-131.1734073407897" z="0.0"/>
  </node>
  <node id="612769" label="zzz2103" cy:nodeId="1210">
    <graphics x="2674.4499993316676" y="-255.49514653756705" z="0.0"/>
  </node>
  <node id="612770" label="zzz2102" cy:nodeId="1211">
    <graphics x="2587.658373355105" y="-154.88407018258658" z="0.0"/>
  </node>
  <node id="612771" label="zzz2101" cy:nodeId="1212">
    <graphics x="2666.9802117340114" y="-274.0574939496764" z="0.0"/>
  </node>
  <node id="612772" label="zzz2100" cy:nodeId="1213">
    <graphics x="2736.1552300445583" y="-128.752699638153" z="0.0"/>
  </node>
  <node id="612773" label="zzz2099" cy:nodeId="1214">
    <graphics x="2623.956163882449" y="-257.85066106393424" z="0.0"/>
  </node>
  <node id="612774" label="zzz2098" cy:nodeId="1215">
    <graphics x="2688.696154116824" y="-211.2955463178405" z="0.0"/>
  </node>
  <node id="612775" label="zzz2097" cy:nodeId="1216">
    <graphics x="-1143.0922865875218" y="1297.1479732744447" z="0.0"/>
  </node>
  <node id="612776" label="zzz2096" cy:nodeId="1217">
    <graphics x="-1143.0922865875218" y="1017.9540111772767" z="0.0"/>
  </node>
  <node id="612777" label="zzz2095" cy:nodeId="1218">
    <graphics x="3420.001848696902" y="1017.9540111772767" z="0.0"/>
  </node>
  <node id="612778" label="zzz2094" cy:nodeId="1219">
    <graphics x="1026.068359375" y="-58.17240905761719" z="0.0"/>
  </node>
  <node id="612779" label="zzz2093" cy:nodeId="1220">
    <graphics x="1479.0634064666774" y="370.2354619257203" z="0.0"/>
  </node>
  <node id="612780" label="zzz2092" cy:nodeId="1221">
    <graphics x="3320.001848696902" y="1017.9540111772767" z="0.0"/>
  </node>
  <node id="612781" label="zzz2091" cy:nodeId="1222">
    <graphics x="3220.001848696902" y="1017.9540111772767" z="0.0"/>
  </node>
  <node id="612782" label="zzz2090" cy:nodeId="1223">
    <graphics x="1168.705160617068" y="1125.6761791460267" z="0.0"/>
  </node>
  <node id="612783" label="zzz2089" cy:nodeId="1224">
    <graphics x="3120.001848696902" y="1017.9540111772767" z="0.0"/>
  </node>
  <node id="612784" label="zzz2088" cy:nodeId="1225">
    <graphics x="1070.5726318359375" y="-113.36868286132812" z="0.0"/>
  </node>
  <node id="612785" label="zzz2087" cy:nodeId="1226">
    <graphics x="1464.7126169197109" y="652.4668209306947" z="0.0"/>
  </node>
  <node id="612786" label="zzz2086" cy:nodeId="1227">
    <graphics x="867.9454216949489" y="535.3876278154603" z="0.0"/>
  </node>
  <node id="612787" label="zzz2085" cy:nodeId="1228">
    <graphics x="1082.6493744842555" y="426.5491802446595" z="0.0"/>
  </node>
  <node id="612788" label="zzz2084" cy:nodeId="1229">
    <graphics x="3392.172198294833" y="652.4668209306947" z="0.0"/>
  </node>
  <node id="612789" label="zzz2083" cy:nodeId="1230">
    <graphics x="2369.079775332644" y="-238.50030400827018" z="0.0"/>
  </node>
  <node id="612790" label="zzz2082" cy:nodeId="1231">
    <graphics x="2410.6276421539333" y="-115.2549731977233" z="0.0"/>
  </node>
  <node id="612791" label="zzz2081" cy:nodeId="1232">
    <graphics x="974.591064453125" y="-45.952911376953125" z="0.0"/>
  </node>
  <node id="612792" label="zzz2080" cy:nodeId="1233">
    <graphics x="1873.3348603240993" y="434.4842846147767" z="0.0"/>
  </node>
  <node id="612793" label="zzz2079" cy:nodeId="1234">
    <graphics x="1092.4503173828125" y="-135.11077880859375" z="0.0"/>
  </node>
  <node id="612794" label="zzz2078" cy:nodeId="1235">
    <graphics x="1078.9906005859375" y="-185.8363494873047" z="0.0"/>
  </node>
  <node id="612795" label="zzz2077" cy:nodeId="1236">
    <graphics x="966.7013549804688" y="-111.21417236328125" z="0.0"/>
  </node>
  <node id="612796" label="zzz2076" cy:nodeId="1237">
    <graphics x="981.24609375" y="-77.60105895996094" z="0.0"/>
  </node>
  <node id="612797" label="zzz2075" cy:nodeId="1238">
    <graphics x="1065.01416015625" y="-75.21681213378906" z="0.0"/>
  </node>
  <node id="612798" label="zzz2074" cy:nodeId="1239">
    <graphics x="923.9326171875" y="118.53160095214844" z="0.0"/>
  </node>
  <node id="612799" label="zzz2073" cy:nodeId="1240">
    <graphics x="1038.641357421875" y="-175.6553192138672" z="0.0"/>
  </node>
  <node id="612800" label="zzz2072" cy:nodeId="1241">
    <graphics x="-545.5182738311742" y="376.55172846243295" z="0.0"/>
  </node>
  <node id="612801" label="zzz2071" cy:nodeId="1242">
    <graphics x="271.74750614090226" y="652.4668209306947" z="0.0"/>
  </node>
  <node id="612802" label="zzz2070" cy:nodeId="1243">
    <graphics x="325.4819970123317" y="307.59550592825326" z="0.0"/>
  </node>
  <node id="612803" label="zzz2069" cy:nodeId="1244">
    <graphics x="2428.80607843323" y="-151.1371753461608" z="0.0"/>
  </node>
  <node id="612804" label="zzz2068" cy:nodeId="1245">
    <graphics x="3191.613764762118" y="652.4668209306947" z="0.0"/>
  </node>
  <node id="612805" label="zzz2067" cy:nodeId="1246">
    <graphics x="188.79006433410905" y="304.3268596880189" z="0.0"/>
  </node>
  <node id="612806" label="zzz2066" cy:nodeId="1247">
    <graphics x="2303.682741641238" y="-113.18217351510611" z="0.0"/>
  </node>
  <node id="612807" label="zzz2065" cy:nodeId="1248">
    <graphics x="994.803466796875" y="-128.1682891845703" z="0.0"/>
  </node>
  <node id="612808" label="zzz2064" cy:nodeId="1249">
    <graphics x="3020.001848696902" y="1017.9540111772767" z="0.0"/>
  </node>
  <node id="612809" label="zzz2063" cy:nodeId="1250">
    <graphics x="2920.001848696902" y="1017.9540111772767" z="0.0"/>
  </node>
  <node id="612810" label="zzz2062" cy:nodeId="1251">
    <graphics x="2991.0553312294032" y="652.4668209306947" z="0.0"/>
  </node>
  <node id="612811" label="zzz2061" cy:nodeId="1252">
    <graphics x="3201.020637273028" y="423.55861017630014" z="0.0"/>
  </node>
  <node id="612812" label="zzz2060" cy:nodeId="1253">
    <graphics x="3288.2373833648708" y="417.633774971222" z="0.0"/>
  </node>
  <node id="612813" label="zzz2059" cy:nodeId="1254">
    <graphics x="1777.7275605194118" y="432.4836742632142" z="0.0"/>
  </node>
  <node id="612814" label="zzz2058" cy:nodeId="1255">
    <graphics x="815.4203820220973" y="469.8355779700032" z="0.0"/>
  </node>
  <node id="612815" label="zzz2057" cy:nodeId="1256">
    <graphics x="1408.3800263397243" y="467.5690495722047" z="0.0"/>
  </node>
  <node id="612816" label="zzz2056" cy:nodeId="1257">
    <graphics x="1443.4693512908962" y="286.40837213919076" z="0.0"/>
  </node>
  <node id="612817" label="zzz2055" cy:nodeId="1258">
    <graphics x="2105.959716796875" y="-124.37652587890625" z="0.0"/>
  </node>
  <node id="612818" label="zzz2054" cy:nodeId="1259">
    <graphics x="1031.1370849609375" y="-180.37139892578125" z="0.0"/>
  </node>
  <node id="612819" label="zzz2053" cy:nodeId="1260">
    <graphics x="-607.718724728391" y="-235.4132983930358" z="0.0"/>
  </node>
  <node id="612820" label="zzz2052" cy:nodeId="1261">
    <graphics x="3027.4540772430446" y="-173.1737964399108" z="0.0"/>
  </node>
  <node id="612821" label="zzz2051" cy:nodeId="1262">
    <graphics x="-643.7432646759007" y="-93.73591497018424" z="0.0"/>
  </node>
  <node id="612822" label="zzz2050" cy:nodeId="1263">
    <graphics x="-809.0143294342015" y="-125.68401982858268" z="0.0"/>
  </node>
  <node id="612823" label="zzz2049" cy:nodeId="1264">
    <graphics x="-610.1833434112523" y="-151.42765691354361" z="0.0"/>
  </node>
  <node id="612824" label="zzz2048" cy:nodeId="1265">
    <graphics x="-630.2673964508031" y="-120.83980443551627" z="0.0"/>
  </node>
  <node id="612825" label="zzz2047" cy:nodeId="1266">
    <graphics x="-659.8513493545506" y="-196.33091619088736" z="0.0"/>
  </node>
  <node id="612826" label="zzz2046" cy:nodeId="1267">
    <graphics x="-591.7459425933812" y="-71.0710132367858" z="0.0"/>
  </node>
  <node id="612827" label="zzz2045" cy:nodeId="1268">
    <graphics x="-584.0114378936742" y="-157.20133092477408" z="0.0"/>
  </node>
  <node id="612828" label="zzz2044" cy:nodeId="1269">
    <graphics x="-628.2408576019261" y="-56.87768628671256" z="0.0"/>
  </node>
  <node id="612829" label="zzz2043" cy:nodeId="1270">
    <graphics x="-513.2097334869359" y="-124.20085027291861" z="0.0"/>
  </node>
  <node id="612830" label="zzz2042" cy:nodeId="1271">
    <graphics x="-565.3293623931859" y="-72.12809255197135" z="0.0"/>
  </node>
  <node id="612831" label="zzz2041" cy:nodeId="1272">
    <graphics x="-516.3121199615452" y="-144.74966313912955" z="0.0"/>
  </node>
  <node id="612832" label="zzz2040" cy:nodeId="1273">
    <graphics x="-579.2882781036351" y="-187.80190923287955" z="0.0"/>
  </node>
  <node id="612833" label="zzz2039" cy:nodeId="1274">
    <graphics x="-514.6790175445531" y="-157.80561711862174" z="0.0"/>
  </node>
  <node id="612834" label="zzz2038" cy:nodeId="1275">
    <graphics x="-597.8553328521702" y="-162.95159795358268" z="0.0"/>
  </node>
  <node id="612835" label="zzz2037" cy:nodeId="1276">
    <graphics x="-485.8163313873265" y="-200.25305059030143" z="0.0"/>
  </node>
  <node id="612836" label="zzz2036" cy:nodeId="1277">
    <graphics x="-683.6641173370335" y="-199.25291326119986" z="0.0"/>
  </node>
  <node id="612837" label="zzz2035" cy:nodeId="1278">
    <graphics x="-600.8219237335179" y="-166.19167974069205" z="0.0"/>
  </node>
  <node id="612838" label="zzz2034" cy:nodeId="1279">
    <graphics x="-652.9066290863011" y="-139.83650090768424" z="0.0"/>
  </node>
  <node id="612839" label="zzz2033" cy:nodeId="1280">
    <graphics x="-661.176844120786" y="-241.57670476510611" z="0.0"/>
  </node>
  <node id="612840" label="zzz2032" cy:nodeId="1281">
    <graphics x="-434.3741927154515" y="-64.73495748117057" z="0.0"/>
  </node>
  <node id="612841" label="zzz2031" cy:nodeId="1282">
    <graphics x="-523.9404082305882" y="-14.500973487640294" z="0.0"/>
  </node>
  <node id="612842" label="zzz2030" cy:nodeId="1283">
    <graphics x="-451.41018819884994" y="-65.38364293649283" z="0.0"/>
  </node>
  <node id="612843" label="zzz2029" cy:nodeId="1284">
    <graphics x="1686.1626152984645" y="-102.85227849557486" z="0.0"/>
  </node>
  <node id="612844" label="zzz2028" cy:nodeId="1285">
    <graphics x="-661.156128407285" y="-266.41230657174674" z="0.0"/>
  </node>
  <node id="612845" label="zzz2027" cy:nodeId="1286">
    <graphics x="-692.6172995574925" y="-200.72587468698111" z="0.0"/>
  </node>
  <node id="612846" label="zzz2026" cy:nodeId="1287">
    <graphics x="1747.5827202789333" y="-134.6036517865905" z="0.0"/>
  </node>
  <node id="612847" label="zzz2025" cy:nodeId="1288">
    <graphics x="1794.544344424441" y="-87.25218083932486" z="0.0"/>
  </node>
  <node id="612848" label="zzz2024" cy:nodeId="1289">
    <graphics x="1741.7550835601833" y="-68.02848699166861" z="0.0"/>
  </node>
  <node id="612849" label="zzz2023" cy:nodeId="1290">
    <graphics x="1702.4224114410426" y="-126.69221379830924" z="0.0"/>
  </node>
  <node id="612850" label="zzz2022" cy:nodeId="1291">
    <graphics x="3004.6070084564235" y="-91.1288745649108" z="0.0"/>
  </node>
  <node id="612851" label="zzz2021" cy:nodeId="1292">
    <graphics x="1769.4714074127223" y="22.745255684112635" z="0.0"/>
  </node>
  <node id="612852" label="zzz2020" cy:nodeId="1293">
    <graphics x="1613.509417056277" y="-54.75794866159049" z="0.0"/>
  </node>
  <node id="612853" label="zzz2019" cy:nodeId="1294">
    <graphics x="-559.7675948150609" y="-151.0321185834655" z="0.0"/>
  </node>
  <node id="612854" label="zzz2018" cy:nodeId="1295">
    <graphics x="-660.1938519485448" y="-43.17693975045768" z="0.0"/>
  </node>
  <node id="612855" label="zzz2017" cy:nodeId="1296">
    <graphics x="-615.5979247100804" y="-47.96478536202994" z="0.0"/>
  </node>
  <node id="612856" label="zzz2016" cy:nodeId="1297">
    <graphics x="-649.7139477737401" y="-275.4620349653014" z="0.0"/>
  </node>
  <node id="612857" label="zzz2015" cy:nodeId="1298">
    <graphics x="-599.1769957550023" y="-49.755789542938146" z="0.0"/>
  </node>
  <node id="612858" label="zzz2014" cy:nodeId="1299">
    <graphics x="-536.4071364410374" y="-117.49460485055533" z="0.0"/>
  </node>
  <node id="612859" label="zzz2013" cy:nodeId="1300">
    <graphics x="-694.0940489776585" y="-108.26215245797721" z="0.0"/>
  </node>
  <node id="612860" label="zzz2012" cy:nodeId="1301">
    <graphics x="-633.7534270294163" y="-132.83433415963736" z="0.0"/>
  </node>
  <node id="612861" label="zzz2011" cy:nodeId="1302">
    <graphics x="-706.8614935882542" y="-140.29339482858268" z="0.0"/>
  </node>
  <node id="612862" label="zzz2010" cy:nodeId="1303">
    <graphics x="-582.7005400665257" y="36.498673652862635" z="0.0"/>
  </node>
  <node id="612863" label="zzz2009" cy:nodeId="1304">
    <graphics x="-589.1857161529515" y="-234.24278142526236" z="0.0"/>
  </node>
  <node id="612864" label="zzz2008" cy:nodeId="1305">
    <graphics x="-583.0949187286351" y="-149.1209857709655" z="0.0"/>
  </node>
  <node id="612865" label="zzz2007" cy:nodeId="1306">
    <graphics x="-570.004556179807" y="-72.93376805856315" z="0.0"/>
  </node>
  <node id="612866" label="zzz2006" cy:nodeId="1307">
    <graphics x="-574.5496535308812" y="-54.720171714569005" z="0.0"/>
  </node>
  <node id="612867" label="zzz2005" cy:nodeId="1308">
    <graphics x="-708.2079901702855" y="-103.29078557565299" z="0.0"/>
  </node>
  <node id="612868" label="zzz2004" cy:nodeId="1309">
    <graphics x="-714.3624968536351" y="-96.68971135690299" z="0.0"/>
  </node>
  <node id="612869" label="zzz2003" cy:nodeId="1310">
    <graphics x="-617.6319518096898" y="-150.3255069501647" z="0.0"/>
  </node>
  <node id="612870" label="zzz2002" cy:nodeId="1311">
    <graphics x="-589.626813412473" y="-157.70554235055533" z="0.0"/>
  </node>
  <node id="612871" label="zzz2001" cy:nodeId="1312">
    <graphics x="-583.9665808685277" y="-81.4222438581237" z="0.0"/>
  </node>
  <node id="612872" label="zzz2000" cy:nodeId="1313">
    <graphics x="-543.0661482818577" y="-130.23928716256705" z="0.0"/>
  </node>
  <node id="612873" label="zzz1999" cy:nodeId="1314">
    <graphics x="-731.3381056793187" y="-38.65197827890006" z="0.0"/>
  </node>
  <node id="612874" label="zzz1998" cy:nodeId="1315">
    <graphics x="-564.4776015289281" y="-163.78262212350455" z="0.0"/>
  </node>
  <node id="612875" label="zzz1997" cy:nodeId="1316">
    <graphics x="-670.9439063079808" y="-116.86897924020377" z="0.0"/>
  </node>
  <node id="612876" label="zzz1996" cy:nodeId="1317">
    <graphics x="-563.0949721343968" y="-206.53132512643424" z="0.0"/>
  </node>
  <node id="612877" label="zzz1995" cy:nodeId="1318">
    <graphics x="-636.3180336959813" y="-213.22204473092643" z="0.0"/>
  </node>
  <node id="612878" label="zzz1994" cy:nodeId="1319">
    <graphics x="-603.0283026702855" y="-123.1641757734069" z="0.0"/>
  </node>
  <node id="612879" label="zzz1993" cy:nodeId="1320">
    <graphics x="-608.5282835967992" y="-145.9112003095397" z="0.0"/>
  </node>
  <node id="612880" label="zzz1992" cy:nodeId="1321">
    <graphics x="-673.7153296478245" y="-121.95819737985221" z="0.0"/>
  </node>
  <node id="612881" label="zzz1991" cy:nodeId="1322">
    <graphics x="-611.8540778167699" y="-127.6848056562194" z="0.0"/>
  </node>
  <node id="612882" label="zzz1990" cy:nodeId="1323">
    <graphics x="-629.7682471282933" y="-180.669447685028" z="0.0"/>
  </node>
  <node id="612883" label="zzz1989" cy:nodeId="1324">
    <graphics x="-593.4018874175999" y="-193.66247441842643" z="0.0"/>
  </node>
  <node id="612884" label="zzz1988" cy:nodeId="1325">
    <graphics x="-673.7343115814183" y="-133.60105016305533" z="0.0"/>
  </node>
  <node id="612885" label="zzz1987" cy:nodeId="1326">
    <graphics x="-619.8392806060765" y="-122.38699987008658" z="0.0"/>
  </node>
  <node id="612886" label="zzz1986" cy:nodeId="1327">
    <graphics x="-645.1591258056615" y="-110.17863347604361" z="0.0"/>
  </node>
  <node id="612887" label="zzz1985" cy:nodeId="1328">
    <graphics x="-692.2998480804417" y="-76.50549199655143" z="0.0"/>
  </node>
  <node id="612888" label="zzz1984" cy:nodeId="1329">
    <graphics x="-656.4757123001073" y="-47.09896829202262" z="0.0"/>
  </node>
  <node id="612889" label="zzz1983" cy:nodeId="1330">
    <graphics x="-564.0296034820531" y="-143.79489781930533" z="0.0"/>
  </node>
  <node id="612890" label="zzz1982" cy:nodeId="1331">
    <graphics x="-629.1411910064671" y="-104.33262517526236" z="0.0"/>
  </node>
  <node id="612891" label="zzz1981" cy:nodeId="1332">
    <graphics x="-637.4014964111302" y="-148.77290990426627" z="0.0"/>
  </node>
  <node id="612892" label="zzz1980" cy:nodeId="1333">
    <graphics x="-609.1609549530003" y="-256.36591985299674" z="0.0"/>
  </node>
  <node id="612893" label="zzz1979" cy:nodeId="1334">
    <graphics x="-620.989398480222" y="-227.248549247528" z="0.0"/>
  </node>
  <node id="612894" label="zzz1978" cy:nodeId="1335">
    <graphics x="-694.6850104339574" y="-208.41673162057486" z="0.0"/>
  </node>
  <node id="612895" label="zzz1977" cy:nodeId="1336">
    <graphics x="-591.9139266021702" y="-206.1983325727233" z="0.0"/>
  </node>
  <node id="612896" label="zzz1976" cy:nodeId="1337">
    <graphics x="-650.8088915355656" y="-92.48879125192252" z="0.0"/>
  </node>
  <node id="612897" label="zzz1975" cy:nodeId="1338">
    <graphics x="-616.1610350616429" y="-101.50735356881705" z="0.0"/>
  </node>
  <node id="612898" label="zzz1974" cy:nodeId="1339">
    <graphics x="-622.3750205047581" y="-115.95811345651236" z="0.0"/>
  </node>
  <node id="612899" label="zzz1973" cy:nodeId="1340">
    <graphics x="-533.3585829742406" y="-97.02273824288932" z="0.0"/>
  </node>
  <node id="612900" label="zzz1972" cy:nodeId="1341">
    <graphics x="-703.8904547698949" y="-165.8769214399108" z="0.0"/>
  </node>
  <node id="612901" label="zzz1971" cy:nodeId="1342">
    <graphics x="-667.3534026153538" y="-142.00723149850455" z="0.0"/>
  </node>
  <node id="612902" label="zzz1970" cy:nodeId="1343">
    <graphics x="-650.7756209381077" y="-94.5496509320983" z="0.0"/>
  </node>
  <node id="612903" label="zzz1969" cy:nodeId="1344">
    <graphics x="-629.5939040191624" y="-103.4871509320983" z="0.0"/>
  </node>
  <node id="612904" label="zzz1968" cy:nodeId="1345">
    <graphics x="-670.0404925353978" y="-193.82005193307486" z="0.0"/>
  </node>
  <node id="612905" label="zzz1967" cy:nodeId="1346">
    <graphics x="-574.5583281524632" y="-182.46198918893424" z="0.0"/>
  </node>
  <node id="612906" label="zzz1966" cy:nodeId="1347">
    <graphics x="-600.7162337310765" y="-135.52280309274283" z="0.0"/>
  </node>
  <node id="612907" label="zzz1965" cy:nodeId="1348">
    <graphics x="-574.2452025421117" y="-115.82995488717643" z="0.0"/>
  </node>
  <node id="612908" label="zzz1964" cy:nodeId="1349">
    <graphics x="-620.5029006011937" y="-218.55418279244986" z="0.0"/>
  </node>
  <node id="612909" label="zzz1963" cy:nodeId="1350">
    <graphics x="-583.951634884641" y="-62.74394681527701" z="0.0"/>
  </node>
  <node id="612910" label="zzz1962" cy:nodeId="1351">
    <graphics x="-538.3604903228734" y="-132.59360387399283" z="0.0"/>
  </node>
  <node id="612911" label="zzz1961" cy:nodeId="1352">
    <graphics x="-698.7355322845433" y="-192.51959111764518" z="0.0"/>
  </node>
  <node id="612912" label="zzz1960" cy:nodeId="1353">
    <graphics x="-710.6349539764378" y="-221.95149114205924" z="0.0"/>
  </node>
  <node id="612913" label="zzz1959" cy:nodeId="1354">
    <graphics x="-575.452325344846" y="-223.78826787545768" z="0.0"/>
  </node>
  <node id="612914" label="zzz1958" cy:nodeId="1355">
    <graphics x="-514.0348067291234" y="-142.5951831586608" z="0.0"/>
  </node>
  <node id="612915" label="zzz1957" cy:nodeId="1356">
    <graphics x="-506.97479391174056" y="-199.208266044403" z="0.0"/>
  </node>
  <node id="612916" label="zzz1956" cy:nodeId="1357">
    <graphics x="-583.4387297637913" y="-155.55664708688346" z="0.0"/>
  </node>
  <node id="612917" label="zzz1955" cy:nodeId="1358">
    <graphics x="-662.5195584304784" y="-235.56176641061393" z="0.0"/>
  </node>
  <node id="612918" label="zzz1954" cy:nodeId="1359">
    <graphics x="-720.9176955230687" y="-75.45049169137565" z="0.0"/>
  </node>
  <node id="612919" label="zzz1953" cy:nodeId="1360">
    <graphics x="-669.9926543243382" y="-256.42133977487174" z="0.0"/>
  </node>
  <node id="612920" label="zzz1952" cy:nodeId="1361">
    <graphics x="-706.4530692108128" y="-138.6879794843444" z="0.0"/>
  </node>
  <node id="612921" label="zzz1951" cy:nodeId="1362">
    <graphics x="-525.5300459869359" y="-86.84895207955924" z="0.0"/>
  </node>
  <node id="612922" label="zzz1950" cy:nodeId="1363">
    <graphics x="-664.9292941101048" y="-88.667193198944" z="0.0"/>
  </node>
  <node id="612923" label="zzz1949" cy:nodeId="1364">
    <graphics x="-639.0495057113621" y="-151.56679418161002" z="0.0"/>
  </node>
  <node id="612924" label="zzz1948" cy:nodeId="1365">
    <graphics x="-673.659844876096" y="-173.78852727487174" z="0.0"/>
  </node>
  <node id="612925" label="zzz1947" cy:nodeId="1366">
    <graphics x="-661.7201380737279" y="-97.34120061471549" z="0.0"/>
  </node>
  <node id="612926" label="zzz1946" cy:nodeId="1367">
    <graphics x="-566.9552168853734" y="-203.08508184030143" z="0.0"/>
  </node>
  <node id="612927" label="zzz1945" cy:nodeId="1368">
    <graphics x="-637.9770369537327" y="-101.45877721383658" z="0.0"/>
  </node>
  <node id="612928" label="zzz1944" cy:nodeId="1369">
    <graphics x="-553.2588973052952" y="-185.82964971139518" z="0.0"/>
  </node>
  <node id="612929" label="zzz1943" cy:nodeId="1370">
    <graphics x="-656.8209242828343" y="-176.59307744577018" z="0.0"/>
  </node>
  <node id="612930" label="zzz1942" cy:nodeId="1371">
    <graphics x="-648.6899399764989" y="-138.49333837106315" z="0.0"/>
  </node>
  <node id="612931" label="zzz1941" cy:nodeId="1372">
    <graphics x="-652.4190011032078" y="-101.26646306588736" z="0.0"/>
  </node>
  <node id="612932" label="zzz1940" cy:nodeId="1373">
    <graphics x="-706.1818251617406" y="-149.5619037397155" z="0.0"/>
  </node>
  <node id="612933" label="zzz1939" cy:nodeId="1374">
    <graphics x="-578.1362090118382" y="-181.3328998334655" z="0.0"/>
  </node>
  <node id="612934" label="zzz1938" cy:nodeId="1375">
    <graphics x="-527.8558211334202" y="-129.8866641767272" z="0.0"/>
  </node>
  <node id="612935" label="zzz1937" cy:nodeId="1376">
    <graphics x="-628.4580626495335" y="-146.65939977243033" z="0.0"/>
  </node>
  <node id="612936" label="zzz1936" cy:nodeId="1377">
    <graphics x="-607.4275755889867" y="-198.69427373483268" z="0.0"/>
  </node>
  <node id="612937" label="zzz1935" cy:nodeId="1378">
    <graphics x="-631.445827008054" y="-133.31733586862174" z="0.0"/>
  </node>
  <node id="612938" label="zzz1934" cy:nodeId="1379">
    <graphics x="-709.489118099973" y="-208.56024053170768" z="0.0"/>
  </node>
  <node id="612939" label="zzz1933" cy:nodeId="1380">
    <graphics x="-594.1317610748265" y="-230.2860248334655" z="0.0"/>
  </node>
  <node id="612940" label="zzz1932" cy:nodeId="1381">
    <graphics x="-723.4445052154515" y="-161.7550189740905" z="0.0"/>
  </node>
  <node id="612941" label="zzz1931" cy:nodeId="1382">
    <graphics x="-698.2341551788304" y="-112.44029119088736" z="0.0"/>
  </node>
  <node id="612942" label="zzz1930" cy:nodeId="1383">
    <graphics x="-695.066323757932" y="-167.13430669381705" z="0.0"/>
  </node>
  <node id="612943" label="zzz1929" cy:nodeId="1384">
    <graphics x="-632.6563830383275" y="-165.33819463327018" z="0.0"/>
  </node>
  <node id="612944" label="zzz1928" cy:nodeId="1385">
    <graphics x="-525.9925856597874" y="-119.32675817086783" z="0.0"/>
  </node>
  <node id="612945" label="zzz1927" cy:nodeId="1386">
    <graphics x="-444.61969137267806" y="-78.78791692330924" z="0.0"/>
  </node>
  <node id="612946" label="zzz1926" cy:nodeId="1387">
    <graphics x="-432.16095113830306" y="-150.30964543893424" z="0.0"/>
  </node>
  <node id="612947" label="zzz1925" cy:nodeId="1388">
    <graphics x="-685.8947005279515" y="-103.96385076119986" z="0.0"/>
  </node>
  <node id="612948" label="zzz1924" cy:nodeId="1389">
    <graphics x="-569.6351790435765" y="-101.39198186471549" z="0.0"/>
  </node>
  <node id="612949" label="zzz1923" cy:nodeId="1390">
    <graphics x="-515.7656264312718" y="-190.18456914498893" z="0.0"/>
  </node>
  <node id="612950" label="zzz1922" cy:nodeId="1391">
    <graphics x="-602.4729056365941" y="-220.00764348580924" z="0.0"/>
  </node>
  <node id="612951" label="zzz1921" cy:nodeId="1392">
    <graphics x="-568.4270644195531" y="-164.6217944867858" z="0.0"/>
  </node>
  <node id="612952" label="zzz1920" cy:nodeId="1393">
    <graphics x="-706.3375563629124" y="-183.6293628461608" z="0.0"/>
  </node>
  <node id="612953" label="zzz1919" cy:nodeId="1394">
    <graphics x="-542.3458571441624" y="-167.012221122528" z="0.0"/>
  </node>
  <node id="612954" label="zzz1918" cy:nodeId="1395">
    <graphics x="-576.9476027496312" y="-107.66458013131705" z="0.0"/>
  </node>
  <node id="612955" label="zzz1917" cy:nodeId="1396">
    <graphics x="-643.1023459442113" y="-137.44535710885611" z="0.0"/>
  </node>
  <node id="612956" label="zzz1916" cy:nodeId="1397">
    <graphics x="-689.4364180572484" y="-155.46755101754752" z="0.0"/>
  </node>
  <node id="612957" label="zzz1915" cy:nodeId="1398">
    <graphics x="-579.7224898345921" y="-172.08184697702018" z="0.0"/>
  </node>
  <node id="612958" label="zzz1914" cy:nodeId="1399">
    <graphics x="-647.4175434120152" y="-160.72280004098502" z="0.0"/>
  </node>
  <node id="612959" label="zzz1913" cy:nodeId="1400">
    <graphics x="-579.899346829221" y="-102.7472827680358" z="0.0"/>
  </node>
  <node id="612960" label="zzz1912" cy:nodeId="1401">
    <graphics x="-670.9866576202367" y="-206.33599736764518" z="0.0"/>
  </node>
  <node id="612961" label="zzz1911" cy:nodeId="1402">
    <graphics x="-706.9958930023167" y="-119.82774236276236" z="0.0"/>
  </node>
  <node id="612962" label="zzz1910" cy:nodeId="1403">
    <graphics x="2948.639746188357" y="-90.11965825631705" z="0.0"/>
  </node>
  <node id="612963" label="zzz1909" cy:nodeId="1404">
    <graphics x="-578.6656279571507" y="-95.34683110787955" z="0.0"/>
  </node>
  <node id="612964" label="zzz1908" cy:nodeId="1405">
    <graphics x="-560.7251982696507" y="-84.22968175485221" z="0.0"/>
  </node>
  <node id="612965" label="zzz1907" cy:nodeId="1406">
    <graphics x="-721.0130553253148" y="-122.67983892037955" z="0.0"/>
  </node>
  <node id="612966" label="zzz1906" cy:nodeId="1407">
    <graphics x="-698.5720839508031" y="-116.61767461373893" z="0.0"/>
  </node>
  <node id="612967" label="zzz1905" cy:nodeId="1408">
    <graphics x="-532.807534695432" y="15.981690620636073" z="0.0"/>
  </node>
  <node id="612968" label="zzz1904" cy:nodeId="1409">
    <graphics x="-502.3238081939671" y="-21.729761863494787" z="0.0"/>
  </node>
  <node id="612969" label="zzz1903" cy:nodeId="1410">
    <graphics x="-634.673779011533" y="-60.105332160736" z="0.0"/>
  </node>
  <node id="612970" label="zzz1902" cy:nodeId="1411">
    <graphics x="-518.2159895904515" y="-96.63068273141471" z="0.0"/>
  </node>
  <node id="612971" label="zzz1901" cy:nodeId="1412">
    <graphics x="-652.0125575073216" y="-63.69853284432975" z="0.0"/>
  </node>
  <node id="612972" label="zzz1900" cy:nodeId="1413">
    <graphics x="-556.9432234771702" y="-218.17161443307486" z="0.0"/>
  </node>
  <node id="612973" label="zzz1899" cy:nodeId="1414">
    <graphics x="-645.5288820274327" y="-119.97541692330924" z="0.0"/>
  </node>
  <node id="612974" label="zzz1898" cy:nodeId="1415">
    <graphics x="-657.8375449188206" y="-76.50468709542838" z="0.0"/>
  </node>
  <node id="612975" label="zzz1897" cy:nodeId="1416">
    <graphics x="-521.180955410764" y="-131.48367192819205" z="0.0"/>
  </node>
  <node id="612976" label="zzz1896" cy:nodeId="1417">
    <graphics x="-557.2346358306859" y="-109.79176213815299" z="0.0"/>
  </node>
  <node id="612977" label="zzz1895" cy:nodeId="1418">
    <graphics x="-603.0907454498265" y="-228.42047002389518" z="0.0"/>
  </node>
  <node id="612978" label="zzz1894" cy:nodeId="1419">
    <graphics x="-600.8181509979222" y="-210.24397161080924" z="0.0"/>
  </node>
  <node id="612979" label="zzz1893" cy:nodeId="1420">
    <graphics x="-606.2705245025609" y="-55.9896037824401" z="0.0"/>
  </node>
  <node id="612980" label="zzz1892" cy:nodeId="1421">
    <graphics x="-583.924966336057" y="-57.52607419564811" z="0.0"/>
  </node>
  <node id="612981" label="zzz1891" cy:nodeId="1422">
    <graphics x="-602.4422392852757" y="-257.5093677289733" z="0.0"/>
  </node>
  <node id="612982" label="zzz1890" cy:nodeId="1423">
    <graphics x="-639.6181406982396" y="-206.82989385202018" z="0.0"/>
  </node>
  <node id="612983" label="zzz1889" cy:nodeId="1424">
    <graphics x="-666.027167797849" y="-45.74915196969596" z="0.0"/>
  </node>
  <node id="612984" label="zzz1888" cy:nodeId="1425">
    <graphics x="1695.8481011383083" y="-116.21275212838736" z="0.0"/>
  </node>
  <node id="612985" label="zzz1887" cy:nodeId="1426">
    <graphics x="-661.71261549072" y="-251.00262334420768" z="0.0"/>
  </node>
  <node id="612986" label="zzz1886" cy:nodeId="1427">
    <graphics x="-695.8195090301488" y="-212.48614385202018" z="0.0"/>
  </node>
  <node id="612987" label="zzz1885" cy:nodeId="1428">
    <graphics x="-661.8883700378392" y="-211.99235417916861" z="0.0"/>
  </node>
  <node id="612988" label="zzz1884" cy:nodeId="1429">
    <graphics x="-547.549363613889" y="-128.37386205270377" z="0.0"/>
  </node>
  <node id="612989" label="zzz1883" cy:nodeId="1430">
    <graphics x="-705.1177763946507" y="-167.03021123483268" z="0.0"/>
  </node>
  <node id="612990" label="zzz1882" cy:nodeId="1431">
    <graphics x="-671.9409575469945" y="-128.95952489450065" z="0.0"/>
  </node>
  <node id="612991" label="zzz1881" cy:nodeId="1432">
    <graphics x="-627.774575711057" y="-167.3707416303405" z="0.0"/>
  </node>
  <node id="612992" label="zzz1880" cy:nodeId="1433">
    <graphics x="-573.1457839019749" y="-110.03861882760611" z="0.0"/>
  </node>
  <node id="612993" label="zzz1879" cy:nodeId="1434">
    <graphics x="-633.4737744338963" y="-98.54517629220572" z="0.0"/>
  </node>
  <node id="612994" label="zzz1878" cy:nodeId="1435">
    <graphics x="-583.0400328643773" y="-26.0608928449401" z="0.0"/>
  </node>
  <node id="612995" label="zzz1877" cy:nodeId="1436">
    <graphics x="-502.0233321197484" y="-64.56407430245963" z="0.0"/>
  </node>
  <node id="612996" label="zzz1876" cy:nodeId="1437">
    <graphics x="-588.0667395599339" y="-55.81549146249381" z="0.0"/>
  </node>
  <node id="612997" label="zzz1875" cy:nodeId="1438">
    <graphics x="-499.9416670806859" y="-5.356125617767248" z="0.0"/>
  </node>
  <node id="612998" label="zzz1874" cy:nodeId="1439">
    <graphics x="-550.6676955230687" y="2.003224586700526" z="0.0"/>
  </node>
  <node id="612999" label="zzz1873" cy:nodeId="1440">
    <graphics x="-722.7598586090062" y="-209.48318364694205" z="0.0"/>
  </node>
  <node id="613000" label="zzz1872" cy:nodeId="1441">
    <graphics x="-535.9107604034398" y="-174.7198627240905" z="0.0"/>
  </node>
  <node id="613001" label="zzz1871" cy:nodeId="1442">
    <graphics x="-512.927537442014" y="6.755799507354823" z="0.0"/>
  </node>
  <node id="613002" label="zzz1870" cy:nodeId="1443">
    <graphics x="-633.0606265075658" y="-222.78985478952018" z="0.0"/>
  </node>
  <node id="613003" label="zzz1869" cy:nodeId="1444">
    <graphics x="-671.2447772033665" y="-58.89945485665885" z="0.0"/>
  </node>
  <node id="613004" label="zzz1868" cy:nodeId="1445">
    <graphics x="-606.1047034271214" y="-226.23791387155143" z="0.0"/>
  </node>
  <node id="613005" label="zzz1867" cy:nodeId="1446">
    <graphics x="-559.1073317535374" y="-92.0728557355651" z="0.0"/>
  </node>
  <node id="613006" label="zzz1866" cy:nodeId="1447">
    <graphics x="-614.4189085967992" y="-41.00801303460685" z="0.0"/>
  </node>
  <node id="613007" label="zzz1865" cy:nodeId="1448">
    <graphics x="-432.9184126861546" y="-133.346449638153" z="0.0"/>
  </node>
  <node id="613008" label="zzz1864" cy:nodeId="1449">
    <graphics x="246.5522866241481" y="-166.54252507760611" z="0.0"/>
  </node>
  <node id="613009" label="zzz1863" cy:nodeId="1450">
    <graphics x="-673.7170023925755" y="-178.6832416303405" z="0.0"/>
  </node>
  <node id="613010" label="zzz1862" cy:nodeId="1451">
    <graphics x="-633.6871218688939" y="-227.604506278778" z="0.0"/>
  </node>
  <node id="613011" label="zzz1861" cy:nodeId="1452">
    <graphics x="-626.3523497589085" y="-156.15020635202018" z="0.0"/>
  </node>
  <node id="613012" label="zzz1860" cy:nodeId="1453">
    <graphics x="-707.2680754669163" y="-161.00271489694205" z="0.0"/>
  </node>
  <node id="613013" label="zzz1859" cy:nodeId="1454">
    <graphics x="-692.4577193267796" y="-228.54888799264518" z="0.0"/>
  </node>
  <node id="613014" label="zzz1858" cy:nodeId="1455">
    <graphics x="-490.17157125549056" y="-20.01630475595084" z="0.0"/>
  </node>
  <node id="613015" label="zzz1857" cy:nodeId="1456">
    <graphics x="-661.4827094085667" y="-68.86408879830924" z="0.0"/>
  </node>
  <node id="613016" label="zzz1856" cy:nodeId="1457">
    <graphics x="-666.9270358093236" y="-250.1949146039733" z="0.0"/>
  </node>
  <node id="613017" label="zzz1855" cy:nodeId="1458">
    <graphics x="-686.434545040891" y="-203.04801824166861" z="0.0"/>
  </node>
  <node id="613018" label="zzz1854" cy:nodeId="1459">
    <graphics x="-635.1828894622777" y="-256.68394353463736" z="0.0"/>
  </node>
  <node id="613019" label="zzz1853" cy:nodeId="1460">
    <graphics x="-709.8311438568089" y="-149.3246524579772" z="0.0"/>
  </node>
  <node id="613020" label="zzz1852" cy:nodeId="1461">
    <graphics x="-718.4932417877171" y="-137.42796208932486" z="0.0"/>
  </node>
  <node id="613021" label="zzz1851" cy:nodeId="1462">
    <graphics x="-601.7783560760472" y="-41.83463790490714" z="0.0"/>
  </node>
  <node id="613022" label="zzz1850" cy:nodeId="1463">
    <graphics x="-629.9074168212865" y="-216.58140447213736" z="0.0"/>
  </node>
  <node id="613023" label="zzz1849" cy:nodeId="1464">
    <graphics x="-604.8820815093968" y="-171.27082707955924" z="0.0"/>
  </node>
  <node id="613024" label="zzz1848" cy:nodeId="1465">
    <graphics x="-687.8491950042699" y="-101.25581243112174" z="0.0"/>
  </node>
  <node id="613025" label="zzz1847" cy:nodeId="1466">
    <graphics x="-606.3032050140355" y="-179.23289372994986" z="0.0"/>
  </node>
  <node id="613026" label="zzz1846" cy:nodeId="1467">
    <graphics x="-545.916924954221" y="-136.1506030805358" z="0.0"/>
  </node>
  <node id="613027" label="zzz1845" cy:nodeId="1468">
    <graphics x="-708.6486296661351" y="-177.69453313424674" z="0.0"/>
  </node>
  <node id="613028" label="zzz1844" cy:nodeId="1469">
    <graphics x="-618.1748633392308" y="-203.62693669869986" z="0.0"/>
  </node>
  <node id="613029" label="zzz1843" cy:nodeId="1470">
    <graphics x="-560.9784102447484" y="-221.6125171430358" z="0.0"/>
  </node>
  <node id="613030" label="zzz1842" cy:nodeId="1471">
    <graphics x="-663.8517279632542" y="-65.56841924264518" z="0.0"/>
  </node>
  <node id="613031" label="zzz1841" cy:nodeId="1472">
    <graphics x="-697.7675375946019" y="-190.6417377240905" z="0.0"/>
  </node>
  <node id="613032" label="zzz1840" cy:nodeId="1473">
    <graphics x="-676.2419714935277" y="-184.28523137643424" z="0.0"/>
  </node>
  <node id="613033" label="zzz1839" cy:nodeId="1474">
    <graphics x="-516.5901045806859" y="-106.22376897409049" z="0.0"/>
  </node>
  <node id="613034" label="zzz1838" cy:nodeId="1475">
    <graphics x="-536.6085829742406" y="-195.82815435006705" z="0.0"/>
  </node>
  <node id="613035" label="zzz1837" cy:nodeId="1476">
    <graphics x="-637.1777739532445" y="-89.47909047677604" z="0.0"/>
  </node>
  <node id="613036" label="zzz1836" cy:nodeId="1477">
    <graphics x="-637.434768200681" y="-249.052748466278" z="0.0"/>
  </node>
  <node id="613037" label="zzz1835" cy:nodeId="1478">
    <graphics x="-574.1942152984593" y="-165.83366277291861" z="0.0"/>
  </node>
  <node id="613038" label="zzz1834" cy:nodeId="1479">
    <graphics x="-528.1358962066624" y="-106.02716710641471" z="0.0"/>
  </node>
  <node id="613039" label="zzz1833" cy:nodeId="1480">
    <graphics x="-726.0314192779515" y="-204.6141040570983" z="0.0"/>
  </node>
  <node id="613040" label="zzz1832" cy:nodeId="1481">
    <graphics x="-524.950974942014" y="-199.23057439401236" z="0.0"/>
  </node>
  <node id="613041" label="zzz1831" cy:nodeId="1482">
    <graphics x="-674.2506098754857" y="-155.89678075387565" z="0.0"/>
  </node>
  <node id="613042" label="zzz1830" cy:nodeId="1483">
    <graphics x="-652.9898872383092" y="-47.553959632659826" z="0.0"/>
  </node>
  <node id="613043" label="zzz1829" cy:nodeId="1484">
    <graphics x="-569.4328932769749" y="-163.610365653778" z="0.0"/>
  </node>
  <node id="613044" label="zzz1828" cy:nodeId="1485">
    <graphics x="-558.1971297271702" y="-247.74868657662955" z="0.0"/>
  </node>
  <node id="613045" label="zzz1827" cy:nodeId="1486">
    <graphics x="-466.97276449279525" y="-8.515753532195959" z="0.0"/>
  </node>
  <node id="613046" label="zzz1826" cy:nodeId="1487">
    <graphics x="2913.173853396609" y="-218.01602056100455" z="0.0"/>
  </node>
  <node id="613047" label="zzz1825" cy:nodeId="1488">
    <graphics x="1789.683947085574" y="-150.84660222604361" z="0.0"/>
  </node>
  <node id="613048" label="zzz1824" cy:nodeId="1489">
    <graphics x="-343.52008199767806" y="186.40837213919076" z="0.0"/>
  </node>
  <node id="613049" label="zzz1823" cy:nodeId="1490">
    <graphics x="-575.9922270782445" y="-137.38657262399283" z="0.0"/>
  </node>
  <node id="613050" label="zzz1822" cy:nodeId="1491">
    <graphics x="-659.9550166137669" y="-188.62481572702018" z="0.0"/>
  </node>
  <node id="613051" label="zzz1821" cy:nodeId="1492">
    <graphics x="-660.32056760864" y="-88.38556935861197" z="0.0"/>
  </node>
  <node id="613052" label="zzz1820" cy:nodeId="1493">
    <graphics x="-676.3613905914281" y="-209.22540166452018" z="0.0"/>
  </node>
  <node id="613053" label="zzz1819" cy:nodeId="1494">
    <graphics x="-560.3160338409398" y="-79.96490361764518" z="0.0"/>
  </node>
  <node id="613054" label="zzz1818" cy:nodeId="1495">
    <graphics x="-623.8273863800023" y="-184.83946111276236" z="0.0"/>
  </node>
  <node id="613055" label="zzz1817" cy:nodeId="1496">
    <graphics x="-517.6972517974827" y="-97.00834539010611" z="0.0"/>
  </node>
  <node id="613056" label="zzz1816" cy:nodeId="1497">
    <graphics x="-540.0017714508031" y="-194.35737493112174" z="0.0"/>
  </node>
  <node id="613057" label="zzz1815" cy:nodeId="1498">
    <graphics x="-674.7385668762181" y="-130.64292790963736" z="0.0"/>
  </node>
  <node id="613058" label="zzz1814" cy:nodeId="1499">
    <graphics x="-588.9453253753636" y="-153.10505559518424" z="0.0"/>
  </node>
  <node id="613059" label="zzz1813" cy:nodeId="1500">
    <graphics x="-650.0516824729893" y="-152.88445928170768" z="0.0"/>
  </node>
  <node id="613060" label="zzz1812" cy:nodeId="1501">
    <graphics x="-651.9442076690648" y="-190.29499700143424" z="0.0"/>
  </node>
  <node id="613061" label="zzz1811" cy:nodeId="1502">
    <graphics x="-647.509568692014" y="-154.14106633737174" z="0.0"/>
  </node>
  <node id="613062" label="zzz1810" cy:nodeId="1503">
    <graphics x="-669.9436526306126" y="-163.04683568551627" z="0.0"/>
  </node>
  <node id="613063" label="zzz1809" cy:nodeId="1504">
    <graphics x="-552.8633894927952" y="-210.45486333444205" z="0.0"/>
  </node>
  <node id="613064" label="zzz1808" cy:nodeId="1505">
    <graphics x="-646.1730599410985" y="-106.4269702680358" z="0.0"/>
  </node>
  <node id="613065" label="zzz1807" cy:nodeId="1506">
    <graphics x="-673.6635890014622" y="-102.13431432321158" z="0.0"/>
  </node>
  <node id="613066" label="zzz1806" cy:nodeId="1507">
    <graphics x="-646.5340508230183" y="-111.87254216744986" z="0.0"/>
  </node>
  <node id="613067" label="zzz1805" cy:nodeId="1508">
    <graphics x="-593.1725935943577" y="-208.66166570260611" z="0.0"/>
  </node>
  <node id="613068" label="zzz1804" cy:nodeId="1509">
    <graphics x="-619.765594006345" y="-105.13952519967643" z="0.0"/>
  </node>
  <node id="613069" label="zzz1803" cy:nodeId="1510">
    <graphics x="-675.7031989105199" y="-148.13872411325065" z="0.0"/>
  </node>
  <node id="613070" label="zzz1802" cy:nodeId="1511">
    <graphics x="-599.688596249387" y="-243.85925176217643" z="0.0"/>
  </node>
  <node id="613071" label="zzz1801" cy:nodeId="1512">
    <graphics x="-635.3546366699193" y="-94.78492620065299" z="0.0"/>
  </node>
  <node id="613072" label="zzz1800" cy:nodeId="1513">
    <graphics x="-584.2724280364964" y="-141.67334630563346" z="0.0"/>
  </node>
  <node id="613073" label="zzz1799" cy:nodeId="1514">
    <graphics x="-594.255345822141" y="-166.49009587838736" z="0.0"/>
  </node>
  <node id="613074" label="zzz1798" cy:nodeId="1515">
    <graphics x="-668.1612772949193" y="-109.51718785836783" z="0.0"/>
  </node>
  <node id="613075" label="zzz1797" cy:nodeId="1516">
    <graphics x="-551.3636794097874" y="-170.9154956586608" z="0.0"/>
  </node>
  <node id="613076" label="zzz1796" cy:nodeId="1517">
    <graphics x="-658.2311491973851" y="-200.85520818307486" z="0.0"/>
  </node>
  <node id="613077" label="zzz1795" cy:nodeId="1518">
    <graphics x="1824.1748223297145" y="-203.92179753854361" z="0.0"/>
  </node>
  <node id="613078" label="zzz1794" cy:nodeId="1519">
    <graphics x="1758.2511467926051" y="-13.444990897918615" z="0.0"/>
  </node>
  <node id="613079" label="zzz1793" cy:nodeId="1520">
    <graphics x="1782.7444024078395" y="-163.73811223580924" z="0.0"/>
  </node>
  <node id="613080" label="zzz1792" cy:nodeId="1521">
    <graphics x="1803.2452874176051" y="-275.4620349653014" z="0.0"/>
  </node>
  <node id="613081" label="zzz1791" cy:nodeId="1522">
    <graphics x="1648.5436577789333" y="-90.22920110299674" z="0.0"/>
  </node>
  <node id="613082" label="zzz1790" cy:nodeId="1523">
    <graphics x="1745.8237175933864" y="-158.14427068307486" z="0.0"/>
  </node>
  <node id="613083" label="zzz1789" cy:nodeId="1524">
    <graphics x="1874.5602593414333" y="-226.70464971139518" z="0.0"/>
  </node>
  <node id="613084" label="zzz1788" cy:nodeId="1525">
    <graphics x="1705.5161919586208" y="-162.49461247994986" z="0.0"/>
  </node>
  <node id="613085" label="zzz1787" cy:nodeId="1526">
    <graphics x="1816.8225731842067" y="-37.915388847137365" z="0.0"/>
  </node>
  <node id="613086" label="zzz1786" cy:nodeId="1527">
    <graphics x="1816.860476016238" y="-107.01853826119986" z="0.0"/>
  </node>
  <node id="613087" label="zzz1785" cy:nodeId="1528">
    <graphics x="-583.884885311887" y="-173.10728337838736" z="0.0"/>
  </node>
  <node id="613088" label="zzz1784" cy:nodeId="1529">
    <graphics x="-610.9909110076878" y="-147.7888858564147" z="0.0"/>
  </node>
  <node id="613089" label="zzz1783" cy:nodeId="1530">
    <graphics x="-612.3708128936742" y="-74.03652837350455" z="0.0"/>
  </node>
  <node id="613090" label="zzz1782" cy:nodeId="1531">
    <graphics x="-552.1962370880101" y="-64.86451795175162" z="0.0"/>
  </node>
  <node id="613091" label="zzz1781" cy:nodeId="1532">
    <graphics x="-574.6199355133031" y="-79.72603490426627" z="0.0"/>
  </node>
  <node id="613092" label="zzz1780" cy:nodeId="1533">
    <graphics x="-647.5198445327733" y="-57.360464835906896" z="0.0"/>
  </node>
  <node id="613093" label="zzz1779" cy:nodeId="1534">
    <graphics x="-582.3606047637913" y="-70.91799428536979" z="0.0"/>
  </node>
  <node id="613094" label="zzz1778" cy:nodeId="1535">
    <graphics x="-644.6746330268834" y="-146.7159564740905" z="0.0"/>
  </node>
  <node id="613095" label="zzz1777" cy:nodeId="1536">
    <graphics x="-557.9476943023656" y="-117.18469884469596" z="0.0"/>
  </node>
  <node id="613096" label="zzz1776" cy:nodeId="1537">
    <graphics x="-553.7844862945531" y="-162.30361821725455" z="0.0"/>
  </node>
  <node id="613097" label="zzz1775" cy:nodeId="1538">
    <graphics x="-579.2674574859593" y="-124.96936681344596" z="0.0"/>
  </node>
  <node id="613098" label="zzz1774" cy:nodeId="1539">
    <graphics x="-528.640313626096" y="-167.04707219674674" z="0.0"/>
  </node>
  <node id="613099" label="zzz1773" cy:nodeId="1540">
    <graphics x="-640.4064555175755" y="-109.03911473825065" z="0.0"/>
  </node>
  <node id="613100" label="zzz1772" cy:nodeId="1541">
    <graphics x="2900.8925957672145" y="-275.4620349653014" z="0.0"/>
  </node>
  <node id="613101" label="zzz1771" cy:nodeId="1542">
    <graphics x="2807.1389722816493" y="758.9538814775697" z="0.0"/>
  </node>
  <node id="613102" label="zzz1770" cy:nodeId="1543">
    <graphics x="2986.414259432986" y="-204.39373662545768" z="0.0"/>
  </node>
  <node id="613103" label="zzz1769" cy:nodeId="1544">
    <graphics x="-742.8102736480687" y="-170.88748052194205" z="0.0"/>
  </node>
  <node id="613104" label="zzz1768" cy:nodeId="1545">
    <graphics x="2891.0553312294032" y="691.2782833330384" z="0.0"/>
  </node>
  <node id="613105" label="zzz1767" cy:nodeId="1546">
    <graphics x="-607.2340979583714" y="-108.80864598825065" z="0.0"/>
  </node>
  <node id="613106" label="zzz1766" cy:nodeId="1547">
    <graphics x="2790.4968976966884" y="652.4668209306947" z="0.0"/>
  </node>
  <node id="613107" label="zzz1765" cy:nodeId="1548">
    <graphics x="2956.969200610354" y="-155.40850713327018" z="0.0"/>
  </node>
  <node id="613108" label="zzz1764" cy:nodeId="1549">
    <graphics x="1705.673723696902" y="-195.08032109811393" z="0.0"/>
  </node>
  <node id="613109" label="zzz1763" cy:nodeId="1550">
    <graphics x="3036.2505784027126" y="-94.76934697702018" z="0.0"/>
  </node>
  <node id="613110" label="zzz1762" cy:nodeId="1551">
    <graphics x="-658.8999199874852" y="-175.0738208539733" z="0.0"/>
  </node>
  <node id="613111" label="zzz1761" cy:nodeId="1552">
    <graphics x="-503.96963644103744" y="-160.36141088082877" z="0.0"/>
  </node>
  <node id="613112" label="zzz1760" cy:nodeId="1553">
    <graphics x="-651.796512127683" y="-132.7880771405944" z="0.0"/>
  </node>
  <node id="613113" label="zzz1759" cy:nodeId="1554">
    <graphics x="-647.3925337799046" y="-119.81738164498893" z="0.0"/>
  </node>
  <node id="613114" label="zzz1758" cy:nodeId="1555">
    <graphics x="-651.4405093200658" y="-162.05124547555533" z="0.0"/>
  </node>
  <node id="613115" label="zzz1757" cy:nodeId="1556">
    <graphics x="-731.2400679595921" y="-162.97256352975455" z="0.0"/>
  </node>
  <node id="613116" label="zzz1756" cy:nodeId="1557">
    <graphics x="-622.3759818084691" y="-208.35281255319205" z="0.0"/>
  </node>
  <node id="613117" label="zzz1755" cy:nodeId="1558">
    <graphics x="-635.6066117294286" y="-215.30427434518424" z="0.0"/>
  </node>
  <node id="613118" label="zzz1754" cy:nodeId="1559">
    <graphics x="-614.1522002227757" y="-207.61100652291861" z="0.0"/>
  </node>
  <node id="613119" label="zzz1753" cy:nodeId="1560">
    <graphics x="-595.6746764190648" y="-86.01368978097526" z="0.0"/>
  </node>
  <node id="613120" label="zzz1752" cy:nodeId="1561">
    <graphics x="-497.87201070861556" y="-149.06303289010611" z="0.0"/>
  </node>
  <node id="613121" label="zzz1751" cy:nodeId="1562">
    <graphics x="-680.2568755157445" y="-104.88185765817252" z="0.0"/>
  </node>
  <node id="613122" label="zzz1750" cy:nodeId="1563">
    <graphics x="-535.2637419708226" y="-101.91978337838736" z="0.0"/>
  </node>
  <node id="613123" label="zzz1749" cy:nodeId="1564">
    <graphics x="-699.1192793853734" y="-133.33499791696158" z="0.0"/>
  </node>
  <node id="613124" label="zzz1748" cy:nodeId="1565">
    <graphics x="-605.0916152008031" y="-98.3504550702819" z="0.0"/>
  </node>
  <node id="613125" label="zzz1747" cy:nodeId="1566">
    <graphics x="-671.6699156768773" y="-68.88187673165885" z="0.0"/>
  </node>
  <node id="613126" label="zzz1746" cy:nodeId="1567">
    <graphics x="-527.2873625762913" y="-112.28993108346549" z="0.0"/>
  </node>
  <node id="613127" label="zzz1745" cy:nodeId="1568">
    <graphics x="-572.2888884551976" y="-47.51849534585563" z="0.0"/>
  </node>
  <node id="613128" label="zzz1744" cy:nodeId="1569">
    <graphics x="-595.6783537872288" y="-234.68070867135611" z="0.0"/>
  </node>
  <node id="613129" label="zzz1743" cy:nodeId="1570">
    <graphics x="-453.76895284728744" y="-87.72009923532096" z="0.0"/>
  </node>
  <node id="613130" label="zzz1742" cy:nodeId="1571">
    <graphics x="-612.6622252471898" y="-140.43366887643424" z="0.0"/>
  </node>
  <node id="613131" label="zzz1741" cy:nodeId="1572">
    <graphics x="-561.3082747467015" y="-202.18318059518424" z="0.0"/>
  </node>
  <node id="613132" label="zzz1740" cy:nodeId="1573">
    <graphics x="-637.5639853485081" y="-123.56018712594596" z="0.0"/>
  </node>
  <node id="613133" label="zzz1739" cy:nodeId="1574">
    <graphics x="2892.5967125885036" y="-153.66918828561393" z="0.0"/>
  </node>
  <node id="613134" label="zzz1738" cy:nodeId="1575">
    <graphics x="-556.8495497711156" y="-201.92324712350455" z="0.0"/>
  </node>
  <node id="613135" label="zzz1737" cy:nodeId="1576">
    <graphics x="-578.3037962921117" y="-191.49583318307486" z="0.0"/>
  </node>
  <node id="613136" label="zzz1736" cy:nodeId="1577">
    <graphics x="-536.8208327300999" y="-94.77189519479361" z="0.0"/>
  </node>
  <node id="613137" label="zzz1735" cy:nodeId="1578">
    <graphics x="-618.5340018280003" y="-179.161146903778" z="0.0"/>
  </node>
  <node id="613138" label="zzz1734" cy:nodeId="1579">
    <graphics x="-654.6878647811864" y="-166.0707690961608" z="0.0"/>
  </node>
  <node id="613139" label="zzz1733" cy:nodeId="1580">
    <graphics x="-702.4110617645238" y="-195.04099919869986" z="0.0"/>
  </node>
  <node id="613140" label="zzz1732" cy:nodeId="1581">
    <graphics x="-593.5134825714085" y="-85.9700496442565" z="0.0"/>
  </node>
  <node id="613141" label="zzz1731" cy:nodeId="1582">
    <graphics x="3043.8020348541286" y="-137.4820239789733" z="0.0"/>
  </node>
  <node id="613142" label="zzz1730" cy:nodeId="1583">
    <graphics x="-542.9656767852757" y="-154.4229419477233" z="0.0"/>
  </node>
  <node id="613143" label="zzz1729" cy:nodeId="1584">
    <graphics x="1671.259630679324" y="-198.12699773385611" z="0.0"/>
  </node>
  <node id="613144" label="zzz1728" cy:nodeId="1585">
    <graphics x="1697.5525078765895" y="-47.92268254830924" z="0.0"/>
  </node>
  <node id="613145" label="zzz1727" cy:nodeId="1586">
    <graphics x="-660.2870535858128" y="-160.7458408124694" z="0.0"/>
  </node>
  <node id="613146" label="zzz1726" cy:nodeId="1587">
    <graphics x="-555.3376250274632" y="-152.27812078073111" z="0.0"/>
  </node>
  <node id="613147" label="zzz1725" cy:nodeId="1588">
    <graphics x="-702.9675307281468" y="-145.59928014352408" z="0.0"/>
  </node>
  <node id="613148" label="zzz1724" cy:nodeId="1589">
    <graphics x="-672.9684348113988" y="-75.49389531686393" z="0.0"/>
  </node>
  <node id="613149" label="zzz1723" cy:nodeId="1590">
    <graphics x="-592.1362853057835" y="-97.62933232858268" z="0.0"/>
  </node>
  <node id="613150" label="zzz1722" cy:nodeId="1591">
    <graphics x="3017.5280251495387" y="-136.6996753461608" z="0.0"/>
  </node>
  <node id="613151" label="zzz1721" cy:nodeId="1592">
    <graphics x="-547.2479186065648" y="-86.92396047189322" z="0.0"/>
  </node>
  <node id="613152" label="zzz1720" cy:nodeId="1593">
    <graphics x="1673.6642937652614" y="-52.52625920846549" z="0.0"/>
  </node>
  <node id="613153" label="zzz1719" cy:nodeId="1594">
    <graphics x="1764.3974785797145" y="-131.4356830365905" z="0.0"/>
  </node>
  <node id="613154" label="zzz1718" cy:nodeId="1595">
    <graphics x="-671.6895060546849" y="-226.359144950653" z="0.0"/>
  </node>
  <node id="613155" label="zzz1717" cy:nodeId="1596">
    <graphics x="-579.9648985870335" y="-220.4338062055358" z="0.0"/>
  </node>
  <node id="613156" label="zzz1716" cy:nodeId="1597">
    <graphics x="-671.718646527097" y="-128.9206454999694" z="0.0"/>
  </node>
  <node id="613157" label="zzz1715" cy:nodeId="1598">
    <graphics x="2919.7595696441676" y="-187.78979375436393" z="0.0"/>
  </node>
  <node id="613158" label="zzz1714" cy:nodeId="1599">
    <graphics x="-648.1305537231419" y="-166.718031669403" z="0.0"/>
  </node>
  <node id="613159" label="zzz1713" cy:nodeId="1600">
    <graphics x="-672.2055315978978" y="-151.71832158639518" z="0.0"/>
  </node>
  <node id="613160" label="zzz1712" cy:nodeId="1601">
    <graphics x="-594.6070113189671" y="-170.35041692330924" z="0.0"/>
  </node>
  <node id="613161" label="zzz1711" cy:nodeId="1602">
    <graphics x="-675.5264086730931" y="-113.67512395455924" z="0.0"/>
  </node>
  <node id="613162" label="zzz1710" cy:nodeId="1603">
    <graphics x="-735.5457320220921" y="-113.40947606637565" z="0.0"/>
  </node>
  <node id="613163" label="zzz1709" cy:nodeId="1604">
    <graphics x="-700.6857848175023" y="-198.60533025338736" z="0.0"/>
  </node>
  <node id="613164" label="zzz1708" cy:nodeId="1605">
    <graphics x="-600.3748984344456" y="-161.84853246286002" z="0.0"/>
  </node>
  <node id="613165" label="zzz1707" cy:nodeId="1606">
    <graphics x="3075.491251467898" y="-250.09783818795768" z="0.0"/>
  </node>
  <node id="613166" label="zzz1706" cy:nodeId="1607">
    <graphics x="3063.3813652984645" y="-171.78433110787955" z="0.0"/>
  </node>
  <node id="613167" label="zzz1705" cy:nodeId="1608">
    <graphics x="-669.6529479034398" y="-93.5610378034362" z="0.0"/>
  </node>
  <node id="613168" label="zzz1704" cy:nodeId="1609">
    <graphics x="-560.0000243194554" y="-228.75979497506705" z="0.0"/>
  </node>
  <node id="613169" label="zzz1703" cy:nodeId="1610">
    <graphics x="-562.8491988189671" y="-235.84367253854361" z="0.0"/>
  </node>
  <node id="613170" label="zzz1702" cy:nodeId="1611">
    <graphics x="-542.0444502838109" y="-105.81317021920768" z="0.0"/>
  </node>
  <node id="613171" label="zzz1701" cy:nodeId="1612">
    <graphics x="1765.3412346832301" y="-233.42582585885611" z="0.0"/>
  </node>
  <node id="613172" label="zzz1700" cy:nodeId="1613">
    <graphics x="1730.2697014801051" y="-63.30854680612174" z="0.0"/>
  </node>
  <node id="613173" label="zzz1699" cy:nodeId="1614">
    <graphics x="-603.4330077178929" y="-57.23187520577994" z="0.0"/>
  </node>
  <node id="613174" label="zzz1698" cy:nodeId="1615">
    <graphics x="-571.2559218414281" y="-213.34341313912955" z="0.0"/>
  </node>
  <node id="613175" label="zzz1697" cy:nodeId="1616">
    <graphics x="3090.8759636871364" y="-215.42944219186393" z="0.0"/>
  </node>
  <node id="613176" label="zzz1696" cy:nodeId="1617">
    <graphics x="-630.585381985471" y="-54.80354001596061" z="0.0"/>
  </node>
  <node id="613177" label="zzz1695" cy:nodeId="1618">
    <graphics x="-650.9674191482518" y="-151.88027837350455" z="0.0"/>
  </node>
  <node id="613178" label="zzz1694" cy:nodeId="1619">
    <graphics x="-563.3084197051976" y="-194.55125310494986" z="0.0"/>
  </node>
  <node id="613179" label="zzz1693" cy:nodeId="1620">
    <graphics x="-536.1366209991429" y="-88.97074773385611" z="0.0"/>
  </node>
  <node id="613180" label="zzz1692" cy:nodeId="1621">
    <graphics x="-508.83682394103744" y="-169.81921269967643" z="0.0"/>
  </node>
  <node id="613181" label="zzz1691" cy:nodeId="1622">
    <graphics x="3014.5441250793483" y="-234.6629321820983" z="0.0"/>
  </node>
  <node id="613182" label="zzz1690" cy:nodeId="1623">
    <graphics x="-696.3345580108617" y="-154.27683141305533" z="0.0"/>
  </node>
  <node id="613183" label="zzz1689" cy:nodeId="1624">
    <graphics x="-599.3191123016331" y="-161.87509801461783" z="0.0"/>
  </node>
  <node id="613184" label="zzz1688" cy:nodeId="1625">
    <graphics x="1774.689318179324" y="-195.22544744088736" z="0.0"/>
  </node>
  <node id="613185" label="zzz1687" cy:nodeId="1626">
    <graphics x="-575.5055403717015" y="-170.7623431928405" z="0.0"/>
  </node>
  <node id="613186" label="zzz1686" cy:nodeId="1627">
    <graphics x="-591.0741744049046" y="-62.922543311859044" z="0.0"/>
  </node>
  <node id="613187" label="zzz1685" cy:nodeId="1628">
    <graphics x="-674.1671404846165" y="-73.878618980194" z="0.0"/>
  </node>
  <node id="613188" label="zzz1684" cy:nodeId="1629">
    <graphics x="-572.9186568267796" y="-122.45815160348502" z="0.0"/>
  </node>
  <node id="613189" label="zzz1683" cy:nodeId="1630">
    <graphics x="-700.9034056671117" y="-160.92336919381705" z="0.0"/>
  </node>
  <node id="613190" label="zzz1682" cy:nodeId="1631">
    <graphics x="-672.4706511505101" y="-106.93320348336783" z="0.0"/>
  </node>
  <node id="613191" label="zzz1681" cy:nodeId="1632">
    <graphics x="1837.6081566803005" y="-90.38130071237174" z="0.0"/>
  </node>
  <node id="613192" label="zzz1680" cy:nodeId="1633">
    <graphics x="2933.9465813629176" y="-98.63647344186393" z="0.0"/>
  </node>
  <node id="613193" label="zzz1679" cy:nodeId="1634">
    <graphics x="-614.1409201629613" y="-137.80882146432486" z="0.0"/>
  </node>
  <node id="613194" label="zzz1678" cy:nodeId="1635">
    <graphics x="-622.1192622192357" y="-161.58134343698111" z="0.0"/>
  </node>
  <node id="613195" label="zzz1677" cy:nodeId="1636">
    <graphics x="-727.1055541046117" y="-93.80672719552604" z="0.0"/>
  </node>
  <node id="613196" label="zzz1676" cy:nodeId="1637">
    <graphics x="1648.599474429324" y="-175.65226628854361" z="0.0"/>
  </node>
  <node id="613197" label="zzz1675" cy:nodeId="1638">
    <graphics x="-659.5257649429295" y="-234.13618352487174" z="0.0"/>
  </node>
  <node id="613198" label="zzz1674" cy:nodeId="1639">
    <graphics x="-556.8104872711156" y="-204.22675969674674" z="0.0"/>
  </node>
  <node id="613199" label="zzz1673" cy:nodeId="1640">
    <graphics x="-617.764171124265" y="-91.68260457589713" z="0.0"/>
  </node>
  <node id="613200" label="zzz1672" cy:nodeId="1641">
    <graphics x="2978.5850362770107" y="-259.85403325631705" z="0.0"/>
  </node>
  <node id="613201" label="zzz1671" cy:nodeId="1642">
    <graphics x="-579.0626006134007" y="-115.6777255780944" z="0.0"/>
  </node>
  <node id="613202" label="zzz1670" cy:nodeId="1643">
    <graphics x="-692.2369971282933" y="-186.56115605905143" z="0.0"/>
  </node>
  <node id="613203" label="zzz1669" cy:nodeId="1644">
    <graphics x="-600.6229338653538" y="-131.83633306100455" z="0.0"/>
  </node>
  <node id="613204" label="zzz1668" cy:nodeId="1645">
    <graphics x="-685.3048911102269" y="-147.97876622750846" z="0.0"/>
  </node>
  <node id="613205" label="zzz1667" cy:nodeId="1646">
    <graphics x="-703.4600539215062" y="-127.88252904489127" z="0.0"/>
  </node>
  <node id="613206" label="zzz1666" cy:nodeId="1647">
    <graphics x="-633.0756821639989" y="-193.8653705365905" z="0.0"/>
  </node>
  <node id="613207" label="zzz1665" cy:nodeId="1648">
    <graphics x="-698.9114432342503" y="-112.7676913984069" z="0.0"/>
  </node>
  <node id="613208" label="zzz1664" cy:nodeId="1649">
    <graphics x="-589.6652083404515" y="-122.20416905953971" z="0.0"/>
  </node>
  <node id="613209" label="zzz1663" cy:nodeId="1650">
    <graphics x="-625.5679259307835" y="-160.555434013153" z="0.0"/>
  </node>
  <node id="613210" label="zzz1662" cy:nodeId="1651">
    <graphics x="-616.2215800292943" y="-27.63633706643668" z="0.0"/>
  </node>
  <node id="613211" label="zzz1661" cy:nodeId="1652">
    <graphics x="-501.3474898345921" y="-144.46903112008658" z="0.0"/>
  </node>
  <node id="613212" label="zzz1660" cy:nodeId="1653">
    <graphics x="-646.1265635498021" y="-223.03845098092643" z="0.0"/>
  </node>
  <node id="613213" label="zzz1659" cy:nodeId="1654">
    <graphics x="-569.8091368682835" y="-123.13084294869986" z="0.0"/>
  </node>
  <node id="613214" label="zzz1658" cy:nodeId="1655">
    <graphics x="-569.7898802764867" y="-76.19487645700065" z="0.0"/>
  </node>
  <node id="613215" label="zzz1657" cy:nodeId="1656">
    <graphics x="-622.5125880248997" y="-184.36419560983268" z="0.0"/>
  </node>
  <node id="613216" label="zzz1656" cy:nodeId="1657">
    <graphics x="2956.1573281280544" y="-147.69790532662955" z="0.0"/>
  </node>
  <node id="613217" label="zzz1655" cy:nodeId="1658">
    <graphics x="-605.9844832427952" y="-62.6111858136901" z="0.0"/>
  </node>
  <node id="613218" label="zzz1654" cy:nodeId="1659">
    <graphics x="-710.8010039337132" y="-115.31251409127799" z="0.0"/>
  </node>
  <node id="613219" label="zzz1653" cy:nodeId="1660">
    <graphics x="1702.9017815582301" y="-14.56220891549674" z="0.0"/>
  </node>
  <node id="613220" label="zzz1652" cy:nodeId="1661">
    <graphics x="2875.7155480377223" y="-56.1589038617858" z="0.0"/>
  </node>
  <node id="613221" label="zzz1651" cy:nodeId="1662">
    <graphics x="-620.8972697265599" y="-9.229367042327794" z="0.0"/>
  </node>
  <node id="613222" label="zzz1650" cy:nodeId="1663">
    <graphics x="-577.5184111602757" y="-159.81729009225455" z="0.0"/>
  </node>
  <node id="613223" label="zzz1649" cy:nodeId="1664">
    <graphics x="-634.3284983642552" y="-207.49629094674674" z="0.0"/>
  </node>
  <node id="613224" label="zzz1648" cy:nodeId="1665">
    <graphics x="-581.2794508941624" y="-175.29170110299674" z="0.0"/>
  </node>
  <node id="613225" label="zzz1647" cy:nodeId="1666">
    <graphics x="-649.8695921905492" y="-66.61731603219596" z="0.0"/>
  </node>
  <node id="613226" label="zzz1646" cy:nodeId="1667">
    <graphics x="-637.9777026184056" y="-184.77371099069205" z="0.0"/>
  </node>
  <node id="613227" label="zzz1645" cy:nodeId="1668">
    <graphics x="-647.7193768032048" y="-184.2112720258483" z="0.0"/>
  </node>
  <node id="613228" label="zzz1644" cy:nodeId="1669">
    <graphics x="-687.3216338165257" y="-145.0247485883483" z="0.0"/>
  </node>
  <node id="613229" label="zzz1643" cy:nodeId="1670">
    <graphics x="-567.7519164092992" y="-197.534437919403" z="0.0"/>
  </node>
  <node id="613230" label="zzz1642" cy:nodeId="1671">
    <graphics x="-643.2959704406712" y="-123.10544469430533" z="0.0"/>
  </node>
  <node id="613231" label="zzz1641" cy:nodeId="1672">
    <graphics x="-635.6119399078343" y="-175.41326787545768" z="0.0"/>
  </node>
  <node id="613232" label="zzz1640" cy:nodeId="1673">
    <graphics x="-607.8057570465062" y="-69.1624439008483" z="0.0"/>
  </node>
  <node id="613233" label="zzz1639" cy:nodeId="1674">
    <graphics x="-628.9906706817601" y="-69.58642461373893" z="0.0"/>
  </node>
  <node id="613234" label="zzz1638" cy:nodeId="1675">
    <graphics x="-674.3719210632298" y="-129.14616277291861" z="0.0"/>
  </node>
  <node id="613235" label="zzz1637" cy:nodeId="1676">
    <graphics x="-633.6408858306859" y="-215.41291692330924" z="0.0"/>
  </node>
  <node id="613236" label="zzz1636" cy:nodeId="1677">
    <graphics x="-604.7396712310765" y="-127.45773961618033" z="0.0"/>
  </node>
  <node id="613237" label="zzz1635" cy:nodeId="1678">
    <graphics x="-582.4541411407445" y="-73.59012105538932" z="0.0"/>
  </node>
  <node id="613238" label="zzz1634" cy:nodeId="1679">
    <graphics x="-615.592462063596" y="-68.8555705793151" z="0.0"/>
  </node>
  <node id="613239" label="zzz1633" cy:nodeId="1680">
    <graphics x="-589.2197356231663" y="-170.832289481903" z="0.0"/>
  </node>
  <node id="613240" label="zzz1632" cy:nodeId="1681">
    <graphics x="-598.584332943723" y="-116.40989568307486" z="0.0"/>
  </node>
  <node id="613241" label="zzz1631" cy:nodeId="1682">
    <graphics x="-661.0533299453709" y="-178.19160344674674" z="0.0"/>
  </node>
  <node id="613242" label="zzz1630" cy:nodeId="1683">
    <graphics x="-636.5198693283055" y="-96.65582158639518" z="0.0"/>
  </node>
  <node id="613243" label="zzz1629" cy:nodeId="1684">
    <graphics x="-581.9033827789281" y="-185.10073735787955" z="0.0"/>
  </node>
  <node id="613244" label="zzz1628" cy:nodeId="1685">
    <graphics x="-575.3324751861546" y="-91.31558110787955" z="0.0"/>
  </node>
  <node id="613245" label="zzz1627" cy:nodeId="1686">
    <graphics x="-639.6838183410619" y="-164.49479558541861" z="0.0"/>
  </node>
  <node id="613246" label="zzz1626" cy:nodeId="1687">
    <graphics x="-642.8306326873753" y="-86.77887990548697" z="0.0"/>
  </node>
  <node id="613247" label="zzz1625" cy:nodeId="1688">
    <graphics x="-635.2451338775609" y="-106.36694982125846" z="0.0"/>
  </node>
  <node id="613248" label="zzz1624" cy:nodeId="1689">
    <graphics x="-632.4577879913304" y="-124.40174748971549" z="0.0"/>
  </node>
  <node id="613249" label="zzz1623" cy:nodeId="1690">
    <graphics x="-598.5718169219945" y="-194.2091968305358" z="0.0"/>
  </node>
  <node id="613250" label="zzz1622" cy:nodeId="1691">
    <graphics x="-563.0075240142796" y="-169.58343389108268" z="0.0"/>
  </node>
  <node id="613251" label="zzz1621" cy:nodeId="1692">
    <graphics x="-634.766892910764" y="-161.01078679635611" z="0.0"/>
  </node>
  <node id="613252" label="zzz1620" cy:nodeId="1693">
    <graphics x="-565.1538481719945" y="-140.02564122750846" z="0.0"/>
  </node>
  <node id="613253" label="zzz1619" cy:nodeId="1694">
    <graphics x="-722.1101470001195" y="-155.0781924970397" z="0.0"/>
  </node>
  <node id="613254" label="zzz1618" cy:nodeId="1695">
    <graphics x="2940.7996048919704" y="-258.4410999067077" z="0.0"/>
  </node>
  <node id="613255" label="zzz1617" cy:nodeId="1696">
    <graphics x="-580.5392928131077" y="-112.25685002877799" z="0.0"/>
  </node>
  <node id="613256" label="zzz1616" cy:nodeId="1697">
    <graphics x="-612.8648924835179" y="-102.42549779489127" z="0.0"/>
  </node>
  <node id="613257" label="zzz1615" cy:nodeId="1698">
    <graphics x="-554.2097945220921" y="-172.92722966744986" z="0.0"/>
  </node>
  <node id="613258" label="zzz1614" cy:nodeId="1699">
    <graphics x="-602.747361660764" y="-93.17727544381705" z="0.0"/>
  </node>
  <node id="613259" label="zzz1613" cy:nodeId="1700">
    <graphics x="-524.5825133331273" y="-141.56439092233268" z="0.0"/>
  </node>
  <node id="613260" label="zzz1612" cy:nodeId="1701">
    <graphics x="-668.4820361144994" y="-125.98582341744986" z="0.0"/>
  </node>
  <node id="613261" label="zzz1611" cy:nodeId="1702">
    <graphics x="-595.0208525665257" y="-197.72964360787955" z="0.0"/>
  </node>
  <node id="613262" label="zzz1610" cy:nodeId="1703">
    <graphics x="-632.80432176666" y="-178.682387138153" z="0.0"/>
  </node>
  <node id="613263" label="zzz1609" cy:nodeId="1704">
    <graphics x="-609.8845000274632" y="-216.32697942330924" z="0.0"/>
  </node>
  <node id="613264" label="zzz1608" cy:nodeId="1705">
    <graphics x="-645.2478060729954" y="-151.26708867623893" z="0.0"/>
  </node>
  <node id="613265" label="zzz1607" cy:nodeId="1706">
    <graphics x="-631.7038607604954" y="-82.01020696237174" z="0.0"/>
  </node>
  <node id="613266" label="zzz1606" cy:nodeId="1707">
    <graphics x="3076.1492180816676" y="-82.50604131295768" z="0.0"/>
  </node>
  <node id="613267" label="zzz1605" cy:nodeId="1708">
    <graphics x="-628.0655856140111" y="-186.41618230416861" z="0.0"/>
  </node>
  <node id="613268" label="zzz1604" cy:nodeId="1709">
    <graphics x="-630.2274527557347" y="-40.69320371224967" z="0.0"/>
  </node>
  <node id="613269" label="zzz1603" cy:nodeId="1710">
    <graphics x="-620.8330836303685" y="-162.31661107614127" z="0.0"/>
  </node>
  <node id="613270" label="zzz1602" cy:nodeId="1711">
    <graphics x="-580.977830410764" y="-79.12072637155143" z="0.0"/>
  </node>
  <node id="613271" label="zzz1601" cy:nodeId="1712">
    <graphics x="-619.0829482086156" y="-193.98710515573111" z="0.0"/>
  </node>
  <node id="613272" label="zzz1600" cy:nodeId="1713">
    <graphics x="-644.3013157852147" y="-80.11418035104361" z="0.0"/>
  </node>
  <node id="613273" label="zzz1599" cy:nodeId="1714">
    <graphics x="-651.4687638290379" y="-212.71475102975455" z="0.0"/>
  </node>
  <node id="613274" label="zzz1598" cy:nodeId="1715">
    <graphics x="-603.5865035064671" y="-188.2946460492858" z="0.0"/>
  </node>
  <node id="613275" label="zzz1597" cy:nodeId="1716">
    <graphics x="-566.1854262359593" y="-95.07367589547721" z="0.0"/>
  </node>
  <node id="613276" label="zzz1596" cy:nodeId="1717">
    <graphics x="-580.3700728424046" y="-137.92956426217643" z="0.0"/>
  </node>
  <node id="613277" label="zzz1595" cy:nodeId="1718">
    <graphics x="-612.1811537750218" y="-131.2803867109069" z="0.0"/>
  </node>
  <node id="613278" label="zzz1594" cy:nodeId="1719">
    <graphics x="-658.2179694183324" y="-127.38970830514518" z="0.0"/>
  </node>
  <node id="613279" label="zzz1593" cy:nodeId="1720">
    <graphics x="-561.9329619415257" y="-175.45336797311393" z="0.0"/>
  </node>
  <node id="613280" label="zzz1592" cy:nodeId="1721">
    <graphics x="-557.7259459503148" y="-148.80600621774283" z="0.0"/>
  </node>
  <node id="613281" label="zzz1591" cy:nodeId="1722">
    <graphics x="-581.6692290313695" y="-89.01672246530143" z="0.0"/>
  </node>
  <node id="613282" label="zzz1590" cy:nodeId="1723">
    <graphics x="-606.7974562652562" y="-158.75564458444205" z="0.0"/>
  </node>
  <node id="613283" label="zzz1589" cy:nodeId="1724">
    <graphics x="-577.0046324737523" y="-112.99726750924674" z="0.0"/>
  </node>
  <node id="613284" label="zzz1588" cy:nodeId="1725">
    <graphics x="-557.3218550689671" y="-77.48575475289908" z="0.0"/>
  </node>
  <node id="613285" label="zzz1587" cy:nodeId="1726">
    <graphics x="-647.1864800460789" y="-75.26296498849479" z="0.0"/>
  </node>
  <node id="613286" label="zzz1586" cy:nodeId="1727">
    <graphics x="-584.3371977813695" y="-213.20432927682486" z="0.0"/>
  </node>
  <node id="613287" label="zzz1585" cy:nodeId="1728">
    <graphics x="-613.0691084869359" y="-218.7107837445983" z="0.0"/>
  </node>
  <node id="613288" label="zzz1584" cy:nodeId="1729">
    <graphics x="-637.5811352737401" y="-235.29069402291861" z="0.0"/>
  </node>
  <node id="613289" label="zzz1583" cy:nodeId="1730">
    <graphics x="-681.0824599273656" y="-177.78494145944205" z="0.0"/>
  </node>
  <node id="613290" label="zzz1582" cy:nodeId="1731">
    <graphics x="-540.2307982452367" y="-207.86221196725455" z="0.0"/>
  </node>
  <node id="613291" label="zzz1581" cy:nodeId="1732">
    <graphics x="80.46460962219498" y="328.5733196489564" z="0.0"/>
  </node>
  <node id="613292" label="zzz1580" cy:nodeId="1733">
    <graphics x="54.85557031555436" y="430.852524971222" z="0.0"/>
  </node>
  <node id="613293" label="zzz1579" cy:nodeId="1734">
    <graphics x="-68.66698217468002" y="368.54367182180795" z="0.0"/>
  </node>
  <node id="613294" label="zzz1578" cy:nodeId="1735">
    <graphics x="-19.125493527219078" y="370.4659282915345" z="0.0"/>
  </node>
  <node id="613295" label="zzz1577" cy:nodeId="1736">
    <graphics x="-711.8004012115452" y="310.76799127981576" z="0.0"/>
  </node>
  <node id="613296" label="zzz1576" cy:nodeId="1737">
    <graphics x="-798.2751021392796" y="295.45500299856576" z="0.0"/>
  </node>
  <node id="613297" label="zzz1575" cy:nodeId="1738">
    <graphics x="-812.8198409088109" y="391.8450786821595" z="0.0"/>
  </node>
  <node id="613298" label="zzz1574" cy:nodeId="1739">
    <graphics x="88.79006433410905" y="382.8378460161439" z="0.0"/>
  </node>
  <node id="613299" label="zzz1573" cy:nodeId="1740">
    <graphics x="-12.115422726437828" y="286.40837213919076" z="0.0"/>
  </node>
  <node id="613300" label="zzz1572" cy:nodeId="1741">
    <graphics x="-787.192918301389" y="358.99199030325326" z="0.0"/>
  </node>
  <node id="613301" label="zzz1571" cy:nodeId="1742">
    <graphics x="45.179575442507485" y="288.4075023882142" z="0.0"/>
  </node>
  <node id="613302" label="zzz1570" cy:nodeId="1743">
    <graphics x="-848.1023116119359" y="404.2596294634095" z="0.0"/>
  </node>
  <node id="613303" label="zzz1569" cy:nodeId="1744">
    <graphics x="-44.12166357116439" y="417.0641414873353" z="0.0"/>
  </node>
  <node id="613304" label="zzz1568" cy:nodeId="1745">
    <graphics x="2.028894900515297" y="439.2050182573548" z="0.0"/>
  </node>
  <node id="613305" label="zzz1567" cy:nodeId="1746">
    <graphics x="-733.8546614654515" y="357.70475885794076" z="0.0"/>
  </node>
  <node id="613306" label="zzz1566" cy:nodeId="1747">
    <graphics x="-7.41444921569564" y="719.5291378252259" z="0.0"/>
  </node>
  <node id="613307" label="zzz1565" cy:nodeId="1748">
    <graphics x="-87.43459081725814" y="758.4368374101869" z="0.0"/>
  </node>
  <node id="613308" label="zzz1564" cy:nodeId="1749">
    <graphics x="-688.186814785764" y="393.776353096222" z="0.0"/>
  </node>
  <node id="613309" label="zzz1563" cy:nodeId="1750">
    <graphics x="35.93406152649186" y="383.85460779592904" z="0.0"/>
  </node>
  <node id="613310" label="zzz1562" cy:nodeId="1751">
    <graphics x="-847.6575789459202" y="357.00200006887826" z="0.0"/>
  </node>
  <node id="613311" label="zzz1561" cy:nodeId="1752">
    <graphics x="-775.2400069244359" y="412.110825752472" z="0.0"/>
  </node>
  <node id="613312" label="zzz1560" cy:nodeId="1753">
    <graphics x="-761.2146773345921" y="323.67485163137826" z="0.0"/>
  </node>
  <node id="613313" label="zzz1559" cy:nodeId="1754">
    <graphics x="-729.803514004514" y="399.84330866262826" z="0.0"/>
  </node>
  <node id="613314" label="zzz1558" cy:nodeId="1755">
    <graphics x="-52.98842382507064" y="319.0997326128236" z="0.0"/>
  </node>
  <node id="613315" label="zzz1557" cy:nodeId="1756">
    <graphics x="-716.5600447662327" y="436.54374811575326" z="0.0"/>
  </node>
  <node id="613316" label="zzz1556" cy:nodeId="1757">
    <graphics x="-764.7086653717015" y="454.0782329790345" z="0.0"/>
  </node>
  <node id="613317" label="zzz1555" cy:nodeId="1758">
    <graphics x="-829.5280318267796" y="321.63017389700326" z="0.0"/>
  </node>
  <node id="613318" label="zzz1554" cy:nodeId="1759">
    <graphics x="-752.4917159088109" y="286.40837213919076" z="0.0"/>
  </node>
  <node id="613319" label="zzz1553" cy:nodeId="1760">
    <graphics x="-810.9637923248265" y="439.14018366262826" z="0.0"/>
  </node>
  <node id="613320" label="zzz1552" cy:nodeId="1761">
    <graphics x="17.724924563601235" y="331.093491768097" z="0.0"/>
  </node>
  <node id="613321" label="zzz1551" cy:nodeId="1762">
    <graphics x="-690.3961043365452" y="347.9737407915345" z="0.0"/>
  </node>
  <node id="613322" label="zzz1548" cy:nodeId="1763">
    <graphics x="-1084.7136397369359" y="-102.17507054879752" z="0.0"/>
  </node>
  <node id="613323" label="zzz1546" cy:nodeId="1764">
    <graphics x="-992.2499251373265" y="-206.25737407281486" z="0.0"/>
  </node>
  <node id="613324" label="zzz1545" cy:nodeId="1765">
    <graphics x="-1089.7359099395726" y="-103.93237187936393" z="0.0"/>
  </node>
  <node id="613325" label="zzz1543" cy:nodeId="1766">
    <graphics x="-1004.0696539886449" y="-146.5234172590026" z="0.0"/>
  </node>
  <node id="613326" label="zzz1542" cy:nodeId="1767">
    <graphics x="-1089.4818968780492" y="-165.37262227609244" z="0.0"/>
  </node>
  <node id="613327" label="zzz1541" cy:nodeId="1768">
    <graphics x="-958.897300244138" y="-114.10942723825065" z="0.0"/>
  </node>
  <node id="613328" label="zzz1540" cy:nodeId="1769">
    <graphics x="-1050.5626235015843" y="-189.7725694425353" z="0.0"/>
  </node>
  <node id="613329" label="zzz1536" cy:nodeId="1770">
    <graphics x="-948.6931643493626" y="-84.90981175973502" z="0.0"/>
  </node>
  <node id="613330" label="zzz1535" cy:nodeId="1771">
    <graphics x="-1104.73928976135" y="-192.114064002777" z="0.0"/>
  </node>
  <node id="613331" label="zzz1533" cy:nodeId="1772">
    <graphics x="-1030.2439475067113" y="-147.517290855194" z="0.0"/>
  </node>
  <node id="613332" label="zzz1532" cy:nodeId="1773">
    <graphics x="-934.328588009641" y="-195.05821445062247" z="0.0"/>
  </node>
  <node id="613333" label="zzz1530" cy:nodeId="1774">
    <graphics x="-972.1552786834691" y="-175.06151654794303" z="0.0"/>
  </node>
  <node id="613334" label="zzz1529" cy:nodeId="1775">
    <graphics x="-1095.403253079221" y="-211.2883737333068" z="0.0"/>
  </node>
  <node id="613335" label="zzz1527" cy:nodeId="1776">
    <graphics x="-1079.4653105743382" y="-71.01306035592643" z="0.0"/>
  </node>
  <node id="613336" label="zzz1526" cy:nodeId="1777">
    <graphics x="32.359411715700844" y="777.7043850176087" z="0.0"/>
  </node>
  <node id="613337" label="zzz1525" cy:nodeId="1778">
    <graphics x="-982.9706797607396" y="-177.1038844831237" z="0.0"/>
  </node>
  <node id="613338" label="zzz1524" cy:nodeId="1779">
    <graphics x="-1069.132745266721" y="-114.18766667916861" z="0.0"/>
  </node>
  <node id="613339" label="zzz1523" cy:nodeId="1780">
    <graphics x="-991.6571650512669" y="-158.17740514352408" z="0.0"/>
  </node>
  <node id="613340" label="zzz1522" cy:nodeId="1781">
    <graphics x="-975.0465312011693" y="-189.40620210244742" z="0.0"/>
  </node>
  <node id="613341" label="zzz1521" cy:nodeId="1782">
    <graphics x="-1023.633218289182" y="-236.74460103585807" z="0.0"/>
  </node>
  <node id="613342" label="zzz1520" cy:nodeId="1783">
    <graphics x="-1045.453919888303" y="-100.5452564008483" z="0.0"/>
  </node>
  <node id="613343" label="zzz1519" cy:nodeId="1784">
    <graphics x="516.5427422515895" y="-54.15276982858268" z="0.0"/>
  </node>
  <node id="613344" label="zzz1518" cy:nodeId="1785">
    <graphics x="-977.3135943420384" y="-230.776718879486" z="0.0"/>
  </node>
  <node id="613345" label="zzz1517" cy:nodeId="1786">
    <graphics x="567.0381340972926" y="-139.04302861764518" z="0.0"/>
  </node>
  <node id="613346" label="zzz1516" cy:nodeId="1787">
    <graphics x="595.9261193267848" y="-214.30368688180533" z="0.0"/>
  </node>
  <node id="613347" label="zzz1504" cy:nodeId="1788">
    <graphics x="-1121.7020888336156" y="-155.76332738473502" z="0.0"/>
  </node>
  <node id="613348" label="zzz1503" cy:nodeId="1789">
    <graphics x="-980.8721270568822" y="-165.2383945234069" z="0.0"/>
  </node>
  <node id="613349" label="zzz1502" cy:nodeId="1790">
    <graphics x="1200.5523843757655" y="684.2185680620423" z="0.0"/>
  </node>
  <node id="613350" label="zzz1501" cy:nodeId="1791">
    <graphics x="-1001.6649909027074" y="-201.11123540475455" z="0.0"/>
  </node>
  <node id="613351" label="zzz1500" cy:nodeId="1792">
    <graphics x="-998.141160488889" y="-187.48284795358268" z="0.0"/>
  </node>
  <node id="613352" label="zzz1499" cy:nodeId="1793">
    <graphics x="-925.6027655609105" y="-179.82973363473502" z="0.0"/>
  </node>
  <node id="613353" label="zzz1498" cy:nodeId="1794">
    <graphics x="-1005.7354331024144" y="-102.47451665475455" z="0.0"/>
  </node>
  <node id="613354" label="zzz1497" cy:nodeId="1795">
    <graphics x="-1023.950414181516" y="-200.14601972177115" z="0.0"/>
  </node>
  <node id="613355" label="zzz1496" cy:nodeId="1796">
    <graphics x="-990.7794470794652" y="-190.9165771253356" z="0.0"/>
  </node>
  <node id="613356" label="zzz1495" cy:nodeId="1797">
    <graphics x="-1080.5381102569554" y="-241.94456746652213" z="0.0"/>
  </node>
  <node id="613357" label="zzz1494" cy:nodeId="1798">
    <graphics x="-1040.8344740875218" y="-188.46160581185904" z="0.0"/>
  </node>
  <node id="613358" label="zzz1493" cy:nodeId="1799">
    <graphics x="-1060.780335903928" y="-142.35100057199088" z="0.0"/>
  </node>
  <node id="613359" label="zzz1492" cy:nodeId="1800">
    <graphics x="-1082.0884718902562" y="-199.22353246286002" z="0.0"/>
  </node>
  <node id="613360" label="zzz1491" cy:nodeId="1801">
    <graphics x="-1095.1150755889867" y="-135.08363607003776" z="0.0"/>
  </node>
  <node id="613361" label="zzz1490" cy:nodeId="1802">
    <graphics x="-1013.2089667327855" y="-177.86508443429557" z="0.0"/>
  </node>
  <node id="613362" label="zzz1489" cy:nodeId="1803">
    <graphics x="-963.3868298538182" y="-103.01927068307486" z="0.0"/>
  </node>
  <node id="613363" label="zzz1488" cy:nodeId="1804">
    <graphics x="-1053.088654995725" y="-185.65022924020377" z="0.0"/>
  </node>
  <node id="613364" label="zzz1487" cy:nodeId="1805">
    <graphics x="-1035.696450711057" y="-101.99821355416861" z="0.0"/>
  </node>
  <node id="613365" label="zzz1486" cy:nodeId="1806">
    <graphics x="-984.0816454894994" y="-174.34790494515983" z="0.0"/>
  </node>
  <node id="613366" label="zzz1485" cy:nodeId="1807">
    <graphics x="-992.9886183746312" y="-77.70425298287955" z="0.0"/>
  </node>
  <node id="613367" label="zzz1484" cy:nodeId="1808">
    <graphics x="-1059.8872618682835" y="-84.64942815377799" z="0.0"/>
  </node>
  <node id="613368" label="zzz1483" cy:nodeId="1809">
    <graphics x="-1096.414597988889" y="-103.84897496774283" z="0.0"/>
  </node>
  <node id="613369" label="zzz1482" cy:nodeId="1810">
    <graphics x="-975.9437265403722" y="-133.04122045114127" z="0.0"/>
  </node>
  <node id="613370" label="zzz1481" cy:nodeId="1811">
    <graphics x="-1007.0861830718968" y="-201.23951985910026" z="0.0"/>
  </node>
  <node id="613371" label="zzz1480" cy:nodeId="1812">
    <graphics x="-1002.3868460662816" y="-207.09506871774283" z="0.0"/>
  </node>
  <node id="613372" label="zzz1478" cy:nodeId="1813">
    <graphics x="-1032.77387380676" y="-224.51452710702506" z="0.0"/>
  </node>
  <node id="613373" label="zzz1477" cy:nodeId="1814">
    <graphics x="-989.2236094482396" y="-181.0388210065612" z="0.0"/>
  </node>
  <node id="613374" label="zzz1476" cy:nodeId="1815">
    <graphics x="-990.1300120361302" y="-273.852309013153" z="0.0"/>
  </node>
  <node id="613375" label="zzz1475" cy:nodeId="1816">
    <graphics x="-1004.287379742429" y="-167.74890019967643" z="0.0"/>
  </node>
  <node id="613376" label="zzz1471" cy:nodeId="1817">
    <graphics x="-1053.1130385406468" y="-217.1609847791442" z="0.0"/>
  </node>
  <node id="613377" label="zzz1469" cy:nodeId="1818">
    <graphics x="-1062.121888638303" y="-175.28036191537467" z="0.0"/>
  </node>
  <node id="613378" label="zzz1466" cy:nodeId="1819">
    <graphics x="-1094.0226149566624" y="-151.9694736249694" z="0.0"/>
  </node>
  <node id="613379" label="zzz1464" cy:nodeId="1820">
    <graphics x="-945.6235213287327" y="-156.20315435006705" z="0.0"/>
  </node>
  <node id="613380" label="zzz1462" cy:nodeId="1821">
    <graphics x="-1086.7023482330296" y="-218.0253875501403" z="0.0"/>
  </node>
  <node id="613381" label="zzz1460" cy:nodeId="1822">
    <graphics x="491.6954216949489" y="-216.0569751508483" z="0.0"/>
  </node>
  <node id="613382" label="zzz1459" cy:nodeId="1823">
    <graphics x="-193.90026617126205" y="670.4288570635072" z="0.0"/>
  </node>
  <node id="613383" label="zzz1458" cy:nodeId="1824">
    <graphics x="-1000.3178172119115" y="-194.16618611886588" z="0.0"/>
  </node>
  <node id="613384" label="zzz1457" cy:nodeId="1825">
    <graphics x="-980.3373913772557" y="-216.43791081979361" z="0.0"/>
  </node>
  <node id="613385" label="zzz1456" cy:nodeId="1826">
    <graphics x="-952.2835326202367" y="-138.12734868600455" z="0.0"/>
  </node>
  <node id="613386" label="zzz1455" cy:nodeId="1827">
    <graphics x="-1082.465882778928" y="-84.26416661813346" z="0.0"/>
  </node>
  <node id="613387" label="zzz1454" cy:nodeId="1828">
    <graphics x="-1051.9735426910374" y="-98.94995763375846" z="0.0"/>
  </node>
  <node id="613388" label="zzz1453" cy:nodeId="1829">
    <graphics x="-1049.1745696075413" y="-187.00970151498404" z="0.0"/>
  </node>
  <node id="613389" label="zzz1452" cy:nodeId="1830">
    <graphics x="-975.9419980056737" y="-229.43002584054557" z="0.0"/>
  </node>
  <node id="613390" label="zzz1451" cy:nodeId="1831">
    <graphics x="-1021.0095534332249" y="-120.73741033151236" z="0.0"/>
  </node>
  <node id="613391" label="zzz1450" cy:nodeId="1832">
    <graphics x="-946.2196402557347" y="-164.59927251412955" z="0.0"/>
  </node>
  <node id="613392" label="zzz1449" cy:nodeId="1833">
    <graphics x="-957.1443285949681" y="-135.14085271432486" z="0.0"/>
  </node>
  <node id="613393" label="zzz1448" cy:nodeId="1834">
    <graphics x="-1020.7197051055882" y="-171.8239028699645" z="0.0"/>
  </node>
  <node id="613394" label="zzz1447" cy:nodeId="1835">
    <graphics x="-1119.992982388303" y="-143.19150426461783" z="0.0"/>
  </node>
  <node id="613395" label="zzz1446" cy:nodeId="1836">
    <graphics x="-1109.8477644927952" y="-138.5024097211608" z="0.0"/>
  </node>
  <node id="613396" label="zzz1445" cy:nodeId="1837">
    <graphics x="-1093.1743941314671" y="-148.24321630075065" z="0.0"/>
  </node>
  <node id="613397" label="zzz1444" cy:nodeId="1838">
    <graphics x="-1055.2309355743382" y="-106.86576726510611" z="0.0"/>
  </node>
  <node id="613398" label="zzz1443" cy:nodeId="1839">
    <graphics x="-1081.7347579009984" y="-210.64545991494742" z="0.0"/>
  </node>
  <node id="613399" label="zzz1442" cy:nodeId="1840">
    <graphics x="-972.8414082534764" y="-193.43972089364615" z="0.0"/>
  </node>
  <node id="613400" label="zzz1441" cy:nodeId="1841">
    <graphics x="-990.1380457885716" y="-93.09522893502799" z="0.0"/>
  </node>
  <node id="613401" label="zzz1440" cy:nodeId="1842">
    <graphics x="-1002.9374499328587" y="-165.8060977704772" z="0.0"/>
  </node>
  <node id="613402" label="zzz1439" cy:nodeId="1843">
    <graphics x="-967.7130084045384" y="-118.3899829633483" z="0.0"/>
  </node>
  <node id="613403" label="zzz1438" cy:nodeId="1844">
    <graphics x="-1023.889035702512" y="-179.1535842664489" z="0.0"/>
  </node>
  <node id="613404" label="zzz1437" cy:nodeId="1845">
    <graphics x="-1060.4570860870335" y="-232.78520848825065" z="0.0"/>
  </node>
  <node id="613405" label="zzz1436" cy:nodeId="1846">
    <graphics x="-1115.3844008453343" y="-96.91248967721549" z="0.0"/>
  </node>
  <node id="613406" label="zzz1435" cy:nodeId="1847">
    <graphics x="-1036.7014861114476" y="-175.34232213571158" z="0.0"/>
  </node>
  <node id="613407" label="zzz1431" cy:nodeId="1848">
    <graphics x="-1072.9378676422093" y="-206.25547101571647" z="0.0"/>
  </node>
  <node id="613408" label="zzz1430" cy:nodeId="1849">
    <graphics x="1082.0218477241542" y="739.1866791002503" z="0.0"/>
  </node>
  <node id="613409" label="zzz1429" cy:nodeId="1850">
    <graphics x="477.5408577911403" y="-130.168471122528" z="0.0"/>
  </node>
  <node id="613410" label="zzz1428" cy:nodeId="1851">
    <graphics x="569.6935296051051" y="-103.35070684030143" z="0.0"/>
  </node>
  <node id="613411" label="zzz1427" cy:nodeId="1852">
    <graphics x="452.21321344299577" y="-105.81902959420768" z="0.0"/>
  </node>
  <node id="613412" label="zzz1425" cy:nodeId="1853">
    <graphics x="-1051.485902310178" y="-72.49053838327018" z="0.0"/>
  </node>
  <node id="613413" label="zzz1424" cy:nodeId="1854">
    <graphics x="588.9072747222926" y="-92.69053533151236" z="0.0"/>
  </node>
  <node id="613414" label="zzz1422" cy:nodeId="1855">
    <graphics x="-1066.894235134885" y="-184.64611890390006" z="0.0"/>
  </node>
  <node id="613415" label="zzz1421" cy:nodeId="1856">
    <graphics x="-1031.5867476470921" y="-229.07220151498404" z="0.0"/>
  </node>
  <node id="613416" label="zzz1420" cy:nodeId="1857">
    <graphics x="530.0288872711208" y="-272.80017640664664" z="0.0"/>
  </node>
  <node id="613417" label="zzz1419" cy:nodeId="1858">
    <graphics x="522.3025689117458" y="-275.4620349653014" z="0.0"/>
  </node>
  <node id="613418" label="zzz1418" cy:nodeId="1859">
    <graphics x="561.8493523590114" y="-157.5673511274108" z="0.0"/>
  </node>
  <node id="613419" label="zzz1417" cy:nodeId="1860">
    <graphics x="-969.8861072071049" y="-156.62202336862174" z="0.0"/>
  </node>
  <node id="613420" label="zzz1416" cy:nodeId="1861">
    <graphics x="-1133.0306105621312" y="-134.68513372018424" z="0.0"/>
  </node>
  <node id="613421" label="zzz1415" cy:nodeId="1862">
    <graphics x="-1008.3059401519749" y="-195.1011042840728" z="0.0"/>
  </node>
  <node id="613422" label="zzz1414" cy:nodeId="1863">
    <graphics x="534.3862938873317" y="-180.74954106881705" z="0.0"/>
  </node>
  <node id="613423" label="zzz1413" cy:nodeId="1864">
    <graphics x="-1059.8271040924046" y="-177.24871137216178" z="0.0"/>
  </node>
  <node id="613424" label="zzz1411" cy:nodeId="1865">
    <graphics x="-1067.5383543975804" y="-154.1600024945983" z="0.0"/>
  </node>
  <node id="613425" label="zzz1409" cy:nodeId="1866">
    <graphics x="-1109.0203413970921" y="-179.59141805245963" z="0.0"/>
  </node>
  <node id="613426" label="zzz1407" cy:nodeId="1867">
    <graphics x="-1106.3824324615452" y="-177.45107915475455" z="0.0"/>
  </node>
  <node id="613427" label="zzz1406" cy:nodeId="1868">
    <graphics x="-975.3024344451878" y="-90.18817784860221" z="0.0"/>
  </node>
  <node id="613428" label="zzz1403" cy:nodeId="1869">
    <graphics x="-1045.684632778928" y="-160.5493419416198" z="0.0"/>
  </node>
  <node id="613429" label="zzz1402" cy:nodeId="1870">
    <graphics x="-1090.5096144683812" y="-89.3442065961608" z="0.0"/>
  </node>
  <node id="613430" label="zzz1401" cy:nodeId="1871">
    <graphics x="-1076.363442898557" y="-114.86366155221549" z="0.0"/>
  </node>
  <node id="613431" label="zzz1400" cy:nodeId="1872">
    <graphics x="1113.8068399421718" y="652.4668209306947" z="0.0"/>
  </node>
  <node id="613432" label="zzz1399" cy:nodeId="1873">
    <graphics x="-1011.3160758026097" y="-92.63522985055533" z="0.0"/>
  </node>
  <node id="613433" label="zzz1398" cy:nodeId="1874">
    <graphics x="-1067.35834646301" y="-219.47810437753287" z="0.0"/>
  </node>
  <node id="613434" label="zzz1397" cy:nodeId="1875">
    <graphics x="-1075.0169463165257" y="-89.20385625436393" z="0.0"/>
  </node>
  <node id="613435" label="zzz1396" cy:nodeId="1876">
    <graphics x="-1009.5204100616429" y="-99.37721135690299" z="0.0"/>
  </node>
  <node id="613436" label="zzz1395" cy:nodeId="1877">
    <graphics x="-1084.7233138092015" y="-257.7352435834655" z="0.0"/>
  </node>
  <node id="613437" label="zzz1393" cy:nodeId="1878">
    <graphics x="-1024.2301917083714" y="-98.66214635446158" z="0.0"/>
  </node>
  <node id="613438" label="zzz1392" cy:nodeId="1879">
    <graphics x="-270.7687993057225" y="652.4668209306947" z="0.0"/>
  </node>
  <node id="613439" label="zzz1391" cy:nodeId="1880">
    <graphics x="-1027.444180966184" y="-177.6430747754821" z="0.0"/>
  </node>
  <node id="613440" label="zzz1390" cy:nodeId="1881">
    <graphics x="-1114.9876265533421" y="-148.69853093698111" z="0.0"/>
  </node>
  <node id="613441" label="zzz1388" cy:nodeId="1882">
    <graphics x="574.2404808990505" y="-150.30241277291861" z="0.0"/>
  </node>
  <node id="613442" label="zzz1387" cy:nodeId="1883">
    <graphics x="-936.6962370880101" y="-114.12390782907096" z="0.0"/>
  </node>
  <node id="613443" label="zzz1386" cy:nodeId="1884">
    <graphics x="-1061.8908247955296" y="-112.21023442819205" z="0.0"/>
  </node>
  <node id="613444" label="zzz1385" cy:nodeId="1885">
    <graphics x="-1038.0257887847874" y="-197.3216007001647" z="0.0"/>
  </node>
  <node id="613445" label="zzz1383" cy:nodeId="1886">
    <graphics x="-1080.5629134185765" y="-125.52864720895377" z="0.0"/>
  </node>
  <node id="613446" label="zzz1381" cy:nodeId="1887">
    <graphics x="-1117.2538008697484" y="-175.74867894723502" z="0.0"/>
  </node>
  <node id="613447" label="zzz1379" cy:nodeId="1888">
    <graphics x="-982.9102845199559" y="-177.76946141793815" z="0.0"/>
  </node>
  <node id="613448" label="zzz1378" cy:nodeId="1889">
    <graphics x="-1056.3557906158421" y="-102.33500554635611" z="0.0"/>
  </node>
  <node id="613449" label="zzz1377" cy:nodeId="1890">
    <graphics x="-1061.57123708801" y="-124.91445806100455" z="0.0"/>
  </node>
  <node id="613450" label="zzz1376" cy:nodeId="1891">
    <graphics x="1168.6859827034023" y="771.0286209337464" z="0.0"/>
  </node>
  <node id="613451" label="zzz1374" cy:nodeId="1892">
    <graphics x="-1019.2579512603734" y="-102.45754888131705" z="0.0"/>
  </node>
  <node id="613452" label="zzz1373" cy:nodeId="1893">
    <graphics x="517.9735894195583" y="-89.0168140180358" z="0.0"/>
  </node>
  <node id="613453" label="zzz1372" cy:nodeId="1894">
    <graphics x="-1005.933526516721" y="-107.8804614789733" z="0.0"/>
  </node>
  <node id="613454" label="zzz1371" cy:nodeId="1895">
    <graphics x="575.9036278717067" y="-175.28401067330924" z="0.0"/>
  </node>
  <node id="613455" label="zzz1368" cy:nodeId="1896">
    <graphics x="-965.7904300697301" y="-212.61416986062613" z="0.0"/>
  </node>
  <node id="613456" label="zzz1365" cy:nodeId="1897">
    <graphics x="-1087.435838223264" y="-144.72059896066276" z="0.0"/>
  </node>
  <node id="613457" label="zzz1363" cy:nodeId="1898">
    <graphics x="-1090.4364333160374" y="-204.78366830422965" z="0.0"/>
  </node>
  <node id="613458" label="zzz1361" cy:nodeId="1899">
    <graphics x="-1011.1065001495335" y="-109.01006963327018" z="0.0"/>
  </node>
  <node id="613459" label="zzz1360" cy:nodeId="1900">
    <graphics x="625.0347161285426" y="-168.1176669843444" z="0.0"/>
  </node>
  <node id="613460" label="zzz1359" cy:nodeId="1901">
    <graphics x="535.7964196197536" y="-147.759535575653" z="0.0"/>
  </node>
  <node id="613461" label="zzz1358" cy:nodeId="1902">
    <graphics x="-938.828172207639" y="-181.41107442452994" z="0.0"/>
  </node>
  <node id="613462" label="zzz1357" cy:nodeId="1903">
    <graphics x="-1030.6242842681859" y="-170.49584462716666" z="0.0"/>
  </node>
  <node id="613463" label="zzz1356" cy:nodeId="1904">
    <graphics x="-1049.8960738189671" y="-81.5613925702819" z="0.0"/>
  </node>
  <node id="613464" label="zzz1355" cy:nodeId="1905">
    <graphics x="585.8638482086208" y="-125.85685613229361" z="0.0"/>
  </node>
  <node id="613465" label="zzz1354" cy:nodeId="1906">
    <graphics x="-1015.9352278717015" y="-171.96865918710319" z="0.0"/>
  </node>
  <node id="613466" label="zzz1352" cy:nodeId="1907">
    <graphics x="-1095.3610396392796" y="-245.07866170480338" z="0.0"/>
  </node>
  <node id="613467" label="zzz1350" cy:nodeId="1908">
    <graphics x="-28.51925420837142" y="652.4668209306947" z="0.0"/>
  </node>
  <node id="613468" label="zzz1349" cy:nodeId="1909">
    <graphics x="-960.3009829528783" y="-153.5820987470397" z="0.0"/>
  </node>
  <node id="613469" label="zzz1348" cy:nodeId="1910">
    <graphics x="-1017.4708914764378" y="-184.28803517892447" z="0.0"/>
  </node>
  <node id="613470" label="zzz1347" cy:nodeId="1911">
    <graphics x="-1113.2148299224827" y="-176.89422490670768" z="0.0"/>
  </node>
  <node id="613471" label="zzz1346" cy:nodeId="1912">
    <graphics x="-1028.4146437652562" y="-232.52405812814322" z="0.0"/>
  </node>
  <node id="613472" label="zzz1344" cy:nodeId="1913">
    <graphics x="-1116.2350630767796" y="-80.83194615914908" z="0.0"/>
  </node>
  <node id="613473" label="zzz1343" cy:nodeId="1914">
    <graphics x="-1028.6232314117406" y="-96.05377843453971" z="0.0"/>
  </node>
  <node id="613474" label="zzz1341" cy:nodeId="1915">
    <graphics x="473.4915871612575" y="-91.67162969186393" z="0.0"/>
  </node>
  <node id="613475" label="zzz1339" cy:nodeId="1916">
    <graphics x="-1081.843080044553" y="-220.9776351697692" z="0.0"/>
  </node>
  <node id="613476" label="zzz1338" cy:nodeId="1917">
    <graphics x="-1021.3832030303929" y="-268.29917790963736" z="0.0"/>
  </node>
  <node id="613477" label="zzz1335" cy:nodeId="1918">
    <graphics x="-1059.0818800933812" y="-180.6348903424987" z="0.0"/>
  </node>
  <node id="613478" label="zzz1334" cy:nodeId="1919">
    <graphics x="573.6409173004176" y="-130.19329717233268" z="0.0"/>
  </node>
  <node id="613479" label="zzz1333" cy:nodeId="1920">
    <graphics x="518.781633853152" y="-125.8958423383483" z="0.0"/>
  </node>
  <node id="613480" label="zzz1332" cy:nodeId="1921">
    <graphics x="604.7353692047145" y="-195.89929082467643" z="0.0"/>
  </node>
  <node id="613481" label="zzz1331" cy:nodeId="1922">
    <graphics x="515.2224755279567" y="-184.13436009957877" z="0.0"/>
  </node>
  <node id="613482" label="zzz1330" cy:nodeId="1923">
    <graphics x="458.02209710998795" y="-125.64216497018424" z="0.0"/>
  </node>
  <node id="613483" label="zzz1329" cy:nodeId="1924">
    <graphics x="-1068.1486907012913" y="-80.26795842721549" z="0.0"/>
  </node>
  <node id="613484" label="zzz1327" cy:nodeId="1925">
    <graphics x="-260.08464717941024" y="779.5846645586244" z="0.0"/>
  </node>
  <node id="613485" label="zzz1326" cy:nodeId="1926">
    <graphics x="-999.8980021484349" y="-152.32524755075065" z="0.0"/>
  </node>
  <node id="613486" label="zzz1325" cy:nodeId="1927">
    <graphics x="-935.037831784055" y="-207.54937532022086" z="0.0"/>
  </node>
  <node id="613487" label="zzz1324" cy:nodeId="1928">
    <graphics x="-1011.1790061004613" y="-132.63787725045768" z="0.0"/>
  </node>
  <node id="613488" label="zzz1322" cy:nodeId="1929">
    <graphics x="-1087.041207791135" y="-152.02119329049674" z="0.0"/>
  </node>
  <node id="613489" label="zzz1319" cy:nodeId="1930">
    <graphics x="-993.0794882781956" y="-228.18349340036002" z="0.0"/>
  </node>
  <node id="613490" label="zzz1318" cy:nodeId="1931">
    <graphics x="-974.9751868255589" y="-135.01985814645377" z="0.0"/>
  </node>
  <node id="613491" label="zzz1316" cy:nodeId="1932">
    <graphics x="499.3920769683864" y="-271.184153342987" z="0.0"/>
  </node>
  <node id="613492" label="zzz1314" cy:nodeId="1933">
    <graphics x="-1049.600762844846" y="-190.25253560617057" z="0.0"/>
  </node>
  <node id="613493" label="zzz1312" cy:nodeId="1934">
    <graphics x="-1041.1260161407445" y="-275.4620349653014" z="0.0"/>
  </node>
  <node id="613494" label="zzz1311" cy:nodeId="1935">
    <graphics x="-1022.6162772186253" y="-161.72927739694205" z="0.0"/>
  </node>
  <node id="613495" label="zzz1309" cy:nodeId="1936">
    <graphics x="-954.6375880248997" y="-227.72182538583365" z="0.0"/>
  </node>
  <node id="613496" label="zzz1307" cy:nodeId="1937">
    <graphics x="-1100.675080776975" y="-160.38631322457877" z="0.0"/>
  </node>
  <node id="613497" label="zzz1304" cy:nodeId="1938">
    <graphics x="-1056.0832533843968" y="-68.25822331979361" z="0.0"/>
  </node>
  <node id="613498" label="zzz1303" cy:nodeId="1939">
    <graphics x="-1014.8128294952367" y="-156.02399709298697" z="0.0"/>
  </node>
  <node id="613499" label="zzz1298" cy:nodeId="1940">
    <graphics x="468.9463067047145" y="-112.26336553170768" z="0.0"/>
  </node>
  <node id="613500" label="zzz1296" cy:nodeId="1941">
    <graphics x="-1047.7188506134007" y="-205.91585805490104" z="0.0"/>
  </node>
  <node id="613501" label="zzz1294" cy:nodeId="1942">
    <graphics x="-1067.5450377471898" y="-163.59601094796744" z="0.0"/>
  </node>
  <node id="613502" label="zzz1293" cy:nodeId="1943">
    <graphics x="-1007.2588248260472" y="-233.95022466256705" z="0.0"/>
  </node>
  <node id="613503" label="zzz1292" cy:nodeId="1944">
    <graphics x="549.8287682525661" y="-248.4611499555358" z="0.0"/>
  </node>
  <node id="613504" label="zzz1289" cy:nodeId="1945">
    <graphics x="-1032.2631239898656" y="-109.97614934518424" z="0.0"/>
  </node>
  <node id="613505" label="zzz1288" cy:nodeId="1946">
    <graphics x="-974.7088255889867" y="-106.9646899945983" z="0.0"/>
  </node>
  <node id="613506" label="zzz1285" cy:nodeId="1947">
    <graphics x="-984.587184429929" y="-256.5711124189147" z="0.0"/>
  </node>
  <node id="613507" label="zzz1284" cy:nodeId="1948">
    <graphics x="-1094.31733083801" y="-236.20385625436393" z="0.0"/>
  </node>
  <node id="613508" label="zzz1283" cy:nodeId="1949">
    <graphics x="508.4458184234645" y="-96.27061345651236" z="0.0"/>
  </node>
  <node id="613509" label="zzz1280" cy:nodeId="1950">
    <graphics x="-976.383082867429" y="-220.89199712350455" z="0.0"/>
  </node>
  <node id="613510" label="zzz1279" cy:nodeId="1951">
    <graphics x="-1011.0657172210667" y="-112.07871129586783" z="0.0"/>
  </node>
  <node id="613511" label="zzz1278" cy:nodeId="1952">
    <graphics x="436.469866275027" y="-214.679213310028" z="0.0"/>
  </node>
  <node id="613512" label="zzz1277" cy:nodeId="1953">
    <graphics x="455.7559685699489" y="-194.60632207467643" z="0.0"/>
  </node>
  <node id="613513" label="zzz1276" cy:nodeId="1954">
    <graphics x="-1041.401170254514" y="-118.01591374948111" z="0.0"/>
  </node>
  <node id="613514" label="zzz1275" cy:nodeId="1955">
    <graphics x="479.0195488922145" y="-139.21528508737174" z="0.0"/>
  </node>
  <node id="613515" label="zzz1274" cy:nodeId="1956">
    <graphics x="-1013.1560225494359" y="-242.9077937848815" z="0.0"/>
  </node>
  <node id="613516" label="zzz1273" cy:nodeId="1957">
    <graphics x="424.33095788879655" y="-177.4429385907897" z="0.0"/>
  </node>
  <node id="613517" label="zzz1272" cy:nodeId="1958">
    <graphics x="-1010.7925620086644" y="-105.18841435983268" z="0.0"/>
  </node>
  <node id="613518" label="zzz1269" cy:nodeId="1959">
    <graphics x="-971.2154784210179" y="-144.57457997872916" z="0.0"/>
  </node>
  <node id="613519" label="zzz1268" cy:nodeId="1960">
    <graphics x="537.5654015533473" y="-126.51751592233268" z="0.0"/>
  </node>
  <node id="613520" label="zzz1266" cy:nodeId="1961">
    <graphics x="-1122.320100308225" y="-217.51228978707877" z="0.0"/>
  </node>
  <node id="613521" label="zzz1265" cy:nodeId="1962">
    <graphics x="-1027.8526625640843" y="-155.40512731149283" z="0.0"/>
  </node>
  <node id="613522" label="zzz1261" cy:nodeId="1963">
    <graphics x="-1101.4206557281468" y="-130.10114934518424" z="0.0"/>
  </node>
  <node id="613523" label="zzz1260" cy:nodeId="1964">
    <graphics x="580.8577599517848" y="-229.75235631539908" z="0.0"/>
  </node>
  <node id="613524" label="zzz1258" cy:nodeId="1965">
    <graphics x="-1060.2301878936742" y="-127.26601293161002" z="0.0"/>
  </node>
  <node id="613525" label="zzz1257" cy:nodeId="1966">
    <graphics x="-960.3754010208104" y="-172.72254636361686" z="0.0"/>
  </node>
  <node id="613526" label="zzz1255" cy:nodeId="1967">
    <graphics x="-985.7650427825902" y="-248.03654363229361" z="0.0"/>
  </node>
  <node id="613527" label="zzz1254" cy:nodeId="1968">
    <graphics x="586.9402489654567" y="-208.76399114205924" z="0.0"/>
  </node>
  <node id="613528" label="zzz1251" cy:nodeId="1969">
    <graphics x="-1078.6742949493382" y="-216.25758626535026" z="0.0"/>
  </node>
  <node id="613529" label="zzz1250" cy:nodeId="1970">
    <graphics x="-1081.2114195831273" y="-84.3980396039733" z="0.0"/>
  </node>
  <node id="613530" label="zzz1249" cy:nodeId="1971">
    <graphics x="-1006.0258727081273" y="-245.7182300336608" z="0.0"/>
  </node>
  <node id="613531" label="zzz1248" cy:nodeId="1972">
    <graphics x="-1111.90237569885" y="-197.75777890756217" z="0.0"/>
  </node>
  <node id="613532" label="zzz1247" cy:nodeId="1973">
    <graphics x="-1004.8675208099339" y="-167.51557996347037" z="0.0"/>
  </node>
  <node id="613533" label="zzz1245" cy:nodeId="1974">
    <graphics x="-1067.2516951568577" y="-138.17897298410026" z="0.0"/>
  </node>
  <node id="613534" label="zzz1244" cy:nodeId="1975">
    <graphics x="-1090.0188689239476" y="-212.63307359292594" z="0.0"/>
  </node>
  <node id="613535" label="zzz1242" cy:nodeId="1976">
    <graphics x="-1041.719918728635" y="-232.248549247528" z="0.0"/>
  </node>
  <node id="613536" label="zzz1240" cy:nodeId="1977">
    <graphics x="-951.0323042877171" y="-161.5733554609069" z="0.0"/>
  </node>
  <node id="613537" label="zzz1237" cy:nodeId="1978">
    <graphics x="-1047.2902464874242" y="-91.84651067330924" z="0.0"/>
  </node>
  <node id="613538" label="zzz1236" cy:nodeId="1979">
    <graphics x="-1028.816308499143" y="-232.8029697187194" z="0.0"/>
  </node>
  <node id="613539" label="zzz1235" cy:nodeId="1980">
    <graphics x="-1014.5408606536839" y="-115.56836583688346" z="0.0"/>
  </node>
  <node id="613540" label="zzz1234" cy:nodeId="1981">
    <graphics x="-1107.0130171783421" y="-160.0938632734069" z="0.0"/>
  </node>
  <node id="613541" label="zzz1233" cy:nodeId="1982">
    <graphics x="-1008.5278143890355" y="-119.06249883248893" z="0.0"/>
  </node>
  <node id="613542" label="zzz1230" cy:nodeId="1983">
    <graphics x="-998.413003445432" y="-161.27381398751822" z="0.0"/>
  </node>
  <node id="613543" label="zzz1228" cy:nodeId="1984">
    <graphics x="-1032.4329314239476" y="-206.09266927316276" z="0.0"/>
  </node>
  <node id="613544" label="zzz1227" cy:nodeId="1985">
    <graphics x="-1060.1354384429906" y="-179.46036603524772" z="0.0"/>
  </node>
  <node id="613545" label="zzz1226" cy:nodeId="1986">
    <graphics x="475.1139473907497" y="-114.22927739694205" z="0.0"/>
  </node>
  <node id="613546" label="zzz1225" cy:nodeId="1987">
    <graphics x="506.67668390198014" y="-199.132094169403" z="0.0"/>
  </node>
  <node id="613547" label="zzz1223" cy:nodeId="1988">
    <graphics x="-964.1205210693333" y="-226.8628547437438" z="0.0"/>
  </node>
  <node id="613548" label="zzz1221" cy:nodeId="1989">
    <graphics x="-1007.383046627805" y="-86.49799230172721" z="0.0"/>
  </node>
  <node id="613549" label="zzz1219" cy:nodeId="1990">
    <graphics x="-982.1292309768651" y="-180.41334798410026" z="0.0"/>
  </node>
  <node id="613550" label="zzz1218" cy:nodeId="1991">
    <graphics x="-1100.8970808990452" y="-182.35655095651236" z="0.0"/>
  </node>
  <node id="613551" label="zzz1217" cy:nodeId="1992">
    <graphics x="438.5334115020778" y="-188.65703466012565" z="0.0"/>
  </node>
  <node id="613552" label="zzz1216" cy:nodeId="1993">
    <graphics x="461.53865289612077" y="-107.8498218305358" z="0.0"/>
  </node>
  <node id="613553" label="zzz1215" cy:nodeId="1994">
    <graphics x="-997.6891341217015" y="-165.0786044843444" z="0.0"/>
  </node>
  <node id="613554" label="zzz1214" cy:nodeId="1995">
    <graphics x="-1051.9566130645726" y="-221.46270444467154" z="0.0"/>
  </node>
  <node id="613555" label="zzz1210" cy:nodeId="1996">
    <graphics x="-1104.9657454498265" y="-108.11553075387565" z="0.0"/>
  </node>
  <node id="613556" label="zzz1209" cy:nodeId="1997">
    <graphics x="-950.3828158386204" y="-89.00720861032096" z="0.0"/>
  </node>
  <node id="613557" label="zzz1208" cy:nodeId="1998">
    <graphics x="-1024.7899031646702" y="-98.45434453561393" z="0.0"/>
  </node>
  <node id="613558" label="zzz1207" cy:nodeId="1999">
    <graphics x="-1059.2560439117406" y="-189.6881187207946" z="0.0"/>
  </node>
  <node id="613559" label="zzz1205" cy:nodeId="2000">
    <graphics x="-1075.2170500762913" y="-133.38801457955924" z="0.0"/>
  </node>
  <node id="613560" label="zzz1204" cy:nodeId="2001">
    <graphics x="-1122.0563216217015" y="-120.11641576364127" z="0.0"/>
  </node>
  <node id="613561" label="zzz1203" cy:nodeId="2002">
    <graphics x="-973.3648037918065" y="-239.62976720407096" z="0.0"/>
  </node>
  <node id="613562" label="zzz1202" cy:nodeId="2003">
    <graphics x="-983.3041033752415" y="-124.79748418405143" z="0.0"/>
  </node>
  <node id="613563" label="zzz1201" cy:nodeId="2004">
    <graphics x="-1096.997216702268" y="-116.33763005807486" z="0.0"/>
  </node>
  <node id="613564" label="zzz1200" cy:nodeId="2005">
    <graphics x="-1007.793317318723" y="-79.40387609078971" z="0.0"/>
  </node>
  <node id="613565" label="zzz1199" cy:nodeId="2006">
    <graphics x="-1098.3882002838109" y="-195.89355351998893" z="0.0"/>
  </node>
  <node id="613566" label="zzz1198" cy:nodeId="2007">
    <graphics x="601.164446353152" y="-158.2018497236022" z="0.0"/>
  </node>
  <node id="613567" label="zzz1197" cy:nodeId="2008">
    <graphics x="498.13070917053483" y="-252.9704559095153" z="0.0"/>
  </node>
  <node id="613568" label="zzz1196" cy:nodeId="2009">
    <graphics x="-969.0884861953709" y="-224.52225186898795" z="0.0"/>
  </node>
  <node id="613569" label="zzz1195" cy:nodeId="2010">
    <graphics x="-994.6528391845677" y="-154.68978002145377" z="0.0"/>
  </node>
  <node id="613570" label="zzz1194" cy:nodeId="2011">
    <graphics x="597.0695977203395" y="-179.53830602243033" z="0.0"/>
  </node>
  <node id="613571" label="zzz1192" cy:nodeId="2012">
    <graphics x="451.29055261535905" y="-198.7637622602233" z="0.0"/>
  </node>
  <node id="613572" label="zzz1190" cy:nodeId="2013">
    <graphics x="-1055.56049490051" y="-244.40619924142447" z="0.0"/>
  </node>
  <node id="613573" label="zzz1189" cy:nodeId="2014">
    <graphics x="-1107.1168074615452" y="-195.34053828790275" z="0.0"/>
  </node>
  <node id="613574" label="zzz1185" cy:nodeId="2015">
    <graphics x="-1109.3876357086156" y="-187.669541145111" z="0.0"/>
  </node>
  <node id="613575" label="zzz1184" cy:nodeId="2016">
    <graphics x="-1057.1641707427952" y="-134.27219274118033" z="0.0"/>
  </node>
  <node id="613576" label="zzz1182" cy:nodeId="2017">
    <graphics x="450.1873650543239" y="-205.45625188424674" z="0.0"/>
  </node>
  <node id="613577" label="zzz1180" cy:nodeId="2018">
    <graphics x="-1022.2942137725804" y="-137.84643056466666" z="0.0"/>
  </node>
  <node id="613578" label="zzz1178" cy:nodeId="2019">
    <graphics x="-944.2671656616185" y="-130.1287296064147" z="0.0"/>
  </node>
  <node id="613579" label="zzz1176" cy:nodeId="2020">
    <graphics x="-1057.0570998199437" y="-186.00057103707877" z="0.0"/>
  </node>
  <node id="613580" label="zzz1175" cy:nodeId="2021">
    <graphics x="-1033.1922621734593" y="-230.1146857984313" z="0.0"/>
  </node>
  <node id="613581" label="zzz1172" cy:nodeId="2022">
    <graphics x="-1090.2568068511937" y="-130.39526250436393" z="0.0"/>
  </node>
  <node id="613582" label="zzz1171" cy:nodeId="2023">
    <graphics x="-1023.8326087005589" y="-154.50713231637565" z="0.0"/>
  </node>
  <node id="613583" label="zzz1169" cy:nodeId="2024">
    <graphics x="-1006.439614773557" y="-132.19480779244986" z="0.0"/>
  </node>
  <node id="613584" label="zzz1168" cy:nodeId="2025">
    <graphics x="-974.7929492004369" y="-133.76274755075065" z="0.0"/>
  </node>
  <node id="613585" label="zzz1165" cy:nodeId="2026">
    <graphics x="-1058.0833449371312" y="-165.93475225045768" z="0.0"/>
  </node>
  <node id="613586" label="zzz1162" cy:nodeId="2027">
    <graphics x="-1136.4725966461156" y="-191.00804975106803" z="0.0"/>
  </node>
  <node id="613587" label="zzz1160" cy:nodeId="2028">
    <graphics x="-1094.3656630523656" y="-163.4676540143737" z="0.0"/>
  </node>
  <node id="613588" label="zzz1159" cy:nodeId="2029">
    <graphics x="-1038.2085890777562" y="-145.836684013153" z="0.0"/>
  </node>
  <node id="613589" label="zzz1157" cy:nodeId="2030">
    <graphics x="-1045.1842818267796" y="-160.54691579415885" z="0.0"/>
  </node>
  <node id="613590" label="zzz1156" cy:nodeId="2031">
    <graphics x="-1005.1616606719945" y="-186.06657102181998" z="0.0"/>
  </node>
  <node id="613591" label="zzz1153" cy:nodeId="2032">
    <graphics x="-977.7921743400548" y="-97.25977971627799" z="0.0"/>
  </node>
  <node id="613592" label="zzz1152" cy:nodeId="2033">
    <graphics x="-982.6055026061986" y="-122.15547063424674" z="0.0"/>
  </node>
  <node id="613593" label="zzz1147" cy:nodeId="2034">
    <graphics x="614.9345879547145" y="-215.39610173776236" z="0.0"/>
  </node>
  <node id="613594" label="zzz1146" cy:nodeId="2035">
    <graphics x="610.0173974029567" y="-127.52363469674674" z="0.0"/>
  </node>
  <node id="613595" label="zzz1144" cy:nodeId="2036">
    <graphics x="-1096.2299666412327" y="-165.22715642526236" z="0.0"/>
  </node>
  <node id="613596" label="zzz1143" cy:nodeId="2037">
    <graphics x="530.8268151275661" y="-130.10821416452018" z="0.0"/>
  </node>
  <node id="613597" label="zzz1141" cy:nodeId="2038">
    <graphics x="-967.5070133216832" y="-128.12605931832877" z="0.0"/>
  </node>
  <node id="613598" label="zzz1139" cy:nodeId="2039">
    <graphics x="-1057.9648299224827" y="-83.67051580026236" z="0.0"/>
  </node>
  <node id="613599" label="zzz1137" cy:nodeId="2040">
    <graphics x="-1013.9634222991917" y="-90.47718694284049" z="0.0"/>
  </node>
  <node id="613600" label="zzz1136" cy:nodeId="2041">
    <graphics x="577.8113884918239" y="-154.554457450653" z="0.0"/>
  </node>
  <node id="613601" label="zzz1135" cy:nodeId="2042">
    <graphics x="434.12594842834733" y="-150.68762090280143" z="0.0"/>
  </node>
  <node id="613602" label="zzz1133" cy:nodeId="2043">
    <graphics x="-1055.4865508087132" y="-212.4985263593444" z="0.0"/>
  </node>
  <node id="613603" label="zzz1132" cy:nodeId="2044">
    <graphics x="-1097.531297207639" y="-127.80236699655143" z="0.0"/>
  </node>
  <node id="613604" label="zzz1130" cy:nodeId="2045">
    <graphics x="-1097.5948119171117" y="-177.51387097909537" z="0.0"/>
  </node>
  <node id="613605" label="zzz1129" cy:nodeId="2046">
    <graphics x="531.2721428863551" y="-119.26606633737174" z="0.0"/>
  </node>
  <node id="613606" label="zzz1128" cy:nodeId="2047">
    <graphics x="-1052.0860610015843" y="-142.08988835885611" z="0.0"/>
  </node>
  <node id="613607" label="zzz1123" cy:nodeId="2048">
    <graphics x="-1143.0922865875218" y="-128.47183110787955" z="0.0"/>
  </node>
  <node id="613608" label="zzz1122" cy:nodeId="2049">
    <graphics x="-1085.0835356719945" y="-186.3759448774108" z="0.0"/>
  </node>
  <node id="613609" label="zzz1120" cy:nodeId="2050">
    <graphics x="-1048.405091763303" y="-223.66470029428092" z="0.0"/>
  </node>
  <node id="613610" label="zzz1119" cy:nodeId="2051">
    <graphics x="-1030.2078185089085" y="-149.99494817330924" z="0.0"/>
  </node>
  <node id="613611" label="zzz1118" cy:nodeId="2052">
    <graphics x="-1061.1362624176" y="-130.08191564157096" z="0.0"/>
  </node>
  <node id="613612" label="zzz1115" cy:nodeId="2053">
    <graphics x="-971.26756811218" y="-138.3722179181823" z="0.0"/>
  </node>
  <node id="613613" label="zzz1113" cy:nodeId="2054">
    <graphics x="607.1961083404567" y="-179.45097997262565" z="0.0"/>
  </node>
  <node id="613614" label="zzz1112" cy:nodeId="2055">
    <graphics x="-1079.159356594846" y="-89.72288396432486" z="0.0"/>
  </node>
  <node id="613615" label="zzz1111" cy:nodeId="2056">
    <graphics x="508.77788019104264" y="-175.9301212079772" z="0.0"/>
  </node>
  <node id="613616" label="zzz1110" cy:nodeId="2057">
    <graphics x="433.53088617248795" y="-119.97218206002799" z="0.0"/>
  </node>
  <node id="613617" label="zzz1109" cy:nodeId="2058">
    <graphics x="528.5881981842067" y="-182.4636905439147" z="0.0"/>
  </node>
  <node id="613618" label="zzz1106" cy:nodeId="2059">
    <graphics x="-1031.6490225799535" y="-247.77012517526236" z="0.0"/>
  </node>
  <node id="613619" label="zzz1100" cy:nodeId="2060">
    <graphics x="-973.1576190002415" y="-196.02869656159965" z="0.0"/>
  </node>
  <node id="613620" label="zzz1099" cy:nodeId="2061">
    <graphics x="-1068.4132018096898" y="-83.22797277047721" z="0.0"/>
  </node>
  <node id="613621" label="zzz1098" cy:nodeId="2062">
    <graphics x="-1024.9939093597386" y="-218.7977321393737" z="0.0"/>
  </node>
  <node id="613622" label="zzz1070" cy:nodeId="2063">
    <graphics x="-1070.5221037872288" y="-65.74633672311393" z="0.0"/>
  </node>
  <node id="613623" label="zzz1069" cy:nodeId="2064">
    <graphics x="-952.1707816131566" y="-147.520220542694" z="0.0"/>
  </node>
  <node id="613624" label="zzz1068" cy:nodeId="2065">
    <graphics x="-978.2005109794591" y="-139.84138372018424" z="0.0"/>
  </node>
  <node id="613625" label="zzz1067" cy:nodeId="2066">
    <graphics x="-1025.8369154937718" y="-212.81726815774527" z="0.0"/>
  </node>
  <node id="613626" label="zzz1065" cy:nodeId="2067">
    <graphics x="575.7639946929958" y="-210.36440923287955" z="0.0"/>
  </node>
  <node id="613627" label="zzz1064" cy:nodeId="2068">
    <graphics x="-1055.3306212432835" y="-219.5065944440612" z="0.0"/>
  </node>
  <node id="613628" label="zzz1063" cy:nodeId="2069">
    <graphics x="-1053.7498564727757" y="-166.49953343942252" z="0.0"/>
  </node>
  <node id="613629" label="zzz1062" cy:nodeId="2070">
    <graphics x="-1103.8904738433812" y="-113.40312078073111" z="0.0"/>
  </node>
  <node id="613630" label="zzz1060" cy:nodeId="2071">
    <graphics x="-1071.7303481109593" y="-200.31789949014274" z="0.0"/>
  </node>
  <node id="613631" label="zzz1059" cy:nodeId="2072">
    <graphics x="-955.8285002716038" y="-166.6030071027526" z="0.0"/>
  </node>
  <node id="613632" label="zzz1058" cy:nodeId="2073">
    <graphics x="-963.6349711425755" y="-139.95888402536002" z="0.0"/>
  </node>
  <node id="613633" label="zzz1057" cy:nodeId="2074">
    <graphics x="-1097.3919692047093" y="-209.90841748788444" z="0.0"/>
  </node>
  <node id="613634" label="zzz1056" cy:nodeId="2075">
    <graphics x="-1049.1380705841038" y="-140.9573543317565" z="0.0"/>
  </node>
  <node id="613635" label="zzz1055" cy:nodeId="2076">
    <graphics x="-1074.8127684600804" y="-142.30002477243033" z="0.0"/>
  </node>
  <node id="613636" label="zzz1054" cy:nodeId="2077">
    <graphics x="-1085.0412001617406" y="-111.23913457467643" z="0.0"/>
  </node>
  <node id="613637" label="zzz1053" cy:nodeId="2078">
    <graphics x="-1066.7861495025609" y="-158.23813130929557" z="0.0"/>
  </node>
  <node id="613638" label="zzz1052" cy:nodeId="2079">
    <graphics x="-1060.3929533966038" y="-127.73733403756705" z="0.0"/>
  </node>
  <node id="613639" label="zzz1048" cy:nodeId="2080">
    <graphics x="-1022.5407843597386" y="-46.383711601043615" z="0.0"/>
  </node>
  <node id="613640" label="zzz1044" cy:nodeId="2081">
    <graphics x="-1090.0712981231663" y="-186.54182889535514" z="0.0"/>
  </node>
  <node id="613641" label="zzz1043" cy:nodeId="2082">
    <graphics x="-1000.5870718963597" y="-141.95743444039908" z="0.0"/>
  </node>
  <node id="613642" label="zzz1041" cy:nodeId="2083">
    <graphics x="-1084.2500929840062" y="-167.03205373361197" z="0.0"/>
  </node>
  <node id="613643" label="zzz1038" cy:nodeId="2084">
    <graphics x="-1006.3500800140355" y="-259.6300952680358" z="0.0"/>
  </node>
  <node id="613644" label="zzz1034" cy:nodeId="2085">
    <graphics x="-945.6890196807835" y="-242.68144109323111" z="0.0"/>
  </node>
  <node id="613645" label="zzz1033" cy:nodeId="2086">
    <graphics x="-964.3670229919408" y="-202.83502557351676" z="0.0"/>
  </node>
  <node id="613646" label="zzz1030" cy:nodeId="2087">
    <graphics x="-1026.3443808563206" y="-182.6315772779235" z="0.0"/>
  </node>
  <node id="613647" label="zzz1028" cy:nodeId="2088">
    <graphics x="-1104.9755873687718" y="-191.56662728860465" z="0.0"/>
  </node>
  <node id="613648" label="zzz1027" cy:nodeId="2089">
    <graphics x="-976.4786396034215" y="-160.59399297311393" z="0.0"/>
  </node>
  <node id="613649" label="zzz1026" cy:nodeId="2090">
    <graphics x="-1017.0887618072484" y="-206.79894187524405" z="0.0"/>
  </node>
  <node id="613650" label="zzz1025" cy:nodeId="2091">
    <graphics x="-964.9214682586644" y="-128.0240619428405" z="0.0"/>
  </node>
  <node id="613651" label="zzz1023" cy:nodeId="2092">
    <graphics x="-1085.3327803619359" y="-216.60524633004752" z="0.0"/>
  </node>
  <node id="613652" label="zzz1022" cy:nodeId="2093">
    <graphics x="-954.2035899169896" y="-152.02143361642447" z="0.0"/>
  </node>
  <node id="613653" label="zzz1021" cy:nodeId="2094">
    <graphics x="-1006.2808699615452" y="-145.31986119821158" z="0.0"/>
  </node>
  <node id="613654" label="zzz1019" cy:nodeId="2095">
    <graphics x="-974.6067223556493" y="-155.82373693063346" z="0.0"/>
  </node>
  <node id="613655" label="zzz1018" cy:nodeId="2096">
    <graphics x="-1003.1459803588841" y="-92.05955388619986" z="0.0"/>
  </node>
  <node id="613656" label="zzz1017" cy:nodeId="2097">
    <graphics x="-1050.8197188384984" y="-187.6644542463073" z="0.0"/>
  </node>
  <node id="613657" label="zzz1016" cy:nodeId="2098">
    <graphics x="-957.8515658386204" y="-187.06126191690055" z="0.0"/>
  </node>
  <node id="613658" label="zzz1015" cy:nodeId="2099">
    <graphics x="-1010.1146521575902" y="-260.4902599103698" z="0.0"/>
  </node>
  <node id="613659" label="zzz1013" cy:nodeId="2100">
    <graphics x="-950.8907828338597" y="-200.5886428601989" z="0.0"/>
  </node>
  <node id="613660" label="zzz1012" cy:nodeId="2101">
    <graphics x="-961.4430708892796" y="-115.85266759469596" z="0.0"/>
  </node>
  <node id="613661" label="zzz1011" cy:nodeId="2102">
    <graphics x="-1054.723779202268" y="-237.3577220685729" z="0.0"/>
  </node>
  <node id="613662" label="zzz1010" cy:nodeId="2103">
    <graphics x="-1072.9167647369359" y="-183.42854383065787" z="0.0"/>
  </node>
  <node id="613663" label="zzz1009" cy:nodeId="2104">
    <graphics x="-1082.3140807159398" y="-168.53830602243033" z="0.0"/>
  </node>
  <node id="613664" label="zzz1008" cy:nodeId="2105">
    <graphics x="-1046.2184157379124" y="-129.68134954049674" z="0.0"/>
  </node>
  <node id="613665" label="zzz1004" cy:nodeId="2106">
    <graphics x="-1048.1834425933812" y="-99.35034062936393" z="0.0"/>
  </node>
  <node id="613666" label="zzz1003" cy:nodeId="2107">
    <graphics x="-1042.0186095245335" y="-114.45744206979361" z="0.0"/>
  </node>
  <node id="613667" label="zzz1002" cy:nodeId="2108">
    <graphics x="-991.1004538543675" y="-73.84919622018424" z="0.0"/>
  </node>
  <node id="613668" label="zzz1000" cy:nodeId="2109">
    <graphics x="-1015.0160918243382" y="-207.63978746011344" z="0.0"/>
  </node>
</graph>
