# Supplementary material for: Discovery of several thousand highly diverse circular DNA viruses
Source: eLife journal article supplement (doi:10.7554/elife.51971), 2020-02-03
Supplement: fig2-figsupp1-data1 [file elife-51971-fig2-figsupp1-data1-v1.cys › CytoscapeSession-2019_08_05-18_21/apps/org.cytoscape.ding.customgraphicsmgr/image_metadata.props]

#Image Metadata
#Mon Aug 05 18:21:31 EDT 2019
32=org.cytoscape.ding.customgraphics.bitmap.URLImageCustomGraphics,32,file\:/Users/apico/Dropbox%20(Gladstone)/20151115_Shah_FHS_Paper/Round2/legend.png,bitmap image
31=org.cytoscape.ding.customgraphics.bitmap.URLImageCustomGraphics,31,file\:/Users/scooter/tmp/export.png,bitmap image
30=org.cytoscape.ding.customgraphics.bitmap.URLImageCustomGraphics,30,file\:/tmp/export.png,bitmap image
19=org.cytoscape.ding.customgraphics.bitmap.URLImageCustomGraphics,19,Oryza_sativa_NL.png,bitmap image
18=org.cytoscape.ding.customgraphics.bitmap.URLImageCustomGraphics,18,Triticum_aestivum_L.png,bitmap image
17=org.cytoscape.ding.customgraphics.bitmap.URLImageCustomGraphics,17,Escherichia_coli_NL.png,bitmap image
16=org.cytoscape.ding.customgraphics.bitmap.URLImageCustomGraphics,16,Caenorhabditis_elegans_L.png,bitmap image
15=org.cytoscape.ding.customgraphics.bitmap.URLImageCustomGraphics,15,Triticum_aestivum_NL.png,bitmap image
14=org.cytoscape.ding.customgraphics.bitmap.URLImageCustomGraphics,14,Escherichia_coli_L.png,bitmap image
13=org.cytoscape.ding.customgraphics.bitmap.URLImageCustomGraphics,13,Arabidopsis_thaliana_NL.png,bitmap image
43=org.cytoscape.ding.customgraphics.bitmap.URLImageCustomGraphics,43,/Users/ppm/Documents/Useful/cytoscapesymbols/Symbol_version_older.png,bitmap image
12=org.cytoscape.ding.customgraphics.bitmap.URLImageCustomGraphics,12,Homo_sapiens_NL.png,bitmap image
42=org.cytoscape.ding.customgraphics.bitmap.URLImageCustomGraphics,42,/Users/ppm/Documents/Useful/cytoscapesymbols/180px-Symbol_version_newer.png,bitmap image
11=org.cytoscape.ding.customgraphics.bitmap.URLImageCustomGraphics,11,Lotus_japonicus_NL.png,bitmap image
10=org.cytoscape.ding.customgraphics.bitmap.URLImageCustomGraphics,10,Lotus_japonicus_L.png,bitmap image
9=org.cytoscape.ding.customgraphics.bitmap.URLImageCustomGraphics,9,Saccharomyces_cerevisiae_L.png,bitmap image
29=org.cytoscape.ding.customgraphics.bitmap.URLImageCustomGraphics,29,file\:/home/scooter/export.png,bitmap image
8=org.cytoscape.ding.customgraphics.bitmap.URLImageCustomGraphics,8,Saccharomyces_cerevisiae_NL.png,bitmap image
28=org.cytoscape.ding.customgraphics.bitmap.URLImageCustomGraphics,28,file\:/Users/apico/Dropbox%20(Gladstone)/For_KristinaAndAlex_FromNiki/pathway_and_network_analysis/Cytoscape/Pathway%20data4%20old%20images/legend_data4.png,bitmap image
7=org.cytoscape.ding.customgraphics.bitmap.URLImageCustomGraphics,7,Arabidopsis_thaliana_L.png,bitmap image
27=org.cytoscape.ding.customgraphics.bitmap.URLImageCustomGraphics,27,file\:/Users/apico/Dropbox%20(Gladstone)/For_KristinaAndAlex_FromNiki/pathway_and_network_analysis/Cytoscape/legend_data4.png,bitmap image
6=org.cytoscape.ding.customgraphics.bitmap.URLImageCustomGraphics,6,Homo_sapiens_L.png,bitmap image
26=org.cytoscape.ding.customgraphics.bitmap.URLImageCustomGraphics,26,file\:/Users/apico/Desktop/Screen%20Shot%202016-04-29%20at%2011.40.00%20AM.png,bitmap image
5=org.cytoscape.ding.customgraphics.bitmap.URLImageCustomGraphics,5,Caenorhabditis_elegans_NL.png,bitmap image
25=org.cytoscape.ding.customgraphics.bitmap.URLImageCustomGraphics,25,/Users/apico/Desktop/Screen Shot 2016-04-29 at 11.40.00 AM.png,bitmap image
4=org.cytoscape.ding.customgraphics.bitmap.URLImageCustomGraphics,4,Oryza_sativa_L.png,bitmap image
24=org.cytoscape.ding.customgraphics.bitmap.URLImageCustomGraphics,24,Rattus_norvegicus_L.png,bitmap image
3=org.cytoscape.ding.customgraphics.bitmap.URLImageCustomGraphics,3,Mus_musculus_L.png,bitmap image
23=org.cytoscape.ding.customgraphics.bitmap.URLImageCustomGraphics,23,Danio_rerio_NL.png,bitmap image
2=org.cytoscape.ding.customgraphics.bitmap.URLImageCustomGraphics,2,Danio_rerio_L.png,bitmap image
22=org.cytoscape.ding.customgraphics.bitmap.URLImageCustomGraphics,22,Drosophila_melanogaster_NL.png,bitmap image
1=org.cytoscape.ding.customgraphics.bitmap.URLImageCustomGraphics,1,Rattus_norvegicus_NL.png,bitmap image
21=org.cytoscape.ding.customgraphics.bitmap.URLImageCustomGraphics,21,Drosophila_melanogaster_L.png,bitmap image
20=org.cytoscape.ding.customgraphics.bitmap.URLImageCustomGraphics,20,Mus_musculus_NL.png,bitmap image
