# Supplementary material for: Discovery of several thousand highly diverse circular DNA viruses
Source: eLife journal article supplement (doi:10.7554/elife.51971), 2020-02-03
Supplement: fig2-figsupp1-data1 [file elife-51971-fig2-figsupp1-data1-v1.cys › CytoscapeSession-2019_08_05-18_21/apps/org.cytoscape.swing-application/session_state.xml]

<?xml version="1.0" encoding="UTF-8" standalone="yes"?>
<sessionState>
    <cytopanels>
        <cytopanel id="CytoPanel1">
            <panelState>DOCK</panelState>
            <selectedPanel>1</selectedPanel>
        </cytopanel>
        <cytopanel id="CytoPanel2">
            <panelState>DOCK</panelState>
            <selectedPanel>0</selectedPanel>
        </cytopanel>
        <cytopanel id="CytoPanel3">
            <panelState>HIDE</panelState>
            <selectedPanel>-1</selectedPanel>
        </cytopanel>
    </cytopanels>
</sessionState>
