# Supplementary material for: Discovery of several thousand highly diverse circular DNA viruses
Source: eLife journal article supplement (doi:10.7554/elife.51971), 2020-02-03
Supplement: fig2-figsupp1-data1 [file elife-51971-fig2-figsupp1-data1-v1.cys › CytoscapeSession-2019_08_05-18_21/networks/36-all_my_seqs_genbank_ssDNA1_protein_with_ttv_orf1_per_PF02956_13_2_fasta+Full+Network.xgmml]

<?xml version="1.0" encoding="UTF-8" standalone="yes"?>
<graph id="36" label="all_my_seqs_genbank_ssDNA1_protein_with_ttv_orf1_per_PF02956_13_2_fasta Full Network" cy:view="0" cy:registered="0" cy:documentVersion="3.0" xmlns:dc="http://purl.org/dc/elements/1.1/" xmlns:xlink="http://www.w3.org/1999/xlink" xmlns:rdf="http://www.w3.org/1999/02/22-rdf-syntax-ns#" xmlns:cy="http://www.cytoscape.org" xmlns="http://www.cs.rpi.edu/XGMML">
  <att>
    <graph id="52" label="all_my_seqs_genbank_ssDNA1_protein_with_ttv_orf1_per_PF02956_13_2_fasta Full Network" cy:registered="1">
      <node id="842" label="zzzz100"/>
      <node id="841" label="zzzz101"/>
      <node id="840" label="zzzz102"/>
      <node id="839" label="zzzz103"/>
      <node id="838" label="zzzz104"/>
      <node id="837" label="zzzz105"/>
      <node id="836" label="zzzz106"/>
      <node id="835" label="zzzz107"/>
      <node id="834" label="zzzz108"/>
      <node id="833" label="zzzz109"/>
      <node id="832" label="zzzz110"/>
      <node id="831" label="zzzz111"/>
      <node id="830" label="zzzz112"/>
      <node id="829" label="zzzz113"/>
      <node id="828" label="zzzz114"/>
      <node id="827" label="zzzz115"/>
      <node id="826" label="zzzz116"/>
      <node id="825" label="zzzz117"/>
      <node id="824" label="zzzz118"/>
      <node id="823" label="zzzz119"/>
      <node id="822" label="zzzz120"/>
      <node id="821" label="zzzz121"/>
      <node id="820" label="zzzz122"/>
      <node id="819" label="zzzz123"/>
      <node id="818" label="zzzz124"/>
      <node id="817" label="zzzz125"/>
      <node id="816" label="zzzz126"/>
      <node id="815" label="zzzz127"/>
      <node id="814" label="zzzz128"/>
      <node id="813" label="zzzz129"/>
      <node id="812" label="zzzz130"/>
      <node id="811" label="zzzz131"/>
      <node id="810" label="zzzz132"/>
      <node id="809" label="zzzz133"/>
      <node id="808" label="zzzz134"/>
      <node id="807" label="zzzz135"/>
      <node id="806" label="zzzz136"/>
      <node id="805" label="zzzz137"/>
      <node id="804" label="zzzz138"/>
      <node id="803" label="zzzz139"/>
      <node id="802" label="zzzz140"/>
      <node id="801" label="zzzz141"/>
      <node id="800" label="zzzz142"/>
      <node id="799" label="zzzz143"/>
      <node id="798" label="zzzz144"/>
      <node id="797" label="zzzz145"/>
      <node id="796" label="zzzz146"/>
      <node id="795" label="zzzz147"/>
      <node id="794" label="zzzz148"/>
      <node id="793" label="zzzz149"/>
      <node id="792" label="zzzz150"/>
      <node id="791" label="zzzz151"/>
      <node id="790" label="zzzz152"/>
      <node id="789" label="zzzz153"/>
      <node id="788" label="zzzz154"/>
      <node id="787" label="zzzz155"/>
      <node id="786" label="zzzz156"/>
      <node id="785" label="zzzz157"/>
      <node id="784" label="zzzz158"/>
      <node id="783" label="zzzz159"/>
      <node id="782" label="zzzz160"/>
      <node id="781" label="zzzz161"/>
      <node id="780" label="zzzz162"/>
      <node id="779" label="zzzz163"/>
      <node id="778" label="zzzz164"/>
      <node id="777" label="zzzz165"/>
      <node id="776" label="zzzz166"/>
      <node id="775" label="zzzz167"/>
      <node id="774" label="zzzz168"/>
      <node id="773" label="zzzz169"/>
      <node id="772" label="zzzz170"/>
      <node id="771" label="zzzz171"/>
      <node id="770" label="zzzz172"/>
      <node id="769" label="zzzz173"/>
      <node id="768" label="zzzz174"/>
      <node id="767" label="zzzz175"/>
      <node id="766" label="zzzz176"/>
      <node id="764" label="zzzz178"/>
      <node id="763" label="zzzz179"/>
      <node id="762" label="zzzz180"/>
      <node id="761" label="zzzz181"/>
      <node id="760" label="zzzz182"/>
      <node id="759" label="zzzz183"/>
      <node id="758" label="zzzz184"/>
      <node id="757" label="zzzz185"/>
      <node id="756" label="zzzz186"/>
      <node id="755" label="zzzz187"/>
      <node id="754" label="zzzz188"/>
      <node id="753" label="zzzz189"/>
      <node id="752" label="zzzz190"/>
      <node id="751" label="zzzz191"/>
      <node id="750" label="zzzz192"/>
      <node id="749" label="zzzz193"/>
      <node id="748" label="zzzz194"/>
      <node id="747" label="zzzz195"/>
      <node id="746" label="zzzz196"/>
      <node id="745" label="zzzz197"/>
      <node id="744" label="zzzz198"/>
      <node id="743" label="zzzz199"/>
      <node id="742" label="zzzz200"/>
      <node id="741" label="zzzz201"/>
      <node id="740" label="zzzz202"/>
      <node id="739" label="zzzz203"/>
      <node id="738" label="zzzz204"/>
      <node id="737" label="zzzz205"/>
      <node id="736" label="zzzz206"/>
      <node id="735" label="zzzz207"/>
      <node id="734" label="zzzz208"/>
      <node id="733" label="zzzz209"/>
      <node id="732" label="zzzz210"/>
      <node id="731" label="zzzz211"/>
      <node id="730" label="zzzz212"/>
      <node id="729" label="zzzz213"/>
      <node id="728" label="zzzz214"/>
      <node id="727" label="zzzz215"/>
      <node id="726" label="zzzz216"/>
      <node id="725" label="zzzz217"/>
      <node id="724" label="zzzz218"/>
      <node id="723" label="zzzz219"/>
      <node id="722" label="zzzz220"/>
      <node id="721" label="zzzz221"/>
      <node id="720" label="zzzz222"/>
      <node id="719" label="zzzz223"/>
      <node id="718" label="zzzz224"/>
      <node id="717" label="zzzz225"/>
      <node id="716" label="zzzz226"/>
      <node id="715" label="zzzz227"/>
      <node id="714" label="zzzz228"/>
      <node id="713" label="zzzz229"/>
      <node id="712" label="zzzz230"/>
      <node id="711" label="zzzz231"/>
      <node id="710" label="zzzz232"/>
      <node id="709" label="zzzz233"/>
      <node id="708" label="zzzz234"/>
      <node id="707" label="zzzz235"/>
      <node id="706" label="zzzz236"/>
      <node id="705" label="zzzz237"/>
      <node id="704" label="zzzz238"/>
      <node id="703" label="zzzz239"/>
      <node id="702" label="zzzz240"/>
      <node id="701" label="zzzz241"/>
      <node id="700" label="zzzz242"/>
      <node id="699" label="zzzz243"/>
      <node id="698" label="zzzz244"/>
      <node id="697" label="zzzz245"/>
      <node id="696" label="zzzz246"/>
      <node id="695" label="zzzz247"/>
      <node id="694" label="zzzz248"/>
      <node id="693" label="zzzz249"/>
      <node id="692" label="zzzz250"/>
      <node id="691" label="zzzz251"/>
      <node id="690" label="zzzz252"/>
      <node id="689" label="zzzz253"/>
      <node id="688" label="zzzz254"/>
      <node id="687" label="zzzz255"/>
      <node id="686" label="zzzz256"/>
      <node id="685" label="zzzz257"/>
      <node id="684" label="zzzz258"/>
      <node id="683" label="zzzz259"/>
      <node id="682" label="zzzz260"/>
      <node id="681" label="zzzz261"/>
      <node id="680" label="zzzz262"/>
      <node id="679" label="zzzz263"/>
      <node id="678" label="zzzz264"/>
      <node id="677" label="zzzz265"/>
      <node id="676" label="zzzz266"/>
      <node id="675" label="zzzz267"/>
      <node id="674" label="zzzz268"/>
      <node id="673" label="zzzz269"/>
      <node id="672" label="zzzz270"/>
      <node id="671" label="zzzz271"/>
      <node id="670" label="zzzz272"/>
      <node id="669" label="zzzz273"/>
      <node id="668" label="zzzz274"/>
      <node id="667" label="zzzz275"/>
      <node id="666" label="zzzz276"/>
      <node id="665" label="zzzz277"/>
      <node id="664" label="zzzz278"/>
      <node id="663" label="zzzz279"/>
      <node id="662" label="zzzz280"/>
      <node id="661" label="zzzz281"/>
      <node id="660" label="zzzz282"/>
      <node id="659" label="zzzz283"/>
      <node id="658" label="zzzz284"/>
      <node id="657" label="zzzz285"/>
      <node id="656" label="zzzz286"/>
      <node id="655" label="zzzz287"/>
      <node id="654" label="zzzz288"/>
      <node id="653" label="zzzz289"/>
      <node id="652" label="zzzz290"/>
      <node id="651" label="zzzz291"/>
      <node id="650" label="zzzz292"/>
      <node id="649" label="zzzz293"/>
      <node id="648" label="zzzz294"/>
      <node id="647" label="zzzz295"/>
      <node id="646" label="zzzz296"/>
      <node id="645" label="zzzz297"/>
      <node id="644" label="zzzz298"/>
      <node id="643" label="zzzz299"/>
      <node id="642" label="zzzz300"/>
      <node id="641" label="zzzz301"/>
      <node id="640" label="zzzz302"/>
      <node id="639" label="zzzz303"/>
      <node id="638" label="zzzz304"/>
      <node id="637" label="zzzz305"/>
      <node id="636" label="zzzz306"/>
      <node id="635" label="zzzz307"/>
      <node id="634" label="zzzz308"/>
      <node id="633" label="zzzz309"/>
      <node id="632" label="zzzz310"/>
      <node id="631" label="zzzz311"/>
      <node id="630" label="zzzz312"/>
      <node id="629" label="zzzz313"/>
      <node id="628" label="zzzz314"/>
      <node id="627" label="zzzz315"/>
      <node id="626" label="zzzz316"/>
      <node id="625" label="zzzz317"/>
      <node id="624" label="zzzz318"/>
      <node id="623" label="zzzz319"/>
      <node id="622" label="zzzz320"/>
      <node id="621" label="zzzz321"/>
      <node id="620" label="zzzz322"/>
      <node id="619" label="zzzz323"/>
      <node id="618" label="zzzz324"/>
      <node id="617" label="zzzz325"/>
      <node id="616" label="zzzz326"/>
      <node id="615" label="zzzz327"/>
      <node id="614" label="zzzz328"/>
      <node id="613" label="zzzz329"/>
      <node id="612" label="zzzz330"/>
      <node id="611" label="zzzz331"/>
      <node id="610" label="zzzz332"/>
      <node id="609" label="zzzz333"/>
      <node id="608" label="zzzz334"/>
      <node id="607" label="zzzz335"/>
      <node id="606" label="zzzz336"/>
      <node id="605" label="zzzz337"/>
      <node id="604" label="zzzz338"/>
      <node id="603" label="zzzz339"/>
      <node id="602" label="zzzz340"/>
      <node id="601" label="zzzz341"/>
      <node id="600" label="zzzz342"/>
      <node id="599" label="zzzz343"/>
      <node id="598" label="zzzz344"/>
      <node id="597" label="zzzz345"/>
      <node id="596" label="zzzz346"/>
      <node id="595" label="zzzz347"/>
      <node id="594" label="zzzz348"/>
      <node id="593" label="zzzz349"/>
      <node id="592" label="zzzz350"/>
      <node id="591" label="zzzz351"/>
      <node id="590" label="zzzz352"/>
      <node id="589" label="zzzz353"/>
      <node id="588" label="zzzz354"/>
      <node id="587" label="zzzz355"/>
      <node id="586" label="zzzz356"/>
      <node id="585" label="zzzz357"/>
      <node id="584" label="zzzz358"/>
      <node id="583" label="zzzz359"/>
      <node id="582" label="zzzz360"/>
      <node id="581" label="zzzz361"/>
      <node id="580" label="zzzz362"/>
      <node id="579" label="zzzz363"/>
      <node id="578" label="zzzz364"/>
      <node id="577" label="zzzz365"/>
      <node id="576" label="zzzz366"/>
      <node id="575" label="zzzz367"/>
      <node id="574" label="zzzz368"/>
      <node id="573" label="zzzz369"/>
      <node id="572" label="zzzz370"/>
      <node id="571" label="zzzz371"/>
      <node id="570" label="zzzz372"/>
      <node id="569" label="zzzz373"/>
      <node id="568" label="zzzz374"/>
      <node id="567" label="zzzz375"/>
      <node id="566" label="zzzz376"/>
      <node id="565" label="zzzz377"/>
      <node id="564" label="zzzz378"/>
      <node id="563" label="zzzz379"/>
      <node id="562" label="zzzz380"/>
      <node id="561" label="zzzz381"/>
      <node id="560" label="zzzz382"/>
      <node id="559" label="zzzz383"/>
      <node id="558" label="zzzz384"/>
      <node id="557" label="zzzz385"/>
      <node id="556" label="zzzz386"/>
      <node id="555" label="zzzz387"/>
      <node id="554" label="zzzz388"/>
      <node id="553" label="zzzz389"/>
      <node id="552" label="zzzz390"/>
      <node id="551" label="zzzz391"/>
      <node id="550" label="zzzz392"/>
      <node id="549" label="zzzz393"/>
      <node id="548" label="zzzz394"/>
      <node id="547" label="zzzz395"/>
      <node id="546" label="zzzz396"/>
      <node id="545" label="zzzz397"/>
      <node id="544" label="zzzz398"/>
      <node id="543" label="zzzz399"/>
      <node id="542" label="zzzz400"/>
      <node id="541" label="zzzz401"/>
      <node id="540" label="zzzz402"/>
      <node id="539" label="zzzz403"/>
      <node id="538" label="zzzz404"/>
      <node id="537" label="zzzz405"/>
      <node id="536" label="zzzz406"/>
      <node id="535" label="zzzz407"/>
      <node id="534" label="zzzz408"/>
      <node id="533" label="zzzz409"/>
      <node id="532" label="zzzz410"/>
      <node id="531" label="zzzz411"/>
      <node id="530" label="zzzz412"/>
      <node id="529" label="zzzz413"/>
      <node id="528" label="zzzz414"/>
      <node id="527" label="zzzz415"/>
      <node id="526" label="zzzz416"/>
      <node id="525" label="zzzz417"/>
      <node id="524" label="zzzz418"/>
      <node id="523" label="zzzz419"/>
      <node id="522" label="zzzz420"/>
      <node id="521" label="zzzz421"/>
      <node id="520" label="zzzz422"/>
      <node id="519" label="zzzz423"/>
      <node id="518" label="zzzz424"/>
      <node id="517" label="zzzz425"/>
      <node id="516" label="zzzz426"/>
      <node id="515" label="zzzz427"/>
      <node id="514" label="zzzz428"/>
      <node id="513" label="zzzz429"/>
      <node id="512" label="zzzz430"/>
      <node id="511" label="zzzz431"/>
      <node id="510" label="zzzz432"/>
      <node id="509" label="zzzz433"/>
      <node id="508" label="zzzz434"/>
      <node id="507" label="zzzz435"/>
      <node id="506" label="zzzz436"/>
      <node id="505" label="zzzz437"/>
      <node id="504" label="zzzz438"/>
      <node id="503" label="zzzz439"/>
      <node id="502" label="zzzz440"/>
      <node id="501" label="zzzz441"/>
      <node id="500" label="zzzz442"/>
      <node id="499" label="zzzz443"/>
      <node id="498" label="zzzz444"/>
      <node id="497" label="zzzz445"/>
      <node id="496" label="zzzz446"/>
      <node id="495" label="zzzz447"/>
      <node id="494" label="zzzz448"/>
      <node id="493" label="zzzz449"/>
      <node id="492" label="zzzz450"/>
      <node id="491" label="zzzz451"/>
      <node id="490" label="zzzz452"/>
      <node id="489" label="zzzz453"/>
      <node id="488" label="zzzz454"/>
      <node id="487" label="zzzz455"/>
      <node id="486" label="zzzz456"/>
      <node id="485" label="zzzz457"/>
      <node id="484" label="zzzz458"/>
      <node id="483" label="zzzz459"/>
      <node id="482" label="zzzz460"/>
      <node id="481" label="zzzz461"/>
      <node id="480" label="zzzz462"/>
      <node id="479" label="zzzz463"/>
      <node id="478" label="zzzz464"/>
      <node id="477" label="zzzz465"/>
      <node id="476" label="zzzz466"/>
      <node id="475" label="zzzz467"/>
      <node id="474" label="zzzz468"/>
      <node id="473" label="zzzz469"/>
      <node id="472" label="zzzz470"/>
      <node id="471" label="zzzz471"/>
      <node id="470" label="zzzz472"/>
      <node id="469" label="zzzz473"/>
      <node id="468" label="zzzz474"/>
      <node id="467" label="zzzz475"/>
      <node id="466" label="zzzz476"/>
      <node id="465" label="zzzz477"/>
      <node id="464" label="zzzz478"/>
      <node id="463" label="zzzz479"/>
      <node id="462" label="zzzz480"/>
      <node id="461" label="zzzz481"/>
      <node id="460" label="zzzz482"/>
      <node id="459" label="zzzz483"/>
      <node id="458" label="zzzz484"/>
      <node id="457" label="zzzz485"/>
      <node id="456" label="zzzz486"/>
      <node id="455" label="zzzz487"/>
      <node id="454" label="zzzz488"/>
      <node id="453" label="zzzz489"/>
      <node id="452" label="zzzz490"/>
      <node id="451" label="zzzz491"/>
      <node id="450" label="zzzz492"/>
      <node id="449" label="zzzz493"/>
      <node id="448" label="zzzz494"/>
      <node id="447" label="zzzz495"/>
      <node id="446" label="zzzz496"/>
      <node id="445" label="zzzz497"/>
      <node id="444" label="zzzz498"/>
      <node id="443" label="zzzz499"/>
      <node id="442" label="zzzz500"/>
      <node id="441" label="zzzz501"/>
      <node id="440" label="zzzz502"/>
      <node id="439" label="zzzz503"/>
      <node id="438" label="zzzz504"/>
      <node id="437" label="zzzz505"/>
      <node id="436" label="zzzz506"/>
      <node id="435" label="zzzz507"/>
      <node id="434" label="zzzz508"/>
      <node id="433" label="zzzz509"/>
      <node id="432" label="zzzz510"/>
      <node id="431" label="zzzz511"/>
      <node id="430" label="zzzz512"/>
      <node id="429" label="zzzz513"/>
      <node id="428" label="zzzz514"/>
      <node id="427" label="zzzz515"/>
      <node id="426" label="zzzz516"/>
      <node id="425" label="zzzz517"/>
      <node id="424" label="zzzz518"/>
      <node id="423" label="zzzz519"/>
      <node id="422" label="zzzz520"/>
      <node id="421" label="zzzz521"/>
      <node id="420" label="zzzz522"/>
      <node id="419" label="zzzz523"/>
      <node id="418" label="zzzz524"/>
      <node id="417" label="zzzz525"/>
      <node id="416" label="zzzz526"/>
      <node id="415" label="zzzz527"/>
      <node id="414" label="zzzz528"/>
      <node id="413" label="zzzz529"/>
      <node id="412" label="zzzz530"/>
      <node id="411" label="zzzz531"/>
      <node id="410" label="zzzz532"/>
      <node id="409" label="zzzz533"/>
      <node id="408" label="zzzz534"/>
      <node id="407" label="zzzz535"/>
      <node id="406" label="zzzz536"/>
      <node id="405" label="zzzz537"/>
      <node id="404" label="zzzz538"/>
      <node id="403" label="zzzz539"/>
      <node id="402" label="zzzz540"/>
      <node id="401" label="zzzz541"/>
      <node id="400" label="zzzz542"/>
      <node id="399" label="zzzz543"/>
      <node id="398" label="zzzz544"/>
      <node id="397" label="zzzz545"/>
      <node id="396" label="zzzz546"/>
      <node id="395" label="zzzz547"/>
      <node id="394" label="zzzz548"/>
      <node id="393" label="zzzz549"/>
      <node id="392" label="zzzz550"/>
      <node id="391" label="zzzz551"/>
      <node id="390" label="zzzz552"/>
      <node id="389" label="zzzz553"/>
      <node id="388" label="zzzz554"/>
      <node id="387" label="zzzz555"/>
      <node id="386" label="zzzz556"/>
      <node id="385" label="zzzz557"/>
      <node id="384" label="zzzz558"/>
      <node id="383" label="zzzz559"/>
      <node id="382" label="zzzz560"/>
      <node id="381" label="zzzz561"/>
      <node id="380" label="zzzz562"/>
      <node id="379" label="zzzz563"/>
      <node id="378" label="zzzz564"/>
      <node id="377" label="zzzz565"/>
      <node id="376" label="zzzz566"/>
      <node id="375" label="zzzz567"/>
      <node id="374" label="zzzz568"/>
      <node id="373" label="zzzz569"/>
      <node id="372" label="zzzz570"/>
      <node id="371" label="zzzz571"/>
      <node id="370" label="zzzz572"/>
      <node id="369" label="zzzz573"/>
      <node id="368" label="zzzz574"/>
      <node id="367" label="zzzz575"/>
      <node id="366" label="zzzz576"/>
      <node id="365" label="zzzz577"/>
      <node id="364" label="zzzz578"/>
      <node id="363" label="zzzz579"/>
      <node id="362" label="zzzz580"/>
      <node id="361" label="zzzz581"/>
      <node id="360" label="zzzz582"/>
      <node id="359" label="zzzz583"/>
      <node id="358" label="zzzz584"/>
      <node id="357" label="zzzz585"/>
      <node id="356" label="zzzz586"/>
      <node id="355" label="zzzz587"/>
      <node id="354" label="zzzz588"/>
      <node id="353" label="zzzz589"/>
      <node id="352" label="zzzz590"/>
      <node id="351" label="zzzz591"/>
      <node id="350" label="zzzz592"/>
      <node id="349" label="zzzz593"/>
      <node id="348" label="zzzz594"/>
      <node id="347" label="zzzz595"/>
      <node id="346" label="zzzz596"/>
      <node id="345" label="zzzz597"/>
      <node id="344" label="zzzz598"/>
      <node id="343" label="zzzz599"/>
      <node id="342" label="zzzz600"/>
      <node id="341" label="zzzz601"/>
      <node id="340" label="zzzz602"/>
      <node id="339" label="zzzz603"/>
      <node id="338" label="zzzz604"/>
      <node id="337" label="zzzz605"/>
      <node id="336" label="zzzz606"/>
      <node id="335" label="zzzz607"/>
      <node id="334" label="zzzz608"/>
      <node id="333" label="zzzz609"/>
      <node id="332" label="zzzz610"/>
      <node id="331" label="zzzz611"/>
      <node id="330" label="zzzz612"/>
      <node id="329" label="zzzz613"/>
      <node id="328" label="zzzz614"/>
      <node id="327" label="zzzz615"/>
      <node id="326" label="zzzz616"/>
      <node id="325" label="zzzz617"/>
      <node id="324" label="zzzz618"/>
      <node id="323" label="zzzz619"/>
      <node id="322" label="zzzz620"/>
      <node id="321" label="zzzz621"/>
      <node id="320" label="zzzz622"/>
      <node id="319" label="zzzz623"/>
      <node id="318" label="zzzz624"/>
      <node id="317" label="zzzz625"/>
      <node id="316" label="zzzz626"/>
      <node id="315" label="zzzz627"/>
      <node id="314" label="zzzz628"/>
      <node id="313" label="zzzz629"/>
      <node id="312" label="zzzz630"/>
      <node id="311" label="zzzz631"/>
      <node id="310" label="zzzz632"/>
      <node id="308" label="zzzz634"/>
      <node id="307" label="zzzz635"/>
      <node id="306" label="zzzz636"/>
      <node id="305" label="zzzz637"/>
      <node id="304" label="zzzz638"/>
      <node id="303" label="zzzz639"/>
      <node id="302" label="zzzz640"/>
      <node id="301" label="zzzz641"/>
      <node id="300" label="zzzz642"/>
      <node id="299" label="zzzz643"/>
      <node id="298" label="zzzz644"/>
      <node id="297" label="zzzz645"/>
      <node id="296" label="zzzz646"/>
      <node id="295" label="zzzz647"/>
      <node id="294" label="zzzz648"/>
      <node id="293" label="zzzz649"/>
      <node id="292" label="zzzz650"/>
      <node id="291" label="zzzz651"/>
      <node id="290" label="zzzz652"/>
      <node id="289" label="zzzz653"/>
      <node id="288" label="zzzz654"/>
      <node id="287" label="zzzz655"/>
      <node id="286" label="zzzz656"/>
      <node id="285" label="zzzz657"/>
      <node id="284" label="zzzz658"/>
      <node id="283" label="zzzz659"/>
      <node id="282" label="zzzz660"/>
      <node id="281" label="zzzz661"/>
      <node id="280" label="zzzz662"/>
      <node id="279" label="zzzz663"/>
      <node id="278" label="zzzz664"/>
      <node id="277" label="zzzz665"/>
      <node id="276" label="zzzz666"/>
      <node id="275" label="zzzz667"/>
      <node id="274" label="zzzz668"/>
      <node id="273" label="zzzz669"/>
      <node id="272" label="zzzz670"/>
      <node id="271" label="zzzz671"/>
      <node id="270" label="zzzz672"/>
      <node id="269" label="zzzz673"/>
      <node id="268" label="zzzz674"/>
      <node id="267" label="zzzz675"/>
      <node id="266" label="zzzz676"/>
      <node id="265" label="zzzz677"/>
      <node id="264" label="zzzz678"/>
      <node id="263" label="zzzz679"/>
      <node id="262" label="zzzz680"/>
      <node id="261" label="zzzz681"/>
      <node id="260" label="zzzz682"/>
      <node id="259" label="zzzz683"/>
      <node id="258" label="zzzz684"/>
      <node id="257" label="zzzz685"/>
      <node id="256" label="zzzz686"/>
      <node id="255" label="zzzz687"/>
      <node id="254" label="zzzz688"/>
      <node id="253" label="zzzz689"/>
      <node id="252" label="zzzz690"/>
      <node id="251" label="zzzz691"/>
      <node id="250" label="zzzz692"/>
      <node id="249" label="zzzz693"/>
      <node id="248" label="zzzz694"/>
      <node id="247" label="zzzz695"/>
      <node id="246" label="zzzz696"/>
      <node id="245" label="zzzz697"/>
      <node id="244" label="zzzz698"/>
      <node id="243" label="zzzz699"/>
      <node id="242" label="zzzz700"/>
      <node id="241" label="zzzz701"/>
      <node id="240" label="zzzz702"/>
      <node id="239" label="zzzz703"/>
      <node id="238" label="zzzz704"/>
      <node id="237" label="zzzz705"/>
      <node id="236" label="zzzz706"/>
      <node id="235" label="zzzz707"/>
      <node id="234" label="zzzz708"/>
      <node id="233" label="zzzz709"/>
      <node id="232" label="zzzz710"/>
      <node id="231" label="zzzz711"/>
      <node id="230" label="zzzz712"/>
      <node id="229" label="zzzz713"/>
      <node id="228" label="zzzz714"/>
      <node id="227" label="zzzz715"/>
      <node id="226" label="zzzz716"/>
      <node id="225" label="zzzz717"/>
      <node id="224" label="zzzz718"/>
      <node id="223" label="zzzz719"/>
      <node id="222" label="zzzz720"/>
      <node id="221" label="zzzz721"/>
      <node id="219" label="zzzz723"/>
      <node id="218" label="zzzz724"/>
      <node id="217" label="zzzz725"/>
      <node id="216" label="zzzz726"/>
      <node id="215" label="zzzz727"/>
      <node id="214" label="zzzz728"/>
      <node id="213" label="zzzz729"/>
      <node id="212" label="zzzz730"/>
      <node id="211" label="zzzz731"/>
      <node id="210" label="zzzz732"/>
      <node id="209" label="zzzz733"/>
      <node id="208" label="zzzz734"/>
      <node id="207" label="zzzz735"/>
      <node id="206" label="zzzz736"/>
      <node id="205" label="zzzz737"/>
      <node id="204" label="zzzz738"/>
      <node id="203" label="zzzz739"/>
      <node id="202" label="zzzz740"/>
      <node id="201" label="zzzz741"/>
      <node id="200" label="zzzz742"/>
      <node id="199" label="zzzz743"/>
      <node id="198" label="zzzz744"/>
      <node id="161" label="zzzzz10"/>
      <node id="160" label="zzzzz11"/>
      <node id="159" label="zzzzz12"/>
      <node id="158" label="zzzzz13"/>
      <node id="157" label="zzzzz14"/>
      <node id="156" label="zzzzz15"/>
      <node id="155" label="zzzzz16"/>
      <node id="154" label="zzzzz17"/>
      <node id="153" label="zzzzz18"/>
      <node id="152" label="zzzzz19"/>
      <node id="151" label="zzzzz20"/>
      <node id="150" label="zzzzz21"/>
      <node id="149" label="zzzzz22"/>
      <node id="148" label="zzzzz23"/>
      <node id="147" label="zzzzz24"/>
      <node id="146" label="zzzzz25"/>
      <node id="145" label="zzzzz26"/>
      <node id="139" label="zzzzz32"/>
      <node id="138" label="zzzzz33"/>
      <node id="137" label="zzzzz34"/>
      <node id="136" label="zzzzz35"/>
      <node id="135" label="zzzzz36"/>
      <node id="134" label="zzzzz37"/>
      <node id="133" label="zzzzz38"/>
      <node id="132" label="zzzzz39"/>
      <node id="131" label="zzzzz40"/>
      <node id="130" label="zzzzz41"/>
      <node id="129" label="zzzzz42"/>
      <node id="128" label="zzzzz43"/>
      <node id="127" label="zzzzz44"/>
      <node id="126" label="zzzzz45"/>
      <node id="125" label="zzzzz46"/>
      <node id="124" label="zzzzz47"/>
      <node id="123" label="zzzzz48"/>
      <node id="122" label="zzzzz49"/>
      <node id="121" label="zzzzz50"/>
      <node id="120" label="zzzzz51"/>
      <node id="119" label="zzzzz52"/>
      <node id="118" label="zzzzz53"/>
      <node id="117" label="zzzzz54"/>
      <node id="116" label="zzzzz55"/>
      <node id="115" label="zzzzz56"/>
      <node id="114" label="zzzzz57"/>
      <node id="113" label="zzzzz58"/>
      <node id="112" label="zzzzz59"/>
      <node id="111" label="zzzzz60"/>
      <node id="110" label="zzzzz61"/>
      <node id="109" label="zzzzz62"/>
      <node id="108" label="zzzzz63"/>
      <node id="107" label="zzzzz64"/>
      <node id="106" label="zzzzz65"/>
      <node id="105" label="zzzzz66"/>
      <node id="104" label="zzzzz67"/>
      <node id="103" label="zzzzz68"/>
      <node id="102" label="zzzzz69"/>
      <node id="101" label="zzzzz70"/>
      <node id="100" label="zzzzz71"/>
      <node id="99" label="zzzzz72"/>
      <node id="98" label="zzzzz73"/>
      <node id="97" label="zzzzz74"/>
      <node id="96" label="zzzzz75"/>
      <node id="95" label="zzzzz76"/>
      <node id="94" label="zzzzz77"/>
      <node id="93" label="zzzzz78"/>
      <node id="92" label="zzzzz79"/>
      <node id="91" label="zzzzz80"/>
      <node id="90" label="zzzzz81"/>
      <node id="89" label="zzzzz82"/>
      <node id="88" label="zzzzz83"/>
      <node id="87" label="zzzzz84"/>
      <node id="86" label="zzzzz85"/>
      <node id="85" label="zzzzz86"/>
      <node id="84" label="zzzzz87"/>
      <node id="83" label="zzzzz88"/>
      <node id="82" label="zzzzz89"/>
      <node id="81" label="zzzzz90"/>
      <node id="80" label="zzzzz91"/>
      <node id="79" label="zzzzz92"/>
      <node id="78" label="zzzzz93"/>
      <node id="77" label="zzzzz94"/>
      <node id="76" label="zzzzz95"/>
      <node id="75" label="zzzzz96"/>
      <node id="74" label="zzzzz97"/>
      <node id="73" label="zzzzz98"/>
      <node id="72" label="zzzzz99"/>
      <node id="70" label="zzzzzz1"/>
      <node id="69" label="zzzzzz2"/>
      <node id="68" label="zzzzzz3"/>
      <node id="67" label="zzzzzz4"/>
      <node id="66" label="zzzzzz5"/>
      <node id="65" label="zzzzzz6"/>
      <node id="64" label="zzzzzz7"/>
      <node id="63" label="zzzzzz8"/>
      <node id="62" label="zzzzzz9"/>
      <edge id="167599" label="zzzz100,zzzz165" source="842" target="777" cy:directed="1"/>
      <edge id="167598" label="zzzz100,zzzzz66" source="842" target="105" cy:directed="1"/>
      <edge id="167597" label="zzzz100,zzzzz41" source="842" target="130" cy:directed="1"/>
      <edge id="167596" label="zzzz100,zzzz102" source="842" target="840" cy:directed="1"/>
      <edge id="167595" label="zzzz100,zzzz501" source="842" target="441" cy:directed="1"/>
      <edge id="167594" label="zzzz100,zzzz133" source="842" target="809" cy:directed="1"/>
      <edge id="167593" label="zzzz100,zzzzz85" source="842" target="86" cy:directed="1"/>
      <edge id="167592" label="zzzz100,zzzz690" source="842" target="252" cy:directed="1"/>
      <edge id="167591" label="zzzz100,zzzz166" source="842" target="776" cy:directed="1"/>
      <edge id="167590" label="zzzz100,zzzz258" source="842" target="684" cy:directed="1"/>
      <edge id="167589" label="zzzz100,zzzzz34" source="842" target="137" cy:directed="1"/>
      <edge id="167588" label="zzzz100,zzzz183" source="842" target="759" cy:directed="1"/>
      <edge id="167587" label="zzzz100,zzzz283" source="842" target="659" cy:directed="1"/>
      <edge id="167586" label="zzzz100,zzzzz87" source="842" target="84" cy:directed="1"/>
      <edge id="167585" label="zzzz100,zzzzz45" source="842" target="126" cy:directed="1"/>
      <edge id="167584" label="zzzz100,zzzzz90" source="842" target="81" cy:directed="1"/>
      <edge id="167583" label="zzzz100,zzzz734" source="842" target="208" cy:directed="1"/>
      <edge id="167582" label="zzzz100,zzzzz84" source="842" target="87" cy:directed="1"/>
      <edge id="167581" label="zzzz100,zzzzz42" source="842" target="129" cy:directed="1"/>
      <edge id="167580" label="zzzz100,zzzzz69" source="842" target="102" cy:directed="1"/>
      <edge id="167579" label="zzzz100,zzzz311" source="842" target="631" cy:directed="1"/>
      <edge id="167578" label="zzzz100,zzzz167" source="842" target="775" cy:directed="1"/>
      <edge id="167577" label="zzzz100,zzzz596" source="842" target="346" cy:directed="1"/>
      <edge id="167576" label="zzzz100,zzzz533" source="842" target="409" cy:directed="1"/>
      <edge id="167575" label="zzzz100,zzzz288" source="842" target="654" cy:directed="1"/>
      <edge id="167574" label="zzzz100,zzzz598" source="842" target="344" cy:directed="1"/>
      <edge id="167573" label="zzzz100,zzzz280" source="842" target="662" cy:directed="1"/>
      <edge id="167572" label="zzzz100,zzzz115" source="842" target="827" cy:directed="1"/>
      <edge id="167571" label="zzzz100,zzzz597" source="842" target="345" cy:directed="1"/>
      <edge id="167570" label="zzzz100,zzzz148" source="842" target="794" cy:directed="1"/>
      <edge id="167569" label="zzzz100,zzzz241" source="842" target="701" cy:directed="1"/>
      <edge id="167568" label="zzzz100,zzzz159" source="842" target="783" cy:directed="1"/>
      <edge id="167567" label="zzzz100,zzzz162" source="842" target="780" cy:directed="1"/>
      <edge id="167566" label="zzzz100,zzzzz65" source="842" target="106" cy:directed="1"/>
      <edge id="167565" label="zzzz100,zzzzz77" source="842" target="94" cy:directed="1"/>
      <edge id="167564" label="zzzz100,zzzz242" source="842" target="700" cy:directed="1"/>
      <edge id="167563" label="zzzz100,zzzz519" source="842" target="423" cy:directed="1"/>
      <edge id="167562" label="zzzz100,zzzz594" source="842" target="348" cy:directed="1"/>
      <edge id="167561" label="zzzz100,zzzzz40" source="842" target="131" cy:directed="1"/>
      <edge id="167560" label="zzzz100,zzzz259" source="842" target="683" cy:directed="1"/>
      <edge id="167559" label="zzzz100,zzzz704" source="842" target="238" cy:directed="1"/>
      <edge id="167558" label="zzzz100,zzzzz92" source="842" target="79" cy:directed="1"/>
      <edge id="167557" label="zzzz100,zzzzz83" source="842" target="88" cy:directed="1"/>
      <edge id="167556" label="zzzz100,zzzzz72" source="842" target="99" cy:directed="1"/>
      <edge id="167555" label="zzzz100,zzzz599" source="842" target="343" cy:directed="1"/>
      <edge id="167554" label="zzzz100,zzzz160" source="842" target="782" cy:directed="1"/>
      <edge id="167553" label="zzzz100,zzzzz80" source="842" target="91" cy:directed="1"/>
      <edge id="167552" label="zzzz100,zzzzz82" source="842" target="89" cy:directed="1"/>
      <edge id="167551" label="zzzz100,zzzz270" source="842" target="672" cy:directed="1"/>
      <edge id="167550" label="zzzz100,zzzz140" source="842" target="802" cy:directed="1"/>
      <edge id="167549" label="zzzz100,zzzz146" source="842" target="796" cy:directed="1"/>
      <edge id="167548" label="zzzz100,zzzz268" source="842" target="674" cy:directed="1"/>
      <edge id="167547" label="zzzz100,zzzz508" source="842" target="434" cy:directed="1"/>
      <edge id="167546" label="zzzz100,zzzz142" source="842" target="800" cy:directed="1"/>
      <edge id="167545" label="zzzz100,zzzz292" source="842" target="650" cy:directed="1"/>
      <edge id="167544" label="zzzz100,zzzz171" source="842" target="771" cy:directed="1"/>
      <edge id="167543" label="zzzz100,zzzz632" source="842" target="310" cy:directed="1"/>
      <edge id="167542" label="zzzz100,zzzz523" source="842" target="419" cy:directed="1"/>
      <edge id="167541" label="zzzz100,zzzz538" source="842" target="404" cy:directed="1"/>
      <edge id="167540" label="zzzz100,zzzzz44" source="842" target="127" cy:directed="1"/>
      <edge id="167539" label="zzzz100,zzzz158" source="842" target="784" cy:directed="1"/>
      <edge id="167538" label="zzzz100,zzzz517" source="842" target="425" cy:directed="1"/>
      <edge id="167537" label="zzzz100,zzzz634" source="842" target="308" cy:directed="1"/>
      <edge id="167536" label="zzzz100,zzzz164" source="842" target="778" cy:directed="1"/>
      <edge id="167535" label="zzzz100,zzzz424" source="842" target="518" cy:directed="1"/>
      <edge id="167534" label="zzzz100,zzzz132" source="842" target="810" cy:directed="1"/>
      <edge id="167533" label="zzzz100,zzzz277" source="842" target="665" cy:directed="1"/>
      <edge id="167532" label="zzzz100,zzzzz89" source="842" target="82" cy:directed="1"/>
      <edge id="167531" label="zzzz100,zzzz131" source="842" target="811" cy:directed="1"/>
      <edge id="167530" label="zzzz100,zzzzz58" source="842" target="113" cy:directed="1"/>
      <edge id="167529" label="zzzz100,zzzz289" source="842" target="653" cy:directed="1"/>
      <edge id="167528" label="zzzz100,zzzz423" source="842" target="519" cy:directed="1"/>
      <edge id="167527" label="zzzz100,zzzzz54" source="842" target="117" cy:directed="1"/>
      <edge id="167526" label="zzzz100,zzzzz55" source="842" target="116" cy:directed="1"/>
      <edge id="167525" label="zzzz100,zzzz134" source="842" target="808" cy:directed="1"/>
      <edge id="167524" label="zzzz100,zzzz163" source="842" target="779" cy:directed="1"/>
      <edge id="167523" label="zzzz100,zzzz628" source="842" target="314" cy:directed="1"/>
      <edge id="167522" label="zzzz100,zzzzz86" source="842" target="85" cy:directed="1"/>
      <edge id="167521" label="zzzz100,zzzzz81" source="842" target="90" cy:directed="1"/>
      <edge id="167520" label="zzzz100,zzzzz88" source="842" target="83" cy:directed="1"/>
      <edge id="167519" label="zzzz100,zzzzz94" source="842" target="77" cy:directed="1"/>
      <edge id="167518" label="zzzz100,zzzz507" source="842" target="435" cy:directed="1"/>
      <edge id="167517" label="zzzz100,zzzzz76" source="842" target="95" cy:directed="1"/>
      <edge id="167516" label="zzzz100,zzzzz78" source="842" target="93" cy:directed="1"/>
      <edge id="167515" label="zzzz100,zzzz240" source="842" target="702" cy:directed="1"/>
      <edge id="167514" label="zzzz100,zzzz298" source="842" target="644" cy:directed="1"/>
      <edge id="167513" label="zzzz100,zzzz266" source="842" target="676" cy:directed="1"/>
      <edge id="167512" label="zzzz100,zzzz101" source="842" target="841" cy:directed="1"/>
      <edge id="167511" label="zzzz100,zzzz129" source="842" target="813" cy:directed="1"/>
      <edge id="167510" label="zzzz100,zzzz293" source="842" target="649" cy:directed="1"/>
      <edge id="167509" label="zzzz100,zzzz287" source="842" target="655" cy:directed="1"/>
      <edge id="167508" label="zzzz100,zzzzz79" source="842" target="92" cy:directed="1"/>
      <edge id="167507" label="zzzz100,zzzz157" source="842" target="785" cy:directed="1"/>
      <edge id="167506" label="zzzz100,zzzz147" source="842" target="795" cy:directed="1"/>
      <edge id="167505" label="zzzz100,zzzzz32" source="842" target="139" cy:directed="1"/>
      <edge id="167504" label="zzzz100,zzzzz74" source="842" target="97" cy:directed="1"/>
      <edge id="167503" label="zzzz100,zzzz595" source="842" target="347" cy:directed="1"/>
      <edge id="167502" label="zzzz100,zzzzz39" source="842" target="132" cy:directed="1"/>
      <edge id="167501" label="zzzz100,zzzzz95" source="842" target="76" cy:directed="1"/>
      <edge id="167500" label="zzzz100,zzzzz99" source="842" target="72" cy:directed="1"/>
      <edge id="167499" label="zzzz100,zzzz172" source="842" target="770" cy:directed="1"/>
      <edge id="167498" label="zzzz100,zzzz169" source="842" target="773" cy:directed="1"/>
      <edge id="167497" label="zzzz100,zzzzz35" source="842" target="136" cy:directed="1"/>
      <edge id="167496" label="zzzz100,zzzz692" source="842" target="250" cy:directed="1"/>
      <edge id="167495" label="zzzz100,zzzz191" source="842" target="751" cy:directed="1"/>
      <edge id="167494" label="zzzz100,zzzz572" source="842" target="370" cy:directed="1"/>
      <edge id="167493" label="zzzz100,zzzz260" source="842" target="682" cy:directed="1"/>
      <edge id="167492" label="zzzz100,zzzz426" source="842" target="516" cy:directed="1"/>
      <edge id="167491" label="zzzz100,zzzz149" source="842" target="793" cy:directed="1"/>
      <edge id="167490" label="zzzz100,zzzz228" source="842" target="714" cy:directed="1"/>
      <edge id="167489" label="zzzz100,zzzz168" source="842" target="774" cy:directed="1"/>
      <edge id="167488" label="zzzz100,zzzz536" source="842" target="406" cy:directed="1"/>
      <edge id="167487" label="zzzz100,zzzz681" source="842" target="261" cy:directed="1"/>
      <edge id="167486" label="zzzz100,zzzz693" source="842" target="249" cy:directed="1"/>
      <edge id="167485" label="zzzz100,zzzz712" source="842" target="230" cy:directed="1"/>
      <edge id="167484" label="zzzz100,zzzz510" source="842" target="432" cy:directed="1"/>
      <edge id="167483" label="zzzz100,zzzzz93" source="842" target="78" cy:directed="1"/>
      <edge id="167482" label="zzzz100,zzzz257" source="842" target="685" cy:directed="1"/>
      <edge id="167481" label="zzzz100,zzzz574" source="842" target="368" cy:directed="1"/>
      <edge id="167480" label="zzzz100,zzzz700" source="842" target="242" cy:directed="1"/>
      <edge id="167479" label="zzzz100,zzzz706" source="842" target="236" cy:directed="1"/>
      <edge id="167478" label="zzzz100,zzzz308" source="842" target="634" cy:directed="1"/>
      <edge id="167477" label="zzzz100,zzzz673" source="842" target="269" cy:directed="1"/>
      <edge id="167476" label="zzzz100,zzzz120" source="842" target="822" cy:directed="1"/>
      <edge id="167475" label="zzzz100,zzzz580" source="842" target="362" cy:directed="1"/>
      <edge id="167474" label="zzzz100,zzzz181" source="842" target="761" cy:directed="1"/>
      <edge id="167473" label="zzzz100,zzzz684" source="842" target="258" cy:directed="1"/>
      <edge id="167472" label="zzzz100,zzzzz73" source="842" target="98" cy:directed="1"/>
      <edge id="167471" label="zzzz100,zzzz567" source="842" target="375" cy:directed="1"/>
      <edge id="167470" label="zzzz100,zzzz685" source="842" target="257" cy:directed="1"/>
      <edge id="167469" label="zzzz100,zzzz111" source="842" target="831" cy:directed="1"/>
      <edge id="167468" label="zzzz100,zzzz233" source="842" target="709" cy:directed="1"/>
      <edge id="167467" label="zzzz100,zzzz235" source="842" target="707" cy:directed="1"/>
      <edge id="167466" label="zzzz100,zzzz312" source="842" target="630" cy:directed="1"/>
      <edge id="167465" label="zzzz100,zzzz506" source="842" target="436" cy:directed="1"/>
      <edge id="167464" label="zzzz100,zzzzz53" source="842" target="118" cy:directed="1"/>
      <edge id="167463" label="zzzz100,zzzz119" source="842" target="823" cy:directed="1"/>
      <edge id="167462" label="zzzz100,zzzz189" source="842" target="753" cy:directed="1"/>
      <edge id="167461" label="zzzz100,zzzz529" source="842" target="413" cy:directed="1"/>
      <edge id="167460" label="zzzz100,zzzz687" source="842" target="255" cy:directed="1"/>
      <edge id="167459" label="zzzz100,zzzz689" source="842" target="253" cy:directed="1"/>
      <edge id="167458" label="zzzz100,zzzz696" source="842" target="246" cy:directed="1"/>
      <edge id="167457" label="zzzz100,zzzzz67" source="842" target="104" cy:directed="1"/>
      <edge id="167456" label="zzzz100,zzzz203" source="842" target="739" cy:directed="1"/>
      <edge id="167455" label="zzzz100,zzzz231" source="842" target="711" cy:directed="1"/>
      <edge id="167454" label="zzzz100,zzzz110" source="842" target="832" cy:directed="1"/>
      <edge id="167453" label="zzzz100,zzzzz71" source="842" target="100" cy:directed="1"/>
      <edge id="167452" label="zzzz100,zzzz136" source="842" target="806" cy:directed="1"/>
      <edge id="167451" label="zzzz100,zzzz697" source="842" target="245" cy:directed="1"/>
      <edge id="167450" label="zzzz100,zzzz708" source="842" target="234" cy:directed="1"/>
      <edge id="167449" label="zzzz100,zzzz230" source="842" target="712" cy:directed="1"/>
      <edge id="167448" label="zzzz100,zzzz238" source="842" target="704" cy:directed="1"/>
      <edge id="167447" label="zzzz100,zzzz248" source="842" target="694" cy:directed="1"/>
      <edge id="167446" label="zzzz100,zzzz282" source="842" target="660" cy:directed="1"/>
      <edge id="167445" label="zzzz100,zzzz504" source="842" target="438" cy:directed="1"/>
      <edge id="167444" label="zzzz100,zzzz576" source="842" target="366" cy:directed="1"/>
      <edge id="167443" label="zzzz100,zzzz263" source="842" target="679" cy:directed="1"/>
      <edge id="167442" label="zzzz100,zzzz537" source="842" target="405" cy:directed="1"/>
      <edge id="167441" label="zzzz100,zzzz124" source="842" target="818" cy:directed="1"/>
      <edge id="167440" label="zzzz100,zzzz161" source="842" target="781" cy:directed="1"/>
      <edge id="167439" label="zzzz100,zzzz178" source="842" target="764" cy:directed="1"/>
      <edge id="167438" label="zzzz100,zzzz252" source="842" target="690" cy:directed="1"/>
      <edge id="167437" label="zzzz100,zzzz611" source="842" target="331" cy:directed="1"/>
      <edge id="167436" label="zzzz100,zzzz680" source="842" target="262" cy:directed="1"/>
      <edge id="167435" label="zzzz100,zzzz694" source="842" target="248" cy:directed="1"/>
      <edge id="167434" label="zzzz100,zzzz262" source="842" target="680" cy:directed="1"/>
      <edge id="167433" label="zzzz100,zzzz273" source="842" target="669" cy:directed="1"/>
      <edge id="167432" label="zzzz100,zzzz284" source="842" target="658" cy:directed="1"/>
      <edge id="167431" label="zzzz100,zzzzz98" source="842" target="73" cy:directed="1"/>
      <edge id="167430" label="zzzz100,zzzz528" source="842" target="414" cy:directed="1"/>
      <edge id="167429" label="zzzz100,zzzz644" source="842" target="298" cy:directed="1"/>
      <edge id="167428" label="zzzz100,zzzzz63" source="842" target="108" cy:directed="1"/>
      <edge id="167427" label="zzzz100,zzzz286" source="842" target="656" cy:directed="1"/>
      <edge id="167426" label="zzzz100,zzzz127" source="842" target="815" cy:directed="1"/>
      <edge id="167425" label="zzzz100,zzzz500" source="842" target="442" cy:directed="1"/>
      <edge id="167424" label="zzzz100,zzzz150" source="842" target="792" cy:directed="1"/>
      <edge id="167423" label="zzzz100,zzzz560" source="842" target="382" cy:directed="1"/>
      <edge id="167422" label="zzzz100,zzzz581" source="842" target="361" cy:directed="1"/>
      <edge id="167421" label="zzzz100,zzzz695" source="842" target="247" cy:directed="1"/>
      <edge id="167420" label="zzzz100,zzzz243" source="842" target="699" cy:directed="1"/>
      <edge id="167419" label="zzzz100,zzzz310" source="842" target="632" cy:directed="1"/>
      <edge id="167418" label="zzzz100,zzzzz36" source="842" target="135" cy:directed="1"/>
      <edge id="167417" label="zzzz100,zzzzz96" source="842" target="75" cy:directed="1"/>
      <edge id="167416" label="zzzz100,zzzz107" source="842" target="835" cy:directed="1"/>
      <edge id="167415" label="zzzz100,zzzz552" source="842" target="390" cy:directed="1"/>
      <edge id="167414" label="zzzz100,zzzz558" source="842" target="384" cy:directed="1"/>
      <edge id="167413" label="zzzz100,zzzz543" source="842" target="399" cy:directed="1"/>
      <edge id="167412" label="zzzz100,zzzz623" source="842" target="319" cy:directed="1"/>
      <edge id="167411" label="zzzz100,zzzz707" source="842" target="235" cy:directed="1"/>
      <edge id="167410" label="zzzz100,zzzz139" source="842" target="803" cy:directed="1"/>
      <edge id="167409" label="zzzz100,zzzz193" source="842" target="749" cy:directed="1"/>
      <edge id="167408" label="zzzz100,zzzz237" source="842" target="705" cy:directed="1"/>
      <edge id="167407" label="zzzz100,zzzz250" source="842" target="692" cy:directed="1"/>
      <edge id="167406" label="zzzz100,zzzz274" source="842" target="668" cy:directed="1"/>
      <edge id="167405" label="zzzz100,zzzz545" source="842" target="397" cy:directed="1"/>
      <edge id="167404" label="zzzz100,zzzz553" source="842" target="389" cy:directed="1"/>
      <edge id="167403" label="zzzz100,zzzz677" source="842" target="265" cy:directed="1"/>
      <edge id="167402" label="zzzz100,zzzz713" source="842" target="229" cy:directed="1"/>
      <edge id="167401" label="zzzz100,zzzz113" source="842" target="829" cy:directed="1"/>
      <edge id="167400" label="zzzz100,zzzz515" source="842" target="427" cy:directed="1"/>
      <edge id="167399" label="zzzz100,zzzzz57" source="842" target="114" cy:directed="1"/>
      <edge id="167398" label="zzzz100,zzzz503" source="842" target="439" cy:directed="1"/>
      <edge id="167397" label="zzzz100,zzzz505" source="842" target="437" cy:directed="1"/>
      <edge id="167396" label="zzzz100,zzzz534" source="842" target="408" cy:directed="1"/>
      <edge id="167395" label="zzzz100,zzzz625" source="842" target="317" cy:directed="1"/>
      <edge id="167394" label="zzzz100,zzzz682" source="842" target="260" cy:directed="1"/>
      <edge id="167393" label="zzzz100,zzzzz68" source="842" target="103" cy:directed="1"/>
      <edge id="167392" label="zzzz100,zzzz106" source="842" target="836" cy:directed="1"/>
      <edge id="167391" label="zzzz100,zzzz236" source="842" target="706" cy:directed="1"/>
      <edge id="167390" label="zzzz100,zzzz679" source="842" target="263" cy:directed="1"/>
      <edge id="167389" label="zzzz100,zzzz703" source="842" target="239" cy:directed="1"/>
      <edge id="167388" label="zzzz100,zzzz112" source="842" target="830" cy:directed="1"/>
      <edge id="167387" label="zzzz100,zzzz154" source="842" target="788" cy:directed="1"/>
      <edge id="167386" label="zzzz100,zzzz492" source="842" target="450" cy:directed="1"/>
      <edge id="167385" label="zzzz100,zzzz145" source="842" target="797" cy:directed="1"/>
      <edge id="167384" label="zzzz100,zzzz179" source="842" target="763" cy:directed="1"/>
      <edge id="167383" label="zzzz100,zzzz105" source="842" target="837" cy:directed="1"/>
      <edge id="167382" label="zzzz100,zzzz185" source="842" target="757" cy:directed="1"/>
      <edge id="167381" label="zzzz100,zzzz190" source="842" target="752" cy:directed="1"/>
      <edge id="167380" label="zzzz100,zzzz234" source="842" target="708" cy:directed="1"/>
      <edge id="167379" label="zzzz100,zzzz688" source="842" target="254" cy:directed="1"/>
      <edge id="167378" label="zzzz100,zzzzz43" source="842" target="128" cy:directed="1"/>
      <edge id="167377" label="zzzz100,zzzzz70" source="842" target="101" cy:directed="1"/>
      <edge id="167376" label="zzzz100,zzzz229" source="842" target="713" cy:directed="1"/>
      <edge id="167375" label="zzzz100,zzzz290" source="842" target="652" cy:directed="1"/>
      <edge id="167374" label="zzzz100,zzzz509" source="842" target="433" cy:directed="1"/>
      <edge id="167373" label="zzzz100,zzzz571" source="842" target="371" cy:directed="1"/>
      <edge id="167372" label="zzzz100,zzzz730" source="842" target="212" cy:directed="1"/>
      <edge id="167371" label="zzzz100,zzzz281" source="842" target="661" cy:directed="1"/>
      <edge id="167370" label="zzzz100,zzzz579" source="842" target="363" cy:directed="1"/>
      <edge id="167369" label="zzzz100,zzzz721" source="842" target="221" cy:directed="1"/>
      <edge id="167368" label="zzzz100,zzzz739" source="842" target="203" cy:directed="1"/>
      <edge id="167367" label="zzzz100,zzzz541" source="842" target="401" cy:directed="1"/>
      <edge id="167366" label="zzzz100,zzzz279" source="842" target="663" cy:directed="1"/>
      <edge id="167365" label="zzzz100,zzzz126" source="842" target="816" cy:directed="1"/>
      <edge id="167364" label="zzzz100,zzzz130" source="842" target="812" cy:directed="1"/>
      <edge id="167363" label="zzzz100,zzzz584" source="842" target="358" cy:directed="1"/>
      <edge id="167362" label="zzzz100,zzzz244" source="842" target="698" cy:directed="1"/>
      <edge id="167361" label="zzzz100,zzzz672" source="842" target="270" cy:directed="1"/>
      <edge id="167360" label="zzzz100,zzzz564" source="842" target="378" cy:directed="1"/>
      <edge id="167359" label="zzzz100,zzzz577" source="842" target="365" cy:directed="1"/>
      <edge id="167358" label="zzzz100,zzzz202" source="842" target="740" cy:directed="1"/>
      <edge id="167357" label="zzzz100,zzzz232" source="842" target="710" cy:directed="1"/>
      <edge id="167356" label="zzzz100,zzzz676" source="842" target="266" cy:directed="1"/>
      <edge id="167355" label="zzzz100,zzzz731" source="842" target="211" cy:directed="1"/>
      <edge id="167354" label="zzzz100,zzzzz62" source="842" target="109" cy:directed="1"/>
      <edge id="167353" label="zzzz100,zzzz726" source="842" target="216" cy:directed="1"/>
      <edge id="167352" label="zzzz100,zzzz194" source="842" target="748" cy:directed="1"/>
      <edge id="167351" label="zzzz100,zzzz514" source="842" target="428" cy:directed="1"/>
      <edge id="167350" label="zzzz100,zzzz686" source="842" target="256" cy:directed="1"/>
      <edge id="167349" label="zzzz100,zzzz525" source="842" target="417" cy:directed="1"/>
      <edge id="167348" label="zzzz100,zzzz735" source="842" target="207" cy:directed="1"/>
      <edge id="167347" label="zzzz100,zzzz144" source="842" target="798" cy:directed="1"/>
      <edge id="167346" label="zzzz100,zzzz531" source="842" target="411" cy:directed="1"/>
      <edge id="167345" label="zzzz100,zzzz557" source="842" target="385" cy:directed="1"/>
      <edge id="167344" label="zzzz100,zzzz732" source="842" target="210" cy:directed="1"/>
      <edge id="167343" label="zzzz100,zzzz737" source="842" target="205" cy:directed="1"/>
      <edge id="167342" label="zzzz100,zzzz551" source="842" target="391" cy:directed="1"/>
      <edge id="167341" label="zzzz100,zzzz522" source="842" target="420" cy:directed="1"/>
      <edge id="167340" label="zzzz100,zzzz720" source="842" target="222" cy:directed="1"/>
      <edge id="167339" label="zzzz100,zzzzz91" source="842" target="80" cy:directed="1"/>
      <edge id="167338" label="zzzz100,zzzz291" source="842" target="651" cy:directed="1"/>
      <edge id="167337" label="zzzz100,zzzz562" source="842" target="380" cy:directed="1"/>
      <edge id="167336" label="zzzz100,zzzz245" source="842" target="697" cy:directed="1"/>
      <edge id="167335" label="zzzz100,zzzzz48" source="842" target="123" cy:directed="1"/>
      <edge id="167334" label="zzzz100,zzzz718" source="842" target="224" cy:directed="1"/>
      <edge id="167333" label="zzzz100,zzzz294" source="842" target="648" cy:directed="1"/>
      <edge id="167332" label="zzzz100,zzzz678" source="842" target="264" cy:directed="1"/>
      <edge id="167331" label="zzzz100,zzzz699" source="842" target="243" cy:directed="1"/>
      <edge id="167330" label="zzzz100,zzzz733" source="842" target="209" cy:directed="1"/>
      <edge id="167329" label="zzzz100,zzzzz49" source="842" target="122" cy:directed="1"/>
      <edge id="167328" label="zzzz100,zzzz152" source="842" target="790" cy:directed="1"/>
      <edge id="167327" label="zzzz100,zzzz717" source="842" target="225" cy:directed="1"/>
      <edge id="167326" label="zzzz100,zzzz285" source="842" target="657" cy:directed="1"/>
      <edge id="167325" label="zzzz100,zzzz422" source="842" target="520" cy:directed="1"/>
      <edge id="167324" label="zzzz100,zzzzz52" source="842" target="119" cy:directed="1"/>
      <edge id="167323" label="zzzz100,zzzz702" source="842" target="240" cy:directed="1"/>
      <edge id="167322" label="zzzz100,zzzz108" source="842" target="834" cy:directed="1"/>
      <edge id="167321" label="zzzz100,zzzz153" source="842" target="789" cy:directed="1"/>
      <edge id="167320" label="zzzz100,zzzz276" source="842" target="666" cy:directed="1"/>
      <edge id="167319" label="zzzz100,zzzz526" source="842" target="416" cy:directed="1"/>
      <edge id="167318" label="zzzz100,zzzz701" source="842" target="241" cy:directed="1"/>
      <edge id="167317" label="zzzz100,zzzz116" source="842" target="826" cy:directed="1"/>
      <edge id="167316" label="zzzz100,zzzz556" source="842" target="386" cy:directed="1"/>
      <edge id="167315" label="zzzz100,zzzz109" source="842" target="833" cy:directed="1"/>
      <edge id="167314" label="zzzz100,zzzz174" source="842" target="768" cy:directed="1"/>
      <edge id="167313" label="zzzz100,zzzz246" source="842" target="696" cy:directed="1"/>
      <edge id="167312" label="zzzz100,zzzz524" source="842" target="418" cy:directed="1"/>
      <edge id="167311" label="zzzz100,zzzz138" source="842" target="804" cy:directed="1"/>
      <edge id="167310" label="zzzz100,zzzz261" source="842" target="681" cy:directed="1"/>
      <edge id="167309" label="zzzz100,zzzz573" source="842" target="369" cy:directed="1"/>
      <edge id="167308" label="zzzz100,zzzzz47" source="842" target="124" cy:directed="1"/>
      <edge id="167307" label="zzzz100,zzzz143" source="842" target="799" cy:directed="1"/>
      <edge id="167306" label="zzzz100,zzzz249" source="842" target="693" cy:directed="1"/>
      <edge id="167305" label="zzzz100,zzzz691" source="842" target="251" cy:directed="1"/>
      <edge id="167304" label="zzzz100,zzzz716" source="842" target="226" cy:directed="1"/>
      <edge id="167303" label="zzzz100,zzzzz33" source="842" target="138" cy:directed="1"/>
      <edge id="167302" label="zzzz100,zzzz539" source="842" target="403" cy:directed="1"/>
      <edge id="167301" label="zzzz100,zzzz137" source="842" target="805" cy:directed="1"/>
      <edge id="167300" label="zzzz100,zzzz683" source="842" target="259" cy:directed="1"/>
      <edge id="167299" label="zzzz100,zzzz715" source="842" target="227" cy:directed="1"/>
      <edge id="167298" label="zzzz100,zzzz725" source="842" target="217" cy:directed="1"/>
      <edge id="167297" label="zzzz100,zzzz738" source="842" target="204" cy:directed="1"/>
      <edge id="167296" label="zzzz100,zzzz135" source="842" target="807" cy:directed="1"/>
      <edge id="167295" label="zzzz100,zzzz278" source="842" target="664" cy:directed="1"/>
      <edge id="167294" label="zzzz100,zzzz741" source="842" target="201" cy:directed="1"/>
      <edge id="167293" label="zzzz100,zzzzz75" source="842" target="96" cy:directed="1"/>
      <edge id="167292" label="zzzz100,zzzz173" source="842" target="769" cy:directed="1"/>
      <edge id="167291" label="zzzz100,zzzz192" source="842" target="750" cy:directed="1"/>
      <edge id="167290" label="zzzz100,zzzz453" source="842" target="489" cy:directed="1"/>
      <edge id="167289" label="zzzz100,zzzz646" source="842" target="296" cy:directed="1"/>
      <edge id="167288" label="zzzz100,zzzz711" source="842" target="231" cy:directed="1"/>
      <edge id="167287" label="zzzz100,zzzzz61" source="842" target="110" cy:directed="1"/>
      <edge id="167286" label="zzzz100,zzzz535" source="842" target="407" cy:directed="1"/>
      <edge id="167285" label="zzzz100,zzzz561" source="842" target="381" cy:directed="1"/>
      <edge id="167284" label="zzzz100,zzzz728" source="842" target="214" cy:directed="1"/>
      <edge id="167283" label="zzzz100,zzzz740" source="842" target="202" cy:directed="1"/>
      <edge id="167282" label="zzzz100,zzzz744" source="842" target="198" cy:directed="1"/>
      <edge id="167281" label="zzzz100,zzzzz64" source="842" target="107" cy:directed="1"/>
      <edge id="167280" label="zzzz100,zzzz196" source="842" target="746" cy:directed="1"/>
      <edge id="167279" label="zzzz100,zzzz520" source="842" target="422" cy:directed="1"/>
      <edge id="167278" label="zzzz100,zzzz698" source="842" target="244" cy:directed="1"/>
      <edge id="167277" label="zzzz100,zzzz122" source="842" target="820" cy:directed="1"/>
      <edge id="167276" label="zzzz100,zzzz499" source="842" target="443" cy:directed="1"/>
      <edge id="167275" label="zzzz100,zzzz705" source="842" target="237" cy:directed="1"/>
      <edge id="167274" label="zzzz100,zzzz714" source="842" target="228" cy:directed="1"/>
      <edge id="167273" label="zzzz100,zzzzz51" source="842" target="120" cy:directed="1"/>
      <edge id="167272" label="zzzz100,zzzz710" source="842" target="232" cy:directed="1"/>
      <edge id="167271" label="zzzz100,zzzz103" source="842" target="839" cy:directed="1"/>
      <edge id="167270" label="zzzz100,zzzz516" source="842" target="426" cy:directed="1"/>
      <edge id="167269" label="zzzz100,zzzz521" source="842" target="421" cy:directed="1"/>
      <edge id="167268" label="zzzz100,zzzzz97" source="842" target="74" cy:directed="1"/>
      <edge id="167267" label="zzzz100,zzzz151" source="842" target="791" cy:directed="1"/>
      <edge id="167266" label="zzzz100,zzzz117" source="842" target="825" cy:directed="1"/>
      <edge id="167265" label="zzzz100,zzzz530" source="842" target="412" cy:directed="1"/>
      <edge id="167264" label="zzzz100,zzzz532" source="842" target="410" cy:directed="1"/>
      <edge id="167263" label="zzzz100,zzzz743" source="842" target="199" cy:directed="1"/>
      <edge id="167262" label="zzzz100,zzzz114" source="842" target="828" cy:directed="1"/>
      <edge id="167261" label="zzzz100,zzzz156" source="842" target="786" cy:directed="1"/>
      <edge id="167260" label="zzzz100,zzzz675" source="842" target="267" cy:directed="1"/>
      <edge id="167259" label="zzzz100,zzzz709" source="842" target="233" cy:directed="1"/>
      <edge id="167258" label="zzzz100,zzzz104" source="842" target="838" cy:directed="1"/>
      <edge id="167257" label="zzzz100,zzzz502" source="842" target="440" cy:directed="1"/>
      <edge id="167256" label="zzzz100,zzzz568" source="842" target="374" cy:directed="1"/>
      <edge id="167255" label="zzzz100,zzzz674" source="842" target="268" cy:directed="1"/>
      <edge id="167254" label="zzzz100,zzzz742" source="842" target="200" cy:directed="1"/>
      <edge id="167253" label="zzzz100,zzzz727" source="842" target="215" cy:directed="1"/>
      <edge id="167252" label="zzzz100,zzzz187" source="842" target="755" cy:directed="1"/>
      <edge id="167251" label="zzzz100,zzzz624" source="842" target="318" cy:directed="1"/>
      <edge id="167250" label="zzzz100,zzzz729" source="842" target="213" cy:directed="1"/>
      <edge id="167249" label="zzzz100,zzzz513" source="842" target="429" cy:directed="1"/>
      <edge id="167248" label="zzzz100,zzzz155" source="842" target="787" cy:directed="1"/>
      <edge id="167247" label="zzzz100,zzzz719" source="842" target="223" cy:directed="1"/>
      <edge id="167246" label="zzzz100,zzzzz38" source="842" target="133" cy:directed="1"/>
      <edge id="167245" label="zzzz100,zzzz511" source="842" target="431" cy:directed="1"/>
      <edge id="167244" label="zzzz100,zzzzz46" source="842" target="125" cy:directed="1"/>
      <edge id="167243" label="zzzz100,zzzz570" source="842" target="372" cy:directed="1"/>
      <edge id="167242" label="zzzz100,zzzz518" source="842" target="424" cy:directed="1"/>
      <edge id="167241" label="zzzz100,zzzz544" source="842" target="398" cy:directed="1"/>
      <edge id="167240" label="zzzz100,zzzz125" source="842" target="817" cy:directed="1"/>
      <edge id="167239" label="zzzz100,zzzz546" source="842" target="396" cy:directed="1"/>
      <edge id="167238" label="zzzz100,zzzz540" source="842" target="402" cy:directed="1"/>
      <edge id="167237" label="zzzz100,zzzz141" source="842" target="801" cy:directed="1"/>
      <edge id="167236" label="zzzz100,zzzz583" source="842" target="359" cy:directed="1"/>
      <edge id="167235" label="zzzz100,zzzzz12" source="842" target="159" cy:directed="1"/>
      <edge id="167234" label="zzzz100,zzzz188" source="842" target="754" cy:directed="1"/>
      <edge id="167233" label="zzzz100,zzzz736" source="842" target="206" cy:directed="1"/>
      <edge id="167232" label="zzzz100,zzzz563" source="842" target="379" cy:directed="1"/>
      <edge id="167231" label="zzzz100,zzzz486" source="842" target="456" cy:directed="1"/>
      <edge id="167230" label="zzzz100,zzzz118" source="842" target="824" cy:directed="1"/>
      <edge id="167229" label="zzzz100,zzzz307" source="842" target="635" cy:directed="1"/>
      <edge id="167228" label="zzzz100,zzzz315" source="842" target="627" cy:directed="1"/>
      <edge id="167227" label="zzzz100,zzzz527" source="842" target="415" cy:directed="1"/>
      <edge id="167226" label="zzzz100,zzzz247" source="842" target="695" cy:directed="1"/>
      <edge id="167225" label="zzzz100,zzzz170" source="842" target="772" cy:directed="1"/>
      <edge id="167224" label="zzzz100,zzzz325" source="842" target="617" cy:directed="1"/>
      <edge id="167223" label="zzzz100,zzzzz59" source="842" target="112" cy:directed="1"/>
      <edge id="167222" label="zzzz100,zzzz251" source="842" target="691" cy:directed="1"/>
      <edge id="167221" label="zzzz100,zzzz575" source="842" target="367" cy:directed="1"/>
      <edge id="167220" label="zzzz100,zzzz593" source="842" target="349" cy:directed="1"/>
      <edge id="167219" label="zzzz100,zzzzzz1" source="842" target="70" cy:directed="1"/>
      <edge id="167218" label="zzzz100,zzzz569" source="842" target="373" cy:directed="1"/>
      <edge id="167217" label="zzzz100,zzzz128" source="842" target="814" cy:directed="1"/>
      <edge id="167216" label="zzzz100,zzzz566" source="842" target="376" cy:directed="1"/>
      <edge id="167215" label="zzzz100,zzzz670" source="842" target="272" cy:directed="1"/>
      <edge id="167214" label="zzzz100,zzzz201" source="842" target="741" cy:directed="1"/>
      <edge id="167213" label="zzzz100,zzzz723" source="842" target="219" cy:directed="1"/>
      <edge id="167212" label="zzzz100,zzzz671" source="842" target="271" cy:directed="1"/>
      <edge id="167211" label="zzzz100,zzzzz60" source="842" target="111" cy:directed="1"/>
      <edge id="167210" label="zzzz100,zzzzzz6" source="842" target="65" cy:directed="1"/>
      <edge id="167209" label="zzzz100,zzzz316" source="842" target="626" cy:directed="1"/>
      <edge id="167208" label="zzzz100,zzzz323" source="842" target="619" cy:directed="1"/>
      <edge id="167207" label="zzzz100,zzzz550" source="842" target="392" cy:directed="1"/>
      <edge id="167206" label="zzzz100,zzzz630" source="842" target="312" cy:directed="1"/>
      <edge id="167205" label="zzzz100,zzzzzz8" source="842" target="63" cy:directed="1"/>
      <edge id="167204" label="zzzz100,zzzz275" source="842" target="667" cy:directed="1"/>
      <edge id="167203" label="zzzz100,zzzz418" source="842" target="524" cy:directed="1"/>
      <edge id="167202" label="zzzz100,zzzz512" source="842" target="430" cy:directed="1"/>
      <edge id="167201" label="zzzz100,zzzz588" source="842" target="354" cy:directed="1"/>
      <edge id="167200" label="zzzz100,zzzz656" source="842" target="286" cy:directed="1"/>
      <edge id="167199" label="zzzz100,zzzzz21" source="842" target="150" cy:directed="1"/>
      <edge id="167198" label="zzzz100,zzzzzz2" source="842" target="69" cy:directed="1"/>
      <edge id="167197" label="zzzz100,zzzzz13" source="842" target="158" cy:directed="1"/>
      <edge id="167196" label="zzzz100,zzzz427" source="842" target="515" cy:directed="1"/>
      <edge id="167195" label="zzzz100,zzzz542" source="842" target="400" cy:directed="1"/>
      <edge id="167194" label="zzzz100,zzzz589" source="842" target="353" cy:directed="1"/>
      <edge id="167193" label="zzzz100,zzzz600" source="842" target="342" cy:directed="1"/>
      <edge id="167192" label="zzzz100,zzzz603" source="842" target="339" cy:directed="1"/>
      <edge id="167191" label="zzzz100,zzzz640" source="842" target="302" cy:directed="1"/>
      <edge id="167190" label="zzzz100,zzzz123" source="842" target="819" cy:directed="1"/>
      <edge id="167189" label="zzzz100,zzzz224" source="842" target="718" cy:directed="1"/>
      <edge id="167188" label="zzzz100,zzzz265" source="842" target="677" cy:directed="1"/>
      <edge id="167187" label="zzzz100,zzzz429" source="842" target="513" cy:directed="1"/>
      <edge id="167186" label="zzzz100,zzzz667" source="842" target="275" cy:directed="1"/>
      <edge id="167185" label="zzzz100,zzzz420" source="842" target="522" cy:directed="1"/>
      <edge id="167184" label="zzzz100,zzzz559" source="842" target="383" cy:directed="1"/>
      <edge id="167183" label="zzzz100,zzzz586" source="842" target="356" cy:directed="1"/>
      <edge id="167182" label="zzzz100,zzzz638" source="842" target="304" cy:directed="1"/>
      <edge id="167181" label="zzzz100,zzzz641" source="842" target="301" cy:directed="1"/>
      <edge id="167180" label="zzzz100,zzzzz11" source="842" target="160" cy:directed="1"/>
      <edge id="167179" label="zzzz100,zzzz299" source="842" target="643" cy:directed="1"/>
      <edge id="167178" label="zzzz100,zzzz547" source="842" target="395" cy:directed="1"/>
      <edge id="167177" label="zzzz100,zzzz554" source="842" target="388" cy:directed="1"/>
      <edge id="167176" label="zzzz100,zzzz619" source="842" target="323" cy:directed="1"/>
      <edge id="167175" label="zzzz100,zzzz636" source="842" target="306" cy:directed="1"/>
      <edge id="167174" label="zzzz100,zzzz578" source="842" target="364" cy:directed="1"/>
      <edge id="167173" label="zzzz100,zzzz295" source="842" target="647" cy:directed="1"/>
      <edge id="167172" label="zzzz100,zzzzzz7" source="842" target="64" cy:directed="1"/>
      <edge id="167171" label="zzzz100,zzzz605" source="842" target="337" cy:directed="1"/>
      <edge id="167170" label="zzzz100,zzzz618" source="842" target="324" cy:directed="1"/>
      <edge id="167169" label="zzzz100,zzzz582" source="842" target="360" cy:directed="1"/>
      <edge id="167168" label="zzzz100,zzzz592" source="842" target="350" cy:directed="1"/>
      <edge id="167167" label="zzzz100,zzzz606" source="842" target="336" cy:directed="1"/>
      <edge id="167166" label="zzzz100,zzzz186" source="842" target="756" cy:directed="1"/>
      <edge id="167165" label="zzzz100,zzzz428" source="842" target="514" cy:directed="1"/>
      <edge id="167164" label="zzzz100,zzzz614" source="842" target="328" cy:directed="1"/>
      <edge id="167163" label="zzzz100,zzzzz25" source="842" target="146" cy:directed="1"/>
      <edge id="167162" label="zzzz100,zzzz620" source="842" target="322" cy:directed="1"/>
      <edge id="167161" label="zzzz100,zzzz665" source="842" target="277" cy:directed="1"/>
      <edge id="167160" label="zzzz100,zzzz412" source="842" target="530" cy:directed="1"/>
      <edge id="167159" label="zzzz100,zzzz655" source="842" target="287" cy:directed="1"/>
      <edge id="167158" label="zzzz100,zzzz565" source="842" target="377" cy:directed="1"/>
      <edge id="167157" label="zzzz100,zzzz590" source="842" target="352" cy:directed="1"/>
      <edge id="167156" label="zzzz100,zzzz604" source="842" target="338" cy:directed="1"/>
      <edge id="167155" label="zzzz100,zzzz645" source="842" target="297" cy:directed="1"/>
      <edge id="167154" label="zzzz100,zzzz264" source="842" target="678" cy:directed="1"/>
      <edge id="167153" label="zzzz100,zzzz414" source="842" target="528" cy:directed="1"/>
      <edge id="167152" label="zzzz100,zzzz591" source="842" target="351" cy:directed="1"/>
      <edge id="167151" label="zzzz100,zzzz180" source="842" target="762" cy:directed="1"/>
      <edge id="167150" label="zzzz100,zzzz220" source="842" target="722" cy:directed="1"/>
      <edge id="167149" label="zzzz100,zzzz413" source="842" target="529" cy:directed="1"/>
      <edge id="167148" label="zzzz100,zzzz419" source="842" target="523" cy:directed="1"/>
      <edge id="167147" label="zzzz100,zzzz660" source="842" target="282" cy:directed="1"/>
      <edge id="167146" label="zzzz100,zzzz662" source="842" target="280" cy:directed="1"/>
      <edge id="167145" label="zzzz100,zzzz668" source="842" target="274" cy:directed="1"/>
      <edge id="167144" label="zzzz100,zzzz669" source="842" target="273" cy:directed="1"/>
      <edge id="167143" label="zzzz100,zzzz326" source="842" target="616" cy:directed="1"/>
      <edge id="167142" label="zzzz100,zzzz661" source="842" target="281" cy:directed="1"/>
      <edge id="167141" label="zzzz100,zzzz207" source="842" target="735" cy:directed="1"/>
      <edge id="167140" label="zzzz100,zzzz415" source="842" target="527" cy:directed="1"/>
      <edge id="167139" label="zzzz100,zzzz425" source="842" target="517" cy:directed="1"/>
      <edge id="167138" label="zzzz100,zzzz613" source="842" target="329" cy:directed="1"/>
      <edge id="167137" label="zzzz100,zzzz616" source="842" target="326" cy:directed="1"/>
      <edge id="167136" label="zzzz100,zzzz209" source="842" target="733" cy:directed="1"/>
      <edge id="167135" label="zzzz100,zzzz621" source="842" target="321" cy:directed="1"/>
      <edge id="167134" label="zzzz100,zzzz305" source="842" target="637" cy:directed="1"/>
      <edge id="167133" label="zzzz100,zzzz411" source="842" target="531" cy:directed="1"/>
      <edge id="167132" label="zzzz100,zzzz615" source="842" target="327" cy:directed="1"/>
      <edge id="167131" label="zzzz100,zzzz221" source="842" target="721" cy:directed="1"/>
      <edge id="167130" label="zzzz100,zzzz416" source="842" target="526" cy:directed="1"/>
      <edge id="167129" label="zzzz100,zzzz642" source="842" target="300" cy:directed="1"/>
      <edge id="167128" label="zzzz100,zzzz654" source="842" target="288" cy:directed="1"/>
      <edge id="167127" label="zzzz100,zzzz664" source="842" target="278" cy:directed="1"/>
      <edge id="167126" label="zzzz100,zzzz210" source="842" target="732" cy:directed="1"/>
      <edge id="167125" label="zzzz100,zzzz626" source="842" target="316" cy:directed="1"/>
      <edge id="167124" label="zzzz100,zzzz657" source="842" target="285" cy:directed="1"/>
      <edge id="167123" label="zzzz100,zzzz213" source="842" target="729" cy:directed="1"/>
      <edge id="167122" label="zzzz100,zzzz223" source="842" target="719" cy:directed="1"/>
      <edge id="167121" label="zzzz100,zzzzzz9" source="842" target="62" cy:directed="1"/>
      <edge id="167120" label="zzzz100,zzzz306" source="842" target="636" cy:directed="1"/>
      <edge id="167119" label="zzzz100,zzzz469" source="842" target="473" cy:directed="1"/>
      <edge id="167118" label="zzzz100,zzzz121" source="842" target="821" cy:directed="1"/>
      <edge id="167117" label="zzzz100,zzzz297" source="842" target="645" cy:directed="1"/>
      <edge id="167116" label="zzzz100,zzzz479" source="842" target="463" cy:directed="1"/>
      <edge id="167115" label="zzzz100,zzzz617" source="842" target="325" cy:directed="1"/>
      <edge id="167114" label="zzzz100,zzzz639" source="842" target="303" cy:directed="1"/>
      <edge id="167113" label="zzzz100,zzzz313" source="842" target="629" cy:directed="1"/>
      <edge id="167112" label="zzzz100,zzzz447" source="842" target="495" cy:directed="1"/>
      <edge id="167111" label="zzzz100,zzzz300" source="842" target="642" cy:directed="1"/>
      <edge id="167110" label="zzzz100,zzzz304" source="842" target="638" cy:directed="1"/>
      <edge id="167109" label="zzzz100,zzzz417" source="842" target="525" cy:directed="1"/>
      <edge id="167108" label="zzzz100,zzzz622" source="842" target="320" cy:directed="1"/>
      <edge id="167107" label="zzzz100,zzzz296" source="842" target="646" cy:directed="1"/>
      <edge id="167106" label="zzzz100,zzzz610" source="842" target="332" cy:directed="1"/>
      <edge id="167105" label="zzzz100,zzzz637" source="842" target="305" cy:directed="1"/>
      <edge id="167104" label="zzzz100,zzzzzz3" source="842" target="68" cy:directed="1"/>
      <edge id="167103" label="zzzz100,zzzz218" source="842" target="724" cy:directed="1"/>
      <edge id="167102" label="zzzz100,zzzz647" source="842" target="295" cy:directed="1"/>
      <edge id="167101" label="zzzz100,zzzzzz5" source="842" target="66" cy:directed="1"/>
      <edge id="167100" label="zzzz100,zzzz464" source="842" target="478" cy:directed="1"/>
      <edge id="167099" label="zzzz100,zzzz255" source="842" target="687" cy:directed="1"/>
      <edge id="167098" label="zzzz100,zzzz322" source="842" target="620" cy:directed="1"/>
      <edge id="167097" label="zzzz100,zzzz198" source="842" target="744" cy:directed="1"/>
      <edge id="167096" label="zzzz100,zzzz321" source="842" target="621" cy:directed="1"/>
      <edge id="167095" label="zzzz100,zzzz441" source="842" target="501" cy:directed="1"/>
      <edge id="167094" label="zzzz100,zzzz497" source="842" target="445" cy:directed="1"/>
      <edge id="167093" label="zzzz100,zzzz627" source="842" target="315" cy:directed="1"/>
      <edge id="167092" label="zzzz100,zzzz302" source="842" target="640" cy:directed="1"/>
      <edge id="167091" label="zzzz100,zzzz473" source="842" target="469" cy:directed="1"/>
      <edge id="167090" label="zzzz100,zzzzz10" source="842" target="161" cy:directed="1"/>
      <edge id="167089" label="zzzz100,zzzzz56" source="842" target="115" cy:directed="1"/>
      <edge id="167088" label="zzzz100,zzzz470" source="842" target="472" cy:directed="1"/>
      <edge id="167087" label="zzzz100,zzzz649" source="842" target="293" cy:directed="1"/>
      <edge id="167086" label="zzzz100,zzzz612" source="842" target="330" cy:directed="1"/>
      <edge id="167085" label="zzzz100,zzzz648" source="842" target="294" cy:directed="1"/>
      <edge id="167084" label="zzzz100,zzzz206" source="842" target="736" cy:directed="1"/>
      <edge id="167083" label="zzzz100,zzzz208" source="842" target="734" cy:directed="1"/>
      <edge id="167082" label="zzzz100,zzzz442" source="842" target="500" cy:directed="1"/>
      <edge id="167081" label="zzzz100,zzzz607" source="842" target="335" cy:directed="1"/>
      <edge id="167080" label="zzzz100,zzzzzz4" source="842" target="67" cy:directed="1"/>
      <edge id="167079" label="zzzz100,zzzz184" source="842" target="758" cy:directed="1"/>
      <edge id="167078" label="zzzz100,zzzz215" source="842" target="727" cy:directed="1"/>
      <edge id="167077" label="zzzz100,zzzz175" source="842" target="767" cy:directed="1"/>
      <edge id="167076" label="zzzz100,zzzz650" source="842" target="292" cy:directed="1"/>
      <edge id="167075" label="zzzz100,zzzz205" source="842" target="737" cy:directed="1"/>
      <edge id="167074" label="zzzz100,zzzz309" source="842" target="633" cy:directed="1"/>
      <edge id="167073" label="zzzz100,zzzz212" source="842" target="730" cy:directed="1"/>
      <edge id="167072" label="zzzz100,zzzz555" source="842" target="387" cy:directed="1"/>
      <edge id="167071" label="zzzz100,zzzz459" source="842" target="483" cy:directed="1"/>
      <edge id="167070" label="zzzz100,zzzz652" source="842" target="290" cy:directed="1"/>
      <edge id="167069" label="zzzz100,zzzz301" source="842" target="641" cy:directed="1"/>
      <edge id="167068" label="zzzz100,zzzz303" source="842" target="639" cy:directed="1"/>
      <edge id="167067" label="zzzz100,zzzz549" source="842" target="393" cy:directed="1"/>
      <edge id="167066" label="zzzz100,zzzz444" source="842" target="498" cy:directed="1"/>
      <edge id="167065" label="zzzz100,zzzz450" source="842" target="492" cy:directed="1"/>
      <edge id="167064" label="zzzz100,zzzz458" source="842" target="484" cy:directed="1"/>
      <edge id="167063" label="zzzz100,zzzz432" source="842" target="510" cy:directed="1"/>
      <edge id="167062" label="zzzz100,zzzz462" source="842" target="480" cy:directed="1"/>
      <edge id="167061" label="zzzz100,zzzz485" source="842" target="457" cy:directed="1"/>
      <edge id="167060" label="zzzz100,zzzz724" source="842" target="218" cy:directed="1"/>
      <edge id="167059" label="zzzz100,zzzz195" source="842" target="747" cy:directed="1"/>
      <edge id="167058" label="zzzz100,zzzz433" source="842" target="509" cy:directed="1"/>
      <edge id="167057" label="zzzz100,zzzz434" source="842" target="508" cy:directed="1"/>
      <edge id="167056" label="zzzz100,zzzz436" source="842" target="506" cy:directed="1"/>
      <edge id="167055" label="zzzz100,zzzz440" source="842" target="502" cy:directed="1"/>
      <edge id="167054" label="zzzz100,zzzz446" source="842" target="496" cy:directed="1"/>
      <edge id="167053" label="zzzz100,zzzz454" source="842" target="488" cy:directed="1"/>
      <edge id="167052" label="zzzz100,zzzz466" source="842" target="476" cy:directed="1"/>
      <edge id="167051" label="zzzz100,zzzz483" source="842" target="459" cy:directed="1"/>
      <edge id="167050" label="zzzz100,zzzz487" source="842" target="455" cy:directed="1"/>
      <edge id="167049" label="zzzz100,zzzz498" source="842" target="444" cy:directed="1"/>
      <edge id="167048" label="zzzz100,zzzz643" source="842" target="299" cy:directed="1"/>
      <edge id="167047" label="zzzz100,zzzz431" source="842" target="511" cy:directed="1"/>
      <edge id="167046" label="zzzz100,zzzz435" source="842" target="507" cy:directed="1"/>
      <edge id="167045" label="zzzz100,zzzz437" source="842" target="505" cy:directed="1"/>
      <edge id="167044" label="zzzz100,zzzz438" source="842" target="504" cy:directed="1"/>
      <edge id="167043" label="zzzz100,zzzz445" source="842" target="497" cy:directed="1"/>
      <edge id="167042" label="zzzz100,zzzz455" source="842" target="487" cy:directed="1"/>
      <edge id="167041" label="zzzz100,zzzz476" source="842" target="466" cy:directed="1"/>
      <edge id="167040" label="zzzz100,zzzz480" source="842" target="462" cy:directed="1"/>
      <edge id="167039" label="zzzz100,zzzz481" source="842" target="461" cy:directed="1"/>
      <edge id="167038" label="zzzz100,zzzz468" source="842" target="474" cy:directed="1"/>
      <edge id="167037" label="zzzz100,zzzz460" source="842" target="482" cy:directed="1"/>
      <edge id="167036" label="zzzz100,zzzz651" source="842" target="291" cy:directed="1"/>
      <edge id="167035" label="zzzz100,zzzz214" source="842" target="728" cy:directed="1"/>
      <edge id="167034" label="zzzz100,zzzz216" source="842" target="726" cy:directed="1"/>
      <edge id="167033" label="zzzz100,zzzz449" source="842" target="493" cy:directed="1"/>
      <edge id="167032" label="zzzz100,zzzz443" source="842" target="499" cy:directed="1"/>
      <edge id="167031" label="zzzz100,zzzz494" source="842" target="448" cy:directed="1"/>
      <edge id="167030" label="zzzz100,zzzz489" source="842" target="453" cy:directed="1"/>
      <edge id="167029" label="zzzz100,zzzz495" source="842" target="447" cy:directed="1"/>
      <edge id="167028" label="zzzz100,zzzz488" source="842" target="454" cy:directed="1"/>
      <edge id="167027" label="zzzz101,zzzz158" source="841" target="784" cy:directed="1"/>
      <edge id="167026" label="zzzz101,zzzz131" source="841" target="811" cy:directed="1"/>
      <edge id="167025" label="zzzz101,zzzz132" source="841" target="810" cy:directed="1"/>
      <edge id="167024" label="zzzz101,zzzz164" source="841" target="778" cy:directed="1"/>
      <edge id="167023" label="zzzz101,zzzz171" source="841" target="771" cy:directed="1"/>
      <edge id="167022" label="zzzz101,zzzzz78" source="841" target="93" cy:directed="1"/>
      <edge id="167021" label="zzzz101,zzzz157" source="841" target="785" cy:directed="1"/>
      <edge id="167020" label="zzzz101,zzzzz39" source="841" target="132" cy:directed="1"/>
      <edge id="167019" label="zzzz101,zzzz293" source="841" target="649" cy:directed="1"/>
      <edge id="167018" label="zzzz101,zzzzz54" source="841" target="117" cy:directed="1"/>
      <edge id="167017" label="zzzz101,zzzzz79" source="841" target="92" cy:directed="1"/>
      <edge id="167016" label="zzzz101,zzzz266" source="841" target="676" cy:directed="1"/>
      <edge id="167015" label="zzzz101,zzzzz35" source="841" target="136" cy:directed="1"/>
      <edge id="167014" label="zzzz101,zzzz147" source="841" target="795" cy:directed="1"/>
      <edge id="167013" label="zzzz101,zzzz289" source="841" target="653" cy:directed="1"/>
      <edge id="167012" label="zzzz101,zzzz172" source="841" target="770" cy:directed="1"/>
      <edge id="167011" label="zzzz101,zzzz149" source="841" target="793" cy:directed="1"/>
      <edge id="167010" label="zzzz101,zzzz517" source="841" target="425" cy:directed="1"/>
      <edge id="167009" label="zzzz101,zzzz507" source="841" target="435" cy:directed="1"/>
      <edge id="167008" label="zzzz101,zzzzz40" source="841" target="131" cy:directed="1"/>
      <edge id="167007" label="zzzz101,zzzz162" source="841" target="780" cy:directed="1"/>
      <edge id="167006" label="zzzz101,zzzzz83" source="841" target="88" cy:directed="1"/>
      <edge id="167005" label="zzzz101,zzzzz93" source="841" target="78" cy:directed="1"/>
      <edge id="167004" label="zzzz101,zzzz160" source="841" target="782" cy:directed="1"/>
      <edge id="167003" label="zzzz101,zzzzz65" source="841" target="106" cy:directed="1"/>
      <edge id="167002" label="zzzz101,zzzz704" source="841" target="238" cy:directed="1"/>
      <edge id="167001" label="zzzz101,zzzzz92" source="841" target="79" cy:directed="1"/>
      <edge id="167000" label="zzzz101,zzzz277" source="841" target="665" cy:directed="1"/>
      <edge id="166999" label="zzzz101,zzzz280" source="841" target="662" cy:directed="1"/>
      <edge id="166998" label="zzzz101,zzzz292" source="841" target="650" cy:directed="1"/>
      <edge id="166997" label="zzzz101,zzzzz57" source="841" target="114" cy:directed="1"/>
      <edge id="166996" label="zzzz101,zzzz240" source="841" target="702" cy:directed="1"/>
      <edge id="166995" label="zzzz101,zzzz597" source="841" target="345" cy:directed="1"/>
      <edge id="166994" label="zzzz101,zzzzz77" source="841" target="94" cy:directed="1"/>
      <edge id="166993" label="zzzz101,zzzz270" source="841" target="672" cy:directed="1"/>
      <edge id="166992" label="zzzz101,zzzz298" source="841" target="644" cy:directed="1"/>
      <edge id="166991" label="zzzz101,zzzzz89" source="841" target="82" cy:directed="1"/>
      <edge id="166990" label="zzzz101,zzzzz86" source="841" target="85" cy:directed="1"/>
      <edge id="166989" label="zzzz101,zzzz115" source="841" target="827" cy:directed="1"/>
      <edge id="166988" label="zzzz101,zzzzz82" source="841" target="89" cy:directed="1"/>
      <edge id="166987" label="zzzz101,zzzz268" source="841" target="674" cy:directed="1"/>
      <edge id="166986" label="zzzz101,zzzz632" source="841" target="310" cy:directed="1"/>
      <edge id="166985" label="zzzz101,zzzz628" source="841" target="314" cy:directed="1"/>
      <edge id="166984" label="zzzz101,zzzz102" source="841" target="840" cy:directed="1"/>
      <edge id="166983" label="zzzz101,zzzzz80" source="841" target="91" cy:directed="1"/>
      <edge id="166982" label="zzzz101,zzzz501" source="841" target="441" cy:directed="1"/>
      <edge id="166981" label="zzzz101,zzzz159" source="841" target="783" cy:directed="1"/>
      <edge id="166980" label="zzzz101,zzzzz55" source="841" target="116" cy:directed="1"/>
      <edge id="166979" label="zzzz101,zzzz596" source="841" target="346" cy:directed="1"/>
      <edge id="166978" label="zzzz101,zzzz599" source="841" target="343" cy:directed="1"/>
      <edge id="166977" label="zzzz101,zzzzz90" source="841" target="81" cy:directed="1"/>
      <edge id="166976" label="zzzz101,zzzz598" source="841" target="344" cy:directed="1"/>
      <edge id="166975" label="zzzz101,zzzz288" source="841" target="654" cy:directed="1"/>
      <edge id="166974" label="zzzz101,zzzz690" source="841" target="252" cy:directed="1"/>
      <edge id="166973" label="zzzz101,zzzzz85" source="841" target="86" cy:directed="1"/>
      <edge id="166972" label="zzzz101,zzzz183" source="841" target="759" cy:directed="1"/>
      <edge id="166971" label="zzzz101,zzzzz69" source="841" target="102" cy:directed="1"/>
      <edge id="166970" label="zzzz101,zzzzz81" source="841" target="90" cy:directed="1"/>
      <edge id="166969" label="zzzz101,zzzz167" source="841" target="775" cy:directed="1"/>
      <edge id="166968" label="zzzz101,zzzz519" source="841" target="423" cy:directed="1"/>
      <edge id="166967" label="zzzz101,zzzzz84" source="841" target="87" cy:directed="1"/>
      <edge id="166966" label="zzzz101,zzzz424" source="841" target="518" cy:directed="1"/>
      <edge id="166965" label="zzzz101,zzzz242" source="841" target="700" cy:directed="1"/>
      <edge id="166964" label="zzzz101,zzzz146" source="841" target="796" cy:directed="1"/>
      <edge id="166963" label="zzzz101,zzzz148" source="841" target="794" cy:directed="1"/>
      <edge id="166962" label="zzzz101,zzzz259" source="841" target="683" cy:directed="1"/>
      <edge id="166961" label="zzzz101,zzzz734" source="841" target="208" cy:directed="1"/>
      <edge id="166960" label="zzzz101,zzzz523" source="841" target="419" cy:directed="1"/>
      <edge id="166959" label="zzzz101,zzzzz42" source="841" target="129" cy:directed="1"/>
      <edge id="166958" label="zzzz101,zzzzz76" source="841" target="95" cy:directed="1"/>
      <edge id="166957" label="zzzz101,zzzz287" source="841" target="655" cy:directed="1"/>
      <edge id="166956" label="zzzz101,zzzz144" source="841" target="798" cy:directed="1"/>
      <edge id="166955" label="zzzz101,zzzzz88" source="841" target="83" cy:directed="1"/>
      <edge id="166954" label="zzzz101,zzzzz58" source="841" target="113" cy:directed="1"/>
      <edge id="166953" label="zzzz101,zzzz258" source="841" target="684" cy:directed="1"/>
      <edge id="166952" label="zzzz101,zzzz634" source="841" target="308" cy:directed="1"/>
      <edge id="166951" label="zzzz101,zzzzz44" source="841" target="127" cy:directed="1"/>
      <edge id="166950" label="zzzz101,zzzzz94" source="841" target="77" cy:directed="1"/>
      <edge id="166949" label="zzzz101,zzzz594" source="841" target="348" cy:directed="1"/>
      <edge id="166948" label="zzzz101,zzzz140" source="841" target="802" cy:directed="1"/>
      <edge id="166947" label="zzzz101,zzzz241" source="841" target="701" cy:directed="1"/>
      <edge id="166946" label="zzzz101,zzzz423" source="841" target="519" cy:directed="1"/>
      <edge id="166945" label="zzzz101,zzzzz87" source="841" target="84" cy:directed="1"/>
      <edge id="166944" label="zzzz101,zzzz165" source="841" target="777" cy:directed="1"/>
      <edge id="166943" label="zzzz101,zzzz283" source="841" target="659" cy:directed="1"/>
      <edge id="166942" label="zzzz101,zzzzz45" source="841" target="126" cy:directed="1"/>
      <edge id="166941" label="zzzz101,zzzz134" source="841" target="808" cy:directed="1"/>
      <edge id="166940" label="zzzz101,zzzz166" source="841" target="776" cy:directed="1"/>
      <edge id="166939" label="zzzz101,zzzz142" source="841" target="800" cy:directed="1"/>
      <edge id="166938" label="zzzz101,zzzz163" source="841" target="779" cy:directed="1"/>
      <edge id="166937" label="zzzz101,zzzzz72" source="841" target="99" cy:directed="1"/>
      <edge id="166936" label="zzzz101,zzzz133" source="841" target="809" cy:directed="1"/>
      <edge id="166935" label="zzzz101,zzzzz66" source="841" target="105" cy:directed="1"/>
      <edge id="166934" label="zzzz101,zzzzz41" source="841" target="130" cy:directed="1"/>
      <edge id="166933" label="zzzz101,zzzzz95" source="841" target="76" cy:directed="1"/>
      <edge id="166932" label="zzzz101,zzzzz34" source="841" target="137" cy:directed="1"/>
      <edge id="166931" label="zzzz101,zzzz538" source="841" target="404" cy:directed="1"/>
      <edge id="166930" label="zzzz101,zzzz168" source="841" target="774" cy:directed="1"/>
      <edge id="166929" label="zzzz101,zzzz129" source="841" target="813" cy:directed="1"/>
      <edge id="166928" label="zzzz101,zzzzz62" source="841" target="109" cy:directed="1"/>
      <edge id="166927" label="zzzz101,zzzz169" source="841" target="773" cy:directed="1"/>
      <edge id="166926" label="zzzz101,zzzz533" source="841" target="409" cy:directed="1"/>
      <edge id="166925" label="zzzz101,zzzz508" source="841" target="434" cy:directed="1"/>
      <edge id="166924" label="zzzz101,zzzzz74" source="841" target="97" cy:directed="1"/>
      <edge id="166923" label="zzzz101,zzzz311" source="841" target="631" cy:directed="1"/>
      <edge id="166922" label="zzzz101,zzzz595" source="841" target="347" cy:directed="1"/>
      <edge id="166921" label="zzzz101,zzzzz32" source="841" target="139" cy:directed="1"/>
      <edge id="166920" label="zzzz101,zzzz685" source="841" target="257" cy:directed="1"/>
      <edge id="166919" label="zzzz101,zzzzz99" source="841" target="72" cy:directed="1"/>
      <edge id="166918" label="zzzz101,zzzz228" source="841" target="714" cy:directed="1"/>
      <edge id="166917" label="zzzz101,zzzz733" source="841" target="209" cy:directed="1"/>
      <edge id="166916" label="zzzz101,zzzz231" source="841" target="711" cy:directed="1"/>
      <edge id="166915" label="zzzz101,zzzz282" source="841" target="660" cy:directed="1"/>
      <edge id="166914" label="zzzz101,zzzz551" source="841" target="391" cy:directed="1"/>
      <edge id="166913" label="zzzz101,zzzz260" source="841" target="682" cy:directed="1"/>
      <edge id="166912" label="zzzz101,zzzz572" source="841" target="370" cy:directed="1"/>
      <edge id="166911" label="zzzz101,zzzz236" source="841" target="706" cy:directed="1"/>
      <edge id="166910" label="zzzz101,zzzz245" source="841" target="697" cy:directed="1"/>
      <edge id="166909" label="zzzz101,zzzz681" source="841" target="261" cy:directed="1"/>
      <edge id="166908" label="zzzz101,zzzz694" source="841" target="248" cy:directed="1"/>
      <edge id="166907" label="zzzz101,zzzz706" source="841" target="236" cy:directed="1"/>
      <edge id="166906" label="zzzz101,zzzz238" source="841" target="704" cy:directed="1"/>
      <edge id="166905" label="zzzz101,zzzz274" source="841" target="668" cy:directed="1"/>
      <edge id="166904" label="zzzz101,zzzz680" source="841" target="262" cy:directed="1"/>
      <edge id="166903" label="zzzz101,zzzz688" source="841" target="254" cy:directed="1"/>
      <edge id="166902" label="zzzz101,zzzz741" source="841" target="201" cy:directed="1"/>
      <edge id="166901" label="zzzz101,zzzz161" source="841" target="781" cy:directed="1"/>
      <edge id="166900" label="zzzz101,zzzz506" source="841" target="436" cy:directed="1"/>
      <edge id="166899" label="zzzz101,zzzz529" source="841" target="413" cy:directed="1"/>
      <edge id="166898" label="zzzz101,zzzz567" source="841" target="375" cy:directed="1"/>
      <edge id="166897" label="zzzz101,zzzz673" source="841" target="269" cy:directed="1"/>
      <edge id="166896" label="zzzz101,zzzz687" source="841" target="255" cy:directed="1"/>
      <edge id="166895" label="zzzz101,zzzz646" source="841" target="296" cy:directed="1"/>
      <edge id="166894" label="zzzz101,zzzz106" source="841" target="836" cy:directed="1"/>
      <edge id="166893" label="zzzz101,zzzz286" source="841" target="656" cy:directed="1"/>
      <edge id="166892" label="zzzz101,zzzz503" source="841" target="439" cy:directed="1"/>
      <edge id="166891" label="zzzz101,zzzz739" source="841" target="203" cy:directed="1"/>
      <edge id="166890" label="zzzz101,zzzzz56" source="841" target="115" cy:directed="1"/>
      <edge id="166889" label="zzzz101,zzzz189" source="841" target="753" cy:directed="1"/>
      <edge id="166888" label="zzzz101,zzzz564" source="841" target="378" cy:directed="1"/>
      <edge id="166887" label="zzzz101,zzzzz73" source="841" target="98" cy:directed="1"/>
      <edge id="166886" label="zzzz101,zzzz273" source="841" target="669" cy:directed="1"/>
      <edge id="166885" label="zzzz101,zzzz528" source="841" target="414" cy:directed="1"/>
      <edge id="166884" label="zzzz101,zzzz560" source="841" target="382" cy:directed="1"/>
      <edge id="166883" label="zzzz101,zzzz698" source="841" target="244" cy:directed="1"/>
      <edge id="166882" label="zzzz101,zzzz285" source="841" target="657" cy:directed="1"/>
      <edge id="166881" label="zzzz101,zzzz422" source="841" target="520" cy:directed="1"/>
      <edge id="166880" label="zzzz101,zzzz552" source="841" target="390" cy:directed="1"/>
      <edge id="166879" label="zzzz101,zzzzz91" source="841" target="80" cy:directed="1"/>
      <edge id="166878" label="zzzz101,zzzz708" source="841" target="234" cy:directed="1"/>
      <edge id="166877" label="zzzz101,zzzz291" source="841" target="651" cy:directed="1"/>
      <edge id="166876" label="zzzz101,zzzz515" source="841" target="427" cy:directed="1"/>
      <edge id="166875" label="zzzz101,zzzz257" source="841" target="685" cy:directed="1"/>
      <edge id="166874" label="zzzz101,zzzz718" source="841" target="224" cy:directed="1"/>
      <edge id="166873" label="zzzz101,zzzz139" source="841" target="803" cy:directed="1"/>
      <edge id="166872" label="zzzz101,zzzz179" source="841" target="763" cy:directed="1"/>
      <edge id="166871" label="zzzz101,zzzz109" source="841" target="833" cy:directed="1"/>
      <edge id="166870" label="zzzz101,zzzz124" source="841" target="818" cy:directed="1"/>
      <edge id="166869" label="zzzz101,zzzz235" source="841" target="707" cy:directed="1"/>
      <edge id="166868" label="zzzz101,zzzz580" source="841" target="362" cy:directed="1"/>
      <edge id="166867" label="zzzz101,zzzz678" source="841" target="264" cy:directed="1"/>
      <edge id="166866" label="zzzz101,zzzz153" source="841" target="789" cy:directed="1"/>
      <edge id="166865" label="zzzz101,zzzz524" source="841" target="418" cy:directed="1"/>
      <edge id="166864" label="zzzz101,zzzzz75" source="841" target="96" cy:directed="1"/>
      <edge id="166863" label="zzzz101,zzzz262" source="841" target="680" cy:directed="1"/>
      <edge id="166862" label="zzzz101,zzzz276" source="841" target="666" cy:directed="1"/>
      <edge id="166861" label="zzzz101,zzzz261" source="841" target="681" cy:directed="1"/>
      <edge id="166860" label="zzzz101,zzzz155" source="841" target="787" cy:directed="1"/>
      <edge id="166859" label="zzzz101,zzzz248" source="841" target="694" cy:directed="1"/>
      <edge id="166858" label="zzzz101,zzzz581" source="841" target="361" cy:directed="1"/>
      <edge id="166857" label="zzzz101,zzzz707" source="841" target="235" cy:directed="1"/>
      <edge id="166856" label="zzzz101,zzzz190" source="841" target="752" cy:directed="1"/>
      <edge id="166855" label="zzzz101,zzzz193" source="841" target="749" cy:directed="1"/>
      <edge id="166854" label="zzzz101,zzzz557" source="841" target="385" cy:directed="1"/>
      <edge id="166853" label="zzzz101,zzzz714" source="841" target="228" cy:directed="1"/>
      <edge id="166852" label="zzzz101,zzzz730" source="841" target="212" cy:directed="1"/>
      <edge id="166851" label="zzzz101,zzzz573" source="841" target="369" cy:directed="1"/>
      <edge id="166850" label="zzzz101,zzzz511" source="841" target="431" cy:directed="1"/>
      <edge id="166849" label="zzzz101,zzzz546" source="841" target="396" cy:directed="1"/>
      <edge id="166848" label="zzzz101,zzzz692" source="841" target="250" cy:directed="1"/>
      <edge id="166847" label="zzzz101,zzzz713" source="841" target="229" cy:directed="1"/>
      <edge id="166846" label="zzzz101,zzzz252" source="841" target="690" cy:directed="1"/>
      <edge id="166845" label="zzzz101,zzzz500" source="841" target="442" cy:directed="1"/>
      <edge id="166844" label="zzzz101,zzzz574" source="841" target="368" cy:directed="1"/>
      <edge id="166843" label="zzzz101,zzzz576" source="841" target="366" cy:directed="1"/>
      <edge id="166842" label="zzzz101,zzzz579" source="841" target="363" cy:directed="1"/>
      <edge id="166841" label="zzzz101,zzzz702" source="841" target="240" cy:directed="1"/>
      <edge id="166840" label="zzzz101,zzzz721" source="841" target="221" cy:directed="1"/>
      <edge id="166839" label="zzzz101,zzzz726" source="841" target="216" cy:directed="1"/>
      <edge id="166838" label="zzzz101,zzzz532" source="841" target="410" cy:directed="1"/>
      <edge id="166837" label="zzzz101,zzzzz70" source="841" target="101" cy:directed="1"/>
      <edge id="166836" label="zzzz101,zzzz290" source="841" target="652" cy:directed="1"/>
      <edge id="166835" label="zzzz101,zzzz737" source="841" target="205" cy:directed="1"/>
      <edge id="166834" label="zzzz101,zzzzz52" source="841" target="119" cy:directed="1"/>
      <edge id="166833" label="zzzz101,zzzz107" source="841" target="835" cy:directed="1"/>
      <edge id="166832" label="zzzz101,zzzz428" source="841" target="514" cy:directed="1"/>
      <edge id="166831" label="zzzz101,zzzz696" source="841" target="246" cy:directed="1"/>
      <edge id="166830" label="zzzz101,zzzz192" source="841" target="750" cy:directed="1"/>
      <edge id="166829" label="zzzz101,zzzz284" source="841" target="658" cy:directed="1"/>
      <edge id="166828" label="zzzz101,zzzz536" source="841" target="406" cy:directed="1"/>
      <edge id="166827" label="zzzz101,zzzz156" source="841" target="786" cy:directed="1"/>
      <edge id="166826" label="zzzz101,zzzz191" source="841" target="751" cy:directed="1"/>
      <edge id="166825" label="zzzz101,zzzz308" source="841" target="634" cy:directed="1"/>
      <edge id="166824" label="zzzz101,zzzz693" source="841" target="249" cy:directed="1"/>
      <edge id="166823" label="zzzz101,zzzz699" source="841" target="243" cy:directed="1"/>
      <edge id="166822" label="zzzz101,zzzzz51" source="841" target="120" cy:directed="1"/>
      <edge id="166821" label="zzzz101,zzzz499" source="841" target="443" cy:directed="1"/>
      <edge id="166820" label="zzzz101,zzzz577" source="841" target="365" cy:directed="1"/>
      <edge id="166819" label="zzzz101,zzzz686" source="841" target="256" cy:directed="1"/>
      <edge id="166818" label="zzzz101,zzzz540" source="841" target="402" cy:directed="1"/>
      <edge id="166817" label="zzzz101,zzzz684" source="841" target="258" cy:directed="1"/>
      <edge id="166816" label="zzzz101,zzzz710" source="841" target="232" cy:directed="1"/>
      <edge id="166815" label="zzzz101,zzzz234" source="841" target="708" cy:directed="1"/>
      <edge id="166814" label="zzzz101,zzzz244" source="841" target="698" cy:directed="1"/>
      <edge id="166813" label="zzzz101,zzzz623" source="841" target="319" cy:directed="1"/>
      <edge id="166812" label="zzzz101,zzzz534" source="841" target="408" cy:directed="1"/>
      <edge id="166811" label="zzzz101,zzzz717" source="841" target="225" cy:directed="1"/>
      <edge id="166810" label="zzzz101,zzzz727" source="841" target="215" cy:directed="1"/>
      <edge id="166809" label="zzzz101,zzzz203" source="841" target="739" cy:directed="1"/>
      <edge id="166808" label="zzzz101,zzzz251" source="841" target="691" cy:directed="1"/>
      <edge id="166807" label="zzzz101,zzzz281" source="841" target="661" cy:directed="1"/>
      <edge id="166806" label="zzzz101,zzzz130" source="841" target="812" cy:directed="1"/>
      <edge id="166805" label="zzzz101,zzzz543" source="841" target="399" cy:directed="1"/>
      <edge id="166804" label="zzzz101,zzzz453" source="841" target="489" cy:directed="1"/>
      <edge id="166803" label="zzzz101,zzzz525" source="841" target="417" cy:directed="1"/>
      <edge id="166802" label="zzzz101,zzzz571" source="841" target="371" cy:directed="1"/>
      <edge id="166801" label="zzzz101,zzzz537" source="841" target="405" cy:directed="1"/>
      <edge id="166800" label="zzzz101,zzzz584" source="841" target="358" cy:directed="1"/>
      <edge id="166799" label="zzzz101,zzzz728" source="841" target="214" cy:directed="1"/>
      <edge id="166798" label="zzzz101,zzzz202" source="841" target="740" cy:directed="1"/>
      <edge id="166797" label="zzzz101,zzzz427" source="841" target="515" cy:directed="1"/>
      <edge id="166796" label="zzzz101,zzzz502" source="841" target="440" cy:directed="1"/>
      <edge id="166795" label="zzzz101,zzzz700" source="841" target="242" cy:directed="1"/>
      <edge id="166794" label="zzzz101,zzzz738" source="841" target="204" cy:directed="1"/>
      <edge id="166793" label="zzzz101,zzzz108" source="841" target="834" cy:directed="1"/>
      <edge id="166792" label="zzzz101,zzzz119" source="841" target="823" cy:directed="1"/>
      <edge id="166791" label="zzzz101,zzzz152" source="841" target="790" cy:directed="1"/>
      <edge id="166790" label="zzzz101,zzzz174" source="841" target="768" cy:directed="1"/>
      <edge id="166789" label="zzzz101,zzzz181" source="841" target="761" cy:directed="1"/>
      <edge id="166788" label="zzzz101,zzzz505" source="841" target="437" cy:directed="1"/>
      <edge id="166787" label="zzzz101,zzzz703" source="841" target="239" cy:directed="1"/>
      <edge id="166786" label="zzzz101,zzzz150" source="841" target="792" cy:directed="1"/>
      <edge id="166785" label="zzzz101,zzzz151" source="841" target="791" cy:directed="1"/>
      <edge id="166784" label="zzzz101,zzzz644" source="841" target="298" cy:directed="1"/>
      <edge id="166783" label="zzzz101,zzzz312" source="841" target="630" cy:directed="1"/>
      <edge id="166782" label="zzzz101,zzzz740" source="841" target="202" cy:directed="1"/>
      <edge id="166781" label="zzzz101,zzzz112" source="841" target="830" cy:directed="1"/>
      <edge id="166780" label="zzzz101,zzzz531" source="841" target="411" cy:directed="1"/>
      <edge id="166779" label="zzzz101,zzzz556" source="841" target="386" cy:directed="1"/>
      <edge id="166778" label="zzzz101,zzzz138" source="841" target="804" cy:directed="1"/>
      <edge id="166777" label="zzzz101,zzzz154" source="841" target="788" cy:directed="1"/>
      <edge id="166776" label="zzzz101,zzzz196" source="841" target="746" cy:directed="1"/>
      <edge id="166775" label="zzzz101,zzzz504" source="841" target="438" cy:directed="1"/>
      <edge id="166774" label="zzzz101,zzzz522" source="841" target="420" cy:directed="1"/>
      <edge id="166773" label="zzzz101,zzzz682" source="841" target="260" cy:directed="1"/>
      <edge id="166772" label="zzzz101,zzzz697" source="841" target="245" cy:directed="1"/>
      <edge id="166771" label="zzzz101,zzzz725" source="841" target="217" cy:directed="1"/>
      <edge id="166770" label="zzzz101,zzzz731" source="841" target="211" cy:directed="1"/>
      <edge id="166769" label="zzzz101,zzzzz48" source="841" target="123" cy:directed="1"/>
      <edge id="166768" label="zzzz101,zzzz105" source="841" target="837" cy:directed="1"/>
      <edge id="166767" label="zzzz101,zzzz113" source="841" target="829" cy:directed="1"/>
      <edge id="166766" label="zzzz101,zzzz185" source="841" target="757" cy:directed="1"/>
      <edge id="166765" label="zzzz101,zzzz294" source="841" target="648" cy:directed="1"/>
      <edge id="166764" label="zzzz101,zzzz492" source="841" target="450" cy:directed="1"/>
      <edge id="166763" label="zzzz101,zzzzz71" source="841" target="100" cy:directed="1"/>
      <edge id="166762" label="zzzz101,zzzz558" source="841" target="384" cy:directed="1"/>
      <edge id="166761" label="zzzz101,zzzz137" source="841" target="805" cy:directed="1"/>
      <edge id="166760" label="zzzz101,zzzz232" source="841" target="710" cy:directed="1"/>
      <edge id="166759" label="zzzz101,zzzz514" source="841" target="428" cy:directed="1"/>
      <edge id="166758" label="zzzz101,zzzz541" source="841" target="401" cy:directed="1"/>
      <edge id="166757" label="zzzz101,zzzz679" source="841" target="263" cy:directed="1"/>
      <edge id="166756" label="zzzz101,zzzz744" source="841" target="198" cy:directed="1"/>
      <edge id="166755" label="zzzz101,zzzzz53" source="841" target="118" cy:directed="1"/>
      <edge id="166754" label="zzzz101,zzzz110" source="841" target="832" cy:directed="1"/>
      <edge id="166753" label="zzzz101,zzzz111" source="841" target="831" cy:directed="1"/>
      <edge id="166752" label="zzzz101,zzzz120" source="841" target="822" cy:directed="1"/>
      <edge id="166751" label="zzzz101,zzzz229" source="841" target="713" cy:directed="1"/>
      <edge id="166750" label="zzzz101,zzzz712" source="841" target="230" cy:directed="1"/>
      <edge id="166749" label="zzzz101,zzzz742" source="841" target="200" cy:directed="1"/>
      <edge id="166748" label="zzzz101,zzzzz67" source="841" target="104" cy:directed="1"/>
      <edge id="166747" label="zzzz101,zzzz143" source="841" target="799" cy:directed="1"/>
      <edge id="166746" label="zzzz101,zzzz230" source="841" target="712" cy:directed="1"/>
      <edge id="166745" label="zzzz101,zzzz719" source="841" target="223" cy:directed="1"/>
      <edge id="166744" label="zzzz101,zzzzz97" source="841" target="74" cy:directed="1"/>
      <edge id="166743" label="zzzz101,zzzz611" source="841" target="331" cy:directed="1"/>
      <edge id="166742" label="zzzz101,zzzz689" source="841" target="253" cy:directed="1"/>
      <edge id="166741" label="zzzz101,zzzz691" source="841" target="251" cy:directed="1"/>
      <edge id="166740" label="zzzz101,zzzz701" source="841" target="241" cy:directed="1"/>
      <edge id="166739" label="zzzz101,zzzz711" source="841" target="231" cy:directed="1"/>
      <edge id="166738" label="zzzz101,zzzz233" source="841" target="709" cy:directed="1"/>
      <edge id="166737" label="zzzz101,zzzz279" source="841" target="663" cy:directed="1"/>
      <edge id="166736" label="zzzz101,zzzz516" source="841" target="426" cy:directed="1"/>
      <edge id="166735" label="zzzz101,zzzz715" source="841" target="227" cy:directed="1"/>
      <edge id="166734" label="zzzz101,zzzz743" source="841" target="199" cy:directed="1"/>
      <edge id="166733" label="zzzz101,zzzz237" source="841" target="705" cy:directed="1"/>
      <edge id="166732" label="zzzz101,zzzz250" source="841" target="692" cy:directed="1"/>
      <edge id="166731" label="zzzz101,zzzz117" source="841" target="825" cy:directed="1"/>
      <edge id="166730" label="zzzz101,zzzz310" source="841" target="632" cy:directed="1"/>
      <edge id="166729" label="zzzz101,zzzzz98" source="841" target="73" cy:directed="1"/>
      <edge id="166728" label="zzzz101,zzzz263" source="841" target="679" cy:directed="1"/>
      <edge id="166727" label="zzzz101,zzzz562" source="841" target="380" cy:directed="1"/>
      <edge id="166726" label="zzzz101,zzzz654" source="841" target="288" cy:directed="1"/>
      <edge id="166725" label="zzzz101,zzzz669" source="841" target="273" cy:directed="1"/>
      <edge id="166724" label="zzzz101,zzzz729" source="841" target="213" cy:directed="1"/>
      <edge id="166723" label="zzzz101,zzzz103" source="841" target="839" cy:directed="1"/>
      <edge id="166722" label="zzzz101,zzzz135" source="841" target="807" cy:directed="1"/>
      <edge id="166721" label="zzzz101,zzzz520" source="841" target="422" cy:directed="1"/>
      <edge id="166720" label="zzzz101,zzzz553" source="841" target="389" cy:directed="1"/>
      <edge id="166719" label="zzzz101,zzzz114" source="841" target="828" cy:directed="1"/>
      <edge id="166718" label="zzzz101,zzzz676" source="841" target="266" cy:directed="1"/>
      <edge id="166717" label="zzzz101,zzzz173" source="841" target="769" cy:directed="1"/>
      <edge id="166716" label="zzzz101,zzzz247" source="841" target="695" cy:directed="1"/>
      <edge id="166715" label="zzzz101,zzzz518" source="841" target="424" cy:directed="1"/>
      <edge id="166714" label="zzzz101,zzzz526" source="841" target="416" cy:directed="1"/>
      <edge id="166713" label="zzzz101,zzzz683" source="841" target="259" cy:directed="1"/>
      <edge id="166712" label="zzzz101,zzzzz38" source="841" target="133" cy:directed="1"/>
      <edge id="166711" label="zzzz101,zzzzz96" source="841" target="75" cy:directed="1"/>
      <edge id="166710" label="zzzz101,zzzzz36" source="841" target="135" cy:directed="1"/>
      <edge id="166709" label="zzzz101,zzzzz47" source="841" target="124" cy:directed="1"/>
      <edge id="166708" label="zzzz101,zzzz178" source="841" target="764" cy:directed="1"/>
      <edge id="166707" label="zzzz101,zzzz243" source="841" target="699" cy:directed="1"/>
      <edge id="166706" label="zzzz101,zzzz677" source="841" target="265" cy:directed="1"/>
      <edge id="166705" label="zzzz101,zzzz716" source="841" target="226" cy:directed="1"/>
      <edge id="166704" label="zzzz101,zzzzz43" source="841" target="128" cy:directed="1"/>
      <edge id="166703" label="zzzz101,zzzzz46" source="841" target="125" cy:directed="1"/>
      <edge id="166702" label="zzzz101,zzzzz61" source="841" target="110" cy:directed="1"/>
      <edge id="166701" label="zzzz101,zzzz638" source="841" target="304" cy:directed="1"/>
      <edge id="166700" label="zzzz101,zzzzz63" source="841" target="108" cy:directed="1"/>
      <edge id="166699" label="zzzz101,zzzz104" source="841" target="838" cy:directed="1"/>
      <edge id="166698" label="zzzz101,zzzz136" source="841" target="806" cy:directed="1"/>
      <edge id="166697" label="zzzz101,zzzz544" source="841" target="398" cy:directed="1"/>
      <edge id="166696" label="zzzz101,zzzz625" source="841" target="317" cy:directed="1"/>
      <edge id="166695" label="zzzz101,zzzz545" source="841" target="397" cy:directed="1"/>
      <edge id="166694" label="zzzz101,zzzz705" source="841" target="237" cy:directed="1"/>
      <edge id="166693" label="zzzz101,zzzzz11" source="841" target="160" cy:directed="1"/>
      <edge id="166692" label="zzzz101,zzzz513" source="841" target="429" cy:directed="1"/>
      <edge id="166691" label="zzzz101,zzzzz64" source="841" target="107" cy:directed="1"/>
      <edge id="166690" label="zzzz101,zzzz278" source="841" target="664" cy:directed="1"/>
      <edge id="166689" label="zzzz101,zzzzzz7" source="841" target="64" cy:directed="1"/>
      <edge id="166688" label="zzzz101,zzzz720" source="841" target="222" cy:directed="1"/>
      <edge id="166687" label="zzzz101,zzzz670" source="841" target="272" cy:directed="1"/>
      <edge id="166686" label="zzzz101,zzzz735" source="841" target="207" cy:directed="1"/>
      <edge id="166685" label="zzzz101,zzzz249" source="841" target="693" cy:directed="1"/>
      <edge id="166684" label="zzzz101,zzzz186" source="841" target="756" cy:directed="1"/>
      <edge id="166683" label="zzzz101,zzzz675" source="841" target="267" cy:directed="1"/>
      <edge id="166682" label="zzzz101,zzzz116" source="841" target="826" cy:directed="1"/>
      <edge id="166681" label="zzzz101,zzzz586" source="841" target="356" cy:directed="1"/>
      <edge id="166680" label="zzzz101,zzzz630" source="841" target="312" cy:directed="1"/>
      <edge id="166679" label="zzzz101,zzzz695" source="841" target="247" cy:directed="1"/>
      <edge id="166678" label="zzzz101,zzzz624" source="841" target="318" cy:directed="1"/>
      <edge id="166677" label="zzzz101,zzzzzz8" source="841" target="63" cy:directed="1"/>
      <edge id="166676" label="zzzz101,zzzzzz2" source="841" target="69" cy:directed="1"/>
      <edge id="166675" label="zzzz101,zzzz593" source="841" target="349" cy:directed="1"/>
      <edge id="166674" label="zzzz101,zzzzzz1" source="841" target="70" cy:directed="1"/>
      <edge id="166673" label="zzzz101,zzzz194" source="841" target="748" cy:directed="1"/>
      <edge id="166672" label="zzzz101,zzzz709" source="841" target="233" cy:directed="1"/>
      <edge id="166671" label="zzzz101,zzzz418" source="841" target="524" cy:directed="1"/>
      <edge id="166670" label="zzzz101,zzzz535" source="841" target="407" cy:directed="1"/>
      <edge id="166669" label="zzzz101,zzzzzz5" source="841" target="66" cy:directed="1"/>
      <edge id="166668" label="zzzz101,zzzzz13" source="841" target="158" cy:directed="1"/>
      <edge id="166667" label="zzzz101,zzzz127" source="841" target="815" cy:directed="1"/>
      <edge id="166666" label="zzzz101,zzzz542" source="841" target="400" cy:directed="1"/>
      <edge id="166665" label="zzzz101,zzzzz21" source="841" target="150" cy:directed="1"/>
      <edge id="166664" label="zzzz101,zzzzz68" source="841" target="103" cy:directed="1"/>
      <edge id="166663" label="zzzz101,zzzz170" source="841" target="772" cy:directed="1"/>
      <edge id="166662" label="zzzz101,zzzz671" source="841" target="271" cy:directed="1"/>
      <edge id="166661" label="zzzz101,zzzz736" source="841" target="206" cy:directed="1"/>
      <edge id="166660" label="zzzz101,zzzz732" source="841" target="210" cy:directed="1"/>
      <edge id="166659" label="zzzz101,zzzz246" source="841" target="696" cy:directed="1"/>
      <edge id="166658" label="zzzz101,zzzzz33" source="841" target="138" cy:directed="1"/>
      <edge id="166657" label="zzzz101,zzzz307" source="841" target="635" cy:directed="1"/>
      <edge id="166656" label="zzzz101,zzzz627" source="841" target="315" cy:directed="1"/>
      <edge id="166655" label="zzzz101,zzzz672" source="841" target="270" cy:directed="1"/>
      <edge id="166654" label="zzzz101,zzzzzz6" source="841" target="65" cy:directed="1"/>
      <edge id="166653" label="zzzz101,zzzz299" source="841" target="643" cy:directed="1"/>
      <edge id="166652" label="zzzz101,zzzz323" source="841" target="619" cy:directed="1"/>
      <edge id="166651" label="zzzz101,zzzz568" source="841" target="374" cy:directed="1"/>
      <edge id="166650" label="zzzz101,zzzz509" source="841" target="433" cy:directed="1"/>
      <edge id="166649" label="zzzz101,zzzz510" source="841" target="432" cy:directed="1"/>
      <edge id="166648" label="zzzz101,zzzzz49" source="841" target="122" cy:directed="1"/>
      <edge id="166647" label="zzzz101,zzzz187" source="841" target="755" cy:directed="1"/>
      <edge id="166646" label="zzzz101,zzzz122" source="841" target="820" cy:directed="1"/>
      <edge id="166645" label="zzzz101,zzzz539" source="841" target="403" cy:directed="1"/>
      <edge id="166644" label="zzzz101,zzzzz59" source="841" target="112" cy:directed="1"/>
      <edge id="166643" label="zzzz101,zzzz218" source="841" target="724" cy:directed="1"/>
      <edge id="166642" label="zzzz101,zzzz647" source="841" target="295" cy:directed="1"/>
      <edge id="166641" label="zzzz101,zzzz145" source="841" target="797" cy:directed="1"/>
      <edge id="166640" label="zzzz101,zzzz610" source="841" target="332" cy:directed="1"/>
      <edge id="166639" label="zzzz101,zzzz667" source="841" target="275" cy:directed="1"/>
      <edge id="166638" label="zzzz101,zzzz223" source="841" target="719" cy:directed="1"/>
      <edge id="166637" label="zzzz101,zzzz126" source="841" target="816" cy:directed="1"/>
      <edge id="166636" label="zzzz101,zzzz180" source="841" target="762" cy:directed="1"/>
      <edge id="166635" label="zzzz101,zzzzzz9" source="841" target="62" cy:directed="1"/>
      <edge id="166634" label="zzzz101,zzzzzz4" source="841" target="67" cy:directed="1"/>
      <edge id="166633" label="zzzz101,zzzz561" source="841" target="381" cy:directed="1"/>
      <edge id="166632" label="zzzz101,zzzz674" source="841" target="268" cy:directed="1"/>
      <edge id="166631" label="zzzz101,zzzz325" source="841" target="617" cy:directed="1"/>
      <edge id="166630" label="zzzz101,zzzz527" source="841" target="415" cy:directed="1"/>
      <edge id="166629" label="zzzz101,zzzzz10" source="841" target="161" cy:directed="1"/>
      <edge id="166628" label="zzzz101,zzzz547" source="841" target="395" cy:directed="1"/>
      <edge id="166627" label="zzzz101,zzzz521" source="841" target="421" cy:directed="1"/>
      <edge id="166626" label="zzzz101,zzzzz25" source="841" target="146" cy:directed="1"/>
      <edge id="166625" label="zzzz101,zzzz315" source="841" target="627" cy:directed="1"/>
      <edge id="166624" label="zzzz101,zzzz530" source="841" target="412" cy:directed="1"/>
      <edge id="166623" label="zzzz101,zzzz639" source="841" target="303" cy:directed="1"/>
      <edge id="166622" label="zzzz101,zzzz209" source="841" target="733" cy:directed="1"/>
      <edge id="166621" label="zzzz101,zzzz316" source="841" target="626" cy:directed="1"/>
      <edge id="166620" label="zzzz101,zzzz188" source="841" target="754" cy:directed="1"/>
      <edge id="166619" label="zzzz101,zzzz420" source="841" target="522" cy:directed="1"/>
      <edge id="166618" label="zzzz101,zzzz201" source="841" target="741" cy:directed="1"/>
      <edge id="166617" label="zzzz101,zzzz421" source="841" target="521" cy:directed="1"/>
      <edge id="166616" label="zzzz101,zzzz213" source="841" target="729" cy:directed="1"/>
      <edge id="166615" label="zzzz101,zzzz302" source="841" target="640" cy:directed="1"/>
      <edge id="166614" label="zzzz101,zzzz486" source="841" target="456" cy:directed="1"/>
      <edge id="166613" label="zzzz101,zzzzzz3" source="841" target="68" cy:directed="1"/>
      <edge id="166612" label="zzzz101,zzzz275" source="841" target="667" cy:directed="1"/>
      <edge id="166611" label="zzzz101,zzzz300" source="841" target="642" cy:directed="1"/>
      <edge id="166610" label="zzzz101,zzzz583" source="841" target="359" cy:directed="1"/>
      <edge id="166609" label="zzzz101,zzzz649" source="841" target="293" cy:directed="1"/>
      <edge id="166608" label="zzzz101,zzzz723" source="841" target="219" cy:directed="1"/>
      <edge id="166607" label="zzzz101,zzzz125" source="841" target="817" cy:directed="1"/>
      <edge id="166606" label="zzzz101,zzzz614" source="841" target="328" cy:directed="1"/>
      <edge id="166605" label="zzzz101,zzzz206" source="841" target="736" cy:directed="1"/>
      <edge id="166604" label="zzzz101,zzzz613" source="841" target="329" cy:directed="1"/>
      <edge id="166603" label="zzzz101,zzzz622" source="841" target="320" cy:directed="1"/>
      <edge id="166602" label="zzzz101,zzzzz12" source="841" target="159" cy:directed="1"/>
      <edge id="166601" label="zzzz101,zzzz295" source="841" target="647" cy:directed="1"/>
      <edge id="166600" label="zzzz101,zzzz575" source="841" target="367" cy:directed="1"/>
      <edge id="166599" label="zzzz101,zzzz512" source="841" target="430" cy:directed="1"/>
      <edge id="166598" label="zzzz101,zzzz570" source="841" target="372" cy:directed="1"/>
      <edge id="166597" label="zzzz101,zzzz198" source="841" target="744" cy:directed="1"/>
      <edge id="166596" label="zzzz101,zzzz621" source="841" target="321" cy:directed="1"/>
      <edge id="166595" label="zzzz101,zzzz265" source="841" target="677" cy:directed="1"/>
      <edge id="166594" label="zzzz101,zzzz322" source="841" target="620" cy:directed="1"/>
      <edge id="166593" label="zzzz101,zzzz615" source="841" target="327" cy:directed="1"/>
      <edge id="166592" label="zzzz101,zzzz617" source="841" target="325" cy:directed="1"/>
      <edge id="166591" label="zzzz101,zzzz620" source="841" target="322" cy:directed="1"/>
      <edge id="166590" label="zzzz101,zzzz224" source="841" target="718" cy:directed="1"/>
      <edge id="166589" label="zzzz101,zzzz255" source="841" target="687" cy:directed="1"/>
      <edge id="166588" label="zzzz101,zzzz588" source="841" target="354" cy:directed="1"/>
      <edge id="166587" label="zzzz101,zzzz618" source="841" target="324" cy:directed="1"/>
      <edge id="166586" label="zzzz101,zzzz656" source="841" target="286" cy:directed="1"/>
      <edge id="166585" label="zzzz101,zzzz123" source="841" target="819" cy:directed="1"/>
      <edge id="166584" label="zzzz101,zzzz303" source="841" target="639" cy:directed="1"/>
      <edge id="166583" label="zzzz101,zzzz640" source="841" target="302" cy:directed="1"/>
      <edge id="166582" label="zzzz101,zzzz200" source="841" target="742" cy:directed="1"/>
      <edge id="166581" label="zzzz101,zzzz554" source="841" target="388" cy:directed="1"/>
      <edge id="166580" label="zzzz101,zzzz559" source="841" target="383" cy:directed="1"/>
      <edge id="166579" label="zzzz101,zzzz118" source="841" target="824" cy:directed="1"/>
      <edge id="166578" label="zzzz101,zzzz212" source="841" target="730" cy:directed="1"/>
      <edge id="166577" label="zzzz101,zzzz605" source="841" target="337" cy:directed="1"/>
      <edge id="166576" label="zzzz101,zzzz569" source="841" target="373" cy:directed="1"/>
      <edge id="166575" label="zzzz101,zzzz606" source="841" target="336" cy:directed="1"/>
      <edge id="166574" label="zzzz101,zzzz616" source="841" target="326" cy:directed="1"/>
      <edge id="166573" label="zzzz101,zzzz626" source="841" target="316" cy:directed="1"/>
      <edge id="166572" label="zzzz101,zzzz220" source="841" target="722" cy:directed="1"/>
      <edge id="166571" label="zzzz101,zzzz563" source="841" target="379" cy:directed="1"/>
      <edge id="166570" label="zzzz101,zzzz582" source="841" target="360" cy:directed="1"/>
      <edge id="166569" label="zzzz101,zzzz590" source="841" target="352" cy:directed="1"/>
      <edge id="166568" label="zzzz101,zzzz619" source="841" target="323" cy:directed="1"/>
      <edge id="166567" label="zzzz101,zzzz326" source="841" target="616" cy:directed="1"/>
      <edge id="166566" label="zzzz101,zzzz589" source="841" target="353" cy:directed="1"/>
      <edge id="166565" label="zzzz101,zzzz603" source="841" target="339" cy:directed="1"/>
      <edge id="166564" label="zzzz101,zzzz607" source="841" target="335" cy:directed="1"/>
      <edge id="166563" label="zzzz101,zzzz195" source="841" target="747" cy:directed="1"/>
      <edge id="166562" label="zzzz101,zzzz655" source="841" target="287" cy:directed="1"/>
      <edge id="166561" label="zzzz101,zzzz221" source="841" target="721" cy:directed="1"/>
      <edge id="166560" label="zzzz101,zzzz641" source="841" target="301" cy:directed="1"/>
      <edge id="166559" label="zzzz101,zzzz313" source="841" target="629" cy:directed="1"/>
      <edge id="166558" label="zzzz101,zzzz604" source="841" target="338" cy:directed="1"/>
      <edge id="166557" label="zzzz101,zzzz199" source="841" target="743" cy:directed="1"/>
      <edge id="166556" label="zzzz101,zzzz211" source="841" target="731" cy:directed="1"/>
      <edge id="166555" label="zzzz101,zzzz636" source="841" target="306" cy:directed="1"/>
      <edge id="166554" label="zzzz101,zzzz204" source="841" target="738" cy:directed="1"/>
      <edge id="166553" label="zzzz101,zzzz210" source="841" target="732" cy:directed="1"/>
      <edge id="166552" label="zzzz101,zzzz301" source="841" target="641" cy:directed="1"/>
      <edge id="166551" label="zzzz101,zzzz550" source="841" target="392" cy:directed="1"/>
      <edge id="166550" label="zzzz101,zzzz661" source="841" target="281" cy:directed="1"/>
      <edge id="166549" label="zzzz101,zzzz205" source="841" target="737" cy:directed="1"/>
      <edge id="166548" label="zzzz101,zzzz411" source="841" target="531" cy:directed="1"/>
      <edge id="166547" label="zzzz101,zzzz207" source="841" target="735" cy:directed="1"/>
      <edge id="166546" label="zzzz101,zzzz305" source="841" target="637" cy:directed="1"/>
      <edge id="166545" label="zzzz101,zzzz413" source="841" target="529" cy:directed="1"/>
      <edge id="166544" label="zzzz101,zzzz141" source="841" target="801" cy:directed="1"/>
      <edge id="166543" label="zzzz101,zzzz215" source="841" target="727" cy:directed="1"/>
      <edge id="166542" label="zzzz101,zzzz425" source="841" target="517" cy:directed="1"/>
      <edge id="166541" label="zzzz101,zzzz566" source="841" target="376" cy:directed="1"/>
      <edge id="166540" label="zzzz101,zzzz662" source="841" target="280" cy:directed="1"/>
      <edge id="166539" label="zzzz101,zzzz297" source="841" target="645" cy:directed="1"/>
      <edge id="166538" label="zzzz101,zzzz419" source="841" target="523" cy:directed="1"/>
      <edge id="166537" label="zzzz101,zzzz657" source="841" target="285" cy:directed="1"/>
      <edge id="166536" label="zzzz101,zzzz416" source="841" target="526" cy:directed="1"/>
      <edge id="166535" label="zzzz101,zzzz197" source="841" target="745" cy:directed="1"/>
      <edge id="166534" label="zzzz101,zzzz216" source="841" target="726" cy:directed="1"/>
      <edge id="166533" label="zzzz101,zzzz651" source="841" target="291" cy:directed="1"/>
      <edge id="166532" label="zzzz101,zzzz652" source="841" target="290" cy:directed="1"/>
      <edge id="166531" label="zzzz101,zzzz296" source="841" target="646" cy:directed="1"/>
      <edge id="166530" label="zzzz101,zzzz497" source="841" target="445" cy:directed="1"/>
      <edge id="166529" label="zzzz101,zzzz555" source="841" target="387" cy:directed="1"/>
      <edge id="166528" label="zzzz101,zzzz578" source="841" target="364" cy:directed="1"/>
      <edge id="166527" label="zzzz101,zzzz214" source="841" target="728" cy:directed="1"/>
      <edge id="166526" label="zzzz101,zzzz321" source="841" target="621" cy:directed="1"/>
      <edge id="166525" label="zzzz101,zzzz665" source="841" target="277" cy:directed="1"/>
      <edge id="166524" label="zzzz101,zzzz412" source="841" target="530" cy:directed="1"/>
      <edge id="166523" label="zzzz101,zzzz417" source="841" target="525" cy:directed="1"/>
      <edge id="166522" label="zzzz101,zzzz668" source="841" target="274" cy:directed="1"/>
      <edge id="166521" label="zzzz101,zzzz217" source="841" target="725" cy:directed="1"/>
      <edge id="166520" label="zzzz101,zzzz264" source="841" target="678" cy:directed="1"/>
      <edge id="166519" label="zzzz101,zzzz592" source="841" target="350" cy:directed="1"/>
      <edge id="166518" label="zzzz101,zzzz128" source="841" target="814" cy:directed="1"/>
      <edge id="166517" label="zzzz101,zzzz664" source="841" target="278" cy:directed="1"/>
      <edge id="166516" label="zzzz101,zzzz304" source="841" target="638" cy:directed="1"/>
      <edge id="166515" label="zzzz101,zzzz429" source="841" target="513" cy:directed="1"/>
      <edge id="166514" label="zzzz101,zzzz612" source="841" target="330" cy:directed="1"/>
      <edge id="166513" label="zzzz101,zzzz415" source="841" target="527" cy:directed="1"/>
      <edge id="166512" label="zzzz101,zzzz637" source="841" target="305" cy:directed="1"/>
      <edge id="166511" label="zzzz101,zzzzz60" source="841" target="111" cy:directed="1"/>
      <edge id="166510" label="zzzz101,zzzz645" source="841" target="297" cy:directed="1"/>
      <edge id="166509" label="zzzz101,zzzz469" source="841" target="473" cy:directed="1"/>
      <edge id="166508" label="zzzz101,zzzz121" source="841" target="821" cy:directed="1"/>
      <edge id="166507" label="zzzz101,zzzz495" source="841" target="447" cy:directed="1"/>
      <edge id="166506" label="zzzz101,zzzz642" source="841" target="300" cy:directed="1"/>
      <edge id="166505" label="zzzz101,zzzz306" source="841" target="636" cy:directed="1"/>
      <edge id="166504" label="zzzz101,zzzz414" source="841" target="528" cy:directed="1"/>
      <edge id="166503" label="zzzz101,zzzz660" source="841" target="282" cy:directed="1"/>
      <edge id="166502" label="zzzz101,zzzz464" source="841" target="478" cy:directed="1"/>
      <edge id="166501" label="zzzz101,zzzz489" source="841" target="453" cy:directed="1"/>
      <edge id="166500" label="zzzz101,zzzz591" source="841" target="351" cy:directed="1"/>
      <edge id="166499" label="zzzz101,zzzz441" source="841" target="501" cy:directed="1"/>
      <edge id="166498" label="zzzz101,zzzz473" source="841" target="469" cy:directed="1"/>
      <edge id="166497" label="zzzz101,zzzz208" source="841" target="734" cy:directed="1"/>
      <edge id="166496" label="zzzz101,zzzz724" source="841" target="218" cy:directed="1"/>
      <edge id="166495" label="zzzz101,zzzz648" source="841" target="294" cy:directed="1"/>
      <edge id="166494" label="zzzz101,zzzz447" source="841" target="495" cy:directed="1"/>
      <edge id="166493" label="zzzz101,zzzz175" source="841" target="767" cy:directed="1"/>
      <edge id="166492" label="zzzz101,zzzz565" source="841" target="377" cy:directed="1"/>
      <edge id="166491" label="zzzz101,zzzz494" source="841" target="448" cy:directed="1"/>
      <edge id="166490" label="zzzz101,zzzz643" source="841" target="299" cy:directed="1"/>
      <edge id="166489" label="zzzz101,zzzz479" source="841" target="463" cy:directed="1"/>
      <edge id="166488" label="zzzz101,zzzz488" source="841" target="454" cy:directed="1"/>
      <edge id="166487" label="zzzz101,zzzz498" source="841" target="444" cy:directed="1"/>
      <edge id="166486" label="zzzz102,zzzz501" source="840" target="441" cy:directed="1"/>
      <edge id="166485" label="zzzz102,zzzzz45" source="840" target="126" cy:directed="1"/>
      <edge id="166484" label="zzzz102,zzzz283" source="840" target="659" cy:directed="1"/>
      <edge id="166483" label="zzzz102,zzzzz87" source="840" target="84" cy:directed="1"/>
      <edge id="166482" label="zzzz102,zzzzz90" source="840" target="81" cy:directed="1"/>
      <edge id="166481" label="zzzz102,zzzz165" source="840" target="777" cy:directed="1"/>
      <edge id="166480" label="zzzz102,zzzz288" source="840" target="654" cy:directed="1"/>
      <edge id="166479" label="zzzz102,zzzzz41" source="840" target="130" cy:directed="1"/>
      <edge id="166478" label="zzzz102,zzzzz66" source="840" target="105" cy:directed="1"/>
      <edge id="166477" label="zzzz102,zzzzz85" source="840" target="86" cy:directed="1"/>
      <edge id="166476" label="zzzz102,zzzzz34" source="840" target="137" cy:directed="1"/>
      <edge id="166475" label="zzzz102,zzzz596" source="840" target="346" cy:directed="1"/>
      <edge id="166474" label="zzzz102,zzzz734" source="840" target="208" cy:directed="1"/>
      <edge id="166473" label="zzzz102,zzzz258" source="840" target="684" cy:directed="1"/>
      <edge id="166472" label="zzzz102,zzzz167" source="840" target="775" cy:directed="1"/>
      <edge id="166471" label="zzzz102,zzzz598" source="840" target="344" cy:directed="1"/>
      <edge id="166470" label="zzzz102,zzzz166" source="840" target="776" cy:directed="1"/>
      <edge id="166469" label="zzzz102,zzzzz42" source="840" target="129" cy:directed="1"/>
      <edge id="166468" label="zzzz102,zzzzz69" source="840" target="102" cy:directed="1"/>
      <edge id="166467" label="zzzz102,zzzzz84" source="840" target="87" cy:directed="1"/>
      <edge id="166466" label="zzzz102,zzzz133" source="840" target="809" cy:directed="1"/>
      <edge id="166465" label="zzzz102,zzzz183" source="840" target="759" cy:directed="1"/>
      <edge id="166464" label="zzzz102,zzzz690" source="840" target="252" cy:directed="1"/>
      <edge id="166463" label="zzzz102,zzzz311" source="840" target="631" cy:directed="1"/>
      <edge id="166462" label="zzzz102,zzzz280" source="840" target="662" cy:directed="1"/>
      <edge id="166461" label="zzzz102,zzzz115" source="840" target="827" cy:directed="1"/>
      <edge id="166460" label="zzzz102,zzzz148" source="840" target="794" cy:directed="1"/>
      <edge id="166459" label="zzzz102,zzzz259" source="840" target="683" cy:directed="1"/>
      <edge id="166458" label="zzzz102,zzzz241" source="840" target="701" cy:directed="1"/>
      <edge id="166457" label="zzzz102,zzzz533" source="840" target="409" cy:directed="1"/>
      <edge id="166456" label="zzzz102,zzzz597" source="840" target="345" cy:directed="1"/>
      <edge id="166455" label="zzzz102,zzzz162" source="840" target="780" cy:directed="1"/>
      <edge id="166454" label="zzzz102,zzzz242" source="840" target="700" cy:directed="1"/>
      <edge id="166453" label="zzzz102,zzzzz92" source="840" target="79" cy:directed="1"/>
      <edge id="166452" label="zzzz102,zzzz160" source="840" target="782" cy:directed="1"/>
      <edge id="166451" label="zzzz102,zzzz146" source="840" target="796" cy:directed="1"/>
      <edge id="166450" label="zzzz102,zzzzz65" source="840" target="106" cy:directed="1"/>
      <edge id="166449" label="zzzz102,zzzz519" source="840" target="423" cy:directed="1"/>
      <edge id="166448" label="zzzz102,zzzz594" source="840" target="348" cy:directed="1"/>
      <edge id="166447" label="zzzz102,zzzz599" source="840" target="343" cy:directed="1"/>
      <edge id="166446" label="zzzz102,zzzzz40" source="840" target="131" cy:directed="1"/>
      <edge id="166445" label="zzzz102,zzzz159" source="840" target="783" cy:directed="1"/>
      <edge id="166444" label="zzzz102,zzzzz83" source="840" target="88" cy:directed="1"/>
      <edge id="166443" label="zzzz102,zzzzz76" source="840" target="95" cy:directed="1"/>
      <edge id="166442" label="zzzz102,zzzz704" source="840" target="238" cy:directed="1"/>
      <edge id="166441" label="zzzz102,zzzzz77" source="840" target="94" cy:directed="1"/>
      <edge id="166440" label="zzzz102,zzzzz81" source="840" target="90" cy:directed="1"/>
      <edge id="166439" label="zzzz102,zzzzz55" source="840" target="116" cy:directed="1"/>
      <edge id="166438" label="zzzz102,zzzz292" source="840" target="650" cy:directed="1"/>
      <edge id="166437" label="zzzz102,zzzzz54" source="840" target="117" cy:directed="1"/>
      <edge id="166436" label="zzzz102,zzzzz89" source="840" target="82" cy:directed="1"/>
      <edge id="166435" label="zzzz102,zzzz157" source="840" target="785" cy:directed="1"/>
      <edge id="166434" label="zzzz102,zzzzz58" source="840" target="113" cy:directed="1"/>
      <edge id="166433" label="zzzz102,zzzzz82" source="840" target="89" cy:directed="1"/>
      <edge id="166432" label="zzzz102,zzzz424" source="840" target="518" cy:directed="1"/>
      <edge id="166431" label="zzzz102,zzzzz78" source="840" target="93" cy:directed="1"/>
      <edge id="166430" label="zzzz102,zzzz140" source="840" target="802" cy:directed="1"/>
      <edge id="166429" label="zzzz102,zzzz268" source="840" target="674" cy:directed="1"/>
      <edge id="166428" label="zzzz102,zzzz277" source="840" target="665" cy:directed="1"/>
      <edge id="166427" label="zzzz102,zzzz632" source="840" target="310" cy:directed="1"/>
      <edge id="166426" label="zzzz102,zzzz142" source="840" target="800" cy:directed="1"/>
      <edge id="166425" label="zzzz102,zzzz423" source="840" target="519" cy:directed="1"/>
      <edge id="166424" label="zzzz102,zzzz523" source="840" target="419" cy:directed="1"/>
      <edge id="166423" label="zzzz102,zzzz289" source="840" target="653" cy:directed="1"/>
      <edge id="166422" label="zzzz102,zzzz240" source="840" target="702" cy:directed="1"/>
      <edge id="166421" label="zzzz102,zzzz131" source="840" target="811" cy:directed="1"/>
      <edge id="166420" label="zzzz102,zzzz158" source="840" target="784" cy:directed="1"/>
      <edge id="166419" label="zzzz102,zzzz508" source="840" target="434" cy:directed="1"/>
      <edge id="166418" label="zzzz102,zzzz517" source="840" target="425" cy:directed="1"/>
      <edge id="166417" label="zzzz102,zzzzz44" source="840" target="127" cy:directed="1"/>
      <edge id="166416" label="zzzz102,zzzz266" source="840" target="676" cy:directed="1"/>
      <edge id="166415" label="zzzz102,zzzz132" source="840" target="810" cy:directed="1"/>
      <edge id="166414" label="zzzz102,zzzz538" source="840" target="404" cy:directed="1"/>
      <edge id="166413" label="zzzz102,zzzz134" source="840" target="808" cy:directed="1"/>
      <edge id="166412" label="zzzz102,zzzzz39" source="840" target="132" cy:directed="1"/>
      <edge id="166411" label="zzzz102,zzzzz72" source="840" target="99" cy:directed="1"/>
      <edge id="166410" label="zzzz102,zzzzz80" source="840" target="91" cy:directed="1"/>
      <edge id="166409" label="zzzz102,zzzz293" source="840" target="649" cy:directed="1"/>
      <edge id="166408" label="zzzz102,zzzz270" source="840" target="672" cy:directed="1"/>
      <edge id="166407" label="zzzz102,zzzz164" source="840" target="778" cy:directed="1"/>
      <edge id="166406" label="zzzz102,zzzz171" source="840" target="771" cy:directed="1"/>
      <edge id="166405" label="zzzz102,zzzzz79" source="840" target="92" cy:directed="1"/>
      <edge id="166404" label="zzzz102,zzzzz94" source="840" target="77" cy:directed="1"/>
      <edge id="166403" label="zzzz102,zzzz163" source="840" target="779" cy:directed="1"/>
      <edge id="166402" label="zzzz102,zzzzz88" source="840" target="83" cy:directed="1"/>
      <edge id="166401" label="zzzz102,zzzz595" source="840" target="347" cy:directed="1"/>
      <edge id="166400" label="zzzz102,zzzzz86" source="840" target="85" cy:directed="1"/>
      <edge id="166399" label="zzzz102,zzzzz35" source="840" target="136" cy:directed="1"/>
      <edge id="166398" label="zzzz102,zzzz634" source="840" target="308" cy:directed="1"/>
      <edge id="166397" label="zzzz102,zzzz147" source="840" target="795" cy:directed="1"/>
      <edge id="166396" label="zzzz102,zzzz298" source="840" target="644" cy:directed="1"/>
      <edge id="166395" label="zzzz102,zzzz628" source="840" target="314" cy:directed="1"/>
      <edge id="166394" label="zzzz102,zzzz129" source="840" target="813" cy:directed="1"/>
      <edge id="166393" label="zzzz102,zzzz287" source="840" target="655" cy:directed="1"/>
      <edge id="166392" label="zzzz102,zzzz507" source="840" target="435" cy:directed="1"/>
      <edge id="166391" label="zzzz102,zzzz172" source="840" target="770" cy:directed="1"/>
      <edge id="166390" label="zzzz102,zzzzz95" source="840" target="76" cy:directed="1"/>
      <edge id="166389" label="zzzz102,zzzz169" source="840" target="773" cy:directed="1"/>
      <edge id="166388" label="zzzz102,zzzzz99" source="840" target="72" cy:directed="1"/>
      <edge id="166387" label="zzzz102,zzzzz74" source="840" target="97" cy:directed="1"/>
      <edge id="166386" label="zzzz102,zzzz733" source="840" target="209" cy:directed="1"/>
      <edge id="166385" label="zzzz102,zzzz191" source="840" target="751" cy:directed="1"/>
      <edge id="166384" label="zzzz102,zzzz257" source="840" target="685" cy:directed="1"/>
      <edge id="166383" label="zzzz102,zzzz189" source="840" target="753" cy:directed="1"/>
      <edge id="166382" label="zzzz102,zzzz702" source="840" target="240" cy:directed="1"/>
      <edge id="166381" label="zzzz102,zzzz168" source="840" target="774" cy:directed="1"/>
      <edge id="166380" label="zzzz102,zzzz580" source="840" target="362" cy:directed="1"/>
      <edge id="166379" label="zzzz102,zzzz673" source="840" target="269" cy:directed="1"/>
      <edge id="166378" label="zzzz102,zzzz706" source="840" target="236" cy:directed="1"/>
      <edge id="166377" label="zzzz102,zzzz282" source="840" target="660" cy:directed="1"/>
      <edge id="166376" label="zzzz102,zzzz581" source="840" target="361" cy:directed="1"/>
      <edge id="166375" label="zzzz102,zzzzz32" source="840" target="139" cy:directed="1"/>
      <edge id="166374" label="zzzz102,zzzz312" source="840" target="630" cy:directed="1"/>
      <edge id="166373" label="zzzz102,zzzz692" source="840" target="250" cy:directed="1"/>
      <edge id="166372" label="zzzz102,zzzz699" source="840" target="243" cy:directed="1"/>
      <edge id="166371" label="zzzz102,zzzz506" source="840" target="436" cy:directed="1"/>
      <edge id="166370" label="zzzz102,zzzz700" source="840" target="242" cy:directed="1"/>
      <edge id="166369" label="zzzz102,zzzz181" source="840" target="761" cy:directed="1"/>
      <edge id="166368" label="zzzz102,zzzz228" source="840" target="714" cy:directed="1"/>
      <edge id="166367" label="zzzz102,zzzz260" source="840" target="682" cy:directed="1"/>
      <edge id="166366" label="zzzz102,zzzzz93" source="840" target="78" cy:directed="1"/>
      <edge id="166365" label="zzzz102,zzzz553" source="840" target="389" cy:directed="1"/>
      <edge id="166364" label="zzzz102,zzzz684" source="840" target="258" cy:directed="1"/>
      <edge id="166363" label="zzzz102,zzzz233" source="840" target="709" cy:directed="1"/>
      <edge id="166362" label="zzzz102,zzzz106" source="840" target="836" cy:directed="1"/>
      <edge id="166361" label="zzzz102,zzzz192" source="840" target="750" cy:directed="1"/>
      <edge id="166360" label="zzzz102,zzzz572" source="840" target="370" cy:directed="1"/>
      <edge id="166359" label="zzzz102,zzzz693" source="840" target="249" cy:directed="1"/>
      <edge id="166358" label="zzzz102,zzzz558" source="840" target="384" cy:directed="1"/>
      <edge id="166357" label="zzzz102,zzzz567" source="840" target="375" cy:directed="1"/>
      <edge id="166356" label="zzzz102,zzzz574" source="840" target="368" cy:directed="1"/>
      <edge id="166355" label="zzzz102,zzzz611" source="840" target="331" cy:directed="1"/>
      <edge id="166354" label="zzzz102,zzzz308" source="840" target="634" cy:directed="1"/>
      <edge id="166353" label="zzzz102,zzzz107" source="840" target="835" cy:directed="1"/>
      <edge id="166352" label="zzzz102,zzzz230" source="840" target="712" cy:directed="1"/>
      <edge id="166351" label="zzzz102,zzzz564" source="840" target="378" cy:directed="1"/>
      <edge id="166350" label="zzzz102,zzzz707" source="840" target="235" cy:directed="1"/>
      <edge id="166349" label="zzzz102,zzzz688" source="840" target="254" cy:directed="1"/>
      <edge id="166348" label="zzzz102,zzzz262" source="840" target="680" cy:directed="1"/>
      <edge id="166347" label="zzzz102,zzzz712" source="840" target="230" cy:directed="1"/>
      <edge id="166346" label="zzzz102,zzzz687" source="840" target="255" cy:directed="1"/>
      <edge id="166345" label="zzzz102,zzzz694" source="840" target="248" cy:directed="1"/>
      <edge id="166344" label="zzzz102,zzzz144" source="840" target="798" cy:directed="1"/>
      <edge id="166343" label="zzzz102,zzzz203" source="840" target="739" cy:directed="1"/>
      <edge id="166342" label="zzzz102,zzzz231" source="840" target="711" cy:directed="1"/>
      <edge id="166341" label="zzzz102,zzzz234" source="840" target="708" cy:directed="1"/>
      <edge id="166340" label="zzzz102,zzzz235" source="840" target="707" cy:directed="1"/>
      <edge id="166339" label="zzzz102,zzzz579" source="840" target="363" cy:directed="1"/>
      <edge id="166338" label="zzzz102,zzzz685" source="840" target="257" cy:directed="1"/>
      <edge id="166337" label="zzzz102,zzzz689" source="840" target="253" cy:directed="1"/>
      <edge id="166336" label="zzzz102,zzzz696" source="840" target="246" cy:directed="1"/>
      <edge id="166335" label="zzzz102,zzzz110" source="840" target="832" cy:directed="1"/>
      <edge id="166334" label="zzzz102,zzzz161" source="840" target="781" cy:directed="1"/>
      <edge id="166333" label="zzzz102,zzzz229" source="840" target="713" cy:directed="1"/>
      <edge id="166332" label="zzzz102,zzzz686" source="840" target="256" cy:directed="1"/>
      <edge id="166331" label="zzzz102,zzzz422" source="840" target="520" cy:directed="1"/>
      <edge id="166330" label="zzzz102,zzzz510" source="840" target="432" cy:directed="1"/>
      <edge id="166329" label="zzzz102,zzzz576" source="840" target="366" cy:directed="1"/>
      <edge id="166328" label="zzzz102,zzzz503" source="840" target="439" cy:directed="1"/>
      <edge id="166327" label="zzzz102,zzzz116" source="840" target="826" cy:directed="1"/>
      <edge id="166326" label="zzzz102,zzzz248" source="840" target="694" cy:directed="1"/>
      <edge id="166325" label="zzzz102,zzzz505" source="840" target="437" cy:directed="1"/>
      <edge id="166324" label="zzzz102,zzzz552" source="840" target="390" cy:directed="1"/>
      <edge id="166323" label="zzzz102,zzzz557" source="840" target="385" cy:directed="1"/>
      <edge id="166322" label="zzzz102,zzzz646" source="840" target="296" cy:directed="1"/>
      <edge id="166321" label="zzzz102,zzzz236" source="840" target="706" cy:directed="1"/>
      <edge id="166320" label="zzzz102,zzzz238" source="840" target="704" cy:directed="1"/>
      <edge id="166319" label="zzzz102,zzzz243" source="840" target="699" cy:directed="1"/>
      <edge id="166318" label="zzzz102,zzzz713" source="840" target="229" cy:directed="1"/>
      <edge id="166317" label="zzzz102,zzzz149" source="840" target="793" cy:directed="1"/>
      <edge id="166316" label="zzzz102,zzzz237" source="840" target="705" cy:directed="1"/>
      <edge id="166315" label="zzzz102,zzzz672" source="840" target="270" cy:directed="1"/>
      <edge id="166314" label="zzzz102,zzzz551" source="840" target="391" cy:directed="1"/>
      <edge id="166313" label="zzzz102,zzzz711" source="840" target="231" cy:directed="1"/>
      <edge id="166312" label="zzzz102,zzzz720" source="840" target="222" cy:directed="1"/>
      <edge id="166311" label="zzzz102,zzzz730" source="840" target="212" cy:directed="1"/>
      <edge id="166310" label="zzzz102,zzzz119" source="840" target="823" cy:directed="1"/>
      <edge id="166309" label="zzzz102,zzzz504" source="840" target="438" cy:directed="1"/>
      <edge id="166308" label="zzzz102,zzzz731" source="840" target="211" cy:directed="1"/>
      <edge id="166307" label="zzzz102,zzzz284" source="840" target="658" cy:directed="1"/>
      <edge id="166306" label="zzzz102,zzzz194" source="840" target="748" cy:directed="1"/>
      <edge id="166305" label="zzzz102,zzzz678" source="840" target="264" cy:directed="1"/>
      <edge id="166304" label="zzzz102,zzzzz67" source="840" target="104" cy:directed="1"/>
      <edge id="166303" label="zzzz102,zzzz190" source="840" target="752" cy:directed="1"/>
      <edge id="166302" label="zzzz102,zzzz113" source="840" target="829" cy:directed="1"/>
      <edge id="166301" label="zzzz102,zzzz273" source="840" target="669" cy:directed="1"/>
      <edge id="166300" label="zzzz102,zzzz534" source="840" target="408" cy:directed="1"/>
      <edge id="166299" label="zzzz102,zzzz676" source="840" target="266" cy:directed="1"/>
      <edge id="166298" label="zzzz102,zzzzz71" source="840" target="100" cy:directed="1"/>
      <edge id="166297" label="zzzz102,zzzz111" source="840" target="831" cy:directed="1"/>
      <edge id="166296" label="zzzz102,zzzz263" source="840" target="679" cy:directed="1"/>
      <edge id="166295" label="zzzz102,zzzz623" source="840" target="319" cy:directed="1"/>
      <edge id="166294" label="zzzz102,zzzz109" source="840" target="833" cy:directed="1"/>
      <edge id="166293" label="zzzz102,zzzz112" source="840" target="830" cy:directed="1"/>
      <edge id="166292" label="zzzz102,zzzz545" source="840" target="397" cy:directed="1"/>
      <edge id="166291" label="zzzz102,zzzz691" source="840" target="251" cy:directed="1"/>
      <edge id="166290" label="zzzz102,zzzz735" source="840" target="207" cy:directed="1"/>
      <edge id="166289" label="zzzz102,zzzz124" source="840" target="818" cy:directed="1"/>
      <edge id="166288" label="zzzz102,zzzz556" source="840" target="386" cy:directed="1"/>
      <edge id="166287" label="zzzz102,zzzz709" source="840" target="233" cy:directed="1"/>
      <edge id="166286" label="zzzz102,zzzzz73" source="840" target="98" cy:directed="1"/>
      <edge id="166285" label="zzzz102,zzzz154" source="840" target="788" cy:directed="1"/>
      <edge id="166284" label="zzzz102,zzzz291" source="840" target="651" cy:directed="1"/>
      <edge id="166283" label="zzzz102,zzzz515" source="840" target="427" cy:directed="1"/>
      <edge id="166282" label="zzzz102,zzzzz98" source="840" target="73" cy:directed="1"/>
      <edge id="166281" label="zzzz102,zzzz136" source="840" target="806" cy:directed="1"/>
      <edge id="166280" label="zzzz102,zzzz178" source="840" target="764" cy:directed="1"/>
      <edge id="166279" label="zzzz102,zzzz625" source="840" target="317" cy:directed="1"/>
      <edge id="166278" label="zzzz102,zzzz644" source="840" target="298" cy:directed="1"/>
      <edge id="166277" label="zzzz102,zzzz682" source="840" target="260" cy:directed="1"/>
      <edge id="166276" label="zzzz102,zzzz739" source="840" target="203" cy:directed="1"/>
      <edge id="166275" label="zzzz102,zzzz543" source="840" target="399" cy:directed="1"/>
      <edge id="166274" label="zzzz102,zzzz732" source="840" target="210" cy:directed="1"/>
      <edge id="166273" label="zzzz102,zzzz130" source="840" target="812" cy:directed="1"/>
      <edge id="166272" label="zzzz102,zzzz150" source="840" target="792" cy:directed="1"/>
      <edge id="166271" label="zzzz102,zzzzz96" source="840" target="75" cy:directed="1"/>
      <edge id="166270" label="zzzz102,zzzz105" source="840" target="837" cy:directed="1"/>
      <edge id="166269" label="zzzz102,zzzz274" source="840" target="668" cy:directed="1"/>
      <edge id="166268" label="zzzz102,zzzz514" source="840" target="428" cy:directed="1"/>
      <edge id="166267" label="zzzz102,zzzz708" source="840" target="234" cy:directed="1"/>
      <edge id="166266" label="zzzz102,zzzz114" source="840" target="828" cy:directed="1"/>
      <edge id="166265" label="zzzz102,zzzz279" source="840" target="663" cy:directed="1"/>
      <edge id="166264" label="zzzz102,zzzz679" source="840" target="263" cy:directed="1"/>
      <edge id="166263" label="zzzz102,zzzz120" source="840" target="822" cy:directed="1"/>
      <edge id="166262" label="zzzz102,zzzz232" source="840" target="710" cy:directed="1"/>
      <edge id="166261" label="zzzz102,zzzz743" source="840" target="199" cy:directed="1"/>
      <edge id="166260" label="zzzz102,zzzzz57" source="840" target="114" cy:directed="1"/>
      <edge id="166259" label="zzzz102,zzzzz75" source="840" target="96" cy:directed="1"/>
      <edge id="166258" label="zzzz102,zzzz246" source="840" target="696" cy:directed="1"/>
      <edge id="166257" label="zzzz102,zzzz737" source="840" target="205" cy:directed="1"/>
      <edge id="166256" label="zzzz102,zzzz127" source="840" target="815" cy:directed="1"/>
      <edge id="166255" label="zzzz102,zzzz577" source="840" target="365" cy:directed="1"/>
      <edge id="166254" label="zzzz102,zzzzz64" source="840" target="107" cy:directed="1"/>
      <edge id="166253" label="zzzz102,zzzzz63" source="840" target="108" cy:directed="1"/>
      <edge id="166252" label="zzzz102,zzzz139" source="840" target="803" cy:directed="1"/>
      <edge id="166251" label="zzzz102,zzzz250" source="840" target="692" cy:directed="1"/>
      <edge id="166250" label="zzzz102,zzzz584" source="840" target="358" cy:directed="1"/>
      <edge id="166249" label="zzzz102,zzzz509" source="840" target="433" cy:directed="1"/>
      <edge id="166248" label="zzzz102,zzzz541" source="840" target="401" cy:directed="1"/>
      <edge id="166247" label="zzzz102,zzzzz36" source="840" target="135" cy:directed="1"/>
      <edge id="166246" label="zzzz102,zzzz245" source="840" target="697" cy:directed="1"/>
      <edge id="166245" label="zzzz102,zzzz310" source="840" target="632" cy:directed="1"/>
      <edge id="166244" label="zzzz102,zzzz718" source="840" target="224" cy:directed="1"/>
      <edge id="166243" label="zzzz102,zzzz174" source="840" target="768" cy:directed="1"/>
      <edge id="166242" label="zzzz102,zzzz571" source="840" target="371" cy:directed="1"/>
      <edge id="166241" label="zzzz102,zzzz104" source="840" target="838" cy:directed="1"/>
      <edge id="166240" label="zzzz102,zzzz729" source="840" target="213" cy:directed="1"/>
      <edge id="166239" label="zzzz102,zzzzz91" source="840" target="80" cy:directed="1"/>
      <edge id="166238" label="zzzz102,zzzz536" source="840" target="406" cy:directed="1"/>
      <edge id="166237" label="zzzz102,zzzz122" source="840" target="820" cy:directed="1"/>
      <edge id="166236" label="zzzz102,zzzz202" source="840" target="740" cy:directed="1"/>
      <edge id="166235" label="zzzz102,zzzz744" source="840" target="198" cy:directed="1"/>
      <edge id="166234" label="zzzz102,zzzz717" source="840" target="225" cy:directed="1"/>
      <edge id="166233" label="zzzz102,zzzz126" source="840" target="816" cy:directed="1"/>
      <edge id="166232" label="zzzz102,zzzz145" source="840" target="797" cy:directed="1"/>
      <edge id="166231" label="zzzz102,zzzz703" source="840" target="239" cy:directed="1"/>
      <edge id="166230" label="zzzz102,zzzz698" source="840" target="244" cy:directed="1"/>
      <edge id="166229" label="zzzz102,zzzz286" source="840" target="656" cy:directed="1"/>
      <edge id="166228" label="zzzz102,zzzz560" source="840" target="382" cy:directed="1"/>
      <edge id="166227" label="zzzz102,zzzz500" source="840" target="442" cy:directed="1"/>
      <edge id="166226" label="zzzz102,zzzz193" source="840" target="749" cy:directed="1"/>
      <edge id="166225" label="zzzz102,zzzz290" source="840" target="652" cy:directed="1"/>
      <edge id="166224" label="zzzz102,zzzz526" source="840" target="416" cy:directed="1"/>
      <edge id="166223" label="zzzz102,zzzzz70" source="840" target="101" cy:directed="1"/>
      <edge id="166222" label="zzzz102,zzzz531" source="840" target="411" cy:directed="1"/>
      <edge id="166221" label="zzzz102,zzzz562" source="840" target="380" cy:directed="1"/>
      <edge id="166220" label="zzzz102,zzzz681" source="840" target="261" cy:directed="1"/>
      <edge id="166219" label="zzzz102,zzzz721" source="840" target="221" cy:directed="1"/>
      <edge id="166218" label="zzzz102,zzzzz61" source="840" target="110" cy:directed="1"/>
      <edge id="166217" label="zzzz102,zzzz528" source="840" target="414" cy:directed="1"/>
      <edge id="166216" label="zzzz102,zzzz697" source="840" target="245" cy:directed="1"/>
      <edge id="166215" label="zzzz102,zzzzz48" source="840" target="123" cy:directed="1"/>
      <edge id="166214" label="zzzz102,zzzz153" source="840" target="789" cy:directed="1"/>
      <edge id="166213" label="zzzz102,zzzz252" source="840" target="690" cy:directed="1"/>
      <edge id="166212" label="zzzz102,zzzz695" source="840" target="247" cy:directed="1"/>
      <edge id="166211" label="zzzz102,zzzzz49" source="840" target="122" cy:directed="1"/>
      <edge id="166210" label="zzzz102,zzzzz52" source="840" target="119" cy:directed="1"/>
      <edge id="166209" label="zzzz102,zzzz135" source="840" target="807" cy:directed="1"/>
      <edge id="166208" label="zzzz102,zzzz249" source="840" target="693" cy:directed="1"/>
      <edge id="166207" label="zzzz102,zzzz285" source="840" target="657" cy:directed="1"/>
      <edge id="166206" label="zzzz102,zzzz701" source="840" target="241" cy:directed="1"/>
      <edge id="166205" label="zzzz102,zzzz173" source="840" target="769" cy:directed="1"/>
      <edge id="166204" label="zzzz102,zzzz675" source="840" target="267" cy:directed="1"/>
      <edge id="166203" label="zzzz102,zzzz715" source="840" target="227" cy:directed="1"/>
      <edge id="166202" label="zzzz102,zzzzz62" source="840" target="109" cy:directed="1"/>
      <edge id="166201" label="zzzz102,zzzz156" source="840" target="786" cy:directed="1"/>
      <edge id="166200" label="zzzz102,zzzz276" source="840" target="666" cy:directed="1"/>
      <edge id="166199" label="zzzz102,zzzz539" source="840" target="403" cy:directed="1"/>
      <edge id="166198" label="zzzz102,zzzz143" source="840" target="799" cy:directed="1"/>
      <edge id="166197" label="zzzz102,zzzz535" source="840" target="407" cy:directed="1"/>
      <edge id="166196" label="zzzz102,zzzz185" source="840" target="757" cy:directed="1"/>
      <edge id="166195" label="zzzz102,zzzz524" source="840" target="418" cy:directed="1"/>
      <edge id="166194" label="zzzz102,zzzz492" source="840" target="450" cy:directed="1"/>
      <edge id="166193" label="zzzz102,zzzz725" source="840" target="217" cy:directed="1"/>
      <edge id="166192" label="zzzz102,zzzz738" source="840" target="204" cy:directed="1"/>
      <edge id="166191" label="zzzz102,zzzz741" source="840" target="201" cy:directed="1"/>
      <edge id="166190" label="zzzz102,zzzzz53" source="840" target="118" cy:directed="1"/>
      <edge id="166189" label="zzzz102,zzzz117" source="840" target="825" cy:directed="1"/>
      <edge id="166188" label="zzzz102,zzzz179" source="840" target="763" cy:directed="1"/>
      <edge id="166187" label="zzzz102,zzzz196" source="840" target="746" cy:directed="1"/>
      <edge id="166186" label="zzzz102,zzzz522" source="840" target="420" cy:directed="1"/>
      <edge id="166185" label="zzzz102,zzzz529" source="840" target="413" cy:directed="1"/>
      <edge id="166184" label="zzzz102,zzzz728" source="840" target="214" cy:directed="1"/>
      <edge id="166183" label="zzzz102,zzzzz38" source="840" target="133" cy:directed="1"/>
      <edge id="166182" label="zzzz102,zzzz108" source="840" target="834" cy:directed="1"/>
      <edge id="166181" label="zzzz102,zzzz540" source="840" target="402" cy:directed="1"/>
      <edge id="166180" label="zzzz102,zzzz683" source="840" target="259" cy:directed="1"/>
      <edge id="166179" label="zzzz102,zzzz511" source="840" target="431" cy:directed="1"/>
      <edge id="166178" label="zzzz102,zzzz516" source="840" target="426" cy:directed="1"/>
      <edge id="166177" label="zzzz102,zzzz740" source="840" target="202" cy:directed="1"/>
      <edge id="166176" label="zzzz102,zzzzz46" source="840" target="125" cy:directed="1"/>
      <edge id="166175" label="zzzz102,zzzz138" source="840" target="804" cy:directed="1"/>
      <edge id="166174" label="zzzz102,zzzz278" source="840" target="664" cy:directed="1"/>
      <edge id="166173" label="zzzz102,zzzz281" source="840" target="661" cy:directed="1"/>
      <edge id="166172" label="zzzz102,zzzz137" source="840" target="805" cy:directed="1"/>
      <edge id="166171" label="zzzz102,zzzz155" source="840" target="787" cy:directed="1"/>
      <edge id="166170" label="zzzz102,zzzz453" source="840" target="489" cy:directed="1"/>
      <edge id="166169" label="zzzz102,zzzz705" source="840" target="237" cy:directed="1"/>
      <edge id="166168" label="zzzz102,zzzzz51" source="840" target="120" cy:directed="1"/>
      <edge id="166167" label="zzzz102,zzzz244" source="840" target="698" cy:directed="1"/>
      <edge id="166166" label="zzzz102,zzzz680" source="840" target="262" cy:directed="1"/>
      <edge id="166165" label="zzzz102,zzzz742" source="840" target="200" cy:directed="1"/>
      <edge id="166164" label="zzzz102,zzzz294" source="840" target="648" cy:directed="1"/>
      <edge id="166163" label="zzzz102,zzzz518" source="840" target="424" cy:directed="1"/>
      <edge id="166162" label="zzzz102,zzzz544" source="840" target="398" cy:directed="1"/>
      <edge id="166161" label="zzzz102,zzzz710" source="840" target="232" cy:directed="1"/>
      <edge id="166160" label="zzzz102,zzzz716" source="840" target="226" cy:directed="1"/>
      <edge id="166159" label="zzzz102,zzzz719" source="840" target="223" cy:directed="1"/>
      <edge id="166158" label="zzzz102,zzzz726" source="840" target="216" cy:directed="1"/>
      <edge id="166157" label="zzzz102,zzzzz68" source="840" target="103" cy:directed="1"/>
      <edge id="166156" label="zzzz102,zzzz499" source="840" target="443" cy:directed="1"/>
      <edge id="166155" label="zzzz102,zzzz727" source="840" target="215" cy:directed="1"/>
      <edge id="166154" label="zzzz102,zzzz261" source="840" target="681" cy:directed="1"/>
      <edge id="166153" label="zzzz102,zzzz624" source="840" target="318" cy:directed="1"/>
      <edge id="166152" label="zzzz102,zzzz502" source="840" target="440" cy:directed="1"/>
      <edge id="166151" label="zzzz102,zzzz573" source="840" target="369" cy:directed="1"/>
      <edge id="166150" label="zzzz102,zzzzz43" source="840" target="128" cy:directed="1"/>
      <edge id="166149" label="zzzz102,zzzz532" source="840" target="410" cy:directed="1"/>
      <edge id="166148" label="zzzz102,zzzz674" source="840" target="268" cy:directed="1"/>
      <edge id="166147" label="zzzz102,zzzz714" source="840" target="228" cy:directed="1"/>
      <edge id="166146" label="zzzz102,zzzzz33" source="840" target="138" cy:directed="1"/>
      <edge id="166145" label="zzzz102,zzzzz47" source="840" target="124" cy:directed="1"/>
      <edge id="166144" label="zzzz102,zzzz561" source="840" target="381" cy:directed="1"/>
      <edge id="166143" label="zzzz102,zzzz546" source="840" target="396" cy:directed="1"/>
      <edge id="166142" label="zzzz102,zzzz568" source="840" target="374" cy:directed="1"/>
      <edge id="166141" label="zzzz102,zzzz677" source="840" target="265" cy:directed="1"/>
      <edge id="166140" label="zzzz102,zzzzz97" source="840" target="74" cy:directed="1"/>
      <edge id="166139" label="zzzz102,zzzz123" source="840" target="819" cy:directed="1"/>
      <edge id="166138" label="zzzz102,zzzz537" source="840" target="405" cy:directed="1"/>
      <edge id="166137" label="zzzz102,zzzz125" source="840" target="817" cy:directed="1"/>
      <edge id="166136" label="zzzz102,zzzz520" source="840" target="422" cy:directed="1"/>
      <edge id="166135" label="zzzz102,zzzz521" source="840" target="421" cy:directed="1"/>
      <edge id="166134" label="zzzz102,zzzz530" source="840" target="412" cy:directed="1"/>
      <edge id="166133" label="zzzz102,zzzz583" source="840" target="359" cy:directed="1"/>
      <edge id="166132" label="zzzz102,zzzz103" source="840" target="839" cy:directed="1"/>
      <edge id="166131" label="zzzz102,zzzz152" source="840" target="790" cy:directed="1"/>
      <edge id="166130" label="zzzz102,zzzz723" source="840" target="219" cy:directed="1"/>
      <edge id="166129" label="zzzz102,zzzz170" source="840" target="772" cy:directed="1"/>
      <edge id="166128" label="zzzz102,zzzz247" source="840" target="695" cy:directed="1"/>
      <edge id="166127" label="zzzz102,zzzz513" source="840" target="429" cy:directed="1"/>
      <edge id="166126" label="zzzz102,zzzz251" source="840" target="691" cy:directed="1"/>
      <edge id="166125" label="zzzz102,zzzz569" source="840" target="373" cy:directed="1"/>
      <edge id="166124" label="zzzz102,zzzz570" source="840" target="372" cy:directed="1"/>
      <edge id="166123" label="zzzz102,zzzz563" source="840" target="379" cy:directed="1"/>
      <edge id="166122" label="zzzz102,zzzz187" source="840" target="755" cy:directed="1"/>
      <edge id="166121" label="zzzz102,zzzz566" source="840" target="376" cy:directed="1"/>
      <edge id="166120" label="zzzz102,zzzz525" source="840" target="417" cy:directed="1"/>
      <edge id="166119" label="zzzz102,zzzz486" source="840" target="456" cy:directed="1"/>
      <edge id="166118" label="zzzz102,zzzz736" source="840" target="206" cy:directed="1"/>
      <edge id="166117" label="zzzz102,zzzzz56" source="840" target="115" cy:directed="1"/>
      <edge id="166116" label="zzzz102,zzzz559" source="840" target="383" cy:directed="1"/>
      <edge id="166115" label="zzzz102,zzzz426" source="840" target="516" cy:directed="1"/>
      <edge id="166114" label="zzzz102,zzzz554" source="840" target="388" cy:directed="1"/>
      <edge id="166113" label="zzzz102,zzzz550" source="840" target="392" cy:directed="1"/>
      <edge id="166112" label="zzzz102,zzzzzz6" source="840" target="65" cy:directed="1"/>
      <edge id="166111" label="zzzz102,zzzz427" source="840" target="515" cy:directed="1"/>
      <edge id="166110" label="zzzz102,zzzz575" source="840" target="367" cy:directed="1"/>
      <edge id="166109" label="zzzz102,zzzz151" source="840" target="791" cy:directed="1"/>
      <edge id="166108" label="zzzz102,zzzz578" source="840" target="364" cy:directed="1"/>
      <edge id="166107" label="zzzz102,zzzz141" source="840" target="801" cy:directed="1"/>
      <edge id="166106" label="zzzz102,zzzz527" source="840" target="415" cy:directed="1"/>
      <edge id="166105" label="zzzz102,zzzz428" source="840" target="514" cy:directed="1"/>
      <edge id="166104" label="zzzz102,zzzz565" source="840" target="377" cy:directed="1"/>
      <edge id="166103" label="zzzz102,zzzz670" source="840" target="272" cy:directed="1"/>
      <edge id="166102" label="zzzz102,zzzz555" source="840" target="387" cy:directed="1"/>
      <edge id="166101" label="zzzz102,zzzzzz7" source="840" target="64" cy:directed="1"/>
      <edge id="166100" label="zzzz102,zzzz275" source="840" target="667" cy:directed="1"/>
      <edge id="166099" label="zzzz102,zzzzz59" source="840" target="112" cy:directed="1"/>
      <edge id="166098" label="zzzz102,zzzzzz2" source="840" target="69" cy:directed="1"/>
      <edge id="166097" label="zzzz102,zzzz586" source="840" target="356" cy:directed="1"/>
      <edge id="166096" label="zzzz102,zzzzzz5" source="840" target="66" cy:directed="1"/>
      <edge id="166095" label="zzzz102,zzzz542" source="840" target="400" cy:directed="1"/>
      <edge id="166094" label="zzzz102,zzzz186" source="840" target="756" cy:directed="1"/>
      <edge id="166093" label="zzzz102,zzzz667" source="840" target="275" cy:directed="1"/>
      <edge id="166092" label="zzzz102,zzzz188" source="840" target="754" cy:directed="1"/>
      <edge id="166091" label="zzzz102,zzzz307" source="840" target="635" cy:directed="1"/>
      <edge id="166090" label="zzzz102,zzzz582" source="840" target="360" cy:directed="1"/>
      <edge id="166089" label="zzzz102,zzzz638" source="840" target="304" cy:directed="1"/>
      <edge id="166088" label="zzzz102,zzzz654" source="840" target="288" cy:directed="1"/>
      <edge id="166087" label="zzzz102,zzzz669" source="840" target="273" cy:directed="1"/>
      <edge id="166086" label="zzzz102,zzzzz11" source="840" target="160" cy:directed="1"/>
      <edge id="166085" label="zzzz102,zzzzzz8" source="840" target="63" cy:directed="1"/>
      <edge id="166084" label="zzzz102,zzzz630" source="840" target="312" cy:directed="1"/>
      <edge id="166083" label="zzzz102,zzzz201" source="840" target="741" cy:directed="1"/>
      <edge id="166082" label="zzzz102,zzzz299" source="840" target="643" cy:directed="1"/>
      <edge id="166081" label="zzzz102,zzzzzz9" source="840" target="62" cy:directed="1"/>
      <edge id="166080" label="zzzz102,zzzz223" source="840" target="719" cy:directed="1"/>
      <edge id="166079" label="zzzz102,zzzz627" source="840" target="315" cy:directed="1"/>
      <edge id="166078" label="zzzz102,zzzz128" source="840" target="814" cy:directed="1"/>
      <edge id="166077" label="zzzz102,zzzz593" source="840" target="349" cy:directed="1"/>
      <edge id="166076" label="zzzz102,zzzzzz1" source="840" target="70" cy:directed="1"/>
      <edge id="166075" label="zzzz102,zzzz121" source="840" target="821" cy:directed="1"/>
      <edge id="166074" label="zzzz102,zzzz295" source="840" target="647" cy:directed="1"/>
      <edge id="166073" label="zzzz102,zzzz671" source="840" target="271" cy:directed="1"/>
      <edge id="166072" label="zzzz102,zzzzz60" source="840" target="111" cy:directed="1"/>
      <edge id="166071" label="zzzz102,zzzz420" source="840" target="522" cy:directed="1"/>
      <edge id="166070" label="zzzz102,zzzz512" source="840" target="430" cy:directed="1"/>
      <edge id="166069" label="zzzz102,zzzz175" source="840" target="767" cy:directed="1"/>
      <edge id="166068" label="zzzz102,zzzz418" source="840" target="524" cy:directed="1"/>
      <edge id="166067" label="zzzz102,zzzz724" source="840" target="218" cy:directed="1"/>
      <edge id="166066" label="zzzz102,zzzz118" source="840" target="824" cy:directed="1"/>
      <edge id="166065" label="zzzz102,zzzz547" source="840" target="395" cy:directed="1"/>
      <edge id="166064" label="zzzz102,zzzzz12" source="840" target="159" cy:directed="1"/>
      <edge id="166063" label="zzzz102,zzzz265" source="840" target="677" cy:directed="1"/>
      <edge id="166062" label="zzzz102,zzzz306" source="840" target="636" cy:directed="1"/>
      <edge id="166061" label="zzzz102,zzzzzz4" source="840" target="67" cy:directed="1"/>
      <edge id="166060" label="zzzz102,zzzz208" source="840" target="734" cy:directed="1"/>
      <edge id="166059" label="zzzz102,zzzz218" source="840" target="724" cy:directed="1"/>
      <edge id="166058" label="zzzz102,zzzz429" source="840" target="513" cy:directed="1"/>
      <edge id="166057" label="zzzz102,zzzz610" source="840" target="332" cy:directed="1"/>
      <edge id="166056" label="zzzz102,zzzz668" source="840" target="274" cy:directed="1"/>
      <edge id="166055" label="zzzz102,zzzz302" source="840" target="640" cy:directed="1"/>
      <edge id="166054" label="zzzz102,zzzz305" source="840" target="637" cy:directed="1"/>
      <edge id="166053" label="zzzz102,zzzz425" source="840" target="517" cy:directed="1"/>
      <edge id="166052" label="zzzz102,zzzzz25" source="840" target="146" cy:directed="1"/>
      <edge id="166051" label="zzzz102,zzzz309" source="840" target="633" cy:directed="1"/>
      <edge id="166050" label="zzzz102,zzzz323" source="840" target="619" cy:directed="1"/>
      <edge id="166049" label="zzzz102,zzzz264" source="840" target="678" cy:directed="1"/>
      <edge id="166048" label="zzzz102,zzzz592" source="840" target="350" cy:directed="1"/>
      <edge id="166047" label="zzzz102,zzzz660" source="840" target="282" cy:directed="1"/>
      <edge id="166046" label="zzzz102,zzzz414" source="840" target="528" cy:directed="1"/>
      <edge id="166045" label="zzzz102,zzzz639" source="840" target="303" cy:directed="1"/>
      <edge id="166044" label="zzzz102,zzzz304" source="840" target="638" cy:directed="1"/>
      <edge id="166043" label="zzzz102,zzzz464" source="840" target="478" cy:directed="1"/>
      <edge id="166042" label="zzzz102,zzzz591" source="840" target="351" cy:directed="1"/>
      <edge id="166041" label="zzzz102,zzzz469" source="840" target="473" cy:directed="1"/>
      <edge id="166040" label="zzzz102,zzzz479" source="840" target="463" cy:directed="1"/>
      <edge id="166039" label="zzzz102,zzzz600" source="840" target="342" cy:directed="1"/>
      <edge id="166038" label="zzzz102,zzzz665" source="840" target="277" cy:directed="1"/>
      <edge id="166037" label="zzzz102,zzzz214" source="840" target="728" cy:directed="1"/>
      <edge id="166036" label="zzzz102,zzzz303" source="840" target="639" cy:directed="1"/>
      <edge id="166035" label="zzzz102,zzzz325" source="840" target="617" cy:directed="1"/>
      <edge id="166034" label="zzzz102,zzzz412" source="840" target="530" cy:directed="1"/>
      <edge id="166033" label="zzzz102,zzzz647" source="840" target="295" cy:directed="1"/>
      <edge id="166032" label="zzzz102,zzzz664" source="840" target="278" cy:directed="1"/>
      <edge id="166031" label="zzzz102,zzzz417" source="840" target="525" cy:directed="1"/>
      <edge id="166030" label="zzzz102,zzzz441" source="840" target="501" cy:directed="1"/>
      <edge id="166029" label="zzzz102,zzzz621" source="840" target="321" cy:directed="1"/>
      <edge id="166028" label="zzzz102,zzzz622" source="840" target="320" cy:directed="1"/>
      <edge id="166027" label="zzzz102,zzzz652" source="840" target="290" cy:directed="1"/>
      <edge id="166026" label="zzzz102,zzzzz10" source="840" target="161" cy:directed="1"/>
      <edge id="166025" label="zzzz102,zzzzzz3" source="840" target="68" cy:directed="1"/>
      <edge id="166024" label="zzzz102,zzzz216" source="840" target="726" cy:directed="1"/>
      <edge id="166023" label="zzzz102,zzzz447" source="840" target="495" cy:directed="1"/>
      <edge id="166022" label="zzzz102,zzzz604" source="840" target="338" cy:directed="1"/>
      <edge id="166021" label="zzzz102,zzzz605" source="840" target="337" cy:directed="1"/>
      <edge id="166020" label="zzzz102,zzzz606" source="840" target="336" cy:directed="1"/>
      <edge id="166019" label="zzzz102,zzzz645" source="840" target="297" cy:directed="1"/>
      <edge id="166018" label="zzzz102,zzzz211" source="840" target="731" cy:directed="1"/>
      <edge id="166017" label="zzzz102,zzzz326" source="840" target="616" cy:directed="1"/>
      <edge id="166016" label="zzzz102,zzzz473" source="840" target="469" cy:directed="1"/>
      <edge id="166015" label="zzzz102,zzzz198" source="840" target="744" cy:directed="1"/>
      <edge id="166014" label="zzzz102,zzzz210" source="840" target="732" cy:directed="1"/>
      <edge id="166013" label="zzzz102,zzzz207" source="840" target="735" cy:directed="1"/>
      <edge id="166012" label="zzzz102,zzzz651" source="840" target="291" cy:directed="1"/>
      <edge id="166011" label="zzzz102,zzzz180" source="840" target="762" cy:directed="1"/>
      <edge id="166010" label="zzzz102,zzzz442" source="840" target="500" cy:directed="1"/>
      <edge id="166009" label="zzzz102,zzzz618" source="840" target="324" cy:directed="1"/>
      <edge id="166008" label="zzzz102,zzzz636" source="840" target="306" cy:directed="1"/>
      <edge id="166007" label="zzzz102,zzzz648" source="840" target="294" cy:directed="1"/>
      <edge id="166006" label="zzzz102,zzzz603" source="840" target="339" cy:directed="1"/>
      <edge id="166005" label="zzzz102,zzzz614" source="840" target="328" cy:directed="1"/>
      <edge id="166004" label="zzzz102,zzzz620" source="840" target="322" cy:directed="1"/>
      <edge id="166003" label="zzzz102,zzzz205" source="840" target="737" cy:directed="1"/>
      <edge id="166002" label="zzzz102,zzzz589" source="840" target="353" cy:directed="1"/>
      <edge id="166001" label="zzzz102,zzzz656" source="840" target="286" cy:directed="1"/>
      <edge id="166000" label="zzzz102,zzzz213" source="840" target="729" cy:directed="1"/>
      <edge id="165999" label="zzzz102,zzzz224" source="840" target="718" cy:directed="1"/>
      <edge id="165998" label="zzzz102,zzzz413" source="840" target="529" cy:directed="1"/>
      <edge id="165997" label="zzzz102,zzzz470" source="840" target="472" cy:directed="1"/>
      <edge id="165996" label="zzzz102,zzzz613" source="840" target="329" cy:directed="1"/>
      <edge id="165995" label="zzzz102,zzzz619" source="840" target="323" cy:directed="1"/>
      <edge id="165994" label="zzzz102,zzzz640" source="840" target="302" cy:directed="1"/>
      <edge id="165993" label="zzzz102,zzzzz21" source="840" target="150" cy:directed="1"/>
      <edge id="165992" label="zzzz102,zzzz322" source="840" target="620" cy:directed="1"/>
      <edge id="165991" label="zzzz102,zzzz641" source="840" target="301" cy:directed="1"/>
      <edge id="165990" label="zzzz102,zzzzz13" source="840" target="158" cy:directed="1"/>
      <edge id="165989" label="zzzz102,zzzz316" source="840" target="626" cy:directed="1"/>
      <edge id="165988" label="zzzz102,zzzz617" source="840" target="325" cy:directed="1"/>
      <edge id="165987" label="zzzz102,zzzz415" source="840" target="527" cy:directed="1"/>
      <edge id="165986" label="zzzz102,zzzz321" source="840" target="621" cy:directed="1"/>
      <edge id="165985" label="zzzz102,zzzz588" source="840" target="354" cy:directed="1"/>
      <edge id="165984" label="zzzz102,zzzz590" source="840" target="352" cy:directed="1"/>
      <edge id="165983" label="zzzz102,zzzz419" source="840" target="523" cy:directed="1"/>
      <edge id="165982" label="zzzz102,zzzz607" source="840" target="335" cy:directed="1"/>
      <edge id="165981" label="zzzz102,zzzz615" source="840" target="327" cy:directed="1"/>
      <edge id="165980" label="zzzz102,zzzz300" source="840" target="642" cy:directed="1"/>
      <edge id="165979" label="zzzz102,zzzz315" source="840" target="627" cy:directed="1"/>
      <edge id="165978" label="zzzz102,zzzz649" source="840" target="293" cy:directed="1"/>
      <edge id="165977" label="zzzz102,zzzz626" source="840" target="316" cy:directed="1"/>
      <edge id="165976" label="zzzz102,zzzz655" source="840" target="287" cy:directed="1"/>
      <edge id="165975" label="zzzz102,zzzz221" source="840" target="721" cy:directed="1"/>
      <edge id="165974" label="zzzz102,zzzz497" source="840" target="445" cy:directed="1"/>
      <edge id="165973" label="zzzz102,zzzz662" source="840" target="280" cy:directed="1"/>
      <edge id="165972" label="zzzz102,zzzz220" source="840" target="722" cy:directed="1"/>
      <edge id="165971" label="zzzz102,zzzz657" source="840" target="285" cy:directed="1"/>
      <edge id="165970" label="zzzz102,zzzz661" source="840" target="281" cy:directed="1"/>
      <edge id="165969" label="zzzz102,zzzz209" source="840" target="733" cy:directed="1"/>
      <edge id="165968" label="zzzz102,zzzz616" source="840" target="326" cy:directed="1"/>
      <edge id="165967" label="zzzz102,zzzz642" source="840" target="300" cy:directed="1"/>
      <edge id="165966" label="zzzz102,zzzz297" source="840" target="645" cy:directed="1"/>
      <edge id="165965" label="zzzz102,zzzz411" source="840" target="531" cy:directed="1"/>
      <edge id="165964" label="zzzz102,zzzz416" source="840" target="526" cy:directed="1"/>
      <edge id="165963" label="zzzz102,zzzz195" source="840" target="747" cy:directed="1"/>
      <edge id="165962" label="zzzz102,zzzz206" source="840" target="736" cy:directed="1"/>
      <edge id="165961" label="zzzz102,zzzz637" source="840" target="305" cy:directed="1"/>
      <edge id="165960" label="zzzz102,zzzz197" source="840" target="745" cy:directed="1"/>
      <edge id="165959" label="zzzz102,zzzz462" source="840" target="480" cy:directed="1"/>
      <edge id="165958" label="zzzz102,zzzzz50" source="840" target="121" cy:directed="1"/>
      <edge id="165957" label="zzzz102,zzzz215" source="840" target="727" cy:directed="1"/>
      <edge id="165956" label="zzzz102,zzzz255" source="840" target="687" cy:directed="1"/>
      <edge id="165955" label="zzzz102,zzzz483" source="840" target="459" cy:directed="1"/>
      <edge id="165954" label="zzzz102,zzzz434" source="840" target="508" cy:directed="1"/>
      <edge id="165953" label="zzzz102,zzzz296" source="840" target="646" cy:directed="1"/>
      <edge id="165952" label="zzzz102,zzzzz37" source="840" target="134" cy:directed="1"/>
      <edge id="165951" label="zzzz102,zzzz301" source="840" target="641" cy:directed="1"/>
      <edge id="165950" label="zzzz102,zzzz496" source="840" target="446" cy:directed="1"/>
      <edge id="165949" label="zzzz102,zzzz430" source="840" target="512" cy:directed="1"/>
      <edge id="165948" label="zzzz102,zzzz184" source="840" target="758" cy:directed="1"/>
      <edge id="165947" label="zzzz102,zzzz643" source="840" target="299" cy:directed="1"/>
      <edge id="165946" label="zzzz102,zzzz650" source="840" target="292" cy:directed="1"/>
      <edge id="165945" label="zzzz102,zzzz199" source="840" target="743" cy:directed="1"/>
      <edge id="165944" label="zzzz102,zzzz212" source="840" target="730" cy:directed="1"/>
      <edge id="165943" label="zzzz102,zzzz432" source="840" target="510" cy:directed="1"/>
      <edge id="165942" label="zzzz102,zzzz313" source="840" target="629" cy:directed="1"/>
      <edge id="165941" label="zzzz102,zzzz444" source="840" target="498" cy:directed="1"/>
      <edge id="165940" label="zzzz102,zzzz459" source="840" target="483" cy:directed="1"/>
      <edge id="165939" label="zzzz102,zzzz487" source="840" target="455" cy:directed="1"/>
      <edge id="165938" label="zzzz102,zzzz498" source="840" target="444" cy:directed="1"/>
      <edge id="165937" label="zzzz102,zzzz454" source="840" target="488" cy:directed="1"/>
      <edge id="165936" label="zzzz102,zzzz438" source="840" target="504" cy:directed="1"/>
      <edge id="165935" label="zzzz102,zzzz458" source="840" target="484" cy:directed="1"/>
      <edge id="165934" label="zzzz102,zzzz480" source="840" target="462" cy:directed="1"/>
      <edge id="165933" label="zzzz102,zzzz436" source="840" target="506" cy:directed="1"/>
      <edge id="165932" label="zzzz102,zzzz449" source="840" target="493" cy:directed="1"/>
      <edge id="165931" label="zzzz102,zzzz494" source="840" target="448" cy:directed="1"/>
      <edge id="165930" label="zzzz103,zzzz521" source="839" target="421" cy:directed="1"/>
      <edge id="165929" label="zzzz103,zzzz530" source="839" target="412" cy:directed="1"/>
      <edge id="165928" label="zzzz103,zzzz540" source="839" target="402" cy:directed="1"/>
      <edge id="165927" label="zzzz103,zzzzz38" source="839" target="133" cy:directed="1"/>
      <edge id="165926" label="zzzz103,zzzz170" source="839" target="772" cy:directed="1"/>
      <edge id="165925" label="zzzz103,zzzz104" source="839" target="838" cy:directed="1"/>
      <edge id="165924" label="zzzz103,zzzz527" source="839" target="415" cy:directed="1"/>
      <edge id="165923" label="zzzz103,zzzz624" source="839" target="318" cy:directed="1"/>
      <edge id="165922" label="zzzz103,zzzz502" source="839" target="440" cy:directed="1"/>
      <edge id="165921" label="zzzz103,zzzz251" source="839" target="691" cy:directed="1"/>
      <edge id="165920" label="zzzz103,zzzz710" source="839" target="232" cy:directed="1"/>
      <edge id="165919" label="zzzz103,zzzz499" source="839" target="443" cy:directed="1"/>
      <edge id="165918" label="zzzz103,zzzz278" source="839" target="664" cy:directed="1"/>
      <edge id="165917" label="zzzz103,zzzzz46" source="839" target="125" cy:directed="1"/>
      <edge id="165916" label="zzzz103,zzzz509" source="839" target="433" cy:directed="1"/>
      <edge id="165915" label="zzzz103,zzzz117" source="839" target="825" cy:directed="1"/>
      <edge id="165914" label="zzzz103,zzzz250" source="839" target="692" cy:directed="1"/>
      <edge id="165913" label="zzzz103,zzzzz68" source="839" target="103" cy:directed="1"/>
      <edge id="165912" label="zzzz103,zzzz135" source="839" target="807" cy:directed="1"/>
      <edge id="165911" label="zzzz103,zzzz532" source="839" target="410" cy:directed="1"/>
      <edge id="165910" label="zzzz103,zzzz516" source="839" target="426" cy:directed="1"/>
      <edge id="165909" label="zzzz103,zzzz136" source="839" target="806" cy:directed="1"/>
      <edge id="165908" label="zzzz103,zzzz544" source="839" target="398" cy:directed="1"/>
      <edge id="165907" label="zzzz103,zzzz510" source="839" target="432" cy:directed="1"/>
      <edge id="165906" label="zzzz103,zzzz716" source="839" target="226" cy:directed="1"/>
      <edge id="165905" label="zzzz103,zzzzz96" source="839" target="75" cy:directed="1"/>
      <edge id="165904" label="zzzz103,zzzz539" source="839" target="403" cy:directed="1"/>
      <edge id="165903" label="zzzz103,zzzz731" source="839" target="211" cy:directed="1"/>
      <edge id="165902" label="zzzz103,zzzz683" source="839" target="259" cy:directed="1"/>
      <edge id="165901" label="zzzz103,zzzz137" source="839" target="805" cy:directed="1"/>
      <edge id="165900" label="zzzz103,zzzz732" source="839" target="210" cy:directed="1"/>
      <edge id="165899" label="zzzz103,zzzzz63" source="839" target="108" cy:directed="1"/>
      <edge id="165898" label="zzzz103,zzzz711" source="839" target="231" cy:directed="1"/>
      <edge id="165897" label="zzzz103,zzzz675" source="839" target="267" cy:directed="1"/>
      <edge id="165896" label="zzzz103,zzzzz36" source="839" target="135" cy:directed="1"/>
      <edge id="165895" label="zzzz103,zzzz138" source="839" target="804" cy:directed="1"/>
      <edge id="165894" label="zzzz103,zzzz703" source="839" target="239" cy:directed="1"/>
      <edge id="165893" label="zzzz103,zzzz194" source="839" target="748" cy:directed="1"/>
      <edge id="165892" label="zzzz103,zzzz514" source="839" target="428" cy:directed="1"/>
      <edge id="165891" label="zzzz103,zzzz691" source="839" target="251" cy:directed="1"/>
      <edge id="165890" label="zzzz103,zzzz720" source="839" target="222" cy:directed="1"/>
      <edge id="165889" label="zzzz103,zzzz677" source="839" target="265" cy:directed="1"/>
      <edge id="165888" label="zzzz103,zzzz715" source="839" target="227" cy:directed="1"/>
      <edge id="165887" label="zzzz103,zzzz500" source="839" target="442" cy:directed="1"/>
      <edge id="165886" label="zzzz103,zzzzz43" source="839" target="128" cy:directed="1"/>
      <edge id="165885" label="zzzz103,zzzz248" source="839" target="694" cy:directed="1"/>
      <edge id="165884" label="zzzz103,zzzz672" source="839" target="270" cy:directed="1"/>
      <edge id="165883" label="zzzz103,zzzz709" source="839" target="233" cy:directed="1"/>
      <edge id="165882" label="zzzz103,zzzz735" source="839" target="207" cy:directed="1"/>
      <edge id="165881" label="zzzz103,zzzz116" source="839" target="826" cy:directed="1"/>
      <edge id="165880" label="zzzz103,zzzz290" source="839" target="652" cy:directed="1"/>
      <edge id="165879" label="zzzz103,zzzzz67" source="839" target="104" cy:directed="1"/>
      <edge id="165878" label="zzzz103,zzzz695" source="839" target="247" cy:directed="1"/>
      <edge id="165877" label="zzzz103,zzzz153" source="839" target="789" cy:directed="1"/>
      <edge id="165876" label="zzzz103,zzzzz70" source="839" target="101" cy:directed="1"/>
      <edge id="165875" label="zzzz103,zzzz696" source="839" target="246" cy:directed="1"/>
      <edge id="165874" label="zzzz103,zzzz422" source="839" target="520" cy:directed="1"/>
      <edge id="165873" label="zzzz103,zzzz526" source="839" target="416" cy:directed="1"/>
      <edge id="165872" label="zzzz103,zzzz713" source="839" target="229" cy:directed="1"/>
      <edge id="165871" label="zzzz103,zzzz109" source="839" target="833" cy:directed="1"/>
      <edge id="165870" label="zzzz103,zzzz528" source="839" target="414" cy:directed="1"/>
      <edge id="165869" label="zzzz103,zzzz721" source="839" target="221" cy:directed="1"/>
      <edge id="165868" label="zzzz103,zzzz712" source="839" target="230" cy:directed="1"/>
      <edge id="165867" label="zzzz103,zzzz156" source="839" target="786" cy:directed="1"/>
      <edge id="165866" label="zzzz103,zzzz249" source="839" target="693" cy:directed="1"/>
      <edge id="165865" label="zzzz103,zzzz286" source="839" target="656" cy:directed="1"/>
      <edge id="165864" label="zzzz103,zzzz150" source="839" target="792" cy:directed="1"/>
      <edge id="165863" label="zzzz103,zzzz119" source="839" target="823" cy:directed="1"/>
      <edge id="165862" label="zzzz103,zzzz122" source="839" target="820" cy:directed="1"/>
      <edge id="165861" label="zzzz103,zzzz126" source="839" target="816" cy:directed="1"/>
      <edge id="165860" label="zzzz103,zzzz515" source="839" target="427" cy:directed="1"/>
      <edge id="165859" label="zzzz103,zzzz111" source="839" target="831" cy:directed="1"/>
      <edge id="165858" label="zzzz103,zzzz145" source="839" target="797" cy:directed="1"/>
      <edge id="165857" label="zzzz103,zzzz644" source="839" target="298" cy:directed="1"/>
      <edge id="165856" label="zzzz103,zzzz718" source="839" target="224" cy:directed="1"/>
      <edge id="165855" label="zzzz103,zzzz705" source="839" target="237" cy:directed="1"/>
      <edge id="165854" label="zzzz103,zzzz192" source="839" target="750" cy:directed="1"/>
      <edge id="165853" label="zzzz103,zzzz139" source="839" target="803" cy:directed="1"/>
      <edge id="165852" label="zzzz103,zzzz105" source="839" target="837" cy:directed="1"/>
      <edge id="165851" label="zzzz103,zzzz714" source="839" target="228" cy:directed="1"/>
      <edge id="165850" label="zzzz103,zzzz154" source="839" target="788" cy:directed="1"/>
      <edge id="165849" label="zzzz103,zzzz113" source="839" target="829" cy:directed="1"/>
      <edge id="165848" label="zzzz103,zzzz682" source="839" target="260" cy:directed="1"/>
      <edge id="165847" label="zzzz103,zzzz729" source="839" target="213" cy:directed="1"/>
      <edge id="165846" label="zzzz103,zzzz112" source="839" target="830" cy:directed="1"/>
      <edge id="165845" label="zzzz103,zzzz679" source="839" target="263" cy:directed="1"/>
      <edge id="165844" label="zzzz103,zzzz742" source="839" target="200" cy:directed="1"/>
      <edge id="165843" label="zzzz103,zzzz504" source="839" target="438" cy:directed="1"/>
      <edge id="165842" label="zzzz103,zzzz726" source="839" target="216" cy:directed="1"/>
      <edge id="165841" label="zzzz103,zzzz246" source="839" target="696" cy:directed="1"/>
      <edge id="165840" label="zzzz103,zzzz730" source="839" target="212" cy:directed="1"/>
      <edge id="165839" label="zzzz103,zzzz737" source="839" target="205" cy:directed="1"/>
      <edge id="165838" label="zzzz103,zzzzz71" source="839" target="100" cy:directed="1"/>
      <edge id="165837" label="zzzz103,zzzz123" source="839" target="819" cy:directed="1"/>
      <edge id="165836" label="zzzz103,zzzz535" source="839" target="407" cy:directed="1"/>
      <edge id="165835" label="zzzz103,zzzz110" source="839" target="832" cy:directed="1"/>
      <edge id="165834" label="zzzz103,zzzz646" source="839" target="296" cy:directed="1"/>
      <edge id="165833" label="zzzz103,zzzz279" source="839" target="663" cy:directed="1"/>
      <edge id="165832" label="zzzz103,zzzz281" source="839" target="661" cy:directed="1"/>
      <edge id="165831" label="zzzz103,zzzz503" source="839" target="439" cy:directed="1"/>
      <edge id="165830" label="zzzz103,zzzz727" source="839" target="215" cy:directed="1"/>
      <edge id="165829" label="zzzz103,zzzz310" source="839" target="632" cy:directed="1"/>
      <edge id="165828" label="zzzz103,zzzz739" source="839" target="203" cy:directed="1"/>
      <edge id="165827" label="zzzz103,zzzz193" source="839" target="749" cy:directed="1"/>
      <edge id="165826" label="zzzz103,zzzz707" source="839" target="235" cy:directed="1"/>
      <edge id="165825" label="zzzz103,zzzz728" source="839" target="214" cy:directed="1"/>
      <edge id="165824" label="zzzz103,zzzz741" source="839" target="201" cy:directed="1"/>
      <edge id="165823" label="zzzz103,zzzzz98" source="839" target="73" cy:directed="1"/>
      <edge id="165822" label="zzzz103,zzzz106" source="839" target="836" cy:directed="1"/>
      <edge id="165821" label="zzzz103,zzzz678" source="839" target="264" cy:directed="1"/>
      <edge id="165820" label="zzzz103,zzzz738" source="839" target="204" cy:directed="1"/>
      <edge id="165819" label="zzzz103,zzzz543" source="839" target="399" cy:directed="1"/>
      <edge id="165818" label="zzzz103,zzzz190" source="839" target="752" cy:directed="1"/>
      <edge id="165817" label="zzzz103,zzzz719" source="839" target="223" cy:directed="1"/>
      <edge id="165816" label="zzzz103,zzzz155" source="839" target="787" cy:directed="1"/>
      <edge id="165815" label="zzzz103,zzzz294" source="839" target="648" cy:directed="1"/>
      <edge id="165814" label="zzzz103,zzzz531" source="839" target="411" cy:directed="1"/>
      <edge id="165813" label="zzzz103,zzzz511" source="839" target="431" cy:directed="1"/>
      <edge id="165812" label="zzzz103,zzzz700" source="839" target="242" cy:directed="1"/>
      <edge id="165811" label="zzzz103,zzzz625" source="839" target="317" cy:directed="1"/>
      <edge id="165810" label="zzzz103,zzzz291" source="839" target="651" cy:directed="1"/>
      <edge id="165809" label="zzzz103,zzzz506" source="839" target="436" cy:directed="1"/>
      <edge id="165808" label="zzzz103,zzzz114" source="839" target="828" cy:directed="1"/>
      <edge id="165807" label="zzzz103,zzzz189" source="839" target="753" cy:directed="1"/>
      <edge id="165806" label="zzzz103,zzzz743" source="839" target="199" cy:directed="1"/>
      <edge id="165805" label="zzzz103,zzzz706" source="839" target="236" cy:directed="1"/>
      <edge id="165804" label="zzzz103,zzzz118" source="839" target="824" cy:directed="1"/>
      <edge id="165803" label="zzzz103,zzzz179" source="839" target="763" cy:directed="1"/>
      <edge id="165802" label="zzzz103,zzzz202" source="839" target="740" cy:directed="1"/>
      <edge id="165801" label="zzzz103,zzzz453" source="839" target="489" cy:directed="1"/>
      <edge id="165800" label="zzzz103,zzzz681" source="839" target="261" cy:directed="1"/>
      <edge id="165799" label="zzzz103,zzzz744" source="839" target="198" cy:directed="1"/>
      <edge id="165798" label="zzzz103,zzzz725" source="839" target="217" cy:directed="1"/>
      <edge id="165797" label="zzzz103,zzzz680" source="839" target="262" cy:directed="1"/>
      <edge id="165796" label="zzzz103,zzzz124" source="839" target="818" cy:directed="1"/>
      <edge id="165795" label="zzzz103,zzzz152" source="839" target="790" cy:directed="1"/>
      <edge id="165794" label="zzzz103,zzzz492" source="839" target="450" cy:directed="1"/>
      <edge id="165793" label="zzzz103,zzzz676" source="839" target="266" cy:directed="1"/>
      <edge id="165792" label="zzzz103,zzzz284" source="839" target="658" cy:directed="1"/>
      <edge id="165791" label="zzzz103,zzzz673" source="839" target="269" cy:directed="1"/>
      <edge id="165790" label="zzzz103,zzzz185" source="839" target="757" cy:directed="1"/>
      <edge id="165789" label="zzzz103,zzzz196" source="839" target="746" cy:directed="1"/>
      <edge id="165788" label="zzzz103,zzzz723" source="839" target="219" cy:directed="1"/>
      <edge id="165787" label="zzzz103,zzzz740" source="839" target="202" cy:directed="1"/>
      <edge id="165786" label="zzzz103,zzzz203" source="839" target="739" cy:directed="1"/>
      <edge id="165785" label="zzzz103,zzzz708" source="839" target="234" cy:directed="1"/>
      <edge id="165784" label="zzzz103,zzzzz49" source="839" target="122" cy:directed="1"/>
      <edge id="165783" label="zzzz103,zzzz736" source="839" target="206" cy:directed="1"/>
      <edge id="165782" label="zzzz103,zzzz546" source="839" target="396" cy:directed="1"/>
      <edge id="165781" label="zzzz103,zzzz107" source="839" target="835" cy:directed="1"/>
      <edge id="165780" label="zzzz103,zzzz545" source="839" target="397" cy:directed="1"/>
      <edge id="165779" label="zzzz103,zzzz534" source="839" target="408" cy:directed="1"/>
      <edge id="165778" label="zzzz103,zzzz623" source="839" target="319" cy:directed="1"/>
      <edge id="165777" label="zzzz103,zzzz252" source="839" target="690" cy:directed="1"/>
      <edge id="165776" label="zzzz103,zzzz505" source="839" target="437" cy:directed="1"/>
      <edge id="165775" label="zzzz103,zzzz698" source="839" target="244" cy:directed="1"/>
      <edge id="165774" label="zzzz103,zzzz524" source="839" target="418" cy:directed="1"/>
      <edge id="165773" label="zzzz103,zzzz518" source="839" target="424" cy:directed="1"/>
      <edge id="165772" label="zzzz103,zzzz121" source="839" target="821" cy:directed="1"/>
      <edge id="165771" label="zzzz103,zzzz513" source="839" target="429" cy:directed="1"/>
      <edge id="165770" label="zzzz103,zzzz512" source="839" target="430" cy:directed="1"/>
      <edge id="165769" label="zzzz103,zzzz541" source="839" target="401" cy:directed="1"/>
      <edge id="165768" label="zzzz103,zzzz733" source="839" target="209" cy:directed="1"/>
      <edge id="165767" label="zzzz103,zzzzz52" source="839" target="119" cy:directed="1"/>
      <edge id="165766" label="zzzz103,zzzz697" source="839" target="245" cy:directed="1"/>
      <edge id="165765" label="zzzz103,zzzz536" source="839" target="406" cy:directed="1"/>
      <edge id="165764" label="zzzz103,zzzz247" source="839" target="695" cy:directed="1"/>
      <edge id="165763" label="zzzz103,zzzz525" source="839" target="417" cy:directed="1"/>
      <edge id="165762" label="zzzz103,zzzz191" source="839" target="751" cy:directed="1"/>
      <edge id="165761" label="zzzz103,zzzz702" source="839" target="240" cy:directed="1"/>
      <edge id="165760" label="zzzz103,zzzz245" source="839" target="697" cy:directed="1"/>
      <edge id="165759" label="zzzz103,zzzz141" source="839" target="801" cy:directed="1"/>
      <edge id="165758" label="zzzz103,zzzz285" source="839" target="657" cy:directed="1"/>
      <edge id="165757" label="zzzz103,zzzzz53" source="839" target="118" cy:directed="1"/>
      <edge id="165756" label="zzzz103,zzzz692" source="839" target="250" cy:directed="1"/>
      <edge id="165755" label="zzzz103,zzzzz97" source="839" target="74" cy:directed="1"/>
      <edge id="165754" label="zzzz103,zzzz173" source="839" target="769" cy:directed="1"/>
      <edge id="165753" label="zzzz103,zzzz529" source="839" target="413" cy:directed="1"/>
      <edge id="165752" label="zzzz103,zzzzz73" source="839" target="98" cy:directed="1"/>
      <edge id="165751" label="zzzz103,zzzz257" source="839" target="685" cy:directed="1"/>
      <edge id="165750" label="zzzz103,zzzz574" source="839" target="368" cy:directed="1"/>
      <edge id="165749" label="zzzz103,zzzz699" source="839" target="243" cy:directed="1"/>
      <edge id="165748" label="zzzz103,zzzz108" source="839" target="834" cy:directed="1"/>
      <edge id="165747" label="zzzz103,zzzz558" source="839" target="384" cy:directed="1"/>
      <edge id="165746" label="zzzz103,zzzz674" source="839" target="268" cy:directed="1"/>
      <edge id="165745" label="zzzz103,zzzzz47" source="839" target="124" cy:directed="1"/>
      <edge id="165744" label="zzzz103,zzzz572" source="839" target="370" cy:directed="1"/>
      <edge id="165743" label="zzzz103,zzzz611" source="839" target="331" cy:directed="1"/>
      <edge id="165742" label="zzzz103,zzzz263" source="839" target="679" cy:directed="1"/>
      <edge id="165741" label="zzzz103,zzzz701" source="839" target="241" cy:directed="1"/>
      <edge id="165740" label="zzzz103,zzzz161" source="839" target="781" cy:directed="1"/>
      <edge id="165739" label="zzzz103,zzzzz48" source="839" target="123" cy:directed="1"/>
      <edge id="165738" label="zzzz103,zzzz120" source="839" target="822" cy:directed="1"/>
      <edge id="165737" label="zzzz103,zzzz567" source="839" target="375" cy:directed="1"/>
      <edge id="165736" label="zzzz103,zzzz260" source="839" target="682" cy:directed="1"/>
      <edge id="165735" label="zzzz103,zzzz580" source="839" target="362" cy:directed="1"/>
      <edge id="165734" label="zzzz103,zzzzz75" source="839" target="96" cy:directed="1"/>
      <edge id="165733" label="zzzz103,zzzz556" source="839" target="386" cy:directed="1"/>
      <edge id="165732" label="zzzz103,zzzz557" source="839" target="385" cy:directed="1"/>
      <edge id="165731" label="zzzz103,zzzz564" source="839" target="378" cy:directed="1"/>
      <edge id="165730" label="zzzz103,zzzz552" source="839" target="390" cy:directed="1"/>
      <edge id="165729" label="zzzz103,zzzz694" source="839" target="248" cy:directed="1"/>
      <edge id="165728" label="zzzz103,zzzz560" source="839" target="382" cy:directed="1"/>
      <edge id="165727" label="zzzz103,zzzz469" source="839" target="473" cy:directed="1"/>
      <edge id="165726" label="zzzz103,zzzz553" source="839" target="389" cy:directed="1"/>
      <edge id="165725" label="zzzz103,zzzz262" source="839" target="680" cy:directed="1"/>
      <edge id="165724" label="zzzz103,zzzz181" source="839" target="761" cy:directed="1"/>
      <edge id="165723" label="zzzz103,zzzz571" source="839" target="371" cy:directed="1"/>
      <edge id="165722" label="zzzz103,zzzzz64" source="839" target="107" cy:directed="1"/>
      <edge id="165721" label="zzzz103,zzzz520" source="839" target="422" cy:directed="1"/>
      <edge id="165720" label="zzzz103,zzzz128" source="839" target="814" cy:directed="1"/>
      <edge id="165719" label="zzzz103,zzzz573" source="839" target="369" cy:directed="1"/>
      <edge id="165718" label="zzzz103,zzzz581" source="839" target="361" cy:directed="1"/>
      <edge id="165717" label="zzzz103,zzzz261" source="839" target="681" cy:directed="1"/>
      <edge id="165716" label="zzzz103,zzzz282" source="839" target="660" cy:directed="1"/>
      <edge id="165715" label="zzzz103,zzzz576" source="839" target="366" cy:directed="1"/>
      <edge id="165714" label="zzzz103,zzzz425" source="839" target="517" cy:directed="1"/>
      <edge id="165713" label="zzzz103,zzzzz33" source="839" target="138" cy:directed="1"/>
      <edge id="165712" label="zzzz103,zzzz584" source="839" target="358" cy:directed="1"/>
      <edge id="165711" label="zzzz103,zzzz577" source="839" target="365" cy:directed="1"/>
      <edge id="165710" label="zzzz103,zzzz562" source="839" target="380" cy:directed="1"/>
      <edge id="165709" label="zzzz103,zzzzz59" source="839" target="112" cy:directed="1"/>
      <edge id="165708" label="zzzz103,zzzz151" source="839" target="791" cy:directed="1"/>
      <edge id="165707" label="zzzz103,zzzz125" source="839" target="817" cy:directed="1"/>
      <edge id="165706" label="zzzz103,zzzz143" source="839" target="799" cy:directed="1"/>
      <edge id="165705" label="zzzz103,zzzzz60" source="839" target="111" cy:directed="1"/>
      <edge id="165704" label="zzzz103,zzzz561" source="839" target="381" cy:directed="1"/>
      <edge id="165703" label="zzzz103,zzzzz51" source="839" target="120" cy:directed="1"/>
      <edge id="165702" label="zzzz103,zzzz717" source="839" target="225" cy:directed="1"/>
      <edge id="165701" label="zzzz103,zzzz287" source="839" target="655" cy:directed="1"/>
      <edge id="165700" label="zzzz103,zzzz174" source="839" target="768" cy:directed="1"/>
      <edge id="165699" label="zzzz103,zzzz693" source="839" target="249" cy:directed="1"/>
      <edge id="165698" label="zzzz103,zzzz634" source="839" target="308" cy:directed="1"/>
      <edge id="165697" label="zzzz103,zzzz570" source="839" target="372" cy:directed="1"/>
      <edge id="165696" label="zzzz103,zzzz563" source="839" target="379" cy:directed="1"/>
      <edge id="165695" label="zzzz103,zzzz183" source="839" target="759" cy:directed="1"/>
      <edge id="165694" label="zzzz103,zzzz583" source="839" target="359" cy:directed="1"/>
      <edge id="165693" label="zzzz103,zzzz497" source="839" target="445" cy:directed="1"/>
      <edge id="165692" label="zzzz103,zzzz579" source="839" target="363" cy:directed="1"/>
      <edge id="165691" label="zzzz103,zzzz690" source="839" target="252" cy:directed="1"/>
      <edge id="165690" label="zzzz103,zzzz142" source="839" target="800" cy:directed="1"/>
      <edge id="165689" label="zzzz103,zzzz307" source="839" target="635" cy:directed="1"/>
      <edge id="165688" label="zzzz103,zzzz519" source="839" target="423" cy:directed="1"/>
      <edge id="165687" label="zzzz103,zzzz568" source="839" target="374" cy:directed="1"/>
      <edge id="165686" label="zzzz103,zzzz483" source="839" target="459" cy:directed="1"/>
      <edge id="165685" label="zzzz103,zzzz632" source="839" target="310" cy:directed="1"/>
      <edge id="165684" label="zzzz103,zzzzz69" source="839" target="102" cy:directed="1"/>
      <edge id="165683" label="zzzz103,zzzz464" source="839" target="478" cy:directed="1"/>
      <edge id="165682" label="zzzz103,zzzz473" source="839" target="469" cy:directed="1"/>
      <edge id="165681" label="zzzz103,zzzz551" source="839" target="391" cy:directed="1"/>
      <edge id="165680" label="zzzz103,zzzz442" source="839" target="500" cy:directed="1"/>
      <edge id="165679" label="zzzz103,zzzz479" source="839" target="463" cy:directed="1"/>
      <edge id="165678" label="zzzz103,zzzz234" source="839" target="708" cy:directed="1"/>
      <edge id="165677" label="zzzz103,zzzz441" source="839" target="501" cy:directed="1"/>
      <edge id="165676" label="zzzz103,zzzz566" source="839" target="376" cy:directed="1"/>
      <edge id="165675" label="zzzz103,zzzz447" source="839" target="495" cy:directed="1"/>
      <edge id="165674" label="zzzz103,zzzz312" source="839" target="630" cy:directed="1"/>
      <edge id="165673" label="zzzz103,zzzz582" source="839" target="360" cy:directed="1"/>
      <edge id="165672" label="zzzz103,zzzz434" source="839" target="508" cy:directed="1"/>
      <edge id="165671" label="zzzz103,zzzz470" source="839" target="472" cy:directed="1"/>
      <edge id="165670" label="zzzz103,zzzz429" source="839" target="513" cy:directed="1"/>
      <edge id="165669" label="zzzz103,zzzz537" source="839" target="405" cy:directed="1"/>
      <edge id="165668" label="zzzz103,zzzz555" source="839" target="387" cy:directed="1"/>
      <edge id="165667" label="zzzz103,zzzz578" source="839" target="364" cy:directed="1"/>
      <edge id="165666" label="zzzz103,zzzz462" source="839" target="480" cy:directed="1"/>
      <edge id="165665" label="zzzz103,zzzz475" source="839" target="467" cy:directed="1"/>
      <edge id="165664" label="zzzz103,zzzz517" source="839" target="425" cy:directed="1"/>
      <edge id="165663" label="zzzz103,zzzz686" source="839" target="256" cy:directed="1"/>
      <edge id="165662" label="zzzz103,zzzz498" source="839" target="444" cy:directed="1"/>
      <edge id="165661" label="zzzz103,zzzz158" source="839" target="784" cy:directed="1"/>
      <edge id="165660" label="zzzz103,zzzz569" source="839" target="373" cy:directed="1"/>
      <edge id="165659" label="zzzz103,zzzz575" source="839" target="367" cy:directed="1"/>
      <edge id="165658" label="zzzz103,zzzz685" source="839" target="257" cy:directed="1"/>
      <edge id="165657" label="zzzz103,zzzz689" source="839" target="253" cy:directed="1"/>
      <edge id="165656" label="zzzz103,zzzz233" source="839" target="709" cy:directed="1"/>
      <edge id="165655" label="zzzz103,zzzz259" source="839" target="683" cy:directed="1"/>
      <edge id="165654" label="zzzz103,zzzz565" source="839" target="377" cy:directed="1"/>
      <edge id="165653" label="zzzz103,zzzz594" source="839" target="348" cy:directed="1"/>
      <edge id="165652" label="zzzz103,zzzz448" source="839" target="494" cy:directed="1"/>
      <edge id="165651" label="zzzz103,zzzz559" source="839" target="383" cy:directed="1"/>
      <edge id="165650" label="zzzz103,zzzz684" source="839" target="258" cy:directed="1"/>
      <edge id="165649" label="zzzz103,zzzz232" source="839" target="710" cy:directed="1"/>
      <edge id="165648" label="zzzz103,zzzz439" source="839" target="503" cy:directed="1"/>
      <edge id="165647" label="zzzz103,zzzz550" source="839" target="392" cy:directed="1"/>
      <edge id="165646" label="zzzz103,zzzz228" source="839" target="714" cy:directed="1"/>
      <edge id="165645" label="zzzz103,zzzz554" source="839" target="388" cy:directed="1"/>
      <edge id="165644" label="zzzz103,zzzz237" source="839" target="705" cy:directed="1"/>
      <edge id="165643" label="zzzz103,zzzz238" source="839" target="704" cy:directed="1"/>
      <edge id="165642" label="zzzz103,zzzzz37" source="839" target="134" cy:directed="1"/>
      <edge id="165641" label="zzzz103,zzzzz78" source="839" target="93" cy:directed="1"/>
      <edge id="165640" label="zzzz103,zzzz688" source="839" target="254" cy:directed="1"/>
      <edge id="165639" label="zzzz103,zzzzz82" source="839" target="89" cy:directed="1"/>
      <edge id="165638" label="zzzz103,zzzz687" source="839" target="255" cy:directed="1"/>
      <edge id="165637" label="zzzz103,zzzzz87" source="839" target="84" cy:directed="1"/>
      <edge id="165636" label="zzzz103,zzzz283" source="839" target="659" cy:directed="1"/>
      <edge id="165635" label="zzzz103,zzzz522" source="839" target="420" cy:directed="1"/>
      <edge id="165634" label="zzzz103,zzzz243" source="839" target="699" cy:directed="1"/>
      <edge id="165633" label="zzzz103,zzzz229" source="839" target="713" cy:directed="1"/>
      <edge id="165632" label="zzzz103,zzzzz45" source="839" target="126" cy:directed="1"/>
      <edge id="165631" label="zzzz103,zzzzz58" source="839" target="113" cy:directed="1"/>
      <edge id="165630" label="zzzz103,zzzz598" source="839" target="344" cy:directed="1"/>
      <edge id="165629" label="zzzz103,zzzz127" source="839" target="815" cy:directed="1"/>
      <edge id="165628" label="zzzz103,zzzz178" source="839" target="764" cy:directed="1"/>
      <edge id="165627" label="zzzz103,zzzz187" source="839" target="755" cy:directed="1"/>
      <edge id="165626" label="zzzz103,zzzz599" source="839" target="343" cy:directed="1"/>
      <edge id="165625" label="zzzz103,zzzz274" source="839" target="668" cy:directed="1"/>
      <edge id="165624" label="zzzz103,zzzz288" source="839" target="654" cy:directed="1"/>
      <edge id="165623" label="zzzz103,zzzz486" source="839" target="456" cy:directed="1"/>
      <edge id="165622" label="zzzz103,zzzzz90" source="839" target="81" cy:directed="1"/>
      <edge id="165621" label="zzzz103,zzzz273" source="839" target="669" cy:directed="1"/>
      <edge id="165620" label="zzzz103,zzzzz44" source="839" target="127" cy:directed="1"/>
      <edge id="165619" label="zzzz103,zzzzz54" source="839" target="117" cy:directed="1"/>
      <edge id="165618" label="zzzz103,zzzzz66" source="839" target="105" cy:directed="1"/>
      <edge id="165617" label="zzzz103,zzzzz72" source="839" target="99" cy:directed="1"/>
      <edge id="165616" label="zzzz103,zzzz280" source="839" target="662" cy:directed="1"/>
      <edge id="165615" label="zzzz103,zzzz258" source="839" target="684" cy:directed="1"/>
      <edge id="165614" label="zzzz103,zzzz140" source="839" target="802" cy:directed="1"/>
      <edge id="165613" label="zzzz103,zzzz231" source="839" target="711" cy:directed="1"/>
      <edge id="165612" label="zzzz103,zzzzz76" source="839" target="95" cy:directed="1"/>
      <edge id="165611" label="zzzz103,zzzz235" source="839" target="707" cy:directed="1"/>
      <edge id="165610" label="zzzz103,zzzz501" source="839" target="441" cy:directed="1"/>
      <edge id="165609" label="zzzz103,zzzzz32" source="839" target="139" cy:directed="1"/>
      <edge id="165608" label="zzzz103,zzzzz41" source="839" target="130" cy:directed="1"/>
      <edge id="165607" label="zzzz103,zzzzz74" source="839" target="97" cy:directed="1"/>
      <edge id="165606" label="zzzz103,zzzz115" source="839" target="827" cy:directed="1"/>
      <edge id="165605" label="zzzz103,zzzz130" source="839" target="812" cy:directed="1"/>
      <edge id="165604" label="zzzz103,zzzz163" source="839" target="779" cy:directed="1"/>
      <edge id="165603" label="zzzz103,zzzz236" source="839" target="706" cy:directed="1"/>
      <edge id="165602" label="zzzz103,zzzz134" source="839" target="808" cy:directed="1"/>
      <edge id="165601" label="zzzz103,zzzz146" source="839" target="796" cy:directed="1"/>
      <edge id="165600" label="zzzz103,zzzz164" source="839" target="778" cy:directed="1"/>
      <edge id="165599" label="zzzz103,zzzz167" source="839" target="775" cy:directed="1"/>
      <edge id="165598" label="zzzz103,zzzz175" source="839" target="767" cy:directed="1"/>
      <edge id="165597" label="zzzz103,zzzz242" source="839" target="700" cy:directed="1"/>
      <edge id="165596" label="zzzz103,zzzz298" source="839" target="644" cy:directed="1"/>
      <edge id="165595" label="zzzz103,zzzz424" source="839" target="518" cy:directed="1"/>
      <edge id="165594" label="zzzz103,zzzz481" source="839" target="461" cy:directed="1"/>
      <edge id="165593" label="zzzz103,zzzz311" source="839" target="631" cy:directed="1"/>
      <edge id="165592" label="zzzz103,zzzz133" source="839" target="809" cy:directed="1"/>
      <edge id="165591" label="zzzz103,zzzz148" source="839" target="794" cy:directed="1"/>
      <edge id="165590" label="zzzz103,zzzz188" source="839" target="754" cy:directed="1"/>
      <edge id="165589" label="zzzz103,zzzz466" source="839" target="476" cy:directed="1"/>
      <edge id="165588" label="zzzz103,zzzz468" source="839" target="474" cy:directed="1"/>
      <edge id="165587" label="zzzz103,zzzz494" source="839" target="448" cy:directed="1"/>
      <edge id="165586" label="zzzz103,zzzzz85" source="839" target="86" cy:directed="1"/>
      <edge id="165585" label="zzzz103,zzzz165" source="839" target="777" cy:directed="1"/>
      <edge id="165584" label="zzzz103,zzzz166" source="839" target="776" cy:directed="1"/>
      <edge id="165583" label="zzzz103,zzzz277" source="839" target="665" cy:directed="1"/>
      <edge id="165582" label="zzzz103,zzzz432" source="839" target="510" cy:directed="1"/>
      <edge id="165581" label="zzzz103,zzzz435" source="839" target="507" cy:directed="1"/>
      <edge id="165580" label="zzzz103,zzzz437" source="839" target="505" cy:directed="1"/>
      <edge id="165579" label="zzzz103,zzzz438" source="839" target="504" cy:directed="1"/>
      <edge id="165578" label="zzzz103,zzzz440" source="839" target="502" cy:directed="1"/>
      <edge id="165577" label="zzzz103,zzzz444" source="839" target="498" cy:directed="1"/>
      <edge id="165576" label="zzzz103,zzzz450" source="839" target="492" cy:directed="1"/>
      <edge id="165575" label="zzzz103,zzzz455" source="839" target="487" cy:directed="1"/>
      <edge id="165574" label="zzzz103,zzzz476" source="839" target="466" cy:directed="1"/>
      <edge id="165573" label="zzzz103,zzzz595" source="839" target="347" cy:directed="1"/>
      <edge id="165572" label="zzzz103,zzzz734" source="839" target="208" cy:directed="1"/>
      <edge id="165571" label="zzzz103,zzzzz55" source="839" target="116" cy:directed="1"/>
      <edge id="165570" label="zzzz103,zzzz436" source="839" target="506" cy:directed="1"/>
      <edge id="165569" label="zzzz103,zzzz487" source="839" target="455" cy:directed="1"/>
      <edge id="165568" label="zzzz103,zzzzz84" source="839" target="87" cy:directed="1"/>
      <edge id="165567" label="zzzz103,zzzz423" source="839" target="519" cy:directed="1"/>
      <edge id="165566" label="zzzz103,zzzz431" source="839" target="511" cy:directed="1"/>
      <edge id="165565" label="zzzz103,zzzz433" source="839" target="509" cy:directed="1"/>
      <edge id="165564" label="zzzz103,zzzz454" source="839" target="488" cy:directed="1"/>
      <edge id="165563" label="zzzz103,zzzz459" source="839" target="483" cy:directed="1"/>
      <edge id="165562" label="zzzz103,zzzz596" source="839" target="346" cy:directed="1"/>
      <edge id="165561" label="zzzz103,zzzz628" source="839" target="314" cy:directed="1"/>
      <edge id="165560" label="zzzz103,zzzzz34" source="839" target="137" cy:directed="1"/>
      <edge id="165559" label="zzzz103,zzzzz94" source="839" target="77" cy:directed="1"/>
      <edge id="165558" label="zzzz103,zzzz449" source="839" target="493" cy:directed="1"/>
      <edge id="165557" label="zzzz103,zzzz460" source="839" target="482" cy:directed="1"/>
      <edge id="165556" label="zzzz103,zzzz270" source="839" target="672" cy:directed="1"/>
      <edge id="165555" label="zzzz103,zzzz480" source="839" target="462" cy:directed="1"/>
      <edge id="165554" label="zzzz103,zzzzz81" source="839" target="90" cy:directed="1"/>
      <edge id="165553" label="zzzz103,zzzz445" source="839" target="497" cy:directed="1"/>
      <edge id="165552" label="zzzz103,zzzz495" source="839" target="447" cy:directed="1"/>
      <edge id="165551" label="zzzz103,zzzz724" source="839" target="218" cy:directed="1"/>
      <edge id="165550" label="zzzz103,zzzz485" source="839" target="457" cy:directed="1"/>
      <edge id="165549" label="zzzz103,zzzz523" source="839" target="419" cy:directed="1"/>
      <edge id="165548" label="zzzz103,zzzzz42" source="839" target="129" cy:directed="1"/>
      <edge id="165547" label="zzzz103,zzzz308" source="839" target="634" cy:directed="1"/>
      <edge id="165546" label="zzzz103,zzzz443" source="839" target="499" cy:directed="1"/>
      <edge id="165545" label="zzzz103,zzzzz99" source="839" target="72" cy:directed="1"/>
      <edge id="165544" label="zzzz103,zzzz458" source="839" target="484" cy:directed="1"/>
      <edge id="165543" label="zzzz103,zzzz169" source="839" target="773" cy:directed="1"/>
      <edge id="165542" label="zzzz103,zzzz159" source="839" target="783" cy:directed="1"/>
      <edge id="165541" label="zzzz103,zzzz597" source="839" target="345" cy:directed="1"/>
      <edge id="165540" label="zzzz103,zzzz446" source="839" target="496" cy:directed="1"/>
      <edge id="165539" label="zzzz103,zzzzz86" source="839" target="85" cy:directed="1"/>
      <edge id="165538" label="zzzz103,zzzz129" source="839" target="813" cy:directed="1"/>
      <edge id="165537" label="zzzz103,zzzz538" source="839" target="404" cy:directed="1"/>
      <edge id="165536" label="zzzz103,zzzzz80" source="839" target="91" cy:directed="1"/>
      <edge id="165535" label="zzzz103,zzzz131" source="839" target="811" cy:directed="1"/>
      <edge id="165534" label="zzzz103,zzzz292" source="839" target="650" cy:directed="1"/>
      <edge id="165533" label="zzzz103,zzzz230" source="839" target="712" cy:directed="1"/>
      <edge id="165532" label="zzzz103,zzzz323" source="839" target="619" cy:directed="1"/>
      <edge id="165531" label="zzzz103,zzzzz40" source="839" target="131" cy:directed="1"/>
      <edge id="165530" label="zzzz103,zzzzz91" source="839" target="80" cy:directed="1"/>
      <edge id="165529" label="zzzz103,zzzz162" source="839" target="780" cy:directed="1"/>
      <edge id="165528" label="zzzz103,zzzz289" source="839" target="653" cy:directed="1"/>
      <edge id="165527" label="zzzz103,zzzz493" source="839" target="449" cy:directed="1"/>
      <edge id="165526" label="zzzz103,zzzz489" source="839" target="453" cy:directed="1"/>
      <edge id="165525" label="zzzz103,zzzz240" source="839" target="702" cy:directed="1"/>
      <edge id="165524" label="zzzz103,zzzz244" source="839" target="698" cy:directed="1"/>
      <edge id="165523" label="zzzz103,zzzz275" source="839" target="667" cy:directed="1"/>
      <edge id="165522" label="zzzz103,zzzzz62" source="839" target="109" cy:directed="1"/>
      <edge id="165521" label="zzzz103,zzzz621" source="839" target="321" cy:directed="1"/>
      <edge id="165520" label="zzzz103,zzzzzz6" source="839" target="65" cy:directed="1"/>
      <edge id="165519" label="zzzz103,zzzz316" source="839" target="626" cy:directed="1"/>
      <edge id="165518" label="zzzz103,zzzz452" source="839" target="490" cy:directed="1"/>
      <edge id="165517" label="zzzz103,zzzz315" source="839" target="627" cy:directed="1"/>
      <edge id="165516" label="zzzz103,zzzzz83" source="839" target="88" cy:directed="1"/>
      <edge id="165515" label="zzzz103,zzzz326" source="839" target="616" cy:directed="1"/>
      <edge id="165514" label="zzzz103,zzzz421" source="839" target="521" cy:directed="1"/>
      <edge id="165513" label="zzzz103,zzzz508" source="839" target="434" cy:directed="1"/>
      <edge id="165512" label="zzzz103,zzzz669" source="839" target="273" cy:directed="1"/>
      <edge id="165511" label="zzzz103,zzzzz21" source="839" target="150" cy:directed="1"/>
      <edge id="165510" label="zzzz103,zzzz201" source="839" target="741" cy:directed="1"/>
      <edge id="165509" label="zzzz103,zzzz488" source="839" target="454" cy:directed="1"/>
      <edge id="165508" label="zzzz103,zzzz654" source="839" target="288" cy:directed="1"/>
      <edge id="165507" label="zzzz103,zzzz241" source="839" target="701" cy:directed="1"/>
      <edge id="165506" label="zzzz103,zzzz477" source="839" target="465" cy:directed="1"/>
      <edge id="165505" label="zzzz103,zzzz622" source="839" target="320" cy:directed="1"/>
      <edge id="165504" label="zzzz103,zzzzz79" source="839" target="92" cy:directed="1"/>
      <edge id="165503" label="zzzz103,zzzz132" source="839" target="810" cy:directed="1"/>
      <edge id="165502" label="zzzz103,zzzz149" source="839" target="793" cy:directed="1"/>
      <edge id="165501" label="zzzz103,zzzz322" source="839" target="620" cy:directed="1"/>
      <edge id="165500" label="zzzz103,zzzzz89" source="839" target="82" cy:directed="1"/>
      <edge id="165499" label="zzzz103,zzzz268" source="839" target="674" cy:directed="1"/>
      <edge id="165498" label="zzzz103,zzzzz35" source="839" target="136" cy:directed="1"/>
      <edge id="165497" label="zzzz103,zzzz325" source="839" target="617" cy:directed="1"/>
      <edge id="165496" label="zzzz103,zzzz586" source="839" target="356" cy:directed="1"/>
      <edge id="165495" label="zzzz103,zzzzz88" source="839" target="83" cy:directed="1"/>
      <edge id="165494" label="zzzz103,zzzzz77" source="839" target="94" cy:directed="1"/>
      <edge id="165493" label="zzzz103,zzzz605" source="839" target="337" cy:directed="1"/>
      <edge id="165492" label="zzzz103,zzzz606" source="839" target="336" cy:directed="1"/>
      <edge id="165491" label="zzzz103,zzzzzz2" source="839" target="69" cy:directed="1"/>
      <edge id="165490" label="zzzz103,zzzz265" source="839" target="677" cy:directed="1"/>
      <edge id="165489" label="zzzz103,zzzz604" source="839" target="338" cy:directed="1"/>
      <edge id="165488" label="zzzz103,zzzzz12" source="839" target="159" cy:directed="1"/>
      <edge id="165487" label="zzzz103,zzzzz13" source="839" target="158" cy:directed="1"/>
      <edge id="165486" label="zzzz103,zzzz418" source="839" target="524" cy:directed="1"/>
      <edge id="165485" label="zzzz103,zzzz533" source="839" target="409" cy:directed="1"/>
      <edge id="165484" label="zzzz103,zzzz542" source="839" target="400" cy:directed="1"/>
      <edge id="165483" label="zzzz103,zzzz313" source="839" target="629" cy:directed="1"/>
      <edge id="165482" label="zzzz103,zzzz420" source="839" target="522" cy:directed="1"/>
      <edge id="165481" label="zzzz103,zzzz417" source="839" target="525" cy:directed="1"/>
      <edge id="165480" label="zzzz103,zzzz619" source="839" target="323" cy:directed="1"/>
      <edge id="165479" label="zzzz103,zzzzz61" source="839" target="110" cy:directed="1"/>
      <edge id="165478" label="zzzz103,zzzz295" source="839" target="647" cy:directed="1"/>
      <edge id="165477" label="zzzz103,zzzz491" source="839" target="451" cy:directed="1"/>
      <edge id="165476" label="zzzz103,zzzz667" source="839" target="275" cy:directed="1"/>
      <edge id="165475" label="zzzz103,zzzz490" source="839" target="452" cy:directed="1"/>
      <edge id="165474" label="zzzz103,zzzz638" source="839" target="304" cy:directed="1"/>
      <edge id="165473" label="zzzz103,zzzz664" source="839" target="278" cy:directed="1"/>
      <edge id="165472" label="zzzz103,zzzzz11" source="839" target="160" cy:directed="1"/>
      <edge id="165471" label="zzzz103,zzzz160" source="839" target="782" cy:directed="1"/>
      <edge id="165470" label="zzzz103,zzzzz92" source="839" target="79" cy:directed="1"/>
      <edge id="165469" label="zzzz103,zzzz218" source="839" target="724" cy:directed="1"/>
      <edge id="165468" label="zzzz103,zzzz264" source="839" target="678" cy:directed="1"/>
      <edge id="165467" label="zzzz103,zzzz304" source="839" target="638" cy:directed="1"/>
      <edge id="165466" label="zzzz103,zzzz668" source="839" target="274" cy:directed="1"/>
      <edge id="165465" label="zzzz103,zzzzz57" source="839" target="114" cy:directed="1"/>
      <edge id="165464" label="zzzz103,zzzz213" source="839" target="729" cy:directed="1"/>
      <edge id="165463" label="zzzz103,zzzz467" source="839" target="475" cy:directed="1"/>
      <edge id="165462" label="zzzz103,zzzz615" source="839" target="327" cy:directed="1"/>
      <edge id="165461" label="zzzz103,zzzz626" source="839" target="316" cy:directed="1"/>
      <edge id="165460" label="zzzz103,zzzz198" source="839" target="744" cy:directed="1"/>
      <edge id="165459" label="zzzz103,zzzz630" source="839" target="312" cy:directed="1"/>
      <edge id="165458" label="zzzz103,zzzz649" source="839" target="293" cy:directed="1"/>
      <edge id="165457" label="zzzz103,zzzzzz8" source="839" target="63" cy:directed="1"/>
      <edge id="165456" label="zzzz103,zzzz610" source="839" target="332" cy:directed="1"/>
      <edge id="165455" label="zzzz103,zzzz670" source="839" target="272" cy:directed="1"/>
      <edge id="165454" label="zzzz103,zzzz195" source="839" target="747" cy:directed="1"/>
      <edge id="165453" label="zzzz103,zzzz212" source="839" target="730" cy:directed="1"/>
      <edge id="165452" label="zzzz103,zzzz412" source="839" target="530" cy:directed="1"/>
      <edge id="165451" label="zzzz103,zzzz588" source="839" target="354" cy:directed="1"/>
      <edge id="165450" label="zzzz103,zzzzz39" source="839" target="132" cy:directed="1"/>
      <edge id="165449" label="zzzz103,zzzz157" source="839" target="785" cy:directed="1"/>
      <edge id="165448" label="zzzz103,zzzz186" source="839" target="756" cy:directed="1"/>
      <edge id="165447" label="zzzz103,zzzz299" source="839" target="643" cy:directed="1"/>
      <edge id="165446" label="zzzz103,zzzz591" source="839" target="351" cy:directed="1"/>
      <edge id="165445" label="zzzz103,zzzz618" source="839" target="324" cy:directed="1"/>
      <edge id="165444" label="zzzz103,zzzz665" source="839" target="277" cy:directed="1"/>
      <edge id="165443" label="zzzz103,zzzz620" source="839" target="322" cy:directed="1"/>
      <edge id="165442" label="zzzz103,zzzz660" source="839" target="282" cy:directed="1"/>
      <edge id="165441" label="zzzz103,zzzz592" source="839" target="350" cy:directed="1"/>
      <edge id="165440" label="zzzz103,zzzzzz7" source="839" target="64" cy:directed="1"/>
      <edge id="165439" label="zzzz103,zzzz414" source="839" target="528" cy:directed="1"/>
      <edge id="165438" label="zzzz103,zzzz642" source="839" target="300" cy:directed="1"/>
      <edge id="165437" label="zzzz103,zzzz655" source="839" target="287" cy:directed="1"/>
      <edge id="165436" label="zzzz103,zzzz656" source="839" target="286" cy:directed="1"/>
      <edge id="165435" label="zzzz103,zzzz661" source="839" target="281" cy:directed="1"/>
      <edge id="165434" label="zzzz103,zzzz704" source="839" target="238" cy:directed="1"/>
      <edge id="165433" label="zzzz103,zzzz220" source="839" target="722" cy:directed="1"/>
      <edge id="165432" label="zzzz103,zzzz300" source="839" target="642" cy:directed="1"/>
      <edge id="165431" label="zzzz103,zzzz603" source="839" target="339" cy:directed="1"/>
      <edge id="165430" label="zzzz103,zzzz172" source="839" target="770" cy:directed="1"/>
      <edge id="165429" label="zzzz103,zzzz224" source="839" target="718" cy:directed="1"/>
      <edge id="165428" label="zzzz103,zzzz617" source="839" target="325" cy:directed="1"/>
      <edge id="165427" label="zzzz103,zzzzz93" source="839" target="78" cy:directed="1"/>
      <edge id="165426" label="zzzz103,zzzz147" source="839" target="795" cy:directed="1"/>
      <edge id="165425" label="zzzz103,zzzz266" source="839" target="676" cy:directed="1"/>
      <edge id="165424" label="zzzz103,zzzz296" source="839" target="646" cy:directed="1"/>
      <edge id="165423" label="zzzz103,zzzz416" source="839" target="526" cy:directed="1"/>
      <edge id="165422" label="zzzz103,zzzz671" source="839" target="271" cy:directed="1"/>
      <edge id="165421" label="zzzz103,zzzz636" source="839" target="306" cy:directed="1"/>
      <edge id="165420" label="zzzz103,zzzz662" source="839" target="280" cy:directed="1"/>
      <edge id="165419" label="zzzz103,zzzzz65" source="839" target="106" cy:directed="1"/>
      <edge id="165418" label="zzzz103,zzzzzz4" source="839" target="67" cy:directed="1"/>
      <edge id="165417" label="zzzz103,zzzz589" source="839" target="353" cy:directed="1"/>
      <edge id="165416" label="zzzz103,zzzz640" source="839" target="302" cy:directed="1"/>
      <edge id="165415" label="zzzz103,zzzz223" source="839" target="719" cy:directed="1"/>
      <edge id="165414" label="zzzz103,zzzz293" source="839" target="649" cy:directed="1"/>
      <edge id="165413" label="zzzz103,zzzz303" source="839" target="639" cy:directed="1"/>
      <edge id="165412" label="zzzz103,zzzz590" source="839" target="352" cy:directed="1"/>
      <edge id="165411" label="zzzz103,zzzz600" source="839" target="342" cy:directed="1"/>
      <edge id="165410" label="zzzz103,zzzz657" source="839" target="285" cy:directed="1"/>
      <edge id="165409" label="zzzz103,zzzzzz9" source="839" target="62" cy:directed="1"/>
      <edge id="165408" label="zzzz103,zzzz221" source="839" target="721" cy:directed="1"/>
      <edge id="165407" label="zzzz103,zzzz255" source="839" target="687" cy:directed="1"/>
      <edge id="165406" label="zzzz103,zzzz507" source="839" target="435" cy:directed="1"/>
      <edge id="165405" label="zzzz103,zzzz641" source="839" target="301" cy:directed="1"/>
      <edge id="165404" label="zzzz103,zzzz411" source="839" target="531" cy:directed="1"/>
      <edge id="165403" label="zzzz103,zzzzz10" source="839" target="161" cy:directed="1"/>
      <edge id="165402" label="zzzz103,zzzz171" source="839" target="771" cy:directed="1"/>
      <edge id="165401" label="zzzz103,zzzz276" source="839" target="666" cy:directed="1"/>
      <edge id="165400" label="zzzz103,zzzzzz5" source="839" target="66" cy:directed="1"/>
      <edge id="165399" label="zzzz103,zzzz419" source="839" target="523" cy:directed="1"/>
      <edge id="165398" label="zzzz103,zzzz184" source="839" target="758" cy:directed="1"/>
      <edge id="165397" label="zzzz103,zzzz309" source="839" target="633" cy:directed="1"/>
      <edge id="165396" label="zzzz103,zzzz593" source="839" target="349" cy:directed="1"/>
      <edge id="165395" label="zzzz103,zzzz627" source="839" target="315" cy:directed="1"/>
      <edge id="165394" label="zzzz103,zzzzzz1" source="839" target="70" cy:directed="1"/>
      <edge id="165393" label="zzzz103,zzzz211" source="839" target="731" cy:directed="1"/>
      <edge id="165392" label="zzzz103,zzzz415" source="839" target="527" cy:directed="1"/>
      <edge id="165391" label="zzzz103,zzzzz25" source="839" target="146" cy:directed="1"/>
      <edge id="165390" label="zzzz103,zzzz205" source="839" target="737" cy:directed="1"/>
      <edge id="165389" label="zzzz103,zzzz297" source="839" target="645" cy:directed="1"/>
      <edge id="165388" label="zzzz103,zzzz613" source="839" target="329" cy:directed="1"/>
      <edge id="165387" label="zzzz103,zzzz614" source="839" target="328" cy:directed="1"/>
      <edge id="165386" label="zzzz103,zzzz645" source="839" target="297" cy:directed="1"/>
      <edge id="165385" label="zzzz103,zzzz616" source="839" target="326" cy:directed="1"/>
      <edge id="165384" label="zzzz103,zzzz206" source="839" target="736" cy:directed="1"/>
      <edge id="165383" label="zzzz103,zzzz650" source="839" target="292" cy:directed="1"/>
      <edge id="165382" label="zzzz103,zzzz216" source="839" target="726" cy:directed="1"/>
      <edge id="165381" label="zzzz103,zzzz180" source="839" target="762" cy:directed="1"/>
      <edge id="165380" label="zzzz103,zzzz413" source="839" target="529" cy:directed="1"/>
      <edge id="165379" label="zzzz103,zzzz209" source="839" target="733" cy:directed="1"/>
      <edge id="165378" label="zzzz103,zzzz214" source="839" target="728" cy:directed="1"/>
      <edge id="165377" label="zzzz103,zzzz648" source="839" target="294" cy:directed="1"/>
      <edge id="165376" label="zzzz103,zzzz200" source="839" target="742" cy:directed="1"/>
      <edge id="165375" label="zzzz103,zzzz321" source="839" target="621" cy:directed="1"/>
      <edge id="165374" label="zzzz103,zzzz465" source="839" target="477" cy:directed="1"/>
      <edge id="165373" label="zzzz103,zzzz547" source="839" target="395" cy:directed="1"/>
      <edge id="165372" label="zzzz103,zzzz652" source="839" target="290" cy:directed="1"/>
      <edge id="165371" label="zzzz103,zzzz302" source="839" target="640" cy:directed="1"/>
      <edge id="165370" label="zzzz103,zzzz651" source="839" target="291" cy:directed="1"/>
      <edge id="165369" label="zzzz103,zzzz637" source="839" target="305" cy:directed="1"/>
      <edge id="165368" label="zzzz103,zzzz204" source="839" target="738" cy:directed="1"/>
      <edge id="165367" label="zzzz103,zzzz612" source="839" target="330" cy:directed="1"/>
      <edge id="165366" label="zzzz103,zzzz208" source="839" target="734" cy:directed="1"/>
      <edge id="165365" label="zzzz103,zzzz305" source="839" target="637" cy:directed="1"/>
      <edge id="165364" label="zzzz103,zzzz639" source="839" target="303" cy:directed="1"/>
      <edge id="165363" label="zzzz103,zzzzz95" source="839" target="76" cy:directed="1"/>
      <edge id="165362" label="zzzz103,zzzz217" source="839" target="725" cy:directed="1"/>
      <edge id="165361" label="zzzz103,zzzz471" source="839" target="471" cy:directed="1"/>
      <edge id="165360" label="zzzz103,zzzz482" source="839" target="460" cy:directed="1"/>
      <edge id="165359" label="zzzz103,zzzz607" source="839" target="335" cy:directed="1"/>
      <edge id="165358" label="zzzz103,zzzz306" source="839" target="636" cy:directed="1"/>
      <edge id="165357" label="zzzz103,zzzz199" source="839" target="743" cy:directed="1"/>
      <edge id="165356" label="zzzz103,zzzz647" source="839" target="295" cy:directed="1"/>
      <edge id="165355" label="zzzz103,zzzz461" source="839" target="481" cy:directed="1"/>
      <edge id="165354" label="zzzz103,zzzz456" source="839" target="486" cy:directed="1"/>
      <edge id="165353" label="zzzz103,zzzzzz3" source="839" target="68" cy:directed="1"/>
      <edge id="165352" label="zzzz103,zzzz207" source="839" target="735" cy:directed="1"/>
      <edge id="165351" label="zzzz103,zzzz197" source="839" target="745" cy:directed="1"/>
      <edge id="165350" label="zzzz103,zzzz210" source="839" target="732" cy:directed="1"/>
      <edge id="165349" label="zzzz103,zzzz301" source="839" target="641" cy:directed="1"/>
      <edge id="165348" label="zzzz103,zzzzz26" source="839" target="145" cy:directed="1"/>
      <edge id="165347" label="zzzz103,zzzz496" source="839" target="446" cy:directed="1"/>
      <edge id="165346" label="zzzz103,zzzz176" source="839" target="766" cy:directed="1"/>
      <edge id="165345" label="zzzz103,zzzz474" source="839" target="468" cy:directed="1"/>
      <edge id="165344" label="zzzz103,zzzz457" source="839" target="485" cy:directed="1"/>
      <edge id="165343" label="zzzz103,zzzz451" source="839" target="491" cy:directed="1"/>
      <edge id="165342" label="zzzz103,zzzz472" source="839" target="470" cy:directed="1"/>
      <edge id="165341" label="zzzz103,zzzz478" source="839" target="464" cy:directed="1"/>
      <edge id="165340" label="zzzz103,zzzz215" source="839" target="727" cy:directed="1"/>
      <edge id="165339" label="zzzz103,zzzz484" source="839" target="458" cy:directed="1"/>
      <edge id="165338" label="zzzz103,zzzz643" source="839" target="299" cy:directed="1"/>
      <edge id="165337" label="zzzz103,zzzzz50" source="839" target="121" cy:directed="1"/>
      <edge id="165336" label="zzzz103,zzzz463" source="839" target="479" cy:directed="1"/>
      <edge id="165335" label="zzzz103,zzzz549" source="839" target="393" cy:directed="1"/>
      <edge id="165334" label="zzzz103,zzzz327" source="839" target="615" cy:directed="1"/>
      <edge id="165333" label="zzzz103,zzzz430" source="839" target="512" cy:directed="1"/>
      <edge id="165332" label="zzzz103,zzzzz14" source="839" target="157" cy:directed="1"/>
      <edge id="165331" label="zzzz103,zzzz168" source="839" target="774" cy:directed="1"/>
      <edge id="165330" label="zzzz103,zzzz635" source="839" target="307" cy:directed="1"/>
      <edge id="165329" label="zzzz103,zzzz428" source="839" target="514" cy:directed="1"/>
      <edge id="165328" label="zzzz104,zzzz540" source="838" target="402" cy:directed="1"/>
      <edge id="165327" label="zzzz104,zzzzz38" source="838" target="133" cy:directed="1"/>
      <edge id="165326" label="zzzz104,zzzz170" source="838" target="772" cy:directed="1"/>
      <edge id="165325" label="zzzz104,zzzz251" source="838" target="691" cy:directed="1"/>
      <edge id="165324" label="zzzz104,zzzz521" source="838" target="421" cy:directed="1"/>
      <edge id="165323" label="zzzz104,zzzz530" source="838" target="412" cy:directed="1"/>
      <edge id="165322" label="zzzz104,zzzz624" source="838" target="318" cy:directed="1"/>
      <edge id="165321" label="zzzz104,zzzz502" source="838" target="440" cy:directed="1"/>
      <edge id="165320" label="zzzz104,zzzz499" source="838" target="443" cy:directed="1"/>
      <edge id="165319" label="zzzz104,zzzz710" source="838" target="232" cy:directed="1"/>
      <edge id="165318" label="zzzz104,zzzz527" source="838" target="415" cy:directed="1"/>
      <edge id="165317" label="zzzz104,zzzz278" source="838" target="664" cy:directed="1"/>
      <edge id="165316" label="zzzz104,zzzzz46" source="838" target="125" cy:directed="1"/>
      <edge id="165315" label="zzzz104,zzzz250" source="838" target="692" cy:directed="1"/>
      <edge id="165314" label="zzzz104,zzzz539" source="838" target="403" cy:directed="1"/>
      <edge id="165313" label="zzzz104,zzzz153" source="838" target="789" cy:directed="1"/>
      <edge id="165312" label="zzzz104,zzzz422" source="838" target="520" cy:directed="1"/>
      <edge id="165311" label="zzzz104,zzzzz96" source="838" target="75" cy:directed="1"/>
      <edge id="165310" label="zzzz104,zzzz509" source="838" target="433" cy:directed="1"/>
      <edge id="165309" label="zzzz104,zzzzz68" source="838" target="103" cy:directed="1"/>
      <edge id="165308" label="zzzz104,zzzz117" source="838" target="825" cy:directed="1"/>
      <edge id="165307" label="zzzz104,zzzz138" source="838" target="804" cy:directed="1"/>
      <edge id="165306" label="zzzz104,zzzz136" source="838" target="806" cy:directed="1"/>
      <edge id="165305" label="zzzz104,zzzz135" source="838" target="807" cy:directed="1"/>
      <edge id="165304" label="zzzz104,zzzz286" source="838" target="656" cy:directed="1"/>
      <edge id="165303" label="zzzz104,zzzz715" source="838" target="227" cy:directed="1"/>
      <edge id="165302" label="zzzz104,zzzz510" source="838" target="432" cy:directed="1"/>
      <edge id="165301" label="zzzz104,zzzz516" source="838" target="426" cy:directed="1"/>
      <edge id="165300" label="zzzz104,zzzz716" source="838" target="226" cy:directed="1"/>
      <edge id="165299" label="zzzz104,zzzz691" source="838" target="251" cy:directed="1"/>
      <edge id="165298" label="zzzz104,zzzz672" source="838" target="270" cy:directed="1"/>
      <edge id="165297" label="zzzz104,zzzz109" source="838" target="833" cy:directed="1"/>
      <edge id="165296" label="zzzz104,zzzz677" source="838" target="265" cy:directed="1"/>
      <edge id="165295" label="zzzz104,zzzzz63" source="838" target="108" cy:directed="1"/>
      <edge id="165294" label="zzzz104,zzzzz67" source="838" target="104" cy:directed="1"/>
      <edge id="165293" label="zzzz104,zzzz544" source="838" target="398" cy:directed="1"/>
      <edge id="165292" label="zzzz104,zzzzz36" source="838" target="135" cy:directed="1"/>
      <edge id="165291" label="zzzz104,zzzz156" source="838" target="786" cy:directed="1"/>
      <edge id="165290" label="zzzz104,zzzz683" source="838" target="259" cy:directed="1"/>
      <edge id="165289" label="zzzz104,zzzz711" source="838" target="231" cy:directed="1"/>
      <edge id="165288" label="zzzz104,zzzz709" source="838" target="233" cy:directed="1"/>
      <edge id="165287" label="zzzz104,zzzzz43" source="838" target="128" cy:directed="1"/>
      <edge id="165286" label="zzzz104,zzzz111" source="838" target="831" cy:directed="1"/>
      <edge id="165285" label="zzzz104,zzzz532" source="838" target="410" cy:directed="1"/>
      <edge id="165284" label="zzzz104,zzzz732" source="838" target="210" cy:directed="1"/>
      <edge id="165283" label="zzzz104,zzzz119" source="838" target="823" cy:directed="1"/>
      <edge id="165282" label="zzzz104,zzzz713" source="838" target="229" cy:directed="1"/>
      <edge id="165281" label="zzzz104,zzzz137" source="838" target="805" cy:directed="1"/>
      <edge id="165280" label="zzzz104,zzzz194" source="838" target="748" cy:directed="1"/>
      <edge id="165279" label="zzzz104,zzzz248" source="838" target="694" cy:directed="1"/>
      <edge id="165278" label="zzzz104,zzzz500" source="838" target="442" cy:directed="1"/>
      <edge id="165277" label="zzzz104,zzzz703" source="838" target="239" cy:directed="1"/>
      <edge id="165276" label="zzzz104,zzzz721" source="838" target="221" cy:directed="1"/>
      <edge id="165275" label="zzzz104,zzzz116" source="838" target="826" cy:directed="1"/>
      <edge id="165274" label="zzzz104,zzzz249" source="838" target="693" cy:directed="1"/>
      <edge id="165273" label="zzzz104,zzzz528" source="838" target="414" cy:directed="1"/>
      <edge id="165272" label="zzzz104,zzzz290" source="838" target="652" cy:directed="1"/>
      <edge id="165271" label="zzzz104,zzzz695" source="838" target="247" cy:directed="1"/>
      <edge id="165270" label="zzzz104,zzzz514" source="838" target="428" cy:directed="1"/>
      <edge id="165269" label="zzzz104,zzzzz70" source="838" target="101" cy:directed="1"/>
      <edge id="165268" label="zzzz104,zzzz696" source="838" target="246" cy:directed="1"/>
      <edge id="165267" label="zzzz104,zzzz731" source="838" target="211" cy:directed="1"/>
      <edge id="165266" label="zzzz104,zzzz105" source="838" target="837" cy:directed="1"/>
      <edge id="165265" label="zzzz104,zzzz150" source="838" target="792" cy:directed="1"/>
      <edge id="165264" label="zzzz104,zzzz644" source="838" target="298" cy:directed="1"/>
      <edge id="165263" label="zzzz104,zzzz526" source="838" target="416" cy:directed="1"/>
      <edge id="165262" label="zzzz104,zzzz675" source="838" target="267" cy:directed="1"/>
      <edge id="165261" label="zzzz104,zzzz714" source="838" target="228" cy:directed="1"/>
      <edge id="165260" label="zzzz104,zzzz718" source="838" target="224" cy:directed="1"/>
      <edge id="165259" label="zzzz104,zzzz154" source="838" target="788" cy:directed="1"/>
      <edge id="165258" label="zzzz104,zzzz515" source="838" target="427" cy:directed="1"/>
      <edge id="165257" label="zzzz104,zzzz679" source="838" target="263" cy:directed="1"/>
      <edge id="165256" label="zzzz104,zzzz712" source="838" target="230" cy:directed="1"/>
      <edge id="165255" label="zzzz104,zzzz735" source="838" target="207" cy:directed="1"/>
      <edge id="165254" label="zzzz104,zzzz720" source="838" target="222" cy:directed="1"/>
      <edge id="165253" label="zzzz104,zzzz122" source="838" target="820" cy:directed="1"/>
      <edge id="165252" label="zzzz104,zzzz113" source="838" target="829" cy:directed="1"/>
      <edge id="165251" label="zzzz104,zzzz145" source="838" target="797" cy:directed="1"/>
      <edge id="165250" label="zzzz104,zzzz682" source="838" target="260" cy:directed="1"/>
      <edge id="165249" label="zzzz104,zzzz730" source="838" target="212" cy:directed="1"/>
      <edge id="165248" label="zzzz104,zzzz126" source="838" target="816" cy:directed="1"/>
      <edge id="165247" label="zzzz104,zzzz192" source="838" target="750" cy:directed="1"/>
      <edge id="165246" label="zzzz104,zzzz139" source="838" target="803" cy:directed="1"/>
      <edge id="165245" label="zzzz104,zzzz112" source="838" target="830" cy:directed="1"/>
      <edge id="165244" label="zzzz104,zzzz705" source="838" target="237" cy:directed="1"/>
      <edge id="165243" label="zzzz104,zzzz246" source="838" target="696" cy:directed="1"/>
      <edge id="165242" label="zzzz104,zzzz729" source="838" target="213" cy:directed="1"/>
      <edge id="165241" label="zzzz104,zzzz646" source="838" target="296" cy:directed="1"/>
      <edge id="165240" label="zzzz104,zzzz110" source="838" target="832" cy:directed="1"/>
      <edge id="165239" label="zzzz104,zzzz504" source="838" target="438" cy:directed="1"/>
      <edge id="165238" label="zzzz104,zzzz726" source="838" target="216" cy:directed="1"/>
      <edge id="165237" label="zzzz104,zzzz727" source="838" target="215" cy:directed="1"/>
      <edge id="165236" label="zzzz104,zzzz737" source="838" target="205" cy:directed="1"/>
      <edge id="165235" label="zzzz104,zzzzz71" source="838" target="100" cy:directed="1"/>
      <edge id="165234" label="zzzz104,zzzz742" source="838" target="200" cy:directed="1"/>
      <edge id="165233" label="zzzz104,zzzzz98" source="838" target="73" cy:directed="1"/>
      <edge id="165232" label="zzzz104,zzzz281" source="838" target="661" cy:directed="1"/>
      <edge id="165231" label="zzzz104,zzzz739" source="838" target="203" cy:directed="1"/>
      <edge id="165230" label="zzzz104,zzzz193" source="838" target="749" cy:directed="1"/>
      <edge id="165229" label="zzzz104,zzzz310" source="838" target="632" cy:directed="1"/>
      <edge id="165228" label="zzzz104,zzzz719" source="838" target="223" cy:directed="1"/>
      <edge id="165227" label="zzzz104,zzzz728" source="838" target="214" cy:directed="1"/>
      <edge id="165226" label="zzzz104,zzzz741" source="838" target="201" cy:directed="1"/>
      <edge id="165225" label="zzzz104,zzzz279" source="838" target="663" cy:directed="1"/>
      <edge id="165224" label="zzzz104,zzzz738" source="838" target="204" cy:directed="1"/>
      <edge id="165223" label="zzzz104,zzzz503" source="838" target="439" cy:directed="1"/>
      <edge id="165222" label="zzzz104,zzzz707" source="838" target="235" cy:directed="1"/>
      <edge id="165221" label="zzzz104,zzzz179" source="838" target="763" cy:directed="1"/>
      <edge id="165220" label="zzzz104,zzzz202" source="838" target="740" cy:directed="1"/>
      <edge id="165219" label="zzzz104,zzzz535" source="838" target="407" cy:directed="1"/>
      <edge id="165218" label="zzzz104,zzzz678" source="838" target="264" cy:directed="1"/>
      <edge id="165217" label="zzzz104,zzzz294" source="838" target="648" cy:directed="1"/>
      <edge id="165216" label="zzzz104,zzzz155" source="838" target="787" cy:directed="1"/>
      <edge id="165215" label="zzzz104,zzzz196" source="838" target="746" cy:directed="1"/>
      <edge id="165214" label="zzzz104,zzzz291" source="838" target="651" cy:directed="1"/>
      <edge id="165213" label="zzzz104,zzzz492" source="838" target="450" cy:directed="1"/>
      <edge id="165212" label="zzzz104,zzzz708" source="838" target="234" cy:directed="1"/>
      <edge id="165211" label="zzzz104,zzzz725" source="838" target="217" cy:directed="1"/>
      <edge id="165210" label="zzzz104,zzzz185" source="838" target="757" cy:directed="1"/>
      <edge id="165209" label="zzzz104,zzzz123" source="838" target="819" cy:directed="1"/>
      <edge id="165208" label="zzzz104,zzzz124" source="838" target="818" cy:directed="1"/>
      <edge id="165207" label="zzzz104,zzzz511" source="838" target="431" cy:directed="1"/>
      <edge id="165206" label="zzzz104,zzzz744" source="838" target="198" cy:directed="1"/>
      <edge id="165205" label="zzzz104,zzzz743" source="838" target="199" cy:directed="1"/>
      <edge id="165204" label="zzzz104,zzzz543" source="838" target="399" cy:directed="1"/>
      <edge id="165203" label="zzzz104,zzzz740" source="838" target="202" cy:directed="1"/>
      <edge id="165202" label="zzzz104,zzzz106" source="838" target="836" cy:directed="1"/>
      <edge id="165201" label="zzzz104,zzzz189" source="838" target="753" cy:directed="1"/>
      <edge id="165200" label="zzzz104,zzzz190" source="838" target="752" cy:directed="1"/>
      <edge id="165199" label="zzzz104,zzzz505" source="838" target="437" cy:directed="1"/>
      <edge id="165198" label="zzzz104,zzzz531" source="838" target="411" cy:directed="1"/>
      <edge id="165197" label="zzzz104,zzzz118" source="838" target="824" cy:directed="1"/>
      <edge id="165196" label="zzzz104,zzzz506" source="838" target="436" cy:directed="1"/>
      <edge id="165195" label="zzzz104,zzzz625" source="838" target="317" cy:directed="1"/>
      <edge id="165194" label="zzzz104,zzzz114" source="838" target="828" cy:directed="1"/>
      <edge id="165193" label="zzzz104,zzzz284" source="838" target="658" cy:directed="1"/>
      <edge id="165192" label="zzzz104,zzzzz49" source="838" target="122" cy:directed="1"/>
      <edge id="165191" label="zzzz104,zzzz700" source="838" target="242" cy:directed="1"/>
      <edge id="165190" label="zzzz104,zzzz676" source="838" target="266" cy:directed="1"/>
      <edge id="165189" label="zzzz104,zzzz152" source="838" target="790" cy:directed="1"/>
      <edge id="165188" label="zzzz104,zzzz698" source="838" target="244" cy:directed="1"/>
      <edge id="165187" label="zzzz104,zzzz534" source="838" target="408" cy:directed="1"/>
      <edge id="165186" label="zzzz104,zzzz107" source="838" target="835" cy:directed="1"/>
      <edge id="165185" label="zzzz104,zzzz252" source="838" target="690" cy:directed="1"/>
      <edge id="165184" label="zzzz104,zzzz623" source="838" target="319" cy:directed="1"/>
      <edge id="165183" label="zzzz104,zzzz673" source="838" target="269" cy:directed="1"/>
      <edge id="165182" label="zzzz104,zzzz681" source="838" target="261" cy:directed="1"/>
      <edge id="165181" label="zzzz104,zzzz545" source="838" target="397" cy:directed="1"/>
      <edge id="165180" label="zzzz104,zzzz203" source="838" target="739" cy:directed="1"/>
      <edge id="165179" label="zzzz104,zzzz723" source="838" target="219" cy:directed="1"/>
      <edge id="165178" label="zzzz104,zzzz680" source="838" target="262" cy:directed="1"/>
      <edge id="165177" label="zzzz104,zzzz736" source="838" target="206" cy:directed="1"/>
      <edge id="165176" label="zzzz104,zzzz706" source="838" target="236" cy:directed="1"/>
      <edge id="165175" label="zzzz104,zzzz546" source="838" target="396" cy:directed="1"/>
      <edge id="165174" label="zzzz104,zzzzz52" source="838" target="119" cy:directed="1"/>
      <edge id="165173" label="zzzz104,zzzz513" source="838" target="429" cy:directed="1"/>
      <edge id="165172" label="zzzz104,zzzz524" source="838" target="418" cy:directed="1"/>
      <edge id="165171" label="zzzz104,zzzz121" source="838" target="821" cy:directed="1"/>
      <edge id="165170" label="zzzz104,zzzz518" source="838" target="424" cy:directed="1"/>
      <edge id="165169" label="zzzz104,zzzz541" source="838" target="401" cy:directed="1"/>
      <edge id="165168" label="zzzz104,zzzz512" source="838" target="430" cy:directed="1"/>
      <edge id="165167" label="zzzz104,zzzz247" source="838" target="695" cy:directed="1"/>
      <edge id="165166" label="zzzz104,zzzz525" source="838" target="417" cy:directed="1"/>
      <edge id="165165" label="zzzz104,zzzz536" source="838" target="406" cy:directed="1"/>
      <edge id="165164" label="zzzz104,zzzz697" source="838" target="245" cy:directed="1"/>
      <edge id="165163" label="zzzz104,zzzz191" source="838" target="751" cy:directed="1"/>
      <edge id="165162" label="zzzz104,zzzz285" source="838" target="657" cy:directed="1"/>
      <edge id="165161" label="zzzz104,zzzz733" source="838" target="209" cy:directed="1"/>
      <edge id="165160" label="zzzz104,zzzzz48" source="838" target="123" cy:directed="1"/>
      <edge id="165159" label="zzzz104,zzzz173" source="838" target="769" cy:directed="1"/>
      <edge id="165158" label="zzzz104,zzzz702" source="838" target="240" cy:directed="1"/>
      <edge id="165157" label="zzzz104,zzzzz53" source="838" target="118" cy:directed="1"/>
      <edge id="165156" label="zzzz104,zzzz692" source="838" target="250" cy:directed="1"/>
      <edge id="165155" label="zzzz104,zzzzz73" source="838" target="98" cy:directed="1"/>
      <edge id="165154" label="zzzz104,zzzz245" source="838" target="697" cy:directed="1"/>
      <edge id="165153" label="zzzz104,zzzz699" source="838" target="243" cy:directed="1"/>
      <edge id="165152" label="zzzz104,zzzz701" source="838" target="241" cy:directed="1"/>
      <edge id="165151" label="zzzz104,zzzz108" source="838" target="834" cy:directed="1"/>
      <edge id="165150" label="zzzz104,zzzz161" source="838" target="781" cy:directed="1"/>
      <edge id="165149" label="zzzz104,zzzzz97" source="838" target="74" cy:directed="1"/>
      <edge id="165148" label="zzzz104,zzzz557" source="838" target="385" cy:directed="1"/>
      <edge id="165147" label="zzzz104,zzzz674" source="838" target="268" cy:directed="1"/>
      <edge id="165146" label="zzzz104,zzzz558" source="838" target="384" cy:directed="1"/>
      <edge id="165145" label="zzzz104,zzzz611" source="838" target="331" cy:directed="1"/>
      <edge id="165144" label="zzzz104,zzzz257" source="838" target="685" cy:directed="1"/>
      <edge id="165143" label="zzzz104,zzzz141" source="838" target="801" cy:directed="1"/>
      <edge id="165142" label="zzzz104,zzzz584" source="838" target="358" cy:directed="1"/>
      <edge id="165141" label="zzzz104,zzzz529" source="838" target="413" cy:directed="1"/>
      <edge id="165140" label="zzzz104,zzzzz47" source="838" target="124" cy:directed="1"/>
      <edge id="165139" label="zzzz104,zzzz120" source="838" target="822" cy:directed="1"/>
      <edge id="165138" label="zzzz104,zzzz553" source="838" target="389" cy:directed="1"/>
      <edge id="165137" label="zzzz104,zzzz694" source="838" target="248" cy:directed="1"/>
      <edge id="165136" label="zzzz104,zzzz574" source="838" target="368" cy:directed="1"/>
      <edge id="165135" label="zzzz104,zzzz263" source="838" target="679" cy:directed="1"/>
      <edge id="165134" label="zzzz104,zzzz560" source="838" target="382" cy:directed="1"/>
      <edge id="165133" label="zzzz104,zzzz552" source="838" target="390" cy:directed="1"/>
      <edge id="165132" label="zzzz104,zzzz564" source="838" target="378" cy:directed="1"/>
      <edge id="165131" label="zzzz104,zzzzz64" source="838" target="107" cy:directed="1"/>
      <edge id="165130" label="zzzz104,zzzz581" source="838" target="361" cy:directed="1"/>
      <edge id="165129" label="zzzz104,zzzz572" source="838" target="370" cy:directed="1"/>
      <edge id="165128" label="zzzz104,zzzzz33" source="838" target="138" cy:directed="1"/>
      <edge id="165127" label="zzzz104,zzzz261" source="838" target="681" cy:directed="1"/>
      <edge id="165126" label="zzzz104,zzzz567" source="838" target="375" cy:directed="1"/>
      <edge id="165125" label="zzzz104,zzzzz75" source="838" target="96" cy:directed="1"/>
      <edge id="165124" label="zzzz104,zzzz262" source="838" target="680" cy:directed="1"/>
      <edge id="165123" label="zzzz104,zzzz573" source="838" target="369" cy:directed="1"/>
      <edge id="165122" label="zzzz104,zzzz571" source="838" target="371" cy:directed="1"/>
      <edge id="165121" label="zzzz104,zzzz469" source="838" target="473" cy:directed="1"/>
      <edge id="165120" label="zzzz104,zzzz260" source="838" target="682" cy:directed="1"/>
      <edge id="165119" label="zzzz104,zzzz425" source="838" target="517" cy:directed="1"/>
      <edge id="165118" label="zzzz104,zzzz556" source="838" target="386" cy:directed="1"/>
      <edge id="165117" label="zzzz104,zzzz562" source="838" target="380" cy:directed="1"/>
      <edge id="165116" label="zzzz104,zzzz520" source="838" target="422" cy:directed="1"/>
      <edge id="165115" label="zzzz104,zzzz576" source="838" target="366" cy:directed="1"/>
      <edge id="165114" label="zzzz104,zzzz551" source="838" target="391" cy:directed="1"/>
      <edge id="165113" label="zzzz104,zzzzz59" source="838" target="112" cy:directed="1"/>
      <edge id="165112" label="zzzz104,zzzz128" source="838" target="814" cy:directed="1"/>
      <edge id="165111" label="zzzz104,zzzz282" source="838" target="660" cy:directed="1"/>
      <edge id="165110" label="zzzz104,zzzz151" source="838" target="791" cy:directed="1"/>
      <edge id="165109" label="zzzz104,zzzz577" source="838" target="365" cy:directed="1"/>
      <edge id="165108" label="zzzz104,zzzz453" source="838" target="489" cy:directed="1"/>
      <edge id="165107" label="zzzz104,zzzz717" source="838" target="225" cy:directed="1"/>
      <edge id="165106" label="zzzz104,zzzz174" source="838" target="768" cy:directed="1"/>
      <edge id="165105" label="zzzz104,zzzz143" source="838" target="799" cy:directed="1"/>
      <edge id="165104" label="zzzz104,zzzzz60" source="838" target="111" cy:directed="1"/>
      <edge id="165103" label="zzzz104,zzzz561" source="838" target="381" cy:directed="1"/>
      <edge id="165102" label="zzzz104,zzzz125" source="838" target="817" cy:directed="1"/>
      <edge id="165101" label="zzzz104,zzzzz51" source="838" target="120" cy:directed="1"/>
      <edge id="165100" label="zzzz104,zzzz693" source="838" target="249" cy:directed="1"/>
      <edge id="165099" label="zzzz104,zzzz167" source="838" target="775" cy:directed="1"/>
      <edge id="165098" label="zzzz104,zzzz690" source="838" target="252" cy:directed="1"/>
      <edge id="165097" label="zzzz104,zzzz134" source="838" target="808" cy:directed="1"/>
      <edge id="165096" label="zzzz104,zzzz270" source="838" target="672" cy:directed="1"/>
      <edge id="165095" label="zzzz104,zzzz307" source="838" target="635" cy:directed="1"/>
      <edge id="165094" label="zzzz104,zzzz580" source="838" target="362" cy:directed="1"/>
      <edge id="165093" label="zzzz104,zzzzz58" source="838" target="113" cy:directed="1"/>
      <edge id="165092" label="zzzz104,zzzz479" source="838" target="463" cy:directed="1"/>
      <edge id="165091" label="zzzz104,zzzz570" source="838" target="372" cy:directed="1"/>
      <edge id="165090" label="zzzz104,zzzz183" source="838" target="759" cy:directed="1"/>
      <edge id="165089" label="zzzz104,zzzz563" source="838" target="379" cy:directed="1"/>
      <edge id="165088" label="zzzz104,zzzz464" source="838" target="478" cy:directed="1"/>
      <edge id="165087" label="zzzz104,zzzz473" source="838" target="469" cy:directed="1"/>
      <edge id="165086" label="zzzz104,zzzz442" source="838" target="500" cy:directed="1"/>
      <edge id="165085" label="zzzz104,zzzz280" source="838" target="662" cy:directed="1"/>
      <edge id="165084" label="zzzz104,zzzz497" source="838" target="445" cy:directed="1"/>
      <edge id="165083" label="zzzz104,zzzz234" source="838" target="708" cy:directed="1"/>
      <edge id="165082" label="zzzz104,zzzz423" source="838" target="519" cy:directed="1"/>
      <edge id="165081" label="zzzz104,zzzz429" source="838" target="513" cy:directed="1"/>
      <edge id="165080" label="zzzz104,zzzz441" source="838" target="501" cy:directed="1"/>
      <edge id="165079" label="zzzz104,zzzz447" source="838" target="495" cy:directed="1"/>
      <edge id="165078" label="zzzz104,zzzz632" source="838" target="310" cy:directed="1"/>
      <edge id="165077" label="zzzz104,zzzzz44" source="838" target="127" cy:directed="1"/>
      <edge id="165076" label="zzzz104,zzzz142" source="838" target="800" cy:directed="1"/>
      <edge id="165075" label="zzzz104,zzzz470" source="838" target="472" cy:directed="1"/>
      <edge id="165074" label="zzzz104,zzzz568" source="838" target="374" cy:directed="1"/>
      <edge id="165073" label="zzzz104,zzzz158" source="838" target="784" cy:directed="1"/>
      <edge id="165072" label="zzzz104,zzzz181" source="838" target="761" cy:directed="1"/>
      <edge id="165071" label="zzzz104,zzzz519" source="838" target="423" cy:directed="1"/>
      <edge id="165070" label="zzzz104,zzzz578" source="838" target="364" cy:directed="1"/>
      <edge id="165069" label="zzzz104,zzzz582" source="838" target="360" cy:directed="1"/>
      <edge id="165068" label="zzzz104,zzzz689" source="838" target="253" cy:directed="1"/>
      <edge id="165067" label="zzzz104,zzzz288" source="838" target="654" cy:directed="1"/>
      <edge id="165066" label="zzzz104,zzzz312" source="838" target="630" cy:directed="1"/>
      <edge id="165065" label="zzzz104,zzzz233" source="838" target="709" cy:directed="1"/>
      <edge id="165064" label="zzzz104,zzzz287" source="838" target="655" cy:directed="1"/>
      <edge id="165063" label="zzzz104,zzzz566" source="838" target="376" cy:directed="1"/>
      <edge id="165062" label="zzzz104,zzzz569" source="838" target="373" cy:directed="1"/>
      <edge id="165061" label="zzzz104,zzzz579" source="838" target="363" cy:directed="1"/>
      <edge id="165060" label="zzzz104,zzzz685" source="838" target="257" cy:directed="1"/>
      <edge id="165059" label="zzzz104,zzzzz82" source="838" target="89" cy:directed="1"/>
      <edge id="165058" label="zzzz104,zzzz228" source="838" target="714" cy:directed="1"/>
      <edge id="165057" label="zzzz104,zzzz298" source="838" target="644" cy:directed="1"/>
      <edge id="165056" label="zzzz104,zzzz537" source="838" target="405" cy:directed="1"/>
      <edge id="165055" label="zzzz104,zzzz684" source="838" target="258" cy:directed="1"/>
      <edge id="165054" label="zzzz104,zzzz686" source="838" target="256" cy:directed="1"/>
      <edge id="165053" label="zzzz104,zzzz131" source="838" target="811" cy:directed="1"/>
      <edge id="165052" label="zzzz104,zzzz243" source="838" target="699" cy:directed="1"/>
      <edge id="165051" label="zzzz104,zzzz498" source="838" target="444" cy:directed="1"/>
      <edge id="165050" label="zzzz104,zzzz575" source="838" target="367" cy:directed="1"/>
      <edge id="165049" label="zzzz104,zzzz162" source="838" target="780" cy:directed="1"/>
      <edge id="165048" label="zzzz104,zzzz634" source="838" target="308" cy:directed="1"/>
      <edge id="165047" label="zzzz104,zzzzz72" source="838" target="99" cy:directed="1"/>
      <edge id="165046" label="zzzz104,zzzz232" source="838" target="710" cy:directed="1"/>
      <edge id="165045" label="zzzz104,zzzz259" source="838" target="683" cy:directed="1"/>
      <edge id="165044" label="zzzz104,zzzzz78" source="838" target="93" cy:directed="1"/>
      <edge id="165043" label="zzzz104,zzzz293" source="838" target="649" cy:directed="1"/>
      <edge id="165042" label="zzzz104,zzzz555" source="838" target="387" cy:directed="1"/>
      <edge id="165041" label="zzzz104,zzzz599" source="838" target="343" cy:directed="1"/>
      <edge id="165040" label="zzzz104,zzzz266" source="838" target="676" cy:directed="1"/>
      <edge id="165039" label="zzzz104,zzzz289" source="838" target="653" cy:directed="1"/>
      <edge id="165038" label="zzzz104,zzzz565" source="838" target="377" cy:directed="1"/>
      <edge id="165037" label="zzzz104,zzzz274" source="838" target="668" cy:directed="1"/>
      <edge id="165036" label="zzzz104,zzzz483" source="838" target="459" cy:directed="1"/>
      <edge id="165035" label="zzzz104,zzzz550" source="838" target="392" cy:directed="1"/>
      <edge id="165034" label="zzzz104,zzzz598" source="838" target="344" cy:directed="1"/>
      <edge id="165033" label="zzzz104,zzzzz86" source="838" target="85" cy:directed="1"/>
      <edge id="165032" label="zzzz104,zzzz462" source="838" target="480" cy:directed="1"/>
      <edge id="165031" label="zzzz104,zzzzz69" source="838" target="102" cy:directed="1"/>
      <edge id="165030" label="zzzz104,zzzz146" source="838" target="796" cy:directed="1"/>
      <edge id="165029" label="zzzz104,zzzz237" source="838" target="705" cy:directed="1"/>
      <edge id="165028" label="zzzz104,zzzz434" source="838" target="508" cy:directed="1"/>
      <edge id="165027" label="zzzz104,zzzz583" source="838" target="359" cy:directed="1"/>
      <edge id="165026" label="zzzz104,zzzzz37" source="838" target="134" cy:directed="1"/>
      <edge id="165025" label="zzzz104,zzzzz79" source="838" target="92" cy:directed="1"/>
      <edge id="165024" label="zzzz104,zzzzz74" source="838" target="97" cy:directed="1"/>
      <edge id="165023" label="zzzz104,zzzz235" source="838" target="707" cy:directed="1"/>
      <edge id="165022" label="zzzz104,zzzz448" source="838" target="494" cy:directed="1"/>
      <edge id="165021" label="zzzz104,zzzz475" source="838" target="467" cy:directed="1"/>
      <edge id="165020" label="zzzz104,zzzz596" source="838" target="346" cy:directed="1"/>
      <edge id="165019" label="zzzz104,zzzz133" source="838" target="809" cy:directed="1"/>
      <edge id="165018" label="zzzz104,zzzz229" source="838" target="713" cy:directed="1"/>
      <edge id="165017" label="zzzz104,zzzz230" source="838" target="712" cy:directed="1"/>
      <edge id="165016" label="zzzz104,zzzz501" source="838" target="441" cy:directed="1"/>
      <edge id="165015" label="zzzz104,zzzz594" source="838" target="348" cy:directed="1"/>
      <edge id="165014" label="zzzz104,zzzz688" source="838" target="254" cy:directed="1"/>
      <edge id="165013" label="zzzz104,zzzzz76" source="838" target="95" cy:directed="1"/>
      <edge id="165012" label="zzzz104,zzzzz87" source="838" target="84" cy:directed="1"/>
      <edge id="165011" label="zzzz104,zzzz166" source="838" target="776" cy:directed="1"/>
      <edge id="165010" label="zzzz104,zzzz283" source="838" target="659" cy:directed="1"/>
      <edge id="165009" label="zzzz104,zzzzz45" source="838" target="126" cy:directed="1"/>
      <edge id="165008" label="zzzz104,zzzzz99" source="838" target="72" cy:directed="1"/>
      <edge id="165007" label="zzzz104,zzzz238" source="838" target="704" cy:directed="1"/>
      <edge id="165006" label="zzzz104,zzzz258" source="838" target="684" cy:directed="1"/>
      <edge id="165005" label="zzzz104,zzzz486" source="838" target="456" cy:directed="1"/>
      <edge id="165004" label="zzzz104,zzzz559" source="838" target="383" cy:directed="1"/>
      <edge id="165003" label="zzzz104,zzzz277" source="838" target="665" cy:directed="1"/>
      <edge id="165002" label="zzzz104,zzzz439" source="838" target="503" cy:directed="1"/>
      <edge id="165001" label="zzzz104,zzzz522" source="838" target="420" cy:directed="1"/>
      <edge id="165000" label="zzzz104,zzzz595" source="838" target="347" cy:directed="1"/>
      <edge id="164999" label="zzzz104,zzzz687" source="838" target="255" cy:directed="1"/>
      <edge id="164998" label="zzzz104,zzzzz66" source="838" target="105" cy:directed="1"/>
      <edge id="164997" label="zzzz104,zzzz628" source="838" target="314" cy:directed="1"/>
      <edge id="164996" label="zzzz104,zzzzz34" source="838" target="137" cy:directed="1"/>
      <edge id="164995" label="zzzz104,zzzzz41" source="838" target="130" cy:directed="1"/>
      <edge id="164994" label="zzzz104,zzzzz90" source="838" target="81" cy:directed="1"/>
      <edge id="164993" label="zzzz104,zzzz127" source="838" target="815" cy:directed="1"/>
      <edge id="164992" label="zzzz104,zzzz734" source="838" target="208" cy:directed="1"/>
      <edge id="164991" label="zzzz104,zzzzz55" source="838" target="116" cy:directed="1"/>
      <edge id="164990" label="zzzz104,zzzz140" source="838" target="802" cy:directed="1"/>
      <edge id="164989" label="zzzz104,zzzz231" source="838" target="711" cy:directed="1"/>
      <edge id="164988" label="zzzz104,zzzzz84" source="838" target="87" cy:directed="1"/>
      <edge id="164987" label="zzzz104,zzzz242" source="838" target="700" cy:directed="1"/>
      <edge id="164986" label="zzzz104,zzzz273" source="838" target="669" cy:directed="1"/>
      <edge id="164985" label="zzzz104,zzzzz42" source="838" target="129" cy:directed="1"/>
      <edge id="164984" label="zzzz104,zzzz148" source="838" target="794" cy:directed="1"/>
      <edge id="164983" label="zzzz104,zzzz236" source="838" target="706" cy:directed="1"/>
      <edge id="164982" label="zzzz104,zzzz187" source="838" target="755" cy:directed="1"/>
      <edge id="164981" label="zzzz104,zzzz554" source="838" target="388" cy:directed="1"/>
      <edge id="164980" label="zzzz104,zzzz424" source="838" target="518" cy:directed="1"/>
      <edge id="164979" label="zzzz104,zzzzz85" source="838" target="86" cy:directed="1"/>
      <edge id="164978" label="zzzz104,zzzz178" source="838" target="764" cy:directed="1"/>
      <edge id="164977" label="zzzz104,zzzz468" source="838" target="474" cy:directed="1"/>
      <edge id="164976" label="zzzz104,zzzz517" source="838" target="425" cy:directed="1"/>
      <edge id="164975" label="zzzz104,zzzz432" source="838" target="510" cy:directed="1"/>
      <edge id="164974" label="zzzz104,zzzz476" source="838" target="466" cy:directed="1"/>
      <edge id="164973" label="zzzz104,zzzz481" source="838" target="461" cy:directed="1"/>
      <edge id="164972" label="zzzz104,zzzz508" source="838" target="434" cy:directed="1"/>
      <edge id="164971" label="zzzz104,zzzz431" source="838" target="511" cy:directed="1"/>
      <edge id="164970" label="zzzz104,zzzz435" source="838" target="507" cy:directed="1"/>
      <edge id="164969" label="zzzz104,zzzz438" source="838" target="504" cy:directed="1"/>
      <edge id="164968" label="zzzz104,zzzz440" source="838" target="502" cy:directed="1"/>
      <edge id="164967" label="zzzz104,zzzz450" source="838" target="492" cy:directed="1"/>
      <edge id="164966" label="zzzz104,zzzz455" source="838" target="487" cy:directed="1"/>
      <edge id="164965" label="zzzz104,zzzz523" source="838" target="419" cy:directed="1"/>
      <edge id="164964" label="zzzz104,zzzz597" source="838" target="345" cy:directed="1"/>
      <edge id="164963" label="zzzz104,zzzz704" source="838" target="238" cy:directed="1"/>
      <edge id="164962" label="zzzz104,zzzz244" source="838" target="698" cy:directed="1"/>
      <edge id="164961" label="zzzz104,zzzz292" source="838" target="650" cy:directed="1"/>
      <edge id="164960" label="zzzz104,zzzz311" source="838" target="631" cy:directed="1"/>
      <edge id="164959" label="zzzz104,zzzz444" source="838" target="498" cy:directed="1"/>
      <edge id="164958" label="zzzz104,zzzz454" source="838" target="488" cy:directed="1"/>
      <edge id="164957" label="zzzz104,zzzz487" source="838" target="455" cy:directed="1"/>
      <edge id="164956" label="zzzz104,zzzz494" source="838" target="448" cy:directed="1"/>
      <edge id="164955" label="zzzz104,zzzz188" source="838" target="754" cy:directed="1"/>
      <edge id="164954" label="zzzz104,zzzz449" source="838" target="493" cy:directed="1"/>
      <edge id="164953" label="zzzz104,zzzz460" source="838" target="482" cy:directed="1"/>
      <edge id="164952" label="zzzz104,zzzz466" source="838" target="476" cy:directed="1"/>
      <edge id="164951" label="zzzz104,zzzz538" source="838" target="404" cy:directed="1"/>
      <edge id="164950" label="zzzz104,zzzz724" source="838" target="218" cy:directed="1"/>
      <edge id="164949" label="zzzz104,zzzzz91" source="838" target="80" cy:directed="1"/>
      <edge id="164948" label="zzzz104,zzzz436" source="838" target="506" cy:directed="1"/>
      <edge id="164947" label="zzzz104,zzzz437" source="838" target="505" cy:directed="1"/>
      <edge id="164946" label="zzzz104,zzzz459" source="838" target="483" cy:directed="1"/>
      <edge id="164945" label="zzzz104,zzzzz40" source="838" target="131" cy:directed="1"/>
      <edge id="164944" label="zzzz104,zzzzz81" source="838" target="90" cy:directed="1"/>
      <edge id="164943" label="zzzz104,zzzzz89" source="838" target="82" cy:directed="1"/>
      <edge id="164942" label="zzzz104,zzzz268" source="838" target="674" cy:directed="1"/>
      <edge id="164941" label="zzzz104,zzzz433" source="838" target="509" cy:directed="1"/>
      <edge id="164940" label="zzzz104,zzzz445" source="838" target="497" cy:directed="1"/>
      <edge id="164939" label="zzzz104,zzzz480" source="838" target="462" cy:directed="1"/>
      <edge id="164938" label="zzzz104,zzzz485" source="838" target="457" cy:directed="1"/>
      <edge id="164937" label="zzzz104,zzzz130" source="838" target="812" cy:directed="1"/>
      <edge id="164936" label="zzzz104,zzzz240" source="838" target="702" cy:directed="1"/>
      <edge id="164935" label="zzzz104,zzzz443" source="838" target="499" cy:directed="1"/>
      <edge id="164934" label="zzzz104,zzzz446" source="838" target="496" cy:directed="1"/>
      <edge id="164933" label="zzzz104,zzzz458" source="838" target="484" cy:directed="1"/>
      <edge id="164932" label="zzzz104,zzzz115" source="838" target="827" cy:directed="1"/>
      <edge id="164931" label="zzzz104,zzzz129" source="838" target="813" cy:directed="1"/>
      <edge id="164930" label="zzzz104,zzzz175" source="838" target="767" cy:directed="1"/>
      <edge id="164929" label="zzzz104,zzzz241" source="838" target="701" cy:directed="1"/>
      <edge id="164928" label="zzzz104,zzzz495" source="838" target="447" cy:directed="1"/>
      <edge id="164927" label="zzzz104,zzzzz32" source="838" target="139" cy:directed="1"/>
      <edge id="164926" label="zzzz104,zzzz159" source="838" target="783" cy:directed="1"/>
      <edge id="164925" label="zzzz104,zzzz171" source="838" target="771" cy:directed="1"/>
      <edge id="164924" label="zzzz104,zzzz308" source="838" target="634" cy:directed="1"/>
      <edge id="164923" label="zzzz104,zzzz165" source="838" target="777" cy:directed="1"/>
      <edge id="164922" label="zzzz104,zzzz132" source="838" target="810" cy:directed="1"/>
      <edge id="164921" label="zzzz104,zzzz149" source="838" target="793" cy:directed="1"/>
      <edge id="164920" label="zzzz104,zzzz157" source="838" target="785" cy:directed="1"/>
      <edge id="164919" label="zzzz104,zzzz323" source="838" target="619" cy:directed="1"/>
      <edge id="164918" label="zzzz104,zzzzz83" source="838" target="88" cy:directed="1"/>
      <edge id="164917" label="zzzz104,zzzz160" source="838" target="782" cy:directed="1"/>
      <edge id="164916" label="zzzz104,zzzz452" source="838" target="490" cy:directed="1"/>
      <edge id="164915" label="zzzz104,zzzz477" source="838" target="465" cy:directed="1"/>
      <edge id="164914" label="zzzz104,zzzzz57" source="838" target="114" cy:directed="1"/>
      <edge id="164913" label="zzzz104,zzzzz92" source="838" target="79" cy:directed="1"/>
      <edge id="164912" label="zzzz104,zzzzzz6" source="838" target="65" cy:directed="1"/>
      <edge id="164911" label="zzzz104,zzzz489" source="838" target="453" cy:directed="1"/>
      <edge id="164910" label="zzzz104,zzzzz88" source="838" target="83" cy:directed="1"/>
      <edge id="164909" label="zzzz104,zzzz488" source="838" target="454" cy:directed="1"/>
      <edge id="164908" label="zzzz104,zzzz654" source="838" target="288" cy:directed="1"/>
      <edge id="164907" label="zzzz104,zzzzz54" source="838" target="117" cy:directed="1"/>
      <edge id="164906" label="zzzz104,zzzz669" source="838" target="273" cy:directed="1"/>
      <edge id="164905" label="zzzz104,zzzz169" source="838" target="773" cy:directed="1"/>
      <edge id="164904" label="zzzz104,zzzzzz5" source="838" target="66" cy:directed="1"/>
      <edge id="164903" label="zzzz104,zzzz627" source="838" target="315" cy:directed="1"/>
      <edge id="164902" label="zzzz104,zzzz493" source="838" target="449" cy:directed="1"/>
      <edge id="164901" label="zzzz104,zzzzz21" source="838" target="150" cy:directed="1"/>
      <edge id="164900" label="zzzz104,zzzz670" source="838" target="272" cy:directed="1"/>
      <edge id="164899" label="zzzz104,zzzzz35" source="838" target="136" cy:directed="1"/>
      <edge id="164898" label="zzzz104,zzzzzz4" source="838" target="67" cy:directed="1"/>
      <edge id="164897" label="zzzz104,zzzzz13" source="838" target="158" cy:directed="1"/>
      <edge id="164896" label="zzzz104,zzzz164" source="838" target="778" cy:directed="1"/>
      <edge id="164895" label="zzzz104,zzzzz77" source="838" target="94" cy:directed="1"/>
      <edge id="164894" label="zzzz104,zzzzz65" source="838" target="106" cy:directed="1"/>
      <edge id="164893" label="zzzz104,zzzzz80" source="838" target="91" cy:directed="1"/>
      <edge id="164892" label="zzzz104,zzzz186" source="838" target="756" cy:directed="1"/>
      <edge id="164891" label="zzzz104,zzzzz12" source="838" target="159" cy:directed="1"/>
      <edge id="164890" label="zzzz104,zzzz664" source="838" target="278" cy:directed="1"/>
      <edge id="164889" label="zzzz104,zzzzz39" source="838" target="132" cy:directed="1"/>
      <edge id="164888" label="zzzz104,zzzz490" source="838" target="452" cy:directed="1"/>
      <edge id="164887" label="zzzz104,zzzz275" source="838" target="667" cy:directed="1"/>
      <edge id="164886" label="zzzz104,zzzzz62" source="838" target="109" cy:directed="1"/>
      <edge id="164885" label="zzzz104,zzzz201" source="838" target="741" cy:directed="1"/>
      <edge id="164884" label="zzzz104,zzzz417" source="838" target="525" cy:directed="1"/>
      <edge id="164883" label="zzzz104,zzzz316" source="838" target="626" cy:directed="1"/>
      <edge id="164882" label="zzzz104,zzzz491" source="838" target="451" cy:directed="1"/>
      <edge id="164881" label="zzzz104,zzzz195" source="838" target="747" cy:directed="1"/>
      <edge id="164880" label="zzzz104,zzzz300" source="838" target="642" cy:directed="1"/>
      <edge id="164879" label="zzzz104,zzzz660" source="838" target="282" cy:directed="1"/>
      <edge id="164878" label="zzzz104,zzzz668" source="838" target="274" cy:directed="1"/>
      <edge id="164877" label="zzzz104,zzzzz10" source="838" target="161" cy:directed="1"/>
      <edge id="164876" label="zzzz104,zzzz172" source="838" target="770" cy:directed="1"/>
      <edge id="164875" label="zzzz104,zzzz315" source="838" target="627" cy:directed="1"/>
      <edge id="164874" label="zzzz104,zzzz604" source="838" target="338" cy:directed="1"/>
      <edge id="164873" label="zzzz104,zzzz605" source="838" target="337" cy:directed="1"/>
      <edge id="164872" label="zzzz104,zzzz645" source="838" target="297" cy:directed="1"/>
      <edge id="164871" label="zzzz104,zzzz649" source="838" target="293" cy:directed="1"/>
      <edge id="164870" label="zzzz104,zzzz591" source="838" target="351" cy:directed="1"/>
      <edge id="164869" label="zzzz104,zzzz606" source="838" target="336" cy:directed="1"/>
      <edge id="164868" label="zzzz104,zzzz665" source="838" target="277" cy:directed="1"/>
      <edge id="164867" label="zzzz104,zzzz304" source="838" target="638" cy:directed="1"/>
      <edge id="164866" label="zzzz104,zzzz593" source="838" target="349" cy:directed="1"/>
      <edge id="164865" label="zzzz104,zzzzz61" source="838" target="110" cy:directed="1"/>
      <edge id="164864" label="zzzz104,zzzzzz1" source="838" target="70" cy:directed="1"/>
      <edge id="164863" label="zzzz104,zzzz163" source="838" target="779" cy:directed="1"/>
      <edge id="164862" label="zzzz104,zzzz586" source="838" target="356" cy:directed="1"/>
      <edge id="164861" label="zzzz104,zzzz655" source="838" target="287" cy:directed="1"/>
      <edge id="164860" label="zzzz104,zzzzz11" source="838" target="160" cy:directed="1"/>
      <edge id="164859" label="zzzz104,zzzz223" source="838" target="719" cy:directed="1"/>
      <edge id="164858" label="zzzz104,zzzz295" source="838" target="647" cy:directed="1"/>
      <edge id="164857" label="zzzz104,zzzz299" source="838" target="643" cy:directed="1"/>
      <edge id="164856" label="zzzz104,zzzz414" source="838" target="528" cy:directed="1"/>
      <edge id="164855" label="zzzz104,zzzz619" source="838" target="323" cy:directed="1"/>
      <edge id="164854" label="zzzz104,zzzz622" source="838" target="320" cy:directed="1"/>
      <edge id="164853" label="zzzz104,zzzz626" source="838" target="316" cy:directed="1"/>
      <edge id="164852" label="zzzz104,zzzz638" source="838" target="304" cy:directed="1"/>
      <edge id="164851" label="zzzz104,zzzzzz9" source="838" target="62" cy:directed="1"/>
      <edge id="164850" label="zzzz104,zzzz198" source="838" target="744" cy:directed="1"/>
      <edge id="164849" label="zzzz104,zzzz412" source="838" target="530" cy:directed="1"/>
      <edge id="164848" label="zzzz104,zzzz418" source="838" target="524" cy:directed="1"/>
      <edge id="164847" label="zzzz104,zzzz533" source="838" target="409" cy:directed="1"/>
      <edge id="164846" label="zzzz104,zzzz603" source="838" target="339" cy:directed="1"/>
      <edge id="164845" label="zzzz104,zzzz648" source="838" target="294" cy:directed="1"/>
      <edge id="164844" label="zzzz104,zzzz667" source="838" target="275" cy:directed="1"/>
      <edge id="164843" label="zzzz104,zzzzzz2" source="838" target="69" cy:directed="1"/>
      <edge id="164842" label="zzzz104,zzzzzz7" source="838" target="64" cy:directed="1"/>
      <edge id="164841" label="zzzz104,zzzz147" source="838" target="795" cy:directed="1"/>
      <edge id="164840" label="zzzz104,zzzz326" source="838" target="616" cy:directed="1"/>
      <edge id="164839" label="zzzz104,zzzz325" source="838" target="617" cy:directed="1"/>
      <edge id="164838" label="zzzz104,zzzz592" source="838" target="350" cy:directed="1"/>
      <edge id="164837" label="zzzz104,zzzz618" source="838" target="324" cy:directed="1"/>
      <edge id="164836" label="zzzz104,zzzz621" source="838" target="321" cy:directed="1"/>
      <edge id="164835" label="zzzz104,zzzz630" source="838" target="312" cy:directed="1"/>
      <edge id="164834" label="zzzz104,zzzz636" source="838" target="306" cy:directed="1"/>
      <edge id="164833" label="zzzz104,zzzz642" source="838" target="300" cy:directed="1"/>
      <edge id="164832" label="zzzz104,zzzzzz8" source="838" target="63" cy:directed="1"/>
      <edge id="164831" label="zzzz104,zzzz218" source="838" target="724" cy:directed="1"/>
      <edge id="164830" label="zzzz104,zzzz276" source="838" target="666" cy:directed="1"/>
      <edge id="164829" label="zzzz104,zzzz420" source="838" target="522" cy:directed="1"/>
      <edge id="164828" label="zzzz104,zzzz467" source="838" target="475" cy:directed="1"/>
      <edge id="164827" label="zzzz104,zzzz542" source="838" target="400" cy:directed="1"/>
      <edge id="164826" label="zzzz104,zzzz588" source="838" target="354" cy:directed="1"/>
      <edge id="164825" label="zzzz104,zzzz589" source="838" target="353" cy:directed="1"/>
      <edge id="164824" label="zzzz104,zzzz590" source="838" target="352" cy:directed="1"/>
      <edge id="164823" label="zzzz104,zzzz656" source="838" target="286" cy:directed="1"/>
      <edge id="164822" label="zzzz104,zzzz303" source="838" target="639" cy:directed="1"/>
      <edge id="164821" label="zzzz104,zzzz507" source="838" target="435" cy:directed="1"/>
      <edge id="164820" label="zzzz104,zzzz647" source="838" target="295" cy:directed="1"/>
      <edge id="164819" label="zzzz104,zzzz671" source="838" target="271" cy:directed="1"/>
      <edge id="164818" label="zzzz104,zzzz220" source="838" target="722" cy:directed="1"/>
      <edge id="164817" label="zzzz104,zzzz264" source="838" target="678" cy:directed="1"/>
      <edge id="164816" label="zzzz104,zzzz199" source="838" target="743" cy:directed="1"/>
      <edge id="164815" label="zzzz104,zzzz200" source="838" target="742" cy:directed="1"/>
      <edge id="164814" label="zzzz104,zzzz637" source="838" target="305" cy:directed="1"/>
      <edge id="164813" label="zzzz104,zzzz224" source="838" target="718" cy:directed="1"/>
      <edge id="164812" label="zzzz104,zzzz641" source="838" target="301" cy:directed="1"/>
      <edge id="164811" label="zzzz104,zzzz661" source="838" target="281" cy:directed="1"/>
      <edge id="164810" label="zzzz104,zzzz411" source="838" target="531" cy:directed="1"/>
      <edge id="164809" label="zzzz104,zzzz415" source="838" target="527" cy:directed="1"/>
      <edge id="164808" label="zzzz104,zzzz640" source="838" target="302" cy:directed="1"/>
      <edge id="164807" label="zzzz104,zzzz416" source="838" target="526" cy:directed="1"/>
      <edge id="164806" label="zzzz104,zzzz610" source="838" target="332" cy:directed="1"/>
      <edge id="164805" label="zzzz104,zzzzz94" source="838" target="77" cy:directed="1"/>
      <edge id="164804" label="zzzz104,zzzz208" source="838" target="734" cy:directed="1"/>
      <edge id="164803" label="zzzz104,zzzz221" source="838" target="721" cy:directed="1"/>
      <edge id="164802" label="zzzz104,zzzz309" source="838" target="633" cy:directed="1"/>
      <edge id="164801" label="zzzz104,zzzz617" source="838" target="325" cy:directed="1"/>
      <edge id="164800" label="zzzz104,zzzz620" source="838" target="322" cy:directed="1"/>
      <edge id="164799" label="zzzz104,zzzz313" source="838" target="629" cy:directed="1"/>
      <edge id="164798" label="zzzz104,zzzz322" source="838" target="620" cy:directed="1"/>
      <edge id="164797" label="zzzz104,zzzz547" source="838" target="395" cy:directed="1"/>
      <edge id="164796" label="zzzz104,zzzz662" source="838" target="280" cy:directed="1"/>
      <edge id="164795" label="zzzz104,zzzz419" source="838" target="523" cy:directed="1"/>
      <edge id="164794" label="zzzz104,zzzz615" source="838" target="327" cy:directed="1"/>
      <edge id="164793" label="zzzz104,zzzz657" source="838" target="285" cy:directed="1"/>
      <edge id="164792" label="zzzz104,zzzz255" source="838" target="687" cy:directed="1"/>
      <edge id="164791" label="zzzz104,zzzz197" source="838" target="745" cy:directed="1"/>
      <edge id="164790" label="zzzz104,zzzz184" source="838" target="758" cy:directed="1"/>
      <edge id="164789" label="zzzz104,zzzz206" source="838" target="736" cy:directed="1"/>
      <edge id="164788" label="zzzz104,zzzz212" source="838" target="730" cy:directed="1"/>
      <edge id="164787" label="zzzz104,zzzz211" source="838" target="731" cy:directed="1"/>
      <edge id="164786" label="zzzz104,zzzz214" source="838" target="728" cy:directed="1"/>
      <edge id="164785" label="zzzz104,zzzz421" source="838" target="521" cy:directed="1"/>
      <edge id="164784" label="zzzz104,zzzz306" source="838" target="636" cy:directed="1"/>
      <edge id="164783" label="zzzz104,zzzz216" source="838" target="726" cy:directed="1"/>
      <edge id="164782" label="zzzz104,zzzz465" source="838" target="477" cy:directed="1"/>
      <edge id="164781" label="zzzz104,zzzz413" source="838" target="529" cy:directed="1"/>
      <edge id="164780" label="zzzz104,zzzz650" source="838" target="292" cy:directed="1"/>
      <edge id="164779" label="zzzz104,zzzz297" source="838" target="645" cy:directed="1"/>
      <edge id="164778" label="zzzz104,zzzz321" source="838" target="621" cy:directed="1"/>
      <edge id="164777" label="zzzz104,zzzz461" source="838" target="481" cy:directed="1"/>
      <edge id="164776" label="zzzz104,zzzz639" source="838" target="303" cy:directed="1"/>
      <edge id="164775" label="zzzz104,zzzz213" source="838" target="729" cy:directed="1"/>
      <edge id="164774" label="zzzz104,zzzz652" source="838" target="290" cy:directed="1"/>
      <edge id="164773" label="zzzz104,zzzz296" source="838" target="646" cy:directed="1"/>
      <edge id="164772" label="zzzz104,zzzz612" source="838" target="330" cy:directed="1"/>
      <edge id="164771" label="zzzz104,zzzzz93" source="838" target="78" cy:directed="1"/>
      <edge id="164770" label="zzzz104,zzzz209" source="838" target="733" cy:directed="1"/>
      <edge id="164769" label="zzzz104,zzzz651" source="838" target="291" cy:directed="1"/>
      <edge id="164768" label="zzzz104,zzzz180" source="838" target="762" cy:directed="1"/>
      <edge id="164767" label="zzzz104,zzzz265" source="838" target="677" cy:directed="1"/>
      <edge id="164766" label="zzzz104,zzzz614" source="838" target="328" cy:directed="1"/>
      <edge id="164765" label="zzzz104,zzzzzz3" source="838" target="68" cy:directed="1"/>
      <edge id="164764" label="zzzz104,zzzz207" source="838" target="735" cy:directed="1"/>
      <edge id="164763" label="zzzz104,zzzz210" source="838" target="732" cy:directed="1"/>
      <edge id="164762" label="zzzz104,zzzz607" source="838" target="335" cy:directed="1"/>
      <edge id="164761" label="zzzz104,zzzz616" source="838" target="326" cy:directed="1"/>
      <edge id="164760" label="zzzz104,zzzz600" source="838" target="342" cy:directed="1"/>
      <edge id="164759" label="zzzz104,zzzz496" source="838" target="446" cy:directed="1"/>
      <edge id="164758" label="zzzz104,zzzzz50" source="838" target="121" cy:directed="1"/>
      <edge id="164757" label="zzzz104,zzzz302" source="838" target="640" cy:directed="1"/>
      <edge id="164756" label="zzzz104,zzzz613" source="838" target="329" cy:directed="1"/>
      <edge id="164755" label="zzzz104,zzzz205" source="838" target="737" cy:directed="1"/>
      <edge id="164754" label="zzzz104,zzzz482" source="838" target="460" cy:directed="1"/>
      <edge id="164753" label="zzzz104,zzzzz26" source="838" target="145" cy:directed="1"/>
      <edge id="164752" label="zzzz104,zzzzz95" source="838" target="76" cy:directed="1"/>
      <edge id="164751" label="zzzz104,zzzz204" source="838" target="738" cy:directed="1"/>
      <edge id="164750" label="zzzz104,zzzz301" source="838" target="641" cy:directed="1"/>
      <edge id="164749" label="zzzz104,zzzz305" source="838" target="637" cy:directed="1"/>
      <edge id="164748" label="zzzz104,zzzz327" source="838" target="615" cy:directed="1"/>
      <edge id="164747" label="zzzz104,zzzz456" source="838" target="486" cy:directed="1"/>
      <edge id="164746" label="zzzz104,zzzz430" source="838" target="512" cy:directed="1"/>
      <edge id="164745" label="zzzz104,zzzz176" source="838" target="766" cy:directed="1"/>
      <edge id="164744" label="zzzz104,zzzz474" source="838" target="468" cy:directed="1"/>
      <edge id="164743" label="zzzz104,zzzzz16" source="838" target="155" cy:directed="1"/>
      <edge id="164742" label="zzzz104,zzzz457" source="838" target="485" cy:directed="1"/>
      <edge id="164741" label="zzzz104,zzzz472" source="838" target="470" cy:directed="1"/>
      <edge id="164740" label="zzzz104,zzzz635" source="838" target="307" cy:directed="1"/>
      <edge id="164739" label="zzzz104,zzzz451" source="838" target="491" cy:directed="1"/>
      <edge id="164738" label="zzzz104,zzzz471" source="838" target="471" cy:directed="1"/>
      <edge id="164737" label="zzzz104,zzzz478" source="838" target="464" cy:directed="1"/>
      <edge id="164736" label="zzzz104,zzzz217" source="838" target="725" cy:directed="1"/>
      <edge id="164735" label="zzzz104,zzzzz25" source="838" target="146" cy:directed="1"/>
      <edge id="164734" label="zzzz104,zzzz215" source="838" target="727" cy:directed="1"/>
      <edge id="164733" label="zzzz104,zzzz484" source="838" target="458" cy:directed="1"/>
      <edge id="164732" label="zzzz104,zzzz463" source="838" target="479" cy:directed="1"/>
      <edge id="164731" label="zzzz104,zzzz427" source="838" target="515" cy:directed="1"/>
      <edge id="164730" label="zzzz104,zzzzz24" source="838" target="147" cy:directed="1"/>
      <edge id="164729" label="zzzz104,zzzz428" source="838" target="514" cy:directed="1"/>
      <edge id="164728" label="zzzz104,zzzz643" source="838" target="299" cy:directed="1"/>
      <edge id="164727" label="zzzz105,zzzz682" source="837" target="260" cy:directed="1"/>
      <edge id="164726" label="zzzz105,zzzz679" source="837" target="263" cy:directed="1"/>
      <edge id="164725" label="zzzz105,zzzz154" source="837" target="788" cy:directed="1"/>
      <edge id="164724" label="zzzz105,zzzz730" source="837" target="212" cy:directed="1"/>
      <edge id="164723" label="zzzz105,zzzz112" source="837" target="830" cy:directed="1"/>
      <edge id="164722" label="zzzz105,zzzz113" source="837" target="829" cy:directed="1"/>
      <edge id="164721" label="zzzz105,zzzz150" source="837" target="792" cy:directed="1"/>
      <edge id="164720" label="zzzz105,zzzz644" source="837" target="298" cy:directed="1"/>
      <edge id="164719" label="zzzz105,zzzz515" source="837" target="427" cy:directed="1"/>
      <edge id="164718" label="zzzz105,zzzz139" source="837" target="803" cy:directed="1"/>
      <edge id="164717" label="zzzz105,zzzzz49" source="837" target="122" cy:directed="1"/>
      <edge id="164716" label="zzzz105,zzzz193" source="837" target="749" cy:directed="1"/>
      <edge id="164715" label="zzzz105,zzzz504" source="837" target="438" cy:directed="1"/>
      <edge id="164714" label="zzzz105,zzzz110" source="837" target="832" cy:directed="1"/>
      <edge id="164713" label="zzzz105,zzzzz71" source="837" target="100" cy:directed="1"/>
      <edge id="164712" label="zzzz105,zzzzz48" source="837" target="123" cy:directed="1"/>
      <edge id="164711" label="zzzz105,zzzz179" source="837" target="763" cy:directed="1"/>
      <edge id="164710" label="zzzz105,zzzz185" source="837" target="757" cy:directed="1"/>
      <edge id="164709" label="zzzz105,zzzz743" source="837" target="199" cy:directed="1"/>
      <edge id="164708" label="zzzz105,zzzz729" source="837" target="213" cy:directed="1"/>
      <edge id="164707" label="zzzz105,zzzz739" source="837" target="203" cy:directed="1"/>
      <edge id="164706" label="zzzz105,zzzz741" source="837" target="201" cy:directed="1"/>
      <edge id="164705" label="zzzz105,zzzz196" source="837" target="746" cy:directed="1"/>
      <edge id="164704" label="zzzz105,zzzz744" source="837" target="198" cy:directed="1"/>
      <edge id="164703" label="zzzz105,zzzz740" source="837" target="202" cy:directed="1"/>
      <edge id="164702" label="zzzz105,zzzz492" source="837" target="450" cy:directed="1"/>
      <edge id="164701" label="zzzz105,zzzz738" source="837" target="204" cy:directed="1"/>
      <edge id="164700" label="zzzz105,zzzz725" source="837" target="217" cy:directed="1"/>
      <edge id="164699" label="zzzz105,zzzz728" source="837" target="214" cy:directed="1"/>
      <edge id="164698" label="zzzz105,zzzz453" source="837" target="489" cy:directed="1"/>
      <edge id="164697" label="zzzz105,zzzz737" source="837" target="205" cy:directed="1"/>
      <edge id="164696" label="zzzz105,zzzz279" source="837" target="663" cy:directed="1"/>
      <edge id="164695" label="zzzz105,zzzz742" source="837" target="200" cy:directed="1"/>
      <edge id="164694" label="zzzz105,zzzz726" source="837" target="216" cy:directed="1"/>
      <edge id="164693" label="zzzz105,zzzz727" source="837" target="215" cy:directed="1"/>
      <edge id="164692" label="zzzz105,zzzz128" source="837" target="814" cy:directed="1"/>
      <edge id="164691" label="zzzz105,zzzz202" source="837" target="740" cy:directed="1"/>
      <edge id="164690" label="zzzz105,zzzz736" source="837" target="206" cy:directed="1"/>
      <edge id="164689" label="zzzz105,zzzz192" source="837" target="750" cy:directed="1"/>
      <edge id="164688" label="zzzz105,zzzz541" source="837" target="401" cy:directed="1"/>
      <edge id="164687" label="zzzz105,zzzz503" source="837" target="439" cy:directed="1"/>
      <edge id="164686" label="zzzz105,zzzz511" source="837" target="431" cy:directed="1"/>
      <edge id="164685" label="zzzz105,zzzz535" source="837" target="407" cy:directed="1"/>
      <edge id="164684" label="zzzz105,zzzz155" source="837" target="787" cy:directed="1"/>
      <edge id="164683" label="zzzz105,zzzz719" source="837" target="223" cy:directed="1"/>
      <edge id="164682" label="zzzz105,zzzz678" source="837" target="264" cy:directed="1"/>
      <edge id="164681" label="zzzz105,zzzz124" source="837" target="818" cy:directed="1"/>
      <edge id="164680" label="zzzz105,zzzz281" source="837" target="661" cy:directed="1"/>
      <edge id="164679" label="zzzz105,zzzz543" source="837" target="399" cy:directed="1"/>
      <edge id="164678" label="zzzz105,zzzz646" source="837" target="296" cy:directed="1"/>
      <edge id="164677" label="zzzz105,zzzz707" source="837" target="235" cy:directed="1"/>
      <edge id="164676" label="zzzz105,zzzz247" source="837" target="695" cy:directed="1"/>
      <edge id="164675" label="zzzz105,zzzz625" source="837" target="317" cy:directed="1"/>
      <edge id="164674" label="zzzz105,zzzz190" source="837" target="752" cy:directed="1"/>
      <edge id="164673" label="zzzz105,zzzz291" source="837" target="651" cy:directed="1"/>
      <edge id="164672" label="zzzz105,zzzz106" source="837" target="836" cy:directed="1"/>
      <edge id="164671" label="zzzz105,zzzz506" source="837" target="436" cy:directed="1"/>
      <edge id="164670" label="zzzz105,zzzz700" source="837" target="242" cy:directed="1"/>
      <edge id="164669" label="zzzz105,zzzz706" source="837" target="236" cy:directed="1"/>
      <edge id="164668" label="zzzz105,zzzz708" source="837" target="234" cy:directed="1"/>
      <edge id="164667" label="zzzz105,zzzz252" source="837" target="690" cy:directed="1"/>
      <edge id="164666" label="zzzz105,zzzz680" source="837" target="262" cy:directed="1"/>
      <edge id="164665" label="zzzz105,zzzz107" source="837" target="835" cy:directed="1"/>
      <edge id="164664" label="zzzz105,zzzz681" source="837" target="261" cy:directed="1"/>
      <edge id="164663" label="zzzz105,zzzz203" source="837" target="739" cy:directed="1"/>
      <edge id="164662" label="zzzz105,zzzz136" source="837" target="806" cy:directed="1"/>
      <edge id="164661" label="zzzz105,zzzz673" source="837" target="269" cy:directed="1"/>
      <edge id="164660" label="zzzz105,zzzz114" source="837" target="828" cy:directed="1"/>
      <edge id="164659" label="zzzz105,zzzz505" source="837" target="437" cy:directed="1"/>
      <edge id="164658" label="zzzz105,zzzz521" source="837" target="421" cy:directed="1"/>
      <edge id="164657" label="zzzz105,zzzz530" source="837" target="412" cy:directed="1"/>
      <edge id="164656" label="zzzz105,zzzz250" source="837" target="692" cy:directed="1"/>
      <edge id="164655" label="zzzz105,zzzz540" source="837" target="402" cy:directed="1"/>
      <edge id="164654" label="zzzz105,zzzzz38" source="837" target="133" cy:directed="1"/>
      <edge id="164653" label="zzzz105,zzzz156" source="837" target="786" cy:directed="1"/>
      <edge id="164652" label="zzzz105,zzzz676" source="837" target="266" cy:directed="1"/>
      <edge id="164651" label="zzzz105,zzzz677" source="837" target="265" cy:directed="1"/>
      <edge id="164650" label="zzzz105,zzzz152" source="837" target="790" cy:directed="1"/>
      <edge id="164649" label="zzzz105,zzzz137" source="837" target="805" cy:directed="1"/>
      <edge id="164648" label="zzzz105,zzzz251" source="837" target="691" cy:directed="1"/>
      <edge id="164647" label="zzzz105,zzzz696" source="837" target="246" cy:directed="1"/>
      <edge id="164646" label="zzzz105,zzzz718" source="837" target="224" cy:directed="1"/>
      <edge id="164645" label="zzzz105,zzzz116" source="837" target="826" cy:directed="1"/>
      <edge id="164644" label="zzzz105,zzzz248" source="837" target="694" cy:directed="1"/>
      <edge id="164643" label="zzzz105,zzzz509" source="837" target="433" cy:directed="1"/>
      <edge id="164642" label="zzzz105,zzzz514" source="837" target="428" cy:directed="1"/>
      <edge id="164641" label="zzzz105,zzzz286" source="837" target="656" cy:directed="1"/>
      <edge id="164640" label="zzzz105,zzzz695" source="837" target="247" cy:directed="1"/>
      <edge id="164639" label="zzzz105,zzzzz68" source="837" target="103" cy:directed="1"/>
      <edge id="164638" label="zzzz105,zzzz294" source="837" target="648" cy:directed="1"/>
      <edge id="164637" label="zzzz105,zzzz710" source="837" target="232" cy:directed="1"/>
      <edge id="164636" label="zzzz105,zzzzz96" source="837" target="75" cy:directed="1"/>
      <edge id="164635" label="zzzz105,zzzz712" source="837" target="230" cy:directed="1"/>
      <edge id="164634" label="zzzz105,zzzz510" source="837" target="432" cy:directed="1"/>
      <edge id="164633" label="zzzz105,zzzz624" source="837" target="318" cy:directed="1"/>
      <edge id="164632" label="zzzz105,zzzz705" source="837" target="237" cy:directed="1"/>
      <edge id="164631" label="zzzz105,zzzz499" source="837" target="443" cy:directed="1"/>
      <edge id="164630" label="zzzz105,zzzz284" source="837" target="658" cy:directed="1"/>
      <edge id="164629" label="zzzz105,zzzz502" source="837" target="440" cy:directed="1"/>
      <edge id="164628" label="zzzz105,zzzz422" source="837" target="520" cy:directed="1"/>
      <edge id="164627" label="zzzz105,zzzz716" source="837" target="226" cy:directed="1"/>
      <edge id="164626" label="zzzz105,zzzz153" source="837" target="789" cy:directed="1"/>
      <edge id="164625" label="zzzz105,zzzz109" source="837" target="833" cy:directed="1"/>
      <edge id="164624" label="zzzz105,zzzz189" source="837" target="753" cy:directed="1"/>
      <edge id="164623" label="zzzz105,zzzz714" source="837" target="228" cy:directed="1"/>
      <edge id="164622" label="zzzz105,zzzzz36" source="837" target="135" cy:directed="1"/>
      <edge id="164621" label="zzzz105,zzzz672" source="837" target="270" cy:directed="1"/>
      <edge id="164620" label="zzzz105,zzzz691" source="837" target="251" cy:directed="1"/>
      <edge id="164619" label="zzzz105,zzzz709" source="837" target="233" cy:directed="1"/>
      <edge id="164618" label="zzzz105,zzzzz43" source="837" target="128" cy:directed="1"/>
      <edge id="164617" label="zzzz105,zzzz278" source="837" target="664" cy:directed="1"/>
      <edge id="164616" label="zzzz105,zzzzz63" source="837" target="108" cy:directed="1"/>
      <edge id="164615" label="zzzz105,zzzz249" source="837" target="693" cy:directed="1"/>
      <edge id="164614" label="zzzz105,zzzzz67" source="837" target="104" cy:directed="1"/>
      <edge id="164613" label="zzzz105,zzzz513" source="837" target="429" cy:directed="1"/>
      <edge id="164612" label="zzzz105,zzzz683" source="837" target="259" cy:directed="1"/>
      <edge id="164611" label="zzzz105,zzzz170" source="837" target="772" cy:directed="1"/>
      <edge id="164610" label="zzzz105,zzzz135" source="837" target="807" cy:directed="1"/>
      <edge id="164609" label="zzzz105,zzzz138" source="837" target="804" cy:directed="1"/>
      <edge id="164608" label="zzzz105,zzzz528" source="837" target="414" cy:directed="1"/>
      <edge id="164607" label="zzzz105,zzzz145" source="837" target="797" cy:directed="1"/>
      <edge id="164606" label="zzzz105,zzzz545" source="837" target="397" cy:directed="1"/>
      <edge id="164605" label="zzzz105,zzzz703" source="837" target="239" cy:directed="1"/>
      <edge id="164604" label="zzzz105,zzzz526" source="837" target="416" cy:directed="1"/>
      <edge id="164603" label="zzzz105,zzzz713" source="837" target="229" cy:directed="1"/>
      <edge id="164602" label="zzzz105,zzzz524" source="837" target="418" cy:directed="1"/>
      <edge id="164601" label="zzzz105,zzzz544" source="837" target="398" cy:directed="1"/>
      <edge id="164600" label="zzzz105,zzzzz70" source="837" target="101" cy:directed="1"/>
      <edge id="164599" label="zzzz105,zzzz122" source="837" target="820" cy:directed="1"/>
      <edge id="164598" label="zzzz105,zzzz539" source="837" target="403" cy:directed="1"/>
      <edge id="164597" label="zzzz105,zzzz119" source="837" target="823" cy:directed="1"/>
      <edge id="164596" label="zzzz105,zzzz675" source="837" target="267" cy:directed="1"/>
      <edge id="164595" label="zzzz105,zzzz117" source="837" target="825" cy:directed="1"/>
      <edge id="164594" label="zzzz105,zzzz732" source="837" target="210" cy:directed="1"/>
      <edge id="164593" label="zzzz105,zzzz500" source="837" target="442" cy:directed="1"/>
      <edge id="164592" label="zzzz105,zzzz623" source="837" target="319" cy:directed="1"/>
      <edge id="164591" label="zzzz105,zzzz711" source="837" target="231" cy:directed="1"/>
      <edge id="164590" label="zzzz105,zzzz720" source="837" target="222" cy:directed="1"/>
      <edge id="164589" label="zzzz105,zzzz246" source="837" target="696" cy:directed="1"/>
      <edge id="164588" label="zzzz105,zzzz290" source="837" target="652" cy:directed="1"/>
      <edge id="164587" label="zzzz105,zzzz534" source="837" target="408" cy:directed="1"/>
      <edge id="164586" label="zzzz105,zzzz698" source="837" target="244" cy:directed="1"/>
      <edge id="164585" label="zzzz105,zzzz721" source="837" target="221" cy:directed="1"/>
      <edge id="164584" label="zzzz105,zzzz731" source="837" target="211" cy:directed="1"/>
      <edge id="164583" label="zzzz105,zzzz194" source="837" target="748" cy:directed="1"/>
      <edge id="164582" label="zzzz105,zzzz516" source="837" target="426" cy:directed="1"/>
      <edge id="164581" label="zzzz105,zzzz715" source="837" target="227" cy:directed="1"/>
      <edge id="164580" label="zzzz105,zzzz735" source="837" target="207" cy:directed="1"/>
      <edge id="164579" label="zzzz105,zzzz111" source="837" target="831" cy:directed="1"/>
      <edge id="164578" label="zzzz105,zzzz527" source="837" target="415" cy:directed="1"/>
      <edge id="164577" label="zzzz105,zzzz546" source="837" target="396" cy:directed="1"/>
      <edge id="164576" label="zzzz105,zzzz126" source="837" target="816" cy:directed="1"/>
      <edge id="164575" label="zzzz105,zzzz532" source="837" target="410" cy:directed="1"/>
      <edge id="164574" label="zzzz105,zzzz518" source="837" target="424" cy:directed="1"/>
      <edge id="164573" label="zzzz105,zzzzz52" source="837" target="119" cy:directed="1"/>
      <edge id="164572" label="zzzz105,zzzz697" source="837" target="245" cy:directed="1"/>
      <edge id="164571" label="zzzz105,zzzz552" source="837" target="390" cy:directed="1"/>
      <edge id="164570" label="zzzz105,zzzz536" source="837" target="406" cy:directed="1"/>
      <edge id="164569" label="zzzz105,zzzz556" source="837" target="386" cy:directed="1"/>
      <edge id="164568" label="zzzz105,zzzz584" source="837" target="358" cy:directed="1"/>
      <edge id="164567" label="zzzz105,zzzz262" source="837" target="680" cy:directed="1"/>
      <edge id="164566" label="zzzz105,zzzz191" source="837" target="751" cy:directed="1"/>
      <edge id="164565" label="zzzz105,zzzz692" source="837" target="250" cy:directed="1"/>
      <edge id="164564" label="zzzz105,zzzz525" source="837" target="417" cy:directed="1"/>
      <edge id="164563" label="zzzz105,zzzz693" source="837" target="249" cy:directed="1"/>
      <edge id="164562" label="zzzz105,zzzzz98" source="837" target="73" cy:directed="1"/>
      <edge id="164561" label="zzzz105,zzzz571" source="837" target="371" cy:directed="1"/>
      <edge id="164560" label="zzzz105,zzzz260" source="837" target="682" cy:directed="1"/>
      <edge id="164559" label="zzzz105,zzzzz53" source="837" target="118" cy:directed="1"/>
      <edge id="164558" label="zzzz105,zzzzz59" source="837" target="112" cy:directed="1"/>
      <edge id="164557" label="zzzz105,zzzz702" source="837" target="240" cy:directed="1"/>
      <edge id="164556" label="zzzz105,zzzz733" source="837" target="209" cy:directed="1"/>
      <edge id="164555" label="zzzz105,zzzzz73" source="837" target="98" cy:directed="1"/>
      <edge id="164554" label="zzzz105,zzzz245" source="837" target="697" cy:directed="1"/>
      <edge id="164553" label="zzzz105,zzzz572" source="837" target="370" cy:directed="1"/>
      <edge id="164552" label="zzzz105,zzzz310" source="837" target="632" cy:directed="1"/>
      <edge id="164551" label="zzzz105,zzzz611" source="837" target="331" cy:directed="1"/>
      <edge id="164550" label="zzzz105,zzzz564" source="837" target="378" cy:directed="1"/>
      <edge id="164549" label="zzzz105,zzzz263" source="837" target="679" cy:directed="1"/>
      <edge id="164548" label="zzzz105,zzzz699" source="837" target="243" cy:directed="1"/>
      <edge id="164547" label="zzzz105,zzzz108" source="837" target="834" cy:directed="1"/>
      <edge id="164546" label="zzzz105,zzzz701" source="837" target="241" cy:directed="1"/>
      <edge id="164545" label="zzzz105,zzzz573" source="837" target="369" cy:directed="1"/>
      <edge id="164544" label="zzzz105,zzzz567" source="837" target="375" cy:directed="1"/>
      <edge id="164543" label="zzzz105,zzzz261" source="837" target="681" cy:directed="1"/>
      <edge id="164542" label="zzzz105,zzzz723" source="837" target="219" cy:directed="1"/>
      <edge id="164541" label="zzzz105,zzzz161" source="837" target="781" cy:directed="1"/>
      <edge id="164540" label="zzzz105,zzzz285" source="837" target="657" cy:directed="1"/>
      <edge id="164539" label="zzzz105,zzzz531" source="837" target="411" cy:directed="1"/>
      <edge id="164538" label="zzzz105,zzzz120" source="837" target="822" cy:directed="1"/>
      <edge id="164537" label="zzzz105,zzzz529" source="837" target="413" cy:directed="1"/>
      <edge id="164536" label="zzzz105,zzzz551" source="837" target="391" cy:directed="1"/>
      <edge id="164535" label="zzzz105,zzzz257" source="837" target="685" cy:directed="1"/>
      <edge id="164534" label="zzzz105,zzzz580" source="837" target="362" cy:directed="1"/>
      <edge id="164533" label="zzzz105,zzzz560" source="837" target="382" cy:directed="1"/>
      <edge id="164532" label="zzzz105,zzzzz64" source="837" target="107" cy:directed="1"/>
      <edge id="164531" label="zzzz105,zzzz576" source="837" target="366" cy:directed="1"/>
      <edge id="164530" label="zzzz105,zzzz694" source="837" target="248" cy:directed="1"/>
      <edge id="164529" label="zzzz105,zzzz674" source="837" target="268" cy:directed="1"/>
      <edge id="164528" label="zzzz105,zzzz123" source="837" target="819" cy:directed="1"/>
      <edge id="164527" label="zzzz105,zzzz574" source="837" target="368" cy:directed="1"/>
      <edge id="164526" label="zzzz105,zzzz581" source="837" target="361" cy:directed="1"/>
      <edge id="164525" label="zzzz105,zzzz121" source="837" target="821" cy:directed="1"/>
      <edge id="164524" label="zzzz105,zzzz118" source="837" target="824" cy:directed="1"/>
      <edge id="164523" label="zzzz105,zzzz181" source="837" target="761" cy:directed="1"/>
      <edge id="164522" label="zzzz105,zzzz558" source="837" target="384" cy:directed="1"/>
      <edge id="164521" label="zzzz105,zzzz557" source="837" target="385" cy:directed="1"/>
      <edge id="164520" label="zzzz105,zzzz520" source="837" target="422" cy:directed="1"/>
      <edge id="164519" label="zzzz105,zzzz512" source="837" target="430" cy:directed="1"/>
      <edge id="164518" label="zzzz105,zzzz579" source="837" target="363" cy:directed="1"/>
      <edge id="164517" label="zzzz105,zzzz562" source="837" target="380" cy:directed="1"/>
      <edge id="164516" label="zzzz105,zzzzz75" source="837" target="96" cy:directed="1"/>
      <edge id="164515" label="zzzz105,zzzz553" source="837" target="389" cy:directed="1"/>
      <edge id="164514" label="zzzz105,zzzz479" source="837" target="463" cy:directed="1"/>
      <edge id="164513" label="zzzz105,zzzz473" source="837" target="469" cy:directed="1"/>
      <edge id="164512" label="zzzz105,zzzz464" source="837" target="478" cy:directed="1"/>
      <edge id="164511" label="zzzz105,zzzz442" source="837" target="500" cy:directed="1"/>
      <edge id="164510" label="zzzz105,zzzzz46" source="837" target="125" cy:directed="1"/>
      <edge id="164509" label="zzzz105,zzzz447" source="837" target="495" cy:directed="1"/>
      <edge id="164508" label="zzzz105,zzzz125" source="837" target="817" cy:directed="1"/>
      <edge id="164507" label="zzzz105,zzzz173" source="837" target="769" cy:directed="1"/>
      <edge id="164506" label="zzzz105,zzzz470" source="837" target="472" cy:directed="1"/>
      <edge id="164505" label="zzzz105,zzzz441" source="837" target="501" cy:directed="1"/>
      <edge id="164504" label="zzzz105,zzzz282" source="837" target="660" cy:directed="1"/>
      <edge id="164503" label="zzzz105,zzzz497" source="837" target="445" cy:directed="1"/>
      <edge id="164502" label="zzzz105,zzzz143" source="837" target="799" cy:directed="1"/>
      <edge id="164501" label="zzzz105,zzzzz97" source="837" target="74" cy:directed="1"/>
      <edge id="164500" label="zzzz105,zzzz577" source="837" target="365" cy:directed="1"/>
      <edge id="164499" label="zzzz105,zzzzz47" source="837" target="124" cy:directed="1"/>
      <edge id="164498" label="zzzz105,zzzz469" source="837" target="473" cy:directed="1"/>
      <edge id="164497" label="zzzz105,zzzz141" source="837" target="801" cy:directed="1"/>
      <edge id="164496" label="zzzz105,zzzz151" source="837" target="791" cy:directed="1"/>
      <edge id="164495" label="zzzz105,zzzzz51" source="837" target="120" cy:directed="1"/>
      <edge id="164494" label="zzzz105,zzzz717" source="837" target="225" cy:directed="1"/>
      <edge id="164493" label="zzzz105,zzzz425" source="837" target="517" cy:directed="1"/>
      <edge id="164492" label="zzzz105,zzzz228" source="837" target="714" cy:directed="1"/>
      <edge id="164491" label="zzzz105,zzzz429" source="837" target="513" cy:directed="1"/>
      <edge id="164490" label="zzzz105,zzzz431" source="837" target="511" cy:directed="1"/>
      <edge id="164489" label="zzzz105,zzzz445" source="837" target="497" cy:directed="1"/>
      <edge id="164488" label="zzzz105,zzzz466" source="837" target="476" cy:directed="1"/>
      <edge id="164487" label="zzzz105,zzzz685" source="837" target="257" cy:directed="1"/>
      <edge id="164486" label="zzzz105,zzzz433" source="837" target="509" cy:directed="1"/>
      <edge id="164485" label="zzzz105,zzzz435" source="837" target="507" cy:directed="1"/>
      <edge id="164484" label="zzzz105,zzzz446" source="837" target="496" cy:directed="1"/>
      <edge id="164483" label="zzzz105,zzzz438" source="837" target="504" cy:directed="1"/>
      <edge id="164482" label="zzzz105,zzzz459" source="837" target="483" cy:directed="1"/>
      <edge id="164481" label="zzzz105,zzzz684" source="837" target="258" cy:directed="1"/>
      <edge id="164480" label="zzzz105,zzzz449" source="837" target="493" cy:directed="1"/>
      <edge id="164479" label="zzzz105,zzzz468" source="837" target="474" cy:directed="1"/>
      <edge id="164478" label="zzzz105,zzzz476" source="837" target="466" cy:directed="1"/>
      <edge id="164477" label="zzzz105,zzzz485" source="837" target="457" cy:directed="1"/>
      <edge id="164476" label="zzzz105,zzzz437" source="837" target="505" cy:directed="1"/>
      <edge id="164475" label="zzzz105,zzzz440" source="837" target="502" cy:directed="1"/>
      <edge id="164474" label="zzzz105,zzzz458" source="837" target="484" cy:directed="1"/>
      <edge id="164473" label="zzzz105,zzzzz33" source="837" target="138" cy:directed="1"/>
      <edge id="164472" label="zzzz105,zzzzz60" source="837" target="111" cy:directed="1"/>
      <edge id="164471" label="zzzz105,zzzz174" source="837" target="768" cy:directed="1"/>
      <edge id="164470" label="zzzz105,zzzz455" source="837" target="487" cy:directed="1"/>
      <edge id="164469" label="zzzz105,zzzz480" source="837" target="462" cy:directed="1"/>
      <edge id="164468" label="zzzz105,zzzz686" source="837" target="256" cy:directed="1"/>
      <edge id="164467" label="zzzz105,zzzz235" source="837" target="707" cy:directed="1"/>
      <edge id="164466" label="zzzz105,zzzz443" source="837" target="499" cy:directed="1"/>
      <edge id="164465" label="zzzz105,zzzz561" source="837" target="381" cy:directed="1"/>
      <edge id="164464" label="zzzz105,zzzz436" source="837" target="506" cy:directed="1"/>
      <edge id="164463" label="zzzz105,zzzz450" source="837" target="492" cy:directed="1"/>
      <edge id="164462" label="zzzz105,zzzz487" source="837" target="455" cy:directed="1"/>
      <edge id="164461" label="zzzz105,zzzz460" source="837" target="482" cy:directed="1"/>
      <edge id="164460" label="zzzz105,zzzz481" source="837" target="461" cy:directed="1"/>
      <edge id="164459" label="zzzz105,zzzz575" source="837" target="367" cy:directed="1"/>
      <edge id="164458" label="zzzz105,zzzz238" source="837" target="704" cy:directed="1"/>
      <edge id="164457" label="zzzz105,zzzz444" source="837" target="498" cy:directed="1"/>
      <edge id="164456" label="zzzz105,zzzz486" source="837" target="456" cy:directed="1"/>
      <edge id="164455" label="zzzz105,zzzz432" source="837" target="510" cy:directed="1"/>
      <edge id="164454" label="zzzz105,zzzz568" source="837" target="374" cy:directed="1"/>
      <edge id="164453" label="zzzz105,zzzz231" source="837" target="711" cy:directed="1"/>
      <edge id="164452" label="zzzz105,zzzz454" source="837" target="488" cy:directed="1"/>
      <edge id="164451" label="zzzz105,zzzz234" source="837" target="708" cy:directed="1"/>
      <edge id="164450" label="zzzz105,zzzz232" source="837" target="710" cy:directed="1"/>
      <edge id="164449" label="zzzz105,zzzzz74" source="837" target="97" cy:directed="1"/>
      <edge id="164448" label="zzzz105,zzzz688" source="837" target="254" cy:directed="1"/>
      <edge id="164447" label="zzzz105,zzzz237" source="837" target="705" cy:directed="1"/>
      <edge id="164446" label="zzzz105,zzzz494" source="837" target="448" cy:directed="1"/>
      <edge id="164445" label="zzzz105,zzzz555" source="837" target="387" cy:directed="1"/>
      <edge id="164444" label="zzzz105,zzzz687" source="837" target="255" cy:directed="1"/>
      <edge id="164443" label="zzzz105,zzzz565" source="837" target="377" cy:directed="1"/>
      <edge id="164442" label="zzzz105,zzzzz37" source="837" target="134" cy:directed="1"/>
      <edge id="164441" label="zzzz105,zzzz563" source="837" target="379" cy:directed="1"/>
      <edge id="164440" label="zzzz105,zzzz167" source="837" target="775" cy:directed="1"/>
      <edge id="164439" label="zzzz105,zzzz559" source="837" target="383" cy:directed="1"/>
      <edge id="164438" label="zzzz105,zzzzz55" source="837" target="116" cy:directed="1"/>
      <edge id="164437" label="zzzz105,zzzz146" source="837" target="796" cy:directed="1"/>
      <edge id="164436" label="zzzz105,zzzz243" source="837" target="699" cy:directed="1"/>
      <edge id="164435" label="zzzz105,zzzzz90" source="837" target="81" cy:directed="1"/>
      <edge id="164434" label="zzzz105,zzzz133" source="837" target="809" cy:directed="1"/>
      <edge id="164433" label="zzzz105,zzzz273" source="837" target="669" cy:directed="1"/>
      <edge id="164432" label="zzzz105,zzzz423" source="837" target="519" cy:directed="1"/>
      <edge id="164431" label="zzzz105,zzzz689" source="837" target="253" cy:directed="1"/>
      <edge id="164430" label="zzzz105,zzzz178" source="837" target="764" cy:directed="1"/>
      <edge id="164429" label="zzzz105,zzzz134" source="837" target="808" cy:directed="1"/>
      <edge id="164428" label="zzzz105,zzzz142" source="837" target="800" cy:directed="1"/>
      <edge id="164427" label="zzzz105,zzzz283" source="837" target="659" cy:directed="1"/>
      <edge id="164426" label="zzzz105,zzzz554" source="837" target="388" cy:directed="1"/>
      <edge id="164425" label="zzzz105,zzzz489" source="837" target="453" cy:directed="1"/>
      <edge id="164424" label="zzzz105,zzzz632" source="837" target="310" cy:directed="1"/>
      <edge id="164423" label="zzzz105,zzzzz42" source="837" target="129" cy:directed="1"/>
      <edge id="164422" label="zzzz105,zzzzz82" source="837" target="89" cy:directed="1"/>
      <edge id="164421" label="zzzz105,zzzz127" source="837" target="815" cy:directed="1"/>
      <edge id="164420" label="zzzz105,zzzz493" source="837" target="449" cy:directed="1"/>
      <edge id="164419" label="zzzz105,zzzz570" source="837" target="372" cy:directed="1"/>
      <edge id="164418" label="zzzz105,zzzzz76" source="837" target="95" cy:directed="1"/>
      <edge id="164417" label="zzzz105,zzzz311" source="837" target="631" cy:directed="1"/>
      <edge id="164416" label="zzzz105,zzzz495" source="837" target="447" cy:directed="1"/>
      <edge id="164415" label="zzzz105,zzzzz45" source="837" target="126" cy:directed="1"/>
      <edge id="164414" label="zzzz105,zzzzz85" source="837" target="86" cy:directed="1"/>
      <edge id="164413" label="zzzz105,zzzz538" source="837" target="404" cy:directed="1"/>
      <edge id="164412" label="zzzz105,zzzzz69" source="837" target="102" cy:directed="1"/>
      <edge id="164411" label="zzzz105,zzzz183" source="837" target="759" cy:directed="1"/>
      <edge id="164410" label="zzzz105,zzzz488" source="837" target="454" cy:directed="1"/>
      <edge id="164409" label="zzzz105,zzzz583" source="837" target="359" cy:directed="1"/>
      <edge id="164408" label="zzzz105,zzzz634" source="837" target="308" cy:directed="1"/>
      <edge id="164407" label="zzzz105,zzzzz34" source="837" target="137" cy:directed="1"/>
      <edge id="164406" label="zzzz105,zzzz690" source="837" target="252" cy:directed="1"/>
      <edge id="164405" label="zzzz105,zzzzz41" source="837" target="130" cy:directed="1"/>
      <edge id="164404" label="zzzz105,zzzz501" source="837" target="441" cy:directed="1"/>
      <edge id="164403" label="zzzz105,zzzzz84" source="837" target="87" cy:directed="1"/>
      <edge id="164402" label="zzzz105,zzzz519" source="837" target="423" cy:directed="1"/>
      <edge id="164401" label="zzzz105,zzzz140" source="837" target="802" cy:directed="1"/>
      <edge id="164400" label="zzzz105,zzzzz40" source="837" target="131" cy:directed="1"/>
      <edge id="164399" label="zzzz105,zzzz242" source="837" target="700" cy:directed="1"/>
      <edge id="164398" label="zzzz105,zzzzz66" source="837" target="105" cy:directed="1"/>
      <edge id="164397" label="zzzz105,zzzz491" source="837" target="451" cy:directed="1"/>
      <edge id="164396" label="zzzz105,zzzz578" source="837" target="364" cy:directed="1"/>
      <edge id="164395" label="zzzz105,zzzz268" source="837" target="674" cy:directed="1"/>
      <edge id="164394" label="zzzz105,zzzz280" source="837" target="662" cy:directed="1"/>
      <edge id="164393" label="zzzz105,zzzz517" source="837" target="425" cy:directed="1"/>
      <edge id="164392" label="zzzz105,zzzz598" source="837" target="344" cy:directed="1"/>
      <edge id="164391" label="zzzz105,zzzz115" source="837" target="827" cy:directed="1"/>
      <edge id="164390" label="zzzz105,zzzz241" source="837" target="701" cy:directed="1"/>
      <edge id="164389" label="zzzz105,zzzz307" source="837" target="635" cy:directed="1"/>
      <edge id="164388" label="zzzz105,zzzz490" source="837" target="452" cy:directed="1"/>
      <edge id="164387" label="zzzz105,zzzz244" source="837" target="698" cy:directed="1"/>
      <edge id="164386" label="zzzz105,zzzz550" source="837" target="392" cy:directed="1"/>
      <edge id="164385" label="zzzz105,zzzz569" source="837" target="373" cy:directed="1"/>
      <edge id="164384" label="zzzz105,zzzzz81" source="837" target="90" cy:directed="1"/>
      <edge id="164383" label="zzzz105,zzzz566" source="837" target="376" cy:directed="1"/>
      <edge id="164382" label="zzzz105,zzzz582" source="837" target="360" cy:directed="1"/>
      <edge id="164381" label="zzzz105,zzzz159" source="837" target="783" cy:directed="1"/>
      <edge id="164380" label="zzzz105,zzzz229" source="837" target="713" cy:directed="1"/>
      <edge id="164379" label="zzzz105,zzzz259" source="837" target="683" cy:directed="1"/>
      <edge id="164378" label="zzzz105,zzzzz44" source="837" target="127" cy:directed="1"/>
      <edge id="164377" label="zzzz105,zzzzz92" source="837" target="79" cy:directed="1"/>
      <edge id="164376" label="zzzz105,zzzz148" source="837" target="794" cy:directed="1"/>
      <edge id="164375" label="zzzz105,zzzz160" source="837" target="782" cy:directed="1"/>
      <edge id="164374" label="zzzz105,zzzz270" source="837" target="672" cy:directed="1"/>
      <edge id="164373" label="zzzz105,zzzz187" source="837" target="755" cy:directed="1"/>
      <edge id="164372" label="zzzz105,zzzz175" source="837" target="767" cy:directed="1"/>
      <edge id="164371" label="zzzz105,zzzz298" source="837" target="644" cy:directed="1"/>
      <edge id="164370" label="zzzz105,zzzz312" source="837" target="630" cy:directed="1"/>
      <edge id="164369" label="zzzz105,zzzzz54" source="837" target="117" cy:directed="1"/>
      <edge id="164368" label="zzzz105,zzzz293" source="837" target="649" cy:directed="1"/>
      <edge id="164367" label="zzzz105,zzzz171" source="837" target="771" cy:directed="1"/>
      <edge id="164366" label="zzzz105,zzzz233" source="837" target="709" cy:directed="1"/>
      <edge id="164365" label="zzzz105,zzzz287" source="837" target="655" cy:directed="1"/>
      <edge id="164364" label="zzzz105,zzzzz72" source="837" target="99" cy:directed="1"/>
      <edge id="164363" label="zzzz105,zzzzz87" source="837" target="84" cy:directed="1"/>
      <edge id="164362" label="zzzz105,zzzz266" source="837" target="676" cy:directed="1"/>
      <edge id="164361" label="zzzz105,zzzz599" source="837" target="343" cy:directed="1"/>
      <edge id="164360" label="zzzz105,zzzz288" source="837" target="654" cy:directed="1"/>
      <edge id="164359" label="zzzz105,zzzz594" source="837" target="348" cy:directed="1"/>
      <edge id="164358" label="zzzz105,zzzzz89" source="837" target="82" cy:directed="1"/>
      <edge id="164357" label="zzzz105,zzzzz91" source="837" target="80" cy:directed="1"/>
      <edge id="164356" label="zzzz105,zzzz172" source="837" target="770" cy:directed="1"/>
      <edge id="164355" label="zzzz105,zzzz166" source="837" target="776" cy:directed="1"/>
      <edge id="164354" label="zzzz105,zzzzz79" source="837" target="92" cy:directed="1"/>
      <edge id="164353" label="zzzz105,zzzz595" source="837" target="347" cy:directed="1"/>
      <edge id="164352" label="zzzz105,zzzz704" source="837" target="238" cy:directed="1"/>
      <edge id="164351" label="zzzz105,zzzz628" source="837" target="314" cy:directed="1"/>
      <edge id="164350" label="zzzz105,zzzz176" source="837" target="766" cy:directed="1"/>
      <edge id="164349" label="zzzz105,zzzz277" source="837" target="665" cy:directed="1"/>
      <edge id="164348" label="zzzz105,zzzz537" source="837" target="405" cy:directed="1"/>
      <edge id="164347" label="zzzz105,zzzzz58" source="837" target="113" cy:directed="1"/>
      <edge id="164346" label="zzzz105,zzzzz80" source="837" target="91" cy:directed="1"/>
      <edge id="164345" label="zzzz105,zzzz236" source="837" target="706" cy:directed="1"/>
      <edge id="164344" label="zzzz105,zzzz522" source="837" target="420" cy:directed="1"/>
      <edge id="164343" label="zzzz105,zzzz424" source="837" target="518" cy:directed="1"/>
      <edge id="164342" label="zzzz105,zzzz230" source="837" target="712" cy:directed="1"/>
      <edge id="164341" label="zzzz105,zzzz258" source="837" target="684" cy:directed="1"/>
      <edge id="164340" label="zzzz105,zzzz596" source="837" target="346" cy:directed="1"/>
      <edge id="164339" label="zzzz105,zzzzz65" source="837" target="106" cy:directed="1"/>
      <edge id="164338" label="zzzz105,zzzz498" source="837" target="444" cy:directed="1"/>
      <edge id="164337" label="zzzz105,zzzz467" source="837" target="475" cy:directed="1"/>
      <edge id="164336" label="zzzz105,zzzz465" source="837" target="477" cy:directed="1"/>
      <edge id="164335" label="zzzz105,zzzz508" source="837" target="434" cy:directed="1"/>
      <edge id="164334" label="zzzz105,zzzz129" source="837" target="813" cy:directed="1"/>
      <edge id="164333" label="zzzz105,zzzz533" source="837" target="409" cy:directed="1"/>
      <edge id="164332" label="zzzz105,zzzz734" source="837" target="208" cy:directed="1"/>
      <edge id="164331" label="zzzz105,zzzzz32" source="837" target="139" cy:directed="1"/>
      <edge id="164330" label="zzzz105,zzzzz83" source="837" target="88" cy:directed="1"/>
      <edge id="164329" label="zzzz105,zzzz434" source="837" target="508" cy:directed="1"/>
      <edge id="164328" label="zzzz105,zzzz162" source="837" target="780" cy:directed="1"/>
      <edge id="164327" label="zzzz105,zzzz462" source="837" target="480" cy:directed="1"/>
      <edge id="164326" label="zzzz105,zzzzz99" source="837" target="72" cy:directed="1"/>
      <edge id="164325" label="zzzz105,zzzz523" source="837" target="419" cy:directed="1"/>
      <edge id="164324" label="zzzz105,zzzz158" source="837" target="784" cy:directed="1"/>
      <edge id="164323" label="zzzz105,zzzz289" source="837" target="653" cy:directed="1"/>
      <edge id="164322" label="zzzz105,zzzz308" source="837" target="634" cy:directed="1"/>
      <edge id="164321" label="zzzz105,zzzzz94" source="837" target="77" cy:directed="1"/>
      <edge id="164320" label="zzzz105,zzzz130" source="837" target="812" cy:directed="1"/>
      <edge id="164319" label="zzzz105,zzzz163" source="837" target="779" cy:directed="1"/>
      <edge id="164318" label="zzzz105,zzzz131" source="837" target="811" cy:directed="1"/>
      <edge id="164317" label="zzzz105,zzzz169" source="837" target="773" cy:directed="1"/>
      <edge id="164316" label="zzzz105,zzzz448" source="837" target="494" cy:directed="1"/>
      <edge id="164315" label="zzzz105,zzzz475" source="837" target="467" cy:directed="1"/>
      <edge id="164314" label="zzzz105,zzzz597" source="837" target="345" cy:directed="1"/>
      <edge id="164313" label="zzzz105,zzzzz50" source="837" target="121" cy:directed="1"/>
      <edge id="164312" label="zzzz105,zzzz165" source="837" target="777" cy:directed="1"/>
      <edge id="164311" label="zzzz105,zzzz274" source="837" target="668" cy:directed="1"/>
      <edge id="164310" label="zzzz105,zzzz292" source="837" target="650" cy:directed="1"/>
      <edge id="164309" label="zzzz105,zzzz439" source="837" target="503" cy:directed="1"/>
      <edge id="164308" label="zzzz105,zzzz483" source="837" target="459" cy:directed="1"/>
      <edge id="164307" label="zzzz105,zzzzz57" source="837" target="114" cy:directed="1"/>
      <edge id="164306" label="zzzz105,zzzzz88" source="837" target="83" cy:directed="1"/>
      <edge id="164305" label="zzzz105,zzzz132" source="837" target="810" cy:directed="1"/>
      <edge id="164304" label="zzzz105,zzzz496" source="837" target="446" cy:directed="1"/>
      <edge id="164303" label="zzzz105,zzzz147" source="837" target="795" cy:directed="1"/>
      <edge id="164302" label="zzzz105,zzzz276" source="837" target="666" cy:directed="1"/>
      <edge id="164301" label="zzzz105,zzzz461" source="837" target="481" cy:directed="1"/>
      <edge id="164300" label="zzzz105,zzzz188" source="837" target="754" cy:directed="1"/>
      <edge id="164299" label="zzzz105,zzzzz77" source="837" target="94" cy:directed="1"/>
      <edge id="164298" label="zzzz105,zzzzz78" source="837" target="93" cy:directed="1"/>
      <edge id="164297" label="zzzz105,zzzz240" source="837" target="702" cy:directed="1"/>
      <edge id="164296" label="zzzz105,zzzzz35" source="837" target="136" cy:directed="1"/>
      <edge id="164295" label="zzzz105,zzzzz62" source="837" target="109" cy:directed="1"/>
      <edge id="164294" label="zzzz105,zzzz149" source="837" target="793" cy:directed="1"/>
      <edge id="164293" label="zzzz105,zzzz157" source="837" target="785" cy:directed="1"/>
      <edge id="164292" label="zzzz105,zzzzz86" source="837" target="85" cy:directed="1"/>
      <edge id="164291" label="zzzz105,zzzz482" source="837" target="460" cy:directed="1"/>
      <edge id="164290" label="zzzz105,zzzz474" source="837" target="468" cy:directed="1"/>
      <edge id="164289" label="zzzz105,zzzz463" source="837" target="479" cy:directed="1"/>
      <edge id="164288" label="zzzz105,zzzz471" source="837" target="471" cy:directed="1"/>
      <edge id="164287" label="zzzz105,zzzz164" source="837" target="778" cy:directed="1"/>
      <edge id="164286" label="zzzz105,zzzz456" source="837" target="486" cy:directed="1"/>
      <edge id="164285" label="zzzz105,zzzz484" source="837" target="458" cy:directed="1"/>
      <edge id="164284" label="zzzz105,zzzz451" source="837" target="491" cy:directed="1"/>
      <edge id="164283" label="zzzz105,zzzzz39" source="837" target="132" cy:directed="1"/>
      <edge id="164282" label="zzzz105,zzzz472" source="837" target="470" cy:directed="1"/>
      <edge id="164281" label="zzzz105,zzzz618" source="837" target="324" cy:directed="1"/>
      <edge id="164280" label="zzzz105,zzzzzz6" source="837" target="65" cy:directed="1"/>
      <edge id="164279" label="zzzz105,zzzz201" source="837" target="741" cy:directed="1"/>
      <edge id="164278" label="zzzz105,zzzz316" source="837" target="626" cy:directed="1"/>
      <edge id="164277" label="zzzz105,zzzzz12" source="837" target="159" cy:directed="1"/>
      <edge id="164276" label="zzzz105,zzzzzz4" source="837" target="67" cy:directed="1"/>
      <edge id="164275" label="zzzz105,zzzz457" source="837" target="485" cy:directed="1"/>
      <edge id="164274" label="zzzz105,zzzzz21" source="837" target="150" cy:directed="1"/>
      <edge id="164273" label="zzzz105,zzzz478" source="837" target="464" cy:directed="1"/>
      <edge id="164272" label="zzzz105,zzzz669" source="837" target="273" cy:directed="1"/>
      <edge id="164271" label="zzzz105,zzzz264" source="837" target="678" cy:directed="1"/>
      <edge id="164270" label="zzzz105,zzzz654" source="837" target="288" cy:directed="1"/>
      <edge id="164269" label="zzzz105,zzzz724" source="837" target="218" cy:directed="1"/>
      <edge id="164268" label="zzzz105,zzzzz95" source="837" target="76" cy:directed="1"/>
      <edge id="164267" label="zzzz105,zzzz620" source="837" target="322" cy:directed="1"/>
      <edge id="164266" label="zzzz105,zzzz321" source="837" target="621" cy:directed="1"/>
      <edge id="164265" label="zzzz105,zzzzzz5" source="837" target="66" cy:directed="1"/>
      <edge id="164264" label="zzzz105,zzzz325" source="837" target="617" cy:directed="1"/>
      <edge id="164263" label="zzzz105,zzzz415" source="837" target="527" cy:directed="1"/>
      <edge id="164262" label="zzzz105,zzzz619" source="837" target="323" cy:directed="1"/>
      <edge id="164261" label="zzzz105,zzzz627" source="837" target="315" cy:directed="1"/>
      <edge id="164260" label="zzzz105,zzzz315" source="837" target="627" cy:directed="1"/>
      <edge id="164259" label="zzzz105,zzzz477" source="837" target="465" cy:directed="1"/>
      <edge id="164258" label="zzzz105,zzzz649" source="837" target="293" cy:directed="1"/>
      <edge id="164257" label="zzzz105,zzzz323" source="837" target="619" cy:directed="1"/>
      <edge id="164256" label="zzzz105,zzzz507" source="837" target="435" cy:directed="1"/>
      <edge id="164255" label="zzzz105,zzzz590" source="837" target="352" cy:directed="1"/>
      <edge id="164254" label="zzzz105,zzzzz61" source="837" target="110" cy:directed="1"/>
      <edge id="164253" label="zzzz105,zzzz636" source="837" target="306" cy:directed="1"/>
      <edge id="164252" label="zzzz105,zzzz655" source="837" target="287" cy:directed="1"/>
      <edge id="164251" label="zzzz105,zzzz589" source="837" target="353" cy:directed="1"/>
      <edge id="164250" label="zzzz105,zzzz641" source="837" target="301" cy:directed="1"/>
      <edge id="164249" label="zzzz105,zzzz670" source="837" target="272" cy:directed="1"/>
      <edge id="164248" label="zzzz105,zzzz313" source="837" target="629" cy:directed="1"/>
      <edge id="164247" label="zzzz105,zzzz667" source="837" target="275" cy:directed="1"/>
      <edge id="164246" label="zzzz105,zzzzzz7" source="837" target="64" cy:directed="1"/>
      <edge id="164245" label="zzzz105,zzzz419" source="837" target="523" cy:directed="1"/>
      <edge id="164244" label="zzzz105,zzzz592" source="837" target="350" cy:directed="1"/>
      <edge id="164243" label="zzzz105,zzzz603" source="837" target="339" cy:directed="1"/>
      <edge id="164242" label="zzzz105,zzzz309" source="837" target="633" cy:directed="1"/>
      <edge id="164241" label="zzzz105,zzzz416" source="837" target="526" cy:directed="1"/>
      <edge id="164240" label="zzzz105,zzzz665" source="837" target="277" cy:directed="1"/>
      <edge id="164239" label="zzzz105,zzzzzz2" source="837" target="69" cy:directed="1"/>
      <edge id="164238" label="zzzz105,zzzz275" source="837" target="667" cy:directed="1"/>
      <edge id="164237" label="zzzz105,zzzz615" source="837" target="327" cy:directed="1"/>
      <edge id="164236" label="zzzz105,zzzz638" source="837" target="304" cy:directed="1"/>
      <edge id="164235" label="zzzz105,zzzz642" source="837" target="300" cy:directed="1"/>
      <edge id="164234" label="zzzz105,zzzz656" source="837" target="286" cy:directed="1"/>
      <edge id="164233" label="zzzz105,zzzzz11" source="837" target="160" cy:directed="1"/>
      <edge id="164232" label="zzzz105,zzzz418" source="837" target="524" cy:directed="1"/>
      <edge id="164231" label="zzzz105,zzzz593" source="837" target="349" cy:directed="1"/>
      <edge id="164230" label="zzzz105,zzzz660" source="837" target="282" cy:directed="1"/>
      <edge id="164229" label="zzzz105,zzzz664" source="837" target="278" cy:directed="1"/>
      <edge id="164228" label="zzzz105,zzzzzz9" source="837" target="62" cy:directed="1"/>
      <edge id="164227" label="zzzz105,zzzz211" source="837" target="731" cy:directed="1"/>
      <edge id="164226" label="zzzz105,zzzz220" source="837" target="722" cy:directed="1"/>
      <edge id="164225" label="zzzz105,zzzz223" source="837" target="719" cy:directed="1"/>
      <edge id="164224" label="zzzz105,zzzz224" source="837" target="718" cy:directed="1"/>
      <edge id="164223" label="zzzz105,zzzz411" source="837" target="531" cy:directed="1"/>
      <edge id="164222" label="zzzz105,zzzz452" source="837" target="490" cy:directed="1"/>
      <edge id="164221" label="zzzz105,zzzz586" source="837" target="356" cy:directed="1"/>
      <edge id="164220" label="zzzz105,zzzz588" source="837" target="354" cy:directed="1"/>
      <edge id="164219" label="zzzz105,zzzz637" source="837" target="305" cy:directed="1"/>
      <edge id="164218" label="zzzz105,zzzzzz1" source="837" target="70" cy:directed="1"/>
      <edge id="164217" label="zzzz105,zzzz214" source="837" target="728" cy:directed="1"/>
      <edge id="164216" label="zzzz105,zzzz305" source="837" target="637" cy:directed="1"/>
      <edge id="164215" label="zzzz105,zzzz412" source="837" target="530" cy:directed="1"/>
      <edge id="164214" label="zzzz105,zzzz626" source="837" target="316" cy:directed="1"/>
      <edge id="164213" label="zzzz105,zzzzz13" source="837" target="158" cy:directed="1"/>
      <edge id="164212" label="zzzz105,zzzz180" source="837" target="762" cy:directed="1"/>
      <edge id="164211" label="zzzz105,zzzz304" source="837" target="638" cy:directed="1"/>
      <edge id="164210" label="zzzz105,zzzz591" source="837" target="351" cy:directed="1"/>
      <edge id="164209" label="zzzz105,zzzz640" source="837" target="302" cy:directed="1"/>
      <edge id="164208" label="zzzz105,zzzz218" source="837" target="724" cy:directed="1"/>
      <edge id="164207" label="zzzz105,zzzz414" source="837" target="528" cy:directed="1"/>
      <edge id="164206" label="zzzz105,zzzz542" source="837" target="400" cy:directed="1"/>
      <edge id="164205" label="zzzz105,zzzz600" source="837" target="342" cy:directed="1"/>
      <edge id="164204" label="zzzz105,zzzz604" source="837" target="338" cy:directed="1"/>
      <edge id="164203" label="zzzz105,zzzz605" source="837" target="337" cy:directed="1"/>
      <edge id="164202" label="zzzz105,zzzz606" source="837" target="336" cy:directed="1"/>
      <edge id="164201" label="zzzz105,zzzz652" source="837" target="290" cy:directed="1"/>
      <edge id="164200" label="zzzz105,zzzz186" source="837" target="756" cy:directed="1"/>
      <edge id="164199" label="zzzz105,zzzz207" source="837" target="735" cy:directed="1"/>
      <edge id="164198" label="zzzz105,zzzz295" source="837" target="647" cy:directed="1"/>
      <edge id="164197" label="zzzz105,zzzz614" source="837" target="328" cy:directed="1"/>
      <edge id="164196" label="zzzz105,zzzz617" source="837" target="325" cy:directed="1"/>
      <edge id="164195" label="zzzz105,zzzz671" source="837" target="271" cy:directed="1"/>
      <edge id="164194" label="zzzz105,zzzz213" source="837" target="729" cy:directed="1"/>
      <edge id="164193" label="zzzz105,zzzz300" source="837" target="642" cy:directed="1"/>
      <edge id="164192" label="zzzz105,zzzzzz8" source="837" target="63" cy:directed="1"/>
      <edge id="164191" label="zzzz105,zzzz297" source="837" target="645" cy:directed="1"/>
      <edge id="164190" label="zzzz105,zzzz326" source="837" target="616" cy:directed="1"/>
      <edge id="164189" label="zzzz105,zzzz610" source="837" target="332" cy:directed="1"/>
      <edge id="164188" label="zzzz105,zzzz613" source="837" target="329" cy:directed="1"/>
      <edge id="164187" label="zzzz105,zzzz630" source="837" target="312" cy:directed="1"/>
      <edge id="164186" label="zzzz105,zzzz299" source="837" target="643" cy:directed="1"/>
      <edge id="164185" label="zzzz105,zzzzz10" source="837" target="161" cy:directed="1"/>
      <edge id="164184" label="zzzz105,zzzz205" source="837" target="737" cy:directed="1"/>
      <edge id="164183" label="zzzz105,zzzz607" source="837" target="335" cy:directed="1"/>
      <edge id="164182" label="zzzz105,zzzz216" source="837" target="726" cy:directed="1"/>
      <edge id="164181" label="zzzz105,zzzz651" source="837" target="291" cy:directed="1"/>
      <edge id="164180" label="zzzz105,zzzz661" source="837" target="281" cy:directed="1"/>
      <edge id="164179" label="zzzz105,zzzz668" source="837" target="274" cy:directed="1"/>
      <edge id="164178" label="zzzz105,zzzz417" source="837" target="525" cy:directed="1"/>
      <edge id="164177" label="zzzz105,zzzz647" source="837" target="295" cy:directed="1"/>
      <edge id="164176" label="zzzz105,zzzz662" source="837" target="280" cy:directed="1"/>
      <edge id="164175" label="zzzz105,zzzz206" source="837" target="736" cy:directed="1"/>
      <edge id="164174" label="zzzz105,zzzz221" source="837" target="721" cy:directed="1"/>
      <edge id="164173" label="zzzz105,zzzz413" source="837" target="529" cy:directed="1"/>
      <edge id="164172" label="zzzz105,zzzz420" source="837" target="522" cy:directed="1"/>
      <edge id="164171" label="zzzz105,zzzz622" source="837" target="320" cy:directed="1"/>
      <edge id="164170" label="zzzz105,zzzz210" source="837" target="732" cy:directed="1"/>
      <edge id="164169" label="zzzz105,zzzz209" source="837" target="733" cy:directed="1"/>
      <edge id="164168" label="zzzz105,zzzz657" source="837" target="285" cy:directed="1"/>
      <edge id="164167" label="zzzz105,zzzzz93" source="837" target="78" cy:directed="1"/>
      <edge id="164166" label="zzzz105,zzzz296" source="837" target="646" cy:directed="1"/>
      <edge id="164165" label="zzzz105,zzzz306" source="837" target="636" cy:directed="1"/>
      <edge id="164164" label="zzzz105,zzzz322" source="837" target="620" cy:directed="1"/>
      <edge id="164163" label="zzzz105,zzzz547" source="837" target="395" cy:directed="1"/>
      <edge id="164162" label="zzzz105,zzzz648" source="837" target="294" cy:directed="1"/>
      <edge id="164161" label="zzzz105,zzzz302" source="837" target="640" cy:directed="1"/>
      <edge id="164160" label="zzzz105,zzzz430" source="837" target="512" cy:directed="1"/>
      <edge id="164159" label="zzzz105,zzzz421" source="837" target="521" cy:directed="1"/>
      <edge id="164158" label="zzzz105,zzzz645" source="837" target="297" cy:directed="1"/>
      <edge id="164157" label="zzzz105,zzzz303" source="837" target="639" cy:directed="1"/>
      <edge id="164156" label="zzzz105,zzzz208" source="837" target="734" cy:directed="1"/>
      <edge id="164155" label="zzzz105,zzzz621" source="837" target="321" cy:directed="1"/>
      <edge id="164154" label="zzzz105,zzzz212" source="837" target="730" cy:directed="1"/>
      <edge id="164153" label="zzzz105,zzzz639" source="837" target="303" cy:directed="1"/>
      <edge id="164152" label="zzzz105,zzzz616" source="837" target="326" cy:directed="1"/>
      <edge id="164151" label="zzzz105,zzzz195" source="837" target="747" cy:directed="1"/>
      <edge id="164150" label="zzzz105,zzzz255" source="837" target="687" cy:directed="1"/>
      <edge id="164149" label="zzzz105,zzzzzz3" source="837" target="68" cy:directed="1"/>
      <edge id="164148" label="zzzz105,zzzz265" source="837" target="677" cy:directed="1"/>
      <edge id="164147" label="zzzz105,zzzz198" source="837" target="744" cy:directed="1"/>
      <edge id="164146" label="zzzz105,zzzz168" source="837" target="774" cy:directed="1"/>
      <edge id="164145" label="zzzz105,zzzz612" source="837" target="330" cy:directed="1"/>
      <edge id="164144" label="zzzz105,zzzz215" source="837" target="727" cy:directed="1"/>
      <edge id="164143" label="zzzz105,zzzz200" source="837" target="742" cy:directed="1"/>
      <edge id="164142" label="zzzz105,zzzz428" source="837" target="514" cy:directed="1"/>
      <edge id="164141" label="zzzz105,zzzz427" source="837" target="515" cy:directed="1"/>
      <edge id="164140" label="zzzz105,zzzz217" source="837" target="725" cy:directed="1"/>
      <edge id="164139" label="zzzz105,zzzz184" source="837" target="758" cy:directed="1"/>
      <edge id="164138" label="zzzz105,zzzz197" source="837" target="745" cy:directed="1"/>
      <edge id="164137" label="zzzz105,zzzz650" source="837" target="292" cy:directed="1"/>
      <edge id="164136" label="zzzz105,zzzz199" source="837" target="743" cy:directed="1"/>
      <edge id="164135" label="zzzz105,zzzz204" source="837" target="738" cy:directed="1"/>
      <edge id="164134" label="zzzz105,zzzz629" source="837" target="313" cy:directed="1"/>
      <edge id="164133" label="zzzz105,zzzz643" source="837" target="299" cy:directed="1"/>
      <edge id="164132" label="zzzz105,zzzz635" source="837" target="307" cy:directed="1"/>
      <edge id="164131" label="zzzz105,zzzzz25" source="837" target="146" cy:directed="1"/>
      <edge id="164130" label="zzzz105,zzzz301" source="837" target="641" cy:directed="1"/>
      <edge id="164129" label="zzzz105,zzzz548" source="837" target="394" cy:directed="1"/>
      <edge id="164128" label="zzzz106,zzzz152" source="836" target="790" cy:directed="1"/>
      <edge id="164127" label="zzzz106,zzzz680" source="836" target="262" cy:directed="1"/>
      <edge id="164126" label="zzzz106,zzzz506" source="836" target="436" cy:directed="1"/>
      <edge id="164125" label="zzzz106,zzzz646" source="836" target="296" cy:directed="1"/>
      <edge id="164124" label="zzzz106,zzzz189" source="836" target="753" cy:directed="1"/>
      <edge id="164123" label="zzzz106,zzzz676" source="836" target="266" cy:directed="1"/>
      <edge id="164122" label="zzzz106,zzzz114" source="836" target="828" cy:directed="1"/>
      <edge id="164121" label="zzzz106,zzzz706" source="836" target="236" cy:directed="1"/>
      <edge id="164120" label="zzzz106,zzzz281" source="836" target="661" cy:directed="1"/>
      <edge id="164119" label="zzzz106,zzzz203" source="836" target="739" cy:directed="1"/>
      <edge id="164118" label="zzzz106,zzzz294" source="836" target="648" cy:directed="1"/>
      <edge id="164117" label="zzzz106,zzzz252" source="836" target="690" cy:directed="1"/>
      <edge id="164116" label="zzzz106,zzzz673" source="836" target="269" cy:directed="1"/>
      <edge id="164115" label="zzzz106,zzzz107" source="836" target="835" cy:directed="1"/>
      <edge id="164114" label="zzzz106,zzzz700" source="836" target="242" cy:directed="1"/>
      <edge id="164113" label="zzzz106,zzzz681" source="836" target="261" cy:directed="1"/>
      <edge id="164112" label="zzzz106,zzzz505" source="836" target="437" cy:directed="1"/>
      <edge id="164111" label="zzzz106,zzzz513" source="836" target="429" cy:directed="1"/>
      <edge id="164110" label="zzzz106,zzzzz52" source="836" target="119" cy:directed="1"/>
      <edge id="164109" label="zzzz106,zzzz678" source="836" target="264" cy:directed="1"/>
      <edge id="164108" label="zzzz106,zzzz124" source="836" target="818" cy:directed="1"/>
      <edge id="164107" label="zzzz106,zzzz674" source="836" target="268" cy:directed="1"/>
      <edge id="164106" label="zzzz106,zzzz707" source="836" target="235" cy:directed="1"/>
      <edge id="164105" label="zzzz106,zzzz625" source="836" target="317" cy:directed="1"/>
      <edge id="164104" label="zzzz106,zzzz190" source="836" target="752" cy:directed="1"/>
      <edge id="164103" label="zzzz106,zzzz154" source="836" target="788" cy:directed="1"/>
      <edge id="164102" label="zzzz106,zzzz682" source="836" target="260" cy:directed="1"/>
      <edge id="164101" label="zzzz106,zzzz679" source="836" target="263" cy:directed="1"/>
      <edge id="164100" label="zzzz106,zzzz139" source="836" target="803" cy:directed="1"/>
      <edge id="164099" label="zzzz106,zzzz291" source="836" target="651" cy:directed="1"/>
      <edge id="164098" label="zzzz106,zzzz515" source="836" target="427" cy:directed="1"/>
      <edge id="164097" label="zzzz106,zzzz113" source="836" target="829" cy:directed="1"/>
      <edge id="164096" label="zzzz106,zzzz644" source="836" target="298" cy:directed="1"/>
      <edge id="164095" label="zzzz106,zzzz150" source="836" target="792" cy:directed="1"/>
      <edge id="164094" label="zzzz106,zzzz730" source="836" target="212" cy:directed="1"/>
      <edge id="164093" label="zzzz106,zzzz192" source="836" target="750" cy:directed="1"/>
      <edge id="164092" label="zzzz106,zzzz110" source="836" target="832" cy:directed="1"/>
      <edge id="164091" label="zzzz106,zzzz125" source="836" target="817" cy:directed="1"/>
      <edge id="164090" label="zzzz106,zzzz698" source="836" target="244" cy:directed="1"/>
      <edge id="164089" label="zzzz106,zzzz504" source="836" target="438" cy:directed="1"/>
      <edge id="164088" label="zzzz106,zzzz112" source="836" target="830" cy:directed="1"/>
      <edge id="164087" label="zzzz106,zzzz543" source="836" target="399" cy:directed="1"/>
      <edge id="164086" label="zzzz106,zzzzz71" source="836" target="100" cy:directed="1"/>
      <edge id="164085" label="zzzz106,zzzz708" source="836" target="234" cy:directed="1"/>
      <edge id="164084" label="zzzz106,zzzz284" source="836" target="658" cy:directed="1"/>
      <edge id="164083" label="zzzz106,zzzz155" source="836" target="787" cy:directed="1"/>
      <edge id="164082" label="zzzz106,zzzz279" source="836" target="663" cy:directed="1"/>
      <edge id="164081" label="zzzz106,zzzz492" source="836" target="450" cy:directed="1"/>
      <edge id="164080" label="zzzz106,zzzz179" source="836" target="763" cy:directed="1"/>
      <edge id="164079" label="zzzz106,zzzz193" source="836" target="749" cy:directed="1"/>
      <edge id="164078" label="zzzz106,zzzz511" source="836" target="431" cy:directed="1"/>
      <edge id="164077" label="zzzz106,zzzz725" source="836" target="217" cy:directed="1"/>
      <edge id="164076" label="zzzz106,zzzz739" source="836" target="203" cy:directed="1"/>
      <edge id="164075" label="zzzz106,zzzz742" source="836" target="200" cy:directed="1"/>
      <edge id="164074" label="zzzz106,zzzz719" source="836" target="223" cy:directed="1"/>
      <edge id="164073" label="zzzz106,zzzz737" source="836" target="205" cy:directed="1"/>
      <edge id="164072" label="zzzz106,zzzz729" source="836" target="213" cy:directed="1"/>
      <edge id="164071" label="zzzz106,zzzz741" source="836" target="201" cy:directed="1"/>
      <edge id="164070" label="zzzz106,zzzz185" source="836" target="757" cy:directed="1"/>
      <edge id="164069" label="zzzz106,zzzz740" source="836" target="202" cy:directed="1"/>
      <edge id="164068" label="zzzz106,zzzz535" source="836" target="407" cy:directed="1"/>
      <edge id="164067" label="zzzz106,zzzz196" source="836" target="746" cy:directed="1"/>
      <edge id="164066" label="zzzz106,zzzz503" source="836" target="439" cy:directed="1"/>
      <edge id="164065" label="zzzz106,zzzz738" source="836" target="204" cy:directed="1"/>
      <edge id="164064" label="zzzz106,zzzz728" source="836" target="214" cy:directed="1"/>
      <edge id="164063" label="zzzz106,zzzz286" source="836" target="656" cy:directed="1"/>
      <edge id="164062" label="zzzz106,zzzz545" source="836" target="397" cy:directed="1"/>
      <edge id="164061" label="zzzz106,zzzz623" source="836" target="319" cy:directed="1"/>
      <edge id="164060" label="zzzz106,zzzz521" source="836" target="421" cy:directed="1"/>
      <edge id="164059" label="zzzz106,zzzz726" source="836" target="216" cy:directed="1"/>
      <edge id="164058" label="zzzz106,zzzz530" source="836" target="412" cy:directed="1"/>
      <edge id="164057" label="zzzz106,zzzz727" source="836" target="215" cy:directed="1"/>
      <edge id="164056" label="zzzz106,zzzz116" source="836" target="826" cy:directed="1"/>
      <edge id="164055" label="zzzz106,zzzz202" source="836" target="740" cy:directed="1"/>
      <edge id="164054" label="zzzz106,zzzz510" source="836" target="432" cy:directed="1"/>
      <edge id="164053" label="zzzz106,zzzz534" source="836" target="408" cy:directed="1"/>
      <edge id="164052" label="zzzz106,zzzz524" source="836" target="418" cy:directed="1"/>
      <edge id="164051" label="zzzz106,zzzz696" source="836" target="246" cy:directed="1"/>
      <edge id="164050" label="zzzz106,zzzz695" source="836" target="247" cy:directed="1"/>
      <edge id="164049" label="zzzz106,zzzz546" source="836" target="396" cy:directed="1"/>
      <edge id="164048" label="zzzz106,zzzz136" source="836" target="806" cy:directed="1"/>
      <edge id="164047" label="zzzz106,zzzz518" source="836" target="424" cy:directed="1"/>
      <edge id="164046" label="zzzz106,zzzzz67" source="836" target="104" cy:directed="1"/>
      <edge id="164045" label="zzzz106,zzzz111" source="836" target="831" cy:directed="1"/>
      <edge id="164044" label="zzzz106,zzzz712" source="836" target="230" cy:directed="1"/>
      <edge id="164043" label="zzzz106,zzzz514" source="836" target="428" cy:directed="1"/>
      <edge id="164042" label="zzzz106,zzzz137" source="836" target="805" cy:directed="1"/>
      <edge id="164041" label="zzzz106,zzzz624" source="836" target="318" cy:directed="1"/>
      <edge id="164040" label="zzzz106,zzzz703" source="836" target="239" cy:directed="1"/>
      <edge id="164039" label="zzzz106,zzzz718" source="836" target="224" cy:directed="1"/>
      <edge id="164038" label="zzzz106,zzzzz68" source="836" target="103" cy:directed="1"/>
      <edge id="164037" label="zzzz106,zzzzz51" source="836" target="120" cy:directed="1"/>
      <edge id="164036" label="zzzz106,zzzz250" source="836" target="692" cy:directed="1"/>
      <edge id="164035" label="zzzz106,zzzz119" source="836" target="823" cy:directed="1"/>
      <edge id="164034" label="zzzz106,zzzz156" source="836" target="786" cy:directed="1"/>
      <edge id="164033" label="zzzz106,zzzz502" source="836" target="440" cy:directed="1"/>
      <edge id="164032" label="zzzz106,zzzz528" source="836" target="414" cy:directed="1"/>
      <edge id="164031" label="zzzz106,zzzz536" source="836" target="406" cy:directed="1"/>
      <edge id="164030" label="zzzz106,zzzz540" source="836" target="402" cy:directed="1"/>
      <edge id="164029" label="zzzz106,zzzz509" source="836" target="433" cy:directed="1"/>
      <edge id="164028" label="zzzz106,zzzz736" source="836" target="206" cy:directed="1"/>
      <edge id="164027" label="zzzz106,zzzzz63" source="836" target="108" cy:directed="1"/>
      <edge id="164026" label="zzzz106,zzzzz96" source="836" target="75" cy:directed="1"/>
      <edge id="164025" label="zzzz106,zzzz711" source="836" target="231" cy:directed="1"/>
      <edge id="164024" label="zzzz106,zzzzz36" source="836" target="135" cy:directed="1"/>
      <edge id="164023" label="zzzz106,zzzz516" source="836" target="426" cy:directed="1"/>
      <edge id="164022" label="zzzz106,zzzz716" source="836" target="226" cy:directed="1"/>
      <edge id="164021" label="zzzz106,zzzz245" source="836" target="697" cy:directed="1"/>
      <edge id="164020" label="zzzz106,zzzz691" source="836" target="251" cy:directed="1"/>
      <edge id="164019" label="zzzz106,zzzzz38" source="836" target="133" cy:directed="1"/>
      <edge id="164018" label="zzzz106,zzzz525" source="836" target="417" cy:directed="1"/>
      <edge id="164017" label="zzzz106,zzzz733" source="836" target="209" cy:directed="1"/>
      <edge id="164016" label="zzzz106,zzzzz70" source="836" target="101" cy:directed="1"/>
      <edge id="164015" label="zzzz106,zzzz117" source="836" target="825" cy:directed="1"/>
      <edge id="164014" label="zzzz106,zzzz677" source="836" target="265" cy:directed="1"/>
      <edge id="164013" label="zzzz106,zzzz246" source="836" target="696" cy:directed="1"/>
      <edge id="164012" label="zzzz106,zzzz702" source="836" target="240" cy:directed="1"/>
      <edge id="164011" label="zzzz106,zzzz717" source="836" target="225" cy:directed="1"/>
      <edge id="164010" label="zzzz106,zzzz715" source="836" target="227" cy:directed="1"/>
      <edge id="164009" label="zzzz106,zzzz290" source="836" target="652" cy:directed="1"/>
      <edge id="164008" label="zzzz106,zzzz500" source="836" target="442" cy:directed="1"/>
      <edge id="164007" label="zzzz106,zzzz710" source="836" target="232" cy:directed="1"/>
      <edge id="164006" label="zzzz106,zzzzz43" source="836" target="128" cy:directed="1"/>
      <edge id="164005" label="zzzz106,zzzz526" source="836" target="416" cy:directed="1"/>
      <edge id="164004" label="zzzz106,zzzz721" source="836" target="221" cy:directed="1"/>
      <edge id="164003" label="zzzz106,zzzzz49" source="836" target="122" cy:directed="1"/>
      <edge id="164002" label="zzzz106,zzzz138" source="836" target="804" cy:directed="1"/>
      <edge id="164001" label="zzzz106,zzzz194" source="836" target="748" cy:directed="1"/>
      <edge id="164000" label="zzzz106,zzzz278" source="836" target="664" cy:directed="1"/>
      <edge id="163999" label="zzzz106,zzzz532" source="836" target="410" cy:directed="1"/>
      <edge id="163998" label="zzzz106,zzzz693" source="836" target="249" cy:directed="1"/>
      <edge id="163997" label="zzzz106,zzzz697" source="836" target="245" cy:directed="1"/>
      <edge id="163996" label="zzzz106,zzzz713" source="836" target="229" cy:directed="1"/>
      <edge id="163995" label="zzzz106,zzzz731" source="836" target="211" cy:directed="1"/>
      <edge id="163994" label="zzzz106,zzzz135" source="836" target="807" cy:directed="1"/>
      <edge id="163993" label="zzzz106,zzzz174" source="836" target="768" cy:directed="1"/>
      <edge id="163992" label="zzzz106,zzzz499" source="836" target="443" cy:directed="1"/>
      <edge id="163991" label="zzzz106,zzzz675" source="836" target="267" cy:directed="1"/>
      <edge id="163990" label="zzzz106,zzzz541" source="836" target="401" cy:directed="1"/>
      <edge id="163989" label="zzzz106,zzzz544" source="836" target="398" cy:directed="1"/>
      <edge id="163988" label="zzzz106,zzzz683" source="836" target="259" cy:directed="1"/>
      <edge id="163987" label="zzzz106,zzzz732" source="836" target="210" cy:directed="1"/>
      <edge id="163986" label="zzzz106,zzzz735" source="836" target="207" cy:directed="1"/>
      <edge id="163985" label="zzzz106,zzzz153" source="836" target="789" cy:directed="1"/>
      <edge id="163984" label="zzzz106,zzzz249" source="836" target="693" cy:directed="1"/>
      <edge id="163983" label="zzzz106,zzzz251" source="836" target="691" cy:directed="1"/>
      <edge id="163982" label="zzzz106,zzzz672" source="836" target="270" cy:directed="1"/>
      <edge id="163981" label="zzzz106,zzzz692" source="836" target="250" cy:directed="1"/>
      <edge id="163980" label="zzzz106,zzzz720" source="836" target="222" cy:directed="1"/>
      <edge id="163979" label="zzzz106,zzzz701" source="836" target="241" cy:directed="1"/>
      <edge id="163978" label="zzzz106,zzzz539" source="836" target="403" cy:directed="1"/>
      <edge id="163977" label="zzzz106,zzzz699" source="836" target="243" cy:directed="1"/>
      <edge id="163976" label="zzzz106,zzzz694" source="836" target="248" cy:directed="1"/>
      <edge id="163975" label="zzzz106,zzzz709" source="836" target="233" cy:directed="1"/>
      <edge id="163974" label="zzzz106,zzzz248" source="836" target="694" cy:directed="1"/>
      <edge id="163973" label="zzzz106,zzzzz53" source="836" target="118" cy:directed="1"/>
      <edge id="163972" label="zzzz106,zzzz126" source="836" target="816" cy:directed="1"/>
      <edge id="163971" label="zzzz106,zzzz145" source="836" target="797" cy:directed="1"/>
      <edge id="163970" label="zzzz106,zzzz260" source="836" target="682" cy:directed="1"/>
      <edge id="163969" label="zzzz106,zzzzz73" source="836" target="98" cy:directed="1"/>
      <edge id="163968" label="zzzz106,zzzz611" source="836" target="331" cy:directed="1"/>
      <edge id="163967" label="zzzz106,zzzz571" source="836" target="371" cy:directed="1"/>
      <edge id="163966" label="zzzz106,zzzz705" source="836" target="237" cy:directed="1"/>
      <edge id="163965" label="zzzz106,zzzz285" source="836" target="657" cy:directed="1"/>
      <edge id="163964" label="zzzz106,zzzz422" source="836" target="520" cy:directed="1"/>
      <edge id="163963" label="zzzz106,zzzz122" source="836" target="820" cy:directed="1"/>
      <edge id="163962" label="zzzz106,zzzz714" source="836" target="228" cy:directed="1"/>
      <edge id="163961" label="zzzz106,zzzz743" source="836" target="199" cy:directed="1"/>
      <edge id="163960" label="zzzz106,zzzzz98" source="836" target="73" cy:directed="1"/>
      <edge id="163959" label="zzzz106,zzzz191" source="836" target="751" cy:directed="1"/>
      <edge id="163958" label="zzzz106,zzzz572" source="836" target="370" cy:directed="1"/>
      <edge id="163957" label="zzzz106,zzzz108" source="836" target="834" cy:directed="1"/>
      <edge id="163956" label="zzzz106,zzzz170" source="836" target="772" cy:directed="1"/>
      <edge id="163955" label="zzzz106,zzzz263" source="836" target="679" cy:directed="1"/>
      <edge id="163954" label="zzzz106,zzzz529" source="836" target="413" cy:directed="1"/>
      <edge id="163953" label="zzzz106,zzzz552" source="836" target="390" cy:directed="1"/>
      <edge id="163952" label="zzzz106,zzzz744" source="836" target="198" cy:directed="1"/>
      <edge id="163951" label="zzzz106,zzzz109" source="836" target="833" cy:directed="1"/>
      <edge id="163950" label="zzzz106,zzzz527" source="836" target="415" cy:directed="1"/>
      <edge id="163949" label="zzzz106,zzzz567" source="836" target="375" cy:directed="1"/>
      <edge id="163948" label="zzzz106,zzzz584" source="836" target="358" cy:directed="1"/>
      <edge id="163947" label="zzzz106,zzzz558" source="836" target="384" cy:directed="1"/>
      <edge id="163946" label="zzzz106,zzzz161" source="836" target="781" cy:directed="1"/>
      <edge id="163945" label="zzzz106,zzzzz64" source="836" target="107" cy:directed="1"/>
      <edge id="163944" label="zzzz106,zzzz262" source="836" target="680" cy:directed="1"/>
      <edge id="163943" label="zzzz106,zzzz576" source="836" target="366" cy:directed="1"/>
      <edge id="163942" label="zzzz106,zzzz551" source="836" target="391" cy:directed="1"/>
      <edge id="163941" label="zzzz106,zzzz120" source="836" target="822" cy:directed="1"/>
      <edge id="163940" label="zzzz106,zzzz564" source="836" target="378" cy:directed="1"/>
      <edge id="163939" label="zzzz106,zzzzz75" source="836" target="96" cy:directed="1"/>
      <edge id="163938" label="zzzz106,zzzz556" source="836" target="386" cy:directed="1"/>
      <edge id="163937" label="zzzz106,zzzz573" source="836" target="369" cy:directed="1"/>
      <edge id="163936" label="zzzz106,zzzz282" source="836" target="660" cy:directed="1"/>
      <edge id="163935" label="zzzz106,zzzz520" source="836" target="422" cy:directed="1"/>
      <edge id="163934" label="zzzz106,zzzz580" source="836" target="362" cy:directed="1"/>
      <edge id="163933" label="zzzz106,zzzz261" source="836" target="681" cy:directed="1"/>
      <edge id="163932" label="zzzz106,zzzz310" source="836" target="632" cy:directed="1"/>
      <edge id="163931" label="zzzz106,zzzz257" source="836" target="685" cy:directed="1"/>
      <edge id="163930" label="zzzz106,zzzzz48" source="836" target="123" cy:directed="1"/>
      <edge id="163929" label="zzzz106,zzzz247" source="836" target="695" cy:directed="1"/>
      <edge id="163928" label="zzzz106,zzzz574" source="836" target="368" cy:directed="1"/>
      <edge id="163927" label="zzzz106,zzzz562" source="836" target="380" cy:directed="1"/>
      <edge id="163926" label="zzzz106,zzzz123" source="836" target="819" cy:directed="1"/>
      <edge id="163925" label="zzzz106,zzzz581" source="836" target="361" cy:directed="1"/>
      <edge id="163924" label="zzzz106,zzzz531" source="836" target="411" cy:directed="1"/>
      <edge id="163923" label="zzzz106,zzzz118" source="836" target="824" cy:directed="1"/>
      <edge id="163922" label="zzzz106,zzzz181" source="836" target="761" cy:directed="1"/>
      <edge id="163921" label="zzzz106,zzzz553" source="836" target="389" cy:directed="1"/>
      <edge id="163920" label="zzzz106,zzzz560" source="836" target="382" cy:directed="1"/>
      <edge id="163919" label="zzzz106,zzzz557" source="836" target="385" cy:directed="1"/>
      <edge id="163918" label="zzzz106,zzzz579" source="836" target="363" cy:directed="1"/>
      <edge id="163917" label="zzzz106,zzzz512" source="836" target="430" cy:directed="1"/>
      <edge id="163916" label="zzzz106,zzzz723" source="836" target="219" cy:directed="1"/>
      <edge id="163915" label="zzzz106,zzzz577" source="836" target="365" cy:directed="1"/>
      <edge id="163914" label="zzzz106,zzzz121" source="836" target="821" cy:directed="1"/>
      <edge id="163913" label="zzzz106,zzzz453" source="836" target="489" cy:directed="1"/>
      <edge id="163912" label="zzzz106,zzzz151" source="836" target="791" cy:directed="1"/>
      <edge id="163911" label="zzzz106,zzzz128" source="836" target="814" cy:directed="1"/>
      <edge id="163910" label="zzzz106,zzzzz46" source="836" target="125" cy:directed="1"/>
      <edge id="163909" label="zzzz106,zzzz143" source="836" target="799" cy:directed="1"/>
      <edge id="163908" label="zzzz106,zzzz141" source="836" target="801" cy:directed="1"/>
      <edge id="163907" label="zzzz106,zzzz561" source="836" target="381" cy:directed="1"/>
      <edge id="163906" label="zzzz106,zzzz234" source="836" target="708" cy:directed="1"/>
      <edge id="163905" label="zzzz106,zzzzz97" source="836" target="74" cy:directed="1"/>
      <edge id="163904" label="zzzz106,zzzz563" source="836" target="379" cy:directed="1"/>
      <edge id="163903" label="zzzz106,zzzzz74" source="836" target="97" cy:directed="1"/>
      <edge id="163902" label="zzzz106,zzzzz59" source="836" target="112" cy:directed="1"/>
      <edge id="163901" label="zzzz106,zzzz684" source="836" target="258" cy:directed="1"/>
      <edge id="163900" label="zzzz106,zzzz173" source="836" target="769" cy:directed="1"/>
      <edge id="163899" label="zzzz106,zzzz583" source="836" target="359" cy:directed="1"/>
      <edge id="163898" label="zzzz106,zzzzz47" source="836" target="124" cy:directed="1"/>
      <edge id="163897" label="zzzz106,zzzz688" source="836" target="254" cy:directed="1"/>
      <edge id="163896" label="zzzz106,zzzz307" source="836" target="635" cy:directed="1"/>
      <edge id="163895" label="zzzz106,zzzz550" source="836" target="392" cy:directed="1"/>
      <edge id="163894" label="zzzz106,zzzz469" source="836" target="473" cy:directed="1"/>
      <edge id="163893" label="zzzz106,zzzzz33" source="836" target="138" cy:directed="1"/>
      <edge id="163892" label="zzzz106,zzzz228" source="836" target="714" cy:directed="1"/>
      <edge id="163891" label="zzzz106,zzzz596" source="836" target="346" cy:directed="1"/>
      <edge id="163890" label="zzzz106,zzzz115" source="836" target="827" cy:directed="1"/>
      <edge id="163889" label="zzzz106,zzzz235" source="836" target="707" cy:directed="1"/>
      <edge id="163888" label="zzzz106,zzzz425" source="836" target="517" cy:directed="1"/>
      <edge id="163887" label="zzzz106,zzzzz55" source="836" target="116" cy:directed="1"/>
      <edge id="163886" label="zzzz106,zzzzz90" source="836" target="81" cy:directed="1"/>
      <edge id="163885" label="zzzz106,zzzz554" source="836" target="388" cy:directed="1"/>
      <edge id="163884" label="zzzz106,zzzz566" source="836" target="376" cy:directed="1"/>
      <edge id="163883" label="zzzz106,zzzz565" source="836" target="377" cy:directed="1"/>
      <edge id="163882" label="zzzz106,zzzz570" source="836" target="372" cy:directed="1"/>
      <edge id="163881" label="zzzz106,zzzzz76" source="836" target="95" cy:directed="1"/>
      <edge id="163880" label="zzzz106,zzzz167" source="836" target="775" cy:directed="1"/>
      <edge id="163879" label="zzzz106,zzzz568" source="836" target="374" cy:directed="1"/>
      <edge id="163878" label="zzzz106,zzzz686" source="836" target="256" cy:directed="1"/>
      <edge id="163877" label="zzzz106,zzzzz60" source="836" target="111" cy:directed="1"/>
      <edge id="163876" label="zzzz106,zzzz229" source="836" target="713" cy:directed="1"/>
      <edge id="163875" label="zzzz106,zzzz280" source="836" target="662" cy:directed="1"/>
      <edge id="163874" label="zzzz106,zzzz634" source="836" target="308" cy:directed="1"/>
      <edge id="163873" label="zzzz106,zzzz690" source="836" target="252" cy:directed="1"/>
      <edge id="163872" label="zzzz106,zzzz133" source="836" target="809" cy:directed="1"/>
      <edge id="163871" label="zzzz106,zzzz424" source="836" target="518" cy:directed="1"/>
      <edge id="163870" label="zzzz106,zzzz146" source="836" target="796" cy:directed="1"/>
      <edge id="163869" label="zzzz106,zzzz148" source="836" target="794" cy:directed="1"/>
      <edge id="163868" label="zzzz106,zzzz559" source="836" target="383" cy:directed="1"/>
      <edge id="163867" label="zzzz106,zzzz597" source="836" target="345" cy:directed="1"/>
      <edge id="163866" label="zzzz106,zzzz242" source="836" target="700" cy:directed="1"/>
      <edge id="163865" label="zzzz106,zzzz273" source="836" target="669" cy:directed="1"/>
      <edge id="163864" label="zzzz106,zzzz575" source="836" target="367" cy:directed="1"/>
      <edge id="163863" label="zzzz106,zzzzz82" source="836" target="89" cy:directed="1"/>
      <edge id="163862" label="zzzz106,zzzz578" source="836" target="364" cy:directed="1"/>
      <edge id="163861" label="zzzz106,zzzz734" source="836" target="208" cy:directed="1"/>
      <edge id="163860" label="zzzz106,zzzz178" source="836" target="764" cy:directed="1"/>
      <edge id="163859" label="zzzz106,zzzz238" source="836" target="704" cy:directed="1"/>
      <edge id="163858" label="zzzz106,zzzz569" source="836" target="373" cy:directed="1"/>
      <edge id="163857" label="zzzz106,zzzz582" source="836" target="360" cy:directed="1"/>
      <edge id="163856" label="zzzz106,zzzzz69" source="836" target="102" cy:directed="1"/>
      <edge id="163855" label="zzzz106,zzzz258" source="836" target="684" cy:directed="1"/>
      <edge id="163854" label="zzzz106,zzzz519" source="836" target="423" cy:directed="1"/>
      <edge id="163853" label="zzzz106,zzzz283" source="836" target="659" cy:directed="1"/>
      <edge id="163852" label="zzzz106,zzzz473" source="836" target="469" cy:directed="1"/>
      <edge id="163851" label="zzzz106,zzzz479" source="836" target="463" cy:directed="1"/>
      <edge id="163850" label="zzzz106,zzzz555" source="836" target="387" cy:directed="1"/>
      <edge id="163849" label="zzzz106,zzzzz66" source="836" target="105" cy:directed="1"/>
      <edge id="163848" label="zzzz106,zzzz159" source="836" target="783" cy:directed="1"/>
      <edge id="163847" label="zzzz106,zzzz287" source="836" target="655" cy:directed="1"/>
      <edge id="163846" label="zzzz106,zzzz447" source="836" target="495" cy:directed="1"/>
      <edge id="163845" label="zzzz106,zzzz689" source="836" target="253" cy:directed="1"/>
      <edge id="163844" label="zzzz106,zzzz134" source="836" target="808" cy:directed="1"/>
      <edge id="163843" label="zzzz106,zzzz158" source="836" target="784" cy:directed="1"/>
      <edge id="163842" label="zzzz106,zzzz166" source="836" target="776" cy:directed="1"/>
      <edge id="163841" label="zzzz106,zzzz687" source="836" target="255" cy:directed="1"/>
      <edge id="163840" label="zzzz106,zzzz165" source="836" target="777" cy:directed="1"/>
      <edge id="163839" label="zzzz106,zzzz523" source="836" target="419" cy:directed="1"/>
      <edge id="163838" label="zzzz106,zzzz132" source="836" target="810" cy:directed="1"/>
      <edge id="163837" label="zzzz106,zzzz142" source="836" target="800" cy:directed="1"/>
      <edge id="163836" label="zzzz106,zzzz464" source="836" target="478" cy:directed="1"/>
      <edge id="163835" label="zzzz106,zzzz538" source="836" target="404" cy:directed="1"/>
      <edge id="163834" label="zzzz106,zzzzz34" source="836" target="137" cy:directed="1"/>
      <edge id="163833" label="zzzz106,zzzzz87" source="836" target="84" cy:directed="1"/>
      <edge id="163832" label="zzzz106,zzzz442" source="836" target="500" cy:directed="1"/>
      <edge id="163831" label="zzzz106,zzzzz41" source="836" target="130" cy:directed="1"/>
      <edge id="163830" label="zzzz106,zzzz127" source="836" target="815" cy:directed="1"/>
      <edge id="163829" label="zzzz106,zzzz131" source="836" target="811" cy:directed="1"/>
      <edge id="163828" label="zzzz106,zzzz632" source="836" target="310" cy:directed="1"/>
      <edge id="163827" label="zzzz106,zzzzz58" source="836" target="113" cy:directed="1"/>
      <edge id="163826" label="zzzz106,zzzz270" source="836" target="672" cy:directed="1"/>
      <edge id="163825" label="zzzz106,zzzz441" source="836" target="501" cy:directed="1"/>
      <edge id="163824" label="zzzz106,zzzz470" source="836" target="472" cy:directed="1"/>
      <edge id="163823" label="zzzz106,zzzz517" source="836" target="425" cy:directed="1"/>
      <edge id="163822" label="zzzz106,zzzzz44" source="836" target="127" cy:directed="1"/>
      <edge id="163821" label="zzzz106,zzzz497" source="836" target="445" cy:directed="1"/>
      <edge id="163820" label="zzzz106,zzzz240" source="836" target="702" cy:directed="1"/>
      <edge id="163819" label="zzzz106,zzzz599" source="836" target="343" cy:directed="1"/>
      <edge id="163818" label="zzzz106,zzzz268" source="836" target="674" cy:directed="1"/>
      <edge id="163817" label="zzzz106,zzzz241" source="836" target="701" cy:directed="1"/>
      <edge id="163816" label="zzzz106,zzzzz78" source="836" target="93" cy:directed="1"/>
      <edge id="163815" label="zzzz106,zzzz289" source="836" target="653" cy:directed="1"/>
      <edge id="163814" label="zzzz106,zzzz429" source="836" target="513" cy:directed="1"/>
      <edge id="163813" label="zzzz106,zzzz423" source="836" target="519" cy:directed="1"/>
      <edge id="163812" label="zzzz106,zzzzz72" source="836" target="99" cy:directed="1"/>
      <edge id="163811" label="zzzz106,zzzz292" source="836" target="650" cy:directed="1"/>
      <edge id="163810" label="zzzz106,zzzz293" source="836" target="649" cy:directed="1"/>
      <edge id="163809" label="zzzz106,zzzz704" source="836" target="238" cy:directed="1"/>
      <edge id="163808" label="zzzz106,zzzzz77" source="836" target="94" cy:directed="1"/>
      <edge id="163807" label="zzzz106,zzzz298" source="836" target="644" cy:directed="1"/>
      <edge id="163806" label="zzzz106,zzzz140" source="836" target="802" cy:directed="1"/>
      <edge id="163805" label="zzzz106,zzzz157" source="836" target="785" cy:directed="1"/>
      <edge id="163804" label="zzzz106,zzzz163" source="836" target="779" cy:directed="1"/>
      <edge id="163803" label="zzzz106,zzzz311" source="836" target="631" cy:directed="1"/>
      <edge id="163802" label="zzzz106,zzzz685" source="836" target="257" cy:directed="1"/>
      <edge id="163801" label="zzzz106,zzzzz39" source="836" target="132" cy:directed="1"/>
      <edge id="163800" label="zzzz106,zzzzz65" source="836" target="106" cy:directed="1"/>
      <edge id="163799" label="zzzz106,zzzzz89" source="836" target="82" cy:directed="1"/>
      <edge id="163798" label="zzzz106,zzzz175" source="836" target="767" cy:directed="1"/>
      <edge id="163797" label="zzzz106,zzzz288" source="836" target="654" cy:directed="1"/>
      <edge id="163796" label="zzzz106,zzzzz80" source="836" target="91" cy:directed="1"/>
      <edge id="163795" label="zzzz106,zzzz259" source="836" target="683" cy:directed="1"/>
      <edge id="163794" label="zzzz106,zzzz164" source="836" target="778" cy:directed="1"/>
      <edge id="163793" label="zzzz106,zzzzz99" source="836" target="72" cy:directed="1"/>
      <edge id="163792" label="zzzz106,zzzzz86" source="836" target="85" cy:directed="1"/>
      <edge id="163791" label="zzzz106,zzzz171" source="836" target="771" cy:directed="1"/>
      <edge id="163790" label="zzzz106,zzzz244" source="836" target="698" cy:directed="1"/>
      <edge id="163789" label="zzzz106,zzzzz83" source="836" target="88" cy:directed="1"/>
      <edge id="163788" label="zzzz106,zzzz507" source="836" target="435" cy:directed="1"/>
      <edge id="163787" label="zzzz106,zzzzz35" source="836" target="136" cy:directed="1"/>
      <edge id="163786" label="zzzz106,zzzzz79" source="836" target="92" cy:directed="1"/>
      <edge id="163785" label="zzzz106,zzzz486" source="836" target="456" cy:directed="1"/>
      <edge id="163784" label="zzzz106,zzzz243" source="836" target="699" cy:directed="1"/>
      <edge id="163783" label="zzzz106,zzzz172" source="836" target="770" cy:directed="1"/>
      <edge id="163782" label="zzzz106,zzzz537" source="836" target="405" cy:directed="1"/>
      <edge id="163781" label="zzzz106,zzzz277" source="836" target="665" cy:directed="1"/>
      <edge id="163780" label="zzzz106,zzzz312" source="836" target="630" cy:directed="1"/>
      <edge id="163779" label="zzzz106,zzzz169" source="836" target="773" cy:directed="1"/>
      <edge id="163778" label="zzzz106,zzzz522" source="836" target="420" cy:directed="1"/>
      <edge id="163777" label="zzzz106,zzzz237" source="836" target="705" cy:directed="1"/>
      <edge id="163776" label="zzzz106,zzzz274" source="836" target="668" cy:directed="1"/>
      <edge id="163775" label="zzzz106,zzzz494" source="836" target="448" cy:directed="1"/>
      <edge id="163774" label="zzzz106,zzzz533" source="836" target="409" cy:directed="1"/>
      <edge id="163773" label="zzzz106,zzzz594" source="836" target="348" cy:directed="1"/>
      <edge id="163772" label="zzzz106,zzzzz81" source="836" target="90" cy:directed="1"/>
      <edge id="163771" label="zzzz106,zzzz230" source="836" target="712" cy:directed="1"/>
      <edge id="163770" label="zzzz106,zzzz233" source="836" target="709" cy:directed="1"/>
      <edge id="163769" label="zzzz106,zzzz595" source="836" target="347" cy:directed="1"/>
      <edge id="163768" label="zzzz106,zzzzz85" source="836" target="86" cy:directed="1"/>
      <edge id="163767" label="zzzz106,zzzz232" source="836" target="710" cy:directed="1"/>
      <edge id="163766" label="zzzz106,zzzzz62" source="836" target="109" cy:directed="1"/>
      <edge id="163765" label="zzzz106,zzzz149" source="836" target="793" cy:directed="1"/>
      <edge id="163764" label="zzzz106,zzzzz88" source="836" target="83" cy:directed="1"/>
      <edge id="163763" label="zzzz106,zzzz598" source="836" target="344" cy:directed="1"/>
      <edge id="163762" label="zzzz106,zzzz231" source="836" target="711" cy:directed="1"/>
      <edge id="163761" label="zzzz106,zzzz495" source="836" target="447" cy:directed="1"/>
      <edge id="163760" label="zzzz106,zzzz501" source="836" target="441" cy:directed="1"/>
      <edge id="163759" label="zzzz106,zzzz508" source="836" target="434" cy:directed="1"/>
      <edge id="163758" label="zzzz106,zzzzz91" source="836" target="80" cy:directed="1"/>
      <edge id="163757" label="zzzz106,zzzzz32" source="836" target="139" cy:directed="1"/>
      <edge id="163756" label="zzzz106,zzzzz37" source="836" target="134" cy:directed="1"/>
      <edge id="163755" label="zzzz106,zzzz183" source="836" target="759" cy:directed="1"/>
      <edge id="163754" label="zzzz106,zzzz188" source="836" target="754" cy:directed="1"/>
      <edge id="163753" label="zzzz106,zzzz468" source="836" target="474" cy:directed="1"/>
      <edge id="163752" label="zzzz106,zzzz493" source="836" target="449" cy:directed="1"/>
      <edge id="163751" label="zzzz106,zzzz431" source="836" target="511" cy:directed="1"/>
      <edge id="163750" label="zzzz106,zzzz436" source="836" target="506" cy:directed="1"/>
      <edge id="163749" label="zzzz106,zzzz437" source="836" target="505" cy:directed="1"/>
      <edge id="163748" label="zzzz106,zzzz438" source="836" target="504" cy:directed="1"/>
      <edge id="163747" label="zzzz106,zzzz450" source="836" target="492" cy:directed="1"/>
      <edge id="163746" label="zzzz106,zzzz459" source="836" target="483" cy:directed="1"/>
      <edge id="163745" label="zzzz106,zzzz476" source="836" target="466" cy:directed="1"/>
      <edge id="163744" label="zzzz106,zzzz480" source="836" target="462" cy:directed="1"/>
      <edge id="163743" label="zzzz106,zzzzz42" source="836" target="129" cy:directed="1"/>
      <edge id="163742" label="zzzz106,zzzz266" source="836" target="676" cy:directed="1"/>
      <edge id="163741" label="zzzz106,zzzz433" source="836" target="509" cy:directed="1"/>
      <edge id="163740" label="zzzz106,zzzz444" source="836" target="498" cy:directed="1"/>
      <edge id="163739" label="zzzz106,zzzz449" source="836" target="493" cy:directed="1"/>
      <edge id="163738" label="zzzz106,zzzz455" source="836" target="487" cy:directed="1"/>
      <edge id="163737" label="zzzz106,zzzz481" source="836" target="461" cy:directed="1"/>
      <edge id="163736" label="zzzz106,zzzzz40" source="836" target="131" cy:directed="1"/>
      <edge id="163735" label="zzzz106,zzzz130" source="836" target="812" cy:directed="1"/>
      <edge id="163734" label="zzzz106,zzzz432" source="836" target="510" cy:directed="1"/>
      <edge id="163733" label="zzzz106,zzzz435" source="836" target="507" cy:directed="1"/>
      <edge id="163732" label="zzzz106,zzzz440" source="836" target="502" cy:directed="1"/>
      <edge id="163731" label="zzzz106,zzzz445" source="836" target="497" cy:directed="1"/>
      <edge id="163730" label="zzzz106,zzzz466" source="836" target="476" cy:directed="1"/>
      <edge id="163729" label="zzzz106,zzzz485" source="836" target="457" cy:directed="1"/>
      <edge id="163728" label="zzzz106,zzzz489" source="836" target="453" cy:directed="1"/>
      <edge id="163727" label="zzzz106,zzzz236" source="836" target="706" cy:directed="1"/>
      <edge id="163726" label="zzzz106,zzzz454" source="836" target="488" cy:directed="1"/>
      <edge id="163725" label="zzzz106,zzzz487" source="836" target="455" cy:directed="1"/>
      <edge id="163724" label="zzzz106,zzzzz84" source="836" target="87" cy:directed="1"/>
      <edge id="163723" label="zzzz106,zzzzz92" source="836" target="79" cy:directed="1"/>
      <edge id="163722" label="zzzz106,zzzz162" source="836" target="780" cy:directed="1"/>
      <edge id="163721" label="zzzz106,zzzz323" source="836" target="619" cy:directed="1"/>
      <edge id="163720" label="zzzz106,zzzz446" source="836" target="496" cy:directed="1"/>
      <edge id="163719" label="zzzz106,zzzz460" source="836" target="482" cy:directed="1"/>
      <edge id="163718" label="zzzz106,zzzz160" source="836" target="782" cy:directed="1"/>
      <edge id="163717" label="zzzz106,zzzz443" source="836" target="499" cy:directed="1"/>
      <edge id="163716" label="zzzz106,zzzz458" source="836" target="484" cy:directed="1"/>
      <edge id="163715" label="zzzz106,zzzz488" source="836" target="454" cy:directed="1"/>
      <edge id="163714" label="zzzz106,zzzz129" source="836" target="813" cy:directed="1"/>
      <edge id="163713" label="zzzz106,zzzzz45" source="836" target="126" cy:directed="1"/>
      <edge id="163712" label="zzzz106,zzzzz57" source="836" target="114" cy:directed="1"/>
      <edge id="163711" label="zzzz106,zzzzz94" source="836" target="77" cy:directed="1"/>
      <edge id="163710" label="zzzz106,zzzz498" source="836" target="444" cy:directed="1"/>
      <edge id="163709" label="zzzz106,zzzzz54" source="836" target="117" cy:directed="1"/>
      <edge id="163708" label="zzzz106,zzzz308" source="836" target="634" cy:directed="1"/>
      <edge id="163707" label="zzzz106,zzzz147" source="836" target="795" cy:directed="1"/>
      <edge id="163706" label="zzzz106,zzzz448" source="836" target="494" cy:directed="1"/>
      <edge id="163705" label="zzzz106,zzzz618" source="836" target="324" cy:directed="1"/>
      <edge id="163704" label="zzzz106,zzzz439" source="836" target="503" cy:directed="1"/>
      <edge id="163703" label="zzzz106,zzzz620" source="836" target="322" cy:directed="1"/>
      <edge id="163702" label="zzzz106,zzzzz95" source="836" target="76" cy:directed="1"/>
      <edge id="163701" label="zzzz106,zzzz475" source="836" target="467" cy:directed="1"/>
      <edge id="163700" label="zzzz106,zzzz483" source="836" target="459" cy:directed="1"/>
      <edge id="163699" label="zzzz106,zzzz490" source="836" target="452" cy:directed="1"/>
      <edge id="163698" label="zzzz106,zzzz462" source="836" target="480" cy:directed="1"/>
      <edge id="163697" label="zzzz106,zzzz491" source="836" target="451" cy:directed="1"/>
      <edge id="163696" label="zzzz106,zzzz187" source="836" target="755" cy:directed="1"/>
      <edge id="163695" label="zzzz106,zzzz315" source="836" target="627" cy:directed="1"/>
      <edge id="163694" label="zzzz106,zzzz434" source="836" target="508" cy:directed="1"/>
      <edge id="163693" label="zzzz106,zzzz325" source="836" target="617" cy:directed="1"/>
      <edge id="163692" label="zzzz106,zzzz615" source="836" target="327" cy:directed="1"/>
      <edge id="163691" label="zzzz106,zzzzz61" source="836" target="110" cy:directed="1"/>
      <edge id="163690" label="zzzz106,zzzz617" source="836" target="325" cy:directed="1"/>
      <edge id="163689" label="zzzz106,zzzz619" source="836" target="323" cy:directed="1"/>
      <edge id="163688" label="zzzz106,zzzz276" source="836" target="666" cy:directed="1"/>
      <edge id="163687" label="zzzz106,zzzz316" source="836" target="626" cy:directed="1"/>
      <edge id="163686" label="zzzz106,zzzz212" source="836" target="730" cy:directed="1"/>
      <edge id="163685" label="zzzz106,zzzzzz5" source="836" target="66" cy:directed="1"/>
      <edge id="163684" label="zzzz106,zzzz275" source="836" target="667" cy:directed="1"/>
      <edge id="163683" label="zzzz106,zzzz417" source="836" target="525" cy:directed="1"/>
      <edge id="163682" label="zzzz106,zzzz313" source="836" target="629" cy:directed="1"/>
      <edge id="163681" label="zzzz106,zzzz627" source="836" target="315" cy:directed="1"/>
      <edge id="163680" label="zzzz106,zzzzz93" source="836" target="78" cy:directed="1"/>
      <edge id="163679" label="zzzz106,zzzz264" source="836" target="678" cy:directed="1"/>
      <edge id="163678" label="zzzz106,zzzz635" source="836" target="307" cy:directed="1"/>
      <edge id="163677" label="zzzz106,zzzz660" source="836" target="282" cy:directed="1"/>
      <edge id="163676" label="zzzz106,zzzz669" source="836" target="273" cy:directed="1"/>
      <edge id="163675" label="zzzz106,zzzz321" source="836" target="621" cy:directed="1"/>
      <edge id="163674" label="zzzz106,zzzz605" source="836" target="337" cy:directed="1"/>
      <edge id="163673" label="zzzz106,zzzz591" source="836" target="351" cy:directed="1"/>
      <edge id="163672" label="zzzz106,zzzz628" source="836" target="314" cy:directed="1"/>
      <edge id="163671" label="zzzz106,zzzz668" source="836" target="274" cy:directed="1"/>
      <edge id="163670" label="zzzz106,zzzz604" source="836" target="338" cy:directed="1"/>
      <edge id="163669" label="zzzz106,zzzz606" source="836" target="336" cy:directed="1"/>
      <edge id="163668" label="zzzz106,zzzz626" source="836" target="316" cy:directed="1"/>
      <edge id="163667" label="zzzz106,zzzz654" source="836" target="288" cy:directed="1"/>
      <edge id="163666" label="zzzz106,zzzz414" source="836" target="528" cy:directed="1"/>
      <edge id="163665" label="zzzz106,zzzz665" source="836" target="277" cy:directed="1"/>
      <edge id="163664" label="zzzz106,zzzz296" source="836" target="646" cy:directed="1"/>
      <edge id="163663" label="zzzz106,zzzz412" source="836" target="530" cy:directed="1"/>
      <edge id="163662" label="zzzz106,zzzz637" source="836" target="305" cy:directed="1"/>
      <edge id="163661" label="zzzz106,zzzz655" source="836" target="287" cy:directed="1"/>
      <edge id="163660" label="zzzz106,zzzz656" source="836" target="286" cy:directed="1"/>
      <edge id="163659" label="zzzz106,zzzz664" source="836" target="278" cy:directed="1"/>
      <edge id="163658" label="zzzz106,zzzz201" source="836" target="741" cy:directed="1"/>
      <edge id="163657" label="zzzz106,zzzz305" source="836" target="637" cy:directed="1"/>
      <edge id="163656" label="zzzz106,zzzz589" source="836" target="353" cy:directed="1"/>
      <edge id="163655" label="zzzz106,zzzz592" source="836" target="350" cy:directed="1"/>
      <edge id="163654" label="zzzz106,zzzz613" source="836" target="329" cy:directed="1"/>
      <edge id="163653" label="zzzz106,zzzz220" source="836" target="722" cy:directed="1"/>
      <edge id="163652" label="zzzz106,zzzz603" source="836" target="339" cy:directed="1"/>
      <edge id="163651" label="zzzz106,zzzz297" source="836" target="645" cy:directed="1"/>
      <edge id="163650" label="zzzz106,zzzz590" source="836" target="352" cy:directed="1"/>
      <edge id="163649" label="zzzz106,zzzz640" source="836" target="302" cy:directed="1"/>
      <edge id="163648" label="zzzz106,zzzzzz6" source="836" target="65" cy:directed="1"/>
      <edge id="163647" label="zzzz106,zzzz224" source="836" target="718" cy:directed="1"/>
      <edge id="163646" label="zzzz106,zzzz588" source="836" target="354" cy:directed="1"/>
      <edge id="163645" label="zzzz106,zzzz641" source="836" target="301" cy:directed="1"/>
      <edge id="163644" label="zzzz106,zzzz265" source="836" target="677" cy:directed="1"/>
      <edge id="163643" label="zzzz106,zzzz636" source="836" target="306" cy:directed="1"/>
      <edge id="163642" label="zzzz106,zzzz642" source="836" target="300" cy:directed="1"/>
      <edge id="163641" label="zzzz106,zzzz616" source="836" target="326" cy:directed="1"/>
      <edge id="163640" label="zzzz106,zzzzz12" source="836" target="159" cy:directed="1"/>
      <edge id="163639" label="zzzz106,zzzz614" source="836" target="328" cy:directed="1"/>
      <edge id="163638" label="zzzz106,zzzzz21" source="836" target="150" cy:directed="1"/>
      <edge id="163637" label="zzzz106,zzzz326" source="836" target="616" cy:directed="1"/>
      <edge id="163636" label="zzzz106,zzzzzz7" source="836" target="64" cy:directed="1"/>
      <edge id="163635" label="zzzz106,zzzz295" source="836" target="647" cy:directed="1"/>
      <edge id="163634" label="zzzz106,zzzz221" source="836" target="721" cy:directed="1"/>
      <edge id="163633" label="zzzz106,zzzz586" source="836" target="356" cy:directed="1"/>
      <edge id="163632" label="zzzz106,zzzz430" source="836" target="512" cy:directed="1"/>
      <edge id="163631" label="zzzz106,zzzz465" source="836" target="477" cy:directed="1"/>
      <edge id="163630" label="zzzz106,zzzzzz2" source="836" target="69" cy:directed="1"/>
      <edge id="163629" label="zzzz106,zzzz661" source="836" target="281" cy:directed="1"/>
      <edge id="163628" label="zzzz106,zzzzzz4" source="836" target="67" cy:directed="1"/>
      <edge id="163627" label="zzzz106,zzzz452" source="836" target="490" cy:directed="1"/>
      <edge id="163626" label="zzzz106,zzzz542" source="836" target="400" cy:directed="1"/>
      <edge id="163625" label="zzzz106,zzzz638" source="836" target="304" cy:directed="1"/>
      <edge id="163624" label="zzzz106,zzzz306" source="836" target="636" cy:directed="1"/>
      <edge id="163623" label="zzzz106,zzzz415" source="836" target="527" cy:directed="1"/>
      <edge id="163622" label="zzzz106,zzzz420" source="836" target="522" cy:directed="1"/>
      <edge id="163621" label="zzzz106,zzzz647" source="836" target="295" cy:directed="1"/>
      <edge id="163620" label="zzzz106,zzzz300" source="836" target="642" cy:directed="1"/>
      <edge id="163619" label="zzzz106,zzzz477" source="836" target="465" cy:directed="1"/>
      <edge id="163618" label="zzzz106,zzzz662" source="836" target="280" cy:directed="1"/>
      <edge id="163617" label="zzzz106,zzzzz11" source="836" target="160" cy:directed="1"/>
      <edge id="163616" label="zzzz106,zzzz180" source="836" target="762" cy:directed="1"/>
      <edge id="163615" label="zzzz106,zzzz197" source="836" target="745" cy:directed="1"/>
      <edge id="163614" label="zzzz106,zzzz255" source="836" target="687" cy:directed="1"/>
      <edge id="163613" label="zzzz106,zzzzzz8" source="836" target="63" cy:directed="1"/>
      <edge id="163612" label="zzzz106,zzzzzz9" source="836" target="62" cy:directed="1"/>
      <edge id="163611" label="zzzz106,zzzz223" source="836" target="719" cy:directed="1"/>
      <edge id="163610" label="zzzz106,zzzz645" source="836" target="297" cy:directed="1"/>
      <edge id="163609" label="zzzz106,zzzz657" source="836" target="285" cy:directed="1"/>
      <edge id="163608" label="zzzz106,zzzz667" source="836" target="275" cy:directed="1"/>
      <edge id="163607" label="zzzz106,zzzz198" source="836" target="744" cy:directed="1"/>
      <edge id="163606" label="zzzz106,zzzz418" source="836" target="524" cy:directed="1"/>
      <edge id="163605" label="zzzz106,zzzz600" source="836" target="342" cy:directed="1"/>
      <edge id="163604" label="zzzz106,zzzz302" source="836" target="640" cy:directed="1"/>
      <edge id="163603" label="zzzz106,zzzz416" source="836" target="526" cy:directed="1"/>
      <edge id="163602" label="zzzz106,zzzz419" source="836" target="523" cy:directed="1"/>
      <edge id="163601" label="zzzz106,zzzz303" source="836" target="639" cy:directed="1"/>
      <edge id="163600" label="zzzz106,zzzz322" source="836" target="620" cy:directed="1"/>
      <edge id="163599" label="zzzz106,zzzz411" source="836" target="531" cy:directed="1"/>
      <edge id="163598" label="zzzz106,zzzz630" source="836" target="312" cy:directed="1"/>
      <edge id="163597" label="zzzz106,zzzz670" source="836" target="272" cy:directed="1"/>
      <edge id="163596" label="zzzz106,zzzz413" source="836" target="529" cy:directed="1"/>
      <edge id="163595" label="zzzz106,zzzz211" source="836" target="731" cy:directed="1"/>
      <edge id="163594" label="zzzz106,zzzz186" source="836" target="756" cy:directed="1"/>
      <edge id="163593" label="zzzz106,zzzz651" source="836" target="291" cy:directed="1"/>
      <edge id="163592" label="zzzz106,zzzz652" source="836" target="290" cy:directed="1"/>
      <edge id="163591" label="zzzz106,zzzz205" source="836" target="737" cy:directed="1"/>
      <edge id="163590" label="zzzz106,zzzz213" source="836" target="729" cy:directed="1"/>
      <edge id="163589" label="zzzz106,zzzz218" source="836" target="724" cy:directed="1"/>
      <edge id="163588" label="zzzz106,zzzz461" source="836" target="481" cy:directed="1"/>
      <edge id="163587" label="zzzz106,zzzzz10" source="836" target="161" cy:directed="1"/>
      <edge id="163586" label="zzzz106,zzzz216" source="836" target="726" cy:directed="1"/>
      <edge id="163585" label="zzzz106,zzzz195" source="836" target="747" cy:directed="1"/>
      <edge id="163584" label="zzzz106,zzzz610" source="836" target="332" cy:directed="1"/>
      <edge id="163583" label="zzzz106,zzzzz13" source="836" target="158" cy:directed="1"/>
      <edge id="163582" label="zzzz106,zzzz214" source="836" target="728" cy:directed="1"/>
      <edge id="163581" label="zzzz106,zzzz144" source="836" target="798" cy:directed="1"/>
      <edge id="163580" label="zzzz106,zzzz724" source="836" target="218" cy:directed="1"/>
      <edge id="163579" label="zzzz106,zzzz304" source="836" target="638" cy:directed="1"/>
      <edge id="163578" label="zzzz106,zzzz496" source="836" target="446" cy:directed="1"/>
      <edge id="163577" label="zzzz106,zzzz215" source="836" target="727" cy:directed="1"/>
      <edge id="163576" label="zzzz106,zzzz612" source="836" target="330" cy:directed="1"/>
      <edge id="163575" label="zzzz106,zzzz168" source="836" target="774" cy:directed="1"/>
      <edge id="163574" label="zzzz106,zzzz299" source="836" target="643" cy:directed="1"/>
      <edge id="163573" label="zzzz106,zzzz648" source="836" target="294" cy:directed="1"/>
      <edge id="163572" label="zzzz106,zzzzz50" source="836" target="121" cy:directed="1"/>
      <edge id="163571" label="zzzz106,zzzz467" source="836" target="475" cy:directed="1"/>
      <edge id="163570" label="zzzz106,zzzz649" source="836" target="293" cy:directed="1"/>
      <edge id="163569" label="zzzz106,zzzzz25" source="836" target="146" cy:directed="1"/>
      <edge id="163568" label="zzzz106,zzzz206" source="836" target="736" cy:directed="1"/>
[truncated: 14,809,771 more chars]
