# Supplementary material for: Discovery of several thousand highly diverse circular DNA viruses
Source: eLife journal article supplement (doi:10.7554/elife.51971), 2020-02-03
Supplement: fig2-figsupp1-data1 [file elife-51971-fig2-figsupp1-data1-v1.cys › CytoscapeSession-2019_08_05-18_21/tables/36-all_my_seqs_genbank_ssDNA1_protein_with_ttv_orf1_per_PF02956_13_2_fasta+Full+Network/LOCAL_ATTRS-org.cytoscape.model.CyEdge-36+default+edge.cytable]

CyCSV-Version	1
SUID	interaction	name	selected
java.lang.Long	java.lang.String	java.lang.String	java.lang.Boolean
36 default edge
147255		zzzz137,zzzz514	false
165930		zzzz103,zzzz521	false
5099		zzzz738,zzzz741	false
5098		zzzz738,zzzz739	false
140725		zzzz150,zzzz644	false
138060		zzzz155,zzzz511	false
162363		zzzz109,zzzz422	false
165929		zzzz103,zzzz530	false
5010		zzzz739,zzzz741	false
41261		zzzz521,zzzz530	false
5945		zzzz729,zzzz737	false
5944		zzzz729,zzzz742	false
95783		zzzz260,zzzz572	false
3306		zzzzz36,zzzzz63	false
5189		zzzz737,zzzz742	false
35950		zzzz540,zzzzz38	false
157695		zzzz117,zzzz516	false
6044		zzzz728,zzzz739	false
127441		zzzz179,zzzz744	false
146131		zzzz139,zzzz515	false
127440		zzzz179,zzzz725	false
6043		zzzz728,zzzz738	false
164727		zzzz105,zzzz682	false
158280		zzzz116,zzzz695	false
127439		zzzz179,zzzz185	false
6042		zzzz728,zzzz741	false
163533		zzzz107,zzzz252	false
164726		zzzz105,zzzz679	false
127438		zzzz179,zzzz492	false
119505		zzzz196,zzzz725	false
95333		zzzz261,zzzz573	false
6347		zzzz725,zzzz744	false
127437		zzzz179,zzzz196	false
11934		zzzz679,zzzz682	false
12532		zzzz675,zzzz720	false
4664		zzzz743,zzzz744	false
119504		zzzz196,zzzz744	false
164725		zzzz105,zzzz154	false
130840		zzzz170,zzzz540	false
130839		zzzz170,zzzzz38	false
12531		zzzz675,zzzz735	false
124885		zzzz185,zzzz744	false
159988		zzzz113,zzzz730	false
139162		zzzz153,zzzz422	false
39826		zzzz526,zzzzz70	false
138613		zzzz154,zzzz682	false
6727		zzzz720,zzzz735	false
120423		zzzz194,zzzz675	false
12987		zzzz672,zzzz709	false
162362		zzzz109,zzzz153	false
49223		zzzz492,zzzz725	false
47786		zzzz499,zzzz710	false
46854		zzzz502,zzzz624	false
124884		zzzz185,zzzz725	false
22120		zzzz611,zzzz699	false
6144		zzzz727,zzzz729	false
124883		zzzz185,zzzz196	false
84920		zzzz290,zzzzz70	false
6245		zzzz726,zzzz727	false
127436		zzzz179,zzzz740	false
127435		zzzz179,zzzz743	false
49222		zzzz492,zzzz744	false
12530		zzzz675,zzzz732	false
84919		zzzz290,zzzz500	false
6244		zzzz726,zzzz729	false
47470		zzzz500,zzzzz70	false
6621		zzzz721,zzzzz70	false
84918		zzzz290,zzzz713	false
120422		zzzz194,zzzz720	false
84917		zzzz290,zzzz526	false
122473		zzzz190,zzzz707	false
120421		zzzz194,zzzz735	false
47469		zzzz500,zzzz721	false
36222		zzzz539,zzzz715	false
12230		zzzz677,zzzzz63	false
146695		zzzz138,zzzz539	false
124882		zzzz185,zzzz492	false
6726		zzzz720,zzzz732	false
119503		zzzz196,zzzz492	false
6346		zzzz725,zzzz740	false
101342		zzzz245,zzzz733	false
49221		zzzz492,zzzz740	false
6345		zzzz725,zzzz743	false
4922		zzzz740,zzzz744	false
39825		zzzz526,zzzz721	false
124881		zzzz185,zzzz740	false
47468		zzzz500,zzzz526	false
9707		zzzz695,zzzz696	false
146694		zzzz138,zzzz715	false
84916		zzzz290,zzzz721	false
39824		zzzz526,zzzz713	false
7491		zzzz713,zzzzz70	false
5655		zzzz732,zzzz735	false
138612		zzzz154,zzzz679	false
47467		zzzz500,zzzz713	false
119502		zzzz196,zzzz740	false
8683		zzzz703,zzzz716	false
120420		zzzz194,zzzz732	false
119501		zzzz196,zzzz743	false
124880		zzzz185,zzzz743	false
37043		zzzz536,zzzzz73	false
159393		zzzz114,zzzz676	false
6243		zzzz726,zzzz737	false
7490		zzzz713,zzzz721	false
46233		zzzz504,zzzzz71	false
148382		zzzz135,zzzz683	false
156696		zzzz119,zzzzz67	false
12529		zzzz675,zzzz731	false
37042		zzzz536,zzzzz53	false
2311		zzzzz53,zzzzz73	false
158279		zzzz116,zzzz696	false
99149		zzzz250,zzzz677	false
49220		zzzz492,zzzz743	false
99148		zzzz250,zzzzz63	false
116502		zzzz203,zzzz700	false
6242		zzzz726,zzzz742	false
4921		zzzz740,zzzz743	false
56602		zzzz453,zzzz743	false
12229		zzzz677,zzzzz36	false
5750		zzzz731,zzzz735	false
42134		zzzz518,zzzz546	false
160581		zzzz112,zzzz113	false
6143		zzzz727,zzzz737	false
6142		zzzz727,zzzz742	false
1867		zzzzz63,zzzzz96	false
10245		zzzz691,zzzz711	false
6725		zzzz720,zzzz731	false
5280		zzzz736,zzzz743	false
120419		zzzz194,zzzz731	false
155098		zzzz122,zzzz677	false
99147		zzzz250,zzzzz36	false
12834		zzzz673,zzzz706	false
8682		zzzz703,zzzzz68	false
160580		zzzz112,zzzz730	false
157694		zzzz117,zzzz544	false
88608		zzzz281,zzzz646	false
155097		zzzz122,zzzzz63	false
56601		zzzz453,zzzz725	false
127434		zzzz179,zzzz453	false
9061		zzzz700,zzzz706	false
38132		zzzz532,zzzz544	false
127433		zzzz179,zzzz736	false
12833		zzzz673,zzzz700	false
2857		zzzzz43,zzzzz63	false
155096		zzzz122,zzzzz96	false
119500		zzzz196,zzzz453	false
37595		zzzz534,zzzz623	false
3305		zzzzz36,zzzzz43	false
155095		zzzz122,zzzzz36	false
56600		zzzz453,zzzz744	false
42716		zzzz516,zzzz544	false
7156		zzzz716,zzzzz68	false
5749		zzzz731,zzzz732	false
11643		zzzz681,zzzz700	false
3304		zzzzz36,zzzzz96	false
2856		zzzzz43,zzzzz96	false
116501		zzzz203,zzzz706	false
12832		zzzz673,zzzz681	false
11642		zzzz681,zzzz706	false
124879		zzzz185,zzzz453	false
5279		zzzz736,zzzz744	false
164724		zzzz105,zzzz730	false
127875		zzzz178,zzzz273	false
116500		zzzz203,zzzz673	false
160579		zzzz112,zzzz682	false
12228		zzzz677,zzzzz96	false
8935		zzzz701,zzzzz64	false
6344		zzzz725,zzzz736	false
164723		zzzz105,zzzz112	false
159987		zzzz113,zzzz682	false
157693		zzzz117,zzzz532	false
138611		zzzz154,zzzz730	false
11498		zzzz682,zzzz730	false
164722		zzzz105,zzzz113	false
161170		zzzz111,zzzzz67	false
34631		zzzz545,zzzz623	false
42715		zzzz516,zzzz532	false
116499		zzzz203,zzzz681	false
159986		zzzz113,zzzz154	false
160578		zzzz112,zzzz154	false
56599		zzzz453,zzzz492	false
41553		zzzz520,zzzz699	false
119499		zzzz196,zzzz736	false
56598		zzzz453,zzzz740	false
165328		zzzz104,zzzz540	false
135473		zzzz160,zzzz162	false
37594		zzzz534,zzzz545	false
11933		zzzz679,zzzz730	false
155094		zzzz122,zzzz250	false
165327		zzzz104,zzzzz38	false
160577		zzzz112,zzzz679	false
146130		zzzz139,zzzz644	false
124878		zzzz185,zzzz736	false
41552		zzzz520,zzzz611	false
49219		zzzz492,zzzz736	false
146129		zzzz139,zzzz150	false
37041		zzzz536,zzzz693	false
99146		zzzz250,zzzzz96	false
43011		zzzz515,zzzz644	false
5278		zzzz736,zzzz740	false
159985		zzzz113,zzzz679	false
154528		zzzz123,zzzz711	false
25087		zzzz593,zzzzzz1	false
136976		zzzz157,zzzzz39	false
12227		zzzz677,zzzzz43	false
155093		zzzz122,zzzzz43	false
140724		zzzz150,zzzz515	false
143306		zzzz145,zzzzz96	false
99145		zzzz250,zzzzz43	false
56597		zzzz453,zzzz736	false
162948		zzzz108,zzzz245	false
130838		zzzz170,zzzz251	false
155092		zzzz122,zzzz145	false
134453		zzzz162,zzzzz92	false
98688		zzzz251,zzzzz38	false
41551		zzzz520,zzzzz75	false
165326		zzzz104,zzzz170	false
40109		zzzz525,zzzz545	false
162947		zzzz108,zzzz529	false
162946		zzzz108,zzzz733	false
133544		zzzz164,zzzz171	false
22119		zzzz611,zzzzz75	false
17485		zzzz639,zzzzzz3	false
9975		zzzz693,zzzzz53	false
150517		zzzz131,zzzz158	false
103989		zzzz238,zzzz687	false
40108		zzzz525,zzzz623	false
9188		zzzz699,zzzzz75	false
86470		zzzz286,zzzz718	false
101341		zzzz245,zzzz702	false
98687		zzzz251,zzzz540	false
161769		zzzz110,zzzz504	false
9974		zzzz693,zzzzz73	false
8811		zzzz702,zzzz733	false
40107		zzzz525,zzzz534	false
161169		zzzz111,zzzz119	false
139161		zzzz153,zzzz156	false
161768		zzzz110,zzzzz71	false
135472		zzzz160,zzzzz92	false
125754		zzzz183,zzzz690	false
165325		zzzz104,zzzz251	false
156117		zzzz120,zzzz536	false
156116		zzzz120,zzzzz73	false
153051		zzzz126,zzzzz63	false
153050		zzzz126,zzzzz96	false
44130		zzzz511,zzzz719	false
138059		zzzz155,zzzz719	false
19074		zzzz627,zzzzzz5	false
122990		zzzz189,zzzz294	false
26413		zzzz586,zzzzzz2	false
18671		zzzz630,zzzzzz8	false
156115		zzzz120,zzzzz53	false
137514		zzzz156,zzzz422	false
87746		zzzz283,zzzzz45	false
153049		zzzz126,zzzzz43	false
16130		zzzz647,zzzzzz5	false
153048		zzzz126,zzzz145	false
19073		zzzz627,zzzz647	false
7720		zzzz711,zzzz721	false
101340		zzzz245,zzzz529	false
47466		zzzz500,zzzz711	false
137513		zzzz156,zzzz714	false
100426		zzzz247,zzzz503	false
1693		zzzzz67,zzzzz98	false
110001		zzzz220,zzzz221	false
25951		zzzz589,zzzz641	false
38975		zzzz529,zzzz733	false
8559		zzzz704,zzzzz92	false
84915		zzzz290,zzzz711	false
23370		zzzz603,zzzz636	false
137512		zzzz156,zzzz705	false
23369		zzzz603,zzzz640	false
136975		zzzz157,zzzzz78	false
47785		zzzz499,zzzz624	false
19647		zzzz624,zzzz710	false
17138		zzzz641,zzzz656	false
162361		zzzz109,zzzz156	false
156695		zzzz119,zzzzz98	false
46853		zzzz502,zzzz710	false
7719		zzzz711,zzzz713	false
153047		zzzz126,zzzzz36	false
7718		zzzz711,zzzzz70	false
143305		zzzz145,zzzzz43	false
39823		zzzz526,zzzz691	false
35410		zzzz542,zzzzzz2	false
155091		zzzz122,zzzz126	false
47784		zzzz499,zzzz502	false
35409		zzzz542,zzzz586	false
10244		zzzz691,zzzzz70	false
154049		zzzz124,zzzz678	false
150516		zzzz131,zzzz132	false
143304		zzzz145,zzzzz63	false
39822		zzzz526,zzzz711	false
18016		zzzz636,zzzz640	false
143303		zzzz145,zzzz677	false
109186		zzzz223,zzzzzz9	false
139160		zzzz153,zzzz714	false
143302		zzzz145,zzzzz36	false
108774		zzzz224,zzzz641	false
47465		zzzz500,zzzz691	false
35161		zzzz543,zzzz625	false
32986		zzzz553,zzzz557	false
15160		zzzz654,zzzz669	false
17312		zzzz640,zzzz655	false
10243		zzzz691,zzzz721	false
84914		zzzz290,zzzz691	false
67013		zzzz412,zzzz665	false
18015		zzzz636,zzzz655	false
153046		zzzz126,zzzz677	false
149976		zzzz132,zzzz158	false
2990		zzzzz41,zzzzz66	false
109607		zzzz221,zzzz626	false
3125		zzzzz39,zzzzz78	false
166486		zzzz102,zzzz501	false
25950		zzzz589,zzzz640	false
15001		zzzz655,zzzz656	false
14682		zzzz657,zzzz662	false
10242		zzzz691,zzzz713	false
25949		zzzz589,zzzz655	false
23368		zzzz603,zzzz655	false
64005		zzzz422,zzzz714	false
25948		zzzz589,zzzz603	false
154527		zzzz123,zzzz691	false
110000		zzzz220,zzzz626	false
87745		zzzz283,zzzzz87	false
23165		zzzz604,zzzz605	false
134452		zzzz162,zzzz704	false
108773		zzzz224,zzzz589	false
25086		zzzz593,zzzz671	false
139159		zzzz153,zzzz705	false
13136		zzzz671,zzzzzz1	false
64004		zzzz422,zzzz705	false
17137		zzzz641,zzzz655	false
17311		zzzz640,zzzz641	false
162945		zzzz108,zzzz702	false
135471		zzzz160,zzzz704	false
8438		zzzz705,zzzz714	false
17310		zzzz640,zzzz656	false
23367		zzzz603,zzzz641	false
25947		zzzz589,zzzz636	false
109185		zzzz223,zzzz630	false
108772		zzzz224,zzzz640	false
6041		zzzz728,zzzz737	false
108771		zzzz224,zzzz656	false
162360		zzzz109,zzzz714	false
25303		zzzz592,zzzz665	false
26169		zzzz588,zzzz589	false
26168		zzzz588,zzzz655	false
67319		zzzz411,zzzz416	false
26167		zzzz588,zzzz640	false
25946		zzzz589,zzzz656	false
14681		zzzz657,zzzz661	false
162359		zzzz109,zzzz705	false
26166		zzzz588,zzzz641	false
18014		zzzz636,zzzz641	false
6040		zzzz728,zzzz742	false
2730		zzzzz45,zzzzz87	false
82892		zzzz295,zzzz420	false
26165		zzzz588,zzzz636	false
14351		zzzz661,zzzz662	false
147819		zzzz136,zzzz250	false
12986		zzzz672,zzzz723	false
6039		zzzz728,zzzz729	false
143301		zzzz145,zzzz250	false
67012		zzzz412,zzzz592	false
147818		zzzz136,zzzzz63	false
18670		zzzz630,zzzzzz9	false
5188		zzzz737,zzzz738	false
18013		zzzz636,zzzz656	false
5943		zzzz729,zzzz739	false
5187		zzzz737,zzzz739	false
109999		zzzz220,zzzz641	false
22960		zzzz605,zzzz606	false
843		zzzzzz8,zzzzzz9	false
66403		zzzz414,zzzz660	false
108770		zzzz224,zzzz655	false
5097		zzzz738,zzzz742	false
5009		zzzz739,zzzz742	false
147817		zzzz136,zzzz677	false
109184		zzzz223,zzzzzz8	false
33504		zzzz551,zzzz576	false
7956		zzzz709,zzzz723	false
165928		zzzz103,zzzz540	false
25734		zzzz590,zzzz641	false
5942		zzzz729,zzzz741	false
147816		zzzz136,zzzzz36	false
25085		zzzz593,zzzz639	false
153045		zzzz126,zzzz250	false
109606		zzzz221,zzzz641	false
17838		zzzz637,zzzz640	false
17837		zzzz637,zzzz641	false
17484		zzzz639,zzzzzz1	false
109605		zzzz221,zzzz224	false
5941		zzzz729,zzzz738	false
25084		zzzz593,zzzzzz3	false
878		zzzzzz1,zzzzzz3	false
25518		zzzz591,zzzz660	false
5464		zzzz734,zzzzz42	false
108280		zzzz228,zzzz685	false
18669		zzzz630,zzzzzz2	false
5186		zzzz737,zzzz741	false
4835		zzzz741,zzzz742	false
108769		zzzz224,zzzz636	false
127432		zzzz179,zzzz739	false
26164		zzzz588,zzzz637	false
109604		zzzz221,zzzz590	false
40395		zzzz524,zzzz546	false
25302		zzzz592,zzzz664	false
18012		zzzz636,zzzz637	false
127431		zzzz179,zzzz738	false
125273		zzzz184,zzzz650	false
109603		zzzz221,zzzz589	false
109183		zzzz223,zzzzzz2	false
38692		zzzz530,zzzz540	false
17836		zzzz637,zzzz655	false
11212		zzzz684,zzzz685	false
165927		zzzz103,zzzzz38	false
127430		zzzz179,zzzz728	false
12681		zzzz674,zzzz676	false
5008		zzzz739,zzzz743	false
164721		zzzz105,zzzz150	false
159984		zzzz113,zzzz150	false
140723		zzzz150,zzzz154	false
159983		zzzz113,zzzz644	false
138610		zzzz154,zzzz644	false
117011		zzzz202,zzzz728	false
35408		zzzz542,zzzz630	false
140722		zzzz150,zzzz730	false
124877		zzzz185,zzzz739	false
109998		zzzz220,zzzz589	false
67011		zzzz412,zzzz668	false
65195		zzzz418,zzzz667	false
56596		zzzz453,zzzz728	false
26163		zzzz588,zzzz603	false
25945		zzzz589,zzzz637	false
127429		zzzz179,zzzz741	false
88607		zzzz281,zzzzz52	false
38691		zzzz530,zzzzz38	false
108768		zzzz224,zzzz590	false
26412		zzzz586,zzzz630	false
25944		zzzz589,zzzz590	false
870		zzzzzz2,zzzzzz8	false
124876		zzzz185,zzzz728	false
109997		zzzz220,zzzz224	false
109602		zzzz221,zzzz588	false
66402		zzzz414,zzzz591	false
26162		zzzz588,zzzz656	false
16633		zzzz644,zzzz730	false
13433		zzzz669,zzzzzz5	false
56595		zzzz453,zzzz738	false
56594		zzzz453,zzzz741	false
26161		zzzz588,zzzz590	false
25733		zzzz590,zzzz656	false
13886		zzzz665,zzzz668	false
6038		zzzz728,zzzz743	false
164720		zzzz105,zzzz644	false
124875		zzzz185,zzzz738	false
56593		zzzz453,zzzz739	false
14038		zzzz664,zzzz665	false
6241		zzzz726,zzzz728	false
869		zzzzzz2,zzzzzz9	false
165926		zzzz103,zzzz170	false
124874		zzzz185,zzzz741	false
109996		zzzz220,zzzz656	false
19072		zzzz627,zzzz669	false
109995		zzzz220,zzzz588	false
109601		zzzz221,zzzz656	false
66707		zzzz413,zzzz415	false
66706		zzzz413,zzzz419	false
42133		zzzz518,zzzz524	false
17662		zzzz638,zzzzzz2	false
15159		zzzz654,zzzzzz5	false
156114		zzzz120,zzzz693	false
109994		zzzz220,zzzz590	false
23366		zzzz603,zzzz656	false
18668		zzzz630,zzzz638	false
5096		zzzz738,zzzz743	false
4834		zzzz741,zzzz743	false
140167		zzzz151,zzzz285	false
109600		zzzz221,zzzz640	false
109182		zzzz223,zzzz586	false
25732		zzzz590,zzzz603	false
165925		zzzz103,zzzz104	false
140721		zzzz150,zzzz679	false
119498		zzzz196,zzzz739	false
67010		zzzz412,zzzz664	false
65194		zzzz418,zzzzzz2	false
26411		zzzz586,zzzzzz8	false
109181		zzzz223,zzzz542	false
109180		zzzz223,zzzz638	false
41260		zzzz521,zzzz540	false
38974		zzzz529,zzzz702	false
19071		zzzz627,zzzz654	false
5007		zzzz739,zzzz744	false
155090		zzzz122,zzzz136	false
109599		zzzz221,zzzz655	false
25731		zzzz590,zzzz640	false
109179		zzzz223,zzzz418	false
66100		zzzz415,zzzz419	false
35407		zzzz542,zzzzzz8	false
25730		zzzz590,zzzz636	false
160576		zzzz112,zzzz150	false
65193		zzzz418,zzzz586	false
25729		zzzz590,zzzz655	false
17835		zzzz637,zzzz656	false
6240		zzzz726,zzzz739	false
108279		zzzz228,zzzz684	false
65192		zzzz418,zzzz630	false
35406		zzzz542,zzzz667	false
19258		zzzz626,zzzz641	false
16632		zzzz644,zzzz679	false
6343		zzzz725,zzzz739	false
160575		zzzz112,zzzz644	false
140720		zzzz150,zzzz682	false
117010		zzzz202,zzzz738	false
117009		zzzz202,zzzz739	false
25728		zzzz590,zzzz626	false
13733		zzzz667,zzzzzz2	false
13432		zzzz669,zzzzzz4	false
7605		zzzz712,zzzzz67	false
117008		zzzz202,zzzz741	false
5095		zzzz738,zzzz744	false
132524		zzzz166,zzzz258	false
119497		zzzz196,zzzz728	false
119496		zzzz196,zzzz738	false
98228		zzzz252,zzzz505	false
66401		zzzz414,zzzz604	false
49218		zzzz492,zzzz739	false
35405		zzzz542,zzzz638	false
26410		zzzz586,zzzz638	false
26409		zzzz586,zzzzzz9	false
23164		zzzz604,zzzz606	false
6037		zzzz728,zzzz744	false
165324		zzzz104,zzzz521	false
109598		zzzz221,zzzz603	false
108767		zzzz224,zzzz588	false
65191		zzzz418,zzzz542	false
25943		zzzz589,zzzz626	false
25727		zzzz590,zzzz637	false
6239		zzzz726,zzzz738	false
165924		zzzz103,zzzz527	false
165323		zzzz104,zzzz530	false
109993		zzzz220,zzzz640	false
17661		zzzz638,zzzzzz8	false
6342		zzzz725,zzzz738	false
6141		zzzz727,zzzz728	false
5940		zzzz729,zzzz743	false
5185		zzzz737,zzzz743	false
4833		zzzz741,zzzz744	false
109597		zzzz221,zzzz636	false
17483		zzzz639,zzzz671	false
161168		zzzz111,zzzzz98	false
109992		zzzz220,zzzz655	false
49217		zzzz492,zzzz738	false
26408		zzzz586,zzzz667	false
16631		zzzz644,zzzz682	false
15158		zzzz654,zzzzzz4	false
108766		zzzz224,zzzz603	false
147815		zzzz136,zzzzz96	false
23163		zzzz604,zzzz660	false
6238		zzzz726,zzzz741	false
159982		zzzz113,zzzzz49	false
119495		zzzz196,zzzz741	false
108765		zzzz224,zzzz626	false
65497		zzzz417,zzzz665	false
31885		zzzz558,zzzz580	false
6341		zzzz725,zzzz741	false
109178		zzzz223,zzzz667	false
65496		zzzz417,zzzz668	false
41259		zzzz521,zzzz527	false
17660		zzzz638,zzzzzz9	false
4749		zzzz742,zzzz743	false
124352		zzzz186,zzzz670	false
114844		zzzz207,zzzz210	false
109991		zzzz220,zzzz637	false
49216		zzzz492,zzzz728	false
38690		zzzz530,zzzz624	false
6340		zzzz725,zzzz728	false
67009		zzzz412,zzzz417	false
35404		zzzz542,zzzzzz9	false
23365		zzzz603,zzzz637	false
20204		zzzz621,zzzz622	false
65190		zzzz418,zzzzzz8	false
49215		zzzz492,zzzz741	false
13135		zzzz671,zzzzzz3	false
6140		zzzz727,zzzz738	false
130837		zzzz170,zzzz521	false
109990		zzzz220,zzzz603	false
15157		zzzz654,zzzzz10	false
127428		zzzz179,zzzz729	false
65797		zzzz416,zzzz662	false
26160		zzzz588,zzzz626	false
163532		zzzz107,zzzz505	false
127427		zzzz179,zzzz737	false
67318		zzzz411,zzzz415	false
67317		zzzz411,zzzz419	false
65796		zzzz416,zzzz661	false
46852		zzzz502,zzzz530	false
5847		zzzz730,zzzzz49	false
2923		zzzzz42,zzzzz85	false
857		zzzzzz4,zzzzzz5	false
130836		zzzz170,zzzz530	false
5006		zzzz739,zzzz740	false
109596		zzzz221,zzzz637	false
67316		zzzz411,zzzz413	false
65189		zzzz418,zzzzzz9	false
41258		zzzz521,zzzzz38	false
23364		zzzz603,zzzz626	false
138609		zzzz154,zzzz515	false
6139		zzzz727,zzzz739	false
4920		zzzz740,zzzz741	false
67315		zzzz411,zzzz662	false
39541		zzzz527,zzzz530	false
13431		zzzz669,zzzzz10	false
6036		zzzz728,zzzz740	false
124873		zzzz185,zzzz729	false
65188		zzzz418,zzzz638	false
17659		zzzz638,zzzz667	false
94895		zzzz262,zzzz571	false
25301		zzzz592,zzzz668	false
19257		zzzz626,zzzz640	false
167599		zzzz100,zzzz165	false
108764		zzzz224,zzzz637	false
109989		zzzz220,zzzz636	false
56592		zzzz453,zzzz729	false
6138		zzzz727,zzzz741	false
65795		zzzz416,zzzz657	false
19256		zzzz626,zzzz636	false
19255		zzzz626,zzzz656	false
18667		zzzz630,zzzz667	false
16129		zzzz647,zzzz669	false
165923		zzzz103,zzzz624	false
127426		zzzz179,zzzz742	false
5094		zzzz738,zzzz740	false
110437		zzzz218,zzzz610	false
19254		zzzz626,zzzz655	false
19070		zzzz627,zzzzzz4	false
159981		zzzz113,zzzz515	false
67314		zzzz411,zzzz657	false
65495		zzzz417,zzzz592	false
16128		zzzz647,zzzz654	false
165922		zzzz103,zzzz502	false
164719		zzzz105,zzzz515	false
156694		zzzz119,zzzz712	false
67313		zzzz411,zzzz661	false
5463		zzzz734,zzzzz85	false
49214		zzzz492,zzzz729	false
43010		zzzz515,zzzz682	false
25517		zzzz591,zzzz604	false
6237		zzzz726,zzzz743	false
13732		zzzz667,zzzzzz9	false
147814		zzzz136,zzzzz43	false
142261		zzzz147,zzzz266	false
132523		zzzz166,zzzz533	false
127425		zzzz179,zzzz726	false
119494		zzzz196,zzzz729	false
65494		zzzz417,zzzz591	false
40394		zzzz524,zzzz534	false
5939		zzzz729,zzzz744	false
165921		zzzz103,zzzz251	false
124872		zzzz185,zzzz742	false
4135		zzzzz10,zzzzzz4	false
160574		zzzz112,zzzzz49	false
43009		zzzz515,zzzz730	false
14037		zzzz664,zzzz668	false
40393		zzzz524,zzzz623	false
56591		zzzz453,zzzz737	false
25516		zzzz591,zzzz668	false
19253		zzzz626,zzzz637	false
161767		zzzz110,zzzz644	false
161167		zzzz111,zzzz712	false
124871		zzzz185,zzzz737	false
16127		zzzz647,zzzzzz4	false
5184		zzzz737,zzzz744	false
6339		zzzz725,zzzz729	false
155547		zzzz121,zzzz514	false
56590		zzzz453,zzzz726	false
4748		zzzz742,zzzz744	false
161766		zzzz110,zzzz150	false
155546		zzzz121,zzzz137	false
124351		zzzz186,zzzzzz6	false
66705		zzzz413,zzzz416	false
5938		zzzz729,zzzz740	false
86896		zzzz285,zzzz701	false
43008		zzzz515,zzzz679	false
119493		zzzz196,zzzz737	false
98686		zzzz251,zzzz521	false
65493		zzzz417,zzzz660	false
6338		zzzz725,zzzz737	false
119492		zzzz196,zzzz742	false
66400		zzzz414,zzzz668	false
6337		zzzz725,zzzz742	false
6137		zzzz727,zzzz743	false
98685		zzzz251,zzzz530	false
40392		zzzz524,zzzz545	false
17658		zzzz638,zzzzz11	false
110436		zzzz218,zzzz299	false
56589		zzzz453,zzzz742	false
49213		zzzz492,zzzz737	false
2202		zzzzz55,zzzzz81	false
146128		zzzz139,zzzz154	false
49212		zzzz492,zzzz742	false
47783		zzzz499,zzzz530	false
38689		zzzz530,zzzz710	false
13731		zzzz667,zzzzzz8	false
9448		zzzz697,zzzz701	false
6236		zzzz726,zzzz744	false
5277		zzzz736,zzzz739	false
164718		zzzz105,zzzz139	false
159980		zzzz113,zzzz139	false
97666		zzzz254,zzzz335	false
73147		zzzz332,zzzz402	false
72810		zzzz335,zzzz401	false
71851		zzzz344,zzzz356	false
14506		zzzz660,zzzz668	false
146127		zzzz139,zzzz682	false
127424		zzzz179,zzzz727	false
67008		zzzz412,zzzz660	false
65492		zzzz417,zzzz664	false
5276		zzzz736,zzzz738	false
4919		zzzz740,zzzz742	false
124870		zzzz185,zzzz726	false
67007		zzzz412,zzzz591	false
66704		zzzz413,zzzz657	false
66399		zzzz414,zzzz417	false
6035		zzzz728,zzzz736	false
5183		zzzz737,zzzz740	false
161765		zzzz110,zzzz515	false
72809		zzzz335,zzzz352	false
66398		zzzz414,zzzz605	false
22959		zzzz605,zzzz660	false
56588		zzzz453,zzzz727	false
45622		zzzz506,zzzz680	false
165920		zzzz103,zzzz710	false
161764		zzzz110,zzzz139	false
160573		zzzz112,zzzz515	false
119491		zzzz196,zzzz726	false
16305		zzzz646,zzzzz52	false
14505		zzzz660,zzzz665	false
6336		zzzz725,zzzz726	false
5275		zzzz736,zzzz741	false
81441		zzzz299,zzzz610	false
46232		zzzz504,zzzz644	false
154526		zzzz123,zzzz721	false
140719		zzzz150,zzzz504	false
121960		zzzz191,zzzz692	false
117007		zzzz202,zzzz737	false
67006		zzzz412,zzzz414	false
66099		zzzz415,zzzz416	false
65491		zzzz417,zzzz604	false
25515		zzzz591,zzzz664	false
127423		zzzz179,zzzz202	false
66703		zzzz413,zzzz662	false
25514		zzzz591,zzzz665	false
160572		zzzz112,zzzz139	false
84496		zzzz291,zzzz698	false
147254		zzzz137,zzzz544	false
49211		zzzz492,zzzz726	false
154525		zzzz123,zzzz500	false
146126		zzzz139,zzzz679	false
146125		zzzz139,zzzz730	false
117006		zzzz202,zzzz726	false
41257		zzzz521,zzzz624	false
117005		zzzz202,zzzz729	false
46851		zzzz502,zzzz521	false
23162		zzzz604,zzzz668	false
140718		zzzz150,zzzzz71	false
124869		zzzz185,zzzz727	false
66702		zzzz413,zzzz661	false
64892		zzzz419,zzzz657	false
5937		zzzz729,zzzz736	false
147253		zzzz137,zzzz516	false
97665		zzzz254,zzzz401	false
25513		zzzz591,zzzz592	false
16630		zzzz644,zzzzz71	false
165919		zzzz103,zzzz499	false
157692		zzzz117,zzzz137	false
124868		zzzz185,zzzz202	false
117004		zzzz202,zzzz742	false
70975		zzzz353,zzzz364	false
6335		zzzz725,zzzz727	false
6136		zzzz727,zzzz744	false
154524		zzzz123,zzzz290	false
165322		zzzz104,zzzz624	false
157691		zzzz117,zzzz514	false
117003		zzzz202,zzzz740	false
94894		zzzz262,zzzz552	false
66397		zzzz414,zzzz665	false
43307		zzzz514,zzzz516	false
35949		zzzz540,zzzz624	false
71850		zzzz344,zzzz357	false
69841		zzzz366,zzzz378	false
43306		zzzz514,zzzz544	false
23161		zzzz604,zzzz665	false
19069		zzzz627,zzzzz10	false
4134		zzzzz10,zzzzzz5	false
117002		zzzz202,zzzz744	false
71072		zzzz352,zzzz401	false
67005		zzzz412,zzzz604	false
6235		zzzz726,zzzz740	false
154523		zzzz123,zzzzz70	false
119490		zzzz196,zzzz727	false
97664		zzzz254,zzzz352	false
117001		zzzz202,zzzz492	false
70716		zzzz356,zzzz357	false
117000		zzzz202,zzzz453	false
64891		zzzz419,zzzz662	false
19646		zzzz624,zzzzz38	false
14504		zzzz660,zzzz664	false
164717		zzzz105,zzzzz49	false
154522		zzzz123,zzzz713	false
147813		zzzz136,zzzz145	false
116999		zzzz202,zzzz743	false
100885		zzzz246,zzzz712	false
65794		zzzz416,zzzz419	false
37593		zzzz534,zzzz546	false
25300		zzzz592,zzzz660	false
147252		zzzz137,zzzz532	false
86895		zzzz285,zzzzz64	false
34367		zzzz546,zzzz623	false
25299		zzzz592,zzzz604	false
12985		zzzz672,zzzz677	false
146124		zzzz139,zzzz504	false
66396		zzzz414,zzzz592	false
49210		zzzz492,zzzz727	false
41256		zzzz521,zzzz710	false
12226		zzzz677,zzzz709	false
11497		zzzz682,zzzzz49	false
154521		zzzz123,zzzz526	false
116998		zzzz202,zzzz727	false
68298		zzzz391,zzzz407	false
12984		zzzz672,zzzzz96	false
99144		zzzz250,zzzz672	false
42132		zzzz518,zzzz545	false
25512		zzzz591,zzzz605	false
16126		zzzz647,zzzzz10	false
7955		zzzz709,zzzzz96	false
130835		zzzz170,zzzz624	false
72155		zzzz341,zzzz367	false
47782		zzzz499,zzzz521	false
46850		zzzz502,zzzz540	false
66395		zzzz414,zzzz664	false
6135		zzzz727,zzzz740	false
100884		zzzz246,zzzzz67	false
66098		zzzz415,zzzz657	false
34630		zzzz545,zzzz546	false
165321		zzzz104,zzzz502	false
72582		zzzz337,zzzz367	false
66097		zzzz415,zzzz661	false
42131		zzzz518,zzzz623	false
9840		zzzz694,zzzz701	false
3376		zzzzz35,zzzzz79	false
146123		zzzz139,zzzzz71	false
116997		zzzz202,zzzz725	false
43305		zzzz514,zzzz532	false
9187		zzzz699,zzzz701	false
138608		zzzz154,zzzzz49	false
99143		zzzz250,zzzz709	false
46231		zzzz504,zzzz515	false
12983		zzzz672,zzzzz63	false
159979		zzzz113,zzzz193	false
69778		zzzz367,zzzz378	false
46849		zzzz502,zzzzz38	false
70423		zzzz359,zzzz381	false
159392		zzzz114,zzzz674	false
43007		zzzz515,zzzzz71	false
42130		zzzz518,zzzz534	false
11932		zzzz679,zzzzz49	false
138607		zzzz154,zzzz193	false
69579		zzzz370,zzzz381	false
67312		zzzz411,zzzz641	false
33244		zzzz552,zzzz571	false
164716		zzzz105,zzzz193	false
130834		zzzz170,zzzz710	false
70422		zzzz359,zzzz369	false
69647		zzzz369,zzzz370	false
47781		zzzz499,zzzz540	false
46542		zzzz503,zzzz719	false
12982		zzzz672,zzzzz36	false
120940		zzzz193,zzzz679	false
71539		zzzz347,zzzz361	false
64890		zzzz419,zzzz661	false
147812		zzzz136,zzzz672	false
130833		zzzz170,zzzz499	false
130832		zzzz170,zzzz502	false
46230		zzzz504,zzzz541	false
35948		zzzz540,zzzz710	false
163531		zzzz107,zzzz513	false
119489		zzzz196,zzzz202	false
72581		zzzz337,zzzz378	false
69646		zzzz369,zzzz381	false
7954		zzzz709,zzzzz63	false
134983		zzzz161,zzzzz53	false
118196		zzzz199,zzzz200	false
86894		zzzz285,zzzz697	false
66096		zzzz415,zzzz662	false
120939		zzzz193,zzzz730	false
101339		zzzz245,zzzz536	false
71158		zzzz351,zzzz378	false
37040		zzzz536,zzzz733	false
23160		zzzz604,zzzz664	false
12528		zzzz675,zzzz683	false
164715		zzzz105,zzzz504	false
161763		zzzz110,zzzz541	false
153044		zzzz126,zzzz136	false
120418		zzzz194,zzzz683	false
98227		zzzz252,zzzz513	false
72580		zzzz337,zzzz341	false
72154		zzzz341,zzzz378	false
71157		zzzz351,zzzz367	false
68205		zzzz393,zzzz400	false
40391		zzzz524,zzzz525	false
9447		zzzz697,zzzzz64	false
98684		zzzz251,zzzz624	false
164128		zzzz106,zzzz152	false
134982		zzzz161,zzzzz73	false
47780		zzzz499,zzzzz38	false
35677		zzzz541,zzzzz71	false
7266		zzzz715,zzzzz68	false
165320		zzzz104,zzzz499	false
120938		zzzz193,zzzz682	false
65793		zzzz416,zzzz641	false
37039		zzzz536,zzzz702	false
36221		zzzz539,zzzzz68	false
22118		zzzz611,zzzz701	false
13284		zzzz670,zzzzzz6	false
9839		zzzz694,zzzz699	false
158278		zzzz116,zzzz510	false
70169		zzzz362,zzzz389	false
66394		zzzz414,zzzz606	false
7840		zzzz710,zzzzz38	false
69840		zzzz366,zzzz367	false
44430		zzzz510,zzzz696	false
164714		zzzz105,zzzz110	false
140717		zzzz150,zzzz193	false
70421		zzzz359,zzzz370	false
69362		zzzz373,zzzz395	false
22756		zzzz606,zzzz660	false
147811		zzzz136,zzzz709	false
71538		zzzz347,zzzz369	false
71537		zzzz347,zzzz406	false
156693		zzzz119,zzzz246	false
72153		zzzz341,zzzz351	false
31466		zzzz560,zzzz574	false
165319		zzzz104,zzzz710	false
164713		zzzz105,zzzzz71	false
160571		zzzz112,zzzz193	false
146693		zzzz138,zzzzz68	false
11355		zzzz683,zzzz720	false
7953		zzzz709,zzzzz36	false
7952		zzzz709,zzzzz43	false
72928		zzzz334,zzzz335	false
72579		zzzz337,zzzz351	false
65490		zzzz417,zzzz605	false
5274		zzzz736,zzzz737	false
167027		zzzz101,zzzz158	false
138058		zzzz155,zzzz503	false
69511		zzzz371,zzzz394	false
46541		zzzz503,zzzz511	false
12981		zzzz672,zzzzz43	false
11354		zzzz683,zzzz735	false
5273		zzzz736,zzzz742	false
1360		zzzzz76,zzzzz81	false
120937		zzzz193,zzzz644	false
109988		zzzz220,zzzz411	false
70974		zzzz353,zzzz408	false
68247		zzzz392,zzzz405	false
148381		zzzz135,zzzz731	false
138606		zzzz154,zzzzz71	false
72578		zzzz337,zzzz366	false
72152		zzzz341,zzzz366	false
46229		zzzz504,zzzz682	false
98683		zzzz251,zzzz502	false
11353		zzzz683,zzzz731	false
11352		zzzz683,zzzz732	false
161762		zzzz110,zzzz682	false
148380		zzzz135,zzzz194	false
99607		zzzz249,zzzz539	false
83715		zzzz293,zzzzz78	false
72927		zzzz334,zzzz409	false
72808		zzzz335,zzzz409	false
161761		zzzz110,zzzz154	false
157690		zzzz117,zzzz509	false
147251		zzzz137,zzzz509	false
71249		zzzz350,zzzz355	false
36220		zzzz539,zzzz716	false
11496		zzzz682,zzzzz71	false
138605		zzzz154,zzzz504	false
72062		zzzz342,zzzz353	false
71652		zzzz346,zzzz394	false
71156		zzzz351,zzzz366	false
134981		zzzz161,zzzz536	false
69277		zzzz374,zzzz383	false
46228		zzzz504,zzzz679	false
44731		zzzz509,zzzz516	false
22958		zzzz605,zzzz668	false
9838		zzzz694,zzzz697	false
161760		zzzz110,zzzz679	false
155089		zzzz122,zzzz709	false
22957		zzzz605,zzzz665	false
167026		zzzz101,zzzz131	false
161166		zzzz111,zzzz246	false
148379		zzzz135,zzzz720	false
70252		zzzz361,zzzz406	false
71962		zzzz343,zzzz371	false
71536		zzzz347,zzzz370	false
3194		zzzzz38,zzzzz46	false
96588		zzzz258,zzzz533	false
71535		zzzz347,zzzz359	false
71534		zzzz347,zzzz381	false
70516		zzzz358,zzzz396	false
44429		zzzz510,zzzz695	false
155088		zzzz122,zzzz672	false
72807		zzzz335,zzzz404	false
72274		zzzz340,zzzz394	false
44730		zzzz509,zzzz514	false
44729		zzzz509,zzzz532	false
148378		zzzz135,zzzz675	false
148377		zzzz135,zzzz732	false
146692		zzzz138,zzzz716	false
72061		zzzz342,zzzz364	false
70251		zzzz361,zzzz369	false
68557		zzzz386,zzzz410	false
67004		zzzz412,zzzz605	false
11931		zzzz679,zzzzz71	false
148376		zzzz135,zzzz735	false
146691		zzzz138,zzzz249	false
132052		zzzz167,zzzzz85	false
109987		zzzz220,zzzz416	false
71651		zzzz346,zzzz371	false
66095		zzzz415,zzzz641	false
44728		zzzz509,zzzz672	false
9837		zzzz694,zzzzz64	false
7265		zzzz715,zzzz716	false
109595		zzzz221,zzzz416	false
86893		zzzz285,zzzz694	false
70420		zzzz359,zzzz361	false
161759		zzzz110,zzzz112	false
70250		zzzz361,zzzz381	false
44727		zzzz509,zzzz709	false
6234		zzzz726,zzzz736	false
160570		zzzz112,zzzz504	false
109594		zzzz221,zzzz411	false
72273		zzzz340,zzzz371	false
71961		zzzz343,zzzz346	false
70023		zzzz364,zzzz408	false
67311		zzzz411,zzzz588	false
45926		zzzz505,zzzz513	false
44726		zzzz509,zzzz544	false
25511		zzzz591,zzzz606	false
22117		zzzz611,zzzz694	false
120936		zzzz193,zzzz515	false
71960		zzzz343,zzzz394	false
25298		zzzz592,zzzz605	false
72272		zzzz340,zzzz346	false
147810		zzzz136,zzzz510	false
72926		zzzz334,zzzz404	false
65792		zzzz416,zzzz656	false
160569		zzzz112,zzzzz71	false
69645		zzzz369,zzzz406	false
46227		zzzz504,zzzz730	false
164127		zzzz106,zzzz680	false
146690		zzzz138,zzzz703	false
99606		zzzz249,zzzz715	false
67310		zzzz411,zzzz626	false
109593		zzzz221,zzzz415	false
65791		zzzz416,zzzz588	false
9186		zzzz699,zzzzz64	false
6134		zzzz727,zzzz736	false
167025		zzzz101,zzzz132	false
159978		zzzz113,zzzz504	false
19252		zzzz626,zzzz657	false
7604		zzzz712,zzzzz98	false
109986		zzzz220,zzzz657	false
109592		zzzz221,zzzz657	false
70249		zzzz361,zzzz370	false
67309		zzzz411,zzzz589	false
67308		zzzz411,zzzz590	false
66701		zzzz413,zzzz641	false
65790		zzzz416,zzzz590	false
44428		zzzz510,zzzzz67	false
72925		zzzz334,zzzz380	false
69142		zzzz376,zzzz382	false
67606		zzzz404,zzzz409	false
67307		zzzz411,zzzz637	false
67306		zzzz411,zzzz656	false
42129		zzzz518,zzzz525	false
28636		zzzz574,zzzz579	false
22116		zzzz611,zzzzz64	false
109591		zzzz221,zzzz413	false
72806		zzzz335,zzzz385	false
64889		zzzz419,zzzz641	false
17136		zzzz641,zzzz657	false
17135		zzzz641,zzzz661	false
5846		zzzz730,zzzzz71	false
5560		zzzz733,zzzzz53	false
147809		zzzz136,zzzz509	false
72805		zzzz335,zzzz380	false
65789		zzzz416,zzzz626	false
36219		zzzz539,zzzz703	false
159977		zzzz113,zzzzz71	false
146122		zzzz139,zzzz193	false
68849		zzzz381,zzzz406	false
67305		zzzz411,zzzz655	false
46540		zzzz503,zzzzz59	false
69578		zzzz370,zzzz406	false
68622		zzzz385,zzzz409	false
67304		zzzz411,zzzz640	false
40106		zzzz525,zzzz546	false
26159		zzzz588,zzzz657	false
8810		zzzz702,zzzzz73	false
5559		zzzz733,zzzzz73	false
72924		zzzz334,zzzz401	false
68898		zzzz380,zzzz409	false
164126		zzzz106,zzzz506	false
161758		zzzz110,zzzz730	false
136974		zzzz157,zzzz293	false
132051		zzzz167,zzzz734	false
101338		zzzz245,zzzzz73	false
72923		zzzz334,zzzz352	false
17134		zzzz641,zzzz662	false
14841		zzzz656,zzzz657	false
9973		zzzz693,zzzz733	false
161757		zzzz110,zzzz113	false
70419		zzzz359,zzzz406	false
67303		zzzz411,zzzz636	false
26158		zzzz588,zzzz662	false
19251		zzzz626,zzzz662	false
17834		zzzz637,zzzz657	false
8809		zzzz702,zzzzz53	false
2201		zzzzz55,zzzzz76	false
109590		zzzz221,zzzz662	false
72271		zzzz340,zzzz343	false
71071		zzzz352,zzzz404	false
67302		zzzz411,zzzz603	false
22956		zzzz605,zzzz664	false
116996		zzzz202,zzzz736	false
108763		zzzz224,zzzz416	false
101337		zzzz245,zzzz693	false
101336		zzzz245,zzzzz53	false
108762		zzzz224,zzzz411	false
106570		zzzz232,zzzz686	false
83714		zzzz293,zzzzz39	false
67742		zzzz401,zzzz404	false
65788		zzzz416,zzzz637	false
14840		zzzz656,zzzz662	false
9972		zzzz693,zzzz702	false
8681		zzzz703,zzzz715	false
145055		zzzz141,zzzz510	false
109985		zzzz220,zzzz413	false
68897		zzzz380,zzzz404	false
65787		zzzz416,zzzz589	false
65786		zzzz416,zzzz655	false
39540		zzzz527,zzzz540	false
39539		zzzz527,zzzzz38	false
109984		zzzz220,zzzz415	false
86892		zzzz285,zzzz699	false
71070		zzzz352,zzzz409	false
65785		zzzz416,zzzz640	false
15000		zzzz655,zzzz657	false
120935		zzzz193,zzzz504	false
71069		zzzz352,zzzz385	false
67741		zzzz401,zzzz409	false
25726		zzzz590,zzzz657	false
18011		zzzz636,zzzz657	false
156692		zzzz119,zzzz510	false
132050		zzzz167,zzzzz42	false
35947		zzzz540,zzzzz46	false
22755		zzzz606,zzzz668	false
14839		zzzz656,zzzz661	false
65489		zzzz417,zzzz606	false
19250		zzzz626,zzzz661	false
17309		zzzz640,zzzz657	false
9446		zzzz697,zzzz699	false
122989		zzzz189,zzzz680	false
65784		zzzz416,zzzz636	false
18010		zzzz636,zzzz662	false
1612		zzzzz69,zzzzz84	false
163530		zzzz107,zzzz646	false
109983		zzzz220,zzzz661	false
109982		zzzz220,zzzz662	false
66094		zzzz415,zzzz590	false
165318		zzzz104,zzzz527	false
109589		zzzz221,zzzz419	false
109588		zzzz221,zzzz661	false
98682		zzzz251,zzzz499	false
98681		zzzz251,zzzz710	false
66700		zzzz413,zzzz590	false
66093		zzzz415,zzzz588	false
66092		zzzz415,zzzz655	false
25942		zzzz589,zzzz657	false
108761		zzzz224,zzzz657	false
17833		zzzz637,zzzz661	false
1238		zzzzz80,zzzzz88	false
109981		zzzz220,zzzz419	false
86891		zzzz285,zzzz611	false
69213		zzzz375,zzzz387	false
66699		zzzz413,zzzz626	false
66091		zzzz415,zzzz626	false
65783		zzzz416,zzzz603	false
64888		zzzz419,zzzz626	false
26157		zzzz588,zzzz661	false
14999		zzzz655,zzzz662	false
162944		zzzz108,zzzzz73	false
139711		zzzz152,zzzz680	false
98226		zzzz252,zzzz646	false
68896		zzzz380,zzzz401	false
64887		zzzz419,zzzz590	false
134980		zzzz161,zzzz245	false
108760		zzzz224,zzzz415	false
66090		zzzz415,zzzz640	false
23363		zzzz603,zzzz662	false
120934		zzzz193,zzzzz71	false
71068		zzzz352,zzzz380	false
25941		zzzz589,zzzz662	false
18009		zzzz636,zzzz661	false
11495		zzzz682,zzzzz48	false
162943		zzzz108,zzzz536	false
108759		zzzz224,zzzz662	false
98680		zzzz251,zzzz527	false
64886		zzzz419,zzzz656	false
31465		zzzz560,zzzz579	false
23362		zzzz603,zzzz657	false
162942		zzzz108,zzzzz53	false
143300		zzzz145,zzzz709	false
68621		zzzz385,zzzz401	false
66698		zzzz413,zzzz588	false
66697		zzzz413,zzzz656	false
66089		zzzz415,zzzz589	false
66088		zzzz415,zzzz637	false
41550		zzzz520,zzzz701	false
41549		zzzz520,zzzzz64	false
25725		zzzz590,zzzz662	false
17308		zzzz640,zzzz662	false
1822		zzzzz64,zzzzz75	false
134979		zzzz161,zzzz733	false
108758		zzzz224,zzzz413	false
66087		zzzz415,zzzz656	false
22115		zzzz611,zzzz697	false
86040		zzzz287,zzzz634	false
66086		zzzz415,zzzz636	false
64885		zzzz419,zzzz655	false
17832		zzzz637,zzzz662	false
156113		zzzz120,zzzz161	false
147808		zzzz136,zzzz514	false
100425		zzzz247,zzzzz59	false
71740		zzzz345,zzzz379	false
28872		zzzz573,zzzz584	false
23361		zzzz603,zzzz661	false
83319		zzzz294,zzzz506	false
64884		zzzz419,zzzz588	false
14998		zzzz655,zzzz661	false
164712		zzzz105,zzzzz48	false
161165		zzzz111,zzzz510	false
130831		zzzz170,zzzz527	false
104407		zzzz237,zzzz312	false
97663		zzzz254,zzzz385	false
72922		zzzz334,zzzz385	false
67003		zzzz412,zzzz606	false
66696		zzzz413,zzzz655	false
22754		zzzz606,zzzz665	false
139710		zzzz152,zzzz506	false
122988		zzzz189,zzzz506	false
70093		zzzz363,zzzz379	false
66085		zzzz415,zzzz603	false
25724		zzzz590,zzzz661	false
17307		zzzz640,zzzz661	false
71739		zzzz345,zzzz363	false
66695		zzzz413,zzzz636	false
25940		zzzz589,zzzz661	false
162941		zzzz108,zzzz161	false
161756		zzzz110,zzzz193	false
153043		zzzz126,zzzz709	false
147807		zzzz136,zzzzz67	false
108757		zzzz224,zzzz661	false
72060		zzzz342,zzzz408	false
66694		zzzz413,zzzz640	false
64883		zzzz419,zzzz589	false
9577		zzzz696,zzzzz67	false
153042		zzzz126,zzzz672	false
143299		zzzz145,zzzz672	false
87339		zzzz284,zzzz291	false
71738		zzzz345,zzzz368	false
66693		zzzz413,zzzz589	false
64882		zzzz419,zzzz637	false
109177		zzzz223,zzzzz11	false
99142		zzzz250,zzzz509	false
66692		zzzz413,zzzz603	false
64881		zzzz419,zzzz640	false
30066		zzzz567,zzzz568	false
4060		zzzzz11,zzzzzz2	false
66691		zzzz413,zzzz637	false
44427		zzzz510,zzzz712	false
138604		zzzz154,zzzzz48	false
64880		zzzz419,zzzz636	false
158277		zzzz116,zzzz712	false
147806		zzzz136,zzzz137	false
134978		zzzz161,zzzz693	false
108756		zzzz224,zzzz419	false
68620		zzzz385,zzzz404	false
38973		zzzz529,zzzz536	false
25297		zzzz592,zzzz606	false
4059		zzzzz11,zzzzzz9	false
11930		zzzz679,zzzzz48	false
8934		zzzz701,zzzzz75	false
134977		zzzz161,zzzz702	false
95332		zzzz261,zzzz584	false
89877		zzzz278,zzzz521	false
64879		zzzz419,zzzz603	false
38972		zzzz529,zzzzz73	false
9576		zzzz696,zzzz712	false
4058		zzzzz11,zzzzzz8	false
69712		zzzz368,zzzz379	false
159391		zzzz114,zzzz152	false
95331		zzzz261,zzzz555	false
71349		zzzz349,zzzz390	false
53384		zzzz469,zzzz526	false
45621		zzzz506,zzzz676	false
41548		zzzz520,zzzz694	false
35403		zzzz542,zzzzz11	false
18666		zzzz630,zzzzz11	false
53383		zzzz469,zzzzz70	false
44725		zzzz509,zzzz677	false
164125		zzzz106,zzzz646	false
158276		zzzz116,zzzzz67	false
98225		zzzz252,zzzz281	false
70092		zzzz363,zzzz368	false
12381		zzzz676,zzzz680	false
9836		zzzz694,zzzzz75	false
1063		zzzzz87,zzzzz90	false
144114		zzzz143,zzzz733	false
32557		zzzz555,zzzz573	false
22753		zzzz606,zzzz664	false
163529		zzzz107,zzzz281	false
144113		zzzz143,zzzz245	false
139709		zzzz152,zzzz646	false
134976		zzzz161,zzzz529	false
89876		zzzz278,zzzz530	false
44724		zzzz509,zzzz510	false
39538		zzzz527,zzzz624	false
38971		zzzz529,zzzzz53	false
9706		zzzz695,zzzz712	false
103988		zzzz238,zzzz689	false
97662		zzzz254,zzzz334	false
97661		zzzz254,zzzz409	false
87338		zzzz284,zzzz708	false
89434		zzzz279,zzzz535	false
26407		zzzz586,zzzzz11	false
164124		zzzz106,zzzz189	false
161164		zzzz111,zzzz136	false
159390		zzzz114,zzzz680	false
92867		zzzz267,zzzz602	false
39258		zzzz528,zzzz711	false
3703		zzzzz22,zzzzz23	false
2729		zzzzz45,zzzzz90	false
164123		zzzz106,zzzz676	false
121959		zzzz191,zzzz536	false
91258		zzzz274,zzzz276	false
9705		zzzz695,zzzzz67	false
165918		zzzz103,zzzz278	false
159389		zzzz114,zzzz506	false
156691		zzzz119,zzzz696	false
70885		zzzz354,zzzz384	false
164122		zzzz106,zzzz114	false
139708		zzzz152,zzzz281	false
139707		zzzz152,zzzz676	false
97660		zzzz254,zzzz404	false
87744		zzzz283,zzzzz90	false
72804		zzzz335,zzzz396	false
68895		zzzz380,zzzz385	false
127422		zzzz179,zzzz193	false
83318		zzzz294,zzzz680	false
62967		zzzz425,zzzzz70	false
44723		zzzz509,zzzzz63	false
162940		zzzz108,zzzz143	false
158275		zzzz116,zzzz136	false
134975		zzzz161,zzzz191	false
89875		zzzz278,zzzz624	false
86469		zzzz286,zzzz528	false
164121		zzzz106,zzzz706	false
147805		zzzz136,zzzz532	false
147804		zzzz136,zzzz712	false
131537		zzzz168,zzzzz88	false
130830		zzzz170,zzzzz46	false
120933		zzzz193,zzzz492	false
117806		zzzz200,zzzz300	false
84913		zzzz290,zzzz469	false
69939		zzzz365,zzzz409	false
67301		zzzz411,zzzz664	false
62966		zzzz425,zzzz526	false
46848		zzzz502,zzzz527	false
44722		zzzz509,zzzzz96	false
164120		zzzz106,zzzz281	false
99605		zzzz249,zzzzz68	false
147250		zzzz137,zzzz250	false
71849		zzzz344,zzzz408	false
13730		zzzz667,zzzzz11	false
120932		zzzz193,zzzz743	false
164711		zzzz105,zzzz179	false
164119		zzzz106,zzzz203	false
100883		zzzz246,zzzzz98	false
65187		zzzz418,zzzzz11	false
44426		zzzz510,zzzz672	false
16304		zzzz646,zzzz676	false
148896		zzzz134,zzzz140	false
97659		zzzz254,zzzz380	false
16629		zzzz644,zzzz737	false
164118		zzzz106,zzzz294	false
161163		zzzz111,zzzz696	false
120931		zzzz193,zzzz740	false
72692		zzzz336,zzzz357	false
67300		zzzz411,zzzz665	false
164117		zzzz106,zzzz252	false
159976		zzzz113,zzzz743	false
147803		zzzz136,zzzz696	false
144112		zzzz143,zzzz529	false
138603		zzzz154,zzzz729	false
99141		zzzz250,zzzz510	false
99140		zzzz250,zzzz514	false
72484		zzzz338,zzzz349	false
159975		zzzz113,zzzz128	false
120930		zzzz193,zzzz744	false
71446		zzzz348,zzzz382	false
67299		zzzz411,zzzz591	false
16303		zzzz646,zzzz680	false
10793		zzzz687,zzzz689	false
164116		zzzz106,zzzz673	false
159974		zzzz113,zzzz744	false
124867		zzzz185,zzzz193	false
73259		zzzz331,zzzz403	false
71848		zzzz344,zzzz364	false
70248		zzzz361,zzzz395	false
53382		zzzz469,zzzz500	false
53381		zzzz469,zzzz713	false
45925		zzzz505,zzzz646	false
44425		zzzz510,zzzz709	false
161162		zzzz111,zzzz116	false
159973		zzzz113,zzzz729	false
158274		zzzz116,zzzz119	false
157689		zzzz117,zzzz136	false
156690		zzzz119,zzzz695	false
151975		zzzz128,zzzz730	false
89874		zzzz278,zzzz502	false
72691		zzzz336,zzzz344	false
71445		zzzz348,zzzz376	false
70247		zzzz361,zzzz373	false
67298		zzzz411,zzzz668	false
44721		zzzz509,zzzzz36	false
39257		zzzz528,zzzz691	false
22114		zzzz611,zzzz702	false
162939		zzzz108,zzzz693	false
159972		zzzz113,zzzz179	false
156689		zzzz119,zzzz136	false
147249		zzzz137,zzzz677	false
120929		zzzz193,zzzz453	false
72483		zzzz338,zzzz390	false
70344		zzzz360,zzzz398	false
67297		zzzz411,zzzz592	false
62965		zzzz425,zzzz713	false
34897		zzzz544,zzzz672	false
159971		zzzz113,zzzz725	false
159970		zzzz113,zzzz739	false
157688		zzzz117,zzzz672	false
140716		zzzz150,zzzz737	false
89873		zzzz278,zzzz499	false
67296		zzzz411,zzzz417	false
8933		zzzz701,zzzz702	false
164710		zzzz105,zzzz185	false
34896		zzzz544,zzzz709	false
16628		zzzz644,zzzz742	false
164115		zzzz106,zzzz107	false
161161		zzzz111,zzzz695	false
159388		zzzz114,zzzz646	false
147802		zzzz136,zzzz695	false
138602		zzzz154,zzzz179	false
127421		zzzz179,zzzz679	false
124866		zzzz185,zzzz679	false
120928		zzzz193,zzzz725	false
89872		zzzz278,zzzz710	false
73258		zzzz331,zzzz410	false
71067		zzzz352,zzzz396	false
70973		zzzz353,zzzz357	false
53380		zzzz469,zzzz721	false
47464		zzzz500,zzzz528	false
44720		zzzz509,zzzzz43	false
11351		zzzz683,zzzzz68	false
164709		zzzz105,zzzz743	false
159387		zzzz114,zzzz189	false
157687		zzzz117,zzzz709	false
147248		zzzz137,zzzzz36	false
138601		zzzz154,zzzz743	false
118195		zzzz199,zzzz300	false
97040		zzzz257,zzzz558	false
88606		zzzz281,zzzz676	false
70615		zzzz357,zzzz364	false
70614		zzzz357,zzzz408	false
39256		zzzz528,zzzzz70	false
16302		zzzz646,zzzz706	false
164708		zzzz105,zzzz729	false
147801		zzzz136,zzzz516	false
84912		zzzz290,zzzz528	false
71847		zzzz344,zzzz353	false
69644		zzzz369,zzzz395	false
39821		zzzz526,zzzz528	false
39255		zzzz528,zzzz721	false
17133		zzzz641,zzzz664	false
164114		zzzz106,zzzz700	false
159969		zzzz113,zzzz196	false
159968		zzzz113,zzzz741	false
147800		zzzz136,zzzz544	false
147247		zzzz137,zzzzz63	false
138600		zzzz154,zzzz185	false
136973		zzzz157,zzzzz79	false
100882		zzzz246,zzzz510	false
97658		zzzz254,zzzz396	false
88605		zzzz281,zzzz505	false
86890		zzzz285,zzzzz75	false
84911		zzzz290,zzzz425	false
69643		zzzz369,zzzz373	false
67295		zzzz411,zzzz412	false
62964		zzzz425,zzzz469	false
45620		zzzz506,zzzz646	false
43304		zzzz514,zzzz677	false
39254		zzzz528,zzzz713	false
38131		zzzz532,zzzz672	false
38130		zzzz532,zzzz709	false
37038		zzzz536,zzzz701	false
11929		zzzz679,zzzz729	false
164113		zzzz106,zzzz681	false
160568		zzzz112,zzzz729	false
99139		zzzz250,zzzz532	false
72803		zzzz335,zzzz365	false
16301		zzzz646,zzzz700	false
8932		zzzz701,zzzz733	false
164707		zzzz105,zzzz739	false
164706		zzzz105,zzzz741	false
140715		zzzz150,zzzz742	false
139706		zzzz152,zzzz189	false
138599		zzzz154,zzzz744	false
72921		zzzz334,zzzz365	false
72690		zzzz336,zzzz353	false
70715		zzzz356,zzzz364	false
69577		zzzz370,zzzz373	false
69576		zzzz370,zzzz395	false
67294		zzzz411,zzzz660	false
62963		zzzz425,zzzz721	false
17132		zzzz641,zzzz665	false
164705		zzzz105,zzzz196	false
164704		zzzz105,zzzz744	false
159967		zzzz113,zzzz185	false
159966		zzzz113,zzzz738	false
156112		zzzz120,zzzz529	false
140714		zzzz150,zzzzz49	false
140166		zzzz151,zzzz701	false
120927		zzzz193,zzzz196	false
16627		zzzz644,zzzz729	false
9185		zzzz699,zzzz702	false
5845		zzzz730,zzzz741	false
166485		zzzz102,zzzzz45	false
162938		zzzz108,zzzz120	false
156111		zzzz120,zzzz733	false
127420		zzzz179,zzzz682	false
124865		zzzz185,zzzz682	false
69938		zzzz365,zzzz404	false
67293		zzzz411,zzzz414	false
11928		zzzz679,zzzz743	false
11494		zzzz682,zzzz729	false
166484		zzzz102,zzzz283	false
164703		zzzz105,zzzz740	false
159386		zzzz114,zzzz281	false
158273		zzzz116,zzzz250	false
148375		zzzz135,zzzzz68	false
140165		zzzz151,zzzzz64	false
138598		zzzz154,zzzz728	false
89871		zzzz278,zzzz540	false
72920		zzzz334,zzzz396	false
65488		zzzz417,zzzz641	false
44424		zzzz510,zzzz677	false
43303		zzzz514,zzzzz36	false
39537		zzzz527,zzzz710	false
17131		zzzz641,zzzz660	false
13134		zzzz671,zzzzzz7	false
5844		zzzz730,zzzz738	false
5843		zzzz730,zzzz739	false
166483		zzzz102,zzzzz87	false
70418		zzzz359,zzzz373	false
47779		zzzz499,zzzz527	false
5936		zzzz729,zzzz730	false
164702		zzzz105,zzzz492	false
164701		zzzz105,zzzz738	false
160567		zzzz112,zzzz179	false
122987		zzzz189,zzzz676	false
121958		zzzz191,zzzzz53	false
88604		zzzz281,zzzz706	false
87337		zzzz284,zzzz698	false
71533		zzzz347,zzzz395	false
70417		zzzz359,zzzz395	false
68556		zzzz386,zzzz403	false
43604		zzzz513,zzzz646	false
37037		zzzz536,zzzz611	false
17130		zzzz641,zzzz668	false
16626		zzzz644,zzzzz49	false
165317		zzzz104,zzzz278	false
164700		zzzz105,zzzz725	false
164699		zzzz105,zzzz728	false
160566		zzzz112,zzzz743	false
140713		zzzz150,zzzz729	false
138597		zzzz154,zzzz196	false
62962		zzzz425,zzzz500	false
43302		zzzz514,zzzzz63	false
37036		zzzz536,zzzz692	false
11927		zzzz679,zzzz744	false
1866		zzzzz63,zzzzz67	false
156110		zzzz120,zzzz702	false
149975		zzzz132,zzzz164	false
147799		zzzz136,zzzz248	false
144111		zzzz143,zzzz702	false
116498		zzzz203,zzzz646	false
101335		zzzz245,zzzz701	false
73257		zzzz331,zzzz386	false
72689		zzzz336,zzzz364	false
72059		zzzz342,zzzz344	false
71532		zzzz347,zzzz373	false
70972		zzzz353,zzzz356	false
32394		zzzz556,zzzz575	false
11493		zzzz682,zzzz728	false
11492		zzzz682,zzzz744	false
6034		zzzz728,zzzz730	false
877		zzzzzz1,zzzzzz7	false
160565		zzzz112,zzzz739	false
160564		zzzz112,zzzz741	false
155087		zzzz122,zzzz509	false
138596		zzzz154,zzzz740	false
127419		zzzz179,zzzz644	false
118987		zzzz197,zzzz198	false
99138		zzzz250,zzzzz67	false
71846		zzzz344,zzzz371	false
71650		zzzz346,zzzz355	false
70800		zzzz355,zzzz371	false
69937		zzzz365,zzzz385	false
68026		zzzz396,zzzz401	false
41547		zzzz520,zzzz697	false
16300		zzzz646,zzzz673	false
11788		zzzz680,zzzz706	false
5842		zzzz730,zzzz743	false
5841		zzzz730,zzzzz48	false
1297		zzzzz78,zzzzz79	false
161160		zzzz111,zzzz250	false
159965		zzzz113,zzzz728	false
156109		zzzz120,zzzz245	false
120926		zzzz193,zzzz728	false
120925		zzzz193,zzzz739	false
118600		zzzz198,zzzz301	false
87743		zzzz283,zzzz501	false
47161		zzzz501,zzzzz45	false
42714		zzzz516,zzzz672	false
38970		zzzz529,zzzz693	false
25510		zzzz591,zzzz641	false
11926		zzzz679,zzzz725	false
11925		zzzz679,zzzz739	false
11491		zzzz682,zzzz743	false
9445		zzzz697,zzzzz75	false
5840		zzzz730,zzzz744	false
160563		zzzz112,zzzz185	false
159964		zzzz113,zzzz492	false
159963		zzzz113,zzzz740	false
159385		zzzz114,zzzz700	false
148374		zzzz135,zzzz703	false
138595		zzzz154,zzzz492	false
138594		zzzz154,zzzz725	false
138593		zzzz154,zzzz741	false
129315		zzzz173,zzzz683	false
124864		zzzz185,zzzz644	false
120417		zzzz194,zzzzz68	false
99137		zzzz250,zzzz544	false
97039		zzzz257,zzzz580	false
86889		zzzz285,zzzz520	false
69777		zzzz367,zzzz392	false
25083		zzzz593,zzzzzz7	false
13430		zzzz669,zzzzzz6	false
11924		zzzz679,zzzz740	false
11923		zzzz679,zzzz741	false
11490		zzzz682,zzzz741	false
160562		zzzz112,zzzz196	false
160561		zzzz112,zzzz728	false
138592		zzzz154,zzzz739	false
119488		zzzz196,zzzz682	false
88603		zzzz281,zzzz513	false
88602		zzzz281,zzzz680	false
72058		zzzz342,zzzz357	false
69009		zzzz378,zzzz392	false
44423		zzzz510,zzzzz96	false
42713		zzzz516,zzzz709	false
28010		zzzz577,zzzz583	false
11787		zzzz680,zzzz700	false
160560		zzzz112,zzzz738	false
157686		zzzz117,zzzz250	false
140712		zzzz150,zzzz179	false
127418		zzzz179,zzzz730	false
121957		zzzz191,zzzzz73	false
120924		zzzz193,zzzz279	false
120923		zzzz193,zzzz741	false
99136		zzzz250,zzzz516	false
84495		zzzz291,zzzz708	false
73146		zzzz332,zzzz378	false
71959		zzzz343,zzzz344	false
71845		zzzz344,zzzz394	false
68848		zzzz381,zzzz395	false
67643		zzzz403,zzzz410	false
49209		zzzz492,zzzz682	false
44422		zzzz510,zzzzz63	false
12380		zzzz676,zzzz700	false
11922		zzzz679,zzzz728	false
7155		zzzz716,zzzz732	false
164698		zzzz105,zzzz453	false
159384		zzzz114,zzzz706	false
125877		zzzz182,zzzz587	false
120416		zzzz194,zzzz716	false
119487		zzzz196,zzzz730	false
101334		zzzz245,zzzz611	false
69361		zzzz373,zzzz381	false
69008		zzzz378,zzzz405	false
67002		zzzz412,zzzz641	false
65782		zzzz416,zzzz591	false
49208		zzzz492,zzzz679	false
43301		zzzz514,zzzz672	false
34104		zzzz547,zzzz593	false
34103		zzzz547,zzzzzz1	false
13133		zzzz671,zzzzzz8	false
11489		zzzz682,zzzz739	false
11488		zzzz682,zzzz740	false
8680		zzzz703,zzzz720	false
164697		zzzz105,zzzz737	false
160559		zzzz112,zzzz744	false
149974		zzzz132,zzzz171	false
148373		zzzz135,zzzz173	false
147246		zzzz137,zzzz672	false
124863		zzzz185,zzzz730	false
120922		zzzz193,zzzz737	false
119486		zzzz196,zzzz679	false
109587		zzzz221,zzzz665	false
97657		zzzz254,zzzz365	false
93294		zzzz266,zzzzz54	false
88601		zzzz281,zzzz673	false
71958		zzzz343,zzzz355	false
71155		zzzz351,zzzz405	false
44421		zzzz510,zzzzz36	false
22113		zzzz611,zzzz733	false
16625		zzzz644,zzzz743	false
5654		zzzz732,zzzzz68	false
159962		zzzz113,zzzz453	false
158272		zzzz116,zzzz672	false
140711		zzzz150,zzzz185	false
138591		zzzz154,zzzz738	false
76076		zzzz316,zzzz325	false
72688		zzzz336,zzzz356	false
70613		zzzz357,zzzz371	false
69007		zzzz378,zzzz402	false
68025		zzzz396,zzzz404	false
65781		zzzz416,zzzz665	false
56587		zzzz453,zzzz682	false
47160		zzzz501,zzzzz90	false
25082		zzzz593,zzzz667	false
18665		zzzz630,zzzz671	false
15156		zzzz654,zzzzzz6	false
13729		zzzz667,zzzzzz1	false
11921		zzzz679,zzzz738	false
11487		zzzz682,zzzz725	false
124350		zzzz186,zzzz669	false
122986		zzzz189,zzzz646	false
109176		zzzz223,zzzz593	false
88600		zzzz281,zzzz700	false
71844		zzzz344,zzzz346	false
68024		zzzz396,zzzz409	false
12379		zzzz676,zzzz706	false
12225		zzzz677,zzzzz67	false
11486		zzzz682,zzzz738	false
11350		zzzz683,zzzz703	false
6334		zzzz725,zzzz730	false
166482		zzzz102,zzzzz90	false
160558		zzzz112,zzzz740	false
159961		zzzz113,zzzzz48	false
159383		zzzz114,zzzz203	false
159382		zzzz114,zzzz673	false
139705		zzzz152,zzzz294	false
138590		zzzz154,zzzz453	false
138589		zzzz154,zzzz737	false
124349		zzzz186,zzzz654	false
122985		zzzz189,zzzz252	false
109175		zzzz223,zzzzzz1	false
100881		zzzz246,zzzz695	false
98224		zzzz252,zzzz680	false
98223		zzzz252,zzzz706	false
89870		zzzz278,zzzzz38	false
73028		zzzz333,zzzz388	false
72151		zzzz341,zzzz392	false
70799		zzzz355,zzzz394	false
69936		zzzz365,zzzz401	false
69776		zzzz367,zzzz405	false
65780		zzzz416,zzzz664	false
44420		zzzz510,zzzzz43	false
43300		zzzz514,zzzz709	false
37035		zzzz536,zzzz699	false
26191		zzzz587,zzzz608	false
25081		zzzz593,zzzz630	false
16624		zzzz644,zzzz739	false
12082		zzzz678,zzzz707	false
9575		zzzz696,zzzz709	false
3303		zzzzz36,zzzzz67	false
3124		zzzzz39,zzzzz79	false
160557		zzzz112,zzzz725	false
160556		zzzz112,zzzzz48	false
147798		zzzz136,zzzz246	false
147245		zzzz137,zzzz709	false
140710		zzzz150,zzzz743	false
122984		zzzz189,zzzz281	false
109980		zzzz220,zzzz665	false
88599		zzzz281,zzzz506	false
86468		zzzz286,zzzz691	false
73145		zzzz332,zzzz367	false
25296		zzzz592,zzzz641	false
19249		zzzz626,zzzz665	false
16623		zzzz644,zzzz744	false
16299		zzzz646,zzzz681	false
9574		zzzz696,zzzzz63	false
8679		zzzz703,zzzz731	false
1042		zzzzz88,zzzzz95	false
160555		zzzz112,zzzz737	false
109586		zzzz221,zzzz417	false
99604		zzzz249,zzzz716	false
89433		zzzz279,zzzz729	false
72687		zzzz336,zzzz408	false
71154		zzzz351,zzzz392	false
69839		zzzz366,zzzz392	false
66393		zzzz414,zzzz641	false
65487		zzzz417,zzzz626	false
56586		zzzz453,zzzz730	false
18664		zzzz630,zzzzzz1	false
12831		zzzz673,zzzz680	false
163528		zzzz107,zzzz706	false
161159		zzzz111,zzzzz96	false
160554		zzzz112,zzzz128	false
158271		zzzz116,zzzz246	false
157685		zzzz117,zzzz510	false
122983		zzzz189,zzzz706	false
109979		zzzz220,zzzz417	false
109174		zzzz223,zzzz671	false
89432		zzzz279,zzzz743	false
65779		zzzz416,zzzz660	false
26190		zzzz587,zzzz653	false
25509		zzzz591,zzzz626	false
8931		zzzz701,zzzzz73	false
160553		zzzz112,zzzz453	false
140709		zzzz150,zzzz744	false
119485		zzzz196,zzzz644	false
100075		zzzz248,zzzz509	false
98222		zzzz252,zzzz673	false
95330		zzzz261,zzzz556	false
65778		zzzz416,zzzz668	false
56585		zzzz453,zzzz679	false
44419		zzzz510,zzzz532	false
25080		zzzz593,zzzzzz9	false
16622		zzzz644,zzzz728	false
13132		zzzz671,zzzzzz9	false
12830		zzzz673,zzzz676	false
9971		zzzz693,zzzz701	false
876		zzzzzz1,zzzzzz9	false
163527		zzzz107,zzzz700	false
160552		zzzz112,zzzz492	false
157684		zzzz117,zzzz677	false
139704		zzzz152,zzzz706	false
122982		zzzz189,zzzz700	false
120921		zzzz193,zzzz729	false
120920		zzzz193,zzzz738	false
120415		zzzz194,zzzz703	false
116497		zzzz203,zzzz281	false
116496		zzzz203,zzzz676	false
109978		zzzz220,zzzz668	false
86888		zzzz285,zzzz702	false
70714		zzzz356,zzzz408	false
69838		zzzz366,zzzz405	false
67292		zzzz411,zzzz604	false
44719		zzzz509,zzzz696	false
12980		zzzz672,zzzz696	false
8930		zzzz701,zzzzz53	false
8678		zzzz703,zzzz732	false
159960		zzzz113,zzzz737	false
159381		zzzz114,zzzz681	false
158270		zzzz116,zzzzz63	false
140708		zzzz150,zzzz739	false
139703		zzzz152,zzzz673	false
109585		zzzz221,zzzz660	false
100074		zzzz248,zzzz672	false
88598		zzzz281,zzzz681	false
83317		zzzz294,zzzz676	false
69775		zzzz367,zzzz402	false
69360		zzzz373,zzzz406	false
66392		zzzz414,zzzz416	false
47159		zzzz501,zzzzz87	false
42712		zzzz516,zzzz677	false
39253		zzzz528,zzzz718	false
25508		zzzz591,zzzz657	false
25079		zzzz593,zzzzzz8	false
16621		zzzz644,zzzz741	false
12378		zzzz676,zzzz681	false
11920		zzzz679,zzzz737	false
146121		zzzz139,zzzzz49	false
140707		zzzz150,zzzz196	false
140706		zzzz150,zzzz725	false
131536		zzzz168,zzzzz95	false
127417		zzzz179,zzzz279	false
109584		zzzz221,zzzz591	false
100073		zzzz248,zzzz250	false
99135		zzzz250,zzzz696	false
71957		zzzz343,zzzz357	false
71066		zzzz352,zzzz365	false
64003		zzzz422,zzzz512	false
43006		zzzz515,zzzz737	false
16620		zzzz644,zzzz738	false
12527		zzzz675,zzzz703	false
5839		zzzz730,zzzz740	false
875		zzzzzz1,zzzzzz8	false
164112		zzzz106,zzzz505	false
163526		zzzz107,zzzz189	false
156688		zzzz119,zzzzz63	false
140705		zzzz150,zzzz726	false
134451		zzzz162,zzzz292	false
116495		zzzz203,zzzz252	false
109583		zzzz221,zzzz668	false
99603		zzzz249,zzzz703	false
99134		zzzz250,zzzz695	false
98221		zzzz252,zzzz700	false
68095		zzzz395,zzzz406	false
65777		zzzz416,zzzz417	false
65186		zzzz418,zzzz593	false
65185		zzzz418,zzzzzz1	false
13728		zzzz667,zzzz671	false
12979		zzzz672,zzzzz67	false
11485		zzzz682,zzzz737	false
11349		zzzz683,zzzz716	false
10241		zzzz691,zzzz718	false
9835		zzzz694,zzzz702	false
6724		zzzz720,zzzzz68	false
167024		zzzz101,zzzz164	false
164696		zzzz105,zzzz279	false
163525		zzzz107,zzzz673	false
157683		zzzz117,zzzzz63	false
150515		zzzz131,zzzz164	false
116494		zzzz203,zzzz680	false
49207		zzzz492,zzzz730	false
38129		zzzz532,zzzz677	false
9184		zzzz699,zzzz733	false
3591		zzzzz32,zzzzz72	false
167023		zzzz101,zzzz171	false
159959		zzzz113,zzzz726	false
140704		zzzz150,zzzz728	false
139702		zzzz152,zzzz252	false
138588		zzzz154,zzzz726	false
136470		zzzz158,zzzz164	false
120919		zzzz193,zzzz726	false
109977		zzzz220,zzzz660	false
100072		zzzz248,zzzz510	false
73144		zzzz332,zzzz366	false
72577		zzzz337,zzzz392	false
72150		zzzz341,zzzz405	false
71649		zzzz346,zzzz357	false
67001		zzzz412,zzzz416	false
45924		zzzz505,zzzz700	false
25078		zzzz593,zzzz638	false
25077		zzzz593,zzzzzz2	false
23159		zzzz604,zzzz641	false
15155		zzzz654,zzzz670	false
14680		zzzz657,zzzz668	false
11484		zzzz682,zzzz742	false
3781		zzzzz20,zzzzz24	false
874		zzzzzz1,zzzzzz2	false
163524		zzzz107,zzzz680	false
147244		zzzz137,zzzz510	false
140703		zzzz150,zzzz741	false
138587		zzzz154,zzzz279	false
138586		zzzz154,zzzz742	false
134450		zzzz162,zzzzz83	false
125876		zzzz182,zzzz608	false
120918		zzzz193,zzzz202	false
109976		zzzz220,zzzz591	false
70343		zzzz360,zzzz388	false
69935		zzzz365,zzzz380	false
68429		zzzz388,zzzz398	false
45923		zzzz505,zzzz706	false
44418		zzzz510,zzzz514	false
35402		zzzz542,zzzz593	false
19248		zzzz626,zzzz668	false
16619		zzzz644,zzzz726	false
16618		zzzz644,zzzz740	false
164695		zzzz105,zzzz742	false
162358		zzzz109,zzzz512	false
[truncated: 164,398 more rows]
