# Supplementary material for: Discovery of several thousand highly diverse circular DNA viruses
Source: eLife journal article supplement (doi:10.7554/elife.51971), 2020-02-03
Supplement: fig2-figsupp1-data1 [file elife-51971-fig2-figsupp1-data1-v1.cys › CytoscapeSession-2019_08_05-18_21/tables/36-all_my_seqs_genbank_ssDNA1_protein_with_ttv_orf1_per_PF02956_13_2_fasta+Full+Network/LOCAL_ATTRS-org.cytoscape.model.CyNode-36+default+node.cytable]

CyCSV-Version	1
SUID	name	selected
java.lang.Long	java.lang.String	java.lang.Boolean
36 default node
842	zzzz100	false
841	zzzz101	false
840	zzzz102	false
839	zzzz103	false
838	zzzz104	false
837	zzzz105	false
836	zzzz106	false
835	zzzz107	false
834	zzzz108	false
833	zzzz109	false
832	zzzz110	false
831	zzzz111	false
830	zzzz112	false
829	zzzz113	false
828	zzzz114	false
827	zzzz115	false
826	zzzz116	false
825	zzzz117	false
824	zzzz118	false
823	zzzz119	false
822	zzzz120	false
821	zzzz121	false
820	zzzz122	false
819	zzzz123	false
818	zzzz124	false
817	zzzz125	false
816	zzzz126	false
815	zzzz127	false
814	zzzz128	false
813	zzzz129	false
812	zzzz130	false
811	zzzz131	false
810	zzzz132	false
809	zzzz133	false
808	zzzz134	false
807	zzzz135	false
806	zzzz136	false
805	zzzz137	false
804	zzzz138	false
803	zzzz139	false
802	zzzz140	false
801	zzzz141	false
800	zzzz142	false
799	zzzz143	false
798	zzzz144	false
797	zzzz145	false
796	zzzz146	false
795	zzzz147	false
794	zzzz148	false
793	zzzz149	false
792	zzzz150	false
791	zzzz151	false
790	zzzz152	false
789	zzzz153	false
788	zzzz154	false
787	zzzz155	false
786	zzzz156	false
785	zzzz157	false
784	zzzz158	false
783	zzzz159	false
782	zzzz160	false
781	zzzz161	false
780	zzzz162	false
779	zzzz163	false
778	zzzz164	false
777	zzzz165	false
776	zzzz166	false
775	zzzz167	false
774	zzzz168	false
773	zzzz169	false
772	zzzz170	false
771	zzzz171	false
770	zzzz172	false
769	zzzz173	false
768	zzzz174	false
767	zzzz175	false
766	zzzz176	false
764	zzzz178	false
763	zzzz179	false
762	zzzz180	false
761	zzzz181	false
760	zzzz182	false
759	zzzz183	false
758	zzzz184	false
757	zzzz185	false
756	zzzz186	false
755	zzzz187	false
754	zzzz188	false
753	zzzz189	false
752	zzzz190	false
751	zzzz191	false
750	zzzz192	false
749	zzzz193	false
748	zzzz194	false
747	zzzz195	false
746	zzzz196	false
745	zzzz197	false
744	zzzz198	false
743	zzzz199	false
742	zzzz200	false
741	zzzz201	false
740	zzzz202	false
739	zzzz203	false
738	zzzz204	false
737	zzzz205	false
736	zzzz206	false
735	zzzz207	false
734	zzzz208	false
733	zzzz209	false
732	zzzz210	false
731	zzzz211	false
730	zzzz212	false
729	zzzz213	false
728	zzzz214	false
727	zzzz215	false
726	zzzz216	false
725	zzzz217	false
724	zzzz218	false
723	zzzz219	false
722	zzzz220	false
721	zzzz221	false
720	zzzz222	false
719	zzzz223	false
718	zzzz224	false
717	zzzz225	false
716	zzzz226	false
715	zzzz227	false
714	zzzz228	false
713	zzzz229	false
712	zzzz230	false
711	zzzz231	false
710	zzzz232	false
709	zzzz233	false
708	zzzz234	false
707	zzzz235	false
706	zzzz236	false
705	zzzz237	false
704	zzzz238	false
703	zzzz239	false
702	zzzz240	false
701	zzzz241	false
700	zzzz242	false
699	zzzz243	false
698	zzzz244	false
697	zzzz245	false
696	zzzz246	false
695	zzzz247	false
694	zzzz248	false
693	zzzz249	false
692	zzzz250	false
691	zzzz251	false
690	zzzz252	false
689	zzzz253	false
688	zzzz254	false
687	zzzz255	false
686	zzzz256	false
685	zzzz257	false
684	zzzz258	false
683	zzzz259	false
682	zzzz260	false
681	zzzz261	false
680	zzzz262	false
679	zzzz263	false
678	zzzz264	false
677	zzzz265	false
676	zzzz266	false
675	zzzz267	false
674	zzzz268	false
673	zzzz269	false
672	zzzz270	false
671	zzzz271	false
670	zzzz272	false
669	zzzz273	false
668	zzzz274	false
667	zzzz275	false
666	zzzz276	false
665	zzzz277	false
664	zzzz278	false
663	zzzz279	false
662	zzzz280	false
661	zzzz281	false
660	zzzz282	false
659	zzzz283	false
658	zzzz284	false
657	zzzz285	false
656	zzzz286	false
655	zzzz287	false
654	zzzz288	false
653	zzzz289	false
652	zzzz290	false
651	zzzz291	false
650	zzzz292	false
649	zzzz293	false
648	zzzz294	false
647	zzzz295	false
646	zzzz296	false
645	zzzz297	false
644	zzzz298	false
643	zzzz299	false
642	zzzz300	false
641	zzzz301	false
640	zzzz302	false
639	zzzz303	false
638	zzzz304	false
637	zzzz305	false
636	zzzz306	false
635	zzzz307	false
634	zzzz308	false
633	zzzz309	false
632	zzzz310	false
631	zzzz311	false
630	zzzz312	false
629	zzzz313	false
628	zzzz314	false
627	zzzz315	false
626	zzzz316	false
625	zzzz317	false
624	zzzz318	false
623	zzzz319	false
622	zzzz320	false
621	zzzz321	false
620	zzzz322	false
619	zzzz323	false
618	zzzz324	false
617	zzzz325	false
616	zzzz326	false
615	zzzz327	false
614	zzzz328	false
613	zzzz329	false
612	zzzz330	false
611	zzzz331	false
610	zzzz332	false
609	zzzz333	false
608	zzzz334	false
607	zzzz335	false
606	zzzz336	false
605	zzzz337	false
604	zzzz338	false
603	zzzz339	false
602	zzzz340	false
601	zzzz341	false
600	zzzz342	false
599	zzzz343	false
598	zzzz344	false
597	zzzz345	false
596	zzzz346	false
595	zzzz347	false
594	zzzz348	false
593	zzzz349	false
592	zzzz350	false
591	zzzz351	false
590	zzzz352	false
589	zzzz353	false
588	zzzz354	false
587	zzzz355	false
586	zzzz356	false
585	zzzz357	false
584	zzzz358	false
583	zzzz359	false
582	zzzz360	false
581	zzzz361	false
580	zzzz362	false
579	zzzz363	false
578	zzzz364	false
577	zzzz365	false
576	zzzz366	false
575	zzzz367	false
574	zzzz368	false
573	zzzz369	false
572	zzzz370	false
571	zzzz371	false
570	zzzz372	false
569	zzzz373	false
568	zzzz374	false
567	zzzz375	false
566	zzzz376	false
565	zzzz377	false
564	zzzz378	false
563	zzzz379	false
562	zzzz380	false
561	zzzz381	false
560	zzzz382	false
559	zzzz383	false
558	zzzz384	false
557	zzzz385	false
556	zzzz386	false
555	zzzz387	false
554	zzzz388	false
553	zzzz389	false
552	zzzz390	false
551	zzzz391	false
550	zzzz392	false
549	zzzz393	false
548	zzzz394	false
547	zzzz395	false
546	zzzz396	false
545	zzzz397	false
544	zzzz398	false
543	zzzz399	false
542	zzzz400	false
541	zzzz401	false
540	zzzz402	false
539	zzzz403	false
538	zzzz404	false
537	zzzz405	false
536	zzzz406	false
535	zzzz407	false
534	zzzz408	false
533	zzzz409	false
532	zzzz410	false
531	zzzz411	false
530	zzzz412	false
529	zzzz413	false
528	zzzz414	false
527	zzzz415	false
526	zzzz416	false
525	zzzz417	false
524	zzzz418	false
523	zzzz419	false
522	zzzz420	false
521	zzzz421	false
520	zzzz422	false
519	zzzz423	false
518	zzzz424	false
517	zzzz425	false
516	zzzz426	false
515	zzzz427	false
514	zzzz428	false
513	zzzz429	false
512	zzzz430	false
511	zzzz431	false
510	zzzz432	false
509	zzzz433	false
508	zzzz434	false
507	zzzz435	false
506	zzzz436	false
505	zzzz437	false
504	zzzz438	false
503	zzzz439	false
502	zzzz440	false
501	zzzz441	false
500	zzzz442	false
499	zzzz443	false
498	zzzz444	false
497	zzzz445	false
496	zzzz446	false
495	zzzz447	false
494	zzzz448	false
493	zzzz449	false
492	zzzz450	false
491	zzzz451	false
490	zzzz452	false
489	zzzz453	false
488	zzzz454	false
487	zzzz455	false
486	zzzz456	false
485	zzzz457	false
484	zzzz458	false
483	zzzz459	false
482	zzzz460	false
481	zzzz461	false
480	zzzz462	false
479	zzzz463	false
478	zzzz464	false
477	zzzz465	false
476	zzzz466	false
475	zzzz467	false
474	zzzz468	false
473	zzzz469	false
472	zzzz470	false
471	zzzz471	false
470	zzzz472	false
469	zzzz473	false
468	zzzz474	false
467	zzzz475	false
466	zzzz476	false
465	zzzz477	false
464	zzzz478	false
463	zzzz479	false
462	zzzz480	false
461	zzzz481	false
460	zzzz482	false
459	zzzz483	false
458	zzzz484	false
457	zzzz485	false
456	zzzz486	false
455	zzzz487	false
454	zzzz488	false
453	zzzz489	false
452	zzzz490	false
451	zzzz491	false
450	zzzz492	false
449	zzzz493	false
448	zzzz494	false
447	zzzz495	false
446	zzzz496	false
445	zzzz497	false
444	zzzz498	false
443	zzzz499	false
442	zzzz500	false
441	zzzz501	false
440	zzzz502	false
439	zzzz503	false
438	zzzz504	false
437	zzzz505	false
436	zzzz506	false
435	zzzz507	false
434	zzzz508	false
433	zzzz509	false
432	zzzz510	false
431	zzzz511	false
430	zzzz512	false
429	zzzz513	false
428	zzzz514	false
427	zzzz515	false
426	zzzz516	false
425	zzzz517	false
424	zzzz518	false
423	zzzz519	false
422	zzzz520	false
421	zzzz521	false
420	zzzz522	false
419	zzzz523	false
418	zzzz524	false
417	zzzz525	false
416	zzzz526	false
415	zzzz527	false
414	zzzz528	false
413	zzzz529	false
412	zzzz530	false
411	zzzz531	false
410	zzzz532	false
409	zzzz533	false
408	zzzz534	false
407	zzzz535	false
406	zzzz536	false
405	zzzz537	false
404	zzzz538	false
403	zzzz539	false
402	zzzz540	false
401	zzzz541	false
400	zzzz542	false
399	zzzz543	false
398	zzzz544	false
397	zzzz545	false
396	zzzz546	false
395	zzzz547	false
394	zzzz548	false
393	zzzz549	false
392	zzzz550	false
391	zzzz551	false
390	zzzz552	false
389	zzzz553	false
388	zzzz554	false
387	zzzz555	false
386	zzzz556	false
385	zzzz557	false
384	zzzz558	false
383	zzzz559	false
382	zzzz560	false
381	zzzz561	false
380	zzzz562	false
379	zzzz563	false
378	zzzz564	false
377	zzzz565	false
376	zzzz566	false
375	zzzz567	false
374	zzzz568	false
373	zzzz569	false
372	zzzz570	false
371	zzzz571	false
370	zzzz572	false
369	zzzz573	false
368	zzzz574	false
367	zzzz575	false
366	zzzz576	false
365	zzzz577	false
364	zzzz578	false
363	zzzz579	false
362	zzzz580	false
361	zzzz581	false
360	zzzz582	false
359	zzzz583	false
358	zzzz584	false
357	zzzz585	false
356	zzzz586	false
355	zzzz587	false
354	zzzz588	false
353	zzzz589	false
352	zzzz590	false
351	zzzz591	false
350	zzzz592	false
349	zzzz593	false
348	zzzz594	false
347	zzzz595	false
346	zzzz596	false
345	zzzz597	false
344	zzzz598	false
343	zzzz599	false
342	zzzz600	false
341	zzzz601	false
340	zzzz602	false
339	zzzz603	false
338	zzzz604	false
337	zzzz605	false
336	zzzz606	false
335	zzzz607	false
334	zzzz608	false
333	zzzz609	false
332	zzzz610	false
331	zzzz611	false
330	zzzz612	false
329	zzzz613	false
328	zzzz614	false
327	zzzz615	false
326	zzzz616	false
325	zzzz617	false
324	zzzz618	false
323	zzzz619	false
322	zzzz620	false
321	zzzz621	false
320	zzzz622	false
319	zzzz623	false
318	zzzz624	false
317	zzzz625	false
316	zzzz626	false
315	zzzz627	false
314	zzzz628	false
313	zzzz629	false
312	zzzz630	false
311	zzzz631	false
310	zzzz632	false
308	zzzz634	false
307	zzzz635	false
306	zzzz636	false
305	zzzz637	false
304	zzzz638	false
303	zzzz639	false
302	zzzz640	false
301	zzzz641	false
300	zzzz642	false
299	zzzz643	false
298	zzzz644	false
297	zzzz645	false
296	zzzz646	false
295	zzzz647	false
294	zzzz648	false
293	zzzz649	false
292	zzzz650	false
291	zzzz651	false
290	zzzz652	false
289	zzzz653	false
288	zzzz654	false
287	zzzz655	false
286	zzzz656	false
285	zzzz657	false
284	zzzz658	false
283	zzzz659	false
282	zzzz660	false
281	zzzz661	false
280	zzzz662	false
279	zzzz663	false
278	zzzz664	false
277	zzzz665	false
276	zzzz666	false
275	zzzz667	false
274	zzzz668	false
273	zzzz669	false
272	zzzz670	false
271	zzzz671	false
270	zzzz672	false
269	zzzz673	false
268	zzzz674	false
267	zzzz675	false
266	zzzz676	false
265	zzzz677	false
264	zzzz678	false
263	zzzz679	false
262	zzzz680	false
261	zzzz681	false
260	zzzz682	false
259	zzzz683	false
258	zzzz684	false
257	zzzz685	false
256	zzzz686	false
255	zzzz687	false
254	zzzz688	false
253	zzzz689	false
252	zzzz690	false
251	zzzz691	false
250	zzzz692	false
249	zzzz693	false
248	zzzz694	false
247	zzzz695	false
246	zzzz696	false
245	zzzz697	false
244	zzzz698	false
243	zzzz699	false
242	zzzz700	false
241	zzzz701	false
240	zzzz702	false
239	zzzz703	false
238	zzzz704	false
237	zzzz705	false
236	zzzz706	false
235	zzzz707	false
234	zzzz708	false
233	zzzz709	false
232	zzzz710	false
231	zzzz711	false
230	zzzz712	false
229	zzzz713	false
228	zzzz714	false
227	zzzz715	false
226	zzzz716	false
225	zzzz717	false
224	zzzz718	false
223	zzzz719	false
222	zzzz720	false
221	zzzz721	false
219	zzzz723	false
218	zzzz724	false
217	zzzz725	false
216	zzzz726	false
215	zzzz727	false
214	zzzz728	false
213	zzzz729	false
212	zzzz730	false
211	zzzz731	false
210	zzzz732	false
209	zzzz733	false
208	zzzz734	false
207	zzzz735	false
206	zzzz736	false
205	zzzz737	false
204	zzzz738	false
203	zzzz739	false
202	zzzz740	false
201	zzzz741	false
200	zzzz742	false
199	zzzz743	false
198	zzzz744	false
161	zzzzz10	false
160	zzzzz11	false
159	zzzzz12	false
158	zzzzz13	false
157	zzzzz14	false
156	zzzzz15	false
155	zzzzz16	false
154	zzzzz17	false
153	zzzzz18	false
152	zzzzz19	false
151	zzzzz20	false
150	zzzzz21	false
149	zzzzz22	false
148	zzzzz23	false
147	zzzzz24	false
146	zzzzz25	false
145	zzzzz26	false
139	zzzzz32	false
138	zzzzz33	false
137	zzzzz34	false
136	zzzzz35	false
135	zzzzz36	false
134	zzzzz37	false
133	zzzzz38	false
132	zzzzz39	false
131	zzzzz40	false
130	zzzzz41	false
129	zzzzz42	false
128	zzzzz43	false
127	zzzzz44	false
126	zzzzz45	false
125	zzzzz46	false
124	zzzzz47	false
123	zzzzz48	false
122	zzzzz49	false
121	zzzzz50	false
120	zzzzz51	false
119	zzzzz52	false
118	zzzzz53	false
117	zzzzz54	false
116	zzzzz55	false
115	zzzzz56	false
114	zzzzz57	false
113	zzzzz58	false
112	zzzzz59	false
111	zzzzz60	false
110	zzzzz61	false
109	zzzzz62	false
108	zzzzz63	false
107	zzzzz64	false
106	zzzzz65	false
105	zzzzz66	false
104	zzzzz67	false
103	zzzzz68	false
102	zzzzz69	false
101	zzzzz70	false
100	zzzzz71	false
99	zzzzz72	false
98	zzzzz73	false
97	zzzzz74	false
96	zzzzz75	false
95	zzzzz76	false
94	zzzzz77	false
93	zzzzz78	false
92	zzzzz79	false
91	zzzzz80	false
90	zzzzz81	false
89	zzzzz82	false
88	zzzzz83	false
87	zzzzz84	false
86	zzzzz85	false
85	zzzzz86	false
84	zzzzz87	false
83	zzzzz88	false
82	zzzzz89	false
81	zzzzz90	false
80	zzzzz91	false
79	zzzzz92	false
78	zzzzz93	false
77	zzzzz94	false
76	zzzzz95	false
75	zzzzz96	false
74	zzzzz97	false
73	zzzzz98	false
72	zzzzz99	false
70	zzzzzz1	false
69	zzzzzz2	false
68	zzzzzz3	false
67	zzzzzz4	false
66	zzzzzz5	false
65	zzzzzz6	false
64	zzzzzz7	false
63	zzzzzz8	false
62	zzzzzz9	false
