# Supplementary material for: Discovery of several thousand highly diverse circular DNA viruses
Source: eLife journal article supplement (doi:10.7554/elife.51971), 2020-02-03
Supplement: fig2-figsupp1-data1 [file elife-51971-fig2-figsupp1-data1-v1.cys › CytoscapeSession-2019_08_05-18_21/tables/36-all_my_seqs_genbank_ssDNA1_protein_with_ttv_orf1_per_PF02956_13_2_fasta+Full+Network/SHARED_ATTRS-org.cytoscape.model.CyEdge-36+shared+edge.cytable]

CyCSV-Version	1
SUID	%id	alignment_len	alignment_score	shared interaction	shared name
java.lang.Long	java.lang.Double	java.lang.Integer	java.lang.Double	java.lang.String	java.lang.String
	mutable	mutable	mutable
36 shared edge
147255	92.62	691	404.0		zzzz137,zzzz514
165930	94.92	709	403.0		zzzz103,zzzz521
5099	93.22	693	399.0		zzzz738,zzzz741
5098	91.55	698	393.0		zzzz738,zzzz739
140725	95.82	670	392.0		zzzz150,zzzz644
138060	96.32	707	392.0		zzzz155,zzzz511
162363	94.22	692	391.0		zzzz109,zzzz422
165929	91.4	709	390.0		zzzz103,zzzz530
5010	90.04	693	386.0		zzzz739,zzzz741
41261	90.01	711	384.0		zzzz521,zzzz530
5945	89.51	696	383.0		zzzz729,zzzz737
5944	88.79	696	383.0		zzzz729,zzzz742
95783	94.45	667	382.0		zzzz260,zzzz572
3306	94.4	697	381.0		zzzzz36,zzzzz63
5189	93.39	696	379.0		zzzz737,zzzz742
35950	92.5	707	378.0		zzzz540,zzzzz38
157695	89.35	704	377.0		zzzz117,zzzz516
6044	88.18	702	377.0		zzzz728,zzzz739
127441	93.88	703	376.0		zzzz179,zzzz744
146131	92.51	668	375.0		zzzz139,zzzz515
127440	94.32	704	375.0		zzzz179,zzzz725
6043	87.41	699	375.0		zzzz728,zzzz738
164727	93.73	670	373.0		zzzz105,zzzz682
158280	92.02	677	373.0		zzzz116,zzzz695
127439	93.9	705	373.0		zzzz179,zzzz185
6042	87.99	691	372.0		zzzz728,zzzz741
163533	93.73	670	372.0		zzzz107,zzzz252
164726	94.03	670	372.0		zzzz105,zzzz679
127438	94.18	705	372.0		zzzz179,zzzz492
119505	94.18	704	371.0		zzzz196,zzzz725
95333	93.45	702	371.0		zzzz261,zzzz573
6347	94.03	703	371.0		zzzz725,zzzz744
127437	93.48	705	371.0		zzzz179,zzzz196
11934	94.18	670	371.0		zzzz679,zzzz682
12532	93.98	664	370.0		zzzz675,zzzz720
4664	92.72	701	370.0		zzzz743,zzzz744
119504	93.31	703	369.0		zzzz196,zzzz744
164725	93.58	670	369.0		zzzz105,zzzz154
130840	90.72	690	369.0		zzzz170,zzzz540
130839	90.43	690	369.0		zzzz170,zzzzz38
12531	93.22	664	369.0		zzzz675,zzzz735
124885	93.6	703	369.0		zzzz185,zzzz744
159988	93.16	673	368.0		zzzz113,zzzz730
139162	87.66	697	368.0		zzzz153,zzzz422
39826	96.91	680	368.0		zzzz526,zzzzz70
138613	92.42	673	368.0		zzzz154,zzzz682
6727	93.83	664	368.0		zzzz720,zzzz735
120423	92.47	664	367.0		zzzz194,zzzz675
12987	93.35	677	367.0		zzzz672,zzzz709
162362	87.84	691	367.0		zzzz109,zzzz153
49223	94.46	704	367.0		zzzz492,zzzz725
47786	93.36	693	366.0		zzzz499,zzzz710
46854	94.5	709	366.0		zzzz502,zzzz624
124884	93.04	704	366.0		zzzz185,zzzz725
22120	91.78	681	366.0		zzzz611,zzzz699
6144	89.94	696	366.0		zzzz727,zzzz729
124883	93.33	705	365.0		zzzz185,zzzz196
84920	94.26	680	366.0		zzzz290,zzzzz70
6245	91.24	696	366.0		zzzz726,zzzz727
127436	92.89	703	365.0		zzzz179,zzzz740
127435	90.44	701	364.0		zzzz179,zzzz743
49222	94.03	703	364.0		zzzz492,zzzz744
12530	92.03	665	364.0		zzzz675,zzzz732
84919	94.56	680	364.0		zzzz290,zzzz500
6244	86.84	699	364.0		zzzz726,zzzz729
47470	93.97	680	364.0		zzzz500,zzzzz70
6621	92.21	680	363.0		zzzz721,zzzzz70
84918	94.12	680	363.0		zzzz290,zzzz713
120422	91.87	664	363.0		zzzz194,zzzz720
84917	93.68	680	363.0		zzzz290,zzzz526
122473	94.8	654	362.0		zzzz190,zzzz707
120421	90.96	664	362.0		zzzz194,zzzz735
47469	92.06	680	362.0		zzzz500,zzzz721
36222	92.8	681	362.0		zzzz539,zzzz715
12230	87.29	700	362.0		zzzz677,zzzzz63
146695	91.19	681	362.0		zzzz138,zzzz539
124882	94.18	705	362.0		zzzz185,zzzz492
6726	91.58	665	362.0		zzzz720,zzzz732
119503	93.9	705	361.0		zzzz196,zzzz492
6346	92.32	703	361.0		zzzz725,zzzz740
101342	93.09	666	361.0		zzzz245,zzzz733
49221	93.19	705	361.0		zzzz492,zzzz740
6345	90.44	701	361.0		zzzz725,zzzz743
4922	92.46	703	361.0		zzzz740,zzzz744
39825	91.76	680	360.0		zzzz526,zzzz721
124881	92.77	705	360.0		zzzz185,zzzz740
47468	93.09	680	360.0		zzzz500,zzzz526
9707	89.81	677	360.0		zzzz695,zzzz696
146694	91.34	681	360.0		zzzz138,zzzz715
84916	91.76	680	360.0		zzzz290,zzzz721
39824	92.79	680	360.0		zzzz526,zzzz713
7491	92.35	680	359.0		zzzz713,zzzzz70
5655	91.28	665	360.0		zzzz732,zzzz735
138612	92.69	670	359.0		zzzz154,zzzz679
47467	93.38	680	359.0		zzzz500,zzzz713
119502	92.34	705	359.0		zzzz196,zzzz740
8683	90.59	659	359.0		zzzz703,zzzz716
120420	90.53	665	358.0		zzzz194,zzzz732
119501	89.59	701	358.0		zzzz196,zzzz743
124880	89.87	701	358.0		zzzz185,zzzz743
37043	97.5	641	358.0		zzzz536,zzzzz73
159393	90.37	675	357.0		zzzz114,zzzz676
6243	86.93	696	357.0		zzzz726,zzzz737
7490	90.88	680	357.0		zzzz713,zzzz721
46233	93.37	664	357.0		zzzz504,zzzzz71
148382	90.92	672	356.0		zzzz135,zzzz683
156696	96.14	596	356.0		zzzz119,zzzzz67
12529	90.08	665	356.0		zzzz675,zzzz731
37042	97.19	641	355.0		zzzz536,zzzzz53
2311	97.04	641	355.0		zzzzz53,zzzzz73
158279	89.66	677	355.0		zzzz116,zzzz696
99149	82.21	697	355.0		zzzz250,zzzz677
49220	90.44	701	355.0		zzzz492,zzzz743
99148	82.86	700	353.0		zzzz250,zzzzz63
116502	93.63	659	353.0		zzzz203,zzzz700
6242	86.06	696	353.0		zzzz726,zzzz742
4921	89.16	701	353.0		zzzz740,zzzz743
56602	88.45	701	353.0		zzzz453,zzzz743
12229	84.71	700	352.0		zzzz677,zzzzz36
5750	90.38	665	352.0		zzzz731,zzzz735
42134	84.9	702	351.0		zzzz518,zzzz546
160581	88.43	674	351.0		zzzz112,zzzz113
6143	88.22	696	351.0		zzzz727,zzzz737
6142	87.79	696	351.0		zzzz727,zzzz742
1867	89.6	625	351.0		zzzzz63,zzzzz96
10245	84.63	683	350.0		zzzz691,zzzz711
6725	89.32	665	350.0		zzzz720,zzzz731
5280	83.8	753	350.0		zzzz736,zzzz743
120419	87.97	665	350.0		zzzz194,zzzz731
155098	88.18	677	350.0		zzzz122,zzzz677
99147	82.0	700	350.0		zzzz250,zzzzz36
12834	92.68	656	350.0		zzzz673,zzzz706
8682	88.01	659	349.0		zzzz703,zzzzz68
160580	87.98	674	349.0		zzzz112,zzzz730
157694	81.61	707	349.0		zzzz117,zzzz544
88608	84.44	675	349.0		zzzz281,zzzz646
155097	88.92	677	348.0		zzzz122,zzzzz63
56601	87.93	704	348.0		zzzz453,zzzz725
127434	86.93	704	348.0		zzzz179,zzzz453
9061	90.9	659	348.0		zzzz700,zzzz706
38132	81.7	705	347.0		zzzz532,zzzz544
127433	81.54	753	347.0		zzzz179,zzzz736
12833	91.15	655	347.0		zzzz673,zzzz700
2857	89.89	623	347.0		zzzzz43,zzzzz63
155096	91.86	602	347.0		zzzz122,zzzzz96
119500	89.06	704	347.0		zzzz196,zzzz453
37595	94.76	668	346.0		zzzz534,zzzz623
3305	89.57	623	346.0		zzzzz36,zzzzz43
155095	87.89	677	345.0		zzzz122,zzzzz36
56600	86.49	703	345.0		zzzz453,zzzz744
42716	81.59	706	345.0		zzzz516,zzzz544
7156	85.89	659	345.0		zzzz716,zzzzz68
5749	87.69	666	344.0		zzzz731,zzzz732
11643	91.65	659	344.0		zzzz681,zzzz700
3304	87.2	625	344.0		zzzzz36,zzzzz96
2856	87.16	623	344.0		zzzzz43,zzzzz96
116501	92.07	656	343.0		zzzz203,zzzz706
12832	92.68	656	343.0		zzzz673,zzzz681
11642	93.14	656	343.0		zzzz681,zzzz706
124879	86.22	704	341.0		zzzz185,zzzz453
5279	82.34	753	341.0		zzzz736,zzzz744
164724	85.52	670	340.0		zzzz105,zzzz730
127875	93.61	673	340.0		zzzz178,zzzz273
116500	91.31	656	340.0		zzzz203,zzzz673
160579	84.57	674	340.0		zzzz112,zzzz682
12228	86.56	625	340.0		zzzz677,zzzzz96
8935	92.79	652	340.0		zzzz701,zzzzz64
6344	82.07	753	340.0		zzzz725,zzzz736
164723	84.87	674	340.0		zzzz105,zzzz112
159987	83.95	673	339.0		zzzz113,zzzz682
157693	79.72	705	339.0		zzzz117,zzzz532
138611	85.52	670	339.0		zzzz154,zzzz730
11498	84.63	670	339.0		zzzz682,zzzz730
164722	84.7	673	338.0		zzzz105,zzzz113
161170	86.63	673	338.0		zzzz111,zzzzz67
34631	90.72	668	338.0		zzzz545,zzzz623
42715	80.11	704	338.0		zzzz516,zzzz532
116499	92.99	656	338.0		zzzz203,zzzz681
159986	85.44	673	337.0		zzzz113,zzzz154
160578	84.87	674	337.0		zzzz112,zzzz154
56599	86.79	704	337.0		zzzz453,zzzz492
41553	90.97	642	337.0		zzzz520,zzzz699
119499	82.07	753	336.0		zzzz196,zzzz736
56598	86.36	704	336.0		zzzz453,zzzz740
165328	80.36	713	335.0		zzzz104,zzzz540
135473	93.01	572	336.0		zzzz160,zzzz162
37594	90.27	668	335.0		zzzz534,zzzz545
11933	84.18	670	335.0		zzzz679,zzzz730
155094	81.68	677	335.0		zzzz122,zzzz250
165327	79.38	713	334.0		zzzz104,zzzzz38
160577	83.98	674	335.0		zzzz112,zzzz679
146130	82.34	668	334.0		zzzz139,zzzz644
124878	81.54	753	334.0		zzzz185,zzzz736
41552	91.74	642	334.0		zzzz520,zzzz611
49219	82.38	755	334.0		zzzz492,zzzz736
146129	82.63	668	334.0		zzzz139,zzzz150
37041	89.91	664	333.0		zzzz536,zzzz693
99146	83.84	625	332.0		zzzz250,zzzzz96
43011	81.91	669	332.0		zzzz515,zzzz644
5278	80.53	755	331.0		zzzz736,zzzz740
159985	83.51	673	331.0		zzzz113,zzzz679
154528	95.95	593	330.0		zzzz123,zzzz711
25087	99.49	584	330.0		zzzz593,zzzzzz1
136976	91.13	631	329.0		zzzz157,zzzzz39
12227	83.84	625	328.0		zzzz677,zzzzz43
155093	86.54	602	328.0		zzzz122,zzzzz43
140724	81.74	668	328.0		zzzz150,zzzz515
143306	91.8	561	327.0		zzzz145,zzzzz96
99145	83.36	625	327.0		zzzz250,zzzzz43
56597	79.89	751	327.0		zzzz453,zzzz736
162948	87.6	645	326.0		zzzz108,zzzz245
130838	77.81	685	326.0		zzzz170,zzzz251
155092	93.23	561	326.0		zzzz122,zzzz145
134453	90.19	571	325.0		zzzz162,zzzzz92
98688	77.81	685	325.0		zzzz251,zzzzz38
41551	90.22	644	324.0		zzzz520,zzzzz75
165326	78.79	693	324.0		zzzz104,zzzz170
40109	92.45	636	324.0		zzzz525,zzzz545
162947	92.38	551	324.0		zzzz108,zzzz529
162946	87.29	645	323.0		zzzz108,zzzz733
133544	94.83	580	322.0		zzzz164,zzzz171
22119	89.13	644	322.0		zzzz611,zzzzz75
17485	98.63	586	321.0		zzzz639,zzzzzz3
9975	90.17	641	321.0		zzzz693,zzzzz53
150517	92.44	675	321.0		zzzz131,zzzz158
103989	89.76	664	320.0		zzzz238,zzzz687
40108	93.08	636	320.0		zzzz525,zzzz623
9188	88.51	644	320.0		zzzz699,zzzzz75
86470	78.17	687	320.0		zzzz286,zzzz718
101341	82.34	668	320.0		zzzz245,zzzz702
98687	76.5	685	320.0		zzzz251,zzzz540
161769	84.53	666	319.0		zzzz110,zzzz504
9974	89.86	641	320.0		zzzz693,zzzzz73
8811	82.34	668	319.0		zzzz702,zzzz733
40107	91.82	636	318.0		zzzz525,zzzz534
161169	85.33	593	318.0		zzzz111,zzzz119
139161	75.5	694	317.0		zzzz153,zzzz156
161768	83.33	666	316.0		zzzz110,zzzzz71
135472	89.16	572	316.0		zzzz160,zzzzz92
125754	90.33	662	316.0		zzzz183,zzzz690
165325	76.38	690	315.0		zzzz104,zzzz251
156117	96.93	522	315.0		zzzz120,zzzz536
156116	96.55	522	315.0		zzzz120,zzzzz73
153051	89.91	555	315.0		zzzz126,zzzzz63
153050	90.07	554	315.0		zzzz126,zzzzz96
44130	77.04	710	315.0		zzzz511,zzzz719
138059	76.62	710	314.0		zzzz155,zzzz719
19074	98.98	590	314.0		zzzz627,zzzzzz5
122990	78.99	676	313.0		zzzz189,zzzz294
26413	97.75	577	313.0		zzzz586,zzzzzz2
18671	97.87	516	313.0		zzzz630,zzzzzz8
156115	95.98	522	313.0		zzzz120,zzzzz53
137514	74.64	698	313.0		zzzz156,zzzz422
87746	89.4	566	313.0		zzzz283,zzzzz45
153049	89.57	556	312.0		zzzz126,zzzzz43
16130	98.28	582	312.0		zzzz647,zzzzzz5
153048	89.89	554	312.0		zzzz126,zzzz145
19073	98.11	582	311.0		zzzz627,zzzz647
7720	76.95	681	311.0		zzzz711,zzzz721
101340	89.84	551	311.0		zzzz245,zzzz529
47466	77.39	681	310.0		zzzz500,zzzz711
137513	74.53	691	310.0		zzzz156,zzzz714
100426	94.06	572	310.0		zzzz247,zzzz503
1693	93.1	536	310.0		zzzzz67,zzzzz98
110001	92.39	578	310.0		zzzz220,zzzz221
25951	92.6	581	310.0		zzzz589,zzzz641
38975	89.66	551	309.0		zzzz529,zzzz733
8559	91.53	543	309.0		zzzz704,zzzzz92
84915	76.95	681	309.0		zzzz290,zzzz711
23370	93.8	581	308.0		zzzz603,zzzz636
137512	74.35	690	308.0		zzzz156,zzzz705
23369	93.46	581	308.0		zzzz603,zzzz640
136975	83.28	634	308.0		zzzz157,zzzzz78
47785	78.62	711	307.0		zzzz499,zzzz624
19647	77.89	701	307.0		zzzz624,zzzz710
17138	90.83	578	308.0		zzzz641,zzzz656
162361	74.13	692	307.0		zzzz109,zzzz156
156695	93.1	536	307.0		zzzz119,zzzzz98
46853	78.77	702	307.0		zzzz502,zzzz710
7719	76.8	681	307.0		zzzz711,zzzz713
153047	87.93	555	307.0		zzzz126,zzzzz36
7718	76.98	682	307.0		zzzz711,zzzzz70
143305	86.68	563	307.0		zzzz145,zzzzz43
39823	76.25	678	307.0		zzzz526,zzzz691
35410	94.45	577	307.0		zzzz542,zzzzzz2
155091	88.81	554	306.0		zzzz122,zzzz126
47784	78.76	711	306.0		zzzz499,zzzz502
35409	94.28	577	306.0		zzzz542,zzzz586
10244	75.66	678	305.0		zzzz691,zzzzz70
154049	93.31	538	305.0		zzzz124,zzzz678
150516	86.5	674	305.0		zzzz131,zzzz132
143304	86.86	563	305.0		zzzz145,zzzzz63
39822	76.98	682	305.0		zzzz526,zzzz711
18016	92.43	581	305.0		zzzz636,zzzz640
143303	86.5	563	305.0		zzzz145,zzzz677
109186	98.63	512	305.0		zzzz223,zzzzzz9
139160	74.36	698	304.0		zzzz153,zzzz714
143302	85.97	563	304.0		zzzz145,zzzzz36
108774	89.62	578	303.0		zzzz224,zzzz641
47465	75.22	678	303.0		zzzz500,zzzz691
35161	77.06	667	303.0		zzzz543,zzzz625
32986	77.74	656	303.0		zzzz553,zzzz557
15160	91.85	589	303.0		zzzz654,zzzz669
17312	91.38	580	303.0		zzzz640,zzzz655
10243	75.66	678	303.0		zzzz691,zzzz721
84914	75.37	678	303.0		zzzz290,zzzz691
67013	94.95	574	303.0		zzzz412,zzzz665
18015	91.9	580	303.0		zzzz636,zzzz655
153046	87.77	556	302.0		zzzz126,zzzz677
149976	86.85	677	302.0		zzzz132,zzzz158
2990	90.81	544	302.0		zzzzz41,zzzzz66
109607	90.14	578	302.0		zzzz221,zzzz626
3125	81.8	632	301.0		zzzzz39,zzzzz78
166486	89.77	596	301.0		zzzz102,zzzz501
25950	90.69	580	301.0		zzzz589,zzzz640
15001	92.07	580	301.0		zzzz655,zzzz656
14682	93.23	576	300.0		zzzz657,zzzz662
10242	74.63	674	300.0		zzzz691,zzzz713
25949	90.34	580	300.0		zzzz589,zzzz655
23368	91.39	581	299.0		zzzz603,zzzz655
64005	73.0	700	299.0		zzzz422,zzzz714
25948	91.22	581	299.0		zzzz589,zzzz603
154527	83.98	593	299.0		zzzz123,zzzz691
110000	90.43	575	299.0		zzzz220,zzzz626
87745	88.75	569	299.0		zzzz283,zzzzz87
23165	94.06	522	299.0		zzzz604,zzzz605
134452	86.29	547	298.0		zzzz162,zzzz704
108773	90.0	580	298.0		zzzz224,zzzz589
25086	87.67	584	298.0		zzzz593,zzzz671
139159	73.04	690	298.0		zzzz153,zzzz705
13136	87.5	584	298.0		zzzz671,zzzzzz1
64004	73.63	694	297.0		zzzz422,zzzz705
17137	88.12	581	298.0		zzzz641,zzzz655
17311	87.95	581	297.0		zzzz640,zzzz641
162945	80.25	648	297.0		zzzz108,zzzz702
135471	86.56	543	297.0		zzzz160,zzzz704
8438	72.29	693	297.0		zzzz705,zzzz714
17310	89.83	580	296.0		zzzz640,zzzz656
23367	88.66	582	295.0		zzzz603,zzzz641
25947	89.33	581	295.0		zzzz589,zzzz636
109185	89.95	577	295.0		zzzz223,zzzz630
108772	89.83	580	295.0		zzzz224,zzzz640
6041	68.52	702	294.0		zzzz728,zzzz737
108771	92.55	577	294.0		zzzz224,zzzz656
162360	72.19	694	294.0		zzzz109,zzzz714
25303	92.68	574	294.0		zzzz592,zzzz665
26169	88.62	580	293.0		zzzz588,zzzz589
26168	89.14	580	293.0		zzzz588,zzzz655
67319	87.59	580	293.0		zzzz411,zzzz416
26167	88.79	580	293.0		zzzz588,zzzz640
25946	88.45	580	293.0		zzzz589,zzzz656
14681	91.15	576	293.0		zzzz657,zzzz661
162359	72.69	692	293.0		zzzz109,zzzz705
26166	87.09	581	293.0		zzzz588,zzzz641
18014	87.11	582	293.0		zzzz636,zzzz641
6040	68.58	697	293.0		zzzz728,zzzz742
2730	86.14	570	292.0		zzzzz45,zzzzz87
82892	89.54	526	292.0		zzzz295,zzzz420
26165	88.79	580	292.0		zzzz588,zzzz636
14351	91.13	575	291.0		zzzz661,zzzz662
147819	68.57	684	291.0		zzzz136,zzzz250
12986	90.61	554	291.0		zzzz672,zzzz723
6039	66.86	694	291.0		zzzz728,zzzz729
143301	81.53	563	290.0		zzzz145,zzzz250
67012	92.64	571	290.0		zzzz412,zzzz592
147818	68.96	683	290.0		zzzz136,zzzzz63
18670	89.26	512	290.0		zzzz630,zzzzzz9
5188	67.29	700	290.0		zzzz737,zzzz738
18013	88.1	580	290.0		zzzz636,zzzz656
5943	66.52	696	290.0		zzzz729,zzzz739
5187	67.57	700	290.0		zzzz737,zzzz739
109999	85.32	579	290.0		zzzz220,zzzz641
22960	92.16	523	290.0		zzzz605,zzzz606
843	89.45	512	290.0		zzzzzz8,zzzzzz9
66403	91.94	571	289.0		zzzz414,zzzz660
108770	87.59	580	289.0		zzzz224,zzzz655
5097	67.38	699	288.0		zzzz738,zzzz742
5009	68.1	699	288.0		zzzz739,zzzz742
147817	69.06	682	288.0		zzzz136,zzzz677
109184	88.67	512	288.0		zzzz223,zzzzzz8
33504	72.39	670	288.0		zzzz551,zzzz576
7956	89.17	554	288.0		zzzz709,zzzz723
165928	68.67	715	288.0		zzzz103,zzzz540
25734	83.28	580	288.0		zzzz590,zzzz641
5942	65.6	689	288.0		zzzz729,zzzz741
147816	68.09	680	287.0		zzzz136,zzzzz36
25085	85.49	586	287.0		zzzz593,zzzz639
153045	82.19	556	287.0		zzzz126,zzzz250
109606	83.97	580	287.0		zzzz221,zzzz641
17838	87.35	577	287.0		zzzz637,zzzz640
17837	84.92	577	287.0		zzzz637,zzzz641
17484	85.32	586	287.0		zzzz639,zzzzzz1
109605	84.95	578	287.0		zzzz221,zzzz224
5941	65.6	689	287.0		zzzz729,zzzz738
25084	85.49	586	286.0		zzzz593,zzzzzz3
878	85.32	586	286.0		zzzzzz1,zzzzzz3
25518	91.77	571	286.0		zzzz591,zzzz660
5464	83.91	603	286.0		zzzz734,zzzzz42
108280	78.83	600	286.0		zzzz228,zzzz685
18669	87.18	577	286.0		zzzz630,zzzzzz2
5186	67.0	700	285.0		zzzz737,zzzz741
4835	67.24	699	285.0		zzzz741,zzzz742
108769	86.72	580	285.0		zzzz224,zzzz636
127432	67.94	708	284.0		zzzz179,zzzz739
26164	91.51	577	284.0		zzzz588,zzzz637
109604	82.9	579	284.0		zzzz221,zzzz590
40395	68.28	703	284.0		zzzz524,zzzz546
25302	88.91	577	284.0		zzzz592,zzzz664
18012	86.66	577	284.0		zzzz636,zzzz637
127431	67.62	701	283.0		zzzz179,zzzz738
125273	94.2	500	284.0		zzzz184,zzzz650
109603	84.68	581	283.0		zzzz221,zzzz589
109183	87.52	577	283.0		zzzz223,zzzzzz2
38692	68.07	714	283.0		zzzz530,zzzz540
17836	86.66	577	283.0		zzzz637,zzzz655
11212	80.14	564	283.0		zzzz684,zzzz685
165927	68.44	716	283.0		zzzz103,zzzzz38
127430	66.99	712	283.0		zzzz179,zzzz728
12681	95.81	477	283.0		zzzz674,zzzz676
5008	67.14	703	283.0		zzzz739,zzzz743
164721	69.44	674	283.0		zzzz105,zzzz150
159984	69.13	677	283.0		zzzz113,zzzz150
140723	69.44	674	283.0		zzzz150,zzzz154
159983	68.69	677	282.0		zzzz113,zzzz644
138610	69.19	675	282.0		zzzz154,zzzz644
117011	73.98	615	282.0		zzzz202,zzzz728
35408	87.35	577	283.0		zzzz542,zzzz630
140722	69.44	674	282.0		zzzz150,zzzz730
124877	67.76	704	282.0		zzzz185,zzzz739
109998	85.12	578	282.0		zzzz220,zzzz589
67011	89.14	571	282.0		zzzz412,zzzz668
65195	85.62	577	282.0		zzzz418,zzzz667
56596	68.89	704	282.0		zzzz453,zzzz728
26163	87.95	581	282.0		zzzz588,zzzz603
25945	85.96	577	282.0		zzzz589,zzzz637
127429	67.14	697	282.0		zzzz179,zzzz741
88607	89.36	498	282.0		zzzz281,zzzzz52
38691	67.88	716	282.0		zzzz530,zzzzz38
108768	83.91	578	282.0		zzzz224,zzzz590
26412	86.31	577	282.0		zzzz586,zzzz630
25944	84.17	581	282.0		zzzz589,zzzz590
870	86.24	516	282.0		zzzzzz2,zzzzzz8
124876	67.47	704	281.0		zzzz185,zzzz728
109997	84.52	575	281.0		zzzz220,zzzz224
109602	84.51	581	281.0		zzzz221,zzzz588
66402	89.84	571	281.0		zzzz414,zzzz591
26162	87.76	580	281.0		zzzz588,zzzz656
16633	69.14	674	281.0		zzzz644,zzzz730
13433	85.08	590	281.0		zzzz669,zzzzzz5
56595	67.38	705	281.0		zzzz453,zzzz738
56594	67.09	705	281.0		zzzz453,zzzz741
26161	84.68	581	281.0		zzzz588,zzzz590
25733	83.91	578	281.0		zzzz590,zzzz656
13886	88.68	574	281.0		zzzz665,zzzz668
6038	66.86	703	281.0		zzzz728,zzzz743
164720	68.84	674	280.0		zzzz105,zzzz644
124875	66.76	701	280.0		zzzz185,zzzz738
56593	68.08	708	280.0		zzzz453,zzzz739
14038	88.56	577	280.0		zzzz664,zzzz665
6241	67.48	698	280.0		zzzz726,zzzz728
869	87.08	511	280.0		zzzzzz2,zzzzzz9
165926	68.69	693	280.0		zzzz103,zzzz170
124874	66.62	701	280.0		zzzz185,zzzz741
109996	84.35	575	280.0		zzzz220,zzzz656
19072	84.75	590	280.0		zzzz627,zzzz669
109995	84.6	578	280.0		zzzz220,zzzz588
109601	82.87	578	280.0		zzzz221,zzzz656
66707	84.2	576	280.0		zzzz413,zzzz415
66706	84.28	579	280.0		zzzz413,zzzz419
42133	68.85	703	280.0		zzzz518,zzzz524
17662	86.51	578	280.0		zzzz638,zzzzzz2
15159	84.24	590	280.0		zzzz654,zzzzzz5
156114	88.31	522	280.0		zzzz120,zzzz693
109994	82.78	575	280.0		zzzz220,zzzz590
23366	87.95	581	280.0		zzzz603,zzzz656
18668	86.85	578	280.0		zzzz630,zzzz638
5096	66.0	703	279.0		zzzz738,zzzz743
4834	65.67	699	279.0		zzzz741,zzzz743
140167	94.36	550	279.0		zzzz151,zzzz285
109600	83.48	581	279.0		zzzz221,zzzz640
109182	86.31	577	279.0		zzzz223,zzzz586
25732	84.19	582	279.0		zzzz590,zzzz603
165925	66.53	708	279.0		zzzz103,zzzz104
140721	68.1	674	279.0		zzzz150,zzzz679
119498	66.9	704	279.0		zzzz196,zzzz739
67010	88.04	577	279.0		zzzz412,zzzz664
65194	84.23	577	279.0		zzzz418,zzzzzz2
26411	85.47	516	279.0		zzzz586,zzzzzz8
109181	85.96	577	279.0		zzzz223,zzzz542
109180	87.02	578	279.0		zzzz223,zzzz638
41260	68.12	712	279.0		zzzz521,zzzz540
38974	80.69	554	279.0		zzzz529,zzzz702
19071	83.9	590	279.0		zzzz627,zzzz654
5007	67.09	702	279.0		zzzz739,zzzz744
155090	69.7	660	278.0		zzzz122,zzzz136
109599	83.3	581	278.0		zzzz221,zzzz655
25731	83.48	581	278.0		zzzz590,zzzz640
109179	84.23	577	278.0		zzzz223,zzzz418
66100	85.37	581	278.0		zzzz415,zzzz419
35407	85.66	516	278.0		zzzz542,zzzzzz8
25730	84.19	582	278.0		zzzz590,zzzz636
160576	67.99	678	278.0		zzzz112,zzzz150
65193	83.88	577	278.0		zzzz418,zzzz586
25729	83.65	581	278.0		zzzz590,zzzz655
17835	85.79	577	278.0		zzzz637,zzzz656
6240	66.86	697	278.0		zzzz726,zzzz739
108279	76.9	606	277.0		zzzz228,zzzz684
65192	83.88	577	277.0		zzzz418,zzzz630
35406	83.54	577	277.0		zzzz542,zzzz667
19258	81.35	579	277.0		zzzz626,zzzz641
16632	67.51	674	277.0		zzzz644,zzzz679
6343	66.95	702	277.0		zzzz725,zzzz739
160575	67.85	678	277.0		zzzz112,zzzz644
140720	67.66	674	277.0		zzzz150,zzzz682
117010	71.71	615	277.0		zzzz202,zzzz738
117009	73.04	612	277.0		zzzz202,zzzz739
25728	82.09	575	277.0		zzzz590,zzzz626
13733	84.06	577	277.0		zzzz667,zzzzzz2
13432	84.92	590	277.0		zzzz669,zzzzzz4
7605	68.87	681	277.0		zzzz712,zzzzz67
117008	72.03	615	277.0		zzzz202,zzzz741
5095	65.91	701	277.0		zzzz738,zzzz744
132524	84.49	548	277.0		zzzz166,zzzz258
119497	66.48	704	276.0		zzzz196,zzzz728
119496	65.62	701	276.0		zzzz196,zzzz738
98228	69.68	686	276.0		zzzz252,zzzz505
66401	84.78	519	277.0		zzzz414,zzzz604
49218	67.61	704	276.0		zzzz492,zzzz739
35405	85.64	578	277.0		zzzz542,zzzz638
26410	85.64	578	277.0		zzzz586,zzzz638
26409	85.71	511	277.0		zzzz586,zzzzzz9
23164	86.27	539	277.0		zzzz604,zzzz606
6037	66.38	702	276.0		zzzz728,zzzz744
165324	66.11	714	276.0		zzzz104,zzzz521
109598	83.33	582	276.0		zzzz221,zzzz603
108767	86.21	580	276.0		zzzz224,zzzz588
65191	83.54	577	276.0		zzzz418,zzzz542
25943	83.22	578	276.0		zzzz589,zzzz626
25727	83.39	578	276.0		zzzz590,zzzz637
6239	66.14	694	276.0		zzzz726,zzzz738
165924	79.67	546	276.0		zzzz103,zzzz527
165323	65.54	711	276.0		zzzz104,zzzz530
109993	83.39	578	276.0		zzzz220,zzzz640
17661	86.16	513	276.0		zzzz638,zzzzzz8
6342	66.05	701	276.0		zzzz725,zzzz738
6141	66.24	696	276.0		zzzz727,zzzz728
5940	66.67	705	276.0		zzzz729,zzzz743
5185	67.8	705	276.0		zzzz737,zzzz743
4833	65.62	701	276.0		zzzz741,zzzz744
109597	83.33	582	276.0		zzzz221,zzzz636
17483	83.28	586	276.0		zzzz639,zzzz671
161168	82.36	533	275.0		zzzz111,zzzzz98
109992	82.87	578	275.0		zzzz220,zzzz655
49217	67.38	705	275.0		zzzz492,zzzz738
26408	83.88	577	275.0		zzzz586,zzzz667
16631	67.11	675	275.0		zzzz644,zzzz682
15158	85.08	590	275.0		zzzz654,zzzzzz4
108766	86.75	581	275.0		zzzz224,zzzz603
147815	70.13	626	275.0		zzzz136,zzzzz96
23163	84.1	522	275.0		zzzz604,zzzz660
6238	66.28	694	275.0		zzzz726,zzzz741
159982	89.98	489	274.0		zzzz113,zzzzz49
119495	65.48	701	274.0		zzzz196,zzzz741
108765	82.26	575	274.0		zzzz224,zzzz626
65497	85.19	574	274.0		zzzz417,zzzz665
31885	78.13	567	274.0		zzzz558,zzzz580
6341	65.76	701	274.0		zzzz725,zzzz741
109178	83.88	577	274.0		zzzz223,zzzz667
65496	86.16	571	274.0		zzzz417,zzzz668
41259	79.85	546	274.0		zzzz521,zzzz527
17660	86.13	512	274.0		zzzz638,zzzzzz9
4749	67.28	706	274.0		zzzz742,zzzz743
124352	86.53	579	274.0		zzzz186,zzzz670
114844	88.07	528	274.0		zzzz207,zzzz210
109991	83.04	578	274.0		zzzz220,zzzz637
49216	67.05	704	274.0		zzzz492,zzzz728
38690	67.6	713	274.0		zzzz530,zzzz624
6340	66.24	702	274.0		zzzz725,zzzz728
67009	85.11	571	274.0		zzzz412,zzzz417
35404	84.57	512	274.0		zzzz542,zzzzzz9
23365	85.64	578	274.0		zzzz603,zzzz637
20204	89.08	522	274.0		zzzz621,zzzz622
65190	84.74	511	273.0		zzzz418,zzzzzz8
49215	66.62	701	273.0		zzzz492,zzzz741
13135	82.59	586	273.0		zzzz671,zzzzzz3
6140	64.75	695	273.0		zzzz727,zzzz738
130837	67.82	693	273.0		zzzz170,zzzz521
109990	82.9	579	273.0		zzzz220,zzzz603
15157	87.58	499	273.0		zzzz654,zzzzz10
127428	65.82	708	272.0		zzzz179,zzzz729
65797	84.23	577	273.0		zzzz416,zzzz662
26160	82.18	578	273.0		zzzz588,zzzz626
163532	68.08	683	272.0		zzzz107,zzzz505
127427	66.38	705	272.0		zzzz179,zzzz737
67318	80.9	581	272.0		zzzz411,zzzz415
67317	80.82	584	272.0		zzzz411,zzzz419
65796	85.24	576	272.0		zzzz416,zzzz661
46852	67.32	713	272.0		zzzz502,zzzz530
5847	90.16	488	272.0		zzzz730,zzzzz49
2923	74.21	601	272.0		zzzzz42,zzzzz85
857	84.92	590	272.0		zzzzzz4,zzzzzz5
130836	67.77	692	272.0		zzzz170,zzzz530
5006	66.76	704	272.0		zzzz739,zzzz740
109596	82.01	578	272.0		zzzz221,zzzz637
67316	81.0	579	272.0		zzzz411,zzzz413
65189	84.74	511	272.0		zzzz418,zzzzzz9
41258	67.6	716	272.0		zzzz521,zzzzz38
23364	81.69	579	272.0		zzzz603,zzzz626
138609	67.9	673	271.0		zzzz154,zzzz515
6139	65.04	695	271.0		zzzz727,zzzz739
4920	66.05	701	271.0		zzzz740,zzzz741
67315	81.62	582	271.0		zzzz411,zzzz662
39541	78.06	547	271.0		zzzz527,zzzz530
13431	87.1	496	271.0		zzzz669,zzzzz10
6036	67.24	702	271.0		zzzz728,zzzz740
124873	65.06	707	271.0		zzzz185,zzzz729
65188	82.53	578	271.0		zzzz418,zzzz638
17659	82.87	578	271.0		zzzz638,zzzz667
94895	72.54	590	270.0		zzzz262,zzzz571
25301	86.34	571	271.0		zzzz592,zzzz668
19257	81.66	578	271.0		zzzz626,zzzz640
167599	93.31	493	270.0		zzzz100,zzzz165
108764	84.92	577	270.0		zzzz224,zzzz637
109989	82.18	578	270.0		zzzz220,zzzz636
56592	65.3	706	270.0		zzzz453,zzzz729
6138	64.46	695	270.0		zzzz727,zzzz741
65795	83.59	579	270.0		zzzz416,zzzz657
19256	81.31	578	270.0		zzzz626,zzzz636
19255	80.52	575	270.0		zzzz626,zzzz656
18667	81.63	577	270.0		zzzz630,zzzz667
16129	83.85	582	270.0		zzzz647,zzzz669
165923	66.95	711	269.0		zzzz103,zzzz624
127426	64.91	704	269.0		zzzz179,zzzz742
5094	65.91	701	269.0		zzzz738,zzzz740
110437	93.57	513	269.0		zzzz218,zzzz610
19254	80.45	578	269.0		zzzz626,zzzz655
19070	84.07	590	269.0		zzzz627,zzzzzz4
159981	66.42	676	269.0		zzzz113,zzzz515
67314	80.9	581	269.0		zzzz411,zzzz657
65495	83.89	571	269.0		zzzz417,zzzz592
16128	82.99	582	268.0		zzzz647,zzzz654
165922	66.39	711	268.0		zzzz103,zzzz502
164719	67.61	673	268.0		zzzz105,zzzz515
156694	70.18	597	268.0		zzzz119,zzzz712
67313	81.87	579	268.0		zzzz411,zzzz661
5463	73.75	602	268.0		zzzz734,zzzzz85
49214	65.4	708	268.0		zzzz492,zzzz729
43010	66.27	673	268.0		zzzz515,zzzz682
25517	83.24	519	268.0		zzzz591,zzzz604
6237	66.81	705	268.0		zzzz726,zzzz743
13732	84.15	511	268.0		zzzz667,zzzzzz9
147814	68.71	620	267.0		zzzz136,zzzzz43
142261	83.49	624	267.0		zzzz147,zzzz266
132523	92.81	487	267.0		zzzz166,zzzz533
127425	66.24	708	267.0		zzzz179,zzzz726
119494	65.21	707	267.0		zzzz196,zzzz729
65494	83.54	571	267.0		zzzz417,zzzz591
40394	68.66	686	267.0		zzzz524,zzzz534
5939	64.26	705	267.0		zzzz729,zzzz744
165921	66.28	688	267.0		zzzz103,zzzz251
124872	64.91	704	267.0		zzzz185,zzzz742
4135	87.98	499	267.0		zzzzz10,zzzzzz4
160574	87.35	490	267.0		zzzz112,zzzzz49
43009	66.72	673	267.0		zzzz515,zzzz730
14037	85.1	577	267.0		zzzz664,zzzz668
40393	68.22	686	266.0		zzzz524,zzzz623
56591	65.72	703	266.0		zzzz453,zzzz737
25516	83.19	571	266.0		zzzz591,zzzz668
19253	80.8	578	266.0		zzzz626,zzzz637
161767	66.72	670	266.0		zzzz110,zzzz644
161167	67.95	677	266.0		zzzz111,zzzz712
124871	65.2	704	266.0		zzzz185,zzzz737
16127	79.38	582	266.0		zzzz647,zzzzzz4
5184	65.11	705	265.0		zzzz737,zzzz744
6339	64.4	705	265.0		zzzz725,zzzz729
155547	77.68	569	265.0		zzzz121,zzzz514
56590	65.58	706	265.0		zzzz453,zzzz726
4748	64.77	704	265.0		zzzz742,zzzz744
161766	66.72	670	264.0		zzzz110,zzzz150
155546	77.68	569	264.0		zzzz121,zzzz137
124351	78.28	580	265.0		zzzz186,zzzzzz6
66705	80.1	578	265.0		zzzz413,zzzz416
5938	65.11	705	264.0		zzzz729,zzzz740
86896	69.39	673	264.0		zzzz285,zzzz701
43008	65.97	673	264.0		zzzz515,zzzz679
119493	64.91	704	264.0		zzzz196,zzzz737
98686	65.85	691	264.0		zzzz251,zzzz521
65493	82.23	574	264.0		zzzz417,zzzz660
6338	64.49	704	264.0		zzzz725,zzzz737
119492	64.77	704	263.0		zzzz196,zzzz742
66400	82.49	571	263.0		zzzz414,zzzz668
6337	64.63	704	263.0		zzzz725,zzzz742
6137	66.38	705	263.0		zzzz727,zzzz743
98685	65.7	688	263.0		zzzz251,zzzz530
40392	67.35	686	263.0		zzzz524,zzzz545
17658	99.3	428	263.0		zzzz638,zzzzz11
110436	90.47	514	263.0		zzzz218,zzzz299
56589	65.29	703	262.0		zzzz453,zzzz742
49213	65.62	704	262.0		zzzz492,zzzz737
2202	78.21	615	262.0		zzzzz55,zzzzz81
146128	67.76	673	262.0		zzzz139,zzzz154
49212	65.53	705	262.0		zzzz492,zzzz742
47783	64.47	712	262.0		zzzz499,zzzz530
38689	64.71	714	262.0		zzzz530,zzzz710
13731	81.21	511	262.0		zzzz667,zzzzzz8
9448	66.22	675	262.0		zzzz697,zzzz701
6236	65.11	705	262.0		zzzz726,zzzz744
5277	60.93	755	262.0		zzzz736,zzzz739
164718	67.86	672	261.0		zzzz105,zzzz139
159980	66.72	676	261.0		zzzz113,zzzz139
97666	93.15	467	262.0		zzzz254,zzzz335
73147	94.04	470	262.0		zzzz332,zzzz402
72810	92.72	467	262.0		zzzz335,zzzz401
71851	93.1	478	262.0		zzzz344,zzzz356
14506	81.36	574	262.0		zzzz660,zzzz668
146127	66.67	672	261.0		zzzz139,zzzz682
127424	65.39	705	261.0		zzzz179,zzzz727
67008	80.49	574	261.0		zzzz412,zzzz660
65492	81.98	577	261.0		zzzz417,zzzz664
5276	59.92	756	261.0		zzzz736,zzzz738
4919	65.2	704	261.0		zzzz740,zzzz742
124870	64.64	707	260.0		zzzz185,zzzz726
67007	80.74	571	261.0		zzzz412,zzzz591
66704	80.1	578	261.0		zzzz413,zzzz657
66399	81.96	571	261.0		zzzz414,zzzz417
6035	60.58	756	260.0		zzzz728,zzzz736
5183	64.91	704	260.0		zzzz737,zzzz740
161765	65.67	670	260.0		zzzz110,zzzz515
72809	92.29	467	260.0		zzzz335,zzzz352
66398	80.54	519	260.0		zzzz414,zzzz605
22959	80.27	522	260.0		zzzz605,zzzz660
56588	65.29	703	260.0		zzzz453,zzzz727
45622	66.12	676	260.0		zzzz506,zzzz680
165920	64.23	710	259.0		zzzz103,zzzz710
161764	65.22	670	259.0		zzzz110,zzzz139
160573	64.95	679	259.0		zzzz112,zzzz515
119491	64.92	707	259.0		zzzz196,zzzz726
16305	83.73	498	259.0		zzzz646,zzzzz52
14505	80.49	574	259.0		zzzz660,zzzz665
6336	64.07	707	259.0		zzzz725,zzzz726
5275	59.87	755	259.0		zzzz736,zzzz741
81441	90.47	514	259.0		zzzz299,zzzz610
46232	64.42	669	259.0		zzzz504,zzzz644
154526	75.3	591	259.0		zzzz123,zzzz721
140719	64.57	669	259.0		zzzz150,zzzz504
121960	67.01	685	259.0		zzzz191,zzzz692
117007	67.26	614	259.0		zzzz202,zzzz737
67006	80.91	571	259.0		zzzz412,zzzz414
66099	78.76	579	259.0		zzzz415,zzzz416
65491	79.96	519	259.0		zzzz417,zzzz604
25515	81.88	574	259.0		zzzz591,zzzz664
127423	68.88	617	258.0		zzzz179,zzzz202
66703	79.2	577	259.0		zzzz413,zzzz662
25514	80.74	571	259.0		zzzz591,zzzz665
160572	66.72	679	258.0		zzzz112,zzzz139
84496	62.96	675	258.0		zzzz291,zzzz698
147254	62.84	705	258.0		zzzz137,zzzz544
49211	65.21	707	258.0		zzzz492,zzzz726
154525	75.8	591	258.0		zzzz123,zzzz500
146126	66.72	673	257.0		zzzz139,zzzz679
146125	66.72	673	257.0		zzzz139,zzzz730
117006	67.38	610	257.0		zzzz202,zzzz726
41257	66.24	711	257.0		zzzz521,zzzz624
117005	68.25	611	257.0		zzzz202,zzzz729
46851	66.06	713	257.0		zzzz502,zzzz521
23162	79.38	519	257.0		zzzz604,zzzz668
140718	64.13	669	257.0		zzzz150,zzzzz71
124869	64.63	704	257.0		zzzz185,zzzz727
66702	80.03	576	257.0		zzzz413,zzzz661
64892	78.07	579	257.0		zzzz419,zzzz657
5937	59.84	757	256.0		zzzz729,zzzz736
147253	61.65	704	256.0		zzzz137,zzzz516
97665	94.71	435	256.0		zzzz254,zzzz401
25513	80.21	571	256.0		zzzz591,zzzz592
16630	63.68	669	256.0		zzzz644,zzzzz71
165919	63.57	711	256.0		zzzz103,zzzz499
157692	61.88	703	256.0		zzzz117,zzzz137
124868	68.72	617	256.0		zzzz185,zzzz202
117004	67.48	615	256.0		zzzz202,zzzz742
70975	94.14	478	256.0		zzzz353,zzzz364
6335	64.49	704	256.0		zzzz725,zzzz727
6136	64.35	704	256.0		zzzz727,zzzz744
154524	75.3	591	255.0		zzzz123,zzzz290
165322	63.71	722	255.0		zzzz104,zzzz624
157691	61.34	701	255.0		zzzz117,zzzz514
117003	68.07	617	255.0		zzzz202,zzzz740
94894	62.86	700	255.0		zzzz262,zzzz552
66397	80.04	571	255.0		zzzz414,zzzz665
43307	62.04	706	255.0		zzzz514,zzzz516
35949	64.14	711	255.0		zzzz540,zzzz624
71850	91.0	478	255.0		zzzz344,zzzz357
69841	94.69	433	255.0		zzzz366,zzzz378
43306	61.33	706	255.0		zzzz514,zzzz544
23161	78.12	521	255.0		zzzz604,zzzz665
19069	82.57	499	255.0		zzzz627,zzzzz10
4134	82.77	499	255.0		zzzzz10,zzzzzz5
117002	67.91	617	254.0		zzzz202,zzzz744
71072	94.25	435	255.0		zzzz352,zzzz401
67005	77.84	519	255.0		zzzz412,zzzz604
6235	63.93	707	254.0		zzzz726,zzzz740
154523	75.47	591	254.0		zzzz123,zzzzz70
119490	64.49	704	254.0		zzzz196,zzzz727
97664	94.71	435	254.0		zzzz254,zzzz352
117001	68.45	618	254.0		zzzz202,zzzz492
70716	93.1	478	254.0		zzzz356,zzzz357
117000	67.59	617	254.0		zzzz202,zzzz453
64891	77.2	579	254.0		zzzz419,zzzz662
19646	63.94	710	254.0		zzzz624,zzzzz38
14504	79.2	577	254.0		zzzz660,zzzz664
164717	82.79	488	253.0		zzzz105,zzzzz49
154522	74.96	591	253.0		zzzz123,zzzz713
147813	71.63	564	253.0		zzzz136,zzzz145
116999	67.59	617	253.0		zzzz202,zzzz743
100885	67.46	673	253.0		zzzz246,zzzz712
65794	78.18	582	253.0		zzzz416,zzzz419
37593	63.83	705	253.0		zzzz534,zzzz546
25300	78.92	574	253.0		zzzz592,zzzz660
147252	61.45	703	253.0		zzzz137,zzzz532
86895	68.87	652	253.0		zzzz285,zzzzz64
34367	63.92	704	253.0		zzzz546,zzzz623
25299	78.42	519	253.0		zzzz592,zzzz604
12985	64.48	625	253.0		zzzz672,zzzz677
146124	62.03	669	253.0		zzzz139,zzzz504
66396	79.68	571	253.0		zzzz414,zzzz592
49210	65.2	704	253.0		zzzz492,zzzz727
41256	61.59	703	253.0		zzzz521,zzzz710
12226	64.96	625	253.0		zzzz677,zzzz709
11497	81.97	488	253.0		zzzz682,zzzzz49
154521	75.3	591	252.0		zzzz123,zzzz526
116998	67.76	611	252.0		zzzz202,zzzz727
68298	93.67	474	253.0		zzzz391,zzzz407
12984	64.06	626	252.0		zzzz672,zzzzz96
99144	62.26	681	252.0		zzzz250,zzzz672
42132	63.21	704	252.0		zzzz518,zzzz545
25512	79.19	519	252.0		zzzz591,zzzz605
16126	82.36	499	252.0		zzzz647,zzzzz10
7955	64.54	626	252.0		zzzz709,zzzzz96
130835	63.83	694	252.0		zzzz170,zzzz624
72155	93.32	434	252.0		zzzz341,zzzz367
47782	63.38	710	252.0		zzzz499,zzzz521
46850	63.52	710	252.0		zzzz502,zzzz540
66395	79.27	574	252.0		zzzz414,zzzz664
6135	64.35	704	251.0		zzzz727,zzzz740
100884	65.63	675	251.0		zzzz246,zzzzz67
66098	76.3	578	251.0		zzzz415,zzzz657
34630	62.78	704	251.0		zzzz545,zzzz546
165321	63.56	719	251.0		zzzz104,zzzz502
72582	93.78	434	251.0		zzzz337,zzzz367
66097	77.43	576	251.0		zzzz415,zzzz661
42131	63.92	704	251.0		zzzz518,zzzz623
9840	64.24	674	251.0		zzzz694,zzzz701
3376	70.47	613	251.0		zzzzz35,zzzzz79
146123	60.84	669	251.0		zzzz139,zzzzz71
116997	66.94	617	251.0		zzzz202,zzzz725
43305	60.66	699	251.0		zzzz514,zzzz532
9187	63.49	682	251.0		zzzz699,zzzz701
138608	81.56	488	250.0		zzzz154,zzzzz49
99143	62.26	681	250.0		zzzz250,zzzz709
46231	62.33	669	250.0		zzzz504,zzzz515
12983	65.34	626	250.0		zzzz672,zzzzz63
159979	61.39	676	250.0		zzzz113,zzzz193
69778	93.78	434	250.0		zzzz367,zzzz378
46849	62.96	710	250.0		zzzz502,zzzzz38
70423	94.37	426	250.0		zzzz359,zzzz381
159392	83.86	477	249.0		zzzz114,zzzz674
43007	61.73	669	249.0		zzzz515,zzzzz71
42130	62.93	704	249.0		zzzz518,zzzz534
11932	81.15	488	249.0		zzzz679,zzzzz49
138607	63.0	673	249.0		zzzz154,zzzz193
69579	94.6	426	249.0		zzzz370,zzzz381
67312	72.81	581	249.0		zzzz411,zzzz641
33244	67.06	592	249.0		zzzz552,zzzz571
164716	61.22	673	249.0		zzzz105,zzzz193
130834	62.61	690	249.0		zzzz170,zzzz710
70422	94.35	425	249.0		zzzz359,zzzz369
69647	95.05	424	249.0		zzzz369,zzzz370
47781	62.36	712	249.0		zzzz499,zzzz540
46542	62.38	715	249.0		zzzz503,zzzz719
12982	64.54	626	249.0		zzzz672,zzzzz36
120940	63.0	673	248.0		zzzz193,zzzz679
71539	94.84	426	249.0		zzzz347,zzzz361
64890	77.03	579	249.0		zzzz419,zzzz661
147812	60.94	681	248.0		zzzz136,zzzz672
130833	62.75	690	248.0		zzzz170,zzzz499
130832	63.15	692	248.0		zzzz170,zzzz502
46230	85.62	459	248.0		zzzz504,zzzz541
35948	60.36	719	248.0		zzzz540,zzzz710
163531	68.28	640	248.0		zzzz107,zzzz513
119489	66.29	617	247.0		zzzz196,zzzz202
72581	93.09	434	248.0		zzzz337,zzzz378
69646	93.66	426	248.0		zzzz369,zzzz381
7954	64.7	626	248.0		zzzz709,zzzzz63
134983	64.7	643	247.0		zzzz161,zzzzz53
118196	82.89	532	247.0		zzzz199,zzzz200
86894	65.68	673	247.0		zzzz285,zzzz697
66096	75.52	580	247.0		zzzz415,zzzz662
120939	60.71	672	247.0		zzzz193,zzzz730
101339	63.62	668	247.0		zzzz245,zzzz536
71158	92.4	434	247.0		zzzz351,zzzz378
37040	63.92	668	247.0		zzzz536,zzzz733
23160	76.76	525	247.0		zzzz604,zzzz664
12528	63.8	674	247.0		zzzz675,zzzz683
164715	63.38	669	247.0		zzzz105,zzzz504
161763	86.9	458	247.0		zzzz110,zzzz541
153044	71.12	554	247.0		zzzz126,zzzz136
120418	63.81	677	247.0		zzzz194,zzzz683
98227	68.59	640	247.0		zzzz252,zzzz513
72580	93.43	426	247.0		zzzz337,zzzz341
72154	92.4	434	247.0		zzzz341,zzzz378
71157	91.94	434	247.0		zzzz351,zzzz367
68205	92.41	461	247.0		zzzz393,zzzz400
40391	66.97	654	247.0		zzzz524,zzzz525
9447	64.83	654	247.0		zzzz697,zzzzz64
98684	63.88	695	246.0		zzzz251,zzzz624
164128	62.46	666	246.0		zzzz106,zzzz152
134982	64.54	643	246.0		zzzz161,zzzzz73
47780	62.43	708	246.0		zzzz499,zzzzz38
35677	84.75	459	246.0		zzzz541,zzzzz71
7266	61.6	677	246.0		zzzz715,zzzzz68
165320	61.03	716	246.0		zzzz104,zzzz499
120938	61.96	673	246.0		zzzz193,zzzz682
65793	72.15	578	246.0		zzzz416,zzzz641
37039	62.74	671	246.0		zzzz536,zzzz702
36221	60.56	677	246.0		zzzz539,zzzzz68
22118	63.34	682	246.0		zzzz611,zzzz701
13284	76.42	581	246.0		zzzz670,zzzzzz6
9839	62.11	681	246.0		zzzz694,zzzz699
158278	62.61	682	245.0		zzzz116,zzzz510
70169	92.21	475	246.0		zzzz362,zzzz389
66394	77.31	520	246.0		zzzz414,zzzz606
7840	60.48	711	245.0		zzzz710,zzzzz38
69840	91.24	434	245.0		zzzz366,zzzz367
44430	62.54	678	245.0		zzzz510,zzzz696
164714	63.28	670	245.0		zzzz105,zzzz110
140717	62.26	673	245.0		zzzz150,zzzz193
70421	93.63	424	245.0		zzzz359,zzzz370
69362	94.34	424	245.0		zzzz373,zzzz395
22756	77.25	523	245.0		zzzz606,zzzz660
147811	60.21	681	245.0		zzzz136,zzzz709
71538	93.66	426	245.0		zzzz347,zzzz369
71537	93.43	426	245.0		zzzz347,zzzz406
156693	66.67	597	244.0		zzzz119,zzzz246
72153	90.78	434	245.0		zzzz341,zzzz351
31466	68.31	590	244.0		zzzz560,zzzz574
165319	60.42	720	244.0		zzzz104,zzzz710
164713	62.63	669	244.0		zzzz105,zzzzz71
160571	60.12	677	244.0		zzzz112,zzzz193
146693	60.86	677	244.0		zzzz138,zzzzz68
11355	63.35	674	244.0		zzzz683,zzzz720
7953	63.58	626	244.0		zzzz709,zzzzz36
7952	65.7	618	244.0		zzzz709,zzzzz43
72928	85.47	468	244.0		zzzz334,zzzz335
72579	90.78	434	244.0		zzzz337,zzzz351
65490	76.11	519	244.0		zzzz417,zzzz605
5274	59.76	758	244.0		zzzz736,zzzz737
167027	69.63	629	243.0		zzzz101,zzzz158
138058	60.45	713	243.0		zzzz155,zzzz503
69511	94.02	435	244.0		zzzz371,zzzz394
46541	60.45	713	243.0		zzzz503,zzzz511
12981	65.7	618	243.0		zzzz672,zzzzz43
11354	64.0	675	243.0		zzzz683,zzzz735
5273	58.65	757	243.0		zzzz736,zzzz742
1360	72.13	567	243.0		zzzzz76,zzzzz81
120937	62.11	673	243.0		zzzz193,zzzz644
109988	73.01	578	243.0		zzzz220,zzzz411
70974	89.12	478	243.0		zzzz353,zzzz408
68247	94.06	471	243.0		zzzz392,zzzz405
148381	63.18	679	243.0		zzzz135,zzzz731
138606	62.28	668	243.0		zzzz154,zzzzz71
72578	90.32	434	243.0		zzzz337,zzzz366
72152	90.32	434	243.0		zzzz341,zzzz366
46229	62.63	669	243.0		zzzz504,zzzz682
98683	63.6	695	242.0		zzzz251,zzzz502
11353	63.2	674	242.0		zzzz683,zzzz731
11352	62.83	678	242.0		zzzz683,zzzz732
161762	62.54	670	242.0		zzzz110,zzzz682
148380	62.06	680	242.0		zzzz135,zzzz194
99607	62.21	680	242.0		zzzz249,zzzz539
83715	64.94	636	242.0		zzzz293,zzzzz78
72927	94.44	468	242.0		zzzz334,zzzz409
72808	85.26	468	242.0		zzzz335,zzzz409
161761	62.03	669	242.0		zzzz110,zzzz154
157690	59.15	705	242.0		zzzz117,zzzz509
147251	58.64	689	242.0		zzzz137,zzzz509
71249	91.16	475	242.0		zzzz350,zzzz355
36220	59.68	677	242.0		zzzz539,zzzz716
11496	61.88	669	242.0		zzzz682,zzzzz71
138605	62.28	668	242.0		zzzz154,zzzz504
72062	91.63	478	242.0		zzzz342,zzzz353
71652	94.04	436	242.0		zzzz346,zzzz394
71156	90.09	434	242.0		zzzz351,zzzz366
134981	64.7	643	241.0		zzzz161,zzzz536
69277	91.18	431	242.0		zzzz374,zzzz383
46228	62.13	668	241.0		zzzz504,zzzz679
44731	59.52	704	241.0		zzzz509,zzzz516
22958	75.14	519	241.0		zzzz605,zzzz668
9838	63.8	674	241.0		zzzz694,zzzz697
161760	61.88	669	241.0		zzzz110,zzzz679
155089	64.51	603	241.0		zzzz122,zzzz709
22957	74.28	521	241.0		zzzz605,zzzz665
167026	69.59	628	241.0		zzzz101,zzzz131
161166	67.23	595	241.0		zzzz111,zzzz246
148379	62.3	679	241.0		zzzz135,zzzz720
70252	92.25	426	241.0		zzzz361,zzzz406
71962	93.25	474	241.0		zzzz343,zzzz371
71536	92.24	425	241.0		zzzz347,zzzz370
3194	91.21	421	240.0		zzzzz38,zzzzz46
96588	83.03	489	240.0		zzzz258,zzzz533
71535	91.55	426	240.0		zzzz347,zzzz359
71534	91.33	427	240.0		zzzz347,zzzz381
70516	93.13	422	240.0		zzzz358,zzzz396
44429	60.97	679	240.0		zzzz510,zzzz695
155088	63.85	603	240.0		zzzz122,zzzz672
72807	84.19	468	240.0		zzzz335,zzzz404
72274	93.35	436	240.0		zzzz340,zzzz394
44730	58.12	690	240.0		zzzz509,zzzz514
44729	59.52	709	240.0		zzzz509,zzzz532
148378	62.3	679	239.0		zzzz135,zzzz675
148377	61.64	683	239.0		zzzz135,zzzz732
146692	59.68	677	239.0		zzzz138,zzzz716
72061	90.17	478	240.0		zzzz342,zzzz364
70251	92.02	426	240.0		zzzz361,zzzz369
68557	86.97	445	240.0		zzzz386,zzzz410
67004	73.6	519	240.0		zzzz412,zzzz605
11931	61.23	668	239.0		zzzz679,zzzzz71
148376	62.52	675	239.0		zzzz135,zzzz735
146691	61.18	680	239.0		zzzz138,zzzz249
132052	68.29	615	239.0		zzzz167,zzzzz85
109987	72.17	575	239.0		zzzz220,zzzz416
71651	92.89	436	239.0		zzzz346,zzzz371
66095	70.52	580	239.0		zzzz415,zzzz641
44728	61.35	696	239.0		zzzz509,zzzz672
9837	63.55	653	239.0		zzzz694,zzzzz64
7265	60.32	678	239.0		zzzz715,zzzz716
109595	71.68	579	239.0		zzzz221,zzzz416
86893	66.42	673	239.0		zzzz285,zzzz694
70420	91.31	426	239.0		zzzz359,zzzz361
161759	62.17	674	238.0		zzzz110,zzzz112
70250	91.1	427	239.0		zzzz361,zzzz381
44727	60.92	696	238.0		zzzz509,zzzz709
6234	64.17	667	238.0		zzzz726,zzzz736
160570	61.81	673	238.0		zzzz112,zzzz504
109594	71.13	582	238.0		zzzz221,zzzz411
72273	92.89	436	238.0		zzzz340,zzzz371
71961	92.83	474	238.0		zzzz343,zzzz346
70023	86.82	478	238.0		zzzz364,zzzz408
67311	69.93	582	238.0		zzzz411,zzzz588
45926	64.43	641	238.0		zzzz505,zzzz513
44726	58.11	709	238.0		zzzz509,zzzz544
25511	75.58	520	238.0		zzzz591,zzzz606
22117	63.7	675	238.0		zzzz611,zzzz694
120936	62.11	673	238.0		zzzz193,zzzz515
71960	93.35	436	238.0		zzzz343,zzzz394
25298	74.37	519	238.0		zzzz592,zzzz605
72272	91.97	436	238.0		zzzz340,zzzz346
147810	60.39	674	237.0		zzzz136,zzzz510
72926	94.33	406	237.0		zzzz334,zzzz404
65792	70.88	577	237.0		zzzz416,zzzz656
160569	60.92	673	237.0		zzzz112,zzzzz71
69645	91.08	426	237.0		zzzz369,zzzz406
46227	61.29	669	237.0		zzzz504,zzzz730
164127	59.65	679	236.0		zzzz106,zzzz680
146690	61.0	677	236.0		zzzz138,zzzz703
99606	63.09	680	236.0		zzzz249,zzzz715
67310	71.45	578	237.0		zzzz411,zzzz626
109593	71.08	581	236.0		zzzz221,zzzz415
65791	72.24	580	236.0		zzzz416,zzzz588
9186	62.58	660	236.0		zzzz699,zzzzz64
6134	64.13	669	236.0		zzzz727,zzzz736
167025	68.16	625	236.0		zzzz101,zzzz132
159978	59.91	671	236.0		zzzz113,zzzz504
19252	71.8	578	236.0		zzzz626,zzzz657
7604	70.38	530	236.0		zzzz712,zzzzz98
109986	71.63	578	236.0		zzzz220,zzzz657
109592	71.85	579	236.0		zzzz221,zzzz657
70249	90.35	425	236.0		zzzz361,zzzz370
67309	72.04	583	236.0		zzzz411,zzzz589
67308	70.79	582	236.0		zzzz411,zzzz590
66701	69.95	579	236.0		zzzz413,zzzz641
65790	70.93	578	236.0		zzzz416,zzzz590
44428	60.36	676	235.0		zzzz510,zzzzz67
72925	93.35	406	236.0		zzzz334,zzzz380
69142	88.09	470	236.0		zzzz376,zzzz382
67606	92.74	468	236.0		zzzz404,zzzz409
67307	69.55	578	235.0		zzzz411,zzzz637
67306	69.14	580	235.0		zzzz411,zzzz656
42129	63.84	672	235.0		zzzz518,zzzz525
28636	65.05	598	235.0		zzzz574,zzzz579
22116	62.58	660	235.0		zzzz611,zzzzz64
109591	71.21	580	235.0		zzzz221,zzzz413
72806	83.55	468	235.0		zzzz335,zzzz385
64889	69.3	583	235.0		zzzz419,zzzz641
17136	70.34	580	235.0		zzzz641,zzzz657
17135	70.42	578	235.0		zzzz641,zzzz661
5846	60.99	669	235.0		zzzz730,zzzzz71
5560	63.12	648	235.0		zzzz733,zzzzz53
147809	59.65	689	235.0		zzzz136,zzzz509
72805	83.55	468	235.0		zzzz335,zzzz380
65789	71.3	575	235.0		zzzz416,zzzz626
36219	60.71	677	235.0		zzzz539,zzzz703
159977	59.17	671	234.0		zzzz113,zzzzz71
146122	59.88	673	234.0		zzzz139,zzzz193
68849	89.93	427	235.0		zzzz381,zzzz406
67305	71.7	583	234.0		zzzz411,zzzz655
46540	93.08	448	234.0		zzzz503,zzzzz59
69578	90.12	425	234.0		zzzz370,zzzz406
68622	85.9	468	234.0		zzzz385,zzzz409
67304	72.04	583	234.0		zzzz411,zzzz640
40106	62.5	672	234.0		zzzz525,zzzz546
26159	71.94	581	234.0		zzzz588,zzzz657
8810	62.67	651	234.0		zzzz702,zzzzz73
5559	62.81	648	234.0		zzzz733,zzzzz73
72924	85.32	436	234.0		zzzz334,zzzz401
68898	92.74	468	234.0		zzzz380,zzzz409
164126	60.5	681	233.0		zzzz106,zzzz506
161758	60.9	670	233.0		zzzz110,zzzz730
136974	65.04	635	233.0		zzzz157,zzzz293
132051	66.34	609	233.0		zzzz167,zzzz734
101338	62.65	648	233.0		zzzz245,zzzzz73
72923	85.09	436	234.0		zzzz334,zzzz352
17134	70.29	579	234.0		zzzz641,zzzz662
14841	71.28	578	234.0		zzzz656,zzzz657
9973	61.41	666	233.0		zzzz693,zzzz733
161757	60.12	672	233.0		zzzz110,zzzz113
70419	89.2	426	233.0		zzzz359,zzzz406
67303	72.38	583	233.0		zzzz411,zzzz636
26158	71.55	580	233.0		zzzz588,zzzz662
19251	71.28	578	233.0		zzzz626,zzzz662
17834	72.32	578	233.0		zzzz637,zzzz657
8809	62.37	651	233.0		zzzz702,zzzzz53
2201	69.79	566	233.0		zzzzz55,zzzzz76
109590	71.16	579	233.0		zzzz221,zzzz662
72271	94.12	442	233.0		zzzz340,zzzz343
71071	84.86	436	233.0		zzzz352,zzzz404
67302	72.21	583	233.0		zzzz411,zzzz603
22956	73.14	525	233.0		zzzz605,zzzz664
116996	59.38	672	232.0		zzzz202,zzzz736
108763	69.5	577	232.0		zzzz224,zzzz416
101337	61.11	666	232.0		zzzz245,zzzz693
101336	62.65	648	232.0		zzzz245,zzzzz53
108762	68.28	580	232.0		zzzz224,zzzz411
106570	66.0	600	232.0		zzzz232,zzzz686
83714	64.88	635	232.0		zzzz293,zzzzz39
67742	84.4	436	232.0		zzzz401,zzzz404
65788	72.05	576	232.0		zzzz416,zzzz637
14840	70.36	577	232.0		zzzz656,zzzz662
9972	60.75	670	232.0		zzzz693,zzzz702
8681	61.36	678	232.0		zzzz703,zzzz715
145055	95.01	461	232.0		zzzz141,zzzz510
109985	70.36	577	232.0		zzzz220,zzzz413
68897	92.36	406	232.0		zzzz380,zzzz404
65787	70.86	580	232.0		zzzz416,zzzz589
65786	70.86	580	232.0		zzzz416,zzzz655
39540	67.34	548	232.0		zzzz527,zzzz540
39539	67.64	547	232.0		zzzz527,zzzzz38
109984	70.02	577	231.0		zzzz220,zzzz415
86892	59.77	681	231.0		zzzz285,zzzz699
71070	84.63	436	232.0		zzzz352,zzzz409
65785	71.55	580	231.0		zzzz416,zzzz640
15000	70.91	581	231.0		zzzz655,zzzz657
120935	60.51	671	231.0		zzzz193,zzzz504
71069	85.32	436	231.0		zzzz352,zzzz385
67741	84.4	436	231.0		zzzz401,zzzz409
25726	70.42	578	231.0		zzzz590,zzzz657
18011	71.6	581	231.0		zzzz636,zzzz657
156692	63.19	595	231.0		zzzz119,zzzz510
132050	65.62	608	231.0		zzzz167,zzzzz42
35947	88.12	421	231.0		zzzz540,zzzzz46
22755	72.88	520	231.0		zzzz606,zzzz668
14839	71.06	577	231.0		zzzz656,zzzz661
65489	72.88	520	231.0		zzzz417,zzzz606
19250	70.42	578	231.0		zzzz626,zzzz661
17309	70.57	581	231.0		zzzz640,zzzz657
9446	58.21	682	230.0		zzzz697,zzzz699
122989	59.56	680	230.0		zzzz189,zzzz680
65784	71.26	581	230.0		zzzz416,zzzz636
18010	71.03	580	230.0		zzzz636,zzzz662
1612	61.06	601	230.0		zzzzz69,zzzzz84
163530	57.75	677	230.0		zzzz107,zzzz646
109983	70.42	578	230.0		zzzz220,zzzz661
109982	70.42	578	230.0		zzzz220,zzzz662
66094	70.05	581	230.0		zzzz415,zzzz590
165318	67.63	556	230.0		zzzz104,zzzz527
109589	69.59	582	230.0		zzzz221,zzzz419
109588	70.12	579	230.0		zzzz221,zzzz661
98682	61.22	691	230.0		zzzz251,zzzz499
98681	60.03	693	229.0		zzzz251,zzzz710
66700	69.48	580	230.0		zzzz413,zzzz590
66093	71.08	581	230.0		zzzz415,zzzz588
66092	70.79	582	230.0		zzzz415,zzzz655
25942	70.4	581	230.0		zzzz589,zzzz657
108761	69.72	578	229.0		zzzz224,zzzz657
17833	71.35	576	229.0		zzzz637,zzzz661
1238	65.14	657	229.0		zzzzz80,zzzzz88
109981	70.07	578	229.0		zzzz220,zzzz419
86891	60.06	681	229.0		zzzz285,zzzz611
69213	91.45	433	229.0		zzzz375,zzzz387
66699	69.32	577	229.0		zzzz413,zzzz626
66091	68.98	577	229.0		zzzz415,zzzz626
65783	69.54	581	229.0		zzzz416,zzzz603
64888	69.2	578	229.0		zzzz419,zzzz626
26157	70.34	580	229.0		zzzz588,zzzz661
14999	69.83	580	229.0		zzzz655,zzzz662
162944	62.29	647	229.0		zzzz108,zzzzz73
139711	58.0	669	229.0		zzzz152,zzzz680
98226	58.22	675	229.0		zzzz252,zzzz646
68896	83.94	436	229.0		zzzz380,zzzz401
64887	69.76	582	229.0		zzzz419,zzzz590
134980	64.73	584	228.0		zzzz161,zzzz245
108760	70.98	579	228.0		zzzz224,zzzz415
66090	70.62	582	228.0		zzzz415,zzzz640
23363	70.22	581	228.0		zzzz603,zzzz662
120934	60.06	671	228.0		zzzz193,zzzzz71
71068	83.72	436	228.0		zzzz352,zzzz380
25941	69.48	580	228.0		zzzz589,zzzz662
18009	70.69	580	228.0		zzzz636,zzzz661
11495	90.55	402	228.0		zzzz682,zzzzz48
162943	63.81	583	228.0		zzzz108,zzzz536
108759	68.8	577	228.0		zzzz224,zzzz662
98680	66.79	548	228.0		zzzz251,zzzz527
64886	70.74	581	228.0		zzzz419,zzzz656
31465	66.38	586	228.0		zzzz560,zzzz579
23362	70.27	582	228.0		zzzz603,zzzz657
162942	62.29	647	227.0		zzzz108,zzzzz53
143300	65.71	560	227.0		zzzz145,zzzz709
68621	83.72	436	228.0		zzzz385,zzzz401
66698	69.36	581	228.0		zzzz413,zzzz588
66697	69.26	579	228.0		zzzz413,zzzz656
66089	69.76	582	228.0		zzzz415,zzzz589
66088	71.06	577	228.0		zzzz415,zzzz637
41550	62.87	641	227.0		zzzz520,zzzz701
41549	63.34	641	227.0		zzzz520,zzzzz64
25725	69.72	578	228.0		zzzz590,zzzz662
17308	69.48	580	228.0		zzzz640,zzzz662
1822	62.83	643	227.0		zzzzz64,zzzzz75
134979	63.92	582	227.0		zzzz161,zzzz733
108758	69.26	579	227.0		zzzz224,zzzz413
66087	70.98	579	227.0		zzzz415,zzzz656
22115	59.82	682	227.0		zzzz611,zzzz697
86040	61.69	629	227.0		zzzz287,zzzz634
66086	70.62	582	227.0		zzzz415,zzzz636
64885	70.5	583	227.0		zzzz419,zzzz655
17832	70.54	577	227.0		zzzz637,zzzz662
156113	68.39	522	227.0		zzzz120,zzzz161
147808	54.48	692	226.0		zzzz136,zzzz514
100425	91.96	448	227.0		zzzz247,zzzzz59
71740	94.87	390	227.0		zzzz345,zzzz379
28872	58.73	613	226.0		zzzz573,zzzz584
23361	70.22	581	227.0		zzzz603,zzzz661
83319	59.56	680	226.0		zzzz294,zzzz506
64884	71.18	583	226.0		zzzz419,zzzz588
14998	69.66	580	226.0		zzzz655,zzzz661
164712	90.98	399	226.0		zzzz105,zzzzz48
161165	59.79	674	226.0		zzzz111,zzzz510
130831	66.18	547	226.0		zzzz170,zzzz527
104407	66.23	610	226.0		zzzz237,zzzz312
97663	85.04	468	226.0		zzzz254,zzzz385
72922	85.04	468	226.0		zzzz334,zzzz385
67003	70.38	520	226.0		zzzz412,zzzz606
66696	69.88	581	226.0		zzzz413,zzzz655
22754	70.69	522	226.0		zzzz606,zzzz665
139710	58.07	675	226.0		zzzz152,zzzz506
122988	60.06	681	226.0		zzzz189,zzzz506
70093	94.36	390	226.0		zzzz363,zzzz379
66085	69.02	581	226.0		zzzz415,zzzz603
25724	69.38	578	226.0		zzzz590,zzzz661
17307	69.66	580	226.0		zzzz640,zzzz661
71739	94.62	390	226.0		zzzz345,zzzz363
66695	70.74	581	225.0		zzzz413,zzzz636
25940	68.97	580	225.0		zzzz589,zzzz661
162941	63.57	582	225.0		zzzz108,zzzz161
161756	59.44	673	225.0		zzzz110,zzzz193
153043	65.29	556	225.0		zzzz126,zzzz709
147807	56.0	675	225.0		zzzz136,zzzzz67
108757	69.15	577	225.0		zzzz224,zzzz661
72060	89.32	440	225.0		zzzz342,zzzz408
66694	69.88	581	225.0		zzzz413,zzzz640
64883	69.64	583	225.0		zzzz419,zzzz589
9577	57.48	682	225.0		zzzz696,zzzzz67
153042	64.75	556	225.0		zzzz126,zzzz672
143299	63.93	560	225.0		zzzz145,zzzz672
87339	55.82	679	225.0		zzzz284,zzzz291
71738	94.1	390	225.0		zzzz345,zzzz368
66693	69.19	581	225.0		zzzz413,zzzz589
64882	71.03	580	225.0		zzzz419,zzzz637
109177	84.81	428	225.0		zzzz223,zzzzz11
99142	56.3	698	224.0		zzzz250,zzzz509
66692	69.71	581	224.0		zzzz413,zzzz603
64881	70.15	583	224.0		zzzz419,zzzz640
30066	92.62	393	225.0		zzzz567,zzzz568
4060	83.64	428	225.0		zzzzz11,zzzzzz2
66691	68.63	577	224.0		zzzz413,zzzz637
44427	59.35	679	224.0		zzzz510,zzzz712
138604	89.8	402	224.0		zzzz154,zzzzz48
64880	70.21	584	224.0		zzzz419,zzzz636
158277	56.57	677	223.0		zzzz116,zzzz712
147806	54.73	698	223.0		zzzz136,zzzz137
134978	60.81	643	224.0		zzzz161,zzzz693
108756	69.36	581	224.0		zzzz224,zzzz419
68620	84.62	468	224.0		zzzz385,zzzz404
38973	65.58	552	224.0		zzzz529,zzzz536
25297	70.75	523	224.0		zzzz592,zzzz606
4059	84.58	428	224.0		zzzzz11,zzzzzz9
11930	90.48	399	223.0		zzzz679,zzzzz48
8934	61.12	643	223.0		zzzz701,zzzzz75
134977	62.77	650	223.0		zzzz161,zzzz702
95332	59.73	591	223.0		zzzz261,zzzz584
89877	62.63	594	223.0		zzzz278,zzzz521
64879	69.3	583	223.0		zzzz419,zzzz603
38972	65.22	552	223.0		zzzz529,zzzzz73
9576	56.85	679	223.0		zzzz696,zzzz712
4058	83.64	428	223.0		zzzzz11,zzzzzz8
69712	92.56	390	223.0		zzzz368,zzzz379
159391	56.48	671	222.0		zzzz114,zzzz152
95331	96.83	441	222.0		zzzz261,zzzz555
71349	85.17	472	222.0		zzzz349,zzzz390
53384	92.93	396	222.0		zzzz469,zzzz526
45621	58.24	680	222.0		zzzz506,zzzz676
41548	62.87	641	222.0		zzzz520,zzzz694
35403	82.94	428	222.0		zzzz542,zzzzz11
18666	83.18	428	222.0		zzzz630,zzzzz11
53383	92.93	396	222.0		zzzz469,zzzzz70
44725	56.83	681	222.0		zzzz509,zzzz677
164125	56.38	674	221.0		zzzz106,zzzz646
158276	57.18	682	221.0		zzzz116,zzzzz67
98225	55.75	678	221.0		zzzz252,zzzz281
70092	92.77	415	222.0		zzzz363,zzzz368
12381	56.55	679	221.0		zzzz676,zzzz680
9836	62.15	642	221.0		zzzz694,zzzzz75
1063	68.73	550	221.0		zzzzz87,zzzzz90
144114	82.68	433	221.0		zzzz143,zzzz733
32557	93.06	447	221.0		zzzz555,zzzz573
22753	70.83	528	221.0		zzzz606,zzzz664
163529	55.31	678	221.0		zzzz107,zzzz281
144113	82.68	433	221.0		zzzz143,zzzz245
139709	55.42	673	221.0		zzzz152,zzzz646
134976	65.76	549	221.0		zzzz161,zzzz529
89876	60.88	593	221.0		zzzz278,zzzz530
44724	59.03	681	221.0		zzzz509,zzzz510
39538	65.52	551	221.0		zzzz527,zzzz624
38971	64.86	552	221.0		zzzz529,zzzzz53
9706	57.16	677	221.0		zzzz695,zzzz712
103988	60.87	667	221.0		zzzz238,zzzz689
97662	85.62	438	221.0		zzzz254,zzzz334
97661	85.68	468	221.0		zzzz254,zzzz409
87338	54.84	671	220.0		zzzz284,zzzz708
89434	57.81	685	220.0		zzzz279,zzzz535
26407	82.48	428	220.0		zzzz586,zzzzz11
164124	56.87	677	220.0		zzzz106,zzzz189
161164	54.75	674	220.0		zzzz111,zzzz136
159390	56.55	679	220.0		zzzz114,zzzz680
92867	92.44	397	220.0		zzzz267,zzzz602
39258	56.95	676	220.0		zzzz528,zzzz711
3703	85.15	404	220.0		zzzzz22,zzzzz23
2729	67.15	551	220.0		zzzzz45,zzzzz90
164123	57.52	678	220.0		zzzz106,zzzz676
121959	54.74	685	220.0		zzzz191,zzzz536
91258	72.6	500	220.0		zzzz274,zzzz276
9705	55.99	684	220.0		zzzz695,zzzzz67
165918	60.91	591	219.0		zzzz103,zzzz278
159389	57.62	682	219.0		zzzz114,zzzz506
156691	60.0	600	219.0		zzzz119,zzzz696
70885	81.9	464	220.0		zzzz354,zzzz384
164122	57.33	675	219.0		zzzz106,zzzz114
139708	54.45	674	219.0		zzzz152,zzzz281
139707	55.41	675	219.0		zzzz152,zzzz676
97660	84.93	438	219.0		zzzz254,zzzz404
87744	67.27	550	219.0		zzzz283,zzzzz90
72804	78.68	469	219.0		zzzz335,zzzz396
68895	83.55	468	219.0		zzzz380,zzzz385
127422	57.19	633	218.0		zzzz179,zzzz193
83318	56.34	678	218.0		zzzz294,zzzz680
62967	92.29	389	219.0		zzzz425,zzzzz70
44723	56.4	695	218.0		zzzz509,zzzzz63
162940	80.83	433	218.0		zzzz108,zzzz143
158275	54.28	678	218.0		zzzz116,zzzz136
134975	56.06	660	218.0		zzzz161,zzzz191
89875	59.61	619	218.0		zzzz278,zzzz624
86469	58.8	619	218.0		zzzz286,zzzz528
164121	57.61	677	217.0		zzzz106,zzzz706
147805	52.79	699	217.0		zzzz136,zzzz532
147804	55.13	673	217.0		zzzz136,zzzz712
131537	72.08	530	218.0		zzzz168,zzzzz88
130830	87.38	404	218.0		zzzz170,zzzzz46
120933	57.03	633	217.0		zzzz193,zzzz492
117806	75.05	533	218.0		zzzz200,zzzz300
84913	91.41	396	218.0		zzzz290,zzzz469
69939	78.89	469	218.0		zzzz365,zzzz409
67301	65.3	585	218.0		zzzz411,zzzz664
62966	92.29	389	218.0		zzzz425,zzzz526
46848	64.67	552	218.0		zzzz502,zzzz527
44722	58.02	636	217.0		zzzz509,zzzzz96
164120	54.22	675	217.0		zzzz106,zzzz281
99605	55.39	677	217.0		zzzz249,zzzzz68
147250	53.9	692	217.0		zzzz137,zzzz250
71849	76.88	480	217.0		zzzz344,zzzz408
13730	81.07	428	217.0		zzzz667,zzzzz11
120932	56.85	635	217.0		zzzz193,zzzz743
164711	56.21	692	216.0		zzzz105,zzzz179
164119	56.93	678	216.0		zzzz106,zzzz203
100883	66.03	527	216.0		zzzz246,zzzzz98
65187	81.07	428	216.0		zzzz418,zzzzz11
44426	60.13	602	216.0		zzzz510,zzzz672
16304	54.65	677	216.0		zzzz646,zzzz676
148896	64.59	562	216.0		zzzz134,zzzz140
97659	84.25	438	216.0		zzzz254,zzzz380
16629	53.8	684	216.0		zzzz644,zzzz737
164118	56.78	678	216.0		zzzz106,zzzz294
161163	56.01	682	216.0		zzzz111,zzzz696
120931	56.24	633	216.0		zzzz193,zzzz740
72692	79.71	478	216.0		zzzz336,zzzz357
67300	65.07	584	216.0		zzzz411,zzzz665
164117	56.15	675	215.0		zzzz106,zzzz252
159976	53.62	690	215.0		zzzz113,zzzz743
147803	55.1	677	215.0		zzzz136,zzzz696
144112	80.37	433	216.0		zzzz143,zzzz529
138603	53.34	688	215.0		zzzz154,zzzz729
99141	55.05	683	215.0		zzzz250,zzzz510
99140	52.61	690	215.0		zzzz250,zzzz514
72484	83.58	475	216.0		zzzz338,zzzz349
159975	93.25	415	215.0		zzzz113,zzzz128
120930	55.61	633	215.0		zzzz193,zzzz744
71446	78.31	438	215.0		zzzz348,zzzz382
67299	65.07	584	215.0		zzzz411,zzzz591
16303	54.72	678	215.0		zzzz646,zzzz680
10793	61.12	571	215.0		zzzz687,zzzz689
164116	56.59	675	215.0		zzzz106,zzzz673
159974	53.4	691	215.0		zzzz113,zzzz744
124867	56.56	633	215.0		zzzz185,zzzz193
73259	79.54	479	215.0		zzzz331,zzzz403
71848	77.29	480	215.0		zzzz344,zzzz364
70248	82.95	434	215.0		zzzz361,zzzz395
53382	90.4	396	215.0		zzzz469,zzzz500
53381	89.9	396	215.0		zzzz469,zzzz713
45925	54.82	684	215.0		zzzz505,zzzz646
44425	59.8	602	215.0		zzzz510,zzzz709
161162	56.58	684	214.0		zzzz111,zzzz116
159973	53.28	687	214.0		zzzz113,zzzz729
158274	58.91	606	214.0		zzzz116,zzzz119
157689	52.34	705	214.0		zzzz117,zzzz136
156690	59.8	602	214.0		zzzz119,zzzz695
151975	92.77	415	215.0		zzzz128,zzzz730
89874	60.85	590	214.0		zzzz278,zzzz502
72691	76.57	478	215.0		zzzz336,zzzz344
71445	77.68	439	215.0		zzzz348,zzzz376
70247	82.03	434	215.0		zzzz361,zzzz373
67298	64.38	584	215.0		zzzz411,zzzz668
44721	55.83	695	214.0		zzzz509,zzzzz36
39257	56.8	676	214.0		zzzz528,zzzz691
22114	56.37	683	214.0		zzzz611,zzzz702
162939	60.76	581	214.0		zzzz108,zzzz693
159972	54.34	692	214.0		zzzz113,zzzz179
156689	56.37	628	214.0		zzzz119,zzzz136
147249	54.34	692	214.0		zzzz137,zzzz677
120929	56.83	637	214.0		zzzz193,zzzz453
72483	84.66	476	214.0		zzzz338,zzzz390
70344	83.33	432	214.0		zzzz360,zzzz398
67297	65.87	583	214.0		zzzz411,zzzz592
62965	91.52	389	214.0		zzzz425,zzzz713
34897	53.49	703	214.0		zzzz544,zzzz672
159971	53.69	691	214.0		zzzz113,zzzz725
159970	54.37	686	214.0		zzzz113,zzzz739
157688	53.67	708	214.0		zzzz117,zzzz672
140716	53.44	683	214.0		zzzz150,zzzz737
89873	58.78	609	214.0		zzzz278,zzzz499
67296	64.49	583	214.0		zzzz411,zzzz417
8933	57.33	614	214.0		zzzz701,zzzz702
164710	54.64	690	213.0		zzzz105,zzzz185
34896	53.85	702	213.0		zzzz544,zzzz709
16628	53.36	684	214.0		zzzz644,zzzz742
164115	56.1	672	213.0		zzzz106,zzzz107
161161	55.12	684	213.0		zzzz111,zzzz695
159388	53.85	676	213.0		zzzz114,zzzz646
147802	53.69	678	213.0		zzzz136,zzzz695
138602	54.98	693	213.0		zzzz154,zzzz179
127421	55.54	695	213.0		zzzz179,zzzz679
124866	54.64	690	213.0		zzzz185,zzzz679
120928	56.08	633	213.0		zzzz193,zzzz725
89872	58.46	609	213.0		zzzz278,zzzz710
73258	77.7	444	214.0		zzzz331,zzzz410
71067	79.63	437	214.0		zzzz352,zzzz396
70973	79.17	480	214.0		zzzz353,zzzz357
53380	89.39	396	213.0		zzzz469,zzzz721
47464	57.96	609	213.0		zzzz500,zzzz528
44720	58.51	617	213.0		zzzz509,zzzzz43
11351	60.0	600	213.0		zzzz683,zzzzz68
164709	54.14	689	213.0		zzzz105,zzzz743
159387	56.52	683	213.0		zzzz114,zzzz189
157687	53.68	706	213.0		zzzz117,zzzz709
147248	52.81	693	213.0		zzzz137,zzzzz36
138601	54.28	689	213.0		zzzz154,zzzz743
118195	78.22	528	213.0		zzzz199,zzzz300
97040	57.94	592	213.0		zzzz257,zzzz558
88606	53.24	678	213.0		zzzz281,zzzz676
70615	78.75	480	213.0		zzzz357,zzzz364
70614	78.96	480	213.0		zzzz357,zzzz408
39256	59.27	599	213.0		zzzz528,zzzzz70
16302	55.96	679	213.0		zzzz646,zzzz706
164708	52.84	687	213.0		zzzz105,zzzz729
147801	51.49	705	213.0		zzzz136,zzzz516
84912	57.96	609	213.0		zzzz290,zzzz528
71847	76.25	480	213.0		zzzz344,zzzz353
69644	82.45	433	213.0		zzzz369,zzzz395
39821	59.1	599	213.0		zzzz526,zzzz528
39255	57.4	676	213.0		zzzz528,zzzz721
17133	64.05	587	213.0		zzzz641,zzzz664
164114	55.72	673	212.0		zzzz106,zzzz700
159969	53.03	692	212.0		zzzz113,zzzz196
159968	54.09	684	212.0		zzzz113,zzzz741
147800	51.36	697	212.0		zzzz136,zzzz544
147247	52.52	695	212.0		zzzz137,zzzzz63
138600	54.19	692	212.0		zzzz154,zzzz185
136973	60.27	589	212.0		zzzz157,zzzzz79
100882	61.45	581	212.0		zzzz246,zzzz510
97658	79.18	437	213.0		zzzz254,zzzz396
88605	53.96	682	212.0		zzzz281,zzzz505
86890	61.06	642	212.0		zzzz285,zzzzz75
84911	90.49	389	213.0		zzzz290,zzzz425
69643	81.52	433	213.0		zzzz369,zzzz373
67295	64.67	583	212.0		zzzz411,zzzz412
62964	91.26	389	213.0		zzzz425,zzzz469
45620	54.82	684	212.0		zzzz506,zzzz646
43304	52.88	694	212.0		zzzz514,zzzz677
39254	57.96	609	212.0		zzzz528,zzzz713
38131	53.63	703	212.0		zzzz532,zzzz672
38130	54.58	709	212.0		zzzz532,zzzz709
37038	56.95	676	212.0		zzzz536,zzzz701
11929	52.47	688	212.0		zzzz679,zzzz729
164113	56.3	675	212.0		zzzz106,zzzz681
160568	52.1	689	212.0		zzzz112,zzzz729
99139	53.05	705	212.0		zzzz250,zzzz532
72803	76.97	469	212.0		zzzz335,zzzz365
16301	55.24	677	212.0		zzzz646,zzzz700
8932	58.05	615	212.0		zzzz701,zzzz733
164707	54.29	687	212.0		zzzz105,zzzz739
164706	53.79	686	212.0		zzzz105,zzzz741
140715	53.51	684	212.0		zzzz150,zzzz742
139706	54.67	675	212.0		zzzz152,zzzz189
138599	54.49	690	212.0		zzzz154,zzzz744
72921	78.04	469	212.0		zzzz334,zzzz365
72690	77.82	478	212.0		zzzz336,zzzz353
70715	78.54	480	212.0		zzzz356,zzzz364
69577	80.83	433	212.0		zzzz370,zzzz373
69576	81.29	433	212.0		zzzz370,zzzz395
67294	64.55	584	212.0		zzzz411,zzzz660
62963	89.97	389	212.0		zzzz425,zzzz721
17132	63.36	584	212.0		zzzz641,zzzz665
164705	54.06	690	211.0		zzzz105,zzzz196
164704	54.49	690	211.0		zzzz105,zzzz744
159967	53.4	691	211.0		zzzz113,zzzz185
159966	53.22	684	211.0		zzzz113,zzzz738
156112	65.33	525	212.0		zzzz120,zzzz529
140714	68.65	488	212.0		zzzz150,zzzzz49
140166	66.25	554	212.0		zzzz151,zzzz701
120927	56.08	633	211.0		zzzz193,zzzz196
16627	51.74	688	211.0		zzzz644,zzzz729
9185	55.05	683	211.0		zzzz699,zzzz702
5845	54.39	684	211.0		zzzz730,zzzz741
166485	65.19	543	211.0		zzzz102,zzzzz45
162938	64.76	525	211.0		zzzz108,zzzz120
156111	65.33	525	211.0		zzzz120,zzzz733
127420	54.38	697	211.0		zzzz179,zzzz682
124865	53.76	692	211.0		zzzz185,zzzz682
69938	78.46	469	211.0		zzzz365,zzzz404
67293	64.38	584	211.0		zzzz411,zzzz414
11928	53.99	689	211.0		zzzz679,zzzz743
11494	52.23	695	211.0		zzzz682,zzzz729
166484	65.38	543	211.0		zzzz102,zzzz283
164703	56.67	630	211.0		zzzz105,zzzz740
159386	52.36	678	211.0		zzzz114,zzzz281
158273	52.71	683	211.0		zzzz116,zzzz250
148375	55.89	671	211.0		zzzz135,zzzzz68
140165	66.06	554	211.0		zzzz151,zzzzz64
138598	54.07	688	211.0		zzzz154,zzzz728
89871	58.63	597	211.0		zzzz278,zzzz540
72920	78.54	438	211.0		zzzz334,zzzz396
65488	63.87	584	211.0		zzzz417,zzzz641
44424	55.72	673	211.0		zzzz510,zzzz677
43303	52.02	694	211.0		zzzz514,zzzzz36
39537	61.61	547	211.0		zzzz527,zzzz710
17131	64.16	586	211.0		zzzz641,zzzz660
13134	60.51	585	211.0		zzzz671,zzzzzz7
5844	54.09	684	211.0		zzzz730,zzzz738
5843	53.79	686	211.0		zzzz730,zzzz739
166483	65.56	543	211.0		zzzz102,zzzzz87
70418	80.37	433	211.0		zzzz359,zzzz373
47779	62.16	547	211.0		zzzz499,zzzz527
5936	52.26	687	210.0		zzzz729,zzzz730
164702	56.19	630	210.0		zzzz105,zzzz492
164701	53.35	686	210.0		zzzz105,zzzz738
160567	54.05	692	210.0		zzzz112,zzzz179
122987	54.77	681	210.0		zzzz189,zzzz676
121958	54.92	661	210.0		zzzz191,zzzzz53
88604	53.98	678	210.0		zzzz281,zzzz706
87337	54.98	673	210.0		zzzz284,zzzz698
71533	81.34	434	211.0		zzzz347,zzzz395
70417	81.06	433	211.0		zzzz359,zzzz395
68556	77.43	443	211.0		zzzz386,zzzz403
43604	58.53	639	210.0		zzzz513,zzzz646
37037	56.12	686	210.0		zzzz536,zzzz611
17130	62.84	584	210.0		zzzz641,zzzz668
16626	68.24	488	210.0		zzzz644,zzzzz49
165317	57.1	599	210.0		zzzz104,zzzz278
164700	54.49	690	210.0		zzzz105,zzzz725
164699	53.51	684	210.0		zzzz105,zzzz728
160566	53.55	691	210.0		zzzz112,zzzz743
140713	51.98	683	210.0		zzzz150,zzzz729
138597	53.9	692	210.0		zzzz154,zzzz196
62962	89.46	389	210.0		zzzz425,zzzz500
43302	51.72	698	210.0		zzzz514,zzzzz63
37036	54.97	604	210.0		zzzz536,zzzz692
11927	54.12	691	210.0		zzzz679,zzzz744
1866	53.21	686	210.0		zzzzz63,zzzzz67
156110	64.52	527	210.0		zzzz120,zzzz702
149975	63.62	558	210.0		zzzz132,zzzz164
147799	53.27	672	210.0		zzzz136,zzzz248
144111	78.9	436	210.0		zzzz143,zzzz702
116498	55.59	680	210.0		zzzz203,zzzz646
101335	56.49	616	210.0		zzzz245,zzzz701
73257	76.63	445	210.0		zzzz331,zzzz386
72689	76.78	478	210.0		zzzz336,zzzz364
72059	76.46	480	210.0		zzzz342,zzzz344
71532	80.18	434	210.0		zzzz347,zzzz373
70972	78.12	480	210.0		zzzz353,zzzz356
32394	91.53	366	210.0		zzzz556,zzzz575
11493	52.55	685	210.0		zzzz682,zzzz728
11492	53.48	690	210.0		zzzz682,zzzz744
6034	53.87	685	210.0		zzzz728,zzzz730
877	59.83	585	210.0		zzzzzz1,zzzzzz7
160565	52.84	687	209.0		zzzz112,zzzz739
160564	53.14	685	209.0		zzzz112,zzzz741
155087	57.44	672	209.0		zzzz122,zzzz509
138596	54.73	676	209.0		zzzz154,zzzz740
127419	53.84	691	209.0		zzzz179,zzzz644
118987	72.21	511	210.0		zzzz197,zzzz198
99138	52.69	689	209.0		zzzz250,zzzzz67
71846	75.37	479	210.0		zzzz344,zzzz371
71650	80.21	480	210.0		zzzz346,zzzz355
70800	80.38	479	210.0		zzzz355,zzzz371
69937	77.83	469	210.0		zzzz365,zzzz385
68026	77.8	437	210.0		zzzz396,zzzz401
41547	58.85	644	209.0		zzzz520,zzzz697
16300	54.79	679	209.0		zzzz646,zzzz673
11788	56.47	680	209.0		zzzz680,zzzz706
5842	53.56	689	209.0		zzzz730,zzzz743
5841	83.37	403	209.0		zzzz730,zzzzz48
1297	59.23	623	209.0		zzzzz78,zzzzz79
161160	53.23	682	209.0		zzzz111,zzzz250
159965	53.33	690	209.0		zzzz113,zzzz728
156109	64.95	525	209.0		zzzz120,zzzz245
120926	55.08	630	209.0		zzzz193,zzzz728
120925	55.08	630	209.0		zzzz193,zzzz739
118600	93.63	361	209.0		zzzz198,zzzz301
87743	65.18	537	209.0		zzzz283,zzzz501
47161	65.36	537	209.0		zzzz501,zzzzz45
42714	53.6	709	209.0		zzzz516,zzzz672
38970	62.55	550	209.0		zzzz529,zzzz693
25510	63.42	585	209.0		zzzz591,zzzz641
11926	54.06	690	209.0		zzzz679,zzzz725
11925	53.34	688	209.0		zzzz679,zzzz739
11491	52.98	689	209.0		zzzz682,zzzz743
9445	58.57	642	209.0		zzzz697,zzzzz75
5840	53.48	690	209.0		zzzz730,zzzz744
160563	53.48	690	209.0		zzzz112,zzzz185
159964	55.93	615	209.0		zzzz113,zzzz492
159963	55.37	614	209.0		zzzz113,zzzz740
159385	54.75	674	209.0		zzzz114,zzzz700
148374	58.83	600	209.0		zzzz135,zzzz703
138595	56.01	632	209.0		zzzz154,zzzz492
138594	53.9	692	209.0		zzzz154,zzzz725
138593	53.43	685	209.0		zzzz154,zzzz741
129315	91.26	389	209.0		zzzz173,zzzz683
124864	53.55	691	209.0		zzzz185,zzzz644
120417	54.48	670	209.0		zzzz194,zzzzz68
99137	51.41	708	209.0		zzzz250,zzzz544
97039	58.58	565	209.0		zzzz257,zzzz580
86889	60.69	641	209.0		zzzz285,zzzz520
69777	79.08	435	209.0		zzzz367,zzzz392
25083	59.49	585	209.0		zzzz593,zzzzzz7
13430	60.58	591	209.0		zzzz669,zzzzzz6
11924	54.9	674	209.0		zzzz679,zzzz740
11923	53.35	686	209.0		zzzz679,zzzz741
11490	52.63	684	209.0		zzzz682,zzzz741
160562	53.03	692	208.0		zzzz112,zzzz196
160561	52.68	691	208.0		zzzz112,zzzz728
138592	53.71	687	208.0		zzzz154,zzzz739
119488	52.75	692	208.0		zzzz196,zzzz682
88603	57.12	639	208.0		zzzz281,zzzz513
88602	52.72	679	208.0		zzzz281,zzzz680
72058	79.17	480	209.0		zzzz342,zzzz357
69009	78.57	434	209.0		zzzz378,zzzz392
44423	56.0	625	208.0		zzzz510,zzzzz96
42713	54.42	645	208.0		zzzz516,zzzz709
28010	68.91	521	209.0		zzzz577,zzzz583
11787	54.04	681	208.0		zzzz680,zzzz700
160560	52.41	685	208.0		zzzz112,zzzz738
157686	52.06	703	208.0		zzzz117,zzzz250
140712	53.82	693	208.0		zzzz150,zzzz179
127418	53.55	691	208.0		zzzz179,zzzz730
121957	54.01	661	208.0		zzzz191,zzzzz73
120924	54.93	670	208.0		zzzz193,zzzz279
120923	54.62	628	208.0		zzzz193,zzzz741
99136	52.49	703	208.0		zzzz250,zzzz516
84495	52.59	675	208.0		zzzz291,zzzz708
73146	76.44	433	208.0		zzzz332,zzzz378
71959	75.21	480	208.0		zzzz343,zzzz344
71845	75.37	479	208.0		zzzz344,zzzz394
68848	81.73	427	208.0		zzzz381,zzzz395
67643	76.04	480	208.0		zzzz403,zzzz410
49209	55.38	632	208.0		zzzz492,zzzz682
44422	54.69	671	208.0		zzzz510,zzzzz63
12380	54.28	678	208.0		zzzz676,zzzz700
11922	52.92	684	208.0		zzzz679,zzzz728
7155	55.06	672	208.0		zzzz716,zzzz732
164698	55.47	631	208.0		zzzz105,zzzz453
159384	55.79	674	208.0		zzzz114,zzzz706
125877	94.94	415	208.0		zzzz182,zzzz587
120416	54.86	669	208.0		zzzz194,zzzz716
119487	52.75	690	208.0		zzzz196,zzzz730
101334	55.31	687	208.0		zzzz245,zzzz611
69361	81.03	427	208.0		zzzz373,zzzz381
69008	77.88	434	208.0		zzzz378,zzzz405
67002	64.04	584	208.0		zzzz412,zzzz641
65782	63.12	583	208.0		zzzz416,zzzz591
49208	56.03	630	208.0		zzzz492,zzzz679
43301	52.87	698	208.0		zzzz514,zzzz672
34104	94.17	360	208.0		zzzz547,zzzz593
34103	94.17	360	208.0		zzzz547,zzzzzz1
13133	64.55	519	208.0		zzzz671,zzzzzz8
11489	52.69	687	208.0		zzzz682,zzzz739
11488	55.38	632	208.0		zzzz682,zzzz740
8680	55.36	672	208.0		zzzz703,zzzz720
164697	54.39	684	207.0		zzzz105,zzzz737
160559	53.03	692	207.0		zzzz112,zzzz744
149974	63.26	558	208.0		zzzz132,zzzz171
148373	89.26	391	208.0		zzzz135,zzzz173
147246	53.29	700	207.0		zzzz137,zzzz672
124863	52.37	697	207.0		zzzz185,zzzz730
120922	55.13	633	207.0		zzzz193,zzzz737
119486	53.6	694	207.0		zzzz196,zzzz679
109587	61.51	582	208.0		zzzz221,zzzz665
97657	77.83	469	208.0		zzzz254,zzzz365
93294	58.56	596	208.0		zzzz266,zzzzz54
88601	52.87	679	207.0		zzzz281,zzzz673
71958	80.0	480	208.0		zzzz343,zzzz355
71155	78.62	435	208.0		zzzz351,zzzz405
44421	54.4	671	207.0		zzzz510,zzzzz36
22113	55.18	685	207.0		zzzz611,zzzz733
16625	53.04	690	208.0		zzzz644,zzzz743
5654	53.72	672	207.0		zzzz732,zzzzz68
159962	53.39	693	207.0		zzzz113,zzzz453
158272	54.25	671	207.0		zzzz116,zzzz672
140711	53.7	689	207.0		zzzz150,zzzz185
138591	52.92	684	207.0		zzzz154,zzzz738
76076	70.67	491	207.0		zzzz316,zzzz325
72688	78.87	478	207.0		zzzz336,zzzz356
70613	78.08	479	207.0		zzzz357,zzzz371
69007	75.98	433	208.0		zzzz378,zzzz402
68025	77.4	438	208.0		zzzz396,zzzz404
65781	63.53	584	207.0		zzzz416,zzzz665
56587	55.13	633	207.0		zzzz453,zzzz682
47160	65.26	544	207.0		zzzz501,zzzzz90
25082	63.72	521	207.0		zzzz593,zzzz667
18665	64.35	519	207.0		zzzz630,zzzz671
15156	59.39	591	207.0		zzzz654,zzzzzz6
13729	63.72	521	207.0		zzzz667,zzzzzz1
11921	52.92	684	207.0		zzzz679,zzzz738
11487	53.18	692	207.0		zzzz682,zzzz725
124350	61.02	590	207.0		zzzz186,zzzz669
122986	52.86	681	207.0		zzzz189,zzzz646
109176	63.64	583	207.0		zzzz223,zzzz593
88600	53.02	679	207.0		zzzz281,zzzz700
71844	75.26	481	207.0		zzzz344,zzzz346
68024	77.4	438	207.0		zzzz396,zzzz409
12379	55.52	679	207.0		zzzz676,zzzz706
12225	52.92	684	207.0		zzzz677,zzzzz67
11486	52.19	684	207.0		zzzz682,zzzz738
11350	59.67	600	207.0		zzzz683,zzzz703
6334	53.04	690	207.0		zzzz725,zzzz730
166482	61.06	601	207.0		zzzz102,zzzzz90
160558	55.43	635	207.0		zzzz112,zzzz740
159961	81.77	406	207.0		zzzz113,zzzzz48
159383	55.83	677	207.0		zzzz114,zzzz203
159382	55.49	674	207.0		zzzz114,zzzz673
139705	55.18	676	207.0		zzzz152,zzzz294
138590	55.61	633	207.0		zzzz154,zzzz453
138589	54.24	684	207.0		zzzz154,zzzz737
124349	59.66	590	207.0		zzzz186,zzzz654
122985	54.24	684	207.0		zzzz189,zzzz252
109175	63.64	583	207.0		zzzz223,zzzzzz1
100881	55.54	677	207.0		zzzz246,zzzz695
98224	54.03	683	207.0		zzzz252,zzzz680
98223	53.69	678	207.0		zzzz252,zzzz706
89870	57.14	595	207.0		zzzz278,zzzzz38
73028	79.49	468	207.0		zzzz333,zzzz388
72151	79.16	427	207.0		zzzz341,zzzz392
70799	79.12	479	207.0		zzzz355,zzzz394
69936	77.83	469	207.0		zzzz365,zzzz401
69776	78.44	436	207.0		zzzz367,zzzz405
65780	62.91	585	207.0		zzzz416,zzzz664
44420	56.6	606	207.0		zzzz510,zzzzz43
43300	52.86	700	207.0		zzzz514,zzzz709
37035	55.69	686	207.0		zzzz536,zzzz699
26191	92.77	415	207.0		zzzz587,zzzz608
25081	63.12	583	207.0		zzzz593,zzzz630
16624	53.2	688	207.0		zzzz644,zzzz739
12082	53.58	657	207.0		zzzz678,zzzz707
9575	53.93	675	207.0		zzzz696,zzzz709
3303	52.92	686	207.0		zzzzz36,zzzzz67
3124	59.62	582	207.0		zzzzz39,zzzzz79
160557	53.03	692	206.0		zzzz112,zzzz725
160556	82.88	403	206.0		zzzz112,zzzzz48
147798	53.7	676	206.0		zzzz136,zzzz246
147245	52.65	699	206.0		zzzz137,zzzz709
140710	52.62	688	206.0		zzzz150,zzzz743
122984	52.62	688	206.0		zzzz189,zzzz281
109980	61.59	578	206.0		zzzz220,zzzz665
88599	53.29	683	206.0		zzzz281,zzzz506
86468	52.8	697	206.0		zzzz286,zzzz691
73145	76.73	434	207.0		zzzz332,zzzz367
25296	64.38	584	206.0		zzzz592,zzzz641
19249	61.07	578	206.0		zzzz626,zzzz665
16623	52.83	689	206.0		zzzz644,zzzz744
16299	54.13	678	206.0		zzzz646,zzzz681
9574	52.47	688	206.0		zzzz696,zzzzz63
8679	55.59	671	206.0		zzzz703,zzzz731
1042	68.11	530	206.0		zzzzz88,zzzzz95
160555	53.58	685	206.0		zzzz112,zzzz737
109586	62.31	581	206.0		zzzz221,zzzz417
99604	54.06	677	206.0		zzzz249,zzzz716
89433	51.01	690	206.0		zzzz279,zzzz729
72687	80.0	440	206.0		zzzz336,zzzz408
71154	78.16	435	206.0		zzzz351,zzzz392
69839	77.88	434	206.0		zzzz366,zzzz392
66393	63.25	585	206.0		zzzz414,zzzz641
65487	62.46	578	206.0		zzzz417,zzzz626
56586	53.4	691	206.0		zzzz453,zzzz730
18664	62.95	583	206.0		zzzz630,zzzzzz1
12831	55.46	678	206.0		zzzz673,zzzz680
163528	53.05	673	206.0		zzzz107,zzzz706
161159	54.85	618	206.0		zzzz111,zzzzz96
160554	88.19	415	206.0		zzzz112,zzzz128
158271	57.63	616	206.0		zzzz116,zzzz246
157685	54.02	696	206.0		zzzz117,zzzz510
122983	54.05	679	206.0		zzzz189,zzzz706
109979	63.32	578	206.0		zzzz220,zzzz417
109174	64.85	515	206.0		zzzz223,zzzz671
89432	52.38	693	206.0		zzzz279,zzzz743
65779	62.84	584	206.0		zzzz416,zzzz660
26190	93.25	415	206.0		zzzz587,zzzz653
25509	63.06	582	206.0		zzzz591,zzzz626
8931	56.55	656	206.0		zzzz701,zzzzz73
160553	53.39	693	205.0		zzzz112,zzzz453
140709	52.54	689	205.0		zzzz150,zzzz744
119485	52.24	691	205.0		zzzz196,zzzz644
100075	56.98	609	205.0		zzzz248,zzzz509
98222	53.69	678	205.0		zzzz252,zzzz673
95330	56.08	617	205.0		zzzz261,zzzz556
65778	62.26	583	206.0		zzzz416,zzzz668
56585	55.31	631	205.0		zzzz453,zzzz679
44419	53.88	696	205.0		zzzz510,zzzz532
25080	64.47	515	206.0		zzzz593,zzzzzz9
16622	51.09	687	205.0		zzzz644,zzzz728
13132	64.85	515	206.0		zzzz671,zzzzzz9
12830	54.8	677	205.0		zzzz673,zzzz676
9971	55.49	674	205.0		zzzz693,zzzz701
876	64.47	515	206.0		zzzzzz1,zzzzzz9
163527	53.41	674	205.0		zzzz107,zzzz700
160552	54.91	632	205.0		zzzz112,zzzz492
157684	53.24	695	205.0		zzzz117,zzzz677
139704	54.93	670	205.0		zzzz152,zzzz706
122982	54.56	680	205.0		zzzz189,zzzz700
120921	54.02	646	205.0		zzzz193,zzzz729
120920	53.33	630	205.0		zzzz193,zzzz738
120415	55.42	673	205.0		zzzz194,zzzz703
116497	53.16	681	205.0		zzzz203,zzzz281
116496	54.72	678	205.0		zzzz203,zzzz676
109978	61.42	578	205.0		zzzz220,zzzz668
86888	56.8	618	205.0		zzzz285,zzzz702
70714	78.12	480	205.0		zzzz356,zzzz408
69838	77.19	434	205.0		zzzz366,zzzz405
67292	62.39	585	205.0		zzzz411,zzzz604
44719	54.17	683	205.0		zzzz509,zzzz696
12980	53.3	681	205.0		zzzz672,zzzz696
8930	56.55	656	205.0		zzzz701,zzzzz53
8678	55.36	672	205.0		zzzz703,zzzz732
159960	53.51	684	205.0		zzzz113,zzzz737
159381	54.67	675	205.0		zzzz114,zzzz681
158270	52.42	683	205.0		zzzz116,zzzzz63
140708	53.13	687	205.0		zzzz150,zzzz739
139703	54.76	672	205.0		zzzz152,zzzz673
109585	62.63	586	205.0		zzzz221,zzzz660
100074	57.12	604	205.0		zzzz248,zzzz672
88598	53.09	680	205.0		zzzz281,zzzz681
83317	54.42	678	205.0		zzzz294,zzzz676
69775	76.04	434	205.0		zzzz367,zzzz402
69360	79.03	434	205.0		zzzz373,zzzz406
66392	62.26	583	205.0		zzzz414,zzzz416
47159	64.62	537	205.0		zzzz501,zzzzz87
42712	53.1	693	205.0		zzzz516,zzzz677
39253	57.1	613	205.0		zzzz528,zzzz718
25508	62.52	579	205.0		zzzz591,zzzz657
25079	63.2	519	205.0		zzzz593,zzzzzz8
16621	52.57	681	205.0		zzzz644,zzzz741
12378	55.16	678	205.0		zzzz676,zzzz681
11920	56.0	625	205.0		zzzz679,zzzz737
146121	66.19	488	205.0		zzzz139,zzzzz49
140707	52.54	689	204.0		zzzz150,zzzz196
140706	52.54	689	204.0		zzzz150,zzzz725
131536	67.47	538	205.0		zzzz168,zzzzz95
127417	51.51	697	204.0		zzzz179,zzzz279
109584	61.73	588	205.0		zzzz221,zzzz591
100073	51.79	672	204.0		zzzz248,zzzz250
99135	52.58	679	204.0		zzzz250,zzzz696
71957	77.29	480	205.0		zzzz343,zzzz357
71066	77.19	469	205.0		zzzz352,zzzz365
64003	61.25	578	205.0		zzzz422,zzzz512
43006	52.05	684	204.0		zzzz515,zzzz737
16620	51.53	685	205.0		zzzz644,zzzz738
12527	54.98	673	204.0		zzzz675,zzzz703
5839	54.66	633	204.0		zzzz730,zzzz740
875	63.01	519	205.0		zzzzzz1,zzzzzz8
164112	53.49	688	204.0		zzzz106,zzzz505
163526	53.82	680	204.0		zzzz107,zzzz189
156688	54.45	641	204.0		zzzz119,zzzzz63
140705	52.26	685	204.0		zzzz150,zzzz726
134451	59.23	574	204.0		zzzz162,zzzz292
116495	54.13	678	204.0		zzzz203,zzzz252
109583	60.76	581	204.0		zzzz221,zzzz668
99603	54.8	677	204.0		zzzz249,zzzz703
99134	51.39	685	204.0		zzzz250,zzzz695
98221	53.78	675	204.0		zzzz252,zzzz700
68095	79.26	434	205.0		zzzz395,zzzz406
65777	62.26	583	204.0		zzzz416,zzzz417
65186	63.43	525	204.0		zzzz418,zzzz593
65185	63.43	525	204.0		zzzz418,zzzzzz1
13728	62.67	525	204.0		zzzz667,zzzz671
12979	54.41	680	204.0		zzzz672,zzzzz67
11485	53.06	686	204.0		zzzz682,zzzz737
11349	57.17	600	204.0		zzzz683,zzzz716
10241	53.17	694	204.0		zzzz691,zzzz718
9835	54.4	636	204.0		zzzz694,zzzz702
6724	54.26	669	204.0		zzzz720,zzzzz68
167024	63.75	560	204.0		zzzz101,zzzz164
164696	54.38	673	204.0		zzzz105,zzzz279
163525	52.51	676	204.0		zzzz107,zzzz673
157683	52.5	701	204.0		zzzz117,zzzzz63
150515	62.66	557	204.0		zzzz131,zzzz164
116494	55.88	680	204.0		zzzz203,zzzz680
49207	54.19	633	204.0		zzzz492,zzzz730
38129	53.01	698	204.0		zzzz532,zzzz677
9184	53.71	687	204.0		zzzz699,zzzz733
3591	73.24	441	204.0		zzzzz32,zzzzz72
167023	63.75	560	204.0		zzzz101,zzzz171
159959	55.63	613	204.0		zzzz113,zzzz726
140704	52.27	683	204.0		zzzz150,zzzz728
139702	52.55	666	204.0		zzzz152,zzzz252
138588	55.34	627	204.0		zzzz154,zzzz726
136470	62.5	560	204.0		zzzz158,zzzz164
120919	54.75	632	204.0		zzzz193,zzzz726
109977	62.67	584	204.0		zzzz220,zzzz660
100072	57.65	595	204.0		zzzz248,zzzz510
73144	74.36	433	204.0		zzzz332,zzzz366
72577	78.45	427	204.0		zzzz337,zzzz392
72150	77.75	427	204.0		zzzz341,zzzz405
71649	76.88	480	204.0		zzzz346,zzzz357
67001	62.95	583	204.0		zzzz412,zzzz416
45924	53.63	688	204.0		zzzz505,zzzz700
25078	63.44	517	204.0		zzzz593,zzzz638
25077	62.09	583	204.0		zzzz593,zzzzzz2
23159	62.12	586	204.0		zzzz604,zzzz641
15155	60.64	592	204.0		zzzz654,zzzz670
14680	61.49	579	204.0		zzzz657,zzzz668
11484	55.52	625	204.0		zzzz682,zzzz742
3781	85.65	418	204.0		zzzzz20,zzzzz24
874	62.09	583	204.0		zzzzzz1,zzzzzz2
163524	54.06	677	203.0		zzzz107,zzzz680
147244	53.14	685	203.0		zzzz137,zzzz510
140703	52.28	681	203.0		zzzz150,zzzz741
138587	54.15	674	203.0		zzzz154,zzzz279
138586	52.99	685	203.0		zzzz154,zzzz742
134450	57.64	576	203.0		zzzz162,zzzzz83
125876	95.39	369	204.0		zzzz182,zzzz608
120918	57.63	583	203.0		zzzz193,zzzz202
109976	62.89	582	203.0		zzzz220,zzzz591
70343	80.04	466	204.0		zzzz360,zzzz388
69935	76.76	469	204.0		zzzz365,zzzz380
68429	77.25	466	204.0		zzzz388,zzzz398
45923	54.08	686	203.0		zzzz505,zzzz706
44418	53.22	684	203.0		zzzz510,zzzz514
35402	62.09	583	203.0		zzzz542,zzzz593
19248	60.38	578	203.0		zzzz626,zzzz668
16619	51.97	687	203.0		zzzz644,zzzz726
16618	53.55	633	203.0		zzzz644,zzzz740
164695	52.85	685	203.0		zzzz105,zzzz742
[truncated: 164,399 more rows]
