# Supplementary material for: Discovery of several thousand highly diverse circular DNA viruses
Source: eLife journal article supplement (doi:10.7554/elife.51971), 2020-02-03
Supplement: fig2-figsupp1-data1 [file elife-51971-fig2-figsupp1-data1-v1.cys › CytoscapeSession-2019_08_05-18_21/tables/36-all_my_seqs_genbank_ssDNA1_protein_with_ttv_orf1_per_PF02956_13_2_fasta+Full+Network/SHARED_ATTRS-org.cytoscape.model.CyNode-36+shared+node.cytable]

CyCSV-Version	1
SUID	Description	seq_source	Sequence	Sequence Length	Sequence Source	shared name
java.lang.Long	java.util.List<java.lang.String>	java.lang.String	java.lang.String	java.lang.Integer	java.lang.String	java.lang.String
	mutable	mutable	mutable	mutable	mutable
36 shared node
842	my_seqs_ct_ms19_W27_071.1		MPPYNYRYRWRRRPPWRRRYRWFQRRRPRRTLQRFYRRRYWVRRKKLFKNYKKKLNFIKIKQFQPQKIVKCSVKGDICLFWCGKGRVPHNYSMWSESIVPYREPGGGAWSMIVFSLKALYEEYVRYRAWFTKSNEGLPLVRLLGGTMKFYRTDFVDYVVTWQLCPPFSATRDMFLNSHPSRQLMNKNKIIVTSKWKARHKKPYKKKYFRPPSLYSNKWYFQKDICQNAFLLITTSACSLDQMYLPEDEISNNITLYSLNTDFFQNPNFVTENTTGYSPKLDLYLYGTGNGPIENRRPKWTELILLANTTTWTDGHFTRSRDEMLKKTNWGNPFTHLHAHLDTRLYYGRLPQTSDTFDSEASVTQLHELYFQCRYNPLADKGTGNTVYFKSTSISNGTIS…	553	USER	zzzz100
841	my_seqs_ms19_W08_2_2ct15.4		MPFWRTRYRRWWRPRHRRFYRRGIRKPFQRRRWRRRRYTVRRKKLKTIKLKQWQPPYIKRLNVRGYYPIILGTRDRVANNLNCYLESTAPHFFPGGGCFSINNFSLMTLYKEHIDVRNWWTTGNENYPLIRYLGCYINLYREENIDYLFYYNRQWPMNATLTTYQSTQPTAMLLNKHTIKVACKKNTKNKKPYKRIRIPPPSQLQNKWYFQYDLANVPLLQTMATACSFDRMFANSKSISTTIGFVTLDTNTFLNHDFQRGTRGYQPRPGTLLFKVTNGEYNITKIQIQHLIFLGEVEDLQQGTEIQYAPDDTSPPTSLVTTPSKTQKQLYKVSIDHNLWGNVFKSSTFWGEERMIETNLSWDDIIKTYKNPTDTLNTGFTWKTTKWSECRYNPFADHG…	676	USER	zzzz101
840	my_seqs_ms19_W08_2_2ct29.3		MPYFWRRPFYSRWKRWRTRGYWNRRRRFRTTIRRQRRRRPRLRVRRYFPKKLKTIRLKEWQPKTIRRCSIIGHIPLVICGRGRQINNWMQYFDSYVPVDKPGGGGWSSIVFNLGGLYQQFQKLLNWWTHDNDGLPLVRFLGSDWKFYRSWDTDYIVTAQTCPPMTDTEFKHLNSHPYRQLMNKHPIVVPNLVRHQYKKQYVKKHFPPPSLLQNKWYFQQDLCNTNLLMLTTSTCSLDQFWLPNNEYSNNITFYCLNTNIFANPNFLQDSTIGYTPKSTMILWGEGNGHATQPSTFKDLIYLGNLKTFKRGQTQTTGTPPGSQTNWGNPFHGDHGSQDTQIWYSTQMPATFETSTTGKITQAEHLFQECRYNPLKDTGLGNVVFFKSVSISTGNIWDTPK…	650	USER	zzzz102
839	my_seqs_ms19_W08_an1_2ct001.4		MAWWGWRRRRWFWPRRRRWRTRRRRRVPTRRPRRPVRRHRRRRVRRRRWRGRRRYTRRGRLRLRRRRRWRRKRIVLTQWNPQTVRKCMIRGMMPMLWAGMGTGGHNYAVRSDDYTMSGFGGSFGTETFSLKVLYDQYERGFNRWSFSNEDLDLALYFGCTFTFYRHKTTDFIVSWTKNPPMKTNQYTAPLTHPGMLMRSKYKVLIPSWQTKPKGRKTVKVKIGPPHLFQHKWYTQQDLCAVSLVQFNLTAADFQHPFGSPLTETPCVTFQVLGDLYNECLNIDLPPLESDAKKLDSKKGNQSNITAVQKLYDTLFTQNTSGHYWQTFITNSMVKAHVDSTKANDTDYSNNKHTKSKATKEQEIQVNSQWQSKFFDNRDSLFLFATYHPSNILTELKKMR…	782	USER	zzzz103
838	my_seqs_ms19_W08_an1_2ct002.5		MAWWGWRRRWWRPRRRWRWGRTRRRRRVPARRPRRAFRRYRTRTVRRRRRGRRRGYRRRYRLRRLRRRRYKRKKIVLTQWNPQTVRRCTIKGLMPVLWAGMGQGGHNYAVRSDDYVAKGGFGGSFATETFSLKVLYDQYQRGFNRWTYSNEDLDLALYYGCKWVFYRSPETDFIVYFTNNPPMKTNQFTAPLTTPGMLMRSKYKILIPSFKTRPKGRKTVTVRIKPPKLFLHKWYTQQDLCPVPLVQLNVTAADMQHPFGSPLTENPCITFQVLGNLYNNCLNIDLPQFKANGELENSSNYQRDNVTDLKNLYKELFCKKESGHYWQTFITNSMMKAHIDAEKAQSATTTYPNSGTNAAYNKADFPTKPVKENFSNWKNKFTDGRDSNFLFATYHPDQV…	786	USER	zzzz104
837	my_seqs_ms19_W08_an1_2ct003.3		MAWGFWGRRRRWRRWRARRRRWRPRRRRRRRPARRFRTRRRVRRRGGRWRRRYRKWRRGRRRRTHRKKIIIKQWQPNFIRRCYIIGYLPLIFCGENTTAQNYATHSDDMISKGPYGGGMTTTKFTLRILYDEFTRFMNFWTVSNEDLDLCRYVGCKLIFFKHPTVDFIVQINTQPPFLDTHLTAASIHPGIMMLSKRHILIPSLKTRPSRKHRVVVRVGAPRLFQDKWYPQSDLCDTVLLSIFATACDLQYPFGSPLTDNPCVNFQILGPQYKKHLSISSTMDEINKQHYKCNLFNQTALYNTFQTIAQLKETGQTTGISPSWINVQNTTTLNSTGTNALDSKDTWYKGNTYNTKISELAEQTRQRFKAATIAALPNYPTIMSTDLYEYHSGIYSSIFL…	736	USER	zzzz105
836	my_seqs_ms19_W08_an1_2ct004.3		MAWGWWRRRRRGWLRRWGWRRRRRPARRRARWAARRARRRRVRRRRLRRRGRPRRRTFKRRRRRRRFRRKPKIKLTQWQPDMVRRCFIRGFLAAVICGQGTFSNNYSSHLEDRIARGGFGGGHSTMRFSLKVFYEEHLRRLNYWTCSNKDLELVRYFYTTVTFYRHPTQDFIARYNRKTPLGGNILTAPSLHPGSMMTSKHRIMIPSLETRPKGKKTVKVRIAAPTLFTDKWYFSKDVCDLTLLNLDVTMADLRFPFCSPQTDNPCITWQTLSSVYNNFLSITIFQGTSDTQQIEEFLKAAIPDTEHARVLNTFKTEGNYSHPQIPKATAQQSKPKDNETQYFGELDGLWGDPIFMPSSQTLEKLRQCILKNMQNYNAKLKQEFPAMTGSAAHTHLTGI…	739	USER	zzzz106
835	my_seqs_ms19_W08_an1_2ct005.4		MAWGWWRRRRKWWWRRRFARGRLRRRRIRRPRRRTRRRTVRRRRQWRRGRPRRRLFKRKRRFKRRRRKAKIKITQWQPSRVKRCFIIGYFPALICGQGRWSENFTSHIEDKTPKGPFGGGHSTARLSLKVLYEENQKHHNFWTASNKELELARFFGSTWTLYRHEEVDYICTFNRKSPLGGNLLTAPSLHPGAAMLSKHKILVPSFKTRPGGKPTVKFRIRPPTTLIDKWYFQKDICDTTLLNINFVACDLRFPFCSPQTDNVCVTFQVLSAVYNDFLSITNSKLQATSWENEYTNFLNKAFPSDRSINKLNTFTTEGAFSHPKVEKFKPIIPLPESQYFQEKDGQWGDPIHITTSQSRQQVIQKIVQNAKNYLKKYTEEFKQFPNIAQFQHGFFTQWT…	742	USER	zzzz107
834	my_seqs_ms19_W08_an1_2ct006.5		MPLIICGSGSTQFNFITHMDDFPPMGYTYGGNFTNVTFSLEAVYEQFMYHRNRWSSSNHDLDLARYQGTTIKLYRHEYLDYIISYNRTGPFQISDMTYLSTHPAFMLLQKHRIVVPSFKTKPKGRRSIKIRIKPPKLMLNKWYFTKDICSMGLFQLQATACTLNNPWLRDSTKSPVIGFRVLKNSIYTNLSNLPEHDGSREAIRKKLHPESLTGTTPYQKGWEISYTKLMAPIYYQANRNSTYNWLNYQTNYNTTYRAFKQKMSENLSIIQKEYMYHYPSNTTTDIITKNTLTHDWGIYSPYWLTPTRISLDWETPWTYVRYNPLADKGIGNVVYAQWCSEQSCKLDQKKSKCIIKDLPLWAIFYGYVDWLVKSTGVSSAVTDMRIAIISPYTEPALIG…	644	USER	zzzz108
833	my_seqs_ms19_W08_an1_2ct007.4		MAWWGRWRRWRWRPRRWRRRRRRRVPRRRAQRPVRRRRARRVRRKRWGRRRWRRGYRRRLRLRRRRRRKKIRLTQWNPAKVRRCTIKGVLPMILCGAGRSGFNYGLHSDDYTVQKPLGQNPHGGGMSTVTFSLQVLFDQYQRFMNRWSYPNDQLDLARYFGCTFYFYRHPEIDFVAQYDNVPPMKMDENTAPNTHPSFLLQNKRKVKIPSFKTKPFGRKRVRVTVGPPKLFEDKWYSQHDLCKVPLVSWRLTACDFRFPFCSPQTDNPCYTFQVLHENYYPVIGTSSLENGTHYNCKGITELETWLYGKSTHYQTFATDTRLNPQKPISSNPDKTYAPNGTQETIIWGQSDWANFKKNTDSNYGYCSYCPSNSGRGTVDSIKKYRDQRFKWLTEMPVTN…	764	USER	zzzz109
832	my_seqs_ms19_W08_an1_2ct008.3		MAYWWYRRRRRAPRWRRRRWRVRRPRRRRTAVRRRRGRRRVRKRRGRWRRSYRKWRRGRKRRKHKRRLVLTQWQPAFIRRCYIVGFLPLIICGENTSARNFATHSDDLISNGPYGGGMTTTKFTLRILYDEHLRWLNYWTVSNEDLDLCRYLGGTFYAYRHPTVDFIVQIHTSPPFLDTPLTGPSIHPGMLMLAKNKILIPSLKTRPNKKHKVKIRFRPPKLFEDKWYPQSELCDTTLLTVFATACDLQFPFGSPLTDNPCVNFQVLGSAYKRHLSILPDKLNSAKNHFDTNLYTVAAYYNTFQTIAQMKPSAQQLDFTPKWSDIVNNTQLSNDGNNQAQANDTWYLGNAYNATKAKTAAENIRRKYLNATRKALPALLTLGDELLEYHTGIYSSIFLS…	733	USER	zzzz110
831	my_seqs_ms19_W08_an1_2ct009.4		MAWSWWWSRRRRRPWTRRRWRRLRTRRPRRPVRRRRRRKRRVRRRRWGRRRGRRTFYRRRLKKRRRRRKKLVLTQWNPQTIRACSIRGSVCLVMCGHTKAGRNYALHSEDYVPQVHAMGGSFSTTTWSLKALYDEHQKFHNRWSYPNTQLDLARYRGCRWWFYRDPKVDYIVTYYTTPPFKLNKYSCPMLHPGMMMQYKKKILVPSYQTKPKGKGRISIFIKPPTLFEDKWYTQQDLCPVNLLSLAVSAASFLHPFCPPESDNMCITFQVLKDFYYQQMGVTQISGTTLTEPDNNIFKILYETASFWQSHHTSAQLNTSQKPGKKNSSAIPETDWLQGDGPSKFRTGNNSIYGQPNYKPDYKKLESIRKWYWEQETQTNDVHSSYGRPIYNAVDYHVGK…	742	USER	zzzz111
830	my_seqs_ms19_W08_an1_2ct010.3		MAYGWWGRRRRWRRWRTRRRPWRTRRRRRRRAPRRFRPRRRVRRRRGRWRRRYRKWRRRRGRRTHRKKIIIRQWQPNFIRRCYIIGYLPLIFCGENTTAQNFATHSDDMIARRPWGGGMTTTKFTLRILYDEFTRFMNFWTVSNEDLDLCRYVGCKLIFFKHPTVDFIVQINTQPPFLDTNLTAAQIHPGIMMLNKRHILIPSLKTRPSRKHRVVVRVGPPRLFQDKWYPQSDLCDTVLLSIFATACDLQYPFGSPLTDNPCVNFQILGAPYKNNLSISSTCDQSNLAHYEQNLFNVVQYYNTFQTIAQLKDTGQAITENNNQPNMWSTVQNTTALSVNGSNAAQSKDTWYKGNTYNSKIVELAQKTRARFKAATLAALPNYPTVMSTDLYEYHSGIYS…	740	USER	zzzz112
829	my_seqs_ms19_W08_an1_2ct011.4		MAYGWWGRRRRWRRWRTRRRPWRTRRRRRRRAPRRFRPRRRVRRRRGRWRRRYRKWRRRRGRRTHRKKIIIKQWQPNFIRRCYIIGYLPIIFCGENTTAQNFATHSDDMIAKGPWGGGMTTTKFTLRILYDEFTRFMNFWTVSNEDLDLCRYVGAKLIFFRHPTVDFIVRINTQPPFLDTNLTAPQIHPGIMMLSKKHILIPSLKTRPSRKHRVVVRVGPPRLFQDKWYPQSDLCDTVLLSIFATACDLQYPFGSPLTDNPCVNFQILGHQYKNHLSITSTNDESNKQHYENNLFNKIELYNTFQTIAQLKDTGLVTAGTGTQNMWNQVQNTTALSADGNNATASKDTWYKGNTYNEHIKTLAEKTRARFKAATKAALPNYPTIMSTDLYEYHSGIYSS…	739	USER	zzzz113
828	my_seqs_ms19_W08_an1_2ct012.2		MAWGWWKRRRRRWWRGLWRRRRFARRRPRRPARRPRRRRVRRRRRWRRGRLRRRVYNRRRRIRRKRRRQKLTIRQWQPDKRRICRIKGYLPAIIYGDGTFSKNYTSHLEDRISKGPFGGGHGTARMSLKVLYDDHLKGLNIWTYSNKDLELVRYMHTTITFYRHPDTDFIAVYNRKTPLGGNRYTAPSLHPGNMMLQKTKILIPSFKTKPRGSGKIRVVIRPPTLLVDKWYFQKDICDVTLFNLNITAASLRFPFCSPQTNNPCVTFQVLHSVYDKALGINTFGTKDTADTTQQENIKNWLTKAFQQAGYTILNTFRSEGIYSHPQIQKPGAENKPNTNQYFAPKDSLWGDAIYQNTSNQNETTLPTLLAKNAYTYYQKAKNEKIDRHRGAMAHCHLTG…	739	USER	zzzz114
827	my_seqs_ms19_W08_an1_2ct017.2		MPYFYKRHWYRPRTTYNFKRRYRKRWFRPFRWRTRRTLRRKRRKRRVRKRTFFKKRKLKTLKLVQWQPELIRHCKIKGLFTMFQGARERWSNNYIQYRDSLTPEFFPGGGGWGLFVFNLGALFDEFLRIRNWWTFSNINMPLMRYLGMNVKFYRDDFIDYIVTYNRNYPMTDSALAHANAQPSRMLSQKHKIIVQSRAHTPNKKPYIRRHIKPPRQLINKWFFQREMVNTNLVMFTASAASLSDFDVSYQKQTNNITLITLNPKMFPHINYDTHDTNGWRPKSGLYFYGTNSTALNPEDTNPLKNVKYSELIYLGQATRLTSGTPIGIQQRPNIAQYFTNTENWGNIFHEKYLNNEWHVITSNVQHTNWNIDTTNTSLDTTKFNLMIEPIYIKVRYNPD…	686	USER	zzzz115
826	my_seqs_ms19_W08_an1_2ct018.2		MAWSWWWQRRRRRWPWRRRRWRRLRTRRPRRTVRRRRKRYRVRRRRWRGRRRGRRTYLRRRLKKRKRRKKLRLTQWNPSTIRGCTIKGMAPLIICGHTMAGNNFAIRMEDYISQIRPFGGSFSTTTWSLKVLWDEHTRFHNTWSYPNTQLDLARFKGVTFYFYRDKDTDFIITYSSVPPFKIDKYSSAMLHPGMLMQRKKKILLPSFTTRPRGRKKVKVHIKPPVLFEDKWYTQQDLCDVNLLSLAVSAASFRHPFCPPQTDNICITFQVLKDFYYTQMSVTPDDTGKTKDSTIFKQHLFKNPQFYQTVHTQGIINKTQRTAKFTTSNNTLGSNTDINSYLEQPTLTNIGKTLSTGNNSIYGFPSYNPITEKLEKIQDWFWKQETDNENVVTGSYQMPT…	750	USER	zzzz116
825	my_seqs_ms19_W08_an1_2ct019.3		MAWSWWWQRRRRWGRPVRRRRWRRLRRRRPRRPLRRRRRRPRTVRRRRWGRRRGRRRRLRRARRRRRGRRFKKKLILTQWHPSVVRRCLIRGIVPMVICGHTRWNHNYALHSEDYPEQGRFPFGGSLSTTTWNLKVLYDEHQKMHNKWGYPNTQLDLARYRGCRFTFYRHKKTDFIVHFNRRPPFKLNKYSCAMLHPGMLMQSKHKILVPSFDTKPGGKMKIRVSVRPPTLLEDKWYTQQDLCEVNLLQLSVTAADFRHPWISPESNTSVTTFQVLKEFYYNSIGVGTLASNKYKAIAGKDKNQEKEYSRHLTDVWDTLVSDGNYWNSFHVMEVFSSNLGGIDGKDTIRRLIQTDFTTESSTANNQNEFKTGRSTRFGFNTYNPTVKKDKIESLRKYIW…	775	USER	zzzz117
824	my_seqs_ms19_W08_an1_2ct020.3		MLMQQKHKILVPSFDTNPKGRKSVKVPILPPKMFQDKWYSQSDLCGVPLVSLRLTAASLRFPFCSPQTVTSCTTFQVLSEEYNEVIGYSIFNNSDYKSRIEKFEKWLYGKCSHYQAFATEAHLRPREYDPQGNKIENGTPATSTHKWNAKQTETTMTNYTNWRKWWTTDFYATKADSNYGYCSFTPKDNKGIENIKQIRGANFKALTSWDSNNANHLNSTYANGNIEQYEYHAGWFSSMFLSSHRYQLQFRTAYFDCTYNPLNDQASKNRIWFQYMTKPDTNFSESQCKFVLQDIPLWCIFHGYADYVESQLGSTQDHATVGIMCVQCPYTCPPLYNKDKPDMGYVVYDSNFGMGKTPEGYSQVPRFWAQRWRVYFKNQWSVMNDIDKTGPFAYRDERP…	574	USER	zzzz118
823	my_seqs_ms19_W08_an1_2ct021.2		MAWSWWWARRRRRPWTRRRWRRLRTRRPRRPVRRRRRRKRRVRRRRWGRRRGRRTFYRRRFRKRRRRRKKLVLTQWNPQTIRACSIRGTVCLVMCGHTKASRNYALHSEDYVPQLHAMGGSFSTTTWSLKALYDEHQKFHNRWSYPNTQLDLARYRGCRWWFYRDPKVDYIVTYYTVPPFKINKYTSPMLHPGMMMQYKKKILVPSYQTKPKGKSKISVFIKPPVLFEDKWYTQQDLCPVNLMSLAVSAASFIHPFCPPESDNMCITFQVLKDFYYQQMGVTTMSGTTLTAEDEAIFTKLYTNAQYWQSLHTQSQISTTQKPAKFGTTPFPNTNQWLTGEPGTNKFKTGNNSIYGLPNYAPDKTKMHEIRKWYFTQETTDNAVHGSYGKPVYNAVDYHV…	698	USER	zzzz119
822	my_seqs_ms19_W08_an1_2ct023.2		MPLIICGKGSTQFNYITHADDITPRGASYGGNFTNMTFSLEAIYEQFLYHRNRWSASNHDLELCRYKGTTLKLYRHPEVDYIVTYSRTGPFEISHMTYLSTHPLLMLLNKHHIVVPSLKTKPRGRKAIKVRIRPPKLMNNKWYFTRDFCNIGLFQLWATGLELRNPWLRMSTLSPCIGFNVLKNSIYTNLSNLPQYKEARLNIINNTLHPDQITGPNNKKWQYTYTKLMAPIYYSANRASTYDWENYSNETNYHNTFVKFHQKREEKLSKIRKEWQMLYPQQPTALPESYDLLQEYGLYSPYYLNPTRINLDWMTPYTHVRYNPLVDKGFGNRIYIQWCSEADVAYNRTKSKCLLQDMPLFFMAYGYIDWAIKNTGVSSLVRDARICIRCPYTEPQLVG…	522	USER	zzzz120
821	my_seqs_ms19_W08_an1_2ct025.2		MLMQQKHKVLIPSYDTKPKGRPKITVRIKPPTLLEDKWYTQQDLCDVNLLQLVVTAADFQHPFCSPQTNTPTTTFQVLKDIYYNTMSISEPPEAYSNVNKPSESKNFSSYSEELENILYARGSYWNSFHSLEYLNPGISDTYNNKIFNDTSTTLLGWLTGKGNEKFQTGHSTQFGYNSYKPTPDKIKKARLAYWNALNKANDLAVNIAQAKAERFEYHLGWYSPILLSNHRSNLNFARAYQDVTYNPNCDRGVKNRLWVQPLTKPTTEFDEKRCKCVVENLPLWAAFYCYHNFVEEELGISSEIYNSCIVVVQCPYTFPPLYDKKLPNKGYIFYDTLFGNGKMPDGRGQIDVFWQQRWYPRMTTQTQVMHDITMTGPFSYHDELVSTQLTAKYTFDFMW…	569	USER	zzzz121
820	my_seqs_ms19_W08_an1_2ct026.3		MVICGHTRAGRNYAIHSEDFTTQIKPFGGSFSTTTWSLKVLWDEHQKFQNRWSYPNTQLDLARYRGVTFWFYRDQKTDYIVQWSRNPPFKLNKYSSSMYHPGMMMQAKKKLVVPSFQTRPKGKKRYRVRIRPPNMFADKWYTQEDLCPVPLVQIVVSAASLLHPFCPPQTNNPCITFQVLKDIYDECIGVNETMKSKYDTLTNILYSQCTYYQTTQVLAQLSPAFQPAFKPKTTNSTPTHTTLGNYVVDLKYNTGQFHTGQNPVFGMCSYKPTSDIMKKANDWFWQNLTVDNDLHGSYGKATLQCMEYHTGIYSSIFLSPQRSLEFPAAYQDVTYNPNCDRGVGNMVWFQYSTKMDTNFDATKCKCVLKNMPLWAAFNGYADFIEQELSISTEIHNFGI…	675	USER	zzzz122
819	my_seqs_ms19_W08_an1_2ct031.2		MYRHPTTDFILTYDNNPPMKNTIYSSPNTHPGILMQQKHRVLIPSWLTFPKGRKYVKIKIPPPKLFEDHWYTQPDLCKVPLVTLRSTAADFRHPFCSPQTNNPCTTFQVLRDNYNQVIGLPFANTGSNTSVKEQIKSFETWLYESSTHYQTFQTEQMFRPKQYNADGSQWKDYQEMLSEWTTKIYHRKTDSNYGYSSYNFSNNVNGYQYATKMRQHYWTQLTTLTNTVPHINSTFANATTPEYEYHTGWFSPVFIGPNRHNIQFRTAYMDVTYNPLNDKGQFNRVWFQYSTKPTTEFNPTQCKCVLENIPLWSALFGYSEYVESQLGPFQDHETVGLVIVQCPYTVPPLYDKDRKNMGYIFYDTNFGNGKLGNGSGQVPRYWQQRWYPILKRQRQVMND…	593	USER	zzzz123
818	my_seqs_ms19_W08_an1_2ct032.3		MWWWRRRRWRAPWRRRRWRRRRLRTRRFRRAPRRPRRPRVRRPRRRRGWARRYRLRRRRRRRRRRKLILTQWQPAKMRKCLVIGYLALVLCGNGTFSKNYASHSDDYVQKGPFGGGLSSMRFNMRILYDQFKRHLNFWTHTNQDLDLVRYRGCTMTFYRHPEVDFIVKFNRKPPFLDTIVSAPAMHPGMLMTTKHKILVKSFKTKPKGKGTVKVRIRPPTLFDDRWYFQHDICKTTLFTISATPCNLRFPFCSPQTDNPCVNFLVLAAVYNGKLSIDATNVESEYDALTSAISMTTQGTLFNTFKTPEMIKCPPAVKALEPSNASTNYYKKLDSAWGDTIWNTETIQKFKANTDNLWNARNNQTMTGSKYLNYRTGIYSAIFLSAGRLSPDFGGLYNDI…	603	USER	zzzz124
817	my_seqs_ms19_W08_an1_2ct033.2		MKKPPKTVNTGNYFATLDALWGDPIYIQSGLNPDQSTPDSLISNFLIPNMTAYYKKMESEHFANITRGNKAFCHLCGIYSGPYLSQGRISPEVFGLYTEIIYNPYSDKGTGNRIWVDALTKQNNIYTPGQSKCLLENMPLWTMWFGYTDWVKKELNHWDAPFNYRMLVICPYTYPALKQPNNDNYGFVPFSYNFGSGNMPDGSAYIPFHFRTKWYPNMLHQQTVMEDVCKTGPFAPKVEVPSIQLVMKYKFNFNWGGNPIFEQIVRDPCTQPTYELPGGGNLPGRIQVLNPKLLGPNYSFRSWDIRRGQFSQKSIKRMSEQPETSEFLFSEKRPRIDLPKYEPPEEDSRTQRQERPWESEEETETEVQSEEETQGSVREQLQHQLQEQLRIRKQLKLMF…	416	USER	zzzz125
816	my_seqs_ms19_W08_an1_2ct036.1		MVICGHTRAGRNYAIHSEDFTTQIRPFGGSFSTTTWSLKVLWDEYQKFKNRWSYPNTQLDLARYRGVTFWFYRDQKTDYIVQWSRNPPFKLNKYSSSMYHPGMMMQAKKKLVVPSFQTRPKGKKRYRVRIRPPNMFADKWYTQEDLCPVPLVQIVVSAASLLHPFCSPQTNNPCITFQVLKDIYSSCIGVNPSNDTSYTTLQNTLYTQCTYFETTQILAQLSPAFQPALKATAGNSEATKTTLGNYEPKLKANGEFHTGNNPVFGMCKYKPTKEIMNKANEWFWKNLMHENDLHSAYGKATLPCMEYHTGIYSSIFLSPQRSLEFPAAYQDVTYNPNCDRAVGNRVWFQYSTKMDTNFNEKQCKCVLQNIPLWAAFNGYPDFIEQELSISTEIHNFGIV…	553	USER	zzzz126
815	my_seqs_ms19_W08_an1_2ct038.2		MILGGEGTQMFCYTNTAKDYPQPKAPGGGGFGYEVITLKWLYQEFLKHNNIWTRSNEYTDLVRYTGGKITFFAHPYIDFIIAYDLQPPFDLNKFSYPEIQPQNLLLRKHKRVLLSRQSNPKGRHKLTIKFHPPKQMTTKWFFQKDFCPYGLIKITAAAADFSYPIIGPKSQSTILTIYALNTNFYQVSDWAATKTNEPYMNIPAQKLPLYFWYKDKGTDKTYEYKPQTGDQSTYYYNSISWDKGIFCSKVLLAYKMSIDPQGTQLIAGTPIIPLRYNPQEDDGFGNEVYLTNILTGRYNKPSYTTDYQFNNVPLYIAFYGYYSYLKIYSKDKNIMKSYMFVVKCKAIKPLTQTTAQNYYPILDADFVFGKLPWDEYLSTEIKKFWYPTAERQEGIINAI…	549	USER	zzzz127
814	my_seqs_ms19_W08_an1_2ct039.2		MWTKVQNTTALSQNGSNPRESKDTWYKGNTYNTCIQELAEQTRKRFKAATQAALPNYPTIMSTDLYEYHSGIYSSIFLAAGRSYFETPGAYTDVIYNPFTDKGTGNMVWIDYLTKSDSIYTKNKSKCDIFDLPLWATFTGYSEFCSKVTGDTGIHLNARVVVRCPYTEPMLIDHSDPNRGFVPYSFNFGEGKMPGGSSKVPIRMRAKWYVNMFHQQEFMETIVQSGPFGYKGDIKSAVLSMKYKFHWKWGGNPISKQVVRNPCSTSSTSAGHRGPRSVQVVDPKHVTPEVTWHSWDIKRGIFGKAGIKRMQQESDALYIPTGPLKRPRRDTNAQDPEEQNESSGFRVQQRLPWVHSSQETQSSQEEMQAEGTVQEQLLLQLREQRVLRFQLQQLASQVL…	415	USER	zzzz128
813	my_seqs_ms19_W08_an1_2ct042.1		MPYYQRKRWWRPYATRRRKRYRKRWRFPIRRRRPTSTFRRRNYFRVRKYKFKRKRKLKTLPLRQWQPQLIRKSKIIGYFTMFYAQNGRIGNNYVQYKDSINPPNVPGGGGWSIFVFNLGCLFDEFNRDRNWWTTSNIDLPLCRYLGTKITLYRAEDTDYIFYYSTHYPMTDTAQRHADAQPSRLLLKKRKVVVESRKHNNKKPYKKVFIKPPKQLVNKWFFQREFVNTNLFLATVSACSLSEMTINPQHKSTTITFLSLNHNIFKSVNYQMQHTTSYYAPKPNYYLYATTAVIDITQPLHNQLTYNQLIYLGQATRMTEGKPIGSNGTTLTSYFQKPELFGNIFHTNYLLHHYTILVCNVQYTAFSGEPTNKIKENVFTVMSESLYETIQYNPDIDTGK…	498	USER	zzzz129
812	my_seqs_ms19_W08_an1_2ct046.2		MCCYSDEKYTWTPIKAPGGGGFAIDQYTLQWLYTENIDGNNYWSHTNSTKDLCRYTGSKITFYRHPKCDFIIHYSRKPIIQPDKYFYCKHHPKELLLRKKTKILHRQTIRPNAKQHLTIKVKPPRTMQTNWYVQHDFANRPLLELYTAAIDMSNAYISSVDTNQLITANSLSLQMYKNTNWGQATADYNPTGKLPHTLTPVYGTKPGTPIQIPKTYEGEVNHDTGWFQTAILKATKFQEQNVFAIWKVRYNPKIDTGHGNMIYAKHVTQNNPDPPTSDKSTLLQDLPLWQLLYGYTSYLQKIKASEHILKEYVIYIKSPYIYPHKTVEPYLLLDQNFIDGKAPFQQELDSEQLKLWFPTIEHQQQILNTIVQCGPYIPKWGRERESSWDLHGHYTFYFK…	499	USER	zzzz130
811	my_seqs_ms19_W18_2_2ct11.4		MPFWRKYYNYGWRPRRRIYRRRFGRAFQRRRWRRRHRRRWVRKRKLKILTLKQWQPQYIKRLTITGIYPMIMGTRERVANNLNCYLESKAPHYVPGGGCFSICNFSLMTLYQEHLEIRNWWTTSNDNYPLLRYLGCTMYLYREENLDYLFYYNRQPPMNASLTTYQSTQPTAMLLNKHTIKVQCKKNSKSRKPYKKINIKPPTQLQNKWYFSYDIANTPLLQTMTTATSFDRMFLNSSSISNTIGFTTLDTNTFLNHQFQRTTSPYTPRPNTTLFKTKNGAEQINDIQIGDLILLGEVEDLTDGTQLRHVPGTLTPPGQPTPTDFQKRFYTARMNHQYWGNVFKSSTFYGEERMIESNKPIDELIQEYKNPNEKLKTGFTFKTTKYSEIRYNPFADKGK…	673	USER	zzzz131
810	my_seqs_ms19_W18_2_2ct12.4		MPFWRRYYNYGWRPRRRIYRRRLGRTFQRRRWRRKRRYRRVRKRKLKLLPLKQWQPQYIKRLTIVGLYPMIMGTRERIANNLNCYLESKAPHYVPGGGCFSICNFSLMTLYQEHLEIRNWWTTSNDNYPLLRYLGCTMYLYREENLDYLFYYNRQPPMNASLTTYQSTQPTAMLLNKHTVKVQCKKTSKSKKPYKRIYIKPPTQLQNKWYFSYDIANTPLLQTMTTATSFDRMFLNSSSISNTIGFTTLDTNGFLNHQFQRTTSPYTARPGTTIFKTKNGVQDIQKIPIGELILLGEVEDLQDGTQLKLVPKSYDTVPGIATPTDFQKKFYTAKMKAQHWGNVFKSSTFYGDERMIESNKTIDQLIQQFTQENQPIGTGFTEKTTKWAEIRYNPFADKG…	675	USER	zzzz132
809	my_seqs_ms19_W18_2_2ct13.3		MPLYWRRPWYRFRYKRRWRHRRRPLFTRRFRTTVRRRYRRQPRVRRFRFYRKKAKKITIKQWNPSKILKCRIKGTLPLFICGRTRINHDFTLYKESTSPAGESTGGGWSIQQITLQALFQEYIKHKNFWTKSNKGLPLTRYYGATLKFYKSLHTSYIVNISTCPPFSVTMDMFLNTQPQRQLMERKRIIVPQLKSSTRKKYKKIKIHPPSFMQSKWYFQQDICQTPLVLITTTACSLEQPYIPDDQVSNQITLKSLNTNIFQNPNMETLLDQNHGYITKHVGTQTMRLFGQKQHTGGPKPKKWTEVIPLTNTLNYAAGYDHITSITEFNDKQNWGNPFSLPWSHADTQIYYSFNWPKDKLDTEETFTEIEELYTTCRYNPDVDKGTGNKVFLKSNNHNT…	652	USER	zzzz133
808	my_seqs_ms19_W18_2_2ct9.3		MPPFNRRRYFYRNWWNKGKRRKYFRRRRFGIPFRNRKRRHRRVRRKKYLKFYKKLKRVKIQQWQPMSIKKCKIEGYLPLFQAGPGRVGNNYALWKESYFPEHYPGGGGWSIQQMSLGILFKQHTELMNYWTRSNNRLNMCRYFGVYLYLFREPNVDYVFTYMDNVPKVVTKYYYNSHHPIKLLTYKRKITIPSFQTQPHKRKPYKKLYIPPPKLMKNQWFFQAHLADYPLLTFAVSSCSLTGMFGSYRAISNNVTLMCLDTKQFTHPTFQYKGSKPPQHGYTYGTNFLYGIPHSLEIFKENLRGNTVYLGNTMTRQIGATINQMTTSAYTYPNWGNPFYYTYINQNMPTFITETTPQEMVSTKTEKLSEGKFTEKDTPYIFKVRYNPFHDKGDGNKIYV…	668	USER	zzzz134
807	my_seqs_ms19_W18_an1_2ct001.3		MAWGWWRRRRWPTHRKWRRWRRRRRVPRRRPRRAVRRYGKRRVRRRRWGRRRYRRGYRRRGAVRLRRRRRRGRKRLILTQWQPQTRRKCTITGYLPVVWCGYLRAARNYAYHSDDSTKQPDPFGGALSTTSFNLKVLYDQHQRGLNRWSFPNDQLDLARYKGCELTFYRQKSTDFIAVYDISAPYKLDKYSSPSYHPGNMIMQKKKILIPSYDTNPRGRQKVKVKIPPPKLFVDKWYAQEDLCDVNLVTLAVSAASFTHPFGSPLTNNPCVTFQVLDTIYYSAIGYGSPTENKKKVLETLYQQNAYWASHLTPYFTTGLKIPFPKSADPTIAGSGTATTLSTSGDKNTNIKIAGDSNYNWYPYNLKNKVETLHNIRQQYFEWETDKGPQANSDYGKYHT…	750	USER	zzzz135
806	my_seqs_ms19_W18_an1_2ct002.4		MAWRWWWQRRRRRWPWRRRRWRRLRTRRPRRPVRRRRRRATVRRRRWGRRRGRRTYTRRRARRRRRPRKKLLLSIWQPQTIRRCTIRGFTSLVICGNSKSGRNYALHSEDYTTQIEPFGGSFSTTTWSLKVLFDEHQKFLNKWSYPNTQLDLARYKGCTFHFYRDLKTDYIVTWSRNPPFKLNKYSSPMLHPGMMMQRKKKLIVPSFQTRPKGKKRYRVRIRPPNMFEDKWYTQEDLCPVNLVSLAVSAATLTHPFCPPLTNNPCITFQVLKEFYYKAIGISGSLSTQYAEIEESLYEKNCTYYQTSQVLAQLNPNFKPAVNGGANQELGSKISWLKQTNATEGFLTKNNPVFGMCSYKPNKEKLLEIRKWYWDQLNTENNLHGQYGKATLQQFEYHIG…	742	USER	zzzz136
805	my_seqs_ms19_W18_an1_2ct003.3		MAWSWWWQRWRRRRWKPRRRRWRRLRWRRPRRAVRRRRRGRRVRRRRWARRRGRRRRYATRRKRRVRGRRFRKKLVLTQWHPSTMRRCLIKGIVPMVICGHTRWSYNYALHSEDYTEEGRFPHGGSLSTTTWSLKVLYDEYLKHHNFWGYPNNQLDLARYKGAKFTFYRHKKTDFIVFFNRKPPFKLNKYSCASYHPGMLMQQKHKILIPSYDTKPKGRPKITVRIKPPTLLEDKWYTQQDLCNVNLLQLVVSAADFQHPFCSPQTNTPTTTFQVLKDIYYDTMCISEPTDNYTSVNNLTQTHSFTTYSQKLEEILYTRASYWNSFHATEYINPNIIHRNGKKLFTDPHLSSWMTDTSNNGFLTKNNTAFGNNSYRPNEEKIKAARKAYWDALVDRNDL…	764	USER	zzzz137
804	my_seqs_ms19_W18_an1_2ct005.3		MAYSYWWHRRRWPWRGRWRRWRRRRRVPRRRPRRPVRRYRRRPVRRKRRWGRRGRRRRYVRRYRRRLTVRRKRNKLRLTVWQPQNIRYCAIKGLFPILICGHGKSAGNYAIHSDDFVTSRFSFGGGLSTTSYSLKLLFDQNLRGLNRWTASNDQLDLARYLGAIFWFYRDQKTDYIVQYDISEPFKIDKDSSPSYHPGILIRSKHKVLVPSYQTWPKGRSKVKLKIKPPKMFVDKWYTQEDLCNVTLVSLVVSLASLQHPFCRPLTDNPCISFQVLQNFYNNVIGYSSSDALVENVFKNYLYSKASFWQSHLTPSFVKKINNNPDGTAITQKIDSMPDMTNYNIWVSNTSRGAGFYNSNVNVHYNYCQYNPNVQHLTTLRNYYFFWETYPAPSNTTPTP…	759	USER	zzzz138
803	my_seqs_ms19_W18_an1_2ct006.3		MAYWWWRRRRRRPWRRRRRWRLRRPRRRRAPYRRRRGRRRVRKRRGRWRRTYRRWRRKRGRRKHRPKIILKQWQPNFIRNCFIVGYMPLIFCGENTVSQNYATHSDDLVAKGPYGGGMTTTKFTLRILFDEHLRYMNYWTVSNEDLDLCRYVGAKFYFYRHPTVDFMVQIHTQAPFLDTELTGPSIHPGMMILNKRKIFVPSLKTRPNRKHKVRVKVGAPRLFEDKWYPQSELCDTTLVAIYATACDLQFPFGSPLTENPCVNFQVLGSAYKQHLSILTTETEKNKAHYEQALFNKVAYYNTFQTIAHLRETGKQEQANPQWSTCVNSTALKFDGTNQNQCNDTWYYGNAYNCNIQSLCEKTRQKYFKATKSAFPAYATLVDDLYEYHGGIYSSIFLSA…	735	USER	zzzz139
802	my_seqs_ms19_W18_an1_2ct016.3		MPPFQRRRYWNRNFWNYRRPRPYYRRRRFRKSIFSRKRRRRRVRRKTFYKRFKKLKKIKINQWQPQSIKRCRIEGYLCLFQAGPTRYLNNYALWKESFFPEHYPGGGGWSIQQLSLGNLFTQHKEFMNYWTKSNERMNLCRYYGCRIQLFREVYTDYVFYYFQECPKTVNRYFYASQHPIRLLTHGRKKVVPSFETQPHKRKPYKTLFVPPPKLMQTKWFFQQGLSSFPLLSFVASAISLTGMFGSKNAISNNATLFCLDSKVFASPNFQYKTSTHPQYGYTIAGTYYLYGLTNGHDIFTQNKGKDSIYLGNTMEQKRGAPMNQYTPFGKYTFEQWGNPFFWGFLTGNLRTFQANLDPKKMYEENPTLQQAWLKESNYIFKVRYNPFHDKGQGNQVYFI…	664	USER	zzzz140
801	my_seqs_ms19_W18_an1_2ct018.3		MSISPQTATENDPTFDTLYSNCTYFQTLHTPAQLNATVKGAQHNQKIPHADWLSGQGTGKFTTGNNSIFGFCNYNPDKQMLHKIRKWYFEQENKDNNIHGTYGKPTNDALDYHLGKYSPIFLSPHRTNLQFPTAYQDVTYNPLNDKGKGNQIWFQYCTKPTTEFDEKQCKCHLKDLPLWCMFHGYSDYIESELGIQEEIHNIGIVCVISPYTQPKLMLPNKPNWGLVFYDTTFGDGKMPNGSGLVPVYLQNRWYPRMAFQQQVMHDFSLTGPYSYKDDLQSTVLTVFYKFHFLWGGNMIPEQVIRNPCKADGLDATYPSRLPRDLQIVDPRTVGPKWVFHTWDYRRGLFGEGAIKRVSEKPEDDEYSFQLPKKPRLFPPTDREGQEGGFNFQGEIIPPS…	461	USER	zzzz141
800	my_seqs_ms19_W18_an1_2ct020.2		MAPYQRRRYNYYRPYWNKRRRRFRKPRSRNPFRRRRRQPRVRRRRYRRKFKKKLKKLNIQQWQPTHIKKCKIQGYLELFECGKGRVGNNYAAYKDSWVPPHEPSGGGWSLQQLTLNNLYVQNCLLMNWWTRSNKGLNLVRILGVKVTLFRQENIDYIFCYLPEEPSNVTKYYYPSFHPIKMLTYNNKIVVPSFRSQPHKKKPYKKKFIPPPKEYLNKWYFQQHLGTFPLLQFVAVACSLTNPFISPESPNNNVTLYCLNTSFFTHPNFQTYDRKKGYISKENQYIYASDKHTTGAWDESQVQNCTYLANTLLNDPGDTIGNKTDIKNYSFENWGNPFYYEYLTGETPTFITTTDINSALQLKKTDTVKKAFASPTIKTEPYIKQLRYNPHKDKGKGNRV…	669	USER	zzzz142
799	my_seqs_ms19_W18_an1_2ct021.3		MPLIICGSGSTQMNFITHMDDCPPMGYTYGGNFTNLTFSLEGIYEQFLYHRNRWSRSNHDLDLARYKGTTLKLYRHQTLDYIVSYNRTGPFQISDMTYLSTHPAIMLLQKHRIVVPSLLTKPKGRRSIKVRIKPPKLMLNKWYFTKDICSMGLFQLQATACTLYNPWLRDSTKSPVIGFRVLKNSIYSNLSNLPDQEGARKSIITTKLHPDGLTGSDFYKKGWEYTYTRLMASIYYQTIPNSTYNWINYQTNYAQVLQKFKLKRIDSLKLIKKEFLYHYPSNTTTDFIENYSLTHDWGLYSPYYLTPTRISLDWETPWTYVRYNPLADKGIGNRLYAQWCSEKSSNLDNTKSKCIMKDLPLWACCYGYIDWIVKSTGVSSAVTDMRIAIICPYTEPALI…	433	USER	zzzz143
798	my_seqs_ms19_W18_an1_2ct026.2		MLISRKHKTVRCKKHNFLKKPYTKVHIKPPAQLSNKWYFQKDLADTPLVMTFAAATSLDRYFIASNSQSTTIGFYGLDTSLITYHDFRQQTTLGYHPSDILYLWSFQQGQTPKPTLETLQAQNLIFLGQSQKKQMGNTIKDAKQKGEDLTTKWNDIKTRYCSSAEYWGNMFEPPYLTGKYDILHTKDPLQTTLRKMTTPTTTASELNLHYFVQPLIKEYRYNSFEDSGPNNEIYLANLHSLTPGWQRPRDDKESNDNLPLWLGLWGWGDFQKLNKIDIDTDRLIVLKTKHIHPPDPYIVPIDLDFINGNSPFTNKLEVTPSDKLNWHPKGAFQIQSITAICSGGPATIKLPPNTSAEAHVKMKFYFKLGGCAQPIKNIAKPGDQPDFPLPNNQYESNSL…	498	USER	zzzz144
797	my_seqs_ms19_W18_an1_2ct029.1		MVICGHTRAGRNYAIHSEDFTTQIKPFGGSFSTTTWSLKVLWDEHQKFQNRWSYPNTQLDLARYRGVTFWFYRDQKTDYIVQWSRNPPFKLNKYSSSMYHPGMMMQAKKKLVVPSFQTRPKGKKRYRVRIRPPNMFADKWYTQEDLCPVPLVQIVVSAASLLHPFCPPQTNNPCITFQVLKNIYDECIGVNESMKTKYETLQGTLYSQCTYYQTTQVLAQLSPAFQPAMKPTAANNTPTHTTLGNYVQELKSSSGSFHTGQNPVFGMCSYKPTFEIMKKANEWFWQNLMVDNQLHSTYGKATLQCMEYHTGIYSSIFLSPQRSLEFPAAYQDVTYNPNCDRGVGNMVWFQYSTKMDTNFDATKCKCVLQDIPLWAAFNGYADFIEQELSISTEIHNFGI…	561	USER	zzzz145
796	my_seqs_ms19_W27_2_2ct3.3		MPPYWRQKYYRRRYRPFSWRTRRIIQRRKRWRYRKPRKTYWRRKLRVRKRFYKRKLKKIVLKQFQPKIIRRCTIFGTICLFQGSPERANNNYIQTIYSYVPDKEPGGGGWTLITESLSSLWEDWEHLKNVWTQSNAGLPLVRYGGVTLYFYQSAYTDYIAQVFNCYPMTDTKYTHADSAPNRMLLKKHVIRVPSRETRKKRKPYKRVRVGPPSQMQNKWYFQRDICEIPLIMIAATAVDFRYPFCASDCASNNLTLTCLNPLLFQNQDFDHPSDTQGYFPKPGVYLYSTQRSNKPSSSDCIYLGNTKDNQEGKSASSLMTLKTQKITDWGNPFWHYYIDGSKKIFSYFKPPSQLDSSDFEHMTELAEPMFIQVRYNPERDTGQGNLIYVTENFRGQHWD…	655	USER	zzzz146
795	my_seqs_ms19_W27_2_2ct33.3		MPYWRRYGYRWNRRRRWRRRRPFRIPFQRRLWRRRHRRVRKKKLKSIKLKQWQPQFIKRLKIVGTEPLFLTTSERLTNEFTSYKDSIAPHYVPGGGGFSIMNFTLNALYKKHLVLENWWTASNENMPLIRFTGVTLYYYRQAEFDYLAQYIRQYPMTASHLKYTSTHPQVMLLHKNTLKITCKKNNKNKKPYKKIKIKPPTQMQNRWYFQKDLADIPLLQLITTATSLDRMFLNSSSISSTIGFTSLDHLGFFNHNYTKDGSQGYVAKPGQLLFGIIQGTYNIKSVKFSQLIYMGNAMDLIEGTPAGSITETQYNTIKDTKYNTTIKKQLKYIQLHQQTWGNPFNDTFHRTGALITTSLDWESIISKATTDTTALTDDFTWKTTFTFPVRYNPFADKGT…	674	USER	zzzz147
794	my_seqs_ms19_W27_2_2ct38.3		MPYFRKNFRRYYKYRKNYYKRRPWFRRRRPRKTFQTKRRRRPVRKKFFKKKKLKKIKLQQWQPSHIKKCKIKGTIQLFQAGKGRFSHNYQLYKESFVPPHQPGGGGWSYIILSLGNLFTENQRLQNWWTKSNKGLPLCRFSGVKFKFYRQQFTDYIVTWSNEYPMEVGKFHYPSIHPQRMLSYNHRIIVPSYNSMPHWKKPYKSCFIRPPKEMTDKWYFQNHFQRFPLCMLATTACSLNSLYVATNVLNNNCTIKCLNTNFFQRKSFQFPSITTGYFPKSNVYAYASPNGGYTITDIKIKEITYLGQTGPYNEGEELGNYQLQTYTKPHWGNIFHYNYLNEQRQIIITQYQLSHWFEGVPTGTPLTRNINQGEAQFFTDPLYYDCRYNPTKDTGIGNEA…	665	USER	zzzz148
793	my_seqs_ms19_W27_2_2ct64.2		MPYWRRYRWKRWRPRRTWRRRFRRPLQRRFWRRKYAVRKRKKKNLILRQWQPHYIKKLNIKGLYPLAMATRERLSNNLNCYLESIAPHYLHGGGGFSICNFTLHSLYMEHLVLRNWWSTSNDNMPLIRYLWCDIKLYRQAEVDYIFCFNNSFPMTASLLTYQSTSPQAMLLNNKKIIVACKKNNKNKKPYKKIRILPPSQLQNRWYFQKDLAFTPLLQTMTTLVSLDRMYISSTSVSTTMGFISLDTNGFMQRYMRDNGTTPYQPQTEQLIFATPNGQKDISQIPLTNLILLGTVTDYTPGTQLSSIPTSEYITPPSQWGSTFQNPAKALYTAYSKHKYWGNPWFNMWFYGDQRIVMTNKSIETLVKYYANKSQSDAKLDSNFTVKEQKWVELRYNPFA…	510	USER	zzzz149
792	my_seqs_ms19_W27_an1_2ct012.2		MAYWWWRRRRRRPWRRRRRWRLRRPRRRRATYRRRRGRRRVRKRRGRWRRTYRRWRRRKGRRRHRKKIIMKQWQPNFIRHCFIVGFMPLIFCGENTTSQNYATHSDDLVAKGPYGGGMTTTKFTLRILYDEHLRFMNYWTVSNEDLDLCRYLGVKLTFYRHPTVDFMVQIHTQPPFLDTELTGPSIHPGMMILNKKKIFVPSLKTRPNRKHKVRVKIGPPRLYEDKWYPQSELCDTTLLTVYATACDLQFPFGSPLTDNPCVNFQVLGSAYKRHLSILSTNDSKNLQHYTTNLFNKEAYYNTFETIAQLKPTGQTAGVSTTWQEVQNTTTLNASGSNQATSNDTWYYGNTYNKKISDLTEITRNRYLKATQLAFPAYATLNSSLYEYHGGCYSSIFLSA…	735	USER	zzzz150
791	my_seqs_ms19_W27_an1_2ct017.4		MLTHPLAMLLNKHHIVVPSFKTKPKGKRYKTILIKPPKLMINKWYFAKDICKIGLFQLYATGLELSNPWLRSGTKSPIIGIYVLKNSVYNNNLTNLHGGGHEQGRKQVFETLMPTTSNKNWQYTYTPLMSKVYHQSTKSNNDKLPTPYNWKNYSENYTHVKSKWDKLAQTGYKLVKDEYNAVYTTTATYPPDYEQRNYLSHDYGIYSPYFLTPQRYTREWYTAWEYVRYNPLSDKGLGNRIYAQWCSETSSSYNPSKSKCMLQDMPLYMLTYGYLDYVVKCTGNKSAWTDMRICIRCPYTEPPLTGSDSNSGFVILSESFMNGDMPWPSNFIPLKLWFKWFPMIFNQKQAVENIVSCGPFMPRDQEASSWDITIGYKSVFKWGGSPLPPQPIDDPCQKS…	550	USER	zzzz151
790	my_seqs_ms19_W27_an1_2ct018.3		MAWRWWKRKRRWWWRKRWTRGRFRRRRTGRPRRRPRRRRVRRKRQWRRGRRRRTYNRRRRRLKKKRRPKLTLRLWQPDMVRNLKVSGYIPIIISGFGTFSRNFSSHLLDKVIKEPFGGGHSTMRFSLQILFEEHLRGLNYWSYSNTDLELVRYRYCKFTFFRHPETDYIVQYNRKTPLGGNILTAPSLHPGSLMLQKYRVLVPSWKTKPKGKGTVSIKIPPPTMLTDKWYFSKDVADLTLLNLNAVSADLRFPFCSPQTNTTCITFQVLSSVYNKFLSITEINSSNSKEKIKEFLDAAMPTERSANILNTFKSEGNYSHPSIKVFNGSNRPTNDEYFAQKDSLWADAIFVNTAQTLDQLKVKIEKNIENYKKKVDKEITAVTQRGTSAFYHLVGIYGSS…	735	USER	zzzz152
789	my_seqs_ms19_W27_an1_2ct020.4		MAWWGRWRRWRWRPRRWRRRRRRRVPRRRAQRPVRRRRARRVRRRRWGRRRWRRGYRRRLRLRRRRRRKKIRLTQWNPAKVRRCTIKGVLPMILCGAGRSGFNYGLHSDDYTIQKPLGQNPHGGGMSTVTFSLQVLYDQYQRFMNKWSYSNDQLDLARYFGCTFWFYRHPEVDFVAQFDNVPPMKMDENTAPNTHPSFLLQNKHRVKIPSFRTKPFGRKKVRVSVGPPKLFEDKWYSQHDLCKVPLVSWRLTAADFRFPFCSPQTDNPCYTFQVLHEEYYPVIGTSALEQGTHYNASNITNLENFLYKKCTHYQTFATDTRLNPQRPISSDNTKTYNPSGTQETIIWNTTDFNQFKKHTDSNYGYCTYCPTDPLVQKIKSYRDKRFEWLTKMEKDNTCH…	761	USER	zzzz153
788	my_seqs_ms19_W27_an1_2ct022.3		MAWGFWGRRRRWRRWRPRRRRWRPRRRRRRRPARRFRTRRRVRRRGGRWRRRYRKWRRRRGRRTHRKKIIIKQWQPNFIRRCYIIGYLPLIFCGENTTAQNYATHSDDMISKGPYGGGMTTTKFTLRILYDEFTRFMNFWTVSNEDLDLCRYVGAKLIFFKHPTVDFIVQINTQPPFLDTHLTAASIHPGIMMLNKRHILIPSLKTRPSRKHRVVVRVGPPRLFQDKWYPQSDLCDTVLLSIFATACDLQYPFGSPLTDNPCVNFQILGPQYKKHLSISSTMDNTNKQHYENNLFNQIHLYNTFQTIAQLKETGQTRETTPTWNSVQNQQLLNCSGNNATSSRDTWYKGNTYNDTIPQLAKITRERFKAATQAALPNYPTIMSTDLYEYHSGIYSSIYL…	736	USER	zzzz154
787	my_seqs_ms19_W27_an1_2ct023.5		MAWRRWRRRPWWRRRRRRRWRRRRRRPRRRRPYRRRRPRRVRRRRGRWRRAYRRWGRRRRRRKHKKRLVLTQWQPAVVKRCYIIGYDPIIICGINRTAFNYTSHSEDHTYNNDSFGGGLCTAQYSLRILFQDKLAQHNFWTTSNEHLDLARYLGATLIFFRHPTVDFLVRVRTSPPFTDTNMTALTLHPGMMMLAKKTIKIPSLKTRPSRKHFVRIKVGAPKLFQDKWYPQNELCDVTLVTVQATTADFTYPFGSPLTNSPCCNFQVLNSNYDKALSILNTASVLTDEIHTKRENCYKFLLQQYSYYNTKQTQAQLKFDFFPKQNPKMPKKDNATLSKEPSKLTKDNVSSNYPHWDTLYGGLAYGFQPTASSHNTNQAKDLQTQMIEANQFYTKAGKQI…	769	USER	zzzz155
786	my_seqs_ms19_W27_an1_2ct026.3		MAWWGRWRPWRWRRRWRRGRRRRRVRTRGARRPLRRRRTRRVRRRRWGRRRWRRGYRRRLTLRRKRRRRKKIVLTQWNPAKVRRCRISGVLPMALCGAGRSGFNYGLHSDDLTVQKPLNQNPHGGGMSTVTFSLKVLYDQYQRFLNKWSYPNDQLDLARYKGCKFTFYRHPETDFIVQYDNVPPMKMDEFTAPNTHPNLLLQAKHRRKIPSFKTRPFGKKTITIKVGPPKLFEDKWYPQSDLCKVPLVSWRVTAADLRFPFCSPQTDNPCFTFQVLHEEYYNVLGTSILDQRTTYDTNITKFEKWLYENCTHYQTFATDSRLAPEKTTAPSGEHNESTVWTQSEFTQFKKQTDSNYGYCTYCPNKSLSEKIKKYRKKRFDWLTTANSKNQCHINMTYSK…	754	USER	zzzz156
785	my_seqs_ms19_W27_an1_2ct031.3		MPYYYNRYRWRRRRPRRFWRRRFRRPFQRKFWRRRHWVRKRKLKKIRLSQYQPHYIKKLTITGTYPLILSTKERLSNNLNCYLDSIAPAEVHGGGGFSICNFSLYSLYQENLQLRNWWSTSNDNMPLIRFLGCSVTLYRQAHLDYLFYYRNTYPMTASLTTYQSTNPQAMLLTKRTRIMACKTHNKNKKPYKKINIRPPAQLQNKWYFQKEIAQVPLVQFITTACSLDRMFLNSSSISTTLGFTSLDTNGFMQRFLKANTTAPYQPLTGQLMFAAPNGKAISDILVTQLILLGSVEEATEGTIIGSVSPTLDCPTEWQGNTTICKKLYTAYNQSKYWGNPFMPHWFYGDQRILITNKTIEQLCKQFKDKTETTCKLTEGFVEKTQKYQSLRYNPFADRG…	678	USER	zzzz157
784	my_seqs_ms19_W27_an1_2ct033.4		MPFWRRYYNYGWRPRRRIYRRRFGRAFQRRRWRRRHRRRWVRKRKLKILTLKQWQPQYIKRLTVTGLYPMIMGTRERVANNLNCYLESKAPHYVPGGGCFSICNFSLMTLYQEHLEIRNWWTTSNDNFPLIRYLGCTMYLYREENLDYLFYYNRQPPMNASLTTYQSTQPTAMLLNKHTIKVQCKKTSKSRKPYKKINIKPPTQLQNKWYFSYDIANTPLLQTMTTATSFDRMFLNSSSISNTIGFTTLDTNTFLNHQFQRTTSPYTPRPHTTLFKTKNGAFEINQIQIGDLILLGEVEDLNDGTQLNSVPATQTPPQELIPNPTNFQKQFYTARMNHTYWGNVFKSTTFYGDERMIESNTPIDELIKQYKQPTEKLKTGFTFKTTKWAEIRYNPFADK…	676	USER	zzzz158
783	my_seqs_ms19_W27_an1_2ct035.2		MPYFYRNWRTPWWRRRKRRTYWRRGARKNFRRRRYRNRRVRKKLKTLKIKQWQPSTIHKITVKGLYCLFQAHHKRINKNYAQYQSTVTAEGLPGGGGYSILRFTLDSLYQDNQLVRNVWTKSNKHLPLFRYNGCTIKIYRPAYVDAVVRFQTCYPMSASALLYAGCQPSVMMLSKHSHIIPSKLTKPWGKPYRKFRLPPPQQMQNNWYFQGHLATTGLLLMQTAACSLDQYYISKHSESDTITLYTLNTKLFTNLNFKNFPPTTGYQPNENMYLWALPNGEKKLKNLIYLGNTIEYGTGSTIGSMKGNTFQNKISEYFSDRKHWGNPFSEHYMHKKVIMYFTKQHGSLALQGKTSGDETIASPFTELTQELFFMLRYNPRNDTGKDNQIYLKSNWKENE…	657	USER	zzzz159
782	my_seqs_ms19_W27_an1_2ct038.2		MPYYSRRRWPRRRYRWLRRWRARRPFRPRYRRRYWVRKYSRKRKLYKITEKHWQPKVIRKTHVRGTYPLFLCTRHRITNNMIQYLDSIAPEHYYGGGGFSIMQFSLQALYEEFVKAKNWWTHTNCFLPLIRYMGCSFKFYKTEYYDYVVLIERCYPLHCTDEMYLSTQPSIMMLTKKCIFVPCKQNSKGKKPYKKIRIKPPSQMTTGWHFSQDLANMPLVVLKTSVCSFDRYYTDSTAKSTTIGFKTLNTQTFKYHDWQDPPTTGYKPQESLWFYGAENGTPVDPNETLVQNLIYLAGTGPYEKGIPIKNTVQTYFSNPKQWGNIFHDDYTSGTAPVFVTNKSPTQVASEWNNIKDKSVKDSGIFTPRTIPLWLPCRYNPFADKATGNKIWLVSIHGDH…	655	USER	zzzz160
781	my_seqs_ms19_W27_an1_2ct039.3		MPLIICGSGQTQFNFITHMDDITPRGASYGGNFTNVTWSLEGLWEQFQYHRNRWSASNHDLDLARYLFTTLKLYRHENVDYIFSYTRTGPFEISHLSHLSTHPLLMLLSKHHIVVPSLKTKPKGRRYKKVRIKPPKLMLNKWYFTKDICDMGLFQFWATACNLENPWLRTGTVSPCIGINVLSNSIYTDLSNLPSHMANRSTIQNNMHPRTLKDNKGQWQYTYTRLMSKYYYKGNASSTYDWENYSNEQNYSNTYSQWSNDRSTRLEKIKKEYQAVYPQLPTQVPSDSTLLQDFGIYSPFYLTPTRISLDWKTPYIHARYNPLTDKGIGNRIYLQWCSEASCEYNPTKSKCTLVDLPLFIMFYGYIDWCIKCTGVSSLVKDARVMIRCPYTEPQLIGAN…	641	USER	zzzz161
780	my_seqs_ms19_W27_an1_2ct046.2		MPFYARRRWPRRRYRWFRRWRARRPFRPRYRRRYWVRKYSRKRKLYKITEKQWQPKVIRKTHVKGTYPLFLCTKHRIANNMIQYLDSIAPEHYYGGGGFSIMQFSLQALYEEFVKAKNWWTHTNCFLPIIRYMGCSFKFYKTEYYDYVVLIERCYPLHCTDEMYLSTQPSIMMLTKKCIFVPCKQNSKGKKPYKKVRIHPPSQMTTGWHFSQDLANMPLVVLKTSVCSFDRYYTDSTAKSTTIGFKTLNTQTFKYHDWQEPPTTGYKPQDNLWFYGAENGTPIEPDQTKVSDLIYLGGTGPYDKGIPIKENIESYFSNPKQWGNIFHDDYTSGTAPVFVTNKSPAEVKNLWQTIKSKQVKDSGIFTPRSIPLWLPCRYNPFADKATGNKIWLVSIHADH…	655	USER	zzzz162
779	my_seqs_ms19_W27_an1_2ct048.1		MPYYWRKWRYPKRRFRYRRPSSWRTRGTFRRNRRRRYRRRVRRKLSCLPLRQWQPSHIRKMSIRGLYCLFQANKITFNKNFAQYETSIPRQGLPGGGGFSLLRFNLDCLFEQNELARNVWTQSNKYFPLFRYLGCIIKVYRPKYTDAVVKFQTCYPMSASKLLYTGCQPSIMMMSKGCKRIRSLQNAPYKKPYKLYKLKPPQQMINKWYFQGEQSKTGLLLIQSCAASFDEYYISHHSESQAITLKSLNTKIFKNLNFKNPPATGYIPKTGFALYASNGSDEIQDLIWLGNTVEYRKGEQIKDTTGQGTTETDKWKSQLTKYMSDKTKWGNPFHHEYLAKSAPLWFGLNHPTVQLGKQGLTATSKIQAAGLRSVDQELIFDIRYNPQKDKGYQSNIYLK…	665	USER	zzzz163
778	my_seqs_ms19_W27_an1_2ct049.1		MFMATSDRLSNILNCYLETTTPHYMHGGGGFSISNFSLMTLYLEHLQVRNWWTVSNQNMPLIRFTGCTIYLYKMAEYDYLFYYNTQPPMTATLTTYQSTHPAAMLLNKHTRKITCKRYNKKKKPYTKLKIKPPSQFLNKWYFQYDIANTPLLQTMCTACSFDRMFLNSTSVSSTIGFVSLDTRGFLNHQYTPLGTSGYNPKPNTLLFGVNNGTQNISNITYNELIYMGCTTDLQEGITMQHIPITQYSGPASYTDFQKKLFNAKTKHENWGNPFKPSRFTGDQRLIETNKTWDEILQIKSGTQTLGTGWVEKTHKTFECRYNPFADKGSGNILYLLKINSGLHATDWGPPTDKDVVTQDLPLWLLTWGYLDFQRNCKEYRDIDTTCICVIQSPYIFPKT…	607	USER	zzzz164
777	my_seqs_ms19_W27_an1_2ct050.3		MPPYNYRYRWRRRPPWRRRYRWFQRRRPRRTLQRFYRRRYWVRRKKLSKNYKKKLNFIKIKQFQPQKIVKCSIKGDICLFWCGKGRVPHNFSMWSESIVPYQEPGGGAWSMIVFSLKALYEEYVRYRAWFTKSNEGLPLVRLLGGTMKFYRTDFVDYVVTWQLCPPFSATRDMFLNSHPSRLLMNKNKIIVTSKWKARHKKPYKKKYFRPPSLYSNKWYFQKDICQNAFLLITTAACSLDQMYLPEDSISNNITLYSLNTDFFQNPNFVTENITGYSPKLELYLYGTGNGPIQSRNPKWKELILLANTTTWTDGVTTTSTNEMLKKKNWGNPFTHLHAHPDTRLYYGKLPEQSQVFTQDATVTQLHELYFQCRYNPLADKGIGNTVYFKSTSISNGTIS…	643	USER	zzzz165
776	my_seqs_ms19_W27_an1_2ct051.3		MPYPWRWRRRWPTRRRRRWRILSRRPRTSVRRRWRRRTWVRRKFFKRYRKKKLSKLKITEWQPQTIRKCTITGPLPLLLCGRGRLCNNFTLFAESIVPIEEPGGGAWSYIQITLNALYDEYLKYRNWWTTSNGGLPLVRYIKTTLTFYRSEDTDYIVKIIRSPPFSVTRDDYLDTQPSRMLLDRRTILVPSSKGKKYKKNYIKKTIYPPSLWFNKWYFQQDICNTPLFILKTAACSLQQFFQPVDQLSNNITLWTLNTDFFQNPSWKYPETTGYVPKQTRDGQIYLYGTHNGAPEDNEIQWNHLVYLGETQRYTEGLPITTINNQLPDKTTWGNPFHYSYQHPDARLFYSTSKPTSDQTKKPSRLYYIWEPCRYNPLKDTGKGNKMYFKSTSIAQQPFH…	641	USER	zzzz166
775	my_seqs_ms19_W27_an1_2ct052.3		MPPFNYYRRRYYKRPQWRWRRRRWTRRWRTRPLIRRGYTRRRRVRRRKLLKYKHKKLKTITIKQWQPDNIRKCKIKGQLCLLTCGQNRINNNFILTAESIIPVGEAGGGGFSIMQLTLRALYDEYTHFRNWWTTSNCGLPLARYSGCSIKFYCSNDTDYIVTAQHTGPFEVTVDSYLNTQPSRHIMNKKSFVVPKLNPNKKKRPYIKKRFPPPALFYNKWYFQQDILNTPLILLYISATSFDQMYAPNDQISTNITFFSLNTDLFQNPYWEKDNQQPYYPKVVGTKETGLYTSDEHFNNNQEITFNKLYPLLNTTQYKTPPHTPPNFQDITSYNKPENWYNPFTITAHDDHLQTPIFYGIHPKNDNELKGESTPKPSILPITGLYQECRYNPFRDKGIG…	669	USER	zzzz167
774	my_seqs_ms19_W27_an1_2ct053.2		MPLFRYTGCCIKVYRPVDIDLVLKFQTCYPMCCTKLMYTGTQPSLLMMNRGSKKIRCKNNAPNAKPYKKFKFKPPDQMMNKWYFQHNESNAGLILIQAAAASFDNYYTSKYAESSSVTLYGINTRVFQNLNFQTPPTYGYMPKHNFGLWASNGTDTVDNLIWLGQSKLYNVGEPIGKPPTGTSWTEHLSKYMQNPKKWGNPFHQDHIHKTWGRYWYSTSPPLQALQSTTVTTKIQDKLHEFTQEIFLEFRYNPFTDKGYNNIYIKPNFTSNLIGENYDLGPPDDPDLQNPGFPNWLSAFGFEDYLVKLGKKNRIHENYMIFLTTKHIQPLETYYLLVDKYFLHGDTEELIGRTTWDNEHWYPNITHQRGAFNTLTLCAPGAPKLGDTKLAEAKIEYQFY…	534	USER	zzzz168
773	my_seqs_ms19_W27_an1_2ct055.2		MPLTRYLGCKMRFYQSPETDYVVTYDNCWPMVDTPLSHADASPGFMLQKKNKIIVPSSNNKRKRKPYKQIWIKPPAQMYNHWYFTKDICKTPLVLITATTCSLTTPFAKPEAKSNNISLKCLNVRIFQNTNFQHPPETTYYSPKTIETDNQTKNIYLYASVKHYNQAKVTDLFPLGNTKQMQPGVPYQNLTNTESIKLSNLGNPFYNNYFSQDEFFLYYSTLNFTEMLQKKNDGNTINKITEIQVMESQTIITVRYNPDKDTGKDNKIYLVQNFQNNNWQPPTDDNLIIEGFPLYYALWGWLDWQKKLKKATRVFNDYTVVIQTKMFDVDLPYYVLLDQDFIDGYEPYGDLHEPPITPSYYSKENWFPKTTYQEQSIQKICDTGPFTPKTPWNHYLQIR…	535	USER	zzzz169
772	my_seqs_ms19_W27_an1_2ct057.2		MMPVLWAGMGTGGRNYAVRSDDYVVNKGFGGTFATETFSLKVLYDQFQRGFNRWSHTNEDLDLARYRGCRWTFYRHKNTDFIVYFTNNPPMKTNQFSAPLTTPGMLMRSRFKILIPSFQTRPKGRKTVTVRIRPPKLFQDKWYTQQDLCSVPLVQLNVTAADFTHPFGSPLTETPCVEFQVLGDLYNTCLNIDLPQFNADGTLNNINSYSKPNSQDLIKLYQELFTKPSSGHYWQTFITNSMVRAHIDATNAKNAQTESTCKYNTDPFPTKPTKEQFNTWKKSFTDTRDSSFLFATYHPDKITTTIKTMRDNNFALETGPNDKYGDYTSQYAGNTHLLDYYLGFYSPIFLSDGRSNVEFFTAYRDIVYNPLLDKAQGNKVWFQYHTKTDNKFRKPECHW…	689	USER	zzzz170
771	my_seqs_ms19_W27_an1_2ct060.1		MFMATSDRLSNILNCYLETTTPHYMHGGGGFSISNFSLMTLYLEHLQVRNWWTVSNQNMPLIRFTGCTIYLYKMAEYDYLFYYNTQPPMTATLTTYQSTHPAAMLLNKHTRKITCKRYNKKKKPYTKLKIKPPAQFLNKWYFQYDIANTPLLQTMCTACSFDRMFLNSTSVSSTIGFVSLDTRGFLNHQYTPLGTSGYIPKPNTLLFGVNNGATEISKITYNELIYMGCTTDLQDGTPIQHISTTDYKGPSTYTDFQKKLFNAKTKHENWGNPFKQSRFTGDQRLIETNKTWDDILKITNGTQTLNEGWVEKTHKTFECRYNPFADKGSGNILYLLKINTGLHSTDWGPPTDKDVVTQDLPLWLLTWGYLDFQRNCKEYRDIDTTCICVIQSPYIFPKT…	607	USER	zzzz171
770	my_seqs_ms19_W27_an1_2ct066.3		MLYKENLTANNYWTITNDNMPLFRYLGCYITLYTQPEVDYLFYWNNTPPMKATKLTYMSTQPAIMLQLKHVKVMKCRKTNRKKPYKRIYVPPPTQMQNKWYLQHDLANVPLLQTIATVCSLDRKYLHANAKSTTMSFYSINTEEIQNHYFAQTQGTQGYNPKNNVKLFICLEPPAKYNLTDIEFGSLSFLGQVDTQTEGTQIKNINGSQFTEKIQLALTNPGLQGNPFYKECLNPDSYIVKTTADLQTLQTNYNTEKTKLKPQHFSWAGNLLKEIRYNPFKDKGIGNKVYLVNILQQDHSHTWDAPLDDDIVWKDLPLYNLTWGYLDFQRKCGLNTAIDTNKCLVIYTPYVEPQLTTKIYVPVDKKFTEGLSPYANLTYPSDHHNWHPKVRYQVDTANL…	560	USER	zzzz172
769	my_seqs_ms19_W27_an1_2ct069.1		MAWGWWRRRRWPTYRRWRRWRRRRRVPRRRPRRAVRRYGKRRVRRRRWGRRRYRRGYRRRGAVRLRRKRRRGRKRLVLTQWQPQTRRKCTITGYLPVVWCGYLRAARNYAYHSDDSTKQPDPFGGALSTTSFNLKVLFDQHQRGLNRWSFPNDQLDLARYKGCQLTFYRQKNTDFIAVYDISAPYKLDKYSSPSYHPGNMIMQKKKILIPSYDTNPRGRQKVKVNIPPPKLFVDKWYAQEDLCDVNLVTLAVSAASFTHPFGSPLTNNPCVTFQVLDSIYYSVIGYSSSDEKKKNVLESLYKQNAYWASHLTPYFTTGLKIPYPDKNNSTKPASQTVTTLNTTGAQNNIKIAGDSNYNWYPYNLKDKIDILEKIRQQYFKWETDEGPQATSDYGKHHTW…	466	USER	zzzz173
768	my_seqs_ms19_W27_an1_2ct072.2		MAWRWWKRRRRGWLRSLWRRRRLARRRLGRPARRYRRRRVRRKRRWRRGRPRRRLYRRRRRFKRRRRRRPKIKITQWQPSTVKRAFIIGYFPAVICGPGRWSENFTSHIEDKVAIGSYGGGHSTSRWSLKVLYEEFQKHHNFWTRSNKELDLVRFFGSTWTFYRHEDTDYIVTYNRKAPMGGNILTAPSLHPGAAMLTKHKIIVPSFKTRPGGKPTVKFRIKPPTTFTDKWYFQKDMCDVTLLNLNVVLCNLRFPFCSPQTANVNVTFQILHDEIYHNFLSITAEQLIQNQGKNWKDYYKEFLKKALPDKRKANRLNTFITEGAFHAPQVIKYQGKADNQNKYFKEKDALWGDAIHIVEGTEVITGQTAQDLNSLIEKIANNAENYLAKVKQELSTTTV	399	USER	zzzz174
767	my_seqs_ms19_W27_an1_2ct074.2		MRIAIISPYTEPALLGSTPDTGYIPVSDTFCNGDMPFLAPYIPVGWWIKWYPTIAHQKEVFEAIVNCGPFVPRDQTKPSWEITMGYKMNWKWGGSPLPSQAIDDPCQKPTHELPDPDRHPRMLQVSDPTKLGPKTVFHKWDWRRGMLSKRSIKRVQENSSDDEYVAGPLQRKRHKMDTRAAGLQSPEKESYTFLQALQDSAEETLSSQEQAPQEKEVQEEALLEQLQLQKQHQRVLKRGLKLLLGDVLRLRRGVHWDPLLS	261	USER	zzzz175
766	genbank_anelloviridae_YP_003587869.1_	genbank	MAWYWWRRRRRRGWWKPRRRRWRRRRARRRGPARRHRARRRIVRHPCNGQTSSGNRVPRSVQAVDPKYVSLQLVWHSWDFRRGLFGQAGIKRMQQESDALTLSPVHRPKRPKRDTQVKEKTPEKDSDSAVQLRRLQPWIHSSQETKDEEEEIPEGPVQEQLLQQLQQQRLLRVQLESIAQEVLKIRRGHSLHPLLSSHA	199	USER	zzzz176
764	genbank_anelloviridae_A4GZ97.1_	genbank	MPFWWGRRNKFWYGRNYRRKKRRFPKRRKRRFYRRTKYRRPARRRRRRRRKVRRKKKTLIVRQWQPDSIVLCKIKGYDSIIWGAEGTQFQCSTHEMYEYTRQKYPGGGGFGVQLYSLEYLYDQWKLRNNIWTKTNQLKDLCRYLKCVMTFYRHQHIDFVIVYERQPPFEIDKLTYMKYHPYMLLQRKHKIILPSQTTNPRGKLKKKKTIKPPKQMLSKWFFQQQFAKYDLLLIAAAACSLRYPRIGCCNENRMITLYCLNTKFYQDTEWGTTKQAPHYFKPYATINKSMIFVSNYGGKKTEYNIGQWIETDIPGEGNLARYYRSISKEGGYFSPKILQAYQTKVKSVDYKPLPIVLGRYNPAIDDGKGNKIYLQTIMNGHWGLPQKTPDYIIEEVPLWL…	673	USER	zzzz178
763	genbank_anelloviridae_O70739.1_	genbank	MAYGWWRRRRRRWRRWRRRPWRRRWRTRRRRPARRRGRRRNVRRRRRGGRWRRRYRRWKRKGRRRKKAKIIIRQWQPNYRRRCNIVGYIPVLICGENTVSRNYATHSDDTNYPGPFGGGMTTDKFTLRILYDEYKRFMNYWTASNEDLDLCRYLGVNLYFFRHPDVDFIIKINTMPPFLDTELTAPSIHPGMLALDKRARWIPSLKSRPGKKHYIKIRVGAPRMFTDKWYPQTDLCDMVLLTVYATAADMQYPFGSPLTDSVVVNFQVLQSMYDKTISILPDEKSQREILLNKIASYIPFYNTTQTIAQLKPFIDAGNVTSGATATTWASYINTTKFTTATTTTYAYPGTNRPPVTMLTCNDSWYRGTVYNTQIQQLPIKAAKLYLEATKTLLGNTFTN…	770	USER	zzzz179
762	genbank_anelloviridae_YP_009505746.1_	genbank	MAYFRRNFYGGRRHYYRRRNAYTRRRYRRVRRRHRGRRFPYFKQGKRRRTRLLHVTDPRYKAHCTITGWVPIAMTRIQLISQPFTVDTLSPFHVYPGGYGYGVFTLEAMYKEHLMKRNRWSRSNAGFDLGRYLGTWLTLVPHPYFSYLFYYDPEYGNTFEFKKLIHPAIMITHPKTILVLSNKRGGNRRKWPRMWIPRPAIFADGWEFQKDLCQHGLFAFGWAWVDLDRPWMADISKPAQTIDPSTYDKKNDMINKVPNMWWKEAANDWLTEWGRPQGSGVTQQFNQLAMAGPFVLKTNKSEYVNTELLQIILFYKSHFQWGGEFLQDKVLADPTKIPPAQTAYYQQAGQTNLYGSPYKPLSSGLHDSISELPIASPPQNPHKYTVRPSDYDKDGILTE…	502	USER	zzzz180
761	genbank_anelloviridae_YP_003587873.1_	genbank	MPWWPWRRWRRWRRRRGNWRRRVAPRRYRRTARRARRRRKAVRRRRRRRVRRRGYYRRYRRRRRYKRRLLILKQWQPTTNLRLTVKGLIPVVVMGKGKTQNNFGQWEQTVPLEGESYGGSFTIRKFTLQTLYEDYLKLRNRWSRSNTDLELIRYTGLNLRLYRHEFSDYIVHYSLETPMEVGLESHMLAHPLKMIMSSKHVTVPSLLTKKGGRRYLRLKIPPPKLMMTQWYFQKEFCQVGLVLLSISTATLMHPWMAPFVNSPALTIYAVNHKTYSDMSILPSNNQGSTKNELIETLYTAEHTYNPMAQRIWGNIKPQNTNFTPENYWNKWNEIHTKIKTNRQSELTQLKQMRKRLELTTENDYQDPNFGLSYGLYSPLLLYPEMYFPEQSKVYQKARY…	723	USER	zzzz181
760	genbank_anelloviridae_YP_003587837.1_	genbank	MYQSRRRRRRRWGRRILSRYKRKWGRRSRRGHGIYRRWRRWRRRPRTVVTEQHSRRVKTIIVRGWEPLGNICPTDSARAKATPYASYDSDSGQGQWHGTWGHHWFTFQSLVDRAEARLNSFSGNWESYDYLRFLGGTMYFMQPREMCFMFGNDPYLMTSDLDKTASQKNRAEETWITPGYLMHRPGTHLILSRQKVERRSMYKIRVPVPTSWRGWFPIPDCFSYVLCHWYWTWWDPDACFFDPCATGSSCEAEPWWSTAQTKQAWVDRTKLDDPPVGGTGPNQKTWAPFLPSRPCTNYYTHSASFWFKYKLKFQVTGENIWAPVPRDYSQRGTVPTAPSRQQVESEARAPYPKTNRPPTTADILPGDLDSDGILEDEAYERITRDNPCPKRPRPLGIRW…	436	USER	zzzz182
759	genbank_anelloviridae_YP_003587916.1_	genbank	MPPFYYRRRWYSNPWRRKRLRFRRRRLRRPIRKRFRRRRWVRRRRFFRFKRKLRKIRIDQWQPETIRKCHVKGNLCLLTCGRGNINHNYILTSESYVPTSEPGGGSWSILQMTTRVLYDEYKAARNWWTKSNSLLPLTKYIRCKLKFYRSDQTDYIVTIQRTGPFEVTLESYLSTQPSRHLMNHKAFIVPKLGRGPNKETYVKKIVRPPALFQSKWYFSQDIYNTPLFILTVSSCSLDQMYAPQDQISTNISLFSLNTNVFQINNWHKQPYTTKAASTLETYLYCYHNGHEPTQELKWKDIILLGNMTNYTDGKKYNTSGTTPLDLFKTENKPYWGNVFTNLNQDQDVIIYYGTKPKQDDNWTSTAPILPITSLYVECRYNPFKDKGTGNKVYLVPTDS…	662	USER	zzzz183
758	genbank_anelloviridae_YP_003587834.1_	genbank	MRFRYRKWRRPRRLFRSRRRRGYARRRWRRRAWGRRRRVRRYRRRRGGTKRQYISSIMQWNPQHRHLCYIKGITWLCAARADRMSWPGIKQIAATDSTRYWSTILVGGCGVLTLSMDWFFFENLRWRNRWSHSNVGYDLARYMGTHLYFPPLADIWYIVWTDTEFVDQPKKVMSYTHPWILLMTKKHKVIKPRKWNGKGKKIFLKPPAVFNSAWYTSDKWCGAGLGRIYFSFLNPFKQIMHTNQTEQSFPFAIELGNTDYDKPPNNSYDFKDTNEVKKVWNTAGKKYYYRADWDTGDGNAIMLPNTLSPTTPASWLLLEWDAPYWLWFWGKTYQDFVSSHTPEGNPYYGQIYVKWWPITNPYDQGPHTYPEDKEWCLMMLDPQPNFMTCNSIAAALKIA…	576	USER	zzzz184
757	genbank_anelloviridae_Q9QUB8.1_	genbank	MAYGWWRRRRRRWRRWRRRPWRRRWRTRRRRPARRRGRRRNVRRRRRGGRWRRRYRRWKRKGRRRKKAKIIIRQWQPNYRRRCNIVGYIPVLICGENTVSRNYATHSDDTNYPGPFGGGMTTDKFTLRILYDEYKRFMNYWTASNEDLDLCRYLGVNLYFFRHPDVDFIIKINTMPPFLDTELTAPSIHPGMLALDKRARWIPSLKSRPGKKHYIKIRVEAPKMFTDKWYPQTDLCDMVLLTVYATTADMQYPFGSPLTDSVVVNFQVLQSMYDQNISILPTEKSKRTQLHDNITRYTPFYNTTQTIAQLKPFVDAGNVTPVSPTTTWGSYINTTKFTTTATTTYTYPGTTTTTVTMLTCNDSWYRGTVYNNQISQLPKKAAEFYSKATKTLLGDTFTT…	770	USER	zzzz185
756	genbank_anelloviridae_YP_003587831.1_	genbank	MRFRRRRFGRRRRYYRKRRGGWRRRFRIRRRRPWRRWRVRRWRRSVFRRRGRRARPYRISAWNPKVLRNCRITGWWPVIQCMDGMEWIKYKPMDLRVEANRIFDKQGSKIETEQMGYLMQYGGGWSSGVISLEGLFNENRLWRNIWSKSNDGMDLVRYFGCRIRLYPTENQGYLFWYDTEFDEQQRRMLDEYTQPSVMLQAKNSRLIVCKQKMPIRRRVKSIFIPPPAQLTTQWKFQQELCQFPLFNWACICIDMDTPFDYNGAWRNAWWLMRRLQNGNMEYIERWGRIPMTGDTELPPADDFKAGGVNKNFKPTGIQRIYPIVAVCLVEGNKRVVKWATVHNGPIDRWRKKQTGTLKLSALRRLVLRVCSESETYYKWTASEFTGAFQQDWWPVSGTE…	635	USER	zzzz186
755	genbank_anelloviridae_YP_003587887.1_	genbank	MVWRRRWWRRRRRPVWRRRYRRWRRRRRWRRRPRRRRRPYRRRPYRRYGRRRKVRRRRRRTLVVRQFQPPYQRRCRVSGLEPLLYFGKKEEERHFYGNRQIMKDVDQTEGGGVTDGVFSLEELYESYQEGWNHWSASNQMLPLVRYFGCKITLYRSATDSYIFWWTNRPPFQVDRQFWVGMHPYWMLRRGRKVVMLSKQLKPFAKDHVTIKIGPPALMKTKWYFARDFCKTWLLQWRACFFNPIDPYIPRGANNTTVTFYGFPGHSYPSQSLYYTWQEHLAETNVWGITNESEKTKFEALRKAWNEQATKGPVAGYKAVLQAMNAWASVAAPGPEGSNFAKGTNVALGLANLLWLIYSQYYWQNRSPSPWGLPGATLEAMKHPEAWKPYAYKYSWSHDK…	720	USER	zzzz187
754	genbank_anelloviridae_YP_003587880.1_	genbank	MAYGRRYWRRRRWRRRGGRWWRRRRPWKTRWRRRRRRWRRRRYGRRARRFRRRHRVGRWRKLFRRVKSRVVRQWDPNVTRRCMINGYDHALFWGQQAQHRILYDNLPWPIKKEGTQEGGSMNMMQLTLQFLYKDNLAGRNRWTRSNWDMDLAKYHETTLLFPRHRNYSYVVFITRGPNDILDEHTYPGLHPEKMLGRRKKIVVWSKDLRPHGKNYIRVRVPPPQVFKNQWYFQRDICQMPILTLGFAAFDPVNVTLAGNMANSSIILWGIPYWSRPMPYNTWYDYWTKCAGPQNIPWSDRQTNIAAGITQKSAQTCLKLKNKHFGLTNTAIVSDYDKDNIDKNTKQIKTIVMSLNRWYPKWPMKWKDAGDINTQTPFPYRYSWREDQGWGNKVRLWTRE…	712	USER	zzzz188
753	genbank_anelloviridae_Q8V7G3.1_	genbank	MAWGWWKRKRRWWWRKRWTRGRLRRRWPRRSRRRPRRRRVRRRRRWRRGRPRRRLYRRGRRYRRKRKRAKITIRQWQPAMTRRCFIRGHMPALICGWGAYASNYTSHLEDKIVKGPYGGGHATFRFSLQVLCEEHLKHHNYWTRSNQDLELALYYGATIKFYRSPDTDFIVTYQRKSPLGGNILTAPSLHPAEAMLSKNKILIPSLQTKPKGKKTVKVNIPPPTLFVHKWYFQKDICDLTLFNLNVVAADLRFPFCSPQTDNVCITFQVLAAEYNNFLSTTLGTTNESTFIENFLKVAFPDDKPRHSNILNTFRTEGCMSHPQLQKFKPPNTGPGENKYFFTPDGLWGDPIYIYNNGVQQQTAQQIREKIKKNMENYYAKIVEENTIITKGSKAHCHLT…	743	USER	zzzz189
752	genbank_anelloviridae_YP_003587909.1_	genbank	MWWWRRRFWRPKRRWRWRRRRRRPLARRRRRPARLARRPRVRRRRFQWGRPRRYRPRRRRRRRKRQKIKLKQWNPAVTKFCRIIGYYPLIICGEGTTVRNYNVHSQDYVQYESYGGGMTTTMFNLKVPYEQFQLHQNFWTRSNIDLDLVRYHSVKFTFFRHPKVDFIVKFNRNPPFTDSVLTGPMLHPGVLMNSKRKILIPSWETRPRGKKRIPVRIGPPRLFTDHWYFQRDFCGVPLLTVNATACNLRYPFGSPQTKNICIYFLVLASIYNDKVSIAKDEVTKNYDTLVDAIKKSPQGLTVFNTFKTQEHMQEPSSETCKETQKTNPPFKYENLSSLWGDKIYKESTFNSFKTNAENLWKARSKHTLLGSKELNFKTGMYSAIFLTNGRLSPDYPGIY…	719	USER	zzzz190
751	genbank_anelloviridae_YP_003587845.1_	genbank	MAWWWGRWRRRWPRRRWRRRRRVWPRRSRFAVRRRRRGRYVSKRRRFRRRRRRRGRPRYRGRRKKRQTLVIRQWQPDVVRFCKINGWLPLIVCGSGSTQNNFIVHSEDITPRGAPYGGNLTHITWCLEAIYQEFLMHRNRWTRSNHDLDLMRYVGVRFKAYRHPTTDYIISYSKTSPFQVTELSYLSCHPLLMLLSKHHIVVKSLQTKPRGKPYVKFFCKPPKLMLNKWYFTKDFAKVPILMMWATACEPRNPWLGEGTLSPCIGFYALKPSIYTSLSNLPAKVQMFATGTQSDSLTTSSTGFYKTVHPSSITTTSKEWEYTYTGLMEKFFKQATNKPYNWENYGTPADYGSTYTTFSTHRSTRYETIKKEYQKVYPTLTTQTPTNFFLTQEFGFYSPY…	745	USER	zzzz191
750	genbank_anelloviridae_YP_003587828.1_	genbank	MAWPWRRRRWRWRRRRPRWRRWRRRRTWRRRPRRAVRRRRVRRRGRGWRRLYRRYRRRRGRRTYKKKPVLTQWQPTVRRRCFIIGYMPLIICGENLTSKNYASHADDFVKDGPFGGGMTTMQFSLRILYDEFLRFLNIWTHSNQDLDLARYHGFKLTLYRHPTVDFIVIIRNSPPFEDTELTGPNTHPGMLMLRHKKILVPSLRTRPSRRHKITVRIGPPKLFEDKWYSQTDICDVILATVYATACDLQYPFGSPLTENYCISFQVLGSAYNNLISNTLNPNEEQQDIKSAIYNNVNAYLTRITESHMANLISKAPPKQVLKSSDGSLQTDHNDTQFGGNPYNTNQFTTTTVNKIIQGAQNYLTTIKTHLQPNNSAINPNTQWHLEYHAGIYSAPFLSA…	735	USER	zzzz192
749	genbank_anelloviridae_YP_003587868.1_	genbank	MAWYWWRRRRRRGWWKPRRRRWRRRRARRRGPARRHRARRRVRRRRGRWRRRYRRWRRRGGRRRHRKKLIIKQWQPNFIRHCYIIGYMPLIICGENTFSHNYATHSDDMLSTGPYGGGMTTTKFTLRILFDEYQRHLNFWTVSNQDLDLARYLGTKIIFFRHPTVDFVVQIHTQPPFQDTEITAPSIHPGMLILSKKHILIPSLKTRPSKKHYVKVRVGAPRLFQDKWYPQSELCDVTLLVIYATACDLQYPFGSPQTDNVCVNFQILGQPYYQHLKTALGLTEKTTYENHYKNNLYKKIKFYNTTETIAQLKPLVDATTNQTWSHYVNPNKLTTTPTSEITHNNTWYRGNAYNDKITDLPEIVKKSYYKATELAIPEAVKPTTDLFEYHAGIYSSIFL…	736	USER	zzzz193
748	genbank_anelloviridae_YP_003587857.1_	genbank	MAWGWWRRWRRWPARRWRRRRRRRPLRRRRAGRPARRYRRRRTVRTRRRRWGRRRYRRGWRRRTYVRKGRHRKKKKRLILRQWQPATRRRCTITGYLPIVFCGHTKGNKNYALHSDDYTPQGQPFGGALSTTSFSLKVLFDQHQRGLNKWSFPNDQLDLARYRGCKFIFYRTKQTDWIGQYDISEPYKLDKYSCPNYHPGNLIKAKHKFLIPSYDTNPRGRQKIIVKIPPPDLFVDKWYTQEDLCSVNLVSLAVSAASFLHPFGSPQTDNPCYTFQVLKEFYYQAIGFSATDESRNYVFNVLYEENSYWESNITPFYVINVKKGSNTXDYMSPXISDSHFRNKVNTNYNWYTYNAKSHKNDLHXLRRAYFKQLTTEGPQQTSSEKGYASQWTTPTTDAY…	745	USER	zzzz194
747	genbank_anelloviridae_YP_009552545.1_	genbank	MAFFWRRNFYRRPYTTRRSKYTNWRYRWRRPRRTYRRRYRVRRLRKSRRHVIVKQWNPINKKKCVIRGYAPLLYALGGGAGVQDFLFPRNKLILTWLGGGVHSAVMSLLDLFWEERYWRARWSSSNQGYNLFRYFGATITLWPMPRYSYIFWYSTEELAEDKEPLTVCHPSQLLLAKHHVIVAHYKDGKKPKPIKLHVKPPAKMLGVWMTFADYAKRPLLKWRVSLIDLENPWTGFPGSTTSGVEINVWTRLRSKPSEARSANVWYFPLLDEGKDVQVCSKKLVWNTDENGPKPDQTPFWPTSAEFETLLVPFYMYAFGRAATYYDMKQETHEPAPSDGHYGYFLFVKVNNSPAWRGEDGGFPQFQDNTFFITYANVRFIAAQGPWIEKSIPSNGVNAT…	572	USER	zzzz195
746	genbank_anelloviridae_Q9WGZ0.1_	genbank	MAYGWWRRRRRRWRRWRRRPWRRRWRTRRRRPARRRGRRRNVRRRRRGGRWRRRYRRWKRKGRRRKKAKIIIRQWQPNYRRRCNIVGYIPVLICGENTVSRNYATHSDDTNYPGPFGGGMTTDKFTLRILYGEYKRFMNYWTASNEDLDLCRYLGVNLYFFRHPDVDFIIKINTMPPFLDTELTAPSIHPGMLALDKRARWIPSLKSRPGKKHYIKIRVGAPKMFTDKWYPQTDLCDMVLLTVYATAADMQYPFGSPLTDSVVVNFQVLQSMYDEKISILPDEKIQRQNLLTSISNYIPFYNTTQTIAQLKPFVDAGNAISGTTTTTWGSLLNTTKFTTTTTTTYTYPGTTNTTVTFITANDSWYRGTVYNQNIKDVAKKAAELYSKATKAVLGNTFTT…	770	USER	zzzz196
745	genbank_anelloviridae_YP_009551911.1_	genbank	MAFYSRRWGGLRRYGYRNWRRRPWYRRRWRTRPRRYRVRRRRRRLLRRKTRHVPVMQWNPINKKRCTIRGFCPLVYCLGGQKGIMDFTYPGNKLILGWLGGGVHSSLLSLLDLFWEERYWRARWSSSNQGYNLFRYYGATITLYPVMYYTYIFWYSTEELTEDVEPLTVCHPSQLLLSKHHVIVHRLDGFQKTKPIKLHIKPPSQMTGTWHTFAAWAKQPLLKWRISLLDIENPWTGFPNDQTQGVHCTVWARHKTERPTEARSLDLWYFPLLDDGTDLSVTMHKIKWNNDGTGPKYDEANFWPVAAQFQRLLVPFYMYGFGRSATFYDMNETTHEPGPTEGNMGSFLFLKFLNPPCWRGSEGQFPQFKDDMCFMTFGTVAQLCAQGPWCMKRIGTNTA…	585	USER	zzzz197
744	genbank_anelloviridae_YP_009553507.1_	genbank	MAFFYRPWGRLRRYGYKSYRTRRRPWYRRRRRWPARRYRVRRRRRGRMLRRRTRHVPVMQWNPINRKKCTIRGFCPLLYCLGGQKGIMDFTYPANKAILNWMGGGVHSSLISLLDLFWEERYWRARWSSSNQGFNLFRYYGVTITLYPCMYYTYIFWYSTEELAEDSEPLTVCHPSQLLLSKHHVIVHRMHGMKVKPVKLRIKPPSQMTGTWHSFAKWAKQPLLKWRVSLCDIENPWTGFPNSETQGIHVKVWAISQSSTAAGEKDIWYFPLLDDGTDVWICLHEIKWNRNGDGPDESQANFWPVQAEFQKLLVPFYMYGFGRSATFYLMQKDVHMPAASSADKGKFLFLKTINSPAWRDNTGGFPQFKDHQFYMKFSTVAQIAAQGPWCMKSIGNETH…	578	USER	zzzz198
743	genbank_anelloviridae_YP_009552544.1_	genbank	MAPLYQRYRTRFYRPRTRYWRPRWRSRWTRRTYRRRGYRVRRRRGRMLRRKTRHVPVMQWNPINKKKCTIRGVCPLVYALGAQNAVQDFTYPGNKLILNWLGGGVHSSLLSLLDLYWEERYWRARWSSSNQGYNLFRYYGATLYLQRDYNYSYIFYYSTEELTEDTEPLTVCHPSQLLLTKHHVIVLSKKERLTSKPVKLRIKPPSSMIGTWHTFAEWAKKPILKWRISIICLSSPWTGFPSSSGTATHAIHVKVWARHTNSPHEAKEHDLWYIPLLDDGTDLSIADHKIKWNNDGTGPKQDEATFWPTAFEYRKLVVPFYLYAFGRSATYYSDTEETHMPGPTEGNQGVFLFLKFLDSPAWRGIEGGFPKFVDNCCFMKFSTVQQIAANGPWVEKSIA…	579	USER	zzzz199
742	genbank_anelloviridae_YP_009553017.1_	genbank	MAPFYRWYRGGYYPRRRYWRPSWRSRRGRRTRGYRRGYRVRRPRRRRNWLRRKTRHVPVMQWNPINKKKCVIRGVCPLVYAIGAQNAVQDFTYPGNKLILNWLGGGVHSSLLSLLDLYWEERYWRARWSSSNQGYNLFRYYGCTLYLQRTYNFSYIFYYSTEELSEDTEPLTICHPSQLLLTKHHVIVLSKKEKLSSKPVKLRIKPPSSMIGTWHSFAEWAKKPILKWRVSLICLGTPWTGFPNMHGATTHAIHVKVWARHKTDRPSEARELDLWYIPLLDDGTDLSVANHKIKWNSQGDGPETTEATFWPTAYEYQKLVVPFYLYAFGRSASFYSDDETTHMPAPTEGNQGIFIFLKFLNSPAWRGHEGGFPQFKDDCCFIKFSTIQTIAANGPWVEK…	584	USER	zzzz200
741	genbank_anelloviridae_YP_009553018.1_	genbank	MAYYSYRRNWRRPFPRRGGYWTRRLWTRAYHRRRRGYYRTYRRRWRPVRRKRNYHPRKHWVPVPQWNPSNKRWCTIRGYMPLLFCVGAPAGCAVFNYPQKTVSDWKGGGVHSSVFSLADLYQEETEWRCRWSGSNQGFNLCRYYGGTLCLWPNATYSYIFWYSVNDPEPDNLPLRVCHPSQMLVQPRHIVVTRASMHRNMKPIKVRIPPPATLAGNWYSMKDMCQKTLFKWRVSLIDMEQTWTGFPDGHAPVSAQVFACRPGQEALTQTVLSYYPWLDDGNNVNISEHTMEFNQTNSRPTKTANYNWPIEAQFRKLLLPFYMWGFGFPTEYYIDSYQWHLPAPHLDSHNKNVMSFIFLSIKAGAHQWKGFDTTNVYYVPFSTLLKIVCNAPWVEKSIQQ…	575	USER	zzzz201
740	genbank_anelloviridae_AAK01942.1_	genbank	MAYGWWARRRRRWRRWKRRPWRRRWRTRRRRPRRRYRRRRHVRRRRRGRWRRRYRKWRRKGRRRGKKKIIIRQWQPNYRRRCNIIGYMPVLICGNNTVSRNYATHSDDSYLPGPFGGGMTTDKFTLRILYDEYCRFMNYWTASNEDLDLCRYRGCTLWFFRHPDVDFIILINTMSPFLDTQLTGPSIHPGLMALNKRARWIPSLKSRPGRKHVVKIRVGAPRMFTDKWYPQSDLCDLPLLTIFASAADMQYPFGSPLTDSVVVGFQVLQSMYNDCLSILPENFNGNGKGKALHDNITKYLPNYNTTQTLAQLKPYIDNTSTGSTNNWSSYVNTSKFTTASKTITTSAEGPYYTFADTWYRGTAYNNSITNVPLQAAQLYHDTTKKLLGTTFTGGSPYLE…	763	USER	zzzz202
739	genbank_anelloviridae_AAK01940.1_	genbank	MAWGWWKRRRRWWFRKRWTRGRLRRRWPRPARRRPRRRRVRRRRRWRRGRPRRRLYRRYRRKKRRRRKPKIILKQWQPDIVKRCYIVGYIPAIICGAGTWSHNYTSHLLDIIPKGPFGGGHSTMRFSLKVLFEEHLRHLNFWTRSNQDLELVRYFRCSFRFYRDQHTDYLVHYNRKTPLGGNRLTAPSLHPGVQMLSKNKIIVPSYDTKPKGKSYVKVTIAPPTLLTDKWYFAKDVCDTTLVNLDVVLCNLRFPFCSPQTDNPCITFQVLHSIYNDFLSIVDTQEYKNNFVTTLSTKLGTTWGSRLNTFRTEGCYSHPKLPKKQVTAANDSTYFTQPDGLWGDAVFETKDTTIITKNMESYATSAKQRGVNGDPAFCHLTGIYSPPWLTPGRISPETPG…	726	USER	zzzz203
738	genbank_anelloviridae_YP_009552812.1_	genbank	MAWTWNRRRWYRRRGYPARRRYYRRRRYWRRRRPVRRRRRRRRFARRIFRRGGRRGGVYRFSAWNPTHMRKLTISTLGRLLTVSPGYEYLNYKPVTYNNTLNKEGKPVESGIGLAAAGGWTYGFIDLKKLYKANKKLMAHWSTSNKGFDLWRYFGSVIYLWPNEMYDYVFWYDKEWTSEDWLEIKEYCHPLVMFNAPKKILVRSTKWGRKRPKRIFIKPPAFTSTQWQNATIICGAPLFQYAVTVIELTKPYTHDGLVKHDWYASPDVPGSLGPEPEWLNKWGHIQPPGHCLYMQKAKNGVVTWADTSRQGTTTQQEKYTGVGGSGTTGYGPKFSDKRVYIDYDMETNKQTNQGKTFDWWWSKEKQGIAWNSGIRGVAIRKAYTMNDIDYWVARVITAD…	635	USER	zzzz204
737	genbank_anelloviridae_ATY37433.1_	genbank	MAKRFTSRRRKGRGWRSRWRRGWRPRFVSRSHRRRKWRRRRRRVQVRPLTEVQPRFRRKCIIRGLYSPLVMGWSGAHVGAEKEPQHFNPVRRYMPSSNGQKVQFGGWALGSFTLAGLYREHQWYRNRWSFSNCGFDLASYHGTTLYLEQHHLYDYLVFIDPEYRSIAEFAKQATFHPIELITHPQSILVKSRARAGPRRARKVFIPRPSWWDSGWEFAKDIANKGIFCWFVMFVDLDYPWILARLDTGDINAQPSTSNEFINWWRLGDQGWKKEFDDYVRETTTQGHDSKIGETNERTDEQWAKMMAGPMVLKFRNINEHTFAEQVLWFYKSVWRWGWKKPNTEKSL	347	USER	zzzz205
736	genbank_anelloviridae_ATY37435.1_	genbank	MAGIYRRRRFWRGRYRPWYKRRYRRYRRQWRPRGVRWRRAYRRVSRRRGRKRKHTAVKQWQPRYRKRCIIRGSMPLFFCNNALYAVSDFLVPKNELIQEWQGGGVESSRITLLDLYWEEKFWRARWSTSNQGYNLMRYFGVQIKLWPAQHHSYIFWWSTEDLQEDNSPLTICHPSQLLLGKNYVVVKHYGYHTIGKIRPTIVRIRPPATMLNTWINFHDGAKLPLLKWRATFVDIEDTWTGFPNFDDKYCTGVKLKLWCKVNNEAKDVLVYYFPWLDDGTGLGVHTKAIKWNANNNGPDTSEHNFWPIQADYTMITIPFYIFCFGWAPEWYQDEKKFHLPKPQQENNGFFLFSNWPLNNPAWKYYNSNRPTDILWKYSQMNLIAASGPYVEKGFPHQVN…	569	USER	zzzz206
735	genbank_anelloviridae_ATY37436.1_	genbank	MAFYTRRFRRPRYPYYPRRRWYRSRRRRYYPRRRTFRTRYYQAYRVSRRRRVGWRRMYRKIARKRRNVKQFEPKTAVSCKIKAFAPLLWVLGADAAVQEFIPPNTANLPIWRGGGVISGHWTLAELYGEMEYFRAVWSRSNQGLDLCRYWGTKITLFRSPVTNYIFEYSVDDWDDDPEPLVQCHPSQMLLHQRHIIVKQKSSVLQRPVTIFIPPAPGFKGAWHYTKDVARWPLFKFRASLMTLQDVWTGFNTARGTQEKTGWVSFTAWGERISTAQAQQHNLIYIPQMDDGHNVKIADHVLPWNDQGTGPKTDATGFWPVAAEYKELSLPFWQWAFGRNPAFYDSTKRGHRPAPSDQKMGNFIFINVAKSPAFRYQDNGTFAETHGDSATQTGWGFFIT…	594	USER	zzzz207
734	genbank_anelloviridae_ATY37439.1_	genbank	MVFPYYRRWRLAPRPTYRKRRYYRRRPWYRSIRRRYARRTWRRPRWLRVRRRRRRLHPITIRQQKPRYTRPCVIEGIMPILWLSEMRQSVVDNWAPIGPTLMNWTGAGTTVDTMNLADMYSDWSKHLATWSSSNQGLPLGMYLGTKVRLFSNPEVDWMFAFDTTDVTQEQAPLTKNHPLHMFNKRERIVVWSQKTKGGKARTKKAWLPPPTELNKQWFRAKDLAQKLLFKYRASTFNPAETWSTRRTWGIIFDCWGAKGMNEWEPAKLTYFSTIDEGQIKWQIKDGTLDNPPSPADLSTRWPAMNMPLYVWGYGYPPNYYMDGKDHKPNPTSEHAANYLFFKQEGQGPLFDYNTGGYPRHASYYMKWDTLKGLVANGPFTQLHFTRPVNITLQFKSYFK…	559	USER	zzzz208
733	genbank_anelloviridae_ATY37431.1_	genbank	MAYFYWRRYYRPRRRYYRRRYRNQRFFRRTRNRPRRRVSWRSLYRRKGRRKRRRHTQVRQWQPRYRTKCTIKGYLPLFFANSALAAVADFVAPEGKSFRPWVGGGVESCLITLLDLYWEERFWRARWSKSNQGYNLLRYFGCKLKLYPARHYSYIFWWSTEDLTEDENPLTMCHPSQLILGKNFVIVNMWSPNRKNKPKVLNIKPPATMLNTWMPFSSAAKLPLLKWRASFIDFDNAWTGFPQLVGSSDHTSGVEVTIWGQETSTSEAKNYKVLYVPWLDDGNGLKIAYKTIKWNGAGDGPDTSQQDFWPTQFEYETLLIPFYIYAFGWPYQYYLDFQGYHKPESQNPNTNGIFLFLNIKDAKRQWKTLDPQHAEAPSVGYIKYSEVRKIAASGIFTEK…	576	USER	zzzz209
732	genbank_anelloviridae_ATY37434.1_	genbank	MAFYTRRFRRPRYPYYPRRRWYRTRRRRTYYPRRRNFRSRYYAAYRVRRRRVTWRKMFRKIARKRRNVKQFEPKTAVSCKIKAFAPLLWVLGADSAVQEFIPPNTANLPLWRGGGVISAHWDLANLYGEMEYFRATWSRSNQGLDLCRYWGTKITLFRSPVTNYIFEYSVDDWEDDPEPLVQCHPSQMLLHQKHIIVKQKSSVLQRPITIFIPPAPGFKGAWHYTKDVARWPLFKYRASLMTLQDVWTGFNQARGTQERTGWISFTAWGQRISGTQAQQHNLIYIPQMDDGHNVKIADHVIEWNREGTGPKTDAMNFWPVPAEYKELSLPLWQWAFGRNPAFYDSSKRGHRPAPADAKMGNFIFVNLAKAPAFRYQDDGTFAETHGDTATQTGWGFFIT…	594	USER	zzzz210
731	genbank_anelloviridae_ATY37430.1_	genbank	LRRRRRTRRRARTRVRVLTERQPRFWRRCTIRGWWPVLITGRGAPATSGPGDDDKHQKSSFKPFQPFGSTLSNAWFYKDYEIVLGGFSTGTFSLESLYMEHLMYRNRWSQSNCGFDLATYRGTKIYMQPHPDYDYIVLIDPEYRKFDQWIKQPMHPAVLVTHPQSRIIRSLRHAGPRRKMPKIFVPPPSTMNTGWQWMSELANEGLFAWYVQWIDLGAPWVGNIDDPNQVKWWKTGDTTNQPDWVKDSINIQGKTVKDGLNMYYSQVQQGKRHVNPGTAPYTLGFGPFVFKGPHMSDQEHYPQITWFYKSYWQWGGSTTSIKTVCDPQNNPNAEVKTLWKRGTLSEQKGNITNEIWNQS	359	USER	zzzz211
730	genbank_anelloviridae_ATY37440.1_	genbank	MARPYRFYNRRRYRRRWPRRTYRRRAVRSRRGRRKWRKGRRKLKVRVLTEIQPRMQRKCVIRGVMCPLIMGQPDQQSITPKDKYKLYPGQMFSYTKNDVWFGTWGIGNVSLKILYDEHQEYRNRWSTSNCGFDLVRYMGTTVYLEQHKNWDYIAYFDEEFMNISSFTQQATFHPVCLITHPKAVLVKSRERAGPRRARKVFLARPAWWDNGWGLTKNVANWGIFSWFVIMIDLDHPWMDSFFNNDAEKTAAMWWKDQTYKSKFDEYVRTQSQTPHSFHQPDKAVPPGPFMPRQRDLLTQNMNVQLTWFYKSHWRWGGNNLTLRKICDPTMDVPVNT	336	USER	zzzz212
729	genbank_anelloviridae_ATY37437.1_	genbank	TVTPILWCLGAQEAVQEFIPPKTPQLQYWKGGGVASGHWSLDELYGEYNWKRSTWSASNQGLDLARYLGTKLTLYRHKDYHYIFEWTKDDWEDDMEPLAAAHPSQMMLRKRHIFVRKNDSKRVKPIKVWIPPPAMFERRWFYTKDIYKTPIFKYRCTLTSMDIAWGGFPYVPDLQPAHRTASTPFKVWGVKLLDTEAKSHVGLYFPTMDDGRGTRVCFKNLLWDDQKKGPKTDQTPFWPEPAEWLTLSIPFYLWGFGRSPEWYDDSYWGHRPAPSDKKWGTFLFISVKDNPAFRDATTGGFLESKGDKAGVLGQGFFILYDTVRFIASGAPFTMKSMATPANLTYKLQSYWQWGGSQAVKLDPDDPSTKKRPRNILYSEPRHPGQVGDEVIRESDLDSD…	510	USER	zzzz213
728	genbank_anelloviridae_ATY37429.1_	genbank	MALYFRRRRRTWRPRWRRRGYWRRSYRSAFGRRFRRRRRTRRRARVRVRVLTERQPRYWRRCTIRGWWPVLITGRSYPSTAAQGDDGITQLLTFKPFQPFGSKLTNAWIYRDYEIVLGGFSAGTFSLQSLYMEHLMYRNRWSQSNCGFDLASYRGTKLYFQPHPDYDYIVLIDPEYRKFEQWIRQPMHPGVLITHPQSRIIRSIRHAGPRRKMPKMFVPPPSTMNTGWQWMAELANEGLFAFYVQWIDLGAPWLGNVVNPNQVKWWKSGDATHKPDWVTQAIEMQAKTVQQGLDAYYTKSGASGKKWVDPTSAPYHLGFGPFVFKGPHVSDQEHYPQITWFYKSYWQWGGSTTSIKTVCDPKDNPNAEIKSAWNRAASTVQHANTNDIYNQSI	393	USER	zzzz214
727	genbank_anelloviridae_ATY37438.1_	genbank	MMKNRNEFNPVQRYFADPTGTLQMGGWAIGNFSLYNMYTEHQAYRNRWSYSNCGFDLARYSGTTLYFEQHFDIDYMVFIDPEYETIKAFAHQATFHPLSLITHPQTIMVKSRARAGPRRARKVWVPRPSWWDSGWDFSKNIANKGIFSYFICMVDLDWPMMQKIGRSESDMDNQNVSWWKDKNLGWKAKFDKYVTDCVSTPYKDKNHTMTQDDLDVCGWGPFFLRPGTSYLNQNRQLLMFYKSVWHWGGRNMLLKKVCDPSKDLHN	266	USER	zzzz215
726	genbank_anelloviridae_ATY37432.1_	genbank	MALYFRRRRRTWRPRWRRRGYWRRSYRSALGRRFRRRRRTRRRSRIRVRVLTERQPRYWRRCTIRGWWPVLITGRKYPSTAAQGDDAGTQMLTFKPFQPFGSKLSNAWFYRDYEIVLGGFSAGTFSLQALYMEHLMCRNRWSQSNCGFDLASYRGTKLYFQPHPNYDYIVLIDPEYRKFEQWIKQPMHPGVLITHPQSRIIRSISHAGPRRKMPKMFVPPPSTMNSGWQWMGELANEGLFAFYVQWIDLGAPWLGDVQNPNQVKWWKTGDATTKPDWVTKGIEMQGKTVQEGLDAYYTQAGQAGKKWVNPGGAPYQLGFGPFVFKGSHTGDQEHYPQICFFYKSYWQWGGSTTSIKNVCDPKDNPNAEYKSAWNRAAHQTQHARTNEVYNQT	392	USER	zzzz216
725	genbank_anelloviridae_ATY37428.1_	genbank	GNDNTDALKNASFKPWFPFGTQLTNGWFYRDHAIVLGSYSMGTYSLSSLYGEHLVLRNRWSQSNCGFDLGCYRGTKLYFMPHSTYDYIVFIDPEYRDFDQWAKQCMHPAVLITHPQTRIIRSVKNAGPRKKLPRMFVPPPSTMSTGWQWMNSLATEGMFAWFVCWIDFEAPWVGNVLDPNAVKWWKTGSAVAKPDWYTNAIEMQGKTVGDALKAFYDQGNQVGVNNKFQQIGFGPFIFKGTYARGDPGRVDYPQITWFYKSYWQWGGSTTGLKDVCDPKADTADQFYRNKITTQSARTNERWHQSPK	307	USER	zzzz217
724	genbank_anelloviridae_AVD49689.1_	genbank	MAFFYRRRYYRPRRTYYRRRRPYYRRRRTYYRRRKWPVRRRLGRRRAKRVVQWNPRNRTKCLILGYMPLITTARAMDTVADTLMPKGPMVTVWPGGGVDSGHLTLLDLYWEERFWRARWTKSNQGYNLARYFGVEIKLYRYLDFSYIFWYSVDDGSDDPEPLQMAHPSQMLLYRHKVIVHRSLDKRAKTIKLKVKPPSKLFDTWRSFKDLATVPLIKWRCTVVDFDMPFSALKNQIVPYEFDVFSKGSETEGYTKNVIYYPWQDDGTNTKVTFTHIVPYNDQQSGPQGPAGRNDFWPNEIEFKDMNMPMWLAGFGYNQEWSDMSWMNMRPRPPDATTENKKGYWSYVQFNGNPAFKDKTTGDVIKWDHGKGTSFVKWATWGNIASMAGPFVPKGAPKKG…	574	USER	zzzz218
723	genbank_anelloviridae_ADD46855.1_	genbank	MPYRRYRRRRRRPTRRWRHRRWRRFFRYRYRRAPRRRRTKWGGHGTERFKTTIGDPSTIPCPFEPGERYHHGVQDPAKVQNTVLNPWDYDCDGIVRTDTLKRLLELPTETEETEKAYPLLGQKTEKEPLSDSDEESVISSTSSGSSQEEETQRRRQHKPSKRRLLKHLQRVVKRMKTL	178	USER	zzzz219
722	genbank_anelloviridae_ADD46854.1_	genbank	MPYRRYRRRRRRPTRRWRHRRWRRFFRYRYRRAPRRRRTKVRRRRRKAPVIQWFPPSRRTCLIEGFWPLSYGHWFRTCLPMRRLNGLIFTGGGCDWTQWSLQNLYHEKLNWRNIWTASNVGMEFARFLRGKFYFFRHPWRSYIITWDQDIPCKPLPYQNLHPLLMLLKKQHKLVLSQKDCNPNRRQKPVTLKIRPPPKLTSQWRLSRELAKMPLVRLGVSLIDLSEPWLEGWGNAFYSVLGYEASKHSGRWSNWTQIKYFWIYDTGVGNAVYVILLKQEVDDNPGAMATKFVTGPGQHPDAIDRIEQINEGWPYWLFFYGQSEQDIKKLAHDQEIAREYANNPKSKKLKIGVIGWASSNFTTAGSSQNQTPQTPEAIQGGYVAYAGSKIQGAGAITNLY…	625	USER	zzzz220
721	genbank_anelloviridae_ADD46850.1_	genbank	MPYRRYRRRRRRPTRRWRHRRWRRYFRYRYRRAPRRRRPKVRRRRRKAPVIQWFPPSRRTCLIEGFWPLSYGHWFRTCLPMRRLNGLIFTGGGCDWTQWSLQNLFHEKLNWRNIWTASNVGMEFARFLRGKFYFFRHPWRSYIVTWDQDIPCKPLPYQNLQPLLMLLKKQHKLVLSQKDCNPNRKQKPVTLKFRPPPKLTSQWRLSRELSKIPLIRLGISLIDLSEPWLEGWGNAFYSVLGYEASKHSGRWSNWTQMKYFWIYDTGVGNAVYVILLKKDVSDNPGDMATQFVTGSGQHPDAIDHIEMVNEGWPYWLFFYGQSEQDIKKLAHDQDIVREYARDPKSKKLKIGVIGWASSNYTTAGSNQNSVLQTPEAIQGGYVAYAGSRIPGAGSITNLF…	625	USER	zzzz221
720	genbank_anelloviridae_ADD46847.1_	genbank	MAPTRRWRRRFGRRRRRYRKRRYGWRRRYYRYRPRYYRRRWLFGGEYQPPTGIRDPCIDTPAYPVPQSGSVTHPKFAGKGGMLTETDRWGITAASSRTLSADTPTEAAQSALLRGDAEKKGEETEETASSSSITSAESSTEGDGSSDDEETIRRRRRTWKRLRRMVRQQLDRRMDHKRQRLH	182	USER	zzzz222
719	genbank_anelloviridae_ADD46846.1_	genbank	MAPTRRWRRRFGRRRRRYRKRRYGWRRRYYRYRPRYYRRRWLVRRRRRSVYRRGGRRARPYRISAFNPKVMRRVVIRGWWPILQCLKGQESLRYRPLQWDTEKQWRVKKDYEDNYGYLVQYGGGWGSGEVTLEGLYQEHLLWRNSWSKGNDGMDLVRYFGCIVYLYPLQDQDYWFWWDTDFKELYAESIKEYSQPSVMMMAKRTRLVIARDRAPHRRRVRKIFIPPPSRDTTQWQFQTDFCKRPLFTWAAGLIDMQKPFDANGAFRNAWWLETRNDQGEMKYIELWGRVPPQGDTELPKQSEFKKGDNNPNYNITEGHEKNIYPIIIYVDQKDQKTRKKYCVCYNKTLNRWRKAQASTLAIGDLQGLVLRQLMNQEMTYYWKSGEFSSPFLQRWKGTRL…	639	USER	zzzz223
718	genbank_anelloviridae_YP_004021926.1_	genbank	MPYRRYRRRRRRPTRRWRHRRWRRYFRYRYRRAPRRRRTKVRRRRKKAPVIQWFPPSRRTCLIEGFWPLSYGHWFRTCLPFRRLNGLVFPGGGCDWSQWSLQNLYNEKLNWRNIWTASNVGMEFARFLKGKFYFFRHPWRNYIITWDQDIPCRPLPYQNLHPLLMLLKKQHKIVLSQQNCNPNRKQKPVTLKFKPPPKLTSQWRLSRELAKMPLIRLGVSFIDLTEPWVEGWGNAFYSVLGYEAVKDQGHWSNWTQIKYYWIYDTGVGNAVYVILLKKDVTDNPGNMATTFKASGGQHPDAIDHIELINQGWPYWLYFYGKSEQDIKKEAHSAEISREYTRDPKSKKLKIGIVGWASSNYTTTGSDQNSGGSTSAIQGGYVAYAGSGVIGAGSIGNLYQ…	624	USER	zzzz224
717	genbank_anelloviridae_ADN28626.1_	genbank	MPYRRYRRRRRRPTRRWRHRRWTRYFRYRHRRPYRRRRRYKWGGHGTETFKTSIGDPSTIPCPYGPGEAPQHLIRDPSKVHEGVLNAWDYDYDGIVRKDTLKKLLEIPTDSEEEKAYPLLGPKTERLPSSDESGESDISSSSDSSKEESEEEKRYRRRHKPTKRRLLQHVQRLVKRFRTL	180	USER	zzzz225
716	genbank_anelloviridae_ADN28534.1_	genbank	MAAARRWRRRFGRRRRRYRKRRYGWRRRYYRYRPRYYRRRWLFGGEYQPPTGIRDPCTDTPAYPVPQSGSVTHPKFAGKGGMLTETGYWGITAASSRALCADTPTEAAQSALLRGDPPEERKEAEETPSSSSITSAESSSEGDGSSDDEETVRRRRRQWKRLRHMVREQLDRRLGHKRQRLH	182	USER	zzzz226
715	genbank_anelloviridae_YP_009505802.1_	genbank	MPPFRRRRWRWRRYPRYGRRRLRPRRYRRSYRRGRKWGGHGEERFETAIGDPKTIPCPDIFNPGTGTFRTWVRNPLEVHKGILQPWEYDYDGLVRTDTLRRMLQYSTEEDETREKAAPFRGLGRGKGPFSDTSDGSDTSSSESFDYCEEEKEDQAAEEARQEHQLRLLNKRRKLKQLFRFLKRIKTCR	188	USER	zzzz227
714	genbank_anelloviridae_YP_009505798.1_	genbank	MAWRYYWRRKRPFRRRWKRRATKYRKPRLYRRYARRRTRRNPRKRRQRRKRPRVRRKRQTLPLKQWQPESIRRCKIIGHTPIILGCSDRQIHSYTYWQDYYIHPRCAAGGGFAVMKWSLAYLYEDFKRRKNIWTKSNCMYDLCRYTGTKLKLYKHETVDFIVSFSRNYPMVVDENTYMHTHPSIMLLKKHRIIIPSKRTNPHGKNYKKITVRPPRQLINKWFFQKNFNDQGLFLLTATAADLMYPHLGPYSKNRLVTITILNTQHFYQQPNWGTATGDYSFGTTNFSTWGGAKTYIDNKLTDYNPSMDMLKQNNKHNASNGIFNKEFPNIQYWKTITNPTHPTPTMQVQYNPARDTGNGNKVYFISTLQTSWAPSTTDKVMTWTGEPLWLQLYGLTDYI…	658	USER	zzzz228
713	genbank_anelloviridae_YP_009505794.1_	genbank	MPFWWRRRRKPWYGRFRYRRRFQTKRRRNRRRFTRRRNRRVTRRRRRRTRHQKVRRKKNKIPVLQWQPDSIRKCHIKGQGTLVVGAEGTQMFCYTRDKFKYIPPKTPYGGGFGAEKFTLSYLYEEYTFHNNVWTATNLYKDLCRYLYCKIIFFRHPDTDFVINYSRQPPWELSKYTYPSCHPHQMLLDKHKVVIFSQASKPHGKYKYKLRIKPPKQLITKWFFTKPFSNYGLLFLKGSAMNLRYSYLSASNENMLVNISSLNPQWYVNTDWARARQDTQGYLPQPNMNKSLSYKNKTKGGSETTTQMPSTSFTSYSASVSYDNGWFNKNFLRAIELQSPTGTKLGQLPLNYGRYNPTRDKGIGNKIYIISTIADSWGPPTTDKNVLIENLPLWLGLYGY…	667	USER	zzzz229
712	genbank_anelloviridae_YP_009505790.1_	genbank	MPFYWRRRRKFWWGKARPRWRFQRYRRKTTRRRRRRPARKRAHRYAGRRRRRRYKVRRKRQKIPLFQWQPDKIVKCKIKGVTTLVLGAEGKQLVCYTNVKTANTPAKAPGGGGFGCEQFSLDSLYADYKLRKNVWTKSNILLDLCRYLFVKISFYRHPETDFIVTWHRQPPFDISKEIYAACHPQNMLLAKHKMLILSKFTNPKGKLKKTRKVKPPKQMLNKWFFQEHFSHEPLLMIQATAANLNYVNLGCCNTNQMCTFFYINPGFYQIANWGATTTTGYIPYSGYPTATIYTWNYKQWQTGQGGQPFTKPQTYNQSVNYNTGFFSKQMLEAVQLTTDQTGQRPLGMNPVNICRYNPTLDSGKGNAIWLVSSHANTYREPITDKTLIFEGLPLYMLLY…	670	USER	zzzz230
711	genbank_anelloviridae_YP_009505786.1_	genbank	MPFWWRRRRRFWTNRRFTYKRRKRYPRRYNRRYGRRRNYRRPARRRRRKLRKVRRKKKQIAVKQWQPESITKCKILGHSALVVGAEGKQMFCYTTNKNIAVPPKSPYGGGFGVEQYSLNYLYEEYTFHNNYWTKSNILKDLCRFLWLKIIFFRDNKTDFIVSYDRNPPFNLTKFTYPGAHPQQMLLQKHHKLILSQMTKNPNKLTKKFKIKPPRQMISKWFFTKPFAKYPLLSLKASALDLRHSYLGCCNENSQVYFFYLNHGFYKQTNWGQYSTTPYRPSNEINTVYYKDKTGNKKQIGPFNTTATAYDDSVSYTKGYFQPPFLQTQFVCTSSMCDVKAGYLPINVAIYNPMQDSSQGNAIYLVSTLTNTWDQPPKDSSILIQGMPIWLGLFGYLDYV…	664	USER	zzzz231
710	genbank_anelloviridae_YP_009505778.1_	genbank	MPFWWRRRRRPWYTRWGQRRYRRRRYRNKTRRTFGRRRRRNRKAPRRRRRKLHKVRRKKKFLKLVQWQPDRIRKCTIKGRGTLVMGAHGRQMICFTNVKDRLTPSRAPAGGGFGVERITLAHLYEEWKARNNVWTATNENTDLGRYTGCKISFYRHLDTDFIIKYSRNPPFNLEKYSYMYMQPQELLLGKHKRILLSKKTNPKGKLKTTLKIGPPKLLTNKWLLQSELAKQDLVEISAAAASFTYPTIGCCNENRILNLYSINTEFYKDAHWMQAHAGTNYYKPYSTIPSDLKFHYKTQSGGESAINGPDSKEKALTLEGGWFQPKILGAYKITKGSTITQYGELPMVLLRYNPAADQGPGNIVTIIDLVSGQWQGPYPDDYTIKDVPLWLALNGYPNY…	663	USER	zzzz232
709	genbank_anelloviridae_YP_009505774.1_	genbank	MPFWWNRRKRWWRGARRPWYKRKRYTRRYRRRIYKNRRRRPTRRRRRRRHTKVRRKRQTIPVRQWQPERIVRCKIKGISVIVLGGEGKQFQCYTNEATTWTPLRTPGGGGFGVEKYTLSHLYDQYKFGNNIWTKTNILTDLVQYLGCKFVFYRHQYVDFIVKYSRNLPMTIEKLTYPHTHPQALLLSRHKRIIPSRVTKPHGKNRVIIKIKPTRVVLKKWFFQETFDTTGLCSIYAAACDLNYPHIGATSQNQIITLFGLNQSFYSKGNWGAVVQTGYQPYPSVTTFTYKTAATKQVETFNKPTTYEASVSYTTGWFNPKLMQLTEYVTPQQLAKPVLAFRYNAQLDNGKGNSVWFKSILTEDFSKPKVDSDLIISDMPIWQALYGFTDFIKAVKPDPN…	658	USER	zzzz233
708	genbank_anelloviridae_YP_009505782.1_	genbank	MPFWWARRKRWWRGRRRPFYRRRYHYKKRRPRRRLYKRKHRRTYRRRRKSFRKVRRKRRTLPLKQWQPETIRKCKVKGIGIHTLGVEGTQYRCYTANKYEYTIAKQPSGGGFGVERYTLEYLYKEHKAGNNVWTTSNVNLDLVRYTGCRFIFWRHPHIDFVGVYSRNYPMQLQKYTYPDTHPQQIMLAKHKFFIPSLLTKPHGKRYVKIKIKPPTQMSNKWFFQEGFSDTGLVQIHTAACDLRYAHLGCCNTNQLASFLTLNTDFYQYAAWGNPKNPYIPTEQDKWYRPYRIVEPVTEVEDVKGNKKTITTVFTPYTETITYNKGWFQPALLQAKQITKPSQANPPLKGARYNPTLDTGENTAVWLTNVVNQSYYPPKTDLDLFVQGLPLWQLLLGFPD…	664	USER	zzzz234
707	genbank_anelloviridae_YP_009505770.1_	genbank	MPFWWARRKKPWYSNWNRYRRRYKRRRWPRRRRRRIPYGRRRRRRRRKRKVRRKRQRIIVKQWQPESIVKCEIKGLGCLVAGAQGRQPFCYTNSKYEYPQPKAPGGGGFGAELFTLQYLYDEWVARRNIWTKTNDYKDLVRFTGATFYLYKHPTTDFIFNYNNQPPFLLEKDFYNDLHPQMLLLAKHHRVIPSRQRKPLGKPYIKVKIKPPKQMLTEWFFQQDFATQGLFSIHAAAANMQWAYYNPDQQSRCLTLYSLNIKFFANTDWSATHTGTQMYFPYNAWPHTKGLTFWTIDSKGNKTPHSIKPQNYNQSVNYLQGFFSQYVLQAQKITDADDNVPAKYEQYSAAMSTLLIAAFRYNPEEDTGQGNVVWLTSTLSNTHWERPQLSDLVIVGKPLW…	669	USER	zzzz235
706	genbank_anelloviridae_YP_009505766.1_	genbank	MPFWWNRRRKNWWGYKYKTRKYRRRRWPRRRRQTLYRRRRPTRTNRRRRRRHRKVKRKRKTLTVKQWQPESIRKCKIIGLEPQLLGAEGSQIDCFTVVKTDYVPAKLPWGGGFSLQNYTLKYLYSEYTYHNNIWTSSNNQKDLCRYTGGYIKLFRHETQDFIISYDLQPPHELSKYTFPSCHPHQMLLQKRHKILLSKQSNPNGKLYKKIKFKPPKQMINKWLFTKNFTPASLIVLKTAVCNFSHANLSGKNQNMLVSLISLNLSFYKNPAWAQALTASGYKPYDNIPSDLPFVVKQANKEVQKYMKPQATTDYSTSISYDDGWFGPLFLSAIKIGKIEQATATHQIIQARYNPNIDSGVGNQIYCASTHAYSWAPPSKDKQLLIEGMPLWLGLFGYYS…	664	USER	zzzz236
705	genbank_anelloviridae_YP_009505762.1_	genbank	MAFWWRRRRKPWFGRWRRYRRRTNYKPRRKRRRIYRRRRNYRTTKGRRRRRYKVRRKQQKILVKQWQPECIRKCKIKGLGTIVLGAEGTQYRCYTDYLDEWTNPKVPGGGGFGCELFTLRYLYKMYLARKNIWTFSNKYKDLVRYTGTRFTFFRHPETDFILAYDIQPPFHITKWTYMSIHPQMLLLRKHKKLLLSTATKPNGKLTTRFKIRPPKQLVTKWFFQKDFAQYGLVAIAAAACNLRYPWLACCNENLIITLRYLQPQFYHNSAWAQTTKEYNPVYGTQPMKKTLTFNYIIGNQRGTYTMSNSDISDYDSSVSISKGWFQPKILNAYEVKDNTVTQALTPCGVLRYNPADDDGQGNKLWVVNTLTYNWKIPTDDDLILEGYPLWLMLYGYTSF…	666	USER	zzzz237
704	genbank_anelloviridae_YP_009505758.1_	genbank	MPFWWARRRRPWFGRYKRYKTRRYRRRFRPKRHRYPFRRRRRRRRRRRYKVRRKKKKIVIQQWQPESIKKCKIKGFGCLVLGSQGTQYLCYTNEAANYVPPKSPGGGGFGCEYITLEYLYKQWKAHNCIWTASNNYKDLCRYTGCTITLFRHKYIDFIFCYSVMPPFDINKLTYPDIQPQNLLLRQRHKLILSQASNPKGKLRVKVKIKPPKTMQTKWYFQKQIAELPLVQLQAAACDVPFVRIGCCNPSQVSTIYFLNPQFYYDTDWGATKNHAYMYIRTGVSLTGTYKGKDGKDHEKIIGEWKKMGEAQYYESINYDTGWFNSQFLSSYKIEKTSTKQPYAHLPIGVARYNPDQDTGQGNEVWLATIFKGHYDKPTVTDDFVIRGLPLWMAFYGYWS…	664	USER	zzzz238
703	genbank_anelloviridae_YP_009505748.1_	genbank	MFRRRRYRRWRRWPRRRRRFKRHGWRRRHFRRRAVSRQTVHEWIPGRHRVVTVRGWEPLGNLCSTDTPKQEASPYHSVEPQTATGQWHGTWGKHYFTVQNLLLRAQARWNQWSDDWTTYDYIKFTGGAILIPPPSSTQFMINFDPYLQTTVLLYQEKNAEDKYIHPGILMHDPKTHIIFAANYMPRKRMYKIRIKPPPGWKGYQRFPDAMGYILTHWAWTWFSMNQAFFTTTGQGSVCAAEPWWSGNNYLQKWVDRSKYEDISASTGRNWGPFLPAKYGNYPETSLFFKYKLFFKLVGNAIWRPLPRNYLKDGLVDQPEGPTAGGEADSPTAHKKARKRISRPTSEADIRHSDLDSDGILTSPAYRRITYDHSRPKRRKLEDLQRLGSLYDRVQHVLAE…	404	USER	zzzz239
702	genbank_anelloviridae_YP_009505741.1_	genbank	MPYYWRGWRRRRRRRFWRRRAGAPFRRRRYWRYRYRVRRLRRKPKKLPIKQWQPTKMRRLTVTGKYPLFEGTSERIGNNNTQSIDTIAPYLFPSGGLFSITVFTLKGLYELHLKARNWWSISNCNLPLIKYRGCKITLYRNVDVDYVTVYTRCGSLTATEELYRSCQPSLLLLNKHKKVLTCKKNNNKRKISKTIKIPPPTLMQNKWYFQKDFAKYPLVMILSAALSLDRYYTSANSISSTIGFASINTTIFQYSDFKSPNLTQPYKPNDEYWLRTWTNQTITNFSAVETQRVILLGNTNDYQPGEPMGDEKAHYEDYFKTKTKWGNPFYAPYFEPEPQKIFMIKNLNKLQTANPTEKIQNLNCTLLPPEKTVLTICRYNPQNDRSAHNALYASPVTTA…	661	USER	zzzz240
701	genbank_anelloviridae_YP_009505738.1_	genbank	MPAYWRNYRNWRQRRWRRRRPRRYRRWRLRRPFRAFRRYGRTQWVRRKFKLSSIKLKQYQPRSIRRCVLKGMKCLFQGSAMRKSNNYWQYPHTIIPEKYPGGGGWGLQVISLSSLWEDYQHLSNYFSQSNAGLPLVRFKGMKLIFYQNQNTDYVVEIENCWPMVDTPLKHANSQPQRMLMSKKKIIMPSITTKRLRKGKKKIFVKPPAQMLNQWYFQKDVCNTKLAIITATACSLTGYYLPYKSESNNISLNALNTNIFKNADFQQPAATTGYSPRNNYYFYTTGNGTLNIPKKATELIYLGDSKNFVQGKLTEANTLKESGYPKENWGNPLWEHYITGSIPLYTSSLGPTNKIWKDNAKNPTTLNTIDKYLTPLHFPPITRVRYNPDKDTGEGNIVYF…	662	USER	zzzz241
700	genbank_anelloviridae_YP_009505734.1_	genbank	MPYYWRRRQRWRKRYYPRRFRTWRTRPTVFRTWRNRRRRRKPYRRRVRKRLFKRKLQAIKLKEFQPDVIRRCTIFGNICLFQGSPERTNHNYVQYIYSYVPVNGPGGGGWTLMIESLSSLWEDRQHLKNVWTTSNAGLPLVRYRGATLTFFQSPYTDYIVKVHRCYPMTDTKYTHADSAPSRMLLKRKTIKVPSLETRKKRGPYKKVKIPPPAQMQNKWYFQKDICDIPLLMIQATAVGFRYPFAPSSAQSNNVTLLCLNICLFQNSNFDNPSPTQGYFPKPGTYLYSTNSRSVSTPSQLSFNTLIYLGNTKDYTLGKNSEETFAEWGNPFMPEYIHGERPVFTNQVKVNKSNFESQKENFHLLEEDYFFWVRYNPEKDTGDSNTVFLQNNYLQTSWHR…	650	USER	zzzz242
699	genbank_anelloviridae_YP_009505753.1_	genbank	MPFWWRRRRKVWWGAGRRYRKYRKYKPRRKPRYRRRRYKRAPRRRRKRRKKVRRKRKAIPIIQWQPDSIKNCKIKGYNALLLGAEGTQYLCYTNERFTFTPPQYAGGGGFAVQTFSLQYLYEEHKFKNNIWTASNIYSDLCRYLRVKMYFYRHPKTDFILNYARQPPFELNKYTYTLAHPYMLLQSKHKKIIPSKLTKPNGKLWKKIIVKPPKQMLSKWFFQKQFAPQSLLQLQAAAASFTYPRLGCCNENRIITVYYLDPQFIQHSTWARTIQSPYKPYDSISSQVTFWYPSKGKTEKYTPNYLSETGTEAYYKSINYDTGFFSSKVLTATKVTQNPTSETGYALPPINAARYNPEEDNGEGNSVYLVSVVNGFYDRPTEDNLIYKGAPLWLIFHGFY…	658	USER	zzzz243
698	genbank_anelloviridae_YP_009505751.1_	genbank	MPFWWPRRRRWWATTRFKRRKPRYTKRRRRRRYKRKYRRAPRRRRRRRRKVRRKRPNLIVRQWQPDSIVLCKIKLFGSLVLGSEGTQYLCYTNEKGAWTPPQQPGGGGFGIETYSLSYLYDQYLLKRCIWTRSNEYKDLCRYLKCKFVFFRHPKIDFVVNYARQPPFILEKPTYMNCHPIALLLSQHKRVILSKKTDPKGKNRVTLIIKPPKQMITKWFFTKQFAMYDLLQIQAAACTLNYPKLGCCNENLIISIFYLNPQFYQDTNWAQLAQGPYKPYATNKTDLQYHYKIGTQTGTYVPNYLNDTGTPAYYKSISIEEGFFSPRILNTQYITDKSSPTRLGNIPIGAARYNPEIDDGRGNEIYLVSVVSGHYQKPTEDNLIFKGLPLWLMFFGLVSF…	533	USER	zzzz244
697	genbank_anelloviridae_YP_009505731.1_	genbank	MAWWWGRWRRRWRPRYRRRTWRVRRRRPRRTFRRRRRGRYVSRRRRRRYYRRRLRRGRRRGRRKRHRQTLILRQWQPDVVRHCKITGWMPLIICGSGSTQNNFITHMDDFPPMGYSYGGNFTNLTFSLEGIYEQFLYHRNRWSRSNHDLDLARYKGTTLKLYRHHTLDYIVSYNRTGPFQISDMTYLSTHPALMLLQKHRIVVPSLLTKPKGKRSIKVRIKPPKLMLNKWYFTKDICSMGLFQLQATACTLYNPWLRDTTKSPVIASRVLKNSIYTNLSNLPEHNGARESIRNKLHPESLTGSVPNQKGWEYSYTKLMAPIYYQANRNSTYNWLNYQQNYSQTYQAFKQKMNNNLTLIQQEYMYHYPNSVTTDIIGKNTLTHDWGIYSPYWLTPTRISL…	733	USER	zzzz245
696	genbank_anelloviridae_YP_009505723.1_	genbank	MAWRWWWARRRPNRRWTRRRWRRLRTRRPRRPVRRRRRRPRVRRRRWGRRRGRRRFYRRRFKKRRRRRRKLTLKMWNPSTIRACNIKGAINLVMCGHTQAGRNYAIRSEDFYPQIQSFGGSFSTTTWSLRVLFDEYQKFHNFWTYPNTQLDLCRYKYAIFTFYRDPKVDYIVIYNTNPPFKINKYSSPFLHPGLMMLQKKKILIPSFQTKPGGKSRIKVKIKPPALFEDKWYTQQDLCPVNLLSLAVSACSFIHPFCSPESDTICMTFQVLREFYYTHLTVTPTTTTSTPEKDKKIFNDQLYSNANFYQSLHASAFLNIAQAPAIHGHNGIPNNSRYLSSTGTETSFRTGNNSIYGQPNYKPIPEKLTEIRKWFFKQATTPNEIHGTYGKPTYDAVDYH…	740	USER	zzzz246
695	genbank_anelloviridae_YP_009505712.1_	genbank	MLMLAKKRIIIPSLKTRPSKKHYIKIKIGAPKLFEDKWYSQRDLCDTTLVVIEATVADLQYPFGSPLTNSICCNFQVLNSNYDNALSTLIGTQGDKDRDQCYKFLLNTITYYNTSQTLAQLNKFLPTTNTTQLSQNNAQNSINPSNTTENTYDSRNTEIHNNTLYGGAAYYKQNGSNTNTLPPHKMKEANKTYTAAAKKILSNWNFTNMSTSSSADLQGLNYFDYYTGMFSSIFLASGRSNWEVKGSYTDITYNPLVDKGEGNMIWIDWITKGDTIYSENKSKCLLRDLPMWALCYGYADYVLKCTGISSIKNEARIVMRCPYTYPQLVKHNNDNFGFVVYSDNFGRGRMPGGDPVPSTRNRVHWYITITHQTEVLECISQTGPFAYHSDERKAVLTIK…	572	USER	zzzz247
694	genbank_anelloviridae_YP_009505725.1_	genbank	MARWRRWRRRRPWWWKRRRRRWRRVRPRRARRTVRRRRRRYTVRRRRWGRRRGRLRRTRWRRTRRRRKRKTLILRQWNPATVRSCRIKGLVPMVICGHTRAGRNYAMHSEDYPEQGRYPFGGSLSTTTWSLKVLFDEHQKFHNRWSRSNQDLDLARYLGCRFTFYRDKKTDYIVTYRNKPPFKINKLDSPMSHPGMLMQQKQKIIIPSYDTRPGGPQKITVKIRPPKLFQDKWYTQTDLCEVNLVSFVVSACSLTHPFCPPLTNNPCVTFQVLKDFYYGNLNIAEKTNSKNIFETLKKHPGYYENFLTQTLLLGDVKPAKYNDTNGSLKSTITNASIKTNNNGQFGMYVYDKDKLGAALQKAVEWYHQQYQTHNDVHSIYGKPTNEYLGYHTGIYSPMV…	825	USER	zzzz248
693	genbank_anelloviridae_YP_009505721.1_	genbank	MAYWWRRRRWPWRRRWRRRGRRRRVPRRRYRRPVRRYRKRYTVRRRRRRGRRGRPRRRLYRRRYTLRRKRKRLIIKQWQPNNIRKCRITGMLPMVICGHGMSANNYAIRSDDTETMKFSFGGGFSTTTFTLKVLYDQHLRGMNKWSTSNDILDLARYLGCDFYFYRDKHTDYIVQYDTAAPFTIDKDSSANYHPGVLIKARKKVLVPSYDTHPKGRAKIKIHIEPPKMFVDKWYAQHDLCDVELVSFVVSLASFQHPFCRPQTDNPCVTFQVLQNFYNKCIGTSVNLSDSTFDSIFRDYLYKIGSFYQQVLVPSYIKRITHNPDGSTGGTLSTLTAYNEWVTGTGPNKFIPGNTSVHYNFCTYNPKYDNLKALRSYYFHWETVQSVATSNFNAQHVPIT…	750	USER	zzzz249
692	genbank_anelloviridae_YP_009505729.1_	genbank	MAWRWWWQRRRRWWPRRRRRWRRLRRRRPRRPVRRRRRRATVRRRRWRGRRGRRTYTRRAVRRRRRPKKKLVLTQWSPQTVRNCTIRGIVPMVICGHTRAGRNFAIHSEDFTSQIKPHGGSFSTTTWSLKVCWDEHQKFMNRWSYPNTQLDLARYLGVTFYFYRDQKTDYIVQWSRNPPFKLNKYSSPMYHPGMMMQARKKLMVPSFQTRPRGRKRYRVRIRPPNMFADKWYTQEDLCPVPLVQLVVSAASFMHPFCSPLTNNPCITFQVLKDNYYSCIGVNSLETHKNSYTKLQEWLYKTNTFFETTQVIAQLSPSFAPAYKPNGTNNNTHKPLGGMVPELKYNNAGFHTGNNPVFGMCKYKPSTLTMQNANKWFWENLQVENDLQSKYGKANLTCME…	766	USER	zzzz250
691	genbank_anelloviridae_YP_009505717.1_	genbank	MPVIWAGMGTGGQNYAVRSDDFVVDKGFGGSFATETFSLRVLYDQHQRGFNRWSHTNEDLDLARYRGCKWTFYRHPDTDFIVYFTNNPPMKTNQYTAPLTTPGMLMRSKYKILIPSFKTKPKGKKTISFRARPPKLFQDKWYTQQDLCPVPLIQLNLTAADFTHPFGLPLTDSPCVRFQVLGDLYNNCLNIDLPQFDDKGTISDASSYSRDNKQQLEELYKTLFVKKGCGHYWQTFMTNSMVKAHIDAAQAQNHQQDTSGPQSAKDPFPTKPDRNQFEQWKNKFTDPRDSNFLFATYHPENITQTIKTMRDNNFALETGKNDLYGDYQAQYTRNTHLLDYYLGFYSPIFLSSGRSNTEFFTAYRDIIYNPLLDKGTGNMIWFQYHTKTDNIFKKPECHW…	689	USER	zzzz251
690	genbank_anelloviridae_YP_009505715.1_	genbank	MAWGWWRRKRHWWWRRRFARSRLRRRRIRRPRRRTRRRTVRRRRQWRRGRPRRRLFKRKRRFWRRRRKAKIKITQWQPSRVKRCFMIGYFPAIICGQGRWSENFTSHIEDKTPKGPFGGGHSTARLSLKVLYEENQKHHNFWTASNKELELARFFGSTWTLYRHEEVDYICTFNRKSPLGGNLLTGPSLHPGAAMLSKHKILVPSFKTRPGGKPTVKFRIKPPTTLIDKWYFQKDICDTTLLNINFVACDLRFPFCSPQTDNVCVTFQVLSAVYNDFLSITNSKLQATNWTDEYTNFLNKAFPSDRSINKLNTFSTEGAFSHPKVEKFKPKIPLPDGEYFQEKDALWGDPIHITTSQTRQAIIQKIVKNATNYLKKYTDEFKQFPNIAQFHHGFFTQWT…	742	USER	zzzz252
689	genbank_anelloviridae_YP_009389430.1_	genbank	MYHRRRSYRPRRHFFRHRRWRYPRRHWRRAWRRRYRRPRVRAIIQQQPRRKKILVVTGWEILGQIGSQLKYVYDDNTKKPRVEVINIAPMNKQVKYLMGMIPQGLANTCSDTWTDGMKRREEGGLGMTGPTHWDFVGGWGYAKFDLQSLILRNLLGMNRFSENIRTYTHIKFLKFKIQLVPGPSVDYLFRIQQHRGPQDWEEPLLHPAHLLNMPFVTWVQSIKRSKCCRMKVLRRRAGTDLNGWYDMESFRNYELFSYMWSAFDPNNPLGKNPILPGDTGGASTTTKWWNDDWMRARQSPRDQKISINMKLDWTQRNTYDNNFVKSIDPEQLTNETTNFWDWLLGKSPPQGKSSPFVPPILSSEYVNTLWFRYKFYFQIGGASISREAISWPLRETTDN…	495	USER	zzzz253
688	genbank_anelloviridae_YP_009388631.1_	genbank	MAYRRRRWRKPRRSRWRTYRRNRYWRRPHRRHWRRRRYIRPRTATVRYYPSRRRKRISVRGWEPLGNVCSSDIASSEATPYTDLDMYDLSPLEDDTRKYKGKWHGTWGHHFFTLRSLLVRAKYYFNYWSSDWEGYDYVKFKGGYIWIPRMTYFSWIFYLDSSIQSNPREDGEPEAKYKYEKSWLHPGILLNRPGSKLMISSLQQPNRPFYRRIKVTPPSAWEGNYRMDTAMDYLLFHWGWTVCNVTASFFDFFCQRKRSATHNDTCPTTPWFIHDSCWKQGITANEVCKAIKEVYDRINKRHLDPRSVWVNRKMYIKSDCVNTPNSNSVPSNCHNWGPFLPQNVILETSTGNSLYFRYKLFFEVSGDSLYRRQPSQPCKDGVIPPAPGAESACPEISTR…	509	USER	zzzz254
687	genbank_anelloviridae_YP_009380544.1_	genbank	MPWRRRRRWRIPGRRRWRWRRWWRRRYYPRRRFRRRRTVRKPLNIIQYQPRIIKRCVIKGKVLVLGGHTFQTIERFHHTKTAADGTTETVFVHGGTTDWMTVTLQELYKGWKQRQNTWSTSNATFDMARYKGAKFTLWKHIEHDYVVVWDTEQSALLTADIQRMQPFQAQLTEKNHIVVRSNRWGNSAPAKTLRIKPPPGMKNQWYYMSDIADKTLVNYGFSIADIRDGGAGDTGRIITPWPDGSVENTVTEGGKKYTIQNYSWQWDLPPWQIQISDKWRQPFWMSQRGLGLTENNWIYDINIPYYQFWWGIQGSEDPQINTDYWGKKEDGMENLYPYKILWWDQEANRRLFGIKFPGVIHILQNGPMVPHLKNPFSHIIDYKFYWEWGGHIPHSRNIE…	520	USER	zzzz255
686	genbank_anelloviridae_YP_009388627.1_	genbank	MARFWRRWRKRPRIWRRRYRSYRPFRRWSHRRWGRRHRRHFRHRYAAVRYCPSRRHKKLVVSGWEPLGNVCATTTVCSEAKPYKILECKESEIQQVANQMNKDGEWNGSWGHHWFSFAGLLARSQYFFNTFSTDWRSYDYLQFLGGYVWLPRQMYLDWMFYIDYDLQDKVTGEKMDMYKNSKTWFHPAILLNRRGGIIVGSPHRFGIKTMFRRLKVKPPANWEGLYNLPDALHYIFFHWVWTWIDLEQSFMDSDWVKHIRSGDIGSQKPCEDVPWFLGGIETKQPTVQQGFDKRASWVDREKYCCKKQRNFSDPMDNYGRWGPFCPYVYGMPYNQSRSLWFKYKFFFKLSGDSVYRRPPTSEAEELVPEAPGQQQNGPKQQIPSSSILKRPLTPSDILP…	491	USER	zzzz256
685	genbank_anelloviridae_YP_009126951.1_	genbank	MPYWWRRRRRRWPRRRRWTRYRRRRWMGRYKPRRATRRRRRRRRRTVRRRFSGYTRRATRRRGRRRRRLTVTLKQWKPETLRSLRVTGLFPLIVCGSGASRNNWIQRSFDVPGPDTPIGGNLSVSVWTMRVLYEEWQLHRNNWSRTNSDLDLVMYYGCTLKFWRHPYVDYIVKYIRNTPFKTEELTHAAGHPMVLMLSKHHVVVPSLLTKPHGRRWIKVTVRPPRMLTSKFYFQSDFCNVNLLGIVASACKLNSPWLEPDKITPCITFYALKNTVFKNQNITEAQNAYTALTAIIVQNKEMAYNTWLEHHWGSFGNGKAFNITNVKDNSTLTQNQINTLRQTAENTFKSRYNFIYEAQPPTTFTYYNLHGWGLYSPLWLDPDRIEPESEAAFLAVRYNP…	731	USER	zzzz257
684	genbank_anelloviridae_YP_009256215.1_	genbank	MPYPWRWRRRWQTRPRRRRRYLTRRPRTTIRRRWRRRTWVRRKFFKRYKRKKLSKLKLTQWQPQTIRKCTITGPLPLILCGRGRLCNNFTLFAESIVPIQEPGGGAWSFIQITLNALYDEYLKCRNWWTTSNGGLPLVRYIKTTLTFYRSEDTDYIVKIIRCPPFSVTRDDYLDTQPSRMLLDRKTILVPSNKNKKFKKNYIKKTILPPALWLNKWYFQQDICNMPLFILKSSALSLQQFFQPVDQLSNNITLWTLNTDFFQNPNWKPEGTQGYIPKRTPQQGNIYLYGTENGAPENDNDIQWTHLVYLGETQRYTEGKPIQASDISKNTLPPQQNWGNPFHHKFQHKDARLFYSTSTPTADTQKKPTRLYYMWEPCRYNPLKDTGHNNKMYFKSTSIA…	646	USER	zzzz258
683	genbank_anelloviridae_YP_009268642.1_	genbank	MPYYYRRNTPYYRYRRYFWNPYRRRKRIIRPRRRRLRRLVRRRPRRRRRWVRRKKKTIFLKQWQPPTIRRCKIKGHMCSMMCAHGNESHNYNQYVKSYTPSNYPGGGGFSILRFSLGALYEQFSDFFNFWTKTNKNLDLCRYIKCNLLFWRHSDVSYIVSYNKNYPMTANPLSHAQAHPSRQILLKKKLIVPSFKENRNKKPYKRLTIKPPSLLNSKWFFQKDFADVGLFLLTVTSCSLNHAFAATNAESNNISIYCLNTQNVFKKINYVTTSGQQNYQPLGGTETLFAASQKTNLTDNNTWPLGSQKYTEGNPPSNPGNIFFKSYASGETYIFKGNKPKGTEFKEPLYIECRYNPLLDNGDGNQIYLLSTGTTSNPWQPPSDQQLIISGLPLYIALFG…	665	USER	zzzz259
682	genbank_anelloviridae_YP_009129295.1_	genbank	MARRRYRRGARRTRRGRKRVRRRWVGRRRRRRTYRRRPWVRRRRPRRRRLLTLKQWQPQTNVRLTVRGILPFMVFGPKRTQRNYTMWQDTVPPEKESYGGSFATYRFSMQTLYDEYMRLRNWWSRSNTHLDLVRYTGVSFRLYRHTHRDYIVSYSLETPMESSIATHMSLHPMRQLFQSKHRTVPSFYTKPGGKPYITLKARPPRLMKTQWYFQHDFCNVGLILLRAACCNLTNPWMAPSAPTPCLTIYAISNGSHEHLSINADDTHKQYRQHMLQKLYNNPQHLYNNHFRRHWSKVAPKKNGNQQTEPFTWEKVLKNDTIQTIQKNIYQERLKETQEVSTKRQQAGFRGNHNEDETFNYTWGLYSSILLNTEPGFPELSVPYSKVRYNPIADRGSGNA…	716	USER	zzzz260
681	genbank_anelloviridae_YP_009129291.1_	genbank	MVWLRRLWYTGRWRPRRARWRGRFLRRRFRRPLPRRRRRRRRVRRWRRRGRRRYARRYRRRRWGRRRRWGRGRRRRKRTLVLTQWNPYTVRACSIRGWFPIVITGLGRMQHDYTAHSEEIPASSLSFGGGFAYAKLSLRFFYQEYQRHHNWWTASNLELDLCRYKHTTVRFYRDTERSYIVKYSLDTPFTINSLTFMSEHPVVMMLSRHHRLIPSLKDRPFWRKPWVSLRLRPPRLMLNHWYFSQDFCDVGLALIMASPIDLTNMWVDPNKLSPATHFQIFDLTKYKHTFSIASDKVSERENTLKTLLSTNKNNEEVCPAGRHLWTREARDHWNSWRKDNTKGFSSGNLCNSQAWKHSGPYETFKQLGQQEVNDNNKLYKSIYSGTPGNDWTLNNVYGM…	774	USER	zzzz261
680	genbank_anelloviridae_YP_009126947.1_	genbank	MVYWRRRRRWWPRWRWRRTRWRRRVYRRAAGRALRRRRRRRKVRRRRYWRWRRRRRATYRRWPRRRRRRRRKTLRLTQWNPTTIVKCKIRGWFPLLETGLGRQAFNFTTHSEDIPGEKHSFGGGSAYAKFSLQLFYQEFQRNHNWWTGSNRELDLCRYLGTSIRLYRDPDISYIVSYNRDTPVVLNTLTYMSCHPLLQLLSKHHIIVASQRERPGKKRYVKLNIKPPHLMLNKWYFQQDFCPVSLFVIRASAIDLQWTWIDPGKPSPVVNFKILDPSIYTTVTNLSTKKEERNTVLNKIWNTTNGGTGNYSPAALYYYTAPTREAWGTLKKAGGVTAFGIETLNTPGEWLGGNGPGSAMPTLFNKDTETQKKFYKAVTGITPQTSYGTDITMNQKLGMY…	762	USER	zzzz262
679	genbank_anelloviridae_YP_009126942.1_	genbank	MAWYGWRRRRRGWGRRRWRYRRLLRGRPRRALRRRGWRRRWQVRRRRWGRRWRRRRHRRPRRRRRYRRRRRRRRTLALRQWNPTTVRGCSIRGWFPFLITGLGRLPFLYTHHMDDIPAEKMSFGGGLAVSRFSLSVLYEEYRRHHNKWSRSNVDLDLLRYHGVSFKFYREPEIDFIVHWSLETPMEINLMTHMSLHPLLLLLNKHKIIIPSMKTRPHGRRAVRLTLPPPRLMTNKWYFTKDFCKVGLCMLMATPCSLLYPWLDPGKTSPCVHFHILDQSYYKHIPNIDPNKYTERENDLKDILKIDGSSSTCVGACHCYTELFRDAWPSIRKPGVASQPFGLTEICKTQNYTNNSLADTFISKANEAHSNITDKLMPCVYGSNSAVITQLKSSKDKTFM…	773	USER	zzzz263
678	genbank_anelloviridae_YP_009115496.1_	genbank	MAWYWRWRTRRWRWRPRRRFVRRRRRFYPRRANRLRYNRRWVRRRRFRRRRRRHAPFTSKVLLWNPSRIVRCKIIGWHPGLFCNQFNTIDTCYVNAIEDKQTVQGFRGGGVAFLALTLNMLYREHIFGRNFWTRSNEGFDLAQYRGTRVTFFPHYQLPYIVTWLRDFATPVDKHIQDMHPQRALFGPNHKVILPRVFGRKRKWSLYIRPPPLNERKWYSMVSWCNVVIAKIGISFINLTSPLLHQESPFPAVFCGYTMQSGSFGEPPRCMLDPEGLPKVRENPTWHVGNYNLPCCYRPLWDDGTDNYVLMNYTNKPPSVQGTYRPTGTGQEVLIWQAKNRHALLAMVLRFNRIKRNYLCKPLATWQIFWPSVMGMYWYVDQARVLEGTVDTIVPDMSIT…	642	USER	zzzz264
677	genbank_anelloviridae_YP_009058944.1_	genbank	MPIYQGWRFSRRLAYNRRRRWLWRRRLGPAYRGFRRRYRRRYQVRRKRKRGPKLQRVTQWAPARRMKCIISGFWPALAGLPSNVALQFSMRNLSNFAGGGIQTWQMTLHDFYRYHKSHLNTWSATNDGTDLARYFGTVLYCYPNDSFSYIVSWDRDLYSKDIKTYPIWLQHPYLQLLHPDHKIIWSLRHKGRAKAKRIMIRPPAQLTNEWYFQADIAKLNLFTIRFTLFDPDNVWLTPQDASIKMTVGHSGVGITGAKTGELFKVMYSVLWDTDTKGNLVAINRNAQPPASETSEFANPDEYHNDMKWEYYGPDYPYWMVLWGTDFSHIAESEHEISTGNSVWIKWYPPTQKIPNATIEAQKPQFNKPKEWCILTRTQAQIIQKSGWFVPKTDNYDHNL…	547	USER	zzzz265
676	genbank_anelloviridae_YP_009109710.1_	genbank	MPYWRYYRSRWRPRRRWRRRRFTRRPFQRRLWRRRHRRVRKRKLKKIKINQWQPQFIKKMKIVGTEPLFLTTSERLTNNFVCYKDSTAPHLVPGGGGFSIMNFTLNALYEKHLYLENWWTTSNDNMPLIRFTGVTLYYYRQAEFDYLAQYVRQYPMNASLLKYTSTHPQAMLLHKNTLKITCKRNNRNKKPYKKIKIQPPSQMYNHWYFQKDIAHVPLLQLITTSASLDRMFLNSNSLSSTIGFTSLDQLGFLNHNYTKEGTQGYVAKPGQLLFGIHQGKYNIKTVRFSELIYMGNAVDLIEGTEAGAITATQYNTITGTTYNNTIKKQLKYIQQTPNTWGNPFNDTFHRTGGLITTSLAWEQIIGLATSDTATLTDQFTWKTTFTFPVRYNPFADKGV…	674	USER	zzzz266
675	genbank_anelloviridae_YP_009058900.1_	genbank	MAYRHRRPFRRYRRRYRRWRGRKVHHRRTWRPFHRFGWRRRWRHPRRGSAVVRITRPKKHKYITVTGWEPLGNCCVTDSAGAEAKPYEDLDKDVATWCTQNNNAVWHGTFGHHYLTWGLLVQRAQYYFCKFSSDYRGYDYLSFCGGYIWLPYLYAPYMFWLDPCIIDPQEKLMNFQLYKKDSSWFHPGIFMNRKGARFIPPSYQTYTHHLYKRLRVPRPPTWEGVYTIPAATQYILTHWAWTTVTTNTAFFDGACNQSGTTNTCEAVPWFMKGHQPAGKFAQKLTKWKTDTADGTKNLDCFGDPRSWWVNRRKYDDKSSTTCNTDNWGPFLPSKGTGTGVTKQYDSISFWFRYRFKFKVSGDSIYTRIPSRTATEVISEAPGPQSKIQARSILKTRPPD…	488	USER	zzzz267
674	genbank_anelloviridae_YP_009109713.1_	genbank	MPWYNYWPRRRRLRRYWRRPRKTLRRRYWRRPRWVRRPYKRKLRKIVLTQFQPKTIRKSKIKGPICLFQTTNKRLVNNFDMYETSEVPEHQPGGGGWGIKVFTLEGLYSEHIYGRNIWTVTNQDLPLVRYLGCSIRFYQSEYTDYVATYSNQLPLQSSLGMYNAMQPNIHLLLKNKITMPGLKTYKRKVPYKKVFVPPPTQLENKWYFQQNMAKTPLLMTRVTACSLNKFYIDPDHINTNLTITSLNVSLFSNRQFQDATDYHPKTVGTINYYLYSTTQNPPYNGPLKLKMLIPLTDTMIYKPGINYEEYKRNNTTKSWTDWKTEYTIYAGNPFHTNYLSVGEPVFLIGKKPSDLFSSEEGETSDYTTAELTKTIRYNPYNDQGQTNICYFKANFKSET…	656	USER	zzzz268
673	genbank_anelloviridae_YP_009058903.1_	genbank	MARHRFTWRGRRRRRFPRWRRYRRYWRPFHHWRRRRRFHHRHGTASVRYWRSSRNKTIVVRGWEPLGNICPGSDASKEATPWEVLDKDYEDTKTKGKESDCAKSCWSGTFGGHFFTFKLLLQRAKIRLCQFSSDWNGWDYLEFKGGYIWLPRLAGLQWMFNKDHSIKNPTETKEGQELAAAKSWTHPGVWLNRRGPIIMHDPNLFPSHRGFRRLKVKPPTGWEGHYSLPAVMNYIFFQWFWTALDMQHAMYDYWCVKQNPTAEHTKICCQVPWWAAQIDDTWRPKYADDDPAKTCGGDVRELWTDRENYLQSKCNTNQARTDQNNIPANTQNWGPFLPQSFVRPGEAGFSLWFKYKFYFQLSGDSVYRQQPHTDPKVVIPRAPKAKNTLTGEVQPGPER…	464	USER	zzzz269
672	genbank_anelloviridae_YP_007518450.1_	genbank	MPWWYRRRSYNPWRRRNWFRRPRKTIYRRYRRRRRWVRRKPFYKRKIKRLNIVEWQPKSIRKCRIKGMLCLFQTTEDRLSYNFDMYEESIIPEKLPGGGGFSIKNISLYALYQEHIHAHNIFTHTNTDRPLARYTGCSLKFYQSKDIDYVVTYSTSLPLRSSMGMYNSMQPSIHLMQQNKLIVPSKQTQKRRKPYIKKHISPPTQMKSQWYFQHNIANIPLLMIRTTALTLDNYYIGSRQLSTNVTIHTLNTTYIQNRDWGDRNKTYYCQTLGTQRYFLYGTHSTAQNINDIKLQELIPLTNTQDYVQGFDWTEKDKHNITTYKEFLTKGAGNPFHAEWITAQNPVIHTANSPTQIEQIYTASTTTFQNKKLTDLPTPGYIFITPTVSLRYNPYKDLAE…	672	USER	zzzz270
671	genbank_anelloviridae_YP_004286324.1_	genbank	MARRFRRRFQRWRRGRYHPRRGYRRWRPFHHWRHWRRRGRYFRHRTAAVRYRPSRRHKVVVCRGWEPLGNVCKETLASQEATPYKDIEADYDPTTSTLDQFKGSWQGTWGHHYFTLENLVKRNRQLMNTFTSDWRGWDYYQFLGGVFYMPKISGMDYFIYLDYDLQDLKAKGDETDLYKHMKSWIHPGIYMNRYGAKMITSPHRTTAPRLFRKVRIKPPASWEGLYPINTGFKYIFCHWAWTVFDWDMPFFDSYCYLKSCATKPPKPMCEQCCNERPWWSGLKDSHNMCKPNFDDNFNDSKEAYDARATWVRRDQYQMSSCESNTPETGKDCNCFNWGPFLPQCFPLWNSWGRSVWFKYKLFFKFSGDSVYRRTVSKDSKDLIPEAPKGKYSQGEIPSS…	469	USER	zzzz271
670	genbank_anelloviridae_YP_002640216.1_	genbank	MPFRRRFRRRRWRRPFRRYHYRRNRHWWGRRRRKWRHRRRMPAVRYHPSRRHKYIVIRGIEPLGNLCTDHTPSWLRATPGRSFESAGQTLGEWEGTWGAHHHSFAGLLLRAQCRFATFSGDWKSYDYIEYKGGTFYIPPQCTTFLFGIDPQFTKISKEGEKEQPNEETWLHPGWLLHQRGTHIIYSKDIKPWRRWYKLRVKPGPTWEGPYSLPNAFNFIMSQWWWSWLDFQHAFEDNTRSQICHADPQNFSLFCGQKPWWFDSTYKNTIEIPKRLVNKACNAWVNRQEYMIKIGQKVTDKMLHPEDDILCGNQSQQSQKKYFQQQNPGWGPFLPLLYNGDNCSLWFKYRYVFKVSGDCEYRKTPSTDLTQMVPTAPGPWNAEGDRPQIQSRSILKKSRK…	469	USER	zzzz272
669	genbank_anelloviridae_YP_001109584.1_	genbank	MPFWWGRRRKFWYGRQYRRKRKPYQRRKKRRIFRRPKYRRSTRRRRRRRRKVRRKKKTLIVRQWQPDSIVLCKIKGYDSIIWGAEGTQFQCSTHEMYEYTRQKYPGGGGFGVQLYSLEYLYDQWKLRNNIWTKTNEYKDLCRYLKCVMTFYRHQYIDFVIVYERQPPFEIDKLTYMKYHPYMLLQRKHKIILPSQTTNPRGKLKKRKVVKPPKQMLSKWFFQQQFAKYDLVLIAAAACSLRYPRIGCCNENRMITLYCLNTKFYQDTEWGATKQYPHYFKPYATINKNLVFVSNYGGKKTEYNIGTWIETDQSPEGNLARYYRSISKDGGYFSPKILQAYQTKVNSVDYKPLPIILGRYNPAIDDGKGNKIYLQTIMNGHWGLPQKTPDYIIEEVPLWL…	673	USER	zzzz273
668	genbank_anelloviridae_YP_003587905.1_	genbank	MPFWWGRRKRFWLGRRRFRKRWPKRRRKIHRRRFTKRRGRRTTRRRRKRRFKVRRKKPKIPIYQWQPDSIRKCKIKGVGTLVLGAHGKQFVCYTDVETRAPPPKAPGGGGFGCKQFSLQYLYEEYRFRNNIWTHTNINLDLVRYLRAAFTFYRHPDIDFIINYDRQPPFYLDKFTYPLCHPQNLLLGKHKIILLSKASKPNGKVKKRIIIKPPKQMITKWFFQEQFTTQPLLSLRAAAASFQYPHIGCCMPNRVVTFSALNPGFYQQGNWSLAQQETHPYSPWPQIPRRLIFWDVPASEIPTDGQQRLDFSKKHAFITDIHSYSDSVSYNKGYFTSKILKAKFVSKDISDTAGIGNLPLNLCRYNPAIDTGKGNTIWLHSNLVNSYSKPQHDEDIIITG…	677	USER	zzzz274
667	genbank_anelloviridae_YP_238298.1_	genbank	MPFWWRRRKRFWKRRNPYFKRKNYRKRKPIRRRRRTKRIHRRRRRRRRYKVRRKKQKIPIYQWQPDSIRKCKIKGVGVLVLGAHGKQFVCYTDVQQKAPPPRSPGGGGFACQQFSLQLLYEQYKFRNNIWTHTNINYDLVRYIRTVFTFYRHSDIDFIITYDRQPPFILDKLTYPLCHPQTYC	183	USER	zzzz275
666	genbank_anelloviridae_YP_238299.1_	genbank	MSPTNLLLGKHKILILSKNTKPNGKLKKRVVIKPPKQMLTKWFFQEQFSNAPLLSLRAAACSFTYPHISPLAQNQVLTFSCLNPGFYQQGNWAYAQAQTSPYSPYIGIPRNLVFWDVTQREVVEAKKQTDTWEAYKKKHCFQPNIHSYDDSISYKQGYFSTKVLTAKFVGRDTEDLTGIANTPLNICRYNPNIDTGKGNIAWLHSNLTTSYDKPTSDQDIIIQGMPIWMMLYGWLSWVQHVKTAPDFYLSYTLCLQSPALEVATKGTTILPVIPLDNTFIKGNAPYNQILTNKDYTHWYPDIYNQTEIINSFVTSGPYVPKLENVTNSSWELHYSYNFLFKWGGPEQTETPVADPSKQPVYDALDKQQQTIQIRNPAKQKYATIMHPWDVRRGIITNKA…	502	USER	zzzz276
665	genbank_anelloviridae_YP_003587871.1_	genbank	MAYFYRKRYYPRRRRFWRRRPRAPFRRRFWRRRRYRYKVKRKLSTIKLKQWQPIYLRHLKIKGILPLFITTDKRISNDYTMYTNSLAQHYVPGGGGFTIYRFTLKALYELFTKIQNKWTQSNEDWPFIRYTGCEFKFYKSEKADYIINYHRCPPMLATIDTFHSTQPHMMTLNKKHKIIRCKQNNPYKRPYKRVKIKPPALLQNNWYFQKDFAAEPLLLLMTSSMSLDRYYLNSKSISTTMGFISLNDNIFDYYDYKLPPTTGYIPKPKKYMWSLYQPLADIHKTQIKELIYLGKSKEMDKGKPLKNFLHGDPDETWTNYFSSTQNWGNIFDPYYLTQEHVVLYSEKSPNELKTEYQKDKQKWKTFSNEIGEYIQETTHTLLVNCRYNPYADTGGNTVF…	665	USER	zzzz277
664	genbank_anelloviridae_YP_003587855.1_	genbank	MPWGWWRRWRRRPRRWRRWRRWGRRRTRWGLRTRRARAAVRRRRRGRVRRRARGGRRYHYRRRFRRRRARRRKKIVLTQWNPQTVRKCLIRGMFPILWCGSGAAGKNYALHMDDYTPSGGFGGSFSLTTFNLRALYDEHMKGRNRWSHTNEDLELALYFGCRFTFYRHPTTDFIVTFSNTPPMMSNQYTAPLAHPGMLMRSKYKLLLPSFKTRPGGKKTVSVRIRPPKLFNHKWYAQSDLCDVNLVQFTVTAADFMHPFGSPLTETPCVTFQVLGDLYNKCLNIDLPKVDTVKNASSPHTKIQVKLTDNSGNPTNKEAVKTLYEQLFSYGQYWQTFITDFMTANPPKYDNGNNKKLFNDNDYNTFKTTFLTKKDSGYLFASYNPAQVAENIKNIRDQNF…	765	USER	zzzz278
663	genbank_anelloviridae_YP_004021043.1_	genbank	MAFWWWRRRRRARWRRRAAARRWRRRRPRRRRAARRAGRRRRVRRRRGRWRRAHRRWRRRRGRRRHKRKLIIRQWQPPYTRRCYIVGYLPLIMCGENCFSKNFATHSDDIDCSVAYGGGMTATQFTLRILYDEFQRHLNYWTASNNDLDLARYLGATITFFRHPDVDFIVQIHTSPPFRDTEMTGPSIHPGMLMLKKHRLLIPSLKTRPGRKHRITVRIGAPKTFEDKWYPQTDLCDVILVVIYATAADFTFPFGSPLTNTHCVNFQVLGSDYNDILSILPDKLKSKESKIEKIYKNIAYYNTKQTIAHLKITDNCKNTQTDITNTKHNDTQYKGNTYVDEINQVRKDTGDKFIKATSLALSNSWVKPTTNDLEYHTGMYSSIFLSSGRSNPELKGPYT…	727	USER	zzzz279
662	genbank_anelloviridae_YP_003587896.1_	genbank	MPYYYRRNWRLPYRRRRWFWRRRPRPFIRRRFHRRRVRRQPYFHKKLKKLKLQQYQPRTVRYCKIKGFQCLFEASKYRIGNNYTMYFNTFAPEHLPGGGGFSIVKYSLESLYSEHEYVRNWWTKSNLNLPLFRYLGCTLKLYQSEDVDYAFQYQNCYPMVATAHLYISRQPSIMMMNNHSILVPSKRTQKRKKPCIKIKVSPPSQMENKWYFQKDNCKTPLLITTATACSFDHYYLNTSAKNNCITIYSLNTYLYQSRHFNNRGTTGYHPKNNTYLYGTLENGPKYKVGDLIYLGNTMTYQQGQSPRELHPTDTTKGFQEAKQFENWGNPFYTHNLHGTIHILQTTESPTQMYTGTSYEAEKTNLTEISNNFYTLRYNPYRDSGEGNKIYLLKNWTEET…	654	USER	zzzz280
661	genbank_anelloviridae_YP_003587853.1_	genbank	MAWRWWKRRRRWWWKRRWTRGRLRGRRARPAGRRPRRRRVRRRRAWRRGRRKRRTFRRRRRRKGRRHRPKLIIRQWQPEIVRKCLIIGYFPMIICGQGRWSENYSSHLEDRVVKQAFGGGHATTRWSLKVLYEENLRHLNFWTWSNRDLELARYLRVTWTFYRHQDVDFIVYFNRKSPMGGSIYTAPMMHPGALMLSKQKILVKSFKTKPRGKATVKVTIKPPTLLVDKWYFQHDICDMTLLNINAVAADLRYPFCSPQTDNPCVSFLVLSTVYNNFLSIAPDELSPVTSNGKEYYKKFLDAAFKTPRDFNAVNTFRTQANFSHPQLTLPNSASNTSANQYFNTYDGYWGDAIYARDIPAVEPPQTLQQAKEVLINNMENWHRKVQQEGVSKLHHSVFA…	745	USER	zzzz281
660	genbank_anelloviridae_YP_003587859.1_	genbank	MAWWWRRWPRRRRRWRRWGRRRVGSWRRRGVAGRRRRGRRVRRRRRRRVWRRGRRWRLRRRRRLRRYFRNTLILRQWQPTTIKSLRISGWFPGVVCSNRRSQNNYIVHLPDIPARGGGFGGNISITKWNLSMLWHENLMNRNRWSRRNNDLDLVRYLGGSWKFYRDPDRDFIATYSLESPMTTNQYSHLQSHPQIMLLRRHRILIPSLKTKPRGKPYVKRKFKPPKLMRNQWYFQAHFCNVNLIKLTVVGLDLQKAWLRRGTESPIAEFAVLQQSLYNNISLTATETNSEEQKKTWENVWAFPMSMTMNFRELLKTLGATDAELKDGPKRDSVPTLWKKYVTSNKMTENVFNDRQKKINWLVSNSGITTTNTLSRTMYFDRICGMFSSYVLDDTVRWDG…	732	USER	zzzz282
659	genbank_anelloviridae_YP_003587884.1_	genbank	MPHFWRRPWYRRRYNYRRHWYRPRRLRTAFRRRRRRWVRKKSYYTIPKTIRLRQWNPRTTRLCKIKGHIPLIICGRDRQIFNWMQYYDSIGPVEQSGGGGWSSIVFSLGALYQQFKRLMNWWTKDNDGLPLVQYRGCKFKFYKSWDCDYIVTAQTCPPMTDTEYKHLDSHPYRQLMNKRPIIVPNLVRKPSKKTYKIKRFPPPSLLQNKWYFQQDFCATNLLMLTTSAASFDQFWLPNDEISQVITFHSLNTKIFANANFHDPEHTHGYRPKSTYYLWGTGNGTTPKPPKYGELHYLGNTNRYQIGSTWSGNFPPDLPQQGNPFYHDHSSIDTKIYYSTTSPLNADTQTNITESDPLFITCRYNPLKDTGEGNQVFFKSTSISKNPIYEPENNPDIHIS…	628	USER	zzzz283
658	genbank_anelloviridae_YP_003587862.1_	genbank	MAWRWWWRRRRRWPRRRRTTWRRRPRPRRRRRTARTRRRGRVRRWRRRGRGWRRRTYIRRRRRRKKKINIQQWNPATVKKCVVTGYVPLLICGTGTTGTTYKNYGSHINDYTKFDPFGGGFSTLMFNLRILFDEYKKQRCRWSRSNDELELVRYLGCSFTLYREQNVDFLFKYNRRQPFSDSQLTGPSLHPGIIMKQKRKVIVPSYKTKPKGRPVKRIRIKPPTLFTDRWYFQKDFSNFPLVTISASAASLRFPFCSPQTGNICIYFQILDPYWYNRRMSITPDLLKSNYESFFSVLNTKFSSSPLYPNVATTVPSGPIGTVFNTFKTQEHVVDPRWDTVKKQSTGSQWSNTFVDSHWGDHIYENTSSKSILTAMKDNATKMYDRRKRDTYLGSKYLNY…	766	USER	zzzz284
657	genbank_anelloviridae_YP_003587841.1_	genbank	MAWWRYRRRPWRPWRRRGWAVRRRRSRRTFRRRGKRRYVSRRPRRRYRRRYRRGRRRRGRRRRHRQTIVLRQWQPDVMKKCFITGWLPLIICGSGNTQFNFVTHEDDIPPPKASFGGNFTNLTFTLAGLYEQKLLHRNRWSKSNFDLDLARYLYTKIKLYRHPTVDYIVTYNRTGPFEINELSYMLTHPLAMLLNKHHIVVPSFKTRPKGKRSKTILIKPPKLMINKWYFAKDICKIGLFQIYATGLELTNPWLRSGTKSPIIGIYVLKNSVYNNNLTNLHGGGHEEGRKQVFNTLMPETAGKNWQYTYTPLMSKVYHQATKTNNEKLPTPYNWKNYSENYTQVKSKWDSLAQSGYKLVKDEYNAVYTTTATYPPEYTQRNYLSHDYGIYSPYFLTPRR…	734	USER	zzzz285
656	genbank_anelloviridae_YP_003587898.1_	genbank	MAYWFRRWGWRPRRRWRRWRRRRRRLPRRRTRRAVRGLGRRRKPRVRRRRRTRRRTYRRGWRRRRYIRRGRRKKKLILTQWNPAIVKRCNIKGGLPIIICGEPRAAFNYGYHMEDYTPQPFPFGGGMSTVTFSLKALYDQYLKHQNRWTFSNDQLDLARYRGCKLRFYRSPVCDFIVHYNLIPPLKMNQFTSPNTHPGLLMLSKHKIIIPSFQTRPGGRRFVKIRLNPPKLFEDKWYTQQDLCKVPLVSITATAADLRYPFCSPQTNNPCTTFQVLRKNYNTVIGTSVKDQESTQDFENWLYKTDSHYQTFATEAQLGRIPAFNPDGTKNTKQQSWQDNWSKKNSPWTGNSGTYPQTTSEMYKIPYDSNFGFPTYRAQKDYILERRQCNFNYEVNNPVS…	761	USER	zzzz286
655	genbank_anelloviridae_YP_003587893.1_	genbank	MPYYYRRNYYPKWRRWRSRRNRFRRHFRRRTYRRRWVSNPFNKITLKQWQPPYKKTCYIKGQTCLIYYNNDRLGYNSTMYEKSIVPFHWPGGGSFSVSKYTLDGLFDMHKECRNWWTGSNIDLPLCKYKGCTLTFYQAQNTDFIFKVTNEQPAVSNKLTYPSTHPQIMLMSNQHHVLSSTQNRKKRKPYTKIHIPPPEMFENKWYFTQDLFRIPLLQIFATAANMPNPYLKPNRKSNNTVFWGINTQSTQNREMSIETDQSWPFKKQGTQSFYFYYYTGTNPPSDTSQIKVADIIAVTDKKNNKPGESYHDQQTTSNKNWQQYFENYQQFWGNPFNNHLNEHPEYFYYSFISPETLKATAKTKTDQMTWKDLTDTNQSYALTKFDEPIFIPYQYNPERD…	671	USER	zzzz287
654	genbank_anelloviridae_YP_003587890.1_	genbank	MPPYNYYRWNNWRRPTYRRRRWRRRQYRRRRPRPFIRRRFWRRHTVRRRRIKKKLKKIKIYEWQPTVIKKCHIKGTIPLIQGGKDRQGFNYAQYQDSYIPSHKGGGGTWSIMVFSLGALYEEWERLNNVWTKTNNGLPFARYCGCRFKFYRQEYYDYIVHYSICYPMTDTEDQHLNSQPHRLIQGRKKIVVHRYNKQIHKKPYVKKRIRPPAMLQSHWYFQQEICNTGLLLITTSICNLNNYWLSNNHLSNNISFWSVNTRLFSNPNFQNTDSTVGYTPKDGVYLYGTYNGTPTQNLTWMHMIYLGNTHKYQQGLAPIDMSGPTSNQIKALHEKQNWGNPFHYNFANKQVRFFISSKNPTTIQDTDLNNPISNTTILDEPVFQECRYNPYKDKGYGNEA…	661	USER	zzzz288
653	genbank_anelloviridae_YP_003587826.1_	genbank	MPWRNYYYRRRRRPRRFWRRRFRTPIYRRFWRRRYRVRKRHFKRKLSKLTIQEWQPPSIRKLTIKGYYPLFQSTRDRLSNNMITYLESIAPHYVPGGGGFSISCFSLNTLYKEHLKLHNWWTKTNDNYPLIRYNGCTLKLFKSEKVDYIFYYQRHYPMKASALMYTSTQPQILLLNNRKRIVKCKANNKKTKPYIRLRIPPPSQLKTKWYFQRDIANLPLLLTIATACSLDRPYLNSQSISNTVGFKTLNYEAFLNRGFKNIPTTGYFPKPNTRYFITQTHSTDPKNVPIGSLIFLGNTNLLTLGTKIQDACPSSTENEWKNQFEKYLQTEKNWGNPFTPEYLDEDNYNIWITNKTPQELKAKYKSNTDKLHSSDTDTFWTLKRVPSVLDCRYNPFRDD…	675	USER	zzzz289
652	genbank_anelloviridae_YP_003587914.1_	genbank	MAWGWWLKRWRRRKKPAWKKWRTRRWRRFRRRRPKRTYGRRRRRRTVRRRRVRRLRRRGWARRRYIRRRRRKKKLVLTQWNPQDVRRCTIRGIIPLIMCGANTASFNYGMHSDDSTPQPEKFGGGMSTVTFSLFVLYDQYTRHLNRWSYPNDQLDLARYKGCKFKFYRDTNTDFIVTYDINPPMKNTELSSPNTHPGMLMQQKRKILVPSWDTYPRGRKFVLAKIPPPKLFEDHWYTQPDLCKVPLVTLRSTAADLKHPFCSPQTNNPCTTFQVLRDKYNHMIGFPFNYNPQDSSQTEKLTTFEKWLYSTSTHYQTFATEANLRPRQYNADGSSNSQYAQLQPTWTSTIYAKKTDSNFGYTSYNFSGDKGYTYVTQIRQWYWTQLTSWTQTVPHINSTF…	754	USER	zzzz290
651	genbank_anelloviridae_YP_003587878.1_	genbank	MWWNRWKRYRWRPLRRWRTYRRRRPLRWRRRGAARRPRRRRVRRWRRRRRAWGRRRYIRRRRLRRRRKKIPITQWNPSVVRKCVVTGYIPLLICGTGTTGTTYKNYGSHAADYKKYDPFGGGYSTMQFTLETLFDEWVKHRCTWSRSNKDLELVRYLGGSFTLYRHPKCDFIFRYNRKPPFKDTQITGPSLHPGILMTRRKKKIIKSFLTRPRGRATKRVRFKPPTLYTDKWYFQKDICNLPLVNIAASACSLRFPFCSPQTDNTCVNFQVLSKRFNTMLSISPDYPKKNYDSFVKTYLKNAQEHWNQNKKGTLDNYNDPNRLLTVFNTFKTEEHLYDPSAKETKNTTNTDAAGNKYNTVTSLWGDYIYKETVVDNFINNAKNYFESRKGNIVMSNEYL…	745	USER	zzzz291
650	genbank_anelloviridae_YP_003587911.1_	genbank	MPYFYRRWFPRRRRFRRSWRRRIRGPFRRKYWRRHWVRRYSRKRKLSKLNIKEWQPITIRKTKVKGLYPAFLCNDQRIGNNAIQYLDSIAPHHFPGGGGFGIIQFTLQGLYEQFIKATNWWTQTNCSLPLIRYNFCKLKFYRTANVDYVVKIIRCYPLKATHDLYMQTQPSILMRDKHSILIPCMKNGRNRKTYKTIKVRPPTQMTNGWFFQKDLCNFPLLVILATAASFDRYYTNSKAKSTTIGFISLNTLTFQYHNWQDPPTTGYKPQDNMWFWGTLNGSDDPNEEPLTNLIYLGGTNNHTKGIPVKNQSNYASQPNMWGNIFHEDYLFGTSQIYVSNKTPQEVVNYIVSHQTQKVKEYTGITPRTLPLTVECRYNPFNDKSTGNNTFFVSNHADQT…	656	USER	zzzz292
649	genbank_anelloviridae_NP_054656.1_	genbank	MPFYKRWRRWRWRRRPRRLWRRRFRRPLYRRFWRRKYRVRKRKLKYLPLRQWQPHYINKLKVQGWYPLAISTKDRLSNNLNLYLESIAPHYLHGGGGFTICNFSLMTLYQENLVCRNWWTKGNENMPLIRYLGCEITLYRQAELDYMVYVHNSYPMSANLLTYQSTCPQVMLMNNRTRIMPCKRYNRNKKPYKKFFVKPPSQLQNKWYFQKELSNVPLMQVMATTCSLDRMYLSSSSVSTTMGFVSLDTNGFMERYMKDNGTSPYSPLTGQIIFAAPNGEELITNIPLGQCILLGTVTDYTTGTQLSSINLHTGALTPPSTWGTYKTASTAIYNAYYQHKYWGNPFFTNWFHGDQRMVATGKTLKELCDLYKNDDLNTAKLNKGFIFKEQKWVELRYNP…	683	USER	zzzz293
648	genbank_anelloviridae_YP_003587849.1_	genbank	MAWGWWKRRRRGWWRRRWTRGRLRRRWPRRSRRRPRRRRVRRRRRWRRGRPRRRLYRRYRRYRRKRKRAKITIRQWQPAKTRKCYIRGYMPALMCGWGAYSRNYSSHLEDKITAGPYGGGHSTMRFSLQVLYEEHLKHHNYWTRSNQDLELALYYGCTIKFYRDPETDFIVTYQRKSPLGGNIMTAPSLHPAEAMLTRNKILVPSLQTKPKGKKTVKVNIAPPTLFVHKWYFQKDICDLTLFNLNVIAADLRFPFGSPQTDNICITFQVLSSIYNGFLSITHTSSTSDNIINEFLKLAIPDEPKQRHWNVLNTYKTEGCFSHPQLQKYKIPTTGIGTENYFTTPDGLWGDPIYSKNNTGTSQTAQTIRQTIKNNMTSYFKKIEEESTIITKGDKLLCHL…	744	USER	zzzz294
647	genbank_anelloviridae_ATV90788.1_	genbank	MPPFRRRRWRWRRYPRYGRRRLRPRRYRRSYRRGRKVRRRRRYKRRRRTARIIQWHPPTRRFCTIKGIWPLLYGHWMRNALPMRKHNGLIWLGGGIDVTVWTLYNLYMEHNNLRNTWSSSNEGMEFGRFLRATLYFQRHPTKDYIITWDQDITCALKREEMQPFISLLKKNHKLILSRDHCNPKNKARAVKLKFKPPPRMTSKWFLQRELAQMPLFRLTVTWIDLTSYWVEGRGNAFYSTLGYPPNFKEGNNSGGNTNRSDHFRCRYFWIYDRGPGNAVYVARTQNRTKLPQDGTGNFWLSNNNDDWHLISKDQPYWLFFFGKSEKDLKKQAFGQDVDENEDIYVLCIIWWAAEWWNEKDPALATLQGYNQYDYVKPRPVEFGGPAQNLFKDRLWLSSQ…	633	USER	zzzz295
646	genbank_anelloviridae_AWJ58486.1_	genbank	MAWRFPRKRTWRRRTWRRPTRRTYRRRTSRRTRGPRKWRRGRRHLKVRVLTEVQPRFSRRCIIRGIMCPLMVGQPNQTGDPKTAKHYELKQGSIFAYKADGSDLWMGTWGVGMVSLSILYEEHKMWRNRWSQSNCGFDMTEYRGTTVYLEQHSTADYIAFFDEEYRNIQSFAQQASLHPLVLLTHPKTVIIKSRARAGPRRARKVFIPRPSWWDSGWKFSKDVAKKGLFVWYISLVDLEHPWMDSYIQDDNAFEKAKWWKDFKWKEDFDTFVNTAIQQLQTSDNAADYKDSIPHGPTMYSVKDMQKDTMNIQITWFYKSYWHWDGNNLTIKKVCNPDMDVPVS	343	USER	zzzz296
645	genbank_anelloviridae_AWJ58474.1_	genbank	MAWRFPRKRTWRRRAWRRPTRRTYRRRASRRTRGPRKWRRGRRHLKVRVLTEIQPRFSRRCIIRGIMCPLMVGQPNQTGDAKQAKHWELKQGSIFAYKADGTDLWMGTWGVGMVSLSILYEEHKMFRNRWSQSNCGFDMTEYRGTTVYLEQHSTVDYIAFFDEEYRNIQSFAAQASLHPLVMLTHPKTILIKSRARTGPRRARKVFIPRPSWWDSGWKFSKEIAKKGLFVWYVSLVDLEHPWMDAYIQDQATFQKAFWWKDFKWKEDFDTFVSTAIQTLQTSRNDTNYTDNITHGPTMYSVKDLQKDTNNVQLTWFYKSYWHWGGNNLTIKKVCNPDMDVPVS	343	USER	zzzz297
644	genbank_anelloviridae_AVN68373.1_	genbank	MPWRWRPYWRNPWRRRRRWRTFRWRPRKVVRRRQRYRVRKRKRKLKRLTLHQWQPSSIRLCKVKGLMCLFQCNAFRLGNNIALYNQSIVPPHLPGGGGFSVYQYTLHNLYTMHQYVRNWWTSSNVNLPLVRYVKCIFKIYQSKNVDIVFRYFRHFPMESTQLTYPSVQSSVMMMLKNSVLIPSKETKRLRKGYKKYIIRPPEIMTNKWYFQQKIANIPLLITHCTAASFDNYYIDSNNLSTNVTIQCLNSQLIQNRNFGTNAPHPIRVLGTQDIWLIASDDVLVTETDQPTYMSLTLLADAKTYTEGHSFNSAQTQAAPLRPKDWKSYCENIAQYMGNPFHENYLNYDKTHHITLFQYQGTIQSLFDKTKSVQTSTKVDSTIPLTKIIAPLLIPCRYNP…	680	USER	zzzz298
643	genbank_anelloviridae_AVE14391.1_	genbank	MAFFYRRRYYRPRRTYYRRRRTYYRRRRPYYRRRRWPVRRRPGRRGARKLVQWNPRNRTKCVILGYMPLITTARAMDTVADTLMPKGPMVTVWPGGGVDSGHLTLLDLYWEERFYRARWTKSNQGYNLARYFGVEIKLYRYYEFSYIFWYSVDDEKDDPEPLQMAHPSQMLLYKNKIIVKRTLDKRGKTIRLRIKPPSKLFNCWRNFKDLATVPLIKWRCSIIEFDMPFSALKNNIVPYEFDVFAYEGPQAGATKNVIYYPWQDDGTNTKVTLTHVIPYNNEQSGPQGPNNRNDFWPNEIEFKDMNMPMWLAGFGYNQEWYDMSWMNRRPRPPDATTENKKGYWSFVQFNGNPAFKDKTTGDIIKWDHGKGTSFVKWTTWGNIASMAGPFVPKGAPKKG…	574	USER	zzzz299
642	genbank_anelloviridae_ATX61857.1_	genbank	MAPFYQWYRPRYYRPRTRYWRPRWRSRRTRRTYRKRGYRVRRRRGRMLRRKTRHVPVMQWNPINKKKCVIRGYCPLVYCTGAQNAVQDFTFPGNKLILTWLGGGVHSSLISLLDLFWEERYWRARWSSSNQGYNLFRYYGVTLYLHRTPYHNYIFWYSTEELTEDTEPLTVCHPSQLLLAKHHVIVLSKKDRRSSKPVNLRVNPPSAMIGTWHSFAEWAKKPLLKWRISLMSLESPWTGFPNNETQGIHVKVWAIPQGSSTAGEHSIWYFPLLDDGTDLSVAEHPIPWNSSGDGPDVNNQQFWPTAYEYNKLVVPFYLYAFGRGSPYYSMDEHVHIPQPSEGKGKFLFLKFLNSPAWRGTDGGFPKFKDNVCFMKFTTVQVIAANGPWVSKTIPDGTNV…	576	USER	zzzz300
641	genbank_anelloviridae_ATX61891.1_	genbank	MGGGVHSSLISLLDLFWEERYWRARWSSSNQGFNLFRYYGVTITLYPCMYYTYIFWYSTEELAEDSEPLTVCHPSQLLLSKHHVIVHRMHGMKVKPVKLRIKPPSQMTGTWHSFAKWAKQPLLKWRVSLCDIENPWTGFPNSETQGIHVKVWAISTTSTAAGEKDIWYFPLLDDGTDVWISLHEIPWNRNGDGPEVTDQHFWPVQAEYQKLLVPFYMYGFGRSATFYLMNKDVHMPAPTAGNKGKFLFLKTINSPAWRGDDGGFPKFKDNHFYMKFSTVAQIAAQGPWCMKSIGNETHGVNLSMKYKFHFQWGGTPGTHLPPVQPADGGPPQPLLQSTIRWGNSLRADLRDPTTVGDEVLH	361	USER	zzzz301
640	genbank_anelloviridae_ATX61858.1_	genbank	MPFYYNSTFGRKYAYFRRQRWLRRYGRRPARRIRRRYTRRKQVRRRRRRGPRKQTITQWGPGRRLKCNIVGFWSAIVGIQANTTVQYTSRNLYNYGGGGIQTWKWSLLDMYYQHKDHMCYWSASNDGTDLARYHGTTLYCFPNDSFSYIVHWDRDLYKKDVKNYPIYLSHPYLLLLHPDHKVVWSLKHKGRAKAKRIVLRPPAQLTNEWYFQADLAPLNLWTVQFTLFDPDNVWLQASDGSIKMTVGVDSTLIGMGTTGRLWQTMYATLWDIGCEDNLVAVNRTKQPPATATSHLASPEEYHADMNWEYFGAGYPYWITLWGTDLSKSANSPSEIKTGKNVWIKWFPPKEMTKPSQVIEPDFTKKKLWTLLTRTQAQALVKSGWFIQKSDPYSYNIFVK…	540	USER	zzzz302
639	genbank_anelloviridae_ATX61892.1_	genbank	MAYFGNSWSRLRRYGYRRWRRRPYSRRRWYRRPVYRRRYRVRRRRRMLRRRTRHVPVMQWNPINRKRCTIRGYCPLVYCLGGQKGIMDFTYPADKLILNWMGGGVHSSLISLLDLFWEERYWRARWSSSNQGYNLFRYYGVTITLYPCMYYTYIFWYSTEELTEDTEPLTVCHPSQLLLAKHHVIVHRMDGMKVKPVRLHIKPPSQMTGTWHSFSQWAKQPLLKWRISLCDIENPWTGFPNEETQGVHLKVWAVSQGTTEAKEQNVWYFPLLDDGTDV	278	USER	zzzz303
638	genbank_anelloviridae_ATX61877.1_	genbank	MAYAFGYRRRGYYRNYRSWNQPRGRYRRRYYRRRRYYRRPYYRRHYRVRRRRSRRTCKPSKIIQWQPKYRRTCIITGVYPILFVVGAQHAVKAFDYPSEMQGTWQGGGVYSERWTLYKLYTEQTYWRNHWSQSNQGFNLARYFGVDLWFWPTVHFSYIIWWSTDDETPDEQPLVFCHQSQMIISNRKIIVTRQTLHQHFKPVHLRLCPPTSMIGTWYTMAEMCTRILFKLRVAFLDIENPWTGFPENFAGVRIKVFKYNQNAHNRWVDTTITYMPWLDKGTSCKRWIWKKTYADGSPPDPGNPPAWNNASWTYVNVPCYIYWYGYEYHWYDNDPETKRPKVTHDQYPWMLLWILDPSVWGGLQQNDVIEIPYTNINAIVRNGPWVEKTINNPGCNIEMN…	563	USER	zzzz304
637	genbank_anelloviridae_ATX61881.1_	genbank	MARAYKWKPSRWRKRRWRRPRRTYRRRPFSRGKRTRRPRRRHLRVRALYEVQPRFQRKCTIRGVFCPLILGNELANANTYQSVWHGFNPVRRFGIWGNNNSNVQLGGWVVGHFSLQMLYYEHKDWKNRWSNTNCGWDLVQYYGTTLFLEQHKDQDYIVFLDPEYQSTEEFLKTTSIHPLLMITHPNTILIKSRERAGPRRARKVFLPRPSWWDSGWSFSTDICKKGIFLFYVCFIDLDWPWLDNYIEDHKKEKAKWWKDNKWKEEFDKYVKDNFMMPTQDTDIHETLNMGPFWPRPVDVNNSKNLQLVFFYKSYWRWGGNNLTVKAVCDPCNVLPS	336	USER	zzzz305
636	genbank_anelloviridae_ATX61886.1_	genbank	KRQVVTQWAPARRIRCSIVGFWPGVVGVHANCTQQFTIRDLKTFGGGGIQTWQWSLQDMYLQHKAHMNYWSATNDGTDLARYHGTDLYCFPNESYSYIVSWDRDLYTKDIKNYPIYLQHPYLQLLHPEHRIIYSYKYKAKPKAKKIKLRPPAQLTNEWYFQADIAPLNLFTVRITLYDPDNVFLSPTQNNIKFTIGSDSRQIPGGSAKVWQCMYSPLWDMSTEDNLVAYNTKNQPPASQTADFATPEQYHADMGWVYYGAGYPYWITLWGANFDEFANSGDVMAKGKSVWIKWYPPKTVTTPATPLPPDFTKRKSWTILTKDAAYMLANSGWFVQKADTYNYNIFLKYRSKWEWGGYTPDVTDTIIDPIPDKPGTTTRTYSRLQQIQVQDPATVGQSVI…	557	USER	zzzz306
635	genbank_anelloviridae_ATV81290.1_	genbank	TGTTYRNYARHITDNNKFDAFGGGISTLQFNLSWLYEEYCKHRNRWSRTNTDLELIRYKGCSFTLYRHPTCDYFVKYNRKLPFQDSQLTGPSLHPALLMLQKKRKIVQGFKTKPKGRVTKKIRIKPPTLYTNKWYFMRDFCKVPLAYLGVSLGNLRFPFCRPQTDNTCIVFQVLSKFYNPMLSIQEPHLKTNYEYITETLLKTHWHSNQRKGTMGNYQETDRLGVVFNTFKTEEHIKDPAIGENKETVSKPYTYNTVTSLWGDYVYKKGIVDAFNTNASNYYESRKGTQFTASKYLNHKTGLYSAIFL	308	USER	zzzz307
634	genbank_anelloviridae_ATV81291.1_	genbank	LVQCGPNRDNNNYAQYILSTVPENTGGGGGWSMMVFSLASLYEDFQHLLNYWTTSNAGLNLIKYKGCKFKFYQHTTVDYVVIPRLCYPMTDTKLDHANSQPFRALMDRKKIIVPSLATKPLKKRYKKRWFKPPAQMKTGWYFQQKICNLPFLMLTTISCSLTHTFLSPKSKSNNISFKVLNTHFFQMHNFENPPATTGYQPKASTFLYTEGNGNHEPTNKNSL	223	USER	zzzz308
633	genbank_anelloviridae_ASU08515.1_	genbank	MRYRYRRRRRRRPFRRFRWRFRGYGRRRRGYRRRYRVRGRRRRRRRFFKKRRYVSAITQWNPEHRQMCAIYGILPTLTGPKNKVSERGFRQIPQNSEVAYWSTVVSGGTAVFYWSINLLYLENQRWHNRWSHTNEGFDLARYWGTSFYFPPHDYLWYVVYVDTEFTKTTTGYAFAHPFIMQLTKRHKIIKPRVFRGRGKHMWVPPPSIFNSSWFRMTGFCGAALAKIQVSLFNPKQCIMHQGQTIPSFKVGKQAKQMSDLRDSDYYPYGHSKYNGNTPDIYYRWDWDTGTNNKIMLPYARNPTTAGEWEIQTWDAPYWMWFWGKKYDDFLGSLGPSQSTSEAYLNVKILWYPITDPNSEGPFTDPSKKVWINLFMDTISTSNHLLVLGPATAQKIALMG…	578	USER	zzzz309
632	genbank_anelloviridae_ATX61880.1_	genbank	MAWGYWWRRRFWRPKRRWRRWRRRRRLRPRRPRRSVRRPRRRVRRWRRGRRRYRRGWRRRTYVRARRRRRRKRLVLTQWHPAVRRKCTITGYMPVVWCGHGRASYNYAWHSDDCIKQPWPFGGSLSTVSFNLKVLFDENQRGLNRWSYPNDQLDLARYRGCKLTFYRTKDTDYIAQYDISEPYQLDKYSCPSYHPAKMMMAKNKILIPSYDTKPRGRQKISVKIPPPKLYTDKWYSQSDLCKVNLLSLAVTAASFLHPFGSPQTANICTTFQVLQPFYYQAIGTSSQNHQKVINILYSDNTYWQSNITQWFLVGVKNPTNMSQQMFTDINTKANRDTNYDWFAYTPVSKKDDIKKAATAYWTYLTQNHPHTTNSKEGLVQPWTSATIEEYEYHLGMFSP…	615	USER	zzzz310
631	genbank_anelloviridae_APR63555.1_	genbank	MAPYRRRTWKNYRKPWRRRWIYRRRPKTTFRRRTRRHQRVRRRRHFKKKLKRITVREWQPKTIKKCKIKGNIELFVCGKMRLGHDYTNYKESFTPVGEPSGGPWSIQLFTLDALFTEYIKHRCIWTKTNMGLPLARYTGCTLTFYKSLHTDYIVTWSNCPPFTVTMDMYLNTQPMRQLLHKRKLIVPKLTYGSKKRYKKVKIKPPAFMSTKWYFQQDITKTGLVLVTATACSLQQPYCPDNQISYNYTFYSLNTNFFQNPCFEKFGSTGYTAKTIQGKHFKLFAPKSTVTLGHPTKWTEVIPLVNTNEYTKPADETKLMNYEGFTDKNNWENPFTWFIRDHYPHIYYTNDWPTQRTFESAQPNFVEFNDMYWEIRYNPDKDTGIGNKIYFKRNNDEEQG…	646	USER	zzzz311
630	genbank_anelloviridae_BAF76121.1_	genbank	MAFWWYRRNKPWFGRYKRRRTRRYKRTWRTRRRRPIRRRRNRRTNRRRRRRRYKVRRKQKKITLKQWQPESIKKCKIKGTGQIVLGAEGTQFRCFTVYKNEFTNPKVATGGGFGVELFSLKYLYQEYLARNNIWTSTNAYRDFCRYTGSSFTFFRHPDTDFIIVYDIQPPFTINKHTYMMTHPHFLLQRKHKKILLSKSTNPNGKLTKRIKIKPPKMLQTKWYFQEELAEFGLVAIHAAACNFRYPWLACCNENLIITLYYLQPSFWSHTEWAQYSTSAYNPQGHLHPMPETLTFKGKIDNREYTWNMSPFISDKYTNSLNKDSGWFNPKVLNAYTVLKGDQRQSLVPCGVLRYNPYTDTGRGNKMWVNSVLVGAWQEPKDTDLVMEGYPLWAMLYGYT…	668	USER	zzzz312
629	genbank_anelloviridae_ASH99130.1_	genbank	MPLLQLPLLEGPPTATMVRWARRYRRRRWRPYTRRGYGRFRSGLRRNRWRRHRRVRRRRRTFYRKRPYVGPLVQWHPKHRALCTIHGWGIAFYGLSTNTTTNFQTWQIRTGNKPGYYKYYGGGVSIYSLTLDWLYEEHLKAHNTWSRSNEGFDLARYFGTKFILPPHPTIDYIFWWRTDYGTLKKQPFQELHPAVAITNPKHIIIKSIKNGGRRSKKVFISPPSVHNSQWYFMKQWCDASLLKFGFTMIELKNQFIHTGSTRPMVLLGSASGVKTPLQIPTTKTIPTTANQVYYKYDWDTGIGNKVGYGTLKTSTQVLQVSIAEFDMPYWLYFYGQGWQNFNNSNVYFWWWYEDYTSKDTWAPQDLPDQTKQWILIEKFTGNKDYAHNVIDLVQNGPMV…	562	USER	zzzz313
628	genbank_anelloviridae_ASH99109.1_	genbank	MDHSLATVSAQTAAMPYRRRYPRRRRRYQFRYRRWRRPHRYWRRARKRYYHRRRVRPVYQYQPRKRTRLTVTGWEILGVIGSEITYTTQDTDPKWKIEVKDIAPANKQVYYFTKLIPIETQNTCTDKWYNKKNQMPSKNEKYECRYWDFVGGWGYAHFTLEGLVLRNLLGMNRFSTSIKGWTHIKYRGFKWQLVRGRSVDYLFRPEMHRGALDDERDLIHPAHLLNMPFVKWVESVRRTHCCKMMRIIRKPPPDLLGWHDLEDFRKLLLGAYQWTAFDPDNLMGKNPDPNKDDKDVWYNSEWMREKQDGSNIGINTTLKWGLRNEYDSQFVGAINAAKRNKNTNWWDWIFGNDDISTKKGKQTPFLPPIIPSEQPNTLWFRYKFFFQLGGSTISRNYQQ…	507	USER	zzzz314
627	genbank_anelloviridae_ASH99118.1_	genbank	MVLLPRLPPPHTRMARYYYRRRWPRRRRNFRWRTRQFRTWFPRRRYYRRQHRVRRRRRRFYKKRQYISALMQWHPSHRKICIIKGWSYAFYGVDGNTCTNFQSWNEPTHGKLGFYRQYGGGASLYHMTLDWLYDEHKKHHNVWSASNEGFDIARYFGTTIYLWPHPDITYIFWWETNYGNLRPSDYQLIQPAYCLLQKNHVIVKSIKYGGRKPKKIRIHPPSVHQTQWYFMKNWCGAGLLRFGFSLFNINQTFIHENETRPWVIIGSNTSMTDITTLGQDLPPPTADNKNWYKYHWDRAENNKIAWGKKNITKLSQLGMTEIQVPYWIYYYGQGWTNLNSNEDWYYFIWWYNDPVKTNKDAWEPQDLVNQKKCWVLLRTNETNTPVTVVNMVQKAPFCY…	562	USER	zzzz315
626	genbank_anelloviridae_ASH99125.1_	genbank	MRYRRYYRRRWRPYSRRRYGAIRPWFRRHRWNRRRRVRRRRRGYRKRPYVGPLVQWHPQHRTLCTIKGWGEGFFGVATNTTTNFQTWNEKSGQNQGFYRIYGGGVTLYHLTLDWLYDEHLKGHNTWSRSNEGFDLARYFGTTFYLVPHPTISYIFWWQTDYGTLKKTDYQMLHPAVAIITKKHIIVKSIKDGGRRTKRVRVPPPSVHNSQWYFMKQWCGAGLLRFGFTMINLNQIFIKTGEQRNWVPMGVSTGQKTKETLPNTPPVGTAENRVWYKYDWDRGYDNMIGWAQKKSGQQVLVQLQIQKIDIPYWQYYYGQGWTNFNVNSDMYYFWWWYKDPMQENQAFAPQDLKDKQKEWIWIGGIENNNYATLAINITQKSPWAVSAKDLGDTNIFNLAF…	541	USER	zzzz316
625	genbank_anelloviridae_ASH99106.1_	genbank	MLHITYAFLQLWGLDASPSTVSSATTMPWHRRHRRRSRRHFFRYRRWRKPRRFWRRAWRRRYPRRRVRPVYQTQPRKRQHLVVTGWEILGVIGSQIIYDTAHSGDPIIHIKDVAPTNKQVQYFTSMIPTGLNNTCDDRWPRTASSTQYWDFVGGWGYAHFTLAGLVLRNLLGMNRFSTNIRGWTHIKFKGFKWQLVRGRTVDYLFRPEMHRGPLDDETYLLHPAHLLNMPFVKWVESVKRSHCCRSPIIRRRPPIDLLGWHDMEDFKSLLLGAYQWSAFDPDNPLGKNPIAQETADKQKKYWWKNEWMREKQPDTKIGLNKKINWSDRVAYDNNFIKEINNRIKQEQSFANQPWSFWDWLAQITTTQGDTTGKHSPFLPPIIPSEHVNTLWFRYKFYFQ…	500	USER	zzzz317
624	genbank_anelloviridae_ASH99095.1_	genbank	MYSRRRYRRGYRRHFLRHRKWRRPRRIWRRHWRRYRRPRVRSVTQVQPRKKKTIVVTGWEILGTIGSQIQYRYDEGTKSGHIDIQNIAPTNKQVDYLAHLIPQRLNNQCSDTWGQGTPRTAQPAKEPNYWNFVGGWGYAKFDFQSLVLRNLLGFNRFSDSFVGYTHIRIIKFRLDLVRGYSVDYLYRLQMHRGPQDREDPLMHPANLLNMPFVTWVESVKRSKCCRHKIIRRRPGIDYTGWYDIETFRNYELFSYMWTAFDPNNPMGKNPRVDSRTEWWDQSWITSKGKDTKIRENMNVTWFDRNWDNTFVKNVNNIMTPEDSIWDFIWPQQKPENFKGKHTPFLPPVINTEVINTLWFRYKIWFQVGGGSISRISPWWPIRETVDTTNPKNGCPPNCP…	488	USER	zzzz318
623	genbank_anelloviridae_ASH99102.1_	genbank	MPTRYRRRRYRRRPVFRYRRRRRWHRYRRPFRRRWHRRRRPVRYLYQTQPRKRKIIVCRGWEILGIIGSHIEYKIEGEKGKEKPRIYIQNPVPTNKQVVYMSFLIPNGLNNKCDDTWQTRKEWNTKDSTDLRPDKDSPTYWDFCGGFGFANFTFEGLILRNMLGFNRFSEDIRGYTWIRFLGFSFELIPAVDIDYLFRVEQHRGTQDWETNLLHPVNLLNMPFVTWVKSIKRSKCCKPVRLRRRPPPDLHDWYDIEGFRKLLLATYQWTVFDSNNPMGKNPNITIDNKKYTWWDDSWMRMAKWGSAKTAPKKPAKIGINQHLKWWDRGTYDTSFVTEINKGEGVTEPTSEQNWWEWIWGLDPSKKSVGGKTTPFLPPIMPSEHINTIWIRYKFKFQVGG…	510	USER	zzzz319
622	genbank_anelloviridae_ASH99112.1_	genbank	MPFRRHYRRRFRRHQFRYRRWRRPRRYWRKAWRRYRRRKPYKPVYQVQPRKRRLLVVTGWEILGIQGSRISYTVDANNKGHIEILDVAPSNKQVKYLSFMIPCSINNVCDEQWNPQGGRDDCEHTQRAKKPTYWDFVGGYGQAKFDLQSLVLRNLLGMNRFSEDIRGWTHIKFLRFKFQMVRAPELDYLFRTQMHRSPEDWELYAVHPAWLLNQPSVRWIQSIKRSKCCKMVTIKRHAPIDYSGWYDIESFRNYTLVTYQWTVFDPNNPMGKNPKYNTADNESKFWNDDWMRKSNVDRQGQPTRIGRNLNDTLDWMNRITYDNTFVNNVTNNFPGAETKKTWWDVIFSNSDERISGKQTPFLPSIITADRPNTFWFRYKFYFQLGGITIARHLQKWPIR…	494	USER	zzzz320
621	genbank_anelloviridae_ASH99115.1_	genbank	MVPLQRLQDSYPRMARYFHWRRRWPRRRYYRRRRGPFRLGLRRRTYYRRRRPVRRRRFFKKRTYKSAIIQWHPSHRSICYITGWGIGLYGVGTNTTCNFQTYVPATHLAKGYYRQLGGGASLYHLSLEWLYQEHQKRRNVWSHTNEGFDLARYFGTKFTLWPHPDLDYIFWYETDFGGLRKEHYMLLHPAQAMLEKRHVIVKSIKNGGKKPKKIKVPPPSVHQSQWYFMNQWCDVALARFGFSLINLKTPFIHSDLTKPWVTCGVSTGVKTKDKAPTDKTLSTAPKVFYKFRWDNGIDNQIAVCQWKPDTQKLIFVSMTKIDVPYWLYWFGWGWQNFYSGEYWYYYIWWYNDRVDAMPEIFEPEDLKDKAKEWILMKYDNVEIPTCCINLVQRGPFVVS…	559	USER	zzzz321
620	genbank_anelloviridae_ASH99099.1_	genbank	MPWIPRRLWLRRHFGSYRGRPRTFRRSFYYRPWFSRRNRRRYGRRSRIRPRRFRVRTRWMTVRQHNPLQRRRCVIRGWMPALWCDRVTPFMRPMLIGKDTRRAMSGGWTLHELSLLNFYNEHRAHRNLWSQTNCGYDLARYHGTQFTFWPHQTCDYIVWWDADYGDIAEYKKMVKNVHPAILLNRRHVKLILSVETTRRFVPKTILIPPPARVKNEWKTMKEWAKTPLGLFAISVIDFRYPWIHPDFTIYNPIANQEGWTPRDDMYDIKDGTTHDLEARVKHASTKPDINWLWWNAGGDSGSKPATMWVDNWPGWTSESAGRQTMTEREFVAVAMGPFVKKQQVAECQIIATYKSKWTWGGDVLTRDETVCDPETYDPKARLRRDIEDPRYYLEPGDVR…	491	USER	zzzz322
619	genbank_anelloviridae_ASH99133.1_	genbank	MACDRGGLAQPLVRLHRLPDAHPGMAWGRGRRRRRYRRRWRRYPRRRFARRRRVPYRFRARRRRLRPQNRRGYRRRNWVRRRYPRKRQYKGTVTQWNPQHRTGCKIRGWSLAIMAIEGHFGEKTEIYFQSSTKPDRYLVCGGGVSYRHFTLGMFYQEHLLFRNEWSTSNQGYDLARYFGTKLRFYPHEHVDFMVYWETTFEVPEKDEMPELAPGSLINKRHKIIVHSLKRRGRSKRLFIKPPPVHTNQWYFQKTWCNVPLFKIGIVPINFRAPFLHNRHFYGVWIGYTCDTEPPITITWTRNDIEKNWGVPTNKSACPANGGKLTDPNNQPIKPGNGKIGGAEQWKRRVYYRWWWDDGVDNYIMINQYNRDPLEDGLNNCIIKKVDMPYWKYFWGLSQL…	709	USER	zzzz323
618	genbank_anelloviridae_ASH99121.1_	genbank	MYYRRRPYRRRRHFFRHRKWNVHRRRWRRAHRRRGYYRRRRVSNIRQLQPRKKRLLVVTGWEILGQLGSQIKYGVGEDKNPVIEVLNPVPINKQVEYLWKLIPQGLENKCTDYWTMNMNDDNKKPWLGPTHWDFCGGWGYAKFDFQSLILRNLLGFNRFSDDIKSFTHIRFLKFKIQLVRGSSVDYLFRLQMHRGPQDWESPLVHPAHLLNMPFVTWVESNKRSKCCRMKVLRRLATTDLSGWYDIESFRALELFSYQWTAFDPNNPLGKNPILPKELGDKKWWNDDWMRVRAGREKGPENAKIIKDNRRLDWMERTTYDNNFVGSIDPKNLTQTQNFWDWLFDPKNIKKQGKSSPFLPPILPSEYVNTLWFRYKIYFQIGGQTISRLAPPWPLRETYD…	503	USER	zzzz324
617	genbank_anelloviridae_ASH99127.1_	genbank	MVRFYRRWHYRRRRPYTRRYYGRFRPWFRRHRWRKPRRVRRRRGYRKRGYVGPIVQWHPQHRSLCTIKGWGIGFYGVNTNTTTNFQSWNEKTQSLPGFYRVYGGGASLYHLTLDWLYEEHLKAHNIWSRSNEGFDLARYFGTRFYLVPHPTLDYVFWWQTDYGTLKKTDYQMLHPAIAITHKKHIIVKSIRNGGRRTKRVKIPPPSVHNTQWYFMKQWCGAGLLRFGFTPINLDTIFIKTGETKPWVPIGCSTAFKDPNSIPNLVPRATTENKNWYKYDWDNGIGNKIGYGQSSDKTNIRQISITPIDIPYWQYYFGQGWTNLNSNPDFYFFIWWYHDPFQDGNKFAPQDLTDKQKCWVWVGGIDNKTYPELIIPMVQKSPFAVSMGDLRGTNIFNLAF…	541	USER	zzzz325
616	genbank_anelloviridae_ASH99092.1_	genbank	MLLHSSVVLRLPELPAPLQMPWIPRSQWIRRHFGNYYGRARSFRRHYYQRPWFSRRRGYRYGRRRRLRARRLRVRKRWMVVRQTNPLVRRRCVIRGWMPALWCDRVSPFYRPMLVTGTLDKDMSGGWTLHELSLKNFYSEHRVHRNLWSQTNCGFDLARYHGTKITFWPHQTCDYIVWWDSDYGDIAEYKKMVKNVHPAILLNRRHVKLVLSVQTTRRFTPKTIYIKPPSRARNEWRTMKEFASFPLGLFAVSVIDFRYPFIPPGFTIWNPVANKQGWTPEISFYDINQSNKNKLTEEISGRDTFTLNQLWFNAGGSGRQPATKWVDEWPGWVGKEGNYNPVDKDTFVAVALGPFVKKEPSAECQIIATYRSYWTWGGDVLTRDETICDPETYDPKAGR…	511	USER	zzzz326
615	genbank_anelloviridae_ASH99076.1_	genbank	MDVSCGGENTGEEKMWNTRRSITRRRHFFRYRRRPRRPRHRYWPRRWRRWNHYKRHPRVHKEVLTEYTPRKQKRITCIGWEIMGCNGSSIKQWTSSNQLLLNYFTPNNKEVKYYQTMGMTNTNTNYQLHKVNWGDFQGGYGGAWFTFTTLLQRNRLGMNRFTDSFEGFDWIKYLGCRIQLIRAVEIDYLFRPDLRRAPSSQESADEAQNIHPANLLNFPFVKWVQSLKRSKCCKTISFKIHPPAEMIGWWGVETFMPKTLFGYQWTTIDPNNPLGMNPNTQISLNDGPINNEWLGADNKNIDTFCATWGNRTTWDNQFLDSVVPDGTYQKRDQTIPKNNKKPKHSPFCPPIIFCDFVNTFWFRYKFFFKVGGTNISRYPVRVPFTEINPPCNPQTCEAC…	455	USER	zzzz327
614	genbank_anelloviridae_ASH99079.1_	genbank	MPYRRRRRWPWRRHFVRYRRWRKPRKYWKRAWRRYRSRRSKVRTVVQVQPRRRKLLVVTGWEILGVQGSQISYRVTPGDDAESHIDIVNVAPSNKMVTYLHKMVPAAPSNQCTDQWIATDQRPTYWDFVGGFGKAKFDLQSLILRNLLGMNRFSENIRGYTHIKFLRMKFQLVRGPTVDYLFRLQMHRAPFDLEDGLIHPAHFINMPFVTWVESVARSKCCKMKVLRRRAPTDLTGWYDIETFRNYELVTYQWTVFDPNNPLGKNPRITKNKTWWDDSWMREKKTKKRITLNRTIEWANRVKYDQAFVKTIAENAGADDTDEPKPPNETNWWEWIFGTNSDTKGKNTPFLPSILPSSQVNTLWFRYKFYFQLGGSGISRDLQDWPIRETYDNNAPCTGG…	488	USER	zzzz328
613	genbank_anelloviridae_ASH99085.1_	genbank	MPYRRRYRRGYRRHFFRHRKWRRPRRHWRRAWRRYRRPRVRTVKQTQPRRITPLLVSGWEIMGIQGSQIDFVYNHDQTKWELHIKHIAPTNKEVKYLSLMVPENIQNTCSDVWRTTDIPKYWDFVGGYGEAKFDLQSLVLRNLLGMNRFSENIRGYSYIKYLGFSFQLIRAPTLDYLFRPQVHRAPYEWERPLIHPAVMLNMPFVKWVQSVERSNCCRSPTIKRRAGPDLSGWFDMEVFRNYELVSYQWSVFDPNNPMGRNTEPIKSEAKPFFDDSWMRPSKPNQKVGGATLNDRIRWQDRSQWDYTFVNNIENLTKKGTVWEWLWGNKQVDNTAKTTPFLPPIIESPVINTFWFRYRFKFLLGGSTMSRNLQQWPIRETNDDLKPCTGENTCPWCIGE…	478	USER	zzzz329
612	genbank_anelloviridae_ASH99089.1_	genbank	MYYRRRPYRRRRHFLHHRKRRYRRLWRRAHRRRGYYRRRRVSTIKQVNPRRRRLLVCTGWEILGQIGSQLKYTIKSDGKPQIDVLNPIPANKQVTYLSQMVPQGLENKCSDTWVMNIRDPSGMANKKGPTHWDFCGGWGYAKFDFQSLILRNLLGMNRFSESILTFTHIRFLKFKVQLVRGPSLDYLFRLQMHRGPQDWESPLIHPSHLINMPFVTWVESTKRSKCCRMKTLRRIATTDLSGWYDIESFRALELFSYQWTVFDPNNPLGKNPIIPKSNKKWWNDDWMRAMAGENKKISENRHLNWQDRTTYDQGFVKTIDPKKLNATQNFWDWVFTGFDTKNTAGKTTPFLPPIMPSEYVNTFWFRYKIYFQIGGQTISRNAPPWPLRETTDNTGKCMV…	491	USER	zzzz330
611	genbank_anelloviridae_ASA49069.1_	genbank	MAFRRRRYRRPRRPKWRGRRKHLYWRRKYYRGHRRWRRRGLYPRQRTATVRYYPSRRRKRISVRGWEPLGNVCPTDSARAEATPYIDLDKEDVDIFTTDSGSGGEGVGAQWHGQWGHHFFTFYSLLIRAKYYFNYWSSDWEGYDYLQFLGGYIWLPRMPSFSWMFYLDSSIQSNPKDQTTPENKYKFDKSWVHPGILLNRPGSRILLSTLQSRGRSLFRKMKVRPPAGWEGTYRMDVAQDFLLFHWSWTTVNLTSSFYDFYCQRKRDPTKTDSQCVANPWFMGEQKLYNHVQSFSEGNEAKKFSSKLKDNLAKFKNDSRSAWVNRKLYVKSDCKPNNARDDIPSNFHNWGPFLPQNVLFDLSFGNSVYFRYKLFFKVSGDSLYRRLPSVRCKDNVIPPC…	524	USER	zzzz331
610	genbank_anelloviridae_ASA49077.1_	genbank	MVYRRKRWRKPRRARWRSYRRRRYWRRYPYRHHGRRRRYFRRRTASVRYYPSRRRKRISVRGWEPLGNVCNIDDASSEASPYKDLDQIDWDPRKHDCSETDAGKWHGTWGHHFFTLRNLIYRARYYFNYWSSDWEGYDYVKFKGGYIWIPRMPYFSWLFYVDSSIQSNPKEGIPEDKYKFEKSWFHPGIFLNRPGSKLMLSTLQQPNRSFFRRIRVTPPSAWEGNYRMDAAMDYLLFHWAWSVCNVTASFFDFYCQRKRSSGAPDTCPQSPWFICEKSVWENANKSHSDKISVQTKVYENLDTHKEDPRAVWVNRKGYIKSDCANTDWSQNKIPANFHNWGPFLPQNVVLEHTTGNSIYFRYKLFFEVSGDSMFRRKPSQPCKDGVIPPAPGSESACPE…	519	USER	zzzz332
609	genbank_anelloviridae_ASA49065.1_	genbank	MAYRRRRRRAPRRSRWRHRRRPYYWRRYHRGYHRRRRRYPRLRTAQVRYYPSRRRKRISVRGWEPLGNICPTDSASAEATPYKDLDVPPYKVENTEQCKGQWHGQWGHHYFTFRSLLLRANYYFNYWSGDWEGYDYLSFKGGYIWLPRMPGFSWMFYLDPAIQSNPTEDEPEGKYKADKSWVHPGIFLNRPGARLMLSTLQSKGRNFYRKLKVTPPSNWEGNYRMDVAMDYLLIHWSWTTVNVTSPFYDFWCQNKAGRIDADQCNQCPWWIADKEFSKYRNESFMTGQGADKLYEEINKFHQDSRSAWVNRKKYIKSDCTNTGGKDKAPANFHNWGPFLPQNVLLSYQTGYSLYFRYKLYFKVSGDSLYRRLPSTPCTDTVFPPAPGTSKNPCPEISPR…	510	USER	zzzz333
608	genbank_anelloviridae_ASA49073.1_	genbank	MAYRRRRWRKPRRSRWRTYRRKRYWRRPHRRHWRRRRYIRPRTATVRYYPSRRRKRISVRGWEPLGNVCASDIASSEATPYIDLDMYDLSPINSQTGDFKGIWHGTWGHHFFTLRSLLIRAKYYFNYWSSDWEGYDYVKFLGGYIWIPRMTYFSWIFYLDSSIQSNPKEEGTPENKYKYEKSWLHPGILLNRPGSKLMISSLQQPNRPFYRRIRVTPPSAWEGNYRMDAAMDYLLFHWGWTTCNVTASFFDFYCQRKRSTTQNDTCPQTPWFIHDTCWDQHSSQNTAFQPIKEIYNNINKRHLDPRSVWVNRRMYIKSDCVNNPSATNQVAANCHNWGPFLPQNVILETSTGNSLYFRYKLFFEVSGDSLYRRQPSQPCKDGVIPPAPGAESACPEVST…	510	USER	zzzz334
607	genbank_anelloviridae_ASA49081.1_	genbank	MAYRRRRWRKPRRSRWRTYRRRRYWRRPHRRHWRRRRYIRPRTATVRYYPSRRRKRISVRGWEPLGNVCSSDIASSEATPYTDLDMYDLSPLEGDSGKFKGKWHGTWGHHFFTLRSLLVRAKYYFNYWSSDWEGYDYVKFKGGYIWIPRMTYFSWIFYLDSSIQSNPREDGEPEAKYKYEKSWLHPGILLNRPGSKLMISSLQQPNRPFYRRIKVTPPSAWEGNYRMDTAMDYLLFHWGWTVCNVTASFFDFYCQRKRSSTHNDTCPTTPWFIHDTCWNQGITANEAMKSIKELYNNINKRHLDPRSVWVNRKMYIKSDCVNTPSSTSVPSNCHNWGPFLPQNVILETSTGNSLYFRYKLFFEVSGDSLYRRQPSQPCKDGVIPPAPGAESACPEISTR…	509	USER	zzzz335
606	genbank_anelloviridae_ASA49041.1_	genbank	MVWRRKRRYRRPRRSRWRGRRRTLYWRRRHHWPYHRRRRYHRPRTATVRYYPSRRRKRISVRGWEPLGNICPGDAASAEATPYLDLDQEDFNIETANQSTGNNWGQWHGQWGHHFFTLRNLLLRAKYYFNYWSGDWEGYDYIAFKGGKIWLPRMPGFSWIFYLDPSVQSNPKEKESEMKYKFDTTWVHPGILLNRPGGRIMISTFQQPYRSFFRRLNVKPPSGWEGVYRIDLAMDFLLFHWSWTTCNLTSSFFDFYCQRKRNQGESINADKCTQRPWFMGEKAQWDQIGMHKTNGPYKIAHDTINNINMRKQDTRSAWVNRKRYIKSDCLNIAAISNTPANFHNWGPFLPQNVLIDANAGNSLYFRYKLYFKVSGDSLYRRLPSQPCKDAVIPPAPGSD…	520	USER	zzzz336
605	genbank_anelloviridae_ASA49053.1_	genbank	MAYRRRRYRRPRRSRYRGYRRRHYWRRRHGGRHRWWRRRSYRPRTATVRYYPSRRRKRISVRGWEPLGNVCAQDVASSEATPYNDLDMYDLDPRKSDCLDGNHGVWHGTWGHHYFTMRNLLIRAKYYFNYWSSDWEGYDYVSFKGGWIWIPRMPYFSWMFYADPMVQSNPKEGMPEAKYKFEKSWFHPGIFLNRPGAKLMLSSLQQPNRSFFRRIKIRPPSAWEGNYRIDVAMDYLLFHWAWTVTNVTASFFDFYCQRKRAQTATDTCPQTPWFICEKSNWDARTSWKADSSVKIAETNYNNIDARKEDPRSAWVNRKAYIKSDCVNTPIAQGKIPANFHNWGPFLPQNVVLEHTTGNSIYFRYKLFFEVSGDSIYRRKPSQPCTDGVIPSAPGSDYPC…	518	USER	zzzz337
604	genbank_anelloviridae_ASA49061.1_	genbank	MAIRRRRHRWPRRSRYRGRRKHFYRRRYPRYHRWRRRRHLRPRTASVRYYPSRRRKRISVRGWEPLGNICPTVPASVEAKPYLDLDVSERNIFDDTVTNSNWNGTWGHHFFTFNALLIRSKYYFNTWSSDWEGYDYLRFLGGKIWIPRMPGFSWMFGVDSSIQSNPKEGGPEDKYKWEKTWIHPGILFNRPGTRLMISTVQAHNRSFFRKLGVKPPAAWEGNYRMDVAKDFLLFHWYWSVCNITSSFYDFYCQRKKGKDGPDTCIQTPWFMGEKETWGHMQTWINQGKATNAKKLKENLDKRPYVDKRAAWVNRSLYEKSDCVNTPSAQTAIPSNFHNWGPFLPQSVLLDSSTGNSVYFRYKLYFEVSGDTLYRRLPSEPCKDSVIPPAPGTSMDPCPQ…	518	USER	zzzz338
603	genbank_anelloviridae_ASA49017.1_	genbank	MAIYRRRRYRHPRRSRWRGRRRGKYWRRKYYKRHYGRRRGYPRQRTAYVRYYPSRRRKRISVRGWEPLGNICPRDAASAEATPYMDLDVPEQDPKSTTACKGTWHGQWGHHFFTFRSLLTRARYYFNYWSSDWEGYDYLSFRGGYIWLPRMPAFSWMFYLDRSIQSNPKEDAPEAKYTSDKSWVHPGILLNRPGARIILSTLQSRGRSLYRKIKVTPPDGWEGNYRMDVAMDYLLFHWSWTTVNLTASFFDFYCQHKRQAEYTDQCEQCPWFMAEKTAWEEAQNKNYMNEDVKKVYDELAKYKVDPRSVWVNRKKYIRSDCGQPNSGAPGNFHNWGPFLPQNVLLSYANGNSIYFRYKLFFKVSGDNLYRRLPSWPCKDSVIPPAPGSKNNPCGDFSPR…	514	USER	zzzz339
602	genbank_anelloviridae_ASA49013.1_	genbank	MVWRRKRRWRKPRRSRWRGYRRRFYRRRFRRPHHRRRRYSHEPRTATVRYYPSRRRKRISVRGWEPLGNICPGDAASSEATPYIDLDELYVDIMKSDSKGQWHGQWGHHFFTLRNLLRRAKYYFNYWSADWEGYDYIQFRGGKIWLPRMPGFSWIFYLDPAIQSNPKEDPPERKYKSDTSWVHPGIFLNRPGARLMISTFQTCGRSFFRKLYVKPPAAWEGQYRIDYAMDYLLFHWSWTTCNLTSSFFDFYCQRQRSSKEATKQADKCTQAPWFMGEQKTWQAITTWGGGNPIYANIPKKVLTNINTNKQDPRSAWVNRKMYIKSDCVDAPAAQSAPSNFHNWGPFLPQNVLIDYVAGNSLYFRYKLWFKVSGDSLYRRLPSQPCKDQVIPPAPGTEEN…	518	USER	zzzz340
601	genbank_anelloviridae_ASA49029.1_	genbank	MAYRRRRYRRPRRSRYRGYRRRHYWRRRHGGRHRWWRRRSYRPRTATVRYYPSRRRKRISVRGWEPLGNVCAQDVASSEATPYNDLDMYELDPRTNSCAGTNHGIWHGTWGHHYFTMRNLLIRAKYYFNYWSSDWEGYDYVSFKGGWIWIPRMPYFSWMFYADPMVQSNPKEGMPEAKYKFEKSWFHPGIFLNRPGAKLMLSSLQQPNRSFFRRIKIKPPSAWEGNYRIDVAMDYLLFHWAWTVTNVTASFFDFYCQRKRAQTATDTCPQTPWFMCEKENWDARTSWRAESNVQIAENNYKNIDLRKEDPRSAWVNRKAYLKSDCINTPGAQGKIPANFHNWGPFLPQNVVLEHTTGNSIYFRYKLFFEVSGDSIYRRKPSQPCTDGVIPSAPGSEYPC…	518	USER	zzzz341
600	genbank_anelloviridae_ASA49045.1_	genbank	MVWRRKKRYRRPRRSRWRGRRRHQYWRRHHWPYRRRRRHYRHRTATVRYYPSRRRKRISVRGWEPLGNICPGDSASAEATPYLDLDQLDLPINTTTQTDTTKYGQWHGQWGHHFFTLRSLMLRAKYYFNYWSGDWEGYDYVQFLGGRIWLPRMPGFSWMFYLDPSIQSNPKEDAPEKKYKYDTSWVHPGIFLNRPGGRLMISTFQQPYRSFFRRINVKPPPGWEGVYRIDQALDYLLLHWSWTTCNLTSSFYDFYCQRKRQANGAKTADKCTQRPWFMGEKDQWDQISRLQKWNDAPFKMANDTINNINHLKQDTRAAWVNRKRYIKSDCTDSAAVSTVPSNFHNWGPFLPQNVLTDYVSGNSVYFRYKFWFKVSGDSLYRRLPSQPCKDAVIPPAPGT…	521	USER	zzzz342
599	genbank_anelloviridae_ASA49033.1_	genbank	MVWRRKRRWRKPRRSRWRGYRRRFYRRRFRRPHHRRRRYSHGPRTATVRYYPSRRRKRISVRGWEPLGNICPGDAASAEATPYMDLDEIFVDIMKSEAKGQWHGQWGHHFFTLRNLLRRAKYYFNYWSADWEGYDYVQFRGGKIWLPRMPGFSWIFYLDPAIQSNPKEDPPEKKYKSDTSWVHPGIFLNRPGARLMISTFQTCGRSFFRKLYVKPPAAWEGQYRIDYAMDYLLFHWSWTTCNLTSSFFDFYCQRQRSSKESSKQADKCTQAPWFMGEHKTWQTITTLGGGTTQYANIPKKVLTNINTNKQDPRSAWVNRKMYIKSNCVDVPAANSAPSNFHNWGPFLPQNVLIDYVAGNSLYFRYKLWFKVSGDSLYRRLPSQPCKDQVIPPAPGTEEN…	518	USER	zzzz343
598	genbank_anelloviridae_ASA49025.1_	genbank	MVWRRKKRYRKPRRSRWRGRRKHLYWRRRHHWPYRRRRRYHRHRTATVRYYPSRRRKRISVRGWEPLGNICPGDAACAEATPYKDLDEYEIDIETTEQSSNNKYGQWHGQWGHHFFTVRSLLLRAKYYFNYWSSDWEGYDYIQFRGGRIWLPRMPGFSWIFYLDPSIQSNPKESDPEPKYKYDTSWVHPGILLNRPGSRLMISTFQQPYKSFFRSLLVKPPSGWEGVYRIDQAMDYLLFHWSWSTCNLTSSFYDFYCQRRRQAKDSDPRRADKCTLRPWFMGEKDQWKQMGSFIQQGYAKMCKETLNIIRANKQDTRAAWVNRKKYIKSDCVDSAGENSAPSNFHNWGPFLPQNVLTDYVSGNSVYFRYKLWFKVSGDSLYRRLPSQPCKDAVIPPAPG…	522	USER	zzzz344
597	genbank_anelloviridae_ASA48921.1_	genbank	MARYWRRWRKRPRYGRRARFRSWRRFHHWGHRRRRYWRRWRHFRPRTAAVRYTPAKRHKILVVSGYEPLGNVCSQTRAMDEAKPYIVLDVPDMDDKVKNAAKNMKRPDGKGTEWSGTWGHHFFSFRQLVTRAQYYFANFSTDWRTYDYLQFLGGRIWLPRQMFFDWIFYIDYDLQDKTMTPEEMDKYKNSKTWFHPGILINRKGAKLVGSPHRFGLKTMFRKVYVRPPASWEGLFNLPSAMDYIFVHWAWTGIDLEQSFMDAWCVKNRTSGDNTTPCEEVPWFMGGIESMQPQVKEGDRRSDWVDREKYKKEPRICSNQGDSFMRWGPFLPWTFGFPYLQSRSIWFKYKFFFKLSGDSVYRRPPTESHADLVPRAPEHKNQVFSTQVPPRSILKRPLST…	461	USER	zzzz345
596	genbank_anelloviridae_ASA48957.1_	genbank	MVWRRKRRWRKPRRSRWRGYRRRFYRRRFRRPHHGRRRYRHGPRTATVRYYPSRRRKRISVRGWEPLGNICPGDAASAEATPYIDLDELYVDIMKKEAMGQWHGQWGHHFFTLRNLLRRAKYYFNYWSADWEGYDYIQFRGGRIWLPRMPGFSWIFYLDPAIQSNPKEDPPEKKYKSDTSWVHPGIFLNRPGARLMISTFQTCGRSSFRKLYVKPPAAWEGQYRIDYAMDYLLFHWSWTTCNLTSSFFDFYCQRQRSSKETSKQADKCIQAPWFMGEGKTWTALKSIGGTIPTYANIPKKMLENIHTNKQDPRSAWVNRKLYIKSNCVDAPAANGVPSNFHNWGPFLPQNVLIDYVAGNSLYFRYKLWFKVSGDSLYRRLPSQPCKDQVIPPAPGTEEN…	518	USER	zzzz346
595	genbank_anelloviridae_ASA48929.1_	genbank	MVFRKRRWRRPRRPRWRGRRKHLYKWRKRHWPNRRWRRRYHRPRTATVRYYPSRRHKLISVRGWEPLGNVCFNDIASSEATPYIDLDKSYLDPRKNTNNQTGKWSGTWGHHFFTFKNLLYRAQYYFNYWSSDWEGYDYISFRGGWIWIPRMPYFSWIFGIDRSIQSNPKDGGVENKYQNEKSWFHPGIFLNRPCSRLMISSVQQPNRSFFRKIRVTPPSAWEGNYRIDVGIDFLLFHWYWTICNMTSSFYDIYCQRKRQMSDDNPDTCPQVPWFISDPEWEKVKSDATNPIKDVYENITKNHYDPRSVWVDRKKYIKSDCVNTSQATTHVPSNFHNWGPFLPQNVILSGTTGNSLYFRYKLYFKVSGDTIYRRLPSKPCLNAVIPPAPGENQTGCPDFP…	513	USER	zzzz347
594	genbank_anelloviridae_ASA48913.1_	genbank	MALRRRRRWRWPRRRRWRGGRRHLYRRRFGRHRYNRRWRRRHFGLRTASVRYYPSRRRKRISVRGWEPLGNVCSSSIASHEAEPYKDLDVDERDPTTYDGSDSNWQGTWGHHFFTIESLLLRSKYYFNYWSSDWEGYDYISFKGGWIWIPRMPYVSWMFHVDNSIQSNPNEEKPEDKYKNEKTWIHPGILLNRPGSKLMLSTAQAEGRPFFRKLRVVPPSAWEGNYRVDQALKFLLFHWFWTTCNMTSPFFDYFCSKQGGSTKNNQTCMQTPWFIAEKNNWEKMTELGKTHKDSLLKLRSNFINTHQDLRGMWVYRKKYLKSNCVNTPDTGDAVPSNFHNWGPFLPQNVLTNQGYEFSLYFRYKLSFKVSGDTLYRRLPSQIPKKGGLIPPAPGVDDGT…	516	USER	zzzz348
593	genbank_anelloviridae_ASA49057.1_	genbank	MAIRRRRHRWPRRSRYRGRRRHLYWRRRRYPRWHRWRRRRHLRPRTATVRYYPSRRRKRISVRGWEPLGNVCPGIPASSEATPYKDLDVEALDIFDEDGTGQWQGTWGHHFFTFNALLRRSQYYFNTFSSDWEGYDYLRFLGGKIWIPRMPGFTWMFGVDSSIQSNPKESGPEEKYKWEKTWIHPGILLNRPGTKLMISTVQAHNRSFFRQIGVKPPAAWEGNYRMDVAKDFLLFHWYWTVCNMTSSFYDFYCQRKRLKDQPDQCVQRPWFMGEKTQWQNKSKFQPTTLAQRLHDNLEKRSYIDKRAAWVNRTLYEKSDCTNTPQTTSHIPGNFHNWGPFLPQSVLLDIATGNSLYFRYKLFFEVSGDTLYRRLPSHPCKDSVIPPAPGTSDDPCPQVS…	516	USER	zzzz349
592	genbank_anelloviridae_ASA48953.1_	genbank	MVLRRKRRWRRPRRSRWRSYRRRRYYRKHHWPYRRRRRSFRPRTATVRYYPSRRRKRISVRGWEPLGNICPGDAASAEATPYIDLDEDEIRITERSCSDTTKCGQWHGQWGHHFFTLRNLLRRAKYYFNYWSADWEGYDYIQFKGGKIWLPRMPGFSWMFYLDPAIQSNPKEDPPEKKYKSDTSWVHPGIFLNRPGARLMISTFQTQGRNFFRRLGVKPPAIWEGNYRIDMAMDYLLFHWSWTTCNLTSSFFDFYCQRRRGKEGREADKCTQTPWFMGEKDTYSKVKAARSESVAAIDKMLERIDKQHADQRSAWVNRKIYIKSDCVDTPSSTNNIPSNFHNWGPFLPQIVLFDYEAGGSVFFRYQLDLEIAGASNYCGLPSQPCKDQVIPGAPGSEDD…	518	USER	zzzz350
591	genbank_anelloviridae_ASA48925.1_	genbank	MAYRRRRYRRPRRSRYRGYRRRHYWRRRHGGRHRWWRRRSYRPRTATVRYYPSRRRKRFSVRGWEPLGNVCAQEVASSEATPYNDLDTYDLDPRKGACNSENAGIWHGTWGHHYFTLRNLLIRAKYYFNYWSSDWEGYDYVSFKGGWLWIPRMPYFSWMFYADPMVQSNPKEGMPEAKYKFEKSWFHPGIFLNRPGAKLMLSSLQQPNRSFFRRIKIKPPSAWEGNYRIDVAMDYLLFHWAWTVTNLTASFFDFYCQRKRAQTANDTCPQTPWFICEKENWDNLDNWHIESAAKIAKENYTNIDKRKEDPRSAWVNRKAYVKSDCVNTPNATGKIPANFHNWGPFLPQNVVLEHTTGNSIYFRYKLFFEVSGDSIYRRKPSQPCSDGVIPSAPGADYPC…	518	USER	zzzz351
590	genbank_anelloviridae_ASA48977.1_	genbank	MAYRRRRWRKPRRSRWRTYRRNRYWRRPHRRHWRRRRYLRPRTATVRYYPSRRRKRISVRGWEPLGNVCSSDIASSEATPYTDLDMYDLSPLDNNTDKFKGKWHGTWGHHFFTLRSLLVRAKYYFNYWSSDWEGYDYVKFKGGYIWIPRMTYFSWIFYLDSSIQSNPREDGEPEAKYKYEKSWLHPGILLNRPGSKLMISSLQQPNRPFYRRIKVTPPSAWEGNYRMDTAMDYLLFHWGWTVCNVTASFFDFFCQRKRSATYNDTCPTTPWFIHDTCWNQGTTTNDSMKSIKDVYDRIHSRHLDPRSVWVNRKMYIKSDCVNTPNSTSVPSNCHNWGPFLPQNVILETSTGNSLYFRYKLFFEVSGDSLYRRQPSQPCTNGVIPPAPGAESACPEISTR…	509	USER	zzzz352
589	genbank_anelloviridae_ASA48965.1_	genbank	MVWRRKKRFRRPRRSRWRGRRRHQYWRRHHWPYRRRRRHYRHRTATVRYYPSRRRKRISVRGWEPLGNICPGDSASAEATPYLDLDQLDLPINTTDQKDATKFGQWHGQWGHHFFTLRSLMLRAKYYFNYWSGDWEGYDYVQFLGGRIWLPRMPGFSWMFYLDPSIQSNPKEDAPEKKYKYDTSWVHPGIFLNRPGGRLMISTFQQPYRSFFRRLNVKPPPGWEGVYRIDQALDYLLLHWSWTTCNLTSSFYDFYCQRRRQAGAGKQADKCTQRPWFMGEKEQWDAIQKIQKWSDPPFKMAQDTINNINTLKQDTRAAWVNRKRYLKSDCADVAAASTVPANFHNWGPFLPQNVLTDYVSGNSVYFRYKFWFKVSGDSLYRRLPSQPCKDAVIPPAPGT…	521	USER	zzzz353
588	genbank_anelloviridae_ASA48969.1_	genbank	MPLRKRRWRKPRRSRWRGRRRKFYWRRYHRPYRRWRRRHHRPRTASVRYYPSRRRKRISVRGWEPLGNVCPTTIAASEATPYIDLDREDYDIFKDQQSDNHGKWEGSWGHHFFTFRSLLHRSRYYFNYWSGDWEGYDYVAFLGGWIWLPRMPYFSWMFYLDSSIQSNPKQDDPEKKYQSEKSWVHPGILLNRPGARLMLSTAQSAGRSFFRRQRVRPPAAWEGNYRIDVARDFLLFHWSWTTCNMTSSFYDFYCQRKRMQTHTDTCPQVPWFMGEGVTWNKVMTIPNASWAQPLKDFQSTLAAFKADSRSAWVLRKNYIKSDCVNTDAASATHAPSNFHNWGPFLPQNVVLDTSTGQSIYFRYKLYFKVSGDTLYRRLPSTPCKGSVIPPAPGFKDGPC…	501	USER	zzzz354
587	genbank_anelloviridae_ASA48949.1_	genbank	MVLRRKRRWRRPRRSRWRGYRRRRYYRKHHWPYRRRRRSFRPRTATVRYYPSRRRKRISVRGWEPLGNICPGDAASAEATPYIDLDEDEIRLKDRDCGDPTKCGQWHGQWGHHFFTLRNLLRRAKYYFNYWSADWEGYDYIQFKGGKIWLPRMPGFSWMFYLDPAIQSNPKEDPPEKKYKSDTSWVHPGIFLNRPGARLMISTFQTQGRNFFRRLGVKPPAIWEGNYRIDMAMDYLLFHWSWTTCNLTSSFFDFYCQRRRGKDGREADKCTQTPWFMGEKDTYAKVKAANSTSINAIDNLLERIDKQHADQRSAWVNRKLYVKSDCVDTPSAHNILPSNFHNWGPFLPQNVLIDYVAGNSVYFRYKLYFKVSGDSLYRRLPSQPCKDQVIPGAPGSEDD…	518	USER	zzzz355
586	genbank_anelloviridae_ASA48973.1_	genbank	MVWRRKKRYRKPRRSRWRGRRKHLYWRRRHHWPYRRRRRYHRHRTATVRYYPSRRRKRISVRGWEPLGNICPGDAACAEATPYKDLDEYEIDIETTEQSSNNKYGQWHGQWGHHFFTVRSLLLRAKYYFNYWSSDWEGYDYIQFRGGRIWLPRMPGFSWIFYLDPSIQSNPKESDPEPKYKYDTSWVHPGILLNRPGSRLMISTFQQPYKSFFRSLLVKPPSGWEGVYRIDQAMDYLLFHWSWSTCNLTSSFYDFYCQRRRQARDNDPRRADKCTLRPWFMGEKDQWDQMGQFLQEGYAKMCKETLDIIRANKQDTRAAWVNRKKYIKSNCVDSAGADSAPSNFHNWGPFLPQNVLTDYVSGNSVYFRYKLWFKVSGDSLYRRLPSQPCKDAVIPPAPG…	522	USER	zzzz356
585	genbank_anelloviridae_ASA49049.1_	genbank	MVWRRKKRYRKPRRSRWRGRRKHLYWRRRHHWPYRRRRRYHRHRTATVRYYPSRRRKRISVRGWEPLGNICPGDAASAEATPYKDLDEYEIDIENTDQSSSNKYGQWHGQWGHHFFTVRSLLLRAKYYFNYWSSDWEGYDYIQFRGGRIWLPRMPGFSWIFYLDPSIQSNPKESDPEPKYKYDTSWVHPGILLNRPGSRLMISTFQQPYKSFFRSLLVKPPSGWEGVYRIDQAMDYLLFHWSWSTCNLTSSFYDFYCQRRRQARENDPRKADKCTQRPWFMGEKDQWSQMGKFITDGYAKMCKDTLNIIRMNKQDTRAVWVNRKKYIKSDCIDTAAKDNAPSNFHNWGPFLPQNVLTDYVSGNSVYFRYKLWFKVSGDSLYRRLPSQPCKDAVIPPAPG…	522	USER	zzzz357
584	genbank_anelloviridae_ASA48961.1_	genbank	MAYRRRRWRKPRRSRWRTYRRRRYWWRRRGHRRPHYGRRRHFRPRTATVRYYPSRRRKRISVRGWEPLGNVCAIDSASSEATPYLDLDQYDLPPTTSDSNMQKFKGIWHGTWGHHFFTLRSLLIRAKYFFNYWSSDWEGYDYVKFRGGFIWLPRMPYFSWMFYLDSSIQSNPKEGIPEDKYKYEKTWIHPGIFLNRPGAKLMLSSLQAPNRTFFRRIRVRPPAAWEGNYRMDAAMDYLLFHWAWTTVNVTASFYDFYCQRKRSSGAGDSCPLAPWFIHDQNWNQMQNNNAVQAIKDVYDRINKFHYDPRSVWVNRKAYLKSDCASAPSMSHIPANFHNWGPFLPQNVVLETSTGNSIYFRYKLFFEVSGDSLYRRQPSQPCKDGVIPPAPGAESACPEI…	513	USER	zzzz358
583	genbank_anelloviridae_ASA48905.1_	genbank	MVFRKRRWRRPRRPRWRGRRKHLYKWRKRHWPHRRWRRRYHRPRTATVRYYPSRRSKLISVRGWEPLGNVCFNDVASSEATPYIDLDKGYLDPTTNSGKDGKWSGTWGHHFFTFKNLLYRAQYYFNYWSSDWEGYDYISFRGGWIWIPRMPYFSWIFGIDRSIQSNPKDGGVENKYQNEKSWFHPGIFLNRPCSRLMISSVQQPNRSFFRKIRVTPPSAWEGNYRIDVGIDFLLFHWYWTICNMTSSFYDIYCQRKRQMSEDNPDTCPQTPWFIADTCWNNLKSTAKEPIKNIYDNIKKNHYDPRSVWVDRKKYIRSDCVNTNQAASHVPSNCHNWGPFLPQNVILSGTTGNSLYFRYKLYFKVSGDTIYRRLPSKPCLNAVIPPAPGENQTGCPDFPS…	512	USER	zzzz359
582	genbank_anelloviridae_ASA48861.1_	genbank	MAYRRRRRRAPRRSRWRHRRRVYYWRKYRRHHYGRRRRYPRLRTATVRYYPSRRRKRISVRGWEPLGNICPKDGASAEATPYNDLDVPSYNITNSCPNKAQWHGQWGHHFFTFRSLLERSKFYFNYWSGDWEGYDYLSFRGGYVWLPRMPGFSWMFYLDPAIQSNPKEPEPEDKYKADKTWVHPGIFLNRPGARLILSSLQSKGRNFYRKMKIRPPSAWEGNYRMDAAMDYLLFHWAWTTCNVTSPFYDFYCQRKAGQTSDMCEQPPWFMCDQNWDQYKDKEWAAPAKDIYNNIDKFHQDKRAAWVNRKKYLKSDCANTDYNKNAGPGNTHNWGPFLPQNVLLSYSNGYSLYFRYKLFFKVSGDSLYRRLPSYPCKDTVIPPAPGSKDNPLPRNIACSI…	508	USER	zzzz360
581	genbank_anelloviridae_ASA48849.1_	genbank	MVFRKRRWRRPRRPRWRGRRKHLYKWRKRHWPHRRWRRRYHRPRTATVRYYPSRRRKRISVRGWEPFGNVCFNDIASSEATPYIDLDKSYLDPRQNTDNQTGKWSGTWGHHFFTFKNLLYRAQYYFNYWSSDWEGYDYISFRGGWIWIPRMPYFSWIFGIDRSIQSNPKDGGVENKYQNEKSWFHPGIFLNRPCSRLMISSVQQPNRSFFRKIRVTPPSAWEGNYRIDVGIDFLLFHWYWTICNMTSSFYDIYCQRKRQMSEDNPDTCPQVPWFISDPSWNTVKAAAKNPIKDVYENITKNHYDPRSVWVDRKKYIKSDCVNTTQATSHVPSNFHNWGPFLPQNVILSGTTGNSLYFRYKLYFKVSGDTIYRRLPSKPCLNAVIPPAPGENQTGCPDFP…	513	USER	zzzz361
580	genbank_anelloviridae_ASA48889.1_	genbank	MAIRRRRRRWPRRPRWRGRRKHLYRRRWRPPRRHFRRKEIFRTTNCYVRKYPSRRRKRISVRGWEPLGNVCYNTVASSEATPYNDLDITDPNIFTRAGSSLQGQWQGQWGHHFFTFENLLRRAQYYFNYWSGDWQGYDYLSFKGGYIWLPRFPAISWIFYLDNSIQSNPMDQEPEGKYKFEKSWVHPGILLNRPGSRLMINILQQPYKSLFRRIKVRPPAAWEGQYRMDVAKNFLLFHWAWTTCILSAPFFDYYCSRKGPEESKDTCILRPWFMGCKETFERFAHDSDKQKINRLKEQIEKDHTDSRALWVNRKYYLKSDCVPVPNATNKNPANFFNWGPFLAQNILTSPAYEASIYFRYKLFFKVSGDSLYRRLPSKDCDNGLFPPAPGFKDGPCTEV…	512	USER	zzzz362
579	genbank_anelloviridae_ASA48885.1_	genbank	MARYWRRWKRRPRYGRRARFRSWRRFRHWGHRRRRYWRRWRHFRPRTAAVRYTPAKRHKILVVSGYEPLGNVCSQTRAMDEAKPYRVLDVPDMDDNVKDTAAKMKRDGGPSTEWSGTWGHHFFSFRQLVTRAQYYFANFSTDWRTYDYLQFLGGRIWLPRQMFFDWIFYIDYDLQDKTITPDDMDKYKNSKTWFHPGILINRKGAKLVGSPHRFGLKTMFRKVYVRPPASWEGLFNLPSAMDYIFVHWAWTGIDLEQSFMDAWCVKNRTSSDNTTPCEEVPWFMGGIATMQPQVKEGDRRSDWVDREKYDKRTRTCTNQGDSFMRWGPFLPWTFGFPYLQSRSIWFKYKFFFKLSGDSVYRRPPTESHADLVPRAPEHKNQVFSTQVPPRSILKRPLST…	461	USER	zzzz363
578	genbank_anelloviridae_ASA48845.1_	genbank	MVWRRKKRYRRPRRSRWRGRRRHQYWRRHHWPYRRRRRHYRHRTATVRYYPSRRRKRISVRGWEPLGNICPGESASAEATPYLELDELELPINTTNQKEASKYGQWHGQWGHHFFTLRALMLRAKYYFNYWSGDWEGYDYVQFLGGRIWLPRMPGFSWMFYLDPSIQSNPKEDAPEKKYKYDTSWVHPGIFLNRPGSRLMISTFQQPYRSFFRRLNVKPPPGWEGVYRIDQALDYLLLHWSWTTCNLTSSFYDFYCQRRRQPSQGKNADKCTQRPWFMGEKDQWDSISSLQIWTDPPFKMAQETINNINQLKQDTRAAWVNRKRYLKSDCTDAAAASTVPSNFHNWGPFLPQNVLTDYVSGNSVYFRYKFWFKVSGDSLYRRLPSQPCKDAVIPPAPGT…	521	USER	zzzz364
577	genbank_anelloviridae_ASA48841.1_	genbank	MAYRRRRRRKPRRSRWRSYRRKRYWRRPHRRHWRRRRYFRPRTATVRYYPSRRRKRISVRGWEPLGNVCAADIAASEATPYLDLDQYDLNPLDADSGKFKGQWHGTWGHHFFTLRSLLLRAKYYFNYWSSDWEGYDYLKFRGGYIWIPRMPYFSWIFYLDSSIQSNPKDDIPENKYKFEKSWLHPGILLNRPGSRLMLSSLQQPSKSFYRKLKVTPPSAWEGNYRMDAAMDYLLFHWGWTVCNVTASFYDFFCQRKRVQGAPDVCPQTPWFIHDSSWEKHKDQEALGPAKQIYNNIDRFHNDRRAQWVNRRLYVKSDCANTEQAVGKIPSNFHNWGPFLPQNVILETSTGNSLYFRYKLFFEVSGDSLYRRLPSQPCKDGVIPPAPGGESACPEISTIP…	508	USER	zzzz365
576	genbank_anelloviridae_ASA48937.1_	genbank	MAYRRRRYRRPRRSRYRGYRRRHYWRRRHGGRHRWWRRRSYRPRTATVRYYPSRRRKRFSVRGWEPLGNVCAQEVASSEATPYNDLDMYDLDPRRSDCTGDNHGIWHGTWGHHYFTLRNLLIRAKYYFNYWSSDWEGYDYVSFKGGWLWIPRMPYFSWMFYADPMVQSNPKEGMPEAKYKFEKSWFHPGIFLNRPGSKLMLSSLQQPNKSFFRRVKIRPPSAWEGNYRIDVAMDYLLFHWAWTVTNVTASFFDFYCQRKRTQTATDTCPQTPWFICEKGSWDKRSTYNNGSVKIAEKNYENIDSRKEDPRSAWVNRKSYLKSDCVNTDQANGKIPANFHNWGPFLPQNVVLEHTTGNSIYFRYKLFFEVSGDSIYRRKPSQPCNDGVIPSAPGAEYPCP…	517	USER	zzzz366
575	genbank_anelloviridae_ASA48873.1_	genbank	MAYRRRRYRRPRRSRYRGYRRRHYWRRRHGGRHRWWRRRSYRPRTATVRYYPSRRRKRISVRGWEPLGNVCAQEVASSEATPYNDLDMYDLDPRISDCSGTNHGIWHGTWGHHYFTMRNLLIRAKYYFNYWSSDWEGYDYVSFKGGWIWIPRMPYFSWMFYADPMVQSNPKEGMPEAKYKFEKSWFHPGIFLNRPGAKLMLSSLQQPNRSFFRRIKIKPPSAWEGNYRIDVAMDYLLFHWAWTVTNVTASFFDFYCQRKRAQTATDTCPQTPWFICEKSNWEARHKWNADENIKPAQTNYENIDKRKEDPRSAWVNRKAYLKSDCVNTPGASGKIPANFHNWGPFLPQNVVLEHTTGNSIYFRYKLFFEVSGDSIYRRKPSQPCSDGVIPSAPGSDYPC…	518	USER	zzzz367
574	genbank_anelloviridae_ASA48821.1_	genbank	MARYWRRWRKRPRYGRRARFRSWRRFHHWGHRRRRYWRRWRHFRPRTAAVRYTPAKRHKILVVSGYEPLGNVCSQTRAMDEAKPYIVLDVPDMEDKVKKAAETMKRSESTSTEWSGTWGHHFFSFRQLVTRAQYYFANFSTDWRTYDYLQFLGGTIWLPRQMFFDWMFYIDYDLQDKTMTPEEMDKYKNSKTWFHPGILINRKGAKLVGSPHRFGLKTMFRKVYVRPPASWEGLFNLPSAMDYIFVHWAWTGIDLEQSFMDAWCVKNRTSNDMTTPCEEVPWFMGGIDSMQPQVKEGDRRSDWVDREKYNKDQRQCSNKADSFMRWGPFLPWTFGFPYLQSRSIWFKYKFFFKLSGDSVYRRPPTESHADLVPRAPEHKSQVFGTQVPPRSILKRPLST…	461	USER	zzzz368
573	genbank_anelloviridae_ASA48829.1_	genbank	MVFRKRRWRRPRRPRWRGRRKHLYKWRKRHWPHRRWRRRYHRPRTATVRYYPSRRSKLISVRGWEPLGNVCFNDTASSEATPYIDLDKGYLDPETNTSQDSKWSGTWGHHFFTFKNLLYRAQYYFNYWSSDWEGYDYISFRGGWIWIPRMPYFSWIFGIDRSIQSNPKDGGVENKYQNEKSWFHPGIFLNRPCSRLMISSVQQPNRSFFRKIRVTPPSAWEGNYRIDVGIDFLLFHWYWTICNMTSSFYDIYCQRKRQMTDDNPDTCPQTPWFIADTNWNKLKADAKTPIKDVYENIKKNHYDPRSVWVDRKKYIKSDCVNTNQAQTHVPSNCHNWGPFLPQNVILSGTTGNSLYFRYKLYFKVSGDTIYRRLPSKPCLNAVIPPAPGENQTGCPDFPS…	512	USER	zzzz369
572	genbank_anelloviridae_ASA48757.1_	genbank	MVFRKRRWRRPRRPRWRGRRKHLYRWRKHHWPHRRWRRRYHRPRTATVRYYPSRRSKLISVRGWEPLGNVCFNDTASSEATPYMDLDKGYLDPESNESSAGKWSGTWGHHFFTFKNLLYRAQYYFNYWSSDWEGYDYISFRGGWIWIPRMPYFSWIFGIDRSIQSNPKDGGVENKYLNEKSWFHPGIFLNRPCSRLMISSVQQPNRSFFRKIRVTPPSAWEGNYRIDVGIDFLLFHWYWTICNMTSSFYDIYCQRKRQMSEDNPDTCPQTPWFIADTNWKKLKSEAKNSIRDIYDNIKKNHYDPRSVWVDRKKYIKSDCVNTNQATNAVPSNCHNWGPFLPQNVILSGTTGNSLYFRYKLYFKVSGDTIYRRLPSKPCLNAVIPPAPGENQTGCPDFPS…	512	USER	zzzz370
571	genbank_anelloviridae_ASA48801.1_	genbank	MVWRRKRRWRKPRRSRWRGYRRRFYRRRFRRPHHRRRRYSHGPRTATVRYYPSRRRKRISVRGWEPLGNICPGDAASAEATPYIDLDELFVDIMTTEAKGQWHGQWGHHFFTLRNLLRRAKYYFNYWSADWEGYDYIQFRGGKIWLPRMPGFSWIFYLDPAIQSNPKEDPPEKKYKSDTSWVHPGIFLNRPGARLMISTFQTCGRSFFRKLYVKPPAAWEGQYRIDYAMDYLLFHWSWTTCNLTSSFFDFYCQRQRSSKENTKQADKCMQAPWFMGEHKTWESITKLGVTPDYANIPKKVLTNINTNKQDPRSAWVNRKMYIKSNCVDAPAASNVPSNFHNWGPFLPQNVLIDYVAGNSLYFRYKLWFKVSGDSLYRRLPSQPCKDQVIPPAPGTEKNP…	517	USER	zzzz371
570	genbank_anelloviridae_ASA48765.1_	genbank	MARYWRRWRKRPRYGRRARFRSWRRFHRWGHRRRRYWRRWRHFRPRTAAVRYTPAKRHKILVVSGYEPLGNVCSTTRAMDEAKPYRVLDVPDMDQKVKTTAQAMKRNGNGSTEWSGTWGHHFFSFRQLVTRAQYYFANFSTDWRTYDYLQYLGGRIWLPRQMFFDWIFYIDYDLQDKTITPEDMDKYKNSKTWFHPGILINRKGAKLVGSPHRFGLKTMFRKVYLRPPASWEGLFNLPSAMDYIFVHWAWTGIDLEQSFMDSDAVKHITKDQIETVKPCEGVPWFWGGIESKQPAADGYDPRAAWVDREKYNCKDRRNYTGVMDSFARWGPFNPYTYGFPYGQSRSLWFKYRFYFKLSGDSVYRRPPTEGSEDLIPKAPGEKKNDRPRDEVPPRSILKR…	465	USER	zzzz372
569	genbank_anelloviridae_ASA48805.1_	genbank	MLHRKRRWRRPRRPRWRGRRKHLYRWRKYHRPHWRRRRRYFRPRTAAVRYYPSRRRKRISVRGWEPLGNVCFGETASTEATPYDDLDLNYLDVENNAASKGKWHGTWGHHFFTFKNLIYRAQYYFNYWSSDWEGYDYISFRGGWIWIPRMPYFSWIFGLDPSIQSNPKNPGVETKYSNEKSWFHPGIFLNRPGSRLMISSVQQPNRSFFRKIRVTPPSAWEGNYRIDQGIDFLLFHWYWTVCNMTSSFYDIYCQRKREKIDDEHPDTCPTAPWWIADKDFKSLNDTLKGPSKDVYTNIKKNHYDPRSVWVDRRKYIKSDCTNSSLGNKVPSNTHNWGPFLPQNVILSSTTGNSLYFRYKLYFKVSGSSIYRRLPSKPCSTAVIPPAPGENQQDCPDFPS…	511	USER	zzzz373
568	genbank_anelloviridae_ASA48745.1_	genbank	MAFRKRRWRRPRRPRWRGRRKHLYRRRRYHWPHRRWRRRHFGLRTATVRYYPSRRRKRISVRGWEPLGNVCFGDDASSEATPYLDLDQNYINPLNYNPKGKWNGQWGHHFFTIRNLLYRSQYYFNYWSSDWEGYDYISFKGGYIWIPRMPYFSWMFGLDPSIQSNPKQPESDAKYTNEKTWFHPGIFLNRPGTKLMLSSSQQPNRPFFRRMRVVPPSAWEGNYRVDQGMDFLLFHWYWSTCNMTSSFFDIYCQRKRNMDTGSDTCPQVPWFIDDRGFKNLQEDKKGKAKEVYNRINTFKYDPRSVWVDRQLYLKSDCVNTSSQVSHIPSNTHNWGPFLPQNVILSSTTGNSLYFRYKLFFKVSGESIYRRLPSRPCETAVIPPAPGADPKDCPDFPPRS…	506	USER	zzzz374
567	genbank_anelloviridae_ASA48741.1_	genbank	MAFYRRKRLRRPRRSRWRGNRRHLYWRRRGHTRHYGRRRRWYPRQRTATVRYYPSRRRKRISVRGWEPLGNICPSDAASAEATPYKDLDEPEQDPTKTDGCKGKWNGQWGHHFFTFRALLTRAKYYFNYWSGDWEGYDYLQFKGGYIWLPRMPAFSWMFYLDSSIQSNPLEDEPEGKYKADKSWVHPGILLNRPGSRIVLSTLQSRGRSLYRRIHVRPPAGWEGVYRLDLAMDYLLFHWSWTTCNLTSSFFDFYCQNKRERTYADQCEQCPWFMAEKTEWQKHSSEPWFQPCKEIYNNINKYKGDPRSAWVNRKKYIKSDCGNTSTTDRVPGNFHNWGPFLPQNVLLSYSNGNSLYFRYKLYFKVSGDSLYRRLPSWPCNKTVIPPAPESQDNPLPIDT…	512	USER	zzzz375
566	genbank_anelloviridae_ASA48725.1_	genbank	MAIYRRRRWRRPRRSRWRGGRRYLYWRRYGHHRRYRRWRRGHYRSRTANVRYYPSRRRKRISVRGWEPLGNVCATNFAANEATPYMDLDKDESDPTKEEKCDGSWSGTWGHHFFTLQSLLIRSKYYFNYWSSDWAGYDYISFKGGWIWIPRMPYISWMFMVDSSIQSNPLEKEPEAKYKNEKSWVHPGILLNRPGSKLMLSTAQAEKKPFFRKIKVKPPSAWEGNYRVDQAFQFLLFHWIWTICNMTSPFYDYFCSRQSGSGKHTQTCGECPWFIAEKGAWDKMTQSGQTYENQLKKLYSNIINTHEDPRSMWVYRQKYIQSKCINTPSSSEGPSNFHNWGPFLPQNVLTGSAYEFSLYFRYKLFFKVSGDTVYRRLPTKLPKKGGTIPAAPGADDGTG…	515	USER	zzzz376
565	genbank_anelloviridae_ASA48677.1_	genbank	MAIYRRKRIRRYRRPRWRGRRKHLYWRRKHYRRHYGRRRRYPRQRTATVRYYPSRRRKRISVRGWEPLGNICAQDSAESEATPYKDLDVEDNDIFKNDSEGNGQWHGQWGHHFFTFRSLLMRSKYYFNYWSGDWEGYDYLSFLGGWIWLPRMPSFSWMFYLDNSIQSDPKEDGPEEKYKNEKSWVHPGILLNRPGSKLMISTFQYKHGSFFRKLRVRPPASWEGNYRMDVGKDFLLFHWSWTTVNLTASFFDFFCQKKRVAQHTPDTCIASPWFMGEKTLFDRIQSGKELQCKTNSKQLQQNLALDKADTRSAWVNRKLYVKSDCEGRDDVQKCPPNFHNWGPFLPQNVLLDYSFGNSVYFRYKLFFKVSGDSLYRRLPNQPCSKSTIPPCPGYTNPSC…	517	USER	zzzz377
564	genbank_anelloviridae_ASA48701.1_	genbank	MAYRRRRYRRPRRSRYRGHRRRHYWRRRHGGRYRRWRRRSYRPRTATVRYYPSRRRKRISVRGWEPLGNVCAQDVASSEATPYNDLDMYDLDPRKSDCSGENHGIWHGTWGHHYFTLRNLLIRAKYYFNYWSSDWEGYDYVSFKGGWLWIPRMPYFSWMFYADPMVQSNPKEGMPEAKYKFEKSWFHPGIFLNRPGAKLMLSSLQQPNRSFFRRIKIRPPSAWEGNYRIDVAMDYLLFHWAWTVTNVTASFFDFYCQRKRAQTANDTCPQTPWFICEKGSWDNRSKYNNGSVKIAEQNYVNIDARKEDPRSAWVNRKAYLKSDCVNTDTASGKIPANFHNWGPFLPQNVVLEHTTGNSIYFRYKLFFEVSGDSIYRRKPSQPCSDGVIPSAPGSEYPCP…	517	USER	zzzz378
563	genbank_anelloviridae_ASA48729.1_	genbank	MARYWRRWKRRPRYGRRARFRSWRRFRHWGHRRRRYWRRWRHFRPRTAAVRYTPAKRHKILVVSGYEPLGNVCSQTRAMDEAKPYLVLDVPDMDDKVKNTAKKMQRDGEKSTEWSGTWGHHFFSFRQLVTRAQYYFANFSTDWRTYDYLQFLGGRIWLPRQMFFDWIFYIDYDLQDKTMTPEEMDRYKNSKTWFHPGILINRKGAKLVGSPHRFGLKTMFRKVYVRPPASWEGLFNLPSAMDYIFVHWAWTGIDLEQSFMDAWCVKNRTSTDGTTPCEEVPWFMGGIENIQPQVKEGDRRSDWVDREKYNKETRQCTTQGDSFMRWGPFLPWTFGFPYLQSRSIWFKYKFFFKLSGDSVYRRPPTESHADLVPRAPEHKDHVFSTQVPPRSILKRPLST…	461	USER	zzzz379
562	genbank_anelloviridae_ASA48717.1_	genbank	MAYRRRRWRKPRRSRWRTYRRKRYWRRPHRRHWRRRRYIRPRTATVRYYPSRRRKRISVRGWEPLGSVCASDLASSEATPYVELEMYELSPLEENTGNFKGIRHGTWGHHFFTLRSLLIRAKYYFNYRSSEWEGYDYVKFLGGYIWIPRMTYFSRIFYLDSSIQSNPKEEGIPENKYKYEKSWLHPGILLNRPGSKLMISSLQQPNRPFYRRIRVTPPSAWEGNYRMDAAMDFLLFHWGWTTCNLTASFFDFFCQRKRSSTQNDTCPQTPWFIHDTCWSKKSSQNAAFFPIKEIYNNINKRHLDPRSVWVNRRMYIKSDCVNNPSATNQVAANCHNWGPFLPQNVILETSTGNSLYFRYKLFFEVSGDSLYRRQPSQPCKDGVIPPAPGAESACPEVST…	510	USER	zzzz380
561	genbank_anelloviridae_ASA48673.1_	genbank	MVFRKRRWRRPRRPRWRGRRKYLYKWRKRHGPHRRWRRRYHRPRTATVRYYPSRRSKIISVRGWEPLGNVCFNDTASSEATPYIDLDKGYLDPTENSGEDGKWSGTWGHHFFTFKNLLYRAQYYFNYWSSDWEGYDYISFRGGWIWIPRMPYFSWIFGIDRSIQSNPKDGGVENKYLNEKSWFHPGIFLNRPCSRLMISSVQQPNRSFFRKIRVTPPSAWEGNYRIDVGIDFLLFHWYWTICNMTSSFYDIYCQRKRQMTEDNPDTCPQTPWFIADTCWKQLKSEAKNSIKDVYDNIKKNHYDPRSVWVDRKKYLKSDCVNTNQATSHVPSNCHNWGPFLPQNVILSGTTGNSLYFRYKLYFKVSGDTIYRRLPSKPCLNAVIPPAPGENQTGCPDFPS…	512	USER	zzzz381
560	genbank_anelloviridae_ASA48669.1_	genbank	MAIYRRRRWRRPRRSRWRGGRRHLYWRRYGHHRRYRRWRRGYYRPRTANVRYYPSRRRKRISVRGWEPLGNVCSTDFAANEATPYVDLDKDESDPTLVEKCDGIWHGTWGHHFFTLESLLIRSKYYFNYWSSDWAGYDYISFKGGWIWIPRMPYISWMFLVDSSIQSNPTEREPEDKYKNEKSWVHPGILLNRPGARLMLSTAQAEKKPFFRKLRVKPPSAWEGNYRVDQAFQFLLFHWLWTICNMTSPFYDYFCSRQQGAQKHTQTCIECPWFIAEKNTWDKQTEQGKPNKEKLEKLRSNIINNHQDPRSMWVYRKAYLQSKCLNTPASAEPPANFHNWGPFLPQNVLTGSAYEFSLYFRYKLSFKVSGDTVYRRLPSKLPKKGGTIPPAPGADDGTG…	515	USER	zzzz382
559	genbank_anelloviridae_ASA48697.1_	genbank	MAFRKRRWRRPRRPRWRGRRKHLYRRRRYHWPHRRWRRRHFGLRTATVRYYPSRRRKRISVRGWEPLGNVCFGDDASSEATPYLDLDQNYIDPLNYTPKGKWNGQWGHHFFTVRNLLYRSQYYFNYWSSDWEGYDYISFKGGYIWIPRMPYFSWMFGLDPSIQSNPKQQESDAKYTNEKTWFHPGIFLNRPGTKLMLSSSQQPNRPFFRRLRVIPPSAWEGNYRVDQGMDFLLFHWFWSTCNMTSSFFDIYCQRKRSMDSGADTCPQVPWFIDDRGFKVLPDDKKGKAKEVYNRINTFKYDPRSVWVDRQLYLKSDCVNTQSQTSHIPSNTHNWGPFLPQNVILSSTTGNSLYFRYKLFFKVSGESIYRRVPSRPCETGGIPPAPGEGPKDCPDFPPRS…	506	USER	zzzz383
558	genbank_anelloviridae_ASA48593.1_	genbank	MPLRKRRWRRPRRSRWRGRRRKFYWRRYHRPYRRWRRRHHRPRTASVRYYPSRRRKRISVRGWEPLGNVCPTTIASSEATPYIDLDKEDYDIFKDPQSGDHGKWEGSWGHHFFTFRSLLHRSRYYFNYWSGDWEGYDYVAFLGGYIWLPRMPYFSWIFYLDSSIQSNPKQDDPEKKYQSEKSWVHPGILLNRPGARLMLSTAQSAGRGFFRKQRVRPPAAWEGNYRIDVARDFLLFHWSWTTCNMTSSFYDFYCQRKRMQTHNDTCPQVPWFMADQNWNKVKGTLSTAAWAKPLENLDDRIYSYKADTRSAWVLRKLYIKSDCVNTPSSDQAPSNFHNWGPFLPQNVILDSSTGQSIYFRYKLYFKVSGDTLYRRLPSTPCKGSVIPPAPGFKDGPCPE…	501	USER	zzzz384
557	genbank_anelloviridae_ASA48613.1_	genbank	MAYRRKRWRKPRRSRWRSYRRNRYWRRPHRRHWRRRRYFRPRTATVRYYPSRRRKRISVRGWEPLGNVCAADSASSEATPYTDLDMYDLPPTDDNTDKWKGIWHGTWGHHFFTLRSLLVRAKYYFNYWSSDWEGYDYVKFKGGYIWIPRMTYFSWIFYLDSSIQSNPKETGEPEAKYKYEKSWLHPGILLNRPGSKLMISSLQQPNRPFYRRIKVTPPSAWEGNYRMDTAMDYLLFHWGWTVCNVTASFFDFYCQRKRNQTANDQCPTTPWFIHDTCWKEGPTMPEGLKPIRDIYNNINKRHIDPRSVWINRKMYIKSDCTNTPNAVNKIPGNCHNWGPFLPQNVILDTITGNSLYFRYKLFFEVSGDSLYRRQPSQPCADGVIPPAPGADSACPEVST…	510	USER	zzzz385
556	genbank_anelloviridae_ASA48589.1_	genbank	MVFRRRRYRRPRRPRWRGKRRKFYRRRKFHRRHWHRRGLYPRQRSSTVRYYPSRRRKRISVRGWEPLGNVCPADSASVEATPYIDLDMDSVDIFNTNSGSGGNAAQWHGQWGHHFFTFHSLLNRSKYFFNYWSSDWEGYDYLSFLGGYIWLPRMPSFSWMFYLDTSIQSNPKDETIPENKYKYEKSWVHPGIMLNRPGSKILLSTLQSRGRSLFRRISVRPPAGWEGSYRMDVAHDYLLFHWSWTTVNLTSSFYDFYCQRKKGKDDPDQCIANPWFMGEKATYDSVQSWSADHGQAKKNSNQLRNNLNKFHFDSRAAWINRKLYVKADCSTTVGNNKVPGNFHNWGPFLPQNVLFDLSFGNSIYFRYKLFFKVSGDSLYRRQPSTRCKDGVIPPCPGYT…	520	USER	zzzz386
555	genbank_anelloviridae_ASA48625.1_	genbank	MAFYRRKRLRRPRRSRWRGKRRHLYWRRRGHTRHYGRRRRWYPRQRTSTVRYYPSRRRKRISVRGWEPLGNIRPSDSASAEATPYKDLDEPEQDPTESECKGQWHGQWGHHFFTFRALLTRAKYYFNYWSGDWEGYDYLQFKGGYIWLPRMPAFSWMFYLDSSIQSNPTEEEPEGKYKADKSWVHPGILLNRPGSRIVLSTLQSRGRSLYRRINVRPPAGWEGVYRLDVAMDYLLFHWSWTTCNLTSSFFDFYCQNKREASYADQCQQCPWFMAEKTAWQKDSQMPWFSSYKDIYNNIDKYHGDRRSAWVNRKKYIKSDCGNTSTTNKVPGNFHNWGPFLPQNVLLSYHNGNSLYFRYKLYFKVSGDSLYRRLPSWPCKKTVIPPAPGTSSADNPLPID…	513	USER	zzzz387
554	genbank_anelloviridae_ASA48597.1_	genbank	MAYRRRRRRAPRRSRWRHRRRVYYWRKYRRHHYGRRRRYPRLRTAPVRYYPSRRRKRISVRGWEPLGNICPKDSARAEATPYKDLDIEPYNVTTDNCRGQWHGQWGHHYFTFRSLLLRASYYFNYWSGDWEGYDYLSFKGGYLWLPRMPGFSWMFYLDPAIQSNPREEEPEGKYKADKTWVHPGIYLNRPGARLILSTLQSRGRNFYRRMKIRPPSAWEGNYRMDAAMDYLLFHWSWSTCNVTSPFYDFYCQNKNGQNADQCEQCPWFIHDPQFDTLKTKKYMAEAKNIYDKINEYNHDQRAAWVNRKKYVKSDCSNTAGTVDLAPGNFHNWGPFLPQNVLLSYQTGYSVYFRYKLFFQVSGDCLYRRLPSAPCKNTVFPPAPGTTENPCGKIQARSIL…	507	USER	zzzz388
553	genbank_anelloviridae_ASA48645.1_	genbank	MAIRRRRRRWPRRSRWRGRRKYLYRRRWRPHRRHFRRKEISRTTNCYVRYYPSRRRKRISVRGWEPLGNVCYNTVASSEATPYNDLDITDPNIFTRKGTQLQGQWQGQWGHHFFTFENLLRRAQYYFNYWSGDWQGYDYLSFRGGYIWLPRLPAVSWIFYLDNSIQSNPTDKEPEGKYKFEKSWVHPGILLNRPGSRLMVNILQQPYKSLFRRIRVRPPAAWEGQYRMDVAKSFLLFHWAWTTCILSAPFFDYYCSRKGPETAKDTCILRPWFMGCAETYEKFKHTEDKQKIEKLKQQVEKDHTDTRALWVNRKHYLKSDCVAIPDATDKNPSNFFNWGPFLAQNILTGPAYEASVYFRYKLFFKVSGDSLYRRLPSKDCDNGLFPPAPGFKDGPCAEV…	512	USER	zzzz389
552	genbank_anelloviridae_ASA48641.1_	genbank	MAIRRRRHRWPRRSRYRGRRKHLYRRRYPRYHHWRRRRRFRPRTASVRYYPSRRRKRISVRGWEPLGNVRLGVPAPKEAKPYTELEVEEQNTFEKEGNGNWEGTWGDHFFTFNALLRRSQYYFNVFSADREGYDYLRVLGGKIWIPRMPGFSWMFGVDSSIQSNPKDQDPEDKYKWEKTWVHPGILLNRPGTRLMISTVQAHNRPFFRKLGVKPPSAWEGNYRMDVAKDFLLFHWYWTVCNMTSSFYDFYCQRKRLRDAPDQCIQTPWFVGEKTTFENLAKYGDAANPAKKLKENLDKRSYIDKRAAWVNRSLYVKSDCANTPQSTSHLPGNFHNWGPFLPQSVLLDVATGNSLYFRYKLFFEVSGDTLYRRLPSHPCKDSVIPPAPGTSDDPCPQVSS…	515	USER	zzzz390
551	genbank_anelloviridae_ASA48605.1_	genbank	MVFRKRRWRKPRRSRWRGKRRRYYWRRRHHWPHKWRRRHHRPRTASVRYYPSRRRKRISVRGWEPLGNICPGDSACAEATPYNDLDMDEYDITTVDQQQGNNWGQWHGQWGHHFFTMRNLLRRSQYYFNYWSGDWEGYDYLRFMGGTIWLPRMPGFSWLFYLDKSIQSNPRESDPEPKYKSDKTWVHPGILFNRPGAKLMISTFQAQNRVFFRKLKVTPPAAWEGNYRLDVAMDFLLFHWSWTVCNLTSSFFDFYCQKKRTTSETSRADKCTQRPWFMGEKEVWERVQGQSFANIPKEFMDRLKAEKKDSRAAWVYRQAYIKSDCTDTDKAVDKAPANFHNWGPFLPQNVLYDYYAGNSLYFRYKLWFKVSGDSLYRRLPSKPCKGSVIPPAPGAKDGL…	517	USER	zzzz391
550	genbank_anelloviridae_ASA48617.1_	genbank	MAYRRRRWRKPRRSRYRAHRRRYYFWRRRHGGRYRRWRRRSYRPRTASVRYYPSRRRKRISVRGWEPLGNVCASDIASSEATPYDDLDQYYQDPTTTTGGQAKGIWHGTWGHHYFTLRNLLIRSKYYFNYWSSDWEGYDYVSFKGGWIWIPRMPYFSWMFYADPMIQSNPKDEMPEAKYKFEKSWFHPGIFLNRPGARLMLSSLQQPNKSFFRKIRVRPPSAWEGNYRIDVAMDYLLFHWAWTVTNVTASFFDFYCQRKRAVTSTDTCPQTPWFIQEAETWSQKTKYAKDEVNKITKVYENVKKQHEDPRSMWVYRQGYTKSDCVNTPLAEGKIPANFHNWGPFLPQNVVLEHTTGNSIYFRYKLFFEVSGDSIYRRRPSQPCTDGVIPPAPGADSACP…	516	USER	zzzz392
549	genbank_anelloviridae_ASA48997.1_	genbank	MAYRRRRRRYPRRSRWRGRRRPFYWRKYRRSHYGRRRRPHRFRTATVRYYPSRRRKRISVRGWEPLGNICPTDAASSEATPYLDLDVPDYDVTKCNGGHTPKGKWNGQWGHHFFTFKSLLYRAAYYFNYWSGDWQGYDYLQFKGGSIWLPRMPGFSWIFYLDPSIQSNPTEDVPEDKYKVDKTWVHPGIFLNRPGARIILSTLQSKGRSFYRRMKIKPPPGWEGTYRIDLAMNYLLFHWSWTTCNLTSPFYDFYCQNKNGKEADQCSQIPWWICDTNFEQYKHRHTKIAEKIYENINKYKEDTRSVWVNRKLYVKSDCSNTPSGDNTPGNWHNWGPFLPQNVLLSYQTGYSLYFRYKLYFKVSGDSVYRRKPSQPCDKAVFAPAPGTSDNPCSEVQTRS…	509	USER	zzzz393
548	genbank_anelloviridae_ASA48657.1_	genbank	MVWRRKRRWRKPRRSGWRGYRRRFYRRRFRRPHHGRRRYRHGPRTATVRYYPSRRRKRISVRGWEPLGNICPGDAASAEATPYIDLDELYVDIMKNEAKGQWHGQWGHHFFTLRNLLRRAKIYFNYWSADWEGYDYIQFRGGKIWLPRMPGFSWIFYLDPAIQSNPKEDPPEKKYKSDTSWVHPGIFLNRPGARLMISTFQTCGRSFFRKLYVKPPAAWEGQYRIDYAMDYLLFHWSWTTCNLTSSFFDFYCQRQRSSKEATKQADKCIQAPWFMGENKTWQAITSLGQTPAYANIPKQMLQNIHTNKQDPRSAWVNRKLYIKSNCVDAPAAGSAPSNFHNWGPFLPQNVLIDYVAGNSLYFRYKLWFKVSGDSLYRRLPSQPCKDQVIPPAPGTEENP…	517	USER	zzzz394
547	genbank_anelloviridae_ASA48989.1_	genbank	MLHRKRRWRRPRRPRWRGRRKHLYRWRKYHRPHWRRRRRYFRPRTAAVRYYPSRRRKRISVRGWEPLGNVCFGDSASSEATPYDDLDQNYVDVENNQHPQGKWHGTWGHHFFTFKNLIYRAQYYFNYWSSDWEGYDYISFRGGWIWIPRMPYFSWIFGLDPSIQSNPKNPGVETKYTNEKSWFHPGIFLNRPGSRLMISSVQQPNRSFFRKIRVTPPSAWEGNYRIDQGIDFLLFHWYWTVCNMTSSFYDIYCQRKREKIDDEHPDTCPTTPWWIADKDFKSLSDILKGPAKDVYENIKKNHYDPRSVWVDRRKYIKSDCTNSSSGNKVPSNTHNWGPFLPQNVILSSTTGNSLYFRYKLYFKVSGSSIYRWLPSRPCSTAVIPPAPGENQQDCPDFPS…	511	USER	zzzz395
546	genbank_anelloviridae_ASA48881.1_	genbank	MAYRRRRWRKPRRSRWRTYRRRRYWWRRRGHRRPHYGRRRHFRPRTATVRYYPSRRRKRISVRGWEPLGNVCAIDSASSEATPYLDLDQYDLPPTTSDSHMQKFKGIWHGTWGHHFFTLRSLLIRAKYFFNYWSSDWEGYDYVKFRGGSIWLPRMPYFSWMFYLDSSIQSNPKEGIPEDKYKYEKTWIHPGIFLNRPGAKLMLSSLQAPNRAFFRRIRVRPPAAWEGNYRMDAAMDYLLFHWAWTTVNVTASFYDFYCQRKRSSGAGDSCPLAPWFIHDQNWDQMQNNDAVRPISDVYSRIAKFHYDPRSVWVNRKAYLKSDCATAPSSSHIPANFHNWGPFLPQNVILETSTGNSKYFRYKLFFQVSGNSLYRRQPSQPCKDGVIPPAPGAESACPEI…	512	USER	zzzz396
545	genbank_anelloviridae_ASA48993.1_	genbank	MAFRRKRFRKPRRSRWRNWRRPRYWWRRRHRGRHFRRRRYHRPRTATVRYYPSRRRKRISVRGWEPLGNVCSSDIASSEATPYKDLDQPFYYPWERSPNNTDSGKWHGTWGHHFFTMRSLLRRASYYFNYWSSDWEGYDYVQFRGGNIWIPRMPYFSWIFYLDKSIQSNPKNMEEPESKYIYEKSWLHPGILLNRPGSRLMLSSLQQPNRSFYRKIKVIPPAAWEGNYRMDTAMDYLLFHWGWTVCNVTASFFDFWCQRKRSSGAPDTCPQTPWFIADKDTFDKVNQWWNNDAAYQLPKNEVENIKKRKVDGRAVWVYRGNYIKSDCANAPANNSIPSNFHNWGPFLPQNVVLEHTTGNSLYFRYKLYFKVSGDSLYRRLPNQPCKDGVIPPAPGKDDP…	511	USER	zzzz397
544	genbank_anelloviridae_ASA48585.1_	genbank	MAYRRKRKRAPRRSRWRYRRRPYYWRKYHRGYHRRRRRYPRLRTAQVRYYPSRRRKRISVRGWEPLGNICPKDSAKAEATPYLDLDFPIGKISEGQCGSKGQWHGQWGHHFFTFRSLLERSKFYFNYWSGDWEGYDYLSFKGGYVWLPRMPGFSWMFYLDPSIQSNPKEPEPEDKYKADKTWVHPGIFLNRPGARIILSSLQSKGRSFYRKMKVRPPSAWEGEYRMDSAMDYLLMHWSWTTCNLTSPFYDFYCQWKNGNNVDMCEQTPWFMCDKNFEQYKDKPWAIEAKDIYDNINSFHQDQRSAWVNRKKYLKSDCSTTDHNQNKAPGNTHNWGPFLPQNVLLSFSNGYSLYFRYKLFFKVSGDSLYRRLPSVPCKDTVIPPAPGTKDNPCPQIQARS…	509	USER	zzzz398
543	genbank_anelloviridae_ASA48557.1_	genbank	MAIYRRRRWRRPRRSRWRGGRRYLYWRRYGHHRRYRRWRRGHYRSRTASVRYYPSRRRKRISVRGWEPLGNLCTNDTASSEATPYDDLDKLASDPRTGDCEQTKGIWHGTWGHHFFTMENLLIRSKYYFNYWSSDWEGYDFMQFLGAHIWLPRMPFVDWIFGADSSIQSNPNETGPEAKYKNEKSWFHPGILLNRPGSKLMLSTAKAQKKPFYRHLYVKPPSNWEGVHRMDQGIRYLLFHWYWTVCNLTSPFFDFYCARTKPQGPEVCISTPWFICEKTMWEQARSFFNQNAELKKAEQTYNRIDAHKQDPRAVWVNRGTYLKSDCAAAPSISHIPANFHNWGPFLPQNVITDRTYQSSFYFRYKIYFKVSGDTVYRRLPSTPCKDAVIPGAPGYNDQN…	516	USER	zzzz399
542	genbank_anelloviridae_ASA48573.1_	genbank	MAYRRRRRRYPRRSRWRGRRRPYYWRRYRRSHYGRRRRPHRFRTATVRYYPSRRRKRISVRGWEPLGNICPKDSASAEATPYLDLDVPDYDVVKCGTNHNLKGQWHGQWGHHFFTFKSLLYRAAYYFNYWSGDWQGYDYLQFKGGSIWLPRMPGFSWMFYLDPSIQSNPTEDVPEDKYKVDKTWVHPGIFLNRPGSRIILSTLQSKGRSFYRRMKIKPPPGWEGTYRIDLAMNYLLFHWSWTTCNLTSPFYDFYCQNKNGKDVDTCEQPPWWICDTAFEKYKEKQSKKAAQIYENINKYHEDTRSVWVNRKLYVKSDCSNNPVGDLTPANWHNWGPFLPQNVLLSYQTGYSLYFRYKLYFKVSGDSVYRRKPSQPCDKAVFAPAPGTSDNPCSEVQTRS…	509	USER	zzzz400
541	genbank_anelloviridae_ASA48489.1_	genbank	MAYRRRRWRKPRRSRWRSYRRNRYWRRPHRRHWRRRRYIRPRTATVRYYPSRRRKRISVRGWEPLGNVCSSDIAASEATPYTDLDMYDLSPLENDTSKFKGKWHGTWGHHFFTLRSLLVRAKYYFNYWSSDWEGYDYVKFKGGYIWIPRMTYFSWIFYLDSSIQSNPREDGEPEAKYKYEKSWLHPGILLNRPGSKLMISSLQQPNRPFYRRIKVTPPSAWEGNYRMDTAMDYLLFHWGWTVCNVTASFFDFFCQRKRSATHNDTCPTTPWFIHDTCWKQGITANASMQSIKEVYNRINTRHLDPRSVWVNRKMYIKSDCVNTPDATNVPSNCHNWGPFLPQNVILETSTGNSLYFRYKLFFEVSGDSLYRRQPSQPCKDGVIPPAPGAESACPEISTR…	509	USER	zzzz401
540	genbank_anelloviridae_ASA48537.1_	genbank	MVYRRKRWRRPRRSRWRSYRRRRYWRRYPYRHHGRRRRYFRRRTASVRYYPSRRRKRISVRGWEPLGNVCNVDDASSEASPYKDLDQIDWDPRKHDCNESEAGKWHGTWGHHFFTLRNLIYRARYYFNYWSSDWEGYDYVKFKGGYIWIPRMPYFSWLFYVDSSIQSNPKEGMPEEKYKFEKSWFHPGIFLNRPGSKLMLSTLQQPNRSFFRRIRVTPPAAWEGNYRMDAAMDYLLFHWAWSVCNVTASFFDFYCQRKRASGSPDTCPQSPWFICEKSTWENALKSHSDKIGVQKKVYENLDTHKEDPRAVWVNRKGYIKSDCANTDWAANKVPANFHNWGPFLPQNVVLEHTTGNSIYFRYKLFFEVSGDSMFRRKPSQPCKDGVIPPAPGSESACPE…	519	USER	zzzz402
539	genbank_anelloviridae_ASA48565.1_	genbank	MVFRRRRYRRPRRSRWRGKRRTRYWWRKYHRGHRRWRRRGLYPRQRTATVRYYPSRRRKRISVRGWEPLGNVCPSDSARTEATPYLDLDKDSVDIFSENSGSGSNGASWHGQWGHHFFTFYSLLIRAKYYFNYWSSDWEGYDYLQFLGGYLWLPRMPSFSWMFYLDSSIQSNPKDQSIPENKYKYDKSWVHPGILLNRPGSRILLSTLQSRGRSLFRKMKVRPPAGWEGTYRMDAAQDYLLFHWSWTTVNLTSSFYDFYCQRKRDPSKTTSQCIANPWFMGEKETFEAVQNRSQDNEAKKYSKQLQENLNKWKVDSRAAWVNRALYIKSDCSSATGQDDKLPGNFHNWGPFLPQNVLFDLSFGNSVYFRYKLYFKVSGDSLYRRLPSVRCKDNVIPPCP…	521	USER	zzzz403
538	genbank_anelloviridae_ASA48501.1_	genbank	MAYRRRRWRKPRRSRWRTYRRKRYWRRPHRRHWRRRRYIRPRTATVRYYPSRRRKRISVRGWEPLGNVCASDIASSEATPYIDLDMYDLSPLESNSNLFKGQWHGTWGHHFFTLRSLLIRAKYYFNYWSSDWEGYDYVKFLGGYIWIPRMTYFSWIFYLDSSIQSNPKDEGTPENKYKYEKSWLHPGILLNRPGSKLMISSLQQPNRPFYRRIRVTPPSAWEGNYRMDAAMDYLLFHWGWTVCNVTASFFDFFCQRKRSSTQNDTCPQTPWFIHDTCWDKKSSQNAAFDPIKNIYENINKRHLDPRSVWVNRRMYIKSDCVNNPNATNQVAANCHNWGPFLPQNVILETSTGNSLYFRYKLFFEVSGDSLYRRQPSQPCKDGVIPPAPGADSACPEVST…	510	USER	zzzz404
537	genbank_anelloviridae_ASA48533.1_	genbank	MAYRRRRWRKPRRSRYRAHRRRYYFWRRRHGGRYRRWRRRSYRPRTASVRYYPSRRRKRISVRGWEPLGNVCASDIASSEATPYDDLDQYYQDPTQTSGNQAKGIWHGTWGHHYFTLRNLLIRSKYYFNYWSSDWEGYDYVSFKGGWIWIPRMPYFSWMFYADPMIQSNPKDEMPEAKYKFEKSWFHPGIFLNRPGARLMLSSLQQPNKSFFRKLRVRPPSAWEGNYRIDVAMDYLLFHWAWTVTNVTASFFDFYCQRKRVSTANDTCPQTPWFIQEAETWAEKTKFSQAEVTKIQKVYENVKKQGEDPRSMWVYRKGYTKSDCVNTPNATGKIPANFHNWGPFLPQNVVLEHTTGNSIYFRYKLFFEVSGDSIYRRRPSQPCKDGVIPPAPGADSACP…	516	USER	zzzz405
536	genbank_anelloviridae_ASA48545.1_	genbank	MVFRKRRWRRPRRPRWRGRRKHLYKWRKHHWPHRRWRRRYHRPRTATVRYYPSRRRKRISVRGWEPLGNVCFNDIASSEATPYIDLDKSYLDPRKNASSETGKWSGTWGHHFFTFKNLLYRAQYYFNYWSSDWEGYDYISFRGGWIWIPRMPYFSWIFGIDRSIQSNPKDGGVENKYQNEKSWFHPGIFLNRPCSRLMISSVQQPNRSFFRKIRVTPPSAWEGNYRIDVGIDFLLFHWYWTICNMTSSFYDIYCQRKRQMTDDNPDTCPQVPWFISDPEWEKVKANAKNPIMDVYDNITKNHYDPRSVWVDRKKYIKSDCANTGQATSHVPSNFHNWGPFLPQNVILSGTTGNSLYFRYKLYFKVSGDTIYRRLPSKPCLNAVIPPAPGENQTGCPDFP…	513	USER	zzzz406
535	genbank_anelloviridae_ASA48497.1_	genbank	MVFRKRRWRKPRRSRWRGKRRKYYWRRRHHWPHKWRRRHHRPRTASVRYYPSRRRKRISVRGWEPLGNICPGDSASAEATPYNDLDMDEYDITTVNQQEGTKWGQWHGQWGHHFFTMRNLLRRSQYYFNYWSGDWEGYDYLRFMGGTIWLPRMPGFSWLFYLDKSIQSNPREPDPEPKYKSDKTWVHPGILFNRPGSKLMISTFQAQNRVFFRKMKVTPPAAWEGNYRLDVAMDFLLFHWSWTVCNLTSSFFDFYCQKKRTTSETSKADKCTQRPWFMGESEVWEKVQQQTYAKIPKEFMERLSAEKKDSRAAWVYRQAYIKSDCTDTEKAIDKAPANFHNWGPFLPQNVLYDYYAGNSLYFRYKLWFKVSGDSLYRRLPSKPCKGSVIPPAPGAKNGP…	517	USER	zzzz407
534	genbank_anelloviridae_ASA48523.1_	genbank	MVWRRKKRYRRPRRSRWRGRRRHQYWRRHHWPYRRRRRRYRPRTAPVRYYPSRRRKRISVRGWEPLGNICPGDSASAEATPYLDLDQLDLPINTTIQTDTTKYGQWHGQWGHHFFTLRSLMLRAKYYFNYWYGDWEGYDYVQFLGGRIWLPRMPGFSWMFYLDPSIQSNPKEDAPEKKYKYDTSWVHPGIFLNRPGSRLMISTFQQPYRSFFRRLNVKPPPGWEGVYRIDQALDYLLLHWSWTTCNLTSSFYDFYCQRKRQAGQGKQADKCTQRPWFMGEKDQWDAISKLQKKSDAPFKIAQDTINNINTLKQDTRAAWVNRKRYLKSDCADVAAESTVPSNFHNWGPFLPQNVLTDYVSGNSVYFRYKFWFKVSGDSLYRRLPSQPCKDAVIPPAPGS…	521	USER	zzzz408
533	genbank_anelloviridae_ASA48481.1_	genbank	MAYRRRRWRKPRRSRWRTYRRKRYWRRPHRRHWRRRRYIRPRTATVRYYPSRRRKRISVRGWEPLGNVCASDIASSEATPYVDLDMYDLSPIGQNDGQYKGIWHGTWGHHFFTLRSLLIRAKYYFNYWSSDWEGYDYVKFLGGYIWIPRMTYFSWIFYLDSSIQSNPKEEGTPENKYKYEKSWLHPGILLNRPGSKLMISSLQQPNRPFYRRIRVTPPSAWEGNYRMDAAMDYLLFHWGWTTCNVTASFFDFFCQRKRQSTQNDTCPQTPWFIHDSCWNQKNSQNQAFEPIKEIYNNINKRHLDPRSVWVNRRMYIKSDCVNNPSATNQVAANCHNWGPFLPQNVILETSTGNSLYFRYKLFFEVSGDSLYRRQPSQPCKDGVIPPAPGAESACPEVST…	510	USER	zzzz409
532	genbank_anelloviridae_ASA48525.1_	genbank	MAFRRRRYRRYRRPKWRGRRRKLYWRRYHRRYRHRRRRGLYPRQTKTSSVRYYPSRRRKRISVRGWEPLGNICPADSASAEATPYIDLDQDSVDIFNVNSGTGGDGVGAQWHGQWGHHFFTFHSLLNRAKYFFNYWSSDWEGYDYLEFKGGYIWLPRMPSFSWMFYLDTSIQSNPKDMTIPENKYKYEKSWIHPGILLNRPGSKIMLSTLQSKGRSLFRRIKVRPPAGWEGSYRMDVAQDYLLFHWSWTTVNLTSSFYDFYCQRKRQSGAPDQCVANPWFMGEKATFDEIQGWTEDHGSAKNFSKKLQENLNKFKFDSRAAWINRKLYVKSDCSEKPSSKRVPGNFHNWGPFLPQNVLFDLSFGNSVYFRYKLFFKVSGDSLYRRLPSTRCKDGVIPPC…	524	USER	zzzz410
531	genbank_anelloviridae_ARA91703.1_	genbank	MPYYRRRRRRRPTRRRRRRIWRRYFRYRYRRPYRRRRYKVRRRRRRKAPVIQWFPPDRRTCTITGFWPLSYGHWFRTCLPFRRHNGLVFTGGGIDYTQWSLQNLYHEKLNWRNIWTSSNVGMEYARFRKGKFYFFRHEWRSYIVTWDQDIPCKPMPYTNLHPLLMLLKKQHKLVLSKRDCNPSKKARPVTLRIKPPPKLTSQWRLSRELAKMPLVRLGFSFIDISEPWLEGWGNAFYSLLGYEAPYQQGRYTNWAQCRYFWIYDTGVGNAVYVILLKDNIGDNAGDMAQKYGTTPTGGQNAISEIEKINEGWPYWLYFFGRSELDIKSYATNTQIKNEFHENPNSQKIKIGIIGWASSNLTEQNSTQSPGSPQRIQSSYVTYHGGNIVIGAGAISNLYE…	627	USER	zzzz411
530	genbank_anelloviridae_ARA91700.1_	genbank	MPYRRYRRRRRRPTRRWRHRRWRRYFRAWHRRPTRRRRYRKVRRRRIKKAPVIQWFPPTIRNCFIKGIWPLSYGHWLRTCLPMRKENGLIFLGGGIDWTVWTLQNLYNEKLNWRNVWTASNDGMEFARFRYAKFKFFRHEFRSYVVTWDQDIPCKPLPYTNLHPMVMLLKKQHKVVLSKQECNPRKKDRPVTLKIRPPPKLTSQWRLSRELAKIPLLRLGFSLIDFKEPWLEGYGNAFYSTLGYEAHANQSKTSEWCQIKYYWIYDSGVGNHVYVVMLTNDAEDNPGNLASSNNSISHIEQIGEGYPYWLFFFGRSERDLKALATTNVNIRNEFNQNPNSKKLKIAVIGWVSSNNTAADSSQGRSTPIQSSYRISHVLQNSGHSGGAAAIDNLYANGWP…	620	USER	zzzz412
529	genbank_anelloviridae_ARA91697.1_	genbank	MPYRRYRRRRRRPTRRRRRRIWRRYFRYRYRRPYRRRGYKVRRRRRRTAPVIQWFPPARRTCTITGFWPLSYGHWFRTCLPFRRHNGLVFTGGGIDYTQWTLQNLFHEKLNWRNIWTSSNVGMEYARFKKGKFYFFRHEWRSYVITWDQDIPCKPFPYSNLHPFLMLLKKQHKLVLSKKDCDPRKKGKPVTLRFKPPTKLTSQWRLSRELAKLPLIRLGFSFIDIDEPWVEGWGNAFYSLLGYEAQYQQGKNCEWTQIRYFWVYDTGVNNAVYVILLKKDIGSNAGDLAKQAETDGGQNMIQSIEKVNEGFPYWIYFFGRSELDIKSYATETQIRNEYNRDPHSKKLKIGVIGWASSNFTAQDSTQSQGNPQKIQANYVSYHGGGIIPGAGMITDLYNS…	624	USER	zzzz413
528	genbank_anelloviridae_ARA91694.1_	genbank	MPFRRYRRRRRRPTRRWRRRRWRRYFRYWHRRPTRRRRYHKVRRRRVKRAPVIQWFPPTIRNCYIKGIWPLSYGHWLRTCLPMRKENGLIFLGGGIDWTVWSLQNLYHEKLNWRNIWTASNDGMEFARFKYAKFKFFRHEFRSYIVTWDQDIPCKPLPYTNLHPFLMLLKKQHKVILSKQECNPRKKDKPVILKIKPPPKLTSQWRLARELTKMPLLRLGISLIDFKEPWVEGFGNAFYSTLGYEADWSSSDRSEYCQIKYFWIYDTGINNHVYVVLLSQEADDNPGELAHKNITISEIEQIGEGWPYWLYFFGRSERDLKALATTNTNIRAEFNANPTSKRLKIAVIGWASSNKTAENSLQGGGKNIEGTYFISQKLLHSGHTAGATQINNLYAVGWS…	620	USER	zzzz414
527	genbank_anelloviridae_ARA91688.1_	genbank	MPYYRRRRRRRPTRRRRRRIWRRYFRYRHRRPYRRRRYKVRRRRRRKAPVIQWFPPDRRTCTITGFWPLSYGHWFRTCLPFRRHNGLVFTGGGIDYTQWTLQNLYHEKLNWRNIWTAANVGMEYARFRKGKFYFFRHPWRSYIITWDQDIPCKPFPYSNLHPFLMLLKKQHKLVLSKRDCNPAKKARPVTLRFKPPPKLTSQWRLSRELCKIPLIRLGFSFIDITEPWVEGWGNAFYSLLGYEASYQQGRNCNWTQIRYFWVYDTGVGNAIYIILLKQDVESNEGDLAVAAGAAQGENMIEEIEKVNEGWPYWIYFFGRSEIDIKSYAKTQKIRNEFNKDPHSKKLKIGVVGWASSNRTALTSKQSLNNPQEIQGNYVSWHGGSYVIGAGMITNLFQKG…	624	USER	zzzz415
526	genbank_anelloviridae_ARA91691.1_	genbank	MPYRRYRRRRRRPTRRRRRRIWRRYFRYWHRRPYRRRRYKVRRRRRRKAPVIQWFPPSRRTCTITGFWPLSYGHWFRTCLPFRRHNGLVFTGGGIDYTQWSLQNLYHEKLNWRNIWTASNVGMEYARFIKAKFYFFRHDWRSYIITWDQDIPCKPLPYTNLHPLLMLLKKQHKLVLSKRDCNPSKKARPVTLKIKPPPKLTSQWRLSRELTKIPLVRLGFSFIDISEPWLEGWGNAFYSLLGYEAPYHQGRYTNWCQCRYFWIYDTGVGNAVYIILLKDNIGDNAGDMATKYGTTQTGGQNAIDEIEKVSENWPYWLYFFGRSELDIKNFATNQRIRQEFTQNQNSPKIKIGIIGWASSNRTEQNSTQSPGTPQEIQSTYIVYHGSGMVGAAAIDNLYL…	623	USER	zzzz416
525	genbank_anelloviridae_ARA91685.1_	genbank	MPFHRYRRRRRRPTRRWRRRRFQRYFRYRYRRAPRRRRRYKVRRRRVKKAPVIQWFPPTVRNCFIKGIWPLSYGHWLRTCLPMRKENGLIFLGGGIDWTVWSLQNLYHEKLNWRNVWTASNDGMEFARFRYAKFKFFRHETRSYIITWDQDIPCKPLPYTNLHPFVMLLKKQHKVVLSKRDCNPRKRDKPVTLKIKPPPKLTSQWRLSRELSKMPLVRLGISLIDFREPWVEGFGNAFFSTLGYEAKKDSLQTSAWCQCKYFWIYDTGVNNHVYVVMLKNDAEDNPGDLAQKGNEIQHIEQIGEGYPYWLFFFGRSERDLKAMATTNTNIRNEFNANPLSKKLKIAVIGWASSNTTATDSSQGAGLKIEGTYLISHVLQTSGHTAGAAQINNLYASGWP…	620	USER	zzzz417
524	genbank_anelloviridae_ARA91680.1_	genbank	MARPPMAPARRWRRRFGRRRRRYRKRRYGWRRRYYRYRPRYYRRRWLVRRRRRSVYRRGGRRARPYRISAFNPKIMRKVVIRGWWPIIQCLKGQESLRYRPLQWDTEKQWRVRNDFEDQYGYLVQYGGGWGSGEVTLENLYQEHLLWRNSWSKGNDGMDLVRYFGCIVYLYPLKDADYWFWWDTDFKELYAEMIKEYSQPSVMMMAKRTKIIIARERAPHRRKVRKIFIPPPSRDTTQWQFQTDFCKRPLFTWAAGLIEMQKPFDANGAFRNAWWLEQRTDQGEMKYVELWGRVPPQGDSELPKKSDFAKSGDNPNYEIQDGNEKNIYPIIIYVDQKDQQPRKKYCVCYNKTLNRWRRTQGSTINIGPLRGLVLRQLMNQEMTYTWKGQEYSGVFLQRW…	644	USER	zzzz418
523	genbank_anelloviridae_ARA91682.1_	genbank	MPYYRRRRRRRPTRRRRRRIWRRYFRYRHRRPYRRRRYKVRRRRIRKAPVIQWFPPARRKCTITGFWPLSYGHWFRTCLPFRRHNGLVFTGGGIDYTQWTLQNLYHEKLNWRNIWTASNVGMEYARFRKGKFYFFRHEWRSYIITWDQDIPCKPFPYSNLHPFLMLLKKQHKLVLSKQDCNPAKKGRPVTIRFKPPPKLTSQWRLSRELAKIPLIRLGFSFIDISEPWVEGWGNAFYSLLGYEAEYEQGKNCNWSQIRYFWVYDTGVGNAVYVILLKQEVDSNPGDLAKISKTQGGENLIQAIEQVNEGWPYWIYMFGRSEIDIKGYATKTRSIVDEFHANPHSKRLKIGVIGWASSNTTANDSSQNPTSGQAQYIQGNYISYKGGGIIPGAGFINNLW…	627	USER	zzzz419
522	genbank_anelloviridae_ARA91676.1_	genbank	MSLRQLEKTHPTMPFYRRRRGYWRRWPRYHRRRLRPRRYRRPYRRGRKVRRRRHFRRRRKRTARIIQWHPPTRRFCTIKGVWPLLYGHWLRNALPMRKHNGLLWLGGGIDVTVWTLYNLYMEHSNLRNTWSSSNEGMEFGRFLKATLYFQRHETKDYIITWDQDITCALKREEMQPFISLLKRNHKIILSRKHCNPKNKARAVKLKFKPPPRMTSRWFLQRELAQMPLFRLTVTWIDLSSYWVEGRGNAFYSTLGYPPNFKYNSTNQNRSDHFRCRYFWIYDRGPGNAVYVARTENRQKLPTDGTGNFWLSNSNDDWHLVSKDQPYWLYFFGKSEHEIKKQAFGQDVDENPDIYVLCIIWWAAEWWTEKDPALQQLQQYNQYDYVRPRPVELGGISQNL…	643	USER	zzzz420
521	genbank_anelloviridae_ANK58165.1_	genbank	MGWYYWNRYWRNRRQRSRRRGRFFRPWRTHRRWRPRGRRFRVRRRRRRWRGRRRRGRRVGQHLIGQWNPTHRTRCHIYGLAPLAFGLTYDFGQKFTKLKIFKSPPPSRLDYGIQGGCFDFRTLTLEQLYQDHLLGRNIWSKGNEGYDLARYKGTKFYLPPHETIPYIFSWERNWTRTENEQIPYTHPYWLLLHRKHTKFIPPRSWGNKRSRRVFVRPPTLQQTMWYYTSSWSGVALVRFGITPINIKNPFIKGPASGSGNRAIYAPFIGWAQDSQNMPPTKIAWNEQAMAGFNTMVLYRWWWDDGIDNYIMLNTTNADPGADNQQKLVAINMPYWQFFWGSHYPTSKDTIPAVYNTNQSWSVGINPSPYAILWYKDAALKDTHGGLFMDTRYLRPSDLP…	630	USER	zzzz421
520	genbank_anelloviridae_AKO22617.2_	genbank	MAWWGRWRRWRWRPRRWRRRRRRRVPRRRAQRPVRRRRARRVRRRRWGRRRWRRGYRRRLRLRRRRRRKKIRLTQWNPAKVRRCTIKGVLPMILCGAGRSGFNYGLHSDDYTVQKPLGHNPHGGSMSTVTFSLQVLFDQYQRFMNRWSYSNDQLDLARYFGCTFYFYRHPEIDFVAQYDNVPPMKMDENTAPNTHPSFLLQNKRKVKIPSFKTKPFGRKRVRVTVGPPKLFEDKWYSQHDLCKVPLVSWRLTACDFRFPFCSPQTDNPCYTFQVLHENYYPVIGTSSLENGTNYNSDAITTLETWLYGKCTHYQTFATDTRLNPQKTATSGSQNQTYAPSGNLETIVWGQADWQKFKKNTDSNYGYCTYCPSNENNGTVEKIKKYRDQRFKWLTEMPVT…	765	USER	zzzz422
519	genbank_anelloviridae_APA31996.1_	genbank	MPPYYYRRRRWPWRNTYRRRRAWARRKPTVWRFRKIVRRRYPIRRRRFRVRKRKYLKKKLKYLYVKEYQPKKIRNCKITGNICLFQCGPNRISNEWTQYMNSYTHELAEGGGGWSLIKFSLESLYEQFELLRNKWSASNILLPLVRYRGCKLTMYRLPDIDYIVHYNTCLPMLDTVYQHTNAQPNNIMFYSKKIVIPSYKTNPQKKRHYITKRIRPPQQFQNKWYFQQDLNKQPLLLLTTTPIDLNRYYLNPLSYNNTISITHLNLGLFGNPNFQNVTQGTNPWQIKKDYYFYATTSGEKNPLMTQVIFLGQTKANTLGKPMSGDWQSYGNPNKIHENFGNPFNDRYLNGEYYTFISQTSPIAIMATGNWQSKRASELNLALNTQPFVLKSRYTPNRDK…	676	USER	zzzz423
518	genbank_anelloviridae_APA31993.1_	genbank	MPWRYYRRNWRRRPWWRYQRRPRKAIRRRWRRKRYSYWVRNSFKKKLKTITVKQFQPPNVRKCKIKGLMNLIYFNQKRLIFNSVMYENSLVPEEHPGGGGFSVIKLSLETMYDSHLRCHNWWTTSNEDLPLVRYSGMTVKLYQSKYTDYVFKYQNYLPGTSTYLTYPACQPSMMMMAKNSVIVPSLETKRRRKPYKKIHIKPTSQLQTKWYFQTDLNKTPLAIFYTAACSLTSYYLSPDWESNNISILHLNTLLFQHTNFKNYPHKGYAVKTVGTESFYLYVTDEEYSHTKQEYEYQLLTPLTNTKDWTIGQNSAHNHQGYQHYKTDWRRYAGNPFLANTYRENVIFIIKKDPDTLFQNWNSQTAKFNLTTVGGAVLDQPIYQTTRYNPNRDEGIQNEM…	663	USER	zzzz424
517	genbank_anelloviridae_BAB89347.2_	genbank	PPPKLFEDHWYTQPDLCKVPLVTLRSTAADLKHPFCSPQTNNPCTTFQVLRSEYNSMIGFPFNYNPSDTNQKTKLQTFEKWLYSSSTHYQTFATEANLRPRQYNADGTINANYTTLHSKWTTTIYAKKTDSNFGYTSYNFSGDZGYKYVTQIRQWYWTQLTSWTQKVPHINTTFANAIHPEFEYHAGWYSNIFIGPNRFNIQFRAAYMDVTYNPINDKGQLNRVWFQYSTKPTTDFVEKQAKCLLQNLPLWSMLFGYSEYVESQLGPFQDHETVGLVIVQCPYTVPPLYDKDNPEMGYVFYDTHFGNGKLGNGLGQVPXYWQQRWYPILKRQKQVMNDICKTGPFAYRDERLQADLTATYSFRFNWGGDLIYHQVCKNQCDSRGLVPSD	389	USER	zzzz425
516	genbank_anelloviridae_ABB30183.1_	genbank	LLITTSACSLDQMYLPEDEISNNITLYSLNTDFFQNPNFVTENPTGYSPKLDLYLYGTGNGPIETRSPKWTELILLANTTSWTDGKPSKDRASMLKKENWGNPFHH	106	USER	zzzz426
515	genbank_anelloviridae_ABB30182.1_	genbank	RRFWRRRHWVRKRKLKRIRLSQYQPHYIKRLTITGTYPLILSTKERLSNNLNCYLDSIAPAEVHGGGGFSICNFSLYSLYQENLQLRNWWSTSNDNMPLIRYLG	104	USER	zzzz427
514	genbank_anelloviridae_ABB30181.1_	genbank	RRFWRRRFRRPIWRRFWRHRYRVRKRKLKTLKIREWQPPYIRKTMVKGFYPIFLTTNQRLTNNLNCYLESTAPFKYPGGGGFTICNFSLNTLYQEHLIAKNWWTAGNENMPLIRYLG	117	USER	zzzz428
513	genbank_anelloviridae_AAV41460.1_	genbank	KGLLKDFPMWAMCYGYADYCRKVTGDSGVFYNARVVMRCPYTYPQLLKHSDDQWGFVPYSENFGLGRLPGGNTKPPTRMRLHWYPMILHQTEVLECLSQSGPFAYHGDERKTVLTAKYKFRWKWGGNPVFQQVLRDPCTGGAVAPHTSRHPRAIQVLDPKSQAPEYLFHKWDFRRGL	177	USER	zzzz429
512	genbank_anelloviridae_CAF05763.1_	genbank	MAWGWWKRRRRWWFRKRWTRGRLRRRWPRSARRRPRRRRVRRRRRWRRGRRKTRTYRRRRRFRRRRRKAKLIIKLWQPAVIKRCRIKGYIPLIISGNGTFATNFTSHINDRIMKGPFGGGHSTMRSASTFCLRSTSDT	138	USER	zzzz430
511	genbank_anelloviridae_BAA85692.1_	genbank	TDSVVVNFQVLRSMYDEKISILPQEKQERESLLNSIVNYIPFYNTTQTIAQLKPFIDAGNMTSGPTTTTWASYINTTKFTTTATTTYTYPGTNTTTVTMLTSNDSWYRGTVYNSKIRELPKKAAELYSKATKTLLGSTFTTEDYTLEYHGGLYSSIWLSPGRSYFETPGAYTDIKYNPFTDRGEGNMLWIDWLSKKNMNYDKVQSKCLISDLPLWAAAYGYVEFCAKSTGDQNIHMNARLLIRSPFTDPQLLVHTDPTKGFVPYSL	266	USER	zzzz431
510	genbank_anelloviridae_BAA85681.1_	genbank	TDSVVVNFQVLQSMYDEKISILPEEKQQRESLLNSIVNYIPFYNTTQTIAQLKPFVDAGNATSRTTTTTWASYINTTKFTTASTTTYTYPGTNTTTVTMLTCNDSWYRGTVYNNNIRDLPKKAATLYLQATKTLLGNTFTSDDHTLEYHGGLYSSIWLSPGRSYFETPGAYTDIKYNPFTDRGEGNMLWIDWVSKKNMKYDKVQSKCLISDLPLWAAAYGYVEFCAKSTGDQNIHMNVRLLIRSPFTDPQLLVHTDPTKGFVPYSL	266	USER	zzzz432
509	genbank_anelloviridae_BAA85715.1_	genbank	TDSVVVNFQVLQSMYDTTISILPDQKSERTKLLTSIAHYIPFYNTTQTIAQLKPFVDAGNATLSTTTATWASYINTTKFTTTTTTTYTYPGSTTTPVTMLTCNDSWYRGTVYNDKIKELPQKAAELYSQATKTLLGNTFTTQDYTLEYHGGLYSSIWLSAGRSYFETPGAYTDIKYNPFTDRGEGNMLWIDWLTKKNMNYDKLQSKCLISDLPLWAAAYGYVEFCAKSTGDQNIHMNARLLIRSPFTDPQLLVHTDPTKGFVPYSL	266	USER	zzzz433
508	genbank_anelloviridae_BAA94957.1_	genbank	TDNPCYTFQVLKEFYYQAIGFSATDEKRQNVLNILYEQNSYWESNITPFYVLNVKKGSNTTEMLSPAIRDTDFRRKVNTNYNWYTYNAKDNKNKLHELRAAYFKELTSKGPQQTNSHEGYASQWTIPSTNAYEYHLGMFSTIFLAPDRPVPRFPCAYQDVTYNPLMDKGVGNHVWFQYNTKADTQLIVTGGSCKAHIEDIPLWAAFYGYSDFIESELGPFVDAETVGLICVICPYTKPPMFNKTNPTMGYVFYDR	255	USER	zzzz434
507	genbank_anelloviridae_BAA85693.1_	genbank	TDSVVVNFQVLQSMYDEKISILPEEKQKRELLLKSIVNYIPFYNTTQTIAQLKPFIDAGNMTSGATTTTWASYINTSKFTTASTTTYTYPGTTTTKVTMLTCNDSWYRGTVYNDKISDLPQKAATLYSQATKTLLGNTFTTEDYTLEYHGGLYSSIWLSPGRSYFETPGAYTDIKYNPFTDRGEGNMLWIDWVSKKNMKYDKVQSKCLISDLPLWAAAYGYVEFCAKSTGDQNIHMNARLLIRSPFTDPQLLVHTDPTKGFVPYSL	266	USER	zzzz435
506	genbank_anelloviridae_BAA85679.1_	genbank	TDSVVVNFQVLQSMYDENISILADEKPKRENLLENITGYIPFYNTTQTIARLKPFVDAGNATSRTTTTTWGSYINTTKFTTASTTTYTYPGTNTTTVTMLTCNDSWYRGTVYNSKIKELPKKAAELYSKATKTLLGSTFTTEDYTLEYHGGLYSSIWLSPGRSYFETPGAYTDIKYNPFTDRGEGNMLWIDWLSKKNMNYDKVQSKCLISDLPLWAAAYGYAEFCAKSTGDQNIHMNARLLIRSPFTDPQLLVHTDPTKGFVPYSL	266	USER	zzzz436
505	genbank_anelloviridae_BAA85686.1_	genbank	TDSVVVNFQVLQSMYDEKISILPEQRPQRELLLTSITKYIPFYNTTQTIAQLKPFIDAGNITSGTTTTTWASYINTTKFTTTATTTYAYPGTTTTTVTMLTSNDSWYRGTVYNNKISELPKKAAELYSKATKTLLGNTFTTEDPTLEYHGGLYSSIWLSPGRSYFETPGAYTDIKYNPFTDRGEGNMLWIDWLSKKNMKYDKVQSKCLISDLPLWAAAYGYAEFCAKSTGDQNIHMNARLLIRSPFTDPQLLVHTDPTKGFVPYSL	266	USER	zzzz437
504	genbank_anelloviridae_BAA85667.1_	genbank	TDSVVVNFQVLQSMYDENISILTDEKTKRQKLLKSIADYIPFYNTTQTIAQLKPFVDAGNVTSGTTTTTWASYINTTKFTTASTTTYTYPGTTTTTVTMLTCNDSWYRGTVYNNKISDLPEKAATLYSQATKTLLGNTFTTGDHTLEYHGGLYSSIWLSPGRSYFETPGAYTDIKYNPFTDRGEGNMLWIDWLSKKNMNYDKVQSKCLISDLPLWAAAYGYVEFCAKSTGDQNIHMNARLLIRSPFTDPQLLVHTDPTKGFVPYSL	266	USER	zzzz438
503	genbank_anelloviridae_BAA94954.1_	genbank	TNNPCTTFQVLREQYNDMIGFPFNYNPQNPQQQQKLETFEKWLYSSNTHYQTFATEANLRPRQYNADGTANKEYTQLQGIWTSTIYAKKTDSNFGYTSYNFSGDSGYDYVTKIRQWYWTQLTSWKQTAPHINSTFANAIHPEFEYHAGWYSNIFIGPNRFNIQFRAAYMDVTYNPINDKGHLNRVWFQYSTKPTTEFVEKQAKCLLQNLPLWSMLFGYSEYVESQLGPFQDHETVGLVIVQCPYTVPPMYDKDNPDMGYVFYDT	264	USER	zzzz439
502	genbank_anelloviridae_BAA85673.1_	genbank	TDSVVVNFQVLQSMYDKNISILADEKQEREKLLTSIANYIPFYNTTQTIAQLKPFVDAGNATSRTTTTTWGSYINTTKFTTASTTTYTYPGTTTTTVTMLTCNDSWYRGTVYNNKISDLPKKAATLYSQATKTLLGNTFTTEDYTLEYHGGLYSSIWLSPGRSYFETPGAYTDIKYNPFTDRGEGNMLWIDWVSKKNMKYDKVQSKCLISDLPLWAAAYGYVEFCAKSTGDQNIHMNARLLIRSPFTDPQLLVHTDPTKGFVPYSL	266	USER	zzzz440
501	genbank_anelloviridae_CAB42104.1_	genbank	LSKKNTKYKKVKRKCLVADLPLWAAAYGYLEFCSKSTGDTNIHMNARLPIRSPFTDPQLIVHTNPNKGFVPYSLNFGNGKMPGGSSNVPIRMRAKWYPTLFHQQEVLEALAQSGPFAYHSDIKKVSLGIKYRFKWIWGGNPVRQQVVRNPCKEPHSSGNRVPRNIQIVDPKYNSPELTIHAWDFRRGFFGPKAIQ	195	USER	zzzz441
500	genbank_anelloviridae_CAB42100.1_	genbank	LSKKDMQYEKVKRKCLVADLPLWAAAYGYLEFCSKSTGDTNIHMNARLLIRSPFTDPQLIVHTNPNKGFVPYSLNFGNGKMQGGSSNVPIRMRAKWYPTLFHQQEVLEALAQSEPFAYHSDIKKVSLGIKYRFKWIWGGNPVRQQVVRNPCKNPHSSGNRVPRSIQIVDPKYNSPGLTIHAWDFRRGFFGPKAIQ	195	USER	zzzz442
499	genbank_anelloviridae_BAA85709.1_	genbank	TDSVVVNFQVLQSMYDEKISTLPNEKQERIDLLTSIANYIPFYNTTQTIAQLEPFVDAGNVLSSSTATTWGSYINTVKFTTASTTTYTHPGTTTTTVTMLTCNDSWYRGTVYNDKIKELPQKAAELYSQATKTLLGNTFTTQDYTLEYHGGLYSSIWLSAGRSYFETPGAYTDIKYNPFTDRGEGNMLWTDWLTKKNMNYDKVQSKCLISDLPLWAAAYGYVEFCAKSTGDQNIHMNARLLIRSPFTDPQLLVHTNPTKGFVPYSL	266	USER	zzzz443
498	genbank_anelloviridae_BAA85698.1_	genbank	TNSVVVNFQVLQSMYDEKISTLPDQKAERQNLLTSIANYIPFYNTTQTIAQLKPFIDAGNITSGATATTWTSYINTTKFTTTTTTTYTYPGTNTTTVTMLTCNDSWYRGTVYNKEIRNLPEKAAKLYSEATKTLLGNTFTTEDHTLEYHGGLYSSIWLSPGRSYFETPGAYTDIKYNPFTDRGEGNMLWIDWVSKKNMNYDKVQSKCLISDLPLWAAVYGYVEFCAKSTGDQNIHMNARLLIRSPFTDPQLLVHTNPTKGFVPYSL	266	USER	zzzz444
497	genbank_anelloviridae_BAA85736.1_	genbank	TDSVVVNFQVLQPMYDEKISILPDQKPQRQELLTSIANYIPFYNTTQTIAQLKPFIDAGNVTSSTTATTWGSYINTTKFTTTATTIYTYPGTTTTTVTMLTSNDSWYRGTVYNNKIQELPKKAAELYSKATKTLLGNTFTTEDYTLEYHGGLYSSIWLSPGRSYFETPGAYTDIKYNPFTDRGEGNMLWIDWLSKKNMNYDKVQSKCLISDLPLWAAAYGYVEFCAKSTGDQNIHMNARLLIRSPFTDPQLLVHTNPTKGFVPYSL	266	USER	zzzz445
496	genbank_anelloviridae_BAA85706.1_	genbank	TDSVVVNFQVLQSMYDTKISILPEQKQERIQLLTSIANYIPFYNTTQTIAQLKPFVDAGNILPSSTATTWGSYINTNKFTTTSTVTYTHPGTTTTTVTMLTCNDSWYRGTVYNNKITQLPEAAAKLYSQATKTVLGNTFTTEDYTLEYHGGLYSSIWLSAGRSYFETPGAYTDIKYNPFTDRGEGNMLWIDWLTKKNMNYDKLQSKCLISDLPLWAAAYGYVEFCAKSTGDQSIHMNARLLIRSPFTNPQLLVHTNPTKGFVPYSL	266	USER	zzzz446
495	genbank_anelloviridae_CAB41747.1_	genbank	LSKKNMQYDKVQSSCLVADLPLWAASYGYLEFCSKSTGDTNIHMNARLLIRSPFTDPQLVVHTDPTKGFVPYALNFGNGKMPGGSSNVPIRMRAKWYPTLFHQQEVLEAFSQSGPFAYHSDIKKVSLGIKYRFKWMWGGNPVLQQVVRNPCKKPHSSVNRVPRSIQIVDPKYNSPELTIHAWDFGRGFFGPKAIQ	195	USER	zzzz447
494	genbank_anelloviridae_BAA94953.1_	genbank	TNNPCTTFQVLREQYNHMIGFPFNYNPQDSSQKQKLETFEKWLYSSSTHYQTFATEANLRPRQYYGDGTANTHYTQLQNTWTTTIYAKKTDSNFGYTSYNFSGETGYQYVTKIRQWYWTQLTSWTQTVPHINSTFANAIHPEFEYHAGWYSNIFIGPNRFNIQFRAAYMDVTYNPINDKGHLNRVWFQYSTKPTTHFVEKQAKCLIQNLPLWSMLFGFSEYIESQLGPFQDHETVGLVIIQCPYTVPPMYDKENPDMGYVFYDT	264	USER	zzzz448
493	genbank_anelloviridae_BAA85675.1_	genbank	TDSVVVNFQVLQSMYDEKISILPEQKEQRQLLLTNIANYIPFYNTTQTIAQLKPFIDAGNMTSGTTTTTWGSYINTTKFTTTATTTYTYPGTNTTKVTMLTCNDSWYRGTVYNNNIKDLPMKAAELYSKATKTLLGNTFTTEDPTLEYHGGLYSSIWLSPGRSYFETPGAYTDIKYNPFTDRGEGNMLWIDWLSKKNMNYDKVQSKCLISDLPLWAAACGYVEFCAKSTGDQNIHMNARLLIRSPFTDPQLLEHTDPTKGFVPYSL	266	USER	zzzz449
492	genbank_anelloviridae_BAA85717.1_	genbank	TDSVVVNFQVLQSMYDEKISILPDQKSQREQLLNSIANYIPFYNTTQTIAQLKPFIDAGNKTSDTTATTWGSYINTTKFTTTTTTTYTYPGTTTATVTMLTCNDSWYRGTVYNDKIKHLPITAAKLYSTATKTLLGNTFTTEDHTLEYHGGLYSSIWLSPGRSYFETPGAYTDIKYNPFTDRGEGNMLWIDWLSKKNMNYDKLQSKCLISDLPLWAAAYGYVEFCAKSTGDQNIHMNARLLIRSPFTDPQLLVHTDPTKGFVPYSV	266	USER	zzzz450
491	genbank_anelloviridae_AAD51720.1_	genbank	VNFQVLQSMYDETTSILPDEQQKRDHLLDSITSYIPFYNTTQTIAQLKPFVDAGGYSTGTTTTTWGQLLNTTKFTTTTTTTYTYPGTINTTVTFITANDTWYRGTAYKDDIKNVPQKAAELYFQTTQKLLGNTLHGSDRTLEYHGGLYSSIWLSPGRSYFETPGAYTDIKYNPFTDRGEGN	181	USER	zzzz451
490	genbank_anelloviridae_BAB86777.1_	genbank	PPPKLFEDHWYTQPDLCKVPLVTLRSTAADLKHPFCSPQTNNPCTTFQVLRSQYNSMIGFPFNYNPSDSNQTTKLKTFETWLYSSSTHYQTFATEANLRPRQYNADGSLNSKYAELQSKWTTEIYSKKTDSNFGYTSYNLSGEAGYQYVTNIRQWYWTQLTSWTQTVPHINSTFANATHPEFEYHAGWYSNIFIGPNRFNIQFRAA	206	USER	zzzz452
489	genbank_anelloviridae_BAA28164.1_	genbank	MAYGWWRRRRRRWRRWRRQPWRRRWRTRRRRPARRRGRRRNVRRRRRGRWRRRYRRWKRKGRRRRKAKIIIRQWQPNYRRRCNIVGYLPILICGENTVSRNYATHSDDTNYPGPFGGGMTTDKFSLRILYDEYKRFMNYWTASNEDLDLCRYLGCTFYFFRHPEVDFIIKINTMPPFLDTAITAPSIHPGLMALDKRARWIPSLKNRPGKKHYIKIRVGAPKMFTDKWYPQTDLCDMTLLTVYATAADMQYPFGSPLTDTVVVNFQILQSMYDETISILPDEKHNRVKLLTSIANYIPFYNTTQTIAQLKPFVDAGGYTTNTTPTTWGQLLNTTKFTTTTTTTYTYPATTNTTVTFITANDTWYRGTAYKDNIKDVPKKAAELYFETTKKLLGNTFHGS…	769	USER	zzzz453
488	genbank_anelloviridae_BAA85701.1_	genbank	TDSVVMNFQVLQSMYDEKISTLPDQKPQRINLLDSITKYIPFYNTTQTIAQLKPFIDAGNIPSATTATTWGSYINTTKFTTTTTTTYTYPGTNTTTVTMVTCNDSWYRGTVYNEKITQVPEKAARLYLQATKTLLGNTFTTEDHTLEYHGGLYSSIWLSPGRSYFETPGAYTDIKYNPFTDRGEGNMLWIDWVSKKNMNYDKVQSKCLISDLPLWAAAYGYVEFCAKSTGDQNIHMNARLLIRSPFTDPQLLVHTNPTKGFVPYSL	266	USER	zzzz454
487	genbank_anelloviridae_BAA85678.1_	genbank	TDSVVVNFQVLQSMYDENISILADEKPKRENLLENITGYIPFYNTTQTIAQLKPFIDAGNMTSGTTTTTWASYINTTKFTTTATTTYTYPGTTPTTVTMLTCNDSWYRGTVYNNNISELPKKAATLYSQATKTLLGNTFTTEDYTLEYHGGLYSSIWLSPGRSYFETPGAYTDIKYNPFTDRGEGNMLWIDWLSKKNMKYDKVQSKCLISDLPLWAAAYGYVEFCAKSTGDQNIHMNARLLIRSPFTDPQLLVHTDPTKGFVPYSL	266	USER	zzzz455
486	genbank_anelloviridae_AAD51729.1_	genbank	VNFQVLQSMFNDCLSVLPSNFTERTGKGTQLHDKIIKHLPYYNTTQTQAQFKRYVESQEATNGNNIWANYLNSNKFNKSETPKTDNGIGGPYCTYSDTWYKGTAYNSKITNIPTQASKVYYEQTKNLIGITFTGSSHRLHYCGGLYSSVWLSAGRSYFETKGPYTDITYNPFSDRGEGN	179	USER	zzzz456
485	genbank_anelloviridae_AAD51723.1_	genbank	VNFQVLQSMYDETISILPDEKEIRETLLNSIEKYIPFYNTTQPIAQLKPFVDAGGHTTGTTTTTWGQLLNTTKFTTTTTTTYTYPGTTNTQVTFIKANDTWYRGTAYKEDIKNVTKKAAKLYFETTQTLLGNTFHGSDATLEYHAGLYSSIWLSPGRSYFETPGAYTDIKYNPFTDRGEGN	181	USER	zzzz457
484	genbank_anelloviridae_BAA85712.1_	genbank	TDSVVVNFQVLQSMYDTKISILPEQKEQRKELLNSITSYIPFYNTTQTIAQLKPFVDAGNVLSSSTATTWGSYINTVKFTTASTTTYTHPGTTTTTVTMLTCNDSWYRGTVYNDKIKELPQKAAELYSQATKTLLGNTFTTQDYTLEYHGGLYSSIWLSAGRSYFETPGAYTDIKYNPFTDRGEGNMLWIDWVSKKNMNYDKVQSKCLISDLPLWAAAYGYVEFCAKSTGDQNIHMNARLLIRSPFTDPQLLVHTNPTKGFVPYSL	266	USER	zzzz458
483	genbank_anelloviridae_BAA85708.1_	genbank	TDSVVVNFQVLQSMYDEKISTLPDEKPKREQLLKSIANYIPFYNTTQTIAQLKPFIDAGNITSGATTTTWASYINTTKFTTTTTTTYTYPGTNTTAVTMLTCNDSWYRGTVYNKQIAKLPQKAAKLYSEATKTLLGNTFTTEDATLEYHGGLYSSIWLSPGRSYFETPGAYTDIKYNPFTDRGEGNMLWIDWVSKKNMNYDKVQSKCLISDLPLWAAAYGYVEFCAKSTGDQNIHMNARLLIRSPFTDPQLLVHTDPTKGFVPYSL	266	USER	zzzz459
482	genbank_anelloviridae_BAA85710.1_	genbank	TDSVVVNFQVLQSMYDENISILPEKQTQRDILLKSIAEYIPFYNTTQTIAQLKPFIDAGNSTSSTTATTWGSYINTTKFTTTATTTYTYPGSTTTPVTMLTCNDSWYRGTVYNKTIKDLPITAAKLYSKATKTLLGNTFTTEDHTLEYHGGLYSSIWLSAGRSYFETPGAYTDIKYNPFTDRGEGNMLWIDWLTKKNMNYDKVQSKCLISDLPLWAAAYGYVEFCAKSTGDQNIHMNARLLIRSPFTDPQLVVHTNPTKGFVPYSL	266	USER	zzzz460
481	genbank_anelloviridae_AAL15656.1_	genbank	TDRGEGNMLSIDCLSNKNKSYDKLQSTCLVADLPLWAPAYAYVEFCAKSTADHNIHMNPSVLIRSPFTDTQLLVQTNRTKGFLPYCLHYGIGKMAGGSSNVP	102	USER	zzzz461
480	genbank_anelloviridae_BAA94958.1_	genbank	TDNPCYTFQVLKEFYYKAIGFSATDEAKKAVLHTLYKQNSYWESNLTQFFVLNVKKGNNTTAPLTDSMPTRENFIAKTNTNYNWYTYKASSFTSQLDEMRQAYFRQLTSEGPQTTNSTDGYSQHWTTPNTDAYEYHLGMFSTIFLAPDRPVPRFPCAYQDVTYNPLMDKGVGNHIWFQYNTKADTQLIITGGSCKAHIEDIPLWAAFYGYSDFLESELGPFVDAETVGIICVICPYTKPRMYNKTNPMMGYVFYDR	256	USER	zzzz462
479	genbank_anelloviridae_AAD51725.1_	genbank	VNFQVLQSMYDETISILPDEKTKRNNLLTSIANYIPFYNTTQTIAQLKPFVDAGAYTTGGTTTTWGQLLNTTKFTTTATTTYTHPSNANTKVTFITANDTWYRGTAYKEGIKDVPIKAAELYFKTTQTLLGNTFHDSDRTLEYHGGLYSSIWLSAGRSYFETPGAYTDIKYNPFTDRGEGN	181	USER	zzzz463
478	genbank_anelloviridae_CAB42185.1_	genbank	LSKKDTENDKRQSKSLVADLPLWAAPYGYLEFCSKSTGDTNIHMNARLLIRSPFTDPQLIVHTNPNKGFVPYSLNFGSGKMPGGSSNVPIRMRAKWYPTLFHQQEVLEALAQSGPFAYHSDIKKVSLGIKYRFKWIWGGNPVRQQVVRNPCKEPHSSGNRVPRSIQIVDPKYNSPELTIHAWDFRRGFFGPKAIQ	195	USER	zzzz464
477	genbank_anelloviridae_AAL15655.1_	genbank	TDRGEGIMLSIDCLCNKNMYYDKVQSKCLVSDLPLWAAAYGYVEFCARSTADQNIDMNASVLIRSPFTDTQLLVQTNRTKGFVPYSLHFGNGKMAGGSSNVP	102	USER	zzzz465
476	genbank_anelloviridae_BAA85691.1_	genbank	TDSVVVNFQVLQSMYDENISILTDEKAEREKLLNSIAHYIPFYNTTQTIAQLKPFIDAGNMTSGATTTTWASYINTTKFTTTATTTYAYPGTNTTTVTMLTSNDSWYRGTVYNDKISDLPQKAATLYSQATKTLLGNTFTTEDYTLEYHGGLYSSIWLSPGRSYFETPGAYTDIKYNPFTDRGEGNMLWIDWVSKKNMKYDKVQSKCLISDLPLWAAAYGYAEFCAKSTGDQNIHMNARLLIRSPFTDPQLLVHTDPTKGFVPYSL	266	USER	zzzz466
475	genbank_anelloviridae_AAD51731.1_	genbank	YPFGSPLTDTPVVTFQVLRSMYNDALSILPSNFEKDSPGEKLYQQISKYVPYYNTSETIAQLKRYVENTEKTATTPNPWQSKYVNTTVFSTAVTVSTTEPYTTFSDSWYRGTVYKQAITNVPLAAAKLYQTQTKNLLSTTFTGGSEYLEYHGGLYSSIWLSAGRSYFETKGAYTDICYNPYTDRGEGN	188	USER	zzzz467
474	genbank_anelloviridae_BAA85694.1_	genbank	TDSVVVNFQVLQSMYDEKISILPEEKPKRQLLLNSIVNYIPFYNTTQTIAQLKPFIDAGNMTSGATATTWGSYINTTKFTTTATTTYAYPGTNTTTVTMLTSNDSWYRGTVYNTKIKDLPIKAAELYSKATKTLLGSTFTTEDHTLEYHGGLYSSIWLSPGRSYFETPGAYTDIKYNPFTDRGEGNMLWIDWLSKKNMNYDKVQSKCLISDLPLWAAAYGYVEFCAKSTGDQNIHMNARLLIRSPFTDPQLLVHTDPTKGFVPYSL	266	USER	zzzz468
473	genbank_anelloviridae_BAB86774.1_	genbank	VLVKEPPPKLFEDHWYTQPDLCKVPLVTLRSTAADLKHPFCSPQTNNPCTTFQVLRSQYNSMIGFPFNYNPSNQTQTQQLQTFEKWLYSHSAHYQTFATEANLRPRQYNADGSLNKDYANLQSQWTSTIYAKKTDSNFGYTSYNFSGDTGYTYVTKMRQWYWTQLTSWTQTVPHINSTFANAIHPEFEYHAGWYSNIFIGPNRFNIQFRAAYMDVTYNPINDKGQLNRVWFQYSTKPTTDFVEKQAKCLLQNLPLWSMLFGYSEYVESQLGPFQDHETVGLVIVQCPYTVPPLYDKDNPDMGFVFYDTHFGNGKLGNGLGQVPRYWQQRWYPILKRQKQVMNDICKTGPFAYRDERLQADLTAGYSFKFNWGGDLIYHQVVKNPHDSGQLVPSDSS	396	USER	zzzz469
472	genbank_anelloviridae_CAB42165.1_	genbank	LSKKNMQYDKVQSSCLVADLSLWAAAYGYLEFCSKGTGDTNIHMNARLLIRSPFTDPQLIVHTNPNKGFVPYSLNFGNGKMPGGSSNVPIRMRAKWYPTLFHQQEVLEASAQSGPFAYHSDIKKVSLGIKYRFKWIWGGNPVRQQVVRNPCKEPHSSGNRVPRSIQIVDPKYNSPELTIHAWDFGRGFFGPKAIQ	195	USER	zzzz470
471	genbank_anelloviridae_AAD51728.1_	genbank	VNFQVLQSMFNDCLSVLPDNFTETTGKGTQLHKKIIEHLPYYNTTQTQAQFKRFVENMQPINGNNVWANYINTTKFTTTQEPETNTGIGGPYTTYSDLWYKGTVYNDKIKKIPEQASKLYYDQTKKLIGITFTGSTHRLHYCGGLYSSVWLSAGRSYFETKGPYTDITYNPFTDRGEGN	179	USER	zzzz471
470	genbank_anelloviridae_AAD51721.1_	genbank	VNFQVLQSMYDEAISILPDEKQKRETLLTSIANYIPFYNTTQTIAQLKPFIDAGAYTTGSTTTTWGQLLNTTKFTTTTTTTYTYPGTTNTTVTFITANDTWYRGTAYKNDIKHVPKKAAQLYFQTTQKLLGNTLHGSDATLEYHGGLYSSIWLSPGRSYFETPGAYTDIKYNPFTDRGEGN	181	USER	zzzz472
469	genbank_anelloviridae_CAB42108.1_	genbank	LSKKDMQYDKVQSKCLVADLPLWAAAYGYLEFCSKSTGDTNIHMNARLLIRSPFTDPQLIVHTNPNKGFVPYSLNFGNGKMPGGSSNVPIRMRAKWYPSLFHQQGVLEALAQSGPFAYHSDIKKVSLGIKYRFKWIWGGNPVRQQVVRNPCKKPHSSGNRVPRSIQIVDPKYSSPELTIHAWDFRRGFFGPKAIQ	195	USER	zzzz473
468	genbank_anelloviridae_AAD51724.1_	genbank	VNFQVLQSMYDETISILPTEKTKRESLLTSISQYIPFYNTTQTIAQLKPFVDAGAYTTNSTTITWGRLLNTTKFATTTTTTYTYPGTTNTAVTFITANDTWYRGTAYKNDIKNVSQKAAELYFKTTKTLLGDTFHGSDETLEYHAGLYSSIWLSPGRSYFETPGAYTDIKYNPFTDRGEGN	181	USER	zzzz474
467	genbank_anelloviridae_BAA94955.1_	genbank	TNNPCTTFQVLRQQYNDMIGFPFNYNPNNQTQKTKLETFEKWLYSSSTHYQIFATEANLRPRQYNANGTQNRDYSSLQSEWTSRIYAKKTDSNFGYTSYNFSGEQGYTYVTKIRQWYWTQLTSWTETVPHINSTFANAIHPEFEYHAGWYSNIFIGPNRFNIQFRAAYMDVTYNPINDKGHLNRIWFQYSTKPTTQFVEKQAKCLLQNLPLWSMLFGYSEYIESQLGPFQDHETVGLVIVQCPYTVPPLYDKDNPDMGYVFYDT	264	USER	zzzz475
466	genbank_anelloviridae_BAA85677.1_	genbank	TDSVVVNFQVLQSMYDENISILTDEKTNSQKLLKSIADYIPFYNTTQTIAQLKPFVDAGNATSRTTTTTWGSYINTTKFTTATTTTYTYPGTTPTTVTMLTCNDSWYRGTVYNSKIKELPKKAAELYSKATKTLLGSTFTTEDYTLEYHGGLYSSIWLSPGRSYFETPGAYTDIKYNPFTDRGEGNMLWIDWLSKKNMKYDKVQSKCLISDLPLWAAAYGYVEFCAKSTGDQNIHMNARLLIRSPFTDPQLLVHTDPTKGFVPYSL	266	USER	zzzz476
465	genbank_anelloviridae_BAB86776.1_	genbank	PPPKLFEDHWYTQPDLCKVPLVTLRSTAADLKHPFCSPQTNNPCTTFQVLRSQYNSMIGFPFNYNPSDXNQTTKLKTFEKWLYSCSAHYQTFATEANLRPRQYNADGSLNPNYAELQSTWTTEIYSKKTDSNFGYTSYNLSGQTGYKYVTKIRQWYWTQLTSWTQTVPHINSTFANATHSEFEYHAGWYSNIFIGPNRFNIQFRAA	206	USER	zzzz477
464	genbank_anelloviridae_AAD51722.1_	genbank	VNFQVLQSMYDDTISILPDEKSKRESLLTSIADYIPFYNTTQTIAQLKPFVDAGAYKTGTTTTTWGQLLNTTKFTTTTTTTYTYPGTTNTTVTFITANDTWYRGVAYKEDIKNVPKKAAELYFQTTQKLLENTFHGSDTTLEYHGGLYSSIWLSPGRSYFETPGAYTDIKYNPFTDRGEGN	181	USER	zzzz478
463	genbank_anelloviridae_CAB42101.1_	genbank	LSKKNMEHDKVQSKCLISDLPLWAAAYGYLEFCAKSTGDQNIHMNARLLIRSPFTDPQLIVHTNPTNGFVPYSLNFGNGKMPGGSSNVPIRMRAKWYPTLFHQQEVLEALAQSGPFAYHSDIKKVSLGMKYRFKWIWGGNPVRQQVVRNPCKDSHSSGNRVPRSLQIVDPKYNSPELTIHTWDFRRGFFGPKAIQ	195	USER	zzzz479
462	genbank_anelloviridae_BAA85674.1_	genbank	TDSVVVNFQVLQSMYDKNISILADEKQEREKLLTSIANYIPFYNTTQTIAQLKPFVDAGNVTSGTTTTTWGSYINTTKFTTTATTTYTYPGTNTTKVTMLTCNDSWYRGTVYNNNIKDLPMKAAELYSKATKTLLGNTFTTEDPTLEYHGGLYSSIWLSPGRSYFETPGAYTDIKYNPFTDRGEGNMLWIDWLSKKNMNYDKVQSKCLISDLPLWAAAYGYVEFCAKSTGDQNIHMNARLLIRSPFTDPQLLVHTDPTKGFVPYSL	266	USER	zzzz480
461	genbank_anelloviridae_BAA85687.1_	genbank	TDSVVVNFQVLQSMYDENISILTDEKAKREKLLNSIADYIPFYNTTQTIAQLKPFVDAGNATLRTTTTTWASYINTTKFTTASTTTYTYPGTNTTTVTMLTCNDSWYRGTVYNNNIKDLPIKAAKLYLEATKTLLENTFTTDNHTLEYHGGLYSSIWLSPGRSYFETPGAYTDIKYNPFTDRGEGNMLWIDWLSKKNMKYDKVQSKCLISDLPLWAAAYGYAEFCAKSTGDQNIHMNARLLIRSPFTDPQLLVHTDPTKGFVPYSL	266	USER	zzzz481
460	genbank_anelloviridae_AAD51727.1_	genbank	VNFQVLQSMFNDCLSILPDNFTDTSSKGTELHNKIIQHLPYYNTTQTQAQFKRFVENMPATNGNNVWANYINTTKFSQTQNPQNDTGIGGPYTTYSDSWYKGTVYNEKIKQIPEQASKLYYDETKKLIGVTFTGSTHRLHYCGGLYSSVWLSAGRSYFETKGPYTDITYNPFSDRGEGN	179	USER	zzzz482
459	genbank_anelloviridae_BAA94956.1_	genbank	TDNPCYTFQVLKEFYYKAIGFSATETARQAVLDTLYTQNSYWESNLTQFFVLNVKKGNNTNENLITEMPTRDEFVAKINTNYNWYTYKPSQIQQKLNNMRKAYFKQLTSEGPQATSSNNGYSQHWTTPTTDAYEYHLGMFSTIFLAPDRPVTRFPCAYQDVTYNPLMDKGVGNHIWFQYNTKADTQLIITGGSCKAHIEDIPLWAAFYGYSDFLESELGPFVDAETVGLICVICPYTKPPMYNKTNPMMGYVFYDR	256	USER	zzzz483
458	genbank_anelloviridae_AAD51726.1_	genbank	VNFQVLQSMYDETISILPDEKQKRTHLLTSIASYIPFYNTTQTIVQLKPFVDAGAFTKTTTPTTWGQLLNTTKFTTTATTTYTYPGTTSTTSTFITANDSWYRGTAYKNDIKDVAKKAAELYFDTTQKLLGNTFHGSDSTLEYHAGLYSSIWLSAGRSYFETPGAYTDIKYNPFTDRGEGN	181	USER	zzzz484
457	genbank_anelloviridae_BAA85700.1_	genbank	TDSVVVNFQVLQSMYDETISTLPDQKPERIKLLDSITKYIPFYNTTQTIAQLKPFIDAGNITSGATTTTWASYINTTKFTTTSTVTYTHPGTTTTTVTMLTCNDSWYRGTVYNNKITQLPEAAAKLYSQATKTVLGNTFTTEDYTLEYHGGLYSSIWLSAGRSYFETPGAYTDIKYNPFTDRGEGNMLWIDWLTKKNMNYDKLQSKCLISDLPLWAAAYGYVEFCAKSTGDQNIHMNARLLIRSPFTDPQLLVHTDPTKGFVPYSL	266	USER	zzzz485
456	genbank_anelloviridae_AAF28232.1_	genbank	KTWRSXRRRPXRRRWRTXRRRPARRXGRRRNVRRRRRXGRWRRXYRRWKRKGRRRKKAKIIIRQWQPNYRRRCNIVGYIPVLICGENTVSRNYATHSDDTNYPGPFGGGMTTDKFTLRILYDEYKRFMNYWTASNEDLDLCRYLGVNLYFFRHPEVDFIIKINTMPPFLDTELTAPSIHP	180	USER	zzzz486
455	genbank_anelloviridae_BAA85704.1_	genbank	TDSVVVNFQVLQSMYDEKISTLPNEKQERINLLTSIANYIPFYNTTQTIAQLKPFIDAGNITAPKTATTWGSYINTTKFTTTTTTTYTYPGTNTTTVTMLTCNDSWYRGTVYNKQIAELPQQAAKLYSQATKTLLGNTFTTEDHTLEYHGGLYSSIWLSPGRSYFETPGAYTDIKYNPFTDRGEGNMLWIDWVSKKNMNYDKVQSKCLISDLPLWAAAYGYVEFCAKSTGDQNIHMNARLLIRSPFTDPQLLVHTNPTKGFVPYSL	266	USER	zzzz487
454	genbank_anelloviridae_AAD04857.1_	genbank	YNPFTDRGEGNMLWIDWVSKKNMNYDKVQSXCLISDLPLWAAAYGYLEFCAKSTGDPNIHMNARLLIRSPFTDPQLXVHTNPTKGFVPYSLNFGNGKMPGGSSNVPIRMRAKWXPT	116	USER	zzzz488
453	genbank_anelloviridae_AAD04852.1_	genbank	YNPFTDRGEGNMLWIDWLSKKNMEYNKVQSKCLVADLPLWAAAYGYLEFCSKSTGDTNIHMNARLLIRSPFTDPQLIVHTNPNKGFVPYSLNFGNGKMPGGSSNVPXRMRAKWYP	115	USER	zzzz489
452	genbank_anelloviridae_AAD04869.1_	genbank	PFTDRGEGNMLWIDWLSKKNMNYDKVQSKCLISDLPXWAAAYGYLEFCAKSTGDQNIHMDARLLIRSPFTDPQLIVHTNPTKGFVPYXLNFGNGKMPGGSSNVPIKMR	108	USER	zzzz490
451	genbank_anelloviridae_AAD04870.1_	genbank	PFTDRGGGNMLWIDWLSKKNMDYDKVQSKCLISDLPLWAAAYGYLEFCAKSTGDPNIHMDARLLIRSPFTDPQLIVHTNPTKGFVPYFLNFGNGKMPGGSSNVPIRMR	108	USER	zzzz491
450	genbank_anelloviridae_BAA28156.1_	genbank	MAYGWWRRRRRRWRRWRRRPWRRRWRTRRRRPARRRARRRNVRRRRRGGRWRRRYRRWKRKGRRRKKAKIIIRQWQPNYRRRCNIVGYIPVLICGENTVSRNYATHSDDTNYPGPFGGGMTTDKFTLRILYDEYKRFMNYWTASNEDLDLCRYLGVNLYFFRHPDVDFIIKINTMPPFLDTELTAPSIHPGMLALDKRARWIPSLKSRPGKKHYIKIRVGAPKMFTDKWYPQTDLCDMVLLTVYATTADMQYPFGSPLTDSVVVNFQVLQSMYDEKISILPDLIPERTHLLQSISNYIPFYNTTQTIAQLKPFIDAGNGKLNTTATTWGSYINTTKFTTTATTSYSYPGTTTSTVTMLTCNDSWYRGTVYNNQIKGLPIQAAQLYSKATKTLLGNTFTT…	770	USER	zzzz492
449	genbank_anelloviridae_AAD04856.1_	genbank	EGNMXWIDWLTKEDSTYSKSQSKCLIENLPLWAAVYGFKEYCSKVTGDTNIEHNCRCVMRSPYTVPQLLDHNNPLRGYVPYSFNFGNGKMPGGSSLVPIRMRAKWYPTLFHQKEVLEALAL	121	USER	zzzz493
448	genbank_anelloviridae_AAC29428.1_	genbank	TGAYTDIKYNLLTDRGEGNMLWIDWLSKKNMNYDKVQSKCLIADLPLWAAAYGYVEFCAKSTGDTNIHMNARLLIRSPFTDPQLIVHTDPIKGFVPYSLNFGNGKMPGGNSNVPIRMRAKWYPLLFHQQEVL	132	USER	zzzz494
447	genbank_anelloviridae_BAA33426.1_	genbank	ITYNPFSDRGEGNMLWIDWLTKDDSVYNKQQSKCLIENMPLWASVYGYTEYCSKVTGDTNIEHNCRCVIRSPYTVPQLLDHNNSLRGYVPYSINFGNGKMPGGSSLVPIRMRAKWYPTL	119	USER	zzzz495
446	genbank_anelloviridae_BAA28162.1_	genbank	MAYWWWRRRRRAPWRRRRRWRIRRPRRRRAAYRRRRTRRRVRRRRGRWRRTYRKWRRGRKRRRHKRRLILTQWQPAFIRRCYIVGFLPLIFCGEXTSARNFATHSDDLISXGPYGGGMTTTKFT	124	USER	zzzz496
445	genbank_anelloviridae_AAK00620.1_	genbank	NTIAFTTAETVTTTKPYTTYSDTWYRGTAYTQAITEVPLTAAKLYEKQTSNLLSTTFTGGSAYLEYHGGLYSSIWLSAGRSYFETKGAYTDICYNPYTDRGEGNMVWIDWLVKTDSRYDKTRSKCLIEKLPLWAAVYGYAEYCAKATGDSNIDMNARVVIRSPYTTPQMIDTNDPLRGFIVYSFNFGKGKMPGGTNQVPIRMRAKWYPCLFHQKEVLEALGQSGPFAYHSDQKK	234	USER	zzzz497
444	genbank_anelloviridae_AAK00621.1_	genbank	NIFIGPNRYNLQFQTAYVDTTYNPLMDKGKGNKIWFQYLSKKGTDYNEKQCYCLLEDMPLWAMCFGYTDYVETQLGPNVDHETAGLLIIICPYTQPPMYDKTKPNWGYVVYDTNFGNGKMPSGTGQVPVYWQCRWRP	137	USER	zzzz498
443	genbank_anelloviridae_ANQ39374.1_	genbank	RKRYRVRRRRWGRRYTRRGRLRLRRRRRRRKKIVLTQWNPQTTRRCYIRGLMPVIWAGMGSGGRNYAVRSDDYTQSSFGGSFGTETFSLRVLYDQYQRGYNKWSHTNKDLDLALYYGCRFRFYRHDRTDFIVSFTNNPPMKTNQYTAPMTHPGMLMRAKHKILIPSRLTRPRGKKYISVRIRPPKLFQHKWYTQSDLCSVSLVQLNLTAADLKHPFGSPLTDTPCVSFQVLGDLYNECLNIDLPETKQNSLTKLNNSTQDDYSKNLEKLLQQLYTNGQYWQTFITGPFIKDIMEANQYTNNKTNYKKTEFYKTDKATGEKAFVSNADSNYLYATYHPENIEQTLYQIRNNYFKLSIGKNDVFGDHASQYRGATQLLEYHLGIYSPIFLHPGRSNVQMWT…	733	USER	zzzz499
442	genbank_anelloviridae_ANQ39373.1_	genbank	TSTMAWGWWLKRWRRRKKPAWKKWRTRRWRRFRRRRPKRTYGRRRRRRTVRRRRGRRLRRRGWTRRRYIRRRRRKKKLVLTQWNPQDVRRCTIRGIIPLIMCGANTASFNYGMHSDDSTPQPEKFGGGMSTVTFSLFVLYDQYTRHLNSWSYPNDQLDLARYKGCKFKFYRDTNTDFIVTYDINPPMKNTELSSPNTHPGMLMQQKRKILVPSWDTYPRGRKYVLAKIPPPKLFEDHWYTQPDLCKVPLVTLRSTAADLKHPFCSPQTNNPCTTFQVLRDKYNDMIGFPFNYNASDQNQTQKLRQFELWLYGTSTHYQTFATEANLRPRQYCADGSKNTQYTTLQSDWTTKIYAKKTDSNFGYTSYNFQGEQGYTYVTKMRQFYWTQLTSWTQTVPHLN…	757	USER	zzzz500
441	genbank_anelloviridae_ANQ39369.1_	genbank	MPYFWRRPYYNRWKRWRRPGYWNRRRRLRAAFRRPRRRRTRYRVRRLITKKLKTIKLKEWQPKTIRRCSIIGHIPLVLCGRGRQVNNFMQYFDSYVPIDKPGGGGWSSIVFNLGGLYQQFQKLLNWWTHDNDGLPLVRFLGSDWKFYRSWDTDYIVTAQTCPPMTDTEFKHLNSHPYRQLMNKHPIVVPNLVRHQYKKQYVRKHFPPPSLLQNKWYFQQDLCNTNLLMLTTSACSLDQFWMPNNELSNNITFYCLNTNIFANPNFLQNGTRGYNPKSTMILWGEGNGHTTQPQSFQQLIYLGNLKTFKLGNTQSQGTPPGTETNWGNPFHGDHGSQDTKIWYSTQMPHTFTDPTQGKITLAEPLFQQCRYNPLKDTGLGNVVFFKSVSISTGNIWDTPK…	639	USER	zzzz501
440	genbank_anelloviridae_ANQ39370.1_	genbank	MAWWGWRRRWWRPRWRRRRRWTRRRRRVPTRRPRRAVRRYRRRQRVRRRRWGRRWTRRGRLRLRRRRRRRKKIVLTQWNPQTVRRCYIRGLMPVIWAGMGSGGKNYAVRSDDYTTTGFGGSFGTETFSLRVLFDQYQRGFNRWSHSNKDLDLALYYGCSFRFYRHDSVDFIVTFTKNPPMKTNQYTAPLTHPGMLMRAKYKVLIPSRKTRPRGRKYVKIRVKPPNLFQHKWYTQADLCSVSLVQLNLTAADFTHPFGSPLTDTPCVSFQVLGDLYNECLNIDLPKLQKFTKEGPTYEDNAFSNKDSLDKLLKQLFLNGQYWQTFITGPFIKDQMQHNTYDTYLNNLKRTSTFIKPTQTTHYKPEDAAKFVSSADSNYLFVTYHPENIPEKIKAIRDNYF…	779	USER	zzzz502
439	genbank_anelloviridae_ANQ39367.1_	genbank	MVWRRGRRWRRWRWRRKPRWRRWRRWRRRRRRPARRRRPRRVRRRRGGWRRSYRRWKRRRGRRRHKKKLILTQWQPAVVKKCRIVGYDPIIICGLNRTSHNSTTHAEDYTTGNQAFGGGLCTTKYTLRILFQEYMAHHNYWTASNKDLDLARYLGASIIFFKHPTVDFVARVRTMPPFNDTDMTAASLHPGMLMLAKKKIIIPSLKTRPSRKHYVKIKIGAPKLFEDKWYSQRDLCDTTLMVIEATVADLQYPFGSPLTNSICCNFQVLNSNYDNALSTLIGTQGDKDRDQCYNFLLNTITYYNTSQTLAQLNKFLPTTNTTQLSESNAQHSINPSNKKENTYESTNEDIHNNTLYGGAVYYKQKGTSTTTLPPQKMKEANKTYTKAAKKILSNWNFTK…	763	USER	zzzz503
438	genbank_anelloviridae_ANQ39372.1_	genbank	MAYWWWRRRRRAPWRSRRRWRTRRTRRRRAAFRRRGRRRRVRKRRGRWRRTYRKWRRGKKRRRHRRRLILTQWQPAFIRRCYIVGYLPLIICGENTSARNFATHSDDLISNGPYGGGMTTTKFTLRILYDEHLRHLNYWTVSNEDLDLCRYLGGTFYAYRHPTVDFIIQIHTSPPFLDTPLTGPSIHPGMLMLTKHKILIPSLKTRPSKKHKVKIRFRPPKLFQDKWYPQSELCDTTLLTIFATACDLQFPFGSPLTNNPCVNFQVLGSVYKNHLSILPDKLSLYKNYYDSNLYNNVELYQTFQTIAQIKPSAQESSFNPTWQNCQNTTKLNDSGTNQHQCNDTWYYGKTYTSQITDAAKKIRTKYLNATRKALPLLQTHGDELLEYHTGIFSSIFLSA…	731	USER	zzzz504
437	genbank_anelloviridae_ANQ39368.1_	genbank	RKRRRLARRRLGRPARRYRRRRVRRKRRWRRGRPRRRLYRRRRRFKRRRRRRPKIKITQWQPSAVKRAFIIGYFPAVICGPGRWSENFTSHIEDKIAIGSYGGGHSTSRWSLKVLYEEFQKQHNFWTRSNKELDLVRFFGSTWTFYRHEDTDYIVTYNRKAPMGGNVLTAPSLHPGAAMLTKHKIIVPSFKTRPGGKPTVKFRIKPPTTFTDKWYFQKDMCDVTLLNLNVVLCNLRFPFCSPQTANVNVTFQILHDEIYHNFLSITAEKLIQNQGRNWKDYYKDFLKKALPDKRKANRLNTFITEGAFHAPQVIKYQGKANNQNKYFKDKDALWGDAIHIVEQTEVVTGQTAQDLNLLIEKIADNAENYLAKVKQEFSTTTVGSTMHGMFTHFTGMFSP…	737	USER	zzzz505
436	genbank_anelloviridae_ANQ39366.1_	genbank	MAWGWWRRRRRRWFRGLWRRKRRARGRPRWTYRRPRRRRVRRQRRWRRGRLRRRRFKKRRFRRRRKRQKIIIRQWQPAMVRRCYIKGYMAALISGDGTFATNYSSHLQDRIMKGPFGGGHSTMRFSLQVLYEGHLRHENYWTYSNQNLELGRYKGATIKFYRHPDTDFIGIYNRKTPLGGNIMTAPSLHPGNMMLTKRKFLIPSLETRKRGKKYVKIRIGPPTLLVDKWYFQKDICDVTLLNLNVTECDLRFPFCSPQTNNVCISFQVLKPCYNKYLSINAFDNDTTDQKLKDFLNEAFKISTSGNTYRAFNQLNTFKTEGGISHPQLHKPVPEENKPSSSDYFAKRDALWGDPIYCNTRTDQDTGTKIIEKFLIPNMTSYFKKMQSENFHNITRGNKA…	745	USER	zzzz506
435	genbank_anelloviridae_ANQ39365.1_	genbank	FITTSARITNNFTCYKDSIAPHLFPGGGGFSIYNFTLRALYQNHSVLENWWTKSNDNMPLIRLTGITLKLFRNANTDYMFLYNNTYPMAATLLSYTSTHPSAMMLHKHSKKILCKQHNKNKKPYKKLHIRPPSQMYNKWYFQHDIADVPLLQTYCTAASFDRMYLASNGISTTIGFTSLNTVGFQNHNYIKTTTSGYIPIPGTMLFGIHRGELSIKNIKFYDLIFLGNPENLTIGTTIGGTPTGSQQGSTDTEKKIKNHRLDWKYWGNPFDPTFRTTGAILTTNKTWDQLIQEYKTATQQTPIKETDFTYKTQFLIDVRYNPFADKAIGNKLYLIDIKDMAHSNDWETPSKDTLYTDLPMWLMLWGYIDYHKKCGEHSSIDTTHILVFKCPYLQPKDIK…	535	USER	zzzz507
434	genbank_anelloviridae_ANQ39363.1_	genbank	SGSVFDFSNFRFSKRKKKSIILRQFQPSTINKCKCIGYKCLFQGSPLRTMNNFVQYIYSYIPEKQPGGGGWSIQVLSLDSIYEDYQHLQCIWTKGNAGLPLVRYLGCQFTLYQSQETDYVFVYDNCWPMVDTIHTHADSAPFRMLQKKHKIVVPSRNSSKRKKPYKKVFVKPPQQMQNRWYFSKEICKTPLVMFTATAISLFNPFTDPRAKSNNVTVHCINPYIFQNPDFQHWGTTGYSPKSTDSNIPLYLYASNTDNLTYDKLKSKTETIIALTNTKDHTPGNDLRSSNNNISQLAGNPFHEDYTSGNMYTYISMITPQEMKMLVTNGSEPQDTKRSITKTGDFIYTFRYNPDNDDGSTNKQYIVSTASGHTIQPPTEENFILSGFPFPYMLWGWTDW…	544	USER	zzzz508
433	genbank_anelloviridae_ANQ39371.1_	genbank	MAWSWWWQRWRRRPWGRRRRWRRLRARRPRRPLRRRRRRRRRPRVRRRRGGRWGRRRGRRTYKRRRRRRPYFKPKKKLVLTQWHPQTVRRCAIRGMIPLLLCGHETWNRNYAMRSEDYPEQGRYPFGGSLSTTTWSLKVLFDEHQKHRNRWSYPNTQLDLARYKGCKFTFYRHKKTDFIVTWSRRPPFKLNKYSSAMYHPGMMMQEKYKLLIPSWDTKPKGRATVSVRIRPPTLFEDKWYTQQDICEVNLVSLAVSAASFSHPFSQPSSNNICTTFQVLKDKYYPVIGILSNYDTPAGNKKNYNYNKKELETWLYTTGSLYHTFRTQEYLNPNRTFTTASDGFDAPLKTWLSKNANKFQTGKSSLYGFNTYKPDESNLKEARKKYWQTLTGTNDLHSSY…	771	USER	zzzz509
432	genbank_anelloviridae_ANQ39361.1_	genbank	MAWTWWWWRRRGRRRPWRRRRWRRLRPRRTRRTVRRRRRRTTVRRRRWRGRRGRRTYYRRRLKKRRKKRKKLPLTQWNPSTIRRCIIKGMIPMIICGHTTAGRNYALRSDDYISQNRPYGGSFSTTTWSLKVLFDEYQKFHNRWSYPNTQLDLARYKGATFYFYRDKKTDFIVTFNTVPPFKINKYSSCMYHPGMLMMQAKKRILIPSFDTKPRGRKRIKVRLKPPTLFEDKWYTQNDLCDVNLLSFAVTAASFTHPFCPPQTDNTCITFQVLKDFYYPNMSISPQNDTQDDPTFDTLYSKCTYFQTLHTPAQLNATVKGAQYNDKIPQTEWLSGQGPQKFTTGNNSVFGFCNYNPDKSKLHEIRKWYFKQENKDNHIHGTYGKPTNNALDYHLGKYSP…	741	USER	zzzz510
431	genbank_anelloviridae_ANQ39356.1_	genbank	MAWRRWRWRPLWRRRRRRRWRRRRRRPRRRRPYRRRRPRRVRRRRGRWRRAYRRWGRRRRRRKHKKRLVLTQWQPAVVKRCYIIGYDPIIICGINRTAFNYTSHSEDYTYNNDSFGGGLCTTQYSLRILFQDKLAQHNFWTRSNEHLDLARYLGATLILFRHPTVDFLVRVRTSPPFTDTDMTALTLHPGMMMLAKKTIKIPSLKTRPSRKHFVRIKVGAPKLFQDKWYPQNELCDVTLLTVQATTADFTYPFGSPLTNSPCCNFQVLNSNYDKALSILDTASVLTDEIHTKRENCYTFLLQQYSYYNTKQTQAQLKFEFFPKQNPKMPKTDNADLSKDPSQLTKTNVSSNYPHWDTLYGGLAYGFNNTSSSDNTNQAKDLQTQMLEANRFYTKAGKKI…	769	USER	zzzz511
430	genbank_anelloviridae_ANQ39357.1_	genbank	MYSPNTHPNFLLQAKRRVLVYSFKTRPGGRKKVTVKVPPPKLFEDKWYSQHDLCQVHLVSWRATACNLRYPFCSPQTDNPCTTFQVLHENYYEVFGNYGLTDPDGDMNHKIQKFESWLYGQCTHYQTFATESRLRPPAGPNPTEPDGTPYASDFITKWRSCWNSFYTKRDSNYGWCNFDPDQFNRNTVTVQDIRDKRFTFLTSVGSKATQNQHVNTTFAKGKIKYHEYHLGWYSNVFIGSHRYNSQFRPAYIDITYNALNDKGDGNMIWFQYLTKPTTEFDAIQCKCVITDIPLYAALYGYDDYVQRTLGKFTDTEQVGIVCVICKYTDPPLVRTALDKKKWGYIFYDTHFGNGKSPEGLGQIHTYWMQRWRPYMMFQRQVMNDICKCGPFSYRDDLPS…	571	USER	zzzz512
429	genbank_anelloviridae_ANQ39362.1_	genbank	GHSTSRWSMKVLYEENQRHHNFWTASNKDLELARFFGSTWTFYRHQTTDYIVTYSRRAPLGGNIMTAPSMHPGVAMLSKHKIIVPSFLTRPGGKPTVKVRIKPPTTFTDKWYFQHDICDTTLLNLNAVACNLRFPFCSPQTDNYCVTFQVLSSVYNEFLSITHSDLLDTKTPNKFYKNFLEKAMPATNTRSANILNTAATEGNFSHPQITKWKPKTLTNTEYFQPVDGLWGDTVFGDYNTSDFNSSNPNVHLDSIKDKIPKNAANYMKKFKQEFPTTTQLHGVFSHKTGIYSSSFLTYNRISPEVPGLYTDIIYNPLIDKGIGNHVWIDYCSKKDNIYSSTQSKCHIADLPLWIACFGLVDWCKKETGNWAIPAWARVLFICPYTFPKMYNQNVEGYGY…	635	USER	zzzz513
428	genbank_anelloviridae_ANQ39360.1_	genbank	MAWSWWWQRWRRRRWKPRRRRWRRLRWRRPRRAVRRRRRGRRVRRRRWARRRGRRKRYATRRKRRFRGRRFRKKLVLTQWHPSTMRRCLIKGIVPLVVCGHTRWSYNYALHSEDYTEEGRYPHGGSLSTTTWSLKVLYDEYLKHHNFWGYPNNQLDLARYKGARFTFYRHKKTDFIVYFNRKPPFKLNKYSCASYHPGMLMQQKHKILIPSYDTKPKGRPKITVRIKPPTLLEDKWYTQQDLCNVNLLQLVVTAADFQHPFCSPQTNTPTTTFQVLKDIYYDTMSITDLTDNYTSVNTPTETCTFTQFSEKLENILYERASYWNSFHATEYVNPNIIYKNGDKLFKEQNDLMTWMTQTNNSGFLTKNNTAFGNNSYRPNKEKITKARKTYWNALVDKND…	765	USER	zzzz514
427	genbank_anelloviridae_ANQ39359.1_	genbank	MAYWWWRRRRRRPWRRRRRWRLRRPRRRRAPYRRRRGRRRVRKRRGRWRRTYRRWRRKRGRRKHRPKIILKQWQPNFIRNCYIVGFMPLIFCGENTVSQNYATHSDDLVAKGPYGGGMTTTKFTLRILFDEHLRWMNYWTVSNEDLDLCRYLGVKFYFYRHPTVDFMVQIHTQAPFLDTELTGPSIHPGMMILNKKKIFVPSLKTRPNRKHKVKVRVGAPRLFEDKWYPQSELCDTTLVAIYATACDLQFPFGSPLTENPCVNFQVLGSAYKQHLSILSTESENNKTHYEKALFKNIAYYNTFQTIAHLRETGKQQNADPQWNACVNNTALNFQGNNQNACNDTWYYGNAYKDNIQTLCEQTRKKYFAATKSAFPAYATLVDDLYEYHGGIYSSIFLSP…	735	USER	zzzz515
426	genbank_anelloviridae_ANQ39358.1_	genbank	MAWSWWWQRRRRWRRPLRRRRWRRLRRRRPRRPLRRRRRRPRTVRRRRWGWRRGRRRRLRRRRRRRKGRRFKKKLILTQWHPSVVRRCLIRGIVPMMICGHTRWNHNYALHSEDYPEQGRYPFGGSLSTTTWNLKVLYDEHQKMHNRWGYPNTQLDLARYRGCRFTFYRHKKTDFIVYFNRRPPFKLNKYSCAMLHPGMLMQSKHKILVPSFDTKPGGKLKIRVRVRPPTLLEDKWYTQQDLCEVNLLQLSVTAADFRHPWISPESNTSVTTFQVLKEFYYNSIGIGTDPKKTYKPIAGKDKGTEKCYTDHLKTVWETLVSNGNYWNSFHVMEVFSSNLAGVDGKEGIKNLIQTKFTNESSSADDQNQFKTGRSTRFGFNTYNPKCKQNDIENLRENIW…	775	USER	zzzz516
425	genbank_anelloviridae_ANQ39353.1_	genbank	MPWYYNNYRWRRPWRPRRRRRPWRRPRRFVRRRFYRRHRWVRRRFKRKLKSLLVKQYQPPCIRRLKIRGHYPLFMTTHQRLSNNNTLYLDSTGPRYVPGGGGFSLSQFTLRSLFQQHLRLRNWWTQSNDQLPLIRYTGCKILLYRNSTVDYIFSYNNNLQAKANRLMYASTQPAIMNLTKHKRIVPCKQYNRKSKPYTKIRIKVPPQMKNTWYFQHDIVDIPLITLMCTACSLDRWYLSSTAISPTIGLTTLNCQSFQFHNFKAWPTSGYKPSEQIYLYGCPTVKEIETMTFADLIYLGNTNWYQEGKLIKDAGTSTDDFNTKWSKYFADNKQWGNIFHPSYFTGRRPVLITSYDPQTLKTKANNQWTTPLYTQTNPIFHTKTTENIINCRYNPYTDTG…	673	USER	zzzz517
424	genbank_anelloviridae_ANQ39355.1_	genbank	MAAWWWGRRRRWRRWRRRRLPRRRRWRRRRRWPRRRRRRWPRRRRRRRPARRLRRRRRRRRVRRPRRRQKLILTQWNPQTVRKCVIRGFIPLFNCSRTAYHRNFVDHMDDVYTTGPCGGGTGSMLFNLGFFYQEFKKHHCKWSASNRDFDLCRYRGTVLKFYRHSDVDYIVWVNRTPPFQENLLDAMSRQPLAMLQAHKCLLIRSFRTHPRGPAYLKMKVRPPRLLTDKWYFQPDFCNVPLFQLQFALAELRFPIGSPQTANTCVNFLVLDDIYYNFLDNKPSQSHNSQREERSHGYSFKGAEGEEDRNMLWHGLWSTDRYLNTPHINTLFPSISKLNEHKDEDTNANQNYKKLLDGNKKVYKDSQYRQPIWNKTQISNLYRAIAEEQHRKIQQYYNTT…	770	USER	zzzz518
423	genbank_anelloviridae_ANQ39354.1_	genbank	MPPYRKRFYRNNFYQRRRRRFRYRRPRNTFRRRWRLKRTNRRHRKVKKRKYFKKKIKIAIQQFQPSRIRKCKIIGTRCLFQGSPLRTSNNYTDYANSVTPKNVPGGGGWSLQTFTLENLFDDFQRLKNIWTESNAGLPLVRYLGCTFKFYQSLETDYLIHYDRCWPMVDTPYTHADCSPTGMFLKKRKITIPSRQTQINKKPYKKVHIKPPTQMQTKWYFQHDLCKTPLLMLTATSVSLTNPYCYPKAKSNNITLYMLNSFIFQKPNFQNFPQTTGYSPKRAEDTHQQHFGDLYLWATHSTNPSEALEVTNTKNLSGQLYFLGNTKTFNEGTPLTKETNNTLNNWGNPFYHTHADKDSTTKYISYMSSTDYKELLNNATTSKTYHLTRTEAIYFEYRYN…	643	USER	zzzz519
422	genbank_anelloviridae_ANQ39352.1_	genbank	MDDIPPRNASYGGNFTNVTFNLACFYDEFMHHRNRWSASNHDLELVRYLRTSLKLYRHESVDYVVTYTTTGPFETNEMSYMLTHPLAMLLSKKHVVVPSLKTKPHGRKYKKITIKPPKLMLNKWYFAADFCHIGLFQLWATGLELRNPWLRSGTNSPVIGFYVLKNQVYQNKYSNLNTQEAHTARKSAYDELTKPSDGTKWYNWQYTYNKLMKPIYYAASNDTGNQDMKNQTYNWKNYKTYFQKVKTKWETISKSAYELVAEEYRQLYTTTVTYPPPWEPTTSNTGRQYLEHDCGIYSPYFLTPQIYSPEWHTAWSYIRYNPLTDKGIGNRVCVQYCSEASSDYNPVKSKCMLQDMPLWMMLYGYADYVVKSTGIQSAWTDMRVAIRSPYTDPKLIGST…	642	USER	zzzz520
421	genbank_anelloviridae_ANQ39350.1_	genbank	RRRYTRRGRLRLRRRRRWRRKKIVLTQWNPQTVRKCMIRGMMPMLWAGMGTGGHNYAVRSDDYTMSGFGGSFGTETFSLKVLYDQYERGFNRWSFSNEDLDLALYFGCTFTFYRHKTTDFIVSWTKNPPMKTNQYTAPLTHPGMLMRSKYKVLIPSWQTKPKGRKTVKVKIGPPHLFQHKWYTQQDLCAVSLVQFNLTAADFQHPFGSPLTETPCVTFQVLGDLYNDCLNIDLPPLKDDAKTLDESKGNQTNKTAVQKLYDTLFTQNTSGHYWQTFITNSMVKTHVDSKLANDTNYANNGHTKKTKAKENEAAVNNQCQSKFFDNRDSLFLFATYHPANILKELKTMRDNNFELHTGKNDLYGDNKAQYSGQTHLLDYYLGLYSPIFLHPGRSNVEFFT…	731	USER	zzzz521
420	genbank_anelloviridae_ANQ39346.1_	genbank	MPWWWNRRRKPWFGRWRRKKRRYKRRRFPRRRYRRINTRRRRRRRKRKVRRKKQKIPIQQWQPDSIVKCKIKGIGCLVAGAEGRQCFCYTNELKNYPQPKAPGGGGFGAELFTLEYLYKQWIARKNIWTKSNDYKDLVRYTGTSIKLFRHLTTDFIVSYSRQPPFIVEKDFYNEIHPVNMLLQKHKKFIPSLKRKPHGRLYVKIKIKPPKQMITKWFFQQDFANHGLFTLRAAACNMSWGYYGPNTQSRCLTIRALNVNFFKNTGWGQIKGSHQSPTPYLPYDEYPSSHGLYFWYPYKGAKPTDYPFRPTTTNYYTTVNYNTGFFSSKVLTAVKVTQTTEQTTPTHEIPITLCRYNPDLDTGEGNAVWLESIINERHWQPPDDPDLIIVGKPLWMSFYG…	569	USER	zzzz522
419	genbank_anelloviridae_ANQ39343.1_	genbank	MPLFYNYYNRYRRPWRQRRRRRLRFRPRRTRKTLRRKRRPYYWVRRKKFLKSLLRKLKTIKLKQFQPERIKKCKIKGYLELFEGSYGRTSNNFTLWKESYVPPHEPGGGGWTIQQLGLGNLFTQHQYKMNAWTKSNNGYNLCRYLGASITLFRQPEVDYLFHYNLEEPGNITKYTYPSYHPFLVLQYNKKVIVPSFKTQPLKRSLFKKKFIRPPKKLTNQWYFQQHFANTQLLTFYASAIDLTTMFIPSNAKNNNITLNALNTRLFTHPVFQYYRSHTTGFTPDGRQYIWGLPKAPLNPSEPTKQEDWIFLGETRINDPGTPLNNKSTSEYTSKLWGNPFYFEFLLQDSPTMIRDKELTTIINSHKQDPITEDKWRKEPYIIPVRYNPNKDNGNGNIVY…	667	USER	zzzz523
418	genbank_anelloviridae_ANQ39351.1_	genbank	MAYWWGRRRRWRRWRRRRRPLRRRRRWRRRRRWPRRRRWRRRRRRARPARRYRRRRGRRRVRRRRRPQKLVLTQWNPQTVRKCVIRGFLPLFFCGQGAYHRNFTDHYDDVFPKGPSGGGHGSMVFNLSFLYQEFKKHHNKWSRSNLDFDLVRYKGTVIKLYRHQDFDYIVWISRTPPFQESLLTVMTHQPSVMLQAKKCIIVKSYRTHPGGKPYVTAKVRPPRLLTDKWYFQSDFCNVPLFSLQFALAELRFPICSPQTDTNCINFLVLDDIYYKFLDNKPKQSSDPNDENRIKFWHGLWSTMRYLNTTYINTLFPGTDSLVAAKDTDNSVNKYPSTATKQPYKDSQYMQNIWNTSKIHALYTWVAETNYKRLQAYYTQTYGGYQRQFFTGKQYWDYRV…	747	USER	zzzz524
417	genbank_anelloviridae_ANQ39349.1_	genbank	HRNFVEHMDDVFPKGPSGGGFGSMVWNLDFLYQEFKKHHNKWSSSNRDFDLVRYHGTVIKFYRHSDFDYLVHVTRTPPFKEDLLTIISHQPVLMMQNYRCLLVKSYKTHPGGRPYITVKIRPPRLLTDKWYFQPDFCGVPLFKLYVTLTELRFPICSPQTDTNCVTFLVLDNTYYKFLDNTADNTRDTERTNKWTNMIMTPRYHLTTHINTLFSGTQAMQNAKQTGRDSQFRENIWKTEEIVKTIQDIAKKNMEKQQQYYTKTYDAYASQYFTGKKYWDWRVGLFSPIFLSPSRLNPQEPGAYTEIAYNPWTDEGTGNIVCIQYLTKKDSEYKPGAGSKFAVTDVPLWAALFGYYDQCKKESKDANIRLNCLLLVRCPYTTPKLYNPRDADQLFVMYSY…	636	USER	zzzz525
416	genbank_anelloviridae_ANQ39340.1_	genbank	MAWGWWLKRWRRRKKPAWKKWRTRRWRRFRRRRPKRTYGRRRRRRTVRRRRGRRLRRRGWTRRRYIRRRRRKKKLVLTQWNPQDVRRCTIRGIIPLIMCGANTASFNYGMHSDDSTPQPEKFGGGMSTVTFSLFVLYDQYTRHLNRWSYPNDQLDLARYRGCKFKFYRDTSTDFIVTYDINPPMKNTELSSPNTHPGMLMQQKRKILVPSWDTYPRGRKYVLVKIPPPKLFEDHWYTQPDLCKVPLVTLRSTAADLKHPFCSPQTNNPCTTFQVLRSQYNSMIGFPFNYNPSDLNQKAKLETFEKWLYSSSTHYQTFATEANLRPRQYNADGTANRDYTALQKEWTTTIYAKKTDSNFGYTSYDFSGDKGYTYATKIRQWYWTQLTSWTQTVPHINSTF…	754	USER	zzzz526
415	genbank_anelloviridae_ANQ39347.1_	genbank	VFIGGSFGTETFSLKVLYDQYERGFNRWSFSNEDLDLALYFGCTFTFYRHKTTDFIVSWTKNPPMKTNQYTAPLTHPGMLMRSKYKVLIPSWQTKPRGRKTVKVKIGPPNLFQHKWYTQNDLCSVSLVQFNLTAADFQHPFGSPLTDTPCITFQVLGDLYNKVLNIDLPKLKNEKGDFHENTGNQTNKDDVKKLYTTLFYSDNSGHYWQTFITNSMVKWHVPKDKDANDTNYSSNRHTNADTINVYENAKDTTWQNKFFDKRESIFLFATYHPKNIADTIKKMRDRNFELHTGKNDLYGDSKAQYARSTHLLDYYLGFYSPIFLHPGRSNVELFTAYKDIVYNPLLDRGKGNMIWFQYHTKTDNIYDPTKCRWLIQDMPLWSMLHGYCEYLDTQIKWGD…	549	USER	zzzz527
414	genbank_anelloviridae_ANQ39345.1_	genbank	TQWNPPIVKRCFIKGALPLILCGSPRANMNYAMHCEDSTPQPEPFGGGMSTVTFSLLVLYDQHERHLNRWTFPNDQLDLVRYKHTRFKFYRSKDTDFIVTFNIKPPMKMNETTSPNAHPGMLMQMKHKILVPSFQTRPGGRRYVSVKIGPPKLFEDKWYPQADFCKVPLVSLTATAADFRHPFCSPQTNNPCTTFQVLREQYNKVIGFPMKGEEAYKDFETWLYESGGHYQTFQTEAQFRVPSHKPDGDENDKKGEWTSMWSGTNGIYYKKTDSNYGYHSFQVKNKKTDIIKRRNTQFDWETKFTDKATHINPTWQPGHFKQYEYHLGWFSPIFIGPNRYNTQFRPAYYDVTYNPFNDKGKGNIIWFQYLTKPDTEFDPLQCKCVIQDIPLWAAFFGYP…	670	USER	zzzz528
413	genbank_anelloviridae_ANQ39344.1_	genbank	MPLIICGSGSTQFNFITHMDDFPPMGYTYGGNFTNVTFSLEAVYEQFLYHRNRWSSSNHDLDLARYQGTTLKLYRHEYLDYIVSYNRTGPFQISDMTYLSTHPAFMLLQKHRIVVPSFKTKPHGRRSIKVRIKPPKLMLNKWYFTKDICSMGLFQLQATACTLNNPWLRDTTKSPVIGFRVLKNSIYTNLSNLPEHEGARQSIRKRLHPDSLTGSPPNQKGWEISYTKLMAPIYYSSNRNSTYNWLNYQQNYSNTYRAFKTKMDDNLSLIQKEYTYHYPNNVTTDLIANNTLTHDWGIYSPYWLTPTRISLDWETPWTYVRYNPLADKGIGNVVYTQWCSEQSCKVDQKKSKCIMRDLPLWVIFYGYVDWVIKSTGVSSAATDMRVAIISPYTEPALIG…	551	USER	zzzz529
412	genbank_anelloviridae_ANQ39341.1_	genbank	MAWWGWRRRRWFWPRRRRWRTRRRRRVPTRRPRRPVRRHRRRRVRRRRWRGRRRYTRRGRLRLRRRRRYRKKRIVLTQWNPQTVRKCMIRGMMPMLWAGAGTGGHNYAVRSDDYTMNGFGGSFGTETFSLKVLFDQYERGFNRWSFSNEDLDLALYFGCTFTFYRHNTTDFIVSWTKNPPMKTNQYTAPLTHPGMLMRTKYKVLIPSFKTKPRGRKTVKIKIGPPHLFQHKWYTQQDLCSVSLVQFNLTAADFQHPFGSPLTETPCVTFQVLGDLYNECLNIDLPPLKDTQKLDDTKGNQSNIQHVQKLYDTLFTQNSSGHYWQTFITNSMVKEHIDSESANDTDYSNNKHTKFNSKTQKKDSVNKDWQKKFFDDRDSLFLFATYHPKNILQDLKNMRD…	781	USER	zzzz530
411	genbank_anelloviridae_ANQ39336.1_	genbank	AVIRRCLIRGIAPIVLCGHGTWNSNYALHSEDYPEQGRYPLGGSFSTTTWSLKVLYDEHLKKHNWWGYPNTQLDLGRYRGCKLTFYRHKKTDYIVTWSRKPPFKLNKYSCPLGHPGMLMLSKYKLLVPSFDTRPRGRAKISVRIRPPTLLEDKWYTQQDLCSVNLMQLTVSAANFQHPFSSPLTNTTTTTFQVLKDIYTYAIGIVDTGDTKYGPNNKTYKEHVTELETKLTNNASYWNSFHTEEYLNPNITSHNGTKLNQKFSQDKLNKLKQGGSTRFGYNSYKTKELHADIIDARDWYFNELNKPNETSVKFGQATVKHLEYHLGVFSPIFLSIHRSNINFARAYQDVTYNPNCDRGQGNRVWFQPSTKPDTIFDEKRCKVVLEHLPLWALFHCYADF…	507	USER	zzzz531
410	genbank_anelloviridae_ANQ39342.1_	genbank	MAWSWWWQRRRRWRRPIRRRRWRRLRGRRPGRPLRRRRRRPRTVRRRRWGRRRGRRRRPRRARRRRRGRRFKKRLILTQWHPSVVRRCFIKGIVPMMVCGHTRWNYNYALHSEDYPEQGRYPFGGSLTTTTWSLKVLFDEHQKHHNTWGYPNTQLDLARYRGARFTFYRDKKTDFIVFWNRKPPFKLNKYSCAMLHPGMLMQSKHRVLIPSFDTKPRGKMKVRIRIRPPTLLEDKWYTQQDLCEVNLAQLSVTAADFRHPWIAPDSNTLVTTFQVLKEFYYNTIGVGTLPTNSYTAISGKDKGKNKEYKEHLQTVWNTLVNENSYWNSFPVLEIFSSTVGGIDNSDIKTHMQKLKSTDTSPGENNNFHTGRSTRFGFNTYNPKAKQADIENLRDAYWNL…	773	USER	zzzz532
409	genbank_anelloviridae_ANQ39339.1_	genbank	DEYLKYRNWWTTSNGGLPLVRYIKTTLTFYRSEDTDYIVKIIRCPPFSVTRDDYLDTQPSRMLLDRRTILVPSSKGKKYKKNYIKKTIYPPSLWFNKWYFQQDICNTPLFILKTAACSLQQFFQPVDQISNNITLWTLNTDFFQNPSWKYPETTGYLPKQTTEGPLYLYGTHNGAPEDEHITWEHLVYLGETQRYTEGSPIPKLTTQNNNKLPEKSTWGNPFHHSYQDPDARLFYSTSKPTTDQSKKPSRLYYIWEPCRYNPLKDTGKGNKMYFKSTSIAQQPFHILPDNNKIILENYPLWLMAWAFTSWIKKSKPIQHLDDDYQIVFQTDFITPKRTCYVFLDNYFRNPPSTPASLTETERAHWHPAYRMQTEMENSIGETGPAAPKINYTKSIHAKI…	527	USER	zzzz533
408	genbank_anelloviridae_ANQ39338.1_	genbank	GGRWRRWRRRRSPRRRRRWRRRRRWPRRRRWRWRRRRRRPARRHRGRRRRRRVRRRRRRRQKLILTQWNPQTQRKCVVRGFLPLFFCGQGAYHRNFVEHMDDVFPKGPSGGGFGSMVWNLSFLYDEFKKHHNKWSSSNRDFDLVRYHGTVMKFYRHSDFDYLVHLTRTPPFKEDLLSIISHQPCLMMQNYRCLLVKSYKTHPGGRPYVTVKIKPPRLLTDKWYFQPDFCTVPLFKLYVTLAELRFPICSPQTDTNCVTFLVLDNTYYQFLDNTADETRDKERVTKWTNMTHTTRYHLTTHINTLFAGTKDMQDSKQPGKDSQFRENIWDTKKVIEIIKDIANKNMKRQSDYYTKTYGSYATQYFTGKQYWDWRVGLFSPIFLSPSRLNPQEPGAYTEIA…	728	USER	zzzz534
407	genbank_anelloviridae_ANQ39334.1_	genbank	MAYGWWRRRRGRWRRRPWRRRWRTRRRRRRRPRRAFRRRRRVRRRRGRWRRAFRRWKKRGRRRRHKKKLVLRQWQPAFVRKCYIIGYMPLIYCGENVFSKDYACHSDDIQCRNPYGGGMTVTKFNLRILYDEFQRGLNFWTGSNVDLDLARFLGWTMTIFRHPEVDFIVTVRTSPPFKDTDYTAAFTHPGVLMMQKKKILVPSLKSRPSRKHTIRIRMGAPKLFEDRWYPQVDLCDVTLAVVTATAADFKYPFGSPLTANFCVNFQVLGSAYNGLLSNLPENLKNNNKKIKDNIYNKLQFYNTKQTEAQLTMFISDNNKFKGTNGTTALTKTNAQEIQFPLNAQEPKHRDTLYGGSPYTTQIFDAAEKAREAYTTAAKKIVTPWVFGLQETDFKNNHLE…	751	USER	zzzz535
406	genbank_anelloviridae_ANQ39332.1_	genbank	RRRRHKPTLVLRQWQPDVIRHCKITGWMPLIICGKGSTQFNYITHADDITPRGASYGGNFTNMTFSLEAIYEQFLYHRNRWSASNHDLELCRYKGTTLKLYRHPEVDYIVTYSRTGPFEISHMTYLSTHPLLMLLNKHHIVVPSLKTKPRGRKAIKVRIRPPKLMNNKWYFTRDFCNIGLFQLWATGLELRNPWLRMSTLSPCIGFNVLKNSIYTNLSNLPQYKDARLQIINNTLHPDSISGTNNKKWQYTYTKLMAPIYYAANRASTYDWENYSRELNYHNTYEKFQQKREEKLIKIRKEWQMLYPQQPTALPDSYDLLQEYGLYSPYYLNPTRINLDWMTPYTHVRYNPLVDKGFGNRIYIQWCSESDVSYNRTKSKCLLQDMPLFFMAYGYIDWAI…	668	USER	zzzz536
405	genbank_anelloviridae_ANQ39337.1_	genbank	MPYYRRRPWWVRPYRRRYRTTRRRRRPRTYRTRRTQRRRFKKPVRHRRRRRHRVRRKRQKINLKQYQPESIRKCKIKGYDVMVMGAAGREMYSYTYTQEHWIPPRTPGGGGFGVMLYSLDYLYEQHTYGRNVWTTSNCDYDLVRYTGCNFIFYRHPDVSFILTYSRQYPMVIGKQTYQQTHPSMLLLANKKVIIQSQQLNPKGKTKVKLKIKPPRQMSTKWFFQSQFSSFGLVLFQVSAISLSYPHLSPTAQNRLVTIYCLNIYDLYTQPKWGTAGEAYKPGNSPFASQTTLDYYPQNSTTKKQFSTTTTSKTQKEGVFAPEFLQSSVVYTKGTTSNYKTWPILAHRYNPTIDTGKGNEVYFISVIGNSSYAPPTTDVVMYWTGKPLWLLLWGTIDYIK…	655	USER	zzzz537
404	genbank_anelloviridae_ANQ39331.1_	genbank	MPPFQRYRYYNYRNRYRKWRRPYYRRRFRRTFQRKRRHHRVRRRRFFYKPKRKLKRLRLVQFQPTHIRKCKIRGILQLFGAGKGHYYNNFTLYKESFVNPNEPGGGGWSIQQLNLGNLYVQNQYLMNWWTVSNKGLNLARYTGAKIILYRQPVVDYIFLYEIEPPYNVTKYYYNSLHPIKLLQYKKKIIVPSMRTQPHNKKPYIKKKIKPPKLLENKWYFQQNITNTPLIQFITMSCSLTNMFQATNSLNNNCSIFTLNTNFFQNSTFAGIERLQNGYTPKQGTYLYGLQQASVPWNTTPISKITYLGNTAINDPGDMIGAMTKEEYGWAHWGNPFWHQYLDGTFPTFICSVPPAKMIEDHKSQTIAQITGGATFKHEPLIIELRYNPNHDKGTGNTAF…	667	USER	zzzz538
403	genbank_anelloviridae_ANQ39330.1_	genbank	MAYSYWWRRRRWPWRGRWRRWRRRRRVPRRRPRRPVRRYRRRPVRRKRRWGRRGRRRRYVRRYRRRLTVRRKRNKLRLSVWQPQNIRYCAIKGLFPILICGHGKSAGNYAIHSDDYVTSRFSFGGGLSTTSYSLKLLFDQNLRGLNRWTSSNDQLDLARYLGAVFWFYRDQKTDYIVQYDISEPFKIDKDSSPSYHPGILMRSKHKVLVPSYQTWPKGRSKVKLKIKPPKMFVDKWYTQEDLCNVNLVSLVVSLASFQHPFCRPLTENPCVTFQVLQNFYNNVIGYTSADTLVDNVFKSLLYAKASFWQSHLTPSYVKKINNNPDGSLITTQVGTMPTMNSYNTWVSNSTRGAGFVNQNVSVHYNYCQYNPNNAQLTTLRQYYFFWETYAAASNTTPIT…	759	USER	zzzz539
402	genbank_anelloviridae_ANQ39335.1_	genbank	MAWWGWRRRWWRPKRRWRWRRARRRRRVPARRPRRAFRRYRTRTVRRRRRGRRRGYRRRYRLRRYARRRFRRKKIVLTQWNPQTVRKCIIRGMMPVLWAGMGTGGRNYAVRSDDYVVNKGFGGTFATETFSLKVLYDQFQRGFNRWSHTNEDLDLARYRGCRWTFYRHKDTDFIVYFTNNPPMKTNQFSAPLTTPGMLMRSRFKILIPSFQTRPKGRKTVTVRIKPPKLFQDKWYTQQDLCSVPLVQLNVTAADFTHPFGSPLTETPCVEFQVLGDLYNTCLNIDLPQFSEDGEPQNYSKPNKNNLKNLYQELFTKKISGHYWQTFITNSMVRAHIDANKAKDAQTNQGSPTYNSEPFPTQPTKEDFNTWKKKFTDTRDSLFLFATYHPDQIKETIKKM…	779	USER	zzzz540
401	genbank_anelloviridae_ANQ39333.1_	genbank	MAYWWWKRRRRAPWRRRRRWRLRRPRRRRPAYRRRRTRRRVRKRRGRWRRTYRKWRRGRKRRRHKRRLVLTQWQPAFIRRCYIVGFLPLIICGENTSARNFATHSDDLISNGPYGGGMTTTKFTLRILYDEHLRHLNYWTVSNEDLDLCRYLGGTFYAYRHPTVDFIIQIHTSPPFLDTPLTGPSIHPGMLMLTKNKILIPSLKTRPNKKHKVKIRFRPPKLFQDKWYPQSELCDTTLLTIFATACDLQFPFSSPLTNNPCVNFQVLGSAYKRHLSILPEKLSAATTHFETNLFSKLQYYDTFQTIAQIKPSATQTGFSPTWSEIQNKATLSNTGQNQQSANDTWYLGKAYTDKVTEAAKKIRQKYLAATRKALPALATVGDELLEYHTGIYSSIFLSA…	526	USER	zzzz541
400	genbank_anelloviridae_ALN40321.1_	genbank	MAPARRWRRRLGRRRRRYRKRRYGWRRRYYRYRPRYYRRRWLVRRRRRSVYRRGGRRARPYRVSAFNPKVMRRVVIRGWWPILQCLKGQESLRYRPLQWDTERQWRVRADFEDQYGYLVQYGGGWGSGDVTLEGLYQEHLLWRNSWSKGNDGMDLVRYFGCVVYLYPLKDQDYWFWWDTDFKELYAENIKEYSQPSVMMMAKRTRIVIARDRAPHRRKVRKIFIPPPSRDTTQWQFQTDFCNRKLFTWAAGLIDMQKPFDANGAFRNAWWLEQRTEQGEMKYIELWGRVPPQGDSELPKKSESSTNTDNKNYNVNEGEEKPIYPIIIYVDQKDQKPRKKYCVCYNKTLNRWRLGQASTLRIGNLKGLVLRQLMNQEMTYIWKEGEYSSPFVQRWKGSRF…	639	USER	zzzz542
399	genbank_anelloviridae_ACR20277.1_	genbank	MAWWWWRRRRRPWRRRWRWKRRARVRTRRPRRAVRRRRRRVRRRRRGWRRLYRRWRRKGRRRRRRKKLVMKQWNPSTVSRCYIVGYLPIIIMGQGTASMNYASHSDDVYYPGPFGGGISSMRFTLRILYDQFMRGQNFWTKTNEDLDLARFLGSKWRFYRHKDVDFIVTYETSAPFTDSLESGPHQHPGIQMLMKNKILIPSFATKPKGRSSIKVRIQPPKLMIDKWYPQTDFCEVTLLTIHATACNLRFPFCSPQTDTSCVQFQVLSYNAYRQRISILPELCTREKLREFIKQVVKPNLTCINTLATPWCFKFPELDKLPPVANNATGWSVNPDSGDGDVIYQETTLETKWIANNDVWHTKDQRAHNNIHSQYGMPQSDALEHKTGYFSPALLSPQRL…	733	USER	zzzz543
398	genbank_anelloviridae_ACR20276.1_	genbank	MAWSWWWQRRRRWRRPVRRRRWRRLRRRRPGRPLRRRRRRPRAVRRRRWGRRRGRRRRLRRARRRRRGRRFKKRLILTQWHPSVVRRCLIRGIVPMMICGHTRWNNNYALHSEDYPEQGRYAFGGSLTTTTWNLRVLYDKHQKMHNTWGYPNTQLDLARYKGAKFTFYRHKKTDFIAFFNRKPPFKLNKYSMAMMHPGMLMQSRHRILIPSFDTKPGGRLKVRVRIRPPTLLEDKWYTQQDLCEVNLLQLSVTAADFRHPWISPESNTPVTTFQVLKEFYYNSIGVATAAETKYDAIAGKDIQNNKNETYAKHLQNVWDTIVNEGSYWNSFHVLEMFSSSVGGTDGTKIKRLISDHFTTDNGRSGNFKTGKSTRFGFNTYAPKNKKDQIKQLRDAYWEI…	773	USER	zzzz544
397	genbank_anelloviridae_ACR20274.1_	genbank	MAAWWWGRRRRWRRWRRRRXPRRRRWRRRRRWPRRRRRRWPRRRRRRRPARRLRRRRRRRRVRRPRRRQKLVLTQWNPQTQRKCVVRGFLPLFFCGQGAYHRNFVEHMDDVFPKGPSGGGFGSMVWNLDFLYQEFKKHHNRWSSSNRDFDLVRYHGTVIKFYRHSDFDYLVHVTRTPPFKEDLLTIVSHQPGLMMQNYRCILVKSYKTHPGGRPYITLKIRPPRLLTDKWYFQPDFCGVPLFKLYVTLAELRFPICSPQTDTNCVTFLVLDNTYYDYLDSTADTTRDNERHQKWKNMIMTPRYHLTSHINTLFSGTQQMQNAKETGKDSQFRENIWKTEEVVKIIHDIASRNMQKQITYYTKTYGAYATQYFTGKQYWDWRVGLFSPIFLSPSRLNPQE…	736	USER	zzzz545
396	genbank_anelloviridae_ACR20269.1_	genbank	MAAWWWGRRRRWRRWRRRRLPRRRRWRRRRRWPRRRRRRWPRRRRRRRPARRPRRRRRRRRVRRPRRRQKLVLTQWNPQTVRKCIIRGFVPLFQCSRTAYHRNFVDHMDDVYTTGPFGGGTGSMLFTLSFFYHEFKKHHCKWSASNRDFDLCRYRGTVLKFYRHPDVDYIVWLNRNPPFQENLLDAMSRQPLIMLQTHKCILVRSFKTHPRGPSYVRMKVRPPRLLTDKWYFQSDFCNVPLFQLQFALAELRFPIGSPQTNTTCVNFLVLDNRYHLFLDNKPRQSENLQRKERGHGYVFTGNEGEDDRLKFWHSLWSTGRFLNTTHINTLLPNISKLQDHEAEDTQAKTDYKSLINGNKKVYNDSQYMQDVWEQKKIQTLYKVIAEEQYRKIEKYYNTT…	770	USER	zzzz546
395	genbank_anelloviridae_AKO22263.1_	genbank	GRRNAAISLPASDARVMRRIVIQGWWPLIQCLPGQEHLRYRPLNWDIEKEWVVEQDKEPDKMGYLVQYGGGWGSGHITLEDLFNEHQKWRNMWSKSNDGMDLVRYFGCKKYLYPLGDGDYWFLWETDFKNNYEDRIKEYCQPSVMLMAKRTKIVVARKRAQHRRRVKKIFIPPPSRDTTQWKFQTEFCRQPLFTWAAGLIELQKPFDFNGGFRNAWWLEPRNEAGEMDYITLWGRVPPQGDTDMPDPNTFKTGTQNKNYKIQPGKENNVYPIMAYIRQENQQPVVNWSVCYNKTIDRWRKTQAATLKIGNLRGLCVRELSRQEMTYKWKQGEFSKAYHDRWGYNTYFVTIDGRKGTENPT	360	USER	zzzz547
394	genbank_anelloviridae_AKI82146.1_	genbank	ISKILTAIATTSPFAVHNLDIDPAIPSNISIPFTYVSYWKWGGQPYQPKDAIDPCDTDTAGGRDYRGVAVRDPNTVSLFNMHPWDVDQHGIVTKEALQRLISGLFDTGPARQQSQSTEIQKEKDRESGDEEELEPSDSDSYSSAVTDQSSSSETEEETV	159	USER	zzzz548
393	genbank_anelloviridae_AKI82145.1_	genbank	HRVSYICWWESEFGDPKQIHYQSLHPSQLLLRRRKVLMLSKLDGGRKKKKIFIRPPSTQENKWYSQNSWCQVNLFKLGFSLINFNTPFLHHGQKSNAVWIGWYSTSLALTSRLYYNTETFDSFAYPCMYRAHWDDGVGNYLLLNKDNKSWGSGTTTELTALKIDMPYYQYFYGSNLLRGVNGTYMDHTLPIHRPNVCGILWYPDLALLDSTDRTYVANRFLQTPDQLQPRNTKVWVLFSDKTKNHPSGFTWPPSIPITSATEEAKMPTVNTVRKIQTAISSNSPFALHTLDVDPSLPLNINIAFTYKSYWQWGGAPYTPSDAVNPCDSDAPTGRDHAGVQLSDPARVSLHNLHPWDLDSKGIVTRECLQRLLQDIFDAGPARQQSPERESGKEKDKESG…	430	USER	zzzz549
392	genbank_anelloviridae_AJP36564.1_	genbank	NFKKRYKFIYGTEPAGTYTYDLMHSTGPYSAFYLDPNRPQPEAPAVFLSVRYSPHNDKGIGNWMALISVTAQRATLDYSKCKVILKDYPLYMMAYGYTDYATKSLSGWSPLNNYRLILRTPYTDPPLAYTAESEYANGFVVYGHDFATGRMPGGDSYIPITTETKWYPRLQNQQEVLESLSNSGPLMPRNDSVPSWDVTIQYRTKWTLGGSLPTPQDPVDPCKMPKHQLPDPDNKLSAVQVVDPRTMDPFSSFHPWDYRRGMLTTTSLKRTLQDRPTDVFVYPGPGGLPKRPKSDAPTLGNEGEPDVRLERVLRDLLQE	319	USER	zzzz550
391	genbank_anelloviridae_AJP36563.1_	genbank	RRPARRRRRRRGPVRRRWGRYRRRRYYYRGRRGRRYRRRRRRGRTRALLNLKQWQPTTNKKLTVTGFIPLIVGAQGTTQRNFTQWENTVPDAGVPYGGAFTIRKFTLRTLYDDYLKLRSWWSRSNTNLELIRYTGCTMRLYRHPTTDYIFHYSLETPMDVDMTSHMYTHPLFMLFKKKHVTVPSLKTKPRGKRYLKVKIKPPKLMMTQWYFQKDFCSVGLVLVSATTCILKNPWLRPTAHTPCLTVYALKSDIYTNLSILPGTDPNKEEIWEKAYTKQHTYNRVAQRIWDKINSGLTGDNAKFSSKTWFSDDNFTVIKKNMKTNRNKEKDETEQFMKDIGLTTIPQQQGEAFVYSYGLYSSLLLSPSVFFEETNEVYYKCRYNPLLDNGVGNAIWLEPL…	714	USER	zzzz551
390	genbank_anelloviridae_AJP36562.1_	genbank	MVLYFRRWRRWAPRWRRRRWRWRRRLYRRAAARAVRRRRRRRRYQVRRRRRRLWRRRRATRRRRRYPRRRRRRVLRLTQWNPTTVKKCKIRGWFQLLGTGLGRLAYAFTPHSEDLPGEKNSYGGGIAYSRFSLQLLYQEYLRHHNWWTASNRDLDLARYLGTTVRFYRDPDISFIVSYNRETPVQITTLTYMSCHPLIQLLSKHHIIVPSQRERPSKKRYVTVNIKPPHLMLNKWYFSMDFCPVSIFALKASPVDLQWPWMDPSKMSPVVHFQILDPTIYDTVTNGADQTNKAAREAVMNKIYDSNNRVNNYASRTARFYYTGNTRDIWGSLKKSATSPSFGLISLSTTSAWYNDSPKQAIQKLANTNPDLQKALYNAATGLQAPSNWGNDITTNVYFG…	775	USER	zzzz552
389	genbank_anelloviridae_AJP36561.1_	genbank	YFWNRRRRLGYRRPRRLAPRRRRRPTRVRRRRRWVRRRRRGRRYRRHFRRKKQTLTIRQWLPESRRRLTINGHYPLVVCGSGNSQFNWIQRSLSAPKVGPLGGNLSFSLWSLGALFEQYQLNRNRWSRKNTDLDLIMFHRARLRFWRNPDKDYVVTFDRNAPKTVNILSHQMCHPALLLLSKFKIVVPSMKTKPRGKPYKTAKIRPPRMLTQKFYFQADFCSVNLFTLRASCCDLQNGWMYPKDITPCITFFIARNSFYPNQNISSSTFSLENLWGLNNSKQRQHFYRKNFENQWPNFRADNTKLFTLHNVVTDNSYASSFSSKFTSQQNTEKDKLRLDLQAIGQNVTTTNNNFLLYYGAYSPYLLNPTTKITFETSDVYEYIRYNPLTDKGLGNKVAV…	707	USER	zzzz553
388	genbank_anelloviridae_AJP36560.1_	genbank	SPSGSTEAQGFAAVAKNLYTTVFRDAWPSMRSNQAVTQPFDPSTLGTTTNWQTQNSPMETFKAKANAMETETKKYWSSYFGNIQLFPRQPSKTLFHRYGIYSYYWLTDKKIIPQWQGATVKIGYNPHIDEGHGNMIFLQPLSDDTSTYDPIKSKCLIEGQPLWLCLFGYESWCVKALGGENAAYNYRLCCRCPYTYPKMYRQGTPLKCDVPLGYHFCEGNMPNGQWPIPVEWAIKWYPSLYQQRGWIETIVSCGPFMPKAYSQKSWQLTVGYNFKWYWGGNRAYPRQVDDPCTKPTHALPDPRDGAQAVQIEDPGRQHPSLIFHTWDTRRGYYTSRALKRVSEHEPDEPSLYAGAPKRPRSDVWPPAPADPSLADGWTSRTDLQAEVNLRESPRPWPSE…	470	USER	zzzz554
387	genbank_anelloviridae_AJP36565.1_	genbank	MLGSTHMLVRSMGLAMMRARPTSQKSWRKDHTKGFSSGNLCDNSAWKESTGPYDTFKKLGEEEVKNNNKLYKSIYSGTPGNDWTLNNEYGMYTYTMLSQNRLDSEIKGPYQTIGYHPHIDDGEGNLLFLQPLVKGDSVFDTQRSKCAIVDQPLWLAAWGYWDYCSKYLYPDKTWFYSYMICVRCPFTYPKMYRSGEPKKCDVPYSYNFGQGKMPGGIWPPSLDFRNKWYLCAYHQKEWLENLVSCGPMVPKAYPHKSYSLTMGYKSKWLWGGNAIYTRQVQDPCSAGRHELPGPDQKHDSVQVVDPGSQAPQLIFHNWDTRRGGYTDSSLKRVRDYEPLDETLYSGAPKRPRNDVFRVQLSPGRAAAAGDWTSAAGGSEERYPGTESDRWTSSEEEEEE…	466	USER	zzzz555
386	genbank_anelloviridae_AJP36558.1_	genbank	QQRPGCVTMVYPWRWRCRRWRWRRPWRRRRWRGRRLYPRRTRRPLRGRGRRLRVRRGRRRWRRRRWGRRRRRRGRPRRKRKTLVMRQWNPSTVRNCHIRGWFPLLITGLGRLLFNYTTHSEEVPAAPLSYGGGLAYARLTLEWLYHEYLRHHNWWTRSNLDLELCRYLGTRFRFYRDQHTSYIVRWSLETPMQMSILSGMSTHPALMLLSKGHKIIASQDLRPGKKRWVNLRLGPPKLMMNKWYFSMDFCKVGLALLMASPIDLQNIWIDPNKRSPCVHFKIFDLTYFKTFSITSETKLERENSMKSILNQTAITKAPNGCNASKHCWTQAFRDNWRNVTKSTVVGVPFSYGNICSRNSYDSGSLYDAYKKNAAKEKTDLTDQYYSVFGSPALGDDETL…	764	USER	zzzz556
385	genbank_anelloviridae_AJP36556.1_	genbank	MPYWRYRRRWRPWRRRYLWRRRRRLGYRRPRRFITRRRRRPPPVRRRRRWARQRRRGRRVRRRYRRKRQTLTLRQWLPESRRRLKITGHYPLIVCGSGNSQFNWVQRSLSAPKVGPLGGNISLSLWSLGALYEQYQLNRNRWSRKNTDLDLVMFHRAHLRFWRNPTKDYVVIFDRNAPKTVNILSHQMCHPALMLLNKYKIVVKSFRTKPKGRPFVTARIKPPRMLTQKFYFQSDFCQVNLFTLRASCCDLQNGWLYPKDITPCVTFFIARNSYYNNQNISSQTVSLDNIWGFTNAKDRQHMYRKSFQLYWSIFRINEQTLYTLKNVVDNSKYKNTFQTTFAQQQKLEQSKLQDDRSAIGQTTTTTTNNYLITWGAYSPLLLNPNNKIIWETSDVYEFI…	724	USER	zzzz557
384	genbank_anelloviridae_AJP36552.1_	genbank	VRRRRYTRRRAVRRGRRRETVIVRQWKPETLRRLKIKGLFPMIICGSGNSRNNYIQRAYDVPGPDTPFGGNLAVLVFSLRMLYEEFLLHHNNWTRTNKDLDLILYRGTSIKLWRNPDVDYVVSYNRNSPFRTDLLTHMSGHPFILLLSKHRIFVPSFKTKPHGKRYVKLFIKPPRMLTQKFYFQSDFCAVNLFGLVASAMRVPIPWTNPEQITPCVTFYALKNTYFSNQSNVATNEYDQFLKKIVQKPMTIYNYFTEQHWNSLIDNPTTYPFSLHTFTTEQATKWTSSFQTKIKQLKGGEQETYKTRYNVIHGTDPPNTDTTTDFAHTYGLYSETWLDPNRPVPEAEAVFLKVRYSPHNDRGTGNYIALQSITKETPMLDESCKMVIQNYPLWLCCYGY…	650	USER	zzzz558
383	genbank_anelloviridae_AJP36557.1_	genbank	LLLTATAIDFTHPWIDPNKTSPAVHFKILDLGIYTQLSILPEHETSRVNDMKRILSLSPSGSQEAQGFAAVAKNLYTTVFRDVWSSFRSNAALSQPFEPNTLGTGTNWKTSSDPYCTFDAYATTMITETKKYWSSYFGNIQLYPTNPSKTLFHRYGEYSYYWLTDRKIVPQWQGPTIKIGYNPHIDEGHGNMIFLQPLSAQDSVYDPVRSKCLIEGQPLWLCLFGYESWCVKALGDENAAYNYRLCCRCPYTYPKMYRQSTPLKCDVPLGYHFCEGNMPNGQWPIPVEWSIKWYPSLYQQRGWIETIVSCGPFMPKAYSQKSWQLTVGYNFKWYWGGNRAYPRQVDDPCTKPTHALPDPRDGAQAVQVEDPGRQHPSLIFHTWDTRRGYYTSRALKRVS…	435	USER	zzzz559
382	genbank_anelloviridae_AJP36555.1_	genbank	MGRGRYRRAAAGGRRGRWRRYRVRRRQRWGRRRRRRRRPRRRPGRRRRHPRTLVLRQWQPASIRGLHVRGWFPLLLCGMNRTQFNYAQHMTEIPRKGPFGGNISITVWNMQTLWKENQKLRNRWSRRNDDLDLVRYLGCTVRLYRDEEKDYIFSYDLETPMESNSLSHVQAHPQVLLLSRHHVVVHSRKNRPFSRRNYVRVRIRPPRLMRNQWYFQKEFCHVNLVKFTVSGADLGRPWLRKGTNSPAVGFYCLRNDLYHHLSNMSVDTQETMRQVDWKKLWQFPYCYCSGYKTLVRKVDNKNSEIETETNLEKIMKSINNSMTPQKLTDIHKTDTKTLQEKMKVGQTTSTDTATDKYPTLSRDWGMYSPVLLSPHMRQDPLLPKAYLNVRYQPLTDYGI…	716	USER	zzzz560
381	genbank_anelloviridae_AJP36554.1_	genbank	MLLTKGRIVVPSLKTKPKGKPYKSIYLKPPKMLTQKFYFQSDFCPVILFSLIISGCILQDPWIDPLTFSPCITFYALKNSYYTTQGITTTGPESQYNTLTKDSTPWKQFLYTAYTQNLWHKMYPSTLFTLSNLTSKAQTDLKDKVSTQQNTEKENYQTEYQFVYGRQDSTVTSGLLGHNWGIYSGIFLSPEKLIPDTDTAFITVRYNPHADKGIGNWVCIQPLTKDLPNYEAASCKAFLKDYPMWCLLYGYVDYVIKFFDQWSPLTAYRLIMRCPYTKPPLAFTEASNYHRGYTPYGNDFANGNMPGGDPHIPLYTYMKWYPRLQNQQEVIEAFVNCGPLMPRDGRKKGWDFTLGYKASFTLGGTLPPKQDPVDPCSMSKSEIPDPGHQLETVQVVDPA…	541	USER	zzzz561
380	genbank_anelloviridae_AJP36553.1_	genbank	MAYRRWKRRRWFRRRPWRRWRWRRRRVGRYRYRRAPRRRRRPRRRPVRRTRRGTIRRLRRKYRRQVKKETIILRQWTPENQRKLKIGGYFPLIVCGSGNTQNNYTTRTFEIATGPYGGNIATLVWSLSFLYEQWKLHHNWWSRTNGDLDLISYYGTKLKLWRDPYTDYVVTYSRNGPFEADILTNMATHPLILLLNRRKIVVPSLITKPRGKRYKTVFIRPPRMLTHKYYFQSDFCQTQLFFLAASACNLQSPWLFKEAWSPQVTFYVLLNSVYTNQSITGTNPTTQENLLFNNKYFAEFWYNEWTNTHWRIFETTDTTKSIQFSLKNLNNSSNRNLLKTAFTSARTKNTSTWTEQYQIVYPNLGFTPEPGLNHNYGIYSPWWLEPENVVPDIARPFNV…	729	USER	zzzz562
379	genbank_anelloviridae_AJP36549.1_	genbank	MRPNAKTPCLTIYAISKTNSCYSNLSILPDSKADRETIYDNLLKDPQHTYNRTTEQISTHLMRGQDKGNIQGTTNTSKTKYKEAWWDKSDYDKIIANHKALRNNELKMIQEFRQKSLKLTTAKADSDSTMTLSYGIYGPTFLSPYPHYPEQSVCYSKVRYNPYLDKGKGNKIWIESLTKKECSYNTQAQCLIDGAPLWLAFYGYCDWCNKYLRNQQVYWNYRVCCICPYTLPQLYDPNNPTRGWVILHSNFMEGKMPSGDTYVPLRLRDQWYPMMFHQEPIIEEIAASGPFSARDHEDLSWDISFGYNFKFFLGGNLLYQKQVGDPCKEPTHALPAPGGGEFAREIQITDPGKVGATYQFHPWDLRRGLFSSSSLKRVRQDSEDDEYLSPPDKYPKTDP…	483	USER	zzzz563
378	genbank_anelloviridae_AJP36548.1_	genbank	RPWRRRRWRRWGLYRRRLAAAARRGRRRRAKVRRRRWARRRWRRRRRYRLRLRRGRGRRWGRRRKKTLVLRMWNPTTVRKCRVRGWFPFLITGSGRTQFVYTHHMDDIPGEKHSFGGGLAVSRFSLDVLYQEWMRHHNWWTRSNQDLELCRYLGCSFRFYRDPETDFIVTWSLQTPMDIRVTTHMSLQPCLQLLSRRHIVIPSFKTAPHSKRKWISVRFGPPKLMQNRWYFTSDFRSVGLIMLMAAPANLRDPWIDPAKVSPAVNFKVFDTYYFSCFSNLPDKSTERQQCQAKILAHTKKGSGTNTMVTVAAVNLFTLPMRESWSIWQQGALAAAFSIENLSDSTKFQWSTLFTTKQNNLYDSAQKYWWPAKYGNTIGLGNKDGTLMHRYGLYSHYYLS…	760	USER	zzzz564
377	genbank_anelloviridae_AJP36544.1_	genbank	MSSASDWLGGQGPKQALQQLANTDAQNQKKFYYAILGTTPPTNYGTDVTMNYKFGMYSFLFLSEKRIDPQIKGPYITVGYLPHIDEGGGNMIWLNSCADGSRNYNSQRSKCLIKDQPLWLCLFGYEDWCIKNLNDPQCMYNYYLVVKCMYTTPKLMSSQNPSSGEIPYGYYFGEGLMPNGQSPIAMTFRNSWYMCLYHQRPWIETIVNSGPFIPKNYKLKSWQLTIGYSSRWLWGGNRPITQQVEDPCTQGRHQLPDPDHRLNDVQVVDPSTVAPQLIFHGWDLRRGGFTDTSLRRVQEYSAADEPMSSGPPDRPIQDVWKAVSSPSQLLQGLQQKRGWSSSEESSPPRPLKRPRTEEAASEESLELQQQLPEQLLEQHLSRELQRQRQCQRKLKEHLQ…	419	USER	zzzz565
376	genbank_anelloviridae_AJP36543.1_	genbank	MHTFGVYSELWLDPNRRQPESEAAFLKIRYSPHNDKGVGNYMALQSCTKEKVELDETCKMIIQDYPLWLTAYGYADAAVKIYSGWPILTSYRLIMKCPYTDPPMQFTTNLKRGFTVYGQDFATGRMPGGQLFIPVTTANKWYPRLQNQLEVLEILANCGPFMPRDELSQGWTVTIGYRSVFKLGGTLPPKQDPVDPCKVPKRDLPDPGQQLSAVQVVDPATMDPLRSLHAWDYRRGMLTTSALKRMLQDHPTDQTLFSGPIYPPKRPKTDVPTQGDGGPGQEEAVRDVLQSLLREQESEEETQDPETPPQGEGDHHGQLQHWVGQQQRLQLELQRQRARQRKLREGIQSMFQQIIKTQQGVHLHPGLL	368	USER	zzzz566
375	genbank_anelloviridae_AJP36547.1_	genbank	MHSDDITDQGRPYGGGFSVARFSLRVLYQELLRHHNWWTRSNKDLDLTRYLGVKFRFWRHYSISYIVSYSLETPMASSIATHASTHPANLLFSKHHVVVPSLQARPHGRRTRTLTIKPPRLMLNKWYFSEDFCDVGLVLLRASVLDLKDIWLRPTTVSPCVGFLVLKGTVYDHLSVVAGSPGKTNRETLWNKLWGNAGYYFHPLFQRVWQEATKSNAKYETYNWENILSKHSQFLSNFQNTAKEDLKRIKTEYEHTYGATGTAIANNLELALTERFGNYSPYLLSEKRYSPELPTAFTSVRYNPHVDEGTGNMIWVDPVSADSPVYNPRSSKAFLKDLPLWMAFYGYSDWVFKETGDASYLDNYRLVVYSPWTKPKLTYPHLKGQGYVPYSYSFANGQM…	641	USER	zzzz567
374	genbank_anelloviridae_AJP36546.1_	genbank	SPCVGFLVLKGTVYDHLSVVAGSPGKNNRETLWKKLWGESGYYFHPLFQRVWQEATKTNSKYETYSWPNIKTNHTIFYTAFEKTAKADLDRIKKEYTDTYGATGQAIANNLEVALTERFGNYSPYLLSEKRYSPELPTVFTSVRYNPHVDEGTGNMIWVDPVSADSPVYNPRSSKAFLKDLPLWMAFYGYSDWVFKETGDASYLDNYRLVVYSPWTKPKLTYPHLKGQGYVPYSYSFANGQMPGQQQFVPVSYKGKWYPTLRHQEEVMEAVVSSGPFMLRQEDRQSWDVTAGYQFKFLWGGSPGPHKPIDDPCHQGRHELPEPSLVRHAVQVRDPSSITPQYLSHNWDWRRGYVTESGLKRMSEYDPSDPSLPTGPPKRPRTDPGPADACGLW	393	USER	zzzz568
373	genbank_anelloviridae_AJP36538.1_	genbank	YSLTVQNSVNEYLGRQFGLWSFYLLFPDRIHPHLPTVFTGVRYNPNTDKGTGNWIMVQSVSASKAALGQTVREVAFLENLPLWLLAYGYSDWVFKETKDPNYLDNYRAVIRCPYTDPQLINLRDAKVGFVFYGHNFATGRMPDGRDVIPPPYLSKWYPTLRHQQETLNNLVECGPFMPRDLETQNWSVTVGYKFSFTLGGTLLPGQGPVDPAGRPTHELPEPGPVSGRVQVRDPQEIDASFNFHRWDWRRGVVTASALKRVSEYHPTDRDLFTGPTGPPKRPKTDVPTLDDAPPPEGVAGALHALWSLLREQETPREPESPPTES	325	USER	zzzz569
372	genbank_anelloviridae_AJP36536.1_	genbank	IKAQYTSMLTNENIKNQYNQDLQTLKDRQQESTTTSTNLSKDHTLSYDWGLYSPILLSPHLRGDWALKCAYLTIRYQPLVDSGIGNHVWVDALTRDSPVLTPGKSKCHLSDLPLWLLFYGYADYVRKATGDRQAAQNYRLCVICPYTFPPLVDPANKGLGFVIYGEDFATGRMLYKDYKVPLDWRTKWYPSLYHQQEALEAIVNCGPWMPRDDEANSWQLTLGYNFRFKLGGLLPPQQPPVDPCTRPTHALPEPNTLRLAVQVSDPRRVGEDGYPFHPWDVRRGLFSKRSLKRMLDYQTDDESPPVSPEKVSRLDPPFQGTQVNTLHPHLQALLRQDSPQAPPPLLEGAPESPEVRQRLLLELERQREQQRL	372	USER	zzzz570
371	genbank_anelloviridae_AJP36533.1_	genbank	QLGPGSQRLAMVYWRRRRRWAPWRRRRWRWRRRVYAARARRAVRRRRRRRRWQVRRRYRRWRRRRATGRRRRWRRRRRKRRVLRLTQWNPSTVVSCKIRGWFPLLETGLGRLAFNFTPHSEDIPGEKHSFGGGAAYARFSLKLWYIEYLRSHNWWTKSNRDLDLCRYKGTTIRLYRDPEISFIFSYSRETPAIINTLTYMSCHPLLLLLSKHHVIVPSQRERPSKKRWVTIKIKPPHLMLNKWYFQQDFCPVTLFTAKASPIDLQWTWIDPNKVSPVVNFKILDPQIYTTVQNLAQSTSKEARLEVLKKITSTNTVNNNFSNAAKYFYTSTTKESWPSLRATGNLTGFGIEGMNNTNNWLSGSPLGALQQLNTTDQAIQKKFYYAILGINPPTGYGDDV…	700	USER	zzzz571
370	genbank_anelloviridae_AJP36535.1_	genbank	TPATTAWRWGWWGRRGRRWPARRGRGRWMARRRYRRGARRTRRGRKRVRRRWVGRRRRRRTYRRRPWVRRRRPRRRRLLTLKQWQPQTNVRLTVRGILPFMVFGPKRTQRNYTMWQDTVPPERESYGGSFATYRFSMQTLYDEYMRLRNWWSRSNTHLDLVRYTGVSFRLYRHTHRDYIVSYSLETPMETSISTHMSLHPMRQLFQSKHRTVPSFYTKPGGKPYITLKARPPRLMKTQWYFQHDFCNVGLILLRAACCNLTNPWMAPSAPTPCLTIYAISNGSHEHLSINADNTHKEYRQHMLQKLYNNPQHLYNNHFRRHWSTVGLKEDSAQQTKPFTWENVLDKDTIQKIQRKITEQRERETQSVSTKREKAGFRENHNEDETFNYTWGIYSPILLN…	744	USER	zzzz572
369	genbank_anelloviridae_AJP36531.1_	genbank	MVWLRRLWYTGRWRPRRARWRGRFLRRRFRRPFPRRRRRRRRVRRRWRRGRRRYTRRYRRRRWGRRRRWGRGRRRRKRTLVLTQWNPYTVRACSIRGWFPIVITGLGRMQHDYTAHSEEIPASSLSFGGGFAYAKLSLRFFYQEYQRHHNWWTASNLELDLCRYKHTTVRFYRDTERSYIVKYSLDTPFTINSLTFMSEHPVVMMLSKHHRLVPSLKDRPFWHKPWVSLRLRPPRLMLNHWYFSQDFCDVGLALIMASPIDLTNMWVDPNKLSPATHFQIFDLTKYKHTFSIASDKQEARQDTLKALLSTQKTNEEVCLAGRHLWTREARDHWNSWKKDNTKGFSSGNLCQNNAWKESQGPYSTFEKLGKEEVQNNNKLYKSIYSGTPGNDWTLNNIYG…	780	USER	zzzz573
368	genbank_anelloviridae_AJP36529.1_	genbank	PAAATAWGWRRRTWRRRGTGGRRWRLGRRRYRRAAAGGRRRRWRRYRVRRRRRWGRGRRRLRRPRRRPRRRRRPRRTLILRQWQPQTVRPLRVRGWFPMVVCGMGRTQFNYVQHMTEIPKKGPFGGNLSIFVWDLQTLFKENLKLRNRWSRRNSDLDLVRYLGASFRLYRDEEKDYIVRYSLETPMETKAEDYFQTHPQVMLLSRHHVVVPSRKTRPGGRGYVTLRIRPPRLMMNKWYFQRQFCQVKLVKFLVTGADLRRPWLRAGTNSPAVGFYALRNDLYHHLSVITTTTAQNYHKVDHKALWTFPYAFTNGWKAMLIDLNSDKKSTIENTDNNNYETIKQQMDTHLTQSAIQTKYNTLKTEIQNRLKMLPIQQPNTQYADMTLSLDWGCFSPTLLS…	696	USER	zzzz574
367	genbank_anelloviridae_AJP36527.1_	genbank	SILNQTPITNAPNGCNASKHCWTQSFRDNWRLVTKSSAVGVPFSFGNICSTTSYDEGSLYKAYKKNAAKEKTDLINQYYSVFGSPALGEDETLYNKWGCYSFTYMSANRLDPEITGPYKTIGYNPQVDEGEGNLIFLQPLVKGDTIFDPKRSKCPIRDQPLWLCLWGYVDYCSKALGDRSLFYNYYLCVRSPWTEPKMIKTGHESTADFPYSDNFGEGRMPGGLWPPPMQFRTRWYPCLYHQLEWIEQVISCGPFVPKAYTVKSWQLTMGYDSHWLWGGSLPITRQVQDPCNAGRHEIPDPDKKLSGIQVVDPGTQHPQLIFHTWDQRRGLYSDRSLKRVSEYQGPDDFLYAGPPKRPRTDVWTLVP	367	USER	zzzz575
366	genbank_anelloviridae_AJP36526.1_	genbank	MAWRRHRRPLRRRRRRRGPVRRRRGWRRRRTWYRRRPRRFRRRRRRRRALLTLKQWQPTTNKSLHVTGLFPAVVGAQGTTQRNFVQWENTVPDQGVPYGGSFAIRKFTLRTLYDDYLKLRSWWSRSNTNLELIRYTGCTFKLFRHPTTDYIFHYSLETPMDVDMTSHMYSHPLFMLFKKRHVTVPSIRTKPKGKTYLKVKIKPPKLMMTNWYFQKDFCHVGLVLTTISTCVLRDPWLRPSAHTPCLTLYALKDTEYQNLSITISTDTNRDTDWDRLYTAQHTYNAATRKIWNNINTGIPSDKREFNPKNYFENFTKIKESMKANRASEKSQIDEFAKLINITTTTQINTQAFLLSYGLYSTLLLNPQVFFQETNEVYWKCRYNPLIDNGVGNAIWVESI…	716	USER	zzzz576
365	genbank_anelloviridae_AJP36525.1_	genbank	MHHNQWSRTNRDLELIMYRGTRLRLWRNADTDYIVTYSRNAPFKINQFSYMAGQPFVMLMSKKKIVVPSLKTKPKGKPYKSLWLRPPRMLTQKFYFQADFCQVNLFFLTASACNLRSFWLDPLTDTPCFTIYVLKNSIYAKQSVDSANSQIDLLLKGGSSTTSQSHLGTYLYNEYVSHHWNTIKPDDKHFTIATLKEIQTNYSTFKTKLQEASQSVYTNYKSEYSFVYGSEDPVTRNPWLNYMYGIYSPIWLTPDHYLVEGNIPYMEIRYSPHADMGIGNWICIKPLTSETADLDETQCKAIMKDYPMWIMLYGYTDYVLKAYGNLSPLTSYRLCIRCPYSDPPMAFPQEKDYKRGYTPFGHDFATGRMPGGTVNIPIHEQMTWYPKLKNQQEVIELFC…	608	USER	zzzz577
364	genbank_anelloviridae_AJP36522.1_	genbank	EPPTTAATGSQNMHQWGTYSETWLDPNRLQPESEAAFLKIRYSPHNDLGVGNWIALQSVTSPTVQLDSSCHMIIKDYPLWIACHGYADAAVKIMAGYSPLNNYRVIMRCPYCDPPLAFTTTADYNKGFTIYGNDFATGRMPGGNLYIPITTENKWYPRLNNQLEVLEAIVNCGPFMPRDELARGWDVTIGYKARFILGGTLPPKQDPVDPCKVSKSELPDPGNQLSAVQVVDPQTMDPLREFHPWNYRRGSLTAGALKRVLQDHPTDEPLYPGPASVPKKPKTDVRTLEGDELGQKETFRSVFQSLFPQEPEEETGDPETPPPGEGVPQQRDLLRLQPEQLQHALERQRVRQRKLQEGIRFMFQQLVRTQEGLQLDPRLQ	380	USER	zzzz578
363	genbank_anelloviridae_AJP36521.1_	genbank	MGRRRYRRPAAGGRRRKWRTYRVRRRRRWGRGRRRRRRPRRRPGRRRRRFHPRTLILRQWQPATIRPLRVRGWYPAVLCASERTQFNFAQHQTEIPRRGPFGGSFSITVWDMRTLWLENLKCRNRWSRRNDDLDLVRYLGASLRFYRDEEKDYIVSYSLESPMEIKDMSHLQCHPQIALLQRRHVIVRSRKRRPGGRGWVTVRVRPPRLMRNQWYFQSHFCAVKLLKLTVTTCELDRPWVRRGATSPAVGFFALDNNKYHHLSIMAVEASKKYREKDLLGLWSFPHSYTNGWKNLLKTLGAKDKDLNMTNLTNIKDQFNKTVTLTSLQNQAKTENQELQQKLKEAGQTTTTSSDSSKVDVTLTRNWGCYSPTLLSPHMRQDPRLPCVYLNVRYQPLTDR…	711	USER	zzzz579
362	genbank_anelloviridae_AJP36523.1_	genbank	PGHNMPFWWRRRRRWFPRRRRYGRRRFWRRRLGRRRPRRAPRRRRRRRRPRPVSRRRYNRRRYGRRGRRKETVIVRQWKPETLRRLKIGGLFPLIICGSGNSRNNYIQRAYDVPGPDSPFGGNLSVLVFSLRMLYEEFLLHHNYWSRTNKDLDLILYRGTSLKLWRHPDIDYVVSYSRNSPFRTTKLTHMSTHPLILLLSKHRVFVPSFKTKPRGKRYIKLFLKPPRMLTQKFYFQSDFCAVNLFALVASALRAPSPWINPEQITPCVTFFALKNSYFVDQSITTSTNPLTALLSKIEKSPMTIYNYYVQQQWNNLADNPHTNTFNLESFSALNSYLTTTKFSTKFTQLNSDTQQTYKTLYQAVHGASPPTTDTSTYFAYPWGLYSETWLDPNRPVPES…	637	USER	zzzz580
361	genbank_anelloviridae_AJP36519.1_	genbank	ACSHRARREMPSWPLWRRRWWPRRRRRWVRYRVGRRRLRKPARRRARRRRRRTVRRRYSRYPRRRRGRPRRRRRQKLTIRQWLPENTRRLTIGGYFPLVVCGAGVSRRNWIQHSFYVPRTGPVGGNLSLSVWNLGVLYEQWQLHRNWWSRTNKDLDLIRFYKARLKFYRHKEVDYVVYYTRQSPYTASVYSYMACHPFFLMTQKRKLVVPSLLTKPKGRPYRRLTLRGPRMLTDKFYFQADMCKVTLFTLSASAARLGDIWINDKQNTALITFYALRHDIYKNMSIGGSTTTDLWSDINNAPMWFTKQFFHEWETFDQGSLSTYTYTNIKDSTYYKKGTSFTTFANFITTSRTKEKEQVQQDSEHSGYTTTAPAQDMLQHGLGTYSPYILSPDRILPES…	716	USER	zzzz581
360	genbank_anelloviridae_AJP36518.1_	genbank	SKVTTQQGTEKDNYQTEYKFVYGREDSTVTGGLLGHNWGIYSGIFLSPEKLIPDTDTAFLTVRYNPHADKGIGNWVCIQPLTKDLPNYEEANCKAFLKDYPMWCLLYGYVDYVIKFFDQWSPLTAYRLIIRCPYTKPPLAFTESNNYHRGYTPYGNDFANGNMPGGDPHIPLYTYMKWYPRLQNQQEVIEAFVNCGPLMPRDGRKKGWDFTLGYKASFTLGGTLPPKQDPVDPCSMSKSEIPDPGHQLAAVQVVNPTLVDSRWSSHPWDYRRGYLTSSYLKIVSEYSPTDQYLYPGPQSLPKRPKTDAPTLGEEDGPEERLQGVLRSLLQEQESQEETEDPQSPEAPSPGERDP	354	USER	zzzz582
359	genbank_anelloviridae_AJP36524.1_	genbank	MLTQKFYFQADFADVNLFFLTASACNLNSFWLDPSTDTPCFTFYVLKNSVYSKQSVDSADEQLTQLLKSKSTSTGTTQLNTYLYNHYVRDHWNNLKPSTDKDFTMSTLDEINQNSSNFKTQLDKINNNVYDQYKKEFKFVYGRDDTVSRNKNLGYMYGVYSPVWLSPETFIVEGNLPYMEVRYSPHADKGLGNWVCIKPVTSQTADLDETQCKAILKDYPLWIMLYGYSDYVEKAYGNLSPLNNYRLCLRTPYTNPPLAFPQDTDYNRGYTPFGHDFATGRMPGGIIDIPMSYQMIWYPRLQNQQEVLELFSNSGPLMPRDDRQRGWEVTMGYKSYFTLGGQLPPKQDPIDPSKVSKHALPDPSVKLDTVQVVDPKTLDPWSGVHPWDYRRGYLTSKAI…	511	USER	zzzz583
358	genbank_anelloviridae_AJP36520.1_	genbank	MAYWRRPWRRRWWRRRWGRRLQRRRPARAVRRRRWRRRRQVRRRQRRWRVRAVRGRRRRRLRRRRRGRRRRALVLTQWNPYTVRRCTIRGWFPLVTTGLGRMMHNYTQHSEEIPASGLSFGGGFAFATFSLQFLYEEYRRRHNWWTASNVDLDLCRYHSTKIRFYRHKTRSYIASYDLETPVQITNLSFMSCHPVPMLLRKHHKLIPSLQARPHWKRPWVTMTIRPPRLMLNHWYFTQDFCPVRVFLLRATGIDLENMWSDPNKLSPCTHFQIFNQTYYTHFAQTATTKEQRLTDMDKILNHTKINGGTQKGSCLVAKHLWTQDFRDVWPSVRNPTAHTKPFNSENLCNKDNWKENEAAKAFEKQADEDNKNNEMIHYTLYGSAMSTDPSLNNSWGLFS…	762	USER	zzzz584
357	genbank_anelloviridae_AMA20211.1_	genbank	MPYRRYRRRRRRPTRRWRHRKWRRYFRYRYRRAPRRRRPKWGGHGTERFKTNIGDPSTIPCPFEPGDRFHSGIQDPSKVQNTVLNPWDYDCDGIVRKDTLKRLLELPTETEEEEKAYPLLGQKTEKEPLSDSDEESVISSTSSGSSQEEETQRRRHHKPSKRRLLKHLQRVVKRMKTL	178	USER	zzzz585
356	genbank_anelloviridae_AMA20206.1_	genbank	MAPARRWRRRFGRRRRRYRKRRYGWRRRYYRYRPRYYRRRWLVRRRRRSVYRRGGRRARPYRLSAFNPKVMRRVVIRGWWPILQCLKGQEALRYRPLQWDTERQWRVRSDFEDQYGYLVQYGGGWGSGDVTLEGLYQEHLLWRNSWSKGNDGMDLVRYFGCVVYLYPLKDQDYWFWWDTDFKELYAENIKEYSQPSVMMMAKRTRIVIARERTPHRRKVRKIFIPPPSRDTTQWQFQTDFCNRKLFTWAAGLIDMQKPFDANGAFRNAWWLEQRNDQGEMKYIELWGRVPPQGDSELPKKKEFSTGTDNPNYNVQDNEEKNIYPIIIYVDQKDQRPRKKYCVCYNKTLNRWRLGQASTLKIGNLKGLVLRQLMNQEMTYIWKEGEYSAPFVQRWKGSRF…	639	USER	zzzz586
355	genbank_anelloviridae_AKO22615.1_	genbank	MYQGRRRRRRRWGRRVLSHYKRKWRRGSRRGHGIYRRWRRWRRRPRTVVTEQHSRRVKTIIVRGWEPLGNICPTDSAKAKATPYASYDSDSGQGQWHGTWGHHWFTFQSLVDRAEARLNSFSGNWESYDYLRFLGGTMYLMQPREMCFMFGNDPYLMTSDLDKTASQKNRAEETWITPGYLMHRPGTHLILSRQKVERRSMYKIRVPVPTSWRGWFPIPECFTYVLCHWYWTWWDPDACFFDPCATGSSCEAEPWWSTAQTKQAWVDRTKLDDPPVGGIGPKQKTWAPFLPSRPCTNYYTHSASFWFKYKLKFQVTGENIWAPVPRDYTQQGTVPTAPSRQQVESQARTPYPKANRPPTTADILPGDLDSEGILKDEAYERITRDNPSPKRPRPVGIRW…	436	USER	zzzz587
354	genbank_anelloviridae_ALD62446.1_	genbank	MPYRRYRRRRRRPTRRWRHRRWRRYFRYRYRRAPRRRRTKVRRRRRKAPVIQWNPPSRRTCLIEGFWPLSYGHWFRTCLPFRRLNGLVFPGGGCDWTQWSLQNLYHEKLNWRNIWTASNVGMEFARFLRGKFYFFRHPWRNYIITWDQDIPCKPLPYQNLHPLLMLLKKQHKLVLSQQNCNPNRKQKPVTLKFRPPPKLTSQWRLSRELAKMPLIRLGISFIDLSEPWVEGWGNAFYSVLGYEATKTSGRWSNWAQMKYYWMYDTGVGNAVYVVLLKDNVDDNPGDMAKRWPGTSGQHPDAIDHIELINEGWPYWLYFYGKSERDIKAEAHTTEIAREFTNNPKSKKLKIGVVGWASSNYTASNSSQNNGSGPSAIQGGYLAWAGGGGKFNLGAGSIDN…	627	USER	zzzz588
353	genbank_anelloviridae_ALD62444.1_	genbank	MPYRRYRRRRRRPTRRWRHRRWRRYFRYRYRRAPRRRRTKVRRRRRKAPVIQWNPPSRRTCLIEGFWPLSYGHWFRTCLPFRRKNGLIFTGGGCDWTQWSLQNLYHEKLNWRNIWTASNVGMEFTRFLRGKFYFFRHPWRNYIVTWDQDIPCKPLPYQNLHPLLMLLKKQHKLVLSQQNCNPNRKQKPVTLKFRPPPKLTSQWRLSRELAKMPLIRLGVSFIDLTEPWLEGWGNAFYSVLGYEAIKEQGHWSNWAQVKYYWIYDTGVGNAVYVVMLKQEVDDNPGKMASTFKTTQGQHPNAIDHIELINEGWPYWLYFFGKSEQDIKKEAHSQEIAREYATNPKSKKLKIGIVGWASSNFTTPGSSQNTGGNTAAIQGGYVAWAGGQGKLNLGAGSIGN…	627	USER	zzzz589
352	genbank_anelloviridae_ALD62442.1_	genbank	MPYYRRRRRRRRPTRRWRRRRWHRYFRYRYRRAPRRRRGYKVRRRRRKAPVIQWFPPSRRTCLIEGFWPLCYGHWFRTCLPFRRKNGLIFTGGGCDWTQWTLQNLYHEKLNWRNIWTASNVGMELARFLRGKFYFFRHPWRSYIITWDQDIPCRPLPYQNLHPLLMLLKKQHKLVLSQKDCNPNRRQKPVTLKFKPPPKLTSQWRLSRELAKIPLIRLGISLIDLSEPWIEGWGNAFYSILGYEATKTQGHWSNWAQMKYYWIYDTGVGNAVYVILLKKEVDDNPGDMVKKFPVSGGQHPDAIDHLELINTGWPYWLYFFGKSERDIKAEAHGREIAAEFARDPKSKKLKIGVVGWASSNFTTPGSNQNTTAQTPEAIQGGYVAYAGSGVLGAGSIDNL…	624	USER	zzzz590
351	genbank_anelloviridae_ALD62440.1_	genbank	MPYRRYRRRRRRPTRRWRRRRWKRYFRYWHRRPTRRRRYHKVRRRRVKRAPVIQWFPPTIRNCYIKGIWPLSYGHWLRTCLPMRKENGLIFLGGGIDWTVWSLQNLYHEKLNWRNIWTASNDGMEFARFKYAKFKFFRHEFRSYIVTWDQDIPCKPLPYTNLHPFVMLLKKQHKVILSKKECNPRKKDKPVILKIKPPPKLTSQWRLARELTKMPLVRLGISLIDFKEPWLEGFGNAFYSTLGYEANKDSLQTSQWCQIKYFWIYDTGVNNHVYVVMLQKDAGDNPGDLVQNGNSITEVEQIGEGWPYWLYFFGRSERDLKALATTNSNIKAEFNANPESKKLKIAVIGWASSNNTASDSTQGPNTPIKGTYFISPHLLHSGHTAGATQINNLYEVGWK…	620	USER	zzzz591
350	genbank_anelloviridae_ALD62450.1_	genbank	MPYRRYRRRRRRPTRRWRHRRWRRYFRAWHRRPTRRRRYRKVRRRRIKKAPVIQWFPPTIRNCFIKGIWPLSYGHWLRTCLPMRKENGLIFLGGGIDWTVWTLQNLYNEKLNWRNVWTASNDGMEFARFRYAKFKFFRHEFRSYVVTWDQDIPCKPLPYTNLHPMVMLLKKQHKVVLSKQECNPRKKDRPVTLKIRPPPKLTSQWRLSRELAKTPLLRLGFSLIDFKEPWLEGYGNAFYSTLGYEAYEGQQKWSEWCQCKYFWIYDSGVGNHVYVVMLANDAGDNPGNLAQNNNRITEIEQIGEGYPYWLFFFGRSERDLKALATSNANIRNEFHANPESKKLKIGIIGWASSNLTSATSEQTQNVAIKSSYRISHVLQTSGHTGGAAQIDNLWQNGWP…	620	USER	zzzz592
349	genbank_anelloviridae_ALD62438.1_	genbank	MRFRPIRRRRRRRYRKRRWGWRRRYYRHHYRRRPWRRWRVRRWRRSVFRRGGRRARPYRISAFNPRVMRRIVIQGWWPLIQCLPGQEHLRYRPLNWDIEKEWVVEKDKEPDKMGYLVQYGGGWGSGHITLEDLFNEHQKWRNMWSKSNDGMDLVRYFGCKIYLYPLEDVDYWFWWDTDFKNNYEDRIKEYCQPSVMLMAKRTKIVVARKRAQHRRRVKKIFIPPPSRDTTQWKFQTEFCKQPLFTWAAGLIELQRPFDFNGGFRNAWWLEPRNEAGEMDYITLWGRVPPQGDTDMPDPNTFKTTTQNKNYSIQPGKENNVYPIMAYIRQENQQPVVNWCVCYNKTIDRWRKTQAATLKIGNLRGLCVRELSRQEMTYKWKQGEFSKAYHDRWGYNTYFV…	643	USER	zzzz593
348	genbank_anelloviridae_ALN98249.1_	genbank	MPYFYNRGWRNFYPTRRWRRRRRIRSRRRWPRRRRARTTFRRTWRKRRRRRYKVKKFKKKKIFLQQWQPPTIKKCKIKGHMCLYFCAHGRESHNYNQYSKSFTPETYPGGGGFGIYRFNLAALFEQWQDYSNYWTKQNANLDLCRYTGCTFRFWRHTDVSYLVTYQRMYPMTVNALSHAECHPARILLRKKYITVPSYKDAPHKRKPFKKVRISPPSLMNSKWFFQKDLSTQGLLLLTASSCSLNHAYISTTAESNNITITCLDTKQVFEQSGWVYTGTQPYTPYKNNIKIWGGVNGTEPTKRWQLSGIKYIQEPTDNQIGNVFTPKYATGEFKIFKGNDKNSAVEMKDPLYIDCRYNPMYDNGIGNKVYLKSVSAKDYYDEPNDKDLVIKNIPLWVAL…	664	USER	zzzz594
347	genbank_anelloviridae_ALN98241.1_	genbank	MPYYWRRQRPWRRRRRLWTRRTRGPFRRWPYRRYRRTYNIYRVRRRRYPCKLKTITLKQFQPRSIRRCNIIGNICLFQGSPERANNNYIQSIYSYVPVDEPGGGGWTLMIETLSSLWGDFEHLKNIWTASNEGLPLVRYGGVILHFYQSAYTDYIVEVSNCYPMVDTKYTQADAAPSRMLLKRNTIRVPSSETKKRRKPYKRIRVPPPAQMQNKWYFQKDICNIPLLMITATAVDFRYPFCASSCRSNNLTLTCLNTELFQIHSFDSIPATTGYTPKPNTYLYHKNPENPESLEHLIFLGTTKTNTAGKEGNINKPENWGNPFYHEYIDGTKKVYSSNLAPTAVKKENITQITELVQNYFFKVRYNPEKDTGAANKIYIVSNFAHQGWDPPQNPNIIMD…	450	USER	zzzz595
346	genbank_anelloviridae_ALN98251.1_	genbank	MPYYWQRNFRWRRNWRRRLNPYTRRRLRLWRFRNPIRQRRRHRRRVRKRKLKYLTLRQWQPKTIRNCKIKGLICLFQAGHERFSNNWGQYQASYVPEHWPGGGGWSLLVFSLGALYQEFQLLRNWWTTSNRGLPLVRYLGCSFKFYQSEHTDYVATYTTCYPMTDTKYMHANAQPSRMLMSYQKVIVPCKKTNPKRKGYIKKYIKPPKQMLNKWFFQKGMCNTGLVLLTTTACSLDQYYLSNNNISNNITLCSLNTTPFTHKAFQQDITTKPFTPKPSFYLIGSKNGEQKLKYKDLIILGNTHDYTDGHTFSEVIGRTTGKFTSQDVTKYMKKENWGNPFYSEFLKESQRVWITNTDPLKDFNRELTSEVQNITELSNPIVVKCRYNPNKDTGEGNIAY…	675	USER	zzzz596
345	genbank_anelloviridae_ALN98238.1_	genbank	MWIYANPLRLANNYAQYEASTIPEHQPGGGSFSIYRFTLEALYEQFTLVRNWWTQSNNGLPLIRYRGCKLKLYRSDDVDYVVRYCNCFPMSDTELMHISAQPSVMMLNNQKILVPSKKTKPRGKPYVIKRIPPPSQMLTKWFFQKDIARTGLLMTTISAASFDHYFIDSWAQSTNATVTSLNTTIFQSRNFQNLGTTGYVPKPQYYMYATTNGSDNPQVKELIYLGNTLLRQQGTVINNTNLQDYNTKPEYWGNPFWHMYLNKNVTLWVGKTSHTDLFKQNNLTKRVSPEFLTKMEQELIIKCRYNPERDTGVGNKIYILKNTRNESGWDPPSNDNLILEGFPLWLILFGWTDWQKKLGEAQQIDINYILVIQSNFLSPKLPYYVLIDNAFINNKSPFG…	591	USER	zzzz597
344	genbank_anelloviridae_ALN98237.1_	genbank	MPWLWRPQRYNWRQRYPRRTRPYRRRPLRRRRPRGPFRRRRRYRWVRRRRFYKKKLKSLIIRQFQPETIKKCHIKGIICLFQAGIGRLHNNWGQYQQSYVPPLWPGGGGWSILVFSLNALWAERERLRNVWTKSNDALPLARYIGAKLKFYRNQDLDYIVHWSTCYPMTDSEQHHLISQPSMMLMLRHKLIVTSQKKNPRAKPYIIKRIKPPTQMTNRWFFQKDICNTGLLLLQTTGIDTDRYYLNPYSKNNCATLWSLNTVVFKNRNFQLTEMGTTQWCPKDDYYMYATHNGHTTTTELQIKDLIYLGNPTVYQPGTPIGNQKWENYNKIENFGSPFWHEYHTRDRRVWISKTKPSELLNKPSETKLDTLVTEMSQDIYTECRYNPNRDTGQGNRVFL…	669	USER	zzzz598
343	genbank_anelloviridae_ALN98244.1_	genbank	MPYYWRPYKNYRRRPFRRRRIRTPVYRRRWYRRLRPWRRRRRVRKHYIKRKLKSIIIRQFQPQSIRKCNIIGTIPRFQGSPYRANNNYIQTIYSYVPQEEPGGGGWTIMIESLSSLWDDFQRLKNIWTHSNAGLPLARYQGVTLTFYQSPYTDYIVQISNCLPKVDTKYTHADSCPSRMLQRKHTIKVPSLETKKRKKPYKRIFIKPPRQMENKWYFQKDICTTPLLMIIGTAVDFRYPFAGSKARSNNITLDCLNTTLFQIHNFDNLATNGYQPKQNTYLYAYRNDEDPHDKPNTITDKEKQHVIYLGNTKDNQPGTYTFTDFTINNKLEKWGNIFWHDYFTGTIPIYESDQSPTQLNTSWKPLKRLTEPLIKKVKYNPEKDKGESNTIYLVQNYVYT…	649	USER	zzzz599
342	genbank_anelloviridae_AJA71663.1_	genbank	MAWYWRWRTRQWRWRPRRRFTRRRRGLYNRRTYRFGRYRGRVRRRRLRRRRRRRRAPIASKVIVWNPERVVKCRIIGWHFGLFCNSLNSMLCTYVPTVEKKRPILGLHGGGVTLIPFTLESFYRDFLYRRAFWTRSNEGFDLGMYLGTRFTFFPHWQYPYIVTWLRDFSTPQPHHIRDMHPAISLFQANKKVILPRSFGRKKKFSLWLRPPPLNERKWYTIQSWCNVVLAKIGITFINITSPLLHKDTPYPACFAGWSNTSGNFEHRPLWDSQIGNPQTLGNKPEHLATYNVPIMYRPHWDDGKGNYLLVNTGHTPPNIGGMWSPSGGNRVPILSSLAIDMPYWQWFYGCTEISGVFQTTRTEMGPIYWPNVVGILWYADVGTYLPGQTKLTPDYRTYA…	639	USER	zzzz600
341	genbank_anelloviridae_AJA71666.1_	genbank	MAYRHRRPFRRYRRRYPRWKGRRVHRRHTWRPFHHWRRWRRRPYRRGTVAVRYTNPRRHKYISVTGWEPLGNCCIQDKASDEATPYEDLDSDVQTWANRTRTAGIWHGTYGHHYPWQLLCQRAQFYFCTFSSGWKGYDYLQFYGGNIWLPKLAAPYFFWVDPTVQDPKKSSYESLCEGQDLVPPRGIHEQKGAHYIPANNESHTLKGYKRIHIKRLSTWEGVYAISTAADYILVHWVWSTVTKNWAFFDGACYQAGQASSDTCNSTPWFMSAQTAESGVKKEVDEYKKTNDFKNNLYCYPDPRASWVNRQKYNKTIQPLTVTENPGGPFLPSQGAGLGLSRQYDQVSFWFRYRFKFKVSGDSVYRRLPAVSNTDTIPEAPGAQNQVSPRSILKARPLDT…	462	USER	zzzz601
340	genbank_anelloviridae_AJA71660.1_	genbank	MAYRHRRPFRRYRRRYRRWRGRRGPPPTYLETFPPLRLEEEVETSQTRICCCKDHQTQKHKYITVTGWEPLGNCCVTDSAGSEAKPYDDLDKDVSTWCKQSNNAVWHGTFGHHYLTWGLLVQRAQYYFCKFSSDYRGYDYLSFCGGYIWLPYLYAPYMFWLDPCIIDPQEKVMNFSLYNKDSSWFHPGIFMNRKGARFIPPSYQTYTHHLYKRLRVPRPPTWEGVYTIPAATQYILTHWAWTTVTTNTAFFDGACNQSGQTSTCEAVPWFMKGHTPTGEFKKKLETWKTNTNSGAENLDCYGDPRSWWVNRRKYDDKTSTTCNEDNWGPFLPSKGTGTGVTKQYDSISFWFRYRFKFKVSGDSIYTRIPSRTATEVISEAPGPKPKIQARSILKTRPPD…	480	USER	zzzz602
339	genbank_anelloviridae_AHY21722.1_	genbank	MPYRRYRRRRRRPTRRWRHRRWRRYFRYRYRRAPRRRRTKVRRRRRKAPVIQWNPPSRRTCLIEGFWPLSYGHWFRTCLPFRRKNGLVFTGGGCDWTQWSLQNLYHEKLNWRNIWTSSNVGMEFARFLRGKFYFFRHPWRNYIVTWDQDIPCKPLPYQNLHPLLMLLKKQHKLVLSQQNCNPNRKQKPVTLKFRPPPKLTSQWRLSRELAKMPLIRLGVSFIDLTEPWLEGWGNAFYSILGYEATKQQGHISNWAQIKYYWIYDTGVGNAVYVIMLKKETKSNPGQMVYNFPTSGGQHPDAIDHIELINEGWPYWLYFYGKSEQDIKKEAHSTEIAREYAQNPNSLKLKIGIVGWASSNFTTPGSVQNSGSETAAIQGGYVAWAGGQGKYNLGAGSIDN…	628	USER	zzzz603
338	genbank_anelloviridae_AHY21717.1_	genbank	MTLRRYRIRRRSPTYRWKRRRFRRYFRYRYRRPPRRRRRYKVRRRRAKKAPVIQWFPPTIRNCYIKGIWPLSYGHWLRTCLPMRKENGLIFLGGGIDWTVWSLQNLYHEKLNWGNIWTSSNDGMEFARFKYAKLKFFRHEFRSYIITWDQDMPCKPLPYTNLHPFVMLLKKQHKVILSKQECNPRKKDKPVTLKIKPPPKLTSQWRLARELTKIPLFRLGISLIDFKEPWVEGFGNAFYSTIGYEAKVGTQYRSEYAQIKYFWIYDTGVGNHIYVVMLSKEAEDNVGYLAQHNITITEVEQIGEGWPYWLFFFGRSERDLKALAHGNSNIGNGFQANPESKKLKIAIIGWASSNTTAQDSLQGGGRPIDGTYFISTALLHSGHTAGATQINNLAAVGWG…	620	USER	zzzz604
337	genbank_anelloviridae_AHY21714.1_	genbank	MPFHRYRRRRRHPTRRWRRRRFRRYFRYRYRRPPRRRRRYKVRRRRAKKAPVIQWFPPTIRNCYIKGIWPLSYGHWLRTCLPMRKENGLIFLGGGIDWTVWSLQNLYHEKLNWRNIWTSSNDGMEFARFKYAKLKFFRHEFRSYIITWDQDIPCKPLPYTNLHPFVMLLKKQHKVILSKQECNPRKKDKPVTLKIKPPPKLTSQWRLARELTKIPLFRLGISLIDFKEPWVEGFGNAFYSTIGYEAKVGTQYRSEYAQIKYFWIYDTGVGNHIYVVMLSKEAEDNVGYLAQHHITITEVEQIGERWAILAILLWQIRKKSQSFSTWKLKHGNGFQANPESKKLKIAIIGWASSNTTAQDSLQGGGRPIDGTYFISTALLPLGHTAGATQINNLAPVGWG…	620	USER	zzzz605
336	genbank_anelloviridae_AHY21716.1_	genbank	MPFHRYRRRRRHPTRRWRRRRFRRYFRYRYRRPPRRRRRYKVRRRRAKKAPVIQWFPPTIRNCYIKGIWPLSYGHWLRTCLPMRKENGLIFLGGGIDWTVWSLQNLYHEKLNWRNIWTSSNDGMEFARFKYAKLKFFRHEFRSYIITWDQDIPCKPLPYTNLHPFVMLLKKQHKVILSKQECNPRKKDKPVTLKIKPPPKLTSQWRLARELTKIPLFRLGISLIDFKEPWVEGFGNAFYSTIGYEAKVGTQYRSEYAQIKYFWIYDTGVGNHIYVVMLSKRSRGQRRISSTKSHNNNRSRTNRRRMAILAILLWQIKKRSQSFSTWKLKHWKWISSKSHESKKLKIAIIGWASSNTTAQDSLQGGGKAIDGTYFISTALLHSGHTAGATQINNLAAVGW…	621	USER	zzzz606
335	genbank_anelloviridae_AJM13636.1_	genbank	FSFIGQWHPPHRHLCSIYGWYPLLVGFKTAATQRGQIQIPAKSGANKYWSTYVPGGTAIFYLSIDFLYLENLRWRNRWSHSNEGYDLARYFGTKVYFPPHDYLWYVVFYDTEFQKGTGNAYAFNHPSIMLLTKKHIIVKPRKYGGKGKRRFLPPPSVFDSQWYKMSGWCGAGLAKIMISLYNPFTAFMHEGQTVPAFKIGIEANASRWDNNEWMGYNSASYGTMRPTVYYRWDWDTGENNAIAVPYAPNGDTEPNWEIQRWDAPYWMWFFGKKFDDFLGNVPTITSSSTKYLNVKIMWYKIESDQDYGPHTDPSRKQWINLMWYDTSNSTMLQYGGPATCLRIAAMGPYVLGPGDILKSEDDAWNIPFFYQSRWQWGGTTQGAVEHIKNPCGPQSMPTR…	437	USER	zzzz607
334	genbank_anelloviridae_AJW66521.1_	genbank	MYQGRRRRRRRWGRRILSRYKRKWGRRHRRNYGFPRRWRRWRRPRTVVTEQHSRRVKTIIVRGWEPLGNICPTDSAKAKATPYASYDSDSGQGQWHGTWGHHWFTFQSLVDRAEARLNSFSGNWESYDYLRFLGGTMYLMQPREMCFMFGNDPYLVTSDLDKTASQKNRAEETWITPGYLLHRPGTHLILSRQKVERRSMYKIRVPVPTSWRGWFPIPECFSYVLCHWYWAWWDPDACFFDPCATGSSCEAEPWWSTAQTKQAWVDRTKLDDPPVGGIGPNQKTWAPFLPSRPCTNYYTHSASFWFKYKLKFQVTGENIWAPVPRDYSQQGTVPTAPSRQSMESKARASNPKANRPPTTADILPGDLDSEGILKDEAYERITRDNPSPKRPRPLGIRWW…	435	USER	zzzz608
333	genbank_anelloviridae_AJW66524.1_	genbank	MYQSRRRRRRRWGRRVLSRYKRKWGRRHRRNYGFPRRWRRWRRPRTVVTEQHSRRVKTIVVRGWEPMGNVCPTDYAKTKATPYASYDSDQGNGQWHGTWGHHWFTFQSLVDRAEARLNSFSGNWESFDYLRFLGGTMYIMQPREMCFMFGNDPYLMTADLDKTPSQKNRAEETWITPGYLMHRPGTHLILSAQKVHRRSMYKIRVPVPTSWRGWLPIPECFSYVLCHWYWTWWDPDACFFDPCATGSSCEAEPWWSAANMKQSWVDRSQLESSGVITTGLKSWAPFLPTRPCVNYYTHSASFWFKYKLKFQVTGENIWAPVPRDYSQQGTVPTAPARQQVEPKTRTPHKKGLRPPTTADILPGDLDKDGILQDEAYERITRDNPCPKRPKPVGVRWWDG…	433	USER	zzzz609
332	genbank_anelloviridae_AJA32106.1_	genbank	MAFFYRRRYYRPRRTYYRRRRPYYRRRRTYYRRRRWPVRRRLGRRRAKRVVQWNPRNRTKCLILGYMPLITTARAMDTVADTLMPKGPMVTVWPGGGVDSGHLTLLDLYWEERFWRARWTKSNQGYNLARYFGVEIKLYRYLDFSYIFWYSVDDGSDDPEPLQMAHPSQMLLYRHKIIVHRSLDKRAKTIRLKIRPPSKLYDSWRSFKELATVPLIKWRCTIVDFDMPFSALKNQIVPYEFDVFSKGSIDTGYTKNVIYYPWQDDGTNTKVTFTHVVPYNDTQNGPQGPNNRQDFWPNEIEFKDMNMPMWLAGFGYNQEWYDMSWMNRRPRPPGATAEQMKGYWSYVQFNGNPAFKDKSTGDIIKWDNGKGTSFVKWTTWGNIASMAGPFVAKGAPKKG…	574	USER	zzzz610
331	genbank_anelloviridae_AIY70064.1_	genbank	MAWWRYRRRPWKRWRRRRWGLRTRRPRRTFRRRRARRYVSKGRRRRYRRRRRRGRRRRGRRRRHRKTLILRQWQPDVIKRCFITGWLPLIICGNGHTQFNFITHMDDIPPKNASYGGNFTNVTFNLACLYEEFMHHRNRWSASNHDLELVRYLRTSLKLYRHESVDYVVSYTTTGPFETNEMSYMLTHPLAMLLSKRHVVVPSLKTKPHGKKYKKITIKPPKLMLNKWYFAADFCHIGLFQLWATGLELRNPWLRSGTNSPVIGFYVLKNQVYQNRYSNLNTPEAHTARQQAWNELTQQCTNNKWYNWQYTYNKLMKPIYYAASNETGNIDMKGKTYNWKNYKQHYNKTQNKWLAVIKDAYELVREEYQQLYTTTMTYPPPWEPTTSNTGRQYLEHDCG…	746	USER	zzzz611
330	genbank_anelloviridae_AHN14921.1_	genbank	MAWRIPRRQTWRRRDWRKTRRPYRRRTYRRSRRSRRWRRGGRPHKVRVLTEVQPRFQRRCVVRGIACPLMVGQPDQQGTNPKENKNYELRPGAIYGYKSNGSELWMGTWSVGVLSLWILYEEHKLYRNRWSASNCGFDMTEYRGTTLYLEQHSEMDYIAFFDEEYASIESFAQQATLHPLLLLTHPKTVLIKSRKRAGPRRARKVFLPRPSWWDSGWKFSKDIAKKGLFVWYVACIDLEHPWIAPSFNDCNDFKAHYWWLKQDWKQKFDLYVRTAAQQLGDNWNKSNYDNEIAKGPFMPWVADLLQEKNNMRLVWFYKSYWEFGGNNLTLKKICNPDMDVPVANDS	346	USER	zzzz612
329	genbank_anelloviridae_AHN14909.1_	genbank	MAWRIPRRPTWRRRTYYRKPRRTYRRRTSRRTRRTRRWRRTRKQHKVRVLTEVQPRFSRRCVIRGIACPLMIGQPDQTGTDPTNNANWELRQGAMYGYKSDGSELWMGTWSVGMVSLTMLYGEHKNFRNRWSNSNCGFDMVEYRGTTVYLEQHSTVDYIAFFDEEYRTIESFAQQATLHPFIMLTHPKTILIKSRQRVGPRRARKVFVPRPSWWDSGWKFSKDVCNKGVFVWYIAAVDLEHLWCDCYITDNTAWAAAKWWKDMKWKEDFDTYVRTAVQTIGTDWNKNNYKKTIAHGPTMISIKDFQTDKNNWQITWFYKSYWRFGGNNLTLRKICNPSMDVPIS	344	USER	zzzz613
328	genbank_anelloviridae_AHN14905.1_	genbank	MAWRIPRRPTWRRRTYYRKPRRTYRRRTSRRTRRTRRWRRTRKQHKVRVLTEVQPRFSRRCVIRGIACPLMIGQPDQTGTDPTNNANWELRQGAMYGYKSDGSELWMGTWSVGMVSLTMLYGEHKNFRNRWSNSNCGFDMVEYRGTTVYLEQHSTVDYIAFFDEEYRTIESFAQQATLHPFIMLTHPKTILIKSRKRAGPRRARKVFVPRPSWWDSGWRFSKDICNKGAFVWYISAVDLEHLWIDCYIQDQNAFQTARWWHDNSWKEDFDKYVRTGVQTIVTDWNKTNYTNKIAHGPTMLSIKDFQNNKNNWQITWFYKSYWKFGGNNLTLRKICHPDMDVPNP	344	USER	zzzz614
327	genbank_anelloviridae_AHN14893.1_	genbank	MAWRFPRQRTWRRRTWRPTRRRTYRRRTARRTRRTRKWRRGRRNLKVRYLTEVQPRYTRRCVIRGIMCPLIVGQPNQDGSPSTNHWELKQGGIFAYKSDGSDLWMGTWSVGMVSLSILYGEHKAFRNRWSVSNCGFDMVEYRGTTMYLEQHSSLDYIAFFDEEYRDIASFAAQASLHPLVLMTHPKTILIKSRERAGPRRARKVFIPRPSWWDSGWKFSKDVCHKGLFVWFISAVDFEHPWIRAYVANQADFRKDMWWRDNKWKDDFDSYVRTAVQTLQSSNNANNYKTETALGPFMLSIKDRNRATVNQQFTWFYKSYWHWGGNNLTIKKVCNPDMDVPIA	342	USER	zzzz615
326	genbank_anelloviridae_AHN14913.1_	genbank	MAWRIPRRPTWRRRTYYRKPRRTYRRRTARRTRRTRRWRRSRRQHKVRVLTEVQPRFSRRCVIRGIACPLMIGQPDQNGTDPKENKNWELRQGAMYGYKSDGSELWMGTWSVGMVSLTMLYFEHKVYRNRWSNSNCGFDMVEYRGTTVYLEQHSTIDYIAFFDEEYRTIESFAQQATLHPLLMLTHPKTILIKSRQRAGPRRARKVFVPRPSWWDSGWRFSKDICNKGVFVWYISAVDLEHLWCDCYIQDQTAWNTAKWWHQNDWKDKFDQYVRTAVQKIGADWNKDNYDNKIAHGPTMISIKDFQTDKNNWQITWFYKSYWRFGGNNLSLRKICNPDMDVPVPVQ	346	USER	zzzz616
325	genbank_anelloviridae_AHN14881.1_	genbank	MAWRFPRQRTWRRKTWRPTRRRTYRRRASRRIRRTRKWRRGRRNLKVRVLTGIQPRYTRRCVIRGIMCPLIVGQPNRDGSPSDNKWELKQGSIFAYKGDGSDLWMGTWSVGMVSLSILYGEHQAFRNRWSVSNCGFDMVEYKGTTMYLEQHSNLDYIAFFDEEYRNIESFAAQASLHPLVLMTHPKTVLIKSRERAGPRRARKVFIPRPSWWDSGWKFSKDVCNKGLFVWFISIVDMEHPWIRPYIASDQDFKKMMWWTNNKWKEDFDTYVRTTVQMLQTSNNSDQYKKETALGPFMLGLKDKNQATVNQQFTWFYKSYWRWGGNNLTMKKVCNPNMDVPITM	343	USER	zzzz617
324	genbank_anelloviridae_AHN14873.1_	genbank	MAWRFPRQRTWRRRTWRPTRRRTYRRRASRRTRRTRKWRRGRRNLKVRVLTEVQPRYTRRCVIRGIMCPLIVGQPNNDGSPSNKNYELRQGGVFAYKHDGSDLWMGTWSVGMVSLSILYGEHKAFRNRWSVSNCGFDMVQYRGTTMYLEQHPTVDYIAFFDEEYRNIESFAAQASLHPLVLMTHPKTILMKSRERAGPRRARKVFIPRPSWWDSGWRFSKDVCNKGLFVWFISAVDLDYPWMKPYVANDTDFKKLMWWKDNKWKEDFDSYVKTTMPVLRNNKNDSNYRTEITTGPFMLSIKDRNRATVNQQFTWFYKSYWHWGGNNLTIKKVCNPDMDVPIT	342	USER	zzzz618
323	genbank_anelloviridae_AHN14865.1_	genbank	MAWRFPRRTTWKRKTWRQPRRRTYRRRAYRRTRRTRKWRRGRRNLKVRVLTEIQPRYTRRCVIRGIMCPLIVGQPNADGSPSKQNWELRQGGIFAYKHDGSDLWMGTWSMGMVSLSILYGEHQAYRNRWSVSNCGFDMVEYRGTTIYLEQHSTMDYIVFFDEEYRDITSFAAQASLHPLVLMTHPKTILIKSRERAGPRRARKVFIPRPSWWDSGWKFSKDVCNKGLFVWYISAIDMEHPWMKAYVGNKTDFQNLMWWRNNKWKEDFDTYVRTTAQMLQTSKNDNNYKTETATGPFMLSIKDRNRATVNQQFTWFYKSYWHWGGNNLTIKKVCNPNMDVPIT	342	USER	zzzz619
322	genbank_anelloviridae_AHN14857.1_	genbank	MAWRFPRQRTWRRKAWRPTRRRTYRRRTARRARRTRKWRRGRRNLKVRVLTEIQPRYTRRCVIRGIMCPLIVGQPNNDGSPSDKNWELRQGGIFAYKHDGSDLWMGTWSVGMVSLSILYGEHKAFRNRWSVSNCGFDMVEYRGTTIYLEQHPTMDYIVFFDEEYRDIASFAAQASLHPLVLMTHPKTILIKSRERAGPRRARKTFIPRPSWWDSGWKFSKDVCNKGLFVWYISAVDLDYPWLKPYVGGDADFKKLMWWRDNKWKEDFDAYVRTSVQVLQNNKNNGNYRTEIATGPFMLSIKDRNRATVNQQFTWFYKSYWHWGGNNLTIKKVCNPDMDVPIS	342	USER	zzzz620
321	genbank_anelloviridae_AHN14853.1_	genbank	MAYFYRRSFRYPRRNYYRRRYYRRRTHGPRRRTYRRRVRRTGRWRRYYRKYSRRHAAKIVQWNPAIKTKCKIIGLTPLMMALGADSGVQDFILPTTSAVVLWKGGGVDSGTLSLLDLYWEERFWRARWSKSNQGYNLCRYFGVTLTLYRLQHHTYIFWWTVEDFTDDQEPLTVCHPSQLLLTNNHVLVKHYGSNRQVDKAVKIKIPPPTYLDSSWHTFKDIAKKPLLKWRTSLIDTENPWTGFPDNRVGLRIYLWSWDKTSKQGKQTEVMYYPLLDEGNETQVCIHKADWNDAGTGPKLDSAQFWPGHDDQWETLVVPFYMYTFGRSAEWYDTDRHRHMPRPEPAGGQGFFLYIKHNSNPAWRDGITGQLITAWDVAFMTYNTAQRIAASGPWVEKGIQ…	576	USER	zzzz621
320	genbank_anelloviridae_AHN14843.1_	genbank	MAYFYRRTFRYPRRNYYRRRYRRRRQYGTRRRTYRRRVRRPGKWRRYYRKYSRRHAAKIVQWNPAVRTKCKIIGLTPLMMALGADSGIQDFILPTTSAIVLWKGGGVDSGTLSLLDLYWEERFWRARWSKNNQGYNLCRYFGVKLTLYRLQHHTYIFWWTVQDFTDDQEPLTVCHPSQLLLTRNHVLVKHYGSNRQVDKAVRIKIPPPTYLDSSWHTFKDIAKKPLLKWRASLIDTENPWTGYPDNRVGVRIYLWSWDTATKTGKQAEVMYFPLLDEGNNTQICIHKADWNNEGTGPKQDAANFWPDRNDRWETLVVPFYMFTFGRNAEWYDTNRHRHLPKPEPEGNMGYFLYVKHNSNPAWRDGVTGQLITTWEMAFMTYNTAQRIAASGPWVEKGIQ…	576	USER	zzzz622
319	genbank_anelloviridae_AHV83696.1_	genbank	MGYWWGRRRRWRRWRRRRRPLRRRRWRRRRRWPRRRRWRWRRRRRRPARRYRGRRRRRRVRRRRRRRQKLVLTQWNPQTQRKCVVRGFLPLFFCGQGAYHRNFVEHMDDVFPKGPSGGGFGSMVWNLEFLYQEFKKHHNKWSSSNRDFDLVRYHGTVMKFYRHSDFDYLVHLTRTPPFKEDLLSIISHQPALMMQNYRCLLVKSYKTHPGGRPYVTVKIKPPRLLTDKWYFQPDFCGVPLFKLYVTLAELRFPICSPQTDTNCVTFLVLDNTYYQFLDNTADATRDKERDTKWIQMYSTTRYHLTTHINTLFTGTRDMQEAKQAGKDSQFRENIWNTQKIIEIITNIANKNMKKQEQYYTKTYGSYASQYFTGKKYWDWRVGLFSPIFLSPSRLNPQEP…	735	USER	zzzz623
318	genbank_anelloviridae_AHV83693.1_	genbank	MAWWGWRRRWWRPRWRRRRRWTRRRRRVPARRPRRAVRRYRRRQRVRRRRWGRRWTRRGRLRLRRRRRRRKKIVLTQWNPQTVRRCYIRGLMPVIWAGMGSGGKNYAVRSDDYTTAGFGGSFGTETFSLRVLFDQYQRGFNRWSHSNKDLDLALYYGCSFRFYRHESVDFIVTFTKNPPMKTNQYTAPLTHPGMLMRAKYKVLIPSRKTRPRGRKYVKIRVKPPNLFQHKWYTQADLCSVSLVQLNLTAADFTHPFGSPLTDTPCVSFQVLGDLYNECLNIDLPKLQTFTAQGPTYEHDSFSNKQHLDKLLKQLFLNGQYWQTFITGPFIKDQIKANKYDEYVTKLKNANTFQKPEQTNYYTTQEASKFVSAADSNYLFVTYHPENIPEKIKQIRDNYF…	779	USER	zzzz624
317	genbank_anelloviridae_AHN50432.1_	genbank	MAWWWWRRRRRPWRRRRRRWRRRPRVRARRPRRFVRRRRRRVRRKKRGWRRLYGRWKRRGRRRRKRKRLIMTQWNPSTVTRCFIVGYLPIIITGQGTASMNYSSHSDDITYPGPLGGGISSMRFNLRILYDQYCRGLNFWTKTNEDLDLARYLGTRFRFYRHPDVDFIVTWETSAPFTDSVVSGPHQHPGIQMLMKRKVIIPSFKTKPKGSSSIKVRITPPKLMIDKWYPQTELCEVTLFTLHATACDLRFPFCSPQTDTSCIQFQVLSYTAYRQRITILPSESTVEQLANFLQTNVTPNMNVLNTLATPYCFKFPQLDKIPAQDTQSGWSTNPDSQDGDPIYKSENVVSKWLNNNTVWYTKDQRAMTNIHSAYGVADNHTFEHKTGIFSPALLSPQRL…	734	USER	zzzz625
316	genbank_anelloviridae_AHB53092.1_	genbank	MPYRRYRRRRRRPTRRWRHRRWRRFFRYRYRRAPRRRRTKVRRRRRKAPVIQWNPPSRRTCLIEGFWPLSYGHWFRTCLPMRRLNGLIFTGGGCDWTQWSLQNLYHEKLNWRNIWTASNIGMEFARFLRAKFYFFRHPWRSYIITWDQDIPCRPLPYQNLHPLLMLLKKQHKLVLSQKDCNPNRRQKPVTLKIRPPPKLTTQWRLSRELSKIPLVRLGVSLIDLSEPWLEGWGNAFYSVLGYEASKEQGRVAEWCQMKYFWIYDTGVGNAVYVILLKKEIDDNPGSMAKEFVKTASQHPDAIHHIEMINEGWPYWLYFYGQSEQDIKKLAKDRDIVAEYSRNPKSKKLKIGVTGWASSNFTTAGSVQNTTAQTPEAIKGGYVAYPGAKIPGAGSISNLF…	625	USER	zzzz626
315	genbank_anelloviridae_AFQ32891.1_	genbank	MRFRRRRFGRRRRYYRKRRGGWRRRYGRRWRRTAWRRRRVRRWRRSAFRRGGRRARPYRITAWNPRVVRRVVIKGWWPLIQCMQGMEYLRYRPMNNIEKRWIYKKSNSRQFAEDMGYLMQYGGGWASGTISLKGLFNEHQLWRNVWSRSNDGMDLARYFGCSISLYPEVNQDYLFWFDTEFDETQLLNLQEYTQPSVMLQAKNSRLIVAKSRMPIRRRIKKIFIPPPAQMTTQWQFQKDLADYPLFNWACICIDMEKPFDYTGAWRNAWWLMQRQASGDMEYIEKWGRIPPTGDFKLPSKSSMTGNQDNPNWHPQDEPFIYPIVAYWVTEEGKNVCYWSTIHNAPINRWRKKEAMAIQVRDLRGLCLRVCSAQETYYRWQRAEFTDTFKQRWFPQNGSD…	649	USER	zzzz627
314	genbank_anelloviridae_AHA91750.1_	genbank	MPYRRNYYQRRRRRWIYYRRPRGPFRRKWRRYRRRRWVRKKKLPFLRLKEYQPSNIRKCKIQGLIPLYWGTPERFVNNYDSYEMTTAPPKLPSGGLFTIKNFSLQSLYSENRYIRNTWSHTNTDLPLVXYTGCKFKIYKSEHVDTILTFDNNLPLASNQDMYLSMQPSVHSMIKHKIIIPRLTKGYNKKPYKTIHIKPPKPMINKWYFQQDITTIPLCQIRASACSLNEWYINYKSVSTTSTINFLNPGCITNTYFNKYYSTGWYARKLDSGTKIYLISFKNNXQHTWENAVFLGNTLDNQZGSTPKEIXLISXGSTTQDIMQHYGKQQWGNPFYKNYLNNTWKVYFFNEELFTFLDQYRQHXXTPIPVTYITETQLTNAIRYNPLSDEGKDTKIYFKP…	662	USER	zzzz628
313	genbank_anelloviridae_AGU62958.1_	genbank	GQPHTYPETNEQTAMNLIQYRDVQRVLAGLGSEGPFAMSASDIRPYFTNVNISYKYRSYWQWGGVGPTSDNVRDPTANNQPANLQAVDPSLTTRHTVHPWDYDQFGILFTQKLNDLIYTPTATPDPFGLPTKSKETEGKRKREELSSDGEEEKNLQTQIQKATTPSDIQQLLQQLHDRVKLGEHERKR	188	USER	zzzz629
312	genbank_anelloviridae_AFO64349.1_	genbank	MAPARRWRRRFGRRRRRYRKRRYGWRRRYYRYRPRYYRRRWLVRRRRRSVYRRGGRRARPYRISAFNPKVMRRVVIRGWWPILQCLKGQESLRYRPLQWDVEKQWRVKTDFEDNYGYLVQYGGGWGSGEVTLEGLYQEHLLWRNSWSKGNDGMDLVRYFGCLVYLYPLKDRDYWFWWDTDFKELYAENIKEYSQPSVMMMAKRTKIVIARDRAPHRRKVRKIFIPPPSRDTTQWQFQTDFCNRPLFTWAAGLIEMQRPFDANGAFRNAWWLETRNEQGEMKYVELWGRVPPQGDTEMPKKSEFMKGDNNPNYNVQEGYEKNIYPILIYVDKKDQKPRKKYCVCYNKTLNRWRKSQASTMNIGDLQGLVLRQLMNQEMTYYWKSGEYSSPFMQRWSGSRL…	639	USER	zzzz630
311	genbank_anelloviridae_AFO64347.1_	genbank	MAPARRWRRRFGRRRRRYRKRRYGWRRRYYRYRPRYYRRRWLFGGEYQPPTGIRDPCSDNPAYPVPQSGSITHPKFAGKGGMLTETDRWGITAASSRALSADTPTEATQSALLRGDSEKKGEETEETTSSSSITSAESSTEGDGSSDDEETVRRRRRTWKRLRRMVREQLDRRMDHKRQRLH	182	USER	zzzz631
310	genbank_anelloviridae_AGG91488.1_	genbank	MPYYYRRKWNRYRRRYWNYRWRPRAPIRRRRRWRKRQPVRRKLQKLTLKEWQPKTIRKSCIKGLHCLFIVTEDTISRNYRMYEHSFTGEHWPSGGGFSVTKYTLDGLYEQHQLDRNWWTKPNTNMPLVRYLGCKITFYQSWEVDYVCNINLTWPMVATNLLYLSCHPNFMMMNHKAIFVPSKITKRLRRGKKTVRLRPPHQMINKWYFAKELAKTGLVMLTAAAASFDHYYIGSDKLSNNCTFTSLNPLFYKRHDFITPPVQGYILSQDGTIEKKLFSTTHIGDVAQLTIEQANLTYLGDTKMYEQSTTTKLTKSNADTYFTSHKNWGNPFSHENLTTQENLLITNKSYQEIINKAKDTNTSTNKIGPGFFTSPSEVTHYDIRYAPDRDTGVGNKVYLK…	658	USER	zzzz632
308	genbank_anelloviridae_AGG91484.1_	genbank	MPYYYRRRRYNYRRPRWYGRGWIRRPFRRRFRRKRRVRPTYTTIPLKQWQPPYKRTCYIKGQDCLIYYSNLRLGMNSTMYEKSIVPVHWPGGGSFSVSMLTLDALYDIHKLCRNWWTSTNQDLPLVRYKGCKITFYQSTFTDYIVRIHTELPANSNKLTYPNTHPLMMMMSKYKHIIPSRQTRRKKKPYTKIFVKPPPQFENKWYFATDLYKIPLLQIHCTACNLQNPFVKPDKLSNNVTLWSLNTISIQNRNMSVDQGQSWPFKILGTQSFYFYFYTGANLPGDTTQIPVADLLPLTNPRINRPGQSLNEAKITDHITFTEYKNKFTNYWGNPFNKHIQEHLDMILYSLKSPEAIKNEWTTENMKWNQLNNAGTMALTPFNEPIFTQIQYNPDRDTGE…	666	USER	zzzz634
307	genbank_anelloviridae_AEX59988.1_	genbank	MWWWRRWKSRWRRPARRWRRWRRRRRPRTRRYRRARRPARRPRTVKDPCKQPDFHIPGTGGVPPRLQVTNPKLLDEGYFFKAWDIRRGLFDAKALKRMSEQQINAEFFTGPPKRPRFEVPALQGEDYDSQVRKLHPWPEDSESESEAEAPQEEEPKKPIQEQLEQQLREQKQLGRTVQHIIRQLVKTQHHLHVPIIH	197	USER	zzzz635
306	genbank_anelloviridae_AFV66273.1_	genbank	MPYRRYRRRRRRPTRRWRNRRWRRYFRYRYRRAPRRRRPKVRRRRRKAPVIQWNPPSRRTCLIEGFWPLSYGHWFRTCLPFRRKNGLVFTGGGCDWTQWSLQNLFHEKLNWRNIWTASNVGMEFARFLRGKFYFFRHPWRNYIVTWDQDIPCKPLPYQNLHPLLMLLKKQHKLVLSQQSCNPSRKQKPVTLKFRPPPKLTSQWRLSRELAKMPLIRLGVSFIDLTEPWVEGWGNAFYSLLGYEATKQQGHISNWAQMKYYWIYDTGVGNAGYVILLKKDTTSNPGQMVQNFPSSGGQHPDAIDHIELINEGWPYWLYFYGKSEQDIKREAHSTEIAREFAQNPLSLKLKIGVVGWASSNFTATGSVQNTGGTTSAIQGGYVAWAGGAGKYNLGAGSIDN…	627	USER	zzzz636
305	genbank_anelloviridae_AFV66269.1_	genbank	MPYRRYRRRRRRPRRRWRTHRWRRYFRYRYRRAPRRRRPKVRRRRRKAPVIQWFPPSRRTCLIEGFWPLSYGHWYRTCLPFRRLNGLVFPGGGCDWTQWTLQNFYHEKLNWRNIWTASNVGMEYARFLKGKFYFFRHPWRNYIITWDQDIPCKPLPYQNLHPLLMLLKKQHKLVLSQQNCNPNRKQKPVTIKIKPPPKLTSQWRLSRELAKIPLVRLGISFIDLNEPWVEGWGNAFYSVLGYEATKTQGHWSNWAQMKYYWIYDTGVGNAVYVVLLKQDVQDNPGDMAQKWPGQAGQHPDAIDHIELINEGWPYWLYFYGKSERDIKAEAHTTEIAREFANNPKSKKLKIGVVGWASSNYTASNSTQGATTAIQGGYLAWAGGGGKFNLGAGSIDNLHL…	624	USER	zzzz637
304	genbank_anelloviridae_AFV66245.1_	genbank	MAFARRWRRRFGRRRRRYRKRRYGWRRRYYRYRPRYYRRRWLVRRRRRSVYRRGGRRARPYRISAFNPKVMRRVVIRGWWPILQCLKGQESLRYRPLQWDVEKSWRINTTLEDNYGYLVQYGGGWGSGEVTLEGLYQEHLLWRNSWSKGNDGMDLVRYFGCIVYLYPLKDQDYWFWWDTDFKELYAESIKEYSQPSVMMMAKRTKIVIARSRAPHRRKVRRIFIPPPSRDTTQWQFQTDFCNRPLFTWAAGLIDLQKPFDANGAFRNAWWLEQRNEAGEMKYIELWGRVPPQGDTELPQQTEFQKPSGYNPKYYVNPGEEKPIYPVIIYVDMKDQKPRKKYCVCYNKTLNRWRSAQASTLKIGDLQGLVLRQLMNQEMTYTWKEGEFTNVFLQRWRGFR…	640	USER	zzzz638
303	genbank_anelloviridae_AFV66241.1_	genbank	MRFRPIRRRRRRRYRKRRWGWRRRYYRHHYRRRPWRRWRVRRWRRSVFRRGGRRARPYRISAFNPRVMRRVVIQGWWPLLQCLPGQEHLRYRPLNWDIEKQWVVTEGKAPDTMGYLVQYGGGWGSGQITLEDLFNEHMKWRNMWSKSNDGMDLVRYFGCKIYLYPLEDKDYWFWWDTDFKHQYEDKIKEYCQPSVMLMAKRTKIVVARQRAQHRRRVKKIFIPPPSRDTTQWKFQTEFCKQPLFTWAAGLIELMTPFDFNGGFRNAWWLEPRNDMGEMNYITLWGRVPPQGDSDLPDPNIFKNDGTNQNVNYQVQSGKEKNIYPIMAYIQQENQKPVINWCVCYNKTLDRWRRAQASTLNISNLRGLCVRELSKQEMTYIWKQGEFRKEYHDRWGYGTY…	645	USER	zzzz639
302	genbank_anelloviridae_AFJ75537.1_	genbank	MPYRRYRRRRRRPTRRWRHRRWRRYFRYRYRRAPRRRRTKVRRRRKKAPVIQWFPPSRRTCLIEGFWPLSYGHWFRTCLPFRRLNGLVFPGGGCDWSQWSLQNLYHEKLNWRNIWTASNVGMEFARFLKGKFYFFRHPWRNYIITWDQDIPCRPLPYQNLHPLLMLLKKQHKIVLSQQNCNPNRKQKPVTLKFKPPPKLTSQWRLSRELAKMPLIRLGVSFIDLTEPWVEGWGNAFYSVLGYEAVKDQGHWSNWTQIKYYWIYDSGVGNAVYVIMLKRETQSNPGQMVQNFQTTQGQHPDAIDHIELINEGWPYWLYFYGKSEQDIKKEAHTTEIAREYAQNPNSLKLKIGIVGWASSNYTTPGSVQNTGGTTSAIQGGYVAWAGGQGKYNLGAGSIDN…	627	USER	zzzz640
301	genbank_anelloviridae_AFJ75531.1_	genbank	MPYRRYRRRRRRPTRRWRHRRWRRYFRYRYRRAPRRRRTKVRRRRKKAPVIQWFPPSRRTCLIEGFWPLSYGHWFRTCLPFRRKNGLIFTGGGCDWTQWSLQNLYHEKLNWRNIWTASNVGMEFARFLRGKFYFFRHPWRNYIVTWDQDIPCKPLPYQNLHPLLMLLKKQHKLVLSQQNCNPNRKQKPVTLKFRPPPKLTSQWRLSRELAKMPLIRLGVSFIDLTEPWLEGWGNAFYSVLGYEAIKDQGHWSNWAQIKYYWIYDTGVGNAVYVVMLKQDVDDNPGRMASTFTTTQGQHPNAIDHIELINEGWPYWLYFFGKSEQDIKKEAHSQEIAREYATNPKSKKLKIGIVGWASSNFTTTGSSQSPSNPVAIQGGYVAYAGSGVIGAGAIDNLHLK…	624	USER	zzzz641
300	genbank_anelloviridae_AFS64011.1_	genbank	APVIQWFPPSRRTCLIEGFWPLSYGHWFRTCLPFRRHNGLVFTGGGIDWTQWSLQNLYHEKLNWRNIWTASNVGMEFARFRKGKFYFFRHPWRSYIITWDQDIPCKPLPYTNLHPLLMLMKKQHKLVLSQAQCAPHLKQKPVTLRFKPPPKLTSQWRLARELTKMPLIRLGVSMIDLTEPWVEGWGNAFYSVLGYEAPYQQGRYTNWSQCRYFWIYDTGVGNAVYVILLKQDVDDNQGDMAKKFESSGGHPNAIQEIEKVSEGWPYWLYFFGRSELDIKSYAKNQQIRNEYNANKNSKKLKIGIIGWAAST	311	USER	zzzz642
299	genbank_anelloviridae_AFS64008.1_	genbank	WWPLLQCLHGQEYLKYRPMDKLEENWEFFDTTDRKKKLRPRGFLTQYGGGWATGAITLTGLWEEHKLWRNTWSNTNDGMDLVRYLGAKLTFMKHENEDYIFCWE	104	USER	zzzz643
298	genbank_anelloviridae_AEY63593.1_	genbank	MAQAKGATQTQKKIIMKQWQPNFIRHCYIVGFMPLIFCGENTTSQNYATHSDDLVAKGPYGGGMTTTKFTLRILYDEHLRFMNFWTVSNEDLDLCRYLGVKLIFYRHPKVDFMVQIHTQPPFLDTELTGPSIHPGMMILNKKKIFVPSLKTRPNKKHKVRVKIGPPRLYEDKWYPQSELCDTTLLTVYATACDLQFPFGSPLTDNPCVNFQVLGSAYKRHLSILSTNDSKNLDHYTTNLFSKIAYYNTFETIAQLKPTGQTTGVNPQWNTVQNNTALNASGDNQSTSNDTWYYGNTYNSQISNLAEAARNRYLKATQQAFPAYATLNSALYEYHGGCYSSIFLSAGRAYFETLGAYSDIIYNPFVDKGIGNMVWIDYLSKEDAVYTPRTSKCLIKDQPL…	681	USER	zzzz644
297	genbank_anelloviridae_AEW87510.1_	genbank	MAWRYRWRWRRRAPRRRAGRFRYRFRRWRRLRPARKVRRRRRYRKRHFKKKAIKQWQPSHVARCIIRGWHIGFWGNKANLSYPFQEWTRPTKEGEAGFFTIREGGASLWHFNLSHFYREFTFGRNTWSRSNEGFDLATYHGTKLIFYPHPLHNYIVWWWRDFGDVSAAQFKHSHPAKALLERNHFVIKSIPQGGRKKTTIFIPPPTTIQTGWSVMKKWANVNLFRLGMTMINTGNPLLHKGRLLAKVPIGTYWSTGNYRYFEDRLPVETLPEASTNIAYYSWWWDDSQDNKIAIRDNENSNDGETIFHLKIPYWLEFFGAGDQYIEQTKKVYIWWYREDASIIDYHSITSEHRKQWIKLGNSSQGSISTALLAWSNIGRHGPFMMAEEDISNNSYSFFF…	568	USER	zzzz645
296	genbank_anelloviridae_ADO51761.1_	genbank	MAWGWWKRRRKWWWRRRWTRGRLRKRRARRAGRRPRRRRVRRRRAWRRGRRKRRTFRRRRRRKGRRHRTRLIIRQWQPEIVRKCLIIGYFPMIICGQGRWSENYSSHLEDRVVKQAFGGGHATTRWSLKVLYEENLRHLNFWTWTNRDLELARYLKVTWTFYRHQDVDFIIYFNRKSPMGGNIYTAPMMHPGALMLSKHKILVKSFKTKPKGKATVKVTIKPPTLLVDKWYFQKDICDMTLLNLNAVAADLRFPFCSPQTDNPCINFQVLSSVYNNFLSITDNRLTPVTDDGQAYYKAFLDAAFTKDRDFNAVNTFRTISNFSHPQLELPTKTTNTSQDQYFNTLDGYWGDPIYVHTQNIKPDQNLDKCKEILTNNMKNWHKKVKSENPSSLNHSCFAH…	744	USER	zzzz646
295	genbank_anelloviridae_AEO16613.1_	genbank	MPPPQITQMPPQILKEERMESIWEALETDCLETSAGKEMRRSVFRPLLLGTPVRRVVIKGWWPLIQCMQGMEYLRYRPMNNIEKRWIYKKSNSRQFAEDMGYLMQYGGGWASGTISLKGLFNEHQLWRNVWSRSNDGMDLARYFGCSISLYPEDNQDYLFWFDTEFDETQLLNLQEYTQPSVMLQAKNSRLIVAKSRMPIRRRIRKIFIPPPAQMTTQWQFQKDLADYPLFNWACICIDMEKPFDYTGAWRNAWWLMQRQASGDMEYIEKWGRIPPTGDFKLPSKSSMTGNQDNPNWHPQDEPFIYPIVAYWVTEEGKNVCYWCTIHNAPINRWRKKEAMAIQVRDLRGLCLRVCSAQETYYRWQRAEFTDTFKQRWFPQNGTDHSLVVIDATGTRAQG…	634	USER	zzzz647
294	genbank_anelloviridae_AEF58769.1_	genbank	MAYYWRRRYPRYTRRRTTNRRYTRRRRYARRTYGRRRVSWRRLVRRHARRRRFNVTQYQPYYRKKCRITALLPLLFCKDGRNGIVDFMMPTTSLVNNWMGGGVDSGTCSLLDLYWEEKFWRARWSASNQGFDLGRYYGVTITLWPSQHYSYIFWWSTEELAEDKEPLTVCHPSQLLLAKQHVIVQSYARTGRPKPIRIRIKPPTSMIGAWWHITDFAKKPLLKWRTSLIDLETPWTVFPNNNTYCIPINVWAWEPTVSDAREYGIFYHPMLDDGTQLKVCIHEIKWNNTGDGPDIESHGFWPNIVLFANLLVPFYIYCFGRGAEYYSNNKDIHRPQPENRQNGWFIFIYYGNSIAFRQQNGALLNFRDKMFYIKYNTMQIVAAGGPWVEKQIGVPANVA…	578	USER	zzzz648
293	genbank_anelloviridae_AEF58766.1_	genbank	MAYYYPWRRNRWNRRYFPRTRRTWRRRTTRRTYRRRNPRRRVSWRRLYRTYRRRRFAVKQYQPLYRKRCTITAILPLLFVRGGLNAVNDFMMPATGLINFWMGGGCDSGSITMNDLYWEERFWRARWSTSNQGFDLFRYFGVKLTLWPNSEYSYIFWWSTEELSEDKEPLTVCHPSQLLLTKQHVVVEAWRQKGKRLPRIIKVKPPTSILQAWWHIKDAANKPLLKWRVSLIDLENPWTGFPNNNTYCVRITVWGWKTASEAGDIVLYYHPLLDDGTGIKVFTKELQWNNNHDGPALEQPGQSFWPAKAQFEELLVPFYLFCYGRSAEYYSNLQQYHRPAPQTANNGYFQFIMLTGTRSIREENGGLPTHKDNMYYIKYSTMQLIAANGPWTEKSVYDA…	581	USER	zzzz649
292	genbank_anelloviridae_ADZ04866.1_	genbank	MRFRYRKWRRPRRLFRSRRRRGYARRRWRRRAWGRRRRVRRYRRRRGGTKRQYISSIMQWNPQHRHLCYIKGITWLCAARADRISWPGIRQIAATDSTRYWSTILVGGCGVLTLSMDWFFFENLRWRNRWSHSNVGYDLARYMGTHLYFPPLADIWYIVWTDTEFVDQPKKVMSYTHPWILLMTKKHKVIKPRKWNGKGKKIFLKPPAVFNSAWYAPGKWCGAGLGRIYFSFINPFKQIMHTGQTEQSFPFAIELGNTDYDKPPNNKYDFKNTDIVKQVWTAKDKKYHYRADWGTGDGNAIMLPNTLSPTTPASWLLLEWDAPYWLWFWGKTYQDFVSSHTPEGNQYYGQIYVKWWPITNPYDQGPHTYPEDKEWCLVMLDPQPNFMTCNSIAAALKIA…	576	USER	zzzz650
291	genbank_anelloviridae_AEF58763.1_	genbank	MALYFRRRRRYWRPKWRRRGYWRRSYRPAYGRRLRRRRRTRRRSRVRVRVLTERQPRYWRRCTIRGWWPVLITGRKYPSTAAAGDDRGTQMLTFKPFQPFGSKLSNAWFYRDYEIVRGGFSAGTFSLQALYMEHLMCRNRWSQSNCGFDLASYRGTKLYFVPHPNYDYIVLIDPEYRKFEQWIKQPMHPGVLITHPQSRIIRSITHAGPRRKMPKMFVPPPSTMNSGWQWMGELANEGLFAFYVQWIDLGAPWLGDVQNPNQVKWWKTGDATTKPDWVTKGIEMQGKTVQEGLDAYYTQAGQGGKKWVNPGGAPYQLGFGPFVFKGSHSGDQEHYPQICFFYKSYWQWGGSTTSIKNVCDPKDNPNAEYLSAWNRAGFQPAQARNNDIYNQP	392	USER	zzzz651
290	genbank_anelloviridae_AEF58760.1_	genbank	MALYFRRRRRTWRPRWRRRGWWRRSYRSAYGRRFRRRRRTRRRSRVRVRVLTERQPRYWRRCTIRGWWPVLITGRKYPSTAAQGDDAGTQMLTFKPFQPFGSKLSNAWFYRDYEIVLGGFSAGTFSLQALYMEHLMYRNRWSQSNCGFDLASYRGTKLYFLPHPNYDYIVLIDPEYRKFEQWIKQPMHPGVLITHPQSRIIRSISHAGPRRKMPKMFVPPPSTMNSGWQWMGELANEGLFAFYVQWIDLGAPWLGDVQNPNQVKWWKTGDATTKPDWVTKSIEMQSKTVQEGLDTYYSRAGTGDKKWVDPGSAPYQLGFGPFVFKGCHTGDQEHYPQITFFYKSYWQWGGSTTSIKTVCDPKDNPNAEYKSAWNRAGFKPEQARNSDIYNQP	392	USER	zzzz652
289	genbank_anelloviridae_ADJ56635.1_	genbank	MYQSRRRRRRRWGRRVLSHYKRKWRRGSRRGYGLHRRWRRWKRRPRTVVSEQRSRRVKTIVVRGWEPLGNVCPTDSARAKATPYESYDSDSGQGQWHGTWGHHWFTFQSLVDRAEARLNSFSGNWESYDYLRFLGGTMYLMQPREMCFMFGNDPYLMTSDLDKTASQKNRAEETWITPGYLLHRPGTHLILSRQKVERRSMYKIRVPVPTSWRGWFPIPECFSYVLCHWYWTWWDPDACFFDPCATGSSCEAEPWWSGATFKQAWVDRTKLEDPPTGGIPAGNKCWAPFLPSRPCTNYYTHSASFWFKYKLKFQVTGENIWAPVPRDYSQQGTVPTAPSRQQVESQARTPYPKTNRPPTTADILPGDLDSDGILKDEAYERITRDNPCPKRPRPLGIRW…	436	USER	zzzz653
288	genbank_anelloviridae_ADM33784.1_	genbank	MRFRRRRFGRRRRYYRKRRGGWRRRYGRRWRRTAWRRRRVRRWRRSVFRRGGRRARPYRISAWNPRVVRRVVIKGWWPLIQCMEGMEYLRYRPMYNIEKRWIYKKQSSRVFSEDMGYLMQYGGGWASGTISLKGLFNEHELWRNVWSRSNDGMDLARYFGCSITLYPEENQDYLFWFDTEFDQQQLINLQEYTQPSVMLQAKNSRLIAAKSRMPIRRRVKRIFIPPPSQMTTQWQFQKDLADYPLFNWACICIDMEKPFDYTGAWRNAWWSMQRQASGDMEYIEKWGRIPPTGDWQLPSSSVMTQNGNNPNWKPRDAPAIYPIVAYWTSDGSTKTCNWCTIHNTPINRWRKKEAAAVQVRDLRGLCLRVCSEQETYYRWQQGEFTGQFKQQWWPGGGTD…	648	USER	zzzz654
287	genbank_anelloviridae_ADM33768.1_	genbank	MPYRRYRRRRRRPTRRWRHRRWRRYFRYRYRRAPRRRRTKVRRRRRKAPVIQWNPPSRRTCLIEGFWPLSYGHWFRTCLPFRRKNGLVFTGGGCDWTQWSLQNLYHEKLNWRNIWTASNVSMEFARFLRGKFYFFRHPWRNYIVTWDQDIPCKPLPYQNLHPLLMLLKKQHKLVLSQQNCNPNRKQKPVTLKFKPPPKLTSQWRLSRELAKMPLIRLGVSFIDLTEPWVEGWGNAFYSILGYEATKDQGHWSNWAQMKYYWLYDTGVGNAVYVILLKQNVEDNPGDMANTFKTSGGQHPDAIDRIELISQGWPYWLYFYGKSEQDVKKEAHTTEIAREYAQNPHSKKLKIGVVGWACSNYTATGSVQNDSGNIAAIQGGYVAWAGGQGKYNLGAGAIDN…	627	USER	zzzz655
286	genbank_anelloviridae_ADM33764.1_	genbank	MPYRRYRRRRRRPTRRWRHRRWRRYFRYRYRRAPRRRRTKVRRRRKKAPVIQWFPPSRRTCLIEGFWPLSYGHWFRTCLPFRRLNGLVFPGGGCDWSQWSLQNLYHEKLNWRNIWTASNVGMELARFIKGKFYFFRHPWRNYIITWDQDIPCKPLPYQNLHPLLMLLKKQHKIVLSQQNCNPNRKQKPVTLKFKPPPKLTSQWRLSRELAKMPLIRLGVSFIDLTEPWVEGWGNAFYSILGYEATKDQGHWSNWAQMKYYWLYDTGVGNAVYVILLKQNVEDNPGDMANTFKTSGGQHPDAIDRIELISQGWPYWLYFYGKSEQDVKKEAHTTEIAREYAQNPHSKKLKIGVVGWASSNFTTTGSSQNSGGSTSAIQGGYVAYAGSGVIGAGAIDNLHL…	624	USER	zzzz656
285	genbank_anelloviridae_ADN28685.1_	genbank	MPFRRYRRRRRRPTRRWRHRRWRRYFRYWHRRPTRRRRHYKVRRRRRRKAPVIQWHPPSRRTCTITGFWPLSYGHWFRTCLPFRRMNGLIFTGGGIDYTQWSLQNFFHEKLNWRDIWTASNVGMEYARFLKGKFYFFRHEWRSYIITWDQDIPCKPLPYTNLHPLLMLLKRQHKLVLSKRDCNPSKKAKPVTLRIKPPPKLTSQWRLAGELSKIPLVRLGFSFIDLSEPWLEGWGNAFYSLLGYEAPYQQGRNCYWSQMRYFWIYDTGVNNAVYVLLLQQDIEDNPGDLAKNYYEGPQPKTLTAIEKVSENWPYWLYFFGRSELGIKNLATNTQIRNELHNNPNSKKLKIGVIGWASSNYTDKDSSQNTQTGVTNKIQGHYTYYHTGGIIGAGAIDNLY…	625	USER	zzzz657
284	genbank_anelloviridae_ADN28686.1_	genbank	MPFRRYRRRRRRPTRRWRHRRWRRYFRYWHRRPTRRRRHYKWGGHGTERFKTDIGDPSTIPCPFQQGDTSFTGIQDPSKVHTTVLNPWDYDCDGIVRTDTLKKLLELPTETEEEERAYPLLGPKIERRPLSEDDDESVISSTSSCTSEEEEKKKRHKQQPSKRRLLKHLQRVVKRMKTI	179	USER	zzzz658
283	genbank_anelloviridae_ADN28674.1_	genbank	MPFRRYRRRRRRPTRRWRRRRWRRYFRYWHRRPTRRRRYHKWGGHGTEQFKTSVGDPSTIPCPYGPGDPPQLAVRDPSKVHEGVLNAWDYDYDGIVRKDTLKKLLEIPTDSETEKAYPLLGPKTEKLPSSDEEGESDISSSSNSSSEESEEEKRHRRLHHPSKRRLLKHVHRLVKRFKTL	180	USER	zzzz659
282	genbank_anelloviridae_ADN28673.1_	genbank	MPFRRYRRRRRRPTRRWRRRRWRRYFRYWHRRPTRRRRYHKVRRRRVKKAPVIQWFPPTIRNCYIKGIWPLSYGHWLRTCLPMRKENGLIFLGGGIDWTVWSLQNLYHEKLNWRNIWTASNDGMEFARFKYAKFKFFRHEFRSYIVTWDQDIPCKPLPYTNLHPFVMLLKKQHKVILSKRECNPRKKDKPVILKIKPPPKLTSQWRLARELTKMPLIRLGISLIDFKEPWLEGFGNAFYSTLGYEADKDSSDRSEFCQIKYFWVYDTGQGNHVYVVMLSADAEDNPGELVHKQITIKEIEHVGEGWPYWLYFFGRSERDIKALATTNSNIKAEFNANPNSKKLKIAVIGWASSNKTASDSLQGANQPIQGTYFISSKLLTSGHTAGATQINNLYAVGWP…	620	USER	zzzz660
281	genbank_anelloviridae_ADN28665.1_	genbank	MPFRRYRRRRRRPTRRWRHRRWRRYFRYWHRRPTRRRRHYKVRRRRRRKAPVIQWHPPSRRTCTITGFWPLSYGHWFRTCLPFRRMNGLIFTGGGIDYTQWSLQNFYHEKLNWRNIWTSSNVGMEYARFIKGKFYFFRHEWRSYVITWDQDIPCKPLPYTNLHPLLMLLKRQHKIVLSKRDCNPSKKARPVTLRIKPPPKLTSQWRLARELSKIPLVRLGFSFIDLSEPWLEGWGNAFYGLLGYEAPYQQGRQCHWAQMRYFWIYDTGVNNAVYIILLKQDIGDNPGALAKNYYDAQTPKNFDDIEKVSENWPYWLYFFGRSELDIKNLATSTKIRNELHNNPNSQKVKIGVIGWASSNLTDKDSEQSQGQPQQIQGNYIYYHTGGVIGAGAIDNLFLK…	623	USER	zzzz661
280	genbank_anelloviridae_ADN28657.1_	genbank	MPFRRYRRRRRRPTRRWRHRRWRRYFRYWHRRPTRRRRHYKVRRRRRRKAPVIQWHPPSRRTCTITGFWPLSYGHWFRTCLPFRRMNGLIFTGGGIDYTQWSLQNFFHEKLNWRNIWTASNVGMEYARFLKGKFYFFRHEWRSYVITWDQDIPCKPLPYTNLHPLLMLLKRQHKLVLSKRDCNPSKKARPVTLRIRPPPKLTSQWRLARELSKIPLVRLGFSFIDLSEPWLEGWGNAFYSLLGYEAPYQQGRNTYWSQMRYFWIYDTGVNNAVYILLLKDDIGDNPGDMAKNYYDGGTPKTLQAIEKASENWPYWLYFFGRSELDIKNLATNTQIRNELHENPNSKKIKIAVIGWAPSNITDKDSSQNPGSGQQEIQAHYTYYHTGGVIGAGAIDNLFK…	624	USER	zzzz662
279	genbank_anelloviridae_ADN28650.1_	genbank	MPYRRYRRRRRRPTRRWRHRRWTRYFRYRHRRPYRRRRRYKWGGHGTETFKTSIGDPSTILCPYGPGDPPQLAVRDPTKVHEGVLNAWDYDYDGIVRKDTLKKLLEIPTDSEEEKAYPLLGPKTEKLPSSDESGESDISSSGDSSKEESEEEKRYRRRHKPTKRRLLQHVQRLVKRFRTL	180	USER	zzzz663
278	genbank_anelloviridae_ADN28649.1_	genbank	MPYRRYRRRRRRPTRRWRHRRWTRYFRYRHRRPYRRRRRYKVRRRRIKKAPVIQWFPPTIRNCFIKGIWPLGYGHWLRTCLPMRKENGLIFLGGGIDWTVWTLQNLYNEKLNWRNVWTASNDGMEFARFRYAKFKFFRHEYRSYIVTWDQDIPCKPLPYTNLHPLVMLLKKQHKVVLSKQECNPRKKDRPVTLKIKPPPKLTSQWRLSRELAKMPLVRLGFSLIDFKEPWLEGYGNAFYSTLGYEANKLQTQWSNWCQCKYYWIYDSGIGNHVYVVMLQKDAGDEPGDLITNQNSITDIEQIGEGYPYWLYFFGRSERDLKALATTNTNIKNEYIANPNSKKLKIGIIGWASSDYTALNSSQTTSQTPVAIKSSYRISHVLQNSGHTGGAAQIDNLWEN…	623	USER	zzzz664
277	genbank_anelloviridae_ADN28625.1_	genbank	MPYRRYRRRRRRPTRRWRHRRWTRYFRYRHRRPYRRRRRYKVRRRRIKKAPVIQWFPPTIRNCFIKGIWPLSYGHWLRTCLPMRKENGLIFLGGGIDWTVWTLQNLYNEKLNWRNVWTASNDGMEFARFRYAKFKFFRHEFRSYVVTWDQDIPCKPLPYTNLHPMVMLLKKQHKVVLSKQECNPRKKDRPVTLKIRPPPKLTSQWRLSRELAKIPLLRLGFSLIDFKEPWLEGYGNAFYSTLGYEAHMSSQKTSEWCQCKYFWIYDSGVGNHVYVVMLQKDAEDNPGNLAAQSNTIDHIEQIGEGYPYWLFFFGRSERDLKALATTNVNIRNEFNANPNSKKLKIGIIGWVSSNNTAADSSQGRSQPIQSSYRISHVLQTSGHTGGAAAIDNLWENGWP…	620	USER	zzzz665
276	genbank_anelloviridae_ADN28590.1_	genbank	MPYRRYRRRRRRPRRRWRTHRWRRYFRYRYRRAPRRRRAKWGGHGTERFKTNIGDPSTIPCPFEPGDRFHSGIQDPSKVQNTVLNPWDYDCDGIVRKDTLKRLLELPTETEEETKAYPLLGQKTEKEPLSDSEEESVISSTSSGSSQEEETHRRKYHKPSKRRLLKHLQRVVKRMKTL	178	USER	zzzz666
275	genbank_anelloviridae_ADN28569.1_	genbank	MAPARRWRRRFGRRRRRYRKRRYGWRRRYYRYRPRYYRRRWLVRRRRRSVYRRGGRRARPYRISAFNPKIMRRVVIRGWWPILQCLKGQESLRYRPLQWDVEKQWYVSQDLTDNYGYLAQYGGGWGSGEVTLENLYQEHLLWRNSWSKGNDGMDLVRYFGCIVYLYPLQDADYWFWWDTDFKELYAEMIKEYSQPSVMMMAKRTKIVIARSRAPHRRKVRKIFIPPPSRDTTQWQFQTDFCRRKLFTWAAGLIDMQKPFDANGAFRNAWWLEQRTDQGEMKYIELWGRVPPQGDSELPPQTEFKTGNDNKNYNINPGDERKIYPIFIYVDQKDQQPRKKYCVCYNKTLNRWRNTQAGTFKVGNLRGLVLRQLMNQEMTYIWKEGEFSKEFMPRWKGHKL…	639	USER	zzzz667
274	genbank_anelloviridae_ADN28577.1_	genbank	MPFRRYRRRRRKPTRRWRHRRWTRYFRYRHRRPYRRRRRYKVRRRRIKRAPVIQWFPPTIRNCFIKGIWPLSYGHWLRTCLPMRKENGLIFLGGGIDWTVWTLQNLYHEKLNWRNVWTASNDGMEFARFRYAKFKFFRHEFRSYVVTWDQDIPCKPLPYTNLHPFVMLLKKQHKVILSKQECNPRKKDKPVTLKIKPPPKLTSQWRLSRELAKIPLVRLGISLIDFKEPWVEGFGNAFFSTLGYEAHANPGKTSEWSQCKYFWIYDTGINNHVYVVMLNSDAEDNPGDLATKNNSIAHIEQIGEGYPYWLFFFGRSERDLKALATTNVNIRNEFNSNPLSKKLKIAIIGWVSSNKTSKDSTQAKETAIQSAYRISPVLQHSGHSGGAAAIDNLYLNGWP…	620	USER	zzzz668
273	genbank_anelloviridae_ADN28565.1_	genbank	MRFRRRRFGRRRRYYRKRRGGWRRRYGRRWRRTAWRRWRVRRWRRSVFRRGGRRARPYRISAWNPRVVRRVVIKGWWPLIQCMQGMEYLRYRPMYNIEKRWIYKKQNSRIFSEDMGYLMQYGGGWASGTISLKGLFNEHELWRNVWSRSNDGMDLARYFGCSITLYPEENQDYLFWYDTEFDQTQLLNLQEYTQPSVMLQAKNSRLIVAKSRMPIRRRVKRIFIPPPSQMTTQWQFQKDLADYPLFNWACICIDMEKPFDYTGAWRNAWWLMQRQASGDMEYIEKWGRIPPTGDWKLPASSIMKQNQDNPNWKPADEPDIYPIVAYWTSDGNTKTCNWCTIHNTPINRWRKKEASAVQVRDLRGLCLRVCSEQETYYRWQGGEFPGNFKQQWWPQGGTD…	648	USER	zzzz669
272	genbank_anelloviridae_ADN28537.1_	genbank	MRFRRRRFGRRRRYYRKRRGGWRRRFRIRRRRPWRRWRVRRWRRSVFRRGGRRARPYRISAWNPKVVRNCKITGWWPVIQCMEGMEWIKYKPMDLRVEANWIFKKESGSGRVETEQMGYLLQYGGGWSSGVISLEGLFNENRLWRNIWSKSNDGMDLVRYFGCKIRLYPTDHQDYLFWYDTEFDEQQRRQLDEYTQPSVMLQAKNSRLIVCKKKMPIRRRVKSIFIPPPSQLTTQWKFQQELCQFPLFNWACICIDMDTPFDYNGAWRNAWWLMRRLQNGNMEYIERWGRIPLTGDTELPDYDEFRAGGVNPNYNPRGRQKIYPIVAVCLVEGNKRVVKWATIHNQAIERWRTNQAEIMKLSTLRGLVLRVCSESETYYKWTASEFTAAFRADWWPPGG…	637	USER	zzzz670
271	genbank_anelloviridae_ADN28549.1_	genbank	MRFRPIRRRRRRRYRKRKWGWRRRYYRRHRGWRPWRRWRVRRWRRSVYRRGGRRARPYRISAFNPRVMRRVVIQGWWPLLQCLPGQEHLRYRPLNWDVEREWVSEKDKEPDTMGYLVQYGGGWGSGQITLEDLFNEHQKWRNMWSKSNDGMDLVRYFGCKIYLYPLQSDDYWFWWDTDFKQNYSDRIKEYCQPSVMLMAKRTKIVVARDRAQHRRRVKKIYIPPPSRDTTQWKFQTDFCKQPLFTWAAGLIELQRPFDFNGGFRNAWWLEPRNEAGEMDYITLWGRVPPQGDSELPDPNTFKIGNINKNYNIQPGKEKNLYPIMAYIRKENGQPVIYWCVCYNKTIDRWRKAQASTLNISNLRGLCLRELSKQEQTYKWKQGEFNKAYFNRWTYKTYFV…	643	USER	zzzz671
270	genbank_anelloviridae_ABD34286.1_	genbank	MAWSWWWRRRKRWWPRRRRRWRRFRTRRARRAVPRRRRRRRVRRRRWGRRRRRRRVFYKRRRRKTGRLYRKPKKKLVLTQWHPTTVRNCSIRGLVPLVLCGHTQGGRNFALRSDDYPKQGSPYGGSFSTTTWNLRVLFDEHQKHHNTWSYPNNQLDLGRYKGCTFYFYRDKKTDYIVKFQRRGPFKINKYSSPMAHPGMMMLDKMKILVPSFDTRPGGRRRVKVTIRPPTLLEDKWYTQQDLAPVNLVSLVVSAASFIHPFSQPQTNNICTTFQVLKDMYYDCIGINSTLTTKYENLFNKLYSKCCYFETFQTIAQLNPGFKAAKKTTNGSGSTAATLGDAVTELKNPNGTFYTGNNSTFGCCTYKPTKEIGSNANKWFWHQLTATDSDTLGQYGRASI…	747	USER	zzzz672
269	genbank_anelloviridae_ABD34302.1_	genbank	MAWRWWKRRRRWWFRKRWTRGRLRRRWPRPARRRPKRRRVRRRRRWRRERPRRRLYRRYRRKKRRRRKPKIILKQWQPDIVKRCYIVGYIPAIICGAGTWSHNYTSHLLDIIPKGPFGGGHSTMRFSLKVLFEEHLRHLNFWTKSNQDLELIRYFRCSFKFYRDQDTDYIVHYSRKTPLGGNRLTAPNLHPGVQMLSKNKIIVPSYATKPKGPSYIKVTIAPPTLLTDKWYFSKDVCDTTLVNLDVVLCKLRFPFCSPQTDNPCITFQVLHSIYNDFLSIVDTNNYKESFVAALPTKVSTDWGKRLNTFRTEGCYSHPKLHKKAVTAATDTEYFTKPDGLWGDTIFDVENGQKIIKNMESYAKSAKERGINGDPAFCHLTGIYSPPWLTPGRISPETPG…	726	USER	zzzz673
268	genbank_anelloviridae_ABD34307.1_	genbank	MSLKVLYDDHLKGLNIWTYSNKDLELVRYMHTTITFYRHPDTDFIAVYNRKTPLGGNRYTAPSLHPGNMMLQRTKILIPSFKTKPRGSGKIRVVIKPPTLLVDKWYFQKDICDVTLFNLNITAASLRFPFCSPQTNNPCVTFQVLHSVYDKALGINTFGTKETPEDQQMEDIKNWLTKALNTAGFTVLNTFRTEGIYSHPQLKKPPEGSNKPSAEQYFAPLDSLWGDKIYVNNNTSPSQTEATIPGILARNACTYYQKAKTSTLRQHLGAMAHCHLTGIFNPALLTQGRLSPEFFGLYKEIIYNPYDDKGKGNRIWIDPLTKPDNIFDARSKVELEDMPLWMACFGYNDWCKKELNNWGLEVEYRVLLRCPYTYPKLYNDANPNYGYVPISYNFSAGKT…	603	USER	zzzz674
267	genbank_anelloviridae_ABD34292.1_	genbank	MAWGWWRWRRRWPARRWRRRRRRRPVRRTRARRPARRYRRRRTVRTRRRRWGRRRYRRGWRRRTYVRKGRHRKKKKRLILRQWQPATRRRCTITGYLPIVFCGHTKGNKNYALHSDDYTPQGQPFGGALSTTSFSLKVLFDQHQRGLNKWSFPNDQLDLARYRGCKFYFYRTKQTDWIGQYDISEPYKLDKYSCPNYHPGNMIKAKHKFLIPSYDTNPRGRQKIIVKIPPPDLFVDKWYTQEDLCSVNLVSLAVSAASFLHPFGSPQTDNPCYTFQVLKEFYYQAIGFSATDEQREKVFDILYKNNSYWESNITPFYVINVKKGCNTTQYMSPQISDSSFRKKVNTNYNWYTYDAKTNASQLKQLRNAYFKQLTSEGPQHTYSDNGYASQWTTPSTDAY…	745	USER	zzzz675
266	genbank_anelloviridae_ABD34305.1_	genbank	MAWGWWKRRRRRWWRGLWRRRRFARRRPRRPARRPRRRRVRRRRRWRRGRLRRRVYNRRRRIRRKRRRQKLTIRQWQPDKRRICRIKGYLPAIIYGDGTFSKNYTSHLEDRISKGPFGGGHGTARMSLKVLYDDHLKGLNIWTYSNKDLELVRYMHTTITFYRHPDTDFIAVYNRKTPLGGNRYTAPSLHPGNMMLQRTKILIPSFKTKPRGSGKIRVVIKPPTLLVDKWYFQKDICDVTLFNLNITAASLRFPFCSPQTNNPCVTFQVLHSVYDKALGINTFGTKETPEDQQMEDIKNWLTKALNTAGFTVLNTFRTEGIYSHPQLKKPPEGSNKPSAEQYFAPLDSLWGDKIYVNNNTSPSQTEATIPGILARNACTYYQKAKTSTLRQHLGAMAHC…	743	USER	zzzz676
265	genbank_anelloviridae_ACK44071.1_	genbank	MAWRWWWQRRWRRRPWPRRRWRRLRRRRPRRPVRRRRRRATVRRRRWRGRRGRRTYTRRAVRRRRRPRKRFVLTQWSPQTARNCSIRGIVPMVICGHTRAGRNYALHSEDFTTQIRPFGGSFSTTTWSLKVLWDEHQKFQNRWSYPNTQLDLARYRGVTFWFYRDQKTDYIVQWSRNPPFKLNKYSSPMYHPGMMMQAKKKLVVPSFQTRPKGKKRYRVRIRPPNMFNDKWYTQEDLCPVPLVQIVVSAATQTKKNCSPQTNNPCITFQVLKDKYLNYIGVNSSETRRNSYKTLQEKLYSQCTYFQTTQVLAQLSPAFQPAKKPNRTNNSTSTTLGNKVTDLKSNNGKFHTGNNPVFGMCSYKPSKDILYKANEWLWDNLMVENDLHSTYGKATLKCME…	767	USER	zzzz677
264	genbank_anelloviridae_CAF05720.1_	genbank	MWWWRRRRWRAPWRRRRWRRRRPRTRRFRRAARRPRRPRVRRPRRRRGWARRYRLRRRRRRRRRRKLILTQWQSAKIRKCLVIGYLALVLCGNGTFSKNYASHSDDYVQKGPFGGGLSSMRFNMRILYDQFKRHLNFWTHTNQDLDLVRYRGCTMTFYRHPEVDFIVKFNRKPPFLDTIVSGPAMHPGMLMTTKHKILVKSFKTKPKGKGTVKVRIRPPTLFDDRWYFQHDICKTTLFTISATPCDLRFPFCSPQTDNPCVNFLVLAGVYNGKLSIEATKLESQYNSLVSSIEIPTQGTLFNTFKTPEMIKCPPAVKALEHSDVNRSCYKKLDSAWGDTIWNQNTIQNFKENTDKLWEARGNQTMTGSKYLNYRTGIYSAIFLSAGRLSPDFGGLYNDI…	720	USER	zzzz678
263	genbank_anelloviridae_CAF05738.1_	genbank	MAWGFWGRRRRWRRWRARRRRWRPRRRRRRRPTRRFRARRRVRRRGGRWRRRYRKWRRGRRRRTHRKKIVIKQWQPNFIRRCYIIGYLPLIFCGENTTAQNFATHSDDMISKGPYGGGMTTTKFTLRILYDEFTRFMNFWTVSNGDLDLCRYVGCKLIFFKHPTVDFIVQINTQPPFLDTHLTAASIHPGIMMLSKRHILIPSLKTRPSRKHRVVVRVGAPRLFQDKWYPQSDLCDTVLLSIFATACDLQYPFGSPLTDNPCVNFQILGPQYKKHLSISSTMDQTNENHYKENLFNKTELYNTFQTIAQLKETGHISGISPTWNEVQNSTTLTKEGDNATQSRDTWYKGNTYNGKICQLAQITRNRFKNATKGALPNYPTIMSTDLYEYHSGIYSSICL…	736	USER	zzzz679
262	genbank_anelloviridae_CAF05760.1_	genbank	MAWGWWKRQRRWWFRKRWTRGRLRRRWPRSARCRPRRRRVRRRRRWRRGRRKTRTYRRRRRFRRRRRKAKLIIKLWQPAVIKRCRIKGYIPLIISGNGTFATNFTSHINDRIMKGPFGGGHSTMRFSLYILFEEHLRHMNFWTRSNDNLELTRYLGASVKIYRHPDQDFIVIYNRRTPLGGNIYTAPSLHPGNAILAKHKILVPSLQTRPKGRKAIRLRIAPPTLFTDKWYFQKDIADLTLFNIMAVEADLRFPFCSPQTDNTCISFQVLSSVYNNYLSINTFNNDNSDSKLKEFLNKAFPTTGTKGTSLNALNTFRTEGCISHPQLKKPNPQINKPLESQYFAPLDALWGDPIYYNDLNENKSLNDIIEKILIKNMITYHAKLREFPNSYQGNKAFCH…	743	USER	zzzz680
261	genbank_anelloviridae_CAF05746.1_	genbank	MAWRWWERRRRWWLRKRWTRGRLRRRWPRPARRRPRRRRVRRRRRWRRGRPRRRLYRRYRRKKRRRRKPKIILKQWQPDIVKRCYIVGYIPAIICGAGTWSHNYTSHLLDIIPKGPFGGGHSTMRFSLKVLFEEHLRHLNFWTKSNQDLELIRYFRCSFKFYRDQDTDYIVHYSRKTPLGGNRLTAPSLHPGVQMLSKNKILVPSYATKPKGGSYVKVTIAPPTLLTDKWYFSKDICDTTLVNLDVVLCNLRFPFCSPQTDNPCITFQVLHSLYNDFLSIVDTENYKTTFVTTLTTKLGTTWGSRLNTFRTEGCYSHPKLPKKQLIAANDTTYFTSPDGLWGDAVFDISKPQVITENMESYANSAKQRGVNGDPAFCHLTGIYSPPWLTPGRISPETPG…	726	USER	zzzz681
260	genbank_anelloviridae_CAF05740.1_	genbank	MAWGFWGRRRRWRRWRARRRRWGPRRRRRRRPPRRFRARRRVRRRGGRWRRRYRKWRRGRRRRTHRKKIVIKQWQPNFIRRCYIIGYLPLIFCGENTTAQNFATHSDDMISKGPYGGGMTTTKFTLRILYDEFTRFMNFWTVSNEDLDLCRYVGCKLIFFKHPTVDFIVQINTQPPFLDTHLTAASIHPGIMMLSKRHILIPSLKTRPSRKHRVVVRVGAPRLFQDKWYPQSDLCDTVLLSIFATACDLQYPFGSPLTDNPCVNFQILGPQYKKHLSISSTMDDTNKAHYEENLFNKTELYNTFQTIAQLRDTGQTANASPNWNEVQNTAALQLSGANATSSKDTWYKGNTYTKDISKLAEKTRQRFKAATIAALPNYPTIMSTDLYEYHSGIYSSIYL…	736	USER	zzzz682
259	genbank_anelloviridae_CAF05742.1_	genbank	MVETQTLAHLQKVAALETPQESTATKTSKSCSPLWKETSKEAPVGRRRYRRGYRRRVAVRLRRRRRRGRKRLVLTQWQPQTRRKCTITGYLPVVWCGYLRAAKNYAYHSDDSTKQPDPFGGALSTTSFNLKVLYDQHQRGLNRWSFPNDQLDLARYRGCTLTFYRQKATDFIAIYDISAPYKLDKYSSPSYHPGNMIMQKKKILIPSYDTNPRGRQKIVVKIPPPKLFVDKWYAQEDLCDVNLVTLAVSAASFTHPFGSPLTNNPCVTFQVLDSIYYSVIGYGSSDQKKKQVLETLYNENAYWASHLTPYFTTGLKIPYPDTKNPSTTASVTPNTLFTTGSYDSNIKIAGDSNYNWYPYNLKNKIDKLHKIREQYFKWETDEGPQATSDYGKHHTWTKP…	746	USER	zzzz683
258	genbank_anelloviridae_BAG84589.1_	genbank	MPWRWNWRRKPFRRRWRRKRRWPRKRALYRRYPRRRTRRYTRKRRKRRKRTRVRRKRQTLTLKQWQPESIKKCKIIGHTPIILGCSGRQIYCYTFWQDYYIHPRCPAGGGFAAMKWSLAYLYEDFLRRKNIWTKSNCPYDLCRYLGTILKFYKHETVDFIVTYNRNYPMVVDENAYLQTHPSIMLLRKHRIIVPSKKTKPLGKNYVKIRIKPPRQLLNKWFFQKNFNDQGLFLLQATAADLTYPHLGPYSKNRLVTITVLDTQYYFMQPNWGNAAQTYTFHTTVTANLKNWIPAKTLIDGKLQDYSPSIEQLTGTQKLLHTSGLFNPKFLNIQAWKSGASVGTGTPPLPTTQVQYMPAKDTGKGNKIYYISTLQTSYAPPTTDRVLVWEGEPLWLQLYG…	663	USER	zzzz684
257	genbank_anelloviridae_BAG84585.1_	genbank	MAWYFRQWRRPRYRRRWKRRRWPRRKRRFRRTYTRRRSFRPTRKRRKRRKRTRVRRKKQTLTLKQWQPESIKKCKIIGHTPIILGCSGRQIYSYTFWQDYWIHPRCPAGGGFAVMKLSLAYFYEDYRRRKNIWTKSNCPYDLCRYLGVVLKLYKHETVDFIVSYSRNYPMVVDENTYMQTHPAVMLLRKHKVIVPSKKTRPLGKNYVKLRIKPPRQILNKWFFQKNFNEQGLALIQATAADLTYPHLGPYSKNRLVTITILNTQYYYMQPNWGTATGNYTFHTSISTSWNPAKTLIDGKLINYTYDPQMLTEQRKHNYSNGIFNKEFLNIQYWQNPSANSHPTPTMQVQYNPSLDTGQGNKIYFLSTLQTSWAPPTTDKVLVWQNEPLWLQLYGLRDYI…	658	USER	zzzz685
256	genbank_anelloviridae_BAF76129.1_	genbank	MPFWWTRRRKPWFGTWRQRRYRRRRRRTTYKRRKPRYNRRRPRRLTRRRRRRKYKVRRKQKKIHLTQWQPDRIRKCKIKGRGTLIMGAQGRQYMCYTNVKDRLTPSRAPAGGGFGVERFTLEYLYRQWKARNNIWTATNKNTDLVRYLGCRFSFYRHPDTDFIVNFSRQPPFNIDKYTYMSMQPQEMLLGKHKKIILSKLTKPTGRIKHTLKIGPPKLLTNKWMFQEQFATQDLVQIAGTACNFRYPTLGCCNENRILNLFALDTGFYQNVDWMQARQTGVGYKPYSTIDKRLTFHYKTATGSSTVQVDQSDETKWLTYEGGWFQPKILQAYKVTLNGADKALLPLVPIRYNPAADDGTGNLVTIVDLVAGHWTGNYTEAYTIKNIPLWMALHGYASYV…	662	USER	zzzz686
255	genbank_anelloviridae_BAF76097.1_	genbank	MPFWWARRRRPWFGRYKRYKTRRYKRRFRPRRHRYPFKRRRRRRRRRRYKVRRKKKKIVIQQWQPESIRKCKIKGFGCLVLGSQGTQYLCYTNVAATYVPPKSPGGGGFGCEYISLEYLYKQWKSHNCIWTASNNFKDLCRYTGCTITLFRHKYIDSVFSYSNMPPFDINKLTYADIQPQNLLLKQRHKLILSQASNPKGKLKVRIKIKPPKTMQTKWYFQKQIAELPLVQLQAAACDVQFVRLGCCNPSQVSTIYFLNPQFWLNSDWATTREYAYMYIKTGSALTGTYKGKDGKDHTVTIGEWKTRGEQQYYESINYDTGWFTSRFLSSYKIKKAGTEQEYAHLPIGVGRYNPDQDTGQGNEVWLASIFKGHFDKPTVTDDYIIRGLPLWMAFYGYWS…	664	USER	zzzz687
254	genbank_anelloviridae_BAF76089.1_	genbank	MPFWWGRRRKYWWGRRFTRPKYRRYQRRRKRPIRRRKPRRTYRRRYRRRKKVRRKRKTLLVRQWNPDSILTCKIKGFLDILMGADGNQYQCYTQNRYSMPPPKHPCGGGFSVDRFTLQWLYDQWRLRQNIWTKPNTYKDLCRFIVAKITLYRHKTTDFIVQYSRQPPFLIDKWTYMQYHPYMLLQSKHTKIIPSEQTNPKGRLKKKLIIRPPKQMLSKWFFQRQFATADLFQLVTAACSLNYPRLGCCNENRTLTLYYINPYFYQYSDWGQVKEHANYYKPYNSIADLEFWSGNTKNPTKYKPKDEIEKATDPPSTAKYYASINYNTGYFSTKVLNAFKVMVNSKESKPLPLGVARYNPVEDDGKGNEIWVASIHSNAYAKPAEDNLNFNGYPLWLAFW…	669	USER	zzzz688
253	genbank_anelloviridae_BAF76093.1_	genbank	MPFWWARRRKPWYGRFRRRYRYRPYKKRRRRRRRFTRRRNFKASRRRRRRRYEVRRKRQKIVLKQWQPESIKKCKVKGFGCLVLGAEGRQFYCWTNEASNYPQPKAPGGGGFGCEVITLEYLYQQYKAHNCIFTASNHYKDPVRYTGCEIILYRHPYVDFVVTYSNQPPFSINQFTYPDIHPQNLLLRKHKKIVLSRATKPHGKLTVKIKIKPPKLLSTRWFFQKEMSSVPLVQLSAAACDFNYPRIGCCNVSQVMTIFFLNPQFWGQTDWGQYMAHAYMNIATGVALTGTYKDKQDKPQNITVGDYTGENPYYSSINYTGGWFDTRFLNSYEIKKKNTQQWLGYLPVGVARYNPNEDTGEGNEVWLTSIQKGHFDKPSKTPDFLLIGLPLWMAFYGFW…	665	USER	zzzz689
252	genbank_anelloviridae_BAA86948.1_	genbank	MPPFYYRRRWYPNRWRRTRLRFRRRRFRRPIRKRFRRRRWVRRRRFFRFKRKLKKIRIDQWQPETIRKCHIKGNLCLLTCGRGNINHNYILTSESYVPTSEPGGGSWSILQITTRVLYDEYRAARNWWTKSNSLLPLTKYIRCKLKFYRSDQTDYIVTIQRTGPFEVTLDSYLSTQPSRHLMNHRAFIVPKLGRGPNKKTYIKKIVKPPALFQSKWYFSQDIYNTPLFMLTVSSCSLDQMFAPQDQISTNISLFSLNTNVFQISNWHKQPYTTKASGTLETYLYCYHNGHQEEGQKKWENIVLLGNMTNYTDGIKSTKTQITKPIDLFKQENKTNWGNVFTNLNQDHDVIIYYGGKPKETDTWQNNAPILPITSLYVECRYNPFKDKGTGNKVYLVPTD…	663	USER	zzzz690
251	genbank_anelloviridae_BAB69904.1_	genbank	MAWRWWWRRRWKPRRRPAWTKYRRRRWRRLRPRRPRRLARGRRRRRTVRRRRVRRLRRRRGWTRRRYLRRRKRRKLILTQWNPNIVRRCSIKGIIPLTMCGANTASFNYGMHSDDSTPQPEKFGGGMSTVTFSLYVLYDQFTRHMNRWSYSNDQLDLARYRGCSFKLYRNPTTDFIVQYDNNPPMKNTILSSPNTHPGMLMQQKHRILVPSWQTFPRGRKYVKVKIPPPKLFEDHWYTQPDLCKVPLVTLRSTAADFRHPFCSPQTNNPCTTFQVLRENYNEVLGLPYANTGSNNEVKIKIDNFENWLYNSSVHYQTFQTEQMFRPKQYNADGSTWKDYKSMLSTWTSQIYNKKTDSNYGYASYDFSKGKEFATQMRQHYWVQLTQLTATVPHIGPTYS…	755	USER	zzzz691
250	genbank_anelloviridae_BAB79314.1_	genbank	MAWWWGRRWRRRPWGRWRRRRRVWRRRPRTAVRRRRGRRYVSRRRRYRRRLRRRGRRRYRGRRKKRQTLVLKQWQPDVNRLCRITGWLPLIVCGTGRAQDNFIVHSEDITPRGAAYGGNLTHITWCLEAIYQEFLMHRNRWSRSNHDLDLCRYQGVVFKAYRHPKVDYILAYTRTPPFQATELSYMSCHPLLMLTAKHRIVVKSQETKKGGKKYVKFRIKPPRLMLNKWYFTHDFCKVPLFSMWASACDLRNPWLREGALSPTVGFFALKPDFYPNLSILPNEVSQQFDFFLNSAHPPSIQSEKDVRWEYTYTNLMRPIYNQTPSLKASTYDWQNYSNPNNYQACHQQFIAFKAQRFAKIKAEYQTVYPTLTTQTPQSEALTQEFGLYSPYYLTPTRIS…	739	USER	zzzz692
249	genbank_anelloviridae_BAB79318.1_	genbank	MAWWWGRWRRRWRRRRPWRPRLRRRRARRAFPRRRRRRFVSRRWRRPYRRRRRRGRRRRRRRRRHKPTLVLRQWQPDVIRHCKITGRMPLIICGKGSTQFNYITHADDITPRGASYGGNFTNMTFSLEAIYEQFLYHRNRWSASNHDLELCRYKGTTLKLYRHPDVDYIVTYSRTGPFEISHMTYLSTHPLLMLLNKHHIVVPSLKTKPRGRKAIKVRIRPPKLMNNKWYFTRDFCNIGLFQLWATGLELRNPWLRMSTLSPCIGFNVLKNSIYTNLSNLPQHREDRLNIINNTLHPHDITGPNNKKWQYTYTKLMAPIYYSANRASTYDLLREYGLYSPYYLNPTRINLDWMTPYTHVRYNPLVDKGFGNRIYIQWCSEADVSYNRTKSKCLLQDMPL…	680	USER	zzzz693
248	genbank_anelloviridae_BAB79338.1_	genbank	MAWYRYRRRPWRRRRRPRWGLRRRRFRRSFRGRGRRRYVSRWSRRRYRRRRRRGRRRRGRRRRKRQTLIPRQWQPDVTKKCFITGWMPLIICGTGHTQFNFITHEEDIPGAGASYGGNLTNITITLGGLYEQYMLHRNHWSRSNYDLELARYLGFTLKCYRHATVDYILTYSRTTPFETNELSHMLTHPLLMLLNKHHRVIPSLKTRPKGKRSVRIHIKPPKLMINKWYFAKDLCNIGPCQIYATGLELSNPWLRSGTNSPVIGFWVLKNHLYDGNLSNIASGEQLTARQTLFTTKLLPSNNTKDEWQYAYTPLMKTFYTQAANTAAHNITDKTYNWKNYKTHYDKVQQTWTTKAQFNYDLVKEEYKTVYPTTATFPPEWSNRQYLEHDYGLFSPYFLT…	738	USER	zzzz694
247	genbank_anelloviridae_BAB69900.1_	genbank	MAWTWWWQRRRRRWPWRRRRWRRLRTRRPRRLVRRRRKRYRVRRRRRWGRRRGRRTYLRRRLKKRKRRKKLRLTQWNPSTIRGCTIKGMAPLIICGHTMAGNNFAIRMEDYVSQIRPFGGSFSTTTWSLKVLWDEHTRFHNTWSYPNTQLDLARFKGVNFYFYRDKDTDFIVTYSSVPPFKMDKYSSAMLHPGTLMQRKKKILIPSFTTRPRGRKKVKLHIKPPVLFEDKWYTQQDLCDVNLLSLAVSAASFRHPFCPPQTDNICITFQVLKDFYYTQMSVTPDTAGQEKDIEIFEKHLFKNPQFYQTVHTQGIISKTRRTAKFSTSNNTLGSDTNITPYLEQPTATNHKNTLSTGNNSIYGLPSYNPIPDKLKKIQEWFWKQETDKENLVTGSYQTPT…	750	USER	zzzz695
246	genbank_anelloviridae_BAB19928.1_	genbank	MAWTWWWQRRRRRWPWRRRRWRRLRTRRPRRLVRRRRKRYRVRRRRRWGRRRGRRTYLRRGLKKRKRRKKLRLTQWNPSTIRGCTIKGMAPLIVCGHTMAGNNFAIRMEDYVSQIKPFGGSFSTTTWSLKVLWDEHTRFHNTWSYPNTQLDLARFKGVTFYFYRDKDTDFIITYSSVPPFKIDKYSSAMLHPGMLMQRKKKILLPSFTTRPRGRKKVKVHIKPPVLFEDKWYTQQDLCDVNLLSLAVSAASFRHPFCPPQTDNICITFQVLKDKYYTQMSVTPDTAGTKKDDEILDHLYSTAEYYQTVHTQGIINKTQRVAKFSTSNNTLGDQSEISLYLNQPTTTNIGNTLSTGHNSVYGFPSYNPQKDKLRKIADWFWTQEANKENVVTGSYSMPTN…	748	USER	zzzz696
245	genbank_anelloviridae_BAB79334.1_	genbank	MAWYRRRRWRPWRRRRRPWTLRRRRARRFVRRRPRRRYVSRWRRRRYRRRLRRGRRRRGRRRRKETIIVRQWQPDVMRNCYITGFLPLIVCGSGNTQFNFITHENDIPPRGASYGGNLTNITFTLAALYDQYLLHRNRWSRSNFDLDLARYINTKLKLYRHDSVDYIVTYNRTGPFEVNPLTYMHTHPLLMLVNRHHIVVPSLKTKPRGKRYIKVKIKPPKLMLNKWYFAKDICPLGLFQLYATGLELRNPWIREGTNSPIVGFYVLKPSLYNGAMSNLADTEHLNQRQTLFNKLLPTQNQKDEWQYTYNKPMQKIYYEAANKQDSGFKNTTYNWTNYKTNYQKVQSQWQTVAQQNYNQVYNEFKEVYPLTATWPPQWNARQYMSHDFGIYSPYFLSPA…	738	USER	zzzz697
244	genbank_anelloviridae_BAB61611.1_	genbank	MWWNWWKRRRWRPRRRWRTRRRRRLPVWRRRRTTRYARRRRVRRLRRRRRRGWARRRYLRARRRVKRRKKIKLTQWNPTVVKKCVVKGYLPLLICGTGTTGTTYRNYGSHMHDYRKYDPFGGGISTMQFNLSILFDEYMKHRCTWSKSNVDLELIRYRGCSFKLYRHEKCDFFFTYSRKPPFKDSQLTGPSLHPGMLMNRRKKIILLSFKTRPKGHSTKTIRIPPPTLFADRWYFQKDFAKVPLVNIGASIGNLRFPFCRPQTENTCVYFQVLSNAWNNMLSIAHPHTENNWQYITETLLKTHWHSNQRKGTMANYDSRDRVGVVFNTFKTQEHIQNPNFQTDKEQVSTPYTYDTVTSLWGDYVYKESIIDSFKTNATNYYNSRKGTQITASKFLNHKT…	742	USER	zzzz698
243	genbank_anelloviridae_BAB79326.1_	genbank	MAWWRYRRRPWRRWRRRRWGLRTRRPRRTFRRRRARRYVSRGRRRRYRRRRRRGRRRRGRRRRHRKTLIVRQWQPDVIKRCFITGWLPLIICGNGHTQFNFITHMDDIPPKNASYGGNFTNLTFNLACFYDEFMHHRNRWSASNHDLELVRYIRTSLKLYRHESVDYIVCYTTTGPFETNEMSYMLTHPLAMLLSKRHVVVPSLKTKPHGRKYKKITIKPPKLMLNKWYFATDLCHIGLFQLWATGLELRNPWLRSGTNSPVIGFYVLKNQVYKNRYSNLNTTEAHNARQDAWNELTQTKTNDKWYNWQYTYNKLMKPIYYAASNESSNSAMKGKTYNWKHYKEYFSNTQTKWKTIIKDAYDLVREEYQQLYTTTMAYPPPWQSTTSNTGRQYLEHDCG…	746	USER	zzzz699
242	genbank_anelloviridae_BAB79354.1_	genbank	MAWGWWKRRRRWWFRKRWTRGRLRRRWPRSARRRPRRRRVRRRRRWRRGRPRRRLYRRYRRKKRRRRKPKTVLKQWQPDITKRCYIIGYIPAIICGAGTWSHNYTSHLLDIIPKGPFGGGHSTMRFSLKVLFEEHLRHLNFWTRSNQDLELVRYFRCSFRFYRDQHTDYLVHYSRKTPLGGNRLTAPSLHPGVQMLSKNKIIVPSYDTKPKGKSYVKVTIAPPTLLTDKWYFSKDICDTTLVNLDVVLCNLRFPFCSPQTDNPCITFSVLHSIYNDFLSIVDTGNYKTQFVSNLSTKVGTDWGKRLNTFRTEGCYSHPKLPKKAVTPGNDKTYFTVPDGLWGDAVFNAEASNIITKNMESYSESAKARGVQGDPAFCHLTGIYSPPWLTPGRISPETPG…	726	USER	zzzz700
241	genbank_anelloviridae_BAB79330.1_	genbank	MAWGWYRRRRWRPWRRRRWAIRRRRPRRTVRRRGRRRYVSRWPRRRYRRRRRRTRRRGGRKRRHRQTLILRQWQPDVMKKCFITGWMPLIICGTGNTQFNFITHEDDVPPKGASYGGNLTNLTFTLEGLYDEHLLHRNRWSRSNFDLDLSRYLYTIIKLYRHESVDYIVTYNRTGPFEISPLSYMNTHPMLMLLNKHHVVVPSPKTKPKGKRAIKIKIKPPKLMLNKWYFARDTCRIGLFQLYATGANLTNPWLRSGTNSPVVGFYVIKNSIYQDAFDNLADTEHTNQRKNVFENKLYPTTTTNKDNWQYTYTSLMKNIYFKTKQEAENQTMSSTYNFDTYKTNYDKVRTKWIKIAEDGYKLVSKEYKEIYISTATYPPQWNSRNYLSHDYGIYSPYFL…	738	USER	zzzz701
240	genbank_anelloviridae_BAB79342.1_	genbank	MAWWWGRWRQRRWGRRRRRPWRVRRRRPRRSFRRRRRGRYVSRRRRRRYYRRRLRRGRRRGRRKRHRPTLILRQWQPDVVKHCKITGWMPLIICGSGSTQMNFITHMDDTPPMGYTYGGNFVNVTFSLEAIYEQFLYHRNRWSRSNHDLDLARYQGTTLKLYRHATVDYILSYNRTGPFQISEMTYMSTHPAIMLLMKHRIVVPSLRTKPKGRRSIKIRIKPPKLMLNKWYFTKDICSMGLFQLMATGAELTNPWLRDTTKSPVIGFRVLKNSVYTNLSNLKDVSISGERKSILNKIHPETLTGSGNASKGWEYSYTKLMAPIYYSAVRNSTYNWQNYQTHCATTAIKFKEKQTSTLTLIKAEYLYHYPNNVTQVDFIDDPTLTHDFGIYSPYWITPTR…	736	USER	zzzz702
239	genbank_anelloviridae_ABY26046.1_	genbank	MFWWGWRRRWWWKPRRRWRRRRARRPRRVPRRRYRRAARRYRGRRVRRRRAGGWRGRRRYSRHYSRRLTVRRKKKKLTLKIWQPQNIRKCRIRGLLPLLICGHTRSAFNYAIHSDDKTPQQESFGGGLSTVSFSLKVLFDQNQRGLNRWSASNDQLDLARYLGCTFWFYRDKKTDFIVQYDISAPFKLDKNSSPSYHPFMLMKAKHKVLIPSFDTKPKGREKIKVRIQPPKMFIDKWYTQEDLCPVILVSLAVSVASFTHPFCSPQTANPCITFQVLKEFYYPAMGYGAPETTVTSVFNTLYTTATYWQSHLTPQFVRMPTKNPDNTENNQAQAFNTWVDKDFKTGKLVKYNFPQYAPSIEKLKQLRTYYFEWETKHTGVAAPPTWTTPTSDRYEYHMG…	739	USER	zzzz703
238	genbank_anelloviridae_ABU55900.1_	genbank	MPWYPRRRYPRRRYRWIRRWRARRSFRPRYRRRYWVRNYSRKRKLFKITQKQWQPKVIRKTHVKGTYPLFLCTKHRINNNMIQYLDSIAPEHYNGGGGFSIMQFSLQALYEEFIKAKNWWTNTNCFLPLVRYMGSLLNFTKLNFMIILCIERCYPLACTDEMYLSTQPSIMMLTRKCIFVPCKQNSKGRKPYKKVRVRPPSQMLTGWHFSQDLANMPLVVLKASVCSFDRYYTDSTAKSTTIGFKTLNTQTFRYHDWQDPPTTGYKPQNELWFYGAENGTPVDPNDTQISNLIYLGGTGPYEKGTPIKNNIQTYFSQPKLWGNIFHDHYTSGTAPVFVTNKSPSDIKNMWDSIKDKTVKESNVFTVRTIPLYLPCRYNPFADKATNNKIWLVSIHSDHT…	648	USER	zzzz704
237	genbank_anelloviridae_ABY26045.1_	genbank	MAWWGRWRRWRWRPRRWRRRRRRRVPRRRAQRSVRRRRARRVRRRRWGRRRWRRGYRRRLRLRRKRKRKRRLVLTQWHPAKVRRCRISGVLPMILCGAGRSSFNYGLHSDDFTKQKPNNQNPHGGGMSTVTFNLKVLFDQYERFMNKWSYPNDQLDLARYKGCKFTFYRHPEVDFLAQYDNVPPMKMDELTAPNTHPALLLQSRHRVKIYSWKTRPFGSKKVTVKIGPPKLFEDKWYSQSDLCKVSLVSWRLTACDFRFPFCSPQTDNPCVTFQVLGEQYYEVFGTSVLDVPASYNSQITTFEQWLYKKCTHYQTFATDTRLAPQKKATTSTNHTYNPSGNTESSTWTQSNYSKFKPGNTDSNYGYCSYKVDGETFKAIKNYRKQRFKWLTEYTGENHI…	760	USER	zzzz705
236	genbank_anelloviridae_ABU55887.1_	genbank	MAWRWWKRRRRWWFRKRWTRGRLRRRWPRPARRRPRRRRVRRRRRWRRGRPRRRLYRRYRRKKRRRRKPKIILKQWQPDIVKRCYIIGYIPAIICGAGTWSHNYTSHLLDIIPKGPFGGGHSTMRFSLKVLFEEHLRHLNFWTKSNQDLELIRYFRCSFKFYRDQDTDYIVHYSRKTPLGGNRLTAPSLHPGVQMLSKNKILVPSYATKPKGGSYVKVTIAPPTLLTDKWYFSKDVCDTTLVNLDVVLCNLRFPFCSPQTDNPCITFQVLHSYYNDYLSIVDTALYKTSFVNNLSTKLGTTWANRLNTFRTEGCYSHPKLLKKTVTAANDTKYFTTPDGLWGDAVFDVSDAKKLTKNMESYAASANERGVQGDPAFCHLTGIFSPPWLTPGRISPETPG…	726	USER	zzzz706
235	genbank_anelloviridae_ABY26044.1_	genbank	MWWWRRRFWRPKRRWRWRRRRRRPVARRRRRPARLARRPRVRRRRFRWGRPRRYRLRRRRRRRKRQKIKLKQWNPAVTKFCRIIGYYPLIICGEGTTVRNYNVHSQDYVQYDSYGGGMTTTMFNLKVLYEQFQLHQNFWTRSNVDLDLVRYHSVKFTFFRHPKVDFIVKFNRNPPFTDSVLTGPMLHPGVLMNSKGKILIPSWETRPRGKKRISVRIGPPRLFTDHWYFQRDFCGVPLLTVNATACNLRFPFGSPQTKNICIYFLVLASIYNNKVSISKDEVTKNYTELINAIKESPQGLTVFNTFKTQEHMQEPSSETFKETQKTNPPFKYENLSSVWGDKIYKPNTFDGFKTNADNLWNARKQYTLLGSKELNFKTGMYSAIFLTNGRLSPDYPGIY…	719	USER	zzzz707
234	genbank_anelloviridae_ABD61942.1_	genbank	MAWRWWWRRRRPWRWRWRRRRRPARRRRRRRPARRARRPRVRRWRRRRVWAPRPYIRRRRRSFRRKKIKITQWNPAVTKKCTVTGYLPVIYCGTGDIGTTFQNFGSHMNEYKQYNAAGGGFSTMLFTMQNLYEEYQKHRCRWSKSNQDLDLCRYLDCKLTFYRSPNTDFIVGYNRKPPFIDTQITRCTLHPGMLIQERKKVIIPSFQTRPKGRIKRKIKVRPPTLFTDKWYFQRDLCKVPLVTVSASAASLRFPFGSPQTENYCIYFQVLDPWYHTRLSITGGKPAEYWTQLKAYLTQGWGRSTNNAGYQHGPLGTYFNTLKTSEHIRQPPADNYKQANKDTTYYGRVDSHWGDHVYQQTIIQAMEENQSNMYTKRALHTFLGSQYLNFKSGLFSSIFL…	732	USER	zzzz708
233	genbank_anelloviridae_AAW79273.1_	genbank	MAWSWWWRRRKRWWPRRRRRWRRLRTRRTRRAVPRRRRRRRVRRRRWGRRRRRRRVFYKRRRRKTGRLYRKPKKKLILTQWHPTTVRNCSIRGLVPLVLCGHTQGGRNFALRSEDYPKQGSPYGGSFSTTTWNLRVLFDEHQKHHNTWSYPNNQLDLGRYKGCTFYFYRDKKIDYIVKFQRRGPFKINKYSSPMAHPGMMMLDKMKILVPSFDTRPGGRRRVKVTIRPPTLLEDKWYTQQDLAPVNLVSLVVSAASFIHPFSQPQTNNICTTFQVLKDMYYDCIGVNSSLDDKYQKLFDKLYSQCCYFETFQTIAQLNPGFKAAKKTSNGTGDSAATLGDAVTELKSTSGSFHTGNNSTFGCCTYKPTKDIGKKANCWFWHQLTKTNSDTLGQYGQASI…	747	USER	zzzz709
232	genbank_anelloviridae_AAW79277.1_	genbank	MAWWGWRRRWGWRPRWRRRRRWTRRRRRVPARRPRRPVRRHRKRYRVRRRRWGRRYTRRGRLRLRRRRRRRKKIVLTQWNPQTVRRCYIRGLMPVIWAGMGSGGKNYAVRSDDYTQSSFGGSFGTETFSLRVLFDQYQRGFNKWSHTNKDLDLALYYGCRFRFYRHDRTDFIVSFTNNPPMKTNQYTAPMTHPGMLMRAKHKILIPSRLTRPRGKKYISVRIRPPKLFQHKWYTQSDLCSVSLVQLNLTAADLKHPFGSPLTDTPCVSFQVLGDLYNECLNIDLPETEKDSLTKLKNSSTDEYSKNLQKLLQQLYTNGQYWQTFITGPFIKDTMQANNYQQKKTNYTKTNFYTTRDATGDTAFVSNADSNYLYATYHPENIETKLYKIRENYFQLSIGK…	776	USER	zzzz710
231	genbank_anelloviridae_AAS18428.1_	genbank	MAWRWWRRRWKPRRRPAWTKYRRRRWRRFRPRRPRRSTRRRGRRRTVRRRRVRRLRRRRGWTRRRYLRRRKRRKLVLTQWNPSTVRRCNIRGIIPLIMCGANTASFNYGMHSDDSTPQPEKFGGGMSTVTFSLYVLYDQFTRHMNRWSYPNDQLDLARYKGCSFKMYRHPTTDFILTYDNNPPMKNTIYSSPNTHPGILMQQKHRVLIPSWLTFPKGRKYVKVKIPPPKLFEDHWYTQPDLCKVPLVTLRSTAADFRHPFCSPQTNNPCTTFQVLRDKYNEVIGLPFANTGSNTAVSQQIHSFETWLYESSTHYQTFQTEQMFRPKQYNADGSQFKEYQQMLSQWTTKIYHRKTDSNYGYSSYDFSNNAGGYQYATKMRQHYWTQLTTLTSTVPHINST…	758	USER	zzzz711
230	genbank_anelloviridae_BAB69916.1_	genbank	MAFRWWWWRRRPQRRWTRRRWRRLRTRRPRRTVRRRRRRPRVRRRRWGRRRGRRRLYRRTYRKRRKRRKKMTLKMWNPSTIRACNIRGFIALVVCGHTRAGCNYAIHSEDYIPQLRPYGGSFSTTTWSLKLLFDEYLKFRNKWSYPNTELNLARYRGATFTFYRDPKVDYIVVYNTVPPFKLNKYSCPMLHPGMMMQYKKKVLIPSYQTKPKGKAKIRLRIKPPVLFEDKWYTQQDLCPVNLLSLAVSACSFLHPFIPPESDNICITFQVLRDFYYTQMSVTPTTTTSLNQKDEKIFSDHLYKNPEYWQSHHTAARLSTSQKPALRNKEEIPNDHGYLNTTPTDSTFRTGNNTIYGQPSYRPNYTKLTKIREWYFTQENTDNPIHGSYLKPTLNSVDYH…	742	USER	zzzz712
229	genbank_anelloviridae_AAP21825.1_	genbank	MAWGWWLKRWRRRKKPAWKKWRTRRWRRFRRRRPKRTYGRRRRRRTVRRRRVRRLRRRGWTRRRYIRRRRRKKKLVLTQWNPQDVRRCTIRGIIPLIMCGANTASFNYGMHSDDSTPQPEKFGGGMSTVTFSLFVLYDQYTRHLNRWSYPNDQLDLARYKGCKFKFYRDTNTDFIVTYDINPPMKNTELSGPNTHPGMLMQQKRKILVPSWDAYPKGRKYVLAKIPPPKLFEDHWYTQPDLCKVPLVTLRSTAADLKHPFCSPQTNNPCTTFQVLRDKYNDMIGFPFNYNPSDTNQTKTLQDFEKWLYSSSTHYQTFATEANLRPRQYNADGGANPNYAQLQSKWTTTIYAKKTDSNFGYTSYNFSGDQGYKYVTEIRQWYWTQLTSWTQTAPHINSTF…	754	USER	zzzz713
228	genbank_anelloviridae_AAO25538.1_	genbank	MAWWGRWRRWRWRPRRWRRRRRRRVPRRRAQRPVRRRRRRVRRRRWGRRRWRRGYRRRLRLRRRRRRRKKIILTQWNPAKVRKCTIRGVLPMILAGAGRFAFNYGLHSDDITVQKPLNQNPHGGGMSTVTFSLQVLYDQHQRFLNQWSYPNDQLDLARYRGCSFSFYRHPEVDFIAQFDNVPPMKMDELTAPNTHPALLLQSKKKVKIYSWKTRPWGKKKVTVRVGPPKLFEDKWYSQHELCKVPLVSWRLTAADMRFPFCSPLTDNPCYTFQVLHEEYYNVIGTSALLTPTNATYTNFEKWLYGKCTHYQTFATDTRLAPQTTSKYKPDGQPLTSSELTWDQSAFNSFKTKADSNYGYCTYNPNGSTQLVEKIKGYRNQRFRWLTSYTGTNHINDTFA…	755	USER	zzzz714
227	genbank_anelloviridae_BAB69912.1_	genbank	MAYSYWWRRRRWPWRGRWRRWRRRRRIPRRRPRRPVRRYRRRPVRRKRRWGRRGRRRRYTRRYRRRLTVRRKRNKLRLSVWQPQNIRYCAIKGLFPILICGHGKSAGNYAIHSDDFITSRFSFGGGLSTTSYSLKLLFDQNLRGLNRWTASNDQLDLARYLGAIFWFYRDQKTDYIVQYDISEPFKIDKDSSPSFHPGILMKSKHKVLVPSFQTWPKGRSKVKLKIKPPKMFVDKWYTQEDLCTVTLVSLVVSLASFQHPFCRPLTDNPCVTFQVLQNFYNNVIGYSSSDTLVDNVFTSLLYSKASFWQSHLTPSYVKKINNNPDGSSISQRVGTMPDMTEYNKWVSNTNIGTGFVNSNVSVHYNYCQYNPNHTHLTTLRQYYFFWETHPAAANKTPVT…	759	USER	zzzz715
226	genbank_anelloviridae_AAK11708.1_	genbank	MSWWGWRRRWWWKPRRRWRRRRARRPRRLPRRRYRRPTRRYRGRRVRRRRAGGWRGRRRYSRRYSRRLTVRRKKKKLTLKIWQPQNIRRCKIRGLLPLLICGHTRSAFNYAIHSDDKTPQQQSFGGGLSTVSFSLKVLFDPNQRGLNRWSASNDQLDLARYTGCTFWFYRHKKTDFIVQYDVSAPFKLDKNSCPSYHPFMLMKAKHKVLIPSFDTKPKGREKIKLRIQPPKMFIDKWYTQEDLCPVILVTLVATAASFTHPFCSPQTANPCITFQVLKEFYYQAMGYGTPETTMSTIWNTLYTTSTYWQSHLTPQFVRMPKNNPDNTANTEANKFNEWVDKTFKTGKLVKYNYNQYKPDIEKLTLLRQYYFRWETQHTGVAVPPTWTTPTTDRYEYHVG…	739	USER	zzzz716
225	genbank_anelloviridae_AAK11704.1_	genbank	MAWGWWRRRRKWWWRRRFARSRLRRRRIRRPRRRTRRRTVRRRRQWRRGRPRRRLFKRKRRFKRRRRKAKIKITQWQPSSVKRCFVIGYFPLVICGPGRWSENFTSHIEDKISKGPFGGGHSTSRWSLKVLYEEFQRHHNFWTRSNKDLELVRFFGSSWRFYRHEDTDYIVYYSRKAPLGGNLLTAPSLHPGAAMLSKHKIVVPSFKTRPGGKPTVKINIKPPTTLIDKWYFQKDICDTTFLNLNVVLCNLRFPFCSPQTDNICVTFQILHEVYHNYISITAKELLTGTEWRQYYKNFLNAALPNDRSVNKLNTFSTEGAYSHPQIKKHTENITGSGDKYFRKKDGLWGDAIHITDQQNRTEVIDLILKNAENYLKKVQQEYQGQENLKNLIHPVFCQY…	426	USER	zzzz717
224	genbank_anelloviridae_AAK11696.1_	genbank	MAWWGRWRRWPRRRWRRWRRRRRRRLPTRRTRRAVRGLGRRPRKTVRRRRRRPRRTYRRGWRRRRYIRRRRGRRKKLTLTMWNPNIVRRCNIEGGLPLILCGENRAAFNYAYHSEDYTEQPFPFGGGMSTTTFSLRGLYDQYTKHMNRWTFSNDQLDLARYRGCKFRFYRHPTCDFIVHYNLVPPLKMNQFTSPNTHPGLLMLTKHKIIIPSFLTRPGGRRFVKIRLPPPKLFEDKWYTQQDLCKQPLVTLTATAASLRYPFCSPQTNNPNCTFQVLRKNYHKVIGTSSTNSEDVTPFENWLYNTASHYQTFATEAQVGRIPSFNPDGTKNTKESEWQNYWSKKGEPWNPNSSYPHTTTNQMYKIPFDSNYGFPTYKPIKEYMLQRRAWSFKYETDNPV…	760	USER	zzzz718
223	genbank_anelloviridae_AAK11698.1_	genbank	MAWRRWRWRPWWRRRRRRRWRRRRRRPRRRRPYRRRRPRRVRRRRGRWRRAYRRWGRRRRRRRHKKKLVLTQWQPAVVKRCLIVGFDPLIICGINRTIFNYTTHSEDFTFNNDSFGGGLCTAQYTLRILFQEKLAQHNFWSASNEDLDLARYLGATIVLYRHPTVDFLVRIRTSPPFEDTDMTAMTLHPGMMMLAKKTIKIPSLKTRPSRKHVVRIRVGAPKLFEDKWYPQNELCDVTLLTIQATTADFQYPFGSPLTNSPCCNFQVLNSNYDNAHSILNLSNEPTNKWHTYRNNCYKFLLEQYSYYNTKQVVAQLKYKWNPNQNPTMPNTSNASLSKKPDDLTKTKTTNEYPHWDTLYGGLAYGHSTVTPGTTSSPTDLKTQMLTGNEFYTTAGKKLI…	772	USER	zzzz719
222	genbank_anelloviridae_AAK11712.1_	genbank	MAWGWWRRWRRWPTRRWRRRRRRRPVRRTRARRPARRYRRRRTVRTRRRRWGRRRYRRGWRRRTYVRKGRHRKKKKRLVLRQWQPATRRRCTITGYLPIVFCGHTKGNKNYALHSDDYTPQGQPFGGALSTTSFSLKVLYDQHQRGLNKWSFPNDQLDLARYRGCKFYFYRTKQTDWVGQYDISEPYKLDKYSCPNYHPGNMIKAKHKFLIPSYDTNPRGRQKIIVKIPPPDLFVDKWYTQEDLCDVNLVSFAVSAASFLHPFGSPQTDNPCYTFQVLKEFYYQAIGFSATEEKIQNVFNILYENNSYWESNITPFYVINVKKGSNTAQYMSPQISDADFRNKVNTNYNWYTYNAKTHKEKLKTLRQAYFKQLTSEGPQHTSSHAGYATQWTTPSTDAY…	745	USER	zzzz720
221	genbank_anelloviridae_AAL61819.1_	genbank	MAWGWWLKRWRRRKKPAWKKWRTRRWRRFRRRRPKRTYGRRRRRRTVRRRRGRRLRRRGWTRRRYIRRKRRKRKLVLTQWNPQDVRRCTIRGIIPLILCGANTASFNYGMHSDDSTPQPGKFGGGMSTVTFSLFVLYDQWTRHLNRWSYPNDQLDLARYRGCKFKFYRDTNTDFIVTYDINPPMKNTELSSPNTHPGMLMQQKRKILVPSWATYPRGRKYVLAKIPPPKLFEDHWYTQPDLCKVPLVTLRSTAADFQHPFCSPQTNNPCTTFQVLREQYNDMIGFPFNYNPSDETQKTKLETFEKWLYSSSTHYQTFATEANLRPRQYCADGSLNKEYSNLHSKWTSTIYSKKTDSNFGYTSYNFSGEQGYKYVTEIRQFYWTQLTPWNQGVPHINSTF…	754	USER	zzzz721
219	genbank_anelloviridae_AAK54732.1_	genbank	MAHPGMMMLSKMKILVPSSDTRPGGRRRVKVKIRPPALLEDKWYTQQDLAPVNLVSLVVSATSFIHPFSQPQTNNICTTFQVLKDMYYDCIGVSSTLDDKYKKLFQKLYTKCCYFETFQTIAQLNPGFKSAKKTTTGSGKEAATLGDAVTQLKNQHGSFYTGNNSTFGCCTYNPTEEIGKAANEWFWNQLTATESDTLGQYGRASIKYFEYHTGLYSSIFLSPLRSNLEFSTAYQDVTYNPLTDLGIGNRIWYQYSTKPDTTFNETQCKCVLTDLPLWSLFYGYVDFIESELGISAEIHNFGIVCVQCPYTFPPMFDKSKPDKGYVFYDTLFGNGKMPDGSGHVPTYWQQRWWPRFSFQRQVMHDIILTGPFSYKDDSVMTGLTAGYKFKFTWGGDMIS…	554	USER	zzzz723
218	genbank_anelloviridae_AAK54733.1_	genbank	MAWSWWWRRRKRWWPRRRRRWRRLRTRRTGRAVPRRRRRRRVRRRRWGRRPRRRRVYYKRRRRKTGRLYRKPKKKLVLTQWHPTTVRNCSIRGLVPLVLCGHTQGGRNFALRSDDYPKQGTPYGGSFSTTTWNLRVLFDEHQKHHNTWSYPSNQLDLARFRGSIFYFTETKKLTT	175	USER	zzzz724
217	genbank_anelloviridae_AAK29445.1_	genbank	MAYGWWRRRRKRWRRWRRRPWRRRWRTRRRKPARRRGRRRNVRRRRRGGRWRRRYRRWKRKGRRRKKAKIIIRQWQPNYRRRCNIVGYIPVLICGESTVSRNYATHSDDTNYPGPFGGGMTTDKFTLRILYDEYKRFMNYWTASNEDLDLCRYLGVNLYFFRHPDVDFIIKINTMPPFLDTEVTAPSIHPGMLALDKRARWIPSLKSRQEKKHYIKIRVGAPKMFTDKWYPQTDLCDMVLLTVYATAADMQYPFGSPLTDSVVVNFQVLQSMYDEKISILPDQKQQRQSLLTSIANYIPFYNTTQTIAQLKPFIDAGNVTSGTTATTWGQLLNTTKFTTTATTTYTYPDTNTTTVTMLTCNDSWYRGTVYNKQIKDLPIKAATLYSEATKTLLGNTLTT…	770	USER	zzzz725
216	genbank_anelloviridae_BAA90412.1_	genbank	MAYGWWRRRRRRWKRWRRRPRWRRRWRTRRRRPAGRRRRRRTVRRRRRGRWRSRYRRWRRKGRRRRKEKLIIRQWQPNYTRKCNIVGYMPVIMCGENTVIRNYATHTYDCSWPGPFGGGMATQKFTLRILYDDYKRFMNYWTSSNEDLDLCRYRGATLYFFRDPDVDFIILINTTPPFVDTEITGPSIHPGMLALNKRARFIPSLKTRPGRRHIVKIKVGAPRMYEDKWYPQSELCDMPLLTIYATATDMQHPFGSPLTDTPVVTFQVLRSMYNDALSILPSNFEDDSSPGAALYKQISEYIPYYNTTETIAQLKRYVENTEKTQTTLNPWQSRYVNTTLFNTAETIANQKPYTKFADTWYRGTAYKDAIKDIPLKAAELYVNQTKYLLSTTFTGGSKY…	765	USER	zzzz726
215	genbank_anelloviridae_BAA90409.1_	genbank	MAYGWWRRRRRRWKRWRRRPRWRRPWRTRRRRPAGRRGRRRTVRRRRRGRWRRRYRRWRKKGRRRRKKKLIIRQWQPNYTRKCNIVGYMPVIMCGENTLIRNYATHAYNCSWPGPFGGGMATQKFTLRILYDDYKRFMNYWTSSNEDLDLCRYRGATLYFFRDPDVDFIILINTTPPFVDTEITGPSIHPGMLALNKRARFIPSLKTRPSRRHIVKIRVGAPKLYEDKWYPQSELCDMPLLTVYATATDMQYPFGSPLTDTPIVTFQVLRSMYNDALSILPSNFEGDDSAGAKLYKQISEYIPYYNTTETIAQLKGYVENTEKTQTTPNPWQSKYVNTKPFDTAQTITNQKPYTPFADTWYRGTAYKEEIKNVPLKAAELYELHTTHLLSTTFTGGSKY…	765	USER	zzzz727
214	genbank_anelloviridae_BAA90403.1_	genbank	MAYRWWRRRSRRWRRRRWRRWRRRRRPRRRRPARRCRRRRTVRRRRRGRWTRTYRRWRRKGRRRSKKKLIIRQWQPNYRRRCNIVGYMPLLICGENTVARNYATHSDDCYFPGPFGGGMTTDKFTLRILYDEYKRFMNYWTASNEDLNLCRYLGCTLYVFRHPEVDFIIIINTSPPFLDTEITGPSIHPGMMALNKRARWIPSLKNRPGRKHYVKIKVGAPRMFTDKWYPQTDLCDMTLLTIFASAADMQYPFGSPLTDTIVVSFQVLQSMYNDCLSVLPSNFVEPSGKGKLLYDKIRKHLPYYNTTQTQAQLKRYIDNQSTTDTWNSYLNTKKFSTNESPKTDINSIGGPYTTYSDTWYKGTAYIQKITEVPPKAAELYYKQTEQLIGATFTGSTRYL…	764	USER	zzzz728
213	genbank_anelloviridae_BAA90406.1_	genbank	MAYGWWRRRRRRWKRWRRRPRWRRPWRTRRRRPARRRGRRRTVRRRERGRWRRRYRRWRKKGKRRIKKKLIIRQWQPNYTRKCDILGYMPVIMCGENTLIRNYATHANDCYWPGPFGGGMATQKFTLRILYDDYKRFMNYWTSSNEDLDLCRYRGVTLYFFRHPDVDFIILINTTPPFVDTEITGPSIHPGMMALNKRARFIPSLKTRPGRRHIVKIRVGAPKLYEDKWYPQSELCDMPLLTVYATAADMQYPFGSPLTDTPVVTFQVLRSMYNDALSILPSNFEQDDNAGQKLYNEISSYLPYYNTTETIAQLKRYVENTEKISTTPNPWQSNYVNTITFTTAQSITTTTPYTTFSDSWYRGTVYKNAITKVPLAAAKLYETQTKNLLSPTFTGGSEY…	765	USER	zzzz729
212	genbank_anelloviridae_AAG16249.1_	genbank	MAYGWWGRRRRWRRWRTRRRPWRTRRRRRRRAPRRFRPRRRVRRRRGRWRRRYRKWRRRRGRRTHRKKIIIKQWQPNFIRRCYIIGYLPLIFCGENTTANNFATHSDDMIAKGPWGGGMTTTKFTLRILYDEFTRFMNFWTVSNEDLDLCRYVSCKLIFFKHPTVDFIVRINTEPPFLDTNLTAAQIHPGIMMLSKKHILIPSLKTRPSRKHRVVVRVGPPRLFQDKWYPQSDLCDTVLLSVFATACDLQYPFGSPLTDNPCVNFQILGHQYKNHLSISSTNDTTNKQHYDNTLFNKIVLYNTFQTIAQLKETGQLTNLWNEVQNTTALSPKGTNATISKDTWYKGNTYKDKIKELAEKTRSRFAAATKAALPNYPTIMSTDLYEYHSGIYSSIFLAAG…	733	USER	zzzz730
211	genbank_anelloviridae_BAA94878.1_	genbank	MAWGWWRWRRRWPARRWRRRRRRRPVRRTRARRPARRYRRRRTVRTRRRRWGRRRYRRGWRRRTYVRKGRHRKKKKRLILRQWQPATRRRCTITGYLPIVFCGHTRGNKNYALHSDDYTPQGQPFGGALSTTSFSLKVLFDQHQRGLNKWSFPNDQLDLARYRGCKFIFYRTKQTDWVGQYDISEPYKLDKYSCPNYHPGNMIKAKHKFLIPSYDTNPRGRQKIIVKIPPPDLFVDKWYTQEDLCSVNLVSLAVSAASFLHPFGSPQTDNPCYTFQVLKEFYYQAIGFSASTQAMTSVLDTLYTQNSYWESNLTQFYVLNAKKGSDTTQPLTSNMPTREEFMAKKNTNYNWYTYKAASVKNKLHQMRQTYFEELTSKGPQTTKSEEGYSQHWTTPSTNA…	746	USER	zzzz731
210	genbank_anelloviridae_BAA93579.1_	genbank	MAWGWWRRWRRWPARRWRRRRRRRPVRRRRAGRPARRYRRRRTVRTRRRRWGRRRYRRGWRRRTYVRKGRHRKKKKRLILRQWQPATRRRCTITGYLPIVFCGHTKGNKNYALHSDDYTPQGQAFGGALSTTSFSLKVLFDQHQRGLNKWSFPNDQLDLARYRGCKFYFYRTKQTDWIGQYDISEPYKLDKYSCPNYHPGNLIKAKHKFLIPSYDTNPKGRQKIIVKIPPPDLFVDKWYTQEDLCSVNLVSLAVSAASFLHPFGSPQTDNPCYTFQVLKEFYNQAIGFSATQDKIDNVFNILYQNNSYWESNITPFYVINVKKGSNTADYLSPQITDSNFRKKVNTNYNWYTYNAKSNKDNLHKLRQAYFKQLTSEGPQHTSSDNGYASQWTTPSTDAY…	746	USER	zzzz732
209	genbank_anelloviridae_BAA93589.1_	genbank	MAWWWGRWRRRWRPRYRKRTWRLRRRRPRRTFRRRRRRQYVSRRRRRRYYRRRLRRGRRRGRRKRHRQTLVLRQWQPDVVRHCKITGWMPLIICGSGSTQNNFITHMDDFPPMGYSFGGNFTNLTFSLEGIYEQFLYHRNRWSRSNHDLDLARYKGTTLKLYRHHTLDYIVSYNRTGPFQISDMTYPSTHPALMLLQKHRIVVPSVLTKPKGKRSIKVRIKPPKLMLNKWYFTKDICSMGLFQLQATACTLYNPWLRDTTKSPVIGFRVLKNSIYTNLSNLPDHEGSREAIRKKLHPQSLTGHSPNQKGWEYSYTKLMAPIYYSANRNSTYNWLNYQDNYVATYTKFKVKMTDNLQLIQKEYSYHYPNNTTTDLIKNNTLTHDWGIYSPYWLTPTRISL…	733	USER	zzzz733
208	genbank_anelloviridae_BAA93603.1_	genbank	MPPYNYYRRRYFYRPRRYRRRWLTTWRPRQAFRRRFRRRRWVRKRRFFRYKKRKLKKIRLSQWQPDSIRKCTIKGQLCLLTCGIGRINNNFTLTAESYVPISEPGGGGWSIMQITLRALYDEYEHYRNWWTTSNCGLPLVKYTGCSIKFYNSNDTDYIVTVQRTGPFEVDRDSYLNTQPSRHMMNKNSFIVPKLNPNKKRKPYIRKKYRPPALLQNKWYFAQDILNTPLILFTTSSCSLDQMYAPNDQISTNITFLSLNTNIFQNPYWELDDNQPYFPKVTDTINNIGLYTMGNGGDINKMKDWKELIPLYQTQLYKKEHNTSGNHWTNNFSDLQNPKYWANPFSYSAHEDTNDVQIFYGTPPTNHTYNNQPQLQTITGLYQECRYNPFKDKGTGNIFY…	663	USER	zzzz734
207	genbank_anelloviridae_BAA93581.1_	genbank	MAWGWWRRWRRWPARRWRRRRRRRPVRRTRARRPARRYRRRRTVRTRRRRWGRRRYRRGWRRRTYVRKGRLRKKKKRLILRQWQPATRRRCTITGYLPIVFCGHTKGNKNYALHSDDYTPQGQPFGGALSTTSFSLKVLYDQHQRGLNKWSFPNDQLDLARYRGCKFYFYRTKQTDWVGQYDISEPYKLDKYSCPNYHPGNMIKAKHKFLIPSYDTNPRGRQKIIVKIPPPDLFVDKWYTQEDLCSVNLVSLAVSAASFLHPFGSPQTDNPCYTFQVLKEFYYQAIGFSATDEKRQNVFNILYGQNAYWESNITPFYVINVKKGSNTAEMLTPTITDTQFRRKVNTNYNWYTYNAKENKENLKKLRNAYFKELTSHGPQQTDSEKGYGSQWTTPSTDAY…	745	USER	zzzz735
206	genbank_anelloviridae_AAF71533.1_	genbank	MAQGRRRYRRGWQRRVYLRRRRRRRRKRLVLTQWHPAVRRKCTITGYMPVVWCGHGRASYNYAWHSDDCIKQPWPFGGSLSTVSFNLKVLYDENQRGLNRWTYPNDQLDLGRYKGCKLTFYRTKNTNYPGPFGGGMTTDKFTLRILYDEYKRFMNYWTASNEDLDLCRYLGVNLYIFRHPDVDFIIKINTMPPFLDTEITAASIHPGILALDKRARWIPSLKSRPGKKHYIKIRVGAPKMFTDKWYPQTDLCDMVLLTIYATAADMQYPFGSPLTDTVVVNFQVLQSMYDENISILPDQKTQREKLLTSISNYIPFYNTTQTIAQLKPFVDAGNKVSGTTTTTWASYINTTRFTTTATTTYTYPGSTTNTVTMLTSNDSWYRGTVYNNQIKNLPKQAAE…	785	USER	zzzz736
205	genbank_anelloviridae_AAD45641.1_	genbank	MAYGWWRRRRRRWKRWRRRPRWRRPWRTRRRRPARRRGRRGTVRRRRRGRWRRRYRRWRRKGRRRRKKKLIIRQWQPNYTRKCNIVGYMPVIMCGENTLIRNYATHADDCYWPGPFGGGMATQKFTPRILYDDYKRFMNYWTSSNEDLDLCRYRGVTLYFFRHPDVDFIILINTTPPFVDTEITGPSIHPGMMALNKRARFIPSLKTRPGRRHIVKIRVGAPKLYEDKWYPQSELCDVPLLTVYATAADMQYPFGSPLTDTPVVTFQVLRSMYNDALSTLPSNFENASSPGQKLYKEISTYLPYYNTTETIAQLKRYVENTEKNGTTPNPWQSKYVNTTAFTTALNVTTEKPYTTFSDSWYRGTVYKETITEVPLAAAKLYQNQTKKLLSTTFTGGSEY…	765	USER	zzzz737
204	genbank_anelloviridae_AAD45644.1_	genbank	MAYGWWRRRRRRPWWRRRWRRWRRRRRPRRRRPRRRYRRRRTVRRRGRGRWTKRYRRWRRKGKRKGKKKIIIKQWQPNYRRRCNIVGYMPLLICGENTVARNYATHSDDSYYPGPFGGGMTADKFTLRILYDEYKRFMNYWTASNEDLDLCRYLGCTLYVFRHPEVDFIIIINTSPPFLDTEITGPSIHPGMMALNKRVRWIPSIKNRPGKKHYVKIKVGAPRMFTDKWYPQTDLCDMTLLTIFASAADMQYPFGSPLTDTIVVSLQVLQSMFNDCLSVLPTNFVETTGKGTQLHKKIINHLPYYNTTQTQAQFKRFIENKTATNGDNIWANYINTEKFNKEQSPKNDNGIGGPYCTYSDTWYKGTAYNEKIKKIPEEASKLYYEETKQLIGITFTGSS…	767	USER	zzzz738
203	genbank_anelloviridae_AAD45650.1_	genbank	MAYRWWWRRRRRPWRRRRWRRWRRRRRPRRRRPRRRYRRRRTVRRRGRGRWTRRYRRWRRKGKRRGKKKIIIKQWQPNYTRRCNIVGYLPLLICGENTVATNYATHSDDSYYPGPFGGGMTTDKFTLRILYDEYKRFMNYWTASNEDLDLCRYLGLTLYVFRHPEVDFILTINTSPPFLDTEITGPSIHPGMMALNKRARWIPSLKNRPGRKHYVKIKVGAPRMFTDKWYPQTDLCDMTLLTIFASAADMQYPFGSPLTDTIVVSFQVLQSMYNDCLSILPDNFVEHTGKGTQLHKKIIQHLPYYNTTQTQAQFKRVVENMSATNGNNVWANYINTIKFTDTQTPENDSGIGGPYTNYSDSWYKGTVYNNKIKDIPEKASKLYYDQTKQLIGITFTGST…	767	USER	zzzz739
202	genbank_anelloviridae_AAD45635.1_	genbank	MAYGWWRRRRRRWRRWRRRPWRRRWRTRRRRPARRRGHRRNVRRRRRGGRWRRRYRRWKRKGRRRKKAKIIIRQWQPNYRRRCNIVGYIPVLICGENTVSRNYATHSDGTNYPGPFGGGMTTDKFTLRILYDEYKRFMNYWTASNEDLDLCRYLGVNMYLFRHPDVDFIIKINTMPPFLDTELTAPSIHPGMLALDKRARWIPSLKSRPGKKHYIKIRVGAPKMFTDKWYPQTDLCDMVLLTVYATAADMQYPFGSPLTDSVVVNFQVLQSMYDEHISILPDQQTHRENLLSNITKYIPFYNTTQTIAQLKPFIDAGNVTTSTTPLTWGSCINTTKFTTATTVTYTYPGTTTTTVTMLSCNDSWYRGTVYNNKITEVPIKAATLYSKATKTLLGNTFTT…	770	USER	zzzz740
201	genbank_anelloviridae_AAD45638.1_	genbank	MAYGWWRKRRRRPWWRRRWRRWRRRRRPRRRRPRRRYRRRRTVRRRGRGRWTKRYRRWRRKGKRRGKKKIIIKQWQPNYRRRCNIVGYMPLLICGENTVARNYATHSDDSYYPGPFGGGMTTDKFTLRILYDEYKRFMNYWTASNEDLDLCRYLGCTLYVFRHPEVDFIIIINTSPPFLDTEITGPSIHPGMMALNKRARWIPSIKNRPGRKHYVKIKVGAPRMFTDKWYPQTDLCDMTLLTIFASAADMQYPFGSPLTDTIVVSFQVLQSMFNDCLSVLPTNFTETSGKGAQLHDKIINHLPYYNTTQTQAQFKRFTENQEATNGNNVWANYVNSCKFNKQESPKSDNGIGGPYCSYSDTWYKGTAYNNKITTIPEKASKLYYEETKKLIGITFTGSS…	767	USER	zzzz741
200	genbank_anelloviridae_AAD45647.1_	genbank	MAYGWWRRRRRRWKRWRRRPRWRRPWRTRRRRPARRRGRRRTVRRRRRGRWRRRYRRWRRKGRRGRKKKLIIKQWQPNYTRECNIVGYMPVIMCGENTLIRNYATHADDCYWPGPFGGGMATQKFTLRILYDDYKRFMNYWTSSNEDLDLCRYRGVTLYFFRNPDVDFIILINTTPPFVDTEITGPSIHPGMMALNKRARFIPSLKTRPGRRHIVKIKVGAPKLYEDKWYPQSELCDMPLLTVYATAADMQYPFGSPLTDTPVVTFQVLRSMYNDALSILPSNFQSPDSPGQKLYEQISKYLPYYNTTETMAQLKRYIENTEKNTTSPNPWQTKYVNTTAFTTPQTVTTQQPYTSFSDSWYRGTVYTNEITKVPLAAAKVYETQTKNLLSTTFTGGSEY…	765	USER	zzzz742
199	genbank_anelloviridae_AAD20024.1_	genbank	MAYGLWRRRRRRWKRWRRRRWRRRWRTRRRRPAGRRRRRRTVRRRRRRGRWRRRYRRWRRKGRRRKKKKLIIRQWQPNYTRKCNIVGYMPVIMCGENTVSRNYATHSDDTNYPGPFGGGMTTDKFTLRILYDWYKRFMNYWTASNEDLDLCRYLGVNLYFFRHPDVDFIIKINTMPPFLDTELTAPSIHPGMLALDERARWIPSLKSRPGKKHYIKIRVGAPKMFTDKWYPQTDLCDMVLLTVYATAADMQYPFGYPLTDSVVVNFQVLQSMYDKYISILPDQKSQRESLLSNIANYIPFYNTTQTIAQLKPFIDAGNITSGTTATTWGSYINTTKFTTTATTTYTYPGTTTNTVTMLTSNDSWYRGTVYNNQIKELPKKAAELYSKATKTLLGNTFTT…	770	USER	zzzz743
198	genbank_anelloviridae_AAC28465.1_	genbank	MAYGWWRRRRRRWRRWRPRPWRPRWRTRRRRPARRRGHRRNVRRRRRGGRWRRRYRRWKRKGRRRKKAKIIIRQWQPNYRRRCNIVGYIPVLICGENTVSRNYATHSDDTNYPGPFGGGMTTDKFTLRILYDEYKRFMNYWTASNEDLDLCRYLGVNLYFFRHPDVDFIIKINTMPPFLDTELTAPRLHPGMLALDKRARWIPSLKSIPGKKHYIKIRVGAPKMFTDKWYPQTDLCDMVLLTVYATAADIPYPFGSPLTDSVVVNFQVLQSMYDKYISILPDQKSQSKSLLSNIANYIPFYNTTQTIAQLKPFIDAGNITSGTAATTWGSYINTTKFTTTATTTYTYPGTTTNTVTMYSSNDSWYRGTVYNNQIKELPKKAAELYSKATKTLLGNTFTT…	770	USER	zzzz744
161	my_seqs_pig_an1_2ct017.1		MEGMEYLRYRPMYDIEKRWIYKKQSSRVFSEDMGYLMQYGGGWASGTISLKGLFNEHELWRNVWSRSNDGMDLARYFGCSLTLYPEENQDYLFWYDTEFDQLQLQNLQEYTQPSVMLQAKNSRLIVSKNKMPIRRRVKRIFIPPPSQMTTQWQFQQQLADYPLFNWACICIEMQKPFDYTGAWRNAWWLMQRQSTGDMEYIEKWGRIPPTGDWQLPSSSVMKQNQDNPNWKPSDTPFIYPIAAYWVTEDQKNVCRWVTIHNTAINRWRKKEAMAVQVRDLRGLCIRVCSEQETYYRWQRGEFTGTFQQQWWPTSGTDHALCIIDATGTKAVDNPYVYILTWRGQINSTTVPPLTYWGINTGGSSRSWQDEDFGKIQLPKTGHDIDFGHKTRFGPFCVKN…	567	USER	zzzzz10
160	my_seqs_pig_an1_2ct020.1		MAFARRWRRRFGRRRRRYRKRRYGWRRRYYRYRPRYYRRRWLVRRRRRSVYRRGGRRARPYRISAFNPKVMRRVVIRGWWPILQCLKGQESLRYRPLQWDVEKSWRINTTVEDNYGYLVQYGGGWGSGEVTLEGLYQEHLLWRNSWSKGNDGMDLVRYFGCIVYLYPLKDQDYWFWWDTDFKELYAESIKEYSQPSVMMMAKRTKIVIARSRAPHRRKVRRIFIPPPSRDTTQWQFQTDFCNRPLFTWAAGLIDLQKPFDANGAFRNAWWLEQRNEAGEMKYIELWGRVPPQGDTELPLQTEFQKPSGYNPKYYVNPGEEKPIYPVIIYVDMKDQKPRKKYCVCYNKTLNRWRSAQASTLKIGDLQGLVLRQLMNQEMTYTWKEGEFTNVFLQRWRGFR…	492	USER	zzzzz11
159	my_seqs_raccoon_ga014_anct000.1		MPFWRRRRYRRRPYYRRRWRPYTRRRRRPLRSRFQRYRRRKVRRRGKRRVLTVKQWQPQHRRRCTIFGWHIGLWTSTITTTGPFQAWVPKTDESKGYFEVQDGGGGVALWHFSLWHLYQEFLLHRNRWSTSNQGFDLVKYRGTSFTFFPHPAVDYIVWWEVDFRNPSYRWYRKAHPSQAILERNHAVVLSIPHRGRKKKITLKPPSTFLTQWQFMDEFCMVKFLKLSIALFNIEDPFAHKTGHPGKVKIGYIITKENDNTSRSIDGTRVPTSTSGTSPNWGVIAQGNEAYYSWFWDSGQDNKIAVAKSLTDTSDSAKIYLAEGVPYWLLFYGAGSDYFPLGFKAWIWWWPESARSQYDLQEFIKDTKTDANYRHEKQWIFLGSATDGSFPYLSAQLIAG…	595	USER	zzzzz12
158	my_seqs_raccoon_ga014_anct001.2		MPFYRRWRRWRRRPTRFRRRPFRAGLQRRRYTRRRALRAKVRRRPFYKRKRRVKTILQWQPPHQARCRIKGWKPMFWGYMRNSCHPFQYWNDPEGRTPGHFTVMGGGAALHHFTLSMLYDEYLHRRNVWSHSNDGFDLAKYNGTKIVLHPHEDLSYIFWWESDFLQITPTQYHLLHPAISLNHRNHKVILSRKLGNRRKTRVFVQPPSTMTTTWAFMSKWCNIPLFRMGFTLANFYDPFMHATISTGITCLTSIKNLRSTYYQNPDILPQKTPVITSGNNLVYKWWWDDGVDNKIGTVQKDKLDTETEVPKDEHKIYHTDKPYWLTFYGAADDYIDIAKYYVYIWWYEDTGKPEDIWDLEEENRKRCWTLVGFAKQSAAQEANEGWRNIAASGPFIMAP…	562	USER	zzzzz13
157	my_seqs_raccoon_ga014_anct002.3		MGYYQARPGYGYRRRRRYQFHYPHRRVHFRRRRRRYYPRRRRYHHRRRTEVLREHKPRKQKHITVFGWEILGIAGTTFFWDAENKLKSAQNIKNNQEVGHLSKLGISPNNAKPNFNPDNQNTQCQFKDFCGGFGQASISLAGLASRARYGMARFSETMEDYPWIKFKGAKFQLVPCEQVDYLFRLNNRAPYKTSYEVTAESKWNHPANLLLHGGTRVVESIYRSKCCKWKTIRYRPPPEFEGWYDVGTFASFNLVQYMWTTVSLNNPMGIAPYQRGTTNLDESKGQIHNQWWKDGCVDPHSNIKNPIWYDRKEYDKQFVQDTKSWWDVIWDTNKKPKHSPFCPPVFTTNNQNVIWCRYKFWFTVGGGTIENRIPAYPLYEIDPPKTCPGTCQACIKEGD…	457	USER	zzzzz14
156	my_seqs_raccoon_ga014_anct003.3		MAISYPRRGFKRRRFNRRGRYYPRYWHPNFRRHQWWRTRRRYHAYRRRRTEVLREIKPKHQRTLIVRGWEILGSVGSIFTWTGTGGVIKQMIKCNNECSHLYNLGVTSENKNDPTRVNNTCEYKHFCGGYGGAWFTWGGLVLRAKLGMCRFSLDPKGFTWIKFLGGTIYLRRGLDVSYLYRWNTHHGGESEHNREKKWVTPGIMLNQPGHRTVLALKHTNCCKSPKIRVSRPEASSGWNDIGYFYDLLLGGYYWTVFDPFNPLGKRSINKQNKDVSIEHQRQAKYGSQPHTEFWYTNFWWRDNVCGTQSTSPTSQQPLWTNRKIVDKRFVDASENENDWNWWEMLWGTGSKSKFFEELRKPNYSPFLPPVYPASQQNTLWFQYKFRFKLGGDTLENIVP…	480	USER	zzzzz15
155	my_seqs_raccoon_ga014_anct004.3		MAYYQRRYRPRYRRRHFIPHYRRRFHRRRRWYHPRRRRYHRRARTEVLREYRPKKQKWITVYGWEILGIAGTAWFWTNDKKLEQRQNIKNNQQVQHLSALGINTNNAAPNFSNPNDTKCEFKDFCGGYGQATMSLGGLAQRAQLGMARFSETFEDYTWIKFIGAKFRLVPATEVDWLFRLNNRAPFKIQAESDAEKKWNHPANLLLHRGTAIVESIKRSKCCRWKTIKYHPPTEFEGWYDIGTFVKFPLVQYMWTTISLSNPMGIAPYSQIKNTLQENDGQIVNKWWKDGCKDSRSNMHRPTWFDRETYDGPFLKHTENKWWDTIWPTDTNKPKHSPFCPPVFTTTQQNTIWCLYKFWFKVGGTTIENRIPLYPLHEIEAPKTTCPNTCEACIKEGDLD…	456	USER	zzzzz16
154	my_seqs_raccoon_ga014_anct005.1		MVVPYYRRRRRYTPRRRYHRPFHYRRRWNRRTRPWRRLRKHPRRRQTEVLREYKPRKRKTIVVRGWEILGRIGTVFTYNGGSWVATNLIKTNAKVGYLSKMGISGANNNLEENSCEYSDFCGGWGGATFTFSGLVQRAIFGMARFSDCTDGFPWIKYLGGYVTMMQGREVSYLAKFSTHHGLADEYAKETKWVTPGALLNQPGTILVPSLKDSRCCRRKHLRLKPPPGIEGWYDKDKFVNFILVSYWWTAFDIFDPLGPQPLSSTGDPIKTNTGTNIRLQNNWFNDKLNCPAKGRPVIPYWTNRDTYDKKYVDDKASLTVKWWNILFDSTTTWFNSENYPRCAPFLPPWITTGGSDTLWFRYKFYFQVGGSDLQNHVPQYPVHEVDDPPVCTQRCPARL…	460	USER	zzzzz17
153	my_seqs_raccoon_ga014_anct006.2		MVVPRSRRGRGFYPRRRYHKPYTRRYRRWHPRRRWHRRRFWHRRRPRTQVLTEAQPRKIRNINCRGWEILGKIGTVFTQGVNGWTVTNMIKSNFKVTYLGKMGISGANNVLEANTCDYNDFCGGWGGATFTFAGLVQRSRFGMAKFSDCFEGFPWIRFKGAKIELRQGREVSYMIKFTEHHGDFGEYSKEEHWNTPGTLLNVPGSVIVLSLKDSRCCFKKRLKIRRPPGIEGWYDIDKFTNFILTTYMWTAFDPFDPLGPQPLKEDGTPLKTTEGTNIRLQNRWYNDSGQCTGGKEKNLPLPLWTNRQKYDEKYVTDQTTNTSRWWNVLFDSSNKWYKPENYPKCAPFLPPWISTGGSETLWMRYIFFFQVGGGSLQNHVPVYPIHEVDDPPVCTPGCP…	460	USER	zzzzz18
152	my_seqs_raccoon_ga014_anct007.3		MVVPRHRRARRWRTRWRRGRYHPRNTYPWRRHWYRRWHRRNQWRRRPYEVLKEVRPKGQTSLVVTGWEILGSVGSIITWTETGGIIKQLIKANNEVTYLYEMGITKENKDDKDEKTNTAEYKHFCGGYGGAWFTLGGLALRARYGMARFSKPLTGFTWIKFLGARVYLRQGWDVSYLFRWNTHHGGEKEHQAEKKWVHPGTMLNTPGHVTVLAHNHTFCCKAKKLKIKRPPAFSGWFDIDAFYSTLLGGYFWTAFDPWNPLGFRPINKSGSDVSIQHQQNCKYGNKSNCNDYSYFNFWWKDRTANQHGNQQPLWTNRKCFDKKFVDHAESGDGWNWWKMLWGQGDTTYFNGDQKPAFSPFAPPVYQASKQNTLWFQYKFFFKVGGRTLEANVPNFPIQE…	474	USER	zzzzz19
151	my_seqs_raccoon_ga014_anct008.2		MGYYTPRKSYGRRYRRRNFFPHFHRRQHFRRRRYYPRRRRFRHRRRATEVLREHKPHKQKWITVYGWEILGVCGTTWFWNSQNKLEYRQNIKNNQPVEHLSQLGILTSNAKPNFPQGEKCEFKHFCGGHGQATMTLSGLAERARLGMARFSETFEGYTWIKFLGAKFQLVPSGEVDYLFKLNNRAPYTTDAEVKAEAKWNHPANLLLHRGVRVVESIKRSKCCKWKTIKYRPPTEFEGWYDIDHFVTFQLVQYMWTTISLNNPMGIAPYNYGPNPKEDSGAIVNKWWKEGCTDKTSNLHIPQWIDRVTYDTAFLKNPENRWWNNLFPDTTKPKHSPFCPPVFTTEHSNTLWCRYKFWFKVGGATIQNYLPVYPVQEVGPPPSTCPTSCKACIKEGDLDP…	453	USER	zzzzz20
150	my_seqs_raccoon_ga014_anct009.1		MPFFRRRQWPRRWRRVARRYRRPLQSGFQRRGWTRRRRPLRAKVRRRLYYKRKRRVRTVLQWQPSHRGRCKIKGWMPMMWGYMRNSHHAFQYWNDPKERQPGHFTIMGGGAALHHFTLSLFYDEYLKRRNIWTRSNDGFDLAKYHGTKITLWPHEDLTYLFWWESDFLQITPTQYQLLHPAIAMNRRNHKIILSRKLGNRRKTRVFIQPPSTMTSTWAFMTKWCDIPLFRMGFTLCNLYDPFMHATISTGVVMGTTLKNSGTQYLKNPDIPPKKTPTVTRENNRYYKWWWDSGGDNKIATVLKTTINNVDETPNDENKIYHTEYPYWLTFFGADDDYVDPQKYHVFIWWYDDDNTYEDVWDIPTADRVKSWRG	373	USER	zzzzz21
149	my_seqs_raccoon_ga014_anct010.3		MGYFQRRPYYSRRRYHRPQFRYRRHYRRRYHPRRRRRHFRWRRWRRTEVLREHRPRKTKWITVTGWEIMGHVGSALSWEKRGDDFYLHVRRNIKNTIQVDHLSKMGITNDNKPQGNSTCDFKDFCGGYGEAQFTLAGLAQRSRACMARFSESLAGYDWIKFIGGSVTLPPSHEVNYLFRWDNHRGGNDKERQIENVWNHPANLLLFPMTVIVESIERTKCCKWKRIKFKPPPAFEGWWDKDVFSTFILGGYQWTTVDLDNPLGLAPYTNKVTTKTSQYKNEWFTKKGPCPEWIDRAKYNKGFNDSNTGQSSWLDWIWNNLSVDQTPKYSPFCPPVYPTANPQTLWFKYKFHFKVGGANLENRFEEYPIHEVNEPPQTCPQTCRSCIHPQDLDSDGLLTE…	449	USER	zzzzz22
148	my_seqs_raccoon_ga014_anct011.2		MGYFQRRPYYSRRRYHRPQFRYRRHYRRRYHPRRRRRHFHWRRWRRTEVLREHRPRKTKWITVSGWEIMGHVGSAMSWVKQGDNYNLHIRRNIKNTVRVDHLSKMGITNDNKIQGQSNCDFKDFCGGYGEAQFTLAGLVQRSRACMARFSESLGGYDWIKFVGGSVTLPPSHEVNYLFRWDNHRGGNEKERDTENVWNHPANLILFPMTVIVESIERTKCCKWKRIRFKPPPAFEGWWDKDVFATFILGGYQWTTIDLDNPLGLAPYTTRVGTETDQYKNEWFKKKGPCPEWIDRSKYNQGFNNSNTVGTSWLDWVWGSITDISNKPKYSPFCPPVYPTQNPQTLWFKYKFHFKVGGTNIENRFEEYPVHEVNQPPQTCPTSCKACIHPEDLDSDGILT…	450	USER	zzzzz23
147	my_seqs_raccoon_ga014_anct013.3		MGYYTPRQSYGRRYRRRNFIPHFQRRHHFRRRRYYPRRRRYRHRRRSTEVLREHKPRKQKWITVYGWEILGVCGTTWFWTDQGKLEYRQNIKNNQPVSHLSELGILTTNAKPNFTGGEKCEFKHFCGGHGQATITLAGLAERARLGMARFSENFEGYTWIKFLGAKFQLVPANEVDYLFKLNNRAPYKTDPEKAAETKWNHPANLLLHRGVRVVESIQRSKCCKWKTIKYKPPTEFEGWYDIDNFASFQLLQYMWTTISLTNPMGIAPYAQTGLPNEDTGQIVNKWWKEGCTDKSSNLHIPQWIDRVTYDSAFLTKNENKWWNNIFSDTGKPKHSPFCPPVFTTTHPNTLWCRYKFWFKVGGSTIQNYLPLYPIQEIGPPPSTCSTSCTACIKEGDLDP…	436	USER	zzzzz24
146	my_seqs_raccoon_ga11_anct003.3		MPYPRTPYYRRRRRHPYFFRHWYPRWRRFYRRRWYRRHRGRRPFTYHPVSQTRFHWQPANRRDCKIRGWSMALMCPPKRAWQANWVIFKLPTGKVGALFNGGGFSDRIFSLNWLWEEHQFHRNVWSRTNEGTDLSQYLGTTIYLPPIRDVDYIFWWDRDYIRQEQADFVTRHPAFLLLQKNHVVVRSQRYGRNNATKKVWIPPPSTIANQWFFQSQSGNMGMFKYGFALVDFYQCFNYDGNDLCISVKNYFKYAWWADTGAGNRAWLIQKSTTWKEGDAAPTTQQGTPIPFMTDTPYYAAFYGRSDWTWAADIKAPTEADPFQYVAVSWKKGLTSCAQMLPFVAHAEKTYYFALGLAEMGTLGASGPFVPRYFTAPISLPFFYKSHWKWGGITPVDPHV…	522	USER	zzzzz25
145	my_seqs_raccoon_ga11_anct005.1		MVYKYRRRPYRRYRRRNQLYHPRKHFWRRRRWHPYRRRRRTTEVLREHRPRKQKWITVRGWEILGICGSTWFFNTQGQLVIKQNIKNTLPVVYLNNLGINNANSIPQGNNCKFKDFCGGYGNATFTLSGLAERARLGMCKFSETFEGYTWIKFIGATFTLVPAPEVDYLFKLVNRAPFGTEEETKAETKWTHPGNLLLQQGTRIVESNKRRHCCKWPRIRYRPPPAYEGWYSIDQFCKFALVKYMWTTVSLNNPMGIPPYKDNTSSEDNGPLTNKWWQDGCKDKNTNLYAPIWIDRENYNREFNSDGGNSWKDWIITDNKKPKHSPFCPPVFTTEYQNTLWIMYKFWFKVGGTTLQNFYPIYPVQEIGPPPKKQNPCPSCIQPGDLEENGLLTDTAYER…	439	USER	zzzzz26
139	my_seqs_W01_blood_an1_2ct1221.2		MPPYNRRRYYNRNWWGYRKQRRWFRRRRPRNPFRYRKRRNRRVRRKFYFKKLRKLKKLKVNQFQPMSIRKCRIEGYLCLFQAGYGRYSNQYTLWKESIFPPKYPGGGGWSIQRLSLANLYSQHKDHMNYWTRSNQNLNMCRYLGCYVYLFRERFTDYVFTWMEEEPKHVPKYYYCSHHPLRLLTHKRKKVIPSFTTQPHKKKPYKRVFIPPPKLMKNQWFFQQQLSQYTLVTFAAVACSLGNMFGSDKAVSNNCTLWCIDTNVFRSPFFQFRAQHPQWGYQIVNNNFLYGIDSHAITPKEYQWNTAIYLGNTMENKRGAYMTPTTVTNYNEWGNPFHWSFLTGHLPLAQTPATQSPDTLKDKLSEKIPESQLKTTPLVFPIRYNPFKDKGDGNKLYVVP…	500	USER	zzzzz32
138	my_seqs_ct_W01_blood_1231.2		MAWRWWWQRRWRRRPWPRRRWRRIRRRRPRRPVRRRRRRATVRRRRWRGRRGRRTYTRRAVRRRRRPRKKLVLTQWSPQTVRNCSIRGIVPMVICGHTRAGRNYALHSEDFTTQIKSFGGSFSTTTWSLKVLWDEHQKFQNRWSYPNTQLDLARYKGVTFWFYRDQKTDYIVQWSRNPPFKLNKYSSPMYHPGMMMQAKKKLVIPSFQTRPKGKKRYRVRIRPPNMFNDKWYTQEDLCPVPLVQIVVSAASLLHPFCSPQTNNPCITFQVLKDIYSNCIGVNSSNESTYSNLQDKLYSQCTYFQTTQVLAQLSPAFQPAKKPVAVNSDSTTKTLGNAVTELKANGSFHTGNNPVFGMCSYKPTKDILHGLHPDISTCTSEWLSFPRPSAARSRRRSDRA…	481	USER	zzzzz33
137	my_seqs_ct_W01_blood_657.3		MPAFNFYRRRWYPRTRTYWTRRRWLRRRRPRKTIRRRFRRHRRVRRHFKRRFYKKKLSKITVQQWQPTTIKNCSIKGHLPLIICGQGRIPHNWTIFSESIVPVGESGGGAWSYTQLTLRALYDEFLKFNNWWTKGNDGLPLVRYRYTKLKLYRSKDTDYIVTIIRCPPFSVTRENYFDTQPSRMLMNINKHIIPRSDRKYFRKPYKTVIIKPPSLWTNKWYFQQDICNFPFFVIKASACSLDEFYLPSDQLTNNITLLTLNTDFFQNPQWKTTDTTPYIPKQALDTTSEPQQIKPVYLWGTHNGITYDERTNLPKTFENLTLLGNTMNYTPGKEMTQTNETNYMTTKANWGNPFHYKFRGTESRLFYTFIKPNTANTQFKGAELYYMFEQIRYNPLKDN…	661	USER	zzzzz34
136	my_seqs_ct_W01_blood_857.2		MPYYNRYKWRKWRPRRYWRRRPRRAFQRKFWRRRYRVRRKKLKKIKLTQWQPHTIKKCRIVGYYPLIMTTSDRLSNNDCCYLESIAPHYMHGRGGFSICNWSLYALYRENLECRNWWTTGNDNLPLCRYLGCKITLYREMELNYLFCYKNSYPMTASLHTYQSTNPQIMLLNNRVKKMPCKKYNKNRKPYKKLWIRPPSQLQNKWYFQQKMAQTPLLQTIASATSFNRMYLNSTSVSNTIGFVGLDTNGFVNHYFKTNMTRPYAPQTNQLLILIPHADPKNISNITIETCIILGNIVNYTTGQIINTVPPTTLPQYSSYPEYARKFYNAYLNHIYWGNPFYKDYFYGDEVIAMSNCTIDDLMNHFKTNSKLESKFTVKTQKTVEYRYNIFADKGTGNKL…	673	USER	zzzzz35
135	my_seqs_ct_W07_blood_000.4		MAWRWWWQRRWRRRPWPRRRWRRLRRRRPRRPVRRRRRRATVRRRRWRGRRGRRTYTRRAVRRRRRPRKRLVLTQWSPQTVRNCSIRGIVPMVICGHTKGGKNYAIHSEDFTTQIQPFGGSFSTTTWSLKVLWDEHQKFHNRWSYPNTQLDLARYRGVTFWFYRDQKTDYIVQWSRNPPFKLNKYSSAMYHPGMMMQAKKKLIVPSFQTRPKGKKRYRVRIRPPNMFADKWYTQEDLCPVPLVQIVVSAASLLHPFCPPQTNNPCITFQVLKDIYDDCIGVNSTQAEKYSTLQQTLYTNCTYFETTQVLAQLSPHFQPALKATNTTSNTKATTTTLGNYEPQLKTTGTFYTGNNPVFGMCKYNPTKEILKNANQWFWENLMHKNDLHSSYGKANIQCME…	767	USER	zzzzz36
134	my_seqs_ct_W07_blood_662.2		MAAILSKAEVGCHYNKMAATAFRFAQNGGVYLPGQRSRLRHKSRGGGCCANAEVGPATWPITWVVRHGRHFESQNGRLPSSFLKITARRRRARCARAPGAAAPPPRMRGGGAEPLPIPSCPRPTLCSPPPSPSPHKHHSHLLSTLSDNFGRGRMPGGDPVPSTRNRVHWYITITHQTEVLECISQTGPFAYHSDERKAVLTIKYNFRWKWGGNPVFQQILRDPCSGSSGSGPRRQPRSIQVDDPKYQTPEYIWHAWDFRRGLFSQKGIKRVSEQPTDVDLPTGRGKRPKRDTDGPQEQGQEEGSSSIRRVLQQWLHSSQEQSQESEEEAAQTTLSQELQKQLKQQQLMGKQLRELSLQLAQVQAGGHLHPLLQCHA	376	USER	zzzzz37
133	my_seqs_ct_ms19_W08_000.3		MAWWGYRRRWWRPKRRWRWRRARRRRQLPARRPRRAFRRYRTRTVRRRRRGRRRGYRRRYRLRRYARRRFRRKKIVLTQWNPQTVRKCIIRGMMPVLWAGMGTGGRNYAVRSDDYVVNKGFGGTFATETFSLKVLYDQFQRGFNRWSHTNEDLDLTRYRGCRWTFYRHKDTDFIVYFTNNPPMKTNQFSAPLTTPGMLMRSKFKILIPSFRTRPKGRKTVTVRIRPPKLFQDKWYTQQDLCSVPLVQLNVTAADFTHPFGSPLTETPCVEFQVLGDLYNTCLNIDLPQFTESGEITNNYSKPNKNNLEQLYKELFTKPTSGHYWQTFITNSMVRAHIDAEKATSAQTPTTSSTYNQDPFPTVPTKQQFTDWKKKFTDTRDSSFLFATYHPQAITHIIKE…	780	USER	zzzzz38
132	my_seqs_ct_ms19_W08_013.3		MPYYYNRYRRRRWRPRRFWRRRFRRPFQRKFWRRRHRVRKRKLKRIRLSQYQPHYIKRLTITGYYPLVLSTKERLSNNLNCYLDSIAPAEVHGGGGFSICNFSLYSLYQENLQLRNWWSTSNENMPLIRFLGCSVTLYRQAHLDYIFYYRNSYPMTASLTTYQSTNPQAMLLTKRTKIMACKTHNKNKKPYKKLKIKPPAQLQNKWYFQKEIAQVPLVQFITTACSLDRMYLNSTSISSTLGFVTLDTNGFMQRFLKANTTAPYQPLTGQLMFAAPNGKAITDTLLTQIILLGSVEEATEGTLIGSVPAELSCPTEWGVTSEVAKRLYTAYNQSKYWGNPFMPHWFYGDQRIIITNMNIEQLCKQFKNATTTNCKLTSGFVVKEQKYQELRYNPFADKG…	678	USER	zzzzz39
131	my_seqs_ct_ms19_W08_015.2		MPYYRRRYPYRWRRRRWFKSRRPRFTFRRRYWRRYWVRNSYKKRKLTKISLKQFQPITIRRSYIKGMYPCFLTNSHRLDHNMTQFIDSIAPYHFNGGGGFAITQFTLDGLYELFLKGMNWWTHSNCNLPLVRYNGCSIKFYKAENYDYVAIIHRCLPLKATNELYMSSQPQIMMLTKHCIHIPCRKANRNKKNYKKVFVKPPTQFTNKWMFQADICKQPLLVIQTCIASFDRMFLAADSQSTTMGFISLNTQSFVLHNWNTPPTTGYKPQEKQYLFGTENGQHNPTKEPIKNLIYLGGTGPAKTGIPINNFQGLTKLPTETTMWGNIFVPHYFSGEGAVFISSKSPLEIKNYYNDKTTELNTDTVEKVDFITPKSTANFVNCRYNPLADKGTGNKVYLV…	661	USER	zzzzz40
130	my_seqs_ct_ms19_W08_016.2		MPPYYWRRRRPPWRQRNYRRLRRPRRWRIRSLIRRRWRRRHWVRKKRLLFRRKKLTRLTLKEWQPKKIKKCSIKGILPAFICGKSRIANNYVLFSESIVPVGEPGGGAWSILQINLRVLYDQFIKFKNWWTTSNQGLPLFRYLGMKLTFYKTQYVDYIVVPQLCPPFSVVRDNYLNIHPVRMLMNRHKIIIPQRQKGKKNYIKKWFRPPDLMQNKWYFQQDFINIPFIVLHITAASLDQYNIPENQISTNITLWSLNTDFFRNNQFTGYEDEGYIPKTFGTQNYILYTEGNGHEEPQKFSQMIPLRNTTTYTDGKIANTYNAYNNKEYWGNPFTQNHSSPDVPIYYNNVTPTNLNYSNNQIFTPLHELYFQCRYNPEKDTGIGNTVFFKSNKIKQGDID…	642	USER	zzzzz41
129	my_seqs_ct_ms19_W08_022.3		MPPFNYYRRFYRYRPRYYRRTRFRTWRSRQAIRRRHRRRRWVRKRRFLKLKKRKLKKIRLSQWQPDSIRKCHIKGQLCLLTCGINRINNNFTLTSESYVPIGEPGGGGWSIMQITLRALFDEYQHYRNWWTSSNCGLPLVKYMGCRIKFYNSNDCDYIVTVQRTGPFEVDRDTYLNTQPSRHMMNRKSFIIPKLNPNKKRKPYIKKYYRPPALLQNKWYFSQDILNTPLILFTVSSCSLDQMYGPNDQISTNITFTSLNTTLFQNPHWELDDNIPYYPKVTGTIKTGLYTFGNGENPDTQNNWKKLIPLYQTQLWKKEIEPHGNDYTQSWQQFMQQNKWANPFSYTAHEETNDIQIFYGKAPDETTYNKKPNIQQATGIYQECRYNPFKDKGTGNIFYL…	662	USER	zzzzz42
128	my_seqs_ct_ms19_W08_024.2		MAWRWWWQRRWRRRPWPRRRWRRLRRRRPRRPVRRRRRRATVRRRRWRGRRGRRTYTRRAVRRRRRPRKRLVLTQWSPQTVRNCSIRGIVPMVICGHTRAGRNFAIHSEDFTSQIKPHGGSFSTTTWSLKVLWDEHQKFMNRWSYPNTQLDLARYRGVTFWFYRDQKTDYIVQWSRNPPFKLNKYSSCMYHPGMMMQAKKKLIIPSFQTRPKGRKRYKVTIRPPNMFADKWYTQEDLCPVPLVQIVVSAASLLHPFCSPQTNNPCITFQVLKDIYDKCIGVNSSQQTTYSTLQETLYTTCTYYETSQVLAQLSPSFQPALKATNTTQQTNATSTTLGNYEPQLKYQTGSFHTGNNPVFGMCKYKPTKEIMQKANTWFWENLMHTNDLHSNYGKANLQCM…	781	USER	zzzzz43
127	my_seqs_ct_ms19_W08_027.3		MPPYQRRRYHYRNWWGSRRRRAWYRRRRPRNSFFRRKRRRRRVRKRFFKRTRKLKKLKINQWQPSTIKKCRIEGYLCLFQAGFGRYTNNYALWKESIFPHNYPGGGGWSIQQLSLGNLYTQHKEQMNYWTKSNDRLNMCRYFGCIVTCFRQPYTDYVFSYFENLPKNVSKYFYCSQHPLRQLNYKRKRVISSYNTQPHRKKPYKRIFIPPPKPMKNQWFFQQQLADYPLVTFIATACSLTNMFGSNSWKNNNVELWCIDTTFFKTPHFQYRTATTPQWGYRESDQQYLWGLQNALEDFNKNKWSQAIYLGNTMHEQTGQPIDSIKQTEIQSKYPFANWGNPFHWTYMTQTSQVFLSSKGPGDLQDTEKQTQIGGSGTLKENPYAFTVRYNPFKDKGYGN…	643	USER	zzzzz44
126	my_seqs_ct_ms19_W08_029.3		MPYLWRRPWYRRRYHFRRPWYRSRRPRTTFRRRRRRWVRKRFYYTIPKTIKLRQWNPRTTRLCKIKGHIPLIICGRDRQIFNWMQYYDSIGPVEQSGGGGWSSIVFSLGALYQQFKRLMNWWTKDNDGLPLVQYKGCKFKFYKSWDCDYIVTAQTCPPMTDTEFKHLDSHPYRQLMNKKPIIVPNLIRKPSKKTYKVRRFPPPSLLQNKWYFQQDFCSQNLIMLTTSAASFDQFWLPNDQVSQVITFHSLNTKIFANANFHDPQHTHGYRPKSTIYLWGTGNGTTQKPQKYGDLHYLGNTNRYQLGKTWTGNFPPSLPDQGNPFYHDHSSQDTKIYYSTTPPSNATDKTNITEADPIYITCRYNPLKDTGEGNQVFFKSTSISKNPIYEPENNPDIHIS…	632	USER	zzzzz45
125	my_seqs_ct_ms19_W08_030.3		MAWWGWRRRWWRPKRRWRWRRARRRRRVPARRPRRAFRRYRTRTVRRRRRGRRRGYRRRYRLRRYARRRFRRKKIVLTQWNPQTTRKCIIRGMMPVLWAGMGTGGRNYAVRSDDYVVNKGFGGSFATETFSLKVLYDQFLRGFNRWSHTNEDLDLARYRGCRWTFYRHKDTDFIVYFTNNPPMKTNQFSAPLTTPGMLMRSKYKVLIPSFQTRPKGRKTVTVRIRPPKLFQDKWYTQQDLCSVPLVQLNVTAADFTHPFGSPLTETPCVEFQVLGDLYNTCLNIDLPQFTESGDISGSYSKPNQANLKELYKELFTKPTSGHYWQTFITNSMVRAHIDADKAKKAQTEATSSSYNQDPFPTIPTKAEFNEWKKKFTDTRDSSFLFATYHPQAIKDIIKK…	496	USER	zzzzz46
124	my_seqs_ct_ms19_W08_034.3		MAWRWWWQRRRRWWPRRRRRWRRLRRRRPRRPVRRRRRRATVRRRRWRGRRGRRTYTRRAVRRRRRPKKRLVLTQWSPQTVRNCTIRGIVPMVICGHTRAGRNFAIHSEDFTSQIKPHGGSFSTTTWSLKVCWDEHQKFMNRWSYPNTQLDLARYRGVTFFFYRDQKTDYIVQWSRNPPFKLNKYSSAMYHPGMMMQAKKKLVVPSYQTRPKGRKRYRVTIRPPNMFADKWYTQEDLCPVPLVQIVVSAASLLHPFCSPQTNNPCITFQVLKDMYYNCIGVNSLDTNSEKYKKLQETLYNTCTYYETVQVLAQLSPNFRPALKPKNNTDNTKKTLGDAVPELKTGGDFHSGQNPVFGMCTYNPTKDIMNKANQWFWDNLTNVSNNLHSIYGKANIAALE…	456	USER	zzzzz47
123	my_seqs_ct_ms19_W08_035.2		MAWGFWGRRRRWRRWRARRRRWRPRRRRRRRPARRFRARRRVRRRGGRWRRRYRKWRRGRRRRTHRKKIVIKQWQPNFIRRCYIIGYLPLIFCGENTTAQNYATHSDDMIGKGPYGGGMTTTKFTLRILYDEFTRFMNFWTVSNEDLDLCRYVGCKLIFFKHPTVDFIVQINTQPPFLDTHLTAASIHPGIMMLSKRHILIPSLKTRPSRKHRVVVRVGAPRLFQDKWYPQSDLCDTVLLSIFATACDLQYPFGSPLTENPCVNFQILGPQYKKHLSISSTKDADNSTHYNSNLFNQTALYNTFQTIAQLKETGQLSNITPTWTEVQNTEVLDKLGSNATKSKDTWYKGNTYKDSISQLAQKTRERFKGATVAALPNYPTIMSTDLYEYHSGIYSSIFL…	473	USER	zzzzz48
122	my_seqs_ct_ms19_W08_037.1		MTTTKFTLRILYDEFTRFMNFWTVSNEDLDLCRYVGCKLIFFKHPTVDFIVRINTQPPFLDTNLTAAQIHPGIMMLSKKHILIPSLKTRPSRKHRVVVRVGPPRLFQDKWYPQSDLCDTVLLSVFATACDLQYPFGSPLTDNPCVNFQILGAAYKNNLSISSINDTPNETHYKTCLFNQIQYYNTFQTIAQLKETGLITNAGSQSTWNNVQNTKALSETGSNAAESKDTWYKGNTYNSNIEKLAEKTRQRFTAATKAALPNYSTTMSTDLYEYHSGIYSSIFLAAGRSYFETPGAYTDVIYNPFTDKGTGNMVWIDYLTKSDSIYTKHKSKCEIFDLPLWAAFTGYSEFCSKVTGDTAIHLTARVVVRCPYTEPMLIDHSDPNRGFVPYSFNFGEGKMP…	541	USER	zzzzz49
121	my_seqs_ct_ms19_W08_037.2		MAYGWWGRRRRWRRWRTRRRPWRTRRRRRRRPARRFRPRRRVRRRRGRWRRRYRKWRRRRGRRTHRKKIIIKQWQPNFIRRCYIIGYLPLIFCGENTTAQNFATHSDDMIAKGPWGGG	118	USER	zzzzz50
120	my_seqs_ct_ms19_W08_040.2		MAWRWWKRRRRWWLRKRWTRGRLRRRWPRPAGRRPRRRRVRRRRRWRRGRRKARTYRRRRRFRRRRRKAKLIIKLWQPAVIKRCRIKGYIPLIISGNGTFATNFTSHINDRIMKGPFGGGHSTMRFSLYILFEEHLRHMNFWTRSNDNLELTRYLGASVKIYRHPDQDFIVIYNRRTPLGGNIYTAPSLHPGNAILAKHKILVPSLQTRPKGKKAIRLRIAPPTLFTDKWYFQKDIADLTLFNIMAVEADLRFPFCSPQTDNTCVSFQVLSSVYNDYLSINAFNNDTSDANLKAFLTKAFPQTGAKATSLNALNTFRTEGCISHPQLKKPNPQSNKPQDLEYFAPLDALWGDPIYFNELNQEKKLDDILNNILLKNMTAYHKKLNSFPLSYQGNKAFCH…	453	USER	zzzzz51
119	my_seqs_ct_ms19_W08_041.1		MIICGQGRWSENYSSHLEDRVVKQAFGGGHATTRWSLKVLYEENLRHLNFWTWTNRDLELARYLRVTWTFYRHQEVDFIVYFNRKSPMGGNIYTAPMMHPGALMLSKHKILVKSFKTKPKGKATVKVTIKPPTLLVDKWYFQKDICDMTLLNLNAVAADLRFPFCSPQTDNPCISFLVLSTVYNNFLSIAPEDLSPATSNGEQYYKKFLNEAFKQPRDFNAVNTFRTQSNFSHPQLTLPNAQSNTSADQYFNTYDGYWGDPIYARDSPTVQPAQTLSQAIEILTKNMLNWHKKVKTEGVSKLHHSVFAHNVGIFSSSFLSAGRLAVEIPGLYTDIIYNPYTDKGKGNMIWVDYCQKKDNIYKDGQSKCLLTNIPLWMACNGYIDWVKKETDNWVINTQA…	498	USER	zzzzz52
118	my_seqs_ct_ms19_W18_004.5		MPLIICGKGSTQFNYITHADDITPRGASYGGNFTNMTFSLEAIYEQFLYHRNRWSASNHDLELCRYKGTTLKLYRHPEVDYIVTYSRTGPFEISHMTYLSTHPLLMLLNKHHIVVPSLKTKPRGRKAIKVRIRPPKLMNNKWYFTRDFCNIGLFQLWATGLELRNPWLRTSTLSPCIGFNVLKNSIYTNLSNLPQYKQDRLNIINNTLHPHDITGTNNKKWQYTYTKLMAPIYYSANRASTYDWENYSKEGNYYNTYTKFAQKREEKLQKIKKEWQMLYPQQPTAIPDSYDLLQEYGLYSPYYLNPTRINLDWMTPYTHVRYNPLVDKGFGNRIYIQWCSESDVSYSRTRSKCLLQDMPLFFMAYGYIDWAIKNTGVSSLVRDARICIRCPYTEPQLVG…	641	USER	zzzzz53
117	my_seqs_ct_ms19_W18_009.3		MPWRYNYRNYRYRPRRRLWRRRRRFGRPFQRRLWRRKRYRVRKRKLKRIKITQWQPKYIKKLKIIGIMPLFLTTSERTTNNFTCYIDSTAPHLFPSGGGFSINNFTLRALYQNHNVLQNWWTVSNDNMPLIRFTGVTIYLYRSYSSDYLFLYNSSYPMQATLLTYTSTHPMAMLLHKNTKKIVCKQGNKNKKPYKKIHIRPPSQMYNKWYFQHDLADVPLLQTFCTATSLDRMFLNSKAISSTVGFTSLDITGFTNHDYSKLSTTGYTPQPNSLLFGTRRRDLKLDQIKFGDLIFLGNPEDLTDGTTINDAKPDTTQTSKTDFQRKIIAVRQKWQYWGNPFDPIFVTTGRLITTNQTWDQLINHYTQNNVLDTTKFTYKTHYLLDIRYNPFADKGIGNK…	671	USER	zzzzz54
116	my_seqs_ct_ms19_W18_014.3		MPPYYRRRYYRANFWNWKRRRNAFRRRRFRKPIRGKYRRRRVRKQRFSKTFKKKLKQLRVTQWQPSYIRNCRISGILELFEAGQGRFPNNFASYKETFTQHNTPGGGGWSLQELTLSNLFTQNQFFMNYWSVTNSGLNLVRYRGAKIKLYRQRKIDYIFQYYTEEAIHAGKYWYPAFHPIKMILTKNKITVPSLQTQPNNKKLYKKIYLKPPKLLKNNWYFQQHICTYPLIRFVATAVDLNYMFISPKSNNTNITIHMLNTGFFLKHNFQYASPDVGYTPKAQTYLYGLENGEYDLKNEKIRNLIYLGGQKYQKGDPIHNLQWNTYKDKSLWGNIFYTTYFDFERTVIIHTKSPTELYTTFLDKTLNETGSFTSKTTPFYLDVRYNPYKDKGTGNIAYW…	661	USER	zzzzz55
115	my_seqs_ct_ms19_W18_017.2		MTQTGTSGPATVKLPPETSVESHLRYRFRFKIGGEPPPMATLTDPDKQPKYNIPNNLLQTPSLQSPTTPFEYLLWRFDERRGQLTKKATERITKYKETEKPLFPITEPAFACPTTPTIQKTQTPETSDSENEETTIEEQLLKQRKQQKLLRRGIQQLLNRLAILE	165	USER	zzzzz56
114	my_seqs_ct_ms19_W18_017.4		MPYWRNYWWRRRRPRRRWFRRRYTRRPFQRRLWRRKRYRVRKRKLKKITVKEWQPHYIKKLSIVGLHPIIMTTSERLANNLTCYIESTAPALYPGGGGFSINNFTLEGLYKQHLVLKNWWTVGNDNMPLIRYTGCDIQLYRSTNLDYLFQYRNAYPMEASLLTYTSTHPQAMLLHKHTIKMACKQHNRNKKPYKKIHIPPPSQMLNKWYFQKDIAEIPLLQTIATATSFDRMFQNSKSVNTTVGFTSLDILGFRNHDYSKLSTTGYMALPNQLLFGITTGEYNLKTIKLSSLIFLGNPEDDEEGTRIGQITPAEYTHYTDLTTILAKQLRAVRLNNKHWGNPFTVTFHRVGRLITTNKTWDELIHQYNQPSQKDLLVETWFTFKQHTFIDCRYNPYADQ…	444	USER	zzzzz57
113	my_seqs_ct_ms19_W18_019.3		MPPFQRRRYNYRNWWYTRKRRSWYRRRRPRYSIRGRKRKHWVRRKFYRKNFKKKLKKIKINQWQPSTIKKCKITGYLPLFQAGRGRASKNYALAKESFVPRHTPGGGGWSIQQLTLSNLYTQNSELFNYWTKSNNRLNLCRYFGCVMYLFRNDNTDYVFSYFPECPKTVTKYFYASWHPFRMLLYGRKKIIPSFATQPHKRKPYKRIFIPPPKAMKNQWFFQQHFSQSPLVQFAVSACTLNTMFGSPKYMNNNCSIYCLDTTFFKNPTFQYPKTPPQQGEGYKPNNTTYLWGLPHAHEPVTHNKLSDASYLGNSMMNDPGDQVNNNKSTSTYTWANWGNPFYWGYMTGSMPIVITQATSKETLNSYLEKAKDTSIEDSMIKKNPYVFTIRYNPFKDKGT…	698	USER	zzzzz58
112	my_seqs_ct_ms19_W18_022.2		MAAILSKAEAAVAVTKWRRQPSALHKMNTTQLSEQNAEHSINPSNKKENTYESTTKDIHNNTLYGGAAYYKKNGTNTSGLPPQKMKDANKAYTKAAKTILTNWNFTSMNTDSCPDLANLNYFDYYTGMFSSIFLASGRSNWEVKGSYTDITYNPLVDKGEGNMIWIDWITKGDTIYSENKSKCLLRDLPMWALCYGYADYVLKCTGMSSIKNEARIVMRCPYTYPQLIKHTNDNFGFVVYSDNFGRGRMPGGDPVPSTRNRVHWYITITHQTEVLECISQTGPFAYHSDERKAVLTIKYNFRWKWGGNPVFQQILRDPCSGSSGSGPRRVPRSIQVDDPKYQTPEYIWHAWDFRRGLFSQKGIKRVSEQPTDVDLPTGRGKRPKRDTDGPQEQGQEEGS…	471	USER	zzzzz59
111	my_seqs_ct_ms19_W18_027.2		MPSSPLKHKTIFNSTQCKCHIVDIPLWAAFHGYIDFVQSELGIQQEILNIAIIVVICPYTQPKLLHDPPNQNQGFVFYDTQFGDGKMPEGSGLVPIYYQNRWYPRIKFQSQVVHDFILTGPFSYKDDLKSTVLTVEYKFKFLWGGNMIPEQVIRNPCKTEGHDLPHTSRLHRDLQVVDPHTVGPQWALHTWDWRRGLFGTEAIKRVSEQQVHDELYYPPSKKPRFFPPISGLQEQERDYSSQEEKDQSSTEEETDPKKKEQIQQRRLHLQFQEQQRLGNQLRLIFRELQKTQAGLHINPMLSNRL	305	USER	zzzzz60
110	my_seqs_ct_ms19_W18_028.3		MNFHPYMLLQRKHKIVLPSYTTNPRGKPKKTRKIKPPKQMLSKWFFAEQLSKYDLIMVAAAAASLKYPRIGCCNENRTMTLFCLNTKLYQDTNWAQTLADGSFYKPFSTMNESIVFWSGSLQRPTKYNPVTYIKEQPQENHGWYYASINKDSGYFTSRVLKAFKTTLGDTTTVVKPLPMVLGRYNPSADDGKGNVIYLQNIIGGHWGQPTKDDWKIENVPLWLGFWGFWDYLQQKYTKSIFTTHMFVIKSKYIETTQTELEQEYWAFLDPEWIDGKNQYDSPITYTEQKLWYPTCESQIKTINTICSTGPYVPKLDNQLKSTWELPIHYSFHFKWGGPQVQDQPVDDPTTKGKYPVPDTIKEAVQIIDPTKNIAATMFHDWDYRHGCITSTAIKRMQSN…	497	USER	zzzzz61
109	my_seqs_ct_ms19_W18_030.3		MPYWNYYRYRKYRPRQRRFWRRRPRRAFQRRLWRRKRRRVRPRKLKKLRLTEWQPQYIRKIKVHGFYPLFMATDERLSNNNCCYLESVAPEFVPGGGGFSICNFSLETLYNEHLILHNWWTNSNENMPLIRYTGATIKLYRQETVDYLFCYNRSYPMLATFLTYTSSHPQAMLLNKHTRKITCKQRSRNKKPYVKLFIKPPTQMQNKWYFQKDLAFLPLIAEGGFPCPVASNKEAQTPESSDTETQEAPLETQILQQRREQKLLRKRIQQLLNRLAILE	279	USER	zzzzz62
108	my_seqs_ct_ms19_W27_000.4		MAWRWWWQRRWRRRPWPRRRWRRLRRRRPRRPVRRRRRRATVRRRRWRGRRGRRTYTRRAVRRRRRPRKRLVLTQWSPQTVRNCSIRGIVPMVICGHTKGGRNYAIHSEDFTTQIQPFGGSFSTTTWSLKVLWDEHQKFQNRWSYPNTQLDLARYRGVTFWFYRDQKTDYIVQWSRNPPFKLNKYSSSMYHPGMMMQAKKKLVVPSFQTRPKGKKRYRVTIRPPNMFADKWYTQEDLCPVPLVQIVVSAASLLHPFCPPQTNNPCITFQVLKDMYDNCIGVNSTGTTLYSQLQENLYTNCTYFETTQVLAQLSPHFQPALKATNTVHNTKATTTTLGNYEPKLKTTGDFYTGNNPVFGMCKYKPTKDILERANDWFWTNLMHENDLHSIYGKATLKCME…	767	USER	zzzzz63
107	my_seqs_ct_ms19_W27_001.5		MPLIICGTGNTQFNFISHEDDVPPKGASYGGNLTNLTFTLEGLYDEHLLHRNRWSRSNFDLDLSRYLYTVIKLYRHESVDYIVTYNRTGPFEISPLSYMNTHPMLMLLNKHHVVVPSLKTKPKGRRSIKIKIKPPKLMLNKWYFARDMCRIGLFQLYATGANLTNPWLRSGTNSPVVGFYVLKNSVYQDAFDNLADATHTENRKKVFESKLYPPTNKPTNIWQLTYTPLMKNIYFKAKQEQGNASMTNQYNFKTYKDNYDKVYSKWIHIAKDGYDLVSTEYKEIYTSTATYPPQWNNRNYLSHDYGIYSPYFLTPQRYSPQWHTAWTYVRYNPLTDKGIGNRIFVQWCSEKNSSYDTTKSKCMLQDMPLFMLTYGYLDYVLKCTGSKSAWTDMRVCIRS…	652	USER	zzzzz64
106	my_seqs_ct_ms19_W27_003.2		MPYYWRPWRRYRRRLWRRRTRAPFRKRLWRRRRRRRRLRVRKKLKKITVKQWQPDTIRRLKITGEFPLFEGTRERTTNNLTQYLESIAPYRVPGGGLWSINRFTLESLYGLHLKARNWWTQSNCSLPLIRLTGIKLKLHRSLNTDYVFVWANCGDLTATEKMYQSAQPSVLLLNRRKIVVTCDNGLRNKKPYKTVYIKPPAMWENKWYFQKDIANIPFLMTIAASASLDRYYLSSKSESNTIGFTSLNTEFFKNHNFKTPLATTGYRPNDQWYLYTWQGVATDPLNINYSQLIYLGNTKDWQPGTPIGTDQQTAKKYWDKLSNWGNPFYGTNFDTDRLLITNQDFNTIKTKPNFPTCKIEGFQTMTQPITWDCRYNPEADKSQNAVFITPITGATATPW…	652	USER	zzzzz65
105	my_seqs_ct_ms19_W27_004.2		MPPYYWRQRRPTWRQRNYRRFRRPRRWRIRSLIRRRWRRRRRVRNKRLFFRRKKLTRLTLKEWQPKKIKKCSIKGILPAFICGKSRIANNYILFSESIVPVGEPGGGAWSILQINLRVLYDQFIKFKNWWTTSNQGLPLTRYLGMKLTFYKTQFVDYIVVPQLCPPFSVTRDNYLNIHPVRMLMNRHKIIIPQRQKGKKNYIKKWFRPPDLMQNKWYFQQDIVNIPLIVLHISAASLDQYSIPENQISTNITLWSLNTDFFRNNQFTGYEDTGYIPKTFGTQNYYLYTEGNGITNPNKFSQMIPLKNTTTYTDGKKATSFENWKEKTFWGNPFTQNHSSPDVPIYYNNVTPTVDNYNTNLTFTPLHELYFQCRYNPEKDTGIGNKVFFKSNKLKQGEID…	642	USER	zzzzz66
104	my_seqs_ct_ms19_W27_005.3		MAWSWWWARRRRRPWTRRRWRRLRTRRPRRPVRRRRRRKRRVRRRRWGRRRGRRTFYRRRFRKRRRRRKKLVLTQWNPQTIRACSIRGTVCLVMCGHTKASRNYALHSEDYVPQLHAMGGSFSTTTWSLKALYDEHQKFHNRWSYPNTQLDLARYRGCRWWFYRDPKVDYIVTYYTVPPFKINKYTSPMLHPGMMMQYKKKILVPSYQTKPKGKSKISIFIKPPVLFEDKWYTQQDLCPVNLMSLAVSAASFIHPFCPPESDNMCITFQVLKEFYYKQMGVTTMSGTQLTEEDEAIFTKLYTTASYWQSLHTQSQISTTQKPAKSGSDKFPNTDNWLTGEPGQGKFKTGNNSIYGLPNYAPKKNNMDEIRKWYFTQETTDNAVHGSYGKPVYNAVDYHL…	744	USER	zzzzz67
103	my_seqs_ct_ms19_W27_006.3		MSWWGWRRRWWWKPRRRWRRRRARRQRRLRPRRYRRPARRYRGRRVRRRRAGGWRGRRRYSRRYSRRLTVRRKKKKLTLKIWQPQNIRKCRIRGLLPMLICGHGRSAYNYAIHSDDKTTQQESFGGGLSTVSFSLKVLFDQNQRGLNRWSTSNDQLDLARYLGCTFWFYRHKKTDFIVQYDISSPFKLDKNSSPSYHPFMLMKAKNKVLIPSFDTKPKGREKIKLRIQPPKMFIDKWYTQEDLCPVILVSFAVSAASFTHPFCSPLTNNPCITFQVLKEFYYSAMGYGTPETTMNTIWNTLYTTATFYQSHLTPQFIRMPTKNPDNTDNSDASSFNTWVDSNFKTGKLVKYNYPQYSPNREKLKQLREYYFRWETKTDGVAVRPTWTTPTINWYEYHIG…	739	USER	zzzzz68
102	my_seqs_ct_ms19_W27_007.2		MPPFYFYRRRWNPNRTWTRRRRWIRRRRLRPPLRRLFRRRRWVRRRFSKFKRRKKLTKLRLSQWQPKTIHKCTIEGILCTICCGRQRQNHNFTLTAESYVPKSEPGGGAWSIMQLTLRVLYEDYVACRNWWTKSNMGLPLQRYMGGYIKLYRSNQTDYIALISTCPPFEVTRDIYFSTQPSRMLMNRRKIIVPKLDRKYKRKPYIKVHIKPPSLWQNKWYFQQDMYNQPFVMITTSCCDLDQVFQKQDEISSNITFYSLNLEFFQNPQWADLPQKGYRPKFSGTTDTYLFMTENGTQSATITGYQNLTPLLNTKTLTKGQKLPTNSTEALENNIIKTKYWGNPFDPDIVHSGRRYVFGPYPTTQNYNTAVLTDIHTLYEEIRYNPFRDKGTGNKVYLKS…	661	USER	zzzzz69
101	my_seqs_ct_ms19_W27_008.6		MAWSWWLKRWRRRKKPAWKKWRTRRWRRFRRRRSKRTYGRRRRRRTVRRRRGRRLRRRGWTRRRYIRRRRRKKKLVLTQWNPQDVRRCTIRGIIPLIMCGANTASFNYGMHSDDSTPQPEKFGGGMSTVTFSLFVLYDQYTRHLNRWSYPNDQLDLARYRGCKFKFYRDTSTDFIVTYDINPPMKNTELSSPNTHPGMLMQQKRKILVPSWDTYPRGRKYVLVKIPPPKLFEDHWYTQPDLCKVPLVTLRSTAADLKHPFCSPQTNNPCTTFQVLRSQYNSMIGFPFNYNPSDSNQKSKLDTFEKWLYSTSTHYQTFATEANLRPRQYNADGTQNRQYSELQSKWTTTIYAKKTDSNFGYTSYNFSGNEGYEYVTKVRQWYWTQLTSWTQTVPHINSTF…	754	USER	zzzzz70
100	my_seqs_ct_ms19_W27_009.3		MAYWWWRRRRRAPWRSRRRWRTRRTRRRRAALRRRGRRRRVRKRRGRWRRTYRKWRRGKKRRRHRRRLILTQWQPAFIRRCYIVGYLPLIICGENTSARNFATHSDDLLSNGPYGGGMTTTKFTLRILYDEHLRHLNYWTVSNEDLDLCRYLGGTFYAYRHPTVDFIIQIHTSPPFLDTPLTGPSIHPGMLMLTKHKILIPSLKTRPSKKHKVKIRFRPPKLFQDKWYPQSELCDTTLITVFATACDLQFPFGSPLTNNPCVNFQVLSSVYKKHLSILPEKLQGYKNHYDTNLYNKIQLYQTFQTIAQIKPSAQEPEFTPTWQSCQNTIKLDSSGSNQNKCNDTWYYGKTYTTNIIQAAKQIRSKYLNATRAALPVLQTHGHELLEYHTGVYSSIFLSA…	731	USER	zzzzz71
99	my_seqs_ct_ms19_W27_010.3		MPPFQRNYYRRNWWNNRKRRTWYRRRRFGKTLRYRKRRRRRVRRRFPFKRLRKLKKIKIAQYQPSSIKKCRIEGYLCLFQGGYGRYSNNYTLWKESIFPPHYPGGGGWSIQRLSLANLYTQHKENMNYWTKSNDRLNLCRYYGCRVTLFREKFTDYVFTYMEEEPKHVPKYYYSSHHPLRLLTHKRKTVVPSFNTQPHKRKPYKRVWIPPPKIMKNQWFFQQQLSQYTLVTFAAVSCSLLNMFGSEKAVSNNCTLWCLDTKQFTSPYFQFQQQKPKWGYQIVRDQFLYGVDSQHLQPQQAKWSQAIYLGNTMENKRGEYMTTTNIENFETWGNPFFWAYLQEHLHLAQTNATQNPKQQTEQLSSQILNNIKENPYFFQVRYNPFKDKGIGNKLYVVPNY…	661	USER	zzzzz72
98	my_seqs_ct_ms19_W27_011.5		MPLIICGKGSTQFNYITHADDITPRGASYGGNFTNMTFSLEAIYEQFLYHRNRWSASNHDLELCRYKGTTLKLYRHPDVDYIVTYSRTGPFEISHMTYLSTHPLLMLLNKHHIVVPSLKTKPRGRKAIKVRIRPPKLMNNKWYFTRDFCNIGLFQLWATGLELRNPWLRMSTLSPCIGFNVLKNSVYTNLSNLPQYKNARLNIINSTLHPDEITGANNKKWQYTYTKLMAPIYYAANRASTYDWENYSKETNYNNTYMKFNQKREEKLAKIKKEWQMLYPQQPTALPDSYDLLQEYGLYSPYYLNPTRINLDWMTPYTHVRYNPLVDKGFGNRIYIQWCSEPDVSYNRTKSKCLLQDMPLFFMAYGYIDWAIKNTGVSSLVRDARICIRCPYTEPQLVG…	641	USER	zzzzz73
97	my_seqs_ct_ms19_W27_013.3		MPYFYNWYGYRRRRPRQRRFWRRRLRRPFQRRFWRRKHRRVRKKLKKIKISEWQPQYIKRLTVKGYYPLFMSTNERLSNNLTCYLESIAPEFWPGGGGFSIYNFSLNTLYEENSVLHNWWTTSNDNMPLIRFTGVKIILYRQDSVDYLFSYNRNYPMQASMLTYTSTHRTYRVRRRKRFKKKLRKITIKQWQPQNIKKCKIVGHTTLLCCSSGREMYNFISHIYDYVPKDHNFGGGFCIMKFSLSMLFEQWEYWQNFWTASNKNYDLCRYTGCQFKFWRDPIFDYIVAYDINPPLTVAPLVYQSSHPERMLLRKHRVIVRSKLHAPNSKAYKKIKIRPPRTLCTKWFFQKDFSEQPLLLLTITTADLDRQWMAHTEVNPQVGITTINTTMFGTPKFGFT…	792	USER	zzzzz74
96	my_seqs_ct_ms19_W27_015.4		MDDIPPRNASYGGNFTNITFNLACFYEEFMHHRNRWSASNHDLELVRYLRTSLKLYRHESVDYVVSYTTTGPFETNEMSYMLTHPLAMLLSKKHVVVPSLKTKPHGRKYKKITIKPPKLMLNKWYFAKDFCHIGLFQLWATGLELRNPWLRSGTNSPVIGFYVLKNQVYQNRYSNLATETQNRKDAYDELTKSNGNKWYNWQYTYTKVMKPIYYAAANESANISFKNKPYNWKNYKENFNAVQTKWTNTVKDAYTLVAEEYRQIYTTTLTYPPPWTPTTSDINTGRQYLEHDCGIYSPYFLTPQIYSPEWHTAWSYIRYNPLTDKGIGNRVCVQYCSEASSDYNPVKSKCMLQDMPLWMMLYGYADYVIKSTGIQSAWTDMRVAIRCPYTDPKLIGSTE…	641	USER	zzzzz75
95	my_seqs_ct_ms19_W27_016.3		MPPYYRKRFYRRNYWNWRRRRNAFRRKRFRSFIRRKPRRRRVRRKFYSKNFKRKIKRLNIVEWQPSYINRCHIRGWLELFEAGHGRFGNNFANYKETYTPHNTPGGGGWSLQELTLSNLFTQNQQLMNYWTKTNNGLNLVRFLGGKITLYRQPETDYIFMYFTEEAIHAGKYWYPSFHPIKMLVAKNKVVVPSLKTQPQKRKTYKKIKIKPPKLLKSNWYFQQHICTFPLLRFAVTAVDLNYMFLSPKSNNSNITLHMLNTGLFRRHNFQYADLEKGYYPKEGTYLYGTLNGSPTLQTVPRSATIYLGGQLNQEGTPAQKWTTYKNKALWGNIFYYKFFDFIQRSFIAVDPPSTFYNDTNYSKPVGTAGITEKIEPYYIDVRYNPYKDTGTGNVAYWLQ…	659	USER	zzzzz76
94	my_seqs_ct_ms19_W27_019.2		MPFYRWRRRPWRRRYYRRRFRRRYTRRPVRGRFYRRHWVRQKRKLPKIRISEWQPTKIIKSKVKGIYPCFLSNHKRLSNNFVQWIDSTTAHLMPGGGGFGIIQFTLNGLYELFCKAQNWWTKSNCNLPLVRFCGTTLKFWAAENYDYVVHIQRCYPMCCTDLMYMSCQPFIMMMTKNTIFVPCTKNKPRAKRYKKIFVKPPAQMTTQWYFQSQLAKTGLIIIRTAACSLDRIYTSSTASSTTIGLVSLHTTTFQFHNWKKPPTQGYKPQEKFSFYGTLNGQTDPENEPQKNLIYLGGTGPLTQGEPMTNNNTLNTYFDTNKKWGNIFDPRYLYGSSQVYITNKTPNEIKTTLLQNNNLNKTVKDQSPQLFTPRTLPLLVECRYNPLADKGKGNKIYLIS…	662	USER	zzzzz77
93	my_seqs_ct_ms19_W27_021.3		MPYYYNYRWRRRRPRRYWRRRIRRTFRPRFWRRRRHWVRKRKLKRIRLSQYQPHYIKRLNITGTYPLILSTRERLSNNLNCYLDSIAPHEVPGGGGFSICNFSLYSLYQEHIQLHNWWSTSNENMPLIRFLGCTVTLYRQAHLDYLFYYRNSYPMTASLTTYQSTNPQAMLLTKRVRIMACKQHNKNKKPYKKIHIKPPAQLQNKWYFQKEIAQVPLVQFITTACSLDRMYLNSSSISTTVGFTTLDSNGFMQRFMKENTTTPYMPLTGQLMFAGENGTTIQEMLLGNCILLGTVEEATEGTMIKSVPEKTIPSEWGENFQSLSKKLYGAYMNSKYWGNPFMPHWFHGDQRIIITNKTIRDLCVYFKDKTFNTGKLTDGFTEKSQKYQELRYNPFADRG…	678	USER	zzzzz78
92	my_seqs_ct_ms19_W27_025.2		MPYYSRYYRRRWRPRRFWRRRFRRPFQRRFWRRRYSVRRKKLKKLRLAQWQPHTIKKCKIIGYYPLALSTRDRLSENLNCYLDSVAPHLIHSGGGFSICNWSLYALYRENIEMRNWWTTGNDNLPLCRYLGCKITLYRQAEIDYMFAYRNSFPMTASIHTYQSTNPQVMLLNNRTRKMPCKKHNRNKKPYKKIFIRPPSQLQNKWYMQHDISQTPLLQTFTTLCSFDRMYQNASSISNTIGFTGLDTNGFKNHYFKTNGTRPYAPIHDQLLIAIPNSPITNDISKVNILTCIILGTITDYTPGTQINSCEETVSTTINPKPTSTQAKKFYNAYTKVKHWGNPFFADYFHGDTIMAMSNKTLEELITHFNTETTLKDKFTIKTQKYVEYRYNPFADKGEG…	676	USER	zzzzz79
91	my_seqs_ct_ms19_W27_027.3		MARFYYRRFYKPRWRKRYRWFRTWRTRAPLRRRRRRKRRVRKKLPYLHLKQWQPQHINKLTVKGLYCLLQVHKNRFNADFNQYEISVPAEGHPNGGGFTILRFTLNALWEQHEKAHNVWTKSNKNMPLFRYTGCTVRIYRPLNVDLVVKFQTCYPMSSSKLMFTGTQPSIMMMSKGSKKIRCKLNAPNAKPYKTYHLPPPSQMSNKWYFQHTESNTGLLLIQACSASFDNYYSSSNSESSTITLHTLNTRIFQNLNFEKTPTYGYMPKQDYSLFASNGTDKIGDLIWLGNTTDYNKGKHISDTTQQSTWNLTVQSYLQNKKNWGNPFYSEHLHKSHKLWRGTKPPLQQLTSNSSWNKDTPCTTAGLTEVTDDLFYTVRYNPFKDKGYANNIYILPNYTD…	659	USER	zzzzz80
90	my_seqs_ct_ms19_W27_028.3		MPPYYRKKYYRRNYWNWRNRRNAYRRRRFRTLIRRKPRRRRVRKQRFSKTFKRKLKTLRVTQWQPSYIRKCRISGILELFEAGHGHFGNNFVIYKETFTPHNTPGGGGWSIQELTLSNLFIQNQYLMNYWSVTNSGLNLVRYNGAHIKLYRQKKIDYIFQYYTEEAIHAGKYWYPAFHPLKMLLTKNKITVPSLETQPNNKKLYKKVKLKPPKLLKNNWYFQKHICTFPLLRFATTAVDLNYMFLSPHSNNSNITVHMLNTGFFLKHNFQYADPESGYFPKAQTYIYGLENGSYDIQNIKRSQCIYLGGQINQKGDKIGTQTWSTYSKDKSQWGNVFNVSYFDFELTSFITTEPPKTFFENASTKPIGTVQVKQTPYYLDCRYNPYKDKGTGNIAYWLQ…	657	USER	zzzzz81
89	my_seqs_ct_ms19_W27_029.3		MPWYNYWRPNYWRRRRWGRRRRPRYAIRRRFHRRHRVRRKLKTIPIRQWQPPQIRKCRITGLNCLLYFNRNRISHNGTLYEDSIVPNKLPGGGGFSVMQFTLSNLYDIHQKCNNWWTVSNDNMPLCRYMGCTMKFYQARLTDYVVKYSTHYPTNSNKLTYPSCQPHMLLMSKNKITIPSKATQQRKHPYIKVKIPPPQQFTTKWYFQKDIATKPLVLLYTAAASLDNYYIEAQAKSNNITILHLNTKLIQNRHFSTQIPQAYFFKTIGGTLNSYFYYTREIGDINNVKISQIIPLTNAKQWTMGMTYEESHSEFVTFKRDWHLYWGNPFMTEYIHQTDHIYQSTVSPDYIKSKWTSQDTKLSEIESGRVFTKIEEPIMLETRYNPNKDTGEHNKCFLLS…	665	USER	zzzzz82
88	my_seqs_ct_ms19_W27_030.2		MPYYRRWPYRRRRYRWLKRRRARKPIRRRYYRRYWVRNYSRKRKLPKLTLQEWQPQKINKTTVKGIYPLFICNKERISNNFIQFIDSVAPHLFPGGGGFSILQFTLQGLFEQFVKATNWWTKSNCNMPLIRYRGCMLKLYRTEYFDYVIVIHRCYPLKANDMLYMSTQPSIMGMTKRCIHVPCKQNSTNKKPYKKVWIKPPTQMSTGWHFQQDLANFPLVVLTAAATSFDRFYSHSNSASTTIGFDSLNTRLFKFHDWQAPPTTGYKPNEQMYVWGVANGGHTTPGADALKNLIYLGGTGRLQEGTILDKNYDKYSKTPGLWGTIFHPKYLTGTAQIYFTNETVENIANYAKTHPNQTVKESTKFTIRTEPLIVRCRYNPFNDKALNNNTYIVSNLTDH…	658	USER	zzzzz83
87	my_seqs_ct_ms19_W27_034.2		MPAFNFYRRRWYPNRWRRTRRWIRRRRLRPPFRRRFHRRHWVRRRRLFTKRHKKLKKLKLSVWQPRTIHKCRIKGLLCLTTCGKGRVNHNSILTMESYVPESEPGGGAWSILQVSLRVLWDEYTAFRNWWTSSNQGLPLTRYLGGQLKFYRSKQTDYIAIVNTCPPFDVTRDIYLNTQPSRAIMHKYKIIVPRLDRKIHKKPYVKKNIKPPALFTNKWFFQREIYNQPFFTVQTSCCSLDQVFSPDTEINTNLSFISLNCDFFQNPQWGDLPDTGYRPKYTGTSNTYLFRAENGTYAGTGYKRLTPLFNTKNITKGKPLTGDTWQSLQTQLKDKDYWGNPFDPDYLHSHTYWYGPYPTESNFNNATLVQLHEVFLTCRYNPFRDKSKGNKVYLKSTSLQ…	653	USER	zzzzz84
86	my_seqs_ct_ms19_W27_036.3		MPPFNYYRRRYFYRPRRYRRRWPRTWRPRSFIPRRFRRRRWVRKRRFLKYKKKKLKKIKLQQWQPDNIRKCHIKGQLCLLTCGQGRINNNFTLTAESFVPTGEPGGGGWSIMQLTLRALYDEYQHYRNWWTVSNCGLPLTRYCGVTVKFYKSNDTDYLVTAQHTGPFEVTRDLYLNTQPSRHMMNRKSFIVPKLNPNKKKRPYIKKRFRPPALLTNKWYFSQDILNTPLILFTVSSCSLDQMYAPNDQISTNITFLSLNTDLFQNPFWETDNRNPYYPKVTGTVNTELYTYGNGEIEDPPNWKKLIPLYDTQHFTRPTNTHGRDYTTSYDQFQTQNKWGNPFSYTAHDNTNDVKIFYGTPPTQTTYNSPPKLLPITGLYQECRYNPFKDKATGNKVYIK…	662	USER	zzzzz85
85	my_seqs_ct_ms19_W27_040.2		MPWYRNYGRRRRRRWVRSWRPRKTFWRRRWKRRRQPVRRKLRSLILRTYQPPCIRKCTIKGLIPLFWGTPERFINNYELYEMTPAPERLPSGGLFSLKNFTLEGLFAEHQYCRNTWTKTNNSLPLMRFTGAKIKFYKSEHIDYIVTYDTNLPLTASMDTYHTMHPGIHGLLPHKLIVTRKNKWGNNSKPYRKIKIKPPSPMQNKWYFQIDMAKTPLVQIRTSAVDLENYYTNYKSVSTTIGVKFLNPDIIKNINFKKIPPSGYSPLSTPTRQKVYLFSAKKENIEQTTLLNKLIFLGNTNKYQEGTPMTKNHHDSAAQNQPTYTLDKWGNPFYTKYLTGEYKVYTTTTSLALLLTKFTNETTKVENTGATFTEITLIHYFRYNPFRDQGNKNMIYIKGV…	662	USER	zzzzz86
84	my_seqs_ct_ms19_W27_044.3		MPYFWRRPWYRRRYNYRRPWYRTRRPRAALRRRRRRWVRKRFYYTIPKTIRLRQWNPRTTRLCKIKGHIPLIICGRDRQIFNWMQYYDSIGPVEQSGGGGWSSIVFSLGALYQQFKRLMNWWTKDNDGLPLVQYKGCKFKFYKSWDTDYIVTAQTCPPMTDTEYKHLDSHPYRQLMNKKPIIVPNLIRKPSKKTYKIKRFPPPSLLQNKWYFQQDFCATNLLMLTTSAASFDQFWLPNDQVSQVITFHSLNTKIFANANFHAEHTQGYQPKSNYLLWGTGNGTHQKPATFGTLHYLANTNQYTPGKTWNGKFPPEKTFWGNPFYHDHSSVDTVIYYSTNAPKTSTTTTTETAITESDHIYITCRYNPLKDTGEGNQVFFKSTTISKNPIYEPENNPDIH…	634	USER	zzzzz87
83	my_seqs_ct_ms19_W27_045.3		MARYYFRRRWTPRWRKRYRPFWTWRTRTTFRPRRRRRRRRVRRKLPSLPLKQWQPKYINKLAVKGLFCLLQTHKVHYNHNFNQYAATVTREGLANGGGFTIIRFTLNSLYELHEKARNVWTKSNKNMPLFRYTGCKIRVYRPLDTDLVVKFQTCYPMCCSKLMYTGSQPSIMMMTRGAKRIRCKRNAPNAKPYKTYKFRPPDQMTNKWYFQHNESNTGLILIQAAAASFDKYYTSTYSESSTVTLYGINMRIFKNLNFATPPTNGYAPNEKMYLWASNGQGKLKDLIYLGQSKLYNQGEPISTITDETWNTKVQKYLQQPKLWGNPFHQTHMHKQYTTYWFTTIPPLQALTNSSKNENTPISTLTTTFHQFTQEIFLEFRYNPFTDKGYNNVYILPNFT…	665	USER	zzzzz88
82	my_seqs_ct_ms19_W27_047.2		MPYYWRRRRWRRSWRRRPRYPFRRRRFWRRRQRWVRKPKRKLKKITIKQWQPTTIRKLTVKGQYPLFAGTSDRIANDYTAYVDEIAPKDVPGGGLYSITVFTLQGLYELHQKGRNWWTQSNCDLPLIRYSGCTIKLYFNPSADYITTIINCGDLKANLEMFQSTQPSVLLLNKKKRVMLCRNYKRKRRPYKKWFIHPPALLYNKWYFQKELSTYPLLMLITAAGSFDRYYQGANSISETIGFQSLNTDFFVIHSWKFPSTLPYRPNERFYMFGIGGTTTFDHATPLQLILLGNPTDNTKGLMIGTVTTESWSEKVKTYLAKSTNWGNPFHPNWLHADEAEGLICLLEVPGTTTLQEKLTTLDPTKMLKTQGFIEPTKPFTVHCRYNPQADMGRNSIFVT…	598	USER	zzzzz89
81	my_seqs_ct_ms19_W27_054.2		MPYYWRRPYTRNYWRRRRRNRFRAWRTRPTFRRIRRRRYRVRKNFFTRKLKTIKIREWQPRTIKLCKIKGYIPLIICGRDRQTFNFMQYYSSIPRVGQPSGGGWSSIVFSLGALYQQFQRLMNWWTKDNDGLPLTRYLGSKFTFFRSWDTDYIVTWQTCPPMTDTEFKHLNSHPYRQLLTKKHILVPNLVRHQYKHNYIQKKFPPPSLLYNKWYFQQDICNTELLMLTTTAVNLDQMWIPNNELSNTITFNSLNTNIFQNPNFHNPQGTQGYQPKSTYILWGSGNGTHATPETFEHLIYLGETNRYTLGNTDSRTGKTPPQPETSWGNPFYGQHSHEDTVIYYTTKMPTTYTDTQDKTPKTHSQPIYVQCRYNPLADTGEGNEVYFKSTSISKNPIHTA…	621	USER	zzzzz90
80	my_seqs_ct_ms19_W27_056.4		MPYYRRRYYKRKGFYPRRRYWFFNRRSRKTFRKRRRNRVRRKRLFKRRFKKLKTLRLKEYQPEQIRKCRIKGYLELFDCGYGRQSDNYALFKESIVPPHQPGGGGWSIQQLTLGNLYVQGKYAMNYWTKSNRGYNLCRFLGVQITLFRMPETDYIFHYDLEDPQIVTKYTYPSYHPYKMLLFNKKIVVPSLKTAPHKRKQYKKKFIRPPKKLKNQWYFQEHLTNFPLLTFFACACDLSYLFASDKAKNNNVTLNVLNTRFITHPNFQTTTQLKTEPIYFEVRYNPNKDDGDGNEVYFVQNFNAQLKNWDPPTDQDLILRGHPLWLMLWGLQSYIQKTGKFNNLDKNGILVIRTKFFEPEKLGAYVVLSDSFINGQGPYEQDQEEITIFNRQNWYPRWLF…	564	USER	zzzzz91
79	my_seqs_ct_ms19_W27_058.2		MPWYPRRRYPKRRYRWLRRWRARRPFRPRYRRRYWVRNYSLKRKLFKITTKQWQPKVIRKTHVKGTYPLFLCTKHRINNNMIQYLDSIAPEHYYGGGGFSIMQFSLQALYEEFIKAKNWWTNTNCFLPLIRYMGCSFKFYKTEFYDYIVLIERCYPLACTDEMYLSTQPSIMMLTRKCIFVPCKQNSKGKKPYKKVRVRPPSQMTTGWHFSQDLANMPLVVLKTSVCSFDRYYTDSTAKSTTIGFKTLNTQTFRYHDWQEPPTTGYKPQNQLWFYGAENGSPIDPNNTVISNLIYLGGTGPYEKGTPIKTNITTYFSQPKMWGNIFHDDYTSGTSPVFVTNKTPSEIETMWTTIKDKTVKDSNVFTLRTIPLWLPCRYNPFADKATNNKIWLVSIHSDH…	610	USER	zzzzz92
78	my_seqs_ct_ms19_W27_059.2		MQSKWYFQKDLAFLPLLQTMATSCSLDRMFLNSSAVSSTIGFVSLDTEGFRNHNFTKFSTTGYYPVHEEKLFGCPNGAEITQLNIGELTYLGNPQDNQQGTPINNIPITATGTQTQTQQKIDRVKGEWGFQGNPFYSHYFHGDMRVLVTTLDWQTIKDTYGKPDNKLPKLQKKDFKIKTQKWVNCRYNPFKDKGKGNKIYLLKTDSTQHPDEWTPPPTQDVILEDLPLWLGTWGYLDYQRKCGAQQQIDTNSIFVIYSKYIDPPTLKYYVPLDYPFLHGHSPYTDDLYPSDRLNWHPKVRYQVQTVNKFACCGPTVTKLPEQISCEGHMQYQFYFKVGGQPAPMSTIIDPDKQPKYNIPGNVLQTTSLQSPTTPFEYILYNFDQRRGELTKKAAQRITT…	470	USER	zzzzz93
77	my_seqs_ct_ms19_W27_061.1		MWTTSNKHFPLFRYLGCSIKIYRPEFVDAVVKFQTCFPMSASALLYAGTQPSIMMMSKGCKKIPSMKTKPWGKPYRKYRLPPPQQMRNSWYFQAHQVKTGFLMIQSSAASFQHYYLSQHSESQTISFKTLNTKLFENMNFKSISTAGYSPKSNYSMWSTENGQDEWGEIIFLGNTIEYQKGITLNTAKSKYNKHNWSDTVTSYLSNRENWGNPFHEHYISKKTSQYLSTTPPTQTLQNKDFKNKIELTTGLTKLTQEFVFDCRYNPNIDKGIDNKLYLKSNWKEDETLSPPLDPDLMIVGYPLWLQVFGFVDYQIKLGKVTQIPTHYTVIFTNKYVQPQLQYYLPLDTYFVEGNSEYLQGRTGWDNTNWYPMITHQDDTLETIAQSGPGMAKLDKNTTD…	544	USER	zzzzz94
76	my_seqs_ct_ms19_W27_062.2		MPLFRYTGCNIRVYRPLDIDLVIKFQRCYPMCCTKLMYTGCQPSLMMMSKGSKIIRCKKNAPNAKPYVKFKFPPPDQMTNKWYFQHNESNTGLLMIQVAAVSLDHYYTSSYAESSTVTLWGINTRIFQNLNFANPPTYGYIPKSGFTLYATNGADKVEDLIWLGQSKKYNKGDQLKQHKLNNNFDDTVKQYMQHSEWWGNPFHSEMLHQQWTLWKGTSNPLTQLTNKSLNFTSTCTQAGLTKLSQELFFKFRYNPFKDKGYNNIYILANFTDNLINDKYDLEPYDDPDLQNPGFPNWLGCFGFQDYLIKLGKKQRINTDYIMLMKTKAIEPLETYYILVDEYFLHGDSEELIGRTDWDNENWYPMIQHQQGALNTLALCGPGAPKLGDIKTAEAKLDYS…	537	USER	zzzzz95
75	my_seqs_ct_ms19_W27_064.1		MAWRWWWQRRWRRRPWPRRRWRRLRRRRPRRPVRRRRRRATVRRRRWRGKRGRRTYTRRAVRRRRRPRKRLVLTQWSPQTVRNCSIRGIVPMVICGHTRGGRNYAIHSEDFTTQIKPFGGSFSTTTWSLKVLWDEHQKFNNRWSYPNTQLDLARYRGVTFWFYRDQKTDYIVQWSRNPPFKLNKYSSSMYHPGMMMQAKKKLVIPSFQTRPKGKKRYRVRIRPPNMFADKWYTQEDLCPVPLVQIVVSAASLLHPFCPPQTNNPCITFQVLKDIYDNCIGVNQTNESNYKNLQKILYTKCTYYETTQVLAQLSPAFQPALKPNTANTEATHSTLGNYVGELKYNGGSFHTGQNPVFGMCRYKPTEDMMTKANKWFWENLMVENDLHSSYGKATLQCMEY…	694	USER	zzzzz96
74	my_seqs_ct_ms19_W27_067.2		MAWSWWWQRWRRRGWKPRRRRWRRLRWRRPRRPVRRRRRRRRVRRRRWGNRRGRRRRYTRRRKRRIKLRNFKKKLVLTQWHPSVVRRCFIRGIVPILICGHTKWNSNYALHSEDYTEEGRYPHGGSLSTTTWSLKVLYDEHLKHHNFWGYPNTQLDLARYRGCTFTFYRHKKTDFIVWWNRKPPFKLNKLSCASFHPGMLMQQKHKVLIPSFDTKPGGRAKIKVRIKPPTLLEDKWYTQQDLCPVNLAQLVVTAADFQHPFCSPQTNTPTTTFQVLKDMYYDTIGIVDTQESYTSVNDKTKNTTYSKYMETLVNKLYSTGSYWNSFHTAEYLNPNITDTHNHKIFNNSNTDLTSWLSSKGDNKFQTGKSTQFGYNSYQPTVEKIQKANEAYWTALTKQN…	510	USER	zzzzz97
73	my_seqs_ct_ms19_W27_068.1		MAWSWWWARRRRRPWTRRRWRRLRTRRPRRPVRRRRRRKRRVRRRRWGRRRGRRTFYKRRFRKRRRRRKKLVLTQWNPQTIRACSIRGTVCLVMCGHTKASRNYALHSEDYVPQLHAMGGSFSTTTWSLKALYDEHQKFHNRWSYPNTQLDLARYKGCRWWFYRDPKVDYIVTYYTVPPFKINKYTSPMLHPGMMMQYKKKILVPSYQTKPKGKSKISVFIKPPVLFEDKWYTQQDLCPVNLMSLAVSAASFIHPFCPPESDNMCITFQVLKDFYYKQMGVTTMSGTRLTDEDEEIFNKLYTTASYWQSLHTQSQISTTQKPAKQAGTTFPNDNSWLTGEPGPRKFKTGNNSIYGLPNYAPNKESMDKIRQWYFTQETTDNAVHGSYGKPIYNAVDYHV…	604	USER	zzzzz98
72	my_seqs_ct_ms19_W27_070.2		MPPFYRRNFYKRNYWNWRRKRRYFRRRRPYKTFRRKRRHRRVRKNKFPKYFRKKLKTLRVTQWQPKYIRRCCIKGILLLFEAGHGRFSNNFTPFKESFYPHNEPGGGGWSIQELSLSNLFTQNQYFMNIWTHSNGGLNLVRYTGCVITLYRQPETDYIFHYYTEETVNAGKYWYPSMHPIKMLNYNQRVIVPSLQTAPNKKKLYKKIKITPPKLIKNNWYFQQNLSTFPLLRFATVATSLNHMFLSSKSTNSNITLHMLNTKFFQHSAFQYADPTYGYTPKQGTYIYGLQNGILDISKEKRYNVIYIGSQYYDEGKPVGTSGWEQNYNKDKWGNIFFYKYLDHIQTTFLHSDPPNTFLSKANINAEIGSVTIKQEPYYQDVRYNPYRDKGDGNLAYWKS…	488	USER	zzzzz99
70	my_seqs_pig_an1_2ct003.2		MRFRPIRRRRRRRYRKRRWGWRRRYYRHHYRRRPWRRWRVRRWRRSVFRRGGRRARPYRISAFNPRVMRRIVIQGWWPLIQCLPGQEHLRYRPLNWDIEKEWVVEKDKEPDKMGYLVQYGGGWGSGHITLEDLFNEHQKWRNMWSKSNDGMDLVRYFGCKIYLYPLEDVDYWFWWDTDFKNNYEDRIKEYCQPSVMLMAKRTKIVVARKRAQHRRRVKKIFIPPPSRDTTQWKFQTEFCKQPLFTWAAGLIELQRPFDFNGGFRNAWWLEPRNEAGEMDYITLWGRVPPQGDTDMPDPNTFKTTTQNKNYKIQPGKETNVYPIMAYIRQENQQPVVNWCVCYNKTIDRWRKTQAATLKIGNLRGLCVRELSRQEMTYKWKQGEFSKAYHDRWGYNTYFV…	643	USER	zzzzzz1
69	my_seqs_pig_an1_2ct005.2		MAPTRRWRRRFGRRRRRYRKRRYGWKRRYYRYRPRYYRRRWLVRRRRRSVYRRGGRRARPYRLSAFNPKVMRRVVIRGWWPILQCLKGQEALRYRPLQWDTERQWRVRADFEDQYGYLVQYGGGWGSGDVTLEGLYQEHLLWRNSWSKGNDGMDLVRYFGCVVYLYPLKDQDYWFWWDTDFKELYAENIKEYSQPSVMMMAKRTRIVIARERAPHRRKVRKIFIPPPSRDTTQWQFQTDFCNRKLFTWAAGLIDMQKPFDANGAFRNAWWLEQRNDQGEMKYIELWGRVPPQGDSELPKKKEFSTGTDNPNYNVQDTEEKNIYPIIIYVDQKDQKPRKKYCVCYNKTLNRWRLGQASTLKIGNLKGLVLRQLMNQEMTYIWKEGEYSSPFVQRWKGSRF…	639	USER	zzzzzz2
68	my_seqs_pig_an1_2ct008.2		MRFRPIRRRRRRRYRKRRWGWRRRYYRHHYRRRPWRRWRVRRWRRSVFRRGGRRARPYRISAFNPRVMRRVVIQGWWPLLQCLPGQEHLRYRPLNWDIEKQWVVTEGKAPDTMRYLVQYRGGWGSGQITLEDLFNEHMKWRNMWSKSNDGMDLVRYFGCKIYLYPLEDKDYWFWWDTDFKHQYEDKIKEYCQPSVMLMAKRTKIVVARQRAQHRRRVKKIFIPPPSRDTTQWKFQTEFCKQPLFTWAAGLIELMTPFDFNGGFRNAWWLEPRNDMGEMNYITLWGRVPPQGDSDLPDPNIFKNDGTQQNVNYQVQSGKEKNIYPIIAYIQQENQKPVINWCVCYNKTLDRWRRAQASTLNISNLRGLCVRELSRQEMTYIWKQGEFRKEYHDRWGYGTY…	645	USER	zzzzzz3
67	my_seqs_pig_an1_2ct009.1		MRFRRRRFGRRRRYYRKRRGGWRRRYGRRWRRTAWRRRRVRRWRRSVFRRGGRRARPYRISAWNPRVVRRVVIKGWWPLIQCMEGMEHLRYRPMHNLEKRWIYKKQNTRVFSEDMGYLMQYGGGWASGTISLKGLFNEHELWRNVWSRSNDGMDLARYFGCSITLYPEENQDYLFWFDTEFDQTQLTNLQEYTQPSVMLQAKNSRLIVAKNKMPIRRRIKRIFIPPPSQMTTQWQFQTDLSDYPLFNWACICIDMQKPFDYTGAWRNAWWLMLRQPSGDMEYIEKWGRIPATGDWQLPSSSIMKQNQDNPNWNPSGTPNIYPIVAYWYTEDSKNVLRWCTLHNTPINRWRKKEAMSVQVRDLRGLCVRVCSDQETYYRWARGDFNNNFKLQWWPQSGTD…	648	USER	zzzzzz4
66	my_seqs_pig_an1_2ct010.1		MRFRRRRFGRRRRYYRKRRGGWRRRYGRRWRRTAWRRRRVRRWRRSVFRRGGRRARPYRITAWNPRVVRRVVIKGWWPLIQCMQGMEYLRYRPMNNIEKRWIYKKSNSRQFAEDMGYLMQYGGGWASGTISLKGLFNEHQLWRNVWSRSNDGMDLARYFGCSISLYPEENQDYLFWFDTEFDETQLLNLQEYTQPSVMLQAKNSRLIVAKSRMPIRRRIKKIFIPPPAQMTTQWQFQKDLADYPLFNWACICIDMEKPFDYTGAWRNAWWLMQRQASGDMEYIEKWGRIPPTGDFKLPSKSSMTGNQDNPNWHPNDEPFIYPIVAYWVTEEGKNVLYWCTIHNAPINRWRKKEAMAIQVRDLRGLCLRVCSAQETYYRWQRAEFTDTFKQRWFPQNGTD…	649	USER	zzzzzz5
65	my_seqs_pig_an1_2ct011.1		MRFRRRRFGRRRRYYRKRRGGWRRRYRIRRWRPRRRWRVRRWRRSVFRRGGRRARPYRITAWNPRIVRNCVITGWWPMIQCMEGMEYMKYKPMDLRVEANWIYYKSGGGKIDSEQMGYLLQYGGGWSTGTISLEGLFNENKLWRNLWSKSNDGMDLVRYFGCKLKMYPTERQDYIFWYDTEFDEAERQMLDDYTQPSVMLQAKNSRLIVSKIKMPVRRRVKSIFIPPPSQLTTQWKFQQELCNFPLFNWACVCIDMDTPFDYNGAWRNAWWLMRRLQNGNMEYIERWGRIPMTGDTELPDSGDFKAGGINQNFKPTSIQKIYPIVAVCLIENAKRVVKWATIHNKPLNMWRKKQASMLNLTNLRGLVLRVCSAAETYYKWVGSEFTGAFKQDWWSTPST…	638	USER	zzzzzz6
64	my_seqs_pig_an1_2ct012.1		MRFRRRRFGRRRRYYRKRRWGWRRRYGRRWRRTAWRRRRVRRWRRSVFRRGGRRARPYRISAWNPRVVRNVIIRGWWPLIQCLEGQEHLRYRPMDWDAERQWVWKEGEPPDQYGYLVQYGGGWGSGEISLAGLYREHLLWRNSWSKGNDGMDLVRYFGCSIKLYPTQNMDYYFWWDTDFKPGYEDKVKEYSQPSVMMMAKNSRIVIARDRAPNRRRIRKLFIPPPSRDTTQWQFQTDFCNRPLFTWAAGLIDLQKPFDSKGSFRNAWWMEDRTEDGNMEYIEKWGRIPPQGDTQLPDPKKFKNDAAGINKNFKPVEITDIYPIAAFVRQTEGKAWVSWVVIYNKTLDRWRKDTAGPRDVGTLRGLVLRKLSAQEQTYKWKEGEFTKTFIVNWGAKTKIC…	640	USER	zzzzzz7
63	my_seqs_pig_an1_2ct014.1		MAAARRWRRRFGRRRRRYRKRRYGWRRRYYRYRPRYYRRRWLVRRRRRSVYRRGGRRARPYRISAFNPKVMRRVVIRGWWPILQCLKGQESLRYRPLQWDVEKQWRVKTDFEDNYGYLVQYGGGWGSGEVTLEGLYQEHLLWRNSWSKGNDGMDLVRYFGCLVYLYPLKDQDYWFWWDTDFKELYAENIKEYSQPSVMMMAKRTKIVIARDRAPHRRKVRKIFIPPPSRDTTQWQFQTDFCNRPLFTWAAGLIEMQRPFDANGAFRNAWWLETRNEQGEMKYVELWGRVPPQGDTEMPKKSEFSKGGNNPNYNVQDGYEKNIYPILIYVDKKDQKPRKKYCVCYNKTLNRWRKSQASTMNIGDLQGLVLRQLMNQEMTYCWKSGEYSSPFMQRWSGTRL…	623	USER	zzzzzz8
62	my_seqs_pig_an1_2ct015.1		MAFARRWRRRFGRRRRRYRKRRYGWRRRYYRYRPRYYRRRWLVRRRRRSVYRRGGRRARPYRISAFNPKVMRRVVIRGWWPILQCLKGQESLRYRPLQWDTEKQWRVKKDYEDNYGYLVQYGGGWGSGEVTLEGLYQEHLLWRNSWSKGNDGMDLVRYFGCIVYLYPLQDQDYWFWWDTDFKELYAESIKEYSQPSVMMMAKRTRLVIARDRAPHRRRVRKIFIPPPSRDTTQWQFQTDFCKRPLFTWAAGLIDMQKPFDANGAFRNAWWLETRNDQGEMKYIELWGRVPPQGDTELPKQSEFKKGDNNPNYNIQDGHEKNIYPIIIYVDQKDQKTRKKYCVCYNKTLNRWRKAQASTLAIGDLQGLVLRQLMNQEMTYYWKSGEFSSPFMQRWKGTRL…	601	USER	zzzzzz9
