# Supplementary material for: Discovery of several thousand highly diverse circular DNA viruses
Source: eLife journal article supplement (doi:10.7554/elife.51971), 2020-02-03
Supplement: fig2-figsupp1-data1 [file elife-51971-fig2-figsupp1-data1-v1.cys › CytoscapeSession-2019_08_05-18_21/tables/52-all_my_seqs_genbank_ssDNA1_protein_with_ttv_orf1_per_PF02956_13_2_fasta+Full+Network/LOCAL_ATTRS-org.cytoscape.model.CyEdge-all_my_seqs_genbank_ssDNA1_protein_with_ttv_orf1_per_PF02956_13_2_fasta+Full+Network+default+edge.cytable]

CyCSV-Version	1
SUID	interaction	name	selected
java.lang.Long	java.lang.String	java.lang.String	java.lang.Boolean
all_my_seqs_genbank_ssDNA1_protein_with_ttv_orf1_per_PF02956_13_2_fasta Full Network default edge
843		zzzzzz8,zzzzzz9	false
844		zzzzzz7,zzzzzz9	false
845		zzzzzz7,zzzzzz8	false
846		zzzzzz6,zzzzzz9	false
847		zzzzzz6,zzzzzz8	false
848		zzzzzz6,zzzzzz7	false
849		zzzzzz5,zzzzzz9	false
850		zzzzzz5,zzzzzz8	false
851		zzzzzz5,zzzzzz7	false
852		zzzzzz5,zzzzzz6	false
853		zzzzzz4,zzzzzz9	false
854		zzzzzz4,zzzzzz8	false
855		zzzzzz4,zzzzzz7	false
856		zzzzzz4,zzzzzz6	false
857		zzzzzz4,zzzzzz5	false
858		zzzzzz3,zzzzzz4	false
859		zzzzzz3,zzzzzz5	false
860		zzzzzz3,zzzzzz6	false
861		zzzzzz3,zzzzzz9	false
862		zzzzzz3,zzzzzz7	false
863		zzzzzz3,zzzzzz8	false
864		zzzzzz2,zzzzzz4	false
865		zzzzzz2,zzzzzz6	false
866		zzzzzz2,zzzzzz5	false
867		zzzzzz2,zzzzzz3	false
868		zzzzzz2,zzzzzz7	false
869		zzzzzz2,zzzzzz9	false
870		zzzzzz2,zzzzzz8	false
871		zzzzzz1,zzzzzz4	false
872		zzzzzz1,zzzzzz5	false
873		zzzzzz1,zzzzzz6	false
874		zzzzzz1,zzzzzz2	false
875		zzzzzz1,zzzzzz8	false
876		zzzzzz1,zzzzzz9	false
877		zzzzzz1,zzzzzz7	false
878		zzzzzz1,zzzzzz3	false
879		zzzzz99,zzzzzz3	false
880		zzzzz99,zzzzzz9	false
881		zzzzz99,zzzzzz2	false
882		zzzzz99,zzzzzz1	false
883		zzzzz99,zzzzzz8	false
884		zzzzz99,zzzzzz7	false
885		zzzzz99,zzzzzz4	false
886		zzzzz99,zzzzzz5	false
887		zzzzz99,zzzzzz6	false
888		zzzzz98,zzzzzz3	false
889		zzzzz98,zzzzzz9	false
890		zzzzz98,zzzzzz8	false
891		zzzzz98,zzzzzz2	false
892		zzzzz98,zzzzzz1	false
893		zzzzz98,zzzzzz7	false
894		zzzzz98,zzzzzz4	false
895		zzzzz98,zzzzzz5	false
896		zzzzz98,zzzzzz6	false
897		zzzzz98,zzzzz99	false
898		zzzzz97,zzzzzz3	false
899		zzzzz97,zzzzzz1	false
900		zzzzz97,zzzzzz8	false
901		zzzzz97,zzzzzz2	false
902		zzzzz97,zzzzzz9	false
903		zzzzz97,zzzzzz6	false
904		zzzzz97,zzzzzz4	false
905		zzzzz97,zzzzzz7	false
906		zzzzz97,zzzzzz5	false
907		zzzzz97,zzzzz99	false
908		zzzzz97,zzzzz98	false
909		zzzzz96,zzzzzz3	false
910		zzzzz96,zzzzzz2	false
911		zzzzz96,zzzzzz9	false
912		zzzzz96,zzzzzz8	false
913		zzzzz96,zzzzzz1	false
914		zzzzz96,zzzzzz4	false
915		zzzzz96,zzzzzz7	false
916		zzzzz96,zzzzzz5	false
917		zzzzz96,zzzzzz6	false
918		zzzzz96,zzzzz99	false
919		zzzzz96,zzzzz97	false
920		zzzzz96,zzzzz98	false
921		zzzzz95,zzzzzz3	false
922		zzzzz95,zzzzz98	false
923		zzzzz95,zzzzzz9	false
924		zzzzz95,zzzzzz4	false
925		zzzzz95,zzzzzz5	false
926		zzzzz95,zzzzz96	false
927		zzzzz95,zzzzzz8	false
928		zzzzz95,zzzzzz2	false
929		zzzzz95,zzzzzz1	false
930		zzzzz95,zzzzzz6	false
931		zzzzz95,zzzzz97	false
932		zzzzz95,zzzzzz7	false
933		zzzzz95,zzzzz99	false
934		zzzzz94,zzzzzz3	false
935		zzzzz94,zzzzzz8	false
936		zzzzz94,zzzzzz9	false
937		zzzzz94,zzzzzz2	false
938		zzzzz94,zzzzzz1	false
939		zzzzz94,zzzzzz7	false
940		zzzzz94,zzzzzz4	false
941		zzzzz94,zzzzzz6	false
942		zzzzz94,zzzzzz5	false
943		zzzzz94,zzzzz97	false
944		zzzzz94,zzzzz96	false
945		zzzzz94,zzzzz98	false
946		zzzzz94,zzzzz99	false
947		zzzzz94,zzzzz95	false
948		zzzzz93,zzzzz98	false
949		zzzzz93,zzzzz96	false
950		zzzzz93,zzzzz99	false
951		zzzzz93,zzzzz95	false
952		zzzzz93,zzzzz94	false
953		zzzzz92,zzzzzz3	false
954		zzzzz92,zzzzzz4	false
955		zzzzz92,zzzzzz1	false
956		zzzzz92,zzzzzz5	false
957		zzzzz92,zzzzzz9	false
958		zzzzz92,zzzzzz2	false
959		zzzzz92,zzzzzz8	false
960		zzzzz92,zzzzzz7	false
961		zzzzz92,zzzzzz6	false
962		zzzzz92,zzzzz97	false
963		zzzzz92,zzzzz98	false
964		zzzzz92,zzzzz96	false
965		zzzzz92,zzzzz99	false
966		zzzzz92,zzzzz93	false
967		zzzzz92,zzzzz95	false
968		zzzzz92,zzzzz94	false
969		zzzzz91,zzzzzz5	false
970		zzzzz91,zzzzzz4	false
971		zzzzz91,zzzzzz3	false
972		zzzzz91,zzzzzz9	false
973		zzzzz91,zzzzzz7	false
974		zzzzz91,zzzzzz1	false
975		zzzzz91,zzzzzz2	false
976		zzzzz91,zzzzzz8	false
977		zzzzz91,zzzzzz6	false
978		zzzzz91,zzzzz97	false
979		zzzzz91,zzzzz98	false
980		zzzzz91,zzzzz96	false
981		zzzzz91,zzzzz92	false
982		zzzzz91,zzzzz94	false
983		zzzzz91,zzzzz95	false
984		zzzzz91,zzzzz93	false
985		zzzzz91,zzzzz99	false
986		zzzzz90,zzzzzz3	false
987		zzzzz90,zzzzzz4	false
988		zzzzz90,zzzzzz9	false
989		zzzzz90,zzzzzz1	false
990		zzzzz90,zzzzzz2	false
991		zzzzz90,zzzzzz8	false
992		zzzzz90,zzzzzz5	false
993		zzzzz90,zzzzzz7	false
994		zzzzz90,zzzzzz6	false
995		zzzzz90,zzzzz97	false
996		zzzzz90,zzzzz98	false
997		zzzzz90,zzzzz91	false
998		zzzzz90,zzzzz96	false
999		zzzzz90,zzzzz99	false
1000		zzzzz90,zzzzz93	false
1001		zzzzz90,zzzzz95	false
1002		zzzzz90,zzzzz94	false
1003		zzzzz90,zzzzz92	false
1004		zzzzz89,zzzzzz3	false
1005		zzzzz89,zzzzzz9	false
1006		zzzzz89,zzzzzz7	false
1007		zzzzz89,zzzzzz2	false
1008		zzzzz89,zzzzzz8	false
1009		zzzzz89,zzzzzz4	false
1010		zzzzz89,zzzzzz6	false
1011		zzzzz89,zzzzzz1	false
1012		zzzzz89,zzzzzz5	false
1013		zzzzz89,zzzzz97	false
1014		zzzzz89,zzzzz96	false
1015		zzzzz89,zzzzz98	false
1016		zzzzz89,zzzzz91	false
1017		zzzzz89,zzzzz99	false
1018		zzzzz89,zzzzz95	false
1019		zzzzz89,zzzzz93	false
1020		zzzzz89,zzzzz90	false
1021		zzzzz89,zzzzz94	false
1022		zzzzz89,zzzzz92	false
1023		zzzzz88,zzzzzz3	false
1024		zzzzz88,zzzzzz9	false
1025		zzzzz88,zzzzzz1	false
1026		zzzzz88,zzzzzz6	false
1027		zzzzz88,zzzzzz8	false
1028		zzzzz88,zzzzzz2	false
1029		zzzzz88,zzzzzz5	false
1030		zzzzz88,zzzzzz4	false
1031		zzzzz88,zzzzzz7	false
1032		zzzzz88,zzzzz96	false
1033		zzzzz88,zzzzz97	false
1034		zzzzz88,zzzzz98	false
1035		zzzzz88,zzzzz91	false
1036		zzzzz88,zzzzz99	false
1037		zzzzz88,zzzzz93	false
1038		zzzzz88,zzzzz90	false
1039		zzzzz88,zzzzz89	false
1040		zzzzz88,zzzzz92	false
1041		zzzzz88,zzzzz94	false
1042		zzzzz88,zzzzz95	false
1043		zzzzz87,zzzzzz3	false
1044		zzzzz87,zzzzzz4	false
1045		zzzzz87,zzzzzz1	false
1046		zzzzz87,zzzzzz8	false
1047		zzzzz87,zzzzzz5	false
1048		zzzzz87,zzzzzz9	false
1049		zzzzz87,zzzzzz2	false
1050		zzzzz87,zzzzzz7	false
1051		zzzzz87,zzzzzz6	false
1052		zzzzz87,zzzzz97	false
1053		zzzzz87,zzzzz91	false
1054		zzzzz87,zzzzz98	false
1055		zzzzz87,zzzzz96	false
1056		zzzzz87,zzzzz93	false
1057		zzzzz87,zzzzz99	false
1058		zzzzz87,zzzzz95	false
1059		zzzzz87,zzzzz88	false
1060		zzzzz87,zzzzz94	false
1061		zzzzz87,zzzzz89	false
1062		zzzzz87,zzzzz92	false
1063		zzzzz87,zzzzz90	false
1064		zzzzz86,zzzzzz3	false
1065		zzzzz86,zzzzzz8	false
1066		zzzzz86,zzzzzz4	false
1067		zzzzz86,zzzzzz2	false
1068		zzzzz86,zzzzzz9	false
1069		zzzzz86,zzzzzz6	false
1070		zzzzz86,zzzzzz7	false
1071		zzzzz86,zzzzzz1	false
1072		zzzzz86,zzzzzz5	false
1073		zzzzz86,zzzzz97	false
1074		zzzzz86,zzzzz96	false
1075		zzzzz86,zzzzz91	false
1076		zzzzz86,zzzzz98	false
1077		zzzzz86,zzzzz99	false
1078		zzzzz86,zzzzz93	false
1079		zzzzz86,zzzzz87	false
1080		zzzzz86,zzzzz95	false
1081		zzzzz86,zzzzz94	false
1082		zzzzz86,zzzzz90	false
1083		zzzzz86,zzzzz89	false
1084		zzzzz86,zzzzz92	false
1085		zzzzz86,zzzzz88	false
1086		zzzzz85,zzzzzz3	false
1087		zzzzz85,zzzzzz1	false
1088		zzzzz85,zzzzzz9	false
1089		zzzzz85,zzzzzz4	false
1090		zzzzz85,zzzzzz2	false
1091		zzzzz85,zzzzzz8	false
1092		zzzzz85,zzzzzz7	false
1093		zzzzz85,zzzzzz6	false
1094		zzzzz85,zzzzzz5	false
1095		zzzzz85,zzzzz97	false
1096		zzzzz85,zzzzz91	false
1097		zzzzz85,zzzzz98	false
1098		zzzzz85,zzzzz96	false
1099		zzzzz85,zzzzz95	false
1100		zzzzz85,zzzzz93	false
1101		zzzzz85,zzzzz99	false
1102		zzzzz85,zzzzz94	false
1103		zzzzz85,zzzzz86	false
1104		zzzzz85,zzzzz88	false
1105		zzzzz85,zzzzz89	false
1106		zzzzz85,zzzzz92	false
1107		zzzzz85,zzzzz87	false
1108		zzzzz85,zzzzz90	false
1109		zzzzz84,zzzzzz3	false
1110		zzzzz84,zzzzzz9	false
1111		zzzzz84,zzzzzz2	false
1112		zzzzz84,zzzzzz8	false
1113		zzzzz84,zzzzzz1	false
1114		zzzzz84,zzzzzz4	false
1115		zzzzz84,zzzzzz7	false
1116		zzzzz84,zzzzzz5	false
1117		zzzzz84,zzzzzz6	false
1118		zzzzz84,zzzzz97	false
1119		zzzzz84,zzzzz98	false
1120		zzzzz84,zzzzz91	false
1121		zzzzz84,zzzzz96	false
1122		zzzzz84,zzzzz93	false
1123		zzzzz84,zzzzz99	false
1124		zzzzz84,zzzzz95	false
1125		zzzzz84,zzzzz94	false
1126		zzzzz84,zzzzz86	false
1127		zzzzz84,zzzzz88	false
1128		zzzzz84,zzzzz89	false
1129		zzzzz84,zzzzz92	false
1130		zzzzz84,zzzzz87	false
1131		zzzzz84,zzzzz90	false
1132		zzzzz84,zzzzz85	false
1133		zzzzz83,zzzzzz4	false
1134		zzzzz83,zzzzzz3	false
1135		zzzzz83,zzzzzz9	false
1136		zzzzz83,zzzzzz2	false
1137		zzzzz83,zzzzzz1	false
1138		zzzzz83,zzzzzz8	false
1139		zzzzz83,zzzzzz7	false
1140		zzzzz83,zzzzzz5	false
1141		zzzzz83,zzzzzz6	false
1142		zzzzz83,zzzzz97	false
1143		zzzzz83,zzzzz96	false
1144		zzzzz83,zzzzz98	false
1145		zzzzz83,zzzzz91	false
1146		zzzzz83,zzzzz99	false
1147		zzzzz83,zzzzz93	false
1148		zzzzz83,zzzzz95	false
1149		zzzzz83,zzzzz84	false
1150		zzzzz83,zzzzz94	false
1151		zzzzz83,zzzzz86	false
1152		zzzzz83,zzzzz87	false
1153		zzzzz83,zzzzz90	false
1154		zzzzz83,zzzzz85	false
1155		zzzzz83,zzzzz88	false
1156		zzzzz83,zzzzz89	false
1157		zzzzz83,zzzzz92	false
1158		zzzzz82,zzzzzz4	false
1159		zzzzz82,zzzzzz2	false
1160		zzzzz82,zzzzzz9	false
1161		zzzzz82,zzzzzz8	false
1162		zzzzz82,zzzzzz3	false
1163		zzzzz82,zzzzzz5	false
1164		zzzzz82,zzzzzz7	false
1165		zzzzz82,zzzzzz6	false
1166		zzzzz82,zzzzzz1	false
1167		zzzzz82,zzzzz97	false
1168		zzzzz82,zzzzz91	false
1169		zzzzz82,zzzzz98	false
1170		zzzzz82,zzzzz96	false
1171		zzzzz82,zzzzz99	false
1172		zzzzz82,zzzzz93	false
1173		zzzzz82,zzzzz95	false
1174		zzzzz82,zzzzz84	false
1175		zzzzz82,zzzzz87	false
1176		zzzzz82,zzzzz90	false
1177		zzzzz82,zzzzz88	false
1178		zzzzz82,zzzzz85	false
1179		zzzzz82,zzzzz94	false
1180		zzzzz82,zzzzz89	false
1181		zzzzz82,zzzzz83	false
1182		zzzzz82,zzzzz86	false
1183		zzzzz82,zzzzz92	false
1184		zzzzz81,zzzzzz3	false
1185		zzzzz81,zzzzzz9	false
1186		zzzzz81,zzzzzz8	false
1187		zzzzz81,zzzzzz2	false
1188		zzzzz81,zzzzzz1	false
1189		zzzzz81,zzzzzz4	false
1190		zzzzz81,zzzzzz7	false
1191		zzzzz81,zzzzzz5	false
1192		zzzzz81,zzzzzz6	false
1193		zzzzz81,zzzzz97	false
1194		zzzzz81,zzzzz98	false
1195		zzzzz81,zzzzz96	false
1196		zzzzz81,zzzzz95	false
1197		zzzzz81,zzzzz93	false
1198		zzzzz81,zzzzz94	false
1199		zzzzz81,zzzzz91	false
1200		zzzzz81,zzzzz88	false
1201		zzzzz81,zzzzz89	false
1202		zzzzz81,zzzzz87	false
1203		zzzzz81,zzzzz84	false
1204		zzzzz81,zzzzz86	false
1205		zzzzz81,zzzzz83	false
1206		zzzzz81,zzzzz85	false
1207		zzzzz81,zzzzz92	false
1208		zzzzz81,zzzzz82	false
1209		zzzzz81,zzzzz90	false
1210		zzzzz81,zzzzz99	false
1211		zzzzz80,zzzzzz3	false
1212		zzzzz80,zzzzzz9	false
1213		zzzzz80,zzzzzz8	false
1214		zzzzz80,zzzzzz1	false
1215		zzzzz80,zzzzzz2	false
1216		zzzzz80,zzzzzz5	false
1217		zzzzz80,zzzzzz4	false
1218		zzzzz80,zzzzz97	false
1219		zzzzz80,zzzzzz6	false
1220		zzzzz80,zzzzzz7	false
1221		zzzzz80,zzzzz98	false
1222		zzzzz80,zzzzz96	false
1223		zzzzz80,zzzzz91	false
1224		zzzzz80,zzzzz99	false
1225		zzzzz80,zzzzz93	false
1226		zzzzz80,zzzzz81	false
1227		zzzzz80,zzzzz85	false
1228		zzzzz80,zzzzz84	false
1229		zzzzz80,zzzzz87	false
1230		zzzzz80,zzzzz90	false
1231		zzzzz80,zzzzz86	false
1232		zzzzz80,zzzzz89	false
1233		zzzzz80,zzzzz82	false
1234		zzzzz80,zzzzz92	false
1235		zzzzz80,zzzzz83	false
1236		zzzzz80,zzzzz94	false
1237		zzzzz80,zzzzz95	false
1238		zzzzz80,zzzzz88	false
1239		zzzzz79,zzzzzz3	false
1240		zzzzz79,zzzzzz4	false
1241		zzzzz79,zzzzzz9	false
1242		zzzzz79,zzzzzz8	false
1243		zzzzz79,zzzzzz5	false
1244		zzzzz79,zzzzzz2	false
1245		zzzzz79,zzzzzz6	false
1246		zzzzz79,zzzzzz1	false
1247		zzzzz79,zzzzz97	false
1248		zzzzz79,zzzzzz7	false
1249		zzzzz79,zzzzz98	false
1250		zzzzz79,zzzzz96	false
1251		zzzzz79,zzzzz91	false
1252		zzzzz79,zzzzz99	false
1253		zzzzz79,zzzzz95	false
1254		zzzzz79,zzzzz81	false
1255		zzzzz79,zzzzz84	false
1256		zzzzz79,zzzzz88	false
1257		zzzzz79,zzzzz87	false
1258		zzzzz79,zzzzz94	false
1259		zzzzz79,zzzzz80	false
1260		zzzzz79,zzzzz85	false
1261		zzzzz79,zzzzz90	false
1262		zzzzz79,zzzzz86	false
1263		zzzzz79,zzzzz82	false
1264		zzzzz79,zzzzz83	false
1265		zzzzz79,zzzzz93	false
1266		zzzzz79,zzzzz92	false
1267		zzzzz79,zzzzz89	false
1268		zzzzz78,zzzzzz3	false
1269		zzzzz78,zzzzzz4	false
1270		zzzzz78,zzzzzz6	false
1271		zzzzz78,zzzzzz9	false
1272		zzzzz78,zzzzzz7	false
1273		zzzzz78,zzzzzz5	false
1274		zzzzz78,zzzzzz2	false
1275		zzzzz78,zzzzzz8	false
1276		zzzzz78,zzzzzz1	false
1277		zzzzz78,zzzzz98	false
1278		zzzzz78,zzzzz97	false
1279		zzzzz78,zzzzz96	false
1280		zzzzz78,zzzzz91	false
1281		zzzzz78,zzzzz99	false
1282		zzzzz78,zzzzz95	false
1283		zzzzz78,zzzzz88	false
1284		zzzzz78,zzzzz94	false
1285		zzzzz78,zzzzz87	false
1286		zzzzz78,zzzzz81	false
1287		zzzzz78,zzzzz84	false
1288		zzzzz78,zzzzz90	false
1289		zzzzz78,zzzzz80	false
1290		zzzzz78,zzzzz85	false
1291		zzzzz78,zzzzz86	false
1292		zzzzz78,zzzzz82	false
1293		zzzzz78,zzzzz89	false
1294		zzzzz78,zzzzz92	false
1295		zzzzz78,zzzzz83	false
1296		zzzzz78,zzzzz93	false
1297		zzzzz78,zzzzz79	false
1298		zzzzz77,zzzzzz4	false
1299		zzzzz77,zzzzzz3	false
1300		zzzzz77,zzzzzz6	false
1301		zzzzz77,zzzzzz2	false
1302		zzzzz77,zzzzzz8	false
1303		zzzzz77,zzzzz98	false
1304		zzzzz77,zzzzzz9	false
1305		zzzzz77,zzzzzz1	false
1306		zzzzz77,zzzzzz5	false
1307		zzzzz77,zzzzz97	false
1308		zzzzz77,zzzzzz7	false
1309		zzzzz77,zzzzz96	false
1310		zzzzz77,zzzzz91	false
1311		zzzzz77,zzzzz99	false
1312		zzzzz77,zzzzz81	false
1313		zzzzz77,zzzzz93	false
1314		zzzzz77,zzzzz86	false
1315		zzzzz77,zzzzz95	false
1316		zzzzz77,zzzzz94	false
1317		zzzzz77,zzzzz87	false
1318		zzzzz77,zzzzz84	false
1319		zzzzz77,zzzzz79	false
1320		zzzzz77,zzzzz85	false
1321		zzzzz77,zzzzz90	false
1322		zzzzz77,zzzzz80	false
1323		zzzzz77,zzzzz82	false
1324		zzzzz77,zzzzz88	false
1325		zzzzz77,zzzzz78	false
1326		zzzzz77,zzzzz89	false
1327		zzzzz77,zzzzz83	false
1328		zzzzz77,zzzzz92	false
1329		zzzzz76,zzzzzz3	false
1330		zzzzz76,zzzzzz2	false
1331		zzzzz76,zzzzzz8	false
1332		zzzzz76,zzzzzz9	false
1333		zzzzz76,zzzzzz4	false
1334		zzzzz76,zzzzzz1	false
1335		zzzzz76,zzzzzz7	false
1336		zzzzz76,zzzzzz5	false
1337		zzzzz76,zzzzzz6	false
1338		zzzzz76,zzzzz97	false
1339		zzzzz76,zzzzz98	false
1340		zzzzz76,zzzzz96	false
1341		zzzzz76,zzzzz93	false
1342		zzzzz76,zzzzz94	false
1343		zzzzz76,zzzzz95	false
1344		zzzzz76,zzzzz91	false
1345		zzzzz76,zzzzz79	false
1346		zzzzz76,zzzzz84	false
1347		zzzzz76,zzzzz88	false
1348		zzzzz76,zzzzz80	false
1349		zzzzz76,zzzzz77	false
1350		zzzzz76,zzzzz89	false
1351		zzzzz76,zzzzz92	false
1352		zzzzz76,zzzzz83	false
1353		zzzzz76,zzzzz86	false
1354		zzzzz76,zzzzz85	false
1355		zzzzz76,zzzzz87	false
1356		zzzzz76,zzzzz82	false
1357		zzzzz76,zzzzz78	false
1358		zzzzz76,zzzzz90	false
1359		zzzzz76,zzzzz99	false
1360		zzzzz76,zzzzz81	false
1361		zzzzz75,zzzzzz4	false
1362		zzzzz75,zzzzzz3	false
1363		zzzzz75,zzzzz95	false
1364		zzzzz75,zzzzzz5	false
1365		zzzzz75,zzzzzz9	false
1366		zzzzz75,zzzzzz2	false
1367		zzzzz75,zzzzzz6	false
1368		zzzzz75,zzzzzz1	false
1369		zzzzz75,zzzzz81	false
1370		zzzzz75,zzzzzz8	false
1371		zzzzz75,zzzzz93	false
1372		zzzzz75,zzzzzz7	false
1373		zzzzz75,zzzzz76	false
1374		zzzzz75,zzzzz80	false
1375		zzzzz75,zzzzz88	false
1376		zzzzz75,zzzzz91	false
1377		zzzzz75,zzzzz89	false
1378		zzzzz75,zzzzz99	false
1379		zzzzz75,zzzzz79	false
1380		zzzzz75,zzzzz82	false
1381		zzzzz75,zzzzz83	false
1382		zzzzz75,zzzzz92	false
1383		zzzzz75,zzzzz84	false
1384		zzzzz75,zzzzz90	false
1385		zzzzz75,zzzzz78	false
1386		zzzzz75,zzzzz97	false
1387		zzzzz75,zzzzz94	false
1388		zzzzz75,zzzzz86	false
1389		zzzzz75,zzzzz77	false
1390		zzzzz75,zzzzz87	false
1391		zzzzz75,zzzzz85	false
1392		zzzzz75,zzzzz98	false
1393		zzzzz75,zzzzz96	false
1394		zzzzz74,zzzzzz3	false
1395		zzzzz74,zzzzzz2	false
1396		zzzzz74,zzzzzz4	false
1397		zzzzz74,zzzzzz9	false
1398		zzzzz74,zzzzzz8	false
1399		zzzzz74,zzzzzz1	false
1400		zzzzz74,zzzzzz5	false
1401		zzzzz74,zzzzzz7	false
1402		zzzzz74,zzzzzz6	false
1403		zzzzz74,zzzzz97	false
1404		zzzzz74,zzzzz96	false
1405		zzzzz74,zzzzz86	false
1406		zzzzz74,zzzzz91	false
1407		zzzzz74,zzzzz99	false
1408		zzzzz74,zzzzz93	false
1409		zzzzz74,zzzzz85	false
1410		zzzzz74,zzzzz79	false
1411		zzzzz74,zzzzz75	false
1412		zzzzz74,zzzzz95	false
1413		zzzzz74,zzzzz98	false
1414		zzzzz74,zzzzz94	false
1415		zzzzz74,zzzzz81	false
1416		zzzzz74,zzzzz76	false
1417		zzzzz74,zzzzz88	false
1418		zzzzz74,zzzzz89	false
1419		zzzzz74,zzzzz77	false
1420		zzzzz74,zzzzz80	false
1421		zzzzz74,zzzzz83	false
1422		zzzzz74,zzzzz87	false
1423		zzzzz74,zzzzz92	false
1424		zzzzz74,zzzzz90	false
1425		zzzzz74,zzzzz78	false
1426		zzzzz74,zzzzz82	false
1427		zzzzz74,zzzzz84	false
1428		zzzzz73,zzzzzz3	false
1429		zzzzz73,zzzzzz4	false
1430		zzzzz73,zzzzzz1	false
1431		zzzzz73,zzzzzz5	false
1432		zzzzz73,zzzzzz9	false
1433		zzzzz73,zzzzzz6	false
1434		zzzzz73,zzzzzz7	false
1435		zzzzz73,zzzzzz8	false
1436		zzzzz73,zzzzzz2	false
1437		zzzzz73,zzzzz88	false
1438		zzzzz73,zzzzz93	false
1439		zzzzz73,zzzzz99	false
1440		zzzzz73,zzzzz95	false
1441		zzzzz73,zzzzz78	false
1442		zzzzz73,zzzzz91	false
1443		zzzzz73,zzzzz80	false
1444		zzzzz73,zzzzz92	false
1445		zzzzz73,zzzzz76	false
1446		zzzzz73,zzzzz94	false
1447		zzzzz73,zzzzz89	false
1448		zzzzz73,zzzzz87	false
1449		zzzzz73,zzzzz79	false
1450		zzzzz73,zzzzz74	false
1451		zzzzz73,zzzzz86	false
1452		zzzzz73,zzzzz81	false
1453		zzzzz73,zzzzz77	false
1454		zzzzz73,zzzzz83	false
1455		zzzzz73,zzzzz82	false
1456		zzzzz73,zzzzz97	false
1457		zzzzz73,zzzzz84	false
1458		zzzzz73,zzzzz90	false
1459		zzzzz73,zzzzz85	false
1460		zzzzz73,zzzzz98	false
1461		zzzzz73,zzzzz96	false
1462		zzzzz73,zzzzz75	false
1463		zzzzz72,zzzzzz3	false
1464		zzzzz72,zzzzzz2	false
1465		zzzzz72,zzzzzz4	false
1466		zzzzz72,zzzzzz9	false
1467		zzzzz72,zzzzzz1	false
1468		zzzzz72,zzzzzz7	false
1469		zzzzz72,zzzzzz8	false
1470		zzzzz72,zzzzzz6	false
1471		zzzzz72,zzzzzz5	false
1472		zzzzz72,zzzzz97	false
1473		zzzzz72,zzzzz75	false
1474		zzzzz72,zzzzz73	false
1475		zzzzz72,zzzzz98	false
1476		zzzzz72,zzzzz96	false
1477		zzzzz72,zzzzz93	false
1478		zzzzz72,zzzzz95	false
1479		zzzzz72,zzzzz74	false
1480		zzzzz72,zzzzz94	false
1481		zzzzz72,zzzzz91	false
1482		zzzzz72,zzzzz92	false
1483		zzzzz72,zzzzz86	false
1484		zzzzz72,zzzzz77	false
1485		zzzzz72,zzzzz88	false
1486		zzzzz72,zzzzz89	false
1487		zzzzz72,zzzzz80	false
1488		zzzzz72,zzzzz83	false
1489		zzzzz72,zzzzz78	false
1490		zzzzz72,zzzzz87	false
1491		zzzzz72,zzzzz84	false
1492		zzzzz72,zzzzz90	false
1493		zzzzz72,zzzzz82	false
1494		zzzzz72,zzzzz85	false
1495		zzzzz72,zzzzz79	false
1496		zzzzz72,zzzzz99	false
1497		zzzzz72,zzzzz76	false
1498		zzzzz72,zzzzz81	false
1499		zzzzz71,zzzzzz3	false
1500		zzzzz71,zzzzzz1	false
1501		zzzzz71,zzzzzz8	false
1502		zzzzz71,zzzzzz9	false
1503		zzzzz71,zzzzzz7	false
1504		zzzzz71,zzzzzz4	false
1505		zzzzz71,zzzzzz6	false
1506		zzzzz71,zzzzzz5	false
1507		zzzzz71,zzzzzz2	false
1508		zzzzz71,zzzzz95	false
1509		zzzzz71,zzzzz93	false
1510		zzzzz71,zzzzz78	false
1511		zzzzz71,zzzzz89	false
1512		zzzzz71,zzzzz88	false
1513		zzzzz71,zzzzz94	false
1514		zzzzz71,zzzzz99	false
1515		zzzzz71,zzzzz87	false
1516		zzzzz71,zzzzz83	false
1517		zzzzz71,zzzzz80	false
1518		zzzzz71,zzzzz74	false
1519		zzzzz71,zzzzz77	false
1520		zzzzz71,zzzzz86	false
1521		zzzzz71,zzzzz92	false
1522		zzzzz71,zzzzz91	false
1523		zzzzz71,zzzzz79	false
1524		zzzzz71,zzzzz72	false
1525		zzzzz71,zzzzz84	false
1526		zzzzz71,zzzzz81	false
1527		zzzzz71,zzzzz85	false
1528		zzzzz71,zzzzz76	false
1529		zzzzz71,zzzzz82	false
1530		zzzzz71,zzzzz90	false
1531		zzzzz71,zzzzz97	false
1532		zzzzz71,zzzzz75	false
1533		zzzzz71,zzzzz73	false
1534		zzzzz71,zzzzz98	false
1535		zzzzz71,zzzzz96	false
1536		zzzzz70,zzzzz93	false
1537		zzzzz70,zzzzzz3	false
1538		zzzzz70,zzzzz95	false
1539		zzzzz70,zzzzzz1	false
1540		zzzzz70,zzzzzz2	false
1541		zzzzz70,zzzzzz8	false
1542		zzzzz70,zzzzzz4	false
1543		zzzzz70,zzzzz89	false
1544		zzzzz70,zzzzzz9	false
1545		zzzzz70,zzzzzz5	false
1546		zzzzz70,zzzzzz7	false
1547		zzzzz70,zzzzz77	false
1548		zzzzz70,zzzzz78	false
1549		zzzzz70,zzzzzz6	false
1550		zzzzz70,zzzzz94	false
1551		zzzzz70,zzzzz80	false
1552		zzzzz70,zzzzz88	false
1553		zzzzz70,zzzzz92	false
1554		zzzzz70,zzzzz91	false
1555		zzzzz70,zzzzz84	false
1556		zzzzz70,zzzzz99	false
1557		zzzzz70,zzzzz79	false
1558		zzzzz70,zzzzz83	false
1559		zzzzz70,zzzzz81	false
1560		zzzzz70,zzzzz76	false
1561		zzzzz70,zzzzz85	false
1562		zzzzz70,zzzzz72	false
1563		zzzzz70,zzzzz86	false
1564		zzzzz70,zzzzz82	false
1565		zzzzz70,zzzzz87	false
1566		zzzzz70,zzzzz90	false
1567		zzzzz70,zzzzz74	false
1568		zzzzz70,zzzzz75	false
1569		zzzzz70,zzzzz73	false
1570		zzzzz70,zzzzz97	false
1571		zzzzz70,zzzzz71	false
1572		zzzzz70,zzzzz98	false
1573		zzzzz70,zzzzz96	false
1574		zzzzz69,zzzzzz4	false
1575		zzzzz69,zzzzzz3	false
1576		zzzzz69,zzzzzz5	false
1577		zzzzz69,zzzzzz2	false
1578		zzzzz69,zzzzzz1	false
1579		zzzzz69,zzzzzz9	false
1580		zzzzz69,zzzzzz6	false
1581		zzzzz69,zzzzzz8	false
1582		zzzzz69,zzzzzz7	false
1583		zzzzz69,zzzzz97	false
1584		zzzzz69,zzzzz91	false
1585		zzzzz69,zzzzz70	false
1586		zzzzz69,zzzzz96	false
1587		zzzzz69,zzzzz71	false
1588		zzzzz69,zzzzz75	false
1589		zzzzz69,zzzzz98	false
1590		zzzzz69,zzzzz93	false
1591		zzzzz69,zzzzz73	false
1592		zzzzz69,zzzzz99	false
1593		zzzzz69,zzzzz94	false
1594		zzzzz69,zzzzz95	false
1595		zzzzz69,zzzzz74	false
1596		zzzzz69,zzzzz81	false
1597		zzzzz69,zzzzz86	false
1598		zzzzz69,zzzzz76	false
1599		zzzzz69,zzzzz72	false
1600		zzzzz69,zzzzz80	false
1601		zzzzz69,zzzzz79	false
1602		zzzzz69,zzzzz88	false
1603		zzzzz69,zzzzz82	false
1604		zzzzz69,zzzzz77	false
1605		zzzzz69,zzzzz78	false
1606		zzzzz69,zzzzz89	false
1607		zzzzz69,zzzzz83	false
1608		zzzzz69,zzzzz92	false
1609		zzzzz69,zzzzz87	false
1610		zzzzz69,zzzzz90	false
1611		zzzzz69,zzzzz85	false
1612		zzzzz69,zzzzz84	false
1613		zzzzz68,zzzzz95	false
1614		zzzzz68,zzzzz93	false
1615		zzzzz68,zzzzzz3	false
1616		zzzzz68,zzzzz94	false
1617		zzzzz68,zzzzzz1	false
1618		zzzzz68,zzzzzz9	false
1619		zzzzz68,zzzzzz8	false
1620		zzzzz68,zzzzzz2	false
1621		zzzzz68,zzzzzz7	false
1622		zzzzz68,zzzzzz4	false
1623		zzzzz68,zzzzz80	false
1624		zzzzz68,zzzzzz5	false
1625		zzzzz68,zzzzz86	false
1626		zzzzz68,zzzzzz6	false
1627		zzzzz68,zzzzz88	false
1628		zzzzz68,zzzzz78	false
1629		zzzzz68,zzzzz79	false
1630		zzzzz68,zzzzz77	false
1631		zzzzz68,zzzzz69	false
1632		zzzzz68,zzzzz92	false
1633		zzzzz68,zzzzz89	false
1634		zzzzz68,zzzzz90	false
1635		zzzzz68,zzzzz83	false
1636		zzzzz68,zzzzz72	false
1637		zzzzz68,zzzzz87	false
1638		zzzzz68,zzzzz91	false
1639		zzzzz68,zzzzz99	false
1640		zzzzz68,zzzzz76	false
1641		zzzzz68,zzzzz82	false
1642		zzzzz68,zzzzz84	false
1643		zzzzz68,zzzzz85	false
1644		zzzzz68,zzzzz81	false
1645		zzzzz68,zzzzz74	false
1646		zzzzz68,zzzzz75	false
1647		zzzzz68,zzzzz73	false
1648		zzzzz68,zzzzz97	false
1649		zzzzz68,zzzzz71	false
1650		zzzzz68,zzzzz98	false
1651		zzzzz68,zzzzz70	false
1652		zzzzz68,zzzzz96	false
1653		zzzzz67,zzzzz95	false
1654		zzzzz67,zzzzz93	false
1655		zzzzz67,zzzzzz3	false
1656		zzzzz67,zzzzzz8	false
1657		zzzzz67,zzzzzz9	false
1658		zzzzz67,zzzzzz2	false
1659		zzzzz67,zzzzzz1	false
1660		zzzzz67,zzzzzz7	false
1661		zzzzz67,zzzzzz4	false
1662		zzzzz67,zzzzzz5	false
1663		zzzzz67,zzzzzz6	false
1664		zzzzz67,zzzzz88	false
1665		zzzzz67,zzzzz80	false
1666		zzzzz67,zzzzz92	false
1667		zzzzz67,zzzzz89	false
1668		zzzzz67,zzzzz77	false
1669		zzzzz67,zzzzz94	false
1670		zzzzz67,zzzzz91	false
1671		zzzzz67,zzzzz74	false
1672		zzzzz67,zzzzz78	false
1673		zzzzz67,zzzzz84	false
1674		zzzzz67,zzzzz83	false
1675		zzzzz67,zzzzz86	false
1676		zzzzz67,zzzzz79	false
1677		zzzzz67,zzzzz99	false
1678		zzzzz67,zzzzz81	false
1679		zzzzz67,zzzzz76	false
1680		zzzzz67,zzzzz90	false
1681		zzzzz67,zzzzz72	false
1682		zzzzz67,zzzzz82	false
1683		zzzzz67,zzzzz85	false
1684		zzzzz67,zzzzz87	false
1685		zzzzz67,zzzzz69	false
1686		zzzzz67,zzzzz75	false
1687		zzzzz67,zzzzz73	false
1688		zzzzz67,zzzzz97	false
1689		zzzzz67,zzzzz71	false
1690		zzzzz67,zzzzz70	false
1691		zzzzz67,zzzzz68	false
1692		zzzzz67,zzzzz96	false
1693		zzzzz67,zzzzz98	false
1694		zzzzz66,zzzzzz2	false
1695		zzzzz66,zzzzzz9	false
1696		zzzzz66,zzzzzz3	false
1697		zzzzz66,zzzzzz8	false
1698		zzzzz66,zzzzzz4	false
1699		zzzzz66,zzzzzz1	false
1700		zzzzz66,zzzzzz5	false
1701		zzzzz66,zzzzzz7	false
1702		zzzzz66,zzzzzz6	false
1703		zzzzz66,zzzzz75	false
1704		zzzzz66,zzzzz97	false
1705		zzzzz66,zzzzz71	false
1706		zzzzz66,zzzzz91	false
1707		zzzzz66,zzzzz70	false
1708		zzzzz66,zzzzz68	false
1709		zzzzz66,zzzzz96	false
1710		zzzzz66,zzzzz98	false
1711		zzzzz66,zzzzz93	false
1712		zzzzz66,zzzzz67	false
1713		zzzzz66,zzzzz73	false
1714		zzzzz66,zzzzz99	false
1715		zzzzz66,zzzzz74	false
1716		zzzzz66,zzzzz95	false
1717		zzzzz66,zzzzz79	false
1718		zzzzz66,zzzzz94	false
1719		zzzzz66,zzzzz81	false
1720		zzzzz66,zzzzz80	false
1721		zzzzz66,zzzzz78	false
1722		zzzzz66,zzzzz72	false
1723		zzzzz66,zzzzz88	false
1724		zzzzz66,zzzzz76	false
1725		zzzzz66,zzzzz86	false
1726		zzzzz66,zzzzz89	false
1727		zzzzz66,zzzzz77	false
1728		zzzzz66,zzzzz82	false
1729		zzzzz66,zzzzz83	false
1730		zzzzz66,zzzzz92	false
1731		zzzzz66,zzzzz87	false
1732		zzzzz66,zzzzz90	false
1733		zzzzz66,zzzzz69	false
1734		zzzzz66,zzzzz84	false
1735		zzzzz66,zzzzz85	false
1736		zzzzz65,zzzzzz4	false
1737		zzzzz65,zzzzzz2	false
1738		zzzzz65,zzzzzz9	false
1739		zzzzz65,zzzzzz6	false
1740		zzzzz65,zzzzzz3	false
1741		zzzzz65,zzzzzz8	false
1742		zzzzz65,zzzzzz1	false
1743		zzzzz65,zzzzzz7	false
1744		zzzzz65,zzzzzz5	false
1745		zzzzz65,zzzzz97	false
1746		zzzzz65,zzzzz70	false
1747		zzzzz65,zzzzz96	false
1748		zzzzz65,zzzzz68	false
1749		zzzzz65,zzzzz98	false
1750		zzzzz65,zzzzz67	false
1751		zzzzz65,zzzzz71	false
1752		zzzzz65,zzzzz73	false
1753		zzzzz65,zzzzz75	false
1754		zzzzz65,zzzzz91	false
1755		zzzzz65,zzzzz99	false
1756		zzzzz65,zzzzz74	false
1757		zzzzz65,zzzzz72	false
1758		zzzzz65,zzzzz76	false
1759		zzzzz65,zzzzz95	false
1760		zzzzz65,zzzzz81	false
1761		zzzzz65,zzzzz93	false
1762		zzzzz65,zzzzz94	false
1763		zzzzz65,zzzzz66	false
1764		zzzzz65,zzzzz87	false
1765		zzzzz65,zzzzz80	false
1766		zzzzz65,zzzzz84	false
1767		zzzzz65,zzzzz86	false
1768		zzzzz65,zzzzz82	false
1769		zzzzz65,zzzzz69	false
1770		zzzzz65,zzzzz90	false
1771		zzzzz65,zzzzz88	false
1772		zzzzz65,zzzzz85	false
1773		zzzzz65,zzzzz77	false
1774		zzzzz65,zzzzz83	false
1775		zzzzz65,zzzzz79	false
1776		zzzzz65,zzzzz78	false
1777		zzzzz65,zzzzz92	false
1778		zzzzz65,zzzzz89	false
1779		zzzzz64,zzzzzz3	false
1780		zzzzz64,zzzzzz4	false
1781		zzzzz64,zzzzzz5	false
1782		zzzzz64,zzzzzz7	false
1783		zzzzz64,zzzzzz9	false
1784		zzzzz64,zzzzz99	false
1785		zzzzz64,zzzzzz1	false
1786		zzzzz64,zzzzzz8	false
1787		zzzzz64,zzzzzz2	false
1788		zzzzz64,zzzzzz6	false
1789		zzzzz64,zzzzz95	false
1790		zzzzz64,zzzzz79	false
1791		zzzzz64,zzzzz89	false
1792		zzzzz64,zzzzz78	false
1793		zzzzz64,zzzzz91	false
1794		zzzzz64,zzzzz93	false
1795		zzzzz64,zzzzz69	false
1796		zzzzz64,zzzzz88	false
1797		zzzzz64,zzzzz65	false
1798		zzzzz64,zzzzz76	false
1799		zzzzz64,zzzzz80	false
1800		zzzzz64,zzzzz83	false
1801		zzzzz64,zzzzz81	false
1802		zzzzz64,zzzzz92	false
1803		zzzzz64,zzzzz94	false
1804		zzzzz64,zzzzz72	false
1805		zzzzz64,zzzzz82	false
1806		zzzzz64,zzzzz86	false
1807		zzzzz64,zzzzz66	false
1808		zzzzz64,zzzzz77	false
1809		zzzzz64,zzzzz87	false
1810		zzzzz64,zzzzz84	false
1811		zzzzz64,zzzzz97	false
1812		zzzzz64,zzzzz90	false
1813		zzzzz64,zzzzz85	false
1814		zzzzz64,zzzzz74	false
1815		zzzzz64,zzzzz98	false
1816		zzzzz64,zzzzz70	false
1817		zzzzz64,zzzzz67	false
1818		zzzzz64,zzzzz68	false
1819		zzzzz64,zzzzz96	false
1820		zzzzz64,zzzzz71	false
1821		zzzzz64,zzzzz73	false
1822		zzzzz64,zzzzz75	false
1823		zzzzz63,zzzzz95	false
1824		zzzzz63,zzzzzz3	false
1825		zzzzz63,zzzzz93	false
1826		zzzzz63,zzzzzz9	false
1827		zzzzz63,zzzzzz2	false
1828		zzzzz63,zzzzzz1	false
1829		zzzzz63,zzzzzz8	false
1830		zzzzz63,zzzzzz4	false
1831		zzzzz63,zzzzzz7	false
1832		zzzzz63,zzzzzz5	false
1833		zzzzz63,zzzzz88	false
1834		zzzzz63,zzzzz80	false
1835		zzzzz63,zzzzzz6	false
1836		zzzzz63,zzzzz94	false
1837		zzzzz63,zzzzz65	false
1838		zzzzz63,zzzzz89	false
1839		zzzzz63,zzzzz77	false
1840		zzzzz63,zzzzz92	false
1841		zzzzz63,zzzzz86	false
1842		zzzzz63,zzzzz83	false
1843		zzzzz63,zzzzz91	false
1844		zzzzz63,zzzzz90	false
1845		zzzzz63,zzzzz99	false
1846		zzzzz63,zzzzz78	false
1847		zzzzz63,zzzzz81	false
1848		zzzzz63,zzzzz79	false
1849		zzzzz63,zzzzz87	false
1850		zzzzz63,zzzzz76	false
1851		zzzzz63,zzzzz72	false
1852		zzzzz63,zzzzz84	false
1853		zzzzz63,zzzzz69	false
1854		zzzzz63,zzzzz82	false
1855		zzzzz63,zzzzz66	false
1856		zzzzz63,zzzzz74	false
1857		zzzzz63,zzzzz85	false
1858		zzzzz63,zzzzz64	false
1859		zzzzz63,zzzzz75	false
1860		zzzzz63,zzzzz73	false
1861		zzzzz63,zzzzz97	false
1862		zzzzz63,zzzzz71	false
1863		zzzzz63,zzzzz70	false
1864		zzzzz63,zzzzz98	false
1865		zzzzz63,zzzzz68	false
1866		zzzzz63,zzzzz67	false
1867		zzzzz63,zzzzz96	false
1868		zzzzz62,zzzzzz3	false
1869		zzzzz62,zzzzz94	false
1870		zzzzz62,zzzzzz8	false
1871		zzzzz62,zzzzzz1	false
1872		zzzzz62,zzzzzz4	false
1873		zzzzz62,zzzzzz9	false
1874		zzzzz62,zzzzz95	false
1875		zzzzz62,zzzzzz2	false
1876		zzzzz62,zzzzz68	false
1877		zzzzz62,zzzzzz6	false
1878		zzzzz62,zzzzz75	false
1879		zzzzz62,zzzzz70	false
1880		zzzzz62,zzzzzz7	false
1881		zzzzz62,zzzzz98	false
1882		zzzzz62,zzzzz67	false
1883		zzzzz62,zzzzz63	false
1884		zzzzz62,zzzzz96	false
1885		zzzzz62,zzzzz97	false
1886		zzzzz62,zzzzzz5	false
1887		zzzzz62,zzzzz76	false
1888		zzzzz62,zzzzz73	false
1889		zzzzz62,zzzzz99	false
1890		zzzzz62,zzzzz90	false
1891		zzzzz62,zzzzz64	false
1892		zzzzz62,zzzzz87	false
1893		zzzzz62,zzzzz81	false
1894		zzzzz62,zzzzz71	false
1895		zzzzz62,zzzzz72	false
1896		zzzzz62,zzzzz85	false
1897		zzzzz62,zzzzz91	false
1898		zzzzz62,zzzzz84	false
1899		zzzzz62,zzzzz69	false
1900		zzzzz62,zzzzz88	false
1901		zzzzz62,zzzzz80	false
1902		zzzzz62,zzzzz66	false
1903		zzzzz62,zzzzz86	false
1904		zzzzz62,zzzzz82	false
1905		zzzzz62,zzzzz77	false
1906		zzzzz62,zzzzz89	false
1907		zzzzz62,zzzzz92	false
1908		zzzzz62,zzzzz65	false
1909		zzzzz62,zzzzz83	false
1910		zzzzz62,zzzzz74	false
1911		zzzzz62,zzzzz79	false
1912		zzzzz62,zzzzz78	false
1913		zzzzz61,zzzzz97	false
1914		zzzzz61,zzzzz99	false
1915		zzzzz61,zzzzz63	false
1916		zzzzz61,zzzzz96	false
1917		zzzzz61,zzzzz98	false
1918		zzzzz61,zzzzz78	false
1919		zzzzz61,zzzzz79	false
1920		zzzzz61,zzzzz75	false
1921		zzzzz61,zzzzz91	false
1922		zzzzz61,zzzzz81	false
1923		zzzzz61,zzzzz86	false
1924		zzzzz61,zzzzz80	false
1925		zzzzz61,zzzzz68	false
1926		zzzzz61,zzzzz89	false
1927		zzzzz61,zzzzz76	false
1928		zzzzz61,zzzzz71	false
1929		zzzzz61,zzzzz65	false
1930		zzzzz61,zzzzz88	false
1931		zzzzz61,zzzzz93	false
1932		zzzzz61,zzzzz92	false
1933		zzzzz61,zzzzz83	false
1934		zzzzz61,zzzzz70	false
1935		zzzzz61,zzzzz73	false
1936		zzzzz61,zzzzz67	false
1937		zzzzz61,zzzzz85	false
1938		zzzzz61,zzzzz77	false
1939		zzzzz61,zzzzz69	false
1940		zzzzz61,zzzzz84	false
1941		zzzzz61,zzzzz64	false
1942		zzzzz61,zzzzz72	false
1943		zzzzz61,zzzzz66	false
1944		zzzzz61,zzzzz95	false
1945		zzzzz61,zzzzz90	false
1946		zzzzz61,zzzzz94	false
1947		zzzzz61,zzzzz87	false
1948		zzzzz61,zzzzz82	false
1949		zzzzz61,zzzzz74	false
1950		zzzzz60,zzzzz95	false
1951		zzzzz60,zzzzz88	false
1952		zzzzz60,zzzzz77	false
1953		zzzzz60,zzzzz92	false
1954		zzzzz60,zzzzz80	false
1955		zzzzz60,zzzzz79	false
1956		zzzzz60,zzzzz65	false
1957		zzzzz60,zzzzz94	false
1958		zzzzz60,zzzzz83	false
1959		zzzzz60,zzzzz81	false
1960		zzzzz60,zzzzz76	false
1961		zzzzz60,zzzzz89	false
1962		zzzzz60,zzzzz85	false
1963		zzzzz60,zzzzz72	false
1964		zzzzz60,zzzzz90	false
1965		zzzzz60,zzzzz91	false
1966		zzzzz60,zzzzz78	false
1967		zzzzz60,zzzzz69	false
1968		zzzzz60,zzzzz84	false
1969		zzzzz60,zzzzz82	false
1970		zzzzz60,zzzzz86	false
1971		zzzzz60,zzzzz87	false
1972		zzzzz60,zzzzz66	false
1973		zzzzz60,zzzzz93	false
1974		zzzzz60,zzzzz61	false
1975		zzzzz60,zzzzz74	false
1976		zzzzz60,zzzzz64	false
1977		zzzzz60,zzzzz73	false
1978		zzzzz60,zzzzz75	false
1979		zzzzz60,zzzzz71	false
1980		zzzzz60,zzzzz98	false
1981		zzzzz60,zzzzz70	false
1982		zzzzz60,zzzzz68	false
1983		zzzzz60,zzzzz96	false
1984		zzzzz60,zzzzz67	false
1985		zzzzz60,zzzzz63	false
1986		zzzzz59,zzzzz97	false
1987		zzzzz59,zzzzz95	false
1988		zzzzz59,zzzzz65	false
1989		zzzzz59,zzzzz80	false
1990		zzzzz59,zzzzz83	false
1991		zzzzz59,zzzzz88	false
1992		zzzzz59,zzzzz89	false
1993		zzzzz59,zzzzz77	false
1994		zzzzz59,zzzzz79	false
1995		zzzzz59,zzzzz94	false
1996		zzzzz59,zzzzz72	false
1997		zzzzz59,zzzzz87	false
1998		zzzzz59,zzzzz92	false
1999		zzzzz59,zzzzz66	false
2000		zzzzz59,zzzzz82	false
2001		zzzzz59,zzzzz86	false
2002		zzzzz59,zzzzz78	false
2003		zzzzz59,zzzzz93	false
2004		zzzzz59,zzzzz81	false
2005		zzzzz59,zzzzz90	false
2006		zzzzz59,zzzzz61	false
2007		zzzzz59,zzzzz84	false
2008		zzzzz59,zzzzz76	false
2009		zzzzz59,zzzzz85	false
2010		zzzzz59,zzzzz91	false
2011		zzzzz59,zzzzz69	false
2012		zzzzz59,zzzzz74	false
2013		zzzzz59,zzzzz98	false
2014		zzzzz59,zzzzz60	false
2015		zzzzz59,zzzzz75	false
2016		zzzzz59,zzzzz70	false
2017		zzzzz59,zzzzz67	false
2018		zzzzz59,zzzzz64	false
2019		zzzzz59,zzzzz73	false
2020		zzzzz59,zzzzz63	false
2021		zzzzz59,zzzzz96	false
2022		zzzzz59,zzzzz68	false
2023		zzzzz59,zzzzz71	false
2024		zzzzz58,zzzzz60	false
2025		zzzzz58,zzzzzz4	false
2026		zzzzz58,zzzzz59	false
2027		zzzzz58,zzzzzz3	false
2028		zzzzz58,zzzzzz7	false
2029		zzzzz58,zzzzzz5	false
2030		zzzzz58,zzzzzz2	false
2031		zzzzz58,zzzzz75	false
2032		zzzzz58,zzzzzz9	false
2033		zzzzz58,zzzzzz8	false
2034		zzzzz58,zzzzzz1	false
2035		zzzzz58,zzzzzz6	false
2036		zzzzz58,zzzzz97	false
2037		zzzzz58,zzzzz61	false
2038		zzzzz58,zzzzz96	false
2039		zzzzz58,zzzzz62	false
2040		zzzzz58,zzzzz74	false
2041		zzzzz58,zzzzz70	false
2042		zzzzz58,zzzzz64	false
2043		zzzzz58,zzzzz98	false
2044		zzzzz58,zzzzz73	false
2045		zzzzz58,zzzzz63	false
2046		zzzzz58,zzzzz67	false
2047		zzzzz58,zzzzz68	false
2048		zzzzz58,zzzzz71	false
2049		zzzzz58,zzzzz93	false
2050		zzzzz58,zzzzz95	false
2051		zzzzz58,zzzzz94	false
2052		zzzzz58,zzzzz91	false
2053		zzzzz58,zzzzz66	false
2054		zzzzz58,zzzzz88	false
2055		zzzzz58,zzzzz77	false
2056		zzzzz58,zzzzz89	false
2057		zzzzz58,zzzzz80	false
2058		zzzzz58,zzzzz86	false
2059		zzzzz58,zzzzz87	false
2060		zzzzz58,zzzzz82	false
2061		zzzzz58,zzzzz92	false
2062		zzzzz58,zzzzz84	false
2063		zzzzz58,zzzzz78	false
2064		zzzzz58,zzzzz85	false
2065		zzzzz58,zzzzz83	false
2066		zzzzz58,zzzzz90	false
2067		zzzzz58,zzzzz65	false
2068		zzzzz58,zzzzz69	false
2069		zzzzz58,zzzzz79	false
2070		zzzzz58,zzzzz99	false
2071		zzzzz58,zzzzz76	false
2072		zzzzz58,zzzzz81	false
2073		zzzzz58,zzzzz72	false
2074		zzzzz57,zzzzzz4	false
2075		zzzzz57,zzzzzz3	false
2076		zzzzz57,zzzzzz5	false
2077		zzzzz57,zzzzzz9	false
2078		zzzzz57,zzzzzz1	false
2079		zzzzz57,zzzzzz2	false
2080		zzzzz57,zzzzzz6	false
2081		zzzzz57,zzzzzz8	false
2082		zzzzz57,zzzzzz7	false
2083		zzzzz57,zzzzz68	false
2084		zzzzz57,zzzzz64	false
2085		zzzzz57,zzzzz63	false
2086		zzzzz57,zzzzz97	false
2087		zzzzz57,zzzzz96	false
2088		zzzzz57,zzzzz91	false
2089		zzzzz57,zzzzz75	false
2090		zzzzz57,zzzzz70	false
2091		zzzzz57,zzzzz67	false
2092		zzzzz57,zzzzz98	false
2093		zzzzz57,zzzzz73	false
2094		zzzzz57,zzzzz71	false
2095		zzzzz57,zzzzz95	false
2096		zzzzz57,zzzzz94	false
2097		zzzzz57,zzzzz99	false
2098		zzzzz57,zzzzz76	false
2099		zzzzz57,zzzzz84	false
2100		zzzzz57,zzzzz93	false
2101		zzzzz57,zzzzz90	false
2102		zzzzz57,zzzzz85	false
2103		zzzzz57,zzzzz87	false
2104		zzzzz57,zzzzz69	false
2105		zzzzz57,zzzzz74	false
2106		zzzzz57,zzzzz58	false
2107		zzzzz57,zzzzz72	false
2108		zzzzz57,zzzzz66	false
2109		zzzzz57,zzzzz81	false
2110		zzzzz57,zzzzz88	false
2111		zzzzz57,zzzzz82	false
2112		zzzzz57,zzzzz86	false
2113		zzzzz57,zzzzz80	false
2114		zzzzz57,zzzzz77	false
2115		zzzzz57,zzzzz89	false
2116		zzzzz57,zzzzz92	false
2117		zzzzz57,zzzzz62	false
2118		zzzzz57,zzzzz83	false
2119		zzzzz57,zzzzz65	false
2120		zzzzz57,zzzzz79	false
2121		zzzzz57,zzzzz78	false
2122		zzzzz56,zzzzz60	false
2123		zzzzz56,zzzzz73	false
2124		zzzzz56,zzzzz72	false
2125		zzzzz56,zzzzz74	false
2126		zzzzz56,zzzzz58	false
2127		zzzzz56,zzzzz81	false
2128		zzzzz56,zzzzz76	false
2129		zzzzz56,zzzzz91	false
2130		zzzzz56,zzzzz66	false
2131		zzzzz56,zzzzz85	false
2132		zzzzz56,zzzzz84	false
2133		zzzzz56,zzzzz86	false
2134		zzzzz56,zzzzz82	false
2135		zzzzz56,zzzzz88	false
2136		zzzzz56,zzzzz87	false
2137		zzzzz56,zzzzz95	false
2138		zzzzz56,zzzzz90	false
2139		zzzzz56,zzzzz89	false
2140		zzzzz56,zzzzz80	false
2141		zzzzz56,zzzzz69	false
2142		zzzzz56,zzzzz94	false
2143		zzzzz56,zzzzz77	false
2144		zzzzz56,zzzzz83	false
2145		zzzzz56,zzzzz92	false
2146		zzzzz56,zzzzz65	false
2147		zzzzz56,zzzzz79	false
2148		zzzzz56,zzzzz93	false
2149		zzzzz56,zzzzz78	false
2150		zzzzz55,zzzzzz9	false
2151		zzzzz55,zzzzzz3	false
2152		zzzzz55,zzzzzz2	false
2153		zzzzz55,zzzzzz8	false
2154		zzzzz55,zzzzzz4	false
2155		zzzzz55,zzzzz60	false
2156		zzzzz55,zzzzzz1	false
2157		zzzzz55,zzzzz56	false
2158		zzzzz55,zzzzzz5	false
2159		zzzzz55,zzzzzz7	false
2160		zzzzz55,zzzzz59	false
2161		zzzzz55,zzzzz75	false
2162		zzzzz55,zzzzzz6	false
2163		zzzzz55,zzzzz61	false
2164		zzzzz55,zzzzz62	false
2165		zzzzz55,zzzzz97	false
2166		zzzzz55,zzzzz64	false
2167		zzzzz55,zzzzz98	false
2168		zzzzz55,zzzzz67	false
2169		zzzzz55,zzzzz68	false
2170		zzzzz55,zzzzz70	false
2171		zzzzz55,zzzzz73	false
2172		zzzzz55,zzzzz63	false
2173		zzzzz55,zzzzz57	false
2174		zzzzz55,zzzzz96	false
2175		zzzzz55,zzzzz74	false
2176		zzzzz55,zzzzz71	false
2177		zzzzz55,zzzzz93	false
2178		zzzzz55,zzzzz94	false
2179		zzzzz55,zzzzz95	false
2180		zzzzz55,zzzzz91	false
2181		zzzzz55,zzzzz66	false
2182		zzzzz55,zzzzz69	false
2183		zzzzz55,zzzzz84	false
2184		zzzzz55,zzzzz88	false
2185		zzzzz55,zzzzz80	false
2186		zzzzz55,zzzzz79	false
2187		zzzzz55,zzzzz89	false
2188		zzzzz55,zzzzz85	false
2189		zzzzz55,zzzzz77	false
2190		zzzzz55,zzzzz78	false
2191		zzzzz55,zzzzz83	false
2192		zzzzz55,zzzzz65	false
2193		zzzzz55,zzzzz87	false
2194		zzzzz55,zzzzz86	false
2195		zzzzz55,zzzzz82	false
2196		zzzzz55,zzzzz90	false
2197		zzzzz55,zzzzz92	false
2198		zzzzz55,zzzzz72	false
2199		zzzzz55,zzzzz58	false
2200		zzzzz55,zzzzz99	false
2201		zzzzz55,zzzzz76	false
2202		zzzzz55,zzzzz81	false
2203		zzzzz54,zzzzz60	false
2204		zzzzz54,zzzzzz3	false
2205		zzzzz54,zzzzzz7	false
2206		zzzzz54,zzzzzz9	false
2207		zzzzz54,zzzzzz2	false
2208		zzzzz54,zzzzzz1	false
2209		zzzzz54,zzzzzz8	false
2210		zzzzz54,zzzzz59	false
2211		zzzzz54,zzzzzz4	false
2212		zzzzz54,zzzzzz6	false
2213		zzzzz54,zzzzz97	false
2214		zzzzz54,zzzzz70	false
2215		zzzzz54,zzzzzz5	false
2216		zzzzz54,zzzzz75	false
2217		zzzzz54,zzzzz98	false
2218		zzzzz54,zzzzz96	false
2219		zzzzz54,zzzzz63	false
2220		zzzzz54,zzzzz61	false
2221		zzzzz54,zzzzz67	false
2222		zzzzz54,zzzzz68	false
2223		zzzzz54,zzzzz91	false
2224		zzzzz54,zzzzz73	false
2225		zzzzz54,zzzzz64	false
2226		zzzzz54,zzzzz71	false
2227		zzzzz54,zzzzz56	false
2228		zzzzz54,zzzzz99	false
2229		zzzzz54,zzzzz74	false
2230		zzzzz54,zzzzz62	false
2231		zzzzz54,zzzzz66	false
2232		zzzzz54,zzzzz95	false
2233		zzzzz54,zzzzz76	false
2234		zzzzz54,zzzzz72	false
2235		zzzzz54,zzzzz85	false
2236		zzzzz54,zzzzz87	false
2237		zzzzz54,zzzzz81	false
2238		zzzzz54,zzzzz84	false
2239		zzzzz54,zzzzz55	false
2240		zzzzz54,zzzzz94	false
2241		zzzzz54,zzzzz90	false
2242		zzzzz54,zzzzz58	false
2243		zzzzz54,zzzzz88	false
2244		zzzzz54,zzzzz69	false
2245		zzzzz54,zzzzz86	false
2246		zzzzz54,zzzzz82	false
2247		zzzzz54,zzzzz80	false
2248		zzzzz54,zzzzz77	false
2249		zzzzz54,zzzzz89	false
2250		zzzzz54,zzzzz92	false
2251		zzzzz54,zzzzz83	false
2252		zzzzz54,zzzzz65	false
2253		zzzzz54,zzzzz93	false
2254		zzzzz54,zzzzz57	false
2255		zzzzz54,zzzzz79	false
2256		zzzzz54,zzzzz78	false
2257		zzzzz53,zzzzz56	false
2258		zzzzz53,zzzzzz3	false
2259		zzzzz53,zzzzzz4	false
2260		zzzzz53,zzzzzz1	false
2261		zzzzz53,zzzzzz5	false
2262		zzzzz53,zzzzzz9	false
2263		zzzzz53,zzzzzz8	false
2264		zzzzz53,zzzzzz7	false
2265		zzzzz53,zzzzzz6	false
2266		zzzzz53,zzzzzz2	false
2267		zzzzz53,zzzzz93	false
2268		zzzzz53,zzzzz88	false
2269		zzzzz53,zzzzz61	false
2270		zzzzz53,zzzzz99	false
2271		zzzzz53,zzzzz95	false
2272		zzzzz53,zzzzz62	false
2273		zzzzz53,zzzzz78	false
2274		zzzzz53,zzzzz89	false
2275		zzzzz53,zzzzz91	false
2276		zzzzz53,zzzzz57	false
2277		zzzzz53,zzzzz92	false
2278		zzzzz53,zzzzz69	false
2279		zzzzz53,zzzzz80	false
2280		zzzzz53,zzzzz76	false
2281		zzzzz53,zzzzz87	false
2282		zzzzz53,zzzzz94	false
2283		zzzzz53,zzzzz79	false
2284		zzzzz53,zzzzz74	false
2285		zzzzz53,zzzzz86	false
2286		zzzzz53,zzzzz72	false
2287		zzzzz53,zzzzz65	false
2288		zzzzz53,zzzzz81	false
2289		zzzzz53,zzzzz77	false
2290		zzzzz53,zzzzz83	false
2291		zzzzz53,zzzzz55	false
2292		zzzzz53,zzzzz60	false
2293		zzzzz53,zzzzz58	false
2294		zzzzz53,zzzzz82	false
2295		zzzzz53,zzzzz97	false
2296		zzzzz53,zzzzz84	false
2297		zzzzz53,zzzzz54	false
2298		zzzzz53,zzzzz66	false
2299		zzzzz53,zzzzz59	false
2300		zzzzz53,zzzzz90	false
2301		zzzzz53,zzzzz85	false
2302		zzzzz53,zzzzz98	false
2303		zzzzz53,zzzzz67	false
2304		zzzzz53,zzzzz63	false
2305		zzzzz53,zzzzz70	false
2306		zzzzz53,zzzzz96	false
2307		zzzzz53,zzzzz68	false
2308		zzzzz53,zzzzz71	false
2309		zzzzz53,zzzzz75	false
2310		zzzzz53,zzzzz64	false
2311		zzzzz53,zzzzz73	false
2312		zzzzz52,zzzzzz3	false
2313		zzzzz52,zzzzzz1	false
2314		zzzzz52,zzzzzz8	false
2315		zzzzz52,zzzzz61	false
2316		zzzzz52,zzzzzz2	false
2317		zzzzz52,zzzzzz9	false
2318		zzzzz52,zzzzz93	false
2319		zzzzz52,zzzzzz7	false
2320		zzzzz52,zzzzzz4	false
2321		zzzzz52,zzzzzz6	false
2322		zzzzz52,zzzzzz5	false
2323		zzzzz52,zzzzz89	false
2324		zzzzz52,zzzzz95	false
2325		zzzzz52,zzzzz92	false
2326		zzzzz52,zzzzz72	false
2327		zzzzz52,zzzzz88	false
2328		zzzzz52,zzzzz57	false
2329		zzzzz52,zzzzz84	false
2330		zzzzz52,zzzzz99	false
2331		zzzzz52,zzzzz87	false
2332		zzzzz52,zzzzz62	false
2333		zzzzz52,zzzzz83	false
2334		zzzzz52,zzzzz80	false
2335		zzzzz52,zzzzz69	false
2336		zzzzz52,zzzzz94	false
2337		zzzzz52,zzzzz91	false
2338		zzzzz52,zzzzz65	false
2339		zzzzz52,zzzzz77	false
2340		zzzzz52,zzzzz79	false
2341		zzzzz52,zzzzz74	false
2342		zzzzz52,zzzzz66	false
2343		zzzzz52,zzzzz86	false
2344		zzzzz52,zzzzz81	false
2345		zzzzz52,zzzzz54	false
2346		zzzzz52,zzzzz78	false
2347		zzzzz52,zzzzz58	false
2348		zzzzz52,zzzzz90	false
2349		zzzzz52,zzzzz85	false
2350		zzzzz52,zzzzz76	false
2351		zzzzz52,zzzzz60	false
2352		zzzzz52,zzzzz55	false
2353		zzzzz52,zzzzz82	false
2354		zzzzz52,zzzzz59	false
2355		zzzzz52,zzzzz97	false
2356		zzzzz52,zzzzz75	false
2357		zzzzz52,zzzzz64	false
2358		zzzzz52,zzzzz73	false
2359		zzzzz52,zzzzz53	false
2360		zzzzz52,zzzzz68	false
2361		zzzzz52,zzzzz70	false
2362		zzzzz52,zzzzz98	false
2363		zzzzz52,zzzzz67	false
2364		zzzzz52,zzzzz63	false
2365		zzzzz52,zzzzz96	false
2366		zzzzz52,zzzzz71	false
2367		zzzzz51,zzzzz61	false
2368		zzzzz51,zzzzz95	false
2369		zzzzz51,zzzzzz3	false
2370		zzzzz51,zzzzzz1	false
2371		zzzzz51,zzzzz94	false
2372		zzzzz51,zzzzzz9	false
2373		zzzzz51,zzzzzz8	false
2374		zzzzz51,zzzzzz2	false
2375		zzzzz51,zzzzzz7	false
2376		zzzzz51,zzzzzz6	false
2377		zzzzz51,zzzzz88	false
2378		zzzzz51,zzzzzz4	false
2379		zzzzz51,zzzzz80	false
2380		zzzzz51,zzzzzz5	false
2381		zzzzz51,zzzzz65	false
2382		zzzzz51,zzzzz77	false
2383		zzzzz51,zzzzz89	false
2384		zzzzz51,zzzzz92	false
2385		zzzzz51,zzzzz79	false
2386		zzzzz51,zzzzz83	false
2387		zzzzz51,zzzzz58	false
2388		zzzzz51,zzzzz86	false
2389		zzzzz51,zzzzz87	false
2390		zzzzz51,zzzzz69	false
2391		zzzzz51,zzzzz85	false
2392		zzzzz51,zzzzz54	false
2393		zzzzz51,zzzzz66	false
2394		zzzzz51,zzzzz78	false
2395		zzzzz51,zzzzz91	false
2396		zzzzz51,zzzzz81	false
2397		zzzzz51,zzzzz72	false
2398		zzzzz51,zzzzz84	false
2399		zzzzz51,zzzzz62	false
2400		zzzzz51,zzzzz75	false
2401		zzzzz51,zzzzz99	false
2402		zzzzz51,zzzzz57	false
2403		zzzzz51,zzzzz82	false
2404		zzzzz51,zzzzz90	false
2405		zzzzz51,zzzzz74	false
2406		zzzzz51,zzzzz76	false
2407		zzzzz51,zzzzz55	false
2408		zzzzz51,zzzzz64	false
2409		zzzzz51,zzzzz53	false
2410		zzzzz51,zzzzz73	false
2411		zzzzz51,zzzzz98	false
2412		zzzzz51,zzzzz67	false
2413		zzzzz51,zzzzz63	false
2414		zzzzz51,zzzzz96	false
2415		zzzzz51,zzzzz68	false
2416		zzzzz51,zzzzz70	false
2417		zzzzz51,zzzzz97	false
2418		zzzzz51,zzzzz71	false
2419		zzzzz51,zzzzz52	false
2420		zzzzz50,zzzzz91	false
2421		zzzzz50,zzzzz69	false
2422		zzzzz50,zzzzz92	false
2423		zzzzz50,zzzzz76	false
2424		zzzzz50,zzzzz55	false
2425		zzzzz50,zzzzz74	false
2426		zzzzz50,zzzzz85	false
2427		zzzzz50,zzzzz58	false
2428		zzzzz50,zzzzz90	false
2429		zzzzz50,zzzzz66	false
2430		zzzzz50,zzzzz96	false
2431		zzzzz50,zzzzz67	false
2432		zzzzz50,zzzzz98	false
2433		zzzzz50,zzzzz63	false
2434		zzzzz50,zzzzz68	false
2435		zzzzz50,zzzzz70	false
2436		zzzzz50,zzzzz97	false
2437		zzzzz50,zzzzz51	false
2438		zzzzz50,zzzzz71	false
2439		zzzzz49,zzzzzz3	false
2440		zzzzz49,zzzzz93	false
2441		zzzzz49,zzzzzz8	false
2442		zzzzz49,zzzzz61	false
2443		zzzzz49,zzzzzz9	false
2444		zzzzz49,zzzzzz2	false
2445		zzzzz49,zzzzzz7	false
2446		zzzzz49,zzzzzz1	false
2447		zzzzz49,zzzzzz5	false
2448		zzzzz49,zzzzzz4	false
2449		zzzzz49,zzzzzz6	false
2450		zzzzz49,zzzzz62	false
2451		zzzzz49,zzzzz57	false
2452		zzzzz49,zzzzz95	false
2453		zzzzz49,zzzzz83	false
2454		zzzzz49,zzzzz79	false
2455		zzzzz49,zzzzz85	false
2456		zzzzz49,zzzzz77	false
2457		zzzzz49,zzzzz89	false
2458		zzzzz49,zzzzz99	false
2459		zzzzz49,zzzzz65	false
2460		zzzzz49,zzzzz80	false
2461		zzzzz49,zzzzz88	false
2462		zzzzz49,zzzzz91	false
2463		zzzzz49,zzzzz92	false
2464		zzzzz49,zzzzz86	false
2465		zzzzz49,zzzzz78	false
2466		zzzzz49,zzzzz87	false
2467		zzzzz49,zzzzz72	false
2468		zzzzz49,zzzzz94	false
2469		zzzzz49,zzzzz66	false
2470		zzzzz49,zzzzz76	false
2471		zzzzz49,zzzzz54	false
2472		zzzzz49,zzzzz81	false
2473		zzzzz49,zzzzz58	false
2474		zzzzz49,zzzzz84	false
2475		zzzzz49,zzzzz69	false
2476		zzzzz49,zzzzz55	false
2477		zzzzz49,zzzzz90	false
2478		zzzzz49,zzzzz60	false
2479		zzzzz49,zzzzz74	false
2480		zzzzz49,zzzzz82	false
2481		zzzzz49,zzzzz51	false
2482		zzzzz49,zzzzz97	false
2483		zzzzz49,zzzzz64	false
2484		zzzzz49,zzzzz75	false
2485		zzzzz49,zzzzz73	false
2486		zzzzz49,zzzzz59	false
2487		zzzzz49,zzzzz53	false
2488		zzzzz49,zzzzz98	false
2489		zzzzz49,zzzzz67	false
2490		zzzzz49,zzzzz70	false
2491		zzzzz49,zzzzz63	false
2492		zzzzz49,zzzzz68	false
2493		zzzzz49,zzzzz96	false
2494		zzzzz49,zzzzz52	false
2495		zzzzz49,zzzzz71	false
2496		zzzzz48,zzzzz95	false
2497		zzzzz48,zzzzzz3	false
2498		zzzzz48,zzzzzz8	false
2499		zzzzz48,zzzzzz1	false
2500		zzzzz48,zzzzzz9	false
2501		zzzzz48,zzzzzz2	false
2502		zzzzz48,zzzzzz7	false
2503		zzzzz48,zzzzz94	false
2504		zzzzz48,zzzzzz5	false
2505		zzzzz48,zzzzzz6	false
2506		zzzzz48,zzzzzz4	false
2507		zzzzz48,zzzzz80	false
2508		zzzzz48,zzzzz65	false
2509		zzzzz48,zzzzz88	false
2510		zzzzz48,zzzzz89	false
2511		zzzzz48,zzzzz86	false
2512		zzzzz48,zzzzz83	false
2513		zzzzz48,zzzzz62	false
2514		zzzzz48,zzzzz77	false
2515		zzzzz48,zzzzz72	false
2516		zzzzz48,zzzzz57	false
2517		zzzzz48,zzzzz54	false
2518		zzzzz48,zzzzz50	false
2519		zzzzz48,zzzzz99	false
2520		zzzzz48,zzzzz81	false
2521		zzzzz48,zzzzz78	false
2522		zzzzz48,zzzzz59	false
2523		zzzzz48,zzzzz79	false
2524		zzzzz48,zzzzz92	false
2525		zzzzz48,zzzzz84	false
2526		zzzzz48,zzzzz58	false
2527		zzzzz48,zzzzz76	false
2528		zzzzz48,zzzzz82	false
2529		zzzzz48,zzzzz91	false
2530		zzzzz48,zzzzz85	false
2531		zzzzz48,zzzzz66	false
2532		zzzzz48,zzzzz74	false
2533		zzzzz48,zzzzz87	false
2534		zzzzz48,zzzzz69	false
2535		zzzzz48,zzzzz55	false
2536		zzzzz48,zzzzz90	false
2537		zzzzz48,zzzzz75	false
2538		zzzzz48,zzzzz64	false
2539		zzzzz48,zzzzz73	false
2540		zzzzz48,zzzzz53	false
2541		zzzzz48,zzzzz51	false
2542		zzzzz48,zzzzz97	false
2543		zzzzz48,zzzzz98	false
2544		zzzzz48,zzzzz67	false
2545		zzzzz48,zzzzz63	false
2546		zzzzz48,zzzzz52	false
2547		zzzzz48,zzzzz96	false
2548		zzzzz48,zzzzz68	false
2549		zzzzz48,zzzzz70	false
2550		zzzzz48,zzzzz71	false
2551		zzzzz48,zzzzz49	false
2552		zzzzz47,zzzzz59	false
2553		zzzzz47,zzzzz95	false
2554		zzzzz47,zzzzz50	false
2555		zzzzz47,zzzzz61	false
2556		zzzzz47,zzzzzz3	false
2557		zzzzz47,zzzzz94	false
2558		zzzzz47,zzzzzz9	false
2559		zzzzz47,zzzzzz8	false
2560		zzzzz47,zzzzzz2	false
2561		zzzzz47,zzzzzz1	false
2562		zzzzz47,zzzzzz4	false
2563		zzzzz47,zzzzzz5	false
2564		zzzzz47,zzzzz88	false
2565		zzzzz47,zzzzzz7	false
2566		zzzzz47,zzzzzz6	false
2567		zzzzz47,zzzzz80	false
2568		zzzzz47,zzzzz65	false
2569		zzzzz47,zzzzz77	false
2570		zzzzz47,zzzzz79	false
2571		zzzzz47,zzzzz89	false
2572		zzzzz47,zzzzz92	false
2573		zzzzz47,zzzzz78	false
2574		zzzzz47,zzzzz62	false
2575		zzzzz47,zzzzz57	false
2576		zzzzz47,zzzzz86	false
2577		zzzzz47,zzzzz83	false
2578		zzzzz47,zzzzz54	false
2579		zzzzz47,zzzzz72	false
2580		zzzzz47,zzzzz74	false
2581		zzzzz47,zzzzz84	false
2582		zzzzz47,zzzzz91	false
2583		zzzzz47,zzzzz87	false
2584		zzzzz47,zzzzz82	false
2585		zzzzz47,zzzzz90	false
2586		zzzzz47,zzzzz75	false
2587		zzzzz47,zzzzz69	false
2588		zzzzz47,zzzzz85	false
2589		zzzzz47,zzzzz99	false
2590		zzzzz47,zzzzz58	false
2591		zzzzz47,zzzzz81	false
2592		zzzzz47,zzzzz76	false
2593		zzzzz47,zzzzz66	false
2594		zzzzz47,zzzzz55	false
2595		zzzzz47,zzzzz53	false
2596		zzzzz47,zzzzz73	false
2597		zzzzz47,zzzzz64	false
2598		zzzzz47,zzzzz51	false
2599		zzzzz47,zzzzz49	false
2600		zzzzz47,zzzzz52	false
2601		zzzzz47,zzzzz48	false
2602		zzzzz47,zzzzz71	false
2603		zzzzz47,zzzzz70	false
2604		zzzzz47,zzzzz68	false
2605		zzzzz47,zzzzz97	false
2606		zzzzz47,zzzzz67	false
2607		zzzzz47,zzzzz98	false
2608		zzzzz47,zzzzz63	false
2609		zzzzz47,zzzzz96	false
2610		zzzzz46,zzzzz50	false
2611		zzzzz46,zzzzz61	false
2612		zzzzz46,zzzzz95	false
2613		zzzzz46,zzzzzz3	false
2614		zzzzz46,zzzzzz1	false
2615		zzzzz46,zzzzz59	false
2616		zzzzz46,zzzzz94	false
2617		zzzzz46,zzzzzz7	false
2618		zzzzz46,zzzzzz9	false
2619		zzzzz46,zzzzzz8	false
2620		zzzzz46,zzzzzz2	false
2621		zzzzz46,zzzzz65	false
2622		zzzzz46,zzzzz80	false
2623		zzzzz46,zzzzzz4	false
2624		zzzzz46,zzzzz77	false
2625		zzzzz46,zzzzz54	false
2626		zzzzz46,zzzzzz5	false
2627		zzzzz46,zzzzz62	false
2628		zzzzz46,zzzzz88	false
2629		zzzzz46,zzzzzz6	false
2630		zzzzz46,zzzzz57	false
2631		zzzzz46,zzzzz86	false
2632		zzzzz46,zzzzz89	false
2633		zzzzz46,zzzzz78	false
2634		zzzzz46,zzzzz79	false
2635		zzzzz46,zzzzz83	false
2636		zzzzz46,zzzzz92	false
2637		zzzzz46,zzzzz91	false
2638		zzzzz46,zzzzz81	false
2639		zzzzz46,zzzzz85	false
2640		zzzzz46,zzzzz72	false
2641		zzzzz46,zzzzz84	false
2642		zzzzz46,zzzzz76	false
2643		zzzzz46,zzzzz99	false
2644		zzzzz46,zzzzz90	false
2645		zzzzz46,zzzzz55	false
2646		zzzzz46,zzzzz74	false
2647		zzzzz46,zzzzz69	false
2648		zzzzz46,zzzzz58	false
2649		zzzzz46,zzzzz82	false
2650		zzzzz46,zzzzz66	false
2651		zzzzz46,zzzzz87	false
2652		zzzzz46,zzzzz75	false
2653		zzzzz46,zzzzz64	false
2654		zzzzz46,zzzzz53	false
2655		zzzzz46,zzzzz73	false
2656		zzzzz46,zzzzz51	false
2657		zzzzz46,zzzzz49	false
2658		zzzzz46,zzzzz52	false
2659		zzzzz46,zzzzz71	false
2660		zzzzz46,zzzzz48	false
2661		zzzzz46,zzzzz47	false
2662		zzzzz46,zzzzz70	false
2663		zzzzz46,zzzzz97	false
2664		zzzzz46,zzzzz68	false
2665		zzzzz46,zzzzz98	false
2666		zzzzz46,zzzzz67	false
2667		zzzzz46,zzzzz63	false
2668		zzzzz46,zzzzz96	false
2669		zzzzz45,zzzzzz4	false
2670		zzzzz45,zzzzzz3	false
2671		zzzzz45,zzzzz60	false
2672		zzzzz45,zzzzz59	false
2673		zzzzz45,zzzzzz1	false
2674		zzzzz45,zzzzzz5	false
2675		zzzzz45,zzzzzz9	false
2676		zzzzz45,zzzzzz2	false
2677		zzzzz45,zzzzzz8	false
2678		zzzzz45,zzzzz56	false
2679		zzzzz45,zzzzzz7	false
2680		zzzzz45,zzzzzz6	false
2681		zzzzz45,zzzzz52	false
2682		zzzzz45,zzzzz51	false
2683		zzzzz45,zzzzz62	false
2684		zzzzz45,zzzzz97	false
2685		zzzzz45,zzzzz75	false
2686		zzzzz45,zzzzz96	false
2687		zzzzz45,zzzzz47	false
2688		zzzzz45,zzzzz46	false
2689		zzzzz45,zzzzz48	false
2690		zzzzz45,zzzzz53	false
2691		zzzzz45,zzzzz49	false
2692		zzzzz45,zzzzz57	false
2693		zzzzz45,zzzzz91	false
2694		zzzzz45,zzzzz71	false
2695		zzzzz45,zzzzz61	false
2696		zzzzz45,zzzzz63	false
2697		zzzzz45,zzzzz68	false
2698		zzzzz45,zzzzz98	false
2699		zzzzz45,zzzzz64	false
2700		zzzzz45,zzzzz93	false
2701		zzzzz45,zzzzz73	false
2702		zzzzz45,zzzzz70	false
2703		zzzzz45,zzzzz67	false
2704		zzzzz45,zzzzz95	false
2705		zzzzz45,zzzzz99	false
2706		zzzzz45,zzzzz79	false
2707		zzzzz45,zzzzz74	false
2708		zzzzz45,zzzzz86	false
2709		zzzzz45,zzzzz78	false
2710		zzzzz45,zzzzz54	false
2711		zzzzz45,zzzzz81	false
2712		zzzzz45,zzzzz88	false
2713		zzzzz45,zzzzz58	false
2714		zzzzz45,zzzzz72	false
2715		zzzzz45,zzzzz82	false
2716		zzzzz45,zzzzz94	false
2717		zzzzz45,zzzzz76	false
2718		zzzzz45,zzzzz89	false
2719		zzzzz45,zzzzz80	false
2720		zzzzz45,zzzzz55	false
2721		zzzzz45,zzzzz77	false
2722		zzzzz45,zzzzz65	false
2723		zzzzz45,zzzzz83	false
2724		zzzzz45,zzzzz92	false
2725		zzzzz45,zzzzz84	false
2726		zzzzz45,zzzzz69	false
2727		zzzzz45,zzzzz85	false
2728		zzzzz45,zzzzz66	false
2729		zzzzz45,zzzzz90	false
2730		zzzzz45,zzzzz87	false
2731		zzzzz44,zzzzz56	false
2732		zzzzz44,zzzzz60	false
2733		zzzzz44,zzzzzz3	false
2734		zzzzz44,zzzzz59	false
2735		zzzzz44,zzzzzz2	false
2736		zzzzz44,zzzzzz1	false
2737		zzzzz44,zzzzz75	false
2738		zzzzz44,zzzzzz4	false
2739		zzzzz44,zzzzzz9	false
2740		zzzzz44,zzzzzz8	false
2741		zzzzz44,zzzzzz7	false
2742		zzzzz44,zzzzz53	false
2743		zzzzz44,zzzzzz6	false
2744		zzzzz44,zzzzz64	false
2745		zzzzz44,zzzzz52	false
2746		zzzzz44,zzzzzz5	false
2747		zzzzz44,zzzzz46	false
2748		zzzzz44,zzzzz97	false
2749		zzzzz44,zzzzz48	false
2750		zzzzz44,zzzzz47	false
2751		zzzzz44,zzzzz68	false
2752		zzzzz44,zzzzz51	false
2753		zzzzz44,zzzzz49	false
2754		zzzzz44,zzzzz62	false
2755		zzzzz44,zzzzz61	false
2756		zzzzz44,zzzzz70	false
2757		zzzzz44,zzzzz73	false
2758		zzzzz44,zzzzz98	false
2759		zzzzz44,zzzzz63	false
2760		zzzzz44,zzzzz96	false
2761		zzzzz44,zzzzz71	false
2762		zzzzz44,zzzzz67	false
2763		zzzzz44,zzzzz93	false
2764		zzzzz44,zzzzz57	false
2765		zzzzz44,zzzzz74	false
2766		zzzzz44,zzzzz95	false
2767		zzzzz44,zzzzz91	false
2768		zzzzz44,zzzzz94	false
2769		zzzzz44,zzzzz66	false
2770		zzzzz44,zzzzz87	false
2771		zzzzz44,zzzzz77	false
2772		zzzzz44,zzzzz89	false
2773		zzzzz44,zzzzz45	false
2774		zzzzz44,zzzzz80	false
2775		zzzzz44,zzzzz92	false
2776		zzzzz44,zzzzz84	false
2777		zzzzz44,zzzzz82	false
2778		zzzzz44,zzzzz86	false
2779		zzzzz44,zzzzz69	false
2780		zzzzz44,zzzzz85	false
2781		zzzzz44,zzzzz78	false
2782		zzzzz44,zzzzz83	false
2783		zzzzz44,zzzzz90	false
2784		zzzzz44,zzzzz88	false
2785		zzzzz44,zzzzz54	false
2786		zzzzz44,zzzzz65	false
2787		zzzzz44,zzzzz79	false
2788		zzzzz44,zzzzz99	false
2789		zzzzz44,zzzzz76	false
2790		zzzzz44,zzzzz81	false
2791		zzzzz44,zzzzz55	false
2792		zzzzz44,zzzzz58	false
2793		zzzzz44,zzzzz72	false
2794		zzzzz43,zzzzz50	false
2795		zzzzz43,zzzzz95	false
2796		zzzzz43,zzzzz93	false
2797		zzzzz43,zzzzzz3	false
2798		zzzzz43,zzzzzz9	false
2799		zzzzz43,zzzzzz8	false
2800		zzzzz43,zzzzzz2	false
2801		zzzzz43,zzzzzz1	false
2802		zzzzz43,zzzzzz4	false
2803		zzzzz43,zzzzzz7	false
2804		zzzzz43,zzzzzz5	false
2805		zzzzz43,zzzzzz6	false
2806		zzzzz43,zzzzz61	false
2807		zzzzz43,zzzzz94	false
2808		zzzzz43,zzzzz88	false
2809		zzzzz43,zzzzz80	false
2810		zzzzz43,zzzzz65	false
2811		zzzzz43,zzzzz89	false
2812		zzzzz43,zzzzz77	false
2813		zzzzz43,zzzzz78	false
2814		zzzzz43,zzzzz92	false
2815		zzzzz43,zzzzz62	false
2816		zzzzz43,zzzzz57	false
2817		zzzzz43,zzzzz83	false
2818		zzzzz43,zzzzz72	false
2819		zzzzz43,zzzzz54	false
2820		zzzzz43,zzzzz84	false
2821		zzzzz43,zzzzz91	false
2822		zzzzz43,zzzzz90	false
2823		zzzzz43,zzzzz79	false
2824		zzzzz43,zzzzz99	false
2825		zzzzz43,zzzzz58	false
2826		zzzzz43,zzzzz81	false
2827		zzzzz43,zzzzz86	false
2828		zzzzz43,zzzzz66	false
2829		zzzzz43,zzzzz55	false
2830		zzzzz43,zzzzz87	false
2831		zzzzz43,zzzzz45	false
2832		zzzzz43,zzzzz76	false
2833		zzzzz43,zzzzz69	false
2834		zzzzz43,zzzzz82	false
2835		zzzzz43,zzzzz44	false
2836		zzzzz43,zzzzz74	false
2837		zzzzz43,zzzzz51	false
2838		zzzzz43,zzzzz85	false
[truncated: 164,398 more rows]
