# Supplementary material for: Discovery of several thousand highly diverse circular DNA viruses
Source: eLife journal article supplement (doi:10.7554/elife.51971), 2020-02-03
Supplement: fig2-figsupp1-data1 [file elife-51971-fig2-figsupp1-data1-v1.cys › CytoscapeSession-2019_08_05-18_21/tables/cytables.xml]

<?xml version="1.0" encoding="UTF-8" standalone="yes"?>
<cyTables>
    <virtualColumns>
        <virtualColumn name="shared name" sourceColumn="shared name" sourceTable="36-all_my_seqs_genbank_ssDNA1_protein_with_ttv_orf1_per_PF02956_13_2_fasta+Full+Network/SHARED_ATTRS-org.cytoscape.model.CyEdge-36+shared+edge.cytable" sourceJoinKey="SUID" targetTable="52-all_my_seqs_genbank_ssDNA1_protein_with_ttv_orf1_per_PF02956_13_2_fasta+Full+Network/LOCAL_ATTRS-org.cytoscape.model.CyEdge-all_my_seqs_genbank_ssDNA1_protein_with_ttv_orf1_per_PF02956_13_2_fasta+Full+Network+default+edge.cytable" targetJoinKey="SUID" immutable="false"/>
        <virtualColumn name="shared interaction" sourceColumn="shared interaction" sourceTable="36-all_my_seqs_genbank_ssDNA1_protein_with_ttv_orf1_per_PF02956_13_2_fasta+Full+Network/SHARED_ATTRS-org.cytoscape.model.CyEdge-36+shared+edge.cytable" sourceJoinKey="SUID" targetTable="52-all_my_seqs_genbank_ssDNA1_protein_with_ttv_orf1_per_PF02956_13_2_fasta+Full+Network/LOCAL_ATTRS-org.cytoscape.model.CyEdge-all_my_seqs_genbank_ssDNA1_protein_with_ttv_orf1_per_PF02956_13_2_fasta+Full+Network+default+edge.cytable" targetJoinKey="SUID" immutable="false"/>
        <virtualColumn name="%id" sourceColumn="%id" sourceTable="36-all_my_seqs_genbank_ssDNA1_protein_with_ttv_orf1_per_PF02956_13_2_fasta+Full+Network/SHARED_ATTRS-org.cytoscape.model.CyEdge-36+shared+edge.cytable" sourceJoinKey="SUID" targetTable="52-all_my_seqs_genbank_ssDNA1_protein_with_ttv_orf1_per_PF02956_13_2_fasta+Full+Network/LOCAL_ATTRS-org.cytoscape.model.CyEdge-all_my_seqs_genbank_ssDNA1_protein_with_ttv_orf1_per_PF02956_13_2_fasta+Full+Network+default+edge.cytable" targetJoinKey="SUID" immutable="false"/>
        <virtualColumn name="alignment_score" sourceColumn="alignment_score" sourceTable="36-all_my_seqs_genbank_ssDNA1_protein_with_ttv_orf1_per_PF02956_13_2_fasta+Full+Network/SHARED_ATTRS-org.cytoscape.model.CyEdge-36+shared+edge.cytable" sourceJoinKey="SUID" targetTable="52-all_my_seqs_genbank_ssDNA1_protein_with_ttv_orf1_per_PF02956_13_2_fasta+Full+Network/LOCAL_ATTRS-org.cytoscape.model.CyEdge-all_my_seqs_genbank_ssDNA1_protein_with_ttv_orf1_per_PF02956_13_2_fasta+Full+Network+default+edge.cytable" targetJoinKey="SUID" immutable="false"/>
        <virtualColumn name="alignment_len" sourceColumn="alignment_len" sourceTable="36-all_my_seqs_genbank_ssDNA1_protein_with_ttv_orf1_per_PF02956_13_2_fasta+Full+Network/SHARED_ATTRS-org.cytoscape.model.CyEdge-36+shared+edge.cytable" sourceJoinKey="SUID" targetTable="52-all_my_seqs_genbank_ssDNA1_protein_with_ttv_orf1_per_PF02956_13_2_fasta+Full+Network/LOCAL_ATTRS-org.cytoscape.model.CyEdge-all_my_seqs_genbank_ssDNA1_protein_with_ttv_orf1_per_PF02956_13_2_fasta+Full+Network+default+edge.cytable" targetJoinKey="SUID" immutable="false"/>
        <virtualColumn name="shared name" sourceColumn="shared name" sourceTable="36-all_my_seqs_genbank_ssDNA1_protein_with_ttv_orf1_per_PF02956_13_2_fasta+Full+Network/SHARED_ATTRS-org.cytoscape.model.CyNode-36+shared+node.cytable" sourceJoinKey="SUID" targetTable="36-all_my_seqs_genbank_ssDNA1_protein_with_ttv_orf1_per_PF02956_13_2_fasta+Full+Network/LOCAL_ATTRS-org.cytoscape.model.CyNode-36+default+node.cytable" targetJoinKey="SUID" immutable="false"/>
        <virtualColumn name="Sequence Source" sourceColumn="Sequence Source" sourceTable="36-all_my_seqs_genbank_ssDNA1_protein_with_ttv_orf1_per_PF02956_13_2_fasta+Full+Network/SHARED_ATTRS-org.cytoscape.model.CyNode-36+shared+node.cytable" sourceJoinKey="SUID" targetTable="36-all_my_seqs_genbank_ssDNA1_protein_with_ttv_orf1_per_PF02956_13_2_fasta+Full+Network/LOCAL_ATTRS-org.cytoscape.model.CyNode-36+default+node.cytable" targetJoinKey="SUID" immutable="false"/>
        <virtualColumn name="Description" sourceColumn="Description" sourceTable="36-all_my_seqs_genbank_ssDNA1_protein_with_ttv_orf1_per_PF02956_13_2_fasta+Full+Network/SHARED_ATTRS-org.cytoscape.model.CyNode-36+shared+node.cytable" sourceJoinKey="SUID" targetTable="36-all_my_seqs_genbank_ssDNA1_protein_with_ttv_orf1_per_PF02956_13_2_fasta+Full+Network/LOCAL_ATTRS-org.cytoscape.model.CyNode-36+default+node.cytable" targetJoinKey="SUID" immutable="false"/>
        <virtualColumn name="Sequence Length" sourceColumn="Sequence Length" sourceTable="36-all_my_seqs_genbank_ssDNA1_protein_with_ttv_orf1_per_PF02956_13_2_fasta+Full+Network/SHARED_ATTRS-org.cytoscape.model.CyNode-36+shared+node.cytable" sourceJoinKey="SUID" targetTable="36-all_my_seqs_genbank_ssDNA1_protein_with_ttv_orf1_per_PF02956_13_2_fasta+Full+Network/LOCAL_ATTRS-org.cytoscape.model.CyNode-36+default+node.cytable" targetJoinKey="SUID" immutable="false"/>
        <virtualColumn name="Sequence" sourceColumn="Sequence" sourceTable="36-all_my_seqs_genbank_ssDNA1_protein_with_ttv_orf1_per_PF02956_13_2_fasta+Full+Network/SHARED_ATTRS-org.cytoscape.model.CyNode-36+shared+node.cytable" sourceJoinKey="SUID" targetTable="36-all_my_seqs_genbank_ssDNA1_protein_with_ttv_orf1_per_PF02956_13_2_fasta+Full+Network/LOCAL_ATTRS-org.cytoscape.model.CyNode-36+default+node.cytable" targetJoinKey="SUID" immutable="false"/>
        <virtualColumn name="seq_source" sourceColumn="seq_source" sourceTable="36-all_my_seqs_genbank_ssDNA1_protein_with_ttv_orf1_per_PF02956_13_2_fasta+Full+Network/SHARED_ATTRS-org.cytoscape.model.CyNode-36+shared+node.cytable" sourceJoinKey="SUID" targetTable="36-all_my_seqs_genbank_ssDNA1_protein_with_ttv_orf1_per_PF02956_13_2_fasta+Full+Network/LOCAL_ATTRS-org.cytoscape.model.CyNode-36+default+node.cytable" targetJoinKey="SUID" immutable="false"/>
        <virtualColumn name="shared name" sourceColumn="shared name" sourceTable="36-all_my_seqs_genbank_ssDNA1_protein_with_ttv_orf1_per_PF02956_13_2_fasta+Full+Network/SHARED_ATTRS-org.cytoscape.model.CyNetwork-36+shared+network.cytable" sourceJoinKey="SUID" targetTable="36-all_my_seqs_genbank_ssDNA1_protein_with_ttv_orf1_per_PF02956_13_2_fasta+Full+Network/LOCAL_ATTRS-org.cytoscape.model.CyNetwork-36+default+network.cytable" targetJoinKey="SUID" immutable="false"/>
        <virtualColumn name="shared name" sourceColumn="shared name" sourceTable="36-all_my_seqs_genbank_ssDNA1_protein_with_ttv_orf1_per_PF02956_13_2_fasta+Full+Network/SHARED_ATTRS-org.cytoscape.model.CyEdge-36+shared+edge.cytable" sourceJoinKey="SUID" targetTable="36-all_my_seqs_genbank_ssDNA1_protein_with_ttv_orf1_per_PF02956_13_2_fasta+Full+Network/LOCAL_ATTRS-org.cytoscape.model.CyEdge-36+default+edge.cytable" targetJoinKey="SUID" immutable="false"/>
        <virtualColumn name="shared interaction" sourceColumn="shared interaction" sourceTable="36-all_my_seqs_genbank_ssDNA1_protein_with_ttv_orf1_per_PF02956_13_2_fasta+Full+Network/SHARED_ATTRS-org.cytoscape.model.CyEdge-36+shared+edge.cytable" sourceJoinKey="SUID" targetTable="36-all_my_seqs_genbank_ssDNA1_protein_with_ttv_orf1_per_PF02956_13_2_fasta+Full+Network/LOCAL_ATTRS-org.cytoscape.model.CyEdge-36+default+edge.cytable" targetJoinKey="SUID" immutable="false"/>
        <virtualColumn name="%id" sourceColumn="%id" sourceTable="36-all_my_seqs_genbank_ssDNA1_protein_with_ttv_orf1_per_PF02956_13_2_fasta+Full+Network/SHARED_ATTRS-org.cytoscape.model.CyEdge-36+shared+edge.cytable" sourceJoinKey="SUID" targetTable="36-all_my_seqs_genbank_ssDNA1_protein_with_ttv_orf1_per_PF02956_13_2_fasta+Full+Network/LOCAL_ATTRS-org.cytoscape.model.CyEdge-36+default+edge.cytable" targetJoinKey="SUID" immutable="false"/>
        <virtualColumn name="alignment_score" sourceColumn="alignment_score" sourceTable="36-all_my_seqs_genbank_ssDNA1_protein_with_ttv_orf1_per_PF02956_13_2_fasta+Full+Network/SHARED_ATTRS-org.cytoscape.model.CyEdge-36+shared+edge.cytable" sourceJoinKey="SUID" targetTable="36-all_my_seqs_genbank_ssDNA1_protein_with_ttv_orf1_per_PF02956_13_2_fasta+Full+Network/LOCAL_ATTRS-org.cytoscape.model.CyEdge-36+default+edge.cytable" targetJoinKey="SUID" immutable="false"/>
        <virtualColumn name="alignment_len" sourceColumn="alignment_len" sourceTable="36-all_my_seqs_genbank_ssDNA1_protein_with_ttv_orf1_per_PF02956_13_2_fasta+Full+Network/SHARED_ATTRS-org.cytoscape.model.CyEdge-36+shared+edge.cytable" sourceJoinKey="SUID" targetTable="36-all_my_seqs_genbank_ssDNA1_protein_with_ttv_orf1_per_PF02956_13_2_fasta+Full+Network/LOCAL_ATTRS-org.cytoscape.model.CyEdge-36+default+edge.cytable" targetJoinKey="SUID" immutable="false"/>
        <virtualColumn name="shared name" sourceColumn="shared name" sourceTable="36-all_my_seqs_genbank_ssDNA1_protein_with_ttv_orf1_per_PF02956_13_2_fasta+Full+Network/SHARED_ATTRS-org.cytoscape.model.CyNetwork-36+shared+network.cytable" sourceJoinKey="SUID" targetTable="52-all_my_seqs_genbank_ssDNA1_protein_with_ttv_orf1_per_PF02956_13_2_fasta+Full+Network/LOCAL_ATTRS-org.cytoscape.model.CyNetwork-all_my_seqs_genbank_ssDNA1_protein_with_ttv_orf1_per_PF02956_13_2_fasta+Full+Network+default+network.cytable" targetJoinKey="SUID" immutable="false"/>
        <virtualColumn name="shared name" sourceColumn="shared name" sourceTable="36-all_my_seqs_genbank_ssDNA1_protein_with_ttv_orf1_per_PF02956_13_2_fasta+Full+Network/SHARED_ATTRS-org.cytoscape.model.CyNode-36+shared+node.cytable" sourceJoinKey="SUID" targetTable="52-all_my_seqs_genbank_ssDNA1_protein_with_ttv_orf1_per_PF02956_13_2_fasta+Full+Network/LOCAL_ATTRS-org.cytoscape.model.CyNode-all_my_seqs_genbank_ssDNA1_protein_with_ttv_orf1_per_PF02956_13_2_fasta+Full+Network+default+node.cytable" targetJoinKey="SUID" immutable="false"/>
        <virtualColumn name="Sequence Source" sourceColumn="Sequence Source" sourceTable="36-all_my_seqs_genbank_ssDNA1_protein_with_ttv_orf1_per_PF02956_13_2_fasta+Full+Network/SHARED_ATTRS-org.cytoscape.model.CyNode-36+shared+node.cytable" sourceJoinKey="SUID" targetTable="52-all_my_seqs_genbank_ssDNA1_protein_with_ttv_orf1_per_PF02956_13_2_fasta+Full+Network/LOCAL_ATTRS-org.cytoscape.model.CyNode-all_my_seqs_genbank_ssDNA1_protein_with_ttv_orf1_per_PF02956_13_2_fasta+Full+Network+default+node.cytable" targetJoinKey="SUID" immutable="false"/>
        <virtualColumn name="Description" sourceColumn="Description" sourceTable="36-all_my_seqs_genbank_ssDNA1_protein_with_ttv_orf1_per_PF02956_13_2_fasta+Full+Network/SHARED_ATTRS-org.cytoscape.model.CyNode-36+shared+node.cytable" sourceJoinKey="SUID" targetTable="52-all_my_seqs_genbank_ssDNA1_protein_with_ttv_orf1_per_PF02956_13_2_fasta+Full+Network/LOCAL_ATTRS-org.cytoscape.model.CyNode-all_my_seqs_genbank_ssDNA1_protein_with_ttv_orf1_per_PF02956_13_2_fasta+Full+Network+default+node.cytable" targetJoinKey="SUID" immutable="false"/>
        <virtualColumn name="Sequence Length" sourceColumn="Sequence Length" sourceTable="36-all_my_seqs_genbank_ssDNA1_protein_with_ttv_orf1_per_PF02956_13_2_fasta+Full+Network/SHARED_ATTRS-org.cytoscape.model.CyNode-36+shared+node.cytable" sourceJoinKey="SUID" targetTable="52-all_my_seqs_genbank_ssDNA1_protein_with_ttv_orf1_per_PF02956_13_2_fasta+Full+Network/LOCAL_ATTRS-org.cytoscape.model.CyNode-all_my_seqs_genbank_ssDNA1_protein_with_ttv_orf1_per_PF02956_13_2_fasta+Full+Network+default+node.cytable" targetJoinKey="SUID" immutable="false"/>
        <virtualColumn name="Sequence" sourceColumn="Sequence" sourceTable="36-all_my_seqs_genbank_ssDNA1_protein_with_ttv_orf1_per_PF02956_13_2_fasta+Full+Network/SHARED_ATTRS-org.cytoscape.model.CyNode-36+shared+node.cytable" sourceJoinKey="SUID" targetTable="52-all_my_seqs_genbank_ssDNA1_protein_with_ttv_orf1_per_PF02956_13_2_fasta+Full+Network/LOCAL_ATTRS-org.cytoscape.model.CyNode-all_my_seqs_genbank_ssDNA1_protein_with_ttv_orf1_per_PF02956_13_2_fasta+Full+Network+default+node.cytable" targetJoinKey="SUID" immutable="false"/>
        <virtualColumn name="seq_source" sourceColumn="seq_source" sourceTable="36-all_my_seqs_genbank_ssDNA1_protein_with_ttv_orf1_per_PF02956_13_2_fasta+Full+Network/SHARED_ATTRS-org.cytoscape.model.CyNode-36+shared+node.cytable" sourceJoinKey="SUID" targetTable="52-all_my_seqs_genbank_ssDNA1_protein_with_ttv_orf1_per_PF02956_13_2_fasta+Full+Network/LOCAL_ATTRS-org.cytoscape.model.CyNode-all_my_seqs_genbank_ssDNA1_protein_with_ttv_orf1_per_PF02956_13_2_fasta+Full+Network+default+node.cytable" targetJoinKey="SUID" immutable="false"/>
    </virtualColumns>
</cyTables>
