# Supplementary material for: Discovery of several thousand highly diverse circular DNA viruses
Source: eLife journal article supplement (doi:10.7554/elife.51971), 2020-02-03
Supplement: fig2-figsupp1-data1 [file elife-51971-fig2-figsupp1-data1-v1.cys › CytoscapeSession-2019_08_05-18_21/views/52-167615-all_my_seqs_genbank_ssDNA1_protein_with_ttv_orf1_per_PF02956_13_2_fasta+Full+Network.xgmml]

<?xml version="1.0" encoding="UTF-8" standalone="yes"?>
<graph id="167615" label="all_my_seqs_genbank_ssDNA1_protein_with_ttv_orf1_per_PF02956_13_2_fasta Full Network" cy:view="1" cy:networkId="52" cy:visualStyle="Solid" cy:rendererId="org.cytoscape.ding" cy:documentVersion="3.0" xmlns:dc="http://purl.org/dc/elements/1.1/" xmlns:xlink="http://www.w3.org/1999/xlink" xmlns:rdf="http://www.w3.org/1999/02/22-rdf-syntax-ns#" xmlns:cy="http://www.cytoscape.org" xmlns="http://www.cs.rpi.edu/XGMML">
  <graphics>
    <att name="NETWORK_ANNOTATION_SELECTION" value="false" type="string" cy:type="String"/>
    <att name="NETWORK_CENTER_Y_LOCATION" value="-68.0194091796875" type="string" cy:type="String"/>
    <att name="NETWORK_HEIGHT" value="475.0" type="string" cy:type="String"/>
    <att name="NETWORK_CENTER_Z_LOCATION" value="0.0" type="string" cy:type="String"/>
    <att name="NETWORK_EDGE_SELECTION" value="true" type="string" cy:type="String"/>
    <att name="NETWORK_TITLE" value="all_my_seqs_genbank_ssDNA1_protein_with_ttv_orf1_per_PF02956_13_2_fasta Full Network" type="string" cy:type="String"/>
    <att name="NETWORK_WIDTH" value="889.0" type="string" cy:type="String"/>
    <att name="NETWORK_SCALE_FACTOR" value="0.31782335664382294" type="string" cy:type="String"/>
    <att name="NETWORK_CENTER_X_LOCATION" value="-90.74641418457031" type="string" cy:type="String"/>
    <att name="NETWORK_DEPTH" value="0.0" type="string" cy:type="String"/>
    <att name="NETWORK_NODE_SELECTION" value="true" type="string" cy:type="String"/>
  </graphics>
  <node id="168397" label="zzzzzz9" cy:nodeId="62">
    <graphics z="0.0" x="-11.961687004290752" y="223.56659306139687"/>
  </node>
  <node id="168396" label="zzzzzz8" cy:nodeId="63">
    <graphics z="0.0" x="-0.5564288255798147" y="248.8897436961625"/>
  </node>
  <node id="168395" label="zzzzzz7" cy:nodeId="64">
    <graphics z="0.0" x="-10.676179802142315" y="228.08545292467812"/>
  </node>
  <node id="168394" label="zzzzzz6" cy:nodeId="65">
    <graphics z="0.0" x="-6.74084655018919" y="202.59828556627969"/>
  </node>
  <node id="168393" label="zzzzzz5" cy:nodeId="66">
    <graphics z="0.0" x="-14.475191032611065" y="192.4897192821"/>
  </node>
  <node id="168392" label="zzzzzz4" cy:nodeId="67">
    <graphics z="0.0" x="8.180570686138935" y="217.40442265124062"/>
  </node>
  <node id="168391" label="zzzzzz3" cy:nodeId="68">
    <graphics z="0.0" x="-20.701387321673565" y="273.9397467479203"/>
  </node>
  <node id="168390" label="zzzzzz2" cy:nodeId="69">
    <graphics z="0.0" x="-1.2022723314391897" y="239.68849552721719"/>
  </node>
  <node id="168389" label="zzzzzz1" cy:nodeId="70">
    <graphics z="0.0" x="-16.49298278065794" y="225.0232428416703"/>
  </node>
  <node id="168387" label="zzzzz99" cy:nodeId="72">
    <graphics z="0.0" x="-47.291597282611065" y="-347.37368403821245"/>
  </node>
  <node id="168386" label="zzzzz98" cy:nodeId="73">
    <graphics z="0.0" x="153.24972351817019" y="-177.9298974171187"/>
  </node>
  <node id="168385" label="zzzzz97" cy:nodeId="74">
    <graphics z="0.0" x="168.3560772779358" y="-227.97205745129838"/>
  </node>
  <node id="168384" label="zzzzz96" cy:nodeId="75">
    <graphics z="0.0" x="109.72753723887331" y="-94.57665645032182"/>
  </node>
  <node id="168383" label="zzzzz95" cy:nodeId="76">
    <graphics z="0.0" x="-277.92502013417356" y="-310.99895869641557"/>
  </node>
  <node id="168382" label="zzzzz94" cy:nodeId="77">
    <graphics z="0.0" x="-124.84340850087278" y="-388.1950646534468"/>
  </node>
  <node id="168381" label="zzzzz93" cy:nodeId="78">
    <graphics z="0.0" x="-270.99849883290403" y="-88.38938533215776"/>
  </node>
  <node id="168380" label="zzzzz92" cy:nodeId="79">
    <graphics z="0.0" x="-165.2001628038513" y="-271.60989009289995"/>
  </node>
  <node id="168379" label="zzzzz91" cy:nodeId="80">
    <graphics z="0.0" x="-223.64784423085325" y="-129.189006914189"/>
  </node>
  <node id="168378" label="zzzzz90" cy:nodeId="81">
    <graphics z="0.0" x="-63.181123649798565" y="-231.2858544483687"/>
  </node>
  <node id="168377" label="zzzzz89" cy:nodeId="82">
    <graphics z="0.0" x="-147.04076949330442" y="-312.65215693860307"/>
  </node>
  <node id="168376" label="zzzzz88" cy:nodeId="83">
    <graphics z="0.0" x="-144.6378192064392" y="-344.13662349133745"/>
  </node>
  <node id="168375" label="zzzzz87" cy:nodeId="84">
    <graphics z="0.0" x="-37.43080321522825" y="-303.73211299329057"/>
  </node>
  <node id="168374" label="zzzzz86" cy:nodeId="85">
    <graphics z="0.0" x="-184.37300482960813" y="-217.22814570813432"/>
  </node>
  <node id="168373" label="zzzzz85" cy:nodeId="86">
    <graphics z="0.0" x="-59.012239372454815" y="-257.4479943409468"/>
  </node>
  <node id="168372" label="zzzzz84" cy:nodeId="87">
    <graphics z="0.0" x="-53.3327197191345" y="-298.52163325696245"/>
  </node>
  <node id="168371" label="zzzzz83" cy:nodeId="88">
    <graphics z="0.0" x="-152.72035399647825" y="-286.58526240735307"/>
  </node>
  <node id="168370" label="zzzzz82" cy:nodeId="89">
    <graphics z="0.0" x="-119.55514708729856" y="-209.77561580090776"/>
  </node>
  <node id="168369" label="zzzzz81" cy:nodeId="90">
    <graphics z="0.0" x="-80.62729064198606" y="-311.1361962452437"/>
  </node>
  <node id="168368" label="zzzzz80" cy:nodeId="91">
    <graphics z="0.0" x="-180.90446654530638" y="-312.1313134327437"/>
  </node>
  <node id="168367" label="zzzzz79" cy:nodeId="92">
    <graphics z="0.0" x="-198.66451445790403" y="-227.765178789189"/>
  </node>
  <node id="168366" label="zzzzz78" cy:nodeId="93">
    <graphics z="0.0" x="-118.02150908681028" y="-293.5783349171187"/>
  </node>
  <node id="168365" label="zzzzz77" cy:nodeId="94">
    <graphics z="0.0" x="-167.2675456163513" y="-311.5983544483687"/>
  </node>
  <node id="168364" label="zzzzz76" cy:nodeId="95">
    <graphics z="0.0" x="-42.90101805897825" y="-330.3197899952437"/>
  </node>
  <node id="168363" label="zzzzz75" cy:nodeId="96">
    <graphics z="0.0" x="29.768201911724873" y="-46.8798257008101"/>
  </node>
  <node id="168362" label="zzzzz74" cy:nodeId="97">
    <graphics z="0.0" x="-118.84090605946653" y="-151.26580439954057"/>
  </node>
  <node id="168361" label="zzzzz73" cy:nodeId="98">
    <graphics z="0.0" x="33.86948975352175" y="-80.3325844898726"/>
  </node>
  <node id="168360" label="zzzzz72" cy:nodeId="99">
    <graphics z="0.0" x="-40.07228270741575" y="-308.20449458508745"/>
  </node>
  <node id="168359" label="zzzzz71" cy:nodeId="100">
    <graphics z="0.0" x="127.15414246348269" y="-49.57529841809526"/>
  </node>
  <node id="168358" label="zzzzz70" cy:nodeId="101">
    <graphics z="0.0" x="125.73235901621706" y="-156.63470088391557"/>
  </node>
  <node id="168357" label="zzzzz69" cy:nodeId="102">
    <graphics z="0.0" x="-20.644807731829815" y="-283.5601464405562"/>
  </node>
  <node id="168356" label="zzzzz68" cy:nodeId="103">
    <graphics z="0.0" x="152.44808777598269" y="-116.78294001965776"/>
  </node>
  <node id="168355" label="zzzzz67" cy:nodeId="104">
    <graphics z="0.0" x="167.11117371348269" y="-156.41543208508745"/>
  </node>
  <node id="168354" label="zzzzz66" cy:nodeId="105">
    <graphics z="0.0" x="-40.08966246815794" y="-297.54922114758745"/>
  </node>
  <node id="168353" label="zzzzz65" cy:nodeId="106">
    <graphics z="0.0" x="-165.28012648793333" y="-298.82741938977495"/>
  </node>
  <node id="168352" label="zzzzz64" cy:nodeId="107">
    <graphics z="0.0" x="41.838407600201435" y="-127.24724971204057"/>
  </node>
  <node id="168351" label="zzzzz63" cy:nodeId="108">
    <graphics z="0.0" x="144.20330628184206" y="-115.6775780811812"/>
  </node>
  <node id="168350" label="zzzzz62" cy:nodeId="109">
    <graphics z="0.0" x="-251.5124301073181" y="-164.73522578625932"/>
  </node>
  <node id="168349" label="zzzzz61" cy:nodeId="110">
    <graphics z="0.0" x="-283.96457091542356" y="-178.20139705090776"/>
  </node>
  <node id="168348" label="zzzzz60" cy:nodeId="111">
    <graphics z="0.0" x="10.625166023052998" y="133.34122837633834"/>
  </node>
  <node id="168347" label="zzzzz59" cy:nodeId="112">
    <graphics z="0.0" x="84.42727478770144" y="101.50545872301802"/>
  </node>
  <node id="168346" label="zzzzz58" cy:nodeId="113">
    <graphics z="0.0" x="-84.08203307362669" y="-242.46142207532182"/>
  </node>
  <node id="168345" label="zzzzz57" cy:nodeId="114">
    <graphics z="0.0" x="-240.15102950307005" y="-215.09418879895463"/>
  </node>
  <node id="168344" label="zzzzz56" cy:nodeId="115">
    <graphics z="0.0" x="-479.03024474354856" y="-319.64580928235307"/>
  </node>
  <node id="168343" label="zzzzz55" cy:nodeId="116">
    <graphics z="0.0" x="-53.375093376361065" y="-281.62017451672807"/>
  </node>
  <node id="168342" label="zzzzz54" cy:nodeId="117">
    <graphics z="0.0" x="-157.10746184559935" y="-210.12009822278276"/>
  </node>
  <node id="168341" label="zzzzz53" cy:nodeId="118">
    <graphics z="0.0" x="31.299085700787373" y="-91.88433467297807"/>
  </node>
  <node id="168340" label="zzzzz52" cy:nodeId="119">
    <graphics z="0.0" x="186.90267761973269" y="-80.32190333752885"/>
  </node>
  <node id="168339" label="zzzzz51" cy:nodeId="120">
    <graphics z="0.0" x="108.34377869395144" y="48.954414258906695"/>
  </node>
  <node id="168338" label="zzzzz50" cy:nodeId="121">
    <graphics z="0.0" x="-140.93531981679075" y="244.48257816881875"/>
  </node>
  <node id="168337" label="zzzzz49" cy:nodeId="122">
    <graphics z="0.0" x="172.29110535410769" y="-51.67686091809526"/>
  </node>
  <node id="168336" label="zzzzz48" cy:nodeId="123">
    <graphics z="0.0" x="188.65804871348269" y="-35.37120448498979"/>
  </node>
  <node id="168335" label="zzzzz47" cy:nodeId="124">
    <graphics z="0.0" x="192.0772686841858" y="-208.9911767139937"/>
  </node>
  <node id="168334" label="zzzzz46" cy:nodeId="125">
    <graphics z="0.0" x="194.9439679029358" y="-215.56884395032182"/>
  </node>
  <node id="168333" label="zzzzz45" cy:nodeId="126">
    <graphics z="0.0" x="-53.361848747454815" y="-265.5063439503218"/>
  </node>
  <node id="168332" label="zzzzz44" cy:nodeId="127">
    <graphics z="0.0" x="-151.8866976854431" y="-225.01832209973588"/>
  </node>
  <node id="168331" label="zzzzz43" cy:nodeId="128">
    <graphics z="0.0" x="146.45516785410769" y="-103.85682307629838"/>
  </node>
  <node id="168330" label="zzzzz42" cy:nodeId="129">
    <graphics z="0.0" x="-44.84930602284544" y="-291.1828271046187"/>
  </node>
  <node id="168329" label="zzzzz41" cy:nodeId="130">
    <graphics z="0.0" x="-31.065477287493877" y="-303.81350337414995"/>
  </node>
  <node id="168328" label="zzzzz40" cy:nodeId="131">
    <graphics z="0.0" x="-125.62607375355833" y="-256.1486779346968"/>
  </node>
  <node id="168327" label="zzzzz39" cy:nodeId="132">
    <graphics z="0.0" x="-202.23817054005735" y="-269.0473595753218"/>
  </node>
  <node id="168326" label="zzzzz38" cy:nodeId="133">
    <graphics z="0.0" x="177.08755310801394" y="-92.03738795666948"/>
  </node>
  <node id="168325" label="zzzzz37" cy:nodeId="134">
    <graphics z="0.0" x="183.53823670176394" y="196.79884708971719"/>
  </node>
  <node id="168324" label="zzzzz36" cy:nodeId="135">
    <graphics z="0.0" x="175.41354187754519" y="-119.09856807141557"/>
  </node>
  <node id="168323" label="zzzzz35" cy:nodeId="136">
    <graphics z="0.0" x="-198.2426718828308" y="-272.88930903821245"/>
  </node>
  <node id="168322" label="zzzzz34" cy:nodeId="137">
    <graphics z="0.0" x="-78.04809752675169" y="-242.38174067883745"/>
  </node>
  <node id="168321" label="zzzzz33" cy:nodeId="138">
    <graphics z="0.0" x="217.7999249341858" y="-28.24819194226518"/>
  </node>
  <node id="168320" label="zzzzz32" cy:nodeId="139">
    <graphics z="0.0" x="-226.84097472401731" y="-199.78652583508745"/>
  </node>
  <node id="168314" label="zzzzz26" cy:nodeId="145">
    <graphics z="0.0" x="-382.06390563222044" y="8.848306547114703"/>
  </node>
  <node id="168313" label="zzzzz25" cy:nodeId="146">
    <graphics z="0.0" x="-356.549150383197" y="-22.11089717297807"/>
  </node>
  <node id="168312" label="zzzzz24" cy:nodeId="147">
    <graphics z="0.0" x="-452.4785174486267" y="-9.56243525891557"/>
  </node>
  <node id="168311" label="zzzzz23" cy:nodeId="148">
    <graphics z="0.0" x="-498.2608965990173" y="30.726989637324664"/>
  </node>
  <node id="168310" label="zzzzz22" cy:nodeId="149">
    <graphics z="0.0" x="-485.9230975267517" y="-2.704807390263227"/>
  </node>
  <node id="168309" label="zzzzz21" cy:nodeId="150">
    <graphics z="0.0" x="-165.05192557545774" y="145.80731571764693"/>
  </node>
  <node id="168308" label="zzzzz20" cy:nodeId="151">
    <graphics z="0.0" x="-496.2672442552673" y="10.467270742366168"/>
  </node>
  <node id="168307" label="zzzzz19" cy:nodeId="152">
    <graphics z="0.0" x="-555.7482623216736" y="11.476758848140094"/>
  </node>
  <node id="168306" label="zzzzz18" cy:nodeId="153">
    <graphics z="0.0" x="-611.2900103685486" y="47.74425304980025"/>
  </node>
  <node id="168305" label="zzzzz17" cy:nodeId="154">
    <graphics z="0.0" x="-518.7819842455017" y="41.031570325801226"/>
  </node>
  <node id="168304" label="zzzzz16" cy:nodeId="155">
    <graphics z="0.0" x="-378.46010009022825" y="-9.37315760998979"/>
  </node>
  <node id="168303" label="zzzzz15" cy:nodeId="156">
    <graphics z="0.0" x="-587.4175433275329" y="25.910890470454547"/>
  </node>
  <node id="168302" label="zzzzz14" cy:nodeId="157">
    <graphics z="0.0" x="-421.40931884022825" y="1.2979849681352107"/>
  </node>
  <node id="168301" label="zzzzz13" cy:nodeId="158">
    <graphics z="0.0" x="-294.3651141283142" y="-1.9413434162642034"/>
  </node>
  <node id="168300" label="zzzzz12" cy:nodeId="159">
    <graphics z="0.0" x="-170.5683154222595" y="133.53554142565474"/>
  </node>
  <node id="168299" label="zzzzz11" cy:nodeId="160">
    <graphics z="0.0" x="7.638593757427998" y="218.3572272166703"/>
  </node>
  <node id="168298" label="zzzzz10" cy:nodeId="161">
    <graphics z="0.0" x="-1.8693102953063772" y="248.4351080760453"/>
  </node>
  <node id="168261" label="zzzz744" cy:nodeId="198">
    <graphics z="0.0" x="172.7877179029358" y="-6.342245210697797"/>
  </node>
  <node id="168260" label="zzzz743" cy:nodeId="199">
    <graphics z="0.0" x="175.58987244395144" y="-13.656837572147992"/>
  </node>
  <node id="168259" label="zzzz742" cy:nodeId="200">
    <graphics z="0.0" x="153.73013123301394" y="-28.920055498173383"/>
  </node>
  <node id="168258" label="zzzz741" cy:nodeId="201">
    <graphics z="0.0" x="154.54824646738894" y="-22.13765727429643"/>
  </node>
  <node id="168257" label="zzzz740" cy:nodeId="202">
    <graphics z="0.0" x="166.25356873301394" y="18.60714901537642"/>
  </node>
  <node id="168256" label="zzzz739" cy:nodeId="203">
    <graphics z="0.0" x="128.13570984629519" y="-37.29635630994096"/>
  </node>
  <node id="168255" label="zzzz738" cy:nodeId="204">
    <graphics z="0.0" x="134.30074890879519" y="-19.49379741101518"/>
  </node>
  <node id="168254" label="zzzz737" cy:nodeId="205">
    <graphics z="0.0" x="122.06121643809206" y="-36.33173381238237"/>
  </node>
  <node id="168253" label="zzzz736" cy:nodeId="206">
    <graphics z="0.0" x="178.07830628184206" y="-27.680603136112836"/>
  </node>
  <node id="168252" label="zzzz735" cy:nodeId="207">
    <graphics z="0.0" x="136.74410828379519" y="-125.86254512219682"/>
  </node>
  <node id="168251" label="zzzz734" cy:nodeId="208">
    <graphics z="0.0" x="-76.41253844472044" y="-270.16289912610307"/>
  </node>
  <node id="168250" label="zzzz733" cy:nodeId="209">
    <graphics z="0.0" x="16.936170661724873" y="-118.89957820325151"/>
  </node>
  <node id="168249" label="zzzz732" cy:nodeId="210">
    <graphics z="0.0" x="145.89858826426394" y="-115.96812068372026"/>
  </node>
  <node id="168248" label="zzzz731" cy:nodeId="211">
    <graphics z="0.0" x="141.76394470957644" y="-156.12305842786088"/>
  </node>
  <node id="168247" label="zzzz730" cy:nodeId="212">
    <graphics z="0.0" x="110.99825867442019" y="-10.698036302616742"/>
  </node>
  <node id="168246" label="zzzz729" cy:nodeId="213">
    <graphics z="0.0" x="145.65994080332644" y="-30.224960435917524"/>
  </node>
  <node id="168245" label="zzzz728" cy:nodeId="214">
    <graphics z="0.0" x="127.88525208262331" y="-7.833805192997602"/>
  </node>
  <node id="168244" label="zzzz727" cy:nodeId="215">
    <graphics z="0.0" x="144.32220276621706" y="-16.484661211064008"/>
  </node>
  <node id="168243" label="zzzz726" cy:nodeId="216">
    <graphics z="0.0" x="144.3197003248108" y="-13.218975175907758"/>
  </node>
  <node id="168242" label="zzzz725" cy:nodeId="217">
    <graphics z="0.0" x="166.6881085279358" y="2.5319041118119685"/>
  </node>
  <node id="168241" label="zzzz724" cy:nodeId="218">
    <graphics z="0.0" x="335.25015076426394" y="-268.4499169483687"/>
  </node>
  <node id="168240" label="zzzz723" cy:nodeId="219">
    <graphics z="0.0" x="251.17535218027956" y="-91.74128352551713"/>
  </node>
  <node id="168238" label="zzzz721" cy:nodeId="221">
    <graphics z="0.0" x="160.16396912363894" y="-155.44973384289995"/>
  </node>
  <node id="168237" label="zzzz720" cy:nodeId="222">
    <graphics z="0.0" x="151.83914002207644" y="-151.29102717786088"/>
  </node>
  <node id="168236" label="zzzz719" cy:nodeId="223">
    <graphics z="0.0" x="151.47292908457644" y="-41.81212245373979"/>
  </node>
  <node id="168235" label="zzzz718" cy:nodeId="224">
    <graphics z="0.0" x="144.86453064707644" y="-154.4528466358687"/>
  </node>
  <node id="168234" label="zzzz717" cy:nodeId="225">
    <graphics z="0.0" x="95.66222962168581" y="-248.46697627454057"/>
  </node>
  <node id="168233" label="zzzz716" cy:nodeId="226">
    <graphics z="0.0" x="121.73205384043581" y="-171.3528710499312"/>
  </node>
  <node id="168232" label="zzzz715" cy:nodeId="227">
    <graphics z="0.0" x="161.40920838145144" y="-132.8964043751265"/>
  </node>
  <node id="168231" label="zzzz714" cy:nodeId="228">
    <graphics z="0.0" x="134.6936016919983" y="-128.835003007939"/>
  </node>
  <node id="168230" label="zzzz713" cy:nodeId="229">
    <graphics z="0.0" x="157.76846131113894" y="-154.26035701184526"/>
  </node>
  <node id="168229" label="zzzz712" cy:nodeId="230">
    <graphics z="0.0" x="122.04195984629519" y="-162.0263329639937"/>
  </node>
  <node id="168228" label="zzzz711" cy:nodeId="231">
    <graphics z="0.0" x="159.91061219004519" y="-140.47546016125932"/>
  </node>
  <node id="168227" label="zzzz710" cy:nodeId="232">
    <graphics z="0.0" x="163.16717346934206" y="-82.75822078137651"/>
  </node>
  <node id="168226" label="zzzz709" cy:nodeId="233">
    <graphics z="0.0" x="173.10775574473269" y="-111.1495019093062"/>
  </node>
  <node id="168225" label="zzzz708" cy:nodeId="234">
    <graphics z="0.0" x="87.65984925059206" y="-93.82420741467729"/>
  </node>
  <node id="168224" label="zzzz707" cy:nodeId="235">
    <graphics z="0.0" x="69.92602356699831" y="-67.5088769093062"/>
  </node>
  <node id="168223" label="zzzz706" cy:nodeId="236">
    <graphics z="0.0" x="48.79624756602175" y="-83.34869014172807"/>
  </node>
  <node id="168222" label="zzzz705" cy:nodeId="237">
    <graphics z="0.0" x="153.9244366529358" y="-142.90073787122026"/>
  </node>
  <node id="168221" label="zzzz704" cy:nodeId="238">
    <graphics z="0.0" x="-191.19646159382933" y="-301.5129052296187"/>
  </node>
  <node id="168220" label="zzzz703" cy:nodeId="239">
    <graphics z="0.0" x="142.74496277598269" y="-89.42190181164995"/>
  </node>
  <node id="168219" label="zzzz702" cy:nodeId="240">
    <graphics z="0.0" x="3.3101788404358103" y="-70.5637856617476"/>
  </node>
  <node id="168218" label="zzzz701" cy:nodeId="241">
    <graphics z="0.0" x="21.397443855084248" y="-87.78505336194291"/>
  </node>
  <node id="168217" label="zzzz700" cy:nodeId="242">
    <graphics z="0.0" x="78.56326111582644" y="-91.57753383069291"/>
  </node>
  <node id="168216" label="zzzz699" cy:nodeId="243">
    <graphics z="0.0" x="5.811353767193623" y="-65.66970454602495"/>
  </node>
  <node id="168215" label="zzzz698" cy:nodeId="244">
    <graphics z="0.0" x="52.948392951763935" y="-64.41811000256791"/>
  </node>
  <node id="168214" label="zzzz697" cy:nodeId="245">
    <graphics z="0.0" x="16.525480354107685" y="-41.570766557743696"/>
  </node>
  <node id="168213" label="zzzz696" cy:nodeId="246">
    <graphics z="0.0" x="113.21780213145144" y="-139.26951228528276"/>
  </node>
  <node id="168212" label="zzzz695" cy:nodeId="247">
    <graphics z="0.0" x="108.48184021738894" y="-131.33489619641557"/>
  </node>
  <node id="168211" label="zzzz694" cy:nodeId="248">
    <graphics z="0.0" x="5.479078376568623" y="-108.01443110852495"/>
  </node>
  <node id="168210" label="zzzz693" cy:nodeId="249">
    <graphics z="0.0" x="-28.62524596425169" y="-98.57995234875932"/>
  </node>
  <node id="168209" label="zzzz692" cy:nodeId="250">
    <graphics z="0.0" x="28.003950202740498" y="-85.00568782239213"/>
  </node>
  <node id="168208" label="zzzz691" cy:nodeId="251">
    <graphics z="0.0" x="148.31744202402956" y="-122.99633418469682"/>
  </node>
  <node id="168207" label="zzzz690" cy:nodeId="252">
    <graphics z="0.0" x="-16.805925285540752" y="-309.1325646534468"/>
  </node>
  <node id="168206" label="zzzz689" cy:nodeId="253">
    <graphics z="0.0" x="-155.78871337147825" y="-108.89809810071245"/>
  </node>
  <node id="168205" label="zzzz688" cy:nodeId="254">
    <graphics z="0.0" x="47.65757569102175" y="-304.37771235852495"/>
  </node>
  <node id="168204" label="zzzz687" cy:nodeId="255">
    <graphics z="0.0" x="-144.65541640492552" y="-111.70025264172807"/>
  </node>
  <node id="168203" label="zzzz686" cy:nodeId="256">
    <graphics z="0.0" x="-171.8797225114929" y="-142.90490352063432"/>
  </node>
  <node id="168202" label="zzzz685" cy:nodeId="257">
    <graphics z="0.0" x="-126.23109618397825" y="-141.38213740735307"/>
  </node>
  <node id="168201" label="zzzz684" cy:nodeId="258">
    <graphics z="0.0" x="-114.36248198720091" y="-132.48121272473588"/>
  </node>
  <node id="168200" label="zzzz683" cy:nodeId="259">
    <graphics z="0.0" x="112.32818421152956" y="-122.52537166028276"/>
  </node>
  <node id="168199" label="zzzz682" cy:nodeId="260">
    <graphics z="0.0" x="110.74990662363894" y="-45.11274348645463"/>
  </node>
  <node id="168198" label="zzzz681" cy:nodeId="261">
    <graphics z="0.0" x="83.49200257090456" y="-127.60392390637651"/>
  </node>
  <node id="168197" label="zzzz680" cy:nodeId="262">
    <graphics z="0.0" x="81.73580750254519" y="-112.65473567395463"/>
  </node>
  <node id="168196" label="zzzz679" cy:nodeId="263">
    <graphics z="0.0" x="121.68618592051394" y="-25.472717393925336"/>
  </node>
  <node id="168195" label="zzzz678" cy:nodeId="264">
    <graphics z="0.0" x="104.24893006113894" y="-119.16018306164995"/>
  </node>
  <node id="168194" label="zzzz677" cy:nodeId="265">
    <graphics z="0.0" x="178.32574280527956" y="-150.38518916516557"/>
  </node>
  <node id="168193" label="zzzz676" cy:nodeId="266">
    <graphics z="0.0" x="102.97985657481081" y="-164.99058162122026"/>
  </node>
  <node id="168192" label="zzzz675" cy:nodeId="267">
    <graphics z="0.0" x="146.0017071607483" y="-172.26630793957963"/>
  </node>
  <node id="168191" label="zzzz674" cy:nodeId="268">
    <graphics z="0.0" x="234.66387757090456" y="-169.66706477551713"/>
  </node>
  <node id="168190" label="zzzz673" cy:nodeId="269">
    <graphics z="0.0" x="61.9163037183655" y="-102.20389949231401"/>
  </node>
  <node id="168189" label="zzzz672" cy:nodeId="270">
    <graphics z="0.0" x="164.07662781504519" y="-108.89109431653276"/>
  </node>
  <node id="168188" label="zzzz671" cy:nodeId="271">
    <graphics z="0.0" x="-12.99096862050169" y="224.30875004381875"/>
  </node>
  <node id="168187" label="zzzz670" cy:nodeId="272">
    <graphics z="0.0" x="-41.03979674550169" y="210.56756962389687"/>
  </node>
  <node id="168186" label="zzzz669" cy:nodeId="273">
    <graphics z="0.0" x="4.195692146099873" y="210.98195255846719"/>
  </node>
  <node id="168185" label="zzzz668" cy:nodeId="274">
    <graphics z="0.0" x="-271.65390197011106" y="82.49060047716841"/>
  </node>
  <node id="168184" label="zzzz667" cy:nodeId="275">
    <graphics z="0.0" x="10.55822571543581" y="236.34544743151406"/>
  </node>
  <node id="168183" label="zzzz666" cy:nodeId="276">
    <graphics z="0.0" x="-262.31380645009153" y="417.409885297725"/>
  </node>
  <node id="168182" label="zzzz665" cy:nodeId="277">
    <graphics z="0.0" x="-271.11278716298216" y="86.82979191393599"/>
  </node>
  <node id="168181" label="zzzz664" cy:nodeId="278">
    <graphics z="0.0" x="-268.9015139696228" y="82.97436894030318"/>
  </node>
  <node id="168180" label="zzzz663" cy:nodeId="279">
    <graphics z="0.0" x="-295.24708739491575" y="402.56241215319375"/>
  </node>
  <node id="168179" label="zzzz662" cy:nodeId="280">
    <graphics z="0.0" x="-314.67418853016966" y="80.70356358141646"/>
  </node>
  <node id="168178" label="zzzz661" cy:nodeId="281">
    <graphics z="0.0" x="-298.8309573289978" y="98.68977726549849"/>
  </node>
  <node id="168177" label="zzzz660" cy:nodeId="282">
    <graphics z="0.0" x="-268.5506686327087" y="76.9270590648149"/>
  </node>
  <node id="168176" label="zzzz659" cy:nodeId="283">
    <graphics z="0.0" x="-194.18853942128294" y="386.75052250475625"/>
  </node>
  <node id="168175" label="zzzz658" cy:nodeId="284">
    <graphics z="0.0" x="-600.4275836107361" y="161.06601322741255"/>
  </node>
  <node id="168174" label="zzzz657" cy:nodeId="285">
    <graphics z="0.0" x="-315.2884387132751" y="87.4762305125688"/>
  </node>
  <node id="168173" label="zzzz656" cy:nodeId="286">
    <graphics z="0.0" x="-272.5485171434509" y="120.97301090807662"/>
  </node>
  <node id="168172" label="zzzz655" cy:nodeId="287">
    <graphics z="0.0" x="-300.5588397142517" y="76.85707081408248"/>
  </node>
  <node id="168171" label="zzzz654" cy:nodeId="288">
    <graphics z="0.0" x="-14.982866203509502" y="194.31714237780312"/>
  </node>
  <node id="168170" label="zzzz653" cy:nodeId="289">
    <graphics z="0.0" x="-205.33166972371214" y="351.6314734324906"/>
  </node>
  <node id="168169" label="zzzz652" cy:nodeId="290">
    <graphics z="0.0" x="82.50781067637331" y="256.6426428660844"/>
  </node>
  <node id="168168" label="zzzz651" cy:nodeId="291">
    <graphics z="0.0" x="59.53059204844362" y="260.7073706492875"/>
  </node>
  <node id="168167" label="zzzz650" cy:nodeId="292">
    <graphics z="0.0" x="-387.23324767323606" y="-28.29037486462846"/>
  </node>
  <node id="168166" label="zzzz649" cy:nodeId="293">
    <graphics z="0.0" x="-153.29302779408567" y="229.76118839831094"/>
  </node>
  <node id="168165" label="zzzz648" cy:nodeId="294">
    <graphics z="0.0" x="-138.85675994130247" y="263.4564856395219"/>
  </node>
  <node id="168164" label="zzzz647" cy:nodeId="295">
    <graphics z="0.0" x="-11.54882994862669" y="265.15835941881875"/>
  </node>
  <node id="168163" label="zzzz646" cy:nodeId="296">
    <graphics z="0.0" x="78.17147644785769" y="-104.7277489796187"/>
  </node>
  <node id="168162" label="zzzz645" cy:nodeId="297">
    <graphics z="0.0" x="-361.34945861073606" y="-49.16920100598588"/>
  </node>
  <node id="168161" label="zzzz644" cy:nodeId="298">
    <graphics z="0.0" x="120.48397644785769" y="-42.36816035657182"/>
  </node>
  <node id="168160" label="zzzz643" cy:nodeId="299">
    <graphics z="0.0" x="233.96035584238894" y="255.441623578975"/>
  </node>
  <node id="168159" label="zzzz642" cy:nodeId="300">
    <graphics z="0.0" x="-267.2913607713806" y="100.16418827624068"/>
  </node>
  <node id="168158" label="zzzz641" cy:nodeId="301">
    <graphics z="0.0" x="-284.07096282216185" y="124.02829350085005"/>
  </node>
  <node id="168157" label="zzzz640" cy:nodeId="302">
    <graphics z="0.0" x="-265.3302020189392" y="117.81993473620162"/>
  </node>
  <node id="168156" label="zzzz639" cy:nodeId="303">
    <graphics z="0.0" x="-45.663118278704815" y="258.67325199694375"/>
  </node>
  <node id="168155" label="zzzz638" cy:nodeId="304">
    <graphics z="0.0" x="-20.028825676165752" y="218.4191168651078"/>
  </node>
  <node id="168154" label="zzzz637" cy:nodeId="305">
    <graphics z="0.0" x="-302.283281242572" y="88.77897251696334"/>
  </node>
  <node id="168153" label="zzzz636" cy:nodeId="306">
    <graphics z="0.0" x="-295.7813967821228" y="111.95067967028365"/>
  </node>
  <node id="168152" label="zzzz635" cy:nodeId="307">
    <graphics z="0.0" x="-63.7079638597595" y="-471.9918175831343"/>
  </node>
  <node id="168151" label="zzzz634" cy:nodeId="308">
    <graphics z="0.0" x="-159.31444731923216" y="-180.17771541028276"/>
  </node>
  <node id="168149" label="zzzz632" cy:nodeId="310">
    <graphics z="0.0" x="-59.2611865160095" y="-254.55120479016557"/>
  </node>
  <node id="168148" label="zzzz631" cy:nodeId="311">
    <graphics z="0.0" x="212.51778992442019" y="492.9434241160844"/>
  </node>
  <node id="168147" label="zzzz630" cy:nodeId="312">
    <graphics z="0.0" x="-36.96953002186888" y="247.22276676745156"/>
  </node>
  <node id="168146" label="zzzz629" cy:nodeId="313">
    <graphics z="0.0" x="-97.3484896776306" y="402.56344975085"/>
  </node>
  <node id="168145" label="zzzz628" cy:nodeId="314">
    <graphics z="0.0" x="-50.1830615160095" y="-327.3825341358687"/>
  </node>
  <node id="168144" label="zzzz627" cy:nodeId="315">
    <graphics z="0.0" x="8.355360114849873" y="210.55488957018594"/>
  </node>
  <node id="168143" label="zzzz626" cy:nodeId="316">
    <graphics z="0.0" x="-278.0781725999939" y="86.39287174792037"/>
  </node>
  <node id="168142" label="zzzz625" cy:nodeId="317">
    <graphics z="0.0" x="58.43418701914675" y="-92.71482478528276"/>
  </node>
  <node id="168141" label="zzzz624" cy:nodeId="318">
    <graphics z="0.0" x="194.87591370371706" y="-115.73792659192338"/>
  </node>
  <node id="168140" label="zzzz623" cy:nodeId="319">
    <graphics z="0.0" x="67.12032898692019" y="-94.4057274952437"/>
  </node>
  <node id="168139" label="zzzz622" cy:nodeId="320">
    <graphics z="0.0" x="-181.13751021596067" y="216.6749762401078"/>
  </node>
  <node id="168138" label="zzzz621" cy:nodeId="321">
    <graphics z="0.0" x="-173.06332961293333" y="218.27041996569375"/>
  </node>
  <node id="168137" label="zzzz620" cy:nodeId="322">
    <graphics z="0.0" x="138.46487244395144" y="227.10628117174844"/>
  </node>
  <node id="168136" label="zzzz619" cy:nodeId="323">
    <graphics z="0.0" x="128.16607483652956" y="244.92166508288125"/>
  </node>
  <node id="168135" label="zzzz618" cy:nodeId="324">
    <graphics z="0.0" x="121.17284973887331" y="222.34251774401406"/>
  </node>
  <node id="168134" label="zzzz617" cy:nodeId="325">
    <graphics z="0.0" x="151.8612042310608" y="231.38934696764687"/>
  </node>
  <node id="168133" label="zzzz616" cy:nodeId="326">
    <graphics z="0.0" x="96.30499085215456" y="274.0831793651078"/>
  </node>
  <node id="168132" label="zzzz615" cy:nodeId="327">
    <graphics z="0.0" x="152.37002381113894" y="227.36227787585"/>
  </node>
  <node id="168131" label="zzzz614" cy:nodeId="328">
    <graphics z="0.0" x="103.46230896738894" y="257.1173590526078"/>
  </node>
  <node id="168130" label="zzzz613" cy:nodeId="329">
    <graphics z="0.0" x="127.57253845957644" y="264.3511999949906"/>
  </node>
  <node id="168129" label="zzzz612" cy:nodeId="330">
    <graphics z="0.0" x="192.87420471934206" y="266.83797062487344"/>
  </node>
  <node id="168128" label="zzzz611" cy:nodeId="331">
    <graphics z="0.0" x="25.572156989849873" y="-105.48049556164995"/>
  </node>
  <node id="168127" label="zzzz610" cy:nodeId="332">
    <graphics z="0.0" x="-165.01619521351927" y="215.40501774401406"/>
  </node>
  <node id="168126" label="zzzz609" cy:nodeId="333">
    <graphics z="0.0" x="-216.64532653065794" y="336.5440710887406"/>
  </node>
  <node id="168125" label="zzzz608" cy:nodeId="334">
    <graphics z="0.0" x="-227.00541106434935" y="302.64126957506875"/>
  </node>
  <node id="168124" label="zzzz607" cy:nodeId="335">
    <graphics z="0.0" x="-371.06271544667356" y="-22.25611888318315"/>
  </node>
  <node id="168123" label="zzzz606" cy:nodeId="336">
    <graphics z="0.0" x="-282.02750579091185" y="73.8535727366899"/>
  </node>
  <node id="168122" label="zzzz605" cy:nodeId="337">
    <graphics z="0.0" x="-287.98166075917356" y="86.26136768908248"/>
  </node>
  <node id="168121" label="zzzz604" cy:nodeId="338">
    <graphics z="0.0" x="-274.28173247548216" y="105.64418400377974"/>
  </node>
  <node id="168120" label="zzzz603" cy:nodeId="339">
    <graphics z="0.0" x="-255.67273894520872" y="108.76657475085005"/>
  </node>
  <node id="168119" label="zzzz602" cy:nodeId="340">
    <graphics z="0.0" x="-584.7990435716736" y="458.9820288524125"/>
  </node>
  <node id="168118" label="zzzz601" cy:nodeId="341">
    <graphics z="0.0" x="-517.9773577806579" y="551.8926123485062"/>
  </node>
  <node id="168117" label="zzzz600" cy:nodeId="342">
    <graphics z="0.0" x="-388.39357176991575" y="-112.41892634778276"/>
  </node>
  <node id="168116" label="zzzz599" cy:nodeId="343">
    <graphics z="0.0" x="-91.76308623524778" y="-277.22124873547807"/>
  </node>
  <node id="168115" label="zzzz598" cy:nodeId="344">
    <graphics z="0.0" x="-95.19033995839231" y="-239.86480342297807"/>
  </node>
  <node id="168114" label="zzzz597" cy:nodeId="345">
    <graphics z="0.0" x="-103.11312285634153" y="-287.5772668018843"/>
  </node>
  <node id="168113" label="zzzz596" cy:nodeId="346">
    <graphics z="0.0" x="-91.96590605946653" y="-242.9349022999312"/>
  </node>
  <node id="168112" label="zzzz595" cy:nodeId="347">
    <graphics z="0.0" x="-204.43183795186155" y="-227.16099177747026"/>
  </node>
  <node id="168111" label="zzzz594" cy:nodeId="348">
    <graphics z="0.0" x="-76.19617644520872" y="-196.54931270032182"/>
  </node>
  <node id="168110" label="zzzz593" cy:nodeId="349">
    <graphics z="0.0" x="-56.74791136952513" y="227.69961918444375"/>
  </node>
  <node id="168109" label="zzzz592" cy:nodeId="350">
    <graphics z="0.0" x="-269.0129870531189" y="95.90182865710005"/>
  </node>
  <node id="168108" label="zzzz591" cy:nodeId="351">
    <graphics z="0.0" x="-275.1047381517517" y="89.95316685290084"/>
  </node>
  <node id="168107" label="zzzz590" cy:nodeId="352">
    <graphics z="0.0" x="-282.1493472215759" y="120.19552219958052"/>
  </node>
  <node id="168106" label="zzzz589" cy:nodeId="353">
    <graphics z="0.0" x="-293.74923125477903" y="92.21871555895552"/>
  </node>
  <node id="168105" label="zzzz588" cy:nodeId="354">
    <graphics z="0.0" x="-263.7363757249939" y="96.79198063463912"/>
  </node>
  <node id="168104" label="zzzz587" cy:nodeId="355">
    <graphics z="0.0" x="-216.54166785451048" y="429.40262211413125"/>
  </node>
  <node id="168103" label="zzzz586" cy:nodeId="356">
    <graphics z="0.0" x="-23.59521666737669" y="235.69700993151406"/>
  </node>
  <node id="168102" label="zzzz585" cy:nodeId="357">
    <graphics z="0.0" x="-538.5020465013611" y="253.23175419420937"/>
  </node>
  <node id="168101" label="zzzz584" cy:nodeId="358">
    <graphics z="0.0" x="4.063016975201435" y="-43.612392534306196"/>
  </node>
  <node id="168100" label="zzzz583" cy:nodeId="359">
    <graphics z="0.0" x="244.34795960215456" y="-277.1616173878218"/>
  </node>
  <node id="168099" label="zzzz582" cy:nodeId="360">
    <graphics z="0.0" x="274.17202576426394" y="-274.51760493664995"/>
  </node>
  <node id="168098" label="zzzz581" cy:nodeId="361">
    <graphics z="0.0" x="94.09560974863894" y="-217.8788720264937"/>
  </node>
  <node id="168097" label="zzzz580" cy:nodeId="362">
    <graphics z="0.0" x="28.129652107037373" y="-181.29009639172807"/>
  </node>
  <node id="168096" label="zzzz579" cy:nodeId="363">
    <graphics z="0.0" x="-17.194063102923565" y="-105.36208735852495"/>
  </node>
  <node id="168095" label="zzzz578" cy:nodeId="364">
    <graphics z="0.0" x="-91.699541008197" y="109.33283604235396"/>
  </node>
  <node id="168094" label="zzzz577" cy:nodeId="365">
    <graphics z="0.0" x="138.93539246348269" y="-243.36993037610307"/>
  </node>
  <node id="168093" label="zzzz576" cy:nodeId="366">
    <graphics z="0.0" x="1.4255810621154978" y="-110.90600215344682"/>
  </node>
  <node id="168092" label="zzzz575" cy:nodeId="367">
    <graphics z="0.0" x="278.8850079419983" y="-250.03698359875932"/>
  </node>
  <node id="168091" label="zzzz574" cy:nodeId="368">
    <graphics z="0.0" x="-2.3119830247985647" y="-113.59829341321245"/>
  </node>
  <node id="168090" label="zzzz573" cy:nodeId="369">
    <graphics z="0.0" x="-16.450776970111065" y="-21.841190446903852"/>
  </node>
  <node id="168089" label="zzzz572" cy:nodeId="370">
    <graphics z="0.0" x="38.72662171152956" y="-146.08779536633745"/>
  </node>
  <node id="168088" label="zzzz571" cy:nodeId="371">
    <graphics z="0.0" x="3.0405865552795603" y="-42.10947810559526"/>
  </node>
  <node id="168087" label="zzzz570" cy:nodeId="372">
    <graphics z="0.0" x="-47.519380485736065" y="87.0387419566606"/>
  </node>
  <node id="168086" label="zzzz569" cy:nodeId="373">
    <graphics z="0.0" x="254.87728699473269" y="-307.9384728565718"/>
  </node>
  <node id="168085" label="zzzz568" cy:nodeId="374">
    <graphics z="0.0" x="-34.10724059315794" y="73.54325474352584"/>
  </node>
  <node id="168084" label="zzzz567" cy:nodeId="375">
    <graphics z="0.0" x="29.84197815684206" y="-145.17473994641557"/>
  </node>
  <node id="168083" label="zzzz566" cy:nodeId="376">
    <graphics z="0.0" x="-66.03920928212278" y="111.33969486803755"/>
  </node>
  <node id="168082" label="zzzz565" cy:nodeId="377">
    <graphics z="0.0" x="-2.1290911790954397" y="138.244098554561"/>
  </node>
  <node id="168081" label="zzzz564" cy:nodeId="378">
    <graphics z="0.0" x="54.219404304303" y="-170.10833369641557"/>
  </node>
  <node id="168080" label="zzzz563" cy:nodeId="379">
    <graphics z="0.0" x="298.06838806895144" y="-226.5340996876265"/>
  </node>
  <node id="168079" label="zzzz562" cy:nodeId="380">
    <graphics z="0.0" x="69.44460877207644" y="-224.7897606983687"/>
  </node>
  <node id="168078" label="zzzz561" cy:nodeId="381">
    <graphics z="0.0" x="-51.234834587298565" y="57.25410832018599"/>
  </node>
  <node id="168077" label="zzzz560" cy:nodeId="382">
    <graphics z="0.0" x="-9.366365349017315" y="-94.2284814014937"/>
  </node>
  <node id="168076" label="zzzz559" cy:nodeId="383">
    <graphics z="0.0" x="-42.7980517503845" y="108.19687260241255"/>
  </node>
  <node id="168075" label="zzzz558" cy:nodeId="384">
    <graphics z="0.0" x="88.88033875254519" y="-195.0316582813765"/>
  </node>
  <node id="168074" label="zzzz557" cy:nodeId="385">
    <graphics z="0.0" x="24.383253181256123" y="-155.70722590832963"/>
  </node>
  <node id="168073" label="zzzz556" cy:nodeId="386">
    <graphics z="0.0" x="10.280057990826435" y="-41.172206987431196"/>
  </node>
  <node id="168072" label="zzzz555" cy:nodeId="387">
    <graphics z="0.0" x="-19.47955504628294" y="157.80092228502974"/>
  </node>
  <node id="168071" label="zzzz554" cy:nodeId="388">
    <graphics z="0.0" x="-54.38006774159544" y="127.95027531237349"/>
  </node>
  <node id="168070" label="zzzz553" cy:nodeId="389">
    <graphics z="0.0" x="67.37286194590456" y="-202.1180840626265"/>
  </node>
  <node id="168069" label="zzzz552" cy:nodeId="390">
    <graphics z="0.0" x="20.613477790631123" y="-50.19163142590776"/>
  </node>
  <node id="168068" label="zzzz551" cy:nodeId="391">
    <graphics z="0.0" x="-27.042329704486065" y="-118.2973290577437"/>
  </node>
  <node id="168067" label="zzzz550" cy:nodeId="392">
    <graphics z="0.0" x="-55.448945915423565" y="123.60042942614302"/>
  </node>
  <node id="168066" label="zzzz549" cy:nodeId="393">
    <graphics z="0.0" x="-381.8004626390564" y="-252.3659325733687"/>
  </node>
  <node id="168065" label="zzzz548" cy:nodeId="394">
    <graphics z="0.0" x="-158.3978175279724" y="-399.8959618702437"/>
  </node>
  <node id="168064" label="zzzz547" cy:nodeId="395">
    <graphics z="0.0" x="-58.69519225331419" y="225.84144962877969"/>
  </node>
  <node id="168063" label="zzzz546" cy:nodeId="396">
    <graphics z="0.0" x="83.85635193613894" y="-39.60876094250932"/>
  </node>
  <node id="168062" label="zzzz545" cy:nodeId="397">
    <graphics z="0.0" x="72.69018372324831" y="-45.64994441418901"/>
  </node>
  <node id="168061" label="zzzz544" cy:nodeId="398">
    <graphics z="0.0" x="153.86691101817019" y="-166.6082421436812"/>
  </node>
  <node id="168060" label="zzzz543" cy:nodeId="399">
    <graphics z="0.0" x="133.78036316660769" y="-72.28638850598588"/>
  </node>
  <node id="168059" label="zzzz542" cy:nodeId="400">
    <graphics z="0.0" x="-22.515947258197002" y="230.0480231151078"/>
  </node>
  <node id="168058" label="zzzz541" cy:nodeId="401">
    <graphics z="0.0" x="141.93295105723269" y="-23.523979295780805"/>
  </node>
  <node id="168057" label="zzzz540" cy:nodeId="402">
    <graphics z="0.0" x="168.7208233716858" y="-103.35496150403276"/>
  </node>
  <node id="168056" label="zzzz539" cy:nodeId="403">
    <graphics z="0.0" x="169.0100079419983" y="-115.70421992688432"/>
  </node>
  <node id="168055" label="zzzz538" cy:nodeId="404">
    <graphics z="0.0" x="-85.08432189198606" y="-323.7708703175093"/>
  </node>
  <node id="168054" label="zzzz537" cy:nodeId="405">
    <graphics z="0.0" x="-175.25726691456907" y="-106.42921077161088"/>
  </node>
  <node id="168053" label="zzzz536" cy:nodeId="406">
    <graphics z="0.0" x="30.57507141856081" y="-108.10158931164995"/>
  </node>
  <node id="168052" label="zzzz535" cy:nodeId="407">
    <graphics z="0.0" x="163.65798767832644" y="-57.374721635868696"/>
  </node>
  <node id="168051" label="zzzz534" cy:nodeId="408">
    <graphics z="0.0" x="54.00976380137331" y="-53.473842729618696"/>
  </node>
  <node id="168050" label="zzzz533" cy:nodeId="409">
    <graphics z="0.0" x="-80.97886840077513" y="-378.3110009327437"/>
  </node>
  <node id="168049" label="zzzz532" cy:nodeId="410">
    <graphics z="0.0" x="158.3338604810608" y="-145.71718989758745"/>
  </node>
  <node id="168048" label="zzzz531" cy:nodeId="411">
    <graphics z="0.0" x="189.23666199473269" y="-197.50854121594682"/>
  </node>
  <node id="168047" label="zzzz530" cy:nodeId="412">
    <graphics z="0.0" x="167.69363220957644" y="-106.9361230030562"/>
  </node>
  <node id="168046" label="zzzz529" cy:nodeId="413">
    <graphics z="0.0" x="27.366437995709248" y="-140.836956132939"/>
  </node>
  <node id="168045" label="zzzz528" cy:nodeId="414">
    <graphics z="0.0" x="133.97738465098269" y="-109.60056697278276"/>
  </node>
  <node id="168044" label="zzzz527" cy:nodeId="415">
    <graphics z="0.0" x="217.4559307935608" y="-108.8539696827437"/>
  </node>
  <node id="168043" label="zzzz526" cy:nodeId="416">
    <graphics z="0.0" x="162.64156922129519" y="-151.26484309582963"/>
  </node>
  <node id="168042" label="zzzz525" cy:nodeId="417">
    <graphics z="0.0" x="73.16735657481081" y="-148.13801204114213"/>
  </node>
  <node id="168041" label="zzzz524" cy:nodeId="418">
    <graphics z="0.0" x="54.44093140391237" y="-71.47900020032182"/>
  </node>
  <node id="168040" label="zzzz523" cy:nodeId="419">
    <graphics z="0.0" x="-118.85061827870481" y="-218.21023188977495"/>
  </node>
  <node id="168039" label="zzzz522" cy:nodeId="420">
    <graphics z="0.0" x="-179.0624560472595" y="-86.18027125745073"/>
  </node>
  <node id="168038" label="zzzz521" cy:nodeId="421">
    <graphics z="0.0" x="194.94027527598269" y="-98.89414607434526"/>
  </node>
  <node id="168037" label="zzzz520" cy:nodeId="422">
    <graphics z="0.0" x="23.561597907818623" y="-62.509121049931196"/>
  </node>
  <node id="168036" label="zzzz519" cy:nodeId="423">
    <graphics z="0.0" x="-79.21618071766966" y="-250.60219966321245"/>
  </node>
  <node id="168035" label="zzzz518" cy:nodeId="424">
    <graphics z="0.0" x="89.25192078379519" y="-31.87576304822221"/>
  </node>
  <node id="168034" label="zzzz517" cy:nodeId="425">
    <graphics z="0.0" x="-128.6067904588806" y="-233.54848872571245"/>
  </node>
  <node id="168033" label="zzzz516" cy:nodeId="426">
    <graphics z="0.0" x="151.29873474863894" y="-123.07412349133745"/>
  </node>
  <node id="168032" label="zzzz515" cy:nodeId="427">
    <graphics z="0.0" x="112.99618347910769" y="-64.54172908215776"/>
  </node>
  <node id="168031" label="zzzz514" cy:nodeId="428">
    <graphics z="0.0" x="125.67599304942019" y="-126.73943721204057"/>
  </node>
  <node id="168030" label="zzzz513" cy:nodeId="429">
    <graphics z="0.0" x="173.47491272715456" y="-124.53913508801713"/>
  </node>
  <node id="168029" label="zzzz512" cy:nodeId="430">
    <graphics z="0.0" x="292.9118634107483" y="-157.78680049329057"/>
  </node>
  <node id="168028" label="zzzz511" cy:nodeId="431">
    <graphics z="0.0" x="169.2073956373108" y="-58.193996538212446"/>
  </node>
  <node id="168027" label="zzzz510" cy:nodeId="432">
    <graphics z="0.0" x="110.34499939707644" y="-144.79018794446245"/>
  </node>
  <node id="168026" label="zzzz509" cy:nodeId="433">
    <graphics z="0.0" x="172.96645935801394" y="-103.98463069348588"/>
  </node>
  <node id="168025" label="zzzz508" cy:nodeId="434">
    <graphics z="0.0" x="-197.46093550892942" y="-271.36822139172807"/>
  </node>
  <node id="168024" label="zzzz507" cy:nodeId="435">
    <graphics z="0.0" x="-229.4545916673767" y="-229.75115596204057"/>
  </node>
  <node id="168023" label="zzzz506" cy:nodeId="436">
    <graphics z="0.0" x="59.73596009043581" y="-119.79143916516557"/>
  </node>
  <node id="168022" label="zzzz505" cy:nodeId="437">
    <graphics z="0.0" x="77.75839051035769" y="-75.86858760266557"/>
  </node>
  <node id="168021" label="zzzz504" cy:nodeId="438">
    <graphics z="0.0" x="108.64022644785769" y="-37.821098436405805"/>
  </node>
  <node id="168020" label="zzzz503" cy:nodeId="439">
    <graphics z="0.0" x="108.00036438731081" y="-42.82764827161088"/>
  </node>
  <node id="168019" label="zzzz502" cy:nodeId="440">
    <graphics z="0.0" x="163.90545471934206" y="-73.41300593762651"/>
  </node>
  <node id="168018" label="zzzz501" cy:nodeId="441">
    <graphics z="0.0" x="-3.6564654466735647" y="-298.6897851124312"/>
  </node>
  <node id="168017" label="zzzz500" cy:nodeId="442">
    <graphics z="0.0" x="119.51214417246706" y="-121.32181941418901"/>
  </node>
  <node id="168016" label="zzzz499" cy:nodeId="443">
    <graphics z="0.0" x="156.81609925059206" y="-128.69636165051713"/>
  </node>
  <node id="168015" label="zzzz498" cy:nodeId="444">
    <graphics z="0.0" x="406.7677899244202" y="-147.32087336926713"/>
  </node>
  <node id="168014" label="zzzz497" cy:nodeId="445">
    <graphics z="0.0" x="206.7701397779358" y="139.69395817370162"/>
  </node>
  <node id="168013" label="zzzz496" cy:nodeId="446">
    <graphics z="0.0" x="-59.27624694081419" y="275.18277348131875"/>
  </node>
  <node id="168012" label="zzzz495" cy:nodeId="447">
    <graphics z="0.0" x="394.1136151197327" y="41.52206028551802"/>
  </node>
  <node id="168011" label="zzzz494" cy:nodeId="448">
    <graphics z="0.0" x="134.34585388926394" y="218.67309940905312"/>
  </node>
  <node id="168010" label="zzzz493" cy:nodeId="449">
    <graphics z="0.0" x="37.84617432383425" y="250.6924322947953"/>
  </node>
  <node id="168009" label="zzzz492" cy:nodeId="450">
    <graphics z="0.0" x="156.5380841138733" y="2.496150861689898"/>
  </node>
  <node id="168008" label="zzzz491" cy:nodeId="451">
    <graphics z="0.0" x="210.96987732676394" y="269.44054020495156"/>
  </node>
  <node id="168007" label="zzzz490" cy:nodeId="452">
    <graphics z="0.0" x="129.80438050059206" y="268.7991217479203"/>
  </node>
  <node id="168006" label="zzzz489" cy:nodeId="453">
    <graphics z="0.0" x="108.39443787363894" y="239.74782169909219"/>
  </node>
  <node id="168005" label="zzzz488" cy:nodeId="454">
    <graphics z="0.0" x="86.64559754160769" y="236.7645758494828"/>
  </node>
  <node id="168004" label="zzzz487" cy:nodeId="455">
    <graphics z="0.0" x="336.61147888926394" y="107.6517905101274"/>
  </node>
  <node id="168003" label="zzzz486" cy:nodeId="456">
    <graphics z="0.0" x="277.46096619395144" y="78.54126347155318"/>
  </node>
  <node id="168002" label="zzzz485" cy:nodeId="457">
    <graphics z="0.0" x="329.40798767832644" y="140.81071842760787"/>
  </node>
  <node id="168001" label="zzzz484" cy:nodeId="458">
    <graphics z="0.0" x="396.47866638926394" y="275.10286320299844"/>
  </node>
  <node id="168000" label="zzzz483" cy:nodeId="459">
    <graphics z="0.0" x="-115.19191924306028" y="144.28437412829146"/>
  </node>
  <node id="167999" label="zzzz482" cy:nodeId="460">
    <graphics z="0.0" x="115.02065857676394" y="357.15018070788125"/>
  </node>
  <node id="167998" label="zzzz481" cy:nodeId="461">
    <graphics z="0.0" x="203.6088848951233" y="193.172092328975"/>
  </node>
  <node id="167997" label="zzzz480" cy:nodeId="462">
    <graphics z="0.0" x="296.6169415357483" y="158.69128788561568"/>
  </node>
  <node id="167996" label="zzzz479" cy:nodeId="463">
    <graphics z="0.0" x="96.74380310801394" y="152.57665623278365"/>
  </node>
  <node id="167995" label="zzzz478" cy:nodeId="464">
    <graphics z="0.0" x="234.32378968027956" y="325.9204748973344"/>
  </node>
  <node id="167994" label="zzzz477" cy:nodeId="465">
    <graphics z="0.0" x="394.6272869947327" y="-348.4656640186812"/>
  </node>
  <node id="167993" label="zzzz476" cy:nodeId="466">
    <graphics z="0.0" x="297.60931214121706" y="148.09269322008834"/>
  </node>
  <node id="167992" label="zzzz475" cy:nodeId="467">
    <graphics z="0.0" x="432.22854431895144" y="-128.8824120655562"/>
  </node>
  <node id="167991" label="zzzz474" cy:nodeId="468">
    <graphics z="0.0" x="403.9113446119202" y="233.38194645495156"/>
  </node>
  <node id="167990" label="zzzz473" cy:nodeId="469">
    <graphics z="0.0" x="94.08392151621706" y="160.10309208483443"/>
  </node>
  <node id="167989" label="zzzz472" cy:nodeId="470">
    <graphics z="0.0" x="286.92703064707644" y="318.1503332957719"/>
  </node>
  <node id="167988" label="zzzz471" cy:nodeId="471">
    <graphics z="0.0" x="138.12942322520144" y="365.1636694774125"/>
  </node>
  <node id="167987" label="zzzz470" cy:nodeId="472">
    <graphics z="0.0" x="77.17764099863894" y="185.27806461901412"/>
  </node>
  <node id="167986" label="zzzz469" cy:nodeId="473">
    <graphics z="0.0" x="347.23867615488894" y="-143.03522883801713"/>
  </node>
  <node id="167985" label="zzzz468" cy:nodeId="474">
    <graphics z="0.0" x="299.60830506113894" y="143.7293051585649"/>
  </node>
  <node id="167984" label="zzzz467" cy:nodeId="475">
    <graphics z="0.0" x="113.86718567637331" y="301.22171391100625"/>
  </node>
  <node id="167983" label="zzzz466" cy:nodeId="476">
    <graphics z="0.0" x="257.6586895826233" y="162.0769842967485"/>
  </node>
  <node id="167982" label="zzzz465" cy:nodeId="477">
    <graphics z="0.0" x="337.3495770337952" y="263.7322272166703"/>
  </node>
  <node id="167981" label="zzzz464" cy:nodeId="478">
    <graphics z="0.0" x="86.47674378184206" y="148.99982060045943"/>
  </node>
  <node id="167980" label="zzzz463" cy:nodeId="479">
    <graphics z="0.0" x="352.9427166822327" y="278.7400854930375"/>
  </node>
  <node id="167979" label="zzzz462" cy:nodeId="480">
    <graphics z="0.0" x="444.8510418775452" y="-112.23894893079057"/>
  </node>
  <node id="167978" label="zzzz461" cy:nodeId="481">
    <graphics z="0.0" x="417.17434510020144" y="201.76277531237344"/>
  </node>
  <node id="167977" label="zzzz460" cy:nodeId="482">
    <graphics z="0.0" x="360.8229657056702" y="104.72164524645552"/>
  </node>
  <node id="167976" label="zzzz459" cy:nodeId="483">
    <graphics z="0.0" x="267.6968670728577" y="152.04453648180709"/>
  </node>
  <node id="167975" label="zzzz458" cy:nodeId="484">
    <graphics z="0.0" x="190.34173401621706" y="195.15706242174844"/>
  </node>
  <node id="167974" label="zzzz457" cy:nodeId="485">
    <graphics z="0.0" x="472.03237732676394" y="217.101779828975"/>
  </node>
  <node id="167973" label="zzzz456" cy:nodeId="486">
    <graphics z="0.0" x="91.83181580332644" y="329.4666785106156"/>
  </node>
  <node id="167972" label="zzzz455" cy:nodeId="487">
    <graphics z="0.0" x="293.1661053541077" y="158.2291602000688"/>
  </node>
  <node id="167971" label="zzzz454" cy:nodeId="488">
    <graphics z="0.0" x="306.3410321119202" y="134.2815512523149"/>
  </node>
  <node id="167970" label="zzzz453" cy:nodeId="489">
    <graphics z="0.0" x="166.9035626294983" y="10.847066770503375"/>
  </node>
  <node id="167969" label="zzzz452" cy:nodeId="490">
    <graphics z="0.0" x="428.96938904551394" y="-333.61928950696245"/>
  </node>
  <node id="167968" label="zzzz451" cy:nodeId="491">
    <graphics z="0.0" x="334.0940838697327" y="317.20035160631875"/>
  </node>
  <node id="167967" label="zzzz450" cy:nodeId="492">
    <graphics z="0.0" x="265.3858319166077" y="193.60669315905312"/>
  </node>
  <node id="167966" label="zzzz449" cy:nodeId="493">
    <graphics z="0.0" x="331.1459637525452" y="129.98495091051802"/>
  </node>
  <node id="167965" label="zzzz448" cy:nodeId="494">
    <graphics z="0.0" x="451.0655194166077" y="-158.86358271985307"/>
  </node>
  <node id="167964" label="zzzz447" cy:nodeId="495">
    <graphics z="0.0" x="93.69238098887331" y="170.98476017565474"/>
  </node>
  <node id="167963" label="zzzz446" cy:nodeId="496">
    <graphics z="0.0" x="312.64410218027956" y="166.44218815417037"/>
  </node>
  <node id="167962" label="zzzz445" cy:nodeId="497">
    <graphics z="0.0" x="237.73638733652956" y="197.2322272166703"/>
  </node>
  <node id="167961" label="zzzz444" cy:nodeId="498">
    <graphics z="0.0" x="282.58733948496706" y="160.9765967235063"/>
  </node>
  <node id="167960" label="zzzz443" cy:nodeId="499">
    <graphics z="0.0" x="245.59896668223269" y="199.41463078112344"/>
  </node>
  <node id="167959" label="zzzz442" cy:nodeId="500">
    <graphics z="0.0" x="129.91241272715456" y="169.25937260241255"/>
  </node>
  <node id="167958" label="zzzz441" cy:nodeId="501">
    <graphics z="0.0" x="51.483244025982685" y="170.40550602526412"/>
  </node>
  <node id="167957" label="zzzz440" cy:nodeId="502">
    <graphics z="0.0" x="320.0989971998108" y="120.32738102526412"/>
  </node>
  <node id="167956" label="zzzz439" cy:nodeId="503">
    <graphics z="0.0" x="454.68691834238894" y="-114.22526179700151"/>
  </node>
  <node id="167955" label="zzzz438" cy:nodeId="504">
    <graphics z="0.0" x="264.56948670176394" y="191.89480961413125"/>
  </node>
  <node id="167954" label="zzzz437" cy:nodeId="505">
    <graphics z="0.0" x="191.2858868482483" y="210.0961645946"/>
  </node>
  <node id="167953" label="zzzz436" cy:nodeId="506">
    <graphics z="0.0" x="282.99270447520144" y="167.39398563952193"/>
  </node>
  <node id="167952" label="zzzz435" cy:nodeId="507">
    <graphics z="0.0" x="274.89944275645144" y="174.87610233874068"/>
  </node>
  <node id="167951" label="zzzz434" cy:nodeId="508">
    <graphics z="0.0" x="-179.55143729420774" y="83.1713103160356"/>
  </node>
  <node id="167950" label="zzzz433" cy:nodeId="509">
    <graphics z="0.0" x="226.19790467051394" y="186.68367374987344"/>
  </node>
  <node id="167949" label="zzzz432" cy:nodeId="510">
    <graphics z="0.0" x="341.6708660962952" y="115.47987736315474"/>
  </node>
  <node id="167948" label="zzzz431" cy:nodeId="511">
    <graphics z="0.0" x="243.32827576426394" y="200.22255314440469"/>
  </node>
  <node id="167947" label="zzzz430" cy:nodeId="512">
    <graphics z="0.0" x="-153.91677657338255" y="281.7157629832719"/>
  </node>
  <node id="167946" label="zzzz429" cy:nodeId="513">
    <graphics z="0.0" x="361.0962811353577" y="-87.5958901539351"/>
  </node>
  <node id="167945" label="zzzz428" cy:nodeId="514">
    <graphics z="0.0" x="-394.7499255296814" y="-207.93862544446245"/>
  </node>
  <node id="167944" label="zzzz427" cy:nodeId="515">
    <graphics z="0.0" x="-347.2361315843689" y="52.00105465502486"/>
  </node>
  <node id="167943" label="zzzz426" cy:nodeId="516">
    <graphics z="0.0" x="-93.14085570546263" y="-707.1119652882124"/>
  </node>
  <node id="167942" label="zzzz425" cy:nodeId="517">
    <graphics z="0.0" x="352.18691834238894" y="-157.13207637219682"/>
  </node>
  <node id="167941" label="zzzz424" cy:nodeId="518">
    <graphics z="0.0" x="-122.13021270009153" y="-242.80846797375932"/>
  </node>
  <node id="167940" label="zzzz423" cy:nodeId="519">
    <graphics z="0.0" x="-56.13560668202513" y="-306.8641320362593"/>
  </node>
  <node id="167939" label="zzzz422" cy:nodeId="520">
    <graphics z="0.0" x="160.30978211192019" y="-102.50564204602495"/>
  </node>
  <node id="167938" label="zzzz421" cy:nodeId="521">
    <graphics z="0.0" x="-351.44284239979856" y="11.641665349910113"/>
  </node>
  <node id="167937" label="zzzz420" cy:nodeId="522">
    <graphics z="0.0" x="-277.2359942552673" y="53.70732868761763"/>
  </node>
  <node id="167936" label="zzzz419" cy:nodeId="523">
    <graphics z="0.0" x="-298.50180236073606" y="70.57053745836959"/>
  </node>
  <node id="167935" label="zzzz418" cy:nodeId="524">
    <graphics z="0.0" x="-28.236131584368877" y="234.24197758288125"/>
  </node>
  <node id="167934" label="zzzz417" cy:nodeId="525">
    <graphics z="0.0" x="-275.2323092577087" y="89.81952274889693"/>
  </node>
  <node id="167933" label="zzzz416" cy:nodeId="526">
    <graphics z="0.0" x="-303.3061617967712" y="94.18925083727584"/>
  </node>
  <node id="167932" label="zzzz415" cy:nodeId="527">
    <graphics z="0.0" x="-271.2629260179626" y="119.47217167467818"/>
  </node>
  <node id="167931" label="zzzz414" cy:nodeId="528">
    <graphics z="0.0" x="-257.5915621873962" y="95.3263281688188"/>
  </node>
  <node id="167930" label="zzzz413" cy:nodeId="529">
    <graphics z="0.0" x="-317.2444323656189" y="76.77956760973677"/>
  </node>
  <node id="167929" label="zzzz412" cy:nodeId="530">
    <graphics z="0.0" x="-280.5064562914001" y="87.21358479113326"/>
  </node>
  <node id="167928" label="zzzz411" cy:nodeId="531">
    <graphics z="0.0" x="-302.0896319505798" y="70.92502964586959"/>
  </node>
  <node id="167927" label="zzzz410" cy:nodeId="532">
    <graphics z="0.0" x="-492.28122130604856" y="307.2210425242875"/>
  </node>
  <node id="167926" label="zzzz409" cy:nodeId="533">
    <graphics z="0.0" x="-400.0771044847595" y="358.2097815379594"/>
  </node>
  <node id="167925" label="zzzz408" cy:nodeId="534">
    <graphics z="0.0" x="-428.7183856126892" y="306.9694861278031"/>
  </node>
  <node id="167924" label="zzzz407" cy:nodeId="535">
    <graphics z="0.0" x="-470.94992247792356" y="330.9512671336625"/>
  </node>
  <node id="167923" label="zzzz406" cy:nodeId="536">
    <graphics z="0.0" x="-491.7433184740173" y="326.9442786082719"/>
  </node>
  <node id="167922" label="zzzz405" cy:nodeId="537">
    <graphics z="0.0" x="-352.512773430072" y="324.9655798778031"/>
  </node>
  <node id="167921" label="zzzz404" cy:nodeId="538">
    <graphics z="0.0" x="-349.43654051991575" y="378.9559973582719"/>
  </node>
  <node id="167920" label="zzzz403" cy:nodeId="539">
    <graphics z="0.0" x="-395.71969786854856" y="452.7963293895219"/>
  </node>
  <node id="167919" label="zzzz402" cy:nodeId="540">
    <graphics z="0.0" x="-400.8830432054626" y="361.2875403270219"/>
  </node>
  <node id="167918" label="zzzz401" cy:nodeId="541">
    <graphics z="0.0" x="-469.1433428880798" y="306.32425297350625"/>
  </node>
  <node id="167917" label="zzzz400" cy:nodeId="542">
    <graphics z="0.0" x="-424.6806964037048" y="479.4390601024125"/>
  </node>
  <node id="167916" label="zzzz399" cy:nodeId="543">
    <graphics z="0.0" x="-422.55804625722044" y="283.46744145006875"/>
  </node>
  <node id="167915" label="zzzz398" cy:nodeId="544">
    <graphics z="0.0" x="-365.82281676503294" y="361.1061438426469"/>
  </node>
  <node id="167914" label="zzzz397" cy:nodeId="545">
    <graphics z="0.0" x="-378.80612364979856" y="300.7937964305375"/>
  </node>
  <node id="167913" label="zzzz396" cy:nodeId="546">
    <graphics z="0.0" x="-369.23800841542356" y="408.72061527819375"/>
  </node>
  <node id="167912" label="zzzz395" cy:nodeId="547">
    <graphics z="0.0" x="-343.7279070970642" y="312.64358891100625"/>
  </node>
  <node id="167911" label="zzzz394" cy:nodeId="548">
    <graphics z="0.0" x="-409.6790026781189" y="361.133029828975"/>
  </node>
  <node id="167910" label="zzzz393" cy:nodeId="549">
    <graphics z="0.0" x="-373.9359606859314" y="321.3702429637406"/>
  </node>
  <node id="167909" label="zzzz392" cy:nodeId="550">
    <graphics z="0.0" x="-371.3844012376892" y="298.1730994090531"/>
  </node>
  <node id="167908" label="zzzz391" cy:nodeId="551">
    <graphics z="0.0" x="-436.15980712147825" y="438.3524817332719"/>
  </node>
  <node id="167907" label="zzzz390" cy:nodeId="552">
    <graphics z="0.0" x="-394.9083727953064" y="431.0176733836625"/>
  </node>
  <node id="167906" label="zzzz389" cy:nodeId="553">
    <graphics z="0.0" x="-533.4679278490173" y="398.3411597117875"/>
  </node>
  <node id="167905" label="zzzz388" cy:nodeId="554">
    <graphics z="0.0" x="-385.3348254320251" y="383.1270178660844"/>
  </node>
  <node id="167904" label="zzzz387" cy:nodeId="555">
    <graphics z="0.0" x="-357.2697009203064" y="438.1077917918656"/>
  </node>
  <node id="167903" label="zzzz386" cy:nodeId="556">
    <graphics z="0.0" x="-467.0584735033142" y="349.58047855944375"/>
  </node>
  <node id="167902" label="zzzz385" cy:nodeId="557">
    <graphics z="0.0" x="-374.3329638597595" y="315.6886023387406"/>
  </node>
  <node id="167901" label="zzzz384" cy:nodeId="558">
    <graphics z="0.0" x="-414.14479247304075" y="464.24917973131875"/>
  </node>
  <node id="167900" label="zzzz383" cy:nodeId="559">
    <graphics z="0.0" x="-492.83627501698606" y="419.91604984850625"/>
  </node>
  <node id="167899" label="zzzz382" cy:nodeId="560">
    <graphics z="0.0" x="-380.46486083241575" y="469.0927161082719"/>
  </node>
  <node id="167898" label="zzzz381" cy:nodeId="561">
    <graphics z="0.0" x="-401.60284606190794" y="327.17532719225625"/>
  </node>
  <node id="167897" label="zzzz380" cy:nodeId="562">
    <graphics z="0.0" x="-511.68747130604856" y="371.3869665965531"/>
  </node>
  <node id="167896" label="zzzz379" cy:nodeId="563">
    <graphics z="0.0" x="-329.99496642323606" y="509.93338383288125"/>
  </node>
  <node id="167895" label="zzzz378" cy:nodeId="564">
    <graphics z="0.0" x="-350.1129168626892" y="370.27005375475625"/>
  </node>
  <node id="167894" label="zzzz377" cy:nodeId="565">
    <graphics z="0.0" x="-380.5425891039001" y="372.2023962840531"/>
  </node>
  <node id="167893" label="zzzz376" cy:nodeId="566">
    <graphics z="0.0" x="-435.0990466234314" y="450.3157385692094"/>
  </node>
  <node id="167892" label="zzzz375" cy:nodeId="567">
    <graphics z="0.0" x="-445.44369689198606" y="387.0972327098344"/>
  </node>
  <node id="167891" label="zzzz374" cy:nodeId="568">
    <graphics z="0.0" x="-422.1359881517517" y="409.1673315867875"/>
  </node>
  <node id="167890" label="zzzz373" cy:nodeId="569">
    <graphics z="0.0" x="-351.4792803880798" y="332.7185095653031"/>
  </node>
  <node id="167889" label="zzzz372" cy:nodeId="570">
    <graphics z="0.0" x="-345.49286071034544" y="507.00760258288125"/>
  </node>
  <node id="167888" label="zzzz371" cy:nodeId="571">
    <graphics z="0.0" x="-440.1877459642517" y="295.8093298778031"/>
  </node>
  <node id="167887" label="zzzz370" cy:nodeId="572">
    <graphics z="0.0" x="-458.3067645189392" y="312.27969730944375"/>
  </node>
  <node id="167886" label="zzzz369" cy:nodeId="573">
    <graphics z="0.0" x="-428.03830138417356" y="294.28055180163125"/>
  </node>
  <node id="167885" label="zzzz368" cy:nodeId="574">
    <graphics z="0.0" x="-272.23248473378294" y="443.21622074694375"/>
  </node>
  <node id="167884" label="zzzz367" cy:nodeId="575">
    <graphics z="0.0" x="-425.49154845448606" y="411.149631391475"/>
  </node>
  <node id="167883" label="zzzz366" cy:nodeId="576">
    <graphics z="0.0" x="-428.4687365648376" y="407.998752485225"/>
  </node>
  <node id="167882" label="zzzz365" cy:nodeId="577">
    <graphics z="0.0" x="-434.54330626698606" y="325.73697270006875"/>
  </node>
  <node id="167881" label="zzzz364" cy:nodeId="578">
    <graphics z="0.0" x="-478.13836852284544" y="408.5758704051469"/>
  </node>
  <node id="167880" label="zzzz363" cy:nodeId="579">
    <graphics z="0.0" x="-305.7344225999939" y="492.0943335399125"/>
  </node>
  <node id="167879" label="zzzz362" cy:nodeId="580">
    <graphics z="0.0" x="-476.63131896229856" y="357.7276648387406"/>
  </node>
  <node id="167878" label="zzzz361" cy:nodeId="581">
    <graphics z="0.0" x="-391.8660143968689" y="444.4129370555375"/>
  </node>
  <node id="167877" label="zzzz360" cy:nodeId="582">
    <graphics z="0.0" x="-402.2746447679626" y="421.7660559520219"/>
  </node>
  <node id="167876" label="zzzz359" cy:nodeId="583">
    <graphics z="0.0" x="-348.1580065843689" y="421.40494145006875"/>
  </node>
  <node id="167875" label="zzzz358" cy:nodeId="584">
    <graphics z="0.0" x="-361.4636706468689" y="393.356662641475"/>
  </node>
  <node id="167874" label="zzzz357" cy:nodeId="585">
    <graphics z="0.0" x="-455.74667540761106" y="414.203342328975"/>
  </node>
  <node id="167873" label="zzzz356" cy:nodeId="586">
    <graphics z="0.0" x="-448.8865069505798" y="352.2513159617875"/>
  </node>
  <node id="167872" label="zzzz355" cy:nodeId="587">
    <graphics z="0.0" x="-450.2324236986267" y="317.107639203975"/>
  </node>
  <node id="167871" label="zzzz354" cy:nodeId="588">
    <graphics z="0.0" x="-480.89706603261106" y="455.511447797725"/>
  </node>
  <node id="167870" label="zzzz353" cy:nodeId="589">
    <graphics z="0.0" x="-478.42050353261106" y="421.4555395946"/>
  </node>
  <node id="167869" label="zzzz352" cy:nodeId="590">
    <graphics z="0.0" x="-423.28268614979856" y="337.94919193835"/>
  </node>
  <node id="167868" label="zzzz351" cy:nodeId="591">
    <graphics z="0.0" x="-357.0731219408142" y="335.3680151805375"/>
  </node>
  <node id="167867" label="zzzz350" cy:nodeId="592">
    <graphics z="0.0" x="-470.90500060292356" y="388.9947546824906"/>
  </node>
  <node id="167866" label="zzzz349" cy:nodeId="593">
    <graphics z="0.0" x="-382.0438098070251" y="412.5306433543656"/>
  </node>
  <node id="167865" label="zzzz348" cy:nodeId="594">
    <graphics z="0.0" x="-358.738115226947" y="443.44241703600625"/>
  </node>
  <node id="167864" label="zzzz347" cy:nodeId="595">
    <graphics z="0.0" x="-487.93026915761106" y="372.249240766475"/>
  </node>
  <node id="167863" label="zzzz346" cy:nodeId="596">
    <graphics z="0.0" x="-435.3289660570251" y="384.3753088817094"/>
  </node>
  <node id="167862" label="zzzz345" cy:nodeId="597">
    <graphics z="0.0" x="-276.759111320697" y="367.07779301256875"/>
  </node>
  <node id="167861" label="zzzz344" cy:nodeId="598">
    <graphics z="0.0" x="-446.93512145253294" y="351.60110844225625"/>
  </node>
  <node id="167860" label="zzzz343" cy:nodeId="599">
    <graphics z="0.0" x="-434.14547911854856" y="431.49509037585"/>
  </node>
  <node id="167859" label="zzzz342" cy:nodeId="600">
    <graphics z="0.0" x="-488.1123370287048" y="384.08169926256875"/>
  </node>
  <node id="167858" label="zzzz341" cy:nodeId="601">
    <graphics z="0.0" x="-400.48341551991575" y="389.6347082957719"/>
  </node>
  <node id="167857" label="zzzz340" cy:nodeId="602">
    <graphics z="0.0" x="-425.94418517323606" y="389.0308874949906"/>
  </node>
  <node id="167856" label="zzzz339" cy:nodeId="603">
    <graphics z="0.0" x="-438.3983172533142" y="374.5868567332719"/>
  </node>
  <node id="167855" label="zzzz338" cy:nodeId="604">
    <graphics z="0.0" x="-501.91867247792356" y="345.7546423778031"/>
  </node>
  <node id="167854" label="zzzz337" cy:nodeId="605">
    <graphics z="0.0" x="-471.20736876698606" y="414.95999516100625"/>
  </node>
  <node id="167853" label="zzzz336" cy:nodeId="606">
    <graphics z="0.0" x="-463.0329913255798" y="333.7907751903031"/>
  </node>
  <node id="167852" label="zzzz335" cy:nodeId="607">
    <graphics z="0.0" x="-397.64088622304075" y="385.7035864696"/>
  </node>
  <node id="167851" label="zzzz334" cy:nodeId="608">
    <graphics z="0.0" x="-401.22169676991575" y="303.5358313426469"/>
  </node>
  <node id="167850" label="zzzz333" cy:nodeId="609">
    <graphics z="0.0" x="-368.99276915761106" y="448.2816199168656"/>
  </node>
  <node id="167849" label="zzzz332" cy:nodeId="610">
    <graphics z="0.0" x="-444.55343810292356" y="362.4802283153031"/>
  </node>
  <node id="167848" label="zzzz331" cy:nodeId="611">
    <graphics z="0.0" x="-515.9361590501892" y="330.0261877879594"/>
  </node>
  <node id="167847" label="zzzz330" cy:nodeId="612">
    <graphics z="0.0" x="-409.2868517992126" y="-73.36075221448198"/>
  </node>
  <node id="167846" label="zzzz329" cy:nodeId="613">
    <graphics z="0.0" x="-218.14756575795286" y="24.491849790522906"/>
  </node>
  <node id="167845" label="zzzz328" cy:nodeId="614">
    <graphics z="0.0" x="-304.3303546068298" y="5.267276655146929"/>
  </node>
  <node id="167844" label="zzzz327" cy:nodeId="615">
    <graphics z="0.0" x="-349.4065264818298" y="-17.662819017460492"/>
  </node>
  <node id="167843" label="zzzz326" cy:nodeId="616">
    <graphics z="0.0" x="-89.65015593739622" y="212.63382328600625"/>
  </node>
  <node id="167842" label="zzzz325" cy:nodeId="617">
    <graphics z="0.0" x="-152.8517970201599" y="133.15202702135787"/>
  </node>
  <node id="167841" label="zzzz324" cy:nodeId="618">
    <graphics z="0.0" x="-425.7192248460876" y="-56.703212846806196"/>
  </node>
  <node id="167840" label="zzzz323" cy:nodeId="619">
    <graphics z="0.0" x="-281.6960543748962" y="-21.539753068974164"/>
  </node>
  <node id="167839" label="zzzz322" cy:nodeId="620">
    <graphics z="0.0" x="-103.530839836322" y="257.5515631541703"/>
  </node>
  <node id="167838" label="zzzz321" cy:nodeId="621">
    <graphics z="0.0" x="-218.8952654955017" y="197.30366886706094"/>
  </node>
  <node id="167837" label="zzzz320" cy:nodeId="622">
    <graphics z="0.0" x="-231.22108641835325" y="-21.478073228886274"/>
  </node>
  <node id="167836" label="zzzz319" cy:nodeId="623">
    <graphics z="0.0" x="-294.92750731679075" y="-66.17275630383745"/>
  </node>
  <node id="167835" label="zzzz318" cy:nodeId="624">
    <graphics z="0.0" x="-185.88217345448606" y="38.90507210345015"/>
  </node>
  <node id="167834" label="zzzz317" cy:nodeId="625">
    <graphics z="0.0" x="-266.02902404042356" y="-12.15953456311479"/>
  </node>
  <node id="167833" label="zzzz316" cy:nodeId="626">
    <graphics z="0.0" x="-145.8853434679138" y="151.62612522692427"/>
  </node>
  <node id="167832" label="zzzz315" cy:nodeId="627">
    <graphics z="0.0" x="-178.61376944752806" y="173.49196232409224"/>
  </node>
  <node id="167831" label="zzzz314" cy:nodeId="628">
    <graphics z="0.0" x="-327.2569903490173" y="-69.6436425343062"/>
  </node>
  <node id="167830" label="zzzz313" cy:nodeId="629">
    <graphics z="0.0" x="-354.96205321522825" y="14.736553083369586"/>
  </node>
  <node id="167829" label="zzzz312" cy:nodeId="630">
    <graphics z="0.0" x="-139.7922152635681" y="-136.83274470715776"/>
  </node>
  <node id="167828" label="zzzz311" cy:nodeId="631">
    <graphics z="0.0" x="-31.091646110736065" y="-329.06328975110307"/>
  </node>
  <node id="167827" label="zzzz310" cy:nodeId="632">
    <graphics z="0.0" x="168.68282898692019" y="-161.33800898938432"/>
  </node>
  <node id="167826" label="zzzz309" cy:nodeId="633">
    <graphics z="0.0" x="-370.64862242909544" y="-31.52099238782182"/>
  </node>
  <node id="167825" label="zzzz308" cy:nodeId="634">
    <graphics z="0.0" x="68.06878479746706" y="-402.0079003468062"/>
  </node>
  <node id="167824" label="zzzz307" cy:nodeId="635">
    <graphics z="0.0" x="153.13015564707644" y="74.99904240221724"/>
  </node>
  <node id="167823" label="zzzz306" cy:nodeId="636">
    <graphics z="0.0" x="-358.42132750722044" y="-69.47212611584916"/>
  </node>
  <node id="167822" label="zzzz305" cy:nodeId="637">
    <graphics z="0.0" x="100.84112366465456" y="280.9415015086625"/>
  </node>
  <node id="167821" label="zzzz304" cy:nodeId="638">
    <graphics z="0.0" x="-152.97125045033567" y="246.39322270006875"/>
  </node>
  <node id="167820" label="zzzz303" cy:nodeId="639">
    <graphics z="0.0" x="-182.26547900410765" y="224.22830570788125"/>
  </node>
  <node id="167819" label="zzzz302" cy:nodeId="640">
    <graphics z="0.0" x="-264.6478060838806" y="189.192111860225"/>
  </node>
  <node id="167818" label="zzzz301" cy:nodeId="641">
    <graphics z="0.0" x="-236.29434386464231" y="265.2762640819047"/>
  </node>
  <node id="167817" label="zzzz300" cy:nodeId="642">
    <graphics z="0.0" x="-191.5344618913757" y="232.09910954088906"/>
  </node>
  <node id="167816" label="zzzz299" cy:nodeId="643">
    <graphics z="0.0" x="-161.07735625477903" y="217.18567265124062"/>
  </node>
  <node id="167815" label="zzzz298" cy:nodeId="644">
    <graphics z="0.0" x="-126.58150664540403" y="-300.39480220227495"/>
  </node>
  <node id="167814" label="zzzz297" cy:nodeId="645">
    <graphics z="0.0" x="119.31002625254519" y="251.84338749499062"/>
  </node>
  <node id="167813" label="zzzz296" cy:nodeId="646">
    <graphics z="0.0" x="87.60693177012331" y="292.5966833934281"/>
  </node>
  <node id="167812" label="zzzz295" cy:nodeId="647">
    <graphics z="0.0" x="-237.0234812852966" y="121.8542822703813"/>
  </node>
  <node id="167811" label="zzzz294" cy:nodeId="648">
    <graphics z="0.0" x="91.27020081309206" y="-127.94627009778276"/>
  </node>
  <node id="167810" label="zzzz293" cy:nodeId="649">
    <graphics z="0.0" x="-132.9867724535095" y="-262.8328515186812"/>
  </node>
  <node id="167809" label="zzzz292" cy:nodeId="650">
    <graphics z="0.0" x="-158.66824904652708" y="-310.36114131360307"/>
  </node>
  <node id="167808" label="zzzz291" cy:nodeId="651">
    <graphics z="0.0" x="74.42519959238894" y="-89.60682307629838"/>
  </node>
  <node id="167807" label="zzzz290" cy:nodeId="652">
    <graphics z="0.0" x="157.73968323496706" y="-113.24531184582963"/>
  </node>
  <node id="167806" label="zzzz289" cy:nodeId="653">
    <graphics z="0.0" x="-168.96956816884153" y="-207.01406489758745"/>
  </node>
  <node id="167805" label="zzzz288" cy:nodeId="654">
    <graphics z="0.0" x="-90.83254424306028" y="-303.88467036633745"/>
  </node>
  <node id="167804" label="zzzz287" cy:nodeId="655">
    <graphics z="0.0" x="-114.73835173817747" y="-229.84075557141557"/>
  </node>
  <node id="167803" label="zzzz286" cy:nodeId="656">
    <graphics z="0.0" x="117.12283142832644" y="-90.43938838391557"/>
  </node>
  <node id="167802" label="zzzz285" cy:nodeId="657">
    <graphics z="0.0" x="-34.7558154222595" y="-85.45222865491166"/>
  </node>
  <node id="167801" label="zzzz284" cy:nodeId="658">
    <graphics z="0.0" x="86.17263611582644" y="-86.9028969898726"/>
  </node>
  <node id="167800" label="zzzz283" cy:nodeId="659">
    <graphics z="0.0" x="-30.57129088612669" y="-280.9390832081343"/>
  </node>
  <node id="167799" label="zzzz282" cy:nodeId="660">
    <graphics z="0.0" x="33.60780152109987" y="-209.50107966809526"/>
  </node>
  <node id="167798" label="zzzz281" cy:nodeId="661">
    <graphics z="0.0" x="92.93963440684206" y="-131.28164302258745"/>
  </node>
  <node id="167797" label="zzzz280" cy:nodeId="662">
    <graphics z="0.0" x="-93.73577300282591" y="-251.80553828625932"/>
  </node>
  <node id="167796" label="zzzz279" cy:nodeId="663">
    <graphics z="0.0" x="87.40969666270144" y="-42.67387782483354"/>
  </node>
  <node id="167795" label="zzzz278" cy:nodeId="664">
    <graphics z="0.0" x="179.9909649732483" y="-54.89836512952104"/>
  </node>
  <node id="167794" label="zzzz277" cy:nodeId="665">
    <graphics z="0.0" x="-155.88588896962278" y="-291.7423974171187"/>
  </node>
  <node id="167793" label="zzzz276" cy:nodeId="666">
    <graphics z="0.0" x="-233.45043364735716" y="-11.886432756474164"/>
  </node>
  <node id="167792" label="zzzz275" cy:nodeId="667">
    <graphics z="0.0" x="-326.6940783617126" y="-217.92724238782182"/>
  </node>
  <node id="167791" label="zzzz274" cy:nodeId="668">
    <graphics z="0.0" x="-199.93015662404173" y="-134.10699092297807"/>
  </node>
  <node id="167790" label="zzzz273" cy:nodeId="669">
    <graphics z="0.0" x="22.28582581309206" y="-351.68389521985307"/>
  </node>
  <node id="167789" label="zzzz272" cy:nodeId="670">
    <graphics z="0.0" x="-653.5252093431579" y="400.7942541942094"/>
  </node>
  <node id="167788" label="zzzz271" cy:nodeId="671">
    <graphics z="0.0" x="-457.26129332753294" y="247.58613957018594"/>
  </node>
  <node id="167787" label="zzzz270" cy:nodeId="672">
    <graphics z="0.0" x="-133.94536391469114" y="-220.71526729016557"/>
  </node>
  <node id="167786" label="zzzz269" cy:nodeId="673">
    <graphics z="0.0" x="-579.9061602708923" y="348.6983374461625"/>
  </node>
  <node id="167785" label="zzzz268" cy:nodeId="674">
    <graphics z="0.0" x="-112.28575316640013" y="-314.42840205579057"/>
  </node>
  <node id="167784" label="zzzz267" cy:nodeId="675">
    <graphics z="0.0" x="-597.4960955736267" y="417.7603491649125"/>
  </node>
  <node id="167783" label="zzzz266" cy:nodeId="676">
    <graphics z="0.0" x="-161.34007636281126" y="-215.76374446301713"/>
  </node>
  <node id="167782" label="zzzz265" cy:nodeId="677">
    <graphics z="0.0" x="-229.36171141835325" y="160.87953556627974"/>
  </node>
  <node id="167781" label="zzzz264" cy:nodeId="678">
    <graphics z="0.0" x="219.89895447520144" y="182.93028629870162"/>
  </node>
  <node id="167780" label="zzzz263" cy:nodeId="679">
    <graphics z="0.0" x="31.82073792246706" y="-100.9281884327437"/>
  </node>
  <node id="167779" label="zzzz262" cy:nodeId="680">
    <graphics z="0.0" x="-12.894868766986065" y="-86.56797419934526"/>
  </node>
  <node id="167778" label="zzzz261" cy:nodeId="681">
    <graphics z="0.0" x="19.531477058209248" y="-40.62479030041948"/>
  </node>
  <node id="167777" label="zzzz260" cy:nodeId="682">
    <graphics z="0.0" x="47.33335694102175" y="-128.0013085499312"/>
  </node>
  <node id="167776" label="zzzz259" cy:nodeId="683">
    <graphics z="0.0" x="-84.73632994862669" y="-193.39028560071245"/>
  </node>
  <node id="167775" label="zzzz258" cy:nodeId="684">
    <graphics z="0.0" x="-83.16767302723997" y="-306.6130028858687"/>
  </node>
  <node id="167774" label="zzzz257" cy:nodeId="685">
    <graphics z="0.0" x="28.753126228131123" y="-156.95020686536088"/>
  </node>
  <node id="167773" label="zzzz256" cy:nodeId="686">
    <graphics z="0.0" x="-306.87289611073606" y="458.3392981395219"/>
  </node>
  <node id="167772" label="zzzz255" cy:nodeId="687">
    <graphics z="0.0" x="-363.783769523822" y="-77.60442744641557"/>
  </node>
  <node id="167771" label="zzzz254" cy:nodeId="688">
    <graphics z="0.0" x="-388.07452574940794" y="375.2039221629594"/>
  </node>
  <node id="167770" label="zzzz253" cy:nodeId="689">
    <graphics z="0.0" x="-239.8744448778259" y="3.401353727290484"/>
  </node>
  <node id="167769" label="zzzz252" cy:nodeId="690">
    <graphics z="0.0" x="65.84290894297487" y="-62.46192561536088"/>
  </node>
  <node id="167768" label="zzzz251" cy:nodeId="691">
    <graphics z="0.0" x="205.25338562754519" y="-115.29166804700151"/>
  </node>
  <node id="167767" label="zzzz250" cy:nodeId="692">
    <graphics z="0.0" x="134.85711487559206" y="-123.38047419934526"/>
  </node>
  <node id="167766" label="zzzz249" cy:nodeId="693">
    <graphics z="0.0" x="93.85424622324831" y="-87.45161067395463"/>
  </node>
  <node id="167765" label="zzzz248" cy:nodeId="694">
    <graphics z="0.0" x="97.00283631113894" y="-150.22141658215776"/>
  </node>
  <node id="167764" label="zzzz247" cy:nodeId="695">
    <graphics z="0.0" x="153.7923565748108" y="36.0391024455522"/>
  </node>
  <node id="167763" label="zzzz246" cy:nodeId="696">
    <graphics z="0.0" x="132.99624451426394" y="-171.41555415539995"/>
  </node>
  <node id="167762" label="zzzz245" cy:nodeId="697">
    <graphics z="0.0" x="22.24755677012331" y="-114.91688167004838"/>
  </node>
  <node id="167761" label="zzzz244" cy:nodeId="698">
    <graphics z="0.0" x="8.553785407818623" y="-384.40496455579057"/>
  </node>
  <node id="167760" label="zzzz243" cy:nodeId="699">
    <graphics z="0.0" x="-135.80143157216185" y="-112.36895381360307"/>
  </node>
  <node id="167759" label="zzzz242" cy:nodeId="700">
    <graphics z="0.0" x="-96.28415099354856" y="-274.46377192883745"/>
  </node>
  <node id="167758" label="zzzz241" cy:nodeId="701">
    <graphics z="0.0" x="-109.22157469960325" y="-302.02126704602495"/>
  </node>
  <node id="167757" label="zzzz240" cy:nodeId="702">
    <graphics z="0.0" x="-153.96862212391966" y="-244.76379023938432"/>
  </node>
  <node id="167756" label="zzzz239" cy:nodeId="703">
    <graphics z="0.0" x="-576.5878314134704" y="242.9933356151078"/>
  </node>
  <node id="167755" label="zzzz238" cy:nodeId="704">
    <graphics z="0.0" x="-123.79893676015013" y="-133.8847314014937"/>
  </node>
  <node id="167754" label="zzzz237" cy:nodeId="705">
    <graphics z="0.0" x="38.447172248638935" y="-339.6490136280562"/>
  </node>
  <node id="167753" label="zzzz236" cy:nodeId="706">
    <graphics z="0.0" x="-168.92636100026243" y="-144.38294612317338"/>
  </node>
  <node id="167752" label="zzzz235" cy:nodeId="707">
    <graphics z="0.0" x="-133.86673537465208" y="-127.44421016125932"/>
  </node>
  <node id="167751" label="zzzz234" cy:nodeId="708">
    <graphics z="0.0" x="-122.29621306630247" y="-156.72895442395463"/>
  </node>
  <node id="167750" label="zzzz233" cy:nodeId="709">
    <graphics z="0.0" x="-142.3351611253845" y="-143.2826348438765"/>
  </node>
  <node id="167749" label="zzzz232" cy:nodeId="710">
    <graphics z="0.0" x="-160.01833716603392" y="-90.90901576428666"/>
  </node>
  <node id="167748" label="zzzz231" cy:nodeId="711">
    <graphics z="0.0" x="-168.06927291127317" y="-154.88866816907182"/>
  </node>
  <node id="167747" label="zzzz230" cy:nodeId="712">
    <graphics z="0.0" x="-183.19138804646605" y="-127.58286677747026"/>
  </node>
  <node id="167746" label="zzzz229" cy:nodeId="713">
    <graphics z="0.0" x="-173.9406003114807" y="-109.47230159192338"/>
  </node>
  <node id="167745" label="zzzz228" cy:nodeId="714">
    <graphics z="0.0" x="-116.99582091542356" y="-144.30089961438432"/>
  </node>
  <node id="167744" label="zzzz227" cy:nodeId="715">
    <graphics z="0.0" x="-76.5409716722595" y="429.81558598131875"/>
  </node>
  <node id="167743" label="zzzz226" cy:nodeId="716">
    <graphics z="0.0" x="-99.57277861806028" y="564.9695166453812"/>
  </node>
  <node id="167742" label="zzzz225" cy:nodeId="717">
    <graphics z="0.0" x="-105.34860411854856" y="338.445529828975"/>
  </node>
  <node id="167741" label="zzzz224" cy:nodeId="718">
    <graphics z="0.0" x="-325.6329669115173" y="84.02733982653365"/>
  </node>
  <node id="167740" label="zzzz223" cy:nodeId="719">
    <graphics z="0.0" x="-51.00172606679075" y="220.65329350085"/>
  </node>
  <node id="167739" label="zzzz222" cy:nodeId="720">
    <graphics z="0.0" x="64.60287293223269" y="571.0730933055374"/>
  </node>
  <node id="167738" label="zzzz221" cy:nodeId="721">
    <graphics z="0.0" x="-305.06605712147825" y="99.02686680407271"/>
  </node>
  <node id="167737" label="zzzz220" cy:nodeId="722">
    <graphics z="0.0" x="-289.7539080736267" y="111.98585880846724"/>
  </node>
  <node id="167736" label="zzzz219" cy:nodeId="723">
    <graphics z="0.0" x="-453.24460021229856" y="328.6557349071"/>
  </node>
  <node id="167735" label="zzzz218" cy:nodeId="724">
    <graphics z="0.0" x="-167.45394889088743" y="209.01895512194375"/>
  </node>
  <node id="167734" label="zzzz217" cy:nodeId="725">
    <graphics z="0.0" x="94.38961609629519" y="323.35330570788125"/>
  </node>
  <node id="167733" label="zzzz216" cy:nodeId="726">
    <graphics z="0.0" x="89.59963806895144" y="270.58882511706094"/>
  </node>
  <node id="167732" label="zzzz215" cy:nodeId="727">
    <graphics z="0.0" x="165.8085919263733" y="282.7713049754594"/>
  </node>
  <node id="167731" label="zzzz214" cy:nodeId="728">
    <graphics z="0.0" x="51.12414368418581" y="262.61546696276406"/>
  </node>
  <node id="167730" label="zzzz213" cy:nodeId="729">
    <graphics z="0.0" x="-328.5539569017517" y="3.883411298701617"/>
  </node>
  <node id="167729" label="zzzz212" cy:nodeId="730">
    <graphics z="0.0" x="137.6656475904358" y="279.95706547350625"/>
  </node>
  <node id="167728" label="zzzz211" cy:nodeId="731">
    <graphics z="0.0" x="82.53835877207644" y="272.0787848338578"/>
  </node>
  <node id="167727" label="zzzz210" cy:nodeId="732">
    <graphics z="0.0" x="-359.4307879564392" y="43.54187954516158"/>
  </node>
  <node id="167726" label="zzzz209" cy:nodeId="733">
    <graphics z="0.0" x="-208.1266535875427" y="228.49452580065469"/>
  </node>
  <node id="167725" label="zzzz208" cy:nodeId="734">
    <graphics z="0.0" x="-416.35609618397825" y="-135.78197871594682"/>
  </node>
  <node id="167724" label="zzzz207" cy:nodeId="735">
    <graphics z="0.0" x="-353.76706114979856" y="39.71888149828658"/>
  </node>
  <node id="167723" label="zzzz206" cy:nodeId="736">
    <graphics z="0.0" x="-149.40567580433958" y="274.3252600535844"/>
  </node>
  <node id="167722" label="zzzz205" cy:nodeId="737">
    <graphics z="0.0" x="-351.77630797597044" y="-91.76318751721635"/>
  </node>
  <node id="167721" label="zzzz204" cy:nodeId="738">
    <graphics z="0.0" x="-7.526384269915752" y="344.1507605418656"/>
  </node>
  <node id="167720" label="zzzz203" cy:nodeId="739">
    <graphics z="0.0" x="70.13924988535769" y="-141.89623652844682"/>
  </node>
  <node id="167719" label="zzzz202" cy:nodeId="740">
    <graphics z="0.0" x="141.20138367442019" y="-8.114799608280805"/>
  </node>
  <node id="167718" label="zzzz201" cy:nodeId="741">
    <graphics z="0.0" x="-128.50707427235716" y="193.84344853014687"/>
  </node>
  <node id="167717" label="zzzz200" cy:nodeId="742">
    <graphics z="0.0" x="-240.17304793568724" y="260.7003210887406"/>
  </node>
  <node id="167716" label="zzzz199" cy:nodeId="743">
    <graphics z="0.0" x="-189.15212241383665" y="281.1555212840531"/>
  </node>
  <node id="167715" label="zzzz198" cy:nodeId="744">
    <graphics z="0.0" x="-207.10481063099974" y="220.99025333971719"/>
  </node>
  <node id="167714" label="zzzz197" cy:nodeId="745">
    <graphics z="0.0" x="-206.87200537892454" y="281.93680180163125"/>
  </node>
  <node id="167713" label="zzzz196" cy:nodeId="746">
    <graphics z="0.0" x="158.78884705332644" y="-6.069778551151899"/>
  </node>
  <node id="167712" label="zzzz195" cy:nodeId="747">
    <graphics z="0.0" x="-200.17340842457884" y="232.73218144030312"/>
  </node>
  <node id="167711" label="zzzz194" cy:nodeId="748">
    <graphics z="0.0" x="181.88455017832644" y="-162.59893428235307"/>
  </node>
  <node id="167710" label="zzzz193" cy:nodeId="749">
    <graphics z="0.0" x="122.36196717051394" y="-49.86388026623979"/>
  </node>
  <node id="167709" label="zzzz192" cy:nodeId="750">
    <graphics z="0.0" x="99.70345886973269" y="-47.40652858166948"/>
  </node>
  <node id="167708" label="zzzz191" cy:nodeId="751">
    <graphics z="0.0" x="0.39459046152956034" y="-118.66994868664995"/>
  </node>
  <node id="167707" label="zzzz190" cy:nodeId="752">
    <graphics z="0.0" x="120.86807068613894" y="-94.88502894788041"/>
  </node>
  <node id="167706" label="zzzz189" cy:nodeId="753">
    <graphics z="0.0" x="75.32644470957644" y="-112.21239863782182"/>
  </node>
  <node id="167705" label="zzzz188" cy:nodeId="754">
    <graphics z="0.0" x="-281.38287535878294" y="-92.73264705090776"/>
  </node>
  <node id="167704" label="zzzz187" cy:nodeId="755">
    <graphics z="0.0" x="-245.34478942128294" y="-124.07084285168901"/>
  </node>
  <node id="167703" label="zzzz186" cy:nodeId="756">
    <graphics z="0.0" x="-52.051607048236065" y="200.6020239696"/>
  </node>
  <node id="167702" label="zzzz185" cy:nodeId="757">
    <graphics z="0.0" x="172.66219910410769" y="9.553933988520953"/>
  </node>
  <node id="167701" label="zzzz184" cy:nodeId="758">
    <graphics z="0.0" x="-377.98300353261106" y="-24.784504045536664"/>
  </node>
  <node id="167700" label="zzzz183" cy:nodeId="759">
    <graphics z="0.0" x="-18.223482048236065" y="-292.52077876477495"/>
  </node>
  <node id="167699" label="zzzz182" cy:nodeId="760">
    <graphics z="0.0" x="-229.82592192860716" y="296.24600590319375"/>
  </node>
  <node id="167698" label="zzzz181" cy:nodeId="761">
    <graphics z="0.0" x="28.018888557232685" y="-133.55335627942338"/>
  </node>
  <node id="167697" label="zzzz180" cy:nodeId="762">
    <graphics z="0.0" x="40.9939404371155" y="275.82632816881875"/>
  </node>
  <node id="167696" label="zzzz179" cy:nodeId="763">
    <graphics z="0.0" x="154.73818787363894" y="-14.402958025028852"/>
  </node>
  <node id="167695" label="zzzz178" cy:nodeId="764">
    <graphics z="0.0" x="43.15856751231081" y="-338.5811425343062"/>
  </node>
  <node id="167693" label="zzzz176" cy:nodeId="766">
    <graphics z="0.0" x="415.1752606275452" y="195.80592716784219"/>
  </node>
  <node id="167692" label="zzzz175" cy:nodeId="767">
    <graphics z="0.0" x="-83.73765746327513" y="136.90776432604537"/>
  </node>
  <node id="167691" label="zzzz174" cy:nodeId="768">
    <graphics z="0.0" x="76.30618103770144" y="44.77345074267134"/>
  </node>
  <node id="167690" label="zzzz173" cy:nodeId="769">
    <graphics z="0.0" x="168.57931336192019" y="-240.50097285657182"/>
  </node>
  <node id="167689" label="zzzz172" cy:nodeId="770">
    <graphics z="0.0" x="-205.73647490712278" y="-249.50323115735307"/>
  </node>
  <node id="167688" label="zzzz171" cy:nodeId="771">
    <graphics z="0.0" x="-173.93472186299437" y="-262.7515526905562"/>
  </node>
  <node id="167687" label="zzzz170" cy:nodeId="772">
    <graphics z="0.0" x="206.59213074473269" y="-102.8631020679976"/>
  </node>
  <node id="167686" label="zzzz169" cy:nodeId="773">
    <graphics z="0.0" x="-92.98062316151731" y="-396.5087548389937"/>
  </node>
  <node id="167685" label="zzzz168" cy:nodeId="774">
    <graphics z="0.0" x="-167.4951838609802" y="-441.19768916516557"/>
  </node>
  <node id="167684" label="zzzz167" cy:nodeId="775">
    <graphics z="0.0" x="-44.23132506581419" y="-238.82702266125932"/>
  </node>
  <node id="167683" label="zzzz166" cy:nodeId="776">
    <graphics z="0.0" x="-88.31498137684935" y="-300.90508662610307"/>
  </node>
  <node id="167682" label="zzzz165" cy:nodeId="777">
    <graphics z="0.0" x="-74.77820006581419" y="-304.8288231983687"/>
  </node>
  <node id="167681" label="zzzz164" cy:nodeId="778">
    <graphics z="0.0" x="-194.4216803667175" y="-251.45217524914995"/>
  </node>
  <node id="167680" label="zzzz163" cy:nodeId="779">
    <graphics z="0.0" x="-110.819658195697" y="-367.0423241749312"/>
  </node>
  <node id="167679" label="zzzz162" cy:nodeId="780">
    <graphics z="0.0" x="-173.24069777699583" y="-224.94561396985307"/>
  </node>
  <node id="167678" label="zzzz161" cy:nodeId="781">
    <graphics z="0.0" x="37.96824463633425" y="-170.131878007939"/>
  </node>
  <node id="167677" label="zzzz160" cy:nodeId="782">
    <graphics z="0.0" x="-173.21179190846556" y="-260.1202355518843"/>
  </node>
  <node id="167676" label="zzzz159" cy:nodeId="783">
    <graphics z="0.0" x="-121.00085631581419" y="-325.42556392102495"/>
  </node>
  <node id="167675" label="zzzz158" cy:nodeId="784">
    <graphics z="0.0" x="-145.91469756337278" y="-216.38076411633745"/>
  </node>
  <node id="167674" label="zzzz157" cy:nodeId="785">
    <graphics z="0.0" x="-183.01469317647093" y="-212.48113643079057"/>
  </node>
  <node id="167673" label="zzzz156" cy:nodeId="786">
    <graphics z="0.0" x="103.77404602793581" y="-107.49738704114213"/>
  </node>
  <node id="167672" label="zzzz155" cy:nodeId="787">
    <graphics z="0.0" x="170.58148010996706" y="-50.33459865002885"/>
  </node>
  <node id="167671" label="zzzz154" cy:nodeId="788">
    <graphics z="0.0" x="102.67907532481081" y="-44.61801539807573"/>
  </node>
  <node id="167670" label="zzzz153" cy:nodeId="789">
    <graphics z="0.0" x="120.68704041270144" y="-119.32267390637651"/>
  </node>
  <node id="167669" label="zzzz152" cy:nodeId="790">
    <graphics z="0.0" x="100.11071594981081" y="-135.31188594250932"/>
  </node>
  <node id="167668" label="zzzz151" cy:nodeId="791">
    <graphics z="0.0" x="27.551099860943623" y="37.45179642290816"/>
  </node>
  <node id="167667" label="zzzz150" cy:nodeId="792">
    <graphics z="0.0" x="90.09033020762331" y="-43.32938777356401"/>
  </node>
  <node id="167666" label="zzzz149" cy:nodeId="793">
    <graphics z="0.0" x="-217.06955710621946" y="-194.523967851689"/>
  </node>
  <node id="167665" label="zzzz148" cy:nodeId="794">
    <graphics z="0.0" x="-62.98149291249388" y="-258.00014888196245"/>
  </node>
  <node id="167664" label="zzzz147" cy:nodeId="795">
    <graphics z="0.0" x="-169.28002730580442" y="-310.9818993702437"/>
  </node>
  <node id="167663" label="zzzz146" cy:nodeId="796">
    <graphics z="0.0" x="-71.8034457323181" y="-293.1812707081343"/>
  </node>
  <node id="167662" label="zzzz145" cy:nodeId="797">
    <graphics z="0.0" x="181.45208557871706" y="-116.7547265186812"/>
  </node>
  <node id="167661" label="zzzz144" cy:nodeId="798">
    <graphics z="0.0" x="-231.93436232777708" y="-457.17409907727495"/>
  </node>
  <node id="167660" label="zzzz143" cy:nodeId="799">
    <graphics z="0.0" x="76.57900818613894" y="-215.92303096204057"/>
  </node>
  <node id="167659" label="zzzz142" cy:nodeId="800">
    <graphics z="0.0" x="-24.474046623431377" y="-271.4659081593062"/>
  </node>
  <node id="167658" label="zzzz141" cy:nodeId="801">
    <graphics z="0.0" x="279.8366375806702" y="-172.525432695439"/>
  </node>
  <node id="167657" label="zzzz140" cy:nodeId="802">
    <graphics z="0.0" x="-116.12123290272825" y="-267.8518944874312"/>
  </node>
  <node id="167656" label="zzzz139" cy:nodeId="803">
    <graphics z="0.0" x="132.83978089121706" y="-33.754257310917524"/>
  </node>
  <node id="167655" label="zzzz138" cy:nodeId="804">
    <graphics z="0.0" x="162.14462097910769" y="-160.68720637707963"/>
  </node>
  <node id="167654" label="zzzz137" cy:nodeId="805">
    <graphics z="0.0" x="145.04983338145144" y="-129.385540117314"/>
  </node>
  <node id="167653" label="zzzz136" cy:nodeId="806">
    <graphics z="0.0" x="127.08770569590456" y="-129.12946711926713"/>
  </node>
  <node id="167652" label="zzzz135" cy:nodeId="807">
    <graphics z="0.0" x="148.5095196607483" y="-138.7757226124312"/>
  </node>
  <node id="167651" label="zzzz134" cy:nodeId="808">
    <graphics z="0.0" x="-119.20689574452513" y="-228.45098506360307"/>
  </node>
  <node id="167650" label="zzzz133" cy:nodeId="809">
    <graphics z="0.0" x="-41.88319579335325" y="-247.63518916516557"/>
  </node>
  <node id="167649" label="zzzz132" cy:nodeId="810">
    <graphics z="0.0" x="-170.16012183400267" y="-244.00939570813432"/>
  </node>
  <node id="167648" label="zzzz131" cy:nodeId="811">
    <graphics z="0.0" x="-178.21905127736204" y="-224.39878474622026"/>
  </node>
  <node id="167647" label="zzzz130" cy:nodeId="812">
    <graphics z="0.0" x="-195.77426425191038" y="-99.82011042981401"/>
  </node>
  <node id="167646" label="zzzz129" cy:nodeId="813">
    <graphics z="0.0" x="-206.11068907948606" y="-249.45315181164995"/>
  </node>
  <node id="167645" label="zzzz128" cy:nodeId="814">
    <graphics z="0.0" x="145.9171124341858" y="102.65684879870162"/>
  </node>
  <node id="167644" label="zzzz127" cy:nodeId="815">
    <graphics z="0.0" x="-152.10439864369505" y="-78.44904719739213"/>
  </node>
  <node id="167643" label="zzzz126" cy:nodeId="816">
    <graphics z="0.0" x="185.55538758067019" y="-128.58240901379838"/>
  </node>
  <node id="167642" label="zzzz125" cy:nodeId="817">
    <graphics z="0.0" x="4.831281745709248" y="83.16122425646529"/>
  </node>
  <node id="167641" label="zzzz124" cy:nodeId="818">
    <graphics z="0.0" x="91.96420105723269" y="-83.49964534192338"/>
  </node>
  <node id="167640" label="zzzz123" cy:nodeId="819">
    <graphics z="0.0" x="235.48385437754519" y="-137.7223778858687"/>
  </node>
  <node id="167639" label="zzzz122" cy:nodeId="820">
    <graphics z="0.0" x="194.40054138926394" y="-137.3903466358687"/>
  </node>
  <node id="167638" label="zzzz121" cy:nodeId="821">
    <graphics z="0.0" x="284.1289959791077" y="-123.18232356457963"/>
  </node>
  <node id="167637" label="zzzz120" cy:nodeId="822">
    <graphics z="0.0" x="-5.030504142962627" y="-85.97183619885698"/>
  </node>
  <node id="167636" label="zzzz119" cy:nodeId="823">
    <graphics z="0.0" x="117.44726380137331" y="-148.44561396985307"/>
  </node>
  <node id="167635" label="zzzz118" cy:nodeId="824">
    <graphics z="0.0" x="299.42007263926394" y="-127.73185359387651"/>
  </node>
  <node id="167634" label="zzzz117" cy:nodeId="825">
    <graphics z="0.0" x="158.15261658457644" y="-123.90411006360307"/>
  </node>
  <node id="167633" label="zzzz116" cy:nodeId="826">
    <graphics z="0.0" x="106.64999207285769" y="-137.10500728039995"/>
  </node>
  <node id="167632" label="zzzz115" cy:nodeId="827">
    <graphics z="0.0" x="-103.03048888417356" y="-256.76617061047807"/>
  </node>
  <node id="167631" label="zzzz114" cy:nodeId="828">
    <graphics z="0.0" x="75.00665100840456" y="-119.98926936536088"/>
  </node>
  <node id="167630" label="zzzz113" cy:nodeId="829">
    <graphics z="0.0" x="138.9753399732483" y="-28.635234941532758"/>
  </node>
  <node id="167629" label="zzzz112" cy:nodeId="830">
    <graphics z="0.0" x="137.67086609629519" y="-36.37504207043901"/>
  </node>
  <node id="167628" label="zzzz111" cy:nodeId="831">
    <graphics z="0.0" x="111.39663513926394" y="-133.99338923840776"/>
  </node>
  <node id="167627" label="zzzz110" cy:nodeId="832">
    <graphics z="0.0" x="118.06497010020144" y="-71.0487939014937"/>
  </node>
  <node id="167626" label="zzzz109" cy:nodeId="833">
    <graphics z="0.0" x="190.09225281504519" y="-108.96197139172807"/>
  </node>
  <node id="167625" label="zzzz108" cy:nodeId="834">
    <graphics z="0.0" x="24.31048401621706" y="-68.46461116223588"/>
  </node>
  <node id="167624" label="zzzz107" cy:nodeId="835">
    <graphics z="0.0" x="81.00842102793581" y="-141.10973750500932"/>
  </node>
  <node id="167623" label="zzzz106" cy:nodeId="836">
    <graphics z="0.0" x="63.56712158945925" y="-96.06688319592729"/>
  </node>
  <node id="167622" label="zzzz105" cy:nodeId="837">
    <graphics z="0.0" x="97.68038758067019" y="-37.81543742566362"/>
  </node>
  <node id="167621" label="zzzz104" cy:nodeId="838">
    <graphics z="0.0" x="175.84322937754519" y="-111.30120479016557"/>
  </node>
  <node id="167620" label="zzzz103" cy:nodeId="839">
    <graphics z="0.0" x="191.31448181895144" y="-89.18635188489213"/>
  </node>
  <node id="167619" label="zzzz102" cy:nodeId="840">
    <graphics z="0.0" x="-37.29722777577513" y="-270.85146724133745"/>
  </node>
  <node id="167618" label="zzzz101" cy:nodeId="841">
    <graphics z="0.0" x="-150.869218742572" y="-273.97646724133745"/>
  </node>
  <node id="167617" label="zzzz100" cy:nodeId="842">
    <graphics z="0.0" x="-27.996873771868877" y="-317.6497460499312"/>
  </node>
</graph>
