# Supplementary material for: Discovery of several thousand highly diverse circular DNA viruses
Source: eLife journal article supplement (doi:10.7554/elife.51971), 2020-02-03
Supplement: fig2-figsupp1-data2 [file elife-51971-fig2-figsupp1-data2-v1.cys › CytoscapeSession-2019_08_05-17_27/apps/org.cytoscape.browser/NetworkTable.props]

all_my_seqs_genbank_ssDNA1_domains_ino_zot_fasta Full Network default network	0	SUID	false
all_my_seqs_genbank_ssDNA1_domains_ino_zot_fasta Full Network default network	1	selected	false
all_my_seqs_genbank_ssDNA1_domains_ino_zot_fasta Full Network default network	2	shared name	true
all_my_seqs_genbank_ssDNA1_domains_ino_zot_fasta Full Network default network	3	name	true
all_my_seqs_genbank_ssDNA1_domains_ino_zot_fasta Full Network default network	4	__Annotations	true
