# Supplementary material for: Discovery of several thousand highly diverse circular DNA viruses
Source: eLife journal article supplement (doi:10.7554/elife.51971), 2020-02-03
Supplement: fig2-figsupp1-data2 [file elife-51971-fig2-figsupp1-data2-v1.cys › CytoscapeSession-2019_08_05-17_27/networks/36-all_my_seqs_genbank_ssDNA1_domains_ino_zot_fasta+Full+Network.xgmml]

<?xml version="1.0" encoding="UTF-8" standalone="yes"?>
<graph id="36" label="all_my_seqs_genbank_ssDNA1_domains_ino_zot_fasta Full Network" cy:view="0" cy:registered="0" cy:documentVersion="3.0" xmlns:dc="http://purl.org/dc/elements/1.1/" xmlns:xlink="http://www.w3.org/1999/xlink" xmlns:rdf="http://www.w3.org/1999/02/22-rdf-syntax-ns#" xmlns:cy="http://www.cytoscape.org" xmlns="http://www.cs.rpi.edu/XGMML">
  <att>
    <graph id="52" label="all_my_seqs_genbank_ssDNA1_domains_ino_zot_fasta Full Network" cy:registered="1">
      <node id="164" label="zzzz100"/>
      <node id="163" label="zzzz101"/>
      <node id="162" label="zzzz102"/>
      <node id="161" label="zzzzz10"/>
      <node id="160" label="zzzzz11"/>
      <node id="159" label="zzzzz12"/>
      <node id="158" label="zzzzz13"/>
      <node id="157" label="zzzzz14"/>
      <node id="156" label="zzzzz15"/>
      <node id="155" label="zzzzz16"/>
      <node id="154" label="zzzzz17"/>
      <node id="153" label="zzzzz18"/>
      <node id="152" label="zzzzz19"/>
      <node id="151" label="zzzzz20"/>
      <node id="150" label="zzzzz21"/>
      <node id="149" label="zzzzz22"/>
      <node id="148" label="zzzzz23"/>
      <node id="147" label="zzzzz24"/>
      <node id="146" label="zzzzz25"/>
      <node id="145" label="zzzzz26"/>
      <node id="144" label="zzzzz27"/>
      <node id="143" label="zzzzz28"/>
      <node id="142" label="zzzzz29"/>
      <node id="141" label="zzzzz30"/>
      <node id="140" label="zzzzz31"/>
      <node id="139" label="zzzzz32"/>
      <node id="138" label="zzzzz33"/>
      <node id="137" label="zzzzz34"/>
      <node id="136" label="zzzzz35"/>
      <node id="135" label="zzzzz36"/>
      <node id="134" label="zzzzz37"/>
      <node id="133" label="zzzzz38"/>
      <node id="132" label="zzzzz39"/>
      <node id="131" label="zzzzz40"/>
      <node id="130" label="zzzzz41"/>
      <node id="129" label="zzzzz42"/>
      <node id="128" label="zzzzz43"/>
      <node id="127" label="zzzzz44"/>
      <node id="126" label="zzzzz45"/>
      <node id="125" label="zzzzz46"/>
      <node id="124" label="zzzzz47"/>
      <node id="123" label="zzzzz48"/>
      <node id="122" label="zzzzz49"/>
      <node id="121" label="zzzzz50"/>
      <node id="120" label="zzzzz51"/>
      <node id="119" label="zzzzz52"/>
      <node id="118" label="zzzzz53"/>
      <node id="117" label="zzzzz54"/>
      <node id="116" label="zzzzz55"/>
      <node id="115" label="zzzzz56"/>
      <node id="114" label="zzzzz57"/>
      <node id="113" label="zzzzz58"/>
      <node id="112" label="zzzzz59"/>
      <node id="111" label="zzzzz60"/>
      <node id="110" label="zzzzz61"/>
      <node id="109" label="zzzzz62"/>
      <node id="108" label="zzzzz63"/>
      <node id="107" label="zzzzz64"/>
      <node id="106" label="zzzzz65"/>
      <node id="105" label="zzzzz66"/>
      <node id="104" label="zzzzz67"/>
      <node id="103" label="zzzzz68"/>
      <node id="102" label="zzzzz69"/>
      <node id="101" label="zzzzz70"/>
      <node id="100" label="zzzzz71"/>
      <node id="99" label="zzzzz72"/>
      <node id="98" label="zzzzz73"/>
      <node id="97" label="zzzzz74"/>
      <node id="96" label="zzzzz75"/>
      <node id="95" label="zzzzz76"/>
      <node id="94" label="zzzzz77"/>
      <node id="93" label="zzzzz78"/>
      <node id="92" label="zzzzz79"/>
      <node id="91" label="zzzzz80"/>
      <node id="90" label="zzzzz81"/>
      <node id="89" label="zzzzz82"/>
      <node id="88" label="zzzzz83"/>
      <node id="87" label="zzzzz84"/>
      <node id="86" label="zzzzz85"/>
      <node id="85" label="zzzzz86"/>
      <node id="84" label="zzzzz87"/>
      <node id="83" label="zzzzz88"/>
      <node id="82" label="zzzzz89"/>
      <node id="81" label="zzzzz90"/>
      <node id="80" label="zzzzz91"/>
      <node id="79" label="zzzzz92"/>
      <node id="78" label="zzzzz93"/>
      <node id="77" label="zzzzz94"/>
      <node id="76" label="zzzzz95"/>
      <node id="75" label="zzzzz96"/>
      <node id="74" label="zzzzz97"/>
      <node id="73" label="zzzzz98"/>
      <node id="72" label="zzzzz99"/>
      <node id="71" label="zzzzzz0"/>
      <node id="70" label="zzzzzz1"/>
      <node id="69" label="zzzzzz2"/>
      <node id="68" label="zzzzzz3"/>
      <node id="67" label="zzzzzz4"/>
      <node id="66" label="zzzzzz5"/>
      <node id="65" label="zzzzzz6"/>
      <node id="64" label="zzzzzz7"/>
      <node id="63" label="zzzzzz8"/>
      <node id="62" label="zzzzzz9"/>
      <edge id="1627" label="zzzz100,zzzzz81" source="164" target="90" cy:directed="1"/>
      <edge id="1626" label="zzzz100,zzzzz97" source="164" target="74" cy:directed="1"/>
      <edge id="1625" label="zzzz100,zzzzz57" source="164" target="114" cy:directed="1"/>
      <edge id="1624" label="zzzz100,zzzzz55" source="164" target="116" cy:directed="1"/>
      <edge id="1623" label="zzzz100,zzzz101" source="164" target="163" cy:directed="1"/>
      <edge id="1622" label="zzzz100,zzzzz25" source="164" target="146" cy:directed="1"/>
      <edge id="1621" label="zzzz100,zzzzz16" source="164" target="155" cy:directed="1"/>
      <edge id="1620" label="zzzz100,zzzzz80" source="164" target="91" cy:directed="1"/>
      <edge id="1619" label="zzzz100,zzzzz56" source="164" target="115" cy:directed="1"/>
      <edge id="1618" label="zzzz100,zzzzz29" source="164" target="142" cy:directed="1"/>
      <edge id="1617" label="zzzz100,zzzzz76" source="164" target="95" cy:directed="1"/>
      <edge id="1616" label="zzzz100,zzzzz78" source="164" target="93" cy:directed="1"/>
      <edge id="1615" label="zzzz100,zzzzz79" source="164" target="92" cy:directed="1"/>
      <edge id="1614" label="zzzz100,zzzzz75" source="164" target="96" cy:directed="1"/>
      <edge id="1613" label="zzzz100,zzzzz14" source="164" target="157" cy:directed="1"/>
      <edge id="1612" label="zzzz100,zzzzz28" source="164" target="143" cy:directed="1"/>
      <edge id="1611" label="zzzz100,zzzzz18" source="164" target="153" cy:directed="1"/>
      <edge id="1610" label="zzzz100,zzzzz72" source="164" target="99" cy:directed="1"/>
      <edge id="1609" label="zzzz100,zzzzz73" source="164" target="98" cy:directed="1"/>
      <edge id="1608" label="zzzz100,zzzzz68" source="164" target="103" cy:directed="1"/>
      <edge id="1607" label="zzzz100,zzzzz69" source="164" target="102" cy:directed="1"/>
      <edge id="1606" label="zzzz100,zzzzz70" source="164" target="101" cy:directed="1"/>
      <edge id="1605" label="zzzz100,zzzzz67" source="164" target="104" cy:directed="1"/>
      <edge id="1604" label="zzzz100,zzzzz54" source="164" target="117" cy:directed="1"/>
      <edge id="1603" label="zzzz100,zzzzz61" source="164" target="110" cy:directed="1"/>
      <edge id="1602" label="zzzz100,zzzzz63" source="164" target="108" cy:directed="1"/>
      <edge id="1601" label="zzzz100,zzzzz20" source="164" target="151" cy:directed="1"/>
      <edge id="1600" label="zzzz100,zzzzzz6" source="164" target="65" cy:directed="1"/>
      <edge id="1599" label="zzzz100,zzzzz99" source="164" target="72" cy:directed="1"/>
      <edge id="1598" label="zzzz100,zzzzz65" source="164" target="106" cy:directed="1"/>
      <edge id="1597" label="zzzz100,zzzzz95" source="164" target="76" cy:directed="1"/>
      <edge id="1596" label="zzzz100,zzzzz74" source="164" target="97" cy:directed="1"/>
      <edge id="1595" label="zzzz100,zzzzz77" source="164" target="94" cy:directed="1"/>
      <edge id="1594" label="zzzz100,zzzzz49" source="164" target="122" cy:directed="1"/>
      <edge id="1593" label="zzzz100,zzzzz64" source="164" target="107" cy:directed="1"/>
      <edge id="1592" label="zzzz100,zzzzz82" source="164" target="89" cy:directed="1"/>
      <edge id="1591" label="zzzz100,zzzzz66" source="164" target="105" cy:directed="1"/>
      <edge id="1590" label="zzzz100,zzzzz86" source="164" target="85" cy:directed="1"/>
      <edge id="1589" label="zzzz100,zzzzz24" source="164" target="147" cy:directed="1"/>
      <edge id="1588" label="zzzz100,zzzzzz0" source="164" target="71" cy:directed="1"/>
      <edge id="1587" label="zzzz100,zzzzz62" source="164" target="109" cy:directed="1"/>
      <edge id="1586" label="zzzz100,zzzzz43" source="164" target="128" cy:directed="1"/>
      <edge id="1585" label="zzzz100,zzzzz98" source="164" target="73" cy:directed="1"/>
      <edge id="1584" label="zzzz100,zzzzz94" source="164" target="77" cy:directed="1"/>
      <edge id="1583" label="zzzz101,zzzzz55" source="163" target="116" cy:directed="1"/>
      <edge id="1582" label="zzzz101,zzzzz81" source="163" target="90" cy:directed="1"/>
      <edge id="1581" label="zzzz101,zzzzz97" source="163" target="74" cy:directed="1"/>
      <edge id="1580" label="zzzz101,zzzzz57" source="163" target="114" cy:directed="1"/>
      <edge id="1579" label="zzzz101,zzzzz16" source="163" target="155" cy:directed="1"/>
      <edge id="1578" label="zzzz101,zzzzz25" source="163" target="146" cy:directed="1"/>
      <edge id="1577" label="zzzz101,zzzzz79" source="163" target="92" cy:directed="1"/>
      <edge id="1576" label="zzzz101,zzzzz75" source="163" target="96" cy:directed="1"/>
      <edge id="1575" label="zzzz101,zzzzz56" source="163" target="115" cy:directed="1"/>
      <edge id="1574" label="zzzz101,zzzzz80" source="163" target="91" cy:directed="1"/>
      <edge id="1573" label="zzzz101,zzzzz28" source="163" target="143" cy:directed="1"/>
      <edge id="1572" label="zzzz101,zzzzz78" source="163" target="93" cy:directed="1"/>
      <edge id="1571" label="zzzz101,zzzzz76" source="163" target="95" cy:directed="1"/>
      <edge id="1570" label="zzzz101,zzzzz67" source="163" target="104" cy:directed="1"/>
      <edge id="1569" label="zzzz101,zzzzz73" source="163" target="98" cy:directed="1"/>
      <edge id="1568" label="zzzz101,zzzzz54" source="163" target="117" cy:directed="1"/>
      <edge id="1567" label="zzzz101,zzzzz72" source="163" target="99" cy:directed="1"/>
      <edge id="1566" label="zzzz101,zzzzz14" source="163" target="157" cy:directed="1"/>
      <edge id="1565" label="zzzz101,zzzzz68" source="163" target="103" cy:directed="1"/>
      <edge id="1564" label="zzzz101,zzzzz69" source="163" target="102" cy:directed="1"/>
      <edge id="1563" label="zzzz101,zzzzz70" source="163" target="101" cy:directed="1"/>
      <edge id="1562" label="zzzz101,zzzzz18" source="163" target="153" cy:directed="1"/>
      <edge id="1561" label="zzzz101,zzzzz20" source="163" target="151" cy:directed="1"/>
      <edge id="1560" label="zzzz101,zzzzz63" source="163" target="108" cy:directed="1"/>
      <edge id="1559" label="zzzz101,zzzzz29" source="163" target="142" cy:directed="1"/>
      <edge id="1558" label="zzzz101,zzzzz61" source="163" target="110" cy:directed="1"/>
      <edge id="1557" label="zzzz101,zzzzzz6" source="163" target="65" cy:directed="1"/>
      <edge id="1556" label="zzzz101,zzzzz95" source="163" target="76" cy:directed="1"/>
      <edge id="1555" label="zzzz101,zzzzz15" source="163" target="156" cy:directed="1"/>
      <edge id="1554" label="zzzz101,zzzzz64" source="163" target="107" cy:directed="1"/>
      <edge id="1553" label="zzzz101,zzzzz19" source="163" target="152" cy:directed="1"/>
      <edge id="1552" label="zzzz101,zzzzz66" source="163" target="105" cy:directed="1"/>
      <edge id="1551" label="zzzz101,zzzzzz5" source="163" target="66" cy:directed="1"/>
      <edge id="1550" label="zzzz101,zzzzz65" source="163" target="106" cy:directed="1"/>
      <edge id="1549" label="zzzz101,zzzzz99" source="163" target="72" cy:directed="1"/>
      <edge id="1548" label="zzzz101,zzzzz77" source="163" target="94" cy:directed="1"/>
      <edge id="1547" label="zzzz101,zzzzz49" source="163" target="122" cy:directed="1"/>
      <edge id="1546" label="zzzz101,zzzzz94" source="163" target="77" cy:directed="1"/>
      <edge id="1545" label="zzzz102,zzzzz26" source="162" target="145" cy:directed="1"/>
      <edge id="1544" label="zzzz102,zzzzz31" source="162" target="140" cy:directed="1"/>
      <edge id="1543" label="zzzz102,zzzzzz1" source="162" target="70" cy:directed="1"/>
      <edge id="1542" label="zzzz102,zzzzz37" source="162" target="134" cy:directed="1"/>
      <edge id="1541" label="zzzz102,zzzzz84" source="162" target="87" cy:directed="1"/>
      <edge id="1540" label="zzzz102,zzzzz33" source="162" target="138" cy:directed="1"/>
      <edge id="1539" label="zzzz102,zzzzz98" source="162" target="73" cy:directed="1"/>
      <edge id="1538" label="zzzz102,zzzzz36" source="162" target="135" cy:directed="1"/>
      <edge id="1537" label="zzzz102,zzzzz23" source="162" target="148" cy:directed="1"/>
      <edge id="1536" label="zzzz102,zzzzz35" source="162" target="136" cy:directed="1"/>
      <edge id="1535" label="zzzz102,zzzzzz9" source="162" target="62" cy:directed="1"/>
      <edge id="1534" label="zzzz102,zzzzzz8" source="162" target="63" cy:directed="1"/>
      <edge id="1533" label="zzzz102,zzzzz50" source="162" target="121" cy:directed="1"/>
      <edge id="1532" label="zzzz102,zzzzz30" source="162" target="141" cy:directed="1"/>
      <edge id="1531" label="zzzz102,zzzzz15" source="162" target="156" cy:directed="1"/>
      <edge id="1530" label="zzzz102,zzzzzz5" source="162" target="66" cy:directed="1"/>
      <edge id="1529" label="zzzz102,zzzzz19" source="162" target="152" cy:directed="1"/>
      <edge id="1528" label="zzzz102,zzzzzz0" source="162" target="71" cy:directed="1"/>
      <edge id="1527" label="zzzz102,zzzzz93" source="162" target="78" cy:directed="1"/>
      <edge id="1526" label="zzzz102,zzzzz43" source="162" target="128" cy:directed="1"/>
      <edge id="1525" label="zzzz102,zzzzz61" source="162" target="110" cy:directed="1"/>
      <edge id="1524" label="zzzz102,zzzzz12" source="162" target="159" cy:directed="1"/>
      <edge id="1523" label="zzzz102,zzzzz40" source="162" target="131" cy:directed="1"/>
      <edge id="1522" label="zzzz102,zzzzz78" source="162" target="93" cy:directed="1"/>
      <edge id="1521" label="zzzz102,zzzzz67" source="162" target="104" cy:directed="1"/>
      <edge id="1520" label="zzzz102,zzzzz68" source="162" target="103" cy:directed="1"/>
      <edge id="1519" label="zzzz102,zzzzz69" source="162" target="102" cy:directed="1"/>
      <edge id="1518" label="zzzz102,zzzzz70" source="162" target="101" cy:directed="1"/>
      <edge id="1517" label="zzzz102,zzzzz72" source="162" target="99" cy:directed="1"/>
      <edge id="1516" label="zzzz102,zzzzz73" source="162" target="98" cy:directed="1"/>
      <edge id="1515" label="zzzz102,zzzzz62" source="162" target="109" cy:directed="1"/>
      <edge id="1514" label="zzzz102,zzzzz21" source="162" target="150" cy:directed="1"/>
      <edge id="1513" label="zzzz102,zzzzz56" source="162" target="115" cy:directed="1"/>
      <edge id="1512" label="zzzz102,zzzzz38" source="162" target="133" cy:directed="1"/>
      <edge id="1511" label="zzzz102,zzzzz76" source="162" target="95" cy:directed="1"/>
      <edge id="1510" label="zzzz102,zzzzz94" source="162" target="77" cy:directed="1"/>
      <edge id="1509" label="zzzz102,zzzzz96" source="162" target="75" cy:directed="1"/>
      <edge id="1508" label="zzzzz10,zzzzz13" source="161" target="158" cy:directed="1"/>
      <edge id="1507" label="zzzzz10,zzzzzz7" source="161" target="64" cy:directed="1"/>
      <edge id="1506" label="zzzzz10,zzzzzz4" source="161" target="67" cy:directed="1"/>
      <edge id="1505" label="zzzzz10,zzzzz32" source="161" target="139" cy:directed="1"/>
      <edge id="1504" label="zzzzz10,zzzzz21" source="161" target="150" cy:directed="1"/>
      <edge id="1503" label="zzzzz10,zzzzz52" source="161" target="119" cy:directed="1"/>
      <edge id="1502" label="zzzzz10,zzzzz86" source="161" target="85" cy:directed="1"/>
      <edge id="1501" label="zzzzz10,zzzzz43" source="161" target="128" cy:directed="1"/>
      <edge id="1500" label="zzzzz10,zzzzz44" source="161" target="127" cy:directed="1"/>
      <edge id="1499" label="zzzzz10,zzzzzz1" source="161" target="70" cy:directed="1"/>
      <edge id="1498" label="zzzzz11,zzzzz27" source="160" target="144" cy:directed="1"/>
      <edge id="1497" label="zzzzz11,zzzzz39" source="160" target="132" cy:directed="1"/>
      <edge id="1496" label="zzzzz12,zzzzz40" source="159" target="131" cy:directed="1"/>
      <edge id="1495" label="zzzzz12,zzzzzz0" source="159" target="71" cy:directed="1"/>
      <edge id="1494" label="zzzzz12,zzzzzz2" source="159" target="69" cy:directed="1"/>
      <edge id="1493" label="zzzzz12,zzzzzz3" source="159" target="68" cy:directed="1"/>
      <edge id="1492" label="zzzzz12,zzzzz17" source="159" target="154" cy:directed="1"/>
      <edge id="1491" label="zzzzz12,zzzzz98" source="159" target="73" cy:directed="1"/>
      <edge id="1490" label="zzzzz12,zzzzzz5" source="159" target="66" cy:directed="1"/>
      <edge id="1489" label="zzzzz13,zzzzzz7" source="158" target="64" cy:directed="1"/>
      <edge id="1488" label="zzzzz13,zzzzzz4" source="158" target="67" cy:directed="1"/>
      <edge id="1487" label="zzzzz13,zzzzz32" source="158" target="139" cy:directed="1"/>
      <edge id="1486" label="zzzzz13,zzzzz21" source="158" target="150" cy:directed="1"/>
      <edge id="1485" label="zzzzz13,zzzzz52" source="158" target="119" cy:directed="1"/>
      <edge id="1484" label="zzzzz13,zzzzz86" source="158" target="85" cy:directed="1"/>
      <edge id="1483" label="zzzzz13,zzzzz43" source="158" target="128" cy:directed="1"/>
      <edge id="1482" label="zzzzz13,zzzzz44" source="158" target="127" cy:directed="1"/>
      <edge id="1481" label="zzzzz14,zzzzz69" source="157" target="102" cy:directed="1"/>
      <edge id="1480" label="zzzzz14,zzzzz72" source="157" target="99" cy:directed="1"/>
      <edge id="1479" label="zzzzz14,zzzzz73" source="157" target="98" cy:directed="1"/>
      <edge id="1478" label="zzzzz14,zzzzz68" source="157" target="103" cy:directed="1"/>
      <edge id="1477" label="zzzzz14,zzzzz70" source="157" target="101" cy:directed="1"/>
      <edge id="1476" label="zzzzz14,zzzzz67" source="157" target="104" cy:directed="1"/>
      <edge id="1475" label="zzzzz14,zzzzz80" source="157" target="91" cy:directed="1"/>
      <edge id="1474" label="zzzzz14,zzzzz75" source="157" target="96" cy:directed="1"/>
      <edge id="1473" label="zzzzz14,zzzzz79" source="157" target="92" cy:directed="1"/>
      <edge id="1472" label="zzzzz14,zzzzz76" source="157" target="95" cy:directed="1"/>
      <edge id="1471" label="zzzzz14,zzzzz56" source="157" target="115" cy:directed="1"/>
      <edge id="1470" label="zzzzz14,zzzzz78" source="157" target="93" cy:directed="1"/>
      <edge id="1469" label="zzzzz14,zzzzz63" source="157" target="108" cy:directed="1"/>
      <edge id="1468" label="zzzzz14,zzzzz24" source="157" target="147" cy:directed="1"/>
      <edge id="1467" label="zzzzz14,zzzzz25" source="157" target="146" cy:directed="1"/>
      <edge id="1466" label="zzzzz14,zzzzz16" source="157" target="155" cy:directed="1"/>
      <edge id="1465" label="zzzzz14,zzzzz29" source="157" target="142" cy:directed="1"/>
      <edge id="1464" label="zzzzz14,zzzzz18" source="157" target="153" cy:directed="1"/>
      <edge id="1463" label="zzzzz14,zzzzz94" source="157" target="77" cy:directed="1"/>
      <edge id="1462" label="zzzzz14,zzzzz74" source="157" target="97" cy:directed="1"/>
      <edge id="1461" label="zzzzz14,zzzzz99" source="157" target="72" cy:directed="1"/>
      <edge id="1460" label="zzzzz14,zzzzz49" source="157" target="122" cy:directed="1"/>
      <edge id="1459" label="zzzzz14,zzzzz77" source="157" target="94" cy:directed="1"/>
      <edge id="1458" label="zzzzz14,zzzzz96" source="157" target="75" cy:directed="1"/>
      <edge id="1457" label="zzzzz14,zzzzz58" source="157" target="113" cy:directed="1"/>
      <edge id="1456" label="zzzzz14,zzzzz65" source="157" target="106" cy:directed="1"/>
      <edge id="1455" label="zzzzz14,zzzzz66" source="157" target="105" cy:directed="1"/>
      <edge id="1454" label="zzzzz14,zzzzz60" source="157" target="111" cy:directed="1"/>
      <edge id="1453" label="zzzzz14,zzzzz81" source="157" target="90" cy:directed="1"/>
      <edge id="1452" label="zzzzz14,zzzzz20" source="157" target="151" cy:directed="1"/>
      <edge id="1451" label="zzzzz14,zzzzz57" source="157" target="114" cy:directed="1"/>
      <edge id="1450" label="zzzzz14,zzzzzz6" source="157" target="65" cy:directed="1"/>
      <edge id="1449" label="zzzzz14,zzzzz61" source="157" target="110" cy:directed="1"/>
      <edge id="1448" label="zzzzz14,zzzzz97" source="157" target="74" cy:directed="1"/>
      <edge id="1447" label="zzzzz14,zzzzz64" source="157" target="107" cy:directed="1"/>
      <edge id="1446" label="zzzzz14,zzzzz59" source="157" target="112" cy:directed="1"/>
      <edge id="1445" label="zzzzz14,zzzzz54" source="157" target="117" cy:directed="1"/>
      <edge id="1444" label="zzzzz14,zzzzz28" source="157" target="143" cy:directed="1"/>
      <edge id="1443" label="zzzzz14,zzzzz55" source="157" target="116" cy:directed="1"/>
      <edge id="1442" label="zzzzz14,zzzzz95" source="157" target="76" cy:directed="1"/>
      <edge id="1441" label="zzzzz14,zzzzz82" source="157" target="89" cy:directed="1"/>
      <edge id="1440" label="zzzzz14,zzzzzz1" source="157" target="70" cy:directed="1"/>
      <edge id="1439" label="zzzzz14,zzzzz19" source="157" target="152" cy:directed="1"/>
      <edge id="1438" label="zzzzz14,zzzzzz5" source="157" target="66" cy:directed="1"/>
      <edge id="1437" label="zzzzz14,zzzzz62" source="157" target="109" cy:directed="1"/>
      <edge id="1436" label="zzzzz14,zzzzz86" source="157" target="85" cy:directed="1"/>
      <edge id="1435" label="zzzzz14,zzzzz15" source="157" target="156" cy:directed="1"/>
      <edge id="1434" label="zzzzz14,zzzzz37" source="157" target="134" cy:directed="1"/>
      <edge id="1433" label="zzzzz14,zzzzz36" source="157" target="135" cy:directed="1"/>
      <edge id="1432" label="zzzzz15,zzzzz19" source="156" target="152" cy:directed="1"/>
      <edge id="1431" label="zzzzz15,zzzzzz5" source="156" target="66" cy:directed="1"/>
      <edge id="1430" label="zzzzz15,zzzzz50" source="156" target="121" cy:directed="1"/>
      <edge id="1429" label="zzzzz15,zzzzz30" source="156" target="141" cy:directed="1"/>
      <edge id="1428" label="zzzzz15,zzzzzz9" source="156" target="62" cy:directed="1"/>
      <edge id="1427" label="zzzzz15,zzzzzz8" source="156" target="63" cy:directed="1"/>
      <edge id="1426" label="zzzzz15,zzzzz35" source="156" target="136" cy:directed="1"/>
      <edge id="1425" label="zzzzz15,zzzzz23" source="156" target="148" cy:directed="1"/>
      <edge id="1424" label="zzzzz15,zzzzz76" source="156" target="95" cy:directed="1"/>
      <edge id="1423" label="zzzzz15,zzzzzz1" source="156" target="70" cy:directed="1"/>
      <edge id="1422" label="zzzzz15,zzzzz26" source="156" target="145" cy:directed="1"/>
      <edge id="1421" label="zzzzz15,zzzzz54" source="156" target="117" cy:directed="1"/>
      <edge id="1420" label="zzzzz15,zzzzz78" source="156" target="93" cy:directed="1"/>
      <edge id="1419" label="zzzzz15,zzzzzz0" source="156" target="71" cy:directed="1"/>
      <edge id="1418" label="zzzzz15,zzzzz56" source="156" target="115" cy:directed="1"/>
      <edge id="1417" label="zzzzz15,zzzzz80" source="156" target="91" cy:directed="1"/>
      <edge id="1416" label="zzzzz15,zzzzzz6" source="156" target="65" cy:directed="1"/>
      <edge id="1415" label="zzzzz15,zzzzz67" source="156" target="104" cy:directed="1"/>
      <edge id="1414" label="zzzzz15,zzzzz72" source="156" target="99" cy:directed="1"/>
      <edge id="1413" label="zzzzz15,zzzzz73" source="156" target="98" cy:directed="1"/>
      <edge id="1412" label="zzzzz15,zzzzz68" source="156" target="103" cy:directed="1"/>
      <edge id="1411" label="zzzzz15,zzzzz69" source="156" target="102" cy:directed="1"/>
      <edge id="1410" label="zzzzz15,zzzzz70" source="156" target="101" cy:directed="1"/>
      <edge id="1409" label="zzzzz15,zzzzz31" source="156" target="140" cy:directed="1"/>
      <edge id="1408" label="zzzzz15,zzzzz20" source="156" target="151" cy:directed="1"/>
      <edge id="1407" label="zzzzz15,zzzzz28" source="156" target="143" cy:directed="1"/>
      <edge id="1406" label="zzzzz15,zzzzz33" source="156" target="138" cy:directed="1"/>
      <edge id="1405" label="zzzzz15,zzzzz25" source="156" target="146" cy:directed="1"/>
      <edge id="1404" label="zzzzz15,zzzzz37" source="156" target="134" cy:directed="1"/>
      <edge id="1403" label="zzzzz15,zzzzz79" source="156" target="92" cy:directed="1"/>
      <edge id="1402" label="zzzzz15,zzzzz93" source="156" target="78" cy:directed="1"/>
      <edge id="1401" label="zzzzz15,zzzzz16" source="156" target="155" cy:directed="1"/>
      <edge id="1400" label="zzzzz15,zzzzz38" source="156" target="133" cy:directed="1"/>
      <edge id="1399" label="zzzzz15,zzzzz74" source="156" target="97" cy:directed="1"/>
      <edge id="1398" label="zzzzz15,zzzzz18" source="156" target="153" cy:directed="1"/>
      <edge id="1397" label="zzzzz15,zzzzz77" source="156" target="94" cy:directed="1"/>
      <edge id="1396" label="zzzzz15,zzzzz75" source="156" target="96" cy:directed="1"/>
      <edge id="1395" label="zzzzz16,zzzzz25" source="155" target="146" cy:directed="1"/>
      <edge id="1394" label="zzzzz16,zzzzz29" source="155" target="142" cy:directed="1"/>
      <edge id="1393" label="zzzzz16,zzzzzz6" source="155" target="65" cy:directed="1"/>
      <edge id="1392" label="zzzzz16,zzzzz55" source="155" target="116" cy:directed="1"/>
      <edge id="1391" label="zzzzz16,zzzzz28" source="155" target="143" cy:directed="1"/>
      <edge id="1390" label="zzzzz16,zzzzz56" source="155" target="115" cy:directed="1"/>
      <edge id="1389" label="zzzzz16,zzzzz20" source="155" target="151" cy:directed="1"/>
      <edge id="1388" label="zzzzz16,zzzzz97" source="155" target="74" cy:directed="1"/>
      <edge id="1387" label="zzzzz16,zzzzz78" source="155" target="93" cy:directed="1"/>
      <edge id="1386" label="zzzzz16,zzzzz57" source="155" target="114" cy:directed="1"/>
      <edge id="1385" label="zzzzz16,zzzzz76" source="155" target="95" cy:directed="1"/>
      <edge id="1384" label="zzzzz16,zzzzz63" source="155" target="108" cy:directed="1"/>
      <edge id="1383" label="zzzzz16,zzzzz80" source="155" target="91" cy:directed="1"/>
      <edge id="1382" label="zzzzz16,zzzzz75" source="155" target="96" cy:directed="1"/>
      <edge id="1381" label="zzzzz16,zzzzz67" source="155" target="104" cy:directed="1"/>
      <edge id="1380" label="zzzzz16,zzzzz81" source="155" target="90" cy:directed="1"/>
      <edge id="1379" label="zzzzz16,zzzzz18" source="155" target="153" cy:directed="1"/>
      <edge id="1378" label="zzzzz16,zzzzz79" source="155" target="92" cy:directed="1"/>
      <edge id="1377" label="zzzzz16,zzzzz68" source="155" target="103" cy:directed="1"/>
      <edge id="1376" label="zzzzz16,zzzzz69" source="155" target="102" cy:directed="1"/>
      <edge id="1375" label="zzzzz16,zzzzz70" source="155" target="101" cy:directed="1"/>
      <edge id="1374" label="zzzzz16,zzzzz72" source="155" target="99" cy:directed="1"/>
      <edge id="1373" label="zzzzz16,zzzzz73" source="155" target="98" cy:directed="1"/>
      <edge id="1372" label="zzzzz16,zzzzz54" source="155" target="117" cy:directed="1"/>
      <edge id="1371" label="zzzzz16,zzzzz24" source="155" target="147" cy:directed="1"/>
      <edge id="1370" label="zzzzz16,zzzzz61" source="155" target="110" cy:directed="1"/>
      <edge id="1369" label="zzzzz16,zzzzz99" source="155" target="72" cy:directed="1"/>
      <edge id="1368" label="zzzzz16,zzzzz74" source="155" target="97" cy:directed="1"/>
      <edge id="1367" label="zzzzz16,zzzzz65" source="155" target="106" cy:directed="1"/>
      <edge id="1366" label="zzzzz16,zzzzz77" source="155" target="94" cy:directed="1"/>
      <edge id="1365" label="zzzzz16,zzzzz49" source="155" target="122" cy:directed="1"/>
      <edge id="1364" label="zzzzz16,zzzzz94" source="155" target="77" cy:directed="1"/>
      <edge id="1363" label="zzzzz16,zzzzz95" source="155" target="76" cy:directed="1"/>
      <edge id="1362" label="zzzzz16,zzzzz96" source="155" target="75" cy:directed="1"/>
      <edge id="1361" label="zzzzz16,zzzzz66" source="155" target="105" cy:directed="1"/>
      <edge id="1360" label="zzzzz16,zzzzz64" source="155" target="107" cy:directed="1"/>
      <edge id="1359" label="zzzzz16,zzzzz82" source="155" target="89" cy:directed="1"/>
      <edge id="1358" label="zzzzz16,zzzzz58" source="155" target="113" cy:directed="1"/>
      <edge id="1357" label="zzzzz16,zzzzz62" source="155" target="109" cy:directed="1"/>
      <edge id="1356" label="zzzzz16,zzzzz86" source="155" target="85" cy:directed="1"/>
      <edge id="1355" label="zzzzz16,zzzzz60" source="155" target="111" cy:directed="1"/>
      <edge id="1354" label="zzzzz16,zzzzz98" source="155" target="73" cy:directed="1"/>
      <edge id="1353" label="zzzzz16,zzzzz59" source="155" target="112" cy:directed="1"/>
      <edge id="1352" label="zzzzz16,zzzzz19" source="155" target="152" cy:directed="1"/>
      <edge id="1351" label="zzzzz16,zzzzzz5" source="155" target="66" cy:directed="1"/>
      <edge id="1350" label="zzzzz17,zzzzzz3" source="154" target="68" cy:directed="1"/>
      <edge id="1349" label="zzzzz17,zzzzzz2" source="154" target="69" cy:directed="1"/>
      <edge id="1348" label="zzzzz17,zzzzz40" source="154" target="131" cy:directed="1"/>
      <edge id="1347" label="zzzzz17,zzzzzz0" source="154" target="71" cy:directed="1"/>
      <edge id="1346" label="zzzzz18,zzzzz20" source="153" target="151" cy:directed="1"/>
      <edge id="1345" label="zzzzz18,zzzzzz6" source="153" target="65" cy:directed="1"/>
      <edge id="1344" label="zzzzz18,zzzzz54" source="153" target="117" cy:directed="1"/>
      <edge id="1343" label="zzzzz18,zzzzz24" source="153" target="147" cy:directed="1"/>
      <edge id="1342" label="zzzzz18,zzzzz28" source="153" target="143" cy:directed="1"/>
      <edge id="1341" label="zzzzz18,zzzzz78" source="153" target="93" cy:directed="1"/>
      <edge id="1340" label="zzzzz18,zzzzz29" source="153" target="142" cy:directed="1"/>
      <edge id="1339" label="zzzzz18,zzzzz25" source="153" target="146" cy:directed="1"/>
      <edge id="1338" label="zzzzz18,zzzzz76" source="153" target="95" cy:directed="1"/>
      <edge id="1337" label="zzzzz18,zzzzz75" source="153" target="96" cy:directed="1"/>
      <edge id="1336" label="zzzzz18,zzzzz80" source="153" target="91" cy:directed="1"/>
      <edge id="1335" label="zzzzz18,zzzzz56" source="153" target="115" cy:directed="1"/>
      <edge id="1334" label="zzzzz18,zzzzz67" source="153" target="104" cy:directed="1"/>
      <edge id="1333" label="zzzzz18,zzzzz68" source="153" target="103" cy:directed="1"/>
      <edge id="1332" label="zzzzz18,zzzzz69" source="153" target="102" cy:directed="1"/>
      <edge id="1331" label="zzzzz18,zzzzz70" source="153" target="101" cy:directed="1"/>
      <edge id="1330" label="zzzzz18,zzzzz72" source="153" target="99" cy:directed="1"/>
      <edge id="1329" label="zzzzz18,zzzzz73" source="153" target="98" cy:directed="1"/>
      <edge id="1328" label="zzzzz18,zzzzz79" source="153" target="92" cy:directed="1"/>
      <edge id="1327" label="zzzzz18,zzzzz63" source="153" target="108" cy:directed="1"/>
      <edge id="1326" label="zzzzz18,zzzzz81" source="153" target="90" cy:directed="1"/>
      <edge id="1325" label="zzzzz18,zzzzz97" source="153" target="74" cy:directed="1"/>
      <edge id="1324" label="zzzzz18,zzzzz57" source="153" target="114" cy:directed="1"/>
      <edge id="1323" label="zzzzz18,zzzzz65" source="153" target="106" cy:directed="1"/>
      <edge id="1322" label="zzzzz18,zzzzz49" source="153" target="122" cy:directed="1"/>
      <edge id="1321" label="zzzzz18,zzzzz74" source="153" target="97" cy:directed="1"/>
      <edge id="1320" label="zzzzz18,zzzzz77" source="153" target="94" cy:directed="1"/>
      <edge id="1319" label="zzzzz18,zzzzz94" source="153" target="77" cy:directed="1"/>
      <edge id="1318" label="zzzzz18,zzzzz59" source="153" target="112" cy:directed="1"/>
      <edge id="1317" label="zzzzz18,zzzzz99" source="153" target="72" cy:directed="1"/>
      <edge id="1316" label="zzzzz18,zzzzz60" source="153" target="111" cy:directed="1"/>
      <edge id="1315" label="zzzzz18,zzzzz64" source="153" target="107" cy:directed="1"/>
      <edge id="1314" label="zzzzz18,zzzzz55" source="153" target="116" cy:directed="1"/>
      <edge id="1313" label="zzzzz18,zzzzz66" source="153" target="105" cy:directed="1"/>
      <edge id="1312" label="zzzzz18,zzzzz58" source="153" target="113" cy:directed="1"/>
      <edge id="1311" label="zzzzz18,zzzzz61" source="153" target="110" cy:directed="1"/>
      <edge id="1310" label="zzzzz18,zzzzz96" source="153" target="75" cy:directed="1"/>
      <edge id="1309" label="zzzzz18,zzzzz82" source="153" target="89" cy:directed="1"/>
      <edge id="1308" label="zzzzz18,zzzzz95" source="153" target="76" cy:directed="1"/>
      <edge id="1307" label="zzzzz18,zzzzz19" source="153" target="152" cy:directed="1"/>
      <edge id="1306" label="zzzzz18,zzzzzz5" source="153" target="66" cy:directed="1"/>
      <edge id="1305" label="zzzzz19,zzzzzz5" source="152" target="66" cy:directed="1"/>
      <edge id="1304" label="zzzzz19,zzzzz50" source="152" target="121" cy:directed="1"/>
      <edge id="1303" label="zzzzz19,zzzzz30" source="152" target="141" cy:directed="1"/>
      <edge id="1302" label="zzzzz19,zzzzzz9" source="152" target="62" cy:directed="1"/>
      <edge id="1301" label="zzzzz19,zzzzz23" source="152" target="148" cy:directed="1"/>
      <edge id="1300" label="zzzzz19,zzzzzz8" source="152" target="63" cy:directed="1"/>
      <edge id="1299" label="zzzzz19,zzzzz35" source="152" target="136" cy:directed="1"/>
      <edge id="1298" label="zzzzz19,zzzzz76" source="152" target="95" cy:directed="1"/>
      <edge id="1297" label="zzzzz19,zzzzz54" source="152" target="117" cy:directed="1"/>
      <edge id="1296" label="zzzzz19,zzzzzz1" source="152" target="70" cy:directed="1"/>
      <edge id="1295" label="zzzzz19,zzzzz56" source="152" target="115" cy:directed="1"/>
      <edge id="1294" label="zzzzz19,zzzzz78" source="152" target="93" cy:directed="1"/>
      <edge id="1293" label="zzzzz19,zzzzz67" source="152" target="104" cy:directed="1"/>
      <edge id="1292" label="zzzzz19,zzzzz80" source="152" target="91" cy:directed="1"/>
      <edge id="1291" label="zzzzz19,zzzzz72" source="152" target="99" cy:directed="1"/>
      <edge id="1290" label="zzzzz19,zzzzzz0" source="152" target="71" cy:directed="1"/>
      <edge id="1289" label="zzzzz19,zzzzz68" source="152" target="103" cy:directed="1"/>
      <edge id="1288" label="zzzzz19,zzzzz69" source="152" target="102" cy:directed="1"/>
      <edge id="1287" label="zzzzz19,zzzzz70" source="152" target="101" cy:directed="1"/>
      <edge id="1286" label="zzzzz19,zzzzz73" source="152" target="98" cy:directed="1"/>
      <edge id="1285" label="zzzzz19,zzzzz26" source="152" target="145" cy:directed="1"/>
      <edge id="1284" label="zzzzz19,zzzzzz6" source="152" target="65" cy:directed="1"/>
      <edge id="1283" label="zzzzz19,zzzzz28" source="152" target="143" cy:directed="1"/>
      <edge id="1282" label="zzzzz19,zzzzz31" source="152" target="140" cy:directed="1"/>
      <edge id="1281" label="zzzzz19,zzzzz20" source="152" target="151" cy:directed="1"/>
      <edge id="1280" label="zzzzz19,zzzzz33" source="152" target="138" cy:directed="1"/>
      <edge id="1279" label="zzzzz19,zzzzz25" source="152" target="146" cy:directed="1"/>
      <edge id="1278" label="zzzzz19,zzzzz79" source="152" target="92" cy:directed="1"/>
      <edge id="1277" label="zzzzz19,zzzzz38" source="152" target="133" cy:directed="1"/>
      <edge id="1276" label="zzzzz19,zzzzz75" source="152" target="96" cy:directed="1"/>
      <edge id="1275" label="zzzzz19,zzzzz37" source="152" target="134" cy:directed="1"/>
      <edge id="1274" label="zzzzz19,zzzzz74" source="152" target="97" cy:directed="1"/>
      <edge id="1273" label="zzzzz20,zzzzzz6" source="151" target="65" cy:directed="1"/>
      <edge id="1272" label="zzzzz20,zzzzz28" source="151" target="143" cy:directed="1"/>
      <edge id="1271" label="zzzzz20,zzzzz54" source="151" target="117" cy:directed="1"/>
      <edge id="1270" label="zzzzz20,zzzzz25" source="151" target="146" cy:directed="1"/>
      <edge id="1269" label="zzzzz20,zzzzz24" source="151" target="147" cy:directed="1"/>
      <edge id="1268" label="zzzzz20,zzzzz78" source="151" target="93" cy:directed="1"/>
      <edge id="1267" label="zzzzz20,zzzzz63" source="151" target="108" cy:directed="1"/>
      <edge id="1266" label="zzzzz20,zzzzz29" source="151" target="142" cy:directed="1"/>
      <edge id="1265" label="zzzzz20,zzzzz56" source="151" target="115" cy:directed="1"/>
      <edge id="1264" label="zzzzz20,zzzzz66" source="151" target="105" cy:directed="1"/>
      <edge id="1263" label="zzzzz20,zzzzz80" source="151" target="91" cy:directed="1"/>
      <edge id="1262" label="zzzzz20,zzzzz70" source="151" target="101" cy:directed="1"/>
      <edge id="1261" label="zzzzz20,zzzzz72" source="151" target="99" cy:directed="1"/>
      <edge id="1260" label="zzzzz20,zzzzz67" source="151" target="104" cy:directed="1"/>
      <edge id="1259" label="zzzzz20,zzzzz68" source="151" target="103" cy:directed="1"/>
      <edge id="1258" label="zzzzz20,zzzzz75" source="151" target="96" cy:directed="1"/>
      <edge id="1257" label="zzzzz20,zzzzz79" source="151" target="92" cy:directed="1"/>
      <edge id="1256" label="zzzzz20,zzzzz73" source="151" target="98" cy:directed="1"/>
      <edge id="1255" label="zzzzz20,zzzzz69" source="151" target="102" cy:directed="1"/>
      <edge id="1254" label="zzzzz20,zzzzz99" source="151" target="72" cy:directed="1"/>
      <edge id="1253" label="zzzzz20,zzzzz64" source="151" target="107" cy:directed="1"/>
      <edge id="1252" label="zzzzz20,zzzzz76" source="151" target="95" cy:directed="1"/>
      <edge id="1251" label="zzzzz20,zzzzz61" source="151" target="110" cy:directed="1"/>
      <edge id="1250" label="zzzzz20,zzzzz94" source="151" target="77" cy:directed="1"/>
      <edge id="1249" label="zzzzz20,zzzzz96" source="151" target="75" cy:directed="1"/>
      <edge id="1248" label="zzzzz20,zzzzz49" source="151" target="122" cy:directed="1"/>
      <edge id="1247" label="zzzzz20,zzzzz81" source="151" target="90" cy:directed="1"/>
      <edge id="1246" label="zzzzz20,zzzzz77" source="151" target="94" cy:directed="1"/>
      <edge id="1245" label="zzzzz20,zzzzz95" source="151" target="76" cy:directed="1"/>
      <edge id="1244" label="zzzzz20,zzzzz74" source="151" target="97" cy:directed="1"/>
      <edge id="1243" label="zzzzz20,zzzzz97" source="151" target="74" cy:directed="1"/>
      <edge id="1242" label="zzzzz20,zzzzz59" source="151" target="112" cy:directed="1"/>
      <edge id="1241" label="zzzzz20,zzzzz65" source="151" target="106" cy:directed="1"/>
      <edge id="1240" label="zzzzz20,zzzzz58" source="151" target="113" cy:directed="1"/>
      <edge id="1239" label="zzzzz20,zzzzz82" source="151" target="89" cy:directed="1"/>
      <edge id="1238" label="zzzzz20,zzzzz55" source="151" target="116" cy:directed="1"/>
      <edge id="1237" label="zzzzz20,zzzzz93" source="151" target="78" cy:directed="1"/>
      <edge id="1236" label="zzzzz20,zzzzz62" source="151" target="109" cy:directed="1"/>
      <edge id="1235" label="zzzzz20,zzzzzz5" source="151" target="66" cy:directed="1"/>
      <edge id="1234" label="zzzzz20,zzzzz57" source="151" target="114" cy:directed="1"/>
      <edge id="1233" label="zzzzz20,zzzzz60" source="151" target="111" cy:directed="1"/>
      <edge id="1232" label="zzzzz21,zzzzz32" source="150" target="139" cy:directed="1"/>
      <edge id="1231" label="zzzzz21,zzzzzz7" source="150" target="64" cy:directed="1"/>
      <edge id="1230" label="zzzzz21,zzzzzz4" source="150" target="67" cy:directed="1"/>
      <edge id="1229" label="zzzzz21,zzzzz52" source="150" target="119" cy:directed="1"/>
      <edge id="1228" label="zzzzz21,zzzzz86" source="150" target="85" cy:directed="1"/>
      <edge id="1227" label="zzzzz21,zzzzz44" source="150" target="127" cy:directed="1"/>
      <edge id="1226" label="zzzzz21,zzzzzz1" source="150" target="70" cy:directed="1"/>
      <edge id="1225" label="zzzzz22,zzzzz45" source="149" target="126" cy:directed="1"/>
      <edge id="1224" label="zzzzz22,zzzzz91" source="149" target="80" cy:directed="1"/>
      <edge id="1223" label="zzzzz22,zzzzz87" source="149" target="84" cy:directed="1"/>
      <edge id="1222" label="zzzzz22,zzzzz88" source="149" target="83" cy:directed="1"/>
      <edge id="1221" label="zzzzz22,zzzzz46" source="149" target="125" cy:directed="1"/>
      <edge id="1220" label="zzzzz22,zzzzz51" source="149" target="120" cy:directed="1"/>
      <edge id="1219" label="zzzzz22,zzzzz42" source="149" target="129" cy:directed="1"/>
      <edge id="1218" label="zzzzz22,zzzzz48" source="149" target="123" cy:directed="1"/>
      <edge id="1217" label="zzzzz23,zzzzz50" source="148" target="121" cy:directed="1"/>
      <edge id="1216" label="zzzzz23,zzzzz30" source="148" target="141" cy:directed="1"/>
      <edge id="1215" label="zzzzz23,zzzzzz8" source="148" target="63" cy:directed="1"/>
      <edge id="1214" label="zzzzz23,zzzzz35" source="148" target="136" cy:directed="1"/>
      <edge id="1213" label="zzzzz23,zzzzzz9" source="148" target="62" cy:directed="1"/>
      <edge id="1212" label="zzzzz23,zzzzzz5" source="148" target="66" cy:directed="1"/>
      <edge id="1211" label="zzzzz23,zzzzzz1" source="148" target="70" cy:directed="1"/>
      <edge id="1210" label="zzzzz23,zzzzz26" source="148" target="145" cy:directed="1"/>
      <edge id="1209" label="zzzzz23,zzzzz31" source="148" target="140" cy:directed="1"/>
      <edge id="1208" label="zzzzz23,zzzzz33" source="148" target="138" cy:directed="1"/>
      <edge id="1207" label="zzzzz23,zzzzz98" source="148" target="73" cy:directed="1"/>
      <edge id="1206" label="zzzzz23,zzzzz84" source="148" target="87" cy:directed="1"/>
      <edge id="1205" label="zzzzz23,zzzzzz0" source="148" target="71" cy:directed="1"/>
      <edge id="1204" label="zzzzz23,zzzzz37" source="148" target="134" cy:directed="1"/>
      <edge id="1203" label="zzzzz23,zzzzz24" source="148" target="147" cy:directed="1"/>
      <edge id="1202" label="zzzzz24,zzzzzz6" source="147" target="65" cy:directed="1"/>
      <edge id="1201" label="zzzzz24,zzzzz78" source="147" target="93" cy:directed="1"/>
      <edge id="1200" label="zzzzz24,zzzzz56" source="147" target="115" cy:directed="1"/>
      <edge id="1199" label="zzzzz24,zzzzz68" source="147" target="103" cy:directed="1"/>
      <edge id="1198" label="zzzzz24,zzzzz69" source="147" target="102" cy:directed="1"/>
      <edge id="1197" label="zzzzz24,zzzzz70" source="147" target="101" cy:directed="1"/>
      <edge id="1196" label="zzzzz24,zzzzz72" source="147" target="99" cy:directed="1"/>
      <edge id="1195" label="zzzzz24,zzzzz73" source="147" target="98" cy:directed="1"/>
      <edge id="1194" label="zzzzz24,zzzzz28" source="147" target="143" cy:directed="1"/>
      <edge id="1193" label="zzzzz24,zzzzz67" source="147" target="104" cy:directed="1"/>
      <edge id="1192" label="zzzzz24,zzzzz79" source="147" target="92" cy:directed="1"/>
      <edge id="1191" label="zzzzz24,zzzzz76" source="147" target="95" cy:directed="1"/>
      <edge id="1190" label="zzzzz24,zzzzz75" source="147" target="96" cy:directed="1"/>
      <edge id="1189" label="zzzzz24,zzzzz80" source="147" target="91" cy:directed="1"/>
      <edge id="1188" label="zzzzz24,zzzzz54" source="147" target="117" cy:directed="1"/>
      <edge id="1187" label="zzzzz24,zzzzz63" source="147" target="108" cy:directed="1"/>
      <edge id="1186" label="zzzzz24,zzzzz99" source="147" target="72" cy:directed="1"/>
      <edge id="1185" label="zzzzz24,zzzzz25" source="147" target="146" cy:directed="1"/>
      <edge id="1184" label="zzzzz24,zzzzz94" source="147" target="77" cy:directed="1"/>
      <edge id="1183" label="zzzzz24,zzzzz66" source="147" target="105" cy:directed="1"/>
      <edge id="1182" label="zzzzz24,zzzzz96" source="147" target="75" cy:directed="1"/>
      <edge id="1181" label="zzzzz24,zzzzz49" source="147" target="122" cy:directed="1"/>
      <edge id="1180" label="zzzzz24,zzzzz77" source="147" target="94" cy:directed="1"/>
      <edge id="1179" label="zzzzz24,zzzzz74" source="147" target="97" cy:directed="1"/>
      <edge id="1178" label="zzzzz24,zzzzz59" source="147" target="112" cy:directed="1"/>
      <edge id="1177" label="zzzzz24,zzzzz64" source="147" target="107" cy:directed="1"/>
      <edge id="1176" label="zzzzz24,zzzzz65" source="147" target="106" cy:directed="1"/>
      <edge id="1175" label="zzzzz24,zzzzz61" source="147" target="110" cy:directed="1"/>
      <edge id="1174" label="zzzzz24,zzzzz62" source="147" target="109" cy:directed="1"/>
      <edge id="1173" label="zzzzz24,zzzzz58" source="147" target="113" cy:directed="1"/>
      <edge id="1172" label="zzzzz24,zzzzz29" source="147" target="142" cy:directed="1"/>
      <edge id="1171" label="zzzzz24,zzzzz97" source="147" target="74" cy:directed="1"/>
      <edge id="1170" label="zzzzz24,zzzzz57" source="147" target="114" cy:directed="1"/>
      <edge id="1169" label="zzzzz24,zzzzz82" source="147" target="89" cy:directed="1"/>
      <edge id="1168" label="zzzzz24,zzzzz81" source="147" target="90" cy:directed="1"/>
      <edge id="1167" label="zzzzz24,zzzzz95" source="147" target="76" cy:directed="1"/>
      <edge id="1166" label="zzzzz24,zzzzz60" source="147" target="111" cy:directed="1"/>
      <edge id="1165" label="zzzzz24,zzzzz30" source="147" target="141" cy:directed="1"/>
      <edge id="1164" label="zzzzz24,zzzzzz1" source="147" target="70" cy:directed="1"/>
      <edge id="1163" label="zzzzz24,zzzzz50" source="147" target="121" cy:directed="1"/>
      <edge id="1162" label="zzzzz24,zzzzz55" source="147" target="116" cy:directed="1"/>
      <edge id="1161" label="zzzzz25,zzzzzz6" source="146" target="65" cy:directed="1"/>
      <edge id="1160" label="zzzzz25,zzzzz29" source="146" target="142" cy:directed="1"/>
      <edge id="1159" label="zzzzz25,zzzzz78" source="146" target="93" cy:directed="1"/>
      <edge id="1158" label="zzzzz25,zzzzz56" source="146" target="115" cy:directed="1"/>
      <edge id="1157" label="zzzzz25,zzzzz57" source="146" target="114" cy:directed="1"/>
      <edge id="1156" label="zzzzz25,zzzzz97" source="146" target="74" cy:directed="1"/>
      <edge id="1155" label="zzzzz25,zzzzz28" source="146" target="143" cy:directed="1"/>
      <edge id="1154" label="zzzzz25,zzzzz55" source="146" target="116" cy:directed="1"/>
      <edge id="1153" label="zzzzz25,zzzzz76" source="146" target="95" cy:directed="1"/>
      <edge id="1152" label="zzzzz25,zzzzz63" source="146" target="108" cy:directed="1"/>
      <edge id="1151" label="zzzzz25,zzzzz68" source="146" target="103" cy:directed="1"/>
      <edge id="1150" label="zzzzz25,zzzzz69" source="146" target="102" cy:directed="1"/>
      <edge id="1149" label="zzzzz25,zzzzz70" source="146" target="101" cy:directed="1"/>
      <edge id="1148" label="zzzzz25,zzzzz72" source="146" target="99" cy:directed="1"/>
      <edge id="1147" label="zzzzz25,zzzzz73" source="146" target="98" cy:directed="1"/>
      <edge id="1146" label="zzzzz25,zzzzz80" source="146" target="91" cy:directed="1"/>
      <edge id="1145" label="zzzzz25,zzzzz67" source="146" target="104" cy:directed="1"/>
      <edge id="1144" label="zzzzz25,zzzzz81" source="146" target="90" cy:directed="1"/>
      <edge id="1143" label="zzzzz25,zzzzz75" source="146" target="96" cy:directed="1"/>
      <edge id="1142" label="zzzzz25,zzzzz54" source="146" target="117" cy:directed="1"/>
      <edge id="1141" label="zzzzz25,zzzzz79" source="146" target="92" cy:directed="1"/>
      <edge id="1140" label="zzzzz25,zzzzz99" source="146" target="72" cy:directed="1"/>
      <edge id="1139" label="zzzzz25,zzzzz61" source="146" target="110" cy:directed="1"/>
      <edge id="1138" label="zzzzz25,zzzzz74" source="146" target="97" cy:directed="1"/>
      <edge id="1137" label="zzzzz25,zzzzz49" source="146" target="122" cy:directed="1"/>
      <edge id="1136" label="zzzzz25,zzzzz77" source="146" target="94" cy:directed="1"/>
      <edge id="1135" label="zzzzz25,zzzzz65" source="146" target="106" cy:directed="1"/>
      <edge id="1134" label="zzzzz25,zzzzz95" source="146" target="76" cy:directed="1"/>
      <edge id="1133" label="zzzzz25,zzzzz94" source="146" target="77" cy:directed="1"/>
      <edge id="1132" label="zzzzz25,zzzzz66" source="146" target="105" cy:directed="1"/>
      <edge id="1131" label="zzzzz25,zzzzz64" source="146" target="107" cy:directed="1"/>
      <edge id="1130" label="zzzzz25,zzzzz82" source="146" target="89" cy:directed="1"/>
      <edge id="1129" label="zzzzz25,zzzzz96" source="146" target="75" cy:directed="1"/>
      <edge id="1128" label="zzzzz25,zzzzz58" source="146" target="113" cy:directed="1"/>
      <edge id="1127" label="zzzzz25,zzzzz60" source="146" target="111" cy:directed="1"/>
      <edge id="1126" label="zzzzz25,zzzzz86" source="146" target="85" cy:directed="1"/>
      <edge id="1125" label="zzzzz25,zzzzz62" source="146" target="109" cy:directed="1"/>
      <edge id="1124" label="zzzzz25,zzzzz59" source="146" target="112" cy:directed="1"/>
      <edge id="1123" label="zzzzz25,zzzzz98" source="146" target="73" cy:directed="1"/>
      <edge id="1122" label="zzzzz25,zzzzzz5" source="146" target="66" cy:directed="1"/>
      <edge id="1121" label="zzzzz26,zzzzz31" source="145" target="140" cy:directed="1"/>
      <edge id="1120" label="zzzzz26,zzzzzz1" source="145" target="70" cy:directed="1"/>
      <edge id="1119" label="zzzzz26,zzzzz33" source="145" target="138" cy:directed="1"/>
      <edge id="1118" label="zzzzz26,zzzzz37" source="145" target="134" cy:directed="1"/>
      <edge id="1117" label="zzzzz26,zzzzz84" source="145" target="87" cy:directed="1"/>
      <edge id="1116" label="zzzzz26,zzzzz98" source="145" target="73" cy:directed="1"/>
      <edge id="1115" label="zzzzz26,zzzzz36" source="145" target="135" cy:directed="1"/>
      <edge id="1114" label="zzzzz26,zzzzz35" source="145" target="136" cy:directed="1"/>
      <edge id="1113" label="zzzzz26,zzzzzz9" source="145" target="62" cy:directed="1"/>
      <edge id="1112" label="zzzzz26,zzzzzz8" source="145" target="63" cy:directed="1"/>
      <edge id="1111" label="zzzzz26,zzzzz30" source="145" target="141" cy:directed="1"/>
      <edge id="1110" label="zzzzz26,zzzzz50" source="145" target="121" cy:directed="1"/>
      <edge id="1109" label="zzzzz26,zzzzz93" source="145" target="78" cy:directed="1"/>
      <edge id="1108" label="zzzzz26,zzzzzz5" source="145" target="66" cy:directed="1"/>
      <edge id="1107" label="zzzzz26,zzzzzz0" source="145" target="71" cy:directed="1"/>
      <edge id="1106" label="zzzzz26,zzzzz86" source="145" target="85" cy:directed="1"/>
      <edge id="1105" label="zzzzz26,zzzzz38" source="145" target="133" cy:directed="1"/>
      <edge id="1104" label="zzzzz26,zzzzz78" source="145" target="93" cy:directed="1"/>
      <edge id="1103" label="zzzzz26,zzzzz43" source="145" target="128" cy:directed="1"/>
      <edge id="1102" label="zzzzz26,zzzzz54" source="145" target="117" cy:directed="1"/>
      <edge id="1101" label="zzzzz26,zzzzz56" source="145" target="115" cy:directed="1"/>
      <edge id="1100" label="zzzzz27,zzzzz39" source="144" target="132" cy:directed="1"/>
      <edge id="1099" label="zzzzz28,zzzzz54" source="143" target="117" cy:directed="1"/>
      <edge id="1098" label="zzzzz28,zzzzzz6" source="143" target="65" cy:directed="1"/>
      <edge id="1097" label="zzzzz28,zzzzz29" source="143" target="142" cy:directed="1"/>
      <edge id="1096" label="zzzzz28,zzzzz78" source="143" target="93" cy:directed="1"/>
      <edge id="1095" label="zzzzz28,zzzzz81" source="143" target="90" cy:directed="1"/>
      <edge id="1094" label="zzzzz28,zzzzz80" source="143" target="91" cy:directed="1"/>
      <edge id="1093" label="zzzzz28,zzzzz75" source="143" target="96" cy:directed="1"/>
      <edge id="1092" label="zzzzz28,zzzzz79" source="143" target="92" cy:directed="1"/>
      <edge id="1091" label="zzzzz28,zzzzz68" source="143" target="103" cy:directed="1"/>
      <edge id="1090" label="zzzzz28,zzzzz73" source="143" target="98" cy:directed="1"/>
      <edge id="1089" label="zzzzz28,zzzzz69" source="143" target="102" cy:directed="1"/>
      <edge id="1088" label="zzzzz28,zzzzz70" source="143" target="101" cy:directed="1"/>
      <edge id="1087" label="zzzzz28,zzzzz72" source="143" target="99" cy:directed="1"/>
      <edge id="1086" label="zzzzz28,zzzzz67" source="143" target="104" cy:directed="1"/>
      <edge id="1085" label="zzzzz28,zzzzz56" source="143" target="115" cy:directed="1"/>
      <edge id="1084" label="zzzzz28,zzzzz76" source="143" target="95" cy:directed="1"/>
      <edge id="1083" label="zzzzz28,zzzzz95" source="143" target="76" cy:directed="1"/>
      <edge id="1082" label="zzzzz28,zzzzz57" source="143" target="114" cy:directed="1"/>
      <edge id="1081" label="zzzzz28,zzzzz61" source="143" target="110" cy:directed="1"/>
      <edge id="1080" label="zzzzz28,zzzzz97" source="143" target="74" cy:directed="1"/>
      <edge id="1079" label="zzzzz28,zzzzz99" source="143" target="72" cy:directed="1"/>
      <edge id="1078" label="zzzzz28,zzzzz55" source="143" target="116" cy:directed="1"/>
      <edge id="1077" label="zzzzz28,zzzzz63" source="143" target="108" cy:directed="1"/>
      <edge id="1076" label="zzzzz28,zzzzz65" source="143" target="106" cy:directed="1"/>
      <edge id="1075" label="zzzzz28,zzzzz96" source="143" target="75" cy:directed="1"/>
      <edge id="1074" label="zzzzz28,zzzzz62" source="143" target="109" cy:directed="1"/>
      <edge id="1073" label="zzzzz28,zzzzz60" source="143" target="111" cy:directed="1"/>
      <edge id="1072" label="zzzzz28,zzzzz64" source="143" target="107" cy:directed="1"/>
      <edge id="1071" label="zzzzz28,zzzzz94" source="143" target="77" cy:directed="1"/>
      <edge id="1070" label="zzzzz28,zzzzzz5" source="143" target="66" cy:directed="1"/>
      <edge id="1069" label="zzzzz28,zzzzz58" source="143" target="113" cy:directed="1"/>
      <edge id="1068" label="zzzzz28,zzzzz66" source="143" target="105" cy:directed="1"/>
      <edge id="1067" label="zzzzz28,zzzzz91" source="143" target="80" cy:directed="1"/>
      <edge id="1066" label="zzzzz28,zzzzz45" source="143" target="126" cy:directed="1"/>
      <edge id="1065" label="zzzzz28,zzzzz37" source="143" target="134" cy:directed="1"/>
      <edge id="1064" label="zzzzz28,zzzzz98" source="143" target="73" cy:directed="1"/>
      <edge id="1063" label="zzzzz28,zzzzz49" source="143" target="122" cy:directed="1"/>
      <edge id="1062" label="zzzzz29,zzzzz80" source="142" target="91" cy:directed="1"/>
      <edge id="1061" label="zzzzz29,zzzzz76" source="142" target="95" cy:directed="1"/>
      <edge id="1060" label="zzzzz29,zzzzz78" source="142" target="93" cy:directed="1"/>
      <edge id="1059" label="zzzzz29,zzzzzz6" source="142" target="65" cy:directed="1"/>
      <edge id="1058" label="zzzzz29,zzzzz56" source="142" target="115" cy:directed="1"/>
      <edge id="1057" label="zzzzz29,zzzzz67" source="142" target="104" cy:directed="1"/>
      <edge id="1056" label="zzzzz29,zzzzz79" source="142" target="92" cy:directed="1"/>
      <edge id="1055" label="zzzzz29,zzzzz68" source="142" target="103" cy:directed="1"/>
      <edge id="1054" label="zzzzz29,zzzzz69" source="142" target="102" cy:directed="1"/>
      <edge id="1053" label="zzzzz29,zzzzz70" source="142" target="101" cy:directed="1"/>
      <edge id="1052" label="zzzzz29,zzzzz72" source="142" target="99" cy:directed="1"/>
      <edge id="1051" label="zzzzz29,zzzzz73" source="142" target="98" cy:directed="1"/>
      <edge id="1050" label="zzzzz29,zzzzz75" source="142" target="96" cy:directed="1"/>
      <edge id="1049" label="zzzzz29,zzzzz54" source="142" target="117" cy:directed="1"/>
      <edge id="1048" label="zzzzz29,zzzzz81" source="142" target="90" cy:directed="1"/>
      <edge id="1047" label="zzzzz29,zzzzz63" source="142" target="108" cy:directed="1"/>
      <edge id="1046" label="zzzzz29,zzzzz55" source="142" target="116" cy:directed="1"/>
      <edge id="1045" label="zzzzz29,zzzzz97" source="142" target="74" cy:directed="1"/>
      <edge id="1044" label="zzzzz29,zzzzz57" source="142" target="114" cy:directed="1"/>
      <edge id="1043" label="zzzzz29,zzzzz49" source="142" target="122" cy:directed="1"/>
      <edge id="1042" label="zzzzz29,zzzzz77" source="142" target="94" cy:directed="1"/>
      <edge id="1041" label="zzzzz29,zzzzz94" source="142" target="77" cy:directed="1"/>
      <edge id="1040" label="zzzzz29,zzzzz74" source="142" target="97" cy:directed="1"/>
      <edge id="1039" label="zzzzz29,zzzzz66" source="142" target="105" cy:directed="1"/>
      <edge id="1038" label="zzzzz29,zzzzz99" source="142" target="72" cy:directed="1"/>
      <edge id="1037" label="zzzzz29,zzzzz96" source="142" target="75" cy:directed="1"/>
      <edge id="1036" label="zzzzz29,zzzzz64" source="142" target="107" cy:directed="1"/>
      <edge id="1035" label="zzzzz29,zzzzz60" source="142" target="111" cy:directed="1"/>
      <edge id="1034" label="zzzzz29,zzzzz59" source="142" target="112" cy:directed="1"/>
      <edge id="1033" label="zzzzz29,zzzzz58" source="142" target="113" cy:directed="1"/>
      <edge id="1032" label="zzzzz29,zzzzz61" source="142" target="110" cy:directed="1"/>
      <edge id="1031" label="zzzzz29,zzzzz65" source="142" target="106" cy:directed="1"/>
      <edge id="1030" label="zzzzz29,zzzzz95" source="142" target="76" cy:directed="1"/>
      <edge id="1029" label="zzzzz29,zzzzz82" source="142" target="89" cy:directed="1"/>
      <edge id="1028" label="zzzzz30,zzzzz50" source="141" target="121" cy:directed="1"/>
      <edge id="1027" label="zzzzz30,zzzzz35" source="141" target="136" cy:directed="1"/>
      <edge id="1026" label="zzzzz30,zzzzzz9" source="141" target="62" cy:directed="1"/>
      <edge id="1025" label="zzzzz30,zzzzzz8" source="141" target="63" cy:directed="1"/>
      <edge id="1024" label="zzzzz30,zzzzzz5" source="141" target="66" cy:directed="1"/>
      <edge id="1023" label="zzzzz30,zzzzzz1" source="141" target="70" cy:directed="1"/>
      <edge id="1022" label="zzzzz30,zzzzz31" source="141" target="140" cy:directed="1"/>
      <edge id="1021" label="zzzzz30,zzzzzz0" source="141" target="71" cy:directed="1"/>
      <edge id="1020" label="zzzzz30,zzzzz33" source="141" target="138" cy:directed="1"/>
      <edge id="1019" label="zzzzz30,zzzzz84" source="141" target="87" cy:directed="1"/>
      <edge id="1018" label="zzzzz30,zzzzz37" source="141" target="134" cy:directed="1"/>
      <edge id="1017" label="zzzzz31,zzzzzz1" source="140" target="70" cy:directed="1"/>
      <edge id="1016" label="zzzzz31,zzzzz37" source="140" target="134" cy:directed="1"/>
      <edge id="1015" label="zzzzz31,zzzzz33" source="140" target="138" cy:directed="1"/>
      <edge id="1014" label="zzzzz31,zzzzz84" source="140" target="87" cy:directed="1"/>
      <edge id="1013" label="zzzzz31,zzzzz98" source="140" target="73" cy:directed="1"/>
      <edge id="1012" label="zzzzz31,zzzzz36" source="140" target="135" cy:directed="1"/>
      <edge id="1011" label="zzzzz31,zzzzz93" source="140" target="78" cy:directed="1"/>
      <edge id="1010" label="zzzzz31,zzzzz35" source="140" target="136" cy:directed="1"/>
      <edge id="1009" label="zzzzz31,zzzzzz9" source="140" target="62" cy:directed="1"/>
      <edge id="1008" label="zzzzz31,zzzzz50" source="140" target="121" cy:directed="1"/>
      <edge id="1007" label="zzzzz31,zzzzzz8" source="140" target="63" cy:directed="1"/>
      <edge id="1006" label="zzzzz31,zzzzzz0" source="140" target="71" cy:directed="1"/>
      <edge id="1005" label="zzzzz31,zzzzz78" source="140" target="93" cy:directed="1"/>
      <edge id="1004" label="zzzzz31,zzzzz67" source="140" target="104" cy:directed="1"/>
      <edge id="1003" label="zzzzz31,zzzzzz5" source="140" target="66" cy:directed="1"/>
      <edge id="1002" label="zzzzz31,zzzzz56" source="140" target="115" cy:directed="1"/>
      <edge id="1001" label="zzzzz31,zzzzz86" source="140" target="85" cy:directed="1"/>
      <edge id="1000" label="zzzzz32,zzzzzz4" source="139" target="67" cy:directed="1"/>
      <edge id="999" label="zzzzz32,zzzzzz7" source="139" target="64" cy:directed="1"/>
      <edge id="998" label="zzzzz32,zzzzz52" source="139" target="119" cy:directed="1"/>
      <edge id="997" label="zzzzz32,zzzzz86" source="139" target="85" cy:directed="1"/>
      <edge id="996" label="zzzzz32,zzzzz43" source="139" target="128" cy:directed="1"/>
      <edge id="995" label="zzzzz32,zzzzz44" source="139" target="127" cy:directed="1"/>
      <edge id="994" label="zzzzz32,zzzzz76" source="139" target="95" cy:directed="1"/>
      <edge id="993" label="zzzzz32,zzzzz68" source="139" target="103" cy:directed="1"/>
      <edge id="992" label="zzzzz32,zzzzz69" source="139" target="102" cy:directed="1"/>
      <edge id="991" label="zzzzz32,zzzzz70" source="139" target="101" cy:directed="1"/>
      <edge id="990" label="zzzzz32,zzzzz73" source="139" target="98" cy:directed="1"/>
      <edge id="989" label="zzzzz32,zzzzz80" source="139" target="91" cy:directed="1"/>
      <edge id="988" label="zzzzz32,zzzzz67" source="139" target="104" cy:directed="1"/>
      <edge id="987" label="zzzzz32,zzzzz72" source="139" target="99" cy:directed="1"/>
      <edge id="986" label="zzzzz33,zzzzzz1" source="138" target="70" cy:directed="1"/>
      <edge id="985" label="zzzzz33,zzzzz37" source="138" target="134" cy:directed="1"/>
      <edge id="984" label="zzzzz33,zzzzz98" source="138" target="73" cy:directed="1"/>
      <edge id="983" label="zzzzz33,zzzzz84" source="138" target="87" cy:directed="1"/>
      <edge id="982" label="zzzzz33,zzzzz36" source="138" target="135" cy:directed="1"/>
      <edge id="981" label="zzzzz33,zzzzzz9" source="138" target="62" cy:directed="1"/>
      <edge id="980" label="zzzzz33,zzzzz35" source="138" target="136" cy:directed="1"/>
      <edge id="979" label="zzzzz33,zzzzzz8" source="138" target="63" cy:directed="1"/>
      <edge id="978" label="zzzzz33,zzzzz50" source="138" target="121" cy:directed="1"/>
      <edge id="977" label="zzzzz33,zzzzzz5" source="138" target="66" cy:directed="1"/>
      <edge id="976" label="zzzzz33,zzzzzz0" source="138" target="71" cy:directed="1"/>
      <edge id="975" label="zzzzz33,zzzzz43" source="138" target="128" cy:directed="1"/>
      <edge id="974" label="zzzzz33,zzzzz38" source="138" target="133" cy:directed="1"/>
      <edge id="973" label="zzzzz33,zzzzz86" source="138" target="85" cy:directed="1"/>
      <edge id="972" label="zzzzz33,zzzzz93" source="138" target="78" cy:directed="1"/>
      <edge id="971" label="zzzzz34,zzzzz38" source="137" target="133" cy:directed="1"/>
      <edge id="970" label="zzzzz35,zzzzzz9" source="136" target="62" cy:directed="1"/>
      <edge id="969" label="zzzzz35,zzzzzz8" source="136" target="63" cy:directed="1"/>
      <edge id="968" label="zzzzz35,zzzzz50" source="136" target="121" cy:directed="1"/>
      <edge id="967" label="zzzzz35,zzzzzz5" source="136" target="66" cy:directed="1"/>
      <edge id="966" label="zzzzz35,zzzzzz1" source="136" target="70" cy:directed="1"/>
      <edge id="965" label="zzzzz35,zzzzz37" source="136" target="134" cy:directed="1"/>
      <edge id="964" label="zzzzz35,zzzzz84" source="136" target="87" cy:directed="1"/>
      <edge id="963" label="zzzzz35,zzzzzz0" source="136" target="71" cy:directed="1"/>
      <edge id="962" label="zzzzz36,zzzzz37" source="135" target="134" cy:directed="1"/>
      <edge id="961" label="zzzzz36,zzzzzz1" source="135" target="70" cy:directed="1"/>
      <edge id="960" label="zzzzz36,zzzzz84" source="135" target="87" cy:directed="1"/>
      <edge id="959" label="zzzzz36,zzzzz98" source="135" target="73" cy:directed="1"/>
      <edge id="958" label="zzzzz36,zzzzz43" source="135" target="128" cy:directed="1"/>
      <edge id="957" label="zzzzz36,zzzzz74" source="135" target="97" cy:directed="1"/>
      <edge id="956" label="zzzzz36,zzzzz61" source="135" target="110" cy:directed="1"/>
      <edge id="955" label="zzzzz36,zzzzz78" source="135" target="93" cy:directed="1"/>
      <edge id="954" label="zzzzz36,zzzzz77" source="135" target="94" cy:directed="1"/>
      <edge id="953" label="zzzzz36,zzzzz38" source="135" target="133" cy:directed="1"/>
      <edge id="952" label="zzzzz36,zzzzz49" source="135" target="122" cy:directed="1"/>
      <edge id="951" label="zzzzz36,zzzzz68" source="135" target="103" cy:directed="1"/>
      <edge id="950" label="zzzzz36,zzzzz69" source="135" target="102" cy:directed="1"/>
      <edge id="949" label="zzzzz36,zzzzz70" source="135" target="101" cy:directed="1"/>
      <edge id="948" label="zzzzz36,zzzzz72" source="135" target="99" cy:directed="1"/>
      <edge id="947" label="zzzzz36,zzzzz73" source="135" target="98" cy:directed="1"/>
      <edge id="946" label="zzzzz37,zzzzzz1" source="134" target="70" cy:directed="1"/>
      <edge id="945" label="zzzzz37,zzzzz98" source="134" target="73" cy:directed="1"/>
      <edge id="944" label="zzzzz37,zzzzz84" source="134" target="87" cy:directed="1"/>
      <edge id="943" label="zzzzz37,zzzzzz9" source="134" target="62" cy:directed="1"/>
      <edge id="942" label="zzzzz37,zzzzzz8" source="134" target="63" cy:directed="1"/>
      <edge id="941" label="zzzzz37,zzzzzz0" source="134" target="71" cy:directed="1"/>
      <edge id="940" label="zzzzz37,zzzzz43" source="134" target="128" cy:directed="1"/>
      <edge id="939" label="zzzzz37,zzzzz61" source="134" target="110" cy:directed="1"/>
      <edge id="938" label="zzzzz37,zzzzz50" source="134" target="121" cy:directed="1"/>
      <edge id="937" label="zzzzz37,zzzzz78" source="134" target="93" cy:directed="1"/>
      <edge id="936" label="zzzzz37,zzzzz68" source="134" target="103" cy:directed="1"/>
      <edge id="935" label="zzzzz37,zzzzz69" source="134" target="102" cy:directed="1"/>
      <edge id="934" label="zzzzz37,zzzzz70" source="134" target="101" cy:directed="1"/>
      <edge id="933" label="zzzzz37,zzzzz73" source="134" target="98" cy:directed="1"/>
      <edge id="932" label="zzzzz37,zzzzz72" source="134" target="99" cy:directed="1"/>
      <edge id="931" label="zzzzz37,zzzzzz5" source="134" target="66" cy:directed="1"/>
      <edge id="930" label="zzzzz37,zzzzz74" source="134" target="97" cy:directed="1"/>
      <edge id="929" label="zzzzz37,zzzzz38" source="134" target="133" cy:directed="1"/>
      <edge id="928" label="zzzzz37,zzzzz56" source="134" target="115" cy:directed="1"/>
      <edge id="927" label="zzzzz37,zzzzz96" source="134" target="75" cy:directed="1"/>
      <edge id="926" label="zzzzz38,zzzzz48" source="133" target="123" cy:directed="1"/>
      <edge id="925" label="zzzzz38,zzzzzz1" source="133" target="70" cy:directed="1"/>
      <edge id="924" label="zzzzz38,zzzzz43" source="133" target="128" cy:directed="1"/>
      <edge id="923" label="zzzzz38,zzzzz86" source="133" target="85" cy:directed="1"/>
      <edge id="922" label="zzzzz38,zzzzz67" source="133" target="104" cy:directed="1"/>
      <edge id="921" label="zzzzz38,zzzzz76" source="133" target="95" cy:directed="1"/>
      <edge id="920" label="zzzzz38,zzzzz44" source="133" target="127" cy:directed="1"/>
      <edge id="919" label="zzzzz38,zzzzzz5" source="133" target="66" cy:directed="1"/>
      <edge id="918" label="zzzzz38,zzzzz80" source="133" target="91" cy:directed="1"/>
      <edge id="917" label="zzzzz38,zzzzz98" source="133" target="73" cy:directed="1"/>
      <edge id="916" label="zzzzz40,zzzzzz0" source="131" target="71" cy:directed="1"/>
      <edge id="915" label="zzzzz40,zzzzzz2" source="131" target="69" cy:directed="1"/>
      <edge id="914" label="zzzzz40,zzzzzz3" source="131" target="68" cy:directed="1"/>
      <edge id="913" label="zzzzz40,zzzzz98" source="131" target="73" cy:directed="1"/>
      <edge id="912" label="zzzzz40,zzzzzz5" source="131" target="66" cy:directed="1"/>
      <edge id="911" label="zzzzz41,zzzzz85" source="130" target="86" cy:directed="1"/>
      <edge id="910" label="zzzzz41,zzzzz89" source="130" target="82" cy:directed="1"/>
      <edge id="909" label="zzzzz41,zzzzz90" source="130" target="81" cy:directed="1"/>
      <edge id="908" label="zzzzz41,zzzzz92" source="130" target="79" cy:directed="1"/>
      <edge id="907" label="zzzzz41,zzzzz71" source="130" target="100" cy:directed="1"/>
      <edge id="906" label="zzzzz41,zzzzz83" source="130" target="88" cy:directed="1"/>
      <edge id="905" label="zzzzz41,zzzzz48" source="130" target="123" cy:directed="1"/>
      <edge id="904" label="zzzzz42,zzzzz88" source="129" target="83" cy:directed="1"/>
      <edge id="903" label="zzzzz42,zzzzz91" source="129" target="80" cy:directed="1"/>
      <edge id="902" label="zzzzz42,zzzzz45" source="129" target="126" cy:directed="1"/>
      <edge id="901" label="zzzzz42,zzzzz51" source="129" target="120" cy:directed="1"/>
      <edge id="900" label="zzzzz42,zzzzz48" source="129" target="123" cy:directed="1"/>
      <edge id="899" label="zzzzz42,zzzzz46" source="129" target="125" cy:directed="1"/>
      <edge id="898" label="zzzzz42,zzzzz87" source="129" target="84" cy:directed="1"/>
      <edge id="897" label="zzzzz43,zzzzz86" source="128" target="85" cy:directed="1"/>
      <edge id="896" label="zzzzz43,zzzzz44" source="128" target="127" cy:directed="1"/>
      <edge id="895" label="zzzzz43,zzzzzz1" source="128" target="70" cy:directed="1"/>
      <edge id="894" label="zzzzz43,zzzzz98" source="128" target="73" cy:directed="1"/>
      <edge id="893" label="zzzzz43,zzzzzz4" source="128" target="67" cy:directed="1"/>
      <edge id="892" label="zzzzz43,zzzzzz7" source="128" target="64" cy:directed="1"/>
      <edge id="891" label="zzzzz43,zzzzz84" source="128" target="87" cy:directed="1"/>
      <edge id="890" label="zzzzz43,zzzzz55" source="128" target="116" cy:directed="1"/>
      <edge id="889" label="zzzzz43,zzzzz81" source="128" target="90" cy:directed="1"/>
      <edge id="888" label="zzzzz43,zzzzzz0" source="128" target="71" cy:directed="1"/>
      <edge id="887" label="zzzzz43,zzzzz54" source="128" target="117" cy:directed="1"/>
      <edge id="886" label="zzzzz44,zzzzz86" source="127" target="85" cy:directed="1"/>
      <edge id="885" label="zzzzz44,zzzzzz4" source="127" target="67" cy:directed="1"/>
      <edge id="884" label="zzzzz44,zzzzz52" source="127" target="119" cy:directed="1"/>
      <edge id="883" label="zzzzz44,zzzzzz7" source="127" target="64" cy:directed="1"/>
      <edge id="882" label="zzzzz45,zzzzz91" source="126" target="80" cy:directed="1"/>
      <edge id="881" label="zzzzz45,zzzzz51" source="126" target="120" cy:directed="1"/>
      <edge id="880" label="zzzzz45,zzzzz88" source="126" target="83" cy:directed="1"/>
      <edge id="879" label="zzzzz45,zzzzz87" source="126" target="84" cy:directed="1"/>
      <edge id="878" label="zzzzz45,zzzzz46" source="126" target="125" cy:directed="1"/>
      <edge id="877" label="zzzzz45,zzzzz48" source="126" target="123" cy:directed="1"/>
      <edge id="876" label="zzzzz45,zzzzz54" source="126" target="117" cy:directed="1"/>
      <edge id="875" label="zzzzz46,zzzzz87" source="125" target="84" cy:directed="1"/>
      <edge id="874" label="zzzzz46,zzzzz91" source="125" target="80" cy:directed="1"/>
      <edge id="873" label="zzzzz46,zzzzz51" source="125" target="120" cy:directed="1"/>
      <edge id="872" label="zzzzz46,zzzzz88" source="125" target="83" cy:directed="1"/>
      <edge id="871" label="zzzzz46,zzzzz48" source="125" target="123" cy:directed="1"/>
      <edge id="870" label="zzzzz48,zzzzz88" source="123" target="83" cy:directed="1"/>
      <edge id="869" label="zzzzz48,zzzzz51" source="123" target="120" cy:directed="1"/>
      <edge id="868" label="zzzzz48,zzzzz91" source="123" target="80" cy:directed="1"/>
      <edge id="867" label="zzzzz48,zzzzz87" source="123" target="84" cy:directed="1"/>
      <edge id="866" label="zzzzz49,zzzzz77" source="122" target="94" cy:directed="1"/>
      <edge id="865" label="zzzzz49,zzzzz74" source="122" target="97" cy:directed="1"/>
      <edge id="864" label="zzzzz49,zzzzz63" source="122" target="108" cy:directed="1"/>
      <edge id="863" label="zzzzz49,zzzzz78" source="122" target="93" cy:directed="1"/>
      <edge id="862" label="zzzzz49,zzzzz65" source="122" target="106" cy:directed="1"/>
      <edge id="861" label="zzzzz49,zzzzz94" source="122" target="77" cy:directed="1"/>
      <edge id="860" label="zzzzz49,zzzzz79" source="122" target="92" cy:directed="1"/>
      <edge id="859" label="zzzzz49,zzzzz61" source="122" target="110" cy:directed="1"/>
      <edge id="858" label="zzzzz49,zzzzz75" source="122" target="96" cy:directed="1"/>
      <edge id="857" label="zzzzz49,zzzzz80" source="122" target="91" cy:directed="1"/>
      <edge id="856" label="zzzzz49,zzzzz76" source="122" target="95" cy:directed="1"/>
      <edge id="855" label="zzzzz49,zzzzz67" source="122" target="104" cy:directed="1"/>
      <edge id="854" label="zzzzz49,zzzzz56" source="122" target="115" cy:directed="1"/>
      <edge id="853" label="zzzzz49,zzzzz96" source="122" target="75" cy:directed="1"/>
      <edge id="852" label="zzzzz49,zzzzz72" source="122" target="99" cy:directed="1"/>
      <edge id="851" label="zzzzz49,zzzzz62" source="122" target="109" cy:directed="1"/>
      <edge id="850" label="zzzzz49,zzzzz69" source="122" target="102" cy:directed="1"/>
      <edge id="849" label="zzzzz49,zzzzz73" source="122" target="98" cy:directed="1"/>
      <edge id="848" label="zzzzz49,zzzzz68" source="122" target="103" cy:directed="1"/>
      <edge id="847" label="zzzzz49,zzzzz70" source="122" target="101" cy:directed="1"/>
      <edge id="846" label="zzzzz49,zzzzz95" source="122" target="76" cy:directed="1"/>
      <edge id="845" label="zzzzz49,zzzzz58" source="122" target="113" cy:directed="1"/>
      <edge id="844" label="zzzzz49,zzzzz99" source="122" target="72" cy:directed="1"/>
      <edge id="843" label="zzzzz49,zzzzz59" source="122" target="112" cy:directed="1"/>
      <edge id="842" label="zzzzz49,zzzzz66" source="122" target="105" cy:directed="1"/>
      <edge id="841" label="zzzzz49,zzzzz64" source="122" target="107" cy:directed="1"/>
      <edge id="840" label="zzzzz49,zzzzz60" source="122" target="111" cy:directed="1"/>
      <edge id="839" label="zzzzz49,zzzzzz6" source="122" target="65" cy:directed="1"/>
      <edge id="838" label="zzzzz49,zzzzz97" source="122" target="74" cy:directed="1"/>
      <edge id="837" label="zzzzz49,zzzzz81" source="122" target="90" cy:directed="1"/>
      <edge id="836" label="zzzzz49,zzzzz82" source="122" target="89" cy:directed="1"/>
      <edge id="835" label="zzzzz49,zzzzz55" source="122" target="116" cy:directed="1"/>
      <edge id="834" label="zzzzz49,zzzzz57" source="122" target="114" cy:directed="1"/>
      <edge id="833" label="zzzzz49,zzzzz84" source="122" target="87" cy:directed="1"/>
      <edge id="832" label="zzzzz49,zzzzzz5" source="122" target="66" cy:directed="1"/>
      <edge id="831" label="zzzzz50,zzzzzz8" source="121" target="63" cy:directed="1"/>
      <edge id="830" label="zzzzz50,zzzzzz9" source="121" target="62" cy:directed="1"/>
      <edge id="829" label="zzzzz50,zzzzzz5" source="121" target="66" cy:directed="1"/>
      <edge id="828" label="zzzzz50,zzzzzz1" source="121" target="70" cy:directed="1"/>
      <edge id="827" label="zzzzz50,zzzzzz0" source="121" target="71" cy:directed="1"/>
      <edge id="826" label="zzzzz50,zzzzz84" source="121" target="87" cy:directed="1"/>
      <edge id="825" label="zzzzz51,zzzzz91" source="120" target="80" cy:directed="1"/>
      <edge id="824" label="zzzzz51,zzzzz88" source="120" target="83" cy:directed="1"/>
      <edge id="823" label="zzzzz51,zzzzz87" source="120" target="84" cy:directed="1"/>
      <edge id="822" label="zzzzz52,zzzzzz4" source="119" target="67" cy:directed="1"/>
      <edge id="821" label="zzzzz52,zzzzzz7" source="119" target="64" cy:directed="1"/>
      <edge id="820" label="zzzzz52,zzzzz86" source="119" target="85" cy:directed="1"/>
      <edge id="819" label="zzzzz54,zzzzzz6" source="117" target="65" cy:directed="1"/>
      <edge id="818" label="zzzzz54,zzzzz80" source="117" target="91" cy:directed="1"/>
      <edge id="817" label="zzzzz54,zzzzz78" source="117" target="93" cy:directed="1"/>
      <edge id="816" label="zzzzz54,zzzzz81" source="117" target="90" cy:directed="1"/>
      <edge id="815" label="zzzzz54,zzzzz75" source="117" target="96" cy:directed="1"/>
      <edge id="814" label="zzzzz54,zzzzz79" source="117" target="92" cy:directed="1"/>
      <edge id="813" label="zzzzz54,zzzzz68" source="117" target="103" cy:directed="1"/>
      <edge id="812" label="zzzzz54,zzzzz69" source="117" target="102" cy:directed="1"/>
      <edge id="811" label="zzzzz54,zzzzz70" source="117" target="101" cy:directed="1"/>
      <edge id="810" label="zzzzz54,zzzzz72" source="117" target="99" cy:directed="1"/>
      <edge id="809" label="zzzzz54,zzzzz73" source="117" target="98" cy:directed="1"/>
      <edge id="808" label="zzzzz54,zzzzz56" source="117" target="115" cy:directed="1"/>
      <edge id="807" label="zzzzz54,zzzzz55" source="117" target="116" cy:directed="1"/>
      <edge id="806" label="zzzzz54,zzzzz76" source="117" target="95" cy:directed="1"/>
      <edge id="805" label="zzzzz54,zzzzz67" source="117" target="104" cy:directed="1"/>
      <edge id="804" label="zzzzz54,zzzzz63" source="117" target="108" cy:directed="1"/>
      <edge id="803" label="zzzzz54,zzzzz57" source="117" target="114" cy:directed="1"/>
      <edge id="802" label="zzzzz54,zzzzz61" source="117" target="110" cy:directed="1"/>
      <edge id="801" label="zzzzz54,zzzzz96" source="117" target="75" cy:directed="1"/>
      <edge id="800" label="zzzzz54,zzzzz97" source="117" target="74" cy:directed="1"/>
      <edge id="799" label="zzzzz54,zzzzz95" source="117" target="76" cy:directed="1"/>
      <edge id="798" label="zzzzz54,zzzzzz5" source="117" target="66" cy:directed="1"/>
      <edge id="797" label="zzzzz54,zzzzz99" source="117" target="72" cy:directed="1"/>
      <edge id="796" label="zzzzz54,zzzzz65" source="117" target="106" cy:directed="1"/>
      <edge id="795" label="zzzzz54,zzzzz91" source="117" target="80" cy:directed="1"/>
      <edge id="794" label="zzzzz54,zzzzz64" source="117" target="107" cy:directed="1"/>
      <edge id="793" label="zzzzz54,zzzzz62" source="117" target="109" cy:directed="1"/>
      <edge id="792" label="zzzzz54,zzzzz98" source="117" target="73" cy:directed="1"/>
      <edge id="791" label="zzzzz54,zzzzz94" source="117" target="77" cy:directed="1"/>
      <edge id="790" label="zzzzz54,zzzzzz1" source="117" target="70" cy:directed="1"/>
      <edge id="789" label="zzzzz54,zzzzz74" source="117" target="97" cy:directed="1"/>
      <edge id="788" label="zzzzz54,zzzzz59" source="117" target="112" cy:directed="1"/>
      <edge id="787" label="zzzzz54,zzzzz66" source="117" target="105" cy:directed="1"/>
      <edge id="786" label="zzzzz54,zzzzz77" source="117" target="94" cy:directed="1"/>
      <edge id="785" label="zzzzz55,zzzzz81" source="116" target="90" cy:directed="1"/>
      <edge id="784" label="zzzzz55,zzzzz97" source="116" target="74" cy:directed="1"/>
      <edge id="783" label="zzzzz55,zzzzz57" source="116" target="114" cy:directed="1"/>
      <edge id="782" label="zzzzz55,zzzzz79" source="116" target="92" cy:directed="1"/>
      <edge id="781" label="zzzzz55,zzzzz75" source="116" target="96" cy:directed="1"/>
      <edge id="780" label="zzzzz55,zzzzz78" source="116" target="93" cy:directed="1"/>
      <edge id="779" label="zzzzz55,zzzzz99" source="116" target="72" cy:directed="1"/>
      <edge id="778" label="zzzzz55,zzzzz56" source="116" target="115" cy:directed="1"/>
      <edge id="777" label="zzzzz55,zzzzz76" source="116" target="95" cy:directed="1"/>
      <edge id="776" label="zzzzz55,zzzzz80" source="116" target="91" cy:directed="1"/>
      <edge id="775" label="zzzzz55,zzzzz69" source="116" target="102" cy:directed="1"/>
      <edge id="774" label="zzzzz55,zzzzz73" source="116" target="98" cy:directed="1"/>
      <edge id="773" label="zzzzz55,zzzzz72" source="116" target="99" cy:directed="1"/>
      <edge id="772" label="zzzzz55,zzzzz68" source="116" target="103" cy:directed="1"/>
      <edge id="771" label="zzzzz55,zzzzz70" source="116" target="101" cy:directed="1"/>
      <edge id="770" label="zzzzz55,zzzzz63" source="116" target="108" cy:directed="1"/>
      <edge id="769" label="zzzzz55,zzzzz67" source="116" target="104" cy:directed="1"/>
      <edge id="768" label="zzzzz55,zzzzz61" source="116" target="110" cy:directed="1"/>
      <edge id="767" label="zzzzz55,zzzzz95" source="116" target="76" cy:directed="1"/>
      <edge id="766" label="zzzzz55,zzzzz74" source="116" target="97" cy:directed="1"/>
      <edge id="765" label="zzzzz55,zzzzz77" source="116" target="94" cy:directed="1"/>
      <edge id="764" label="zzzzz55,zzzzz64" source="116" target="107" cy:directed="1"/>
      <edge id="763" label="zzzzz55,zzzzzz6" source="116" target="65" cy:directed="1"/>
      <edge id="762" label="zzzzz55,zzzzz94" source="116" target="77" cy:directed="1"/>
      <edge id="761" label="zzzzz55,zzzzz66" source="116" target="105" cy:directed="1"/>
      <edge id="760" label="zzzzz55,zzzzzz0" source="116" target="71" cy:directed="1"/>
      <edge id="759" label="zzzzz55,zzzzz62" source="116" target="109" cy:directed="1"/>
      <edge id="758" label="zzzzz55,zzzzz65" source="116" target="106" cy:directed="1"/>
      <edge id="757" label="zzzzz55,zzzzz98" source="116" target="73" cy:directed="1"/>
      <edge id="756" label="zzzzz55,zzzzz82" source="116" target="89" cy:directed="1"/>
      <edge id="755" label="zzzzz56,zzzzz68" source="115" target="103" cy:directed="1"/>
      <edge id="754" label="zzzzz56,zzzzz69" source="115" target="102" cy:directed="1"/>
      <edge id="753" label="zzzzz56,zzzzz72" source="115" target="99" cy:directed="1"/>
      <edge id="752" label="zzzzz56,zzzzz73" source="115" target="98" cy:directed="1"/>
      <edge id="751" label="zzzzz56,zzzzz70" source="115" target="101" cy:directed="1"/>
      <edge id="750" label="zzzzz56,zzzzz67" source="115" target="104" cy:directed="1"/>
      <edge id="749" label="zzzzz56,zzzzz80" source="115" target="91" cy:directed="1"/>
      <edge id="748" label="zzzzz56,zzzzz76" source="115" target="95" cy:directed="1"/>
      <edge id="747" label="zzzzz56,zzzzz75" source="115" target="96" cy:directed="1"/>
      <edge id="746" label="zzzzz56,zzzzz79" source="115" target="92" cy:directed="1"/>
      <edge id="745" label="zzzzz56,zzzzz78" source="115" target="93" cy:directed="1"/>
      <edge id="744" label="zzzzz56,zzzzz63" source="115" target="108" cy:directed="1"/>
      <edge id="743" label="zzzzz56,zzzzz94" source="115" target="77" cy:directed="1"/>
      <edge id="742" label="zzzzz56,zzzzz99" source="115" target="72" cy:directed="1"/>
      <edge id="741" label="zzzzz56,zzzzz74" source="115" target="97" cy:directed="1"/>
      <edge id="740" label="zzzzz56,zzzzz77" source="115" target="94" cy:directed="1"/>
      <edge id="739" label="zzzzz56,zzzzz96" source="115" target="75" cy:directed="1"/>
      <edge id="738" label="zzzzz56,zzzzz61" source="115" target="110" cy:directed="1"/>
      <edge id="737" label="zzzzz56,zzzzzz6" source="115" target="65" cy:directed="1"/>
      <edge id="736" label="zzzzz56,zzzzz81" source="115" target="90" cy:directed="1"/>
      <edge id="735" label="zzzzz56,zzzzz65" source="115" target="106" cy:directed="1"/>
      <edge id="734" label="zzzzz56,zzzzz97" source="115" target="74" cy:directed="1"/>
      <edge id="733" label="zzzzz56,zzzzz57" source="115" target="114" cy:directed="1"/>
      <edge id="732" label="zzzzz56,zzzzz64" source="115" target="107" cy:directed="1"/>
      <edge id="731" label="zzzzz56,zzzzz58" source="115" target="113" cy:directed="1"/>
      <edge id="730" label="zzzzz56,zzzzz66" source="115" target="105" cy:directed="1"/>
      <edge id="729" label="zzzzz56,zzzzz60" source="115" target="111" cy:directed="1"/>
      <edge id="728" label="zzzzz56,zzzzz59" source="115" target="112" cy:directed="1"/>
      <edge id="727" label="zzzzz56,zzzzz95" source="115" target="76" cy:directed="1"/>
      <edge id="726" label="zzzzz56,zzzzz82" source="115" target="89" cy:directed="1"/>
      <edge id="725" label="zzzzz56,zzzzz62" source="115" target="109" cy:directed="1"/>
      <edge id="724" label="zzzzz56,zzzzzz5" source="115" target="66" cy:directed="1"/>
      <edge id="723" label="zzzzz56,zzzzzz1" source="115" target="70" cy:directed="1"/>
      <edge id="722" label="zzzzz57,zzzzz97" source="114" target="74" cy:directed="1"/>
      <edge id="721" label="zzzzz57,zzzzz81" source="114" target="90" cy:directed="1"/>
      <edge id="720" label="zzzzz57,zzzzz75" source="114" target="96" cy:directed="1"/>
      <edge id="719" label="zzzzz57,zzzzz79" source="114" target="92" cy:directed="1"/>
      <edge id="718" label="zzzzz57,zzzzz80" source="114" target="91" cy:directed="1"/>
      <edge id="717" label="zzzzz57,zzzzz78" source="114" target="93" cy:directed="1"/>
      <edge id="716" label="zzzzz57,zzzzz69" source="114" target="102" cy:directed="1"/>
      <edge id="715" label="zzzzz57,zzzzz76" source="114" target="95" cy:directed="1"/>
      <edge id="714" label="zzzzz57,zzzzz68" source="114" target="103" cy:directed="1"/>
      <edge id="713" label="zzzzz57,zzzzz70" source="114" target="101" cy:directed="1"/>
      <edge id="712" label="zzzzz57,zzzzz72" source="114" target="99" cy:directed="1"/>
      <edge id="711" label="zzzzz57,zzzzz73" source="114" target="98" cy:directed="1"/>
      <edge id="710" label="zzzzz57,zzzzz67" source="114" target="104" cy:directed="1"/>
      <edge id="709" label="zzzzz57,zzzzz63" source="114" target="108" cy:directed="1"/>
      <edge id="708" label="zzzzz57,zzzzz99" source="114" target="72" cy:directed="1"/>
      <edge id="707" label="zzzzz57,zzzzz61" source="114" target="110" cy:directed="1"/>
      <edge id="706" label="zzzzz57,zzzzz77" source="114" target="94" cy:directed="1"/>
      <edge id="705" label="zzzzz57,zzzzz95" source="114" target="76" cy:directed="1"/>
      <edge id="704" label="zzzzz57,zzzzz74" source="114" target="97" cy:directed="1"/>
      <edge id="703" label="zzzzz57,zzzzzz6" source="114" target="65" cy:directed="1"/>
      <edge id="702" label="zzzzz57,zzzzz66" source="114" target="105" cy:directed="1"/>
      <edge id="701" label="zzzzz57,zzzzz94" source="114" target="77" cy:directed="1"/>
      <edge id="700" label="zzzzz57,zzzzz98" source="114" target="73" cy:directed="1"/>
      <edge id="699" label="zzzzz57,zzzzz64" source="114" target="107" cy:directed="1"/>
      <edge id="698" label="zzzzz58,zzzzz60" source="113" target="111" cy:directed="1"/>
      <edge id="697" label="zzzzz58,zzzzz59" source="113" target="112" cy:directed="1"/>
      <edge id="696" label="zzzzz58,zzzzz82" source="113" target="89" cy:directed="1"/>
      <edge id="695" label="zzzzz58,zzzzz78" source="113" target="93" cy:directed="1"/>
      <edge id="694" label="zzzzz58,zzzzz63" source="113" target="108" cy:directed="1"/>
      <edge id="693" label="zzzzz58,zzzzz76" source="113" target="95" cy:directed="1"/>
      <edge id="692" label="zzzzz58,zzzzz80" source="113" target="91" cy:directed="1"/>
      <edge id="691" label="zzzzz58,zzzzz67" source="113" target="104" cy:directed="1"/>
      <edge id="690" label="zzzzz58,zzzzz69" source="113" target="102" cy:directed="1"/>
      <edge id="689" label="zzzzz58,zzzzz72" source="113" target="99" cy:directed="1"/>
      <edge id="688" label="zzzzz58,zzzzz73" source="113" target="98" cy:directed="1"/>
      <edge id="687" label="zzzzz58,zzzzz68" source="113" target="103" cy:directed="1"/>
      <edge id="686" label="zzzzz58,zzzzz70" source="113" target="101" cy:directed="1"/>
      <edge id="685" label="zzzzz58,zzzzz94" source="113" target="77" cy:directed="1"/>
      <edge id="684" label="zzzzz58,zzzzz77" source="113" target="94" cy:directed="1"/>
      <edge id="683" label="zzzzz58,zzzzz79" source="113" target="92" cy:directed="1"/>
      <edge id="682" label="zzzzz58,zzzzz74" source="113" target="97" cy:directed="1"/>
      <edge id="681" label="zzzzz58,zzzzz75" source="113" target="96" cy:directed="1"/>
      <edge id="680" label="zzzzz58,zzzzz99" source="113" target="72" cy:directed="1"/>
      <edge id="679" label="zzzzz58,zzzzz96" source="113" target="75" cy:directed="1"/>
      <edge id="678" label="zzzzz58,zzzzz62" source="113" target="109" cy:directed="1"/>
      <edge id="677" label="zzzzz58,zzzzz66" source="113" target="105" cy:directed="1"/>
      <edge id="676" label="zzzzz58,zzzzz64" source="113" target="107" cy:directed="1"/>
      <edge id="675" label="zzzzz58,zzzzz65" source="113" target="106" cy:directed="1"/>
      <edge id="674" label="zzzzz58,zzzzz95" source="113" target="76" cy:directed="1"/>
      <edge id="673" label="zzzzz58,zzzzzz6" source="113" target="65" cy:directed="1"/>
      <edge id="672" label="zzzzz59,zzzzz60" source="112" target="111" cy:directed="1"/>
      <edge id="671" label="zzzzz59,zzzzz82" source="112" target="89" cy:directed="1"/>
      <edge id="670" label="zzzzz59,zzzzz96" source="112" target="75" cy:directed="1"/>
      <edge id="669" label="zzzzz59,zzzzz62" source="112" target="109" cy:directed="1"/>
      <edge id="668" label="zzzzz59,zzzzz95" source="112" target="76" cy:directed="1"/>
      <edge id="667" label="zzzzz59,zzzzz94" source="112" target="77" cy:directed="1"/>
      <edge id="666" label="zzzzz59,zzzzz78" source="112" target="93" cy:directed="1"/>
      <edge id="665" label="zzzzz59,zzzzz63" source="112" target="108" cy:directed="1"/>
      <edge id="664" label="zzzzz59,zzzzz77" source="112" target="94" cy:directed="1"/>
      <edge id="663" label="zzzzz59,zzzzz74" source="112" target="97" cy:directed="1"/>
      <edge id="662" label="zzzzz59,zzzzz67" source="112" target="104" cy:directed="1"/>
      <edge id="661" label="zzzzz59,zzzzz76" source="112" target="95" cy:directed="1"/>
      <edge id="660" label="zzzzz59,zzzzz68" source="112" target="103" cy:directed="1"/>
      <edge id="659" label="zzzzz59,zzzzz73" source="112" target="98" cy:directed="1"/>
      <edge id="658" label="zzzzz59,zzzzz69" source="112" target="102" cy:directed="1"/>
      <edge id="657" label="zzzzz59,zzzzz70" source="112" target="101" cy:directed="1"/>
      <edge id="656" label="zzzzz59,zzzzz72" source="112" target="99" cy:directed="1"/>
      <edge id="655" label="zzzzz59,zzzzz80" source="112" target="91" cy:directed="1"/>
      <edge id="654" label="zzzzz59,zzzzz75" source="112" target="96" cy:directed="1"/>
      <edge id="653" label="zzzzz59,zzzzz79" source="112" target="92" cy:directed="1"/>
      <edge id="652" label="zzzzz59,zzzzz61" source="112" target="110" cy:directed="1"/>
      <edge id="651" label="zzzzz59,zzzzz99" source="112" target="72" cy:directed="1"/>
      <edge id="650" label="zzzzz59,zzzzz66" source="112" target="105" cy:directed="1"/>
      <edge id="649" label="zzzzz59,zzzzzz6" source="112" target="65" cy:directed="1"/>
      <edge id="648" label="zzzzz59,zzzzz64" source="112" target="107" cy:directed="1"/>
      <edge id="647" label="zzzzz59,zzzzz65" source="112" target="106" cy:directed="1"/>
      <edge id="646" label="zzzzz60,zzzzz82" source="111" target="89" cy:directed="1"/>
      <edge id="645" label="zzzzz60,zzzzz63" source="111" target="108" cy:directed="1"/>
      <edge id="644" label="zzzzz60,zzzzz78" source="111" target="93" cy:directed="1"/>
      <edge id="643" label="zzzzz60,zzzzz80" source="111" target="91" cy:directed="1"/>
      <edge id="642" label="zzzzz60,zzzzz76" source="111" target="95" cy:directed="1"/>
      <edge id="641" label="zzzzz60,zzzzz68" source="111" target="103" cy:directed="1"/>
      <edge id="640" label="zzzzz60,zzzzz69" source="111" target="102" cy:directed="1"/>
      <edge id="639" label="zzzzz60,zzzzz70" source="111" target="101" cy:directed="1"/>
      <edge id="638" label="zzzzz60,zzzzz73" source="111" target="98" cy:directed="1"/>
      <edge id="637" label="zzzzz60,zzzzz72" source="111" target="99" cy:directed="1"/>
      <edge id="636" label="zzzzz60,zzzzz79" source="111" target="92" cy:directed="1"/>
      <edge id="635" label="zzzzz60,zzzzz67" source="111" target="104" cy:directed="1"/>
      <edge id="634" label="zzzzz60,zzzzz75" source="111" target="96" cy:directed="1"/>
      <edge id="633" label="zzzzz60,zzzzz77" source="111" target="94" cy:directed="1"/>
      <edge id="632" label="zzzzz60,zzzzz74" source="111" target="97" cy:directed="1"/>
      <edge id="631" label="zzzzz60,zzzzz99" source="111" target="72" cy:directed="1"/>
      <edge id="630" label="zzzzz60,zzzzz94" source="111" target="77" cy:directed="1"/>
      <edge id="629" label="zzzzz60,zzzzz62" source="111" target="109" cy:directed="1"/>
      <edge id="628" label="zzzzz60,zzzzz96" source="111" target="75" cy:directed="1"/>
      <edge id="627" label="zzzzz60,zzzzz64" source="111" target="107" cy:directed="1"/>
      <edge id="626" label="zzzzz60,zzzzz66" source="111" target="105" cy:directed="1"/>
      <edge id="625" label="zzzzz60,zzzzz65" source="111" target="106" cy:directed="1"/>
      <edge id="624" label="zzzzz60,zzzzz95" source="111" target="76" cy:directed="1"/>
      <edge id="623" label="zzzzz60,zzzzz81" source="111" target="90" cy:directed="1"/>
      <edge id="622" label="zzzzz60,zzzzzz6" source="111" target="65" cy:directed="1"/>
      <edge id="621" label="zzzzz61,zzzzz95" source="110" target="76" cy:directed="1"/>
      <edge id="620" label="zzzzz61,zzzzz63" source="110" target="108" cy:directed="1"/>
      <edge id="619" label="zzzzz61,zzzzz99" source="110" target="72" cy:directed="1"/>
      <edge id="618" label="zzzzz61,zzzzz78" source="110" target="93" cy:directed="1"/>
      <edge id="617" label="zzzzz61,zzzzz77" source="110" target="94" cy:directed="1"/>
      <edge id="616" label="zzzzz61,zzzzz74" source="110" target="97" cy:directed="1"/>
      <edge id="615" label="zzzzz61,zzzzz94" source="110" target="77" cy:directed="1"/>
      <edge id="614" label="zzzzz61,zzzzz79" source="110" target="92" cy:directed="1"/>
      <edge id="613" label="zzzzz61,zzzzz75" source="110" target="96" cy:directed="1"/>
      <edge id="612" label="zzzzz61,zzzzz80" source="110" target="91" cy:directed="1"/>
      <edge id="611" label="zzzzz61,zzzzz76" source="110" target="95" cy:directed="1"/>
      <edge id="610" label="zzzzz61,zzzzz68" source="110" target="103" cy:directed="1"/>
      <edge id="609" label="zzzzz61,zzzzz69" source="110" target="102" cy:directed="1"/>
      <edge id="608" label="zzzzz61,zzzzz70" source="110" target="101" cy:directed="1"/>
      <edge id="607" label="zzzzz61,zzzzz72" source="110" target="99" cy:directed="1"/>
      <edge id="606" label="zzzzz61,zzzzz73" source="110" target="98" cy:directed="1"/>
      <edge id="605" label="zzzzz61,zzzzz67" source="110" target="104" cy:directed="1"/>
      <edge id="604" label="zzzzz61,zzzzzz6" source="110" target="65" cy:directed="1"/>
      <edge id="603" label="zzzzz61,zzzzz96" source="110" target="75" cy:directed="1"/>
      <edge id="602" label="zzzzz61,zzzzz65" source="110" target="106" cy:directed="1"/>
      <edge id="601" label="zzzzz61,zzzzz64" source="110" target="107" cy:directed="1"/>
      <edge id="600" label="zzzzz61,zzzzz66" source="110" target="105" cy:directed="1"/>
      <edge id="599" label="zzzzz61,zzzzz62" source="110" target="109" cy:directed="1"/>
      <edge id="598" label="zzzzz61,zzzzz81" source="110" target="90" cy:directed="1"/>
      <edge id="597" label="zzzzz61,zzzzz97" source="110" target="74" cy:directed="1"/>
      <edge id="596" label="zzzzz61,zzzzzz1" source="110" target="70" cy:directed="1"/>
      <edge id="595" label="zzzzz61,zzzzz82" source="110" target="89" cy:directed="1"/>
      <edge id="594" label="zzzzz61,zzzzz84" source="110" target="87" cy:directed="1"/>
      <edge id="593" label="zzzzz62,zzzzz96" source="109" target="75" cy:directed="1"/>
      <edge id="592" label="zzzzz62,zzzzz95" source="109" target="76" cy:directed="1"/>
      <edge id="591" label="zzzzz62,zzzzz94" source="109" target="77" cy:directed="1"/>
      <edge id="590" label="zzzzz62,zzzzz63" source="109" target="108" cy:directed="1"/>
      <edge id="589" label="zzzzz62,zzzzz82" source="109" target="89" cy:directed="1"/>
      <edge id="588" label="zzzzz62,zzzzz77" source="109" target="94" cy:directed="1"/>
      <edge id="587" label="zzzzz62,zzzzz74" source="109" target="97" cy:directed="1"/>
      <edge id="586" label="zzzzz62,zzzzz99" source="109" target="72" cy:directed="1"/>
      <edge id="585" label="zzzzz62,zzzzz64" source="109" target="107" cy:directed="1"/>
      <edge id="584" label="zzzzz62,zzzzz78" source="109" target="93" cy:directed="1"/>
      <edge id="583" label="zzzzz62,zzzzz79" source="109" target="92" cy:directed="1"/>
      <edge id="582" label="zzzzz62,zzzzz75" source="109" target="96" cy:directed="1"/>
      <edge id="581" label="zzzzz62,zzzzz66" source="109" target="105" cy:directed="1"/>
      <edge id="580" label="zzzzz62,zzzzz80" source="109" target="91" cy:directed="1"/>
      <edge id="579" label="zzzzz62,zzzzz76" source="109" target="95" cy:directed="1"/>
      <edge id="578" label="zzzzz62,zzzzz65" source="109" target="106" cy:directed="1"/>
      <edge id="577" label="zzzzz62,zzzzz68" source="109" target="103" cy:directed="1"/>
      <edge id="576" label="zzzzz62,zzzzz69" source="109" target="102" cy:directed="1"/>
      <edge id="575" label="zzzzz62,zzzzz73" source="109" target="98" cy:directed="1"/>
      <edge id="574" label="zzzzz62,zzzzz67" source="109" target="104" cy:directed="1"/>
      <edge id="573" label="zzzzz62,zzzzz70" source="109" target="101" cy:directed="1"/>
      <edge id="572" label="zzzzz62,zzzzz72" source="109" target="99" cy:directed="1"/>
      <edge id="571" label="zzzzz62,zzzzzz6" source="109" target="65" cy:directed="1"/>
      <edge id="570" label="zzzzz62,zzzzz97" source="109" target="74" cy:directed="1"/>
      <edge id="569" label="zzzzz62,zzzzz81" source="109" target="90" cy:directed="1"/>
      <edge id="568" label="zzzzz62,zzzzz84" source="109" target="87" cy:directed="1"/>
      <edge id="567" label="zzzzz63,zzzzz99" source="108" target="72" cy:directed="1"/>
      <edge id="566" label="zzzzz63,zzzzz76" source="108" target="95" cy:directed="1"/>
      <edge id="565" label="zzzzz63,zzzzz78" source="108" target="93" cy:directed="1"/>
      <edge id="564" label="zzzzz63,zzzzz80" source="108" target="91" cy:directed="1"/>
      <edge id="563" label="zzzzz63,zzzzz68" source="108" target="103" cy:directed="1"/>
      <edge id="562" label="zzzzz63,zzzzz69" source="108" target="102" cy:directed="1"/>
      <edge id="561" label="zzzzz63,zzzzz73" source="108" target="98" cy:directed="1"/>
      <edge id="560" label="zzzzz63,zzzzz70" source="108" target="101" cy:directed="1"/>
      <edge id="559" label="zzzzz63,zzzzz72" source="108" target="99" cy:directed="1"/>
      <edge id="558" label="zzzzz63,zzzzz75" source="108" target="96" cy:directed="1"/>
      <edge id="557" label="zzzzz63,zzzzz67" source="108" target="104" cy:directed="1"/>
      <edge id="556" label="zzzzz63,zzzzz79" source="108" target="92" cy:directed="1"/>
      <edge id="555" label="zzzzz63,zzzzz74" source="108" target="97" cy:directed="1"/>
      <edge id="554" label="zzzzz63,zzzzz77" source="108" target="94" cy:directed="1"/>
      <edge id="553" label="zzzzz63,zzzzz94" source="108" target="77" cy:directed="1"/>
      <edge id="552" label="zzzzz63,zzzzz64" source="108" target="107" cy:directed="1"/>
      <edge id="551" label="zzzzz63,zzzzz66" source="108" target="105" cy:directed="1"/>
      <edge id="550" label="zzzzz63,zzzzz65" source="108" target="106" cy:directed="1"/>
      <edge id="549" label="zzzzz63,zzzzz96" source="108" target="75" cy:directed="1"/>
      <edge id="548" label="zzzzz63,zzzzz95" source="108" target="76" cy:directed="1"/>
      <edge id="547" label="zzzzz63,zzzzzz6" source="108" target="65" cy:directed="1"/>
      <edge id="546" label="zzzzz63,zzzzz81" source="108" target="90" cy:directed="1"/>
      <edge id="545" label="zzzzz63,zzzzz97" source="108" target="74" cy:directed="1"/>
      <edge id="544" label="zzzzz63,zzzzz82" source="108" target="89" cy:directed="1"/>
      <edge id="543" label="zzzzz64,zzzzz66" source="107" target="105" cy:directed="1"/>
      <edge id="542" label="zzzzz64,zzzzz80" source="107" target="91" cy:directed="1"/>
      <edge id="541" label="zzzzz64,zzzzz78" source="107" target="93" cy:directed="1"/>
      <edge id="540" label="zzzzz64,zzzzz96" source="107" target="75" cy:directed="1"/>
      <edge id="539" label="zzzzz64,zzzzz76" source="107" target="95" cy:directed="1"/>
      <edge id="538" label="zzzzz64,zzzzz67" source="107" target="104" cy:directed="1"/>
      <edge id="537" label="zzzzz64,zzzzzz6" source="107" target="65" cy:directed="1"/>
      <edge id="536" label="zzzzz64,zzzzz68" source="107" target="103" cy:directed="1"/>
      <edge id="535" label="zzzzz64,zzzzz69" source="107" target="102" cy:directed="1"/>
      <edge id="534" label="zzzzz64,zzzzz70" source="107" target="101" cy:directed="1"/>
      <edge id="533" label="zzzzz64,zzzzz73" source="107" target="98" cy:directed="1"/>
      <edge id="532" label="zzzzz64,zzzzz72" source="107" target="99" cy:directed="1"/>
      <edge id="531" label="zzzzz64,zzzzz79" source="107" target="92" cy:directed="1"/>
      <edge id="530" label="zzzzz64,zzzzz75" source="107" target="96" cy:directed="1"/>
      <edge id="529" label="zzzzz64,zzzzz94" source="107" target="77" cy:directed="1"/>
      <edge id="528" label="zzzzz64,zzzzz74" source="107" target="97" cy:directed="1"/>
      <edge id="527" label="zzzzz64,zzzzz77" source="107" target="94" cy:directed="1"/>
      <edge id="526" label="zzzzz64,zzzzz99" source="107" target="72" cy:directed="1"/>
      <edge id="525" label="zzzzz64,zzzzz65" source="107" target="106" cy:directed="1"/>
      <edge id="524" label="zzzzz64,zzzzz95" source="107" target="76" cy:directed="1"/>
      <edge id="523" label="zzzzz64,zzzzz82" source="107" target="89" cy:directed="1"/>
      <edge id="522" label="zzzzz64,zzzzz81" source="107" target="90" cy:directed="1"/>
      <edge id="521" label="zzzzz65,zzzzz74" source="106" target="97" cy:directed="1"/>
      <edge id="520" label="zzzzz65,zzzzz77" source="106" target="94" cy:directed="1"/>
      <edge id="519" label="zzzzz65,zzzzz78" source="106" target="93" cy:directed="1"/>
      <edge id="518" label="zzzzz65,zzzzz80" source="106" target="91" cy:directed="1"/>
      <edge id="517" label="zzzzz65,zzzzz76" source="106" target="95" cy:directed="1"/>
      <edge id="516" label="zzzzz65,zzzzz75" source="106" target="96" cy:directed="1"/>
      <edge id="515" label="zzzzz65,zzzzz79" source="106" target="92" cy:directed="1"/>
      <edge id="514" label="zzzzz65,zzzzz68" source="106" target="103" cy:directed="1"/>
      <edge id="513" label="zzzzz65,zzzzz69" source="106" target="102" cy:directed="1"/>
      <edge id="512" label="zzzzz65,zzzzz70" source="106" target="101" cy:directed="1"/>
      <edge id="511" label="zzzzz65,zzzzz72" source="106" target="99" cy:directed="1"/>
      <edge id="510" label="zzzzz65,zzzzz73" source="106" target="98" cy:directed="1"/>
      <edge id="509" label="zzzzz65,zzzzz67" source="106" target="104" cy:directed="1"/>
      <edge id="508" label="zzzzz65,zzzzz94" source="106" target="77" cy:directed="1"/>
      <edge id="507" label="zzzzz65,zzzzz96" source="106" target="75" cy:directed="1"/>
      <edge id="506" label="zzzzz65,zzzzz99" source="106" target="72" cy:directed="1"/>
      <edge id="505" label="zzzzz65,zzzzz95" source="106" target="76" cy:directed="1"/>
      <edge id="504" label="zzzzz65,zzzzz66" source="106" target="105" cy:directed="1"/>
      <edge id="503" label="zzzzz65,zzzzz81" source="106" target="90" cy:directed="1"/>
      <edge id="502" label="zzzzz65,zzzzzz6" source="106" target="65" cy:directed="1"/>
      <edge id="501" label="zzzzz65,zzzzz82" source="106" target="89" cy:directed="1"/>
      <edge id="500" label="zzzzz66,zzzzz80" source="105" target="91" cy:directed="1"/>
      <edge id="499" label="zzzzz66,zzzzz78" source="105" target="93" cy:directed="1"/>
      <edge id="498" label="zzzzz66,zzzzz76" source="105" target="95" cy:directed="1"/>
      <edge id="497" label="zzzzz66,zzzzzz6" source="105" target="65" cy:directed="1"/>
      <edge id="496" label="zzzzz66,zzzzz96" source="105" target="75" cy:directed="1"/>
      <edge id="495" label="zzzzz66,zzzzz67" source="105" target="104" cy:directed="1"/>
      <edge id="494" label="zzzzz66,zzzzz94" source="105" target="77" cy:directed="1"/>
      <edge id="493" label="zzzzz66,zzzzz73" source="105" target="98" cy:directed="1"/>
      <edge id="492" label="zzzzz66,zzzzz69" source="105" target="102" cy:directed="1"/>
      <edge id="491" label="zzzzz66,zzzzz75" source="105" target="96" cy:directed="1"/>
      <edge id="490" label="zzzzz66,zzzzz79" source="105" target="92" cy:directed="1"/>
      <edge id="489" label="zzzzz66,zzzzz70" source="105" target="101" cy:directed="1"/>
      <edge id="488" label="zzzzz66,zzzzz68" source="105" target="103" cy:directed="1"/>
      <edge id="487" label="zzzzz66,zzzzz72" source="105" target="99" cy:directed="1"/>
      <edge id="486" label="zzzzz66,zzzzz74" source="105" target="97" cy:directed="1"/>
      <edge id="485" label="zzzzz66,zzzzz77" source="105" target="94" cy:directed="1"/>
      <edge id="484" label="zzzzz66,zzzzz99" source="105" target="72" cy:directed="1"/>
      <edge id="483" label="zzzzz66,zzzzz95" source="105" target="76" cy:directed="1"/>
      <edge id="482" label="zzzzz66,zzzzz81" source="105" target="90" cy:directed="1"/>
      <edge id="481" label="zzzzz66,zzzzz82" source="105" target="89" cy:directed="1"/>
      <edge id="480" label="zzzzz67,zzzzz72" source="104" target="99" cy:directed="1"/>
      <edge id="479" label="zzzzz67,zzzzz69" source="104" target="102" cy:directed="1"/>
      <edge id="478" label="zzzzz67,zzzzz68" source="104" target="103" cy:directed="1"/>
      <edge id="477" label="zzzzz67,zzzzz70" source="104" target="101" cy:directed="1"/>
      <edge id="476" label="zzzzz67,zzzzz73" source="104" target="98" cy:directed="1"/>
      <edge id="475" label="zzzzz67,zzzzz80" source="104" target="91" cy:directed="1"/>
      <edge id="474" label="zzzzz67,zzzzz76" source="104" target="95" cy:directed="1"/>
      <edge id="473" label="zzzzz67,zzzzz75" source="104" target="96" cy:directed="1"/>
      <edge id="472" label="zzzzz67,zzzzz79" source="104" target="92" cy:directed="1"/>
      <edge id="471" label="zzzzz67,zzzzz78" source="104" target="93" cy:directed="1"/>
      <edge id="470" label="zzzzz67,zzzzz74" source="104" target="97" cy:directed="1"/>
      <edge id="469" label="zzzzz67,zzzzz77" source="104" target="94" cy:directed="1"/>
      <edge id="468" label="zzzzz67,zzzzz94" source="104" target="77" cy:directed="1"/>
      <edge id="467" label="zzzzz67,zzzzz99" source="104" target="72" cy:directed="1"/>
      <edge id="466" label="zzzzz67,zzzzz96" source="104" target="75" cy:directed="1"/>
      <edge id="465" label="zzzzz67,zzzzzz6" source="104" target="65" cy:directed="1"/>
      <edge id="464" label="zzzzz67,zzzzz81" source="104" target="90" cy:directed="1"/>
      <edge id="463" label="zzzzz67,zzzzz97" source="104" target="74" cy:directed="1"/>
      <edge id="462" label="zzzzz67,zzzzz95" source="104" target="76" cy:directed="1"/>
      <edge id="461" label="zzzzz67,zzzzz82" source="104" target="89" cy:directed="1"/>
      <edge id="460" label="zzzzz67,zzzzzz5" source="104" target="66" cy:directed="1"/>
      <edge id="459" label="zzzzz67,zzzzzz1" source="104" target="70" cy:directed="1"/>
      <edge id="458" label="zzzzz67,zzzzz84" source="104" target="87" cy:directed="1"/>
      <edge id="457" label="zzzzz67,zzzzz86" source="104" target="85" cy:directed="1"/>
      <edge id="456" label="zzzzz68,zzzzz70" source="103" target="101" cy:directed="1"/>
      <edge id="455" label="zzzzz68,zzzzz69" source="103" target="102" cy:directed="1"/>
      <edge id="454" label="zzzzz68,zzzzz73" source="103" target="98" cy:directed="1"/>
      <edge id="453" label="zzzzz68,zzzzz72" source="103" target="99" cy:directed="1"/>
      <edge id="452" label="zzzzz68,zzzzz80" source="103" target="91" cy:directed="1"/>
      <edge id="451" label="zzzzz68,zzzzz76" source="103" target="95" cy:directed="1"/>
      <edge id="450" label="zzzzz68,zzzzz75" source="103" target="96" cy:directed="1"/>
      <edge id="449" label="zzzzz68,zzzzz79" source="103" target="92" cy:directed="1"/>
      <edge id="448" label="zzzzz68,zzzzz78" source="103" target="93" cy:directed="1"/>
      <edge id="447" label="zzzzz68,zzzzz94" source="103" target="77" cy:directed="1"/>
      <edge id="446" label="zzzzz68,zzzzz96" source="103" target="75" cy:directed="1"/>
      <edge id="445" label="zzzzz68,zzzzz77" source="103" target="94" cy:directed="1"/>
      <edge id="444" label="zzzzz68,zzzzz99" source="103" target="72" cy:directed="1"/>
      <edge id="443" label="zzzzz68,zzzzz74" source="103" target="97" cy:directed="1"/>
      <edge id="442" label="zzzzz68,zzzzzz6" source="103" target="65" cy:directed="1"/>
      <edge id="441" label="zzzzz68,zzzzz97" source="103" target="74" cy:directed="1"/>
      <edge id="440" label="zzzzz68,zzzzz81" source="103" target="90" cy:directed="1"/>
      <edge id="439" label="zzzzz68,zzzzz82" source="103" target="89" cy:directed="1"/>
      <edge id="438" label="zzzzz68,zzzzz95" source="103" target="76" cy:directed="1"/>
      <edge id="437" label="zzzzz68,zzzzzz5" source="103" target="66" cy:directed="1"/>
      <edge id="436" label="zzzzz68,zzzzzz1" source="103" target="70" cy:directed="1"/>
      <edge id="435" label="zzzzz68,zzzzz84" source="103" target="87" cy:directed="1"/>
      <edge id="434" label="zzzzz68,zzzzz86" source="103" target="85" cy:directed="1"/>
      <edge id="433" label="zzzzz69,zzzzz70" source="102" target="101" cy:directed="1"/>
      <edge id="432" label="zzzzz69,zzzzz73" source="102" target="98" cy:directed="1"/>
      <edge id="431" label="zzzzz69,zzzzz72" source="102" target="99" cy:directed="1"/>
      <edge id="430" label="zzzzz69,zzzzz80" source="102" target="91" cy:directed="1"/>
      <edge id="429" label="zzzzz69,zzzzz76" source="102" target="95" cy:directed="1"/>
      <edge id="428" label="zzzzz69,zzzzz75" source="102" target="96" cy:directed="1"/>
      <edge id="427" label="zzzzz69,zzzzz79" source="102" target="92" cy:directed="1"/>
      <edge id="426" label="zzzzz69,zzzzz78" source="102" target="93" cy:directed="1"/>
      <edge id="425" label="zzzzz69,zzzzz94" source="102" target="77" cy:directed="1"/>
      <edge id="424" label="zzzzz69,zzzzz96" source="102" target="75" cy:directed="1"/>
      <edge id="423" label="zzzzz69,zzzzz99" source="102" target="72" cy:directed="1"/>
      <edge id="422" label="zzzzz69,zzzzz74" source="102" target="97" cy:directed="1"/>
      <edge id="421" label="zzzzz69,zzzzz77" source="102" target="94" cy:directed="1"/>
      <edge id="420" label="zzzzz69,zzzzzz6" source="102" target="65" cy:directed="1"/>
      <edge id="419" label="zzzzz69,zzzzz97" source="102" target="74" cy:directed="1"/>
      <edge id="418" label="zzzzz69,zzzzz81" source="102" target="90" cy:directed="1"/>
      <edge id="417" label="zzzzz69,zzzzz82" source="102" target="89" cy:directed="1"/>
      <edge id="416" label="zzzzz69,zzzzz95" source="102" target="76" cy:directed="1"/>
      <edge id="415" label="zzzzz69,zzzzzz5" source="102" target="66" cy:directed="1"/>
      <edge id="414" label="zzzzz69,zzzzzz1" source="102" target="70" cy:directed="1"/>
      <edge id="413" label="zzzzz69,zzzzz84" source="102" target="87" cy:directed="1"/>
      <edge id="412" label="zzzzz69,zzzzz86" source="102" target="85" cy:directed="1"/>
      <edge id="411" label="zzzzz70,zzzzz72" source="101" target="99" cy:directed="1"/>
      <edge id="410" label="zzzzz70,zzzzz73" source="101" target="98" cy:directed="1"/>
      <edge id="409" label="zzzzz70,zzzzz80" source="101" target="91" cy:directed="1"/>
      <edge id="408" label="zzzzz70,zzzzz76" source="101" target="95" cy:directed="1"/>
      <edge id="407" label="zzzzz70,zzzzz75" source="101" target="96" cy:directed="1"/>
      <edge id="406" label="zzzzz70,zzzzz79" source="101" target="92" cy:directed="1"/>
      <edge id="405" label="zzzzz70,zzzzz78" source="101" target="93" cy:directed="1"/>
      <edge id="404" label="zzzzz70,zzzzz94" source="101" target="77" cy:directed="1"/>
      <edge id="403" label="zzzzz70,zzzzz96" source="101" target="75" cy:directed="1"/>
      <edge id="402" label="zzzzz70,zzzzz77" source="101" target="94" cy:directed="1"/>
      <edge id="401" label="zzzzz70,zzzzz99" source="101" target="72" cy:directed="1"/>
      <edge id="400" label="zzzzz70,zzzzz74" source="101" target="97" cy:directed="1"/>
      <edge id="399" label="zzzzz70,zzzzzz6" source="101" target="65" cy:directed="1"/>
      <edge id="398" label="zzzzz70,zzzzz97" source="101" target="74" cy:directed="1"/>
      <edge id="397" label="zzzzz70,zzzzz81" source="101" target="90" cy:directed="1"/>
      <edge id="396" label="zzzzz70,zzzzz82" source="101" target="89" cy:directed="1"/>
      <edge id="395" label="zzzzz70,zzzzz95" source="101" target="76" cy:directed="1"/>
      <edge id="394" label="zzzzz70,zzzzzz5" source="101" target="66" cy:directed="1"/>
      <edge id="393" label="zzzzz70,zzzzzz1" source="101" target="70" cy:directed="1"/>
      <edge id="392" label="zzzzz70,zzzzz84" source="101" target="87" cy:directed="1"/>
      <edge id="391" label="zzzzz70,zzzzz86" source="101" target="85" cy:directed="1"/>
      <edge id="390" label="zzzzz71,zzzzz89" source="100" target="82" cy:directed="1"/>
      <edge id="389" label="zzzzz71,zzzzz90" source="100" target="81" cy:directed="1"/>
      <edge id="388" label="zzzzz72,zzzzz73" source="99" target="98" cy:directed="1"/>
      <edge id="387" label="zzzzz72,zzzzz80" source="99" target="91" cy:directed="1"/>
      <edge id="386" label="zzzzz72,zzzzz76" source="99" target="95" cy:directed="1"/>
      <edge id="385" label="zzzzz72,zzzzz75" source="99" target="96" cy:directed="1"/>
      <edge id="384" label="zzzzz72,zzzzz79" source="99" target="92" cy:directed="1"/>
      <edge id="383" label="zzzzz72,zzzzz78" source="99" target="93" cy:directed="1"/>
      <edge id="382" label="zzzzz72,zzzzz94" source="99" target="77" cy:directed="1"/>
      <edge id="381" label="zzzzz72,zzzzz74" source="99" target="97" cy:directed="1"/>
      <edge id="380" label="zzzzz72,zzzzz96" source="99" target="75" cy:directed="1"/>
      <edge id="379" label="zzzzz72,zzzzz77" source="99" target="94" cy:directed="1"/>
      <edge id="378" label="zzzzz72,zzzzz99" source="99" target="72" cy:directed="1"/>
      <edge id="377" label="zzzzz72,zzzzzz6" source="99" target="65" cy:directed="1"/>
      <edge id="376" label="zzzzz72,zzzzz81" source="99" target="90" cy:directed="1"/>
      <edge id="375" label="zzzzz72,zzzzz97" source="99" target="74" cy:directed="1"/>
      <edge id="374" label="zzzzz72,zzzzz82" source="99" target="89" cy:directed="1"/>
      <edge id="373" label="zzzzz72,zzzzz95" source="99" target="76" cy:directed="1"/>
      <edge id="372" label="zzzzz72,zzzzzz5" source="99" target="66" cy:directed="1"/>
      <edge id="371" label="zzzzz72,zzzzzz1" source="99" target="70" cy:directed="1"/>
      <edge id="370" label="zzzzz72,zzzzz84" source="99" target="87" cy:directed="1"/>
      <edge id="369" label="zzzzz72,zzzzz86" source="99" target="85" cy:directed="1"/>
      <edge id="368" label="zzzzz73,zzzzz80" source="98" target="91" cy:directed="1"/>
      <edge id="367" label="zzzzz73,zzzzz76" source="98" target="95" cy:directed="1"/>
      <edge id="366" label="zzzzz73,zzzzz75" source="98" target="96" cy:directed="1"/>
      <edge id="365" label="zzzzz73,zzzzz79" source="98" target="92" cy:directed="1"/>
      <edge id="364" label="zzzzz73,zzzzz78" source="98" target="93" cy:directed="1"/>
      <edge id="363" label="zzzzz73,zzzzz94" source="98" target="77" cy:directed="1"/>
      <edge id="362" label="zzzzz73,zzzzz96" source="98" target="75" cy:directed="1"/>
      <edge id="361" label="zzzzz73,zzzzz99" source="98" target="72" cy:directed="1"/>
      <edge id="360" label="zzzzz73,zzzzz74" source="98" target="97" cy:directed="1"/>
      <edge id="359" label="zzzzz73,zzzzz77" source="98" target="94" cy:directed="1"/>
      <edge id="358" label="zzzzz73,zzzzzz6" source="98" target="65" cy:directed="1"/>
      <edge id="357" label="zzzzz73,zzzzz97" source="98" target="74" cy:directed="1"/>
      <edge id="356" label="zzzzz73,zzzzz81" source="98" target="90" cy:directed="1"/>
      <edge id="355" label="zzzzz73,zzzzz82" source="98" target="89" cy:directed="1"/>
      <edge id="354" label="zzzzz73,zzzzz95" source="98" target="76" cy:directed="1"/>
      <edge id="353" label="zzzzz73,zzzzzz5" source="98" target="66" cy:directed="1"/>
      <edge id="352" label="zzzzz73,zzzzzz1" source="98" target="70" cy:directed="1"/>
      <edge id="351" label="zzzzz73,zzzzz84" source="98" target="87" cy:directed="1"/>
      <edge id="350" label="zzzzz73,zzzzz86" source="98" target="85" cy:directed="1"/>
      <edge id="349" label="zzzzz74,zzzzz77" source="97" target="94" cy:directed="1"/>
      <edge id="348" label="zzzzz74,zzzzz78" source="97" target="93" cy:directed="1"/>
      <edge id="347" label="zzzzz74,zzzzz79" source="97" target="92" cy:directed="1"/>
      <edge id="346" label="zzzzz74,zzzzz94" source="97" target="77" cy:directed="1"/>
      <edge id="345" label="zzzzz74,zzzzz75" source="97" target="96" cy:directed="1"/>
      <edge id="344" label="zzzzz74,zzzzz80" source="97" target="91" cy:directed="1"/>
      <edge id="343" label="zzzzz74,zzzzz76" source="97" target="95" cy:directed="1"/>
      <edge id="342" label="zzzzz74,zzzzz96" source="97" target="75" cy:directed="1"/>
      <edge id="341" label="zzzzz74,zzzzz99" source="97" target="72" cy:directed="1"/>
      <edge id="340" label="zzzzz74,zzzzz95" source="97" target="76" cy:directed="1"/>
      <edge id="339" label="zzzzz74,zzzzzz6" source="97" target="65" cy:directed="1"/>
      <edge id="338" label="zzzzz74,zzzzz81" source="97" target="90" cy:directed="1"/>
      <edge id="337" label="zzzzz74,zzzzz97" source="97" target="74" cy:directed="1"/>
      <edge id="336" label="zzzzz74,zzzzz82" source="97" target="89" cy:directed="1"/>
      <edge id="335" label="zzzzz74,zzzzz84" source="97" target="87" cy:directed="1"/>
      <edge id="334" label="zzzzz74,zzzzzz1" source="97" target="70" cy:directed="1"/>
      <edge id="333" label="zzzzz74,zzzzzz5" source="97" target="66" cy:directed="1"/>
      <edge id="332" label="zzzzz75,zzzzz79" source="96" target="92" cy:directed="1"/>
      <edge id="331" label="zzzzz75,zzzzz80" source="96" target="91" cy:directed="1"/>
      <edge id="330" label="zzzzz75,zzzzz76" source="96" target="95" cy:directed="1"/>
      <edge id="329" label="zzzzz75,zzzzz78" source="96" target="93" cy:directed="1"/>
      <edge id="328" label="zzzzz75,zzzzz77" source="96" target="94" cy:directed="1"/>
      <edge id="327" label="zzzzz75,zzzzz99" source="96" target="72" cy:directed="1"/>
      <edge id="326" label="zzzzz75,zzzzz94" source="96" target="77" cy:directed="1"/>
      <edge id="325" label="zzzzz75,zzzzz96" source="96" target="75" cy:directed="1"/>
      <edge id="324" label="zzzzz75,zzzzz81" source="96" target="90" cy:directed="1"/>
      <edge id="323" label="zzzzz75,zzzzz97" source="96" target="74" cy:directed="1"/>
      <edge id="322" label="zzzzz75,zzzzzz6" source="96" target="65" cy:directed="1"/>
      <edge id="321" label="zzzzz75,zzzzz95" source="96" target="76" cy:directed="1"/>
      <edge id="320" label="zzzzz75,zzzzz82" source="96" target="89" cy:directed="1"/>
      <edge id="319" label="zzzzz75,zzzzz84" source="96" target="87" cy:directed="1"/>
      <edge id="318" label="zzzzz75,zzzzzz7" source="96" target="64" cy:directed="1"/>
      <edge id="317" label="zzzzz75,zzzzzz5" source="96" target="66" cy:directed="1"/>
      <edge id="316" label="zzzzz75,zzzzz98" source="96" target="73" cy:directed="1"/>
      <edge id="315" label="zzzzz76,zzzzz80" source="95" target="91" cy:directed="1"/>
      <edge id="314" label="zzzzz76,zzzzz79" source="95" target="92" cy:directed="1"/>
      <edge id="313" label="zzzzz76,zzzzz78" source="95" target="93" cy:directed="1"/>
      <edge id="312" label="zzzzz76,zzzzz77" source="95" target="94" cy:directed="1"/>
      <edge id="311" label="zzzzz76,zzzzz99" source="95" target="72" cy:directed="1"/>
      <edge id="310" label="zzzzz76,zzzzz94" source="95" target="77" cy:directed="1"/>
      <edge id="309" label="zzzzz76,zzzzz96" source="95" target="75" cy:directed="1"/>
      <edge id="308" label="zzzzz76,zzzzz81" source="95" target="90" cy:directed="1"/>
      <edge id="307" label="zzzzz76,zzzzzz6" source="95" target="65" cy:directed="1"/>
      <edge id="306" label="zzzzz76,zzzzz97" source="95" target="74" cy:directed="1"/>
      <edge id="305" label="zzzzz76,zzzzz95" source="95" target="76" cy:directed="1"/>
      <edge id="304" label="zzzzz76,zzzzz82" source="95" target="89" cy:directed="1"/>
      <edge id="303" label="zzzzz76,zzzzzz5" source="95" target="66" cy:directed="1"/>
      <edge id="302" label="zzzzz76,zzzzz86" source="95" target="85" cy:directed="1"/>
      <edge id="301" label="zzzzz76,zzzzzz0" source="95" target="71" cy:directed="1"/>
      <edge id="300" label="zzzzz77,zzzzz78" source="94" target="93" cy:directed="1"/>
      <edge id="299" label="zzzzz77,zzzzz94" source="94" target="77" cy:directed="1"/>
      <edge id="298" label="zzzzz77,zzzzz79" source="94" target="92" cy:directed="1"/>
      <edge id="297" label="zzzzz77,zzzzz80" source="94" target="91" cy:directed="1"/>
      <edge id="296" label="zzzzz77,zzzzz96" source="94" target="75" cy:directed="1"/>
      <edge id="295" label="zzzzz77,zzzzz95" source="94" target="76" cy:directed="1"/>
      <edge id="294" label="zzzzz77,zzzzz99" source="94" target="72" cy:directed="1"/>
      <edge id="293" label="zzzzz77,zzzzzz6" source="94" target="65" cy:directed="1"/>
      <edge id="292" label="zzzzz77,zzzzz81" source="94" target="90" cy:directed="1"/>
      <edge id="291" label="zzzzz77,zzzzz82" source="94" target="89" cy:directed="1"/>
      <edge id="290" label="zzzzz77,zzzzz97" source="94" target="74" cy:directed="1"/>
      <edge id="289" label="zzzzz77,zzzzz84" source="94" target="87" cy:directed="1"/>
      <edge id="288" label="zzzzz77,zzzzzz5" source="94" target="66" cy:directed="1"/>
      <edge id="287" label="zzzzz78,zzzzz80" source="93" target="91" cy:directed="1"/>
      <edge id="286" label="zzzzz78,zzzzz79" source="93" target="92" cy:directed="1"/>
      <edge id="285" label="zzzzz78,zzzzz94" source="93" target="77" cy:directed="1"/>
      <edge id="284" label="zzzzz78,zzzzz99" source="93" target="72" cy:directed="1"/>
      <edge id="283" label="zzzzz78,zzzzz96" source="93" target="75" cy:directed="1"/>
      <edge id="282" label="zzzzz78,zzzzzz6" source="93" target="65" cy:directed="1"/>
      <edge id="281" label="zzzzz78,zzzzz95" source="93" target="76" cy:directed="1"/>
      <edge id="280" label="zzzzz78,zzzzz81" source="93" target="90" cy:directed="1"/>
      <edge id="279" label="zzzzz78,zzzzz97" source="93" target="74" cy:directed="1"/>
      <edge id="278" label="zzzzz78,zzzzz82" source="93" target="89" cy:directed="1"/>
      <edge id="277" label="zzzzz78,zzzzzz5" source="93" target="66" cy:directed="1"/>
      <edge id="276" label="zzzzz78,zzzzzz0" source="93" target="71" cy:directed="1"/>
      <edge id="275" label="zzzzz78,zzzzzz1" source="93" target="70" cy:directed="1"/>
      <edge id="274" label="zzzzz78,zzzzz84" source="93" target="87" cy:directed="1"/>
      <edge id="273" label="zzzzz79,zzzzz80" source="92" target="91" cy:directed="1"/>
      <edge id="272" label="zzzzz79,zzzzz99" source="92" target="72" cy:directed="1"/>
      <edge id="271" label="zzzzz79,zzzzz94" source="92" target="77" cy:directed="1"/>
      <edge id="270" label="zzzzz79,zzzzz96" source="92" target="75" cy:directed="1"/>
      <edge id="269" label="zzzzz79,zzzzz81" source="92" target="90" cy:directed="1"/>
      <edge id="268" label="zzzzz79,zzzzz97" source="92" target="74" cy:directed="1"/>
      <edge id="267" label="zzzzz79,zzzzzz6" source="92" target="65" cy:directed="1"/>
      <edge id="266" label="zzzzz79,zzzzz95" source="92" target="76" cy:directed="1"/>
      <edge id="265" label="zzzzz79,zzzzzz7" source="92" target="64" cy:directed="1"/>
      <edge id="264" label="zzzzz79,zzzzz82" source="92" target="89" cy:directed="1"/>
      <edge id="263" label="zzzzz79,zzzzzz5" source="92" target="66" cy:directed="1"/>
      <edge id="262" label="zzzzz79,zzzzz84" source="92" target="87" cy:directed="1"/>
      <edge id="261" label="zzzzz80,zzzzz99" source="91" target="72" cy:directed="1"/>
      <edge id="260" label="zzzzz80,zzzzz94" source="91" target="77" cy:directed="1"/>
      <edge id="259" label="zzzzz80,zzzzz96" source="91" target="75" cy:directed="1"/>
      <edge id="258" label="zzzzz80,zzzzz81" source="91" target="90" cy:directed="1"/>
      <edge id="257" label="zzzzz80,zzzzzz6" source="91" target="65" cy:directed="1"/>
      <edge id="256" label="zzzzz80,zzzzz97" source="91" target="74" cy:directed="1"/>
      <edge id="255" label="zzzzz80,zzzzz95" source="91" target="76" cy:directed="1"/>
      <edge id="254" label="zzzzz80,zzzzz82" source="91" target="89" cy:directed="1"/>
      <edge id="253" label="zzzzz80,zzzzzz5" source="91" target="66" cy:directed="1"/>
      <edge id="252" label="zzzzz80,zzzzz86" source="91" target="85" cy:directed="1"/>
      <edge id="251" label="zzzzz80,zzzzzz1" source="91" target="70" cy:directed="1"/>
      <edge id="250" label="zzzzz80,zzzzz84" source="91" target="87" cy:directed="1"/>
      <edge id="249" label="zzzzz80,zzzzzz0" source="91" target="71" cy:directed="1"/>
      <edge id="248" label="zzzzz81,zzzzz97" source="90" target="74" cy:directed="1"/>
      <edge id="247" label="zzzzz81,zzzzz99" source="90" target="72" cy:directed="1"/>
      <edge id="246" label="zzzzz81,zzzzzz6" source="90" target="65" cy:directed="1"/>
      <edge id="245" label="zzzzz81,zzzzz95" source="90" target="76" cy:directed="1"/>
      <edge id="244" label="zzzzz81,zzzzz82" source="90" target="89" cy:directed="1"/>
      <edge id="243" label="zzzzz81,zzzzz86" source="90" target="85" cy:directed="1"/>
      <edge id="242" label="zzzzz81,zzzzz98" source="90" target="73" cy:directed="1"/>
      <edge id="241" label="zzzzz81,zzzzz94" source="90" target="77" cy:directed="1"/>
      <edge id="240" label="zzzzz81,zzzzzz0" source="90" target="71" cy:directed="1"/>
      <edge id="239" label="zzzzz81,zzzzz96" source="90" target="75" cy:directed="1"/>
      <edge id="238" label="zzzzz82,zzzzz96" source="89" target="75" cy:directed="1"/>
      <edge id="237" label="zzzzz82,zzzzz94" source="89" target="77" cy:directed="1"/>
      <edge id="236" label="zzzzz82,zzzzz95" source="89" target="76" cy:directed="1"/>
      <edge id="235" label="zzzzz82,zzzzz99" source="89" target="72" cy:directed="1"/>
      <edge id="234" label="zzzzz82,zzzzzz6" source="89" target="65" cy:directed="1"/>
      <edge id="233" label="zzzzz82,zzzzz86" source="89" target="85" cy:directed="1"/>
      <edge id="232" label="zzzzz83,zzzzz92" source="88" target="79" cy:directed="1"/>
      <edge id="231" label="zzzzz83,zzzzz90" source="88" target="81" cy:directed="1"/>
      <edge id="230" label="zzzzz83,zzzzz89" source="88" target="82" cy:directed="1"/>
      <edge id="229" label="zzzzz84,zzzzz98" source="87" target="73" cy:directed="1"/>
      <edge id="228" label="zzzzz84,zzzzzz1" source="87" target="70" cy:directed="1"/>
      <edge id="227" label="zzzzz84,zzzzzz8" source="87" target="63" cy:directed="1"/>
      <edge id="226" label="zzzzz84,zzzzzz9" source="87" target="62" cy:directed="1"/>
      <edge id="225" label="zzzzz84,zzzzz93" source="87" target="78" cy:directed="1"/>
      <edge id="224" label="zzzzz84,zzzzz96" source="87" target="75" cy:directed="1"/>
      <edge id="223" label="zzzzz84,zzzzz95" source="87" target="76" cy:directed="1"/>
      <edge id="222" label="zzzzz85,zzzzz89" source="86" target="82" cy:directed="1"/>
      <edge id="221" label="zzzzz85,zzzzz90" source="86" target="81" cy:directed="1"/>
      <edge id="220" label="zzzzz85,zzzzz92" source="86" target="79" cy:directed="1"/>
      <edge id="219" label="zzzzz85,zzzzz71" source="86" target="100" cy:directed="1"/>
      <edge id="218" label="zzzzz85,zzzzz83" source="86" target="88" cy:directed="1"/>
      <edge id="217" label="zzzzz85,zzzzz48" source="86" target="123" cy:directed="1"/>
      <edge id="216" label="zzzzz86,zzzzzz4" source="85" target="67" cy:directed="1"/>
      <edge id="215" label="zzzzz86,zzzzzz7" source="85" target="64" cy:directed="1"/>
      <edge id="214" label="zzzzz86,zzzzz98" source="85" target="73" cy:directed="1"/>
      <edge id="213" label="zzzzz86,zzzzz99" source="85" target="72" cy:directed="1"/>
      <edge id="212" label="zzzzz87,zzzzz91" source="84" target="80" cy:directed="1"/>
      <edge id="211" label="zzzzz87,zzzzz88" source="84" target="83" cy:directed="1"/>
      <edge id="210" label="zzzzz87,zzzzz92" source="84" target="79" cy:directed="1"/>
      <edge id="209" label="zzzzz88,zzzzz91" source="83" target="80" cy:directed="1"/>
      <edge id="208" label="zzzzz89,zzzzz90" source="82" target="81" cy:directed="1"/>
      <edge id="207" label="zzzzz89,zzzzz92" source="82" target="79" cy:directed="1"/>
      <edge id="206" label="zzzzz90,zzzzz92" source="81" target="79" cy:directed="1"/>
      <edge id="205" label="zzzzz93,zzzzz98" source="78" target="73" cy:directed="1"/>
      <edge id="204" label="zzzzz93,zzzzzz1" source="78" target="70" cy:directed="1"/>
      <edge id="203" label="zzzzz93,zzzzzz0" source="78" target="71" cy:directed="1"/>
      <edge id="202" label="zzzzz93,zzzzzz6" source="78" target="65" cy:directed="1"/>
      <edge id="201" label="zzzzz93,zzzzzz5" source="78" target="66" cy:directed="1"/>
      <edge id="200" label="zzzzz94,zzzzz96" source="77" target="75" cy:directed="1"/>
      <edge id="199" label="zzzzz94,zzzzz95" source="77" target="76" cy:directed="1"/>
      <edge id="198" label="zzzzz94,zzzzz99" source="77" target="72" cy:directed="1"/>
      <edge id="197" label="zzzzz94,zzzzzz6" source="77" target="65" cy:directed="1"/>
      <edge id="196" label="zzzzz94,zzzzzz1" source="77" target="70" cy:directed="1"/>
      <edge id="195" label="zzzzz94,zzzzz97" source="77" target="74" cy:directed="1"/>
      <edge id="194" label="zzzzz94,zzzzz98" source="77" target="73" cy:directed="1"/>
      <edge id="193" label="zzzzz95,zzzzz96" source="76" target="75" cy:directed="1"/>
      <edge id="192" label="zzzzz95,zzzzz99" source="76" target="72" cy:directed="1"/>
      <edge id="191" label="zzzzz95,zzzzzz6" source="76" target="65" cy:directed="1"/>
      <edge id="190" label="zzzzz95,zzzzz97" source="76" target="74" cy:directed="1"/>
      <edge id="189" label="zzzzz96,zzzzz99" source="75" target="72" cy:directed="1"/>
      <edge id="188" label="zzzzz96,zzzzzz6" source="75" target="65" cy:directed="1"/>
      <edge id="187" label="zzzzz96,zzzzzz1" source="75" target="70" cy:directed="1"/>
      <edge id="186" label="zzzzz97,zzzzz99" source="74" target="72" cy:directed="1"/>
      <edge id="185" label="zzzzz97,zzzzzz6" source="74" target="65" cy:directed="1"/>
      <edge id="184" label="zzzzz97,zzzzz98" source="74" target="73" cy:directed="1"/>
      <edge id="183" label="zzzzz98,zzzzzz1" source="73" target="70" cy:directed="1"/>
      <edge id="182" label="zzzzz98,zzzzzz0" source="73" target="71" cy:directed="1"/>
      <edge id="181" label="zzzzz98,zzzzzz5" source="73" target="66" cy:directed="1"/>
      <edge id="180" label="zzzzz99,zzzzzz6" source="72" target="65" cy:directed="1"/>
      <edge id="179" label="zzzzzz0,zzzzzz2" source="71" target="69" cy:directed="1"/>
      <edge id="178" label="zzzzzz0,zzzzzz3" source="71" target="68" cy:directed="1"/>
      <edge id="177" label="zzzzzz0,zzzzzz1" source="71" target="70" cy:directed="1"/>
      <edge id="176" label="zzzzzz0,zzzzzz5" source="71" target="66" cy:directed="1"/>
      <edge id="175" label="zzzzzz0,zzzzzz9" source="71" target="62" cy:directed="1"/>
      <edge id="174" label="zzzzzz0,zzzzzz8" source="71" target="63" cy:directed="1"/>
      <edge id="173" label="zzzzzz1,zzzzzz9" source="70" target="62" cy:directed="1"/>
      <edge id="172" label="zzzzzz1,zzzzzz8" source="70" target="63" cy:directed="1"/>
      <edge id="171" label="zzzzzz1,zzzzzz5" source="70" target="66" cy:directed="1"/>
      <edge id="170" label="zzzzzz2,zzzzzz3" source="69" target="68" cy:directed="1"/>
      <edge id="169" label="zzzzzz4,zzzzzz7" source="67" target="64" cy:directed="1"/>
      <edge id="168" label="zzzzzz5,zzzzzz9" source="66" target="62" cy:directed="1"/>
      <edge id="167" label="zzzzzz5,zzzzzz8" source="66" target="63" cy:directed="1"/>
      <edge id="166" label="zzzzzz5,zzzzzz6" source="66" target="65" cy:directed="1"/>
      <edge id="165" label="zzzzzz8,zzzzzz9" source="63" target="62" cy:directed="1"/>
    </graph>
  </att>
</graph>
