# Supplementary material for: Discovery of several thousand highly diverse circular DNA viruses
Source: eLife journal article supplement (doi:10.7554/elife.51971), 2020-02-03
Supplement: fig2-figsupp1-data2 [file elife-51971-fig2-figsupp1-data2-v1.cys › CytoscapeSession-2019_08_05-17_27/tables/36-all_my_seqs_genbank_ssDNA1_domains_ino_zot_fasta+Full+Network/SHARED_ATTRS-org.cytoscape.model.CyEdge-36+shared+edge.cytable]

CyCSV-Version	1
SUID	%id	alignment_len	alignment_score	shared interaction	shared name
java.lang.Long	java.lang.Double	java.lang.Integer	java.lang.Double	java.lang.String	java.lang.String
	mutable	mutable	mutable
36 shared edge
1432	93.41	440	233.0		zzzzz15,zzzzz19
698	84.55	440	231.0		zzzzz58,zzzzz60
970	93.41	440	228.0		zzzzz35,zzzzzz9
165	93.64	440	225.0		zzzzzz8,zzzzzz9
1350	80.44	455	222.0		zzzzz17,zzzzzz3
1431	89.52	439	221.0		zzzzz15,zzzzzz5
969	94.55	440	218.0		zzzzz35,zzzzzz8
1305	92.8	403	214.0		zzzzz19,zzzzzz5
1028	82.13	442	208.0		zzzzz30,zzzzz50
722	80.31	452	199.0		zzzzz57,zzzzz97
1496	84.63	423	196.0		zzzzz12,zzzzz40
1121	82.81	384	191.0		zzzzz26,zzzzz31
1508	85.21	365	184.0		zzzzz10,zzzzz13
866	95.2	333	184.0		zzzzz49,zzzzz77
349	94.51	328	183.0		zzzzz74,zzzzz77
865	94.21	328	180.0		zzzzz49,zzzzz74
1627	65.65	425	176.0		zzzz100,zzzzz81
456	99.01	302	169.0		zzzzz68,zzzzz70
455	98.02	303	168.0		zzzzz68,zzzzz69
454	98.35	303	168.0		zzzzz68,zzzzz73
433	98.68	302	167.0		zzzzz69,zzzzz70
432	97.69	303	167.0		zzzzz69,zzzzz73
411	98.02	303	167.0		zzzzz70,zzzzz72
1273	70.39	385	165.0		zzzzz20,zzzzzz6
431	97.68	302	166.0		zzzzz69,zzzzz72
410	98.01	302	166.0		zzzzz70,zzzzz73
453	97.02	302	165.0		zzzzz68,zzzzz72
388	96.36	302	163.0		zzzzz72,zzzzz73
332	95.35	301	160.0		zzzzz75,zzzzz79
480	91.42	303	158.0		zzzzz67,zzzzz72
479	90.43	303	156.0		zzzzz67,zzzzz69
478	89.74	302	155.0		zzzzz67,zzzzz68
477	89.77	303	155.0		zzzzz67,zzzzz70
476	89.74	302	154.0		zzzzz67,zzzzz73
1498	93.75	320	153.0		zzzzz11,zzzzz27
543	69.29	381	153.0		zzzzz64,zzzzz66
1395	70.94	382	149.0		zzzzz16,zzzzz25
169	65.16	353	139.0		zzzzzz4,zzzzzz7
911	100.0	228	137.0		zzzzz41,zzzzz85
831	55.98	443	137.0		zzzzz50,zzzzzz8
830	54.63	443	134.0		zzzzz50,zzzzzz9
968	55.08	443	134.0		zzzzz35,zzzzz50
1027	54.34	449	131.0		zzzzz30,zzzzz35
1026	55.56	450	131.0		zzzzz30,zzzzzz9
1025	56.0	450	129.0		zzzzz30,zzzzzz8
1099	62.73	330	129.0		zzzzz28,zzzzz54
315	69.77	301	126.0		zzzzz76,zzzzz80
946	100.0	199	119.0		zzzzz37,zzzzzz1
1545	55.0	380	118.0		zzzz102,zzzzz26
1544	54.03	385	115.0		zzzz102,zzzzz31
1507	56.47	363	115.0		zzzzz10,zzzzzz7
1489	56.32	364	115.0		zzzzz13,zzzzzz7
387	63.46	301	113.0		zzzzz72,zzzzz80
1481	65.54	296	113.0		zzzzz14,zzzzz69
1480	65.54	296	113.0		zzzzz14,zzzzz72
1479	65.88	296	113.0		zzzzz14,zzzzz73
368	63.46	301	113.0		zzzzz73,zzzzz80
1478	65.66	297	113.0		zzzzz14,zzzzz68
1477	65.99	297	113.0		zzzzz14,zzzzz70
475	62.71	303	113.0		zzzzz67,zzzzz80
452	62.79	301	112.0		zzzzz68,zzzzz80
430	63.12	301	112.0		zzzzz69,zzzzz80
409	63.12	301	112.0		zzzzz70,zzzzz80
1476	63.85	296	112.0		zzzzz14,zzzzz67
248	45.69	429	110.0		zzzzz81,zzzzz97
1543	51.72	379	110.0		zzzz102,zzzzzz1
1475	61.62	297	110.0		zzzzz14,zzzzz80
882	80.45	220	110.0		zzzzz45,zzzzz91
367	63.84	307	110.0		zzzzz73,zzzzz76
697	46.85	429	109.0		zzzzz58,zzzzz59
429	64.47	304	109.0		zzzzz69,zzzzz76
451	63.52	307	108.0		zzzzz68,zzzzz76
474	63.82	304	108.0		zzzzz67,zzzzz76
386	64.14	304	108.0		zzzzz72,zzzzz76
721	44.65	430	107.0		zzzzz57,zzzzz81
408	64.14	304	108.0		zzzzz70,zzzzz76
1626	43.39	431	107.0		zzzz100,zzzzz97
1488	49.73	364	106.0		zzzzz13,zzzzzz4
428	60.67	300	106.0		zzzzz69,zzzzz75
385	60.67	300	105.0		zzzzz72,zzzzz75
407	60.33	300	105.0		zzzzz70,zzzzz75
1506	50.82	364	104.0		zzzzz10,zzzzzz4
672	43.52	455	104.0		zzzzz59,zzzzz60
450	60.0	300	104.0		zzzzz68,zzzzz75
427	59.41	303	104.0		zzzzz69,zzzzz79
473	61.0	300	104.0		zzzzz67,zzzzz75
384	60.54	299	104.0		zzzzz72,zzzzz79
366	59.33	300	104.0		zzzzz73,zzzzz75
1120	48.62	362	103.0		zzzzz26,zzzzzz1
449	59.27	302	103.0		zzzzz68,zzzzz79
472	58.94	302	103.0		zzzzz67,zzzzz79
406	59.87	299	103.0		zzzzz70,zzzzz79
365	58.61	302	103.0		zzzzz73,zzzzz79
755	77.31	216	102.0		zzzzz56,zzzzz68
754	70.95	241	102.0		zzzzz56,zzzzz69
753	71.25	240	102.0		zzzzz56,zzzzz72
752	77.78	216	102.0		zzzzz56,zzzzz73
621	61.11	270	102.0		zzzzz61,zzzzz95
751	77.78	216	102.0		zzzzz56,zzzzz70
1625	42.46	431	101.0		zzzz100,zzzzz57
1474	58.78	296	99.0		zzzzz14,zzzzz75
750	75.46	216	99.0		zzzzz56,zzzzz67
331	57.38	305	99.0		zzzzz75,zzzzz80
273	57.57	304	99.0		zzzzz79,zzzzz80
1017	48.07	362	98.0		zzzzz31,zzzzzz1
1473	58.11	296	98.0		zzzzz14,zzzzz79
1472	56.76	296	97.0		zzzzz14,zzzzz76
749	65.32	248	96.0		zzzzz56,zzzzz80
170	40.61	458	95.0		zzzzzz2,zzzzzz3
1471	57.95	283	95.0		zzzzz14,zzzzz56
1000	44.04	361	91.0		zzzzz32,zzzzzz4
1349	40.65	460	91.0		zzzzz17,zzzzzz2
748	66.25	240	91.0		zzzzz56,zzzzz76
287	51.96	306	90.0		zzzzz78,zzzzz80
1505	46.03	365	90.0		zzzzz10,zzzzz32
330	54.13	303	90.0		zzzzz75,zzzzz76
314	53.8	303	89.0		zzzzz76,zzzzz79
1487	45.36	366	88.0		zzzzz13,zzzzz32
313	53.14	303	88.0		zzzzz76,zzzzz78
471	52.63	304	86.0		zzzzz67,zzzzz78
383	52.3	304	86.0		zzzzz72,zzzzz78
999	42.42	363	85.0		zzzzz32,zzzzzz7
426	51.3	308	85.0		zzzzz69,zzzzz78
448	51.32	304	85.0		zzzzz68,zzzzz78
405	51.64	304	84.0		zzzzz70,zzzzz78
364	51.32	304	84.0		zzzzz73,zzzzz78
286	49.17	303	83.0		zzzzz78,zzzzz79
1470	52.7	296	82.0		zzzzz14,zzzzz78
329	47.04	304	80.0		zzzzz75,zzzzz78
785	43.6	344	79.0		zzzzz55,zzzzz81
1542	63.32	199	78.0		zzzz102,zzzzz37
1119	93.62	141	75.0		zzzzz26,zzzzz33
747	61.76	204	74.0		zzzzz56,zzzzz75
1624	41.46	316	74.0		zzzz100,zzzzz55
784	44.55	303	74.0		zzzzz55,zzzzz97
746	61.27	204	73.0		zzzzz56,zzzzz79
783	45.7	291	72.0		zzzzz55,zzzzz57
745	51.06	282	73.0		zzzzz56,zzzzz78
229	40.73	383	73.0		zzzzz84,zzzzz98
875	54.51	233	73.0		zzzzz46,zzzzz87
1098	37.5	408	69.0		zzzzz28,zzzzzz6
1217	34.88	453	69.0		zzzzz23,zzzzz50
232	56.94	209	69.0		zzzzz83,zzzzz92
1118	57.07	198	69.0		zzzzz26,zzzzz37
910	52.25	222	68.0		zzzzz41,zzzzz89
222	52.25	222	68.0		zzzzz85,zzzzz89
1232	47.06	238	67.0		zzzzz21,zzzzz32
1016	56.06	198	66.0		zzzzz31,zzzzz37
1231	48.28	232	66.0		zzzzz21,zzzzzz7
1583	32.83	460	65.0		zzzz101,zzzzz55
1230	45.17	259	66.0		zzzzz21,zzzzzz4
1504	49.14	232	65.0		zzzzz10,zzzzz21
1486	48.71	232	64.0		zzzzz13,zzzzz21
671	32.29	449	63.0		zzzzz59,zzzzz82
670	35.13	464	63.0		zzzzz59,zzzzz96
1272	37.5	392	62.0		zzzzz20,zzzzz28
1216	35.57	447	62.0		zzzzz23,zzzzz30
881	49.56	226	61.0		zzzzz45,zzzzz51
1117	37.27	373	60.0		zzzzz26,zzzzz84
1623	33.91	407	60.0		zzzz100,zzzz101
1541	35.77	383	60.0		zzzz102,zzzzz84
1015	76.6	141	60.0		zzzzz31,zzzzz33
825	49.52	210	60.0		zzzzz51,zzzzz91
193	40.0	350	60.0		zzzzz95,zzzzz96
183	33.42	386	59.0		zzzzz98,zzzzzz1
1215	33.87	437	58.0		zzzzz23,zzzzzz8
1582	38.93	280	57.0		zzzz101,zzzzz81
1271	37.43	358	58.0		zzzzz20,zzzzz54
962	91.82	110	58.0		zzzzz36,zzzzz37
593	35.0	400	58.0		zzzzz62,zzzzz96
961	91.82	110	58.0		zzzzz36,zzzzzz1
819	38.92	352	57.0		zzzzz54,zzzzzz6
646	32.52	449	57.0		zzzzz60,zzzzz82
1014	35.6	382	57.0		zzzzz31,zzzzz84
696	31.22	474	56.0		zzzzz58,zzzzz82
1214	33.18	434	56.0		zzzzz23,zzzzz35
1213	32.57	436	56.0		zzzzz23,zzzzzz9
228	47.03	236	56.0		zzzzz84,zzzzzz1
1540	67.86	140	56.0		zzzz102,zzzzz33
620	40.54	296	55.0		zzzzz61,zzzzz63
619	39.54	306	54.0		zzzzz61,zzzzz99
1581	39.86	281	54.0		zzzz101,zzzzz97
1116	32.55	384	54.0		zzzzz26,zzzzz98
669	33.71	439	54.0		zzzzz59,zzzzz62
209	49.5	202	54.0		zzzzz88,zzzzz91
1580	38.79	281	53.0		zzzz101,zzzzz57
880	50.0	192	53.0		zzzzz45,zzzzz88
824	46.48	213	52.0		zzzzz51,zzzzz88
1539	39.92	248	51.0		zzzz102,zzzzz98
1013	31.44	388	51.0		zzzzz31,zzzzz98
592	37.0	373	51.0		zzzzz62,zzzzz95
200	32.65	392	49.0		zzzzz94,zzzzz96
668	30.81	422	48.0		zzzzz59,zzzzz95
986	59.29	140	48.0		zzzzz33,zzzzzz1
945	41.95	205	48.0		zzzzz37,zzzzz98
199	31.77	384	47.0		zzzzz94,zzzzz95
567	36.77	310	47.0		zzzzz63,zzzzz99
667	30.18	454	47.0		zzzzz59,zzzzz94
944	47.34	188	47.0		zzzzz37,zzzzz84
879	43.56	202	47.0		zzzzz45,zzzzz87
1346	31.33	399	45.0		zzzzz18,zzzzz20
1469	34.46	325	45.0		zzzzz14,zzzzz63
1345	31.02	403	45.0		zzzzz18,zzzzzz6
878	43.01	193	45.0		zzzzz45,zzzzz46
874	40.91	198	44.0		zzzzz46,zzzzz91
212	39.64	222	44.0		zzzzz87,zzzzz91
566	33.96	318	43.0		zzzzz63,zzzzz76
1430	31.39	395	42.0		zzzzz15,zzzzz50
823	40.78	206	43.0		zzzzz51,zzzzz87
591	32.08	424	42.0		zzzzz62,zzzzz94
565	35.18	253	43.0		zzzzz63,zzzzz78
564	39.72	214	43.0		zzzzz63,zzzzz80
873	37.1	221	42.0		zzzzz46,zzzzz51
563	38.12	223	42.0		zzzzz63,zzzzz68
562	38.12	223	42.0		zzzzz63,zzzzz69
561	38.12	223	42.0		zzzzz63,zzzzz73
192	37.09	275	41.0		zzzzz95,zzzzz99
1202	33.01	418	41.0		zzzzz24,zzzzzz6
744	37.67	223	41.0		zzzzz56,zzzzz63
560	38.12	223	41.0		zzzzz63,zzzzz70
559	37.67	223	41.0		zzzzz63,zzzzz72
829	31.67	401	40.0		zzzzz50,zzzzzz5
1304	31.44	404	40.0		zzzzz19,zzzzz50
822	34.52	252	40.0		zzzzz52,zzzzzz4
558	39.81	216	40.0		zzzzz63,zzzzz75
557	36.32	223	40.0		zzzzz63,zzzzz67
556	39.81	216	40.0		zzzzz63,zzzzz79
555	41.18	204	39.0		zzzzz63,zzzzz74
1495	38.43	229	39.0		zzzzz12,zzzzzz0
821	34.94	249	39.0		zzzzz52,zzzzzz7
554	33.66	309	38.0		zzzzz63,zzzzz77
1429	30.61	392	38.0		zzzzz15,zzzzz30
1201	37.17	226	38.0		zzzzz24,zzzzz78
1161	33.43	335	38.0		zzzzz25,zzzzzz6
864	40.2	204	38.0		zzzzz49,zzzzz63
1344	32.11	380	38.0		zzzzz18,zzzzz54
897	35.94	217	38.0		zzzzz43,zzzzz86
211	40.39	203	38.0		zzzzz87,zzzzz88
1538	57.52	113	38.0		zzzz102,zzzzz36
985	56.3	119	38.0		zzzzz33,zzzzz37
1503	33.47	248	37.0		zzzzz10,zzzzz52
1497	35.74	277	37.0		zzzzz11,zzzzz39
1343	29.56	406	37.0		zzzzz18,zzzzz24
916	37.33	225	37.0		zzzzz40,zzzzzz0
1485	33.47	248	37.0		zzzzz13,zzzzz52
1270	33.03	330	36.0		zzzzz20,zzzzz25
1100	36.33	256	37.0		zzzzz27,zzzzz39
1024	29.26	417	36.0		zzzzz30,zzzzzz5
998	34.54	249	36.0		zzzzz32,zzzzz52
1428	29.85	392	35.0		zzzzz15,zzzzzz9
1342	30.39	385	36.0		zzzzz18,zzzzz28
553	30.86	350	36.0		zzzzz63,zzzzz94
1212	28.86	402	35.0		zzzzz23,zzzzzz5
872	39.9	198	35.0		zzzzz46,zzzzz88
168	30.28	393	35.0		zzzzzz5,zzzzzz9
1303	29.7	394	35.0		zzzzz19,zzzzz30
1302	29.34	392	35.0		zzzzz19,zzzzzz9
1200	36.92	214	35.0		zzzzz24,zzzzz56
167	27.69	390	35.0		zzzzzz5,zzzzzz8
1468	35.98	214	34.0		zzzzz14,zzzzz24
1115	52.73	110	35.0		zzzzz26,zzzzz36
984	46.85	143	35.0		zzzzz33,zzzzz98
967	27.95	390	34.0		zzzzz35,zzzzzz5
1269	31.67	360	34.0		zzzzz20,zzzzz24
1229	33.06	242	34.0		zzzzz21,zzzzz52
348	34.47	206	34.0		zzzzz74,zzzzz78
1427	28.9	391	34.0		zzzzz15,zzzzzz8
1199	35.81	215	34.0		zzzzz24,zzzzz68
1198	35.81	215	34.0		zzzzz24,zzzzz69
1197	35.81	215	34.0		zzzzz24,zzzzz70
1196	35.81	215	34.0		zzzzz24,zzzzz72
1195	35.81	215	34.0		zzzzz24,zzzzz73
1467	40.21	189	34.0		zzzzz14,zzzzz25
1426	28.24	425	33.0		zzzzz15,zzzzz35
863	28.2	305	34.0		zzzzz49,zzzzz78
1425	27.79	403	33.0		zzzzz15,zzzzz23
1301	27.54	403	33.0		zzzzz19,zzzzz23
1194	29.45	421	33.0		zzzzz24,zzzzz28
1193	35.81	215	33.0		zzzzz24,zzzzz67
1192	34.05	232	33.0		zzzzz24,zzzzz79
1160	31.42	331	33.0		zzzzz25,zzzzz29
983	47.52	141	34.0		zzzzz33,zzzzz84
300	34.47	206	33.0		zzzzz77,zzzzz78
1466	40.43	188	33.0		zzzzz14,zzzzz16
1394	29.73	333	33.0		zzzzz16,zzzzz29
1191	36.79	212	33.0		zzzzz24,zzzzz76
1190	33.19	232	32.0		zzzzz24,zzzzz75
1189	33.19	232	32.0		zzzzz24,zzzzz80
1393	28.28	343	32.0		zzzzz16,zzzzzz6
1159	39.25	186	32.0		zzzzz25,zzzzz78
1188	30.3	363	32.0		zzzzz24,zzzzz54
552	30.0	350	32.0		zzzzz63,zzzzz64
1392	41.38	145	31.0		zzzzz16,zzzzz55
1341	38.54	205	31.0		zzzzz18,zzzzz78
1300	28.21	390	31.0		zzzzz19,zzzzzz8
1062	29.94	334	31.0		zzzzz29,zzzzz80
521	27.22	327	32.0		zzzzz65,zzzzz74
1158	38.83	188	31.0		zzzzz25,zzzzz56
1340	29.49	373	31.0		zzzzz18,zzzzz29
1157	40.28	144	31.0		zzzzz25,zzzzz57
1391	30.49	328	30.0		zzzzz16,zzzzz28
1390	37.77	188	31.0		zzzzz16,zzzzz56
1299	27.95	390	30.0		zzzzz19,zzzzz35
1156	40.28	144	30.0		zzzzz25,zzzzz97
1012	49.09	110	31.0		zzzzz31,zzzzz36
862	32.26	217	31.0		zzzzz49,zzzzz65
520	31.09	238	31.0		zzzzz65,zzzzz77
1389	29.64	334	30.0		zzzzz16,zzzzz20
618	36.76	185	30.0		zzzzz61,zzzzz78
347	33.49	215	30.0		zzzzz74,zzzzz79
1155	28.26	322	30.0		zzzzz25,zzzzz28
1154	34.81	158	30.0		zzzzz25,zzzzz55
861	36.28	215	30.0		zzzzz49,zzzzz94
1622	39.73	146	29.0		zzzz100,zzzzz25
1465	29.97	337	30.0		zzzzz14,zzzzz29
1388	38.0	150	29.0		zzzzz16,zzzzz97
1153	39.47	190	30.0		zzzzz25,zzzzz76
346	36.28	215	30.0		zzzzz74,zzzzz94
299	35.81	215	30.0		zzzzz77,zzzzz94
285	35.78	204	30.0		zzzzz78,zzzzz94
284	25.16	306	30.0		zzzzz78,zzzzz99
1387	38.1	189	29.0		zzzzz16,zzzzz78
551	27.71	350	29.0		zzzzz63,zzzzz66
345	32.56	215	29.0		zzzzz74,zzzzz75
1464	36.56	227	29.0		zzzzz14,zzzzz18
1386	39.16	143	29.0		zzzzz16,zzzzz57
1385	39.68	189	29.0		zzzzz16,zzzzz76
1339	28.03	314	29.0		zzzzz18,zzzzz25
1152	29.71	350	29.0		zzzzz25,zzzzz63
860	33.02	215	29.0		zzzzz49,zzzzz79
550	29.63	243	29.0		zzzzz63,zzzzz65
298	33.02	215	29.0		zzzzz77,zzzzz79
238	30.74	270	29.0		zzzzz82,zzzzz96
1384	36.46	192	29.0		zzzzz16,zzzzz63
1151	38.95	190	29.0		zzzzz25,zzzzz68
1150	38.95	190	29.0		zzzzz25,zzzzz69
1149	38.95	190	29.0		zzzzz25,zzzzz70
1148	38.95	190	29.0		zzzzz25,zzzzz72
1147	38.95	190	29.0		zzzzz25,zzzzz73
1146	37.89	190	29.0		zzzzz25,zzzzz80
590	27.47	364	29.0		zzzzz62,zzzzz63
1338	34.62	234	28.0		zzzzz18,zzzzz76
1145	38.42	190	28.0		zzzzz25,zzzzz67
1061	30.54	334	28.0		zzzzz29,zzzzz76
617	35.11	188	28.0		zzzzz61,zzzzz77
237	30.92	304	28.0		zzzzz82,zzzzz94
1383	38.62	189	28.0		zzzzz16,zzzzz80
1187	29.66	236	28.0		zzzzz24,zzzzz63
859	35.11	188	28.0		zzzzz49,zzzzz61
858	32.09	215	28.0		zzzzz49,zzzzz75
589	33.96	268	28.0		zzzzz62,zzzzz82
519	29.49	295	28.0		zzzzz65,zzzzz78
328	32.09	215	28.0		zzzzz75,zzzzz77
297	26.67	315	28.0		zzzzz77,zzzzz80
261	36.93	176	28.0		zzzzz80,zzzzz99
1621	37.32	142	28.0		zzzz100,zzzzz16
1382	33.33	192	28.0		zzzzz16,zzzzz75
1060	33.2	241	28.0		zzzzz29,zzzzz78
1059	31.84	358	28.0		zzzzz29,zzzzzz6
344	31.48	216	28.0		zzzzz74,zzzzz80
1381	37.77	188	28.0		zzzzz16,zzzzz67
1380	33.56	146	27.0		zzzzz16,zzzzz81
982	52.63	95	28.0		zzzzz33,zzzzz36
272	34.69	196	27.0		zzzzz79,zzzzz99
1463	37.07	205	27.0		zzzzz14,zzzzz94
1379	29.56	318	27.0		zzzzz16,zzzzz18
1378	32.81	192	27.0		zzzzz16,zzzzz79
857	31.94	216	27.0		zzzzz49,zzzzz80
616	34.04	188	27.0		zzzzz61,zzzzz74
327	35.29	187	27.0		zzzzz75,zzzzz99
1462	33.84	198	27.0		zzzzz14,zzzzz74
1461	39.24	158	27.0		zzzzz14,zzzzz99
1377	37.77	188	27.0		zzzzz16,zzzzz68
1376	37.77	188	27.0		zzzzz16,zzzzz69
1375	37.77	188	27.0		zzzzz16,zzzzz70
1374	37.77	188	27.0		zzzzz16,zzzzz72
1373	37.77	188	27.0		zzzzz16,zzzzz73
1186	30.43	207	27.0		zzzzz24,zzzzz99
1144	34.03	144	27.0		zzzzz25,zzzzz81
896	33.18	223	27.0		zzzzz43,zzzzz44
236	28.43	306	27.0		zzzzz82,zzzzz95
743	32.16	255	27.0		zzzzz56,zzzzz94
549	27.37	369	27.0		zzzzz63,zzzzz96
425	38.89	198	27.0		zzzzz69,zzzzz94
382	38.89	198	27.0		zzzzz72,zzzzz94
363	38.89	198	27.0		zzzzz73,zzzzz94
312	26.61	327	27.0		zzzzz76,zzzzz77
1460	33.84	198	26.0		zzzzz14,zzzzz49
1459	33.84	198	26.0		zzzzz14,zzzzz77
742	37.34	158	26.0		zzzzz56,zzzzz99
548	26.43	314	26.0		zzzzz63,zzzzz95
500	30.74	231	26.0		zzzzz66,zzzzz80
470	28.08	317	26.0		zzzzz67,zzzzz74
447	38.89	198	26.0		zzzzz68,zzzzz94
404	38.89	198	26.0		zzzzz70,zzzzz94
260	37.44	211	26.0		zzzzz80,zzzzz94
1494	28.47	288	26.0		zzzzz12,zzzzzz2
1225	35.26	173	26.0		zzzzz22,zzzzz45
909	38.04	184	26.0		zzzzz41,zzzzz90
221	38.04	184	26.0		zzzzz85,zzzzz90
886	33.65	208	26.0		zzzzz44,zzzzz86
856	29.11	316	26.0		zzzzz49,zzzzz76
518	28.52	305	26.0		zzzzz65,zzzzz80
343	28.8	316	26.0		zzzzz74,zzzzz76
283	32.87	216	26.0		zzzzz78,zzzzz96
198	26.8	347	26.0		zzzzz94,zzzzz99
1185	27.62	344	26.0		zzzzz24,zzzzz25
1058	35.82	201	26.0		zzzzz29,zzzzz56
960	51.49	101	26.0		zzzzz36,zzzzz84
741	29.64	253	26.0		zzzzz56,zzzzz74
615	34.83	201	26.0		zzzzz61,zzzzz94
446	37.73	220	26.0		zzzzz68,zzzzz96
424	37.73	220	26.0		zzzzz69,zzzzz96
403	37.73	220	26.0		zzzzz70,zzzzz96
362	37.73	220	26.0		zzzzz73,zzzzz96
311	36.08	158	26.0		zzzzz76,zzzzz99
208	35.9	195	26.0		zzzzz89,zzzzz90
1337	30.97	226	25.0		zzzzz18,zzzzz75
1097	27.07	351	25.0		zzzzz28,zzzzz29
1057	28.99	338	25.0		zzzzz29,zzzzz67
1056	32.34	235	25.0		zzzzz29,zzzzz79
915	29.08	282	25.0		zzzzz40,zzzzzz2
855	27.48	313	26.0		zzzzz49,zzzzz67
469	28.08	317	26.0		zzzzz67,zzzzz77
468	37.37	198	25.0		zzzzz67,zzzzz94
259	34.63	205	25.0		zzzzz80,zzzzz96
1336	32.11	218	25.0		zzzzz18,zzzzz80
1055	35.82	201	25.0		zzzzz29,zzzzz68
1054	35.82	201	25.0		zzzzz29,zzzzz69
1053	35.82	201	25.0		zzzzz29,zzzzz70
1052	28.19	337	25.0		zzzzz29,zzzzz72
1051	35.82	201	25.0		zzzzz29,zzzzz73
854	29.64	253	25.0		zzzzz49,zzzzz56
695	30.08	246	25.0		zzzzz58,zzzzz78
381	27.64	322	25.0		zzzzz72,zzzzz74
380	37.27	220	25.0		zzzzz72,zzzzz96
1335	35.83	187	25.0		zzzzz18,zzzzz56
1334	37.23	188	25.0		zzzzz18,zzzzz67
1333	37.23	188	25.0		zzzzz18,zzzzz68
1332	37.23	188	25.0		zzzzz18,zzzzz69
1331	37.23	188	25.0		zzzzz18,zzzzz70
1330	37.23	188	25.0		zzzzz18,zzzzz72
1329	37.23	188	25.0		zzzzz18,zzzzz73
1050	31.62	234	25.0		zzzzz29,zzzzz75
645	27.42	299	25.0		zzzzz60,zzzzz63
379	27.41	321	25.0		zzzzz72,zzzzz77
296	33.18	220	25.0		zzzzz77,zzzzz96
271	37.32	209	25.0		zzzzz79,zzzzz94
1458	35.94	192	25.0		zzzzz14,zzzzz96
1372	27.44	328	24.0		zzzzz16,zzzzz54
1268	29.91	234	25.0		zzzzz20,zzzzz78
740	31.11	225	25.0		zzzzz56,zzzzz77
739	37.17	191	25.0		zzzzz56,zzzzz96
445	25.63	316	25.0		zzzzz68,zzzzz77
444	34.78	161	24.0		zzzzz68,zzzzz99
423	34.78	161	24.0		zzzzz69,zzzzz99
402	25.63	316	25.0		zzzzz70,zzzzz77
401	34.78	161	24.0		zzzzz70,zzzzz99
378	34.78	161	24.0		zzzzz72,zzzzz99
361	34.78	161	24.0		zzzzz73,zzzzz99
326	37.8	209	25.0		zzzzz75,zzzzz94
325	32.39	213	25.0		zzzzz75,zzzzz96
282	30.71	241	25.0		zzzzz78,zzzzzz6
1328	30.53	226	24.0		zzzzz18,zzzzz79
1143	32.29	192	24.0		zzzzz25,zzzzz75
499	29.0	231	24.0		zzzzz66,zzzzz78
179	27.34	289	24.0		zzzzzz0,zzzzzz2
1267	30.22	278	24.0		zzzzz20,zzzzz63
853	32.73	220	24.0		zzzzz49,zzzzz96
588	30.65	248	24.0		zzzzz62,zzzzz77
467	34.78	161	24.0		zzzzz67,zzzzz99
443	26.5	317	24.0		zzzzz68,zzzzz74
400	26.5	317	24.0		zzzzz70,zzzzz74
1142	27.02	322	24.0		zzzzz25,zzzzz54
1049	27.11	343	24.0		zzzzz29,zzzzz54
466	37.82	193	24.0		zzzzz67,zzzzz96
310	35.36	181	24.0		zzzzz76,zzzzz94
270	31.92	213	24.0		zzzzz79,zzzzz96
1371	26.36	349	24.0		zzzzz16,zzzzz24
1266	29.21	356	24.0		zzzzz20,zzzzz29
959	43.43	99	24.0		zzzzz36,zzzzz98
852	27.53	316	24.0		zzzzz49,zzzzz72
587	30.0	250	24.0		zzzzz62,zzzzz74
851	30.24	248	24.0		zzzzz49,zzzzz62
644	29.14	278	24.0		zzzzz60,zzzzz78
542	29.61	233	24.0		zzzzz64,zzzzz80
422	25.95	316	24.0		zzzzz69,zzzzz74
360	27.44	317	24.0		zzzzz73,zzzzz74
342	31.82	220	24.0		zzzzz74,zzzzz96
1265	31.17	247	24.0		zzzzz20,zzzzz56
1141	31.77	192	24.0		zzzzz25,zzzzz79
694	28.74	261	24.0		zzzzz58,zzzzz63
643	28.81	243	24.0		zzzzz60,zzzzz80
1140	25.18	274	23.0		zzzzz25,zzzzz99
693	31.17	231	23.0		zzzzz58,zzzzz76
517	32.66	199	24.0		zzzzz65,zzzzz76
498	27.19	331	23.0		zzzzz66,zzzzz76
421	32.32	198	23.0		zzzzz69,zzzzz77
269	35.47	172	23.0		zzzzz79,zzzzz81
359	32.32	198	23.0		zzzzz73,zzzzz77
309	36.31	179	23.0		zzzzz76,zzzzz96
850	32.32	198	23.0		zzzzz49,zzzzz69
849	32.32	198	23.0		zzzzz49,zzzzz73
692	28.25	269	23.0		zzzzz58,zzzzz80
324	35.47	172	23.0		zzzzz75,zzzzz81
1457	29.57	230	23.0		zzzzz14,zzzzz58
848	26.67	315	23.0		zzzzz49,zzzzz68
847	26.67	315	23.0		zzzzz49,zzzzz70
268	35.58	163	23.0		zzzzz79,zzzzz97
738	35.62	160	23.0		zzzzz56,zzzzz61
737	31.43	245	23.0		zzzzz56,zzzzzz6
614	32.34	201	23.0		zzzzz61,zzzzz79
323	36.67	150	23.0		zzzzz75,zzzzz97
295	33.53	170	23.0		zzzzz77,zzzzz95
1139	39.23	130	22.0		zzzzz25,zzzzz61
720	36.24	149	23.0		zzzzz57,zzzzz75
258	35.48	155	23.0		zzzzz80,zzzzz81
1620	35.44	158	22.0		zzzz100,zzzzz80
1264	30.08	236	22.0		zzzzz20,zzzzz66
846	33.53	170	22.0		zzzzz49,zzzzz95
497	29.24	236	22.0		zzzzz66,zzzzzz6
257	30.37	214	22.0		zzzzz80,zzzzzz6
719	37.5	136	22.0		zzzzz57,zzzzz79
541	29.61	233	22.0		zzzzz64,zzzzz78
281	34.32	169	22.0		zzzzz78,zzzzz95
1493	27.34	289	22.0		zzzzz12,zzzzzz3
1327	28.93	242	22.0		zzzzz18,zzzzz63
1224	37.33	150	23.0		zzzzz22,zzzzz91
642	30.3	231	22.0		zzzzz60,zzzzz76
341	33.17	202	22.0		zzzzz74,zzzzz99
736	34.81	135	22.0		zzzzz56,zzzzz81
540	29.49	234	22.0		zzzzz64,zzzzz96
1537	30.68	251	22.0		zzzz102,zzzzz23
1456	30.65	199	22.0		zzzzz14,zzzzz65
516	32.31	229	22.0		zzzzz65,zzzzz75
515	32.31	229	22.0		zzzzz65,zzzzz79
280	32.08	159	22.0		zzzzz78,zzzzz81
1455	26.27	335	22.0		zzzzz14,zzzzz66
1263	29.52	227	22.0		zzzzz20,zzzzz80
735	31.16	199	22.0		zzzzz56,zzzzz65
691	30.04	233	22.0		zzzzz58,zzzzz67
613	32.65	196	22.0		zzzzz61,zzzzz75
539	26.36	330	22.0		zzzzz64,zzzzz76
1454	29.13	230	22.0		zzzzz14,zzzzz60
1370	40.0	130	22.0		zzzzz16,zzzzz61
612	33.15	178	22.0		zzzzz61,zzzzz80
496	28.3	212	22.0		zzzzz66,zzzzz96
308	36.62	142	22.0		zzzzz76,zzzzz81
1453	35.29	153	22.0		zzzzz14,zzzzz81
1369	33.82	136	21.0		zzzzz16,zzzzz99
1223	34.17	199	22.0		zzzzz22,zzzzz87
690	29.61	233	21.0		zzzzz58,zzzzz69
689	29.61	233	21.0		zzzzz58,zzzzz72
688	29.61	233	21.0		zzzzz58,zzzzz73
611	33.94	165	22.0		zzzzz61,zzzzz76
279	33.33	153	22.0		zzzzz78,zzzzz97
1492	26.64	274	21.0		zzzzz12,zzzzz17
1222	35.92	142	22.0		zzzzz22,zzzzz88
914	26.8	291	21.0		zzzzz40,zzzzzz3
734	31.89	185	21.0		zzzzz56,zzzzz97
687	29.61	233	21.0		zzzzz58,zzzzz68
686	29.61	233	21.0		zzzzz58,zzzzz70
685	26.95	449	21.0		zzzzz58,zzzzz94
377	26.05	334	21.0		zzzzz72,zzzzzz6
340	32.35	170	21.0		zzzzz74,zzzzz95
547	27.03	344	21.0		zzzzz63,zzzzzz6
1619	32.99	194	21.0		zzzz100,zzzzz56
733	37.59	133	21.0		zzzzz56,zzzzz57
666	27.84	255	21.0		zzzzz59,zzzzz78
465	24.7	336	21.0		zzzzz67,zzzzzz6
1579	31.25	160	21.0		zzzz101,zzzzz16
1138	33.15	178	21.0		zzzzz25,zzzzz74
732	29.03	217	21.0		zzzzz56,zzzzz64
495	24.83	298	21.0		zzzzz66,zzzzz67
494	27.4	281	21.0		zzzzz66,zzzzz94
731	29.18	233	21.0		zzzzz56,zzzzz58
1618	31.66	199	21.0		zzzz100,zzzzz29
782	33.14	172	21.0		zzzzz55,zzzzz79
538	28.81	236	21.0		zzzzz64,zzzzz67
514	31.66	199	21.0		zzzzz65,zzzzz68
513	31.66	199	21.0		zzzzz65,zzzzz69
512	31.66	199	21.0		zzzzz65,zzzzz70
511	31.66	199	21.0		zzzzz65,zzzzz72
510	31.66	199	21.0		zzzzz65,zzzzz73
493	25.83	302	21.0		zzzzz66,zzzzz73
1262	26.36	330	21.0		zzzzz20,zzzzz70
845	26.67	255	21.0		zzzzz49,zzzzz58
537	26.5	351	21.0		zzzzz64,zzzzzz6
442	25.07	335	21.0		zzzzz68,zzzzzz6
904	31.09	193	21.0		zzzzz42,zzzzz88
586	26.47	340	20.0		zzzzz62,zzzzz99
399	25.07	335	21.0		zzzzz70,zzzzzz6
358	25.07	335	21.0		zzzzz73,zzzzzz6
307	25.75	334	21.0		zzzzz76,zzzzzz6
206	29.21	202	21.0		zzzzz90,zzzzz92
1617	33.14	175	20.0		zzzz100,zzzzz76
684	26.67	255	20.0		zzzzz58,zzzzz77
683	26.92	260	20.0		zzzzz58,zzzzz79
665	24.67	304	20.0		zzzzz59,zzzzz63
1452	31.16	199	20.0		zzzzz14,zzzzz20
1261	26.36	330	20.0		zzzzz20,zzzzz72
781	32.56	172	20.0		zzzzz55,zzzzz75
730	29.18	233	20.0		zzzzz56,zzzzz66
682	26.67	255	20.0		zzzzz58,zzzzz74
492	25.93	297	20.0		zzzzz66,zzzzz69
491	29.66	236	20.0		zzzzz66,zzzzz75
490	29.0	231	20.0		zzzzz66,zzzzz79
322	28.51	221	20.0		zzzzz75,zzzzzz6
1451	36.3	146	20.0		zzzzz14,zzzzz57
1260	26.97	330	20.0		zzzzz20,zzzzz67
681	26.92	260	20.0		zzzzz58,zzzzz75
641	28.26	230	20.0		zzzzz60,zzzzz68
640	28.26	230	20.0		zzzzz60,zzzzz69
639	28.26	230	20.0		zzzzz60,zzzzz70
638	28.26	230	20.0		zzzzz60,zzzzz73
489	25.93	297	20.0		zzzzz66,zzzzz70
420	31.47	197	20.0		zzzzz69,zzzzzz6
1450	30.85	201	20.0		zzzzz14,zzzzzz6
1348	25.56	266	20.0		zzzzz17,zzzzz40
1259	25.76	330	20.0		zzzzz20,zzzzz68
1048	34.57	162	20.0		zzzzz29,zzzzz81
844	32.45	188	20.0		zzzzz49,zzzzz99
637	28.26	230	20.0		zzzzz60,zzzzz72
636	25.89	282	20.0		zzzzz60,zzzzz79
610	33.54	161	20.0		zzzzz61,zzzzz68
609	33.54	161	20.0		zzzzz61,zzzzz69
608	33.54	161	20.0		zzzzz61,zzzzz70
607	33.54	161	20.0		zzzzz61,zzzzz72
606	33.54	161	20.0		zzzzz61,zzzzz73
294	31.91	188	20.0		zzzzz77,zzzzz99
1578	34.78	138	20.0		zzzz101,zzzzz25
1258	24.4	332	20.0		zzzzz20,zzzzz75
509	31.16	199	20.0		zzzzz65,zzzzz67
488	25.93	297	20.0		zzzzz66,zzzzz68
1616	29.32	191	20.0		zzzz100,zzzzz78
729	28.26	230	20.0		zzzzz56,zzzzz60
635	28.26	230	20.0		zzzzz60,zzzzz67
605	34.16	161	20.0		zzzzz61,zzzzz67
1615	34.34	166	20.0		zzzz100,zzzzz79
1536	31.62	234	20.0		zzzz102,zzzzz35
1449	31.25	160	20.0		zzzzz14,zzzzz61
1137	32.02	178	20.0		zzzzz25,zzzzz49
1136	32.02	178	20.0		zzzzz25,zzzzz77
843	24.25	301	20.0		zzzzz49,zzzzz59
718	36.3	135	20.0		zzzzz57,zzzzz80
536	30.37	214	20.0		zzzzz64,zzzzz68
535	30.37	214	20.0		zzzzz64,zzzzz69
534	30.37	214	20.0		zzzzz64,zzzzz70
533	30.37	214	20.0		zzzzz64,zzzzz73
267	29.15	223	20.0		zzzzz79,zzzzzz6
1535	31.25	240	20.0		zzzz102,zzzzzz9
532	30.37	214	20.0		zzzzz64,zzzzz72
487	25.5	298	20.0		zzzzz66,zzzzz72
486	24.25	334	20.0		zzzzz66,zzzzz74
419	28.46	267	20.0		zzzzz69,zzzzz97
1448	36.03	136	20.0		zzzzz14,zzzzz97
1326	32.04	181	19.0		zzzzz18,zzzzz81
664	24.38	283	19.0		zzzzz59,zzzzz77
604	30.12	166	19.0		zzzzz61,zzzzzz6
508	25.17	286	20.0		zzzzz65,zzzzz94
1614	32.95	173	19.0		zzzz100,zzzzz75
1447	29.03	217	19.0		zzzzz14,zzzzz64
1257	23.8	332	19.0		zzzzz20,zzzzz79
1184	28.94	235	19.0		zzzzz24,zzzzz94
717	31.17	154	19.0		zzzzz57,zzzzz78
531	28.07	228	19.0		zzzzz64,zzzzz79
256	33.33	150	19.0		zzzzz80,zzzzz97
1256	25.76	330	19.0		zzzzz20,zzzzz73
903	31.94	191	20.0		zzzzz42,zzzzz91
842	25.21	242	19.0		zzzzz49,zzzzz66
680	25.13	394	19.0		zzzzz58,zzzzz99
663	23.92	301	19.0		zzzzz59,zzzzz74
1534	31.25	240	19.0		zzzz102,zzzzzz8
1368	32.02	178	19.0		zzzzz16,zzzzz74
1255	26.06	330	19.0		zzzzz20,zzzzz69
1183	27.65	264	19.0		zzzzz24,zzzzz66
716	25.48	263	19.0		zzzzz57,zzzzz69
530	28.88	232	19.0		zzzzz64,zzzzz75
485	24.79	242	19.0		zzzzz66,zzzzz77
1135	30.93	194	19.0		zzzzz25,zzzzz65
1096	28.92	204	19.0		zzzzz28,zzzzz78
715	35.21	142	19.0		zzzzz57,zzzzz76
634	26.12	268	19.0		zzzzz60,zzzzz75
1095	34.07	135	19.0		zzzzz28,zzzzz81
841	23.49	332	19.0		zzzzz49,zzzzz64
818	30.04	223	19.0		zzzzz54,zzzzz80
714	27.15	221	19.0		zzzzz57,zzzzz68
713	25.48	263	19.0		zzzzz57,zzzzz70
398	28.46	267	19.0		zzzzz70,zzzzz97
231	28.99	207	19.0		zzzzz83,zzzzz90
1613	36.96	138	19.0		zzzz100,zzzzz14
840	27.76	245	19.0		zzzzz49,zzzzz60
712	27.0	263	19.0		zzzzz57,zzzzz72
679	24.28	449	19.0		zzzzz58,zzzzz96
441	28.09	267	19.0		zzzzz68,zzzzz97
1367	31.05	190	19.0		zzzzz16,zzzzz65
1254	31.33	150	19.0		zzzzz20,zzzzz99
1047	25.24	313	19.0		zzzzz29,zzzzz63
357	28.73	268	19.0		zzzzz73,zzzzz97
711	25.76	264	19.0		zzzzz57,zzzzz73
1612	26.45	155	18.0		zzzz100,zzzzz28
1366	30.17	179	19.0		zzzzz16,zzzzz77
633	27.35	245	18.0		zzzzz60,zzzzz77
464	33.33	135	18.0		zzzzz67,zzzzz81
1446	28.57	238	18.0		zzzzz14,zzzzz59
1365	30.17	179	18.0		zzzzz16,zzzzz49
1221	36.31	157	19.0		zzzzz22,zzzzz46
1182	29.09	220	18.0		zzzzz24,zzzzz96
710	31.85	157	18.0		zzzzz57,zzzzz67
662	29.96	237	18.0		zzzzz59,zzzzz67
632	27.76	245	18.0		zzzzz60,zzzzz74
631	24.03	387	18.0		zzzzz60,zzzzz99
529	28.57	245	18.0		zzzzz64,zzzzz94
418	33.33	135	18.0		zzzzz69,zzzzz81
376	33.33	135	18.0		zzzzz72,zzzzz81
356	33.33	135	18.0		zzzzz73,zzzzz81
1611	29.03	186	18.0		zzzz100,zzzzz18
1253	27.9	233	18.0		zzzzz20,zzzzz64
817	29.46	224	18.0		zzzzz54,zzzzz78
463	34.81	135	18.0		zzzzz67,zzzzz97
440	33.33	135	18.0		zzzzz68,zzzzz81
397	33.33	135	18.0		zzzzz70,zzzzz81
247	25.55	317	18.0		zzzzz81,zzzzz99
189	22.38	344	18.0		zzzzz96,zzzzz99
180	24.22	289	18.0		zzzzz99,zzzzzz6
1533	27.72	285	18.0		zzzz102,zzzzz50
1364	33.33	222	18.0		zzzzz16,zzzzz94
375	26.14	264	18.0		zzzzz72,zzzzz97
1252	30.41	194	18.0		zzzzz20,zzzzz76
1134	37.5	136	18.0		zzzzz25,zzzzz95
1094	27.94	204	18.0		zzzzz28,zzzzz80
902	32.11	190	18.0		zzzzz42,zzzzz45
661	28.63	227	18.0		zzzzz59,zzzzz76
630	24.48	433	18.0		zzzzz60,zzzzz94
528	24.33	337	18.0		zzzzz64,zzzzz74
178	24.01	354	18.0		zzzzzz0,zzzzzz3
1445	30.81	185	18.0		zzzzz14,zzzzz54
1220	32.62	141	18.0		zzzzz22,zzzzz51
1181	26.52	230	18.0		zzzzz24,zzzzz49
603	32.64	193	18.0		zzzzz61,zzzzz96
1180	26.52	230	18.0		zzzzz24,zzzzz77
1610	31.85	157	18.0		zzzz100,zzzzz72
1609	34.59	133	18.0		zzzz100,zzzzz73
1251	29.75	158	17.0		zzzzz20,zzzzz61
1179	26.09	230	18.0		zzzzz24,zzzzz74
816	45.0	80	17.0		zzzzz54,zzzzz81
266	29.21	178	18.0		zzzzz79,zzzzz95
188	30.32	221	17.0		zzzzz96,zzzzzz6
1608	34.59	133	17.0		zzzz100,zzzzz68
1607	34.59	133	17.0		zzzz100,zzzzz69
1606	34.59	133	17.0		zzzz100,zzzzz70
1250	31.98	222	17.0		zzzzz20,zzzzz94
1133	31.96	194	17.0		zzzzz25,zzzzz94
780	28.98	176	17.0		zzzzz55,zzzzz78
321	29.78	178	17.0		zzzzz75,zzzzz95
1605	34.59	133	17.0		zzzz100,zzzzz67
1363	38.28	128	17.0		zzzzz16,zzzzz95
660	28.69	237	17.0		zzzzz59,zzzzz68
659	28.69	237	17.0		zzzzz59,zzzzz73
527	22.85	337	17.0		zzzzz64,zzzzz77
1178	25.64	273	17.0		zzzzz24,zzzzz59
1046	29.7	165	17.0		zzzzz29,zzzzz55
1045	33.33	156	17.0		zzzzz29,zzzzz97
658	28.69	237	17.0		zzzzz59,zzzzz69
657	28.69	237	17.0		zzzzz59,zzzzz70
656	28.69	237	17.0		zzzzz59,zzzzz72
1093	30.88	204	17.0		zzzzz28,zzzzz75
602	27.72	184	17.0		zzzzz61,zzzzz65
1604	26.53	196	17.0		zzzz100,zzzzz54
1444	30.11	186	17.0		zzzzz14,zzzzz28
901	29.38	194	17.0		zzzzz42,zzzzz51
507	22.19	311	17.0		zzzzz65,zzzzz96
1532	31.03	203	17.0		zzzz102,zzzzz30
1211	26.4	250	17.0		zzzzz23,zzzzzz1
506	27.68	177	17.0		zzzzz65,zzzzz99
1325	31.46	178	17.0		zzzzz18,zzzzz97
173	29.71	239	17.0		zzzzzz1,zzzzzz9
1324	32.86	140	17.0		zzzzz18,zzzzz57
1044	36.69	139	17.0		zzzzz29,zzzzz57
728	28.39	236	17.0		zzzzz56,zzzzz59
601	25.42	299	17.0		zzzzz61,zzzzz64
484	25.59	211	17.0		zzzzz66,zzzzz99
1249	29.82	228	16.0		zzzzz20,zzzzz96
1177	26.12	245	16.0		zzzzz24,zzzzz64
1043	32.41	216	17.0		zzzzz29,zzzzz49
655	26.29	251	17.0		zzzzz59,zzzzz80
1603	24.46	323	16.0		zzzz100,zzzzz61
1092	30.88	204	16.0		zzzzz28,zzzzz79
1042	33.18	217	16.0		zzzzz29,zzzzz77
1041	24.73	372	16.0		zzzzz29,zzzzz94
815	29.55	220	16.0		zzzzz54,zzzzz75
585	27.85	237	16.0		zzzzz62,zzzzz64
546	25.37	201	16.0		zzzzz63,zzzzz81
1347	25.52	337	16.0		zzzzz17,zzzzzz0
1176	27.9	233	16.0		zzzzz24,zzzzz65
779	24.46	323	16.0		zzzzz55,zzzzz99
172	29.36	218	16.0		zzzzzz1,zzzzzz8
727	31.82	132	16.0		zzzzz56,zzzzz95
306	34.53	139	16.0		zzzzz76,zzzzz97
1602	27.78	234	16.0		zzzz100,zzzzz63
584	26.72	232	16.0		zzzzz62,zzzzz78
814	29.55	220	16.0		zzzzz54,zzzzz79
583	26.52	230	16.0		zzzzz62,zzzzz79
1601	29.89	174	16.0		zzzz100,zzzzz20
1091	30.48	187	16.0		zzzzz28,zzzzz68
1090	30.48	187	16.0		zzzzz28,zzzzz73
839	24.64	349	16.0		zzzzz49,zzzzzz6
813	29.89	184	16.0		zzzzz54,zzzzz68
812	29.89	184	16.0		zzzzz54,zzzzz69
811	29.89	184	16.0		zzzzz54,zzzzz70
810	29.89	184	16.0		zzzzz54,zzzzz72
809	29.89	184	16.0		zzzzz54,zzzzz73
778	32.59	135	16.0		zzzzz55,zzzzz56
1323	22.82	241	16.0		zzzzz18,zzzzz65
1089	30.48	187	16.0		zzzzz28,zzzzz69
1088	30.48	187	16.0		zzzzz28,zzzzz70
1087	30.48	187	16.0		zzzzz28,zzzzz72
246	27.33	172	16.0		zzzzz81,zzzzzz6
1577	31.79	173	16.0		zzzz101,zzzzz79
1086	29.95	187	16.0		zzzzz28,zzzzz67
1040	31.94	216	16.0		zzzzz29,zzzzz74
966	29.25	212	15.0		zzzzz35,zzzzzz1
808	27.96	186	16.0		zzzzz54,zzzzz56
777	31.82	198	16.0		zzzzz55,zzzzz76
678	22.44	410	15.0		zzzzz58,zzzzz62
293	27.13	258	16.0		zzzzz77,zzzzzz6
807	31.91	188	15.0		zzzzz54,zzzzz55
806	30.37	214	15.0		zzzzz54,zzzzz76
582	27.39	230	15.0		zzzzz62,zzzzz75
191	27.33	172	15.0		zzzzz95,zzzzzz6
1576	31.79	173	15.0		zzzz101,zzzzz75
997	33.11	148	15.0		zzzzz32,zzzzz86
900	30.65	199	16.0		zzzzz42,zzzzz48
805	29.35	184	15.0		zzzzz54,zzzzz67
776	29.41	153	15.0		zzzzz55,zzzzz80
1210	28.19	259	15.0		zzzzz23,zzzzz26
1085	26.88	186	15.0		zzzzz28,zzzzz56
629	20.4	402	15.0		zzzzz60,zzzzz62
1175	25.75	167	15.0		zzzzz24,zzzzz61
581	27.56	254	15.0		zzzzz62,zzzzz66
255	32.89	149	15.0		zzzzz80,zzzzz95
1443	28.68	136	15.0		zzzzz14,zzzzz55
1084	30.93	194	15.0		zzzzz28,zzzzz76
1083	29.19	161	15.0		zzzzz28,zzzzz95
1039	28.87	239	15.0		zzzzz29,zzzzz66
804	27.56	225	15.0		zzzzz54,zzzzz63
600	24.54	273	15.0		zzzzz61,zzzzz66
1600	27.08	192	15.0		zzzz100,zzzzzz6
1575	28.93	197	15.0		zzzz101,zzzzz56
1248	22.67	344	15.0		zzzzz20,zzzzz49
1114	31.29	163	15.0		zzzzz26,zzzzz35
654	24.16	269	15.0		zzzzz59,zzzzz75
545	27.75	227	15.0		zzzzz63,zzzzz97
305	31.65	158	15.0		zzzzz76,zzzzz95
197	32.26	217	15.0		zzzzz94,zzzzzz6
1574	33.33	165	15.0		zzzz101,zzzzz80
1362	28.85	208	15.0		zzzzz16,zzzzz96
1322	26.82	220	15.0		zzzzz18,zzzzz49
1082	37.66	77	15.0		zzzzz28,zzzzz57
877	29.69	192	15.0		zzzzz45,zzzzz48
803	37.21	86	15.0		zzzzz54,zzzzz57
186	29.94	157	14.0		zzzzz97,zzzzz99
1442	31.34	134	15.0		zzzzz14,zzzzz95
1321	26.82	220	15.0		zzzzz18,zzzzz74
1320	26.56	241	15.0		zzzzz18,zzzzz77
1113	29.19	161	14.0		zzzzz26,zzzzzz9
775	27.5	200	15.0		zzzzz55,zzzzz69
526	24.3	214	14.0		zzzzz64,zzzzz99
1573	35.35	99	14.0		zzzz101,zzzzz28
774	28.0	200	14.0		zzzzz55,zzzzz73
1361	30.22	139	14.0		zzzzz16,zzzzz66
1112	31.48	162	14.0		zzzzz26,zzzzzz8
1081	28.66	164	14.0		zzzzz28,zzzzz61
1080	37.66	77	14.0		zzzzz28,zzzzz97
870	33.59	131	15.0		zzzzz48,zzzzz88
773	28.25	177	14.0		zzzzz55,zzzzz72
525	29.83	238	14.0		zzzzz64,zzzzz65
1132	29.41	136	14.0		zzzzz25,zzzzz66
772	28.81	177	14.0		zzzzz55,zzzzz68
771	28.81	177	14.0		zzzzz55,zzzzz70
599	26.74	187	14.0		zzzzz61,zzzzz62
177	27.35	245	14.0		zzzzzz0,zzzzzz1
1247	27.5	160	14.0		zzzzz20,zzzzz81
1174	22.92	240	14.0		zzzzz24,zzzzz62
726	35.63	87	14.0		zzzzz56,zzzzz82
505	29.38	177	14.0		zzzzz65,zzzzz95
1572	34.35	131	14.0		zzzz101,zzzzz78
1173	24.7	247	14.0		zzzzz24,zzzzz58
1111	30.25	162	14.0		zzzzz26,zzzzz30
1038	24.56	285	14.0		zzzzz29,zzzzz99
770	28.87	239	14.0		zzzzz55,zzzzz63
769	30.88	136	14.0		zzzzz55,zzzzz67
709	26.11	226	14.0		zzzzz57,zzzzz63
653	23.89	247	14.0		zzzzz59,zzzzz79
504	28.57	224	14.0		zzzzz65,zzzzz66
1599	27.05	329	14.0		zzzz100,zzzzz99
1246	25.91	220	14.0		zzzzz20,zzzzz77
869	29.22	219	14.0		zzzzz48,zzzzz51
339	25.29	257	14.0		zzzzz74,zzzzzz6
1531	26.86	242	14.0		zzzz102,zzzzz15
1298	32.12	165	14.0		zzzzz19,zzzzz76
1011	28.29	258	14.0		zzzzz31,zzzzz93
828	26.86	242	14.0		zzzzz50,zzzzzz1
462	32.58	132	14.0		zzzzz67,zzzzz95
171	26.95	256	14.0		zzzzzz1,zzzzzz5
1530	25.62	242	14.0		zzzz102,zzzzzz5
1245	27.4	146	13.0		zzzzz20,zzzzz95
1079	29.93	147	13.0		zzzzz28,zzzzz99
1010	31.71	164	14.0		zzzzz31,zzzzz35
1009	31.1	164	14.0		zzzzz31,zzzzzz9
1360	26.24	263	13.0		zzzzz16,zzzzz64
1319	27.78	216	13.0		zzzzz18,zzzzz94
1209	27.06	255	13.0		zzzzz23,zzzzz31
1110	33.13	163	13.0		zzzzz26,zzzzz50
802	28.85	156	13.0		zzzzz54,zzzzz61
801	30.0	240	13.0		zzzzz54,zzzzz96
800	35.37	82	13.0		zzzzz54,zzzzz97
544	25.29	261	13.0		zzzzz63,zzzzz82
439	34.48	87	13.0		zzzzz68,zzzzz82
396	34.48	87	13.0		zzzzz70,zzzzz82
304	34.48	87	13.0		zzzzz76,zzzzz82
1219	32.77	119	14.0		zzzzz22,zzzzz42
799	27.01	174	13.0		zzzzz54,zzzzz95
768	28.76	153	13.0		zzzzz55,zzzzz61
417	34.48	87	13.0		zzzzz69,zzzzz82
374	34.48	87	13.0		zzzzz72,zzzzz82
355	34.48	87	13.0		zzzzz73,zzzzz82
182	22.97	296	13.0		zzzzz98,zzzzzz0
1598	26.32	228	13.0		zzzz100,zzzzz65
1597	22.59	301	13.0		zzzz100,zzzzz95
1318	26.48	253	13.0		zzzzz18,zzzzz59
1208	29.8	151	14.0		zzzzz23,zzzzz33
1109	26.56	256	13.0		zzzzz26,zzzzz93
1008	29.67	246	13.0		zzzzz31,zzzzz50
895	26.53	196	13.0		zzzzz43,zzzzzz1
598	25.25	297	13.0		zzzzz61,zzzzz81
461	33.33	87	13.0		zzzzz67,zzzzz82
438	34.65	101	13.0		zzzzz68,zzzzz95
416	34.65	101	13.0		zzzzz69,zzzzz95
395	34.65	101	13.0		zzzzz70,zzzzz95
354	34.65	101	13.0		zzzzz73,zzzzz95
1317	26.14	176	13.0		zzzzz18,zzzzz99
1244	25.91	220	13.0		zzzzz20,zzzzz74
1023	26.46	223	13.0		zzzzz30,zzzzzz1
1007	31.1	164	13.0		zzzzz31,zzzzzz8
373	40.0	75	13.0		zzzzz72,zzzzz95
216	27.4	208	13.0		zzzzz86,zzzzzz4
1571	30.59	170	13.0		zzzz101,zzzzz76
1529	25.31	241	13.0		zzzz102,zzzzz19
1424	32.12	165	13.0		zzzzz15,zzzzz76
1423	28.09	235	13.0		zzzzz15,zzzzzz1
1297	28.57	245	13.0		zzzzz19,zzzzz54
1078	37.84	74	13.0		zzzzz28,zzzzz55
1077	25.45	220	13.0		zzzzz28,zzzzz63
1022	32.1	162	13.0		zzzzz30,zzzzz31
798	29.39	245	13.0		zzzzz54,zzzzzz5
1422	24.68	316	13.0		zzzzz15,zzzzz26
1243	24.85	169	13.0		zzzzz20,zzzzz97
1131	29.63	135	13.0		zzzzz25,zzzzz64
1130	34.88	86	13.0		zzzzz25,zzzzz82
652	23.2	250	13.0		zzzzz59,zzzzz61
215	27.27	209	13.0		zzzzz86,zzzzzz7
827	24.31	288	13.0		zzzzz50,zzzzzz0
303	31.52	165	13.0		zzzzz76,zzzzzz5
245	27.16	232	12.0		zzzzz81,zzzzz95
235	21.79	257	12.0		zzzzz82,zzzzz99
1316	22.65	446	12.0		zzzzz18,zzzzz60
1172	23.54	378	13.0		zzzzz24,zzzzz29
1171	29.75	158	12.0		zzzzz24,zzzzz97
1037	31.72	145	13.0		zzzzz29,zzzzz96
926	33.33	138	13.0		zzzzz38,zzzzz48
254	31.58	114	12.0		zzzzz80,zzzzz82
1170	28.25	177	12.0		zzzzz24,zzzzz57
1021	24.67	227	12.0		zzzzz30,zzzzzz0
651	24.11	224	12.0		zzzzz59,zzzzz99
205	24.71	255	12.0		zzzzz93,zzzzz98
1570	32.33	133	12.0		zzzz101,zzzzz67
1569	26.32	247	12.0		zzzz101,zzzzz73
1315	26.52	230	12.0		zzzzz18,zzzzz64
1242	28.67	143	12.0		zzzzz20,zzzzz59
708	30.47	128	12.0		zzzzz57,zzzzz99
460	33.12	154	12.0		zzzzz67,zzzzzz5
1596	24.53	212	12.0		zzzz100,zzzzz74
1568	30.93	97	12.0		zzzz101,zzzzz54
1567	29.89	174	12.0		zzzz101,zzzzz72
1484	27.4	208	12.0		zzzzz13,zzzzz86
1296	24.6	252	12.0		zzzzz19,zzzzzz1
981	28.37	141	12.0		zzzzz33,zzzzzz9
725	25.91	247	12.0		zzzzz56,zzzzz62
580	23.89	247	12.0		zzzzz62,zzzzz80
1566	31.11	90	12.0		zzzz101,zzzzz14
1565	32.33	133	12.0		zzzz101,zzzzz68
1564	32.33	133	12.0		zzzz101,zzzzz69
1563	32.33	133	12.0		zzzz101,zzzzz70
1421	28.05	246	12.0		zzzzz15,zzzzz54
1314	25.0	196	12.0		zzzzz18,zzzzz55
1129	28.06	196	12.0		zzzzz25,zzzzz96
1076	25.1	243	12.0		zzzzz28,zzzzz65
353	32.47	154	12.0		zzzzz73,zzzzzz5
1595	24.53	212	12.0		zzzz100,zzzzz77
1036	27.35	234	12.0		zzzzz29,zzzzz64
894	26.6	203	12.0		zzzzz43,zzzzz98
767	24.76	311	12.0		zzzzz55,zzzzz95
437	32.47	154	12.0		zzzzz68,zzzzzz5
415	32.47	154	12.0		zzzzz69,zzzzzz5
394	32.47	154	12.0		zzzzz70,zzzzzz5
372	32.47	154	12.0		zzzzz72,zzzzzz5
1528	23.83	256	12.0		zzzz102,zzzzzz0
1313	23.58	229	12.0		zzzzz18,zzzzz66
899	27.84	194	12.0		zzzzz42,zzzzz46
838	26.32	190	12.0		zzzzz49,zzzzz97
524	27.89	147	12.0		zzzzz64,zzzzz95
278	33.33	87	12.0		zzzzz78,zzzzz82
1594	26.63	169	12.0		zzzz100,zzzzz49
1483	24.18	182	12.0		zzzzz13,zzzzz43
1295	30.91	165	12.0		zzzzz19,zzzzz56
980	28.37	141	12.0		zzzzz33,zzzzz35
797	26.67	165	12.0		zzzzz54,zzzzz99
414	26.87	201	12.0		zzzzz69,zzzzzz1
277	26.62	263	12.0		zzzzz78,zzzzzz5
1502	30.12	166	12.0		zzzzz10,zzzzz86
1294	28.57	147	12.0		zzzzz19,zzzzz78
1035	25.78	256	11.0		zzzzz29,zzzzz60
597	32.19	146	11.0		zzzzz61,zzzzz97
579	26.7	206	12.0		zzzzz62,zzzzz76
483	27.91	129	11.0		zzzzz66,zzzzz95
436	26.87	201	12.0		zzzzz68,zzzzzz1
393	26.87	201	12.0		zzzzz70,zzzzzz1
371	26.87	201	12.0		zzzzz72,zzzzzz1
352	26.87	201	12.0		zzzzz73,zzzzzz1
176	23.6	267	11.0		zzzzzz0,zzzzzz5
1420	28.57	147	11.0		zzzzz15,zzzzz78
1312	24.02	229	11.0		zzzzz18,zzzzz58
1311	27.12	177	11.0		zzzzz18,zzzzz61
1034	23.94	259	11.0		zzzzz29,zzzzz59
1020	28.86	149	12.0		zzzzz30,zzzzz33
943	27.49	211	12.0		zzzzz37,zzzzzz9
796	25.69	218	11.0		zzzzz54,zzzzz65
578	24.12	228	11.0		zzzzz62,zzzzz65
1562	29.8	151	11.0		zzzz101,zzzzz18
1419	23.23	254	11.0		zzzzz15,zzzzzz0
1293	33.12	154	11.0		zzzzz19,zzzzz67
1292	25.7	249	11.0		zzzzz19,zzzzz80
1169	29.82	114	11.0		zzzzz24,zzzzz82
1108	26.53	245	11.0		zzzzz26,zzzzzz5
942	27.41	197	11.0		zzzzz37,zzzzzz8
908	30.73	192	12.0		zzzzz41,zzzzz92
220	30.73	192	12.0		zzzzz85,zzzzz92
1418	30.91	165	11.0		zzzzz15,zzzzz56
1207	23.88	268	11.0		zzzzz23,zzzzz98
979	28.37	141	11.0		zzzzz33,zzzzzz8
650	22.38	344	11.0		zzzzz59,zzzzz66
1291	30.82	159	11.0		zzzzz19,zzzzz72
1290	27.94	136	11.0		zzzzz19,zzzzzz0
1033	23.19	427	11.0		zzzzz29,zzzzz58
978	28.86	149	11.0		zzzzz33,zzzzz50
677	20.72	333	11.0		zzzzz58,zzzzz66
503	25.86	263	11.0		zzzzz65,zzzzz81
1561	26.43	140	11.0		zzzz101,zzzzz20
1501	23.63	182	11.0		zzzzz10,zzzzz43
1417	26.36	239	11.0		zzzzz15,zzzzz80
1289	32.47	154	11.0		zzzzz19,zzzzz68
1288	32.47	154	11.0		zzzzz19,zzzzz69
1287	32.47	154	11.0		zzzzz19,zzzzz70
1286	32.47	154	11.0		zzzzz19,zzzzz73
837	27.44	164	11.0		zzzzz49,zzzzz81
795	25.79	190	11.0		zzzzz54,zzzzz91
628	20.67	450	11.0		zzzzz60,zzzzz96
338	28.57	168	11.0		zzzzz74,zzzzz81
292	27.44	164	11.0		zzzzz77,zzzzz81
207	27.75	191	11.0		zzzzz89,zzzzz92
1416	24.55	330	11.0		zzzzz15,zzzzzz6
1168	30.36	168	11.0		zzzzz24,zzzzz81
1075	28.8	191	11.0		zzzzz28,zzzzz96
941	28.49	186	11.0		zzzzz37,zzzzzz0
893	22.99	187	11.0		zzzzz43,zzzzzz4
724	30.3	165	11.0		zzzzz56,zzzzzz5
676	22.75	255	11.0		zzzzz58,zzzzz64
291	38.27	81	11.0		zzzzz77,zzzzz82
1527	26.61	248	11.0		zzzz102,zzzzz93
1415	32.12	165	11.0		zzzzz15,zzzzz67
836	38.27	81	11.0		zzzzz49,zzzzz82
649	26.17	149	11.0		zzzzz59,zzzzzz6
1285	23.72	253	10.0		zzzzz19,zzzzz26
1074	23.74	219	10.0		zzzzz28,zzzzz62
898	33.33	123	11.0		zzzzz42,zzzzz87
766	24.18	153	11.0		zzzzz55,zzzzz74
337	25.26	190	11.0		zzzzz74,zzzzz97
204	25.4	248	11.0		zzzzz93,zzzzzz1
1560	23.15	203	10.0		zzzz101,zzzzz63
1414	30.0	170	10.0		zzzzz15,zzzzz72
1413	30.0	170	10.0		zzzzz15,zzzzz73
1228	30.82	146	11.0		zzzzz21,zzzzz86
1107	26.67	255	10.0		zzzzz26,zzzzzz0
965	26.9	197	11.0		zzzzz35,zzzzz37
835	24.18	153	10.0		zzzzz49,zzzzz55
290	24.84	161	10.0		zzzzz77,zzzzz97
187	30.14	146	10.0		zzzzz96,zzzzzz1
1441	29.89	87	10.0		zzzzz14,zzzzz82
1412	30.0	170	10.0		zzzzz15,zzzzz68
1411	30.0	170	10.0		zzzzz15,zzzzz69
1410	30.0	170	10.0		zzzzz15,zzzzz70
1128	21.55	232	10.0		zzzzz25,zzzzz58
1032	33.58	137	10.0		zzzzz29,zzzzz61
765	24.18	153	10.0		zzzzz55,zzzzz77
707	30.47	128	10.0		zzzzz57,zzzzz61
627	24.3	251	10.0		zzzzz60,zzzzz64
276	27.53	287	10.0		zzzzz78,zzzzzz0
253	28.75	160	10.0		zzzzz80,zzzzzz5
244	28.04	214	10.0		zzzzz81,zzzzz82
1559	40.0	65	10.0		zzzz101,zzzzz29
1440	27.36	201	10.0		zzzzz14,zzzzzz1
1359	32.56	86	10.0		zzzzz16,zzzzz82
1127	22.41	232	10.0		zzzzz25,zzzzz60
459	28.14	167	10.0		zzzzz67,zzzzzz1
1558	24.68	235	10.0		zzzz101,zzzzz61
1241	25.11	223	10.0		zzzzz20,zzzzz65
1073	23.1	277	10.0		zzzzz28,zzzzz60
868	26.42	193	10.0		zzzzz48,zzzzz91
626	21.91	251	10.0		zzzzz60,zzzzz66
390	30.67	150	11.0		zzzzz71,zzzzz89
214	26.97	152	10.0		zzzzz86,zzzzz98
185	23.98	171	10.0		zzzzz97,zzzzzz6
1206	25.49	204	10.0		zzzzz23,zzzzz84
1205	23.44	256	10.0		zzzzz23,zzzzzz0
1167	37.14	70	10.0		zzzzz24,zzzzz95
1072	23.81	231	10.0		zzzzz28,zzzzz64
1071	28.3	212	10.0		zzzzz28,zzzzz94
907	32.0	150	10.0		zzzzz41,zzzzz71
219	32.0	150	10.0		zzzzz85,zzzzz71
826	24.21	318	10.0		zzzzz50,zzzzz84
625	22.78	259	10.0		zzzzz60,zzzzz65
577	28.06	196	10.0		zzzzz62,zzzzz68
576	28.06	196	10.0		zzzzz62,zzzzz69
575	28.06	196	10.0		zzzzz62,zzzzz73
502	26.46	223	10.0		zzzzz65,zzzzzz6
1409	26.21	248	10.0		zzzzz15,zzzzz31
1240	25.66	113	10.0		zzzzz20,zzzzz58
1227	27.1	155	10.0		zzzzz21,zzzzz44
574	28.4	169	10.0		zzzzz62,zzzzz67
573	28.06	196	10.0		zzzzz62,zzzzz70
336	33.68	95	10.0		zzzzz74,zzzzz82
234	31.19	109	10.0		zzzzz82,zzzzzz6
1593	28.89	180	10.0		zzzz100,zzzzz64
1557	24.59	183	10.0		zzzz101,zzzzzz6
1439	30.56	144	10.0		zzzzz14,zzzzz19
1438	29.7	165	10.0		zzzzz14,zzzzzz5
1408	27.96	211	10.0		zzzzz15,zzzzz20
940	32.38	105	10.0		zzzzz37,zzzzz43
572	28.57	168	10.0		zzzzz62,zzzzz72
252	25.87	143	10.0		zzzzz80,zzzzz86
1592	27.78	180	9.0		zzzz100,zzzzz82
1526	26.95	167	10.0		zzzz102,zzzzz43
1358	22.32	233	10.0		zzzzz16,zzzzz58
1357	25.76	198	10.0		zzzzz16,zzzzz62
964	24.67	227	10.0		zzzzz35,zzzzz84
925	30.07	153	10.0		zzzzz38,zzzzzz1
885	28.06	139	10.0		zzzzz44,zzzzzz4
675	22.01	259	10.0		zzzzz58,zzzzz65
275	25.13	199	10.0		zzzzz78,zzzzzz1
1591	28.89	180	9.0		zzzz100,zzzzz66
1310	25.79	221	9.0		zzzzz18,zzzzz96
1239	28.89	135	9.0		zzzzz20,zzzzz82
1166	23.05	269	9.0		zzzzz24,zzzzz60
1106	29.34	167	10.0		zzzzz26,zzzzz86
674	21.13	388	9.0		zzzzz58,zzzzz95
624	20.88	407	9.0		zzzzz60,zzzzz95
1284	25.0	328	9.0		zzzzz19,zzzzzz6
1126	30.28	142	10.0		zzzzz25,zzzzz86
1031	23.29	249	10.0		zzzzz29,zzzzz65
939	27.94	136	10.0		zzzzz37,zzzzz61
924	26.88	160	10.0		zzzzz38,zzzzz43
923	29.37	143	10.0		zzzzz38,zzzzz86
871	30.3	165	10.0		zzzzz46,zzzzz48
227	24.67	227	9.0		zzzzz84,zzzzzz8
1590	37.63	93	9.0		zzzz100,zzzzz86
1125	29.32	133	9.0		zzzzz25,zzzzz62
1006	24.7	247	9.0		zzzzz31,zzzzzz0
996	27.52	149	9.0		zzzzz32,zzzzz43
820	24.16	149	10.0		zzzzz52,zzzzz86
596	27.94	136	9.0		zzzzz61,zzzzzz1
413	25.73	206	9.0		zzzzz69,zzzzz84
370	25.73	206	9.0		zzzzz72,zzzzz84
351	25.73	206	9.0		zzzzz73,zzzzz84
1589	28.14	167	9.0		zzzz100,zzzzz24
1437	25.0	248	9.0		zzzzz14,zzzzz62
1407	33.88	121	9.0		zzzzz15,zzzzz28
1356	30.22	139	9.0		zzzzz16,zzzzz86
1283	34.71	121	9.0		zzzzz19,zzzzz28
884	31.43	140	10.0		zzzzz44,zzzzz52
571	25.53	282	9.0		zzzzz62,zzzzzz6
435	25.73	206	9.0		zzzzz68,zzzzz84
392	25.73	206	9.0		zzzzz70,zzzzz84
243	35.35	99	9.0		zzzzz81,zzzzz86
226	24.23	227	9.0		zzzzz84,zzzzzz9
1282	24.0	250	9.0		zzzzz19,zzzzz31
1238	24.34	152	9.0		zzzzz20,zzzzz55
1237	28.28	145	9.0		zzzzz20,zzzzz93
971	26.92	208	9.0		zzzzz34,zzzzz38
458	25.24	206	9.0		zzzzz67,zzzzz84
302	28.67	143	9.0		zzzzz76,zzzzz86
1525	25.29	174	9.0		zzzz102,zzzzz61
1355	22.13	235	9.0		zzzzz16,zzzzz60
1281	28.39	155	9.0		zzzzz19,zzzzz20
1236	24.91	265	9.0		zzzzz20,zzzzz62
1070	34.43	122	9.0		zzzzz28,zzzzzz5
1019	24.49	196	9.0		zzzzz30,zzzzz84
794	25.11	231	9.0		zzzzz54,zzzzz64
764	23.2	181	9.0		zzzzz55,zzzzz64
763	24.83	149	9.0		zzzzz55,zzzzzz6
673	26.77	127	9.0		zzzzz58,zzzzzz6
648	23.28	262	9.0		zzzzz59,zzzzz64
523	24.5	249	9.0		zzzzz64,zzzzz82
457	27.59	145	9.0		zzzzz67,zzzzz86
1556	26.34	243	9.0		zzzz101,zzzzz95
1105	28.1	153	9.0		zzzzz26,zzzzz38
1030	30.82	146	9.0		zzzzz29,zzzzz95
995	30.3	132	9.0		zzzzz32,zzzzz44
977	26.15	130	9.0		zzzzz33,zzzzzz5
892	21.93	187	9.0		zzzzz43,zzzzzz7
793	22.97	148	9.0		zzzzz54,zzzzz62
647	34.15	82	9.0		zzzzz59,zzzzz65
1524	21.43	196	9.0		zzzz102,zzzzz12
1523	21.43	196	9.0		zzzz102,zzzzz40
1522	23.38	201	9.0		zzzz102,zzzzz78
1482	27.46	142	9.0		zzzzz13,zzzzz44
1069	22.27	256	9.0		zzzzz28,zzzzz58
1029	23.62	254	9.0		zzzzz29,zzzzz82
1005	25.74	202	9.0		zzzzz31,zzzzz78
963	21.8	289	9.0		zzzzz35,zzzzzz0
883	28.17	142	9.0		zzzzz44,zzzzzz7
501	29.1	134	9.0		zzzzz65,zzzzz82
251	30.41	148	9.0		zzzzz80,zzzzzz1
175	21.29	263	9.0		zzzzzz0,zzzzzz9
1436	29.08	141	9.0		zzzzz14,zzzzz86
1235	37.5	80	9.0		zzzzz20,zzzzzz5
1218	24.37	197	9.0		zzzzz22,zzzzz48
1204	23.81	210	9.0		zzzzz23,zzzzz37
1165	41.1	73	9.0		zzzzz24,zzzzz30
994	29.17	144	9.0		zzzzz32,zzzzz76
623	27.03	148	8.0		zzzzz60,zzzzz81
622	28.35	127	9.0		zzzzz60,zzzzzz6
265	27.89	147	9.0		zzzzz79,zzzzzz7
190	37.88	66	8.0		zzzzz95,zzzzz97
1280	27.48	131	9.0		zzzzz19,zzzzz33
1203	50.0	42	8.0		zzzzz23,zzzzz24
1004	26.79	168	9.0		zzzzz31,zzzzz67
938	24.4	209	9.0		zzzzz37,zzzzz50
891	26.45	155	9.0		zzzzz43,zzzzz84
320	28.45	116	8.0		zzzzz75,zzzzz82
250	25.96	208	9.0		zzzzz80,zzzzz84
174	20.62	257	8.0		zzzzzz0,zzzzzz8
166	23.87	331	8.0		zzzzzz5,zzzzzz6
1279	28.33	120	8.0		zzzzz19,zzzzz25
1124	24.19	124	8.0		zzzzz25,zzzzz59
1068	21.56	218	8.0		zzzzz28,zzzzz66
1003	24.41	254	8.0		zzzzz31,zzzzzz5
762	25.88	228	8.0		zzzzz55,zzzzz94
706	25.65	191	8.0		zzzzz57,zzzzz77
595	22.09	249	8.0		zzzzz61,zzzzz82
301	26.73	202	8.0		zzzzz76,zzzzzz0
1588	22.68	194	8.0		zzzz100,zzzzzz0
1521	26.35	167	8.0		zzzz102,zzzzz67
1520	25.87	201	8.0		zzzz102,zzzzz68
1519	25.87	201	8.0		zzzz102,zzzzz69
1518	25.87	201	8.0		zzzz102,zzzzz70
1517	25.87	201	8.0		zzzz102,zzzzz72
1516	25.87	201	8.0		zzzz102,zzzzz73
1406	25.38	130	9.0		zzzzz15,zzzzz33
976	28.29	152	9.0		zzzzz33,zzzzzz0
761	24.65	142	8.0		zzzzz55,zzzzz66
522	27.51	189	8.0		zzzzz64,zzzzz81
434	26.21	145	9.0		zzzzz68,zzzzz86
391	26.21	145	9.0		zzzzz70,zzzzz86
369	26.21	145	9.0		zzzzz72,zzzzz86
350	26.21	145	9.0		zzzzz73,zzzzz86
319	24.62	260	8.0		zzzzz75,zzzzz84
264	29.17	96	8.0		zzzzz79,zzzzz82
242	35.06	77	8.0		zzzzz81,zzzzz98
1555	31.82	110	8.0		zzzz101,zzzzz15
1435	28.48	165	8.0		zzzzz14,zzzzz15
1278	27.88	165	8.0		zzzzz19,zzzzz79
1234	23.45	145	8.0		zzzzz20,zzzzz57
1233	23.01	113	8.0		zzzzz20,zzzzz60
1123	27.19	114	8.0		zzzzz25,zzzzz98
1104	25.37	201	8.0		zzzzz26,zzzzz78
1067	26.99	163	8.0		zzzzz28,zzzzz91
1018	24.75	202	8.0		zzzzz30,zzzzz37
760	29.89	87	8.0		zzzzz55,zzzzzz0
723	24.88	201	8.0		zzzzz56,zzzzzz1
705	27.23	224	8.0		zzzzz57,zzzzz95
412	26.21	145	8.0		zzzzz69,zzzzz86
196	28.66	164	8.0		zzzzz94,zzzzzz1
181	22.57	257	8.0		zzzzz98,zzzzzz5
1554	27.87	122	8.0		zzzz101,zzzzz64
1309	27.78	144	8.0		zzzzz18,zzzzz82
1164	22.61	199	8.0		zzzzz24,zzzzzz1
922	26.81	138	8.0		zzzzz38,zzzzz67
876	25.26	190	8.0		zzzzz45,zzzzz54
867	30.56	144	8.0		zzzzz48,zzzzz87
704	25.37	201	8.0		zzzzz57,zzzzz74
703	23.45	145	8.0		zzzzz57,zzzzzz6
482	27.46	142	8.0		zzzzz66,zzzzz81
335	29.27	123	8.0		zzzzz74,zzzzz84
318	27.21	147	8.0		zzzzz75,zzzzzz7
230	26.53	147	8.0		zzzzz83,zzzzz89
225	28.1	210	8.0		zzzzz84,zzzzz93
1587	27.71	166	8.0		zzzz100,zzzzz62
1553	35.21	71	8.0		zzzz101,zzzzz19
1552	27.05	122	8.0		zzzz101,zzzzz66
1515	24.22	289	8.0		zzzz102,zzzzz62
1405	34.55	55	8.0		zzzzz15,zzzzz25
1404	26.01	223	8.0		zzzzz15,zzzzz37
937	24.58	179	8.0		zzzzz37,zzzzz78
834	25.13	191	8.0		zzzzz49,zzzzz57
759	24.75	202	8.0		zzzzz55,zzzzz62
570	25.29	174	8.0		zzzzz62,zzzzz97
317	25.0	240	8.0		zzzzz75,zzzzzz5
263	25.0	240	8.0		zzzzz79,zzzzzz5
203	22.68	291	8.0		zzzzz93,zzzzzz0
1551	31.82	110	8.0		zzzz101,zzzzzz5
1514	25.62	160	8.0		zzzz102,zzzzz21
1403	27.88	165	8.0		zzzzz15,zzzzz79
1103	25.0	164	8.0		zzzzz26,zzzzz43
993	28.37	141	8.0		zzzzz32,zzzzz68
992	28.37	141	8.0		zzzzz32,zzzzz69
991	28.37	141	8.0		zzzzz32,zzzzz70
990	28.37	141	8.0		zzzzz32,zzzzz73
989	27.08	144	8.0		zzzzz32,zzzzz80
975	26.58	158	8.0		zzzzz33,zzzzz43
958	39.71	68	8.0		zzzzz36,zzzzz43
936	23.33	180	8.0		zzzzz37,zzzzz68
935	23.33	180	8.0		zzzzz37,zzzzz69
934	23.33	180	8.0		zzzzz37,zzzzz70
933	23.33	180	8.0		zzzzz37,zzzzz73
921	26.62	139	8.0		zzzzz38,zzzzz76
906	24.08	191	8.0		zzzzz41,zzzzz83
218	24.08	191	8.0		zzzzz85,zzzzz83
334	29.93	147	8.0		zzzzz74,zzzzzz1
274	24.81	133	8.0		zzzzz78,zzzzz84
1500	25.35	142	8.0		zzzzz10,zzzzz44
1402	31.5	127	8.0		zzzzz15,zzzzz93
1163	56.41	39	8.0		zzzzz24,zzzzz50
1122	26.67	120	8.0		zzzzz25,zzzzzz5
1002	26.73	202	8.0		zzzzz31,zzzzz56
988	28.37	141	8.0		zzzzz32,zzzzz67
987	28.37	141	8.0		zzzzz32,zzzzz72
932	23.33	180	8.0		zzzzz37,zzzzz72
594	32.39	71	8.0		zzzzz61,zzzzz84
289	30.08	123	8.0		zzzzz77,zzzzz84
241	29.11	158	8.0		zzzzz81,zzzzz94
195	25.0	152	8.0		zzzzz94,zzzzz97
974	28.08	146	8.0		zzzzz33,zzzzz38
973	29.45	146	8.0		zzzzz33,zzzzz86
931	25.11	223	8.0		zzzzz37,zzzzzz5
913	20.09	214	7.0		zzzzz40,zzzzz98
792	24.14	174	8.0		zzzzz54,zzzzz98
481	22.4	250	7.0		zzzzz66,zzzzz82
240	21.01	257	7.0		zzzzz81,zzzzzz0
202	26.9	145	8.0		zzzzz93,zzzzzz6
194	25.88	170	8.0		zzzzz94,zzzzz98
1513	25.87	201	7.0		zzzz102,zzzzz56
1491	20.09	214	7.0		zzzzz12,zzzzz98
1308	25.97	154	7.0		zzzzz18,zzzzz95
920	27.33	150	8.0		zzzzz38,zzzzz44
919	28.35	127	7.0		zzzzz38,zzzzzz5
833	29.69	128	7.0		zzzzz49,zzzzz84
1550	24.82	137	7.0		zzzz101,zzzzz65
1434	26.77	127	8.0		zzzzz14,zzzzz37
1401	24.44	135	7.0		zzzzz15,zzzzz16
1354	26.09	115	7.0		zzzzz16,zzzzz98
1277	29.13	127	7.0		zzzzz19,zzzzz38
918	26.62	139	7.0		zzzzz38,zzzzz80
569	26.9	171	7.0		zzzzz62,zzzzz81
239	25.13	199	7.0		zzzzz81,zzzzz96
201	30.71	127	7.0		zzzzz93,zzzzzz5
1586	26.61	109	7.0		zzzz100,zzzzz43
1549	31.58	76	7.0		zzzz101,zzzzz99
1400	29.13	127	7.0		zzzzz15,zzzzz38
1353	24.6	126	7.0		zzzzz16,zzzzz59
1066	25.79	190	7.0		zzzzz28,zzzzz45
791	25.0	212	7.0		zzzzz54,zzzzz94
262	23.85	260	7.0		zzzzz79,zzzzz84
1512	25.64	156	7.0		zzzz102,zzzzz38
1352	30.91	55	7.0		zzzzz16,zzzzz19
1065	26.06	142	7.0		zzzzz28,zzzzz37
1064	28.3	106	7.0		zzzzz28,zzzzz98
930	36.99	73	7.0		zzzzz37,zzzzz74
917	38.33	60	7.0		zzzzz38,zzzzz98
790	22.71	229	7.0		zzzzz54,zzzzzz1
758	25.81	155	7.0		zzzzz55,zzzzz65
249	24.41	254	7.0		zzzzz80,zzzzzz0
224	23.23	155	7.0		zzzzz84,zzzzz96
1585	37.5	56	7.0		zzzz100,zzzzz98
1499	26.35	148	7.0		zzzzz10,zzzzzz1
957	36.99	73	8.0		zzzzz36,zzzzz74
929	32.89	76	7.0		zzzzz37,zzzzz38
223	28.57	91	7.0		zzzzz84,zzzzz95
1276	27.88	165	7.0		zzzzz19,zzzzz75
956	30.14	73	7.0		zzzzz36,zzzzz61
890	35.19	54	7.0		zzzzz43,zzzzz55
568	24.1	166	7.0		zzzzz62,zzzzz84
1511	21.91	283	7.0		zzzz102,zzzzz76
1490	26.21	145	7.0		zzzzz12,zzzzzz5
1399	27.23	202	7.0		zzzzz15,zzzzz74
1351	24.24	132	7.0		zzzzz16,zzzzzz5
1275	24.66	223	7.0		zzzzz19,zzzzz37
889	34.92	63	7.0		zzzzz43,zzzzz81
888	27.43	113	7.0		zzzzz43,zzzzzz0
702	27.82	133	7.0		zzzzz57,zzzzz66
701	26.67	120	7.0		zzzzz57,zzzzz94
700	27.27	99	7.0		zzzzz57,zzzzz98
333	26.29	194	7.0		zzzzz74,zzzzzz5
1584	29.14	175	7.0		zzzz100,zzzzz94
1433	32.98	94	7.0		zzzzz14,zzzzz36
1398	31.06	132	7.0		zzzzz15,zzzzz18
1102	22.22	171	7.0		zzzzz26,zzzzz54
1101	27.36	201	7.0		zzzzz26,zzzzz56
972	44.68	47	7.0		zzzzz33,zzzzz93
905	27.32	194	7.0		zzzzz41,zzzzz48
217	27.32	194	7.0		zzzzz85,zzzzz48
789	28.57	133	7.0		zzzzz54,zzzzz74
288	26.29	194	7.0		zzzzz77,zzzzzz5
1510	22.46	187	6.0		zzzz102,zzzzz94
1509	23.27	159	6.0		zzzz102,zzzzz96
1397	27.23	202	6.0		zzzzz15,zzzzz77
1307	30.3	132	6.0		zzzzz18,zzzzz19
1226	23.75	160	7.0		zzzzz21,zzzzzz1
928	24.31	181	7.0		zzzzz37,zzzzz56
912	26.21	145	6.0		zzzzz40,zzzzzz5
887	33.33	66	7.0		zzzzz43,zzzzz54
788	34.78	69	6.0		zzzzz54,zzzzz59
787	24.16	149	6.0		zzzzz54,zzzzz66
757	31.33	83	6.0		zzzzz55,zzzzz98
213	39.73	73	7.0		zzzzz86,zzzzz99
210	29.7	101	7.0		zzzzz87,zzzzz92
1396	27.88	165	6.0		zzzzz15,zzzzz75
1306	31.06	132	6.0		zzzzz18,zzzzzz5
1162	26.95	167	6.0		zzzzz24,zzzzz55
756	31.33	83	6.0		zzzzz55,zzzzz82
184	20.83	336	6.0		zzzzz97,zzzzz98
1548	27.05	122	6.0		zzzz101,zzzzz77
955	27.96	93	7.0		zzzzz36,zzzzz78
832	25.77	194	6.0		zzzzz49,zzzzzz5
786	27.07	133	6.0		zzzzz54,zzzzz77
699	27.07	133	6.0		zzzzz57,zzzzz64
316	26.79	168	6.0		zzzzz75,zzzzz98
233	30.23	86	6.0		zzzzz82,zzzzz86
1547	27.05	122	6.0		zzzz101,zzzzz49
1546	25.64	195	6.0		zzzz101,zzzzz94
1063	21.56	334	6.0		zzzzz28,zzzzz49
927	28.57	126	6.0		zzzzz37,zzzzz96
1274	27.23	202	6.0		zzzzz19,zzzzz74
1001	25.29	174	6.0		zzzzz31,zzzzz86
389	28.79	66	6.0		zzzzz71,zzzzz90
954	35.62	73	6.0		zzzzz36,zzzzz77
953	33.33	72	6.0		zzzzz36,zzzzz38
952	35.82	67	6.0		zzzzz36,zzzzz49
951	28.0	100	6.0		zzzzz36,zzzzz68
950	28.0	100	6.0		zzzzz36,zzzzz69
949	28.0	100	6.0		zzzzz36,zzzzz70
948	28.0	100	6.0		zzzzz36,zzzzz72
947	28.0	100	6.0		zzzzz36,zzzzz73
