# Supplementary material for: Discovery of several thousand highly diverse circular DNA viruses
Source: eLife journal article supplement (doi:10.7554/elife.51971), 2020-02-03
Supplement: fig2-figsupp1-data2 [file elife-51971-fig2-figsupp1-data2-v1.cys › CytoscapeSession-2019_08_05-17_27/tables/36-all_my_seqs_genbank_ssDNA1_domains_ino_zot_fasta+Full+Network/SHARED_ATTRS-org.cytoscape.model.CyNetwork-36+shared+network.cytable]

"CyCSV-Version","1"
"SUID","shared name"
"java.lang.Long","java.lang.String"
"",""
"36 shared network",""
"52","all_my_seqs_genbank_ssDNA1_domains_ino_zot_fasta Full Network"
"36",
