# Supplementary material for: Discovery of several thousand highly diverse circular DNA viruses
Source: eLife journal article supplement (doi:10.7554/elife.51971), 2020-02-03
Supplement: fig2-figsupp1-data2 [file elife-51971-fig2-figsupp1-data2-v1.cys › CytoscapeSession-2019_08_05-17_27/tables/36-all_my_seqs_genbank_ssDNA1_domains_ino_zot_fasta+Full+Network/SHARED_ATTRS-org.cytoscape.model.CyNode-36+shared+node.cytable]

"CyCSV-Version","1"
"SUID","Description","seq_source","Sequence","Sequence Length","Sequence Source","shared name"
"java.lang.Long","java.util.List<java.lang.String>","java.lang.String","java.lang.String","java.lang.Integer","java.lang.String","java.lang.String"
"","mutable","mutable","mutable","mutable","mutable",""
"36 shared node",""
"164","my_seqs_seabass_ms2_2ct138.11@PF05707.11","my_seqs","MLELCTGKPGASKSLNTLASLIASNQGNRPIYYTNVRLLMLDYNIASSFSGWFYGNYSLFLKNKGAKKRLAKIIKRVHADDEFLTLADVPWLESYFEAANPVDTWLLWARKLYSKKQLSRMEEFISNMPSDELKFEHLKQFNLHFNYFHNPREWHLLPKTSIIFIDECQQFFPPRAAGSTVPIHVTKFETHRHDGYDIHLVTQDRMLLDSNVRKLVNRHIHYHNPFGGNRVTRFEQSKSFDSDNYFDLKVAQKTFVKRPVKLYGSYFSSEMHTHKFKLPNFVYAFVLLVIFIAYTVYSLATSSLFSSAETEAAIKTDSNGLVVKESKVTHISPRSSLLSPDENKVLTAFVQNTIEDVFISGSQYIKDVNGVVRYDYSFVQSTTDLVFEPEAVGFEILPITACLVRLNFNDFTTFITCNPFYKHTDKDPVIDSETPSDFDLLASF","444","USER","zzzz100"
"163","my_seqs_seabass_ms2_2ct147.6@PF05707.11","my_seqs","MIYLRTGVPGAGKTLNSLKEICNDPAVTQKPKYYNNIKAFLLDLDFCNSFQGFFYGYYYPSIQNSPKAGRYKKIIKAVHAEARLVDVSDVPWLAPNYARYSEQSVIDLFVSWCRKCYPKSNLKALDLFLEESENPTVETIKLLNYHWTHTDDPTRWPELPNGSIALFDECQDYFPPMANSAKRPYYYTQFQKHRHSGVDIHLVTQHYTFLDAVIQKCTGMHVHYFRPMGGAVITRFSRDKQFSTDYSGDLEKCVTKAIKRDSNFYGVYWSADEHTAKFKMPPKLMLMLLLIPFIIYLFYTLLVSLGLTSDEPELKVNDSEQQVIAPKSLPSQTKEVENIQFKTTKFKHPLNELCKSYEYGGYQLKRTNGILEVEHYINCVTGQEVEKQKAISFTTKDDEEQTRSEQIKEPEVILLSSNYLEKLGYFIYLNEDLPILKFKDTKIFLHQF","448","USER","zzzz101"
"162","my_seqs_squid_r1_2ct000.9@PF05707.11","my_seqs","MIYCISGRPRSGKSYESVVYHIIPAIKSGRKVITNVTLNIDWFVKLFGPEVKSLIQIVDGQLNEFGKMNRPFSCIADYMTDWRDDQNRGPLFVIDEAHMVLPTRLNDAKILEFYSLHGHYGLDIILLTQNLRKLHRDIKDMIEMTYYCAKNTAFGSDKTYTKKVRIGATTEVVNEEIRKYKEHYFPAYQSHTQSSGSVAEAMANDIKPIWKRWPFYGAAIFLLIGPAILIYASLSKDEPKAVQSKNEIKAQVQSQAQASDVSVPDDSQQTVQVRDSRTSRKKVDFGPLNDYDIFATGISQQIAYHTKSGVYQVNYDETFKKVHISVYSKARKLFTVDHLQLSRMGYEFQELGDCVYKATWNDESRIITCIKDEDIFLDVDSPLSSVPVVSI","391","USER","zzzz102"
"161","genbank_inoviridae_NP_040578.1_@PF05707.11","genbank","MAVYVVTGKLGAGKTLVAVSRIQRTLAKGGIVATNLNLKLHHFPQVGRYAKQCRVMRIADKPTLEDLESIGRGNLTYDESKNGLLVLDECGTWFNSRNWSDKSRQPVIDWCLHARKLGWDIIFIIQDISLMDKQARDALAEHVVYCRRLDKLNIPIIGGLISVLSGGRLPLPKVHFGIVKYGDNPQSLTVDKWVYTGTDLYAAYDTKQIFTSDREISPPYCPLSPYYTHGIFSVKRDAKYYMRMTKIYFKKMNRVFLMASFLALGAACGIFYKSQAYSNQLQHIQDNSKTSVISKTDQSAEILPRLSINSYSQMGYDVSVTFKDAKAKIYNSFDLIKDGYRVDIKDACHVTIVKKSYIQQITCEG","365","USER","zzzzz10"
"160","genbank_inoviridae_NP_620621.1_@PF05707.11","genbank","MKKFIFFFKNYCYISGSMLLFSLIDLLLWIISLYCVGLVFWILFALQCVYFVWWLWKNIFYQLNAFRLVNFVWDNPLSVIIGKLGTGKTLLLTYLSQTMKLLTDEIYSNYPLEDDKVKVLTFKNLDFTDRTKPVPPDDSVILFDESYLYIDGTSPHDEKKVHSGKIPWIVLARHFRHRALFTAQREGMIWNNIRQLASGIIIPISLKKPVAKKGFNFFNRFFIMRMGIFQDITDYEIWKTKSVERTAEGKRAKHKSDVGLGIRFFKIIIPLEFANKYDSEWLKFVRDLKNDEIVNEKFYYWSEITKLSVKERLELFDIDILKKNLKPRKEKGNGKDD","337","USER","zzzzz11"
"159","genbank_inoviridae_WP_015979088.1_@PF05707.11","genbank","MSIKIHHGPNGSYKTSGAIQDDAVPALKDGRVIITNVRGFTLERAYQVFPDLPNTAEIINLDLESLEDLEKMRTWFQWAPRGAFLIFDETQLLFPKSWREKDLERFDYPGGPEAAHAADRPMGWLDAWTRHRHFNWDIVLTTPNISYIRDDIRMTCEMAYKHSNLAVIGIPGRYKEAQHDAQLNRPPADGTIIEYKRIRKQTFALYQSTATGKTQDTKAGKSLFRSPKLVLLLALLAGTIGFVWYMGPLRTIGGPAAATPADAPGDPAQAPAAPAAVAAPARPAANSFLPPGLVPDGPAAAPVDLNAHPFADRRISILAHAYRKSRGDIYMFALEDPTGRHLELTSWQLIGSGYRVTPKGECVVELRYEDWKQTVTCAGRQAGAVASIAPAAPVAASADAPARGQSPLTIVPDSEYASRPWRQK","424","USER","zzzzz12"
"158","genbank_inoviridae_NP_039622.1_@PF05707.11","genbank","MAVYVVTGKLGAGKTLVAVSRIQRTLAKGGIVATNLNLKLHHFPQVGRYAKQCRVMRIADKPTLEDLEAIGRGNLSYDESKNGLIVLDECGTWFNSRNWSDKSRQPVIDWFLHARKLGWDVIFIIQDISLMDKQAREALAEHVVYCRRLDKLNIPIIGGLISVLSGGRLPLPKVHFGIVKYGDNPQSLTVDKWIYTGTDLYAAYDTKQIFTSDRELSPPFCPVSPYYTHGIFAVKRDAKYYMRMTKIYFKKMNRVWLMASFLALGAGVGFFYKSRQINEQLSNMPVASAQANTTKTDHTIDELPRLSINSFAQMGYDVNVSFKDAKGKIYYSFDLMKSGYALDIKDSCHITLRKRNYIQQVTCEG","365","USER","zzzzz13"
"157","genbank_inoviridae_NP_040656.1_@PF05707.11","genbank","MITLITAVPGSGKTLYAIGLIEAALSEGRPVFTNISGLVKDKFSNPHLLSDAPDDWRDTPEGSLVVYDEAQQAHLYPSNAQRGPVTDERLTAMETHRHTGHDLVFITQAPTFVHHHIRKLVGLHIHLYRSRGLQAASKYEWSHVCDSPNDRKEQQRADFVLWKFPKEHFAFYTSAVMHTHKFKMPKKIGVLLVFVVLGLGAVGFNLYKNSGLASMAEATASVAEATPSPLALNGVKPSSLAAPYQWSAAAPAVPVSGCVANRSTNRCQCFDASGVVLAIEHAACLSVISSPLPRQLLSTSK","301","USER","zzzzz14"
"156","genbank_inoviridae_YP_002290962.1_@PF05707.11","genbank","MLIVHEGLPGAGKTWEAVVKRLIPALQRGRKVYARINGLDHAKIAEVAGVELERVRELLHEIPEADVLRWNELVENDSLVILDEAQNFWPHGATRTMPPDQIKAVAEHRHRGLDIVLMCQVLQGAGGVHPVWVNRVDQKIVFEKLNARGKDDRYKWTAYKGLHNGTKIKFVQINKGTEGYDSKYFGTYASHQAATENTETYQDARTNVWNNPVLKRWLPLFGVALVVAVWYLWHALKGGGLEQSMSAGHKVETKTAVVSVPATVAAQPVASGVQAGVSQAQPVAAKAEPVTGGQRQDAMADDYVASISQKWRPRLSGLAWAANRARLVVEWYDESNRVKERLSAAQLEEFGWGVARSAYGDHVILSKGGVHVAVTAWPIEEFGRVSDRDNQALHELAVGKSGGLPSSDVSGSERVPVVPSADRAQDVPAADGRQRWSHG","439","USER","zzzzz15"
"155","genbank_inoviridae_WP_012435533.1_@PF05707.11","genbank","MLTLITGQPGNGKSLYTIAFVEAKRKAESRPVFYFGIPELSLPWTMLDDPTKWHECPEKSIIVIDEVQKVMPPRPSSSKAPLHVSELETHRHKGFDLFFMTQDPSLVDNHLKKLAGEHIHLIRQWGRQKADLFKMQKVQDPTNANLKRALHSSFPYPKEVFGWYKSADAHTHKKAIPLKYYMMYALPVVALAAALFGGWKLWKISHPDVPQVQVPVSGAAAGQLGAPGAAAAAAQRAPMTAKEYVASYVPRVPGLQYTAPAYDELTKPSRVPVPAACVQIRGGCECWTQQGTRLETTPQICDQVVKRGFFEAFEANGQMARSQERVQPAPQPVPAPPAQAQEVRVVVDASRPAQAAQEPRKRTVIGSGKARRVDELEVFPEG","382","USER","zzzzz16"
"154","genbank_inoviridae_WP_015975294.1_@PF05707.11","genbank","MAIFIRTGANGSYKSAYVAYFVILEALKAGRVVVTNMQGFETLDVIEKRFDITFPSTTRLIRIFSRDKNGIELWQHFFCWCPIGALIVIDECQDIFSKNIGFRMEKVFYRPLSDFLPMLPPDYESFFNARYLPADMSKLQACEMDDRGIAEYDETGRIIYPLSFNEGFMRHRHYNWDIHLLSPDWGQIDSAIRACAEECYFHKGRDAYFFARRKPLIYRHPKNVATLVIPKGKDPNVFPQKIPLDAHLLYKSTSTGQANQSGAINMLLKNPTILGSLLLGILSIGYFIYAFSGLVFGSSKTVADTSAQTSNTSVSQSPDSVPQTGGQNAPALSTGGDGHQASSVSPAPSHRIDTIKQMLGLYDLQTLYYTGHTTRQSQTKGFQFFVTLEAKTPEGTYYLDDTFLRANDIAYVHYDDCLLKLTKENITINVTCKPILREAVPDASQPPQVKLGALF","455","USER","zzzzz17"
"153","genbank_inoviridae_WP_015979236.1_@PF05707.11","genbank","MIGDTASISLLTGLPGSGKSLRIIQAIRYLMDKGAHVYVCNIDGISVPGTTPWADPHKWQDLPAGSILFVDEAQHFFPARRGGDPVETIKAMSTIRHDGVRLVLATQQPNYLDTYLRGLVGYHEHLLRQSGKQKTFIFRNSQIIEEVRSPLPRIKKLYDYEVWKQPTECFKFYKSAEVHTMKYQMPALVKKALMILPVVALLAGGAWYAVYRDTMFAKKADAAPANKTAPSGPSLAGTASAGAAARPKVNSAEDYVGQLVPLVADVPWSAPAYVDRPVVSDPHVYCMATENTCRCVTEQNSRVVMRDDVCRDIARWGEPYNPYKPPHSPAQKQQDSPVAEATQPKPQVPQQSGAVSSSVQRATRSLGTFPESPPYQTTTYTPPTTRDL","388","USER","zzzzz18"
"152","genbank_inoviridae_YP_009103105.1_@PF05707.11","genbank","MLIVHEGLPGAGKTWEAVVKRLIPALQKGRKVYARINGLDRAKIAEVACVELERVRELLHEIPEADVLRWNELVENDSLVILDEAQNFWPHGATRTMPPDQIKAIAEHRHRGLDIVLMCQVLQGAGGVHPVWVNRVDQKIVFEKLNARGKDHRYKWTAYKGLHNGTKIKFTQINKGTEGYDPKYFGTYASHQAATENTETYQDARTNVWNNPVLKRWLPLFGVALVVAVWYLWHALKGGGLEQSMNAGHKVETKTTVVAGPAPVAAPVAASGVQAGVGQAQPMAVKAEPVTGGQKQDAMADDYVASISQKWRPRLSGLAWAANRARLVVEWYDESNRVKERLSAAQLEEFGWGVARSAYGDHVILSKGGVHVAVTAWPIEEFGRVSDRDNQALHDLAVGKSGGLPSSDFSSSERAPVATPAVDRAQDVPVSDGRQRWSHG","440","USER","zzzzz19"
"151","genbank_inoviridae_WP_069959848.1_@PF05707.11","genbank","MPIELYTGQPGNGKTALMMERLVEEAKRAERPIFAAGIDGLQDGLATVLDDPRKWNDKDADGNYVVPNGSLIFVDEAWKWYGHLHDATRQQTPKHVLDLAEHRHRGLDFVWTTQQPNQLYPFVRGLIGAHTHVVRRFGTKMIDVFRWGELNEEIKSSAKRDLAQRTTRLLPSSIFGAYKSAEVHTIKPRIPWKVMALPGLVILAIALGWLAYTMLKPSAMAGKLGGKGTQSASADAAPGGSATTARRDGPRWESPTEYAKQHLPRFGTMPWTAPVFDDRSITADPMLICMSSLAGTDAQGKHKEASCTCITEQGTAYDLDQPQCRTIAKRGPVYNPYRQQRQNEQQPAQQQQAAQGGVAAPGLNGVAVQRSTRTQGSFPESKAYSTKTTTPSTTLEM","397","USER","zzzzz20"
"150","genbank_inoviridae_WP_055348846.1_@PF05707.11","genbank","MPIYIITGRLGSGKSLATVGRIRDLLAEGRAVATNLDLDLEKLCGPKAKTPRVVRLPDKPTVAHLDSLGRGNESYDETKNGGIFLDEVSQLLNARNWQDKRQQDVIDWLVHSRKKGWDVYFICQHISQVDRQVRDALVEYLVECRRFDRLKIPFLSSAVDTFTLGKVKLKLPRMHVAKVLYGTEYNAMVADRWWYRGEDLYAAYDTRQVFREDASQAPYSYLPGWYTHGRLQPQKVRGIEAKLDERRKILKLREAGIITQEQWREWSNFISRCPSW","276","USER","zzzzz21"
"149","genbank_inoviridae_YP_009126701.1_@PF05707.11","genbank","MLYGILIFCVCWLFVYIDNYCKNPYKLEAVVGSKGSGKSLYMSRVADKWLRSNKGLIYSNMGIGYELEPEYWKQTFLPDSLILIDEIGVLHSNRDFKTMPREAVEFFKMQRKYHLTIIVSSQTMDFDKKIRDLCDRIYLCNRIGWFCRLTPYRSCIAMEHRPEGGQELVNTVRKAGRARWYTIPKSVKQVSALEYDTEQVISKFPSK","207","USER","zzzzz22"
"148","genbank_inoviridae_YP_008130373.1_@PF05707.11","genbank","MIFGHEGLPRSGKSYEAVLHHILPALRAKRHVYVRLNGVGESLDKIAAHLGMPEEEVRELVHVMGDKEVVDWCVCDTDNDGAISFPHIEKHALIVIDEAHEYWPTNRANLPERTANFFAKHGHISLDMVIISQDCKDLHRLIIRRMAKKNTYTKLDALGSDQRYSVRFYAATGTGKYETVGTEVRKYDPAIWELYHGVQPGIESNEVYKGNTRTLWKTLRGPSIVMGLALVIGVVMFLRFFFADGSTGEESKLKEVVKTQKAAIPAIAHAPGAQPATVVTKVVETPKTKEKLPAGVQYILDMAANARARHAGWYGQRDIVEFRASGGGQVLDRFTTEQLWALGWSVKRTEFGVLLSAKGHEIIATTWPVDPFGEQSDATTARIKAAAGSPVTSASETQPTTAAANGSTLIAVGKRPLGTFPETPPYPASF","430","USER","zzzzz23"
"147","genbank_inoviridae_YP_004539137.1_@PF05707.11","genbank","MMYLISGQPGNGKTLRAMSMALEFYEQNQQQVKEGKAQPRRFFTNIAGATVEEGAGAFPWMEKLPDHNDWTQLPDGSFVIYDEAHSDGNTQGLERYGKLFPSTGKPGESDDPRIRAMSTHRHRGFDLVFVTQWPNKIHHQCARSLARTRTMNRSFGMQRAGVLTWSRVQSDPYDEKVRDKAEEEIWAYPKALYTRYRSATLHTASHKFKVPKKVWQALSVTIALVLGVWLIYAFIIKPPSAPKKVDQGAGALPAAGALAPLGAGGPAARPLNREEYIERHKPRIEFQPWSAPAFDDRSVQSQPELYCMASGTTEQDTTCTCVTEQGTKAKISIPVCVAIARDGPAYNPYRAPRQEADPRRDDPHRGVAQSEPSSTREPSPHALVEVGKRPMGTFPESPPYPASF","404","USER","zzzzz24"
"146","genbank_inoviridae_YP_004327586.1_@PF05707.11","genbank","MLTLITGQPGNGKSLYVIALVEAMRKAESRPVFYYGIPELTLPWTLLEDPTTWHECPEKSIIVIDEVQKVMPPRPSSSKPPAHVAPLEVHRHRGFDLFFMTQDPSLVDNHIKKLAGEHVHLIRQFGMQRADVFKMQKVQDPTNANLKRALRTTFKYPKEVFGWYKSADAHTHKRKVPARVYLLLVLPILLIALIWFGVKTLHGVGKGKTEAAAGAPGTPGAGLPGASTGAPGRQNQVQTPAEYLASYTPRVAGLQYTAPAYDELTKPSRVPVPAACVQIRGGCECWTQQGTHLETTQQICDQVVKRGFFEAFDADGRVARNQERVQVAQQPASVPVAQPQEVRMVLGVAMPRETTQEPRKRTVVGSGRARRVDELDAFPEG","381","USER","zzzzz25"
"145","genbank_inoviridae_YP_002925195.1_@PF05707.11","genbank","MLGYDYVSNHYSYLITTCSIYSFRFLTMIYAIVGRPRSGKSYESVVYHIIPAIQSGRKVITNIPLNIPMFEKVFGESAKYLIKVIDAQFTEYGSMNRPFSKVEHYLDDWRDGKNRAPLYVIDEAHMVIPTRLGTPKILEFYSMHGHYGIDIIILTQNLRKIHADIRAMIEMTYYCAKNTAFGSKKTYTKKVRIGDTREDINIEQHTYKEHYFGFYQSHTQSSGAVDEAQAFDITPIWKRWPFWGSLICFIIVILILGYYFQSRKSKTIDAQPLPAEQVEQVPLSAPPQPSISKPQQTIKTVPVSEPLKDFKLYVSGHAKQIAYKKMSFSREIDTKLTFYHVYISAYQDDQFSFSLNNIDLEKMGYQFEALTECVYRITWGSNSRVITCIDESRFNQQKAETVFDHVPKLGI","411","USER","zzzzz26"
"144","genbank_inoviridae_YP_001552221.1_@PF05707.11","genbank","MKNFVFFFKNYCYISGSMFLFSLIDLLFWIISLYCVGLVFWLLFALQCVYFVWWLWKNIFYQLNAFRLVQFIWDNPLSVIIGKLGTGKTLLLTYLSQTMKLLTDEIYSNYPLEDDKVKFLTFKNLDFTDITKRVPPDDSVILFDESYLYIDGTSPHDEKKVHSGKIPWIVLARHFGNRALFSAQREGMIWNNIRQLASGIIIPISLKKLVAKKGFNFFNRFFIMRIGIFQDITDYEIWKTKSVERTAEGKRVKHKSDVGLGIRFFKIIIPLEFANKYDSQWLKFVRDLKNDEIINKKEYYWSEITKLSVKERLELFDIDILKKNLKPKKEKGNRKDD","337","USER","zzzzz27"
"143","genbank_inoviridae_YP_001718372.1_@PF05707.11","genbank","MGGHLCAKGHACEAGVQLMALYLVTGQPGHGKTAYALDKAFKFQKEGRAIYAHGVKDLDYAKAGWAYLDDPTQWEALPDGSVVLLDECYTILPNRNPGAKVPPHIEAMARHRHRGFDFILIAQQGLQLDPFLRGLYEEHVHVRQTSIMRSKTKLKRWNQYQSNVQAVCADTVDWVRPKYVFDYYTSTTMVTTKRQMPMWLRYLILGVVVLGIILFGIRWYFASKIAEYGAERPAATQPVARAAATADSGAAAGAAAPRVYETTAQYATAHNPRIGTMPWTAPIYDQRAVTADPQLYCIASGEGLDGNGRHTEATCTCLTEQGTRYDLSQPECRTLARNGPAYNPYRTTQPPPPAPVPPMPATSGDRATAGIQGAVISRGDRANGSFPESPAFETSSYMTSPTIPTKL","407","USER","zzzzz28"
"142","genbank_inoviridae_YP_007011052.1_@PF05707.11","genbank","MSATQPITLITATPGGGKTALAVQMMKAAVDQGRPLFVMGIPELKLPYIPTPAVSDWTGVREDPENPGMMLPYFTFPPNSLIVLDEAQRVFRVRTAGSKVPDHVAAFETVRHTGVTFVLITQNPTFLDSHIRKLVGQHVHLRDAGLLGRWYYEWPECANPETFNTAPIKKKWSLPKSSFGLYKSSSLHIKRKYTVPPVLMLFIACVLIAAFLAYRVYYRTGQLTTATPAKPVAAEQGRGGVASAPAVAVKAGPSAAATDGAEILAAFVPAVSGRPETAPAYAQLRQIRSMPTVIGGACTSTRCTCYTAQGTDAGLDDMQCREWIRKPPFDPYREPQAAQEPISAQLAPATAQPEKTAPKPAEGV","364","USER","zzzzz29"
"141","genbank_inoviridae_YP_257149.1_@PF05707.11","genbank","MLVFNEGVPRAGKSYDAVKNHILPTIKKGRRVFARLNGLNHERIAEYLGMQVDDVQQLLTLVDTKDVAATFACYKDDVTGQWCIPDQFKDSLCVIDEVHEFYVAQRQPLPDAVENFWALLGQNGGDAVIMTQWINRVHQAVRARIERKNVFQKLTAVGMKNRYRVTFFHTTSPGKYERVGGKTEKYDPAIYPLYHGYAVGAENTEVYEEGGTNVWKALALKGGVMGVVGIVGAVAFIGFFLSGGGLVPEEEKSKEKQLHGVTAAAPADQSTIPNLPGVPAPKAAPDPMDALTPEQRYVAQLSKGNRIRLALTAVFGDRQVGMVEWVDSSNNTVDQLTFDALIALGFRVRVFAYGANISADNYKLVATPWPRQAPRREEDPTLYRLDKPDAGTGIATAGSEAGAGVRVIGAQGAVSTAGGTLVRVGERPMGTFPESKPYPPSF","442","USER","zzzzz30"
"140","genbank_inoviridae_NP_835479.1_@PF05707.11","genbank","MIYAIVGRPRSGKSYESVVYHIIPAVKSGRKVITNIPLNMDMFVKVFGDSVRDLIRIVDAKFNEYGSMNRPFSKVDDYLDDWRDDKNRAPLYVIDEAHMVIPTRLGDQRYLSSIQCTVHYGIDIIILTQNLRKIHADIRAMIEMTYYCAKNTAFGSKKTYTKKVRIGDTREDLHIEQRTYKEHYFGFYQSHTQSAGSVVEAQAFDITPIWKRWPFWGSLVCFIIVILILAYYFQSRKSKHAEDVPPVPEHSQQTPSSDSSISHPPKPLQTIKAAPLSEPLRDFQLYVSGHAKQIAYKKMSFSREIDTRLTFYHVYISAYQDDKFSFSLNNIDLEKMGYQFEALTECVYRITWGSNSRVITCIDESRFNQQKAETVFDHVPKLDI","384","USER","zzzzz31"
"139","genbank_inoviridae_NP_047371.1_@PF05707.11","genbank","MASVYFVTGKLGSGKSLIAVSRIRDALMRGVPVATNLNINLKEMIGRDKRNTRLYRLPDKPTVEDIEILGYAISPYDTSKDGLIVLDECGTWFNSRTWNDKNRQALLDRFLHIRKLGWDVIFIVQNISMVDKQAREGLAEHVVHCKRLDRMQIPYLSTIVWILTLGQLKIPMPKLHIGIVKYGDTINALTVDKWMLWGTDLYSSYDTKQIFQNHYPHGTYSVLPPWYIHGRYTVPYTARNIMRITKILFRKYSRVAMFAVGPAFGAAFWHFTSPEPELIQLVQAQNQMLSSQPDSKLSELLGGFTISRYTALPDAPVTFELSNGAKRLTSYELQSMGFEIEPLSRCEIIIKSGAQNETIHC","361","USER","zzzzz32"
"138","genbank_inoviridae_NP_542361.2_@PF05707.11","genbank","MIYAIVGRPRSGKSYESVVYHIIPAIQSGRKVITNIPLRIPMFEKVFGESAKYLIKVIDAQFTEYGSMNRPFSKVEHYLDDWRDRARIEPLLYVIDEAHMVIPTRLGDPKRLEFYSMHGHYGIDIIILTQNLRKIHADIRATMIR","145","USER","zzzzz33"
"137","genbank_inoviridae_NP_604428.1_@PF05707.11","genbank","MSWQSKRDLRRRFGIVGYVGSNGSGKSLMAVLDTMPTLEAGRQVLSTVRLLDWENPRPCDDPGCDLPGHPDHLAAHPLWVPLRELSQMLDFEGGDILLDEVTGVASSRESMSLPPQIANMLVQLRRRDVVLRWTTPAWSRADLIIRETTQAVVLCRGAMSKTLPGRVWPSHRLIMSRVVSAADATALSAGGQTAGRVSSLARSVIRLEQCPAIQAYDTLDRVLSVPVAEGGRCVVCGGRRSVPGCSCGDDGDSCGTGRGAGPLGVARDPSRAGRPVTALRAVESTSSDLAVRLGKKSEAEGMNPPASA","308","USER","zzzzz34"
"136","genbank_inoviridae_WP_011347640.1_@PF05707.11","genbank","MHVFNEGVPRAGKSYDAVKNHILPALKKGRRVFARLNGLRFDRIAKHLGIAESDVQSLLVLVDTKDVTKLFACTQDESGKWCIPDEFKDSLVVIDEVHEFYVNERKPLSPAVENFWALLGQNGGDAVIMTQWINRLHSAVKARIEKKNTFQKLTAIGMKGRYRVTYFHTTSPGKFEKVGGQTLKYDPAIFPLYDGYAPGAENTEVYEEGGKNVWAAMAVRAAIFIVVGGVGIYFFVHYFTKDRSDPNKPVASASQTNKPAHVGAGLANGAPSVPIQPPPPDPLADLTQEQRYVAELASKGRIRLSARARVGDQDRAWVQWIDESNNVIEELDLTQLRALGYSVSVVTYGVRLSAGKHIMVATAWPWTAPIREKDARLYNMAPDGSGGAAGVATVGSDGGGADRDRVRGGVIEYGPRTQGTFPDNKAYTTNTTTPATTLQM","440","USER","zzzzz35"
"135","genbank_inoviridae_ARP21997.1_@PF05707.11","genbank","MFGEDVRELIKIVDGRLTDFGSTSRPFSQIEDYSDEWRNEKGQGPLYVVDEAHMSLPSRGLAAPILEWYSIHRHYGVDIILLTQNIRKVHRDIKDMIEVTLPMHKEHSDGLNQFVIYTLIIKRVYM","126","USER","zzzzz36"
"134","genbank_inoviridae_ARP21975.1_@PF05707.11","genbank","MAVKPMRRLPTTFIPAIKDGRKVITNITLNIDWFVKVFGEDVRELIKIVDGRLTDFGSTSRPFSQIEDYSDEWRNEKGQGPLYVVDEAHMSLPSRGLAAPILEWYSIHRHYGVDIILLTQNIRKVHRDIKDMIEVTYRCTKNTAMGSTSSYTKKVQDGCAGEVVNTSTRFYKSEYFPFYKSHSQSNKQVQEAEAKDIRPFWKRWPVVGTVVL","212","USER","zzzzz37"
"133","genbank_inoviridae_BAX02605.1_@PF05707.11","genbank","MIEAFVGIPGSGKSYALVLKGLQSLAAGRPVYANFGFIRENVYYWLRKRAKLSHREAVLRTDLIREIRDYSELLNVHDGVLLFDEAHMWLPSRQFDLIPVEVIAFWSQHRKVGVDVYLATQRYGSVDAIVRELVAFVYWARPAPFWLRVLLLPWARGRKVLRYTSIMDESLGMMQRQAKGIFEGVARNSVVILDPLAASCYDTYAIFEPPIVRLQRELDPKKRAIFDRMGLAWDASKVKGRRDVPRATDGFPWLTMQELARAYREGRPPHELLRQKWQEWVDSLCGVGSPDSSPDAARASAEESAEGSFDWSCFAWGS","318","USER","zzzzz38"
"132","genbank_inoviridae_CAI94593.1_@2R2A_A","genbank","MLNIRKWIINWYLMNWFFTLIMIVLNCLIIFKKNIFSGWLNIIFIVFVYIFSIYVIFLFFKDLKSQLAFFKTIKQSPITMVIGDLGSGKTALATYLLIYSKYETKYSNYPIFNNDIALGTFDMFDNNNLKNPIPYSESNLVVLDEMALYIPANEVKDGAMKKYSGVIPSLVLMRQYDINVVFIGQREKHHWVEYRELATALLLPLDCKTPLLQFKGILKYFIWFFPKFKFNIGIFKDKDNYDIWKSESVKRSANGKKVKLKNASAIGMRNFKITVSLLDVMNYDTKYLQFVRDIKNDRVKDKSLTYWDYVNFDSLEDLEKMGATRLVENLQKGGK","335","USER","zzzzz39"
"131","genbank_inoviridae_AAQ94688.1_@PF05707.11","genbank","MHHGPNGSYKTSGAIQDDAVPALKDGRVIITNVRGFTLERAYQVFPDLPNTAEIINLDLESLEDLEKMRTWFQWAPRGAFLIFDETQLLFPKSWREKDLERFDYPGGPEAAHAADRPMGWLDAWTRHRHFNWDIVLTTPNISYIRDDIRMTCEMAYKHSNLAVIGIPGRYKEAQHDAQLNRPPADGTIIEYKRIRKQTFALYQSTATGKTQDTKAGKSLFRSPKLVLLLALLAGTIGFVSYMGPMRVIGAKPDPAASAPTPKPLPTATAPAAVAAPARPAANSFLPPGLVPDGPAAAPVDLNAHPFADRRISILAHAYMPSKGDIYMFALDDPAGRHLELTSWQLVGSGYAIKPRGECVAELLYGEWEGTVTCAGSSVRPVAVAGVPPLLNLPPSAAGAREPDKVPLTIVPDSEYASRPWRQK","423","USER","zzzzz40"
"130","genbank_unclassified_ssDNA_viruses_AXH73183.1_@PF05707.11","genbank","MELNLLDGSLNPVNIGRVIKHNHDFYKSHPGYFRPEGLLVFCGEQGSGKTLSAVQYVKKLCSEYPDAILCTNVQISGLNPSTHVVEYDGLDCLKNLENGYFGVIYLIDEIHLEFNSLESKNIDIEVMIEVSQQRKQRKHIIGTSQVYGRLAKPFREQIRNVVLCSNFCKILQINTLIDGSKSVEKDGKLITESVKRFYWFHDPALYDSYDTYAKMKRYKKEWQGRRLT","228","USER","zzzzz41"
"129","my_seqs_macstool_de1a1_2ct27.1@PF05707.11
my_seqs_macstool_de1a1_2ct27.1@PF01057.16
my_seqs_macstool_de1a1_2ct27.13@PF05707.11","my_seqs","MKAKPVALSLYFGIPGAGKSTFAAYLAKKDMKKGRKVWSNFGITGAYKCEKSDFGKYMMCDGRLIIDEAGLEYDNRKMQMTNDEIYFFKYHRHYQLDVDFFSQGLDVDIKIRKLARHVYLIKPSLLPFFIKRKEIGRRVGINDMTKEICDEYFFVPFLAGGAKLIFCPPLWKLFNTLARKPLPEKCWETW","190","USER","zzzzz42"
"128","my_seqs_macstool_de1a1_2ct58.5@PF05707.11","my_seqs","MIHLYSGTPGSGKSFHATEKIFYRLRMKKNVICNYPISLENCSYSALGFWLKKIFPKYKPHRKKLGKFDYVPNNEMTVQYLKNYAKKNHKGHREHETLVVIDECGIKFNPRTFAQADRMEWIEFFSLHRHYGYDFILVSQSDRMVDRQIRSFFEYNHQHRNVGNFKLFGKILALLCGGSLFTDVTVFYSIREKVNSDFFKYKRRIASLYDTFLLYDDTPEDVDEHPEQHEDVPCRNGDSAAEQGGDPSATDTPVNPASDVAP","262","USER","zzzzz43"
"127","my_seqs_macstool_de1a1_2ct65.6@PF05707.11","my_seqs","MITLYEGVPGSGKSLFSAGQILDQLSLGHLVICNFPFSVPSKKKYRRGALVTCSNDELSVDFLRRWYNIWLKFRCGGEPREHQIYLVVDEAGTVFNPRDWQSSGRREWLAFFSQHRKLMFDVCIIAQQDIMIDNQIRGCIDVVERFADVRKFFPDRGWYLPPIFKRSARVYMTKNSRAGQLGTHFFRVRRGWASAYNTFSLFDDEGSAPDSGASCSVLLRPAVVPCLRWRRSLSVRLAVR","240","USER","zzzzz44"
"126","my_seqs_10mus_7_2ct117.18@PF05707.11","my_seqs","MILFFALFFALIVFCAVMAYKYRNPYKLCLVFGKKGSGKTTLLVKKAIQYMRKGKTVYSTVYIPGAHLFDVKLLGVYTFPPESVVFIDEVGMIWDNRNFKAFREDVRDWFKLQRHYHVTVWLFSQTNDIDKKLRDLMDEMYLCNCHMGFISVARKIKRLITIVHPSAEGEARIADDIDFVPVWYSLFGAKSAIFTYIPNWVKFYDSFEAPALPFVDAVYQEIPEAVRHCYNQGAFKRFFLSMALSARRAVALAGAQGGKKHTHSRKFVSLRNSVHKFTKWKK","282","USER","zzzzz45"
"125","my_seqs_10mus_7_2ct431.7@PF05707.11","my_seqs","MIVLLTVFGLFLGFVLYTRRYRNPYRLIFIFGKKGAGKSCYMVREMLKHLKKGWLVYTDMPDCNIPNIRIIDGKDLSVFAPEYHSCLFLDEVGISFDNRNFKSFDSGLRDFFKFQRKYKCKIYMNSQAFDVDKKIRDVTDSMILQTSILDCISISRPIKRTVTLTEPSAEAESRIADRLVFEPVWNWRFYWMPHYFKYFDSFAAPEREPIAFREVAGEALPAIRKLRLESVKTALKGVWNK","241","USER","zzzzz46"
"124","my_seqs_10mus_7_2ct486.2@2R2A_A","my_seqs","MTLLILIVIAIALFIILRKCKLPKIGSLACFTGGVKTGKSAVSLHFAIRTYKRIRFSWHIKCFFCKIFRKEKPEEPLFYSNIPLRKIKYVPLTRDHLLRKVRLNWGSVAFLDEVALVADSQLIRNGEINFQLLLFTKLFGHSCGGLLIFNSQQITDLHYAFKRCTSQYFYIHHTTKLPFIRLSYLREERYSEDGTTINSYDKDVEDSLKRIVYFSSIYKKYDAYCYSVLTDHLPTKNEIKYNGKHDSLKTTNIVSFRKEYTDLFVSGKSEIDKVMSEVSTNAQT","284","USER","zzzzz47"
"123","my_seqs_10mus_7_2ct500.7@PF05707.11","my_seqs","MISAFFGVPGVGKSLALAWVAKQAVLGKPVRICGRLICEQHKRVFANFDCPGCYKFDFSMLGVYDFRDCVILIDEIMMYADARDFKRFSEDLKFFFSQHRKFNVDVVWTSQSYDDSDKKIRNLTANYFLIDYSRLPNCSKFVYIEPFFDIVDFTPRSGYAFGSSQRYYLPTLYKYVDSYQTISREKDSLKPVPLELYSDFPLELKDKLRIQLFLLISMLKRTVKKGKKRREEQEKLMQMCLCRW","244","USER","zzzzz48"
"122","my_seqs_abalone_6_2ct10.5@PF05707.11","my_seqs","MLRLITGIPGAGKTLYAVSLLKKAVEENAALPPNEQRKIYSDITGLKIEGIDPPPLDWRETPPRSLLVYDEAQFHKPFQPTRGLSAFDYIQELTIHRKTGHEIWYITQDPKRLHSNILDMVEQHHHLDRPYGAKLATIFKFRGVERITKSESAKERAESKTLFNYDKKLFSLYQSSQVDDGIKLRLPPKLIFFVSLPILLMAFAAYMFTTDGSKKMLTGGDKKNDTPISNVTHNIASAVPAPAVVPSGELPKLSPVEHIEFEPTKVIFEQVATVVSNGKHCIAKDYSGKTLDISSDECLLFAENPYSASYIPMDALTYVYVDENLPNEPVPSL","333","USER","zzzzz49"
"121","my_seqs_abalone_6_2ct6.9@PF05707.11","my_seqs","MLVFNEGVPRAGKSYDAVKNHILPTIKKGRRVFARLNGLNHERIAEYLGMPVDEVHQLLTLVDTKDVAATFACYKDDVTGQWCIPDQFKDSLCVIDEVHEFYVAQRQPLPDAVENFWALLGQNGGDAVIMTQWINRVHQAVRARIERKNVFQKLTAVGMKTRYRVTYFHTTSPGKYERVGGKTEKYDPAIYPLYHGYAVGSENTEVYEEGGTNIWKSLALKGSIFGVVGLVGAIVFIRFFLTGGGMVPEEEKTDELPGMKAQASGAANPAPQVPGMPSKKAEPDPIEKLSPEQRYVAQLSKSNRIRLALTASFGERQVGMVEWVDSSNKTADQLSFDALTAMGYRVRVFAYGAKLTAEEYTLIATAWPREAPQRDVDARLYRLDDASAGAGLATGGSEAGAGVRVSGGNGTAPTASSTLVRVGERPMGTFPESKPYPPSF","440","USER","zzzzz50"
"120","my_seqs_mac_stool_D2CW_7_2ct17.7@PF05707.11","my_seqs","MIWYFICALLIVVGVYCGYFVIKFHNPFRLDMIFGKKGCGKTTTLCMLALKYQRKGWTVYSTEALPGCRKFDVQNLGQYHFAKKSVILIDEVGMIWDNRDFKNFKTHVRDWFKYQRHAQCRVYLFSQTFDIDKKLRDLTDEMYMMVNVLGVLSYGKRIKKKICVVHPSGDGESRLADDLEISPFFTAPFGGRMFCWIPKYAKYIQSFDIWELPDMPYELVSYPDDMPKKLLPKKLRKNKQTKRRVPFGRRCCKVFWSLLRKRNGQRPA","268","USER","zzzzz51"
"119","my_seqs_16minnow_6_2ct525.7@PF05707.11","my_seqs","MPVWGVTGKTGQGKGLISMALIADYLKKGRVVATNMDIYPENFKDPYNDKIRIIRLPDYPTAQDLIDLGKGAADGVVDEDDFGLLMLDEGATWLNSRDWNSPGRREFNDWLVQRRKYLWNVAIQIQSLESMDAQARRSVISHEMRAVKINTVHVPIVSAVIKELTGQRYPQFPKWFRYHKAKTTNLETEHTEDVTRYRGADLYRLYNTLQTYSANYPHGSFCYLTPWHLKGRYMGPKLGPRFWLRQILRLPVYGAVFLSTLLSRECRQFFNADN","274","USER","zzzzz52"
"118","my_seqs_16minnow_6_2ct588.4@PF05707.11","my_seqs","MITPKLGFFSPSGFNFRGLKSYLFYGNKGNGKSLVYASIVDSLLSEYRYIERKYPKLPKRVLYSNQNLKLHDSFASDHIRFWSSPRQLASVRNSDILWDEVGKDLPASSWQETPKDIKQIFSHLRKRGNRLFANTQVYDDIDISFRRQIDRTFKTIKFVGSPDISATMPPVAHPWGLIILMEMDKNSLENESDADKQKKSFKFSLPRFCFIERGYIDLYDTTAELPPYRPLELEHLIYKCVVPGCKHENHVEHRKF","256","USER","zzzzz53"
"117","my_seqs_axolotl_blastema1_2ct2.1@PF05707.11
my_seqs_axolotl_blastema1_2ct2.1@PF02486.18
my_seqs_axolotl_blastema1_2ct2.14@PF05707.11","my_seqs","MGMILVTGQPGHGKTAWAIDHAFQLKKEGREVYASGIKDFDYQRAGFHFLAEPEKWQDLPDGSVVLLDECYTVFPNRNPGAKVPDHVEAMARHRHRGFDFVLIAQQGLQLDPFLRGLYEQHIHVRQTSVLRSKTKLKRWNQYQGNVNGPCNDVIDWLRPKYVFDYYTSTTKITTKRHVPTWLRWLAVGVVFLIVLLLALKWYFTGKIAEQSAQHTATHGSLLSPGARAQAAADPAAPKWESAADYAKAHLPRFATMPWTAPVFDGRNVVADPQLFCMSSKPGKDANGDHSDGSCTCLTEQATTYDISEPECRRLAARGQVYNPYRVVSQGQGMAPLPMTPAPSPRASAQASPGRSSSPELVASYGTMRDGTPQKPIALSATY","382","USER","zzzzz54"
"116","my_seqs_haddock_1_2ct1.5@PF05707.11
my_seqs_haddock_1_2ct1.6@PF05144.13
my_seqs_haddock_1_2ct11.6@PF05707.11","my_seqs","MLHIRTGLPGASKSLNTLKEIVEEKNNWGRPIYYNNIKLLMLDFEVVSSFAGWFYGVYLGSLDKKIQKPIYSRLLKIHEQGELASLETFSHLRHVFDAWLESKGDIELWLYWVRRVYPDAARQNLRFFLESSEKEHVTTESLKQFNLDFREFKEPAFWFKLPRNSVIIIDECQQTFPPRPVGSKVPLHCSEFETHRHKGWDIHLVTQDAKLIDNHVRRLAGCHIHYFNPFKSSRVTRYQADKIFDQDDYFQKKNTISSVIGRDKNFYGLYWSADAHTHKLVIPKKLLFAIPIPFLIGWLVWYITSGNWANTPEQQPIQQVSAPRTQTQTQQKNNSESKPDPVYLLPDIKPHSLISADTPIGQLCDQLIYAGFELKKDRYGRYSSIHFFNCELPYSENEAKNDDNFVKPSLVVDVSYLNKLGFNFEFSNRMPILSYGDAQYIFPRY","445","USER","zzzzz55"
"115","my_seqs_haddock_1_2ct12.6@PF05707.11","my_seqs","MITLITAVPGSGKTLFSISLIDEALKQNRPVFTNINGLVKDKFPNSALLQDAPDDWRDCPNGSLVIYDEAQQAHLYPSNAQRGKVEDERLTALETHRHGGYDLVFITQAPTFVHHHIRKLVGRHIHLYRARGVSGAVRYEWSHTCESPNDRREQERAETTVWKFPKHYFPYYTSAVMHTHKFKIPIKLALFLALLLLLVAYIVFTLVSNGGLQIFNDEKNGKGEKTPSAPAVSINSNSLTTLPPSTEWKLQGYTTLGSLTSVGRPLAVIRSVYGTRYIDFTQCDYDEYKLTVFCEIDGNTVSFYTGDSSKTPVSASPFN","319","USER","zzzzz56"
"114","my_seqs_haddock_1_2ct13.4@PF05707.11","my_seqs","MIYLRTGLPGASKTLNTLTDLVLNNDGTRPIYYHNIKLLMLDYDVCNSFAGWFYGSYLYKLKDQVLLTRLNKIIKRKHDNNDLVELSDVPFLTAIYDAANAFDIWIFWVRRLYTKNQLIEFEELLLNCFDTEYYNFDSFKKLNLHFTYFENPSLWHTLPKQSIILIDEVQQYFPQRPAGSKVPLAISALETHRHGGYDLYLITQDAMLIDVNMRRLVGRHTNYYNGLGGKRLSKVEDSKVFNPSDYFSTQNLDKKIIKHNKNFYGSYHSAEIHTHKFKLPKFVYYFFGILLLLFFSAFVLYNVLFSDDSIDKDIIKKTDISVVNTVPVLKNVAALTVGSPSKVNSDDSVIADYYNKLLKGVYIDGTVWHSKNGGFFDYSFSNRDTKMIFSATDSGLVVSSISRCIAKLSINSYVTFVTCYSFVPMTPKISLDDDSDSSSNPNNLTQSPFAS","451","USER","zzzzz57"
"113","my_seqs_haddock_1_2ct14.8@PF05707.11","my_seqs","MAQLITAPIGTGKTLYTIQLIFKYLNEGRPVYSNIVGLKIPGVIALNYTSQNPFDWRDLPNDAVTFFDEAHEHPAFSERDLLKSLTIQSFEDDLKNVEHLDFSDTKKKSITSQIEKEYSKALRLKKETILDIGLSMSMHRHFGQEIVLITQNPTKLNKDVLSNVTQHFVMRRKFNFEAANIWTFGEAMTNWGKSVADSALNKQYWKFPKHLYKYYLSSDSHNMKSYFPKKYLAYACIPLLIFALGYSKAAKTGFMGLIPKTEETVKSNQSSVDLSTVENGYDAKIIKLDDDDPQKLALDKLEADSLGLTVGQYRDLKNPEKRNHEQAQKLSEYNLKNPFDYGYAAAPPVTQYRVFSGCLNNVAYDQQGSVIEDADPTLCKRLINKGERPFNPYKQVSNDNSSVTQNFASQTQPSNTEQNNQTISKEEMEKFQIAKAQGLI","440","USER","zzzzz58"
"112","my_seqs_haddock_1_2ct17.7@PF05707.11","my_seqs","MAILITAPVGTGKTLKCIEMCFEYLNQGREVFTNIIGINVSGVRVIESNTLHPFDWRDLPPDSVLIFDEAHEHPAFSERDLLRNFKIEYWENELRRITRMTDISDTKRKSLLSETKEMYSRILKDEKEKIMDIGLSMSMHRHFNQEIVLITQNPTKLNKDVLGNVTIHHVMRRKFGFEAATIWTFGEAMTTWGKSVADGALVKKQWKFPKHLFKFYKSAEGHNVQKYFPKKYYAIAMIPVLLFGVGIIKAKETGFFGIFGGSDTQVSDVKPEPILIQEGDTRTQAEILEQHAADQAGMSLEQYRASQNPTLQNLDFECRKAENLSRPECVQWFDNLSKTNSSVMPNGNVVQTVSYNPNKPYDFEYQPQIQPQDYPRMSGVMTLANGRLMAIDQQGNYMSNVSQEDCRKWLSGYRPFNFAKAPQQQNQYAYSQPEQSQRSVGEQPQFNPETSSL","453","USER","zzzzz59"
"111","my_seqs_haddock_1_2ct19.6@PF05707.11","my_seqs","MAQLITAPIGTGKTLYTIQLIFKYLNDGRPVYSNIVGLKIPGVINLNYTSQNPFDWRDLPNDAVSFFDEAHEHPAFSERDLLKNLTIESFENDLKDVEHLEFSDTKKKSITAQIEKEYSKALRRKKEEILDIGLSMSMHRHFGQEIFLITQNPTKLSKDILGNVTQHFVMRRKFNFDAATIWTFGEAITTWGSSVAKSALNKQHWRFPKHLYNYYLSSDSHNMKGYFPKKYLLYVFALLCIFGLGYSKAAQTGFFGLIPKSEQSVKSNQVSVDPSQNGFDSKIIELDNNDPQNIALDKLQAESLGLTLGQYQDLKNPEKRNKEQAEKLSEYNLKNPFDYAYASAPVVTQHRVFSGCLNNVAYDQQGSVIEDADPSLCKRLINKGERPFNPYKQVSNDNSSVTQNSAAQTEPSNSKQNNQTISNEEMEKYQLAKAQGLI","438","USER","zzzzz60"
"110","my_seqs_haddock_1_2ct20.6@PF05707.11","my_seqs","MLYLATGTPGAKKTVFVVSKLDKVERDNKVNLVKNKEYYAFNKQLIDRFRSDFGYYESDVGSGHRLKNVIDVLPDDYFDMFAQDFDDLRPDDYFLRTTRFNEICERINEREGEQKFKFLLPVRTIYTNIKALKIDYVRDIEYDWRDCPDGSIVVIDEVQLVEPFDQTKNKNDPIIQELTIHRHRGFDFYFITQYPSLLHPTVKDLVGVHYHLTVPYGLKTRVYQFGSTRAYPNTMANKFNCETKFYFSPPDRLFKLYKSTTINTHQKRIPYKQLFGFGILILLGVSVFLFSVFGAKDSAIFGGDTKKPAVLAAAAPVVDNPMPTATTGQPDTLTPAPVTGQPDTLTPAPVTASSGIYDPLSGGYINDINLVPVSGMQMNGRCSVYNAYGALLTHISNADCNVYLSVKGMMPKVKSSTPKLSAPTAVSPASS","431","USER","zzzzz61"
"109","my_seqs_haddock_1_2ct21.7@PF05707.11","my_seqs","MAIYLIVGQPRHGKSQFSVKTAYDYHLKNLEIQKRIDSGKFDPNKDIVREIYSDIEGHSEKCDFIHPAPADWRDVPDNSIIFMDEIHKRPEYTDSDGKMSQNPMIVDLTTHGHQNKDILLMTQDPQRLNKGIRALVEKMYLVKRPIQKPNFATIYEFERWLRDPWQAAASERSVKYQDSYKFFYKKKWQDMYTSASAHTSINFKIQSKFIYAIIAIIVLMSAAYFLFTKSGGDKLARNAVSGITGEKVEKEQTQKTDNSVSNDSKFDPNIECRKGENVQKPECVKWFNDLSKSGSSVTSSGTVQTVSYNPNKPYDFEYQPQVQPTDFPRMSGVIQLSSGKLMAVDQQGNYMTGVSQEDCKKYLSGYRPFDYFRKEQSLRSAGDKTQSKPKDTPLPDDKLPSKAETVDTEDRKASELTSI","419","USER","zzzzz62"
"108","my_seqs_haddock_1_2ct24.8@PF05707.11","my_seqs","MLHLITGTPGSGKTLYAVSLLDKYRKDNLKLLNEGKEPRPLYADIDGLEMDGVEPAPDDWRDTPDGSVIFYDEIQQRDVYKKQKNDNDIVNDLQIHRHTGHDIYGITQFPVLLHNNFKAVVGLHYHLHRGWGLQASTVYQWAHCIDSPNSPSNKRLAEHDFRFSFPKELFNVYKSATQHTHKRRIPKKFLAVVFAIPIMIFIVFKLLSGDNIITKVAGVKDAKDVQQATSSPIDNTSASTSIQSDNVNQPIYQQPVKGGYYDPLTADYIADVNLVPVSAVSFGGSCRAYNKQGNLLTHITESDCKRYLSTAGMLPKLPRADSVAQQPKPTTMTTTTTTRDEEAAAEELKEVEGA","354","USER","zzzzz63"
"107","my_seqs_haddock_1_2ct25.5@PF05707.11","my_seqs","MPIMLVNGANGHGKGQFAIKMILDYQKENDALEKKGLPRRAIFANIHGINQPGSTPLKDVSPIPSDKVFFGKQDNPESPPPEGYFVPPLGSIFFYDEAQKEEWIKQKAGALSNDIRVTSLEEHRHAGLDIIFITQSTNYIHSHITGLVAPHYYVERPLGLATTNVFMFNKFQKTPDAVSTRSKADDQFMISLGKKYGQYYKSSAQHNIKRNIPLKAKLAIGALLFCVLFTLWNVSKAKKDDVPPVVAADAPALVPADVPHEVFSSTTDMMLERIAKLEQELYEARLPPDYQVTKENPALRVAGVMNFNGSCRAYNAHGEFLNLTADECNYYLAGAGRVQKSGNTLGRVQSSNVAPAEPSSISTVQNMVNPVINPVS","376","USER","zzzzz64"
"106","my_seqs_haddock_1_2ct29.5@PF05707.11","my_seqs","MRYFNGNVILVTGAIRTGKTLYVVAGLKAMIADEQKKPEDKRRQFFTDIDGLNLEGVGISPTDWRDAPAGSVVIYDECQLNSHFQADGKAVSSYDFVLELTLAGRKGYTIIFISQSPRFIHSTIRNLANEHIHVQRLHGAQKALICRYPKPVLNPDSASNIKLCADQFNWEYPKTVYGDYSSLDSDTQSAEHQVKFKLPAPLIKGFAFSFILFIGLMYYGGSSFFASPTESISDKKDSFTASLSPVQSSETLSNFGVIVGSYLDKNNNCIAYDSKANTDDNYPDCFRYLPKPAPSVYTLEKYNQVVADRDTKINSFVS","318","USER","zzzzz65"
"105","my_seqs_haddock_1_2ct30.7@PF05707.11","my_seqs","MPIMLINGANGHGKGQLVVKMILDYQNENDKLEKKGLPRRPIFANVHGINESGVTPLPDVSPIPSDKVFFGKQNNPDSPPPDGFFVPPIGSIFIYDEAQKIEWIKQKAGALSTDERVSSLEEHRHAGLDVIFVTQSTNYIHSHIAGLVSPHYYVERPLGLATTNVFMFNKFQKTPDAVSTRSKADDQFMISLGKKYGQYYKSSEQHNIKRTIPLKLKVMVAVLALCILYTLFNYNKSQSNKVVPPVAESPTALSNEVIAEVDSAHQKMVIDDLTARLAMLERELYEQRLPADYQVTEKNPAIRVSGVVNMGDKGCRAYNAYGEMLNLTVGECDYYLADAGRVQKSHGGSISSVPPSNPSNPVSSSSNNEQMVNPTVNPFS","380","USER","zzzzz66"
"104","my_seqs_haddock_1_2ct31.4@PF05707.11","my_seqs","MIKLITAVPGSGKTLSAIAIIIEALEAGRPVFTNINGLVKAKFPNNTLLQDAPDDWRDTPEGSLVIYDEAQQAHLYPSNAQRGKVEDERLTSMETHRHSGHDLVFITQAPTFVHHHIRKLVGEHLHLYRGRGIGGATRHTWSHTCENPNDRREQERATSVFWKFPKDHFEYYTSAVMHTHKFKIPLKIAAALVVAAALASFVIYNLVSNQGLAILNTTDQTPALAQTQPAGARGGLPITSPYSWSSTTETVPVAGCIANHDRSRCQCFGDSGITLDLEHAQCLSILNNPLPRSIKVNQSKTNA","303","USER","zzzzz67"
"103","my_seqs_haddock_1_2ct32.5@PF05707.11","my_seqs","MIKLITAVPGSGKTLSAIAIIIEALEEGRPVFTNINGLVKDKFPNNSLLQDAPDDWRDTPEGSLVIYDEAQQAHLYPSNAQRGKVEDERLTAMETHRHSGHDLIFITQAPTFVHHHIRKLVGEHLHLYRGRGIGGATRHTWSHTCENPNDRREQERATSVFWKFPKEHFPYYTSAVMHTHKFKIPFKIAAAFAVAAALAGYVIFNLVSNDGLAIMNTLDQSPALALSQPAGARGGPSPNSPYSWSSTVEAVPVAGCIANYDRSRCQCFSDTGLTLELEHGQCLSILNNPLPRSIKVNQSKTNT","303","USER","zzzzz68"
"102","my_seqs_haddock_1_2ct33.8@PF05707.11","my_seqs","MIKLITAVPGSGKTLSAIAIIIEALEEGRPVFTNINGLVKDKFPNNSLLQDAPDDWRDTPEGSLVIYDEAQQAHLYPSNAQRGKVEDERLTAMETHRHSGHDLIFITQAPTFVHHHIRKLVGEHLHLYRGRGIGGATRHTWSHTCENPNDRREQERATSVFWKFPKEHFPYYTSAVMHTHKFKIPFKIAAALAVAAALAGYVIFNLVSNDGLAIMNTLDQSPALALTQPAGARGGQSPNSPYSWSSTVEAVPVAGCIANHDRSRCQCFSDTGLTLTLEHGQCLSILNNPLPRSIKVNQSKTNS","303","USER","zzzzz69"
"101","my_seqs_haddock_1_2ct34.7@PF05707.11","my_seqs","MIKLITAVPGSGKTLSAIAIIIEALEEGRPVFTNINGLVKDKFPNNSLLQDAPDDWRDTPEGSLVIYDEAQQAHLYPSNAQRGKVEDERLTAMETHRHSGHDLIFITQAPTFVHHHIRKLVGEHLHLYRGRGIGGATRHTWSHTCENPNDRREQERATSVFWKFPKEHFPYYTSAVMHTHKFKIPFKIAAALAVAAALAGYVIFNLVSNDGLAIMNTLDQSPALALSQPAGARGGPSPNSPYSWSSTVEAVPVAGCIANHDRSRCQCFSDTGLTLELEHGQCLSILNNPLPRSIKVNQSKING","303","USER","zzzzz70"
"100","my_seqs_haddock_1_2ct35.4@PF05707.11","my_seqs","MLGKQNSVISLDPIDRKKKKNWLERLFITQWSGGDSVRKTVKFGHYMFCGPQRAGKTSSALWFAERLAKKHKRRPLEYKDDTTGKFVRFTEPTTIKLWSNFGVGTHVNKEGLFKLIDEFDPYANEVRIIIIDEVHTYFPRGTQSKETALQVSQLTAVFSQLAKRNTYILSTAQVYGRLDKSMREQCLYMIDCRVNRRNRLVNEFILETDIIADELGRWAGNPQFIRVHGLSKMEYDTKRLIRE","243","USER","zzzzz71"
"99","my_seqs_haddock_1_2ct36.6@PF05707.11","my_seqs","MIKLITAVPGSGKTLSAIAIIIEALEEGRPVFTNINGLVKDKFPNNSLLQDAPDDWRDTPEGSLVIYDEAQQAHLYPSNAQRGKVEDERLTAMETHRHSGHDLIFITQAPTFVHHHIRKLVGEHLHLYRGRGIGGATRHTWSHTCENPNDRREQERATSVFWKFPKEHFPYYTSAVMHTHKFKIPFKIAAALAVAAALAGYVIYNLVSNDGLAIMNTTDQSPALALTQPAGARGGLSTNSPYSWSSTVEAVPVAGCIANHDRSRCQCFSDTGLTLELEHAQCLSILNNPLPRSIKVNQSKING","303","USER","zzzzz72"
"98","my_seqs_haddock_1_2ct37.8@PF05707.11","my_seqs","MIKLITAVPGSGKTLSAIAIIIEALEEGRPVFTNINGLVKDKFPNNSLLQDAPDDWRDTPEGSLVIYDEAQQAHLYPSNAQRGKVEDERLTAMETHRHSGHDLIFITQAPTFVHHHIRKLVGEHLHLYRGRGIGGATRHTWSHTCENPNDRREQERATSVFWKFPKEHFPYYTSAVMHTHKFKIPFKIAAALAVAAALAGYVIFNLVSNDGLAIMNTLDQSPALAQSLPAGARGGQSPNSPYSWSSTVEAVPVAGCIANYDRSRCQCFSDTGLTLELEHGQCLSILSNPLPRSIKVNQSKTNT","303","USER","zzzzz73"
"97","my_seqs_haddock_1_2ct39.5@PF05707.11","my_seqs","MLRLITGIPGAGKTLYAVSLLKKAVEENAALPPNEQRKIYSDITGLQIEGIEPPPLDWRETPPRSLLVYDEAQLNTPFQPSRGLSAFDYIQKLTIHRKTGHEIWYITQDPKRLHNNILDMVEQHHHLDRPYGAKLATIFKFRGVERITKSQSAKERAENKTLFNYDKKLFSLYQSSQVDDGIKLRLPPKLIFFVSLPILLMAFAAYMFTTDGSKKMLTGGDKKNDTPISNVTDNIASAVPAPAVVPSGELPKLSPVEHTPYPMPKVIFEQVATVVSNGKHCIAKDYSGKTLDISSDECLLFAENPYSASYIPMDALNYVYVDETLPNEQPNL","332","USER","zzzzz74"
"96","my_seqs_haddock_1_2ct40.9@PF05707.11","my_seqs","MITLITAVPGSGKTLLAVGLIVDYIAEGRHVFHNIAGLQVDKFSRPDLIHDAPADWRDTPHGSVVIYDECQQPHLYPATAQRGAVDDERLTAMETHRHSGHDLIFITQAPTFLHHHARKLVGQHIHLYRGGGSKIVARYEWSHVCDNPNDRREQERADFQAFPFNKSHYEFYQSSTIHTHKFKIPRKLIILGVFILSLVSFLVYLGYDSFLVTGEFHKQPESPPAQVQARAAAVPAIYSWAAADPAVPVAGCIANHDRSRCQCFSDEGVTLTLEHSQCLSILNNPLPRSIKVNQSKNKDNS","301","USER","zzzzz75"
"95","my_seqs_haddock_1_2ct41.6@PF05707.11","my_seqs","MITLITAVPGSGKTLSAIAMIIKALESGRPVYTNINGLVKEKFPNNHNLHDAPSDWRDTPEGSLVIYDECQQPHLYPSDAKRGLVTDERLTAMETHRHSGHDLVFITQAPTFVHHHVRKLVGEHIHLYRGRGIGGAMRYEWSHTCDSPNDRGEQSRANSQFWKFPKEHFAYYKSATVHTHKFKVPLKLALFLFALALSIVFIISRVVASGGLASFDDSNIIKNGIAAPAQQQQPVNSQPLPFDWSNTVQESIPLGGCISSVSKCHCYTKFGVTLNISESQCRIIINNPLPRHIKLGSTKEKT","302","USER","zzzzz76"
"94","my_seqs_haddock_1_2ct42.5@PF05707.11","my_seqs","MLRLITGIPGAGKTLYAVSLLKKAVEENAALPPNEQRKIYSDITGLKIEGIEPPPLDWRETPPRSLLVYDEAQFHKPFQPTRGLSAFDYIQELTIHRKTGHEIWYITQDPKRLHSNILDMVEQHHHLDRPYGAKLATIFKFRGVERITKSEAAKERAESKTLFNYDKKLFSLYQSSQVDDGIKLRLPPKLIFFVSLPILLMAFAAYMFTTDGSRKMLTGGDKKDDTSISNVTDNIASAVPAPAVVPSSELPKLSPVEHTPYPMPKVIFEQVATVVSNGKHCIAKDYSGKTLDISSDECLIFADNPYSASYIPMDALTYVYVDENLPNEPDPSL","333","USER","zzzzz77"
"93","my_seqs_haddock_1_2ct43.5@PF05707.11","my_seqs","MITLVTAVPGSGKTLLMIDRILKAMESGRRVYTNIDGLLIEGVHDAPDDWRDTPEGSLVIYDEAQELFPSNAKPGVVTDERLTSMEVHRHTGHDLVFVTQAPTFIHHHIRKLVGEHIHLFRPNGMTGANIYTWGFAVTDPNDRREQERADHQLWKYPKEHFKLYKSATIHTHKFRVPRKIAVLLGLILCGVAYVTYSLAGGLESFNVAKQSQEKGAEGVSAAPPAPAVSNFSWSQAEVIKPISGCMESKRGCFCYDDSMTPLNLPIAQCKAIIQSPLPRSLRVGGSSDKSKAS","293","USER","zzzzz78"
"92","my_seqs_haddock_1_2ct44.7@PF05707.11","my_seqs","MITLITAVPGSGKTLLAVGLIVDYIVEGRHVFHNIAGLQVEKFSRPDLIHDAPADWRDTPHGSVVIYDECQQPHLYPATAQRGAVDDERLTAMETHRHSGHDLIFITQAPTFLHHHARKLVGQHIHLYRGGGSKIVARYEWSHVCDNPNDRREQERADFQAFPFNKAHYELYQSSTIHTHKFKIPRKLIILGVFILCLVSFLVYLGYDSFLVTGEFNKQPESPPAQVQARAAAVPSIYSWAAADPAVPVAGCIANQDRSRCQCFSDEGVTLTLEHAQCLSILNNPLPRSIKVNQSNSKNKT","301","USER","zzzzz79"
"91","my_seqs_haddock_1_2ct45.7@PF05707.11","my_seqs","MITLITAVPGSGKTLMTIKLIEDALKEGRPVFTNISGLIKDKFTNNQLLQDAPDDWRDTPHGSLVIYDECQQSHLYPSNAQRGLVTDERLTAMETHRHSGHDLIFITQAPTFVHHHIRKLVGQHIHLYRGRGIGGAMRYEWSHTCDNPNDRREQERADSLFWKFPKQHFAYYKSSTIHTHKFKLPVKLTIFLVALLCFIVFLFYRLYDNAGLASLNEHTITKAAAGQHVAAAPVTTTLPLPYDWSNNVTDSIPLGGCISSATKCQCYSKAGVTLNIPIEQCKIIISKPLPRTINISSDKRKNT","303","USER","zzzzz80"
"90","my_seqs_haddock_1_2ct6.7@PF05707.11","my_seqs","MLGLCTGKPGASKSLNSLASIVSKNQGDRPIYYTNIRLLMLDYRVASSFSGWFYGNYLPKLKNKAAIKRLNKIIKRVHADDEFVTLSDVPWLESYFEAANPLETWLLWVRKLYTKKQLARMEEFISNMPAETLDISHLIQFNLHFIHFDNPRDWHLLPKGSIVLIDECQQFFPPRAVGAPVPLHISKFETHRHDGFDIYLITQDRMLLDSNVRRLVNNHVHYHNAFNSNRVTRYELSKSFDADDYHQVKTTQKSLIKRPTNFYGAYFSSELHTHKFKMPKVFYILIFLILLVAGSIYSFASSMLTSDTVVAAPKAAIPSLTSSSITSNKVSIKSSKSPLLNDNEKKYLTDYVSKTVDGVFITGSQYIKTSAGLDKYDYSFSKSTTDQIFDPYSVGFVVLPINQCLVRLTFNDFTTFITCDPFHKLEPLNNESSQLAAS","438","USER","zzzzz81"
"89","my_seqs_haddock_1_2ct7.7@PF05707.11","my_seqs","MVATVISAPPRTGKSLYTMEILEKAVIDNPDRLIYTNIIGCKLPGVLPAVSRPDNPFDWRTLPNGALYVHDEAHEHPAFCKNDLLKDKDLISRAPYDEFILLINDYEQLSTDKKTNLLTVLKVINQYPELPLSLKVKEKESLVRLVKDAFDKNNLKRKEEILDIGRALTMHGHFGIDIYFITQRPTLLNEHVRASISEHIILRRLFKMNFAIIYNYAELQENFGMMTRKNAITTRFWRYPKHLYKYYVSAESHPKSNFPKLWYAVGLLPIFLMFGGYKYTMDFFAPKETTATVPVVENELPKQPLLNADNQQKDLNDLCRSAVNLDKPECKKYIQEITNKGLSIAPVNVYDPAKPYDVEYTVQDFEPKDFPRFKNAIVYNGKCTAYSQQGTIMHNVSSKDCFRLANGDRPFDYYYEKPSSSPPVQASSAANFSSELINTLARMEAEKMIAAQNANVQVEQIPLGEPKPRF","470","USER","zzzzz82"
"88","my_seqs_haddock_1_2ct70.4@2R2A_A","my_seqs","MLPIVLVILVLVIAYVMWQAKVRIDVMSFFRATIPLDRGVFGVYCFTGKQGTGKTYGVTKFVKNFGDDSEKIYSNLTIKGTEYEKIRSIQHLLSLKDEENRLIIFDEIFTVLNDKTIPRDIRDDLMEFLSQQRKMKNILMTTAQEWLNIPIEFRRFVRIQVECRTIPLGRWGGIFIETYYDATQMEWSQFDNEYVAPRISMKISKYQARYMNAYDTYERIRRLKRRED","228","USER","zzzzz83"
"87","my_seqs_haddock_1_2ct9.10@PF05707.11","my_seqs","MINAIVGRPRAGKSYESVLFHIIPSAAEGRLVVTNIPVNLASVVKFYSQEVADRIIIVKANFTDYGMIRPFSKPEDFTKYDWKNEKGQGPLFVVDEAHLCLGSTANREVLEYLSLHGHYGHDIIIVTQSPKKLHRDLKDMIEVCWRCVKKSVFGDDTHYIKKTYHGVSARNEDFVHEEEREYKKQYFQFYQSHTQSSAPVDEAVSKDINATLFPRKKLIICMLVVGTITALYLGKKMMYQSIESTTQVTQAEPVTKSIPSIQPSSPQQAIEQKLTYTKQSNQTERTDFKPTKSFHPFYKVQLHADGYSEYTMGGRLYKDIYFVASQNGQNIFTIGLPDLKLAGYDVSVYGKCAVLVEYGDYQDWITCDSPVISADVGVSPSNENDS","386","USER","zzzzz84"
"86","my_seqs_macstool_de2c2_2ct30.1@PF05707.11","my_seqs","MELNLLDGSLNPVNIGRVIKHNHDFYKSHPGYFRPEGLLVFCGEQGSGKTLSAVQYVKKLCSEYPDAILCTNVQISGLNPSTHVVEYDGLDCLKNLENGYFGVIYLIDEIHLEFNSLESKNIDIEVMIEVSQQRKQRKHIIGTSQVYGRLAKPFREQIRNVVLCSNFCKILQINTLIDGSKSVEKDGKLITESVKRFYWFHDPALYDSYDTYAKMKRYKKEWQGRRLT","228","USER","zzzzz85"
"85","my_seqs_macstool_de2c2_2ct31.9@PF05707.11","my_seqs","MIYLFTGTPGSGKSLDVARVIKNKLRAKQPVICNFPVNKKFVKNPDYFYFKGNDDLTVEYLVRFARNYFDGKRVKESSITLVIDECQMLFNAREWNKSGRAVWNKFFQVHRHFGFDIVLITQFDSMLDKQLRALVEYEIVHRKVSNYGIKGYFIRLLMFAPVLFVRIKVWYPMKQKVSSEFLRANKNLFKLYDTYSLSFFDFDMDFDMDFDEEM","214","USER","zzzzz86"
"84","my_seqs_macstool_de2c2_2ct32.9@PF05707.11","my_seqs","MSLPSVPALGFLFGGFMFYLLLIFCALFGSFQYLSAKYNNPNKLIFIFGKKGSGKSTYMVSLMLQHLKKGWNVYTNMTDIVIPGVRVFPIEQLKICAPEPHSVLFVDEGGLIWDNRGFKSFDKGYTEFFKLQRKYKCKVYINSQDFDIDKKIRQLTDSMVLMNCIAGCIGVVRPIIRKVALVEASAQGESRVADNLRFGGLFSYRFLWLPKYFKYFDSYKAPERPQIDFKSVEGDVIALHPKRSLTPLKNAFRRVDEKQKKQP","263","USER","zzzzz87"
"83","my_seqs_macstool_de2c2_2ct45.8@PF05707.11","my_seqs","MFMIAVSILFFIVCFQISTLPFSNPYTLTMIFGKKGSGKTTTMTKIAHDAKRRGKKVFANVPLPGCYLIEDKDIGFKMFPPNSVLLVDEVGMIWDNRHFKDFKPEVRDWFKLQRHYRVKVYLFSQTFDIDKKLRDLTDDMFLIEKKFRIFAYGKRILKKCVLTEASADQPSRIDENLKFDSILFFWAGSRTLTLIPRWAKSFDSFAAPALPVKHWPLDEQEFQPVPYRVVFHTLAANFAHVVGADRLAHWLWKTKDRVDEESDLAPEEIDFDDFFSHRPDSED","283","USER","zzzzz88"
"82","my_seqs_macstool_de2c2_2ct53.3@PF05707.11","my_seqs","MDRWLAGLKGTLNLWDAHRVKVYNKEFRAEHPEYFDPDGILVFCGPQGSGKTLSMIQYAYRLSLAYPDMIICTNVELHDWPPVRDIIQWEGMKSLSEVENGFAGVLFLIDEIQLEFNSLESKQIDPSVMQEIAQQRKQRKHIVGTSQVFQRIAKPFREQFKYVVQCRKVLGVLQCNTVIDGQSAVVNDDGTIQAAGVKTYHWIHKPSLYQLYDTYAKVLRVNEDRYGQQYWRK","233","USER","zzzzz89"
"81","my_seqs_mice_vagnl_1_2ct14.4@2R2A_A","my_seqs","MKVDWQSFKKKYVKPKTNGFPVGSIVFKGYQGSGKTLSMVHYMFQLKKYFPKCHIYSNVIIKSLDYYQIKDDNDLSRAITDRNGEDGVVVLLDEAHLFFNKKKGISLDVLTAISQQRKDRRRIVMSSQIWEELDISLRKQVKHIVDCHSFGHIQVNTIYDGESLCWDKMSSSYVAKKIYTECFKHHQELYNSYDTYQKIIKNDQYIQNTTSSPTSTTIVVDKKALKKGR","229","USER","zzzzz90"
"80","my_seqs_mice_vagnl_1_2ct4.18@PF05707.11","my_seqs","MIFLVVFFFLLFFCAFMVRKYRNPYKLVLVFGKKGSGKTTLLVKKALQYMRRGKEVYSTIYIPGAHLFDVQLIGTHTFPPESVVFVDEVGMIWDNRNFKAFRPEVRDWFKLQRHYHVTVFLFSQAADIDIKLRMLMDEMYLCTCHMNFLSVARKIRRSITIVHPSGDSEARIADDIDFVPVWYSLFGAKSAIFTYIPNWVKFFDSFDAPELPIVPSDYQEIPDAVSGCYYSSSLRRTMHSLRLLLLFLRARTPAALAAGVRRRKRKYAEPRSRFRKNIFKRDSEDESMEPEK","292","USER","zzzzz91"
"79","my_seqs_rainbowtrout1_2ct29.3@PF05707.11","my_seqs","MIEIGLMMLGIVLVAYMIRNKVSLDFPSFLDRTLPLERGVFGVYSYNGKQGSGKTYSLVKYVLKHQYEAMEVYSNMHIEGLDYTPITSVEHLFSLRDKEHCFIIYDEIFTLLQKSSKIDEELMEFLTQQRKMKNILFTTAQEWLEIPITFRRFVRIAIDCNTRPLGRFGGILIEVYRDGYRMKWDNDENEYIAPIIRTKISKYQKRYMVAYDTFARVKRLKR","222","USER","zzzzz92"
"78","my_seqs_rainbowtrout1_2ct3.9@PF05707.11","my_seqs","MPIHAYVGKPGHGKSYGVVERVVIPSLKQNRHVVTNIPLNADDLLADFGGNITQLPEDWFDLEDMAELFPPGCVAILDEVWRRWPRGQRSNMANKLDQSLLAEHRHKVDARNNSMRIVLVTQDLQQLANWACLLIETTFRVVKLSKKVYRVDVYNGSVTGDKPSQKNLIRQYPGKFSSDIHRYYSSATQSSTGEVGDESVADKSGSILRSWGLWSLVGIFIICLTSGLYGVSSFFSSSPKSPVKPESSTNPVVTAKVEKQQSKPVPSVVFSSEWRLAGLVHPAQPKPDSDSASFAVIVNRSGITRYIPFDQCSYYEGFKDAFCDLDGQRITKWSSSNSTFLNPTEEVFGSGSAQRSVSRPTSEPPMIR","368","USER","zzzzz93"
"77","my_seqs_rainbowtrout1_2ct5.7@PF05707.11","my_seqs","MIYLITATPGSGKTLWAVNEIFKRVNEADPWNIFSNIDGLRLDTAQPLKDKFEDYPARSLVVIDEAQKITHFSKKYKHPVKNEFHPEVEFLQTHRHADFLDIIFITQAPRLLHADVLDMVGMHYHLHRPMGMKMATWWLWRYHVLNPNTKSTKADAEDSGTFTYPKNLFGMYKSSNGGDDSHGKIKIPMKIINAVWMLVLVIGATGWLWVKSQPDKKEEAKQEQSIKQEIPTQANSATQQPLVLEQDCRKGVNVEKPECVQWFNDMSKNNASISSDGAVTYDSSKPYDFKPQARIQVVDYPKLTGCSKYDGKYYAFDQQGNRMPSVSQADCKRWLNGERLFDYTKAPQQVQNNAQFNTQSNSTNTLQQAPQSDIPKQMEIANNDVQPHLQAQVVS","395","USER","zzzzz94"
"76","my_seqs_rainbowtrout1_2ct6.6@PF05707.11","my_seqs","MLNLVTGVPGASKTAYVVTQLFDIERKNKINLKKNILVFEHNKSFQDKFKDDFSYIEVEQGSGHELKIILQVLEENYFDMLGQDFDDLRPDDYYYRSVQYNEIIERIRDRGELEDFLFFQPVRTIYANIKALKIDYARALTYDWRLCPDGSIIVIDEVQLVEPYSDLKDKNNPIIQELTIHRHRGFDFWFITQAPSYMHPTIKELISCHLHITRPYWRTPKIYQFGSLRQYPNTLINKLNCESKFSFKPKDFIFKLYKSTSIDTSKKRTPKGLIGFGIFILFALFIMGYGLSGGSGFLGHFFGADDKKETTNATQAASNHSASDSSNSNSASSDKNALDLSLECRKAVNVEKAECVQWFDDLSKSKASVSENGVATVVYDPSKPYEFKHIPQVQPTDFPRMSGVVKMANGRLMAIDQQGNYMQSVSQNDCKKWLSGYRPFNYFAQKQQSTERVPTSESGNQNTVTSSL","468","USER","zzzzz95"
"75","my_seqs_rainbowtrout1_2ct8.6@PF05707.11","my_seqs","MPAILITGKPGQGKTHFAMKKWVSEAVKEGRQVFTNIDDCNFDVQPIPVNEQGELDWTLTPDGSLTVYDEAQRLEDIKGTRYFAWANRQKLSERPVIREIEYHRHSSKDLVYITQSPKFLHLHLLELINEHYHCTRLRNEKRSQISLWRSWQEKPDSVAAQERAEDIFFQPFDNEIFKRYKSTEEVTDGKTRIPKYYYKLAAIALFCFGLAGALLFNMTNHFGDGHRIGQGAIETATGQKQTTKSSESASDLKANSQNVDLTIECRKAVNVDKPECKEWFDKLTSDKSSVTSTGQVVQAVSYNPNKPYDFEYHPQVTPTDFPKMSGVMKLSSGKLIALDQQGNYMQNVSQQDCQKWLSGYRPFDYFAQAQNQQRERSVPEHPQINSQTSSL","391","USER","zzzzz96"
"74","my_seqs_redsnapper1_2ct11.5@PF05707.11","my_seqs","MIYLRTGLPGASKTLNTLTDLVLNNDGTRPIYYHNIKLLMLDYDVCNSFSGWFYGSYLNKLKDQVLLTRLNKIIKRKHNNNDLVELSDVPFLTAIYEASNPFDVWIYWVRRLYTKDQLIEFEELIINCSDTEYYNFESFKKLNLHFTYFDNPSLWHTLPKQSIILIDEVQQYFPQRPAGSKVPIAIGELETHRHGGYDLYLITQDAMLIDVNMRRLVGRHTNYYNGLGGKRLTKVEDSKVFNPSDYFATQNLDKKIIKHNKNFYGAYHSAEIHTHKFKVPKFVYYFFGIIVLLLVCGFAVNSVLFSDDDIKPDNKKPDIPIINTEVKLNNVAALTVSNPPAAINKNDSIIAEYYNNLVKGVYIDGSVWHSKNGGYFDYSFSNRDKKQIFSASDAGLAVTSISSCLAKLSINSYVTYITCNSFIDMTPKKSFRDNDNNDDDEHQTKSPFAS","450","USER","zzzzz97"
"73","my_seqs_seabass1_1_2ct37.4@PF05707.11","my_seqs","MIHGISGKTGGGKSYEAVVRHIIPTVTEHKRKVVTNLPLNIDHFCAVYGDYCRDLIEVVDGEFHNYGGQRPFSKKEHYLQFEDWKNEAGNRVYFFIDECHLALPQSGTDKEVKQFFDMHRHYGFDIMLITQNFRKVDRDIRDLIANHYRAIKKSMMGQDDKYILKVHDGSSATNATVVATHEREYEKKYFKFYQSHTKSDQSIKEAAPSDIQKWYDNWFVKGSVIFFVVAIFLMYLGFKKQTEKKAVDNVQTTQQNSVGSGSPVQAIAPTLPPEFLAQQAEAKKIIEQQKKEEEAEQKKHPFHKVGLHIVGWGEYMELNRLTKNYYLSASQNGQHIFDLSLRDLVLAGYSVVVRSSCVIEVTYRKYHDFLTCDAPKVGAFDQAPQEFTE","389","USER","zzzzz98"
"72","my_seqs_seabass4_6_2ct24.6@PF05707.11","my_seqs","MIRLDTGTPGAGKTLINVRDIVQLEKTNQKNIILNPKIYETNLKIIQDKSLSDEFLYCVRKIGQGVDLKDEVFHFDNLYFEFLKSSERIEEYFSRSIFYNEIIERINNEHNLKLNNIRPVRTIYTNISGLQIDTIRSIPADADWRKLPDGSFVVYDEIQNIPVFSSESRAVDPIVKDLTIHRHRGFDIVGITQFPDLVHKTFRAVTGHHRHLVNSFGLKRSTQYEWSTVKIDPNAFKNKATAEVKSTFVFPSDLYKYYRSSTAHTHKRRLPWRFIMILSSVLIACIALFSCSFSKDNNVLKQIATGTPHDSTKPSSDKSDTKQSSASTKTDSSQIQNENATSSNSINNESNLDVRTAYNASDPFGYQPVQYVEPTSVRVFSGCFCTKKSCKAYDEQGTQINGIDSKLCKSLMDDSTSRPYNYFRQSQTAGNQTTNQSQQQQASAPQT","447","USER","zzzzz99"
"71","genbank_inoviridae_WP_032474098.1_@PF05707.11","genbank","MSIFIHHGAPGSYKTSGALWLRLLPAIKSGRHIITNVRGLNLERMANYLKMDVSDISIEFIDTDHPDGRLTMARFWHWARKDAFLFIDECGRIWPPRLTATNLKALDTPPDLVAEDRPESFEVAFDMHRHHGWDICLTTPNIAKVHNMIREAAEIGYRHFNRATVGLGAKFTLTTHDAANSGQMESHALTRQVKKIPSPIFKMYASTTTGKARDTMAGTALWKDRKILFLFGMVFLMFSYSFYGLHDNPIFTGVNDATIESEQSEPQSKATAGNAVGSKAVAPASFGFCIGRLCVQDGFVTVGDERYRLVDNLDIPYRGLWATGHHIYKDKLTVFFETESGSVPTELFASSYRYKVLPLPDFNHFVVFDTFAAQALWVEVRRGLPVKKEKEESIIKSFL","399","USER","zzzzzz0"
"70","genbank_inoviridae_WP_045607620.1_@PF05707.11","genbank","MIYAIAGRPGGGKTYEAVAYHIIPAIKDGRKVITNITLNIDWFVKVFGEDVRELIKIVDGRLTDFGSTSRPFSQIEDYSDEWRNEKGQGPLYVVDEAHMSLPSRGLAAPILEWYSIHRHYGVDIILLTQNIRKVHRDIKDMIEVTYRCTKNTAMGSTSSYTKKVQDGCAGEVVNTSTRFYKSEYFPFYKSHSQSNKQVQEAEAKDIRPFWKRWPVVGTVVLLSLGLVFNIWAWWPEPEQPPDPVKPPQPVQAQLPDGTPTVDTAETKAKKKKKASGFGPLEDYDFYITGYAKQIAYAKRLKYAAELDRDLTFYKIYIDVYDGRDKLFSFDHLDLVKIGYQFEVLSDCVYRVTWEETERIFTCGQREKPSDILQQNMPVHI","380","USER","zzzzzz1"
"69","genbank_inoviridae_WP_005477655.1_@PF05707.11","genbank","MATSFRYGHGGSYKSACAVWFDLLPALREGRICITNIHGMQPLEVIEQRLGEKFPDTARLIRISSRNPEGFELWKYFFCWAPIGAFILIDECQQIFSVNAGFKMANIHKRPFTDFEPHLPEGFSELFHSRWLTIDTSSLDNGEIDDCQRTRFDEQGRIIYPENFNNAFMEHRHYNWDIVLLTPDFAQIPKELKGVAELAKQHKGKDGIFFSNRKPRILEHDPTRTVTKPSKDDVVYNLKVPLDVHLLYASTVTGQITKSGLGKNIFLNPKFLAAMALVVLSFGYLVYALIGMVSDSETTTAEGTQLHQTSQQSGVSTSQGQARPGQSGSPGSVMGSSGSGCTGSGCGNESYHDVGTVPAWFPLANSESIYVSAVERWHKATSIHVNVHFEVVTPRGVTYLDDGFLNKLGVKMEYLDDCLVQLSHGASNFYVTCSPYEQYAQRQEQDIELKPVGGLFSGDET","461","USER","zzzzzz2"
"68","genbank_inoviridae_WP_016042359.1_@PF05707.11","genbank","MAIFIRTGANGSYKSAHVVYFTIFEALKAGRVVVTNIEGMEPLEVIEQRFDIKFPSTTRLLRIFSRDLKGKELWQYFFCWCPIGALIVIDECQDIYSKNIGFRMEKVFYRPLSDFLPYLPPDFENLFNSRHTPVDITKLLPSEIDDRGVAEYDSEGRIIYPQSFNEGFMRHRKYNWDIHLLSPDWGQIDTAIRACAEECYFHKGRDAYFFTKRKPYIYRHPKNVATLVIPKGKDPNVFTQKIPLEAHLLYKSTSTGKATQSGAINMLFKNPTILGSLILGVGSIGYFIYALSGLVFGSSETVQESSAQTSSVSATQSSTDLSQTSTKNAPSLPSSGDGNQAPNVSVAPANRIDSIKQMLGLYDLQTLYYTGHVTRQTENSFQFFVTLEAKTPEGTYYLDDTFLRANDIAYVHYDDCLLKLTKENITINVTCKPILREAQPNANQPQQVKIGSIF","454","USER","zzzzzz3"
"67","genbank_inoviridae_P03657.1_@PF05707.11","genbank","MAVYFVTGKLGSGKTLVSVGKIQDKIVAGCKIATNLDLRLQNLPQVGRFAKTPRVLRIPDKPSISDLLAIGRGNDSYDENKNGLLVLDECGTWFNTRSWNDKERQPIIDWFLHARKLGWDIIFLVQDLSIVDKQARSALAENVVYCRRLDRITLPFVGTLYSLITGSKMPLPKLHVGVVKYGDSQLSPTVERWLYTGKNLYNAYDTKQAFSSNYDSGVYSYLTPYLSHGRYFKPLNLGQKMKLTKIYLKKFSRVLCLAIGFASAFTYSYITQPKPEVKKVVSQTYDFDKFTIDSSQRLNLSYRYVFKDSKGKLINSDDLQKQGYSLTYIDLCTVSIKKGNSNEIVKCN","348","USER","zzzzzz4"
"66","genbank_inoviridae_WP_003262646.1_@PF05707.11","genbank","MLIVHEGLPGAGKTWEAVVKRLIPALQKGRKVYARINGLDHAKIAEVAGVELERVKELLHEIPEAEVLRWNELVENDSLVILDEAQNFWPHGATRTMPPDQIKAVAEHRHRGLDIVLMCQVLQGAGGVHPVWVNRVDQKIVFEKLNARGKDDKYKWTAYKGLHNGTKIKFTQINKGTEGYDPKYFGTYASHQASTENTETYKDARTNVWNNPVLRRWLPLFGAALVVAVWYLWHALKGGGLEQSINAGHKVETKTTVVSAPAPVALPAAASGVQASVSQAQPMASKAEPVSGGQRQDAMADDYVASISQKWRPRLSGLAWAADKARLVVEWYDESNRVKERLSAAQLEEFGWGVARSAYGDHVILSKGGVHVAVTSWPIEEFGRVSDRDNRALHEMAVGKGDGSSSSELPSSMRVPVVPVDARDVSAPDSRQSWSHG","437","USER","zzzzzz5"
"65","genbank_inoviridae_YP_009664531.1_@PF05707.11","genbank","MPIELFTGQPGNGKTALMMERLVAEAKAASRPIFAAGIDGLDPGLATVLDDPRHWNNKDADGNYIVPDGSLIFVDEAWKWFGHLHDATRQQTPRHVLELAEHRHRGLDFVWTTQQPNQLYPFVRGLIGSHAHVVRRFGTKMLDVYRWGELNEEIKSLAKRDMAQRTTRLLPSQVFGQYKSAEVHTIKARIPFKVMLLPVLAIAAIVFAYLAYTSLRPSSFAGGEGKEGTQSASADAAPSPFRPAGAKEDAPRWPTAAAYAKDHLPRISTMPWTAPVFDERQARSDPQLVCMSSLEGLDAQGVRQEASCRCLTEQGTAYELSQPECRTLARNGPVYNPYRERSEERSTQRIEDLERSRPGVATTSAGGVAQHVERSMGTFPESPSYRSDSYMTTAPGPNKL","400","USER","zzzzzz6"
"64","genbank_inoviridae_WP_015979776.1_@PF05707.11","genbank","MAVYVVTGKLGAGKTLVAVGKIQDKIVSGCRVATNLDLRIHKLPRVGIFAKSPDVIRIPDKPSLDDLLAIGRGNNSYDENKNGLLVLDECGTWFNSRSWADKERQSVINWFLHARKLGWDIIFLIQDLSIMDKQARVALAEHVVYCRRLDKITIPFIGSIYSVITGSKLPLPKVHVGIVKYGDSPQSMTVERWTYTGRDLYAAYDTKQAFSDAYEHSSFSYLTPYLSHGRYAVKRDATFYMRLTRIYLKKYSRVLCLFCGFVSAFTYLSLSKPEATPQIKPVTTQIITSRYKPSELRITTSYRMGNAVGFEFMDAKKQKIASDDLIKDGFRMVYITPCSVELIKDGKHEKVTC","353","USER","zzzzzz7"
"63","genbank_inoviridae_WP_011269756.1_@PF05707.11","genbank","MLVFNEGVPRAGKSYDAVKNHILPALKKGRRVFARLNGLRFDRIAKHLGIPESDVQQLLVLVDTKDVAKLFACTQDDSGKWCIPDEFKDALVVIDEVHEFYVNERKPLAPAVENFWALLGQNGGDAVIMTQWINRLHSAVKARIEKKNTFQKMTAIGMKGRYRVTYFHTTSPGKFEKVGGQTLKYDPSIFPLYDGYAPGAENTEVYEEGGKNVWAAMAVRAVIFIVVGGVGIYFFVHYFTKDRSDPSKPVAAASQTAKPAHVGAGLANGAPSVPIQPPPPDPLADLTQEQRYVAELAGKGRIRLAARARVGDQDRAWVQWIDDSNNVIEQLDLTQLRALGYSVSVVTYGVRLSAGKHIMVATAWPWTAPIREKDARLYNMAPDGSGGAAGVATAGSDGGGADRDQVRGGVIEYGPRTQGTFPDNKGYSSSTSTPATTLQM","440","USER","zzzzzz8"
"62","genbank_inoviridae_WP_011037227.1_@PF05707.11","genbank","MLVFNEGVPRAGKSYDAVKNHILPALKKGRRVFARLNGLRFDRIAKHLGMAENDVQHLLVLVDTKDVSKLFACTQDESGKWCIPDEFKDALVVIDEVHEFYVNERKPLAPAVENFWALLGQNGGDAVIMTQWINRLHSAVKARIEKKNTFQKLTAIGMKGRYRVTYFHTTSPGKFEKVGGQTLKYDPAIFPLYDGYAPGAENTEVYEEGGKNVWAAMAVRAAIFLTLGGVGIYFFMHYFTKDRADPNKPMASASQTTKPTHVGAGFANGAPSVPIQPPPPDPLADLTQEQRYVAQLADKGRIRLSARARVGDQDRAWIQWIDASNNVVEELDLSQLRALGYSVSVVTYGVRLSAGKHIMVATAWPWTAPIREKDARLYNMAPDGSGGAAGVATAGSDGGGADRDQVRGGVIEYGPRTQGTFPDNKGYSSSTSTPATTLQM","440","USER","zzzzzz9"
