# Supplementary material for: Discovery of several thousand highly diverse circular DNA viruses
Source: eLife journal article supplement (doi:10.7554/elife.51971), 2020-02-03
Supplement: fig2-figsupp1-data2 [file elife-51971-fig2-figsupp1-data2-v1.cys › CytoscapeSession-2019_08_05-17_27/tables/52-all_my_seqs_genbank_ssDNA1_domains_ino_zot_fasta+Full+Network/LOCAL_ATTRS-org.cytoscape.model.CyEdge-all_my_seqs_genbank_ssDNA1_domains_ino_zot_fasta+Full+Network+default+edge.cytable]

CyCSV-Version	1
SUID	interaction	name	selected
java.lang.Long	java.lang.String	java.lang.String	java.lang.Boolean
all_my_seqs_genbank_ssDNA1_domains_ino_zot_fasta Full Network default edge
165		zzzzzz8,zzzzzz9	false
166		zzzzzz5,zzzzzz6	false
167		zzzzzz5,zzzzzz8	false
168		zzzzzz5,zzzzzz9	false
169		zzzzzz4,zzzzzz7	false
170		zzzzzz2,zzzzzz3	false
171		zzzzzz1,zzzzzz5	false
172		zzzzzz1,zzzzzz8	false
173		zzzzzz1,zzzzzz9	false
174		zzzzzz0,zzzzzz8	false
175		zzzzzz0,zzzzzz9	false
176		zzzzzz0,zzzzzz5	false
177		zzzzzz0,zzzzzz1	false
178		zzzzzz0,zzzzzz3	false
179		zzzzzz0,zzzzzz2	false
180		zzzzz99,zzzzzz6	false
181		zzzzz98,zzzzzz5	false
182		zzzzz98,zzzzzz0	false
183		zzzzz98,zzzzzz1	false
184		zzzzz97,zzzzz98	false
185		zzzzz97,zzzzzz6	false
186		zzzzz97,zzzzz99	false
187		zzzzz96,zzzzzz1	false
188		zzzzz96,zzzzzz6	false
189		zzzzz96,zzzzz99	false
190		zzzzz95,zzzzz97	false
191		zzzzz95,zzzzzz6	false
192		zzzzz95,zzzzz99	false
193		zzzzz95,zzzzz96	false
194		zzzzz94,zzzzz98	false
195		zzzzz94,zzzzz97	false
196		zzzzz94,zzzzzz1	false
197		zzzzz94,zzzzzz6	false
198		zzzzz94,zzzzz99	false
199		zzzzz94,zzzzz95	false
200		zzzzz94,zzzzz96	false
201		zzzzz93,zzzzzz5	false
202		zzzzz93,zzzzzz6	false
203		zzzzz93,zzzzzz0	false
204		zzzzz93,zzzzzz1	false
205		zzzzz93,zzzzz98	false
206		zzzzz90,zzzzz92	false
207		zzzzz89,zzzzz92	false
208		zzzzz89,zzzzz90	false
209		zzzzz88,zzzzz91	false
210		zzzzz87,zzzzz92	false
211		zzzzz87,zzzzz88	false
212		zzzzz87,zzzzz91	false
213		zzzzz86,zzzzz99	false
214		zzzzz86,zzzzz98	false
215		zzzzz86,zzzzzz7	false
216		zzzzz86,zzzzzz4	false
217		zzzzz85,zzzzz48	false
218		zzzzz85,zzzzz83	false
219		zzzzz85,zzzzz71	false
220		zzzzz85,zzzzz92	false
221		zzzzz85,zzzzz90	false
222		zzzzz85,zzzzz89	false
223		zzzzz84,zzzzz95	false
224		zzzzz84,zzzzz96	false
225		zzzzz84,zzzzz93	false
226		zzzzz84,zzzzzz9	false
227		zzzzz84,zzzzzz8	false
228		zzzzz84,zzzzzz1	false
229		zzzzz84,zzzzz98	false
230		zzzzz83,zzzzz89	false
231		zzzzz83,zzzzz90	false
232		zzzzz83,zzzzz92	false
233		zzzzz82,zzzzz86	false
234		zzzzz82,zzzzzz6	false
235		zzzzz82,zzzzz99	false
236		zzzzz82,zzzzz95	false
237		zzzzz82,zzzzz94	false
238		zzzzz82,zzzzz96	false
239		zzzzz81,zzzzz96	false
240		zzzzz81,zzzzzz0	false
241		zzzzz81,zzzzz94	false
242		zzzzz81,zzzzz98	false
243		zzzzz81,zzzzz86	false
244		zzzzz81,zzzzz82	false
245		zzzzz81,zzzzz95	false
246		zzzzz81,zzzzzz6	false
247		zzzzz81,zzzzz99	false
248		zzzzz81,zzzzz97	false
249		zzzzz80,zzzzzz0	false
250		zzzzz80,zzzzz84	false
251		zzzzz80,zzzzzz1	false
252		zzzzz80,zzzzz86	false
253		zzzzz80,zzzzzz5	false
254		zzzzz80,zzzzz82	false
255		zzzzz80,zzzzz95	false
256		zzzzz80,zzzzz97	false
257		zzzzz80,zzzzzz6	false
258		zzzzz80,zzzzz81	false
259		zzzzz80,zzzzz96	false
260		zzzzz80,zzzzz94	false
261		zzzzz80,zzzzz99	false
262		zzzzz79,zzzzz84	false
263		zzzzz79,zzzzzz5	false
264		zzzzz79,zzzzz82	false
265		zzzzz79,zzzzzz7	false
266		zzzzz79,zzzzz95	false
267		zzzzz79,zzzzzz6	false
268		zzzzz79,zzzzz97	false
269		zzzzz79,zzzzz81	false
270		zzzzz79,zzzzz96	false
271		zzzzz79,zzzzz94	false
272		zzzzz79,zzzzz99	false
273		zzzzz79,zzzzz80	false
274		zzzzz78,zzzzz84	false
275		zzzzz78,zzzzzz1	false
276		zzzzz78,zzzzzz0	false
277		zzzzz78,zzzzzz5	false
278		zzzzz78,zzzzz82	false
279		zzzzz78,zzzzz97	false
280		zzzzz78,zzzzz81	false
281		zzzzz78,zzzzz95	false
282		zzzzz78,zzzzzz6	false
283		zzzzz78,zzzzz96	false
284		zzzzz78,zzzzz99	false
285		zzzzz78,zzzzz94	false
286		zzzzz78,zzzzz79	false
287		zzzzz78,zzzzz80	false
288		zzzzz77,zzzzzz5	false
289		zzzzz77,zzzzz84	false
290		zzzzz77,zzzzz97	false
291		zzzzz77,zzzzz82	false
292		zzzzz77,zzzzz81	false
293		zzzzz77,zzzzzz6	false
294		zzzzz77,zzzzz99	false
295		zzzzz77,zzzzz95	false
296		zzzzz77,zzzzz96	false
297		zzzzz77,zzzzz80	false
298		zzzzz77,zzzzz79	false
299		zzzzz77,zzzzz94	false
300		zzzzz77,zzzzz78	false
301		zzzzz76,zzzzzz0	false
302		zzzzz76,zzzzz86	false
303		zzzzz76,zzzzzz5	false
304		zzzzz76,zzzzz82	false
305		zzzzz76,zzzzz95	false
306		zzzzz76,zzzzz97	false
307		zzzzz76,zzzzzz6	false
308		zzzzz76,zzzzz81	false
309		zzzzz76,zzzzz96	false
310		zzzzz76,zzzzz94	false
311		zzzzz76,zzzzz99	false
312		zzzzz76,zzzzz77	false
313		zzzzz76,zzzzz78	false
314		zzzzz76,zzzzz79	false
315		zzzzz76,zzzzz80	false
316		zzzzz75,zzzzz98	false
317		zzzzz75,zzzzzz5	false
318		zzzzz75,zzzzzz7	false
319		zzzzz75,zzzzz84	false
320		zzzzz75,zzzzz82	false
321		zzzzz75,zzzzz95	false
322		zzzzz75,zzzzzz6	false
323		zzzzz75,zzzzz97	false
324		zzzzz75,zzzzz81	false
325		zzzzz75,zzzzz96	false
326		zzzzz75,zzzzz94	false
327		zzzzz75,zzzzz99	false
328		zzzzz75,zzzzz77	false
329		zzzzz75,zzzzz78	false
330		zzzzz75,zzzzz76	false
331		zzzzz75,zzzzz80	false
332		zzzzz75,zzzzz79	false
333		zzzzz74,zzzzzz5	false
334		zzzzz74,zzzzzz1	false
335		zzzzz74,zzzzz84	false
336		zzzzz74,zzzzz82	false
337		zzzzz74,zzzzz97	false
338		zzzzz74,zzzzz81	false
339		zzzzz74,zzzzzz6	false
340		zzzzz74,zzzzz95	false
341		zzzzz74,zzzzz99	false
342		zzzzz74,zzzzz96	false
343		zzzzz74,zzzzz76	false
344		zzzzz74,zzzzz80	false
345		zzzzz74,zzzzz75	false
346		zzzzz74,zzzzz94	false
347		zzzzz74,zzzzz79	false
348		zzzzz74,zzzzz78	false
349		zzzzz74,zzzzz77	false
350		zzzzz73,zzzzz86	false
351		zzzzz73,zzzzz84	false
352		zzzzz73,zzzzzz1	false
353		zzzzz73,zzzzzz5	false
354		zzzzz73,zzzzz95	false
355		zzzzz73,zzzzz82	false
356		zzzzz73,zzzzz81	false
357		zzzzz73,zzzzz97	false
358		zzzzz73,zzzzzz6	false
359		zzzzz73,zzzzz77	false
360		zzzzz73,zzzzz74	false
361		zzzzz73,zzzzz99	false
362		zzzzz73,zzzzz96	false
363		zzzzz73,zzzzz94	false
364		zzzzz73,zzzzz78	false
365		zzzzz73,zzzzz79	false
366		zzzzz73,zzzzz75	false
367		zzzzz73,zzzzz76	false
368		zzzzz73,zzzzz80	false
369		zzzzz72,zzzzz86	false
370		zzzzz72,zzzzz84	false
371		zzzzz72,zzzzzz1	false
372		zzzzz72,zzzzzz5	false
373		zzzzz72,zzzzz95	false
374		zzzzz72,zzzzz82	false
375		zzzzz72,zzzzz97	false
376		zzzzz72,zzzzz81	false
377		zzzzz72,zzzzzz6	false
378		zzzzz72,zzzzz99	false
379		zzzzz72,zzzzz77	false
380		zzzzz72,zzzzz96	false
381		zzzzz72,zzzzz74	false
382		zzzzz72,zzzzz94	false
383		zzzzz72,zzzzz78	false
384		zzzzz72,zzzzz79	false
385		zzzzz72,zzzzz75	false
386		zzzzz72,zzzzz76	false
387		zzzzz72,zzzzz80	false
388		zzzzz72,zzzzz73	false
389		zzzzz71,zzzzz90	false
390		zzzzz71,zzzzz89	false
391		zzzzz70,zzzzz86	false
392		zzzzz70,zzzzz84	false
393		zzzzz70,zzzzzz1	false
394		zzzzz70,zzzzzz5	false
395		zzzzz70,zzzzz95	false
396		zzzzz70,zzzzz82	false
397		zzzzz70,zzzzz81	false
398		zzzzz70,zzzzz97	false
399		zzzzz70,zzzzzz6	false
400		zzzzz70,zzzzz74	false
401		zzzzz70,zzzzz99	false
402		zzzzz70,zzzzz77	false
403		zzzzz70,zzzzz96	false
404		zzzzz70,zzzzz94	false
405		zzzzz70,zzzzz78	false
406		zzzzz70,zzzzz79	false
407		zzzzz70,zzzzz75	false
408		zzzzz70,zzzzz76	false
409		zzzzz70,zzzzz80	false
410		zzzzz70,zzzzz73	false
411		zzzzz70,zzzzz72	false
412		zzzzz69,zzzzz86	false
413		zzzzz69,zzzzz84	false
414		zzzzz69,zzzzzz1	false
415		zzzzz69,zzzzzz5	false
416		zzzzz69,zzzzz95	false
417		zzzzz69,zzzzz82	false
418		zzzzz69,zzzzz81	false
419		zzzzz69,zzzzz97	false
420		zzzzz69,zzzzzz6	false
421		zzzzz69,zzzzz77	false
422		zzzzz69,zzzzz74	false
423		zzzzz69,zzzzz99	false
424		zzzzz69,zzzzz96	false
425		zzzzz69,zzzzz94	false
426		zzzzz69,zzzzz78	false
427		zzzzz69,zzzzz79	false
428		zzzzz69,zzzzz75	false
429		zzzzz69,zzzzz76	false
430		zzzzz69,zzzzz80	false
431		zzzzz69,zzzzz72	false
432		zzzzz69,zzzzz73	false
433		zzzzz69,zzzzz70	false
434		zzzzz68,zzzzz86	false
435		zzzzz68,zzzzz84	false
436		zzzzz68,zzzzzz1	false
437		zzzzz68,zzzzzz5	false
438		zzzzz68,zzzzz95	false
439		zzzzz68,zzzzz82	false
440		zzzzz68,zzzzz81	false
441		zzzzz68,zzzzz97	false
442		zzzzz68,zzzzzz6	false
443		zzzzz68,zzzzz74	false
444		zzzzz68,zzzzz99	false
445		zzzzz68,zzzzz77	false
446		zzzzz68,zzzzz96	false
447		zzzzz68,zzzzz94	false
448		zzzzz68,zzzzz78	false
449		zzzzz68,zzzzz79	false
450		zzzzz68,zzzzz75	false
451		zzzzz68,zzzzz76	false
452		zzzzz68,zzzzz80	false
453		zzzzz68,zzzzz72	false
454		zzzzz68,zzzzz73	false
455		zzzzz68,zzzzz69	false
456		zzzzz68,zzzzz70	false
457		zzzzz67,zzzzz86	false
458		zzzzz67,zzzzz84	false
459		zzzzz67,zzzzzz1	false
460		zzzzz67,zzzzzz5	false
461		zzzzz67,zzzzz82	false
462		zzzzz67,zzzzz95	false
463		zzzzz67,zzzzz97	false
464		zzzzz67,zzzzz81	false
465		zzzzz67,zzzzzz6	false
466		zzzzz67,zzzzz96	false
467		zzzzz67,zzzzz99	false
468		zzzzz67,zzzzz94	false
469		zzzzz67,zzzzz77	false
470		zzzzz67,zzzzz74	false
471		zzzzz67,zzzzz78	false
472		zzzzz67,zzzzz79	false
473		zzzzz67,zzzzz75	false
474		zzzzz67,zzzzz76	false
475		zzzzz67,zzzzz80	false
476		zzzzz67,zzzzz73	false
477		zzzzz67,zzzzz70	false
478		zzzzz67,zzzzz68	false
479		zzzzz67,zzzzz69	false
480		zzzzz67,zzzzz72	false
481		zzzzz66,zzzzz82	false
482		zzzzz66,zzzzz81	false
483		zzzzz66,zzzzz95	false
484		zzzzz66,zzzzz99	false
485		zzzzz66,zzzzz77	false
486		zzzzz66,zzzzz74	false
487		zzzzz66,zzzzz72	false
488		zzzzz66,zzzzz68	false
489		zzzzz66,zzzzz70	false
490		zzzzz66,zzzzz79	false
491		zzzzz66,zzzzz75	false
492		zzzzz66,zzzzz69	false
493		zzzzz66,zzzzz73	false
494		zzzzz66,zzzzz94	false
495		zzzzz66,zzzzz67	false
496		zzzzz66,zzzzz96	false
497		zzzzz66,zzzzzz6	false
498		zzzzz66,zzzzz76	false
499		zzzzz66,zzzzz78	false
500		zzzzz66,zzzzz80	false
501		zzzzz65,zzzzz82	false
502		zzzzz65,zzzzzz6	false
503		zzzzz65,zzzzz81	false
504		zzzzz65,zzzzz66	false
505		zzzzz65,zzzzz95	false
506		zzzzz65,zzzzz99	false
507		zzzzz65,zzzzz96	false
508		zzzzz65,zzzzz94	false
509		zzzzz65,zzzzz67	false
510		zzzzz65,zzzzz73	false
511		zzzzz65,zzzzz72	false
512		zzzzz65,zzzzz70	false
513		zzzzz65,zzzzz69	false
514		zzzzz65,zzzzz68	false
515		zzzzz65,zzzzz79	false
516		zzzzz65,zzzzz75	false
517		zzzzz65,zzzzz76	false
518		zzzzz65,zzzzz80	false
519		zzzzz65,zzzzz78	false
520		zzzzz65,zzzzz77	false
521		zzzzz65,zzzzz74	false
522		zzzzz64,zzzzz81	false
523		zzzzz64,zzzzz82	false
524		zzzzz64,zzzzz95	false
525		zzzzz64,zzzzz65	false
526		zzzzz64,zzzzz99	false
527		zzzzz64,zzzzz77	false
528		zzzzz64,zzzzz74	false
529		zzzzz64,zzzzz94	false
530		zzzzz64,zzzzz75	false
531		zzzzz64,zzzzz79	false
532		zzzzz64,zzzzz72	false
533		zzzzz64,zzzzz73	false
534		zzzzz64,zzzzz70	false
535		zzzzz64,zzzzz69	false
536		zzzzz64,zzzzz68	false
537		zzzzz64,zzzzzz6	false
538		zzzzz64,zzzzz67	false
539		zzzzz64,zzzzz76	false
540		zzzzz64,zzzzz96	false
541		zzzzz64,zzzzz78	false
542		zzzzz64,zzzzz80	false
543		zzzzz64,zzzzz66	false
544		zzzzz63,zzzzz82	false
545		zzzzz63,zzzzz97	false
546		zzzzz63,zzzzz81	false
547		zzzzz63,zzzzzz6	false
548		zzzzz63,zzzzz95	false
549		zzzzz63,zzzzz96	false
550		zzzzz63,zzzzz65	false
551		zzzzz63,zzzzz66	false
552		zzzzz63,zzzzz64	false
553		zzzzz63,zzzzz94	false
554		zzzzz63,zzzzz77	false
555		zzzzz63,zzzzz74	false
556		zzzzz63,zzzzz79	false
557		zzzzz63,zzzzz67	false
558		zzzzz63,zzzzz75	false
559		zzzzz63,zzzzz72	false
560		zzzzz63,zzzzz70	false
561		zzzzz63,zzzzz73	false
562		zzzzz63,zzzzz69	false
563		zzzzz63,zzzzz68	false
564		zzzzz63,zzzzz80	false
565		zzzzz63,zzzzz78	false
566		zzzzz63,zzzzz76	false
567		zzzzz63,zzzzz99	false
568		zzzzz62,zzzzz84	false
569		zzzzz62,zzzzz81	false
570		zzzzz62,zzzzz97	false
571		zzzzz62,zzzzzz6	false
572		zzzzz62,zzzzz72	false
573		zzzzz62,zzzzz70	false
574		zzzzz62,zzzzz67	false
575		zzzzz62,zzzzz73	false
576		zzzzz62,zzzzz69	false
577		zzzzz62,zzzzz68	false
578		zzzzz62,zzzzz65	false
579		zzzzz62,zzzzz76	false
580		zzzzz62,zzzzz80	false
581		zzzzz62,zzzzz66	false
582		zzzzz62,zzzzz75	false
583		zzzzz62,zzzzz79	false
584		zzzzz62,zzzzz78	false
585		zzzzz62,zzzzz64	false
586		zzzzz62,zzzzz99	false
587		zzzzz62,zzzzz74	false
588		zzzzz62,zzzzz77	false
589		zzzzz62,zzzzz82	false
590		zzzzz62,zzzzz63	false
591		zzzzz62,zzzzz94	false
592		zzzzz62,zzzzz95	false
593		zzzzz62,zzzzz96	false
594		zzzzz61,zzzzz84	false
595		zzzzz61,zzzzz82	false
596		zzzzz61,zzzzzz1	false
597		zzzzz61,zzzzz97	false
598		zzzzz61,zzzzz81	false
599		zzzzz61,zzzzz62	false
600		zzzzz61,zzzzz66	false
601		zzzzz61,zzzzz64	false
602		zzzzz61,zzzzz65	false
603		zzzzz61,zzzzz96	false
604		zzzzz61,zzzzzz6	false
605		zzzzz61,zzzzz67	false
606		zzzzz61,zzzzz73	false
607		zzzzz61,zzzzz72	false
608		zzzzz61,zzzzz70	false
609		zzzzz61,zzzzz69	false
610		zzzzz61,zzzzz68	false
611		zzzzz61,zzzzz76	false
612		zzzzz61,zzzzz80	false
613		zzzzz61,zzzzz75	false
614		zzzzz61,zzzzz79	false
615		zzzzz61,zzzzz94	false
616		zzzzz61,zzzzz74	false
617		zzzzz61,zzzzz77	false
618		zzzzz61,zzzzz78	false
619		zzzzz61,zzzzz99	false
620		zzzzz61,zzzzz63	false
621		zzzzz61,zzzzz95	false
622		zzzzz60,zzzzzz6	false
623		zzzzz60,zzzzz81	false
624		zzzzz60,zzzzz95	false
625		zzzzz60,zzzzz65	false
626		zzzzz60,zzzzz66	false
627		zzzzz60,zzzzz64	false
628		zzzzz60,zzzzz96	false
629		zzzzz60,zzzzz62	false
630		zzzzz60,zzzzz94	false
631		zzzzz60,zzzzz99	false
632		zzzzz60,zzzzz74	false
633		zzzzz60,zzzzz77	false
634		zzzzz60,zzzzz75	false
635		zzzzz60,zzzzz67	false
636		zzzzz60,zzzzz79	false
637		zzzzz60,zzzzz72	false
638		zzzzz60,zzzzz73	false
639		zzzzz60,zzzzz70	false
640		zzzzz60,zzzzz69	false
641		zzzzz60,zzzzz68	false
642		zzzzz60,zzzzz76	false
643		zzzzz60,zzzzz80	false
644		zzzzz60,zzzzz78	false
645		zzzzz60,zzzzz63	false
646		zzzzz60,zzzzz82	false
647		zzzzz59,zzzzz65	false
648		zzzzz59,zzzzz64	false
649		zzzzz59,zzzzzz6	false
650		zzzzz59,zzzzz66	false
651		zzzzz59,zzzzz99	false
652		zzzzz59,zzzzz61	false
653		zzzzz59,zzzzz79	false
654		zzzzz59,zzzzz75	false
655		zzzzz59,zzzzz80	false
656		zzzzz59,zzzzz72	false
657		zzzzz59,zzzzz70	false
658		zzzzz59,zzzzz69	false
659		zzzzz59,zzzzz73	false
660		zzzzz59,zzzzz68	false
661		zzzzz59,zzzzz76	false
662		zzzzz59,zzzzz67	false
663		zzzzz59,zzzzz74	false
664		zzzzz59,zzzzz77	false
665		zzzzz59,zzzzz63	false
666		zzzzz59,zzzzz78	false
667		zzzzz59,zzzzz94	false
668		zzzzz59,zzzzz95	false
669		zzzzz59,zzzzz62	false
670		zzzzz59,zzzzz96	false
671		zzzzz59,zzzzz82	false
672		zzzzz59,zzzzz60	false
673		zzzzz58,zzzzzz6	false
674		zzzzz58,zzzzz95	false
675		zzzzz58,zzzzz65	false
676		zzzzz58,zzzzz64	false
677		zzzzz58,zzzzz66	false
678		zzzzz58,zzzzz62	false
679		zzzzz58,zzzzz96	false
680		zzzzz58,zzzzz99	false
681		zzzzz58,zzzzz75	false
682		zzzzz58,zzzzz74	false
683		zzzzz58,zzzzz79	false
684		zzzzz58,zzzzz77	false
685		zzzzz58,zzzzz94	false
686		zzzzz58,zzzzz70	false
687		zzzzz58,zzzzz68	false
688		zzzzz58,zzzzz73	false
689		zzzzz58,zzzzz72	false
690		zzzzz58,zzzzz69	false
691		zzzzz58,zzzzz67	false
692		zzzzz58,zzzzz80	false
693		zzzzz58,zzzzz76	false
694		zzzzz58,zzzzz63	false
695		zzzzz58,zzzzz78	false
696		zzzzz58,zzzzz82	false
697		zzzzz58,zzzzz59	false
698		zzzzz58,zzzzz60	false
699		zzzzz57,zzzzz64	false
700		zzzzz57,zzzzz98	false
701		zzzzz57,zzzzz94	false
702		zzzzz57,zzzzz66	false
703		zzzzz57,zzzzzz6	false
704		zzzzz57,zzzzz74	false
705		zzzzz57,zzzzz95	false
706		zzzzz57,zzzzz77	false
707		zzzzz57,zzzzz61	false
708		zzzzz57,zzzzz99	false
709		zzzzz57,zzzzz63	false
710		zzzzz57,zzzzz67	false
711		zzzzz57,zzzzz73	false
712		zzzzz57,zzzzz72	false
713		zzzzz57,zzzzz70	false
714		zzzzz57,zzzzz68	false
715		zzzzz57,zzzzz76	false
716		zzzzz57,zzzzz69	false
717		zzzzz57,zzzzz78	false
718		zzzzz57,zzzzz80	false
719		zzzzz57,zzzzz79	false
720		zzzzz57,zzzzz75	false
721		zzzzz57,zzzzz81	false
722		zzzzz57,zzzzz97	false
723		zzzzz56,zzzzzz1	false
724		zzzzz56,zzzzzz5	false
725		zzzzz56,zzzzz62	false
726		zzzzz56,zzzzz82	false
727		zzzzz56,zzzzz95	false
728		zzzzz56,zzzzz59	false
729		zzzzz56,zzzzz60	false
730		zzzzz56,zzzzz66	false
731		zzzzz56,zzzzz58	false
732		zzzzz56,zzzzz64	false
733		zzzzz56,zzzzz57	false
734		zzzzz56,zzzzz97	false
735		zzzzz56,zzzzz65	false
736		zzzzz56,zzzzz81	false
737		zzzzz56,zzzzzz6	false
738		zzzzz56,zzzzz61	false
739		zzzzz56,zzzzz96	false
740		zzzzz56,zzzzz77	false
741		zzzzz56,zzzzz74	false
742		zzzzz56,zzzzz99	false
743		zzzzz56,zzzzz94	false
744		zzzzz56,zzzzz63	false
745		zzzzz56,zzzzz78	false
746		zzzzz56,zzzzz79	false
747		zzzzz56,zzzzz75	false
748		zzzzz56,zzzzz76	false
749		zzzzz56,zzzzz80	false
750		zzzzz56,zzzzz67	false
751		zzzzz56,zzzzz70	false
752		zzzzz56,zzzzz73	false
753		zzzzz56,zzzzz72	false
754		zzzzz56,zzzzz69	false
755		zzzzz56,zzzzz68	false
756		zzzzz55,zzzzz82	false
757		zzzzz55,zzzzz98	false
758		zzzzz55,zzzzz65	false
759		zzzzz55,zzzzz62	false
760		zzzzz55,zzzzzz0	false
761		zzzzz55,zzzzz66	false
762		zzzzz55,zzzzz94	false
763		zzzzz55,zzzzzz6	false
764		zzzzz55,zzzzz64	false
765		zzzzz55,zzzzz77	false
766		zzzzz55,zzzzz74	false
767		zzzzz55,zzzzz95	false
768		zzzzz55,zzzzz61	false
769		zzzzz55,zzzzz67	false
770		zzzzz55,zzzzz63	false
771		zzzzz55,zzzzz70	false
772		zzzzz55,zzzzz68	false
773		zzzzz55,zzzzz72	false
774		zzzzz55,zzzzz73	false
775		zzzzz55,zzzzz69	false
776		zzzzz55,zzzzz80	false
777		zzzzz55,zzzzz76	false
778		zzzzz55,zzzzz56	false
779		zzzzz55,zzzzz99	false
780		zzzzz55,zzzzz78	false
781		zzzzz55,zzzzz75	false
782		zzzzz55,zzzzz79	false
783		zzzzz55,zzzzz57	false
784		zzzzz55,zzzzz97	false
785		zzzzz55,zzzzz81	false
786		zzzzz54,zzzzz77	false
787		zzzzz54,zzzzz66	false
788		zzzzz54,zzzzz59	false
789		zzzzz54,zzzzz74	false
790		zzzzz54,zzzzzz1	false
791		zzzzz54,zzzzz94	false
792		zzzzz54,zzzzz98	false
793		zzzzz54,zzzzz62	false
794		zzzzz54,zzzzz64	false
795		zzzzz54,zzzzz91	false
796		zzzzz54,zzzzz65	false
797		zzzzz54,zzzzz99	false
798		zzzzz54,zzzzzz5	false
799		zzzzz54,zzzzz95	false
800		zzzzz54,zzzzz97	false
801		zzzzz54,zzzzz96	false
802		zzzzz54,zzzzz61	false
803		zzzzz54,zzzzz57	false
804		zzzzz54,zzzzz63	false
805		zzzzz54,zzzzz67	false
806		zzzzz54,zzzzz76	false
807		zzzzz54,zzzzz55	false
808		zzzzz54,zzzzz56	false
809		zzzzz54,zzzzz73	false
810		zzzzz54,zzzzz72	false
811		zzzzz54,zzzzz70	false
812		zzzzz54,zzzzz69	false
813		zzzzz54,zzzzz68	false
814		zzzzz54,zzzzz79	false
815		zzzzz54,zzzzz75	false
816		zzzzz54,zzzzz81	false
817		zzzzz54,zzzzz78	false
818		zzzzz54,zzzzz80	false
819		zzzzz54,zzzzzz6	false
820		zzzzz52,zzzzz86	false
821		zzzzz52,zzzzzz7	false
822		zzzzz52,zzzzzz4	false
823		zzzzz51,zzzzz87	false
824		zzzzz51,zzzzz88	false
825		zzzzz51,zzzzz91	false
826		zzzzz50,zzzzz84	false
827		zzzzz50,zzzzzz0	false
828		zzzzz50,zzzzzz1	false
829		zzzzz50,zzzzzz5	false
830		zzzzz50,zzzzzz9	false
831		zzzzz50,zzzzzz8	false
832		zzzzz49,zzzzzz5	false
833		zzzzz49,zzzzz84	false
834		zzzzz49,zzzzz57	false
835		zzzzz49,zzzzz55	false
836		zzzzz49,zzzzz82	false
837		zzzzz49,zzzzz81	false
838		zzzzz49,zzzzz97	false
839		zzzzz49,zzzzzz6	false
840		zzzzz49,zzzzz60	false
841		zzzzz49,zzzzz64	false
842		zzzzz49,zzzzz66	false
843		zzzzz49,zzzzz59	false
844		zzzzz49,zzzzz99	false
845		zzzzz49,zzzzz58	false
846		zzzzz49,zzzzz95	false
847		zzzzz49,zzzzz70	false
848		zzzzz49,zzzzz68	false
849		zzzzz49,zzzzz73	false
850		zzzzz49,zzzzz69	false
851		zzzzz49,zzzzz62	false
852		zzzzz49,zzzzz72	false
853		zzzzz49,zzzzz96	false
854		zzzzz49,zzzzz56	false
855		zzzzz49,zzzzz67	false
856		zzzzz49,zzzzz76	false
857		zzzzz49,zzzzz80	false
858		zzzzz49,zzzzz75	false
859		zzzzz49,zzzzz61	false
860		zzzzz49,zzzzz79	false
861		zzzzz49,zzzzz94	false
862		zzzzz49,zzzzz65	false
863		zzzzz49,zzzzz78	false
864		zzzzz49,zzzzz63	false
865		zzzzz49,zzzzz74	false
866		zzzzz49,zzzzz77	false
867		zzzzz48,zzzzz87	false
868		zzzzz48,zzzzz91	false
869		zzzzz48,zzzzz51	false
870		zzzzz48,zzzzz88	false
871		zzzzz46,zzzzz48	false
872		zzzzz46,zzzzz88	false
873		zzzzz46,zzzzz51	false
874		zzzzz46,zzzzz91	false
875		zzzzz46,zzzzz87	false
876		zzzzz45,zzzzz54	false
877		zzzzz45,zzzzz48	false
878		zzzzz45,zzzzz46	false
879		zzzzz45,zzzzz87	false
880		zzzzz45,zzzzz88	false
881		zzzzz45,zzzzz51	false
882		zzzzz45,zzzzz91	false
883		zzzzz44,zzzzzz7	false
884		zzzzz44,zzzzz52	false
885		zzzzz44,zzzzzz4	false
886		zzzzz44,zzzzz86	false
887		zzzzz43,zzzzz54	false
888		zzzzz43,zzzzzz0	false
889		zzzzz43,zzzzz81	false
890		zzzzz43,zzzzz55	false
891		zzzzz43,zzzzz84	false
892		zzzzz43,zzzzzz7	false
893		zzzzz43,zzzzzz4	false
894		zzzzz43,zzzzz98	false
895		zzzzz43,zzzzzz1	false
896		zzzzz43,zzzzz44	false
897		zzzzz43,zzzzz86	false
898		zzzzz42,zzzzz87	false
899		zzzzz42,zzzzz46	false
900		zzzzz42,zzzzz48	false
901		zzzzz42,zzzzz51	false
902		zzzzz42,zzzzz45	false
903		zzzzz42,zzzzz91	false
904		zzzzz42,zzzzz88	false
905		zzzzz41,zzzzz48	false
906		zzzzz41,zzzzz83	false
907		zzzzz41,zzzzz71	false
908		zzzzz41,zzzzz92	false
909		zzzzz41,zzzzz90	false
910		zzzzz41,zzzzz89	false
911		zzzzz41,zzzzz85	false
912		zzzzz40,zzzzzz5	false
913		zzzzz40,zzzzz98	false
914		zzzzz40,zzzzzz3	false
915		zzzzz40,zzzzzz2	false
916		zzzzz40,zzzzzz0	false
917		zzzzz38,zzzzz98	false
918		zzzzz38,zzzzz80	false
919		zzzzz38,zzzzzz5	false
920		zzzzz38,zzzzz44	false
921		zzzzz38,zzzzz76	false
922		zzzzz38,zzzzz67	false
923		zzzzz38,zzzzz86	false
924		zzzzz38,zzzzz43	false
925		zzzzz38,zzzzzz1	false
926		zzzzz38,zzzzz48	false
927		zzzzz37,zzzzz96	false
928		zzzzz37,zzzzz56	false
929		zzzzz37,zzzzz38	false
930		zzzzz37,zzzzz74	false
931		zzzzz37,zzzzzz5	false
932		zzzzz37,zzzzz72	false
933		zzzzz37,zzzzz73	false
934		zzzzz37,zzzzz70	false
935		zzzzz37,zzzzz69	false
936		zzzzz37,zzzzz68	false
937		zzzzz37,zzzzz78	false
938		zzzzz37,zzzzz50	false
939		zzzzz37,zzzzz61	false
940		zzzzz37,zzzzz43	false
941		zzzzz37,zzzzzz0	false
942		zzzzz37,zzzzzz8	false
943		zzzzz37,zzzzzz9	false
944		zzzzz37,zzzzz84	false
945		zzzzz37,zzzzz98	false
946		zzzzz37,zzzzzz1	false
947		zzzzz36,zzzzz73	false
948		zzzzz36,zzzzz72	false
949		zzzzz36,zzzzz70	false
950		zzzzz36,zzzzz69	false
951		zzzzz36,zzzzz68	false
952		zzzzz36,zzzzz49	false
953		zzzzz36,zzzzz38	false
954		zzzzz36,zzzzz77	false
955		zzzzz36,zzzzz78	false
956		zzzzz36,zzzzz61	false
957		zzzzz36,zzzzz74	false
958		zzzzz36,zzzzz43	false
959		zzzzz36,zzzzz98	false
960		zzzzz36,zzzzz84	false
961		zzzzz36,zzzzzz1	false
962		zzzzz36,zzzzz37	false
963		zzzzz35,zzzzzz0	false
964		zzzzz35,zzzzz84	false
965		zzzzz35,zzzzz37	false
966		zzzzz35,zzzzzz1	false
967		zzzzz35,zzzzzz5	false
968		zzzzz35,zzzzz50	false
969		zzzzz35,zzzzzz8	false
970		zzzzz35,zzzzzz9	false
971		zzzzz34,zzzzz38	false
972		zzzzz33,zzzzz93	false
973		zzzzz33,zzzzz86	false
974		zzzzz33,zzzzz38	false
975		zzzzz33,zzzzz43	false
976		zzzzz33,zzzzzz0	false
977		zzzzz33,zzzzzz5	false
978		zzzzz33,zzzzz50	false
979		zzzzz33,zzzzzz8	false
980		zzzzz33,zzzzz35	false
981		zzzzz33,zzzzzz9	false
982		zzzzz33,zzzzz36	false
983		zzzzz33,zzzzz84	false
984		zzzzz33,zzzzz98	false
985		zzzzz33,zzzzz37	false
986		zzzzz33,zzzzzz1	false
987		zzzzz32,zzzzz72	false
988		zzzzz32,zzzzz67	false
989		zzzzz32,zzzzz80	false
990		zzzzz32,zzzzz73	false
991		zzzzz32,zzzzz70	false
992		zzzzz32,zzzzz69	false
993		zzzzz32,zzzzz68	false
994		zzzzz32,zzzzz76	false
995		zzzzz32,zzzzz44	false
996		zzzzz32,zzzzz43	false
997		zzzzz32,zzzzz86	false
998		zzzzz32,zzzzz52	false
999		zzzzz32,zzzzzz7	false
1000		zzzzz32,zzzzzz4	false
1001		zzzzz31,zzzzz86	false
1002		zzzzz31,zzzzz56	false
1003		zzzzz31,zzzzzz5	false
1004		zzzzz31,zzzzz67	false
1005		zzzzz31,zzzzz78	false
1006		zzzzz31,zzzzzz0	false
1007		zzzzz31,zzzzzz8	false
1008		zzzzz31,zzzzz50	false
1009		zzzzz31,zzzzzz9	false
1010		zzzzz31,zzzzz35	false
1011		zzzzz31,zzzzz93	false
1012		zzzzz31,zzzzz36	false
1013		zzzzz31,zzzzz98	false
1014		zzzzz31,zzzzz84	false
1015		zzzzz31,zzzzz33	false
1016		zzzzz31,zzzzz37	false
1017		zzzzz31,zzzzzz1	false
1018		zzzzz30,zzzzz37	false
1019		zzzzz30,zzzzz84	false
1020		zzzzz30,zzzzz33	false
1021		zzzzz30,zzzzzz0	false
1022		zzzzz30,zzzzz31	false
1023		zzzzz30,zzzzzz1	false
1024		zzzzz30,zzzzzz5	false
1025		zzzzz30,zzzzzz8	false
1026		zzzzz30,zzzzzz9	false
1027		zzzzz30,zzzzz35	false
1028		zzzzz30,zzzzz50	false
1029		zzzzz29,zzzzz82	false
1030		zzzzz29,zzzzz95	false
1031		zzzzz29,zzzzz65	false
1032		zzzzz29,zzzzz61	false
1033		zzzzz29,zzzzz58	false
1034		zzzzz29,zzzzz59	false
1035		zzzzz29,zzzzz60	false
1036		zzzzz29,zzzzz64	false
1037		zzzzz29,zzzzz96	false
1038		zzzzz29,zzzzz99	false
1039		zzzzz29,zzzzz66	false
1040		zzzzz29,zzzzz74	false
1041		zzzzz29,zzzzz94	false
1042		zzzzz29,zzzzz77	false
1043		zzzzz29,zzzzz49	false
1044		zzzzz29,zzzzz57	false
1045		zzzzz29,zzzzz97	false
1046		zzzzz29,zzzzz55	false
1047		zzzzz29,zzzzz63	false
1048		zzzzz29,zzzzz81	false
1049		zzzzz29,zzzzz54	false
1050		zzzzz29,zzzzz75	false
1051		zzzzz29,zzzzz73	false
1052		zzzzz29,zzzzz72	false
1053		zzzzz29,zzzzz70	false
1054		zzzzz29,zzzzz69	false
1055		zzzzz29,zzzzz68	false
1056		zzzzz29,zzzzz79	false
1057		zzzzz29,zzzzz67	false
1058		zzzzz29,zzzzz56	false
1059		zzzzz29,zzzzzz6	false
1060		zzzzz29,zzzzz78	false
1061		zzzzz29,zzzzz76	false
1062		zzzzz29,zzzzz80	false
1063		zzzzz28,zzzzz49	false
1064		zzzzz28,zzzzz98	false
1065		zzzzz28,zzzzz37	false
1066		zzzzz28,zzzzz45	false
1067		zzzzz28,zzzzz91	false
1068		zzzzz28,zzzzz66	false
1069		zzzzz28,zzzzz58	false
1070		zzzzz28,zzzzzz5	false
1071		zzzzz28,zzzzz94	false
1072		zzzzz28,zzzzz64	false
1073		zzzzz28,zzzzz60	false
1074		zzzzz28,zzzzz62	false
1075		zzzzz28,zzzzz96	false
1076		zzzzz28,zzzzz65	false
1077		zzzzz28,zzzzz63	false
1078		zzzzz28,zzzzz55	false
1079		zzzzz28,zzzzz99	false
1080		zzzzz28,zzzzz97	false
1081		zzzzz28,zzzzz61	false
1082		zzzzz28,zzzzz57	false
1083		zzzzz28,zzzzz95	false
1084		zzzzz28,zzzzz76	false
1085		zzzzz28,zzzzz56	false
1086		zzzzz28,zzzzz67	false
1087		zzzzz28,zzzzz72	false
1088		zzzzz28,zzzzz70	false
1089		zzzzz28,zzzzz69	false
1090		zzzzz28,zzzzz73	false
1091		zzzzz28,zzzzz68	false
1092		zzzzz28,zzzzz79	false
1093		zzzzz28,zzzzz75	false
1094		zzzzz28,zzzzz80	false
1095		zzzzz28,zzzzz81	false
1096		zzzzz28,zzzzz78	false
1097		zzzzz28,zzzzz29	false
1098		zzzzz28,zzzzzz6	false
1099		zzzzz28,zzzzz54	false
1100		zzzzz27,zzzzz39	false
1101		zzzzz26,zzzzz56	false
1102		zzzzz26,zzzzz54	false
1103		zzzzz26,zzzzz43	false
1104		zzzzz26,zzzzz78	false
1105		zzzzz26,zzzzz38	false
1106		zzzzz26,zzzzz86	false
1107		zzzzz26,zzzzzz0	false
1108		zzzzz26,zzzzzz5	false
1109		zzzzz26,zzzzz93	false
1110		zzzzz26,zzzzz50	false
1111		zzzzz26,zzzzz30	false
1112		zzzzz26,zzzzzz8	false
1113		zzzzz26,zzzzzz9	false
1114		zzzzz26,zzzzz35	false
1115		zzzzz26,zzzzz36	false
1116		zzzzz26,zzzzz98	false
1117		zzzzz26,zzzzz84	false
1118		zzzzz26,zzzzz37	false
1119		zzzzz26,zzzzz33	false
1120		zzzzz26,zzzzzz1	false
1121		zzzzz26,zzzzz31	false
1122		zzzzz25,zzzzzz5	false
1123		zzzzz25,zzzzz98	false
1124		zzzzz25,zzzzz59	false
1125		zzzzz25,zzzzz62	false
1126		zzzzz25,zzzzz86	false
1127		zzzzz25,zzzzz60	false
1128		zzzzz25,zzzzz58	false
1129		zzzzz25,zzzzz96	false
1130		zzzzz25,zzzzz82	false
1131		zzzzz25,zzzzz64	false
1132		zzzzz25,zzzzz66	false
1133		zzzzz25,zzzzz94	false
1134		zzzzz25,zzzzz95	false
1135		zzzzz25,zzzzz65	false
1136		zzzzz25,zzzzz77	false
1137		zzzzz25,zzzzz49	false
1138		zzzzz25,zzzzz74	false
1139		zzzzz25,zzzzz61	false
1140		zzzzz25,zzzzz99	false
1141		zzzzz25,zzzzz79	false
1142		zzzzz25,zzzzz54	false
1143		zzzzz25,zzzzz75	false
1144		zzzzz25,zzzzz81	false
1145		zzzzz25,zzzzz67	false
1146		zzzzz25,zzzzz80	false
1147		zzzzz25,zzzzz73	false
1148		zzzzz25,zzzzz72	false
1149		zzzzz25,zzzzz70	false
1150		zzzzz25,zzzzz69	false
1151		zzzzz25,zzzzz68	false
1152		zzzzz25,zzzzz63	false
1153		zzzzz25,zzzzz76	false
1154		zzzzz25,zzzzz55	false
1155		zzzzz25,zzzzz28	false
1156		zzzzz25,zzzzz97	false
1157		zzzzz25,zzzzz57	false
1158		zzzzz25,zzzzz56	false
1159		zzzzz25,zzzzz78	false
1160		zzzzz25,zzzzz29	false
1161		zzzzz25,zzzzzz6	false
1162		zzzzz24,zzzzz55	false
1163		zzzzz24,zzzzz50	false
1164		zzzzz24,zzzzzz1	false
1165		zzzzz24,zzzzz30	false
1166		zzzzz24,zzzzz60	false
1167		zzzzz24,zzzzz95	false
1168		zzzzz24,zzzzz81	false
1169		zzzzz24,zzzzz82	false
1170		zzzzz24,zzzzz57	false
1171		zzzzz24,zzzzz97	false
1172		zzzzz24,zzzzz29	false
1173		zzzzz24,zzzzz58	false
1174		zzzzz24,zzzzz62	false
1175		zzzzz24,zzzzz61	false
1176		zzzzz24,zzzzz65	false
1177		zzzzz24,zzzzz64	false
1178		zzzzz24,zzzzz59	false
1179		zzzzz24,zzzzz74	false
1180		zzzzz24,zzzzz77	false
1181		zzzzz24,zzzzz49	false
1182		zzzzz24,zzzzz96	false
1183		zzzzz24,zzzzz66	false
1184		zzzzz24,zzzzz94	false
1185		zzzzz24,zzzzz25	false
1186		zzzzz24,zzzzz99	false
1187		zzzzz24,zzzzz63	false
1188		zzzzz24,zzzzz54	false
1189		zzzzz24,zzzzz80	false
1190		zzzzz24,zzzzz75	false
1191		zzzzz24,zzzzz76	false
1192		zzzzz24,zzzzz79	false
1193		zzzzz24,zzzzz67	false
1194		zzzzz24,zzzzz28	false
1195		zzzzz24,zzzzz73	false
1196		zzzzz24,zzzzz72	false
1197		zzzzz24,zzzzz70	false
1198		zzzzz24,zzzzz69	false
1199		zzzzz24,zzzzz68	false
1200		zzzzz24,zzzzz56	false
1201		zzzzz24,zzzzz78	false
1202		zzzzz24,zzzzzz6	false
1203		zzzzz23,zzzzz24	false
1204		zzzzz23,zzzzz37	false
1205		zzzzz23,zzzzzz0	false
1206		zzzzz23,zzzzz84	false
1207		zzzzz23,zzzzz98	false
1208		zzzzz23,zzzzz33	false
1209		zzzzz23,zzzzz31	false
1210		zzzzz23,zzzzz26	false
1211		zzzzz23,zzzzzz1	false
1212		zzzzz23,zzzzzz5	false
1213		zzzzz23,zzzzzz9	false
1214		zzzzz23,zzzzz35	false
1215		zzzzz23,zzzzzz8	false
1216		zzzzz23,zzzzz30	false
1217		zzzzz23,zzzzz50	false
1218		zzzzz22,zzzzz48	false
1219		zzzzz22,zzzzz42	false
1220		zzzzz22,zzzzz51	false
1221		zzzzz22,zzzzz46	false
1222		zzzzz22,zzzzz88	false
1223		zzzzz22,zzzzz87	false
1224		zzzzz22,zzzzz91	false
1225		zzzzz22,zzzzz45	false
1226		zzzzz21,zzzzzz1	false
1227		zzzzz21,zzzzz44	false
1228		zzzzz21,zzzzz86	false
1229		zzzzz21,zzzzz52	false
1230		zzzzz21,zzzzzz4	false
1231		zzzzz21,zzzzzz7	false
1232		zzzzz21,zzzzz32	false
1233		zzzzz20,zzzzz60	false
1234		zzzzz20,zzzzz57	false
1235		zzzzz20,zzzzzz5	false
1236		zzzzz20,zzzzz62	false
1237		zzzzz20,zzzzz93	false
1238		zzzzz20,zzzzz55	false
1239		zzzzz20,zzzzz82	false
1240		zzzzz20,zzzzz58	false
1241		zzzzz20,zzzzz65	false
1242		zzzzz20,zzzzz59	false
1243		zzzzz20,zzzzz97	false
1244		zzzzz20,zzzzz74	false
1245		zzzzz20,zzzzz95	false
1246		zzzzz20,zzzzz77	false
1247		zzzzz20,zzzzz81	false
1248		zzzzz20,zzzzz49	false
1249		zzzzz20,zzzzz96	false
1250		zzzzz20,zzzzz94	false
1251		zzzzz20,zzzzz61	false
1252		zzzzz20,zzzzz76	false
1253		zzzzz20,zzzzz64	false
1254		zzzzz20,zzzzz99	false
1255		zzzzz20,zzzzz69	false
1256		zzzzz20,zzzzz73	false
1257		zzzzz20,zzzzz79	false
1258		zzzzz20,zzzzz75	false
1259		zzzzz20,zzzzz68	false
1260		zzzzz20,zzzzz67	false
1261		zzzzz20,zzzzz72	false
1262		zzzzz20,zzzzz70	false
1263		zzzzz20,zzzzz80	false
1264		zzzzz20,zzzzz66	false
1265		zzzzz20,zzzzz56	false
1266		zzzzz20,zzzzz29	false
1267		zzzzz20,zzzzz63	false
1268		zzzzz20,zzzzz78	false
1269		zzzzz20,zzzzz24	false
1270		zzzzz20,zzzzz25	false
1271		zzzzz20,zzzzz54	false
1272		zzzzz20,zzzzz28	false
1273		zzzzz20,zzzzzz6	false
1274		zzzzz19,zzzzz74	false
1275		zzzzz19,zzzzz37	false
1276		zzzzz19,zzzzz75	false
1277		zzzzz19,zzzzz38	false
1278		zzzzz19,zzzzz79	false
1279		zzzzz19,zzzzz25	false
1280		zzzzz19,zzzzz33	false
1281		zzzzz19,zzzzz20	false
1282		zzzzz19,zzzzz31	false
1283		zzzzz19,zzzzz28	false
1284		zzzzz19,zzzzzz6	false
1285		zzzzz19,zzzzz26	false
1286		zzzzz19,zzzzz73	false
1287		zzzzz19,zzzzz70	false
1288		zzzzz19,zzzzz69	false
1289		zzzzz19,zzzzz68	false
1290		zzzzz19,zzzzzz0	false
1291		zzzzz19,zzzzz72	false
1292		zzzzz19,zzzzz80	false
1293		zzzzz19,zzzzz67	false
1294		zzzzz19,zzzzz78	false
1295		zzzzz19,zzzzz56	false
1296		zzzzz19,zzzzzz1	false
1297		zzzzz19,zzzzz54	false
1298		zzzzz19,zzzzz76	false
1299		zzzzz19,zzzzz35	false
1300		zzzzz19,zzzzzz8	false
1301		zzzzz19,zzzzz23	false
1302		zzzzz19,zzzzzz9	false
1303		zzzzz19,zzzzz30	false
1304		zzzzz19,zzzzz50	false
1305		zzzzz19,zzzzzz5	false
1306		zzzzz18,zzzzzz5	false
1307		zzzzz18,zzzzz19	false
1308		zzzzz18,zzzzz95	false
1309		zzzzz18,zzzzz82	false
1310		zzzzz18,zzzzz96	false
1311		zzzzz18,zzzzz61	false
1312		zzzzz18,zzzzz58	false
1313		zzzzz18,zzzzz66	false
1314		zzzzz18,zzzzz55	false
1315		zzzzz18,zzzzz64	false
1316		zzzzz18,zzzzz60	false
1317		zzzzz18,zzzzz99	false
1318		zzzzz18,zzzzz59	false
1319		zzzzz18,zzzzz94	false
1320		zzzzz18,zzzzz77	false
1321		zzzzz18,zzzzz74	false
1322		zzzzz18,zzzzz49	false
1323		zzzzz18,zzzzz65	false
1324		zzzzz18,zzzzz57	false
1325		zzzzz18,zzzzz97	false
1326		zzzzz18,zzzzz81	false
1327		zzzzz18,zzzzz63	false
1328		zzzzz18,zzzzz79	false
1329		zzzzz18,zzzzz73	false
1330		zzzzz18,zzzzz72	false
1331		zzzzz18,zzzzz70	false
1332		zzzzz18,zzzzz69	false
1333		zzzzz18,zzzzz68	false
1334		zzzzz18,zzzzz67	false
1335		zzzzz18,zzzzz56	false
1336		zzzzz18,zzzzz80	false
1337		zzzzz18,zzzzz75	false
1338		zzzzz18,zzzzz76	false
1339		zzzzz18,zzzzz25	false
1340		zzzzz18,zzzzz29	false
1341		zzzzz18,zzzzz78	false
1342		zzzzz18,zzzzz28	false
1343		zzzzz18,zzzzz24	false
1344		zzzzz18,zzzzz54	false
1345		zzzzz18,zzzzzz6	false
1346		zzzzz18,zzzzz20	false
1347		zzzzz17,zzzzzz0	false
1348		zzzzz17,zzzzz40	false
1349		zzzzz17,zzzzzz2	false
1350		zzzzz17,zzzzzz3	false
1351		zzzzz16,zzzzzz5	false
1352		zzzzz16,zzzzz19	false
1353		zzzzz16,zzzzz59	false
1354		zzzzz16,zzzzz98	false
1355		zzzzz16,zzzzz60	false
1356		zzzzz16,zzzzz86	false
1357		zzzzz16,zzzzz62	false
1358		zzzzz16,zzzzz58	false
1359		zzzzz16,zzzzz82	false
1360		zzzzz16,zzzzz64	false
1361		zzzzz16,zzzzz66	false
1362		zzzzz16,zzzzz96	false
1363		zzzzz16,zzzzz95	false
1364		zzzzz16,zzzzz94	false
1365		zzzzz16,zzzzz49	false
1366		zzzzz16,zzzzz77	false
1367		zzzzz16,zzzzz65	false
1368		zzzzz16,zzzzz74	false
1369		zzzzz16,zzzzz99	false
1370		zzzzz16,zzzzz61	false
1371		zzzzz16,zzzzz24	false
1372		zzzzz16,zzzzz54	false
1373		zzzzz16,zzzzz73	false
1374		zzzzz16,zzzzz72	false
1375		zzzzz16,zzzzz70	false
1376		zzzzz16,zzzzz69	false
1377		zzzzz16,zzzzz68	false
1378		zzzzz16,zzzzz79	false
1379		zzzzz16,zzzzz18	false
1380		zzzzz16,zzzzz81	false
1381		zzzzz16,zzzzz67	false
1382		zzzzz16,zzzzz75	false
1383		zzzzz16,zzzzz80	false
1384		zzzzz16,zzzzz63	false
1385		zzzzz16,zzzzz76	false
1386		zzzzz16,zzzzz57	false
1387		zzzzz16,zzzzz78	false
1388		zzzzz16,zzzzz97	false
1389		zzzzz16,zzzzz20	false
1390		zzzzz16,zzzzz56	false
1391		zzzzz16,zzzzz28	false
1392		zzzzz16,zzzzz55	false
1393		zzzzz16,zzzzzz6	false
1394		zzzzz16,zzzzz29	false
1395		zzzzz16,zzzzz25	false
1396		zzzzz15,zzzzz75	false
1397		zzzzz15,zzzzz77	false
1398		zzzzz15,zzzzz18	false
1399		zzzzz15,zzzzz74	false
1400		zzzzz15,zzzzz38	false
1401		zzzzz15,zzzzz16	false
1402		zzzzz15,zzzzz93	false
1403		zzzzz15,zzzzz79	false
1404		zzzzz15,zzzzz37	false
1405		zzzzz15,zzzzz25	false
1406		zzzzz15,zzzzz33	false
1407		zzzzz15,zzzzz28	false
1408		zzzzz15,zzzzz20	false
1409		zzzzz15,zzzzz31	false
1410		zzzzz15,zzzzz70	false
1411		zzzzz15,zzzzz69	false
1412		zzzzz15,zzzzz68	false
1413		zzzzz15,zzzzz73	false
1414		zzzzz15,zzzzz72	false
1415		zzzzz15,zzzzz67	false
1416		zzzzz15,zzzzzz6	false
1417		zzzzz15,zzzzz80	false
1418		zzzzz15,zzzzz56	false
1419		zzzzz15,zzzzzz0	false
1420		zzzzz15,zzzzz78	false
1421		zzzzz15,zzzzz54	false
1422		zzzzz15,zzzzz26	false
1423		zzzzz15,zzzzzz1	false
1424		zzzzz15,zzzzz76	false
1425		zzzzz15,zzzzz23	false
1426		zzzzz15,zzzzz35	false
1427		zzzzz15,zzzzzz8	false
1428		zzzzz15,zzzzzz9	false
1429		zzzzz15,zzzzz30	false
1430		zzzzz15,zzzzz50	false
1431		zzzzz15,zzzzzz5	false
1432		zzzzz15,zzzzz19	false
1433		zzzzz14,zzzzz36	false
1434		zzzzz14,zzzzz37	false
1435		zzzzz14,zzzzz15	false
1436		zzzzz14,zzzzz86	false
1437		zzzzz14,zzzzz62	false
1438		zzzzz14,zzzzzz5	false
1439		zzzzz14,zzzzz19	false
1440		zzzzz14,zzzzzz1	false
1441		zzzzz14,zzzzz82	false
1442		zzzzz14,zzzzz95	false
1443		zzzzz14,zzzzz55	false
1444		zzzzz14,zzzzz28	false
1445		zzzzz14,zzzzz54	false
1446		zzzzz14,zzzzz59	false
1447		zzzzz14,zzzzz64	false
1448		zzzzz14,zzzzz97	false
1449		zzzzz14,zzzzz61	false
1450		zzzzz14,zzzzzz6	false
1451		zzzzz14,zzzzz57	false
1452		zzzzz14,zzzzz20	false
1453		zzzzz14,zzzzz81	false
1454		zzzzz14,zzzzz60	false
1455		zzzzz14,zzzzz66	false
1456		zzzzz14,zzzzz65	false
1457		zzzzz14,zzzzz58	false
1458		zzzzz14,zzzzz96	false
1459		zzzzz14,zzzzz77	false
1460		zzzzz14,zzzzz49	false
1461		zzzzz14,zzzzz99	false
1462		zzzzz14,zzzzz74	false
1463		zzzzz14,zzzzz94	false
1464		zzzzz14,zzzzz18	false
1465		zzzzz14,zzzzz29	false
1466		zzzzz14,zzzzz16	false
1467		zzzzz14,zzzzz25	false
1468		zzzzz14,zzzzz24	false
1469		zzzzz14,zzzzz63	false
1470		zzzzz14,zzzzz78	false
1471		zzzzz14,zzzzz56	false
1472		zzzzz14,zzzzz76	false
1473		zzzzz14,zzzzz79	false
1474		zzzzz14,zzzzz75	false
1475		zzzzz14,zzzzz80	false
1476		zzzzz14,zzzzz67	false
1477		zzzzz14,zzzzz70	false
1478		zzzzz14,zzzzz68	false
1479		zzzzz14,zzzzz73	false
1480		zzzzz14,zzzzz72	false
1481		zzzzz14,zzzzz69	false
1482		zzzzz13,zzzzz44	false
1483		zzzzz13,zzzzz43	false
1484		zzzzz13,zzzzz86	false
1485		zzzzz13,zzzzz52	false
1486		zzzzz13,zzzzz21	false
1487		zzzzz13,zzzzz32	false
1488		zzzzz13,zzzzzz4	false
1489		zzzzz13,zzzzzz7	false
1490		zzzzz12,zzzzzz5	false
1491		zzzzz12,zzzzz98	false
1492		zzzzz12,zzzzz17	false
1493		zzzzz12,zzzzzz3	false
1494		zzzzz12,zzzzzz2	false
1495		zzzzz12,zzzzzz0	false
1496		zzzzz12,zzzzz40	false
1497		zzzzz11,zzzzz39	false
1498		zzzzz11,zzzzz27	false
1499		zzzzz10,zzzzzz1	false
1500		zzzzz10,zzzzz44	false
1501		zzzzz10,zzzzz43	false
1502		zzzzz10,zzzzz86	false
1503		zzzzz10,zzzzz52	false
1504		zzzzz10,zzzzz21	false
1505		zzzzz10,zzzzz32	false
1506		zzzzz10,zzzzzz4	false
1507		zzzzz10,zzzzzz7	false
1508		zzzzz10,zzzzz13	false
1509		zzzz102,zzzzz96	false
1510		zzzz102,zzzzz94	false
1511		zzzz102,zzzzz76	false
1512		zzzz102,zzzzz38	false
1513		zzzz102,zzzzz56	false
1514		zzzz102,zzzzz21	false
1515		zzzz102,zzzzz62	false
1516		zzzz102,zzzzz73	false
1517		zzzz102,zzzzz72	false
1518		zzzz102,zzzzz70	false
1519		zzzz102,zzzzz69	false
1520		zzzz102,zzzzz68	false
1521		zzzz102,zzzzz67	false
1522		zzzz102,zzzzz78	false
1523		zzzz102,zzzzz40	false
1524		zzzz102,zzzzz12	false
1525		zzzz102,zzzzz61	false
1526		zzzz102,zzzzz43	false
1527		zzzz102,zzzzz93	false
1528		zzzz102,zzzzzz0	false
1529		zzzz102,zzzzz19	false
1530		zzzz102,zzzzzz5	false
1531		zzzz102,zzzzz15	false
1532		zzzz102,zzzzz30	false
1533		zzzz102,zzzzz50	false
1534		zzzz102,zzzzzz8	false
1535		zzzz102,zzzzzz9	false
1536		zzzz102,zzzzz35	false
1537		zzzz102,zzzzz23	false
1538		zzzz102,zzzzz36	false
1539		zzzz102,zzzzz98	false
1540		zzzz102,zzzzz33	false
1541		zzzz102,zzzzz84	false
1542		zzzz102,zzzzz37	false
1543		zzzz102,zzzzzz1	false
1544		zzzz102,zzzzz31	false
1545		zzzz102,zzzzz26	false
1546		zzzz101,zzzzz94	false
1547		zzzz101,zzzzz49	false
1548		zzzz101,zzzzz77	false
1549		zzzz101,zzzzz99	false
1550		zzzz101,zzzzz65	false
1551		zzzz101,zzzzzz5	false
1552		zzzz101,zzzzz66	false
1553		zzzz101,zzzzz19	false
1554		zzzz101,zzzzz64	false
1555		zzzz101,zzzzz15	false
1556		zzzz101,zzzzz95	false
1557		zzzz101,zzzzzz6	false
1558		zzzz101,zzzzz61	false
1559		zzzz101,zzzzz29	false
1560		zzzz101,zzzzz63	false
1561		zzzz101,zzzzz20	false
1562		zzzz101,zzzzz18	false
1563		zzzz101,zzzzz70	false
1564		zzzz101,zzzzz69	false
1565		zzzz101,zzzzz68	false
1566		zzzz101,zzzzz14	false
1567		zzzz101,zzzzz72	false
1568		zzzz101,zzzzz54	false
1569		zzzz101,zzzzz73	false
1570		zzzz101,zzzzz67	false
1571		zzzz101,zzzzz76	false
1572		zzzz101,zzzzz78	false
1573		zzzz101,zzzzz28	false
1574		zzzz101,zzzzz80	false
1575		zzzz101,zzzzz56	false
1576		zzzz101,zzzzz75	false
1577		zzzz101,zzzzz79	false
1578		zzzz101,zzzzz25	false
1579		zzzz101,zzzzz16	false
1580		zzzz101,zzzzz57	false
1581		zzzz101,zzzzz97	false
1582		zzzz101,zzzzz81	false
1583		zzzz101,zzzzz55	false
1584		zzzz100,zzzzz94	false
1585		zzzz100,zzzzz98	false
1586		zzzz100,zzzzz43	false
1587		zzzz100,zzzzz62	false
1588		zzzz100,zzzzzz0	false
1589		zzzz100,zzzzz24	false
1590		zzzz100,zzzzz86	false
1591		zzzz100,zzzzz66	false
1592		zzzz100,zzzzz82	false
1593		zzzz100,zzzzz64	false
1594		zzzz100,zzzzz49	false
1595		zzzz100,zzzzz77	false
1596		zzzz100,zzzzz74	false
1597		zzzz100,zzzzz95	false
1598		zzzz100,zzzzz65	false
1599		zzzz100,zzzzz99	false
1600		zzzz100,zzzzzz6	false
1601		zzzz100,zzzzz20	false
1602		zzzz100,zzzzz63	false
1603		zzzz100,zzzzz61	false
1604		zzzz100,zzzzz54	false
1605		zzzz100,zzzzz67	false
1606		zzzz100,zzzzz70	false
1607		zzzz100,zzzzz69	false
1608		zzzz100,zzzzz68	false
1609		zzzz100,zzzzz73	false
1610		zzzz100,zzzzz72	false
1611		zzzz100,zzzzz18	false
1612		zzzz100,zzzzz28	false
1613		zzzz100,zzzzz14	false
1614		zzzz100,zzzzz75	false
1615		zzzz100,zzzzz79	false
1616		zzzz100,zzzzz78	false
1617		zzzz100,zzzzz76	false
1618		zzzz100,zzzzz29	false
1619		zzzz100,zzzzz56	false
1620		zzzz100,zzzzz80	false
1621		zzzz100,zzzzz16	false
1622		zzzz100,zzzzz25	false
1623		zzzz100,zzzz101	false
1624		zzzz100,zzzzz55	false
1625		zzzz100,zzzzz57	false
1626		zzzz100,zzzzz97	false
1627		zzzz100,zzzzz81	false
