# Supplementary material for: Discovery of several thousand highly diverse circular DNA viruses
Source: eLife journal article supplement (doi:10.7554/elife.51971), 2020-02-03
Supplement: fig2-figsupp1-data2 [file elife-51971-fig2-figsupp1-data2-v1.cys › CytoscapeSession-2019_08_05-17_27/tables/52-all_my_seqs_genbank_ssDNA1_domains_ino_zot_fasta+Full+Network/LOCAL_ATTRS-org.cytoscape.model.CyNode-all_my_seqs_genbank_ssDNA1_domains_ino_zot_fasta+Full+Network+default+node.cytable]

CyCSV-Version	1
SUID	name	selected
java.lang.Long	java.lang.String	java.lang.Boolean
all_my_seqs_genbank_ssDNA1_domains_ino_zot_fasta Full Network default node
62	zzzzzz9	false
63	zzzzzz8	false
64	zzzzzz7	false
65	zzzzzz6	false
66	zzzzzz5	false
67	zzzzzz4	false
68	zzzzzz3	false
69	zzzzzz2	false
70	zzzzzz1	false
71	zzzzzz0	false
72	zzzzz99	false
73	zzzzz98	false
74	zzzzz97	false
75	zzzzz96	false
76	zzzzz95	false
77	zzzzz94	false
78	zzzzz93	false
79	zzzzz92	false
80	zzzzz91	false
81	zzzzz90	false
82	zzzzz89	false
83	zzzzz88	false
84	zzzzz87	false
85	zzzzz86	false
86	zzzzz85	false
87	zzzzz84	false
88	zzzzz83	false
89	zzzzz82	false
90	zzzzz81	false
91	zzzzz80	false
92	zzzzz79	false
93	zzzzz78	false
94	zzzzz77	false
95	zzzzz76	false
96	zzzzz75	false
97	zzzzz74	false
98	zzzzz73	false
99	zzzzz72	false
100	zzzzz71	false
101	zzzzz70	false
102	zzzzz69	false
103	zzzzz68	false
104	zzzzz67	false
105	zzzzz66	false
106	zzzzz65	false
107	zzzzz64	false
108	zzzzz63	false
109	zzzzz62	false
110	zzzzz61	false
111	zzzzz60	false
112	zzzzz59	false
113	zzzzz58	false
114	zzzzz57	false
115	zzzzz56	false
116	zzzzz55	false
117	zzzzz54	false
118	zzzzz53	false
119	zzzzz52	false
120	zzzzz51	false
121	zzzzz50	false
122	zzzzz49	false
123	zzzzz48	false
124	zzzzz47	false
125	zzzzz46	false
126	zzzzz45	false
127	zzzzz44	false
128	zzzzz43	false
129	zzzzz42	false
130	zzzzz41	false
131	zzzzz40	false
132	zzzzz39	false
133	zzzzz38	false
134	zzzzz37	false
135	zzzzz36	false
136	zzzzz35	false
137	zzzzz34	false
138	zzzzz33	false
139	zzzzz32	false
140	zzzzz31	false
141	zzzzz30	false
142	zzzzz29	false
143	zzzzz28	false
144	zzzzz27	false
145	zzzzz26	false
146	zzzzz25	false
147	zzzzz24	false
148	zzzzz23	false
149	zzzzz22	false
150	zzzzz21	false
151	zzzzz20	false
152	zzzzz19	false
153	zzzzz18	false
154	zzzzz17	false
155	zzzzz16	false
156	zzzzz15	false
157	zzzzz14	false
158	zzzzz13	false
159	zzzzz12	false
160	zzzzz11	false
161	zzzzz10	false
162	zzzz102	false
163	zzzz101	false
164	zzzz100	false
