# Supplementary material for: Discovery of several thousand highly diverse circular DNA viruses
Source: eLife journal article supplement (doi:10.7554/elife.51971), 2020-02-03
Supplement: fig2-figsupp1-data2 [file elife-51971-fig2-figsupp1-data2-v1.cys › CytoscapeSession-2019_08_05-17_27/views/52-1643-all_my_seqs_genbank_ssDNA1_domains_ino_zot_fasta+Full+Network.xgmml]

<?xml version="1.0" encoding="UTF-8" standalone="yes"?>
<graph id="1643" label="all_my_seqs_genbank_ssDNA1_domains_ino_zot_fasta Full Network" cy:view="1" cy:networkId="52" cy:visualStyle="Sample2" cy:rendererId="org.cytoscape.ding" cy:documentVersion="3.0" xmlns:dc="http://purl.org/dc/elements/1.1/" xmlns:xlink="http://www.w3.org/1999/xlink" xmlns:rdf="http://www.w3.org/1999/02/22-rdf-syntax-ns#" xmlns:cy="http://www.cytoscape.org" xmlns="http://www.cs.rpi.edu/XGMML">
  <graphics>
    <att name="NETWORK_TITLE" value="all_my_seqs_genbank_ssDNA1_domains_ino_zot_fasta Full Network" type="string" cy:type="String"/>
    <att name="NETWORK_DEPTH" value="0.0" type="string" cy:type="String"/>
    <att name="NETWORK_CENTER_Z_LOCATION" value="0.0" type="string" cy:type="String"/>
    <att name="NETWORK_SCALE_FACTOR" value="0.8752864786286821" type="string" cy:type="String"/>
    <att name="NETWORK_HEIGHT" value="602.0" type="string" cy:type="String"/>
    <att name="NETWORK_WIDTH" value="1278.0" type="string" cy:type="String"/>
    <att name="NETWORK_CENTER_Y_LOCATION" value="18.99603271484375" type="string" cy:type="String"/>
    <att name="NETWORK_ANNOTATION_SELECTION" value="false" type="string" cy:type="String"/>
    <att name="NETWORK_EDGE_SELECTION" value="true" type="string" cy:type="String"/>
    <att name="NETWORK_NODE_SELECTION" value="true" type="string" cy:type="String"/>
    <att name="NETWORK_CENTER_X_LOCATION" value="-82.67694091796875" type="string" cy:type="String"/>
  </graphics>
  <node id="1747" label="zzzzzz9" cy:nodeId="62">
    <graphics z="0.0" x="-1.833987720995458" y="131.46509334676756"/>
  </node>
  <node id="1746" label="zzzzzz8" cy:nodeId="63">
    <graphics z="0.0" x="74.60409974238345" y="163.77127620809568"/>
  </node>
  <node id="1745" label="zzzzzz7" cy:nodeId="64">
    <graphics z="0.0" x="140.08166455409" y="-179.59492900735842"/>
  </node>
  <node id="1744" label="zzzzzz6" cy:nodeId="65">
    <graphics z="0.0" x="164.75966309687564" y="-44.88929202920901"/>
  </node>
  <node id="1743" label="zzzzzz5" cy:nodeId="66">
    <graphics z="0.0" x="-15.632434376268895" y="21.120061608486303"/>
  </node>
  <node id="1742" label="zzzzzz4" cy:nodeId="67">
    <graphics z="0.0" x="185.80607270380924" y="-225.16059711343752"/>
  </node>
  <node id="1741" label="zzzzzz3" cy:nodeId="68">
    <graphics z="0.0" x="-132.36032439091733" y="-157.3267042911719"/>
  </node>
  <node id="1740" label="zzzzzz2" cy:nodeId="69">
    <graphics z="0.0" x="-122.25903654912045" y="-53.17334964639651"/>
  </node>
  <node id="1739" label="zzzzzz1" cy:nodeId="70">
    <graphics z="0.0" x="33.680080882520166" y="101.03128597372067"/>
  </node>
  <node id="1738" label="zzzzzz0" cy:nodeId="71">
    <graphics z="0.0" x="-9.499866016893895" y="-20.024149206943385"/>
  </node>
  <node id="1737" label="zzzzz99" cy:nodeId="72">
    <graphics z="0.0" x="63.37962006709048" y="-54.7671454227637"/>
  </node>
  <node id="1736" label="zzzzz98" cy:nodeId="73">
    <graphics z="0.0" x="136.15799473902652" y="9.998372765712865"/>
  </node>
  <node id="1735" label="zzzzz97" cy:nodeId="74">
    <graphics z="0.0" x="80.20119904658267" y="101.3920342647363"/>
  </node>
  <node id="1734" label="zzzzz96" cy:nodeId="75">
    <graphics z="0.0" x="103.19286965510318" y="87.84921810262692"/>
  </node>
  <node id="1733" label="zzzzz95" cy:nodeId="76">
    <graphics z="0.0" x="165.1390080370612" y="-7.539087561435572"/>
  </node>
  <node id="1732" label="zzzzz94" cy:nodeId="77">
    <graphics z="0.0" x="110.47221039912174" y="37.20792171590818"/>
  </node>
  <node id="1731" label="zzzzz93" cy:nodeId="78">
    <graphics z="0.0" x="-48.198031910448584" y="56.87769100301755"/>
  </node>
  <node id="1730" label="zzzzz92" cy:nodeId="79">
    <graphics z="0.0" x="-499.93670988896423" y="22.98253414266599"/>
  </node>
  <node id="1729" label="zzzzz91" cy:nodeId="80">
    <graphics z="0.0" x="-181.0448641858392" y="17.029851647548803"/>
  </node>
  <node id="1728" label="zzzzz90" cy:nodeId="81">
    <graphics z="0.0" x="-534.3205599866204" y="-48.66169193155276"/>
  </node>
  <node id="1727" label="zzzzz89" cy:nodeId="82">
    <graphics z="0.0" x="-594.6991000256829" y="-48.3883612430762"/>
  </node>
  <node id="1726" label="zzzzz88" cy:nodeId="83">
    <graphics z="0.0" x="-244.09704924443295" y="58.56070491903318"/>
  </node>
  <node id="1725" label="zzzzz87" cy:nodeId="84">
    <graphics z="0.0" x="-336.756473072558" y="29.606649132900365"/>
  </node>
  <node id="1724" label="zzzzz86" cy:nodeId="85">
    <graphics z="0.0" x="90.89561890742252" y="-126.19996097452152"/>
  </node>
  <node id="1723" label="zzzzz85" cy:nodeId="86">
    <graphics z="0.0" x="-441.66827727177673" y="-102.99669101602542"/>
  </node>
  <node id="1722" label="zzzzz84" cy:nodeId="87">
    <graphics z="0.0" x="-3.912143238573583" y="33.127462121181615"/>
  </node>
  <node id="1721" label="zzzzz83" cy:nodeId="88">
    <graphics z="0.0" x="-557.5630526624017" y="-118.37525394327152"/>
  </node>
  <node id="1720" label="zzzzz82" cy:nodeId="89">
    <graphics z="0.0" x="159.98202942988345" y="-4.186823157138697"/>
  </node>
  <node id="1719" label="zzzzz81" cy:nodeId="90">
    <graphics z="0.0" x="65.04277466914127" y="73.33322689168942"/>
  </node>
  <node id="1718" label="zzzzz80" cy:nodeId="91">
    <graphics z="0.0" x="111.62086915156314" y="-16.594690588779322"/>
  </node>
  <node id="1717" label="zzzzz79" cy:nodeId="92">
    <graphics z="0.0" x="17.52483033320376" y="-2.0802710331152596"/>
  </node>
  <node id="1716" label="zzzzz78" cy:nodeId="93">
    <graphics z="0.0" x="160.82012414118716" y="90.45023128622067"/>
  </node>
  <node id="1715" label="zzzzz77" cy:nodeId="94">
    <graphics z="0.0" x="133.0470204271979" y="102.20557186239255"/>
  </node>
  <node id="1714" label="zzzzz76" cy:nodeId="95">
    <graphics z="0.0" x="122.70239686152408" y="55.67258236043943"/>
  </node>
  <node id="1713" label="zzzzz75" cy:nodeId="96">
    <graphics z="0.0" x="77.04427003046939" y="-50.22606876260745"/>
  </node>
  <node id="1712" label="zzzzz74" cy:nodeId="97">
    <graphics z="0.0" x="106.75830697199771" y="2.463720055751928"/>
  </node>
  <node id="1711" label="zzzzz73" cy:nodeId="98">
    <graphics z="0.0" x="193.85895203730533" y="-16.274194983310572"/>
  </node>
  <node id="1710" label="zzzzz72" cy:nodeId="99">
    <graphics z="0.0" x="176.0897564806647" y="54.64121029012693"/>
  </node>
  <node id="1709" label="zzzzz71" cy:nodeId="100">
    <graphics z="0.0" x="-527.7802157483392" y="-160.47315814859377"/>
  </node>
  <node id="1708" label="zzzzz70" cy:nodeId="101">
    <graphics z="0.0" x="16.422794810742822" y="-30.794916418857447"/>
  </node>
  <node id="1707" label="zzzzz69" cy:nodeId="102">
    <graphics z="0.0" x="118.52948712489078" y="-71.6199286258887"/>
  </node>
  <node id="1706" label="zzzzz68" cy:nodeId="103">
    <graphics z="0.0" x="158.00570916315982" y="-59.22594669229495"/>
  </node>
  <node id="1705" label="zzzzz67" cy:nodeId="104">
    <graphics z="0.0" x="71.93715333125064" y="-12.911371496982447"/>
  </node>
  <node id="1704" label="zzzzz66" cy:nodeId="105">
    <graphics z="0.0" x="208.4174923815436" y="20.291722985439428"/>
  </node>
  <node id="1703" label="zzzzz65" cy:nodeId="106">
    <graphics z="0.0" x="80.19320725581119" y="-31.61164310342776"/>
  </node>
  <node id="1702" label="zzzzz64" cy:nodeId="107">
    <graphics z="0.0" x="121.21894883295963" y="24.41191646688474"/>
  </node>
  <node id="1701" label="zzzzz63" cy:nodeId="108">
    <graphics z="0.0" x="6.074200145215479" y="5.963109704189428"/>
  </node>
  <node id="1700" label="zzzzz62" cy:nodeId="109">
    <graphics z="0.0" x="47.54680298945376" y="14.215581628017553"/>
  </node>
  <node id="1699" label="zzzzz61" cy:nodeId="110">
    <graphics z="0.0" x="38.99619721552798" y="71.9445244991113"/>
  </node>
  <node id="1698" label="zzzzz60" cy:nodeId="111">
    <graphics z="0.0" x="116.3700585283942" y="-23.622156409091822"/>
  </node>
  <node id="1697" label="zzzzz59" cy:nodeId="112">
    <graphics z="0.0" x="1.929104320020167" y="91.82425472372067"/>
  </node>
  <node id="1696" label="zzzzz58" cy:nodeId="113">
    <graphics z="0.0" x="155.10536812922427" y="71.26108333700192"/>
  </node>
  <node id="1695" label="zzzzz57" cy:nodeId="114">
    <graphics z="0.0" x="127.18109749934146" y="-85.72209384805667"/>
  </node>
  <node id="1694" label="zzzzz56" cy:nodeId="115">
    <graphics z="0.0" x="121.7296490587897" y="-27.603876379794947"/>
  </node>
  <node id="1693" label="zzzzz55" cy:nodeId="116">
    <graphics z="0.0" x="82.9005474962897" y="55.31924984090818"/>
  </node>
  <node id="1692" label="zzzzz54" cy:nodeId="117">
    <graphics z="0.0" x="40.5548443712897" y="1.7934624873925529"/>
  </node>
  <node id="1691" label="zzzzz53" cy:nodeId="118">
    <graphics z="0.0" x="-494.699100025683" y="311.5271661006738"/>
  </node>
  <node id="1690" label="zzzzz52" cy:nodeId="119">
    <graphics z="0.0" x="63.11455201289126" y="-273.53510501749025"/>
  </node>
  <node id="1689" label="zzzzz51" cy:nodeId="120">
    <graphics z="0.0" x="-232.75744963505795" y="112.57996151083005"/>
  </node>
  <node id="1688" label="zzzzz50" cy:nodeId="121">
    <graphics z="0.0" x="-83.83302641728451" y="12.94859859579099"/>
  </node>
  <node id="1687" label="zzzzz49" cy:nodeId="122">
    <graphics z="0.0" x="192.29127930781314" y="77.2842461787988"/>
  </node>
  <node id="1686" label="zzzzz48" cy:nodeId="123">
    <graphics z="0.0" x="-272.1467623791986" y="-32.81435611612307"/>
  </node>
  <node id="1685" label="zzzzz47" cy:nodeId="124">
    <graphics z="0.0" x="-594.6991000256829" y="311.5271661006738"/>
  </node>
  <node id="1684" label="zzzzz46" cy:nodeId="125">
    <graphics z="0.0" x="-287.97153044560486" y="137.0730645381738"/>
  </node>
  <node id="1683" label="zzzzz45" cy:nodeId="126">
    <graphics z="0.0" x="-164.70154143193295" y="76.14978572958005"/>
  </node>
  <node id="1682" label="zzzzz44" cy:nodeId="127">
    <graphics z="0.0" x="-3.441653736620458" y="-181.71966770059572"/>
  </node>
  <node id="1681" label="zzzzz43" cy:nodeId="128">
    <graphics z="0.0" x="59.928616038770166" y="-94.08645847208011"/>
  </node>
  <node id="1680" label="zzzzz42" cy:nodeId="129">
    <graphics z="0.0" x="-278.93307829716736" y="13.511510583095678"/>
  </node>
  <node id="1679" label="zzzzz41" cy:nodeId="130">
    <graphics z="0.0" x="-444.130008228808" y="-41.54548099405276"/>
  </node>
  <node id="1678" label="zzzzz40" cy:nodeId="131">
    <graphics z="0.0" x="-59.596835621386084" y="-106.99189212686527"/>
  </node>
  <node id="1677" label="zzzzz39" cy:nodeId="132">
    <graphics z="0.0" x="429.3452153124518" y="-253.513803747959"/>
  </node>
  <node id="1676" label="zzzzz38" cy:nodeId="133">
    <graphics z="0.0" x="-74.05018950322201" y="27.878850670986303"/>
  </node>
  <node id="1675" label="zzzzz37" cy:nodeId="134">
    <graphics z="0.0" x="51.95817231318423" y="24.649312707119115"/>
  </node>
  <node id="1674" label="zzzzz36" cy:nodeId="135">
    <graphics z="0.0" x="93.0643658556647" y="115.72232601278317"/>
  </node>
  <node id="1673" label="zzzzz35" cy:nodeId="136">
    <graphics z="0.0" x="-87.75334502080014" y="148.58151790731443"/>
  </node>
  <node id="1672" label="zzzzz34" cy:nodeId="137">
    <graphics z="0.0" x="-153.6694979749017" y="188.77780696981443"/>
  </node>
  <node id="1671" label="zzzzz33" cy:nodeId="138">
    <graphics z="0.0" x="35.457783214063134" y="124.0896661006738"/>
  </node>
  <node id="1670" label="zzzzz32" cy:nodeId="139">
    <graphics z="0.0" x="82.80314301630924" y="-160.92977359659182"/>
  </node>
  <node id="1669" label="zzzzz31" cy:nodeId="140">
    <graphics z="0.0" x="184.98431824824283" y="18.278341027431615"/>
  </node>
  <node id="1668" label="zzzzz30" cy:nodeId="141">
    <graphics z="0.0" x="49.06913422724673" y="211.5271661006738"/>
  </node>
  <node id="1667" label="zzzzz29" cy:nodeId="142">
    <graphics z="0.0" x="66.98019074580142" y="44.866475793056615"/>
  </node>
  <node id="1666" label="zzzzz28" cy:nodeId="143">
    <graphics z="0.0" x="63.158161632031884" y="48.619039269619115"/>
  </node>
  <node id="1665" label="zzzzz27" cy:nodeId="144">
    <graphics z="0.0" x="359.0370869555182" y="-171.7929785526465"/>
  </node>
  <node id="1664" label="zzzzz26" cy:nodeId="145">
    <graphics z="0.0" x="1.4014096178717295" y="59.85489437215818"/>
  </node>
  <node id="1663" label="zzzzz25" cy:nodeId="146">
    <graphics z="0.0" x="158.88440941950748" y="48.61801693075193"/>
  </node>
  <node id="1662" label="zzzzz24" cy:nodeId="147">
    <graphics z="0.0" x="127.48033808848331" y="47.93163082235349"/>
  </node>
  <node id="1661" label="zzzzz23" cy:nodeId="148">
    <graphics z="0.0" x="-20.956225880175147" y="157.55228206747068"/>
  </node>
  <node id="1660" label="zzzzz22" cy:nodeId="149">
    <graphics z="0.0" x="-315.6832614026361" y="85.60318538778317"/>
  </node>
  <node id="1659" label="zzzzz21" cy:nodeId="150">
    <graphics z="0.0" x="199.73651551386783" y="-151.3504965580176"/>
  </node>
  <node id="1658" label="zzzzz20" cy:nodeId="151">
    <graphics z="0.0" x="97.23670243403384" y="-90.48532321817386"/>
  </node>
  <node id="1657" label="zzzzz19" cy:nodeId="152">
    <graphics z="0.0" x="61.0214962877936" y="79.1290948116113"/>
  </node>
  <node id="1656" label="zzzzz18" cy:nodeId="153">
    <graphics z="0.0" x="183.66569184443424" y="95.48801204793942"/>
  </node>
  <node id="1655" label="zzzzz17" cy:nodeId="154">
    <graphics z="0.0" x="-142.44897795537045" y="-94.5636542118262"/>
  </node>
  <node id="1654" label="zzzzz16" cy:nodeId="155">
    <graphics z="0.0" x="83.75917863032291" y="-67.97724368936527"/>
  </node>
  <node id="1653" label="zzzzz15" cy:nodeId="156">
    <graphics z="0.0" x="42.01032685419985" y="11.148229333095678"/>
  </node>
  <node id="1652" label="zzzzz14" cy:nodeId="157">
    <graphics z="0.0" x="167.70335816523502" y="36.73058101766599"/>
  </node>
  <node id="1651" label="zzzzz13" cy:nodeId="158">
    <graphics z="0.0" x="128.24673031947086" y="-259.70832279092775"/>
  </node>
  <node id="1650" label="zzzzz12" cy:nodeId="159">
    <graphics z="0.0" x="-96.07127714970639" y="-4.254389075107447"/>
  </node>
  <node id="1649" label="zzzzz11" cy:nodeId="160">
    <graphics z="0.0" x="323.4435772814459" y="-273.53510501749025"/>
  </node>
  <node id="1648" label="zzzzz10" cy:nodeId="161">
    <graphics z="0.0" x="123.78814648768375" y="-142.50614383584963"/>
  </node>
  <node id="1647" label="zzzz102" cy:nodeId="162">
    <graphics z="0.0" x="38.080219737500634" y="46.39743587606443"/>
  </node>
  <node id="1646" label="zzzz101" cy:nodeId="163">
    <graphics z="0.0" x="223.44357728144595" y="-25.77234866983401"/>
  </node>
  <node id="1645" label="zzzz100" cy:nodeId="164">
    <graphics z="0.0" x="182.03718232294986" y="-74.7300589359473"/>
  </node>
</graph>
