# Supplementary material for: Discovery of several thousand highly diverse circular DNA viruses
Source: eLife journal article supplement (doi:10.7554/elife.51971), 2020-02-03
Supplement: fig2-figsupp1-data3 [file elife-51971-fig2-figsupp1-data3-v1.cys › CytoscapeSession-2019_08_05-17_08/apps/org.cytoscape.browser/EdgeTable.props]

all_my_seqs_genbank_ssDNA1_domains_micro_MCP_fasta Full Network default edge	0	SUID	false
all_my_seqs_genbank_ssDNA1_domains_micro_MCP_fasta Full Network default edge	1	selected	false
all_my_seqs_genbank_ssDNA1_domains_micro_MCP_fasta Full Network default edge	2	shared name	true
all_my_seqs_genbank_ssDNA1_domains_micro_MCP_fasta Full Network default edge	3	shared interaction	true
all_my_seqs_genbank_ssDNA1_domains_micro_MCP_fasta Full Network default edge	4	name	true
all_my_seqs_genbank_ssDNA1_domains_micro_MCP_fasta Full Network default edge	5	interaction	true
all_my_seqs_genbank_ssDNA1_domains_micro_MCP_fasta Full Network default edge	6	%id	true
all_my_seqs_genbank_ssDNA1_domains_micro_MCP_fasta Full Network default edge	7	alignment_score	true
all_my_seqs_genbank_ssDNA1_domains_micro_MCP_fasta Full Network default edge	8	alignment_len	true
