# Supplementary material for: Discovery of several thousand highly diverse circular DNA viruses
Source: eLife journal article supplement (doi:10.7554/elife.51971), 2020-02-03
Supplement: fig2-figsupp1-data3 [file elife-51971-fig2-figsupp1-data3-v1.cys › CytoscapeSession-2019_08_05-17_08/networks/36-all_my_seqs_genbank_ssDNA1_domains_micro_MCP_fasta+Full+Network.xgmml]

<?xml version="1.0" encoding="UTF-8" standalone="yes"?>
<graph id="36" label="all_my_seqs_genbank_ssDNA1_domains_micro_MCP_fasta Full Network" cy:view="0" cy:registered="0" cy:documentVersion="3.0" xmlns:dc="http://purl.org/dc/elements/1.1/" xmlns:xlink="http://www.w3.org/1999/xlink" xmlns:rdf="http://www.w3.org/1999/02/22-rdf-syntax-ns#" xmlns:cy="http://www.cytoscape.org" xmlns="http://www.cs.rpi.edu/XGMML">
  <att>
    <graph id="52" label="all_my_seqs_genbank_ssDNA1_domains_micro_MCP_fasta Full Network" cy:registered="1">
      <node id="1046" label="zzz1000"/>
      <node id="1045" label="zzz1001"/>
      <node id="1044" label="zzz1002"/>
      <node id="1043" label="zzz1003"/>
      <node id="1042" label="zzz1004"/>
      <node id="1041" label="zzz1005"/>
      <node id="1040" label="zzz1006"/>
      <node id="1039" label="zzz1007"/>
      <node id="1038" label="zzz1008"/>
      <node id="1037" label="zzz1009"/>
      <node id="1036" label="zzz1010"/>
      <node id="1035" label="zzz1011"/>
      <node id="1034" label="zzz1012"/>
      <node id="1033" label="zzz1013"/>
      <node id="1032" label="zzz1014"/>
      <node id="1031" label="zzz1015"/>
      <node id="1030" label="zzz1016"/>
      <node id="1029" label="zzz1017"/>
      <node id="1028" label="zzz1019"/>
      <node id="1027" label="zzz1020"/>
      <node id="1026" label="zzz1021"/>
      <node id="1025" label="zzzz100"/>
      <node id="1024" label="zzzz101"/>
      <node id="1023" label="zzzz102"/>
      <node id="1022" label="zzzz103"/>
      <node id="1021" label="zzzz104"/>
      <node id="1020" label="zzzz105"/>
      <node id="1019" label="zzzz106"/>
      <node id="1018" label="zzzz107"/>
      <node id="1017" label="zzzz108"/>
      <node id="1016" label="zzzz109"/>
      <node id="1015" label="zzzz110"/>
      <node id="1014" label="zzzz111"/>
      <node id="1013" label="zzzz112"/>
      <node id="1012" label="zzzz113"/>
      <node id="1011" label="zzzz114"/>
      <node id="1010" label="zzzz115"/>
      <node id="1009" label="zzzz116"/>
      <node id="1008" label="zzzz117"/>
      <node id="1007" label="zzzz118"/>
      <node id="1006" label="zzzz119"/>
      <node id="1005" label="zzzz120"/>
      <node id="1004" label="zzzz121"/>
      <node id="1003" label="zzzz122"/>
      <node id="1002" label="zzzz123"/>
      <node id="1001" label="zzzz124"/>
      <node id="1000" label="zzzz125"/>
      <node id="999" label="zzzz126"/>
      <node id="998" label="zzzz127"/>
      <node id="997" label="zzzz128"/>
      <node id="996" label="zzzz129"/>
      <node id="995" label="zzzz130"/>
      <node id="994" label="zzzz131"/>
      <node id="993" label="zzzz132"/>
      <node id="992" label="zzzz133"/>
      <node id="991" label="zzzz134"/>
      <node id="990" label="zzzz135"/>
      <node id="989" label="zzzz136"/>
      <node id="988" label="zzzz137"/>
      <node id="987" label="zzzz138"/>
      <node id="986" label="zzzz139"/>
      <node id="985" label="zzzz140"/>
      <node id="984" label="zzzz141"/>
      <node id="983" label="zzzz142"/>
      <node id="982" label="zzzz143"/>
      <node id="981" label="zzzz144"/>
      <node id="980" label="zzzz145"/>
      <node id="979" label="zzzz146"/>
      <node id="978" label="zzzz147"/>
      <node id="977" label="zzzz148"/>
      <node id="976" label="zzzz149"/>
      <node id="975" label="zzzz150"/>
      <node id="974" label="zzzz151"/>
      <node id="973" label="zzzz152"/>
      <node id="972" label="zzzz153"/>
      <node id="971" label="zzzz154"/>
      <node id="970" label="zzzz155"/>
      <node id="969" label="zzzz156"/>
      <node id="968" label="zzzz157"/>
      <node id="967" label="zzzz158"/>
      <node id="966" label="zzzz159"/>
      <node id="965" label="zzzz160"/>
      <node id="964" label="zzzz161"/>
      <node id="963" label="zzzz162"/>
      <node id="962" label="zzzz163"/>
      <node id="961" label="zzzz164"/>
      <node id="960" label="zzzz165"/>
      <node id="959" label="zzzz166"/>
      <node id="958" label="zzzz167"/>
      <node id="957" label="zzzz168"/>
      <node id="956" label="zzzz169"/>
      <node id="955" label="zzzz170"/>
      <node id="954" label="zzzz171"/>
      <node id="953" label="zzzz172"/>
      <node id="952" label="zzzz173"/>
      <node id="951" label="zzzz174"/>
      <node id="950" label="zzzz175"/>
      <node id="949" label="zzzz176"/>
      <node id="948" label="zzzz177"/>
      <node id="947" label="zzzz178"/>
      <node id="946" label="zzzz179"/>
      <node id="945" label="zzzz180"/>
      <node id="944" label="zzzz181"/>
      <node id="943" label="zzzz182"/>
      <node id="942" label="zzzz183"/>
      <node id="941" label="zzzz184"/>
      <node id="940" label="zzzz185"/>
      <node id="939" label="zzzz186"/>
      <node id="938" label="zzzz187"/>
      <node id="937" label="zzzz188"/>
      <node id="936" label="zzzz189"/>
      <node id="935" label="zzzz190"/>
      <node id="934" label="zzzz191"/>
      <node id="933" label="zzzz192"/>
      <node id="932" label="zzzz193"/>
      <node id="931" label="zzzz194"/>
      <node id="930" label="zzzz195"/>
      <node id="929" label="zzzz196"/>
      <node id="928" label="zzzz197"/>
      <node id="927" label="zzzz198"/>
      <node id="926" label="zzzz199"/>
      <node id="925" label="zzzz200"/>
      <node id="924" label="zzzz201"/>
      <node id="923" label="zzzz202"/>
      <node id="922" label="zzzz203"/>
      <node id="921" label="zzzz204"/>
      <node id="920" label="zzzz205"/>
      <node id="919" label="zzzz206"/>
      <node id="918" label="zzzz207"/>
      <node id="917" label="zzzz208"/>
      <node id="916" label="zzzz209"/>
      <node id="915" label="zzzz210"/>
      <node id="914" label="zzzz211"/>
      <node id="913" label="zzzz212"/>
      <node id="912" label="zzzz213"/>
      <node id="911" label="zzzz214"/>
      <node id="910" label="zzzz215"/>
      <node id="909" label="zzzz216"/>
      <node id="908" label="zzzz217"/>
      <node id="907" label="zzzz218"/>
      <node id="906" label="zzzz219"/>
      <node id="905" label="zzzz220"/>
      <node id="904" label="zzzz221"/>
      <node id="903" label="zzzz222"/>
      <node id="902" label="zzzz223"/>
      <node id="901" label="zzzz224"/>
      <node id="900" label="zzzz225"/>
      <node id="899" label="zzzz226"/>
      <node id="898" label="zzzz227"/>
      <node id="897" label="zzzz228"/>
      <node id="896" label="zzzz229"/>
      <node id="895" label="zzzz230"/>
      <node id="894" label="zzzz231"/>
      <node id="893" label="zzzz232"/>
      <node id="892" label="zzzz233"/>
      <node id="891" label="zzzz234"/>
      <node id="890" label="zzzz235"/>
      <node id="889" label="zzzz236"/>
      <node id="888" label="zzzz237"/>
      <node id="887" label="zzzz238"/>
      <node id="886" label="zzzz239"/>
      <node id="885" label="zzzz240"/>
      <node id="884" label="zzzz241"/>
      <node id="883" label="zzzz242"/>
      <node id="882" label="zzzz243"/>
      <node id="881" label="zzzz244"/>
      <node id="880" label="zzzz245"/>
      <node id="879" label="zzzz246"/>
      <node id="878" label="zzzz247"/>
      <node id="877" label="zzzz248"/>
      <node id="876" label="zzzz249"/>
      <node id="875" label="zzzz250"/>
      <node id="874" label="zzzz251"/>
      <node id="873" label="zzzz252"/>
      <node id="872" label="zzzz253"/>
      <node id="871" label="zzzz254"/>
      <node id="870" label="zzzz255"/>
      <node id="869" label="zzzz256"/>
      <node id="868" label="zzzz257"/>
      <node id="867" label="zzzz258"/>
      <node id="866" label="zzzz259"/>
      <node id="865" label="zzzz260"/>
      <node id="864" label="zzzz261"/>
      <node id="863" label="zzzz262"/>
      <node id="862" label="zzzz263"/>
      <node id="861" label="zzzz264"/>
      <node id="860" label="zzzz265"/>
      <node id="859" label="zzzz266"/>
      <node id="858" label="zzzz267"/>
      <node id="857" label="zzzz268"/>
      <node id="856" label="zzzz269"/>
      <node id="855" label="zzzz270"/>
      <node id="854" label="zzzz271"/>
      <node id="853" label="zzzz272"/>
      <node id="852" label="zzzz273"/>
      <node id="851" label="zzzz274"/>
      <node id="850" label="zzzz275"/>
      <node id="849" label="zzzz276"/>
      <node id="848" label="zzzz277"/>
      <node id="847" label="zzzz278"/>
      <node id="846" label="zzzz279"/>
      <node id="845" label="zzzz280"/>
      <node id="844" label="zzzz281"/>
      <node id="843" label="zzzz282"/>
      <node id="842" label="zzzz283"/>
      <node id="841" label="zzzz284"/>
      <node id="840" label="zzzz285"/>
      <node id="839" label="zzzz286"/>
      <node id="838" label="zzzz287"/>
      <node id="837" label="zzzz288"/>
      <node id="836" label="zzzz289"/>
      <node id="835" label="zzzz290"/>
      <node id="834" label="zzzz291"/>
      <node id="833" label="zzzz292"/>
      <node id="832" label="zzzz293"/>
      <node id="831" label="zzzz294"/>
      <node id="830" label="zzzz295"/>
      <node id="829" label="zzzz296"/>
      <node id="828" label="zzzz297"/>
      <node id="827" label="zzzz298"/>
      <node id="826" label="zzzz299"/>
      <node id="825" label="zzzz300"/>
      <node id="824" label="zzzz301"/>
      <node id="823" label="zzzz302"/>
      <node id="822" label="zzzz303"/>
      <node id="821" label="zzzz304"/>
      <node id="820" label="zzzz305"/>
      <node id="819" label="zzzz306"/>
      <node id="818" label="zzzz307"/>
      <node id="817" label="zzzz308"/>
      <node id="816" label="zzzz309"/>
      <node id="815" label="zzzz310"/>
      <node id="814" label="zzzz311"/>
      <node id="813" label="zzzz312"/>
      <node id="812" label="zzzz313"/>
      <node id="811" label="zzzz314"/>
      <node id="810" label="zzzz315"/>
      <node id="809" label="zzzz316"/>
      <node id="808" label="zzzz317"/>
      <node id="807" label="zzzz318"/>
      <node id="806" label="zzzz319"/>
      <node id="805" label="zzzz320"/>
      <node id="804" label="zzzz321"/>
      <node id="803" label="zzzz322"/>
      <node id="802" label="zzzz323"/>
      <node id="801" label="zzzz324"/>
      <node id="800" label="zzzz325"/>
      <node id="799" label="zzzz326"/>
      <node id="798" label="zzzz327"/>
      <node id="797" label="zzzz328"/>
      <node id="796" label="zzzz329"/>
      <node id="795" label="zzzz330"/>
      <node id="794" label="zzzz331"/>
      <node id="793" label="zzzz332"/>
      <node id="792" label="zzzz333"/>
      <node id="791" label="zzzz334"/>
      <node id="790" label="zzzz335"/>
      <node id="789" label="zzzz336"/>
      <node id="788" label="zzzz337"/>
      <node id="787" label="zzzz338"/>
      <node id="786" label="zzzz339"/>
      <node id="785" label="zzzz340"/>
      <node id="784" label="zzzz341"/>
      <node id="783" label="zzzz342"/>
      <node id="782" label="zzzz343"/>
      <node id="781" label="zzzz344"/>
      <node id="780" label="zzzz345"/>
      <node id="779" label="zzzz346"/>
      <node id="778" label="zzzz347"/>
      <node id="777" label="zzzz348"/>
      <node id="776" label="zzzz349"/>
      <node id="775" label="zzzz350"/>
      <node id="774" label="zzzz351"/>
      <node id="773" label="zzzz352"/>
      <node id="772" label="zzzz353"/>
      <node id="771" label="zzzz354"/>
      <node id="770" label="zzzz355"/>
      <node id="769" label="zzzz356"/>
      <node id="768" label="zzzz357"/>
      <node id="767" label="zzzz358"/>
      <node id="766" label="zzzz359"/>
      <node id="765" label="zzzz360"/>
      <node id="764" label="zzzz361"/>
      <node id="763" label="zzzz362"/>
      <node id="762" label="zzzz363"/>
      <node id="761" label="zzzz364"/>
      <node id="760" label="zzzz365"/>
      <node id="759" label="zzzz366"/>
      <node id="758" label="zzzz367"/>
      <node id="757" label="zzzz368"/>
      <node id="756" label="zzzz369"/>
      <node id="755" label="zzzz370"/>
      <node id="754" label="zzzz371"/>
      <node id="753" label="zzzz372"/>
      <node id="752" label="zzzz373"/>
      <node id="751" label="zzzz374"/>
      <node id="750" label="zzzz375"/>
      <node id="749" label="zzzz376"/>
      <node id="748" label="zzzz377"/>
      <node id="747" label="zzzz378"/>
      <node id="746" label="zzzz379"/>
      <node id="745" label="zzzz380"/>
      <node id="744" label="zzzz381"/>
      <node id="743" label="zzzz382"/>
      <node id="742" label="zzzz383"/>
      <node id="741" label="zzzz384"/>
      <node id="740" label="zzzz385"/>
      <node id="739" label="zzzz386"/>
      <node id="738" label="zzzz387"/>
      <node id="737" label="zzzz388"/>
      <node id="736" label="zzzz389"/>
      <node id="735" label="zzzz390"/>
      <node id="734" label="zzzz391"/>
      <node id="733" label="zzzz392"/>
      <node id="732" label="zzzz393"/>
      <node id="731" label="zzzz394"/>
      <node id="730" label="zzzz395"/>
      <node id="729" label="zzzz396"/>
      <node id="728" label="zzzz397"/>
      <node id="727" label="zzzz398"/>
      <node id="726" label="zzzz399"/>
      <node id="725" label="zzzz400"/>
      <node id="724" label="zzzz401"/>
      <node id="723" label="zzzz402"/>
      <node id="722" label="zzzz403"/>
      <node id="721" label="zzzz404"/>
      <node id="720" label="zzzz405"/>
      <node id="719" label="zzzz406"/>
      <node id="718" label="zzzz407"/>
      <node id="717" label="zzzz408"/>
      <node id="716" label="zzzz409"/>
      <node id="715" label="zzzz410"/>
      <node id="714" label="zzzz411"/>
      <node id="713" label="zzzz412"/>
      <node id="712" label="zzzz413"/>
      <node id="711" label="zzzz414"/>
      <node id="710" label="zzzz415"/>
      <node id="709" label="zzzz416"/>
      <node id="708" label="zzzz417"/>
      <node id="707" label="zzzz418"/>
      <node id="706" label="zzzz419"/>
      <node id="705" label="zzzz420"/>
      <node id="704" label="zzzz421"/>
      <node id="703" label="zzzz422"/>
      <node id="702" label="zzzz423"/>
      <node id="701" label="zzzz424"/>
      <node id="700" label="zzzz425"/>
      <node id="699" label="zzzz426"/>
      <node id="698" label="zzzz427"/>
      <node id="697" label="zzzz428"/>
      <node id="696" label="zzzz429"/>
      <node id="695" label="zzzz430"/>
      <node id="694" label="zzzz431"/>
      <node id="693" label="zzzz432"/>
      <node id="692" label="zzzz433"/>
      <node id="691" label="zzzz434"/>
      <node id="690" label="zzzz435"/>
      <node id="689" label="zzzz436"/>
      <node id="688" label="zzzz437"/>
      <node id="687" label="zzzz438"/>
      <node id="686" label="zzzz439"/>
      <node id="685" label="zzzz440"/>
      <node id="684" label="zzzz441"/>
      <node id="683" label="zzzz442"/>
      <node id="682" label="zzzz443"/>
      <node id="681" label="zzzz444"/>
      <node id="680" label="zzzz447"/>
      <node id="679" label="zzzz448"/>
      <node id="678" label="zzzz449"/>
      <node id="677" label="zzzz463"/>
      <node id="676" label="zzzz464"/>
      <node id="675" label="zzzz465"/>
      <node id="674" label="zzzz466"/>
      <node id="673" label="zzzz467"/>
      <node id="672" label="zzzz468"/>
      <node id="671" label="zzzz469"/>
      <node id="670" label="zzzz470"/>
      <node id="669" label="zzzz471"/>
      <node id="668" label="zzzz472"/>
      <node id="667" label="zzzz473"/>
      <node id="666" label="zzzz474"/>
      <node id="665" label="zzzz475"/>
      <node id="664" label="zzzz476"/>
      <node id="663" label="zzzz477"/>
      <node id="662" label="zzzz478"/>
      <node id="661" label="zzzz479"/>
      <node id="660" label="zzzz480"/>
      <node id="659" label="zzzz481"/>
      <node id="658" label="zzzz482"/>
      <node id="657" label="zzzz483"/>
      <node id="656" label="zzzz484"/>
      <node id="655" label="zzzz485"/>
      <node id="654" label="zzzz486"/>
      <node id="653" label="zzzz487"/>
      <node id="652" label="zzzz488"/>
      <node id="651" label="zzzz489"/>
      <node id="650" label="zzzz490"/>
      <node id="649" label="zzzz491"/>
      <node id="648" label="zzzz492"/>
      <node id="647" label="zzzz493"/>
      <node id="646" label="zzzz494"/>
      <node id="645" label="zzzz495"/>
      <node id="644" label="zzzz496"/>
      <node id="643" label="zzzz497"/>
      <node id="642" label="zzzz498"/>
      <node id="641" label="zzzz499"/>
      <node id="640" label="zzzz500"/>
      <node id="639" label="zzzz501"/>
      <node id="638" label="zzzz502"/>
      <node id="637" label="zzzz503"/>
      <node id="636" label="zzzz505"/>
      <node id="635" label="zzzz506"/>
      <node id="634" label="zzzz507"/>
      <node id="633" label="zzzz508"/>
      <node id="632" label="zzzz509"/>
      <node id="631" label="zzzz510"/>
      <node id="630" label="zzzz511"/>
      <node id="629" label="zzzz512"/>
      <node id="628" label="zzzz513"/>
      <node id="627" label="zzzz514"/>
      <node id="626" label="zzzz515"/>
      <node id="625" label="zzzz516"/>
      <node id="624" label="zzzz517"/>
      <node id="623" label="zzzz518"/>
      <node id="622" label="zzzz519"/>
      <node id="621" label="zzzz520"/>
      <node id="620" label="zzzz521"/>
      <node id="619" label="zzzz522"/>
      <node id="618" label="zzzz523"/>
      <node id="617" label="zzzz524"/>
      <node id="616" label="zzzz525"/>
      <node id="615" label="zzzz526"/>
      <node id="614" label="zzzz527"/>
      <node id="613" label="zzzz528"/>
      <node id="612" label="zzzz529"/>
      <node id="611" label="zzzz530"/>
      <node id="610" label="zzzz531"/>
      <node id="609" label="zzzz532"/>
      <node id="608" label="zzzz533"/>
      <node id="607" label="zzzz534"/>
      <node id="606" label="zzzz535"/>
      <node id="605" label="zzzz536"/>
      <node id="604" label="zzzz537"/>
      <node id="603" label="zzzz538"/>
      <node id="602" label="zzzz539"/>
      <node id="601" label="zzzz540"/>
      <node id="600" label="zzzz541"/>
      <node id="599" label="zzzz542"/>
      <node id="598" label="zzzz543"/>
      <node id="597" label="zzzz544"/>
      <node id="596" label="zzzz545"/>
      <node id="595" label="zzzz546"/>
      <node id="594" label="zzzz547"/>
      <node id="593" label="zzzz548"/>
      <node id="592" label="zzzz549"/>
      <node id="591" label="zzzz550"/>
      <node id="590" label="zzzz551"/>
      <node id="589" label="zzzz552"/>
      <node id="588" label="zzzz553"/>
      <node id="587" label="zzzz554"/>
      <node id="586" label="zzzz555"/>
      <node id="585" label="zzzz556"/>
      <node id="584" label="zzzz557"/>
      <node id="583" label="zzzz558"/>
      <node id="582" label="zzzz559"/>
      <node id="581" label="zzzz560"/>
      <node id="580" label="zzzz561"/>
      <node id="579" label="zzzz562"/>
      <node id="578" label="zzzz563"/>
      <node id="577" label="zzzz564"/>
      <node id="576" label="zzzz565"/>
      <node id="575" label="zzzz566"/>
      <node id="574" label="zzzz567"/>
      <node id="573" label="zzzz568"/>
      <node id="572" label="zzzz569"/>
      <node id="571" label="zzzz570"/>
      <node id="570" label="zzzz571"/>
      <node id="569" label="zzzz572"/>
      <node id="568" label="zzzz573"/>
      <node id="567" label="zzzz574"/>
      <node id="566" label="zzzz575"/>
      <node id="565" label="zzzz576"/>
      <node id="564" label="zzzz577"/>
      <node id="563" label="zzzz578"/>
      <node id="562" label="zzzz579"/>
      <node id="561" label="zzzz580"/>
      <node id="560" label="zzzz581"/>
      <node id="559" label="zzzz582"/>
      <node id="558" label="zzzz583"/>
      <node id="557" label="zzzz584"/>
      <node id="556" label="zzzz585"/>
      <node id="555" label="zzzz586"/>
      <node id="554" label="zzzz587"/>
      <node id="553" label="zzzz588"/>
      <node id="552" label="zzzz589"/>
      <node id="551" label="zzzz590"/>
      <node id="550" label="zzzz591"/>
      <node id="549" label="zzzz592"/>
      <node id="548" label="zzzz593"/>
      <node id="547" label="zzzz594"/>
      <node id="546" label="zzzz595"/>
      <node id="545" label="zzzz596"/>
      <node id="544" label="zzzz597"/>
      <node id="543" label="zzzz598"/>
      <node id="542" label="zzzz599"/>
      <node id="541" label="zzzz600"/>
      <node id="540" label="zzzz601"/>
      <node id="539" label="zzzz602"/>
      <node id="538" label="zzzz603"/>
      <node id="537" label="zzzz604"/>
      <node id="536" label="zzzz605"/>
      <node id="535" label="zzzz606"/>
      <node id="534" label="zzzz607"/>
      <node id="533" label="zzzz608"/>
      <node id="532" label="zzzz609"/>
      <node id="531" label="zzzz610"/>
      <node id="530" label="zzzz611"/>
      <node id="529" label="zzzz612"/>
      <node id="528" label="zzzz613"/>
      <node id="527" label="zzzz614"/>
      <node id="526" label="zzzz615"/>
      <node id="525" label="zzzz616"/>
      <node id="524" label="zzzz617"/>
      <node id="523" label="zzzz618"/>
      <node id="522" label="zzzz619"/>
      <node id="521" label="zzzz620"/>
      <node id="520" label="zzzz621"/>
      <node id="519" label="zzzz622"/>
      <node id="518" label="zzzz623"/>
      <node id="517" label="zzzz624"/>
      <node id="516" label="zzzz625"/>
      <node id="515" label="zzzz626"/>
      <node id="514" label="zzzz627"/>
      <node id="513" label="zzzz628"/>
      <node id="512" label="zzzz629"/>
      <node id="511" label="zzzz630"/>
      <node id="510" label="zzzz631"/>
      <node id="509" label="zzzz632"/>
      <node id="508" label="zzzz633"/>
      <node id="507" label="zzzz634"/>
      <node id="506" label="zzzz635"/>
      <node id="505" label="zzzz636"/>
      <node id="504" label="zzzz637"/>
      <node id="503" label="zzzz638"/>
      <node id="502" label="zzzz639"/>
      <node id="501" label="zzzz640"/>
      <node id="500" label="zzzz641"/>
      <node id="499" label="zzzz642"/>
      <node id="498" label="zzzz643"/>
      <node id="497" label="zzzz644"/>
      <node id="496" label="zzzz645"/>
      <node id="495" label="zzzz646"/>
      <node id="494" label="zzzz647"/>
      <node id="493" label="zzzz648"/>
      <node id="492" label="zzzz649"/>
      <node id="491" label="zzzz650"/>
      <node id="490" label="zzzz651"/>
      <node id="489" label="zzzz652"/>
      <node id="488" label="zzzz653"/>
      <node id="487" label="zzzz654"/>
      <node id="486" label="zzzz655"/>
      <node id="485" label="zzzz656"/>
      <node id="484" label="zzzz657"/>
      <node id="483" label="zzzz658"/>
      <node id="482" label="zzzz659"/>
      <node id="481" label="zzzz660"/>
      <node id="480" label="zzzz661"/>
      <node id="479" label="zzzz662"/>
      <node id="478" label="zzzz663"/>
      <node id="477" label="zzzz664"/>
      <node id="476" label="zzzz665"/>
      <node id="475" label="zzzz666"/>
      <node id="474" label="zzzz667"/>
      <node id="473" label="zzzz668"/>
      <node id="472" label="zzzz669"/>
      <node id="471" label="zzzz670"/>
      <node id="470" label="zzzz671"/>
      <node id="469" label="zzzz672"/>
      <node id="468" label="zzzz673"/>
      <node id="467" label="zzzz674"/>
      <node id="466" label="zzzz675"/>
      <node id="465" label="zzzz676"/>
      <node id="464" label="zzzz677"/>
      <node id="463" label="zzzz678"/>
      <node id="462" label="zzzz679"/>
      <node id="461" label="zzzz680"/>
      <node id="460" label="zzzz681"/>
      <node id="459" label="zzzz682"/>
      <node id="458" label="zzzz683"/>
      <node id="457" label="zzzz684"/>
      <node id="456" label="zzzz685"/>
      <node id="455" label="zzzz686"/>
      <node id="454" label="zzzz687"/>
      <node id="453" label="zzzz688"/>
      <node id="452" label="zzzz689"/>
      <node id="451" label="zzzz690"/>
      <node id="450" label="zzzz691"/>
      <node id="449" label="zzzz692"/>
      <node id="448" label="zzzz693"/>
      <node id="447" label="zzzz694"/>
      <node id="446" label="zzzz695"/>
      <node id="445" label="zzzz696"/>
      <node id="444" label="zzzz697"/>
      <node id="443" label="zzzz698"/>
      <node id="442" label="zzzz699"/>
      <node id="441" label="zzzz700"/>
      <node id="440" label="zzzz701"/>
      <node id="439" label="zzzz702"/>
      <node id="438" label="zzzz703"/>
      <node id="437" label="zzzz704"/>
      <node id="436" label="zzzz705"/>
      <node id="435" label="zzzz706"/>
      <node id="434" label="zzzz707"/>
      <node id="433" label="zzzz708"/>
      <node id="432" label="zzzz709"/>
      <node id="431" label="zzzz710"/>
      <node id="430" label="zzzz711"/>
      <node id="429" label="zzzz712"/>
      <node id="428" label="zzzz713"/>
      <node id="427" label="zzzz714"/>
      <node id="426" label="zzzz715"/>
      <node id="425" label="zzzz716"/>
      <node id="424" label="zzzz717"/>
      <node id="423" label="zzzz718"/>
      <node id="422" label="zzzz719"/>
      <node id="421" label="zzzz720"/>
      <node id="420" label="zzzz721"/>
      <node id="419" label="zzzz722"/>
      <node id="418" label="zzzz723"/>
      <node id="417" label="zzzz724"/>
      <node id="416" label="zzzz725"/>
      <node id="415" label="zzzz726"/>
      <node id="414" label="zzzz727"/>
      <node id="413" label="zzzz728"/>
      <node id="412" label="zzzz729"/>
      <node id="411" label="zzzz730"/>
      <node id="410" label="zzzz731"/>
      <node id="409" label="zzzz732"/>
      <node id="408" label="zzzz733"/>
      <node id="407" label="zzzz734"/>
      <node id="406" label="zzzz735"/>
      <node id="405" label="zzzz736"/>
      <node id="404" label="zzzz737"/>
      <node id="403" label="zzzz738"/>
      <node id="402" label="zzzz739"/>
      <node id="401" label="zzzz740"/>
      <node id="400" label="zzzz741"/>
      <node id="399" label="zzzz742"/>
      <node id="398" label="zzzz743"/>
      <node id="397" label="zzzz744"/>
      <node id="396" label="zzzz745"/>
      <node id="395" label="zzzz746"/>
      <node id="394" label="zzzz747"/>
      <node id="393" label="zzzz748"/>
      <node id="392" label="zzzz749"/>
      <node id="391" label="zzzz750"/>
      <node id="390" label="zzzz751"/>
      <node id="389" label="zzzz752"/>
      <node id="388" label="zzzz753"/>
      <node id="387" label="zzzz754"/>
      <node id="386" label="zzzz755"/>
      <node id="385" label="zzzz756"/>
      <node id="384" label="zzzz757"/>
      <node id="383" label="zzzz758"/>
      <node id="382" label="zzzz759"/>
      <node id="381" label="zzzz760"/>
      <node id="380" label="zzzz761"/>
      <node id="379" label="zzzz762"/>
      <node id="378" label="zzzz763"/>
      <node id="377" label="zzzz764"/>
      <node id="376" label="zzzz765"/>
      <node id="375" label="zzzz766"/>
      <node id="374" label="zzzz767"/>
      <node id="373" label="zzzz768"/>
      <node id="372" label="zzzz769"/>
      <node id="371" label="zzzz770"/>
      <node id="370" label="zzzz771"/>
      <node id="369" label="zzzz772"/>
      <node id="368" label="zzzz773"/>
      <node id="367" label="zzzz774"/>
      <node id="366" label="zzzz775"/>
      <node id="365" label="zzzz776"/>
      <node id="364" label="zzzz777"/>
      <node id="363" label="zzzz778"/>
      <node id="362" label="zzzz779"/>
      <node id="361" label="zzzz780"/>
      <node id="360" label="zzzz781"/>
      <node id="359" label="zzzz782"/>
      <node id="358" label="zzzz783"/>
      <node id="357" label="zzzz784"/>
      <node id="356" label="zzzz785"/>
      <node id="355" label="zzzz786"/>
      <node id="354" label="zzzz787"/>
      <node id="353" label="zzzz788"/>
      <node id="352" label="zzzz789"/>
      <node id="351" label="zzzz790"/>
      <node id="350" label="zzzz791"/>
      <node id="349" label="zzzz792"/>
      <node id="348" label="zzzz793"/>
      <node id="347" label="zzzz794"/>
      <node id="346" label="zzzz795"/>
      <node id="345" label="zzzz796"/>
      <node id="344" label="zzzz797"/>
      <node id="343" label="zzzz798"/>
      <node id="342" label="zzzz799"/>
      <node id="341" label="zzzz800"/>
      <node id="340" label="zzzz801"/>
      <node id="339" label="zzzz802"/>
      <node id="338" label="zzzz803"/>
      <node id="337" label="zzzz804"/>
      <node id="336" label="zzzz805"/>
      <node id="335" label="zzzz806"/>
      <node id="334" label="zzzz807"/>
      <node id="333" label="zzzz808"/>
      <node id="332" label="zzzz809"/>
      <node id="331" label="zzzz810"/>
      <node id="330" label="zzzz811"/>
      <node id="329" label="zzzz812"/>
      <node id="328" label="zzzz813"/>
      <node id="327" label="zzzz814"/>
      <node id="326" label="zzzz815"/>
      <node id="325" label="zzzz816"/>
      <node id="324" label="zzzz817"/>
      <node id="323" label="zzzz818"/>
      <node id="322" label="zzzz819"/>
      <node id="321" label="zzzz820"/>
      <node id="320" label="zzzz821"/>
      <node id="319" label="zzzz822"/>
      <node id="318" label="zzzz823"/>
      <node id="317" label="zzzz824"/>
      <node id="316" label="zzzz825"/>
      <node id="315" label="zzzz826"/>
      <node id="314" label="zzzz827"/>
      <node id="313" label="zzzz828"/>
      <node id="312" label="zzzz829"/>
      <node id="311" label="zzzz830"/>
      <node id="310" label="zzzz831"/>
      <node id="309" label="zzzz832"/>
      <node id="308" label="zzzz833"/>
      <node id="307" label="zzzz834"/>
      <node id="306" label="zzzz835"/>
      <node id="305" label="zzzz836"/>
      <node id="304" label="zzzz837"/>
      <node id="303" label="zzzz838"/>
      <node id="302" label="zzzz839"/>
      <node id="301" label="zzzz840"/>
      <node id="300" label="zzzz841"/>
      <node id="299" label="zzzz842"/>
      <node id="298" label="zzzz843"/>
      <node id="297" label="zzzz844"/>
      <node id="296" label="zzzz845"/>
      <node id="295" label="zzzz846"/>
      <node id="294" label="zzzz847"/>
      <node id="293" label="zzzz848"/>
      <node id="292" label="zzzz849"/>
      <node id="291" label="zzzz850"/>
      <node id="290" label="zzzz851"/>
      <node id="289" label="zzzz852"/>
      <node id="288" label="zzzz853"/>
      <node id="287" label="zzzz854"/>
      <node id="286" label="zzzz855"/>
      <node id="285" label="zzzz856"/>
      <node id="284" label="zzzz857"/>
      <node id="283" label="zzzz858"/>
      <node id="282" label="zzzz859"/>
      <node id="281" label="zzzz860"/>
      <node id="280" label="zzzz861"/>
      <node id="279" label="zzzz862"/>
      <node id="278" label="zzzz863"/>
      <node id="277" label="zzzz864"/>
      <node id="276" label="zzzz865"/>
      <node id="275" label="zzzz866"/>
      <node id="274" label="zzzz867"/>
      <node id="273" label="zzzz868"/>
      <node id="272" label="zzzz869"/>
      <node id="271" label="zzzz870"/>
      <node id="270" label="zzzz871"/>
      <node id="269" label="zzzz872"/>
      <node id="268" label="zzzz873"/>
      <node id="267" label="zzzz874"/>
      <node id="266" label="zzzz875"/>
      <node id="265" label="zzzz876"/>
      <node id="264" label="zzzz877"/>
      <node id="263" label="zzzz878"/>
      <node id="262" label="zzzz879"/>
      <node id="261" label="zzzz880"/>
      <node id="260" label="zzzz881"/>
      <node id="259" label="zzzz882"/>
      <node id="258" label="zzzz883"/>
      <node id="257" label="zzzz884"/>
      <node id="256" label="zzzz885"/>
      <node id="255" label="zzzz886"/>
      <node id="254" label="zzzz887"/>
      <node id="253" label="zzzz888"/>
      <node id="252" label="zzzz889"/>
      <node id="251" label="zzzz890"/>
      <node id="250" label="zzzz891"/>
      <node id="249" label="zzzz892"/>
      <node id="248" label="zzzz893"/>
      <node id="247" label="zzzz894"/>
      <node id="246" label="zzzz895"/>
      <node id="245" label="zzzz896"/>
      <node id="244" label="zzzz897"/>
      <node id="243" label="zzzz898"/>
      <node id="242" label="zzzz899"/>
      <node id="241" label="zzzz900"/>
      <node id="240" label="zzzz901"/>
      <node id="239" label="zzzz902"/>
      <node id="238" label="zzzz903"/>
      <node id="237" label="zzzz904"/>
      <node id="236" label="zzzz905"/>
      <node id="235" label="zzzz906"/>
      <node id="234" label="zzzz907"/>
      <node id="233" label="zzzz908"/>
      <node id="232" label="zzzz909"/>
      <node id="231" label="zzzz910"/>
      <node id="230" label="zzzz911"/>
      <node id="229" label="zzzz912"/>
      <node id="228" label="zzzz913"/>
      <node id="227" label="zzzz914"/>
      <node id="226" label="zzzz915"/>
      <node id="225" label="zzzz916"/>
      <node id="224" label="zzzz917"/>
      <node id="223" label="zzzz918"/>
      <node id="222" label="zzzz919"/>
      <node id="221" label="zzzz920"/>
      <node id="220" label="zzzz921"/>
      <node id="219" label="zzzz922"/>
      <node id="218" label="zzzz923"/>
      <node id="217" label="zzzz924"/>
      <node id="216" label="zzzz925"/>
      <node id="215" label="zzzz926"/>
      <node id="214" label="zzzz927"/>
      <node id="213" label="zzzz928"/>
      <node id="212" label="zzzz929"/>
      <node id="211" label="zzzz930"/>
      <node id="210" label="zzzz931"/>
      <node id="209" label="zzzz932"/>
      <node id="208" label="zzzz933"/>
      <node id="207" label="zzzz934"/>
      <node id="206" label="zzzz935"/>
      <node id="205" label="zzzz936"/>
      <node id="204" label="zzzz937"/>
      <node id="203" label="zzzz938"/>
      <node id="202" label="zzzz939"/>
      <node id="201" label="zzzz940"/>
      <node id="200" label="zzzz941"/>
      <node id="199" label="zzzz942"/>
      <node id="198" label="zzzz943"/>
      <node id="197" label="zzzz944"/>
      <node id="196" label="zzzz945"/>
      <node id="195" label="zzzz946"/>
      <node id="194" label="zzzz947"/>
      <node id="193" label="zzzz948"/>
      <node id="192" label="zzzz949"/>
      <node id="191" label="zzzz950"/>
      <node id="190" label="zzzz951"/>
      <node id="189" label="zzzz952"/>
      <node id="188" label="zzzz953"/>
      <node id="187" label="zzzz954"/>
      <node id="186" label="zzzz955"/>
      <node id="185" label="zzzz956"/>
      <node id="184" label="zzzz957"/>
      <node id="183" label="zzzz958"/>
      <node id="182" label="zzzz959"/>
      <node id="181" label="zzzz960"/>
      <node id="180" label="zzzz961"/>
      <node id="179" label="zzzz962"/>
      <node id="178" label="zzzz963"/>
      <node id="177" label="zzzz964"/>
      <node id="176" label="zzzz965"/>
      <node id="175" label="zzzz967"/>
      <node id="174" label="zzzz968"/>
      <node id="173" label="zzzz969"/>
      <node id="172" label="zzzz970"/>
      <node id="171" label="zzzz971"/>
      <node id="170" label="zzzz972"/>
      <node id="169" label="zzzz973"/>
      <node id="168" label="zzzz974"/>
      <node id="167" label="zzzz975"/>
      <node id="166" label="zzzz976"/>
      <node id="165" label="zzzz977"/>
      <node id="164" label="zzzz978"/>
      <node id="163" label="zzzz979"/>
      <node id="162" label="zzzz980"/>
      <node id="161" label="zzzz981"/>
      <node id="160" label="zzzz982"/>
      <node id="159" label="zzzz983"/>
      <node id="158" label="zzzz984"/>
      <node id="157" label="zzzz985"/>
      <node id="156" label="zzzz986"/>
      <node id="155" label="zzzz987"/>
      <node id="154" label="zzzz988"/>
      <node id="153" label="zzzz989"/>
      <node id="152" label="zzzz990"/>
      <node id="151" label="zzzz991"/>
      <node id="150" label="zzzz992"/>
      <node id="149" label="zzzz993"/>
      <node id="148" label="zzzz994"/>
      <node id="147" label="zzzz995"/>
      <node id="146" label="zzzz996"/>
      <node id="145" label="zzzz997"/>
      <node id="144" label="zzzz998"/>
      <node id="143" label="zzzz999"/>
      <node id="142" label="zzzzz12"/>
      <node id="141" label="zzzzz13"/>
      <node id="140" label="zzzzz14"/>
      <node id="139" label="zzzzz15"/>
      <node id="138" label="zzzzz17"/>
      <node id="137" label="zzzzz18"/>
      <node id="136" label="zzzzz19"/>
      <node id="135" label="zzzzz20"/>
      <node id="134" label="zzzzz21"/>
      <node id="133" label="zzzzz22"/>
      <node id="132" label="zzzzz23"/>
      <node id="131" label="zzzzz24"/>
      <node id="130" label="zzzzz25"/>
      <node id="129" label="zzzzz26"/>
      <node id="128" label="zzzzz27"/>
      <node id="127" label="zzzzz28"/>
      <node id="126" label="zzzzz29"/>
      <node id="125" label="zzzzz30"/>
      <node id="124" label="zzzzz31"/>
      <node id="123" label="zzzzz32"/>
      <node id="122" label="zzzzz33"/>
      <node id="121" label="zzzzz34"/>
      <node id="120" label="zzzzz35"/>
      <node id="119" label="zzzzz36"/>
      <node id="118" label="zzzzz37"/>
      <node id="117" label="zzzzz38"/>
      <node id="116" label="zzzzz39"/>
      <node id="115" label="zzzzz40"/>
      <node id="114" label="zzzzz41"/>
      <node id="113" label="zzzzz42"/>
      <node id="112" label="zzzzz47"/>
      <node id="111" label="zzzzz48"/>
      <node id="110" label="zzzzz49"/>
      <node id="109" label="zzzzz50"/>
      <node id="108" label="zzzzz51"/>
      <node id="107" label="zzzzz52"/>
      <node id="106" label="zzzzz53"/>
      <node id="105" label="zzzzz54"/>
      <node id="104" label="zzzzz55"/>
      <node id="103" label="zzzzz56"/>
      <node id="102" label="zzzzz57"/>
      <node id="101" label="zzzzz58"/>
      <node id="100" label="zzzzz59"/>
      <node id="99" label="zzzzz60"/>
      <node id="98" label="zzzzz61"/>
      <node id="97" label="zzzzz62"/>
      <node id="96" label="zzzzz63"/>
      <node id="95" label="zzzzz64"/>
      <node id="94" label="zzzzz65"/>
      <node id="93" label="zzzzz66"/>
      <node id="92" label="zzzzz67"/>
      <node id="91" label="zzzzz68"/>
      <node id="90" label="zzzzz69"/>
      <node id="89" label="zzzzz70"/>
      <node id="88" label="zzzzz71"/>
      <node id="87" label="zzzzz72"/>
      <node id="86" label="zzzzz73"/>
      <node id="85" label="zzzzz74"/>
      <node id="84" label="zzzzz75"/>
      <node id="83" label="zzzzz76"/>
      <node id="82" label="zzzzz77"/>
      <node id="81" label="zzzzz78"/>
      <node id="80" label="zzzzz79"/>
      <node id="79" label="zzzzz80"/>
      <node id="78" label="zzzzz81"/>
      <node id="77" label="zzzzz82"/>
      <node id="76" label="zzzzz83"/>
      <node id="75" label="zzzzz84"/>
      <node id="74" label="zzzzz85"/>
      <node id="73" label="zzzzz88"/>
      <node id="72" label="zzzzz89"/>
      <node id="71" label="zzzzz90"/>
      <node id="70" label="zzzzz91"/>
      <node id="69" label="zzzzz92"/>
      <node id="68" label="zzzzz93"/>
      <node id="67" label="zzzzz94"/>
      <node id="66" label="zzzzz95"/>
      <node id="65" label="zzzzz96"/>
      <node id="64" label="zzzzz97"/>
      <node id="63" label="zzzzz98"/>
      <node id="62" label="zzzzz99"/>
      <edge id="446428" label="zzz1000,zzz1006" source="1046" target="1040" cy:directed="1"/>
      <edge id="446427" label="zzz1000,zzz1017" source="1046" target="1029" cy:directed="1"/>
      <edge id="446426" label="zzz1000,zzzz976" source="1046" target="166" cy:directed="1"/>
      <edge id="446425" label="zzz1000,zzzz811" source="1046" target="330" cy:directed="1"/>
      <edge id="446424" label="zzz1000,zzzz757" source="1046" target="384" cy:directed="1"/>
      <edge id="446423" label="zzz1000,zzzz812" source="1046" target="329" cy:directed="1"/>
      <edge id="446422" label="zzz1000,zzzz791" source="1046" target="350" cy:directed="1"/>
      <edge id="446421" label="zzz1000,zzzz795" source="1046" target="346" cy:directed="1"/>
      <edge id="446420" label="zzz1000,zzzzz24" source="1046" target="131" cy:directed="1"/>
      <edge id="446419" label="zzz1000,zzzz810" source="1046" target="331" cy:directed="1"/>
      <edge id="446418" label="zzz1000,zzzz922" source="1046" target="219" cy:directed="1"/>
      <edge id="446417" label="zzz1000,zzzz878" source="1046" target="263" cy:directed="1"/>
      <edge id="446416" label="zzz1000,zzzz740" source="1046" target="401" cy:directed="1"/>
      <edge id="446415" label="zzz1000,zzzzz40" source="1046" target="115" cy:directed="1"/>
      <edge id="446414" label="zzz1000,zzzz777" source="1046" target="364" cy:directed="1"/>
      <edge id="446413" label="zzz1000,zzzz776" source="1046" target="365" cy:directed="1"/>
      <edge id="446412" label="zzz1000,zzzz804" source="1046" target="337" cy:directed="1"/>
      <edge id="446411" label="zzz1000,zzzz803" source="1046" target="338" cy:directed="1"/>
      <edge id="446410" label="zzz1000,zzzz779" source="1046" target="362" cy:directed="1"/>
      <edge id="446409" label="zzz1000,zzzz802" source="1046" target="339" cy:directed="1"/>
      <edge id="446408" label="zzz1000,zzzz794" source="1046" target="347" cy:directed="1"/>
      <edge id="446407" label="zzz1000,zzzz669" source="1046" target="472" cy:directed="1"/>
      <edge id="446406" label="zzz1000,zzzz648" source="1046" target="493" cy:directed="1"/>
      <edge id="446405" label="zzz1000,zzzz885" source="1046" target="256" cy:directed="1"/>
      <edge id="446404" label="zzz1000,zzzz712" source="1046" target="429" cy:directed="1"/>
      <edge id="446403" label="zzz1000,zzzz720" source="1046" target="421" cy:directed="1"/>
      <edge id="446402" label="zzz1000,zzzz875" source="1046" target="266" cy:directed="1"/>
      <edge id="446401" label="zzz1000,zzzz787" source="1046" target="354" cy:directed="1"/>
      <edge id="446400" label="zzz1000,zzzz887" source="1046" target="254" cy:directed="1"/>
      <edge id="446399" label="zzz1000,zzzzz41" source="1046" target="114" cy:directed="1"/>
      <edge id="446398" label="zzz1000,zzzz744" source="1046" target="397" cy:directed="1"/>
      <edge id="446397" label="zzz1000,zzzz694" source="1046" target="447" cy:directed="1"/>
      <edge id="446396" label="zzz1000,zzzz781" source="1046" target="360" cy:directed="1"/>
      <edge id="446395" label="zzz1000,zzzz492" source="1046" target="648" cy:directed="1"/>
      <edge id="446394" label="zzz1000,zzzz736" source="1046" target="405" cy:directed="1"/>
      <edge id="446393" label="zzz1000,zzzz870" source="1046" target="271" cy:directed="1"/>
      <edge id="446392" label="zzz1000,zzzz685" source="1046" target="456" cy:directed="1"/>
      <edge id="446391" label="zzz1000,zzzz780" source="1046" target="361" cy:directed="1"/>
      <edge id="446390" label="zzz1000,zzzz881" source="1046" target="260" cy:directed="1"/>
      <edge id="446389" label="zzz1000,zzzz747" source="1046" target="394" cy:directed="1"/>
      <edge id="446388" label="zzz1000,zzzz759" source="1046" target="382" cy:directed="1"/>
      <edge id="446387" label="zzz1000,zzzz585" source="1046" target="556" cy:directed="1"/>
      <edge id="446386" label="zzz1000,zzzz923" source="1046" target="218" cy:directed="1"/>
      <edge id="446385" label="zzz1000,zzzz703" source="1046" target="438" cy:directed="1"/>
      <edge id="446384" label="zzz1000,zzzz783" source="1046" target="358" cy:directed="1"/>
      <edge id="446383" label="zzz1000,zzzz807" source="1046" target="334" cy:directed="1"/>
      <edge id="446382" label="zzz1000,zzzz749" source="1046" target="392" cy:directed="1"/>
      <edge id="446381" label="zzz1000,zzzz678" source="1046" target="463" cy:directed="1"/>
      <edge id="446380" label="zzz1000,zzzz852" source="1046" target="289" cy:directed="1"/>
      <edge id="446379" label="zzz1000,zzzz872" source="1046" target="269" cy:directed="1"/>
      <edge id="446378" label="zzz1000,zzzz786" source="1046" target="355" cy:directed="1"/>
      <edge id="446377" label="zzz1000,zzzz765" source="1046" target="376" cy:directed="1"/>
      <edge id="446376" label="zzz1000,zzzz806" source="1046" target="335" cy:directed="1"/>
      <edge id="446375" label="zzz1000,zzzz697" source="1046" target="444" cy:directed="1"/>
      <edge id="446374" label="zzz1000,zzzz671" source="1046" target="470" cy:directed="1"/>
      <edge id="446373" label="zzz1000,zzzz473" source="1046" target="667" cy:directed="1"/>
      <edge id="446372" label="zzz1000,zzzz983" source="1046" target="159" cy:directed="1"/>
      <edge id="446371" label="zzz1000,zzzz793" source="1046" target="348" cy:directed="1"/>
      <edge id="446370" label="zzz1000,zzzz869" source="1046" target="272" cy:directed="1"/>
      <edge id="446369" label="zzz1000,zzzz874" source="1046" target="267" cy:directed="1"/>
      <edge id="446368" label="zzz1000,zzzz883" source="1046" target="258" cy:directed="1"/>
      <edge id="446367" label="zzz1000,zzzz797" source="1046" target="344" cy:directed="1"/>
      <edge id="446366" label="zzz1000,zzzz205" source="1046" target="920" cy:directed="1"/>
      <edge id="446365" label="zzz1000,zzzz805" source="1046" target="336" cy:directed="1"/>
      <edge id="446364" label="zzz1000,zzzz877" source="1046" target="264" cy:directed="1"/>
      <edge id="446363" label="zzz1000,zzzz758" source="1046" target="383" cy:directed="1"/>
      <edge id="446362" label="zzz1000,zzzz889" source="1046" target="252" cy:directed="1"/>
      <edge id="446361" label="zzz1000,zzzz631" source="1046" target="510" cy:directed="1"/>
      <edge id="446360" label="zzz1000,zzzz516" source="1046" target="625" cy:directed="1"/>
      <edge id="446359" label="zzz1000,zzzz716" source="1046" target="425" cy:directed="1"/>
      <edge id="446358" label="zzz1000,zzzz769" source="1046" target="372" cy:directed="1"/>
      <edge id="446357" label="zzz1000,zzzz686" source="1046" target="455" cy:directed="1"/>
      <edge id="446356" label="zzz1000,zzzz909" source="1046" target="232" cy:directed="1"/>
      <edge id="446355" label="zzz1000,zzzz548" source="1046" target="593" cy:directed="1"/>
      <edge id="446354" label="zzz1000,zzzz714" source="1046" target="427" cy:directed="1"/>
      <edge id="446353" label="zzz1000,zzzz856" source="1046" target="285" cy:directed="1"/>
      <edge id="446352" label="zzz1000,zzzz202" source="1046" target="923" cy:directed="1"/>
      <edge id="446351" label="zzz1000,zzzz837" source="1046" target="304" cy:directed="1"/>
      <edge id="446350" label="zzz1000,zzzzz26" source="1046" target="129" cy:directed="1"/>
      <edge id="446349" label="zzz1000,zzzz815" source="1046" target="326" cy:directed="1"/>
      <edge id="446348" label="zzz1000,zzzz200" source="1046" target="925" cy:directed="1"/>
      <edge id="446347" label="zzz1000,zzzz499" source="1046" target="641" cy:directed="1"/>
      <edge id="446346" label="zzz1000,zzzz692" source="1046" target="449" cy:directed="1"/>
      <edge id="446345" label="zzz1000,zzzzz31" source="1046" target="124" cy:directed="1"/>
      <edge id="446344" label="zzz1000,zzzz695" source="1046" target="446" cy:directed="1"/>
      <edge id="446343" label="zzz1000,zzzz743" source="1046" target="398" cy:directed="1"/>
      <edge id="446342" label="zzz1000,zzzz820" source="1046" target="321" cy:directed="1"/>
      <edge id="446341" label="zzz1000,zzzz710" source="1046" target="431" cy:directed="1"/>
      <edge id="446340" label="zzz1000,zzzz972" source="1046" target="170" cy:directed="1"/>
      <edge id="446339" label="zzz1000,zzzzz22" source="1046" target="133" cy:directed="1"/>
      <edge id="446338" label="zzz1000,zzzz754" source="1046" target="387" cy:directed="1"/>
      <edge id="446337" label="zzz1000,zzzz843" source="1046" target="298" cy:directed="1"/>
      <edge id="446336" label="zzz1000,zzzz679" source="1046" target="462" cy:directed="1"/>
      <edge id="446335" label="zzz1000,zzzz724" source="1046" target="417" cy:directed="1"/>
      <edge id="446334" label="zzz1000,zzzz561" source="1046" target="580" cy:directed="1"/>
      <edge id="446333" label="zzz1000,zzzz611" source="1046" target="530" cy:directed="1"/>
      <edge id="446332" label="zzz1000,zzzz667" source="1046" target="474" cy:directed="1"/>
      <edge id="446331" label="zzz1000,zzzz785" source="1046" target="356" cy:directed="1"/>
      <edge id="446330" label="zzz1000,zzzz846" source="1046" target="295" cy:directed="1"/>
      <edge id="446329" label="zzz1000,zzz1007" source="1046" target="1039" cy:directed="1"/>
      <edge id="446328" label="zzz1000,zzzz500" source="1046" target="640" cy:directed="1"/>
      <edge id="446327" label="zzz1000,zzzz604" source="1046" target="537" cy:directed="1"/>
      <edge id="446326" label="zzz1000,zzzz665" source="1046" target="476" cy:directed="1"/>
      <edge id="446325" label="zzz1000,zzzz701" source="1046" target="440" cy:directed="1"/>
      <edge id="446324" label="zzz1000,zzzz702" source="1046" target="439" cy:directed="1"/>
      <edge id="446323" label="zzz1000,zzzz770" source="1046" target="371" cy:directed="1"/>
      <edge id="446322" label="zzz1000,zzzz997" source="1046" target="145" cy:directed="1"/>
      <edge id="446321" label="zzz1000,zzzzz32" source="1046" target="123" cy:directed="1"/>
      <edge id="446320" label="zzz1000,zzzz469" source="1046" target="671" cy:directed="1"/>
      <edge id="446319" label="zzz1000,zzzz553" source="1046" target="588" cy:directed="1"/>
      <edge id="446318" label="zzz1000,zzzz731" source="1046" target="410" cy:directed="1"/>
      <edge id="446317" label="zzz1000,zzzz748" source="1046" target="393" cy:directed="1"/>
      <edge id="446316" label="zzz1000,zzzz898" source="1046" target="243" cy:directed="1"/>
      <edge id="446315" label="zzz1000,zzzz109" source="1046" target="1016" cy:directed="1"/>
      <edge id="446314" label="zzz1000,zzzz550" source="1046" target="591" cy:directed="1"/>
      <edge id="446313" label="zzz1000,zzzz755" source="1046" target="386" cy:directed="1"/>
      <edge id="446312" label="zzz1000,zzzzz69" source="1046" target="90" cy:directed="1"/>
      <edge id="446311" label="zzz1000,zzzz707" source="1046" target="434" cy:directed="1"/>
      <edge id="446310" label="zzz1000,zzzz751" source="1046" target="390" cy:directed="1"/>
      <edge id="446309" label="zzz1000,zzzz984" source="1046" target="158" cy:directed="1"/>
      <edge id="446308" label="zzz1000,zzzz986" source="1046" target="156" cy:directed="1"/>
      <edge id="446307" label="zzz1000,zzzz990" source="1046" target="152" cy:directed="1"/>
      <edge id="446306" label="zzz1000,zzzz612" source="1046" target="529" cy:directed="1"/>
      <edge id="446305" label="zzz1000,zzzz675" source="1046" target="466" cy:directed="1"/>
      <edge id="446304" label="zzz1000,zzzz684" source="1046" target="457" cy:directed="1"/>
      <edge id="446303" label="zzz1000,zzzz711" source="1046" target="430" cy:directed="1"/>
      <edge id="446302" label="zzz1000,zzzz739" source="1046" target="402" cy:directed="1"/>
      <edge id="446301" label="zzz1000,zzzz756" source="1046" target="385" cy:directed="1"/>
      <edge id="446300" label="zzz1000,zzzz861" source="1046" target="280" cy:directed="1"/>
      <edge id="446299" label="zzz1000,zzz1014" source="1046" target="1032" cy:directed="1"/>
      <edge id="446298" label="zzz1000,zzzz465" source="1046" target="675" cy:directed="1"/>
      <edge id="446297" label="zzz1000,zzzz639" source="1046" target="502" cy:directed="1"/>
      <edge id="446296" label="zzz1000,zzzz789" source="1046" target="352" cy:directed="1"/>
      <edge id="446295" label="zzz1000,zzzz873" source="1046" target="268" cy:directed="1"/>
      <edge id="446294" label="zzz1000,zzzz899" source="1046" target="242" cy:directed="1"/>
      <edge id="446293" label="zzz1000,zzzz596" source="1046" target="545" cy:directed="1"/>
      <edge id="446292" label="zzz1000,zzzz670" source="1046" target="471" cy:directed="1"/>
      <edge id="446291" label="zzz1000,zzzz865" source="1046" target="276" cy:directed="1"/>
      <edge id="446290" label="zzz1000,zzzz978" source="1046" target="164" cy:directed="1"/>
      <edge id="446289" label="zzz1000,zzzzz94" source="1046" target="67" cy:directed="1"/>
      <edge id="446288" label="zzz1000,zzzz564" source="1046" target="577" cy:directed="1"/>
      <edge id="446287" label="zzz1000,zzzz579" source="1046" target="562" cy:directed="1"/>
      <edge id="446286" label="zzz1000,zzzz642" source="1046" target="499" cy:directed="1"/>
      <edge id="446285" label="zzz1000,zzzz699" source="1046" target="442" cy:directed="1"/>
      <edge id="446284" label="zzz1000,zzzz784" source="1046" target="357" cy:directed="1"/>
      <edge id="446283" label="zzz1000,zzzz902" source="1046" target="239" cy:directed="1"/>
      <edge id="446282" label="zzz1000,zzzz406" source="1046" target="719" cy:directed="1"/>
      <edge id="446281" label="zzz1000,zzzz593" source="1046" target="548" cy:directed="1"/>
      <edge id="446280" label="zzz1000,zzzz819" source="1046" target="322" cy:directed="1"/>
      <edge id="446279" label="zzz1000,zzzz956" source="1046" target="185" cy:directed="1"/>
      <edge id="446278" label="zzz1000,zzzz545" source="1046" target="596" cy:directed="1"/>
      <edge id="446277" label="zzz1000,zzzz555" source="1046" target="586" cy:directed="1"/>
      <edge id="446276" label="zzz1000,zzzz616" source="1046" target="525" cy:directed="1"/>
      <edge id="446275" label="zzz1000,zzzz709" source="1046" target="432" cy:directed="1"/>
      <edge id="446274" label="zzz1000,zzzz718" source="1046" target="423" cy:directed="1"/>
      <edge id="446273" label="zzz1000,zzzz729" source="1046" target="412" cy:directed="1"/>
      <edge id="446272" label="zzz1000,zzzz732" source="1046" target="409" cy:directed="1"/>
      <edge id="446271" label="zzz1000,zzzz788" source="1046" target="353" cy:directed="1"/>
      <edge id="446270" label="zzz1000,zzzzz36" source="1046" target="119" cy:directed="1"/>
      <edge id="446269" label="zzz1000,zzzzz39" source="1046" target="116" cy:directed="1"/>
      <edge id="446268" label="zzz1000,zzzz404" source="1046" target="721" cy:directed="1"/>
      <edge id="446267" label="zzz1000,zzzz662" source="1046" target="479" cy:directed="1"/>
      <edge id="446266" label="zzz1000,zzzz687" source="1046" target="454" cy:directed="1"/>
      <edge id="446265" label="zzz1000,zzzz722" source="1046" target="419" cy:directed="1"/>
      <edge id="446264" label="zzz1000,zzzz768" source="1046" target="373" cy:directed="1"/>
      <edge id="446263" label="zzz1000,zzzz988" source="1046" target="154" cy:directed="1"/>
      <edge id="446262" label="zzz1000,zzzzz53" source="1046" target="106" cy:directed="1"/>
      <edge id="446261" label="zzz1000,zzzz571" source="1046" target="570" cy:directed="1"/>
      <edge id="446260" label="zzz1000,zzzz646" source="1046" target="495" cy:directed="1"/>
      <edge id="446259" label="zzz1000,zzzz900" source="1046" target="241" cy:directed="1"/>
      <edge id="446258" label="zzz1000,zzzzz65" source="1046" target="94" cy:directed="1"/>
      <edge id="446257" label="zzz1000,zzzz201" source="1046" target="924" cy:directed="1"/>
      <edge id="446256" label="zzz1000,zzzz449" source="1046" target="678" cy:directed="1"/>
      <edge id="446255" label="zzz1000,zzzz663" source="1046" target="478" cy:directed="1"/>
      <edge id="446254" label="zzz1000,zzzz664" source="1046" target="477" cy:directed="1"/>
      <edge id="446253" label="zzz1000,zzzz705" source="1046" target="436" cy:directed="1"/>
      <edge id="446252" label="zzz1000,zzzz730" source="1046" target="411" cy:directed="1"/>
      <edge id="446251" label="zzz1000,zzzz764" source="1046" target="377" cy:directed="1"/>
      <edge id="446250" label="zzz1000,zzzz801" source="1046" target="340" cy:directed="1"/>
      <edge id="446249" label="zzz1000,zzzz924" source="1046" target="217" cy:directed="1"/>
      <edge id="446248" label="zzz1000,zzzz930" source="1046" target="211" cy:directed="1"/>
      <edge id="446247" label="zzz1000,zzzz998" source="1046" target="144" cy:directed="1"/>
      <edge id="446246" label="zzz1000,zzzzz93" source="1046" target="68" cy:directed="1"/>
      <edge id="446245" label="zzz1000,zzzzz95" source="1046" target="66" cy:directed="1"/>
      <edge id="446244" label="zzz1000,zzzz203" source="1046" target="922" cy:directed="1"/>
      <edge id="446243" label="zzz1000,zzzz607" source="1046" target="534" cy:directed="1"/>
      <edge id="446242" label="zzz1000,zzzz614" source="1046" target="527" cy:directed="1"/>
      <edge id="446241" label="zzz1000,zzz1008" source="1046" target="1038" cy:directed="1"/>
      <edge id="446240" label="zzz1000,zzzz582" source="1046" target="559" cy:directed="1"/>
      <edge id="446239" label="zzz1000,zzzz647" source="1046" target="494" cy:directed="1"/>
      <edge id="446238" label="zzz1000,zzzz723" source="1046" target="418" cy:directed="1"/>
      <edge id="446237" label="zzz1000,zzzz867" source="1046" target="274" cy:directed="1"/>
      <edge id="446236" label="zzz1000,zzzz903" source="1046" target="238" cy:directed="1"/>
      <edge id="446235" label="zzz1000,zzzz980" source="1046" target="162" cy:directed="1"/>
      <edge id="446234" label="zzz1000,zzzz111" source="1046" target="1014" cy:directed="1"/>
      <edge id="446233" label="zzz1000,zzzz857" source="1046" target="284" cy:directed="1"/>
      <edge id="446232" label="zzz1000,zzzz971" source="1046" target="171" cy:directed="1"/>
      <edge id="446231" label="zzz1000,zzzz992" source="1046" target="150" cy:directed="1"/>
      <edge id="446230" label="zzz1000,zzzzz78" source="1046" target="81" cy:directed="1"/>
      <edge id="446229" label="zzz1000,zzz1004" source="1046" target="1042" cy:directed="1"/>
      <edge id="446228" label="zzz1000,zzzz110" source="1046" target="1015" cy:directed="1"/>
      <edge id="446227" label="zzz1000,zzzz568" source="1046" target="573" cy:directed="1"/>
      <edge id="446226" label="zzz1000,zzzz589" source="1046" target="552" cy:directed="1"/>
      <edge id="446225" label="zzz1000,zzzz706" source="1046" target="435" cy:directed="1"/>
      <edge id="446224" label="zzz1000,zzzz828" source="1046" target="313" cy:directed="1"/>
      <edge id="446223" label="zzz1000,zzzz844" source="1046" target="297" cy:directed="1"/>
      <edge id="446222" label="zzz1000,zzzz858" source="1046" target="283" cy:directed="1"/>
      <edge id="446221" label="zzz1000,zzzz864" source="1046" target="277" cy:directed="1"/>
      <edge id="446220" label="zzz1000,zzzz562" source="1046" target="579" cy:directed="1"/>
      <edge id="446219" label="zzz1000,zzzz565" source="1046" target="576" cy:directed="1"/>
      <edge id="446218" label="zzz1000,zzzz606" source="1046" target="535" cy:directed="1"/>
      <edge id="446217" label="zzz1000,zzzz625" source="1046" target="516" cy:directed="1"/>
      <edge id="446216" label="zzz1000,zzzz676" source="1046" target="465" cy:directed="1"/>
      <edge id="446215" label="zzz1000,zzzz682" source="1046" target="459" cy:directed="1"/>
      <edge id="446214" label="zzz1000,zzzz733" source="1046" target="408" cy:directed="1"/>
      <edge id="446213" label="zzz1000,zzzz734" source="1046" target="407" cy:directed="1"/>
      <edge id="446212" label="zzz1000,zzzz746" source="1046" target="395" cy:directed="1"/>
      <edge id="446211" label="zzz1000,zzzz760" source="1046" target="381" cy:directed="1"/>
      <edge id="446210" label="zzz1000,zzzz762" source="1046" target="379" cy:directed="1"/>
      <edge id="446209" label="zzz1000,zzzz836" source="1046" target="305" cy:directed="1"/>
      <edge id="446208" label="zzz1000,zzzz918" source="1046" target="223" cy:directed="1"/>
      <edge id="446207" label="zzz1000,zzzz989" source="1046" target="153" cy:directed="1"/>
      <edge id="446206" label="zzz1000,zzzzz30" source="1046" target="125" cy:directed="1"/>
      <edge id="446205" label="zzz1000,zzzzz64" source="1046" target="95" cy:directed="1"/>
      <edge id="446204" label="zzz1000,zzz1005" source="1046" target="1041" cy:directed="1"/>
      <edge id="446203" label="zzz1000,zzzz100" source="1046" target="1025" cy:directed="1"/>
      <edge id="446202" label="zzz1000,zzzz156" source="1046" target="969" cy:directed="1"/>
      <edge id="446201" label="zzz1000,zzzz199" source="1046" target="926" cy:directed="1"/>
      <edge id="446200" label="zzz1000,zzzz666" source="1046" target="475" cy:directed="1"/>
      <edge id="446199" label="zzz1000,zzzz674" source="1046" target="467" cy:directed="1"/>
      <edge id="446198" label="zzz1000,zzzz841" source="1046" target="300" cy:directed="1"/>
      <edge id="446197" label="zzz1000,zzzz862" source="1046" target="279" cy:directed="1"/>
      <edge id="446196" label="zzz1000,zzzz967" source="1046" target="175" cy:directed="1"/>
      <edge id="446195" label="zzz1000,zzzzz62" source="1046" target="97" cy:directed="1"/>
      <edge id="446194" label="zzz1000,zzzzz99" source="1046" target="62" cy:directed="1"/>
      <edge id="446193" label="zzz1000,zzzz737" source="1046" target="404" cy:directed="1"/>
      <edge id="446192" label="zzz1000,zzzz834" source="1046" target="307" cy:directed="1"/>
      <edge id="446191" label="zzz1000,zzzz863" source="1046" target="278" cy:directed="1"/>
      <edge id="446190" label="zzz1000,zzzz880" source="1046" target="261" cy:directed="1"/>
      <edge id="446189" label="zzz1000,zzzz968" source="1046" target="174" cy:directed="1"/>
      <edge id="446188" label="zzz1000,zzzz991" source="1046" target="151" cy:directed="1"/>
      <edge id="446187" label="zzz1000,zzzz115" source="1046" target="1010" cy:directed="1"/>
      <edge id="446186" label="zzz1000,zzzz403" source="1046" target="722" cy:directed="1"/>
      <edge id="446185" label="zzz1000,zzzz599" source="1046" target="542" cy:directed="1"/>
      <edge id="446184" label="zzz1000,zzzz617" source="1046" target="524" cy:directed="1"/>
      <edge id="446183" label="zzz1000,zzzz884" source="1046" target="257" cy:directed="1"/>
      <edge id="446182" label="zzz1000,zzz1009" source="1046" target="1037" cy:directed="1"/>
      <edge id="446181" label="zzz1000,zzzz169" source="1046" target="956" cy:directed="1"/>
      <edge id="446180" label="zzz1000,zzzz563" source="1046" target="578" cy:directed="1"/>
      <edge id="446179" label="zzz1000,zzzz602" source="1046" target="539" cy:directed="1"/>
      <edge id="446178" label="zzz1000,zzzz652" source="1046" target="489" cy:directed="1"/>
      <edge id="446177" label="zzz1000,zzzz728" source="1046" target="413" cy:directed="1"/>
      <edge id="446176" label="zzz1000,zzzz752" source="1046" target="389" cy:directed="1"/>
      <edge id="446175" label="zzz1000,zzzz818" source="1046" target="323" cy:directed="1"/>
      <edge id="446174" label="zzz1000,zzzz853" source="1046" target="288" cy:directed="1"/>
      <edge id="446173" label="zzz1000,zzzz901" source="1046" target="240" cy:directed="1"/>
      <edge id="446172" label="zzz1000,zzzz982" source="1046" target="160" cy:directed="1"/>
      <edge id="446171" label="zzz1000,zzzzz19" source="1046" target="136" cy:directed="1"/>
      <edge id="446170" label="zzz1000,zzzzz57" source="1046" target="102" cy:directed="1"/>
      <edge id="446169" label="zzz1000,zzzzz59" source="1046" target="100" cy:directed="1"/>
      <edge id="446168" label="zzz1000,zzzzz84" source="1046" target="75" cy:directed="1"/>
      <edge id="446167" label="zzz1000,zzz1021" source="1046" target="1026" cy:directed="1"/>
      <edge id="446166" label="zzz1000,zzzz113" source="1046" target="1012" cy:directed="1"/>
      <edge id="446165" label="zzz1000,zzzz148" source="1046" target="977" cy:directed="1"/>
      <edge id="446164" label="zzz1000,zzzz195" source="1046" target="930" cy:directed="1"/>
      <edge id="446163" label="zzz1000,zzzz559" source="1046" target="582" cy:directed="1"/>
      <edge id="446162" label="zzz1000,zzzz569" source="1046" target="572" cy:directed="1"/>
      <edge id="446161" label="zzz1000,zzzz581" source="1046" target="560" cy:directed="1"/>
      <edge id="446160" label="zzz1000,zzzz645" source="1046" target="496" cy:directed="1"/>
      <edge id="446159" label="zzz1000,zzzz654" source="1046" target="487" cy:directed="1"/>
      <edge id="446158" label="zzz1000,zzzz655" source="1046" target="486" cy:directed="1"/>
      <edge id="446157" label="zzz1000,zzzz845" source="1046" target="296" cy:directed="1"/>
      <edge id="446156" label="zzz1000,zzzz851" source="1046" target="290" cy:directed="1"/>
      <edge id="446155" label="zzz1000,zzzz882" source="1046" target="259" cy:directed="1"/>
      <edge id="446154" label="zzz1000,zzzzz61" source="1046" target="98" cy:directed="1"/>
      <edge id="446153" label="zzz1000,zzzzz98" source="1046" target="63" cy:directed="1"/>
      <edge id="446152" label="zzz1000,zzzz166" source="1046" target="959" cy:directed="1"/>
      <edge id="446151" label="zzz1000,zzzz552" source="1046" target="589" cy:directed="1"/>
      <edge id="446150" label="zzz1000,zzzz573" source="1046" target="568" cy:directed="1"/>
      <edge id="446149" label="zzz1000,zzzz584" source="1046" target="557" cy:directed="1"/>
      <edge id="446148" label="zzz1000,zzzz681" source="1046" target="460" cy:directed="1"/>
      <edge id="446147" label="zzz1000,zzzz727" source="1046" target="414" cy:directed="1"/>
      <edge id="446146" label="zzz1000,zzzz778" source="1046" target="363" cy:directed="1"/>
      <edge id="446145" label="zzz1000,zzzz824" source="1046" target="317" cy:directed="1"/>
      <edge id="446144" label="zzz1000,zzzz848" source="1046" target="293" cy:directed="1"/>
      <edge id="446143" label="zzz1000,zzzz868" source="1046" target="273" cy:directed="1"/>
      <edge id="446142" label="zzz1000,zzzz977" source="1046" target="165" cy:directed="1"/>
      <edge id="446141" label="zzz1000,zzzzz66" source="1046" target="93" cy:directed="1"/>
      <edge id="446140" label="zzz1000,zzzzz97" source="1046" target="64" cy:directed="1"/>
      <edge id="446139" label="zzz1000,zzz1016" source="1046" target="1030" cy:directed="1"/>
      <edge id="446138" label="zzz1000,zzzz114" source="1046" target="1011" cy:directed="1"/>
      <edge id="446137" label="zzz1000,zzzz472" source="1046" target="668" cy:directed="1"/>
      <edge id="446136" label="zzz1000,zzzz609" source="1046" target="532" cy:directed="1"/>
      <edge id="446135" label="zzz1000,zzzz650" source="1046" target="491" cy:directed="1"/>
      <edge id="446134" label="zzz1000,zzzz829" source="1046" target="312" cy:directed="1"/>
      <edge id="446133" label="zzz1000,zzzz871" source="1046" target="270" cy:directed="1"/>
      <edge id="446132" label="zzz1000,zzzz973" source="1046" target="169" cy:directed="1"/>
      <edge id="446131" label="zzz1000,zzzz127" source="1046" target="998" cy:directed="1"/>
      <edge id="446130" label="zzz1000,zzzz162" source="1046" target="963" cy:directed="1"/>
      <edge id="446129" label="zzz1000,zzzz513" source="1046" target="628" cy:directed="1"/>
      <edge id="446128" label="zzz1000,zzzz597" source="1046" target="544" cy:directed="1"/>
      <edge id="446127" label="zzz1000,zzzz615" source="1046" target="526" cy:directed="1"/>
      <edge id="446126" label="zzz1000,zzzz774" source="1046" target="367" cy:directed="1"/>
      <edge id="446125" label="zzz1000,zzzz974" source="1046" target="168" cy:directed="1"/>
      <edge id="446124" label="zzz1000,zzzzz60" source="1046" target="99" cy:directed="1"/>
      <edge id="446123" label="zzz1000,zzzz161" source="1046" target="964" cy:directed="1"/>
      <edge id="446122" label="zzz1000,zzzz566" source="1046" target="575" cy:directed="1"/>
      <edge id="446121" label="zzz1000,zzzz574" source="1046" target="567" cy:directed="1"/>
      <edge id="446120" label="zzz1000,zzzz620" source="1046" target="521" cy:directed="1"/>
      <edge id="446119" label="zzz1000,zzzz823" source="1046" target="318" cy:directed="1"/>
      <edge id="446118" label="zzz1000,zzzz859" source="1046" target="282" cy:directed="1"/>
      <edge id="446117" label="zzz1000,zzzz108" source="1046" target="1017" cy:directed="1"/>
      <edge id="446116" label="zzz1000,zzzz163" source="1046" target="962" cy:directed="1"/>
      <edge id="446115" label="zzz1000,zzzz590" source="1046" target="551" cy:directed="1"/>
      <edge id="446114" label="zzz1000,zzzz677" source="1046" target="464" cy:directed="1"/>
      <edge id="446113" label="zzz1000,zzzz696" source="1046" target="445" cy:directed="1"/>
      <edge id="446112" label="zzz1000,zzzz775" source="1046" target="366" cy:directed="1"/>
      <edge id="446111" label="zzz1000,zzzz790" source="1046" target="351" cy:directed="1"/>
      <edge id="446110" label="zzz1000,zzzz814" source="1046" target="327" cy:directed="1"/>
      <edge id="446109" label="zzz1000,zzzz849" source="1046" target="292" cy:directed="1"/>
      <edge id="446108" label="zzz1000,zzzzz92" source="1046" target="69" cy:directed="1"/>
      <edge id="446107" label="zzz1000,zzzz493" source="1046" target="647" cy:directed="1"/>
      <edge id="446106" label="zzz1000,zzzz570" source="1046" target="571" cy:directed="1"/>
      <edge id="446105" label="zzz1000,zzzz575" source="1046" target="566" cy:directed="1"/>
      <edge id="446104" label="zzz1000,zzzz649" source="1046" target="492" cy:directed="1"/>
      <edge id="446103" label="zzz1000,zzz1010" source="1046" target="1036" cy:directed="1"/>
      <edge id="446102" label="zzz1000,zzzz142" source="1046" target="983" cy:directed="1"/>
      <edge id="446101" label="zzz1000,zzzz168" source="1046" target="957" cy:directed="1"/>
      <edge id="446100" label="zzz1000,zzzz567" source="1046" target="574" cy:directed="1"/>
      <edge id="446099" label="zzz1000,zzzz688" source="1046" target="453" cy:directed="1"/>
      <edge id="446098" label="zzz1000,zzzz689" source="1046" target="452" cy:directed="1"/>
      <edge id="446097" label="zzz1000,zzzz767" source="1046" target="374" cy:directed="1"/>
      <edge id="446096" label="zzz1000,zzzz827" source="1046" target="314" cy:directed="1"/>
      <edge id="446095" label="zzz1000,zzzz833" source="1046" target="308" cy:directed="1"/>
      <edge id="446094" label="zzz1000,zzzzz71" source="1046" target="88" cy:directed="1"/>
      <edge id="446093" label="zzz1000,zzz1013" source="1046" target="1033" cy:directed="1"/>
      <edge id="446092" label="zzz1000,zzzz107" source="1046" target="1018" cy:directed="1"/>
      <edge id="446091" label="zzz1000,zzzz167" source="1046" target="958" cy:directed="1"/>
      <edge id="446090" label="zzz1000,zzzz721" source="1046" target="420" cy:directed="1"/>
      <edge id="446089" label="zzz1000,zzzz735" source="1046" target="406" cy:directed="1"/>
      <edge id="446088" label="zzz1000,zzzz742" source="1046" target="399" cy:directed="1"/>
      <edge id="446087" label="zzz1000,zzzz761" source="1046" target="380" cy:directed="1"/>
      <edge id="446086" label="zzz1000,zzzz822" source="1046" target="319" cy:directed="1"/>
      <edge id="446085" label="zzz1000,zzzz842" source="1046" target="299" cy:directed="1"/>
      <edge id="446084" label="zzz1000,zzzzz96" source="1046" target="65" cy:directed="1"/>
      <edge id="446083" label="zzz1000,zzz1001" source="1046" target="1045" cy:directed="1"/>
      <edge id="446082" label="zzz1000,zzz1003" source="1046" target="1043" cy:directed="1"/>
      <edge id="446081" label="zzz1000,zzzz103" source="1046" target="1022" cy:directed="1"/>
      <edge id="446080" label="zzz1000,zzzz206" source="1046" target="919" cy:directed="1"/>
      <edge id="446079" label="zzz1000,zzzz463" source="1046" target="677" cy:directed="1"/>
      <edge id="446078" label="zzz1000,zzzz558" source="1046" target="583" cy:directed="1"/>
      <edge id="446077" label="zzz1000,zzzz572" source="1046" target="569" cy:directed="1"/>
      <edge id="446076" label="zzz1000,zzzz587" source="1046" target="554" cy:directed="1"/>
      <edge id="446075" label="zzz1000,zzzz588" source="1046" target="553" cy:directed="1"/>
      <edge id="446074" label="zzz1000,zzzz638" source="1046" target="503" cy:directed="1"/>
      <edge id="446073" label="zzz1000,zzzz854" source="1046" target="287" cy:directed="1"/>
      <edge id="446072" label="zzz1000,zzzz970" source="1046" target="172" cy:directed="1"/>
      <edge id="446071" label="zzz1000,zzzz194" source="1046" target="931" cy:directed="1"/>
      <edge id="446070" label="zzz1000,zzzz621" source="1046" target="520" cy:directed="1"/>
      <edge id="446069" label="zzz1000,zzzz635" source="1046" target="506" cy:directed="1"/>
      <edge id="446068" label="zzz1000,zzzz719" source="1046" target="422" cy:directed="1"/>
      <edge id="446067" label="zzz1000,zzzz726" source="1046" target="415" cy:directed="1"/>
      <edge id="446066" label="zzz1000,zzzz104" source="1046" target="1021" cy:directed="1"/>
      <edge id="446065" label="zzz1000,zzzz405" source="1046" target="720" cy:directed="1"/>
      <edge id="446064" label="zzz1000,zzzz636" source="1046" target="505" cy:directed="1"/>
      <edge id="446063" label="zzz1000,zzzz947" source="1046" target="194" cy:directed="1"/>
      <edge id="446062" label="zzz1000,zzzz155" source="1046" target="970" cy:directed="1"/>
      <edge id="446061" label="zzz1000,zzzz490" source="1046" target="650" cy:directed="1"/>
      <edge id="446060" label="zzz1000,zzzz618" source="1046" target="523" cy:directed="1"/>
      <edge id="446059" label="zzz1000,zzzz653" source="1046" target="488" cy:directed="1"/>
      <edge id="446058" label="zzz1000,zzzz683" source="1046" target="458" cy:directed="1"/>
      <edge id="446057" label="zzz1000,zzzz741" source="1046" target="400" cy:directed="1"/>
      <edge id="446056" label="zzz1000,zzzz763" source="1046" target="378" cy:directed="1"/>
      <edge id="446055" label="zzz1000,zzzz835" source="1046" target="306" cy:directed="1"/>
      <edge id="446054" label="zzz1000,zzzz850" source="1046" target="291" cy:directed="1"/>
      <edge id="446053" label="zzz1000,zzzz112" source="1046" target="1013" cy:directed="1"/>
      <edge id="446052" label="zzz1000,zzzz150" source="1046" target="975" cy:directed="1"/>
      <edge id="446051" label="zzz1000,zzzz598" source="1046" target="543" cy:directed="1"/>
      <edge id="446050" label="zzz1000,zzzz921" source="1046" target="220" cy:directed="1"/>
      <edge id="446049" label="zzz1000,zzzz960" source="1046" target="181" cy:directed="1"/>
      <edge id="446048" label="zzz1000,zzzzz54" source="1046" target="105" cy:directed="1"/>
      <edge id="446047" label="zzz1000,zzzz556" source="1046" target="585" cy:directed="1"/>
      <edge id="446046" label="zzz1000,zzzz600" source="1046" target="541" cy:directed="1"/>
      <edge id="446045" label="zzz1000,zzzzz58" source="1046" target="101" cy:directed="1"/>
      <edge id="446044" label="zzz1000,zzzzz72" source="1046" target="87" cy:directed="1"/>
      <edge id="446043" label="zzz1000,zzz1002" source="1046" target="1044" cy:directed="1"/>
      <edge id="446042" label="zzz1000,zzz1015" source="1046" target="1031" cy:directed="1"/>
      <edge id="446041" label="zzz1000,zzzz557" source="1046" target="584" cy:directed="1"/>
      <edge id="446040" label="zzz1000,zzzz630" source="1046" target="511" cy:directed="1"/>
      <edge id="446039" label="zzz1000,zzzz725" source="1046" target="416" cy:directed="1"/>
      <edge id="446038" label="zzz1000,zzzz813" source="1046" target="328" cy:directed="1"/>
      <edge id="446037" label="zzz1000,zzzz944" source="1046" target="197" cy:directed="1"/>
      <edge id="446036" label="zzz1000,zzzz591" source="1046" target="550" cy:directed="1"/>
      <edge id="446035" label="zzz1000,zzzz668" source="1046" target="473" cy:directed="1"/>
      <edge id="446034" label="zzz1000,zzzz673" source="1046" target="468" cy:directed="1"/>
      <edge id="446033" label="zzz1000,zzzz704" source="1046" target="437" cy:directed="1"/>
      <edge id="446032" label="zzz1000,zzzz715" source="1046" target="426" cy:directed="1"/>
      <edge id="446031" label="zzz1000,zzzz945" source="1046" target="196" cy:directed="1"/>
      <edge id="446030" label="zzz1000,zzzz985" source="1046" target="157" cy:directed="1"/>
      <edge id="446029" label="zzz1000,zzzzz88" source="1046" target="73" cy:directed="1"/>
      <edge id="446028" label="zzz1000,zzzz105" source="1046" target="1020" cy:directed="1"/>
      <edge id="446027" label="zzz1000,zzzz106" source="1046" target="1019" cy:directed="1"/>
      <edge id="446026" label="zzz1000,zzzz165" source="1046" target="960" cy:directed="1"/>
      <edge id="446025" label="zzz1000,zzzz486" source="1046" target="654" cy:directed="1"/>
      <edge id="446024" label="zzz1000,zzzz586" source="1046" target="555" cy:directed="1"/>
      <edge id="446023" label="zzz1000,zzzz622" source="1046" target="519" cy:directed="1"/>
      <edge id="446022" label="zzz1000,zzzz632" source="1046" target="509" cy:directed="1"/>
      <edge id="446021" label="zzz1000,zzzz651" source="1046" target="490" cy:directed="1"/>
      <edge id="446020" label="zzz1000,zzzz798" source="1046" target="343" cy:directed="1"/>
      <edge id="446019" label="zzz1000,zzzz969" source="1046" target="173" cy:directed="1"/>
      <edge id="446018" label="zzz1000,zzzz979" source="1046" target="163" cy:directed="1"/>
      <edge id="446017" label="zzz1000,zzzz981" source="1046" target="161" cy:directed="1"/>
      <edge id="446016" label="zzz1000,zzzzz37" source="1046" target="118" cy:directed="1"/>
      <edge id="446015" label="zzz1000,zzzzz55" source="1046" target="104" cy:directed="1"/>
      <edge id="446014" label="zzz1000,zzzzz63" source="1046" target="96" cy:directed="1"/>
      <edge id="446013" label="zzz1000,zzzz603" source="1046" target="538" cy:directed="1"/>
      <edge id="446012" label="zzz1000,zzzz643" source="1046" target="498" cy:directed="1"/>
      <edge id="446011" label="zzz1000,zzzz659" source="1046" target="482" cy:directed="1"/>
      <edge id="446010" label="zzz1000,zzzzz25" source="1046" target="130" cy:directed="1"/>
      <edge id="446009" label="zzz1000,zzzz644" source="1046" target="497" cy:directed="1"/>
      <edge id="446008" label="zzz1000,zzzz691" source="1046" target="450" cy:directed="1"/>
      <edge id="446007" label="zzz1000,zzzz821" source="1046" target="320" cy:directed="1"/>
      <edge id="446006" label="zzz1000,zzzz855" source="1046" target="286" cy:directed="1"/>
      <edge id="446005" label="zzz1000,zzzz915" source="1046" target="226" cy:directed="1"/>
      <edge id="446004" label="zzz1000,zzzz958" source="1046" target="183" cy:directed="1"/>
      <edge id="446003" label="zzz1000,zzzz580" source="1046" target="561" cy:directed="1"/>
      <edge id="446002" label="zzz1000,zzzz610" source="1046" target="531" cy:directed="1"/>
      <edge id="446001" label="zzz1000,zzzz800" source="1046" target="341" cy:directed="1"/>
      <edge id="446000" label="zzz1000,zzzz860" source="1046" target="281" cy:directed="1"/>
      <edge id="445999" label="zzz1000,zzzz913" source="1046" target="228" cy:directed="1"/>
      <edge id="445998" label="zzz1000,zzzz987" source="1046" target="155" cy:directed="1"/>
      <edge id="445997" label="zzz1000,zzzz554" source="1046" target="587" cy:directed="1"/>
      <edge id="445996" label="zzz1000,zzzz583" source="1046" target="558" cy:directed="1"/>
      <edge id="445995" label="zzz1000,zzzz626" source="1046" target="515" cy:directed="1"/>
      <edge id="445994" label="zzz1000,zzzz672" source="1046" target="469" cy:directed="1"/>
      <edge id="445993" label="zzz1000,zzzz693" source="1046" target="448" cy:directed="1"/>
      <edge id="445992" label="zzz1000,zzzz826" source="1046" target="315" cy:directed="1"/>
      <edge id="445991" label="zzz1000,zzzz946" source="1046" target="195" cy:directed="1"/>
      <edge id="445990" label="zzz1000,zzzz975" source="1046" target="167" cy:directed="1"/>
      <edge id="445989" label="zzz1000,zzzzz47" source="1046" target="112" cy:directed="1"/>
      <edge id="445988" label="zzz1000,zzzz151" source="1046" target="974" cy:directed="1"/>
      <edge id="445987" label="zzz1000,zzzz192" source="1046" target="933" cy:directed="1"/>
      <edge id="445986" label="zzz1000,zzzz146" source="1046" target="979" cy:directed="1"/>
      <edge id="445985" label="zzz1000,zzzz149" source="1046" target="976" cy:directed="1"/>
      <edge id="445984" label="zzz1000,zzzz816" source="1046" target="325" cy:directed="1"/>
      <edge id="445983" label="zzz1000,zzzz839" source="1046" target="302" cy:directed="1"/>
      <edge id="445982" label="zzz1000,zzzzz34" source="1046" target="121" cy:directed="1"/>
      <edge id="445981" label="zzz1000,zzzz124" source="1046" target="1001" cy:directed="1"/>
      <edge id="445980" label="zzz1000,zzzz634" source="1046" target="507" cy:directed="1"/>
      <edge id="445979" label="zzz1000,zzzz773" source="1046" target="368" cy:directed="1"/>
      <edge id="445978" label="zzz1000,zzzz782" source="1046" target="359" cy:directed="1"/>
      <edge id="445977" label="zzz1000,zzzz799" source="1046" target="342" cy:directed="1"/>
      <edge id="445976" label="zzz1000,zzzz830" source="1046" target="311" cy:directed="1"/>
      <edge id="445975" label="zzz1000,zzzzz15" source="1046" target="139" cy:directed="1"/>
      <edge id="445974" label="zzz1000,zzzzz17" source="1046" target="138" cy:directed="1"/>
      <edge id="445973" label="zzz1000,zzzzz29" source="1046" target="126" cy:directed="1"/>
      <edge id="445972" label="zzz1000,zzzzz48" source="1046" target="111" cy:directed="1"/>
      <edge id="445971" label="zzz1000,zzzzz74" source="1046" target="85" cy:directed="1"/>
      <edge id="445970" label="zzz1000,zzzz466" source="1046" target="674" cy:directed="1"/>
      <edge id="445969" label="zzz1000,zzzz483" source="1046" target="657" cy:directed="1"/>
      <edge id="445968" label="zzz1000,zzzz485" source="1046" target="655" cy:directed="1"/>
      <edge id="445967" label="zzz1000,zzzz641" source="1046" target="500" cy:directed="1"/>
      <edge id="445966" label="zzz1000,zzzz879" source="1046" target="262" cy:directed="1"/>
      <edge id="445965" label="zzz1000,zzzz929" source="1046" target="212" cy:directed="1"/>
      <edge id="445964" label="zzz1000,zzzz948" source="1046" target="193" cy:directed="1"/>
      <edge id="445963" label="zzz1000,zzzzz12" source="1046" target="142" cy:directed="1"/>
      <edge id="445962" label="zzz1000,zzzzz68" source="1046" target="91" cy:directed="1"/>
      <edge id="445961" label="zzz1000,zzzz122" source="1046" target="1003" cy:directed="1"/>
      <edge id="445960" label="zzz1000,zzzz123" source="1046" target="1002" cy:directed="1"/>
      <edge id="445959" label="zzz1000,zzzz157" source="1046" target="968" cy:directed="1"/>
      <edge id="445958" label="zzz1000,zzzz159" source="1046" target="966" cy:directed="1"/>
      <edge id="445957" label="zzz1000,zzzz551" source="1046" target="590" cy:directed="1"/>
      <edge id="445956" label="zzz1000,zzzz637" source="1046" target="504" cy:directed="1"/>
      <edge id="445955" label="zzz1000,zzzz656" source="1046" target="485" cy:directed="1"/>
      <edge id="445954" label="zzz1000,zzzz772" source="1046" target="369" cy:directed="1"/>
      <edge id="445953" label="zzz1000,zzzz847" source="1046" target="294" cy:directed="1"/>
      <edge id="445952" label="zzz1000,zzzz916" source="1046" target="225" cy:directed="1"/>
      <edge id="445951" label="zzz1000,zzzzz33" source="1046" target="122" cy:directed="1"/>
      <edge id="445950" label="zzz1000,zzzz102" source="1046" target="1023" cy:directed="1"/>
      <edge id="445949" label="zzz1000,zzzz164" source="1046" target="961" cy:directed="1"/>
      <edge id="445948" label="zzz1000,zzzz601" source="1046" target="540" cy:directed="1"/>
      <edge id="445947" label="zzz1000,zzzz623" source="1046" target="518" cy:directed="1"/>
      <edge id="445946" label="zzz1000,zzzz661" source="1046" target="480" cy:directed="1"/>
      <edge id="445945" label="zzz1000,zzzz963" source="1046" target="178" cy:directed="1"/>
      <edge id="445944" label="zzz1000,zzzzz18" source="1046" target="137" cy:directed="1"/>
      <edge id="445943" label="zzz1000,zzzzz28" source="1046" target="127" cy:directed="1"/>
      <edge id="445942" label="zzz1000,zzzz125" source="1046" target="1000" cy:directed="1"/>
      <edge id="445941" label="zzz1000,zzzz475" source="1046" target="665" cy:directed="1"/>
      <edge id="445940" label="zzz1000,zzzz866" source="1046" target="275" cy:directed="1"/>
      <edge id="445939" label="zzz1000,zzzzz27" source="1046" target="128" cy:directed="1"/>
      <edge id="445938" label="zzz1000,zzzzz73" source="1046" target="86" cy:directed="1"/>
      <edge id="445937" label="zzz1000,zzzz627" source="1046" target="514" cy:directed="1"/>
      <edge id="445936" label="zzz1000,zzzz629" source="1046" target="512" cy:directed="1"/>
      <edge id="445935" label="zzz1000,zzzz750" source="1046" target="391" cy:directed="1"/>
      <edge id="445934" label="zzz1000,zzzz838" source="1046" target="303" cy:directed="1"/>
      <edge id="445933" label="zzz1000,zzzz624" source="1046" target="517" cy:directed="1"/>
      <edge id="445932" label="zzz1000,zzzz121" source="1046" target="1004" cy:directed="1"/>
      <edge id="445931" label="zzz1000,zzzz690" source="1046" target="451" cy:directed="1"/>
      <edge id="445930" label="zzz1000,zzzz713" source="1046" target="428" cy:directed="1"/>
      <edge id="445929" label="zzz1000,zzzz928" source="1046" target="213" cy:directed="1"/>
      <edge id="445928" label="zzz1000,zzzz920" source="1046" target="221" cy:directed="1"/>
      <edge id="445927" label="zzz1000,zzzzz14" source="1046" target="140" cy:directed="1"/>
      <edge id="445926" label="zzz1000,zzzzz21" source="1046" target="134" cy:directed="1"/>
      <edge id="445925" label="zzz1000,zzzzz23" source="1046" target="132" cy:directed="1"/>
      <edge id="445924" label="zzz1000,zzzzz35" source="1046" target="120" cy:directed="1"/>
      <edge id="445923" label="zzz1000,zzzz120" source="1046" target="1005" cy:directed="1"/>
      <edge id="445922" label="zzz1000,zzzz471" source="1046" target="669" cy:directed="1"/>
      <edge id="445921" label="zzz1000,zzzz576" source="1046" target="565" cy:directed="1"/>
      <edge id="445920" label="zzz1000,zzzz831" source="1046" target="310" cy:directed="1"/>
      <edge id="445919" label="zzz1000,zzzz147" source="1046" target="978" cy:directed="1"/>
      <edge id="445918" label="zzz1000,zzzz488" source="1046" target="652" cy:directed="1"/>
      <edge id="445917" label="zzz1000,zzzz619" source="1046" target="522" cy:directed="1"/>
      <edge id="445916" label="zzz1000,zzzz955" source="1046" target="186" cy:directed="1"/>
      <edge id="445915" label="zzz1000,zzz1020" source="1046" target="1027" cy:directed="1"/>
      <edge id="445914" label="zzz1000,zzzz608" source="1046" target="533" cy:directed="1"/>
      <edge id="445913" label="zzz1000,zzzz745" source="1046" target="396" cy:directed="1"/>
      <edge id="445912" label="zzz1000,zzzzz70" source="1046" target="89" cy:directed="1"/>
      <edge id="445911" label="zzz1000,zzzz578" source="1046" target="563" cy:directed="1"/>
      <edge id="445910" label="zzz1000,zzzz448" source="1046" target="679" cy:directed="1"/>
      <edge id="445909" label="zzz1000,zzzz470" source="1046" target="670" cy:directed="1"/>
      <edge id="445908" label="zzz1000,zzz1019" source="1046" target="1028" cy:directed="1"/>
      <edge id="445907" label="zzz1000,zzzz126" source="1046" target="999" cy:directed="1"/>
      <edge id="445906" label="zzz1000,zzzz160" source="1046" target="965" cy:directed="1"/>
      <edge id="445905" label="zzz1000,zzzz717" source="1046" target="424" cy:directed="1"/>
      <edge id="445904" label="zzz1000,zzzz766" source="1046" target="375" cy:directed="1"/>
      <edge id="445903" label="zzz1000,zzzz660" source="1046" target="481" cy:directed="1"/>
      <edge id="445902" label="zzz1000,zzzz825" source="1046" target="316" cy:directed="1"/>
      <edge id="445901" label="zzz1000,zzzz962" source="1046" target="179" cy:directed="1"/>
      <edge id="445900" label="zzz1000,zzzz152" source="1046" target="973" cy:directed="1"/>
      <edge id="445899" label="zzz1000,zzzz700" source="1046" target="441" cy:directed="1"/>
      <edge id="445898" label="zzz1000,zzzz657" source="1046" target="484" cy:directed="1"/>
      <edge id="445897" label="zzz1000,zzzz832" source="1046" target="309" cy:directed="1"/>
      <edge id="445896" label="zzz1000,zzzz917" source="1046" target="224" cy:directed="1"/>
      <edge id="445895" label="zzz1000,zzzz964" source="1046" target="177" cy:directed="1"/>
      <edge id="445894" label="zzz1000,zzzz141" source="1046" target="984" cy:directed="1"/>
      <edge id="445893" label="zzz1000,zzzz502" source="1046" target="638" cy:directed="1"/>
      <edge id="445892" label="zzz1000,zzzz537" source="1046" target="604" cy:directed="1"/>
      <edge id="445891" label="zzz1000,zzzz738" source="1046" target="403" cy:directed="1"/>
      <edge id="445890" label="zzz1000,zzzz886" source="1046" target="255" cy:directed="1"/>
      <edge id="445889" label="zzz1000,zzzz640" source="1046" target="501" cy:directed="1"/>
      <edge id="445888" label="zzz1000,zzzzz56" source="1046" target="103" cy:directed="1"/>
      <edge id="445887" label="zzz1000,zzzz208" source="1046" target="917" cy:directed="1"/>
      <edge id="445886" label="zzz1000,zzzzz20" source="1046" target="135" cy:directed="1"/>
      <edge id="445885" label="zzz1000,zzzz131" source="1046" target="994" cy:directed="1"/>
      <edge id="445884" label="zzz1000,zzzz197" source="1046" target="928" cy:directed="1"/>
      <edge id="445883" label="zzz1000,zzzz771" source="1046" target="370" cy:directed="1"/>
      <edge id="445882" label="zzz1000,zzzz876" source="1046" target="265" cy:directed="1"/>
      <edge id="445881" label="zzz1000,zzzz808" source="1046" target="333" cy:directed="1"/>
      <edge id="445880" label="zzz1000,zzzzz52" source="1046" target="107" cy:directed="1"/>
      <edge id="445879" label="zzz1000,zzzz140" source="1046" target="985" cy:directed="1"/>
      <edge id="445878" label="zzz1000,zzzz628" source="1046" target="513" cy:directed="1"/>
      <edge id="445877" label="zzz1000,zzzz926" source="1046" target="215" cy:directed="1"/>
      <edge id="445876" label="zzz1000,zzzz927" source="1046" target="214" cy:directed="1"/>
      <edge id="445875" label="zzz1000,zzzz464" source="1046" target="676" cy:directed="1"/>
      <edge id="445874" label="zzz1000,zzzz888" source="1046" target="253" cy:directed="1"/>
      <edge id="445873" label="zzz1000,zzzz809" source="1046" target="332" cy:directed="1"/>
      <edge id="445872" label="zzz1000,zzzzz67" source="1046" target="92" cy:directed="1"/>
      <edge id="445871" label="zzz1000,zzzz154" source="1046" target="971" cy:directed="1"/>
      <edge id="445870" label="zzz1000,zzzz484" source="1046" target="656" cy:directed="1"/>
      <edge id="445869" label="zzz1000,zzzz840" source="1046" target="301" cy:directed="1"/>
      <edge id="445868" label="zzz1000,zzzzz76" source="1046" target="83" cy:directed="1"/>
      <edge id="445867" label="zzz1000,zzzzz75" source="1046" target="84" cy:directed="1"/>
      <edge id="445866" label="zzz1000,zzzzz80" source="1046" target="79" cy:directed="1"/>
      <edge id="445865" label="zzz1000,zzzz546" source="1046" target="595" cy:directed="1"/>
      <edge id="445864" label="zzz1000,zzzz698" source="1046" target="443" cy:directed="1"/>
      <edge id="445863" label="zzz1000,zzzz198" source="1046" target="927" cy:directed="1"/>
      <edge id="445862" label="zzz1000,zzzz134" source="1046" target="991" cy:directed="1"/>
      <edge id="445861" label="zzz1000,zzzz153" source="1046" target="972" cy:directed="1"/>
      <edge id="445860" label="zzz1000,zzzz594" source="1046" target="547" cy:directed="1"/>
      <edge id="445859" label="zzz1000,zzzz129" source="1046" target="996" cy:directed="1"/>
      <edge id="445858" label="zzz1000,zzzz512" source="1046" target="629" cy:directed="1"/>
      <edge id="445857" label="zzz1000,zzzz933" source="1046" target="208" cy:directed="1"/>
      <edge id="445856" label="zzz1000,zzzz792" source="1046" target="349" cy:directed="1"/>
      <edge id="445855" label="zzz1000,zzzz796" source="1046" target="345" cy:directed="1"/>
      <edge id="445854" label="zzz1000,zzzz995" source="1046" target="147" cy:directed="1"/>
      <edge id="445853" label="zzz1000,zzzz136" source="1046" target="989" cy:directed="1"/>
      <edge id="445852" label="zzz1000,zzzz905" source="1046" target="236" cy:directed="1"/>
      <edge id="445851" label="zzz1000,zzzz595" source="1046" target="546" cy:directed="1"/>
      <edge id="445850" label="zzz1000,zzzzz85" source="1046" target="74" cy:directed="1"/>
      <edge id="445849" label="zzz1000,zzzz501" source="1046" target="639" cy:directed="1"/>
      <edge id="445848" label="zzz1000,zzzz592" source="1046" target="549" cy:directed="1"/>
      <edge id="445847" label="zzz1000,zzzz133" source="1046" target="992" cy:directed="1"/>
      <edge id="445846" label="zzz1000,zzzz144" source="1046" target="981" cy:directed="1"/>
      <edge id="445845" label="zzz1000,zzzz139" source="1046" target="986" cy:directed="1"/>
      <edge id="445844" label="zzz1000,zzzz515" source="1046" target="626" cy:directed="1"/>
      <edge id="445843" label="zzz1000,zzzz143" source="1046" target="982" cy:directed="1"/>
      <edge id="445842" label="zzz1000,zzzzz83" source="1046" target="76" cy:directed="1"/>
      <edge id="445841" label="zzz1000,zzzz193" source="1046" target="932" cy:directed="1"/>
      <edge id="445840" label="zzz1000,zzzz474" source="1046" target="666" cy:directed="1"/>
      <edge id="445839" label="zzz1000,zzzz680" source="1046" target="461" cy:directed="1"/>
      <edge id="445838" label="zzz1000,zzzzz79" source="1046" target="80" cy:directed="1"/>
      <edge id="445837" label="zzz1000,zzzz116" source="1046" target="1009" cy:directed="1"/>
      <edge id="445836" label="zzz1000,zzzz138" source="1046" target="987" cy:directed="1"/>
      <edge id="445835" label="zzz1000,zzzz207" source="1046" target="918" cy:directed="1"/>
      <edge id="445834" label="zzz1000,zzzzz82" source="1046" target="77" cy:directed="1"/>
      <edge id="445833" label="zzz1000,zzzz996" source="1046" target="146" cy:directed="1"/>
      <edge id="445832" label="zzz1000,zzzz514" source="1046" target="627" cy:directed="1"/>
      <edge id="445831" label="zzz1000,zzzz511" source="1046" target="630" cy:directed="1"/>
      <edge id="445830" label="zzz1000,zzzzz89" source="1046" target="72" cy:directed="1"/>
      <edge id="445829" label="zzz1000,zzzz128" source="1046" target="997" cy:directed="1"/>
      <edge id="445828" label="zzz1000,zzzz135" source="1046" target="990" cy:directed="1"/>
      <edge id="445827" label="zzz1000,zzzz137" source="1046" target="988" cy:directed="1"/>
      <edge id="445826" label="zzz1000,zzzz753" source="1046" target="388" cy:directed="1"/>
      <edge id="445825" label="zzz1000,zzzz931" source="1046" target="210" cy:directed="1"/>
      <edge id="445824" label="zzz1000,zzzz961" source="1046" target="180" cy:directed="1"/>
      <edge id="445823" label="zzz1000,zzzzz13" source="1046" target="141" cy:directed="1"/>
      <edge id="445822" label="zzz1000,zzzz950" source="1046" target="191" cy:directed="1"/>
      <edge id="445821" label="zzz1000,zzzz130" source="1046" target="995" cy:directed="1"/>
      <edge id="445820" label="zzz1000,zzzz132" source="1046" target="993" cy:directed="1"/>
      <edge id="445819" label="zzz1000,zzzz938" source="1046" target="203" cy:directed="1"/>
      <edge id="445818" label="zzz1000,zzzz577" source="1046" target="564" cy:directed="1"/>
      <edge id="445817" label="zzz1000,zzzz817" source="1046" target="324" cy:directed="1"/>
      <edge id="445816" label="zzz1000,zzzz180" source="1046" target="945" cy:directed="1"/>
      <edge id="445815" label="zzz1000,zzzz204" source="1046" target="921" cy:directed="1"/>
      <edge id="445814" label="zzz1000,zzzz954" source="1046" target="187" cy:directed="1"/>
      <edge id="445813" label="zzz1000,zzzz476" source="1046" target="664" cy:directed="1"/>
      <edge id="445812" label="zzz1000,zzzz184" source="1046" target="941" cy:directed="1"/>
      <edge id="445811" label="zzz1000,zzzz904" source="1046" target="237" cy:directed="1"/>
      <edge id="445810" label="zzz1000,zzzz181" source="1046" target="944" cy:directed="1"/>
      <edge id="445809" label="zzz1000,zzzz908" source="1046" target="233" cy:directed="1"/>
      <edge id="445808" label="zzz1000,zzzzz50" source="1046" target="109" cy:directed="1"/>
      <edge id="445807" label="zzz1000,zzzz912" source="1046" target="229" cy:directed="1"/>
      <edge id="445806" label="zzz1000,zzzz477" source="1046" target="663" cy:directed="1"/>
      <edge id="445805" label="zzz1000,zzzz175" source="1046" target="950" cy:directed="1"/>
      <edge id="445804" label="zzz1000,zzzz186" source="1046" target="939" cy:directed="1"/>
      <edge id="445803" label="zzz1000,zzzz919" source="1046" target="222" cy:directed="1"/>
      <edge id="445802" label="zzz1000,zzzz174" source="1046" target="951" cy:directed="1"/>
      <edge id="445801" label="zzz1000,zzzz910" source="1046" target="231" cy:directed="1"/>
      <edge id="445800" label="zzz1000,zzzz951" source="1046" target="190" cy:directed="1"/>
      <edge id="445799" label="zzz1000,zzzz182" source="1046" target="943" cy:directed="1"/>
      <edge id="445798" label="zzz1000,zzzz196" source="1046" target="929" cy:directed="1"/>
      <edge id="445797" label="zzz1000,zzzz176" source="1046" target="949" cy:directed="1"/>
      <edge id="445796" label="zzz1000,zzzz170" source="1046" target="955" cy:directed="1"/>
      <edge id="445795" label="zzz1000,zzzz605" source="1046" target="536" cy:directed="1"/>
      <edge id="445794" label="zzz1000,zzzz633" source="1046" target="508" cy:directed="1"/>
      <edge id="445793" label="zzz1000,zzzz658" source="1046" target="483" cy:directed="1"/>
      <edge id="445792" label="zzz1000,zzzz911" source="1046" target="230" cy:directed="1"/>
      <edge id="445791" label="zzz1000,zzzz158" source="1046" target="967" cy:directed="1"/>
      <edge id="445790" label="zzz1000,zzzz171" source="1046" target="954" cy:directed="1"/>
      <edge id="445789" label="zzz1000,zzzz183" source="1046" target="942" cy:directed="1"/>
      <edge id="445788" label="zzz1000,zzzz907" source="1046" target="234" cy:directed="1"/>
      <edge id="445787" label="zzz1000,zzzz173" source="1046" target="952" cy:directed="1"/>
      <edge id="445786" label="zzz1000,zzzz185" source="1046" target="940" cy:directed="1"/>
      <edge id="445785" label="zzz1000,zzzz101" source="1046" target="1024" cy:directed="1"/>
      <edge id="445784" label="zzz1000,zzzz914" source="1046" target="227" cy:directed="1"/>
      <edge id="445783" label="zzz1000,zzzz188" source="1046" target="937" cy:directed="1"/>
      <edge id="445782" label="zzz1000,zzzz119" source="1046" target="1006" cy:directed="1"/>
      <edge id="445781" label="zzz1000,zzzz172" source="1046" target="953" cy:directed="1"/>
      <edge id="445780" label="zzz1000,zzzz435" source="1046" target="690" cy:directed="1"/>
      <edge id="445779" label="zzz1000,zzzz560" source="1046" target="581" cy:directed="1"/>
      <edge id="445778" label="zzz1000,zzzz952" source="1046" target="189" cy:directed="1"/>
      <edge id="445777" label="zzz1000,zzzz189" source="1046" target="936" cy:directed="1"/>
      <edge id="445776" label="zzz1000,zzzz438" source="1046" target="687" cy:directed="1"/>
      <edge id="445775" label="zzz1000,zzzz482" source="1046" target="658" cy:directed="1"/>
      <edge id="445774" label="zzz1000,zzzz416" source="1046" target="709" cy:directed="1"/>
      <edge id="445773" label="zzz1000,zzzz436" source="1046" target="689" cy:directed="1"/>
      <edge id="445772" label="zzz1000,zzzz187" source="1046" target="938" cy:directed="1"/>
      <edge id="445771" label="zzz1000,zzzz419" source="1046" target="706" cy:directed="1"/>
      <edge id="445770" label="zzz1000,zzzz415" source="1046" target="710" cy:directed="1"/>
      <edge id="445769" label="zzz1000,zzzz432" source="1046" target="693" cy:directed="1"/>
      <edge id="445768" label="zzz1000,zzzz145" source="1046" target="980" cy:directed="1"/>
      <edge id="445767" label="zzz1000,zzzz420" source="1046" target="705" cy:directed="1"/>
      <edge id="445766" label="zzz1000,zzzz425" source="1046" target="700" cy:directed="1"/>
      <edge id="445765" label="zzz1000,zzzz427" source="1046" target="698" cy:directed="1"/>
      <edge id="445764" label="zzz1000,zzzz412" source="1046" target="713" cy:directed="1"/>
      <edge id="445763" label="zzz1000,zzzz437" source="1046" target="688" cy:directed="1"/>
      <edge id="445762" label="zzz1000,zzzz439" source="1046" target="686" cy:directed="1"/>
      <edge id="445761" label="zzz1000,zzzz508" source="1046" target="633" cy:directed="1"/>
      <edge id="445760" label="zzz1000,zzzz410" source="1046" target="715" cy:directed="1"/>
      <edge id="445759" label="zzz1000,zzzz422" source="1046" target="703" cy:directed="1"/>
      <edge id="445758" label="zzz1000,zzzz442" source="1046" target="683" cy:directed="1"/>
      <edge id="445757" label="zzz1000,zzzz506" source="1046" target="635" cy:directed="1"/>
      <edge id="445756" label="zzz1000,zzzz433" source="1046" target="692" cy:directed="1"/>
      <edge id="445755" label="zzz1000,zzzz407" source="1046" target="718" cy:directed="1"/>
      <edge id="445754" label="zzz1000,zzzz429" source="1046" target="696" cy:directed="1"/>
      <edge id="445753" label="zzz1000,zzzz613" source="1046" target="528" cy:directed="1"/>
      <edge id="445752" label="zzz1000,zzzz364" source="1046" target="761" cy:directed="1"/>
      <edge id="445751" label="zzz1000,zzzz418" source="1046" target="707" cy:directed="1"/>
      <edge id="445750" label="zzz1000,zzzz221" source="1046" target="904" cy:directed="1"/>
      <edge id="445749" label="zzz1000,zzzz414" source="1046" target="711" cy:directed="1"/>
      <edge id="445748" label="zzz1000,zzzz229" source="1046" target="896" cy:directed="1"/>
      <edge id="445747" label="zzz1000,zzzz428" source="1046" target="697" cy:directed="1"/>
      <edge id="445746" label="zzz1000,zzzz430" source="1046" target="695" cy:directed="1"/>
      <edge id="445745" label="zzz1000,zzzz434" source="1046" target="691" cy:directed="1"/>
      <edge id="445744" label="zzz1000,zzzz547" source="1046" target="594" cy:directed="1"/>
      <edge id="445743" label="zzz1000,zzzz245" source="1046" target="880" cy:directed="1"/>
      <edge id="445742" label="zzz1000,zzzz391" source="1046" target="734" cy:directed="1"/>
      <edge id="445741" label="zzz1000,zzzz374" source="1046" target="751" cy:directed="1"/>
      <edge id="445740" label="zzz1000,zzzz431" source="1046" target="694" cy:directed="1"/>
      <edge id="445739" label="zzz1000,zzzz379" source="1046" target="746" cy:directed="1"/>
      <edge id="445738" label="zzz1000,zzzz440" source="1046" target="685" cy:directed="1"/>
      <edge id="445737" label="zzz1000,zzzz341" source="1046" target="784" cy:directed="1"/>
      <edge id="445736" label="zzz1000,zzzz381" source="1046" target="744" cy:directed="1"/>
      <edge id="445735" label="zzz1000,zzzz392" source="1046" target="733" cy:directed="1"/>
      <edge id="445734" label="zzz1000,zzzz426" source="1046" target="699" cy:directed="1"/>
      <edge id="445733" label="zzz1000,zzzz408" source="1046" target="717" cy:directed="1"/>
      <edge id="445732" label="zzz1000,zzzz306" source="1046" target="819" cy:directed="1"/>
      <edge id="445731" label="zzz1000,zzzz409" source="1046" target="716" cy:directed="1"/>
      <edge id="445730" label="zzz1000,zzzz177" source="1046" target="948" cy:directed="1"/>
      <edge id="445729" label="zzz1000,zzzz353" source="1046" target="772" cy:directed="1"/>
      <edge id="445728" label="zzz1000,zzzz489" source="1046" target="651" cy:directed="1"/>
      <edge id="445727" label="zzz1000,zzzz250" source="1046" target="875" cy:directed="1"/>
      <edge id="445726" label="zzz1000,zzzz307" source="1046" target="818" cy:directed="1"/>
      <edge id="445725" label="zzz1000,zzzz331" source="1046" target="794" cy:directed="1"/>
      <edge id="445724" label="zzz1000,zzzz378" source="1046" target="747" cy:directed="1"/>
      <edge id="445723" label="zzz1000,zzzz382" source="1046" target="743" cy:directed="1"/>
      <edge id="445722" label="zzz1000,zzzz389" source="1046" target="736" cy:directed="1"/>
      <edge id="445721" label="zzz1000,zzzz393" source="1046" target="732" cy:directed="1"/>
      <edge id="445720" label="zzz1000,zzzz411" source="1046" target="714" cy:directed="1"/>
      <edge id="445719" label="zzz1000,zzzz424" source="1046" target="701" cy:directed="1"/>
      <edge id="445718" label="zzz1000,zzzz377" source="1046" target="748" cy:directed="1"/>
      <edge id="445717" label="zzz1000,zzzz390" source="1046" target="735" cy:directed="1"/>
      <edge id="445716" label="zzz1000,zzzz413" source="1046" target="712" cy:directed="1"/>
      <edge id="445715" label="zzz1000,zzzz375" source="1046" target="750" cy:directed="1"/>
      <edge id="445714" label="zzz1000,zzzz993" source="1046" target="149" cy:directed="1"/>
      <edge id="445713" label="zzz1000,zzzz237" source="1046" target="888" cy:directed="1"/>
      <edge id="445712" label="zzz1000,zzzz241" source="1046" target="884" cy:directed="1"/>
      <edge id="445711" label="zzz1000,zzzz290" source="1046" target="835" cy:directed="1"/>
      <edge id="445710" label="zzz1000,zzzz304" source="1046" target="821" cy:directed="1"/>
      <edge id="445709" label="zzz1000,zzzz336" source="1046" target="789" cy:directed="1"/>
      <edge id="445708" label="zzz1000,zzzz370" source="1046" target="755" cy:directed="1"/>
      <edge id="445707" label="zzz1000,zzzz383" source="1046" target="742" cy:directed="1"/>
      <edge id="445706" label="zzz1000,zzzz949" source="1046" target="192" cy:directed="1"/>
      <edge id="445705" label="zzz1000,zzzz262" source="1046" target="863" cy:directed="1"/>
      <edge id="445704" label="zzz1000,zzzz310" source="1046" target="815" cy:directed="1"/>
      <edge id="445703" label="zzz1000,zzzz322" source="1046" target="803" cy:directed="1"/>
      <edge id="445702" label="zzz1000,zzzz380" source="1046" target="745" cy:directed="1"/>
      <edge id="445701" label="zzz1000,zzzz441" source="1046" target="684" cy:directed="1"/>
      <edge id="445700" label="zzz1000,zzzz317" source="1046" target="808" cy:directed="1"/>
      <edge id="445699" label="zzz1000,zzzz328" source="1046" target="797" cy:directed="1"/>
      <edge id="445698" label="zzz1000,zzzz349" source="1046" target="776" cy:directed="1"/>
      <edge id="445697" label="zzz1000,zzzz329" source="1046" target="796" cy:directed="1"/>
      <edge id="445696" label="zzz1000,zzzz339" source="1046" target="786" cy:directed="1"/>
      <edge id="445695" label="zzz1000,zzzz940" source="1046" target="201" cy:directed="1"/>
      <edge id="445694" label="zzz1000,zzzzz42" source="1046" target="113" cy:directed="1"/>
      <edge id="445693" label="zzz1000,zzzz212" source="1046" target="913" cy:directed="1"/>
      <edge id="445692" label="zzz1000,zzzz217" source="1046" target="908" cy:directed="1"/>
      <edge id="445691" label="zzz1000,zzzz252" source="1046" target="873" cy:directed="1"/>
      <edge id="445690" label="zzz1000,zzzz278" source="1046" target="847" cy:directed="1"/>
      <edge id="445689" label="zzz1000,zzzz283" source="1046" target="842" cy:directed="1"/>
      <edge id="445688" label="zzz1000,zzzz301" source="1046" target="824" cy:directed="1"/>
      <edge id="445687" label="zzz1000,zzzz303" source="1046" target="822" cy:directed="1"/>
      <edge id="445686" label="zzz1000,zzzz323" source="1046" target="802" cy:directed="1"/>
      <edge id="445685" label="zzz1000,zzzz363" source="1046" target="762" cy:directed="1"/>
      <edge id="445684" label="zzz1000,zzzz369" source="1046" target="756" cy:directed="1"/>
      <edge id="445683" label="zzz1000,zzzzz90" source="1046" target="71" cy:directed="1"/>
      <edge id="445682" label="zzz1000,zzzz235" source="1046" target="890" cy:directed="1"/>
      <edge id="445681" label="zzz1000,zzzz238" source="1046" target="887" cy:directed="1"/>
      <edge id="445680" label="zzz1000,zzzz248" source="1046" target="877" cy:directed="1"/>
      <edge id="445679" label="zzz1000,zzzz279" source="1046" target="846" cy:directed="1"/>
      <edge id="445678" label="zzz1000,zzzz299" source="1046" target="826" cy:directed="1"/>
      <edge id="445677" label="zzz1000,zzzz319" source="1046" target="806" cy:directed="1"/>
      <edge id="445676" label="zzz1000,zzzz335" source="1046" target="790" cy:directed="1"/>
      <edge id="445675" label="zzz1000,zzzz371" source="1046" target="754" cy:directed="1"/>
      <edge id="445674" label="zzz1000,zzzz417" source="1046" target="708" cy:directed="1"/>
      <edge id="445673" label="zzz1000,zzzz959" source="1046" target="182" cy:directed="1"/>
      <edge id="445672" label="zzz1000,zzzz226" source="1046" target="899" cy:directed="1"/>
      <edge id="445671" label="zzz1000,zzzz244" source="1046" target="881" cy:directed="1"/>
      <edge id="445670" label="zzz1000,zzzz321" source="1046" target="804" cy:directed="1"/>
      <edge id="445669" label="zzz1000,zzzz347" source="1046" target="778" cy:directed="1"/>
      <edge id="445668" label="zzz1000,zzzz932" source="1046" target="209" cy:directed="1"/>
      <edge id="445667" label="zzz1000,zzzz261" source="1046" target="864" cy:directed="1"/>
      <edge id="445666" label="zzz1000,zzzz270" source="1046" target="855" cy:directed="1"/>
      <edge id="445665" label="zzz1000,zzzz356" source="1046" target="769" cy:directed="1"/>
      <edge id="445664" label="zzz1000,zzzz957" source="1046" target="184" cy:directed="1"/>
      <edge id="445663" label="zzz1000,zzzz224" source="1046" target="901" cy:directed="1"/>
      <edge id="445662" label="zzz1000,zzzz259" source="1046" target="866" cy:directed="1"/>
      <edge id="445661" label="zzz1000,zzzz266" source="1046" target="859" cy:directed="1"/>
      <edge id="445660" label="zzz1000,zzzz333" source="1046" target="792" cy:directed="1"/>
      <edge id="445659" label="zzz1000,zzzz357" source="1046" target="768" cy:directed="1"/>
      <edge id="445658" label="zzz1000,zzzz384" source="1046" target="741" cy:directed="1"/>
      <edge id="445657" label="zzz1000,zzzz444" source="1046" target="681" cy:directed="1"/>
      <edge id="445656" label="zzz1000,zzzz232" source="1046" target="893" cy:directed="1"/>
      <edge id="445655" label="zzz1000,zzzz239" source="1046" target="886" cy:directed="1"/>
      <edge id="445654" label="zzz1000,zzzz254" source="1046" target="871" cy:directed="1"/>
      <edge id="445653" label="zzz1000,zzzz286" source="1046" target="839" cy:directed="1"/>
      <edge id="445652" label="zzz1000,zzzz372" source="1046" target="753" cy:directed="1"/>
      <edge id="445651" label="zzz1000,zzzz179" source="1046" target="946" cy:directed="1"/>
      <edge id="445650" label="zzz1000,zzzz243" source="1046" target="882" cy:directed="1"/>
      <edge id="445649" label="zzz1000,zzzz276" source="1046" target="849" cy:directed="1"/>
      <edge id="445648" label="zzz1000,zzzz337" source="1046" target="788" cy:directed="1"/>
      <edge id="445647" label="zzz1000,zzzz340" source="1046" target="785" cy:directed="1"/>
      <edge id="445646" label="zzz1000,zzzz387" source="1046" target="738" cy:directed="1"/>
      <edge id="445645" label="zzz1000,zzzz925" source="1046" target="216" cy:directed="1"/>
      <edge id="445644" label="zzz1000,zzzz332" source="1046" target="793" cy:directed="1"/>
      <edge id="445643" label="zzz1000,zzzz366" source="1046" target="759" cy:directed="1"/>
      <edge id="445642" label="zzz1000,zzzz388" source="1046" target="737" cy:directed="1"/>
      <edge id="445641" label="zzz1000,zzzz117" source="1046" target="1008" cy:directed="1"/>
      <edge id="445640" label="zzz1000,zzzz311" source="1046" target="814" cy:directed="1"/>
      <edge id="445639" label="zzz1000,zzzz423" source="1046" target="702" cy:directed="1"/>
      <edge id="445638" label="zzz1000,zzzz211" source="1046" target="914" cy:directed="1"/>
      <edge id="445637" label="zzz1000,zzzz223" source="1046" target="902" cy:directed="1"/>
      <edge id="445636" label="zzz1000,zzzz281" source="1046" target="844" cy:directed="1"/>
      <edge id="445635" label="zzz1000,zzzz314" source="1046" target="811" cy:directed="1"/>
      <edge id="445634" label="zzz1000,zzzz355" source="1046" target="770" cy:directed="1"/>
      <edge id="445633" label="zzz1000,zzzz487" source="1046" target="653" cy:directed="1"/>
      <edge id="445632" label="zzz1000,zzzz233" source="1046" target="892" cy:directed="1"/>
      <edge id="445631" label="zzz1000,zzzz251" source="1046" target="874" cy:directed="1"/>
      <edge id="445630" label="zzz1000,zzzz255" source="1046" target="870" cy:directed="1"/>
      <edge id="445629" label="zzz1000,zzzz271" source="1046" target="854" cy:directed="1"/>
      <edge id="445628" label="zzz1000,zzzz302" source="1046" target="823" cy:directed="1"/>
      <edge id="445627" label="zzz1000,zzzz325" source="1046" target="800" cy:directed="1"/>
      <edge id="445626" label="zzz1000,zzzz330" source="1046" target="795" cy:directed="1"/>
      <edge id="445625" label="zzz1000,zzzz345" source="1046" target="780" cy:directed="1"/>
      <edge id="445624" label="zzz1000,zzzz395" source="1046" target="730" cy:directed="1"/>
      <edge id="445623" label="zzz1000,zzzz242" source="1046" target="883" cy:directed="1"/>
      <edge id="445622" label="zzz1000,zzzz280" source="1046" target="845" cy:directed="1"/>
      <edge id="445621" label="zzz1000,zzzz287" source="1046" target="838" cy:directed="1"/>
      <edge id="445620" label="zzz1000,zzzz344" source="1046" target="781" cy:directed="1"/>
      <edge id="445619" label="zzz1000,zzzz362" source="1046" target="763" cy:directed="1"/>
      <edge id="445618" label="zzz1000,zzzz443" source="1046" target="682" cy:directed="1"/>
      <edge id="445617" label="zzz1000,zzzz209" source="1046" target="916" cy:directed="1"/>
      <edge id="445616" label="zzz1000,zzzz351" source="1046" target="774" cy:directed="1"/>
      <edge id="445615" label="zzz1000,zzzz361" source="1046" target="764" cy:directed="1"/>
      <edge id="445614" label="zzz1000,zzzz939" source="1046" target="202" cy:directed="1"/>
      <edge id="445613" label="zzz1000,zzzz227" source="1046" target="898" cy:directed="1"/>
      <edge id="445612" label="zzz1000,zzzz292" source="1046" target="833" cy:directed="1"/>
      <edge id="445611" label="zzz1000,zzzz300" source="1046" target="825" cy:directed="1"/>
      <edge id="445610" label="zzz1000,zzzz342" source="1046" target="783" cy:directed="1"/>
      <edge id="445609" label="zzz1000,zzzz352" source="1046" target="773" cy:directed="1"/>
      <edge id="445608" label="zzz1000,zzzz354" source="1046" target="771" cy:directed="1"/>
      <edge id="445607" label="zzz1000,zzzz386" source="1046" target="739" cy:directed="1"/>
      <edge id="445606" label="zzz1000,zzzzz91" source="1046" target="70" cy:directed="1"/>
      <edge id="445605" label="zzz1000,zzzz246" source="1046" target="879" cy:directed="1"/>
      <edge id="445604" label="zzz1000,zzzz274" source="1046" target="851" cy:directed="1"/>
      <edge id="445603" label="zzz1000,zzzz298" source="1046" target="827" cy:directed="1"/>
      <edge id="445602" label="zzz1000,zzzz338" source="1046" target="787" cy:directed="1"/>
      <edge id="445601" label="zzz1000,zzzz346" source="1046" target="779" cy:directed="1"/>
      <edge id="445600" label="zzz1000,zzzz368" source="1046" target="757" cy:directed="1"/>
      <edge id="445599" label="zzz1000,zzzz218" source="1046" target="907" cy:directed="1"/>
      <edge id="445598" label="zzz1000,zzzz225" source="1046" target="900" cy:directed="1"/>
      <edge id="445597" label="zzz1000,zzzz231" source="1046" target="894" cy:directed="1"/>
      <edge id="445596" label="zzz1000,zzzz253" source="1046" target="872" cy:directed="1"/>
      <edge id="445595" label="zzz1000,zzzz289" source="1046" target="836" cy:directed="1"/>
      <edge id="445594" label="zzz1000,zzzz367" source="1046" target="758" cy:directed="1"/>
      <edge id="445593" label="zzz1000,zzzz213" source="1046" target="912" cy:directed="1"/>
      <edge id="445592" label="zzz1000,zzzz282" source="1046" target="843" cy:directed="1"/>
      <edge id="445591" label="zzz1000,zzzz385" source="1046" target="740" cy:directed="1"/>
      <edge id="445590" label="zzz1000,zzzz942" source="1046" target="199" cy:directed="1"/>
      <edge id="445589" label="zzz1000,zzzz222" source="1046" target="903" cy:directed="1"/>
      <edge id="445588" label="zzz1000,zzzz247" source="1046" target="878" cy:directed="1"/>
      <edge id="445587" label="zzz1000,zzzz249" source="1046" target="876" cy:directed="1"/>
      <edge id="445586" label="zzz1000,zzzz264" source="1046" target="861" cy:directed="1"/>
      <edge id="445585" label="zzz1000,zzzz269" source="1046" target="856" cy:directed="1"/>
      <edge id="445584" label="zzz1000,zzzz308" source="1046" target="817" cy:directed="1"/>
      <edge id="445583" label="zzz1000,zzzz350" source="1046" target="775" cy:directed="1"/>
      <edge id="445582" label="zzz1000,zzzz228" source="1046" target="897" cy:directed="1"/>
      <edge id="445581" label="zzz1000,zzzz230" source="1046" target="895" cy:directed="1"/>
      <edge id="445580" label="zzz1000,zzzz315" source="1046" target="810" cy:directed="1"/>
      <edge id="445579" label="zzz1000,zzzz358" source="1046" target="767" cy:directed="1"/>
      <edge id="445578" label="zzz1000,zzzz376" source="1046" target="749" cy:directed="1"/>
      <edge id="445577" label="zzz1000,zzzz402" source="1046" target="723" cy:directed="1"/>
      <edge id="445576" label="zzz1000,zzz1011" source="1046" target="1035" cy:directed="1"/>
      <edge id="445575" label="zzz1000,zzzz360" source="1046" target="765" cy:directed="1"/>
      <edge id="445574" label="zzz1000,zzzz191" source="1046" target="934" cy:directed="1"/>
      <edge id="445573" label="zzz1000,zzzz216" source="1046" target="909" cy:directed="1"/>
      <edge id="445572" label="zzz1000,zzzz219" source="1046" target="906" cy:directed="1"/>
      <edge id="445571" label="zzz1000,zzzz265" source="1046" target="860" cy:directed="1"/>
      <edge id="445570" label="zzz1000,zzzz275" source="1046" target="850" cy:directed="1"/>
      <edge id="445569" label="zzz1000,zzzz295" source="1046" target="830" cy:directed="1"/>
      <edge id="445568" label="zzz1000,zzzz348" source="1046" target="777" cy:directed="1"/>
      <edge id="445567" label="zzz1000,zzzz359" source="1046" target="766" cy:directed="1"/>
      <edge id="445566" label="zzz1000,zzzz401" source="1046" target="724" cy:directed="1"/>
      <edge id="445565" label="zzz1000,zzzz118" source="1046" target="1007" cy:directed="1"/>
      <edge id="445564" label="zzz1000,zzzz215" source="1046" target="910" cy:directed="1"/>
      <edge id="445563" label="zzz1000,zzzz220" source="1046" target="905" cy:directed="1"/>
      <edge id="445562" label="zzz1000,zzzz234" source="1046" target="891" cy:directed="1"/>
      <edge id="445561" label="zzz1000,zzzz296" source="1046" target="829" cy:directed="1"/>
      <edge id="445560" label="zzz1000,zzzz334" source="1046" target="791" cy:directed="1"/>
      <edge id="445559" label="zzz1000,zzzz210" source="1046" target="915" cy:directed="1"/>
      <edge id="445558" label="zzz1000,zzzz365" source="1046" target="760" cy:directed="1"/>
      <edge id="445557" label="zzz1000,zzzz394" source="1046" target="731" cy:directed="1"/>
      <edge id="445556" label="zzz1000,zzz1012" source="1046" target="1034" cy:directed="1"/>
      <edge id="445555" label="zzz1000,zzzz284" source="1046" target="841" cy:directed="1"/>
      <edge id="445554" label="zzz1000,zzzz236" source="1046" target="889" cy:directed="1"/>
      <edge id="445553" label="zzz1000,zzzz258" source="1046" target="867" cy:directed="1"/>
      <edge id="445552" label="zzz1000,zzzz327" source="1046" target="798" cy:directed="1"/>
      <edge id="445551" label="zzz1000,zzzz343" source="1046" target="782" cy:directed="1"/>
      <edge id="445550" label="zzz1000,zzzz263" source="1046" target="862" cy:directed="1"/>
      <edge id="445549" label="zzz1000,zzzz291" source="1046" target="834" cy:directed="1"/>
      <edge id="445548" label="zzz1000,zzzz324" source="1046" target="801" cy:directed="1"/>
      <edge id="445547" label="zzz1000,zzzz288" source="1046" target="837" cy:directed="1"/>
      <edge id="445546" label="zzz1000,zzzz312" source="1046" target="813" cy:directed="1"/>
      <edge id="445545" label="zzz1000,zzzz309" source="1046" target="816" cy:directed="1"/>
      <edge id="445544" label="zzz1000,zzzz373" source="1046" target="752" cy:directed="1"/>
      <edge id="445543" label="zzz1000,zzzz214" source="1046" target="911" cy:directed="1"/>
      <edge id="445542" label="zzz1000,zzzz421" source="1046" target="704" cy:directed="1"/>
      <edge id="445541" label="zzz1000,zzzz277" source="1046" target="848" cy:directed="1"/>
      <edge id="445540" label="zzz1000,zzzzz77" source="1046" target="82" cy:directed="1"/>
      <edge id="445539" label="zzz1000,zzzz260" source="1046" target="865" cy:directed="1"/>
      <edge id="445538" label="zzz1000,zzzz272" source="1046" target="853" cy:directed="1"/>
      <edge id="445537" label="zzz1000,zzzz273" source="1046" target="852" cy:directed="1"/>
      <edge id="445536" label="zzz1000,zzzz297" source="1046" target="828" cy:directed="1"/>
      <edge id="445535" label="zzz1000,zzzz305" source="1046" target="820" cy:directed="1"/>
      <edge id="445534" label="zzz1000,zzzz549" source="1046" target="592" cy:directed="1"/>
      <edge id="445533" label="zzz1000,zzzz257" source="1046" target="868" cy:directed="1"/>
      <edge id="445532" label="zzz1000,zzzz293" source="1046" target="832" cy:directed="1"/>
      <edge id="445531" label="zzz1000,zzzz313" source="1046" target="812" cy:directed="1"/>
      <edge id="445530" label="zzz1000,zzzz240" source="1046" target="885" cy:directed="1"/>
      <edge id="445529" label="zzz1000,zzzz318" source="1046" target="807" cy:directed="1"/>
      <edge id="445528" label="zzz1000,zzzz320" source="1046" target="805" cy:directed="1"/>
      <edge id="445527" label="zzz1000,zzzz268" source="1046" target="857" cy:directed="1"/>
      <edge id="445526" label="zzz1000,zzzz285" source="1046" target="840" cy:directed="1"/>
      <edge id="445525" label="zzz1000,zzzz316" source="1046" target="809" cy:directed="1"/>
      <edge id="445524" label="zzz1000,zzzz396" source="1046" target="729" cy:directed="1"/>
      <edge id="445523" label="zzz1000,zzzz498" source="1046" target="642" cy:directed="1"/>
      <edge id="445522" label="zzz1000,zzzz994" source="1046" target="148" cy:directed="1"/>
      <edge id="445521" label="zzz1000,zzzz400" source="1046" target="725" cy:directed="1"/>
      <edge id="445520" label="zzz1000,zzzz953" source="1046" target="188" cy:directed="1"/>
      <edge id="445519" label="zzz1000,zzzz294" source="1046" target="831" cy:directed="1"/>
      <edge id="445518" label="zzz1000,zzzz496" source="1046" target="644" cy:directed="1"/>
      <edge id="445517" label="zzz1000,zzzz397" source="1046" target="728" cy:directed="1"/>
      <edge id="445516" label="zzz1000,zzzz256" source="1046" target="869" cy:directed="1"/>
      <edge id="445515" label="zzz1000,zzzz478" source="1046" target="662" cy:directed="1"/>
      <edge id="445514" label="zzz1000,zzzz497" source="1046" target="643" cy:directed="1"/>
      <edge id="445513" label="zzz1000,zzzz326" source="1046" target="799" cy:directed="1"/>
      <edge id="445512" label="zzz1000,zzzz267" source="1046" target="858" cy:directed="1"/>
      <edge id="445511" label="zzz1000,zzzzz49" source="1046" target="110" cy:directed="1"/>
      <edge id="445510" label="zzz1000,zzzz190" source="1046" target="935" cy:directed="1"/>
      <edge id="445509" label="zzz1000,zzzz999" source="1046" target="143" cy:directed="1"/>
      <edge id="445508" label="zzz1000,zzzz510" source="1046" target="631" cy:directed="1"/>
      <edge id="445507" label="zzz1000,zzzz941" source="1046" target="200" cy:directed="1"/>
      <edge id="445506" label="zzz1000,zzzz399" source="1046" target="726" cy:directed="1"/>
      <edge id="445505" label="zzz1000,zzzz494" source="1046" target="646" cy:directed="1"/>
      <edge id="445504" label="zzz1000,zzzz937" source="1046" target="204" cy:directed="1"/>
      <edge id="445503" label="zzz1000,zzzz481" source="1046" target="659" cy:directed="1"/>
      <edge id="445502" label="zzz1000,zzzz398" source="1046" target="727" cy:directed="1"/>
      <edge id="445501" label="zzz1000,zzzz479" source="1046" target="661" cy:directed="1"/>
      <edge id="445500" label="zzz1000,zzzz934" source="1046" target="207" cy:directed="1"/>
      <edge id="445499" label="zzz1000,zzzz495" source="1046" target="645" cy:directed="1"/>
      <edge id="445498" label="zzz1000,zzzz178" source="1046" target="947" cy:directed="1"/>
      <edge id="445497" label="zzz1000,zzzz936" source="1046" target="205" cy:directed="1"/>
      <edge id="445496" label="zzz1000,zzzz893" source="1046" target="248" cy:directed="1"/>
      <edge id="445495" label="zzz1000,zzzzz51" source="1046" target="108" cy:directed="1"/>
      <edge id="445494" label="zzz1000,zzzz543" source="1046" target="598" cy:directed="1"/>
      <edge id="445493" label="zzz1000,zzzz509" source="1046" target="632" cy:directed="1"/>
      <edge id="445492" label="zzz1000,zzzz542" source="1046" target="599" cy:directed="1"/>
      <edge id="445491" label="zzz1000,zzzz525" source="1046" target="616" cy:directed="1"/>
      <edge id="445490" label="zzz1000,zzzzz81" source="1046" target="78" cy:directed="1"/>
      <edge id="445489" label="zzz1000,zzzz524" source="1046" target="617" cy:directed="1"/>
      <edge id="445488" label="zzz1000,zzzz531" source="1046" target="610" cy:directed="1"/>
      <edge id="445487" label="zzz1000,zzzz935" source="1046" target="206" cy:directed="1"/>
      <edge id="445486" label="zzz1000,zzzzz38" source="1046" target="117" cy:directed="1"/>
      <edge id="445485" label="zzz1000,zzzz535" source="1046" target="606" cy:directed="1"/>
      <edge id="445484" label="zzz1000,zzzz447" source="1046" target="680" cy:directed="1"/>
      <edge id="445483" label="zzz1000,zzzz541" source="1046" target="600" cy:directed="1"/>
      <edge id="445482" label="zzz1000,zzzz505" source="1046" target="636" cy:directed="1"/>
      <edge id="445481" label="zzz1000,zzzz529" source="1046" target="612" cy:directed="1"/>
      <edge id="445480" label="zzz1000,zzzz539" source="1046" target="602" cy:directed="1"/>
      <edge id="445479" label="zzz1000,zzzz480" source="1046" target="660" cy:directed="1"/>
      <edge id="445478" label="zzz1000,zzzz528" source="1046" target="613" cy:directed="1"/>
      <edge id="445477" label="zzz1000,zzzz897" source="1046" target="244" cy:directed="1"/>
      <edge id="445476" label="zzz1000,zzzz943" source="1046" target="198" cy:directed="1"/>
      <edge id="445475" label="zzz1000,zzzz534" source="1046" target="607" cy:directed="1"/>
      <edge id="445474" label="zzz1000,zzzz536" source="1046" target="605" cy:directed="1"/>
      <edge id="445473" label="zzz1000,zzzz491" source="1046" target="649" cy:directed="1"/>
      <edge id="445472" label="zzz1000,zzzz538" source="1046" target="603" cy:directed="1"/>
      <edge id="445471" label="zzz1000,zzzz544" source="1046" target="597" cy:directed="1"/>
      <edge id="445470" label="zzz1000,zzzz895" source="1046" target="246" cy:directed="1"/>
      <edge id="445469" label="zzz1000,zzzz533" source="1046" target="608" cy:directed="1"/>
      <edge id="445468" label="zzz1000,zzzz530" source="1046" target="611" cy:directed="1"/>
      <edge id="445467" label="zzz1000,zzzz540" source="1046" target="601" cy:directed="1"/>
      <edge id="445466" label="zzz1000,zzzz892" source="1046" target="249" cy:directed="1"/>
      <edge id="445465" label="zzz1000,zzzz532" source="1046" target="609" cy:directed="1"/>
      <edge id="445464" label="zzz1001,zzzz988" source="1045" target="154" cy:directed="1"/>
      <edge id="445463" label="zzz1001,zzzzz39" source="1045" target="116" cy:directed="1"/>
      <edge id="445462" label="zzz1001,zzzz984" source="1045" target="158" cy:directed="1"/>
      <edge id="445461" label="zzz1001,zzzz998" source="1045" target="144" cy:directed="1"/>
      <edge id="445460" label="zzz1001,zzz1009" source="1045" target="1037" cy:directed="1"/>
      <edge id="445459" label="zzz1001,zzzz967" source="1045" target="175" cy:directed="1"/>
      <edge id="445458" label="zzz1001,zzzz989" source="1045" target="153" cy:directed="1"/>
      <edge id="445457" label="zzz1001,zzz1004" source="1045" target="1042" cy:directed="1"/>
      <edge id="445456" label="zzz1001,zzz1008" source="1045" target="1038" cy:directed="1"/>
      <edge id="445455" label="zzz1001,zzzz980" source="1045" target="162" cy:directed="1"/>
      <edge id="445454" label="zzz1001,zzzz977" source="1045" target="165" cy:directed="1"/>
      <edge id="445453" label="zzz1001,zzz1005" source="1045" target="1041" cy:directed="1"/>
      <edge id="445452" label="zzz1001,zzz1007" source="1045" target="1039" cy:directed="1"/>
      <edge id="445451" label="zzz1001,zzzz990" source="1045" target="152" cy:directed="1"/>
      <edge id="445450" label="zzz1001,zzzz968" source="1045" target="174" cy:directed="1"/>
      <edge id="445449" label="zzz1001,zzzz404" source="1045" target="721" cy:directed="1"/>
      <edge id="445448" label="zzz1001,zzzz986" source="1045" target="156" cy:directed="1"/>
      <edge id="445447" label="zzz1001,zzzz992" source="1045" target="150" cy:directed="1"/>
      <edge id="445446" label="zzz1001,zzzz201" source="1045" target="924" cy:directed="1"/>
      <edge id="445445" label="zzz1001,zzzz918" source="1045" target="223" cy:directed="1"/>
      <edge id="445444" label="zzz1001,zzzz756" source="1045" target="385" cy:directed="1"/>
      <edge id="445443" label="zzz1001,zzzz203" source="1045" target="922" cy:directed="1"/>
      <edge id="445442" label="zzz1001,zzzz670" source="1045" target="471" cy:directed="1"/>
      <edge id="445441" label="zzz1001,zzzz974" source="1045" target="168" cy:directed="1"/>
      <edge id="445440" label="zzz1001,zzzz902" source="1045" target="239" cy:directed="1"/>
      <edge id="445439" label="zzz1001,zzzz689" source="1045" target="452" cy:directed="1"/>
      <edge id="445438" label="zzz1001,zzzz702" source="1045" target="439" cy:directed="1"/>
      <edge id="445437" label="zzz1001,zzzz701" source="1045" target="440" cy:directed="1"/>
      <edge id="445436" label="zzz1001,zzzz846" source="1045" target="295" cy:directed="1"/>
      <edge id="445435" label="zzz1001,zzzz195" source="1045" target="930" cy:directed="1"/>
      <edge id="445434" label="zzz1001,zzzz675" source="1045" target="466" cy:directed="1"/>
      <edge id="445433" label="zzz1001,zzzz858" source="1045" target="283" cy:directed="1"/>
      <edge id="445432" label="zzz1001,zzzz873" source="1045" target="268" cy:directed="1"/>
      <edge id="445431" label="zzz1001,zzzz642" source="1045" target="499" cy:directed="1"/>
      <edge id="445430" label="zzz1001,zzzz682" source="1045" target="459" cy:directed="1"/>
      <edge id="445429" label="zzz1001,zzzz679" source="1045" target="462" cy:directed="1"/>
      <edge id="445428" label="zzz1001,zzzz707" source="1045" target="434" cy:directed="1"/>
      <edge id="445427" label="zzz1001,zzzz723" source="1045" target="418" cy:directed="1"/>
      <edge id="445426" label="zzz1001,zzzz733" source="1045" target="408" cy:directed="1"/>
      <edge id="445425" label="zzz1001,zzzz739" source="1045" target="402" cy:directed="1"/>
      <edge id="445424" label="zzz1001,zzzz729" source="1045" target="412" cy:directed="1"/>
      <edge id="445423" label="zzz1001,zzzz754" source="1045" target="387" cy:directed="1"/>
      <edge id="445422" label="zzz1001,zzzz768" source="1045" target="373" cy:directed="1"/>
      <edge id="445421" label="zzz1001,zzzz746" source="1045" target="395" cy:directed="1"/>
      <edge id="445420" label="zzz1001,zzzz868" source="1045" target="273" cy:directed="1"/>
      <edge id="445419" label="zzz1001,zzzz499" source="1045" target="641" cy:directed="1"/>
      <edge id="445418" label="zzz1001,zzzz857" source="1045" target="284" cy:directed="1"/>
      <edge id="445417" label="zzz1001,zzzz975" source="1045" target="167" cy:directed="1"/>
      <edge id="445416" label="zzz1001,zzzz734" source="1045" target="407" cy:directed="1"/>
      <edge id="445415" label="zzz1001,zzzz760" source="1045" target="381" cy:directed="1"/>
      <edge id="445414" label="zzz1001,zzzz863" source="1045" target="278" cy:directed="1"/>
      <edge id="445413" label="zzz1001,zzzz112" source="1045" target="1013" cy:directed="1"/>
      <edge id="445412" label="zzz1001,zzzz647" source="1045" target="494" cy:directed="1"/>
      <edge id="445411" label="zzz1001,zzzz762" source="1045" target="379" cy:directed="1"/>
      <edge id="445410" label="zzz1001,zzzz635" source="1045" target="506" cy:directed="1"/>
      <edge id="445409" label="zzz1001,zzzz705" source="1045" target="436" cy:directed="1"/>
      <edge id="445408" label="zzz1001,zzzz709" source="1045" target="432" cy:directed="1"/>
      <edge id="445407" label="zzz1001,zzzz755" source="1045" target="386" cy:directed="1"/>
      <edge id="445406" label="zzz1001,zzzz764" source="1045" target="377" cy:directed="1"/>
      <edge id="445405" label="zzz1001,zzzz656" source="1045" target="485" cy:directed="1"/>
      <edge id="445404" label="zzz1001,zzzz706" source="1045" target="435" cy:directed="1"/>
      <edge id="445403" label="zzz1001,zzzz841" source="1045" target="300" cy:directed="1"/>
      <edge id="445402" label="zzz1001,zzzz982" source="1045" target="160" cy:directed="1"/>
      <edge id="445401" label="zzz1001,zzz1013" source="1045" target="1033" cy:directed="1"/>
      <edge id="445400" label="zzz1001,zzzz110" source="1045" target="1015" cy:directed="1"/>
      <edge id="445399" label="zzz1001,zzzz113" source="1045" target="1012" cy:directed="1"/>
      <edge id="445398" label="zzz1001,zzzz599" source="1045" target="542" cy:directed="1"/>
      <edge id="445397" label="zzz1001,zzzz650" source="1045" target="491" cy:directed="1"/>
      <edge id="445396" label="zzz1001,zzzz752" source="1045" target="389" cy:directed="1"/>
      <edge id="445395" label="zzz1001,zzzz960" source="1045" target="181" cy:directed="1"/>
      <edge id="445394" label="zzz1001,zzzz978" source="1045" target="164" cy:directed="1"/>
      <edge id="445393" label="zzz1001,zzzz724" source="1045" target="417" cy:directed="1"/>
      <edge id="445392" label="zzz1001,zzzz828" source="1045" target="313" cy:directed="1"/>
      <edge id="445391" label="zzz1001,zzzz728" source="1045" target="413" cy:directed="1"/>
      <edge id="445390" label="zzz1001,zzzz761" source="1045" target="380" cy:directed="1"/>
      <edge id="445389" label="zzz1001,zzzz842" source="1045" target="299" cy:directed="1"/>
      <edge id="445388" label="zzz1001,zzzz732" source="1045" target="409" cy:directed="1"/>
      <edge id="445387" label="zzz1001,zzzz921" source="1045" target="220" cy:directed="1"/>
      <edge id="445386" label="zzz1001,zzzz469" source="1045" target="671" cy:directed="1"/>
      <edge id="445385" label="zzz1001,zzzz611" source="1045" target="530" cy:directed="1"/>
      <edge id="445384" label="zzz1001,zzzz850" source="1045" target="291" cy:directed="1"/>
      <edge id="445383" label="zzz1001,zzzz865" source="1045" target="276" cy:directed="1"/>
      <edge id="445382" label="zzz1001,zzzz985" source="1045" target="157" cy:directed="1"/>
      <edge id="445381" label="zzz1001,zzzz643" source="1045" target="498" cy:directed="1"/>
      <edge id="445380" label="zzz1001,zzzz721" source="1045" target="420" cy:directed="1"/>
      <edge id="445379" label="zzz1001,zzzz676" source="1045" target="465" cy:directed="1"/>
      <edge id="445378" label="zzz1001,zzzz730" source="1045" target="411" cy:directed="1"/>
      <edge id="445377" label="zzz1001,zzzz784" source="1045" target="357" cy:directed="1"/>
      <edge id="445376" label="zzz1001,zzzz991" source="1045" target="151" cy:directed="1"/>
      <edge id="445375" label="zzz1001,zzzzz64" source="1045" target="95" cy:directed="1"/>
      <edge id="445374" label="zzz1001,zzzz579" source="1045" target="562" cy:directed="1"/>
      <edge id="445373" label="zzz1001,zzzz646" source="1045" target="495" cy:directed="1"/>
      <edge id="445372" label="zzz1001,zzzz659" source="1045" target="482" cy:directed="1"/>
      <edge id="445371" label="zzz1001,zzzz834" source="1045" target="307" cy:directed="1"/>
      <edge id="445370" label="zzz1001,zzzzz97" source="1045" target="64" cy:directed="1"/>
      <edge id="445369" label="zzz1001,zzzz449" source="1045" target="678" cy:directed="1"/>
      <edge id="445368" label="zzz1001,zzzzz58" source="1045" target="101" cy:directed="1"/>
      <edge id="445367" label="zzz1001,zzzz662" source="1045" target="479" cy:directed="1"/>
      <edge id="445366" label="zzz1001,zzzz667" source="1045" target="474" cy:directed="1"/>
      <edge id="445365" label="zzz1001,zzzz684" source="1045" target="457" cy:directed="1"/>
      <edge id="445364" label="zzz1001,zzzz568" source="1045" target="573" cy:directed="1"/>
      <edge id="445363" label="zzz1001,zzzz604" source="1045" target="537" cy:directed="1"/>
      <edge id="445362" label="zzz1001,zzzz619" source="1045" target="522" cy:directed="1"/>
      <edge id="445361" label="zzz1001,zzzz636" source="1045" target="505" cy:directed="1"/>
      <edge id="445360" label="zzz1001,zzzz696" source="1045" target="445" cy:directed="1"/>
      <edge id="445359" label="zzz1001,zzzz718" source="1045" target="423" cy:directed="1"/>
      <edge id="445358" label="zzz1001,zzzz731" source="1045" target="410" cy:directed="1"/>
      <edge id="445357" label="zzz1001,zzzzz61" source="1045" target="98" cy:directed="1"/>
      <edge id="445356" label="zzz1001,zzzz677" source="1045" target="464" cy:directed="1"/>
      <edge id="445355" label="zzz1001,zzzz838" source="1045" target="303" cy:directed="1"/>
      <edge id="445354" label="zzz1001,zzz1014" source="1045" target="1032" cy:directed="1"/>
      <edge id="445353" label="zzz1001,zzzz500" source="1045" target="640" cy:directed="1"/>
      <edge id="445352" label="zzz1001,zzzz851" source="1045" target="290" cy:directed="1"/>
      <edge id="445351" label="zzz1001,zzzzz57" source="1045" target="102" cy:directed="1"/>
      <edge id="445350" label="zzz1001,zzzz663" source="1045" target="478" cy:directed="1"/>
      <edge id="445349" label="zzz1001,zzzz687" source="1045" target="454" cy:directed="1"/>
      <edge id="445348" label="zzz1001,zzzz862" source="1045" target="279" cy:directed="1"/>
      <edge id="445347" label="zzz1001,zzzz111" source="1045" target="1014" cy:directed="1"/>
      <edge id="445346" label="zzz1001,zzzz623" source="1045" target="518" cy:directed="1"/>
      <edge id="445345" label="zzz1001,zzzz695" source="1045" target="446" cy:directed="1"/>
      <edge id="445344" label="zzz1001,zzzz735" source="1045" target="406" cy:directed="1"/>
      <edge id="445343" label="zzz1001,zzzz584" source="1045" target="557" cy:directed="1"/>
      <edge id="445342" label="zzz1001,zzzz617" source="1045" target="524" cy:directed="1"/>
      <edge id="445341" label="zzz1001,zzzz665" source="1045" target="476" cy:directed="1"/>
      <edge id="445340" label="zzz1001,zzzz859" source="1045" target="282" cy:directed="1"/>
      <edge id="445339" label="zzz1001,zzzzz53" source="1045" target="106" cy:directed="1"/>
      <edge id="445338" label="zzz1001,zzzz813" source="1045" target="328" cy:directed="1"/>
      <edge id="445337" label="zzz1001,zzzz552" source="1045" target="589" cy:directed="1"/>
      <edge id="445336" label="zzz1001,zzzz987" source="1045" target="155" cy:directed="1"/>
      <edge id="445335" label="zzz1001,zzzz576" source="1045" target="565" cy:directed="1"/>
      <edge id="445334" label="zzz1001,zzzz673" source="1045" target="468" cy:directed="1"/>
      <edge id="445333" label="zzz1001,zzzz979" source="1045" target="163" cy:directed="1"/>
      <edge id="445332" label="zzz1001,zzzz622" source="1045" target="519" cy:directed="1"/>
      <edge id="445331" label="zzz1001,zzzz814" source="1045" target="327" cy:directed="1"/>
      <edge id="445330" label="zzz1001,zzz1010" source="1045" target="1036" cy:directed="1"/>
      <edge id="445329" label="zzz1001,zzzz634" source="1045" target="507" cy:directed="1"/>
      <edge id="445328" label="zzz1001,zzzz972" source="1045" target="170" cy:directed="1"/>
      <edge id="445327" label="zzz1001,zzzz403" source="1045" target="722" cy:directed="1"/>
      <edge id="445326" label="zzz1001,zzzz654" source="1045" target="487" cy:directed="1"/>
      <edge id="445325" label="zzz1001,zzzz571" source="1045" target="570" cy:directed="1"/>
      <edge id="445324" label="zzz1001,zzzz645" source="1045" target="496" cy:directed="1"/>
      <edge id="445323" label="zzz1001,zzzz710" source="1045" target="431" cy:directed="1"/>
      <edge id="445322" label="zzz1001,zzzz790" source="1045" target="351" cy:directed="1"/>
      <edge id="445321" label="zzz1001,zzz1016" source="1045" target="1030" cy:directed="1"/>
      <edge id="445320" label="zzz1001,zzzz580" source="1045" target="561" cy:directed="1"/>
      <edge id="445319" label="zzz1001,zzzz971" source="1045" target="171" cy:directed="1"/>
      <edge id="445318" label="zzz1001,zzzz587" source="1045" target="554" cy:directed="1"/>
      <edge id="445317" label="zzz1001,zzzz824" source="1045" target="317" cy:directed="1"/>
      <edge id="445316" label="zzz1001,zzzz861" source="1045" target="280" cy:directed="1"/>
      <edge id="445315" label="zzz1001,zzzz920" source="1045" target="221" cy:directed="1"/>
      <edge id="445314" label="zzz1001,zzzzz60" source="1045" target="99" cy:directed="1"/>
      <edge id="445313" label="zzz1001,zzzz820" source="1045" target="321" cy:directed="1"/>
      <edge id="445312" label="zzz1001,zzzz672" source="1045" target="469" cy:directed="1"/>
      <edge id="445311" label="zzz1001,zzzz548" source="1045" target="593" cy:directed="1"/>
      <edge id="445310" label="zzz1001,zzzzz59" source="1045" target="100" cy:directed="1"/>
      <edge id="445309" label="zzz1001,zzzz556" source="1045" target="585" cy:directed="1"/>
      <edge id="445308" label="zzz1001,zzzz620" source="1045" target="521" cy:directed="1"/>
      <edge id="445307" label="zzz1001,zzzz884" source="1045" target="257" cy:directed="1"/>
      <edge id="445306" label="zzz1001,zzzz107" source="1045" target="1018" cy:directed="1"/>
      <edge id="445305" label="zzz1001,zzzz614" source="1045" target="527" cy:directed="1"/>
      <edge id="445304" label="zzz1001,zzzz823" source="1045" target="318" cy:directed="1"/>
      <edge id="445303" label="zzz1001,zzzzz96" source="1045" target="65" cy:directed="1"/>
      <edge id="445302" label="zzz1001,zzzz591" source="1045" target="550" cy:directed="1"/>
      <edge id="445301" label="zzz1001,zzzzz47" source="1045" target="112" cy:directed="1"/>
      <edge id="445300" label="zzz1001,zzzz561" source="1045" target="580" cy:directed="1"/>
      <edge id="445299" label="zzz1001,zzzzz48" source="1045" target="111" cy:directed="1"/>
      <edge id="445298" label="zzz1001,zzzz551" source="1045" target="590" cy:directed="1"/>
      <edge id="445297" label="zzz1001,zzzz681" source="1045" target="460" cy:directed="1"/>
      <edge id="445296" label="zzz1001,zzzz199" source="1045" target="926" cy:directed="1"/>
      <edge id="445295" label="zzz1001,zzzz775" source="1045" target="366" cy:directed="1"/>
      <edge id="445294" label="zzz1001,zzzz406" source="1045" target="719" cy:directed="1"/>
      <edge id="445293" label="zzz1001,zzzz567" source="1045" target="574" cy:directed="1"/>
      <edge id="445292" label="zzz1001,zzzz649" source="1045" target="492" cy:directed="1"/>
      <edge id="445291" label="zzz1001,zzzz800" source="1045" target="341" cy:directed="1"/>
      <edge id="445290" label="zzz1001,zzzzz19" source="1045" target="136" cy:directed="1"/>
      <edge id="445289" label="zzz1001,zzzzz62" source="1045" target="97" cy:directed="1"/>
      <edge id="445288" label="zzz1001,zzzz108" source="1045" target="1017" cy:directed="1"/>
      <edge id="445287" label="zzz1001,zzzz618" source="1045" target="523" cy:directed="1"/>
      <edge id="445286" label="zzz1001,zzzz843" source="1045" target="298" cy:directed="1"/>
      <edge id="445285" label="zzz1001,zzzz200" source="1045" target="925" cy:directed="1"/>
      <edge id="445284" label="zzz1001,zzzz569" source="1045" target="572" cy:directed="1"/>
      <edge id="445283" label="zzz1001,zzzz715" source="1045" target="426" cy:directed="1"/>
      <edge id="445282" label="zzz1001,zzzz829" source="1045" target="312" cy:directed="1"/>
      <edge id="445281" label="zzz1001,zzzz844" source="1045" target="297" cy:directed="1"/>
      <edge id="445280" label="zzz1001,zzzzz15" source="1045" target="139" cy:directed="1"/>
      <edge id="445279" label="zzz1001,zzzz465" source="1045" target="675" cy:directed="1"/>
      <edge id="445278" label="zzz1001,zzzz602" source="1045" target="539" cy:directed="1"/>
      <edge id="445277" label="zzz1001,zzzz624" source="1045" target="517" cy:directed="1"/>
      <edge id="445276" label="zzz1001,zzzz652" source="1045" target="489" cy:directed="1"/>
      <edge id="445275" label="zzz1001,zzzz864" source="1045" target="277" cy:directed="1"/>
      <edge id="445274" label="zzz1001,zzzz973" source="1045" target="169" cy:directed="1"/>
      <edge id="445273" label="zzz1001,zzzzz54" source="1045" target="105" cy:directed="1"/>
      <edge id="445272" label="zzz1001,zzzz405" source="1045" target="720" cy:directed="1"/>
      <edge id="445271" label="zzz1001,zzzz837" source="1045" target="304" cy:directed="1"/>
      <edge id="445270" label="zzz1001,zzzz855" source="1045" target="286" cy:directed="1"/>
      <edge id="445269" label="zzz1001,zzzz898" source="1045" target="243" cy:directed="1"/>
      <edge id="445268" label="zzz1001,zzzz854" source="1045" target="287" cy:directed="1"/>
      <edge id="445267" label="zzz1001,zzzz555" source="1045" target="586" cy:directed="1"/>
      <edge id="445266" label="zzz1001,zzzz626" source="1045" target="515" cy:directed="1"/>
      <edge id="445265" label="zzz1001,zzzz688" source="1045" target="453" cy:directed="1"/>
      <edge id="445264" label="zzz1001,zzzz826" source="1045" target="315" cy:directed="1"/>
      <edge id="445263" label="zzz1001,zzzzz94" source="1045" target="67" cy:directed="1"/>
      <edge id="445262" label="zzz1001,zzzz743" source="1045" target="398" cy:directed="1"/>
      <edge id="445261" label="zzz1001,zzzz562" source="1045" target="579" cy:directed="1"/>
      <edge id="445260" label="zzz1001,zzzz839" source="1045" target="302" cy:directed="1"/>
      <edge id="445259" label="zzz1001,zzzz575" source="1045" target="566" cy:directed="1"/>
      <edge id="445258" label="zzz1001,zzzz668" source="1045" target="473" cy:directed="1"/>
      <edge id="445257" label="zzz1001,zzzzz65" source="1045" target="94" cy:directed="1"/>
      <edge id="445256" label="zzz1001,zzzzz69" source="1045" target="90" cy:directed="1"/>
      <edge id="445255" label="zzz1001,zzzz853" source="1045" target="288" cy:directed="1"/>
      <edge id="445254" label="zzz1001,zzzz553" source="1045" target="588" cy:directed="1"/>
      <edge id="445253" label="zzz1001,zzzz586" source="1045" target="555" cy:directed="1"/>
      <edge id="445252" label="zzz1001,zzzz630" source="1045" target="511" cy:directed="1"/>
      <edge id="445251" label="zzz1001,zzzz691" source="1045" target="450" cy:directed="1"/>
      <edge id="445250" label="zzz1001,zzzzz78" source="1045" target="81" cy:directed="1"/>
      <edge id="445249" label="zzz1001,zzzz589" source="1045" target="552" cy:directed="1"/>
      <edge id="445248" label="zzz1001,zzzz600" source="1045" target="541" cy:directed="1"/>
      <edge id="445247" label="zzz1001,zzzz616" source="1045" target="525" cy:directed="1"/>
      <edge id="445246" label="zzz1001,zzzz835" source="1045" target="306" cy:directed="1"/>
      <edge id="445245" label="zzz1001,zzzz100" source="1045" target="1025" cy:directed="1"/>
      <edge id="445244" label="zzz1001,zzzz564" source="1045" target="577" cy:directed="1"/>
      <edge id="445243" label="zzz1001,zzzz590" source="1045" target="551" cy:directed="1"/>
      <edge id="445242" label="zzz1001,zzzz607" source="1045" target="534" cy:directed="1"/>
      <edge id="445241" label="zzz1001,zzzz818" source="1045" target="323" cy:directed="1"/>
      <edge id="445240" label="zzz1001,zzzzz95" source="1045" target="66" cy:directed="1"/>
      <edge id="445239" label="zzz1001,zzzz566" source="1045" target="575" cy:directed="1"/>
      <edge id="445238" label="zzz1001,zzzz737" source="1045" target="404" cy:directed="1"/>
      <edge id="445237" label="zzz1001,zzzz748" source="1045" target="393" cy:directed="1"/>
      <edge id="445236" label="zzz1001,zzzz845" source="1045" target="296" cy:directed="1"/>
      <edge id="445235" label="zzz1001,zzzzz66" source="1045" target="93" cy:directed="1"/>
      <edge id="445234" label="zzz1001,zzzzz92" source="1045" target="69" cy:directed="1"/>
      <edge id="445233" label="zzz1001,zzzz582" source="1045" target="559" cy:directed="1"/>
      <edge id="445232" label="zzz1001,zzzz651" source="1045" target="490" cy:directed="1"/>
      <edge id="445231" label="zzz1001,zzzz683" source="1045" target="458" cy:directed="1"/>
      <edge id="445230" label="zzz1001,zzzz871" source="1045" target="270" cy:directed="1"/>
      <edge id="445229" label="zzz1001,zzzz699" source="1045" target="442" cy:directed="1"/>
      <edge id="445228" label="zzz1001,zzzz819" source="1045" target="322" cy:directed="1"/>
      <edge id="445227" label="zzz1001,zzzz821" source="1045" target="320" cy:directed="1"/>
      <edge id="445226" label="zzz1001,zzzz848" source="1045" target="293" cy:directed="1"/>
      <edge id="445225" label="zzz1001,zzzz123" source="1045" target="1002" cy:directed="1"/>
      <edge id="445224" label="zzz1001,zzzz836" source="1045" target="305" cy:directed="1"/>
      <edge id="445223" label="zzz1001,zzzz638" source="1045" target="503" cy:directed="1"/>
      <edge id="445222" label="zzz1001,zzzz847" source="1045" target="294" cy:directed="1"/>
      <edge id="445221" label="zzz1001,zzzz882" source="1045" target="259" cy:directed="1"/>
      <edge id="445220" label="zzz1001,zzzzz99" source="1045" target="62" cy:directed="1"/>
      <edge id="445219" label="zzz1001,zzzz550" source="1045" target="591" cy:directed="1"/>
      <edge id="445218" label="zzz1001,zzzz565" source="1045" target="576" cy:directed="1"/>
      <edge id="445217" label="zzz1001,zzzz644" source="1045" target="497" cy:directed="1"/>
      <edge id="445216" label="zzz1001,zzzz664" source="1045" target="477" cy:directed="1"/>
      <edge id="445215" label="zzz1001,zzzzz25" source="1045" target="130" cy:directed="1"/>
      <edge id="445214" label="zzz1001,zzzz901" source="1045" target="240" cy:directed="1"/>
      <edge id="445213" label="zzz1001,zzzzz28" source="1045" target="127" cy:directed="1"/>
      <edge id="445212" label="zzz1001,zzzzz93" source="1045" target="68" cy:directed="1"/>
      <edge id="445211" label="zzz1001,zzzz109" source="1045" target="1016" cy:directed="1"/>
      <edge id="445210" label="zzz1001,zzzz597" source="1045" target="544" cy:directed="1"/>
      <edge id="445209" label="zzz1001,zzzz778" source="1045" target="363" cy:directed="1"/>
      <edge id="445208" label="zzz1001,zzzz930" source="1045" target="211" cy:directed="1"/>
      <edge id="445207" label="zzz1001,zzzzz21" source="1045" target="134" cy:directed="1"/>
      <edge id="445206" label="zzz1001,zzzz609" source="1045" target="532" cy:directed="1"/>
      <edge id="445205" label="zzz1001,zzzz830" source="1045" target="311" cy:directed="1"/>
      <edge id="445204" label="zzz1001,zzzz570" source="1045" target="571" cy:directed="1"/>
      <edge id="445203" label="zzz1001,zzzz606" source="1045" target="535" cy:directed="1"/>
      <edge id="445202" label="zzz1001,zzzz666" source="1045" target="475" cy:directed="1"/>
      <edge id="445201" label="zzz1001,zzzz557" source="1045" target="584" cy:directed="1"/>
      <edge id="445200" label="zzz1001,zzzz558" source="1045" target="583" cy:directed="1"/>
      <edge id="445199" label="zzz1001,zzzz572" source="1045" target="569" cy:directed="1"/>
      <edge id="445198" label="zzz1001,zzzz880" source="1045" target="261" cy:directed="1"/>
      <edge id="445197" label="zzz1001,zzzz924" source="1045" target="217" cy:directed="1"/>
      <edge id="445196" label="zzz1001,zzzz583" source="1045" target="558" cy:directed="1"/>
      <edge id="445195" label="zzz1001,zzzz722" source="1045" target="419" cy:directed="1"/>
      <edge id="445194" label="zzz1001,zzzzz33" source="1045" target="122" cy:directed="1"/>
      <edge id="445193" label="zzz1001,zzzz102" source="1045" target="1023" cy:directed="1"/>
      <edge id="445192" label="zzz1001,zzzz559" source="1045" target="582" cy:directed="1"/>
      <edge id="445191" label="zzz1001,zzzz603" source="1045" target="538" cy:directed="1"/>
      <edge id="445190" label="zzz1001,zzzz726" source="1045" target="415" cy:directed="1"/>
      <edge id="445189" label="zzz1001,zzzz596" source="1045" target="545" cy:directed="1"/>
      <edge id="445188" label="zzz1001,zzzz103" source="1045" target="1022" cy:directed="1"/>
      <edge id="445187" label="zzz1001,zzzz483" source="1045" target="657" cy:directed="1"/>
      <edge id="445186" label="zzz1001,zzzz574" source="1045" target="567" cy:directed="1"/>
      <edge id="445185" label="zzz1001,zzzz122" source="1045" target="1003" cy:directed="1"/>
      <edge id="445184" label="zzz1001,zzzz899" source="1045" target="242" cy:directed="1"/>
      <edge id="445183" label="zzz1001,zzzzz18" source="1045" target="137" cy:directed="1"/>
      <edge id="445182" label="zzz1001,zzzz628" source="1045" target="513" cy:directed="1"/>
      <edge id="445181" label="zzz1001,zzzzz72" source="1045" target="87" cy:directed="1"/>
      <edge id="445180" label="zzz1001,zzzzz98" source="1045" target="63" cy:directed="1"/>
      <edge id="445179" label="zzz1001,zzz1021" source="1045" target="1026" cy:directed="1"/>
      <edge id="445178" label="zzz1001,zzzz101" source="1045" target="1024" cy:directed="1"/>
      <edge id="445177" label="zzz1001,zzzz192" source="1045" target="933" cy:directed="1"/>
      <edge id="445176" label="zzz1001,zzzz206" source="1045" target="919" cy:directed="1"/>
      <edge id="445175" label="zzz1001,zzzz727" source="1045" target="414" cy:directed="1"/>
      <edge id="445174" label="zzz1001,zzzz816" source="1045" target="325" cy:directed="1"/>
      <edge id="445173" label="zzz1001,zzzz970" source="1045" target="172" cy:directed="1"/>
      <edge id="445172" label="zzz1001,zzzz588" source="1045" target="553" cy:directed="1"/>
      <edge id="445171" label="zzz1001,zzzz655" source="1045" target="486" cy:directed="1"/>
      <edge id="445170" label="zzz1001,zzzz125" source="1045" target="1000" cy:directed="1"/>
      <edge id="445169" label="zzz1001,zzzz632" source="1045" target="509" cy:directed="1"/>
      <edge id="445168" label="zzz1001,zzzz900" source="1045" target="241" cy:directed="1"/>
      <edge id="445167" label="zzz1001,zzzz958" source="1045" target="183" cy:directed="1"/>
      <edge id="445166" label="zzz1001,zzzz104" source="1045" target="1021" cy:directed="1"/>
      <edge id="445165" label="zzz1001,zzzz115" source="1045" target="1010" cy:directed="1"/>
      <edge id="445164" label="zzz1001,zzzz106" source="1045" target="1019" cy:directed="1"/>
      <edge id="445163" label="zzz1001,zzzz466" source="1045" target="674" cy:directed="1"/>
      <edge id="445162" label="zzz1001,zzzz545" source="1045" target="596" cy:directed="1"/>
      <edge id="445161" label="zzz1001,zzzz554" source="1045" target="587" cy:directed="1"/>
      <edge id="445160" label="zzz1001,zzzz750" source="1045" target="391" cy:directed="1"/>
      <edge id="445159" label="zzz1001,zzzz833" source="1045" target="308" cy:directed="1"/>
      <edge id="445158" label="zzz1001,zzzz725" source="1045" target="416" cy:directed="1"/>
      <edge id="445157" label="zzz1001,zzzzz34" source="1045" target="121" cy:directed="1"/>
      <edge id="445156" label="zzz1001,zzzz124" source="1045" target="1001" cy:directed="1"/>
      <edge id="445155" label="zzz1001,zzzz598" source="1045" target="543" cy:directed="1"/>
      <edge id="445154" label="zzz1001,zzzz639" source="1045" target="502" cy:directed="1"/>
      <edge id="445153" label="zzz1001,zzzz825" source="1045" target="316" cy:directed="1"/>
      <edge id="445152" label="zzz1001,zzzz903" source="1045" target="238" cy:directed="1"/>
      <edge id="445151" label="zzz1001,zzzzz74" source="1045" target="85" cy:directed="1"/>
      <edge id="445150" label="zzz1001,zzzz629" source="1045" target="512" cy:directed="1"/>
      <edge id="445149" label="zzz1001,zzzzz14" source="1045" target="140" cy:directed="1"/>
      <edge id="445148" label="zzz1001,zzzz981" source="1045" target="161" cy:directed="1"/>
      <edge id="445147" label="zzz1001,zzz1003" source="1045" target="1043" cy:directed="1"/>
      <edge id="445146" label="zzz1001,zzzz127" source="1045" target="998" cy:directed="1"/>
      <edge id="445145" label="zzz1001,zzzzz37" source="1045" target="118" cy:directed="1"/>
      <edge id="445144" label="zzz1001,zzzz827" source="1045" target="314" cy:directed="1"/>
      <edge id="445143" label="zzz1001,zzzz621" source="1045" target="520" cy:directed="1"/>
      <edge id="445142" label="zzz1001,zzzz625" source="1045" target="516" cy:directed="1"/>
      <edge id="445141" label="zzz1001,zzzz573" source="1045" target="568" cy:directed="1"/>
      <edge id="445140" label="zzz1001,zzzzz20" source="1045" target="135" cy:directed="1"/>
      <edge id="445139" label="zzz1001,zzzz581" source="1045" target="560" cy:directed="1"/>
      <edge id="445138" label="zzz1001,zzzzz55" source="1045" target="104" cy:directed="1"/>
      <edge id="445137" label="zzz1001,zzzz767" source="1045" target="374" cy:directed="1"/>
      <edge id="445136" label="zzz1001,zzzz962" source="1045" target="179" cy:directed="1"/>
      <edge id="445135" label="zzz1001,zzzzz68" source="1045" target="91" cy:directed="1"/>
      <edge id="445134" label="zzz1001,zzzzz12" source="1045" target="142" cy:directed="1"/>
      <edge id="445133" label="zzz1001,zzzz105" source="1045" target="1020" cy:directed="1"/>
      <edge id="445132" label="zzz1001,zzzz601" source="1045" target="540" cy:directed="1"/>
      <edge id="445131" label="zzz1001,zzzz610" source="1045" target="531" cy:directed="1"/>
      <edge id="445130" label="zzz1001,zzzz849" source="1045" target="292" cy:directed="1"/>
      <edge id="445129" label="zzz1001,zzzz741" source="1045" target="400" cy:directed="1"/>
      <edge id="445128" label="zzz1001,zzzz120" source="1045" target="1005" cy:directed="1"/>
      <edge id="445127" label="zzz1001,zzzz151" source="1045" target="974" cy:directed="1"/>
      <edge id="445126" label="zzz1001,zzzz674" source="1045" target="467" cy:directed="1"/>
      <edge id="445125" label="zzz1001,zzzz763" source="1045" target="378" cy:directed="1"/>
      <edge id="445124" label="zzz1001,zzzz774" source="1045" target="367" cy:directed="1"/>
      <edge id="445123" label="zzz1001,zzzz627" source="1045" target="514" cy:directed="1"/>
      <edge id="445122" label="zzz1001,zzzzz70" source="1045" target="89" cy:directed="1"/>
      <edge id="445121" label="zzz1001,zzz1020" source="1045" target="1027" cy:directed="1"/>
      <edge id="445120" label="zzz1001,zzzz121" source="1045" target="1004" cy:directed="1"/>
      <edge id="445119" label="zzz1001,zzzz700" source="1045" target="441" cy:directed="1"/>
      <edge id="445118" label="zzz1001,zzzz126" source="1045" target="999" cy:directed="1"/>
      <edge id="445117" label="zzz1001,zzzz913" source="1045" target="228" cy:directed="1"/>
      <edge id="445116" label="zzz1001,zzzz773" source="1045" target="368" cy:directed="1"/>
      <edge id="445115" label="zzz1001,zzzz448" source="1045" target="679" cy:directed="1"/>
      <edge id="445114" label="zzz1001,zzzz513" source="1045" target="628" cy:directed="1"/>
      <edge id="445113" label="zzz1001,zzzz653" source="1045" target="488" cy:directed="1"/>
      <edge id="445112" label="zzz1001,zzzz860" source="1045" target="281" cy:directed="1"/>
      <edge id="445111" label="zzz1001,zzzz490" source="1045" target="650" cy:directed="1"/>
      <edge id="445110" label="zzz1001,zzzz945" source="1045" target="196" cy:directed="1"/>
      <edge id="445109" label="zzz1001,zzzzz73" source="1045" target="86" cy:directed="1"/>
      <edge id="445108" label="zzz1001,zzzzz63" source="1045" target="96" cy:directed="1"/>
      <edge id="445107" label="zzz1001,zzzz131" source="1045" target="994" cy:directed="1"/>
      <edge id="445106" label="zzz1001,zzzz156" source="1045" target="969" cy:directed="1"/>
      <edge id="445105" label="zzz1001,zzzz486" source="1045" target="654" cy:directed="1"/>
      <edge id="445104" label="zzz1001,zzzz470" source="1045" target="670" cy:directed="1"/>
      <edge id="445103" label="zzz1001,zzzz831" source="1045" target="310" cy:directed="1"/>
      <edge id="445102" label="zzz1001,zzzz150" source="1045" target="975" cy:directed="1"/>
      <edge id="445101" label="zzz1001,zzzz471" source="1045" target="669" cy:directed="1"/>
      <edge id="445100" label="zzz1001,zzzz162" source="1045" target="963" cy:directed="1"/>
      <edge id="445099" label="zzz1001,zzzz578" source="1045" target="563" cy:directed="1"/>
      <edge id="445098" label="zzz1001,zzzz594" source="1045" target="547" cy:directed="1"/>
      <edge id="445097" label="zzz1001,zzzz464" source="1045" target="676" cy:directed="1"/>
      <edge id="445096" label="zzz1001,zzzz546" source="1045" target="595" cy:directed="1"/>
      <edge id="445095" label="zzz1001,zzz1019" source="1045" target="1028" cy:directed="1"/>
      <edge id="445094" label="zzz1001,zzzz944" source="1045" target="197" cy:directed="1"/>
      <edge id="445093" label="zzz1001,zzzzz84" source="1045" target="75" cy:directed="1"/>
      <edge id="445092" label="zzz1001,zzzz147" source="1045" target="978" cy:directed="1"/>
      <edge id="445091" label="zzz1001,zzzz155" source="1045" target="970" cy:directed="1"/>
      <edge id="445090" label="zzz1001,zzzz608" source="1045" target="533" cy:directed="1"/>
      <edge id="445089" label="zzz1001,zzzz501" source="1045" target="639" cy:directed="1"/>
      <edge id="445088" label="zzz1001,zzzz929" source="1045" target="212" cy:directed="1"/>
      <edge id="445087" label="zzz1001,zzzzz56" source="1045" target="103" cy:directed="1"/>
      <edge id="445086" label="zzz1001,zzzzz67" source="1045" target="92" cy:directed="1"/>
      <edge id="445085" label="zzz1001,zzzz158" source="1045" target="967" cy:directed="1"/>
      <edge id="445084" label="zzz1001,zzzz149" source="1045" target="976" cy:directed="1"/>
      <edge id="445083" label="zzz1001,zzzz717" source="1045" target="424" cy:directed="1"/>
      <edge id="445082" label="zzz1001,zzzzz71" source="1045" target="88" cy:directed="1"/>
      <edge id="445081" label="zzz1001,zzzzz88" source="1045" target="73" cy:directed="1"/>
      <edge id="445080" label="zzz1001,zzzz879" source="1045" target="262" cy:directed="1"/>
      <edge id="445079" label="zzz1001,zzzz141" source="1045" target="984" cy:directed="1"/>
      <edge id="445078" label="zzz1001,zzzz161" source="1045" target="964" cy:directed="1"/>
      <edge id="445077" label="zzz1001,zzzz502" source="1045" target="638" cy:directed="1"/>
      <edge id="445076" label="zzz1001,zzzz657" source="1045" target="484" cy:directed="1"/>
      <edge id="445075" label="zzz1001,zzzz822" source="1045" target="319" cy:directed="1"/>
      <edge id="445074" label="zzz1001,zzzz927" source="1045" target="214" cy:directed="1"/>
      <edge id="445073" label="zzz1001,zzzz928" source="1045" target="213" cy:directed="1"/>
      <edge id="445072" label="zzz1001,zzzz946" source="1045" target="195" cy:directed="1"/>
      <edge id="445071" label="zzz1001,zzzz947" source="1045" target="194" cy:directed="1"/>
      <edge id="445070" label="zzz1001,zzzzz76" source="1045" target="83" cy:directed="1"/>
      <edge id="445069" label="zzz1001,zzzz680" source="1045" target="461" cy:directed="1"/>
      <edge id="445068" label="zzz1001,zzzzz17" source="1045" target="138" cy:directed="1"/>
      <edge id="445067" label="zzz1001,zzzz142" source="1045" target="983" cy:directed="1"/>
      <edge id="445066" label="zzz1001,zzzz163" source="1045" target="962" cy:directed="1"/>
      <edge id="445065" label="zzz1001,zzzz165" source="1045" target="960" cy:directed="1"/>
      <edge id="445064" label="zzz1001,zzzz832" source="1045" target="309" cy:directed="1"/>
      <edge id="445063" label="zzz1001,zzzz148" source="1045" target="977" cy:directed="1"/>
      <edge id="445062" label="zzz1001,zzzz157" source="1045" target="968" cy:directed="1"/>
      <edge id="445061" label="zzz1001,zzzz166" source="1045" target="959" cy:directed="1"/>
      <edge id="445060" label="zzz1001,zzzz168" source="1045" target="957" cy:directed="1"/>
      <edge id="445059" label="zzz1001,zzzz169" source="1045" target="956" cy:directed="1"/>
      <edge id="445058" label="zzz1001,zzzz745" source="1045" target="396" cy:directed="1"/>
      <edge id="445057" label="zzz1001,zzzz917" source="1045" target="224" cy:directed="1"/>
      <edge id="445056" label="zzz1001,zzzz136" source="1045" target="989" cy:directed="1"/>
      <edge id="445055" label="zzz1001,zzzz660" source="1045" target="481" cy:directed="1"/>
      <edge id="445054" label="zzz1001,zzzz738" source="1045" target="403" cy:directed="1"/>
      <edge id="445053" label="zzz1001,zzzz782" source="1045" target="359" cy:directed="1"/>
      <edge id="445052" label="zzz1001,zzzz640" source="1045" target="501" cy:directed="1"/>
      <edge id="445051" label="zzz1001,zzzz713" source="1045" target="428" cy:directed="1"/>
      <edge id="445050" label="zzz1001,zzzz167" source="1045" target="958" cy:directed="1"/>
      <edge id="445049" label="zzz1001,zzzz641" source="1045" target="500" cy:directed="1"/>
      <edge id="445048" label="zzz1001,zzzz995" source="1045" target="147" cy:directed="1"/>
      <edge id="445047" label="zzz1001,zzzz114" source="1045" target="1011" cy:directed="1"/>
      <edge id="445046" label="zzz1001,zzzz133" source="1045" target="992" cy:directed="1"/>
      <edge id="445045" label="zzz1001,zzzz146" source="1045" target="979" cy:directed="1"/>
      <edge id="445044" label="zzz1001,zzzz485" source="1045" target="655" cy:directed="1"/>
      <edge id="445043" label="zzz1001,zzz1002" source="1045" target="1044" cy:directed="1"/>
      <edge id="445042" label="zzz1001,zzzz164" source="1045" target="961" cy:directed="1"/>
      <edge id="445041" label="zzz1001,zzzz547" source="1045" target="594" cy:directed="1"/>
      <edge id="445040" label="zzz1001,zzzz772" source="1045" target="369" cy:directed="1"/>
      <edge id="445039" label="zzz1001,zzzz916" source="1045" target="225" cy:directed="1"/>
      <edge id="445038" label="zzz1001,zzzz493" source="1045" target="647" cy:directed="1"/>
      <edge id="445037" label="zzz1001,zzzz134" source="1045" target="991" cy:directed="1"/>
      <edge id="445036" label="zzz1001,zzzz904" source="1045" target="237" cy:directed="1"/>
      <edge id="445035" label="zzz1001,zzzz915" source="1045" target="226" cy:directed="1"/>
      <edge id="445034" label="zzz1001,zzzz560" source="1045" target="581" cy:directed="1"/>
      <edge id="445033" label="zzz1001,zzzz132" source="1045" target="993" cy:directed="1"/>
      <edge id="445032" label="zzz1001,zzzz809" source="1045" target="332" cy:directed="1"/>
      <edge id="445031" label="zzz1001,zzzzz52" source="1045" target="107" cy:directed="1"/>
      <edge id="445030" label="zzz1001,zzzz197" source="1045" target="928" cy:directed="1"/>
      <edge id="445029" label="zzz1001,zzzz866" source="1045" target="275" cy:directed="1"/>
      <edge id="445028" label="zzz1001,zzzzz85" source="1045" target="74" cy:directed="1"/>
      <edge id="445027" label="zzz1001,zzzz129" source="1045" target="996" cy:directed="1"/>
      <edge id="445026" label="zzz1001,zzzz135" source="1045" target="990" cy:directed="1"/>
      <edge id="445025" label="zzz1001,zzzz159" source="1045" target="966" cy:directed="1"/>
      <edge id="445024" label="zzz1001,zzzzz82" source="1045" target="77" cy:directed="1"/>
      <edge id="445023" label="zzz1001,zzzz488" source="1045" target="652" cy:directed="1"/>
      <edge id="445022" label="zzz1001,zzzz152" source="1045" target="973" cy:directed="1"/>
      <edge id="445021" label="zzz1001,zzzzz83" source="1045" target="76" cy:directed="1"/>
      <edge id="445020" label="zzz1001,zzzz137" source="1045" target="988" cy:directed="1"/>
      <edge id="445019" label="zzz1001,zzzz128" source="1045" target="997" cy:directed="1"/>
      <edge id="445018" label="zzz1001,zzzzz79" source="1045" target="80" cy:directed="1"/>
      <edge id="445017" label="zzz1001,zzzz153" source="1045" target="972" cy:directed="1"/>
      <edge id="445016" label="zzz1001,zzzz130" source="1045" target="995" cy:directed="1"/>
      <edge id="445015" label="zzz1001,zzzz116" source="1045" target="1009" cy:directed="1"/>
      <edge id="445014" label="zzz1001,zzzz154" source="1045" target="971" cy:directed="1"/>
      <edge id="445013" label="zzz1001,zzzz512" source="1045" target="629" cy:directed="1"/>
      <edge id="445012" label="zzz1001,zzz1006" source="1045" target="1040" cy:directed="1"/>
      <edge id="445011" label="zzz1001,zzzzz13" source="1045" target="141" cy:directed="1"/>
      <edge id="445010" label="zzz1001,zzzz160" source="1045" target="965" cy:directed="1"/>
      <edge id="445009" label="zzz1001,zzzz577" source="1045" target="564" cy:directed="1"/>
      <edge id="445008" label="zzz1001,zzzz886" source="1045" target="255" cy:directed="1"/>
      <edge id="445007" label="zzz1001,zzzz143" source="1045" target="982" cy:directed="1"/>
      <edge id="445006" label="zzz1001,zzzz432" source="1045" target="693" cy:directed="1"/>
      <edge id="445005" label="zzz1001,zzzz474" source="1045" target="666" cy:directed="1"/>
      <edge id="445004" label="zzz1001,zzzz876" source="1045" target="265" cy:directed="1"/>
      <edge id="445003" label="zzz1001,zzzz592" source="1045" target="549" cy:directed="1"/>
      <edge id="445002" label="zzz1001,zzzz698" source="1045" target="443" cy:directed="1"/>
      <edge id="445001" label="zzz1001,zzz1017" source="1045" target="1029" cy:directed="1"/>
      <edge id="445000" label="zzz1001,zzzz996" source="1045" target="146" cy:directed="1"/>
      <edge id="444999" label="zzz1001,zzzz138" source="1045" target="987" cy:directed="1"/>
      <edge id="444998" label="zzz1001,zzzz139" source="1045" target="986" cy:directed="1"/>
      <edge id="444997" label="zzz1001,zzzz484" source="1045" target="656" cy:directed="1"/>
      <edge id="444996" label="zzz1001,zzzz144" source="1045" target="981" cy:directed="1"/>
      <edge id="444995" label="zzz1001,zzzz785" source="1045" target="356" cy:directed="1"/>
      <edge id="444994" label="zzz1001,zzzz950" source="1045" target="191" cy:directed="1"/>
      <edge id="444993" label="zzz1001,zzzz140" source="1045" target="985" cy:directed="1"/>
      <edge id="444992" label="zzz1001,zzzz922" source="1045" target="219" cy:directed="1"/>
      <edge id="444991" label="zzz1001,zzzz117" source="1045" target="1008" cy:directed="1"/>
      <edge id="444990" label="zzz1001,zzzz430" source="1045" target="695" cy:directed="1"/>
      <edge id="444989" label="zzz1001,zzzz476" source="1045" target="664" cy:directed="1"/>
      <edge id="444988" label="zzz1001,zzzz477" source="1045" target="663" cy:directed="1"/>
      <edge id="444987" label="zzz1001,zzzz119" source="1045" target="1006" cy:directed="1"/>
      <edge id="444986" label="zzz1001,zzzz811" source="1045" target="330" cy:directed="1"/>
      <edge id="444985" label="zzz1001,zzzz789" source="1045" target="352" cy:directed="1"/>
      <edge id="444984" label="zzz1001,zzzz776" source="1045" target="365" cy:directed="1"/>
      <edge id="444983" label="zzz1001,zzzz428" source="1045" target="697" cy:directed="1"/>
      <edge id="444982" label="zzz1001,zzzz182" source="1045" target="943" cy:directed="1"/>
      <edge id="444981" label="zzz1001,zzzz205" source="1045" target="920" cy:directed="1"/>
      <edge id="444980" label="zzz1001,zzzz407" source="1045" target="718" cy:directed="1"/>
      <edge id="444979" label="zzz1001,zzzz753" source="1045" target="388" cy:directed="1"/>
      <edge id="444978" label="zzz1001,zzzz870" source="1045" target="271" cy:directed="1"/>
      <edge id="444977" label="zzz1001,zzzzz50" source="1045" target="109" cy:directed="1"/>
      <edge id="444976" label="zzz1001,zzzz808" source="1045" target="333" cy:directed="1"/>
      <edge id="444975" label="zzz1001,zzzz810" source="1045" target="331" cy:directed="1"/>
      <edge id="444974" label="zzz1001,zzzz983" source="1045" target="159" cy:directed="1"/>
      <edge id="444973" label="zzz1001,zzzz658" source="1045" target="483" cy:directed="1"/>
      <edge id="444972" label="zzz1001,zzzz796" source="1045" target="345" cy:directed="1"/>
      <edge id="444971" label="zzz1001,zzzz931" source="1045" target="210" cy:directed="1"/>
      <edge id="444970" label="zzz1001,zzzz183" source="1045" target="942" cy:directed="1"/>
      <edge id="444969" label="zzz1001,zzzz515" source="1045" target="626" cy:directed="1"/>
      <edge id="444968" label="zzz1001,zzzz792" source="1045" target="349" cy:directed="1"/>
      <edge id="444967" label="zzz1001,zzzz801" source="1045" target="340" cy:directed="1"/>
      <edge id="444966" label="zzz1001,zzzz204" source="1045" target="921" cy:directed="1"/>
      <edge id="444965" label="zzz1001,zzzz492" source="1045" target="648" cy:directed="1"/>
      <edge id="444964" label="zzz1001,zzzz770" source="1045" target="371" cy:directed="1"/>
      <edge id="444963" label="zzz1001,zzzz878" source="1045" target="263" cy:directed="1"/>
      <edge id="444962" label="zzz1001,zzzz976" source="1045" target="166" cy:directed="1"/>
      <edge id="444961" label="zzz1001,zzzz181" source="1045" target="944" cy:directed="1"/>
      <edge id="444960" label="zzz1001,zzzz429" source="1045" target="696" cy:directed="1"/>
      <edge id="444959" label="zzz1001,zzzz804" source="1045" target="337" cy:directed="1"/>
      <edge id="444958" label="zzz1001,zzzzz41" source="1045" target="114" cy:directed="1"/>
      <edge id="444957" label="zzz1001,zzzz887" source="1045" target="254" cy:directed="1"/>
      <edge id="444956" label="zzz1001,zzzz180" source="1045" target="945" cy:directed="1"/>
      <edge id="444955" label="zzz1001,zzzz720" source="1045" target="421" cy:directed="1"/>
      <edge id="444954" label="zzz1001,zzzz777" source="1045" target="364" cy:directed="1"/>
      <edge id="444953" label="zzz1001,zzzz794" source="1045" target="347" cy:directed="1"/>
      <edge id="444952" label="zzz1001,zzzz431" source="1045" target="694" cy:directed="1"/>
      <edge id="444951" label="zzz1001,zzzz613" source="1045" target="528" cy:directed="1"/>
      <edge id="444950" label="zzz1001,zzzz703" source="1045" target="438" cy:directed="1"/>
      <edge id="444949" label="zzz1001,zzzzz75" source="1045" target="84" cy:directed="1"/>
      <edge id="444948" label="zzz1001,zzzz176" source="1045" target="949" cy:directed="1"/>
      <edge id="444947" label="zzz1001,zzzz174" source="1045" target="951" cy:directed="1"/>
      <edge id="444946" label="zzz1001,zzzz433" source="1045" target="692" cy:directed="1"/>
      <edge id="444945" label="zzz1001,zzzz633" source="1045" target="508" cy:directed="1"/>
      <edge id="444944" label="zzz1001,zzzz740" source="1045" target="401" cy:directed="1"/>
      <edge id="444943" label="zzz1001,zzzz758" source="1045" target="383" cy:directed="1"/>
      <edge id="444942" label="zzz1001,zzzz780" source="1045" target="361" cy:directed="1"/>
      <edge id="444941" label="zzz1001,zzzz171" source="1045" target="954" cy:directed="1"/>
      <edge id="444940" label="zzz1001,zzzz250" source="1045" target="875" cy:directed="1"/>
      <edge id="444939" label="zzz1001,zzzzz24" source="1045" target="131" cy:directed="1"/>
      <edge id="444938" label="zzz1001,zzzz175" source="1045" target="950" cy:directed="1"/>
      <edge id="444937" label="zzz1001,zzzz704" source="1045" target="437" cy:directed="1"/>
      <edge id="444936" label="zzz1001,zzzz881" source="1045" target="260" cy:directed="1"/>
      <edge id="444935" label="zzz1001,zzzzz80" source="1045" target="79" cy:directed="1"/>
      <edge id="444934" label="zzz1001,zzzz885" source="1045" target="256" cy:directed="1"/>
      <edge id="444933" label="zzz1001,zzzz969" source="1045" target="173" cy:directed="1"/>
      <edge id="444932" label="zzz1001,zzzz671" source="1045" target="470" cy:directed="1"/>
      <edge id="444931" label="zzz1001,zzzz787" source="1045" target="354" cy:directed="1"/>
      <edge id="444930" label="zzz1001,zzzz791" source="1045" target="350" cy:directed="1"/>
      <edge id="444929" label="zzz1001,zzzz184" source="1045" target="941" cy:directed="1"/>
      <edge id="444928" label="zzz1001,zzzz779" source="1045" target="362" cy:directed="1"/>
      <edge id="444927" label="zzz1001,zzzz795" source="1045" target="346" cy:directed="1"/>
      <edge id="444926" label="zzz1001,zzzz798" source="1045" target="343" cy:directed="1"/>
      <edge id="444925" label="zzz1001,zzzz954" source="1045" target="187" cy:directed="1"/>
      <edge id="444924" label="zzz1001,zzzz439" source="1045" target="686" cy:directed="1"/>
      <edge id="444923" label="zzz1001,zzzz712" source="1045" target="429" cy:directed="1"/>
      <edge id="444922" label="zzz1001,zzzz757" source="1045" target="384" cy:directed="1"/>
      <edge id="444921" label="zzz1001,zzzz685" source="1045" target="456" cy:directed="1"/>
      <edge id="444920" label="zzz1001,zzzz697" source="1045" target="444" cy:directed="1"/>
      <edge id="444919" label="zzz1001,zzzz812" source="1045" target="329" cy:directed="1"/>
      <edge id="444918" label="zzz1001,zzzzz40" source="1045" target="115" cy:directed="1"/>
      <edge id="444917" label="zzz1001,zzzz194" source="1045" target="931" cy:directed="1"/>
      <edge id="444916" label="zzz1001,zzzz415" source="1045" target="710" cy:directed="1"/>
      <edge id="444915" label="zzz1001,zzzz615" source="1045" target="526" cy:directed="1"/>
      <edge id="444914" label="zzz1001,zzzz637" source="1045" target="504" cy:directed="1"/>
      <edge id="444913" label="zzz1001,zzzz719" source="1045" target="422" cy:directed="1"/>
      <edge id="444912" label="zzz1001,zzzz170" source="1045" target="955" cy:directed="1"/>
      <edge id="444911" label="zzz1001,zzzz299" source="1045" target="826" cy:directed="1"/>
      <edge id="444910" label="zzz1001,zzzz511" source="1045" target="630" cy:directed="1"/>
      <edge id="444909" label="zzz1001,zzzz631" source="1045" target="510" cy:directed="1"/>
      <edge id="444908" label="zzz1001,zzzz173" source="1045" target="952" cy:directed="1"/>
      <edge id="444907" label="zzz1001,zzzz416" source="1045" target="709" cy:directed="1"/>
      <edge id="444906" label="zzz1001,zzzz427" source="1045" target="698" cy:directed="1"/>
      <edge id="444905" label="zzz1001,zzzz648" source="1045" target="493" cy:directed="1"/>
      <edge id="444904" label="zzz1001,zzzz955" source="1045" target="186" cy:directed="1"/>
      <edge id="444903" label="zzz1001,zzzz410" source="1045" target="715" cy:directed="1"/>
      <edge id="444902" label="zzz1001,zzzz678" source="1045" target="463" cy:directed="1"/>
      <edge id="444901" label="zzz1001,zzzz736" source="1045" target="405" cy:directed="1"/>
      <edge id="444900" label="zzz1001,zzzz420" source="1045" target="705" cy:directed="1"/>
      <edge id="444899" label="zzz1001,zzzz425" source="1045" target="700" cy:directed="1"/>
      <edge id="444898" label="zzz1001,zzzz781" source="1045" target="360" cy:directed="1"/>
      <edge id="444897" label="zzz1001,zzzz669" source="1045" target="472" cy:directed="1"/>
      <edge id="444896" label="zzz1001,zzzz765" source="1045" target="376" cy:directed="1"/>
      <edge id="444895" label="zzz1001,zzzz185" source="1045" target="940" cy:directed="1"/>
      <edge id="444894" label="zzz1001,zzzz303" source="1045" target="822" cy:directed="1"/>
      <edge id="444893" label="zzz1001,zzzz304" source="1045" target="821" cy:directed="1"/>
      <edge id="444892" label="zzz1001,zzzz438" source="1045" target="687" cy:directed="1"/>
      <edge id="444891" label="zzz1001,zzzz923" source="1045" target="218" cy:directed="1"/>
      <edge id="444890" label="zzz1001,zzzzz22" source="1045" target="133" cy:directed="1"/>
      <edge id="444889" label="zzz1001,zzzz414" source="1045" target="711" cy:directed="1"/>
      <edge id="444888" label="zzz1001,zzzz744" source="1045" target="397" cy:directed="1"/>
      <edge id="444887" label="zzz1001,zzzz189" source="1045" target="936" cy:directed="1"/>
      <edge id="444886" label="zzz1001,zzzz883" source="1045" target="258" cy:directed="1"/>
      <edge id="444885" label="zzz1001,zzzz749" source="1045" target="392" cy:directed="1"/>
      <edge id="444884" label="zzz1001,zzzz803" source="1045" target="338" cy:directed="1"/>
      <edge id="444883" label="zzz1001,zzzz852" source="1045" target="289" cy:directed="1"/>
      <edge id="444882" label="zzz1001,zzzz514" source="1045" target="627" cy:directed="1"/>
      <edge id="444881" label="zzz1001,zzzz802" source="1045" target="339" cy:directed="1"/>
      <edge id="444880" label="zzz1001,zzzz422" source="1045" target="703" cy:directed="1"/>
      <edge id="444879" label="zzz1001,zzzz875" source="1045" target="266" cy:directed="1"/>
      <edge id="444878" label="zzz1001,zzzz188" source="1045" target="937" cy:directed="1"/>
      <edge id="444877" label="zzz1001,zzzz516" source="1045" target="625" cy:directed="1"/>
      <edge id="444876" label="zzz1001,zzzz909" source="1045" target="232" cy:directed="1"/>
      <edge id="444875" label="zzz1001,zzzz187" source="1045" target="938" cy:directed="1"/>
      <edge id="444874" label="zzz1001,zzzz714" source="1045" target="427" cy:directed="1"/>
      <edge id="444873" label="zzz1001,zzzz349" source="1045" target="776" cy:directed="1"/>
      <edge id="444872" label="zzz1001,zzzz383" source="1045" target="742" cy:directed="1"/>
      <edge id="444871" label="zzz1001,zzzz436" source="1045" target="689" cy:directed="1"/>
      <edge id="444870" label="zzz1001,zzzz437" source="1045" target="688" cy:directed="1"/>
      <edge id="444869" label="zzz1001,zzzz442" source="1045" target="683" cy:directed="1"/>
      <edge id="444868" label="zzz1001,zzzz202" source="1045" target="923" cy:directed="1"/>
      <edge id="444867" label="zzz1001,zzzz370" source="1045" target="755" cy:directed="1"/>
      <edge id="444866" label="zzz1001,zzzz766" source="1045" target="375" cy:directed="1"/>
      <edge id="444865" label="zzz1001,zzzz371" source="1045" target="754" cy:directed="1"/>
      <edge id="444864" label="zzz1001,zzzz374" source="1045" target="751" cy:directed="1"/>
      <edge id="444863" label="zzz1001,zzzz463" source="1045" target="677" cy:directed="1"/>
      <edge id="444862" label="zzz1001,zzzz747" source="1045" target="394" cy:directed="1"/>
      <edge id="444861" label="zzz1001,zzzzz26" source="1045" target="129" cy:directed="1"/>
      <edge id="444860" label="zzz1001,zzzzz32" source="1045" target="123" cy:directed="1"/>
      <edge id="444859" label="zzz1001,zzzzz42" source="1045" target="113" cy:directed="1"/>
      <edge id="444858" label="zzz1001,zzz1015" source="1045" target="1031" cy:directed="1"/>
      <edge id="444857" label="zzz1001,zzzz419" source="1045" target="706" cy:directed="1"/>
      <edge id="444856" label="zzz1001,zzzz440" source="1045" target="685" cy:directed="1"/>
      <edge id="444855" label="zzz1001,zzzz473" source="1045" target="667" cy:directed="1"/>
      <edge id="444854" label="zzz1001,zzzz694" source="1045" target="447" cy:directed="1"/>
      <edge id="444853" label="zzz1001,zzzz793" source="1045" target="348" cy:directed="1"/>
      <edge id="444852" label="zzz1001,zzzz805" source="1045" target="336" cy:directed="1"/>
      <edge id="444851" label="zzz1001,zzzz872" source="1045" target="269" cy:directed="1"/>
      <edge id="444850" label="zzz1001,zzzzz89" source="1045" target="72" cy:directed="1"/>
      <edge id="444849" label="zzz1001,zzzz381" source="1045" target="744" cy:directed="1"/>
      <edge id="444848" label="zzz1001,zzzz661" source="1045" target="480" cy:directed="1"/>
      <edge id="444847" label="zzz1001,zzzz997" source="1045" target="145" cy:directed="1"/>
      <edge id="444846" label="zzz1001,zzzz807" source="1045" target="334" cy:directed="1"/>
      <edge id="444845" label="zzz1001,zzzz856" source="1045" target="285" cy:directed="1"/>
      <edge id="444844" label="zzz1001,zzzz379" source="1045" target="746" cy:directed="1"/>
      <edge id="444843" label="zzz1001,zzzz788" source="1045" target="353" cy:directed="1"/>
      <edge id="444842" label="zzz1001,zzzzz36" source="1045" target="119" cy:directed="1"/>
      <edge id="444841" label="zzz1001,zzzz172" source="1045" target="953" cy:directed="1"/>
      <edge id="444840" label="zzz1001,zzzz221" source="1045" target="904" cy:directed="1"/>
      <edge id="444839" label="zzz1001,zzzz418" source="1045" target="707" cy:directed="1"/>
      <edge id="444838" label="zzz1001,zzzz783" source="1045" target="358" cy:directed="1"/>
      <edge id="444837" label="zzz1001,zzzz482" source="1045" target="658" cy:directed="1"/>
      <edge id="444836" label="zzz1001,zzzz585" source="1045" target="556" cy:directed="1"/>
      <edge id="444835" label="zzz1001,zzzz759" source="1045" target="382" cy:directed="1"/>
      <edge id="444834" label="zzz1001,zzzz786" source="1045" target="355" cy:directed="1"/>
      <edge id="444833" label="zzz1001,zzzz867" source="1045" target="274" cy:directed="1"/>
      <edge id="444832" label="zzz1001,zzzz307" source="1045" target="818" cy:directed="1"/>
      <edge id="444831" label="zzz1001,zzzz331" source="1045" target="794" cy:directed="1"/>
      <edge id="444830" label="zzz1001,zzzz380" source="1045" target="745" cy:directed="1"/>
      <edge id="444829" label="zzz1001,zzzz435" source="1045" target="690" cy:directed="1"/>
      <edge id="444828" label="zzz1001,zzzzz30" source="1045" target="125" cy:directed="1"/>
      <edge id="444827" label="zzz1001,zzzz226" source="1045" target="899" cy:directed="1"/>
      <edge id="444826" label="zzz1001,zzzz806" source="1045" target="335" cy:directed="1"/>
      <edge id="444825" label="zzz1001,zzzz186" source="1045" target="939" cy:directed="1"/>
      <edge id="444824" label="zzz1001,zzzz378" source="1045" target="747" cy:directed="1"/>
      <edge id="444823" label="zzz1001,zzzz321" source="1045" target="804" cy:directed="1"/>
      <edge id="444822" label="zzz1001,zzzz375" source="1045" target="750" cy:directed="1"/>
      <edge id="444821" label="zzz1001,zzzz956" source="1045" target="185" cy:directed="1"/>
      <edge id="444820" label="zzz1001,zzzz344" source="1045" target="781" cy:directed="1"/>
      <edge id="444819" label="zzz1001,zzzz869" source="1045" target="272" cy:directed="1"/>
      <edge id="444818" label="zzz1001,zzzz145" source="1045" target="980" cy:directed="1"/>
      <edge id="444817" label="zzz1001,zzzz877" source="1045" target="264" cy:directed="1"/>
      <edge id="444816" label="zzz1001,zzzz434" source="1045" target="691" cy:directed="1"/>
      <edge id="444815" label="zzz1001,zzzzz31" source="1045" target="124" cy:directed="1"/>
      <edge id="444814" label="zzz1001,zzzz799" source="1045" target="342" cy:directed="1"/>
      <edge id="444813" label="zzz1001,zzzz341" source="1045" target="784" cy:directed="1"/>
      <edge id="444812" label="zzz1001,zzzz409" source="1045" target="716" cy:directed="1"/>
      <edge id="444811" label="zzz1001,zzzz769" source="1045" target="372" cy:directed="1"/>
      <edge id="444810" label="zzz1001,zzzz797" source="1045" target="344" cy:directed="1"/>
      <edge id="444809" label="zzz1001,zzzz245" source="1045" target="880" cy:directed="1"/>
      <edge id="444808" label="zzz1001,zzzz306" source="1045" target="819" cy:directed="1"/>
      <edge id="444807" label="zzz1001,zzzzz23" source="1045" target="132" cy:directed="1"/>
      <edge id="444806" label="zzz1001,zzz1012" source="1045" target="1034" cy:directed="1"/>
      <edge id="444805" label="zzz1001,zzzz232" source="1045" target="893" cy:directed="1"/>
      <edge id="444804" label="zzz1001,zzzz424" source="1045" target="701" cy:directed="1"/>
      <edge id="444803" label="zzz1001,zzzz686" source="1045" target="455" cy:directed="1"/>
      <edge id="444802" label="zzz1001,zzzz751" source="1045" target="390" cy:directed="1"/>
      <edge id="444801" label="zzz1001,zzzz961" source="1045" target="180" cy:directed="1"/>
      <edge id="444800" label="zzz1001,zzzz208" source="1045" target="917" cy:directed="1"/>
      <edge id="444799" label="zzz1001,zzzz301" source="1045" target="824" cy:directed="1"/>
      <edge id="444798" label="zzz1001,zzzz408" source="1045" target="717" cy:directed="1"/>
      <edge id="444797" label="zzz1001,zzzz230" source="1045" target="895" cy:directed="1"/>
      <edge id="444796" label="zzz1001,zzzz238" source="1045" target="887" cy:directed="1"/>
      <edge id="444795" label="zzz1001,zzzz279" source="1045" target="846" cy:directed="1"/>
      <edge id="444794" label="zzz1001,zzzz393" source="1045" target="732" cy:directed="1"/>
      <edge id="444793" label="zzz1001,zzzz411" source="1045" target="714" cy:directed="1"/>
      <edge id="444792" label="zzz1001,zzzz212" source="1045" target="913" cy:directed="1"/>
      <edge id="444791" label="zzz1001,zzzz262" source="1045" target="863" cy:directed="1"/>
      <edge id="444790" label="zzz1001,zzzz270" source="1045" target="855" cy:directed="1"/>
      <edge id="444789" label="zzz1001,zzzz286" source="1045" target="839" cy:directed="1"/>
      <edge id="444788" label="zzz1001,zzzz690" source="1045" target="451" cy:directed="1"/>
      <edge id="444787" label="zzz1001,zzzz693" source="1045" target="448" cy:directed="1"/>
      <edge id="444786" label="zzz1001,zzzz815" source="1045" target="326" cy:directed="1"/>
      <edge id="444785" label="zzz1001,zzzz259" source="1045" target="866" cy:directed="1"/>
      <edge id="444784" label="zzz1001,zzzz395" source="1045" target="730" cy:directed="1"/>
      <edge id="444783" label="zzz1001,zzzz412" source="1045" target="713" cy:directed="1"/>
      <edge id="444782" label="zzz1001,zzzz742" source="1045" target="399" cy:directed="1"/>
      <edge id="444781" label="zzz1001,zzzz874" source="1045" target="267" cy:directed="1"/>
      <edge id="444780" label="zzz1001,zzzz889" source="1045" target="252" cy:directed="1"/>
      <edge id="444779" label="zzz1001,zzzz711" source="1045" target="430" cy:directed="1"/>
      <edge id="444778" label="zzz1001,zzzz177" source="1045" target="948" cy:directed="1"/>
      <edge id="444777" label="zzz1001,zzzz248" source="1045" target="877" cy:directed="1"/>
      <edge id="444776" label="zzz1001,zzzz252" source="1045" target="873" cy:directed="1"/>
      <edge id="444775" label="zzz1001,zzzz283" source="1045" target="842" cy:directed="1"/>
      <edge id="444774" label="zzz1001,zzzz593" source="1045" target="548" cy:directed="1"/>
      <edge id="444773" label="zzz1001,zzzz716" source="1045" target="425" cy:directed="1"/>
      <edge id="444772" label="zzz1001,zzzz771" source="1045" target="370" cy:directed="1"/>
      <edge id="444771" label="zzz1001,zzzz265" source="1045" target="860" cy:directed="1"/>
      <edge id="444770" label="zzz1001,zzzz278" source="1045" target="847" cy:directed="1"/>
      <edge id="444769" label="zzz1001,zzzz362" source="1045" target="763" cy:directed="1"/>
      <edge id="444768" label="zzz1001,zzzz413" source="1045" target="712" cy:directed="1"/>
      <edge id="444767" label="zzz1001,zzzz222" source="1045" target="903" cy:directed="1"/>
      <edge id="444766" label="zzz1001,zzzz243" source="1045" target="882" cy:directed="1"/>
      <edge id="444765" label="zzz1001,zzzz254" source="1045" target="871" cy:directed="1"/>
      <edge id="444764" label="zzz1001,zzzz351" source="1045" target="774" cy:directed="1"/>
      <edge id="444763" label="zzz1001,zzzz948" source="1045" target="193" cy:directed="1"/>
      <edge id="444762" label="zzz1001,zzzz237" source="1045" target="888" cy:directed="1"/>
      <edge id="444761" label="zzz1001,zzzz537" source="1045" target="604" cy:directed="1"/>
      <edge id="444760" label="zzz1001,zzzz888" source="1045" target="253" cy:directed="1"/>
      <edge id="444759" label="zzz1001,zzzz227" source="1045" target="898" cy:directed="1"/>
      <edge id="444758" label="zzz1001,zzzz284" source="1045" target="841" cy:directed="1"/>
      <edge id="444757" label="zzz1001,zzzz328" source="1045" target="797" cy:directed="1"/>
      <edge id="444756" label="zzz1001,zzzz392" source="1045" target="733" cy:directed="1"/>
      <edge id="444755" label="zzz1001,zzzz426" source="1045" target="699" cy:directed="1"/>
      <edge id="444754" label="zzz1001,zzzz118" source="1045" target="1007" cy:directed="1"/>
      <edge id="444753" label="zzz1001,zzzz325" source="1045" target="800" cy:directed="1"/>
      <edge id="444752" label="zzz1001,zzzz352" source="1045" target="773" cy:directed="1"/>
      <edge id="444751" label="zzz1001,zzzz367" source="1045" target="758" cy:directed="1"/>
      <edge id="444750" label="zzz1001,zzzz595" source="1045" target="546" cy:directed="1"/>
      <edge id="444749" label="zzz1001,zzzz963" source="1045" target="178" cy:directed="1"/>
      <edge id="444748" label="zzz1001,zzzz964" source="1045" target="177" cy:directed="1"/>
      <edge id="444747" label="zzz1001,zzzzz35" source="1045" target="120" cy:directed="1"/>
      <edge id="444746" label="zzz1001,zzzz276" source="1045" target="849" cy:directed="1"/>
      <edge id="444745" label="zzz1001,zzzz319" source="1045" target="806" cy:directed="1"/>
      <edge id="444744" label="zzz1001,zzzz346" source="1045" target="779" cy:directed="1"/>
      <edge id="444743" label="zzz1001,zzzz355" source="1045" target="770" cy:directed="1"/>
      <edge id="444742" label="zzz1001,zzzz382" source="1045" target="743" cy:directed="1"/>
      <edge id="444741" label="zzz1001,zzzz389" source="1045" target="736" cy:directed="1"/>
      <edge id="444740" label="zzz1001,zzzz692" source="1045" target="449" cy:directed="1"/>
      <edge id="444739" label="zzz1001,zzzz296" source="1045" target="829" cy:directed="1"/>
      <edge id="444738" label="zzz1001,zzzz338" source="1045" target="787" cy:directed="1"/>
      <edge id="444737" label="zzz1001,zzzz340" source="1045" target="785" cy:directed="1"/>
      <edge id="444736" label="zzz1001,zzzz356" source="1045" target="769" cy:directed="1"/>
      <edge id="444735" label="zzz1001,zzzz363" source="1045" target="762" cy:directed="1"/>
      <edge id="444734" label="zzz1001,zzzz386" source="1045" target="739" cy:directed="1"/>
      <edge id="444733" label="zzz1001,zzzz391" source="1045" target="734" cy:directed="1"/>
      <edge id="444732" label="zzz1001,zzzz211" source="1045" target="914" cy:directed="1"/>
      <edge id="444731" label="zzz1001,zzzz239" source="1045" target="886" cy:directed="1"/>
      <edge id="444730" label="zzz1001,zzzz251" source="1045" target="874" cy:directed="1"/>
      <edge id="444729" label="zzz1001,zzzz345" source="1045" target="780" cy:directed="1"/>
      <edge id="444728" label="zzz1001,zzzz364" source="1045" target="761" cy:directed="1"/>
      <edge id="444727" label="zzz1001,zzzz323" source="1045" target="802" cy:directed="1"/>
      <edge id="444726" label="zzz1001,zzzz198" source="1045" target="927" cy:directed="1"/>
      <edge id="444725" label="zzz1001,zzzz281" source="1045" target="844" cy:directed="1"/>
      <edge id="444724" label="zzz1001,zzzz287" source="1045" target="838" cy:directed="1"/>
      <edge id="444723" label="zzz1001,zzzz288" source="1045" target="837" cy:directed="1"/>
      <edge id="444722" label="zzz1001,zzzz317" source="1045" target="808" cy:directed="1"/>
      <edge id="444721" label="zzz1001,zzzz361" source="1045" target="764" cy:directed="1"/>
      <edge id="444720" label="zzz1001,zzzz472" source="1045" target="668" cy:directed="1"/>
      <edge id="444719" label="zzz1001,zzzz249" source="1045" target="876" cy:directed="1"/>
      <edge id="444718" label="zzz1001,zzzz314" source="1045" target="811" cy:directed="1"/>
      <edge id="444717" label="zzz1001,zzzz333" source="1045" target="792" cy:directed="1"/>
      <edge id="444716" label="zzz1001,zzzz350" source="1045" target="775" cy:directed="1"/>
      <edge id="444715" label="zzz1001,zzzz218" source="1045" target="907" cy:directed="1"/>
      <edge id="444714" label="zzz1001,zzzz244" source="1045" target="881" cy:directed="1"/>
      <edge id="444713" label="zzz1001,zzzz264" source="1045" target="861" cy:directed="1"/>
      <edge id="444712" label="zzz1001,zzzz266" source="1045" target="859" cy:directed="1"/>
      <edge id="444711" label="zzz1001,zzzz330" source="1045" target="795" cy:directed="1"/>
      <edge id="444710" label="zzz1001,zzzz353" source="1045" target="772" cy:directed="1"/>
      <edge id="444709" label="zzz1001,zzzz377" source="1045" target="748" cy:directed="1"/>
      <edge id="444708" label="zzz1001,zzz1011" source="1045" target="1035" cy:directed="1"/>
      <edge id="444707" label="zzz1001,zzzz298" source="1045" target="827" cy:directed="1"/>
      <edge id="444706" label="zzz1001,zzzz329" source="1045" target="796" cy:directed="1"/>
      <edge id="444705" label="zzz1001,zzzz342" source="1045" target="783" cy:directed="1"/>
      <edge id="444704" label="zzz1001,zzzz359" source="1045" target="766" cy:directed="1"/>
      <edge id="444703" label="zzz1001,zzzz417" source="1045" target="708" cy:directed="1"/>
      <edge id="444702" label="zzz1001,zzzz563" source="1045" target="578" cy:directed="1"/>
      <edge id="444701" label="zzz1001,zzzz231" source="1045" target="894" cy:directed="1"/>
      <edge id="444700" label="zzz1001,zzzz241" source="1045" target="884" cy:directed="1"/>
      <edge id="444699" label="zzz1001,zzzz271" source="1045" target="854" cy:directed="1"/>
      <edge id="444698" label="zzz1001,zzzz926" source="1045" target="215" cy:directed="1"/>
      <edge id="444697" label="zzz1001,zzzzz29" source="1045" target="126" cy:directed="1"/>
      <edge id="444696" label="zzz1001,zzzz308" source="1045" target="817" cy:directed="1"/>
      <edge id="444695" label="zzz1001,zzzz390" source="1045" target="735" cy:directed="1"/>
      <edge id="444694" label="zzz1001,zzzz394" source="1045" target="731" cy:directed="1"/>
      <edge id="444693" label="zzz1001,zzzz423" source="1045" target="702" cy:directed="1"/>
      <edge id="444692" label="zzz1001,zzzz933" source="1045" target="208" cy:directed="1"/>
      <edge id="444691" label="zzz1001,zzzz246" source="1045" target="879" cy:directed="1"/>
      <edge id="444690" label="zzz1001,zzzz229" source="1045" target="896" cy:directed="1"/>
      <edge id="444689" label="zzz1001,zzzz247" source="1045" target="878" cy:directed="1"/>
      <edge id="444688" label="zzz1001,zzzz253" source="1045" target="872" cy:directed="1"/>
      <edge id="444687" label="zzz1001,zzzz354" source="1045" target="771" cy:directed="1"/>
      <edge id="444686" label="zzz1001,zzzz357" source="1045" target="768" cy:directed="1"/>
      <edge id="444685" label="zzz1001,zzzz225" source="1045" target="900" cy:directed="1"/>
      <edge id="444684" label="zzz1001,zzzz339" source="1045" target="786" cy:directed="1"/>
      <edge id="444683" label="zzz1001,zzzz348" source="1045" target="777" cy:directed="1"/>
      <edge id="444682" label="zzz1001,zzzz443" source="1045" target="682" cy:directed="1"/>
      <edge id="444681" label="zzz1001,zzzz335" source="1045" target="790" cy:directed="1"/>
      <edge id="444680" label="zzz1001,zzzz336" source="1045" target="789" cy:directed="1"/>
      <edge id="444679" label="zzz1001,zzzz366" source="1045" target="759" cy:directed="1"/>
      <edge id="444678" label="zzz1001,zzzz376" source="1045" target="749" cy:directed="1"/>
      <edge id="444677" label="zzz1001,zzzz384" source="1045" target="741" cy:directed="1"/>
      <edge id="444676" label="zzz1001,zzzz444" source="1045" target="681" cy:directed="1"/>
      <edge id="444675" label="zzz1001,zzzzz90" source="1045" target="71" cy:directed="1"/>
      <edge id="444674" label="zzz1001,zzzz274" source="1045" target="851" cy:directed="1"/>
      <edge id="444673" label="zzz1001,zzzz228" source="1045" target="897" cy:directed="1"/>
      <edge id="444672" label="zzz1001,zzzz233" source="1045" target="892" cy:directed="1"/>
      <edge id="444671" label="zzz1001,zzzz292" source="1045" target="833" cy:directed="1"/>
      <edge id="444670" label="zzz1001,zzzz295" source="1045" target="830" cy:directed="1"/>
      <edge id="444669" label="zzz1001,zzzz193" source="1045" target="932" cy:directed="1"/>
      <edge id="444668" label="zzz1001,zzzz280" source="1045" target="845" cy:directed="1"/>
      <edge id="444667" label="zzz1001,zzzz368" source="1045" target="757" cy:directed="1"/>
      <edge id="444666" label="zzz1001,zzzz372" source="1045" target="753" cy:directed="1"/>
      <edge id="444665" label="zzz1001,zzzz261" source="1045" target="864" cy:directed="1"/>
      <edge id="444664" label="zzz1001,zzzz311" source="1045" target="814" cy:directed="1"/>
      <edge id="444663" label="zzz1001,zzzz315" source="1045" target="810" cy:directed="1"/>
      <edge id="444662" label="zzz1001,zzzz324" source="1045" target="801" cy:directed="1"/>
      <edge id="444661" label="zzz1001,zzzz337" source="1045" target="788" cy:directed="1"/>
      <edge id="444660" label="zzz1001,zzzz282" source="1045" target="843" cy:directed="1"/>
      <edge id="444659" label="zzz1001,zzzz332" source="1045" target="793" cy:directed="1"/>
      <edge id="444658" label="zzz1001,zzzz369" source="1045" target="756" cy:directed="1"/>
      <edge id="444657" label="zzz1001,zzzz215" source="1045" target="910" cy:directed="1"/>
      <edge id="444656" label="zzz1001,zzzz285" source="1045" target="840" cy:directed="1"/>
      <edge id="444655" label="zzz1001,zzzzz27" source="1045" target="128" cy:directed="1"/>
      <edge id="444654" label="zzz1001,zzzz269" source="1045" target="856" cy:directed="1"/>
      <edge id="444653" label="zzz1001,zzzz275" source="1045" target="850" cy:directed="1"/>
      <edge id="444652" label="zzz1001,zzzz217" source="1045" target="908" cy:directed="1"/>
      <edge id="444651" label="zzz1001,zzzz219" source="1045" target="906" cy:directed="1"/>
      <edge id="444650" label="zzz1001,zzzz236" source="1045" target="889" cy:directed="1"/>
      <edge id="444649" label="zzz1001,zzzz302" source="1045" target="823" cy:directed="1"/>
      <edge id="444648" label="zzz1001,zzzz402" source="1045" target="723" cy:directed="1"/>
      <edge id="444647" label="zzz1001,zzzz612" source="1045" target="529" cy:directed="1"/>
      <edge id="444646" label="zzz1001,zzzz908" source="1045" target="233" cy:directed="1"/>
      <edge id="444645" label="zzz1001,zzzzz91" source="1045" target="70" cy:directed="1"/>
      <edge id="444644" label="zzz1001,zzzz209" source="1045" target="916" cy:directed="1"/>
      <edge id="444643" label="zzz1001,zzzz289" source="1045" target="836" cy:directed="1"/>
      <edge id="444642" label="zzz1001,zzzz475" source="1045" target="665" cy:directed="1"/>
      <edge id="444641" label="zzz1001,zzzz210" source="1045" target="915" cy:directed="1"/>
      <edge id="444640" label="zzz1001,zzzz358" source="1045" target="767" cy:directed="1"/>
      <edge id="444639" label="zzz1001,zzzz223" source="1045" target="902" cy:directed="1"/>
      <edge id="444638" label="zzz1001,zzzz224" source="1045" target="901" cy:directed="1"/>
      <edge id="444637" label="zzz1001,zzzz291" source="1045" target="834" cy:directed="1"/>
      <edge id="444636" label="zzz1001,zzzz347" source="1045" target="778" cy:directed="1"/>
      <edge id="444635" label="zzz1001,zzzz272" source="1045" target="853" cy:directed="1"/>
      <edge id="444634" label="zzz1001,zzzz207" source="1045" target="918" cy:directed="1"/>
      <edge id="444633" label="zzz1001,zzzz242" source="1045" target="883" cy:directed="1"/>
      <edge id="444632" label="zzz1001,zzzz255" source="1045" target="870" cy:directed="1"/>
      <edge id="444631" label="zzz1001,zzzz300" source="1045" target="825" cy:directed="1"/>
      <edge id="444630" label="zzz1001,zzzz334" source="1045" target="791" cy:directed="1"/>
      <edge id="444629" label="zzz1001,zzzz387" source="1045" target="738" cy:directed="1"/>
      <edge id="444628" label="zzz1001,zzzz388" source="1045" target="737" cy:directed="1"/>
      <edge id="444627" label="zzz1001,zzzz191" source="1045" target="934" cy:directed="1"/>
      <edge id="444626" label="zzz1001,zzzz263" source="1045" target="862" cy:directed="1"/>
      <edge id="444625" label="zzz1001,zzzz441" source="1045" target="684" cy:directed="1"/>
      <edge id="444624" label="zzz1001,zzzz213" source="1045" target="912" cy:directed="1"/>
      <edge id="444623" label="zzz1001,zzzz911" source="1045" target="230" cy:directed="1"/>
      <edge id="444622" label="zzz1001,zzzz235" source="1045" target="890" cy:directed="1"/>
      <edge id="444621" label="zzz1001,zzzz257" source="1045" target="868" cy:directed="1"/>
      <edge id="444620" label="zzz1001,zzzz310" source="1045" target="815" cy:directed="1"/>
      <edge id="444619" label="zzz1001,zzzz220" source="1045" target="905" cy:directed="1"/>
      <edge id="444618" label="zzz1001,zzzz421" source="1045" target="704" cy:directed="1"/>
      <edge id="444617" label="zzz1001,zzzz293" source="1045" target="832" cy:directed="1"/>
      <edge id="444616" label="zzz1001,zzzz305" source="1045" target="820" cy:directed="1"/>
      <edge id="444615" label="zzz1001,zzzz312" source="1045" target="813" cy:directed="1"/>
      <edge id="444614" label="zzz1001,zzzz322" source="1045" target="803" cy:directed="1"/>
      <edge id="444613" label="zzz1001,zzzz273" source="1045" target="852" cy:directed="1"/>
      <edge id="444612" label="zzz1001,zzzz365" source="1045" target="760" cy:directed="1"/>
      <edge id="444611" label="zzz1001,zzzz214" source="1045" target="911" cy:directed="1"/>
      <edge id="444610" label="zzz1001,zzzz290" source="1045" target="835" cy:directed="1"/>
      <edge id="444609" label="zzz1001,zzzz309" source="1045" target="816" cy:directed="1"/>
      <edge id="444608" label="zzz1001,zzzz277" source="1045" target="848" cy:directed="1"/>
      <edge id="444607" label="zzz1001,zzzz297" source="1045" target="828" cy:directed="1"/>
      <edge id="444606" label="zzz1001,zzzz258" source="1045" target="867" cy:directed="1"/>
      <edge id="444605" label="zzz1001,zzzz313" source="1045" target="812" cy:directed="1"/>
      <edge id="444604" label="zzz1001,zzzz360" source="1045" target="765" cy:directed="1"/>
      <edge id="444603" label="zzz1001,zzzz910" source="1045" target="231" cy:directed="1"/>
      <edge id="444602" label="zzz1001,zzzz179" source="1045" target="946" cy:directed="1"/>
      <edge id="444601" label="zzz1001,zzzz216" source="1045" target="909" cy:directed="1"/>
      <edge id="444600" label="zzz1001,zzzz260" source="1045" target="865" cy:directed="1"/>
      <edge id="444599" label="zzz1001,zzzz907" source="1045" target="234" cy:directed="1"/>
      <edge id="444598" label="zzz1001,zzzz912" source="1045" target="229" cy:directed="1"/>
      <edge id="444597" label="zzz1001,zzzz234" source="1045" target="891" cy:directed="1"/>
      <edge id="444596" label="zzz1001,zzzz320" source="1045" target="805" cy:directed="1"/>
      <edge id="444595" label="zzz1001,zzzz373" source="1045" target="752" cy:directed="1"/>
      <edge id="444594" label="zzz1001,zzzz240" source="1045" target="885" cy:directed="1"/>
      <edge id="444593" label="zzz1001,zzzz343" source="1045" target="782" cy:directed="1"/>
      <edge id="444592" label="zzz1001,zzzz914" source="1045" target="227" cy:directed="1"/>
      <edge id="444591" label="zzz1001,zzzz905" source="1045" target="236" cy:directed="1"/>
      <edge id="444590" label="zzz1001,zzzz951" source="1045" target="190" cy:directed="1"/>
      <edge id="444589" label="zzz1001,zzzz316" source="1045" target="809" cy:directed="1"/>
      <edge id="444588" label="zzz1001,zzzz327" source="1045" target="798" cy:directed="1"/>
      <edge id="444587" label="zzz1001,zzzz919" source="1045" target="222" cy:directed="1"/>
      <edge id="444586" label="zzz1001,zzzz196" source="1045" target="929" cy:directed="1"/>
      <edge id="444585" label="zzz1001,zzzzz49" source="1045" target="110" cy:directed="1"/>
      <edge id="444584" label="zzz1001,zzzz840" source="1045" target="301" cy:directed="1"/>
      <edge id="444583" label="zzz1001,zzzz938" source="1045" target="203" cy:directed="1"/>
      <edge id="444582" label="zzz1001,zzzz385" source="1045" target="740" cy:directed="1"/>
      <edge id="444581" label="zzz1001,zzzz400" source="1045" target="725" cy:directed="1"/>
      <edge id="444580" label="zzz1001,zzzz952" source="1045" target="189" cy:directed="1"/>
      <edge id="444579" label="zzz1001,zzzz268" source="1045" target="857" cy:directed="1"/>
      <edge id="444578" label="zzz1001,zzzz817" source="1045" target="324" cy:directed="1"/>
      <edge id="444577" label="zzz1001,zzzz294" source="1045" target="831" cy:directed="1"/>
      <edge id="444576" label="zzz1001,zzzz326" source="1045" target="799" cy:directed="1"/>
      <edge id="444575" label="zzz1001,zzzz267" source="1045" target="858" cy:directed="1"/>
      <edge id="444574" label="zzz1001,zzzz318" source="1045" target="807" cy:directed="1"/>
      <edge id="444573" label="zzz1001,zzzz397" source="1045" target="728" cy:directed="1"/>
      <edge id="444572" label="zzz1001,zzzz256" source="1045" target="869" cy:directed="1"/>
      <edge id="444571" label="zzz1001,zzzz401" source="1045" target="724" cy:directed="1"/>
      <edge id="444570" label="zzz1001,zzzz605" source="1045" target="536" cy:directed="1"/>
      <edge id="444569" label="zzz1001,zzzz190" source="1045" target="935" cy:directed="1"/>
      <edge id="444568" label="zzz1001,zzzz949" source="1045" target="192" cy:directed="1"/>
      <edge id="444567" label="zzz1001,zzzz498" source="1045" target="642" cy:directed="1"/>
      <edge id="444566" label="zzz1001,zzzz993" source="1045" target="149" cy:directed="1"/>
      <edge id="444565" label="zzz1001,zzzz396" source="1045" target="729" cy:directed="1"/>
      <edge id="444564" label="zzz1001,zzzz940" source="1045" target="201" cy:directed="1"/>
      <edge id="444563" label="zzz1001,zzzz506" source="1045" target="635" cy:directed="1"/>
      <edge id="444562" label="zzz1001,zzzz489" source="1045" target="651" cy:directed="1"/>
      <edge id="444561" label="zzz1001,zzzz508" source="1045" target="633" cy:directed="1"/>
      <edge id="444560" label="zzz1001,zzzz959" source="1045" target="182" cy:directed="1"/>
      <edge id="444559" label="zzz1001,zzzz487" source="1045" target="653" cy:directed="1"/>
      <edge id="444558" label="zzz1001,zzzz957" source="1045" target="184" cy:directed="1"/>
      <edge id="444557" label="zzz1001,zzzz399" source="1045" target="726" cy:directed="1"/>
      <edge id="444556" label="zzz1001,zzzz999" source="1045" target="143" cy:directed="1"/>
      <edge id="444555" label="zzz1001,zzzzz51" source="1045" target="108" cy:directed="1"/>
      <edge id="444554" label="zzz1001,zzzz953" source="1045" target="188" cy:directed="1"/>
      <edge id="444553" label="zzz1001,zzzz496" source="1045" target="644" cy:directed="1"/>
      <edge id="444552" label="zzz1001,zzzz932" source="1045" target="209" cy:directed="1"/>
      <edge id="444551" label="zzz1001,zzzz549" source="1045" target="592" cy:directed="1"/>
      <edge id="444550" label="zzz1001,zzzzz77" source="1045" target="82" cy:directed="1"/>
      <edge id="444549" label="zzz1001,zzzz398" source="1045" target="727" cy:directed="1"/>
      <edge id="444548" label="zzz1001,zzzz942" source="1045" target="199" cy:directed="1"/>
      <edge id="444547" label="zzz1001,zzzz497" source="1045" target="643" cy:directed="1"/>
      <edge id="444546" label="zzz1001,zzzz941" source="1045" target="200" cy:directed="1"/>
      <edge id="444545" label="zzz1001,zzzz994" source="1045" target="148" cy:directed="1"/>
      <edge id="444544" label="zzz1001,zzzz510" source="1045" target="631" cy:directed="1"/>
      <edge id="444543" label="zzz1001,zzzz934" source="1045" target="207" cy:directed="1"/>
      <edge id="444542" label="zzz1001,zzzz925" source="1045" target="216" cy:directed="1"/>
      <edge id="444541" label="zzz1001,zzzz494" source="1045" target="646" cy:directed="1"/>
      <edge id="444540" label="zzz1001,zzzz478" source="1045" target="662" cy:directed="1"/>
      <edge id="444539" label="zzz1001,zzzz543" source="1045" target="598" cy:directed="1"/>
      <edge id="444538" label="zzz1001,zzzz178" source="1045" target="947" cy:directed="1"/>
      <edge id="444537" label="zzz1001,zzzz939" source="1045" target="202" cy:directed="1"/>
      <edge id="444536" label="zzz1001,zzzz534" source="1045" target="607" cy:directed="1"/>
      <edge id="444535" label="zzz1001,zzzz529" source="1045" target="612" cy:directed="1"/>
      <edge id="444534" label="zzz1001,zzzz509" source="1045" target="632" cy:directed="1"/>
      <edge id="444533" label="zzz1001,zzzz542" source="1045" target="599" cy:directed="1"/>
      <edge id="444532" label="zzz1001,zzzz893" source="1045" target="248" cy:directed="1"/>
      <edge id="444531" label="zzz1001,zzzz894" source="1045" target="247" cy:directed="1"/>
      <edge id="444530" label="zzz1001,zzzz524" source="1045" target="617" cy:directed="1"/>
      <edge id="444529" label="zzz1001,zzzz540" source="1045" target="601" cy:directed="1"/>
      <edge id="444528" label="zzz1001,zzzz937" source="1045" target="204" cy:directed="1"/>
      <edge id="444527" label="zzz1001,zzzz481" source="1045" target="659" cy:directed="1"/>
      <edge id="444526" label="zzz1001,zzzz895" source="1045" target="246" cy:directed="1"/>
      <edge id="444525" label="zzz1001,zzzz892" source="1045" target="249" cy:directed="1"/>
      <edge id="444524" label="zzz1001,zzzz527" source="1045" target="614" cy:directed="1"/>
      <edge id="444523" label="zzz1001,zzzz541" source="1045" target="600" cy:directed="1"/>
      <edge id="444522" label="zzz1001,zzzz539" source="1045" target="602" cy:directed="1"/>
      <edge id="444521" label="zzz1001,zzzz535" source="1045" target="606" cy:directed="1"/>
      <edge id="444520" label="zzz1001,zzzz897" source="1045" target="244" cy:directed="1"/>
      <edge id="444519" label="zzz1001,zzzz525" source="1045" target="616" cy:directed="1"/>
      <edge id="444518" label="zzz1001,zzzz532" source="1045" target="609" cy:directed="1"/>
      <edge id="444517" label="zzz1001,zzzz544" source="1045" target="597" cy:directed="1"/>
      <edge id="444516" label="zzz1001,zzzz507" source="1045" target="634" cy:directed="1"/>
      <edge id="444515" label="zzz1001,zzzz533" source="1045" target="608" cy:directed="1"/>
      <edge id="444514" label="zzz1001,zzzz536" source="1045" target="605" cy:directed="1"/>
      <edge id="444513" label="zzz1001,zzzz528" source="1045" target="613" cy:directed="1"/>
      <edge id="444512" label="zzz1001,zzzz531" source="1045" target="610" cy:directed="1"/>
      <edge id="444511" label="zzz1001,zzzz530" source="1045" target="611" cy:directed="1"/>
      <edge id="444510" label="zzz1001,zzzz538" source="1045" target="603" cy:directed="1"/>
      <edge id="444509" label="zzz1002,zzzz924" source="1044" target="217" cy:directed="1"/>
      <edge id="444508" label="zzz1002,zzzz916" source="1044" target="225" cy:directed="1"/>
      <edge id="444507" label="zzz1002,zzzz915" source="1044" target="226" cy:directed="1"/>
      <edge id="444506" label="zzz1002,zzzz843" source="1044" target="298" cy:directed="1"/>
      <edge id="444505" label="zzz1002,zzzz403" source="1044" target="722" cy:directed="1"/>
      <edge id="444504" label="zzz1002,zzzz499" source="1044" target="641" cy:directed="1"/>
      <edge id="444503" label="zzz1002,zzzz857" source="1044" target="284" cy:directed="1"/>
      <edge id="444502" label="zzz1002,zzz1021" source="1044" target="1026" cy:directed="1"/>
      <edge id="444501" label="zzz1002,zzzz404" source="1044" target="721" cy:directed="1"/>
      <edge id="444500" label="zzz1002,zzz1010" source="1044" target="1036" cy:directed="1"/>
      <edge id="444499" label="zzz1002,zzzz679" source="1044" target="462" cy:directed="1"/>
      <edge id="444498" label="zzz1002,zzzz990" source="1044" target="152" cy:directed="1"/>
      <edge id="444497" label="zzz1002,zzzz552" source="1044" target="589" cy:directed="1"/>
      <edge id="444496" label="zzz1002,zzzz846" source="1044" target="295" cy:directed="1"/>
      <edge id="444495" label="zzz1002,zzzz844" source="1044" target="297" cy:directed="1"/>
      <edge id="444494" label="zzz1002,zzzz902" source="1044" target="239" cy:directed="1"/>
      <edge id="444493" label="zzz1002,zzzz681" source="1044" target="460" cy:directed="1"/>
      <edge id="444492" label="zzz1002,zzzzz97" source="1044" target="64" cy:directed="1"/>
      <edge id="444491" label="zzz1002,zzzz695" source="1044" target="446" cy:directed="1"/>
      <edge id="444490" label="zzz1002,zzzz701" source="1044" target="440" cy:directed="1"/>
      <edge id="444489" label="zzz1002,zzzz854" source="1044" target="287" cy:directed="1"/>
      <edge id="444488" label="zzz1002,zzzz200" source="1044" target="925" cy:directed="1"/>
      <edge id="444487" label="zzz1002,zzzz863" source="1044" target="278" cy:directed="1"/>
      <edge id="444486" label="zzz1002,zzzzz92" source="1044" target="69" cy:directed="1"/>
      <edge id="444485" label="zzz1002,zzzz562" source="1044" target="579" cy:directed="1"/>
      <edge id="444484" label="zzz1002,zzzz729" source="1044" target="412" cy:directed="1"/>
      <edge id="444483" label="zzz1002,zzzz820" source="1044" target="321" cy:directed="1"/>
      <edge id="444482" label="zzz1002,zzzz569" source="1044" target="572" cy:directed="1"/>
      <edge id="444481" label="zzz1002,zzzz971" source="1044" target="171" cy:directed="1"/>
      <edge id="444480" label="zzz1002,zzzzz94" source="1044" target="67" cy:directed="1"/>
      <edge id="444479" label="zzz1002,zzzz469" source="1044" target="671" cy:directed="1"/>
      <edge id="444478" label="zzz1002,zzzz761" source="1044" target="380" cy:directed="1"/>
      <edge id="444477" label="zzz1002,zzzz813" source="1044" target="328" cy:directed="1"/>
      <edge id="444476" label="zzz1002,zzzz930" source="1044" target="211" cy:directed="1"/>
      <edge id="444475" label="zzz1002,zzzz968" source="1044" target="174" cy:directed="1"/>
      <edge id="444474" label="zzz1002,zzzz972" source="1044" target="170" cy:directed="1"/>
      <edge id="444473" label="zzz1002,zzzz617" source="1044" target="524" cy:directed="1"/>
      <edge id="444472" label="zzz1002,zzzz654" source="1044" target="487" cy:directed="1"/>
      <edge id="444471" label="zzz1002,zzzz707" source="1044" target="434" cy:directed="1"/>
      <edge id="444470" label="zzz1002,zzzz991" source="1044" target="151" cy:directed="1"/>
      <edge id="444469" label="zzz1002,zzz1014" source="1044" target="1032" cy:directed="1"/>
      <edge id="444468" label="zzz1002,zzzz602" source="1044" target="539" cy:directed="1"/>
      <edge id="444467" label="zzz1002,zzzz667" source="1044" target="474" cy:directed="1"/>
      <edge id="444466" label="zzz1002,zzzz706" source="1044" target="435" cy:directed="1"/>
      <edge id="444465" label="zzz1002,zzzz865" source="1044" target="276" cy:directed="1"/>
      <edge id="444464" label="zzz1002,zzzz756" source="1044" target="385" cy:directed="1"/>
      <edge id="444463" label="zzz1002,zzzz973" source="1044" target="169" cy:directed="1"/>
      <edge id="444462" label="zzz1002,zzzz579" source="1044" target="562" cy:directed="1"/>
      <edge id="444461" label="zzz1002,zzzz721" source="1044" target="420" cy:directed="1"/>
      <edge id="444460" label="zzz1002,zzzz764" source="1044" target="377" cy:directed="1"/>
      <edge id="444459" label="zzz1002,zzzz992" source="1044" target="150" cy:directed="1"/>
      <edge id="444458" label="zzz1002,zzzz203" source="1044" target="922" cy:directed="1"/>
      <edge id="444457" label="zzz1002,zzzz646" source="1044" target="495" cy:directed="1"/>
      <edge id="444456" label="zzz1002,zzzz724" source="1044" target="417" cy:directed="1"/>
      <edge id="444455" label="zzz1002,zzzz851" source="1044" target="290" cy:directed="1"/>
      <edge id="444454" label="zzz1002,zzzzz54" source="1044" target="105" cy:directed="1"/>
      <edge id="444453" label="zzz1002,zzzzz69" source="1044" target="90" cy:directed="1"/>
      <edge id="444452" label="zzz1002,zzz1003" source="1044" target="1043" cy:directed="1"/>
      <edge id="444451" label="zzz1002,zzzz565" source="1044" target="576" cy:directed="1"/>
      <edge id="444450" label="zzz1002,zzzz604" source="1044" target="537" cy:directed="1"/>
      <edge id="444449" label="zzz1002,zzzz731" source="1044" target="410" cy:directed="1"/>
      <edge id="444448" label="zzz1002,zzzz732" source="1044" target="409" cy:directed="1"/>
      <edge id="444447" label="zzz1002,zzzz201" source="1044" target="924" cy:directed="1"/>
      <edge id="444446" label="zzz1002,zzzz768" source="1044" target="373" cy:directed="1"/>
      <edge id="444445" label="zzz1002,zzzz650" source="1044" target="491" cy:directed="1"/>
      <edge id="444444" label="zzz1002,zzzz837" source="1044" target="304" cy:directed="1"/>
      <edge id="444443" label="zzz1002,zzzzz96" source="1044" target="65" cy:directed="1"/>
      <edge id="444442" label="zzz1002,zzzz449" source="1044" target="678" cy:directed="1"/>
      <edge id="444441" label="zzz1002,zzzz642" source="1044" target="499" cy:directed="1"/>
      <edge id="444440" label="zzz1002,zzzz676" source="1044" target="465" cy:directed="1"/>
      <edge id="444439" label="zzz1002,zzzz986" source="1044" target="156" cy:directed="1"/>
      <edge id="444438" label="zzz1002,zzzz195" source="1044" target="930" cy:directed="1"/>
      <edge id="444437" label="zzz1002,zzzz500" source="1044" target="640" cy:directed="1"/>
      <edge id="444436" label="zzz1002,zzzz611" source="1044" target="530" cy:directed="1"/>
      <edge id="444435" label="zzz1002,zzzz620" source="1044" target="521" cy:directed="1"/>
      <edge id="444434" label="zzz1002,zzzz684" source="1044" target="457" cy:directed="1"/>
      <edge id="444433" label="zzz1002,zzzz687" source="1044" target="454" cy:directed="1"/>
      <edge id="444432" label="zzz1002,zzzz699" source="1044" target="442" cy:directed="1"/>
      <edge id="444431" label="zzz1002,zzzz718" source="1044" target="423" cy:directed="1"/>
      <edge id="444430" label="zzz1002,zzzz824" source="1044" target="317" cy:directed="1"/>
      <edge id="444429" label="zzz1002,zzzz834" source="1044" target="307" cy:directed="1"/>
      <edge id="444428" label="zzz1002,zzzzz65" source="1044" target="94" cy:directed="1"/>
      <edge id="444427" label="zzz1002,zzzz570" source="1044" target="571" cy:directed="1"/>
      <edge id="444426" label="zzz1002,zzzz599" source="1044" target="542" cy:directed="1"/>
      <edge id="444425" label="zzz1002,zzzz859" source="1044" target="282" cy:directed="1"/>
      <edge id="444424" label="zzz1002,zzzz987" source="1044" target="155" cy:directed="1"/>
      <edge id="444423" label="zzz1002,zzzzz21" source="1044" target="134" cy:directed="1"/>
      <edge id="444422" label="zzz1002,zzzzz57" source="1044" target="102" cy:directed="1"/>
      <edge id="444421" label="zzz1002,zzzz665" source="1044" target="476" cy:directed="1"/>
      <edge id="444420" label="zzz1002,zzzz702" source="1044" target="439" cy:directed="1"/>
      <edge id="444419" label="zzz1002,zzzz710" source="1044" target="431" cy:directed="1"/>
      <edge id="444418" label="zzz1002,zzzz723" source="1044" target="418" cy:directed="1"/>
      <edge id="444417" label="zzz1002,zzzz858" source="1044" target="283" cy:directed="1"/>
      <edge id="444416" label="zzz1002,zzzz899" source="1044" target="242" cy:directed="1"/>
      <edge id="444415" label="zzz1002,zzzzz78" source="1044" target="81" cy:directed="1"/>
      <edge id="444414" label="zzz1002,zzzz109" source="1044" target="1016" cy:directed="1"/>
      <edge id="444413" label="zzz1002,zzzz548" source="1044" target="593" cy:directed="1"/>
      <edge id="444412" label="zzz1002,zzzz623" source="1044" target="518" cy:directed="1"/>
      <edge id="444411" label="zzz1002,zzzz677" source="1044" target="464" cy:directed="1"/>
      <edge id="444410" label="zzz1002,zzzz728" source="1044" target="413" cy:directed="1"/>
      <edge id="444409" label="zzz1002,zzzz868" source="1044" target="273" cy:directed="1"/>
      <edge id="444408" label="zzz1002,zzzz465" source="1044" target="675" cy:directed="1"/>
      <edge id="444407" label="zzz1002,zzzz638" source="1044" target="503" cy:directed="1"/>
      <edge id="444406" label="zzz1002,zzzz705" source="1044" target="436" cy:directed="1"/>
      <edge id="444405" label="zzz1002,zzzz739" source="1044" target="402" cy:directed="1"/>
      <edge id="444404" label="zzz1002,zzzz643" source="1044" target="498" cy:directed="1"/>
      <edge id="444403" label="zzz1002,zzzz670" source="1044" target="471" cy:directed="1"/>
      <edge id="444402" label="zzz1002,zzzz674" source="1044" target="467" cy:directed="1"/>
      <edge id="444401" label="zzz1002,zzzz823" source="1044" target="318" cy:directed="1"/>
      <edge id="444400" label="zzz1002,zzzz841" source="1044" target="300" cy:directed="1"/>
      <edge id="444399" label="zzz1002,zzzz974" source="1044" target="168" cy:directed="1"/>
      <edge id="444398" label="zzz1002,zzzz108" source="1044" target="1017" cy:directed="1"/>
      <edge id="444397" label="zzz1002,zzzz662" source="1044" target="479" cy:directed="1"/>
      <edge id="444396" label="zzz1002,zzzz733" source="1044" target="408" cy:directed="1"/>
      <edge id="444395" label="zzz1002,zzzz828" source="1044" target="313" cy:directed="1"/>
      <edge id="444394" label="zzz1002,zzzz847" source="1044" target="294" cy:directed="1"/>
      <edge id="444393" label="zzz1002,zzzz921" source="1044" target="220" cy:directed="1"/>
      <edge id="444392" label="zzz1002,zzzzz18" source="1044" target="137" cy:directed="1"/>
      <edge id="444391" label="zzz1002,zzzzz93" source="1044" target="68" cy:directed="1"/>
      <edge id="444390" label="zzz1002,zzzz561" source="1044" target="580" cy:directed="1"/>
      <edge id="444389" label="zzz1002,zzzz606" source="1044" target="535" cy:directed="1"/>
      <edge id="444388" label="zzz1002,zzzz755" source="1044" target="386" cy:directed="1"/>
      <edge id="444387" label="zzz1002,zzzz842" source="1044" target="299" cy:directed="1"/>
      <edge id="444386" label="zzz1002,zzzz982" source="1044" target="160" cy:directed="1"/>
      <edge id="444385" label="zzz1002,zzzz101" source="1044" target="1024" cy:directed="1"/>
      <edge id="444384" label="zzz1002,zzzz659" source="1044" target="482" cy:directed="1"/>
      <edge id="444383" label="zzz1002,zzzz748" source="1044" target="393" cy:directed="1"/>
      <edge id="444382" label="zzz1002,zzzz848" source="1044" target="293" cy:directed="1"/>
      <edge id="444381" label="zzz1002,zzzz880" source="1044" target="261" cy:directed="1"/>
      <edge id="444380" label="zzz1002,zzzz110" source="1044" target="1015" cy:directed="1"/>
      <edge id="444379" label="zzz1002,zzzz663" source="1044" target="478" cy:directed="1"/>
      <edge id="444378" label="zzz1002,zzzz673" source="1044" target="468" cy:directed="1"/>
      <edge id="444377" label="zzz1002,zzzz735" source="1044" target="406" cy:directed="1"/>
      <edge id="444376" label="zzz1002,zzzz814" source="1044" target="327" cy:directed="1"/>
      <edge id="444375" label="zzz1002,zzzz873" source="1044" target="268" cy:directed="1"/>
      <edge id="444374" label="zzz1002,zzzzz19" source="1044" target="136" cy:directed="1"/>
      <edge id="444373" label="zzz1002,zzzz639" source="1044" target="502" cy:directed="1"/>
      <edge id="444372" label="zzz1002,zzzz754" source="1044" target="387" cy:directed="1"/>
      <edge id="444371" label="zzz1002,zzzz882" source="1044" target="259" cy:directed="1"/>
      <edge id="444370" label="zzz1002,zzzz566" source="1044" target="575" cy:directed="1"/>
      <edge id="444369" label="zzz1002,zzzz622" source="1044" target="519" cy:directed="1"/>
      <edge id="444368" label="zzz1002,zzzz634" source="1044" target="507" cy:directed="1"/>
      <edge id="444367" label="zzz1002,zzzz668" source="1044" target="473" cy:directed="1"/>
      <edge id="444366" label="zzz1002,zzzz709" source="1044" target="432" cy:directed="1"/>
      <edge id="444365" label="zzz1002,zzzz722" source="1044" target="419" cy:directed="1"/>
      <edge id="444364" label="zzz1002,zzzz864" source="1044" target="277" cy:directed="1"/>
      <edge id="444363" label="zzz1002,zzzzz61" source="1044" target="98" cy:directed="1"/>
      <edge id="444362" label="zzz1002,zzz1013" source="1044" target="1033" cy:directed="1"/>
      <edge id="444361" label="zzz1002,zzzz556" source="1044" target="585" cy:directed="1"/>
      <edge id="444360" label="zzz1002,zzzz683" source="1044" target="458" cy:directed="1"/>
      <edge id="444359" label="zzz1002,zzzz979" source="1044" target="163" cy:directed="1"/>
      <edge id="444358" label="zzz1002,zzzzz53" source="1044" target="106" cy:directed="1"/>
      <edge id="444357" label="zzz1002,zzzz103" source="1044" target="1022" cy:directed="1"/>
      <edge id="444356" label="zzz1002,zzzz586" source="1044" target="555" cy:directed="1"/>
      <edge id="444355" label="zzz1002,zzzz589" source="1044" target="552" cy:directed="1"/>
      <edge id="444354" label="zzz1002,zzzz647" source="1044" target="494" cy:directed="1"/>
      <edge id="444353" label="zzz1002,zzzz762" source="1044" target="379" cy:directed="1"/>
      <edge id="444352" label="zzz1002,zzzz901" source="1044" target="240" cy:directed="1"/>
      <edge id="444351" label="zzz1002,zzzz545" source="1044" target="596" cy:directed="1"/>
      <edge id="444350" label="zzz1002,zzzz616" source="1044" target="525" cy:directed="1"/>
      <edge id="444349" label="zzz1002,zzzz672" source="1044" target="469" cy:directed="1"/>
      <edge id="444348" label="zzz1002,zzzz752" source="1044" target="389" cy:directed="1"/>
      <edge id="444347" label="zzz1002,zzzz836" source="1044" target="305" cy:directed="1"/>
      <edge id="444346" label="zzz1002,zzzz105" source="1044" target="1020" cy:directed="1"/>
      <edge id="444345" label="zzz1002,zzzz568" source="1044" target="573" cy:directed="1"/>
      <edge id="444344" label="zzz1002,zzzz652" source="1044" target="489" cy:directed="1"/>
      <edge id="444343" label="zzz1002,zzzz746" source="1044" target="395" cy:directed="1"/>
      <edge id="444342" label="zzz1002,zzzz835" source="1044" target="306" cy:directed="1"/>
      <edge id="444341" label="zzz1002,zzzz903" source="1044" target="238" cy:directed="1"/>
      <edge id="444340" label="zzz1002,zzzz918" source="1044" target="223" cy:directed="1"/>
      <edge id="444339" label="zzz1002,zzzzz64" source="1044" target="95" cy:directed="1"/>
      <edge id="444338" label="zzz1002,zzz1016" source="1044" target="1030" cy:directed="1"/>
      <edge id="444337" label="zzz1002,zzzz107" source="1044" target="1018" cy:directed="1"/>
      <edge id="444336" label="zzz1002,zzzz596" source="1044" target="545" cy:directed="1"/>
      <edge id="444335" label="zzz1002,zzzz775" source="1044" target="366" cy:directed="1"/>
      <edge id="444334" label="zzz1002,zzzz871" source="1044" target="270" cy:directed="1"/>
      <edge id="444333" label="zzz1002,zzzz978" source="1044" target="164" cy:directed="1"/>
      <edge id="444332" label="zzz1002,zzzzz66" source="1044" target="93" cy:directed="1"/>
      <edge id="444331" label="zzz1002,zzzz635" source="1044" target="506" cy:directed="1"/>
      <edge id="444330" label="zzz1002,zzzz100" source="1044" target="1025" cy:directed="1"/>
      <edge id="444329" label="zzz1002,zzzz111" source="1044" target="1014" cy:directed="1"/>
      <edge id="444328" label="zzz1002,zzzz571" source="1044" target="570" cy:directed="1"/>
      <edge id="444327" label="zzz1002,zzzz576" source="1044" target="565" cy:directed="1"/>
      <edge id="444326" label="zzz1002,zzzz743" source="1044" target="398" cy:directed="1"/>
      <edge id="444325" label="zzz1002,zzzz590" source="1044" target="551" cy:directed="1"/>
      <edge id="444324" label="zzz1002,zzzz821" source="1044" target="320" cy:directed="1"/>
      <edge id="444323" label="zzz1002,zzzz985" source="1044" target="157" cy:directed="1"/>
      <edge id="444322" label="zzz1002,zzzz564" source="1044" target="577" cy:directed="1"/>
      <edge id="444321" label="zzz1002,zzzz625" source="1044" target="516" cy:directed="1"/>
      <edge id="444320" label="zzz1002,zzzz682" source="1044" target="459" cy:directed="1"/>
      <edge id="444319" label="zzz1002,zzzz862" source="1044" target="279" cy:directed="1"/>
      <edge id="444318" label="zzz1002,zzzz900" source="1044" target="241" cy:directed="1"/>
      <edge id="444317" label="zzz1002,zzzz115" source="1044" target="1010" cy:directed="1"/>
      <edge id="444316" label="zzz1002,zzzz582" source="1044" target="559" cy:directed="1"/>
      <edge id="444315" label="zzz1002,zzzz630" source="1044" target="511" cy:directed="1"/>
      <edge id="444314" label="zzz1002,zzzzz99" source="1044" target="62" cy:directed="1"/>
      <edge id="444313" label="zzz1002,zzzz603" source="1044" target="538" cy:directed="1"/>
      <edge id="444312" label="zzz1002,zzzz653" source="1044" target="488" cy:directed="1"/>
      <edge id="444311" label="zzz1002,zzzz730" source="1044" target="411" cy:directed="1"/>
      <edge id="444310" label="zzz1002,zzzz760" source="1044" target="381" cy:directed="1"/>
      <edge id="444309" label="zzz1002,zzzz784" source="1044" target="357" cy:directed="1"/>
      <edge id="444308" label="zzz1002,zzzz898" source="1044" target="243" cy:directed="1"/>
      <edge id="444307" label="zzz1002,zzzz960" source="1044" target="181" cy:directed="1"/>
      <edge id="444306" label="zzz1002,zzzz112" source="1044" target="1013" cy:directed="1"/>
      <edge id="444305" label="zzz1002,zzzz550" source="1044" target="591" cy:directed="1"/>
      <edge id="444304" label="zzz1002,zzzz614" source="1044" target="527" cy:directed="1"/>
      <edge id="444303" label="zzz1002,zzzz626" source="1044" target="515" cy:directed="1"/>
      <edge id="444302" label="zzz1002,zzzz734" source="1044" target="407" cy:directed="1"/>
      <edge id="444301" label="zzz1002,zzzz767" source="1044" target="374" cy:directed="1"/>
      <edge id="444300" label="zzz1002,zzzz829" source="1044" target="312" cy:directed="1"/>
      <edge id="444299" label="zzz1002,zzzz884" source="1044" target="257" cy:directed="1"/>
      <edge id="444298" label="zzz1002,zzzz675" source="1044" target="466" cy:directed="1"/>
      <edge id="444297" label="zzz1002,zzzz833" source="1044" target="308" cy:directed="1"/>
      <edge id="444296" label="zzz1002,zzzz627" source="1044" target="514" cy:directed="1"/>
      <edge id="444295" label="zzz1002,zzzz778" source="1044" target="363" cy:directed="1"/>
      <edge id="444294" label="zzz1002,zzzz818" source="1044" target="323" cy:directed="1"/>
      <edge id="444293" label="zzz1002,zzzz831" source="1044" target="310" cy:directed="1"/>
      <edge id="444292" label="zzz1002,zzzz853" source="1044" target="288" cy:directed="1"/>
      <edge id="444291" label="zzz1002,zzzz861" source="1044" target="280" cy:directed="1"/>
      <edge id="444290" label="zzz1002,zzzz572" source="1044" target="569" cy:directed="1"/>
      <edge id="444289" label="zzz1002,zzzz774" source="1044" target="367" cy:directed="1"/>
      <edge id="444288" label="zzz1002,zzzz975" source="1044" target="167" cy:directed="1"/>
      <edge id="444287" label="zzz1002,zzzz819" source="1044" target="322" cy:directed="1"/>
      <edge id="444286" label="zzz1002,zzzz830" source="1044" target="311" cy:directed="1"/>
      <edge id="444285" label="zzz1002,zzzz838" source="1044" target="303" cy:directed="1"/>
      <edge id="444284" label="zzz1002,zzzzz59" source="1044" target="100" cy:directed="1"/>
      <edge id="444283" label="zzz1002,zzzz553" source="1044" target="588" cy:directed="1"/>
      <edge id="444282" label="zzz1002,zzzz588" source="1044" target="553" cy:directed="1"/>
      <edge id="444281" label="zzz1002,zzzz591" source="1044" target="550" cy:directed="1"/>
      <edge id="444280" label="zzz1002,zzzz641" source="1044" target="500" cy:directed="1"/>
      <edge id="444279" label="zzz1002,zzzz649" source="1044" target="492" cy:directed="1"/>
      <edge id="444278" label="zzz1002,zzzz655" source="1044" target="486" cy:directed="1"/>
      <edge id="444277" label="zzz1002,zzzz750" source="1044" target="391" cy:directed="1"/>
      <edge id="444276" label="zzz1002,zzzz850" source="1044" target="291" cy:directed="1"/>
      <edge id="444275" label="zzz1002,zzzz981" source="1044" target="161" cy:directed="1"/>
      <edge id="444274" label="zzz1002,zzzzz95" source="1044" target="66" cy:directed="1"/>
      <edge id="444273" label="zzz1002,zzzz555" source="1044" target="586" cy:directed="1"/>
      <edge id="444272" label="zzz1002,zzzz558" source="1044" target="583" cy:directed="1"/>
      <edge id="444271" label="zzz1002,zzzz644" source="1044" target="497" cy:directed="1"/>
      <edge id="444270" label="zzz1002,zzzz725" source="1044" target="416" cy:directed="1"/>
      <edge id="444269" label="zzz1002,zzzzz98" source="1044" target="63" cy:directed="1"/>
      <edge id="444268" label="zzz1002,zzzz597" source="1044" target="544" cy:directed="1"/>
      <edge id="444267" label="zzz1002,zzzz598" source="1044" target="543" cy:directed="1"/>
      <edge id="444266" label="zzz1002,zzzz607" source="1044" target="534" cy:directed="1"/>
      <edge id="444265" label="zzz1002,zzzzz60" source="1044" target="99" cy:directed="1"/>
      <edge id="444264" label="zzz1002,zzzz715" source="1044" target="426" cy:directed="1"/>
      <edge id="444263" label="zzz1002,zzzz466" source="1044" target="674" cy:directed="1"/>
      <edge id="444262" label="zzz1002,zzzz580" source="1044" target="561" cy:directed="1"/>
      <edge id="444261" label="zzz1002,zzzz618" source="1044" target="523" cy:directed="1"/>
      <edge id="444260" label="zzz1002,zzzz688" source="1044" target="453" cy:directed="1"/>
      <edge id="444259" label="zzz1002,zzzzz47" source="1044" target="112" cy:directed="1"/>
      <edge id="444258" label="zzz1002,zzzz113" source="1044" target="1012" cy:directed="1"/>
      <edge id="444257" label="zzz1002,zzzz551" source="1044" target="590" cy:directed="1"/>
      <edge id="444256" label="zzz1002,zzzz584" source="1044" target="557" cy:directed="1"/>
      <edge id="444255" label="zzz1002,zzzz629" source="1044" target="512" cy:directed="1"/>
      <edge id="444254" label="zzz1002,zzzzz48" source="1044" target="111" cy:directed="1"/>
      <edge id="444253" label="zzz1002,zzzzz55" source="1044" target="104" cy:directed="1"/>
      <edge id="444252" label="zzz1002,zzzz696" source="1044" target="445" cy:directed="1"/>
      <edge id="444251" label="zzz1002,zzzzz15" source="1044" target="139" cy:directed="1"/>
      <edge id="444250" label="zzz1002,zzzz199" source="1044" target="926" cy:directed="1"/>
      <edge id="444249" label="zzz1002,zzzz574" source="1044" target="567" cy:directed="1"/>
      <edge id="444248" label="zzz1002,zzzz600" source="1044" target="541" cy:directed="1"/>
      <edge id="444247" label="zzz1002,zzzz691" source="1044" target="450" cy:directed="1"/>
      <edge id="444246" label="zzz1002,zzzz104" source="1044" target="1021" cy:directed="1"/>
      <edge id="444245" label="zzz1002,zzzz726" source="1044" target="415" cy:directed="1"/>
      <edge id="444244" label="zzz1002,zzzz958" source="1044" target="183" cy:directed="1"/>
      <edge id="444243" label="zzz1002,zzzz636" source="1044" target="505" cy:directed="1"/>
      <edge id="444242" label="zzz1002,zzzzz12" source="1044" target="142" cy:directed="1"/>
      <edge id="444241" label="zzz1002,zzzzz25" source="1044" target="130" cy:directed="1"/>
      <edge id="444240" label="zzz1002,zzzz575" source="1044" target="566" cy:directed="1"/>
      <edge id="444239" label="zzz1002,zzzz763" source="1044" target="378" cy:directed="1"/>
      <edge id="444238" label="zzz1002,zzzz845" source="1044" target="296" cy:directed="1"/>
      <edge id="444237" label="zzz1002,zzzz206" source="1044" target="919" cy:directed="1"/>
      <edge id="444236" label="zzz1002,zzzz621" source="1044" target="520" cy:directed="1"/>
      <edge id="444235" label="zzz1002,zzzzz58" source="1044" target="101" cy:directed="1"/>
      <edge id="444234" label="zzz1002,zzzz405" source="1044" target="720" cy:directed="1"/>
      <edge id="444233" label="zzz1002,zzzz559" source="1044" target="582" cy:directed="1"/>
      <edge id="444232" label="zzz1002,zzzz573" source="1044" target="568" cy:directed="1"/>
      <edge id="444231" label="zzz1002,zzzz624" source="1044" target="517" cy:directed="1"/>
      <edge id="444230" label="zzz1002,zzzz816" source="1044" target="325" cy:directed="1"/>
      <edge id="444229" label="zzz1002,zzzz826" source="1044" target="315" cy:directed="1"/>
      <edge id="444228" label="zzz1002,zzzz962" source="1044" target="179" cy:directed="1"/>
      <edge id="444227" label="zzz1002,zzzzz34" source="1044" target="121" cy:directed="1"/>
      <edge id="444226" label="zzz1002,zzzzz68" source="1044" target="91" cy:directed="1"/>
      <edge id="444225" label="zzz1002,zzzz106" source="1044" target="1019" cy:directed="1"/>
      <edge id="444224" label="zzz1002,zzzz554" source="1044" target="587" cy:directed="1"/>
      <edge id="444223" label="zzz1002,zzzz583" source="1044" target="558" cy:directed="1"/>
      <edge id="444222" label="zzz1002,zzzz406" source="1044" target="719" cy:directed="1"/>
      <edge id="444221" label="zzz1002,zzzz557" source="1044" target="584" cy:directed="1"/>
      <edge id="444220" label="zzz1002,zzzz855" source="1044" target="286" cy:directed="1"/>
      <edge id="444219" label="zzz1002,zzzz567" source="1044" target="574" cy:directed="1"/>
      <edge id="444218" label="zzz1002,zzzz645" source="1044" target="496" cy:directed="1"/>
      <edge id="444217" label="zzz1002,zzzz609" source="1044" target="532" cy:directed="1"/>
      <edge id="444216" label="zzz1002,zzzz664" source="1044" target="477" cy:directed="1"/>
      <edge id="444215" label="zzz1002,zzzz825" source="1044" target="316" cy:directed="1"/>
      <edge id="444214" label="zzz1002,zzzz102" source="1044" target="1023" cy:directed="1"/>
      <edge id="444213" label="zzz1002,zzzz619" source="1044" target="522" cy:directed="1"/>
      <edge id="444212" label="zzz1002,zzzz656" source="1044" target="485" cy:directed="1"/>
      <edge id="444211" label="zzz1002,zzzz913" source="1044" target="228" cy:directed="1"/>
      <edge id="444210" label="zzz1002,zzzzz33" source="1044" target="122" cy:directed="1"/>
      <edge id="444209" label="zzz1002,zzzzz37" source="1044" target="118" cy:directed="1"/>
      <edge id="444208" label="zzz1002,zzzz689" source="1044" target="452" cy:directed="1"/>
      <edge id="444207" label="zzz1002,zzzz192" source="1044" target="933" cy:directed="1"/>
      <edge id="444206" label="zzz1002,zzzz827" source="1044" target="314" cy:directed="1"/>
      <edge id="444205" label="zzz1002,zzzz651" source="1044" target="490" cy:directed="1"/>
      <edge id="444204" label="zzz1002,zzzzz74" source="1044" target="85" cy:directed="1"/>
      <edge id="444203" label="zzz1002,zzzz581" source="1044" target="560" cy:directed="1"/>
      <edge id="444202" label="zzz1002,zzzz610" source="1044" target="531" cy:directed="1"/>
      <edge id="444201" label="zzz1002,zzzz727" source="1044" target="414" cy:directed="1"/>
      <edge id="444200" label="zzz1002,zzzz127" source="1044" target="998" cy:directed="1"/>
      <edge id="444199" label="zzz1002,zzzz470" source="1044" target="670" cy:directed="1"/>
      <edge id="444198" label="zzz1002,zzzz587" source="1044" target="554" cy:directed="1"/>
      <edge id="444197" label="zzz1002,zzzz666" source="1044" target="475" cy:directed="1"/>
      <edge id="444196" label="zzz1002,zzzzz72" source="1044" target="87" cy:directed="1"/>
      <edge id="444195" label="zzz1002,zzzz628" source="1044" target="513" cy:directed="1"/>
      <edge id="444194" label="zzz1002,zzzz849" source="1044" target="292" cy:directed="1"/>
      <edge id="444193" label="zzz1002,zzzzz62" source="1044" target="97" cy:directed="1"/>
      <edge id="444192" label="zzz1002,zzzz578" source="1044" target="563" cy:directed="1"/>
      <edge id="444191" label="zzz1002,zzzz737" source="1044" target="404" cy:directed="1"/>
      <edge id="444190" label="zzz1002,zzzz741" source="1044" target="400" cy:directed="1"/>
      <edge id="444189" label="zzz1002,zzzz448" source="1044" target="679" cy:directed="1"/>
      <edge id="444188" label="zzz1002,zzzz920" source="1044" target="221" cy:directed="1"/>
      <edge id="444187" label="zzz1002,zzzzz73" source="1044" target="86" cy:directed="1"/>
      <edge id="444186" label="zzz1002,zzzz717" source="1044" target="424" cy:directed="1"/>
      <edge id="444185" label="zzz1002,zzzz114" source="1044" target="1011" cy:directed="1"/>
      <edge id="444184" label="zzz1002,zzzz998" source="1044" target="144" cy:directed="1"/>
      <edge id="444183" label="zzz1002,zzzz632" source="1044" target="509" cy:directed="1"/>
      <edge id="444182" label="zzz1002,zzzz738" source="1044" target="403" cy:directed="1"/>
      <edge id="444181" label="zzz1002,zzzzz70" source="1044" target="89" cy:directed="1"/>
      <edge id="444180" label="zzz1002,zzzz126" source="1044" target="999" cy:directed="1"/>
      <edge id="444179" label="zzz1002,zzzz123" source="1044" target="1002" cy:directed="1"/>
      <edge id="444178" label="zzz1002,zzzz471" source="1044" target="669" cy:directed="1"/>
      <edge id="444177" label="zzz1002,zzzz860" source="1044" target="281" cy:directed="1"/>
      <edge id="444176" label="zzz1002,zzzz122" source="1044" target="1003" cy:directed="1"/>
      <edge id="444175" label="zzz1002,zzzz501" source="1044" target="639" cy:directed="1"/>
      <edge id="444174" label="zzz1002,zzzz790" source="1044" target="351" cy:directed="1"/>
      <edge id="444173" label="zzz1002,zzzz984" source="1044" target="158" cy:directed="1"/>
      <edge id="444172" label="zzz1002,zzzz125" source="1044" target="1000" cy:directed="1"/>
      <edge id="444171" label="zzz1002,zzzz502" source="1044" target="638" cy:directed="1"/>
      <edge id="444170" label="zzz1002,zzzz782" source="1044" target="359" cy:directed="1"/>
      <edge id="444169" label="zzz1002,zzzz800" source="1044" target="341" cy:directed="1"/>
      <edge id="444168" label="zzz1002,zzzz483" source="1044" target="657" cy:directed="1"/>
      <edge id="444167" label="zzz1002,zzzz773" source="1044" target="368" cy:directed="1"/>
      <edge id="444166" label="zzz1002,zzzzz39" source="1044" target="116" cy:directed="1"/>
      <edge id="444165" label="zzz1002,zzzz124" source="1044" target="1001" cy:directed="1"/>
      <edge id="444164" label="zzz1002,zzzz713" source="1044" target="428" cy:directed="1"/>
      <edge id="444163" label="zzz1002,zzz1007" source="1044" target="1039" cy:directed="1"/>
      <edge id="444162" label="zzz1002,zzz1009" source="1044" target="1037" cy:directed="1"/>
      <edge id="444161" label="zzz1002,zzzz148" source="1044" target="977" cy:directed="1"/>
      <edge id="444160" label="zzz1002,zzzz660" source="1044" target="481" cy:directed="1"/>
      <edge id="444159" label="zzz1002,zzzz980" source="1044" target="162" cy:directed="1"/>
      <edge id="444158" label="zzz1002,zzzz156" source="1044" target="969" cy:directed="1"/>
      <edge id="444157" label="zzz1002,zzzz839" source="1044" target="302" cy:directed="1"/>
      <edge id="444156" label="zzz1002,zzzz970" source="1044" target="172" cy:directed="1"/>
      <edge id="444155" label="zzz1002,zzz1004" source="1044" target="1042" cy:directed="1"/>
      <edge id="444154" label="zzz1002,zzz1008" source="1044" target="1038" cy:directed="1"/>
      <edge id="444153" label="zzz1002,zzzz967" source="1044" target="175" cy:directed="1"/>
      <edge id="444152" label="zzz1002,zzzz989" source="1044" target="153" cy:directed="1"/>
      <edge id="444151" label="zzz1002,zzzz879" source="1044" target="262" cy:directed="1"/>
      <edge id="444150" label="zzz1002,zzzz988" source="1044" target="154" cy:directed="1"/>
      <edge id="444149" label="zzz1002,zzzz161" source="1044" target="964" cy:directed="1"/>
      <edge id="444148" label="zzz1002,zzzz832" source="1044" target="309" cy:directed="1"/>
      <edge id="444147" label="zzz1002,zzzzz63" source="1044" target="96" cy:directed="1"/>
      <edge id="444146" label="zzz1002,zzzz464" source="1044" target="676" cy:directed="1"/>
      <edge id="444145" label="zzz1002,zzzzz20" source="1044" target="135" cy:directed="1"/>
      <edge id="444144" label="zzz1002,zzzz928" source="1044" target="213" cy:directed="1"/>
      <edge id="444143" label="zzz1002,zzzzz28" source="1044" target="127" cy:directed="1"/>
      <edge id="444142" label="zzz1002,zzz1005" source="1044" target="1041" cy:directed="1"/>
      <edge id="444141" label="zzz1002,zzzz121" source="1044" target="1004" cy:directed="1"/>
      <edge id="444140" label="zzz1002,zzzz657" source="1044" target="484" cy:directed="1"/>
      <edge id="444139" label="zzz1002,zzzz822" source="1044" target="319" cy:directed="1"/>
      <edge id="444138" label="zzz1002,zzzz917" source="1044" target="224" cy:directed="1"/>
      <edge id="444137" label="zzz1002,zzzz700" source="1044" target="441" cy:directed="1"/>
      <edge id="444136" label="zzz1002,zzzz486" source="1044" target="654" cy:directed="1"/>
      <edge id="444135" label="zzz1002,zzzz745" source="1044" target="396" cy:directed="1"/>
      <edge id="444134" label="zzz1002,zzzzz84" source="1044" target="75" cy:directed="1"/>
      <edge id="444133" label="zzz1002,zzzz120" source="1044" target="1005" cy:directed="1"/>
      <edge id="444132" label="zzz1002,zzzz164" source="1044" target="961" cy:directed="1"/>
      <edge id="444131" label="zzz1002,zzzz601" source="1044" target="540" cy:directed="1"/>
      <edge id="444130" label="zzz1002,zzzz946" source="1044" target="195" cy:directed="1"/>
      <edge id="444129" label="zzz1002,zzzzz67" source="1044" target="92" cy:directed="1"/>
      <edge id="444128" label="zzz1002,zzzzz76" source="1044" target="83" cy:directed="1"/>
      <edge id="444127" label="zzz1002,zzzzz88" source="1044" target="73" cy:directed="1"/>
      <edge id="444126" label="zzz1002,zzzz142" source="1044" target="983" cy:directed="1"/>
      <edge id="444125" label="zzz1002,zzzz131" source="1044" target="994" cy:directed="1"/>
      <edge id="444124" label="zzz1002,zzzz168" source="1044" target="957" cy:directed="1"/>
      <edge id="444123" label="zzz1002,zzzz772" source="1044" target="369" cy:directed="1"/>
      <edge id="444122" label="zzz1002,zzzz945" source="1044" target="196" cy:directed="1"/>
      <edge id="444121" label="zzz1002,zzzz169" source="1044" target="956" cy:directed="1"/>
      <edge id="444120" label="zzz1002,zzzz162" source="1044" target="963" cy:directed="1"/>
      <edge id="444119" label="zzz1002,zzzz150" source="1044" target="975" cy:directed="1"/>
      <edge id="444118" label="zzz1002,zzzz157" source="1044" target="968" cy:directed="1"/>
      <edge id="444117" label="zzz1002,zzzzz17" source="1044" target="138" cy:directed="1"/>
      <edge id="444116" label="zzz1002,zzzz547" source="1044" target="594" cy:directed="1"/>
      <edge id="444115" label="zzz1002,zzzz977" source="1044" target="165" cy:directed="1"/>
      <edge id="444114" label="zzz1002,zzzzz71" source="1044" target="88" cy:directed="1"/>
      <edge id="444113" label="zzz1002,zzzz546" source="1044" target="595" cy:directed="1"/>
      <edge id="444112" label="zzz1002,zzzz155" source="1044" target="970" cy:directed="1"/>
      <edge id="444111" label="zzz1002,zzzz158" source="1044" target="967" cy:directed="1"/>
      <edge id="444110" label="zzz1002,zzzz166" source="1044" target="959" cy:directed="1"/>
      <edge id="444109" label="zzz1002,zzzz513" source="1044" target="628" cy:directed="1"/>
      <edge id="444108" label="zzz1002,zzzz608" source="1044" target="533" cy:directed="1"/>
      <edge id="444107" label="zzz1002,zzzz680" source="1044" target="461" cy:directed="1"/>
      <edge id="444106" label="zzz1002,zzzz886" source="1044" target="255" cy:directed="1"/>
      <edge id="444105" label="zzz1002,zzzz165" source="1044" target="960" cy:directed="1"/>
      <edge id="444104" label="zzz1002,zzzz167" source="1044" target="958" cy:directed="1"/>
      <edge id="444103" label="zzz1002,zzzz490" source="1044" target="650" cy:directed="1"/>
      <edge id="444102" label="zzz1002,zzz1019" source="1044" target="1028" cy:directed="1"/>
      <edge id="444101" label="zzz1002,zzz1020" source="1044" target="1027" cy:directed="1"/>
      <edge id="444100" label="zzz1002,zzzz485" source="1044" target="655" cy:directed="1"/>
      <edge id="444099" label="zzz1002,zzzz493" source="1044" target="647" cy:directed="1"/>
      <edge id="444098" label="zzz1002,zzzz141" source="1044" target="984" cy:directed="1"/>
      <edge id="444097" label="zzz1002,zzzz947" source="1044" target="194" cy:directed="1"/>
      <edge id="444096" label="zzz1002,zzzz136" source="1044" target="989" cy:directed="1"/>
      <edge id="444095" label="zzz1002,zzzz594" source="1044" target="547" cy:directed="1"/>
      <edge id="444094" label="zzz1002,zzzz929" source="1044" target="212" cy:directed="1"/>
      <edge id="444093" label="zzz1002,zzzz944" source="1044" target="197" cy:directed="1"/>
      <edge id="444092" label="zzz1002,zzzzz56" source="1044" target="103" cy:directed="1"/>
      <edge id="444091" label="zzz1002,zzzz560" source="1044" target="581" cy:directed="1"/>
      <edge id="444090" label="zzz1002,zzzz927" source="1044" target="214" cy:directed="1"/>
      <edge id="444089" label="zzz1002,zzzz149" source="1044" target="976" cy:directed="1"/>
      <edge id="444088" label="zzz1002,zzzz640" source="1044" target="501" cy:directed="1"/>
      <edge id="444087" label="zzz1002,zzzz163" source="1044" target="962" cy:directed="1"/>
      <edge id="444086" label="zzz1002,zzzz147" source="1044" target="978" cy:directed="1"/>
      <edge id="444085" label="zzz1002,zzzz151" source="1044" target="974" cy:directed="1"/>
      <edge id="444084" label="zzz1002,zzzz995" source="1044" target="147" cy:directed="1"/>
      <edge id="444083" label="zzz1002,zzzz133" source="1044" target="992" cy:directed="1"/>
      <edge id="444082" label="zzz1002,zzzz866" source="1044" target="275" cy:directed="1"/>
      <edge id="444081" label="zzz1002,zzzz809" source="1044" target="332" cy:directed="1"/>
      <edge id="444080" label="zzz1002,zzzz134" source="1044" target="991" cy:directed="1"/>
      <edge id="444079" label="zzz1002,zzzz140" source="1044" target="985" cy:directed="1"/>
      <edge id="444078" label="zzz1002,zzzz753" source="1044" target="388" cy:directed="1"/>
      <edge id="444077" label="zzz1002,zzzz197" source="1044" target="928" cy:directed="1"/>
      <edge id="444076" label="zzz1002,zzzz474" source="1044" target="666" cy:directed="1"/>
      <edge id="444075" label="zzz1002,zzzzz52" source="1044" target="107" cy:directed="1"/>
      <edge id="444074" label="zzz1002,zzzz159" source="1044" target="966" cy:directed="1"/>
      <edge id="444073" label="zzz1002,zzzz146" source="1044" target="979" cy:directed="1"/>
      <edge id="444072" label="zzz1002,zzzz512" source="1044" target="629" cy:directed="1"/>
      <edge id="444071" label="zzz1002,zzzz698" source="1044" target="443" cy:directed="1"/>
      <edge id="444070" label="zzz1002,zzzz808" source="1044" target="333" cy:directed="1"/>
      <edge id="444069" label="zzz1002,zzzz796" source="1044" target="345" cy:directed="1"/>
      <edge id="444068" label="zzz1002,zzzz152" source="1044" target="973" cy:directed="1"/>
      <edge id="444067" label="zzz1002,zzzz484" source="1044" target="656" cy:directed="1"/>
      <edge id="444066" label="zzz1002,zzzz138" source="1044" target="987" cy:directed="1"/>
      <edge id="444065" label="zzz1002,zzzz160" source="1044" target="965" cy:directed="1"/>
      <edge id="444064" label="zzz1002,zzzz132" source="1044" target="993" cy:directed="1"/>
      <edge id="444063" label="zzz1002,zzzzz82" source="1044" target="77" cy:directed="1"/>
      <edge id="444062" label="zzz1002,zzzz153" source="1044" target="972" cy:directed="1"/>
      <edge id="444061" label="zzz1002,zzzz592" source="1044" target="549" cy:directed="1"/>
      <edge id="444060" label="zzz1002,zzzz144" source="1044" target="981" cy:directed="1"/>
      <edge id="444059" label="zzz1002,zzzz996" source="1044" target="146" cy:directed="1"/>
      <edge id="444058" label="zzz1002,zzzz488" source="1044" target="652" cy:directed="1"/>
      <edge id="444057" label="zzz1002,zzzz143" source="1044" target="982" cy:directed="1"/>
      <edge id="444056" label="zzz1002,zzzz703" source="1044" target="438" cy:directed="1"/>
      <edge id="444055" label="zzz1002,zzzz139" source="1044" target="986" cy:directed="1"/>
      <edge id="444054" label="zzz1002,zzzz950" source="1044" target="191" cy:directed="1"/>
      <edge id="444053" label="zzz1002,zzzz154" source="1044" target="971" cy:directed="1"/>
      <edge id="444052" label="zzz1002,zzzz810" source="1044" target="331" cy:directed="1"/>
      <edge id="444051" label="zzz1002,zzzz792" source="1044" target="349" cy:directed="1"/>
      <edge id="444050" label="zzz1002,zzzz878" source="1044" target="263" cy:directed="1"/>
      <edge id="444049" label="zzz1002,zzzz931" source="1044" target="210" cy:directed="1"/>
      <edge id="444048" label="zzz1002,zzzzz89" source="1044" target="72" cy:directed="1"/>
      <edge id="444047" label="zzz1002,zzzz648" source="1044" target="493" cy:directed="1"/>
      <edge id="444046" label="zzz1002,zzzz904" source="1044" target="237" cy:directed="1"/>
      <edge id="444045" label="zzz1002,zzzz577" source="1044" target="564" cy:directed="1"/>
      <edge id="444044" label="zzz1002,zzzz870" source="1044" target="271" cy:directed="1"/>
      <edge id="444043" label="zzz1002,zzzz777" source="1044" target="364" cy:directed="1"/>
      <edge id="444042" label="zzz1002,zzzz983" source="1044" target="159" cy:directed="1"/>
      <edge id="444041" label="zzz1002,zzzz802" source="1044" target="339" cy:directed="1"/>
      <edge id="444040" label="zzz1002,zzzzz79" source="1044" target="80" cy:directed="1"/>
      <edge id="444039" label="zzz1002,zzzz876" source="1044" target="265" cy:directed="1"/>
      <edge id="444038" label="zzz1002,zzzzz75" source="1044" target="84" cy:directed="1"/>
      <edge id="444037" label="zzz1002,zzzz117" source="1044" target="1008" cy:directed="1"/>
      <edge id="444036" label="zzz1002,zzzz137" source="1044" target="988" cy:directed="1"/>
      <edge id="444035" label="zzz1002,zzzz135" source="1044" target="990" cy:directed="1"/>
      <edge id="444034" label="zzz1002,zzzz205" source="1044" target="920" cy:directed="1"/>
      <edge id="444033" label="zzz1002,zzzz720" source="1044" target="421" cy:directed="1"/>
      <edge id="444032" label="zzz1002,zzzz922" source="1044" target="219" cy:directed="1"/>
      <edge id="444031" label="zzz1002,zzzzz83" source="1044" target="76" cy:directed="1"/>
      <edge id="444030" label="zzz1002,zzzz129" source="1044" target="996" cy:directed="1"/>
      <edge id="444029" label="zzz1002,zzzz804" source="1044" target="337" cy:directed="1"/>
      <edge id="444028" label="zzz1002,zzz1006" source="1044" target="1040" cy:directed="1"/>
      <edge id="444027" label="zzz1002,zzzz669" source="1044" target="472" cy:directed="1"/>
      <edge id="444026" label="zzz1002,zzzz887" source="1044" target="254" cy:directed="1"/>
      <edge id="444025" label="zzz1002,zzz1017" source="1044" target="1029" cy:directed="1"/>
      <edge id="444024" label="zzz1002,zzzz803" source="1044" target="338" cy:directed="1"/>
      <edge id="444023" label="zzz1002,zzzzz80" source="1044" target="79" cy:directed="1"/>
      <edge id="444022" label="zzz1002,zzzz776" source="1044" target="365" cy:directed="1"/>
      <edge id="444021" label="zzz1002,zzzzz85" source="1044" target="74" cy:directed="1"/>
      <edge id="444020" label="zzz1002,zzzz744" source="1044" target="397" cy:directed="1"/>
      <edge id="444019" label="zzz1002,zzzz514" source="1044" target="627" cy:directed="1"/>
      <edge id="444018" label="zzz1002,zzzz736" source="1044" target="405" cy:directed="1"/>
      <edge id="444017" label="zzz1002,zzzz811" source="1044" target="330" cy:directed="1"/>
      <edge id="444016" label="zzz1002,zzzz116" source="1044" target="1009" cy:directed="1"/>
      <edge id="444015" label="zzz1002,zzzz130" source="1044" target="995" cy:directed="1"/>
      <edge id="444014" label="zzz1002,zzzz204" source="1044" target="921" cy:directed="1"/>
      <edge id="444013" label="zzz1002,zzzz658" source="1044" target="483" cy:directed="1"/>
      <edge id="444012" label="zzz1002,zzzz794" source="1044" target="347" cy:directed="1"/>
      <edge id="444011" label="zzz1002,zzzz128" source="1044" target="997" cy:directed="1"/>
      <edge id="444010" label="zzz1002,zzzz885" source="1044" target="256" cy:directed="1"/>
      <edge id="444009" label="zzz1002,zzzz515" source="1044" target="626" cy:directed="1"/>
      <edge id="444008" label="zzz1002,zzzz678" source="1044" target="463" cy:directed="1"/>
      <edge id="444007" label="zzz1002,zzzz807" source="1044" target="334" cy:directed="1"/>
      <edge id="444006" label="zzz1002,zzzz787" source="1044" target="354" cy:directed="1"/>
      <edge id="444005" label="zzz1002,zzzz812" source="1044" target="329" cy:directed="1"/>
      <edge id="444004" label="zzz1002,zzzzz24" source="1044" target="131" cy:directed="1"/>
      <edge id="444003" label="zzz1002,zzzz791" source="1044" target="350" cy:directed="1"/>
      <edge id="444002" label="zzz1002,zzzz872" source="1044" target="269" cy:directed="1"/>
      <edge id="444001" label="zzz1002,zzzz923" source="1044" target="218" cy:directed="1"/>
      <edge id="444000" label="zzz1002,zzzz786" source="1044" target="355" cy:directed="1"/>
      <edge id="443999" label="zzz1002,zzzz805" source="1044" target="336" cy:directed="1"/>
      <edge id="443998" label="zzz1002,zzzz976" source="1044" target="166" cy:directed="1"/>
      <edge id="443997" label="zzz1002,zzzz757" source="1044" target="384" cy:directed="1"/>
      <edge id="443996" label="zzz1002,zzzz476" source="1044" target="664" cy:directed="1"/>
      <edge id="443995" label="zzz1002,zzzz685" source="1044" target="456" cy:directed="1"/>
      <edge id="443994" label="zzz1002,zzzz740" source="1044" target="401" cy:directed="1"/>
      <edge id="443993" label="zzz1002,zzzz780" source="1044" target="361" cy:directed="1"/>
      <edge id="443992" label="zzz1002,zzzz795" source="1044" target="346" cy:directed="1"/>
      <edge id="443991" label="zzz1002,zzzzz41" source="1044" target="114" cy:directed="1"/>
      <edge id="443990" label="zzz1002,zzzz633" source="1044" target="508" cy:directed="1"/>
      <edge id="443989" label="zzz1002,zzzz801" source="1044" target="340" cy:directed="1"/>
      <edge id="443988" label="zzz1002,zzzzz40" source="1044" target="115" cy:directed="1"/>
      <edge id="443987" label="zzz1002,zzzz183" source="1044" target="942" cy:directed="1"/>
      <edge id="443986" label="zzz1002,zzzz492" source="1044" target="648" cy:directed="1"/>
      <edge id="443985" label="zzz1002,zzzz765" source="1044" target="376" cy:directed="1"/>
      <edge id="443984" label="zzz1002,zzzz712" source="1044" target="429" cy:directed="1"/>
      <edge id="443983" label="zzz1002,zzzz781" source="1044" target="360" cy:directed="1"/>
      <edge id="443982" label="zzz1002,zzzz852" source="1044" target="289" cy:directed="1"/>
      <edge id="443981" label="zzz1002,zzzzz50" source="1044" target="109" cy:directed="1"/>
      <edge id="443980" label="zzz1002,zzzz749" source="1044" target="392" cy:directed="1"/>
      <edge id="443979" label="zzz1002,zzzzz14" source="1044" target="140" cy:directed="1"/>
      <edge id="443978" label="zzz1002,zzzz881" source="1044" target="260" cy:directed="1"/>
      <edge id="443977" label="zzz1002,zzzz779" source="1044" target="362" cy:directed="1"/>
      <edge id="443976" label="zzz1002,zzzz875" source="1044" target="266" cy:directed="1"/>
      <edge id="443975" label="zzz1002,zzzz806" source="1044" target="335" cy:directed="1"/>
      <edge id="443974" label="zzz1002,zzzz694" source="1044" target="447" cy:directed="1"/>
      <edge id="443973" label="zzz1002,zzzz697" source="1044" target="444" cy:directed="1"/>
      <edge id="443972" label="zzz1002,zzzz182" source="1044" target="943" cy:directed="1"/>
      <edge id="443971" label="zzz1002,zzzz783" source="1044" target="358" cy:directed="1"/>
      <edge id="443970" label="zzz1002,zzzz184" source="1044" target="941" cy:directed="1"/>
      <edge id="443969" label="zzz1002,zzzz511" source="1044" target="630" cy:directed="1"/>
      <edge id="443968" label="zzz1002,zzzz789" source="1044" target="352" cy:directed="1"/>
      <edge id="443967" label="zzz1002,zzzz869" source="1044" target="272" cy:directed="1"/>
      <edge id="443966" label="zzz1002,zzzz909" source="1044" target="232" cy:directed="1"/>
      <edge id="443965" label="zzz1002,zzzz181" source="1044" target="944" cy:directed="1"/>
      <edge id="443964" label="zzz1002,zzzz477" source="1044" target="663" cy:directed="1"/>
      <edge id="443963" label="zzz1002,zzzz758" source="1044" target="383" cy:directed="1"/>
      <edge id="443962" label="zzz1002,zzzz759" source="1044" target="382" cy:directed="1"/>
      <edge id="443961" label="zzz1002,zzzz883" source="1044" target="258" cy:directed="1"/>
      <edge id="443960" label="zzz1002,zzzz180" source="1044" target="945" cy:directed="1"/>
      <edge id="443959" label="zzz1002,zzzz714" source="1044" target="427" cy:directed="1"/>
      <edge id="443958" label="zzz1002,zzzz175" source="1044" target="950" cy:directed="1"/>
      <edge id="443957" label="zzz1002,zzzz671" source="1044" target="470" cy:directed="1"/>
      <edge id="443956" label="zzz1002,zzzz176" source="1044" target="949" cy:directed="1"/>
      <edge id="443955" label="zzz1002,zzzz686" source="1044" target="455" cy:directed="1"/>
      <edge id="443954" label="zzz1002,zzzz797" source="1044" target="344" cy:directed="1"/>
      <edge id="443953" label="zzz1002,zzzz954" source="1044" target="187" cy:directed="1"/>
      <edge id="443952" label="zzz1002,zzzz889" source="1044" target="252" cy:directed="1"/>
      <edge id="443951" label="zzz1002,zzzz463" source="1044" target="677" cy:directed="1"/>
      <edge id="443950" label="zzz1002,zzzz770" source="1044" target="371" cy:directed="1"/>
      <edge id="443949" label="zzz1002,zzzz785" source="1044" target="356" cy:directed="1"/>
      <edge id="443948" label="zzz1002,zzzz119" source="1044" target="1006" cy:directed="1"/>
      <edge id="443947" label="zzz1002,zzzz788" source="1044" target="353" cy:directed="1"/>
      <edge id="443946" label="zzz1002,zzzz439" source="1044" target="686" cy:directed="1"/>
      <edge id="443945" label="zzz1002,zzzz585" source="1044" target="556" cy:directed="1"/>
      <edge id="443944" label="zzz1002,zzzz173" source="1044" target="952" cy:directed="1"/>
      <edge id="443943" label="zzz1002,zzzz407" source="1044" target="718" cy:directed="1"/>
      <edge id="443942" label="zzz1002,zzzz613" source="1044" target="528" cy:directed="1"/>
      <edge id="443941" label="zzz1002,zzzz711" source="1044" target="430" cy:directed="1"/>
      <edge id="443940" label="zzz1002,zzzz793" source="1044" target="348" cy:directed="1"/>
      <edge id="443939" label="zzz1002,zzzz410" source="1044" target="715" cy:directed="1"/>
      <edge id="443938" label="zzz1002,zzzz482" source="1044" target="658" cy:directed="1"/>
      <edge id="443937" label="zzz1002,zzzz704" source="1044" target="437" cy:directed="1"/>
      <edge id="443936" label="zzz1002,zzzz874" source="1044" target="267" cy:directed="1"/>
      <edge id="443935" label="zzz1002,zzzzz13" source="1044" target="141" cy:directed="1"/>
      <edge id="443934" label="zzz1002,zzzz422" source="1044" target="703" cy:directed="1"/>
      <edge id="443933" label="zzz1002,zzzz719" source="1044" target="422" cy:directed="1"/>
      <edge id="443932" label="zzz1002,zzzz856" source="1044" target="285" cy:directed="1"/>
      <edge id="443931" label="zzz1002,zzzz186" source="1044" target="939" cy:directed="1"/>
      <edge id="443930" label="zzz1002,zzzz631" source="1044" target="510" cy:directed="1"/>
      <edge id="443929" label="zzz1002,zzzz716" source="1044" target="425" cy:directed="1"/>
      <edge id="443928" label="zzz1002,zzzz956" source="1044" target="185" cy:directed="1"/>
      <edge id="443927" label="zzz1002,zzzzz36" source="1044" target="119" cy:directed="1"/>
      <edge id="443926" label="zzz1002,zzzz188" source="1044" target="937" cy:directed="1"/>
      <edge id="443925" label="zzz1002,zzzz997" source="1044" target="145" cy:directed="1"/>
      <edge id="443924" label="zzz1002,zzzz170" source="1044" target="955" cy:directed="1"/>
      <edge id="443923" label="zzz1002,zzzz747" source="1044" target="394" cy:directed="1"/>
      <edge id="443922" label="zzz1002,zzzzz26" source="1044" target="129" cy:directed="1"/>
      <edge id="443921" label="zzz1002,zzzzz31" source="1044" target="124" cy:directed="1"/>
      <edge id="443920" label="zzz1002,zzzz172" source="1044" target="953" cy:directed="1"/>
      <edge id="443919" label="zzz1002,zzzz877" source="1044" target="264" cy:directed="1"/>
      <edge id="443918" label="zzz1002,zzzzz22" source="1044" target="133" cy:directed="1"/>
      <edge id="443917" label="zzz1002,zzzz171" source="1044" target="954" cy:directed="1"/>
      <edge id="443916" label="zzz1002,zzzz174" source="1044" target="951" cy:directed="1"/>
      <edge id="443915" label="zzz1002,zzzz436" source="1044" target="689" cy:directed="1"/>
      <edge id="443914" label="zzz1002,zzzz798" source="1044" target="343" cy:directed="1"/>
      <edge id="443913" label="zzz1002,zzzz185" source="1044" target="940" cy:directed="1"/>
      <edge id="443912" label="zzz1002,zzzz419" source="1044" target="706" cy:directed="1"/>
      <edge id="443911" label="zzz1002,zzzz769" source="1044" target="372" cy:directed="1"/>
      <edge id="443910" label="zzz1002,zzzz473" source="1044" target="667" cy:directed="1"/>
      <edge id="443909" label="zzz1002,zzzz516" source="1044" target="625" cy:directed="1"/>
      <edge id="443908" label="zzz1002,zzzz637" source="1044" target="504" cy:directed="1"/>
      <edge id="443907" label="zzz1002,zzzz969" source="1044" target="173" cy:directed="1"/>
      <edge id="443906" label="zzz1002,zzzz412" source="1044" target="713" cy:directed="1"/>
      <edge id="443905" label="zzz1002,zzzz424" source="1044" target="701" cy:directed="1"/>
      <edge id="443904" label="zzz1002,zzzz442" source="1044" target="683" cy:directed="1"/>
      <edge id="443903" label="zzz1002,zzzz418" source="1044" target="707" cy:directed="1"/>
      <edge id="443902" label="zzz1002,zzzz437" source="1044" target="688" cy:directed="1"/>
      <edge id="443901" label="zzz1002,zzzz145" source="1044" target="980" cy:directed="1"/>
      <edge id="443900" label="zzz1002,zzzz189" source="1044" target="936" cy:directed="1"/>
      <edge id="443899" label="zzz1002,zzzz411" source="1044" target="714" cy:directed="1"/>
      <edge id="443898" label="zzz1002,zzzz425" source="1044" target="700" cy:directed="1"/>
      <edge id="443897" label="zzz1002,zzzz415" source="1044" target="710" cy:directed="1"/>
      <edge id="443896" label="zzz1002,zzzz423" source="1044" target="702" cy:directed="1"/>
      <edge id="443895" label="zzz1002,zzzz429" source="1044" target="696" cy:directed="1"/>
      <edge id="443894" label="zzz1002,zzzz433" source="1044" target="692" cy:directed="1"/>
      <edge id="443893" label="zzz1002,zzzz194" source="1044" target="931" cy:directed="1"/>
      <edge id="443892" label="zzz1002,zzzz435" source="1044" target="690" cy:directed="1"/>
      <edge id="443891" label="zzz1002,zzz1015" source="1044" target="1031" cy:directed="1"/>
      <edge id="443890" label="zzz1002,zzzz187" source="1044" target="938" cy:directed="1"/>
      <edge id="443889" label="zzz1002,zzzz420" source="1044" target="705" cy:directed="1"/>
      <edge id="443888" label="zzz1002,zzzz693" source="1044" target="448" cy:directed="1"/>
      <edge id="443887" label="zzz1002,zzzz692" source="1044" target="449" cy:directed="1"/>
      <edge id="443886" label="zzz1002,zzzz926" source="1044" target="215" cy:directed="1"/>
      <edge id="443885" label="zzz1002,zzzz416" source="1044" target="709" cy:directed="1"/>
      <edge id="443884" label="zzz1002,zzzz434" source="1044" target="691" cy:directed="1"/>
      <edge id="443883" label="zzz1002,zzzz595" source="1044" target="546" cy:directed="1"/>
      <edge id="443882" label="zzz1002,zzzzz42" source="1044" target="113" cy:directed="1"/>
      <edge id="443881" label="zzz1002,zzzz593" source="1044" target="548" cy:directed="1"/>
      <edge id="443880" label="zzz1002,zzzz427" source="1044" target="698" cy:directed="1"/>
      <edge id="443879" label="zzz1002,zzzz615" source="1044" target="526" cy:directed="1"/>
      <edge id="443878" label="zzz1002,zzzz409" source="1044" target="716" cy:directed="1"/>
      <edge id="443877" label="zzz1002,zzzz472" source="1044" target="668" cy:directed="1"/>
      <edge id="443876" label="zzz1002,zzzz408" source="1044" target="717" cy:directed="1"/>
      <edge id="443875" label="zzz1002,zzzz438" source="1044" target="687" cy:directed="1"/>
      <edge id="443874" label="zzz1002,zzzzz23" source="1044" target="132" cy:directed="1"/>
      <edge id="443873" label="zzz1002,zzz1012" source="1044" target="1034" cy:directed="1"/>
      <edge id="443872" label="zzz1002,zzzz661" source="1044" target="480" cy:directed="1"/>
      <edge id="443871" label="zzz1002,zzzz430" source="1044" target="695" cy:directed="1"/>
      <edge id="443870" label="zzz1002,zzzz431" source="1044" target="694" cy:directed="1"/>
      <edge id="443869" label="zzz1002,zzzz306" source="1044" target="819" cy:directed="1"/>
      <edge id="443868" label="zzz1002,zzzz414" source="1044" target="711" cy:directed="1"/>
      <edge id="443867" label="zzz1002,zzzz815" source="1044" target="326" cy:directed="1"/>
      <edge id="443866" label="zzz1002,zzzz948" source="1044" target="193" cy:directed="1"/>
      <edge id="443865" label="zzz1002,zzzz426" source="1044" target="699" cy:directed="1"/>
      <edge id="443864" label="zzz1002,zzzz432" source="1044" target="693" cy:directed="1"/>
      <edge id="443863" label="zzz1002,zzzz766" source="1044" target="375" cy:directed="1"/>
      <edge id="443862" label="zzz1002,zzzz867" source="1044" target="274" cy:directed="1"/>
      <edge id="443861" label="zzz1002,zzzz961" source="1044" target="180" cy:directed="1"/>
      <edge id="443860" label="zzz1002,zzzzz32" source="1044" target="123" cy:directed="1"/>
      <edge id="443859" label="zzz1002,zzz1011" source="1044" target="1035" cy:directed="1"/>
      <edge id="443858" label="zzz1002,zzzz202" source="1044" target="923" cy:directed="1"/>
      <edge id="443857" label="zzz1002,zzzz253" source="1044" target="872" cy:directed="1"/>
      <edge id="443856" label="zzz1002,zzzz475" source="1044" target="665" cy:directed="1"/>
      <edge id="443855" label="zzz1002,zzzz742" source="1044" target="399" cy:directed="1"/>
      <edge id="443854" label="zzz1002,zzzz177" source="1044" target="948" cy:directed="1"/>
      <edge id="443853" label="zzz1002,zzzz690" source="1044" target="451" cy:directed="1"/>
      <edge id="443852" label="zzz1002,zzzz963" source="1044" target="178" cy:directed="1"/>
      <edge id="443851" label="zzz1002,zzzz428" source="1044" target="697" cy:directed="1"/>
      <edge id="443850" label="zzz1002,zzzzz27" source="1044" target="128" cy:directed="1"/>
      <edge id="443849" label="zzz1002,zzzzz29" source="1044" target="126" cy:directed="1"/>
      <edge id="443848" label="zzz1002,zzzz393" source="1044" target="732" cy:directed="1"/>
      <edge id="443847" label="zzz1002,zzzz286" source="1044" target="839" cy:directed="1"/>
      <edge id="443846" label="zzz1002,zzzz440" source="1044" target="685" cy:directed="1"/>
      <edge id="443845" label="zzz1002,zzzz799" source="1044" target="342" cy:directed="1"/>
      <edge id="443844" label="zzz1002,zzzz955" source="1044" target="186" cy:directed="1"/>
      <edge id="443843" label="zzz1002,zzzzz35" source="1044" target="120" cy:directed="1"/>
      <edge id="443842" label="zzz1002,zzzz118" source="1044" target="1007" cy:directed="1"/>
      <edge id="443841" label="zzz1002,zzzz262" source="1044" target="863" cy:directed="1"/>
      <edge id="443840" label="zzz1002,zzzz370" source="1044" target="755" cy:directed="1"/>
      <edge id="443839" label="zzz1002,zzzz377" source="1044" target="748" cy:directed="1"/>
      <edge id="443838" label="zzz1002,zzzz208" source="1044" target="917" cy:directed="1"/>
      <edge id="443837" label="zzz1002,zzzz364" source="1044" target="761" cy:directed="1"/>
      <edge id="443836" label="zzz1002,zzzz296" source="1044" target="829" cy:directed="1"/>
      <edge id="443835" label="zzz1002,zzzz349" source="1044" target="776" cy:directed="1"/>
      <edge id="443834" label="zzz1002,zzzz379" source="1044" target="746" cy:directed="1"/>
      <edge id="443833" label="zzz1002,zzzz271" source="1044" target="854" cy:directed="1"/>
      <edge id="443832" label="zzz1002,zzzz301" source="1044" target="824" cy:directed="1"/>
      <edge id="443831" label="zzz1002,zzzz323" source="1044" target="802" cy:directed="1"/>
      <edge id="443830" label="zzz1002,zzzz346" source="1044" target="779" cy:directed="1"/>
      <edge id="443829" label="zzz1002,zzzz443" source="1044" target="682" cy:directed="1"/>
      <edge id="443828" label="zzz1002,zzzz751" source="1044" target="390" cy:directed="1"/>
      <edge id="443827" label="zzz1002,zzzz771" source="1044" target="370" cy:directed="1"/>
      <edge id="443826" label="zzz1002,zzzz933" source="1044" target="208" cy:directed="1"/>
      <edge id="443825" label="zzz1002,zzzz276" source="1044" target="849" cy:directed="1"/>
      <edge id="443824" label="zzz1002,zzzz374" source="1044" target="751" cy:directed="1"/>
      <edge id="443823" label="zzz1002,zzzz381" source="1044" target="744" cy:directed="1"/>
      <edge id="443822" label="zzz1002,zzzz413" source="1044" target="712" cy:directed="1"/>
      <edge id="443821" label="zzz1002,zzzz441" source="1044" target="684" cy:directed="1"/>
      <edge id="443820" label="zzz1002,zzzz221" source="1044" target="904" cy:directed="1"/>
      <edge id="443819" label="zzz1002,zzzz341" source="1044" target="784" cy:directed="1"/>
      <edge id="443818" label="zzz1002,zzzz193" source="1044" target="932" cy:directed="1"/>
      <edge id="443817" label="zzz1002,zzzz218" source="1044" target="907" cy:directed="1"/>
      <edge id="443816" label="zzz1002,zzzzz30" source="1044" target="125" cy:directed="1"/>
      <edge id="443815" label="zzz1002,zzzz228" source="1044" target="897" cy:directed="1"/>
      <edge id="443814" label="zzz1002,zzzz355" source="1044" target="770" cy:directed="1"/>
      <edge id="443813" label="zzz1002,zzzz417" source="1044" target="708" cy:directed="1"/>
      <edge id="443812" label="zzz1002,zzzz444" source="1044" target="681" cy:directed="1"/>
      <edge id="443811" label="zzz1002,zzzz230" source="1044" target="895" cy:directed="1"/>
      <edge id="443810" label="zzz1002,zzzz255" source="1044" target="870" cy:directed="1"/>
      <edge id="443809" label="zzz1002,zzzz307" source="1044" target="818" cy:directed="1"/>
      <edge id="443808" label="zzz1002,zzzz325" source="1044" target="800" cy:directed="1"/>
      <edge id="443807" label="zzz1002,zzzz907" source="1044" target="234" cy:directed="1"/>
      <edge id="443806" label="zzz1002,zzzz243" source="1044" target="882" cy:directed="1"/>
      <edge id="443805" label="zzz1002,zzzz249" source="1044" target="876" cy:directed="1"/>
      <edge id="443804" label="zzz1002,zzzz375" source="1044" target="750" cy:directed="1"/>
      <edge id="443803" label="zzz1002,zzzzz91" source="1044" target="70" cy:directed="1"/>
      <edge id="443802" label="zzz1002,zzzz222" source="1044" target="903" cy:directed="1"/>
      <edge id="443801" label="zzz1002,zzzz329" source="1044" target="796" cy:directed="1"/>
      <edge id="443800" label="zzz1002,zzzz378" source="1044" target="747" cy:directed="1"/>
      <edge id="443799" label="zzz1002,zzzz380" source="1044" target="745" cy:directed="1"/>
      <edge id="443798" label="zzz1002,zzzz226" source="1044" target="899" cy:directed="1"/>
      <edge id="443797" label="zzz1002,zzzz233" source="1044" target="892" cy:directed="1"/>
      <edge id="443796" label="zzz1002,zzzz237" source="1044" target="888" cy:directed="1"/>
      <edge id="443795" label="zzz1002,zzzz261" source="1044" target="864" cy:directed="1"/>
      <edge id="443794" label="zzz1002,zzzz331" source="1044" target="794" cy:directed="1"/>
      <edge id="443793" label="zzz1002,zzzz339" source="1044" target="786" cy:directed="1"/>
      <edge id="443792" label="zzz1002,zzzz388" source="1044" target="737" cy:directed="1"/>
      <edge id="443791" label="zzz1002,zzzz241" source="1044" target="884" cy:directed="1"/>
      <edge id="443790" label="zzz1002,zzzz314" source="1044" target="811" cy:directed="1"/>
      <edge id="443789" label="zzz1002,zzzz328" source="1044" target="797" cy:directed="1"/>
      <edge id="443788" label="zzz1002,zzzz366" source="1044" target="759" cy:directed="1"/>
      <edge id="443787" label="zzz1002,zzzz368" source="1044" target="757" cy:directed="1"/>
      <edge id="443786" label="zzz1002,zzzz563" source="1044" target="578" cy:directed="1"/>
      <edge id="443785" label="zzz1002,zzzz302" source="1044" target="823" cy:directed="1"/>
      <edge id="443784" label="zzz1002,zzzz369" source="1044" target="756" cy:directed="1"/>
      <edge id="443783" label="zzz1002,zzzz383" source="1044" target="742" cy:directed="1"/>
      <edge id="443782" label="zzz1002,zzzz387" source="1044" target="738" cy:directed="1"/>
      <edge id="443781" label="zzz1002,zzzz389" source="1044" target="736" cy:directed="1"/>
      <edge id="443780" label="zzz1002,zzzz537" source="1044" target="604" cy:directed="1"/>
      <edge id="443779" label="zzz1002,zzzz888" source="1044" target="253" cy:directed="1"/>
      <edge id="443778" label="zzz1002,zzzz212" source="1044" target="913" cy:directed="1"/>
      <edge id="443777" label="zzz1002,zzzz225" source="1044" target="900" cy:directed="1"/>
      <edge id="443776" label="zzz1002,zzzz245" source="1044" target="880" cy:directed="1"/>
      <edge id="443775" label="zzz1002,zzzz279" source="1044" target="846" cy:directed="1"/>
      <edge id="443774" label="zzz1002,zzzz283" source="1044" target="842" cy:directed="1"/>
      <edge id="443773" label="zzz1002,zzzz317" source="1044" target="808" cy:directed="1"/>
      <edge id="443772" label="zzz1002,zzzz330" source="1044" target="795" cy:directed="1"/>
      <edge id="443771" label="zzz1002,zzzz232" source="1044" target="893" cy:directed="1"/>
      <edge id="443770" label="zzz1002,zzzz239" source="1044" target="886" cy:directed="1"/>
      <edge id="443769" label="zzz1002,zzzz248" source="1044" target="877" cy:directed="1"/>
      <edge id="443768" label="zzz1002,zzzz250" source="1044" target="875" cy:directed="1"/>
      <edge id="443767" label="zzz1002,zzzz312" source="1044" target="813" cy:directed="1"/>
      <edge id="443766" label="zzz1002,zzzz342" source="1044" target="783" cy:directed="1"/>
      <edge id="443765" label="zzz1002,zzzz353" source="1044" target="772" cy:directed="1"/>
      <edge id="443764" label="zzz1002,zzzz229" source="1044" target="896" cy:directed="1"/>
      <edge id="443763" label="zzz1002,zzzz259" source="1044" target="866" cy:directed="1"/>
      <edge id="443762" label="zzz1002,zzzz275" source="1044" target="850" cy:directed="1"/>
      <edge id="443761" label="zzz1002,zzzz319" source="1044" target="806" cy:directed="1"/>
      <edge id="443760" label="zzz1002,zzzz322" source="1044" target="803" cy:directed="1"/>
      <edge id="443759" label="zzz1002,zzzz361" source="1044" target="764" cy:directed="1"/>
      <edge id="443758" label="zzz1002,zzzz332" source="1044" target="793" cy:directed="1"/>
      <edge id="443757" label="zzz1002,zzzz333" source="1044" target="792" cy:directed="1"/>
      <edge id="443756" label="zzz1002,zzzz338" source="1044" target="787" cy:directed="1"/>
      <edge id="443755" label="zzz1002,zzzz371" source="1044" target="754" cy:directed="1"/>
      <edge id="443754" label="zzz1002,zzzz244" source="1044" target="881" cy:directed="1"/>
      <edge id="443753" label="zzz1002,zzzz284" source="1044" target="841" cy:directed="1"/>
      <edge id="443752" label="zzz1002,zzzz358" source="1044" target="767" cy:directed="1"/>
      <edge id="443751" label="zzz1002,zzzz382" source="1044" target="743" cy:directed="1"/>
      <edge id="443750" label="zzz1002,zzzz334" source="1044" target="791" cy:directed="1"/>
      <edge id="443749" label="zzz1002,zzzz335" source="1044" target="790" cy:directed="1"/>
      <edge id="443748" label="zzz1002,zzzz352" source="1044" target="773" cy:directed="1"/>
      <edge id="443747" label="zzz1002,zzzz908" source="1044" target="233" cy:directed="1"/>
      <edge id="443746" label="zzz1002,zzzz209" source="1044" target="916" cy:directed="1"/>
      <edge id="443745" label="zzz1002,zzzz246" source="1044" target="879" cy:directed="1"/>
      <edge id="443744" label="zzz1002,zzzz252" source="1044" target="873" cy:directed="1"/>
      <edge id="443743" label="zzz1002,zzzz345" source="1044" target="780" cy:directed="1"/>
      <edge id="443742" label="zzz1002,zzzz348" source="1044" target="777" cy:directed="1"/>
      <edge id="443741" label="zzz1002,zzzz351" source="1044" target="774" cy:directed="1"/>
      <edge id="443740" label="zzz1002,zzzz354" source="1044" target="771" cy:directed="1"/>
      <edge id="443739" label="zzz1002,zzzz363" source="1044" target="762" cy:directed="1"/>
      <edge id="443738" label="zzz1002,zzzz612" source="1044" target="529" cy:directed="1"/>
      <edge id="443737" label="zzz1002,zzzz238" source="1044" target="887" cy:directed="1"/>
      <edge id="443736" label="zzz1002,zzzz299" source="1044" target="826" cy:directed="1"/>
      <edge id="443735" label="zzz1002,zzzz347" source="1044" target="778" cy:directed="1"/>
      <edge id="443734" label="zzz1002,zzzz356" source="1044" target="769" cy:directed="1"/>
      <edge id="443733" label="zzz1002,zzzz357" source="1044" target="768" cy:directed="1"/>
      <edge id="443732" label="zzz1002,zzzz362" source="1044" target="763" cy:directed="1"/>
      <edge id="443731" label="zzz1002,zzzz367" source="1044" target="758" cy:directed="1"/>
      <edge id="443730" label="zzz1002,zzzz211" source="1044" target="914" cy:directed="1"/>
      <edge id="443729" label="zzz1002,zzzz392" source="1044" target="733" cy:directed="1"/>
      <edge id="443728" label="zzz1002,zzzzz90" source="1044" target="71" cy:directed="1"/>
      <edge id="443727" label="zzz1002,zzzz219" source="1044" target="906" cy:directed="1"/>
      <edge id="443726" label="zzz1002,zzzz227" source="1044" target="898" cy:directed="1"/>
      <edge id="443725" label="zzz1002,zzzz247" source="1044" target="878" cy:directed="1"/>
      <edge id="443724" label="zzz1002,zzzz270" source="1044" target="855" cy:directed="1"/>
      <edge id="443723" label="zzz1002,zzzz278" source="1044" target="847" cy:directed="1"/>
      <edge id="443722" label="zzz1002,zzzz281" source="1044" target="844" cy:directed="1"/>
      <edge id="443721" label="zzz1002,zzzz289" source="1044" target="836" cy:directed="1"/>
      <edge id="443720" label="zzz1002,zzzz304" source="1044" target="821" cy:directed="1"/>
      <edge id="443719" label="zzz1002,zzzz344" source="1044" target="781" cy:directed="1"/>
      <edge id="443718" label="zzz1002,zzzz350" source="1044" target="775" cy:directed="1"/>
      <edge id="443717" label="zzz1002,zzzz359" source="1044" target="766" cy:directed="1"/>
      <edge id="443716" label="zzz1002,zzzz376" source="1044" target="749" cy:directed="1"/>
      <edge id="443715" label="zzz1002,zzzz384" source="1044" target="741" cy:directed="1"/>
      <edge id="443714" label="zzz1002,zzzz391" source="1044" target="734" cy:directed="1"/>
      <edge id="443713" label="zzz1002,zzzz258" source="1044" target="867" cy:directed="1"/>
      <edge id="443712" label="zzz1002,zzzz390" source="1044" target="735" cy:directed="1"/>
      <edge id="443711" label="zzz1002,zzzz269" source="1044" target="856" cy:directed="1"/>
      <edge id="443710" label="zzz1002,zzzz298" source="1044" target="827" cy:directed="1"/>
      <edge id="443709" label="zzz1002,zzzz303" source="1044" target="822" cy:directed="1"/>
      <edge id="443708" label="zzz1002,zzzz320" source="1044" target="805" cy:directed="1"/>
      <edge id="443707" label="zzz1002,zzzz254" source="1044" target="871" cy:directed="1"/>
      <edge id="443706" label="zzz1002,zzzz287" source="1044" target="838" cy:directed="1"/>
      <edge id="443705" label="zzz1002,zzzz292" source="1044" target="833" cy:directed="1"/>
      <edge id="443704" label="zzz1002,zzzz315" source="1044" target="810" cy:directed="1"/>
      <edge id="443703" label="zzz1002,zzzz395" source="1044" target="730" cy:directed="1"/>
      <edge id="443702" label="zzz1002,zzzz291" source="1044" target="834" cy:directed="1"/>
      <edge id="443701" label="zzz1002,zzzz372" source="1044" target="753" cy:directed="1"/>
      <edge id="443700" label="zzz1002,zzzz421" source="1044" target="704" cy:directed="1"/>
      <edge id="443699" label="zzz1002,zzzz282" source="1044" target="843" cy:directed="1"/>
      <edge id="443698" label="zzz1002,zzzz340" source="1044" target="785" cy:directed="1"/>
      <edge id="443697" label="zzz1002,zzzz952" source="1044" target="189" cy:directed="1"/>
      <edge id="443696" label="zzz1002,zzzz235" source="1044" target="890" cy:directed="1"/>
      <edge id="443695" label="zzz1002,zzzz265" source="1044" target="860" cy:directed="1"/>
      <edge id="443694" label="zzz1002,zzzz911" source="1044" target="230" cy:directed="1"/>
      <edge id="443693" label="zzz1002,zzzz214" source="1044" target="911" cy:directed="1"/>
      <edge id="443692" label="zzz1002,zzzz217" source="1044" target="908" cy:directed="1"/>
      <edge id="443691" label="zzz1002,zzzz236" source="1044" target="889" cy:directed="1"/>
      <edge id="443690" label="zzz1002,zzzz264" source="1044" target="861" cy:directed="1"/>
      <edge id="443689" label="zzz1002,zzzz964" source="1044" target="177" cy:directed="1"/>
      <edge id="443688" label="zzz1002,zzzz274" source="1044" target="851" cy:directed="1"/>
      <edge id="443687" label="zzz1002,zzzz336" source="1044" target="789" cy:directed="1"/>
      <edge id="443686" label="zzz1002,zzzz386" source="1044" target="739" cy:directed="1"/>
      <edge id="443685" label="zzz1002,zzzz402" source="1044" target="723" cy:directed="1"/>
      <edge id="443684" label="zzz1002,zzzz817" source="1044" target="324" cy:directed="1"/>
      <edge id="443683" label="zzz1002,zzzz223" source="1044" target="902" cy:directed="1"/>
      <edge id="443682" label="zzz1002,zzzz910" source="1044" target="231" cy:directed="1"/>
      <edge id="443681" label="zzz1002,zzzz912" source="1044" target="229" cy:directed="1"/>
      <edge id="443680" label="zzz1002,zzzz251" source="1044" target="874" cy:directed="1"/>
      <edge id="443679" label="zzz1002,zzzz263" source="1044" target="862" cy:directed="1"/>
      <edge id="443678" label="zzz1002,zzzz266" source="1044" target="859" cy:directed="1"/>
      <edge id="443677" label="zzz1002,zzzz311" source="1044" target="814" cy:directed="1"/>
      <edge id="443676" label="zzz1002,zzzz321" source="1044" target="804" cy:directed="1"/>
      <edge id="443675" label="zzz1002,zzzz394" source="1044" target="731" cy:directed="1"/>
      <edge id="443674" label="zzz1002,zzzz293" source="1044" target="832" cy:directed="1"/>
      <edge id="443673" label="zzz1002,zzzz191" source="1044" target="934" cy:directed="1"/>
      <edge id="443672" label="zzz1002,zzzz215" source="1044" target="910" cy:directed="1"/>
      <edge id="443671" label="zzz1002,zzzz288" source="1044" target="837" cy:directed="1"/>
      <edge id="443670" label="zzz1002,zzzz198" source="1044" target="927" cy:directed="1"/>
      <edge id="443669" label="zzz1002,zzzz210" source="1044" target="915" cy:directed="1"/>
      <edge id="443668" label="zzz1002,zzzz343" source="1044" target="782" cy:directed="1"/>
      <edge id="443667" label="zzz1002,zzzz938" source="1044" target="203" cy:directed="1"/>
      <edge id="443666" label="zzz1002,zzzz297" source="1044" target="828" cy:directed="1"/>
      <edge id="443665" label="zzz1002,zzzz337" source="1044" target="788" cy:directed="1"/>
      <edge id="443664" label="zzz1002,zzzz220" source="1044" target="905" cy:directed="1"/>
      <edge id="443663" label="zzz1002,zzzz310" source="1044" target="815" cy:directed="1"/>
      <edge id="443662" label="zzz1002,zzzz327" source="1044" target="798" cy:directed="1"/>
      <edge id="443661" label="zzz1002,zzzz224" source="1044" target="901" cy:directed="1"/>
      <edge id="443660" label="zzz1002,zzzz234" source="1044" target="891" cy:directed="1"/>
      <edge id="443659" label="zzz1002,zzzz290" source="1044" target="835" cy:directed="1"/>
      <edge id="443658" label="zzz1002,zzzz179" source="1044" target="946" cy:directed="1"/>
      <edge id="443657" label="zzz1002,zzzz216" source="1044" target="909" cy:directed="1"/>
      <edge id="443656" label="zzz1002,zzzz196" source="1044" target="929" cy:directed="1"/>
      <edge id="443655" label="zzz1002,zzzz231" source="1044" target="894" cy:directed="1"/>
      <edge id="443654" label="zzz1002,zzzz257" source="1044" target="868" cy:directed="1"/>
      <edge id="443653" label="zzz1002,zzzz242" source="1044" target="883" cy:directed="1"/>
      <edge id="443652" label="zzz1002,zzzz268" source="1044" target="857" cy:directed="1"/>
      <edge id="443651" label="zzz1002,zzzz308" source="1044" target="817" cy:directed="1"/>
      <edge id="443650" label="zzz1002,zzzz397" source="1044" target="728" cy:directed="1"/>
      <edge id="443649" label="zzz1002,zzzz914" source="1044" target="227" cy:directed="1"/>
      <edge id="443648" label="zzz1002,zzzz213" source="1044" target="912" cy:directed="1"/>
      <edge id="443647" label="zzz1002,zzzz324" source="1044" target="801" cy:directed="1"/>
      <edge id="443646" label="zzz1002,zzzz840" source="1044" target="301" cy:directed="1"/>
      <edge id="443645" label="zzz1002,zzzz277" source="1044" target="848" cy:directed="1"/>
      <edge id="443644" label="zzz1002,zzzz285" source="1044" target="840" cy:directed="1"/>
      <edge id="443643" label="zzz1002,zzzz360" source="1044" target="765" cy:directed="1"/>
      <edge id="443642" label="zzz1002,zzzz385" source="1044" target="740" cy:directed="1"/>
      <edge id="443641" label="zzz1002,zzzz309" source="1044" target="816" cy:directed="1"/>
      <edge id="443640" label="zzz1002,zzzz207" source="1044" target="918" cy:directed="1"/>
      <edge id="443639" label="zzz1002,zzzzz49" source="1044" target="110" cy:directed="1"/>
      <edge id="443638" label="zzz1002,zzzz240" source="1044" target="885" cy:directed="1"/>
      <edge id="443637" label="zzz1002,zzzz905" source="1044" target="236" cy:directed="1"/>
      <edge id="443636" label="zzz1002,zzzz280" source="1044" target="845" cy:directed="1"/>
      <edge id="443635" label="zzz1002,zzzz365" source="1044" target="760" cy:directed="1"/>
      <edge id="443634" label="zzz1002,zzzz919" source="1044" target="222" cy:directed="1"/>
      <edge id="443633" label="zzz1002,zzzz295" source="1044" target="830" cy:directed="1"/>
      <edge id="443632" label="zzz1002,zzzz300" source="1044" target="825" cy:directed="1"/>
      <edge id="443631" label="zzz1002,zzzz313" source="1044" target="812" cy:directed="1"/>
      <edge id="443630" label="zzz1002,zzzz260" source="1044" target="865" cy:directed="1"/>
      <edge id="443629" label="zzz1002,zzzz951" source="1044" target="190" cy:directed="1"/>
      <edge id="443628" label="zzz1002,zzzz316" source="1044" target="809" cy:directed="1"/>
      <edge id="443627" label="zzz1002,zzzz305" source="1044" target="820" cy:directed="1"/>
      <edge id="443626" label="zzz1002,zzzz373" source="1044" target="752" cy:directed="1"/>
      <edge id="443625" label="zzz1002,zzzz272" source="1044" target="853" cy:directed="1"/>
      <edge id="443624" label="zzz1002,zzzz999" source="1044" target="143" cy:directed="1"/>
      <edge id="443623" label="zzz1002,zzzz294" source="1044" target="831" cy:directed="1"/>
      <edge id="443622" label="zzz1002,zzzz273" source="1044" target="852" cy:directed="1"/>
      <edge id="443621" label="zzz1002,zzzz508" source="1044" target="633" cy:directed="1"/>
      <edge id="443620" label="zzz1002,zzzz605" source="1044" target="536" cy:directed="1"/>
      <edge id="443619" label="zzz1002,zzzz489" source="1044" target="651" cy:directed="1"/>
      <edge id="443618" label="zzz1002,zzzz498" source="1044" target="642" cy:directed="1"/>
      <edge id="443617" label="zzz1002,zzzz400" source="1044" target="725" cy:directed="1"/>
      <edge id="443616" label="zzz1002,zzzz949" source="1044" target="192" cy:directed="1"/>
      <edge id="443615" label="zzz1002,zzzz190" source="1044" target="935" cy:directed="1"/>
      <edge id="443614" label="zzz1002,zzzz318" source="1044" target="807" cy:directed="1"/>
      <edge id="443613" label="zzz1002,zzzz957" source="1044" target="184" cy:directed="1"/>
      <edge id="443612" label="zzz1002,zzzz487" source="1044" target="653" cy:directed="1"/>
      <edge id="443611" label="zzz1002,zzzz959" source="1044" target="182" cy:directed="1"/>
      <edge id="443610" label="zzz1002,zzzz267" source="1044" target="858" cy:directed="1"/>
      <edge id="443609" label="zzz1002,zzzz506" source="1044" target="635" cy:directed="1"/>
      <edge id="443608" label="zzz1002,zzzz496" source="1044" target="644" cy:directed="1"/>
      <edge id="443607" label="zzz1002,zzzz993" source="1044" target="149" cy:directed="1"/>
      <edge id="443606" label="zzz1002,zzzz326" source="1044" target="799" cy:directed="1"/>
      <edge id="443605" label="zzz1002,zzzz399" source="1044" target="726" cy:directed="1"/>
      <edge id="443604" label="zzz1002,zzzz401" source="1044" target="724" cy:directed="1"/>
      <edge id="443603" label="zzz1002,zzzz932" source="1044" target="209" cy:directed="1"/>
      <edge id="443602" label="zzz1002,zzzz396" source="1044" target="729" cy:directed="1"/>
      <edge id="443601" label="zzz1002,zzzz256" source="1044" target="869" cy:directed="1"/>
      <edge id="443600" label="zzz1002,zzzzz51" source="1044" target="108" cy:directed="1"/>
      <edge id="443599" label="zzz1002,zzzzz77" source="1044" target="82" cy:directed="1"/>
      <edge id="443598" label="zzz1002,zzzz953" source="1044" target="188" cy:directed="1"/>
      <edge id="443597" label="zzz1002,zzzz549" source="1044" target="592" cy:directed="1"/>
      <edge id="443596" label="zzz1002,zzzz940" source="1044" target="201" cy:directed="1"/>
      <edge id="443595" label="zzz1002,zzzz942" source="1044" target="199" cy:directed="1"/>
      <edge id="443594" label="zzz1002,zzzz994" source="1044" target="148" cy:directed="1"/>
      <edge id="443593" label="zzz1002,zzzz398" source="1044" target="727" cy:directed="1"/>
      <edge id="443592" label="zzz1002,zzzz178" source="1044" target="947" cy:directed="1"/>
      <edge id="443591" label="zzz1002,zzzz925" source="1044" target="216" cy:directed="1"/>
      <edge id="443590" label="zzz1002,zzzz497" source="1044" target="643" cy:directed="1"/>
      <edge id="443589" label="zzz1002,zzzz937" source="1044" target="204" cy:directed="1"/>
      <edge id="443588" label="zzz1002,zzzz943" source="1044" target="198" cy:directed="1"/>
      <edge id="443587" label="zzz1002,zzzz480" source="1044" target="660" cy:directed="1"/>
      <edge id="443586" label="zzz1002,zzzz495" source="1044" target="645" cy:directed="1"/>
      <edge id="443585" label="zzz1002,zzzz939" source="1044" target="202" cy:directed="1"/>
      <edge id="443584" label="zzz1002,zzzz509" source="1044" target="632" cy:directed="1"/>
      <edge id="443583" label="zzz1002,zzzz539" source="1044" target="602" cy:directed="1"/>
      <edge id="443582" label="zzz1002,zzzz529" source="1044" target="612" cy:directed="1"/>
      <edge id="443581" label="zzz1002,zzzz481" source="1044" target="659" cy:directed="1"/>
      <edge id="443580" label="zzz1002,zzzz542" source="1044" target="599" cy:directed="1"/>
      <edge id="443579" label="zzz1002,zzzz893" source="1044" target="248" cy:directed="1"/>
      <edge id="443578" label="zzz1002,zzzz895" source="1044" target="246" cy:directed="1"/>
      <edge id="443577" label="zzz1002,zzzz478" source="1044" target="662" cy:directed="1"/>
      <edge id="443576" label="zzz1002,zzzz479" source="1044" target="661" cy:directed="1"/>
      <edge id="443575" label="zzz1002,zzzz531" source="1044" target="610" cy:directed="1"/>
      <edge id="443574" label="zzz1002,zzzz524" source="1044" target="617" cy:directed="1"/>
      <edge id="443573" label="zzz1002,zzzz532" source="1044" target="609" cy:directed="1"/>
      <edge id="443572" label="zzz1002,zzzz891" source="1044" target="250" cy:directed="1"/>
      <edge id="443571" label="zzz1002,zzzz536" source="1044" target="605" cy:directed="1"/>
      <edge id="443570" label="zzz1002,zzzz494" source="1044" target="646" cy:directed="1"/>
      <edge id="443569" label="zzz1002,zzzz892" source="1044" target="249" cy:directed="1"/>
      <edge id="443568" label="zzz1002,zzzz897" source="1044" target="244" cy:directed="1"/>
      <edge id="443567" label="zzz1002,zzzz934" source="1044" target="207" cy:directed="1"/>
      <edge id="443566" label="zzz1002,zzzz510" source="1044" target="631" cy:directed="1"/>
      <edge id="443565" label="zzz1002,zzzz541" source="1044" target="600" cy:directed="1"/>
      <edge id="443564" label="zzz1002,zzzz941" source="1044" target="200" cy:directed="1"/>
      <edge id="443563" label="zzz1002,zzzz533" source="1044" target="608" cy:directed="1"/>
      <edge id="443562" label="zzz1002,zzzz543" source="1044" target="598" cy:directed="1"/>
      <edge id="443561" label="zzz1002,zzzz534" source="1044" target="607" cy:directed="1"/>
      <edge id="443560" label="zzz1002,zzzz896" source="1044" target="245" cy:directed="1"/>
      <edge id="443559" label="zzz1002,zzzz544" source="1044" target="597" cy:directed="1"/>
      <edge id="443558" label="zzz1002,zzzz491" source="1044" target="649" cy:directed="1"/>
      <edge id="443557" label="zzz1002,zzzz935" source="1044" target="206" cy:directed="1"/>
      <edge id="443556" label="zzz1002,zzzz526" source="1044" target="615" cy:directed="1"/>
      <edge id="443555" label="zzz1002,zzzz894" source="1044" target="247" cy:directed="1"/>
      <edge id="443554" label="zzz1003,zzzz707" source="1043" target="434" cy:directed="1"/>
      <edge id="443553" label="zzz1003,zzzzz97" source="1043" target="64" cy:directed="1"/>
      <edge id="443552" label="zzz1003,zzzz863" source="1043" target="278" cy:directed="1"/>
      <edge id="443551" label="zzz1003,zzzz857" source="1043" target="284" cy:directed="1"/>
      <edge id="443550" label="zzz1003,zzzz200" source="1043" target="925" cy:directed="1"/>
      <edge id="443549" label="zzz1003,zzzz841" source="1043" target="300" cy:directed="1"/>
      <edge id="443548" label="zzz1003,zzzz679" source="1043" target="462" cy:directed="1"/>
      <edge id="443547" label="zzz1003,zzzz971" source="1043" target="171" cy:directed="1"/>
      <edge id="443546" label="zzz1003,zzzzz96" source="1043" target="65" cy:directed="1"/>
      <edge id="443545" label="zzz1003,zzzz918" source="1043" target="223" cy:directed="1"/>
      <edge id="443544" label="zzz1003,zzzz846" source="1043" target="295" cy:directed="1"/>
      <edge id="443543" label="zzz1003,zzzz701" source="1043" target="440" cy:directed="1"/>
      <edge id="443542" label="zzz1003,zzzzz78" source="1043" target="81" cy:directed="1"/>
      <edge id="443541" label="zzz1003,zzzz611" source="1043" target="530" cy:directed="1"/>
      <edge id="443540" label="zzz1003,zzzz718" source="1043" target="423" cy:directed="1"/>
      <edge id="443539" label="zzz1003,zzzz642" source="1043" target="499" cy:directed="1"/>
      <edge id="443538" label="zzz1003,zzzz764" source="1043" target="377" cy:directed="1"/>
      <edge id="443537" label="zzz1003,zzzz902" source="1043" target="239" cy:directed="1"/>
      <edge id="443536" label="zzz1003,zzzz990" source="1043" target="152" cy:directed="1"/>
      <edge id="443535" label="zzz1003,zzzzz65" source="1043" target="94" cy:directed="1"/>
      <edge id="443534" label="zzz1003,zzzz844" source="1043" target="297" cy:directed="1"/>
      <edge id="443533" label="zzz1003,zzzz978" source="1043" target="164" cy:directed="1"/>
      <edge id="443532" label="zzz1003,zzzz654" source="1043" target="487" cy:directed="1"/>
      <edge id="443531" label="zzz1003,zzzz992" source="1043" target="150" cy:directed="1"/>
      <edge id="443530" label="zzz1003,zzzz548" source="1043" target="593" cy:directed="1"/>
      <edge id="443529" label="zzz1003,zzzz629" source="1043" target="512" cy:directed="1"/>
      <edge id="443528" label="zzz1003,zzzz868" source="1043" target="273" cy:directed="1"/>
      <edge id="443527" label="zzz1003,zzz1014" source="1043" target="1032" cy:directed="1"/>
      <edge id="443526" label="zzz1003,zzzz195" source="1043" target="930" cy:directed="1"/>
      <edge id="443525" label="zzz1003,zzzz499" source="1043" target="641" cy:directed="1"/>
      <edge id="443524" label="zzz1003,zzzz646" source="1043" target="495" cy:directed="1"/>
      <edge id="443523" label="zzz1003,zzzz449" source="1043" target="678" cy:directed="1"/>
      <edge id="443522" label="zzz1003,zzzz687" source="1043" target="454" cy:directed="1"/>
      <edge id="443521" label="zzz1003,zzzz695" source="1043" target="446" cy:directed="1"/>
      <edge id="443520" label="zzz1003,zzzz901" source="1043" target="240" cy:directed="1"/>
      <edge id="443519" label="zzz1003,zzzz972" source="1043" target="170" cy:directed="1"/>
      <edge id="443518" label="zzz1003,zzzz110" source="1043" target="1015" cy:directed="1"/>
      <edge id="443517" label="zzz1003,zzzz722" source="1043" target="419" cy:directed="1"/>
      <edge id="443516" label="zzz1003,zzzz729" source="1043" target="412" cy:directed="1"/>
      <edge id="443515" label="zzz1003,zzzz730" source="1043" target="411" cy:directed="1"/>
      <edge id="443514" label="zzz1003,zzzz755" source="1043" target="386" cy:directed="1"/>
      <edge id="443513" label="zzz1003,zzzz768" source="1043" target="373" cy:directed="1"/>
      <edge id="443512" label="zzz1003,zzzz865" source="1043" target="276" cy:directed="1"/>
      <edge id="443511" label="zzz1003,zzzz667" source="1043" target="474" cy:directed="1"/>
      <edge id="443510" label="zzz1003,zzzz733" source="1043" target="408" cy:directed="1"/>
      <edge id="443509" label="zzz1003,zzzzz94" source="1043" target="67" cy:directed="1"/>
      <edge id="443508" label="zzz1003,zzzz203" source="1043" target="922" cy:directed="1"/>
      <edge id="443507" label="zzz1003,zzzz564" source="1043" target="577" cy:directed="1"/>
      <edge id="443506" label="zzz1003,zzzz568" source="1043" target="573" cy:directed="1"/>
      <edge id="443505" label="zzz1003,zzzz589" source="1043" target="552" cy:directed="1"/>
      <edge id="443504" label="zzz1003,zzzz702" source="1043" target="439" cy:directed="1"/>
      <edge id="443503" label="zzz1003,zzzz731" source="1043" target="410" cy:directed="1"/>
      <edge id="443502" label="zzz1003,zzzz974" source="1043" target="168" cy:directed="1"/>
      <edge id="443501" label="zzz1003,zzzzz92" source="1043" target="69" cy:directed="1"/>
      <edge id="443500" label="zzz1003,zzzz834" source="1043" target="307" cy:directed="1"/>
      <edge id="443499" label="zzz1003,zzzz899" source="1043" target="242" cy:directed="1"/>
      <edge id="443498" label="zzz1003,zzzz469" source="1043" target="671" cy:directed="1"/>
      <edge id="443497" label="zzz1003,zzzz630" source="1043" target="511" cy:directed="1"/>
      <edge id="443496" label="zzz1003,zzzz650" source="1043" target="491" cy:directed="1"/>
      <edge id="443495" label="zzz1003,zzzz682" source="1043" target="459" cy:directed="1"/>
      <edge id="443494" label="zzz1003,zzzz746" source="1043" target="395" cy:directed="1"/>
      <edge id="443493" label="zzz1003,zzzz836" source="1043" target="305" cy:directed="1"/>
      <edge id="443492" label="zzz1003,zzzz968" source="1043" target="174" cy:directed="1"/>
      <edge id="443491" label="zzz1003,zzzz665" source="1043" target="476" cy:directed="1"/>
      <edge id="443490" label="zzz1003,zzzz732" source="1043" target="409" cy:directed="1"/>
      <edge id="443489" label="zzz1003,zzzz843" source="1043" target="298" cy:directed="1"/>
      <edge id="443488" label="zzz1003,zzzz109" source="1043" target="1016" cy:directed="1"/>
      <edge id="443487" label="zzz1003,zzzz569" source="1043" target="572" cy:directed="1"/>
      <edge id="443486" label="zzz1003,zzzz604" source="1043" target="537" cy:directed="1"/>
      <edge id="443485" label="zzz1003,zzzz659" source="1043" target="482" cy:directed="1"/>
      <edge id="443484" label="zzz1003,zzzz681" source="1043" target="460" cy:directed="1"/>
      <edge id="443483" label="zzz1003,zzzz705" source="1043" target="436" cy:directed="1"/>
      <edge id="443482" label="zzz1003,zzzz752" source="1043" target="389" cy:directed="1"/>
      <edge id="443481" label="zzz1003,zzzz754" source="1043" target="387" cy:directed="1"/>
      <edge id="443480" label="zzz1003,zzzz107" source="1043" target="1018" cy:directed="1"/>
      <edge id="443479" label="zzz1003,zzzz112" source="1043" target="1013" cy:directed="1"/>
      <edge id="443478" label="zzz1003,zzzz113" source="1043" target="1012" cy:directed="1"/>
      <edge id="443477" label="zzz1003,zzzz404" source="1043" target="721" cy:directed="1"/>
      <edge id="443476" label="zzz1003,zzzz500" source="1043" target="640" cy:directed="1"/>
      <edge id="443475" label="zzz1003,zzzz724" source="1043" target="417" cy:directed="1"/>
      <edge id="443474" label="zzz1003,zzz1010" source="1043" target="1036" cy:directed="1"/>
      <edge id="443473" label="zzz1003,zzzz647" source="1043" target="494" cy:directed="1"/>
      <edge id="443472" label="zzz1003,zzzz762" source="1043" target="379" cy:directed="1"/>
      <edge id="443471" label="zzz1003,zzzz873" source="1043" target="268" cy:directed="1"/>
      <edge id="443470" label="zzz1003,zzzz709" source="1043" target="432" cy:directed="1"/>
      <edge id="443469" label="zzz1003,zzzz739" source="1043" target="402" cy:directed="1"/>
      <edge id="443468" label="zzz1003,zzzz987" source="1043" target="155" cy:directed="1"/>
      <edge id="443467" label="zzz1003,zzzz555" source="1043" target="586" cy:directed="1"/>
      <edge id="443466" label="zzz1003,zzzz734" source="1043" target="407" cy:directed="1"/>
      <edge id="443465" label="zzz1003,zzzz656" source="1043" target="485" cy:directed="1"/>
      <edge id="443464" label="zzz1003,zzzz728" source="1043" target="413" cy:directed="1"/>
      <edge id="443463" label="zzz1003,zzzz784" source="1043" target="357" cy:directed="1"/>
      <edge id="443462" label="zzz1003,zzzz824" source="1043" target="317" cy:directed="1"/>
      <edge id="443461" label="zzz1003,zzzz562" source="1043" target="579" cy:directed="1"/>
      <edge id="443460" label="zzz1003,zzzz670" source="1043" target="471" cy:directed="1"/>
      <edge id="443459" label="zzz1003,zzzz760" source="1043" target="381" cy:directed="1"/>
      <edge id="443458" label="zzz1003,zzzz858" source="1043" target="283" cy:directed="1"/>
      <edge id="443457" label="zzz1003,zzzz900" source="1043" target="241" cy:directed="1"/>
      <edge id="443456" label="zzz1003,zzzzz64" source="1043" target="95" cy:directed="1"/>
      <edge id="443455" label="zzz1003,zzzz663" source="1043" target="478" cy:directed="1"/>
      <edge id="443454" label="zzz1003,zzzz579" source="1043" target="562" cy:directed="1"/>
      <edge id="443453" label="zzz1003,zzzz662" source="1043" target="479" cy:directed="1"/>
      <edge id="443452" label="zzz1003,zzzz673" source="1043" target="468" cy:directed="1"/>
      <edge id="443451" label="zzz1003,zzzz735" source="1043" target="406" cy:directed="1"/>
      <edge id="443450" label="zzz1003,zzzz761" source="1043" target="380" cy:directed="1"/>
      <edge id="443449" label="zzz1003,zzzz848" source="1043" target="293" cy:directed="1"/>
      <edge id="443448" label="zzz1003,zzzz859" source="1043" target="282" cy:directed="1"/>
      <edge id="443447" label="zzz1003,zzzz921" source="1043" target="220" cy:directed="1"/>
      <edge id="443446" label="zzz1003,zzzz973" source="1043" target="169" cy:directed="1"/>
      <edge id="443445" label="zzz1003,zzzzz19" source="1043" target="136" cy:directed="1"/>
      <edge id="443444" label="zzz1003,zzzz617" source="1043" target="524" cy:directed="1"/>
      <edge id="443443" label="zzz1003,zzzz710" source="1043" target="431" cy:directed="1"/>
      <edge id="443442" label="zzz1003,zzzz553" source="1043" target="588" cy:directed="1"/>
      <edge id="443441" label="zzz1003,zzzz618" source="1043" target="523" cy:directed="1"/>
      <edge id="443440" label="zzz1003,zzzz111" source="1043" target="1014" cy:directed="1"/>
      <edge id="443439" label="zzz1003,zzzz571" source="1043" target="570" cy:directed="1"/>
      <edge id="443438" label="zzz1003,zzzz620" source="1043" target="521" cy:directed="1"/>
      <edge id="443437" label="zzz1003,zzzz635" source="1043" target="506" cy:directed="1"/>
      <edge id="443436" label="zzz1003,zzzz684" source="1043" target="457" cy:directed="1"/>
      <edge id="443435" label="zzz1003,zzzz756" source="1043" target="385" cy:directed="1"/>
      <edge id="443434" label="zzz1003,zzzz828" source="1043" target="313" cy:directed="1"/>
      <edge id="443433" label="zzz1003,zzzz837" source="1043" target="304" cy:directed="1"/>
      <edge id="443432" label="zzz1003,zzzz985" source="1043" target="157" cy:directed="1"/>
      <edge id="443431" label="zzz1003,zzzz861" source="1043" target="280" cy:directed="1"/>
      <edge id="443430" label="zzz1003,zzzz623" source="1043" target="518" cy:directed="1"/>
      <edge id="443429" label="zzz1003,zzzz820" source="1043" target="321" cy:directed="1"/>
      <edge id="443428" label="zzz1003,zzzz556" source="1043" target="585" cy:directed="1"/>
      <edge id="443427" label="zzz1003,zzzz675" source="1043" target="466" cy:directed="1"/>
      <edge id="443426" label="zzz1003,zzzz851" source="1043" target="290" cy:directed="1"/>
      <edge id="443425" label="zzz1003,zzzz575" source="1043" target="566" cy:directed="1"/>
      <edge id="443424" label="zzz1003,zzzz672" source="1043" target="469" cy:directed="1"/>
      <edge id="443423" label="zzz1003,zzzz818" source="1043" target="323" cy:directed="1"/>
      <edge id="443422" label="zzz1003,zzzz561" source="1043" target="580" cy:directed="1"/>
      <edge id="443421" label="zzz1003,zzzz572" source="1043" target="569" cy:directed="1"/>
      <edge id="443420" label="zzz1003,zzzz814" source="1043" target="327" cy:directed="1"/>
      <edge id="443419" label="zzz1003,zzzz864" source="1043" target="277" cy:directed="1"/>
      <edge id="443418" label="zzz1003,zzzzz99" source="1043" target="62" cy:directed="1"/>
      <edge id="443417" label="zzz1003,zzz1021" source="1043" target="1026" cy:directed="1"/>
      <edge id="443416" label="zzz1003,zzzz580" source="1043" target="561" cy:directed="1"/>
      <edge id="443415" label="zzz1003,zzzz610" source="1043" target="531" cy:directed="1"/>
      <edge id="443414" label="zzz1003,zzzz115" source="1043" target="1010" cy:directed="1"/>
      <edge id="443413" label="zzz1003,zzzz403" source="1043" target="722" cy:directed="1"/>
      <edge id="443412" label="zzz1003,zzzz649" source="1043" target="492" cy:directed="1"/>
      <edge id="443411" label="zzz1003,zzzz652" source="1043" target="489" cy:directed="1"/>
      <edge id="443410" label="zzz1003,zzzz706" source="1043" target="435" cy:directed="1"/>
      <edge id="443409" label="zzz1003,zzzz827" source="1043" target="314" cy:directed="1"/>
      <edge id="443408" label="zzz1003,zzzz960" source="1043" target="181" cy:directed="1"/>
      <edge id="443407" label="zzz1003,zzzzz98" source="1043" target="63" cy:directed="1"/>
      <edge id="443406" label="zzz1003,zzzz626" source="1043" target="515" cy:directed="1"/>
      <edge id="443405" label="zzz1003,zzzz676" source="1043" target="465" cy:directed="1"/>
      <edge id="443404" label="zzz1003,zzzz723" source="1043" target="418" cy:directed="1"/>
      <edge id="443403" label="zzz1003,zzzz726" source="1043" target="415" cy:directed="1"/>
      <edge id="443402" label="zzz1003,zzzz854" source="1043" target="287" cy:directed="1"/>
      <edge id="443401" label="zzz1003,zzzz981" source="1043" target="161" cy:directed="1"/>
      <edge id="443400" label="zzz1003,zzzz991" source="1043" target="151" cy:directed="1"/>
      <edge id="443399" label="zzz1003,zzzzz21" source="1043" target="134" cy:directed="1"/>
      <edge id="443398" label="zzz1003,zzzz603" source="1043" target="538" cy:directed="1"/>
      <edge id="443397" label="zzz1003,zzzz108" source="1043" target="1017" cy:directed="1"/>
      <edge id="443396" label="zzz1003,zzzz565" source="1043" target="576" cy:directed="1"/>
      <edge id="443395" label="zzz1003,zzzz602" source="1043" target="539" cy:directed="1"/>
      <edge id="443394" label="zzz1003,zzzz616" source="1043" target="525" cy:directed="1"/>
      <edge id="443393" label="zzz1003,zzzz819" source="1043" target="322" cy:directed="1"/>
      <edge id="443392" label="zzz1003,zzzz842" source="1043" target="299" cy:directed="1"/>
      <edge id="443391" label="zzz1003,zzzz100" source="1043" target="1025" cy:directed="1"/>
      <edge id="443390" label="zzz1003,zzzz550" source="1043" target="591" cy:directed="1"/>
      <edge id="443389" label="zzz1003,zzzz596" source="1043" target="545" cy:directed="1"/>
      <edge id="443388" label="zzz1003,zzzz598" source="1043" target="543" cy:directed="1"/>
      <edge id="443387" label="zzz1003,zzzz632" source="1043" target="509" cy:directed="1"/>
      <edge id="443386" label="zzz1003,zzzz639" source="1043" target="502" cy:directed="1"/>
      <edge id="443385" label="zzz1003,zzzz829" source="1043" target="312" cy:directed="1"/>
      <edge id="443384" label="zzz1003,zzzz979" source="1043" target="163" cy:directed="1"/>
      <edge id="443383" label="zzz1003,zzzz545" source="1043" target="596" cy:directed="1"/>
      <edge id="443382" label="zzz1003,zzzz551" source="1043" target="590" cy:directed="1"/>
      <edge id="443381" label="zzz1003,zzzz683" source="1043" target="458" cy:directed="1"/>
      <edge id="443380" label="zzz1003,zzzz696" source="1043" target="445" cy:directed="1"/>
      <edge id="443379" label="zzz1003,zzzz721" source="1043" target="420" cy:directed="1"/>
      <edge id="443378" label="zzz1003,zzzz743" source="1043" target="398" cy:directed="1"/>
      <edge id="443377" label="zzz1003,zzzz823" source="1043" target="318" cy:directed="1"/>
      <edge id="443376" label="zzz1003,zzzz465" source="1043" target="675" cy:directed="1"/>
      <edge id="443375" label="zzz1003,zzzz584" source="1043" target="557" cy:directed="1"/>
      <edge id="443374" label="zzz1003,zzzz614" source="1043" target="527" cy:directed="1"/>
      <edge id="443373" label="zzz1003,zzzz636" source="1043" target="505" cy:directed="1"/>
      <edge id="443372" label="zzz1003,zzzz660" source="1043" target="481" cy:directed="1"/>
      <edge id="443371" label="zzz1003,zzzz813" source="1043" target="328" cy:directed="1"/>
      <edge id="443370" label="zzz1003,zzzz835" source="1043" target="306" cy:directed="1"/>
      <edge id="443369" label="zzz1003,zzzz898" source="1043" target="243" cy:directed="1"/>
      <edge id="443368" label="zzz1003,zzzz622" source="1043" target="519" cy:directed="1"/>
      <edge id="443367" label="zzz1003,zzzz552" source="1043" target="589" cy:directed="1"/>
      <edge id="443366" label="zzz1003,zzzz570" source="1043" target="571" cy:directed="1"/>
      <edge id="443365" label="zzz1003,zzzz588" source="1043" target="553" cy:directed="1"/>
      <edge id="443364" label="zzz1003,zzzz677" source="1043" target="464" cy:directed="1"/>
      <edge id="443363" label="zzz1003,zzzz855" source="1043" target="286" cy:directed="1"/>
      <edge id="443362" label="zzz1003,zzzz986" source="1043" target="156" cy:directed="1"/>
      <edge id="443361" label="zzz1003,zzzzz61" source="1043" target="98" cy:directed="1"/>
      <edge id="443360" label="zzz1003,zzzz559" source="1043" target="582" cy:directed="1"/>
      <edge id="443359" label="zzz1003,zzzz573" source="1043" target="568" cy:directed="1"/>
      <edge id="443358" label="zzz1003,zzzz591" source="1043" target="550" cy:directed="1"/>
      <edge id="443357" label="zzz1003,zzzz638" source="1043" target="503" cy:directed="1"/>
      <edge id="443356" label="zzz1003,zzzz643" source="1043" target="498" cy:directed="1"/>
      <edge id="443355" label="zzz1003,zzzz597" source="1043" target="544" cy:directed="1"/>
      <edge id="443354" label="zzz1003,zzzz847" source="1043" target="294" cy:directed="1"/>
      <edge id="443353" label="zzz1003,zzzz853" source="1043" target="288" cy:directed="1"/>
      <edge id="443352" label="zzz1003,zzzz862" source="1043" target="279" cy:directed="1"/>
      <edge id="443351" label="zzz1003,zzzz192" source="1043" target="933" cy:directed="1"/>
      <edge id="443350" label="zzz1003,zzzz581" source="1043" target="560" cy:directed="1"/>
      <edge id="443349" label="zzz1003,zzzz599" source="1043" target="542" cy:directed="1"/>
      <edge id="443348" label="zzz1003,zzzz634" source="1043" target="507" cy:directed="1"/>
      <edge id="443347" label="zzz1003,zzzzz25" source="1043" target="130" cy:directed="1"/>
      <edge id="443346" label="zzz1003,zzzz619" source="1043" target="522" cy:directed="1"/>
      <edge id="443345" label="zzz1003,zzzz644" source="1043" target="497" cy:directed="1"/>
      <edge id="443344" label="zzz1003,zzzz838" source="1043" target="303" cy:directed="1"/>
      <edge id="443343" label="zzz1003,zzzz664" source="1043" target="477" cy:directed="1"/>
      <edge id="443342" label="zzz1003,zzzz590" source="1043" target="551" cy:directed="1"/>
      <edge id="443341" label="zzz1003,zzzz748" source="1043" target="393" cy:directed="1"/>
      <edge id="443340" label="zzz1003,zzzz930" source="1043" target="211" cy:directed="1"/>
      <edge id="443339" label="zzz1003,zzz1016" source="1043" target="1030" cy:directed="1"/>
      <edge id="443338" label="zzz1003,zzzz850" source="1043" target="291" cy:directed="1"/>
      <edge id="443337" label="zzz1003,zzzzz69" source="1043" target="90" cy:directed="1"/>
      <edge id="443336" label="zzz1003,zzzzz93" source="1043" target="68" cy:directed="1"/>
      <edge id="443335" label="zzz1003,zzzz689" source="1043" target="452" cy:directed="1"/>
      <edge id="443334" label="zzz1003,zzzz880" source="1043" target="261" cy:directed="1"/>
      <edge id="443333" label="zzz1003,zzzz903" source="1043" target="238" cy:directed="1"/>
      <edge id="443332" label="zzz1003,zzzz201" source="1043" target="924" cy:directed="1"/>
      <edge id="443331" label="zzz1003,zzzz574" source="1043" target="567" cy:directed="1"/>
      <edge id="443330" label="zzz1003,zzzz624" source="1043" target="517" cy:directed="1"/>
      <edge id="443329" label="zzz1003,zzzz975" source="1043" target="167" cy:directed="1"/>
      <edge id="443328" label="zzz1003,zzzzz18" source="1043" target="137" cy:directed="1"/>
      <edge id="443327" label="zzz1003,zzzzz57" source="1043" target="102" cy:directed="1"/>
      <edge id="443326" label="zzz1003,zzzzz60" source="1043" target="99" cy:directed="1"/>
      <edge id="443325" label="zzz1003,zzzz567" source="1043" target="574" cy:directed="1"/>
      <edge id="443324" label="zzz1003,zzzz199" source="1043" target="926" cy:directed="1"/>
      <edge id="443323" label="zzz1003,zzzz821" source="1043" target="320" cy:directed="1"/>
      <edge id="443322" label="zzz1003,zzzz609" source="1043" target="532" cy:directed="1"/>
      <edge id="443321" label="zzz1003,zzzz715" source="1043" target="426" cy:directed="1"/>
      <edge id="443320" label="zzz1003,zzzz666" source="1043" target="475" cy:directed="1"/>
      <edge id="443319" label="zzz1003,zzzz586" source="1043" target="555" cy:directed="1"/>
      <edge id="443318" label="zzz1003,zzzz767" source="1043" target="374" cy:directed="1"/>
      <edge id="443317" label="zzz1003,zzzzz55" source="1043" target="104" cy:directed="1"/>
      <edge id="443316" label="zzz1003,zzzzz58" source="1043" target="101" cy:directed="1"/>
      <edge id="443315" label="zzz1003,zzzz607" source="1043" target="534" cy:directed="1"/>
      <edge id="443314" label="zzz1003,zzzz774" source="1043" target="367" cy:directed="1"/>
      <edge id="443313" label="zzz1003,zzzz775" source="1043" target="366" cy:directed="1"/>
      <edge id="443312" label="zzz1003,zzzz790" source="1043" target="351" cy:directed="1"/>
      <edge id="443311" label="zzz1003,zzzzz95" source="1043" target="66" cy:directed="1"/>
      <edge id="443310" label="zzz1003,zzzz206" source="1043" target="919" cy:directed="1"/>
      <edge id="443309" label="zzz1003,zzzz830" source="1043" target="311" cy:directed="1"/>
      <edge id="443308" label="zzz1003,zzzz882" source="1043" target="259" cy:directed="1"/>
      <edge id="443307" label="zzz1003,zzzz621" source="1043" target="520" cy:directed="1"/>
      <edge id="443306" label="zzz1003,zzzz913" source="1043" target="228" cy:directed="1"/>
      <edge id="443305" label="zzz1003,zzzzz53" source="1043" target="106" cy:directed="1"/>
      <edge id="443304" label="zzz1003,zzzz406" source="1043" target="719" cy:directed="1"/>
      <edge id="443303" label="zzz1003,zzzz800" source="1043" target="341" cy:directed="1"/>
      <edge id="443302" label="zzz1003,zzzz871" source="1043" target="270" cy:directed="1"/>
      <edge id="443301" label="zzz1003,zzzzz59" source="1043" target="100" cy:directed="1"/>
      <edge id="443300" label="zzz1003,zzzzz62" source="1043" target="97" cy:directed="1"/>
      <edge id="443299" label="zzz1003,zzzz558" source="1043" target="583" cy:directed="1"/>
      <edge id="443298" label="zzz1003,zzzz566" source="1043" target="575" cy:directed="1"/>
      <edge id="443297" label="zzz1003,zzzz625" source="1043" target="516" cy:directed="1"/>
      <edge id="443296" label="zzz1003,zzzz845" source="1043" target="296" cy:directed="1"/>
      <edge id="443295" label="zzz1003,zzzz924" source="1043" target="217" cy:directed="1"/>
      <edge id="443294" label="zzz1003,zzzz405" source="1043" target="720" cy:directed="1"/>
      <edge id="443293" label="zzz1003,zzzz699" source="1043" target="442" cy:directed="1"/>
      <edge id="443292" label="zzz1003,zzzz884" source="1043" target="257" cy:directed="1"/>
      <edge id="443291" label="zzz1003,zzzz582" source="1043" target="559" cy:directed="1"/>
      <edge id="443290" label="zzz1003,zzzz655" source="1043" target="486" cy:directed="1"/>
      <edge id="443289" label="zzz1003,zzzz778" source="1043" target="363" cy:directed="1"/>
      <edge id="443288" label="zzz1003,zzzz958" source="1043" target="183" cy:directed="1"/>
      <edge id="443287" label="zzz1003,zzzzz37" source="1043" target="118" cy:directed="1"/>
      <edge id="443286" label="zzz1003,zzz1013" source="1043" target="1033" cy:directed="1"/>
      <edge id="443285" label="zzz1003,zzzz554" source="1043" target="587" cy:directed="1"/>
      <edge id="443284" label="zzz1003,zzzz576" source="1043" target="565" cy:directed="1"/>
      <edge id="443283" label="zzz1003,zzzz826" source="1043" target="315" cy:directed="1"/>
      <edge id="443282" label="zzz1003,zzzz651" source="1043" target="490" cy:directed="1"/>
      <edge id="443281" label="zzz1003,zzzzz66" source="1043" target="93" cy:directed="1"/>
      <edge id="443280" label="zzz1003,zzzz103" source="1043" target="1022" cy:directed="1"/>
      <edge id="443279" label="zzz1003,zzzz557" source="1043" target="584" cy:directed="1"/>
      <edge id="443278" label="zzz1003,zzzz600" source="1043" target="541" cy:directed="1"/>
      <edge id="443277" label="zzz1003,zzzz674" source="1043" target="467" cy:directed="1"/>
      <edge id="443276" label="zzz1003,zzzz741" source="1043" target="400" cy:directed="1"/>
      <edge id="443275" label="zzz1003,zzzz816" source="1043" target="325" cy:directed="1"/>
      <edge id="443274" label="zzz1003,zzzz825" source="1043" target="316" cy:directed="1"/>
      <edge id="443273" label="zzz1003,zzzzz54" source="1043" target="105" cy:directed="1"/>
      <edge id="443272" label="zzz1003,zzzz737" source="1043" target="404" cy:directed="1"/>
      <edge id="443271" label="zzz1003,zzzz101" source="1043" target="1024" cy:directed="1"/>
      <edge id="443270" label="zzz1003,zzzz725" source="1043" target="416" cy:directed="1"/>
      <edge id="443269" label="zzz1003,zzzzz48" source="1043" target="111" cy:directed="1"/>
      <edge id="443268" label="zzz1003,zzzz601" source="1043" target="540" cy:directed="1"/>
      <edge id="443267" label="zzz1003,zzzz653" source="1043" target="488" cy:directed="1"/>
      <edge id="443266" label="zzz1003,zzzz691" source="1043" target="450" cy:directed="1"/>
      <edge id="443265" label="zzz1003,zzzz717" source="1043" target="424" cy:directed="1"/>
      <edge id="443264" label="zzz1003,zzzz502" source="1043" target="638" cy:directed="1"/>
      <edge id="443263" label="zzz1003,zzzz583" source="1043" target="558" cy:directed="1"/>
      <edge id="443262" label="zzz1003,zzzz920" source="1043" target="221" cy:directed="1"/>
      <edge id="443261" label="zzz1003,zzz1009" source="1043" target="1037" cy:directed="1"/>
      <edge id="443260" label="zzz1003,zzzz668" source="1043" target="473" cy:directed="1"/>
      <edge id="443259" label="zzz1003,zzzz727" source="1043" target="414" cy:directed="1"/>
      <edge id="443258" label="zzz1003,zzzzz70" source="1043" target="89" cy:directed="1"/>
      <edge id="443257" label="zzz1003,zzz1007" source="1043" target="1039" cy:directed="1"/>
      <edge id="443256" label="zzz1003,zzzz501" source="1043" target="639" cy:directed="1"/>
      <edge id="443255" label="zzz1003,zzzz645" source="1043" target="496" cy:directed="1"/>
      <edge id="443254" label="zzz1003,zzzzz47" source="1043" target="112" cy:directed="1"/>
      <edge id="443253" label="zzz1003,zzzz606" source="1043" target="535" cy:directed="1"/>
      <edge id="443252" label="zzz1003,zzzz688" source="1043" target="453" cy:directed="1"/>
      <edge id="443251" label="zzz1003,zzzz833" source="1043" target="308" cy:directed="1"/>
      <edge id="443250" label="zzz1003,zzzzz15" source="1043" target="139" cy:directed="1"/>
      <edge id="443249" label="zzz1003,zzzz448" source="1043" target="679" cy:directed="1"/>
      <edge id="443248" label="zzz1003,zzzz587" source="1043" target="554" cy:directed="1"/>
      <edge id="443247" label="zzz1003,zzz1005" source="1043" target="1041" cy:directed="1"/>
      <edge id="443246" label="zzz1003,zzzz763" source="1043" target="378" cy:directed="1"/>
      <edge id="443245" label="zzz1003,zzzz849" source="1043" target="292" cy:directed="1"/>
      <edge id="443244" label="zzz1003,zzzz970" source="1043" target="172" cy:directed="1"/>
      <edge id="443243" label="zzz1003,zzzz982" source="1043" target="160" cy:directed="1"/>
      <edge id="443242" label="zzz1003,zzzz470" source="1043" target="670" cy:directed="1"/>
      <edge id="443241" label="zzz1003,zzzz628" source="1043" target="513" cy:directed="1"/>
      <edge id="443240" label="zzz1003,zzzz860" source="1043" target="281" cy:directed="1"/>
      <edge id="443239" label="zzz1003,zzzz578" source="1043" target="563" cy:directed="1"/>
      <edge id="443238" label="zzz1003,zzzzz34" source="1043" target="121" cy:directed="1"/>
      <edge id="443237" label="zzz1003,zzzz102" source="1043" target="1023" cy:directed="1"/>
      <edge id="443236" label="zzz1003,zzzz750" source="1043" target="391" cy:directed="1"/>
      <edge id="443235" label="zzz1003,zzzz713" source="1043" target="428" cy:directed="1"/>
      <edge id="443234" label="zzz1003,zzzz998" source="1043" target="144" cy:directed="1"/>
      <edge id="443233" label="zzz1003,zzzz822" source="1043" target="319" cy:directed="1"/>
      <edge id="443232" label="zzz1003,zzzz839" source="1043" target="302" cy:directed="1"/>
      <edge id="443231" label="zzz1003,zzzz471" source="1043" target="669" cy:directed="1"/>
      <edge id="443230" label="zzz1003,zzzz831" source="1043" target="310" cy:directed="1"/>
      <edge id="443229" label="zzz1003,zzzzz12" source="1043" target="142" cy:directed="1"/>
      <edge id="443228" label="zzz1003,zzzz627" source="1043" target="514" cy:directed="1"/>
      <edge id="443227" label="zzz1003,zzzz984" source="1043" target="158" cy:directed="1"/>
      <edge id="443226" label="zzz1003,zzzz832" source="1043" target="309" cy:directed="1"/>
      <edge id="443225" label="zzz1003,zzzz988" source="1043" target="154" cy:directed="1"/>
      <edge id="443224" label="zzz1003,zzzzz74" source="1043" target="85" cy:directed="1"/>
      <edge id="443223" label="zzz1003,zzzz464" source="1043" target="676" cy:directed="1"/>
      <edge id="443222" label="zzz1003,zzzz608" source="1043" target="533" cy:directed="1"/>
      <edge id="443221" label="zzz1003,zzzz466" source="1043" target="674" cy:directed="1"/>
      <edge id="443220" label="zzz1003,zzzz772" source="1043" target="369" cy:directed="1"/>
      <edge id="443219" label="zzz1003,zzzz916" source="1043" target="225" cy:directed="1"/>
      <edge id="443218" label="zzz1003,zzzz962" source="1043" target="179" cy:directed="1"/>
      <edge id="443217" label="zzz1003,zzzz547" source="1043" target="594" cy:directed="1"/>
      <edge id="443216" label="zzz1003,zzzzz68" source="1043" target="91" cy:directed="1"/>
      <edge id="443215" label="zzz1003,zzz1008" source="1043" target="1038" cy:directed="1"/>
      <edge id="443214" label="zzz1003,zzzzz39" source="1043" target="116" cy:directed="1"/>
      <edge id="443213" label="zzz1003,zzzzz72" source="1043" target="87" cy:directed="1"/>
      <edge id="443212" label="zzz1003,zzzz773" source="1043" target="368" cy:directed="1"/>
      <edge id="443211" label="zzz1003,zzzz967" source="1043" target="175" cy:directed="1"/>
      <edge id="443210" label="zzz1003,zzzz104" source="1043" target="1021" cy:directed="1"/>
      <edge id="443209" label="zzz1003,zzzz980" source="1043" target="162" cy:directed="1"/>
      <edge id="443208" label="zzz1003,zzzzz28" source="1043" target="127" cy:directed="1"/>
      <edge id="443207" label="zzz1003,zzzz106" source="1043" target="1019" cy:directed="1"/>
      <edge id="443206" label="zzz1003,zzz1004" source="1043" target="1042" cy:directed="1"/>
      <edge id="443205" label="zzz1003,zzzz989" source="1043" target="153" cy:directed="1"/>
      <edge id="443204" label="zzz1003,zzzz105" source="1043" target="1020" cy:directed="1"/>
      <edge id="443203" label="zzz1003,zzzz127" source="1043" target="998" cy:directed="1"/>
      <edge id="443202" label="zzz1003,zzzz738" source="1043" target="403" cy:directed="1"/>
      <edge id="443201" label="zzz1003,zzzz782" source="1043" target="359" cy:directed="1"/>
      <edge id="443200" label="zzz1003,zzzzz33" source="1043" target="122" cy:directed="1"/>
      <edge id="443199" label="zzz1003,zzzzz67" source="1043" target="92" cy:directed="1"/>
      <edge id="443198" label="zzz1003,zzzzz20" source="1043" target="135" cy:directed="1"/>
      <edge id="443197" label="zzz1003,zzzz490" source="1043" target="650" cy:directed="1"/>
      <edge id="443196" label="zzz1003,zzzz915" source="1043" target="226" cy:directed="1"/>
      <edge id="443195" label="zzz1003,zzzz640" source="1043" target="501" cy:directed="1"/>
      <edge id="443194" label="zzz1003,zzzz641" source="1043" target="500" cy:directed="1"/>
      <edge id="443193" label="zzz1003,zzzz879" source="1043" target="262" cy:directed="1"/>
      <edge id="443192" label="zzz1003,zzzz142" source="1043" target="983" cy:directed="1"/>
      <edge id="443191" label="zzz1003,zzzz123" source="1043" target="1002" cy:directed="1"/>
      <edge id="443190" label="zzz1003,zzzz150" source="1043" target="975" cy:directed="1"/>
      <edge id="443189" label="zzz1003,zzzz162" source="1043" target="963" cy:directed="1"/>
      <edge id="443188" label="zzz1003,zzzz680" source="1043" target="461" cy:directed="1"/>
      <edge id="443187" label="zzz1003,zzzz122" source="1043" target="1003" cy:directed="1"/>
      <edge id="443186" label="zzz1003,zzzz917" source="1043" target="224" cy:directed="1"/>
      <edge id="443185" label="zzz1003,zzzz114" source="1043" target="1011" cy:directed="1"/>
      <edge id="443184" label="zzz1003,zzzzz56" source="1043" target="103" cy:directed="1"/>
      <edge id="443183" label="zzz1003,zzzz513" source="1043" target="628" cy:directed="1"/>
      <edge id="443182" label="zzz1003,zzzzz73" source="1043" target="86" cy:directed="1"/>
      <edge id="443181" label="zzz1003,zzzzz63" source="1043" target="96" cy:directed="1"/>
      <edge id="443180" label="zzz1003,zzzz977" source="1043" target="165" cy:directed="1"/>
      <edge id="443179" label="zzz1003,zzzz161" source="1043" target="964" cy:directed="1"/>
      <edge id="443178" label="zzz1003,zzzz745" source="1043" target="396" cy:directed="1"/>
      <edge id="443177" label="zzz1003,zzzz945" source="1043" target="196" cy:directed="1"/>
      <edge id="443176" label="zzz1003,zzzz546" source="1043" target="595" cy:directed="1"/>
      <edge id="443175" label="zzz1003,zzzz753" source="1043" target="388" cy:directed="1"/>
      <edge id="443174" label="zzz1003,zzzz124" source="1043" target="1001" cy:directed="1"/>
      <edge id="443173" label="zzz1003,zzzz158" source="1043" target="967" cy:directed="1"/>
      <edge id="443172" label="zzz1003,zzz1019" source="1043" target="1028" cy:directed="1"/>
      <edge id="443171" label="zzz1003,zzzz147" source="1043" target="978" cy:directed="1"/>
      <edge id="443170" label="zzz1003,zzzz560" source="1043" target="581" cy:directed="1"/>
      <edge id="443169" label="zzz1003,zzzz126" source="1043" target="999" cy:directed="1"/>
      <edge id="443168" label="zzz1003,zzzz928" source="1043" target="213" cy:directed="1"/>
      <edge id="443167" label="zzz1003,zzzz166" source="1043" target="959" cy:directed="1"/>
      <edge id="443166" label="zzz1003,zzzz125" source="1043" target="1000" cy:directed="1"/>
      <edge id="443165" label="zzz1003,zzzz486" source="1043" target="654" cy:directed="1"/>
      <edge id="443164" label="zzz1003,zzzz165" source="1043" target="960" cy:directed="1"/>
      <edge id="443163" label="zzz1003,zzzz594" source="1043" target="547" cy:directed="1"/>
      <edge id="443162" label="zzz1003,zzzz700" source="1043" target="441" cy:directed="1"/>
      <edge id="443161" label="zzz1003,zzzz149" source="1043" target="976" cy:directed="1"/>
      <edge id="443160" label="zzz1003,zzzz886" source="1043" target="255" cy:directed="1"/>
      <edge id="443159" label="zzz1003,zzzz169" source="1043" target="956" cy:directed="1"/>
      <edge id="443158" label="zzz1003,zzzz657" source="1043" target="484" cy:directed="1"/>
      <edge id="443157" label="zzz1003,zzzzz14" source="1043" target="140" cy:directed="1"/>
      <edge id="443156" label="zzz1003,zzz1020" source="1043" target="1027" cy:directed="1"/>
      <edge id="443155" label="zzz1003,zzzz483" source="1043" target="657" cy:directed="1"/>
      <edge id="443154" label="zzz1003,zzzz146" source="1043" target="979" cy:directed="1"/>
      <edge id="443153" label="zzz1003,zzzz927" source="1043" target="214" cy:directed="1"/>
      <edge id="443152" label="zzz1003,zzzz148" source="1043" target="977" cy:directed="1"/>
      <edge id="443151" label="zzz1003,zzzz156" source="1043" target="969" cy:directed="1"/>
      <edge id="443150" label="zzz1003,zzzz168" source="1043" target="957" cy:directed="1"/>
      <edge id="443149" label="zzz1003,zzzz944" source="1043" target="197" cy:directed="1"/>
      <edge id="443148" label="zzz1003,zzzz946" source="1043" target="195" cy:directed="1"/>
      <edge id="443147" label="zzz1003,zzzz155" source="1043" target="970" cy:directed="1"/>
      <edge id="443146" label="zzz1003,zzzz493" source="1043" target="647" cy:directed="1"/>
      <edge id="443145" label="zzz1003,zzzzz71" source="1043" target="88" cy:directed="1"/>
      <edge id="443144" label="zzz1003,zzzz141" source="1043" target="984" cy:directed="1"/>
      <edge id="443143" label="zzz1003,zzzz163" source="1043" target="962" cy:directed="1"/>
      <edge id="443142" label="zzz1003,zzzzz84" source="1043" target="75" cy:directed="1"/>
      <edge id="443141" label="zzz1003,zzzz151" source="1043" target="974" cy:directed="1"/>
      <edge id="443140" label="zzz1003,zzzz167" source="1043" target="958" cy:directed="1"/>
      <edge id="443139" label="zzz1003,zzzz485" source="1043" target="655" cy:directed="1"/>
      <edge id="443138" label="zzz1003,zzzz866" source="1043" target="275" cy:directed="1"/>
      <edge id="443137" label="zzz1003,zzzz929" source="1043" target="212" cy:directed="1"/>
      <edge id="443136" label="zzz1003,zzzz131" source="1043" target="994" cy:directed="1"/>
      <edge id="443135" label="zzz1003,zzzz157" source="1043" target="968" cy:directed="1"/>
      <edge id="443134" label="zzz1003,zzzz164" source="1043" target="961" cy:directed="1"/>
      <edge id="443133" label="zzz1003,zzzz809" source="1043" target="332" cy:directed="1"/>
      <edge id="443132" label="zzz1003,zzzz947" source="1043" target="194" cy:directed="1"/>
      <edge id="443131" label="zzz1003,zzzz484" source="1043" target="656" cy:directed="1"/>
      <edge id="443130" label="zzz1003,zzzzz52" source="1043" target="107" cy:directed="1"/>
      <edge id="443129" label="zzz1003,zzzz138" source="1043" target="987" cy:directed="1"/>
      <edge id="443128" label="zzz1003,zzzz121" source="1043" target="1004" cy:directed="1"/>
      <edge id="443127" label="zzz1003,zzzz120" source="1043" target="1005" cy:directed="1"/>
      <edge id="443126" label="zzz1003,zzzzz88" source="1043" target="73" cy:directed="1"/>
      <edge id="443125" label="zzz1003,zzzzz17" source="1043" target="138" cy:directed="1"/>
      <edge id="443124" label="zzz1003,zzzzz76" source="1043" target="83" cy:directed="1"/>
      <edge id="443123" label="zzz1003,zzzz139" source="1043" target="986" cy:directed="1"/>
      <edge id="443122" label="zzz1003,zzzz134" source="1043" target="991" cy:directed="1"/>
      <edge id="443121" label="zzz1003,zzzz512" source="1043" target="629" cy:directed="1"/>
      <edge id="443120" label="zzz1003,zzzz904" source="1043" target="237" cy:directed="1"/>
      <edge id="443119" label="zzz1003,zzzz488" source="1043" target="652" cy:directed="1"/>
      <edge id="443118" label="zzz1003,zzzz698" source="1043" target="443" cy:directed="1"/>
      <edge id="443117" label="zzz1003,zzzz592" source="1043" target="549" cy:directed="1"/>
      <edge id="443116" label="zzz1003,zzzz136" source="1043" target="989" cy:directed="1"/>
      <edge id="443115" label="zzz1003,zzzz160" source="1043" target="965" cy:directed="1"/>
      <edge id="443114" label="zzz1003,zzzz197" source="1043" target="928" cy:directed="1"/>
      <edge id="443113" label="zzz1003,zzzz140" source="1043" target="985" cy:directed="1"/>
      <edge id="443112" label="zzz1003,zzzz154" source="1043" target="971" cy:directed="1"/>
      <edge id="443111" label="zzz1003,zzzz152" source="1043" target="973" cy:directed="1"/>
      <edge id="443110" label="zzz1003,zzzz995" source="1043" target="147" cy:directed="1"/>
      <edge id="443109" label="zzz1003,zzzz143" source="1043" target="982" cy:directed="1"/>
      <edge id="443108" label="zzz1003,zzzz474" source="1043" target="666" cy:directed="1"/>
      <edge id="443107" label="zzz1003,zzzz133" source="1043" target="992" cy:directed="1"/>
      <edge id="443106" label="zzz1003,zzzz996" source="1043" target="146" cy:directed="1"/>
      <edge id="443105" label="zzz1003,zzzz137" source="1043" target="988" cy:directed="1"/>
      <edge id="443104" label="zzz1003,zzzz153" source="1043" target="972" cy:directed="1"/>
      <edge id="443103" label="zzz1003,zzzz129" source="1043" target="996" cy:directed="1"/>
      <edge id="443102" label="zzz1003,zzzz931" source="1043" target="210" cy:directed="1"/>
      <edge id="443101" label="zzz1003,zzzzz82" source="1043" target="77" cy:directed="1"/>
      <edge id="443100" label="zzz1003,zzzz159" source="1043" target="966" cy:directed="1"/>
      <edge id="443099" label="zzz1003,zzzz577" source="1043" target="564" cy:directed="1"/>
      <edge id="443098" label="zzz1003,zzzzz83" source="1043" target="76" cy:directed="1"/>
      <edge id="443097" label="zzz1003,zzzz204" source="1043" target="921" cy:directed="1"/>
      <edge id="443096" label="zzz1003,zzzzz85" source="1043" target="74" cy:directed="1"/>
      <edge id="443095" label="zzz1003,zzzz116" source="1043" target="1009" cy:directed="1"/>
      <edge id="443094" label="zzz1003,zzzz144" source="1043" target="981" cy:directed="1"/>
      <edge id="443093" label="zzz1003,zzzz658" source="1043" target="483" cy:directed="1"/>
      <edge id="443092" label="zzz1003,zzzz117" source="1043" target="1008" cy:directed="1"/>
      <edge id="443091" label="zzz1003,zzzz515" source="1043" target="626" cy:directed="1"/>
      <edge id="443090" label="zzz1003,zzzz128" source="1043" target="997" cy:directed="1"/>
      <edge id="443089" label="zzz1003,zzzz876" source="1043" target="265" cy:directed="1"/>
      <edge id="443088" label="zzz1003,zzzz132" source="1043" target="993" cy:directed="1"/>
      <edge id="443087" label="zzz1003,zzzz130" source="1043" target="995" cy:directed="1"/>
      <edge id="443086" label="zzz1003,zzzz796" source="1043" target="345" cy:directed="1"/>
      <edge id="443085" label="zzz1003,zzzz135" source="1043" target="990" cy:directed="1"/>
      <edge id="443084" label="zzz1003,zzzzz79" source="1043" target="80" cy:directed="1"/>
      <edge id="443083" label="zzz1003,zzzz808" source="1043" target="333" cy:directed="1"/>
      <edge id="443082" label="zzz1003,zzzz511" source="1043" target="630" cy:directed="1"/>
      <edge id="443081" label="zzz1003,zzzz792" source="1043" target="349" cy:directed="1"/>
      <edge id="443080" label="zzz1003,zzzz205" source="1043" target="920" cy:directed="1"/>
      <edge id="443079" label="zzz1003,zzz1017" source="1043" target="1029" cy:directed="1"/>
      <edge id="443078" label="zzz1003,zzzz476" source="1043" target="664" cy:directed="1"/>
      <edge id="443077" label="zzz1003,zzzzz80" source="1043" target="79" cy:directed="1"/>
      <edge id="443076" label="zzz1003,zzzz950" source="1043" target="191" cy:directed="1"/>
      <edge id="443075" label="zzz1003,zzzz777" source="1043" target="364" cy:directed="1"/>
      <edge id="443074" label="zzz1003,zzz1006" source="1043" target="1040" cy:directed="1"/>
      <edge id="443073" label="zzz1003,zzzz703" source="1043" target="438" cy:directed="1"/>
      <edge id="443072" label="zzz1003,zzzz785" source="1043" target="356" cy:directed="1"/>
      <edge id="443071" label="zzz1003,zzzzz75" source="1043" target="84" cy:directed="1"/>
      <edge id="443070" label="zzz1003,zzzz477" source="1043" target="663" cy:directed="1"/>
      <edge id="443069" label="zzz1003,zzzz922" source="1043" target="219" cy:directed="1"/>
      <edge id="443068" label="zzz1003,zzzz119" source="1043" target="1006" cy:directed="1"/>
      <edge id="443067" label="zzz1003,zzzz878" source="1043" target="263" cy:directed="1"/>
      <edge id="443066" label="zzz1003,zzzz787" source="1043" target="354" cy:directed="1"/>
      <edge id="443065" label="zzz1003,zzzz976" source="1043" target="166" cy:directed="1"/>
      <edge id="443064" label="zzz1003,zzzz744" source="1043" target="397" cy:directed="1"/>
      <edge id="443063" label="zzz1003,zzzz870" source="1043" target="271" cy:directed="1"/>
      <edge id="443062" label="zzz1003,zzzz794" source="1043" target="347" cy:directed="1"/>
      <edge id="443061" label="zzz1003,zzzz514" source="1043" target="627" cy:directed="1"/>
      <edge id="443060" label="zzz1003,zzzz720" source="1043" target="421" cy:directed="1"/>
      <edge id="443059" label="zzz1003,zzzz983" source="1043" target="159" cy:directed="1"/>
      <edge id="443058" label="zzz1003,zzzz802" source="1043" target="339" cy:directed="1"/>
      <edge id="443057" label="zzz1003,zzzz181" source="1043" target="944" cy:directed="1"/>
      <edge id="443056" label="zzz1003,zzzz182" source="1043" target="943" cy:directed="1"/>
      <edge id="443055" label="zzz1003,zzzz669" source="1043" target="472" cy:directed="1"/>
      <edge id="443054" label="zzz1003,zzzz633" source="1043" target="508" cy:directed="1"/>
      <edge id="443053" label="zzz1003,zzzz789" source="1043" target="352" cy:directed="1"/>
      <edge id="443052" label="zzz1003,zzzzz13" source="1043" target="141" cy:directed="1"/>
      <edge id="443051" label="zzz1003,zzzz736" source="1043" target="405" cy:directed="1"/>
      <edge id="443050" label="zzz1003,zzzz887" source="1043" target="254" cy:directed="1"/>
      <edge id="443049" label="zzz1003,zzzz881" source="1043" target="260" cy:directed="1"/>
      <edge id="443048" label="zzz1003,zzzz176" source="1043" target="949" cy:directed="1"/>
      <edge id="443047" label="zzz1003,zzzz969" source="1043" target="173" cy:directed="1"/>
      <edge id="443046" label="zzz1003,zzzz804" source="1043" target="337" cy:directed="1"/>
      <edge id="443045" label="zzz1003,zzzz180" source="1043" target="945" cy:directed="1"/>
      <edge id="443044" label="zzz1003,zzzz183" source="1043" target="942" cy:directed="1"/>
      <edge id="443043" label="zzz1003,zzzz648" source="1043" target="493" cy:directed="1"/>
      <edge id="443042" label="zzz1003,zzzz810" source="1043" target="331" cy:directed="1"/>
      <edge id="443041" label="zzz1003,zzzz954" source="1043" target="187" cy:directed="1"/>
      <edge id="443040" label="zzz1003,zzzzz50" source="1043" target="109" cy:directed="1"/>
      <edge id="443039" label="zzz1003,zzzz184" source="1043" target="941" cy:directed="1"/>
      <edge id="443038" label="zzz1003,zzzz194" source="1043" target="931" cy:directed="1"/>
      <edge id="443037" label="zzz1003,zzzzz41" source="1043" target="114" cy:directed="1"/>
      <edge id="443036" label="zzz1003,zzzz786" source="1043" target="355" cy:directed="1"/>
      <edge id="443035" label="zzz1003,zzzz749" source="1043" target="392" cy:directed="1"/>
      <edge id="443034" label="zzz1003,zzzz798" source="1043" target="343" cy:directed="1"/>
      <edge id="443033" label="zzz1003,zzzzz89" source="1043" target="72" cy:directed="1"/>
      <edge id="443032" label="zzz1003,zzzz872" source="1043" target="269" cy:directed="1"/>
      <edge id="443031" label="zzz1003,zzzz175" source="1043" target="950" cy:directed="1"/>
      <edge id="443030" label="zzz1003,zzzz187" source="1043" target="938" cy:directed="1"/>
      <edge id="443029" label="zzz1003,zzzz885" source="1043" target="256" cy:directed="1"/>
      <edge id="443028" label="zzz1003,zzzz186" source="1043" target="939" cy:directed="1"/>
      <edge id="443027" label="zzz1003,zzzz678" source="1043" target="463" cy:directed="1"/>
      <edge id="443026" label="zzz1003,zzzz807" source="1043" target="334" cy:directed="1"/>
      <edge id="443025" label="zzz1003,zzzz492" source="1043" target="648" cy:directed="1"/>
      <edge id="443024" label="zzz1003,zzzz613" source="1043" target="528" cy:directed="1"/>
      <edge id="443023" label="zzz1003,zzzz174" source="1043" target="951" cy:directed="1"/>
      <edge id="443022" label="zzz1003,zzzz693" source="1043" target="448" cy:directed="1"/>
      <edge id="443021" label="zzz1003,zzzz803" source="1043" target="338" cy:directed="1"/>
      <edge id="443020" label="zzz1003,zzzzz40" source="1043" target="115" cy:directed="1"/>
      <edge id="443019" label="zzz1003,zzzz185" source="1043" target="940" cy:directed="1"/>
      <edge id="443018" label="zzz1003,zzzz685" source="1043" target="456" cy:directed="1"/>
      <edge id="443017" label="zzz1003,zzzz719" source="1043" target="422" cy:directed="1"/>
      <edge id="443016" label="zzz1003,zzzz419" source="1043" target="706" cy:directed="1"/>
      <edge id="443015" label="zzz1003,zzzz801" source="1043" target="340" cy:directed="1"/>
      <edge id="443014" label="zzz1003,zzzz805" source="1043" target="336" cy:directed="1"/>
      <edge id="443013" label="zzz1003,zzzz615" source="1043" target="526" cy:directed="1"/>
      <edge id="443012" label="zzz1003,zzzz780" source="1043" target="361" cy:directed="1"/>
      <edge id="443011" label="zzz1003,zzzz758" source="1043" target="383" cy:directed="1"/>
      <edge id="443010" label="zzz1003,zzzz173" source="1043" target="952" cy:directed="1"/>
      <edge id="443009" label="zzz1003,zzzz439" source="1043" target="686" cy:directed="1"/>
      <edge id="443008" label="zzz1003,zzzz770" source="1043" target="371" cy:directed="1"/>
      <edge id="443007" label="zzz1003,zzzz923" source="1043" target="218" cy:directed="1"/>
      <edge id="443006" label="zzz1003,zzzzz24" source="1043" target="131" cy:directed="1"/>
      <edge id="443005" label="zzz1003,zzzz757" source="1043" target="384" cy:directed="1"/>
      <edge id="443004" label="zzz1003,zzzz436" source="1043" target="689" cy:directed="1"/>
      <edge id="443003" label="zzz1003,zzzz407" source="1043" target="718" cy:directed="1"/>
      <edge id="443002" label="zzz1003,zzzzz22" source="1043" target="133" cy:directed="1"/>
      <edge id="443001" label="zzz1003,zzzz811" source="1043" target="330" cy:directed="1"/>
      <edge id="443000" label="zzz1003,zzzz997" source="1043" target="145" cy:directed="1"/>
      <edge id="442999" label="zzz1003,zzzz909" source="1043" target="232" cy:directed="1"/>
      <edge id="442998" label="zzz1003,zzzz418" source="1043" target="707" cy:directed="1"/>
      <edge id="442997" label="zzz1003,zzzz420" source="1043" target="705" cy:directed="1"/>
      <edge id="442996" label="zzz1003,zzzz852" source="1043" target="289" cy:directed="1"/>
      <edge id="442995" label="zzz1003,zzzz856" source="1043" target="285" cy:directed="1"/>
      <edge id="442994" label="zzz1003,zzzz883" source="1043" target="258" cy:directed="1"/>
      <edge id="442993" label="zzz1003,zzzz171" source="1043" target="954" cy:directed="1"/>
      <edge id="442992" label="zzz1003,zzzz202" source="1043" target="923" cy:directed="1"/>
      <edge id="442991" label="zzz1003,zzzz415" source="1043" target="710" cy:directed="1"/>
      <edge id="442990" label="zzz1003,zzzz956" source="1043" target="185" cy:directed="1"/>
      <edge id="442989" label="zzz1003,zzzz249" source="1043" target="876" cy:directed="1"/>
      <edge id="442988" label="zzz1003,zzzz422" source="1043" target="703" cy:directed="1"/>
      <edge id="442987" label="zzz1003,zzzz697" source="1043" target="444" cy:directed="1"/>
      <edge id="442986" label="zzz1003,zzzz765" source="1043" target="376" cy:directed="1"/>
      <edge id="442985" label="zzz1003,zzzz806" source="1043" target="335" cy:directed="1"/>
      <edge id="442984" label="zzz1003,zzzz410" source="1043" target="715" cy:directed="1"/>
      <edge id="442983" label="zzz1003,zzzz955" source="1043" target="186" cy:directed="1"/>
      <edge id="442982" label="zzz1003,zzzz172" source="1043" target="953" cy:directed="1"/>
      <edge id="442981" label="zzz1003,zzzz424" source="1043" target="701" cy:directed="1"/>
      <edge id="442980" label="zzz1003,zzzz409" source="1043" target="716" cy:directed="1"/>
      <edge id="442979" label="zzz1003,zzzz776" source="1043" target="365" cy:directed="1"/>
      <edge id="442978" label="zzz1003,zzzz516" source="1043" target="625" cy:directed="1"/>
      <edge id="442977" label="zzz1003,zzzz671" source="1043" target="470" cy:directed="1"/>
      <edge id="442976" label="zzz1003,zzzz408" source="1043" target="717" cy:directed="1"/>
      <edge id="442975" label="zzz1003,zzzz712" source="1043" target="429" cy:directed="1"/>
      <edge id="442974" label="zzz1003,zzzz170" source="1043" target="955" cy:directed="1"/>
      <edge id="442973" label="zzz1003,zzzz189" source="1043" target="936" cy:directed="1"/>
      <edge id="442972" label="zzz1003,zzzz416" source="1043" target="709" cy:directed="1"/>
      <edge id="442971" label="zzz1003,zzzz482" source="1043" target="658" cy:directed="1"/>
      <edge id="442970" label="zzz1003,zzzz788" source="1043" target="353" cy:directed="1"/>
      <edge id="442969" label="zzz1003,zzzz795" source="1043" target="346" cy:directed="1"/>
      <edge id="442968" label="zzz1003,zzz1015" source="1043" target="1031" cy:directed="1"/>
      <edge id="442967" label="zzz1003,zzzz793" source="1043" target="348" cy:directed="1"/>
      <edge id="442966" label="zzz1003,zzzzz23" source="1043" target="132" cy:directed="1"/>
      <edge id="442965" label="zzz1003,zzzz412" source="1043" target="713" cy:directed="1"/>
      <edge id="442964" label="zzz1003,zzzz414" source="1043" target="711" cy:directed="1"/>
      <edge id="442963" label="zzz1003,zzzz438" source="1043" target="687" cy:directed="1"/>
      <edge id="442962" label="zzz1003,zzzz188" source="1043" target="937" cy:directed="1"/>
      <edge id="442961" label="zzz1003,zzzz463" source="1043" target="677" cy:directed="1"/>
      <edge id="442960" label="zzz1003,zzzz637" source="1043" target="504" cy:directed="1"/>
      <edge id="442959" label="zzz1003,zzzz661" source="1043" target="480" cy:directed="1"/>
      <edge id="442958" label="zzz1003,zzzz704" source="1043" target="437" cy:directed="1"/>
      <edge id="442957" label="zzz1003,zzzz740" source="1043" target="401" cy:directed="1"/>
      <edge id="442956" label="zzz1003,zzzz759" source="1043" target="382" cy:directed="1"/>
      <edge id="442955" label="zzz1003,zzzz783" source="1043" target="358" cy:directed="1"/>
      <edge id="442954" label="zzz1003,zzzz791" source="1043" target="350" cy:directed="1"/>
      <edge id="442953" label="zzz1003,zzzz867" source="1043" target="274" cy:directed="1"/>
      <edge id="442952" label="zzz1003,zzzz425" source="1043" target="700" cy:directed="1"/>
      <edge id="442951" label="zzz1003,zzzz429" source="1043" target="696" cy:directed="1"/>
      <edge id="442950" label="zzz1003,zzzz118" source="1043" target="1007" cy:directed="1"/>
      <edge id="442949" label="zzz1003,zzzz433" source="1043" target="692" cy:directed="1"/>
      <edge id="442948" label="zzz1003,zzzz812" source="1043" target="329" cy:directed="1"/>
      <edge id="442947" label="zzz1003,zzzzz26" source="1043" target="129" cy:directed="1"/>
      <edge id="442946" label="zzz1003,zzzz430" source="1043" target="695" cy:directed="1"/>
      <edge id="442945" label="zzz1003,zzzz442" source="1043" target="683" cy:directed="1"/>
      <edge id="442944" label="zzz1003,zzzz742" source="1043" target="399" cy:directed="1"/>
      <edge id="442943" label="zzz1003,zzzz435" source="1043" target="690" cy:directed="1"/>
      <edge id="442942" label="zzz1003,zzzz437" source="1043" target="688" cy:directed="1"/>
      <edge id="442941" label="zzz1003,zzzz423" source="1043" target="702" cy:directed="1"/>
      <edge id="442940" label="zzz1003,zzzz426" source="1043" target="699" cy:directed="1"/>
      <edge id="442939" label="zzz1003,zzz1011" source="1043" target="1035" cy:directed="1"/>
      <edge id="442938" label="zzz1003,zzzzz32" source="1043" target="123" cy:directed="1"/>
      <edge id="442937" label="zzz1003,zzzz431" source="1043" target="694" cy:directed="1"/>
      <edge id="442936" label="zzz1003,zzzz797" source="1043" target="344" cy:directed="1"/>
      <edge id="442935" label="zzz1003,zzzz799" source="1043" target="342" cy:directed="1"/>
      <edge id="442934" label="zzz1003,zzzz473" source="1043" target="667" cy:directed="1"/>
      <edge id="442933" label="zzz1003,zzzz411" source="1043" target="714" cy:directed="1"/>
      <edge id="442932" label="zzz1003,zzzz690" source="1043" target="451" cy:directed="1"/>
      <edge id="442931" label="zzz1003,zzzz874" source="1043" target="267" cy:directed="1"/>
      <edge id="442930" label="zzz1003,zzzz368" source="1043" target="757" cy:directed="1"/>
      <edge id="442929" label="zzz1003,zzzz631" source="1043" target="510" cy:directed="1"/>
      <edge id="442928" label="zzz1003,zzzz889" source="1043" target="252" cy:directed="1"/>
      <edge id="442927" label="zzz1003,zzzz585" source="1043" target="556" cy:directed="1"/>
      <edge id="442926" label="zzz1003,zzzz694" source="1043" target="447" cy:directed="1"/>
      <edge id="442925" label="zzz1003,zzzzz31" source="1043" target="124" cy:directed="1"/>
      <edge id="442924" label="zzz1003,zzzzz36" source="1043" target="119" cy:directed="1"/>
      <edge id="442923" label="zzz1003,zzzz381" source="1043" target="744" cy:directed="1"/>
      <edge id="442922" label="zzz1003,zzzz440" source="1043" target="685" cy:directed="1"/>
      <edge id="442921" label="zzz1003,zzzz145" source="1043" target="980" cy:directed="1"/>
      <edge id="442920" label="zzz1003,zzzz306" source="1043" target="819" cy:directed="1"/>
      <edge id="442919" label="zzz1003,zzzz766" source="1043" target="375" cy:directed="1"/>
      <edge id="442918" label="zzz1003,zzzz714" source="1043" target="427" cy:directed="1"/>
      <edge id="442917" label="zzz1003,zzzz869" source="1043" target="272" cy:directed="1"/>
      <edge id="442916" label="zzz1003,zzzz434" source="1043" target="691" cy:directed="1"/>
      <edge id="442915" label="zzz1003,zzzz875" source="1043" target="266" cy:directed="1"/>
      <edge id="442914" label="zzz1003,zzzz877" source="1043" target="264" cy:directed="1"/>
      <edge id="442913" label="zzz1003,zzzz286" source="1043" target="839" cy:directed="1"/>
      <edge id="442912" label="zzz1003,zzzz307" source="1043" target="818" cy:directed="1"/>
      <edge id="442911" label="zzz1003,zzzz595" source="1043" target="546" cy:directed="1"/>
      <edge id="442910" label="zzz1003,zzzz692" source="1043" target="449" cy:directed="1"/>
      <edge id="442909" label="zzz1003,zzzz747" source="1043" target="394" cy:directed="1"/>
      <edge id="442908" label="zzz1003,zzzz781" source="1043" target="360" cy:directed="1"/>
      <edge id="442907" label="zzz1003,zzzz933" source="1043" target="208" cy:directed="1"/>
      <edge id="442906" label="zzz1003,zzzz427" source="1043" target="698" cy:directed="1"/>
      <edge id="442905" label="zzz1003,zzzz298" source="1043" target="827" cy:directed="1"/>
      <edge id="442904" label="zzz1003,zzzz428" source="1043" target="697" cy:directed="1"/>
      <edge id="442903" label="zzz1003,zzzz779" source="1043" target="362" cy:directed="1"/>
      <edge id="442902" label="zzz1003,zzzz208" source="1043" target="917" cy:directed="1"/>
      <edge id="442901" label="zzz1003,zzzz364" source="1043" target="761" cy:directed="1"/>
      <edge id="442900" label="zzz1003,zzzz374" source="1043" target="751" cy:directed="1"/>
      <edge id="442899" label="zzz1003,zzzzz27" source="1043" target="128" cy:directed="1"/>
      <edge id="442898" label="zzz1003,zzzz432" source="1043" target="693" cy:directed="1"/>
      <edge id="442897" label="zzz1003,zzzz355" source="1043" target="770" cy:directed="1"/>
      <edge id="442896" label="zzz1003,zzzz686" source="1043" target="455" cy:directed="1"/>
      <edge id="442895" label="zzz1003,zzzz926" source="1043" target="215" cy:directed="1"/>
      <edge id="442894" label="zzz1003,zzzz349" source="1043" target="776" cy:directed="1"/>
      <edge id="442893" label="zzz1003,zzzz370" source="1043" target="755" cy:directed="1"/>
      <edge id="442892" label="zzz1003,zzzz232" source="1043" target="893" cy:directed="1"/>
      <edge id="442891" label="zzz1003,zzzz391" source="1043" target="734" cy:directed="1"/>
      <edge id="442890" label="zzz1003,zzzzz35" source="1043" target="120" cy:directed="1"/>
      <edge id="442889" label="zzz1003,zzzz245" source="1043" target="880" cy:directed="1"/>
      <edge id="442888" label="zzz1003,zzzz301" source="1043" target="824" cy:directed="1"/>
      <edge id="442887" label="zzz1003,zzzz380" source="1043" target="745" cy:directed="1"/>
      <edge id="442886" label="zzz1003,zzzz315" source="1043" target="810" cy:directed="1"/>
      <edge id="442885" label="zzz1003,zzzz593" source="1043" target="548" cy:directed="1"/>
      <edge id="442884" label="zzz1003,zzzz948" source="1043" target="193" cy:directed="1"/>
      <edge id="442883" label="zzz1003,zzzz229" source="1043" target="896" cy:directed="1"/>
      <edge id="442882" label="zzz1003,zzzz353" source="1043" target="772" cy:directed="1"/>
      <edge id="442881" label="zzz1003,zzzz379" source="1043" target="746" cy:directed="1"/>
      <edge id="442880" label="zzz1003,zzzz389" source="1043" target="736" cy:directed="1"/>
      <edge id="442879" label="zzz1003,zzzz179" source="1043" target="946" cy:directed="1"/>
      <edge id="442878" label="zzz1003,zzzz221" source="1043" target="904" cy:directed="1"/>
      <edge id="442877" label="zzz1003,zzzz339" source="1043" target="786" cy:directed="1"/>
      <edge id="442876" label="zzz1003,zzzz344" source="1043" target="781" cy:directed="1"/>
      <edge id="442875" label="zzz1003,zzzz563" source="1043" target="578" cy:directed="1"/>
      <edge id="442874" label="zzz1003,zzzz751" source="1043" target="390" cy:directed="1"/>
      <edge id="442873" label="zzz1003,zzzz243" source="1043" target="882" cy:directed="1"/>
      <edge id="442872" label="zzz1003,zzzz341" source="1043" target="784" cy:directed="1"/>
      <edge id="442871" label="zzz1003,zzzz378" source="1043" target="747" cy:directed="1"/>
      <edge id="442870" label="zzz1003,zzzz537" source="1043" target="604" cy:directed="1"/>
      <edge id="442869" label="zzz1003,zzzz283" source="1043" target="842" cy:directed="1"/>
      <edge id="442868" label="zzz1003,zzzz363" source="1043" target="762" cy:directed="1"/>
      <edge id="442867" label="zzz1003,zzzz371" source="1043" target="754" cy:directed="1"/>
      <edge id="442866" label="zzz1003,zzzz383" source="1043" target="742" cy:directed="1"/>
      <edge id="442865" label="zzz1003,zzzz177" source="1043" target="948" cy:directed="1"/>
      <edge id="442864" label="zzz1003,zzz1012" source="1043" target="1034" cy:directed="1"/>
      <edge id="442863" label="zzz1003,zzzz248" source="1043" target="877" cy:directed="1"/>
      <edge id="442862" label="zzz1003,zzzz250" source="1043" target="875" cy:directed="1"/>
      <edge id="442861" label="zzz1003,zzzz331" source="1043" target="794" cy:directed="1"/>
      <edge id="442860" label="zzz1003,zzzz345" source="1043" target="780" cy:directed="1"/>
      <edge id="442859" label="zzz1003,zzzz375" source="1043" target="750" cy:directed="1"/>
      <edge id="442858" label="zzz1003,zzzz769" source="1043" target="372" cy:directed="1"/>
      <edge id="442857" label="zzz1003,zzzz218" source="1043" target="907" cy:directed="1"/>
      <edge id="442856" label="zzz1003,zzzz239" source="1043" target="886" cy:directed="1"/>
      <edge id="442855" label="zzz1003,zzzz262" source="1043" target="863" cy:directed="1"/>
      <edge id="442854" label="zzz1003,zzzz276" source="1043" target="849" cy:directed="1"/>
      <edge id="442853" label="zzz1003,zzzz327" source="1043" target="798" cy:directed="1"/>
      <edge id="442852" label="zzz1003,zzzz711" source="1043" target="430" cy:directed="1"/>
      <edge id="442851" label="zzz1003,zzzz287" source="1043" target="838" cy:directed="1"/>
      <edge id="442850" label="zzz1003,zzzz321" source="1043" target="804" cy:directed="1"/>
      <edge id="442849" label="zzz1003,zzzz394" source="1043" target="731" cy:directed="1"/>
      <edge id="442848" label="zzz1003,zzzz417" source="1043" target="708" cy:directed="1"/>
      <edge id="442847" label="zzz1003,zzzzz90" source="1043" target="71" cy:directed="1"/>
      <edge id="442846" label="zzz1003,zzzz226" source="1043" target="899" cy:directed="1"/>
      <edge id="442845" label="zzz1003,zzzz259" source="1043" target="866" cy:directed="1"/>
      <edge id="442844" label="zzz1003,zzzz274" source="1043" target="851" cy:directed="1"/>
      <edge id="442843" label="zzz1003,zzzz311" source="1043" target="814" cy:directed="1"/>
      <edge id="442842" label="zzz1003,zzzz377" source="1043" target="748" cy:directed="1"/>
      <edge id="442841" label="zzz1003,zzzzz42" source="1043" target="113" cy:directed="1"/>
      <edge id="442840" label="zzz1003,zzzz237" source="1043" target="888" cy:directed="1"/>
      <edge id="442839" label="zzz1003,zzzz253" source="1043" target="872" cy:directed="1"/>
      <edge id="442838" label="zzz1003,zzzz296" source="1043" target="829" cy:directed="1"/>
      <edge id="442837" label="zzz1003,zzzz322" source="1043" target="803" cy:directed="1"/>
      <edge id="442836" label="zzz1003,zzzz338" source="1043" target="787" cy:directed="1"/>
      <edge id="442835" label="zzz1003,zzzz716" source="1043" target="425" cy:directed="1"/>
      <edge id="442834" label="zzz1003,zzzz815" source="1043" target="326" cy:directed="1"/>
      <edge id="442833" label="zzz1003,zzzz949" source="1043" target="192" cy:directed="1"/>
      <edge id="442832" label="zzz1003,zzzz244" source="1043" target="881" cy:directed="1"/>
      <edge id="442831" label="zzz1003,zzzz284" source="1043" target="841" cy:directed="1"/>
      <edge id="442830" label="zzz1003,zzzz362" source="1043" target="763" cy:directed="1"/>
      <edge id="442829" label="zzz1003,zzzz289" source="1043" target="836" cy:directed="1"/>
      <edge id="442828" label="zzz1003,zzzz304" source="1043" target="821" cy:directed="1"/>
      <edge id="442827" label="zzz1003,zzzz351" source="1043" target="774" cy:directed="1"/>
      <edge id="442826" label="zzz1003,zzzz361" source="1043" target="764" cy:directed="1"/>
      <edge id="442825" label="zzz1003,zzzz413" source="1043" target="712" cy:directed="1"/>
      <edge id="442824" label="zzz1003,zzzz212" source="1043" target="913" cy:directed="1"/>
      <edge id="442823" label="zzz1003,zzzz281" source="1043" target="844" cy:directed="1"/>
      <edge id="442822" label="zzz1003,zzzz319" source="1043" target="806" cy:directed="1"/>
      <edge id="442821" label="zzz1003,zzzz392" source="1043" target="733" cy:directed="1"/>
      <edge id="442820" label="zzz1003,zzzzz30" source="1043" target="125" cy:directed="1"/>
      <edge id="442819" label="zzz1003,zzzz214" source="1043" target="911" cy:directed="1"/>
      <edge id="442818" label="zzz1003,zzzz222" source="1043" target="903" cy:directed="1"/>
      <edge id="442817" label="zzz1003,zzzz233" source="1043" target="892" cy:directed="1"/>
      <edge id="442816" label="zzz1003,zzzz278" source="1043" target="847" cy:directed="1"/>
      <edge id="442815" label="zzz1003,zzzz282" source="1043" target="843" cy:directed="1"/>
      <edge id="442814" label="zzz1003,zzzz299" source="1043" target="826" cy:directed="1"/>
      <edge id="442813" label="zzz1003,zzzz382" source="1043" target="743" cy:directed="1"/>
      <edge id="442812" label="zzz1003,zzzz388" source="1043" target="737" cy:directed="1"/>
      <edge id="442811" label="zzz1003,zzzz393" source="1043" target="732" cy:directed="1"/>
      <edge id="442810" label="zzz1003,zzzz475" source="1043" target="665" cy:directed="1"/>
      <edge id="442809" label="zzz1003,zzzz247" source="1043" target="878" cy:directed="1"/>
      <edge id="442808" label="zzz1003,zzzz317" source="1043" target="808" cy:directed="1"/>
      <edge id="442807" label="zzz1003,zzzz323" source="1043" target="802" cy:directed="1"/>
      <edge id="442806" label="zzz1003,zzzz347" source="1043" target="778" cy:directed="1"/>
      <edge id="442805" label="zzz1003,zzzz252" source="1043" target="873" cy:directed="1"/>
      <edge id="442804" label="zzz1003,zzzz333" source="1043" target="792" cy:directed="1"/>
      <edge id="442803" label="zzz1003,zzzz384" source="1043" target="741" cy:directed="1"/>
      <edge id="442802" label="zzz1003,zzzz386" source="1043" target="739" cy:directed="1"/>
      <edge id="442801" label="zzz1003,zzzz961" source="1043" target="180" cy:directed="1"/>
      <edge id="442800" label="zzz1003,zzzz963" source="1043" target="178" cy:directed="1"/>
      <edge id="442799" label="zzz1003,zzzz219" source="1043" target="906" cy:directed="1"/>
      <edge id="442798" label="zzz1003,zzzz227" source="1043" target="898" cy:directed="1"/>
      <edge id="442797" label="zzz1003,zzzz236" source="1043" target="889" cy:directed="1"/>
      <edge id="442796" label="zzz1003,zzzz246" source="1043" target="879" cy:directed="1"/>
      <edge id="442795" label="zzz1003,zzzz292" source="1043" target="833" cy:directed="1"/>
      <edge id="442794" label="zzz1003,zzzz346" source="1043" target="779" cy:directed="1"/>
      <edge id="442793" label="zzz1003,zzzz366" source="1043" target="759" cy:directed="1"/>
      <edge id="442792" label="zzz1003,zzzz369" source="1043" target="756" cy:directed="1"/>
      <edge id="442791" label="zzz1003,zzzz387" source="1043" target="738" cy:directed="1"/>
      <edge id="442790" label="zzz1003,zzzz905" source="1043" target="236" cy:directed="1"/>
      <edge id="442789" label="zzz1003,zzzz211" source="1043" target="914" cy:directed="1"/>
      <edge id="442788" label="zzz1003,zzzz230" source="1043" target="895" cy:directed="1"/>
      <edge id="442787" label="zzz1003,zzzz279" source="1043" target="846" cy:directed="1"/>
      <edge id="442786" label="zzz1003,zzzz324" source="1043" target="801" cy:directed="1"/>
      <edge id="442785" label="zzz1003,zzzz325" source="1043" target="800" cy:directed="1"/>
      <edge id="442784" label="zzz1003,zzzz328" source="1043" target="797" cy:directed="1"/>
      <edge id="442783" label="zzz1003,zzzz352" source="1043" target="773" cy:directed="1"/>
      <edge id="442782" label="zzz1003,zzzz270" source="1043" target="855" cy:directed="1"/>
      <edge id="442781" label="zzz1003,zzzz330" source="1043" target="795" cy:directed="1"/>
      <edge id="442780" label="zzz1003,zzzz332" source="1043" target="793" cy:directed="1"/>
      <edge id="442779" label="zzz1003,zzzz350" source="1043" target="775" cy:directed="1"/>
      <edge id="442778" label="zzz1003,zzzz354" source="1043" target="771" cy:directed="1"/>
      <edge id="442777" label="zzz1003,zzzz359" source="1043" target="766" cy:directed="1"/>
      <edge id="442776" label="zzz1003,zzzz367" source="1043" target="758" cy:directed="1"/>
      <edge id="442775" label="zzz1003,zzzz209" source="1043" target="916" cy:directed="1"/>
      <edge id="442774" label="zzz1003,zzzz228" source="1043" target="897" cy:directed="1"/>
      <edge id="442773" label="zzz1003,zzzz335" source="1043" target="790" cy:directed="1"/>
      <edge id="442772" label="zzz1003,zzzz356" source="1043" target="769" cy:directed="1"/>
      <edge id="442771" label="zzz1003,zzzz376" source="1043" target="749" cy:directed="1"/>
      <edge id="442770" label="zzz1003,zzzz443" source="1043" target="682" cy:directed="1"/>
      <edge id="442769" label="zzz1003,zzzz275" source="1043" target="850" cy:directed="1"/>
      <edge id="442768" label="zzz1003,zzzz295" source="1043" target="830" cy:directed="1"/>
      <edge id="442767" label="zzz1003,zzzz303" source="1043" target="822" cy:directed="1"/>
      <edge id="442766" label="zzz1003,zzzz348" source="1043" target="777" cy:directed="1"/>
      <edge id="442765" label="zzz1003,zzzz395" source="1043" target="730" cy:directed="1"/>
      <edge id="442764" label="zzz1003,zzzz238" source="1043" target="887" cy:directed="1"/>
      <edge id="442763" label="zzz1003,zzzz263" source="1043" target="862" cy:directed="1"/>
      <edge id="442762" label="zzz1003,zzzz320" source="1043" target="805" cy:directed="1"/>
      <edge id="442761" label="zzz1003,zzzz336" source="1043" target="789" cy:directed="1"/>
      <edge id="442760" label="zzz1003,zzzz390" source="1043" target="735" cy:directed="1"/>
      <edge id="442759" label="zzz1003,zzzz223" source="1043" target="902" cy:directed="1"/>
      <edge id="442758" label="zzz1003,zzzz241" source="1043" target="884" cy:directed="1"/>
      <edge id="442757" label="zzz1003,zzzz242" source="1043" target="883" cy:directed="1"/>
      <edge id="442756" label="zzz1003,zzzz444" source="1043" target="681" cy:directed="1"/>
      <edge id="442755" label="zzz1003,zzzz472" source="1043" target="668" cy:directed="1"/>
      <edge id="442754" label="zzz1003,zzzz771" source="1043" target="370" cy:directed="1"/>
      <edge id="442753" label="zzz1003,zzzz888" source="1043" target="253" cy:directed="1"/>
      <edge id="442752" label="zzz1003,zzzz964" source="1043" target="177" cy:directed="1"/>
      <edge id="442751" label="zzz1003,zzzz251" source="1043" target="874" cy:directed="1"/>
      <edge id="442750" label="zzz1003,zzzz261" source="1043" target="864" cy:directed="1"/>
      <edge id="442749" label="zzz1003,zzzz265" source="1043" target="860" cy:directed="1"/>
      <edge id="442748" label="zzz1003,zzzz312" source="1043" target="813" cy:directed="1"/>
      <edge id="442747" label="zzz1003,zzzz373" source="1043" target="752" cy:directed="1"/>
      <edge id="442746" label="zzz1003,zzzz191" source="1043" target="934" cy:directed="1"/>
      <edge id="442745" label="zzz1003,zzzz193" source="1043" target="932" cy:directed="1"/>
      <edge id="442744" label="zzz1003,zzzz254" source="1043" target="871" cy:directed="1"/>
      <edge id="442743" label="zzz1003,zzzz290" source="1043" target="835" cy:directed="1"/>
      <edge id="442742" label="zzz1003,zzzz334" source="1043" target="791" cy:directed="1"/>
      <edge id="442741" label="zzz1003,zzzz357" source="1043" target="768" cy:directed="1"/>
      <edge id="442740" label="zzz1003,zzzz225" source="1043" target="900" cy:directed="1"/>
      <edge id="442739" label="zzz1003,zzzz231" source="1043" target="894" cy:directed="1"/>
      <edge id="442738" label="zzz1003,zzzz255" source="1043" target="870" cy:directed="1"/>
      <edge id="442737" label="zzz1003,zzzz264" source="1043" target="861" cy:directed="1"/>
      <edge id="442736" label="zzz1003,zzzz288" source="1043" target="837" cy:directed="1"/>
      <edge id="442735" label="zzz1003,zzzz342" source="1043" target="783" cy:directed="1"/>
      <edge id="442734" label="zzz1003,zzzz258" source="1043" target="867" cy:directed="1"/>
      <edge id="442733" label="zzz1003,zzzz266" source="1043" target="859" cy:directed="1"/>
      <edge id="442732" label="zzz1003,zzzz285" source="1043" target="840" cy:directed="1"/>
      <edge id="442731" label="zzz1003,zzzz329" source="1043" target="796" cy:directed="1"/>
      <edge id="442730" label="zzz1003,zzzz340" source="1043" target="785" cy:directed="1"/>
      <edge id="442729" label="zzz1003,zzzz441" source="1043" target="684" cy:directed="1"/>
      <edge id="442728" label="zzz1003,zzzz907" source="1043" target="234" cy:directed="1"/>
      <edge id="442727" label="zzz1003,zzzzz29" source="1043" target="126" cy:directed="1"/>
      <edge id="442726" label="zzz1003,zzzz217" source="1043" target="908" cy:directed="1"/>
      <edge id="442725" label="zzz1003,zzzzz91" source="1043" target="70" cy:directed="1"/>
      <edge id="442724" label="zzz1003,zzzz280" source="1043" target="845" cy:directed="1"/>
      <edge id="442723" label="zzz1003,zzzz300" source="1043" target="825" cy:directed="1"/>
      <edge id="442722" label="zzz1003,zzzz213" source="1043" target="912" cy:directed="1"/>
      <edge id="442721" label="zzz1003,zzzz215" source="1043" target="910" cy:directed="1"/>
      <edge id="442720" label="zzz1003,zzzz308" source="1043" target="817" cy:directed="1"/>
      <edge id="442719" label="zzz1003,zzzz257" source="1043" target="868" cy:directed="1"/>
      <edge id="442718" label="zzz1003,zzzz291" source="1043" target="834" cy:directed="1"/>
      <edge id="442717" label="zzz1003,zzzz372" source="1043" target="753" cy:directed="1"/>
      <edge id="442716" label="zzz1003,zzzz269" source="1043" target="856" cy:directed="1"/>
      <edge id="442715" label="zzz1003,zzzz293" source="1043" target="832" cy:directed="1"/>
      <edge id="442714" label="zzz1003,zzzz360" source="1043" target="765" cy:directed="1"/>
      <edge id="442713" label="zzz1003,zzzz216" source="1043" target="909" cy:directed="1"/>
      <edge id="442712" label="zzz1003,zzzz224" source="1043" target="901" cy:directed="1"/>
      <edge id="442711" label="zzz1003,zzzz337" source="1043" target="788" cy:directed="1"/>
      <edge id="442710" label="zzz1003,zzzz271" source="1043" target="854" cy:directed="1"/>
      <edge id="442709" label="zzz1003,zzzz314" source="1043" target="811" cy:directed="1"/>
      <edge id="442708" label="zzz1003,zzzz358" source="1043" target="767" cy:directed="1"/>
      <edge id="442707" label="zzz1003,zzzz235" source="1043" target="890" cy:directed="1"/>
      <edge id="442706" label="zzz1003,zzzz207" source="1043" target="918" cy:directed="1"/>
      <edge id="442705" label="zzz1003,zzzz297" source="1043" target="828" cy:directed="1"/>
      <edge id="442704" label="zzz1003,zzzz421" source="1043" target="704" cy:directed="1"/>
      <edge id="442703" label="zzz1003,zzzz302" source="1043" target="823" cy:directed="1"/>
      <edge id="442702" label="zzz1003,zzzz343" source="1043" target="782" cy:directed="1"/>
      <edge id="442701" label="zzz1003,zzzz240" source="1043" target="885" cy:directed="1"/>
      <edge id="442700" label="zzz1003,zzzz272" source="1043" target="853" cy:directed="1"/>
      <edge id="442699" label="zzz1003,zzzz313" source="1043" target="812" cy:directed="1"/>
      <edge id="442698" label="zzz1003,zzzz911" source="1043" target="230" cy:directed="1"/>
      <edge id="442697" label="zzz1003,zzzz210" source="1043" target="915" cy:directed="1"/>
      <edge id="442696" label="zzz1003,zzzz260" source="1043" target="865" cy:directed="1"/>
      <edge id="442695" label="zzz1003,zzzz198" source="1043" target="927" cy:directed="1"/>
      <edge id="442694" label="zzz1003,zzzz402" source="1043" target="723" cy:directed="1"/>
      <edge id="442693" label="zzz1003,zzzz914" source="1043" target="227" cy:directed="1"/>
      <edge id="442692" label="zzz1003,zzzz220" source="1043" target="905" cy:directed="1"/>
      <edge id="442691" label="zzz1003,zzzz309" source="1043" target="816" cy:directed="1"/>
      <edge id="442690" label="zzz1003,zzzz908" source="1043" target="233" cy:directed="1"/>
      <edge id="442689" label="zzz1003,zzzz910" source="1043" target="231" cy:directed="1"/>
      <edge id="442688" label="zzz1003,zzzz305" source="1043" target="820" cy:directed="1"/>
      <edge id="442687" label="zzz1003,zzzz310" source="1043" target="815" cy:directed="1"/>
      <edge id="442686" label="zzz1003,zzzz951" source="1043" target="190" cy:directed="1"/>
      <edge id="442685" label="zzz1003,zzzz316" source="1043" target="809" cy:directed="1"/>
      <edge id="442684" label="zzz1003,zzzz273" source="1043" target="852" cy:directed="1"/>
      <edge id="442683" label="zzz1003,zzzz612" source="1043" target="529" cy:directed="1"/>
      <edge id="442682" label="zzz1003,zzzz912" source="1043" target="229" cy:directed="1"/>
      <edge id="442681" label="zzz1003,zzzz919" source="1043" target="222" cy:directed="1"/>
      <edge id="442680" label="zzz1003,zzzz268" source="1043" target="857" cy:directed="1"/>
      <edge id="442679" label="zzz1003,zzzz234" source="1043" target="891" cy:directed="1"/>
      <edge id="442678" label="zzz1003,zzzz277" source="1043" target="848" cy:directed="1"/>
      <edge id="442677" label="zzz1003,zzzzz49" source="1043" target="110" cy:directed="1"/>
      <edge id="442676" label="zzz1003,zzzz365" source="1043" target="760" cy:directed="1"/>
      <edge id="442675" label="zzz1003,zzzz817" source="1043" target="324" cy:directed="1"/>
      <edge id="442674" label="zzz1003,zzzz196" source="1043" target="929" cy:directed="1"/>
      <edge id="442673" label="zzz1003,zzzz938" source="1043" target="203" cy:directed="1"/>
      <edge id="442672" label="zzz1003,zzzz318" source="1043" target="807" cy:directed="1"/>
      <edge id="442671" label="zzz1003,zzzz294" source="1043" target="831" cy:directed="1"/>
      <edge id="442670" label="zzz1003,zzzz385" source="1043" target="740" cy:directed="1"/>
      <edge id="442669" label="zzz1003,zzzz605" source="1043" target="536" cy:directed="1"/>
      <edge id="442668" label="zzz1003,zzzz190" source="1043" target="935" cy:directed="1"/>
      <edge id="442667" label="zzz1003,zzzz840" source="1043" target="301" cy:directed="1"/>
      <edge id="442666" label="zzz1003,zzzz952" source="1043" target="189" cy:directed="1"/>
      <edge id="442665" label="zzz1003,zzzz508" source="1043" target="633" cy:directed="1"/>
      <edge id="442664" label="zzz1003,zzzz999" source="1043" target="143" cy:directed="1"/>
      <edge id="442663" label="zzz1003,zzzz400" source="1043" target="725" cy:directed="1"/>
      <edge id="442662" label="zzz1003,zzzz401" source="1043" target="724" cy:directed="1"/>
      <edge id="442661" label="zzz1003,zzzz397" source="1043" target="728" cy:directed="1"/>
      <edge id="442660" label="zzz1003,zzzz957" source="1043" target="184" cy:directed="1"/>
      <edge id="442659" label="zzz1003,zzzz498" source="1043" target="642" cy:directed="1"/>
      <edge id="442658" label="zzz1003,zzzz506" source="1043" target="635" cy:directed="1"/>
      <edge id="442657" label="zzz1003,zzzz959" source="1043" target="182" cy:directed="1"/>
      <edge id="442656" label="zzz1003,zzzz487" source="1043" target="653" cy:directed="1"/>
      <edge id="442655" label="zzz1003,zzzz326" source="1043" target="799" cy:directed="1"/>
      <edge id="442654" label="zzz1003,zzzz399" source="1043" target="726" cy:directed="1"/>
      <edge id="442653" label="zzz1003,zzzz256" source="1043" target="869" cy:directed="1"/>
      <edge id="442652" label="zzz1003,zzzz496" source="1043" target="644" cy:directed="1"/>
      <edge id="442651" label="zzz1003,zzzz993" source="1043" target="149" cy:directed="1"/>
      <edge id="442650" label="zzz1003,zzzz267" source="1043" target="858" cy:directed="1"/>
      <edge id="442649" label="zzz1003,zzzzz51" source="1043" target="108" cy:directed="1"/>
      <edge id="442648" label="zzz1003,zzzz396" source="1043" target="729" cy:directed="1"/>
      <edge id="442647" label="zzz1003,zzzz932" source="1043" target="209" cy:directed="1"/>
      <edge id="442646" label="zzz1003,zzzz549" source="1043" target="592" cy:directed="1"/>
      <edge id="442645" label="zzz1003,zzzz953" source="1043" target="188" cy:directed="1"/>
      <edge id="442644" label="zzz1003,zzzz489" source="1043" target="651" cy:directed="1"/>
      <edge id="442643" label="zzz1003,zzzz398" source="1043" target="727" cy:directed="1"/>
      <edge id="442642" label="zzz1003,zzzz940" source="1043" target="201" cy:directed="1"/>
      <edge id="442641" label="zzz1003,zzzzz77" source="1043" target="82" cy:directed="1"/>
      <edge id="442640" label="zzz1003,zzzz497" source="1043" target="643" cy:directed="1"/>
      <edge id="442639" label="zzz1003,zzzz178" source="1043" target="947" cy:directed="1"/>
      <edge id="442638" label="zzz1003,zzzz925" source="1043" target="216" cy:directed="1"/>
      <edge id="442637" label="zzz1003,zzzz994" source="1043" target="148" cy:directed="1"/>
      <edge id="442636" label="zzz1003,zzzz494" source="1043" target="646" cy:directed="1"/>
      <edge id="442635" label="zzz1003,zzzz510" source="1043" target="631" cy:directed="1"/>
      <edge id="442634" label="zzz1003,zzzz939" source="1043" target="202" cy:directed="1"/>
      <edge id="442633" label="zzz1003,zzzz509" source="1043" target="632" cy:directed="1"/>
      <edge id="442632" label="zzz1003,zzzz543" source="1043" target="598" cy:directed="1"/>
      <edge id="442631" label="zzz1003,zzzz480" source="1043" target="660" cy:directed="1"/>
      <edge id="442630" label="zzz1003,zzzz943" source="1043" target="198" cy:directed="1"/>
      <edge id="442629" label="zzz1003,zzzz495" source="1043" target="645" cy:directed="1"/>
      <edge id="442628" label="zzz1003,zzzz937" source="1043" target="204" cy:directed="1"/>
      <edge id="442627" label="zzz1003,zzzz942" source="1043" target="199" cy:directed="1"/>
      <edge id="442626" label="zzz1003,zzzz530" source="1043" target="611" cy:directed="1"/>
      <edge id="442625" label="zzz1003,zzzz539" source="1043" target="602" cy:directed="1"/>
      <edge id="442624" label="zzz1003,zzzz526" source="1043" target="615" cy:directed="1"/>
      <edge id="442623" label="zzz1003,zzzz535" source="1043" target="606" cy:directed="1"/>
      <edge id="442622" label="zzz1003,zzzz478" source="1043" target="662" cy:directed="1"/>
      <edge id="442621" label="zzz1003,zzzz531" source="1043" target="610" cy:directed="1"/>
      <edge id="442620" label="zzz1003,zzzz941" source="1043" target="200" cy:directed="1"/>
      <edge id="442619" label="zzz1003,zzzz895" source="1043" target="246" cy:directed="1"/>
      <edge id="442618" label="zzz1003,zzzz507" source="1043" target="634" cy:directed="1"/>
      <edge id="442617" label="zzz1003,zzzz529" source="1043" target="612" cy:directed="1"/>
      <edge id="442616" label="zzz1003,zzzz538" source="1043" target="603" cy:directed="1"/>
      <edge id="442615" label="zzz1003,zzzz532" source="1043" target="609" cy:directed="1"/>
      <edge id="442614" label="zzz1003,zzzz534" source="1043" target="607" cy:directed="1"/>
      <edge id="442613" label="zzz1003,zzzz893" source="1043" target="248" cy:directed="1"/>
      <edge id="442612" label="zzz1003,zzzz894" source="1043" target="247" cy:directed="1"/>
      <edge id="442611" label="zzz1004,zzz1008" source="1042" target="1038" cy:directed="1"/>
      <edge id="442610" label="zzz1004,zzz1005" source="1042" target="1041" cy:directed="1"/>
      <edge id="442609" label="zzz1004,zzzz980" source="1042" target="162" cy:directed="1"/>
      <edge id="442608" label="zzz1004,zzzz984" source="1042" target="158" cy:directed="1"/>
      <edge id="442607" label="zzz1004,zzzz998" source="1042" target="144" cy:directed="1"/>
      <edge id="442606" label="zzz1004,zzz1009" source="1042" target="1037" cy:directed="1"/>
      <edge id="442605" label="zzz1004,zzzz967" source="1042" target="175" cy:directed="1"/>
      <edge id="442604" label="zzz1004,zzzz989" source="1042" target="153" cy:directed="1"/>
      <edge id="442603" label="zzz1004,zzzz988" source="1042" target="154" cy:directed="1"/>
      <edge id="442602" label="zzz1004,zzzzz39" source="1042" target="116" cy:directed="1"/>
      <edge id="442601" label="zzz1004,zzzz977" source="1042" target="165" cy:directed="1"/>
      <edge id="442600" label="zzz1004,zzz1007" source="1042" target="1039" cy:directed="1"/>
      <edge id="442599" label="zzz1004,zzzz990" source="1042" target="152" cy:directed="1"/>
      <edge id="442598" label="zzz1004,zzzz902" source="1042" target="239" cy:directed="1"/>
      <edge id="442597" label="zzz1004,zzzz729" source="1042" target="412" cy:directed="1"/>
      <edge id="442596" label="zzz1004,zzzz203" source="1042" target="922" cy:directed="1"/>
      <edge id="442595" label="zzz1004,zzzz754" source="1042" target="387" cy:directed="1"/>
      <edge id="442594" label="zzz1004,zzzz739" source="1042" target="402" cy:directed="1"/>
      <edge id="442593" label="zzz1004,zzzz404" source="1042" target="721" cy:directed="1"/>
      <edge id="442592" label="zzz1004,zzzz968" source="1042" target="174" cy:directed="1"/>
      <edge id="442591" label="zzz1004,zzzz679" source="1042" target="462" cy:directed="1"/>
      <edge id="442590" label="zzz1004,zzzz918" source="1042" target="223" cy:directed="1"/>
      <edge id="442589" label="zzz1004,zzzz755" source="1042" target="386" cy:directed="1"/>
      <edge id="442588" label="zzz1004,zzzz706" source="1042" target="435" cy:directed="1"/>
      <edge id="442587" label="zzz1004,zzzz733" source="1042" target="408" cy:directed="1"/>
      <edge id="442586" label="zzz1004,zzzz746" source="1042" target="395" cy:directed="1"/>
      <edge id="442585" label="zzz1004,zzzz764" source="1042" target="377" cy:directed="1"/>
      <edge id="442584" label="zzz1004,zzzz611" source="1042" target="530" cy:directed="1"/>
      <edge id="442583" label="zzz1004,zzzz851" source="1042" target="290" cy:directed="1"/>
      <edge id="442582" label="zzz1004,zzzz974" source="1042" target="168" cy:directed="1"/>
      <edge id="442581" label="zzz1004,zzzz682" source="1042" target="459" cy:directed="1"/>
      <edge id="442580" label="zzz1004,zzzz846" source="1042" target="295" cy:directed="1"/>
      <edge id="442579" label="zzz1004,zzzz702" source="1042" target="439" cy:directed="1"/>
      <edge id="442578" label="zzz1004,zzzz709" source="1042" target="432" cy:directed="1"/>
      <edge id="442577" label="zzz1004,zzzz756" source="1042" target="385" cy:directed="1"/>
      <edge id="442576" label="zzz1004,zzzz760" source="1042" target="381" cy:directed="1"/>
      <edge id="442575" label="zzz1004,zzzz992" source="1042" target="150" cy:directed="1"/>
      <edge id="442574" label="zzz1004,zzzz195" source="1042" target="930" cy:directed="1"/>
      <edge id="442573" label="zzz1004,zzzz642" source="1042" target="499" cy:directed="1"/>
      <edge id="442572" label="zzz1004,zzzz707" source="1042" target="434" cy:directed="1"/>
      <edge id="442571" label="zzz1004,zzzz768" source="1042" target="373" cy:directed="1"/>
      <edge id="442570" label="zzz1004,zzzz647" source="1042" target="494" cy:directed="1"/>
      <edge id="442569" label="zzz1004,zzzz689" source="1042" target="452" cy:directed="1"/>
      <edge id="442568" label="zzz1004,zzzz865" source="1042" target="276" cy:directed="1"/>
      <edge id="442567" label="zzz1004,zzzz201" source="1042" target="924" cy:directed="1"/>
      <edge id="442566" label="zzz1004,zzzz643" source="1042" target="498" cy:directed="1"/>
      <edge id="442565" label="zzz1004,zzzz701" source="1042" target="440" cy:directed="1"/>
      <edge id="442564" label="zzz1004,zzzz752" source="1042" target="389" cy:directed="1"/>
      <edge id="442563" label="zzz1004,zzzz604" source="1042" target="537" cy:directed="1"/>
      <edge id="442562" label="zzz1004,zzzz813" source="1042" target="328" cy:directed="1"/>
      <edge id="442561" label="zzz1004,zzzz110" source="1042" target="1015" cy:directed="1"/>
      <edge id="442560" label="zzz1004,zzzz695" source="1042" target="446" cy:directed="1"/>
      <edge id="442559" label="zzz1004,zzzz718" source="1042" target="423" cy:directed="1"/>
      <edge id="442558" label="zzz1004,zzzz728" source="1042" target="413" cy:directed="1"/>
      <edge id="442557" label="zzz1004,zzzz784" source="1042" target="357" cy:directed="1"/>
      <edge id="442556" label="zzz1004,zzzz858" source="1042" target="283" cy:directed="1"/>
      <edge id="442555" label="zzz1004,zzzz762" source="1042" target="379" cy:directed="1"/>
      <edge id="442554" label="zzz1004,zzzz828" source="1042" target="313" cy:directed="1"/>
      <edge id="442553" label="zzz1004,zzzz841" source="1042" target="300" cy:directed="1"/>
      <edge id="442552" label="zzz1004,zzzz857" source="1042" target="284" cy:directed="1"/>
      <edge id="442551" label="zzz1004,zzzz868" source="1042" target="273" cy:directed="1"/>
      <edge id="442550" label="zzz1004,zzzz761" source="1042" target="380" cy:directed="1"/>
      <edge id="442549" label="zzz1004,zzzz986" source="1042" target="156" cy:directed="1"/>
      <edge id="442548" label="zzz1004,zzzz650" source="1042" target="491" cy:directed="1"/>
[truncated: 40,515,541 more chars]
