# Supplementary material for: Discovery of several thousand highly diverse circular DNA viruses
Source: eLife journal article supplement (doi:10.7554/elife.51971), 2020-02-03
Supplement: fig2-figsupp1-data3 [file elife-51971-fig2-figsupp1-data3-v1.cys › CytoscapeSession-2019_08_05-17_08/tables/36-all_my_seqs_genbank_ssDNA1_domains_micro_MCP_fasta+Full+Network/LOCAL_ATTRS-org.cytoscape.model.CyEdge-36+default+edge.cytable]

CyCSV-Version	1
SUID	interaction	name	selected
java.lang.Long	java.lang.String	java.lang.String	java.lang.Boolean
36 default edge
161251		zzzz480,zzzz943	false
138874		zzzz542,zzzz893	false
142274		zzzz531,zzzz539	false
139193		zzzz541,zzzz897	false
392608		zzzz138,zzzz139	false
8215		zzzz957,zzzz959	false
376032		zzzz157,zzzz929	false
1348		zzzzz72,zzzzz74	false
3928		zzzzz15,zzzzz47	false
423268		zzzz104,zzzz106	false
421436		zzzz106,zzzzz72	false
366569		zzzz168,zzzz169	false
423267		zzzz104,zzzzz72	false
423266		zzzz104,zzzzz74	false
401507		zzzz128,zzzzz79	false
421435		zzzz106,zzzzz74	false
368295		zzzz166,zzzz169	false
1279		zzzzz75,zzzzz80	false
404198		zzzz125,zzzz483	false
368294		zzzz166,zzzz168	false
437863		zzz1009,zzzz984	false
5537		zzzz984,zzzz988	false
9721		zzzz945,zzzz946	false
437862		zzz1009,zzzz998	false
43691		zzzz777,zzzz878	false
5536		zzzz984,zzzzz39	false
5535		zzzz984,zzzz989	false
5167		zzzz988,zzzz989	false
437861		zzz1009,zzzz988	false
5534		zzzz984,zzzz998	false
158245		zzzz486,zzzz945	false
5166		zzzz988,zzzz998	false
5077		zzzz989,zzzzz39	false
437860		zzz1009,zzzzz39	false
5165		zzzz988,zzzzz39	false
375172		zzzz158,zzzz486	false
375171		zzzz158,zzzz945	false
11442		zzzz930,zzzzz93	false
4315		zzzz998,zzzzz39	false
437859		zzz1009,zzzz989	false
442611		zzz1004,zzz1008	false
158244		zzzz486,zzzz946	false
7291		zzzz967,zzzz984	false
7290		zzzz967,zzzz998	false
57567		zzzz733,zzzz768	false
20570		zzzz871,zzzz880	false
406910		zzzz122,zzzz123	false
393487		zzzz137,zzzzz83	false
437858		zzz1009,zzzz967	false
375170		zzzz158,zzzz946	false
5076		zzzz989,zzzz998	false
166729		zzzz470,zzzz471	false
7289		zzzz967,zzzz988	false
18802		zzzz880,zzzz882	false
7288		zzzz967,zzzzz39	false
7287		zzzz967,zzzz989	false
1219		zzzzz78,zzzzz94	false
438808		zzz1008,zzzz980	false
442610		zzz1004,zzz1005	false
441664		zzz1005,zzzz980	false
441663		zzz1005,zzz1008	false
9853		zzzz944,zzzz945	false
375169		zzzz158,zzzz944	false
20569		zzzz871,zzzz882	false
3779		zzzzz18,zzzzz21	false
9852		zzzz944,zzzz946	false
408720		zzzz120,zzzz121	false
46667		zzzz767,zzzz774	false
9076		zzzz950,zzzz996	false
442609		zzz1004,zzzz980	false
3927		zzzzz15,zzzzz48	false
429694		zzz1019,zzz1020	false
2273		zzzzz47,zzzzz48	false
108799		zzzz604,zzzz828	false
90254		zzzz646,zzzz841	false
416847		zzzz111,zzzz604	false
1995		zzzzz53,zzzzz59	false
169048		zzzz464,zzzz470	false
158243		zzzz486,zzzz944	false
400617		zzzz129,zzzzz79	false
57566		zzzz733,zzzz868	false
24315		zzzz853,zzzz864	false
401506		zzzz128,zzzz129	false
9720		zzzz945,zzzz947	false
111590		zzzz598,zzzz610	false
138036		zzzz544,zzzz892	false
6535		zzzz974,zzzz992	false
399723		zzzz130,zzzzz85	false
73790		zzzz687,zzzz730	false
376031		zzzz157,zzzz945	false
133683		zzzz553,zzzz900	false
46369		zzzz768,zzzz868	false
11586		zzzz929,zzzz945	false
5923		zzzz980,zzzz998	false
436925		zzz1010,zzzz991	false
9851		zzzz944,zzzz947	false
375168		zzzz158,zzzz947	false
433429		zzz1014,zzzz449	false
158242		zzzz486,zzzz947	false
66719		zzzz706,zzzz756	false
68549		zzzz701,zzzz846	false
53255		zzzz746,zzzz760	false
76875		zzzz679,zzzz846	false
88567		zzzz650,zzzz768	false
66718		zzzz706,zzzz754	false
6853		zzzz971,zzzz973	false
111589		zzzz598,zzzz621	false
397935		zzzz132,zzzz133	false
376030		zzzz157,zzzz947	false
76874		zzzz679,zzzz701	false
13247		zzzz918,zzzz992	false
377762		zzzz155,zzzz945	false
54888		zzzz741,zzzz860	false
11585		zzzz929,zzzz947	false
6852		zzzz971,zzzz972	false
55554		zzzz739,zzzz851	false
9590		zzzz946,zzzz947	false
433428		zzz1014,zzzz972	false
68185		zzzz702,zzzz762	false
417774		zzzz110,zzzz724	false
377761		zzzz155,zzzz156	false
433427		zzz1014,zzzz971	false
400616		zzzz129,zzzzz85	false
48500		zzzz761,zzzz868	false
23458		zzzz857,zzzz863	false
388225		zzzz143,zzzz950	false
134708		zzzz551,zzzz556	false
128097		zzzz564,zzzz899	false
170203		zzzz449,zzzz972	false
68184		zzzz702,zzzz706	false
68183		zzzz702,zzzz858	false
426953		zzzz100,zzzzz99	false
48499		zzzz761,zzzz768	false
43690		zzzz777,zzzz794	false
13246		zzzz918,zzzz974	false
417773		zzzz110,zzzz642	false
1994		zzzzz53,zzzzz61	false
376029		zzzz157,zzzz944	false
73789		zzzz687,zzzz754	false
376028		zzzz157,zzzz486	false
195789		zzzz403,zzzz991	false
90253		zzzz646,zzzz724	false
60630		zzzz724,zzzz841	false
39099		zzzz793,zzzz883	false
38822		zzzz794,zzzz878	false
6746		zzzz972,zzzz973	false
1201		zzzzz79,zzzzz85	false
132149		zzzz556,zzzz580	false
1166		zzzzz82,zzzzz83	false
372589		zzzz161,zzzz162	false
66717		zzzz706,zzzz762	false
388224		zzzz143,zzzz996	false
376027		zzzz157,zzzz158	false
66716		zzzz706,zzzz734	false
170202		zzzz449,zzzz971	false
134707		zzzz551,zzzz580	false
68182		zzzz702,zzzz754	false
376026		zzzz157,zzzz946	false
68181		zzzz702,zzzz734	false
57230		zzzz734,zzzz858	false
8335		zzzz956,zzzz997	false
401505		zzzz128,zzzzz85	false
109261		zzzz603,zzzz847	false
11584		zzzz929,zzzz946	false
91952		zzzz642,zzzz724	false
89410		zzzz648,zzzz669	false
57565		zzzz733,zzzz761	false
1993		zzzzz53,zzzzz60	false
88566		zzzz650,zzzz868	false
68180		zzzz702,zzzz729	false
436924		zzz1010,zzzz403	false
416846		zzzz111,zzzz828	false
375167		zzzz158,zzzz929	false
13720		zzzz915,zzzz916	false
91951		zzzz642,zzzz646	false
433426		zzz1014,zzzz973	false
401504		zzzz128,zzzz130	false
376902		zzzz156,zzzz945	false
1752		zzzzz59,zzzzz60	false
377760		zzzz155,zzzz946	false
91524		zzzz643,zzzz659	false
66715		zzzz706,zzzz858	false
417772		zzzz110,zzzz646	false
441662		zzz1005,zzz1009	false
106037		zzzz610,zzzz621	false
88565		zzzz650,zzzz733	false
58578		zzzz730,zzzz764	false
9850		zzzz944,zzzzz84	false
417771		zzzz110,zzzz718	false
91950		zzzz642,zzzz841	false
66714		zzzz706,zzzz729	false
58917		zzzz729,zzzz858	false
442608		zzz1004,zzzz984	false
376901		zzzz156,zzzz486	false
169047		zzzz464,zzzz471	false
88564		zzzz650,zzzz707	false
62727		zzzz718,zzzz868	false
57229		zzzz734,zzzz754	false
57228		zzzz734,zzzz762	false
442607		zzz1004,zzzz998	false
398836		zzzz131,zzzz133	false
370012		zzzz164,zzzz165	false
141870		zzzz532,zzzz892	false
139364		zzzz540,zzzz542	false
50703		zzzz754,zzzz762	false
11583		zzzz929,zzzz944	false
120189		zzzz580,zzzz584	false
101976		zzzz619,zzzz643	false
68179		zzzz702,zzzz868	false
377759		zzzz155,zzzz158	false
376900		zzzz156,zzzz946	false
50074		zzzz756,zzzz762	false
48192		zzzz762,zzzz858	false
170201		zzzz449,zzzz973	false
140832		zzzz536,zzzz896	false
68178		zzzz702,zzzz756	false
400615		zzzz129,zzzz130	false
376899		zzzz156,zzzz944	false
58916		zzzz729,zzzz734	false
1715		zzzzz60,zzzzz61	false
442606		zzz1004,zzz1009	false
399722		zzzz130,zzzzz79	false
16897		zzzz892,zzzz896	false
438807		zzz1008,zzzz998	false
158241		zzzz486,zzzz929	false
68177		zzzz702,zzzz718	false
66713		zzzz706,zzzz739	false
57227		zzzz734,zzzz756	false
50702		zzzz754,zzzz756	false
128096		zzzz564,zzzz574	false
55222		zzzz740,zzzz779	false
11582		zzzz929,zzzzz84	false
438806		zzz1008,zzzz984	false
73788		zzzz687,zzzz764	false
1751		zzzzz59,zzzzz61	false
441661		zzz1005,zzzz998	false
131132		zzzz558,zzzz644	false
66355		zzzz707,zzzz768	false
62726		zzzz718,zzzz733	false
57226		zzzz734,zzzz768	false
23246		zzzz858,zzzz868	false
376898		zzzz156,zzzz157	false
376025		zzzz157,zzzzz84	false
132148		zzzz556,zzzz584	false
58915		zzzz729,zzzz756	false
438805		zzz1008,zzz1009	false
377758		zzzz155,zzzz486	false
376897		zzzz156,zzzz158	false
372588		zzzz161,zzzz169	false
66712		zzzz706,zzzz761	false
58914		zzzz729,zzzz739	false
58913		zzzz729,zzzz754	false
4561		zzzz995,zzzzz76	false
442605		zzz1004,zzzz967	false
376896		zzzz156,zzzzz84	false
372587		zzzz161,zzzz166	false
91949		zzzz642,zzzz718	false
68176		zzzz702,zzzz739	false
66711		zzzz706,zzzz733	false
58912		zzzz729,zzzz762	false
377757		zzzz155,zzzz157	false
109260		zzzz603,zzzzz19	false
5922		zzzz980,zzzz984	false
417770		zzzz110,zzzz858	false
376895		zzzz156,zzzz929	false
131131		zzzz558,zzzz816	false
120188		zzzz580,zzzzz62	false
73408		zzzz688,zzzz748	false
62725		zzzz718,zzzz768	false
9719		zzzz945,zzzzz84	false
442604		zzz1004,zzzz989	false
393486		zzzz137,zzzzz82	false
73787		zzzz687,zzzz706	false
57905		zzzz732,zzzz865	false
57225		zzzz734,zzzz739	false
50701		zzzz754,zzzz858	false
50073		zzzz756,zzzz858	false
48498		zzzz761,zzzz858	false
442603		zzz1004,zzzz988	false
441660		zzz1005,zzzz984	false
437857		zzz1009,zzzz980	false
66710		zzzz706,zzzz868	false
45173		zzzz772,zzzz773	false
438804		zzz1008,zzzz989	false
417769		zzzz110,zzzz868	false
62724		zzzz718,zzzz734	false
55553		zzzz739,zzzz754	false
442602		zzz1004,zzzzz39	false
158240		zzzz486,zzzzz84	false
117281		zzzz586,zzzz603	false
110655		zzzz600,zzzz668	false
62723		zzzz718,zzzz858	false
55552		zzzz739,zzzz762	false
9460		zzzz947,zzzzz84	false
417768		zzzz110,zzzz841	false
376894		zzzz156,zzzz947	false
372586		zzzz161,zzzz168	false
134706		zzzz551,zzzz584	false
133682		zzzz553,zzzz901	false
57564		zzzz733,zzzz734	false
57563		zzzz733,zzzz756	false
57224		zzzz734,zzzz761	false
417767		zzzz110,zzzz702	false
75330		zzzz683,zzzz835	false
65938		zzzz709,zzzz764	false
126591		zzzz567,zzzz580	false
68175		zzzz702,zzzz733	false
66354		zzzz707,zzzz733	false
65577		zzzz710,zzzz865	false
57562		zzzz733,zzzz754	false
48191		zzzz762,zzzz851	false
5921		zzzz980,zzzzz39	false
377756		zzzz155,zzzz944	false
118252		zzzz584,zzzzz62	false
91948		zzzz642,zzzz761	false
377755		zzzz155,zzzz947	false
372585		zzzz161,zzzz163	false
141869		zzzz532,zzzz544	false
135224		zzzz550,zzzz899	false
131130		zzzz558,zzzz590	false
91947		zzzz642,zzzz858	false
66709		zzzz706,zzzz851	false
65937		zzzz709,zzzz746	false
55551		zzzz739,zzzz858	false
16896		zzzz892,zzzz895	false
426040		zzzz101,zzzz958	false
140831		zzzz536,zzzz892	false
88563		zzzz650,zzzz761	false
73786		zzzz687,zzzz702	false
66708		zzzz706,zzzz768	false
66353		zzzz707,zzzz761	false
62722		zzzz718,zzzz761	false
370863		zzzz163,zzzz169	false
139363		zzzz540,zzzz893	false
50700		zzzz754,zzzz764	false
25840		zzzz846,zzzz902	false
438803		zzz1008,zzzz967	false
438802		zzz1008,zzzz988	false
131129		zzzz558,zzzz821	false
66352		zzzz707,zzzz868	false
65936		zzzz709,zzzz734	false
65935		zzzz709,zzzz752	false
62721		zzzz718,zzzz762	false
9589		zzzz946,zzzzz84	false
375166		zzzz158,zzzzz84	false
70775		zzzz695,zzzz710	false
50699		zzzz754,zzzz768	false
50698		zzzz754,zzzz868	false
441659		zzz1005,zzzz988	false
370862		zzzz163,zzzz168	false
134705		zzzz551,zzzzz62	false
91946		zzzz642,zzzz868	false
5920		zzzz980,zzzz989	false
441658		zzz1005,zzzz989	false
115363		zzzz590,zzzz722	false
91945		zzzz642,zzzz734	false
58911		zzzz729,zzzz851	false
58577		zzzz730,zzzz768	false
57561		zzzz733,zzzz858	false
57223		zzzz734,zzzz868	false
76102		zzzz681,zzzzz19	false
62720		zzzz718,zzzz756	false
377754		zzzz155,zzzzz84	false
370861		zzzz163,zzzz166	false
132147		zzzz556,zzzzz62	false
127593		zzzz565,zzzz899	false
101975		zzzz619,zzzz659	false
91944		zzzz642,zzzz768	false
66707		zzzz706,zzzz730	false
62719		zzzz718,zzzz754	false
58576		zzzz730,zzzz734	false
58575		zzzz730,zzzz868	false
46368		zzzz768,zzzz858	false
7286		zzzz967,zzzz980	false
369147		zzzz165,zzzz169	false
134704		zzzz551,zzzz567	false
91943		zzzz642,zzzz702	false
91942		zzzz642,zzzz733	false
68174		zzzz702,zzzz768	false
58574		zzzz730,zzzz746	false
50072		zzzz756,zzzz868	false
73785		zzzz687,zzzz868	false
68173		zzzz702,zzzz761	false
66706		zzzz706,zzzz718	false
62718		zzzz718,zzzz724	false
58910		zzzz729,zzzz733	false
58909		zzzz729,zzzz768	false
56893		zzzz735,zzzz746	false
55550		zzzz739,zzzz756	false
50071		zzzz756,zzzz768	false
6224		zzzz977,zzzzz39	false
5919		zzzz980,zzzz988	false
376024		zzzz157,zzzz163	false
370860		zzzz163,zzzz513	false
116800		zzzz587,zzzzz58	false
73784		zzzz687,zzzz762	false
65934		zzzz709,zzzz730	false
62717		zzzz718,zzzz730	false
32948		zzzz816,zzzz821	false
438801		zzz1008,zzzzz39	false
415019		zzzz113,zzzz828	false
371723		zzzz162,zzzz163	false
115362		zzzz590,zzzz644	false
73783		zzzz687,zzzz718	false
70774		zzzz695,zzzz865	false
62716		zzzz718,zzzz841	false
369146		zzzz165,zzzz166	false
368293		zzzz166,zzzz167	false
367428		zzzz167,zzzz169	false
91100		zzzz644,zzzz681	false
65576		zzzz710,zzzz732	false
62715		zzzz718,zzzz784	false
58908		zzzz729,zzzz761	false
56892		zzzz735,zzzz859	false
50070		zzzz756,zzzz761	false
23245		zzzz858,zzzz918	false
370859		zzzz163,zzzz165	false
76873		zzzz679,zzzz723	false
73782		zzzz687,zzzz733	false
66705		zzzz706,zzzz764	false
62714		zzzz718,zzzz729	false
58907		zzzz729,zzzz764	false
58906		zzzz729,zzzz868	false
58905		zzzz729,zzzz918	false
55549		zzzz739,zzzz768	false
51331		zzzz752,zzzz784	false
23244		zzzz858,zzzz992	false
6223		zzzz977,zzzz984	false
88562		zzzz650,zzzz756	false
86906		zzzz654,zzzz676	false
73781		zzzz687,zzzz768	false
68548		zzzz701,zzzz902	false
65933		zzzz709,zzzz859	false
58904		zzzz729,zzzz992	false
58573		zzzz730,zzzz754	false
140830		zzzz536,zzzz895	false
128095		zzzz564,zzzz565	false
100634		zzzz622,zzzz626	false
88561		zzzz650,zzzz702	false
65932		zzzz709,zzzz729	false
57560		zzzz733,zzzz739	false
441657		zzz1005,zzzz967	false
365706		zzzz169,zzzz513	false
126590		zzzz567,zzzz584	false
115361		zzzz590,zzzzz66	false
91941		zzzz642,zzzz687	false
88560		zzzz650,zzzz739	false
68172		zzzz702,zzzz709	false
68171		zzzz702,zzzz764	false
63786		zzzz715,zzzz737	false
57222		zzzz734,zzzz784	false
48497		zzzz761,zzzz762	false
417766		zzzz110,zzzz734	false
370858		zzzz163,zzzz929	false
368292		zzzz166,zzzz513	false
115840		zzzz589,zzzz644	false
73780		zzzz687,zzzz756	false
73779		zzzz687,zzzz761	false
70773		zzzz695,zzzz732	false
68170		zzzz702,zzzz851	false
67082		zzzz705,zzzz918	false
58572		zzzz730,zzzz733	false
58571		zzzz730,zzzz858	false
56891		zzzz735,zzzz752	false
24752		zzzz851,zzzz858	false
146290		zzzz513,zzzzz84	false
88559		zzzz650,zzzz734	false
68169		zzzz702,zzzz730	false
68168		zzzz702,zzzz992	false
65931		zzzz709,zzzz735	false
60976		zzzz723,zzzz846	false
57221		zzzz734,zzzz851	false
49125		zzzz759,zzzz783	false
47577		zzzz764,zzzz858	false
41641		zzzz784,zzzz868	false
16589		zzzz895,zzzz896	false
437856		zzz1009,zzzz977	false
417765		zzzz110,zzzz729	false
144146		zzzz519,zzzz523	false
123120		zzzz574,zzzz899	false
91099		zzzz644,zzzz821	false
88558		zzzz650,zzzz706	false
88557		zzzz650,zzzz718	false
73778		zzzz687,zzzz734	false
68167		zzzz702,zzzz918	false
65930		zzzz709,zzzz733	false
65929		zzzz709,zzzz756	false
41640		zzzz784,zzzz859	false
6222		zzzz977,zzzz998	false
377753		zzzz155,zzzz929	false
88984		zzzz649,zzzz847	false
76101		zzzz681,zzzzz66	false
60629		zzzz724,zzzz858	false
57559		zzzz733,zzzz762	false
48190		zzzz762,zzzz868	false
417764		zzzz110,zzzz768	false
376023		zzzz157,zzzz162	false
372584		zzzz161,zzzz165	false
371722		zzzz162,zzzz929	false
141868		zzzz532,zzzz536	false
133167		zzzz554,zzzz816	false
115839		zzzz589,zzzz681	false
91940		zzzz642,zzzz730	false
90252		zzzz646,zzzz718	false
76872		zzzz679,zzzz729	false
72274		zzzz691,zzzz826	false
68166		zzzz702,zzzz784	false
65928		zzzz709,zzzz768	false
58903		zzzz729,zzzz730	false
58570		zzzz730,zzzz761	false
50697		zzzz754,zzzz784	false
48189		zzzz762,zzzz768	false
417763		zzzz110,zzzz706	false
368291		zzzz166,zzzz485	false
367427		zzzz167,zzzz168	false
124596		zzzz571,zzzz898	false
94941		zzzz635,zzzz702	false
76100		zzzz681,zzzz722	false
73777		zzzz687,zzzz709	false
68165		zzzz702,zzzz846	false
66704		zzzz706,zzzz709	false
66703		zzzz706,zzzz752	false
62713		zzzz718,zzzz859	false
60628		zzzz724,zzzz868	false
58902		zzzz729,zzzz974	false
57220		zzzz734,zzzz764	false
6221		zzzz977,zzzz989	false
398835		zzzz131,zzzz132	false
371721		zzzz162,zzzz169	false
369145		zzzz165,zzzz168	false
344087		zzzz195,zzzz203	false
115360		zzzz590,zzzz666	false
94940		zzzz635,zzzz729	false
91939		zzzz642,zzzz706	false
88556		zzzz650,zzzz858	false
83233		zzzz663,zzzz706	false
76871		zzzz679,zzzz902	false
66702		zzzz706,zzzz784	false
50069		zzzz756,zzzz851	false
16026		zzzz900,zzzz901	false
371720		zzzz162,zzzz513	false
127091		zzzz566,zzzz861	false
91938		zzzz642,zzzz756	false
77659		zzzz677,zzzzz57	false
73776		zzzz687,zzzz746	false
68547		zzzz701,zzzz918	false
68164		zzzz702,zzzz974	false
65927		zzzz709,zzzz718	false
65926		zzzz709,zzzz868	false
62712		zzzz718,zzzz739	false
51330		zzzz752,zzzz859	false
130621		zzzz559,zzzz644	false
117280		zzzz586,zzzz847	false
91098		zzzz644,zzzz836	false
90251		zzzz646,zzzz868	false
83232		zzzz663,zzzz734	false
68163		zzzz702,zzzz705	false
68162		zzzz702,zzzz724	false
60627		zzzz724,zzzz734	false
57219		zzzz734,zzzz918	false
51329		zzzz752,zzzz868	false
417762		zzzz110,zzzz859	false
369144		zzzz165,zzzz513	false
366568		zzzz168,zzzz513	false
141867		zzzz532,zzzz896	false
127592		zzzz565,zzzz574	false
91937		zzzz642,zzzz709	false
91936		zzzz642,zzzz739	false
90250		zzzz646,zzzz858	false
68546		zzzz701,zzzz729	false
65925		zzzz709,zzzz761	false
48496		zzzz761,zzzz764	false
6220		zzzz977,zzzz988	false
441656		zzz1005,zzzzz39	false
371719		zzzz162,zzzz166	false
370857		zzzz163,zzzz947	false
365705		zzzz169,zzzz485	false
91935		zzzz642,zzzz729	false
88555		zzzz650,zzzz992	false
66351		zzzz707,zzzz739	false
55548		zzzz739,zzzz761	false
53254		zzzz746,zzzz752	false
51328		zzzz752,zzzz754	false
51327		zzzz752,zzzz764	false
50696		zzzz754,zzzz761	false
50695		zzzz754,zzzz918	false
23033		zzzz859,zzzz868	false
417761		zzzz110,zzzz762	false
372583		zzzz161,zzzz929	false
370856		zzzz163,zzzzz84	false
141866		zzzz532,zzzz895	false
94939		zzzz635,zzzz705	false
91934		zzzz642,zzzz784	false
58901		zzzz729,zzzz846	false
51326		zzzz752,zzzz841	false
48811		zzzz760,zzzz858	false
18801		zzzz880,zzzzz66	false
372582		zzzz161,zzzz485	false
371718		zzzz162,zzzz168	false
115359		zzzz590,zzzz880	false
91933		zzzz642,zzzz650	false
91097		zzzz644,zzzzz66	false
88554		zzzz650,zzzz754	false
76099		zzzz681,zzzz880	false
73775		zzzz687,zzzz858	false
68161		zzzz702,zzzz735	false
65924		zzzz709,zzzz762	false
62711		zzzz718,zzzz746	false
60975		zzzz723,zzzz729	false
50694		zzzz754,zzzz846	false
20568		zzzz871,zzzzz66	false
83231		zzzz663,zzzz702	false
83230		zzzz663,zzzz858	false
76870		zzzz679,zzzz918	false
67081		zzzz705,zzzz868	false
62710		zzzz718,zzzz918	false
58569		zzzz730,zzzz784	false
50693		zzzz754,zzzz851	false
46367		zzzz768,zzzz918	false
21178		zzzz868,zzzz918	false
417760		zzzz110,zzzz687	false
417759		zzzz110,zzzz764	false
370855		zzzz163,zzzz167	false
90249		zzzz646,zzzz734	false
73774		zzzz687,zzzz729	false
67080		zzzz705,zzzz992	false
66350		zzzz707,zzzz730	false
66349		zzzz707,zzzz734	false
65923		zzzz709,zzzz858	false
60626		zzzz724,zzzz768	false
53253		zzzz746,zzzz764	false
41639		zzzz784,zzzz858	false
23243		zzzz858,zzzz974	false
376893		zzzz156,zzzz513	false
369143		zzzz165,zzzz167	false
369142		zzzz165,zzzz493	false
138035		zzzz544,zzzz896	false
131128		zzzz558,zzzz903	false
91096		zzzz644,zzzz861	false
91095		zzzz644,zzzz903	false
76098		zzzz681,zzzz683	false
68545		zzzz701,zzzz734	false
61323		zzzz722,zzzz880	false
57558		zzzz733,zzzz764	false
57218		zzzz734,zzzz752	false
55547		zzzz739,zzzz868	false
7285		zzzz967,zzzz977	false
417758		zzzz110,zzzz784	false
370854		zzzz163,zzzz485	false
367426		zzzz167,zzzz493	false
135223		zzzz550,zzzz564	false
135222		zzzz550,zzzz574	false
88553		zzzz650,zzzz687	false
88552		zzzz650,zzzz709	false
66701		zzzz706,zzzz859	false
65922		zzzz709,zzzz760	false
58568		zzzz730,zzzz735	false
58567		zzzz730,zzzz762	false
21177		zzzz868,zzzz992	false
433425		zzz1014,zzzz500	false
417757		zzzz110,zzzz754	false
372581		zzzz161,zzzz945	false
371717		zzzz162,zzzz944	false
133166		zzzz554,zzzz558	false
95374		zzzz634,zzzz838	false
91932		zzzz642,zzzz754	false
91931		zzzz642,zzzz762	false
91930		zzzz642,zzzz859	false
91094		zzzz644,zzzzz19	false
90248		zzzz646,zzzz702	false
88551		zzzz650,zzzz730	false
88550		zzzz650,zzzz762	false
75329		zzzz683,zzzz848	false
73773		zzzz687,zzzz735	false
65921		zzzz709,zzzz784	false
62709		zzzz718,zzzz764	false
58566		zzzz730,zzzz739	false
58565		zzzz730,zzzz859	false
57217		zzzz734,zzzz859	false
56890		zzzz735,zzzz868	false
48188		zzzz762,zzzz764	false
417756		zzzz110,zzzz733	false
417755		zzzz110,zzzz756	false
158801		zzzz485,zzzz513	false
146289		zzzz513,zzzz928	false
138034		zzzz544,zzzz895	false
132146		zzzz556,zzzz567	false
115838		zzzz589,zzzz590	false
115837		zzzz589,zzzzz19	false
109259		zzzz603,zzzz649	false
83229		zzzz663,zzzz764	false
68160		zzzz702,zzzz752	false
65920		zzzz709,zzzz754	false
61322		zzzz722,zzzzz19	false
60625		zzzz724,zzzz729	false
60624		zzzz724,zzzz761	false
57557		zzzz733,zzzz746	false
57556		zzzz733,zzzz859	false
57216		zzzz734,zzzz841	false
417754		zzzz110,zzzz761	false
371716		zzzz162,zzzz947	false
366567		zzzz168,zzzz485	false
115358		zzzz590,zzzz816	false
109258		zzzz603,zzzz681	false
105584		zzzz611,zzzz731	false
91093		zzzz644,zzzz715	false
88549		zzzz650,zzzz974	false
82425		zzzz665,zzzz675	false
76869		zzzz679,zzzz974	false
68544		zzzz701,zzzz992	false
62708		zzzz718,zzzz865	false
53252		zzzz746,zzzz756	false
50692		zzzz754,zzzz760	false
48810		zzzz760,zzzz784	false
48187		zzzz762,zzzz784	false
39372		zzzz792,zzzz808	false
26748		zzzz842,zzzz918	false
23242		zzzz858,zzzz859	false
2428		zzzzz40,zzzzz41	false
417753		zzzz110,zzzz739	false
370853		zzzz163,zzzz164	false
370852		zzzz163,zzzz945	false
369141		zzzz165,zzzzz84	false
154704		zzzz493,zzzz513	false
146288		zzzz513,zzzz945	false
141865		zzzz532,zzzz534	false
117279		zzzz586,zzzz681	false
109728		zzzz602,zzzz835	false
104234		zzzz614,zzzz824	false
91929		zzzz642,zzzz764	false
91092		zzzz644,zzzz825	false
90247		zzzz646,zzzz752	false
88548		zzzz650,zzzz729	false
88547		zzzz650,zzzz784	false
84847		zzzz659,zzzz684	false
83228		zzzz663,zzzz679	false
68543		zzzz701,zzzz709	false
68159		zzzz702,zzzz707	false
62707		zzzz718,zzzz752	false
50068		zzzz756,zzzz846	false
48495		zzzz761,zzzz851	false
47576		zzzz764,zzzz768	false
46366		zzzz768,zzzz859	false
25620		zzzz847,zzzzz19	false
21176		zzzz868,zzzz974	false
369140		zzzz165,zzzzz17	false
118733		zzzz583,zzzz589	false
115357		zzzz590,zzzz681	false
109257		zzzz603,zzzz644	false
80425		zzzz670,zzzz729	false
68542		zzzz701,zzzz718	false
68541		zzzz701,zzzz974	false
57555		zzzz733,zzzz752	false
57554		zzzz733,zzzz784	false
47575		zzzz764,zzzz868	false
22609		zzzz861,zzzzz19	false
372580		zzzz161,zzzz167	false
371715		zzzz162,zzzz945	false
140829		zzzz536,zzzz544	false
137809		zzzz545,zzzz553	false
127090		zzzz566,zzzz681	false
109256		zzzz603,zzzz722	false
91523		zzzz643,zzzz684	false
76868		zzzz679,zzzz754	false
76867		zzzz679,zzzz992	false
68540		zzzz701,zzzz723	false
68158		zzzz702,zzzz723	false
66348		zzzz707,zzzz754	false
65919		zzzz709,zzzz992	false
58564		zzzz730,zzzz756	false
53251		zzzz746,zzzz754	false
50067		zzzz756,zzzz992	false
32947		zzzz816,zzzz825	false
26978		zzzz841,zzzz868	false
15682		zzzz902,zzzz974	false
381221		zzzz151,zzzz513	false
376022		zzzz157,zzzz161	false
376021		zzzz157,zzzz513	false
144103		zzzz524,zzzz542	false
91928		zzzz642,zzzz851	false
90246		zzzz646,zzzz761	false
83227		zzzz663,zzzz730	false
73772		zzzz687,zzzz859	false
68157		zzzz702,zzzz760	false
66700		zzzz706,zzzz760	false
66347		zzzz707,zzzz729	false
65918		zzzz709,zzzz841	false
61321		zzzz722,zzzzz66	false
60623		zzzz724,zzzz733	false
58563		zzzz730,zzzz752	false
57215		zzzz734,zzzz992	false
53250		zzzz746,zzzz858	false
417752		zzzz110,zzzz709	false
381220		zzzz151,zzzz947	false
376892		zzzz156,zzzz166	false
371714		zzzz162,zzzz485	false
371713		zzzz162,zzzzz84	false
146287		zzzz513,zzzz929	false
115356		zzzz590,zzzz903	false
106036		zzzz610,zzzz722	false
94938		zzzz635,zzzz992	false
91091		zzzz644,zzzz722	false
83226		zzzz663,zzzz701	false
82026		zzzz666,zzzz737	false
76097		zzzz681,zzzz848	false
68539		zzzz701,zzzz739	false
67079		zzzz705,zzzz846	false
66346		zzzz707,zzzz718	false
56889		zzzz735,zzzz756	false
55546		zzzz739,zzzz784	false
53249		zzzz746,zzzz868	false
50066		zzzz756,zzzz764	false
26747		zzzz842,zzzz992	false
22608		zzzz861,zzzzz66	false
18418		zzzz882,zzzzz66	false
15681		zzzz902,zzzz918	false
417751		zzzz110,zzzz752	false
376020		zzzz157,zzzz165	false
371712		zzzz162,zzzz165	false
371711		zzzz162,zzzz167	false
365704		zzzz169,zzzzz84	false
158800		zzzz485,zzzzz84	false
146286		zzzz513,zzzz944	false
135221		zzzz550,zzzz565	false
115355		zzzz590,zzzz750	false
115354		zzzz590,zzzz871	false
100633		zzzz622,zzzzz61	false
91927		zzzz642,zzzz663	false
91090		zzzz644,zzzz816	false
90245		zzzz646,zzzz859	false
89831		zzzz647,zzzz663	false
83225		zzzz663,zzzz729	false
80424		zzzz670,zzzz701	false
76866		zzzz679,zzzz702	false
68538		zzzz701,zzzz702	false
68156		zzzz702,zzzz859	false
67078		zzzz705,zzzz858	false
60622		zzzz724,zzzz784	false
58562		zzzz730,zzzz760	false
55545		zzzz739,zzzz974	false
51325		zzzz752,zzzz858	false
50691		zzzz754,zzzz859	false
46365		zzzz768,zzzz974	false
26977		zzzz841,zzzz859	false
417750		zzzz110,zzzz730	false
372579		zzzz161,zzzz164	false
368290		zzzz166,zzzzz84	false
151243		zzzz500,zzzz971	false
109727		zzzz602,zzzz644	false
76096		zzzz681,zzzz835	false
73771		zzzz687,zzzz707	false
68537		zzzz701,zzzz705	false
67077		zzzz705,zzzz734	false
65917		zzzz709,zzzz739	false
58900		zzzz729,zzzz755	false
57214		zzzz734,zzzz746	false
46364		zzzz768,zzzz992	false
26976		zzzz841,zzzz858	false
25839		zzzz846,zzzz858	false
417749		zzzz110,zzzz992	false
372578		zzzz161,zzzz944	false
129102		zzzz562,zzzz835	false
115353		zzzz590,zzzz882	false
103329		zzzz616,zzzz737	false
94937		zzzz635,zzzz734	false
91926		zzzz642,zzzz707	false
83224		zzzz663,zzzz846	false
83223		zzzz663,zzzz918	false
73770		zzzz687,zzzz752	false
73769		zzzz687,zzzz784	false
68155		zzzz702,zzzz841	false
67076		zzzz705,zzzz733	false
65916		zzzz709,zzzz724	false
63785		zzzz715,zzzz903	false
62706		zzzz718,zzzz992	false
60974		zzzz723,zzzz858	false
51324		zzzz752,zzzz760	false
46363		zzzz768,zzzz784	false
38263		zzzz796,zzzz808	false
11581		zzzz929,zzzzz71	false
9718		zzzz945,zzzzz71	false
417748		zzzz110,zzzz663	false
372577		zzzz161,zzzz947	false
369139		zzzz165,zzzz490	false
367425		zzzz167,zzzz513	false
151242		zzzz500,zzzz972	false
146285		zzzz513,zzzz947	false
141382		zzzz534,zzzz892	false
94936		zzzz635,zzzz868	false
88546		zzzz650,zzzz735	false
76095		zzzz681,zzzz821	false
76094		zzzz681,zzzz871	false
68536		zzzz701,zzzz733	false
68154		zzzz702,zzzz746	false
62705		zzzz718,zzzz851	false
60621		zzzz724,zzzz739	false
53248		zzzz746,zzzz918	false
418702		zzzz109,zzzz681	false
372576		zzzz161,zzzzz84	false
366566		zzzz168,zzzzz84	false
365703		zzzz169,zzzz493	false
88545		zzzz650,zzzz746	false
84846		zzzz659,zzzz829	false
83222		zzzz663,zzzz868	false
82025		zzzz666,zzzz715	false
66699		zzzz706,zzzz746	false
62704		zzzz718,zzzz760	false
62703		zzzz718,zzzz846	false
62702		zzzz718,zzzz974	false
57553		zzzz733,zzzz992	false
55544		zzzz739,zzzz859	false
55543		zzzz739,zzzz992	false
53247		zzzz746,zzzz859	false
51323		zzzz752,zzzz756	false
50690		zzzz754,zzzz974	false
50065		zzzz756,zzzz784	false
48809		zzzz760,zzzz859	false
48186		zzzz762,zzzz859	false
46362		zzzz768,zzzz841	false
428783		zzz1020,zzzz149	false
377752		zzzz155,zzzz162	false
376019		zzzz157,zzzzz71	false
373450		zzzz160,zzzzz84	false
365702		zzzz169,zzzz929	false
170200		zzzz449,zzzz500	false
156049		zzzz490,zzzz929	false
141381		zzzz534,zzzz544	false
133165		zzzz554,zzzz644	false
131127		zzzz558,zzzzz66	false
127089		zzzz566,zzzzz19	false
90244		zzzz646,zzzz706	false
90243		zzzz646,zzzz729	false
83221		zzzz663,zzzz718	false
83220		zzzz663,zzzz992	false
82024		zzzz666,zzzz903	false
80423		zzzz670,zzzz705	false
73768		zzzz687,zzzz846	false
70401		zzzz696,zzzz975	false
68535		zzzz701,zzzz858	false
67075		zzzz705,zzzz761	false
66345		zzzz707,zzzz858	false
65915		zzzz709,zzzz918	false
60973		zzzz723,zzzz734	false
57904		zzzz732,zzzz735	false
57552		zzzz733,zzzz760	false
57551		zzzz733,zzzz851	false
57550		zzzz733,zzzz918	false
56888		zzzz735,zzzz760	false
55542		zzzz739,zzzz755	false
55541		zzzz739,zzzz918	false
28348		zzzz835,zzzz848	false
25838		zzzz846,zzzz918	false
25837		zzzz846,zzzz992	false
18800		zzzz880,zzzzz25	false
3283		zzzzz25,zzzzz66	false
417747		zzzz110,zzzz851	false
370851		zzzz163,zzzz493	false
370011		zzzz164,zzzz166	false
370010		zzzz164,zzzzz71	false
368289		zzzz166,zzzz945	false
158239		zzzz486,zzzzz71	false
130620		zzzz559,zzzz848	false
125094		zzzz570,zzzz681	false
115352		zzzz590,zzzz821	false
94935		zzzz635,zzzz846	false
91925		zzzz642,zzzz752	false
76865		zzzz679,zzzz709	false
76864		zzzz679,zzzz858	false
67074		zzzz705,zzzz729	false
65914		zzzz709,zzzz974	false
62701		zzzz718,zzzz735	false
60620		zzzz724,zzzz756	false
50689		zzzz754,zzzz992	false
48494		zzzz761,zzzz992	false
418701		zzzz109,zzzz562	false
376891		zzzz156,zzzz169	false
372575		zzzz161,zzzz928	false
370009		zzzz164,zzzz167	false
369138		zzzz165,zzzzz71	false
133164		zzzz554,zzzzz66	false
125093		zzzz570,zzzzz19	false
109255		zzzz603,zzzz683	false
94934		zzzz635,zzzz679	false
94933		zzzz635,zzzz754	false
90242		zzzz646,zzzz733	false
88544		zzzz650,zzzz752	false
83219		zzzz663,zzzz733	false
83218		zzzz663,zzzz754	false
82023		zzzz666,zzzz722	false
80422		zzzz670,zzzz868	false
76863		zzzz679,zzzz734	false
68534		zzzz701,zzzz768	false
68153		zzzz702,zzzz834	false
67073		zzzz705,zzzz974	false
66698		zzzz706,zzzz724	false
66697		zzzz706,zzzz918	false
61320		zzzz722,zzzz871	false
58899		zzzz729,zzzz746	false
57213		zzzz734,zzzz974	false
56219		zzzz737,zzzz903	false
53246		zzzz746,zzzz768	false
50688		zzzz754,zzzz841	false
48493		zzzz761,zzzz859	false
41638		zzzz784,zzzz992	false
15680		zzzz902,zzzz992	false
376890		zzzz156,zzzz162	false
91089		zzzz644,zzzz880	false
83217		zzzz663,zzzz705	false
83216		zzzz663,zzzz761	false
83215		zzzz663,zzzz768	false
76862		zzzz679,zzzz730	false
67072		zzzz705,zzzz718	false
67071		zzzz705,zzzz723	false
61319		zzzz722,zzzz882	false
60972		zzzz723,zzzz918	false
57549		zzzz733,zzzz735	false
57212		zzzz734,zzzz760	false
56887		zzzz735,zzzz784	false
55540		zzzz739,zzzz764	false
53245		zzzz746,zzzz784	false
47574		zzzz764,zzzz841	false
26746		zzzz842,zzzz974	false
417746		zzzz110,zzzz974	false
381219		zzzz151,zzzz945	false
375165		zzzz158,zzzzz71	false
372574		zzzz161,zzzz490	false
371710		zzzz162,zzzz490	false
370008		zzzz164,zzzz168	false
366565		zzzz168,zzzz493	false
133163		zzzz554,zzzz681	false
131126		zzzz558,zzzz589	false
131125		zzzz558,zzzz715	false
130619		zzzz559,zzzzz66	false
117278		zzzz586,zzzz821	false
109254		zzzz603,zzzz825	false
94932		zzzz635,zzzz701	false
94931		zzzz635,zzzz706	false
89830		zzzz647,zzzz702	false
89829		zzzz647,zzzz858	false
76861		zzzz679,zzzz705	false
76093		zzzz681,zzzz882	false
73767		zzzz687,zzzz739	false
67070		zzzz705,zzzz709	false
66696		zzzz706,zzzz723	false
60971		zzzz723,zzzz992	false
60619		zzzz724,zzzz859	false
60618		zzzz724,zzzz918	false
58561		zzzz730,zzzz851	false
56886		zzzz735,zzzz992	false
50064		zzzz756,zzzz974	false
48808		zzzz760,zzzz868	false
46361		zzzz768,zzzz851	false
417745		zzzz110,zzzz735	false
376889		zzzz156,zzzz163	false
376888		zzzz156,zzzz168	false
372573		zzzz161,zzzz513	false
372572		zzzz161,zzzzz71	false
370850		zzzz163,zzzz944	false
365701		zzzz169,zzzz944	false
365700		zzzz169,zzzzz71	false
141380		zzzz534,zzzz536	false
102875		zzzz617,zzzzz64	false
94930		zzzz635,zzzz858	false
88543		zzzz650,zzzz724	false
76092		zzzz681,zzzz836	false
76091		zzzz681,zzzz861	false
73766		zzzz687,zzzz918	false
66695		zzzz706,zzzz735	false
60970		zzzz723,zzzz754	false
60969		zzzz723,zzzz902	false
58898		zzzz729,zzzz862	false
58897		zzzz729,zzzz902	false
57211		zzzz734,zzzz846	false
56885		zzzz735,zzzz754	false
51322		zzzz752,zzzz762	false
47573		zzzz764,zzzz859	false
18417		zzzz882,zzzzz25	false
376018		zzzz157,zzzz485	false
375164		zzzz158,zzzz162	false
370007		zzzz164,zzzz169	false
368288		zzzz166,zzzz929	false
366564		zzzz168,zzzz929	false
366563		zzzz168,zzzzz71	false
131124		zzzz558,zzzz823	false
91924		zzzz642,zzzz992	false
90241		zzzz646,zzzz764	false
88542		zzzz650,zzzz760	false
88541		zzzz650,zzzz859	false
82022		zzzz666,zzzzz66	false
76860		zzzz679,zzzz739	false
76859		zzzz679,zzzz756	false
75714		zzzz682,zzzz689	false
60617		zzzz724,zzzz730	false
60616		zzzz724,zzzz752	false
57903		zzzz732,zzzz859	false
56884		zzzz735,zzzz841	false
56883		zzzz735,zzzz858	false
55539		zzzz739,zzzz846	false
48492		zzzz761,zzzz918	false
41637		zzzz784,zzzz841	false
32946		zzzz816,zzzzz66	false
381218		zzzz151,zzzz166	false
376017		zzzz157,zzzz169	false
370006		zzzz164,zzzz493	false
368287		zzzz166,zzzz493	false
368286		zzzz166,zzzzz71	false
344086		zzzz195,zzzz978	false
158238		zzzz486,zzzz513	false
141379		zzzz534,zzzz895	false
131123		zzzz558,zzzz681	false
131122		zzzz558,zzzz848	false
117277		zzzz586,zzzz644	false
116322		zzzz588,zzzz899	false
103328		zzzz616,zzzz715	false
91923		zzzz642,zzzz846	false
91088		zzzz644,zzzz750	false
91087		zzzz644,zzzz824	false
88540		zzzz650,zzzz663	false
83214		zzzz663,zzzz687	false
70772		zzzz695,zzzz734	false
68533		zzzz701,zzzz868	false
67069		zzzz705,zzzz768	false
66694		zzzz706,zzzz707	false
65913		zzzz709,zzzz846	false
57548		zzzz733,zzzz846	false
56882		zzzz735,zzzz762	false
50063		zzzz756,zzzz859	false
50062		zzzz756,zzzz918	false
48491		zzzz761,zzzz784	false
25836		zzzz846,zzzz851	false
9588		zzzz946,zzzzz71	false
418700		zzzz109,zzzz570	false
417744		zzzz110,zzzz650	false
372571		zzzz161,zzzz486	false
137808		zzzz545,zzzz901	false
131121		zzzz558,zzzz861	false
115836		zzzz589,zzzzz65	false
109726		zzzz602,zzzz836	false
88539		zzzz650,zzzz679	false
76858		zzzz679,zzzz733	false
74948		zzzz684,zzzz960	false
66693		zzzz706,zzzz841	false
66692		zzzz706,zzzz846	false
66344		zzzz707,zzzz764	false
60968		zzzz723,zzzz974	false
53244		zzzz746,zzzz761	false
53243		zzzz746,zzzz846	false
48185		zzzz762,zzzz846	false
47572		zzzz764,zzzz784	false
41636		zzzz784,zzzz918	false
415018		zzzz113,zzzz604	false
381217		zzzz151,zzzz157	false
376016		zzzz157,zzzz168	false
370849		zzzz163,zzzz486	false
369137		zzzz165,zzzz485	false
139192		zzzz541,zzzz892	false
124103		zzzz572,zzzz901	false
115835		zzzz589,zzzz722	false
109725		zzzz602,zzzz848	false
91922		zzzz642,zzzz679	false
91086		zzzz644,zzzz737	false
91085		zzzz644,zzzz847	false
90240		zzzz646,zzzz756	false
88538		zzzz650,zzzz851	false
83213		zzzz663,zzzz709	false
76857		zzzz679,zzzz707	false
76856		zzzz679,zzzz718	false
76855		zzzz679,zzzz768	false
68532		zzzz701,zzzz746	false
68531		zzzz701,zzzz862	false
68152		zzzz702,zzzz862	false
67068		zzzz705,zzzz754	false
65575		zzzz710,zzzz730	false
56881		zzzz735,zzzz764	false
56880		zzzz735,zzzz768	false
51321		zzzz752,zzzz768	false
50061		zzzz756,zzzz902	false
47571		zzzz764,zzzz918	false
47570		zzzz764,zzzz992	false
30729		zzzz825,zzzzz66	false
25835		zzzz846,zzzz974	false
18416		zzzz882,zzzzz34	false
3853		zzzzz17,zzzzz84	false
376015		zzzz157,zzzz490	false
370005		zzzz164,zzzz513	false
368285		zzzz166,zzzz947	false
158799		zzzz485,zzzz947	false
126589		zzzz567,zzzzz62	false
115834		zzzz589,zzzz861	false
91921		zzzz642,zzzz760	false
91920		zzzz642,zzzz918	false
91084		zzzz644,zzzz823	false
90239		zzzz646,zzzz754	false
88537		zzzz650,zzzz723	false
83212		zzzz663,zzzz739	false
83211		zzzz663,zzzz784	false
83210		zzzz663,zzzz862	false
80421		zzzz670,zzzz734	false
76090		zzzz681,zzzz847	false
73765		zzzz687,zzzz705	false
73764		zzzz687,zzzz974	false
73763		zzzz687,zzzz992	false
70771		zzzz695,zzzz718	false
65912		zzzz709,zzzz851	false
62700		zzzz718,zzzz732	false
60615		zzzz724,zzzz762	false
58560		zzzz730,zzzz846	false
57210		zzzz734,zzzz735	false
53242		zzzz746,zzzz841	false
46360		zzzz768,zzzz865	false
31706		zzzz821,zzzz825	false
31705		zzzz821,zzzzz66	false
25619		zzzz847,zzzz861	false
415934		zzzz112,zzzz576	false
375163		zzzz158,zzzz163	false
117276		zzzz586,zzzz861	false
117275		zzzz586,zzzzz19	false
115351		zzzz590,zzzz825	false
109724		zzzz602,zzzz683	false
94929		zzzz635,zzzz739	false
90238		zzzz646,zzzz918	false
83209		zzzz663,zzzz974	false
82021		zzzz666,zzzz880	false
81224		zzzz668,zzzz880	false
81223		zzzz668,zzzz882	false
76854		zzzz679,zzzz862	false
76089		zzzz681,zzzz903	false
73762		zzzz687,zzzz724	false
68530		zzzz701,zzzz841	false
60967		zzzz723,zzzz768	false
57547		zzzz733,zzzz974	false
50687		zzzz754,zzzz755	false
20567		zzzz871,zzzzz25	false
3706		zzzzz19,zzzzz65	false
417743		zzzz110,zzzz746	false
381216		zzzz151,zzzz168	false
376887		zzzz156,zzzz161	false
156048		zzzz490,zzzzz84	false
130618		zzzz559,zzzzz25	false
94928		zzzz635,zzzz902	false
90237		zzzz646,zzzz768	false
90236		zzzz646,zzzz784	false
89828		zzzz647,zzzz729	false
88536		zzzz650,zzzz701	false
83208		zzzz663,zzzz723	false
80420		zzzz670,zzzz846	false
80419		zzzz670,zzzz858	false
80418		zzzz670,zzzz992	false
76853		zzzz679,zzzz746	false
76852		zzzz679,zzzz764	false
73761		zzzz687,zzzz841	false
70770		zzzz695,zzzz706	false
70769		zzzz695,zzzz730	false
68529		zzzz701,zzzz756	false
66691		zzzz706,zzzz992	false
66343		zzzz707,zzzz756	false
66342		zzzz707,zzzz918	false
65911		zzzz709,zzzz732	false
60614		zzzz724,zzzz851	false
58896		zzzz729,zzzz784	false
57209		zzzz734,zzzz755	false
55538		zzzz739,zzzz841	false
50060		zzzz756,zzzz841	false
48807		zzzz760,zzzz992	false
48490		zzzz761,zzzz974	false
25834		zzzz846,zzzz868	false
25401		zzzz848,zzzz861	false
1992		zzzzz53,zzzzz63	false
417742		zzzz110,zzzz701	false
417741		zzzz110,zzzz846	false
381215		zzzz151,zzzzz71	false
370004		zzzz164,zzzz929	false
370003		zzzz164,zzzzz84	false
369136		zzzz165,zzzz947	false
365699		zzzz169,zzzz945	false
132658		zzzz555,zzzz571	false
130617		zzzz559,zzzz836	false
94927		zzzz635,zzzz974	false
91919		zzzz642,zzzz701	false
91918		zzzz642,zzzz723	false
91917		zzzz642,zzzz735	false
91916		zzzz642,zzzz746	false
89827		zzzz647,zzzz992	false
84845		zzzz659,zzzz960	false
73760		zzzz687,zzzz695	false
70768		zzzz695,zzzz754	false
66341		zzzz707,zzzz762	false
66340		zzzz707,zzzz846	false
62699		zzzz718,zzzz723	false
57208		zzzz734,zzzz862	false
53241		zzzz746,zzzz992	false
48806		zzzz760,zzzz761	false
48805		zzzz760,zzzz764	false
48804		zzzz760,zzzz918	false
48803		zzzz760,zzzz974	false
48184		zzzz762,zzzz992	false
41635		zzzz784,zzzz851	false
417740		zzzz110,zzzz679	false
381214		zzzz151,zzzz169	false
381213		zzzz151,zzzzz84	false
375162		zzzz158,zzzz167	false
367424		zzzz167,zzzz944	false
366562		zzzz168,zzzz945	false
144111		zzzz523,zzzz890	false
131120		zzzz558,zzzz836	false
117274		zzzz586,zzzz825	false
109253		zzzz603,zzzzz66	false
91915		zzzz642,zzzz974	false
91083		zzzz644,zzzz666	false
91082		zzzz644,zzzz835	false
90235		zzzz646,zzzz709	false
90234		zzzz646,zzzz846	false
89826		zzzz647,zzzz679	false
83207		zzzz663,zzzz756	false
80417		zzzz670,zzzz679	false
80416		zzzz670,zzzz974	false
76088		zzzz681,zzzz816	false
76087		zzzz681,zzzz819	false
75328		zzzz683,zzzzz19	false
73759		zzzz687,zzzz760	false
73758		zzzz687,zzzz851	false
68528		zzzz701,zzzz707	false
68527		zzzz701,zzzz730	false
68526		zzzz701,zzzz834	false
67067		zzzz705,zzzz862	false
66339		zzzz707,zzzz851	false
65910		zzzz709,zzzz755	false
60966		zzzz723,zzzz733	false
58895		zzzz729,zzzz752	false
56879		zzzz735,zzzz918	false
48802		zzzz760,zzzz841	false
48183		zzzz762,zzzz918	false
47569		zzzz764,zzzz974	false
31704		zzzz821,zzzz882	false
31703		zzzz821,zzzz903	false
26745		zzzz842,zzzz858	false
23241		zzzz858,zzzz862	false
23032		zzzz859,zzzz974	false
22399		zzzz862,zzzz918	false
15511		zzzz903,zzzzz66	false
373449		zzzz160,zzzz945	false
370848		zzzz163,zzzz490	false
367423		zzzz167,zzzz929	false
367422		zzzz167,zzzz945	false
151241		zzzz500,zzzz973	false
144102		zzzz524,zzzz540	false
144101		zzzz524,zzzz893	false
132657		zzzz555,zzzz898	false
130616		zzzz559,zzzz681	false
129101		zzzz562,zzzz681	false
117273		zzzz586,zzzz649	false
104233		zzzz614,zzzz681	false
94926		zzzz635,zzzz756	false
91081		zzzz644,zzzz848	false
91080		zzzz644,zzzz871	false
82020		zzzz666,zzzz882	false
76851		zzzz679,zzzz755	false
76850		zzzz679,zzzz761	false
76086		zzzz681,zzzzz65	false
70767		zzzz695,zzzz702	false
70766		zzzz695,zzzz729	false
56878		zzzz735,zzzz974	false
53240		zzzz746,zzzz762	false
51320		zzzz752,zzzz974	false
48489		zzzz761,zzzz846	false
48182		zzzz762,zzzz974	false
25400		zzzz848,zzzzz19	false
11732		zzzz928,zzzz947	false
417739		zzzz110,zzzz707	false
381212		zzzz151,zzzz163	false
376886		zzzz156,zzzz165	false
376014		zzzz157,zzzz166	false
370847		zzzz163,zzzz946	false
158798		zzzz485,zzzz945	false
156047		zzzz490,zzzz947	false
133162		zzzz554,zzzz590	false
125092		zzzz570,zzzz603	false
120677		zzzz579,zzzz820	false
115350		zzzz590,zzzz737	false
89825		zzzz647,zzzz718	false
83206		zzzz663,zzzz746	false
80415		zzzz670,zzzz723	false
76849		zzzz679,zzzz850	false
76085		zzzz681,zzzz824	false
68525		zzzz701,zzzz752	false
68524		zzzz701,zzzz754	false
67066		zzzz705,zzzz752	false
66690		zzzz706,zzzz755	false
66338		zzzz707,zzzz709	false
60965		zzzz723,zzzz868	false
58894		zzzz729,zzzz841	false
57902		zzzz732,zzzz841	false
51319		zzzz752,zzzz918	false
50686		zzzz754,zzzz902	false
47568		zzzz764,zzzz846	false
46359		zzzz768,zzzz846	false
34238		zzzz811,zzzz812	false
1324		zzzzz73,zzzzz74	false
418699		zzzz109,zzzz835	false
417738		zzzz110,zzzz723	false
417737		zzzz110,zzzz760	false
377751		zzzz155,zzzz168	false
372570		zzzz161,zzzz946	false
369135		zzzz165,zzzz929	false
144145		zzzz519,zzzz522	false
133161		zzzz554,zzzz589	false
131119		zzzz558,zzzz825	false
130615		zzzz559,zzzz715	false
125091		zzzz570,zzzz861	false
120187		zzzz580,zzzz838	false
115349		zzzz590,zzzz600	false
115348		zzzz590,zzzz861	false
90233		zzzz646,zzzz650	false
90232		zzzz646,zzzz735	false
89824		zzzz647,zzzz734	false
88535		zzzz650,zzzz764	false
80414		zzzz670,zzzz702	false
80413		zzzz670,zzzz756	false
76848		zzzz679,zzzz695	false
68523		zzzz701,zzzz761	false
67065		zzzz705,zzzz706	false
66337		zzzz707,zzzz746	false
66336		zzzz707,zzzz752	false
60613		zzzz724,zzzz754	false
60612		zzzz724,zzzz764	false
58893		zzzz729,zzzz732	false
58892		zzzz729,zzzz859	false
58559		zzzz730,zzzz865	false
57901		zzzz732,zzzz754	false
57900		zzzz732,zzzz768	false
57207		zzzz734,zzzz902	false
55537		zzzz739,zzzz746	false
55536		zzzz739,zzzz752	false
55535		zzzz739,zzzz865	false
53239		zzzz746,zzzz865	false
381211		zzzz151,zzzz164	false
377750		zzzz155,zzzzz71	false
371709		zzzz162,zzzz486	false
367421		zzzz167,zzzz485	false
158797		zzzz485,zzzz928	false
133160		zzzz554,zzzz821	false
109723		zzzz602,zzzz666	false
104232		zzzz614,zzzz861	false
91522		zzzz643,zzzz960	false
82424		zzzz665,zzzz707	false
81222		zzzz668,zzzz871	false
76847		zzzz679,zzzz706	false
76084		zzzz681,zzzz825	false
75327		zzzz683,zzzz861	false
70765		zzzz695,zzzz756	false
70764		zzzz695,zzzz764	false
67064		zzzz705,zzzz746	false
65574		zzzz710,zzzz859	false
60964		zzzz723,zzzz762	false
60611		zzzz724,zzzz846	false
55888		zzzz738,zzzz782	false
51318		zzzz752,zzzz761	false
51317		zzzz752,zzzz992	false
23031		zzzz859,zzzz992	false
417736		zzzz110,zzzz918	false
376885		zzzz156,zzzz167	false
376013		zzzz157,zzzz164	false
375161		zzzz158,zzzz161	false
375160		zzzz158,zzzz513	false
371708		zzzz162,zzzz164	false
371707		zzzz162,zzzzz71	false
368284		zzzz166,zzzz928	false
368283		zzzz166,zzzz944	false
367420		zzzz167,zzzz486	false
141864		zzzz532,zzzz541	false
137807		zzzz545,zzzz854	false
130614		zzzz559,zzzz603	false
125090		zzzz570,zzzz683	false
109252		zzzz603,zzzz880	false
104231		zzzz614,zzzz644	false
103327		zzzz616,zzzz681	false
94925		zzzz635,zzzz718	false
90231		zzzz646,zzzz730	false
83205		zzzz663,zzzz902	false
82019		zzzz666,zzzz871	false
80412		zzzz670,zzzz718	false
80411		zzzz670,zzzz733	false
76846		zzzz679,zzzz834	false
76083		zzzz681,zzzz715	false
67063		zzzz705,zzzz842	false
63784		zzzz715,zzzzz66	false
60963		zzzz723,zzzz739	false
60610		zzzz724,zzzz755	false
58558		zzzz730,zzzz992	false
57546		zzzz733,zzzz841	false
57545		zzzz733,zzzz865	false
56877		zzzz735,zzzz761	false
53238		zzzz746,zzzz902	false
53237		zzzz746,zzzz974	false
51316		zzzz752,zzzz846	false
48801		zzzz760,zzzz768	false
47567		zzzz764,zzzz851	false
445464		zzz1001,zzzz988	false
377749		zzzz155,zzzz166	false
377748		zzzz155,zzzz513	false
376012		zzzz157,zzzz167	false
370846		zzzz163,zzzzz71	false
369134		zzzz165,zzzz945	false
142825		zzzz529,zzzz535	false
137806		zzzz545,zzzz900	false
131118		zzzz558,zzzz559	false
131117		zzzz558,zzzz880	false
94924		zzzz635,zzzz670	false
80829		zzzz669,zzzz744	false
78442		zzzz675,zzzz679	false
76845		zzzz679,zzzz851	false
68522		zzzz701,zzzz724	false
68521		zzzz701,zzzz865	false
67062		zzzz705,zzzz762	false
60962		zzzz723,zzzz730	false
60961		zzzz723,zzzz862	false
57899		zzzz732,zzzz733	false
50059		zzzz756,zzzz760	false
45172		zzzz772,zzzz782	false
1679		zzzzz61,zzzzz64	false
417735		zzzz110,zzzz755	false
376884		zzzz156,zzzz159	false
370845		zzzz163,zzzz928	false
370002		zzzz164,zzzz944	false
366561		zzzz168,zzzz944	false
146284		zzzz513,zzzz946	false
129100		zzzz562,zzzz569	false
129099		zzzz562,zzzz589	false
127088		zzzz566,zzzz835	false
118732		zzzz583,zzzz644	false
115833		zzzz589,zzzz903	false
115347		zzzz590,zzzz715	false
109722		zzzz602,zzzz681	false
109251		zzzz603,zzzz848	false
104230		zzzz614,zzzzz66	false
94923		zzzz635,zzzz762	false
91079		zzzz644,zzzz882	false
90230		zzzz646,zzzz705	false
90229		zzzz646,zzzz739	false
90228		zzzz646,zzzz762	false
90227		zzzz646,zzzz851	false
88534		zzzz650,zzzz918	false
76844		zzzz679,zzzz687	false
76843		zzzz679,zzzz762	false
76842		zzzz679,zzzz868	false
70763		zzzz695,zzzz709	false
67061		zzzz705,zzzz764	false
66335		zzzz707,zzzz724	false
61318		zzzz722,zzzz861	false
60609		zzzz724,zzzz992	false
58891		zzzz729,zzzz760	false
57898		zzzz732,zzzz764	false
41634		zzzz784,zzzz974	false
28582		zzzz834,zzzz846	false
445463		zzz1001,zzzzz39	false
429693		zzz1019,zzzz149	false
418698		zzzz109,zzzz569	false
377747		zzzz155,zzzz169	false
372569		zzzz161,zzzz493	false
367419		zzzz167,zzzz946	false
366560		zzzz168,zzzz928	false
365698		zzzz169,zzzz947	false
139191		zzzz541,zzzz544	false
127087		zzzz566,zzzz586	false
127086		zzzz566,zzzzz66	false
109721		zzzz602,zzzz903	false
109250		zzzz603,zzzz821	false
103326		zzzz616,zzzzz66	false
94922		zzzz635,zzzz723	false
90226		zzzz646,zzzz760	false
88983		zzzz649,zzzz848	false
88533		zzzz650,zzzz902	false
83204		zzzz663,zzzz760	false
83203		zzzz663,zzzz841	false
80410		zzzz670,zzzz709	false
75326		zzzz683,zzzz836	false
68520		zzzz701,zzzz764	false
67060		zzzz705,zzzz739	false
66689		zzzz706,zzzz974	false
66334		zzzz707,zzzz723	false
61317		zzzz722,zzzz737	false
58890		zzzz729,zzzz865	false
48488		zzzz761,zzzz842	false
47566		zzzz764,zzzz865	false
22607		zzzz861,zzzzz65	false
18799		zzzz880,zzzzz19	false
9849		zzzz944,zzzzz71	false
418697		zzzz109,zzzz683	false
376883		zzzz156,zzzz164	false
375159		zzzz158,zzzz166	false
374308		zzzz159,zzzz944	false
374307		zzzz159,zzzz945	false
337475		zzzz203,zzzz921	false
130613		zzzz559,zzzz586	false
115832		zzzz589,zzzz602	false
115831		zzzz589,zzzz880	false
115346		zzzz590,zzzz668	false
109249		zzzz603,zzzz614	false
103325		zzzz616,zzzz880	false
94921		zzzz635,zzzz918	false
91078		zzzz644,zzzz683	false
89823		zzzz647,zzzz756	false
88532		zzzz650,zzzz705	false
83202		zzzz663,zzzz707	false
77658		zzzz677,zzzz684	false
75325		zzzz683,zzzz847	false
70762		zzzz695,zzzz739	false
67059		zzzz705,zzzz760	false
65909		zzzz709,zzzz723	false
60608		zzzz724,zzzz746	false
58889		zzzz729,zzzz735	false
58239		zzzz731,zzzz846	false
28118		zzzz836,zzzz903	false
431568		zzz1016,zzzz987	false
381210		zzzz151,zzzz946	false
371706		zzzz162,zzzz493	false
371705		zzzz162,zzzz946	false
365697		zzzz169,zzzz928	false
158796		zzzz485,zzzz929	false
156046		zzzz490,zzzz513	false
156045		zzzz490,zzzz944	false
154703		zzzz493,zzzz928	false
144144		zzzz519,zzzz890	false
142824		zzzz529,zzzz533	false
131116		zzzz558,zzzz737	false
131115		zzzz558,zzzz871	false
131114		zzzz558,zzzz882	false
130612		zzzz559,zzzz649	false
129098		zzzz562,zzzz683	false
127085		zzzz566,zzzz603	false
127084		zzzz566,zzzz644	false
127083		zzzz566,zzzz683	false
126588		zzzz567,zzzz626	false
115830		zzzz589,zzzzz66	false
111588		zzzz598,zzzz722	false
102874		zzzz617,zzzzz61	false
101974		zzzz619,zzzz684	false
91077		zzzz644,zzzzz34	false
90225		zzzz646,zzzz663	false
88531		zzzz650,zzzz846	false
73757		zzzz687,zzzz732	false
68151		zzzz702,zzzz755	false
68150		zzzz702,zzzz902	false
67058		zzzz705,zzzz724	false
60960		zzzz723,zzzz724	false
60959		zzzz723,zzzz851	false
57897		zzzz732,zzzz868	false
48800		zzzz760,zzzz762	false
48799		zzzz760,zzzz902	false
30728		zzzz825,zzzz861	false
28117		zzzz836,zzzz861	false
27656		zzzz838,zzzzz58	false
23240		zzzz858,zzzz902	false
9459		zzzz947,zzzzz71	false
1373		zzzzz71,zzzzz84	false
377746		zzzz155,zzzz161	false
370001		zzzz164,zzzz485	false
91076		zzzz644,zzzz845	false
89822		zzzz647,zzzz695	false
89821		zzzz647,zzzz739	false
83201		zzzz663,zzzz665	false
81626		zzzz667,zzzz702	false
80409		zzzz670,zzzz754	false
80408		zzzz670,zzzz768	false
80407		zzzz670,zzzz918	false
70761		zzzz695,zzzz846	false
66333		zzzz707,zzzz992	false
65573		zzzz710,zzzz735	false
58557		zzzz730,zzzz918	false
57896		zzzz732,zzzz761	false
55534		zzzz739,zzzz902	false
50389		zzzz755,zzzz756	false
26975		zzzz841,zzzz918	false
25399		zzzz848,zzzzz66	false
22606		zzzz861,zzzz903	false
1750		zzzzz59,zzzzz63	false
1347		zzzzz72,zzzzz73	false
445462		zzz1001,zzzz984	false
445461		zzz1001,zzzz998	false
417734		zzzz110,zzzz705	false
367418		zzzz167,zzzzz84	false
366559		zzzz168,zzzz486	false
133159		zzzz554,zzzz880	false
131113		zzzz558,zzzz722	false
127591		zzzz565,zzzz588	false
125592		zzzz569,zzzz570	false
125591		zzzz569,zzzz681	false
125590		zzzz569,zzzz835	false
125089		zzzz570,zzzz589	false
115829		zzzz589,zzzz836	false
109248		zzzz603,zzzz861	false
109247		zzzz603,zzzz882	false
106498		zzzz609,zzzz616	false
94920		zzzz635,zzzz784	false
94919		zzzz635,zzzz834	false
89820		zzzz647,zzzz701	false
89819		zzzz647,zzzz768	false
81221		zzzz668,zzzz903	false
76841		zzzz679,zzzz724	false
73030		zzzz689,zzzz828	false
67057		zzzz705,zzzz730	false
67056		zzzz705,zzzz756	false
67055		zzzz705,zzzz902	false
66332		zzzz707,zzzz784	false
65572		zzzz710,zzzz734	false
62698		zzzz718,zzzz902	false
60958		zzzz723,zzzz756	false
60957		zzzz723,zzzz784	false
58556		zzzz730,zzzz841	false
57895		zzzz732,zzzz918	false
56876		zzzz735,zzzz865	false
56218		zzzz737,zzzzz66	false
50388		zzzz755,zzzz858	false
48487		zzzz761,zzzz841	false
383830		zzzz148,zzzz163	false
377745		zzzz155,zzzz165	false
377744		zzzz155,zzzz167	false
368282		zzzz166,zzzz486	false
129097		zzzz562,zzzz824	false
115828		zzzz589,zzzz816	false
115345		zzzz590,zzzz836	false
115344		zzzz590,zzzzz19	false
94918		zzzz635,zzzz663	false
94917		zzzz635,zzzz709	false
90224		zzzz646,zzzz732	false
89818		zzzz647,zzzz974	false
83200		zzzz663,zzzz724	false
83199		zzzz663,zzzz752	false
82423		zzzz665,zzzz679	false
82422		zzzz665,zzzz846	false
80406		zzzz670,zzzz762	false
78441		zzzz675,zzzz702	false
78440		zzzz675,zzzz858	false
76840		zzzz679,zzzz752	false
60956		zzzz723,zzzz761	false
60607		zzzz724,zzzz760	false
56875		zzzz735,zzzz846	false
56217		zzzz737,zzzz880	false
55533		zzzz739,zzzz760	false
51961		zzzz750,zzzz825	false
48181		zzzz762,zzzz902	false
46358		zzzz768,zzzz862	false
28347		zzzz835,zzzzz19	false
1749		zzzzz59,zzzzz64	false
445460		zzz1001,zzz1009	false
371704		zzzz162,zzzz928	false
367417		zzzz167,zzzzz71	false
337474		zzzz203,zzzz985	false
139190		zzzz541,zzzz895	false
131640		zzzz557,zzzz823	false
125088		zzzz570,zzzz835	false
115827		zzzz589,zzzz821	false
109246		zzzz603,zzzz871	false
103324		zzzz616,zzzz644	false
94916		zzzz635,zzzz768	false
91914		zzzz642,zzzz647	false
91913		zzzz642,zzzz695	false
90223		zzzz646,zzzz701	false
90222		zzzz646,zzzz974	false
89817		zzzz647,zzzz709	false
89816		zzzz647,zzzz918	false
83198		zzzz663,zzzz851	false
80405		zzzz670,zzzz707	false
78439		zzzz675,zzzz733	false
67054		zzzz705,zzzz834	false
66688		zzzz706,zzzz902	false
60955		zzzz723,zzzz746	false
60606		zzzz724,zzzz865	false
51315		zzzz752,zzzz902	false
46357		zzzz768,zzzz902	false
28346		zzzz835,zzzz836	false
28116		zzzz836,zzzz848	false
25398		zzzz848,zzzzz65	false
24751		zzzz851,zzzz868	false
24750		zzzz851,zzzz992	false
445459		zzz1001,zzzz967	false
376882		zzzz156,zzzz485	false
376881		zzzz156,zzzzz71	false
370844		zzzz163,zzzzz17	false
369133		zzzz165,zzzz928	false
368281		zzzz166,zzzzz17	false
158795		zzzz485,zzzzz17	false
133158		zzzz554,zzzz871	false
130611		zzzz559,zzzz722	false
130610		zzzz559,zzzzz19	false
129096		zzzz562,zzzz861	false
125589		zzzz569,zzzz861	false
117272		zzzz586,zzzzz66	false
115826		zzzz589,zzzz715	false
111124		zzzz599,zzzz838	false
107414		zzzz607,zzzzz66	false
104229		zzzz614,zzzz835	false
103323		zzzz616,zzzz666	false
91912		zzzz642,zzzz865	false
91075		zzzz644,zzzz649	false
91074		zzzz644,zzzzz25	false
90221		zzzz646,zzzz687	false
90220		zzzz646,zzzz746	false
88530		zzzz650,zzzz732	false
83197		zzzz663,zzzz762	false
78438		zzzz675,zzzz846	false
78053		zzzz676,zzzz723	false
76839		zzzz679,zzzz732	false
76838		zzzz679,zzzz865	false
76082		zzzz681,zzzz823	false
76081		zzzz681,zzzzz25	false
68519		zzzz701,zzzz706	false
68518		zzzz701,zzzz762	false
67053		zzzz705,zzzz841	false
65571		zzzz710,zzzz754	false
60605		zzzz724,zzzz842	false
60604		zzzz724,zzzz974	false
58888		zzzz729,zzzz850	false
58555		zzzz730,zzzz732	false
58554		zzzz730,zzzz974	false
57894		zzzz732,zzzz746	false
57893		zzzz732,zzzz752	false
57206		zzzz734,zzzz842	false
56874		zzzz735,zzzz739	false
50685		zzzz754,zzzz865	false
50387		zzzz755,zzzz762	false
48798		zzzz760,zzzz846	false
31702		zzzz821,zzzz880	false
26974		zzzz841,zzzz846	false
25833		zzzz846,zzzz862	false
24749		zzzz851,zzzz859	false
24748		zzzz851,zzzz918	false
18415		zzzz882,zzzzz19	false
417733		zzzz110,zzzz865	false
382961		zzzz149,zzzzz17	false
381209		zzzz151,zzzz158	false
366558		zzzz168,zzzz947	false
134195		zzzz552,zzzz731	false
117271		zzzz586,zzzz683	false
102873		zzzz617,zzzzz53	false
100632		zzzz622,zzzz838	false
91911		zzzz642,zzzz755	false
91073		zzzz644,zzzzz65	false
80404		zzzz670,zzzz746	false
76837		zzzz679,zzzz760	false
70760		zzzz695,zzzz761	false
70759		zzzz695,zzzz768	false
68149		zzzz702,zzzz732	false
68148		zzzz702,zzzz842	false
65570		zzzz710,zzzz718	false
65569		zzzz710,zzzz768	false
63783		zzzz715,zzzz821	false
57892		zzzz732,zzzz858	false
22605		zzzz861,zzzz899	false
438800		zzz1008,zzzz977	false
420529		zzzz107,zzzz589	false
417732		zzzz110,zzzz670	false
417731		zzzz110,zzzz732	false
382960		zzzz149,zzzz163	false
377743		zzzz155,zzzz163	false
375158		zzzz158,zzzz169	false
365696		zzzz169,zzzz486	false
144117		zzzz522,zzzz890	false
133157		zzzz554,zzzz848	false
130609		zzzz559,zzzz861	false
129095		zzzz562,zzzzz19	false
115825		zzzz589,zzzz835	false
110191		zzzz601,zzzz632	false
108798		zzzz604,zzzz617	false
107413		zzzz607,zzzz644	false
91910		zzzz642,zzzz732	false
91521		zzzz643,zzzz829	false
90219		zzzz646,zzzz723	false
89815		zzzz647,zzzz846	false
89814		zzzz647,zzzz868	false
83196		zzzz663,zzzz834	false
82421		zzzz665,zzzz702	false
70758		zzzz695,zzzz858	false
70757		zzzz695,zzzz859	false
70756		zzzz695,zzzz992	false
66687		zzzz706,zzzz865	false
65908		zzzz709,zzzz902	false
60603		zzzz724,zzzz735	false
53236		zzzz746,zzzz842	false
50386		zzzz755,zzzz974	false
48180		zzzz762,zzzz841	false
30727		zzzz825,zzzz903	false
30726		zzzz825,zzzzz19	false
26973		zzzz841,zzzz851	false
26972		zzzz841,zzzz865	false
22398		zzzz862,zzzz868	false
21788		zzzz865,zzzz868	false
21175		zzzz868,zzzz902	false
11580		zzzz929,zzzzz17	false
9458		zzzz947,zzzzz17	false
3852		zzzzz17,zzzzz71	false
3705		zzzzz19,zzzzz66	false
381208		zzzz151,zzzz156	false
376011		zzzz157,zzzz159	false
373448		zzzz160,zzzz946	false
158237		zzzz486,zzzz490	false
131112		zzzz558,zzzz586	false
131111		zzzz558,zzzz602	false
118731		zzzz583,zzzz590	false
117270		zzzz586,zzzz848	false
89409		zzzz648,zzzz744	false
86490		zzzz655,zzzz681	false
78437		zzzz675,zzzz754	false
78052		zzzz676,zzzz858	false
77657		zzzz677,zzzz829	false
76836		zzzz679,zzzz841	false
75713		zzzz682,zzzz828	false
70755		zzzz695,zzzz762	false
68517		zzzz701,zzzz760	false
68147		zzzz702,zzzz865	false
65568		zzzz710,zzzz841	false
63782		zzzz715,zzzz722	false
63781		zzzz715,zzzz861	false
60602		zzzz724,zzzz732	false
57544		zzzz733,zzzz902	false
48486		zzzz761,zzzz902	false
25618		zzzz847,zzzz880	false
13245		zzzz918,zzzz990	false
6219		zzzz977,zzzz980	false
442601		zzz1004,zzzz977	false
418696		zzzz109,zzzz566	false
418695		zzzz109,zzzz589	false
381207		zzzz151,zzzz929	false
374306		zzzz159,zzzz929	false
370000		zzzz164,zzzz945	false
133156		zzzz554,zzzz861	false
133155		zzzz554,zzzzz19	false
115824		zzzz589,zzzz871	false
91909		zzzz642,zzzz675	false
91908		zzzz642,zzzz902	false
88982		zzzz649,zzzz681	false
83195		zzzz663,zzzz859	false
80403		zzzz670,zzzz706	false
73756		zzzz687,zzzz723	false
73755		zzzz687,zzzz865	false
70754		zzzz695,zzzz733	false
70753		zzzz695,zzzz735	false
70752		zzzz695,zzzz746	false
68516		zzzz701,zzzz851	false
67052		zzzz705,zzzz784	false
65907		zzzz709,zzzz865	false
61316		zzzz722,zzzz903	false
55532		zzzz739,zzzz862	false
50385		zzzz755,zzzz851	false
32945		zzzz816,zzzz861	false
22397		zzzz862,zzzz974	false
423265		zzzz104,zzzzz73	false
381206		zzzz151,zzzz167	false
376010		zzzz157,zzzzz17	false
374305		zzzz159,zzzz486	false
374304		zzzz159,zzzz947	false
369999		zzzz164,zzzz486	false
367416		zzzz167,zzzz947	false
365695		zzzz169,zzzzz17	false
146283		zzzz513,zzzzz17	false
130608		zzzz559,zzzz590	false
115343		zzzz590,zzzz835	false
104228		zzzz614,zzzz649	false
103322		zzzz616,zzzz848	false
102425		zzzz618,zzzz634	false
100631		zzzz622,zzzzz53	false
90218		zzzz646,zzzz755	false
89813		zzzz647,zzzz902	false
88981		zzzz649,zzzz683	false
78436		zzzz675,zzzz868	false
76835		zzzz679,zzzz735	false
75324		zzzz683,zzzzz66	false
70751		zzzz695,zzzz723	false
70750		zzzz695,zzzz918	false
67051		zzzz705,zzzz859	false
66686		zzzz706,zzzz710	false
63780		zzzz715,zzzz871	false
62697		zzzz718,zzzz862	false
62023		zzzz720,zzzz780	false
60954		zzzz723,zzzz760	false
57891		zzzz732,zzzz762	false
56216		zzzz737,zzzz882	false
50384		zzzz755,zzzz841	false
50383		zzzz755,zzzz918	false
48485		zzzz761,zzzz865	false
31701		zzzz821,zzzzz19	false
30971		zzzz824,zzzz861	false
28581		zzzz834,zzzz992	false
26066		zzzz845,zzzzz19	false
1714		zzzzz60,zzzzz64	false
1047		zzzzz98,zzzzz99	false
425109		zzzz102,zzzz103	false
418694		zzzz109,zzzz861	false
154702		zzzz493,zzzzz71	false
131110		zzzz558,zzzzz25	false
115342		zzzz590,zzzz597	false
115341		zzzz590,zzzzz25	false
110654		zzzz600,zzzz666	false
106035		zzzz610,zzzz681	false
104227		zzzz614,zzzz683	false
84844		zzzz659,zzzz677	false
[truncated: 443,386 more rows]
