# Supplementary material for: Discovery of several thousand highly diverse circular DNA viruses
Source: eLife journal article supplement (doi:10.7554/elife.51971), 2020-02-03
Supplement: fig2-figsupp1-data3 [file elife-51971-fig2-figsupp1-data3-v1.cys › CytoscapeSession-2019_08_05-17_08/tables/36-all_my_seqs_genbank_ssDNA1_domains_micro_MCP_fasta+Full+Network/LOCAL_ATTRS-org.cytoscape.model.CyNode-36+default+node.cytable]

CyCSV-Version	1
SUID	name	selected
java.lang.Long	java.lang.String	java.lang.Boolean
36 default node
1046	zzz1000	false
1045	zzz1001	false
1044	zzz1002	false
1043	zzz1003	false
1042	zzz1004	false
1041	zzz1005	false
1040	zzz1006	false
1039	zzz1007	false
1038	zzz1008	false
1037	zzz1009	false
1036	zzz1010	false
1035	zzz1011	false
1034	zzz1012	false
1033	zzz1013	false
1032	zzz1014	false
1031	zzz1015	false
1030	zzz1016	false
1029	zzz1017	false
1028	zzz1019	false
1027	zzz1020	false
1026	zzz1021	false
1025	zzzz100	false
1024	zzzz101	false
1023	zzzz102	false
1022	zzzz103	false
1021	zzzz104	false
1020	zzzz105	false
1019	zzzz106	false
1018	zzzz107	false
1017	zzzz108	false
1016	zzzz109	false
1015	zzzz110	false
1014	zzzz111	false
1013	zzzz112	false
1012	zzzz113	false
1011	zzzz114	false
1010	zzzz115	false
1009	zzzz116	false
1008	zzzz117	false
1007	zzzz118	false
1006	zzzz119	false
1005	zzzz120	false
1004	zzzz121	false
1003	zzzz122	false
1002	zzzz123	false
1001	zzzz124	false
1000	zzzz125	false
999	zzzz126	false
998	zzzz127	false
997	zzzz128	false
996	zzzz129	false
995	zzzz130	false
994	zzzz131	false
993	zzzz132	false
992	zzzz133	false
991	zzzz134	false
990	zzzz135	false
989	zzzz136	false
988	zzzz137	false
987	zzzz138	false
986	zzzz139	false
985	zzzz140	false
984	zzzz141	false
983	zzzz142	false
982	zzzz143	false
981	zzzz144	false
980	zzzz145	false
979	zzzz146	false
978	zzzz147	false
977	zzzz148	false
976	zzzz149	false
975	zzzz150	false
974	zzzz151	false
973	zzzz152	false
972	zzzz153	false
971	zzzz154	false
970	zzzz155	false
969	zzzz156	false
968	zzzz157	false
967	zzzz158	false
966	zzzz159	false
965	zzzz160	false
964	zzzz161	false
963	zzzz162	false
962	zzzz163	false
961	zzzz164	false
960	zzzz165	false
959	zzzz166	false
958	zzzz167	false
957	zzzz168	false
956	zzzz169	false
955	zzzz170	false
954	zzzz171	false
953	zzzz172	false
952	zzzz173	false
951	zzzz174	false
950	zzzz175	false
949	zzzz176	false
948	zzzz177	false
947	zzzz178	false
946	zzzz179	false
945	zzzz180	false
944	zzzz181	false
943	zzzz182	false
942	zzzz183	false
941	zzzz184	false
940	zzzz185	false
939	zzzz186	false
938	zzzz187	false
937	zzzz188	false
936	zzzz189	false
935	zzzz190	false
934	zzzz191	false
933	zzzz192	false
932	zzzz193	false
931	zzzz194	false
930	zzzz195	false
929	zzzz196	false
928	zzzz197	false
927	zzzz198	false
926	zzzz199	false
925	zzzz200	false
924	zzzz201	false
923	zzzz202	false
922	zzzz203	false
921	zzzz204	false
920	zzzz205	false
919	zzzz206	false
918	zzzz207	false
917	zzzz208	false
916	zzzz209	false
915	zzzz210	false
914	zzzz211	false
913	zzzz212	false
912	zzzz213	false
911	zzzz214	false
910	zzzz215	false
909	zzzz216	false
908	zzzz217	false
907	zzzz218	false
906	zzzz219	false
905	zzzz220	false
904	zzzz221	false
903	zzzz222	false
902	zzzz223	false
901	zzzz224	false
900	zzzz225	false
899	zzzz226	false
898	zzzz227	false
897	zzzz228	false
896	zzzz229	false
895	zzzz230	false
894	zzzz231	false
893	zzzz232	false
892	zzzz233	false
891	zzzz234	false
890	zzzz235	false
889	zzzz236	false
888	zzzz237	false
887	zzzz238	false
886	zzzz239	false
885	zzzz240	false
884	zzzz241	false
883	zzzz242	false
882	zzzz243	false
881	zzzz244	false
880	zzzz245	false
879	zzzz246	false
878	zzzz247	false
877	zzzz248	false
876	zzzz249	false
875	zzzz250	false
874	zzzz251	false
873	zzzz252	false
872	zzzz253	false
871	zzzz254	false
870	zzzz255	false
869	zzzz256	false
868	zzzz257	false
867	zzzz258	false
866	zzzz259	false
865	zzzz260	false
864	zzzz261	false
863	zzzz262	false
862	zzzz263	false
861	zzzz264	false
860	zzzz265	false
859	zzzz266	false
858	zzzz267	false
857	zzzz268	false
856	zzzz269	false
855	zzzz270	false
854	zzzz271	false
853	zzzz272	false
852	zzzz273	false
851	zzzz274	false
850	zzzz275	false
849	zzzz276	false
848	zzzz277	false
847	zzzz278	false
846	zzzz279	false
845	zzzz280	false
844	zzzz281	false
843	zzzz282	false
842	zzzz283	false
841	zzzz284	false
840	zzzz285	false
839	zzzz286	false
838	zzzz287	false
837	zzzz288	false
836	zzzz289	false
835	zzzz290	false
834	zzzz291	false
833	zzzz292	false
832	zzzz293	false
831	zzzz294	false
830	zzzz295	false
829	zzzz296	false
828	zzzz297	false
827	zzzz298	false
826	zzzz299	false
825	zzzz300	false
824	zzzz301	false
823	zzzz302	false
822	zzzz303	false
821	zzzz304	false
820	zzzz305	false
819	zzzz306	false
818	zzzz307	false
817	zzzz308	false
816	zzzz309	false
815	zzzz310	false
814	zzzz311	false
813	zzzz312	false
812	zzzz313	false
811	zzzz314	false
810	zzzz315	false
809	zzzz316	false
808	zzzz317	false
807	zzzz318	false
806	zzzz319	false
805	zzzz320	false
804	zzzz321	false
803	zzzz322	false
802	zzzz323	false
801	zzzz324	false
800	zzzz325	false
799	zzzz326	false
798	zzzz327	false
797	zzzz328	false
796	zzzz329	false
795	zzzz330	false
794	zzzz331	false
793	zzzz332	false
792	zzzz333	false
791	zzzz334	false
790	zzzz335	false
789	zzzz336	false
788	zzzz337	false
787	zzzz338	false
786	zzzz339	false
785	zzzz340	false
784	zzzz341	false
783	zzzz342	false
782	zzzz343	false
781	zzzz344	false
780	zzzz345	false
779	zzzz346	false
778	zzzz347	false
777	zzzz348	false
776	zzzz349	false
775	zzzz350	false
774	zzzz351	false
773	zzzz352	false
772	zzzz353	false
771	zzzz354	false
770	zzzz355	false
769	zzzz356	false
768	zzzz357	false
767	zzzz358	false
766	zzzz359	false
765	zzzz360	false
764	zzzz361	false
763	zzzz362	false
762	zzzz363	false
761	zzzz364	false
760	zzzz365	false
759	zzzz366	false
758	zzzz367	false
757	zzzz368	false
756	zzzz369	false
755	zzzz370	false
754	zzzz371	false
753	zzzz372	false
752	zzzz373	false
751	zzzz374	false
750	zzzz375	false
749	zzzz376	false
748	zzzz377	false
747	zzzz378	false
746	zzzz379	false
745	zzzz380	false
744	zzzz381	false
743	zzzz382	false
742	zzzz383	false
741	zzzz384	false
740	zzzz385	false
739	zzzz386	false
738	zzzz387	false
737	zzzz388	false
736	zzzz389	false
735	zzzz390	false
734	zzzz391	false
733	zzzz392	false
732	zzzz393	false
731	zzzz394	false
730	zzzz395	false
729	zzzz396	false
728	zzzz397	false
727	zzzz398	false
726	zzzz399	false
725	zzzz400	false
724	zzzz401	false
723	zzzz402	false
722	zzzz403	false
721	zzzz404	false
720	zzzz405	false
719	zzzz406	false
718	zzzz407	false
717	zzzz408	false
716	zzzz409	false
715	zzzz410	false
714	zzzz411	false
713	zzzz412	false
712	zzzz413	false
711	zzzz414	false
710	zzzz415	false
709	zzzz416	false
708	zzzz417	false
707	zzzz418	false
706	zzzz419	false
705	zzzz420	false
704	zzzz421	false
703	zzzz422	false
702	zzzz423	false
701	zzzz424	false
700	zzzz425	false
699	zzzz426	false
698	zzzz427	false
697	zzzz428	false
696	zzzz429	false
695	zzzz430	false
694	zzzz431	false
693	zzzz432	false
692	zzzz433	false
691	zzzz434	false
690	zzzz435	false
689	zzzz436	false
688	zzzz437	false
687	zzzz438	false
686	zzzz439	false
685	zzzz440	false
684	zzzz441	false
683	zzzz442	false
682	zzzz443	false
681	zzzz444	false
680	zzzz447	false
679	zzzz448	false
678	zzzz449	false
677	zzzz463	false
676	zzzz464	false
675	zzzz465	false
674	zzzz466	false
673	zzzz467	false
672	zzzz468	false
671	zzzz469	false
670	zzzz470	false
669	zzzz471	false
668	zzzz472	false
667	zzzz473	false
666	zzzz474	false
665	zzzz475	false
664	zzzz476	false
663	zzzz477	false
662	zzzz478	false
661	zzzz479	false
660	zzzz480	false
659	zzzz481	false
658	zzzz482	false
657	zzzz483	false
656	zzzz484	false
655	zzzz485	false
654	zzzz486	false
653	zzzz487	false
652	zzzz488	false
651	zzzz489	false
650	zzzz490	false
649	zzzz491	false
648	zzzz492	false
647	zzzz493	false
646	zzzz494	false
645	zzzz495	false
644	zzzz496	false
643	zzzz497	false
642	zzzz498	false
641	zzzz499	false
640	zzzz500	false
639	zzzz501	false
638	zzzz502	false
637	zzzz503	false
636	zzzz505	false
635	zzzz506	false
634	zzzz507	false
633	zzzz508	false
632	zzzz509	false
631	zzzz510	false
630	zzzz511	false
629	zzzz512	false
628	zzzz513	false
627	zzzz514	false
626	zzzz515	false
625	zzzz516	false
624	zzzz517	false
623	zzzz518	false
622	zzzz519	false
621	zzzz520	false
620	zzzz521	false
619	zzzz522	false
618	zzzz523	false
617	zzzz524	false
616	zzzz525	false
615	zzzz526	false
614	zzzz527	false
613	zzzz528	false
612	zzzz529	false
611	zzzz530	false
610	zzzz531	false
609	zzzz532	false
608	zzzz533	false
607	zzzz534	false
606	zzzz535	false
605	zzzz536	false
604	zzzz537	false
603	zzzz538	false
602	zzzz539	false
601	zzzz540	false
600	zzzz541	false
599	zzzz542	false
598	zzzz543	false
597	zzzz544	false
596	zzzz545	false
595	zzzz546	false
594	zzzz547	false
593	zzzz548	false
592	zzzz549	false
591	zzzz550	false
590	zzzz551	false
589	zzzz552	false
588	zzzz553	false
587	zzzz554	false
586	zzzz555	false
585	zzzz556	false
584	zzzz557	false
583	zzzz558	false
582	zzzz559	false
581	zzzz560	false
580	zzzz561	false
579	zzzz562	false
578	zzzz563	false
577	zzzz564	false
576	zzzz565	false
575	zzzz566	false
574	zzzz567	false
573	zzzz568	false
572	zzzz569	false
571	zzzz570	false
570	zzzz571	false
569	zzzz572	false
568	zzzz573	false
567	zzzz574	false
566	zzzz575	false
565	zzzz576	false
564	zzzz577	false
563	zzzz578	false
562	zzzz579	false
561	zzzz580	false
560	zzzz581	false
559	zzzz582	false
558	zzzz583	false
557	zzzz584	false
556	zzzz585	false
555	zzzz586	false
554	zzzz587	false
553	zzzz588	false
552	zzzz589	false
551	zzzz590	false
550	zzzz591	false
549	zzzz592	false
548	zzzz593	false
547	zzzz594	false
546	zzzz595	false
545	zzzz596	false
544	zzzz597	false
543	zzzz598	false
542	zzzz599	false
541	zzzz600	false
540	zzzz601	false
539	zzzz602	false
538	zzzz603	false
537	zzzz604	false
536	zzzz605	false
535	zzzz606	false
534	zzzz607	false
533	zzzz608	false
532	zzzz609	false
531	zzzz610	false
530	zzzz611	false
529	zzzz612	false
528	zzzz613	false
527	zzzz614	false
526	zzzz615	false
525	zzzz616	false
524	zzzz617	false
523	zzzz618	false
522	zzzz619	false
521	zzzz620	false
520	zzzz621	false
519	zzzz622	false
518	zzzz623	false
517	zzzz624	false
516	zzzz625	false
515	zzzz626	false
514	zzzz627	false
513	zzzz628	false
512	zzzz629	false
511	zzzz630	false
510	zzzz631	false
509	zzzz632	false
508	zzzz633	false
507	zzzz634	false
506	zzzz635	false
505	zzzz636	false
504	zzzz637	false
503	zzzz638	false
502	zzzz639	false
501	zzzz640	false
500	zzzz641	false
499	zzzz642	false
498	zzzz643	false
497	zzzz644	false
496	zzzz645	false
495	zzzz646	false
494	zzzz647	false
493	zzzz648	false
492	zzzz649	false
491	zzzz650	false
490	zzzz651	false
489	zzzz652	false
488	zzzz653	false
487	zzzz654	false
486	zzzz655	false
485	zzzz656	false
484	zzzz657	false
483	zzzz658	false
482	zzzz659	false
481	zzzz660	false
480	zzzz661	false
479	zzzz662	false
478	zzzz663	false
477	zzzz664	false
476	zzzz665	false
475	zzzz666	false
474	zzzz667	false
473	zzzz668	false
472	zzzz669	false
471	zzzz670	false
470	zzzz671	false
469	zzzz672	false
468	zzzz673	false
467	zzzz674	false
466	zzzz675	false
465	zzzz676	false
464	zzzz677	false
463	zzzz678	false
462	zzzz679	false
461	zzzz680	false
460	zzzz681	false
459	zzzz682	false
458	zzzz683	false
457	zzzz684	false
456	zzzz685	false
455	zzzz686	false
454	zzzz687	false
453	zzzz688	false
452	zzzz689	false
451	zzzz690	false
450	zzzz691	false
449	zzzz692	false
448	zzzz693	false
447	zzzz694	false
446	zzzz695	false
445	zzzz696	false
444	zzzz697	false
443	zzzz698	false
442	zzzz699	false
441	zzzz700	false
440	zzzz701	false
439	zzzz702	false
438	zzzz703	false
437	zzzz704	false
436	zzzz705	false
435	zzzz706	false
434	zzzz707	false
433	zzzz708	false
432	zzzz709	false
431	zzzz710	false
430	zzzz711	false
429	zzzz712	false
428	zzzz713	false
427	zzzz714	false
426	zzzz715	false
425	zzzz716	false
424	zzzz717	false
423	zzzz718	false
422	zzzz719	false
421	zzzz720	false
420	zzzz721	false
419	zzzz722	false
418	zzzz723	false
417	zzzz724	false
416	zzzz725	false
415	zzzz726	false
414	zzzz727	false
413	zzzz728	false
412	zzzz729	false
411	zzzz730	false
410	zzzz731	false
409	zzzz732	false
408	zzzz733	false
407	zzzz734	false
406	zzzz735	false
405	zzzz736	false
404	zzzz737	false
403	zzzz738	false
402	zzzz739	false
401	zzzz740	false
400	zzzz741	false
399	zzzz742	false
398	zzzz743	false
397	zzzz744	false
396	zzzz745	false
395	zzzz746	false
394	zzzz747	false
393	zzzz748	false
392	zzzz749	false
391	zzzz750	false
390	zzzz751	false
389	zzzz752	false
388	zzzz753	false
387	zzzz754	false
386	zzzz755	false
385	zzzz756	false
384	zzzz757	false
383	zzzz758	false
382	zzzz759	false
381	zzzz760	false
380	zzzz761	false
379	zzzz762	false
378	zzzz763	false
377	zzzz764	false
376	zzzz765	false
375	zzzz766	false
374	zzzz767	false
373	zzzz768	false
372	zzzz769	false
371	zzzz770	false
370	zzzz771	false
369	zzzz772	false
368	zzzz773	false
367	zzzz774	false
366	zzzz775	false
365	zzzz776	false
364	zzzz777	false
363	zzzz778	false
362	zzzz779	false
361	zzzz780	false
360	zzzz781	false
359	zzzz782	false
358	zzzz783	false
357	zzzz784	false
356	zzzz785	false
355	zzzz786	false
354	zzzz787	false
353	zzzz788	false
352	zzzz789	false
351	zzzz790	false
350	zzzz791	false
349	zzzz792	false
348	zzzz793	false
347	zzzz794	false
346	zzzz795	false
345	zzzz796	false
344	zzzz797	false
343	zzzz798	false
342	zzzz799	false
341	zzzz800	false
340	zzzz801	false
339	zzzz802	false
338	zzzz803	false
337	zzzz804	false
336	zzzz805	false
335	zzzz806	false
334	zzzz807	false
333	zzzz808	false
332	zzzz809	false
331	zzzz810	false
330	zzzz811	false
329	zzzz812	false
328	zzzz813	false
327	zzzz814	false
326	zzzz815	false
325	zzzz816	false
324	zzzz817	false
323	zzzz818	false
322	zzzz819	false
321	zzzz820	false
320	zzzz821	false
319	zzzz822	false
318	zzzz823	false
317	zzzz824	false
316	zzzz825	false
315	zzzz826	false
314	zzzz827	false
313	zzzz828	false
312	zzzz829	false
311	zzzz830	false
310	zzzz831	false
309	zzzz832	false
308	zzzz833	false
307	zzzz834	false
306	zzzz835	false
305	zzzz836	false
304	zzzz837	false
303	zzzz838	false
302	zzzz839	false
301	zzzz840	false
300	zzzz841	false
299	zzzz842	false
298	zzzz843	false
297	zzzz844	false
296	zzzz845	false
295	zzzz846	false
294	zzzz847	false
293	zzzz848	false
292	zzzz849	false
291	zzzz850	false
290	zzzz851	false
289	zzzz852	false
288	zzzz853	false
287	zzzz854	false
286	zzzz855	false
285	zzzz856	false
284	zzzz857	false
283	zzzz858	false
282	zzzz859	false
281	zzzz860	false
280	zzzz861	false
279	zzzz862	false
278	zzzz863	false
277	zzzz864	false
276	zzzz865	false
275	zzzz866	false
274	zzzz867	false
273	zzzz868	false
272	zzzz869	false
271	zzzz870	false
270	zzzz871	false
269	zzzz872	false
268	zzzz873	false
267	zzzz874	false
266	zzzz875	false
265	zzzz876	false
264	zzzz877	false
263	zzzz878	false
262	zzzz879	false
261	zzzz880	false
260	zzzz881	false
259	zzzz882	false
258	zzzz883	false
257	zzzz884	false
256	zzzz885	false
255	zzzz886	false
254	zzzz887	false
253	zzzz888	false
252	zzzz889	false
251	zzzz890	false
250	zzzz891	false
249	zzzz892	false
248	zzzz893	false
247	zzzz894	false
246	zzzz895	false
245	zzzz896	false
244	zzzz897	false
243	zzzz898	false
242	zzzz899	false
241	zzzz900	false
240	zzzz901	false
239	zzzz902	false
238	zzzz903	false
237	zzzz904	false
236	zzzz905	false
235	zzzz906	false
234	zzzz907	false
233	zzzz908	false
232	zzzz909	false
231	zzzz910	false
230	zzzz911	false
229	zzzz912	false
228	zzzz913	false
227	zzzz914	false
226	zzzz915	false
225	zzzz916	false
224	zzzz917	false
223	zzzz918	false
222	zzzz919	false
221	zzzz920	false
220	zzzz921	false
219	zzzz922	false
218	zzzz923	false
217	zzzz924	false
216	zzzz925	false
215	zzzz926	false
214	zzzz927	false
213	zzzz928	false
212	zzzz929	false
211	zzzz930	false
210	zzzz931	false
209	zzzz932	false
208	zzzz933	false
207	zzzz934	false
206	zzzz935	false
205	zzzz936	false
204	zzzz937	false
203	zzzz938	false
202	zzzz939	false
201	zzzz940	false
200	zzzz941	false
199	zzzz942	false
198	zzzz943	false
197	zzzz944	false
196	zzzz945	false
195	zzzz946	false
194	zzzz947	false
193	zzzz948	false
192	zzzz949	false
191	zzzz950	false
190	zzzz951	false
189	zzzz952	false
188	zzzz953	false
187	zzzz954	false
186	zzzz955	false
185	zzzz956	false
184	zzzz957	false
183	zzzz958	false
182	zzzz959	false
181	zzzz960	false
180	zzzz961	false
179	zzzz962	false
178	zzzz963	false
177	zzzz964	false
176	zzzz965	false
175	zzzz967	false
174	zzzz968	false
173	zzzz969	false
172	zzzz970	false
171	zzzz971	false
170	zzzz972	false
169	zzzz973	false
168	zzzz974	false
167	zzzz975	false
166	zzzz976	false
165	zzzz977	false
164	zzzz978	false
163	zzzz979	false
162	zzzz980	false
161	zzzz981	false
160	zzzz982	false
159	zzzz983	false
158	zzzz984	false
157	zzzz985	false
156	zzzz986	false
155	zzzz987	false
154	zzzz988	false
153	zzzz989	false
152	zzzz990	false
151	zzzz991	false
150	zzzz992	false
149	zzzz993	false
148	zzzz994	false
147	zzzz995	false
146	zzzz996	false
145	zzzz997	false
144	zzzz998	false
143	zzzz999	false
142	zzzzz12	false
141	zzzzz13	false
140	zzzzz14	false
139	zzzzz15	false
138	zzzzz17	false
137	zzzzz18	false
136	zzzzz19	false
135	zzzzz20	false
134	zzzzz21	false
133	zzzzz22	false
132	zzzzz23	false
131	zzzzz24	false
130	zzzzz25	false
129	zzzzz26	false
128	zzzzz27	false
127	zzzzz28	false
126	zzzzz29	false
125	zzzzz30	false
124	zzzzz31	false
123	zzzzz32	false
122	zzzzz33	false
121	zzzzz34	false
120	zzzzz35	false
119	zzzzz36	false
118	zzzzz37	false
117	zzzzz38	false
116	zzzzz39	false
115	zzzzz40	false
114	zzzzz41	false
113	zzzzz42	false
112	zzzzz47	false
111	zzzzz48	false
110	zzzzz49	false
109	zzzzz50	false
108	zzzzz51	false
107	zzzzz52	false
106	zzzzz53	false
105	zzzzz54	false
104	zzzzz55	false
103	zzzzz56	false
102	zzzzz57	false
101	zzzzz58	false
100	zzzzz59	false
99	zzzzz60	false
98	zzzzz61	false
97	zzzzz62	false
96	zzzzz63	false
95	zzzzz64	false
94	zzzzz65	false
93	zzzzz66	false
92	zzzzz67	false
91	zzzzz68	false
90	zzzzz69	false
89	zzzzz70	false
88	zzzzz71	false
87	zzzzz72	false
86	zzzzz73	false
85	zzzzz74	false
84	zzzzz75	false
83	zzzzz76	false
82	zzzzz77	false
81	zzzzz78	false
80	zzzzz79	false
79	zzzzz80	false
78	zzzzz81	false
77	zzzzz82	false
76	zzzzz83	false
75	zzzzz84	false
74	zzzzz85	false
73	zzzzz88	false
72	zzzzz89	false
71	zzzzz90	false
70	zzzzz91	false
69	zzzzz92	false
68	zzzzz93	false
67	zzzzz94	false
66	zzzzz95	false
65	zzzzz96	false
64	zzzzz97	false
63	zzzzz98	false
62	zzzzz99	false
