# Supplementary material for: Discovery of several thousand highly diverse circular DNA viruses
Source: eLife journal article supplement (doi:10.7554/elife.51971), 2020-02-03
Supplement: fig2-figsupp1-data3 [file elife-51971-fig2-figsupp1-data3-v1.cys › CytoscapeSession-2019_08_05-17_08/tables/36-all_my_seqs_genbank_ssDNA1_domains_micro_MCP_fasta+Full+Network/SHARED_ATTRS-org.cytoscape.model.CyEdge-36+shared+edge.cytable]

CyCSV-Version	1
SUID	%id	alignment_len	alignment_score	shared interaction	shared name
java.lang.Long	java.lang.Double	java.lang.Integer	java.lang.Double	java.lang.String	java.lang.String
	mutable	mutable	mutable
36 shared edge
161251	98.02	707	428.0		zzzz480,zzzz943
138874	82.28	666	339.0		zzzz542,zzzz893
142274	74.3	712	331.0		zzzz531,zzzz539
139193	75.39	699	328.0		zzzz541,zzzz897
392608	94.08	557	327.0		zzzz138,zzzz139
8215	90.15	589	325.0		zzzz957,zzzz959
376032	94.27	558	322.0		zzzz157,zzzz929
1348	88.56	577	316.0		zzzzz72,zzzzz74
3928	94.4	554	313.0		zzzzz15,zzzzz47
423268	89.21	556	313.0		zzzz104,zzzz106
421436	89.59	557	310.0		zzzz106,zzzzz72
366569	91.17	555	310.0		zzzz168,zzzz169
423267	88.15	557	309.0		zzzz104,zzzzz72
423266	88.01	559	305.0		zzzz104,zzzzz74
401507	87.9	562	305.0		zzzz128,zzzzz79
421435	87.84	559	304.0		zzzz106,zzzzz74
368295	88.55	559	301.0		zzzz166,zzzz169
1279	89.03	547	299.0		zzzzz75,zzzzz80
404198	86.96	560	299.0		zzzz125,zzzz483
368294	87.7	569	298.0		zzzz166,zzzz168
437863	88.01	559	298.0		zzz1009,zzzz984
5537	90.54	539	297.0		zzzz984,zzzz988
9721	86.51	571	295.0		zzzz945,zzzz946
437862	87.39	563	294.0		zzz1009,zzzz998
43691	96.84	506	294.0		zzzz777,zzzz878
5536	89.96	538	294.0		zzzz984,zzzzz39
5535	88.81	545	292.0		zzzz984,zzzz989
5167	89.11	542	292.0		zzzz988,zzzz989
437861	87.3	559	292.0		zzz1009,zzzz988
5534	87.48	551	292.0		zzzz984,zzzz998
158245	84.15	568	291.0		zzzz486,zzzz945
5166	87.84	551	291.0		zzzz988,zzzz998
5077	88.19	542	291.0		zzzz989,zzzzz39
437860	87.14	560	291.0		zzz1009,zzzzz39
5165	89.59	538	289.0		zzzz988,zzzzz39
375172	87.34	561	288.0		zzzz158,zzzz486
375171	84.33	568	288.0		zzzz158,zzzz945
11442	86.33	556	288.0		zzzz930,zzzzz93
4315	85.79	556	288.0		zzzz998,zzzzz39
437859	85.87	559	287.0		zzz1009,zzzz989
442611	88.77	543	286.0		zzz1004,zzz1008
158244	84.56	570	286.0		zzzz486,zzzz946
7291	87.41	540	286.0		zzzz967,zzzz984
7290	87.8	549	286.0		zzzz967,zzzz998
57567	87.1	535	285.0		zzzz733,zzzz768
20570	88.38	542	285.0		zzzz871,zzzz880
406910	86.96	537	285.0		zzzz122,zzzz123
393487	84.18	550	283.0		zzzz137,zzzzz83
437858	84.92	557	283.0		zzz1009,zzzz967
375170	84.6	565	283.0		zzzz158,zzzz946
5076	85.33	552	283.0		zzzz989,zzzz998
166729	83.61	543	282.0		zzzz470,zzzz471
7289	85.64	543	281.0		zzzz967,zzzz988
18802	87.74	530	280.0		zzzz880,zzzz882
7288	85.0	540	280.0		zzzz967,zzzzz39
7287	85.01	547	279.0		zzzz967,zzzz989
1219	85.13	558	279.0		zzzzz78,zzzzz94
438808	84.25	565	278.0		zzz1008,zzzz980
442610	83.42	573	278.0		zzz1004,zzz1005
441664	83.78	561	278.0		zzz1005,zzzz980
441663	86.32	563	277.0		zzz1005,zzz1008
9853	80.98	573	277.0		zzzz944,zzzz945
375169	83.48	563	276.0		zzzz158,zzzz944
20569	88.05	527	276.0		zzzz871,zzzz882
3779	81.32	562	276.0		zzzzz18,zzzzz21
9852	82.69	566	275.0		zzzz944,zzzz946
408720	81.99	572	275.0		zzzz120,zzzz121
46667	86.15	520	275.0		zzzz767,zzzz774
9076	77.1	594	275.0		zzzz950,zzzz996
442609	83.99	556	274.0		zzz1004,zzzz980
3927	84.24	571	274.0		zzzzz15,zzzzz48
429694	85.71	553	273.0		zzz1019,zzz1020
2273	82.63	570	273.0		zzzzz47,zzzzz48
108799	82.32	543	273.0		zzzz604,zzzz828
90254	85.85	523	273.0		zzzz646,zzzz841
416847	82.7	555	272.0		zzzz111,zzzz604
1995	85.0	540	272.0		zzzzz53,zzzzz59
169048	82.5	543	271.0		zzzz464,zzzz470
158243	85.36	567	271.0		zzzz486,zzzz944
400617	77.26	563	270.0		zzzz129,zzzzz79
57566	81.89	541	270.0		zzzz733,zzzz868
24315	83.02	536	269.0		zzzz853,zzzz864
401506	77.18	561	269.0		zzzz128,zzzz129
9720	77.72	570	269.0		zzzz945,zzzz947
111590	82.0	550	268.0		zzzz598,zzzz610
138036	67.63	692	267.0		zzzz544,zzzz892
6535	82.02	534	267.0		zzzz974,zzzz992
399723	78.97	561	267.0		zzzz130,zzzzz85
73790	83.21	536	266.0		zzzz687,zzzz730
376031	76.08	581	266.0		zzzz157,zzzz945
133683	78.77	537	266.0		zzzz553,zzzz900
46369	81.11	540	266.0		zzzz768,zzzz868
11586	75.91	577	266.0		zzzz929,zzzz945
5923	78.04	551	266.0		zzzz980,zzzz998
436925	83.36	535	266.0		zzz1010,zzzz991
9851	78.18	573	266.0		zzzz944,zzzz947
375168	78.83	562	265.0		zzzz158,zzzz947
433429	85.14	518	265.0		zzz1014,zzzz449
158242	77.72	570	265.0		zzzz486,zzzz947
66719	80.22	541	265.0		zzzz706,zzzz756
68549	81.71	525	265.0		zzzz701,zzzz846
53255	80.56	540	265.0		zzzz746,zzzz760
76875	80.75	530	264.0		zzzz679,zzzz846
88567	79.15	542	264.0		zzzz650,zzzz768
66718	79.78	534	264.0		zzzz706,zzzz754
6853	83.83	538	264.0		zzzz971,zzzz973
111589	81.57	548	264.0		zzzz598,zzzz621
397935	85.83	508	263.0		zzzz132,zzzz133
376030	77.24	558	263.0		zzzz157,zzzz947
76874	81.56	526	263.0		zzzz679,zzzz701
13247	81.82	539	263.0		zzzz918,zzzz992
377762	75.82	579	263.0		zzzz155,zzzz945
54888	83.21	536	263.0		zzzz741,zzzz860
11585	77.01	561	263.0		zzzz929,zzzz947
6852	81.33	541	263.0		zzzz971,zzzz972
55554	84.42	520	263.0		zzzz739,zzzz851
9590	76.44	573	263.0		zzzz946,zzzz947
433428	83.4	524	262.0		zzz1014,zzzz972
68185	79.89	537	262.0		zzzz702,zzzz762
417774	81.23	538	262.0		zzzz110,zzzz724
377761	76.9	580	262.0		zzzz155,zzzz156
433427	81.53	536	262.0		zzz1014,zzzz971
400616	77.02	557	262.0		zzzz129,zzzzz85
48500	80.22	536	262.0		zzzz761,zzzz868
23458	80.61	521	262.0		zzzz857,zzzz863
388225	72.23	587	261.0		zzzz143,zzzz950
134708	81.4	543	261.0		zzzz551,zzzz556
128097	78.7	540	261.0		zzzz564,zzzz899
170203	82.99	529	261.0		zzzz449,zzzz972
68184	78.96	537	261.0		zzzz702,zzzz706
68183	80.49	533	261.0		zzzz702,zzzz858
426953	83.18	541	261.0		zzzz100,zzzzz99
48499	81.02	532	261.0		zzzz761,zzzz768
43690	84.78	506	261.0		zzzz777,zzzz794
13246	80.41	541	261.0		zzzz918,zzzz974
417773	81.58	532	260.0		zzzz110,zzzz642
1994	81.11	540	260.0		zzzzz53,zzzzz61
376029	77.39	566	260.0		zzzz157,zzzz944
73789	79.77	529	260.0		zzzz687,zzzz754
376028	76.15	566	260.0		zzzz157,zzzz486
195789	83.4	518	260.0		zzzz403,zzzz991
90253	80.57	525	260.0		zzzz646,zzzz724
60630	80.19	525	260.0		zzzz724,zzzz841
39099	80.9	513	260.0		zzzz793,zzzz883
38822	84.39	506	260.0		zzzz794,zzzz878
6746	83.02	524	260.0		zzzz972,zzzz973
1201	76.74	559	260.0		zzzzz79,zzzzz85
132149	81.3	540	259.0		zzzz556,zzzz580
1166	77.48	555	259.0		zzzzz82,zzzzz83
372589	74.2	566	259.0		zzzz161,zzzz162
66717	79.21	534	259.0		zzzz706,zzzz762
388224	71.77	588	259.0		zzzz143,zzzz996
376027	75.3	575	259.0		zzzz157,zzzz158
66716	78.52	540	259.0		zzzz706,zzzz734
170202	78.49	544	258.0		zzzz449,zzzz971
134707	81.45	539	258.0		zzzz551,zzzz580
68182	77.92	539	258.0		zzzz702,zzzz754
376026	75.92	573	258.0		zzzz157,zzzz946
68181	78.4	537	258.0		zzzz702,zzzz734
57230	77.18	539	258.0		zzzz734,zzzz858
8335	85.4	507	258.0		zzzz956,zzzz997
401505	75.85	559	257.0		zzzz128,zzzzz85
109261	78.04	560	257.0		zzzz603,zzzz847
11584	75.83	575	257.0		zzzz929,zzzz946
91952	78.84	534	257.0		zzzz642,zzzz724
89410	81.8	511	257.0		zzzz648,zzzz669
57565	80.56	540	257.0		zzzz733,zzzz761
1993	79.67	551	257.0		zzzzz53,zzzzz60
88566	77.63	541	256.0		zzzz650,zzzz868
68180	77.53	534	256.0		zzzz702,zzzz729
436924	79.18	538	256.0		zzz1010,zzzz403
416846	78.56	555	256.0		zzzz111,zzzz828
375167	75.66	571	256.0		zzzz158,zzzz929
13720	77.93	521	256.0		zzzz915,zzzz916
91951	80.15	529	255.0		zzzz642,zzzz646
433426	83.14	516	255.0		zzz1014,zzzz973
401504	74.96	563	255.0		zzzz128,zzzz130
376902	73.06	568	255.0		zzzz156,zzzz945
1752	81.34	552	255.0		zzzzz59,zzzzz60
377760	75.84	567	254.0		zzzz155,zzzz946
91524	78.29	539	254.0		zzzz643,zzzz659
66715	77.28	537	254.0		zzzz706,zzzz858
417772	79.43	530	254.0		zzzz110,zzzz646
441662	77.02	557	254.0		zzz1005,zzz1009
106037	78.0	550	254.0		zzzz610,zzzz621
88565	77.22	540	254.0		zzzz650,zzzz733
58578	78.88	535	254.0		zzzz730,zzzz764
9850	75.27	566	253.0		zzzz944,zzzzz84
417771	78.49	530	253.0		zzzz110,zzzz718
91950	79.21	534	253.0		zzzz642,zzzz841
66714	77.86	533	253.0		zzzz706,zzzz729
58917	77.4	531	253.0		zzzz729,zzzz858
442608	77.08	541	253.0		zzz1004,zzzz984
376901	73.59	568	253.0		zzzz156,zzzz486
169047	76.43	543	253.0		zzzz464,zzzz471
88564	75.04	557	253.0		zzzz650,zzzz707
62727	78.77	537	253.0		zzzz718,zzzz868
57229	76.49	536	253.0		zzzz734,zzzz754
57228	77.38	535	253.0		zzzz734,zzzz762
442607	75.96	549	252.0		zzz1004,zzzz998
398836	78.21	546	252.0		zzzz131,zzzz133
370012	73.89	563	252.0		zzzz164,zzzz165
141870	64.86	683	252.0		zzzz532,zzzz892
139364	63.6	684	252.0		zzzz540,zzzz542
50703	77.24	536	252.0		zzzz754,zzzz762
11583	77.35	565	252.0		zzzz929,zzzz944
120189	78.66	539	252.0		zzzz580,zzzz584
101976	76.94	542	252.0		zzzz619,zzzz643
68179	77.43	545	252.0		zzzz702,zzzz868
377759	75.57	569	252.0		zzzz155,zzzz158
376900	74.04	570	252.0		zzzz156,zzzz946
50074	76.61	543	252.0		zzzz756,zzzz762
48192	77.01	535	252.0		zzzz762,zzzz858
170201	81.27	518	251.0		zzzz449,zzzz973
140832	66.04	689	251.0		zzzz536,zzzz896
68178	76.42	547	251.0		zzzz702,zzzz756
400615	74.78	563	251.0		zzzz129,zzzz130
376899	74.82	564	251.0		zzzz156,zzzz944
58916	76.69	532	251.0		zzzz729,zzzz734
1715	76.99	565	251.0		zzzzz60,zzzzz61
442606	74.87	557	251.0		zzz1004,zzz1009
399722	73.63	565	251.0		zzzz130,zzzzz79
16897	64.78	690	251.0		zzzz892,zzzz896
438807	75.77	549	251.0		zzz1008,zzzz998
158241	76.24	564	250.0		zzzz486,zzzz929
68177	75.42	541	251.0		zzzz702,zzzz718
66713	78.1	525	251.0		zzzz706,zzzz739
57227	74.73	550	251.0		zzzz734,zzzz756
50702	76.34	541	251.0		zzzz754,zzzz756
128096	78.29	539	250.0		zzzz564,zzzz574
55222	81.08	502	250.0		zzzz740,zzzz779
11582	74.96	563	250.0		zzzz929,zzzzz84
438806	76.75	542	250.0		zzz1008,zzzz984
73788	77.59	531	250.0		zzzz687,zzzz764
1751	79.26	540	249.0		zzzzz59,zzzzz61
441661	74.15	561	249.0		zzz1005,zzzz998
131132	73.63	546	249.0		zzzz558,zzzz644
66355	75.55	544	249.0		zzzz707,zzzz768
62726	75.28	530	249.0		zzzz718,zzzz733
57226	75.61	533	249.0		zzzz734,zzzz768
23246	76.1	544	249.0		zzzz858,zzzz868
376898	72.36	568	249.0		zzzz156,zzzz157
376025	72.46	570	249.0		zzzz157,zzzzz84
132148	77.51	538	249.0		zzzz556,zzzz584
58915	75.74	540	249.0		zzzz729,zzzz756
438805	74.47	564	248.0		zzz1008,zzz1009
377758	74.52	569	248.0		zzzz155,zzzz486
376897	72.95	573	248.0		zzzz156,zzzz158
372588	71.6	574	248.0		zzzz161,zzzz169
66712	76.78	534	248.0		zzzz706,zzzz761
58914	77.2	522	248.0		zzzz729,zzzz739
58913	76.26	535	248.0		zzzz729,zzzz754
4561	75.82	550	248.0		zzzz995,zzzzz76
442605	75.96	549	248.0		zzz1004,zzzz967
376896	73.11	569	248.0		zzzz156,zzzzz84
372587	72.65	563	248.0		zzzz161,zzzz166
91949	76.32	532	248.0		zzzz642,zzzz718
68176	77.08	528	248.0		zzzz702,zzzz739
66711	76.22	534	248.0		zzzz706,zzzz733
58912	76.77	538	248.0		zzzz729,zzzz762
377757	72.15	578	248.0		zzzz155,zzzz157
109260	75.22	557	248.0		zzzz603,zzzzz19
5922	75.14	551	248.0		zzzz980,zzzz984
417770	75.65	542	248.0		zzzz110,zzzz858
376895	71.28	571	247.0		zzzz156,zzzz929
131131	76.42	547	247.0		zzzz558,zzzz816
120188	78.85	539	248.0		zzzz580,zzzzz62
73408	75.32	547	248.0		zzzz688,zzzz748
62725	75.48	526	248.0		zzzz718,zzzz768
9719	72.82	574	247.0		zzzz945,zzzzz84
442604	75.5	547	247.0		zzz1004,zzzz989
393486	76.12	557	247.0		zzzz137,zzzzz82
73787	75.61	533	247.0		zzzz687,zzzz706
57905	77.69	520	247.0		zzzz732,zzzz865
57225	76.58	521	247.0		zzzz734,zzzz739
50701	75.0	532	247.0		zzzz754,zzzz858
50073	73.67	547	247.0		zzzz756,zzzz858
48498	76.03	534	247.0		zzzz761,zzzz858
442603	77.16	543	247.0		zzz1004,zzzz988
441660	73.31	562	247.0		zzz1005,zzzz984
437857	73.1	565	247.0		zzz1009,zzzz980
66710	76.31	536	247.0		zzzz706,zzzz868
45173	73.94	541	247.0		zzzz772,zzzz773
438804	73.84	562	247.0		zzz1008,zzzz989
417769	75.79	537	247.0		zzzz110,zzzz868
62724	74.11	533	247.0		zzzz718,zzzz734
55553	75.47	530	247.0		zzzz739,zzzz754
442602	75.87	547	246.0		zzz1004,zzzzz39
158240	72.41	569	246.0		zzzz486,zzzzz84
117281	74.43	567	246.0		zzzz586,zzzz603
110655	77.13	551	246.0		zzzz600,zzzz668
62723	73.65	539	246.0		zzzz718,zzzz858
55552	76.76	525	246.0		zzzz739,zzzz762
9460	72.63	559	246.0		zzzz947,zzzzz84
417768	79.7	532	246.0		zzzz110,zzzz841
376894	71.81	564	246.0		zzzz156,zzzz947
372586	71.58	570	246.0		zzzz161,zzzz168
134706	77.14	538	246.0		zzzz551,zzzz584
133682	73.7	540	246.0		zzzz553,zzzz901
57564	75.42	533	246.0		zzzz733,zzzz734
57563	74.91	542	246.0		zzzz733,zzzz756
57224	76.72	537	246.0		zzzz734,zzzz761
417767	76.18	529	246.0		zzzz110,zzzz702
75330	75.23	549	246.0		zzzz683,zzzz835
65938	75.51	543	246.0		zzzz709,zzzz764
126591	77.08	541	245.0		zzzz567,zzzz580
68175	74.31	541	245.0		zzzz702,zzzz733
66354	73.63	546	245.0		zzzz707,zzzz733
65577	75.77	520	245.0		zzzz710,zzzz865
57562	76.59	534	245.0		zzzz733,zzzz754
48191	77.71	525	245.0		zzzz762,zzzz851
5921	74.95	551	245.0		zzzz980,zzzzz39
377756	73.16	570	245.0		zzzz155,zzzz944
118252	76.49	536	245.0		zzzz584,zzzzz62
91948	76.94	529	245.0		zzzz642,zzzz761
377755	71.53	569	245.0		zzzz155,zzzz947
372585	70.44	565	245.0		zzzz161,zzzz163
141869	63.7	697	245.0		zzzz532,zzzz544
135224	74.12	541	245.0		zzzz550,zzzz899
131130	72.53	546	245.0		zzzz558,zzzz590
91947	74.44	540	245.0		zzzz642,zzzz858
66709	77.06	523	245.0		zzzz706,zzzz851
65937	75.8	533	245.0		zzzz709,zzzz746
55551	75.67	526	245.0		zzzz739,zzzz858
16896	64.14	686	245.0		zzzz892,zzzz895
426040	71.11	592	244.0		zzzz101,zzzz958
140831	63.48	679	244.0		zzzz536,zzzz892
88563	75.97	541	244.0		zzzz650,zzzz761
73786	74.58	535	245.0		zzzz687,zzzz702
66708	76.94	529	245.0		zzzz706,zzzz768
66353	73.72	548	244.0		zzzz707,zzzz761
62722	75.93	536	245.0		zzzz718,zzzz761
370863	69.82	560	244.0		zzzz163,zzzz169
139363	63.54	683	244.0		zzzz540,zzzz893
50700	75.47	530	244.0		zzzz754,zzzz764
25840	75.92	519	244.0		zzzz846,zzzz902
438803	73.12	558	244.0		zzz1008,zzzz967
438802	77.12	542	244.0		zzz1008,zzzz988
131129	76.49	536	244.0		zzzz558,zzzz821
66352	74.45	544	244.0		zzzz707,zzzz868
65936	75.51	535	244.0		zzzz709,zzzz734
65935	74.3	537	244.0		zzzz709,zzzz752
62721	75.05	533	244.0		zzzz718,zzzz762
9589	73.72	567	244.0		zzzz946,zzzzz84
375166	73.08	561	244.0		zzzz158,zzzzz84
70775	75.94	532	244.0		zzzz695,zzzz710
50699	75.46	538	244.0		zzzz754,zzzz768
50698	75.84	538	244.0		zzzz754,zzzz868
441659	75.18	556	243.0		zzz1005,zzzz988
370862	70.13	559	243.0		zzzz163,zzzz168
134705	76.21	538	243.0		zzzz551,zzzzz62
91946	75.71	531	243.0		zzzz642,zzzz868
5920	73.21	560	243.0		zzzz980,zzzz989
441658	73.43	557	243.0		zzz1005,zzzz989
115363	71.86	558	243.0		zzzz590,zzzz722
91945	74.57	527	243.0		zzzz642,zzzz734
58911	76.69	519	243.0		zzzz729,zzzz851
58577	75.98	533	243.0		zzzz730,zzzz768
57561	74.12	537	243.0		zzzz733,zzzz858
57223	74.26	540	243.0		zzzz734,zzzz868
76102	74.73	546	243.0		zzzz681,zzzzz19
62720	73.76	545	243.0		zzzz718,zzzz756
377754	71.43	567	242.0		zzzz155,zzzzz84
370861	70.19	567	242.0		zzzz163,zzzz166
132147	76.39	538	242.0		zzzz556,zzzzz62
127593	73.45	550	242.0		zzzz565,zzzz899
101975	74.91	542	242.0		zzzz619,zzzz659
91944	75.57	528	242.0		zzzz642,zzzz768
66707	75.42	537	242.0		zzzz706,zzzz730
62719	74.44	536	242.0		zzzz718,zzzz754
58576	75.61	537	242.0		zzzz730,zzzz734
58575	76.25	539	242.0		zzzz730,zzzz868
46368	73.87	532	242.0		zzzz768,zzzz858
7286	73.68	551	242.0		zzzz967,zzzz980
369147	71.71	562	242.0		zzzz165,zzzz169
134704	76.77	538	242.0		zzzz551,zzzz567
91943	74.58	535	242.0		zzzz642,zzzz702
91942	74.34	534	242.0		zzzz642,zzzz733
68174	73.58	545	242.0		zzzz702,zzzz768
58574	76.58	538	242.0		zzzz730,zzzz746
50072	74.86	541	242.0		zzzz756,zzzz868
73785	75.61	533	242.0		zzzz687,zzzz868
68173	74.58	539	242.0		zzzz702,zzzz761
66706	73.93	537	242.0		zzzz706,zzzz718
62718	75.53	523	242.0		zzzz718,zzzz724
58910	74.81	532	242.0		zzzz729,zzzz733
58909	74.71	522	242.0		zzzz729,zzzz768
56893	73.89	540	242.0		zzzz735,zzzz746
55550	75.56	532	242.0		zzzz739,zzzz756
50071	73.48	543	242.0		zzzz756,zzzz768
6224	75.05	545	242.0		zzzz977,zzzzz39
5919	75.32	551	242.0		zzzz980,zzzz988
376024	69.75	562	241.0		zzzz157,zzzz163
370860	69.15	564	241.0		zzzz163,zzzz513
116800	77.94	562	241.0		zzzz587,zzzzz58
73784	75.14	535	241.0		zzzz687,zzzz762
65934	75.09	538	241.0		zzzz709,zzzz730
62717	74.58	535	241.0		zzzz718,zzzz730
32948	77.26	532	241.0		zzzz816,zzzz821
438801	77.31	542	241.0		zzz1008,zzzzz39
415019	73.97	534	241.0		zzzz113,zzzz828
371723	69.53	571	241.0		zzzz162,zzzz163
115362	72.86	549	241.0		zzzz590,zzzz644
73783	76.13	532	241.0		zzzz687,zzzz718
70774	75.1	526	241.0		zzzz695,zzzz865
62716	75.1	522	241.0		zzzz718,zzzz841
369146	71.94	556	241.0		zzzz165,zzzz166
368293	72.39	547	241.0		zzzz166,zzzz167
367428	71.3	561	241.0		zzzz167,zzzz169
91100	69.69	551	241.0		zzzz644,zzzz681
65576	75.95	524	241.0		zzzz710,zzzz732
62715	74.53	530	241.0		zzzz718,zzzz784
58908	75.76	528	241.0		zzzz729,zzzz761
56892	75.0	524	241.0		zzzz735,zzzz859
50070	73.8	542	241.0		zzzz756,zzzz761
23245	75.33	523	241.0		zzzz858,zzzz918
370859	71.33	558	241.0		zzzz163,zzzz165
76873	74.9	526	241.0		zzzz679,zzzz723
73782	75.38	532	241.0		zzzz687,zzzz733
66705	74.1	529	241.0		zzzz706,zzzz764
62714	72.83	530	241.0		zzzz718,zzzz729
58907	75.05	529	241.0		zzzz729,zzzz764
58906	74.3	533	241.0		zzzz729,zzzz868
58905	75.68	514	241.0		zzzz729,zzzz918
55549	75.14	523	241.0		zzzz739,zzzz768
51331	72.88	531	241.0		zzzz752,zzzz784
23244	74.16	534	241.0		zzzz858,zzzz992
6223	72.89	546	241.0		zzzz977,zzzz984
88562	71.53	555	240.0		zzzz650,zzzz756
86906	74.1	525	240.0		zzzz654,zzzz676
73781	75.52	531	240.0		zzzz687,zzzz768
68548	75.05	521	240.0		zzzz701,zzzz902
65933	75.14	523	240.0		zzzz709,zzzz859
58904	73.03	545	240.0		zzzz729,zzzz992
58573	75.38	532	240.0		zzzz730,zzzz754
140830	63.13	678	240.0		zzzz536,zzzz895
128095	74.03	543	240.0		zzzz564,zzzz565
100634	75.32	543	240.0		zzzz622,zzzz626
88561	73.18	537	240.0		zzzz650,zzzz702
65932	73.51	536	240.0		zzzz709,zzzz729
57560	75.19	520	240.0		zzzz733,zzzz739
441657	72.63	559	240.0		zzz1005,zzzz967
365706	68.73	566	240.0		zzzz169,zzzz513
126590	75.46	538	240.0		zzzz567,zzzz584
115361	72.84	545	240.0		zzzz590,zzzzz66
91941	75.05	529	240.0		zzzz642,zzzz687
88560	73.87	532	240.0		zzzz650,zzzz739
68172	74.44	540	240.0		zzzz702,zzzz709
68171	73.18	537	240.0		zzzz702,zzzz764
63786	71.79	560	240.0		zzzz715,zzzz737
57222	73.33	525	240.0		zzzz734,zzzz784
48497	75.51	535	240.0		zzzz761,zzzz762
417766	74.86	529	239.0		zzzz110,zzzz734
370858	69.04	562	239.0		zzzz163,zzzz929
368292	69.64	560	239.0		zzzz166,zzzz513
115840	72.45	548	239.0		zzzz589,zzzz644
73780	73.37	537	239.0		zzzz687,zzzz756
73779	76.14	528	239.0		zzzz687,zzzz761
70773	75.99	529	239.0		zzzz695,zzzz732
68170	75.19	528	239.0		zzzz702,zzzz851
67082	76.05	522	239.0		zzzz705,zzzz918
58572	76.92	533	239.0		zzzz730,zzzz733
58571	74.21	535	239.0		zzzz730,zzzz858
56891	73.89	540	239.0		zzzz735,zzzz752
24752	75.86	522	239.0		zzzz851,zzzz858
146290	69.63	563	239.0		zzzz513,zzzzz84
88559	72.11	545	239.0		zzzz650,zzzz734
68169	74.26	540	239.0		zzzz702,zzzz730
68168	72.83	541	239.0		zzzz702,zzzz992
65931	73.03	534	239.0		zzzz709,zzzz735
60976	73.31	532	239.0		zzzz723,zzzz846
57221	74.95	527	239.0		zzzz734,zzzz851
49125	76.62	526	239.0		zzzz759,zzzz783
47577	74.67	529	239.0		zzzz764,zzzz858
41641	73.92	533	239.0		zzzz784,zzzz868
16589	63.72	689	239.0		zzzz895,zzzz896
437856	70.39	564	239.0		zzz1009,zzzz977
417765	74.39	531	239.0		zzzz110,zzzz729
144146	70.04	564	239.0		zzzz519,zzzz523
123120	75.79	541	239.0		zzzz574,zzzz899
91099	73.55	533	239.0		zzzz644,zzzz821
88558	72.64	541	239.0		zzzz650,zzzz706
88557	71.59	542	239.0		zzzz650,zzzz718
73778	73.75	541	239.0		zzzz687,zzzz734
68167	73.33	540	239.0		zzzz702,zzzz918
65930	73.68	532	239.0		zzzz709,zzzz733
65929	72.91	539	239.0		zzzz709,zzzz756
41640	74.43	524	239.0		zzzz784,zzzz859
6222	70.77	561	239.0		zzzz977,zzzz998
377753	72.43	573	238.0		zzzz155,zzzz929
88984	75.65	538	238.0		zzzz649,zzzz847
76101	72.73	539	238.0		zzzz681,zzzzz66
60629	73.91	529	238.0		zzzz724,zzzz858
57559	73.84	539	238.0		zzzz733,zzzz762
48190	72.61	544	238.0		zzzz762,zzzz868
417764	73.28	539	238.0		zzzz110,zzzz768
376023	68.91	579	238.0		zzzz157,zzzz162
372584	69.91	565	238.0		zzzz161,zzzz165
371722	68.24	573	238.0		zzzz162,zzzz929
141868	62.28	684	238.0		zzzz532,zzzz536
133167	78.61	547	238.0		zzzz554,zzzz816
115839	72.95	536	238.0		zzzz589,zzzz681
91940	75.05	533	238.0		zzzz642,zzzz730
90252	72.78	529	238.0		zzzz646,zzzz718
76872	74.0	527	238.0		zzzz679,zzzz729
72274	75.24	521	238.0		zzzz691,zzzz826
68166	73.33	540	238.0		zzzz702,zzzz784
65928	74.62	532	238.0		zzzz709,zzzz768
58903	74.16	534	238.0		zzzz729,zzzz730
58570	78.21	537	238.0		zzzz730,zzzz761
50697	73.74	537	238.0		zzzz754,zzzz784
48189	73.97	534	238.0		zzzz762,zzzz768
417763	73.6	534	238.0		zzzz110,zzzz706
368291	69.78	556	238.0		zzzz166,zzzz485
367427	71.4	556	238.0		zzzz167,zzzz168
124596	73.26	531	238.0		zzzz571,zzzz898
94941	74.58	535	238.0		zzzz635,zzzz702
76100	69.69	551	238.0		zzzz681,zzzz722
73777	73.97	534	238.0		zzzz687,zzzz709
68165	71.43	532	238.0		zzzz702,zzzz846
66704	73.15	540	238.0		zzzz706,zzzz709
66703	73.63	531	238.0		zzzz706,zzzz752
62713	73.52	525	238.0		zzzz718,zzzz859
60628	74.25	532	238.0		zzzz724,zzzz868
58902	74.57	523	238.0		zzzz729,zzzz974
57220	73.43	542	238.0		zzzz734,zzzz764
6221	71.3	547	238.0		zzzz977,zzzz989
398835	78.06	515	238.0		zzzz131,zzzz132
371721	67.99	578	238.0		zzzz162,zzzz169
369145	70.82	562	238.0		zzzz165,zzzz168
344087	75.67	526	238.0		zzzz195,zzzz203
115360	71.06	546	238.0		zzzz590,zzzz666
94940	75.05	533	238.0		zzzz635,zzzz729
91939	73.62	527	238.0		zzzz642,zzzz706
88556	71.35	548	238.0		zzzz650,zzzz858
83233	72.18	532	238.0		zzzz663,zzzz706
76871	73.7	521	238.0		zzzz679,zzzz902
66702	73.21	530	238.0		zzzz706,zzzz784
50069	73.92	533	238.0		zzzz756,zzzz851
16026	72.41	540	238.0		zzzz900,zzzz901
371720	69.51	574	237.0		zzzz162,zzzz513
127091	70.66	542	237.0		zzzz566,zzzz861
91938	72.59	540	237.0		zzzz642,zzzz756
77659	74.21	535	237.0		zzzz677,zzzzz57
73776	73.98	538	237.0		zzzz687,zzzz746
68547	73.88	513	237.0		zzzz701,zzzz918
68164	72.78	540	237.0		zzzz702,zzzz974
65927	73.63	531	237.0		zzzz709,zzzz718
65926	73.52	540	237.0		zzzz709,zzzz868
62712	73.64	516	237.0		zzzz718,zzzz739
51330	73.9	525	237.0		zzzz752,zzzz859
130621	72.5	549	237.0		zzzz559,zzzz644
117280	74.16	538	237.0		zzzz586,zzzz847
91098	71.88	544	237.0		zzzz644,zzzz836
90251	72.88	531	237.0		zzzz646,zzzz868
83232	72.97	529	237.0		zzzz663,zzzz734
68163	72.9	535	237.0		zzzz702,zzzz705
68162	73.37	537	237.0		zzzz702,zzzz724
60627	73.24	527	237.0		zzzz724,zzzz734
57219	74.71	518	237.0		zzzz734,zzzz918
51329	73.46	535	237.0		zzzz752,zzzz868
417762	74.86	525	237.0		zzzz110,zzzz859
369144	69.09	563	237.0		zzzz165,zzzz513
366568	68.27	561	237.0		zzzz168,zzzz513
141867	61.43	687	236.0		zzzz532,zzzz896
127592	74.58	539	237.0		zzzz565,zzzz574
91937	73.06	527	237.0		zzzz642,zzzz709
91936	72.92	528	237.0		zzzz642,zzzz739
90250	73.3	528	237.0		zzzz646,zzzz858
68546	73.38	526	237.0		zzzz701,zzzz729
65925	74.95	531	237.0		zzzz709,zzzz761
48496	74.81	536	237.0		zzzz761,zzzz764
6220	72.98	544	237.0		zzzz977,zzzz988
441656	74.82	556	236.0		zzz1005,zzzzz39
371719	68.66	568	236.0		zzzz162,zzzz166
370857	68.64	558	236.0		zzzz163,zzzz947
365705	69.91	555	236.0		zzzz169,zzzz485
91935	72.62	526	236.0		zzzz642,zzzz729
88555	72.43	544	236.0		zzzz650,zzzz992
66351	71.95	549	236.0		zzzz707,zzzz739
55548	74.48	529	236.0		zzzz739,zzzz761
53254	74.39	535	236.0		zzzz746,zzzz752
51328	73.32	536	236.0		zzzz752,zzzz754
51327	73.23	538	236.0		zzzz752,zzzz764
50696	74.67	537	236.0		zzzz754,zzzz761
50695	74.57	519	236.0		zzzz754,zzzz918
23033	74.76	531	236.0		zzzz859,zzzz868
417761	73.83	535	236.0		zzzz110,zzzz762
372583	67.88	576	236.0		zzzz161,zzzz929
370856	69.35	558	236.0		zzzz163,zzzzz84
141866	62.88	687	236.0		zzzz532,zzzz895
94939	73.64	535	236.0		zzzz635,zzzz705
91934	74.0	527	236.0		zzzz642,zzzz784
58901	72.88	531	236.0		zzzz729,zzzz846
51326	72.81	526	236.0		zzzz752,zzzz841
48811	72.56	543	236.0		zzzz760,zzzz858
18801	71.85	547	236.0		zzzz880,zzzzz66
372582	69.57	562	236.0		zzzz161,zzzz485
371718	68.43	567	236.0		zzzz162,zzzz168
115359	73.03	545	236.0		zzzz590,zzzz880
91933	71.85	540	236.0		zzzz642,zzzz650
91097	71.56	545	236.0		zzzz644,zzzzz66
88554	72.46	541	236.0		zzzz650,zzzz754
76099	71.96	542	236.0		zzzz681,zzzz880
73775	73.96	530	236.0		zzzz687,zzzz858
68161	71.09	543	236.0		zzzz702,zzzz735
65924	73.21	530	236.0		zzzz709,zzzz762
62711	72.71	535	236.0		zzzz718,zzzz746
60975	72.99	522	236.0		zzzz723,zzzz729
50694	72.35	528	236.0		zzzz754,zzzz846
20568	73.1	539	236.0		zzzz871,zzzzz66
83231	71.48	540	235.0		zzzz663,zzzz702
83230	71.51	530	235.0		zzzz663,zzzz858
76870	74.23	520	235.0		zzzz679,zzzz918
67081	72.18	532	235.0		zzzz705,zzzz868
62710	74.81	516	235.0		zzzz718,zzzz918
58569	73.69	536	235.0		zzzz730,zzzz784
50693	74.43	528	235.0		zzzz754,zzzz851
46367	72.8	533	235.0		zzzz768,zzzz918
21178	74.38	523	235.0		zzzz868,zzzz918
417760	75.24	529	235.0		zzzz110,zzzz687
417759	74.62	532	235.0		zzzz110,zzzz764
370855	70.62	548	235.0		zzzz163,zzzz167
90249	71.81	525	235.0		zzzz646,zzzz734
73774	73.58	530	235.0		zzzz687,zzzz729
67080	73.97	534	235.0		zzzz705,zzzz992
66350	72.23	551	235.0		zzzz707,zzzz730
66349	70.67	549	235.0		zzzz707,zzzz734
65923	72.4	529	235.0		zzzz709,zzzz858
60626	74.76	527	235.0		zzzz724,zzzz768
53253	74.44	532	235.0		zzzz746,zzzz764
41639	73.21	530	235.0		zzzz784,zzzz858
23243	74.19	527	235.0		zzzz858,zzzz974
376893	67.49	569	235.0		zzzz156,zzzz513
369143	70.25	558	235.0		zzzz165,zzzz167
369142	71.23	563	235.0		zzzz165,zzzz493
138035	61.25	702	235.0		zzzz544,zzzz896
131128	71.58	549	235.0		zzzz558,zzzz903
91096	68.97	564	235.0		zzzz644,zzzz861
91095	69.89	548	235.0		zzzz644,zzzz903
76098	72.81	548	235.0		zzzz681,zzzz683
68545	73.04	523	235.0		zzzz701,zzzz734
61323	71.48	554	235.0		zzzz722,zzzz880
57558	74.39	531	235.0		zzzz733,zzzz764
57218	72.73	539	235.0		zzzz734,zzzz752
55547	73.95	526	235.0		zzzz739,zzzz868
7285	71.66	547	235.0		zzzz967,zzzz977
417758	73.48	528	235.0		zzzz110,zzzz784
370854	68.94	557	235.0		zzzz163,zzzz485
367426	72.23	551	235.0		zzzz167,zzzz493
135223	74.26	540	235.0		zzzz550,zzzz564
135222	75.14	539	235.0		zzzz550,zzzz574
88553	73.61	538	235.0		zzzz650,zzzz687
88552	72.24	544	235.0		zzzz650,zzzz709
66701	73.91	529	235.0		zzzz706,zzzz859
65922	72.66	534	235.0		zzzz709,zzzz760
58568	72.71	535	235.0		zzzz730,zzzz735
58567	73.47	539	235.0		zzzz730,zzzz762
21177	72.76	536	235.0		zzzz868,zzzz992
433425	74.42	516	234.0		zzz1014,zzzz500
417757	73.73	533	234.0		zzzz110,zzzz754
372581	68.48	571	234.0		zzzz161,zzzz945
371717	68.69	578	234.0		zzzz162,zzzz944
133166	73.36	548	234.0		zzzz554,zzzz558
95374	73.84	539	234.0		zzzz634,zzzz838
91932	73.35	529	234.0		zzzz642,zzzz754
91931	73.06	527	234.0		zzzz642,zzzz762
91930	72.95	525	234.0		zzzz642,zzzz859
91094	70.45	555	234.0		zzzz644,zzzzz19
90248	72.21	529	234.0		zzzz646,zzzz702
88551	74.77	543	234.0		zzzz650,zzzz730
88550	70.44	548	234.0		zzzz650,zzzz762
75329	73.55	552	234.0		zzzz683,zzzz848
73773	72.8	533	234.0		zzzz687,zzzz735
65921	72.47	534	234.0		zzzz709,zzzz784
62709	72.66	534	234.0		zzzz718,zzzz764
58566	74.29	525	234.0		zzzz730,zzzz739
58565	74.48	525	234.0		zzzz730,zzzz859
57217	73.56	522	234.0		zzzz734,zzzz859
56890	71.64	543	234.0		zzzz735,zzzz868
48188	72.98	533	234.0		zzzz762,zzzz764
417756	75.24	529	234.0		zzzz110,zzzz733
417755	73.13	536	234.0		zzzz110,zzzz756
158801	69.11	560	234.0		zzzz485,zzzz513
146289	67.13	572	234.0		zzzz513,zzzz928
138034	59.43	705	234.0		zzzz544,zzzz895
132146	73.8	542	234.0		zzzz556,zzzz567
115838	71.32	544	234.0		zzzz589,zzzz590
115837	70.91	550	234.0		zzzz589,zzzzz19
109259	72.5	560	234.0		zzzz603,zzzz649
83229	72.69	531	234.0		zzzz663,zzzz764
68160	71.64	536	234.0		zzzz702,zzzz752
65920	71.27	543	234.0		zzzz709,zzzz754
61322	68.6	551	234.0		zzzz722,zzzzz19
60625	73.76	526	234.0		zzzz724,zzzz729
60624	74.01	531	234.0		zzzz724,zzzz761
57557	73.74	537	234.0		zzzz733,zzzz746
57556	73.47	524	234.0		zzzz733,zzzz859
57216	73.18	522	234.0		zzzz734,zzzz841
417754	75.71	531	234.0		zzzz110,zzzz761
371716	68.84	568	234.0		zzzz162,zzzz947
366567	69.86	554	234.0		zzzz168,zzzz485
115358	72.76	547	234.0		zzzz590,zzzz816
109258	73.43	557	234.0		zzzz603,zzzz681
105584	73.74	537	234.0		zzzz611,zzzz731
91093	71.3	547	234.0		zzzz644,zzzz715
88549	73.61	538	234.0		zzzz650,zzzz974
82425	73.86	528	234.0		zzzz665,zzzz675
76869	73.85	524	234.0		zzzz679,zzzz974
68544	71.46	536	234.0		zzzz701,zzzz992
62708	72.25	519	234.0		zzzz718,zzzz865
53252	72.41	540	234.0		zzzz746,zzzz756
50692	72.43	544	234.0		zzzz754,zzzz760
48810	73.12	532	234.0		zzzz760,zzzz784
48187	71.19	538	234.0		zzzz762,zzzz784
39372	79.77	514	234.0		zzzz792,zzzz808
26748	72.61	533	234.0		zzzz842,zzzz918
23242	71.93	538	234.0		zzzz858,zzzz859
2428	70.0	560	234.0		zzzzz40,zzzzz41
417753	72.02	529	233.0		zzzz110,zzzz739
370853	67.65	575	233.0		zzzz163,zzzz164
370852	66.84	573	233.0		zzzz163,zzzz945
369141	69.11	560	233.0		zzzz165,zzzzz84
154704	70.34	563	233.0		zzzz493,zzzz513
146288	66.61	578	233.0		zzzz513,zzzz945
141865	58.45	686	233.0		zzzz532,zzzz534
117279	73.23	538	233.0		zzzz586,zzzz681
109728	73.99	546	233.0		zzzz602,zzzz835
104234	71.64	536	233.0		zzzz614,zzzz824
91929	72.64	530	233.0		zzzz642,zzzz764
91092	71.74	552	233.0		zzzz644,zzzz825
90247	71.29	526	233.0		zzzz646,zzzz752
88548	69.78	546	233.0		zzzz650,zzzz729
88547	71.22	542	233.0		zzzz650,zzzz784
84847	72.17	539	233.0		zzzz659,zzzz684
83228	72.71	535	233.0		zzzz663,zzzz679
68543	72.93	532	233.0		zzzz701,zzzz709
68159	71.43	546	233.0		zzzz702,zzzz707
62707	71.94	531	233.0		zzzz718,zzzz752
50068	70.3	532	233.0		zzzz756,zzzz846
48495	75.14	523	233.0		zzzz761,zzzz851
47576	73.95	526	233.0		zzzz764,zzzz768
46366	72.95	525	233.0		zzzz768,zzzz859
25620	71.61	546	233.0		zzzz847,zzzzz19
21176	73.53	529	233.0		zzzz868,zzzz974
369140	67.58	583	233.0		zzzz165,zzzzz17
118733	73.61	538	233.0		zzzz583,zzzz589
115357	69.36	545	233.0		zzzz590,zzzz681
109257	70.74	557	233.0		zzzz603,zzzz644
80425	70.48	542	233.0		zzzz670,zzzz729
68542	72.15	517	233.0		zzzz701,zzzz718
68541	72.99	522	233.0		zzzz701,zzzz974
57555	73.41	534	233.0		zzzz733,zzzz752
57554	72.52	535	233.0		zzzz733,zzzz784
47575	72.68	538	233.0		zzzz764,zzzz868
22609	71.56	552	233.0		zzzz861,zzzzz19
372580	70.29	552	233.0		zzzz161,zzzz167
371715	68.13	571	233.0		zzzz162,zzzz945
140829	59.04	691	233.0		zzzz536,zzzz544
137809	69.6	546	233.0		zzzz545,zzzz553
127090	70.84	535	233.0		zzzz566,zzzz681
109256	68.04	557	233.0		zzzz603,zzzz722
91523	71.24	539	233.0		zzzz643,zzzz684
76868	71.83	529	233.0		zzzz679,zzzz754
76867	71.99	532	233.0		zzzz679,zzzz992
68540	73.03	519	233.0		zzzz701,zzzz723
68158	70.09	535	233.0		zzzz702,zzzz723
66348	70.86	549	233.0		zzzz707,zzzz754
65919	71.24	532	233.0		zzzz709,zzzz992
58564	72.27	541	233.0		zzzz730,zzzz756
53251	72.38	543	233.0		zzzz746,zzzz754
50067	70.44	548	233.0		zzzz756,zzzz992
32947	73.5	551	233.0		zzzz816,zzzz825
26978	73.11	528	233.0		zzzz841,zzzz868
15682	72.95	525	233.0		zzzz902,zzzz974
381221	67.74	561	232.0		zzzz151,zzzz513
376022	67.96	565	232.0		zzzz157,zzzz161
376021	68.49	568	232.0		zzzz157,zzzz513
144103	62.39	678	232.0		zzzz524,zzzz542
91928	73.11	528	232.0		zzzz642,zzzz851
90246	72.64	530	232.0		zzzz646,zzzz761
83227	73.5	532	232.0		zzzz663,zzzz730
73772	74.38	523	232.0		zzzz687,zzzz859
68157	71.75	538	232.0		zzzz702,zzzz760
66700	73.5	532	232.0		zzzz706,zzzz760
66347	70.44	548	232.0		zzzz707,zzzz729
65918	72.4	529	232.0		zzzz709,zzzz841
61321	69.93	552	232.0		zzzz722,zzzzz66
60623	73.33	525	232.0		zzzz724,zzzz733
58563	72.41	540	232.0		zzzz730,zzzz752
57215	70.04	544	232.0		zzzz734,zzzz992
53250	71.8	539	232.0		zzzz746,zzzz858
417752	70.72	543	232.0		zzzz110,zzzz709
381220	67.32	557	232.0		zzzz151,zzzz947
376892	68.53	572	232.0		zzzz156,zzzz166
371714	68.42	570	232.0		zzzz162,zzzz485
371713	68.88	572	232.0		zzzz162,zzzzz84
146287	67.9	567	232.0		zzzz513,zzzz929
115356	69.53	548	232.0		zzzz590,zzzz903
106036	69.02	552	232.0		zzzz610,zzzz722
94938	72.71	535	232.0		zzzz635,zzzz992
91091	69.57	552	232.0		zzzz644,zzzz722
83226	71.62	532	232.0		zzzz663,zzzz701
82026	70.99	548	232.0		zzzz666,zzzz737
76097	70.93	547	232.0		zzzz681,zzzz848
68539	72.8	511	232.0		zzzz701,zzzz739
67079	71.69	537	232.0		zzzz705,zzzz846
66346	70.51	546	232.0		zzzz707,zzzz718
56889	70.96	544	232.0		zzzz735,zzzz756
55546	72.5	531	232.0		zzzz739,zzzz784
53249	72.58	547	232.0		zzzz746,zzzz868
50066	70.48	542	232.0		zzzz756,zzzz764
26747	73.61	538	232.0		zzzz842,zzzz992
22608	71.19	545	232.0		zzzz861,zzzzz66
18418	72.45	530	232.0		zzzz882,zzzzz66
15681	73.22	519	232.0		zzzz902,zzzz918
417751	71.83	529	232.0		zzzz110,zzzz752
376020	67.02	567	232.0		zzzz157,zzzz165
371712	66.96	569	232.0		zzzz162,zzzz165
371711	70.27	555	232.0		zzzz162,zzzz167
365704	68.78	567	232.0		zzzz169,zzzzz84
158800	70.76	554	232.0		zzzz485,zzzzz84
146286	67.5	563	232.0		zzzz513,zzzz944
135221	70.46	545	232.0		zzzz550,zzzz565
115355	73.63	546	232.0		zzzz590,zzzz750
115354	71.98	546	232.0		zzzz590,zzzz871
100633	72.2	536	232.0		zzzz622,zzzzz61
91927	70.19	530	232.0		zzzz642,zzzz663
91090	72.21	547	232.0		zzzz644,zzzz816
90245	72.35	528	232.0		zzzz646,zzzz859
89831	71.78	535	232.0		zzzz647,zzzz663
83225	70.74	540	232.0		zzzz663,zzzz729
80424	71.32	530	232.0		zzzz670,zzzz701
76866	70.54	533	232.0		zzzz679,zzzz702
68538	70.71	536	232.0		zzzz701,zzzz702
68156	71.51	537	232.0		zzzz702,zzzz859
67078	71.86	533	232.0		zzzz705,zzzz858
60622	71.8	532	232.0		zzzz724,zzzz784
58562	72.28	534	232.0		zzzz730,zzzz760
55545	70.98	541	232.0		zzzz739,zzzz974
51325	70.73	533	232.0		zzzz752,zzzz858
50691	72.02	529	232.0		zzzz754,zzzz859
46365	73.85	524	232.0		zzzz768,zzzz974
26977	72.74	532	232.0		zzzz841,zzzz859
417750	75.38	528	232.0		zzzz110,zzzz730
372579	67.66	569	232.0		zzzz161,zzzz164
368290	68.32	565	232.0		zzzz166,zzzzz84
151243	72.76	536	232.0		zzzz500,zzzz971
109727	72.73	550	232.0		zzzz602,zzzz644
76096	72.52	535	232.0		zzzz681,zzzz835
73771	70.96	544	232.0		zzzz687,zzzz707
68537	71.29	533	232.0		zzzz701,zzzz705
67077	71.19	538	232.0		zzzz705,zzzz734
65917	73.66	524	232.0		zzzz709,zzzz739
58900	73.95	522	232.0		zzzz729,zzzz755
57214	71.32	544	232.0		zzzz734,zzzz746
46364	71.54	534	232.0		zzzz768,zzzz992
26976	73.14	525	232.0		zzzz841,zzzz858
25839	70.83	528	232.0		zzzz846,zzzz858
417749	71.64	536	231.0		zzzz110,zzzz992
372578	68.21	563	231.0		zzzz161,zzzz944
129102	69.4	536	231.0		zzzz562,zzzz835
115353	72.56	532	231.0		zzzz590,zzzz882
103329	70.83	552	231.0		zzzz616,zzzz737
94937	73.68	532	231.0		zzzz635,zzzz734
91926	69.95	549	231.0		zzzz642,zzzz707
83224	71.11	533	231.0		zzzz663,zzzz846
83223	71.02	528	231.0		zzzz663,zzzz918
73770	71.69	537	231.0		zzzz687,zzzz752
73769	71.14	544	231.0		zzzz687,zzzz784
68155	71.91	534	231.0		zzzz702,zzzz841
67076	71.11	533	231.0		zzzz705,zzzz733
65916	71.94	531	231.0		zzzz709,zzzz724
63785	68.98	548	231.0		zzzz715,zzzz903
62706	72.47	534	231.0		zzzz718,zzzz992
60974	71.1	526	231.0		zzzz723,zzzz858
51324	71.99	539	231.0		zzzz752,zzzz760
46363	71.8	532	231.0		zzzz768,zzzz784
38263	76.04	530	231.0		zzzz796,zzzz808
11581	66.78	575	231.0		zzzz929,zzzzz71
9718	66.08	572	231.0		zzzz945,zzzzz71
417748	71.35	541	231.0		zzzz110,zzzz663
372577	65.85	574	231.0		zzzz161,zzzz947
369139	68.78	551	231.0		zzzz165,zzzz490
367425	69.38	552	231.0		zzzz167,zzzz513
151242	72.5	531	231.0		zzzz500,zzzz972
146285	67.55	567	231.0		zzzz513,zzzz947
141382	59.65	679	231.0		zzzz534,zzzz892
94936	71.21	535	231.0		zzzz635,zzzz868
88546	69.12	544	231.0		zzzz650,zzzz735
76095	74.4	539	231.0		zzzz681,zzzz821
76094	71.83	536	231.0		zzzz681,zzzz871
68536	72.76	525	231.0		zzzz701,zzzz733
68154	70.9	543	231.0		zzzz702,zzzz746
62705	72.39	518	231.0		zzzz718,zzzz851
60621	72.76	525	231.0		zzzz724,zzzz739
53248	72.71	524	231.0		zzzz746,zzzz918
418702	69.78	536	231.0		zzzz109,zzzz681
372576	68.62	564	231.0		zzzz161,zzzzz84
366566	68.81	561	231.0		zzzz168,zzzzz84
365703	69.53	558	231.0		zzzz169,zzzz493
88545	70.96	544	231.0		zzzz650,zzzz746
84846	70.76	554	231.0		zzzz659,zzzz829
83222	71.11	540	231.0		zzzz663,zzzz868
82025	69.76	549	231.0		zzzz666,zzzz715
66699	72.83	541	231.0		zzzz706,zzzz746
62704	70.5	539	231.0		zzzz718,zzzz760
62703	70.55	523	231.0		zzzz718,zzzz846
62702	72.8	522	231.0		zzzz718,zzzz974
57553	71.72	534	231.0		zzzz733,zzzz992
55544	72.99	522	231.0		zzzz739,zzzz859
55543	71.67	533	231.0		zzzz739,zzzz992
53247	72.73	528	231.0		zzzz746,zzzz859
51323	70.74	540	231.0		zzzz752,zzzz756
50690	73.51	521	231.0		zzzz754,zzzz974
50065	70.4	544	231.0		zzzz756,zzzz784
48809	72.49	527	231.0		zzzz760,zzzz859
48186	72.28	523	231.0		zzzz762,zzzz859
46362	72.71	524	231.0		zzzz768,zzzz841
428783	70.32	556	230.0		zzz1020,zzzz149
377752	68.41	573	230.0		zzzz155,zzzz162
376019	66.67	567	230.0		zzzz157,zzzzz71
373450	75.98	512	230.0		zzzz160,zzzzz84
365702	65.57	578	230.0		zzzz169,zzzz929
170200	71.81	518	230.0		zzzz449,zzzz500
156049	68.16	559	230.0		zzzz490,zzzz929
141381	57.41	695	230.0		zzzz534,zzzz544
133165	72.79	544	230.0		zzzz554,zzzz644
131127	70.2	547	230.0		zzzz558,zzzzz66
127089	70.8	548	230.0		zzzz566,zzzzz19
90244	70.83	528	230.0		zzzz646,zzzz706
90243	71.13	523	230.0		zzzz646,zzzz729
83221	70.89	529	230.0		zzzz663,zzzz718
83220	71.08	536	230.0		zzzz663,zzzz992
82024	69.33	551	230.0		zzzz666,zzzz903
80423	71.48	533	230.0		zzzz670,zzzz705
73768	70.4	527	230.0		zzzz687,zzzz846
70401	75.47	534	230.0		zzzz696,zzzz975
68535	71.83	529	230.0		zzzz701,zzzz858
67075	71.75	531	230.0		zzzz705,zzzz761
66345	69.57	552	230.0		zzzz707,zzzz858
65915	73.42	523	230.0		zzzz709,zzzz918
60973	70.77	520	230.0		zzzz723,zzzz734
57904	71.51	530	230.0		zzzz732,zzzz735
57552	72.25	537	230.0		zzzz733,zzzz760
57551	72.74	521	230.0		zzzz733,zzzz851
57550	71.24	532	230.0		zzzz733,zzzz918
56888	71.3	540	230.0		zzzz735,zzzz760
55542	73.04	523	230.0		zzzz739,zzzz755
55541	73.04	523	230.0		zzzz739,zzzz918
28348	72.89	546	230.0		zzzz835,zzzz848
25838	71.32	530	230.0		zzzz846,zzzz918
25837	71.46	536	230.0		zzzz846,zzzz992
18800	68.91	550	230.0		zzzz880,zzzzz25
3283	69.4	549	230.0		zzzzz25,zzzzz66
417747	72.15	535	230.0		zzzz110,zzzz851
370851	68.52	575	230.0		zzzz163,zzzz493
370011	66.31	561	230.0		zzzz164,zzzz166
370010	68.12	574	230.0		zzzz164,zzzzz71
368289	65.92	578	230.0		zzzz166,zzzz945
158239	65.21	572	230.0		zzzz486,zzzzz71
130620	70.47	552	230.0		zzzz559,zzzz848
125094	68.57	544	230.0		zzzz570,zzzz681
115352	70.79	534	230.0		zzzz590,zzzz821
94935	72.1	534	230.0		zzzz635,zzzz846
91925	71.27	529	230.0		zzzz642,zzzz752
76865	71.32	530	230.0		zzzz679,zzzz709
76864	69.94	529	230.0		zzzz679,zzzz858
67074	71.99	532	230.0		zzzz705,zzzz729
65914	72.38	525	230.0		zzzz709,zzzz974
62701	69.81	540	230.0		zzzz718,zzzz735
60620	71.43	539	230.0		zzzz724,zzzz756
50689	71.75	538	230.0		zzzz754,zzzz992
48494	72.26	548	230.0		zzzz761,zzzz992
418701	71.0	538	230.0		zzzz109,zzzz562
376891	67.54	570	230.0		zzzz156,zzzz169
372575	66.67	573	230.0		zzzz161,zzzz928
370009	69.93	552	230.0		zzzz164,zzzz167
369138	67.14	566	230.0		zzzz165,zzzzz71
133164	72.17	539	230.0		zzzz554,zzzzz66
125093	69.38	552	230.0		zzzz570,zzzzz19
109255	71.38	559	230.0		zzzz603,zzzz683
94934	71.56	545	230.0		zzzz635,zzzz679
94933	71.9	541	230.0		zzzz635,zzzz754
90242	71.51	530	230.0		zzzz646,zzzz733
88544	71.09	543	230.0		zzzz650,zzzz752
83219	70.3	532	230.0		zzzz663,zzzz733
83218	70.28	535	230.0		zzzz663,zzzz754
82023	68.57	560	230.0		zzzz666,zzzz722
80422	69.67	544	230.0		zzzz670,zzzz868
76863	70.57	530	230.0		zzzz679,zzzz734
68534	71.68	519	230.0		zzzz701,zzzz768
68153	69.55	532	230.0		zzzz702,zzzz834
67073	72.56	532	230.0		zzzz705,zzzz974
66698	72.35	528	230.0		zzzz706,zzzz724
66697	72.55	521	230.0		zzzz706,zzzz918
61320	69.93	552	230.0		zzzz722,zzzz871
58899	71.16	541	230.0		zzzz729,zzzz746
57213	72.17	521	230.0		zzzz734,zzzz974
56219	70.26	548	230.0		zzzz737,zzzz903
53246	73.05	538	230.0		zzzz746,zzzz768
50688	73.33	525	230.0		zzzz754,zzzz841
48493	72.64	530	230.0		zzzz761,zzzz859
41638	70.22	534	230.0		zzzz784,zzzz992
15680	72.11	527	230.0		zzzz902,zzzz992
376890	66.38	574	229.0		zzzz156,zzzz162
91089	68.77	554	229.0		zzzz644,zzzz880
83217	71.0	531	229.0		zzzz663,zzzz705
83216	70.95	537	229.0		zzzz663,zzzz761
83215	71.14	537	229.0		zzzz663,zzzz768
76862	71.51	530	229.0		zzzz679,zzzz730
67072	71.02	528	229.0		zzzz705,zzzz718
67071	71.64	536	229.0		zzzz705,zzzz723
61319	71.43	539	229.0		zzzz722,zzzz882
60972	72.48	516	229.0		zzzz723,zzzz918
57549	71.69	537	229.0		zzzz733,zzzz735
57212	70.56	540	229.0		zzzz734,zzzz760
56887	69.72	545	229.0		zzzz735,zzzz784
55540	71.79	521	229.0		zzzz739,zzzz764
53245	71.16	541	229.0		zzzz746,zzzz784
47574	72.05	526	229.0		zzzz764,zzzz841
26746	71.78	535	229.0		zzzz842,zzzz974
417746	71.97	528	229.0		zzzz110,zzzz974
381219	64.69	572	229.0		zzzz151,zzzz945
375165	65.73	569	229.0		zzzz158,zzzzz71
372574	68.71	556	229.0		zzzz161,zzzz490
371710	67.97	562	229.0		zzzz162,zzzz490
370008	66.55	562	229.0		zzzz164,zzzz168
366565	68.64	558	229.0		zzzz168,zzzz493
133163	73.48	543	229.0		zzzz554,zzzz681
131126	70.02	547	229.0		zzzz558,zzzz589
131125	69.16	548	229.0		zzzz558,zzzz715
130619	69.22	549	229.0		zzzz559,zzzzz66
117278	72.37	532	229.0		zzzz586,zzzz821
109254	72.76	558	229.0		zzzz603,zzzz825
94932	72.52	535	229.0		zzzz635,zzzz701
94931	72.37	532	229.0		zzzz635,zzzz706
89830	71.08	536	229.0		zzzz647,zzzz702
89829	71.08	529	229.0		zzzz647,zzzz858
76861	72.07	537	229.0		zzzz679,zzzz705
76093	71.4	528	229.0		zzzz681,zzzz882
73767	72.41	522	229.0		zzzz687,zzzz739
67070	69.94	539	229.0		zzzz705,zzzz709
66696	71.37	524	229.0		zzzz706,zzzz723
60971	70.68	532	229.0		zzzz723,zzzz992
60619	72.95	525	229.0		zzzz724,zzzz859
60618	70.34	526	229.0		zzzz724,zzzz918
58561	73.45	531	229.0		zzzz730,zzzz851
56886	69.74	542	229.0		zzzz735,zzzz992
50064	70.15	546	229.0		zzzz756,zzzz974
48808	70.82	538	229.0		zzzz760,zzzz868
46361	72.71	524	229.0		zzzz768,zzzz851
417745	72.4	529	229.0		zzzz110,zzzz735
376889	66.49	570	229.0		zzzz156,zzzz163
376888	67.96	568	229.0		zzzz156,zzzz168
372573	66.79	563	229.0		zzzz161,zzzz513
372572	66.78	569	229.0		zzzz161,zzzzz71
370850	67.02	564	229.0		zzzz163,zzzz944
365701	67.14	563	229.0		zzzz169,zzzz944
365700	65.73	572	229.0		zzzz169,zzzzz71
141380	59.2	674	229.0		zzzz534,zzzz536
102875	69.29	547	229.0		zzzz617,zzzzz64
94930	72.28	534	229.0		zzzz635,zzzz858
88543	69.3	544	229.0		zzzz650,zzzz724
76092	69.89	548	229.0		zzzz681,zzzz836
76091	73.25	542	229.0		zzzz681,zzzz861
73766	72.02	529	229.0		zzzz687,zzzz918
66695	69.5	541	229.0		zzzz706,zzzz735
60970	69.65	537	229.0		zzzz723,zzzz754
60969	72.88	520	229.0		zzzz723,zzzz902
58898	72.68	527	229.0		zzzz729,zzzz862
58897	72.74	521	229.0		zzzz729,zzzz902
57211	69.06	530	229.0		zzzz734,zzzz846
56885	69.05	546	229.0		zzzz735,zzzz754
51322	71.03	535	229.0		zzzz752,zzzz762
47573	72.54	528	229.0		zzzz764,zzzz859
18417	70.11	542	229.0		zzzz882,zzzzz25
376018	69.22	562	229.0		zzzz157,zzzz485
375164	67.2	567	229.0		zzzz158,zzzz162
370007	66.32	570	229.0		zzzz164,zzzz169
368288	66.43	569	229.0		zzzz166,zzzz929
366564	67.38	564	229.0		zzzz168,zzzz929
366563	66.67	567	229.0		zzzz168,zzzzz71
131124	69.6	546	229.0		zzzz558,zzzz823
91924	70.36	533	229.0		zzzz642,zzzz992
90241	71.48	526	229.0		zzzz646,zzzz764
88542	69.09	550	229.0		zzzz650,zzzz760
88541	71.0	531	229.0		zzzz650,zzzz859
82022	69.69	551	229.0		zzzz666,zzzzz66
76860	71.05	525	229.0		zzzz679,zzzz739
76859	70.86	532	229.0		zzzz679,zzzz756
75714	72.32	531	229.0		zzzz682,zzzz689
60617	72.21	529	229.0		zzzz724,zzzz730
60616	70.43	531	229.0		zzzz724,zzzz752
57903	71.86	526	229.0		zzzz732,zzzz859
56884	70.34	536	229.0		zzzz735,zzzz841
56883	70.69	539	229.0		zzzz735,zzzz858
55539	70.83	521	229.0		zzzz739,zzzz846
48492	75.24	521	229.0		zzzz761,zzzz918
41637	71.05	532	229.0		zzzz784,zzzz841
32946	69.68	564	229.0		zzzz816,zzzzz66
381218	66.37	556	228.0		zzzz151,zzzz166
376017	67.26	562	228.0		zzzz157,zzzz169
370006	68.98	561	228.0		zzzz164,zzzz493
368287	68.64	558	228.0		zzzz166,zzzz493
368286	66.14	570	228.0		zzzz166,zzzzz71
344086	71.37	517	228.0		zzzz195,zzzz978
158238	65.38	572	228.0		zzzz486,zzzz513
141379	59.38	682	228.0		zzzz534,zzzz895
131123	68.59	554	228.0		zzzz558,zzzz681
131122	70.14	556	228.0		zzzz558,zzzz848
117277	69.78	546	228.0		zzzz586,zzzz644
116322	69.89	548	228.0		zzzz588,zzzz899
103328	69.82	550	228.0		zzzz616,zzzz715
91923	70.08	528	228.0		zzzz642,zzzz846
91088	70.64	545	228.0		zzzz644,zzzz750
91087	68.68	546	228.0		zzzz644,zzzz824
88540	70.79	534	228.0		zzzz650,zzzz663
83214	70.65	535	228.0		zzzz663,zzzz687
70772	69.94	529	228.0		zzzz695,zzzz734
68533	71.16	534	228.0		zzzz701,zzzz868
67069	70.36	533	228.0		zzzz705,zzzz768
66694	70.0	550	228.0		zzzz706,zzzz707
65913	69.57	529	228.0		zzzz709,zzzz846
57548	70.7	529	228.0		zzzz733,zzzz846
56882	69.85	544	228.0		zzzz735,zzzz762
50063	71.94	531	228.0		zzzz756,zzzz859
50062	69.1	547	228.0		zzzz756,zzzz918
48491	71.19	538	228.0		zzzz761,zzzz784
25836	70.94	530	228.0		zzzz846,zzzz851
9588	65.34	577	228.0		zzzz946,zzzzz71
418700	69.57	539	228.0		zzzz109,zzzz570
417744	73.17	533	228.0		zzzz110,zzzz650
372571	66.61	572	228.0		zzzz161,zzzz486
137808	68.74	547	228.0		zzzz545,zzzz901
131121	70.74	557	228.0		zzzz558,zzzz861
115836	69.33	551	228.0		zzzz589,zzzzz65
109726	71.3	547	228.0		zzzz602,zzzz836
88539	70.81	531	228.0		zzzz650,zzzz679
76858	70.45	528	228.0		zzzz679,zzzz733
74948	72.15	535	228.0		zzzz684,zzzz960
66693	71.73	527	228.0		zzzz706,zzzz841
66692	69.71	525	228.0		zzzz706,zzzz846
66344	70.11	542	228.0		zzzz707,zzzz764
60968	71.4	521	228.0		zzzz723,zzzz974
53244	71.4	542	228.0		zzzz746,zzzz761
53243	70.2	537	228.0		zzzz746,zzzz846
48185	70.04	524	228.0		zzzz762,zzzz846
47572	70.65	535	228.0		zzzz764,zzzz784
41636	69.91	535	228.0		zzzz784,zzzz918
415018	68.89	540	228.0		zzzz113,zzzz604
381217	66.73	565	228.0		zzzz151,zzzz157
376016	67.08	562	228.0		zzzz157,zzzz168
370849	67.2	561	228.0		zzzz163,zzzz486
369137	69.27	550	228.0		zzzz165,zzzz485
139192	56.49	701	227.0		zzzz541,zzzz892
124103	67.9	542	228.0		zzzz572,zzzz901
115835	68.24	551	228.0		zzzz589,zzzz722
109725	72.33	553	228.0		zzzz602,zzzz848
91922	69.89	528	228.0		zzzz642,zzzz679
91086	68.8	548	228.0		zzzz644,zzzz737
91085	68.99	545	228.0		zzzz644,zzzz847
90240	70.49	532	228.0		zzzz646,zzzz756
88538	70.71	536	228.0		zzzz650,zzzz851
83213	70.65	535	228.0		zzzz663,zzzz709
76857	69.8	543	228.0		zzzz679,zzzz707
76856	70.99	524	228.0		zzzz679,zzzz718
76855	70.27	528	228.0		zzzz679,zzzz768
68532	70.3	532	228.0		zzzz701,zzzz746
68531	72.4	529	228.0		zzzz701,zzzz862
68152	70.9	536	228.0		zzzz702,zzzz862
67068	70.51	529	228.0		zzzz705,zzzz754
65575	71.75	531	228.0		zzzz710,zzzz730
56881	70.63	538	228.0		zzzz735,zzzz764
56880	69.76	539	228.0		zzzz735,zzzz768
51321	71.21	535	228.0		zzzz752,zzzz768
50061	71.51	530	228.0		zzzz756,zzzz902
47571	72.12	520	228.0		zzzz764,zzzz918
47570	69.82	550	228.0		zzzz764,zzzz992
30729	72.28	552	228.0		zzzz825,zzzzz66
25835	70.91	526	228.0		zzzz846,zzzz974
18416	70.64	528	228.0		zzzz882,zzzzz34
3853	67.35	585	228.0		zzzzz17,zzzzz84
376015	68.04	560	227.0		zzzz157,zzzz490
370005	66.08	566	227.0		zzzz164,zzzz513
368285	67.26	559	227.0		zzzz166,zzzz947
158799	68.11	555	227.0		zzzz485,zzzz947
126589	72.38	543	227.0		zzzz567,zzzzz62
115834	69.98	553	227.0		zzzz589,zzzz861
91921	71.62	532	227.0		zzzz642,zzzz760
91920	71.0	531	227.0		zzzz642,zzzz918
91084	68.68	546	227.0		zzzz644,zzzz823
90239	71.51	523	227.0		zzzz646,zzzz754
88537	69.56	542	227.0		zzzz650,zzzz723
83212	69.57	529	227.0		zzzz663,zzzz739
83211	71.16	527	227.0		zzzz663,zzzz784
83210	71.32	537	227.0		zzzz663,zzzz862
80421	68.63	542	227.0		zzzz670,zzzz734
76090	70.3	532	227.0		zzzz681,zzzz847
73765	71.46	536	227.0		zzzz687,zzzz705
73764	71.95	524	227.0		zzzz687,zzzz974
73763	70.13	549	227.0		zzzz687,zzzz992
70771	70.59	527	227.0		zzzz695,zzzz718
65912	73.09	524	227.0		zzzz709,zzzz851
62700	70.55	523	227.0		zzzz718,zzzz732
60615	72.64	530	227.0		zzzz724,zzzz762
58560	70.51	529	227.0		zzzz730,zzzz846
57210	69.44	540	227.0		zzzz734,zzzz735
53242	69.98	533	227.0		zzzz746,zzzz841
46360	71.29	519	227.0		zzzz768,zzzz865
31706	75.28	538	227.0		zzzz821,zzzz825
31705	71.16	534	227.0		zzzz821,zzzzz66
25619	71.14	544	227.0		zzzz847,zzzz861
415934	69.22	536	227.0		zzzz112,zzzz576
375163	66.67	561	227.0		zzzz158,zzzz163
117276	71.56	545	227.0		zzzz586,zzzz861
117275	70.47	552	227.0		zzzz586,zzzzz19
115351	70.23	561	227.0		zzzz590,zzzz825
109724	70.11	552	227.0		zzzz602,zzzz683
94929	72.59	529	227.0		zzzz635,zzzz739
90238	69.85	524	227.0		zzzz646,zzzz918
83209	70.47	535	227.0		zzzz663,zzzz974
82021	69.76	549	227.0		zzzz666,zzzz880
81224	69.4	549	227.0		zzzz668,zzzz880
81223	70.94	530	227.0		zzzz668,zzzz882
76854	72.49	538	227.0		zzzz679,zzzz862
76089	68.66	552	227.0		zzzz681,zzzz903
73762	70.54	533	227.0		zzzz687,zzzz724
68530	71.59	521	227.0		zzzz701,zzzz841
60967	70.89	529	227.0		zzzz723,zzzz768
57547	72.47	523	227.0		zzzz733,zzzz974
50687	71.86	526	227.0		zzzz754,zzzz755
20567	68.35	553	227.0		zzzz871,zzzzz25
3706	69.45	550	227.0		zzzzz19,zzzzz65
417743	71.29	533	227.0		zzzz110,zzzz746
381216	65.71	560	227.0		zzzz151,zzzz168
376887	65.55	569	227.0		zzzz156,zzzz161
156048	68.67	549	227.0		zzzz490,zzzzz84
130618	69.62	553	227.0		zzzz559,zzzzz25
94928	72.11	527	227.0		zzzz635,zzzz902
90237	70.7	529	227.0		zzzz646,zzzz768
90236	70.91	526	227.0		zzzz646,zzzz784
89828	70.51	529	227.0		zzzz647,zzzz729
88536	70.04	534	227.0		zzzz650,zzzz701
83208	70.57	530	227.0		zzzz663,zzzz723
80420	69.42	533	227.0		zzzz670,zzzz846
80419	68.77	538	227.0		zzzz670,zzzz858
80418	70.2	537	227.0		zzzz670,zzzz992
76853	70.11	532	227.0		zzzz679,zzzz746
76852	70.7	529	227.0		zzzz679,zzzz764
73761	71.0	531	227.0		zzzz687,zzzz841
70770	71.13	523	227.0		zzzz695,zzzz706
70769	72.69	531	227.0		zzzz695,zzzz730
68529	69.89	538	227.0		zzzz701,zzzz756
66691	68.56	547	227.0		zzzz706,zzzz992
66343	68.49	549	227.0		zzzz707,zzzz756
66342	71.14	537	227.0		zzzz707,zzzz918
65911	72.11	527	227.0		zzzz709,zzzz732
60614	72.16	528	227.0		zzzz724,zzzz851
58896	69.17	532	227.0		zzzz729,zzzz784
57209	70.53	526	227.0		zzzz734,zzzz755
55538	71.65	522	227.0		zzzz739,zzzz841
50060	70.84	535	227.0		zzzz756,zzzz841
48807	69.91	535	227.0		zzzz760,zzzz992
48490	73.85	524	227.0		zzzz761,zzzz974
25834	69.22	536	227.0		zzzz846,zzzz868
25401	70.59	544	227.0		zzzz848,zzzz861
1992	79.4	466	227.0		zzzzz53,zzzzz63
417742	70.94	530	226.0		zzzz110,zzzz701
417741	70.78	527	226.0		zzzz110,zzzz846
381215	64.8	571	226.0		zzzz151,zzzzz71
370004	65.38	572	226.0		zzzz164,zzzz929
370003	67.49	566	226.0		zzzz164,zzzzz84
369136	65.66	562	226.0		zzzz165,zzzz947
365699	65.56	572	226.0		zzzz169,zzzz945
132658	74.5	545	226.0		zzzz555,zzzz571
130617	71.22	549	226.0		zzzz559,zzzz836
94927	72.05	526	226.0		zzzz635,zzzz974
91919	70.08	528	226.0		zzzz642,zzzz701
91918	69.07	527	226.0		zzzz642,zzzz723
91917	70.08	528	226.0		zzzz642,zzzz735
91916	70.43	531	226.0		zzzz642,zzzz746
89827	68.6	535	226.0		zzzz647,zzzz992
84845	70.66	542	226.0		zzzz659,zzzz960
73760	70.94	530	226.0		zzzz687,zzzz695
70768	71.1	526	226.0		zzzz695,zzzz754
66341	69.38	552	226.0		zzzz707,zzzz762
66340	69.52	538	226.0		zzzz707,zzzz846
62699	69.26	527	226.0		zzzz718,zzzz723
57208	71.51	530	226.0		zzzz734,zzzz862
53241	70.84	535	226.0		zzzz746,zzzz992
48806	71.01	545	226.0		zzzz760,zzzz761
48805	70.87	539	226.0		zzzz760,zzzz764
48804	71.27	529	226.0		zzzz760,zzzz918
48803	71.67	526	226.0		zzzz760,zzzz974
48184	70.2	537	226.0		zzzz762,zzzz992
41635	71.27	529	226.0		zzzz784,zzzz851
417740	69.83	537	226.0		zzzz110,zzzz679
381214	65.37	566	226.0		zzzz151,zzzz169
381213	65.6	564	226.0		zzzz151,zzzzz84
375162	66.85	552	226.0		zzzz158,zzzz167
367424	66.61	557	226.0		zzzz167,zzzz944
366562	65.39	575	226.0		zzzz168,zzzz945
144111	68.9	537	226.0		zzzz523,zzzz890
131120	69.78	546	226.0		zzzz558,zzzz836
117274	71.63	557	226.0		zzzz586,zzzz825
109253	68.04	557	226.0		zzzz603,zzzzz66
91915	70.49	532	226.0		zzzz642,zzzz974
91083	67.58	549	226.0		zzzz644,zzzz666
91082	70.15	546	226.0		zzzz644,zzzz835
90235	70.1	525	226.0		zzzz646,zzzz709
90234	68.44	526	226.0		zzzz646,zzzz846
89826	69.51	528	226.0		zzzz647,zzzz679
83207	69.74	532	226.0		zzzz663,zzzz756
80417	69.74	532	226.0		zzzz670,zzzz679
80416	70.15	526	226.0		zzzz670,zzzz974
76088	72.41	551	226.0		zzzz681,zzzz816
76087	70.19	530	226.0		zzzz681,zzzz819
75328	70.97	558	226.0		zzzz683,zzzzz19
73759	69.24	543	226.0		zzzz687,zzzz760
73758	71.59	521	226.0		zzzz687,zzzz851
68528	69.2	539	226.0		zzzz701,zzzz707
68527	70.51	529	226.0		zzzz701,zzzz730
68526	69.92	532	226.0		zzzz701,zzzz834
67067	71.08	536	226.0		zzzz705,zzzz862
66339	71.56	538	226.0		zzzz707,zzzz851
65910	70.8	524	226.0		zzzz709,zzzz755
60966	69.87	531	226.0		zzzz723,zzzz733
58895	69.5	541	226.0		zzzz729,zzzz752
56879	71.37	524	226.0		zzzz735,zzzz918
48802	71.51	530	226.0		zzzz760,zzzz841
48183	70.89	529	226.0		zzzz762,zzzz918
47569	72.49	527	226.0		zzzz764,zzzz974
31704	69.1	534	226.0		zzzz821,zzzz882
31703	70.07	538	226.0		zzzz821,zzzz903
26745	72.45	530	226.0		zzzz842,zzzz858
23241	71.16	527	226.0		zzzz858,zzzz862
23032	71.62	525	226.0		zzzz859,zzzz974
22399	73.18	522	226.0		zzzz862,zzzz918
15511	68.86	546	226.0		zzzz903,zzzzz66
373449	72.41	511	226.0		zzzz160,zzzz945
370848	67.87	554	226.0		zzzz163,zzzz490
367423	68.23	554	226.0		zzzz167,zzzz929
367422	67.51	554	226.0		zzzz167,zzzz945
151241	72.67	516	226.0		zzzz500,zzzz973
144102	59.88	693	226.0		zzzz524,zzzz540
144101	61.71	679	226.0		zzzz524,zzzz893
132657	71.32	551	226.0		zzzz555,zzzz898
130616	70.31	549	226.0		zzzz559,zzzz681
129101	67.1	544	226.0		zzzz562,zzzz681
117273	71.9	541	226.0		zzzz586,zzzz649
104233	69.26	540	226.0		zzzz614,zzzz681
94926	71.29	533	226.0		zzzz635,zzzz756
91081	69.22	549	226.0		zzzz644,zzzz848
91080	68.57	544	226.0		zzzz644,zzzz871
82020	70.41	534	226.0		zzzz666,zzzz882
76851	71.78	528	226.0		zzzz679,zzzz755
76850	71.32	530	226.0		zzzz679,zzzz761
76086	69.51	551	226.0		zzzz681,zzzzz65
70767	69.92	532	226.0		zzzz695,zzzz702
70766	71.26	522	226.0		zzzz695,zzzz729
56878	70.67	525	226.0		zzzz735,zzzz974
53240	69.84	547	226.0		zzzz746,zzzz762
51320	69.92	532	226.0		zzzz752,zzzz974
48489	70.51	529	226.0		zzzz761,zzzz846
48182	72.33	524	226.0		zzzz762,zzzz974
25400	69.13	554	226.0		zzzz848,zzzzz19
11732	67.02	564	226.0		zzzz928,zzzz947
417739	69.91	545	226.0		zzzz110,zzzz707
381212	65.89	557	226.0		zzzz151,zzzz163
376886	66.67	564	226.0		zzzz156,zzzz165
376014	66.55	565	226.0		zzzz157,zzzz166
370847	65.22	575	225.0		zzzz163,zzzz946
158798	65.55	569	225.0		zzzz485,zzzz945
156047	66.43	566	226.0		zzzz490,zzzz947
133162	71.56	545	226.0		zzzz554,zzzz590
125092	67.26	562	226.0		zzzz570,zzzz603
120677	69.2	539	226.0		zzzz579,zzzz820
115350	68.3	552	226.0		zzzz590,zzzz737
89825	70.4	527	226.0		zzzz647,zzzz718
83206	70.17	533	226.0		zzzz663,zzzz746
80415	68.48	533	226.0		zzzz670,zzzz723
76849	69.19	529	226.0		zzzz679,zzzz850
76085	67.54	536	226.0		zzzz681,zzzz824
68525	69.38	529	226.0		zzzz701,zzzz752
68524	70.13	529	226.0		zzzz701,zzzz754
67066	69.25	530	226.0		zzzz705,zzzz752
66690	71.51	530	226.0		zzzz706,zzzz755
66338	69.29	547	226.0		zzzz707,zzzz709
60965	69.91	535	226.0		zzzz723,zzzz868
58894	71.73	527	226.0		zzzz729,zzzz841
57902	70.62	531	226.0		zzzz732,zzzz841
51319	69.77	526	226.0		zzzz752,zzzz918
50686	71.89	523	226.0		zzzz754,zzzz902
47568	70.91	526	226.0		zzzz764,zzzz846
46359	69.36	532	226.0		zzzz768,zzzz846
34238	72.28	505	226.0		zzzz811,zzzz812
1324	64.46	588	225.0		zzzzz73,zzzzz74
418699	70.38	530	225.0		zzzz109,zzzz835
417738	69.83	527	225.0		zzzz110,zzzz723
417737	70.86	532	225.0		zzzz110,zzzz760
377751	67.37	567	225.0		zzzz155,zzzz168
372570	66.78	566	225.0		zzzz161,zzzz946
369135	66.37	568	225.0		zzzz165,zzzz929
144145	65.4	578	225.0		zzzz519,zzzz522
133161	72.88	542	225.0		zzzz554,zzzz589
131119	69.38	552	225.0		zzzz558,zzzz825
130615	69.33	551	225.0		zzzz559,zzzz715
125091	68.2	544	225.0		zzzz570,zzzz861
120187	72.06	544	225.0		zzzz580,zzzz838
115349	67.58	546	225.0		zzzz590,zzzz600
115348	68.17	553	225.0		zzzz590,zzzz861
90233	68.33	540	225.0		zzzz646,zzzz650
90232	69.26	527	225.0		zzzz646,zzzz735
89824	69.61	533	225.0		zzzz647,zzzz734
88535	70.13	539	225.0		zzzz650,zzzz764
80414	67.66	538	225.0		zzzz670,zzzz702
80413	68.08	542	225.0		zzzz670,zzzz756
76848	70.99	524	225.0		zzzz679,zzzz695
68523	71.73	527	225.0		zzzz701,zzzz761
67065	69.42	533	225.0		zzzz705,zzzz706
66337	69.08	553	225.0		zzzz707,zzzz746
66336	68.92	547	225.0		zzzz707,zzzz752
60613	70.81	531	225.0		zzzz724,zzzz754
60612	70.97	527	225.0		zzzz724,zzzz764
58893	70.77	520	225.0		zzzz729,zzzz732
58892	69.96	526	225.0		zzzz729,zzzz859
58559	71.59	528	225.0		zzzz730,zzzz865
57901	71.02	528	225.0		zzzz732,zzzz754
57900	71.24	525	225.0		zzzz732,zzzz768
57207	71.32	523	225.0		zzzz734,zzzz902
55537	71.46	529	225.0		zzzz739,zzzz746
55536	70.21	527	225.0		zzzz739,zzzz752
55535	72.04	515	225.0		zzzz739,zzzz865
53239	71.05	532	225.0		zzzz746,zzzz865
381211	66.73	562	225.0		zzzz151,zzzz164
377750	65.61	570	225.0		zzzz155,zzzzz71
371709	65.01	583	225.0		zzzz162,zzzz486
367421	68.17	553	225.0		zzzz167,zzzz485
158797	65.66	562	225.0		zzzz485,zzzz928
133160	74.86	541	225.0		zzzz554,zzzz821
109723	68.72	553	225.0		zzzz602,zzzz666
104232	69.5	541	225.0		zzzz614,zzzz861
91522	70.53	543	225.0		zzzz643,zzzz960
82424	69.27	537	225.0		zzzz665,zzzz707
81222	68.93	544	225.0		zzzz668,zzzz871
76847	69.14	525	225.0		zzzz679,zzzz706
76084	72.23	551	225.0		zzzz681,zzzz825
75327	69.31	554	225.0		zzzz683,zzzz861
70765	69.04	533	225.0		zzzz695,zzzz756
70764	71.35	527	225.0		zzzz695,zzzz764
67064	70.04	544	225.0		zzzz705,zzzz746
65574	70.45	528	225.0		zzzz710,zzzz859
60964	68.98	532	225.0		zzzz723,zzzz762
60611	69.55	532	225.0		zzzz724,zzzz846
55888	69.83	537	225.0		zzzz738,zzzz782
51318	70.54	533	225.0		zzzz752,zzzz761
51317	67.9	542	225.0		zzzz752,zzzz992
23031	69.74	532	225.0		zzzz859,zzzz992
417736	71.46	529	225.0		zzzz110,zzzz918
376885	67.45	553	225.0		zzzz156,zzzz167
376013	65.91	572	225.0		zzzz157,zzzz164
375161	66.96	563	225.0		zzzz158,zzzz161
375160	65.6	564	225.0		zzzz158,zzzz513
371708	66.2	577	225.0		zzzz162,zzzz164
371707	65.22	578	225.0		zzzz162,zzzzz71
368284	65.02	566	225.0		zzzz166,zzzz928
368283	65.26	570	225.0		zzzz166,zzzz944
367420	66.91	553	225.0		zzzz167,zzzz486
141864	56.0	700	224.0		zzzz532,zzzz541
137807	67.22	546	225.0		zzzz545,zzzz854
130614	69.41	572	225.0		zzzz559,zzzz603
125090	68.48	552	225.0		zzzz570,zzzz683
109252	68.21	560	225.0		zzzz603,zzzz880
104231	68.12	552	225.0		zzzz614,zzzz644
103327	69.83	537	225.0		zzzz616,zzzz681
94925	71.4	535	225.0		zzzz635,zzzz718
90231	69.81	540	225.0		zzzz646,zzzz730
83205	70.62	531	225.0		zzzz663,zzzz902
82019	68.8	548	225.0		zzzz666,zzzz871
80412	67.72	539	225.0		zzzz670,zzzz718
80411	68.03	538	225.0		zzzz670,zzzz733
76846	69.4	536	225.0		zzzz679,zzzz834
76083	68.32	546	225.0		zzzz681,zzzz715
67063	71.64	529	225.0		zzzz705,zzzz842
63784	68.74	547	225.0		zzzz715,zzzzz66
60963	70.49	515	225.0		zzzz723,zzzz739
60610	70.72	526	225.0		zzzz724,zzzz755
58558	69.91	545	225.0		zzzz730,zzzz992
57546	71.13	530	225.0		zzzz733,zzzz841
57545	71.56	524	225.0		zzzz733,zzzz865
56877	68.86	546	225.0		zzzz735,zzzz761
53238	70.97	534	225.0		zzzz746,zzzz902
53237	70.49	532	225.0		zzzz746,zzzz974
51316	68.4	538	225.0		zzzz752,zzzz846
48801	70.26	538	225.0		zzzz760,zzzz768
47567	71.54	527	225.0		zzzz764,zzzz851
445464	67.64	547	224.0		zzz1001,zzzz988
377749	67.08	568	224.0		zzzz155,zzzz166
377748	66.55	571	224.0		zzzz155,zzzz513
376012	68.35	553	224.0		zzzz157,zzzz167
370846	65.56	572	224.0		zzzz163,zzzzz71
369134	62.59	580	224.0		zzzz165,zzzz945
142825	61.16	654	224.0		zzzz529,zzzz535
137806	67.09	550	224.0		zzzz545,zzzz900
131118	69.33	551	224.0		zzzz558,zzzz559
131117	66.55	556	224.0		zzzz558,zzzz880
94924	69.83	537	224.0		zzzz635,zzzz670
80829	74.71	514	224.0		zzzz669,zzzz744
78442	69.55	532	224.0		zzzz675,zzzz679
76845	70.48	525	224.0		zzzz679,zzzz851
68522	69.26	527	224.0		zzzz701,zzzz724
68521	70.96	520	224.0		zzzz701,zzzz865
67062	71.08	529	224.0		zzzz705,zzzz762
60962	70.06	531	224.0		zzzz723,zzzz730
60961	70.02	527	224.0		zzzz723,zzzz862
57899	70.38	530	224.0		zzzz732,zzzz733
50059	68.59	554	224.0		zzzz756,zzzz760
45172	69.16	535	224.0		zzzz772,zzzz782
1679	70.39	537	224.0		zzzzz61,zzzzz64
417735	69.98	533	224.0		zzzz110,zzzz755
376884	71.88	505	224.0		zzzz156,zzzz159
370845	65.49	565	224.0		zzzz163,zzzz928
370002	65.72	563	224.0		zzzz164,zzzz944
366561	66.55	565	224.0		zzzz168,zzzz944
146284	65.28	576	224.0		zzzz513,zzzz946
129100	69.32	541	224.0		zzzz562,zzzz569
129099	67.71	542	224.0		zzzz562,zzzz589
127088	68.9	537	224.0		zzzz566,zzzz835
118732	68.82	542	224.0		zzzz583,zzzz644
115833	67.34	548	224.0		zzzz589,zzzz903
115347	68.32	546	224.0		zzzz590,zzzz715
109722	68.84	552	224.0		zzzz602,zzzz681
109251	69.12	557	224.0		zzzz603,zzzz848
104230	68.89	540	224.0		zzzz614,zzzzz66
94923	72.5	531	224.0		zzzz635,zzzz762
91079	68.9	537	224.0		zzzz644,zzzz882
90230	68.63	526	224.0		zzzz646,zzzz705
90229	70.17	523	224.0		zzzz646,zzzz739
90228	70.24	531	224.0		zzzz646,zzzz762
90227	70.53	526	224.0		zzzz646,zzzz851
88534	70.95	537	224.0		zzzz650,zzzz918
76844	69.51	528	224.0		zzzz679,zzzz687
76843	69.98	523	224.0		zzzz679,zzzz762
76842	69.46	537	224.0		zzzz679,zzzz868
70763	70.3	532	224.0		zzzz695,zzzz709
67061	71.38	538	224.0		zzzz705,zzzz764
66335	69.37	542	224.0		zzzz707,zzzz724
61318	65.65	556	224.0		zzzz722,zzzz861
60609	69.1	534	224.0		zzzz724,zzzz992
58891	68.7	540	224.0		zzzz729,zzzz760
57898	72.47	523	224.0		zzzz732,zzzz764
41634	69.14	538	224.0		zzzz784,zzzz974
28582	69.79	533	224.0		zzzz834,zzzz846
445463	67.4	546	224.0		zzz1001,zzzzz39
429693	69.55	555	224.0		zzz1019,zzzz149
418698	68.93	544	224.0		zzzz109,zzzz569
377747	66.26	578	224.0		zzzz155,zzzz169
372569	67.57	555	224.0		zzzz161,zzzz493
367419	67.2	561	224.0		zzzz167,zzzz946
366560	65.43	567	224.0		zzzz168,zzzz928
365698	66.79	557	224.0		zzzz169,zzzz947
139191	55.46	714	224.0		zzzz541,zzzz544
127087	68.33	540	224.0		zzzz566,zzzz586
127086	67.96	540	224.0		zzzz566,zzzzz66
109721	69.65	547	224.0		zzzz602,zzzz903
109250	71.32	544	224.0		zzzz603,zzzz821
103326	68.45	542	224.0		zzzz616,zzzzz66
94922	69.7	538	224.0		zzzz635,zzzz723
90226	69.87	531	224.0		zzzz646,zzzz760
88983	70.04	544	224.0		zzzz649,zzzz848
88533	69.57	529	224.0		zzzz650,zzzz902
83204	69.16	535	224.0		zzzz663,zzzz760
83203	69.1	534	224.0		zzzz663,zzzz841
80410	68.73	534	224.0		zzzz670,zzzz709
75326	69.49	554	224.0		zzzz683,zzzz836
68520	70.23	524	224.0		zzzz701,zzzz764
67060	70.86	525	224.0		zzzz705,zzzz739
66689	71.32	523	224.0		zzzz706,zzzz974
66334	68.58	541	224.0		zzzz707,zzzz723
61317	67.38	558	224.0		zzzz722,zzzz737
58890	69.6	523	224.0		zzzz729,zzzz865
48488	71.96	535	224.0		zzzz761,zzzz842
47566	72.0	525	224.0		zzzz764,zzzz865
22607	69.44	553	224.0		zzzz861,zzzzz65
18799	68.18	550	224.0		zzzz880,zzzzz19
9849	64.62	571	224.0		zzzz944,zzzzz71
418697	65.76	549	223.0		zzzz109,zzzz683
376883	65.91	569	223.0		zzzz156,zzzz164
375159	66.01	562	223.0		zzzz158,zzzz166
374308	73.76	503	223.0		zzzz159,zzzz944
374307	73.28	509	223.0		zzzz159,zzzz945
337475	69.23	533	223.0		zzzz203,zzzz921
130613	70.05	551	223.0		zzzz559,zzzz586
115832	70.51	546	223.0		zzzz589,zzzz602
115831	67.9	542	223.0		zzzz589,zzzz880
115346	66.73	544	223.0		zzzz590,zzzz668
109249	68.25	567	223.0		zzzz603,zzzz614
103325	68.74	547	223.0		zzzz616,zzzz880
94921	72.62	526	223.0		zzzz635,zzzz918
91078	68.0	550	223.0		zzzz644,zzzz683
89823	69.7	538	223.0		zzzz647,zzzz756
88532	69.04	533	223.0		zzzz650,zzzz705
83202	68.5	546	223.0		zzzz663,zzzz707
77658	69.33	538	223.0		zzzz677,zzzz684
75325	69.47	547	223.0		zzzz683,zzzz847
70762	70.5	522	223.0		zzzz695,zzzz739
67059	68.91	534	223.0		zzzz705,zzzz760
65909	69.62	530	223.0		zzzz709,zzzz723
60608	69.66	534	223.0		zzzz724,zzzz746
58889	68.72	537	223.0		zzzz729,zzzz735
58239	69.14	525	223.0		zzzz731,zzzz846
28118	67.82	547	223.0		zzzz836,zzzz903
431568	71.64	536	223.0		zzz1016,zzzz987
381210	63.06	582	223.0		zzzz151,zzzz946
371706	68.03	563	223.0		zzzz162,zzzz493
371705	67.19	570	223.0		zzzz162,zzzz946
365697	64.49	566	223.0		zzzz169,zzzz928
158796	68.98	561	223.0		zzzz485,zzzz929
156046	66.97	554	223.0		zzzz490,zzzz513
156045	66.43	560	223.0		zzzz490,zzzz944
154703	68.14	565	223.0		zzzz493,zzzz928
144144	65.64	553	223.0		zzzz519,zzzz890
142824	59.82	657	223.0		zzzz529,zzzz533
131116	67.88	548	223.0		zzzz558,zzzz737
131115	68.37	547	223.0		zzzz558,zzzz871
131114	68.34	537	223.0		zzzz558,zzzz882
130612	70.24	551	223.0		zzzz559,zzzz649
129098	65.23	555	223.0		zzzz562,zzzz683
127085	67.98	559	223.0		zzzz566,zzzz603
127084	69.05	546	223.0		zzzz566,zzzz644
127083	67.52	548	223.0		zzzz566,zzzz683
126588	72.41	540	223.0		zzzz567,zzzz626
115830	67.84	541	223.0		zzzz589,zzzzz66
111588	66.67	552	223.0		zzzz598,zzzz722
102874	68.72	537	223.0		zzzz617,zzzzz61
101974	68.68	546	223.0		zzzz619,zzzz684
91077	70.55	523	223.0		zzzz644,zzzzz34
90225	67.86	529	223.0		zzzz646,zzzz663
88531	68.8	532	223.0		zzzz650,zzzz846
73757	70.02	527	223.0		zzzz687,zzzz732
68151	70.45	528	223.0		zzzz702,zzzz755
68150	70.43	531	223.0		zzzz702,zzzz902
67058	69.96	526	223.0		zzzz705,zzzz724
60960	69.85	524	223.0		zzzz723,zzzz724
60959	71.29	519	223.0		zzzz723,zzzz851
57897	70.86	532	223.0		zzzz732,zzzz868
48800	70.04	544	223.0		zzzz760,zzzz762
48799	69.79	533	223.0		zzzz760,zzzz902
30728	72.46	552	223.0		zzzz825,zzzz861
28117	70.35	543	223.0		zzzz836,zzzz861
27656	71.53	548	223.0		zzzz838,zzzzz58
23240	69.98	523	223.0		zzzz858,zzzz902
9459	65.14	568	223.0		zzzz947,zzzzz71
1373	65.02	566	223.0		zzzzz71,zzzzz84
377746	63.41	593	223.0		zzzz155,zzzz161
370001	66.49	561	223.0		zzzz164,zzzz485
91076	69.5	541	223.0		zzzz644,zzzz845
89822	70.19	530	223.0		zzzz647,zzzz695
89821	69.87	521	223.0		zzzz647,zzzz739
83201	69.98	533	223.0		zzzz663,zzzz665
81626	69.1	534	223.0		zzzz667,zzzz702
80409	68.15	540	223.0		zzzz670,zzzz754
80408	67.59	543	223.0		zzzz670,zzzz768
80407	70.42	524	223.0		zzzz670,zzzz918
70761	70.5	522	223.0		zzzz695,zzzz846
66333	69.45	550	223.0		zzzz707,zzzz992
65573	67.67	532	223.0		zzzz710,zzzz735
58557	72.22	522	223.0		zzzz730,zzzz918
57896	71.97	528	223.0		zzzz732,zzzz761
55534	70.71	519	223.0		zzzz739,zzzz902
50389	69.83	537	223.0		zzzz755,zzzz756
26975	71.54	520	223.0		zzzz841,zzzz918
25399	68.57	544	223.0		zzzz848,zzzzz66
22606	68.55	550	223.0		zzzz861,zzzz903
1750	81.86	463	223.0		zzzzz59,zzzzz63
1347	63.9	590	223.0		zzzzz72,zzzzz73
445462	67.22	546	223.0		zzz1001,zzzz984
445461	66.61	554	223.0		zzz1001,zzzz998
417734	70.13	529	223.0		zzzz110,zzzz705
367418	67.74	558	223.0		zzzz167,zzzzz84
366559	66.31	561	222.0		zzzz168,zzzz486
133159	71.03	542	223.0		zzzz554,zzzz880
131113	66.55	559	223.0		zzzz558,zzzz722
127591	69.1	547	223.0		zzzz565,zzzz588
125592	68.27	542	223.0		zzzz569,zzzz570
125591	68.62	545	223.0		zzzz569,zzzz681
125590	67.96	540	223.0		zzzz569,zzzz835
125089	67.96	543	223.0		zzzz570,zzzz589
115829	70.15	546	223.0		zzzz589,zzzz836
109248	70.07	558	223.0		zzzz603,zzzz861
109247	68.93	544	223.0		zzzz603,zzzz882
106498	70.58	537	223.0		zzzz609,zzzz616
94920	69.0	529	223.0		zzzz635,zzzz784
94919	71.38	538	223.0		zzzz635,zzzz834
89820	69.64	527	223.0		zzzz647,zzzz701
89819	70.51	529	223.0		zzzz647,zzzz768
81221	67.46	544	223.0		zzzz668,zzzz903
76841	69.38	529	223.0		zzzz679,zzzz724
73030	68.67	533	223.0		zzzz689,zzzz828
67057	70.07	538	223.0		zzzz705,zzzz730
67056	68.55	531	223.0		zzzz705,zzzz756
67055	70.48	525	223.0		zzzz705,zzzz902
66332	70.56	540	223.0		zzzz707,zzzz784
65572	69.73	522	223.0		zzzz710,zzzz734
62698	70.5	522	223.0		zzzz718,zzzz902
60958	68.16	537	223.0		zzzz723,zzzz756
60957	67.78	537	223.0		zzzz723,zzzz784
58556	70.84	535	223.0		zzzz730,zzzz841
57895	71.26	515	223.0		zzzz732,zzzz918
56876	69.36	532	222.0		zzzz735,zzzz865
56218	66.67	561	223.0		zzzz737,zzzzz66
50388	69.89	528	223.0		zzzz755,zzzz858
48487	72.49	527	223.0		zzzz761,zzzz841
383830	65.68	574	222.0		zzzz148,zzzz163
377745	67.25	568	222.0		zzzz155,zzzz165
377744	68.35	553	222.0		zzzz155,zzzz167
368282	65.18	560	222.0		zzzz166,zzzz486
129097	67.1	535	222.0		zzzz562,zzzz824
115828	70.09	545	222.0		zzzz589,zzzz816
115345	66.73	544	222.0		zzzz590,zzzz836
115344	68.13	546	222.0		zzzz590,zzzzz19
94918	69.61	543	222.0		zzzz635,zzzz663
94917	69.85	534	222.0		zzzz635,zzzz709
90224	70.53	526	222.0		zzzz646,zzzz732
89818	68.43	548	222.0		zzzz647,zzzz974
83200	67.66	535	222.0		zzzz663,zzzz724
83199	68.29	533	222.0		zzzz663,zzzz752
82423	70.43	531	222.0		zzzz665,zzzz679
82422	69.39	526	222.0		zzzz665,zzzz846
80406	67.47	541	222.0		zzzz670,zzzz762
78441	68.22	535	222.0		zzzz675,zzzz702
78440	68.43	529	222.0		zzzz675,zzzz858
76840	67.79	534	222.0		zzzz679,zzzz752
60956	70.27	528	222.0		zzzz723,zzzz761
60607	69.25	530	222.0		zzzz724,zzzz760
56875	67.54	536	222.0		zzzz735,zzzz846
56217	68.11	555	222.0		zzzz737,zzzz880
55533	69.14	538	222.0		zzzz739,zzzz760
51961	71.74	552	222.0		zzzz750,zzzz825
48181	70.88	522	222.0		zzzz762,zzzz902
46358	70.34	526	222.0		zzzz768,zzzz862
28347	69.89	548	222.0		zzzz835,zzzzz19
1749	72.08	530	222.0		zzzzz59,zzzzz64
445460	65.01	563	222.0		zzz1001,zzz1009
371704	63.48	575	222.0		zzzz162,zzzz928
367417	68.01	544	222.0		zzzz167,zzzzz71
337474	67.84	541	222.0		zzzz203,zzzz985
139190	55.92	701	222.0		zzzz541,zzzz895
131640	68.81	545	222.0		zzzz557,zzzz823
125088	69.36	545	222.0		zzzz570,zzzz835
115827	70.07	538	222.0		zzzz589,zzzz821
109246	67.26	559	222.0		zzzz603,zzzz871
103324	67.7	548	222.0		zzzz616,zzzz644
94916	69.27	537	222.0		zzzz635,zzzz768
91914	70.0	530	222.0		zzzz642,zzzz647
91913	69.32	528	222.0		zzzz642,zzzz695
90223	69.29	521	222.0		zzzz646,zzzz701
90222	69.75	529	222.0		zzzz646,zzzz974
89817	70.94	530	222.0		zzzz647,zzzz709
89816	71.48	519	222.0		zzzz647,zzzz918
83198	69.89	528	222.0		zzzz663,zzzz851
80405	67.46	544	222.0		zzzz670,zzzz707
78439	68.3	530	222.0		zzzz675,zzzz733
67054	69.85	534	222.0		zzzz705,zzzz834
66688	69.58	526	222.0		zzzz706,zzzz902
60955	69.66	534	222.0		zzzz723,zzzz746
60606	68.3	530	222.0		zzzz724,zzzz865
51315	70.34	526	222.0		zzzz752,zzzz902
46357	70.1	525	222.0		zzzz768,zzzz902
28346	69.72	545	222.0		zzzz835,zzzz836
28116	69.78	546	222.0		zzzz836,zzzz848
25398	67.09	556	222.0		zzzz848,zzzzz65
24751	70.72	526	222.0		zzzz851,zzzz868
24750	69.61	533	222.0		zzzz851,zzzz992
445459	67.29	538	222.0		zzz1001,zzzz967
376882	64.91	570	222.0		zzzz156,zzzz485
376881	64.75	573	222.0		zzzz156,zzzzz71
370844	65.42	587	222.0		zzzz163,zzzzz17
369133	65.26	567	222.0		zzzz165,zzzz928
368281	64.43	582	222.0		zzzz166,zzzzz17
158795	65.08	587	222.0		zzzz485,zzzzz17
133158	70.46	545	222.0		zzzz554,zzzz871
130611	67.38	558	222.0		zzzz559,zzzz722
130610	68.67	549	222.0		zzzz559,zzzzz19
129096	66.97	551	222.0		zzzz562,zzzz861
125589	67.59	540	222.0		zzzz569,zzzz861
117272	68.02	541	222.0		zzzz586,zzzzz66
115826	68.92	547	222.0		zzzz589,zzzz715
111124	71.11	533	222.0		zzzz599,zzzz838
107414	68.58	541	222.0		zzzz607,zzzzz66
104229	68.88	543	222.0		zzzz614,zzzz835
103323	68.55	550	222.0		zzzz616,zzzz666
91912	68.18	528	222.0		zzzz642,zzzz865
91075	69.4	549	222.0		zzzz644,zzzz649
91074	66.79	548	222.0		zzzz644,zzzzz25
90221	69.89	528	222.0		zzzz646,zzzz687
90220	68.55	531	222.0		zzzz646,zzzz746
88530	69.22	536	222.0		zzzz650,zzzz732
83197	68.48	533	222.0		zzzz663,zzzz762
78438	68.49	530	222.0		zzzz675,zzzz846
78053	69.13	515	222.0		zzzz676,zzzz723
76839	68.41	535	222.0		zzzz679,zzzz732
76838	69.57	529	222.0		zzzz679,zzzz865
76082	66.97	542	222.0		zzzz681,zzzz823
76081	69.68	554	222.0		zzzz681,zzzzz25
68519	68.95	525	222.0		zzzz701,zzzz706
68518	70.17	523	222.0		zzzz701,zzzz762
67053	69.51	528	222.0		zzzz705,zzzz841
65571	69.52	525	222.0		zzzz710,zzzz754
60605	69.83	527	222.0		zzzz724,zzzz842
60604	69.11	531	222.0		zzzz724,zzzz974
58888	69.0	529	222.0		zzzz729,zzzz850
58555	71.48	533	222.0		zzzz730,zzzz732
58554	71.02	528	222.0		zzzz730,zzzz974
57894	70.86	532	222.0		zzzz732,zzzz746
57893	68.87	530	222.0		zzzz732,zzzz752
57206	71.13	523	222.0		zzzz734,zzzz842
56874	69.26	527	222.0		zzzz735,zzzz739
50685	69.52	525	222.0		zzzz754,zzzz865
50387	70.08	528	222.0		zzzz755,zzzz762
48798	66.98	536	222.0		zzzz760,zzzz846
31702	67.79	534	222.0		zzzz821,zzzz880
26974	69.14	525	222.0		zzzz841,zzzz846
25833	69.85	534	222.0		zzzz846,zzzz862
24749	70.86	525	222.0		zzzz851,zzzz859
24748	69.83	527	222.0		zzzz851,zzzz918
18415	69.36	545	222.0		zzzz882,zzzzz19
417733	68.72	537	221.0		zzzz110,zzzz865
382961	65.58	581	221.0		zzzz149,zzzzz17
381209	65.12	559	221.0		zzzz151,zzzz158
366558	65.38	569	221.0		zzzz168,zzzz947
134195	69.5	518	221.0		zzzz552,zzzz731
117271	68.94	557	221.0		zzzz586,zzzz683
102873	68.07	548	221.0		zzzz617,zzzzz53
100632	68.91	550	221.0		zzzz622,zzzz838
91911	68.75	528	221.0		zzzz642,zzzz755
91073	67.03	558	221.0		zzzz644,zzzzz65
80404	67.84	541	221.0		zzzz670,zzzz746
76837	67.17	533	221.0		zzzz679,zzzz760
70760	70.68	532	221.0		zzzz695,zzzz761
70759	69.71	525	221.0		zzzz695,zzzz768
68149	69.53	535	221.0		zzzz702,zzzz732
68148	69.75	529	221.0		zzzz702,zzzz842
65570	69.75	519	221.0		zzzz710,zzzz718
65569	70.31	522	221.0		zzzz710,zzzz768
63783	68.68	546	221.0		zzzz715,zzzz821
57892	70.23	524	221.0		zzzz732,zzzz858
22605	67.45	550	221.0		zzzz861,zzzz899
438800	69.24	556	221.0		zzz1008,zzzz977
420529	67.72	536	221.0		zzzz107,zzzz589
417732	68.8	532	221.0		zzzz110,zzzz670
417731	69.92	532	221.0		zzzz110,zzzz732
382960	65.3	559	221.0		zzzz149,zzzz163
377743	65.51	574	221.0		zzzz155,zzzz163
375158	65.03	569	221.0		zzzz158,zzzz169
365696	64.56	570	221.0		zzzz169,zzzz486
144117	62.57	569	221.0		zzzz522,zzzz890
133157	70.4	544	221.0		zzzz554,zzzz848
130609	68.78	551	221.0		zzzz559,zzzz861
129095	66.67	552	221.0		zzzz562,zzzzz19
115825	69.81	540	221.0		zzzz589,zzzz835
110191	72.36	550	221.0		zzzz601,zzzz632
108798	67.9	542	221.0		zzzz604,zzzz617
107413	67.75	552	221.0		zzzz607,zzzz644
91910	68.93	531	221.0		zzzz642,zzzz732
91521	67.32	560	221.0		zzzz643,zzzz829
90219	68.38	525	221.0		zzzz646,zzzz723
89815	68.43	529	221.0		zzzz647,zzzz846
89814	70.38	530	221.0		zzzz647,zzzz868
83196	69.61	533	221.0		zzzz663,zzzz834
82421	70.2	537	221.0		zzzz665,zzzz702
70758	69.06	530	221.0		zzzz695,zzzz858
70757	69.58	526	221.0		zzzz695,zzzz859
70756	69.36	532	221.0		zzzz695,zzzz992
66687	69.51	528	221.0		zzzz706,zzzz865
65908	69.89	528	221.0		zzzz709,zzzz902
60603	68.89	540	221.0		zzzz724,zzzz735
53236	69.1	534	221.0		zzzz746,zzzz842
50386	69.11	531	221.0		zzzz755,zzzz974
48180	69.75	529	221.0		zzzz762,zzzz841
30727	69.03	565	221.0		zzzz825,zzzz903
30726	71.71	555	221.0		zzzz825,zzzzz19
26973	70.86	525	221.0		zzzz841,zzzz851
26972	69.02	523	221.0		zzzz841,zzzz865
22398	69.09	537	221.0		zzzz862,zzzz868
21788	69.25	530	221.0		zzzz865,zzzz868
21175	70.42	524	221.0		zzzz868,zzzz902
11580	64.84	583	221.0		zzzz929,zzzzz17
9458	63.64	583	221.0		zzzz947,zzzzz17
3852	62.31	589	221.0		zzzzz17,zzzzz71
3705	68.05	554	221.0		zzzzz19,zzzzz66
381208	64.61	568	221.0		zzzz151,zzzz156
376011	73.4	500	221.0		zzzz157,zzzz159
373448	72.8	511	221.0		zzzz160,zzzz946
158237	66.19	562	221.0		zzzz486,zzzz490
131112	68.65	555	221.0		zzzz558,zzzz586
131111	69.31	554	221.0		zzzz558,zzzz602
118731	67.84	541	221.0		zzzz583,zzzz590
117270	68.32	546	221.0		zzzz586,zzzz848
89409	72.09	516	221.0		zzzz648,zzzz744
86490	68.38	544	221.0		zzzz655,zzzz681
78437	68.18	528	221.0		zzzz675,zzzz754
78052	66.98	527	221.0		zzzz676,zzzz858
77657	66.36	544	221.0		zzzz677,zzzz829
76836	69.2	526	221.0		zzzz679,zzzz841
75713	68.89	524	221.0		zzzz682,zzzz828
70755	69.9	525	221.0		zzzz695,zzzz762
68517	67.78	537	221.0		zzzz701,zzzz760
68147	68.29	533	221.0		zzzz702,zzzz865
65568	69.04	520	221.0		zzzz710,zzzz841
63782	67.56	561	221.0		zzzz715,zzzz722
63781	66.61	554	221.0		zzzz715,zzzz861
60602	70.0	530	221.0		zzzz724,zzzz732
57544	70.75	523	221.0		zzzz733,zzzz902
48486	70.51	529	221.0		zzzz761,zzzz902
25618	67.72	539	221.0		zzzz847,zzzz880
13245	69.19	516	221.0		zzzz918,zzzz990
6219	67.91	561	221.0		zzzz977,zzzz980
442601	68.72	553	220.0		zzz1004,zzzz977
418696	67.47	538	220.0		zzzz109,zzzz566
418695	67.16	539	220.0		zzzz109,zzzz589
381207	65.95	561	220.0		zzzz151,zzzz929
374306	72.16	510	220.0		zzzz159,zzzz929
370000	64.17	575	220.0		zzzz164,zzzz945
133156	69.43	543	220.0		zzzz554,zzzz861
133155	70.38	547	220.0		zzzz554,zzzzz19
115824	68.4	538	220.0		zzzz589,zzzz871
91909	67.3	526	220.0		zzzz642,zzzz675
91908	70.23	524	220.0		zzzz642,zzzz902
88982	69.59	536	220.0		zzzz649,zzzz681
83195	67.22	546	220.0		zzzz663,zzzz859
80403	66.85	543	220.0		zzzz670,zzzz706
73756	68.5	527	220.0		zzzz687,zzzz723
73755	69.75	529	220.0		zzzz687,zzzz865
70754	69.45	527	220.0		zzzz695,zzzz733
70753	68.86	533	220.0		zzzz695,zzzz735
70752	69.79	533	220.0		zzzz695,zzzz746
68516	70.44	521	220.0		zzzz701,zzzz851
67052	68.37	528	220.0		zzzz705,zzzz784
65907	68.5	527	220.0		zzzz709,zzzz865
61316	65.05	555	220.0		zzzz722,zzzz903
55532	70.5	522	220.0		zzzz739,zzzz862
50385	70.62	531	220.0		zzzz755,zzzz851
32945	69.66	557	220.0		zzzz816,zzzz861
22397	72.0	525	220.0		zzzz862,zzzz974
423265	64.31	566	220.0		zzzz104,zzzzz73
381206	66.97	551	220.0		zzzz151,zzzz167
376010	64.78	582	220.0		zzzz157,zzzzz17
374305	72.62	504	220.0		zzzz159,zzzz486
374304	71.46	508	220.0		zzzz159,zzzz947
369999	65.27	573	220.0		zzzz164,zzzz486
367416	66.42	548	220.0		zzzz167,zzzz947
365695	64.49	583	220.0		zzzz169,zzzzz17
146283	64.1	585	220.0		zzzz513,zzzzz17
130608	66.06	551	220.0		zzzz559,zzzz590
115343	68.12	549	220.0		zzzz590,zzzz835
104228	70.37	540	220.0		zzzz614,zzzz649
103322	68.37	547	220.0		zzzz616,zzzz848
102425	70.13	549	220.0		zzzz618,zzzz634
100631	69.52	538	220.0		zzzz622,zzzzz53
90218	68.95	525	220.0		zzzz646,zzzz755
89813	68.17	531	220.0		zzzz647,zzzz902
88981	68.85	549	220.0		zzzz649,zzzz683
78436	67.59	540	220.0		zzzz675,zzzz868
76835	67.66	535	220.0		zzzz679,zzzz735
75324	67.51	554	220.0		zzzz683,zzzzz66
70751	69.16	522	220.0		zzzz695,zzzz723
70750	70.53	526	220.0		zzzz695,zzzz918
67051	69.27	524	220.0		zzzz705,zzzz859
66686	69.96	526	220.0		zzzz706,zzzz710
63780	67.82	547	220.0		zzzz715,zzzz871
62697	69.22	523	220.0		zzzz718,zzzz862
62023	69.44	517	220.0		zzzz720,zzzz780
60954	67.85	535	220.0		zzzz723,zzzz760
57891	69.38	529	220.0		zzzz732,zzzz762
56216	69.0	542	220.0		zzzz737,zzzz882
50384	69.6	523	220.0		zzzz755,zzzz841
50383	69.14	525	220.0		zzzz755,zzzz918
48485	70.15	526	220.0		zzzz761,zzzz865
31701	71.0	538	220.0		zzzz821,zzzzz19
30971	67.29	538	220.0		zzzz824,zzzz861
28581	65.81	544	220.0		zzzz834,zzzz992
26066	68.84	536	220.0		zzzz845,zzzzz19
1714	70.99	555	220.0		zzzzz60,zzzzz64
1047	68.31	549	220.0		zzzzz98,zzzzz99
425109	66.26	569	220.0		zzzz102,zzzz103
418694	66.36	547	220.0		zzzz109,zzzz861
154702	67.14	563	220.0		zzzz493,zzzzz71
131110	67.15	551	220.0		zzzz558,zzzzz25
115342	67.46	547	220.0		zzzz590,zzzz597
115341	67.33	551	220.0		zzzz590,zzzzz25
110654	68.67	549	220.0		zzzz600,zzzz666
106035	66.85	552	220.0		zzzz610,zzzz681
104227	66.85	549	220.0		zzzz614,zzzz683
[truncated: 443,387 more rows]
