# Supplementary material for: Discovery of several thousand highly diverse circular DNA viruses
Source: eLife journal article supplement (doi:10.7554/elife.51971), 2020-02-03
Supplement: fig2-figsupp1-data3 [file elife-51971-fig2-figsupp1-data3-v1.cys › CytoscapeSession-2019_08_05-17_08/tables/36-all_my_seqs_genbank_ssDNA1_domains_micro_MCP_fasta+Full+Network/SHARED_ATTRS-org.cytoscape.model.CyNode-36+shared+node.cytable]

CyCSV-Version	1
SUID	Description	seq_source	Sequence	Sequence Length	Sequence Source	shared name
java.lang.Long	java.util.List<java.lang.String>	java.lang.String	java.lang.String	java.lang.Integer	java.lang.String	java.lang.String
	mutable	mutable	mutable	mutable	mutable
36 shared node
1046	my_seqs_redsnapper_r1_2ct004.4@PF02305.16	my_seqs	MSIFSKVAMPRPPSNTFDLSHSRKFSGHIGELMPISVMECVPGDKFSIKATNLTRFAPLITPIMHKASVYCHFFFVPNRILWNNWETFIAGSVDGQFPNSDPADPAYSEPAFPKMNISAVQSEAGSLPDYIGLPQQYNVSGAATLPINDVSALPFAGYQKIYNDYFRDENLIVPDEVTLANGTQSVGDTVKLVKLQKRAWQHDYYTSALPWTQKGPEATLPLGTTAPITYQSGSPNYLRNYLTGNAIVSTSFPEIETDANASITVDNPTPEIINWDNSSSLSANLSGATAASINELRRAFRLQEWLERNARGGTRYIEIIMAHFGVQSSDARLQRPEFLGGSSTPITISEVLQTSDNSGGADGGPQGNMAGHGVSVGSSNYVNYKCEEHGYIIGIMSVM…	535	USER	zzz1000
1045	my_seqs_redsnapper_r1_2ct005.3@PF02305.16	my_seqs	MPMKNTRVGSAKNYQFSEVPRANIRRSTFNRSHGYKTTFNSGELIPVFFEEALPGDSFNVNMTAFARLSTPINPTMDNLRMQTHFFAVPLRLLWEDFEEFMGETKTYKAAGATRLDGTPDFTVAAPIPPTITAGVSGEAELGLSDYLSIPTKVASLEFSALFHRAYYKIFNDWWRDENLQAPLDYPLTSGADATTYEVQKRNKIHDYFSSALPWPQKGADVALPLGTSAPIKVQQFAGTSALDDKYFGIEGGTTHYSESLFGNATENTLTGKVDIVSGDNANLYTDLTSATAATINSLRLAFATQRYLEKNALGGSRYIEIILNHFGVSSPDSRLQRSEFLGSGTSLINISPIAQTSSTDAVSPQANLSAIGTGLIQGHGFTKSFTEHSIVIGLVSARP…	541	USER	zzz1001
1044	my_seqs_redsnapper_r1_2ct006.5@PF02305.16	my_seqs	MKKGNDSHFARVAQVDIKRSLFPRPSTHKTTMNADLLTPIFIDEVLPGDTFKMRSSSFCRLSNPIKPSMDNLHTDVHYFFVPNRLLWDNWEKFMGAQDNPGDSVDYLVPKVRVDALLDEQYVNTMPDYFGIPNPHTDADDPTIKGHHEVCAFPFRAYNLIFNEWYRDQNLQDSVYITKSDETVSADNYSLLKRGKRHDYFTSSLPFPQKGEPVGLSLSGDLPIVGTGTAPKFSGDEAGEGREMYIPEPADDGRVHIHSSIKGHINWDSTELIGVMDGVTAVTINALRQAFQLQKFLERDARSGTRYIEIIKSHFGVTNPDYRLQRPEYLGGTKDNVVFTTVAQTSESATTPQGNLSALAISSGSGHCFNHSFTEHGFIIGIASIYGDLTYQSGINRMWK…	535	USER	zzz1002
1043	my_seqs_redsnapper_r1_2ct007.4@PF02305.16	my_seqs	MAHKSNMTHSFSNVPTADIPRSVFNRSHVHKTTFNAGDLIPIYVDEALPGDTFKLNAALLARMQTPIVPIMDNLFLETFFFAVPNRLLWDNWEKMNGARDNPTDSVDYLVPQIPIQNQPIGSMSDYFGLQIQKAGEYKVSALPFRAYNLIYNEWFRDQNIQNSEPINTGDSDDVISDYHVMKRCKRPDYFTSCLPWPQKGADVMLPLGDTAPVIGDSTSLGLMDGTNALGLCSAPSGTSLTGRQTYETSTIGDVVSTGGNPVNARVLGVSDLASQSGLIADLSDATAATINNIREAFQVQRMLEKDARGGTRYVELLKQHFKVVSPDFRLQRPEYLGGGSQRISFSSVPQTSETDTTEQGRLGAFALGASPRNGFNKSFVEHCTIIGIANIRADITYQQ…	537	USER	zzz1003
1042	my_seqs_redsnapper_r1_2ct008.3@PF02305.16	my_seqs	MKNPHRANTRINSPSYKQFVEVPHADIQRSTFDRSFGHKTTFDAGELIPIYADEMLPGDTFSCNLTAFARLATPIHPTMDNAFMDTHFFSVPIRLIWDDFEEFMGETKTYTASGTARLDETPDFTVAAPIPPTITAGGSGEAEGSLADYLGVPTKQAGLVFSAMWHRAYTLIWNDWFRDENLQKQATLLTTSGTDATAYAVLNRGKRHDYFTSALPWPQKGADVTLPLGTQAPIAYENIAGTPSVQDKYTVLGRNGSGVAYLGYGDTWGTNTDATPNSSDQALYADLSSATSATINQLRLAFATQKFLERQARGGSRYIEVILSHFNVTSPDARLQRPQYLGGGSSPVNISPVAQTSSTDTTSPQGNLSAIGTSVLSGHSFTYSATEHCILIGVVSVRT…	541	USER	zzz1004
1041	my_seqs_redsnapper_r1_2ct009.3@PF02305.16	my_seqs	MKNPHRANTRINSPSYKQFVEVPHADIQRSTFDRSFGHKTTFDAGELIPIYADEMLPGDSFSCKLTAFARLATPIHPTMDNAFMDTHFFSVPLRLLWDDFEEFMGETKTYTASGSARLDETPDFTVAAPVAPTITAGVSGEAEGSLADYLGVPTKQAGLIFSALWHRAYTLIWNDWFRDENLQKQATLDTTSGTDSTAYAVLNRGKRHDYFTSALPWPQKGADVTLPLGTTAPVYGNGTGIGLTDGSTNTSLWQTTSDGLSTANASFGAATGAAASGSAITTGNVLGVVQTGASGLAADLSSATSATINQLRLAFATQKFLERQARSGSRYIEVIKGHFNVTSPDARLQRPQYLGGGSSPVNISPVAQTSSTDTTSPQGNLSAIGTSVLSGHSFTYSAT…	554	USER	zzz1005
1040	my_seqs_redsnapper_r1_2ct010.5@PF02305.16	my_seqs	MSIFSKVAMPRPQTNTFDLSHDRKFSGKIGELMPISVMEVVPGDKFNIKATNLTRFAPLITPIMHQASVYCHFFFVPNRILWPNWENFISGGEDGLADPTFPTVDLTIPTQYGVQTLADYLGLPTGNQLQNVSALPFAAYQKIYQDYYRDENLITKTDVSVSDGTQSAIDTIELASMKKRAWQHDYFTSALPWTQRGPEATIPLGSTAPISFANTGRATEIRNNSTGSVIPSTSFDAVASFQTNVGGELYADLPAQTYLDIDNSANLEVDLSTATASSINDLRRAFRLQEWLERNARGGARYIEIITAHFGVRSSDARLQRPEFLGGSSTPITISEVLQTSNTAGATGSDATPQGNMAGHGVSVGSSNYVSYRAEEHGYIIGIMSVMPKTAYQQGVPKH…	524	USER	zzz1006
1039	my_seqs_redsnapper_r1_2ct011.3@PF02305.16	my_seqs	MKQPRNHTTNTKIGSANYHQFAEVPHLNIPRSTFDRSHGYKTTFESGMLVPILVDEALPGDTFSTKMTAFARLSTPIAPIMDNMYMDTHFFSIPVRLVWDNWQQFMGETEPSDPVTTPPAAYAHNVPQMVSPAGGYLEQTLSDYLTIPTKVAALTHSSLWHRAYNLVWNQWFRDENLQDSIVVDTDNGPDTSTDYVLKRRGKRHDYFTSCLPWPQKGAAVDLPTGTSAPVKYSQISGNTDSVDQYVAVDGNDYRGYGTAPATYTGDLVPNAKKQMYADLTDATAVTINELRLAFATQRYLEIQARGGTRYIEVIKAHFNVSSPDGRLQRSEYLGGGSSPVNISPVAQTTSTDASGNTTPQGNLAAIGTTVLSDHGFTKSFTEHCLIIGLVSVRADLTYQ…	535	USER	zzz1007
1038	my_seqs_redsnapper_r1_2ct012.3@PF02305.16	my_seqs	MKNPHRANTRINSPSYKQFVEVPHADIQRSTFDRSFGHKTTFDAGELIPIYADEMLPGDTFSCQLTAFARLATPIHPTMDNAFMDTHFFSVPLRLVWDDFEEFMGETKTYTASGSARLDETPDFTVAAPVAPTITAGGSGEAEGSLADYLGVPTKQAGLVFSALWHRAYTLIWNDWFRDENLQKQATLDTTSGSDSTAYAVLNRGKRHDYFTSALPWPQKGADVTLPLGTTAPVTFDTFSGTDVTDNYPRIGGTGTATPTMHMTTEYGADTGVTDLPSGSLNNLSTDLSSATAATINQLRLAFATQKFLERQARSGSRYIEVIKGHFNVTSPDARLQRPQYLGGGSSPVNISPVAQTSSTDSTSPQGNLSAIGTSVLSGHSFTYSATEHCILIGVVSVR…	542	USER	zzz1008
1037	my_seqs_redsnapper_r1_2ct013.3@PF02305.16	my_seqs	MPMKNPHKYNTRIGSAQQHQFSEVPHADIQRSTFDRSHGLKTTFNAGELVPIYVDEALPGDTFSCNLTAFSRLATPIHPTMDNAFMDSHFFAVPVRLVWDDFEEFMGETKTYKAAGSDRLDGTPDFTVAAPVPPTITAGGSGEAEQSLSDYFGIPTKVAGLEFSALWHRAYTLVWNDWFRDENLQAPKTLLTTSGADATTYALLNRGKKHDYFTSSLPWPQKGADVTIPLGTTATVFGDGKALGLTDGTNTGGMNSGSSSTGFQLKGNQGNLGQNVGSAAAGASMATEVTYGVVTTGDSGLYADLTDATSATINQLRLAFATQKFLEIQARGGSRYIEVIKNHFNVTSPDARLQRPEYLGGGSSPVNISPVAQTSSTDATTPQGNLSAIGTTVLSGHSF…	559	USER	zzz1009
1036	my_seqs_redsnapper_r1_2ct014.4@PF02305.16	my_seqs	MFGPQGNLPSTLTKDFSRIPKVDIQRSVFNRDHGLKTTFDAGYLVPIFYDEVLPGDTFQMDANGFGRLATPINPFMDNLYIETFFFAVPYRLIWDNWVKFCGEQTNPGDSTDYLVPTTTTTATNSSLYDYFGVPTDVNLTFNNLCGRAYALIWNDWFRDENLQDSVTVDKGDGPDNASDYVLLKRGKRHDYFTSSLPWPQKGEAVALPLGTSAPVYGNGKTMGVTDGTNLMGLAGRGSDGDIFQWTGLYNTDVGTARTGSTNTSDSLGLVSSGESGIYADLTSATAATINQLREAFQIQRLYEKDARGGTRYTEVIQSHFGVTSPDARLQRPEYLGGGKDRINVNPVAQTSSTDTTTPQGNLSGYATTGFMGHKFSKSFTEHSVIIGLANVYADLTYQQ…	535	USER	zzz1010
1035	my_seqs_seabass_ms2_2ct198.5@PF02305.16	my_seqs	MLGGRMGNLPTVMKHEFSRVPRADIQRSTFNRSHGLKTTFDSGYLVPIFVDEVVPGDSFNVRAHGFGRLATPIYPVMDNLYVETFFFFVPNRLIWDNWEKFNGAQDNPGDSTSYLVPQLTLGSGVSIAGDSLYDYMGLPTGVNGIAFNNLHGRAYNLCYNEWFRDENLQDSVVVDKGDGPDNISDYTLLKRGKRHDYFTSCLPWPQKGDAVNLPLGTTAPIVGYNVPFDASTSGNNYINVRHEGGDLRHLSSSGGSVIGYNA	262	USER	zzz1011
1034	my_seqs_seabass_ms2_2ct198.6@PF02305.16	my_seqs	MQPVPQTSSTDATSPQGNLSAMGTVGVQGHGFSKSFVEHGVIIGMACVFADLTYQQGMNRMWSRRDRWDFYWPALAHLGEQAVLNEEIYTQGTSADQDVFGYQERYAEYRYKPSQITGKMRSNAAGSLDVWHLSQDFSSVPVLNASFIEENPPIDRVVALPTEPDLLFDWYFDMKCTRPMPTYSVPGLIDHF	192	USER	zzz1012
1033	my_seqs_seabass_ms2_2ct200.1@PF02305.16	my_seqs	MKSVMSHQFSQVPRADIQRSKFDRSHGVKTTFDSGYLIPVFVDEALPGDTFNLRTTGFARLATPIYPVMDNINLDTFYFSVPVRLVWDNFKRMMGEQRNPKDSTDFICPVVKSPVGGFEELSLFDYFGIPTKVPNLSINATFSRAYNLIWNEWFRDQNLQDSVVVDLDDTDDDPADYVLLKRGKRHDYFTSALPWPQKGPSVDLGLSGNAPVGFASGVPGDTVNVSQHGSSLFRELGTAGPRLILDADVSENSRSLTADMNDVTAVTINQLRTAFQVQKMLEKDARGGTRYIEMIRSHFGVTSPDARLQRPEYLGGGSSRVNITPVAQTSGSDGSTVQGNLAAMGTVSFQGNGFVKSFTEHCVIIGMVCVRADLTYQQGLNRMFTRSDKLDFYWPALSH…	514	USER	zzz1013
1032	my_seqs_seabass_ms2_2ct201.3@PF02305.16	my_seqs	MLGGPMGTLPTTLSHEFSRVPQAEIQRSTFNRVHGLKTTFDSGQLVPIYVDEVLPGDTFQMNATGFGRLATPIYPIMDNMYVETFFFFVPNRLVWDNWEKFNGAQDDPGDSTDFLVPQIQGATVAENSLFDYMGLPTQIAGIDFNNLHGRGMNLIWNEWFRDENLQDSLPVPKGDGPDNYTDFTIQKRGKRHDYFTSALPWPQKGDAVDLPLGTSAPVFTETNSGHLTYKYLGVDQYMNAASTVVVPGGAATNTVPLMADLSAATAATINQLREAFQIQRLYERDARGGTRYTEILQSHFGVTSPDARLQRPEYLGGQKTPIQMQAIPQTSSTDTTSPQGNLSALGTASSRGGFSKSFVEHGVLIGLACVFADLTYQQGMNRMWSRRDRWDFYWPALAH…	514	USER	zzz1014
1031	my_seqs_seabass_ms2_2ct213.6@PF02305.16	my_seqs	MKRNKHNLSHNNLLTCNMGVAVPFNKVEVLPGDSVQAHVSAFMRVTPLITPIMHSVTARIHHWFCPYRILWPEWEQFITGGPDGMDASVFPTLTTTVAEGDPLDYMGIPPATASPVEISALPTRAYNKIINEWYRDADLVTERLEDDETMANIAWEKDYFTSARPWPQKGPEVTLPLGTTAPVKGLGQTTQTYGGPETIFETGASGSRVYAATKGLETNSFMEQDPANAGFPGIFADLTNATAASVTDLRTALAIQRYQEARSRYGSRYTEYLRYLGVKSSDARLQRPEFLGGGKTQLQFSEVLNTTSALDDPASSLDDLGRMGGHGIAGMRSNRFRRFFEEHGVIISILSIRPKTMYTQGIHRSWLRRVKEDFWQKELEHIGQQDVKGKEIYADAITE…	485	USER	zzz1015
1030	my_seqs_seabass_ms2_2ct217.3@PF02305.16	my_seqs	MASNTKTQNRNNTMSRRPSNSNHTFSEVPAVQIPRSSFNRSHSYKTTFDSGYLYPIMVDEALPGDTFKCNLTAFARMATPIYPVMDNLFMDVFYFSCPNRLLWDNWEKFCGEQIDPGDSIDYTIPKCAPGGAVVEGSISDYMGVPIQGSTVSILDSLSSLPFRMYNRVYNEWFRDQNLQDSLDQITTDGPDASSFGDFNTKYALRKRGKRHDYFTSALPWPQKGDSVDLPLGTTAPLFADGTTPTFDVNNQINTVLRVDPLSDQVSIPTAVGGSGSFQLEWNNSGLAADLSAATAATINQLRQAFQVQKLLERDARGGTRYVEIIKSHFGVTTPSAGWRSEYLGGGTKMVNISPIAQTSSTDTTSPQGNLSAMGTATLDQIGFTKSFTEHSTILCLINV…	543	USER	zzz1016
1029	my_seqs_seabass_ms2_2ct218.4@PF02305.16	my_seqs	MSIFNEILINKPKSNTFNLSHDRKMSMQMGTLTPTLVMDVLPGDKIKLNSTQMLRFAPMIAPVMHRIDVFTHFFFVPNRLTWSNWEDFITGGEDGLDNSVFPYIKCDADTTKPGSLTDYLGIPILPGTGIQQSEVSALPFAAYSLIFNEYYRDQNLIAKRPYELVDGYQGASQSAKLQDLQYRAWQHDYFTSALPWTQKGPEATIPLGSKAPIMMETSGPAYISPQFVNDTPLDPINLAQNKSMSSTGDGYMVAGSPGTSDYATLDLKDSHFADLSTATASSINDLRQAFRLQEFLEKNARGGSRYIEVIKSHFGVTSSDARLQRPEYLGGGKSPVTISEVLQTSESGVASTDPTPQGNMAGHGINVGGSNNFSYYAQEHGYIIGIMSIMPKTAYFQGI…	530	USER	zzz1017
1028	my_seqs_QBQ83334.1@PF02305.16	my_seqs	MSRNQNSRFATNPTNLDISRSKFERSHTVKTSFNVGDIIPFYVDEVLPGDTFQIDTSRVVRLQTPITPFMDNIYLDTYYFFVPNRIVWEHWKQFQGENTESAWLPTTEYTVPQIVAPKEGFAEGTIADYFGIPTKVPGLSVNALPFRAYALICNEWFRDQNLCDPLNIPLNDATVTGVNTGVFVTDVAKGGLPYKAAKYHDYFTSALPAPQKGADVGIGLAGSAEVYGSGLSPSLGFGNVLSSGSDKLGLRSSVAGDTALSFNTNSATTQESFFKTKADGVNPLGLADLGTASAVTINELRLAFQMQKLLEKDARGGTRYVEILKSHFGVTSPDARLQRPEYLGGNRVPISVSQTVQTSQTTQDSPLGDTGAYSLTVDSHSDFTRSFTEHGFVIGLMVA…	546	USER	zzz1019
1027	my_seqs_QBQ83333.1@PF02305.16	my_seqs	MSRNQNSRFATNPTNLDISRSKFERSHSIKTSFNVGDIIPFYVDEVLPGDTFQIDTSKVVRLQTPVTPFMDNIYLDTYYFFVPNRIVWEHWKQFQGENTESAWLPTTEYTVPQITAPEGGFAEGTIADYFGIPTKVSGLSVNALPFRAYALICNDWFRDENLCDPLNIPLSDATVTGVNTGDFVTDVAKGGLPYKAAKYHDYFTSALPAPQKGADVGIGLAGNADVIGTPVFSSVDSYPFDTKRANTSYFKSLDSDSSKSHLGFYHTLSSGDVFTSVKLDSGLVADLGTASAVTINELRLAFQMQKLLEKDARGGTRYIEILKSHFGVTSPDARLQRPEYLGGNRVPISVSQTIQTSQTTQDSPLGDTGAYSLTVDSHSDFTRSFTEHGFVIGLMVARY…	544	USER	zzz1020
1026	my_seqs_QBQ83331.1@PF02305.16	my_seqs	MRQAKRVRRRRYIVYSHNHSSGSTRTTEQHFSSAPQADIPRSNFDRSHSHKTTFDAGYLVPLYVDEVLPGDTFKCDATIFVRLATPIYPIMDELIADVHYWFVPNRLLWVNWEKFCGAQDNPGDSTSYLVPVTDPGAALIQVGSLQHYLGIPPLVPNLEYNSLYERAYNLIYNEWYRDQNLQASLVVDTGDAGNNIANYQLVRRGKRHDYFTSCLPWTQKGPAVELPLGLSAPVISNSVVPTFSSLTGGLTNLPLHGNPDGSGNLLLYGGPTGGVANQLFFGSNTGLQADLTSATAATINELRQAIQVQRLYERDARGGTRYVEVLRSHFRVVSPDFRLQRPEYLGGGSFNINIHPVVQTGLGGTTPLGEVSAFGTGTGDRIGFTHSFVEHGVIIGLIS…	544	USER	zzz1021
1025	genbank_microviridae_ALS03747.1_@PF02305.16	genbank	MSRHSVQHLFSQVPTAQIPRSKFNRSHGLKTTFDSGYLVPIFVDEVLPGDTFTMDCTLFARVATLISPIMDNMYMDTFWFFVPERLLFDHFQAMCGEQDNPTDSTDYLFPTVKSPTGTGFEVGSIADYFGLPTGVPNLEVRAEPFRAYNLIYNEWFRDENLQESLPFTKADSDQYSNYKLVRRGKRHDYFTSALPWPQKGPGVELPFGGSAPVTVPSGSFSSPTSLGVIDPSGAQARLLTHTGNASGSNFVYPDNSFNFSNALMYADLSKATSITINQFREAFQIQRWYERAARGGTRYTEIIRSFFGVVSPDARLQRPEYLGGSSNRIDVNVIPQTSGTTDVSPQANLSAFAVGTNGRGNGFSKSFTEHGWIIGLVNVRADLTYQQGINRMWTRSTKF…	523	USER	zzzz100
1024	genbank_microviridae_ALS03742.1_@PF02305.16	genbank	MAKNSARSHRKNNRFSQIPNSPIQRSVFDRSHDYKTTLDSGYLIPFFVDEVLPGDTFKLRVNAFVRMNTLIAPFMDNVFMDTFFFFVPTRLVWDNWQRFCGEQKNPGDSTDFLIPSLSGTNTFTNGSIFDYMGLPTGVPLDPANTPINALPFRAYNLIYNEWFRDENLIDSITVLTNDGPDPISNYTLRKRAKRHDYFTSALPWPQKGPSVDVGLTGNAPIVGFGDDSRWNFSSNDTYSGTQAIFGNPVDIQDNIGLQVFTNRKMFSTGMMVPIMQEKNQSGRWANIGNQDQSNGDNISPTRAIRGEGFYLPNGILKNSSGVTPYADLSGVSAITINDLRQAFQIQKFYEKWARGGSRYTETLRVMFNVISPDARLQRPEYLGGTHSRVNLVPTAQTSS…	582	USER	zzzz101
1023	genbank_microviridae_ALS03737.1_@PF02305.16	genbank	MQPQANIRRSVFDRSHVYKTAFDEGKLIPFFVDEVIPGDTFKLSFTSFCRLATPICPFMDNLYFETFWFFVPYRLVWDNWVRMCGEQDNPEDSTDFTVPLFSFIGSGVNSIGTLYDYFGLGTFDFASSSSSSLRKLVSALPFRAYWLIWNEWFRDENLQKSVKVSKGDTNIILDSMGEGTANPNYGFPSGISNSYECAPRGKRYDYFTGCLPWPQKGPGVELPLGTIANVESNGEPFQLTTQANYVPSGADTTKNFSLVGSALGHSDELIYHQISSPVWKNVTTSGLPNNSGGSSTSSGSLKLDPFYYANGLQVNLQSATAITINSLRQAFMLQRYYEIDARGGTRYTEKIQAHFGVTNPDSRLQRSEFLGSTSSMFNISPIAQTSSTDSTSPQGNLAA…	570	USER	zzzz102
1022	genbank_microviridae_ALS03732.1_@PF02305.16	genbank	MNALTPQIFINYAGDVMAKNIKVNQSHFARIPTANIRRSVFDRSHVYKTTFDEGKLIPYFVDEVLPGDTFTLSPTEFCRLSTPIAPFMDNLYFETFFFFIPYRLVWDNWVKMCGEQDNPEDSTDFMLPQVSITLNQDYIGTLPDYLGISSAKAGTGSEVLKVSALPFRAIWLTWNEWFRDENLQKSVKIDKSDKDAIVEQMGVGSSNVNYGLPAGIANIFMCPPRGKRYDYFTSALPWPQKGPAVDLPLGATASVTGGYNSVTIPVQSMAVQYSNETSAGSFFGSNLRSGSQVLNGGSVSSSTLTGSIDASKLSVDLSSASAVTINSLRQAFMLQRYYEIDARGGTRYTEKLVAHFGVTNPDSRLQRPEYLGGHSSMFNINPVAQTSSSDSTSPQGNLA…	571	USER	zzzz103
1021	genbank_microviridae_ALS03727.1_@PF02305.16	genbank	MYMRRTKFDRSHVYKTTFNSGKLIPIFVDEVLPGDTTRMSINYFARLATPIKPIMDNIYLDWFFFFVPNRLVWEHWQNFCFEQEDPDDSTDYVIPTVTATANSGNGYVGSLWDYFGLPINTAGNLSGINALPFRAVYLIWNEWFRDENLQKSVKIQKGDTNEVLDSSRASDQPSWVFTSDTNIVPGLACPPRGKRHDYFTSALPWTQKGPGVSIGLAGTATLVDPSPVSGYFVQQSNNSLGAAQLSKDGGVHDVYTGNGTLSYQGGHSTSIAGHSINGSGVATVTAQPGSSWLSKSAYADLDSSSIFTINSLRTAFQMQKFYERLARGGSRYTEVLRSFFGVVSPDARLQRPEFLGSFTKMVNVNPIAQTSATDDTSPQGNLSAYGVTASRFHGFTKSF…	556	USER	zzzz104
1020	genbank_microviridae_ALS03717.1_@PF02305.16	genbank	MSSTSAARWRNRVAHQFSQAPQAQIGRSRFRRSHGYTSTFKPDYLYPILFQEVLPGDTWKVRTVSITRVEAMLKPIMDSLYCETFYFFVPYRLVWDNFQKFMGEQDNPDDSIDFLLPTFDSSWLTQVSAARGEGSLWDYFGLPPGYKASSTSTALHICSLWFRAYNLIWNQWFRDQNLQDSVNVPKGDGPDDLNSLFGASNGLLKRAKPHDYFTSALPWPQKGPAVDIPLGDVAPVWTVDGSGLKVQALGHTSVTQTVNLTAGDNAMRAKYLTTNETWNSANSGEMLIPKDGNLKADLSEATAVSINSLRQAFQLQKFYERMALGGSRYIEILKAHFGVTSPDARLQRAEYLGGNSKPLTFNTVAQTSSTDSTSPQANLTAYGFFGGDIGGFTRSFVEH…	552	USER	zzzz105
1019	genbank_microviridae_ALS03722.1_@PF02305.16	genbank	MYMKRTKFDRSHVYKTTFNSGKLIPVFVDEVLPGDTARMSVNYFARLATPIKPIMDNIYLDWFFFFVPNRLVWEHWQNFCFEQEDPDDSTDFVIPTVVATGNSDNAYVGSLWDYFGLPVNTSGNLSGINALPFRGVYLIWNEWFRDENLQKSVKIQKGDTNEVLDSSRAADQPSWVFTSGTSIVSGLACPPRGKRHDYFTSALPWTQKGPGVSIGLAGTAALVDPKPVTGFFVSQANSDLGAVQLSKDGGVHNVYTGTGSLSYQGGYDVSIAGHAIKGAGTSQVVCKPGNSWLSKDSYADLDSSSVFTINSLRTAFQMQKFYERLARGGSRYTEVLRSFFGVVSPDARLQRPEFLGSFTKMVNVNPIAQTSATDDTSPQGNLSAYGVTAAKFHGFTKSF…	556	USER	zzzz106
1018	genbank_microviridae_ALS03697.1_@PF02305.16	genbank	MMFKNKSVNTHDFSMIPRADIPRAAFAIQTVHKTTFDASWLIPIYIDEILPGDSFNLQATAFCRLATPIAPVMDNLHLDTFWFFVPYRLVWDNWQKFQGERIDPDDSIDYLVPQQVSPAGGYAPLSLQDYMGLPTVGQVSATKTISHSALYTRAYNLIWNEWFRDENLQDSIPVPRTDGPDNVADFVLRRRGKRHDYFTSALPWPQKGASVTLPLGTTAPVIPNGTFPTFLGATGSPTQILLRGSASALPGAFTAAGGAPPSDTVVGFSNSGLVADLSTATAATINQIRQSFQIQRLLERDARGGTRYTEIIRSHFGVVSPDARLQRPEYLGGGSTPININPIAQTSSTDGSTPLATLAAIGTTVANRQGFTQSFTEHGMIIGLCAVRADLSYQQGMRK…	534	USER	zzzz107
1017	genbank_microviridae_ALS03692.1_@PF02305.16	genbank	MPGYGRESYMTVANPAGHTRGQHSFAEIPRAEIQRSLFNRSCGLKTTFDEGLLVPIFVDEVLPGDTFNLSMTHFGRLATPLKPFMDNIWIDFHFFYCPNRLVWDNWQKMNGEQANPDDSTDFEVPVINSGGGFSAGSLWDYFGIRTGIANINVTALHHRAYNLIWNEWYRDQNLQDSVVVDKDDGPDTVSDYGILKRGKRHDYFTSALPFPQKGPAVTLPLGTEAPIVATIVGGEPAGSNLAPIFSHSAGPITTALRVQGGGSSNIITAAAVAGAADNLDWSDPNLSLAGAGGLGSPFADLSTATAATINQLRESFQIQRLFERDARGGTRYIEILKAHFGVVSPDARLQRPEFLGGGTARLNVNPVAQTLNDSGGDTTVGSLGAFVTTSSSNVGFIKS…	556	USER	zzzz108
1016	genbank_microviridae_ALS03702.1_@PF02305.16	genbank	MFRNKSVNVHQFAMVPKAEIPRSSFRMQHAHKTTFDAGYLIPIYVDEVLPGDTFNLRMTAFARLATPLFPVMDNMHMDTFFFFVSNRLVWDNWERMMGSQDNPDDSTSFIVPQIVSPAGGYPAVSIFDYFGLPTVGQVDPAGTVSHSALPLRAYNLIYNEWFRDENLQDSLVVNKDDGPDPSTDYALVRRGKRHDYFTSCLPWPQKGPSVPLPLGDLAPIVTPGNPVASPSIPEVSTSANPNGAFVFVGASTPAGNQMFADLSDATAATINQLRQSFQIQKLLERDARGGTRYTEIIRAHFGVVSPDARLQRPEYLGGGSTPIAITPIAQTSGTAPTGDGYSDTPQGNLAAVGTALARNNGFRQSFTEHGIIIGLVSIRADLNYQQGMRKFWSRSTRYD…	525	USER	zzzz109
1015	genbank_microviridae_ALS03687.1_@PF02305.16	genbank	MRSVMKHTFSQVPKADIPRSSFDRSHGYKTTFDAGLLIPFLVDEALPGDTFNARVSALARLATPIVPLMDNMYLDTQFFAVPIRLVWDNWQKFNGEQKNPGDSTDFTIPQIVAPDGGWAANSLEDYFGLPVGVAGLSVSALFHRAYNLIWNEWYRDQNLQDSVNVPTGDGPDDFADYGLLRRGKRHDYFTSALPWPQKGPGVQIPLGTAAPVRGLYTMNAISAPVGNTQYFAVGRNALPDLELNTPWPGTDREGLFSPGGDNASLPGLFADLSQATAATINSLRQAFQIQKVFERDARGGTRYTELIKSHFGVTSPDARLQRPEYLGGGSSPVNVTPVVQTSPTGSYAETPQGNLAAYGTSTFSGHGFSSSFTEHCLIIGLMSVRADLTYQQGVNRMWS…	529	USER	zzzz110
1014	genbank_microviridae_ALS03677.1_@PF02305.16	genbank	MSSVQKINQGHFSMVPRADIPRSSFDRSHGWKGTFNAGDLIPIYVDEALPGDTFNMRLTAFGRLATPLHPFMDNLHMDFFFFFVPNRLIWANFKKFMGEQVNPGDSTSYLVPQINSPVAGYANGSLSDYMGIPTKIAVVFQHSALWHRAYNLIWNEWFRDQNLQNSVTVNTGDGPDASTDYTLLKRGKRHDYFTSCLPWPQKGPAVTLPLGTSAPLTGTSPVKGIGVLQGNSFGASAGNNYWETGSTSMPVGTPGVATSSVSSVWVKGQANGAVGSGNTPQIFADLSGVTANLTAATAATINQLRQSFQVQRMYERDARGGTRYTEIVQSHFNVVSPDARLQRPEYLGGGSVPININPVAQTGPSGTTGSTTPQGNLAAMGTVAAHNVGFTQSFTEHGV…	550	USER	zzzz111
1013	genbank_microviridae_ALS03682.1_@PF02305.16	genbank	MRSVMTHQFSQVPRADIPRSSFDRSHGVKTTFNAGRLIPIFVDEALPGDTFHLSVTSFGRLATPLHPIMDNLFLDYFFFAVPLRLIWTNFVRFMGEQPNPGDSTSFLVPQITAPVGGFTEGSPYDYMGIPTKIAGIKVNSLHLRAYNLIWNEWFRDQNLQNSVPVPKGDGPDTSTDFVILQRGKRHDYFTSALPWPQKGPAVSIPLGSTAPVISNNTPITIAFNDGTGSPIQMHTSGTVNPLLGPTHAGAGTHPIKFAGTATGLSTDLSTATAATINQLRQAFQVQKIYERDARGGTRYTELIQSHFGVTSPDARLQRPEYLGGGQANVNVNPIAQTSNTSAAPAPLGTLGAMGTLAARGVGFSKSFTEHCVLIGMVCARADLNYQQGLNRMWSRQSRF…	523	USER	zzzz112
1012	genbank_microviridae_ALS03672.1_@PF02305.16	genbank	MRSVMKHQFSQVPRADIPRSSFDRSHGFKATFNAGYLVPFYVDECLPGDTFNMNTTMFARLATPLHPFMDNMFADTFFFAVPLRLLWSNFQKFMGEQRNPGDSTSYIIPIINSPAAGYANGTLFDYMGLPTKVTASYTHSALFLRAYNLIYNEWFRDQNMQNSVVNNMGDGPDVYTDYNLLRRGKRHDYFTSCLPWPQKGPAVTLPLGSTALVKTSVADTYTGVQEAAHWRNTAGLSLTQNMLLSSGTGATVNQFGASGTAGSIGGGALYPTNLYADLTSATAATINQLRQAFQIQRLYERDARGGTRYTEIVQAHFNVISPDARLNRPEYLGGSSTPINVNPIAQTSATSSQPSPQGNLAAMGTFSARSGFTKSFTEHSIIIGLVSVRADLNYQQGLN…	532	USER	zzzz113
1011	genbank_microviridae_ALS03667.1_@PF02305.16	genbank	MNRFSMIPRVNLPRSSFDMSYSHSTSLNNGYLIPVVCREVYPGDTFSINQSHVLRLASSLVTPMMDNLEVKTEWFFVPNRLLWEHWVNMMGEQEDPDDSIDYLAPTLTISANCQTWVPGSILDYFGVPANSTAIPNYSLEINALPLRAYWKIYQDWYKDENLCKSQKRIVTDLFPSPTIPQQSVVNLFGRGDVSANLSTLTEAQFKKVFRLAKRAKKHDYFTSCLPWPQKGPGVELPLGNSAPVVSSGDPVKMGWTGASTGGNVALGVLALTSSSVPNYLFLGQNGVNRVNFGKEGDTTTGLYTDLSSASAATINSIRQAFQLQKFYEQCARGGSRYTEIVRSFFGVVSPDARLQRSEYLGGYSAPLQVQSVPQTSATDATSPQANLAAFGVSSSVNKC…	563	USER	zzzz114
1010	genbank_microviridae_ALS03662.1_@PF02305.16	genbank	MSRTTARKHYSNPAKQFVELPKTSIPRSVFNRSHGHKTAIPVGKLIPFFVDEVLPGDTFNLKTAMLARLSTPIVPFMDNLYIRTFYFFVPNRLLWEHWEAMNGDQKSGPTASTDYMVPEGNISFSSGGIPIGSIGDYMGLPTGLSSGSLLVSELPLRAYSLIWNEWFRDENLQDAVNIDKNTGRQFVGDSSITSSNSNNVVWYQNNPLSVAKFHDYFTSALPWPQKGPGVEISLGGSAAVVPSEDGIPLFEGATGQNVANSLRRSTSSGNSVYYYDDASSTNLESLKWNQSGLIADLSTATPITINDLRQAFQIQKLYERDARGGTRYTEILRSHFGVVSPDARLQRPEYLGGGKSRINVNPVQQTSSTDESSGTPQGNLAAYAVGFDCRHCFTKSFVE…	553	USER	zzzz115
1009	genbank_microviridae_ALS03658.1_@PF02305.16	genbank	MNRFALNPTSIDMPRSVFDRSCSLKTSFDMGKLIPIYLDEMLPGDTVSMDMAEVIRMGTPIAPIMDDLYCKISWFFVPYRVIWTHFKQFCGENDVSAWTQTAEYTLPQTVTYGADKFTGSLADYMGLPNTSSAEMVCDLPFRAYFKIWNDWFRDQNNQDPVIFGLGDGATTYKWSGYDDGFGGHDLTLGNGSSALMPVAKEHDLFTSALPAPQKGNAVLIPLTGNAPVVVGAYGINSVQATTTTYPISAADNSGAHLFLQRGGTAIKIQAGAATDFIADLSAVSGATINALRLAFQTQKFLEKNARGGTRYVEFVYNHFHVRSPDATQQRSELLCEFTLPINVDQVISTTNNVEPNTEAQNLLGTTGAFSKTVGKGSAFTYSATEHGYLMGFILVRQRH…	540	USER	zzzz116
1008	genbank_microviridae_ALS03654.1_@PF02305.16	genbank	MNVNQANHFARAVTGLKRKRTAFNRPNGLHCDFNAGKLIPIYCDEVLPGDTKSMSMSAVVRMTTPKFPVMDNAYMESFFFFVPCRQVWKHWQEFMGELGSAPYVNPTVYEIPQVLVPVESSNELTKRKFNDVADYFGIPPCYSAVKASSASVFSYYSVTALKFRAYVKIWNDWFRDENLQNAANMNDDETTLSYIADTGEPDDYVYSSQTGGALLPVDKYKDYFTAALPSPQRGEPVLLPLGQLAPVVFRENAIVDSDSLSKVSFYDKDGYRVVPTAGSNYGLDTVGIGAKAANVAVTSHTGFLAHLANTSSSGGAPADGYQPLYLSSYVDLSEAGNVTVNQMRLAFQTQKFFETSMRGGTRYVEIIKSMFGVSTSDYLMGRSEFLGGKRIPISLSEVN…	591	USER	zzzz117
1007	genbank_microviridae_ALS03650.1_@PF02305.16	genbank	MIGNETFSGNPVRLDISRSKYHAQPTITGTFNAGELVPFYIDQDVMPGSSYKVRLRTCIRGSTPVGVPMDNLYMDVFYFFVPNELLLSRQSMSPNVNDSNHSWSAIVGAQDNLLNMPLPDSTATVPAMTLGLGSAAYVGGFWDWTGQSLGAQAVTKVNPLGFLAYCKVWNDFFRDPNGGMNPVTYSISNGGFVEIHGGAFAADSGTAGLINSYSLLPVCRFHGYFGSALPWPQRNATSVTIPVGGSAPISFTDKGLVYVDNLDAMERSNVFNMVVGGANPPSGGSLTAATDLSAASSLPNGAFPNGRFSNLIADLSQAAGITVNRFRQLVQEQRWYEALARSGNNTLGELTAGMFGVTPPTGSSHRAEYLGSKRIALNVIQVNNTAGNNKSTETQSSLG…	578	USER	zzzz118
1006	genbank_microviridae_ALS03646.1_@PF02305.16	genbank	MDVMHDFASSDSGLTIKRSTFSGQPHVRTTFNAGKLVPLGHPFEVLPGDTIRMDCSALVRMITPYAPVMDDAYLDVYFFWTPLRQLWNHFEEEQGANKSTFWDDPTDWIEPRLENLDDVAVGNPLDYLGVPPGAGAITVSALPLSNYLKIWDEWFRDENLQVPHSDVSIIYNAGNNVDVYSDLSFAASDQLLDVNKYHDLFTSCLPSPQKGDAVKVPVGGQAPLEVGDAVNKFSVQDLALKLSTVSPISQGSSYSLGVNGGTNLVGASAAGSSTPAPNFINGTNLYADLSKATGATVNELRLAFQTQKLLERDARGGTRYVEMLKSHFGVAPSSEILNRSELLGSIHQRLNMTQVNQTSQPSTPSGDNSVGSTGAYSATGLNKSAFVKSFKEYGYVQAL…	549	USER	zzzz119
1005	genbank_microviridae_ALS03641.1_@PF02305.16	genbank	MNRNSNFDFSRNPSVSLSRSRFTRTSDRLDTFDTGEIVPIYVDEVLPGDTFELDMTAIIRGSTPIFPVMDNSYLDVYFFFVPNRLTWEHWRELMGENRTTAWTQKVDYSVPQVTAPTGGWAELSLADHFGIPTKVDNISVNALPFRAYGLIYNEFFRNQNLTNPTQVEVDDANTTGKNPADVTNTNDWAITGAKCLKSAKFFDYFTGALPQPQKGEPVEISLASNWLPVGIGDYHGPLDKVSNSDTLTWESPAMEYQSINQGALMFRQGGTNDNGLKNLKTLTGNGTPSGQNLGMYPTNLWASPVTAAATVNQLRQAFQVQKLLEKDARGGTRYREILKNHFGVTSSDARMQIPEYLGGCKVPINVSQVVQTSASTDASPQGNTAAISVTPFSKSMFTK…	558	USER	zzzz120
1004	genbank_microviridae_ALS03636.1_@PF02305.16	genbank	MNRNSNFDFSRNPGVSLSRSRFNRTSDRLDTFDTGEIVPIYVDEVLPGDTFELDMTAIIRGSTPIFPVMDNSYLDVYFFFVPNRLTWEHWRELMGENRTTAWTQKVDYSVPQVTAPAGGWAELSLADHFGIPTKVDNISVNALPFRAYGLIYNEFFRNQNLTNPTQVEVNDANITGKNPDDVTNSNDWAITGAKCLKSAKFFDYFTGALPQPQKGEPVEIGATGGVPLAVYSDAKLTNLYPIDNNAQNEKWILGDTGIVSQWKIPNEYNQEAWSTRVKNNQNNKNGYLGANLGNAFAISVNQLRQAFQVQKLLEKDARGGTRYREILKNHFGVTTSDARMQIPEYLGGCKVPINVSQVVQTSASTDASPQGNTAAISVTPFSKSMFTKSFDEHGFIIGV…	547	USER	zzzz121
1003	genbank_microviridae_ALS03626.1_@PF02305.16	genbank	MNRNSEYNFAQNPQVGVSRSRFQRNSDNKTTFNTGDLIPIYLDEVLPGDTHQVNAACVIRMATPIFPVMDNAFCDFYFFFVPNRLLWEHWKEFMGENKETAWTPKTEYSVPQVTAPKGGWEEGTLADYLGLPTKVEGISVSALPGRAYGLIYNEWFRNQNVTQPTLVEVTDATTNGKNDGNATNDSAITLAKPLKAAKVFDYYTGALPEPQKGEPITLPLTGSAKLILYKEADLKTKYDIEGQYTNTTWTNPHTYTGPEGSGEIGTNISNKEIANGWLGADLSSVTAATINQLRQAFQIQKLLEKDARGGTRYREVLREHFGVISPDSRMQIPEYLGGYRLPINMSQVIQTSSTDGTSPLGNAAALSVTTMNKPMFTKSFTEHGFIMGLAVVRTDQTYQ…	537	USER	zzzz122
1002	genbank_microviridae_ALS03631.1_@PF02305.16	genbank	MNRNSEYNFAQNPQVGVSRSRFQRNSDNKTTFNTGDLIPVYLDEVLPGDTHQVDVACVMRMATPIFPVMDNAFCDFYFFFVPNRLLWEHWKEFMGENKETAWTPKTEYSVPQVTAPAGGWAEGTLADYLGLPTKVEGISVSALPGRAYGLIYNEWFRNQNVTQPTLVEVTDATTTGKNDGSATNDSAITLAKPLKAAKVFDYYTGALPEPQKGEPITIPLGDTAKVYAYEQNGAKFEGSQDLTNFHIYNEDDKTEGLTAYPGNVALGMLTLKTDLSSVTAATINQLRQAFQIQKLLEKDARGGTRYREILREHFGVISPDSRMQIPEYLGGYRLPINVSQVIQTSSTDSTSPLGNTAALSVTTMNKPMFTKSFTEHGFIMGLAVVRTDQTYQQGIERMW…	530	USER	zzzz123
1001	genbank_microviridae_ALS03621.1_@PF02305.16	genbank	MNRNTTNHFAQIPKVQVSRSKFIRNHDHKTTFNAGDLIPIYVDEVLPGDTKTIDMAALVRMTTPVFPVMDNAYMDVYFFSVPNRILWEHWRELMGENRTTAWEQTVEYNVPQTTAPAGGWTEGTIADYMGIPTKVENLSVSSLPFRAYTMIWNEWFRDQNLKEPAMVTLDDKNTQGANSGDYVSNAEKGALPLKAAKLYDYFTGALPNPQKGPDVGFDLNPGKGLVGIEFPANITYRGETVGIATSPYAGLNGHMTNTGNNDNNQVGLKKVDETFYSLKFTGSTSEPALYANWPTDNGNKEGYVTLTAAAPNTNFLSINQLRMAFQIQKLYERDARGGTRYRELIRSHFGVTTSDARMQIPEYLGGYREPINVMQVVQTSGTEATGGTPQGNVSAYSVT…	567	USER	zzzz124
1000	genbank_microviridae_ALS03617.1_@PF02305.16	genbank	MNRNTESHFSVNPINLDIQRSKFVRPSTHKTTFNAGNLIPIYVDEVLPGDTFKMNMSSVIRMSTPIYPVMDNANLDVYFFFVPNRLVWDHWKEFFGENNTTHWEQPVEYEVPQITAPTGGWAKGTIADYMGIPTKIENISVQALPFRAYCKIWNDWFRDQNLKDPAMISMDETTTAGANTGDYVTNAEKGALPLKVAKYHDYFTAALPEPQKGPEVNIGGMTGYMPVVTREESVNLAQATQNLRWKSDRTGTDPLLITMAGTNEMNQDGTYPTKMRTLQTTVAGAKTAIPANLWVDMTNSTATSINALRQAFAIQRLYEKNARGGTRYIEIIKAHFGVQSPDARQQRSEYLGGTRVPINMDQVVQTSNSGDGITPQGNTAAYSLTAFNESMFTKSFTEH…	555	USER	zzzz125
999	genbank_microviridae_ALS03614.1_@PF02305.16	genbank	MNRNTNERFAMNPTNINIQRSTFHRPSTHKTTFNAGKLIPVYVDEVLPGDTFEFNVRNITRMATPMFPVMDNAYMDIYSFFVPCRLVWDHWKEFCGENTTSKWEQETEYTIPQITAPKTLLDKPGGWKTNDLMDYFGIPTNVGSATEGTGDIKISVNHLPIRAYCLIWDEYFRDQNLQDPVLIDTGDSATEGLNASDNTTNYQQNALAGGKLLPVNKMHDYFTSALPEPQKGPDVLLPLGTTAPVVTLPNNHGKTTGASPHMKFIPSTGLGDDNRYVGMVSTGGGGFEFSATTPDTSNDPSGYLIPSNLAANLEDATAATINELRMAFQIQKLFERDARGGTRYREIIKNHFGVTSPDARMQVPEYLGGEHIPINMDQVLQTSATNETSPQGNTAAFSL…	575	USER	zzzz126
998	genbank_microviridae_ALS03611.1_@PF02305.16	genbank	MNRNSNSRFAQAPQVDIQRSTFDRSSGHKTTFNAGKLVPIYVDEVLPGDTFEMKTSAIIRGSTPIFPVMDNANLDIYFFFVPNRLVWEHWKEFNGENTRNKWEQTIEYSIPQMAPPLSNGTVVGWEKGTLADYMGIPTLVGPGASQTNPEYSVNHLPFRAYCLIWNEWFRDQNLQDPVLIDTGDSRTNGSHLVPEDNENTRKIYQAALQGANLLPVNKYFDYFTGALPEPQKGPDVLLPLGQMAPVITSNKTNKISSNAAMIFSAPQTGATGSNHILYVQKGTGGASTSQGRLVAGNQDASGGDITQIVPQNLVADLGNATAATINELRLAFQLQKLYERDARGGTRYIEIIKSHFGVTSPDARLQRPEYLGGERIPINIDQVIQTSGTMEGTTPQGNT…	576	USER	zzzz127
997	genbank_microviridae_ALS03603.1_@PF02305.16	genbank	MNRNNERHFLQIPEMHASRTRFNRDQTILTTFDAGKLIPFFVDEVLPGDTFQVDTTAIIRMTTPKYPVMDDAFIDFYYFYTPDRILWDNFKHFMGEVEETPWMPTKAYAVPQIKINGTNAKPAPDERSILDYMGVPTKIKKPFTINALPVRAYVKIWNEFFRDENVDNAAVLKSDDADVTYNFTAEASETLETDLQNAVLGGNLLPVNKFHDYFTSCMPYPQRGPEITLPMQGNAKIEAYKDDNLNEKIELSGQRYLRWKTTDPDLPITTYTGGWGKNGTSFDADVANSGSPTVNTYWMGADLSTVTAATINNLREAIAVQQYYEALARGGSRYREQVRALWDVTISDKTVQIPEYLGGGRYQVNVNQIIQTSGQQTENDTPIGETGAVSVTPIRESSF…	559	USER	zzzz128
996	genbank_microviridae_ALS03608.1_@PF02305.16	genbank	MNRNNERHFNQIPEMKASRTRFDRNQTILTTFDAGKLIPFYVDEVLPGDTFSIDTAAIIRMTTPKYPVMDDSYIDIYYFFCPNRILWDNFKHFMGEVEETPWMPTKNYTVPQIKINGTDEKPAPDEKSVLDYMGVPTKVKKPFTINALPIRAYVKIWNEFFRDENVDNAAVFKTDDSDVTYTMSNGEEDTMEKELQEAVTGGNLLPVNKFHDYFTSCLPYPQRGPDVTLPTEGTAPVRLYSSPTENRLNTEEYGYFSSTSSTPGANAMIGVNNDGDPVKIDYSDKPVGTTMTNGGWLRTDLSAATSATINQLRQAISVQQYYEALARGGSRYREQVQAIWNVIISDKTVQVPEYLGGGRYHVNINQIVQTSGQQTNADTPIGETGAMSVTPINESSFTK…	557	USER	zzzz129
995	genbank_microviridae_ALS03599.1_@PF02305.16	genbank	MNRNNERHFNQIPEMKASRTRFNRDQTILTTFDSGKLIPFYVDEVLPGDTFSVDTSAIIRMTTPKYPVMDDAFIDFYYFYCPNRILWDHFKQFMGEVENTPWMPTKNYEIPRITILKNSANPTTKYPLENSILDYMGVPTKVEETFEVNALPVRAYVMIWNEFFRDENVGNQALFRTNDDGETYSETEETNTEEILRYAITGGRCLPVNKFHDYFTSCMPYPQRGPAVTLPMQGNARISGYSNDKFNEKTPLYANSFFDGSTNPGNIKDKLYAIAQDGGTGAAYLNIGDGTGTDHNVVYLGADLSSVTAATINDLRKAVAVQQYYEALARGGSRYREQVQALWDVVISDKTVQIPEYLGGGRYHVNMNQIVQTSGQQTANDTPIGETGAMSVTPVNESS…	560	USER	zzzz130
994	genbank_microviridae_ALS03595.1_@PF02305.16	genbank	MGKKSGYLQRKSSRSRNSGAGRKNGGKAVNRNKDAGFNQVPRLDITRSRFKRRQDVKLTMNAGQLIPFYVDEVLPGDTFSVDQAAIIRMTTPIFPVMDNCYMDIYYFFTPNRILWKNWKRFMGENDSGPWVQTQEYTIPQIRIKASSSGNPLPLEGSLMDYMGIPTKVCKDANTEFEVNALPFRAYAMIWQEWFRDQNVDNPAINSDEDATVTYADGNDTKNIEKCLQEAYRGGRPLPVNKFHDYFTSALPSPQKGEPVTIPITGSAPIGLYNAATGNVTTNTAKMKEIFSDVGLVATNGTYQASYWDPGDGPTANKGLAVGNTTGSVYRGVALGADLSSVNATTINQLRQAFQVQKYYEELARGGSRYREMIYSLFHTKISDKTVQIPEYLGGTRITI…	593	USER	zzzz131
993	genbank_microviridae_ALS03590.1_@PF02305.16	genbank	MTTPIFPVMDNCYMDIYYFNVPCRILWKNFKRFMGENDTGPWAQTQEYTIPQVKVTGTTEKPAPYEGSILDYMGIPTKVSKGADTAFSINALPMRAYAMIWQEWFRDQNVDNPAINSDGDATVNYTDDETKGMDAATPDLEYILQNAYTGGRPLPVNKYHDYFTSALPSPQKTGEPVTIPMGGLAPVTGYNKDTGVPTTSTIELVSYSATAGTVYPKVENAYANDVIKNANMLKINGRNDDGSGESTYLVANMSAVQATTINQLRQAFQIQKYYEELARGGSRYREMIYSLFHTKISDKTVQIPEYLGGTRITINMSQVIQTSGTTAESPQGNTAAVSVTPYNGSMFTKSFEEHGFVIGVCCIRHDHTYQQGLERMWSRKTNLDFYYPVFANLGEQAIL…	508	USER	zzzz132
992	genbank_microviridae_ALS03585.1_@PF02305.16	genbank	MNAGQLIPFYVDEVLPGDTFSIDQAAIIRMTTPIFPVMDNCYLDIYYFNVPCRILWKNFKRFMGENDTGPWAQTQEYTIPQVKITGTTEKPAPYEGSILDYMGIPTKVSKGADTAFSINALPMRAYAMIWQEWFRDQNVDNPAVNSDADATVNYTDDETKGMDAAKPNLEYILQNAYTGGRPLPVNKYHDYFTSALPSPQKAGEAVTIPLTGSARVAVYKYDSEHPDNPTEKYGVSIGKPLLGNTLTSPEGNDNYILYDSPAIPGVLAADMGSVTAATINQLRQAFQVQKYYEELARGGSRYREMIYSLFHTKISDKTVQIPEYLGGTRITINMSQVIQTSGTTAESPQGNTAAVSVTPYNGSMFTKSFEEHGFVIGVCCIRHDHTYQQGLERMWSRKT…	526	USER	zzzz133
991	genbank_microviridae_ALS03580.1_@PF02305.16	genbank	MNRNTETQFSQMPTKTIPRSKFDHSQSIKFTFNTGDIIPFYVEEILPHDTTNIATNMVIRMATPIYPVMDNAYIDFYYFFVPSRILWEHWKAMNGENEEDYWTQKTEYSVPQLQFDEAVQVGTIADYMGIPVGYKDTNKANRGVNALPFRAYAKIFNDWFRNENTTLPATLSTDDLNRNYNPGDSNTNPQYAELGGLPLKASKFHDYFTSALPAPQKGPAVNISLQNDVPVITGNNIKDWGSEENAQGMRIARNLSGFTGAGQFMLGVQAGRTGEELSQWVGDLRAGQNSATLQENIKVFPANLWAQTSALTATNVNELRMAFAVQRMLELDARSGTRYIEILQAHWGVSSPDARLQRSEYLGGFRKIINISQVLQTSSTDNTSPLGETGAYSLTEEFE…	567	USER	zzzz134
990	genbank_microviridae_ALS03577.1_@PF02305.16	genbank	MNRNTVNLFAEEATIETNRSHWSEEWTHKTSFNNGDLVPIAATSDILPGTTIKNRTSVLIRMSTPKYPTMDTLEADTYWFWVPWWHIWKNSKAFFGENEKGTWTVTAEYSIPKIQINTTAVSVHSIISYMGIPQGLKNFTINALNVRAYCRIYNYWFRDQNLIAPLDYSDGDETVTYVITNPITGGQVCKVAKYHDYFTSALPEPQKSPQGAVGIPIGTEAPVKIYGTGKPVYLNVDGGNRGAWRQSGDTGLTVGNLNKLMNQGANIAGQITFSNSSVGADEVGLRGVADLTSATAATINALRLAFATQRIFEKDARYGTRYNEVIRGHFGVTSPNASLHVPEYLGGSHFLINVETVLQNSSTNEESPLGETGAFSVTFDTNDDFTKSFTEHGCLIGLI…	548	USER	zzzz135
989	genbank_microviridae_ALS03572.1_@PF02305.16	genbank	MATRNSESRFAEIPRANIRRARFKRNFSNITTFNEGDLIPLYVDEVLPGDTISIKLNGLVRMSTPLYPVMDNAYMDTYCFFVPNRLLWEHWENLQGQNDQGYWADKTEYTTPVCAAPAGGWNVGTIADYMGIPTGVAGLKVNSLPFRAYARIWNEWFRDENLQAPVTQDTDDKEQTGVNTGKAPTDAQNGGLPLKVAKFHDYFTSCLPEPQKGQAIGFDLTGGTKGLIGVQFPTEAEVIASSERFTATGPSGNDYMIVEAASANTKGLVKTGKEGFYALGGENQKFMIGASNRGPANWQTAEGVKAGIIKATSSSLDTNFLSINDLRQAIALQQILEADARGGTRYTEILKNHFGVTSPDARLQRSEYVGGARTPINVNQVVQTSGSTSTSPQGNTGAY…	571	USER	zzzz136
988	genbank_microviridae_ALS03568.1_@PF02305.16	genbank	MERPRSKFDRGHQLLTTINEGELVPIYMDEVLPGDTARVQLNGLIRMSTPIYPIMDNCYMDTYFFFVPARLLWEHFENMFGENDTDYWAEDTEYSTPKCTIGGTSGLANGSIGDYFGLPTQVTNALEVNALPARAYCKIYNEWFRDENLEAPLMLGYKKTDDGGTNADASKITENANALDQTTNTNEATLYAMKPARAGKFHDYFTSCLPSPLKNAEPVTLPMTGSAGVYAYSDKELKNKTNKTINSFASQTEPGGTEKQRLYDIFMWEGTPAQTYVGNGTAKEVSYLGADLSSVTATTINDLRQAIALQHIFEADARNGTRYREFLSGTWGVTSPDSRLQIPEYIGGQRIAINVNQVVQTSQTDTTTGQALGNTAAYSLTTCSKQMADYAATEYGYII…	550	USER	zzzz137
987	genbank_microviridae_ALS03564.1_@PF02305.16	genbank	MAKNSNFTWSQKPMLYHSRSKFDLSHHHKTMFNEGQLIPFYVQEVYPGDTFKCKSTNVIRTTVPFLRPVMDNLFLDMFYFFVPNRLTYDKWQEVMGENKTSYWAPETYAEVPTASTESNGIGTIADYMGVPVTLSNKYQNVSTLPFRAYALIWNEWFRDQNTQQPVLIDTGDEGDYILNTSVWSVNNIYGMPAPINKLHDYFTSCLPAPQKGSSVDLPFTGSVPVYATSSQNPNPGVGNFQNLTFVNQDWSKLANGYYNSVVFANSVDSFMGFGANTTSPISPNPTLSGVTPSNLQAIFNNSDLGLTVNDLRLAFQTQKLLEKDARGGTRYTEYLQEHFGVLSPDSRLQRPEFLGGKRMPLQLQQVAQTSSSVEDSPLAQVSAFSLSNGTCGFSKGFVE…	557	USER	zzzz138
986	genbank_microviridae_ALS03560.1_@PF02305.16	genbank	MAKKSNFTWSQKPMLYHSRSKFDLSHHHKTMFNEGQLIPFYVQEVYPGDTFKCKTTNVIRTTVPFLRPVMDNLFLDMFYFFVPNRLTYDKWQEVMGENKTSYWAPETYAEVPVASTESNGIGTIADYMGIPVTLSNKYQLVSTLPFRAYALIWNEWFRDENTQQPVLVDTGDEGDYIINTGVWSVNNIYGKPAPINKLHDYFTSCLPAPQKGSSVDLPFTGSVPVYATSNQNPNPGTGNFQNLTFVNQDWSKFANGCYNSVVFANSVDSFMGFGANTTSPISPNPTLGGISPSNLQAVFNNSDLGLTVNDLRLAFQTQKLLEKDARGGTRYTEYLQEHFGVLSPDSRLQRPEFLGGKRMPLQLQQVAQTSSSVENSPLAQVSAFSLSNGTCGFSKGFVE…	557	USER	zzzz139
985	genbank_microviridae_ALS03556.1_@PF02305.16	genbank	MSNFSTVPNINISRSKFTTRYHHKTSFNMGKLIPFDIIEVLPGDTFKLKMNEVCRISSALVRPIMDNLFLDVYYFFVPNRLSMEKWAEVMGEKKNGHWAPSTVQNVITATIKQVKQGSIPDYFGLPLGDTFTSNPKVSILPFNAYALIWNEFFRDENNQDPVQLWNGNFTGSATTGEWSPTNYVQSYPAPVCKLHDYFTSALPAPQKGEAVKFSLVGDAPVVDGGGENPFRLKVYGTLPSSPYAFGSSSNNNVAYLSLPNGTYSIVDTAPEFSLKAQTSNMTVANVNDLRFAFQLQKMLEKDARGGTRYREYLQSHFGVTSPDSRMQVPEFLGGARLPVSIQQVEQTAPGEGASTVGQVGAYSLSNGRAGFTKGFVEHGFVIGVLCVRQHHTYQQGLEK…	535	USER	zzzz140
984	genbank_microviridae_ALS03552.1_@PF02305.16	genbank	MKLSTFKPDVRISRSKFDRSSDVKTTFNAGRLIPFFVDEVLPGDTFSDKTSMVVRMTTPIFPVMDDCFLDYFYFFVPNRLVWDNWEKFMGENDESQWTSPFDKPLPTVLVNSGSDLRNTTFDYFGLPATVNFGGVQLAVNALPFRAYQLIWNKFFRDENLQTPMLINHSDSGDSFATLSQLLPVCKVPDYFTTALPAPQKGPSTLIPGVLYKSSAPITFSTASTHDGGGPVHFADVPGTGDDPSNTGYYIGARANENYARKIGTSSGLNTSQVTIDNAYAYLGEVKASGSTINDLRQAFAVQRMLERDARGGTRYQELLESHFGVTSPDSRVQVPECIGRDRVYVNMQQVVQQSATDSTSPQGNVSGLSKTVHTGGGFSKSFTEHGYIIGVLCVRAKHT…	541	USER	zzzz141
983	genbank_microviridae_ALS03547.1_@PF02305.16	genbank	MSRNQNSHFSLNPSVDVSRSRFDRSSSVKFTFNAGDLIPFFVDEVLPGDTFNISTHKLCRMQTLITPVMDDMFLDTYYFFVPNRLIWSHWQEFMGENNSSPWIQSTVYSVPQVLNLRESSAGIFSGFPVGSIADYMGIPVNIKNEFTVSALPFRAYALIWNEWFRDENLQAPQYISVGDATFNADKSMEGTPNQAQAGLSPLKVGKFRDYFTSCLPSPQKGPDVLLPLGTEAPVYTRSDVVPDLNLDNTLRFYQPSGLSTGAKQLFATPSQNHLGDYEVYVNNQAYSGSTEFSPAVPANLWTDLSLASAASVNELRMAFQIQKLYEKDARGGTRYIEILKNHFGVTSPDSRLQRPEYLGGNRLSINVNQVVQNSGTTDTSPQGHTAAYSLSVDSNDDFT…	561	USER	zzzz142
982	genbank_microviridae_ALS03544.1_@PF02305.16	genbank	MNRNVESHFSELPSAEIQRSIFDRSCSYKTSFNAGRLIPFYVDEVLPGDTFDITTAKVVRSQTLLTPLMDNMYLDTYYFFVPNRLVWDHWQEFCGENTKSAWAPSTEYAMPVITPPSGGFASGTIADYMGLPVGVEWQATDELAPMALPFRAYALICNEFFRDENLTDPLLIPTDDANQTGTNGDSYIADVANGGMPFKVAKYHDYFTSALPAPQKGQAVGIPITVPGFAGGTFPVTTGTANNYADKSSAVPAAWATVNVKGTIGAPYPSGSFLSNGKIAVSKQNSSGDGVVAQDQWSGNSYTGMLPVNLQTVIPAQEGVSPEGTEVSFSVNELRLAFAYQRYLEALARGGSRYTEILLGLFGVRSPDARLQRPEYLGGNRIPVSVSEVTNSAQSEQDF…	579	USER	zzzz143
981	genbank_microviridae_ALS03532.1_@PF02305.16	genbank	MDRNSDKNFSLLPSADIQRSKFHRPQSVKFTFNVGEVIPFYIDEVLPGDTMQIKTSKMVRLQTPAVPFMDDLFLDTYYFFVPNRLIWDKWKEFQGENDSSAWIPTTSYSVPQLVFPQPGSSISGPSSDWTNKKDIVSNRSMFFAPGSVADYLGLPTAAQLAKKTGIDHDINFPVSMSGSSAGDHLSVNALPFRAYAKIINDWFRDENLCDPLVIDTGSGIVNGVFDYASMPSSNSVFSDINGSNIPVLARTARGGRVFTAAKYHDYFTSALPSPQKGADVTIPIEPNSNSPYFIRLEDGGTQYYIIRDASSGALTTSTTPTNAIKFGNLLTNDGANITINSLRLAFATQAQYERDARGGTRYTEIIRSNFGVVSPDSRLQRSEYLGGNHIPINVNQVVQ…	595	USER	zzzz144
980	genbank_microviridae_ALS03537.1_@PF02305.16	genbank	MMDNMYLDTYWFFVPNRLVWNHWEEFCGENKTGPWSQKVEYTVPTIGCPVDSSGALLHFESGTLADYMGLPIGSLWKPTDALAPSALPFRAYSLIINNFFRDENFANPLLVNLDDANVSGSNDAPFGPNQNLSACSLGGKPYLANKYHDYFTSALPSSQKGSPVEIPINVPGFAGGTFPVVTGANLNYDVGDSGFPLLTLLTPSYSTTNPKADPNNPAALPLSNKGFLRDISGDGSTQCPVYNRSDADYRGIVPANLQTTIPPAGNSEGSDVSFSINQFRLAYVYQCYLEAIARSGSRYGEMIQAIFGVTNPDSRLQLPEYLGGNRVPINISEVTNVSQAEKDFLGDVGAKSNTTDINHDFVKSFTEHGILMGLMVVRYDHSYSQGLERFWTRHKYTDF…	533	USER	zzzz145
979	genbank_microviridae_ALS03528.1_@PF02305.16	genbank	MASLIDSNSKFAINPTNLNMPRAQFDLSNTVKTTFNVGDLIPFDVIEVLPGDTFSVETNILARLQTLITPIMDDIYLDMYYFFVPNRLTWEHWKNFMGENTQSAWYPTTQYTIPQIVLPKSQANFQGTVFDYLGCMYQGAEGTASVNALPFRAYGLIYNEWFRDENLIDPSLVPVDDTTVQPVTTVGYNGKPYKVAKYHDYFTSALPAPQKGPDVTIPMASSADFPVYAKDAMIAENRIPAELATDPIYFSHGDGYNKSYTYPAYFATSGNPNVNMASLQANATEDTFSNGGPLSPLNLWSNIGGLPVATVNQLRLAFATQKLYEKDARGGTRYTEILRSHFGVISPDSRLQRPELLSYNHIPLNIQQVVQSSETQTTPLGNLSAFSATANSDGSFTKS…	559	USER	zzzz146
978	genbank_microviridae_ALS03523.1_@PF02305.16	genbank	MRNENSRFSQLPRVNISRSKFNRDSTVKTSFNVGDLIPFYIDEVLPGDTFQVKTNLVARMQPLVSAPMDNLYLDTYYFFVPNRLVWNHWKELNGENTESAWIPETEYQVPQIQSPTGGWSIGTIADYFGIPTGISGLSVSALPFRAYSLICNEWFRDENLKDPLETPVDDTTVVGVNTGNYITDCAKGGLPFKAAKLHDYFTSCLPGPQKGPDVTLNIASGTVPVSTSSISRSVSGVPLTFSMSDGYINPITGNRALYVSCSENSNIMKATSGANYDQETVANAGIEPLNLVANFDSSGGLPLVTINQLRTAFQIQRMYEKDARGGTRYTEILRSHFGVTSPDSRLQRPEYLGGQRIPININQVVQSSSSTENSPQGNVAAYSLTSESHGDFIESFTEH…	555	USER	zzzz147
977	genbank_microviridae_ALS03518.1_@PF02305.16	genbank	MSRNLQSRFALNPTNLDMSRSKFPRHSSVKFSFNVGDVVPFYVDEVLPGDTFNVKTSKVVRMQSLLTPIMDNIYLDYYFFFVPNRIVWDHWRELNGENRESAWVQTTEYEVPQVTAPAGGWNVGTIADYMGIPTGVANISVNAMPFRAYAMICDEWFRDENLVDPLYISKGDAVTTGVNTRTNPGDYAAGGQPFIAAKFHDYFTSALPFPQKGPDVGIGLTGNFDVVGNGNPIRFTALTSDGTSIPVGAVGAAADFSDRRSSGAQNTLGIGFDNQNSTGTMGFPTAAQFTGDVLPFMEVNLGDVNSVTINALRMAFQLQKLYEKDARGGTRYIEILKSHFGVTSPDSRMQRPEYLGGSRVPININQVVQTSETGAGTPQGNTAAYSVTTDSHKDFTKSF…	558	USER	zzzz148
976	genbank_microviridae_ALS03508.1_@PF02305.16	genbank	MSRNQNSRFASNPTNLDISRSRFRRDSDIKFTFNVGDIIPFYVDEVLPGDTFSIDSSKVVRLQTPAVPIMDNIYLDYYWFFVPNRIVWEHWRELMGENTKSAWIPDTEYQVPQITAPDGGFSAGTIADYMGIPTNVGNLSVNALPFRAYALIMNEWFRDENLTDPLNIPTNDATVAGSNGDNYLTDVAKGGKPFKASKYHDYFTSALPAPQKGADVGIGLTGSAPVITTSSPKSLPTPIIPLTWNDVSTGKLFTPDSRYEISLNPGGSGIQFTKAVSSSHGAGVDFNEIAPRNLVADLGSTSAITVNELRMAFQLQKLYEKDARGGSRYIELLKSHFGVTSPDARLQRPEYLGGNRIPININQVVQTSSNVTDQPLGDTGAYSLTVDYHSDFTRSFVEH…	555	USER	zzzz149
975	genbank_microviridae_ALS03504.1_@PF02305.16	genbank	MNPTNIDIQRSSFQRSSSVKTSFNVGQIVPFYLDEVLPGDTFNVKTSKVVRLQTLLTPLMDNMYLDTYFFFVPNRIIWDHWEEFMGANKTSAWESTIEYQIPQITAPTNGWHVGTIADYFGIPTGVDNISVSALPFRAYALIMDEWFRDQNLSDPLNIPTNDTTVKGVNTGVFVSDVAKGGLPYTAAKYHDYFTSCLPAPQKGPEVSIPLGDQAPVYGDGKALAFHSMRGNSTTRFAVLGSGNGPLTVGSGSSSRYPFLVFESEDLKTSDQFASGGQRSIDGIGSAASTGDMNLLGLASKDDLADSAWTSGAYADLAAASSISINSLRLAFQIQKLYEKDARGGTRYIELLKSHFGVTSPDARLQRPEYLGGNRIPININQVVQTSSTADGTTPQGNVS…	574	USER	zzzz150
974	genbank_microviridae_ALS03499.1_@PF02305.16	genbank	MNRNTESRFAMNPTDIDIQRSVFNRDSSVKTTFNVGELIPFYCDEVLPGDTFSIDRSIVARLQTLITPPMDNLYLDTYFFFVPNRLVWEHWKQFCGENTESPWIPQTEYSVPQLTAPAGGWEVGTLADYFGIPTGVENLSVNAMPFRGYSLIVNDWFRDENLCDPLNIPVTDATVAGVNTANFVTDCAKGGKPYIAAKYHDYFTSGLPSPQKGPDVLIPSNTSGTYPVVTKNQSVPNLPTVGMQVYGDVNDAGSYNGVAVRNLSSYNSAYRPGDTNDFLNIEGNSLAAAPSNLWVETSGGIGATINQLRLAFQIQKFYEKQARGGSRYIEVIKSFFGVTSPDARLQRPEYLGGNRIPIHIQQVVQNSGTQSTGTPQGTPTGLSVTSDTHSDFTKSFVEH…	555	USER	zzzz151
973	genbank_microviridae_ALS03494.1_@PF02305.16	genbank	MMDNIYLDTYFFFVPNRLVWNHWKEFNGENTESAWLPTTEYEIPQITSPATDGWKVGTVADYFGIPTGVPGLSVNALPFRAYALIMNEWFRDENLSDPLVVPLDDATVVGVNTGAYITDVAKGGLPFVAAKYHDYFTSCLPAPQKGPDVTIPVVEAANLPVLPLSDTHSFTTASPANNLSWSELDGSLSWAGTWRNPNDGLHVDPLGSTANPYVVPNNLWAVQSGVASAATINQLRLAFQIQKLYEKDARGGTRYTEILKTHFGVTSPDARLQRPEYLGGNRIPVNINQIVQQSATAEGSTPQGNPVGLSLTTDNHSDFTKSFTEHGFILGLMVARYDHTYQQGLDRMFSRKSRFDYYWPVFANIGEQAVYNKEIYAQGSAADDEVFGYQEAWADYRYK…	482	USER	zzzz152
972	genbank_microviridae_ALS03489.1_@PF02305.16	genbank	MDNIYLDTYYFFVPNRLVWQHWKEFNGENTQSAWLPSVDYEVPQLVAPAETGWNVGSVADYLGVPTGVPNISVNALPFRAYALICNEWFRDQNLTDPLLVPVDDATVQGVNTGNYITDVVKGGLPFKAAKYHDYYTSCLPAPQKGPDVTIPVATAGNLPVVPMSDVIPRDKFSSPLSAWVLNPSGFDSNNQDLTPVFTANSGTVNNSLTQNPNKTLNTFGGSARGEAVFNNLWALNDGNAAAATINQLRFAFQVQKLYERDARGGTRYIEILKSHFGVTSPDSRLQRPEYLGGNRVPIQVNQIIQQSGTVAGSAALGSTAGMSLTTDIHDEFTKSFTEHGFVIGLMVARYPHTYQQGLERMWSRKTRFDYYWPVFANIGEQAVLNKEIFAQGTAEDDEV…	495	USER	zzzz153
971	genbank_microviridae_ALS03484.1_@PF02305.16	genbank	MMDNVYLDTYYFFVPNRLVWDHWKEFNGENTQSAWIPEVEYSIPQVTAPSGGWNIGTIADYFGIPTGVSGLSVSALPFRAYTMIMNEWFRDQNLVDPLLLDTDDTTRVGSNDAGIDKVELGGKPFVAAKYHDYFTSCLPAPQKGPDVMIPVTGSGAALPVVPLNQDSLTSPGLSIGMINGVSAGYENASGKPFKYFSGFSPSGSTVYDNFADVPKFDLVPGSSGANSFTVPANLWAINTGSQAAATINQLRMAFQIQKLYERDARGGTRYTEILRSHFGVVSPDARLQRPEYLGGNRIPININQVIQTSGTVEGSTPQGATSGQSLTTDRHSDFTKSFTEHGYVIGLLVARYDHTYQQGLDRLWSRKGRFDFYWPVLANIGEQAVKNKEIYAQGTEVDD…	497	USER	zzzz154
970	genbank_microviridae_ALS03474.1_@PF02305.16	genbank	MNRNTESHFSLLPRVDISRSRFDRSASVKTTFNTGDIVPFFLEEVLPGDTFNVKTSKVVRMQTLLTPLMDNLYLDTYYFFVPNRLVWQHWKEFCGENTESAWIPETEYAMPQITSPASTGWEVGTIADYFGIPTGVANLSVSALPFRAYALIMNEWFRDENLQDPLVVPVDDATVVGVNSATFVTDVAKGGKPYKAAKYHDYFTSALPAPQKGPDVTIPVSQGGTYPVYGDGNALMITAGGSTRAWTSKVGGPFNDNITYSGISGNKKPGAFGEDNLQAFNNDYIGVGTQSQLGRGTSSGLIAVDDGGVSMATINQLRLAFQIQKFYECQARGGSRYTEVIRSFFGVTSPDARLQRPEYLGGNRVPININQVIQQSGTGSESSSTPQGTVVGMSQTTDT…	566	USER	zzzz155
969	genbank_microviridae_ALS03470.1_@PF02305.16	genbank	MNRNTESHFSTLPHIDIQRSRFDRSSSIKTTFNAGDVVPFYLEEVLPGDTFNVKTSKVVRMQTLLTPIMDNIYLDTYYFFVPNRLVWQHWKEFCGENTESAWIPETEYAMPQITSPADKGWEVGTIADYFGIPTGVKGLSVSALPFRAYALIINEWFRDENLQDPLVVPVDDSTVAGSNGATLVTDVAKGGKPFIACKYHDYYTSALPAPQKGPDVTIPVSAGANLPVMATKDVHAAGGYSLFGNAQVSTSGVYSKGTGYATASFGGDFSTPTTFSFSKASSPVAVPSSNDPAYFDPTNLWAIDNGAVSAATINQLRLAFQIQKFYERQARGGSRYTEVIRSFFGVTSPDSRLQRPEYLGGNRVPININQVVQQSGTGESSSTPQGTVVGMSQTTDTNS…	564	USER	zzzz156
968	genbank_microviridae_ALS03465.1_@PF02305.16	genbank	MNRNTESHFSLNPHVDISRSRFDRSASVKTSFNVGDIVPFYVEEVLPGDTFQVKSSKVVRMQTLLTPMMDNVYLDTYYFFVPNRLVWQHWKEFCGENTESAWIPETEYNIPQLVSPATDGWKVGSIADYFGIPTGVPGLSVNALPFRAYALIMNEWFRDQNLQDPLVVPLDDSTVIGVNTGTFVTDVAKGGLPYIASKYHDYFTSCLPSPQKGPDVTIPVAQAGNYPVVPRADTVPSSLIGSQTYTASFIGVPFTVSNKRGIGFDTSTGVQSPLSSGGSTSSGEALPVINNLWAVADSNAQAATINQLRLAFQIQKFYEQQARGGSRYTEVVRSFFGVTSPDARLQRPEYLGGNRVPINVNQVIQQSGTESTGTPQGTVVGMSQTTDTHADFMKSFTEH…	558	USER	zzzz157
967	genbank_microviridae_ALS03460.1_@PF02305.16	genbank	MNRNTESHFSLSPHVDISRSRFDRSASLKTSFNAGDVVPFFLEEVLPGDTFSVDTSKVVRMQTLLTPMMDNVYLDTYYFFVPNRLVWDHWKEFCGENTESAWIAKTEYTMPQITSPAGTGWDVGTLADYFGIPTGVAGLSVSALPFRAYALIMNEWFRDQNLQDPLVVPTDDSTVAGVNTGTLVTDVAKGGKPFIAAKYHDYFTSALPAPQKGPDVMIPVASAGETYVVGNGKTLGLTNGTTLGVLGLSSDRQGIYPDQFGSSFSGGSPSANGYTGYFGVATLDQLAGHPENSGLVAVQPSVAQAATINQLRLAFQIQKFYEQQARGGSRYTEVVRSFFGVTSPDARLQRPEYLGGNRVPINVNQIVQQSGTESSGTPQGTVVGQSLTTDKHSDFTKSF…	558	USER	zzzz158
966	genbank_microviridae_ALS03455.1_@PF02305.16	genbank	MQTLLTPMMDNVYLDTYYFFVPNRLVWDHWKEFCGENTESAWIPQTEYSIPQITAPAGGWEVGTIADYFGVPTGVANLSISALPFRAYALIMNEWFRDQNLMDPLAVPVDDATVVGSNGALAIQDVAKGGKPYVASKYHDYFTSALPSPQKGPDVTIPVGSSGPYPVMSLQNSVKPMDYVSYNVDSMKFVLPDGRPAGQGIFGSSGDGAVRLQDNTSFTSTSSYYPGNLWALDDGSAVAATINQLRLAFQVQKFYEKQARGGSRYTEVVRSFFGVTSPDARLQRPEYLGGNRVPINVNQVIQQSGTGTASETPQGTVVGMSLTTDSHSDFTKSFTEHGFIIGVMCARYDHTYQQGLERMWSRKDKFDYYWPVFANIGEQGIKNKEIYAQGTAQDDQIFG…	493	USER	zzzz159
965	genbank_microviridae_ALS03452.1_@PF02305.16	genbank	MQTLLTPMMDNVYLDTYYFFVPNRLVWKHWKEFNGENTESAWIPETTYEVPQITSPSDIGWAVGTIADYFGIPTGVPNLSVSALPFRAYALIMNEWFRDQNLSDPLVVPDDDATVAGVNTGTFVSDVAKGGKPYIAAKYHDYFTSCLPSPQKGPDVKIPIMGDTDLPVYGNGKALLFESSDFSYGTLSYLNYGSGNGESFLYFTPGVKSTGTVTSIDDNNNSKFQNQALGLPPLGRIGANQTSLVAHYDGSLNAASINQLRLAFQIQKLYERDARGGSRYIEILKSHFGVTSPDSRLQRPEYLGGNRVPININQVVQQSGTGSGSTTPQGTVVGMSQTTDSHSDFIKSFTEHGFIIGVMVARYDHTYQQGLDRIWSRKDRFDYYWPVFANIGEQAVKNK…	508	USER	zzzz160
964	genbank_microviridae_ALS03447.1_@PF02305.16	genbank	MNRNTNSHFSTLPRVDIGRSTFDRSSSHKTSFNVGDVIPFYIDEVLPGDTFNIRTSKVVRMQSLITPIMDNLYLDTYYFFVPNRIVWSHWRELNGENTQSAWIPSVEYQVPQITAPTGGWSTGTVADYLGIPVGVDNLSVNALPFRAYALVMQEWFRDENLTDPLEIPTSDATVAGVNTGNYVTDVAKGGLPFKAAKFRDYFTSCLPSPQKGPDVQIPVAEAGNYPVVPLAQRVDHNLLKDPMTAYLTGAETGKDYSVIVPKFDFGSPSSASVNSIGSSFYNSIDGSQRQGTVYYDNLWAVASGNAQAATINQLRLAFQIQKLYERDARGGTRYIEVLKSHFGVTSPDARLQRPEYLGGNRIPITINQVLQNSETTQTSPQGNPTGQSLTTDVHGDFKK…	560	USER	zzzz161
963	genbank_microviridae_ALS03442.1_@PF02305.16	genbank	MNRNVESHFSTLPKVDISRSRFDRSCSHKTSFNAGDLIPFYIDEVLPGDTFNVKTSKVVRMQSLITPVMDNVYLDTYYFYVPNRLVWQHWRELNGENTQSDWVSPVEYEVPQITAPVGGWSSGTIADYLGIPTGVSNIGVSALPFRAYALICNEWFRDQNLSDPLNVPTDDSTVVGVNSGTFVTDVAKGGLPYKAAKYHDYFTSCLPSPQKGPDVTIPVAQAGTYAVVPRSDKVPDALFDGSEISARFINYVAGSEPINSGLIYPKSTSYVPGTSVSPIQGFNFNGSQSPSSYGTGTPVFDNLWAIGTGEAQAATINQLRQAFQVQKLYERDARGGTRYIEILKSHFGVTSPDARLQRPEYLGGNRMPININQVLQQSQTTDQSAQGTPTGFSLTTDVH…	565	USER	zzzz162
962	genbank_microviridae_ALS03437.1_@PF02305.16	genbank	MTRNTETRFALNPTNISMSRSRFKRPSSVKLSFNVGDVIPFYVDEVLPGDTFDVKTSKVVRLQTLLTPVMDNIYLDTYYFFVPNRLTWSHWREMMGENTESAWIPKTEYSVPQITAPSGGWSVGTIADYMGIPTGVAGLSVNALPFRAYALIMNEWFRDENLTDPLDIPVTDATVAGVNSGNYITDTAKGGLPFKAAKYHDYFTSALPSPQKGPDVLIPGGTGANVPVVPMPQKVPSELLTNKRYTATYTHGTPSSTDWVVNAIGFDLSGVEGSVTNSSSNTNGGLTPVIDNLWAVGDSSLASATINQLRMAFQVQRLYEKDARGGTRYIEILKSHFGVTSPDARLQRPEYLGGNRLPININQVIQQSGTGTGSATPQGTTTGQSLTTDVHSDFRKSFV…	557	USER	zzzz163
961	genbank_microviridae_ALS03432.1_@PF02305.16	genbank	MSRNANSRFATNPVRLDMSRSKFPRNFSHKTTFNAGQVIPFYVDEVLPGDTFQVRTSKVVRMQTLLTPVMDNVYLDTYYFFVPNRLVWEHWKQFMGENTESAWIPQVEYEVPQLTAPANGWEVGTLADYMGIPTGVKGLSVSALPFRAYALIMNEWFRSENLTDPLNIPVDDATVQGVNTGNYVSDVAKGGKPFVANKFRDYFTSCLPSPQKGPDVTINTAQLGNAPVVPMNKPVPKDLLNYPYNVYIPNGNRDFEAGYHAGSVHSNGFGGAYWLPDTGNADLDPTIDNGVLGYPANLWAQFDNTVSVATINQLRTAFQIQKFYERSARGGSRYIETLKVHFGVTSPDARLQRPEYLGGNRIPVSINQVIQNSGTVSGSTPLGDTGAMSLTTDVHSDFT…	561	USER	zzzz164
960	genbank_microviridae_ALS03427.1_@PF02305.16	genbank	MSRNAESRFAVNPTRIDMSRSRFDRNCSVKTTFNVGDVVPFYVDEVLPGDTFQIRTSKVVRMQTLLTPVMDNIYLDTYFFFVPNRIVWEHWKELMGENAQSAWIPEVSYEVPQITSPPSTGWEVGTIADYMGIPTGVPNLSVNALPFRAYALIMNEWFRDENLTDPLQIPMDETTVSGVNTGNYVTDVAKGGLPFKAAKYHDYFTSCLPAPQKGPDVTLNVLDGQNLPVFPGNAPIPSEIVENKNVLFRTADGSDALGDLSLFNGSLQATGSQPALGKGVYPANLYAFTQAGLAVATINQLRMAFQVQKLYERDARGGTRYIEVLKSHFGVTSPDARLQRPEYLGGNRIPITINQVIQNSGTVTGSTPLGDTGAMSLTTDVHGDFSKSFVEHGFVIGVM…	548	USER	zzzz165
959	genbank_microviridae_ALS03416.1_@PF02305.16	genbank	MNRNTNSHFALNPTRIDMSRSTFDRNSSVKTSFNVGDIVPFYVDEVLPGDTFDIDTSKVIRMPSLLTPIMDNLYLDTYYFFVPNRIVWQHWKELMGENNESAWIPTTEYEVPQITAPSGGWSIGTIADYMGVPTGVSGLSVNALPFRAYALICNEWFRDENLCDPLNIPLTDATVAGVNTGTFVTDVAKGGLPYKAAKYRDYFTSCLPAPQKGPDVTIPVSGGANYPVMALEQEISSPNGISMVMKNKQTVANSQYGVIRGGSSSSPAWGVTYAGDFSEALGNDNAAFPVNLYAINNGDVSSATINQLRLAFQVQKLYERDARGGTRYIEVLKSHFGVTSPDARLQRPEYLGGNRIPIVISEINQTSGTAADSTPQGNPSGQSRTTDVHSDFKKSFVEH…	555	USER	zzzz166
958	genbank_microviridae_ALS03421.1_@PF02305.16	genbank	MSRSRFDRSSSYKTTFNVGQIIPFYVDEVLPGDTFSIDTSKVVRMQTLLTPVMDDIFLDTYYFFVPNRLTWSHWKQFMGENTESAWIPSVEYEVPQLTAPEGGWNIGTIADYMGIPTGVSGLSVNALPFRAYALIMNEWFRDENLSDPLNIPVTDATVQGVNTGTFVTDVAKGGLPYTAAKYHDYFTSALPAPQKGPDVTIPVASAVQYPVIPLDKNVSFDSSGIGMRLGDVETSNPVIPSNGTYYPLNYGGGSGSGSPLGKTGFYIGSLENNPQGSALAPLNLWAVGDGTVQAATINQLRLAFQIQKLYERDARGGTRYIEILKSHFGVTSPDARLQRPEYLGGNRIPININQVVQSSSTDASGTPQGNTAAYSLTSDNHSDFTKSFVEHGFLIGVMV…	547	USER	zzzz167
957	genbank_microviridae_ALS03411.1_@PF02305.16	genbank	MNRNTNSHFALNPTRIDMSRSTFDRNSSVKTSFNVGDIVPFYVDEVLPGDTFDIDTSKVIRMPSLLTPIMDNLYLDTYYFFVPNRIVWQHWKELMGENNESAWIPTTEYEVPQITAPSGGWSIGTIADYMGVPTGVSGLSVNALPFRAYALICNEWFRDENLCDPLNIPLTDATVAGVNTGTFVTDVAKGGLPYKAAKYRDYFTSCLPAPQKSEDVTIPVSGGANYPVMSLDDKIPNVGSVATTWTDVKGGVSSANWHLGGDNYNGQLPGNDLGMFNVSANVSSLVAPTNLWAINDGVVSTATINQLRLAFQVQKLYERDARGGTRYIEVLKSHFGVTSPDARLQRPEYLGGNRIPIVISEINQTSGTSANSTPQGNPSGQSRTTDVHSDFKKSFVEHG…	554	USER	zzzz168
956	genbank_microviridae_ALS03406.1_@PF02305.16	genbank	MNRNTNSHFALNPTRIDMSRSTFDRNSSVKTSFNVGDIVPFYVDEVLPGDTFDIDTSKVIRMPSLLTPIMDNLYLDTYYFFVPNRIVWQHWKELMGENNESAWIPTTEYEVPQITAPSGGWSIGTIADYMGVPTGVSGLSVNALPFRAYALICNEWFRDENLCDPLNIPLTDATVAGVNTGTFVTDVAKGGLPYKAAKYRDYFTSCLPAPQKGPDVTIPVSSGSNYPVLSLSDIVPTPGTVPIKWNDANNVVSDAQWLLGGKNYNGSITSNDISLTKANTGPTYSAVTPINLWAINDGSVSSATINQLRLAFQVQKLYERDARGGTRYIEVLKSHFGVTSPDARLQRPEYLGGNRIPIVISEINQTSGTAADSTPQGNPSGQSRTTDVHSDFKKSFVEH…	555	USER	zzzz169
955	genbank_microviridae_AKU75044.1_@1KVP_A	genbank	YNQWFRDENLQNSRVVDKGDGPDATPSTTYSILRRGKRHDYFTSSLPWPQKGGTAVTLPLGTSAPIKATTTTNSFLTVSDANNVARNVDFNSVSNAILMKTVTPIVGSVPLFADLSSATAATINQLRQSFQIQKLLERDARGGTRYTEILRSHFGVTSPDARLQRPEYLGGGSTPINISPIAQTSGTGQTGQATPQGNLAAMGTYTAHNHGFTQSFVEHGYVIGVVSVRADLTYQQGLRRHWSRSTRYDYYFPAFAMLGEQAVLNKEIYVTGGSSDSNV	279	USER	zzzz170
954	genbank_microviridae_AKU75042.1_@1KVP_A	genbank	YNQWFRDENLQNSVVVDKGDGPDTTPSTNYTILRRGKRHDYFTGALPWPQKGGTAVTLPLGTSAPVKWGPAIVAGTTPLNNFVVLRDDPSNVAQFSYGTTVGVNTGNLAAGDSLNVYADLSAATAATINQLRQSFQIQKLLERDARGGTRYTEILRSHFGVTSPDARLQRPEYLGGGSTPINISPIAQTSGTGQTGQSTPQGNLAAMGTYLAKDHGFTQSFVEHGYVIGVVSVRADLTYQQGLRRHWSRSTRYDFYFPAFAMLGEQAVLNKEIYVTGGSSDSNVFGYQ	288	USER	zzzz171
953	genbank_microviridae_AKU75038.1_@1KVP_A	genbank	WNEWFRDQNLQDSAVVDIDDGPDSPADYFLRRRGKRHDYFTSALPWPQKGDAVTLPLGGFAEVITDGTNPKFKNATQTERPFIYNNSPSGGATSITPTTGYATNDQLVFGSNTGLTADLSTATSATINSLRQSFQIQKLLERDARGGTRYTEIIRSHFGVVSPDARLQRPEYLGGGSTPVSINPVAQTSATGISDDTSPQGNLAAFGTALAYNHGFTYNATEHGVLIGLVSVRADLTYQQGLPRMWSRSTRYDFYFPAFATLGEQAVLNKRDLLHWYSG	279	USER	zzzz172
952	genbank_microviridae_AKU75032.1_@1KVP_A	genbank	YNDWFRDQNLQNSVTVHQGNGPDLSTDYTLLRRGKRHDYFTSSLPWPQKGASVSIPLGQNAVVETATASQTTTGWEPFRFQRIDGNAMQSTGIAVFVNGKMNRVDNGALANYAEIVPANLVADLSSATAATINQLRQAFQVQKLYERDARGGTRYTEIVRSHFGVVSPDARLQRPEYLGGGQSPVVFHSVEQTSQSAAGAPLGKLAAYGTSVARDHGFTKGFTEHCVIIGLACIRADLNYQQGINRMWSRRTRFDYYWPALAHIGEQAVLSKEIYADGTAADDNV	285	USER	zzzz173
951	genbank_microviridae_AKU75029.1_@1KVP_A	genbank	YNEWFRDENLQNSVHVDLGDGPDTVSDYTLLRRGKRKDYFTSALPWPQKGASVTLPLGSTAPIKYSTNIYPGTNFDGKLVVADGTTTGNNMAYGNTANTYTGAMNNASNLYADLSAATAATINQLRQSFQIQKLLERDARGGTRYTEIVRSHFGVISPDARLQRPEYIGGGSTNININPIAQTSGTNASGTTTPMGTLAAMGTALAHNHGFTYSSTEHGVIIGLVSIRADLTYQQGLARMWSRSTRYDFYFPAFATFGEQAVLNKEIYVTGNSGDDDV	278	USER	zzzz174
950	genbank_microviridae_AKU75027.1_@1KVP_A	genbank	RAYNLIYNQWFRDENLQNSSVVDKGDGPDATPSTSYSILRRGKRHDYFTSSLPWPQKGGTAVTLPLGTVAPIVSANYSFSMTGSTFVPASIGLNAPAGTGPYTWGTSGNNALYADLSSATAATINQLRQSFQIQKLLERDARGGARYTEILRSHFGVTSPDARLQRPEYLGGGSTPINISPIAQTSGTGQTGQATPQGNLAAMGTYTAHNHGFTQSFVEHGYVIGVVSVRADLTYQQGLRRHWSRSTRYDYYFPAFAMLGEQAILNKEIYVTGLSSDSDVFGYQER	286	USER	zzzz175
949	genbank_microviridae_AKU75022.1_@1KVP_A	genbank	RAYNLIYNEWFRDENLQNSVVVDTGDGPDTVTNYTILRRGKRKDYFTSSLPWPQKGTAVTIPIGTTAPIKYDPNFGAGGTTADNTYVVAQTAANQTGNWGYGVTTNTFDGLVPGSSYMNLYADLSTATAATINQLRQSFQIQKLLERDARGGTRYTEIIRSHFGVISPDARLQRPEYIGGGSTNLNINPIAQTSGTNASGTTTPMGTLAAMGTALAHNHGFTYSSTEHGVIIGMVSVRADLTYQQGLQRMWSRSTRYDFYFPAFATLGEQAVLNKEIYVTGGSGDNDVFGYQER	294	USER	zzzz176
948	genbank_microviridae_AKU74992.1_@1KVP_A	genbank	RAYNLIYNQWFRDENLQNSVTVDTGDGPDTTPSTNYTLLRRGKRHDYFTSALPWPQKGGTAVTIPLGTTAPIKFATNFGGGGTGADNKFAYVVRDSAGINQINNSATLNTAGSANPLTSTINMYADLSAATAATINQLRQSFQIQKLLERDARGGTRYTEIIRSHFGVASPDARLQRPEYLGGGSTNISISPIAQNSATGLSGSTTPIGNLAAFGTFLGKGHGFTQSFVEHGYVIGLVSVRADLTYQQ	248	USER	zzzz177
947	genbank_microviridae_AKU74991.1_@PF02305.16	genbank	RAYNLIWNWNYRDENWQPAYNPTGATVVVAGDPSMSISAPTFNILQSCWEKDYFTTALKSQQRGVASAVTVQGVGQAVWAAATFQQAGTATKGVGVDNTASNPKLYGTSAAMTANEAGNALGVFNANTLSVTGLGVDISKLRLSIATQRVLERNSRAGARESEFYKAHYGDGPTDNRGDKPQFIGRYKQAITFSDVVNTAVNGTPAVGTDPTIAVQTMGHRQTRGDASGTGYIGDFHCKEFGILMAVMTIRP	252	USER	zzzz178
946	genbank_microviridae_AKU74984.1_@1KVP_A	genbank	RAYNLIYNQWFRDENLQNSLVVPTDDGPDTLSDFVLRRRGKRHDYFTSALPWPQKGASVSLPLGTSAPVWGNGKALGFQDGATNFGLVTNATSVVTGGTSNFNVVAGTATGGSAPLANKGLGISTAGNPDGSSGLYADLSTATAATINQLRQSFQIQKLLERDARGGTRYTEILRAHFGVISPDARLQRPEYLGGGSTPIAINPISQTSGTSATRKV	217	USER	zzzz179
945	genbank_microviridae_AKU74979.1_@1KVP_A	genbank	RAYNLIWNEWFRDQNLQDSAVVDTDDGPDSPADYVLRRRGKRHDYFTSALPWPQKGQAVTLPLGSSAPVKTNATNTGAFDPTILDGNDHYVRMNTASTYLVTAANTGYSDDGALFADLSAATAATINQLRQSFQIQKLLERDARGGTRYTEIIRSHFGVVSPDARLQRPEYLGGGSTPVSINPVAQTSATGITANTSPQGNLAAFGTALAYNHGFTYNATEHGVLIGLVSVRADLTYQQGLPRMWSRSTRYDFYFPAFATLGEQAVLNKEIYCTGTATDDDVFGYQER	288	USER	zzzz180
944	genbank_microviridae_AKU74977.1_@1KVP_A	genbank	RAYNLIYNEWFRDENLQNSVHVDLGDGPDTVSDYTLLRRGKRKDYFTSALPWPQKGSSVSLPLGTTAPALTNNLQPQFKIAGVQGGLRQSNNGQVAYFNNTTVDAGTVLFGTESGLYADLSTATAATINQLRQSFQIQKLLERDARGGTRYTEIIRSHFGVITPDARLQRPEYIGGGSTNININPIAQTSGTNASGTTTPMGTLAAMGTALAHNHGFTYSSTEHGVIIGLVSVRADLTYQQGLARMWSRSTRYDFYFPAFATLGEQAVLNKEIYVTGTSGDNNVFGYQER	290	USER	zzzz181
943	genbank_microviridae_AKU74973.1_@1KVP_A	genbank	RAYNLIYNEWFRDENLQNSVHLDLGDGPDTTTDYTLLRRGKRKDYFTSALPWPQKGTSVTLPLGTTAPVLSDNTSPSFASTSSASGTRGFYFGLDGGGYKQYGYDGTSLDGQLTKFVNTGLYADLSSATAATINQLRQSFQIQKLLERDARGGTRYTEIIRSHFGVISPDARLQRPEYIGGGSTNININPIAQTSGTNASGTTTPMGTLAAMGTALAHNHGFTYSATEHGVIIGLVSVRADLTYQQGLARMWSRSTRYDFYFPAFATLGEQAVLNKEIYVTGGSGDNNVFGYQES	295	USER	zzzz182
942	genbank_microviridae_AKU74974.1_@1KVP_A	genbank	RAYNLIYNEWFRDQNMQNSVTVHKNDGPDTYTDYALLRRGKRHDYFTSALPWPQKGTAVTLPLGSSAAVKSDGTVPKITGGGAVNADMFIYNSPSIGVGLNPGPSSNGNGIWGNNTGLYADLSTATAATVNQLRQSFQIQKLLERDARGGTRYTEIIRSHFGVISPDARLQRPEYLGGGSTVVNINPIAQTSATNLSGGTTVLGNLAAMGTSLASGHGFTQSFVEHGVIIGLVSVRADLTYQQGLPRMWSRSTRYDFYFPAFATLGEQAVLNKEIYATGAAANNNVFGYQES	292	USER	zzzz183
941	genbank_microviridae_AKU74971.1_@1KVP_A	genbank	RAYNLIWNEWFRDQNLQDSAVVDIDDGPDSPADYFLRRRGKRHDYFTSALPWPQKGDAVTLPLGGFADVITDGTNPKFKNATQTERPFIYNNAVTGGATSITPTTGYATNDQLVFGSNTGLTADLSTATSATINQLRQSFQIQKLLERDARGGTRYTEIIRSHFGVVSPDARLQRPEYLGGGSTPVSINPVAQTSATGISDDTSPQGNLAAFGTALAYNHGFTYNATEHGVLIGLVSVRAGLTYQQGLPRMWSRSTRYDFYFPAFATLGEQAVLNKEIYCTGTADDDDVFGYQER	295	USER	zzzz184
940	genbank_microviridae_AKU74962.1_@1KVP_A	genbank	RAYNLIYNTWFRSQDLRNSLVVDTDDGPDTYADYVIKRRGKRHDYFTSCLPWPQKGSAVTIPAGAASAPVTRVSNSAAWKFYQAGTDTLETSALGIGTKATTGLLTRDAQTVDYSLDPNSGLIADLSSAFATTINALRLAEQTQVLLERDARGGTRYTEILKSHFGVSNPADAILQRPEYLGGGSSPVNFHPVPNTAVASGATAAGQQGNLAAFATTSATGHGFNKSFTEHGIILGLISVRADLSYGQGVDKMWTRSTRYDFYWPSLAHIGEQAVLNREIYTVGTSADDTVFGYQER	297	USER	zzzz185
939	genbank_microviridae_AKU74961.1_@1KVP_A	genbank	RAYNLIYNEWFRDENLQNSVTVRTGDSGDVPSDYTMVRRGKRKDYFTGALPWPQKGESVSLPLGTSAPVLTNSVSPSWVNITTGATASQTILRVPEAGHDAIAPGGSMTGSWNNLNVLRFGSQTGLYADLSDATAATINQLRQSFQIQKLLERDARGGTRYTELLRAHFGVTPQDYRLQRPEYIGGGSTYVNVNPIAQTSATSISGGATPLGNLAAMGTALASGHGFTYHAQEHGYIIGLVNVRADLTYQQGLPKMWSRETRYDFYFPVFAHLGEQAILN	280	USER	zzzz186
938	genbank_microviridae_AKU74955.1_@1KVP_A	genbank	YNQWFRDENLQNSLVVPTDDGPDTLSDFVLCRRGKRHDYFTSALPWPQKGASVSLPLGTSAPVWGNGKALGFQDGATNFGLATNATSVVTGGTSNFNVVAGTATGGSGPLANKGLGISTAGNPDGSSGLYADLSTATAATINQPRQSFQIQKLLERDARGGTRYTEILRAHFGVISPDARLQRPEYLGGGSTPIAINPISQTSGTSASGTTTPLGTLAAMGTALASGHGFTQSFVEHGVIIGLVAVRADLTYQQGLRKMWSRSTRYDYYMPEFAMLGEQAILN	283	USER	zzzz187
937	genbank_microviridae_AKU74958.1_@1KVP_A	genbank	YNQWFRDENLQNSRIVDKGDGPDAAAATNYAILRRGKRHDYFTGSLPWPQKGGTPVTVPLGTTAPIIRTSNASPWTFYNTGTNVPATPFQDLGIGPGSTLRETTLNTQLSADPNGGLYADLSSATAVTINQLRQSFQIQKLLERDARGGTRYTEILRSHFGVTSPDARLQRPEYLGGGSTPINISPIAQTSGTGVTGSATPQGNLAAMGTYMAKGHGFTQSFVEHGYVIGVVFVRADLTYQQGLRRHWSRSTRYDYYFPVFAMLGEQAVLNKEIYVTG	278	USER	zzzz188
936	genbank_microviridae_AKU74952.1_@1KVP_A	genbank	YNQWFRDENLQNSRVVDKGDGPDASASTNYAILRRGKRHDYFTGSLPWPQKGGAAVTLPLGSSAPITFAGGAADDIGVVAIQSSSAVKRLVTTAGVPPLASRVDFAGASPTFGLYADLSQATSATINQLRQSFQIQKLLERDARGGTRYTEILRSHFGVTSPDARLQRPEYLGGGSTPINISPIAQTSGTGVTGSATPQGNLAAMGTYMAKGHGFTQSFVEHGYVIGVVSVRADLTYQQGLRRHWSRSTRYDYYFPVFAMLGEQAVLN	268	USER	zzzz189
935	genbank_microviridae_AKU74948.1_@1KVP_A	genbank	FNEWFRDQNLQNSLVVDVDDGPDSITDYVLKLRNKRYDYFTSCLPWPQKGTAVTIPLGTSAPVYGNAVTATTGSQIFQGWNSTDGAKQRFGMDKSAGATTLKANGTGIDNGDTFYSVGLAPKSDYDALGANYSPPFADLTLATAATIALLNQSFAIQSLYERDARGGTRLTEILRAHFGVISPDARIQRPEYLGGSMQDSPWSPSLNPPSPPLCPRGISPVTVSRPAATTRSSNLSPNTAW	241	USER	zzzz190
934	genbank_microviridae_AKU74947.1_@1KVP_A	genbank	WNQWYKAQDLQSDVVVDLDDGPDDPDDYVLLKRNKRHDYFTSCLPYPQKGSTAVSLPLGTSATVKMNSTALLTGSQNPILFKASTGGAVMANDTVAQWGGGNGGLYATSTPSAVAINTAAYASNLYADLSTATAATINELRSAFQVQKLLERDARGGTRYTELVLSHFGVTSPDARQQRPEYLGGGSTPIKINPVAQTSATGLTGGSTAAGNLSGFGVAATGGQGFVKSFTEHTLLLGLCSVRADLSYQQGLNR	254	USER	zzzz191
933	genbank_microviridae_AJK28327.1_@PF02305.16	genbank	MEMPMRSVMQHAFSEVPRAEIQRSSFNRSHGYKTTFDADYLVPMFLDDVVPGDTFNLNMHFFARLATPLYPIMDNLYLESFWFFVPYRLVWTNWEKMHGAQDNPTDSIDFTIPVCSGNNTIGVGDRGNYFGLPIGYNFDNDSPVSALPFRAYRLIWNEWFRDENLQDSETVVTGDGPDGGGVHEGDDPPLKRGKRHDYFTSCLPWPQKGDAVSLPLGTSAPVASGTSSNTDTLGVEHADGTNALLLPVTSTSVIATDAGTPDTMLVADLSTATAATINDLRLAFQTQRLLERDARSGTRYNELILSHFGVTVPDFRVQRPEFLGGGSDRINISPVAQTSGQPSPAADDKLGQLAAFGTASGTHGFTKSFTEHGMIIGLVNVRGDITYSQGIERYWRKST…	526	USER	zzzz192
932	genbank_microviridae_AJK28324.1_@PF02305.16	genbank	MISPIMDRVHVKTYCFYVPYRLLYPFWEKFMEEQDAPGRVHPYVTLAGDLPTGSLGDYMGLPKDCPSGTEVNAFPFAAYELIYHEWFRNQYLNTDDFDDIALGDGDQSGNYAGRVAGDVKFKCWNNDRYTAALPQAQRGNPVSLPLVTGTIPVELDTTNPAAWTVHDVNGGGPLGPPTGAIVESGTNSELKMDSQGPTDRIMLNPNDTLYVDIQAEAVTINALREAIALQRMLEIDNFGGARYTEIIEAHFGVKSPDARLQRPELVGYFSGVVTISEVLQTATPQSAATDSTAPDAQPLGSMAGHGISVNGSERFGYYATEHGLILNMICVLPDTSYFQGLDRKWSHRLRTDYPFPSLANVGEVAVLNKEVYARHSEPDGEWGYLPPYYDWKDVPGNTV…	476	USER	zzzz193
931	genbank_microviridae_AJK28316.1_@PF02305.16	genbank	MKRAKFSLSNYKLLSMDLGELVPCGLTEVLPGDTIQQASSVLVRLAPLVAPVMHPLHVRIHHFYVPNRLIWEDFEKFITGGPDGNDSSVYPTITTPASTGFLAGSLADYLGIPPGVPDIEVSALPFRAYAFIFNEFFRDQDLVSELTFATASGADTTTNTELQVVPWQRDYFTIARPWEQKGPAVTLPLGTTAPVIGIGVDDANPISATATVRETGGSASTQFQDYWQGSSGSQGILVEEDPNNPNYPGIYADLSNASAADINDLREAFALQRYQEARARYGSRYTEYLRYLGVRSSDARLDRPEYFGGGRQTIQFSEVLATAEGANTEVGDLKGHGIGAMRSNRYRRFIEEHGWIVSLISTRPKTIYSDGLQRHWNRRTKEDFHQKELEHIGQQEILN…	497	USER	zzzz194
930	genbank_microviridae_AJK28312.1_@PF02305.16	genbank	MISASSSMPSVMSHSFSQVPSAEIPRSSFNRSHGLKTTFDSGYLIPIYVDEALPADTFNLSLDVFARLATPLHPFMDNVFFDTQFFAVPIRLIWDNWEKFNGAQDNPSDSTDFIIPTMTAPVLGYTNQSLSDYFGIPTQVPGLEHSSLWHRAYNLIYNEWYRDENLQDSVHLDTGDGPDDPVNYTLLKRGKRHDYFTSALPWPQKGPAVDMPLGTTAPVFGIGKNDQSYNLLDRAVYETAGTGTTVYANSNHPDGFLIEEDPNNPGFPNIYADLSDATAATINQLRQAFQIQKLYERDARGGTRYAEIIRSHFGVVSPDARLQRPEYLGGGSVRLNVNPIAQTSSTDATTPQGNLAAMGTVSGKVGGFTKSFTEHCVIIGLASVRADLNYQQGLNRMFS…	530	USER	zzzz195
929	genbank_microviridae_AJK28307.1_@PF02305.16	genbank	MKRHKHNLNHYRVMSGRMGELIPVSCMEVLPGDTIRMQSTCLLRLSPMNAPVMHPLHVRMHSFFVPNRIIWPEWEDFIPDMNTALSVPTVGIDVAEGTLLDYLGIPPDDYSSKPVNALPLMACNEVWNEFFRDQDIDAERDSLDNSLPRVRWEKDYFTTARLEAQSGATETVDIEFDNPLPVQTNADLGTAQGNGVINDGANTNVRVFGINDSTLQVPAQTAAGSMDINEWRRAMAWQRLAEHRNKYGSRFTDYLNFLGVRSSDARLQRPEYLGGGSTTVNISEVLSTADTVGVDQGAPVGALSGHGIAGHRTRPFRRFIEEHGHIITFASVRPKTIYSQGIHRNWWRAKPADYWQKEMEIMGDQPVLVGEIYGLSDTPKTSLDTSIAIVTTDSIPLMS…	402	USER	zzzz196
928	genbank_microviridae_AJK28301.1_@PF02305.16	genbank	MADLVNVRRPSGSSRYQAPKMRLGRSQHDLTHSHKTMFDAGDLIPYFVKPVMPGETLTCDMLAFARVFSPLDAPIMDDIEMSIDFFFVPNRLVWDNWEAFLGAHDAAGAQDTDYTIPVVATGATVNEGYLVAYMGWPVGLDTAQTTPQVLPVRGYRLIYNEWYRDQNLIDEVSVATGDGPDSITTISGNGLFKSAKAPDYFTTALPYLQKGDPVTINLGGEAEIHFDQAFNQDVTVRDSGTANYMRLSASGSFVQFVNNAGSSANNLYADLSTATGVSINALREAAAIQRLLERDARGGTRHPELIRAHFGVDVPDYRTQRPEYLGGGKGYINVSPVANTSATATENQAELAGTAAGTLRAKFAKSFVEHGFVIGILRARGQISYHQGLERYWSWSTKY…	524	USER	zzzz197
927	genbank_microviridae_AJK28297.1_@PF02305.16	genbank	MRMGSLYPVCGFETIPGDTVQIQNRVLIRVTPLATPVMHPCVVRLHTYFVPNRILDPADGSFKWENFITGGEDGTYVTPPPTASAVTVTEGDVADYFGITPGTRTYNVFLMRAYAKIWNEFYRDQQLQTALDVDTYTGATAPQKVSWARDYFTEARPEAQLGDAVTLSVGSQAPIKTAAPVSGGNPSIFTTDDDTQRIMTAGGANVGLGAVDAAGGDMYADLSAANAIDINDVRRAFALQRYKEARNLYGARFVEYLRYLGIRSSDARLQRPEYIGGGKGLISFSEVLSTDDGGTNPVGSMSGHGIANVTTRPSRYFCEEEGHVITLMSVRPIAIYMQAQHQMFNRTTKEEYWQKELQQIGQQAVENREIYVDHTTPTGTFGWNDRYRAFKEVPNLAVG…	467	USER	zzzz198
926	genbank_microviridae_AJK28284.1_@PF02305.16	genbank	MRIFSMKSVMTHSFSNLPRVNINRSVFDRSHGHKTTFDVGDLIPFFWDEILPGDSISLKPTALIRMTTPLHPIMDNMFADVFFFSVPNRLLWQNWQKFCGERINPDDSIDYIIPTINFTANIAEDSIFQYLGLPIGQQPSNISSLPFRAMNLIYNEWFRDQNLQDSLVVNTDDGPDDDTDYSIQKRGKRHDYFTSSLPWLQKGDSVSIPLGQNAPVVTTDESIIVKQGTSGFDRNLAFGGTLEYSGGPSDGNSFQPIVFGGSSTTGDVRFGSQTGLEADLTSATAATINQLRQASSVQRLLEKDARSGTRYTEILMAHFGVTSPDSRVQRPEYLGGTSAPINITPIAQTSSTDATTPQANLAAIGTSFIEKNRITKSFVEHCQLIGFINVRADLTYQQG…	534	USER	zzzz199
925	genbank_microviridae_AJK28278.1_@PF02305.16	genbank	MRQPSVMNHSFSRVPRADIPRSSFDRSHGLKTAFDAGDLIPIFVDEALPGDTFSMSMSMFGRLATPIFPFMDNAFLDTFFFFVPNRLLWDNWERFNGAQDDPDDSTDFLVPQLTYGASPQNDRISDFFGIPVDNTDGTSVNALHFRAYNLIWNEWFRDENLQDSVPVEKGDSGDGFADYNILKRGKRHDYFTSCLPWPQKGPSVPLPLGDQAPVTGIGVSPSATNQAGPTTFNETGGQQASYTNYRINQGTTDTFAMQGDPDNAGYPLIYADLSDATAATINQLRQSFQIQKLYERDARGGTRYTELVRSHFGVVSPDARLQRPEYLGGSSTPININPVAQTGETDGTPQGNLAAFGTVAGKAGSWTKSFTEHGVLIGLASVRADLNYQQGLNRMWSRQ…	526	USER	zzzz200
924	genbank_microviridae_AJK28273.1_@PF02305.16	genbank	MARSVMSHSFSQVPNVEIPRSQFDRSHGHKTTFNSGYLVPVFVDEALPGDTLSVRMTSFARMATPIHPIMDNVRMTSFFFAVPMRLLWDNWQRFMGERINPGDSIDYTMPTMTSTAGTGYANESLHDYIGIPTQVAGLVHNSHFHRAYNLIYNEWFRDENLQDSVVVDTDDGPDDPTDYVLLRRGKRHDYFTSSLPSPQKGDAVTLPLGTSADVKTAASESSVIGVYSDGEAAYRQMAADSASVYVSSTGTNAETNKLYADLSTATAATINALRQAFQIQKLLERDARGGTRYIEILLSHFGVTSPDARLQRPEYLGGSSSPISVNPVVQTSSTDATTPQGNLAAYATSVINGHGFTKSFTEHSVIIGLVSVQADLTYQQGLDRMFSRQTRYDFYWPAL…	516	USER	zzzz201
923	genbank_microviridae_AJK28264.1_@PF02305.16	genbank	MAQDHIFNSIKVERPNRNTFDLSHAVNMSFDMGHLVPCCCIDMVPGDKVSIGAETMLRFSPLIAPIMSKVNVTMWYFAVPDRILFDNPKDWEEWIVGEGQDGHINAYISNMQNNQPGTLLDHLYKLQNLPGNEEVLAAPAAAYFKIYDDWFRNQNITDVEKFVPLNINENMVAYRALLEADPLRRTWEKDYFTAALPWAQKGDAVTLPLLEDGGNLDVELSGVNAVGLIRNASDGLGGTPGDSLDIGTGSGLVAGVGATASFYDPNGTLSVPLSAAAATVNQLRMAYRLQEYLELDAMGGTRYTEKIYAHFGVKSPDSRLQRPELLGRWTGRMSISEVLQTSAGGVGTPLGTMGGHGISLIQGDPIQYYATEHCWLIGIINVQPKPQYSQGIQRKFLRF…	523	USER	zzzz202
922	genbank_microviridae_AJK28256.1_@PF02305.16	genbank	MARRPSIMSHDFSRVPSAEIPRSSFDRSHGCKTTFDAGKLIPVFVDEALPGDTFNLRMTAFGRLATPIHPFMDNLFMETFFAVPIRLIWDNWQKFNGEQANPADSTDFVLPTMTTVAGYNNSSLSDYFGIPTGVAGLTHMSLFHRAYNLIWNEWFRDQNLQNSVVVDMDDGPDSEGDYVLLRRGKRHDYFTSALPWPQKGPAVDLPIGDTAPVVGIGKVNQTYAGAAGTVYETAGSASTSYASYAPIDPASDLWRVEEDASNTGFPAIFADLSAATAATVNQLRQAFQIQKLYERDARGGTRYTEIIRSHFGVVSPDARLQRPEYLGGGSTMINVNPIAQTSSTDVTSPQGNLAAMATANASGHGFTKSFTEHCVLLGLVAVRADLNYQQGLNRMFSRS…	526	USER	zzzz203
921	genbank_microviridae_AJK28244.1_@PF02305.16	genbank	MDRGSHMQHEFSRTPRGSIPRSVFNRSHTHKTTFDAGLLIPIMVDEAVPGDIMRCRIAAIARLATPLFPVMDNAYLDIHCWSAPKRLLWPNFKKFLGEQTDPGDSIDYTVPVVNGTYQVVESSLAHYMGLPIDLDFSVTTGISALPWRAYTMIYDEHYRDQNLIDSVSKTFGDGPDSSFDAAGSFHLTSGVQRRGKRFDYFTQALPWPQKGDSVDLPLGTRADVVGIGLNVTDGGSAAGTIATRQTGGPPTVNMDNTWVSGDPQLLFQAETGNTSYPDIYADLTNATAATINQLRQSLAIQQFLELAARGGTRFAEIIESFFGVEFQDVRYRPEYLGGGTVPVNITPIANTSDTTSYEQGELAGFGVAAGSGIGFTKAFDEWAYIIVLASVRADLTYQQ…	433	USER	zzzz204
920	genbank_microviridae_AJK28239.1_@PF02305.16	genbank	MFQNIRSMRPKLNKFDLSHDVKLSFNMGDLIPILVNEVVPGDRFQVQSEVMLRFAPMLAPIMHRVNVWTHYFFVPNRLVWNEWEEFITGGEDGTAAPVHPHFTTAQMHVANKIGNGDLADYMGVPLVTGQFQSQQISALPFRAYSLIWNEWYRDQNLQTEIPVNLTSGNDLTLEQLDLQKRCWEKDYLTSCLPWPQRGEAVSVPGSVNYTTFSTIHDGVTGASRGDTQQAGTDHPWAPGTIYSTGGSAAGGDYVRLENIEDLEVDINDLRRSNALQRWLELAARGGSRYVEQVKAFFGVTSSDARLQRPEFLGGGRQNVMISEVLQTGETATTPQGNMAGHGIAVGATNRFKRRFEEHGFVLGIVSVLPKTAYQQGIHRMFSRADKFDYYFPQFAHLGE…	508	USER	zzzz205
919	genbank_microviridae_AJK28234.1_@PF02305.16	genbank	MRSVMEHSFSEVPRANIPRSTFNRSHGLKTTFDADWLIPILVDDVIPGDTFNVNMDHVARLGSPLSFPIMDNLFLETFYFFVPYRLVWDNWEKFCGAREDPSDSIDYTIPKISSTTNKDTTTGGGFNELATYMGLPYNTSVDLSEFSALPFRAYNLIFNEWFRDQNLTDSAEVKTTDGPDAGSTDYTLLKRAKRHDYFTSCLPWPQKGDAVTLPLSGFAPVLGIGKDDTTWRTGAVGVYESDNSTATYNDWSNVDGTTSLDQDRFMVEKHPSGDAPYIRADLSQATAATINDLRLAFQTQRLLERDARSGTRYNETILAHFGVTVPDFRVQRPEFLGGGSSVINVNQVASTYADGTQSNVGDLSAFAISSGRSGFTKSFTEHGVIIGLANVRGDITYSQ…	537	USER	zzzz206
918	genbank_microviridae_AJK28230.1_@PF02305.16	genbank	MMKLRRSKQSLTHQWFNTGEIGQLLPIGLIPVLPGDVVGGQTNLLTRVTPLAAPVFHRVDVEVRHVYASNRILWNDNDGTDWEEFITGGEDGMNADTVPTIANTATAGDLLDKFCLPRVASVNINALPVRMYNFIWNEMFRDQDLQTTKRLLTDVTVAKVNWAGDYLTNARPFSSKGPAVSIPVGTSAPIKTAAAVSGGNPSIYTTDDNTQRILSSGGANVGLGSVDASSQDMYADLNAATGADPIAFRRAWGIQRFMEHSAEYGSRYPEKMRALGSRYKGLMERPQVIGGGRSTMNFSEVLQTANDASDRAYGVGDMYGHGIDAQRTNKYAFRVDEHGYIMTLMFVRPKAMYQNGIPREWLRTDREDFHDPYLEDIGMQEVWLNEIYADSANTKANVF…	487	USER	zzzz207
917	genbank_microviridae_AJK28223.1_@PF02305.16	genbank	MRKRTLHDLGNYKLATGDMGELIPIMCEEALAGDTWKHKTNTFMRLLPTLFPIMHPCHVSVHHWFVPYRLIWEDYEDFITGGEDGLNASVLPTIDFSGSAVAAGDLADYLGLPVGFNSTASALPFRAYAKIYNENYRDDQIQAEIGLSEASGADTTTSTDLKNANWQKDNFTGARADEQLGTAVTLPLGTSAPVTSDAGTNAFIGVTSTTQSGLIKSMTTDGGAGDRVRQGTTTTTDGLYADLSNASAPDINQIRQAFLLQRFMELRNWTGSDHEEMLKTDFGVSPRDFRIGNPEYLGGGKETVQFSEVLDTGSSASAVGDLKGHGIAAMRTNNYIKFFPEHGLVLTFLCVKPIPMYHQGVRKHWNYDSKEDFYNPILEGLGVQAIENQEIYFAHSSKT…	490	USER	zzzz208
916	genbank_microviridae_AHN52939.1_@1KVP_A	genbank	PGLQKGDAVELPLGTSVPVATDISSTTYANAQVSVWNTSTSSYELLQADQKYLFRPGDAGVQANQLYADLSQATAATINQLRQAFQIQKLLERDARSGTRYAEIVKAHFGVNFMDVTYRPEFLGGTSTPINVTSVPQTSESGTTPQGTLAAFGTATVNGGGFTKSFTEHCIVMGIASVRADLTYQQGLNRMFSRSTRYDFYFPALAHIGEQAVLNKEIY	219	USER	zzzz209
915	genbank_microviridae_AHN52938.1_@1KVP_A	genbank	PGSQKGDAVQLSLGTVAPVVDQGFAPRFDIGTQTNVVLESAGGGSATMQHSGTGQATQDSMFWNDAFLETDLASATASTVNELRQAIQVQRLLERDARSGTRYPEIVKSHFGVDSDDARMQRPEYLGGGSTPVNIRPIPRTDSSPGTLGAFGTSAFKGHGFVKSFTEHCVVIGLVCVRADLTYQEGIDRWHNYQTRYDMYWPTLAHLGEQAVLNKEFT	218	USER	zzzz210
914	genbank_microviridae_AHN52934.1_@1KVP_A	genbank	PGSQKGDAVTLPLGDKAYITGSIDFDNVGDVYNLANVYNTNGDVRTLKGGATNVYGSNTDASSGNSEPLYADLSTATAATINSIRNSFQVQRLLERDARGGTRYTEIVRSHFGVISPDARLQRPEYLGGGSAPIVINPIAQQSATAATGTGTPLGTLGAVGTGLADGHGFSQSFTEHGIIIGLASVRADLTYQQGLHKMYSRSTRYDFYFPVFSHLGEQAIENREIY	227	USER	zzzz211
913	genbank_microviridae_AHN52933.1_@1KVP_A	genbank	PGFQKGEQVLLPLGTRADIHADTASHLTMYDDINAKPKTLDSSGSTLQFGTQAGSVNVYADLSTATAATINQLREAFQIQRLLERDARGGTRYTEVIKSHFGVTSPDARLQRPEYLGGGYSPVNINPVAQTSATDTNTSPQGNLAAFGTASPRSHGFTKSFTEHGVIIGFVCVRADLTYQQGINRMFSRQIRWDYYWPTLAHLGEQAVLSKEIY	214	USER	zzzz212
912	genbank_microviridae_AHN52932.1_@1KVP_A	genbank	PGLQKGASVQLPLGSLAPVTGFDIGTGGNAVVVHDGEVGVNRSLRATSANADYVYFDSTGNNGRKLYADLADATSATINDLRLAFQTQRLLERDARGGTRYNELIRAHFGVTVPDFRVQRPEFIGGGSSMVNVTPIANTAGQAGDYVGQLGAMGTVSGAHDWTYSAVEHGVIIGLANVRGDITYSQGLERYWSKSTRYDFYYPVLAQIGEQAVLGKEIY	219	USER	zzzz213
911	genbank_microviridae_AHN52935.1_@1KVP_A	genbank	QKGDAVLLSLGQSAPLTHDISGSGTNVGVKAPNIGTSVYRLDAGATVVSSGSTTATANLMYADLSNAIGPSVNELRQAIQVQRLLERDARSGTRYVEILKSHFGVTSPDARLQRPEYLGGGSTPVIVNPIARTDSSPGELGALGIASFKRHGFVKSFVEHCVVIGLVNVRADLTYQEGIERMWSRQTRYDTYFPVLAHLGEQAVLNKEIY	210	USER	zzzz214
910	genbank_microviridae_AHN52930.1_@1KVP_A	genbank	PGLQKGDAVQLSLGLQAPVTGLGALNQTWTTGPQSVYETDGSGTESYAATKSFNVSQAQQTMYVEEDTNNTGYPNIRADLSAATASTVNELRQAIQIQRLLERDARAGTRYTEIVKSHFGVSSDDARQQRPEYLGGGSQTINISPIARTDSSPGVLGAMGTTRISNHGFVKSFTEHCMVIGLVSVRADLTYQEGIDRHYDYRTRYDFYWPTLAHIGEQAVLNREIY	226	USER	zzzz215
909	genbank_microviridae_AHN52927.1_@1KVP_A	genbank	PGPQKGDAVDLPLGTSANIFGDSAVSAASKVLVEEHDSSGSTGDVWELDVGASGQLEYDATLTTSANLKADLSNATAATINELRLAFQTQRLLERDARSGTRINELILAHFGVVVPDYRVQRPEFLGGGSSPVMYKEVQQTTYQGTETIMDGRGATSMRGMATGRPGFTKSFTEHGYVIGFINVRGDITYQQGIDRDWSKQTRYDIYWPVLSQIGEQAVMDQEIY	225	USER	zzzz216
908	genbank_microviridae_AHN52931.1_@1KVP_A	genbank	PQKGDAVDLPLGTTAPVVSDGGNPEFSGSGFTNADIQPLVTSGDLHVNAAPSATASVTWGAVTGLEADLSTATAATINELRLAFQTQRLLERDARSGTRYNEMVLAHFGVTVPDFRVQRPEFLGGGSTPINITPIAQTTYQGTQTVEDAKGALSGIGTASGRHGFTKSFVEHGLIIGLVNVRGDITYSQGLDRYWTKSTRYDFYYPVLAQIGEQAVNNREAW	222	USER	zzzz217
907	genbank_microviridae_AHN52926.1_@1KVP_A	genbank	PGLQKGDAVTLPLGGSAEVVGDGTNPQFSRLDGTVTDRDLYYNNTNQVFETSALLGSGTTGVQFGSNTGLYADLSTATAATINSIRNSFQVQRLLERDARGGTRYTEIVRSHFGVVSPDARLQRPEYLGGGSAPIIVNPVAQQSASGASGTDTPLGTLGAVGTGLANGHGFASSFTEHGIIIGLCSVRADLTYQQGLHRKWSRETRYDFYFPVFAHLGEQAILNKEIY	228	USER	zzzz218
906	genbank_microviridae_AHN52936.1_@1KVP_A	genbank	PGLQKGDAVDLPLGDSAYVAVDNATHGDVLTIKATDIGTGDYQTATGYTGTYLSVTNADAGNANRALYADLSSATAATINQLRQAFQIQKLLERDARSGTRYSEIVKAHFGVNFMDVTYRPEFLGGSSTPVNVTSVPQTSESGTTPQGTLAAFGTATINGGGFTKSFTEHCIVMGIASVRADLTYQQGLNRMFSRSTRYDFYFPALAHIGEQSVLNKEIY	220	USER	zzzz219
905	genbank_microviridae_AHN52923.1_@1KVP_A	genbank	PGSQKGDAVTLPLAGEIPIAGNATASGVAYSIDNQRTGTWTQLATNTTTLTDTATAGLETNKLYADMSEGVTATVNDLRLAFQTQRLLERDARSGTRYVETILAHYGVTVPDFRVQRPEFLGGGSSPVNISPVANQSGSSGDLGDLAAIGVSSGTHGFTKSFVEHGVIIGLVNVRGDITYSQGQERYWAKSTRYDFYYPVLANIGEQAVLNKEIY	215	USER	zzzz220
904	genbank_microviridae_AHN52920.1_@1KVP_A	genbank	PGSQKGTEVDIPLGTTADIYTDSLAGTGNDISIYSTAHSQFRELSTNAGASNLYIDSTPGNESRKLYADLSTATAATINQLREAFQVQKLLERDARGGTRYVEILKAHFGVTSPDQRVQRPEYLGGGSSPVQIQPVAQTSSSDTTTPQGNLSGFGTAHLQGHGFTKSFTEHCLIIGIVSVRADLTYQQGLNRMFSRQTRYDFYWPALAHIGEQAVLNKEIY	221	USER	zzzz221
903	genbank_microviridae_AHN52917.1_@1KVP_A	genbank	PGSQKGDSVTLPLGDKAYVKAEDRTGNTSGIDDKYVINARSDDNRMMYPWGSDTINGSMTSSSANQAFYMYADLSTATAATINSIRNSFQIQRLLERDARGGTRYTEIIRSHFGVVSPDARLQRPEYLGGGSAPIIVNPIAQQSATAATGTDTPLGTLGAVGTGLADGHGFSQSFTEHGIIIGMASIRADLTYQQGIHRMWNRSTRYDFYFPVFAHLGEQAILNKEIY	228	USER	zzzz222
902	genbank_microviridae_AHN52921.1_@1KVP_A	genbank	PGLQKGASVQLPLGSLAPVTGATGSASVINSTLGTEVNLLQSTTNDNVLIHTSKIGTTQQLYADLGDATAATINDLRLAFQTQRLLERDARGGTRYNELIRAHFGVTVPDFRIQRPEYIGGGSSMVNVTPVANTAGQSGDYVGQLGAMGTVSGSHDWTYSAVEHGVIIGLANVRGDITYSQGLERYWSKSTRYDFYYPVLAQIGEQAVLNKEIY	214	USER	zzzz223
901	genbank_microviridae_AHN52918.1_@1KVP_A	genbank	PGPQKGDAVDLPLGTTAPIYSNSSGGADYTVRAGIGSSSAIKLVASTAYVSHTATTGSSSDLLRVDLSDATAATINDLRLAFQTQRLLERDARSGTRYNETILAHFGVTVPDFRVQRPEFLGGGSTPVNITPVAQTSGQPTPVSDDMLGQLAGIGTVHGTHGFTKSFVEHGYVIGLVNVRGDITYSQGIDRHWLNQTRYDFYYPVLAQLGEQAVENREIK	220	USER	zzzz224
900	genbank_microviridae_AHN52915.1_@1KVP_A	genbank	PGLQKGDAVSLPLGTSAEIHSTSGGFGAMGVIDDDDGIGYRIDTSGSTAVLSSTPSSTNLYADLADATAATINQLREAFQIQRLYERDARGGTRYTEILQSHFGVTSPDARLQRPEYLGGGKTGLDMQPVPQTSSTDATSPQGNLSALATVGVHGHGFTKSFVEHGVLIGLACVFADLTYQQGLNRMWSRRDRWDFYWPALAHIGEQPVLNQEIY	215	USER	zzzz225
899	genbank_microviridae_AHN52910.1_@1KVP_A	genbank	PWSQKGDSVDLPLGQSAIVRVAGKTDESYSGNVHWNIDTPNESILAVNGSGTPGGPNQAYADLSQATSATINQLREAFQIQKLLERDARGGTRYTEIVKSHFGVTSPDARLQRPEYLGGGSSPVNVTPIEQTSSTDATSPQGNLAAMATVSLTNHGFTKSFTEHCVILGLVSVRADLTYQQGLNRMFSRQTRYDFYWPALSHIGEQAVLNKEIY	214	USER	zzzz226
898	genbank_microviridae_AHN52913.1_@1KVP_A	genbank	PGPQKGDAVTLPLGDKAYITGSIDFDNVGDVNNIANVYNTNGDIRSLRGGATNVFGASTDNSSGSSEPLYADLSTATAATINSIRNSFQVQRLLERDARGGTRYTEIVRSHFGVISPDARLQRPEYLGGGSAPIVINPIAQQSATAATGTDTPLGTLGAVGTGLADGHGFSQSFTEHGIIIGLASVRADLTYQQGLHKMYSRSTRCDFYFPVFSHLGEQAIENREIY	227	USER	zzzz227
897	genbank_microviridae_AHN52912.1_@1KVP_A	genbank	PGLQKGDAVNLPLGSTAPVVSSGQTIQYSIDSSTRTVSGILEATTGQNMVVLPGASFNSGVHQATYGNAGTGQTGLQTDLTTATAATINELREAFQIQRLYERDARGGTRYTEIIQSHFGVTSPDARLQRPEYLGGGKDRINIHPIAQTSSTDTTTPQGNLSAFGTTGFGGHGFSKSFTEHCVIIGLVNVYADLTYQQGLNRMFSRQDRWDYYWPALAHLGEQAVLNKEIY	231	USER	zzzz228
896	genbank_microviridae_AHN52911.1_@1KVP_A	genbank	PWSQKGTAIDLPLGTDAPLMGHGKQTTVYTSGSQAVYETGQSSTINYTSYNAVNAGAGNDKTYYVEEDANNSNYPGLFADLSSATASTINELRTAFQQQKLMERDARGGTRYTEIVRSHFGVISADARLQRPEYLGGSSTPIIITPVAQASETNTTPQGTLSGYGTAADVGNGFTKSFTEHCVIMGILNVRADLHYQEGIPRMFSRSTRYDFYWPALAHIGEQSVLNQEIY	231	USER	zzzz229
895	genbank_microviridae_AHN52907.1_@1KVP_A	genbank	PGLQKGDSIDLPLGTTAPVNGTGRPSFEDQFGVSQGYLTNPSTGNIESSLGGAAALGNLHWRSTGLTADLSTATATTINQLRQAFQVQKLLERDARGGTRYVEIIKAHFGVTTPSAGWRSEYLGGGTRMVNISPIAQTSSSDATSPQGNLAAMGTATLDGIGFVKSFTEHCTIIGLVNVRADLTYQQGLNRMWSRSTRYDFYWPALANIGEQAVLNKEIY	220	USER	zzzz230
894	genbank_microviridae_AHN52905.1_@1KVP_A	genbank	PGFQKGDAVSLPLGTVAPVYMDEIGSGGLEIAFKDGSAGVYRDADIGSSGNLEMDATISNAHTFFADLSSATSATINDLRLAFQTQRLLERDARSGTRYVEMILAHFGVTVPDFRLQRPEFLGGGSSRVNITPVAQTSGQPVPASNDKLGELAAFGTVAGKHGFTKSFVEHGVVIGLVNARADITYSQGVERFWSKSTRYDYYYPVLAQIGEQSVLNKEIW	221	USER	zzzz231
893	genbank_microviridae_AHN52904.1_@1KVP_A	genbank	PGLQKGTGVELPLGDKAYVRVDGITGNEPTNDGGYYVALADGSADGKHYASTTLDSIGSTFGASNNANLYADLSEATGSTINSLREAFQLQKMLEKDARGGTRYTEVIRSHFGVTSPDARLQRPEYLGGGSAPINVTPVQQTSSTDATSPQGNLASFATATSMGKGFTKSFTEHCVIIGLCNVRADLTYQKGIPRMFSRSTRYDFYWPSLAHLGEQPVYNREIY	224	USER	zzzz232
892	genbank_microviridae_AHN52906.1_@1KVP_A	genbank	PGSQKGDAVDLPLGDSAPVVADHLTTGTPTNFTAPNVSGNATAMVVAGGSNFDGQQLYTDLSTATAATINQLRQAFQIQKLLERDARSGTRYSEIVKAHFGVNFMDVTYRPEFLGGTSTPINVTSVPQTSESGTTPQGTLAAFGTATINGGGFTKSFTEHCIVMGIASVRADLTYQQGLNRMFSRSTRYDFYFPALAHIGEQSVLNKEIY	210	USER	zzzz233
891	genbank_microviridae_AHN52903.1_@1KVP_A	genbank	PGLQKGDAVTLPLGTSADIYTDASTLADVSVYGTTPAAYHTLKADVANLQLDSTTGNENNKLYADLSNATSSTVNALRQSFQIQKFLEGDARGGTRYTEKVYSHFGVKSPDARLQPELLGLSQSVIQIHPVPQQGETGTTPQGNMAGFGTVSDQPAFTQSFTEHGYIIGLCAAVGDITYQQGINKLWKRSTQYDFYFPSFAYLGEQAVTVSEIY	214	USER	zzzz234
890	genbank_microviridae_AHN52898.1_@1KVP_A	genbank	PGPQKGDAISLPLTGDAPVHGIGKINTVFSATDATVYETGNAPNTTLYEDQALISPTDVNGQFSVQEDPDNGGWPNIKADLSGVTAATVNQLREAFALQKLSERDARGGTRYNEIINSHFNVSSPMDAVLQRPVYLGGSSVPVNVSQVAQTSETLTGTPQGNLTAFGTVSSNSGFVKSFHEHCIVIGIASVRADLTYQLGIPKMFSRLTRFDFYWPALSHIGEQAILNKEIF	232	USER	zzzz235
889	genbank_microviridae_AHN52896.1_@1KVP_A	genbank	PGLQKGDAVDLPLGSTAPIIGLGIDDSSTFTTGPKTDIYETDKTAAQSYAKYLETGGGGANELFIEEDPNKAGYPGIYADLTNATAATINSLREAFQLQKLLERDARGGSRYIEILKSHFKVTSPDSRLQRPEYLGGGSSMVNVSAVAETASFGGSVVGDLNAIAYHSQSGVGFTKSFVEHSVVIGMVSVRADLTYQQGLNRMFTRQTKYDYYWPALAHLG	221	USER	zzzz236
888	genbank_microviridae_AHN52895.1_@1KVP_A	genbank	PGLQKGEEVQLPLGDSAPVSGIGSSSQTYVAGPANAYETDGTGAASYADHVHNFLTMEEDPLNAGFPNVRADLQSATSSTINAIRQAFQLQKLFERDARGGTRYTEIIKSHFGVSSPDARLQRPEYLGGGSVPIGITPVPQTSESSATAQGTLAATGTATLHDHGFVKSFTEHGIIIGLVNVRADITYQQGLNKMFSRADRFDYYWPSLAHIGEQAVLNKEI	222	USER	zzzz237
887	genbank_microviridae_AHN52894.1_@1KVP_A	genbank	PGPQKGDPVTIPLGEQAPIAFGGAVEDLELTIEDNTGVDTYMKASAATLTSGLPIAGTAIYADLTSATAATINSLRQAFQVQKLLERDARGGTRYTEIIKAHFGVTSPDARLQRPEYLGGGSSPVNIAPVAQATQDLDIGQDSPLGTLAAVGTAELHNHGFTKSFTEHCVLLALISVRADITYQQGLNRMFDRQTRYDYYWPALSHIGEQAIKNKEIF	218	USER	zzzz238
886	genbank_microviridae_AHN52897.1_@1KVP_A	genbank	PGFQKGEAIDLPLGTKAPIATDIATGGVVGINSTVSGYRQLDTDGTKLDVSATVGSEAINMYADLTEATAATINELRQAFQIQRLLERDARGGTRYTEIIKSHFGVISDDARLQRAEYLGGGVSNVNINPVTQTANDGTTGAGVGELGAYSTTAIRGHGFTKSFTEHCVIIGLVSVTADLTYQQGLNRMWSRQTRYDYFWPAFAHLGEQSVLNKEIY	217	USER	zzzz239
885	genbank_microviridae_AHN52891.1_@1KVP_A	genbank	PGFQKGTAVSMPLGTQAPITGLGALTTKAWTDNSGAPISVDVTDSPAESWALASINSSLYMQGTPAGTDAVPNVYADLSNATSANINDIRLAFQTQRLLERDARSGTRYVEALKAHWGVTSPDFRLQRAEFLGGGSSVVQLSPVQQQSAQTTPAEDDKVGNLAANGTVSGTHSWNKSFVEHGVVIILGNIRGDISYSQGIDRYWSKSTRYDFFYPVLSGIGEQSVLNREIW	231	USER	zzzz240
884	genbank_microviridae_AHN52892.1_@1KVP_A	genbank	QKGDAVALPLGDEAPVEGIGKFTQDYRVEDVSVYEGLGTGTVVYADNALIGPLEDDRIYVEEDPNNAGFPNIKVNLAAATGATINALRQAFQLQKLYERDARGGTRYTEIVRSHFGVTSPDARLQRPEYLGGTSVPVNITPVPQTSQTDTTPQGNVSGYGTMTATAGFTKSFTEHCVILGLMNVRADLTYQEGIPRMFSRLTRFDYYWPGLAHIGEQSVLNKEIY	225	USER	zzzz241
883	genbank_microviridae_AHN52890.1_@1KVP_A	genbank	PGLQKGDEIELPLGTQAPIEGLYLEDGDAFNRTEDLTSLNGSSTAYTTNDVSAIKIVTHTDYNQVYADLSSATASTINSLREAFQLQRLLERDARGGTRYTEIIKSHFRVDSPDARLQRPEYLGGGSAPLNVLTAVGQGDTAIGQLQGYGFQTAGGVGFTKSFVEHCTIIGMVCARADLTYQQGLRKMWTRQTKYDFYWPALANLGEQEVLNGELW	216	USER	zzzz242
882	genbank_microviridae_AHN52888.1_@1KVP_A	genbank	PGLQKGPGVELPLGDRAYVKYGEVSGYTAGAQLDQYTDTRSDGSNAVFLRYSAVPEGVSNANPADTGNSLYADLSSATSATINSLREAFQLQKLLERDARGGTRYTEILNSHFKVQSPDARLQRPEYLGGGSSPVQVTPIAQTESSDATTPQGNLSAIGYHSQSGVGFTKSFVEHCVIIGLVSVRADLTYQQGLNRMWSRQTKYDFYWPALAHLGEQEVLNKEIW	225	USER	zzzz243
881	genbank_microviridae_AHN52884.1_@1KVP_A	genbank	PGLQKGESVDLPLGVSAPVIPTGAEAPLFDISGTNIQASGLRVEAGQSRVDWSAVGDATGGPATWNDPSLIADLSTATAATINQLRQSFQIQKMLERDARGGTRYTEVIKAHFGVTSPDARLQRPEYLGGGHSRVNITQVPNTASEASGGAADLLPLGTLAGYGTANLHNHGFTKSFTEHCIIIGLINVRADLSYQQGLNRMFSRQTRYDFYWPALSNIGEQAVLNKEIY	230	USER	zzzz244
880	genbank_microviridae_AHN52889.1_@1KVP_A	genbank	PGFQKGDAINLPLGESAPIYGDPDTFGTNVLLSNPDNAAHAVPLTASGATLTYAGTNPGTPNLFADLSDATAATINELRQAFQVQRLVERDARGGTRYTEIIRSHFGVTSPDARLQRPEYLGGGSTPINITPIAQTTSTDATSPQGNLAATGTATLHNHGFNKSFTEHCIIIGLANVRADLTYQQGLPRMYSRLTRFDFYWPALANIGEQAVLNKEIY	218	USER	zzzz245
879	genbank_microviridae_AHN52887.1_@1KVP_A	genbank	PGFQKGVGVDLPLGTEAPIYTDADVGEAVGVYSVPDGNVKYLASDVAHVTVDAVTIPTNRELYADLSNATAASINSLREAFQLQKLLERNARGGTRYTELINSHFGVTSPDARLQRPEYLGGGSSPVQITPVASTTSGLTYKVGSLAAVGYHSQQTAGFTKSFVEHGVIIGLVSCRADLTYQQGLNRMFSRQTRYDFFFPVLAHLGEQEVLNKEIW	216	USER	zzzz246
878	genbank_microviridae_AHN52881.1_@1KVP_A	genbank	PGSQKGESVTVGLGETAPITGIAFNDANTPATTSVSGKETGGGAIDYPAFYHGDTPTTATMFKAATTSTGSAPSIFADLTEASAITINALRESFQIQKLYERDARGGTRYTEIIKSHFGVTSPDQRLQRPEYLGGGSSPVNITPVAMTNNINAQARTGTLGGYGTSSMSGNGFTKSFTEHCVIIGMVCVRADLTYQQGLNRMFSRSTRWDFYWPALSHIGEQEVYQKEIF	230	USER	zzzz247
877	genbank_microviridae_AHN52879.1_@1KVP_A	genbank	PWSQKGEAVTIPLGSNAPVVGLGVGTQTFAEAADPVYETGGITTAYAEAKNIQNANVYVKGSAASSGFPEIYADLSQATATTINDLRQAFQIQRLLERDARGGTRYTEIIRSHFGVISPDQRLQRPEYLGGGTSYINITPVPQQTPSDIAPALTPQGNLAAIGTASATGHGFTKSFVEHTLIIGLVSVRADLSYQQGLNRMFFRSTRFDFYWPSLSHLGEQTIL	224	USER	zzzz248
876	genbank_microviridae_AHN52875.1_@1KVP_A	genbank	PGLQKGTAIDLPIGSSAPVIGDGTALGLVEATSTYGMGTDASFNLKGYSGQQADAIGTAGTGGNLVGSKIVGVSATPSSSGLIADLSAATAATINSIREAFQLQKLLERDARAGSRYTEILKAHFRVTSPDSRLQRPEYLGGGSSPVSITPIAQTSETLVGTAQGHLSAVGYHQQSGVGFSKSFVEHSVIIGLVNVRADLTYQQGLNRMWSRQTKYDYYWPALANLGEQSVLNTEIW	237	USER	zzzz249
875	genbank_microviridae_AHN52877.1_@1KVP_A	genbank	PGPQKGADVTLPLGTSAPITSTDMTFTGANDVTNRVNITDSSGNIRGLQSAGANTSLYGDNAQSGSTASLVADLTNATSATINQLRLAFATQKFLEKQARGGTRYIEVIKSHFNVTSPDARLQRPEYLGGGSSPVNISPVAQTTSTDAVTPQGNLAAIGTTVLNGHGFTKSFTEHTILIGLVSVRADLTYQQGLNRMFSRQTIYDYYWPTLSTIGEQAVLNKEIY	225	USER	zzzz250
874	genbank_microviridae_AHN52876.1_@1KVP_A	genbank	PGLQKGENSVLLPLGDRAPVNVNNTGGGTGDITVVSEVGLTTVELDSGGAMLQIGGPGAGGPDLYADLAEATSATINELRQAFQIQRLQERDARGGTRYTEIVKSHFGVTSSDAGLNRPEFLGGGTSMVNINPVAQTSATDPAGPDASPQGNLSAYGTATLKNHGFTHSFTEHCIVLGMVCVRADLTYQQGLNRMWSRRSKHDFYWPSLAQIGEQAVLNQEI	222	USER	zzzz251
873	genbank_microviridae_AHN52874.1_@1KVP_A	genbank	PGSQKGDPVTIPLGDQAPITGIGTSSQEFPATDVAVTETDLGAKTYDFAVATTSTLDGVVVEGTALTGGTPLIYADLTNATAATINSLRQAFQVQKLLERDARGGTRYTEIIKAHFGVTSPDARLQRPEYLGGGSSPVNIAPVAQATQDLDIGQDSPLGTLAAVGTAELHNHGFTKSFTEHCVLLALISVRADITYQQGLNRMFDRQTRYDYYWPALSHIGEQAIKNKEIF	231	USER	zzzz252
872	genbank_microviridae_AHN52872.1_@1KVP_A	genbank	PGLQKGEEINIGLSGTAPVIGVGTLTPQFTSTEGGVAGPLNVLAAGSGNPGPGALLLRTAAANPAEGNLRWSQSSLRADLSGAGAITINVLRQAFQLQRMQEKDARGGTRYVEVIKSHFGVTSPDFRLQRPEFLGSGSTPIGATPVTQNTQAFDGAAAPTPQGNLSAYAVGTATGHGFTKSFTEHCIIIGLVNVRADLTYQQGLNRMFSRQTRYDFYWPSLSHIGEQSILNKEIF	235	USER	zzzz253
871	genbank_microviridae_AHN52878.1_@1KVP_A	genbank	QKGDPVTIPLGDKATINVDRSIDETIGVFSTNEAAFQTMSASTTQVEVNISTANEATSMYADLTDATATTINSLRQAFQVQKLLERDARGGTRYTEIIKAHFGVTSPDARLQRPEYLGGGSSPVNIAPVAQATQDLDIGQDSPLGTLAAVGTAELHNHGFTKSFTEHCVLLALISVRADITYQQGLNRMFDRQTRYDYYWPALSHIGEQAIKNKEIF	217	USER	zzzz254
870	genbank_microviridae_AHN52867.1_@1KVP_A	genbank	PCLQKGDAVELPLSGDAPITGLGMGTTSYAYGTQAVYPVDGTGTIIYADAKALDSSPNNQGFVEEDTANAGYPNIRADLSGIGATTINELREAFQLQKLLERDARGGTRYTEIIKSHFNVTSPDARLQRPEFLGGRTSPISINPVQQTGETGGTPQGNISAYGTVVSTREGFTKSFTEHGYVMAILNVRADLTYQLGLDKMWSRSTKYDFYWPALAHLGEQAVLNKG	227	USER	zzzz255
869	genbank_microviridae_AHN52870.1_@1KVP_A	genbank	PGFQKGDPVTIPLGDSAPIKGIGKQTQDFTAPGLQVFESDGSQPTYVGGVAIGTDATEKTIIEEDPFNPGFPNIHADLTNATAATINSLRQAFQVQRLLERDARGGTRYTEIIKAHFGVTSPDARLQRPEYLGGGSSPVNIAPVAQATQDLDIGQELTTRNPGSSRHPPKLHNHGFTKSFTEH	183	USER	zzzz256
868	genbank_microviridae_AHN52868.1_@1KVP_A	genbank	PGLQKGDAVTVPLGTAADIHTAADVDEKVGVFSDPQADFQQLDNDLITLDVNATPLITTGKLYADLTDATAVTINTLRQAFQVQRLLERDARGGTRYTEIIRAHFGVTSPDARLQRPEYLGGGSSRVNITPVPNTVPTDLDPTTPQGTLAGFGTVSLINHGFTKSFTEHCVLIGLVNVRADLTYQNCINRMWSRQTRFDFYWP	203	USER	zzzz257
867	genbank_microviridae_AHN52864.1_@1KVP_A	genbank	PGPQKGDMVTLDLGGTAPVISDVSTGGSGRPWLASLGDGQARVLQTDGTNHNVQIDGVPAAGDFRWSGTAGQTGLVADLGVATQISVNALRESFQVQRMLERDARGGTRYTEVIRSHFGVISPDSRLQRPEYLGGGTSTVNITPIAQTSSTNDSQGPVDTPQGNLAAMGTAQLSGHGFNQSFTEHCVIIGLIAVRADLTYQQGVDRMWYRNTRFDFFW	218	USER	zzzz258
866	genbank_microviridae_AHN52862.1_@1KVP_A	genbank	PGLQKGETVLLPLGQTAPIAADGFTGNSVTVETDPGGAVPMDINANLVSLSGAGGGDTPLYADLSDATAVTINELRQAFQIQRLQERDARGGTRYTEIIRAHFGVTSPDARLQRPEFLGGGSSSVNIHPVAQTSQTDETTPKGDLSGYGTATLSGHGFTKSFTEHCIIIGLINVRSDITYQQGINRMWSRETRYDFYWPASAQIGEQSVLNK	212	USER	zzzz259
865	genbank_microviridae_AHN52861.1_@1KVP_A	genbank	PGLQKGDAVNIAIAGIAPVETSGAPNYSMSGSQVPMYLSQASGGALEGVGQTLGISDTVAGKAVGHDNSHTFSDDGGVYPGNLFANLGNATAMTINDLRLAFQTQRLLERDARAGTRYNELILAHFGVTIPDFRIQRPEFLGGGSQQINVTPVAQTSGQPVPAENDKLGELGGFGTVSGTHGFTKSFVEHGVILGFVNVRSDITYSQGLERYWSKQSRYDFFYPVLSQIGEQAVLNK	237	USER	zzzz260
864	genbank_microviridae_AHN52859.1_@1KVP_A	genbank	PGLQKGDAVTLPIGDSAPVIPITGGEDAVPTFRGQTSGNNAALVGDGGINVDWRVPIDGDAIWNTTALQTDLSGATATTINDLREAFQIQRLYERDARGGSRYTEILKSHFGVTSPDSRLQRVEYLGGGTTPLMLTPVARTADELADTDVSIGQLAAYGVASSSGQGFTKSFTEHGMILGLVASRADINYQQGINRMFTRSTRFDYYWPVFSHLGEQAVLNKEIF	225	USER	zzzz261
863	genbank_microviridae_AHN52857.1_@1KVP_A	genbank	PGSQKGDSIDLPLGERAPLATDQSGTQEVAIYRPAADQYHKLDTDGAKLTVSGDTSAVSNVMYADLTEATAATINQLRQAFQIQKMLERDARGGTRYTEIIKSHFGVTSPDARLQRPEYLGGGSTPVIINPVAQTSGTDQQSDTPQGTLAAIGTAQVRGHGFTKSFTEHCIILGLVSVRADLTYQQGLNRMWNRQTRYDYYFPALSHLGEQEILNKEIY	219	USER	zzzz262
862	genbank_microviridae_AHN52860.1_@1KVP_A	genbank	PGPQKGDEVDLPLGERASVRVDTDSTSDALGVLNDSNNPKNLDTSGALLQLAASGSTKSMYADLANATAATISTLREAFQLQRLKERDARGGTRYTEIIKAHFRVDSPDSRLQRPEYLGGGSSPITITPIAQTSQSDTTDQGNLAAIGYQSASGIGFTKSFVEHGVLIGMACVRADLTYQQGLDRMWSRQTKYDFYWPAR	200	USER	zzzz263
861	genbank_microviridae_AHN52855.1_@1KVP_A	genbank	PGPQKGESILVPLGAKAPVTGIGTNGFGVNGPIALRETGQDPVIASFDYYIQTESAGGSAFKMDRVGAGAYPEIYADLSQTTGWNINELREAFQLQRMLERDARGGTRYIEVIKAHFGVTSPDARLQRPEFLGGGSSAVNISPVAQTTGTLGVAGGDTPQANLAAIGTATLHGHGFTKSFTEHCILIGMVNVRADLTYQQGLNRMWSRETRYDFYWARTISSGEQAVLN	229	USER	zzzz264
860	genbank_microviridae_AHN52854.1_@1KVP_A	genbank	PGLQKGDAVSIPLGQAAPIATDTQLGLDVDVISTVTGLPQKLDSSAVMLNLSATDGFGGELYADLSDATAATINQLRQAFQVQRMFEKDARGGTRYTEVIKSHFGVTSPDSRLQRPEYLGGGSSMVNINPIAQTSETNPDGDPNVETPQANLSGVGTALLKNHGFTKSFTEHCLIIGLINVRTDLTYQDSLNKMWSRQTRFDFYWPSLAMIGEQAVL	217	USER	zzzz265
859	genbank_microviridae_AHN52852.1_@1KVP_A	genbank	PGLQKGDPVTIPLGDSAPVTGIGKGNQTYATPGVESFETDATGSRTYANAVDNSTGGALAYWEEDPNNLGFPNIRADLTNATAATINSLRQAFQVQKLLERDARGGTRYTEIIKAHFGVTSPDARLQRPEYLGGGSSPVNIAPVAQATQDLDIGQDSPLGTLAAVGTAELHNHGFTKSFTEHCVLIALISVRADITYQQGLNRMFDRQTRYDYYWPALSHIGEQAIK	227	USER	zzzz266
858	genbank_microviridae_AHN52850.1_@1KVP_A	genbank	GSQKGDSVQIPIDTKISGTGNPTMMVSGQAASQLRADLTNDNVEMQTNQTVSGVLGWGDPELELDLTSDGLGTINDLRIANQLQIMLERDARGGTRYTEILQAHFGVTSPDARLQRPEFLGGGTSRITIKPVEQNTASDQLTPQGNLAAIGTAALHNHGFVKSFTEHVIIIGLINV	176	USER	zzzz267
857	genbank_microviridae_AHN52844.1_@1KVP_A	genbank	PGFQKGEAVTIELGGDVPVQTQAAETISIGIFSVPEDDYRNLQDTAFVQVSAAGGVPEQQRMFVNLDDASFTINDLRESFQIQKLLERDARGGTRYPEILKSHFGVIDPQMLVHQRPLFLAGGHTQIHVTQVPQTTPEDTDNAGPETAQANLAAYGQIEGGGGSFTHSFTEHGIIIGLVNVRADVTYQQNIERYWSRQTRYDFYWPALSHLGEQAVHNREIF	222	USER	zzzz268
856	genbank_microviridae_AHN52851.1_@1KVP_A	genbank	PGFQKGDSVTIPLGSQAPITGLGARDGAYPSLGVSSFETGGGSPTYAAAKLITDVPGPDTELYVEEDPNLPGFPNIYADLSQATATTINALRQAFQIQKLLERDARGGTRYTEIIRSHFGVTSPDARLQRPEYLGGGSTNINISPVAQTNATESDVQVQSTPQGNLSAIGTASWSGHGFSKSFTEHCVLLGLVSVRADLTYQQGIERQFLRQTRYDFYWPA	221	USER	zzzz269
855	genbank_microviridae_AHN52849.1_@1KVP_A	genbank	PGPQKGDPVTIPLGDSAPIKGIGKQTQDFTAPGLQVFESDGSQPTYVGGVAIGTDATEKTIIEEDPFNPGFPNIHADLTNATAATINSLRQAFQVQRLLERDARGGTRYTEIIKAHFGVTSPDARLQRPEYLGGGSSPVNIAPVAQATQDLDIGQDSPLGTLAAVGTAELHNHGFTKSFTEHCVLLALISVRADITYQQGLNRMFDRQTRYDYYWPALSHIGEQAIKNKEIF	232	USER	zzzz270
854	genbank_microviridae_AHN52847.1_@1KVP_A	genbank	PGSQKGDPVEIPIATSAPVISEGTGIPDFYGVGTGDASGKQFEAVDTSATPDMRMGGGTGSFDADDTIRWKYTALQADFTAAGVTINALREAFQLQKMFERDARGGTRYTEMIKSHFGVTSPDARLQRTEYLGGGRAPVTLSPIAQNSAADAQPTPQGNLSAVGTSSFGGHGFTKSFTEHCIVMGLVCATADLTYQEGLDRMWSRETRYDFYWPSFANLGEQAVLNKEI	229	USER	zzzz271
853	genbank_microviridae_AHN52846.1_@1KVP_A	genbank	PGPQKGDAVSLPLGTFAPVTVVVPGQPELTGNSSPMLFRGASGGALTPSDETLGISSTNAGRVVASDKSQTFADDGGVYPSNLIADLSGATSATINDLRLAFQTQRLLERDARGGTRYNELILAHFGVTVPDFRIQRAEFLGGGTSRVNVTPVAQTSGQPVPAENDKLGELSAFGTVSGSHGFTKSFVEHGVIIGFVNLRSDITYSQGLERYWSKQTRYDFFYPVLSQIGE	231	USER	zzzz272
852	genbank_microviridae_AHN52841.1_@1KVP_A	genbank	PGLQKGDVVSLPLGTSAVVMPANANQLTGIQAPTTVRAANSGNYSGAGFTLGISETEAGRAIGTDQSQTFTDNGGIYFSNLYADLSTATSATINDLRLAFQTQRLLERDARGGTRYNEMILAHFGVTIPDFRIQRPEFLGGGSQQINVTPVAQTSGQPVPAENDKLGELSAFGTVSGTHGFVKSFVEHGIILGFVNVRSDITYSQGLERYWSKATRYDFFYPVLSQIGE	229	USER	zzzz273
851	genbank_microviridae_AHN52848.1_@1KVP_A	genbank	PGFQKGDAVELPLGSSAPVAHDTTDGTDLTVFSTVHDHYQKMAATTTNVVASASAGNEPEALYADLSDATAATINELRQAFQIQKLLERDARGGTRYTEIIKSHFQVVSDDARLQRAEYLGGGVSNVNINPVLTTTSIATLDATAGETAAYSTTVVRNNGFTKSFTEHCVLIGFVSVTADLTYQQGLNRMWSRQTRYDYYWPAFAHLGEQSVLNKEIY	218	USER	zzzz274
850	genbank_microviridae_AHN52840.1_@1KVP_A	genbank	PGLQKGAEVTTPIGDLAPVVPDTENAVPTFFPIGGQESPSALAVVAESIDTTWAAPIHLTGNPAQWWNTALNADLSGATGVSINELRQSFQIQKMLERDARGGTRYPEILKSHFGVTDPQMLVLQRPEFLGGGSSPVNINPVAQTAETNPDGDPNVETPQGNLAAFGTVTLSGHGFTKSFTEHCILIGIVNVRADLTYQTALNRMWSRQTRFDYYWPALSHLGEQEILNKEI	232	USER	zzzz275
849	genbank_microviridae_AHN52839.1_@1KVP_A	genbank	PGLQKGEAVTIPIGDSAPISGIGKSDANFTTVPEDFIETDGTTKTYDAYSFSDAGTGANRIAFQDDPTNPGTLGIYADLSQATATTINALREAFQWQRMFERDARGGTRYTEIIRSHFNVVSPDARLQRPEYLGGGSQNINIHPVTQTTQSFESATAQTPQGNLAAFGTSSGSGHGFTKSFTEHTIIIGLCSVRADLTYQKGLDRMWSRQERFDFYWPTLAHLGEQAILNKEIY	234	USER	zzzz276
848	genbank_microviridae_AHN52838.1_@1KVP_A	genbank	PGLQKGDAVSLPLGTSAPVISDGTGQPTFNADDVTAGALLMAATTGNLKSDDIPSNQAPAYWNDPELKTDLSSATGATINELRLTFQTQRLLERDARSGTRYVETLAAHWGISNYPDARLQRPEFLGGGSSIINMSSIAQTTYQGTQTLEDAKGALSGIGTVSGRHGWTKSFVEHGIVLGLVNVRGDISYSQGLERYWSKSTRYDFYYPVLSMIGEQSIPVQEIF	225	USER	zzzz277
847	genbank_microviridae_AHN52837.1_@1KVP_A	genbank	PGSQKGDAVTIPLGNAAPIIGLGIPQAGSTAFTDVSVKETLNGNQVIYGQSIQADNISALQVRTDPLAPTTNPLIFADLTSATAVTINSLREAFQVQRLLERDARGGTRYTEIIKAHFNVTSPDSRLQRPEYLGGGSSPINIQPVASTVPTDLGGTTPQANLAAVGTSVLNKHGFIKSFTEHSLILGFVVVRADLTYQQGLNRMWSRLDRYDFYWPSLAHLGEQSILNKELV	232	USER	zzzz278
846	genbank_microviridae_AHN52836.1_@1KVP_A	genbank	PGPQKGEAVRLPLGLEAPIRGIGSTTQTLTTETDPVYETGGVTTSYDAGTTSGGDLIAIDATLPSGGFPNIYADLEDATAATINQLRQAFQVQRMFEKDARGGTRYTEVIKSHFGVTSPDSRLQRPEYLGGGKGMVNVNPIAQTTDEITPGEGTPQGNLAGVGTAVLKGHGFTKSFTEHCVIIGLVNVRADLTYQNVLNRMWSRQTRFDYYWPSLAMIGEQAVLNKEIF	229	USER	zzzz279
845	genbank_microviridae_AHN52835.1_@1KVP_A	genbank	PGLQKGDSVDLPLGTAAPIAADATFDDGFQPDNTFTINDTFGSPHNLSTDQAALFGASGSTGLAPMYADLTSATAATINQLRQAFQIQKLLERDARGGTRYTEVILAHFNVTSPDARQQRPEILATGSTPIIINPIVQTAPDPTGPEDSVVGDLGAMGIAVLKNGFTKSFSEHCTIIGMICARADITYQQGLNRMFSRQTRYDYYWPALSHIGEQTITNGEIM	223	USER	zzzz280
844	genbank_microviridae_AHN52834.1_@1KVP_A	genbank	PGFQKGDGVELPLGASAPVDYVPFGTENNPMLVRVASDDSLAGGIHNLQFSASGVLESSEGGTEDLFIDPNGRLEADLSSATAATINSLREAFQLQKLLERDARGGSRYTEILQSHFKVNSPDSRLQRPEYLGGGSAPIVVSPVANTTDTGEKIGHLAAVGFSSAQGIGFTKSFVEHSVIIGMACVRADLTYQQGLNRMWSRQTKYDYYWPALAHLGEQSVLNKEIF	227	USER	zzzz281
843	genbank_microviridae_AHN52833.1_@1KVP_A	genbank	PGLQKGDAVELPLGTSAPITGIGKSNQTYATSTSVYETDGSGTILYADDAQFGGTMLMEEDPDNPGFPNIRADLSTATAATINELRQAFQLQKMLERDARGGTRYTEIIKSHFQVVSDDARLQRAEYLGGGVTNVNINPVVTTMAKDDNTSIAGETAAYSTTAIRNNGFTKSFTEHCVLIGFVSVTADLTYQQGLNRMWSRQTRYDYYWPAFAHLGEQSVLNKEIY	226	USER	zzzz282
842	genbank_microviridae_AHN52831.1_@1KVP_A	genbank	PGSQKGDAVQIPLGEWAPVEGTSSSSEPQFRVQTFGQTSIYSVGAGDIKAEWEAGYAPTGPMTWGDPGLRADLSDASTITINELREAFQVQRLLERDARGGTRYTEILRSHFGVTSPDARLQRPEYLGGGSAYVNISPVAQTSSTQDSQGPVDTPQGNLAAVGTAALNHHGFTKSFTEHCVVIGLINVRADLTYQQGMNRMWSRETRFDFYWPALANIGEQAVLNKEIY	229	USER	zzzz283
841	genbank_microviridae_AHN52829.1_@1KVP_A	genbank	PQKGDAVTIPLGEQAPLIGIGVNASQNTTAPDVTVAQTDQVNEVWANSWDGARLQGEADGIDGSPLFYADLTNATATTINALRTGFQVQRLLERDARGGTRYTEVIKAHFGVTSPDARLQRPEYLGGGSSPVNITPIGSTVPTDLDPGEPLGTLAGVGTAHISNHGFTKSFTEHCVIIGLVNVRADLTYQQGLNRMWSRQTRYDYYWPALSHIGEQGVLNKEIY	224	USER	zzzz284
840	genbank_microviridae_AHN52827.1_@1KVP_A	genbank	PGLQKGDSVELPLGSSAVVATQVADLTGAREAMHLGSAASGTVAATGRTLGIDPTTAGDTATFASSLTNGDPVYPLNLYADLSSATAATINELRLAFQTQRLLERDARAGTRYVETLAAHWGITNYPDARLQRPEFLGGGSSIINMSSIAQTTYQGTQTLEDAKGALSGIGTVSGRHGFTKSFVEHGIILGLVNVRGDISYSQGLERYWSKQTRYDFYYPVLSMIGEQAVLNKEIW	236	USER	zzzz285
839	genbank_microviridae_AHN52822.1_@1KVP_A	genbank	PGPQKGESVALPLGSTAPVLGLGVGSQTFGTVDESVYDSAGSNPTYPYSKDVDEGNVHTNLFVRGTGQTSAYPDIYADLSDATAATINELRQAFQVQKMLERDARGGTRYTEILKSHFGVTSPDARLNRPEYLGGGSAPINVSPISQTTGTDVTTPQGNLAAMATASFSGHGFAKSFTEHCILIGLVSVRADLSYQQGRHKMWLRTTRYDFYWPALAHIGEQAVLNAEIY	230	USER	zzzz286
838	genbank_microviridae_AHN52826.1_@1KVP_A	genbank	PGFQKGEEVTILLGTTADIDFVPNAGTIGQMVDPVTGTPAGAIAAATFGLDGNSNISDIGTAPYGYDPNGTLEADLSTATAATINSLRLAFQVQKLFERDARGGTRYTEIIQSHFNVTSPDSRLQRPEYLGGGSQRLGMSTVPQTSSTDVTTPQGNLSGYASVTMQNGFTKSFTEHCVLLGLICARADLTYQQGLNRMWSRQSRWDYYWPALSHIGEQAVLNKEIY	226	USER	zzzz287
837	genbank_microviridae_AHN52825.1_@1KVP_A	genbank	PGPQKGTAVDLPLGTTAPIIMATSNNVGKILDASTQVGMATTVGLRHNTDEFENDSAVNLQYDPNGTLNADLTNATAATINALRLAFQTQKLLERDARGGTRYTEIIRSHFGVTSPDSRLQRPELLSTGSTQISFTPIPQTSSTDVTTPQGNLSAYSTISSNSNGFVKSFTEHCVLIGLVSVRADLNYQQGLNKMFSRLTRYDYYWPAS	209	USER	zzzz288
836	genbank_microviridae_AHN52824.1_@1KVP_A	genbank	PGSQKGESVALPLGTTAPVIGDGVDQPTFNVGSSQVAIGGDDASDNAAWSEAISGTGVATWLNPHLVADLTNATAATINAIRQAFQMQKLLERDARGGTRYTELLRSHFGVTSPDARLQRPEFLGGGTTPLFTKPVEGTVTMGSTELGQLGAYGIAANTSHGFTKSFTEHCTLIGMVSVRADLNYSRGMPRQFSRRTRYDYYWPSLAHIGEQAVLNQEI	219	USER	zzzz289
835	genbank_microviridae_AHN52820.1_@1KVP_A	genbank	PGPQKGEGINLPLGDSAPIVYAPDQLPNIIKGEAGTPVTVAENLQYSASGRLINPADSGLTLDISNSHYADLSSASAASINSLRQAFQLQKMLERDARGGTRYTEILQSHFQVHSPDQRLQRCEYLAGGSVPVVMNPISQTTQTSENLGASPIGRQAGYATAQSGAGGFSKSFTEHCLVIGLVSVQADLTYQKGIPRMFSRRSRFDFYWPALAHLGEQSILNREIY	226	USER	zzzz290
834	genbank_microviridae_AHN52819.1_@1KVP_A	genbank	PWSQKGAEVTTPIGGLAPVIPDAENAVPTFFPIGGQESPSALAFIAESIDTTWAAPIHLTGNPAQWWNTALNADLTGATGVSINELRQSFQIQKMLERDARGGTRYPEILKSHFGVTDPQMLVLQRPEFLGGGSSPVNINPVAQTAETNPDGDPNVETPQGNLAAFGTVTLSGHGFTKSFTEHCILIGIVNVRADLTYQTALNRMWSRQTRFDYYWASTIPTWGEQEILNKEI	233	USER	zzzz291
833	genbank_microviridae_AHN52815.1_@1KVP_A	genbank	PGLQKGDPVTIPLGDSAPIVSDGTGFKISRTDETGAPDQVVSDGPGTLAALTGGVADVYIPDGSTLSSGMVASLTDATATTINALRQAFQVQRLLERDARGGTRYTEIIKAHFGVTSPDARLQRPEYLGGGSSPVNIAPVAQATQDLDIGQDSPLGTLAAVGTAELHNHGFTKSFTEHCVLLALISVRADITYQQGLNRMFDRQTRYDFYWPALSHIGEQAI	222	USER	zzzz292
832	genbank_microviridae_AHN52812.1_@1KVP_A	genbank	PGSQKGAEVTTPIGGLAPVIPDANDLVPTFFPIGGQEAPSSLAFVAESIDTTWGAPIQQNGNPAQWWNPALNADLSAATGVSINELRQSFQIQKMLERDARGGTRYPEILKSHFGVTDPQMLVLQRPEFLGGGSSPVNINPVAQTAETNPDGDPSVETPQGNLAAFGTVTLSGHGFTKSFTEHCILIGIVNVRADLTYQTALNRMWSRQTRFDYYWASTLPLGRTRILNKEI	232	USER	zzzz293
831	genbank_microviridae_AHN52813.1_@1KVP_A	genbank	PGSQKGDEVTLSLVGDAPLSESAVPVVGRDDLQPTFDVGNLSTARLVSVTGTAETNFDSVVTGNDYAEWVDSKLDADLTGVVAELGALPMITINEFREAVTLQQALELDARGGTRYTEKLQTLWGVSPEDFRLQRSQFLGGGSQGMQINQVPVTAMKTNEPPAYPGDIGAFGISASNDHGFVSEFKEHGILIGLISARADLNYQQGIQKMWSRETVWDYYSPIFANLGEEGVLNKEIF	238	USER	zzzz294
830	genbank_microviridae_AHN52806.1_@1KVP_A	genbank	PWPQKGDAVSLPLGTQATVIPNPAELITGTRSPTIVRAASGGDLIGTGETLGISNTVQGRGMATNLSQSFPDDGGIYFSNLYADLSTATSATINDLRLAFQTQRLLERDARGGTRYNEMILAHFGVTIPDFRIQRPEFLGGGSQQVNVTPVAQTSGQPVPAENDKLGELSGFGTVSGTHGFVKSFVEHGIILGFVNVRSDITYSQGLERYWSKATRYDFFYPVLSQIGEQAVLNKEIW	238	USER	zzzz295
829	genbank_microviridae_AHN52805.1_@1KVP_A	genbank	PGLQKGDAVEIPLGTSAPVVSNQVNPTMVAAPGGSALNLGQTDTTTNIAWSGGSASSTGPVHFVTTGLETDLTNATAATINTLRQAFQIQKLFERDARGGTRYIEIIKAHFGVTSPDARLQRAEYLGGGQSNINFSAVASTVPTDLGGTPQGNLSAYATSSSMGHGFTKSFVEHGVVLGLVSVRADITYQAGLNRMWSRQTRFDYFWPALAMIGEQEILAKELP	224	USER	zzzz296
828	genbank_microviridae_AHN52817.1_@1KVP_A	genbank	PGLQKGGAVDIPMGISAPVIGAGIDPTLAVPTFDASTDDSEIFSIATSSGNMATQPGGTGDIAGAYWQDPALIADLTSATAATINDLREAFQVQKLLERDARGGTRYTEIIRSHFGITDAGGDARLQRPEYLGGGSTRVNVNPIAATSGYSSAPDVGDLASFITQAADGIGWTKSFTEHGVLLGLVSVRADLVYQQGLDRMWSRQYREDFYFPSLAHIGEQAVLTKEI	228	USER	zzzz297
827	genbank_microviridae_AHN52810.1_@1KVP_A	genbank	PWLQKGVGVELPLGSVAPVLGIGKLDQTFNLNDQAVYETAGTGTTVYEKASEIADASANRWFVEHDLNNSGFPGIYADLSNATAATINSLREAFQLQRLLERDARGGTRYTEILQAHFKVNSPDSRLQRPEYLGGGSTAIQLTPIAATTLATGQAVGNLAAVGYSAQSNIGFTKSFVEHSTILGLVNIRGDMTYQQGLNRMWSRQTKYDFYWPALAHLGEQSVLNKEIW	229	USER	zzzz298
826	genbank_microviridae_AHN52804.1_@1KVP_A	genbank	PGLQKGADVTLPLGSSAPIVADGALNVIGSVSGGTSVLNAAPAIPSIYAGTGALTAADDVLYLSGLAADLTTATSATINQLRLAFATQKFLEKQARGGTRYIEVIKSHFNVTSPDSRLQRPEYLGGGTTPVNISPVAQTTSTDAVTPQGNLAAIGTAVLNGHGFTKSFTEHTILIGMVSTRADLTYQQGLNRMFSRQTIYDYYWPTLSTIGEQAVLNKEIY	221	USER	zzzz299
825	genbank_microviridae_AHN52802.1_@1KVP_A	genbank	PGFQKGDAVSLPIGNRADITSDVGQTNAVSVYSTLDSDERYLDSSSTLLQVSTTGPTGAMLYADLSNATSATINDLRLAFQTQRLLERDARGGTRYNEMLLAHFGVTVPDFRVQRPEFLGGGSQQINVTPVAQTSGQPVPAENDKLGELSAFGTVSGSHGFVKSFVEHGVIIGLVNVRSDITYSQGLERYWSKQSRYDFFYPVLSQIGEQAVLNKEIW	218	USER	zzzz300
824	genbank_microviridae_AHN52797.1_@1KVP_A	genbank	PGFQKGESVALPLGSTAPVLGLGVGSQTFNTVDESVYDSAGSNPTYPYSKDVDEASVHTNLFVRGTGQTTAYPDIYTDLSDATAATINELRQAFQVQKMLERDARGGTRYTEILKSHFGVTSPDARLNRPEYLGGGSAPINVSPISQTSSTDVTTPQGNLSAMGTVSFSGHGFAKSFTEHCILIGLVSVRADLSYQQGRHKMWLRTTRYDFYWPALAHIGEQAVLNREIY	230	USER	zzzz301
823	genbank_microviridae_AHN52796.1_@1KVP_A	genbank	PGLQKGDSVTIPMLGTAPVVPGGTGIPTYGGFPTKAAVGLDAPVTMDGNFAGGQLAWTDPALEADLTNATTATINALRQAFQIQKLLERDARGGTRYTEIIRAHFGVTSPDARLQRPEYLGGGVTPLNVSPVAQTTNSASDVQVADTPQANLAGIGTVSWTGHGWSKSFTEHGHIIGLINARADLTYQQGLSRMWNRRTRYDFFWPALAMIGEQAVEQQEIW	222	USER	zzzz302
822	genbank_microviridae_AHN52795.1_@1KVP_A	genbank	PGLQKGADVLIPMGTSAPVVGIGAYTQAYTFSDPAAYETGASTGTTYDSARNISLDNSDNTFWVEEDPDNTGFPNIRADLTNATAVTINQLRLAFATQKFLEKQARGGSRYIEVIKSHFNVTSPDARLQRPEYLGGGSSPVNISPVAQTMSTDATSPQGNLAGIGTTVLNQHGFTKSFTEHCIIIGVVSVRADLTYQQGLNRMFSRSTIYDYYWPTLSTIGEQAVLNKEIY	231	USER	zzzz303
821	genbank_microviridae_AHN52798.1_@1KVP_A	genbank	PGSQKGADVTLPLGTTAPVNFDTQIDYAVSAYSTVDSRLNFISTDAGFIRQSGADASSYPLSALYTDLSDATAATINQLRLAFATQKFLEKQARGGSRYIEVIKSHFNVTSPDQRLQRPEYLGGGSSPVNISPVAQTSSTDSTTPQGNLSAVGTTVLNEHGFTKSFTEHCILIGLVSVRSDLTYQQGLNRMYSRQTIYDYYWPTLSTIGEQAVLNKEIY	219	USER	zzzz304
820	genbank_microviridae_AHN52793.1_@1KVP_A	genbank	PGLQKGDSVELPLGTTATIHTAAGVGANIGIYSDTADAFKLLDADTTNVDVSTTDTNAATNRMFANLSSATAATINELRLAFQTQRLLERDARSGTRYVETLAAHWGITNYPDARLQRPEFLGGGSSIINMSSIAQTTYQGTQTLEDAKGALSGIGTVSGRHGWTKSFVEHGIVLGLVNVRGDISYSQGLERYWSKSTRYDFYYPVLSMIGEQAVTVQEIF	221	USER	zzzz305
819	genbank_microviridae_AHN52789.1_@1KVP_A	genbank	PGSQKGTQVTIPLGTSAPVVSDGGNPSITGVVEGGRVLQYTAGPTQTVGLSATVNTTEAVTWNTTGLEADLTTAVAATINQQREAFQTQKLLERDARGGTRYVEIIKSHFGVTSPDFRLQRPEFLGGGRSSLNITPVAQTSSSDVTTPQGNLAAFGTASMVNHGFSKSFTEHNIIIGLVNVRADITYQQGLNRMWSRQTRYDFYWPSFAHLGEQEVLSKEIY	222	USER	zzzz306
818	genbank_microviridae_AHN52788.1_@1KVP_A	genbank	PGFQKGAAVQLPLGTTAPIINDFTGGLAQQIYNSNGDLTTDTAGLSQMSGLFSNDAGAGKVIGPNGTLVADLSDATAATINELRQAFQVQRLLERDARGGTRYIELIKSHFGVSSPDARLQRPEYLGGGSTPVNITPVTQQSASDATTPQGNLAAFGTASLHNHGFSKSFTEHCIIIGMVSVRADLTYQQGLNRMFSRSTRYDFYWPALSHLGEQSILNKEIF	223	USER	zzzz307
817	genbank_microviridae_AHN52790.1_@1KVP_A	genbank	PGLQKGEAVSLPLGESAPIHTTAISGDEVAVFNDTYDYVADINSSGSKLLYSAGTSPEENLYADLSAATAATINQLRQSFQIQRLLERDARGGTRYTEIVKSHFGVTSPDSRLQRPEYLGGGSTPININPVVTSATTMLPISPYSVIGRSGDTTAYSTTAIKSNGFTKSFTEHCVIIGLVSVRADLTYQQGLNRMFSRSTRYDMFWPSLAMIGEQAIL	218	USER	zzzz308
816	genbank_microviridae_AHN52786.1_@1KVP_A	genbank	PGLQKGDAVSLPLGVTAPINAISDFTPLFDAGATEDDAIQVIDSTANLELPTDPEATVDLKWSQNAGATKLVANLSTATAATINELRLAFQTQRLLERDARSGTRYVETLSAHWGISNYPDARLQRPEFLGGGSSIINMSSIAQTTYQGTQTLEDAKGALSGIGTVSGRHGWTKSFVEHGIVLGLVNVRGDISYSQGVERYWRKSTRYDFYCPVLSMIGEQAVLNSEIW	229	USER	zzzz309
815	genbank_microviridae_AHN52785.1_@1KVP_A	genbank	PGPQKGDSITLPLGTTAPLQSTGDGIPKFYIDGISGYQIEAHSDESLDVFPSTVTTESNPLSWNDVKLECDLSTATSATINEIRQAFQMQKLLERDARGGTRYTEVIRAHFGVSSPDARLQRPELIMAGTMPIIGREVAATNRSSGASLPVGELGAYAMGADTGPRCVKSFTEHGYVLTLISARADLDYQQGLDKLWSRTSKYDFYWPALAQIGEQAVKNREIF	224	USER	zzzz310
814	genbank_microviridae_AHN52783.1_@1KVP_A	genbank	PGLQKGDAVELPLGTQAPVAYETITGTDVTGEFANAKEIASSNLVHAATYGTVGSALANPSEHALFADLSEATAATINELRQAFQIQKLLERDARGGTRYTEIIKSHFQVISDDARLQRAEYLGGGVTNVNINPVLSTASFSSVEPQGVGLTGAYSTTAIRNNGFTKSFTEHCVLIGFVSVTADLTYQQGLNRMWSRQTRYDYYWPAFAHLGEQSVLNKEIL	222	USER	zzzz311
813	genbank_microviridae_AHN52782.1_@1KVP_A	genbank	PGPQKGDPIELSLGSTAPLTILGDGTEPEFEIDSTGGYKLHGDALNIEAEWDSQPGGGDANWDDPHLTGTADLSVATAATINEIREAFQVQRLLERDARGGTGYTELMRSHFGVISPDSRLQRVEYLGGGTTRINVNAVAATADIGDPVLGDLAAFATQQASGIGFVKSFTEHCLIMGLVSVRAELTYQQGLDRMWRRQSRYDYFWPALANLGEQEILTAEIF	223	USER	zzzz312
812	genbank_microviridae_AHN52780.1_@1KVP_A	genbank	PGSQKGTAVSMPLGTTAPILGIGSVGAAVFPAGSIGPVEETGSATPTYGNANLLSTTGGLYAEGSTTTKPNIRADLANALAPSINDIRLAFQTQRLLERDARSGTRYVEALKAHWGVTSPDFRLQRAEFLGGGSSVIQLSPVQQQSAQTTPTEDDKVGNLAANGIVNGTHSWTKSFVEHGVVIILGNIRGDISYSQGIDRYWSKSTRYDFFYPVLSGIGEQSILNKEIW	229	USER	zzzz313
811	genbank_microviridae_AHN52778.1_@1KVP_A	genbank	PGLQKGDAVSIPLGGSAPVTGIGTQFSGGTADLLDQSVQENDTATTYPFANEVKIASIGAPLYVNWSSAFGTPELFADLTEATAVTINVLRQGFQVQKLLERDARGGTRYVELLKSHFGVTSPDFRLQRPEYLGGGQTNINIQPVASTVPTTLDAVTPQANLAGIGTATMSGNGFTKSFTEHCLIIGLVCATADLTYQQGLPRMFSRSTRYDFYWPALSMIGEQSVL	227	USER	zzzz314
810	genbank_microviridae_AHN52777.1_@1KVP_A	genbank	PGFQKGDAVDLPLGTVAPVVGLGKTDQAYGSSSTSVYETGATGSTLFASSANVSTSTLHMEEDPDNTGFPAVYADLSDATAATINELRQAFQIQKLLERDARGGTRYTEIIKSHFQVVSDDARLQRAEYLGGGTTNVNVNPVLNTAAFVENTSRGIGTLGAYSTTAIRNNGFTKSFTEHCVLIGFVSVTADLTYQQGLNRMWSRQTRYDYYWPAFAHLGEQSVLNKEIY	229	USER	zzzz315
809	genbank_microviridae_AHN52776.1_@1KVP_A	genbank	PGLQKGDAVSLPLGEAATVYATGDRIPLFNAGAAESDALQVTDSTGNVIIPTDPEATVSLEWSDTPAELKLVANLSTATSATINELRLAFQTQRLLERDARSGTRYVETLAAHWGISNYPDARLQRPEFLGGGSSIINMSSIAQTTYQGTQTLEDAKGALSGIGTVSGRHGWTKSFVEHGIVLGLVNVRGDISYSQGLERYWSKSTRYDFYYPVLSMIGEQAVAVKEI	228	USER	zzzz316
808	genbank_microviridae_AHN52775.1_@1KVP_A	genbank	PGLQKGDSVNLPLGTTAPIAWDGVVDSDRLTAYSTVAAEDRPIESIDTVYNTLGHTILETSPLYADLSDASSATINELRLAFQVQKLLETDARGGTRYIELIKAHFGVTSDDARLQRPEFLGGGTSNVIINAVQQTSESNTTPQGTIASFGTATQQGHGFIKSFTEHCIVIGIISTRADLTYQKGLERMFSRKTRFDHYWPALAQIGEQAVLNKEIY	217	USER	zzzz317
807	genbank_microviridae_AHN52774.1_@1KVP_A	genbank	PGSQKGDSVSLPLGTTAPVEATAPGYPTFEMNSVGSYKIRSDVSGDSAHWDGTAGAVYTAHWDDPNLHTDLSLATAATINEIRQAFQFQKLLERDARGGTRYVELLKSHFHVTSPDFRLQRPEFLHGSTTPLFTRAVESTNGANTGNFGKLGSYGVAADTLHGFTKSFTEHCIIIGMISARADLNYQQGFPRQF	194	USER	zzzz318
806	genbank_microviridae_AHN52773.1_@1KVP_A	genbank	PGLQKGTAVDLPLGDAAIIHHYGGVTDEVSVYNDSTSAYRNLYDDAGSVTNTIISATIDNPGLAKALYADLSTATAATINQLRQSFQIQKMLERDARGGTRYVELVKSHFGVTSPDARQQRPEYLGGGSSRVTVHPIAQTSETGTTAQGTLAAMGTAAFQGHGFTKSFTEHSVIIGLVNVRADLTYQQGLNKMFSRSDKLDFYWPASPQIGEQSVLNKEIY	221	USER	zzzz319
805	genbank_microviridae_AHN52769.1_@1KVP_A	genbank	PGLQKGDPITLSMGGSAPITGLGTATNTFPLGPVDSYETDASATTSYADAASSVQVLYAEEDPLNTGFPNIRANLTGAAAQSINEIREAFQVQRLLERDARGGTRLTESLRAHFGVTSPDSRLQRPEYLGGGSSRINVNAVAATSGYSTAPEIGTLAAFATQAASGIGFVKSFTEHSTLIGLVNVRTDLIYQQGIDRMWHRQTRFDYAWPVLARLGEQEVLTKEIF	226	USER	zzzz320
804	genbank_microviridae_AHN52767.1_@1KVP_A	genbank	PWLQKGQEVLLPLGQTAPVGGGGNDGAGIEIDKFQGSDHYSMGTAGANASWEIQIGPPDPQEQLYVDLSQATSSTINELRQAFQVQRLQERDARGGTRLTEIIRAHFKVISPDSRLQRPEFLGGGTSMVNINPVAQTSETDPVGQDASPQANLAAFGTVQLNNHGFTQSFTEHCIVIGLVNVRADLTYQQGLNRMWSRKTRFDFYWPVLANLGEQTVLNQEIF	223	USER	zzzz321
803	genbank_microviridae_AHN52770.1_@1KVP_A	genbank	PGLQKGDSVSLPLGTTAPLTGTITGAGQPSWDIGTSTDIGIIRGTPVNADVGWEGGDPGAAGTTPAEWNDPALDTSGLTVDLSTATSATINALREAFQIQKLLERDARGGTRYVELVKSHFGVTSPDARLQRPEYLGGGSTPVIITAVAQNTQKTSASNWDTTEKGSLAGFGTATGTNIGFNKSFVEHGHIIGLVSARADLTHQFGLHKMWSRLTRYDFYWPAFANLGEQAVLNQEIF	238	USER	zzzz322
802	genbank_microviridae_AHN52771.1_@1KVP_A	genbank	PGSQKGEAIEIPIGGNVEVIADGAGAYPAFLSVPASVTADGLNTGGFGNPNVEFGAGASMTDGLQWSDSGLVADLSSATAISINDLRLAFQLQKMLERDARGGTRYTEVIRAHFGVTSPDARLQRPEFLGGGKSQVTIAPVAQTTQQFTAGTLTPQGNLAAFGTAQLHGHGFTKSFTEHCVIIGLINVRADLTYQQGLNRMWSRQTRFDYYWPALAQIGEQAVLNKEIM	229	USER	zzzz323
801	genbank_microviridae_AHN52763.1_@1KVP_A	genbank	PWLQKGESVSLPLGTVAPIQGLGLIYSPAQNEQTLINVHETDNPTQTWATGYRANPVPSIAGEAALWIETDGFKKPKIYADLSNATAATINDLRESFQIQRLLERDARGGTRYAEIIGSHFGVNFMDVTYRPEYLGGGSTPININPIAETAAGTAGELGAFGTASFNGHGFVKSFTEHCYIIGLVNVRADLTYQQGLNRLWSRSTRYDFYWPSLAQIGEQAVLNKEIY	228	USER	zzzz324
800	genbank_microviridae_AHN52760.1_@1KVP_A	genbank	PGLQKGDAVSLPLGQDAPIVWNGTGGSTENVRITDHTGTQYDLYENDVADRIRTTGVSGGGHLLYTDLSDATAATINELREAFQIQRLYERDARGGTRYTEIIQSHFGVTSPDARLQRPEYLGGGKDRINIHPIAQTSSTDATTPQGNLSAFGTTGFGGHGFSKSFTEHCVIIGLINVYADLTYQQGLNRMFSRQDRWDYYWPALAHLGEQAVLNKEFM	219	USER	zzzz325
799	genbank_microviridae_AHN52759.1_@1KVP_A	genbank	PGLQKGNAVSLPLGQDAPIVWNGTGGSTENVRITNHTGTQYDLYENDVPNRIKTTGVSGGGHLLYTDLSNATAATINELREAFQIQRLYERDARGGTRYTEIIQSHFGVTSPDARLQRPEYLGGGKNKINIHPIAQTSSTDATTPQGNLSAF	152	USER	zzzz326
798	genbank_microviridae_AHN52755.1_@1KVP_A	genbank	PGLQKGDAIELPLGTIAPVYGDGNTLGLTDGANTGGMYTNTVDAGTPLDLSTTLYNVANGTAVGTPASLSHNVGIGVVESGASGLYADLAGATAATINDLRRAFAFQKVLELDARSGTRYVEILKARFNVTSPDFRLQRPEYLGGGSSRFNIEQVAQTTYQSSASDIRNVKGGMAGGGFAIDSGNGFSKSFVEHGYIISLANVRADLTYQDGLDRMWSRRTFWDFYIPELAHLGEQEVYNREID	244	USER	zzzz327
797	genbank_microviridae_AHN52748.1_@1KVP_A	genbank	PWLQKGTEVSLPLGTSATVKTSTTDLFTGAQHSVTLRKDTDGSYASANTILSTSTDGELHLNTLTPGSSGAGMYPANLYADLSTATAATINQLRQSFQIQKLLERDARGGTRYTEIIRAHFGVTSPDARLQRPEYLGGGSTPVIVNPVAQTSATGLTGGTTVLGGLAALGTTLANNHGFTQAFTEHGVLLGLVSVRADLTYQQGLRRMWSRSTRYDYYFPAFAMLGEQAILNKEIY	236	USER	zzzz328
796	genbank_microviridae_AHN52747.1_@1KVP_A	genbank	PGLQKGDAVELPLGTRAQVKSDATSTEELTILNPADAYMKIGTAGTYAIMTGTGGAVTESLYADLSSATAATINQLRQSFQIQKLLERDARGGTRYTEIIRAHFGVASPDSRLQRPEFIGGGSAPVVINPIAQTSATGLTGGSTPIGNLAAMGTSLAGGHGFSQSFTEHGIVIGLVSIRADLSYQQGLERFWSRSTRYDFYFPAFAMLGEQSILNKEIY	219	USER	zzzz329
795	genbank_microviridae_AHN52742.1_@1KVP_A	genbank	PGLQKGDTAVSLPLGASATVRTNATDLVTGSAVEPMHMFNASGAAPGANWTMGITATSGDAAAITNSPTLGVGVYPTNLYADLSTATAATINQLRQSFQIQKLLERDARGGTRYTEIVRAHFGVVSPDSRLQRPEFLGGGSSPVSINPIAQTSATGLTGGSTALGNLSAMGTALVSGHGFSQSFTEHGMVIGLVSIRADLSYQQGLRKMWSRSTRYDFYFPAFSHLGEQAVLNKEIY	237	USER	zzzz330
794	genbank_microviridae_AHN52750.1_@1KVP_A	genbank	PGSQKGDSVELPLGSQAPLGFSPGIAQYATDATGAHYGAAGDVQYSGTGVLTNAGATWVSLDVAASHFADLSTATAATINQLRQAFQIQKLYERDARGGTRYIEVVKAHFGVTSPDARLQRPEYLGGGQTHINVAPVAQTSSTDGTSPQGNLAAFGTATIQGHGFTKSFTEHCVLLGLVSVRADLTYQQGLNRMFSRQTRWDFYWPALAHIGEQTVLNKEIY	222	USER	zzzz331
793	genbank_microviridae_AHN52740.1_@1KVP_A	genbank	PGLQKGNVAITIPLGTSAPVKTSVADQVTGAQATMRVYTAGGGAPVASSAIGTGPASGNVVQGAAGTYGGAGLYPANLFADLSTATGATINALRQSFQVQKLLERDARGGTRYTEIVRSHFGVVSPDARLQRPEYLGGGSTPIIISPIPQTSNTAAPLTPLGTLAAYGTATARGHGFSQAFTEHGYVIGIANVRADLTYQQGIRKLWSRSTRYDFYFPVFSHLGEQAVALRELY	234	USER	zzzz332
792	genbank_microviridae_AHN52739.1_@1KVP_A	genbank	PGSQKGDAVSIPMGTEAPVLGIGWSAGSSASGPSQAVYESGQTATTTYNPYKQVGNTNIPASTDLIIETAPTSLYPNIRADLIEAADVTINQLRQAFQIQKLLERDARGGTRYTEIVRSHFGVTSPDARVQRPEYLGGGSSPVNITPIPQTSSTDATTPQGNLAAYGTAGLTNHGFNKSFTEHCVILGLVSVRADLTYQQGLDRMFFRRTRYDMYWPALAHIGEQTVQNSEIY	233	USER	zzzz333
791	genbank_microviridae_AHN52736.1_@1KVP_A	genbank	PGLQKGDPVFLPLGSYAPVTGIGTSSGEFSGTNVTVNQTPDDPTGTGQRTWASAQMVGGDNSNIWVKEDDNRDGIPAIYANLTTATAATINDIRTAFQIQRLLERDARGGTRYIEIILSHFNVTSPDARLQRPEYIGGGSARIVVNPVAATVATSEAPQGNLAAVGSGLVNAKMNHSFTEHGYLFALISCRADLTYQNGLDRMWSRKTRYDYYWPALSHLGEQGILNKEIF	231	USER	zzzz334
790	genbank_microviridae_AHN52733.1_@1KVP_A	genbank	PGSQKGDPVTIPIGDSAPILTSASSTVTGAQSGATYRDVNGNLISAYSNVGIDTNSHLVRTTTGPGTTASEIYPDNLYADLQSATSISINELRTAFQIQRLLERDARGGTRYIELILSHFGVRSPDGRLQRPEYLGGNSNRVGIQPVAATATDSTIPQGNLAATGSVVSKAGFKKSFTEHGIIIGISSIRADLTYQQGLDRFWSRQTRYDFYWPTLAHLGEQAVLNKEI	229	USER	zzzz335
789	genbank_microviridae_AHN52734.1_@1KVP_A	genbank	PGFQKGESVSIPLGTSADIVTQAADSTTIGVYSTAASGYRAMDTAGGIGDHVALDTGTTPSESQKLYADLSSATAGTINQIRQAFQIQKLLERDARSGTRYAEIVRAHFGVQFMDVTYRPEFLGGSSTPVNIQQVPQTSSTDGTSPQGNLAAYGTAVMNSGGFTKSFTEHGLVMGIASVRADLTYQQGIERFWSRQTRYDFYWPALAHIGEQAVLNKEIY	220	USER	zzzz336
788	genbank_microviridae_AHN52732.1_@1KVP_A	genbank	PGLQKGDAVTIPLGQFAPVVGIENEGPIFKTNSVTGSTINLRPGEGFQLTASGNPSVSQIESFEWLTPNLQADLSTATATTINDLRTAFQIQRLLERDARGGTRYIELILSHFGVASDDGRLQRPEYLGAGSAYINVNPIASTFSDEENPQGQLAGVGTGLVKGGFKHSFTEHGIVMGILSIQTDLTYQQGLDRHWSRKTRYDYYWPALSHLGEQPVLQQEIF	223	USER	zzzz337
787	genbank_microviridae_AHN52730.1_@1KVP_A	genbank	PGPQKGDAVTLPLGDTADIYTDAGISDNQNLTVYSTDSSAFRLLQTDSTDGRLNLVSGGGPQESNKLYADLSTATASTINSIRNSFQVQRLLERDARGGTRYTEIVRSHFGVVSPDARLQRPEYLGGGSASIIVNPVAQQSASGASGTDTPLGTLGAVGTGLVNGHGFASSFTEHGIIIGLCSVRADLTYQQGLHRKWSRETRYDFYFPVFAHLGEQAILNKEIY	225	USER	zzzz338
786	genbank_microviridae_AHN52729.1_@1KVP_A	genbank	PWPQKGDAVELPLTGDAPVLGIGKENQTWYTGGNVYETNGSGTTAYADYCAFNGTATDTKFFAEEDPSNEGYPWIRADMSAVSGATINDLREAFQLQKLFERDARGGTRYTEIVRSHFGVVSPDARLQRPEFLGGNSTPIMVNPVAQTSGQFKYADGESEVDTTPQGTLTAFAQGVSRGEGFTKSFTEHCVILGLLSVRADLTYQQGIPRMFSRQTRYDFYWPALAHLGEQEILNKEIY	239	USER	zzzz339
785	genbank_microviridae_AHN52738.1_@1KVP_A	genbank	PGFQKGDSVDLPLGTSAPIAHDAAGAGVDLTVNATAFGNRVLDSGGAKLRSDLSPGTSPVPLYADLTSATAATINQLRQAFQIQKLLERDARGGTRYVEMVHAHFGVRDAGGDARMQRPEYLGGSTDMINITPIAQTSSTDGTSPQGNLAAMGTVSLRSGFTKSFTEHGYIFCLGNARADLTYQQGLNRMWSRSTRYDFYFPVLSNIGEQAVLSKEIY	218	USER	zzzz340
784	genbank_microviridae_AHN52726.1_@1KVP_A	genbank	PWPQKGPAVSLPLGGNVPVVTNGLQPTVSGSAQNEPLIYGTDNASLRSSGAQTQLSAVTWGNETGMQADLSETTAATINQLREAFQIQKLYERDARGGTRYTEIIKSHFGVTSPDARLQRPEYLGGGSSPVNVNPVAQTSATDTNVSPQGNLAAIGTMTMNRHGFTKSFTEHCIIIGMVCARADLTYQQGLDRQFSRRSRWDFYWPALAHIGEQAILNKEIY	222	USER	zzzz341
783	genbank_microviridae_AHN52744.1_@1KVP_A	genbank	PGLQKGDTAVTLPLGDSAVVKTHADDQFTGVQEEVRVRLAGSGALPGSTAAIGYQTGTGGVGGLTGAVTFGSTVYPTNLYADLSTATAATINQLRQSFQIQKLLERDARGGTRYTEIVRAHFGVVSPDSRLQRPEFLGGGSSAVVINPIAQTSATGLTGGSTTLANLAAMGTALAAGHGFSQSFTEHGMVIGLVAVRADLSYQQGLRKMWSRSTRYDFYFPAFAHLGEQAVLNKEIY	237	USER	zzzz342
782	genbank_microviridae_AHN52723.1_@1KVP_A	genbank	PGPQKGDAVDLPLTGNADVITGAEHTTGASTAMKMRNTAGGFYVGSIGTDGVGTVSSMSPAGTVGTSDDLYPTNLYADMASVSAATINDLRLAFQTQRLLERDARSGTRYNELILAHFGVTVPDFRVQRPEFLGGGSTPIYFNETQQTTYQGTETIYDHRGQSSSRGMATGRHGFTKSFTEHGYVIGLVNVRSDITYQQGIDRDWSKQTRYEIYWPALSMIGEQAVMDQEIY	232	USER	zzzz343
781	genbank_microviridae_AHN52722.1_@1KVP_A	genbank	PGSQKGDSVDLPLGSSAYIKYEETVGSTIDDMNVVAYTNTGGEHQWRYSDGPAAAAGTQNPDLTGGNLYADLTDATAATINQLRQAFQLQKLYERDARGGTRYTEIIRSHFGVVSPDQRLQRPEYLGGGSTRININPIAQTSSTDGTTPQGNLAAFGVGTMQNGFTKSFTEHCVLLGLASVRADLTYQQGLDRMFSRSTRYDFYWPALSHIGEQAILNKEIY	222	USER	zzzz344
780	genbank_microviridae_AHN52720.1_@1KVP_A	genbank	PGSQKGDAVTLPLGDAAPVAFDGGVGTSNKLGAIDSATGVLRRLVANGASSYDLASEPTTPDNALYADLSAATAATINSIRNSFQVQRLLERDARGGTRYTEIVRSHFGVVSPDARLQRPEYLGGGSAPIIVNPVAQQSASGASGTDTPLGTLGAVGTGLANGHGFASSFTEHGIIIGLCSVRADLTYQQGLHRKWSRETRYDFYFPVFAHLGEQAILNKEIY	223	USER	zzzz345
779	genbank_microviridae_AHN52727.1_@1KVP_A	genbank	PGPQKGDAVSVPLTGDARVASDAIATESLSYYDTVSGRYEKMSTAGTYLANVDLAGNENYRLYADLTDVAAVTINTLRQAFQVQRAYERDARAGTRYIEILRGHFGVISPDSRMQRPEYLGGGTTSVNVNPVAQTSQSDTTPQGTLAGMGTVSFSKHGFTKSFTEHCVILGLVCVHADLSYQEGLDRMWTRQTRFDYYWPSLAHIGEQAVLNKEIY	216	USER	zzzz346
778	genbank_microviridae_AHN52724.1_@1KVP_A	genbank	PGSQKGESIDLPLGETAPVVNDGTWLRLAETPETFGNPTAIYREVSAASSVMRVRESGTNNTNMYYRSGMEVDLTEATAATINQLRQAFQIQKLLERDARSGTRYAEIVNAHFGVRFLDVTYRPEFLGGTSTPVNIQQVPQTSQSDATPQGNLAAFGTAMLNGGGVTKSFTEHGVVMGIASVRADLTYQQGLDRMYSRETRYDFYWPALAHIGEQAVLNKEIY	223	USER	zzzz347
777	genbank_microviridae_AHN52719.1_@1KVP_A	genbank	GLQKGDAVRLPLGDNAPVYMEDANGVRPGVIGSGGFGVDSNSQPYHASYPQYKAVTDLSAATAATINSIRNSFQVQRLLERDARGGTRYTEIVRSHFGVVSPDARLQRPEYLGGGSAPIIVNPVAQQSASGASGTDTPLGTLGAVGTGLANGHGFASSFTEHGIIIGLCSVRADLTYQQGLHRKWSRETRYDFYFPVFAHLGEQAILNKEIY	212	USER	zzzz348
776	genbank_microviridae_AHN52715.1_@1KVP_A	genbank	PWPQKGDSVDLPLGNTAPLIYGDNYGSGGTAADGKYVKGQLGEPSIFYGPNLGDNSGSSNLPTGSFYDLSADLSSATAATINQLRQAFQIQRMLERDARGGTRYTEIIRSHFGVTSPDARVQRPEYLSGGSSPVNITPIAQTSSTDATSPQGNLSAFGTTVLSNHGFTKSFTEHCLILGFVSVRADLTYQQGLNRMFSRQTRYDFYWPSLSHIGEQAVLNKEIY	224	USER	zzzz349
775	genbank_microviridae_AHN52714.1_@1KVP_A	genbank	PGLQKGDAVTLPLGDKAYVKYDAGFGTGGTDSDNDYVVARDNSLFGYGETTGTMVGNAVNNRYNLYADLGEATASTINSIRNSFQVQRLLERDARGGTRYTEIVRSHFGVVSPDARLQRPEYLGGGSAPIIVNPVAQQSASGASGTDTPLGTLGAVGTGLANGHGFASSFTEHGIIIGLCSVRADLTYQQGLHRKWSRETRYDFYFPVFAHLGEQAILNKEIY	223	USER	zzzz350
774	genbank_microviridae_AHN52718.1_@1KVP_A	genbank	PGFQKGDAVTLPLGDAAPVKYDTFSGGDMTDDYVVTTPGGLYYSSTYGTSGSPHLNPSGNNIYADLSEATASTINSIRNSFQVQRLLERDARGGTRYTEIVRSHFGVVSPDARLQRPEYLGGGSAPIIVNPVAQQSASGASGTDTPLGTLGAVGTGLANGHGFASSFTEHGIIIGLCSVRADLTYQQGLHRKWSRETRYDFYFPVFAHLGEQAILNKEIY	220	USER	zzzz351
773	genbank_microviridae_AHN52713.1_@1KVP_A	genbank	PCLQKGDAVTLPLGDKAYVKYDENYSSGGTAADDTFVVANGNNFARDLAYGAALASGGSDVPTNGRYNLYADLAGATAATINSIRNSFQVQRLLERDARGGTRYTEIVRSHFGVVSPDARLQRPEYLGGGSAPIIVNPVAQQSASGASGTDTPLGTLGAVGTGLANGHGFASSFTEHGIIIGLCSVRADLTYQQGLHRKWSRETRYDFYFPVFAHLGEQAILNKEIY	227	USER	zzzz352
772	genbank_microviridae_AHN52711.1_@1KVP_A	genbank	PGLQKGDSVTLPLGTSAPVTGIAKTTTNYDNGPANNIYESGGNQVSYTSATAITGTGGDDAFRVEEDPDNAGYPNIRADLSNATAATINALRQAFQLQKLYERDARGGTRYTEIVRSHFGVVSPDARLQRPKYLGGNSIPIQIAPVAQTSETGTSPQGNLAAYGTAASTNAGFTKSFTEHCVLIGLVNVRADLNYQQGLNRMFSRSGRFDFYWPALSHIGEQAVLNKEIY	230	USER	zzzz353
771	genbank_microviridae_AHN52710.1_@1KVP_A	genbank	PGLQKGDAVTLPLGDKAYIGSDASGTSTLAVKDSLGNNTDMRASASVLEMGTGTGYADDRLLYADLSTATAATINSIRNSFQVQRLLERDARGGTRYTEIVRSHFGVVSPDARLQRPEYLGGGSAPIIVNPVAQQSASGASGTDTPLGTLGAVGTGLANGHGFASSFTEHGIIIGLCSVRADLTYQQGLHRKWSRETRFDFYFPVFAHLGEQAILNKEIY	220	USER	zzzz354
770	genbank_microviridae_AHN52709.1_@1KVP_A	genbank	PWSQKGDSVTLPLGTAADIHTDATTGEIPAVYSSTANAYRDLYSDGAAGSIIVRSTGTDADNKLYADLSNATASTINELRQAFQIQKLLERDARGGTRYTEIIRSHFGVVSPDQRLQRPEYLGGGRSYVNQHTVPTTAESTGRKVGELSAFATATMDGHGFVKSFTEHCIIIGLVNVRADLTYQQGLNRMWSRSTRYDFYWPSLAHIGEQSVLNKEIY	218	USER	zzzz355
769	genbank_microviridae_AHN52717.1_@1KVP_A	genbank	PGLQKGDAVTLPLGDKADVRYGDAFIGSSSADGQYAVLRDVGGTDYLKYGTTLGVDTGGITDSAHNLYADLSTATAATINSIRNSFQVQRLLERDARGGTRYTEIVRSHFGVISPDARLQRPEYLGGGSAPIIINPIAQQSATAVTGSDTPLGTLGAVGTALADGHGFSQSFTEHGIIIGLASVRADLTYQQGLHKMYSRSTRYDFYFPVFSHLGEQAIENREIY	225	USER	zzzz356
768	genbank_microviridae_AHN52708.1_@1KVP_A	genbank	PGLQKGDAVSLPLGDRANIVYEHDNVAQYIRLRSSGGLPSTATDLRNSSTGIFEQVDNDDVHLDLNGTHYADLSTATAATINSLRNSFQVQRLLERDARGGTRYTEIVRSHFGVVSPDARLQRPEYLGGGSAPIIVNPVAQQSASGASGTDTPLGTLGAVGTGLANGHGFASSFTEHGIIIGLCSVRADLTYQQGLHRKWSRETRYDFYFPVFAHLGEQAILNKEIY	227	USER	zzzz357
767	genbank_microviridae_AHN52706.1_@1KVP_A	genbank	PGPQKGDAVELSLGDSAPVVGEGTGVPRFAIDGSVRTLQGSGSSDAVWSASTTNAIDASWNDTRLETDLSSATASTVNELRQAIQIQRLLERDARSGTRYTEIVQSHFGVTSPDARLQRPELLGMSSTPVKIGAVARTDSSPGVLGAVGTVGERNSGFIKSFTEHGYLFTIINVRADLTYQEGLDKMWSRSTRYDFYWPTLAHLGEQAILNREIY	215	USER	zzzz358
766	genbank_microviridae_AHN52702.1_@1KVP_A	genbank	PCPQKGDAVTLPLGDRADIHVGGATNTPIGVYDDTLDAWSNLALGGGAQYTGGGVTAANGQLYADLSTATAATINSIRNSFQVQRLLERDARGGTRYTEIVRSHFGVVSPDARLQRPEYLGGGSAPIIVNPVAQQSVSGASGTDTPLGTLGAVGTGLANGHGFASSFTEHGIIIGLCSVRADLTYQQGLHRKWSRETRYDFYFPVFAHLGEQAILNKEIY	220	USER	zzzz359
765	genbank_microviridae_AHN52705.1_@1KVP_A	genbank	PGFQKGDAVDLPLGTSAPVGGLGAAAAATWTTSGGPVGTVDDAALGAGVTYPGAYLNATLFTKGVGDSADTTPDIYADLSQATGANINDLRLAFQTQRLLERDARSGTRYNELILAHFGVTVPDFRIQRPEFLGGGSTPIYFNETQQTTYNATETIENHKGASASRGMASGRHGFTKSFTEHGYIIGLVNVRADITYQDGIDRDWSKQTRYDIYWPALSMIGEQAVMDSEIY	232	USER	zzzz360
764	genbank_microviridae_AHN52704.1_@1KVP_A	genbank	PGPQKGDAVTLPLGDSANIQGIGMASQNTGNTNATVFETGGTATYANWVDTNLPFRVQVDSNGSPLITADLSTATAATINSIRNSFQVQRLLERDARGGTRYTEIVRSHFGVVSPDARLQRPEYLGGGSAPIIVNPVAQQSASGASGTDTPLGTLGAVGTGLANGHGFASSFTEHGIIIGLCSVRADLTYQQGLHRKWSRETRYDFYFPVFAHLGEQAILNKEIY	225	USER	zzzz361
763	genbank_microviridae_AHN52703.1_@1KVP_A	genbank	PGPQKGDAVTLPLGDSAPVAFDAAYTDSGYVSVRDKNNVETLLWTQGTDMLKINNSGSGFDMYADLSQATAATINSIRNSFQVQRLLERDARGGTRYTEIVRSHFGVISPDARLQRPEYLGGGSAPIVINPIAQQSATAVTGSDTPLGTLGAVGTGLADGHGFSQSFTEHGIIIGLASVRADLTYQQGLHKMYSRSTRYDFYFPVFAHLGEQAILNKEIY	220	USER	zzzz362
762	genbank_microviridae_AHN52700.1_@1KVP_A	genbank	PWPQKGPGVELPLGESAPVVDTGYLRLKNDNGDVGAITKQSTVGLNVTQLSNNLLTSYHDGLEVDLSDATAASINSLRQAFQLQRLAEKDARGGTRYTEIVRSHFNVTSPDARLQRPEFLGGSTARVQITPVANTGGLQDTGITSVQGQLAGFGTVQQANDGFTKSFTEHGIIIGLVSARADLTYQQGVNRMFSRRTKYDYYWPTLAHLGEQEVLNKEIY	220	USER	zzzz363
761	genbank_microviridae_AHN52701.1_@1KVP_A	genbank	PGFQKGDSVDLPLGTTAPISGTGAPTFDVDDATGVTFGAVGASNDVLFSGNPTNTDLSAIWNDPQLEADLSGATAATINQLRQAFQIQKLLERDARGGTRYTEIIQAHFGVTSPDARLQRPEYLGGGTTPIIISQVPQTSESDGTPQGTLAAYGTATMRKAGFTKSFTEHCVIIGLASVRADLTYQQGLERMWSRQTRYDVYWPALAMIGEQAVLNKEIY	220	USER	zzzz364
760	genbank_microviridae_AHN52699.1_@1KVP_A	genbank	PGFQKGDAIDLPLGTLAPVEGNLEIKQASGWSGSATWSSSYGMYANTDSGSVVGTEELLFDSSKGTSAYADLSTATAATVNELRQAFQIQRLLERDARSGTRYAEIVKAHFGVDFLDVTYRPEFLGGGSTPIQMESIAQTSSTDATTPQGNLSAVAAGVGKGGGFVKSFTEHGILMGIISVRADLTYSQGLPREFSRSTRYDYYMPVLAHLGEQAVLTKELF	222	USER	zzzz365
759	genbank_microviridae_AHN52707.1_@1KVP_A	genbank	PWLQKGDTIDLPLGTQAPVIGIGVRNTGGDTAGSIGVRETGSTNEVTYTDYYGTGPSWPSGQDWYIETEGTTNIPAVYADLTAATASTINELRQAFQIQKMLERDARSGTRYTEVIQAHFGVTNPSDARLRRPEYLGGGSSPINITPIAQTSETGTSEQGNLAAMGTGSIRGHGFTKSFVEHGFVIGIINVRADLTYQQGLHRSWSRLTRYDHYYPSLAHLGEQAVLTKEIN	232	USER	zzzz366
758	genbank_microviridae_AHN52698.1_@1KVP_A	genbank	PGLQKGDAVTLPLGDKAYVKWDNFSGGTAGEDQFSVIRQDASVGADARYAATLGTNGTSLPSSSYQNMYADLANATAATINSIRNSFQVQRLLERDARGGTRYTEIVRSHFGVVSPDARLQRPEYLGGGSAPIIVNPVAQQSASGASGTDTPLGTLGAVGTGLANGHGFASSFTEHGIIIGLCSVRADLTYQQGMHRKWSRLTRYDFYFPVFAHLGEQAILNKEIY	226	USER	zzzz367
757	genbank_microviridae_AHN52692.1_@1KVP_A	genbank	PGPQKGDAISVPIGDSAPVFGTEYAMRFSDGGQGQYFYNVSGNTYAAYDTNEILRGDDVTPSNIPARQNDAIGLITSTANKESGLMADLSQATAATINQLREAFQLQRVLEKDARGGSRYVEQIKMHFGTTTPDYRLQRPEYLGGSTQRITFNPVAQTGYGDPATQTELGNLGAYGVVVDQSARWSKSFTEHCYIIGLANVRADLTYQQGLNRMWSRQTRYDFYWPSLANLGEQEVLNKEIY	242	USER	zzzz368
756	genbank_microviridae_AHN52690.1_@1KVP_A	genbank	PGFQKGESVDIPLGSTAPVVSAGTGIPTFDVGTLTDTALGVATGEGRRALWESTSGSNDTEAVWNTPSLEADLSSATAATINTLRQAYQVQRILERDARGGTRYTELVKAHFGVTSPDARLQRPEYLGGSSTPVMISEIHQTSATDGGTALGQVGAIGRAILDGGRHGFMSSFTEHGLVMGLINLRADLTYQNQLNRMWSRSTRYDFYWPALAHIGEQAVLNKEMW	226	USER	zzzz369
755	genbank_microviridae_AHN52683.1_@1KVP_A	genbank	PWLQKGDSVDLPLGSSAPIESTGILRLADPNSVANNVTVGAGDNLFLVGSTVGGGVSYESGLSADLTSATAATINQLRQAFQIQRMLERDARGGTRYTEIIRSHFGVTSPDARVQRPEYLGGGSSPVNITPIAQTSSTDATSPQGNLSAFGTTVLSNHGFTKSFTEHCLILGFVSVRADLTYQQGLNRMFSRQTRYDFYWPSLSHIGEQAVLNKEIY	217	USER	zzzz370
754	genbank_microviridae_AHN52689.1_@1KVP_A	genbank	PGSQKGDSVDLPLGDRADIRISDVVDTGQDGNYYVGYQGSTLGTGGHLGSSTLNTNGTVWLNAGRANLYADLSEATASTINQLRQAFQIQRMLERDARGGTRYTEIIRSHFGVTSPDARVQRPEYLGGGSSPVNITPIAQTSSTDDTSPQGNLSAFGTTVLSNHGFTKSFTGHCLILGFVSVRADLTYQQGLNRMFSRQTRYDFYWPSLSHIGEQAVLNKEIY	223	USER	zzzz371
753	genbank_microviridae_AHN52678.1_@1KVP_A	genbank	PGSQKGSTAVTLPLGTSADVKWRGGGQPQIKNATTGVLMGAGTLNVDAAGSFVHNAATGVAYDPAGTGVSTLYADLSTATAATINQLRQSFQIQKLLERDARGGTRYTEIVRAHFGVVSPDARLQRPEYLGGGTSPITINPIAQTSATGLTGGTTPAGTLAAMATALAGGHGFTQSFTEHGMIIGLVSVRADLTYQQGLRRMWSRSTRYDFYFPAFAMLGEQAVLSRELY	230	USER	zzzz372
752	genbank_microviridae_AHN52680.1_@1KVP_A	genbank	PGLQKGDDVATPLAGSAVVKGIGKLNRNNTATNVSVYESDLSHPTYAEAAIIGDDVSTDHYHYSELQVSGGYRYLDIRADLTSASSATINEIRESFQIQKLLERDAIGGSRYSEIVKSHFGVDFIDASYRPEFLGGDSTSIQVSQVPQTTPTSGGEVKGSLAAYGTLALSDRGFTKSFTEHCLVIGLVNVRADLTYQQGLNRMWSRQTRYDFYMPVFAHLGEQAVLNKEIY	231	USER	zzzz373
751	genbank_microviridae_AHN52685.1_@1KVP_A	genbank	PGLQKGDSVSLPLGSTAPVATDASVSTDDVSIYNTNTSGYQKLYEASTYVRTSAIAGLEADRLYTDLSSATAATINQLRQAFQVQRLLERDARGGTRYIEIIKSHFGVTSPDARVQRPEYLGGGSSPVNISPVAQTSSTDGTTPQGNLAAFGTVGFSGHGFTKSFTEHCVIIGLVNVRADLTYQQGLNRMFSRSTRYDFYWPALAHIGEQAVLNKEIY	218	USER	zzzz374
750	genbank_microviridae_AHN52676.1_@1KVP_A	genbank	PGPQKGDSVDLPLGNKAFLTSDISGAASPYYNGAVYTGDNTYRQLEADGTGLYVGPTTVGESQLLYADLSTATAATINQLRQAFQVQRMLERDARGGTRYTEIIRSHFGVTSPDARVQRPEYLGGGSSPVNITPIAQTSSTDDISPQGNLSAFGTTVLSNHGFTKSFTEHCLILGFVSVRADLTYQQGLNRMFSRQTRYDFYWPSLSHIGEQAVLNKEIY	220	USER	zzzz375
749	genbank_microviridae_AHN52672.1_@1KVP_A	genbank	PCLQKGAAVELSLGQSAPLKYDGTGGGATRVSIYDVDDTQHDLQTNAGDSNYIIGGAAGSGELAYADLSSATASTVNELRQAVQVQRILERDARAGTRYTEIVESHFGVTSPDARLQRPEYLGGGSTPVVIKPIARTDSSPGVLGALGVAGFTNHGFMKSFTEHCVIIGLVNVRADLTYQEGIDRMWSRQTRYDFYWPALAHLGEQAVLNKEIY	214	USER	zzzz376
748	genbank_microviridae_AHN52669.1_@1KVP_A	genbank	PGPQKGNTAVSLPLGTSAPVLTSVPAIVTGAQTALRMSETDGTTVGANRLLGINGGSGEIGSSTAGTHTPSLGLYPNNLFADLSAATVATINQIRQAFQIQKLLERDARGGTRYTEIVRSHFGVVSPDARLQRPEYLGGGSQAIQVNPVAQTSETSGTPLGGLAAMATSVGSHGFTQSFTEHGYVLGIVSVRADLTYQQGLRRHWSRSTRYDYYFPAFAHLGEQAILNKEIY	232	USER	zzzz377
747	genbank_microviridae_AHN52677.1_@1KVP_A	genbank	PGLQKGDAVSLPLGETAIVNWNDTQATGYVGGAYLGSVAMLGRAGTGEASVGYGTDEIAWSTLVPTDGRASLVADLSSATAATINQLRQAFQIQRMLERDARGGTRYTEIIRSHFGVTSPDARVQRPEYLGGGSSSVNITPIAQTSSTDDTSPQGNLSAFGTTVLSNHGFTKSFTEHCLILGFVSVRADLTYQQGLNRMFSRQTRYDFYWPSLSHIGEQTILNKEIY	227	USER	zzzz378
746	genbank_microviridae_AHN52666.1_@1KVP_A	genbank	PGSQKGDSVDLPLGTSAPIFTTSSSEASIAYMEAPNYASGAAYFESDAGYVRTYSTTANANLFANLSDATAATINQLRQAFQIQRMLERDARGGTRYTEIIRSHFGVTSPDARVQRPEYLGGGSSPVNITPIAQTSSTDATSPQGNLSAFGTTVLSNHGFTKSFTEHCLILGFVSVRADLTYQQGLNRMFSRQTRYDFYWPSLSHIGEQAVLNKEIY	217	USER	zzzz379
745	genbank_microviridae_AHN52659.1_@1KVP_A	genbank	PGPQKGDSVDLPLGDKAYVAHGITSSTSVAALTALNGNGDHIFLTSNTPDFLYGNSTVGSAEEERKLYADLSTATAATINQLRQAFQIQRMLERDARGGTRYTEIIRSHFGVTSPDARVQRPEYLGGGSSPVNITPIAQTSSTDDTSPQGNLSAFGTTVLSNHGFTKSFTEHCLILGFVSVRADLTYQQGLNRMFSRQTRYDFYWPSLSHIGEQAVLNKEIY	222	USER	zzzz380
744	genbank_microviridae_AHN52658.1_@1KVP_A	genbank	PGLQKGDSVSLPLGTTAPVTGLLAGTSANTVAVAGASAIGSLPAGYNSMATLSSVSVLSRSAIGTAMGTAFNSTNSMLEADLSSATAATINQLRQSFQVQRLLERDARGGSRYIEIVKAHFGVSSPDARLQRPEFLGGGSTPLNVVPVPQTSSTDATTPQGNLSAFGVASLRGHGFIKSFTEHCLIIGLVSVRADLTYQQGLNRMFSRQTRYDFYWPALAHIGEQAVLNKEIF	233	USER	zzzz381
743	genbank_microviridae_AHN52655.1_@1KVP_A	genbank	PGPQKGTSVSIPLGAQAPVLRNTNGGPWKSFVAGSNTPSAVSTDLKLANVSGTAILAGTIPASFDPSGSLYADLSTATAATINSLRQAFQIQKLLERNARGGTRYIEIIQSHFGVSSPDARLQRPEYLGGSSTRINVNAVAQTSSTSGDAALGDLAAFGIAADQFPAFRKSFSEHMIIIGLANVRADLTYQQGINRKFSRKTRYDYYWPALSNIGEQAVLNKEIY	225	USER	zzzz382
742	genbank_microviridae_AHN52652.1_@1KVP_A	genbank	PGLQKGEAVNLPLGESAYVKWDSFNGSTGHDNKYAVIALDNIGNTTAKYSPTTHYTGAVLAPSTLSNLYADLTDVTAATINELRQAFQLQRLFERDARGGSRYTEIIRSHFGVTSPDARMQRPEYLGGGSARININPIAQTSSTDGTSPQGNLAAFGVGTMTGNGFTKSFTEHCVIIGLVSVRADLTYQQGLDRMFSRSTRWDYYWPALAHIGEQAVLNKEIY	223	USER	zzzz383
741	genbank_microviridae_AHN52649.1_@1KVP_A	genbank	PGRRKVALLLFLWGPLPNIISTGSNLVVRADTGSMATVNSNNSLGLNIGANFGNINFGAAGTTIGAMRADLSAATASTINQLRQAFQIQKLLERNARGGTRYTEILQSHFGVVSPDARLQRPEYLGGSSSRININQVAQTSPTSGSNAMGDLAAFGMVADRFHGFTKSFTEHMVIIGLANVRADITYQQGLNRMFSRKTRYDFYWPALANIGEQSVLNKEIY	222	USER	zzzz384
740	genbank_microviridae_AHN52650.1_@1KVP_A	genbank	PGLQKGEAVPLPMSGDANVYMYSTVQDKVYDGDIWLESTNQNAPRFNQQGDKLVQVFGSKTKNGSDLTQSIFKADLSTVTAATINELRQAIAVQHILERDARTGTRYKEILQGAWGVTSPDARLDRSEYIGGYRLPININQVVQTSSTDNTSPQGNTGAYSMTTMSKDMCTYSATEHGYIIGLAAVRVEHSYQQGLARMWTRSTRFSYYDPMLANLGEQAVLNQEIY	227	USER	zzzz385
739	genbank_microviridae_AHN52648.1_@1KVP_A	genbank	PWLQKGDSVEINLGTKAPVGTLASADGGVMGFYDIATGIWKKGNASSTYVQDTSGAQTGAGSRLYADLESAQAATVNELRECIQIQRMLERDARAGTRYTEIVKSHFGVTSPDGRLQRPEYLGGGSTPVNISAIAQTDTKVGDLAGIGTAQFRNHGFTKSFSEHCIIIGLVNVRADLTYQQGLDKMWSRSTRYDFYWPTLAHLGEQAVLNKEIY	214	USER	zzzz386
738	genbank_microviridae_AHN52651.1_@1KVP_A	genbank	PGPQKGPGVEISIGGSASVSIMGDGLPTFSFGDKTVDATTKGLYANASSIGSNFKVAALSVGTGFDNGSGEYRTVSWLDPALKGTADLSSASPISINDLRQAFQIQKLYERDARGGTRYTEILRSHFGVISPDARLQRPEYLGGSSARISINPVQQTSSTNETTPQGNLAAYGVVSDSFHGFSKSFVEHGYVFGFVNVRADLTYQQGLNRMWSRQGRFDFYWPVLAHLGEQAVLNKEIY	239	USER	zzzz387
737	genbank_microviridae_AHN52647.1_@1KVP_A	genbank	PGSQKGPGVEISIGGSATVSGTVSGSGNPLFDFAGTGQSSTIPVGTLTTIGNPDDFGMISLDVKSGSGSKSQSGYALIGWKDPALTVKGVADLSSATPISINDLRQAFQIQKLYERDARGGTRYTEILRSHFGVISPDARLQRPEYLGGSSARISINPVQQTSSTNETTPQGNLAAYGVVADSFHGFSKSFVEHGYVFGFVNVRADLTYQQGLNRMWSRQGRFDFYWPVLAHLGEQAVLNKEIY	244	USER	zzzz388
736	genbank_microviridae_AHN52653.1_@1KVP_A	genbank	PGPQKGTSVAVPLGSTANIVSTGSAISVRSNSNTGNIQTASVDGPLKMSNHPSAVANVTFGNAGTVVSSLQADLTGATASTINQLRQAFQIQKLLERNARGGTRYTEILQSHFGVVSPDARLQRPEYLGGSSSRININQVAQTSPTSGSNALGDLAAFGMVADRFHGFTKSFTEHMVIIGLANVRADITYQQGLNRMFSRKTRYDFYWPALANIGEQAVLNKEIY	225	USER	zzzz389
735	genbank_microviridae_AHN52645.1_@1KVP_A	genbank	PGLQKRDERCDSIRDSSSRFYAIPNGGPWKSFVAGSNNPSAVNTDLVLANVSGTAILAGTVPASLDPSGSLYADLSTATAATINSLRQAFQIQKLLERNARGGTRYIEIIQSHFGVSSPDARLQRPEYLGGSSTRINVNAVAQTSSTTGSNALGDLAAFGIAADQFPAFRKSFSEHMIIIGLANVRADLTYQQGINKKFSRKTRYDYYWPALANIGEQAVLNKEIY	226	USER	zzzz390
734	genbank_microviridae_AHN52644.1_@1KVP_A	genbank	PGLQKGTAVSLPLGTTASIKTSATDTVTGTSAALKFRVGSTGNLPTTQRGLTIDAAGYFGNNSTAAATAMSEGLYPSNLYADLSTATAATINQLREAFQIQRMLERDARSGTRYTEILQAHFGVLSPDGRQQRPEYLGGSSTRININAVAQTSETDAGVSPQGNLAGHGIAADHIHGFTRSFTEHCVIIGIANVRADLTYQQGLAKKFSRRTRYDFYWPGLAHLGEQAVLNQEIY	235	USER	zzzz391
733	genbank_microviridae_AHN52643.1_@1KVP_A	genbank	PGPQKGTSVAIPLGTQAPVLRNTNGGPWKSFVAGSNTPSAVNTDLVLSNVSGTAILAGTIPASLDPSGSLYADLSTATAATINSLRQAFQIQKLLERNARGGTRYIEIIQSHFGVSSPDARLQRPEYLGGSSTRINVNAVAQTSSTTGSDALGDLAAFGIAADQFPAFRKSFSEHMIIIGLANVRADLTYQQGINKKFSRKTRYDYYWPALASIGEQAVLNKEIY	225	USER	zzzz392
732	genbank_microviridae_AHN52642.1_@1KVP_A	genbank	PGSQKGDTNEVLNSARASEQPAWVFTSGSNIVPGFACPPRGKRHDYFTSALPWTQKGPGVNISLTGDAPVFGSGQRLGISPDSADNPVGYMGMTNNVGAMFRRDNGDEWDSSQVAFVTADKNKSGMIADLSGVSAITINGLRTAFQMQKFYERLARGGSRYTEVLRSFFGVVSPDARLQRPEFLGSFTKMVNVNPIAQTSATDNTSPQGNLSAYGVTAAKFHGFTKSFVEHGYIFGFVCARADLTYQQGINKMWLRSTVYDFYWPTFAHLGEQAIELREIY	281	USER	zzzz393
731	genbank_microviridae_AHN52639.1_@1KVP_A	genbank	PWLQKGDDVLLSLGTEAPIKGIAKWDDSFDATEKSVYESDPNNTAAVTYTAQRSIDAGVQQTTFFVEKHPTNNRPYIRADLTNAVGPTVNELREAIQIQRLLEKDARSGTRYTEIIQAHFGVSSPDARLQRPEYLGGGSTRINITPVPNTTGTGQGELGAYGLAGFTGHGFTKSFSEHCIIIGLINVRADLTYQNGLNKLWTRETKYDFYWPTLAHLGEQAVLNKEIL	228	USER	zzzz394
730	genbank_microviridae_AHN52638.1_@1KVP_A	genbank	PGSQKGPAVALPLGTSAAVKTNATALVTGAQPAMLMLRSTGAVAPSNSPLSVDSGALAYNSAPATSGATQGLYPTNLYADLTSATAATINQLRQAFQIQRIYEKDARGGTRYTELIQAHFGVVSPDARLQRTEYLGGGTVPININPIAQTSASNTQPTPLGNLGAMGTVSAKGVGFTKSFTEHGILLGMVSVRADLNYGQGLNRMWSRSTRFDFYWPSLAQIGEQAILNGEIY	233	USER	zzzz395
729	genbank_microviridae_AHN52636.1_@1KVP_A	genbank	PGLQKGAAVNLPLGTSAPIEIVTGLATAGLGRSIATDAVFASADLGTGAGGVFQDNTGGQDLYYDPNGTLVANLTTATAVTINSLRESITMEQLFELDARGGTRLIEIIRAHYGVISSDARLQRPEYLGGGSTPIVVSAIAQTSGSGIGSESTPQGWLAGAASAVLRNHSYSKSFEEHGYVIG	183	USER	zzzz396
728	genbank_microviridae_AHN52635.1_@1KVP_A	genbank	PGLQKGEAVTIPIAGDAPVISTGDGIPTFAIGGGTDYNLTGDGTTDNTSWQTQALAGDASWGETKLTANMTEVTATTINALREAFQIQRLYEKDARGGTRYIEIIKSHFGVTSPDARLQRPEYLGGGKTNVNITAVAQTTDSLDVAGGDTPQGNLAAYGTAAGSNHGFTKSFTEHCLL	178	USER	zzzz397
727	genbank_microviridae_AHN52634.1_@1KVP_A	genbank	PGLQKGPSVDIPLFGQAPITGIGIHDAANSTSSGSWRYVQTDDVGTIGNFPFSWPMNTTTTMSVLASEQNGATAQPQVYANLDETQSSATVNQLRQAFQVQKMYERDARGGTRYTEIIRAHFNVVSPDSRLQRSEYLGGGTTAINISPLAATADTLTDVQTGRELGGLSAVGNS	174	USER	zzzz398
726	genbank_microviridae_AHN52633.1_@1KVP_A	genbank	PGLQKGDAVEIATGGFADVVPTVLGASFPTWDRDDDEADSWVMQAGGDRTTVEMDHIAPVGTENWQWKTTGLSADLATADSITINALRESITLQQLLERDARGGTRYTEQIQSHFGVTSKDSRMQRPEYLGGGSVQISVNPVAATANDSTTTDVGDLGGYVTAQGSGRGFVHSFTEHCTVLGFGFDSSGPDLSAGKTPGCSVDNRNTISIFPVLANLGEQAVLN	224	USER	zzzz399
725	genbank_microviridae_AHN52630.1_@1KVP_A	genbank	PGPQKGDPVYIPLGTTAPVEGIFSSTQSYSTASVNLFGTQGTAIPTGTGSVIEHTGADLSPYIAVQEDPDFPGYPKMTADLTEASAVTINDLRTAFQIQRLLERDARGGTRYIEIILSHFNVQSPDARLQRPEYLGGGNTQIMINPLASTVATVDSPQAELAAIGTGLLSAGMNHSFTEHGYVFALLSTRSDLTYQNGL	199	USER	zzzz400
724	genbank_microviridae_AHN52629.1_@PF02305.16	genbank	PGSQKGPDITIPLGTSAPVYGDGLSTNFTDGSSTGTFYTGTGNPYPAEAKGAKDAPLGSGASSNWSAGKTVGLPTKASGEDSHIYADLASATGANINDVRTAFALQRYQEARARYGSRYTEYLRYLGINPSDARLQRPEYLGGGRQTIAFSEVLQTGEGTDPVGTLRGHGISAMRSNKYRRFFEEHGVVLSLMSIRPKNIYTDGIRRQFLKFTKEDYYQKELEHIGQQPIYQNEIY	236	USER	zzzz401
723	genbank_microviridae_AHN52631.1_@1KVP_A	genbank	PGLQKGDPVYIPLGTEAPVLGIGKFDDSFPLVNVGVLETGGWPDPTIYENAQIFDGNDASASWFMEQETDRVWPHIRADLSEASAVTINDLRTAFQIQRLLERDARGGTRYIEIILSHFNVQSPDAGLQRPEYLGGGKTQIMINPLASTVVTVDSPQAELAAIGTGLLSAGMNHSFTEHGYVFALLSTRSDLTYQNGLNRHWSRQTRYDYYWPALSHLGEQAILNKEIF	229	USER	zzzz402
722	genbank_microviridae_AGT39938.1_@PF02305.16	genbank	MFGPMGTLPSTLTKDFSRVPKVDIQRSVFNRDHGLKTTFDAGYLVPIFYDEALPGDTFTMDANGFGRLATPIAPFMDNLYIETFFFAVPYRLIWTNWEKFCGEQDNPGDSTDYLVPQTTGTISNSTLYDYFGVPTDVNLTFNNLCGRAYNLVYNEWFRDQNLQNSVTVDKGDGPDTASNYTLLKRGKRHDYFTSALPWPQKGEAVTLPLGTTAPIMSGDFTTTPTNYIPSNGNNIPPQDANGDYSFAGTGVGGYGIWADLSDATAATINQLREAFQIQRLYEKDARGGTRYTEVIQSHFGVTSPDARLQRPEYLGGGKDRININPIAQTSSTDATTPQGNLSGYGTTGFTGHRFNKSFTEHSVVLGLACVFADLTYQQGLPRHFSRQTRWDFYWPALAH…	514	USER	zzzz403
721	genbank_microviridae_AGT39927.1_@PF02305.16	genbank	MQGPNNHKFSEVPNADIQRSSFDRSHGYKTTLTEAGYLYPIFMDEALPGDTFNCRLTAFARMATPIFPVMDNMYMSTFFFAVPYRLIWDNWEKFNGAQDNPGDSTSFLLPEMTVPVGGYLEGSLSDYLGLPTQVATFDHCSLWHRAYNLIFNEWFRDENLQNSAVVDTDNGPDTDTDYVLRRRGKRHDYFTSSLPWPQKGTAVTLPLGTSAPVVGDGNNPWFTGGGAVDSALQTRNGTQEVDIQGTITSSTSLGWGTQTGLEADLSSATAATINQIREAFQIQKLYERDARGGTRYIEVVKAHFGVTSPDARLQRPEYLGGGQSTINIAPVAQTSSTDATTPQGNLSAFGTASIQGHGFTKSFTEHSILLGLVSVRADLGYQQGLNRMFSRSTRWDMYW…	519	USER	zzzz404
720	genbank_microviridae_AGT39918.1_@PF02305.16	genbank	MGNLPTVMKHEFSRVPQAEIQRSTFNRSHGLKTTFDAGYLVPIFVDEVVPGDSFNLKAHGFGRLATPIYPVMDNLYVETFFFFVPNRLIWDNWEKFNGAQDDPGDSTSYLVPQLTLGSGVSIAGDSLYDYMGLPTGVNGIAFNNLHGRGYNLVYNEWFRDENLQDSVKVDKGDGPDNINDYTLLKRGKRHDYFTSCLPWPQKGDAVSLPLGSVAPVVAKDPITLADVGVVPASVGAAIGYSYINSAPNNNLYADLTDATAATINQLREAFQIQRLYERDARGGTRYTEILQSHFGVTSPDARLQRPEYLGGGKTPVSMQPIPQTSSTDATSPQGNLSAMGTVGVQGHGFSKSFVEHGVIIGMACVFADLTYQQGMNRMWSRRDRWDFYWPALAHLGEQA…	473	USER	zzzz405
719	genbank_microviridae_AGT39907.1_@PF02305.16	genbank	MMHRNKSASAHQFSMIPRAEIPRSKFDAQKTLKTAFDSGYLVPILVDEVLPGDSMNLRMTAFTRLATPLFPVMDNMYLDTFFFFVPNRLLWSNWQRFMGERDPDPDSSIDYTIPTMTSPNGGYAVNSLQDYMGLPTAGQVDAGSSISHNSLFTRAYNLIWNEWFRDENLQDSVVVDKGDGPDTYTDYTLLRRGKRHDYFTSALPWPQKGDAVTLPLGGSANVVYNDTGDPAYIREVSTGNVWTTPSRESVSKEANGNMSVPTGSVNAQYDPNGSLVADLSTATAATINAIRQSFQIQRLLERDARGGTRYTEIVRSHFGVISPDARMQRPEYLGGGSAPIIVNPVAQQSASGASGTDTPLGTLGAVGTGLASGHGFASSFTEHGVVVGLCSVRADLTYQ…	539	USER	zzzz406
718	genbank_microviridae_AGT39899.1_@1KVP_A	genbank	DENLQDSVVVDKDDGPDTTTDYVLLRRGKRHDYFTSCLPWPQKGDAIDLPIGDKAPITGLGARDQTYSGPTTVYETGGSGTTIYAGRKNLADDVTANNVYLEEDPDNAGYPGVYADLSSATAATINQLRLAFQTQRLLERDARGGTRYIEIIKSHFGVTSPDARLQRPEYLGGGSTPVNISPVAQTSSTDATTPQGNLSAIGTSHLHGHGFTKSFTEHSLIIGLVSVRADLTYQQGLNRMWSRQTRYDFYWPALSHIGEQAVLNKEI	267	USER	zzzz407
717	genbank_microviridae_AGT39897.1_@1KVP_A	genbank	DQNLQDSVVVDLDDGPDDEADYVLKKRGKRHDYFTSCLPWPQKGDAVDLPLGSVAPVITGVDRTWDTGGETPLRGWDSASGNFPSALANLAINSSGEVRYGSTPGSTSDDFTPSNLWADLSNATAATINSLREAFQLQKMMERDARGGTRYTEIIQSHFGVTSPDARLQRPEYLGGGSRPVIIEPIPRTNAGSINNIGDLHATGYHNVSGIGFTKSFTEHCVIIGLVNVRADLTYQQGLNRMWSRQTRYDYYFPALAHLGEQEVLNKEI	269	USER	zzzz408
716	genbank_microviridae_AGT39896.1_@1KVP_A	genbank	DENLQDSLTVHKDDSDYPVTEYVLKRRGKRHDYFTSCLPWPQKGTAVDLPLGSTAPIESDGSFTVEGQTSSNTGQLDWNATAGWTTSGSSFTNGEELRYESGLIADLSSATAATINSLREAFQLQKMMERDARGGTRYTEIIRSHFGVTSPDFRLQRPEYLGGGSTPVIVEPIANTSNYAGLPVGYLGGTGYQTSGHIGFTKSFVEHGVILGLVNVRADLTYQKGVNKMWSRQTRYEYYFPSLAHLGEQEVLNKEI	256	USER	zzzz409
715	genbank_microviridae_AGT39895.1_@1KVP_A	genbank	DENLQDSVVVNKDDGPDSAADYVLLKRGKRHDYFTSCLPWPQKGDAVNLPLGSQAPLKSDGTVNVDYVGALDSTNTARLLRDGGAGLYMSPLSPSTGAELYADLSDATAATINELREAFQIQRLYERDARGGTRYTEIIQSHFGVTSPDARLQRPEYLGGGKDRVNIHPISQTSSTDATTPQGNMSAFGTTAFGGHGFSKSFTEHSIIIGMVNVYADLTYQQGLNRMFSRQDRWDFYWPALAHLGEQAVLNKEI	254	USER	zzzz410
714	genbank_microviridae_AGT39894.1_@1KVP_A	genbank	DENLQDSVVVDTDDGPDTDTDYVLLRRGKRYDYFTSCLPWPQKGDASYISLGGEVPVQGLAMNQSAIYNHNATNAYDSSGTFQPTGTNWETTTSSYLYIQGDNSTKIPNVHVDLGDVTTVTINALRESMQIQKLLERDARGGTRYTEIVKSHFGVTSPDARLQRPEFLGGGSTPINITSVPQTSESNTTPQGTLAAYGTATAMGHGFTKSFTEHCLIIGMVSARADLSYQQGLNRMFSRGTRYNFYWPSLSHLGEQAVLNKEI	263	USER	zzzz411
713	genbank_microviridae_AGT39893.1_@1KVP_A	genbank	DENIQDSVVVDKDDGPDDPTDYVLLKRGKRHDYFTSCLPWPQKGDAITMSLGTTAPVVSDGEIARFSPTSGTYQGNNYNLQVYNYNTPGPGNQLGLYGIPGFDDATRACVFGNVTGLEADLENAEAPTINQLREAFQLQVMAERDARGGTRYTEIVRSHFGTISPDARLQRPEFLGGSSNRVVVVPVPQTSEAGSTPQGNLAGYGTVASASEGFTKSFTEHCVIIGLMSARADLTYQQGMPRMFSRSTKYDYYWPALAHLGEQEVLNKEI	270	USER	zzzz412
712	genbank_microviridae_AGT39892.1_@1KVP_A	genbank	DQNLQDSLYQNRTDAHDDGPDTLASLTSSNGGQLHYLPNKRGKRHDYFTSCLPWPQKGDAVSLPLGTSAPIAEDTSGVLAASVWNSQLSSYQQLGASAATVTTRAGAGLEANRLYADLSTATGATINDLRLAFQTQRLLERDARSGTRYNELILAHFGVTVPDFRVQRPEFLGGGSSAINITPVANQSGSSGDLGDLAAIGTASGSHGFTKSFTEHGVIIGLINVSGDITYSQGQERYWAKSTRYDFYYPVLSQIGEQAVLNKEI	265	USER	zzzz413
711	genbank_microviridae_AGT39891.1_@1KVP_A	genbank	DENLQNSVTVNTGDGPDADTDYNLLRRGKRHDYFTSCLPWPQKGDAVALPLGTSADVQVDVASGNILTVYDTVASVYRQMGAGGTYVTNAGVTGSSVNKLYADLTNATASTINDLREAFQIQKLYERDARGGTRYTEIISSHFGVNSPDARMQRPEYLGGGSSPLMINPVEQTSSTDVTSPQGNLAAVGTLGFRGHGFSKSFTEHCVIVGLCNVRADLNYQQGINKMWTRQTRWDYFWPALQNIGEQAVLSREI	254	USER	zzzz414
710	genbank_microviridae_AGT39890.1_@1KVP_A	genbank	DQNLQNSLVVDTDDGPDTVTDYVLKRRGKRHDYFTSCLPWPQKGTAVELPLGTSARIATDAVTTSSLGIYSTANSAINAMGTDTTLVNLDNTVIALGNSLYADLSTATASTINALRQAFQIQKLYERDARGGTRYTEIIRSHFGVTSPDARLQRPEYLGGGSSSVNVNPIPQTSSTDATTPQGNLAAMGTMSGSGQGFTKSFTEHCVIVGLVSVRADLNYQQGLNKMFSRRSRWDFYWPALSHIGEQAVLNQEI	254	USER	zzzz415
709	genbank_microviridae_AGT39889.1_@1KVP_A	genbank	DKNLQDSVVVDTDDGPDSPTDYTLLNRGKRHDYFTSALPWPQKGEAVDIPLGQAAPVTYDLAGGNEVSVYSTTYSEYRNLLSTGSPNAVTMATTVSEPENQGLYADLSDATAATINQLRQAFQVQKLLERDARGGTRYTEIIKAHFGVTSPDARLQRPEYLGGGSTPVQIQPVASTIPTDIGVQPQGSLSAVGTASMNGHGFTKSFTEHCIILGVVNVRADLTYQQGLPRMFSRSTRYDFYWPALAHIGEQAVLNKEI	258	USER	zzzz416
708	genbank_microviridae_AGT39887.1_@1KVP_A	genbank	DQNLQDSLTVNTASGTDSLAYYDLRKRGKRHDYFTSSLPSPQKGASVQLPLGSLAPVTSAAGRQSVIDSGTGNPINLTYDATNNVIIHSGSAANPQLLYADLADATAATINDLRLAFQTQRLLERDSRGGTRYNELIRAHFGVTVPDFRIQRPEYIGGGSSMVNVTPVAYTAGQSGDYVGQLGAMGTVSGAHDWTYSAVEHGVIIGLANVRSDITYSQGLERYWSKSTRYDFYYPVLAQIGEQAVLNKEI	250	USER	zzzz417
707	genbank_microviridae_AGT39888.1_@1KVP_A	genbank	DQNLQDSVVVDKDDGPDDPADYTLLKRGKRHDYFTSCLPWPQKGAAVDLPLGTSAPVTGLGTFNQNYSSISLYETDGTAITGPASGTTGSGVNPIGAFEDPLNSGFPDIRVDLTNATAATINQLRQAFQVQRLLERDARGGTRYTEIIKSHFGVTSPDQRLQRPEYLGGGSTPVNVTPVMSTNQSPTISTGEPGAYATIAVNGHGFTKSFTEHCLIIGILSVRADLTYQQGLNRMFSRQTRYDFYWPSLAQIGEQAVLNKEI	262	USER	zzzz418
706	genbank_microviridae_AGT39886.1_@1KVP_A	genbank	DENLQDSVTINKGDGPDTYTDYEVLRRGKRHDYFTSALPWPQKGEAVQLPLGTQAPIAFDSSLSSVIGIKDTSGVNRQMVTNGSPGDEVTFSTAGSPPNAMYADLSEATAATINQIREAFQTQRLLERDARGGTRYTEIIRSHFGVVSPDARLQRPEYLGGGSTPVNINPIAQTSATAASGTDTPLGNLAAVGTALATNNGFTQSFTEHGVIIGLASIRADLTYQQGMRRMWNRRTRYDFYFPVFAHLGEQAVLNKEI	258	USER	zzzz419
705	genbank_microviridae_AGT39885.1_@1KVP_A	genbank	DQNLQDSVTVPTDDGPDTPGDFVLLRRGKRHDYFTSCLPWPQKGPAVELPLGTTAPLKYDLSGSSGINLSALDANDTHRALQTTSTNLSTSNAAGLPANALYADLSVATAATINQLRQAFQIQKLYERDARGGTRYTEIVRSHFGVVSPDARLQRPEYLGGGSTPININPIAQTSETATTPQGNLAAMGTLTIRNNGFTKSFTEHSVLIGLVSVRADLTYQQGLNRMFSRSTRWDFYWPALAHIGEQAVLSKEI	254	USER	zzzz420
704	genbank_microviridae_AGT39884.1_@1KVP_A	genbank	DQNLQDSRPVYTDDGPDPLTVGDYDILRRGKRHDYFTSALPWPQKGDSVDLPLGTSATIRTSASDLVSGVQSPMAMNRDGGGKPPDSRFMTTSVTSGNVGYNLSSTGVDDWLYPSNLYADLTTATAATINQLRQAFQIQKLLERDARGGTRYTEVIRAHFGVTSPDARLQRPEYLGGGSTPVNISPVSQTSESATTPQGNLSAYGTAGLHGHGFTKSFTEHCVLL	225	USER	zzzz421
703	genbank_microviridae_AGT39883.1_@1KVP_A	genbank	DQNLQDSRPVYTDDGPDPLTTNDYDILRRGKRHDYFTSSLPWPQKGDSVDLPLGTVAPIITSATDVVSGVRTPMQMREEDGNSPAASRVLVVNPAAGNDVEGFSPIPATQDIGLYPSNLQADLSTATAATINQLRQAFQIQKLLERDARGGTRYTEVIRAHFGVTSPDARLQRPEYLGGGSSPVNISPVSQTSESATTPQGNLSAYGAAGLHGHGFTKSFTEHCVLLGLISVRADLTYQQGINRLWSRSTRYDFYWPALAMIGEQAVLNKEI	272	USER	zzzz422
702	genbank_microviridae_AGT39882.1_@1KVP_A	genbank	DENLQDSVVVDLDDGPDTETDYSTVLKRGKRKDYFTGSLPFAQKGTSVPLPLGTSAPITGTITGDGTNAPTFTTNGTWNGELEVNALGANSAVQIDSSSLAGNMYWVDPALDATGLTANLSAATAATVNEIRTAFQIQKLYERDARGGTRYTELVRNHFGVVSPDARLQRPEYLGGASNRINIQPVTMNANVASKPLGTVGSYAVGGDFNTGFVKSFTEHSVLIGLAMVRADLTYQQGINRMFSRDTRFDYYWPSFAHLGEQEVLSKEI	269	USER	zzzz423
701	genbank_microviridae_AGT39881.1_@1KVP_A	genbank	DENLQDSVPLDLDDGPDTVTDYVLLRRGKRKDYFTSALPFAQKGDPVELPLGGQAALGGFTTAIQGVGAPVFQRGGSSETGELEINAGTGTRNVSWTRSSGSSAGDLQWNDPNLFLNGVGSGLFADLSTATAATINSIREAFQVQRLLERDARGGTRYTEIIRAHFGVVSDDARLQRPEYLGGGPSMINIHPVAQTSNNDTQTSPQGNLSAYATGGGNSQGFNKSFTEHCIVIGIACIRADLTYQQGLNRAWSRSTRYDYYWPAFQALGEQEILSKEI	278	USER	zzzz424
700	genbank_microviridae_AGT39880.1_@1KVP_A	genbank	DENLQDSLVVDTDNGPDSPTDYVLQRRGKRHDYFTSSLPWPQKGSTPVSLPLGSEAPITGLGKTTQVYNGPADTVYETGGVAGVTYALNDNAAINVAQPDQFFRIQQDPDNAGFPNIKADLSNATSATINQLREAFQIQKLLERDARGGTRYVEIIRSHFGVTSPDARLQRPEYLGGGSTPVIVNPIAQTSSTDVTTPQGNLAAMGTVGLNNNGFTKSFTEHCILIGLVSVRADLTYQQGLNRMYSRSTRYDFYWPALSHIGEQSVLNKEI	271	USER	zzzz425
699	genbank_microviridae_AGT39879.1_@1KVP_A	genbank	DQNLQDSIFFETGDSVNEIPANWILRRRGKRHDYFTSSLPWPQKGDAVTIPLGQEAPVLGIGTEDTVTWLSNPPDVRQSDGSTITYDDAINTDTVTPGLRTYIEEDPDNPGYPNIRADLTSATATTINALRQGFQIQKLLERDARGGTRYTEIIRSHFGVISPDQRLQRPEYLGGGSAPISVQPVAETTTSTFGGQAGTIGAFATAMANNHGFTKSFTEHCIILGLANVRADLTYQQGLPRHWSRRTRYDFYWPSLSHLGEQAVLNKEI	269	USER	zzzz426
698	genbank_microviridae_AGT39878.1_@1KVP_A	genbank	DENLQDSVVVDKDNGPDSPTDYVLLKRGKRHDYFTSALPWAQKGDSVGLPLGTSAPVTGIAARSNVYRTSDQTVYETDGTTTSIYNPHKFSDAGVNDMFVMEEDPNNAGFPNIRADLSLATSATINQLRQAFQIQRLLERDARSGTRYTEIIRSHFGVTSPDSRLQRSEYLGGGSSMVDISPIQQTSESTAASPQGTLTAQGTANLHNHGFTKSFTEHGVIIGLISVRADLTYQQGLNRRFSRQTRYDYYYPVLGNIGEQTILNKEI	267	USER	zzzz427
697	genbank_microviridae_AGT39877.1_@1KVP_A	genbank	DENLQKFAVVSTASGNDTTTNQLVLNRGKRHDYFTSALPWPQKGADVTLPLGSYAPVNGLYTIGTEQTANVDWYDQDGNTATGDKIYYAGDSATNKYLGYASDGTDTNTLAVTADLTNATSATINQLRLAFATQKFLEKQARSGSRYIEVIKGHFNVTSPDARLQRPEYCGGGSSPVNISPVAQTSSTDTTTPQGNLSAIGTTVLSGHSFTKSFTEHSILMGLVSVRTDLTYQQGLNRMFSRTTIYDYYWPTLSTIGEQAVLNKEI	266	USER	zzzz428
696	genbank_microviridae_AGT39875.1_@1KVP_A	genbank	DQNLQDSVTTSTSDGPDTSTDYVIQRRGKRHDYFTSCLPWPQKGDAVSLPLGESAPIATDALLNGNISLQNTNYNGTSSSLLGATHTWLNAKTDVGTESNRMYADLSSATSATINQLRESFAIQHLLEKTARAGSRYTEIIKGHFGVTSPDARLQRPEYLGGGSSPIIVTPIEQTSSTDGTSPQGNLAAMATSTLNGHGFTKSFTEHCILIGLVSVRADLTYQQGLDRMFSRSTRYDFFWPSLANIGEQAVLNKEI	256	USER	zzzz429
695	genbank_microviridae_AGT39873.1_@1KVP_A	genbank	DQNLQDSVTTSTSDGPDTSTDYVIQRRGKRHDYFTSCLPWPQKGEAVSLPLGTTANVKLDNFAGSSAPDDNYLNLIGQSGTTSPSALYNSTYGASGGAAIPPSSENYLYADLSTASSATINQLRESFAIQHLLEKTARAGSRYTEIIKGHFGVTSPDARLQRPEYLGGGSSPIIVTPIEQTSSTDTTSPQGNLAAMATSTLNGHGFTKSFTEHCILIGLVSVRADLTYQQGLDRMFSRSTRYDFFWPSLANIGEQAVLNKEI	262	USER	zzzz430
694	genbank_microviridae_AGT39872.1_@1KVP_A	genbank	DQNLQDSITTSTSDGPDSPTDYVIQRRGKRHDYFTSCLPWPQKGDAVSLPLGDNAYVKYDNIQGDSSPDNEYAVVQGYTAGDIWRYSSTLDTIGTSLNDASYNNIYADLSTATSATINQLRESFAIQHLLEKTARAGSRYTEIIKGHFGVTSPDARLQRPEYLGGGSSPIIVTPIEQTSSTDTTSPQGNLAAMATSTLNGHGFTKSFTEHCILIGLVSVRADLTYQQGLDRMFSRSTRYDFFWPSLANIGEQAVLNKEI	259	USER	zzzz431
693	genbank_microviridae_AGT39876.1_@1KVP_A	genbank	DENLQAPKTILTTSGADATTYALLNRGKKHDYFTSALPWPQKGADVTIPLGTSAPIHTPSGLSAEQSIYSDSQSKLAHMYTDGGVGSELKLGGTTGDAANAWYADLSDATAATINQLRLAFATQKFLEIQARGGSRYIEVIKNHFNVTSPDARLQRPEYLGGGSSPVNISPVAQTSSTDATTPQGNLSAIGTTVLSGHSFTKSFTEHTIVIGMVSVRTDLTYQQGLNRMFSRETIYDYYWPTLSTIGEQAVKNKEI	256	USER	zzzz432
692	genbank_microviridae_AGT39874.1_@1KVP_A	genbank	DQNLQDSITTSTSDGPDSPTDYVIQRRGKRHDYFTSCLPWPQKGDSVSLPLGESAPVTSDGFSGSNPHVSIINGNGLEKNIYSNSPDNPPFVSNTLAATASPLYADLSTATSATINQLRESFAIQHLLEKTARAGSRYTEIIKGHFGVTSPDARLQRPEYLGGGSSPIIVTPIEQTSSTDATSPQGNLAAMATSTLNGHGFTKSFTEHCILIGLVSVRADLTYQQGLDRMFSRSTRYDFFWPSLANIGEQAVLNKEI	257	USER	zzzz433
691	genbank_microviridae_AGT39870.1_@1KVP_A	genbank	DENLQDSITVDKDDGPDTLTNYTLQKRGKRHDYFTSALPWPQKGDAVNLPLGTAAPIKTDVTSYGSILSILDGNDAYKGMIPGATTEINQSGNSALEANRLYADLTDAAAATINQLREAFQIQRLYERDARGGTRYTEILQSHFGVTSPDARLQRPEYLGGQKTELQMQPIPQTSATDSTSPQGNLSAIGTLQSRGGFSKSFVEHGVLIGMACVFADLTYQQGMNRMWSRXDRWDFYWPALAHLGEQAVLNXEI	254	USER	zzzz434
690	genbank_microviridae_AGT39868.1_@1KVP_A	genbank	DENLQDSIVVDKDDGPDTLTDYTLQKRGKRHDYFTSALPWPQKGDAVSLPLGTTAPVGYEGGGTPYLTVLNMDTGANTMQAISAGAVAAAGALTGAELVADLSDAAAATINQLREAFQIQRLYERDARGGTRYTEILQAHFGVTSPDARLQRPEYLGGQKTELQIQPVPQTSSTDGTSPQGNLSALGTVQSRGGFNKSFVEHGVLIGMACVFADLTYQQGMNRMWSRRDRWDFYWPALAHLGEQAILNQEI	251	USER	zzzz435
689	genbank_microviridae_AGT39867.1_@1KVP_A	genbank	DENLQDSVTINKDDGPDTYTDYAVLRRGKRHDYFTSALPWPQKGDAVTLPLGTTAPIVTTGGTGSIVNVINGSGTEVSLNANTTGVTLNSTTYGGSAAIYADLSDAAAATINQIREAFQTQRLLERDARGGTRYTEIIRSHFGVVSPDARLQRPEYLGGGTTPVNINPIAQTSATAASGTDTPLGNLAAVGTALATNNGFTQSFTEHGVIIGLANIRADLTYQQGMRRMWNRRTRYDFYFPVFAHLGEQAVLNKEI	256	USER	zzzz436
688	genbank_microviridae_AGT39871.1_@1KVP_A	genbank	DENLQDSITVDKGDGPDTLTNYTLQKRGKRHDYFTSALPWPQKGDAVTLPLGTEAPVTYSAVSGTPTGDDKYIALYNDASNNQTHYYANTFPGGGAGNLALSTEFNFTADLSDAAAATINQLREAFQIXRLYERDARGGTRYTEILQSHFGVTSPDARLQRPEYLGGQRTELQMQPIPQTSATDATSPQGNLSAIGTLNSRGGFSKSFVEHGVLIGMACVFADLTYQQGLNRMWSRRDRWDFYWPALAHLGEQAILNQEI	260	USER	zzzz437
687	genbank_microviridae_AGT39866.1_@1KVP_A	genbank	DENLQDSLTVNIDDGPDPYTDYELVRRGKRHDYFTSALPWPQKGPAVPLPLGTTAPVQGIGNMTQSYPLAGRTVYESGNTVATTFAQSQVTGSASPTIIREDPDNPGFPGIFADLSEATAATINQLRSAFQIQRLYERDARGGSRYTEILRAHFGVTSPDSRLQRPEYLGGGSIPINLNPVAQTESSDAATPQGNLAAIGTVQGNAGGFTKSFTEHNVIIGLCNVRADLNYQQGLNRMWSRQTRWDFYWPALAHIGEQAVLNKEL	265	USER	zzzz438
686	genbank_microviridae_AGT39865.1_@1KVP_A	genbank	DQNLQDSVVVNLDDGPDTVADYTLLRRGKRHDYFTSCLPWPQKGDSVELPLGTSADVHSAADIGEVIGYYSTAQADHIQQTLDFTPGAALKGRASTTDAEAGKLYADLSTATAATINQLRQAFQIQRLLERDARGGTRYIEIIKSHFGVTSPDFRLQRPEYLGGGSSPISINPIAQTSSTDVTTPQGNLAAIGTAHLSGHGFNQSFTEHCVIIGLVNIRADLNYQQGINRMWSRQTRYDYYWPALSHIGEQAVLNKEI	258	USER	zzzz439
685	genbank_microviridae_AGT39864.1_@1KVP_A	genbank	DENLVDSLSIFMGDGPDPTSGTAFGGNPQKRAKKHDYFTSALPWPQKGDAVTIPTGDRAPILGIGKTDQTYGSALTDVYETNTTAQQTYVDSAAFGTSFHVEEDTDKPGYPAIYADLNQATATTINELRQAFQIQRLLERDARAGTRYVEILKAHFGVTSPDFRLQRAEYLGGGKSFINVSPVAQTGETGTTSPQGHLTAVGTGDVIGAGFAKSFVEHGIILGLASARPDLTYQQGLDRFWSRQTRYDFYWPALATIGEQSILKREL	267	USER	zzzz440
684	genbank_microviridae_AGT39863.1_@1KVP_A	genbank	DENLSNAASLPLDDGVDSQSYYNLLDRAKSHDYFTSALPWPQKFIAPTIPLSGNAPITGLGKITGGFPSSPAVRETYAGGITYPYGAKIAGVGDEEWYGQGSAATNGYPAIYAVLSSTGGIPINTLRQAWMVQALLERDARGGTRYIEIIKSHFGVTSPDFRLQRPEYIGGGSTDLNITPIAQTVPGGGNPLGQIGGAGTAAGSHRASYAATEHGYIIGIISVKSELSYQQGINKMWDRHTRYDFYFPATAQLGEQAITQREI	263	USER	zzzz441
683	genbank_microviridae_AGT39862.1_@1KVP_A	genbank	DQNLQDSVTVDKGDGPDGIGNYTLLKRGKRHDYFTSCLPWPQKGDAVSLPLGTSADVYGFYRVQQLDTGLKDTLATKSTGTNTIGTFDDNLNDGVIKTLQAYSEPFYAAGSAARGLQADLNTATAATVNQLREAFQIQKLLERDARGGTRYTEIVQSHFGVTSPDARLQRPXYLGGGKDRININPIAQTSSTDATTPQGNMSAFGTTGFSGHGFSKSFTEHSVVIGLMCVFADLTYQQGLSXHFSRRDRYDFYWPALAHIGEQAVLNKEI	270	USER	zzzz442
682	genbank_microviridae_AGT39861.1_@1KVP_A	genbank	DQNLQDSAVVYTGNANTSTANYFLRKRGKRHDYFTSSLPSPQEGASVQLPLGSLAPVTAQNIGTGGVTVVVNDGVAGVDRHLRSDGLNVYFDATASNGRKLYADLADATAATINDLRLAFQTQRLLERDARGGTRYNELIRAHFGVTVPDFRVQRPEFIGGGSSMVNVTPIANTAGQAGDYVGQLGAMGTVSGSHDWTYSAVEHGVIIGLANVRGDITYSQGLERYWSKSTRYDFYYPVLAQIGEQAVLNKEI	253	USER	zzzz443
681	genbank_microviridae_AGT39860.1_@1KVP_A	genbank	DQNLQDSASVYTNSVGDGHTLYALKKRGKRHDYFTSSLPSPQKGASVQLPLGSLAPVTGVQYGQLNSDIIIDDGGVLRTTNAGSDGIIQFGATAVNGKQLYADLADATAATINDLRLAFQTQRLLERDARSGTRYNELIRAHFGVTVPDFRVQRPEFIGGGSSMVNVTPIANTAGQSGDYVGQLGAMGTVSGSHDWTYSAVEHGVIIGLANVRGDITYSQGLERYWSKSTRYDFYYPVLAQIGEQAVLNKEI	252	USER	zzzz444
680	genbank_microviridae_1KVP_A_@1M06_F	genbank	SNIQTGAERMPHDLSHLGFLAGQIGRLITISTTPVIAGDSFEMDAVGALRLSPLRRGLAIDSTVDIFTFYVPHRHVYGEQWIKFMKDGVNATPLPTVNTTGYIDHAAFLGTINPDTNKIPKHLFQGYLNIYNNYFKAPWMPDRTEANPNELNQDDARYGFRCCHLKNIWTAPLPPETELSRQMTTSTGMAPVTTKFRDVPNLSGTPLIFRDNKGRTIKTGQLGIGPVDAGFLVAQNTAQAANGERAIPSNLWADLSNATSIDIMGLQAAYANLHTDQERDYFMQRYRDVISSFGGKTSYDADNRPLLVMRSNLWASGYDVDGTDQTSLGQFSGRVQQTYKHSVPRFFVPEHGTMFTLALVRFPPTATKEIQYLNAKGALTYTDIAGDPVLYGNLPPREI…	497	USER	zzzz447
679	genbank_microviridae_ADR80650.1_@PF02305.16	genbank	MQSVMDHSFSEVPQVDLPRSTFNRSFSHKTTMDADYLVPLLVDDVIPGDTYNCNMSFVAKLASPTVISLMDNIYFDSFFFFVPYRLLWDNWERFMGAQDDPGDSIAYTIPEWSSNTDIDMTDVGDGSDYRALADYMGVPHKSSVNLTEMSALPFRAYNLIFNEWFRDQNLQDSVPVETGNGPDIPWTQYELLKRGKRHDYFTSALPWPQKGTAVSSPLTGLAPVTGIGRLNGAAWDTGSQDVHETDNDVVTYAQNIGGTGGGNDKNFMMQVEGSGRPLVYADMAQAVGGININDFRLAYQTQRLLERDARGGTRYVETLKNHWGVTSPDFRLQRPEFLGGGSDRVNMQNVAQTTHQGTQTVYDAKGQEVSIGEAQGTHGFSKSFTEHGVIIGLVNVRSD…	542	USER	zzzz448
678	genbank_microviridae_ADR80653.1_@PF02305.16	genbank	MLGGPMGTLPTTLSHEFSRVPQADIQRSTFSRVHGLKTTFNSGDLIPIYVDEVLPGDTFQMNATGFGRLATPLYPVMDNMYVETFFFYVPNRIIWDNWEKFNGAQDDPNDSTDFLVPQIQSATVAEGSLFDYMGLPTQIAGIDFNNLHGRAYNLIWNEWFRDENLQDSLGVPKDDGPDTYTGYTIQKRGKRHDYFTSALPWPQKGDAVSLPLGTSADIHTAAAAGTDIGIYSVGSSDFRLLTSDPVEVALSGGTPPETNKMFADLSNATAATINQLREAFQIQRLYEKDARGGTRYTEILQSHFGVTSPDARLQRPEYLGGQKTEVMMQTVPQTSSTDSTSPQGNLAALGTATSRGGFSKSFVEHGVLIGLACVFADLTYQQGMNRMWSRRDRWDFYWP…	533	USER	zzzz449
677	genbank_unclassified_ssDNA_viruses_YP_006908226.1_@PF02305.16	genbank	MKRTKHSLSHYLLSTFDMGQLVPVGHFEVLPGDSIRMSTSSLLRVSPLLTPVMHPVQVRIHHWFVPFRVLWPEWEDFITGADPEAELPLMGPTTNALSLADYFGLPPGGMASQEVVAWPWMAYNLIWNEFYRDQDLQTPVDNDPTTAINNGVLNVAWEKDYFTAARPWTQKGPEVTLPLGGTAPVQPSSGLPPTFLLGTSTPQALAYANAQQGVDWEGPTPGSSGSATWADPRLEADLSAATAVGVNDVRLAFALQRYQEARAQYGSRYTEYLRYLGVRSSDARLQRPEYLGGGKSTIAFSEVLRTGNSDDEVTEGVVGEMKGHGISAVRTRRWVRFFEEHGIVMALASIRPRSMYESGTARSWHRKTKEDYWQRELEQIGQQEVYRKEVYAQGGSLDT…	485	USER	zzzz463
676	my_seqs_crucian1_2ct11.3@PF02305.16	my_seqs	MKINRKLPLVDATRFSMIPRGDVPRSTFQTQHTVKSTFDLDYLVPVYVDEIIPGDVHRGEMTFFARMQTPIFPIMDNICVESFFFFVPSRLVWTNWRKFMGEQANPSDNIDFLVPQITSPQGGFAVSGLYDYLGLPTAGQVQQNVTVSVNALPIRAYNLIFNEWFRDENVQNSTTVEVDDGPDDPTNYVLLKRNKKHDYFTSCLPWPLKGGQEVFLPVGDSAPVIPATPTAAPMWVQTAGGSSTPRFLVQGPTQPELQMSGTGAVNGIGYTWANPQLEADLSQAVGASLNATRLAIATQHLLEKDARGGTRYTELLRNHFGVVPEDSRLQRPEYIGGGKSYLKTQAIPQTSASAYGGTASTPLGSLGATILGSDGHAFRYMAKEHGYILGLVNVSGDVT…	540	USER	zzzz464
675	my_seqs_crucian1_2ct13.6@PF02305.16	my_seqs	MAKTTAKRRSSHTFNQTPQAKIPRSSFNRSHSYKTTFDAGLLIPIFVDEVLPGDTHVLRASLFGRLATPLKPFMDNLFMDTFFFFVPTRLVWENWQKFNGEQDNPGDSTDYTVPNRTFTVTVGSLSDYLGLPLGTVPGASVLPHRAYNLIWNEWFRSQDLQNSAAVPRSDSGNESAAELILRRRGKRHDYFTSALPWPQKGDPVTVPLGNSAPIYGVGASGDQVKIWDYDIGTDGIGSQARNLVGDPAAMTDTTGAGMLFADLQAATGFTINQLRESFQIQKLLERDARGGTRYTEVIRSHFGVISPDARLQRPEFLGGGTTMININPVAQTSGTAQDPSTGYTAGPQGNLAAFGTVSAHNHGFTKSFTEHGYIIGLVNVRADLTYQQGLNRLWSRKGR…	524	USER	zzzz465
674	my_seqs_crucian1_2ct14.4@PF02305.16	my_seqs	MAKSVMAHQFSKAPQANIQRSKFNRNHGRKTTFDSGVLVPILCDEVYPGDSVRCRMDALVRMATPIHVPMDNIWIDTHFFFVPNRLIWTNWQRFMGEQDNPDDSTDYLVPVLTNLGTANTEGSNFDHMELPPGVNAADVSALPFRALHLIWNQWYRDQNLQDSLQLKLDDGPDDANLYKNLLKRGKRHDYFTSALPAPQRGPGVDIPLNGNALVTANTADADTAVMIGSGALIGTSRKLQVKDPNLIETIQVSTIAGQGNGLYADLSSVSATTINELRSAFQIQKLMERDARGGTRYIELIKSHFQVTSPDARLQRAEYLGGGTSGVHMHVVPQTSGTPSGTGQYTPTEKGNLSAYGTATMQGHGFSKGFVEHGWIIGLMSVRADLTYQQGIPRQLLRQ…	526	USER	zzzz466
673	my_seqs_crucian1_2ct2.6@PF02305.16	my_seqs	MARQNQAPVSFNKSIRTDRTTAVTSGRAGKIYPVDYIPLLRGDSLSGSVAIDINLAEMPKPVLNAVVLNVQAWFVPKSAHPQFSGYDEFVHSYQSENIKSLGVSGEESRAAPPLFFQDTVLDSAILESDFFKTLGVHLLPTIDYQVDLIDAYNLIVNFRKSAYTDRLPRRPYFSENPANATSLSRAFWPKGRHSSWVPDYERALILGDLALDIAAGQIPVSGIGVGVGAASGSVSVQETDNGTVTFDNHWFGNDVKVEKHPDGGPNIFAEMGGQPVSTFLADIDKARVAQSFAKLRSSYAGNDATGFDNADALVAELMQGFSVPSDLFKRPWLLDAKMQPFGWSERFATDAANLDQSVTQGMISTTLNLNVPKQDTGGVIVVTVEVVPEYILEAASDEW…	545	USER	zzzz467
672	my_seqs_crucian1_2ct3.5@PF02305.16	my_seqs	MKRPKDNKSNSMSLADRLKTQPVSFDRTLRPDSVATVTSGNAGQCIPLAIVPLLREDALETSRFNARVYMDETADLLLNQVNAVFSAYFVPKLAFPRFNKSMDALNRSYMGQQEIDGSVVQWFRTHSYKGGGTSQRSTYQKMGFHAAPNASVNMDYLEAYQAIFEFRCRQRSEALWASVAGEYSENDIVPAFFDNSQMSIVKPSFDTQMLEGEIPLSVTNAQMPVKGLGVNPTDITYPGSGKPILETGGAEVTYADIHEGNSSLGNTWRMAAINNAPAIFAELAENGITVSVANIELAKQTQAWARVRNQYSGIDDDDLVDLLMSGVAVPAQYQAQPMLLARQKVPFGMTQRYSSDADNLDVSATRGIAGTTLTLRVPQTNCGGYVVVLAEVVPDQFWE…	585	USER	zzzz468
671	my_seqs_crucian1_2ct6.6@PF02305.16	my_seqs	MRSVMTHQFSQVPKAEIQRSSFDRSHGYKTTFDAGGLYPIFVDEVLPGDTFNLKMTGFARLATPIYPIMDNMVMETFFFFVPNRLLWVNWKKFNGEQQNPGDSTDFTVPQAVCTNGWEIGSLGDYFGLPTGVAGLTCNALPLRAYRLIYNEWFRDQNLQNASSVPTTDGPDNYPNGFNVLKRGKRHDYFTSCLPWPQKGESVNLPLGERALVMMDSSPVLTGTQNPLVWSRTDGNIIQNANIETGANGVTTAHTGSAGAFITNVYPNNLYADLTDATAATINQLRQAFQIQRLLERDARGGTRYTEIIKSHFGVTSPDARLQRPEYLGGGSSPVTFSPIAQTQATSAGVTPQGNLAAMATANLQGHGFTQSFTEHGYIIGLVNVRADLTYQQGLDRMWS…	528	USER	zzzz469
670	my_seqs_crucian1_2ct8.4@PF02305.16	my_seqs	MKINRKLPLVDATRFSMIPRGDVPRSTFQTQHTVKSTFDADLLVPVYVDEVLPGDVHRGDMTFFARLQTPIFPIMDNLCVESFFFFVPSRLVWTNWRRFMGEQANPSDTIDFLVPQIVSPLGGFAVGSLYDYFGLPTAGQVQAGVTVSVNALPIRAYNLIFNEWFRDENVQGSQTVLVDDGPDNPTNYFLMRRNKRHDYFTSCLPWPLKGGQEVGLPLAGSAPVVPDTTANNGGPMFKEFGLGLSQSIYTSTAVAYSPLTWGPSAADAGVDQLVWDVSGLKADLSQAVGASINATRLALATQHLLEKDARGGTRYTELLRNHFGVVPEDSRLQRPEYIGGGKSYLKTQAIPQTSASAYGGTASTPLGSLGATILGSDGHPFRYMAKEHGYIIGLVNITG…	543	USER	zzzz470
669	my_seqs_crucian1_2ct9.3@PF02305.16	my_seqs	MKINRKLPLVDATRFSMIPKGDVPRSTFQTQHTVKTTFDADYLVPMYVDEVLPGDVHRGDMTFFARLQTPIFPIMDNICVESFFFFVPCRLVWTNWRKFMGEQANPNDSIDFVVPQLESPDGGFAVGSLYDYFGLPTVGQIDPAQKVSINVLPIRAYNLIYNEWFRDENVGPAAFTSTSDGPDPAGSYGLQKRMKKHDYFTSCLPWPLKGGQEVNLPLGGTAPVVANTAVNNGGPMFKEFGFGLAQSIYTSSNAAYSPVTWGPTGGDAGIDQLVWDQSGLQADLSQAVGASLNATRLAIATQHLLEKDARGGTRYTELLRNHFGVVPEDSRLQRPEYIGGGKSYLKTQAIPQTSASAYGGTASTPLGSLGATILGSDGHPFRYMAKEHGYIIGLVNITG…	543	USER	zzzz471
668	my_seqs_lamb_2_2ct197.4@PF02305.16	my_seqs	MKKSRFNLSHEVLLTADFGNLIPILCQECLPGDKFHISTEMFTRFQALIAPAMQRVDAKIEYFFVPNRIIFHEWKNYITNKDQTGDILPRLSASRIPSALKGKNSLIDYMGLPCACKTMLDDGTWQDMSPVWDNINALPFIAYQRIWYDWYNDQNIQATAREALEDTRGEFDTYLSGFIDPEKYCQLRQRCYPRDYFTSALPWAQAGEAARLPLNYPAGSTTFNNVGTQAGDVTVDGFVYKVGSANARLKLNQPQNIVQGPTVEEMRRTNAIQRWLEKNARYGRRYIEQIAAHFGVRVPDYRLDRSEYLGSNKAPISISEVLQQSQTTSDSPLGDFAGHAVGAGISSMRPYRCDEHGYIIGILSFIPRASYAEGVPRPFIKDSYLDFAFPEFDRLGEQP…	509	USER	zzzz472
667	my_seqs_turkey_2ct24.3@PF02305.16	my_seqs	MSIFTTNAMGNYPSNTFDLSHNVKLTCKDGLLYPICNLDVLPGDKLNISNQILCRLMPMLSPVMHEMDITVTHHFVPLRLLWSTGYERFFAQPIPDDDTPVHPYFSEIVVENGSLSDYLGLPTRIFHSDSGEPLPQYATIDKVSAMFHAAYQKIYNDWYRDQNLILEVPDTLTDGLNSFTHFDVLRRRAWQHDYFTAALPFAQKGEAVEIPIAEFDDVPVKYNSTLGAFAEWETTGGSEFPATITAKVAAANNSLDGNTLFADTSTLSDAASVTINALRWANKLQEFLERNARGGTRYIELVRSHFGVISSDARQQRAEFLGWSRTPIVISEVLTQANTEAGGEPVGVTGEMYGHGIGVGRTKNAFYRAEEHGIFMSLLSIRPKTNYSQGIPRKFSRFQ…	518	USER	zzzz473
666	my_seqs_macstool_de1a1_2ct107.5@PF02305.16	my_seqs	MNVNAESHFAFSPADVDFKRSQFDRSHSNKLTFNVGELVPFYISEVLPGDTFDVSTNKVVRLQTLLAPVMDNLYLDTYYFFVPNRLIWEHWQNFCGESNQAWTPSVEYTIPQIKSPVNQGFAGWKFGSLADYLGVPPNDGSVDFETNKSFTVNALPFRAYAKICDDWFRDQNLQDPLLIPTGDATVQGSDAGEVCYGGSLFHANKFHDYFSSCLPAPQRGPVASVPMRGAIPVVAYGRSWDNATLSQAEAGLRWKNLASGEEIGDVSGGTWLADSGSTRWFSGSNTHVSGTSSVVPSNLTAFSFGSDSSDSLHVDVSTLRFAFQLQRFLERLARGGSRYVEILKSMFGVTSPDARLQRSEYLGGNRVPINIHEVTNNAQSESNFLGNLGAFSHTTDSHG…	563	USER	zzzz474
665	my_seqs_macstool_de1a1_2ct111.6@PF02305.16	my_seqs	MAKNVFRGDMLSSIPAPKLKKNWFDLSHENKLTAGMGTLIPIDWFDGVPGDVHKIRPSMLLRWQALIAPIMHRVDVSIHYFKVPKRLLFNDFEKFYTGGVSGNEWTAGIPYWTYDDILSALRVSTNVSQKEQYLGSLLDYLGVPMDFEEVGDAVVINNAETYKFDIMPILAYIKIWLDWYRDLSLDETDVEDQFNCMIAGGHAVGDGTAPARFGLSLLRRCWRKDYFTSCLPQSQRGQQVEFSNLVEVNSSTWTKQFKLNGDFPDVGTGVPVNVQAVDISTSKDRHAVSLQLQQDGVGAPPEVRINTNGLLTVNPISVTLLRYGLKLQQYLERNNYAGGRYQEQLLARFGVQPRDARLQRSEYIGGGSQPVVISEVESNATTEQEVTGQLAGKAKVLGS…	558	USER	zzzz475
664	my_seqs_macstool_de1a1_2ct118.5@PF02305.16	my_seqs	MNVNKANHYVSKVNVTRKRLTQFYQPHGLHTTFDSGVLVPIYFTEVLPNDVRKLKWSSVVRLLTPKFPTMDNAKLDTFFFYVRNRDVWEHWSNFMGYSPTSWTPAVDYIVPQLNVPLSHIARKVGDLADYMGIPIEKNLPAPSQTSVSQLPYRAIAKIWNDYFRDENYQDEAYFPLDESSQNYSGSVSSYVNGIVCGRILPPVNRYKDYFSSCLPAPQKGAAVSLPLGGYAPIITGEDSDTPAILKGKTIFSSNPTSDYYVPAFRLAGGDARVSTTGGNLLPEGSKVGIQMRADLTDVTMASVNALRLAFQTQRFLEQSARGGTRYTELLQSMFGVTAPDLMLNRAEFLGGKSFPISLTPVTNVADNLGSVGGMSNTVAGDYVFKKHFTEHGMIIGFAC…	546	USER	zzzz476
663	my_seqs_macstool_de1a1_2ct123.3@PF02305.16	my_seqs	MNVNKVNKYTSTVETTTRRLNKFYQPHGLHTTFDSGKLIPIYLKEVLPNDVRKLKWSSVVRLMTPKFPTMDNAKIDTFFFYVRNRDIWDDWNKFMGENNDPWAISTPPVVPQIQIPIDSSKRIIGDLADYLGIPIQKYSGTVSDTLSVNALPFRAVCKIWNDYFRDENYQSALYFPKNSEDFVYHNIVENPSSSLTDVVFRGGACPPVNRYKDYFSSCLPSPQKGNSVTFPLGDYAPVEFSAGDTVDTKYLSDIKLYNPDGNSINILDNSFSALKYGGTDKKVGLSADLTTAQHQLYNDVKGFARANLANATAASINAIRLAFQSQRFLEQSARGGTRYTELLVSMFGVNAPDLMMNRAEFLGGKSFPVSLTPVTDVGANLGSVGGMSSTVSGDYAFKK…	558	USER	zzzz477
662	my_seqs_macstool_de1a1_2ct45.5@PF02305.16	my_seqs	MKENLFNPKLKNKVARNGFDLSRRSLTTMKAGTLLPTFCTEVLPADKFKINLRSFARTLPINQAAFTRLRIYHEFFFVPYRLLWRFFPQFVVNRGDGLATASGPAKYNQDGMSGSTDAWNVPYVGEANLTTLCQLGIANSRKKLMNYNATNFASARDEFGFSRASNAKRLAMQLGYYHTCLQGQFEDDGKTYTPLIHYGTRKLSAFPFLAYHKIYADYFRNNQWEYAEPWTFNADYVLPNSTANANLASRFSASVPQSIQIDSIPAFPNFHTCFDLRYVDYNRDFIVGAFPTAQFGAVSSVVLEVPDLGIATVGAGGTDSYATFTDTSTQGSAYLTRNGSPTAIMRLTETFGTTSPKPQLQDRLKLSFDILTLRNAIASQKYKEITNSTDADYASQIEA…	619	USER	zzzz478
661	my_seqs_macstool_de1a1_2ct48.6@PF02305.16	my_seqs	MKLINPFDRLKKHENVPLSLFPANKITRTTMPIGRAVPLYCIDMMQGNRLKLSVDQLTRFMEMNGPVMQNYEVTYGAFFVPDVSFDRCFQSSWFRQNAGLTDVQQKLVLSMRDFFNPATADSLRVHPAKISVQQVGGTKVGSLYNHLGYPTYGIVEFHNSSAPFADPSSYVGFYASLTLLTSQDSVTTEKNYIAPDDMFISPLLGGVVTHLSDNTRMGTIESMGYEVINSGALIRSQTECLPFALWAINKSGTGSNLNKFLLYYDDGTQTTNYRFRYFKNGVSEVIPYSKAFDIKSAGGTNPELQLAVLYNIRAAAALYSLTVGDINNSDAIYDTYKSEAPRFKDFWPNSRLEDLYQEYRQYISDNLNLQLYGEQKFNTRRWLAYNMIYADYFLNPIYT…	728	USER	zzzz479
660	my_seqs_macstool_de1a1_2ct52.6@PF02305.16	my_seqs	MNTASSSPVSPERNANQAAPINNEGYNSFDHSRLELYTQRFSEVMPCYFDKCIEGDNVVNQATQDVRTFALQSPLMNNLKMYRSFYAVPLSAIAPKAWEYLLRQPNRGQDITFSDYDISGTFKQVFALPLTLLKKCQTMLAPDDGAVSASVKNVTMALLAYYGSLYFSNNGLFKALGYTAPTRTRTVLAAAQDATPVSSVWDRMYSALVDMICAGGHLNIHYFNENNAMFSLNGTVDKSVQKYTPSEVFNFLSAASFYGSLYIEADAKQAATMTVYEPLKKLVLEALSANFLQNVEAITTRVSLRPLIAYQTIIAQFFSSSNVDSIYNAKAYTDTALSLVTKAHQICKNISTAADVVNSPFVYSSKVNGVDVFFDAYSGHYNEYMANAFDKMISHAENP…	707	USER	zzzz480
659	my_seqs_macstool_de1a1_2ct64.5@PF02305.16	my_seqs	MLTIKLLCILLVALVALGVVALLLDSSIAADDCSSAPRLSTRAYRVVTGCSYIVKFGMVLTAVALVGCLAPAGLGLAMAFAIPKPTSVPNGSWFDHSHNVATTIPFGAVVPVDWRFMLPGEKIKTNVSGFCRALMLKAPAMQDVDLKYATYFVPTRLLCDKNEEIISEVSTPQLNASDGILSDVIAPAGSSDTFPYFMFNSQRYTIILQSILMFKKPSGTGFDFDAYRAALELPSTDEKWLAADVIRRYSVGSLIDYLGFPAVTDSQLNSLCVTYGSGSVTGVNMNIKSVPMSLLPFKAYHAICNHFFVPDFQRRQVVDTKALTDIRSQESGFIDVVYSPLMRLRYSQYESDPYTCARNSSAIARVGGASATSPNEQDVMINANTIRGMFALDEYARKI…	657	USER	zzzz481
658	my_seqs_macstool_de1a1_2ct68.4@PF02305.16	my_seqs	MNTTSLVRMQTMLTPVFGNIYLDTYWFFVPNRLTWQHWKEFMGENTQSAWIPQQEYTIPRLKFPKKSASDATKVGFPVNSVADYMGINPDLVLADDSEVQVSALPFRALGLIWNDFFRDQNVQDPLFVPVTDTQDAPVLSNLDNNPVFGGFPCKAAKFHDYFTSCLPAPQKGPAVSVPVGGNLAQQPMPVRPGAVHNGYSTNPDGSFILPTYGSFKGTGSGSKWSVANTFNLGQVGISGQLPDVVSTNVQQPAGNNKTPNTTSNFASTFTNLWAYPASDAPISGLSVGINELRLAVVTQMYYEALARGGSRYEEQIQQFFGVSNPDSRIQHPEYLGGRRMQINVHEVTNTAQSEKDFLGDVGAQSVTAGSNSDFTKSFTEHGWLIGLAVVRYEHSYSQG…	542	USER	zzzz482
657	my_seqs_macstool_de1a1_2ct80.7@PF02305.16	my_seqs	MNRNTESHFSVNPINLDIQRSKFVRPSTHKTTFNAGNLIPIYVDEVLPGDTFKMNMSSVIRMSTPIYPVMDNANMDVYFFFVPNRLVWEHWKEFFGENNTTHWEQPVEYEVPQITAPTGGWAKGTIADYMGIPTHISNISVQALPFRAYCKIWNDWFRDQNLKDPAMISMDETTTAGANSGDYVTNTEKGALPLKVAKYHDYFTSALPEPQKGPEVTIGGIAGYAPVTTREEKIKEPTKSMQWYQKELGIPGANFRGQIAITGTNPADMVVTENSQYGTPKGLIAPANLWADMSNGTPTSINALRQAFAIQRLYEKNARGGTRYIEIIKAHFGVQSPDARQQRSEYLGGTRVPINMDQVVQTSNSGDGITPQGNTAAYSLTAFNESMFTKSFTEHGYII…	551	USER	zzzz483
656	my_seqs_macstool_de1a1_2ct82.6@PF02305.16	my_seqs	MNLNKANRFASNPTSLDISRSRFARPFTHKTTINAGDLVPIFWDEVLPGDTFDLDVSFVARMLTPVVPVMDNCFIDLYHFFVPNRLLSSVIVSNSSNTNDWETFMGANKSGFWARSTETVLRSIKFYGCEPNSVAQYLGLPIYDVANNPSGGEVLCNVNAIPFACYNLIYNEWFRDQNLIAPIPLDNGFGKSVICGGSTVTGFSYGGNYGIAGSILKASKFHDYFTSCLPAPQKGDSVLLPLGDTAPVIARPTTHEIDEFTPITFNTIVGQAFANKPLIIKGDSKLSTGTQEVEPMSSGYDVPAPNNLYADLTNATAATVNQLRQAFAVQRLLEKDARGGTRYFEMLKAHYGTAPEDLIIQRPEYLGGTRVPINVDQVLQTAPTNDVSPLGFTGAFSNT…	568	USER	zzzz484
655	my_seqs_macstool_de1a1_2ct83.6@PF02305.16	my_seqs	MSRNAESHFALNPTNADISRSRFDRPSDILTSFNVGDIVPFYVDEVLPGDTHQIDTSKVVRLQTLITPMMGNLYLDTYYFFVPNRLVWSHWKNFMGENTESSWIPKTEYSVPQIKPPVGGWSSGTIADYMGIPTGVDNISVSALPFRAYALIMNDWFRDENLCDPVNVPVDDTTVTGVNTGDFPVDVCLGGLPYKAAKYHDYFTSCLPSPQKGPDVQIPVAEGHSLPVVPLAQKVDLPSNATGMLWKADPSPSGSNFGIYSSGNNWNPSTSYTDPSSTVLPTNLWAIQTGDVTAATINQLRIAFQIQKLYERDARGGTRYIEVLKSHFGVTSPDARLQRPEYLGGNRIPISINQVIQQSGTAEGTTPQGNVVGMSQTTDFNSDFTHSFVEHGFIIGVMV…	547	USER	zzzz485
654	my_seqs_macstool_de1a1_2ct86.5@PF02305.16	my_seqs	MNRNTESHFSLSPHVDISRSRFDRSASLKTSFNAGDVVPFFLEEVLPGDTFSVDTSKVVRMQTLLTPMMDNVYLDTYYFFVPNRLVWDHWKEFCGENTESAWIPQTEYTMPQITSPADQGWSVGTLADYFGIPTGVAGLSVSALPFRAYALIMNEWFRDQNLQDPLVVPTDDSTVAGVNTGTLVTDVAKGGKPFIAAKYHDYFTSALPAPQKGPDVTIPVATGGDINVVGNGKPLHFYGTGDGYLVGGQSNTYSRLGLADSAGNQLKDYNAPSGLLHLATVAELGSDLSNSGLIGVQSAVAQAATINQLRLAFQIQKFYEQQARGGSRYTEVVRSFFGVTSPDARLQRPEYLGGNRVPINVNQIVQQSGTQSGTTPQGTVVGQSLTTDKHSDFTKSFTE…	556	USER	zzzz486
653	my_seqs_macstool_de1a1_2ct93.5@PF02305.16	my_seqs	MGYLIAMDISLFLHLALMSKTNLAIQLWIGCLILGNKGYKMKKSKFNLTHMHSTTLDMGTLVPIMIQDTLPNDTYKISSRVFARMQPMLAPIMHEVFQYTQTWYVPYRLIWEDFEDFITGKSAYEGGVVPTMPYIKADDAHGFAVGSLADYFGFPTKQAGIKVSALPFRAMALIWNDRYRDQDLQTEVNLSLASGEDTTTSQKLLSPCWTKNYLTTARNSTQRGGEISVPIGQGNSVASRKWNNPRITSLDFESVTVINANGSTWDTKDFDSTWLVANQSKISQAFNTKWVASQEKGVINLTVTKEDLTTSGVQWTYETTIFQGNQPLPATVTVSLTSMTLKSDSYSVVDNYVVSDNLLHHQGFSSTKGSFPVDVLNLYSAESGSYGVLDIRDLRYASS…	633	USER	zzzz487
652	my_seqs_macstool_de1a1_2ct94.2@PF02305.16	my_seqs	MTTLISPIMDNIYLDTYFFFVPDRLVWKHWKQFMGENTESAWIPETSYTIPQVKAPTGGWSTGTIADYMGIPVNVEGISVSALPFRAYAMVMNEWFRDENLTDPVYFPDDDADITGSNGDNYISDIYKGGKPFKAAKYHDYFTSALPAPQKGPDVPLPLGNRAPVIQGSEIAYSVPGATPSGTTVKLNTGASIDTNHLAVNLWKSTGASIPSYTRMVYESGLVADLTQATGTSINQLRQAFQVQRLYEKDARGGTRYTEIIKSHFGVSSPDARLQRPEYLGGSRVPVNIHQVVQNSSTNDKSPQGHTAAYSLTIDNHSDFTKSFTEHGFILGLMVARYDHTYQQGIERFWKRTVREDFYFPVFANLGEQAIKNGEIYAQGNSKDDEVFGYQEAWAEYRY…	483	USER	zzzz488
651	my_seqs_10mus_7_2ct205.6@PF02305.16	my_seqs	MANPFKPSNSAVHKPNRNSFDLSHSNHLTFGFGQLIPCLCQECLPGDTFKIDSALGLRFMPLAFPVQTKVRAHVHFFYQRAKNLWPDFLDFIYGNDKLQGRTLVHPYIDFGPSGTKNLGLLETCGLGDYLGLPTVRYSSSISKTGGSFDYRAPVAANSVFAFDYNSSPGSAVQPVPSISNAANFTATAFSPLAPSTGSSPVQDVTYPNRSKYGLAMFYGNLTLSQLVYPGQARFTVDFPAGWQFDDSSVGFAVYARSSTGNKPLKIGSASVESVSRVGTSGTEFFTRVVFSFEFLSISDELIGIANGTSTAQPFYVGVWSRFQTVGTTPQLSVEFLPSASSSSDAVADVNGSPLTRPSDYHISALPFRCYESIYNAFYRDNRNNPFKTLVDGTVMPVYN…	744	USER	zzzz489
650	my_seqs_10mus_7_2ct214.5@PF02305.16	my_seqs	MLPHANISRSKFDRSHSVKTTFNAGQVIPFLVEEVLPGDTFELTTSKVVRMPALLTPIMDNLYLDTYYFYVPNRLCWEHWRELNGENTKSAWIPETEYQVPQITSPADTGWAVGTIADYFGIPTGVPNLSVNAMPFRAYALIMNEWFRDENLTDPLLVPLDDATVAGVNTGDYITDTAKGGLPFKAAKYHDYFTSCLPSPQKGPDVTIPVASSSYSDVPVITGATSVPSDLPVGMTFYAPSAVGGSSRSVYPGTVVGTGNANFPGLAYGVNASPPAEGNRVVPANLWAQTSALVADEAVAATINQLRMAFQIQKLYEKDARGGTRYVEVLKSHFGVTSPDARLQRPEYLGGNRVPIHVNQIVQQSQTTDQSPQGTPVGLSLTTDSHQDFRKSFVEHGFV…	552	USER	zzzz490
649	my_seqs_10mus_7_2ct250.6@PF02305.16	my_seqs	MSSIISARRAPFPESNVHLGHAFRTTTNVGTIRPIGFFPIVPGDDVFFAGGGLVRLLPIRLPFLSRFKVSIDMFFVPYKLYCKDLRDNNVSTFDPNNIQFPLISFAPVPNADHITYSSIDYARPAAGGSGTYISGDMIPFVWLAEYANSWNPSGYAARYSPLYQDAKDKEAVLVESGSFMNLAGLPVGFCNTKKQRSSALAGEEHFCALRPLMYVDIFRNYYANLQVDYVPLASEAVMNQPADDTQAAIEPIYELKASYGRRQVIKCSALDEFIEQGYNFKATTEDPYFITSHFENGAPANPLRSTEIWCGRDSALFCRSFKPYFEETWINKSKYDTGPGAISVQVEGDQVLLTSIRSGSKILKFSELSVAGGYRYDDFLSVQFDVRTTSDTTTPVYLG…	689	USER	zzzz491
648	my_seqs_10mus_7_2ct269.3@PF02305.16	my_seqs	MSRNVFNSVAVKRPSRNTFALNHDFKFSCDMGELIPVLCSDVLPGDVWRLRSQPLNRFAPMLAPIMHSVNVHLHCFFVPNRIVWPNWEDFISPPKANSTPPAHPFINAQFGSGAVWQKGSLADYLGLPVQQSSVGVVTPVNAIPFAAYQKIWNEYYRDQNLQGEVTDTLTNGSNAGAVLATLRNRSWMHDYFTGSLPFAQKGAAVSIPVDFDGEAPVYRNNSTAATFNLTGSSTPATGTTASVANIQSSLGQQPNSLYVDLSSAGAVNSGTINDLRTAMRTQEFLERQARGGSRYIEQIRMQFGVKSSDARLQRPEYIGGVSSPVIISEVLQTSETTGSGTPQATMAGHGYSASKGYNMRYYAEEHGYIFVIMSVTPKTAYQQGIPRHFSRRDMYDYAW…	514	USER	zzzz492
647	my_seqs_10mus_7_2ct317.5@PF02305.16	my_seqs	MNPTRLDMSRSRFDRSSSYKTTFNVGDLIPFYVDEVLPGDTFSVKSSRVVRMQTLLTPMMDNIYLDTYYFFVPNRLTWNHWRELMGENTESAWIPEVEYSIPQVTAPEGGWTAGTIADYMGIPTNVSGLSVSALPFRAYALICNEWFRDENLLDPLNIPVTDANVEGSNGSNYIIDCAKGGKPFIAAKYHDYFTGALPAPQKGPDVTISVLDGQNLPVRALSDSIPGYVPGQPRPSDWASLQIGGTSPAGNMNTPSYLIGGPAVESGSPVTYAGFIRTNQTIPSGWYQGGYPTNLWALTDGNLSVATINQLRMAFQIQKLYERDARGGTRYIEILKSHFGVTSPDARLQRPEYLGGNRIPININQVIQSSSTVANGTPQGNTAAYSLTTDTHSDFTKSF…	558	USER	zzzz493
646	my_seqs_10mus_7_2ct329.8@PF02305.16	my_seqs	MSSNKLFQELDLKNDVSRNGFDLSNHLYFTAKAGELLPVLHRDLMFGDKVRLSINHFTRTAPVETAAYTRINEYFDVFFVPYRLLWRNAPQVHTNNVSNPVSASSPTANQSIGSGTPQFDFSSFYTSDSPLRFAVLASSGYDMFGYSRGCLMAKLLNHLGYTYFSVDHLKSLFNMNPPEGYERPKYYGPKYLSLYPLLAYHCIYYNHFRNSQWENNVPYNYNVDYLGSNTLFNIPFWNGTSVDRSYWKNPTVFDLHYVNYPRDLFFGAFPDAQYGDTATVDVDSELVNNGTDTQYSYPVVGSDTGNAGTFAGVHAETASQNASVLTTIPQGKGINSNLYADLSDLSPHFDIPGQFNILALRKAQFLQKYKEIRGSGSQDYPDIVYKIFGVKVPQTLGYK…	627	USER	zzzz494
645	my_seqs_10mus_7_2ct346.2@PF02305.16	my_seqs	MLFSMSLFPKEKKKPPKMAHHDKSHYFDTSMAVGPKVPILVQECIAGDVHQLAFESLVNTQALLSPLYGSFKLNIEVFFAGTSLYIPKLWRNGSMQQADGTLDANYPYIIVDPERTVAWSESLLDESALWAYLGYNPGFTDRHYSTTGQRQRNAIPILMYLDTMRHYYANRQQPNLYYIAQKTSGTKGDVMLATITIRAVDWLFEHLPANGGDLLRHLDSAYKDDPGLVSSQELADLKGYFNNYGNSPMYGLICGNHMPDKNTVILNSDFYKNNVTSVQVDTSSGALVVDQLVTAKKLWMSRNNDAITSGSFKDWIRVHYGVTPKIMDDMPTFCGSTSSEIIFEDIRATTAAETPDGTQRLGDKGSSGKGYSHSRMHSVVCDRPGYIIVLASITPRVKY…	554	USER	zzzz495
644	my_seqs_10mus_7_2ct390.5@PF02305.16	my_seqs	MSRKSKNPNVHFVPRITNLGSGSHFSAAVNGAPVHSSMVADPVRYNTFNASEIVPIYCAEVLPDDVFEIRLREGIIRQTTMLTPTMGNLVVDYYSFFVPNRVVNESWKAVMGENINGSWTAPDVVLAPLVNNAYQANGVPAISNVSVPVGSVADHYGFPTQLPIPYAVLNACNDLKFRGYVSIYNEYFRDQNYQPPIPFSTLNVYQGFFDHHYTSPARSLLLPRGSVQSGVITAETLPNHSSGTGDFGVESYAATMGVTEQSTTSIGGSVPSVPLADRFDALGSPLRANKLHDYFTSVLPSQCKGPVSMIPLSGGGLCRVYPRSEFSDPPAVANYPNITYEQGVRYLPGGVGFGTIMKPFVGAPPATSDGTSTALYGSSPLSAPSGAQNYYSPFNLGVD…	660	USER	zzzz496
643	my_seqs_10mus_7_2ct495.4@PF02305.16	my_seqs	MSSSIFKKPKVGAPQGRNGFDLSFHRSFTTSCGMLLPIAHDIANPGDKYVLNSQSFVRTEAVETAAFCELKMHVDWFFVPMTQIYSRWNEFYNQVDDVMSSLFVSDNSTPYKYELPKFSVFPALFGFFDGKPNDFFATSSVSGQNTIVKFKNDPYGLPYYWNFRRLWDMLGYGSVDTTASITLISDFTLLPFLAYHKIFHSHYMPTDWFKNDPLLYNVDSYVNPSRVHSPSELPAIISTLHYRPYRKDYFTNILPSPIFSDVYANYISGSFDADFMKIINPEARDSGNSLYLDYSVNDSDTQTQLRPVSGSTVSGFSTADLRSMYALDKLLRVNAFSKSHYADQVFAHFGYKMPEGISDEAYKLGSQTIDIGISQVLSTASTEDTALGEVGGKGFGATP…	610	USER	zzzz497
642	my_seqs_10mus_7_2ct658.6@PF02305.16	my_seqs	MSNFRRVTNRDTEVHFSKALFGEVEQSRMLASPLHLTTLNAGDIVPVYCREVLPHEHLSLSLDFDMRQTTIQTPTMGTMYVDYYAFWVPNRVVNQSFKAVMGENYNGSWTGNPVTLAPLVSPSMGETAVQIPVGSVADYYGFATQSAIPVSVLSQCHDLKFRGYVMIYNEFFRDQNYQPPIPMSTLNVYQGFLDPANGNIPLHGGPGQTMPLSAGVVPDGSYGAGAVANAVYGSGVPAANGSIVAARDAMNAFKAYKAPLKANKLHDYFTSVLPSPQRSPEQIFVPVSGTIGGAQVVPSLTNLSGPYPPLMFRNSSDGTAVTAPISLAVSNGSSLAGLTPVSGVQGSLYPSNLRTNSQTVTGLAMSIEDLRMSAAIQQVYEALGRGGSRYREYLRSFFG…	619	USER	zzzz498
641	my_seqs_abalone_6_2ct11.6@PF02305.16	my_seqs	MGPMSPMPTVMGHKFSQVPQAEIPRASFDRSHGHKTTFDAGKLIPIFVDEVLPGDTFNLNMSGFGRLATPLHPIMDNMFLETFFFFVPNRLVWDNWEKFNGEQTDPGDSTDYLIPTVGSGGLFPNEGSIWDHFGLPVGVDINQQFSALPFRAYNLIYNEWFRDQNLIDSLSVSRGDGPDLPSLYEIQRRGKRHDYFTSCLPWPQKGEAVSLPLSGNAPIATNATTDTHVSVFSSDLDNQATFDTDGLKLTISSNFGNETMKLYADLSEVTSSTINDLREAFQVQKLLERDARGGTRYTEIVQSHFGVTSPDARLQRPEYLGGGSTRLNISPVAQTSESGSTTPQGNLAALGTVGINSHGFTKSFTEHGHIIGLVCARADLTYQQGINRMWSRQGRFDYY…	520	USER	zzzz499
640	my_seqs_abalone_6_2ct12.2@PF02305.16	my_seqs	MALGGPNPSLPTTMQQDFSKVPNAEINRSTFARTHGLKTTFDAGDLVPIYVDEVLPGDTFEMSATGFGRLNTPLFPVMDNIYVETFFFFVPNRLIWDNWEKFNGEQTNPGDSTDYLIPQITSHTVPENGLYDYMGIPTQVPLTIFNNLHGRAYNLIWNEWFRDENLQDSINVPTDDGPDTVADFVIQKRNKAHDYFTSALPWPQKGDAVDLPLGTSAPVQSDALGSNLGLRFTNGNYYDLYTAGNYLVTTGTANTSGNVLYTDLTQATAATINQLREAFQIQRLYERDARGGTRYIEILQAHFGVTSPDARLQRPEYIGGGKVPLTMEPIPQTSSTDATSPQGNLSAIGTTSVNNHSFNKSFVEHGVLIGLVNVRADLTYQQGMNRMWSRRDRWDFYWP…	518	USER	zzzz500
639	my_seqs_abalone_6_2ct13.5@PF02305.16	my_seqs	MSRHFPSTHRTSSHLFSESPAVKIQRSSFPSNSKYATTFNEGDIVPFYCKEALPGDTFKLKLGLFARTMTMKFPIMHNIYLDVFYFAVPMRLLWDNFQRFMGQQDNPDDSTDYLIPQVISPSGFYNIGSIFDYFGLPVVDSITPKEGTISASSLPFRAYNLIVNDWFRDQNLSESLSVPKGDGPDDPSLFSVVKRAKRHDYFTSCLPWPQKGLPVSVPLGDKAPVTGIGVRNQVFNQGPLVSYETGASAPITYPIASDINSGDINRTFSVKGSAETGGFPEIYADLSAATAANVNDLRMAFQLQRLSEKWARSGTRYTEIVKSEFHVTSPDARLQRPEYLGGGTSMIHVHPVAQTGAEIDSTTPKIDSTPLGELAAFGTVSSTDIGFTRSFTEHCYVIG…	548	USER	zzzz501
638	my_seqs_abalone_6_2ct14.5@PF02305.16	my_seqs	MKRRQKSTTTHRFDRVPSASIPRSVFNLSRGHKTTIDAGYLYPFYTEECLPGDTFKVKANIFGRLATPLKPIMDNMFLETFYFSVPVRLLQDNWTKLNGEQDNPDDPTDFLTPTLDPSNPEGFQEGSLADHFGMPTGVPGLTVTSLYHRAYNLIWKEWFRDQNLQDSPTINKGDGPDSELDYVLRRRGKRQDYFTSCLPFPQKGEAVTIDLGGTAPIIPDPADPRPQIENTNNEFMGFLESVPNNNDVRSSIGALTQNDIRWFSTGMLADLTAGSGTTINALREAIQVQKIFERDARGGTRYPEMIKAHFGVTHPDMSWRSEYLGGGSSPVNITPVANTVGAFGMQQGQLAGYGTVAGVNHDYTKSFTEHCVVIGLVNVRADLTYQQGLDRKFSRLTRF…	523	USER	zzzz502
637	my_seqs_abalone_6_2ct8.1@PF02305.16	my_seqs	MQSSNLLIDQKVRTQPAIYSKSVRRNHRRIMTSMNAGKMMPLSCIPLLREDAVRRSRFNFEFVMAETAESLMNGVRVDLRAYFVSNLAFERFKGMDDLNAAYSHTDVINYPLFVDIHKFGGGVQQDEIRPFYQAIGAHAKFSDNVNTAYLEAYNHVFNHRCKQVSSKIQLRDRLDDTIAPAFWYHTNLRHVVPDFDDASIEGEISLSIVDAKMPVKGIGVNTNYPASSSEAISLMQSDGTAFRGDGFLSTTSGGNDALIGVSQKIANTHVPDIYAEMKAEGVVVSLANIELAKKTRAFAEIRRQYQGVDEEHIIDLLMSGINVPEQALKQPILLDKSSTVFGHNTRYATDAGNLEQSVTDGKAYLGLNLRLPPVNTGGVIVITAEVTPEQMYERIQDPY…	555	USER	zzzz503
636	my_seqs_mac_stool_D2CW_7_2ct12.5@PF02305.16	my_seqs	MKFSIGLGQKMYNHVGQVTNSSSCGFGEVQPVFSAVMLPKSTMSVKIAQKARLLPMPYPTFGHLSLETVGKYVSFGDVFPQLDNLLSGLPYKYLTVGEGNVTEYTSALVKSFPFITNKYLQQVLLGTDYSTSTTYADSTVTTSSANDVTPDGADYVVRVNNPTTHKVDLKCYKYNDRGLRLRKIFLGLGYNPSLDDGSTFNLLPLLCYYKAYFDEFAPKRFVSFQDTKCFVIIKLFEQYPTLFVDGSSFVAGDVVNFVDSSTSAKPFYDALLDFFKSELSECFATEPTDWVSMHTAAILNGTADVEPLPSDVTNPGVLDVNNVGIGSPVSTNAKQITKVQLDLLRRITSSVTRDSLVGRSIKKWIDNKFGADITNQIYEDTITLGHSSLHVTISDVEST…	672	USER	zzzz505
635	my_seqs_mac_stool_D2CW_7_2ct15.7@PF02305.16	my_seqs	MSHSSNIFEQRKVQIKNKSGFDLAHSNFLTQTCGTLTPVCVVPMLPNDSISLGFMSQVKLPPMATSFYGRVDYRLEAFFVPYRILWGGWENFVTMPTNDPYGTTTIRPKYLPNLLFSGSGSDGNFVQAIQNTFKRGSLADYLGFKGVPVTSGITKYAVNNIMPFLAYHKIYDDWYRNANIQKPVFVRSETPTKSLSSLPWNPKFSTVVGGSSPVVGSDHNKGWSDDVISGQDEILKAFGFNVTSRVSDTVLSPLFNDGSSLFTLRQRNWSKDYFTTATLYPQQNGMTGGAGVTSRVASDSTTFTISQLRQANILQKWLERNNIAGERYADQIRATFGVLPSDAMLDRPIFLGGSNFGIYTNSIAQSAGGDAGSSSNPFRGEVGSDAGQTSGFGKDSLID…	574	USER	zzzz506
634	my_seqs_mac_stool_D2CW_7_2ct16.6@PF02305.16	my_seqs	MNPLLIRGNGSSNKATNPTNNLNTATPQVRKTFNRFNNSYNHYTTCNYAEYTPFFVQEMNPADYKGFSSKTQVRTETLDSPLYSGVKMNKDYFFVPYDAILPFNWEKIFKNPSQGDDVPSDANCCVFDFTTKLKSFLQKFVSLLNSFAQSLTEQSDIPAQVYFTFPLVDAFLSASGICARMGTPFSHLFLFNFAGKLLTWDRLSETLFPLLFPAGAKFGFRYSQSESDIDYYIVVDNSVSGQVPFITSTSDAIPIVKMSGKDVLALFRYYPACMQGYNDWKEYFWNPGLNAQAFSPFINCTLVSFVSANLTDDDKKFNYSRMLAYSLCCAQFFSNGSVDSVYNAQLYRDLMSHFVRNAVSESAVAGNYTFLYNGVKTPYDWLSSHFFVTIFESAIDPSK…	693	USER	zzzz507
633	my_seqs_mac_stool_D2CW_7_2ct18.5@PF02305.16	my_seqs	MANRNRNPFKVTPPPNRPKRNTFDLSYSNNLTAKIGKLIPVMCKEVVPGDTFHITPDFGLRFMPTIFPIQTRLRADLHFFYVRNRNLWDGWQKFIGDTGKSSSDFPVIADKPITSGFYDNGSLADYLGIPTQAVSDIQEQQTVTPNEFPIGRPWLDIAYQSPNVHSSSLRPKMLRYLPFQRYANSNIGATSHVRFPISVSFNSDGTIMAPHVMFLLPVSDNSSLLDGSELYLTTANRYFTLSSSLLQSSQSCRVAYFSSKLMFQTDIDLKLLAVTDPLDITFKESRKLGVKFSAFSKLYRKEGGAEVKFDEIANDVQYIALCFDGDFSGLFEDGFTLSDITPMTADKPTSVVAPVTFDSLRLCYTLNFTQNVVDDDVYNTYKRANFPISALPFRAYRSI…	769	USER	zzzz508
632	my_seqs_mac_stool_D2CW_7_2ct19.7@PF02305.16	my_seqs	MADIINSAAQNANAATNPGEHINDPGVSRGRTHNRFDLGYSNFMTARFGDILPFFVMESVEGDKTPLSSQHEVRSYTMSAPLMSRIRMCKDNFFVPLPAILRKNWDILYRNPSQGDDAPADAWPVIPNTLTSNFLLRIKKLYEIFVGKLAYTTEGTPTVYTAEKQLSYFLRGMFFFEQFFSTGSLLNVLGAHLHACFIGLHAEGLDTENPIMKTLTFDQVFEAVLDAMKESPFKFTIDSVSYAYVPASIGPNYDTTNCTVVSFHRMIELLRENPQFKFAAADLAGTTVETALKSFYDGASITIDDPALQIAVQDKPFNFSRCLAYQCVCSQFYTNDKVDYLYTYQLYEDAAFAVLRDVVKHTSGTDDLYFTYNGVSKLYDVFSGHNLEYILAKMEITFG…	704	USER	zzzz509
631	my_seqs_mac_stool_D2CW_7_2ct21.5@PF02305.16	my_seqs	MCTLKIFVILLLALLVLGVLVFVFDLYLYHNDLADDECLRTYRVVKACSFIVKFGMILTACGIIGSIVPAGLGLAMAFAIPKPTKVQPSSWFDHSHNVASTIPFGAIVPVDWRFLLPGEKVKQSVSGFCRALQLKSPAMQDIDLKYATYFVPIRLLSDDYEFITSHIEASNSLEFSPTGDDPMDIIGASSDGTSARKFPYFMFNKSAVDSILTAFNAFRKTSAAGTPIDLEKLMHQKDDLTNDGQSARLAKSFMIGSLLDYMGFPCISASDVSSLPSASTAQNAPYSRPINCLPFMAYQAICNHFFVPDFQRRSDSASLVDISKINSGLQTLASVVQGKDAILQLRYTQYESDPWTCSKSGESVARINTASQAFGSECFDSGSVPLFNANTIRGMFALD…	657	USER	zzzz510
630	my_seqs_mac_stool_D2CW_7_2ct24.6@PF02305.16	my_seqs	MWMDTYYFFVPNRLVWKHWKEFQGENTESAWLPQTTYEVPQIKAPAGGWSVGTIADYMGIPIGVSDISVNALPFRAYAKVMDYFFRNQALQDPFVIPDNETLQTGSNGSNFVTDVANGGKPWIARRYNDYFSQALPAPQKGPSVTLPLFSGGTYPVVGNGNAVGFVGKNSDGVADTLFGTGFSATASALSLTLNDNALDKAQGTQFANGHHPAHNTVVGVTSDPSKSGLVANVSGDVQGVTINELRAAFQLQKYYEQLARSGSRYSEVLKAQFHVDAQDYRLQNPEYLGGSHVSINVSQVVQNSATGADTTPQGNMAAYSLTTDSHHDFVKSFVEHGFVIGVCVVRYEHSYQQGIERFWSRKKVTDYYLPVFANLGEQAILNKEIYAQGSSAVDGSGNP…	500	USER	zzzz511
629	my_seqs_mac_stool_D2CW_7_2ct25.9@PF02305.16	my_seqs	MNRNVESHFSTLPSADIRRSIMDRSSGHKTSFNVGDLVPLYVDEVLPGDSVKITTSKVVRLQTLLTPIMDNMYLDTYWFFVPNRLVWDHWKEFCGENTASAWAPTTEYQIPTIKSPAGGWNSGTIADYFGLPVGVPMTTGDHLPSALPFRGYALICNEFFRDENLSDPLNIPTGDANQQGSNGDNYITDVINGGKPFKAAKYHDLFTSSLPSPQKGTAPQISVGGAVLPEMNIPVFSQSQNIDLDKFYPNSAGKNVPASALRFNYVQGGSATPASGGKDSQLYGVADNTDLRYYAGNESNRNFFNFYPSNLWAHVDEQDLSAGSGVININELRLAFAAQRFLERNARGGSRYAELLLSHFSVRSPDARLQRPEYLGGNRAPLQVHSVNNTAQSEKDFLG…	576	USER	zzzz512
628	my_seqs_mac_stool_D2CW_7_2ct30.6@PF02305.16	my_seqs	MNRNQESHFSLNPTRLDIQRSRFDRSHSVKTTFNVGEIVPFYVDEVLPGDTFSVDTSKVIRMQTLITPIMDNIYLDTYYFFVPNRLTWEHWRELNGENTSSPWTQTVEYTVPQLTAPEGGWSVGTIMDYMGVPTGVSGLSVSALPVRAYGLICNEWFRDENLSDPLSVPIDDTTVVGSNGSTFVTDVAKGGKPYIAAKYHDYFTSCLPSPQKGPDVLIPGGTGANVPVYALSSVVPSMDNTYALFGKSVPSGGGTASTVYLRSGSSTATVVGPVRAEDASAPLDIGSGVGGFSPTNLWAVGDSSVATATINQLRLAYQIQKLYERDARGGTRYIEILKSHFGITSPDARLQRPEYLGGNRIPVNINQVTQQSATQTGSTPQGTVTGMSVTTDTHSDFTK…	560	USER	zzzz513
627	my_seqs_mac_stool_D2CW_7_2ct34.4@PF02305.16	my_seqs	MSQFSYQHNATVRLPRSRFDLSYNHKTSLNVGELVPFMCKEVYPGDTFKVESSFVARVTSSFIRPVMDDLFMDEMYFFVPNRVVDDNFVKIFGDTGKAWASDASTYVAPQVALPATCGKEFVGTLGDYFGALAPGVNTSYAVNVSQYPFRAYAKIWNDWFRDENFEDEVDFAPSTPAGGWKLNADDFSPGNIFGKPAIVAKVHDRYTSALPATQKGDAVKLPILASGRNAGFAPVTNHYFTSSELFIPTLYGQAGTTLPSNGILSAWAPSPGGNSILGVSTSTPSAVPTQAASMSLGADLSKAIDSVSVNDLRFSFQLQKQLERMARGGSRYTEYVSAAFGVTSPDSRLQRSEFLGGSRNPLSVQQVVQTSQATEASPLASLGAFSLSAGKARFTKSFT…	556	USER	zzzz514
626	my_seqs_mac_stool_D2CW_7_2ct36.4@PF02305.16	my_seqs	MAKQYLFNSVPTIHRRRTPFNLSHKVFTSMNVGDLVPILCQEVYPGDDFKIDSAYIARTLSEYIRPVMDSLYMDIAYFFVPNRLILNTFKNVMGESNGAWAPSQTYTIPDLMDWSGRMNGVNNEVFPGTVADYLGIPPRKYPVVSQEALADLPKVSVLPFRAFALVYDTWWRDENVEPPMSIRTDTSFVGVECFNNQEWSPTNYTGKLPKVSKFHDYFTSALPSPQKGSAVSLPIGSFAPVVTGDNHSVNSSVPVHFVSRGSSSPVGNLYLDSSGELKATDSSVADTGLFATPSNLVADLSEATAATINDQRVAWQTQRLLERDARGGTRFIEYIRSAFGVDAGDYRLNRPEFLGGKRIPLSVQQVPQTVNNDADKEFVGSLGAYSLSFGSARARKGFV…	558	USER	zzzz515
625	my_seqs_16minnow_6_2ct1024.3@PF02305.16	my_seqs	MAKRGLNIFNSIKLAGVPSSSFDLSHDKKYTFDMGELVPTCCLEVIPGDRFDISIVNFLRFTPLVAPVMHKIKVTTDFYFVPNRILWDEWDKWITTDNDVAEAPYIQLSSFVLLQGTIADYMGLPVGAYESQRVNALPFAAYFKIYDEFYRDQNLQNEEFIPLIAGDNAAYAGKINNEPLHRAWMHDYFTAALPFAQKGDVVQLPLTIADNQVVEYQNNAGTTDAGILRNTSGTILTTGTVTAGTGPSPLTGSMQVGGNPAAYDPNGTLVVDVQSDAVDINTVRRAFRLQEWLERLARGGSRYKETILSMFGVNSSDARLQRPEFIGRNVQNMVISEVLSSAETLDSEDATVNPVGQMAGHGISAGGDFNGSYYAEEHGWIIGLVSVQPDTTYQDGLHK…	521	USER	zzzz516
624	my_seqs_16minnow_6_2ct480.4@PF02305.16	my_seqs	MIGMAAADRGPMTRMRTDPIAVRRTSRPFIYRNLTSGNAGKMIPILAQPLLREDQMAGAFRFTFKMDETVEVLMNAVNVRVMAYLVPKLAFDRYDGWDTLNRSYEGVTTGHAGQAIPAWFEPYTAPADPKTNEIFWALGKHAKAGTVLNSDYIEAYNQIWNFRARNRSPHLTLRNRLDLTLAPAFWVHQAWAHVVPDFDQAIIDGEVPLNIVNNSFSVKGIGIPAANTHVPNAGVSVIESDGATVTYPYSQPIDASGSGGASVRLKVADATAIAAPQIFAEMAQNGITVSLSNIELARKTQAFANLRRQYNGHPDEYIIDLLMDGISIPDEGWKQPILLADQSTIFGMAKRWATDGASLTESVVNGGSMIDLRLRVPRCGPGGIVMIVAEIAPEQLFER…	570	USER	zzzz517
623	my_seqs_16minnow_6_2ct483.4@PF02305.16	my_seqs	MEMRITEQTIERAAPVPRSMRMDRWRGLTSCKAGVIVPLAYFPLLREDAISGTVNVSVRMQETVLPLLNGVRCKVMAHLFANSADERFSSLEELNASYRNEPNFAGRPTVPFVDQAVYNGTSEIHKTLGVHQVVGSQINRVLFTAYNTIVNTRRQTRSKHLPSRALTDNTLAQAFWHDPNRWEIVPDFDVAMIEGLVPLTGEAPVSGIGIDTRMAQVPGALTVKETGYQDVGTSSWNKGILITGAQSAAVYGKGSTAADFWPEIYAEMGGVSLSLQNLHMVEKTQTFARLRDQYSGNNPAYIIDLLMSGISVPPSQLRDPVLLGTAVGMFGMQERHASDYANLDKSLTTGTLSLSVPIRVPPINPGGIVLVTMEIVPESLPELGADPFLEVLNPGQYPD…	569	USER	zzzz518
622	my_seqs_16minnow_6_2ct492.6@PF02305.16	my_seqs	MAGNVLSGLGAMNRTKTSPIPVQRTTRASQHRVLTSLPAGKMVPIAVIPLLREDSISSGSFTFGFEMNETVELLMNAVNVRVMAYLVPNLALDRFDGLDSLNKSYEGVPLVEGGPVTPWFEMGAAPIRGGAPVLEYMGKHYKPGAQINTSYLECYNQIWNFRAKNRSADIPLRQRLDATLAPAFWDHQSFAHIVPDFDQAVIDGEVALNVVNSKMPVGGLGLVGSANTAPVQMVDAATGTTILHPDAWAIQDVAAGSQVGRNALGVKATGPNTGIPDVWAELQDNGITVSLSNIEMARKTQAFARLRQQYQGHSDEYIIDLLMDGITLPDQIWKQPILLADRRTVFGMSKRYASDADNLTESVVNGATYIDVRFSVPRCNSGGVVMLVAEIAPEQLFER…	591	USER	zzzz519
621	my_seqs_16minnow_6_2ct495.3@PF02305.16	my_seqs	MAIKSIPDLSRTNLQPIAVPRTARIHAMRGITSLPAGKMVPIGCASLLREDALVSGRLRFTFEMNETAEVLMNAVNVSVKAYLVPFLALQRFEGSMDLFNRSWEGIALGNEPVVPWIEHEPMGAHGSDPIYKYLGLHARPNQEVNTCYKEAYNAIWNFRATNRSKNLTLRNRLDDTLAPAFWVRDRFKHIVPDFDQAVIDGEVALNVVDMKMPLRGLYAPQGSPGSLVAEGGNWRDAAGKSIPVGGQYLTNFSAVMPDAWTAARTKIHPGGVSPTESWPDIYTELQADGITVSLSNIEMARKTQAFARLREQFAGHSDEYIINLLMDGLTVPDKQLAQPMLIGQRETVFGMSKRYASDGENLSMSAVNGATFVDLSIQTPRIPTGGVIMVVAEITPDQL…	598	USER	zzzz520
620	my_seqs_16minnow_6_2ct500.3@PF02305.16	my_seqs	MARQNTAPVQFQRSVRDDNGILMTSGRAGIVMPLAYVPLLRGDSAAGRISVDMNLAEMPKPLLNAVFVNLQAWFVPKSAHPQFYGIDDFLYSYQGMVQRGASSGSLPDRQPVSFFRGDGNMGNGLSQKTWVKRLGLHYKLGFAHADLYDALALVYNFRLQAHSTKLPVAKFYGQPANTFDADFRAFWPTGRFSRIVPDYERALLLGNLDLDVLAGNVNLKGFAFNPIKGSAYIDKDTLLQTDAFPLGQSDPGIGGIFADLTDQTITSTLADLDKARTTQAFAKLRASYAGNDPQGLGNDLALLATLMQGLSVPSDLFKRPWLLDSKRVPFGFAERFASDGESLDQSVTTGRVSGTLSVNVPTNDTGGLIVVTAEVLPERVDERMDDEWLYYGPTTEKLP…	545	USER	zzzz521
619	my_seqs_16minnow_6_2ct506.3@PF02305.16	my_seqs	MRNLGQASGFMNRMRSTPLPVKRTARPANQRILTSFNAGQMVPVMAIPLLREDQLARSRFRFAFEMQETVEVLMNAVNVRVTAYLVPRLAFERYDGLDSLNKSYEGVEGPTGSVVPWFETMVANAPQAGIMLALGKHAKAGDVINTDYIEAYNQIWNFRAKNRSADIPLRTRLDTTLAPAYWAHQTMAHIVPDFDQAVIDGEVALSVANSKMPIKGMGIISASAANAVSSPVLEAGSDQPVTYNANENWLLDGTAGQGVSRFLVRKDMQFPASSVPDIFAELQDNGITVSLSNIELARKTQGFAKLRQQYQGHSDEYIIDLLMDGIALPDQAWKQPILLADKTVQFGMAKRYASDGASLTESVTNGGTFIDLSLSTPRVNSGGIVMVCVEVTPEQLFER…	572	USER	zzzz522
618	my_seqs_16minnow_6_2ct507.6@PF02305.16	my_seqs	MALKGNAFGAVTRTRTTPVPVQRTNRAMEQRILTSLPAGKMVPLMVLPLLREDSIATAAYRLSFEMQETVEVLMNAVNVRVMAYLVPNLAFDRFPGLDVLNRSYEGQPTSTADPTIVPWFETIAGPAHGVNQILTKMGKHFREGQMINTAYVEAYNQIWNFRAKNRSPDITLRTRLDDTLAPAFWQHQTFAHIVPDFDQAVIDGEVALNVTNAKMPVLGMGAFSVSLAPGSLTLRESGDKDTAYPRAYQVASSQETASAGQSALGFKAGATDGYPDVWAELQDNGITVSLSNIEMARKTQAFAQLRRQYHGHSDEYIIDLLMDGISIPDEAWKQPMLLADDSTVFGMSKRYASDGASLTESVVNGVTFIDVRFSVPRCPTGGVVMMVAEIAPEQLFERQ…	567	USER	zzzz523
617	my_seqs_16minnow_6_2ct509.5@PF02305.16	my_seqs	MGQQVTLGGERLGSGKKMKVDMHGFERSTHDMSYIWRSTMSSGTLVPFLKEVALPGDTFDIHLNCDIKTHPTTGPLFGSYKVQLDVFSVPMRLYHAALHNNRLGIGMNMAQVKLPIVEIDLTDFDIFNPDIDNCQINPSCILSYLGIRGVGFPVPPFDTDAYRVYNAIPILAYWDIYKNYYANKQEEIGAGIHLAMTGTGTVTGVSIIRGTVVAGSIPHYPTVGTNQLQKGDVIAVSVGAPNTITPEQVTIQLDTYGPRVNLYDLLGGAVEINPTSGTMYGTWDINKWGPTPVIGQNWEYLSQDDALVTPPRVTTFPLENIDKMKDELLAASITSPFNVSGASIWEPYNWPMTGNTLHDGYQFNSARFSQEGLGIKCYQSDLFNNWLSTEWIDGTGGIN…	672	USER	zzzz524
616	my_seqs_16minnow_6_2ct515.5@PF02305.16	my_seqs	MEVTLGGDRLGSGKKMKVDLHTYNRSTHDLGYLFRTTMAAGTLVPFLVELMTPGDTFDIDLDAIIMTHPTIGPLFGSYKVQLDVFSAPIRLYQGKLHNNQVNLGLKMSDVKIPQMTLFANQIGADVVDLDNCQVNPSALLKYLGISGVGAPIGDDTYQRDFNALPLLMYFDIYKNYYANKQEEEGAIIYTVPAAVESNVSSVEVNSIDIDSTPSPITGPVEIQVTWTGGSLNQANLIFITDIGEFPLSQIGYPTSDVNFSPTTFTWKWWLTGNLTVTGRRYRTPDELPNTGIQVERFPLSTVDDMKKALLAHATEADAFNVNDAGNVIGAGNPYSKVLNWVDNASPYMPTQNGLAIKTYQNDLFNNWLNTEWIDGNDGINEITRVVITGGSFGMDELAL…	650	USER	zzzz525
615	my_seqs_16minnow_6_2ct523.4@PF02305.16	my_seqs	MQLELGGKRLGAGKKMTVEARTYNRSTHDLSTIKRTTMAPGTLVPLYCNYMQPGDTWDGTIRAQLNTLPTNGPLFGSFKFSVDVFQAAIRNYQQWLTNNKFNVGLTMADVKLPEYWLKAIKRNTVKDNDQVNSSALMRYLGISALGTPDNTIGVGDLWIRRFNAFPLLVYWDIFKNYYANKQEDNAYVIHTGATLFPVAITLIQGGTPHALPHGAGGGMSFALGAGDILQLTYDHNVVPDSTEGKLIPQIQINTDAGTQSATDLWQYIVTQGGSSNILLLETLNPVVIGQVIHFWDAPNSNGISLYSFPLENLDEMRENIMATSGGTAVTITEASLEPYSLPMKVFTDTDGNQHYPLEYDQEGIAVKTYQNDLFNNWIKTETQQYISDTSAISTLSGQI…	653	USER	zzzz526
614	my_seqs_16minnow_6_2ct543.5@PF02305.16	my_seqs	MKKTIGGDRLGSGKKMKVDLHNYSRSTHDLGYIWRSSMAAGTLVPFMSEVALPGDTFDINLDGDIKTLPTIGPLFGSYKVQLDVFLCPIRLYNSLLHNNALGIGLKMANVKLPVYELQGTDNQNATDIDNSHTNPSSLPAYFGIRGTGRQTQNVSKRRFNALPIIAYWDIYKNYYANKMEEIGALVATEETGFTEIEATCVNGTGIVIPFANPGTATVRVMDQELVSWGSTQAVSMAGIPQNSFIMVLDDGTEYNATEIFTGWSYTATGVTGNYNGQAGVRINVAYWRYSQPTDVSSTIEVNTFPLENIDNLRNEILAWQDESAPFVLPNYPPYSYIIGNNPSSQRNKVMNSQQGLALKTYNSDLFNNWLNTEWIDGSGGISELTAIDTSAGNFTLDTL…	647	USER	zzzz527
613	my_seqs_16minnow_6_2ct547.4@PF02305.16	my_seqs	MKTTAFGGNRLGSGNNRTAELRTFERSTHNLDYVWRSTMAPGVLVPFMVEIALPGDTFDIELASKVMTHPTIGPLLGSFKAQFDIFEVPIRNYQAQLHNNKLGIGMEMSSIKLPQLWLKAKNLKPTDISTADGTFKDIDNWQIEPSHILSYLGIRGLGQRADAATKPNEQHWIDRKFDATPFIGYYDIMKNYYANKQEGRGFYINKPIPITILVRFTNPSLTLQLYNENNVPSASTTVTKDQTQLTITSPKNTEDLLNAVKKTKYWYKTNGEDQYITAEQLGNAWVYDNTNKYYSTTAKVTISAQWKGYENNIGTQETKPELKQFDLRDVDNMREEILLDIKNANAFHIALDATELPSLYTEQITGTETGGGTANGIWYSKLNNTMQGLCVKTYQSDIF…	690	USER	zzzz528
612	my_seqs_16minnow_6_2ct549.6@PF02305.16	my_seqs	MEKTLGGDRLGSGKKMKVHLHNYERSTFDLGYVVRTTMSAGTLVPFISELALPGDTFDINLDCDVKTLPTIGPLFGSYKVQLDVFQAPVRLYNANLHNNELNIGRNMSAIKLPKIEFYVGAIGSTVENIDNAQVNPSCILSHFGYRGFGITSTTQTRRFNAIPILAYWEIYKNYYANKQEEIGAVIHTPAITPNQTVDPPIEITTDGITETLPTGSSGTVDINGSSTIEINWTGTAPTGIMILTDNGWQTLESLFNVVAGNPITGAYIGSEPLTAFQWRYRTATDNQLLPPAVVTFDLANIDQMRKNILRETDPQFVVNDSNLEPYKWLYEQPGNVANILSSQEGLGLKTYQSDLFNNWLSTEWIDGAGGITEVTSIDTTGGSFSLDTLNLSKKVYNML…	635	USER	zzzz529
611	my_seqs_16minnow_6_2ct550.6@PF02305.16	my_seqs	MKLTVGGGRLGSGNRMTQELHGYGKSNHDIGYQFKTTMAPGVLVPFLTEIGLPGTDFDINLNANINTKPTLGPLFDGFKFQADIFQIPMRLYNGWLNNDKLDIGLQMEKVKFPLMTFIAPDFTQEEYENMVDIDNCHINPSCILKYIQISGFGISRGGDRARSFNALMLLCVWDAYKCYYANKQEKLGAVIHTDVQQPDEVVDDIFIDSINLPQFPAVQQQILTFGTSIQINSTALVNDADIILTTDTGIEYTVQQLFYMYNVTPTLQQGTYDAAGWGELTIVNWRYRAAGLSILPPKVQLFELANIDLMRERILQATGAAGAFEVMSQALEPYSYLVDVTGKFQSIQQALEGLPVKTYQSDMLQNWLNTETIVGSNGINEITAIDTSGGSFTIDALIM…	649	USER	zzzz530
610	my_seqs_16minnow_6_2ct551.5@PF02305.16	my_seqs	MKNKVTLGGDRLGSGNKQQVELEQFSWSGHDLSSIFRSTMSAGTLVPFMVQPCLPGDQWEIKLNADAKTLPTVAPVFGSFKVQVDMFSIPMRLYNSWTHNNKLGIGLNMSSVKHPLMTLTALNENSTFFKENPYPYPINNSNVLKYLGISGAGRYSEAGETTTKYKNRDFNAVPLLGYWDIFKNYYANKQEDNAWIISGYSGNPTITGIGYGVTTPNYFDKNLVTDDMTLGNNSSVGFEIITDNDNALYTLNSVWIRDKATATPLYSIFDVFKGEPIFLGEYNNAYEPNLNIQSVYWYYWWYTAPNGVRRIKCWGNSKVSGVFVNYQTLVNQNYALPPNLREFELKEIDEIREEILRVDGGTVFNVNNFGQANNSELIKSTLPKIPTSVSEAEAAAVHQ…	711	USER	zzzz531
609	my_seqs_16minnow_6_2ct553.5@PF02305.16	my_seqs	MQVTIGGERLGAGNKNKVWMREYERSTHDIGYVWRSTMASGTLVPFLCEVALPGDTLDIDLNAEVLTHPTIGPLFGTYKLQLDVFQIPVRLYQAQLHMNLLGVGMDMSKVKLPELLLEATQPDPTKSVDNQQINPSCIFSYLGIRGLGYNKTASVGTGFKRKFNAVPYLGYWDIYKNYYANKQEEIGAVIHKDLTANTTVLTGADTKSSAPPINIPAGNATEPATFLATVLNNISSIVISGTGITSFTDDFYIILWIKDESGVAYPISASLIFTVWEIHPDTQTIIGHAVAPVWLNRLIEFGSIWYNGTNAVEDTDTEPQIRTFPLANIDDMRKEILAQVNLTTPFQIDINRKEPYNLPFAVQAGGPGVLYAKAYNQEGLALKTYQSDLFNNWISTEWI…	681	USER	zzzz532
608	my_seqs_16minnow_6_2ct556.7@PF02305.16	my_seqs	MEKTLGGDRLGSGNKMKVELHGYGRSTHDLGQVTRTTMAPGTLVPVYKKVALAGDTWDIDLDAFSNTHPTIGPLFGGFKLQIDVFQCPVRLYNAHLHNNTLGIGLKMNTVKLPLITFQALPSDPDVEDQDNSQVNPSSIVNYLGMKGIGVTAANQNRSFNAVPIIAYWDIYKNYYANKQEEIGAVIHTPAEALVETVDDITIDNQYGNNQPLSGTAPGTGSIELDNTALLFINYTGTSPIPSQIMITTPSGRRSFEELCTGIFDNGLGVISGTYNFGKWGASQAWYWSYITAADINNRQPAVVTFPLSEIDDMRTKILGKQTYDAFEINTDAATLRPYKWLYEQPEGIPNILSSQEGLGIKTYQSDLFNNWLSTEWIDGAGGINEITSVSTAGDSFTID…	649	USER	zzzz533
607	my_seqs_16minnow_6_2ct560.6@PF02305.16	my_seqs	MEQTIGGQRLGSGNRMTAHLHGYERSTHDLGYIWRSTMSAGTLVPFMSELALPGDTFDINLDADILTQPTIGPLFGSYKIQLDVFQVPIRLYQMQLHQNMLGIGKKMSQVKLPQITVVPLAYDNTKPVDNQQINPSCILSYLGIRGAGWTATLTAPTSRDFNAIPYLAYWDIYKNYYANKQEEIGAVIHANLTAASLSGASATLKYQASSYVIPVVTTQTAPPETATQVITMDIDSTMTVSATSGIVDGMDMGRFQLWHKNSAGAWSWVKATTVFAIQREDAGAQKIVFSQPIGKYTVNSYTWGAIFYDSAVSKQDSNIEVSVVTFPLSNIDDMRKNILGFNPAAAYKITASSAQPYGLPLAGYSTLHKYSQFSQEGLALKTYQSDLFNNWISTEWIDG…	671	USER	zzzz534
606	my_seqs_16minnow_6_2ct565.7@PF02305.16	my_seqs	MKKTLGGDRLGSGKKMSVDLHGYERSTHDLSYIWRSTMSSGTLVPFMSEIALPGDTFDIDLECEIRTHPTEGPLFGSYKVQLDVFQAPIRLYNSLLHNNMLGIGMNMNNVKLPIIWLEAPFNADPAKQSENFINPSCLLAYLGIRGVGDGNGFTNILRSFNAVPILAYWEIYKNYYANKQEEIGAVIHTPAQALLNNITQVEEVHNGIGVIIPEEPLTGTVGLSRRSIIRATFTGPVFEPEQLIITTDKGTYNGSEIAIPGTWATAGGIATADYNRDKLGNTIAENWRNALPEDIKQGQPKISQFQLANIDAQRREILANGTFNPHNITATNLWPYRWLDEIVNGINNSASSQEGLALKTYQSDLFNNWLSTDWIDGANGISEITAIDTSGGSFTIDTL…	650	USER	zzzz535
605	my_seqs_16minnow_6_2ct569.6@PF02305.16	my_seqs	MGQSVTIGGNRLGAGNKNKAYMHGYERSTHDLSYVWRSTIAPGTLVPFLTELALPGDTFDIGLNVDVLTHPTIGPLFGTYKIQLDVFQIPIRLYQGKLHMNMLNIGMDMSKVPIPQMRLTGSPVKTAETVDNQHINPSAIFSYLGVRGLGMNVANNADVKRDFNAIPYLGYWDIYKNYYANKQEEQGAMIHKDTTPTALVVASATWYEWPNDPSPVVLDPAGATTVPVEIRPDSSITMVVTGATPANFDPGQLEFEITIGGQPSVVLGTDLFALWTVLTGGQVIGEQCYDLTDTAFGIGAIQYVNTGGSTNDTEPKITYFDLTEIDKMRQNLLSHFLDTPYMIDGTKPAPYGLPFGGSSVDGWSKNYSQEGLALKTYNSDLFNNWISTEWIDGPDGISA…	669	USER	zzzz536
604	my_seqs_16minnow_6_2ct574.5@PF02305.16	my_seqs	MSRTKGVPRGGMRIDGATRKGMEIFTQMPSMDIPGSWCNLSHPHSTSFDMNYMIPILCEEVVPGDRFNFSVEGLLRMAPMLAPVMANIDIKYYWFFVAERTLWANQDDWAAHIMGASGDETLPADPGWNYFTLVDGAVPSGTIGNYMGLNPPVADVEIQVKCAPIAGFLKVYDDYFRSEQLQPELFTPLVPGEQTIYAAVADFTPPKISWMHDYFTSALPTPQVGLPVLIPLTNGTNSSIVFNPNASAFNFGVITDSNGTSIPGADIPLISDSGAFRADTAGGDVDAFYDPKGSLFVDDANLNSNAATIPDLRLAFRMQSYFEQQMRNGSRLNEWLWSMFNVMSSDARLQRAEYLSMSTHKMAISQVLATANTLVDTAETAVGQMAGHGISYGGGRRDE…	553	USER	zzzz537
603	my_seqs_16minnow_6_2ct575.5@PF02305.16	my_seqs	MKTTIGGDRLGAGSKQEVSFKNYERSSHDLGYVWRSSMASGTLVPFLNKVGLPGDKWEIDLNAEVLTLPTLGPLFGSYKVQLDVFEIPIRLYNAKLHMNRLGIGMDMKSILLPQIRVLAQNIYQSGGTPKYEDNEQINSSSLLKYLGISGLGRTANDYANAALFRDFNAVPYLAYWDIYKNYYSNKQEEIGYHIHTTQTNLDAAQTPKAATLQTSEFQTVGGCLDPQVLNIYTGNNLVIEYPDNALQPDPRQIIVNVGGADKLLNLVFTNFTWFDKLKMLRCENSKDNEVLFKVLKQPSPTLNTNSYHFGLESFPLENIDKMRDKILQWTGAGAFEITQNEISPYSSPMKSVNTTEGTKHATTFSQEALGIKTYQSDLFNNWINTEWIDGANGISELTA…	671	USER	zzzz538
602	my_seqs_16minnow_6_2ct584.3@PF02305.16	my_seqs	MSKNKVTLGGDRLGSGNKNQVELEQFSWSGHDLGNVFRSTMSAGTLVPFLLQPALPGDQFEIKFEADGKTLPTVAPVFGNFKIQIDTFSIPMRLYNSWTHNNKLGIGLKMSDVKHPLLTVTAINENSDWFLENQYPYPINNSNVLKYMGISGAGRYSEAGSTASKYKTRDFNATPLLGYWDIYKNYYANKQEENGFMLAGQFGNPTVTHVWFGNDSTNTGFYPKDIVTDTLTLENGGSVGFDVLATGENPLYILGSISLRDSVSALPFVSLYDVYKGTPQYIGEYNNNYPPSLNINSLYWYYWWYTDLSGIRRLRTWGIVNKVGSARNFQTLPNSKYGITPNIEQFELKEIDALREAILKEDGGTVFNLNDWGSTYGSDLVLNTLYKKPTNAFEAESSV…	714	USER	zzzz539
601	my_seqs_16minnow_6_2ct589.5@PF02305.16	my_seqs	MKKTLGGDRLGAGNKMTVDTHHFERSTHDTGYIWRSTMSAGTLVPFMHEVALPGDTIDIHLNCDIKTHPTIGPLFGSYKVQLDVFTVPMRLYHSALHNNRLGIGMNMAQIKLPKVRLNTNDAQVAYDPNDYTNTQIHPSCIFAYLGIRGVGTLDPADIASNAAERSFNAIAWLAYWEIYKNYYANKQEEIGYVITKALVFNAGTTTTNVLANSTSLGTVGTPVIVNLTYNDVIHVDHTGAAPDPDSVFIQLNDGTVGNAGRLTLREITIPGSIVTESATRIGGVYNFAKFGNKSSVYWTILTSVEQVQAPPRLEPFPLEDIDKMRDEILQSPWNVEFAIYDGSTSLLPYAYTLDNATVTGGKRYQMVMNNQEGLGVKTYQSDLFNNWLSTEWLDGTGGV…	681	USER	zzzz540
600	my_seqs_16minnow_6_2ct593.4@PF02305.16	my_seqs	MSKSVTIGGERLGSGKKMKASLHGYERSNHDLSYTWRSSMASGTLVPFMTELALPGDTFDIDLSADVMTHPTIGPLFGTYKVQLDVFQVPMRLYLAQLHMNMLNIGRDMSKVILPQIYMEADVIDPVAPVSNSQMNASSIFAYLGIRGVGQSEETPAQNVARCFNAIPYLAYWDIYKSYYANKQEGIGVLIHRDVAQPVYTLSSITVKNTSGGDLVIATDPVPETYQSGKLNSNSTCYITSTDMLQDFNPGEILFNVTINTFSGPLNVQARGTEIWTNWKINPTQHTALGGTVNPYYMNSIVSWGNYTYTAYDMPPGEESQPVLKTFPLANIDQMRLNILRYTPATEADPFIIYHTTDLPPYNLPLLFDNDTPRHFSRLYPQEGLAIKTYNSDQFNNWI…	699	USER	zzzz541
599	my_seqs_16minnow_6_2ct595.6@PF02305.16	my_seqs	MKKTLGGQRLGSGNKMEVEMHGFERSSHDMGYIWRSTMSSGTLVPFLKEVALPGDTFDIHLNCDIKTHPTVGPLFGSYKVQLDIFQVPVRLYHSALHNNKLGIGMNIKTVKLPKVVLPATQLEVIKAPDPNNAQISPSSIFSYLGIRGVGSVDTGAGVNQSRPFNAIPWLAYWEIYKNYYANKQEEIGYVISKATTFALNKTITAFTANGDAIAQRPASSNVALGLGESLIISYTGAAPDIDTVKLIFWGFPPGVTLRQLAVGGTWADSGTQLFATYDFAQFGNQIALGWDYISADSQLTTPPELVSFPLENIDIMRETILKQSPSAELLIPLTSGTSIAPYMYPMTTVNISTGKDFVMMQCAQEGLAIKTYQSDLFNNWLSTEWLDGTGGINEITAVD…	665	USER	zzzz542
598	my_seqs_16minnow_6_2ct605.5@PF02305.16	my_seqs	MPKVTIGGNRLGSGGKNDVSLHNFYRSTHDLSYLWRSTISAGTLVPFLCEVALPGDTFDINLNCDVKTHPTIGPLFGSYKVQLDVFAVPVRLYVANLHMNMLGIGMKMNTVVLPQVKVRADNNLDLARPIDNQQVNPSSLLSYLGIRGCGLEDSPSNYVERKFNAIPLLAYWSIYKQYYANKMEGKGVAIHNPSVTVPFTLTQAKTTFPSATIPIAEGGTAIAIDFNTETVLEISTNGLTSASNPLTLTLMATNGESQIPYYLKNIFRKMDVYVESQRVVFSEPILSIHSKIELYDYVFDAYEPAAINDIPPVLQEFDLTKIDDMRLEILRATGPIVIDQNSLEPYKWPLENNGDHPFYGSLTKTQEGLGVKTYQSDLFNNWLNTEWIDGANGISEITA…	666	USER	zzzz543
597	my_seqs_16minnow_6_2ct606.7@PF02305.16	my_seqs	MSQVTIGGQRLGSGNKMTAHLRNYERSGHDLSYTWRSTMAPGTLVPFMSQVALPGDTFDIDLNADVLTHPTIGPLFGSYKLQLDVFQIPMRLYQGQLHMNMLGIGLDMSKILLPQLTFHASKIDKTEPIDNQHVNPSCILSYLGMRGLGYNLVSPDTLFVRDFNAVPYLGYWDIYKNYYANKQEEIGVMIHKNPNVSAPTLTTCNIAHANPDITIPPLTSVEATPATGELTQCNGETTCEIFGSTGITYDTTAQNLWFVLSNPNSPNTSDQTWNGAELFTHWEIYPDENLMIGSKPIHWLTGANGGNGITFEWKCVRYLDDGQTIPTDNEPQLIEFPLKNIDDMRKKILAHTDGSKFVISKDDPAPYGLPFTIYDKTATEKRYSKNYSQEGLAIKTYQS…	690	USER	zzzz544
596	my_seqs_16minnow_6_2ct612.2@PF02305.16	my_seqs	MHRNRSVNVHQFSMVPRADIPRSGFRIESAYKTTFDSGYLVPIYCEEVLPGDTFNLRATMFARLATPIVPIIDNLYLESFFFFVPNRLTWNNWQKFCGEQENPGDSIDYTIPQVVSAAGGFVAGSVFDYLGLPTAGQITAPNTVTANALPFRGYNLIWNEWFRDENLQTRAIVNKTDASEAVAAFPLRRRGKRHDYFTSCLPWTQKGAPVTLPLGGQAVVKADVNNLVTGAQNPMRYLYSPAGGAVANVAIASVGGYAQSSNNAIASDPTQRMYPSNLYADLSTATAATINQIRQAFQIQRLLERDARGGTRYTELLKSHFGVTSADARLQRPEYLGGGLTAVNIQSVTQTSGSPGSGGYTDTPLGALSAVGTALAHGHGFTHSFTEHGYVIGMIAVRA…	545	USER	zzzz545
595	my_seqs_16minnow_6_2ct613.5@PF02305.16	my_seqs	MPRPNKRMPTVMKSGHQFSQVPSVSINRSVFDRSHGHKTTFDAGLLIPFFLDWILPGDTMTLRLHAMVRMLNPLFKPVMDNLYLETFFFFVPDRLVWTNFPKFMGEQVNPGDSIAYTTPQITLAATLYSVHSIQDYFGLNSAQHANGTWTHSALPIRAYNLIYNQWFRDENLINSVTVDMDDGSDGAINITPYKRGKRHDYFTSCLPFLQKGTAVSMPLGTQAPVRRTDAADPGIVSVMDAGGGYDTMQVTAVNTDLRAGTFFGAGAAGNRLYADLTGATAATINDFRQAVAVQQFLERDARGGTRLTEIIYNHFHVRSDDARLQRAEYLGGGSTPILINPVAQQSQTGLTGGTTQLGNLVGVASAGVGGHGFTRSFTEHGMIIGIVNVRSDLTYSQGV…	534	USER	zzzz546
594	my_seqs_16minnow_6_2ct615.5@PF02305.16	my_seqs	MFGGTSGKLPSAFNHDFATVPATRLPRSAFDRSHTVKTTIQAGDLVPIFLDEILPGDTVSLNSTVFARLSTPVVPAMDNLEVTTQYFFVPNRLLWTNWERFCGAQDNPGDSISYTVPYLNSVVFGVMSLADYFGLPPGTYGTETGGAGAQVCALPFRAYALIWNQWYRDENLQNSLTVSLADGPDSTTSVVIMKRGRKKDYFYGSLTGAQKGTAVPFLSGTANVYSATQDATGRNTVFQHWNTTDSAAQYGGLAKTAGATTLSLGGGWTGTAAGDNTGGFALGTAAQYTALGAGYQAPYADLSTNVTDVVNTLRLAFQTQKFLERDMRGGTRYTELNQSHFGVVNPDARLQRSEYLGGGVSTLQITPIPQTSATGLTGGTTKLGDLAAFGTALSSRNGF…	569	USER	zzzz547
593	my_seqs_16minnow_6_2ct617.6@PF02305.16	my_seqs	MSYSFSQVPIADIPRSAFNRSHGHKTTFEASYLIPFYVDEALPGDTFNVKVSLFARLATPIVPIMDNMTMDVFFFAVPNRLIWDNWQRFMGEQTNPGDTTDFLVPQIVAGAGGFDALSIYDYLGVPVDVANISISALWCRAYNLIWNEWFRDQNLQTPLHITKSDGPDDPSYYNLVRRGKRHDYFTSCLPWPQKGPGVELPLGGSAPVISAGDGFPIFSGAGTSPASALVTGDLIDTSTRRNIEIDLATAPGEALAWSQTKLQADLSSATAATINSLRQAFQVQKLLERDARGGTRYTEILRSHFGVVSPDARLQRPEYLGGGNVPVTINPVTQTSATAMAGTTPQGNLAAYGVAGGSNVGYTKSFVEHCVIIGLVMVRPEISYQQGINKMFLRKTRFD…	534	USER	zzzz548
592	my_seqs_16minnow_6_2ct618.4@PF02305.16	my_seqs	MKNYRQNQFDNLQKKQANKSLFDLSHEVKTQMCFGRYYPILYEECLPGDEWTIDGEYQFRFPSTYFPIQQIGTMRADWFYVPYKLLWQGMPGGDTAQSPQKYGWQGFIMGENLELPVTSLNINGTDWNGQPLSDYYPGCSYPIENYLGFPMDKHGMLDINKQMSIEGSAFPLSMYLFCYDEYYRNPQWEEPVFTPLQDGNNDSMFNNGVTQTINGVEYLTWERTGSGSAVVQHPPFFAYYEKDYFTTARPQPQDGDAILIPSLGIEEDGTFTPQRVYKLDGTNPSEASLGATGPGGPGNPRYLSDAGDETPLVLETNASIKQLRIYQVLQQFHERVIRIGKRYRGYIVGLWGNDPEPNAVDIPQLIGSHFGRIQISDTLTTADTSDSNTGNYRGNINFH…	590	USER	zzzz549
591	my_seqs_16minnow_6_2ct619.3@PF02305.16	my_seqs	MMHRNKSVDVHHFAMTPRADIPRSSFKIQHTHKTTFLQGVLVPIYVDEILPGDTFNLRATIFTRLSTPLFPIMDNMYLDTFFFFVPLRLLWDNFQKFMGEQTDPGDSIDYLIPQATCEVGGYKIGSLGDYMGLPTFGQIGASATVQHSVLPFRAYNLIYNEWFRDENLQDSAYMSRGDTAIADPQNYYFLRLRGKRHDYFTSCLPWPQKGQSIPLPLGTSAPIKAVAGGQQQLRVAATLAPAISQTGIGSDASANLLAAPGGFNAIIDPGNSLYADLSQATAATINQLRQSFQVQKLLERDARGGTRYTEIIRSHFGVISPDARLQRPEYLGGGSTPIIINPIAQNSATTISGGDTPLGTLGAMGTGLANGHGFSQSFTEHGIVLGLACVRADLTYQQG…	539	USER	zzzz550
590	my_seqs_16minnow_6_2ct624.4@PF02305.16	my_seqs	MEVYMRSVMRHQFSQVPRAEIPRSSFDRSHGYKTTFDAGYLVPFFVDEALPGDTFNLRCTTFARLSTPLHPFMDNLYADVFFFACPYRLVWSNFVKMFGEQANPADSTSFLVPQFTAHKPAVGSLSDYMGIPCDGTSPVLAGNITYNSLHHRAYNLIYNEWFRDQNLQNSVTTSLGDGPDNIANYVLLRRGKRHDYFTSALPWPQKGTAVSIPLGTSAPVKTSSTELVSGAQSGLLARQISGSTLGTSATLATGGAATNQVGYTATASGALVAQIYPSNLYADLSTATAATINSLRQAFQIQKIYERDARGGTRYTELIQSHFGVTSPDARLNRPEYLGGGSAPINVNPIAQTGPTGTTGSTTPQGNLTGMGTFHHAGYGFSKSFTEHTLLLGMINVRA…	542	USER	zzzz551
589	my_seqs_16minnow_6_2ct625.5@PF02305.16	my_seqs	MARMPGSSGSHQFSQIPRAEIQRSSFDRSRGYKTTLDPAYLYPVFFDEVLPGDTYSVSMTGFARLSTPLKPIMDNAYFNTFFFFVPNRLVWDNWQRLNGEQTNPGDSTDYLVPEIIAPAGGFAHSSIYDYFGLPVGAAGVRIAAFHFRAYNLIWNEWFRDENLQARVVTNKGDGPDTSTDYTLLKRGKRHDYFTSSLPWPQKGESVSIPLGTTAPILANAGGMPVFHVGSGGPTNLAGTTGNNSVTFSSGQTATGAALWSDPQLHADLSTATAATINQLRQAFQIQRLYERDARGGTRYTEIVRSHFGVVSPDARLQRPEYLGGGQSDVNVSPIAQTGATRPDIAETTPQGNLAAIGTSTMHGHGFSKSFTEHGVLVGLICVRADLSYQQGLNRMWSRR…	526	USER	zzzz552
588	my_seqs_16minnow_6_2ct626.2@PF02305.16	my_seqs	MHRNQSVQAHNFAMVPRSDVPRSGFKIENAYKTTFNGGILVPVYCEEVLPGDTFNLKATMFARLATPIVPVMDNLYLESFFFFVPNRLVWDNWKRFCGEQDTPGATVDYVVPKIGVNSSHVQPGTIYDYFGIPGAGQLTGGLAINALPFRAYNLIWNEWFRDENLQVPLTVNKTDSDVPGNYQLRRRGKRHDYFTSCLPWVQKGNSVTLPLGTSAPVKTSSTGQVSGPRSGLSFLNATTGNAITNSGDFGIDVNSSMVYNASGITGAIGGVYPNNLYADLSAATAATINQIRQAFQIQKLLERDARGGTRYTELVKSHFGVTSPDARLQRPEYLGGGMTPINIQPIAQTQATAADGTPLGALAAYGTALAHNHGFTQSFTEHGHVIGLISVRADLNYQQ…	537	USER	zzzz553
587	my_seqs_16minnow_6_2ct627.2@PF02305.16	my_seqs	MFRNKSVDVHRFSMVPDADIPRSRFRIEKAHKTTFDGGYLVPVFVEEVLPGDTVHCRMTAFARLATPLFPVMDNLHLDSFFFFVPNRLVWSNWKKFMGEQANPADSISFSIPQQVSPVAGYAVGSLQDYFGLPTVGQVAGGATVSHSALPLRAYNLTWNEWFRDENLQNSVTVDTGDGPDTVANYVLLRRGKRHDYFTSALPWPQKGGTSVSLPLGTSADVRMVPTSGSALVVNQGAVGAANNYLTVVTASGANPVNVQSGGAGSSANKLYADLSTATAATINQLRQAFQIQKLLERDARGGTRYTEIVRAHFKVASPDARLQRPEYIGGGSTNVNVNPIAQTSGTAATGTTTPLGTLGGMATVVGQHGFSYSSVEHGLIIGLVNVRADLSYQQGLRKF…	533	USER	zzzz554
586	my_seqs_16minnow_6_2ct628.7@PF02305.16	my_seqs	MGRLLRGGRPFHTRSLLDVSVWTDTILCVCPGGCGRTPSLFLTSLLGFAILLLVSPLVRFPLKEIYMSRKHDQFQFSHVPKADIPRSTFDRSFGHKTTFDSGFLIPVLVDEVLPGDTYQVKASLFARLATPIYPIMDNMYMDTFFFFVPNRLLWNNWQKFMGEQKAPGDSTDYLVPETQSPFSGFGVQSVFDYMGIPAAVGGLKVSALWARAYNLIYNEWFRDENLQDPAVVPLDDGPDDPDVFVLRRRGKRHDYFTSCLPWPQKGPGVMLPLGTTAPVIGVAAKGMHLVDLNDPSKIAPLTTGANALTTNWSANNPFADRFLGVTTDPSESGLVADLSTATAATINSLRQAFQVQKLLERDARGGTRYVEILKSHFGVTSPDARLQRPEFLGGGEIPV…	607	USER	zzzz555
585	my_seqs_16minnow_6_2ct630.6@PF02305.16	my_seqs	MKSVMRHQFSQVPRAEIPRSSFDRSHGYKTTLDAGYLYPIFVDEALPGDTFNLRLTTFARLATPIKPFMDNLHADVFFFAVPYRLVWDNFKKFFGEQNNPADSTSFLVPQFTAHKPVTGSLSDYMGLPVDGTSPVLAGNITYNSLHHRAYNLIWNEWFRDQNMQNSVTVDKGDGPDNIANYVLLRRGKRHDYFTSALPWPQKGVAVSIPLGTSAPVKTSSTQQFNTNGASALVFRDLNNVLPGASNSIGASNVTGAAFLSNTAATASAQFLAPSNLYADLSTATAATINSLRQAFQIQKIYERDARGGTRYTELIQSHFGVTSPDARLQRPEYLGGGSTAINVNPIAQTGQTGLTGGGTPQGNLAAMGTFHHSGPGFSKSFTEHCLILGLVNIRADLNY…	538	USER	zzzz556
584	my_seqs_16minnow_6_2ct631.7@PF02305.16	my_seqs	MFRNRSVDVHQFAMVPRAEIPRSRFRMQKAYKTTFDASLLIPIFVEEVLPGDTFQVKMTAFARLATPIFPIMDNMYLDSFFFFVPNRLVWTDWKKFNGEQVNPGDSISFTVPQNASPVGGFAVGSIGDYMGLPTVGQVGGAASIAVNTLPFRAYYLIYNEWFRDENLINSFVFSTGAGPDSLSGNPLRRGKRHDYFTSCLPFVQKGTAVSIGMTGQAVVKAQASPFLAGAQPAAQWRRATDGGDPTGGLALRMTGGANSTMQESATTANTGGGNPSFYPSNLYADLSTATANTINALRLAFQTQKLLERDARGGTRYTEIVRSHFGVISPDARLQRPEYLGGGSTAVNINPVIQSTQSGLTGGTTKMGSMSGFGTALAAGHGFTQSFTEHGYIIGIVSV…	544	USER	zzzz557
583	my_seqs_16minnow_6_2ct632.6@PF02305.16	my_seqs	MMMFRNKSVDVHRFSMVPRAEIPRSAFKIEKTYKTTFDGGYLIPVYCEEVLPGDSFQCRMTAFCRLATPLFPLMDNLHLDSFFFFVPNRLTWTNWVKFMGEQVNPADSISFTIPQCVSPVGGWTVNSLQDYFGLPTVGQVAGGNTISANNLPLRAYNQIYNEWFRDENLQNSVTEDVGDGPDTAANYVLLRRGKRHDYFTSCLPWPQKGATAVSLPLGTSATVKTNSSELFTGAQASMKIRAVSGSLPGSAQYLGTDSLNPSNWAQVTGATATQSANYFYPSNLYADLSTATAATINQIRQAFQIQKLLERDARGGTRYTEIIRAHFGVVSPDARLQRPEYLGGGSTPVNIQPVVQQAQTGLTGGTTPLGTLASYGTAVAQHGFSQSFTEHGYIIGLVS…	547	USER	zzzz558
582	my_seqs_16minnow_6_2ct633.5@PF02305.16	my_seqs	MHRNRSVDVHKFSMVPRADIPRSRFDRQFTHKTTFDAGYLVPILVDEVLPGDTFNLSMTAFARLATPIFPLMDNLWLDSFFFFVPNRLVWSNWVKFMGEQLNPADSISFSVPQLVSSVGGYAANSVFDYFGLPTAGQVIGGNTVSHSALPLRSYNLIYNTWFRDENLQNSFSVQVDDGPDSIGAYALARRGKRADYFTSCLPWPQKGGTSVTLPLGTSAPVNFSSQTIVGSAAPTFNFSSTSGPHGIRVAAIGTNQTLQNSGTTTGSQTDPATWGAPGLTLGGTAFADLSAATAATINQLRQSFQIQKLLERDARGGTRYTEIVRSHFGVISPDARLQRPEYLGGGSTPVSINPIAQTSATGLTGGSAPLGNLAAMGSVLARNHGFTQSFTEHGHIIGL…	549	USER	zzzz559
581	my_seqs_16minnow_6_2ct634.5@PF02305.16	my_seqs	MCVRAACKIIWSRLLINPGVNMFPSSGRQPTNMRQHFDTVPAAILQRSQFVSPYRYTTAFDSGYIVPFGVFEVLPGDTFNDQFMIFARLQSLVKPYMDNLYMDIHFFYCCNRILWTHWDNFIFNEKANPGDVNSYVMPTSTSPVGGYAIGSLQDYMGLGTVGQIGGGATFTHTVFPLRMYNFVWNEFYRDENLQNSLTVDLGDGPDTTANYVLKRRNKRFDYFTSCLTSPQKGAAVGFALSGSADVWGSAALPVAIGSNNAAPVFGQMVDRATTDGSVAGTLTWSLKNTGGATPSTGDVWQPGNTALTYRGASVTGTGATTASETSDMVFLNKAASQTFRGTATAPWSADLSTATAITINTFRQAFQIQMLLEKDARAGTRAVESLWAHFGVISPDQRM…	603	USER	zzzz560
580	my_seqs_16minnow_6_2ct635.8@PF02305.16	my_seqs	MASHKGQYSFSQVPKAETPRSSFVRNHGYKTTFNAGYLIPFYVDEALPGDTFNVSASIFARLATPIVPLMDNMYLDTFFFFVPNRLLWDHWQNLMGERATPTDTTEYLVPEVDAGATGFEDLSVADYFGIPCKIPNLKVSALPFRAYNLIYNEWFRDENLQDPGVDKKDDTISTAVDYPLRRRGKRHDYFTSALPWPQKGPGVELPLGTRAPVATDAGANQLISVRNVNDQWMDMNAAAPTSLTLGSTVQADDSDGLYADLSQASAATINSLREAFQIQKLLERDARGGTRYTEILRSHFGVTSPDARLQRPEYLGGHSQPVIINPVTQTSGTATGVDTPQGNLAAYGVVGGDGNGFTKSFVEHGVIMGLVMVRADLSYQQGVNRMWSRRTRWDFYWPA…	539	USER	zzzz561
579	my_seqs_16minnow_6_2ct638.3@PF02305.16	my_seqs	MFRNKSVDVHKFSMVPRADIPRSVFNIQHTHKTTFDSSFLIPIYVDEVLPGDSFNLRMTAFARMSTPLFPVMDNMHMDTFFFFVPNRLVWDNWQKFMGEQRNPGDSISYLVPQVTSPAGGYPIGSIFDYFGLPTVGQVDATSTISHSALPLRAYSLIYNEWFRDENLQNSILVPTNDGPDPSATYALQRRGKRHDYFTSALPWPQKGQSVTLPLGGTAPVIGNPADATPVFMVDGASRVLFTDGGSGNIHMSPVPTNNDSQAHWANSGLVADLSAATAATINQLRQSFQIQKLLERDARGGTRYTELIRAHFGVVSPDARLQRPEYLGGGSTPVNVSPIAQTSGSAATPGGYTDTPLGNLAAIGTVLARNHGFSQSFTEHGHIIGLAMVRADLTYQQGI…	536	USER	zzzz562
578	my_seqs_16minnow_6_2ct639.6@PF02305.16	my_seqs	MKVSKKADIFNKVSIGTPKRNTFDLSHEKLFTCDMGMAVPILCEEAYPNEHWSVGSTTLCRTAPLARPMMSTVTIKKQNYFIRNQILWSNWNLFITGGDKFQEAAPVPVAPYVTIPIGGFPVGSLADYLGFPTLQGQGMKVSAFPFAAYLRTMQEYFFDENLQNTTLIMLADGDNTIAFQTFPWMGGTRNLLTSPPLPVCWEKDYFTAALPEPQKGPEVTIPLGDTADIVWNTESPSGAAPLYRGDGTTPAADGGLDSFSIGTDNFMQANGDGFPLVMDNTAYMKVDLSSATSATINDLRRSYALQRLYERLNRGGSRTPEFLRSVWGANPKNLELDRPDYFGGAKEFLSISEVLQQSQTTTDGDDASPQGNMSGHGVAVVGSNMSQYSTNDYGVMLSL…	543	USER	zzzz563
577	my_seqs_16minnow_6_2ct640.4@PF02305.16	my_seqs	MHRNKSVSTHRFAMTPRADIPRSAFKIQKTHKTTFNSGILIPIWVDEVLPGDTFSLNATIFTRLGTPLFPIMDNMYLDTFFFFVPNRLVWNNWQKFMGEQDDPGDSTDYTIPQVTCEEGGYKIGSLGDYMGLPTKGQVPSTAKIAHSALWFRAYNLIYNEWFRDENLQDAVVVNKGDQGLADPENFYYLHRRGKRHDYFTSCLPWPQKGESVTLPLGTEAPVKLHGGTTQTLVYQTGATAGDPFPSVGLFSGGVGQLLGGSGGAQALLDPGNSMYADLSQATAATINQLRQSFQIQKLLERDARGGTRYTELVRSHFGVVSPDARLQRPEYLGGGSSPIIVNPIAQNSATGTQGSTTPLGTLGAMGTGLGTKHGFSTSFVEHGMVIGLACVRADLTYQQ…	539	USER	zzzz564
576	my_seqs_16minnow_6_2ct642.3@PF02305.16	my_seqs	MHRNKSVDVHRFAMTPRADIPRSAFKIQKTHKTTFDSGWLIPIWVDEVLPGDTFNLRATIFTRLATPIFPVMDNLYLDTFFFFVPNRLVWDNWQKFMGEQIDPGDSIDYVIPQMQSGDGGYQVGSLFDYLGLPTLGQMPPTSRINHSALFARAYNLIWNEWFRDENLQDSAPVPRDDVQIADPNANGFVLRKRGKRHDYFTSCLPWPQKGESVQLPLGSSAPVRSNVGGPTSGRWQEVGTNNYLSGAVTGAATTGEVQVNGLTAFYNPDLSLYADLSEATAATINQLRQSFAVQRLLERDARGGTRYTEILRSHFGVVSPDARLQRPEYLGGGSTPIIVNPIAQNSATGQDGSTTPLGTLSAMGTGLASGHGFSTSFVEHGMVIGVASVRADLTYQQGV…	539	USER	zzzz565
575	my_seqs_16minnow_6_2ct644.4@PF02305.16	my_seqs	MMHRNKSVDVHQFAMIPKADIPRSSFKIESTHKTSFDAGFLVPVYVDEVLPGDTFRLSMTAFARLATPLFPIMDNMYLDSFFFFVPNRLIWSNWQKFMGAQDNPDDSTSFIVPVCPTPVGGYAIGSLQDYMGLPTVGQLGAGATVNHAAFHTRAYNLIYNEWFRDENLQDSVVVDKDDGPDNAADYVLLRRGKRHDYITSSLPWPQKGESVSIPLGTSADVKLMSTLGVNQGIRNAVTHDPFTSSGLGSDAGANLVDLAGPVGVVLDPAGTLYADLSAATAATINQLRQSFQIQKLLERDARGGTRYTEIVRAHFGVVSPDARLQRPEYLGGGSVPVNIHPIAQTSGTGAYTPTPQGNLAAMGTVLQQGTGFSQSFTEHGVIIGLVSVRADLTYQQGMR…	535	USER	zzzz566
574	my_seqs_16minnow_6_2ct645.3@PF02305.16	my_seqs	MRSVMRHQFSQVPKVQIPRSSFDRSHGFKTTFNAGYLVPIYVDEALPGDTFSLQCTTFARMSTPLHPIMDNLYADVFFFAVPYRLVWTHFVNFFGEQANPADSTSFLVPQFTAHKPANGSLSDYMGIPTDGTPPLAGNITYNSLHHRAYNLIWNQWFRDQNLQNSVTVDMGDGPDNIANYVLLQRGKRHDYFTSALPWPQKGTAVSIPLGTLAPIKGLAISSTATTAANTGAISYGFDSAHDIASGTPAWTSTSQAFIMQAQSAAVPSTGNRPQIYADLTNATAATINSLRQAFQVQKVYERDARGGTRYTELIQAHFGVTSPDARLQRSEYLGGGSTPINVNPIAQTTATGLTGGTTPQGNLAAMGIFSHRGYGFTKSFTEHCLLLGLINVRADLTYQ…	537	USER	zzzz567
573	my_seqs_16minnow_6_2ct646.3@PF02305.16	my_seqs	MSGNFTFSQVPMADIPRSVFNRTHGHKTTFDAGLLIPFFVDEALPGDTFNVHASIFARLATPIVPLMDNLHMDVFWFAVPNRLVWENWQKFCGEQENPGDTTDFSIPQVTAGGSGFGTGSIFDYFGLPVSVGSLQVNALFARAYNIIYNEWFRDENLCARVPQHKGDGPDAAADYAVRKRGKRHDYFTSCLPWPQKGPATEVPLGASAPVIASAVNAGPQFSFAGAGSGAAMGINSGTAGDPNPPIYLSGDLPATGTPGKDLMWWNSGLIADLSSATSVTINALRQAFQIQRLLERDARGGTRYIELIKSHFGVTSPDARLQRPEFLGGGSIAVHINPVSQTSPATGTTGYQATPQGNLAGFGTAGGSQGFTKSFVEHCVILGLVCVRADLSYQQGLNR…	531	USER	zzzz568
572	my_seqs_16minnow_6_2ct647.5@PF02305.16	my_seqs	MFRNKSVNVHQFSMIPRADIPRSRFNMQTSHKTTFDAGYLIPIYVDEVLPGDTFNLRMTAFARMSTPIFPIMDNLYLDTFFFFVPNRLVWDNWAKFMGEQRNPGDSTSYIIPQCVMPTGGPALHSLFDYMGIPTSNQIEPTSNLAVNALPFRAYNLIWQEWFRDENLQGSPNIPRGDGPDAHTDYPLLYRGKRHDYFTSCLPWPQKGTSVNLPLGQDLPIKSNGLSPQFTSTVAGPVNSPLGIRNDTFNTVYVPGSAPASDSPIVFGAETGLFADLSEATAATINQLRQAFQIQKLLERDARGGTRYTEILRAHFGVISPDARLQRPEYLGGGSSPVTISPIAQTSGTGTYTDTPQGNLSAIGQVVAKNHGFSQSFTEHGFIIGLACVRADLNYQQGLR…	535	USER	zzzz569
571	my_seqs_16minnow_6_2ct648.1@PF02305.16	my_seqs	MRVRAQERSIMFRNKSVDVHKFSMIPSASIPRSSFRIQKTHKTTFNSGFLIPVYVDEVLPGDSFNLRMTAFARMATPIFPLMDNLRMDSFWFFVPNRLVWSNWKKFMGEQDNPNDSTSYVIPQMVSPAGGYAGNSLQDYMGLPTSGQVTPGLTVSHSALWTRAYNLIWNEWFRDENLQNSVKVDKGDGPDLYTDYSLLRRGKRHDYFTACLPWPQKGPSVPLPLGTTAPVYGDGAYPITVNPATNQGDQRTLTFGAGNTATYTGVTIAGQAPMTFSFTQGLYADLTQATAATINQLRQSFQVQKLLERDARGGTRYTEIVRSHFGVVSPDARLQRPEYLGGGSTPVSITPVAQTSGSPGTNQYTNTPMGTLSATGSMVASGHGFRQSFTEHGVIIGMVV…	548	USER	zzzz570
570	my_seqs_16minnow_6_2ct649.2@PF02305.16	my_seqs	MSKRHDQFQFAHVPTADIPRSTFDRSYGHKTTFDAGYLVPIFADEALPGDTFQVNASLFARLATPIFPVMDNMYMDVFFFFVPNRLLWDNWQKFMGEQRSPGESTDYLVPEITASVGGFGVQSPFDYLGIPAAVGGIKVCAFWPRAYNLIWNEWFRDENLQNPVSVPTDDGPDSPADYVLLRRGKRHDYFTSCLPWPQKGPGVMLPLGTSAPVRTDEIGAGDLGVRNQAGLLSNLDTAGATLKIGAGVAPDVGALYADLSNATAATINSLRQAFQIQKLLERDARGGTRYVEILKAHFGVTSPDARLQRPEFLGGGEIPVIINPVAQSSGTPPTSGGYTSTPQGNLAGYGVVSGGGIGFSKSFVEHGVILGLMAVRADISYQFGIQRMFSRRTRYDFYW…	522	USER	zzzz571
569	my_seqs_16minnow_6_2ct650.6@PF02305.16	my_seqs	MHRNQSVNTHKFAMVPRADIPRSGFKIETTHKTTLDAGYLYPIYLTEILPGDSFNLKATIFARLATPIVPIMDNLYLETFFFFVPNRLVWSNWVKFMGEQKSPGDTISYTIPQITSPTNGHARASIYDYFGIPCAGQIGLGNVISHSALPLRAYYLIWTEWFRDENLQAGGTLNIGNGPDTASFYNLLRRGKRHDYFTSCLPWVQKGTSVSLPLGTSATVKTAGSALVTGAHPALVFSQAADGSAPAGNYLTGVNAAGTLARTTGMAGETLNQVMYPNNLYADLSTATAATINQIRQAFQIQKLLERDARGGTRYTELVKSHFGVISPDARLQRPEYLGGGTTPISIREVPQTQSTEAGTTPQGNLAGVGTATAHGHGFTQSFTEHGHVIGLASIRADL…	541	USER	zzzz572
568	my_seqs_16minnow_6_2ct651.8@PF02305.16	my_seqs	MFSQVPVADIPRSRFNRSHGHKTTFDVANLIPIYVDEALPGDTFQVKCTAFARLATPIFPIMDNIYLDFFFFAVPNRLLWDKWERFMGEQPNPGDSIDFLVPQATSPTGVGWQVNTLGDYFGLPTTFTNLVANALPFRAYNLIWNEWFRDQNLQARAPEYIGDGPDPAATAAADYAIRKRGKRHDYFTSCLPWPQKGTAASIFPGTGSTAPVIAGPTNTPLFSSADGFTINQQLSRAAGIPGPTTVGATTSGVSLLRWGAQTGLVADLSQSVATTINQLRQAFAVQRLLERDARGGTRYVELLKSHFGVVSPDFRLQRPEFLGGGTIPVNINPVSQTSATALTGSTTPLGNLAAYGLAAGSSPGFTKSFTEHCTLIGLVAARADMNYYQGMARAWSRRS…	526	USER	zzzz573
567	my_seqs_16minnow_6_2ct652.6@PF02305.16	my_seqs	MAMMHRNRSVDVHRFAMTPRADIPRSSFKIQKTHKTSFDAGILIPIWVDEVLPGDTFNLRATIFTRLGTPLFPIMDNMYMDTFFFFVPNRLVWDNWQKFMGEQTDPDDSTDFTIPQVTCPAGGYQIGALGDYMGLPTVGQIGPAATVSHSALWFRAYNLIYNEWFRDENLQDSAYMSRGDSGIADPENFYFLRRRGKRHDYFTSCLPWPQKGDSVQIPIGTSAPVKVGNTTAAGGWLGIGGAGATGAASASGGQAQINGVGALYDPNNTLFADLSEATAATINQLRQSFQIQKLLERDARGGTRYTEIVRSHFGVVSPDARLQRPEYLGGGSTPIIINPIAQNSATPSAGTETPLGTLGGMGTGLASGHGFSTSFVEHGMVIGLACVRADLTYQQGLRK…	535	USER	zzzz574
566	my_seqs_16minnow_6_2ct653.3@PF02305.16	my_seqs	MMHRNQSASTHQFAMIPKAEIPRSSFRKQHTHKTSIDASRLYPIYLDEVLPGDTFACRMTAFARMSTPIFPIMDNLHLETFFFYVPCRLLWTNWVKFMGQQDNPSDSISYTIPQIVSPPSGHPPFTLYDYFGLPTSPQIGAGNTYSHSALPLRAYNKIFKDWFKDENLYTTGVSINTGDGPDPSTDYFIRRRGKRHDYFTSALPWTQKGASVTLPLGTSAPVITLPNNITNFTGNTLQMGVVGSGASVGALYTGTNSTGKMSTGSSATGGAFTAASQIYPMNLYADLSQATASTINQLRQSFQIQKLLERDARGGTRYTEIIRSHFGVISPDARLQRSEYLGGGSTPINISPVAQTQATQATITPLGNLAAYGTALANNHGFTQSFTEHGYIIGLAQIR…	545	USER	zzzz575
565	my_seqs_16minnow_6_2ct654.6@PF02305.16	my_seqs	MRSVMEHQFSQVPRAEIPRSSFDRSHGIKTTFNAGTLIPIFVDEALPGDTFHLNAVSFGRLSTPLHPIMDNMCLDYFFFSVPIRLVWANFQRFMGEQPNPGDSTSFLVPQITAPAGGFAEDSIYDYYAIPVKIPNIKVNALHMRAYNLIWNEWFRDQNLQTRAIQNTGDGPDAYSDYVILNRGKRHDYFTSALPWPQKGPAVSIPFAGQLPVKTIAADNITTTQPAMRYRNASSGAALSGDQLMGHSTGQAAGFAATPGAGQFTAYPSNLYVDLSTTTAVTINQLRQAFQVQKIYERDARGGTRYTELIQSHFGVTSPDARLQRPEYLGGGRADLNINPIAQTSNNAASPTPLGNLAAMGTIHNRGVGFSKSFTEHSVIIGMVCARADLNYQAGIDRMW…	530	USER	zzzz576
564	my_seqs_16minnow_6_2ct655.2@PF02305.16	my_seqs	MDNLHFDWFYFFVPYRIVWTNFLKFMGEQNSPADSISYNIPQCTGPNVASGGIAILSLHDYLGLPVGALSGGGGTTGITFNNLVPRSYNKIYMDWFKDQNLQNAVTLDLGDGPDTYTNYVLLKRGKRHDYFTSALLSLQKGTAVTMSLGTSANVMTSASNLVTGAQAGMKMLNTGGSSPAAGKYLRIGTSDQFASDTTAAAGSVQDTLYPSNLYADLSTATAASINTLRQSVALQQFLENDARGGTRYTEIVKQRFGVTSPDMRLQRAELLSLGSSPVNLSPVAQTSSKPSAGTTTDQGNLSAFGTASNIGNGFTKSFTEHGCVIGLCMVRSDLSYEQGFDRHWSYRTRYDLYNPEFANLGEQSILNQEIYANLPDGTGAAQKSGVFGYQERYAEYRYS…	485	USER	zzzz577
563	my_seqs_16minnow_6_2ct656.2@PF02305.16	my_seqs	MIPRADIPRSSFRMQQQHKTTINASQLIPVYLQEVLPGDSFNVSMTAFCRMATPLFPVMDNLDLESFFFFVPNRLVWVHWPNFMGEQNNPADSISYSIPQIVSPVGGFTQFSIFDYFGLPCSGQTAGGNTISVSALPFRAYNLICQEWFRDENLENALQTGSAGALVAGAKWMCQSDDGPDGAASYALFTTAKRHDYFTSCLPWTQKGNTAVTLPLGTSAIVKTSAADTFTGAQPPLHLLTVAGGSPTSGRALGFGAPSMFNSTTAATIQGAETVYPSNLFADLSTATAATINQIRLAFQTQRLLERDARGGTRYTEIIRSHFGVISPDARLMRPEYLGGGKTPITISPVPQTTATGLTGGSSPLGTLAAAGTALARNHGFRQSFTEHGHIIGLVAVRR…	546	USER	zzzz578
562	my_seqs_16minnow_6_2ct657.8@PF02305.16	my_seqs	MAGGGYTFSQVPMADIPRSSFNRSHGHKTTFDAGYLVPIFVDEALPGDTFNVHSSIFARLATPIAPIMDNLHMEMFYFAVPHRLVWDNWQKFCGEQENPGDSTDFTVPVIDAGATGFPLLSIFDYFGIPCSVPNLQVNALFARAYNLIYNEWFRDENLCTRAYMNKGDTTDAPSNFPLRKRGKRHDYFTACLPWPQKGPGVELPIGSTAPVVPSGAGSRPYFLSELDAKIAPLGISGGGVTPVSFDNAGGAAGAQQLLWNTSGLVADLAGATAATINKLREAFQIQKLLERDARGGTRYIEILKSHFGVTSPDYRLQRPEFLGGGHIPVTINPIAQTSATGTYAATPQGNLSAYGLAAGRDVGFTKSFVEHSVIIGLVCVRADLSYQQGLPRMFSRSTR…	534	USER	zzzz579
561	my_seqs_16minnow_6_2ct659.2@PF02305.16	my_seqs	MKSVMRHQFSQVPRAEIPRSSFDRSHGYKTTMDSGYLYPFYVDEVLPGDTFNLQCTTFARLSTPLHPIMDNLFADVFFFAVPYRLVWTHFVNFFGEQNNPADSTSFLVPQFTAHKPVTGSLSDYMGIPVDGTSPVLAGNITYNSLHHRAYNLIWNQWFRDQNLQNSVTVDVGDGPDNIANYVLLRRGKRHDYFTSSLPWPQKGVAVSIPLGTSATVKTSSTALFTGVQTQQFNNYSASGAGITGSLSMASVGGTGGMSTSGTALVPVGSGIYPSNLYADLSTATAATINSLRQAFQVQKIYERDARGGTRYTELIQSHFGVVSPDARLQRPEYLGGGSAPINVNPIAQTGASGATGTTTPQGNLAAMGTFSHHGYGFTKSFTEHCLLLGLINIRADLNY…	538	USER	zzzz580
560	my_seqs_16minnow_6_2ct660.6@PF02305.16	my_seqs	MRHKGQYTFSQVPQADIPRSVFQRNHQHKTTFNAGDLIPVYLDEVLPGDTFKCKVSMFCRFAQPMIAAIMDNMYLDVHFFFIPTRLVWSNWQKFCGEQINPGDSTSYTIPQVTFTSSPGNLYDYMGLPMGNNGNGGISFTVNALPLRCYYRVYQDWYKDENLAVAPSLATNDGPDSGSAYGIKKRGKRHDYFTSCLPWPQKGVGVQLPLGGTAPVVRVTTTSQPGLEYTDSSLGVTQATPILDTAAAVTKANLNIERAGSGSMNETNQKVRWGSTVGLMTDLASATAATINSLRQAFQVQRLLERDARGGTRYVEILKSHFQVTSPDARLQRTEYLGGGTIPVMVNPVVQTSGTPATGTAQGTVAAFATAARHNLGFVKSFVEHGYILGIVSARADMTY…	545	USER	zzzz581
559	my_seqs_16minnow_6_2ct661.4@PF02305.16	my_seqs	MTMEKQFEQPSVMTAQQHFSVVPSADIPRSRFDRSHAVKTTLDAGLLIPFFVDEALPGDTFDADATAFCRMATPIKPIMDNIYLDIHWWYVPNRLLWDNWKKFCGEQVNPGDSTVFSIPTVPVPLNAGPGTLSNYMGIPYRGTANTVSVSSMFQRAYFKIFNDWYRDENLVNSITVPTGDGPDALINSNLPVRRGKRHDYFTSCLPWPQKGSSVVIPLGTTAPVRGLGVIGSVTNVVTNSVRETGGVTTNYPYSLTNQQTYMKLAQTGPGAYPDIVADISSASAIDINALRTAFQVQRLLERDARGGTRYTEILFNHFGVTSSDARLQRPEYLGGGTTRVNINPVASTVQQTTPAVPQGNLAAVGHGTARAGFRKAFEEHGIIIGLMSARADLTYQQGI…	534	USER	zzzz582
558	my_seqs_16minnow_6_2ct662.5@PF02305.16	my_seqs	MFRNKSVDTHKFAMVPDPQIPRSSFAIEKAHKTTFDAGYLIPVYVDEILPGDTFNVNMTAFARLSTPLFPVMDNLHLDSFFFFVPNRLVWDNWQKFMGEQENPGDSISFVTPQQVSPAGGYAVNSLQDYMGLPTIGGLGAGNTISHNALPLRAYNLIWNEWFRDENLQNSLVVDKGNGPDTISNYVIQRRGKRHDYFTSALPSPQKGPSVQVPLGTSAIVKTSPVESYISSGDPLQFRELGSGSPAAGFALGVGTSHSLSSTSTPVTLGLGLIPSNLYADLSTATAATINAIRTSVAIQQLLERDARGGTRYTEILRNHFKVTSPDARLQRPEYLGGGSNPIMFSPIAQTSGTGISGGTTPLGNLSAMATSISNRHGFTQSFVEHGYVIGLVSIRADLT…	540	USER	zzzz583
557	my_seqs_16minnow_6_2ct663.3@PF02305.16	my_seqs	MKSVMRHQFSQVPRAEIPRSSFDRSHGLKTTFNAGDLIPIFVDEALPGDTFSLRCTTFARMATPLHPIMDNLFSEIFFFAVPYRLVWTHFVNFFGEQANPGDSTSFLVPQFTAHKPVSGSLADYFGIPIDGTAPVLAGNITFNSLHHRAYNKIYNEWFRDQNLQNSVTVDMGDGPDNVANYVVLKRGKRHDYFTSALPWPQKGTAVSIPLGTSAPVKTGATQVTGAQNNVKFTNTSGAAISAAVALGLDNTGTLAGWTAAGTAGAPFVYPNNLYADLSTATAATINSLRQAFQIQKIYERDARGGTRYTELIQSHFGVTSPDARLQRSEYLGGGHTAINVNPIAQTGGTGASGTTTPQGNLAAMATFSHSGAGFTKSFTEHCLLIGLINVRADLNYQQG…	535	USER	zzzz584
556	my_seqs_16minnow_6_2ct666.5@PF02305.16	my_seqs	MKQNFMNTIKVETPSTNVFDLTHDHKLSGNMGFLIPTMTLECIPGDNHTISYESLLRFAPMLAPIMHRIRQYFHTFFVPSRVLWAGWEEYISPSEPGATPPIHPYINFGPNGGGENPIVSGSLADYLGLPLTDDLNADQTAGARVSAFPFAAVQKIYNDYYRDQNLIPEVEWSLTDGDNSTVGDLLVLRQRAWEHDLFTASLPFAQKGAPVDLPLGTIGDLPINVNTLDPNFTTWDALFNGNPGTMSVPNQDSDNPAIPTGDMYAEGANATLGATTINDFRMALRLQEFLETDARGGTRYVESIYTHFGVKSDDARLQRPEYITGSVQNVSISEVLNTTGTDDAPQGDMAGHGIAYTQDDQRASYYCKEHGWIITLMSIMPQTAYQQGIPKHFLRINDR…	521	USER	zzzz585
555	my_seqs_16minnow_6_2ct667.4@PF02305.16	my_seqs	MTIMHKNRSVDAHQFSMVPRADIPRSSFDRQFTHKTTFDAGYLIPVYCDEVLPGDTFNLQMTAFARLATPIFPIMDNMYLDSFFFFVPNRLLWTNWQRFMGQQDNPADSISYLVPQQVSPLGGYTVGSLQDYMGLPVTGMVGGSSSVGHCAFFTRAYNLIWNEWFRDENLQNSVVVDKGDGPDASPSSNYVLLRRGKRHDYFTSCLPWPQKGGTAVTLPLGSSAPVRVMSADGTINGKVAGLDRNSGGVSNAGYSLTQSNALAAYFPNSTQGTLYADLSTATSATINSLRQSFQIQRLLERDARGGTRYTEIVRSHFGVVSPDARLQRPEYLGGGTAPVIVSPIAQTSGTSATGTTTPLGNLAAAGTVLAKGHGFSQSFTEHGVIIGLVSVRADLTYQQ…	538	USER	zzzz586
554	my_seqs_16minnow_6_2ct669.7@PF02305.16	my_seqs	MKGTMQHQFSQVPQVQIPRSTFDRSHGYKTTLDSGYLVPVFVDEALPGDTFNCHMTTFCRLSTPLHPFMDNLYMDAFFFAVPIRLVWSHFVNMFGEQANPGDSTSYLVPTMTSPVGGYAIGSLQDYLGLPVASATAGVGVDPARTVTHSALFTRAYNKIYNEWFRDQNLQNSVVVDTDDGPDNPADYVLLRRGKRHDYFTSALPWPQKGPAVSIPLGTTAPVTGYAPVTGLGIPNTQAATANAVQTKDAVGGPYTWDPDFNSSTMTFHMKRINVAGTDYPDVRVQASGGANTLAADLTAATAATINQLRQAFQIQRIYEKDARGGTRYTELIQAHFGVVSPDARLQRPEYLGGGTSMVNVNPVAQTGPSGTTGSTTPQGNLTGVGTSSMRNAGFTKSFT…	556	USER	zzzz587
553	my_seqs_16minnow_6_2ct670.6@PF02305.16	my_seqs	MMHRNKSVDVHRFAMTPRADIPRAAFKIQKTHKTTFDAGYLIPIYVDEVLPGDTFNCRATVFTRLSTPLYPVMDNMYMDTFFFFVPNRLIWTNWVKFMGEQDSPGDSTDYVIPQVVSPADGYPVGSMMDYMGLPTAGQLTPGDKITTGVLPMRAYNLIWNEWFRDENLQIPAAEDKSDITELDPIGKFPLRKRGKRHDYFTSALPWPQKGQSVQLPLGSKAPVYMDITTLPIPGNQIRDRITGVPVAAAYPLRTEGGTMVANAGGVAVVVDPGGAMYADLNAATSATINQLRQSFQVQKLLERDARGGTRYTEIVRSHFGVNSPDARLQRPEYLGGGSSPIIINPIAQNSATGAYADAPLGTLGAMGTGLAAGHGFSSSFVEHGIVIGLISIRADLTYQ…	538	USER	zzzz588
552	my_seqs_16minnow_6_2ct671.3@PF02305.16	my_seqs	MFRNKSVDVHQFAMVPRAEIPRSAFKIETMHKTTFDAGYLVPVYVDEVLPGDTFNVNMTAFARLATPIFPVMDNLHLDSFFFFVPNRLVWDNWEKFMGAQANPGDSISFVIPQQISPAGGYAVGSLQDYLGLPTVGQIPAGATVTHNALPLRACNLIYNEWFRDENLQNSLQQDTGNGPDAVANYVIRRRGKRHDYFTSALPWPQKGASVQLPLGTVAPVKSDGSQVFVTNGASNFGLVTVAASNDLELGVAAPGGGNVRFGTTGNVYSTGLVADLSQATAATINQLRQSFQIQKLLERDARGGTRYTEILRAHFGVVSPDARLQRPEYLGGGSNPILFNPIAQTSGTGISGGSTPLGNLGAMATSLSNRHGFTQSFTEHGYILGFVNVRADLTYQQGL…	536	USER	zzzz589
551	my_seqs_16minnow_6_2ct673.7@PF02305.16	my_seqs	MFRNASVDVHQFAMVPSADIPRSSFNIQKALKTTFDGGYLVPVFCEEILPGDTFNVSATMFARLSTPLFPIMDNLHLDSFWFFVPNRLTWGNFRKFMGEQANPADSISFTIPQQVTPAGGYAINSLQDYFGLPTVGQVAGGSTVSHSALPLRGYNLIYNEWFRDENLQNSVTVDTGDGPDTVANYVLLRRGKRHDYFTGALPWPQKGASVSIPIGTSATVKTQTTELFTGAQAGLKIRGAAAGATLTATQALGTGAAPPIVGHSSNASHTDAGAWYPTNLYADLSTATATTINQLRQSFQIQKLLERDARGGTRYTELVRAHFGVVSPDARLQRPEYLGGGSTPINVSPVPQTSATGITGGSTPVGNLAAIGTGLSQIHGFTQSFTEHGYVIGLVSVRA…	544	USER	zzzz590
550	my_seqs_16minnow_6_2ct675.6@PF02305.16	my_seqs	MKSVMAHSFSQVPQADIQRSSFNRSHGYKTAFDSGYLIPIFVDEALPGDSLNLRMSAFCRLSTPIKPIMDNLFLDSFFFAVPNRLLWTNWEKFNGAQTNPGDSTSYLVPQMQAPGAGGVTVGSLSDYIGIPTGINSILFDSLWHRAYNLIWNTWFRDENLQNSVTVDTGDGPDTYTNYVLLRRGKRHDYFTSSLPFPQKGTAVTIPLGTSATVKTNASDLLTGAQNPIRWLQSAAGALPGASALITTGAGAAATNINYSATAGTSQGTSLYPTNLFADLTGATAATINALRQAFQIQRMYERDARGGTRYTEILKAHFGVTSPDARLQRPEYLGGGSSPINIHPVAQTTPTPAAGTTTPQGNLAAFGTGGFTGHGFTKSFTEHCTLIGLVSVRADLNYQ…	536	USER	zzzz591
549	my_seqs_16minnow_6_2ct677.4@PF02305.16	my_seqs	MSYQRMPSRELVSQQDSALNPRTSVPRSRFLNNFGVKTTFDAGLLIPFLLDEILPGDMMKYDVTAYLRMATPLFPIFDNQRIDTHFFFVPTRLLWDNFVKMMGEQDNPADSIAFTVPYIDSPAGGFAVHSIFDQFGLPCVGQITAGQTIRVNALPLRAYNLIVNQWFKDQNLQNNLVFSRGNGPDVVGSYALFRRAKAHDYFTSCLPWPQKFTAPNVPLLGTAPIVGLGFDIAVAGTAGSLDVRETSNAVVQQYAAWRLASSAGAVAIEATGSAANAQPLVFANLAAASGVSINQLREAFLIQQLLEQQARGGTRYTEIVFEEFGITSDDARLQRAEYIGGGSSALDVTPIAQTATGGGGVGALGAAATSVGSHRASFAAKEHGYVIGLISVRTELSYQ…	538	USER	zzzz592
548	my_seqs_16minnow_6_2ct679.3@PF02305.16	my_seqs	MDVKKGEIFNAVKVAQLPRNTFDLTHQHVTTCNFADLIPIMTLEAMPGDIFNLSCETFMRLQPMITPMFHRCDVTVHYFYVPNRLLWDGWEDFITGNNALDGGLNTPVAPYFKMSSLSFGDWDESKTLLNYMGCEIDFATKIDNAGFGTYGISALAPAAYTKIYYDYYIPRELAQKENLQYEFQKLENGLNDTDLERWLRLRKKGWQRDYFTSALPYAQKGDAVLIPMEGDVLLDSTATAAGQIKASVGHANLTGDVTAAAGTMQNVGGVTSNAVYDPNGTLIVNNAQTTINDLRRAMRLQEWLEKNARAGTRYSESLRIHFGVISSDARLQRAEYITGIKSPIIVSEVLATAATAELPQGNMSGHGMAMADGGYDSFYCEEHGFVIGILSVTPKTAYS…	544	USER	zzzz593
547	my_seqs_16minnow_6_2ct680.4@PF02305.16	my_seqs	MQFGSRYNQHSFAEIPAVNTPRSVFQRDFQAKDTYQFDYLYPFFVDEYLPGDTFNLNVNMFARLNTQVVPLMDRLYCSIHFFSIPNRLVWDNFKKFMGEQDDPGDTTDYILPYLTAPNTTGFDVGSLYDKLGLPTGISQLRVNNSLPMRGYSLLWNQWFRDQNLQDSLVVPMDDGPDAPGDFALQKINKSHDYFTSALPFPQKGPDVTLPLGTTAPIMENGDFRLQFQAVASGPRNVVGAAGGLTYSGAGLAGNPVAQYSDGLIVDLTSATAATINQLREAMLMQSLFELDARGGTRYPEILLAHFNTVLPDAQHRVEYLGGNYVDVNIHPVAQNSASETGKPQANLAAFATMSAGGGRVGFTKSFLEHGHVIGVIAFKAAITYQQGVYRMWNRSTRYD…	531	USER	zzzz594
546	my_seqs_16minnow_6_2ct681.5@PF02305.16	my_seqs	MRERKMRKTSNPFQAVGSAKVRRSALDLSHSHMMSQKFGELVPLSPIEVLPGDVVELGLSSFIRAQPMVRPPLGRTKVRTYHFFINYRILWDEWEQFIGGQEDYDPDVPYVPPELPYFPAPDTANNTTMCALGSLWDYFGWPINGSASDSYDPATSYKAMTFVHDAYWKIYNEFFRVPGIQPKLVPDWVAGTTDAGYAWQYKPAYRNHTRDYFTSLLPWTQRGTPPALGVFGTTNADFSLSLQDNSAWGSFANLTVRNDTIAVTGVPMGVSAASNFTNVNANINKALSDNNVVDGAAFSSVDINDLRLAWQTQVFLERQARGGARYSEVIESHFGIRLFDSNIQRPQFIGGTVSDMLFSEIPQTSQSDTTPQGYIVGHGVGTDAQNIGKFRVMEHGIIL…	556	USER	zzzz595
545	my_seqs_16minnow_6_2ct682.6@PF02305.16	my_seqs	MIGHKNRSVSVHQFAMVPKADIPRSQFRMQKAVKTTFNSGDLCPMFCEEVLPGDTFRCSLTAFIRMATPVKPIMDNLYFETFFFFVPNRLVWVNWKKFMGEQANPGDSISYTIPTLTTPVGGFAAGTIGDQFGLPTVGQVGAPNSVLFNALPFRGYNLIFNEWFRDENLVNSQVVNTADEAGGSSGPYAIQKRGKRHDYFTSCLPFLQKGTAVTLPLGTSAPVKTQGPAVFTGVQPAVSWNNSTSGATLPTALQISSGASGIIGSSGTAATAAPIGIYPSNLIVDLSSATAATINQLRQSIQIQKMLERDARGGTRYTEIVLAQFGVRSPDARLQRPEYLGGGSASINVAPVMQTSNTPVTGTPQGNLAAYATGLADGHAFSQSFTEHGYIIGIMNVRA…	541	USER	zzzz596
544	my_seqs_16minnow_6_2ct683.4@PF02305.16	my_seqs	MMYKNASVDPHNFAMVPRADIPRSKFNIQSALKTTFDASWLIPIYVDEVLPGDAFNLRMTAFCRLATPTTPVMDNLHLETFWFFVPNRLVWTNWQKFQGEQTNPGDSISYVIPQQVSPASGYLKLTLQDYMGLPTVGQVTGGLTVSHSALPLRAYNLIYNEWFRDENLQNSVVVDKGDGPDTVTNYTLLKRGKRHDYFTSALPWPQKGTSVSLPLGTLAPIKTQATNLVTGTQSAVQFLLQGGGAITSGFAAGLGTSGALTNSTTAVAGQSSGIYPANLYADLTAATAATINQLRQSFQIQKLLERDARGGTRYTEILKAHWGVTSPDARLQRPEYLGGGSTLVNINPIAQTGPTGTTGASTPLGNLAAMGTILKQSDGFNQAFTEHGHIIGLAMVRAD…	546	USER	zzzz597
543	my_seqs_16minnow_6_2ct684.5@PF02305.16	my_seqs	MSMNYRNKSVNAHDFAMIPRAQIPRSSFKMEKGYKTTFDAGYLIPFHLQEILPGDTFSVNAACFARMATPLYPIMDNLHLDTFWFFVPNRLVWTNWVKFQGEQDDPGDSISYTVPHQVSPTNGYALNTLQDYFGLPTVGTPAITASYTHSALPQRGYNLIYNQWFRDENLQDSVVVDKDDGPDTYTDYVLLRRGKRHDYFTSALPWPQKGGTAVSLPLGSSAPVYGTGKALGLTDGTDSVGLSLRNTNGFATGNLGVNVGTANSGSYIDSNKAAGVVTSGVSGLYADLSSATAATINQLRQAFQTQRLLERDARGGTRYTEILRSHFGVVSPDARLQRPEYLGGNSVPIQTRAIAQTSAAGLTGGNTPLAQLGAVAQVVAKTGFSQSFVEHGYIFGLMS…	546	USER	zzzz598
542	my_seqs_16minnow_6_2ct685.4@PF02305.16	my_seqs	MQSNMRHQFSQVPEANIPRSSFDRSHGYKTTFNAGDLIPVFLDEALPGDTFNLRMTTFARLSTPLHPVMDNMFCDAFFFFVPMRLVWTNFPKFFGEQTNPGDSTSYLVPQTVTGAGGFASQGLADYFGIPTLAPNISVNCLPLRAYNLIWNQWFRDQNMQNSAVQGTSDGPDSQGNFVIRKRGKRHDYFTSALPWPQKGPAVNIPLGTSAPVVSTGTGIPAFTGGGLTNSQLSTVNAQTTASFSGTATSTQGAAWATTSLMADLSTATAATINSLRQAFQVQKIYERDARGGTRYTEIIQAHFGVTSPDARLQRAEYLGGGSSPVNVNPIAQTGGSGASGTTTPQGNLAAIGTMSHNGVGFSKSFTEHGYVIGLLSVRADLNYQQGLNRLWSRSTRFDF…	523	USER	zzzz599
541	my_seqs_16minnow_6_2ct686.3@PF02305.16	my_seqs	MEPDTMPMNYKHQSVSAHQFAMIPRADIPRSAFTMQKGLKTTFDSGYLVPIFCEEVLPGDTVNLRMTSFVRLATPIFPIMDNLHLESFFFFVPNRLTWSNWEKFMGQQNSPADSISYVVPTITSPAGGHAVGSVYDYFGLPTVGQVAGGATYTHSSLPLRAYAQIFNEWFRDENLVLPKGSGLTGDSSDPVAAYDLALRGKRHDYFTGALPWPQKGNTAVSIPLLGNATVKTTNTALFTGAQQAIKFYDTTGATTGGLKTLATGAAGTGVGIGATSTAGTIAGSEFYPNNLYADLSTATTTTINALRLAFQTQKLLERDARGGTRYAEIIRSHFGVISPDARLQRPEYLGGGHSPIIISPIAQTSATGVTGGTTPAATLSAVGTSLANGHGFSQSFTEH…	555	USER	zzzz600
540	my_seqs_16minnow_6_2ct687.4@PF02305.16	my_seqs	MPSNFKNQSVNTHSFAMIPKPSVPRSSFKQEHTHKTTLDAGYLIPIYRAMVYPGDTFNLRGTIYARLATPLFPVMDNLWMDTQFWFVPLRLLWDNFKRFMGEQDNPADSISYTVPQMVTPAGGYAINSLQDYFGLPTAGQVTAGLTVSHSALPLRAYNLIYNNWYKDENLQNAVVVDKDDGPDLYTDYNLLRRGKRPDYFTSCLPWAQKGAAVTLPLGTTAPIKSDGTDIQMRGGTGTMTKINPAGAGANSNVQVITGTTVAAMNFGASGASTTGLYADLSTAAGATINAFRNALAVQALLEKDARGGTRYTEVVRQQFNVQSADARLQRPEYLGGGSAPININPVAQTTGTGATGTTTPLGNLAAVGAGLARHHGFTQSFTEHGIIIGILSIRADLTY…	540	USER	zzzz601
539	my_seqs_16minnow_6_2ct688.5@PF02305.16	my_seqs	MFRNKSVDVHQFAMVPKSDVPRSVFNRQSTHKTTFDSAYLIPVFCDEVLPGDSFNLKMTAFARLSTPIFPIMDNLYLDSFFFFVPCRLVWNNWKKFMGEQSTPGDSISYVIPQLVSPPGGFVVGSIFDYFGLPTVGQVDAGNTVSVNALPLRCYNIIYNEWFRDENLQNPNFLQLNDGPDVLTSYSLTRRGKRHDYFTSALPWPQKGTAVSLPLGTSAPIKTSSAVQQTGAQSAMGFNLASSGASAGTFQLGTVAGAASVNATAFAGSTGGVYPNNLYADLSTATAATINQLRQSFQIQKLLERDARGGTRYTELLRAHFGVMSPDARLQRPEYLGGGTTAVNISPIAQTSGSPIPSGYTTTPMGTLAAMGTALASGHGFTQSFTEHGYIIGLVSIRAD…	545	USER	zzzz602
538	my_seqs_16minnow_6_2ct689.6@PF02305.16	my_seqs	MVMMHKNRSVDPHQFAMIPHADIPRASFDRQFTHKTTFDAGYLVPIYVDEVLPGDTFKLRMTAFARLATPLFPVMDNMKLSSFFFFVPNRLIWNNWQRFMGQQDNPADSISYLVPQQVSPVGGYAVGSLQDYMGLPTVGQVGGGNTVSHCAFWPRAYNLIWNEWFRDENLQNSLTVDKGDGPDVTPSVNYTLQRRGKRHDYFTSCLPWPQKGGTAVTLPLGTSAPVFGTGLNLGLNRSSGTNYGLRTDGASAFTADVNSYGAAQGSAPGGAAITALQGVGVVTKAQAGANPTYSGLYADLSSATAATINQLRQSFQIQKLLERDARGGTRYTEIVRSHFGVISPDARLQRPEYLGGGVTPVIVNPIAQTSATGVTGGSTPVGTLAAAGTVVAQGHGFSQ…	560	USER	zzzz603
537	my_seqs_16minnow_6_2ct690.2@PF02305.16	my_seqs	MSSVQKINQGHFSMVPRADIPRSSFDRSHGWKGTMNAGYLIPIYVDEALPGDTFHLNLSAFGRLATPLHPFMDNLYMDFFFFFVPNRLIWDNFKKFMGEQVNPGDSTSYLVPQVNSPAAGYANGSLSDYMGIPTKIAVTFQHSALWHRAYNLIWNEWFRDQNLQNSVTVNKGDGPDASTDYVLLQRGKRHDYFTSCLPWPQKGPAVTLPLGTSAPVKGIGVNAGITAASTAVQMWETGASAVSVGYPIWQTSAGGVSTNQPFAIKAQSTAIPSSSNTPQIFADLSGAAAATINQLRQSFQIQRMYERDARGGTRYTEIVQSHFNVTSPDARLQRPEYLGGGSVPLNVNPIAQTSNTPVSGTPQGNLAAMGTVSAHGVGFTQSFTEHGVLLGLCMVRSDL…	539	USER	zzzz604
536	my_seqs_16minnow_6_2ct693.4@PF02305.16	my_seqs	MRDMVKQVSENLLMAVPQKSRHNIDSQTLTTSGFGTLTPVYIQEAVPGGQYTLSAETLVRFQPLASPLMHKCTTKIFYFYVPYRILWHNWEHFVMGKPDPLTGLDPVFPYYPASYYSSTPLVNGVNQNRLADYLGIKVPPTGSSQNLNPMAFAAYQKIYNRYFRHKALKTESFSPDTLNDGLLSPTNFVLMSTLQKITYEDDYFNQALPTPQKGDPIFIDDNSIVRVNDDSANSWKIKTLLAGGNYDMTLPDNPPGTGVRSNVPALELYADVKIAMEELRVANAMQKFVEAERHTHTYKDYHKMMFNSNIKDDRVQDAEYITGHTQPITISDVVNTADLQGRLTSTGDSYFRADGDTYYTPEHGLIMGIAVTTYSSAYMKALPKVHLKTDRFEYFHPAF…	508	USER	zzzz605
535	my_seqs_16minnow_6_2ct697.5@PF02305.16	my_seqs	MAEKYFNQPSVMTAQQHFSGAPQSDIQRSRFDRSHAYKTTFDAGYIFPFMCDEVLPGDTFNLGVTSFARLATPLKPFMDNVYLDIQFFFVPNRLVWDNWQQFMGERLNPDDDPLVFTMPQATVDTSVADGATLPEYFGIPPMVGTVQVQALPFRAYCLIWNEWYRDQNLQDRIFISTGDGPDTWTGSQPLARGKRHDYFTSCLPWPQKGSAVTIPIGVSAPVLTSNTDTVTGVQAAMGFNTVGGGNPAAGSLNVAADGFAYQAVPAGTFGNSVYPSNLYADLTAATSISINDLRTAFQIQRLLERDARGGTRYIELILSHFGVRSPDARLQRPEFLGGGTTRVNINPVAATAPLPDAPQGNLAAYGTAAIRAGFSKSFTEHGFIIGLASARADLTYQQG…	534	USER	zzzz606
534	my_seqs_16minnow_6_2ct698.3@PF02305.16	my_seqs	MFRNKSVSVHQFAMVPRADIPRSSFRMQTTHKTTFDSGYLIPVYVDEVLPGDSFNLKMTAFARLTTPLYPVMDNLVMESFFFFVPNRLTWSNWKKFQGEQATPASSISYTVPQMVSKASGYDIGSLQDYMGLPTLGQLTAAQTVSHNALPVRAYNLIWNEWFRDENLQDSVVVDTGDAASVYTDYVLLRRGKRHDYFTSALPWPQKGSTAVSIPLGTSAPIHVQSGGTAGKAPGVYSDSAAAYKALDAGGSLVTISASSPDTNANLYADLSTATAATINQLRQSFAIQRLLERDARGGTRYVEALQARFGVRPQDARLQRPEYLGGGRTSVNISPIAQSSASGLTGSATPLGNLAAMGTSVLRDNGFNHSFPEHGYVIGLISVRADLTYQQGLRKMWSR…	531	USER	zzzz607
533	my_seqs_16minnow_6_2ct699.1@PF02305.16	my_seqs	MPLPMHKNKSVGTHSFAMIPKADIPRSTFLQKSTHKTTGDAGYLIPIYLNEVYPGDTYNLHGTIFARLATPLFPIMDNLWLDIQYWFVPYRLVWTNWAKFMGEQANPADSISYTIPIVPTKASGYDINSLQDYMGLPTLGQMTAAATINHSTLPLRAYNLIWNNWYRDENLQNSVVVDLDDGPDVYTDYNLLRRGKRPDYITSCLPWAQKGTSVTLPIGTTAPISGIGITTGAATAQARSAWGVTSTNDWTSQPTWVGTDGIEILAQSNAVPGTSNRPQIFADLSQATGATINAFRNAVAVQTLLEKDARGGTRLTEIIRQQFGVVSPDARLQRPEYLGGSSAPINVNPIAQTSGTSASGTTTPLGNLAAAGAGVNKSGFTQSFTEHGVVMGLMSIRAD…	545	USER	zzzz608
532	my_seqs_16minnow_6_2ct700.6@PF02305.16	my_seqs	MNFRNKSVSAHHFAMTPRPDIPRAAFNMDFTHKTTFDAGLLVPVLCEEVLPGDSFSVEMTAFARLATPIFPLMDNLHLDSFFFYVPNRLVWDNWVKFMGEQASPSDSISYVVPQIVTPSGGWPVGHLADYFGLPTVGQVAGGASVSHSALPLRAYNLIWNTWFRDQNLDIPLVVSTSDASDTTSWYNLARRRKRPDYFTTALPWPQKGGVAVSLPLGTTAPIVATGSFRLQAPGTGPFTPSTFRVAAPASSPYITGGAASGSAGTDMVYAGGLQADLSAATAATINQLRQAFQIQKLLERDARGGTRYAEIVRSHFGVVSPDARLQRPEYLGGGSQPMMVTPIAQNSATGVTGGSTPLGNLAGIGTVVARHGFRQSFTEHGYVIGMVSVRADLTYQQGL…	536	USER	zzzz609
531	my_seqs_16minnow_6_2ct701.3@PF02305.16	my_seqs	MGGMNYRNRSVNAHDFAMIPRASIPRSSFKMDKSYKTTFDAGYLIPFHLQEVLPGDSLSVSGSAFARMATPLYPIMDNLHLDTFWFFVPNRLVWTNWVKFQGEQDNPADSISYTVPQQVAPSSGYPLNTLQDYFGLPTVGTPGPTLPISHSALPLRGYNLIWNQWFRDENLQNSVTVDKGDGPDTTSNYVLLRRGKRHDYFTSCLPWPQKGGASVSLPLGTSAPVYGTGKNLGLYDGTTLGGMFTNASNQLAGMNVNNVNTGTAISGSLLALSKAVGVPTLAQVGAGNSGLYADLSTATAATINQLRQAFQTQKLLERDARGGTRYTEILRAHFGVISPDARLQRPEYLGGGSVPVETRAIPQTSAAGLTGGNTPLAQLGATAQVVAHTGFSQSFVEHG…	553	USER	zzzz610
530	my_seqs_16minnow_6_2ct703.5@PF02305.16	my_seqs	MALPSVMTHTFSQVPRADIPRSSFDRSHGLKTTLDSGFLVPIFVDEALPGDTFNVNMTGFARLATPLHPYMDNAFFNTFFFAVPIRLIWDNWEKFNGAQASPGDSTDYIVPQVNAPAGGWPSGSMSDYFGLPTLKYPCASSAFWHRAYNLIWNEWFRDQNLQVPVTVKTDDGPDTATLYGLKRRGKRHDYFTSSLPWPQKGESVSIPLGTTAPVLGTATGGILVEGTGASTGARALYGQTNLGVTYDGTAFNPAQGLTFAAGAQPLTADLSEATAATINQLRQAFQVQRLYERDARGGTRYTEIVRSHFGVVSPDARLQRPEYLGGGQSSVNIHQVEQTSGTATAADGYTPTPQGNLAAFGTSVMSGHGFSKSFTEHCVILGLVSVRADLNYQQGMNRM…	530	USER	zzzz611
529	my_seqs_16minnow_6_2ct704.4@PF02305.16	my_seqs	MSKTKVTRNYEQPRGGFKITGNTARAPFMESIQSQRNETNTFDLTHDIKLSGEMGNIIPLGAIECYPGDSFEIGADLFTRIAPTIFPIMHRVNQSIVCAFVPRRLLWAEHEDFIAGKATGGRPKIEVSLTQTDEENAFLDYFGVPPFNVVGSGVNKLINAEPFAAYQKMYEDLFRDQNVIAEVDYMCTSGTQSTGKMQELLKMRRVSWQRDYFTSMLPTPQAETAVDVPIGTVIIDPDWAANGSDPVFEDSTGALPTGSNPLNQDAGAGQILTGAPATQVAYNPDGSLITDPVTVNTLRRALQLQRIKEMFIRGGRRFKEVIKSAFGVDASDPRLDRAEYVFGVKTPIVISEVLNTTGGFSALDPTDPTSRVQGDMAGHGVAVARNDRYNDYHVKEHGY…	545	USER	zzzz612
528	my_seqs_16minnow_6_2ct705.5@PF02305.16	my_seqs	MQFDYLYPMYVKYIYPGDTISASLGMLARLQTQIRPLYDDLYFDIHAWYVPMRLIHTNWARYQFNTKVTGPSQDNTALTSPKIDLATLGAGGFASKGLYDYLGLPTKINAVASTQHINNYAARAYNLIWNQNYMDQNLQTPVTVDLGDGPDLASNYVLLKRGKRHDRFTSSLTSAQKGAAVTLPLGTSAPVRGIGKFGTQNFPNTAATVYESGQTSTTTFGFSATSSGVGDGRFEIQGTAATGGYPNIYADLTNATSATVNQLRQSIAVQHLLEADSRGGSRDVEAILNRWGVSVPDFRMQRPEYLAGQTFSFDGHVVPQTSATGLTGGTTPAGYLTQFSQSMSQMNIVHSFVEHGIFMVLISARSNMTYQQGLLKEMQYKTRYDWYQPEFSNLGEVGV…	510	USER	zzzz613
527	my_seqs_16minnow_6_2ct706.6@PF02305.16	my_seqs	MVANFKNRSVNVHDFAMTPHADIPRSSFSIPHTHKTTFDAGYLVPVYVDEVLPGDTFNVKMTAFARLSTPLFPTMDNLHMESFFFFVPNRLVWTNWKRFNGEQTNPGDSVSYVIPQLVSPVGGYAVNTIFDYMGLPTVGQVGGANTVSHSALPLRAYNLIWNEWFRDENLVPSLPVQVDDGPDVLGNYGTQLRGKRHDYFTSCLPWPQKGTSVSLPLGTSAPVKIVPFGTSTNPWISQNAATGALGNGALSAAAGTGQVNIAGTTQAFDPNGRLFADLSVATAATINQLRQSFQIQKLLERDARGGTRYTEIILSHFGVRSPDARLQRPEFLGGGSTPVNVSPIVQQSATGVTGGSTPMGTLGGVGSFVANNHGFRQSFTEHGHVIGIVCVRADLTYQQ…	540	USER	zzzz614
526	my_seqs_16minnow_6_2ct707.5@PF02305.16	my_seqs	MKRNKHSLSHNRLLSCDMGALVPIGWFEVLPGDTIQHATSALLRASPMLSPVMHPMDVRIHHWFVPYRLLWSSFEDFITGGPSGTSLPTFPTITFASAPGLGSLSDYLGVPHSVTGQVVSALPYRAYARIWNESYRDEDLQSALVQSTADGNDTTTSTAIQNISWEKDYFTSARPFEQKGPAVSLPLGTSAPVKTNASDLVTGAQTALKLRQAPTGNVFPASKGLGVDSGSNVFAGDNPLVNVTATAYPSNLFADLSSATAATVNQLRQAMAIQRFEEARARYGSRYVEYLRYLGVRSSDARLQRAEYLGGGKNRVQFSEVLQVGPSASPDQANTVGALKGHGISAMRSNRYRRFIEEHGLIMSLLSIRPKTIYMNGLDKKFNRRLKEEFWQRELEHIG…	503	USER	zzzz615
525	my_seqs_16minnow_6_2ct708.4@PF02305.16	my_seqs	MGAFVVIGGFMFRNRSVDSHQFAMVPRADIPRASFKMDRAYKTTFDAGLLIPVLCEEVLPGDSFRLKMTAFARLATPIFPVMDNMYLDSFFFFVPNRLVWQNWKKFMGEQVNPGDSISYVVPKVTSPAGGFPVGSIYDYFGLPTVGQVTAGNTISVSSLPFRAYALIFNEWFRDQNLIPSEVIPLGDGPDVSTAYSLARRGKRHDYFTGCLPWPQKGGTSVTIPLGTTAPIVGTPSFVPDTGTGPFNPSRLAFGTGAAGQPITVNTAMGSGGSNGLKLVSGSLIADLSQATAATINQLRQSFQIQKLLERDARGGTRYTEIVRAHFGVNSPDARLQRPEYLGGGSAPIILNPVAQTSGTGASGQTTPLGNLAAVGTMVAYGHGFSQSFVEHGYVIGLVS…	547	USER	zzzz616
524	my_seqs_16minnow_6_2ct709.2@PF02305.16	my_seqs	MTGTGRSVMRHQFSQVPRASIERSSFDRSHGLKTTFNAGDLVPIFVDEVLPGDTFSLNATMFGRLATPLHPFMDNLFLDTFYFFVPNRLLWTNFVKFFGEQDNPSDSVSFLVPQITAPAGGYTEQSVYDYMGLPTKVVGLKHNALHLRAYNLIWNQWFRDQNLQTSVAVNKGDGPDAPTDYTLLKRGKRHDYFTSCLPWPQKGPAVSIPLGTKADIYGIGLLEGAATGLSGSIARGPTSAQDIAASSTGIASPGTGIFFKSTTSGVISNTNRPQFYADLSNATAATINSLRQSFQIQKIYERDARGGTRYTELILAHFGVSSPDARLQRPEYLGGGSVPLNVNPIAQTSATSISGGTTPQGNLAAIGTVHTSQSGFTKSFTEHGVLLGLCSVRADLNYQ…	540	USER	zzzz617
523	my_seqs_16minnow_6_2ct710.6@PF02305.16	my_seqs	MKSVMRHQFSQVPKATIQRSSFDRSHGFKTTFNAGYLIPVYVDEALPGDTFNLRMTTFARLSTPLHPIMDNMFCDAFFFAVPIRLVWSHFVNFFGEQDNPSDSTSYLVPTTSGVHAVGSLQDYMGLPVPNAVGQSYNVLHLRAYNLIWNQWFRDENLQNSAPVNKGDGPDNIADYTLRRRGKRHDYFTSCLPWPQKGPAVMLPLGASAKVVTSAPTFATPPGPQLIWHNSVTGGAITAGGTMGVDSAGGTVASATGVTATINLQPANLYADLSTATAATINQLRQAFQVQKIYERDARGGTRYTELIQSHFGVTSPDARLQRPEYLGGGSTPINVNAIAQTSATGAAGATTPQGNLAAVGTMSHHGVGFTKSFTEHCLLLGMISVRADLSYQQGIERMW…	529	USER	zzzz618
522	my_seqs_16minnow_6_2ct711.6@PF02305.16	my_seqs	MSKMPSVMSHDFSRVPRAEIPRSSFQRNHGMKTTFDSGYLIPIYLDEALPGDTFNVNLTGFGRLATPLHPFMDNVFMNTFFFAVPYRLVWDNWQKFNGEQRNPGDSTDYLIPQMISTAVTGYGEQSIFDYFALPTKVPGLAHSCLPLRAYNLIWNEWFRDQNLQNSVVVNVDDGPDDPTDYTLLRRGKRHDYFTSSLPWPQKGPGVDIPLGTSAPIIGLSYMATGTATGSTGYGYGVSDSGSGDVPFAGTPVIGTSNAAGLIRMESLGAVSATNRPQVYADLSDATAATINQLRQAFAVQKLYERDARGGTRYTEIIRAHFNVTSPDARLQRPEYIGGGQTPINLYPIAQTQAQGTGVDTPLGNLAAYGTTHVQGHGFTKSFTEHCIIVGMVSVRADLN…	541	USER	zzzz619
521	my_seqs_16minnow_6_2ct712.4@PF02305.16	my_seqs	MFGIGSGKLPTVMKHDFSQVPKADIPRSSFDRSHGFKSTFNAGYLVPFFVDEALPGDTFSLRASLFARLATPVAPVMDNLHCDTFFFAVPIRLIWDNFKKMMGEQEPNTFTSYLVPIMTSPTGGYAVQSLQDYMGLPTAGTYGVDATKTVSHSALWTRAYNLIYNEWFRDQNLQASVTVDKGDGPDDPANYVLLRRGKRHDYFTSCLPWPQKGTAVSIPLGTSAPIRGVNGSGTVDDLVYLFGDSNGAFVRSDTTPQTNGNLRFGGAGSIAANATMKWQQASDNGGSVDGYNIADLSAATAATINSLRQAFQLQRLYERDARGGTRYTEIVRSHFGVTSPDARLQRPEYLGGGSTPITFTPIPQTSVTAATPQGNLAAMATMSGTGHGFSKSFTEHCVL…	548	USER	zzzz620
520	my_seqs_16minnow_6_2ct713.5@PF02305.16	my_seqs	MSMNYRNKSVNAHDFAMIPRASIPRSSFKMEKSFKTTFDAGYLVPFHLQEVLPGDTFSVNAACFARMATPLYPIMDNLHLDTFWFFVPNRLVWTNWVKFQGEQDNPADSISFTVPQVLSPATGYVLNSLQDYFGLPTVGTPAITAAVSHSSLPLRGYNLIYNQWFRDENLQNSVVVDKDDGPDVYSDYVLLRRGKRHDYFTSCLPWPQKGGTAVSLPLGTSAPIKIPGTSAVYPSVVGSNGTEYIMNTTATYATTAAGSGSAMYADLSAATAATINQLRQAFQTQKLLERDARGGTRYTEILRSHFGVVSPDARLQRPEYLGGNSVPIQTRAIAQTSAAGLTGGNTPLAQLGAVAQVVAKSGFSQSFVEHGYVFGILSVRADLTYQQGLERHWSRLTRY…	525	USER	zzzz621
519	my_seqs_16minnow_6_2ct715.6@PF02305.16	my_seqs	MKSVMRHQFSQVPKADIPRSSFDRSHGFKTTFNAGFLVPVFVDEALPGDTFNLQMTTFARLATPLKPFMDNLFMDCFFFAVPYRLVWNNFKKFFGEQDNPADSTSFLVPTATSPVGTGYVVGSLQDYMGLPTAIPGYVHSNLWPRAYNLIWNEWFRDQNLQNSVTVDKGDGPDTPANYVLLQRGKRHDYFTSSLPFPQKGPAVNIPLGGTAPVKGIGLVGTPGNSGAQAVVRETTPLPNRAYSQSSETVLGTAGNGIYVEFDSAASATTKPLIFADLTNATAATINQLRQAFQIQKIYERDARGGTRYTELIQSHFGVTSPDARLQRSEYLGGGTVPININPIAQTGGSGASGTTTPLANLAAVGVSSIKGCGFTKSFTEHCLLIGMVSVRADLNYQQG…	537	USER	zzzz622
518	my_seqs_16minnow_6_2ct716.7@PF02305.16	my_seqs	MRHQFSVVPKAEIPRSTFDRTHGHKSTFSAGWLVPFFVDEALPGDTFNVRATLFARMATPIFPLMDNLYLDTQFFACPIRLLWNNWQKFNGEQDNPGDSTSYLVPQMTSPAGGYAVGSLSDYMGIPTLVAGIEHVSLWHRMYNLTFNQWYRDENLQNSVTVDKGDGPDTPGNYVLLQRGKRHDYFTSCLPWPQKGTAVTIPLGTSAPVKDSGPPASANLNFVKFSGGLPAAGATNFDGAGHLRDSASIAVNYAGGLIADLSTATAATINSLRQAFQIQKMFERDARGGTRYQELIKAHFGVTSPDARMQRVEYLGGGSSPVGFSSVPQTSSTDATTPQGNVSAFGTVTGHGHGFTKSFTEHCLIMGIMSVRADLTYAQGLNRMFSRSTRFDFYWPALSH…	515	USER	zzzz623
517	my_seqs_16minnow_6_2ct718.9@PF02305.16	my_seqs	MSRSVMTHQFSRVPEADIPRSSFDRSHNIKTTFDAGYLVPVFVDEALPGDTFHLNMSMFGRLATPLHPFMDNMFVDVFFFAIPNRLVWDNFVKMMGEQTNPGDSTSYIMPTATPGAGGYGENSLQDYMGLPTKIQSMPHQNLPMRAYYLVWNEWFRDQNLQNSLAVPKGDGPDSAANFVLQRRGKRHDYFTAALPFPQKGPAVNLPLGTAATVRTNATPLITGVQNAMTISRADAAVALGTNLVLGTNAAGLSTQAMQGLNASGGSAGSIYPNNLYADLTTATAATINQLRQAFQVQKIYERDARGGTRYTELIRAHFGVTSPDARLNRPEYLGGGSVPLNVNPIAQTSSTATQPTPQGNLAAMGTFSTGKVGFSKSFTEHTIVLGLVSVRADLNYQQG…	537	USER	zzzz624
516	my_seqs_16minnow_6_2ct720.4@PF02305.16	my_seqs	MAKYFNQPEKMNSSARFSQAPQAEIERSKFDRSHGVKTTFNAGQLIPVYLDEVLPGDTFTMHSTGFCRMATLLKPIMDNLYLDTHYFFVPNRLVWDNWQRFMGEQDNPTDNPGDYSVPKTPFNLANGGGTLADYFGVPVGQTSSQHQISALPFRAYTLIWNEWYRDENIQDSLVFSKGDGPDAWGATMPAYRNKRKDYFTSALPWPQKGDSIFIPLGTSAPVVGDPNQAIQIAASASNNTPRTMILGPDANTSGQGNLGYGGALVTGNLIAFLADQDSGMIADLTQATAITINDLRTAFQIQKLLERNARGGTRYIELVLAHFGVSSPDLRAIRPVYLGGGSTPISVNPVAATANVIDETIQGDLSAYATGVQNAGFSHSFTEHGYVMGIVSVRSDLTY…	539	USER	zzzz625
515	my_seqs_16minnow_6_2ct721.6@PF02305.16	my_seqs	MKSVMRHQFSQVPEAQIPRSSFDRSHGFKTTFDAGYLIPVFVDEALPGDTFNLQMTTFARLATPLKPFMDNLFCDAFFFAVPYRLVWTHFVNFFGEQANPADSTSFLVPQMVSTAYAVGSLHDYFGLPTSPVTGFSHSSLWHRAYNLIWNQWFRDENLQNSVTVDMGDGPDLPANYVLLRRGKRHDYFTSSLPFPQKGPAVNIPLGGQAPVKGIGVQTTAAAAQAVTALGQQSAYDAGLNAASFFGAAPGLVLQAQTAAVPNASTNRPQIYADLSSATAATINQLRQAFQIQKIYERDARGGTRYTELIQSHFGVTSPDARLQRPEYLGGGSVPITVTPIPQTTATGLTGGTTPQGNLAAYATTSMNGVGFSKSFTEHCLLIGLISVRADLNYQQGLNR…	534	USER	zzzz626
514	my_seqs_16minnow_6_2ct722.6@PF02305.16	my_seqs	MQNFRNKSVKVDHFAMVPRAEIPRSNFKIETAHKSTFNAGNLVPIFVDEVLPGDTISLKLTAFARMATPIFPIMDNLHMEHFFFFVPNRLVWDNWQRFMGEQDNPGDSTSFIIPVVNHTTALPPPLGLYDYFGLPTTGQAVSTTLSHSALPMRCYNLIWNQWFRDENIQNSASFVRGNGPDNPSAYFLRPRGKRKDYFTSCLPFVQKGAPVSFGLTGIVPVGSTGVAPTFNATGGSTNQTLKVQYASAEPPVLWAGTGATVKSDLKFGATTGLQVDLATATATTVNALRNSFQVQRLLERDARGGTRYTEILFAHFGVKSPDARLQRPEYLGGSHTSINIHPIAQQSGTGATGQSTPLGALAGVATGLSTSNGFSQSFTEHGYIIGLVSIRADLTYQQG…	538	USER	zzzz627
513	my_seqs_16minnow_6_2ct723.1@PF02305.16	my_seqs	MRIKGSNQHNFAKAPQALLQRSKFNRSFSIKTTFDAGKIYPLFWDEILPGDTYKCDLKAFCRFSTLLFPLMDNVWCDVFYFFIPNRLVWDNWVRLCGEQDNPSDTTNYLVPNMVAPVGGYAEGSIYDYFGLPTKVAGFSHISLPLRSYNLTYNRWFRDENLINSVPVNKTDSIDPSTDYILRPRGKRKDYFTSGLPWPQKNNTGIPITVPLGSSAPVVTNNLNPTFTGGSGITNSLLAFTAAGSNPNVQIIGTATGAGNLVFGNQSGLIADLANATGATINSMRQAFQIQRMYERDARGGTRYQEVLVSHFKVHAPDQRLQYPEFLHQSSHYVNITAIPQSAPTGAYANTPQGNLAAIGTLAINDTGFTRSFVEHGILLCLISARADLTYQQGLNRMWS…	528	USER	zzzz628
512	my_seqs_16minnow_6_2ct724.5@PF02305.16	my_seqs	MFRQSTPHNKSPMPYTFGNVPQIDVQRSTFRRDHTVKTTFDAGKLIPFYVDEILPGDTVSFNATILARLATPIFPVMDNIFIDTHFFFVPNRLVWDNWERFQGAQDNPDDSTDFLIPQVSFHPAQSVQPESIYDYMGIPLGVNGLAFNGLYFRAYNLIWNEWFRDQNLQDSVPVYKNNGPEDSVEYTILRRGKRHDYFTSCLPWPQKGAEVLLPLGSVAPVIGNGMALGMMDGSGNFYGAGSGGGGTGDWRTTRYGTLLPNNDAGTLAASKTLGVTDDPDNSGLIADLSAATAATINDLRFAFQYQLKQERDARGGTRYVEKLLSHWGVVSPDFRLQRPEYLGGGSQRMGFEAVPNTNITGTSSADLSAYGVSVGNNHSFVKSFVEHGMIIGLVSARAD…	540	USER	zzzz629
511	my_seqs_16minnow_6_2ct725.4@PF02305.16	my_seqs	MHRNKSVNPHNFAMIPSAEIPRSSFRVQSSHKTTFNASYLIPIYVDEILPGDSINLNATIFARLATPIAPVMDNLHLDTFWFFVPNRLVWDNWVKMMGQQTNPGDSISYVTPQVTGTTGGYAALSIFDYMGLPTVGQVNAAGNFTHSALPLRAYNLIYNEWFRDENLQNSLTVNKGDGPDTPATYSLVRRGKRHDYFTSCLPWPQKGSSVSLPLGTTAPVLRTDNAAAWVPKVAGSNASVGTAGVQTVSGSLNVVGVANVSLDPNGGLYADLSAATAATINQLRQSFQVQRLLERDARGGTRYTEIVRSHFGVVSPDARLQRPEYLGGGSTLINVNPIAQTGPTGTTGSTAPMGTLAAMGTALRQGDGFSQAFTEHGHVIGLAMVRADLTYQQGMRKMW…	534	USER	zzzz630
510	my_seqs_16minnow_6_2ct728.5@PF02305.16	my_seqs	MAPYKGFTTVELRKPTRSTFDLSHEKRLSTRIGRLTPIFVTETLPNDTFHGSTEILLKLAPMFAPIFHRLNLYVHYFFVPNRLLWDEWEEFITGGRLGETVQTPPVPPRIVVEQMLALNNNVMDIGSMCDYFGIPPIPDSALAGGTWAGITLDAMPFAAWYQIWYDYYRDRNFYADNDVLPLISGPNNGDNFMSTTWSRLWQHDYFTSALPWTQRGAEVLLPLQGTGTVNYMPSSIFLDTATDAAFAGDNAMGTNASTPTLKNITLPGAVFGSAGRIENIQDVTIDNSEVSINDLRRAVSLQQWLERNALAGSRYNESIMAHFGRKTSDSRLQRAEYLGGGKAVVQISEVMTTAYSADADDVVVPPANPTGRGSTYSDINKFSYNCEEHGFIIGVMSCM…	541	USER	zzzz631
509	my_seqs_16minnow_6_2ct729.5@PF02305.16	my_seqs	MQGIPSHKNKSVNVHSFAMIPKPDIPRSSFIQEHTHKTTMDSGYLVPIYRIEVLPGDTMNLDGTIFARLATPINPVMDNLHMDFQFWFVPYRLVWTNWPKFMGEQTNPADSISYTIPTVPTKASGYDIGSLQDYFGLPTLGQMTAAATISHSTLPLRAYNLIYNNWYRDENLQNSVVVDLDDGPDVYTDYNLLKRGKRPDYFASALPWPQKGTAVSLPLGTTAPVYGTGKSLGMYDGTGATGGSAADNVGGLVANVTNYNANVGVVPAGANLGPSLGVGVVTTGVSGLYADLSTATAATINALRNAVAVQSLLEKDARGGTRLTEIIRQQFGVVSPDARLQRPEYLGGGSAPIVINPVAQTSGTSAAGTTTPLGNLGGVGAGVARNQGFRQSFTEHGIV…	552	USER	zzzz632
508	my_seqs_16minnow_6_2ct730.5@PF02305.16	my_seqs	MQSQFTAAPSTVPHERSAFDRSFAVKTTADVDMLIPVMAEEVLPGDTMNLHTSVVGRLYSRIKQSLMDSLYMDVFAFYVPDRLVWDNANAFLGERPDGNAPDPSTFTTPQIDFNGNAAGVMSNFDYLGIPPSYGVNGQPVPVSALFFRAIAKIWSDWFRDGQRQDLPSGLVTDDGPDLFSIHQAVYPRGKTPNDYFASALLQPYAGTPPVLNLGATAPVVSTNAAFQTTGLSSGQYGTFGFYTPGYNPVAPSSGGAFTDGESVVFRNNGSGVFPGLEVDLSSATPITLNAFREFTAINQLLELDNRGGFARINEIVKSHFNVVIPDARLQRAEFLASGSSEMSIHTIASTETANLGSISGSFGTFATNLSFVHSFPEHGYVIVLACARPKLTYQQGIDK…	531	USER	zzzz633
507	my_seqs_16minnow_6_2ct731.3@PF02305.16	my_seqs	MKSVMRHQFAQVPQAEIQRSSFDRSHGLKTTFDAGWLIPVFVDEALPGDTFNLRMTTFARFSTPLHPIMDNLYCDAFFFSVPYRLVWNNFQRFMGEQDNPTDTTSYLVPYMNSPAGGVLNGSLADYFGIPTQINNVNFWFDSLHFRAYNLIWNQWFRDQNMQNSVVVDKGDGPDTYANYNLLRRGKRHDYFTSALPWPQKGPAVTLPLGTSAPVKTSATRQVTGVQSAMIMAVDTTGTTVAGGGASWGTGGQAGWFSGGTGPTATLYPQNLLADLSTATAATINQLRQAFQIQKIYERDARGGTRYTEIIHSHFGVTSPDARLQRPEYLGGGSSPVNVNPIAQTSGSGITGATTPQGNLAAIGTMSHSGVGFTKSFTEHCLLLGLISVRADLNYQQGLN…	532	USER	zzzz634
506	my_seqs_16minnow_6_2ct732.5@PF02305.16	my_seqs	MHRNPSVMKHTFSQVPKAEIPRSSFDRSHGHKTTFDSGYLVPVYVDEALPGDTFNLNMTGFARLATPIVPVMDNMYLDTHFFAVPVRLVWDNWQRFNGEQPNPGDSTDFTIPQMVSPGGGYLSGSLSDYFGIPTGVAGLSHSCLWHRAYALVWNEWFRDQNLQDAIAVPKTDGPDLPSFYDLQRRGKRHDYFTSSLPWPQKGPGVTIPLGGTAPVIGIGPAAGTATITSSSLINQTGGTTIPSGSQVWAGNTAGSIYALQDSGAPGFPAIYADLSAASAATINSLRQAFQIQKIYERDARGGTRYIEVIKAHFGVTSPDARLQRPEYLGGGSTPVNISPIPQTSGTPGTGGYTTTPQGNLAAMGTALARNHGFTRSFTEHTLIIGVVSVRADLTYQQGL…	534	USER	zzzz635
505	my_seqs_16minnow_6_2ct734.6@PF02305.16	my_seqs	MKSTMSHQFSQVPRADIPRSVFNRSHGYKTTFDAGYLIPFYVDEALPGDTFNLSATLFSRMTTPIYPLMDNLFCDVHYFAVPLRLLWTNFQAFMGEQATPLTPTDYRVPQVVAAASGGFANGSLFDYFGLPTAVNSLSVSAFWSRAYNLIWNDWFRDENLQTKATVDVGDGPDTVTNYTLKKRGKRHDYFTSALPWPQKGPAVSLPLGSTAPIMTMAARQVTGIRDPLQFAVAGSGSYPGANTTIYIGSTDGVLKKNTTAIGSDGNDRYYPSNLAADLSTATAATINALRQAFQLQRLYERDARGGTRYTEIVRSHFGVVSPDARLQRPEYLGGSTARVNLTSVAQTMDGDRKLGELAAVGTITAKAGFTKSFTEHCVIIGLCSVRADLTYQQGLPRMF…	529	USER	zzzz636
504	my_seqs_16minnow_6_2ct735.5@PF02305.16	my_seqs	MKRQKHSLSHYRLATMDMGKLYPVDCVEVLMGDSFNAHSSALIRVSPLVAPVMHPVSVRLHHWFVPSRILWDGWEDFITGGPDGAGGSAGAYPVITAPVGGFPEKGLADYLGIPPLVPSLEVCALPFRAYNLIYNEFYRDQDLVTEAGEDDQVIRSIAWEKDYFTDARPWAQKGPQVSLPLGVSAPVSVNEVWAGATQRGTLGHTSAAFAGKSVLETTPLFAGTEAIQLKGVADLSAATAANVTALREAMALQRYEEARAQWGSRFAEYLRYYGIRSSDARLQRPEYLGGGKQTITFSEVLRTGAESAADPVGIGDMYGHGIAAVRTRPYLRFFEEHGYVVTLMSVRPMSIYMNGLHRMWSRRIKEDYFTRELEAIGQQEVLDKEVFATTADTVFGYQN…	479	USER	zzzz637
503	my_seqs_16minnow_6_2ct736.2@PF02305.16	my_seqs	MHRNKTVSTAHFAMTPRPDVPRSAFKIQKSHKTTFDSGLLIPIYVDEVLPGDSFNLRATMFARMATPLFPVMDNLHLDTFFFFVPNRLVWDNWQRFMGEQTSPGDTTDYLVPQFTSVAGGFQPNGLFDYFGLPTVGQVDPTGKISCNQLFGRAYNLIWNEWFRDQNLQDPAFIYTGDADDTNPEFNYKLLRRGKRHDYFTSALPWPQKGPAVGLPLGSYAPVVMGPPPHPVGRFKDPSGTLMAAGPVTSSATGDLLVNAAVAAYEPNGSLVADLSAATAATVNALRQSFQVQKLLERDARGGTRYTEILRAHFGVVSPDARLQRPEYLGGGSTPIIVNPIAQTSATPATGTDETPLGTLGAMATGLAGGIGFSQSFVEHGMVIGLVSVRADLSYQQGIR…	535	USER	zzzz638
502	my_seqs_16minnow_6_2ct737.6@PF02305.16	my_seqs	MLYDQITSHSFAMIPKAEIPRSAFKMRFSHKTTFDSGFLYPIYVEELVPGDQFSGNMHAIARLATPITPFMDDLTFESFFFFVPNRLLWSNWEKFNGEQDNPGDSTSYVIPQVVSPASGFVVSSIADYFGLPTVGQVAAAATVSVSALPFRAYNLIYNEWFRDENLQNSLNVLKTDGPDSIANYNLVRRGKRHDYFTSCLPWPQKGAAVSLPLGTTAPVVSSSATVQLRGGTGAMTGLQFPAGGAGSNVVNLAATTGLAALNFGPPGQNTTGLFADLSTATASTINAIRTAFQVQRLLERDARGGTRYTELILSHFGVRSPDMRLQRPEYIGGGSTPVVVNGVAQTSATGLTGSATPAGNLSATGTMLSVGGHSFRFSATEHGYIIGLINVRGENTYQQ…	537	USER	zzzz639
501	my_seqs_16minnow_6_2ct738.5@PF02305.16	my_seqs	MHNKSIMQHAFSRVPKVKLPRSVFDRSHAWKGTFDADYLIPFYVDEALPGDTFNLRCSLLVRMNSPFVRAPLDNLYLDTFFFFVPNRLLWTNFKRFMGEQDDPSSTIAYTVPTVTGPNVGAGGIPIGHLYDYMGLPVGALSGGGATTGITFANLHGRAYNQIWVQFFKDQNLQNAVTQDLGDSADTFSNYNLLKRGKRHDYFTSCLPYTQKGSTAVSLPLGTSATIYTSDSELVTGARSSGVRFRGKTAGAVPTATRAVGFDGGAGDINESTTVLTTSGQPVYPSNLYADLSTATSATLNSLRDSVALQHFLERDARGGTRYPELISSHFGVSNPDFRVQRPELLSTSSQRLNITPVAQTTPKPAAGTTTDQGFVAAFGTGQSFGPGFSKSFTEHGVLL…	557	USER	zzzz640
500	my_seqs_16minnow_6_2ct739.5@PF02305.16	my_seqs	MDNLYMDVFFFFVPNRLVWQNWQRFMGEQPNPGDSTDFLTPQIICPAHLGGNFTHSVFDYMGIPDTTISIEVSALPFRGLNLIYNEWFRDENLQTRVPQHVGDGPDLYTDYALMKRGKRHDYFTSALPWPQKGPAMELPLGGYANVETFGPPNDRPLFRGVSGGNAVPLHVATVTAAAPVSINSSSFTAASDIVWGVTNLRANLNTATGVTINELREAFQIQRLYERDARGGTRYTEILKSHFGVTSPDARLQRPEYLGGGTVNVSINPVQQTSATGTGDTPQGNLAAYGVVGHSGHGFTKSFVEHGFVFGLVSVRADMSYQYGLPRMWSRKTRFDYYWPVLSHLGEQAILTKEIWCDGQAGDDVIFGYQERWAEYRYHPSVITGKFRSNDPQSLDIWH…	459	USER	zzzz641
499	my_seqs_16minnow_6_2ct740.3@PF02305.16	my_seqs	MRSVMTHQFSQVPKAEIPRSSFDRSHGYKTTFDAGLLIPFFLDEALPGDTFNCRVSALARLATPIVPIMDNMFLDTQFFAVPIRLVWDNWQKFNGEQKNPGDSTDYTIPQLTAPTGGWSALNLEDYMGLPVGVENLSVSALFHRAYNLIWNEWYRDQNLQDSVAVPTGDGPDSTSQYGLLRRGKRHDYFTSALPWPQKGPGVQIPLGSYAPVFGNESQVWVHSAFGSSTDRYLNLQTSNTTVNLNANGAEDAVLLWGRDGDLSQTGLYADLAGATAATINSLRQAFQVQKIFERDARGGTRYTELIKAHFGVTSPDARLQRPEYLGGGSSPINVTPVPQTSPTGTYANTPQGNLAAYGLSAFSGHGFNSSFTEHCLIIGLMSVRADLTYQQGINRMFSR…	528	USER	zzzz642
498	my_seqs_16minnow_6_2ct743.3@PF02305.16	my_seqs	MAKIPSVMSHDFSRVPRAEIPRSSFDRSHGLKTTFDSGQLVPIFWDEALPGDTFTLNMTGFGRLATPLHPFMDNVFMNTFFFAVPYRLVWDNWQRFMGEQPNPGDSTDFLIPQMVSPAGTGYDEQSVFDYFGLPTKVPGLSHSCLPLRAYNLVWNEWFRDQNLQDRVLVPKGDGPDLPANYTVLRRGKRHDYFTSALPWPQKGPGVDIPLSGTAPVIGIAMEGGAAFGASAGGYYGVTAAGDIAAGEPSVPMWPDNVFHARGESVGAVGPTNRPQIFADLTNASAATINQLRQAFAVQKLYERDARGGTRYIEIIKAHFNVTSPDARLQRPEYLGGGQSPINLYPVAQQSPTGAYADTPQGNLAAYGTTSFSGHGFSKSFTEHCIVIGVVAVRADLNYQ…	539	USER	zzzz643
497	my_seqs_16minnow_6_2ct744.2@PF02305.16	my_seqs	MFRNKSVDVHQFAMVPKAEIPRSSFQVEKTHKTTFDGGYLVPVYLDEVLPGDSHSLKMTAFARLSTPLFPIMDNMHLDSFFFFVPARLVWFNWVKLMGEQINPGDSISYVVPQQVSPAGGYAIGSLQDYFGLPTVGQVGGGNTVSHNALPLRAYNMIFREWFRDENLQNSPVVDTGDGPDTISNYVLLRRGKRADYFTSALPWPQKGGTAVTLPLGTSAPVKTQSARTVTGAQVALQLAGTTAGAFTATNDNVALQAGGNAYRTASAGGALTETIYPANLYADLSAATAATINQLRQSFQIQRLLERDARSGTRYTELVRAHFGVVSPDARLQRPEYLGGGSTPVNVNPIAQTSATGLTGGSAPLGTLGSMATALAQGHGFSQSFTEHGYVIGLVSVRA…	544	USER	zzzz644
496	my_seqs_16minnow_6_2ct745.5@PF02305.16	my_seqs	MGISPSWSNVGASRGHTFANTPQANIRRSVFDRSHGLKTAFDSGYLIPVYVDEVIPGDTFNLKGSFFGRLSTPVVPIIDNIYMDSFFFFVPYRLIWDNFKKMMGEQANPADSISYSAPTFSVSAGDFAPGGKVTTGTLMDYMGIPANLTWGAQGIAINSLAARAYNKIWNEWFRDENLQNSVTVDTGDGPDASASYVLLKRGKRHDYFTSCLPWPQKGTAVSLPLGTSAPVAHAGAVTDRVGVVSTTQSNAVKGMYTSANNVLLDSVTVTNGLYADLSTATAATINALRLAFQTQALLERDARGGTRYTEIVRSHFGVVSPDARLQRTEYLGGGSTPINISPIPQTSATGATGTVQGNLAAMGTLAASGHGFVKSFTEHGLILGLVSVRADMTYQQGVE…	533	USER	zzzz645
495	my_seqs_16minnow_6_2ct747.3@PF02305.16	my_seqs	MRSVMSHQFSQVPRADIPRSTFDRSHGHKTTFDSGLLIPFLVDEALPGDTFNCRVSALARLATPIVPIMDNMYLDTQFFAVPIRLVWDNWQKFNGEQKNPGDSTDFTVPQIVAPATTGFSPLSIEDYFGLPVGVPGISVSSLFHRAYNLIWNEWYRDQNIQDSVSVPTGDGPDLPSDFKLLRRGKRHDYFTSALPWPQKGPGVQIPLGVSAPVIGRFSVADSEGNNQNVMSTLSGSAGVVLNGNAGSTFELFARGADNGVDLRADLSEATAATINSLRQAFQIQKIFERDARGGTRYTELIRSHFGVTSPDARLQRPEYLGGGSSPINVTPVVQTSPTGTYANTPQGNLAAYGLSAFSGHGFNSSFTEHCLIIGILSVRADLTYQQGINRMFSRRTRFD…	523	USER	zzzz646
494	my_seqs_16minnow_6_2ct748.7@PF02305.16	my_seqs	MASYAQGKRPSVMKHAFSQVPKSEIQRSKFDRSHGHKTTFDAGYLIPIFIDEALPGDTFNLNMTGFARLATPIFPLMDNMYMDTQFFSVPVRLVWDNWQKFNGEQTNPDDSTDYTIPQIFPPVAGYPVGSLEDHMGLPVGYAGFSTSVLWHRAYNLIWNEWYRDENLQDSLEVHTDDGPDPENLYRLQRRGKRHDYFTSCLPWPQKGPGVTIPLGGSAPVVSTGEEFLFKAFPGGTENPVYTDSGAFLKAGTGPTGVNQAWGAVTGLEADLTSATAATINSLRQAFAVQRMYERDARGGTRYTEILKAHFGVTSPDARLQRPEYLGGGSSTINISPIPQTSGTPGTGGYTPTPQGNLAGVGTAVLAGHGFNHSFTEHCLVIGLVSVRADLTYQQGINRM…	531	USER	zzzz647
493	my_seqs_16minnow_6_2ct750.4@PF02305.16	my_seqs	MKLFNDIQFNKPKKNKFDLSHEKKLTMKMGAMVPILLQEVIPGDQFRVNTEMLMRLQPMLAPIMHRVRVKTDYFFVPNRLVWDNWQKFITGGEDGLSTNVSPYVLIETGIPANLIEKSTLWDYYGMPSFDPTGMPGQLKVNAMPFRAYQLIYNEYYRDQNLVPEITIAKTDGLEPNTAAMLKLRTSAWEKDYFTSALPFAQKGGPVSLPIDPVVNYKNISIVKQSGTGANADGALSVDPITGDLHDVSGTARIENIQDITNASTTINDLRVAVRLQEWLEKNARAGSRYIESILAHFGVRSSDARLQRPEYLGGSSNPIVISEVLSTFQFSGDPDGAPQGNMSGHGVSAGNVPGFKRSFEEHGFVIGIMRVLPKTAYQQGIPKFMTRTDKLEYAWPSFA…	511	USER	zzzz648
492	my_seqs_16minnow_6_2ct751.5@PF02305.16	my_seqs	MSMMHKNRSVNPHSFAMIPRADIPRASFDRQFTHKTTFDAGQLIPVYVDEVLPGDTFKLRMTAFARLSTPLFPIMDNMKLSSFFFFVPNRLVWSNWVKFMGEQDNPADSISYVVPTLTSSASGYAVNSIFDYMGLPTVGQVQAAATVTHSSLPLRAYNLIYNEWFRDENLQNSLVERKTDGGDLVADFAIARRGKRADYFTSCLPWPQKGGTAVTLPLGTSAPVKYSPAFVGAGTADNKFVVALQDGTAVSHWNYGATANVNTGNNPANAGANLFADLSAATSATINQLRQSFQIQRLLERDARGGTRYTEIVRSHFGVVSPDARLQRPEYLGGGVSPVNISPIAQTSGTGITGGTTTLANLAGVGTVLSNGHGFSQSFTEHGHVIGIVCIDADLTYQQ…	538	USER	zzzz649
491	my_seqs_16minnow_6_2ct752.4@PF02305.16	my_seqs	MLGAKSQNRKSVMTHQFSQVPKAEIPRSTFDRSHGYKTTFDAGYLIPVFIDEALPGDTFNVNLTGLARLATPIFPLMDNMYMDTHFFSVPIRLIWDNWQKFNGEQRDPGDSTDFLVPQLTNATSPFLANSLEDYFGLPVGVQNLSVCAFWHRAYNLIWNEWFRDQNLQDSVEVPRGDGPDTHASGTYNLLRRGKRHDYFTSCLPWPQKGEAVSIPLGGNAPVLGIGINQGSTSSATTGYIDAMGNVIAAPNLWTSSTGNIGIEASGAATGVPSATNVPNIYADLSQATAATINSLRQAFQIQKIYERDARGGTRYTELIKSHFGVTSPDARLQRPEYLGGGSTPVVVSPIPQTSPTGSYATTPQGNLAAIGTASLQRHGFTTSFTEHCVIIGLVSVRAD…	541	USER	zzzz650
490	my_seqs_16minnow_6_2ct753.4@PF02305.16	my_seqs	MQKQHRFSEVPTVGVPRSVFDRSHGLKTTLNAMQLVPVLVDEALPGDTFSVKGTFLARMATPIKPVMDNIWLDSFFFFIPNRLIWSHWVNFCGEQDNPADTIAYTIPQIVSPGGGYANSSVYDYMGLPTAIAGISHSALPLRSYNLTWNQWFRDENLQNSVARNLGDGPDASTDYVILNRGVRHDYFTSCLPNPQKGSTAVSLPLGTTAPVKAGGPSGGIVDIQSGASGIRTLQMDGATKNITYSGAIYGVAGNITYASDNNTGLFTDLSAATATTINAVRQAFTIQQFLELDARGGTRYIEKVKAHFGVSSPDARLQRVEYLGGGSTRVNIGAVPQTAPTVAGQTPQGNVAAYSATVSTGNGFSKSFTEHGIILGLVAIRADITYQQGLDKMWSRSTE…	522	USER	zzzz651
489	my_seqs_16minnow_6_2ct754.6@PF02305.16	my_seqs	MMHRNQSASVHQFAMVPRADIPRSSFRIQKSHKTTFDAGYLIPMFVDEVLPGDSFNLKMTAFARLATPINPVMDNLYLDSFFFFIPNRLVWTNWVKLMGQQTNPGDSTDYTVPQVVMPAGGFAVGSLFDYFGLPTVGQMTAGKAVNVNALPARAYNLVWNEWFRDENLQPSVTVPVADSQSAASVFPLQRRGKRHDYFTSCLPWPQKGESVMLPLGQRAPVISDYNSGLGGIFTGVSGPPAAHPTGAVTSAAGGAMQVSGADVFYSPNGTLFADLSQATAATINQLRQAFQIQKLLERDARGGTRYTEIIRAHFGVVSPDARLQRPEYLGGGSTPIIINPIAQTQRTDANATPLGTLGAMGTALGHHGFSQSFTEHGYILGLVSVRADLTYQQGLRKLW…	532	USER	zzzz652
488	my_seqs_16minnow_6_2ct755.4@PF02305.16	my_seqs	MSASISNRQSQHVFSQVPSADIPRSKFNRSFNRKQTFNAGDLVPIYVDEVLPADTFNLRMSSFVRMLSPLVYPIMDNLYLDTFFFFVPNRLVWNNWEKFNGAQDNPADSTSFSIPQCVSPSGGYLNSSLQDYMGLPTAGTGGVTAGGTFTHNNLPLRAYNLIWNTWFRDENLQNSVTVDKGDGPDTAANYTLLKRGKRHDYFTSCLPWPQKGTAVSLPLGTSAPVKWSNMTSTGAPVAGFTGALVAEGWSGGVVQVGRDVGGTYTTVPANTVMDMYADLSAATASTINQLRQSFQIQKLYERDARGGTRYTEIIRSHFGVVSPDSRLQRPEYLGGGSSPINVHTVAQTGATGATGTTTAAGNLTAFVTSAFNGHGFSKSFVEHGYIIGLANVRADYTYQ…	538	USER	zzzz653
487	my_seqs_16minnow_6_2ct756.7@PF02305.16	my_seqs	MKSNMSHTFSQVPKADIPRSTFNRTHGHKTTFDSGYLIPFFVDEALPGDTFTLKATLFARLATPIFPVMDNMFMDTQFFAVPMRLIWNNWEKFMGQQDNPGDSTDYLVPHMISPVGGYAPLSIYDYMGLPTGVAGLQHQSSWLRAYNLIYNTWYKDQNLIDNLPVHKGDTPDPVADYSLQRRGKRHDYFTSSLPWPQKGESVTIPLGTQAPIWTDAAGATALQVHAPNAASPAGNYTLNAALADVTLGNPVTPGASALYADLTNASAATINQLRQSFQVQKMLERDARSGTRYTEKIKAHFGVTSPDSRLQRPEYLGGGSQTINITPVPQTSPTGTYANTPQGNVSGYGTSSGNNHGFTKSFTEHCVIIGLVSVRADLNYQQGLDRMWSRESLYDYYWP…	519	USER	zzzz654
486	my_seqs_16minnow_6_2ct757.6@PF02305.16	my_seqs	MYRNKSVSVHQFAMVPKSNVPRSTFNREQAHKTTFDSGYLVPFYVDEVLPGDTFKLKATVFARLSTPIFPVMDNMHLDTFYFFIPYRLVWQNWVRFMGEQDNPADSISYVIPTITSAANGFVAGSIYDYCGLPTVGQVGAGNTVKCNALPLRAYNLIYNEWFRDENLQNSVGMGSTNNPNDIGDGPDPLTNYVLLRRGKRHDYFTSCLPWPQKGSTSVTLPLGTSAPIRYDGVVPGTTTAHAVGVTSSVAGANRILFTGGGLGGDIGVGSTAPAAGYTLYADLSQATAATINQLRQSFAIQELLERDARGGTRYTEIVRSHFGVLSPDARLQRPEYLGGDSVPVVINPIAQTGATGATGTTSPLGNLAAMGTVLARNHGFHTSFVEHGIVMGIASIRAD…	543	USER	zzzz655
485	my_seqs_16minnow_6_2ct758.3@PF02305.16	my_seqs	MSNGKRSVMVHTFSQIPDARIPRSQFNRSHGYKTAFDSGYLIPVFVDEALPGDTFNLRMHAFTRMSTPIVPVMDNMYLETFFFAVPIRLIWANFKKFMGEQANPGDSISYLVPTITSPASGWTVGSLSDYLGLPTVGQVAGANTTTSVSLWHRAYNLIWNEWFRSEALQNSVTVDTGDGPDTAANYVLLRRGKRHDYFTSALPWPQKGSTAVSLPLGTSAPVVTSSLDIKMKVVADGNVDRTLTGNVAGVKTFLNGLGADGAVRFGSESGLTADLSTATAATINQLRQSIATQQLLERDALGGTRYTEIVRSHFGVVSPDARLQRPEYLGGGSSPINFHPVAQTSPTSGSAAQGDLAAFATGSISGHGFVKSFTEHCVLLGLANIRCDLTYQQGQNRMF…	528	USER	zzzz656
484	my_seqs_16minnow_6_2ct759.5@PF02305.16	my_seqs	MPPMKRMPTVMRSGHGFSQVPSAQIERSVLDRSHGVKATFDAGYLIPVLVDPVLPGDTFTVRMTAFCRLTTPIKPLMDNMYLESFFFFVPLRLVWTNFVKFMGEREPGDVTAYTIPVITVPFTPALHSVYDYMGVMPSGAAGTAGTIAVQTPNKVSCLPIRAFYLIYNQWFRDQNLVASVGISLGDGPDSLSQALLKRGKRHDYFTSCLPFLQKGTASAAAVSAITNIAPYSVPLFRDAVTGLSAGPLERTAAGAATAVQINSAGSGAGTDLAWWDPQLQVDINNLRLAMQIQKLLERDARGGTRYTEKIWSHFRVKSPDARLQRTEYLGGGSTSVVVSPIAQTTQAAAPSNKDGLANLGAAGAAVASGHGFTKSFTEHGYIIGIVNVRADLTYQQGIE…	538	USER	zzzz657
483	my_seqs_16minnow_6_2ct760.3@PF02305.16	my_seqs	MRNQSPNQHNFALVPTLSKPRSVFDRSQSYKTTLDADYLYPYYFPLCYPGDGIKASQNILVRFNSPLLFAPLDNLWLDTFTFFVPIRLVWTNFVKFMGEQTNPGDSISYTVPQCTGPNVASGGIALGSLMDYFGLPTEAQSGGGATTGITYNNLLPRCYQLIWNTWFRDENLQNSVTVDLGDGPDTYTNYNLLRRGKRFDYFTSCLPYPQKDSTAISMPLAGSAPVTLTAGAAGDISIQNSSGSPIKMGSSGTYVDVTGTAGSSANALYANLASATGATITAMRQSVALQQFLENDARGGVRYTEILKHRWGVNQPDKSWRPELVHTSSVPIKLNVVASTVGAAADPAYPLGALGSFGTAVNSPSFTYQVTEHGYLISLLSIRADIAYAQGMDRSWSYR…	532	USER	zzzz658
482	my_seqs_16minnow_6_2ct761.6@PF02305.16	my_seqs	MSKIPSVMSHDFSRVPRAEIPRSSFDRSCGHKTAFDSGQLIPIFLDEALPGDTFTLNMTGFGRLATPLHPFMDNVFMNTFFFAVPYRLVWDNWQKFMGEQKNPGDSTDYLVPQTTSPPAGGYGTNSIYDYFGCPSLVAGVTHSVLPLRAYNLIWNEWFRDQNLQNSVPVPTNDGPDDPFQYVLLRRGKRHDYFTSSLPWPQKGPGVDIPLGTTAPIKGIATTGPLTASGALQYGTTAAQDMPIGTHGNITNTLAAFIQHSGSGATVDANNRPQIFADLTEASAATINQLRQAFQIQKLYERDARGGTRYTEIIRAHFNVVSPDARLQRPEYLGGGQSAINLYPVPQQSPTGSYANTPQGNLAAYGTASFSGHGFSKSFTEHCIIIGLVAVRADLNYQQG…	537	USER	zzzz659
481	my_seqs_16minnow_6_2ct762.6@PF02305.16	my_seqs	MQSRSHMNHNFSQIPAPQTERSVFQRDHSVKTTFDAAYLVPFYVDEILPADTVNLSATLLARLSTPLFPTMDNIFLDTFYFFVPNRLLWKNWERFNGAQDKPDDSIDFTIPVLLRDEAHDFQELSIFDYMGLPTERDVVTDINALPLRAYNLIWNQWFRDQNLQDSITFGATEDADDGPDNEAQYELKKRGKRHDYFTSCLPWPQKGEAVVMPIGSTAPVIGNGKTLGFQDSSNEYGAYSVDIADTGSYGVKLAANYLGQNVGFSATASGFPANAHLGLGVSPDAATSGLIADLSEAVAATINDMRQAFAYQKILERDARGGTRYTEQLKAHWGVSVPDYRLQRPEYLGGGSHRINITAVPQTSPPVTADIATGSTRKGSMAAYGQVVSKTGFNKSFVE…	562	USER	zzzz660
480	my_seqs_16minnow_6_2ct763.5@PF02305.16	my_seqs	MKRSKFSLSNYKLLSCKMGQLIPVTWFEALPGDTIQHATSALIRCAPLVTPVMHPVVVRFHHWFVPNRLLWANWQNFITGGPDGLNASAHPYVLSGALAGASGNNAGVSTLSDYMGVPTSGLGASTKLNALPWRAYATIWNEFYRDEDLQTALTVNTGDGADATTATALQNCSWEKDYLTSSRPWAVKGATVTMPLGGTAPVKGIAFPNANVYTGAGPAAFTESGVAGTPPPGASNWQVNPTGYAVRGDNATKIPGLYADLTSATAVDINTVRHAFALQRFEEARARYGSRYTEYLRYLGIRSSDARLQRPEYLGGGKNTIQFSEVLQTGGASTGAQTGVGTMAGHGIAAMRTNRYRRFFEEHGIVMTLMSVRPKTMYTQRVKRGFIRGIDPLFLGTTG…	516	USER	zzzz661
479	my_seqs_16minnow_6_2ct764.5@PF02305.16	my_seqs	MFGINPGKQPSVMKHDFSRVPKAEIQRSQFNRSHGLKTTFDSGYLIPIFVDEAVPGDTFNLKMTSFVRLQPSVVPAMDNLYLDWFFFAVPNRLLWTNWKKFNGEQANPGDSTSYTVPQIVMPAVTGAAIGSLSDYFGIPTGIPSLTVNSLWHRAYNAVYNDWFRDQNLIGDLVVDVDDGPDTYTDYVLKKRGKRHDYFTSCLPWPQKGTAVSLPLGTSAPVLGIGKYNTTFSETSVTARESDSTTSVYAKAAPIGTTDDRVFYVEEKGSATGYPNIRADLTNATASTINDIREAFQLQRLYERDARGGTRYTEIIKSHFGVTSPDARLQRPEYLGGGSTPIVFSPIPQTSATSGSNALGQLAAFATASNSAHTFVKSFTEHMVIIGLCSVRADLTYQQG…	534	USER	zzzz662
478	my_seqs_16minnow_6_2ct765.6@PF02305.16	my_seqs	MHRNKSVMKHTFSEVPKAEIPRSSFDRSHGHKTTFNAGYLVPILIDEALPGDTFNCKMTGFARIATPIFPLMDNLMMDTQFFAVPVRLVWDNWQKFNGEQENPGDSTDYVIPEMVAPAVTGYAANSLEDYMGLPVGVPLFAHSALWHRAYNLIYNTWYRDQNMIDSLTVRKDDGPDPNGLYTLQRRGKRHDYFTSCLPWPQKGPGVTIPLGGAAPVRRHDTNQEVWMTNGTDDLRVTTAAASQTMTFNPAATLNFNASWGKFGDGTLTGLEADLSAATAATINSLRQAFQIQKIFERDARGGTRYTEILKAHFQVSSPDQRLQRPEYLGGGSSPVNISPIPQTSGSGAYTPTPQGNLAAMGTATLRNHGFTMSFTEHCLIIGLLSVRADLTYQQGLNRM…	531	USER	zzzz663
477	my_seqs_16minnow_6_2ct766.3@PF02305.16	my_seqs	MLPRISYSSTQRILICSCLVRLIQTPACSIVVFPVKLLLVRIWSMFRNKSVSTHQFAMIPRADIPRSSFVIEKAHKTTFDSGWLIPVYVDEVLPGDSFSVSMTAFARLATPLYPIMDNMTLESFFFFVPCRLLWDKWRNFMGQQDYPAQGTDYLVPVCPTPAGGWPVNSIGDYFGLPTVGQVNPGQAVNFNVLPLRAYNLIWDEWFRDENLQPSTEPHYTSEGPDDPAYYTLLRRGKRKDYFTACLPWTQKGPSVQVPLGTTAPVIGAGAYPLNRPTFDVTSGPSAQYLESGQADWPSLFVGPSVTGPTLASASLSWGAQTGLVADLSAATAATVNQIRQSFQIQKLLERDARGGTRYTELVRSHFGVISPDARQQRPEYIGGGSTPVNISPVAQTSGT…	589	USER	zzzz664
476	my_seqs_16minnow_6_2ct767.4@PF02305.16	my_seqs	MHRNPSVMKHTFSQVPEAEIPRSVFNRSFGHKTTFDAGLLIPIYLDEALPGDTAKVNMTGFARLATPIFPIMDNMVMDTFFFSVPIRLVWDNWQRFNGEQTNPDDSTDYVVPTLTLDATVTWGSIHDYFGLPLSTGVQVSALWHRAYNLIWNEWFRDQNLQDSVNVQKDDGPDGLGQYSLLRRGKRHDYFTSALPWPQKGPGVSIPLGTTAPVFSSGQAVYMKTPDGNEGPLQQFAATGNYMNVDAPATTGYLGYGSQTGLLADLSNATAATINSLRQAFQVQKIYERDARGGTRYTELIRAHFGVTSPDARLQRPEFLGGGSSPVNISPIPQTSASGAYADSPQGNLAAIGTAVLRGHGFTSSFTEHCLIIGLVSVRADLTYQQGINKMFLRRTRFSF…	521	USER	zzzz665
475	my_seqs_16minnow_6_2ct768.5@PF02305.16	my_seqs	MMTYKNQSVSSHDFAMVPKAEIPRSSFKMQKALKTTFDAGYLVPMFCEEVLPGDTFNVKGTFFARLATPLFPVMDNMWLDTFYFFVPNRLVWSNWQKFMGEQESPADSISYVIPQIVSPANGFAVGSLFDYFGLPTVGQVAAAATVSVNVLPLRAYNLIYNQWFRDENLIGWKGQSPPYGDGPDNLANYTIAKRGKRHDYFTSALPWPQKGGVSVTIPLGTSAPVKTSASSTVSGAQPGMTWQLAASGVTGSGNFALMPRTGITSISSTAATAVGASNDVYPGNLYADLSQATAATINQLRQSFQIQKLLERDARGGTRYTEIIRAHFGVMSPDARLQRPEYLGGGTTPITVNPIAQTSATGVTGGSTPVGTLSAMGTGLAQNQGFTQSFTEHGYVIGL…	549	USER	zzzz666
474	my_seqs_16minnow_6_2ct769.5@PF02305.16	my_seqs	MHRNKSVMVHQFSRVPKAQIPRSSFDRSHGHKTTFDAGLLIPVFVDEALPGDTFKMNMTAFARLATPIFPIMDNMYMDTQFFSVPIRLLFDNWQKLNGEQTNPGDSTDYLTPVLANATFTEGSIFDYMGLPVGIPTSGISALPLRAYNLVYNEWYRDQNLIDSVPRHVGDGPDPVADYELLRRAKRPDYFTTSLPFPQKGPGVQIPLGSSAPVITGLDHTTGVVTNPMKFMKVDGNGPSNNSFLRVNGTGQVHNDTTTAVGTLGLGQYPSNLYADLTQATAATINSLRQAFQVQKIFERDARGGTRYIEIIKAHFGVDSPDARLQRPEYLGGGSTPVNIRPIPQTSATGAYAQSPQGNLSAMGTALASGHGFTASFTEHCIIIGLLSVRADLTYQQGLN…	532	USER	zzzz667
473	my_seqs_16minnow_6_2ct770.6@PF02305.16	my_seqs	MTMNYKQKSVSAHNFAMIPRADIPRSAFQMQKGLKTTFDAGNLYPIFCEEVLPGDTVNLRMTAFCRLATPIFPVMDNLHLESFFFFVPNRILWSNWKRFMGEQDDPSSSISYTIPQIVSPAGGHAVLSVYDYFGLPTVGQVLGGNTVSHSALPLRAWNKIWYEWFRDENLEAAVAINTGDGPDAAANYAILPRGKRHDYFTSALPWPQKGNAVSIPLAGSAPVKTAGTAQVTGSQVGLTWFTSAGAVPTSNTSIGLGTSGLTGGNATAFTPTTTLYPNNLYADLSASTATTINALRLAFQTQKLLERDARGGTRYTEIVRSHFGVISPDARLQRPEYLGGGHSPIIISPIAQTSASGVSGGTTPLANLSAVGTTLANGHGFSQSFTEHGYIIGMVNVRA…	545	USER	zzzz668
472	my_seqs_16minnow_6_2ct773.4@PF02305.16	my_seqs	MKLFNDVQFNKPKKNKFDLSHEKKLTMKMGTMVPILVQEVIPGDQFRVNTEMLMRLQPMLAPIMHRVRIKTDYFFVPNRLVWDNWQKFITGGEDGLSNNVAPYLPINNGILKAEVDKSTLWDYMGLPIIDPALLALELRINALPFRAYQLIYNEYYRDQNLIPEVVIDKGDGAVVGASNLLQLRSCAWEKDYFTSALPFAQKGGPVSLPIDPVVNYKPTSDVINTGTGGNADGALSSDPLTGDLRDISGQARIENIESITNATTTINDLRVAVRLQEWLEKNARAGSRYIESILAHFGVRSSDARLQRPEYLGGASNPMVISEVLSNFQFSGDAEGLPQGNMAGHGVSAGTVHGFKRGFEEHGFVIGIMRVLPKTAYQQGIPKFMRRFDKLEYAWPSFA…	508	USER	zzzz669
471	my_seqs_16minnow_6_2ct778.2@PF02305.16	my_seqs	MFGAKNHRNPSVMKHTFSEVPKAEIQRSSFNRSHGYKTTFNAGELIPIFVDEALPGDTFNVRMTGFSRLATPIVPIMDNMYMDTQFFSIPMRLVFDNWQKLQGEQIDPGDSTDYTIPQMVAPVGGYQIGSLEDYFGLPTGVAGISHSALWHRAYNLVFNQWYRDQNLQDSLPVPRGDGPDLSTSYSIQRRGKRHDYFSAALPWPQKGAAVEIPLGTTAPVIGIGLQPASPFSLSNTLVKQTGGPASGTTYPFGISTSTQELTIRGTAADASGTPMIYADLSDATAATINSLRQAFQIQKIFERDARGGTRYVEAIKARFGVTSPDARLQRPEFLGGGSSPVNISPIPQTSPTGAYANTPQGNLAAMGVSVLNNHGFTHSFTEHCLLLGIVSVRADLTYQ…	536	USER	zzzz670
470	my_seqs_16minnow_6_2ct779.3@PF02305.16	my_seqs	MKKTRKDNVFTNVLNSGVDSNTFDLSHSVKQSFRMGELVPVMCKEVLPGDKFDIDFVNMLRFAPLIAPVMHNVKCTTDYFFVPNRILWNLWEDFITGTGDNPEAPYINFDDSEVCPVGCIGDYLGVPPGDYQAKPLHISAFQVAAYYKIYDDWYRDQNQIAEQFDPLVPGDNTSNYLSKIGGRCLKRAWEHDYFTSALPTSQQGTDVEIPLTFQDNIPVDFTPGANAGDGTWQTVDPVTGAVINTAGNIGVASGPSPLSSGLHNSAGVPIALDPNGTLTVDVQSDAASINDLRRAFSLQAFLERSIRGGLRYIEQMWSHFQVKSSDARLQRAEFLGRSVQTMTISEVLATAQSNNDAATAEIPVGSMAGHGISVGGGDHISFRAEEHGFVIGIISVLPE…	538	USER	zzzz671
469	my_seqs_16minnow_6_2ct780.5@PF02305.16	my_seqs	MKSVLTPQQVFSHVASPEIQRSKFDRSHGYKTTLDAGKLIPVFIDEALPGDTFSLRASIFARLATPIKPLMDNMFADIHFFSVPYRLVWDHWKQFNGEQKNPSDSTDFIIPQCSTVARSGYTEQSIFDYMGLPTKVGGFSHSALPLRAYNLIWNEWFRDENLQNSAPVPTGDGPDAPSNFGILDRNKRKDYFTSALPFAQKHAPVVIPLGGTAPLTGLPTVTNFNTVSNGSPLTFNVADLSNVNINSNTGDTNAKFSSQAGSNTNPQIKFGNQTGSRVNGSDFLNSWSNGTLSADLSSATATTINALREAFQIQRMYEKDARGGTRYTETIRAHFGVISPDARLQRPEFLGSMTAPININPIAQTAPTVTGQTPQGNLSAMGTVSMSGNGFVKSFTEHE…	551	USER	zzzz672
468	my_seqs_16minnow_6_2ct781.6@PF02305.16	my_seqs	MKSSMQHQFSQVPRADIPRSSFDRSNNFKTTFNAGDLIPVMCDEVYPGDTFNCHMTAFGRLATPLHPFMDNMWLDTFFFFVPNRLVWDNWQKFMGEQRNPGDSIDYLVPQIVSPAGGFANSTVYDYLGIPTLVPGLSFSALPLRAHNLIWNEWFRDQNMQNSLVNNTGDGPDAYTDYVIKKRGKRHDYFTSALPWPQKGAAVQMPLGSSAPVVGIAVSGNAAAVSGIQAWGTVAAGDIAAGVPGSINPSTTSTYIKTQLGTNTVVSGSNRPQIFADLSQATAASINQIRQAFQIQRLLERDARGGTRYTELIQAHFGVTSPDARLQRPEYLGGSSIPLNVNPIAQTSAVPSQPTPTGNLAAMATYHVNTGFTKSFTEHGVILGYISARADLNYQQGLNR…	534	USER	zzzz673
467	my_seqs_16minnow_6_2ct782.5@PF02305.16	my_seqs	MLHNLVNKIGSVEQSHFATVPHTSIPRSSFRRSHRHSTTINGNLLFPIYVDEVLPGDTFNMNVTAFGRLTTLIAPIMDNVYIDTFFFFVPNRLLWDNWQRFNGEQADPGDSTDFLIPRLADPGDTGYASGSIYDYFGLPVLQKFTSESAKVNSLPFRAYNLIWNEWFRDQNLQKSVAVSRADGPDSLDSFVLLPRNKSHDYFTSCLPWPQKGPAVDLPLAGSNAPIVSDFTNPKVAVNYLGRGGGVDYTFPGFMATSSSRGVYFDADGFQDGRIGLDLSHVSADLSQVTSVTINALRQAFQIQKMYERDARGGTRYTEILRSHFGVISPDSRLQRPEFLGGSHSVMNVSPVPQTSATGDGSTPQANLSAFGIFHNIGRQSGFSKSFVEHGYIIGLINVR…	543	USER	zzzz674
466	my_seqs_16minnow_6_2ct785.6@PF02305.16	my_seqs	MHRNPSVMRHTFSEVPQAEIPRSTFVRSHGHKTTFDAGLLVPIYVDEALPGDTAHVSMTGFARMATPIFPIMDNMVMDTFFFSIPLRLVWENWQRFNGEQPYPGAPTDFVVPQITTAVGGEPVGSIYDYMGVPPQVSSLSVSALFFRAYNLVWNEWFRDQNLMGPVNVPLGDGPDPNTNYSVLRRGKRHDYFTSALPWPQKGPGVSIPLGLTAPVLTANTGVQVRVGSAVGVDQQWQQFDATGKYMNAISGDPAAVGNVYFGTNTGLFTDLSGATAATINSLRQAFQIQKIYERDARGGTRYTEIIKAHFGVSSPDARLQRPEFLGGGSSPVNIAPIPQTSASGAYADSPQGNLAAMGTSVLRNHGFTTSFTEHCIVLGLVCVRADLTYQQGLNRMFSR…	528	USER	zzzz675
465	my_seqs_16minnow_6_2ct786.4@PF02305.16	my_seqs	MKSVMTHTFSQVPKADIPRSTFDRTHGHKTTFDAGYLIPFFVDEALPGDTFNVKATLFARLATPIFPLMDNMFMDTQFFAVPLRLIWDNFQKFMGEQTDPGDSTDFICPTITAPVGGYAANSIYDYMGLPTGKAGIEHSAFWLRAYNLIYNQWYRDQNLVDSLSVPRTDGPDDPALYTLQRRGKRHDYFTSALPWPQKGESVTIPLGDTIPVSVNEVWAGATQRGTLGHTSAASAGHSVLETIPLFAGTEAVALKGVGDMTAGVSATINQLRQSFQIQKMLERDARGGTRYTEIVKAHFSVSSPDSRLQRPEFLGGGSHSINITIVPQTSATGAYADSPQGNLAAYGVAAGNNHGFTKSFTEHCVIIGIVSVRADLNYQQGMDRMWSRSGKYDFYWPAL…	517	USER	zzzz676
464	my_seqs_16minnow_6_2ct788.4@PF02305.16	my_seqs	MARMPSVTAGQHDFSQVPRAEIPRSSFDRSHGLKTAFDAGLLIPVFVDEALPGDTFNLSMTGFGRLSTPLRPFMDNVYINSFFFFVPYRLLWTNFQKFMGQQDNPGDSTSFLVPQIVSTAGTGYGEQSIYDYFGLPTKVPGLSHSALPLRAYNLIWNEWFRDQNMQTSVPKNMGDGPDAVADYVLKRRGKRHDYFTSCLPWPQKGNSVTIPLSGNAPVEGIGTLASVNFATTTTPTVRDASLGNTTYPGFFTTAASGQIYLRGDGSAGTMPQIFANLSLATTATINQLRQAFQMQKLLERDARGGTRYTEIVRAHFNVVSPDARLQRPEYLGGGQGTINVHQVPQMSATVAGQTPQANLAAYGTTTVNNHGFTKSFTEHGVIIGLVSVRADLNYQQGLN…	535	USER	zzzz677
463	my_seqs_16minnow_6_2ct789.4@PF02305.16	my_seqs	MKNIFNSIQLQKPSTNMFDLSHDVKLSFNMGELVPIMCMECVPGDKFRLGADSLLRLAPLSSPMMHRCDQTIHYFFVPNRLLWPNWETWITDTQTETLPAHPVVSIADSNYSRLMDYLGIPVPTASEAEAVSALPFAVYQKIWFDYYRDQNVQPMDEEDIRCTDGNNTGSSDLFTLRNRAWEHDYFTSCLPWAQKGAPVSIPITANFPDVPVKINSLDSGTTLSGSPESAIVDNGTPVGGIVIGDDSNELYAQTSSLTADGTGTINDLRRAYRLQAWLEKFARGGSRLVEVIYQMFGVKSSDARLQRAEYITGIKSPVVISEMPSTVQTDDLPQGNLAGKGVSVEQGQYGSYYCEEHGFIMGIISVMPKTAYMQGIEKMWLKYQDKTQLYWPDFANIGE…	506	USER	zzzz678
462	my_seqs_16minnow_6_2ct790.5@PF02305.16	my_seqs	MHRNPSVMKHTFSQVPKAEIPRSSFDRSHGHKTTFDAGYLVPVFVDEALPGDTFKVNMTGFARLATPIFPIMDNMHMDSHFFAVPVRLVWDNWQKFNGEQENPGDSTDYLVPQITAPAGGYPIGSVYDYLGLPTGVAGFKHSALWNRAINLIWNQWFRDQNLQDSLPVPKGDGPDDPALYSLLKRGKRHDYFTSCLPWPQKGPGVTIPLGTTAPVVYDGTAPQMGNQADMSGSFTASLLGRSADTTVNLSSAPGGDMTLAFKTSGLQADLSQATAATINSLRQAFQIQKIYERDARGGTRYTELIKAHFGVSSPDARLQRPEFLGGGSTPVNIHPVQQTSATGTYASTPQGNLSAFGTALMQGHGFAMSFTEHCLIVGFVSVRADLTYQQGLNRMFSRR…	526	USER	zzzz679
461	my_seqs_16minnow_6_2ct791.1@PF02305.16	my_seqs	MTMHNPSVMSHDFGKAPLVNHPRSSFDRSYGVKTTFNAGYLIPFHVDEVIPGDTHNLHSTCLLRFATLLFPLMDNIHVDIQYFFVPMRILQDNFQKLMGAQANPGDSISYILPTVTSTNTTDFGEGTIYDYFGIATKISGVAVNSLPLRAYNKIYNTWYRDQLLQNSVIENQDDGPDAVSDFALLRRGKRHDYFTSCLNAPQKGTAVSLPLGTSAPVKGIGIYTDQTPTAGISGLSENGGTPGGITFDYGYQANTTGALGAGKAQMYVHMAGVSASNNPQIYADLSNATAATINALRLAIATQQLQETDIRCGTRYQEILWGHFQVDGGDARLQRPELLSVYSQLMNVNTVPQTAPAAGGSTPLANLGAYSTGVVHRAGFVKSFVEHGYIIGLISARAD…	539	USER	zzzz680
460	my_seqs_16minnow_6_2ct792.6@PF02305.16	my_seqs	MFRNQSVNVHQFSMIPKADIPRSSFDMETTHKTTFDAGYLVPIFVDEVLPGDTFKMSMTAFARLATPIFPVMDNLHLDTFFFFVPNRLVWSNWQKFMGQQDNPGDSISYVIPQQVCPVGGYAVSSLQDYFGLPTVGQVGAGNTVSHSALPLRAYNLIYNEWFRDENLQNSVVVDKGDGPDTVTNYTLLRRGKRHDYFTSCLPWPQKGASVSLPLGTSAPIKGTMPFDGTASGNNYVNVQNSSGVLKALISNSSGGTVYGGSAASGTSQLYADLSSATAATINQLRQSFQIQKLLERDARGGTRYTEIIRAHFGVISPDARLQRPEYLGGGSVPIVVNPIAQTSGTSASGTTTPLGNLAAMATSVARGHGYSQSFVEHGHVIGLVSVRADLTYQQGLRRM…	533	USER	zzzz681
459	my_seqs_16minnow_6_2ct793.5@PF02305.16	my_seqs	MRSVMVHQFSQVPKAEIPRSSFDRSHGHKTTFDGGYLVPIYVDEVLPGDTFSLSMTVFARLATPLHPIMDNLMMDAFFFAVPQRLLWTNWQRFNGEQDNPTDTTSFIMPTITAPVGGYLNGTLYDYMGLPTQVAGITHRACWMRAYNQIWNQWFRDENLQQSVPVNKGDGPDAPTDYVLKRRGKRHDYFTSALPWPQKGPAVTLPLGSSAPVKTSPEVRNTGPQSGLIMYTTAGGIPPASAMGTLNGTGGVIYGGTAPGATGSLAPVNLYADLNQATAATINSLRQAFQVQKMYERDARGGTRYTEIIQSHFGVTSPDARLQRPEYLGGGSCPISVSPIAQTSSTETQPTPQGNLAAIGTASMSGIGFTKSFTEHCVLLGLVSVRADLNYQQGLNKMWT…	528	USER	zzzz682
458	my_seqs_16minnow_6_2ct794.4@PF02305.16	my_seqs	MFRNKSVDVHQFAMIPKADIPRSSFDRQFTHKTTFDSGKLIPVYVDEVLPGDTFHCKMTCFGRVATPIFPIMDNLHLDSFFFFVPNRLVWNNWKKFMGEQDNPADSISYVIPTVSSPVGGYVVGSLFDYFGLPTVGQVGASNTVTNSTMYGRAYNLIWNEWFRDENLQNSVVVHKDDGPDPAADYSLLSRGKRKDYFTSCLPWPQKGTAVTLPLGTKAPVYGIGQTTTGNGTFGTPNAVVRDSTNLTTTLTYPNAAQINAAGGATGTFLVAGTAAASGYPNIYADLTQATAATINQLRQSFQIQKLLERDARGGTRYTEIVRAHFGVISPDARLQRPEYLGGGHTMININPIAQTSGTPVASGYTTTPQGNLAAMGTLLATNHGFSQSFTEHGMIIGMV…	548	USER	zzzz683
457	my_seqs_16minnow_6_2ct796.5@PF02305.16	my_seqs	MSKMPSIMSHDFSRVPRAEIPRSSFDRSHGLKTTFDSGYLVPIFIDEALPGDTFNLNMTGFARLATPLHPFMDNIFMNTFFFFVPYRLIWNNFQRFMGEQPNPGDSTDFVVPQIVGPGYGEGSIYDYLGIPTIVPCTHSALPLRAYNLIYNEWFRDQNLQNAVVVPKNDGPDNALDYTLKRRGKRHDYFTSSLPWPQKGEAVDIPLGTTAPVMGIGMASAGSFNQPNIVVTETGGVGNTYVDGQFTAAANGIAVKGTGSTPEIYVDLSNAASATINQLRQAFAIQKLYERDARGGTRYTEIIRAHFNVTSPDARLQRPEYLGGGQSPVHAYSVPQNSGTGAYTPTPQGNLAAYATSNLSGHGFSKSFTEHGVIIGLLSVRADLNYQQGLNRMWSRRTKF…	523	USER	zzzz684
456	my_seqs_16minnow_6_2ct797.4@PF02305.16	my_seqs	MNIFKEKIQINAPQKSKFDLSHEKKLSCEMGNLIPIMVQETLPGDSFQVNTNLMVRLAPMLAPLYHKIDVYTHYFFVPNRIIWNEWESFITGGADGLQAPVHPQINFTATKIATGSLMDFMGLPSDDLNDIANLTVNALPFRAYMEIYNEYYRDENLIPKQNYSKASGITATGSPDFLALVELKKRAWEKDYFTTALPFAQKGNPAAAPVERTGPTYATNPADGSGVINQTSFTSDSTAKIKGSGGGDIQFDTQASVLITELRKASRLQEFLEAAARGGHRLTEWVLHVFGVQSSDSRIQRPEYLGGGKTPVTISEVLSNFQFSGDAEGKPQGNMTGHGIAVGDTHGFERHFEEHGFIIGIMSIMPKANYYQGLERVWKRPTRFDYYIPQFAHLGEQEV…	504	USER	zzzz685
455	my_seqs_16minnow_6_2ct798.3@PF02305.16	my_seqs	MSKYKGFDTVELVKPKKSYFDLSATKRTTTRAGRMTPVFITECIPSDVFNGSSEILLRMAPLLAPIYDNIKLYVHYWFVPNRLLWDEWETFITGGRLGVGIDPTTAPVPPFVDLGLVGGAAPVTKSSLADYLGLPIFEDLPGFTNWASYTGKNIDIMPFLAYQLIWFEYYRDRNFVDDDQAVTWGVTIPAPSGDAGLPLGIFDLKQRAWSADYFTSALPFTQRGEEVLMPVSLGGVAQLKVDPLGSETSAVLSGISQPGSIAVGYGIDIDPETGVNNGDLYVKGEDFGGTTTSINDFRTAYALQVWYERNAIGGSRYTESTQAHFGVRPQDSRLQRPEYIGGGVIPIKISEVVSTAYSNDGTDVVPLANLAGHGITYGNTNHFNYFCVEHGFIIGIASI…	547	USER	zzzz686
454	my_seqs_16minnow_6_2ct799.4@PF02305.16	my_seqs	MFPKQHAKPSVMVHQFSQVPKAEIPRSSFDRSHGYKTTFDAGLLIPFFCDEALPGDTFNLRTTALARLATPIFPLMDNMVLDTFFFSVPVRLIWDNWQRFNGEQTNPGDSTDFTIPQTTGNTLGYAANSLEDYMGLPVGAPLLNQSALWHRAYNLIWNEWFRDQNLQDSKPIYKGDGPDNINQYGLLRRGKRHDYFTSCLPWPQKGNSVEIPLGTTAPILGFGDGVPTWTRDGGTSISQLSTQADQVIRWKDNASAGAGDLAWYDPKLHVDLSNATAATINSLRQAFQIQKIFERDARGGTRYTELIKSHFGVTSPDARLQRPEYLGGGSSPVVVSPIPQTSPTGTYANTPQGNLAAIGTSILNNHGFTSSFTEHCILIGLVCCRADLTYQQGLNRMWS…	530	USER	zzzz687
453	my_seqs_16minnow_6_2ct800.4@PF02305.16	my_seqs	MKEKYFAQPSGTLSQQHFSQVPEAEIQRSSFDRSHGYKTTFDEGSLVPVFVDEVLPGDTFNLSMTGFARLATPLRPFMDNLYLDTHFFFVPNRLVWDNWTKFMGERVNPEDDPTAFTVPQVIVGLNRAETNDTASYLGIPNNQPGGAVASINALPFRAITLIWNEWFRDQNLSSTVVFPRNDGPDAYSYYNALLPRAKRHDYFTSALPWPQKGSPVYIPLGTSAPVVNSLTPGIKLANAGNPTTARGMMIGNVANASGQGDLGYAGALVGTATPAQLVSGADTGMMTDLTEATAITINDLRTSFQIQRLLERDARGGTRYIELILSHFGVQSPDARLQRPEYLGGGHSMLNVNPVATTFLNAEVALGDLGAVAAGTTKASFSKSFTEHGFIIGFISVRS…	541	USER	zzzz688
452	my_seqs_16minnow_6_2ct801.7@PF02305.16	my_seqs	MSMRSVMVHQFSQVPKAEIQRSSFDRSHGYKTTFDAGLLVPVFVDEALPGDTFNCRMTVFARLATPLHPIMDNMTLDAFFFFVPLRLVWTNFPKFFGEQENPTDSTSFLVPTMTSPAGGYTAGSLSDYFGLPTKVAGVVHSSLWHRAYYLIWNQWFRDENLQTSVVVPKGDGPDNPAVLSTVMRRGKRHDYFTSALPWPQKGPAVTLPLGASAPVGTSVSSQVGGVQPAMRMLAATSGGAPGAPSGLGIDNSAEVKIGPTAPGTLSAGMYPSNLYADLSLATAATINQLRQAFQVQRMYERDARGGTRYIEIIQSHFGVTSPDARLQRAEYLGGGSAQINVNPIAQTSSTADQPTPTGSLAAMGTVAMHSIGFSKGFTEHGVIIGMVCVRADLNYQQGL…	533	USER	zzzz689
451	my_seqs_16minnow_6_2ct802.4@PF02305.16	my_seqs	MAQQTFTTVQGLKNAYAQERPCRPSFVFSSFSFPSWSQLPAASSCGSHRLPALGLKYMKRYKHNLSNTRLTTCDMGQLIPVGLTEALPGDTFQLGTSAMIRVSPLAAPVMHPVNVRIHHFFVPHRLAWDAAVKTGNATGSWEDFITGGPDGRDASLPPVGPVKVGPAVKKTLYDYFGFPVNSPDDTGFGVEVNQMPLIGYNLIWNEYFRDQDLQSEVTIQNVQVLNIGWGKDYFTTARPWTQKGPEVTLPLGSKAPVVGIGSPATFNYNAPNADVFETGKATSTLYAHGAAVFSTSPAQGLYIKGTEAGTAGRPEIYADLSAAGAININDFRRAFAIQRYQEARARYGSRYTEYLRYLGVTPSDARLQRPEYIGGGTARLNFSEVLQTAQANRDGGDGG…	572	USER	zzzz690
450	my_seqs_16minnow_6_2ct803.5@PF02305.16	my_seqs	MHRNRSVMKKNFAQIPKADINRSTFDRSHGYKTAFDAGYLIPVFCDEILPGDSCKLSMTAFARLATPIYPLMDNMFLDTHWFFVPTRLVWDNFQRFMGEQDNPTDSTDYLVPQCTSDSATGYAVGSIFDYLGLPTGIPNLQHNVLPLRCLNLIYNQWYRDENLQDSLIVHKGDGPDSPLDYNLFRRGKRPDYFTSCLPFPQKGPAVTIPLGTSAPVIATGPGAPTFRVNTIGGQHLRGAAAGVGVEWQTAPGAASNALWDDPALSADLSAATSATINSLRQAFAIQQLFEKDARGGTRYQELVWQHFQVRGADSRLQRPEYLGGGSTPVNISPVPQTSGTGAYTPTPQGNLSAFGTALASNHGFTMSFVEHGYVIGLASVRSDLTYQQGMRKMWSRRTK…	524	USER	zzzz691
449	my_seqs_16minnow_6_2ct805.5@PF02305.16	my_seqs	MKNIFADIGLRKPRKSSFDLSHARKMSFWPGMLIPIFLHDTMPGDKFSMSSSALVRMMPMLAPIMHLVDCCSYSFFVPMRLCMKHSKFEVFITGGKNGDGKDAQGNTVEIPYFVVNNGGSSVPPYSFDISKIGKGTLGDYLGIGMSDIYGTMGSGSQRINAMPFLAFWRIWCEYFRDQNLHPDYVSLYPDVFDAEGDITHALELAQTDGTNPFDWFHVPNVCWEKDLLTSALPFAQRGQPVETPLSGTATVTYKTNTEQIVQSDGNPLTVGGDVEVVPGTGGAGFLRNKTGPEGLSVENIQDVELTSGGFTINALRLAARLQEWLERMARGGARYVEQCLSMWGVVSSDARLQRSEYLAGGKMPVSISEVLQTGEEGVTAQGNMSGHGVAAGNVTHWSK…	551	USER	zzzz692
448	my_seqs_16minnow_6_2ct806.5@PF02305.16	my_seqs	MKRSKFSLSHYNLLTANMGDLIPIGLVEVLPGDTVQHATSMLLRCSPLVAPPMHPVHVSVHHWFVPNRIVWDGWEDFITGGPDGMNNDAIPSITFAGGSIQAGNLADLLGIPPQADVTYVNALPFRAYNLIFNEWYRDQDLQAPATLSTGDGDDAITSTALAGACWEKDYFTTCRPWEAKGPAITLPLGTTAPVAVTMAETGTTPQTLTAVRNNASAGALLTINQAGTLNDPVHWTGIADLSTASAVSINVLREALALQRFEEARARYGSRYTEYLRYLGVKSSDARLQRPEYLGGGKQTIQFSEVLSTNVDTSDLDAVKPGQFGGHGIAAMRSNRYRRFFEEHGYIMSLMVVRPKTMYANSLPRHWSYGVKEHYWQREMQHIGQQEVWLNEVYNSNGD…	490	USER	zzzz693
447	my_seqs_16minnow_6_2ct807.5@PF02305.16	my_seqs	MSKANIFNQIQVKKPQSNWFDLSHDVKLSCNMAELIPVMCIKAMPGDKFNCSQEALTRLAPMVAPMMHRVDQTFHTFFVPNRILWPNWEKYITNTKLEATDLLPVHPYCYADAANYSRLSDYLGIPTPLGVEREFVSAIPFAVYQMIYNEYYRDQNMIDPVPFELVDGFNQFDDLGILRTRAWEHDYFTSALPFAQKGDPVTIPIAGSVILDPAVTNVPGHIVNSATHLPVAAGNLSAQGGAGFLQADTTPEPAVYDPNGTLLVDSANTTINDLRKAYVLQRWLEKSARAGSRYTEQLKVQFDVRSSDARLQRPEYITGTKSPIVISEVLQTGESATTPQGNMAGHGVSVTEGQYGDFFCEEHGYIMTIMSVMPKTAYQQGIEKHFLEIGSPLDDYPWP…	510	USER	zzzz694
446	my_seqs_16minnow_6_2ct808.1@PF02305.16	my_seqs	MGRPSVMVHQFSQVPKAEIPRSTFDRSHGHKTTFDAGQLIPIFIDEALPGDTFHLRMTALARLATPIYPLMDNMFMDTHFFSVPCRLVWDNWQKFNGEQTNPNDSTDFTVPTINLDSVANVTGSIYDYAGLPIGKSNIKVNALPFRAMNLIWNEWFRDENLQPSLTVRKDNGPDSNTLYTIQRRGKRHDYFTSCLPWPQKGPGVTIPLGTSAPIVSSGESFVLSTPDKTRTGDFGTNLPASDAWVHVNNNFLSGDSSLHYFRGLEADLTNATAATINSLRQAFQIQKIYERDARGGTRYIELIKSHFGVTSPDARLQRPEYLGGGSSPVIITPVPQTSPTGTYASTPQGNIAGFGTVGLHNHGFSSSFTEHCYIIGFVSVRADLTYQQGLNRLWSRQTR…	525	USER	zzzz695
445	my_seqs_16minnow_6_2ct809.7@PF02305.16	my_seqs	MHIQSHMKHEFSQVPNADIPRSKFDRSCGYKTTFDAGLLVPVFIDEALPGDTFNVHMTAFARLATPIAPFMDNMFLDTFFFAVPYRLIWDNWQKFNGEQRNPGDSTSYLLPVFDKTLPPLSTTGFTADSMSDFFGLPTEVPGLTVTSVWHRAYHLIYNEWFRDENLQNSVTVDVDDGPDDPAVYNNLLRRGKRHDYFTSCLPWPQKGPAVALPLGTTAPVRGIGKGNQTFGGAATVYESGQTSSTVYSSASLIDPTPAAQQFAIRQDPNNAGFPGIYADLSAATAATINQLRQSFQIQKLYERDARGGTRYTEIIRAHFGVTSPDARLQRPEYLGGGSKRININPIAQTSAVPSQPSPLGNLAAMGVVSADAGFTKSFTEHCLIIGLVSARADLSYQQG…	537	USER	zzzz696
444	my_seqs_16minnow_6_2ct810.4@PF02305.16	my_seqs	MKFFDEKVTIMGPKKSKFDLSHERKFSCNMGELIPILVQDVMPGDSFKVSSEQMMRLAPMIAPMMHRVNVYMHYFFVPNRLLWDEWEDFITGGQVGSTPPVFPTFNIGGAPTNKPELYKAGSLMDYLGVPPIDTYTTGPSGPVTSPLTISALPFRAYRLIYDQYFRDEDISAQIDPPDKSSGPVSQGLQETYMEILHRSWEKDYYTSARPWAQKGGSVGIPFTYKDISEVKDENGNPAAVNTLVGTHGSLAGEMMVGKTDAVTGGTFGRVENIEALASINELREASALQRFLEKLARSGNRYIEYIKSIFGETSSDSRLQRPEYLGGGRSPIVISEVLSTFDNTTGGLPQGTMSGHGISAGTTNGFSRSFNEHGYIMCLMSVLPRTGYQQGIEKHFTRF…	524	USER	zzzz697
443	my_seqs_16minnow_6_2ct811.6@PF02305.16	my_seqs	MVMRNRTATQHNFATVPRADIPRSKFRIRQTRKQAFDASDLIPIMCEEVLPGDTWQHTESIMARLATPIAPLVDDMDLETFYFYAPNRITWPDWEDFITGVDTALVVPKINPRDSTGANAVVTAKGVFDHFGILPQPLADNLPLTAFPIFAYFEIWNEWFRDQNLQSEWIYSTVTVANPGSNFIKYNGVTAWDQLPLRVNKRHDYFTGSLPWAQKGTAVTIGLTGNAPVKTSASQTVTSATDPMRMLLTAGGAPNNNSIIGTRDISGNLGAGAATYAGDQGGIYPTNLYADLGAVTATTINALRLAFQTQKLLERDARGGSRYVEQLLSHFGVRSPDYRLQRPEYLGGSKIPITINPIAQTAAYDAEPAASASAIGNLGAEMHASGHKRTFTYAAVEHG…	560	USER	zzzz698
442	my_seqs_16minnow_6_2ct812.5@PF02305.16	my_seqs	MAEKYFKQPEKAQQHFANVPTADIERSRFDRSHGRKTTFDAGELIPVYVDEVLPGDSFQMKTTAFCRLATPLKPLMDNMQVDIHYFFVPYRLVWFNWERFMGERTNPDDTIDQYRIPTTTIKLKTLDTWHLAHQLGLPMRKTNVAATDCPVTVSALPFRAYVLIFNDWYREQNTQAWQPFSLGDGPDAWDGYAVLRRNKRHDYFTSCLPWPQKGEPVYVPLGVDAPILPSGTDPSLVSVNNTTPLKIQATTSGVSSAATFSPLPGGAHVVEPLHWSQTGMIADLTAATAMTINDLRTAFQIQRLLERDARSGTRYVEVLLGHFGVVSPDARLQRPEYLGGGTGNISINPIAQTVSDADAPLANLAAYGTGVGNGGFSKSFTEHGVVIGCLSVRSDKSYQ…	536	USER	zzzz699
441	my_seqs_16minnow_6_2ct813.4@PF02305.16	my_seqs	MASNMHVQGPQIHQFSHIQGQSVPRSSFKRDFTRRSTFNQDYLIPIFLDEVLPGDEINLKMTAFTRMSTPVKPLMDNLYQDSFFFFVPNRLVWPNWEKLQGEQANPGDSVAYTIPRLNGTVAPMSTTGFAVESIFDYFGLPILVTGMSNGTTTPPISSLYNRAYDLIWNEWFRDENLQNSINIQTDDGPDNPANYVLRKRNKRKDYITSALPWPQKGTAITIPFGTSAPVSVTGATVGSPVNLSNSQLRMEYNSTTPTQGGRLVSGSTYSVSQTPTTLINATLNGTADLSAATAVTINALRQAALYQQILELDARGGTRYVESIYSRFGVVSPDFRLQRPELIGQGSSRINIYAVPQTAPTVSGQTPQGNLAAFGTNIIQGHGCSYAATEHGMIIGLMS…	542	USER	zzzz700
440	my_seqs_16minnow_6_2ct815.7@PF02305.16	my_seqs	MHRNPSVMKHTFSQVPQAEIPRSSFDRSHGHKTTFDAGYLIPVFLDEALPGDTFKVRMTGFARLATPIFPIMDNLHMDSQFFAVPIRLLWDNWQKFNGEQENPGDSTDYLIPQMVAPVGGYAIGSLSDYFGLPTGVAGYSHSSLWHRAYNLIYNQWYRDQNLQDSLPVPKGDGPDLPADFVLQRRGKRHDYFTSCLPWPQKGPGVTIPLGTSAPLAVDLNTGSSVSIKSLSGQVQLDPQGTSLIVGSVPQATGGMYADLSQATAATINSLRQAFQIQKIYERDARGGTRYTELIKAHFGVTSPDARLQRPEYLGGGSTPVNIHPVAQTSPTGTYAATPQGNISAFGTALMQGHGFSMSFTEHCLILGLVSVRADLTYQQGMNRMFSRRTRFDFYWPALA…	515	USER	zzzz701
439	my_seqs_16minnow_6_2ct816.4@PF02305.16	my_seqs	MAFNMKQQRHPSVMAHTFSQVPKADIPRSTFDRSHGYKTTFDAGLLIPFFVDEALPGDTFNLKTTAFARLATPIFPIMDNMYMDTFYFSVPIRLLWDNWQRFNGEQPNPGDSTDFTIPQMVSPGAGYEANTIHDYFGLPVGVPGVSHSALWHRAYALIWNEWFRDENLQDAIAVPKTDGPDLHTFYELQRRGKRHDYFTSALPWPQKGPGVQIPLGGSAPVVTSASNQLSGPHDQLQFLTAAGNPVTPNYSLNVSAGGLMENSTPAGTGQVALYPSNLYADLTQATAATINSLRQAFQIQKIYERDARGGTRYTELIKSHFGVTSPDSRLQRPEYLGGGSTPINISPIPQTSPTGTYADTPQGNLAAVGTALVSNNGFTTSFTEHCLVIGLVSVRADLT…	539	USER	zzzz702
438	my_seqs_16minnow_6_2ct817.5@PF02305.16	my_seqs	MSIFDSVKGMRVPKNKFDLSHEKKMSMKMGTLTPFLLQEIIPGDSFRVNTEMLMRLQPMLAPIFHRVRVKTDYFFVPNRLVWENWQKFITGGDTGADNPVHPYITIDNTGRGNFAKGSLADYMGIPPVETPTVSAEGQLQINALPFRAYQLVYNEYYRDQNLQSEVTVNKTDGAIATGSAEYNSLLTMRNRAWEKDYFTSCLPWAQKGGPVVVPSETVYHADGSKLIRADTGLPLPNEAGIKSVAGGVLEGTGSAGIPANIDNLEGVNITVNDLRVAVRLQEWLERNARAGSRYIENILANFGVLSSDARLQRPEWLGGNINPIVISEVLSTYQNADDSGYPQGTMAGHGISTGGNGGFKRKFEEHGFVIGLMTIIPRTAYQQGVDKMWSRFDKLEYAW…	517	USER	zzzz703
437	my_seqs_16minnow_6_2ct819.7@PF02305.16	my_seqs	MGELIPLTWFEALPGDSIQQATSLLLRVSPLLAPVMHPVHARIHHWFVPNRLIWDKFEDFITGGPDGMDATIPPHIGGGVMTQGALGDYFGVPIGAIATEYSALPFRAYGLIWNEHYRDQDLQPEITVSTASGLDTTTSTTIQNCAWEKDYFTSARPWTQKGPAVGVSLAASAPVSGDGGQPTWKFGAGPPAGLFSDATADPTVQWTLDGATAADPGAGLAGWANPHLVADLTSASVININELRTAFALQRYAEARARFGSRYTEYLAYLGVNSPDARLQRPEYLGGGKQTIQFSEVLQTGPDNSATPSSVVGDLKGHGIGAMRSNRYRRFFPEHGIVMSLLSVKPKTMYSQGLHRSWLRFTKEDYFQRELQHVGQQAIKKAELFAIDPAADDTWGYQD…	481	USER	zzzz704
436	my_seqs_16minnow_6_2ct820.7@PF02305.16	my_seqs	MHRNPSVMSHKFSEVPKAEIPRSSFDRSHGYKTTFDAGYLVPIFVDEALPGDTFNLRTTAFGRLATPIFPIMDNMFMDMHFFSVPVRLVWDNWQKFNGEQVNPGDSTDFTVPQMVSTAVTGYLPLSIHDYFGLPTGVPGLTHSALWHRAYNLIFNQWFRDENLIDSLPVATGDGPDLPADYSLQRRAKRHDYFTSCLPWPQKGPGVSIPLGTTAPIIGIGSADGVFNQPGLTVTETGGASVVYPQSIRSADVGGIRIKGTAAVGGAPEIYADLSEASAATINSLRQAFQIQKIFERDARGGTRYTEMIKAHFGVTSPDARLQRPEYLGGGTTMVNVSPIPQTSASGAYADSPQGNLAAMGTVLTQGNGFTRSFTEHCLILGFVSVRADLTYQQGLNRMW…	530	USER	zzzz705
435	my_seqs_16minnow_6_2ct821.1@PF02305.16	my_seqs	MFNVPHSKNKSVMLHQFSQVPKAEIPRSTFDRSHGYKTTFDAGYLIPFLIDEALPGDTFNVRTTALARLATPIFPIMDNMFMDTHFFSVPIRLVWENWQRFNGEQPNPGDSTDFTIPQMVAPGSGHAANSIHDYMGIPVGVPAISHSALWHRAYALIWNEWFRDQNLQDAIAVPKTDGPDLHTFYPLMRRGKRHDYFTSSLPWPQKGDAVTIPIGGFAPVVSTGSHFPTFSYNDLSGTGPMKVATGVDAVTMTSVNQTAVSSDVRWSNPNLQADLSSATATTINTLRQAFQIQKIFERDARGGSRYIELIKSHFGVTSPDARLQRPEYLGGGSTPINISPIPQTSPTGTYANTPQGNLAAVGTAQLHNHGFTTSFTEHCLIIGLVSVRADLTYQQGLNR…	532	USER	zzzz706
434	my_seqs_16minnow_6_2ct822.7@PF02305.16	my_seqs	MLGAQRHGNKSVMTHQFSQVPKADIPRSSFDRSHGHKTTFDAGLLVPIFIDEALPGDTFNVSMTGLARLATPIFPVMDNMFMDTHFFSVPVRLLWDNWQKFNGEQTDPGDSTDFLVPQLTNVTPFAAGSLEDHFGLPVGVGNLSVCAFWHRAYNLIWNEWFRDQNLQDSVDVPRGNGPDLHSSGTYNLLRRGKRHDYFTSCLPWPQKGPAVNIPLGGSAPVFGDGKTLGLTDGTLSYGLVADSAPKLMGYTGAYNTPVGTYVSTGTPTNTKNLGVVTSGESGLLADLSGATAATINSLRQAFQIQKIYERDARGGTRYTELIKSHFGVTSPDARLQRPEYLGGGSTPINISPVPQTSPTGTYAETPQGNLAAFGTGVLRGHGFTTSFTEHCVIVGLISV…	543	USER	zzzz707
433	my_seqs_16minnow_6_2ct823.3@PF02305.16	my_seqs	MLEEVISKADTTSFPLGTIAGRGRMGGKNKGGKIEISVNEPSYIMGIVSITPRIDYSQGNEWDINLKTYDDLHKPALDAIGFQDLITEQLLWSDTRMVANKWTQKSLGKQPAWINYMTSVNKVFGAFAEKDNSMFMVLNRRYEKNDDGSLKDGTTYIDPTKYNNIFAETSLDSQNFWVQIGCGITARRKMSAKIIPNL	198	USER	zzzz708
432	my_seqs_16minnow_6_2ct824.5@PF02305.16	my_seqs	MFPKHHGNPSVMVHQFSQVPKAEIPRSSFDRSHGHKTTFDAGLLIPFFIDEALPGDTFNLRATAIARLATPIFPIMDNMFMDTQFFSVPIRLIWDNWQKFNGEQKNPGDSTDYTIPQMTAPVGGYEIGSIHDYFGLPTGVSGITHSSLWHRAYALIFNEWYRDQNMIVSQPCPTDDGPDTWSNFYLLRRGKRHDYFTSCLPWPQKGPGVTIPLGTSAPVMGLGRKNGPAALATGSDWKNASGMYYPNGTTLFNSDNATADIGFLEDSGNINVYADLTQATAATINSLRQAFQIQKIYERDARGGTRYTELIKSHFGVTSPDARLQRPEYLGGGSSPVVISPIPQTSPTGTYASTPQGNLAAVGTAQLHGHGFTTSFTEHCIVMGLVSVRADLTYQQGLN…	533	USER	zzzz709
431	my_seqs_16minnow_6_2ct825.2@PF02305.16	my_seqs	MPRPSVMVHQFSQVPKAEIPRSTFDRSHGHKTAFDAGYLIPIFIDEALPGDTFHLRMTALARLATPIYPLMDNMFMDTHFFSVPARLVWAHWKHFNGEQANPTDSTDYTVPKINMSSLPSGFAENSIYDYLGLPVGVPNLTVNALPLRAINLIYNEWFRDQNLQGSKSVPQNDGPDDPVIYNLFRRGKRHDYFTSCLPWPQKGPGVTIPLGTTAPVKYMAVTGNALSATLTGFDLSAQSITVPSRPTSEGNVNDTLVADLSNATAATINSLRQAFQIQKIYERDARGGTRYIELIKSHFGVTSPDARLQRPEFLGGGSSPIIITPVPQTSPTGTYANTPQGNVSGFGTVGLHNHGFSASFTEHCYVIGFVSVRADLTYQNGINRMWSRQTRFDFYWPAL…	517	USER	zzzz710
430	my_seqs_16minnow_6_2ct826.3@PF02305.16	my_seqs	MDKLNFMNSIRVPSPKKSVFDLTHDVKLSCNMGWLVPSMVADLVPGDKVDLSTEALIRLAPLVSPMYARLNVTFHSWAIPYRILWPGWSDYITETKSGTPPVLPAFPTLTIGPTGHSYSSLLDYLGIPDVPTGPVPLQNETISAMRLAAYQCVYNEFYRDENLVPEVNWELVDGDNNSNADLWDLRKRAWRHDYFTSNLPFAQKGDPVDLPISFTDLPVKANKDYFQFTLPGTDTQVADPTGWVGQPSATPTAPAVDIEDPTGTDVANTDAFFAQGAGTGSTTINDLRLAEQLQKYLERAARAGTRLVEWIRGMFDEILPDYTAQRPQYIGGTMSPIQISEVLNTTGVAGELPQGNMSGRGISVNSGHMGTYKAREHCVILTFMSIMPETTYQQGIERE…	526	USER	zzzz711
429	my_seqs_16minnow_6_2ct827.4@PF02305.16	my_seqs	MAGKNLFNSVKMTKPNKNVFDLSHDVKLSCNMGDLVPVMCTKCVPGDKFNVSAEALIRFAPLVAPMMHRVDVYIHYFFVPFRLVWPNWESWITNGYNGDPDPVAIPAYPYVKLNDGNYANFPLFDYMGFPKPDVASGDFNVSAMPFACYQKIYDEYYRDQNNIYREYQDLVDGDNTFLLDDLVSLRKRAWEHDYFTSALPWAQKGNPVELPLGALDDVSVLYKDPHDGDTATVLTGTGQPSATPQNATVPFGDPNVSTGGDLFAETSELNLASTTINELRTAFRLQEWLEKAARGGSRYVEQILTFFGVKSPDARLQRPEYITGVKSPVNISEVLNTTGTDDLPQGNMAGHGVAVVSGNRGHYFCQEHGFIMGIMSVMPKTAYQQGIPKKFDVLSDPTE…	514	USER	zzzz712
428	my_seqs_16minnow_6_2ct828.4@PF02305.16	my_seqs	MEMKATAFGRMATLLRPVLENIYLDYFFFSVPVRLLWDNWQKMNGEQKDPGDSTDFLVPVLASGSTFTEQTLPDYFGLPTHKSLSGVSALWFRAYNMIWNEWFRDENLQDSVPFNTDDGPDATADYVVLPRGKRHDYFTSCLPFPQKGAAVSLPLGVSAPVSGLISASGVPTFNATGYTNKAMRVNDIVAGDVMLASPVGGAASDISWNNPQLDFTSGLADLSTATAATINELREAFQVQRLYERDARGGSRYTEILRSHFGVVSPDARLQRPEYLGGGSSRVNVNSVASTNFNASTSLALGELGAFATFGGSGIGFRRSFTEHCVLIGMVCARADITYQQGMERMWSRRTRFDFYWPALAHLGEQAVLNKEIFYQATSDDDDVFGYQERYAEYRYKPS…	479	USER	zzzz713
427	my_seqs_16minnow_6_2ct829.4@PF02305.16	my_seqs	MSAYKGFNKVKLTKPQRSTFDLTHDKRISMQPGKLIPGLVMEAIPSDQFNGSSEMLLRLLPLLAPIYDQLIVYVHFFFVPNRLLWADWETFITGGRLGVGVDPVDAPIPPYHSAEDFFTYIPTQESSLMDYLGIPILSDIDNTPANWTDVYIDAMPVLAYNLIYQNYYRDRNFVSDTQQDVYPYSSGLIGDFLELYTLKSRNYMHDYFTSALPFTQRGEEVLIPIDGAVTYLESSRIMDATDNPVNSAQYLGTDDSGGLGRLNIGGGVPNNPFSGSQFVRVENIDEVTNISSTINDFRSAYALQVWLERNAVGGSRYTESTQAHFGVRPQDSRLQRPEYIGGGRINIKISEVVATANSLDADDNVVPQANMAGHGVSYGTTNSFNYFCTEHGFIMGIIS…	548	USER	zzzz714
426	my_seqs_16minnow_6_2ct830.4@PF02305.16	my_seqs	MMHRNRSVDVHQFAMVPRADIPRASFNMQKTHKTTFDAGWLVPVFCEEILPGDTFKVRMTAFARLATPIFPVMDNMYLESFFFFVPNRLVWSNWVKFMGEQVNTFDSISFVIPQIVSPASGFAVGGIYDQLGLPTVGQVAGGATVSINALPLRAYNLIYNQWFRDENMQNSFTVPTGDGPDTSGTYQLLRRGKRHDYFTSCLPWPQKGNTSVSLPLGTSAPVRTQVGTVVAGGAPSPVVWLTTATGGNPGGAGLSYSISATGTGTQGAGASAAGTAVYPSNLYADLSTATSATINQLRQSFQIQRLLERDARGGTRYTEIVRSHFGVVSPDARLQRPEYLGGGSAPVVLNPIAQTSATGLTGGSAPLGNLAAVGTMLAQGHGFTQSFTEHGYVIGLVCV…	547	USER	zzzz715
425	my_seqs_16minnow_6_2ct832.4@PF02305.16	my_seqs	MSKANIFNSIRLVKPNRSNFDLSHDVKLSCKMGDLIPIFNCEALPGDRISIGADSIVRMAPMIAPVMHRLDISIHYFFVPYRLLWDNWENYIFNNGTTLPAHPFVKLSTTSPFTYNPLLDYLGIPEITNSLAEANISPFSIAAYNFIWNEYYRAQYLQTEVGYKLQDGDNTGTPLASSTLLKRGWEHDYFTSALPQAQLSNPVSIPIGRIELDPNWKINGTNPFFNTNTTTPLPIGDIQQNIGTTGNIQANVNTGTSIDQAAYDPDGSLVVNPTTITDLRRSYKLQEWLERAARSGSRYIEALRAHWDEISSDARLQRPEYITGVKAPIIISEVLNTSATSTSPQGNMSGHGISLQQGKYGTYKCEEFGIYMGIMSVMPKTAYQQGIPKSFLKINSPFE…	516	USER	zzzz716
424	my_seqs_16minnow_6_2ct833.2@PF02305.16	my_seqs	MFRNKSVNIHSFSMVPKFDVPRSKFERQWTHKTTFDAGKLVPIMVDEVLPADTFSLHMTALARFATPIFPVMDNLVLDSFFFFVPNRLIWTNWEKFQGAQDNPGDSISFVIPQQVSPNGGYAVGSLQDYMGLPTVGQVTGGVNVTHNALPLRAYNLIYNTWYKSQDLQTNVVVDKGDGPDTVTNYTLLSRGKRHDYFTSCLPWPLKGGVNVTLPLGTSAPVKSDGTSFQIRGATGALTTLIANPGTAGGPVLINSPTTANNSFNWGAVGASTTGLFADLSTASAATVNQLRTSFQIQKLLERDARSGTRYVEMLQNRWGVRPQDSRFDRPEYLGGGSTPVNINPIAQTSGTGITGGTTPLGNLSAMGTVGAINHGFTASFPEHGYIIGIINIRAELSYQ…	547	USER	zzzz717
423	my_seqs_16minnow_6_2ct834.5@PF02305.16	my_seqs	MFGVKTKSHPSVMAHTFSQVPKAEIPRSSFDRSHGYKTTFDAGYLVPFFLDEALPGDTFNVKVAALARLATPIFPIMDNMYLDTQFFSVPMRLLWDNWQRFNGEQKNPDDSTDFTIPQIAAPTGGFVANSLEDYFGLPVGVDGIAVSSMWHRAYNLVWNEWYRDQNLQDSVTVTTGDGPDIPANYKLLRRGKRHDYFTSCLPWPQKGPGVTIPLGTSAPIALGAGVATGNQFGIRISDGSTRDMASATPTLTLGGNTLSQEAGMFADLSLAAGATINSLRQAFQIQKIFERDARGGTRYIELIKSHFGVTSPDARLQRPEYLGGGSTPINVVPIPQTSPTGTYADTPQGNLAAVGTGTFNNHGFTSSFTEHCLVIGLMSVRADLTYQQGINRMWNRKTR…	525	USER	zzzz718
422	my_seqs_16minnow_6_2ct835.6@PF02305.16	my_seqs	MTSKSMQSLSHDVKLSCNMGELVPIACFEAVPSDKIDQSTACLLRTQPLVSPVMHEVKVDIQTWFVPNRLIWDDWDSFWTGGADGMDASVAPTIESPSITGFAEGTLGDYLGVPTGVPNKIVSALPFRAYQLIWNTWYRDEDLQSEASIGTASGVDITTSRSLQFGCWEKDYFTSARPAPQKGPAVTIPLVGTAPVEAASAALTKSSVEVAGVNKQLRTQNANTDVYVSNVTDNTNPLFVDGTAFSSFNIDDLRLGAALQRFAENISRFGNRPIERLMQAFGVRPEDYRLQLPEYLGGGQQRIQFSEVLATAESTGVEIGDMKGHGIAALRSNRYRYHAKEYGIIITLMCVRPRTQYIQGLNKMWMRSTKEDYLMPELVDLGQQEVLNQEVYLAHTTPL…	486	USER	zzzz719
421	my_seqs_16minnow_6_2ct836.6@PF02305.16	my_seqs	MSGLFGSIQNFRPKKNKFDLSHEKKMSFKMGTLTPFLLQEVIPGDQFRVNTEMLMRLQPMLAPIFHRIRVKTDYFFVPNRLVWDNWQKFITGGEDGNDATVAPYFLMEQAQIDAGYCQKGSLWDYMGLPTIEKLEPLTAELKVNALPFRAYQLIYNEYFRDENLVPKVNVTKTDGQDGNTGSLTELQKRAWEKDYYTSALPWAQKGGAVTMPTDIQYKVGGTLLRDVGGAPVDPNGALTATGAGGDATSATFQAANSGNLQVENIDSIGTTINDLRVAVRLQEWLEKNARAGSRYIESILAHFGVLSSDARLQRPEYLGGNQNPIVISEVLSSYQNADDSGYPQGNMSGHGIATGGNGGFKRRFEEHGFVIGIMTVLPRTAYQQGIAREWQRFDKLEYA…	514	USER	zzzz720
420	my_seqs_16minnow_6_2ct837.6@PF02305.16	my_seqs	MRSVQSSAQHTFALSPQANIPRASFNRSHGYKTTFDEGYLVPVFLDEVLPGDTFSLNMTAFARMATPIYPIMDNLYLDSFFFFIPNRLVWDNWERFNGAQDDPSDSTDYILPVTTAPVSGGVATGSLCDYFGIPTKINSLEFQSLPLRCYNFLWNSWFRDENLQDSVPVPKGDGPDSYTDFNLLRRGKRHDYFTSALPWPQKINDGTVVEIPLGVSAPVVPNAPFAIPVFANVNTGTGANLAFLNANSAAQWNPGPVASGDAGWGVTNLIADLSDATAASINQLRQAFQLQKLYERDARGGTRYTEIIRSHFNVVSPDARLQRPEYLGGGSTMVNINPVTQTAPPTSEQDTPQGNLAAFATASVTGHGFTKSFTEHGYIIGLVSVRADLNYQQGLNRLW…	529	USER	zzzz721
419	my_seqs_16minnow_6_2ct838.4@PF02305.16	my_seqs	MHRNSSVDVHQFAMVPKADIPRSAFNMQKTYKTTFDAGNLVPFFCEEVLPGDTFRCSATMFARLATPIFPVMDNLYIDTFWFFVPNRLVWSNWRKFMGEQDNPGDSISFTVPQQVCPAGGYAINSLQDYFGLPTVGQVAGGATVSHSALPLRGYNLIYREWFRDQNLINSPVVDTGDGPDTVSNYVLRKRGKRHDYFTGALPWPQKGTAVTLPLGVSAPVYGTGKALGMHDGTTAFGSVGNASGIFIMKTSALNTAVGTAEGGGTLPNAKVVGLGTKAQLGANDSGLFADLSAATAATINQLRQSFQIQKLLERDARGGTRYTEIVRAHFGVVSPDARLQRPEYLGGGTVPINITPIPQNSSTGLTGATTPMGTLAAMGTSLMRGNGFTQSFTEHGYVF…	551	USER	zzzz722
418	my_seqs_16minnow_6_2ct839.2@PF02305.16	my_seqs	MRNHHNPSVMAHTFSQVPKAEIPRSTFDRSHGHKTTFNAGDLVPIFLDEALPGDTFKVRMTGFARLATPIFPIMDNMFMETHFFSVPMRQVWDNWQKFNGEQVDPGDSTDFLVPQMTSPVGGYAALSIHDYMGIPPGVANLSHSCLWHRAINLIWNQWFRDQNLQDSVQVPRTDGPDDPALYTMLKRGKRHDYFTGALPWPQKGPGVQIPLGTSAPNYVDAVHAIDDNASYGSIVITTPGGALGATSVPGATEAVKLRGLTDLSNATSATINSLRQAFQIQKIFERDARGGTRYTEIIKAHFGVTSPDARLQRPEYLGGGSSMVNISPIPQTSATGAYAESPQGNLAAMGTALMQNHGFSHSFTEHCLIVGFVSVRADLTYQQGLNRMFSRKTRFDFYW…	520	USER	zzzz723
417	my_seqs_16minnow_6_2ct840.5@PF02305.16	my_seqs	MRSVMKHTFSQVPKADIPRSTFDRSHGYKTTFDAGLLIPFLIDEALPGDTFSTRVSALARLATPIVPIMDNMYLDTQFFSVPIRLVWDNWQKFNGEQKNPGDSTDYTVPQIVAPSGAGFAPLNIEDYFGLPVGVPGISVSALFHRAYNLIWNEWYRDQNLQDSVPVPTGDGPDSTMDYTLLRRGKRHDYFTSALPWPQKGPGVQIPLGTTAPVIGAFTVRNGDNSWQSALTGSVGQQNVALGSAPPDSSILYAPLVDDPNPDRLFADLSNASAATINSLRQAFQIQKVFERDARGGTRYTELIKSHFGVTSPDARLQRPEYLGGGSNPINITPVVQNSPTGAYAETPQGNLAGYGTSAFSGHGFTTSFTEHCLIIGIMSVRADLTYQQGINRMFSRKTR…	525	USER	zzzz724
416	my_seqs_16minnow_6_2ct841.3@PF02305.16	my_seqs	MIPSHRNQSVNVHQFAMVPKAEVPRSSFLRQHTHKTTFDENYLVPIYVDEVLPGDTFSLSMTAFARLTTPIFPVMDNMYLDSFFFFVPCRILWNNWVKLMGEQANPGDSIAFTVPSFTSPVGGWITNSLHDYFGLPCVGQVGGAATVAGVNSLPFRAYNKIWNDWFRDENLQTAAFMDATQDTDSSGNYALLKRGKRHDYFTSCLPWTQKGGASITVPIAGSAIVKTSSAANYTGVQQAVQWLQSTTGTGFSNNSTVMNGSQLRTSVTATGASTETGAYPTNLYADLSTATSVTINQLRQSFQIQKLLERDARGGTRYVELIRAHWGVVNPDFRLQRSEYLGGGTTAVNISPIPQTDHTPTVGTPLGTLAAYGTMLTKGHGFTQSFTEHGYVIGLANIR…	543	USER	zzzz725
415	my_seqs_16minnow_6_2ct842.5@PF02305.16	my_seqs	MSGQHSFAQIPKAEIQRSSFDRSHGHKTTIEGGLLYPIFLDEALPGDTFNLKAHAVARLATPIFPIMDNIFIDTFFFAVPYRLVWDKWQQFNGEQANPTDSTDFTIPQATGTVATGQLGDYFGLPVGVAGLSVSALPFRAYDLIWNEWFRDQNLQDSIPIDLGNLPANVNAVPLRRGKRHDYFTSCLPWPQKGEAVTIPLGTTAPVIGAGPYPANRPSFSFPTGSAGLTNQYLEAGDADWSSAFFGPSLTGPGAASAGAAWGETGLITDLSDASAATINTLRQAFQIQRILERDARGGTRYTEVIKAHFGVTSPDARLQRPEYLGGYSQPMNISQIHQTQRTDPGTGTPLGQVGGIGTAVLNGNQNGFTTSFTEHCLVIGLVNVRADLTYQNRVDRSWS…	529	USER	zzzz726
414	my_seqs_16minnow_6_2ct844.8@PF02305.16	my_seqs	MFRNKSVDLHKFAMVPKSDIPRSSFRIEKTHKTTFDAGYLIPVYVDEVLPGDSFAVKMTAFARLATPIFPVMDNMYLESFFFFVPNRLVWDNWVRMMGEQDNPADSISYTVPTISPTGGYAVGSLQDYMGLGTVGQVTAVTWPHQTLPLRAYNLIWNQWFRDENLQNSVIVRKTDGGDLTADWTLLRRGKRHDYFTSCLPWTQKGGVAVTLPLGTSAPVVPSSSHAAPTFWNTTAASNAGVLQRTAVGAGTNVAINLGGGAADTLGWNTTNLIADLSSATGPSVNLWRQAIGLQRMLEKDARGGTRYTEKIRQHFGVASPDARLQRPEYLGGGSTQITINPVAQGSGTSASGTTTPLGTLAGVGTSVAHDHGFTASFVEHGHVLGLVSVRADLTYQQGL…	536	USER	zzzz727
413	my_seqs_16minnow_6_2ct845.5@PF02305.16	my_seqs	MSFNIPNQNHQSVMSHKFSEVPHADIPRSTFDRSHGYKTTFDAGLLIPILVDEVLPGDTFNVNVTGFARLATPIFPIMDNMFLDTHYFAVPVRLLWSNWQKFHGEQENPGDSTDYTVPQIESGEDGFIIGSLFDYFGLPTDVSGISVSALYSRAYNLIYNEWYRDENLIDSLVVDKDDGPDTLGDYQTVRRRGKRHDYFTSALPWPQKGVGVSIPLGTVAPVVSNNTQIQFRGVGTGSTRNLDMSSVSGANKIGYSGAAMSDSAGFGANTGLYTDLSTATAATINSLRQAFQIQRIYEKDSRSGSRYIEMLKAHFGVTSPDYRLQRPEYLGGGSVPVNISPIPQTSSTNVTTPQGNLSAIGTASLRNGFTQSFTEHCIIMGIASVRADLTYQQGIDRMF…	530	USER	zzzz728
412	my_seqs_16minnow_6_2ct846.4@PF02305.16	my_seqs	MFGSNHRNPSVMAHTFSQVPKADIPRSSFDRSHGYKTTFDAGYLIPIFVDEALPGDTFNLRMTGFSRLATPIYPLMDNMYMDTQFFSVPVRLVWDNWQRFNGEQPNPGDSTDFTIPQMVAPAGGYAENSIHDYMGLPTGVAGISHSALWHRAYALIWNEWYRDQNMQDAIAVPKGDGPDLHTFYPLMKRGKRHDYFTSSLPWPQKGEAVQIPLGASAPINASGNFQMHSSGTPSAHGTLATNGTGQLVATGTSNNDYLVYDSGLIADLSSATAATINSLRQAFQIQKIFERDARGGTRYTELIRSHFGVTSPDARLQRPEYLGGGSTPVNISPIPQTSPTGTYANTPQGNLAAIGTALVSGHGFTTSFTEHCLIIGIVSVRADLTYQQGLNRMWSRKTR…	525	USER	zzzz729
411	my_seqs_16minnow_6_2ct848.3@PF02305.16	my_seqs	MFPKPHHNPSVMVHQFSQVPKAEIPRSSFDRSHGYKTTFDAGYLIPFYCDEALPGDTFNLRATALARLATPIFPIMDNMFMDTQFFSVPVRLIWDNWQKFNGEQTNPTDSTDFTVPQTTGNTLGYAANSLEDYMGLPVGAPLLNQSALWHRAYNLIWNEWYRDQNLQFSRTVPKGDGPDNVSTYTLLRRGKRHDYFTSCLPWPQKGPGVTIPLGGMAPVGFVANTGAWARLVKQDGTFNTSDASPLTSQPNSFFSTTGTPGDYLNLDPNGTLSADLSQATAATINSLRQAFQIQKIYERDARGGTRYTELIKSHFGVTSPDARLQRPEFLGGGSSPVIVSPIPQTSPTGTYANTPQGNLAAIGTAMLHGHGFTSSFTEHCIIIGLVSVRADLTYQQGLD…	534	USER	zzzz730
410	my_seqs_16minnow_6_2ct849.4@PF02305.16	my_seqs	MSQPSVMKHTFSQVPKAEIPRSSFDRSHGHKTTMNSGELIPFFIDEALPGDTFNLSMTGLARLSTPLHPYMDNAYFNTFFFAVPNRLIWDNWQKFNGEQTDPGDSTDYLVPQVLAPAGGWPTGSLADYMGLPLGVADLPACAFWHRAYNLIWNEWFRDQNLQDSLPVPRGDGPDPATLYPVQRRGKRHDYFTSCLPWPQKGESVSIPLGTSAPVTSAGLGFPSFVGQSVQTTNLIVNDGANAVRVGTNAQGLNDPLKWVDPALQADLSDATAATINQLRQAFQVQKLYERDARGGTRYTEIVRSHFGVTSPDARLQRPEYLGGGQSSINIHQVEQTSASAYGAAADTPQGNLAAFGTSVMHGHGFSKSFTEHCTIIGLVCVRADLTYQRGLARMFSRRG…	525	USER	zzzz731
409	my_seqs_16minnow_6_2ct850.4@PF02305.16	my_seqs	MSRPSVMVHQFSQVPRAEIPRSTFDRSHGYKTTFDAGLLIPFFIDEALPGDTFNLRVSALARLATPIYPIMDNMFMDTHFFSVPCRLVWDNWQKFNGEQKNPNDSTDFTVPILDNSVRPTGFIQGSIFDYVGLPTNVSGLTVNALPFRAMNLIWNEWFRDQNMQDSLPVVTNDGPDQVDYRLMRRGKRHDYFTSCLPWPQKGPGVSIPLGTSAPIVKNGTFMLNTAADTGLNLSTTAGANTVTWNKNATVQDPTFYESGLIADLSQATAATINSLRQAFQIQKIYERDARGGTRYIELIKSHFGVTSPDARLQRPEFLGGGSTPVIISPIAQTSPTGTYATTPQGNLAAIGTAHINGHGFSSSFTEHCYIIGFVSVRADLTYQNGLNRLWTRQTRFDYY…	521	USER	zzzz732
408	my_seqs_16minnow_6_2ct851.6@PF02305.16	my_seqs	MSFGIKSHSKPSVMTHTFSQVPKAEIPRSTFDRSHGYKTTFDAGYLIPFYVDEALPGDTFNVRATALARLATPIFPVMDNMFMDTQFFSVPIRLVWDNWQKFNGEQKNPGDSTDFVIPQLTNSTSPFLPNSLEDYFGLPTGVQNLSVSALWHRAYNLIWNEWYRDQNLQNSVDVPTGDGPDLHASGTYNLLRRGKRHDYFTSCLPWPQKGEAVNIPLGGMAPIAVDNSTPNAYLSINDINGVARNFTTTALNTADSIKGSVAAAADSEALYADLSSATAATINSLRQAFQIQKIFERDARGGTRYTELIKSHFGVTSPDARLQRPEYLGGGSTPVNISPIPQTSPTGTYANTPQGNLAAIGTAQIHNHGFTTSFTEHCIVIGLVSVRADLTYQQGLNRM…	531	USER	zzzz733
407	my_seqs_16minnow_6_2ct852.3@PF02305.16	my_seqs	MFGASHGRQQSVMTHQFSQIPKAEIPRSSFDRSHGYKTTFDAGYLIPFFADEALPGDTFNLKMTAIARLATPIFPIMDNMFMDTQFFSVPIRLIWENWQKFNGEQANPGDSTDYTIPQMVSPGSGYAANSIHDYFGLPVGVPNVSHSCLWHRAYALIWNEWYRDQNLQDAIAIPKHDGPDLHTFYELQRRGKRHDYFTSCLPWPQKGPGVTIPLGTSAPVYGTYTTLAQPTQGYAGGYLAGIGATSNVIAGPATSDYVLRSDPNAVDGLRADLTEASAATINSLRQAFQIQKIFERDARGGTRYTELIKSHFGVTSPDARLQRPEFLGGGSTPVNISPIPQTSPTGTYADTPQGNLAAIGSAALHNHGFTSSFTEHCLIIGLISVRADLTYQQGLNRMW…	530	USER	zzzz734
406	my_seqs_16minnow_6_2ct853.5@PF02305.16	my_seqs	MLKLLNVISLLLLLTQLLLFLRLRRIIPYMISVLLTLILALLILPPRPFISVQLCNSRSTDMFNQKSSHRPSVMTHQFSTIPKAEIPRSTFDRSHGYKTTLDAGYLIPFYVDEALPGDTFNLKTTALARLATPIFPIMDNMYMDTFYFSVPVRLLWDNWQKFNGEQKNPNDSTDYTIPSTSPQSTGYEIGSLSDYMGIPTGIHCNHSALWHRAYNLIWNEWFRDQNLQSSVPVPTDDGPDDQNNYTLLRRGKRHDYFTSALPWPQKGPGVQIPLGTQAPIIGLLSKGASTIAGSNWYDINSKELYPSANRIWNGEDFGDSNNVAFAEASPAGLNVYADLSQASAATINSLRQAFQIQKVFERDARGGTRYTELLKSHFGVTSPDARLQRPEYLGGGSSP…	596	USER	zzzz735
405	my_seqs_16minnow_6_2ct854.3@PF02305.16	my_seqs	MADIFNNVSLRKPKKNVFDLSHEKKLSCNAGELVPIYLQEIIPGDSFRVNSELMVKLAPMLAPVMHRMNVYTHYFFVPNRIIYDSWETFITGGADGKQVVGFPQLGLSDSRKGSFVPGSLTDYFGIPTINQSETVIDMHYFNALPFRAYQTIYNEYYRDQTLTPPVAVTKEEVVGSDEFYAITTLRKRSWEKDYFTSALPWAQRGGDVLLPMDSIVNYRDAALGIPQGTTGNLGFLNGELSDIQAPANQYGLDNIESIEENVTINELRKAVRLQEWLEKNARAGARYIEQIFSHFGVKSSDARLQRPEYLGGGKSPVVISEQLSSFNNEEVPGATMYGHGVSYGGKNGFKKYFEEHGFVIGIMSIIPKTAYMQGIPKIFNKIDKFDYFWPEFANIGEQE…	505	USER	zzzz736
404	my_seqs_16minnow_6_2ct855.4@PF02305.16	my_seqs	MMHKNRSVSAHQFAMVPRADIPRASFNIQRSYKTTFDAGYLVPILCEEVLPGDTFKLRATMFARLTTPIFPIMDNLHLDSFFFFVPNRLVWTNWVKFMGEQAAAGDSISYTIPQVVSAAGGFPVNSIYDYFGLPTVGQVGGGNTVSVNALPLRGYRLIYQQWFKDENLVAVDFTPPLGDGPDLVSAYGLQRRGKRHDYFTSCLPWPQKGGTSVSIPLGTSALVKTSNVGAVTGMTDGILFGKVGGGAPTAQRAIGTTGAGIATGTTTVTVDGAAQLLYPQNLYADLSTATAATINQLRQSFQVQKLLERDARGGTRYTEIIRAHFGVISPDARLQRPEYLGGGSTPVLVNPIAQTSATGVTGGSAPLGNLAAVGTAVGHGHGFSQSFTEHGYVIGLICA…	546	USER	zzzz737
403	my_seqs_16minnow_6_2ct856.5@PF02305.16	my_seqs	MSLNRKLPQVDPSHFAMVPRSDVPRSVFKTEHTVKTTFDVDYLIPIHVDEVLPGDIHDGDLTVFARLNNLIFPLMDNLTVETFFFFVPCRLVWDNWKKFMGEQANPSDSISYTIPQLVSPTNGFIVGGLADQFGLPTVGQLTAGGTVSVNALPFRAYNLIFNEWFRDQNLMNSVPVPKGDGPDNIADYNREKRCKKHDYFTSALPWPLKGGVEVPVIGSGTAVVKTSPTDLYTGSHDALHFLNISGATPTAGLNLATYGADPRTIGQADTATSPPGAGSRLYPANLYADLSTAGGSTINAMRLAVATQQFLEKDARGGTRYTELLKNHFGVHPEDARLQRPEYIGGGKTIIQTQAIPQTSATGITGGTSPQGALTGQATIAGRHRFKYHATEHGYIIGL…	550	USER	zzzz738
402	my_seqs_16minnow_6_2ct857.3@PF02305.16	my_seqs	MPRSSISTLEKSRGLPALPGRRVRRRSRNHYRPGAGTHLQRHSISTRRLTMQSHMTHQFSQVPKAEIPRSTFDRSHGYKTTFDAGLLIPILVDEALPGDTFNVGLTALARLATPIYPIMDNMFMDTHFFSVPVRLVWENWQKFNGEQFAPGDSTDFTIPQMVAPSGGYTAGSIHDYMGLPTGVAGISHSALWHRAYALCWNEWFRDQNLQDPIAVPRGDGPDLHTFYELKRRGKRHDYFTSCLPWPQKGEGVTIPLGGMAPIRTDSGQGLDLTIKSGAVDVQMVTSSSFLSLGANPIAANPIYADLTEATAATINSLRQAFQIQKIYERDARGGTRYIELIKSHFGVTSPDARLQRPEYLGGGSTPINITPVPQTSPTGTYANTPQGNLAAFGSTVLRG…	563	USER	zzzz739
401	my_seqs_16minnow_6_2ct858.3@PF02305.16	my_seqs	MANKLFNTVKVSSPDSNMFDLTHDVKMTMQMGNLVPILNMECLPGDKINLSSESLIRLAPLLAPVYQRMDVYTHYFFVPNRILWDNWEKFITDAATTIAPPVYSWNTTTDPEVKKYYDYFGVPPTSESALRFLNAFPFAAYQCIYNEYYRDQNLIAPINYKLVDGNNVNPALGILRNRAWEHDYFTSALPFAQKGDAVDIPLGTIQDNALVKSNSSANQTITSSPNNQNIQADGSVFTPFPNTLFAATEGIELEPTTINDLRRAFKLQEWLEKNARGGTRYVESILAHFGVKSSDARLQRPEYITGSKSPIVISEVLNTTGIDGELPQGNMAGHGISVAGGNQGTYYCEEHGFIIGIMSVLPKPAYSQGVPKHFLKKHPLDYYWPSFANIGEQEITNLE…	498	USER	zzzz740
400	my_seqs_16minnow_6_2ct859.4@PF02305.16	my_seqs	MHRNPSVSSHKFAMIPKADIPRSAFRMQKTLKTTFDAGYLIPIYCEEMLPGDRANVKATVFARMATLLFPVMDNMYIETFFFFVPNRLTWSNWQKFMGEQDNPSDSISYVIPQIVSPAGGFAVSGIYDMFGLPTVGQVAGGSTISINALPLRAYNQIYKQWFRDENLINSPTINLGNGPDTYTDYALRRRGKRHDYFTSCLPWPQKGNTAVTLPLTGNAWIKGLGIDPAATPSTGTQNVDESDGTNLNYSEWYSANSVNTLKIRSISSIPNIYADLSTATSATINAIRLAFQTQKFLERDARGGTRYTELVFTHFGVRSPDMRLQRPEYLGGGKSAIQINPIAQTGQTGLTGGSTPLGTLGAMATAVAHGHGFNYAATEHGYIIGLACVDADLTYQQGI…	534	USER	zzzz741
399	my_seqs_16minnow_6_2ct861.5@PF02305.16	my_seqs	MKRYKHSLSNYSLLTMDMGKLVPIGLQEVLPGDTFQQASSALIRFSPQLAPVMHPVTVRIHHWFVPHRLTMEANGKNWEPFITGGSDGLGEGQSLPTNAATFTPAVSGLADYLGLPATIVLPIGTVSMLPFYAYTLIFNEYYRDQDLGAARAITTASAANDVVENVSWEKDYFTAARPWTQKGPAVSLPIGTSATVKTSSTELITSGTNFDMKVRRTTGNAVPTADRALSTGGAGVFAESGNAATGVNGLYPSNLYADLSTATAATVNAVRQAFALQRYQEARAQYGSRYTEYLRYIGVRPSDARMSKPEYLGGGKQTVAFSEVLRTGNVTADATPNVIGQLKGHGIAALRSNRYRYFAEEHGYIMSLMSIRPKSIYVNGIERMWLKRTKEEFFQKELE…	508	USER	zzzz742
398	my_seqs_16minnow_6_2ct862.6@PF02305.16	my_seqs	MHRNKSVSQHTFAMVPKAEIPRSAFNRQFTHKTTFDAGYLIPIYVDEVLPGDTFNLSATLFARMATPIYPVMDNLHLDSFFFFVPNRIIWDNWKRFMGEQANPGDSTSFLVPQHTSPLGGYTANTLQDYMGLPTVGQINGATTFKHNSLHLRGYNKIWNEFFRDENLQDSVVVDMGDGSGDLITNYNLLRRGKRHDYFTSALPWTQKGDSVTLPLGTSAPVRWVDTTSAPIGGATAGLYANAANSTTPTYDGTAWNTFPKASDMYADLAEATAATINQLRQAFQIQKLLERDARGGTRYVERLKAHFGVVSPDFRLQRPEYLGGGSTMVNINPVAQTSGSPGAGGYTDTPQGNLAAFGTALATGHGFTASFTEHGIIIGMISVRADLTYQQGLHKMWSR…	530	USER	zzzz743
397	my_seqs_16minnow_6_2ct863.5@PF02305.16	my_seqs	MKLFNEVQFFKPKKNKFDLSHEKKMTLKMGTITPILIQEVIPGDQFRINTEMLMRMQPMLAPIMHRVRIKTDYFFVPNRLVWDNWQKFITGGEDGLSNNVAPFISLNETTKGYFPKGGLADFFEVPPISDVAAVTADQKISALPFRAYQLIYNEFYRDQNLITEIPINKGDGAELYADYPALLSLRKRAWEKDYFTSALPFAQKGGPVSLPIDPQVNYKPISDVKLQNGTTPTDGDLLSVTGGVSVDALGARIENIESITNATTTINDLRVAVRLQEWLEKNARAGSRYIESILAHFGVRSSDARLQRPEYLGGASNPMVISEVLSTYAQEDGSGLPQGNMTGHGISAGNVPGFKRNFEEHGFIIGLMTILPKTAYQQGLPKQLLKFDKLEYAWPLFAQ…	510	USER	zzzz744
396	my_seqs_16minnow_6_2ct865.5@PF02305.16	my_seqs	MRGALNRNMPPIKVDQFSMVPRSDVPRSTFRTQHSHKTTFGGGYLVPIHVDEVLPGDVHQGEVVIFARMSTLLFPLMDNVQLETFFFFVPCRLLWTNWRKFMGEQANPGDSISFTIPQVVSAAGGFPICTIFDYFGLPTVGQVGGGNTVSVNVLPLRAYNMIWQEWFRDQNLDTSLDVYPKGDGPDGTGSYGLQRRRKKHDYFTSCLPWPVKGGSEVPIPLTGSATVVPITPGVSAPTFKLSTTGAAAATGFQIPAIGASQPLQSVGAATGAVVTPAQWVDPQLKADLSTAAIQNLNAMRLAIATQQLLEKDARGGTRYTELLKNHFGVMPQDSRMQRPEYIGGGCSTLKTAAIPQTSATGLTGGTSPQGALAAQSLVADRHTFSYHAAEHGYIIGLVW…	546	USER	zzzz745
395	my_seqs_16minnow_6_2ct868.4@PF02305.16	my_seqs	MLGSAHTHKNPSVMVHQFSRVPKAEIPRSTFDRSHGYKTTLDAGWLVPFFIDEALPGDTFNCHMTGLARLATPIFPIMDNMFMDTHFFSVPIRLIWDNWQRFNGEQKNPTDSTDFTVPQMTTPDPTGYDIGSLSDYFGIPTGVPGLAHSSLWHRAYNLIYNEWFRDQNLQNSAVVDTGDGPDDPNAYVLRRRGKRHDYFTSCLPWPQKGPGVTIPLGTTAPIIGLVRTTGSAMPLGSEWVSRDGVALPPSVTTGFTSTATQPFDGVGFIAAGEKMEVFADLTAASAATINTLRQAFQIQKIYERDARGGTRYTELIKSHFGVTSPDARLQRPEFLGGGSSPVIISPIPQTSPTGTYANTPQGNLAAIGTAQLNNHGFTTSFTEHCIIIGLVSCRADLTY…	539	USER	zzzz746
394	my_seqs_16minnow_6_2ct869.3@PF02305.16	my_seqs	MANKLFNTVKVDTPDSNSFDLTHDVKLTMQMGNLVPILAMDCIPGDRVNLNFEFMARLAPMLAPPYQRMDAYIHCFFVPNRIVYPNWEKFITDPASTIVPPFIAYNHGFGTARKKFLDYFGVPPCENIVNGANINALPLAAYQAIYHEWYRDQNLVPEFDYKLTDGSNDASLFTTMRKRAWEHDYFTSALPFAQKGQAVDIPLGSLPDNAIVKSNSAADQVLTSTPTNQNIGHDNTVLTPFPNTLFAQTKGMELEATTINDLRRAFKLQEFLEKNARGGTRYIEQNKVQFGVQSSDARLQRPEYITGTKSPIVISEVLNTTGNEGADALPQGNMAGHGIAVSGGESKSYYCEEHGYIIAIMSVMPKASYSQGIPKHFLKKHPLEYYWPSFANIGEQEIQ…	500	USER	zzzz747
393	my_seqs_16minnow_6_2ct870.5@PF02305.16	my_seqs	MKEKYFAQPSGTMQQQHFSQVPEAEIQRSSFDRSHGYKTTFNEGSLVPIFVDEVLPGDTFNLGMTGFARLATPLRPFMDNLYLDTHFFFVPNRLVWTNWVNFMGERTNPTDDPNAHTVPEMAINLARLTDDDLASYYGIPHNQAGAGTISVNALPFRAYQLVFNEWFRDQNLTNSITIQTGSGPDTYADYATLLGRAKRHDYFTSALPWPQKGSPVFIPLGTSAPIQGKTPGAVNQNSINVQIGTNASAAQRNLTSINGTLDVNINGTNATATQVLGWGVDTGLFADLTAATAITINDLRTSFQVQRLLERDARGGTRYIELILSHFGVQSPDARLQRPEYLGGGHAMLNVNPVATSFANAEIALGDLGAVAVGTTRASFSKSFTEHGFIIGLISVRSD…	540	USER	zzzz748
392	my_seqs_16minnow_6_2ct871.4@PF02305.16	my_seqs	MNIFQNVQGNRPTKNKFDLSHERKMSLKMGTLTPFMVQEIVPGDSFKVNTEMLLRLQPMLAPIFHRVRVKTDYFFVPNRLVWDNWQKFITGGEDGLNNSIHPYFQIDPTTPPSLVAKGSLADYMGIPAIDPLTMTNTLKINALPFRAYQLIYDEYFRDENLITAVAPNKTDGQDLRIFDTMTMRKRAWEKDYFTSCLPWAQKGGAVNVPTTVEYKPTAQTSGFGLPAGNLTAAGGAGTTADIQVGGSDVSIENIEEIGITINDLRVSVRLQEWLERAARSGSRYIETILSNFGILSSDARIQRPEYLGGGVTPITISEVLSTFQFSGDPDGEPQGTMKGHGIAVGNYGGFKRKFEEHGFVFGIMTIIPRTAYQQGIPKMFSRPDKFDYLWPSFAQLGEQ…	506	USER	zzzz749
391	my_seqs_16minnow_6_2ct872.4@PF02305.16	my_seqs	MLPNFKQKTVDVHQFAMVPKADIPRSSFSIQSSHKTTFDAGYLVPVYVDEVVPGDTFNLRMTAFARLATPLFPIMDNLHLDSFFFFIPNRLVWSNWKKFMGEQATPASSISFSIPQVLCPAGGYAINSLQDYMGLPTVGQVTAGNQVTHSALFTRAYNLCWNEWFRDENLQDSVVVDVDDGPDVYTDYSLLRRGKRKDYFTGALPWPQKGATSVSLPLGTSATVRTQVTELVSGAQEGLHMRRATAGAAMAAGKNLSSGAGTYLSEDSFASVGTTDSLYPSNLYADLSTATAATINQLRQSFQIQRLLERDARGGTRYTEIVRAHFGVVSPDARLQRPEYLGGGSTPIVVSPIAQTSATGLTGGSTPVGNLAAAASVVASGHGFTQSFTEHGIILGLVS…	549	USER	zzzz750
390	my_seqs_16minnow_6_2ct873.4@PF02305.16	my_seqs	MNNFFESNPKGKIPRNKFNLTHDRKFSFNMGKLYPICVMEAVPGDSFRCSNELMVRTAPLAAPVMARMKVKVESFFVPKRILWDEFEEWITGGPDGTSVPVAPYFDKASLMANSVKMIPGTLWDHMGLPTVSGGSEADALWAPKISVLAFRAYAHIWNEWYRIPELMDPIDVTGESGAIVGGELTALLEMQRRCWERDYFNTCQPNAQRGVAAAAPIDIAYAANSTFKKTADGLGVPVSYDAGIGANGVAGELGYVDPATNNRAGQARIENIGSASVLVEAIRVAAAVQKWLEASARAGSRYVELLFQSFHIKSQDSRLQRPELLGGHVGNIQISEVLSTVQFEGATDDLPQGNMAGHGLHIGHGAGYTYRAPEHGFFITLMSVVPEGGRYGNGYYSGI…	542	USER	zzzz751
389	my_seqs_16minnow_6_2ct874.5@PF02305.16	my_seqs	MFPKHHGNKSVMQHQFSRVPKAEIPRSSFDRSHGHKTTFDAGYLIPFLCDEALPGDTFNVRTTAIARLATPIFPIMDNMFLDTHFFSVPIRLIWDNWQRFNGEQKNPNDSTDFTVPQLISPSSGGYVAGSLHDYMGLPVGIGGISHSALWHRAYNLIWNEWFRDQNLQNSVPVPTDDADGNPANFVLLRRGKRHDYFTSCLPWPQKGPGVTIPLGDTAPVIGLARLGTFTSTSSYKDQDGVACGTVPAYINDNATGKNVAFLADPADTNKFKVYADLTQASAATINSLRQAFQIQKIFERDARGGTRYTELIKSHFGVTSPDARLQRPEYLGGGSTPVNISPIPQTSPTGTYATTPQGNLAAVGTAHVTNNGFTASFTEHCIIIGLCSVRADLTYQQGL…	534	USER	zzzz752
388	my_seqs_16minnow_6_2ct875.2@PF02305.16	my_seqs	MLNGSAQNQSIMSHNFGRISPPRIQRSTFKMPFGHKWCMDAGTLYPWFLQEILPGDTMNTRASFVARLATLINPIMDNIFIDTFWFYVPNRLIWDNWERFQGYRPTPSSTVDFELPSMRHSSGTPEADLNFSEGSIYDAFGLPINIGIKYQDAPISLPMRAYYLIWNQWFRNPDVQDELILLTGDGPDYIADFALQSRNKRHDYFASCLAAPQKGDAVLIPIGDSAPVVGGVAGSGIALGLRSRDLTNSSWVEKGAQTEGSGTYLQWSAGALGDALGVVQGSAETFRQSSSMGVSLDPDLSGLQLVDAVADLSAANGINLNQFRELIVLQQILELDSRGGTRYSEALKVRWGIDAEDYRLQRPEYLGGSSERVNISAVPQTSGSGTSAQGNLAAFGIAT…	568	USER	zzzz753
387	my_seqs_16minnow_6_2ct876.5@PF02305.16	my_seqs	MFGTKRHSNPSVMVHQFSQVPRAEIPRSSFDRSHGHKTTFDAGYLIPFFVDEALPGDTFNVKATALARLATPIFPIMDNMFMDTHFFSVPMRLVWDNWQRFNGERLDPNDITDFVIPQMVSPGSGYAAHSLYDYMGLPVGVPAVEHSALWPRAYTLIWNEWFRDQNLQNPVAVPKTDGPDLHTFYELKRRGKRHDYFTSALPWPQKGDAVSIPLGTTAPIVGSGTGVPLFTHNGGTAISQLAAGNDQVVKWKDNASAPATTADLAWYDSALHADLSQATAATINSLRQAFQIQKIFERDARGGTRYTELIKSHFGVTSPDARLQRPEYLGGGSTPINVTPIPQTSPTGTYANTPQGNLAAIGTAVLHNHGFTQSFTEHCLIIGLVSVRADLTYQQGLNR…	532	USER	zzzz754
386	my_seqs_16minnow_6_2ct877.5@PF02305.16	my_seqs	MKSVMTHQFSHVPKADIPRSTFNRSHGHKTTFDAGLLIPILVDEALPGDTFNVNLAAFARLATPIFPLMDNMHMDTHFFSVPMRLVWENWQRFNGEQTTPGASTDYLVPQQIAPAGGYLEGSIHDYMGLPTKVAGYSHSALPLRAYNLIFNEWFRDQNLVVPGAQLIDDGPDPQNAYALRSRGKRHDYFTSALPWPQKGPGVTIPLGTSAPIFGAFKVKDSAATATGKLTAAPTSGNISWTATAPGTSQDIYANNADPNGLRADLSAASAATINSLRQAFQIQKIYERDARGGSRYVEILKAHFGVTSPDARLQRPEYLGGGSTPVNITPVTQNSPTGTYANTPQGNLAAFGTAGMSQHGFTASFTEHCIIMGFVSVRADLTYQQGLNRMWSRRTRFDF…	522	USER	zzzz755
385	my_seqs_16minnow_6_2ct878.3@PF02305.16	my_seqs	MFGMKSQNRKSVMDHQFSRVPKAEIPRSTFDRSHGYKTTLDAGYLVPFFIDEALPGDTFNVRVTALARLATPIFPLMDNMYMDTQFFSVPMRLVWDNWQRFNGEQPNPGDSTDFTIPQMVAPGSGHAIGSLSDYFGLPTGVAAISHSALWHRAYALIWNEWYRDQNLQDAIAVPKTDGPDLHTFYPLMRRGKRHDYFTSCLPWPQKGDAVTIPLGVSAPVVSSGDGFPIMKSNRINTGPLWHSYSSADPVDTPKDIYLKNTLGGQADAEAVIAWDNPKLQADLTGATAATINSLRQAFQVQKIFERDARGGTRYTELIKSHFGVTSPDMRLQRPEFLGGGSTPINITPIPQTSPTGTYANTPQGNLAAVGTAHINQHGFTSSFTEHCLIIGLVSVRSDL…	540	USER	zzzz756
384	my_seqs_16minnow_6_2ct880.4@PF02305.16	my_seqs	MSKKNLFNTVKMTRPNKNAFDLSHDVKLSLNMGQLVPIMCTECVPGDKFNISCESLLRFAPLVSPVMHKMNVYMHYFFVPHRLVWPNWEKFITNTDGLPPAFPTVEITSGSYTPLCDYLGLPIPPPGAPAEFVNAIPFAAYQKIYNEYYRDQNLAISATDTLQDGLNDINNFRNLRKRAWEHDYFTSALPFAQKGNPVNLPIGVFPEDVPVYVNNGGTDTEFQGNPLNVDVIGQQSDDTPENELYAQTAGVATQATTINDLRRAFKLQEWLEKAARGGTRYVESILSHFGVKSSDKRLQRPEYITGTKSPVIISEVLNTTGTEDAPQGQMAGHGVSVTSGRYGSFFCEEHGYIIGIMSVMPNTAYQQGIPKHFTKTNDPFQYFWPSFAHIGEQPIENRE…	498	USER	zzzz757
383	my_seqs_16minnow_6_2ct881.3@PF02305.16	my_seqs	MDNTQNVFTATPSDRVDGNTFDLSHSHKFTCNMGELIPHICLDVVPGDKFTFNLETMVRLAPMIAPLMHRVNVTTHLFFVPNRIIWTDWEKFISGDETIEWASTLINDEADYPIGLGSLGDYLQYPSRGEYKTQASVLPLAAYFKIFDEYYRDENLVSETFVEVFSSDDNEEYRIKASEPCLKRAWAHDYFTSALPFAQKGSPVLLPLLNDMEVDVKIKEVLTGLTQTLLNEDGTPWTGTNALQSVGGGNNWLASSGSPNKRYLDPNGTLFVDVNSEAVTINTLRRAIKLQEWLERNARGGTRYTELIMSHFGVRGSDARFQRPEYIGGYKQTLGISEVVGTSLTGLNESEETPYTPIGTLAGHAIAVADGFAEFYAEEHGYIIGIFNVQPVPEYMNGI…	529	USER	zzzz758
382	my_seqs_16minnow_6_2ct882.3@PF02305.16	my_seqs	MTWHLHFKKTIMKNALNSVQVSAPSVNAFDLSHDVKLSLQMGKLVPVLAMECLPGDRVRIGCENLIRLAPMLAPMMHRVDVRIEYFFVPNRLVWENWETFITNGGSDPATQGDPLPAPPFINYTEGGGGANYSDFPLLDYMGLPDPVQCPLPDGFEKISAIPFAAYQKIYNDYYRDENLIDEDLDAFNLRSGDNNAFVANILAMRKRAWEADYFTKALPFAQKGEPVTVPLGTLPDVPVYRNSDTVTDTTLLTGTPDDLTVDYELTTHNTSNDPIEAAKLYAKTSAVDDLGVATINDLRLAYRLQEWLEKNARGGTRYSELIRVHFNVMPEDARLQRPEYIVGVKNPIRISEVLNTTGTDEAPQGNMAGHGVSYAEGNWGKYHCTEHGYIIGIMSVMPK…	535	USER	zzzz759
381	my_seqs_16minnow_6_2ct883.1@PF02305.16	my_seqs	MLSGHKHSNPSVMVHQFSRVPKAEIPRSTFDRSHAHKTTFDAGWLIPFLVDEALPGDTFNVKLTGLARLATPIFPIMDNMFMDTHYFSVPIRLVWDNWQRFNGEQKNPNDSTDYTIPQMSAPVEGYQPNSLHDYFGIPTKIPSLIHSSLWHRAYNLIYNEWFRDQNLQNSAVVDTGDGPDDPLAYVIRRRGKRHDYFTSSLPWPQKGPGVSIPLGSQAPVIGLLRTTGSEMPLGSEWLDRNGNPAAATSGPTGFTSTATQPFDGVGIAKSGEAMNVYADLTNATAATINSLRQAFQIQKIFERDARGGTRYTELIKSHFGVTSPDARLQRPEYLGGGSSPINVLPIPQTSGTPLNGSTPQGNLAAIGSAVINNHGFTTSFTEHCLIIGLVSVRADLTYQ…	539	USER	zzzz760
380	my_seqs_16minnow_6_2ct884.5@PF02305.16	my_seqs	MFNIPSHSSPSVMSHQFSQVPKAEIPRSSFDRSHGFKTTFDAGLLIPVFVDEALPGDTFNLRMTALARLATPIFPIMDNMFMDTQFFSVPIRLVWDNWQKFNGEQKNPGDSTDFTIPQLTNMTPYDPNSLEDYFGLPVGVANLSVSALWHRAYNLIWNEWYRDQNLQDSVEVPTGDGPDLHSSGQYNLLRRGKRHDYFTSSLPWPQKGPGVTIPIGGSAPIIPVDGTGPSFKPTTGATTNAFLKWTTTGQATTTWSKTADAGNALWDTPNLTADLSAATATTINSLRQAFQIQKIFERDARGGTRYTELIKSHFGVTSPDARLQRPEYLGGGSTPINISPIPQTSPTGTYADTPQGNLAAIGTAQLHGHGFSASFTEHCLIIGLVSVRADLTYQQGINR…	532	USER	zzzz761
379	my_seqs_16minnow_6_2ct885.5@PF02305.16	my_seqs	MFGMKHSSHKSVMAHQFSQVPRADIPRSSFDRSHGYKTTIDAGKLIPFYVDEALPGDTFNLRTTALARLATPIFPIMDNMFMDTFFFSVPIRLVWENWQRFNGEQFAPGDSTDFTIPQMVAPSGGYGANTIHDYFGLPVGVAGISHSCLWHRAYALIWNEWFRDQNLQDPIAVSRTDGPDLHTFYEIKNRGKRHDYFTSCLPWPQKGNAVEIPLGTSAPVLPLPSDPRPVFHFKGAATNVGSLNVANSASQVTTINNTTGSLRELEWEQPNLVADLSQATAATINSLRQAFQVQKIFERDARGGTRYTELIKSHFGVTSPDARLQRPEYLGGGSTPVNISPIPQTSPTGTYATTPQGNLAAIGTVNVHNNGFTSSFTEHCLIIGLVSVRADLTYQQGMN…	533	USER	zzzz762
378	my_seqs_16minnow_6_2ct886.6@PF02305.16	my_seqs	MAEKYFQQPSVMSTQAHFSSVPSADIERSTFDRSHALKTTFDEAYLVPIYVDEVLPGDTFHLRETSFARLATPLRPIMDNIYYDTFYFFVPYRLVWANFQRFMGERNSPTDDITGLTVPQVKLNTGPEGNTLMQYFGLPHTAVAVTAELSVSALPFRAYNLIFNEWFRDQNLQSLEGCPKDDGPDTNAPYALRRRGKRHDYFTSCLPWPQKGEAVMIPVGAVTGLSVMTPDLEAAYENVDGIPDDVRWLQTGYAVDLAAATGATINDLRSAVQIQKLLERDARGGTRYIEIILSHFGVHSDDGRLQRPEYLGGGSTRISINPVASTFRNTEVPQGDLAGVGTVVGHASFSKSFTEHGVIIGLCNVRSDITYQQGIDRFWSRKTRYDFYWPALAHLGEQA…	516	USER	zzzz763
377	my_seqs_16minnow_6_2ct887.5@PF02305.16	my_seqs	MFPKHHGNKSVMVHQFSQVPKADIPRSSFDRSHGHKTTFDAGLLIPFFVDEALPGDTFNLRTTAIARLATPIFPLMDNMFMETQFFSVPIRLIWDNWQKFNGEQKNPNDSTDFTVPEIQAPAIGYAANSLADYMGIPTAVPLLKHSALWFRAYNLIFNEWYRDQNLIDSLPVPTDDGPDNYSQYKLVYRGKRHDYFTSCLPWPQKGAGVTIPLGGTAPLRSTGNLTLSEANNVNPSLIEREAAQAGGLIKLQAPGNFPAYLQYSSGIEADLSQATAATINSLRQAFQIQKIFERDARGGTRYTELIKSHFGVTSPDARLQRPEYLGGGSTPVNISPIPQTSPTGTYANTPQGNLAAIGTAQLHGHGFSSSFTEHCIIIGIVSVRADLTYQQGLNRMWSR…	529	USER	zzzz764
376	my_seqs_16minnow_6_2ct888.4@PF02305.16	my_seqs	MANIFDSIMVQRPKSSVFDLSHDVKLSCNMGKLVPIMLTDCVPGDKFRIGNESLIRFAPLVSPMMHRVNVSMHYYFVPYRILWDNFEKFITNTPITGSTLPAFPTVDIGDGAGVHTVSPGSLADYLGLPITPAGGATATVSALPFAAYQMIFNDYYRDQNLQEEIDFKVIDGDNTGNSHLFDLRTRAWEHDYFTSCLPFAQKGQPVQIPVTQNFPDVMVKQNSLFGTGVTLEGVPADQIVHAADPVGGLVDEALFAQTSELNVSQPTTINDLRTANALQRWLEKMARGGSRYFEMIRVIFGKKSPDARLQRPEYITGSVSPVQISEVLNTAGDTLPQGNMAGHGVSVVQGNQGFYDCQEHGVIIGIMSIMPKTAYQNGIARMWSKTQDPFQYYSPDFDH…	506	USER	zzzz765
375	my_seqs_16minnow_6_2ct889.4@PF02305.16	my_seqs	MKRNKFSLSHYKLTTADMGNLIPISCYEVLPGDTVQQNTSALIRCTPLATPPMHPVKISIHHWYVPTRILWDGFEDFITGGDYGSVPPVHPFMVASGGWAAGTLADHFGLPLNVNNLTHSALPFRAYAKIFNDQYRDQDLTAELPISYGDGADSTTNTLLQSSNWQSDYFTKARPWPQKSPDITIPMGATTGTGQNPKIRWSGNANPTALQASPGNAITYGGGATATPTQWYWDKPEVQVNGGTINQLREAFALQRYAEARARYGSRYTEYLRFLGISSSDARLQRPEFCGGGKTTLQFSEVLQTGPSSEDGSQTVGQMFGHGMGSVRSNRFRRFFEEHGFVITLMQIMPKPIYSQGMERMWSRADKEDYYQRELEHIGQQPISQREIYVSDADPAGAA…	487	USER	zzzz766
374	my_seqs_16minnow_6_2ct890.4@PF02305.16	my_seqs	MSQKYFNQPSVMSAQKHFAQAPSAEIQRSKFDRSHGHKTTLNAGALVPVYVDEVLPGDSFDMKAVTFGRMSTPLRPVMDNIYLETFYFFVPYRLVWDNWQAFCGERKQPTDPWTTANVPEVQIGLPNVVEDTLAHYMGIPLGHTGAINVSALPFRAYLLIWNEWFRDQNLQFSVNVPTGDGPDVEAETTQFLLPRGKRHDYFTSCLPWPQKGDAVLIPAGGVVSDGTALQMKATQSGTAANMQISTSNAFTFAGTAPGAVSAAVYADRGLMIDNATATINDLRAAFQIQRLLERDARGGTRYIELILAHFGVRSDDARLQRPEYLGGSSARININPVPSTFASTEIAQGDLGGVATVVNRAGFSKSFTEHGIIIGLANIRADLTYQDGVERFWRRQTRY…	523	USER	zzzz767
373	my_seqs_16minnow_6_2ct891.5@PF02305.16	my_seqs	MSFGIQAHSKPSVMKHNFSQVPKAEIPRSTFDRSHGYKTTFDAGYLVPFYIDEALPGDTFNVRATALARLATPIFPLMDNMFMDTHFFSVPIRLIWDNWQKFNGEQKNPGDSTDYVIPQLTNSISPFLANSLEDYFGLPVGVQNLSVSALWHRAYNLIWNEWYRDQNLQDSVDVPTGDGPDLHSSGTYNLLRRGKRHDYFTSCLPWPQKGEAVNIPLGTSAPINCDGVVSAWPGVYDTTNTLVALDSGGAHVAMSSTTTPAVNALYADLSDATAATINSLRQAFQIQKIFERDARGGTRYTELIKSHFGVTSPDARLQRPEYLGGGSTPVNISPIPQTSPTGSYANTPQGNLAAIGTAQLHNHGFTTSFTEHCVVIGLVSVRADLTYQQGLNRMWSRKT…	526	USER	zzzz768
372	my_seqs_16minnow_6_2ct893.5@PF02305.16	my_seqs	MRNLFNSVKLFKPKQNFFDLSHSHITSMNAGDLVPILNIDCIPGDRFNVGSEALVRFLPMIAPAMQRYDVYIHYYFTPYRILWENFSKFITNTKDQDTGFLPAMPTFQIAYDDSNFTKLLHYLGIPKPSEAGGDTTESVNALMIAAYQKIWYEYYRDQNLQLVNENDIKLEDGDNTAYIGNFNVLRKRAWQHDYLTSALPWAQKGDPVTIPLSGFSDLPVKYYDPGNTAPTSTITATPSTIDVPHDTEADGITANRLYVETADLEGTATINDLRRAEAIQKWYERLALGGSRLTEMIYAMFGVKSPDSRLQRPEYITGSRSPIQISEVLNTSGTFDAADPDVPTSPAQGSMAGHGIGIVGSNKGSYFVQEHGCIMAIASIMPKPMYFQGLEKHWLKREP…	515	USER	zzzz769
371	my_seqs_16minnow_6_2ct897.6@PF02305.16	my_seqs	MKRAKHSLSNYKLLSCDLGELVPIGLTEVLAGDSIQQSTNALVRAAPLLSPVMHPVNVSISHWFVPHRLVWEDWEPFITGGPDGMDASVFPTITMPAVGGATVGSLADYLGVPTGVNSLSVSALPFRAYALIFNEWFRDQDLVTKLVIDETSGVDTTTNTALQNAAWEKDYFTSSRPWEQKGPAITIPLGTTAPITRVSNAAGWAAYTAGANTDLATGTADFATYGADTGIESVAGQRASFDPNGGLVTDLTSASAVTVNVLREALALQRYEEARARYGSRYIEYLRYLGVRSSDARLQRPEYLGGGKETIQFSEVLQTGEGTEPVGTLRGHGISSMRSNRYRRFFEEHGYVITLLTARPKTVYASGLPRHWSRTTKEDFWQKELEHIGQQPVLNKEVY…	493	USER	zzzz770
370	my_seqs_16minnow_6_2ct899.5@PF02305.16	my_seqs	MKRNKFSLSHYQLSTMDMGYVLPIACYEVLPGDTIQHATSALIRCTPLATPPMHPVSIRIHHWYVPSRIIWDEFEDFITGGDYGSVPPVHPYSILPTGWSAGDLGDHLGLPLNVDNLTFNALPIRAYGLIINEHYRDQDLTPERVVSKASGLDNTTTLTVATANWQKDYFTQARPWAQKSPDISIPMNDASVQSNGQAITIAPQGAPTSYRNMTMTTGTPNVGYSGSAITTTGNTVWGNQTGLAAQTQAAAGTINQLREAFALQRYAEARARYGSRYTEYLRYLGVNSSDSRLQRPEYLGGGKTTLQFSEVLQTGPASDDGSQTVGEMFGHGMGSMRSNRFRRFFEEHGYVMSLMSVMPKPIYSQGISRMWLKSDKEDYFQKELEAIGQQPIEKAEIFV…	498	USER	zzzz771
369	my_seqs_16minnow_6_2ct900.6@PF02305.16	my_seqs	MVDPSRFAMVPRSDVPRSTFKTEHTRKSTFNAGYLVPIYLDEVLPGDVFKGQVSIFARLQNLLFPLMDNMEVETFFFFTPNRIVWDNWVKMMGEQTNPGDSIAYTIPKLDSPAGGFIVGGIADHLGLPTVGQVTAGQIVTVSALPFRGYNRIFNEWFRDENLMNSVPMSVDDGPDLISEYNLELRAKKHDYFTSALPWPLKGGQSVTMPIGGTAIVKTAASALISSAAPVMRLTRADGSGFPTGGLQAIGHGTGVASETLIAVGGTGFAAGEQLYPSNLYADLATASGATINAMRLAAATQQFLEKDARGGTRYTELLKNHFGVTPEDARLQRPEYIGGGRSPVHTQAMPQTSNGTPQNPLGSLAGQGTINTQHAFQYHATEHGYILGLVNVRADLTYQ…	541	USER	zzzz772
368	my_seqs_16minnow_6_2ct902.4@PF02305.16	my_seqs	MVDPSRFAMVPRSDVPRSTFKTDHAHKTTLDTGLIYPILVEEVLPGDVHKGNVTVFARLSNLLFPLMDNMEVDTFFFFVPNRILWTNWVKFMGEQTNPNDSIAYTIPKLVSPSGGFIVGGLADHFGLPTAGQMTAGQTIAVSALPFRAYAKIFNDWFRDENLMDSVYCPTGDGPDLIANYNLETRCKKHDYFTSALPWPQKGATGISLPIGGIATVKTNATQLVTGAQPGLQWMRADGTALAASQLIGNGAGANSNSLYNAGGTSTPTGAALTPTNLYADLSTATGATINAQRLAVATQQFLEKDARGGTRYTELLKNHFGVTPEDARLQRPEYIGGGRSTVKTQAMPQTSAGTPTNPLGSLAAQGVIADSHRFTYHATEHGYIIGLVNVRADLTYQQG…	539	USER	zzzz773
367	my_seqs_16minnow_6_2ct903.5@PF02305.16	my_seqs	MKYFQQPSVMSAQAHFAHAPDAEIQRSRFDRSHGHKTTLDAGFLVPVYVDEVLPGDTFDMKAVTFGRMSTPLRPVMDNIYLETFYFFVPYRLVWDNWQAFCGERKNPTDPWSTLTLPQVQVGLPNVLQDTLTHYMGIPIGHTGAINVSALPFRAYNLIWNEWFRDQNLQFSLNIPTDDGPDPELDATYLQPRGKRHDYFTSCLPWPQKGDAVLIPAGTVASDGSAMKWKAGPSGSPANMVIEANANLKQAGGAPATETAAHYGAQGLMIDNATATINDLRAAFQIQRLLERDARGGTRYIELILAHFGVRSDDARLQRPEYLGGGSARININPVPSTFASTEIAQGDLGGVGTVVNRAGFHKSFTEHGIIIGLANIRADLTYQDGVERFWRRQTRYDFY…	520	USER	zzzz774
366	my_seqs_16minnow_6_2ct904.4@PF02305.16	my_seqs	MRKQIIGIFRPHLLCLCVGLLTSLQSRAYKMGEKYFSQPSTTAAQSHFSQVPSAEIQRSKFDRSHGHKTTFDAGNLVPVFVDEVLPGDTYHMSSTAFCRLATPLKPIMDNIFLDTHFWFVPYRLVWDHWQEFMGERKNPDDNPGIYSVPTTAIDMALIPPDGLVNYFGIPRRPSGATTVSALPFRAYLAIWNEWYRDQNLTDFEPYQTDDGPDVNWGIVPCSKRGKRHDYFTSCLPWPQKGDPVTIPLGDSAPVVATANIVTTIVDGTTRNLQMTAGNANIGYVPPNAGATQPFYFGPQTGLEADLQAATAITINDLRTAFQIQRLLERDARGGTRYIELILSHFGVRSDDARLQRPEYLGGGTSMVNINPIAQTVPVTDSPQANLAATGTGVNKGGFT…	558	USER	zzzz775
365	my_seqs_16minnow_6_2ct905.5@PF02305.16	my_seqs	MSKNIFNSVKMFKPNSNVFDLTHDVKLTANMGNLVPIMNIECVPGDKFNISSESLIRFAPLLAPVMQRMDVTMHYFFVPHRLVWDGWEDFITKQDSSRIMPIIGYNNTFTSAQQKFLDYMGIPPNPNVLVKNINCLSLAAYQMIYNEYYRDQNLIAPIDFQLIDGDNTANNELFVMRKRAWEHDYFTSSLPYPQAGADGVSLPLGDVKLDLPWSSNPRFVTQGNTVEDGEVDSHSAAGGYIDINNGGVNAVAYDPNGSLKVDPTTINDLRRAFRLQEWLEKSARGGKRYIESILAHFGVHSSDKRLQRPEYITGVKTPVIISEVLNTTGETGGLPQGNMAGHAISVAGGHGGGYFCEEHGHIIGIMSVMPKPSYQQGLPKQFLKRDAFDYYWPSFANIG…	506	USER	zzzz776
364	my_seqs_16minnow_6_2ct906.4@PF02305.16	my_seqs	MSALFQKIKVSKPKSNSFDLGHEKKLTMNAGDLVPILCQEVIPGDRFRVRSEMLMRLMPLASPAMHRVNVFTHFFFVPNRLVYSEWENFITGGEHGDAKPLFPQIQIHGGNKSGFKAGTLPDYMGVPEPDQDTIPGTLEISALPFRAYQLIYNEYFRDQNLTTKVPITKDSLVTTEESWELIAMRKRAWEKDYFTSALPWAQKGGEVELPTTIKYTDSANIFKQGEGQVPITTGGQVSTVAGNPGGLHDGDDALKIENIESLGTTINDLRKATRLQEWLEKNARGGSRYVESILNHFGIRSSDQRLQRPLFLGGGKSPITISEILSTVGTTEAPQGHMAGHGISVGSTHHFSHSFEEHGWIIGIMSILPRTGYQQGIERQFTKFDKFEYFWPSFANLGE…	506	USER	zzzz777
363	my_seqs_16minnow_6_2ct907.5@PF02305.16	my_seqs	MHNSTWRLTDMASHTFSQIPKAEIPRSSFDRSHGHKTTIDGGYLYPIFVDEALPGDTFNLKMHAVARLATPIFPIMDNIYIDTHFFAVPYRLIWTNWEKFNGAQDNPGDSTDFTIPVTNTGTVLAGDLYDYMGLPVGLNFSTCPVSALPARAYIKIWDDWFRDQNLQGNLFYGNGDGPDTSSWVGLQRRGKRHDYFTSCLPWPQKGDAVDVPLAGGSIPVIPNPAQPEPKFAIGSIPSSALYGTGSNATVNWSGTPGVDGAAWADPGLVADLSSVASVTINTLREAFQVQKILERDARGGTRYTELIKSHFGVTSPDARLQRSEYLGGHSQPINISQIHQTSGTAGAGGYTDTPLGQVGAIGTAHLSGNANGFTSSFTEHCVIIGLVSVRAEMTYQHNI…	534	USER	zzzz778
362	my_seqs_16minnow_6_2ct908.4@PF02305.16	my_seqs	MANKLFNTVKVSSPDSNMFDLTHDVKQTMQMGNLVPILNMECVPGDKINISSESLIRLAPLLAPVYQRMDVFVHYFFVPNRLVWKNWEKYIVDAATTIAPPSIGIYSTWTAEQKKFLDYMGIPPNTTLNEPSVNAIPFAAYQCIYNEYYRDQNLIAPVNYQLNDGDQGSSTFAANFIKLRNRAWEHDYFTSALPFAQKGSAVDIPLGTIDQNVLVKTNSTSNQTLTSSPNNQNIQSETGVFTPFPNTLFAATEGIELEPTTINDLRRAFKLQEWLEKNARGGTRYVESILAHFGVRSSDARLQRPEYITGSKSPIVISEVLNTTGIDGELPQGNMAGHGISVAGGNQGSYYCEEHGFIIGIMSILPKAGYSQGIPKHFLKAHPLDYYWPSFANIGEQEI…	501	USER	zzzz779
361	my_seqs_16minnow_6_2ct909.4@PF02305.16	my_seqs	MSKLFNNVQFYKPKKNKFDLSHERKMSMKMGTLTPFLVQEIIPGDSFRVNTEMLMRLQPLIAPMFHRVRVKTDYFFVPNRLVWDNWQNFITGGDTGTDNPTPPYYQIGDAQKTAGFVEKGSLADYMGIPTFEKTDILTNIMNISALPFRAYQTIYNEYYRDQNIIPEINVPKTDGAQADLSNMNIRWRAWEKDYFTSALPWAQKGGAVEMPTDIQYKFPSQFVDANGNKINSSVVSGKVESNLGDLSVQSPAAGPMVPATVDNIESLGTTINDLRVAVRLQEWLERNARAGSRYIESILSNFGVLSSDARLQRPEYLGGGLVPIVISEVLSTYQQSDDTGYPQGTMSGHGIATGGYGGFKRKFEEHGFVIGIMTVIPRTAYQQGIPKHYTRFDNMDYAW…	513	USER	zzzz780
360	my_seqs_16minnow_6_2ct910.3@PF02305.16	my_seqs	MAKIFDKIQITREASNNFDLSHDVKMTGKMGLLMPCAVIECVPGDKMTLSSETLIRFAPLIAPVMHRMDARVEYFFVPNRLTWSNWEEFITLKATHQLPTINVNNGLGAEEQRLLDYLGIPPPDGSIENFDISALPSAAYQMIYNEYYRDQNLITEVPFQLTDGDNSSNSELYVQRRRAWEHDYFTAALPFAQKGNAVDIPLGDVTLKDDWFNNPENPFFIDDLGAIGGGNVVNTGTPQGIGINAGTQSNAYDPAGSLEVQPTTIQDLRRAFKLQEFLEKLARGGSRYIEYIKSIFGVTSSDKRLQRPEYICGVKTPIIISEVLNTTGEDGGLPQGNMAGHAISVGNGKVGSYYCEEHGYIIGILSVMPKTGYSQGVPKTFLKTDPLDYFLPQFQHIGE…	506	USER	zzzz781
359	my_seqs_16minnow_6_2ct911.3@PF02305.16	my_seqs	MVPRNDVPRSTFATEHTLKGTYDVDYLYPIHVDEVIPGDVHDGKVTIFARLNNLIFPLMDNLALETFFFFVPNRLVWDNWTKFMGEQTNPSSSINYTIPQVPSPAGGFIVGGMGDHFGLPTVGQLAAGASINVNALPFRGMNLIYNEWFRDQNLQNSVPVNTGDGPDTLANYNLEKRGKKHDYFTSALPWPLKGGQSVTLPIGGQAQVKTNPTPFFTTAQTAMKLTRADGSGFPVSGPRPIGYGSGANSETLMAISGLTGATAAEPLYPSNLYADLGTATGATINAMRLAVATQQFLEKDARGGTRYTELLRNHFGVTPEDARLQRPEYIGGGKTLIETQAIPQTSATVSGQTPLGQLTGQAVMTGQHHFKYHATEHGYIIGLMNITGDVTYQQGLHRM…	532	USER	zzzz782
358	my_seqs_16minnow_6_2ct912.4@PF02305.16	my_seqs	MKNALNSIKVAAPATNAFDLSHDVKLSMQMGVLVPVLAMECIPGDRVRLGCENLVRLAPMVAPMMHRVDVRVEYFFCPNRLIWENWETWISNGGSDSTQVDPLPVHPFFRYDSGTAFPIVPYNKLMDYMGLPDPQQCPAPGESSEKVSALPFAAYQKIFNDFYRDENLIAEIPTAFNCLDGDNGSQPEMFNIRKRAWEADYFTKALPFAQKGQPVTVPLGTLPDVRVYRDSDTATDQTLLTGAPDNLDITYKLTTHNTSNDPITDGDLYAQNSSIDSLGSATINDLRLAYRLQEWLEKNARGGTRYSELIRSHFNVRPEDSRLQRPEYIVGVKNPIQVSEVLNTTGTDDAPQGTMAGHGVSYNQGNYGKYFCSEHGYIIGIMSIMPKTAYQQGIPRHFL…	524	USER	zzzz783
357	my_seqs_16minnow_6_2ct913.5@PF02305.16	my_seqs	MVPNSRSLAMMKSSSRKSVMTHQFSQVPKADIPRSTFDRSHGHKTTFDAGYLVPILVDEALPGDTFNVKVTALARLATPIFPVMDNMFMDTQFFSVPVRLLWENWQRFNGEQISPGASTDFTIPQLSSPGGGYSANSLEDYMGLPVGVPVTHSSLWHRAYNLIWDEWYRDQNLQNPVSVGRGDGPDSPSSFTLLRRGKRHDYFTSSLPWPQKGPGVTIPLGSTAPVLGLARLGSAANLGGYTDQDGNAIGSGTYGFPAGAPNNVAFLADPDNTSEMSVYADLSEATAATINSLRQAFQVQKIFERDARGGTRYTELIKSHFGVTSPDARLQRPEYLGGGSSPISVTPVPQMSATGAGDSPLATLSGVGVAHLNNHGFTTSFTEHCIIIGLVSVRADLTY…	538	USER	zzzz784
356	my_seqs_16minnow_6_2ct916.5@PF02305.16	my_seqs	MKRSKFSLSNYKVLSANMGSLIPIGLTEVLPGDTIQQATSVLCRLSPMLAPVMHPVHMKVHHFFVPNRILWDDWEDFITGGPDGFNDSDFPTIGAPAQGFGIGSLADYLGVPPSAANLRVSALPFRAYAKIFNDWFRDQDLQAELPLATTSGVDSTTNRTLQNSAWEKDYFTTCRPWTQKGPEITLPLGKKAIVSHDVPSSGGTGTNDRLSAYSTAAGSFRSLGQQSTTYINSSTDVSDVSRSLYADLSTATAATINQLREAFALQRYEEARARYGSRYTEYLRYLGIRSSDARLQRSEYLGGGTQTIQISEVLQTGPENGGGGPSTPGGVADLYGHGIGAMRSNRYRKFFEEHGYVLTLLSVKPKTMYTQGLHRHWNRRTKEDFFQKELQHIGQQEVL…	500	USER	zzzz785
355	my_seqs_16minnow_6_2ct918.5@PF02305.16	my_seqs	MKLFDQVAVKSPKYSKFDLSHERKFSMKHGTLTPIYLQEVLPGDSFRLNSEMLIRLAPMKFPVLHRISAYIHYWFVPNRLVWSEWEDFITGGDDGLSAPLFPVIDETNLTTSQAKAGELWDFMGMPPIAGTVNPKMKINALPFRGYATIYNEFYRDQNLQDKIPVTKTGGSLGSAEVTELLKLRYRAWEHDYFTSCLPQAQKGGEVLLPMEADINYKSEASIRMATSSAGYTEGANVQIQQTGFTPPTAGLFGMEGSTARAFGIENIESIDNATTTINDLRKAVRLQEFLEKAMRAGSRYSESIKAYFGVRSSDARLQRPEFLGGGVQPIVVSEVLQTYEGTDPLGKMGGHGISVGNKSGFKKRFEEHGYIIGIMSIIPKSAYGQGIPKTFMKANRYDF…	521	USER	zzzz786
354	my_seqs_16minnow_6_2ct919.5@PF02305.16	my_seqs	MANIFTKVSMKRPKKNVFDLSHEKKLTCNMGDLIPCYLEEVIPGDKFRVNSEIMMRFAPMIAPVMHRVNVYTHYFFVPNRIIYDEWEKFITGGVDGLQIPNFPLLEIRDGYKTYFNKGTLADYFGLPTVGQTGSFSAIEQINALPFRAYQKIYNEYYRDQTLTPEVVITPSSTVIGTEIPDHLKLRKRSWEKDYFTSSLPWAQRGGDVLLPVDNSITYRDQGIINPPPNTSGHSSGTLSSNGNSTGNDLLLTYKETAGTDYLANIDNIESVDTAITINELRRSNQLQVWLEKNARAGSRYVEQLLSHWGVVSSDARLQRPEFLGGGKQPVVISEVLSTFNNETVPGANMYGHGISVGSSNSFTKTFEEHGYIIGIMSVLPRTSYSQGVPKTFSRKDKFD…	517	USER	zzzz787
353	my_seqs_16minnow_6_2ct920.5@PF02305.16	my_seqs	MGKLVPVGLIEALPGDTFQHSTSLLLRMSPLMAPVMHPVSIRIHHWFVPNRLMWDGWEDFITGGKDGSGTALPYPANTVPITPTVGQVYDYLGLPLKTLPVGAVNMMPITAYNRIYNEFYRDEDLAPEVADDDGTVKQIAWEKDYFTSARPWSQKGPSVSVPISGMAPIVGTGLPTFKDDVTGAGAGSSLVKEASAASATTGIVTVNWSGTSAGLQWDDPQLQADLSMATGGNIIDVRRAFALQRYQEARAMYGSRYTEYLRYLGLSPADSRLQRPEYLGGGKQTVSFSEVLRTGNETAATTSPIGEMKGHGIAALRSNRYRYFCQEHGYILTMLSIRPRTMYMDGLEKTWSRRTKEDYYQKELEFIGQQEVYNREVYAAGTAEDNEIFGYNDRYQEYR…	473	USER	zzzz788
352	my_seqs_16minnow_6_2ct921.5@PF02305.16	my_seqs	MKRSKFSLSNTKLLSCDMGELVPVGLTEVLPGDSIQQNSLCMVRFAPMLAPVMHNTHIQLSHWFVPNRLVWDNWEDFITGGPTGTDASVFPTISTGAGASVGGLFDYLGVPTGVANLSVSALPLRGYALIWNEWYRDQDLQNELVYSKASGADTTTNTALQNSSWEKDYFTSARPWEQKGPTITIPLGSTAPVGTLNAAGDTGTFVQSQAFDAQTLGNRIQTVTANAIPNNNNLIVDLSSASAVTVNLLREAMALQRFEEARARFGSRYVEYLRYLGVKSSDARLQRPEFLGGGRYPVQFSEVLQTAEGSDPVGNLAGHGLGVARSNRFRRFFEEHGYIFTLMNVKPKTIYMDGLPRTWNRRTKEDFYQRELEHIGQQEVLNKEVYAKAAVKDGVFGFQ…	480	USER	zzzz789
351	my_seqs_16minnow_6_2ct922.6@PF02305.16	my_seqs	MANPSVMKHDFSRIPQAEIQRSVFNRSHAYKTTFDAGNLIPFYVDECVPGDSFNVDATLFARMTTPIYPIMDNLVLDVHFFAVPIRLVWDNFVYFMGERINPDDETDFFVPQIVSPASGGWTNGSLSDYFGLPTGVASLSTSALWHRSYALIWNLWYCDQNIQDPINVQHGDGPDAPTLYPLLRRGKRHDYFTSALPWPQKGPAVELPLGDTARVFVDDALSGTKYVSIDNASGSPRNISLNTLSNPVYGTTSLIEPASVPLLADLSTGTAATINALRQAFQLQRLLERDARGGTRYTEIVRAHFGVTSPDARLQRPEYLGGTSARVNLTSVAQTSGTAGSGAYTPDPLGTLAAVGTITAKGGFTKSFTEHSLILGLCSVRADLTYQQGIPRMFSRKTK…	524	USER	zzzz790
350	my_seqs_16minnow_6_2ct925.4@PF02305.16	my_seqs	MRNIFNAIQLTKPKSNVFDLSHDVKLSLNMGELVPIMCEPCIPGDKFNISCESLLRFAPMVSPVMHRMDVTMHYFFVPNRLLWDGWEDYITNTNLAPAHPFVQYGDFSLPNTSQYTRLFDYLGLPDWDGTPNVAEQVSALPFAAYQAVYQEYYRDQNLVTEMDYTLGDGQLLNTDFFKLQLRSYEHDYFTAALPFAQKGDPVTIPISGIVELSSPPGGQTNPQIIRDSTGTAISGDLAAEGGSGNMEIQGSGVDAYLDPNGTLEVNNANSTINDLRRAYRLQEWLEKAARGGSRYVENILMHFGVKSPDARLQRPEYITGTKSPVTISEVLNTTGTDDNPQGNMAGHGVSVTTGRYGNYYCQEHGYIIGVMSVMPKTAYQQGIPKHFLKINDPFEHFWP…	513	USER	zzzz791
349	my_seqs_16minnow_6_2ct926.5@PF02305.16	my_seqs	MIARPDIPRSKFAGSFSRKLTFDAGYLIPFHVEEVYPGDHIKYNFTPLVRTSTPLFPMMDSQRIDIHCFFVANRVTWTNWVKLMGQQDAPGDSIAFTVPQITSSGNGFAVGSALDYMGLPTIGQPTAVLSVNALPVRAYRAIYNSWFRDENIIAAVGNGAGDGTVTEATNGGLLRRAKSHDYFTSALPWPQKFTAPSISAPVSGVGVQVADVSAGAPTTIKETPSPYTAGTGLNAVANYYTSVGGDDILIGALADGTPQVFAQIDVNTFRLAMQTQVFLERMARGGTRYTEITENIFGVRNPDARLQRPEYIGGGSTPLQFTPIAQTAPVAGVGLGALGAAGSAVGNNSASYAATEHGFIICLLSVKSELSYSQGIHKMWDRRTLYDFYNPAFAGLGEQ…	514	USER	zzzz792
348	my_seqs_16minnow_6_2ct928.4@PF02305.16	my_seqs	MSNKLFNSASAKAPQKNLFNLSHEKKLSLNMGELIPIMVQEVIPSDRFKLNSEVLLRVAPMVSPIMHRVNVKLEAFFVPTRTIYGEWEDFITGGVQGTSMPTFPTLQIQEATKPYFSQGKLPDYFGIPAIDVATTIVDSELISALPFRAYQKIYNEYYRDQTLSPEIPVTSDSIVDWTNEGQYLVKMRNRSWEKDYFTSALPQPQRGGDVILPTDINYKTDVRAASGSISIGEDVNMGGSINPFHLKGKTSGAELQIENIEDIGTTITEFRRASRLQEWLEAMARGGSRYIEQMKTMFGVTSSDARLQRAEFLGSASMPIQISEVLSTFNSETQENPVAGGTMYGHGITAGNNFLFNKFFEEHGYIIVMLSVIPKTSYASQGIPKMFQKFDKFEYYWPH…	513	USER	zzzz793
347	my_seqs_16minnow_6_2ct929.4@PF02305.16	my_seqs	MSALFQKIKVSRPKSNSFDLGHEKKLTMNAGDLIPILVQEVVPTDRFKVNTEMLMRLMPLASPAMHRVNVFTHFFFVPNRLVYTEWENFITGGEHGDAKPLFPQVQITEANKTGFGPGTLADYMGIPSPPGSTAIQTLEVSALPFRAYQLIYNEYYRDQNLQEKVPFTKDSIVDVNEIGEIIALRKRAWEKDYFTSGLPWAQKGGEVELPTTINYKDFTEVFAQGPGQTPIASGGQVSSVVGTPGSLSDGNESLKLENIESMGTTINDLRKATRLQEWLEKNARGGSRYVESILNHFGIRSSDQRLQRPLFLGGGKSPITISEILSTVGTTEAPQGHMAGHGISVGSTHHFSHSFEEHGWIIGIMSILPRTGYQQGVEKQFTKFDKFEYFWPSFAHLGE…	506	USER	zzzz794
346	my_seqs_16minnow_6_2ct930.4@PF02305.16	my_seqs	MKNLFNSVKMTRPPQNRFDLSHDVKLSCEMGNLVPTCVMEAIPGDRFNIGCDSLLRFAPLVAPVMHRMDVSMHYFFVPNRILWDGWEDYITNTEVGGSLPAVPFLNTTGEGATYSKLMNYMGVPPQTAGYANNEKVSAFAFAAYQMIYNEYYRDQNLQAEIDFKLVDGDNGANAALIEMRRRAWEHDYFTACLPFAQKGDPVTIPIAGFEDVAVKVDNSNGNTASWTTNLSGGGTQPAVMPQENTDIFPANSDRLYADTSSLDAQAATINDLRRAFRLQEWLEKQARGGSRYTENILAHFGVKSSDARLQRPEYITGTKSPVIISEVLNTTGTDDSPQGNMAGHGISVTQGKYGSYMCEEHGYVIGIMSVMPKTAYQQGIPKHFLKFTDPFQYYWPAFA…	505	USER	zzzz795
345	my_seqs_16minnow_6_2ct932.5@PF02305.16	my_seqs	MHKGYDGPTRRLVSQEDASMIARPDIPRSKFSGSFSWKGTFDAGYLIPFHIEEVYPGDHFKYQFTPFVRTSTPLFPIMDSQRIDVHCFFVPFRILWTNWVRLMGQQDSPGDTIAYSVPQILSTGNGFAVNSVGDYMGFPTVGQPTAQISVSMLPFNAYNAIYNAWYRDENLVNAASVSTTDTNKAEVNYPLRRRAKSHDYFTSALPWPQKFVAPIMNSPVVGLGVANPGAAPTAGPFSVRETASFSTPTGIRNYGAVYESAVVPYLMDADPASTLPLVFSQTDINVFRQAMQVQVFLERMARGGTRYTEITENIFGVRNPDARLQRPEYIGGGSTPLQFTPIAQTAPTTSGSQLGLGALGAAGTAVGNNSASYAATEHGVIVCIMSVKSELSYSQGVHK…	535	USER	zzzz796
344	my_seqs_16minnow_6_2ct937.3@PF02305.16	my_seqs	MPNIFNSVAVKKPKRSKFDLSHEVKMSMNMGTLTPCLVLPCVPGDRIKLNAQALVRMAPMIAPLMHRVNATIHYFFVPNRLIWDNWENFITKTTVGTPAVVPELPVIYLSRNRYDLFPKMDYMGLPRPQSDAAEIAVSALPFAAYNKIYNEYYRQQYVQPEILDQLVDGSNMANLAALMTMKQRAWMHDYFTSGLPFAQKGEEVTVPLGDIELKPDWYADDQKPTWDTHLGSGDTLSGFQPLNVSADGSGPSTSPSSDPFEAGGQYMQVENTPEDPYRRQAYDPNGSLQAAPVTINELRRAESLQAFLELLARGGSRYVEYIKNFFNVKPEDYRLQRPEFICGISSPVQISEVLNTTGNDGQLPQGNMSGHGAAVVRGNAGTYSCKEHGYIIGIMSVTP…	536	USER	zzzz797
343	my_seqs_16minnow_6_2ct938.5@PF02305.16	my_seqs	MKRSKHSLSNYKLLSCDMGELVPCGLTEVLPGDTMQHATNLFIRVQPLNAPVMHPVEARVHHWFVPHRLVWDDWENFITGGPDGMDASVFPTITLSYGAGPPATGSGIVGGLADYLGCPPTINGLEVSALPFRAYALIFNEWYRDQDLVTPLVIATTSGPDTTTSTTLQNIAWEKDYFTSSRPWEQKGPSITLPLGDSAPVLTSATRTVNGAQSALTFATTGDGSFPAASRVLNTATPTGAAFYSSSAAASEASAVYPANLKADLSNASAITVNLLREAMAMQRYEEARARYGSRYTEYLRYLGVRSSDARLQRPEYLGGGKQMIQFSEVLQTAEGNDDDTFVGEMRGHGVGALRSNRYRRSFEEHGYVITMLSVRPKTIYAQGLARTWNRRTKEDFWQ…	511	USER	zzzz798
342	my_seqs_16minnow_6_2ct939.4@PF02305.16	my_seqs	MKRSKHTLSNYRLFTCDMGQLVPVGLQEALPGDTFQLSSSAMIRVSPLAAPVMHPVTVRLHHFFVPHRLVWNGWEDFITGGPDGRNASSPPVIGVPLDGSKKGTLWDYLGVPVINAVGSTPFSMSAMPLNGINLIWNEFYRDQDLSVERALTDDTMPNIAWGKDYFTAARPWTQKGPDITLPLGTQAPVKGIGVLVGSQASPNPGQMLETGNGGAHQAWAQAYAMSQQSPQSLGYIETSGTGAEPVIFADLTQAGQIDVNDFRRAFALQRYQEARARYGSRYTEYLRYLGVTPSDARLQRPEYLGGGSSRINFSEVLQTAGDVPIDASRESFGVGDLYGHGIAGLRHGRIRRFIEEHGYIHSFMSVRPKGIYMNGLHRTFLRKTKEDFYQRELEAIGQQ…	501	USER	zzzz799
341	my_seqs_16minnow_6_2ct942.5@PF02305.16	my_seqs	MLRGSVPSSTGGSAHSFSRAPQANIPRSKFNRSHGIKTTFDAGYLVPILVDEVLPGDTMSLRMDAFARLATPIYPIMDNMYLETFFFAVPYRLVWNNWEKFNGYQIDPGDSTDYTVPTMTGPSGAGVTTGSLADYMGIPIGIASVVFNSLHFRAYNLIWNEWFRHQDLQDSVVVDLDDGPDTYTDYSLKRRGKRYDYFTSCLPYPQKGPDVNIGLAGTLPVTLTTTTNLIQKVKKSSDLTSFNSTGLGSQTLSTVVGTLADNGTNTKILLDPNGTMNVDLGSATAITINDLRLAFQTQKLYERDARGGTRYTEVIRSHFGVVSPDARQQRPEYLGGGSTPVLVNPVAQTSATSGSNALGDLAGYGVCAPKGHGFTYSATEHCLLIGLVNVRADLNYQQG…	534	USER	zzzz800
340	my_seqs_16minnow_6_2ct945.5@PF02305.16	my_seqs	MKRSKFSLSNYKLLTCDMGELVPIGLTEVLPGDTIQQATSALVRVSPLLAPVMHPVQVRIHHWFVPHRIVWDEWEDFITGGPDGMNASAFPTKGPVVPEGSLSDYLGVPTGSALQVSALPYRGYAMIWNEWYRDQDLQPELTISKASGVDATTNEALQNVAWEKDYFTSARPWTQKGPEITLPLGGVAPVSGLPGGAPSWDVGGGIRELKATSGADQVFWNSLAGADGPAVWADPKLQADLSNASAVTINQLREAFALQRYEEARARYGSRYTEYLRYLGVKSSDARLQRPEYLGGGKQTIQFSEVLQTGPSAGDAGVADLKGHGIGAMRSNRYRRFFEEHGYVFSLLSVKPKTMYVQGLARTWNRRTKEDFFQRELQHIGQQEVFNKELYAHHTTPEG…	485	USER	zzzz801
339	my_seqs_16minnow_6_2ct947.5@PF02305.16	my_seqs	MSKLFNQVTFGRPKRNLFDLSHEKKLTMNMGDLVPILLQEIVPGDSFRVNTESLIRLAPMVAPVMHRCNAYVHYFFVPNRLIFDKWETFITGGADGKQTAVMPQISFTSLDGDVLKPGSLADYMGLPAPKGIISYGYQANCLPFRAYQLIYNEYYRDQNLTQPVPITKSEGVVQQAEKDALLTMRKRAWEKDYFTSALPWSQRGDEVLLPNTTDVNYKPVSDIVAEFGGSPSDATTISSHPAGKMSVSANWDGTALGTPGRIENIESLDTQITINDLRRSARLQEFLEKTARGGSRLTEVIRAFFGVTSSDARLQRPEFLGGGKQPITISEVLSTFNNETVPGANMYGHGISVGNTNKFNRFFEEHGWIIGIMSVIPRTAYQQGIPKFFLKKDKFDLYW…	512	USER	zzzz802
338	my_seqs_16minnow_6_2ct948.5@PF02305.16	my_seqs	MSKLFNQVSMSKPKKSLIDLSHEKKLTMNMGDLVPIMVQECVPGDKFRVNTESLIRLAPMVAPAMHRVNAYIHYFFVPNRLLWDNWADFITGGADGKAKPTMPYVYVGNTDSALVHTGSLADYMGIPTADSVTQGNGLIALPFRAYQLIYNEYYRDQNLSQPVAITKNDGIINGSELLATMQIRKRAWEKDYFTSALPWSQRGDEIELPNNLEYKPVTDTTNIVDYAGAAVTGSMTAQNGQIQVGSGVASQIENIKSIGITINDLRRSARLQEFLEKTARGGSRLTEVVKAFFGVTSSDARLQRPEFIGGTKQPISISEVLATFNNTETAGATMYGHGISVGNTKYVKKFCEEHGWLIGIMSVLPRTSYQNSLPKQFLKFDKFDFYWPTFAQLGEQPVF…	502	USER	zzzz803
337	my_seqs_16minnow_6_2ct950.4@PF02305.16	my_seqs	MSIFNQSQRTRVKKNKFDLSHDKKMSLQMGKLIPIMLQEVLPGDSFRVKTEIMLRLAPMIAPIMHRVNVYTHYFFVPNRIIWDNWEEFITGGQDGTSAPVHPYLLYNSGNQFAKGTLGDYLGIPEADPIAGVFQKVNALPFRAYQTIYNEYYRDQTLEDPINFSKGDGDSMLYPELWAMRYKAWEKDYFTSALPWAQRGPEVTIPGTTINRVHKLDGTILNPPETIHTDVDATIRGVTTGTELEMTDSAGNSINELRKAVRLQEWLEKNARGGARYIEQLLSHFGTAPKDERLQRPEYLGGGKQPVVISEVLNTAGSSTIELDPVGEMAGHGISVGSTNGFSRSFSEHGYIIGIMSVIPRSAYMQGIPKVFLKDDKFDYAWPEFAQIGEQPILNKELYY…	500	USER	zzzz804
336	my_seqs_16minnow_6_2ct956.4@PF02305.16	my_seqs	MKNRLFNTIAIRKPKSNAFDLSHEKKLTCNMADLIPVYFEPVIPGDKIRVKTEALIRMAPLTFPVMHRMNVYIHYFKVPYRLVWDNWETFITGGEQEDTPVPNFPKIAIEEGSRSLYGVGSLADYFGIPVPLDPQPITQQLAMSALPFRAYQLIYNEYYRDQNLQDKIPFTKGDSVNSTETGYITTLRQRAWEKDYFTSCLPNAQKGNPVNIPTTLNYKTPSQVTDVNGGLVGGDLTANGTDLMVGSSPAIMDNLSSLGITINDLRKSARLQEWLEKNMRGGSRYVESILSHFGVVSSNKLLQRPQYLGGGKMPIQISEVLSTFNNAEVPGANMYGHGLSAGSMPQINDFAEEHAYIIGLMSILPRTAYMNQTEKEWFKFDKFDFAWPEFANIGEQEVL…	502	USER	zzzz805
335	my_seqs_16minnow_6_2ct960.5@PF02305.16	my_seqs	MSKLFNQVSFGKPQRSLIDLSHEKKMSMNMGDLVPFMLLETVPGDKFRMNVESLVRFAPLVAPVMHRVNAYFHFFYVPNRLVYDKFEQWVTGGADGKQSAQTALPYLYTNSGNIENWKIGSLADYMGLPLSDGTVPIPDANRINISALPFRAYQLIYNQYYRDQNLTPEVPITTHEGLITDPTEIAETLALRHRSWEKDYFTSALPWSQRGDEIELPTSIEYKQHSVFKDSQGETPSSGGPLSTSTIDANGGRYIGDGIDTGRIENLEGIGITINDLRRSARLQEFLEKTARGGSRLTEVVKAFFGVNSSDSRLQRAEFLGGCKNPVQISEVLSTFNNTEVPGANMYGHGVSTGNSKYIKKYCEEFGYIIGIMSVIPRTAYANQGIHKMWRKFDKYDLY…	515	USER	zzzz806
334	my_seqs_16minnow_6_2ct961.5@PF02305.16	my_seqs	MSKLFQQVEFAKTGKSLIDLSHEKKLTMNMGQLVPIMVQEVLPGDKFQCSTEHLIRFAPLVSPVMHRINVYVHHWFVPERLVHAEWEKFITGGKDGKETATRPFIRITAGNESQIAPGSLADYMGIPTIPSTSTISYNNDILASPFRAYQLIYNNFYRDENLIDEVPVLKTSGIVADLEKNNLLTLRKRAWEKDYFTSALPWSQKGDEIELPNNIEYKPVTDTTNIVDLNHQGVTGSLTAQAGQLQAGSGVASQVENIKSIGITINDLRRSARLQEFLEKSARGGNRLTEFIKSFFGVESSDARLQLPEFLGGGKQPVSVSEVLSTFNNETVPGAQMYGHGISVGASNQFRRRFEEHGWIISILSILPRTAYQQGIPKMYRRFDKYDLYWPTFAQLGEQ…	505	USER	zzzz807
333	my_seqs_16minnow_6_2ct963.5@PF02305.16	my_seqs	MSFKLPERRLVSQDDASMIARPDVPRSKFSGSFSVKLTFDAGLLIPFHVEEVYPGDHFKYDFVPLVRTSTPLFPIMDSQRIDIHCFFVPNRISWTNWVKLMGQQDDPSDSIAFTVPKVTSTGNGFAVGGVGDYMGLPTVGQPTAVLSVNALPFRAYNRIYNSWFRDENLVPSANNTTGDGTIGEAFYPLRRRAKSHDYFTSCLPWPQKFVAPSIPSPVTGIGPATVDTTIGPVTLRETPSPTNGLTGFGNYAQGYTTTPAAQFLAGADATGALQVFAQTDVNIFRQAMQVQVFLERMARGGTRYTEITENIFGVRNPDARLQRPEYIGGGSTPLQFTPIAQTAPVAGVGLGALGAAGSAVGSSRASYAATEHGFIVCLLSVKSELSYSQGVHKMWDRNT…	529	USER	zzzz808
332	my_seqs_16minnow_6_2ct966.5@PF02305.16	my_seqs	MQQGYQVKRRDLVSQAGQSMIERPDVPRSRFVCAWTAKKTFDAGYLIPFLLDEVYPGDHIRYDVTAYLRMATPLFPLFDNQSVDTFFFFVPMRLVWSNWQKFMGEQLNPSSSIAYTIPQIVSPAGGHASHTIYDHFGLPVVGQVDPAGAYSHSALPLRAYYLIWQEWFKDENMDGFGSPISTGDGPDAPGLYGTLRRAKMHDYFTSCLPWPQKFTAPTVPIGQYAPVKGLGYDRVGTAPGGAKTVWESPPFGTSGSTPSVNYPNTWTIATATGLFMNADNSGVGWPLVYADLSQATGLASINVLRQAWQTQMLLERDARGGTRYTEIVKSHFGVTSPDGRLQRPEFIGGGSSPLNVTPIAQTAPTAGVPLGAIGGAGTAVGKHRADYASTEHGMIIGLI…	549	USER	zzzz809
331	my_seqs_16minnow_6_2ct969.4@PF02305.16	my_seqs	MKIFDQIKITAPKRNKFDLSHERKMSMNMGELVPIVCQEIVPGDSFRVNSEILLRMAPMLAPIMHRVNVFTHYFFVPNRIIWNEWEDFITAGANGLSNPVHPQMQVGVLYETYTRKGSLLDYFGIPPTNGAGITNPREVSLLPFRAYQTIYNEYYRDQNLINPIEFSLGSGGDTIPHVQNLLTLRKRAWEKDYLTSALPFAQRGGSVSSPLDIDVTYRTSSDYYRSDGSTPNAGPPDLTGGKMYDTAPASALRVENIDEATGGLNINELRRSVRLQEWLEKNARAGARYVEQILAHFGVRSSDARLQRPEYLGGGKSPVVMSEVLSTAETTSIPQGNMAGHGLSVGRSNTFSKSFEEHGFVIGIMSVLPKTAYQQNINKMWRRFDRFDYFWPEFANIGE…	506	USER	zzzz810
330	my_seqs_16minnow_6_2ct975.3@PF02305.16	my_seqs	MKNLFNSIQLRKPKKNVFDLSHDVKLSAKMGNLTPILVQECVPGDKFNLSCESLIRFAPLVSPVMHRMDVTMHYFFVPNRILWDSWETFITNQNSGLVLPFIPYGDLGYNDTDKKFFDYMGVPPYPTAATQVNVNALPLAAYQCIYNEYYRDQNLVSPIDYKLTDGSNFGRTELYQLRRRAWEHDYFTAALPFAQKGAAVDIPLGTVSGEGEVFVNNATAGTTLDGVPYDVTVDNNTATIGGVGADQLFTSFDNVEVEPTTINDLRRAFRLQEWLEKNARGGTRYIENILTHFGVKSSDARLQRPEYITGIKSPVIISEVLNTTGATGELPQGNMAGHGISVSSGNYGSYYCEEHGYIIGVMSVMPKTAYQQGIPKMYLKNDPLDFFWPSFANIGEQEV…	501	USER	zzzz811
329	my_seqs_16minnow_6_2ct994.3@PF02305.16	my_seqs	MKNLFNSIQLQKPKSNSFDLSHDVKLSASMGNLTPILTLECVPGDKFNLSCESLIRFAPLIAPVMHRMDVTMHYFFVPNRIVWSNWEKFITDANSGIVPPYLNYSDSGAYASYAKFMDYMGIPPVPSGGTPTSLNLLPFAAYQCIYNEYYRDQNLITPIDYQLADGNNGALSDWQRWITMRKRAWEHDYFTASLPFAQKGSAVDIPIGNVSGDAVVYYNDTPPGNTLLSGAPNSALVEFQDTSAPATSLFANTDGLPTEPTTINDLRRAFRLQEWLEKNARGGTRYIESILSHFGVKSSDKRLQRPEYITGVKSPVIVSEVLNTTGETSGLPQGNMAGHGISVSSGKAGSYYCEEHGYIIGIMSIMPKTAYQQGIPRTFLKNDTLDYYFPSFANIGEQE…	502	USER	zzzz812
328	my_seqs_18minnow1_2ct1012.6@PF02305.16	my_seqs	MAGRAQFAFSHVPSADIPRSSFDRSFQHKTTFDAGFLVPIFVDEALPGDTFNVDMTGFARLATPLHPIMDNLHLDTFFFAVPIRLLWSNWEKFNGAQDNPDDTTDFIMPTCVSPAGGYLANTVQDYMGLPTGIAGVTHRADFLRAYNLIWNEWFRDENLQDSVPVLKTDGPDPVANYTLLRRGKRHDYFTSSLPWPQKGPSVPLPLTGDAPVRGIGVNTAAVPGASANVKESSGASVPYAAPYSTGAVLFMESGAGGLPTPFADLGAVTAATINELRQAFQIQKLYERDARGGTRYTEIVRSHFGVVSPDARLQRPEYLGGGSSPVNVSPIAQNSGTGAYTPTPQGNLAAMGTSTLRRHGFSKSFTEHCVIIGMVCARADLSYQQGLERMWSRSTRWDF…	521	USER	zzzz813
327	my_seqs_18minnow1_2ct1020.4@PF02305.16	my_seqs	MKSVMKHDFSRIPQANIPRSVFNRSHAYKTTFDAGYLVPFYIDEALPGDSFNLRATIFARMTTPLYPIMDNLFMDVHYFAVPLRLLWQNFQKFMGETDDPYDPETSVEYLTPQVVASGVGGFAAGSLSDYFGLPTEVNSLSVNAFHHRAYNLIYNEWYRDQNMQDSVVVDTDDGPDSITDYVLLKRGKRHDYFTSCLPWPQKGPGVELPLGDSAPVLGIGVNVAGTASNLTSMRESDGTASTYNPWWGSNSAGLAIEGQTIGGVTYPNVRADLSGATAGTINSLRMAFQMQRLYERDARGGTRYTELIRSHFGVVSPDARLQRPEYLGGSTARVTMTTVAQTAPKPASGTTTPLGSVSAVGTITARNVGFTKSFVEHSVIIGLLSVRADLTYQQGLNRM…	530	USER	zzzz814
326	my_seqs_18minnow1_2ct1022.4@PF02305.16	my_seqs	MANQQFDSIQVKAPGSNRFDLTYPVITSINPGYLYPAGHPIEVIPGDKFRIDSEAIVRMAPMLAPVMHRYDVYIHHWAVPHRLVWSGWEKFITQQPDIDTGQIPVHPYMTLNTGTYTKLADYMLLPTPTGLQSEVISPIPFAAYQCIYHEYYRDQNMVPEFDYQLIDGDNTSQPNLNQLRQRAWEHDYFTSALPFAQAGAPVEIPMNFEDVNVYRNSAGTVPATNITGLTGGVNPLTITNATPNSADIPANALFADTSDLGTTTTIRDLRTAMALQRHLEINGRAGRRYPEFIMAHFGVKTSDRRIQRPHYIGGIKNPISISEVLNTTGTDTAPQGNMAGHGISVIGGTHDGEYYSEEYATIISLISILPKTSYMQGIHRSWLKYNDVYKYYTPQFAHV…	506	USER	zzzz815
325	my_seqs_18minnow1_2ct1023.2@PF02305.16	my_seqs	MFRNKSVDVHRFSMIPKAEIPRSTFLIEKAHKTTFDSGYLVPVYCEEVLPGDTFKVSATMFARLATPLFPVMDNLHMDSFFFFVPNRLVWSNWKKFMGEQANPADSISFLIPQQVSPVGGYAVGSLQDYFGLPTAGQVAGGNTVSHSALPVRAYNLIFNEWFRDENLQNSVTVDLGDGPDATSSVNYVLLRRGKRHDYFTSALPWPQKGGTSVTLPLGTTATVKTNASALFTGTQPSLLLKHIDGTLPGARVLLNLDPSGEGFAAGAGSAGGTKFYPANLYADLSTATAATINQLRQAFQIQKLLERDARGGTRYTEIVRSHFGVASPDSRLQRPEYLGGGSVPLIVNPVAQSSGTGITGGTTPLGTLGGLGTVVGRNGFSQSFTEHGHIIGLVSVRAD…	543	USER	zzzz816
324	my_seqs_18minnow1_2ct1038.3@PF02305.16	my_seqs	MSRNIQSGNTFPERMEKHADKNWYDLSFNHKTTLTMGNLIPLATKEAYPGENWRLSTEVMMRFAALYLPIMHQCYFTVDWYYVTNDQLWPKGFYIDFPDGWQNFIKQDPMQPGASWPYFTYKRADAVSTDGILNYMGFNAPPGAGTLIASTEVGALPVAAYAKIYDEYYRNDQIQTPIWAELHGGNNTTIVEAMLPGLEVKRRNWPRDYYTSATPTPQQGENVLIPSFATDPVTGLYIPQIIYALDGTPSATGDLGIVTDAGDPVLGLVGGNPKVLQLSSTIRDFRYAAQMTEYLERALRAGDRYNDFVERHFGYKPNPLYIDRPVWIGGYTGNVVISEVLATAETGDFTVGQYAGQALARDNSPVFTYTTPDYGIIMCLLTVYPKASYYSGLENMWRR…	530	USER	zzzz817
323	my_seqs_18minnow1_2ct1041.5@PF02305.16	my_seqs	MHRNKSVNVHRFAMTPSPEIPRSSFNIQKSHKTTFDAGFLIPIYVDEVLPGDTFRLSMTAFCRLATPLFPIMDNMYLESFFFFVPNRLVWSNWTKMMGEQDAPGDSIDFTVPQSESPIGGYAVGSLQDYMGLPTAGQVEPASRILHSAMWLRAYNMIYNEWFRDENLQTPVVEAKGNGPDAPSDFVLLRRGKRHDYFTSCLPWPQKGESVSIPLGTSAPILAYGDKIPLWRVEGLGADHVLEGVTGTANVQLDGAPASSGRLAWNDPKLFADLSDATAATINQLRQSFQVQKLLERDARGGTRYTEILRSHFGVQSPDARLQRPEYLGGGSTPIQVNPIAQNSATSESGTGTPLGTLGAMGTGLAAGHGFSASFVEHGMVIGLVSLRADLNYQQGLRKM…	532	USER	zzzz818
322	my_seqs_18minnow1_2ct1042.3@PF02305.16	my_seqs	MYQNKSVSTHQFALNPGSRIPRSAFNIQKTHKTTFDSGDLVPIYVDEVLPGDTHNLRMTAFARLATPLFPIMDNLHLDVFFFFVPNRLVWTNWKRFNGEQTNPGDSVAYTIPQQVCPAGGYAVGSLQDHMGLPTVGQIGGGATVSHSALPLRAFNLIYNEWFRDENLVTALTVDVGDSGDNVANYTMRKRGKRHDYFTSCLPWPQKGTATSLPLGTSAPIAFTGTAGTAANLSIRDTAGTATYMAAFSAPPVTIQSGNASSGASALFADLSQATAASINDLRLAFAVQSLLERDARGGTRYTEILKAHFDVTSPDQRLQRPEYLGGGSVMVGVNPIAQTSGTSASGTTTPLGQLGAMATALASGIGFNQSFTEHGHIIGLASVRADLTYQQGLRKMWSR…	530	USER	zzzz819
321	my_seqs_18minnow1_2ct1044.1@PF02305.16	my_seqs	MARGGGYSFSQVPMADIPRSSFNRSHGHKTTFNSGYLVPFFVDEALPGDTFSVKTSLFARLATPIVPIMDNLHMDVFFFAVPNRLVWDKWQRFCGERPNPDDSVDFTIPQVEAPASTGFAAESLFDYMGFPVGIPNISGSALWSRAYNLIFNEWFRDENLIDRAVVDIGDGPDVASNYVLRKRGKRHDYFTSCLPWPQKGEGVELPIGTSAPVVGNNPGGISMPTFKTIGGGTPSPFTQTAYPTGEAGFNQVGMGTQALAGGIGWESPALMVDLSSATAATINSLRQAFQIQKLLERDARGGTRYTEIIKAHFGVTSPDARLQRPEFLGGGSVPVIINPVSQTSGSGAYTDTPQGNLAGYGIAAGGNLGFSKSFVEHCVIIGMVMVRADLSYQQGMPRM…	539	USER	zzzz820
320	my_seqs_18minnow1_2ct1045.6@PF02305.16	my_seqs	MIPKADIPRSGFLIEKTYKTTFDGGYLIPVFCEEVLPGDSFKVRMTAFCRLATPLFPIMDNLHLDSFFFFVPNRLVWTNWVKFMGQQDNPGDSISYVIPQQVSPVGGYAVNSLQDYFGLPTVGQVAGGNTVSHSALPVRCYNLIFNEWFRDENLQNSVPVDKGDGPDAAPATNYVILRRGKRHDYFTSCLPWPQKGGTAVSLPLGTSAVVKTSAAEGFVGAQSGMLMRTAGGAVPTVGAPFGGGTGGFMVQATTGIGAAVSNVYPSNLYADLSTATAATINQLRQAFQIQRLLERDARGGTRYAEIVRSHFGVVSPDARLQRPEYLGGGSTPIVVNPIAQTSGTSASGTTTPLGTLGAMGTAVSQGHGFSQSFTEHGHVLGLVAVRADLTYQQGLRRMW…	532	USER	zzzz821
319	my_seqs_18minnow1_2ct1046.7@PF02305.16	my_seqs	MMLYDQITSHDFAMIPKADIPRSKFRLRHGYKTTFDAGFLVPIYCEELVPGDQFNGKLHAIARLATPITPFMDDLTFESFFFFVPNRIVWDNWVRMMGERRSPSDSIAFSVPQITSPASGYPVNSLYDYFGLPTVGQITGGLTFSHSALPLRMYNLIYQEWFKDQNLINAPALNYGDGPDASTDYVIRRRGKRHDYFTSCLPWTQKGDPVTLPLGTSAPIRYSTTDSPSAELSVLNAAGNYRTLNSSTTYLSTTTNAGLVGNALYADLSAATAATINAIRLAFQVQRLLERDARGGTRYTESILSHFGIRSPDMRLQRPEYIGGGSTPIVVNGVPQTSATSGQPTPAGNLSATATMITQNGHDFRYSASEHGYIIGLANVRGENTYQQGLRRHWSRATR…	527	USER	zzzz822
318	my_seqs_18minnow1_2ct1047.4@PF02305.16	my_seqs	MFRNRSVDVHQFAMIPRAEIPRSQFRMQTTHKTTFGSGYLIPIFCEEVLPGDTFGLKMTAFARLATPIFPIMDNMYLESFFFFVPARLVWTNWQKFMGEQLNPGDSISYTIPQQVSPTGGFVAQGLHDYFGLPTVGQVGAGNTVSVNSLPLRCYNLIWNQWFRDENLATAAKIDVGDGPDTYSDYVIKRRGKRHDYFTSCLPFLQKGTAVGLPLTGNATVKTNATPLFTGAQAGLTFLLSNGAGLVTGRTLTTGGSSNLAESGTAAPAVGNNVYPSNLYADLSSVTATTINAIRLAFQTQKLLERDARGGTRYTEIVRSHFGVVSPDARLQRPEYLGGGSTPVNISPVAQTSNTPVTGTPQGNLAAFGTAVAQGHGFRQSFTEHGYIIGLVNVRADLTY…	537	USER	zzzz823
317	my_seqs_18minnow1_2ct1051.4@PF02305.16	my_seqs	MKNRSVNVHQFAMTPRPDVPRSSFNIQTSHKTTFDAANLVPVYLEEILPGDTYNVQMTAFARMSTPLYPTMDNLHMESFFFFVPTRIIWDNWQKFNGEQRNPGDSISYLIPQSISPVGGYPVNSLQDYFGLPTVGQVGGANTVSHSALPLRAYNMIWNEWFRDENLQNSVASNFGDGPDIQTDYTLLKRGKRHDYFTSCLPWPQKGTAVTLPLGTTAPVISNNVNPTVKTSGAAFGLQIGGDTRTVQNTAAQTSGTLTWVNSGLVADLSAATAATINSIRQAFQIQRLLERDARGGTRYTEIVRSHFGVISPDARLQRPEYLGGGSSPVNVSPIAQQSGSGITGGSTPLGQLGGIGTFHASGHGFRQSFTEHGYVIGLVNIRADLSYQQGLRKIWSRST…	527	USER	zzzz824
316	my_seqs_18minnow1_2ct1061.3@PF02305.16	my_seqs	MMFRNQSVDVHQFAMIPKADIPRSSFSIQKAHKTTFDAGYLIPVYLDEVLPGDTFNLRMTAFCRLATPLFPVMDNLHLDSFFFFVPNRLLWSNWQKFQGEQANPADSVSFLVPQQVSPASGYAVGSLQDYMGLPTVGQVGGGNTVSHCAFWPRAYNLIWNAWFRDENLQNSVVVDLGDGPDAAPSVNYVLLRRGKRHDYFTSCLPWPQKGGVSVSVPLGTSATVKTSATQNLFAGAQTAMHMTRADGSQPTANVVIGLSTGGTGNTRRVEWGQALSGPDAIGVYPSNLYADLTTATAATINQLRQSFQIQRLLERDARGGTRYVESLRARFGVMPPDFRLQRPEYLGGGSMPIVVHPIAQTSATGLTGGTTPAGNLAAVGTGVGHGHGFTQSFTEHGVI…	552	USER	zzzz825
315	my_seqs_18minnow1_2ct1063.4@PF02305.16	my_seqs	MHRNRSVMKKNFAQIPKADIQRSNFDRSHGYKTTFDAGYLVPVFCDEILPGDTCKLNMTGFARLATPIFPIMDNMFLDTQFFFVPSRLVWDNFQKFMGEQDNPDDSTDYLVPQVTAGVSGYAEGTLGDYFALPTHVSNYTHNVLPLRAYNLIYNLWYRDENLQDSVPIHKDDGPDPAASYTLLRRGKRPDYFTTALPWPQKGPAVTIPIAGIAPITTTNTGVPSFKFPSSAGQFLMAGDGTTDMKWTGNAPNGEYAQWNDTALEVDLTMASSATINSLRQAFAIQKLFEKDARGGTRYQELVYQHFQVRGGDARLQRPEYLGGGSTPVNISPVPQTSGTGGYTPSPQGNLAAFGTALATNHGFTMSFVEHGYVIGIASVRADLTYQQGMRKMWSRRTKV…	524	USER	zzzz826
314	my_seqs_18minnow1_2ct1064.4@PF02305.16	my_seqs	MHRNKSVNQHQFAMIPRSDIPRAKFDRETGYKTTMNSGYLVPFFLDEVLPGDVFNFQATIFARLATPLVPFMDNLYADTFFFFVPNRLVWDNWVKMNGEQDNPADSISYTVPQIVSKASGYDIGSIYDYLGLPTLGQLQAAATFSHSALPLRGLNLIWNDWFRDENLQNSVVENRGNGPDLYTDYNLMRRGKRKDYFTSALPFAQKGAAVTLPLGTQAPVKGLFVDTSAPAVLVAGWKDATGGLSTGLTGVNSIIAGPSAKYGALAAAGGNPQIYADLSAATAATINQLRQSFQIQKLLERDARGGTRYSELLQSHFGVNPQDFRLQRPEYLGGGSTPVNINPIAQASGTGASGTTTPLGQLAAMGTLLAKNGFSYSALEHGHIFGLVSIRADLTYQQG…	534	USER	zzzz827
313	my_seqs_18minnow1_2ct1067.5@PF02305.16	my_seqs	MELVMSSVQKINQGHFSMVPRADIPRSSFDRSHGWKGTFNAGYLVPVFVDEALPGDTFHLSMTAFGRLATPLHPFMDNVYMDTFFFFVPLRLVWSNFKKFMGEQVNPGDSTSYVVPQVNSPAAGYANGTLSDYMGIPTKVAVSFQHSAFWHRAYNLIWNEWFRDQNLQNSVTVNMGDGPDASTDYVLLQRGKRHDYFTSCLPWPQKGPAVTLPLGTQATVKTSATETVSGVQPALVNRVATTGAFPGQQALGFNATGNIGGATSSNGVAAGFVYPSNLVADLSTATAATINQLRQSFQIQRMYERDARGGTRYTEIVQSHFSVVSPDARLQRPEYLGGGSVPLNVNPIAQTSNTPVTGTPQGNLAAMGTVNAHGVGFTQSFTEHGVVLGLVMVRADLNY…	537	USER	zzzz828
312	my_seqs_18minnow1_2ct1069.2@PF02305.16	my_seqs	MARMPSVTAAQHSFATVPRAEIPRSSFDRSHGLKTAFDSGQLIPIFVDEALPGDTFTINLTGFGRLATPLRPFMDNVYVNTFFFFVPNRLVWDNWQKFMGEQNNPGDSTDYLVPHIFSPATTGYAENSLFDFMGIPTKVPDVGHSVLPFRAYNLIWNQWFRDQNLQDSIPIVMGDTGDNFADFQIRRRGKRHDYFTSALPWPQKGSAVDIPLGTTAPIKGLGKTTQTWLPGGAPVYETGGSTSVSYANSAGLGSSGADDNWLAKEDPNNPGFPAIYADLSQATAATINQLRQAFQIQKLHERDARGGTRYTEIVRAHFNVISPDARLQRPEYLGGGQGYVQLHQVPQQSPTGTYANTPQGNLAAYGTSGFSGHGFSKSFTEHGIVIGLLAVRADLNYQQ…	544	USER	zzzz829
311	my_seqs_18minnow1_2ct1071.3@PF02305.16	my_seqs	MARLYQPPRVDIPRSTFQRNHSYKSTFDSAQLVPFFVDEALPGDTFNLKCSLFARLSTPIVPIMDNLYMDVHFFAVPNRLVWDNWQKFCGEQENPGDSTDYIVPSFPPGTGWGEGTLADYFGLPTEAWPVGQPQPSALPFRAYKLIWNQWFRDQNLQNSLVVDKDDGPDDPAQNTALLKRGKRHDYFTSCLPWPQKGPGVDIPIGQLPVRTSATDLITGAQSNPARWANAAGGFPGSSLTIATGSGVNSGAFGQTATAGTMAGGAQMHPVNLYADGGNAVTGTGGTINDLRQAVAIQRLLEKDARGGTRYIELLKAHFGVTSPDARLQRSEYLGGQSIPIHINPIAQTSPTASDPATGYAKTPQGNLAAVGVGAANGVGFTKSFVEHCIIIGLVSIRAD…	540	USER	zzzz830
310	my_seqs_18minnow1_2ct1078.1@PF02305.16	my_seqs	MPSAGAMPTTKEPQAMKNFKQRSVKVDHFAMIPRADIPRSTFKMETAHKTTFNAGTLVPVFIDEILPGDTYNLNLTAFARMATPIYPLMDNLHMEHHAFFVPNRLTWDNWEKFMGSQDNPADSISFIVPIISQSNLVTAAVPLSLYDYFGLPVTGQGAPGNMSINALPFRAYNLIWNQWYRDENLQNSVTVTTGNGPDVPTNYTLLSRGKRKDYFTSALPFVQKGPAVSFGLTGIVPVATNNQNITFTPVAGPSNMPAIVASGLDKPIGVQGTVLGSANTPVRFGNQSGLQVDLATATATTVNNLRNSFQVQKLLERDARAGTRYVELIRGHFGVTLPDFTAQRPVFLGSSHTPININAIAQQSGTGTTGTTTPLGQLAGIGTGVSQLHFNQSFTEHGY…	553	USER	zzzz831
309	my_seqs_18minnow1_2ct1079.5@PF02305.16	my_seqs	MVPRNDVPRSTFRTVHSHKTTFNAGSLVPVHVDEVLPGDVHRGSMTVFGRMATPIFPIMDNLALESFFFFIPSRILWSNWKKFMGEQVNPADSISFTLPQVVSANGGFPINTIFDYLGLPTVGQVMAGENVSVNALPLRACNMVWNEWFRDENLQNSVPNNQGDGPDAVADYNLQRRGKRHDYFTSCLPWPLKGGTQVSMPLAGSALVKTSATETWLPSSATSLLMRRYDTGAAPAGNFQAVLNSTALGYSATAGGTFTAGVFPSNLYADLSTATGATINAMRLAVTTQQFLERDARGGTRYTELLRNHFGVLPEDSRVQRPEYIGGGKSRVETSAIPQTSAQVASGPVVGTLGGTSTVAGTHEFSYHAAEHGYILGFVSVNADLTYQQGLHRMWTRST…	528	USER	zzzz832
308	my_seqs_18minnow1_2ct1081.2@PF02305.16	my_seqs	MMNLGNRFAQHSFAQVPDVHMVRSQFDRSHTVKDTMSFDYLTPILVDEILPGDTCNVNLSVFARLATQKVPIMDNMYVDFFFFFVPNRLVWNNWEKFNGAQDNPGDSTSFVIPTLTTTAVTGEVVGSLSDHFGVPTQVPGLSVTALPYRAYNLIYNQWFRDENLQNSLTVPKDDGPDTVGNYVLQKRGKRHDYFTSALPWPQKGTAVTLPLGTSAPVLGLGKGNANFASGSQTVRLSNGTTTTYNPSQLVRSDTADGYLYMEQGTTGYPNIRADLTNASAATINQLRQAFAIQGMYELDARGGTRYVEILQAHFNVISPDFRLQRPEYLGGGQVRINAHPVAQTAPTSGSNAQGQLASFATASSSGSDVGFTKSFVEHGYVIGLAAPRADITYQQGLNK…	534	USER	zzzz833
307	my_seqs_18minnow1_2ct1084.6@PF02305.16	my_seqs	MHRNPSVMKHTFSEVPRAEIPRSTFDRSHGHKSAFNAGVLVPVLVDEALPGDTFNVTGTIFARLATPIFPIMDNLYLDVHYFAVPLRLVWNNWEKFNGAQDNPGDSTDYQIPQTTAPVGGYAIGNLADYFGIPTGVASLQHSALFRRAYWLIWNQWYRDQNLQDSIVVPMGDGPDVIEDSPLLRRGKRHDYFTSCLPWPQKGPGVTIPLGTDAPVRTSAIDMVTGVQSAMKMSTVTGGAPPDQTLAMANAGDVGHSGTGGSITGGLYPRNLYADLTQASAATINSLRQAFQLQRMFERDARGGTRYTEVLKAHFGVTSPDARLQRPEFLGGGTTPVNIAPIPQTSGTGAYTPTPQGNLAAMGTVLSRNGFTMSFTEHCIILGLASVRADLTYQQGLNRM…	531	USER	zzzz834
306	my_seqs_18minnow1_2ct1085.1@PF02305.16	my_seqs	MFRNKSVDVHQFAMIPKADIPRSSFDRQSTHKTTFDANYLVPVYVDEVLPGDTFHLKMTAFARMSTPIFPIMDNLYLDSFFFFVPNRLVWNNWKKFMGEQDNPNDSISFAIPQCVSPAGGYPVSSIYDYFGLPTVGQVGVGNTVSHSALPLRGMNLIYNEWFRDENLQVSATVPKDDGPDPNTMYSLFIRGKRKDYFTSCLPWPQKGSPVQLPLGTSAPVRTNATAGQALYIQDVAGLPKDMDSSTAVLSLGVGAGSGSTQTLFADLSQATAATINQLRQSFQIQKLLERDARGGTRYTEIVRAHFGVVSPDARLQRPEYLGGGSTAINISPIAQTSGTPAPGGYTTTPQGHLAAMGTALANRHGFTQSFTEHGHVIGLVCVRADLTYQQGLRKMWSRS…	529	USER	zzzz835
305	my_seqs_18minnow1_2ct1090.5@PF02305.16	my_seqs	MHRNQSVNVHQFAMVPKAEIPRSKFDRQFTHKSTIDSGYLYPVYVDEVLPGDTFHLNATLFARMATPLYPIMDNLHLDSFYFFVPNRLVWDNWVKFMGEQKNPGDSISYVIPTLQSPVGGFIVNGLADHFGLPTVGQVGSANTVSVNALPFRAYNLIYNEWFRDENLIDSVSVPMGDTGDLISMYNLERRGKRHDYFTSCLPWPQKGAAVSLPLGTSAPVLTSSSPLVTGAHSALNLSTTSGAAPGGLSGIGTTTTGNFGVGVGLSPTSVTGGFYPNNLFADLSQATAATVNQLRQAFQIQKLLERDARGGTRYTEIIRSHFGVISPDSRLQRPEYLGGGSTPININPIAQTSGTGITGGSTPLGQLGAMATALHSGNGFTQSFTEHGYIIGLVAVRAD…	543	USER	zzzz836
304	my_seqs_18minnow1_2ct1091.6@PF02305.16	my_seqs	MLGGGFTFSQVPVADIPRSTFNRSHGHKTTFDSGYLVPIFIDEALPGDTFQVQASVFARLATPIVPIMDNMHMDVFFFFVPNRLIWSNWQKFMGEQDNPGDSTDYLVPEVQAPPGGFPVGSVFDYFGYPTGSVGNSKNMGTALFYRAYRKIWNEWFRDENLQDSVSVPLLDGPDTVTVEDCALLKRGKRHDYFTSCLPWPQKGPGASINIGDTAPVIPNVTGADTDVPYFVSSNGLNIGPLGAATQTGDQNRVYFAPAGGNNQAGNLHWNAQTGLIADLSANSVVTINALREAFQIQKLMERDARGGTRYTEILRSHFGVVSPDSRLQRSEYLGGGTVPVVINPVTQTSGTPNDSATGYTPTPQGNLAGYGVAGGSHLGFSKSFVEHGVILGMVMVRAD…	540	USER	zzzz837
303	my_seqs_18minnow1_2ct1092.3@PF02305.16	my_seqs	MQSVMRHQFSQVPSAEIPRSSFDRSHGYKTTFDSGYLVPVFVDEALPGDTFNCRMTSFARLSTPLHPIMDNMFCDAFFFAVPLRLVWTNFVKFMGEQDNPGDSTSYIVPTATSPAGGYVASSLQDYMGLPVQVPGITHSNLFLRAYNLIWNQWFRDQNLQNSVVVDKGDGPDTYTNYNLLRRGKRHDYFTSALPWPQKGAAVQIPLGTTATVKTAGTTLVTGAHTGMNMTDTAGAAPVVNAAMGIGTGGYASQGTPTITVGTGVYPNNLYADLSTATAATINSLRQAFQIQKIYERDARGGTRYTELIQAHFGVVSPDARLQRPEYLGGGSCPVNVNPVAQTSGSGITGATTPQGNLAAVGTMSHNGIGFTKSFTEHCIILGMVSVRADLNYQNGMNRM…	533	USER	zzzz838
302	my_seqs_18minnow1_2ct1094.3@PF02305.16	my_seqs	MTMPLPMHKNASAKVHQFAMVPKTDIPRSAFVQEKTHKTTIDAGYLIPIYLIEVLPGDTMNLQMTAFARLATPILPVMDNLHMNTSFFFVPYRILWTNFKKMMGEQANPADSISYTVPQCVSAAGGYAINSLQDYMGLPTVGQVTGGATVTHSALPLRAYNLIYDEWYRDENLQDTIGTPLNDGPDNIGNYVLRRRGKRKDYFTSALPWPQKATSSVALPLGTSADIKYREYAGGTTQNNKWVVADRTGTVSHFQYGNSANTTTADISDASQSNLYADLSTATAATINQLRQSIAIQQLLEKDARGGTRYTEIIRQQFGVVSPDARLQRPEYLGGADSPITINPIAQTSGTSASGTTTPLGNLAAVGAGIHRSGFAQSFTEHGIIVGLLSIRADLTYQQ…	539	USER	zzzz839
301	my_seqs_18minnow1_2ct1095.3@PF02305.16	my_seqs	MKMKNFMNSVRLKRPDSNMFALNHMVQTSGEMGTAFPLPPIEVLPGDRIKLNQVAKCRFMPLVAPGDFMADIKFYNVFVANRTIWPQTAGEKNGWEDWLTMTTTGGVLPAFPTITIDPGVNYTRLMNRLGIPDPGLVPGSAEQEVVSALPFAAYQKAWSDLFRNQQTMPDELDYLLQPGDNTANTELTVLRPILWEKDLYTSATIQPQKGDEVTIPVAGFNDVPIKMQQDPIVDAAFGWNGVDVPSSIPGTGSVPMDISDDPSLPDRALFADTSEMEAFGVPISEWRFSLALQKLKERLNVAGSRYFEWIKAFTGITSPDARLQRAELFSSNSTPISFSEVLNTTGETGGLPQGNMAGHGLGIAVGKDGYYNVKEHGFIITFMCVRPRTVYSQGIRKLW…	521	USER	zzzz840
300	my_seqs_18minnow1_2ct1106.5@PF02305.16	my_seqs	MRSVMTHQFSQVPKAEIPRSTFDRSHGHKTTFDSGVLIPFLVDEALPGDTFKCRVSALARLATPIVPIMDNMYLDTQFFAVPIRLVWDNWQKFNGEQKNPDDSTDFTIPQIVAPASTGFSALSLEDYFGLPVGKPGVSVSSLFHRAYNLIWNEWYRDQNIQDSVPVPTGDGPDTPTDFKLLRRGKRHDYFTSCLPWPQKGPGVQIPLGTSAPVVGAFRVTDAAYALEMGMTGLAAGGVSLNPYPPADTALYADNTAAGGLYADLSMATAATINSLRQAFQIQKIFERDARGGTRYTELIKAHFGVTSPDARLQRPEYLGGGSTPINVTPVVQTSPTGTYANTPQGNLAAYGLSAFSGHGFNSSFTEHCLIIGILSVRADLTYQNGLNRMFSRRTRFDFY…	521	USER	zzzz841
299	my_seqs_18minnow1_2ct1107.5@PF02305.16	my_seqs	MDLGRNIPPRANAAHKFSQVPRADIPRSSFDRSCGLKTTFDAGLLIPIFVDEALPGDTFNVNMTALARLATPIFPIMDNMYMDTQFFSVPIRLVWDNWQKFNGEQKNPGDSTDFIIPQMVSPATTGYDIASIHDYFGLPTGVPDLTHSALWHRAYNLIYNEWYRDQNIQDSLPVPTDDGPDDPADYVLQRRGKRHDYFTSCLPWPQKGPGVTIPLGSFAPIVSTAADGTTGFIDEGRYLYVDTAPGAGLVSAPSAGTPNIFADLSSATAATINSLRQAFQIQKIFERDARGGTRYTELIRSHFGVTSPDARLQRPEYLGGGSNMVNISPVPQTSASADYGASGFQALGGLSGVGTAHLNRHGFTSSFTEHCLIIGIVSVRADLTYQQGLNRMWSRKTRF…	524	USER	zzzz842
298	my_seqs_18minnow1_2ct1118.4@PF02305.16	my_seqs	MAKHRGRAGSGNNYTFAQVPKAEIPRSSFLRNHTHKTTFYAGHLIPIYVDEVLPGDTFNLNMNVFGRLATPIFPIMDGLYLESFFFFVPNRLVWDNWQKFMGEKVNPDDTTEYLVPMLQTGTAVTTGSLGDYFGIPPTKALEVNALPFRAYNLIYNEWFRDQNLQDSLKVATGDSGDTLADYSIVSRGKRHDYFTSCLPWPQKGPGVEIPLGANAPVTITGNGAPTFVGASNPLAAAPLMAYGSNTDPSGGSLPGHVMNNSNSSTGQVNMNWSDPKLSGVADLTQATSITINSLRQAFQLQKLQERDARGGTRYVEILKAHFGVTSPDSRLQRPEFLGGGHSPIIINPVAQTSGTSAAEAPTPQGNLAGYGIVAGAGHGFHKSFVEHGYIIGLVSVRAD…	541	USER	zzzz843
297	my_seqs_18minnow1_2ct1121.4@PF02305.16	my_seqs	MNQTSQHTFAQVPSAEIPRSKFDRSCGLKATFDAGDLIPIFVDEVLPGDTFNVKENLFGRLNTPIVPFMDNLYLDTFYFFVPNRLVWNNWQKFNGEQTNPGDSTDYIIPIVTAPGGTGFVANSLYDYMGIPTEVPDIKVNQLHARAYNLIWNEWFRDQNLQNSITVDLDDGPDDPAAYIVQKRGKRHDYFTSCLPFPQKGPAVELPLGTSAQVIGDGTTQSVYTAADATNRTLRVNTASTTLFAQSYSGATSDMYFSTNPANSGLIADLSNATAATINQLREAFQIQRLYERDARGGTRYTEIIRSHFGVISPDARLQRPEYLGGGSNRVNINPVVQNSESATTPQGNLAAFGTVSAGGKGFTKSFTEHGVIIGLASLRADLNYQQGLNKMWSRQTRFD…	522	USER	zzzz844
296	my_seqs_18minnow1_2ct1122.3@PF02305.16	my_seqs	MVPKADIPRSKFKIQTTHKSTFDAGYLIPVYLDEVLPGDSFNVRMTAFARMSTPLYPLMDNLTLYSFFFFVPNRLVWTNWKKFMGEQATPASSISYTIPQMVPPANGYTINSLQDYMGLPTVGQVNAGSGINITHSSLFLRAYNLIYNEWFRDENLQDSVTVDTGDGPDTYSNYVLLRRGKRHDYFTSALPWPQKGSTAVTLPLGTSAPVKGIGFNSSTTDGGAGMTMRESTPLPNRAYAHAQATNAATTIYIEQDVAGGASSKPLVYADLTQATAATINQLRQSFQIQKLLERDARGGTRYTEIIRAHFGVVSPDARLQRPEYLGGGSTPVTLNPIAQTSGTSASGTTTPLGTLGGMGTLLAGGHGFTQGFTEHGMIIGLVSISADLTYQQGMRKMWS…	530	USER	zzzz845
295	my_seqs_18minnow1_2ct1123.5@PF02305.16	my_seqs	MMHRNPSVMKHTFSQVPQAEIPRASFDRSHGHKTTFDAGYLIPIFLDEALPGDTFKVRMTGFARLATPIFPVMDNMFMDSFFFAVPYRLVWDNWQKFNGEQENPGDSTDYLIPQITAPAGGYQVGTLSDYYGIPTGVAGLKHSALWHRAYNLVWNQWFRDQNLQDSLSVPKGDGPDDPALYTLQKRGKRHDYFTSCLPWPQKGPGVTIPLGTMAPVVAQAGTDGVPLFNVPGGGVSPLVGQGGSANVLLNGNASATGSLTWNESKLEADLSQATAATINSLRQAFQIQKIYERDARGGTRYTELIKAHFGVTSPDARLQRPEYLGGGTTMVNIHPVAQTSPTGTYAATPQGNVSAFGTALMNGHGFSMSFTEHCLIIGMVCVRADLTYQQGLNRMFSRR…	526	USER	zzzz846
294	my_seqs_18minnow1_2ct1125.5@PF02305.16	my_seqs	MVMHHKNRSVDPHQFAMIPHADIPRASFDRQFAHKTTFDAGLLIPIYVDEVLPADTFKLRMTGFARMSTPLFPVMDNMKLSTFFFFVPNRLIWNNWQRFMGQQDNPSDSISYLVPQVSSPAGGYAVGSLQDYMGLPTVGQVAGANIVSHCAFWTRAYNLIWNEWFRDENLQSSVTVDKGDGPDSASNYVLLRRGKRQDYFTSCLPWPQKGGTAVTIPLGTSAPVKGVTAGAGPAYISTNASNIAYMQTLTPTTGALYADLTQATAATINQLRQSFQIQKLLERDARGGTRYTEIVRSHFGVISPDSRLQRPEYLGGGVSPVNINPIAQTSGTGITGGSTPLAALSGVGTVLAQHGFTQSFTEHGVILGLACVDADLTYQQGLHRMWSRSTRYDFYFPAF…	519	USER	zzzz847
293	my_seqs_18minnow1_2ct1128.6@PF02305.16	my_seqs	MFRNRSVDVHQFAMIPKADVPRSTFNRQSTHKTTFDAGLLIPVFLDEVLPGDTFHLKMTAFARVSTPIFPIMDNLYLDSFFFFVPNRLVWSNWKKFMGEQANPADSISFVIPQMTSAVGGFVVGSIFDYFGLPTVGQVGGGNSIQVSCLPLRCYNLIYNEWFRDENLQNSVPQNVSDGPDNIADYTLLRRGKRKDYFTSCLPWPQKGGTAVSIPLGTKAPVLGLTTSTGVTQAIGSTQYVGTPQTGVSQSMSSAGTMFATSLSAVGTAAATAFNSTNSNVFADLSSATAATINQLRQAFQIQKLLERDARGGTRYTEIVRAHFGVISPDARLQRPEYLGGGSQAINISPIAQTSGTGITGGTTPMGTLSAMGTVVAAGHGFTQSFTEHGHIIGLVSVRA…	544	USER	zzzz848
292	my_seqs_18minnow1_2ct1130.3@PF02305.16	my_seqs	MLGNRYSQHSFAQIPDVKMARSQFDRSFTVKDTFNFDYLIPIFVDEILPGDTCNVRVNTFARLATQLVPIMDNLYIDFFFFFVPNRLVWNNWEKFNGAQTNPGDSTSYVLPSLDAFPAGGPEVDTIYDKFGLPTDVSGAWTLGNTLPLRCYNKIWNAWFRDENLQNSVIDNMDDGPDQIADYTLLKRGRRHDYFTSALPWPQKGAAVSLPLGTSAPILRTSGAPNAWIAYQKNTNTTTTVDGEIRANNAGAVYQGGSSAELSFDPMGGLYTDLSNATAATINSLRQAFQVQGLLELDARGGTRYVEILQAHFNVISPDFRLQRPEYLGGGQTKINSHPVAQSAPTSGSNYFAQLGAFATSSTMGSNIGFTKSFVEHGYVIGLACARADITYQQGLERFW…	529	USER	zzzz849
291	my_seqs_18minnow1_2ct1133.4@PF02305.16	my_seqs	MKMHRNKSVMKHTFSQVPKVSISRSSFDRSHGHKTTMDASFLIPVYVDEALPGDTYNVSMTGFARLATPIFPIMDNMFLDTQFFAVPMRLVWDNWERFNGAQDNPGDSTSYLIPQVVSPAGGYLEGSVQDYMGIPTKVAGLETSALFNRGINLIWNQWYRDQNLQDSLPVPKGDGPDDPAIYTLLRRGKRHDYFTSCLPFAQKGQAVDIPLGLTAPIIGIGSSQSQFPTVDVSVLETQGIAKVYPNAVATNDAGGAIYIDGTGDGSGSRPNVYADLSAATAATINSLRQAFAVQQILEQDARGGTRYTEIIRSFFGVVSPDARLQRPEYLGGGSTPINISPIPQTSGTGAYTASPQGNLAAMGTALCNHGFQMSFTEHCMIIGFCSVRADLTYQQGLNR…	531	USER	zzzz850
290	my_seqs_18minnow1_2ct1134.4@PF02305.16	my_seqs	MKSVMAHQFSQVPKAEIPRSSFDRSHGYKTTFDAGLLIPILVDEALPGDTFNCRLTALARLATPIYPIMDNMFLDTFFFSVPYRLVWDNWQKFNGEQFAPGDSTDFTIPQMVSPSGGYSANTIHDYMGLPTSVAGISHSCLWHRAYALIWNEWFRDQNLQDPIAVPRTDGPDLPTFYTLMRRGKRHDYFTSCLPWPQKGEGVTIPLGGMAPVKSDGQPFIFTNGQSGNGNVAWDGTGYTATAPGFTGGDANMLFGNQGLMADLTAATAATINSLRQAFQIQKIYERDARGGTRYIELIKSHFGVTSPDARLQRPEYLGGGSSPINITPVAQTSPTGTYANTPQGNLAAFGQTVLHGHGFTTSFTEHCLILGLACVRADLTYQQGLDRMWSRKTRFDFYW…	520	USER	zzzz851
289	my_seqs_18minnow1_2ct1141.4@PF02305.16	my_seqs	MKFFSQKIKVGPVKASKFDLSHERKMSLNFGKLVPTLVQDVIPGDNIKVKATELFMRFAPMLAPVMHRVNVYQHYFFVPNRIIWDEWESFITGGEDGNAKPVFPTIRVTEQQGTQTITEAFGIGSLADYLGVGYTQPPVAVTTNPYDISALPFRAYQQIFNDYFRDQNVEGKIAFPKTGGDQTLADTTNGTTFCENLLTLRNRAWEKDYFTTSLPWPQRNTQQAFAPIDNYSKVAGGDPMIGGAEFQSNGKMSDAGGAITQGELLINELRKANKLQEWLEKQARGGGRMFETILSHFGVKISDGRVQRSEYLGGGRTPVKISEVLSTYDNTAGDLPQGNMSGHGIASNSFQGFNRSFEEHGYIIGIMSVLPLSAYQNGLERHWLKKDKFDFAWPSFANL…	511	USER	zzzz852
288	my_seqs_18minnow1_2ct1143.4@PF02305.16	my_seqs	MSDFTFSQVPRAEIPRSTFNRSHGHKTTFDSGLLIPIFVDEALPGDTFKVHAHMFARLATPIFPIMDNVHLDTFFFAVPNRLLWDNWQAFCGEGDPWTTEPPTTDYEVPFIKAPVTGFEVGSIFDYMGLPVGVPNVEANSLHLRAYNLIYNEWFRDQNLITKVPVQKGDSDNQSYYSLLRRGKRHDYFTSALPWPQKGPATEVPLGGTIPINPAPYPVAKFTVYEGGSDIFSLGLDAVTAGTNPNMIGLAQGQPTTPGGELHWYQSGLIGDLSNATTVTINKLREAFQIQKLLERDARGGTRYTEILKSHFGVTSPDARLQRPEFLGGGSFPVIVNPIAQTSNTVTESPQGNLAAFAQANGASGFTKSFVEHSVIIGLICARADLSYQQGLHRMWSRRT…	530	USER	zzzz853
287	my_seqs_18minnow1_2ct1147.3@PF02305.16	my_seqs	MHRNKSVSTHQFAMVPQADIPRSSFRIEKTHKTTFDASFLIPIYVDEVLPGDTFNLRATIFARLATPIFPIMDNLYLDTFFFFVPNRLVWNNWQKFMGEQDNPTDTTDYLVPEITTPAGGYAVNSLQDYMGLPTVGTLGAAATVTHNALFLRAYNLIWNQWFRDQNLQDSVAVPKTDASEPANTYTLLRRGKRHDYFTSCLPWTQKGDPVALPLNGNAPVIAAAEHWTSGVKPAIQYRQVDGSVPLSMATAIVSGYGQQSNNSIALSAPLRVAPSNLYADLSAATASTINQIRQATQIQRLLERDARGGTRYTEIVRAHFGVISPDARLQRPEYLGGGSSPVNIHEVAQTSGTAGTNAYTPTPQGNLAAVGTVLAHGHGFTQSFTEHGMIIGLAAVRAD…	543	USER	zzzz854
286	my_seqs_18minnow1_2ct1150.5@PF02305.16	my_seqs	MKNKSVMNHDFSRIPQAEIQRSVFNRSHAHKTTFNAGDLVPIYVDEVLPGDTFNLNATFFARMTTPIYPIMDNLVMDVHFFYVPNRLVWENFQQFCGERKNPDDDLDFLVPEVNAPSGGWQVGSLADYFGWPLGIFPFTASALWHRAYNLIWNEWYRSTSLQDRLPLDIGDGPDVAFDYTVQKRGKRHDYFTSAMPWPQLGPAVALPLGDKAYVSSNASVGASIAVDSAVGTSITGYKLGTNTTNLLQLDAPGDAEAGRLYADLATATATTINELRQAFQIQRIYERDARGGSRFTELLKSHFGVTSPDARLQRPEYLGGTSANVQLTSIAQTSGSPNDGATGYTPDPMGTLSAVGTITAKGGFTKSFVEHGVILGLASVRADLTYQQGLPRMFSRKTR…	524	USER	zzzz855
285	my_seqs_18minnow1_2ct1151.5@PF02305.16	my_seqs	MKFFDEQIKIKNVKKSKFDLSHEVKLSCNMGELIPVLVEDVMPGDSYRCNTEVFARLAPMIAPLMHRVNFYIHTFAVPMRLLMPGGEWERLIAGNQTGDNRPAPVIPQIQLGVAANIDYCKAGKLLDYLGIPTTESSAFAPNPIEVSSLPIHAYHLIYDEYYRDQDLELAGRHKSELDVFYNTRKRAWEKDYFTSARPFAQKGGAVTIPFEYSPISEVYNESGGPAPVNTLVGTNGADGSQMMVGKTDFQTGGTLGRIENIEALASINEFREANALQRFLEKLARSGNRYVEYIKMIFNKKSPDARLQRPEYLGGGRIPVVISEVLSTYDNTTGGLPQGNMSGHGLAVGNTSTWSKEFDEHCYVISLLSILPRTGYQQGVRKHWFRKDQLDWPIPDFAH…	511	USER	zzzz856
284	my_seqs_18minnow1_2ct1152.3@PF02305.16	my_seqs	MKSNQTHQFSQVPKATIPRSRFNRSHGHKTTFDSGYLVPFYVDEALPGDTFKMKATLFARLATPVVPFMDNLFMDTFFFAVPIRLIWDNWQAFNGEQKNPNDSTDFLVPQVNSIGGFAEGSIHDYFGLPTGVANLSVAAFHHRAYNLIWNEWFRDQNLQDSVRVETGDGPDAIPYTLLKRNKRHDYFTSCLPWPQKGPGVELPLGTSAPVVPNNQFQSTPSFYPSMDGTRTPVLFTTTTADTHSLYTAIPQAAGPLSWADTALHADLSNATAATINSLRQAFQIQKLLERDARGGTRYTELLKSHFGVTSPDSRLQRPEYLGGNSSRINISAVAQTSSTDATTPQGNLAAFGTVGSHFNGFNKSFTEHCVILGLVSVRADLSYQQGIRRMWSRKTRFDF…	521	USER	zzzz857
283	my_seqs_18minnow1_2ct1155.4@PF02305.16	my_seqs	MLGAPHHKQRSVMTHAFSQVPRADIPRSTFDRSHGYKTTFDAGLLIPFLVDEALPGDTFNVRLTGFARLATPIFPIMDNMYMDTQYFSVPIRLLWDNWQQFNGEQKNPGDSTDFTIPQMVSPAGGYGANTIHDYMGLPVGVAGLSHSCLWHRAYALIWNEWYRDQNLQDAIAVPTGDGPDLHTFYELQRRGKRHDYFTSALPWPQKGPGVSIPLGISAPVISNNMIPTYSPYNGGQPGSTEAGAIFGSRGLDLSASIAQGNLQVGAQSGLQADLSEATAATINSLRQAFQIQKIFERDARGGTRYTELIKSHFGVTSPDSRLQRPEYLGGGSSPINISPVPQTSPTGTYADTPQGNLAAIGTALLNNHGFTQSFTEHCLIIGLVSVRADLTYQQGLNRM…	531	USER	zzzz858
282	my_seqs_18minnow1_2ct1163.1@PF02305.16	my_seqs	MVHQFSQVPKAEIPRSTFDRSHGHKTTFDAGYLIPFFIDEALPGDTFNVKVSALARLATPIFPLMDNMFMDTQFFSVPIRLLWDNWEKFNGAQKNPGDSTDFTIPQITAPSGGYLPNSIHDYMGLPLGIAGMQTSALWMRAYNLIWNEWYRDQNIQDSLSVVTTDGPDPGESYMLKRRGKRHDYFTSCLPWPQKGPGVSIPLGTDAPVIGLARMGAPATPGSGIFWDQDNQSVPTSQKIWGVDGATTSIAFFATPDDKIDVYADLSNATAATINSLRQAFQIQKIFERDARGGTRYIELIKSHFGVTSPDARLQRPEYLGGGSSPVIITPIPQTSPTGTYADTPQGNLAAVGASNIHGHGFTSSFTEHCIIIGLVSCRADLTYQNGLNRMWSRKTRFDF…	522	USER	zzzz859
281	my_seqs_18minnow1_2ct1164.6@PF02305.16	my_seqs	MHRNPSVSSHKFAMIPKAEIPRSSFPMDKTLKTTFDAGNLIPIYCEEVLPGDTVKLRATIFARMATLLFPVMDNMYIETFFFNVPNRLVWNNWKKFMGEQDSPGDSISYTIPTMTSPAGGYTVSSLGDMFGLPTVGQVGGGNTFTHSALPFRAYGLIYNQWFRDENLVNPRTVALTDGPDTTTTTTIAKRGKRHDYFTSCLPWPQKGNTAVTLPLTGNAWVKGLGIDPAATPSTGTQNVDESDGTNLNYSEWYSANTASTLKIRSISSIPNIYADLSTATSATINAIRLAFQTQKFLERDARGGTRYTELIYSHFGVRSPDARLQRAEYLGGGKSPITINPIAQTGQTGLTGGSTPLGTLGAMATTVASGQRHGFSYSATEHGYIIGLACVTADLTYQQ…	536	USER	zzzz860
280	my_seqs_18minnow1_2ct1165.5@PF02305.16	my_seqs	MMHRNQSVDVHKFAMVPRAEIPRSSFQIQHTHKTTFDAGYLIPVYLDEVLPGDTFNVSMTAFTRLSTPLFPVMDNLHLDSFFFFVPNRLLWTNWQKFMGEQTNPGDSISYSIPQLLSPAGGWAVGSLQDYMGLSTVGQVAGANVISVSALHTRAYNLIWKEWFRDENMQNSPVVDLDDGPDATSDYVLLRRGKRHDYFTSCLPWPQKGTSVSLPLGTSAPVLLNPTSGIKQAVRAATGHAAYGAAVLLSDATGNLVDTLGPNIVIDPQPVAGGTSSLYADLGSATAATINQLRQAFQIQKLLERDARGGTRYTEIIRAHFGVISPDARLQRPEYLGGGSSPITVNPIAQTSGTSASGTTTPLGTLAAMGTGLASSHGFTQSFTEHGVIVGLVSVRADLT…	541	USER	zzzz861
279	my_seqs_18minnow1_2ct1167.5@PF02305.16	my_seqs	MTMHRNPSVMKHQFSQVPKAEIPRSSFDRSHGHKTTFDAGYLIPVFVDEALPGDTFNLRMTGFSRLATPIFPIMDNMYMDTHFFAIPYRLLWDNFEKFQGAQDAPGDSTDYLIPQMTAPASTGYAPGTLEDFFGLPVGVPDFPHSALWHRAYALCYNEWFRDQNLQAKITIPKGDGPDAPFVGLLRRGKRHDYFTSCLPWPQKGPGVAIPLGTTAPTNITNWNVTVPTPLSGPIQITNSASALGGGLIGTPPPAPGQEGIAFLSGITDLSSATAATINSLRQAFQIQKIFERDARGGTRYVESLKAHWGVTSPDFRLQRPEYLGGGSTPVNISPIPQTSASGAYADSPQGNLAAMGTALISNHGFTTSFTEHCLILGLVSVRADLTYQQGLDRMWSRRT…	526	USER	zzzz862
278	my_seqs_18minnow1_2ct1171.4@PF02305.16	my_seqs	MKSNQTHQFSQIPKATIPRSRFNRSHGHKTTFDSGYLVPFYVDEALPGDTFKLKATIFGRLSTPIVPIMDNLFMDTFFFAVPIRLIWDNWQKFNGEQRNPGDSTDFLVPQVNSIAGWDEGSIHDYFGLPIGIANLSVSAFHHRAYNLIYNEWFRDENLQSSVTVETGDGPDAIPYTLLKRNKRHDYFTSCLPWPQKGPGVELPLGTTAPVIPITINAQPQFKLSGDSAPAYLNSTAGVGNVIWDHTPPQNSSAGWMDPRLVADLSSASAATINSLRQAFQIQKLLERDARGGTRYTELLRSHFGVTSPDSRLQRPEYLGGSSTRVNISAVAQTSETGTTTPQGNLAAFGTAGAHFHGFNKSFTEHCVIIGLVNLRADLSYQQGIRRMWSRRTRFDFYWP…	518	USER	zzzz863
277	my_seqs_18minnow1_2ct1172.3@PF02305.16	my_seqs	MSDYTFSQVPRAEIPRSTFNRSHGHKTTFDSGYLVPIYVDEALPGDTFKLSAHMFARLATPIFPIMDNVHLDVFFFAVPNRLLWDNWQKFCGEGDPWSTTPPTTDYEVPFIKAPVTGFEVGSIFDYMGLPVGVPNVEASSLHLRAYNLIFNEWFRDQNLINKLTIQTGDSDNQSYYALQRRGKRHDYFTSCLPWPQKGPATEIPLGGTIPIYPSSETATPVFKSATPGLHQLQEEPVGGNVTITNPASGGSGANLLQWDQSGLVGVLSEATTVTINRLREAFQIQKLLERDARGGTRYTEILKSHFGVTSPDARLQRPEFLGGGSFPLIVNPIAQTSNTVTESPQGNLAAFAQAHGSAGFSKSFVEHCVIIGLISARADLSYQQGLHRMWSRRTRYDFY…	525	USER	zzzz864
276	my_seqs_18minnow1_2ct1173.5@PF02305.16	my_seqs	MSRRPSVMVHQFSQVPRAEIPRSTFDRSHGYKTAFDAGLLIPFFIDEALPGDTFNLRVSALARLATPIYPIMDNMFMDTHFFSVPCRLVWDNWQRFNGEQKNPTDSTDFTIPKIDMSALSTGFAENSVFDYLGIPTKVPNLTVNALPLRAINLIWNEWFRDQNLQPSLPVNTGDGPDTPADYNLYRRGKRHDYFTSCLPWPQKGPGVTIPLGTEAKIATKALTGGDISIRDNTNTQRLMPTNAENLTLGSTIGNAQSYMYADLTSATAATINSLRQAFQIQKIYERDARGGTRYIELLKSHFGVTSPDARLQRPEYLGGGSTPVIINPIAQTSPTGTYANTPQGNLAGFGTAALNGHGFSSSFTEHCYIIGFVSVRADLTYQQGLNRLWSRQTRFDYYW…	520	USER	zzzz865
275	my_seqs_18minnow1_2ct1175.6@PF02305.16	my_seqs	MLRNKTASQHNFATVPRSDIPRSKFAMRQTRKMAFDASELIPIMCEEVLPGDTWQHNESILARLATPIAPLIDDLDLETFYFFVPNRIINPKWEDLITGADTTALTPKMLPINGGTVKILPNSVLDFFGLPPGNYTAPLYINLHPILGYFTIYNEWFRDQNMQEEYVWPTTISPYINSEEITQDTIAWDQYPLRINKRHDYFTSSLPWPQKGNAVDIPLGTSAPIYVDSSITTGNSVAVIVEGTTTHRQVVSNTSGLGTTWGAQSSTGQTPQLYADLSSATAATINALRLAFQTQRLLERDARGGSRYVEQLLSHFGTRAPDFRLQRPEYLGGSKIPITINPIAQTAAYDAEPANAASAVGNLGAEMHASGHSRTFTYAATEHGYIIGLAAVRSTPTYQ…	543	USER	zzzz866
274	my_seqs_18minnow1_2ct1181.4@PF02305.16	my_seqs	MKRTKHSLSHYKLLTCDMGKLVPIGLVEALPGDTIQAATSLLLRFTPQLSPVMHPISVRIHHYFVPNRLVFGTTNGWSDFITGGADGLGNGAVYPTNSGTVVVAQGDPLDYLGVPPASYAAGKLGLMALRAYNMIFNEYYRDEDLVSVVAQDTNTLQNVAWEKDYFTSSRPWTQKGPAVTLPLGTSAPVKTSSASQVTGAQQAMKLRKASDGSLAAADNILAVNTSAQVYGTSVAGSGTGLGPAYPENLFADLTGATATDVNAVRRAFALMRYQEARARYGSRYTEYLRYLGITPSDARLDRPEYLGGGKQTVSFSEVLRTGNVTADDATLPIGQLKGHGIAAMRSNRYRYFCEEHGYIMSLLSVRPRSMYVNGLDRTWSRRTKEDYYQKELERIGQQA…	502	USER	zzzz867
273	my_seqs_18minnow1_2ct1182.5@PF02305.16	my_seqs	MTFGVKSHSHPSVMKHTFSQVPKAEIPRSTFDRSHGYKTTFDAGYLVPFFIDEALPGDTFNVRATALARLATPIFPIMDNMFMDTQFFSVPIRLLWDNWQKFNGEQKNPGDSTDFTVPQLTNITGYTPNSLEDYFGLPTGVANLSVSALWHRAYNLIWNEWYRDQNLQDSVDVPTGDGPDLHASGTYNLLRRGKRHDYFTSALPWPQKGDAVQIPLGQSAPVLGIGPTDSTFATTGTIRQSDGTTLAGTDHSNFSNASFGWQTAQNPDHLGYPLIYADLSEATAATINSLRQAFQIQKIFERDARGGTRYTELIKSHFGVTSPDSRLQRPEYLGGGSTPINISPIPQTSPTGTYADTPQGNLAAVGTAMVSNHGFTTSFTEHCIVIGLISVRADLTYQQ…	536	USER	zzzz868
272	my_seqs_18minnow1_2ct1185.4@PF02305.16	my_seqs	MAKPNLLNSIKISSPKKSVFDLSHDVKLSCSMAELVPVMCLEVVPSDRIQCSQEALVRLQPMVAPMMHRCDVSFHTFFVPSRLLWPNFEKFITNQKVAGSIPAFPTVNIAEAPGDGHNVNTGDLADYLGLPLTDGTTEPETVSAMPFAAYQLIWNEYYRDQNNQDETDVVLLDGDNTANADLWTLQKRAWEHDYFTAAAPTAQAGDPVNLPLGTFNDVSVKINDGVFAGGITLEGVPSDVIVQPDTPNDTVDSMYAQTSELQSQSTNINDLRTAFRLQEWLEKSMRGGRRLFENILVFFGLRSPDSRLQRPEYIYGSKSPIQISEVLNTTGTDDAPQGTMAGHGVSVVQPKNGTYNVQEWGYVITIMSVLPRTAYQQGIHRMWLKYKDPMQTYWPQFDH…	506	USER	zzzz869
271	my_seqs_18minnow1_2ct1194.5@PF02305.16	my_seqs	MSNKLFNSVKMSKPKRNAFDLSHEKKLSLNMGDLVPIYLQEVLPGDKFRVNTEMLMRFAPLVSPVMHRINVYTHFFHVPYRLLYDGWETFITGGTDGKQTVPFPTVGVDEGNKLEHGIGSLSDYFGVPVPKDIIAKQLVLSALPYRAYQLVYNEYYRDQTLTPPVPVTKDNVMQATEYAEVLKIRKRSWEKDYFSSALPWAQRGGEVELPADVTYKAQSSVRDGGGGPATGILESVGGFLQAPNGTGAFIDNVDSLGVTINDLRRSVRLQEWLEKNARGGARYIEQILSHFGVKSSNQLLQRPQFLGGGKSPVVISEVLSTFNNETVPGANMYGHGITAGNTHQFSRYFEEHGFIIGIMSVLPRTAYQQGVPKIFKKFDKFDYAWPEFAHLGEQEIFNW…	502	USER	zzzz870
270	my_seqs_18minnow1_2ct1196.6@PF02305.16	my_seqs	MMFSNKSVNVHSFAMVPKADIPRSKFTMQKTLKTTFDAGPLVPVFCEEVLPGDTFNLRATMFGRLATPIFPVMDNLHLDSFFFFVPNRLVWSNWVKFMGEQDNPADSISFAVPQQVSPVGGYAPLSLQDYFGLPTVGQVTAGNSVSHSALPLRAYNLIWNEWFRDQNLQNSVTEDRGDGPDTVANYTLLRRGKRHDYFTGALPWPQKGNTAVTIPIGTSAPIRINGAVNTYGTILDNTGTARAIATGAAATNQLAITATAAQTPTAPLFADLSAATAATINQLRQSFQVQKLLERDARGGTRYTEILRAHFGVTSPDARLQRPEYLGGGSTLIGIQPVAQTSGTGITGGSAPLGNLSGFGTYLANGHGFTQSFVEHGYVIGLVSVRADLTYQQGLRRHW…	532	USER	zzzz871
269	my_seqs_18minnow1_2ct1197.4@PF02305.16	my_seqs	MSIFSKNKTTRVKRNKFNKSHERKLSINMGYLYPILCEEVIPADHFRVSTESLIRFHPMVAPIMHRIDAYIHYFFVPYRLVWDGWNDFITGGPDGKNTSIVPTMTISNDNKQHFKKGALADYFGIPAMDPTVPMLATEAINALPFRAYHTIYNEYYRDQTLTPEATVTKNDTVDFNTEGASLASLRKRSWKKDYFTSALPWTQRGDEILIPIEGKVTYLNESLVKASSDGLPISGALSADADGDLATSGIKSRIENIEGVTNAVTTINDLRKSIHLQKWLEKNARAGARIVEFVFEHFGIHQDDLRMSRPQYLGGGRSNITISEVLATFGNDTIAQGTMAGHGVGVGNTNYFNKGFNEHGVILGILSVTPQPSYQQGIPKMFSHLDKFEYPFPEFANLG…	512	USER	zzzz872
268	my_seqs_18minnow1_2ct1198.3@PF02305.16	my_seqs	MNRNKQTHVFSEVPRAEIQRSSFDRSHGVKTTFDSSFLIPVFVDEALPGDTFNVRMTAMARLATPIKPIMDNLYLDSFFFAVPYRLLWDNWEKFNGAQTDPGDSIDFEIPQVHNGATVLPVGSLYDYMGLPTGITNLEFSQLPLRAYVAIWNQWFRDQNLQDSIPELTNDAVVTDLTKFPLLFRGKRHDYFTSCLPWPQKGDAVSIPLGSYADVISDLGISGGDGIPTFQNTINFGGLVTGVFSTPDKTVNRQLGGSTAAVNEIMKWNNPSLVADLSTATAVTINALREAFQVQRLLERDARGGTRYTEVIRSHFGVTSPDARMQRPEYLGGGTSYVNISPVAQTAQTDLAPDTTPQGNLAAIGTASLNGHGFSKSFTEHCVVIGLVCARADLTYQQGL…	535	USER	zzzz873
267	my_seqs_18minnow1_2ct1202.6@PF02305.16	my_seqs	MNQEFSSIQVKAPNKNVFDLSHEVKLSANMGWLIPTLRIHCLPGDMHSISNETLIRVAPMIAPMMHRVNLFFHCFFVPHRILWPNWEKFITNTKVGGILPAIPTITFNDAWYNGDKLSDYLQLPNPNGTTHEINAFIFAAYQKTYNEIYRDENLVTTGIWSGELIDGDNTAEPYLNVLRKRAWEHDYFTSCLPFAQKGDAVSIPIGSIQDDFPVRVRNSDYTAGPGLFENLNPPPIQMTIQTDSPDGGFSDEIFAKAAGIDLGATTINDFRTAETIQKWLELAARGGTRYAELLRNYFNIKVQDARLQRPEYIYGSKSPIQVSEVLQTSETSATPQGNMAGHGIGVQSGNTGRYYCHEHGYIIGMLSVMPKTAYQQGIDREFFYQQPLDFPWPQFAHLG…	504	USER	zzzz874
266	my_seqs_18minnow1_2ct1203.4@PF02305.16	my_seqs	MKNLLNSIKLQTPKSNKFDLTHDVKMSGKMGLLYPIMNMECVPGDRFTIGADSLIRFAPLIAPVMHRMDVTIHYFFVPNRILWENWEEFITNHNSGLDAPYITISDGLTDTVKKFFTYFGIPFNDGGSDANVLAFSMAAYQAIYNEYYRDQNLITEVDYALVDGDNTSNTDLFTQRLRAWEHDYFTACLPWAQKGGGVDIPLGDVVLKDTWNEIDPPFFITEGGAIPDGNLVNANNGGGNGAVNVSGPVLVGPTAYDPNGTLTVGSTTINDLRRAYKLQEWLEKAARGGSRYIESILTHFGVRSSDARLQRPEYITGIKSPVIISEVLNTTGADGGLPQGNMAGHAVNVNTGKYGSYFCEEHGIIMGMLSITPKTAYQQGIPRMFSKFDSMDYYWPSFA…	511	USER	zzzz875
265	my_seqs_18minnow1_2ct1204.5@PF02305.16	my_seqs	MLRNKTARQKNFAIIPSQHIQRSRLRLKQTRKQAFNASELIPIMCEEVLPGDTWQHTESVMARLATPIAPAVDDIDLETFYFFVPNRISWPDWEEFITGTNPSLTIPTIAAYDTGLPGYRLNTNSVFDHFGLIPQTYGAAAFKINVLPIWAYFEIYNQWFRDENLQTEWTWSAAWTYNTSEQITQGGTQWTQACLRLNKRHDYFTSSLPFAQKGTAVSIPLGTSAPVYTTTLTGFAPTIWTPGSANSKNLVNTNPVTVSADTGANGSIFADLSTATAATINSLRLAVTTQQLLELDARGGSRYVENLLAHWGVRSPDYRLQLPEYLGGSKLPVNVNPIAQTAAYTTVDGSSADSALGNLGAEMHASGTNRTFTYAATEHGYIIGLAAVRATPTYQQGTR…	538	USER	zzzz876
264	my_seqs_18minnow1_2ct1208.3@PF02305.16	my_seqs	MGNIFQNVAVRKPKRSRFDLSHDVKLSCDMGVLVPVMNMECIPGDVIKINHQALVRMAPMIAPLMHRLIVTIHTFFTPYRILWPGWEDFITRTAVGSPAIIPPIPTLNIAEADWATGGLLDYMGIPAPDPGADSHITINAFVFAAYNKIWNEYYRQQYIMNEILDELEDGDNTANITQLTLLQRRSWMHDYFTSALPFAQKGDQVEVPLGDVEFNPNWLADGQQPKWDIDLKAGDTNTGAIDMHIGNGTPPVTNPASDPNWDGATYPQVENTPDDPYRVAAYDPDGSLTVAPITINELRRAESLQQFLELLARGGSRYVELIKNFFNVRPEDYRLQRPEYICGSTTPVQISEVLNTTGNDGELPQGNMAGHGAAVVRGKGGKYVCKEHGCIISIMSVTP…	536	USER	zzzz877
263	my_seqs_18minnow1_2ct1209.4@PF02305.16	my_seqs	MSALFQKIKVSKPKSNSFDLGHEKKLTMNAGDLVPILCQEVIPGDRFRVRSEMLMRLMPLASPAMHRVNVFTHFFFVPNRLVYSEWENFITGGEHGDAKPLFPQIQIHGGNKSGFKAGTLPDYMGVPEPDQNTIPGTLEISALPFRAYQLIYNEYFRDQNLTTKVPITKDSLVTTEESWELIAMRKRAWEKDYFTSALPWAQKGGEVELPTTIKYRNSADIWAQGEGEVPIATGGPVSTVAGSPGSLHDGDDALKIENIESLGTTINDLRKATRLQEWLEKNARGGSRYVESILNHFGIRSSDQRLQRPLFLGGGKSPITISEILSTVGTTEAPQGHMAGHGISVGSTHHFSHSFEEHGWIIGIMSILPRTGYQQGIERQFTKFDKFEYYWPSFANLGE…	506	USER	zzzz878
262	my_seqs_18minnow1_2ct1212.4@PF02305.16	my_seqs	MSLNRNLPPVSTNRFAMVPRNDVPRSKFRSQHSLKSTFDAGYLVPIHVDEVLPGDVHEGHVTIFARLATLLFPVMDNVDVSTFFFFVPSRLLWTHWENFCGEQANPGDTIAYTIPQVVSAAGGFVVGSLYDYFGLPTVGQVLGGNTVSVNVLPVRAYQFIYQEWFRDENLQNSVTSFPVGDGPDSVGAYVLLRRNKKHDYFTSCLPWPLKGGVEVPMPIGLTAPVIPSGSAVAPQFKKGAGPTPTLTIQAASAASPVNTLQGSVSAAWAAGDNLNWGTTNLVADLASATGATINAMRLAVTTQQFLERDARGGTRYTESLRSHFGVTPEDARLQRPEYIGGGCSPVVVHSVPQTAAAGASPVGALAAASVVNGGHHFSYHATEHGYIIGLAHVGADLTY…	539	USER	zzzz879
261	my_seqs_18minnow1_2ct1217.6@PF02305.16	my_seqs	MFSNKSVNVHSFAMVPKADIPRSRFTMQKTLKTTFDAGPLVPIFCEEVLPGDTFNLRATMFGRLATPIFPVMDNLHLDSFFFFVPNRLVWSNWAKFMGEQDNPADSISYSIPQQVSPAGGYAPLSLQDYFGLPTVGQVTAGNTVSHSALPLRAYNLIWNEWFRDQNLQNSVIEDRGDGPDTVANYTLLRRGKRHDYFTGALPWPQKGNSAVTIPIGTSAPIRGITVGAAGAAAGSAVNSFGYTAAQDLAAGTPTAPTAQVFVQMQSNAIASASNRPQIFADLSAATAATINQLRQSFQVQKLLERDARGGTRYTEILRAHFGVTSPDARLQRPEYLGGGSTLIGIQPVAQTSGTGITGGSAPLGNLSGFGTYLANGHGFSQSFVEHGYVIGLVSVRADL…	542	USER	zzzz880
260	my_seqs_18minnow1_2ct1228.4@PF02305.16	my_seqs	MKFFDSIQINRPKRSKFDLSHENKLTLNMGELIPILVQEIIPGDSFKAQSEIIARFAPMIAPMYQRINISTHYFFVPNRLVWNEWEQFITGGEEGTAQPVAPYFDTLANVGLDLKAGSLADYMGMPSNQAGTGATINQKISSIPFRAYQMIYNEYYRDQNLCPKIVYPITSGAETAGNAQIIATKRQRAWEKDYFTSALPWAQKGGAVTLPWEYKDRSDVIMTDTGLPAGNGPLTANVAGQLEAISGAVGAARLENIDTLSSINDIRRASALQRWLEKMARGGSRYAELLLHMFGEKSDDARLQRPEYLGGGIQPVSISEVLSTYDNTANDLPQGNMSGHGISVGGTNGFTSKFKEHGYIIGIMSILPKTGYMQGLPRHLQRFDRFDYAWPDFANIGEQ…	511	USER	zzzz881
259	my_seqs_18minnow1_2ct1230.6@PF02305.16	my_seqs	MVPKSDIPRSKFTMQKTLKTTFDAGPLVPIFCEEVLPGDTFNLRATMFGRLATPIFPVMDNLHLDSFFFFVPNRLVWSNWVKFMGEQDNPADSISFSIPQQVSPSGGYAPLSLQDYFGLPTVGQVTAGNTVSHSALPLRAYNLIWNEWFRDQNLQNSVTEDRGDGPDTVANYTLLRRGKRHDYFTGALPWPQKGNNAVTLPLGTSAPVRGLGVSGANVASGAITYDSSGAAIPAGTFGWGALTAYDKINSTGTAGVSGHIPNVYADLSSATAATINQLRQSFQVQKLLERDARGGTRYTEILRAHFGVTSPDARLQRPEYLGGGSTLIGIQPVAQTSGTGITGGSAPLGNLSGFGTYLANGHGFTQSFVEHGYVIGLVSVRADLTYQQGLRRHWSRATR…	527	USER	zzzz882
258	my_seqs_18minnow1_2ct1231.4@PF02305.16	my_seqs	MSNKLFNSVSGRSPQKNLFNLSHEKKLSLNMGELVPIFCQEVVPSDRFKLSSEILLRVAPLVSPIMHRVNVKLEAFFVPSRTLWDDWESFITGGPTGNDLPAFPYIDIAESRKQLFAKGTLSDYLGIAIPDQSASIIVNEKISALPFRAYQKIYNEYYRDQTLTPEVPFVTTGGALSGPEQEMIQELRRRSWEKDYFTSALPQPQRGGDVILPTDINYKTDVRAAAGTIQIGEDVNIGGTINPFHLKGKTSGAELQVENIEDIGTTITDFRRASRLQEWLEAMARGGSRYIEQMKTMFGVTSSDARLQRAEFLGSSVMPIQISEVLSTFNSETAENPVAGATMYGHGISAGSNFLFNKFFEEHGYIIVNLSVIPRSTYSSQGIPKMFQKFDKFEYYWPH…	513	USER	zzzz883
257	my_seqs_18minnow1_2ct1250.3@PF02305.16	my_seqs	MAEKYFAQPSGTGAQEHFANVPKADIERSKFDRSHGHKTTFNAGELIPVYVDEILPGDTFHMKSTAFARLSTPLKPVMDNMYLDTHFFFVPTRLVWNEFQRFMGERTTPEEDNTGITVPKALLDIKAGTLPIYTLANRMGVPISSNAGSTLCFVNMLPFRAYQLIWNDWYRDENLQQPLTIVKSGTGDSALWQTFACMKRNKRRDYFTSCLPWPQKGDPVYVPLGTSAPVVTNDKAITIQAFGQNADKSIVMAGSSNALTYGGTQIGTNNDATFGIESGLYTDLTSATAITINDLRTAFQVQRLLERDARGGTRYIELILSHFGVHSDDARLQRPEYLGGGSSPVNINPIASTAPTAEQPQGALAAFGTAVGAAGFSKSFTEHGYIIGLCSVRADLTYQ…	536	USER	zzzz884
256	my_seqs_18minnow1_2ct1256.5@PF02305.16	my_seqs	MSKLFNQVSFSKPKRNLFDLSHEKKLSMKFGDLVPVLLQEVVPGDSFNVNTESLLRLAPMVAPVMHRCNAYIHYFFVPNRLVWEGWETFITGGEDGKQTASTPECYLFGDDYTLLNKGTLADYMGIPTAPQSTISTATGISALPFRAYQLIYNEYYRDQNLVQKVPLLKTSGQLTEGEKIAVMTLRRRAYEKDYFTSCLPWSQRGDEVLLPNDIVSSTTEATEAFTIPGGGVPANAPLSIDAGKVSNGTTYVNLQTADQVQITINDLRRSARLQEFLEKTARGGSRLTEVIRSFFGVTSSDARLQRPEFLGGGKQPITISEVLSTFNNETVPGGEMYGHGISVGNTNRFKKFFEEHGFIIGIMSVLPRTAYQQGIPKQFMRFDKFDYYWPTFAQLGEEE…	506	USER	zzzz885
255	my_seqs_18minnow1_2ct1267.3@PF02305.16	my_seqs	MIERPDVPRSTFQNHWTRKTTFNASDLVPILCDEILPGDHMRYSVTALIRMATPLFPIFDNQKVCTFFFFVPARLVWNNWVRFMGEQDSPADSIAYTIPQVVSAANGFPANTIYDHFGVPVVGQTGVGNTVSINALPLRAYNLIFNDWFRDQNLSNSQAVSETSNGPDPVANYSLLQRAKQHDYFTSALPWPQKFTATTIPFTGTAPIIGLGTKAGIVPGAGVTTIWEAGASASTTYPFESPSSAAATHYVRFANGGAVGAANTPQVFANLAAAAGISLNQLRQTWMIQQLLERDARGGSRYVESILAHFGVRSPDYRLQRPEYIGGGSTPLTTTPVAQTAPAVSPAIVGALGAATTGVAQHAASYAATEHGYIIGLINIQTDLSYQQGLHKMWTRSVR…	530	USER	zzzz886
254	my_seqs_18minnow1_2ct1275.4@PF02305.16	my_seqs	MSKLFKGQSYNGPKKNVFDLSHEKKLSMNMGKIVPFYLQEIVPGDKFKVSSEQLIRLAPMIAPMMHRVNVFTHYFFVPNRLVFDKWQDFITGGTDGKQAPSFPTIPVNAGNYMFFDKNHLPDYFGIPPVEPGSLTIPAPEFNALPFRAYHLIYNEYFRDQTLIAPIEFSIGETVPAEDYPVLTQLRDRCWEKDYFTTAMPWAQRGDEVLIPTVGAPFAGSYPPTKAVFADTETQAGQGYFDAEAMTTRRTGSDAILAGNNQVNIDVHLTDASQATSASGSINDLRKAVRLQEWLEKNARAGARYVEQIMAHFGVRSSDARLQRPEFLGGGINPVVVSEVLSTVQTTDLPQGNMSGHGISVGHDNAFTKTFEEHGYIIGVMSVLPRTGYQQGVPRAFLKK…	520	USER	zzzz887
253	my_seqs_18minnow1_2ct1281.5@PF02305.16	my_seqs	MKQNLFNLSNYRMMSSFGGELVPLDVRECLPNDKLRGNTEVFMRLNALVAPTMHPLKVKVFHFFVPTRILWSNWEAFITQGAYGSTPPVHPYLNIDDSYDEGDLPDYMGIPPQATGQTLQVNALPFAAYYKIYDDFFRDQDLVATRSFPLANGNNTTAFSLLGLTPENVSWKKDYFTTARPWPQKSADVPIPQSGIVTNGSSITVSDSVVVDSPLTRSAGTGGVFMGGPAAGGTNIEFGDESGLQMDDSANIRDLRLAGALQRFFENRASDGSRLVEYLRRAFGASVQDSRLQNAELISYGEKTINFSEVLQTAEGTDPVGTLRGHGVAGLASNKFEYYVPEHGWFMTLAYIMPEPVYDSAIERHWLKSTFVDYFQSEFEAVGQQEILPREIQAKLASV…	489	USER	zzzz888
252	my_seqs_18minnow1_2ct1285.4@PF02305.16	my_seqs	MKTPIFNSVQLKKPKTNLFDLSHECKLSGRMGYLVPVFLDEYIPTDRFRINQECLLRFAPLLSPMMERVNVSFHWFAVPQRLLWDSHESFITGGENGHDASVVPQIQLVEAHRQRIGIGSLADYMGIPSPADTPITQAPFINAMPFRAYQLIYNEYFRDQNLAPKVEIAKTSYVSAEEATALLTIRKRAWEKDYFTSALPWAQKGDETGIPTTVNYKSQSDVFNQDGTPANGPLDAVLGKLNTGDPDPVASSRLENIENLEITINDLRTSNAIQKWMEKNARGGSRYIEYILNFFGKESSNKLLQRPQYLGGSKQVVTVSEVLSTFNNTEVPGGEMYGHALSVGRGNTINYNAEEYGYLMCIMSVLPRTSYCQGLPKIYTKFDRHEYFNPMFAHLGEQA…	503	USER	zzzz889
251	my_seqs_18minnow1_2ct828.3@PF02305.16	my_seqs	MRRSNGGGATTTRMKTTPIPVQRTRRPIEQRILTSLNAGKMVPLMAIPLLREDSLSGGSFRVSFQMSETVEILMNAINVRVLTYLVPKLAFDRFNGIDEINRSYEGIPREEGGPVIPWFETMTANSAAGGILQTMGKHAKVGAQINTDYIEAYNQIWNFRAKNRSPDLDLRSRLDVSLAPSFWEHQTFSHIVPDFDQAIIDGEISLNVVNSKMPVKGFGLTNAGTSTAMTIVESGSSVAATGQGWNITEPGNAGSAGNASMGFFKDASQTSFSAPDVWAELQDNGITVSLSNIELARKTQAFAQLRRQYNGHSDEYIIDLLMDGITIPEQAWKQPMLLSDVSTVFGMSKRYASDGASLTESVVNGATYVDVRINCPRVPMGGVIMMVAEIAPEQLFERQ…	560	USER	zzzz890
250	my_seqs_18minnow1_2ct865.6@PF02305.16	my_seqs	MKTTIGSNRIGGGKKMQVSFDGYQRATFDLSKVVRTTASIGTLIPIYNNIMLPDDTWDIGMFMEVYTNPTIGPLFGTIKGEVHTFTADIRLYNSYLHNNKLRIGNNISQVKFPQLELTSYPVDDWTLIEDLDNSQINPSCVLAYMGIRGVGVSQVEATRQFNALWYIMYIEVYKQYYANLQENIGAVIHNQVPAPTAESIDGVSILSQGATWTISQAPTTGEIGTLTTGSLITINYTGTTPDPKQILFNTMDGQTISVYNLGTGAISDLGASLEIIYNAQRWGRLIITNWRYQLPTDTRLVAPGIVTFDLGNVDIVREEILAFQQTSLPYILNSANVEPYNLLLAESATQNPRLNSQEGLLIKTYMNDKFNNWLETESIEYINNASAVTISGGKFTMDQ…	650	USER	zzzz891
249	my_seqs_18minnow1_2ct871.6@PF02305.16	my_seqs	MGHEVTIGGERLGSGKKMKAYLHNYERSTHDLSYVWRSTMASGTLVPFMSQVALPGDTFDIDLNVDILTHPTIGPLFGSYKIQLDVFQIPIRLYQGQLHMNMLGIGLDMSKILLPKLNFSAAVIDKTKTIDNQQINPSSILSYLGIRGLGYDGSVPTATPVRKFNAIPYLGYWDIYKNYYANKQEEIGAVIHKNPQPNTGTLTDASIEDAEPNITFPVEVAAPPYTYVYTTMNATSRIVITAAGLTADATASDIKLFLERNYAGQTFEQQLRGDQMFQTWEIYPDTGTMIGTNPVLNLANEVIGWGNADYAGTTVEEPDQEPQITTFPLTNIDDMRKLLLAKLDGTEFLIDNTAIAPYGLPMQNFVAGPNIYYSQLANQEGLALKTYNSDLFNNWIQTE…	676	USER	zzzz892
248	my_seqs_18minnow1_2ct899.6@PF02305.16	my_seqs	MKKTLGGQRLGSGNKMEVEMHGFERSSHDMGYIWRSTMSSGTLVPFLKEVALPGDTFDIHLNCHINTHPTVGPLFGSYKVQLDVFQIPMRLYMSALHNNKLGIGMNMKTVKLPKVILPTSFQPILNAPNINNSQINPSAIFSYLGIRGLGSIDTSLGVNQTREFNAIPWLAYWEIYKNYYANKQEEIGYVITKATTFALNRTITGITANSDLIPQSPGADHVTLGLGESLQVTFAGAAPDIDTVKIILWGFPTGLTLRQIAVNGQWTISGSVMYGVFDFGTYGNQQAVNWDYIAANSVLNTPPELVSFPLENIDKMREVILQQSPIAQLLIPSTTGTNIPPYSYPGTVINVDVDEDFVMMQCSQEGLAIKTYQSDLFNNWLSTEWLDGTGGINEITAVD…	665	USER	zzzz893
247	my_seqs_18minnow1_2ct904.3@PF02305.16	my_seqs	MKKVTLGGDRLGAGKKQKVELQGFERSTHNLSNAWRSTMSAGTLVPFMVQPALPGDVWEINLDADVMTHPTLGPLLGSMKVQLDTFTVPMRLYNSWIHNNKLGIGNHMETVMLPDMILRSLNETNAWSIANPTQYPINNSHLIKYLGISGVNRNLSTSPSDTTQALRFNAIPLLGYWDIFKNYYANKQEENAYVISTPLEIVTEVETVYGFTPGTPGWEDITITPIDLLPSDGSFQNTIAIKPTDPDTSTWNIPMILQQLKFKDGVIVLGDITNIATGSIVYGAIGTPFKIYVEVRTEPIVGEAIYVTFDSSIAGTLDGWEMSTEISYRRPPQLAPFKLTEIDDIREAILGTRGDTIFNLNEYGYTNNIELIKKSLPENINDISAILPLRYNQEGLLVK…	692	USER	zzzz894
246	my_seqs_18minnow1_2ct907.6@PF02305.16	my_seqs	MSKVTLGGNRLGSGNKQKVSMREYQRSSHDTSYIWRSTMASGTLVPFLSELALPGDSFDIDLNIDMLTHPTIGPLFGSWKIQLDVFQVPIRLYQGKLHQNMLGIGMDMSKVPLPQIQLFGVVPDQQKPIDNQQMNPSHLLSYLGIRGVGTNGDTVTAVADRKFNAIPYLGYWDIYKNYYANKQEEIGAMIHRPLTIPAPVFNDVALNNAAGRTTLAADPTAPLTYTTVQLDAGATLTLQGTNIQESTEISSLYLLMKIQNSEVEYPATQLFQSWQINNSGGSTGVIIGSNPPNPNVVIQIAGYTWKNIASQPNTDSEPIIQTFPLKAIDDMRGTLLSHLADTPYLITKATPAPYGYPIDNNGTTLTTQLFNQEGLALKTYNSDLFNNWISTEWIDGTDG…	676	USER	zzzz895
245	my_seqs_18minnow1_2ct909.6@PF02305.16	my_seqs	MGHNVTIGGERLGAGKKNKAYLRGYERSTHDLSYIWRSTMAAGTLVPFMTLVGLPGDTFDIDLNCDILTHPTIGPLFGTYKIQLDVFQIPVRLYQGKLHMNMLKIGLDMGKVPLPQINMFGNAIDKTQTLDNQQVNPSCIFSYLGIRGLGTNAEDQTQNVYRKFNAVPYLGYWDIYKNYYANKQEEAGVMIHKDLAAAAPTIVSATILDGIPTPVGLPVDPVLPPTYVNVQLVPSSTRMVIITTGLTQQTDPANFQIYILKSNGEDAGTPMIVKATDLFATWTIIPSTQNLIGENPIPLNGTYLQAVGGITYDGTIPVQPPLDASPQLSGFLLKNIDDMRQALLSHFEDTPYIIDTNTPAPYGNALQFQFAPSPDRFVFTKQYNQEGLGIKTYNSDLFN…	689	USER	zzzz896
244	my_seqs_18minnow1_2ct941.5@PF02305.16	my_seqs	MSKSVTIGGERLGAGKKMKAELHGYSRSTHNLGYTWRSTMSPGTLVPFMSELALPGDTMDIDISADVLTHPTIGPLFGTYKLQMDIFQVPMRLYLAQLHMNMLNIGRDMSQVILPQVYMEADIIDPLKPVSTSQINPSSIWAYLGIRGVGQSNEIPQQNIARCFNAVPFLAYWDIYKQYYANKQEGVGYAVHRDVGQPVYTISTVEVRQTQQGTITLATGPATETFQPGTLQTNSTLIITSTDMLQDFSPSDIMLRVKFKWGGTNVATYRATEIFTTFKINATNHTCSMANPTPNAISLITEWGLYNYTQVDIPPGEQSEPKLKQFPLANIDTMRLNILRYTPSAPADPFIIYHQTNLPPYNWPLQYDNDTPRYFSRYYPQEGLGIKTYNSDQFQNWIS…	696	USER	zzzz897
243	my_seqs_18minnow1_2ct976.5@PF02305.16	my_seqs	MSKNHDQFQFSHVPKADIPRSTFDRSFGHKTTFDAGYLVPVLVDEVLPGDTFQCRATIFARLATPIFPIMDNMYLDAFFFFVPNRLLWNNWQKFMGEQKSPGDSTDFLIPQVAPSVPGFGVDSIFDHMGIPAERSGFTVSALWARAYNLIWNEWFRDENLQDPVPVALDDGPDPVTNYGPVSYPNAETMLRRGKRHDYFTSCLPWPQKGPGVMLPLGTSAPIQSNTPYQGGIGIHNAAGAPVDMATSANILTMGSAAVPEDVVMFADLSNATAATINSLRQAFQVQKLLERDARGGTRYVEILKAHFGVTSPDARLQRPEFLGGGQIPVIVNPVTQTSGTPPTSGGYTMNPQGHMSGYGVVAGSNLGFSKSFVEHGVLLGLIAVRADVSYQDGINRMFS…	531	USER	zzzz898
242	my_seqs_18minnow1_2ct987.1@PF02305.16	my_seqs	MMHRNRSVDVHRFAMTPRADIPRSSFKIQKAHKTTFNAGILIPIWVDEVLPGDTFNVRATIFTRLSTPLFPIMDNMYLDTFFFFVPNRLVWDNWQKFMGEQTDPGDSIDYLIPQIQCPSGGYPIGSLGDYMGLPTVGQINAGKTIFHSALWFRAYNLIYNEWFRDENLQNSRPVPRDDIVENDPASKFALLRRGKRHDYFTSCLPWPQKGASVTLPLGSEAPVLMHPGGVQTLVYQTGANIGQPIPNQTLSSGSLGQLIATPDTSQALLDPGNSLYADLSQATSATINQLRQSFQIQKLLERDARGGTRYTEIVRSHFGVVSPDARLQRPEYIGGGSTPIIINPIAQNSATGAGGSTTPIGTLAAMGTGLANGHGFSTSFVEHGMVIGLAAVRADLTYQ…	541	USER	zzzz899
241	my_seqs_18minnow1_2ct991.3@PF02305.16	my_seqs	MHRNKSVNTHSFAMVPRADIPRSGFKIESSYKTTFDSGYLVPIYCEEVLPGDTFNLKATMFARLATPIVPIMDNLYLESFFFFVPNRLVWQNWQRFCGEQMNPGETTDYVVPKIGVNSSHVTVGSIFDYFGIPGAGQLVGGLAINALPFRAYNLIWNEWFRDENLQQRVTQNTSDSDSPGNYALKRRGKRHDYFTSCLPWVQKGASVSLPLGSSAPVKTNNDRQQTGNGWPVQIANTGTGNLVNNSGDLGVSAAGAGQYNATGITGVAGEFYIANLYADLSKATAATINQLRQAFQIQKLLERDARGGTRYTEMVKAHFGVTSPDARLQRPEYLGGGMTPISISPVAQTMQATNGLSVGTLGAFATATAHNHGFTQSFTEHGHVIGLISVRADLNYQQG…	536	USER	zzzz900
240	my_seqs_18minnow1_2ct992.4@PF02305.16	my_seqs	MHRNQSVSTHNFAMVPRADIPRSGFSIESSYKTTFDAGYLYPIYVEEVLPGDTFNLKATMFARLATPIVPIIDNLYLESFFFFVPNRLVWDNWQKFMGERTAPNSTIDYTVPQIGSPINGFPERSIYDYMGIPGVGQIALGSAIAVNALPLRAYNLIWNEWFRDENLQDPAPIYTNDASEEYNVYGLLRRGKRHDYFTSCLPWVQKGDSVMLPLGTTAPVKTASASQITGVQNALQWRETSAGNLVSNSGTIGIGASSQPVYNASGITGVVGNLYPANLFADLSEATASTINQIRQAFQIQKLLERDARGGTRYTELVRSHFGVISPDARLQRPEYLGGGRTPVNISAIAQTSATDTDVTPLGTLSAYGTALAHGHGFTQSFTEHGHVIGLISVRADLN…	540	USER	zzzz901
239	my_seqs_18minnow1_2ct995.6@PF02305.16	my_seqs	MRHTFSEVPRADIPRSSFDRSFGHKTTFDAGYLIPVFLDEALPGDTFKVRMTGFARLATPIFPIMDNLFLDTHFFAVPMRLVWDNWQKFNGEQTDPGDSTDFIIPQMVSPVGGYTEGSLSDYFGIPTGVAGLTHSSLWHRAYNLIYNEWFRDQNMQDSVVVDTDDGPDAPADYVLLRRGKRHDYFTSCLPWPQKGPGVTIPLGTSAPVIANASGTGVPTFTGPLAATPLAGVAASTNVQWGAGPAGASVAAEWLDPQLVADLTNATAATINSLRQAFQVQKIYERDARGGTRYTEIIRAHFGVTSPDARLQRPEYLGGGSTSVNITPIAQTSSTDATTPQGNLAAMGTALAMNHGFSMSFTEHCLIIGVMSVRADLTYQQGLNRMFSRRTRFDFYWPAL…	516	USER	zzzz902
238	my_seqs_18minnow1_2ct996.1@PF02305.16	my_seqs	MHRNQSVSTHHFSMIPRADIPRSSFNIESTHKTTFDAGYLVPIYCDEVLPGDSMALSMTAFCRLSTPLFPIMDNLHLDSFFFFVPNRLIWDNWVKFMGEQRNPGDSISFTIPQVVSAANGFVVGSIYDYFGLPTVGQVTAASTVSVNALPLRAYNLCYREWFRDENLINSPTVATNDGPDPLANYALLKRGKRHDYFTSSLPWPQKGATAVSLPLGTSATVKTAGSNLFTGAQTGMQVLRATGATTAANVLTAANAGAFYESTGAATGNSGGLYPSNLYADLSTATAATINQLRQSFQIQKLLERDARGGTRYTEIIRAHFGVMSPDARLDRPEYLGGGSSPIVISPIAQTSATGLTGGSTPVGNLAAVGTAVQNRHGFSYSATEHGYIIGLLNVRADL…	545	USER	zzzz903
237	my_seqs_apo1_1_2ct45.5@PF02305.16	my_seqs	MNRNTTNFFAEEATIDIQRSMWTTNHNHKTSFNNGELVPFFIDTDVLPGMTIKNTTAILIRMSTPKFPTMDNLYLDTYYFKVPIWTIWDNWKAFCGENEDGAWTQTTEYETPVFTNTTRAVTIRDINAYMGIPIGVTGLTWNQFGVRAYCRCYNFWFRDQNLIAPVKYPTGDDTVTTDETTITGGQLLKVAKFHDYFTSALPEPQKGTAISTPLGTTAPVIGNGNALGVTNGTTIFGMAAYGNGGDINAMQFSGGTNYTTPLPAGTSTAGHNKAFTNNTFAGVTTNPEFSGLVADLTQATAATINALRLAFATQRILEKDARFGTRYNEIIRGQFGVTSPNASLHIPEYLGGNRIPINIETVLQNSSSDTTSPLGQTGAFSVSFDINEDFTKSFEEHCV…	553	USER	zzzz904
236	my_seqs_bison1_1_2ct22.5@PF02305.16	my_seqs	MLQKRSLFRPHDSFIGALKTGKLYPVEVMEMYPNDRIIISHEALLRAAPMLFPLYSPMKLTFDYFYSENRLVWRGDETKDWSTFITGSVDGKPIEDIDELPEMPYITVPEGGFAAGSLGDFLGFSSNANLAGAKVSALRFRHYQKIMRDYYADENFSTLPGLALTEGEDTITSLELFTRCWNKDRFTTATDDPQKGISVGISLTGDIPVVGNGMTLGLTDGTDNYGLADQSLTGYQTSYGTNVGSASGSNVLPQLKTIGITTDPEKSGLVADASDVEPISVDELHFLTQIQRLNQRNNMWGSRDFECILTNFGVMIPDTRLQRATHLGRTVVDVNFSEVLQTSATTDDSAQGNISGHSIAVSANRPVRYLAREHGYLFVICNIQPIAQYQQGIPRDAMY…	528	USER	zzzz905
235	my_seqs_ct_4fly1_ps_NODE_x4.1@PF02305.16	my_seqs	MAQIKTRHATNPLAVPRTRRKHDVRNMTSLPAGKVVPVATIPLLREDSMRGRFAFAFEMQQTVEVLLNGIDVVCEAWLVPNLAMPEFRTADDLDLAYTGRKRDGEAAPTPYFVTQPAGAPETNQIHQRLGKHRRATQSANMSYVRAYNAAVNFARSEVSANIPQRDLLDKTLAQAMWPKNMFSHIVPDFDQAVMQGEVALTVAQQNLTLKGPANARYVDVTNPTTAPLTTLSSGAGGGTPTPIKTVDRAGNHVAYAGLGDIRQITGLKADLQGAVAVLQDNGITISLANIETARKAQIFANIMKRYNAHEDMIRDLLMDGISVTEQAWRQPILLKRGDTRFGMSKRYSSDADAMTTSIVDGAAAIEFNLNVPRVPGGGVVIILAYCAPEQLFERMEDPY…	558	USER	zzzz906
234	my_seqs_haddock_1_2ct3.5@PF02305.16 my_seqs_haddock_1_2ct30.3@PF05616.12 my_seqs_haddock_1_2ct4.5@PF02305.16 my_seqs_haddock_1_2ct40.2@PF07618.10 my_seqs_haddock_1_2ct52.4@PF02305.16	my_seqs	MKLIRHNHDLSFTHMTSFAPGKLIPVAHVEILPGDTINMKTSAFLRVEPLNKPMIHEVEMRIHHWFVPNRIIWDGWENFITGRTPVTTASLPKINVSQAGNYEIIDHCGGNPIPHTEYSDFPIRCYNTIWNEFYRDQEVQNPLTDTQIEEQGALKSIAWNKDYFTTARKLPQQGSSINVQFTGDSQLPVQGLALRATPNNASATWVTPRETGNRVPDTFQGWLVNPTSTPTAGRAGLLVEESSVTEEAGFPAIYTDLSASSLGINIDDLRKAMATQRIAEARALFGDRYTDYLAYYGVKSSDARLQRPEYLGGFTKRVHFSEVLGTGDTDTGKLVGHGIAHKSGGRFRKMFEEHGTLMSLMSVRPLAMYQQGRPRKFNRRTPLDFWTREFENTPWQEIR…	522	USER	zzzz907
233	my_seqs_haddock_1_2ct53.4@PF02305.16	my_seqs	MKLIRHNHNLSYTHTTSMNAGELIPVAHVEVLPGDTFNMKTSALIRVSPLDFPLMHEVEARVHHWFVPNRILWDGWEDFITGVSDPTATATKMPNFTSDDAANYKIIEYCGGQAIANTNYQAFINGGYNKIWTEFYRDQELQTALTQDNILYTGKIRNVAWNKDYFTTARSSPAQGEAIQVKFSGDSNIPVRGIGIADWDAVTAFSTTRQTGAIQGEMTGWEAHDGGTITGEANVIIEQDTENLLYPNVRADIGGADIGINIDDLRTAMASQRIIEARQLFGTRYTDYLAYYGVKSSDARLQRPEYLGGFTKRIHFSEVLATDGGNTGNLYGHGIAHKSGGRFRKMFEEHGQLYTLMSIRPLAVYQQGRPRKMNRRLPFDYWTREFENTPWQGIGQSEI…	512	USER	zzzz908
232	my_seqs_haddock_1_2ct54.4@PF02305.16	my_seqs	MGIFNETQNAKTSYSSFNLSHNRIGSYSAGILYPVMCEEYLPGDNFSQHQQQMIKTLPLVSPAMDEYNVYFHYFAVPNRLLDDTWQDFITGGEDGQSDALPPFLENLYQADGTLTDHLGYPTSTTGDMPDVSRLPFAAYHLIYNEYYRDQNLIEKIKPLNDVEGTIAASQVVNLEPKYLSLHRRAWAHDYFTSNLPFAQKGDPVRIPLINSTGQYLGVEFDESGFTLIKREDNSGTSPDGSGLSWPVATNNLVTDATGTRAAVDNSSNLRVALEDLDVNAAYINDLRTAISVQQWMELAARGGSRYVEMINVIFGVRSSDGRLQRPVYLGGNMSPLMISEIDQTSQTTDFSPQGNLAGKGINMHSTHAYNQRFEEHGFIMCLMSIIPKARYMSQGLPRK…	525	USER	zzzz909
231	my_seqs_haddock_1_2ct55.5@PF02305.16	my_seqs	MKLIRHTHDLSFTHTTSFSPGQLVPVAHLEILPGDTINMKTSALLRCEPLNKPLMHEVEMRIHHWFVPNRILWDGWEDFITGVTAPTTTATRPPVTQTSDPANMEIIDHCGGRPLQNTAYTAFLNRGYNTIWNEFYRDQELQNALTTSQLDTSGKLANINWNKDYFTTARSSPQEGAATTIPLNLDTLPVKGLGISGSNNTRSNITDFQESGTYEARDASGSLSATNDLFYETVSQTAPAVSPYYPNIRVDTADLGLGITIDTLRQAMATQRVLEARSLFGTRYTDYLAYYGVKSSDARLQRPEYLGGFTKRIHFSEVLNTGASTGDLFGHGIAHKSGGRFRKMFEEHGHLFSLMSVRPLATYQQGRPRKFNRQTPFDYWTREFENTPWQEIKLSELFS…	516	USER	zzzz910
230	my_seqs_haddock_1_2ct56.5@PF02305.16	my_seqs	MKLRRHTHDLSYTNTLTAKAGILVPCGHTEILPGDTFNMKTSALIRVQPLNKPLMHEVECRVHHWFVPNRILWGGWEDFITGVTDHVTTPIPVQVPQSLPNFEIYEHCGGATGVVGMAFHSFINQGYNKIWNEFYRDQEVQTELSEAQIASSGTLQNICWNKDYFTTARKSPQLGSSVQIPIGLDGLIPVRGIGWAGGDSLPTATPTSVDNFLDSAFEAANKTDDGRQAWVYSDQTNPSLGPRLQLEAQQAAGTSRTPKAPRIYADTSSTGSGININVLRGAMASQRIAEARALFGTRYTDYLAYYGVKSSDARLQRPEYLGGWSKRINFSEVLTTDTGTTGAGQLYGHGIAHKSGGRFRKMFEEHGTLWSLLSIRPLAVYQQGKPRKFSRRSPLDYWS…	524	USER	zzzz911
229	my_seqs_haddock_1_2ct57.5@PF02305.16	my_seqs	MKLIRHNHDLSFTHTTSFDAGKLVPVAHVEILPGDTINMKTSAFLRVEPLNKPLMHEVEMRIHHWFVPNRIMWDLWEDFITGVSVPTSPATRPPLYRSTNVNNYEIIDHCGGSPVANAAYDAWPVLAYNRIWDEFYRDQEVQIPLDATQLSAGTLRNIAWNKDYFTTARKLPQQGVSTTIPFEGEGGLFPVKGIGWTTNPESALPTNNPALVANFGDTANRTGHSAYVYSDFTSITSGPRLQFESKSAGPTAKEPSIYADATASSNLGISIDALRQAMATQRIHEARALFGERYTDYLKYYGVNSSDARLQRPEYLGGFTKRVHFSEVLSTGDTTTGAQLGHGIAHKTGGRFRKMFEEHGTLMSLMSVRPLATYQQGRPKKFNRPTPLDHWTREFENTP…	529	USER	zzzz912
228	my_seqs_haddock_1_2ct59.3@PF02305.16	my_seqs	MNIGNRHSQHSFAQVPSVNMARSAFNRSYAIKDTFDFDYLTPLFVEEILPGDTMNLNVKCFARLATQVVPVMDNMYLDFFFFFVPNRLVWNNWERFNGAQDDPGDSTDFLIPTITSPVTTGFTVGSTFDHWGIPTGVPGFTVSALPFRAMNLVWNEWFRDQNLQDSIVISKGDGPDLASAYPLLKRAKKHDYFTSCLPNPQKGPAVTMPLGSTAPITGLAVTPVQNINVYRGTGTSIGGAFSSASTATGPIGVNITSGAVPANNNITLATVPTNIVTSGLEADLTDATAATINQFRQAIMMQSLLELDARGGTRYVEIIKAHFNVISPDFRLQRPEFLSGGTIPISQHPVAQTSETGTSPQANLAAYSTAAEFGNRIGFSKSFVEHGYVLGFVQARADV…	541	USER	zzzz913
227	my_seqs_haddock_1_2ct60.4@PF02305.16	my_seqs	MKLKRYNHDLSYTNTTTAIAGKLVPVGHTEVLPGDTFNMKTSALIRVQPLNKPLMHEVECRVHHWFVPNRILWAGWEDFITGVVHHDVTALPLSTPADLTNLQLYQHCGGGNAQVGVSYHSFLNQGYNTIWNEFYRDQEVTTKKTDTEIKDEGYLKDICWNKDYFTTARKQPQLGSAVAIPLSIADMPIKGLGWSSLANASQLQTLTDYEQTDKAVSTNLVARSYSETPGKVLYTAVKSTVPGSTTDPYEPQIYADAQASASAITVDQLRESIATQRIAEARSLFGERYTDYLAYYGVKSSDARLQRPEYLGGWSKRINFSEVLTTDNTGTGAGQLYGHGIAHKSGGRFRKMFEEHGTVWSLLSIRPLAVYQQGKPRKFSRTSPLDYWSREFENTPWQA…	516	USER	zzzz914
226	my_seqs_haddock_1_2ct61.5@PF02305.16	my_seqs	MGNQSRFSVVPTINAPRSNFKTPYRHITTCNENELVPVFTHEINPGDTIKMDMSVFGRMNTQIVPAMDNINQDIHFFFVPNRLVWDNWEKFMGAQENPSDSIDYLIPTINVTSTDWLEDSIFDHFGIPKPANGSIDVSALPFRALALIFNEWYRDQNFQDSIVIEKGDTGAFDTSTFPNYPYNLPRNKRHDYFTSALPFAQKGSPVSISLTGNAPIGSSASSGEPLAILRDDDNKHALIGTAGITAAMGSATGTQPSPGILTARLDDVTAITINKLRQAFQLQKFLERDARSGTRYIEVIKSHFNVDNPDYRLQRPEYLGGQHNGVNVSTVPQTTPDFTGSETPQGNLAAFATVSGSGHCFNKSFTEHGFIIGLMNFTADVTYQQGLERFWSRQTRVDH…	521	USER	zzzz915
225	my_seqs_haddock_1_2ct63.4@PF02305.16	my_seqs	MGIQSQFSVVPTISAPRSNFKTPYRHITTCNENELVPVFVHEINPGDTIDMNLSLFGRMNTQLVPALDDINQDIHFFFVPNRLVWDNWERFMGAQDNPADSIDYLIPKVSLNAVDWKSDSIFDHFGIPKPVGGSVDFSALPFRAYALIYNEWYRDQNLQDSIVVDKGDSGFFDVSTYPNYPYCLKRNKRHDYFTSCLPFAQKGAPVSLSLAGDAPIVNTGNANSALGVIAADGTNKSLQSSGTYLAQSSTAGVDDEHVLKARLDDVTAVTINKLRQAFQLQKFLERDARSGTRYIEIVKSHFNVDNPDYRLQRPEYLGGQHNGVNVSAVPQTTPDFTGNETPQASLAAFATFSGNGHAFNKSFTEHGFIIGVMNFTADITYQQGLERFWSRSTRVDHYF…	519	USER	zzzz916
224	my_seqs_haddock_1_2ct64.5@PF02305.16	my_seqs	MARTQHQYSQTKTADIPRSSFDLSHGLKTTLESSQLVPILSLEVLPGDTINCKASLFGRLATPIKPFMDNVFMETFFFFTPWRQVWPNFTKMMGEQDAPGDSIEYSVPIISGGNGNVTEQSISDYLGIPIGATLNAGILPVNALPFRCYNKIFNYWFRDENLVAPVPEITSDGPDNLANNYSIKSRRKRRDYITSSLPFPQKGPDVTIDFAITGNVITDAPDGTVVTIDDSTTGLPHSLNAQINPAQVQKGTQEGTANSPLYIDGGESAITINSLRESFQIQKLLERDARGGTRYPEILQSHFRVNDPSLLVHQRPLYLGGGSSMVNINPVQQSSGTAEPDGYTPTPQGNLSAYGTVSGRNHGFTASFTEHGHVMGIVNFRADLTYQQGLERYWTRQTR…	525	USER	zzzz917
223	my_seqs_haddock_1_2ct65.4@PF02305.16	my_seqs	MAFNLSMQPRQTKSHVFSQVPKAEIPRSSFDRSHGHKTTFDAGYLVPVFIDEALPGDTFNLKMTGFARLATPIFPIMDNMYMETHYFSIPMRLVWDNWQKFNGEQKNPGDSTDFLIPQMVSTAVTGYPVGSLSDYMGLPTGVPGLTHSALWHRAYNLVWNEWFRDQNLQDSLPVPTGDGPDLPTDYSLQRRGKRHDYFTSCLPWPQKGPGVQIPLGTSAPVLGTPTWSVGGGTNLTIGSLGGGSGTAAWSSGTVSSTSATITGGLTADLSQATAATINSLRQAFQIQKIFERDARGGTRYTELIRSHFGVTSPDARLQRPEYLGGGSTPVNVSPIPQTSGTNSDSPQGNLAAVGTGLLQDHGFTTSFTEHCLIIGVVSVRADLTYQQGLNRMWSRKTRF…	524	USER	zzzz918
222	my_seqs_haddock_1_2ct66.3@PF02305.16	my_seqs	MRLIRHNHDLSFMHNLSGNMGYLIPIACLDVLPGDSFIHSTNLMARLAPLAKPVMHPVEIRVHNWYVPNRIIWEDWEDFITEANTGLTYPTQTITSAAAGVLYDHMGCEPTVGSVQSLMPIRAYNAIWNEFYRDQDLAQPRNTNALGLAKIAWGKDYFTTARTTRQSGPSIEVGFSSGSVPISGIGPNAVNLPAASQKSLFETQRSANRNVTGWETNTAHGIFEQDPDNPGFPNIRADLTRANGGIDITALRNGVALQRMSEARSMFGSRYADYLRYYGVNPRDGRLDRPEYLGGGKQQISFSEVLSNSVVSGNDDPGQLFGHGIAGLRSRRYKKTFEEHGWMISLLSVRPVGIYQTGHPRKFQRRKAQDFWHRELELLPWQSIPVTEIYGGGDKSITF…	486	USER	zzzz919
221	my_seqs_haddock_1_2ct69.3@PF02305.16	my_seqs	MKSGHIPSVMTHRFSEVPKVNIPRSSFDRSHGIKTTFDSGYLVPIMVDEALPGDTFKVKLTAFARMATPIYPIMDNVYMDIFHFAVPMRLVWDNFTKFMGEQIDPGDSIDYTIPTYPVAPATEGEFWDYCGIPTGKANVMAGVSALPARANNLIYNQWFRDENLQDSLHVDLDDGPDNIAPYRYLNRRGKRHDYFTSALPFAQKGDAVDLPLGTTAPVISTGDGRPAFDIGGTTHQLTGAAATTTAYWDPINVAGGYAEWDDTKLVADLTDAAAATINQLREAFSVQALLERDARGGTRYPEIVLSHFGVTTPTAGWRSEYLGGGSQMVNISPIAQTSSTDATSPQANLAAMGTVSINNNGYTKSFTEHTILISYANIRADLTYQQGINRMWSRSTRYD…	522	USER	zzzz920
220	my_seqs_haddock_1_2ct72.3@PF02305.16	my_seqs	MKSVMKHDFSKVPDATIERSSFDRSHGFKTTFNAGELIPIFVDEALPGDTFNLSLAAFGRLATPLHPFMDNLFFETFFFAVPNRLLWENWQRFNGEQDNPADSTDFLVPTMDAPLGGYQAGSLADYMGIPTLVQPLTHNSLHHRAYALIWNEWFRDQNLQDSAHFDKDDGPDTDTDYPIRRRGKRHDYFTSALPWPQKGPSVTLPFTGNAPVFGLGSESPTTPSTGPINVAETGTVDTSYASYFDGSGPRRVVVDDDGSGYPAVFANLNAVAAATINELRQAFQVQKLFERDARGGTRYTEIIRSHFGVTSPDARLQRPEYLGGGSSSINTNPVAQTSETGATTPQGNLAAVSTLTANGHGFTKSFTEHCVIIGLASVRADLNYQQGLNRMWTRQTRFD…	522	USER	zzzz921
219	my_seqs_haddock_1_2ct73.5@PF02305.16	my_seqs	MSIFDKIQLTRPGSSSFNLSHDRKFSLNMGKITPILCQEIVPGDKFNVTTQQMLRFAPMLSPVMHEVNVFTHFFFVPNRLIFDDWEKFITGGESGTDQTLFPTITNLNVQIRELGDYLGLPTSSFGSEKISRLPFNAYNLIFNEFYRDQNLIDELPINKAGGNIDRNALSSEERATFSLLQNRAWQHDYFTSALPWAQKGNPVKLPIGTTAEIYYDMNNRVADQLIRDAGAPHDVLIPPHDQYLENRGGSLQQELSGEVSKKVHLDLQGTHKVDLTDAVSATINDLRKAFKLQEWLEKNARAGSRYVESLLAHFGVKSSDARLQRPEFLGGGMSPVMISETLQTSQTQDTPLGEMAGHGLNLGKSHSFNRFFEEHGFVIGVMSVMPKTAYQQGIPKAFS…	521	USER	zzzz922
218	my_seqs_haddock_1_2ct74.4@PF02305.16	my_seqs	MGRNIFNSVLMPKVDSNSFDLSHDVKTSFQMGEVVPTCVLDCVPGDSFTLSAENMLRFVPLVSPVMHQVKVDTRYFFVPTRLIWPEWEKWITGESDVEAPYISVAGAEVGSLADYIGIPTGEYQTTIKTSPMALAAYVKIWNDYYRDQNLQTPYDETLTAGNNSLKFINWLADSPLRRAWEHDYFTSALPFAQKGDSVSIPLVSQDNLLVEYTYDGAAGVARNTGLLRDADNGNLTGNAAGYMKSNLGPAPFAQGGMQVEGSGGTGFVAYDPNGTLSVDVQADATDINTLRKAFSIQAWLEKNARGGTRYIENILAHFGVKSSDTRLNRPEYIGGTKQNMVISEVLATAQSTDDGVAVGSMAGHGISVGGGNTFNYRCEEHGFIIGVINVQPTTAYQQG…	526	USER	zzzz923
217	my_seqs_haddock_1_2ct75.5@PF02305.16	my_seqs	MAKQPQKTDFSKVAGAEIQRSRFNRGSTHKTTMDGNYLVPVFVDEVLPGDTFNMSTSSFCRLATPIKPSMDNLHMDIHYFFVPNRLVWDNWERFMGARDNPDDSIDYLIPTFVPPTEPITAWSGSIFDYMGIPRANIAINSLPFRAYNLIYNEWYRDQNLQESLHVEKGDRDSRSNYELKKRGKRHDYFTSALPFPQKGEPVSLSLAGNIPVMLTGESGSNHEVGLELSDGTFKKLEINADNYLQTSNRGESTELRAIYGKLDDVTAITINELRQAFQLQKFLERDARGGTRYIEMIKAHFGVTNPDFRLQRPEYLGGNRQDINFTTIAQTNSSDSTTPQGNLAAMAVAAGNGHSFSKSFTEHGYIIGIASVYADLTYQQGLNRMWSRETRVDFYWPAF…	516	USER	zzzz924
216	my_seqs_macstool_cl86_1_2ct10.5@PF02305.16	my_seqs	MPVSLMRNGLTAEKSIFSQKPSLNVSRSRFDLSRLSVFTSDIGALIPVDLIPTLPNDDYDLNCQYKIDFRPLLVPTLTPYKVRVHYYYCPLSYLWDGAETFMSKGRSGNISLTIPSIDFGAASVPSAVGTPTQVGNNDIALGFDASGSRICTLTTGSLVDYLCGSIPYDIKDASKRYLPFCVGPSSSERNPGVSTGYKLSPTSVLPFLMYQKIYRSNYLDPNLMSNGTVESKCWFPDDIDSSHWRIDYTGSNLFSLGYGNDGFVPIGMDAPQLSNAVANFVPEPSLVGATGGDNCVNLLQLRYAMYTNDMFTTALPFMQRGVQTSLDLDLSDAKFNSVFSGDISKVQIQPGTDFVLKDFRYTNDNNTASVNLVQSDTTDLTKVGLQKYSNSGAPEEIGR…	686	USER	zzzz925
215	my_seqs_macstool_cl86_1_2ct12.4@PF02305.16	my_seqs	MARNIFDGVQGNNPRLNKFDLSHSHLFSAKVGLLYPVMCQEVYPGDVFKITDAVYVQVTPMVAPLMSDLDMYCHTFFVPYRLIYGIDTSDGKPIWEKFITGGEEGDYATPLPEWRPNWSKTSFSSDTIWDSIGNPVKYTPNTTGFPTWTPLVPDASVSVSIAPKRAYNFIWNSFYRDENLQEELDLDNEDLVYPCFRKDYFTSALEAQQRGTAPAIPISGVIPVNFPNFGEYGTQVSLPNGQIGPTANQMLMAVIQDNAENPNDPTHAGLQMRSANTPYVYKNLQLEGTVDLQNATTFNVSDLRLAFAIQRMQELNMRAGVRYTEFLRAHFGVSPTDARLDRPEYIGGCVFPINVSPTVQTSATTETSPQGNKAGIASAVDAEYIGGYRAQEYGLIMTL…	549	USER	zzzz926
214	my_seqs_macstool_cl86_1_2ct14.5@PF02305.16	my_seqs	MALNNAFTNSFSDAPVNLDLQRSKFQRNFNHKTTFREGDLVPVYFDEVLPGDTFSLDSSFLVRMSTPIFPVMDNSAIDLYFFFVPNRLVWSHWQEFCGENTSAPWTQTTEYQIPQMTFDKEVDPDFSFGATRYSVMNYFGIPSFLSHKSLSVSDLPNRAYRLIWNEWFRDQNIQSPVYVPLDDSSRSFAKNSDLSKDYGGLPLKVGKFHDYFTSCLPFPQKGPSVTLSLGSLAPVISGSTNPDLTSSIPANTIRFVTVARGEDSGYHSLLFDSTGQAGSAVLSPAGASADKVTLGGISNVIFANQYADLSQATATTINELRQAFAIQRLYEKDSRGGTRYRELLKAHFGVTAPDARVQVPEYLGGCRVPININQVLQTSSSDATSPQGNTAAYSCTTDS…	572	USER	zzzz927
213	my_seqs_macstool_cl86_1_2ct15.6@PF02305.16	my_seqs	MSNRNTESHFSVAPASLDMGRSRFDRSCSYKTSFNVGDLIPFFVDEVLPGDTFALDTSMVVRLQTLLTPMMDNLYLDTYYFFVPNRLVWSHWKELMGENTSSAWIPSVEYSVPQVTSPTGGWSAGTIADYFGVPTGVDNLSISALPFRAYALICNEWFRDQNLLDPLNIPVTDAAVAGSNGDNYITDIVKGGKPFVAAKFHDYFTSCLPGPQKAPDVLIPQGTSGQLPVYALNTAVPSVDAASSLMFGVSNAAGAGSNRYASQSGSGSNLALSETDNISGSGNSRGVYPLNLWAVGSGAAAGATINQLRLAFQLQKLYEKDARSGTRYIEVLKAHFGVTSPDARLQRPEYLGGKRIPITVNQIVQQSQTTESSPMGDVAGQSLTTDYASSFTHSFVEHG…	563	USER	zzzz928
212	my_seqs_macstool_cl86_1_2ct16.6@PF02305.16	my_seqs	MNRNTESHFSLNPHVDISRSRFDRSASVKTSFNVGDIVPFYVEEVLPGDTFQVKSSKVVRMQTLLTPMMDNVYLDTYYFFVPNRLVWQHWKEFCGENTESAWIPETEYNIPQLVSPATDGWKVGSIADYFGIPTGVPGLSVNALPFRAYALIMNEWFRDQNLQDPLVVPLDDSTVTGVNTGTFVTDVAKGGLPYIASKYHDYFTSCLPSPQKGPDVTIPVAQAGNYPVVPLADKVPSNLIGSQTYTSTFVGNPFSVSSSRSITFDTEFGTQKSGAPAGAVVAGEALPVIDNLWAVASTNAQAATINQLRLAFQIQKFYEQQARGGSRYTEVVRSFFGVTSPDARLQRPEYLGGNRVPINVNQVIQQSGTESTGTPQGTVVGMSQTTDTHADFMKSFTEH…	558	USER	zzzz929
211	my_seqs_macstool_cl86_1_2ct17.5@PF02305.16	my_seqs	MKSVMKHAFSMIPKTNIQRSSFDRSFGYKTTFNEGLLIPFFCDEVLPGDTFKLKTSVLARLSTPIVPVMDNMFLDMQFFFVPNRLLWDHWTNFNGEQRDPSDSTDFLVPTVTSPTGGFATQSIFDYLGLPTGVANLSINSLPLRAYNLIWNEWYRDENLQDSVTVEHGDSDNVNNYTLLKRGKRHDYFTSCLPWPQKGSAVTVPLAGEISAKDVMDLPHYSTDGSSPVTPLRFVVGSTNASAINFNLASRSFSDGGTYWTSSSSSPTLGAGLLMDQSNVDSLANMLQLTSTTENSVNVNDLRSAFQIQRLLERDARGGTRYTEILRSHFGVISPDARLQRPEYLGGCSTPVNINPVQQTSATTSVTPQGNLAAFGYISNTHSDFNHSFVEHGYIIGLMS…	544	USER	zzzz930
210	my_seqs_macstool_cl86_1_2ct19.3@PF02305.16	my_seqs	MARRNRRSSQFSYSNVPMLKYSRSMFDLSHKCLTSMNVGDLVPVFLEEVYPGDTFKITGNCVCRTSSPLIRPVMDNLFLDVYYFYVPNRIIYDNFVNVMGENTSSAWANTVEYTIPQIGNGVVESKTVGDYLGLPVGLTLGQPSNQYQVSVLPFRAFAKIWDDWFRDENNVLPLHLQTGNYVSSEGLNNSAWSPSNYTGKLPKVAKFHDMFTSALPAPQKGDSVPLTIQGDVPVITKNTFNDISAFSAPLKFRPIGGGSIPSTNAESIALNGDGTYATLEYITDPNVVISGSTNPLNYTWSPNITPPVPVNLYAQTSGLSATTVNDLRLAFQLQKLLERDARGGTRFVEYLMSHWGVVSPDGRLQRSEFLGGKRTPLNINQVTQTTGTTTTEENELGQL…	577	USER	zzzz931
209	my_seqs_macstool_cl86_1_2ct20.5@PF02305.16	my_seqs	MRKSKHNLSNFELTTASMGKLYPVNLREVLPNDTFIGRTECFARMQPLVRPIMHPIKIIFQHWYCPSRILWEDFEEFYTQGGIEETYPIYPTIKFEEAVKAGSLANRLGVPVGQKNLEVSALPFRMYNLIWNDRYRNQELEEPVSIGYESGIDITTRTELLSPLWPRDYLTTCMLSTQLGSRVGVPVNNITSTSPSVVTAVCKLENYSFSFKLKQLGKFEQTFRATLSSFKVPASFLNSFIFSGDTFQYTFNATTNITSSSVTTSISFADSAGFVANFSTSIPVGYSGNVTCSFKAILKVGSYTATPDATVIDCTLLPGTDSTLICKSQGVGSYIDLRDLATASHLQKLKEKAEIYGNRYEERLQREFGLRPRDGRIARPEYLGGSSQVFQTSEVLQTA…	579	USER	zzzz932
208	my_seqs_macstool_cl86_1_2ct21.6@PF02305.16	my_seqs	MKKRSKLNLSNFHNSTFKMGYLYPCNCMEVLPGDTIQMSTSVFLRMTPMVAPVMHPTYMFKHDFFVPSRVIANKIRDDGGVDFDFESFITGGPDGTDSQTIPTLTLNKTNAPVGSLPDAFGIPVQNFGDSGSFKVNMLPFAAYFMIWNEYYRDQTLQDPIDFSIWTDGWARGDAWVLHRPCWSKDYFTTATPNPQLGPQVTIPVNLTSSGGDPLITATTTLSGGGVSFSNAGPADNTTWKTAYGLKTQGNRLSWRVGDGGSGSQQDSTLNYSNPSAKTTVTWNGGSDTQGNINVNDVREAMAIQRFEEHRSLYGARYDDYLRFLGVRPQDARLQLPEYLGGFSAPVQFSEVLQTSAGEFGGVGDLYGHGISAGRSRRIRRFIPEHGYIISIICVRPIPV…	530	USER	zzzz933
207	my_seqs_macstool_cl86_1_2ct6.5@PF02305.16	my_seqs	MANKVLGMHRLKNKVNRNAFDLSHRHMFTAQVGELLPVFTQWCNPNETFKIGYNGKTRTAALNSDAFTRIRENIQYYFVPFQSLWKYFEQQVNNLTQGDAGQNISKFASSSTEPSRISTTMPYISYVDIAEWLRKMYLHARKALGLYIESHSTGRSALGFKTYCETSALYKDVFICDGYRLCRAAKLLMSLGYGNFVTVIQYDIYAMAESFLRDGNNWSEQDFQDSIQALDLDVFEAAKITNSPNLSLFPLLAYHKICNDHYRNEKWQPFEPWTCNIDYLRPTDNMDAKSFIDASTFDSVMTSIIDLENSNLPIDYFTSVLPRAQYGDESAAVVNSRGSSATLMLNQSSKDGALFNGSTYSADNWLKRDSFDLNPVDGYYPSTLVSRFNNEQLAGFKGK…	679	USER	zzzz934
206	my_seqs_macstool_cl86_1_2ct7.6@PF02305.16	my_seqs	MSNQKNNVIGKAKLFNKSNYNSFDLSHRNCFTNTTGAIIPCYVGDVLPTEKVSLNIGWFSRAQTLVTNSYGRFVENVQAFYVPYSSIYRNFTQNAITSALSNAKGDNECRISDGFGVKQPLNDGNLPSLYLSDVFEWLFYLSIYETVYTAYFTAMQNEGNIAIPAPSIKLLSRTYMTRSMSIALLLENLGYGSFSLFTDPKFRNEPVTLPISMQPFTNDNKALLTISPLDLSKVFPGGFDLAKELWHQWRNAYGIGVSPMRLAAYHKVYNDYYRNDTWQPYESETCNFDYLFATEYKVVDFPWSTYVSTTSQTWDNKMDAVLNSCYSASTSADFKAILDELDLFIDDNANKKQWFADYNIFDMRCCNLPLDSVNGVLPSPQYGADSKVAISEVNWGPTL…	696	USER	zzzz935
205	my_seqs_macstool_cl86_1_2ct9.5@PF02305.16	my_seqs	MTIKIGAISLGRASKKYTHDMSFDNNTTMGFGFMQPLCSQLMYKGDKINLSAKQLVRLAPMPVPSFARIKAINRAFFVPMSDVFPAWDALLAHQTVSTTVYSYIPQKLPRISNRFLATWLIGCYGYYGLFAQSEKTAVGVTSNKIQRYPQHVQAYKVTQKISSIVGEPQGVLSTGFQSDVTGTVDDSVTIDGSDFLIVGDTAHYNASADPTDFDIVAVKLNDDGKHIYTILRGLGYSLDLADDNLISAIPIMAFYKAWFDHFAPKRFLNWSSTPMYQLINYVYERGDAGSKPATNLNISLDYTVSAKFTDAHKVLSSLAECWFTESDDFYSVHTLQPYNNASISDVNLPQPTVNSAVNPSETDTVAQNALGSLPFIKAAGLDASNTMTQIAFDTLKRLS…	707	USER	zzzz936
204	my_seqs_macstool_de2c2_2ct20.4@PF02305.16	my_seqs	MANVKSKPSYEAHLSKTGYDVGQTFNFSSSCGHILPVWYDIANPKEHYSLSVDLFTRTQPLASAPMVDIDEYIDFFFVPFSLLYGNFDSWIYGINDQFSSLMVEQLKGGASYALPCIDATGGNYLSSNTPKGLPVANRFVTSTGEPVFENWNRMAARLCDHLEQVPFEALHKGSRFSFPFYNFAAYQCICDRFYRNTQYVTSNVKAYNFDDLLGVPKSYLGWLNATGALQEQKSTEVDPLRVCDLFRLHYRPYALDYFTNVQPSPLQNATNMLATATNQKGANSVGSPSIDMLLDVNNWLDRDNGQNLVVNINSNTPQSGMWHTSSYLDGKSSPNSTNVTNTSLTFSQNLANLRSSFAIEKLLSITQRAGKHYDDQTLAHFGVKTDKDKYHDVLCIGQH…	652	USER	zzzz937
203	my_seqs_macstool_de2c2_2ct24.5@PF02305.16	my_seqs	MALKLAQRGGTQITAPQDNNASFVGLEYRTPERNAFNLSKQTHGSLQFGKIYPVYSRMVFPGDTFKIKESHFLRFAAVISPILNKINITTMAFYVPFRLVWKYWPTFITGGFNNDGVLTDDLGNMIDKDGYPTSTPFAPQPPTFNALEIPNGSDDVPYSGAVVDGGLGDWLGFPTFASEADFIDARDNEFDNMRPLFSNMTMLPFMCYQKVVNDWLTNNNIVDSSRDKSLPPSSVYGLVPYDDTFGDFADLAYINYGLDYFTSCLPRLQRGDALTLNSSDDSIIFDQENVSPSVLYTENNGLSSKSGNLSSNGSGHLSVAGYDNQLLALDNSESLKVQLNTTIQELRFLNAMQRWQEKSLRVGTRYIDFLKCYFGVKSSDRSLQRSEFIGASVDAVVKN…	599	USER	zzzz938
202	my_seqs_macstool_de2c2_2ct25.5@PF02305.16	my_seqs	MPMSSIMSLKTIKNKPHRSAFDLSMRKLFTAKVGEVLPVYFKEVIPGDKFKLGLQSFTRTQPVNSAAYTRIKEYYDYFFVPYRLLWRYFDQFITQTEGSNPQFANSLLQSALSSNRLPYVISTDILYYLNSTLYNAENDNANARKENSYKTYPNEFGFGRAALSYKLLKMLGYGFINDQSRGASPVPTSFGTYNESVTPFAMNVFPLLAYQKICQDYFRNQQWEKSNPTLYNVDYLNGSSTRLDINAAYTKEFIKSHKTIFDLQYCTWNKDLFTGVLPSPQFGDTATISQGQLGDVTGDFTPRDDSQLAINGGSFSTFHQEQGVADFGPGGINLSDTSTIQGQFYFNNAEISKFSVLALRQAEALQKWKEISISGKQDYKDQIEKHFGVHVSDVRSNLS…	625	USER	zzzz939
201	my_seqs_macstool_de2c2_2ct26.7@PF02305.16	my_seqs	MSNTTRLFSSVPVEQQKASSFDMSFYSLGSAKCGQLIPVFKQDIIPGDLVSLGIMSQIDLPPMAANFMGRIDMRYEAFFVPNRICWGGWEDFMTKQSDDPYSRDIVRSSHLPYITFSSVDNLYSLERRVGRSTLFDYLGYRFDGSSADNLLHPLGLSVGADDVICDNALCFLAYHRIYDDWYRNSQIQKPLFVRSTGNTFGIASFPWLQFDDNTHKPVIDLFTESSDYSTFDNGDEIDTIHQRNWADDRFTTLALYPQAALQPQAASVVVTQSADKSVSAASLSIPTLRAANILQRYKELKNLAGERYPDQLYAEYGVRPADAILDRPLFIGSFSHGVYTSAIFQNSATDKGNSKNPFSNQLGSSAGDTSGFGKNSLINGFKATEHGYVIVIGSLVPHC…	566	USER	zzzz940
200	my_seqs_macstool_de2c2_2ct27.7@PF02305.16	my_seqs	MSKRIPTSARVPISASRATKFDLSCRHIGTTNFGELKPLYCESVIPSDRFTLDVQSFTRLDPMPAPSMAEMFVHTRAFFVPYNTIFRGFSEFIANTQNTSASATLSNFRVPYMLESTVDIAFADSSLSTKASSKDNPWDIAIVREYDPLGMPVFDYYKLTPQGRRIYNILVSLGYNFTFDKERDAMAKYSLLPLIAFCKVYLDWYVPSKYWQSDADIIWLRQFVHADFDNYNNLKTVFLNNGSILTNTLIKLFNIDFSVFFTQDYFSNCLANPFGNSNNVDFNDVEPSFGNVFIDGQNSVVSDKLSGASIQQVTSGSDVITALDLKTVGQLQKIVNKGMVIDNKVQDYLRVTFGIEPSSDALRISKYIGHFADTIKVGDVMSNADTMSADSKSGAVLGQ…	611	USER	zzzz941
199	my_seqs_macstool_de2c2_2ct28.5@PF02305.16	my_seqs	MKSIFETQRSQANLQRNAFDLSENHIFSASPGMLLPFFFKECNPNEHFEINPQSFVRTMPLNTAAFTRLTQFVDFYFVPYSVLCRQFSQFVVGTEYNTSSIMQLNSYKANLPALNLIELTNVLSNSATQKDDLGFPLVDGTIRLLDLCGYGIANKEMYDKLHVTDDNDLLNVNPFRLLAYQKVYQDYFRNPDYELADPLSYNIDSTFGKAKLTPNIGMAKLRYRNWKKDYLTAIKPYFQGTDYLTKSTEVPQFWLELNRGKQFYPTTDKSLETAGRLGNAQAILTYSGLNSGETPVLSVANLRAAYALDKLYRLTINAGDGDYASQIRAHYGFNVRNDSDKSVYLGGVNSPIQISEVITTANTTNDTGAQIGVTGDVYGKASGANVPQNISYDTNEHGV…	562	USER	zzzz942
198	my_seqs_macstool_de2c2_2ct29.6@PF02305.16	my_seqs	MNTASSSPVSPERNANQAAPINNEGYNSFDHSRLELYTQRFSEVMPCYFDKCIEGDNVVNQATQDVRTFALQSPLMNNLKMYRSFYAVPLSAIAPKAWEYLLRQPNRGQDITFADYDISGTFKQVFALPLTLLKKCQSMLAPDNDAVSASVKNVTMALLAYYGSLYFSNNGLFKALGYTAPTRTRTVLAAAQDATPVSSVWDRMYSALVDMICAGGHLNIHYFNENNAMFSLNGTVDKSVQKYTPSEVFNFLSAASFYGSLYIEADGKQAATMTVYEPLKKLVLEALSANFLQNVEAITTRVSLRPLIAYQTIIAQFFSSSNVDSIYNAKAFTDTALSLVTKAHQICKNISTAADVVNSPFVYSSKVNGVDVFYDAYSGHYNEYMANAFDKMILHAENP…	707	USER	zzzz943
197	my_seqs_macstool_de2c2_2ct38.7@PF02305.16	my_seqs	MNRNTESHFSLSPHVDISRSRFDRSASLKTSFNAGDVVPFFLEEVLPGDTFSVDTSKVVRMQTLLTPIMDNVYLDTYYFFVPNRLVWDHWKEFCGENTESAWIPQTEYTMPQITSPASEGWSVGTLADYFGIPTGVAGLSVSALPFRAYALIMNEWFRDQNLQDPLVVPTDDSTVAGVNTGTFVTDVAKGGKPFIAAKYHDYFTSALPAPQKGPDVTIPVAQAGSYQVVPLADNVDYTKATAPLTWMRRTTGAVYDSTEYTRSIVTGTNSYDANKLETGLSNSQESFHSGYPDYVPSNLWAIADGNAAAATINQLRLAFQIQKFYERQARGGSRYTEVVRSFFGVTSPDSRLQRPEYLGGNRVPINVNQIVQQSGTQSGTTPQGTVVGQSLTTDKHSDF…	562	USER	zzzz944
196	my_seqs_macstool_de2c2_2ct39.8@PF02305.16	my_seqs	MNRNTESHFSLSPHVDISRSRFDRSASLKTSFNVGDVVPFFLDEVLPGDTFSVDTSKVVRMQTLLTPMMDNVYLDTYYFFIPNRLVWDHWKEFCGENTESAWIPETEYTMPQITAPANGGWSVGTLADYFGVPTGVSGLSISALPFRAYALVINEWFRDQNLQDPLVVPTDDSTVAGVNTATFVTDVAKGGKPFIAAKYHDYFTSALPSPQKGPDVTIPVAEAGNYNVVGNGKSLALTTGGSKLGGLQYGYEGAGSSQSTLLYATYGSFGQAPGSASSTGGLGSNVVLGVPTQAQLGSDLSNSGLIAVASGNAAAATINQLRLAFQIQKFYEQQARGGSRYTEVVRSFFGVTSPDARLQRPEYLGGNRVPINVNQIIQQSGTESSGTPQGTVVGQSLTT…	568	USER	zzzz945
195	my_seqs_macstool_de2c2_2ct41.6@PF02305.16	my_seqs	MNRNTESHFSLTPHVDISRSRFDRSASLKTSFNAGDVVPFFLDEVLPGDTFSVDTSKVVRMQTLLTPMMDNVYLDTYYFFVPNRLVWDHWKEFCGENTESAWIPATEYIMPQITSPADKGWNVGTLADYFGIPTGVAGLSVSALPFRAYALIINEWFRDQNLQDPLVVPTDDSTVAGVNTGTFVTDVAKGGKPFVAAKYHDYFTSALPAPQKGPDVEIPVATAGNYNVVGNGKALAITADVNSAGPMVSYGSAGALGYDFGQGSLGKAFGVRTTTGSGFDSNTTIGVATQAQLGENLENSGLIAIAAGNAAAATINQLRLAFQIQKFYEQQARGGSRYTEVVRSFFGVTSPDARLQRPEYLGGNRVPINVNQIVQQSGTESTGTPQGTVVGQSLTTDKH…	565	USER	zzzz946
194	my_seqs_macstool_de2c2_2ct42.3@PF02305.16	my_seqs	MNRNTESHFSLAPHVDISRSRFDRSASLKTSFNAGDVVPFFVDEVLPGDTFSVDTSKVVRLQTLLTPMMDNVYLDTYYFFVPNRLVWNHWKEFCGENTESAWIPETEYTMPQITSPAGSGWSVGTLADYFGIPTGVPNLSVNALPFRAYALIINEWFRDQNLQDPLVVPLDDSTVAGVNTGTFVTDVAKGGKPFIAAKYHDYFTSCLPSPQKGPDVLIPSATSGEFPVVTRSQKVDSSLITQPLSVQYLQTPSRAPTALLFGTDGSQDSFLFPEASSQVGDKNGTPVFNNLYAISSGGLGASINQLRLAFQIQKYYEQLARGGSRYTEVVRSFFGVVSPDARLQRPEYLGGNRVPINVNQIVQQSGTEANSTPQGTVVGQSLTTDSHSDFTKSFTEHGY…	553	USER	zzzz947
193	my_seqs_macstool_de2c2_2ct43.7@PF02305.16	my_seqs	MKKSKFNLSHDASLTASMGNLIPFVTLDCLPNDSHRLKLQSFVRAQPMLAPLMHRVNLYAQYWFVPYRLLWNDWETFITGGNSGDEDKGLVFPTIKIKPETSSLADYFGLPPNGKELEVSAMPFRAMAEIWNTRYRDEDLQVEVPISYEGGVDTTTNTKLLRCSWAKDRFTIARPFTQRGAQISVPVKGSLPVTEKFATSISVVSVKTASPTDTFLLEIDSSYFSSLNYNGEVVFHFDGNSTASGVYPSRETSAVRGGATILSNPFEITILFSQVRTDLAVSSGNVHLSVANDGTLNSIKPTMPYVAISSYTTDGSVNIRDLRAASQLQRYQERSLEYGNRYEEFIQREFGIKPRDSRIQRPEYLGGGSSVLQISEVLQTAEGENTGVGTMRGHGVSAF…	555	USER	zzzz948
192	my_seqs_macstool_de2c2_2ct44.5@PF02305.16	my_seqs	MKRSRFNLSNYVLGNIDFGKLYPVHIQEVCMGDTFKGRTHALIRMEPMVSPVMHPMFVRLHTWYVPYRLVWDGFEDFVVSGGSLGIDCPNLPKITLTEADCTKGSLADIMGIPPTAKGMKVSALPFRAYNLIWNNFYRDQDLQGELKVPTDNNDDSDIERVIQRVSYAKDYFTTARPWTQRGDEVSIPVNSTAGVTGSLASLNLTFKVNGIKQNVNNFIITLPKELLSSGFSGSVLSFEVSNPAFVDNNKAIVKLTNASGVSVLWNGAVGVPDLQSWINHYGDRYTISVTLNSINSYGGEVVEYSKTMPTSYSWTDNIVAKYSASNAGGNIDIMELRAALALQRFQEARAKYGHRYVDFLQYHGIKPSDARLQLPEYVYGGKSVIQISDVVQTAGAGDS…	570	USER	zzzz949
191	my_seqs_macstool_de2c2_2ct46.5@PF02305.16	my_seqs	MLHVNRNVESHFSQLPSAEIQRSTFDRSCSYKTSLNSSRIVPFMIDEVLPGDTFDITTSKVVRSQTLLTPLMDNMYLDTYYFFVPNRLVWKHWREFCGENTSGPWAPTVEYTIPKIIPPAGGFASGTLADYMGLPVGVEWKADDELAPSALPFRGLALIMNEFFRDENLSDPLLIPMDDANQQGSNGDNYISDVANGGMPFRAAKYHDYFTSALPSPQKGEAVGVPITVPGFKGGTFPVTTGTLPSSLSSEPVYPLITALTAPTSDASNVFSPQVFNESKGVLSVVGSGDSGEAIVWEGSRGTTQSHRRQVPINLQTVIPPAGSGDDSTVNFSVNELRLAFAYQRFLESLARSGSRYTELLLGLFGVRSPDARLQRPEYLGGNRVPINVSEVTNNAQSE…	584	USER	zzzz950
190	my_seqs_macstool_de2c2_2ct47.4@PF02305.16	my_seqs	MTNPQVVKYPAPKLNAFPVGWKRQYTLSMGGLYPVMCEYAMPNSRWKFKALHKLRTLAMIAPTMHNIRCYVQYFKVPLRLLMNEEQYANYMTGGKNDDDNTPTPSVNSGINGYAVGSLMDYLGYASNYLNDNQVEVKVPNVTQNAWALRAYNKIINDWYINPNITDERVLSLESGLDTTTDQTLFYRGWQPDKYTNAMPSLQRGDPTYLPLGQSADVSVFGNGNVIGLTDGTGLMSIRGNNSVGCVNMMQTEYITTPNYAYGSDIGLRTAGISEKSVGLTKDAKQSGIIGQADLTGASAIDVNELRDTMALGFAKNLGMYVGYRLTDWLYGMFGCRPADARLQRAEFIGGTVSPVIVDEVEQTSATVAGQTPQGNLAGKGITINGNKWIKCFCDEPCVI…	574	USER	zzzz951
189	my_seqs_macstool_de2c2_2ct48.4@PF02305.16	my_seqs	MFNLSAILCRVIKFILKIGVLMKKSKFNLSHNASLTADMGKLVPFMVLDCIPNDSFQMKLQSFVRAQPMLAPLMHQVNLYTQYWFVPYRILWDNWTDFITGGISGSDAPTFPTIKVKPEVSSLSDYFGLPVKNNGTSDSPNYQEFEVSALPYRAYAEIWNTRYRDEDLQNELPISYSDGLDETTNTQLAQPSWAKDYFTTARPFTQRGSQISVPVQSMNSSQPAKVSASVYIDSISASKVHFRMSNGVYVTISNFRVSLSDSFISDGFFINDNQFSFSASGSFSISYSASSTKGVASISSKFNGLSIMFDWASDGITPSSTFSVSFNVVLFIGPKTLSESALSTNVVLTETPQDIVFNYGSAVVSSVNIRDLRLSSALQRYQERSLEYGNRYEEFIQRE…	606	USER	zzzz952
188	my_seqs_macstool_de2c2_2ct50.5@PF02305.16	my_seqs	MRNYSSVNVKVQKKSGFDKSFQNLFTSKVGTITPILCDELIPNSTVYLKAAISAALPPLASDTFMRCKLKYAAFFVPMRIIMPGFEKWLLNNDVSDEDKVRVPQLEFPSSYLNSTTAEDQKLRTKTLGPGSLADYLGFKITEADIKRNVQTGEPGYRYNLSFNALPFLAYHRIYNDWFRNSLVQTDIYDDVATTSYVAATSNSVIPTQTNGYKITFDPADQAIAYNDGVDVWSLRQANFGYDIYTTASPQAQNGKAQAVTMTKIENQDGFTISALRAANSMQQFLERNNLAGNRLVDFVRAQYGAHLSDSIAQRPILLGKGSFDVYSKGIYQTTPDDPASGGTSSVNPFNSVGARYGSAYADGTDMLVNNFTTAEPGYLMVLAWLSPKVTYSTGIDPML…	556	USER	zzzz953
187	my_seqs_macstool_de2c2_2ct51.6@PF02305.16	my_seqs	MNVGTLYPIYVQEVYPGDTFKVKPTFVCRSTSPFVKPVMDNLFIDQYFFFVPHRIVDKDFETVIGAVASPSEWTARTERTVPCLNMGANGVTPGGVADYLGLPLGCKQTDISIYPFRAFAKVFDDWFRDENNVPPMLVQTGDIASSEVLNDNAWAPNNYTGKLPKVAKMHDYFTSCLPNVYKGDTPVIPVEMGASQDIVGAQKWIPVHSLTQQHENIIGTGFAPLGFSTDGTFSPGDYNLFSRHSSYGVPGVLNIGQENSQASAYEAYPNNLWANVTGSGITSVDIIQAMALQRMLANDARGGTRYTEILQSHFGVMSPDQRLQRSEFLGGKRLPLSVTQVAQTGATTENNPLADLAGYSQSVGQSKFSKGFVEHGFIIGVACIRYFHSYQQGVERFWT…	532	USER	zzzz954
186	my_seqs_macstool_de2c2_2ct52.6@PF02305.16	my_seqs	MRIKKSKQNLSYENKFTFNMGELVPFLVQEVVPGQIARFGANVLLRTQPLVAPIMHRIDTLMWYIYIPYRLLQTNFEDFMTGGLQGNANISSPIIKSPANTGFAVGSLADYLNYATGVPDFESLAWGFRAYAKAFNDYFVNQNIEGQELPLSLGDGLDTTTNTTLQNKNWRRDYFTGNLPWPQRGPDVYLPLGVTAPVRIEPGEGFFALQDPDGHWGEVAKKEMSPLTYGAGFANGTSSEIPLNQPLKYYGGLKGTADLASSSSVTINQIRLSAKVQEVFESLARGGARFIEMLYNCFGVVSGDARLQRSEYFGGSKSPFIISEVLQTSETTETSPQANMSGRGICAVKTKRIKKYFPEHGIVLGLMCVSPEANYFQGSPRMYNRRSRFDYLWPQLTGI…	508	USER	zzzz955
185	my_seqs_macstool_de2c2_2ct55.5@PF02305.16	my_seqs	MRKRNKFSLSYQRLLSCRMGQLIPIGLTEVLPNDTIQHATTGIVRCAPLVSPVMARCDVRIHHFYVPTRILWENWEDFITGGPDGNDDSVLPTVSSGSSGFVEGSLADYFGLPTGVPNLSVSALPFRAYNLIYNEYYRDEDLIDPVAIGSGDGSDTVTNLQLLNCAWEKDYFTSARPWTQKGNAVSIPVGQGSAISATISSDGAFKLGGFSFSTQGGSDKSWKSDVSSGSFNTQAYTSGLKVDVDGTAGSIDVSDLRLALSLQRFQEARARYGSRYTEYLRYLGVISSDARLQRPEYLAGGRSPLQFSEVLQTAQGSNPVGSMAGHGLTALRSNRYRRFIEEHGYIVTLMSIRPKTVYKDMIPRTWLRRTKEDYFQPEFQHIGQQEVYNKELNANSENP…	492	USER	zzzz956
184	my_seqs_mice_vagnl_1_2ct10.6@PF02305.16	my_seqs	MKHKRNRFDLSFPLQTTFDAGVLVPFFVQDTLPNDTFYLSAKSFIRAQPMTAPLLHDVDVFLQYFYCPERILWDKTEDFFLGIPDDTGALPVRPTVKAPVEGWAIGSLADYLGFPTGQGEIEHSAIPFRAYAAIYNEFYRDKTLQSPVSISLASALDEVTNLELQHPRWKKDYFHKSELQRQLGGGVSVPIEPMESIGEQSFYHYVIQPYFLLSDGSYKISTDSRNDIYRVQGSVGLHCPNVANVQDWVVENQDTLFQAEVGAEFDTGITYRYGRGWDGGFRWIDCKIVVRLVEKTLEAYTSQPVGQYVTPASINCRRWQDGGYVCGTQSITAAVYHSALLQNTGQLNIGNLAQATHMQRFQETMLKVDNDYSRFIKAMYGFKLRNDIIDLPQYLGGSR…	589	USER	zzzz957
183	my_seqs_mice_vagnl_1_2ct12.5@PF02305.16	my_seqs	MAKNSARRRPRPNHFSQIPATTIQRSRFDRSFDYKTTLDAGYLIPVLVDEVLPGDTFSLRMNSFVRMNTLVAPFMDNVYMDSFFFFVPNRLVWDNWQRFCGEQKNPGDSTDFLIPILRNPGTFPVGSIFDYMGLPTGIAINNTYNPINSLPLRAYNLIYNNWFRDENLIDSVPVPTGDGPDDMSNFKLLKRAKRHDYFTSALPWPQKGPAVEVGLSGNAPISGNAFFESAEEGGSFSFIDPNGLVGVSHIPIATSGNRNYYFDSLTMNGTKPYGGPNNTNLYYIDSDIVSTDQSGGDTKRVDNTLDGFMSSDSAEVSLGNLKLSSDSSLYADLSGVNAISINDLRQAFQIQKFYEKWARGGSRYTETLRVMFNVISPDARLQRPEYLGGTHSRINIVPT…	587	USER	zzzz958
182	my_seqs_mice_vagnl_1_2ct9.6@PF02305.16	my_seqs	MKHRRNRFDLSFPLQTTFDAGVLVPFLVQDTLPNDTFYISAKSFLRAQPMTAPLLHDVDVFLQYFYCPERILWDKTEDFFLGIPDETGALPVRPTIKAPVEGWQIGSLADYLGFPTDQPEIEHSAIPHRAYAAIYNEFYRDKTLQSPVSISLASALDDVTNLELQSPRWKRDYFHKAELQRQLGGGVSVPVEPMDSVGEQSFYHYVLQPYFLLSDGSYKISTDSHDNLYRVQGNVGLNCPSVPNLQDWIVENQEKLLSTEVGAEFDTGITYLYGRGWDSGFRWIDCKIVVRLTEKTLESYTSQPVGQYVTPASINCTRWEGGGYTHGRQSLTAAVYHSALLQNTGQINISNLAQATHMQRFQETMLKVDNDYSKFIKAMYGFKLRNDTIDLPQYLGGSR…	589	USER	zzzz959
181	my_seqs_rainbowtrout1_2ct11.3@PF02305.16	my_seqs	MSKIPSVMNHDFSRVPRADIPRSSFDRSHGLKTTFDCGQLVPVFWDEALPGDTFNLNMHGFARLATPLHPFMDNVFMNTFFFAVPLRLLWDNFQRFMGEQPNPDDSTDFLIPQIVAPVGGYANGSIYDYFGLPTQVAGISHSALYLRAYNLIWNEWFRDQNLQDSTVVPKDDGPDGSTAYNILHRGKRHDYFTSSLPWPQKGPAVQVPLGEYAPVIGIGKINQVFENGPPVAVYEQNGARTYEDWQFPDSATVDRQFLVEGWQNPANSEWYPDIRADLREATASTINQLRQAFQIQKLYERDARGGTRYTEIIRAHFNVVSPDARLQRPEYLGGGQSPVNLYAVPQTSAAASQPTPQGNLAAYGTANIGGHGFSKSFTEHCVIIGLVSVRADLNYQQGI…	533	USER	zzzz960
180	my_seqs_rainbowtrout1_2ct12.6@PF02305.16	my_seqs	MRRSRHNLSHTHKLSCDMGQLIPVCTEEVLPGDTFKGSTSLLARVAPQVKPVMHDVDIRVHHWYIPNRILWSGWEDFITGEDDVTAKPSITLAAELDLVDHMGMYPLAGLEMDALPVRAYNKVWNEFYRDQDLATERGEDDLDIARIAWGKDYFTTARPTPQQGDPFDIGFSAGVAPVGGIGFLANSSSTSQINTNTRNRSGAVQDVDGFRVGESHTETTAGNASLVIEELDGSPGHPWIYADLTAATGGIDINDLRQSIALQRIAEARARYGHRYVDYLRFLGVNPKDGRLSRPEYLGGGTENINFSEVIQTAEGGSTDIGDLYGHGIASMRSKTYMKMFEEHGWVMSLLSVRPKTSYLQAFPRKFNRTIATDYWHRELENLPWQTVYETEVYAPGTA…	487	USER	zzzz961
179	my_seqs_rainbowtrout1_2ct16.2@PF02305.16	my_seqs	MIFISLSMIMDWFKLVQGLLLLTIFVLTTLILLIEVRMSRTDLNQGHFGRAPQVGAPRSSFSRSHSHKTTFNSGDLIPIFVDEVLPGDTIKLKLKIFARLATPIRPVMDPLFMDSFFFFTPMRLLWKNWERMNGARDNPKDSIDFTIPQMVSPSNGGYAGGSLSDYMGIPTAVPDLSHSSLFHRNYNLVWNEWFRSQDLQDSLVVDQDDGPDDHNDYPIQKRGKRYDYFTSCLPSPQKGSTVDIPLTGDAPVTGIGGRNNLNRNSWETGVGLWNAGQFVKYPRVSTVSGATTSAALNYAMTPTYNNPDSFTPDVKVDLSNVSAITINELRTAFQLQRLLEKDARGGTRYVEFLKSHFGVISPDYRLQRPEYLGGSADSVTFHTVAQTEATNATTPQANV…	575	USER	zzzz962
178	my_seqs_rainbowtrout1_2ct19.5@PF02305.16	my_seqs	MKRSKFNLSHYKLLTANPGYLVPLTWYEALPGDTIQHQTGLMLRLSPLVAPIMHPMRVRLHHWFVPNRLIWEDWEDFITGGDDGLDASVHPFISTDDLTSDTVDESGLLDYLGIMPADYTGNTRTFSALPYRAYMAIYNEYYRDQDLKTAVSYDVTSGQETSPSQSCMLCAWEKDYLTTSRAWTQKGTEVTIPVSPETVGSTLPTFTYGSATENLEILAAQDNVSVKNTTPGTTRDLAWGDPGLMVNIDELRLALALGRYQEARAQYGSRYVEYLRYLGVRSSDARLQKPEYLGGGRMSIQTSEVLRTGNVDADSTNIGDMAGHGIGAGSSKRFRRFFEEHGIVMTMMSVIPKTIYNNALHRSFLREDKEDYFQKELQFIGDQEVSNAEVMIDHTGHTA…	485	USER	zzzz963
177	my_seqs_rainbowtrout1_2ct20.6@PF02305.16	my_seqs	MRRSKHTLSHYRMHTCDMGELIPIQCVPVLAGDTMQGSSSAMIRVSPLNTPVMHPVTVRIHHWFVPNRLLWKEDENGGWEQFITGGPDGNNSATIPQRVYATGKKNLGNYLGIPALGTGRALNDLPLRATNFIFNQRYRDQDLVTERSLSNQTIPRIAWEKDDLTSARPWTQKGPQVTLPLGTAAPIFTDQSGGDNFISVKDDAGVNRLVENPSGTQVKTAIGTASPGQELFADLSAAGAIDVNDFREAFAKQRYQEARARYGSRFTEYLRYLGIRPSDARLQEPEYVGGGTARLSFSEVLQTSGTTDGSGDGVGDLYGHGIAGVRTPSFRKFFEEHGYLVSLLSVRPKAVYMNGVDREFLKLTKEEYFQKELANLGQQAVLAGQLFTDQAGYRDDWAF…	481	USER	zzzz964
176	my_seqs_rainbowtrout1_2ct9.7@1KVP_A	my_seqs	MEDMQEMQTRREVRSIVGRSRGGKLMPVNVVPVIGGESGMLSQSVMVELDPIAGRLLNPVTVEMTAVFVPLQAMEHTRWPSDDTKSVTELIRRRLDSGEDLYPLEAPNEVTDRLRIHPRMVAGVPKVSSSVRIAHNAAVNFLRKRRYTYAAQRLPGDITISPAILSQTVLDRMNAVLDPEERVNGFVPFDLPTLTLPVEGIGVREAAGAIAPGYNPASGSVVETGGDFASPETKVTTSSSGSDANPVMALTAAGVPDVNVVFGGQTSGISLTDMYNAETQDKLVRYFRRVIDANPIDGEEQILRWCYGLSMDTARNPWVIAERTISLGMDYSEATDGVSLLNDVARSKLMGNISFSAPVPKTELGGMIVTFLSVKPDEVLEGQPHPILTEGVSMPNRAA…	528	USER	zzzz965
175	my_seqs_redsnapper1_2ct25.3@PF02305.16	my_seqs	MKKSHNRSRIGSSQQHQFAEVPHADIQRSTFDRSHGLKTTFNAGELIPIYVDEALPGDTFSCNLTAFSRLATPIHPTMDNAFMDSFFFAVPVRIVWDDFEEFMGETKTYKAAGATRLDGTPDFTVAAPIPPTITAGGSGEAEQSLSDYFGIPTKIAALEFSALWHRAYTLVWNDWFRDENLQAPKTISTASGADATAYALLNRGKKHDYFTSALPWPQKGADVTIPLGVQADIKLKDITVTGGDDEYAVFYSGANVQDDFRSHPTLGDVGTAWNNNTSANLYADLTDATSATINQLRLAFATQKFLEIQARGGSRYIEVIKNHFNVTSPDARLQRPEYLGGGSSPVNISPVAQTSSTDATTPQGNLSAIGTTVLSGHSFTKSFTEHTIVIGMVSVRTDL…	539	USER	zzzz967
174	my_seqs_redsnapper1_2ct35.4@PF02305.16	my_seqs	MKLPSVMKHDFSKAPHANIQRSSFDRSFGYKTTFDAGLLIPIFVDEALPGDTFNVNMTGFGRLATPLYPLMDNLYLDTFFFAVPNRLLWDNWQKFMGEQENPGDSTDYLVPTVSSGVSGFAENSLWDYFGIPTKVPNLTVNALHSRAYNLIYNEWFRDENLQDSVTVDKGDGPDSAADYVLRRRGKRHDYFTSCLPWTQKGDAVSLPLGLSAPVTTDGIGNSTLGVINSNQGSLSGIKTDGSQAQLSGILPADFPLYADLTNATAATINQLREAFQVQRLLERDARGGTRYVEMIKAHFGVTSPDSRMQRPEYLGGGSAPIQITPVAQTSSTDATSPQGNLAAMGTVVAKGRHGFTKSFTEHCTIIGLAMVRADLNYQQGLNRMWSRQTRYDYYFPVLA…	515	USER	zzzz968
173	my_seqs_redsnapper1_2ct37.5@PF02305.16	my_seqs	MKFANHNLTHDIKLTANMGELVPVACFEALPGDVVNHEIACLIRTQPLVTPVMHKAEVKLHTWFVPYRLLHSGWEDFITGGQDGLDATVLPTIALPSIAVGSLADYLGIPVSASAKTVSAFPFRAYTHIWNNYYRDQDLQTELPINLGSGADATTSVLLQNACWEKDYFTSARPTAQKGSAVTVPLTGSAPVVTNNQNVLITDQNSAPEQTWNHTSAVGNPLVMGGGTIGSNAAIRFGSQSGLTANLSAVTGININDLRLVVALQRFKENMSRYGSRYMERLEQAFGVTNLDARLQLPEYLGGGSQTLQFSEVLQTAEGVNPTGTLRGHGIGAMRSNRYKTKIPEYGVIITLMVARPKTQYVDGLNRMWSRLTKEDYYQPELENLGAQAVRNKEVYHAH…	490	USER	zzzz969
172	my_seqs_redsnapper1_2ct42.5@PF02305.16	my_seqs	MALTRNKMASQHSFAMIPRSDIPRSRYLLQQDYKTTFDGGYLIPFVCEEVLPGDHFDGKAEIFGRFATPITPVLDNAELETFFFYIPNRILWENWEEFISGVGDHLIPTLESTTGTGFAPLSIQDYFGIPPNNQTTQDLSVNALPFRAYNLIYNEWFRDQNYGAELVVDTGDGPDNITWYALQKRSKKHDYFTSSLPWPQKGTAVELPLGTTAPIIPDNTNVGLFSDSPSFKADGVVWPGPSNATGLGTANGSPNVQWGLGNAGATSDVVRWNNPALLADLSSATAATINALRLAFQVQKMLEKDARGGSRYIEQIQVHFGVRPPDYRLNRPEYIGGGKSMVNTHPIAQTSETTETTPQGNLAAFTTVVGQGHRFKYAAVEHGYIIGLVNVRTDLTYQQ…	540	USER	zzzz970
171	my_seqs_redsnapper1_2ct43.5@PF02305.16	my_seqs	MLGGPMGALPTTMSHEFSRVPNAEIQRSTFNRVHGLKTTFDSGLLVPIYVDEVLPGDTFQMNANGFGRLATPLYPLMDNCYLETFFFFVPNRLIWDNWEKFNGAQDDPGDSTDYLIPQIQGATVAENTLFDYMGLPTQVAGIDWNNLHGRAYNLIWNEWFRDENLQDSLVVPKNDGPDTYTDFTLQKRGKRHDYFTSALPWPQKGDAVTLPLGTIAPVTTNATEVTTGGQAQMMLRTTSGGLMNNNVALATSQGGGTSNFGVANATGATISAYAYPSNLVADLTDATAATINELREAFQIQRLYERDARGGTRYTEILQSHFGVTSPDARLQRPEYLGGNKTELMMQPVPQTSATDTTSPQGNLSALGTVQGRGGFSKSFVEHGVLIGMACVFADLTYQ…	536	USER	zzzz971
170	my_seqs_redsnapper1_2ct47.3@PF02305.16	my_seqs	MLGGPMGTLPTTLSHEFSRVPQAEIQRSTFNRVHGLKTTFDSGQLVPIYVDEVLPGDTFQLNATGFGRLSTPLYPVMDNMYVETFFFFVPNRIIWDNWEKFNGAQDDPGDSTDYLVPQITNATIAEETLYDYMGLPTKTAGLDFNNLHGRAYNLIWNEWFRDENLQDSLVVPKGDGPDTLTDFTIQKRGKRHDYFTSALPWPQKGDAVSLPLGTSAPVDSVPAASGIFVKQNFTNNALASQSGFSTDGSGYALLNGTGMYIDPHESLVADLTNATAATINQLREAFQIQRLYERDARGGTRYTEILQSHFGVTSPDARLQRPEYLGGQKSEIQMQAVPQTSSTDTTSPQGNLAALGTTTSRGGFSKSFVEHGVLIGMACVFADLTYQQGMNRMWSRRDR…	524	USER	zzzz972
169	my_seqs_redsnapper1_2ct48.4@PF02305.16	my_seqs	MLGGPMGTLPTTMSHEFSRVPNAEIQRSTFSRVHGLKTTFDSGLLVPIYVDEVLPGDTFQMNANGFGRLATPIYPLMDNMYLETFFFFVPNRLIWDNWEKFNGAQDNPGDTTDYLVPQIQNVTIAGDTLYDYMGLPTAVAGIDFNNLHGRAYNLIWNEWFRDENLQDSLVVDKGDGPDTITDYTLQKRGKRHDYFTSALPWPQKGDAVSLPLGSTAPVGAFNSTSGVFFNAVAEYSATSSYPVLIDNALGQTGYTQIKADLADATAATINELREAFQIQRLYERDARGGTRYTEILQSHFGVTSPDARLQRPEYLGGNKTELQMQPVPQTSSSDTTSPQGNLSALATMSTRGGFSKSFVEHGVLIGMACVFADLTYQQGMNRMWSRRDRWDFYWPALAH…	514	USER	zzzz973
168	my_seqs_redsnapper1_2ct51.5@PF02305.16	my_seqs	MSYNKMQPRQSQNHVFSQVPKAEIPRSSFDRSHGHKTTFDAGLLVPVFVDEALPGDTFNLKMTGFARLATPIFPIMDNMYMETHYFSVPMRLVWDNWQKFNGEQKNPGDSTDFVIPQMVAPAGGYLINSLSDYMGLPTGVAGFSHSALWHRAYNLIWNEWFRDQNLQDSLPVPTGDGPDPIANYEIRRRGKRHDYFTSCLPWPQKGPGVQIPLGTRAPVTGIGIDAAEGYPGSGAGIKQTTGNPGTGGNWTSGTGSIFVQGPTGGGTGAFPQIYADLSQATAATINSLRQAFQVQKIFERDARGGTRYTELIRSHFGVTSPDARLQRPEYLGGGSTPINVSPIPQTSSTDADSPQGNLAAIGTSLLTDHGFTTSFTEHCLIIGLVSVRADLTYQQGLNR…	532	USER	zzzz974
167	my_seqs_redsnapper1_2ct54.8@PF02305.16	my_seqs	MSKTNAGSHSNHKFSQVPNAEIPRSKFDRSCGYKTTFDSGFLVPVFLDEALPGDTFNCHMTAFARLATPIFPFMDNMFMDTFFFAVPYRLVWDNWQKFNGEQRNPGDSTSFLVPVLDKTKAPLNAAGFPANSISDYFGLPTLTPGIAPVSLWHRAYNLIWNEWFRDENLQQSVTVPVTDGPDDPALFTLLRRGKRHDYFTSALPWPQKGPAVSIPLSGNAPIVSPSPTTPLVLQRTSGTAMTNGAISYDASTNKFYPATGGSATTGPMRYESGLQADLSAVTAATINALRQAFQIQKLYERDARGGTRYTEIIRAHFGVTSPDARLQRPEYLGGGSTPININPIAQTSAVPSQPSPLGNLAAMGTASVHNHGFTKSFTEHTLIIGLVSVRADLSYQQGL…	536	USER	zzzz975
166	my_seqs_redsnapper1_2ct59.3@PF02305.16	my_seqs	MSIFTQVQNKKVGSNTFDLSHDKKLSCKMGELVPIHCMEIVPGDSISMSTSQLLRMAPMIAPIMHQVNVYTHFFFVPNRILWPNWEKFITGGEDGFDETVFPVCDFAAAPIASLGDYLGLPNLPEGMVSMNVSALPALAYNKIYNEYYRDQNLINPVIDSAVDGENIMAPVTYNSQPYKRAWQHDYFTAALPWTQKGPEATIPLGDFNQLERMDGGEFVTGQQIDLVGMTFTDTKKALLQGITGTPGAPEFVKFSEATATSINDLRRAFKLQEWLEKNARGGSRYTESILSHFGVRSSDQRLQRPEYLGGGSSPMVISEVLQTSNNDTQETPQGNMAGHGLNVGGSNSFRYTAEEHGYIIGIMSIMPKPAYQQGVPKHFLKFDKFDYFWPSFAHLGEQP…	506	USER	zzzz976
165	my_seqs_redsnapper1_2ct6.1@PF02305.16 my_seqs_redsnapper1_2ct6.3@PF09675.9 my_seqs_redsnapper1_2ct64.5@PF02305.16	my_seqs	MRNPHKGNTRIGSSNQHTFAEIPRADIRRSTFDRSHGLKTTFNAGQLIPILADEAIPGDSFSCNMTGFARLATPIHPTMDNAFFDTHFFAIPLRLIWDDFEEFMGETKTYTASGAPSPSNPLPETPDFTASIPVVPTITSGGSGEAELSLSDYLTIPTKVPGLKFSALWHRAYQLVYQDWFRDENLQKLPEISTASGNDTTVYPIRNRGKRHDYFTSSLPWPQKGTDVTIPLGQAAPLTTDIGSGGIVTVYDSVAEDWKYLDSSSAQLKVDVGASGTDARHLYADLSEATSATINQLRLAFATQKFLELQARGGSRYIEVIKNHFNVTSPDARLQRPEFLGSGSSPVNITPVAQTSSTDSTTPQGNLSSIGTTVLSGHSFTKSFTEHSIILGLVSVRTD…	543	USER	zzzz977
164	my_seqs_redsnapper1_2ct66.1@PF02305.16	my_seqs	MSKTSLPTVMSHAFSRVPKAEIQRSSFDRSHGLKTTFNSGFLVPIFVDEALPGDTMSLNTSVFARLATPIFPFMDNAFFDTFFFAVPMRLVWENWERFNGSQDNPGDTTDYLIPTMETPAVTGATIGTLSDYFGIPTAVPGLTHSAIWHRAYNLIYNDWFRDENLQDSLTVNIDDGPDPYSDYSLKKRGKRHDYFTSSLPWPQKGPAVPLPLGTTAPVQGIGNMDQVYPMTNTTVYESGNTVSTVFANSQVTGAASPTIIREDPDNAGFPGIFADLSEATAATINQLRSAFQIQRLYERDARGGSRYTEILRAHFGVTSPDSRLQRPEYLGGGNIPINLNPVAQTESSDAATPQGNLAAIGTVQGNAGGFTKSFTEHNVIIGLCNVRADLNYQQGLNRM…	530	USER	zzzz978
163	my_seqs_redsnapper1_2ct67.2@PF02305.16	my_seqs	MKSPTQHQFSQVPQADIPRSSFRRDCGNKTTFDAGWIVPVFVDEALPGDTFNLRMTAFARLATPLKPFMDNMYLDVFFFSVANRLVWNNWKKFNGEQTNPGDSTDYIIPTITSTAVSGYPNGSIYDYLTLPTLIPGIVHSALFNRAEALIYNEWFRDENLQNSVTVNLGDGPDAPTDYALKRRGKRHDYFTSALPWPQKGPSVALPITGNAPVLRTANATAPDWYQSGTNTKTAASGTTGFSASAKLQNLASQAVSMDPLGSLYADLSAVTAATINQLRQSFQIQKLYERDARGGTRYTEILKSHFGVTSPDARLQRPEYLGGGSTPININPIAQTSAQTSQPTPQGNLAALGTAHLNRIGFTKSFTEHSIILGFVSVRADLTYQNGLNRMFFRSTRWD…	525	USER	zzzz979
162	my_seqs_redsnapper1_2ct68.4@PF02305.16	my_seqs	MKNPHRANTRINSPSYKQFVEVPRAEIQRSTFDRSFGHKTTFDAGELIPIYSDEMLPGDTFSCNLTAFARLATPIHPTMDNAFMDTQFFAVPIRLLWDDFEEFMGETKTYTASGSSRLDETPDFTVSAPVAPTITAGGTGEAEGSLADYLGVPTKTAGLIFSALWHRAYTLVWNDWYRDENLQKPATLDTTSGTDSTAYAVLNRGKRHDYFTSALPWPQKGADVTLPLGTSAPITGIGKFTQTFETVSGSFYETDGSGTTTYAKSAYTDNVSGNNNNLFAIEEDPDNSGFPNIKADLSTATAATINQLRLAFATQKFLERQARSGSRYIEVIKGHFNVTSPDARLQRPQYLGGGSSPVNISPVAQTSSTDATTPQGNLSAIGTSVLSGHSFTYSATEHC…	551	USER	zzzz980
161	my_seqs_redsnapper1_2ct69.4@PF02305.16	my_seqs	MKGVANQNARKSQHKFAHIPTVETQRSTFDRSHGVKTAFDAGKLIPIYVDEALPGDTFRLRMASFARLATPIFPIMDNMYMDFFFFAVPNRLLWTNWQKFCGEQNNPGDSTDFTIPQVTNVPIGSGTLGSLMGLPAGGGNPTVNALHFRAYNLIWNEWFRDENLQNKEANNIGDGPDVSGDYDILNRGKRHDYFTSCLPFTQKGDPVSLPLGTSAPVTSTGDGIPIFDGTGWAAPANLTGQTGTPNAGWETSPTSNDDAFWDDPKLITDLSTATAATINDIRQAFQIQKLLERDARGGTRYTEVCRSHFGVVSDDARLQRPEYLGGGSTRVNIHPVSATAGDATQPDVGTLAGFGTAMQDGIGFVKSFTEHCTLIGMVNVRADLTYQQGLERMWTRQTR…	525	USER	zzzz981
160	my_seqs_redsnapper1_2ct70.4@PF02305.16	my_seqs	MTMTLFGKKGNQPTTTTKDFSRSPQANIQRSSFNRDHGLKTTINTDYLYPIFYDEALPGDSFNLNATGFGRLATPINPFMDNLYVQTYFFSVPFRILWQNWEKFMGEQINPGDSIDYSTPQIQGATVVEETLFDYFGLPTGVAGIDFNNFAGRGYNMCWNEWFRDENLQNSTTVDLGDGPDTLSDYVLLKKGKQHDLFTSALPWPQKGDAVTLPLGGAAEVKTSGVNNDYIFVGNDDATYANTYLKEDGAYITGEFSNSNLPNLYADLSGAAAATVNQLREAFQVQGLLERDSRSGTRYKEIIYGHFGVTSPDMRLDRPEYLGGGKSYINVMPIAQTSSTDATTPQGNMSGFGTAQFTGHTFNKSFTEHCIVIGLVCVYADLTYQQGLNRFFSKRTRYD…	522	USER	zzzz982
159	my_seqs_redsnapper1_2ct71.3@PF02305.16	my_seqs	MSNQFTDVIYNNIPRNSFNLSHSKKFSMNMGQLVPFLTQEVVPGDSFRMSQEQMVRMAPMVAPVMDKVTVDTHFFFVPNRLLWAGWEEFITNPTDPLNPAPFVKPYNFADPITIQTGSIMDYLGYPTGAVPQTAKLNALPLAAYNRIYNEYYRDQNLQNSSSDIKAEELTDGNNNLTNDAFFKMGQAKPYRRAWGKDYFTSALPFPQKGNPVTLGLGGTAPILFTPDNPIPTGETDRYKKTGLTNPVDGAASFLTGSLKDSAGNIISVDNSKNLSADLTAATAVTINDLRTATKLQEWLEINARSGTRYIESIKAHYGVTSRDARLQRPEFLGGGSSNIAFSEVLQQSASDEVTPQGNMSGHGINVGNSRTINYRAEEHGFIIGIISVKPVTSYMNITP…	527	USER	zzzz983
158	my_seqs_redsnapper1_2ct73.1@PF02305.16	my_seqs	MPMKNPHKYNTRIGSSQQHQFSEVPHADIQRSTFDRSHGLKTTFNAGELIPIYVDEALPGDTFSCNLTAFSRLATPIHPTMDNAFMDTHFFAVPVRLVWDDFEEFMGETKTYKAAGSDRLDGTPDFSVAAPVPPTITAGGSGEAEQSLSDYFGIPTKIAGLEFSALWHRAYTLVWNDWFRDENLQAPKTILTTSGADATTYALLNRGKKHDYFTSALPWPQKGADVTIPLGTTANVLSNVDSAFTDTQRSIRVDSGDKTVGIWGSSGSAEADSNLYADLSDATAATINQLRLAFATQKFLEIQARGGSRYIEVIKNHFNVTSPDARLQRPEYLGGGSSPVNISPVAQTSSTDATTPQGNLSAIGTTVLSGHSFTKSFTEHTIVIGMVSVRTDLTYQQGL…	533	USER	zzzz984
157	my_seqs_redsnapper1_2ct75.5@PF02305.16	my_seqs	MKTRPSVMSPHFSEVPKADIPRSKFNRSHGVKTTFDAGELVPIFCDDVVPGDTMSLSMTGFGRLATPIHPFMDNLFIDTFFFAVPMRLLWDNWERFNGSQDNPDDSTDFITPIMTSPPTVGYVNSSLSCYFGIPTEIPDLDHSTMWHRAYNLIWNEWFRDQNLQDSVVVDTDDGPDSIVDYQVLKRGKRHDYFTSALPWPQKGPAVELPLGSTAPIIGFGPETGDQDQDAAFALNYRNTDGTLFGNALSDEGWDIEGVGSPAGAGQAHFGVKSNKAGVPQVFADLANATAATINQLRQSFQIQKMYERDARGGTRYTEIVKSHFGVTSPDARLQRPEYLGGGSSPINVNPVAQTSATDVAVSPQGNLAALGTLNLNGHGFNKSFTEHCVLIGLVNVRAD…	541	USER	zzzz985
156	my_seqs_redsnapper1_2ct77.5@PF02305.16	my_seqs	MKSVMSHKFSEVPRAEIPRSSFDRSHGVKTTFDSGKLIPFFADEALPGDTFNLRTSGFARMSTPLYPLMDNLYLDTFYFAIPIRLLWSNFQKMMGEQDNPGDSVDYTVPTVTAGGAGFNESGLSDYLGIPTKIANLQVNSLFHRAYNLVWNEWFRDQNLQDSITVPLNDGPDSETYYTLRPRGKRHDYFTSALPWPQKGIAVELPLGSTAPIQHVDGFQERLRRFDTDAYPSVNTDLTAGASDGRIINTSTGSPSFYIDPNGALEADLSSATASTINQLRQAFQIQKMYERDARGGTRYTEIVKSHFGVSSPDSRLQRPEYLGGGSSPINITPIAQTSESGTTAQGTLAAMGTSSFQGHGFTKSFTEHSVIIGLINVRADLTYQQGLNKMFSREDKLDF…	521	USER	zzzz986
155	my_seqs_redsnapper1_2ct79.4@PF02305.16	my_seqs	MSRNPSHMNHTFSEVPGITIPRSSFNRSHSVKTTFDSGYLYPIFVDEALPGDTFKLDLTAFARMATPIYPVMDNLFMDVFFFSCPNRLLWDNWTKFMGEQNNPGDSIDYLVPKLRWSGSGKPFNEGTMGDYFGLPTGVSAATTVASALPFRMYNRVWNEWFRDQNLQDSVPEITGDGPDETTGGDDFYPLKRRGKRHDYFTSALPWPQKGDSVDLPLGTTAPILSDGNAMQYQVAAGPSAGNDMGQLTSSGTNALFSLSQGGAAEYTSGLIADLSDATAATINQLRQAFQVQKLLERDARGGTRYVELVKSHFGVTTPSAGWRSEYLGGGTRMVNISPIAQTSETGTSPQGNLAAMGTVSMDGIGFTKSFTEHSTLIGLINVRADLTYQQGMNRLWSRE…	526	USER	zzzz987
154	my_seqs_redsnapper1_2ct89.5@PF02305.16	my_seqs	MPMKNPHKYNTRIGSAQQHQFSEVPHADIQRSTFDRSHGLKTTFNAGELVPIYVDEALPGDTFSCNLTAFSRLATPIHPTMDNAFMDTHFFAVPVRLVWDDFEEFMGETKTYKAAGPTRLDGTPDFSVTAPVPPTITAGGSGEAEGSLSDYFGIPTKVAGLEFSALWHRAYTLVWNDWFRDENLQAPKTLLTTSGADATAYTLLNRGKKHDYFTSALPWPQKGADVTIPLGTKANVWSDAEDNTTVSVYSTHQTAYKTLYADATENVKMGTTAATEANVLYADLSDATAATINQLRLAFATQKFLEIQARGGSRYIEVIKNHFNVTSPDARLQRPEYLGGGSSPVNISPVAQTSSTDTTSPQGNLSAIGTTVLSGHSFTKSFTEHTIVIGMVSVRTDLT…	538	USER	zzzz988
153	my_seqs_redsnapper1_2ct90.3@PF02305.16	my_seqs	MPMKNPHKYNTRIGSAQQHQFSEVPHADIQRSTFDRSHGLKTTFNAGELVPIYVDEALPGDTFSCNLTAFSRLATPIHPTMDNAFMDTHFFAVPVRLVWDDFEEFMGETKTYKAAGSDRLDGTPDFTVAAPVPPTITAGGSGEAECALADDFGIPTKQAGLEVAARWHRAYTLVWNDWFRDENLQAPKTISTTSGADSTTYELLNRGKKHDYFTSALPWPQKGADVTIPLGTVANIHTAAGTDDEIGVYSDADSDFKRLLPFTGTPDYITMSGSGGATPETNKLYADLSDATAATINQLRLAFATQKFLEIQARGGSRYIEVIKNHFNVTSPDARLMRPEYIGGGSSPVNISPVAQTSSTDATTPQGNLSAIGTTVLSGHSFTKSFTEHTIVIGMVSVR…	542	USER	zzzz989
152	my_seqs_redsnapper1_2ct94.6@PF02305.16	my_seqs	MKSVMSHNFSQIPKADIQRSSFDRSHGVKTTFDAGKLIPILVDEALPGDTFKLNMTAFARLATPINPIMDNMYMDTHFFAVPMRLLWDNWQKFNGEQIDPGDSIDYLIPTTTAPAITGYTEGSMSDYFGIPTKVAGLEHSVMWHRAYNLVWNEWFRDENLQDSLTVSRGDGPDPSTDYTIQRRGKRHDYFTSALPWPQKGAAVQLPLGTSAPVTTAGTLGTNNKTTLIDGDGNLSGLLTDGGGVYVSGTNPSGSSPLFADLSDATAATINELRQAFQIQRLLERDARGGTRYIELIKSHFGVSSPDARLQRPEYLGGGSTPVNITPVTQQSASDATTPQGNLAAYGTATLNNHGFSKSFTEHTIIIGLVSVRADLTYQQGLNRMFSRSTRYDFYWPALS…	515	USER	zzzz990
151	my_seqs_redsnapper1_2ct97.3@PF02305.16	my_seqs	MFGPQGNLPSTLSKDFSRVPKVDIQRSVFNRDHGLKTTFDAGNLIPIFYDEALPGDTFQMDANGFGRLATPINPFMDNLYIETFFFAVPYRLIWDNWEKFCGEQTNPGDSTDYLVPTTTTTATNSTLFDYFGVPTDVALTFNNLCGRAYNLIYNDWFRDENLQNSVTVDKGDGPDTATNYTLLKRGKRHDYFTSALPWPQKGDAVTLPLGTQAPIASGATLANGNDLSFLSTTDNAYHKMVANTTNLYGDPQAGLESNRLYADLTDASAATINQLREAFQIQRLYEKDARGGTRYTEVIQSHFGVTSPDARLQRPEYLGGGKDRINVNPIAQTSSTDTTTPQGNLSGYATTGFMGHKFSKSFTEHSVIIGLANVFADLTYQQGLPRHFSRQTKFDFYWP…	518	USER	zzzz991
150	my_seqs_seabass2_1_2ct1.3@PF02305.16	my_seqs	MFNAAMQPRSSQSHVFSQVPKAEIPRSSFDRSHGHKTTFDAGYLVPVFVDEALPGDTFNLKMTGFARLATPIFPLMDNMYMETHYFSVPMRLVWDNWQKFNGEQRNPGDSTDFLIPQMVSPAGGYTINSLSDYMGLPTGVANLTHSALWHRAYNLIWNEWFRDQNLQDSLPVPTGDGPDPVANYEIQRRGKRHDYFTSCLPWPQKGPGVQIPLGLSAPIRGLGVSQNAANTTAPNAFTGGDGTIIPAGTRGWLSSTSGYFMPDTVNSAGTAGTAGHIPNIYADLSQATAATINSLRQAFQIQKIFERDARGGTRYTELIRSHFGVTSPDARLQRPEYLGGGSTPVNVSPVPQTSGSAATPQGNLAAVGTSLLQDHGFTTSFTEHCLIIGVVSVRADLTY…	538	USER	zzzz992
149	my_seqs_10mus_r1_2ct002.5@PF02305.16	my_seqs	MSNPFGKNKFPNVKRNRNLFDMSFINNLTTGFGKLVPFCVKEVLPGDSAEIDLSVAFRMMPMVFPVQTKMRCDLHMFYVRNRNLWKDFPDFYGNLKEGLVMPYLTNLNDSNAGIGQLHDYLGLPNVIHGNYGSIPFVASSSQNCGADIVSPSANRLTSVGATSLTDSSTFRSIYDSVSVQGVVSTIASSPLCSISSPDAFSITIQCSSSSFANLSPSINIILEIPLPQSAVLTETFPVVLTTLGSLVSSRQSYTLFGSIISSGSTGRLFRLSIPYDIYSRLVFVDSSGAYNYAWFILTVPAKPYTDASGVSYVWPSGFHLSPSGHFSSPQGYKSLYGDIGFINPFLPSGSSAPLIPVSALPARAYEQIYNAFYRDERNNPYILNGEKEYNKFLPTLEGG…	738	USER	zzzz993
148	my_seqs_macstl_de1a_r1_2ct000.5@PF02305.16	my_seqs	MDSLKTKGQMYDQIDLGKIQKSGFDLSNNVKGTGRIGRIIPTRCQEVLPGDRMKGSSTAVVQFEPLAVPMLANMYVRQEHFYVPNRIVWKNWDKFFTGGEKLDFTTPPPSFTLSAVWTALQTYLPTFLRFLLYANNTKLTENDGWYANSVDNSSSATSMYGAYRMLVSDKADKLPSGVADLCQPYFDVVEKYISDLVVKYPVSNNKVPMFGYPTDFYADSTILEQAKYSTKFAYAVSLSPDPYEAVLAPYLDSYVGGLSGDKSNLFPMLDEMRNLVHMLYDSYRQFVGVSSNLDYLSYKRLTPTDMYYLVYMTLIPKFVNVTAVSFPFPAISGSLFSNQPLTAFALRANYIIWYNYYRDQLLELDAPEPSVEDSVTTSELFQLLLPRQRCWSKDTFTTA…	732	USER	zzzz994
147	my_seqs_macstl_de1a_r1_2ct001.5@PF02305.16	my_seqs	MQMNRNSEQHYAQVPHAEIRRAKFDRPFSLLTTMNEGDLVPIYVDEVLPADTFKINLNALVRMATPLYPVMDNANIDFYFFFVPARLLWNHFENLMGQNDSTFWAETTEYTTPQTTAPANGWNVGTIADYMGIPTGVKGLSVNSMPFRAYAKIWNEWFRDENLQQPVTQSKDDSTTAGSNTGTKLTDAEAGGLPLKVCKYKDYFTSCLPSPQKNTEPVTIPLSGNAKLYAYDDQDLTKYHDDDALTFWETNTVTGGSKWYAGTFGGPKGNGTSIPRGLKIINSDIYVGADLSSVNGTTINELRQAIAVQHIFERDARTGTRYKEILKGAWGVTSPDARLDRSEYIGGYRLPININQVIQTSSTDSTSPQGNTAAYSMTTMSQKMCTYSATEHGYVLGLA…	547	USER	zzzz995
146	my_seqs_macstl_de1a_r1_2ct002.5@PF02305.16	my_seqs	MNRNVESHFSQLPAAELQRSTFDRSSCYKTSFNVGDVIPFMVDEVLPGDSFDITTSKVVRSQTLLTPLMDNIYLDTYYFFVPNRLVWKHWKEFCGENTAGAWAPAAEYTIPKIASPAGGFTSGTIADYMGLPVNVAWSADDQLAPSALPFRAYALICNEFFRDENLSDPLLIPMDDANQTGVNTGNYIADVANGGKPFRAAKYHDYFTSALPAPQKGESVGVPITVPVFNGGTFPVSTGENLSHSQNFFPLVFDTGIPDTGKTVSSSGDKVASVPAIGNVVPYFMNRDGANLLHGAGSLAHQQWSGSYGALYPLNLQTVIPSSGSGDDTTVNFSVNELRLAFAYQRFLESLARSGSRYTELLLGLFGVRSPDARLQRPEYLGGNRIPINISEVTNNSQS…	585	USER	zzzz996
145	my_seqs_macstl_de1a_r1_2ct003.5@PF02305.16	my_seqs	MRKRNKFSLSYQRLLSCRMGQLIPIGLTEVLPNDTIQHATTGLVRCAPLVSPVMARCDVRIHHFYVPTRILWSSWEDFITGGPDGADDSVLPTVNSGASGFAEGSLADYFGLPTGVPNLEVSALPFRAYNLIFNEYYRDEDLIDPVRIGTEDGPDTVTNLQLLNCAWEKDYFTSARPWTQKGSAVSIPVFGDNVPVNTTISSNGSLKLDIGTSTTLDSLTFGTKSGGVYSNAQLGVTSGYNTIYKSGLKATSSIDTSAAAATGINVSDLRLALSLQRFQEARARYGSRYTEYLRYLGVISSDARLQRPEYLAGGRSPLQFSEVLQTAQGSNPVGTMAGHGLTALRSNRYRRFIEEHGYIVTLMSIRPKTVYKDMIPRTWLRRTKEDYFQPEFQHIGQQE…	505	USER	zzzz997
144	my_seqs_redsnapper_r1_2ct002.3@PF02305.16	my_seqs	MPMKNPHKYNTRIGSAQQHQFAEVPHADIQRSTFDRSHGLKTTFNAGELVPIYVDEALPGDTFSCNLTAFSRLATPIHPTMDNAFMDSHFFAVPVRLVWDDFEEFMGETKTYKAAGATRLDGTPDFTVAAPIPPTITAGGTGEAEQSLSDYFGIPTKIAALEFSALWHRAYTLVWNDWFRDENLQAPKTILTTSGADATAYALLNRGKKHDYFTSALPWPQKGADVTIPLGTVAPVIGIGKNNQTWNSGTTTVYETAGTGSTTYTGFQDINGGVDDGVFRVEEDANNSGFPGIFADLTDATAATINQLRLAFATQKFLEIQARGGSRYIEVIKNHFNVTSPDARLQRPEYLGGGSSPVNISPVAQTSSTDATTPQGNLSAIGTTVLSGHSFTKSFTEHT…	551	USER	zzzz998
143	my_seqs_redsnapper_r1_2ct003.7@PF02305.16	my_seqs	MSNARDMVEIRRPHGNMFSQVPKAKIPRSQFDRSMGLKTTLDMDRIVPIYVEEVLPGDTVTMRTRGFTRLFSPLKAPIMDNLHLDVHYFYVPYRILWDNWEKFNGAQDDPGDSIDYTIPVMSGGTPITTGMLGDYMGLPYGLDPANIDISALPFRAYVRIYNDWYSD	167	USER	zzzz999
142	genbank_microviridae_NP_073538.1_@PF02305.16	genbank	MKLGSRHNQHSFAQIPSVHTTRSKFNRSFGTKDTFKFDDLTPIFIDEILPGDTINMNTKTFIRLATQVVPVMDRMMLDFYFFFVPCRLVWDNWEKFNGAQDNPSDSTDYLIPTITAPAGGFENMSIYDHFGIPTQVANLEINALPFRAYNLIYNDWFRDQNLIGKIAVPKGDGPDNHADYQLLKAAKPHDYFTSALPWPQKGMAVEMPIGNSAPITYVPNAGNGPYPHFNWVQTPGGPGNNGALSQVTFGGQKAISAAGNDPIGYDPQGTLIADLSSATAATINQLRQAMMMQSLLELDARGGTRYVEILKSHFNVISLDFRLQRPEYLSGGTIDLQQNPVPQTSSSTTDSPQGNLAAFSTASEFGNKIGFSKSFVEHGYVLGFIRARGQVTYQQGLHK…	533	USER	zzzzz12
141	genbank_microviridae_NP_598320.1_@PF02305.16	genbank	MKKKMSKLNARVHDFSMFKGNHIPRSKIHIPHKTIRAFNVGEIIPIYQTPVYPGEHIKMDLTSLYRPSTFIVPPMDDLIVDTYAFAVPWRIVWKDLEKFFGENSDSWDVKNAPPVPDIVAPSGGWDYGTLADHFGITPKVPGIRVKSLRFRAYAKIINDWFRDQNLSSECALTLDSSNSQGSNGSNQVTDIQLGGKPYIANKYHDYFTSCLPAPQKGAPTTLNVGGMAPVTTKFRDVPNLSGTPLIFRDNKGRTIKTGQLGIGPVDAGFLVAQNTAQAANGERAIPSNLWADLSNATGISISDLRLAITYQHYKEMDARGGTRYVEFTLNHFGVHTADARLQRSEFLGGHSQSLLVQSVPQTSSTVEKMTPQGNLAAFSETMIQNNYLVNKTFTEHSYI…	553	USER	zzzzz13
140	genbank_microviridae_NP_044312.1_@PF02305.16	genbank	MAKGRKLPSVMKNRFSEVPTATIRRSSFDRSHGYKTTFDMDYLVPFFVDEVLPGDTFSLSETHLCRLTTLVQPIMDNIQLTTQFFFVPNRLLWDNWESFITGGDEPVAWTSTNPANEYFVPQVTSPDGGYAENSIYDYFGLPTKVANYRHQVLPLRAYNLIFNEYYRDENLQESLPVWTGDADPKVDPTTGEESQEDDAVPYVYKLMRRNKRYDYFTSALPGLQKGPSVGIGITGGDSGRLPVHGLAIRSYLDDSSDDQFSFGVSYVNASQKWFTADGRLTSGMGSVPVGTTGNFPIDNVVYPSYFGTTVAQTGSPSSSSTPPFVKGDFPVYVDLAASSSVTINSLRNAITLQQWFEKSARYGSRYVESVQGHFGVHLGDYRAQRPIYLGGSKSYVSVN…	596	USER	zzzzz14
139	genbank_microviridae_YP_338238.1_@PF02305.16	genbank	MVRNRRLPSVMSHSFAQVPSARIQRSSFDRSCGLKTTFDAGYLIPIFCDEVLPGDTFSLKEAFLARMATPIFPLMDNLRLDTQYFFVPLRLLWSNFQKFCGEQDDPGDSTDFLTPILTAPQNGGFAEGSIHDYLGLPTKVAGVQCVAFWHRAYNLIWNQYYRDENIQDSVEVQMGDTTADEVNNYKLLKRGKRYDYFTSCLPWPQKGPAVTIGVGGIVPVQGLGIQWGGSTGPNPITASDWRDSVNPTYVNSATQTPTGTNKILSYGQAYYIKKPGEPATDPAPRAYVDLGSTSPVTINSLREAFQLQKLYERDARGGTRYIEIIRSHFNVQSPDARLQRAEYLGGSSTPVNISPIPQTSSTDSTSPQGNLAAYGTAIGSKRVFTKSFTEHGVILGLAS…	554	USER	zzzzz15
138	genbank_microviridae_YP_009259742.1_@PF02305.16	genbank	MSRNQNSRFALNPTNIDISRSRFTRNSSVKTSFNVGDIVPFYVDEVLPGDSFDVSTNKVVRMQPLVSAPMDNLYLDTYYFFVPNRLVWEHWRNLMGENTDSAWIPTTEYEVPQITSPASTGWTEGTIADYFGIPTNIPNLSVNALPFRAYALIMNEWFRDENLTDPLNIPVDETTVAGVNTGTYVTDVAKGGLPFVASKYHDYFTSCLPSPQKGPDVVISATDSIGKVFTGDSHDNNGSVVNMHYGLYNSTSNSITYSNAQRAFPAVKASGSDNLVVPSNSVADASSYDMVVSYNSSQVGDALNIYPDNLYASLGATATTINQLRMAFQIQKLYEKDARGGTRYIESIKSHFGVTSPDARLQRPEYLGGNRVPININQVIQTSNSGTDITPQGNVAGYS…	580	USER	zzzzz17
137	genbank_microviridae_YP_009259688.1_@PF02305.16	genbank	MNHVFSMIPKSSIKRSFFDRSSNHKTTLNSGVLVPVFCDEVLPSDTFKFDMSAFARLTTQVVPTMSNVYMDFQFFFVPYRLVWEHWNNFMGEQDNPSDSTDFLVPQITKELTTSLNGTIWDYFGLPTSGGSQKFSALPFRAYNLIWNDWYRDENLQASVEIPLGDTDDGTAYKLLPRGKRHDYFTSCLPWAQKNTDGWLPTLGIGGSAPVVGNGNPVNFYGVTEVDSNDYVKSLGNFNLVGYQSSSASTASNKIPVSVQNTTKSVMPSIGDRGVDVGNLSVSDSLNFGIGLASSDSNVFADLSKAGGITINDLRTAFQMQRLKERDARGGTRYTEILRAHFGVVSPDSRLQRPEYLGGGEIPLIVSSVPQTSSSDATTPQGNLAAYSVFSGRNTCRWTK…	558	USER	zzzzz18
136	genbank_microviridae_YP_009216768.1_@PF02305.16	genbank	MHRNKSVDVHQFTMIPKADIPRSSFDCQSTHKTTFDAGFLVPVYVDEMLPGDTFRLNMTAFARLATPLYPIMDNMHLDSFFFFVPNRLIWNNWQKFMGQQANPDSSISFVVPQQVSPAGGYAIGSLQDYMGLPTVGQVGAGNTVSHCAFWPRAYNLIYNEWFRDENLQNSVTVDLGDGPDTVTNYTLLRRGKRKDYFTSALPWPQKGTSVTLPLGTSAPVYGTGRTIGVSNGSGNFGLTTNSAGGVFGYAGAYDKALGGSNITGTILATKDIGVVTSGVSGLYADLSVATAATINQLRQSFQIQKLLERDARGGTRYTEIIRSHFGVISPDARLQRPEYIGGGSTNININPIAQTSGSNASGTTTPMGTLAAMGTALAHNHGFTYSATEHGVILGLVSV…	581	USER	zzzzz19
135	genbank_microviridae_YP_009216767.1_@1KVP_A	genbank	MTMMHKNRSVDPHRFAMIPHADIPRAKFDRQFTHKTTFDAGYLVPVYVDEVLPGDTFNLNMTAFARLATPFFLLWIIWFWIVFFFFVPNRLIWDNWQKFMVSSVTLVIRLLCCSSTSFSRRWLCCWFFARLYGFTNCWSGWCWQYYFPLRFFTRAYNLIWNEWFRDQNLQNSVTVDTGDGPDASASTNYTLLRRGKRHDYFTSALPWPQKGSSVTLPLGTSAPIKSDTTQVQFKYGATTFNSVSRTDVNVLGFNGAAVGAAGQAISFGANTGLYADLSQATAATINQLRQSFQIQKLLERDARGGTRYTEIIRAHFGVISPDARLQRPEYLGGGSTPVIINPIAQTSGTGVTGGSTPLANLAGVGTVLASGHGFTQSFTEHGVIIGLVSIRADLTYQQG…	537	USER	zzzzz20
134	genbank_microviridae_YP_009259727.1_@PF02305.16	genbank	MNHVFSMIPKSSIKRSFFDRSSNYKTTLNSGVLVPVFCDEVLPSDTFKFDMSAFARLTTQVVPTMSNVYMDFQFFFVPYRLVWEHWNNFMGEQDNPGDSTDFLVPQIERNLTTADNMTIWDYFGLPTSAGTQKFSALPFRAYNLIWNNWYRDENLQESVSVPLGDIDDGTSYSLLARGKRHDYFTSCLPWAQKSTDGWLPTLNVGGSASVVGTGIAIGLSDASNNYGLTAGGTGASTYAFKPSVSAYGSALGNTSTTSSVTNNINIGLTADPDKSGIVADLSTASGISINDLRTAFQMQRLKERDARGGTRYTEILRAHFGVVSPDSRLQRPEYLGGGEIPLIVSSVPQTSSTDATTPQGNLAAYSVFSGRNTCRWTKSFVEHGVVIGLCSVRADLEYQ…	537	USER	zzzzz21
133	genbank_microviridae_YP_009160402.1_@PF02305.16	genbank	MSQRILDTGNKALVERPVVNVPSNHFNLSHDVKLSCNIGQLIPCCTMEMLPGDRVNINTEALVRFQPMIAPIMHRLSIRSEWFFVPNRLLWPKWEDFISPPIEGVEPPAVPLIAETDWSVTPNSLGDYLGLPLGLFDETQPGVSALPFSAYQRIFYDWYRDEDFYPLQWQYAGQLVDGNNGDNLDELDVIRIRNNDRDYFTSAKPWAQKGVVVTIPLLNTTLTLDNAGYAFSKSDGSAPNVGGAKFDGTGFQLEDVNGDQLFLDSPYAITPEDATAAAGTIEQLRQAVALQKFLEADARGGTRYVELLWQHFEEYMEDYRAQRCEYIGNTVQPITISEVLNTTGTDAAPQGTMSGHGISVARHADGLYYHAKEHGFLMCIMSVIPVSGYYQGVPKMWSR…	528	USER	zzzzz22
132	genbank_microviridae_YP_009160412.1_@PF02305.16	genbank	MKRSKFSLSHYKLLTCKMGQLVPVTWYEALPGDTIQQATSALIRCAPLVTPVMHPVSVRFHHWFVPNRIIWTNWENFITGGANGLDTTAHPALSISNVTVSGLMDHLGWPTSGLSGAVLANALPARAYALIFNEFYRDQDLQTPVALSLGDGTDSTTSVSIQNINWEKDYLTSARPWEQKGPAVSVPVGGLAPITGLGFQDGTATAAQANVRETSGTTVSYTMGTTGVIAKTSGAASPTGASNYAQIFANLAGATGVDINVVRHAFAMQRWQEARARYGSRYVEYLRYLGVHSSDARLQRPEYLGGGKNTIQFSEVLQTAPTTAGTAGGLGGIGQFGGHGITAMRSNRYRRFFEEHGIVMTLMSVRPKTMYSQRMGRAWWRGQTINGMVGTKEDYWQRE…	507	USER	zzzzz23
131	genbank_microviridae_YP_009160407.1_@PF02305.16	genbank	MSRNIFNSVKMMRPKKNVFDLTHDVKQTTRFGELAPCLWLECVPGDKFKIGAETLIRFAPLISPVMHRMNASIHYFFVPYRILWPNWEDYITNTSSVHAPPYVDYSQIATSHQRLGDFLGIPPQVQSGNGHPKVSAFPFAAYLKIYDDYYRDQNLIQPAWSPLTDGLQVANLVDLVTMRNRAWEHDYFTASLPWAQKGAQVEIPLGDITLGQPAGGPNQFLRRGIDGSTEGNIAALGTDTPGFLVDAAGQVPVNIDPNGSLINEATTINDLRRAFRLQEWLEKNARAGTRYIENILAHFGVNSSDKRLQRPEYICGLKTPVVISEVLNTTGAPDGLAQGNMAGHGIAAHSAKDGSYSCEEHGLIMGVMSIMPNTAYQQGIHKSWSKFDQLDYFWPTFAH…	506	USER	zzzzz24
130	genbank_microviridae_YP_009160396.1_@PF02305.16	genbank	MAYTANRSVNAHDFAMVPRAEIPRSSFAMQKTLKTTFDSGYLVPIMCEEVLPGDTFNVKTTLFGRLATPIFPVMDNLHLETFFFFVPNRLVWSDWQRFMGEQANPADSISFSIPQVVSPASGYVANSLYDYFGLPTVGQVAGTNTVSHSALPMRAYNLIFNQWFRDENLQNSLGFGATNTVSDFGDGPDPYTNYTLMRRGKRADYFTSCLPWPQKGGVAVSLPLGTSAPIKSDGTNLQMRGGGGGMTGLAFAAGTVGSNLQNQSGTTGASSVNWGAAGTATTGLYADLSTATAATINQLRQSFQIQKLLERDARGGTRYTEIVRSHFGVISPDARLQRPEYLGGGHSMISMNPIAQTQGTGASGTSTPQGNLAAFGHYLAPNHGFTQSFTEHGHIIGLV…	548	USER	zzzzz25
129	genbank_microviridae_YP_009160391.1_@PF02305.16	genbank	MAQRILDTGNPILMDRPINNVNRNTFSLSHNVKTSCEIGQLVPICTLEVMPGDTFHITTEALIRYQALISPVMHAQNARTEWFFVPYRLLWQNWENFISPPTGQVVPPAMPFFPTGSLGLPEGGPGTPNIIQVGSLDDYLGCVPGLQNPQICAFFHAAYQKIFTDWYMDEDLGDAAPVGQNTAPYLSDGENFSGPDFPYNWSVLQLRNYDRDYFTSAKPWTQKGPAVVIPITSSISAAPVDFDGNIQKGILTSGDPLLSTGANVRLNPDSSGASHGQVEFSNSSGTLEPGSFEIPAAQISADNFQQMMGTIEQLRQCEALQKFLEADSRGGTRYAEVLKQHFGVYSSDARLQRPEYLGGTNQPIVISEVLNTTGTDTAPQGQMAGHGISAAAHNQGIHY…	553	USER	zzzzz26
128	genbank_microviridae_YP_009160386.1_@PF02305.16	genbank	MQPMLAPVLHRLSIRSEWFFIPNRILWPNWESFISPPVEGVDGPAAPFLSNFTVVSNSLGDYLGLPLGSWNNGDGGDPSQIVNALPFSAYQRVWWDWYRDEDFQPLQWQYAGQLVDGDNSEQEELFPIRIRNNDRDYFTSAKPWPQKGDAVVIPAFVGDLPVSANLETQWHVNRTDHTGLSATALVSTGTSDTDGIGLDGGGTGVALDPRGALSISSDDMLAQAGTIEQLRMANALQRFLEADARGGTRYVELLWRHFKAYLPDKIDRSEYIGNTVQPISISEVLNTTGTTDAPQGTMTGHGISAARHATDLSYSAVEHGWLMCICSVIPATGYYQGIPKMWSRFDRFDYAWPEFAHLGEQPILNQELYYDTASVDPDTGNTATWGYLPRYTEYKSQMN…	473	USER	zzzzz27
127	genbank_microviridae_YP_009160379.1_@PF02305.16	genbank	MSHMFSQVPKASIPRSTFDRSHGMKATFDSGYLIPIYVDEALPGDTFNLSLTTFARLSTPLHPVMDNMKADVFFSLSRIGLFGRIFVNFLVEQANPTDSTSFLVPTCTSPSGPGYVNESLQDYMGIPTAVVNLTHDNLFPRAYNLIWNQWFRDQNLQNSVVVDMGDGPDNPANYVLLRRGKRHDYFTASLPWPQKGPSVSIPLGGTAPVIGIGGSGAASALPGSTYFQTDGTTLSGAGVVASTVNEVAIRATAAGAFSASNPPQIFANLATATAATINQLRQAFQIQKIYERDARGGTRYTELIQAHFGVTSPDARLQRAEYLGGGSTPINVNPIAQTQGTGASGTTTPQGNLAAIGTMSHRGVGFTKSFTEHCLLIGLLEVTADLSYQQGLERMWSRQ…	526	USER	zzzzz28
126	genbank_microviridae_YP_009160373.1_@PF02305.16	genbank	MGLFETNQAPRVPRAKFDLSHDRKLTMNMGTLIPVLNKEVLPGDVWRCSPTVFLRFLALLAPIMHKVNVKLEVFFCAYRLVWPNFPDFVSGGESGTAAPVFPTFNTTQCNVTNTTILQDGSLLDYLGFPTYPQSGTYNAAYNGNTFSILHPRVYTLIYDTWYRNQNVETTVIGTTFGADGPQNAGDYPFIFSLRSRQWERDYFTSCQPSTQRGTQVVIPISSTITSPSGNTNIPIVRVSGGAANTVSHAIGSKAADGSLMDQTSLAGVYLDPNGSLIASNTSLTVNALRASITLQTYKERMQRGGGRYIEYLWNVFGVASDDARLQRPELIYTLREPVTVSEVLTTSTGTGTGQTPPGTLAGAAMSIGSGGSGVYAAKEHGCIMALMSVIPRSAYQNGI…	537	USER	zzzzz29
125	genbank_microviridae_YP_009160368.1_@PF02305.16	genbank	MSTQRIINTGNQILTERPKPHMIDMSTFSMSHDVKLSTEMGYLVPACVLECMPGDEWHIQSEALIRCQALISPVMGRLTYRAEWFFTPNRLLWQNWENFISPINEAMTAPVCPNLPSNSVTPATHDINDFLGLPTGGGALPQFNPMPHAAYQKIFSDWYADQDLYSGGTTTFVPGGWWTPQGYPLVDGNNIANVSGLCGTQPGSAFGGVNQRNYDRDYFTSAKPWTQKGPTVTIPSFTGPLPVTTIPGSGMGITSNSTEAAGSAITTAGTSGPSTVAGINVNGVVGHIVDSGSLNVTQANLTALAGTIAQLRQAEALQKFFEADSRGGTRYIEFLLNHFGVMNGDQRLWRAEYIGSSKQPIVISEVLNTTGTTTAPQGALAGHGLAVNPPGAPMRYKCS…	551	USER	zzzzz30
124	genbank_microviridae_YP_009160363.1_@PF02305.16	genbank	MCAQRILDTGNKIAIERPISHVEANAFDLSHDVKLSTDLGYLTPACVMEVLPGDQFHITTECLTRLQALISPVMHRMNQRSEWFFVPTRLLWANWEDFISPQVEGSTPPAMPYFANVPNYIGNLGDYLGLPAYANTDPDFQNLTKVCALPHYAVSKIISDWYTDEDLVSEGPPFFQAEDGDNSDHWGVLNAVSVRNKDRDYFTSAKPWAQKGPAVTIPVGSAGTFPNVGINGPSSPINTVLKATDNNGFAVFPAEQVFVAATVQDHNYASLGLTSDDVDANAMIDPAASGWTADTSALDLSGLGGTIEELRTAEALQKFLEADSRGGTRYIESMEQHWGVYSSDARLQRAEYIGSTFQPIVISEVLNTTGTSTAPQGAMAGHGIAVTHVNEPMHYRAEE…	554	USER	zzzzz31
123	genbank_microviridae_YP_009160359.1_@PF02305.16	genbank	MSTQKIIQTGKVGLVSRPNNSVPSNTFDLSYDVKTSFNIGELIPIGCWEALPGDRFNCQSEALVRFAPMLAPIMQRLNLRLEYFFVPNRILWSDWEDFISPSTEGEASPSMAAFSDDFQVTPYSVSGYLGLPLTGPDLVISKDDVNCLRHAGYRRIYEDWYRDENYDMSGGNTSLSSGFTNQFDIYDHIFTRNLDRDYFTSSYPWPQKGADVLIPVTIDQTPQVVPVSRTSQGVYTVFEPVDNADHSGGAVDWVPDPEPSSNTGYLTAGSTPLSIDPGSSGFQVSIPADSSTVGTINDLRTAAAVQRWLEADIYGTRYIELIENHFATTVEDFRLQRAEFLGMTLEPIQISEVLQTSETATSPQGNMSGHGLAVHKGEHYNYHCKEHGHFYVIASVLPT…	537	USER	zzzzz32
122	genbank_microviridae_YP_009160353.1_@PF02305.16	genbank	MSSASLISQHSFAIAPHPKLPRAIFNRTFTHKTTCNAGMLIPFLIDEIYPGDTFKLRSTFLARMSTPIYPVMDNLFIDTQFFFIPNRLLWTHWEQFMGYQENPGDSIDYTLPTITSPTGGYLEQTIYDYLGLPTKIAGVTHQALPLRAYNKVYNDWYRDQNLQDSVVLPNGDGPDAPTDYVLLPRGKRHDYFTSALPTPQKGAAVQLPLGTTAPILSNNTQVNFSDEAMTSPDHGLYGQEGTNLLVLGGSAFGATEPLIFGNNTGLYADLSSATSATINDLRLSIATQQYLERDMRSGTRYTEVLLGHWGIAAQDARLQRSEYLGGGSTQINFHPVAQTAPSDASGSGEESSPQGTLSAFATAVGYDHGFTKSFPEHGFILGLMSIRADYTYQQGAERF…	529	USER	zzzzz33
121	genbank_microviridae_YP_009160347.1_@PF02305.16	genbank	MFIVLRWFPKRIFRVRRLIIQTTHKTTFDAGYLIPIYVDEILPGDTFNLQMTAFARMATPLFPLMDNLYMDSFFFFVPNRLVWIHWKQFMGEQDNPGDSISYTVPTMTTPASGYTPGNLFDYFGLPTIGQVGGGNTVVHNSLPLRCYNLIWNQWFRDENLQNSVQIDNGDGPDNPVNYNLCRRGKRHDYFTSSLPWPQKGGTAITLPLGTRAPVLGLAIPATANVVSAATAYQSDGSTVAAGTRIWSASNFNVTDAINSAGTAGTGGHLPNVYADLSQATAATINQLRQSFQIQKLLERDARGGTRYTEIVRSHFGVISPDARLQRPEYLGGASTPIAVNPIAQTSGTSASGTTTPLGTLSAMGTALHQGSGFTQSFTEHGYVIGLVAVRADLTYQQGL…	536	USER	zzzzz34
120	genbank_microviridae_YP_009160342.1_@PF02305.16	genbank	MSKQRIINTGQLNLTERPTPNYPHNSFNLSHSVKLSFNYGNLVPVMVMDVVPGDRVHIDHECLLRYQPMIAPPMQRVKVRSESFFVPYRLLWPNFESAMGQRDVSDPAPAFPTISVDPEVGISKSSLANYLGMPVLPVQPGGSTYVYPTMNAFRFAAYQKIFADWYADEDLQIDSVFVPLSDGDNGSIETSGYGFLNQRLYDLDYFTVAKPWPQKGSEVVIPALNTQVPVSVIDSTAQQRLYQTVNGTYADAGAPNIEHDSMPIQAAFQDGGGFLINLDPKGSLGINPADWAGAAGTIEQLRVAEAMQRFLEADSRGGTRYGELIYAHFGVMNPDARLQYSEYLGSTSQQISFGEVLNTTGTSTAPQGAMAGHGVSAHKTNAPYHCNVTEHGVILTLMS…	546	USER	zzzzz35
119	genbank_microviridae_YP_009160336.1_@PF02305.16	genbank	MTLNMGYLYPFFVQEVLPGDRFRVACQIFLRFLSLISPVMHRVDVYTHFFVPNRLVWANWYSFVTGGESGTSGPVMPQFSLNNVTAGIGTNALRTGSLLDHLGFPVMKGTDTYQGGLYGTNQYNALIPRAYQLIYDQYYRDQNVETTNLTATFNSDGLMSVADTTVALTLRQRAWEKDLLTSALPFTQRGNAVTLPINVTAPTTGIGGNQPFFRNSSTGAAQGASINVNATGSNVPVNAATTTGATSVYYDPNGSLSANNLTVNALRLSVKLQEWLEINARGGGRYIETIWSNFGVLSSDARLQRAEYKGGGKSPVTISEVLQTSTPSTATGGNTPLATMSGHGMSLSNVHGFTGFFEEHGVVIGILSVLPRTSYQQLMGKEWTRYVNTDYYIPSFANL…	511	USER	zzzzz36
118	genbank_microviridae_YP_009160331.1_@PF02305.16	genbank	MRSVMKHQFSMIPRANIPRSTFNRSHGYKTTFRAGYLIPFYVDEVLPGDTFNLKVSTFARLLTPIVPIMDNMFMDIHFFVVPNRLVWNNWEKFAGQGNAEPGDENIGPTDFVIPTVKISNSVSVLPQFYGVFPAYANLTGVYTHPVSPPGVGDYFGLPLMPSGVLAVQSTHVSALPFRAYRLIWNEWFRDENLQHSVHVNLTDSQDVLSENLTATSNDGVDQLLSRGKRHDYFTSCLPFPQKGPGVEIPLGTTAPVHAINTGITAANAPFMRSDVDGTRVPLGVAGSTVSVDYTSTTPTSTTGILGLATATPGTYLGTYYDPASTLYADLSLATAATINSLRQAFQIQKLYERDARGGTRYTEVLRAHFGVVSPDARLQRPEYLGGGSVRVIINPVAQT…	606	USER	zzzzz37
117	genbank_microviridae_YP_009113043.1_@PF02305.16	genbank	MLNFNIGVTRRKYSHNKSFHIDTTADFGSFQPILCDYLSPGDTAAMRSFRQLVRNAVMPSPTFGDIKCINKFTFVPVSDVFPAFEALLSRQSIKTDIREYIPTSVPTISSTDLVLLLMRKSLSSCVVYDVVNKTETEKPGDPSHFGGNNFNLFTINSSFTDVFSLFKSLIEGNLGVNSLTSAAILKNIQTVVSTLSPDSCDFRISNIDSNSAPAGARFLGVRLNAIGRRIYNILRGLGYSLDPLNNNKVSFLPLLAYYKAWFDSYFPTREVNFQSTSCYKIIQLINSHGISYVFDSANAPFPELRDLLFKFFDEELAYCYYTYPDDFVSSHMSKPLSNVLPSSSSLPTDGITPNVPTSASKLRNNTLGSITSDFADYASLSMLVRATKFLSKNSLIGAR…	706	USER	zzzzz38
116	genbank_microviridae_YP_008798242.1_@PF02305.16	genbank	MPMKNPHKYNTRIGSAKQHQFSEVPHADIQRSTFDRSHGLKTTFNAGQLVPIYVDEALPGDTFSCNLTAFSRLATPIHPTMDNAFMDTHFFAVPVRLVWDDFEEFMGETKTYKAAGSDRLDGTPDFSVAAPVPPTITASGSGEAEASLSDYFGIPTKVGGLEFSALWHRAYTLVWNDWFRDENLQAPKTIDTTSGNDTTTYALLNRGKKHDYFTSALPWPQKGADVTIPLGTSAPVTTANSSNQDVTIFTPNIGNTHRFLNSASTNVYPGDENTDEARRLYADLSEATSATINQLRLAFATQKFLEIQARGGSRYIEVIKNHFNVTSPDARLQRPEYLGGGSSPVNISPVAQTSSTDATTPQGNLSAIGTTVLSGHSFTKSFTEHTIVIGMVSVRTDLT…	538	USER	zzzzz39
115	genbank_microviridae_YP_009218802.1_@PF02305.16	genbank	MANIFNSIRMKRPRRNAFNLSYESKLTLNMGELVPIMCMPVVSGDKFRVKTESLVRLAPLVAPMMHRVNVFTHYFFVPNRLVWNEWEDFITKGVDGEDMPMFPKIQINQDSHLVSSASLIKEYFGDSSLWDYLGLPTLSACGNKSYDVVNGVKVPSGFQVSALPFRAYQLIYNEYYRDQNLTEPIDFTLGSGTTVGGDQLMALMSLRRRAWEKDYFTSALPWLQRGPEVTVPVQGAGGSMDVVYERQSDSQKWVDSSGREFENGHAYDITMARANDPNSALMVAVNGGTNNRAPELDPNGTLKVNVDEMGININDLRTSNALQRWFERNARGGSRYIEQILSHFGVRSSDARLQRPQFLGGGRMPISVSEVLQTSSTDETSPQANMAGHGISAGINNGF…	553	USER	zzzzz40
[truncated: 53 more rows]
