# Supplementary material for: Discovery of several thousand highly diverse circular DNA viruses
Source: eLife journal article supplement (doi:10.7554/elife.51971), 2020-02-03
Supplement: fig2-figsupp1-data3 [file elife-51971-fig2-figsupp1-data3-v1.cys › CytoscapeSession-2019_08_05-17_08/tables/52-all_my_seqs_genbank_ssDNA1_domains_micro_MCP_fasta+Full+Network/HIDDEN-org.cytoscape.model.CyNetwork-52+hidden+network.cytable]

"CyCSV-Version","1"
"SUID","layoutAlgorithm"
"java.lang.Long","java.lang.String"
"",""
"52 hidden network",""
"52","Prefuse Force Directed OpenCL Layout"
