# Supplementary material for: Discovery of several thousand highly diverse circular DNA viruses
Source: eLife journal article supplement (doi:10.7554/elife.51971), 2020-02-03
Supplement: fig2-figsupp1-data3 [file elife-51971-fig2-figsupp1-data3-v1.cys › CytoscapeSession-2019_08_05-17_08/tables/52-all_my_seqs_genbank_ssDNA1_domains_micro_MCP_fasta+Full+Network/LOCAL_ATTRS-org.cytoscape.model.CyEdge-all_my_seqs_genbank_ssDNA1_domains_micro_MCP_fasta+Full+Network+default+edge.cytable]

CyCSV-Version	1
SUID	interaction	name	selected
java.lang.Long	java.lang.String	java.lang.String	java.lang.Boolean
all_my_seqs_genbank_ssDNA1_domains_micro_MCP_fasta Full Network default edge
1047		zzzzz98,zzzzz99	false
1048		zzzzz97,zzzzz99	false
1049		zzzzz97,zzzzz98	false
1050		zzzzz96,zzzzz99	false
1051		zzzzz96,zzzzz98	false
1052		zzzzz96,zzzzz97	false
1053		zzzzz95,zzzzz98	false
1054		zzzzz95,zzzzz99	false
1055		zzzzz95,zzzzz96	false
1056		zzzzz95,zzzzz97	false
1057		zzzzz94,zzzzz99	false
1058		zzzzz94,zzzzz96	false
1059		zzzzz94,zzzzz95	false
1060		zzzzz94,zzzzz98	false
1061		zzzzz94,zzzzz97	false
1062		zzzzz93,zzzzz98	false
1063		zzzzz93,zzzzz99	false
1064		zzzzz93,zzzzz96	false
1065		zzzzz93,zzzzz95	false
1066		zzzzz93,zzzzz97	false
1067		zzzzz93,zzzzz94	false
1068		zzzzz92,zzzzz99	false
1069		zzzzz92,zzzzz98	false
1070		zzzzz92,zzzzz96	false
1071		zzzzz92,zzzzz95	false
1072		zzzzz92,zzzzz97	false
1073		zzzzz92,zzzzz94	false
1074		zzzzz92,zzzzz93	false
1075		zzzzz91,zzzzz94	false
1076		zzzzz91,zzzzz97	false
1077		zzzzz91,zzzzz96	false
1078		zzzzz91,zzzzz99	false
1079		zzzzz91,zzzzz92	false
1080		zzzzz91,zzzzz98	false
1081		zzzzz91,zzzzz93	false
1082		zzzzz91,zzzzz95	false
1083		zzzzz90,zzzzz93	false
1084		zzzzz90,zzzzz95	false
1085		zzzzz90,zzzzz99	false
1086		zzzzz90,zzzzz97	false
1087		zzzzz90,zzzzz98	false
1088		zzzzz90,zzzzz96	false
1089		zzzzz90,zzzzz94	false
1090		zzzzz90,zzzzz91	false
1091		zzzzz90,zzzzz92	false
1092		zzzzz89,zzzzz90	false
1093		zzzzz89,zzzzz91	false
1094		zzzzz89,zzzzz99	false
1095		zzzzz89,zzzzz98	false
1096		zzzzz89,zzzzz95	false
1097		zzzzz89,zzzzz97	false
1098		zzzzz89,zzzzz94	false
1099		zzzzz89,zzzzz92	false
1100		zzzzz89,zzzzz96	false
1101		zzzzz89,zzzzz93	false
1102		zzzzz88,zzzzz90	false
1103		zzzzz88,zzzzz91	false
1104		zzzzz88,zzzzz89	false
1105		zzzzz88,zzzzz98	false
1106		zzzzz88,zzzzz99	false
1107		zzzzz88,zzzzz96	false
1108		zzzzz88,zzzzz97	false
1109		zzzzz88,zzzzz94	false
1110		zzzzz88,zzzzz93	false
1111		zzzzz88,zzzzz95	false
1112		zzzzz88,zzzzz92	false
1113		zzzzz85,zzzzz89	false
1114		zzzzz85,zzzzz90	false
1115		zzzzz85,zzzzz91	false
1116		zzzzz85,zzzzz88	false
1117		zzzzz85,zzzzz99	false
1118		zzzzz85,zzzzz92	false
1119		zzzzz85,zzzzz98	false
1120		zzzzz85,zzzzz95	false
1121		zzzzz85,zzzzz93	false
1122		zzzzz85,zzzzz97	false
1123		zzzzz85,zzzzz96	false
1124		zzzzz85,zzzzz94	false
1125		zzzzz84,zzzzz89	false
1126		zzzzz84,zzzzz90	false
1127		zzzzz84,zzzzz91	false
1128		zzzzz84,zzzzz88	false
1129		zzzzz84,zzzzz96	false
1130		zzzzz84,zzzzz98	false
1131		zzzzz84,zzzzz99	false
1132		zzzzz84,zzzzz85	false
1133		zzzzz84,zzzzz92	false
1134		zzzzz84,zzzzz94	false
1135		zzzzz84,zzzzz93	false
1136		zzzzz84,zzzzz97	false
1137		zzzzz84,zzzzz95	false
1138		zzzzz83,zzzzz90	false
1139		zzzzz83,zzzzz89	false
1140		zzzzz83,zzzzz91	false
1141		zzzzz83,zzzzz88	false
1142		zzzzz83,zzzzz92	false
1143		zzzzz83,zzzzz96	false
1144		zzzzz83,zzzzz99	false
1145		zzzzz83,zzzzz98	false
1146		zzzzz83,zzzzz97	false
1147		zzzzz83,zzzzz93	false
1148		zzzzz83,zzzzz94	false
1149		zzzzz83,zzzzz95	false
1150		zzzzz83,zzzzz85	false
1151		zzzzz83,zzzzz84	false
1152		zzzzz82,zzzzz90	false
1153		zzzzz82,zzzzz89	false
1154		zzzzz82,zzzzz91	false
1155		zzzzz82,zzzzz88	false
1156		zzzzz82,zzzzz92	false
1157		zzzzz82,zzzzz98	false
1158		zzzzz82,zzzzz99	false
1159		zzzzz82,zzzzz96	false
1160		zzzzz82,zzzzz97	false
1161		zzzzz82,zzzzz93	false
1162		zzzzz82,zzzzz95	false
1163		zzzzz82,zzzzz94	false
1164		zzzzz82,zzzzz85	false
1165		zzzzz82,zzzzz84	false
1166		zzzzz82,zzzzz83	false
1167		zzzzz81,zzzzz90	false
1168		zzzzz81,zzzzz89	false
1169		zzzzz80,zzzzz89	false
1170		zzzzz80,zzzzz91	false
1171		zzzzz80,zzzzz88	false
1172		zzzzz80,zzzzz90	false
1173		zzzzz80,zzzzz98	false
1174		zzzzz80,zzzzz96	false
1175		zzzzz80,zzzzz97	false
1176		zzzzz80,zzzzz93	false
1177		zzzzz80,zzzzz83	false
1178		zzzzz80,zzzzz99	false
1179		zzzzz80,zzzzz95	false
1180		zzzzz80,zzzzz92	false
1181		zzzzz80,zzzzz94	false
1182		zzzzz80,zzzzz82	false
1183		zzzzz80,zzzzz85	false
1184		zzzzz80,zzzzz84	false
1185		zzzzz79,zzzzz90	false
1186		zzzzz79,zzzzz89	false
1187		zzzzz79,zzzzz91	false
1188		zzzzz79,zzzzz88	false
1189		zzzzz79,zzzzz80	false
1190		zzzzz79,zzzzz99	false
1191		zzzzz79,zzzzz98	false
1192		zzzzz79,zzzzz92	false
1193		zzzzz79,zzzzz95	false
1194		zzzzz79,zzzzz94	false
1195		zzzzz79,zzzzz96	false
1196		zzzzz79,zzzzz97	false
1197		zzzzz79,zzzzz93	false
1198		zzzzz79,zzzzz83	false
1199		zzzzz79,zzzzz82	false
1200		zzzzz79,zzzzz84	false
1201		zzzzz79,zzzzz85	false
1202		zzzzz78,zzzzz91	false
1203		zzzzz78,zzzzz90	false
1204		zzzzz78,zzzzz88	false
1205		zzzzz78,zzzzz89	false
1206		zzzzz78,zzzzz80	false
1207		zzzzz78,zzzzz79	false
1208		zzzzz78,zzzzz85	false
1209		zzzzz78,zzzzz83	false
1210		zzzzz78,zzzzz82	false
1211		zzzzz78,zzzzz84	false
1212		zzzzz78,zzzzz96	false
1213		zzzzz78,zzzzz99	false
1214		zzzzz78,zzzzz93	false
1215		zzzzz78,zzzzz95	false
1216		zzzzz78,zzzzz98	false
1217		zzzzz78,zzzzz92	false
1218		zzzzz78,zzzzz97	false
1219		zzzzz78,zzzzz94	false
1220		zzzzz77,zzzzz90	false
1221		zzzzz77,zzzzz91	false
1222		zzzzz77,zzzzz88	false
1223		zzzzz77,zzzzz95	false
1224		zzzzz77,zzzzz97	false
1225		zzzzz77,zzzzz98	false
1226		zzzzz77,zzzzz92	false
1227		zzzzz77,zzzzz79	false
1228		zzzzz77,zzzzz93	false
1229		zzzzz77,zzzzz96	false
1230		zzzzz77,zzzzz84	false
1231		zzzzz77,zzzzz80	false
1232		zzzzz77,zzzzz85	false
1233		zzzzz77,zzzzz99	false
1234		zzzzz77,zzzzz94	false
1235		zzzzz77,zzzzz89	false
1236		zzzzz77,zzzzz82	false
1237		zzzzz77,zzzzz78	false
1238		zzzzz77,zzzzz83	false
1239		zzzzz76,zzzzz77	false
1240		zzzzz76,zzzzz90	false
1241		zzzzz76,zzzzz89	false
1242		zzzzz76,zzzzz91	false
1243		zzzzz76,zzzzz88	false
1244		zzzzz76,zzzzz80	false
1245		zzzzz76,zzzzz78	false
1246		zzzzz76,zzzzz96	false
1247		zzzzz76,zzzzz94	false
1248		zzzzz76,zzzzz98	false
1249		zzzzz76,zzzzz92	false
1250		zzzzz76,zzzzz99	false
1251		zzzzz76,zzzzz79	false
1252		zzzzz76,zzzzz95	false
1253		zzzzz76,zzzzz97	false
1254		zzzzz76,zzzzz85	false
1255		zzzzz76,zzzzz93	false
1256		zzzzz76,zzzzz84	false
1257		zzzzz76,zzzzz82	false
1258		zzzzz76,zzzzz83	false
1259		zzzzz75,zzzzz77	false
1260		zzzzz75,zzzzz89	false
1261		zzzzz75,zzzzz91	false
1262		zzzzz75,zzzzz88	false
1263		zzzzz75,zzzzz90	false
1264		zzzzz75,zzzzz96	false
1265		zzzzz75,zzzzz97	false
1266		zzzzz75,zzzzz98	false
1267		zzzzz75,zzzzz94	false
1268		zzzzz75,zzzzz99	false
1269		zzzzz75,zzzzz95	false
1270		zzzzz75,zzzzz79	false
1271		zzzzz75,zzzzz78	false
1272		zzzzz75,zzzzz83	false
1273		zzzzz75,zzzzz93	false
1274		zzzzz75,zzzzz92	false
1275		zzzzz75,zzzzz82	false
1276		zzzzz75,zzzzz85	false
1277		zzzzz75,zzzzz76	false
1278		zzzzz75,zzzzz84	false
1279		zzzzz75,zzzzz80	false
1280		zzzzz74,zzzzz77	false
1281		zzzzz74,zzzzz91	false
1282		zzzzz74,zzzzz90	false
1283		zzzzz74,zzzzz88	false
1284		zzzzz74,zzzzz89	false
1285		zzzzz74,zzzzz75	false
1286		zzzzz74,zzzzz80	false
1287		zzzzz74,zzzzz79	false
1288		zzzzz74,zzzzz85	false
1289		zzzzz74,zzzzz83	false
1290		zzzzz74,zzzzz82	false
1291		zzzzz74,zzzzz76	false
1292		zzzzz74,zzzzz84	false
1293		zzzzz74,zzzzz96	false
1294		zzzzz74,zzzzz95	false
1295		zzzzz74,zzzzz97	false
1296		zzzzz74,zzzzz93	false
1297		zzzzz74,zzzzz99	false
1298		zzzzz74,zzzzz92	false
1299		zzzzz74,zzzzz98	false
1300		zzzzz74,zzzzz94	false
1301		zzzzz74,zzzzz78	false
1302		zzzzz73,zzzzz77	false
1303		zzzzz73,zzzzz91	false
1304		zzzzz73,zzzzz90	false
1305		zzzzz73,zzzzz89	false
1306		zzzzz73,zzzzz88	false
1307		zzzzz73,zzzzz80	false
1308		zzzzz73,zzzzz75	false
1309		zzzzz73,zzzzz85	false
1310		zzzzz73,zzzzz79	false
1311		zzzzz73,zzzzz83	false
1312		zzzzz73,zzzzz82	false
1313		zzzzz73,zzzzz76	false
1314		zzzzz73,zzzzz84	false
1315		zzzzz73,zzzzz96	false
1316		zzzzz73,zzzzz99	false
1317		zzzzz73,zzzzz97	false
1318		zzzzz73,zzzzz95	false
1319		zzzzz73,zzzzz93	false
1320		zzzzz73,zzzzz98	false
1321		zzzzz73,zzzzz92	false
1322		zzzzz73,zzzzz78	false
1323		zzzzz73,zzzzz94	false
1324		zzzzz73,zzzzz74	false
1325		zzzzz72,zzzzz77	false
1326		zzzzz72,zzzzz91	false
1327		zzzzz72,zzzzz90	false
1328		zzzzz72,zzzzz88	false
1329		zzzzz72,zzzzz89	false
1330		zzzzz72,zzzzz75	false
1331		zzzzz72,zzzzz80	false
1332		zzzzz72,zzzzz83	false
1333		zzzzz72,zzzzz79	false
1334		zzzzz72,zzzzz82	false
1335		zzzzz72,zzzzz85	false
1336		zzzzz72,zzzzz76	false
1337		zzzzz72,zzzzz84	false
1338		zzzzz72,zzzzz95	false
1339		zzzzz72,zzzzz96	false
1340		zzzzz72,zzzzz93	false
1341		zzzzz72,zzzzz98	false
1342		zzzzz72,zzzzz97	false
1343		zzzzz72,zzzzz99	false
1344		zzzzz72,zzzzz92	false
1345		zzzzz72,zzzzz94	false
1346		zzzzz72,zzzzz78	false
1347		zzzzz72,zzzzz73	false
1348		zzzzz72,zzzzz74	false
1349		zzzzz71,zzzzz77	false
1350		zzzzz71,zzzzz89	false
1351		zzzzz71,zzzzz90	false
1352		zzzzz71,zzzzz91	false
1353		zzzzz71,zzzzz88	false
1354		zzzzz71,zzzzz72	false
1355		zzzzz71,zzzzz73	false
1356		zzzzz71,zzzzz96	false
1357		zzzzz71,zzzzz74	false
1358		zzzzz71,zzzzz99	false
1359		zzzzz71,zzzzz75	false
1360		zzzzz71,zzzzz80	false
1361		zzzzz71,zzzzz79	false
1362		zzzzz71,zzzzz98	false
1363		zzzzz71,zzzzz92	false
1364		zzzzz71,zzzzz85	false
1365		zzzzz71,zzzzz78	false
1366		zzzzz71,zzzzz83	false
1367		zzzzz71,zzzzz94	false
1368		zzzzz71,zzzzz82	false
1369		zzzzz71,zzzzz97	false
1370		zzzzz71,zzzzz95	false
1371		zzzzz71,zzzzz93	false
1372		zzzzz71,zzzzz76	false
1373		zzzzz71,zzzzz84	false
1374		zzzzz70,zzzzz81	false
1375		zzzzz70,zzzzz77	false
1376		zzzzz70,zzzzz91	false
1377		zzzzz70,zzzzz90	false
1378		zzzzz70,zzzzz89	false
1379		zzzzz70,zzzzz75	false
1380		zzzzz70,zzzzz80	false
1381		zzzzz70,zzzzz83	false
1382		zzzzz70,zzzzz82	false
1383		zzzzz70,zzzzz85	false
1384		zzzzz70,zzzzz79	false
1385		zzzzz70,zzzzz71	false
1386		zzzzz70,zzzzz88	false
1387		zzzzz70,zzzzz76	false
1388		zzzzz70,zzzzz84	false
1389		zzzzz70,zzzzz73	false
1390		zzzzz70,zzzzz72	false
1391		zzzzz70,zzzzz74	false
1392		zzzzz70,zzzzz95	false
1393		zzzzz70,zzzzz93	false
1394		zzzzz70,zzzzz99	false
1395		zzzzz70,zzzzz97	false
1396		zzzzz70,zzzzz92	false
1397		zzzzz70,zzzzz96	false
1398		zzzzz70,zzzzz98	false
1399		zzzzz70,zzzzz78	false
1400		zzzzz70,zzzzz94	false
1401		zzzzz69,zzzzz77	false
1402		zzzzz69,zzzzz91	false
1403		zzzzz69,zzzzz90	false
1404		zzzzz69,zzzzz89	false
1405		zzzzz69,zzzzz75	false
1406		zzzzz69,zzzzz80	false
1407		zzzzz69,zzzzz83	false
1408		zzzzz69,zzzzz82	false
1409		zzzzz69,zzzzz85	false
1410		zzzzz69,zzzzz79	false
1411		zzzzz69,zzzzz76	false
1412		zzzzz69,zzzzz88	false
1413		zzzzz69,zzzzz71	false
1414		zzzzz69,zzzzz84	false
1415		zzzzz69,zzzzz73	false
1416		zzzzz69,zzzzz74	false
1417		zzzzz69,zzzzz72	false
1418		zzzzz69,zzzzz70	false
1419		zzzzz69,zzzzz95	false
1420		zzzzz69,zzzzz99	false
1421		zzzzz69,zzzzz98	false
1422		zzzzz69,zzzzz96	false
1423		zzzzz69,zzzzz93	false
1424		zzzzz69,zzzzz92	false
1425		zzzzz69,zzzzz78	false
1426		zzzzz69,zzzzz97	false
1427		zzzzz69,zzzzz94	false
1428		zzzzz68,zzzzz77	false
1429		zzzzz68,zzzzz91	false
1430		zzzzz68,zzzzz90	false
1431		zzzzz68,zzzzz75	false
1432		zzzzz68,zzzzz80	false
1433		zzzzz68,zzzzz89	false
1434		zzzzz68,zzzzz79	false
1435		zzzzz68,zzzzz85	false
1436		zzzzz68,zzzzz83	false
1437		zzzzz68,zzzzz82	false
1438		zzzzz68,zzzzz76	false
1439		zzzzz68,zzzzz71	false
1440		zzzzz68,zzzzz84	false
1441		zzzzz68,zzzzz88	false
1442		zzzzz68,zzzzz72	false
1443		zzzzz68,zzzzz74	false
1444		zzzzz68,zzzzz70	false
1445		zzzzz68,zzzzz73	false
1446		zzzzz68,zzzzz99	false
1447		zzzzz68,zzzzz93	false
1448		zzzzz68,zzzzz98	false
1449		zzzzz68,zzzzz78	false
1450		zzzzz68,zzzzz95	false
1451		zzzzz68,zzzzz94	false
1452		zzzzz68,zzzzz92	false
1453		zzzzz68,zzzzz96	false
1454		zzzzz68,zzzzz97	false
1455		zzzzz68,zzzzz69	false
1456		zzzzz67,zzzzz77	false
1457		zzzzz67,zzzzz91	false
1458		zzzzz67,zzzzz90	false
1459		zzzzz67,zzzzz82	false
1460		zzzzz67,zzzzz89	false
1461		zzzzz67,zzzzz75	false
1462		zzzzz67,zzzzz83	false
1463		zzzzz67,zzzzz80	false
1464		zzzzz67,zzzzz79	false
1465		zzzzz67,zzzzz85	false
1466		zzzzz67,zzzzz71	false
1467		zzzzz67,zzzzz88	false
1468		zzzzz67,zzzzz84	false
1469		zzzzz67,zzzzz76	false
1470		zzzzz67,zzzzz74	false
1471		zzzzz67,zzzzz73	false
1472		zzzzz67,zzzzz72	false
1473		zzzzz67,zzzzz93	false
1474		zzzzz67,zzzzz95	false
1475		zzzzz67,zzzzz70	false
1476		zzzzz67,zzzzz99	false
1477		zzzzz67,zzzzz96	false
1478		zzzzz67,zzzzz78	false
1479		zzzzz67,zzzzz98	false
1480		zzzzz67,zzzzz94	false
1481		zzzzz67,zzzzz92	false
1482		zzzzz67,zzzzz97	false
1483		zzzzz67,zzzzz69	false
1484		zzzzz67,zzzzz68	false
1485		zzzzz66,zzzzz77	false
1486		zzzzz66,zzzzz91	false
1487		zzzzz66,zzzzz90	false
1488		zzzzz66,zzzzz89	false
1489		zzzzz66,zzzzz75	false
1490		zzzzz66,zzzzz80	false
1491		zzzzz66,zzzzz83	false
1492		zzzzz66,zzzzz82	false
1493		zzzzz66,zzzzz85	false
1494		zzzzz66,zzzzz79	false
1495		zzzzz66,zzzzz76	false
1496		zzzzz66,zzzzz88	false
1497		zzzzz66,zzzzz71	false
1498		zzzzz66,zzzzz84	false
1499		zzzzz66,zzzzz74	false
1500		zzzzz66,zzzzz73	false
1501		zzzzz66,zzzzz72	false
1502		zzzzz66,zzzzz70	false
1503		zzzzz66,zzzzz99	false
1504		zzzzz66,zzzzz95	false
1505		zzzzz66,zzzzz98	false
1506		zzzzz66,zzzzz96	false
1507		zzzzz66,zzzzz93	false
1508		zzzzz66,zzzzz78	false
1509		zzzzz66,zzzzz94	false
1510		zzzzz66,zzzzz92	false
1511		zzzzz66,zzzzz97	false
1512		zzzzz66,zzzzz67	false
1513		zzzzz66,zzzzz69	false
1514		zzzzz66,zzzzz68	false
1515		zzzzz65,zzzzz77	false
1516		zzzzz65,zzzzz91	false
1517		zzzzz65,zzzzz90	false
1518		zzzzz65,zzzzz75	false
1519		zzzzz65,zzzzz89	false
1520		zzzzz65,zzzzz80	false
1521		zzzzz65,zzzzz79	false
1522		zzzzz65,zzzzz83	false
1523		zzzzz65,zzzzz85	false
1524		zzzzz65,zzzzz82	false
1525		zzzzz65,zzzzz88	false
1526		zzzzz65,zzzzz76	false
1527		zzzzz65,zzzzz71	false
1528		zzzzz65,zzzzz84	false
1529		zzzzz65,zzzzz74	false
1530		zzzzz65,zzzzz72	false
1531		zzzzz65,zzzzz73	false
1532		zzzzz65,zzzzz70	false
1533		zzzzz65,zzzzz67	false
1534		zzzzz65,zzzzz95	false
1535		zzzzz65,zzzzz98	false
1536		zzzzz65,zzzzz99	false
1537		zzzzz65,zzzzz96	false
1538		zzzzz65,zzzzz93	false
1539		zzzzz65,zzzzz92	false
1540		zzzzz65,zzzzz94	false
1541		zzzzz65,zzzzz78	false
1542		zzzzz65,zzzzz97	false
1543		zzzzz65,zzzzz68	false
1544		zzzzz65,zzzzz69	false
1545		zzzzz65,zzzzz66	false
1546		zzzzz64,zzzzz77	false
1547		zzzzz64,zzzzz91	false
1548		zzzzz64,zzzzz90	false
1549		zzzzz64,zzzzz89	false
1550		zzzzz64,zzzzz75	false
1551		zzzzz64,zzzzz80	false
1552		zzzzz64,zzzzz83	false
1553		zzzzz64,zzzzz82	false
1554		zzzzz64,zzzzz79	false
1555		zzzzz64,zzzzz85	false
1556		zzzzz64,zzzzz71	false
1557		zzzzz64,zzzzz76	false
1558		zzzzz64,zzzzz88	false
1559		zzzzz64,zzzzz84	false
1560		zzzzz64,zzzzz67	false
1561		zzzzz64,zzzzz73	false
1562		zzzzz64,zzzzz74	false
1563		zzzzz64,zzzzz72	false
1564		zzzzz64,zzzzz70	false
1565		zzzzz64,zzzzz98	false
1566		zzzzz64,zzzzz68	false
1567		zzzzz64,zzzzz95	false
1568		zzzzz64,zzzzz69	false
1569		zzzzz64,zzzzz99	false
1570		zzzzz64,zzzzz96	false
1571		zzzzz64,zzzzz65	false
1572		zzzzz64,zzzzz93	false
1573		zzzzz64,zzzzz94	false
1574		zzzzz64,zzzzz78	false
1575		zzzzz64,zzzzz92	false
1576		zzzzz64,zzzzz66	false
1577		zzzzz64,zzzzz97	false
1578		zzzzz63,zzzzz77	false
1579		zzzzz63,zzzzz91	false
1580		zzzzz63,zzzzz90	false
1581		zzzzz63,zzzzz75	false
1582		zzzzz63,zzzzz80	false
1583		zzzzz63,zzzzz89	false
1584		zzzzz63,zzzzz83	false
1585		zzzzz63,zzzzz85	false
1586		zzzzz63,zzzzz82	false
1587		zzzzz63,zzzzz79	false
1588		zzzzz63,zzzzz76	false
1589		zzzzz63,zzzzz88	false
1590		zzzzz63,zzzzz71	false
1591		zzzzz63,zzzzz84	false
1592		zzzzz63,zzzzz67	false
1593		zzzzz63,zzzzz72	false
1594		zzzzz63,zzzzz74	false
1595		zzzzz63,zzzzz73	false
1596		zzzzz63,zzzzz70	false
1597		zzzzz63,zzzzz95	false
1598		zzzzz63,zzzzz99	false
1599		zzzzz63,zzzzz98	false
1600		zzzzz63,zzzzz96	false
1601		zzzzz63,zzzzz92	false
1602		zzzzz63,zzzzz69	false
1603		zzzzz63,zzzzz93	false
1604		zzzzz63,zzzzz94	false
1605		zzzzz63,zzzzz78	false
1606		zzzzz63,zzzzz66	false
1607		zzzzz63,zzzzz65	false
1608		zzzzz63,zzzzz97	false
1609		zzzzz63,zzzzz68	false
1610		zzzzz63,zzzzz64	false
1611		zzzzz62,zzzzz77	false
1612		zzzzz62,zzzzz91	false
1613		zzzzz62,zzzzz90	false
1614		zzzzz62,zzzzz89	false
1615		zzzzz62,zzzzz80	false
1616		zzzzz62,zzzzz75	false
1617		zzzzz62,zzzzz83	false
1618		zzzzz62,zzzzz82	false
1619		zzzzz62,zzzzz79	false
1620		zzzzz62,zzzzz85	false
1621		zzzzz62,zzzzz71	false
1622		zzzzz62,zzzzz76	false
1623		zzzzz62,zzzzz88	false
1624		zzzzz62,zzzzz84	false
1625		zzzzz62,zzzzz67	false
1626		zzzzz62,zzzzz73	false
1627		zzzzz62,zzzzz72	false
1628		zzzzz62,zzzzz74	false
1629		zzzzz62,zzzzz70	false
1630		zzzzz62,zzzzz93	false
1631		zzzzz62,zzzzz69	false
1632		zzzzz62,zzzzz92	false
1633		zzzzz62,zzzzz99	false
1634		zzzzz62,zzzzz68	false
1635		zzzzz62,zzzzz95	false
1636		zzzzz62,zzzzz98	false
1637		zzzzz62,zzzzz78	false
1638		zzzzz62,zzzzz63	false
1639		zzzzz62,zzzzz94	false
1640		zzzzz62,zzzzz96	false
1641		zzzzz62,zzzzz66	false
1642		zzzzz62,zzzzz65	false
1643		zzzzz62,zzzzz97	false
1644		zzzzz62,zzzzz64	false
1645		zzzzz61,zzzzz77	false
1646		zzzzz61,zzzzz91	false
1647		zzzzz61,zzzzz90	false
1648		zzzzz61,zzzzz75	false
1649		zzzzz61,zzzzz89	false
1650		zzzzz61,zzzzz80	false
1651		zzzzz61,zzzzz83	false
1652		zzzzz61,zzzzz82	false
1653		zzzzz61,zzzzz85	false
1654		zzzzz61,zzzzz79	false
1655		zzzzz61,zzzzz71	false
1656		zzzzz61,zzzzz76	false
1657		zzzzz61,zzzzz88	false
1658		zzzzz61,zzzzz84	false
1659		zzzzz61,zzzzz67	false
1660		zzzzz61,zzzzz74	false
1661		zzzzz61,zzzzz73	false
1662		zzzzz61,zzzzz72	false
1663		zzzzz61,zzzzz70	false
1664		zzzzz61,zzzzz68	false
1665		zzzzz61,zzzzz95	false
1666		zzzzz61,zzzzz99	false
1667		zzzzz61,zzzzz98	false
1668		zzzzz61,zzzzz96	false
1669		zzzzz61,zzzzz69	false
1670		zzzzz61,zzzzz93	false
1671		zzzzz61,zzzzz92	false
1672		zzzzz61,zzzzz65	false
1673		zzzzz61,zzzzz66	false
1674		zzzzz61,zzzzz78	false
1675		zzzzz61,zzzzz94	false
1676		zzzzz61,zzzzz97	false
1677		zzzzz61,zzzzz62	false
1678		zzzzz61,zzzzz63	false
1679		zzzzz61,zzzzz64	false
1680		zzzzz60,zzzzz77	false
1681		zzzzz60,zzzzz91	false
1682		zzzzz60,zzzzz90	false
1683		zzzzz60,zzzzz88	false
1684		zzzzz60,zzzzz75	false
1685		zzzzz60,zzzzz89	false
1686		zzzzz60,zzzzz80	false
1687		zzzzz60,zzzzz83	false
1688		zzzzz60,zzzzz82	false
1689		zzzzz60,zzzzz85	false
1690		zzzzz60,zzzzz79	false
1691		zzzzz60,zzzzz71	false
1692		zzzzz60,zzzzz76	false
1693		zzzzz60,zzzzz84	false
1694		zzzzz60,zzzzz67	false
1695		zzzzz60,zzzzz73	false
1696		zzzzz60,zzzzz74	false
1697		zzzzz60,zzzzz72	false
1698		zzzzz60,zzzzz70	false
1699		zzzzz60,zzzzz68	false
1700		zzzzz60,zzzzz96	false
1701		zzzzz60,zzzzz95	false
1702		zzzzz60,zzzzz98	false
1703		zzzzz60,zzzzz69	false
1704		zzzzz60,zzzzz99	false
1705		zzzzz60,zzzzz93	false
1706		zzzzz60,zzzzz92	false
1707		zzzzz60,zzzzz65	false
1708		zzzzz60,zzzzz66	false
1709		zzzzz60,zzzzz78	false
1710		zzzzz60,zzzzz94	false
1711		zzzzz60,zzzzz97	false
1712		zzzzz60,zzzzz62	false
1713		zzzzz60,zzzzz63	false
1714		zzzzz60,zzzzz64	false
1715		zzzzz60,zzzzz61	false
1716		zzzzz59,zzzzz77	false
1717		zzzzz59,zzzzz91	false
1718		zzzzz59,zzzzz90	false
1719		zzzzz59,zzzzz75	false
1720		zzzzz59,zzzzz89	false
1721		zzzzz59,zzzzz80	false
1722		zzzzz59,zzzzz83	false
1723		zzzzz59,zzzzz85	false
1724		zzzzz59,zzzzz79	false
1725		zzzzz59,zzzzz82	false
1726		zzzzz59,zzzzz71	false
1727		zzzzz59,zzzzz76	false
1728		zzzzz59,zzzzz88	false
1729		zzzzz59,zzzzz84	false
1730		zzzzz59,zzzzz67	false
1731		zzzzz59,zzzzz73	false
1732		zzzzz59,zzzzz72	false
1733		zzzzz59,zzzzz74	false
1734		zzzzz59,zzzzz70	false
1735		zzzzz59,zzzzz68	false
1736		zzzzz59,zzzzz95	false
1737		zzzzz59,zzzzz69	false
1738		zzzzz59,zzzzz98	false
1739		zzzzz59,zzzzz99	false
1740		zzzzz59,zzzzz92	false
1741		zzzzz59,zzzzz96	false
1742		zzzzz59,zzzzz66	false
1743		zzzzz59,zzzzz65	false
1744		zzzzz59,zzzzz93	false
1745		zzzzz59,zzzzz94	false
1746		zzzzz59,zzzzz78	false
1747		zzzzz59,zzzzz97	false
1748		zzzzz59,zzzzz62	false
1749		zzzzz59,zzzzz64	false
1750		zzzzz59,zzzzz63	false
1751		zzzzz59,zzzzz61	false
1752		zzzzz59,zzzzz60	false
1753		zzzzz58,zzzzz77	false
1754		zzzzz58,zzzzz91	false
1755		zzzzz58,zzzzz90	false
1756		zzzzz58,zzzzz89	false
1757		zzzzz58,zzzzz80	false
1758		zzzzz58,zzzzz75	false
1759		zzzzz58,zzzzz85	false
1760		zzzzz58,zzzzz82	false
1761		zzzzz58,zzzzz79	false
1762		zzzzz58,zzzzz83	false
1763		zzzzz58,zzzzz71	false
1764		zzzzz58,zzzzz76	false
1765		zzzzz58,zzzzz88	false
1766		zzzzz58,zzzzz84	false
1767		zzzzz58,zzzzz67	false
1768		zzzzz58,zzzzz73	false
1769		zzzzz58,zzzzz72	false
1770		zzzzz58,zzzzz74	false
1771		zzzzz58,zzzzz70	false
1772		zzzzz58,zzzzz69	false
1773		zzzzz58,zzzzz92	false
1774		zzzzz58,zzzzz95	false
1775		zzzzz58,zzzzz98	false
1776		zzzzz58,zzzzz93	false
1777		zzzzz58,zzzzz68	false
1778		zzzzz58,zzzzz96	false
1779		zzzzz58,zzzzz63	false
1780		zzzzz58,zzzzz94	false
1781		zzzzz58,zzzzz78	false
1782		zzzzz58,zzzzz99	false
1783		zzzzz58,zzzzz65	false
1784		zzzzz58,zzzzz66	false
1785		zzzzz58,zzzzz97	false
1786		zzzzz58,zzzzz64	false
1787		zzzzz58,zzzzz59	false
1788		zzzzz58,zzzzz60	false
1789		zzzzz58,zzzzz61	false
1790		zzzzz58,zzzzz62	false
1791		zzzzz57,zzzzz77	false
1792		zzzzz57,zzzzz91	false
1793		zzzzz57,zzzzz90	false
1794		zzzzz57,zzzzz89	false
1795		zzzzz57,zzzzz75	false
1796		zzzzz57,zzzzz80	false
1797		zzzzz57,zzzzz79	false
1798		zzzzz57,zzzzz82	false
1799		zzzzz57,zzzzz83	false
1800		zzzzz57,zzzzz85	false
1801		zzzzz57,zzzzz71	false
1802		zzzzz57,zzzzz76	false
1803		zzzzz57,zzzzz88	false
1804		zzzzz57,zzzzz84	false
1805		zzzzz57,zzzzz67	false
1806		zzzzz57,zzzzz74	false
1807		zzzzz57,zzzzz73	false
1808		zzzzz57,zzzzz72	false
1809		zzzzz57,zzzzz70	false
1810		zzzzz57,zzzzz68	false
1811		zzzzz57,zzzzz96	false
1812		zzzzz57,zzzzz98	false
1813		zzzzz57,zzzzz95	false
1814		zzzzz57,zzzzz63	false
1815		zzzzz57,zzzzz99	false
1816		zzzzz57,zzzzz92	false
1817		zzzzz57,zzzzz93	false
1818		zzzzz57,zzzzz94	false
1819		zzzzz57,zzzzz78	false
1820		zzzzz57,zzzzz69	false
1821		zzzzz57,zzzzz62	false
1822		zzzzz57,zzzzz65	false
1823		zzzzz57,zzzzz66	false
1824		zzzzz57,zzzzz97	false
1825		zzzzz57,zzzzz58	false
1826		zzzzz57,zzzzz59	false
1827		zzzzz57,zzzzz61	false
1828		zzzzz57,zzzzz60	false
1829		zzzzz57,zzzzz64	false
1830		zzzzz56,zzzzz77	false
1831		zzzzz56,zzzzz91	false
1832		zzzzz56,zzzzz90	false
1833		zzzzz56,zzzzz85	false
1834		zzzzz56,zzzzz79	false
1835		zzzzz56,zzzzz89	false
1836		zzzzz56,zzzzz75	false
1837		zzzzz56,zzzzz80	false
1838		zzzzz56,zzzzz82	false
1839		zzzzz56,zzzzz83	false
1840		zzzzz56,zzzzz71	false
1841		zzzzz56,zzzzz88	false
1842		zzzzz56,zzzzz84	false
1843		zzzzz56,zzzzz76	false
1844		zzzzz56,zzzzz74	false
1845		zzzzz56,zzzzz72	false
1846		zzzzz56,zzzzz73	false
1847		zzzzz56,zzzzz95	false
1848		zzzzz56,zzzzz63	false
1849		zzzzz56,zzzzz70	false
1850		zzzzz56,zzzzz93	false
1851		zzzzz56,zzzzz98	false
1852		zzzzz56,zzzzz96	false
1853		zzzzz56,zzzzz99	false
1854		zzzzz56,zzzzz94	false
1855		zzzzz56,zzzzz92	false
1856		zzzzz56,zzzzz78	false
1857		zzzzz56,zzzzz62	false
1858		zzzzz56,zzzzz57	false
1859		zzzzz56,zzzzz59	false
1860		zzzzz56,zzzzz97	false
1861		zzzzz56,zzzzz69	false
1862		zzzzz56,zzzzz60	false
1863		zzzzz56,zzzzz67	false
1864		zzzzz56,zzzzz61	false
1865		zzzzz56,zzzzz58	false
1866		zzzzz56,zzzzz64	false
1867		zzzzz56,zzzzz68	false
1868		zzzzz56,zzzzz66	false
1869		zzzzz56,zzzzz65	false
1870		zzzzz55,zzzzz77	false
1871		zzzzz55,zzzzz91	false
1872		zzzzz55,zzzzz90	false
1873		zzzzz55,zzzzz89	false
1874		zzzzz55,zzzzz80	false
1875		zzzzz55,zzzzz75	false
1876		zzzzz55,zzzzz83	false
1877		zzzzz55,zzzzz79	false
1878		zzzzz55,zzzzz82	false
1879		zzzzz55,zzzzz85	false
1880		zzzzz55,zzzzz76	false
1881		zzzzz55,zzzzz88	false
1882		zzzzz55,zzzzz71	false
1883		zzzzz55,zzzzz84	false
1884		zzzzz55,zzzzz72	false
1885		zzzzz55,zzzzz74	false
1886		zzzzz55,zzzzz73	false
1887		zzzzz55,zzzzz63	false
1888		zzzzz55,zzzzz70	false
1889		zzzzz55,zzzzz67	false
1890		zzzzz55,zzzzz99	false
1891		zzzzz55,zzzzz56	false
1892		zzzzz55,zzzzz95	false
1893		zzzzz55,zzzzz98	false
1894		zzzzz55,zzzzz62	false
1895		zzzzz55,zzzzz96	false
1896		zzzzz55,zzzzz60	false
1897		zzzzz55,zzzzz59	false
1898		zzzzz55,zzzzz58	false
1899		zzzzz55,zzzzz57	false
1900		zzzzz55,zzzzz93	false
1901		zzzzz55,zzzzz61	false
1902		zzzzz55,zzzzz78	false
1903		zzzzz55,zzzzz64	false
1904		zzzzz55,zzzzz92	false
1905		zzzzz55,zzzzz97	false
1906		zzzzz55,zzzzz94	false
1907		zzzzz55,zzzzz68	false
1908		zzzzz55,zzzzz69	false
1909		zzzzz55,zzzzz66	false
1910		zzzzz55,zzzzz65	false
1911		zzzzz54,zzzzz77	false
1912		zzzzz54,zzzzz91	false
1913		zzzzz54,zzzzz90	false
1914		zzzzz54,zzzzz89	false
1915		zzzzz54,zzzzz75	false
1916		zzzzz54,zzzzz80	false
1917		zzzzz54,zzzzz79	false
1918		zzzzz54,zzzzz83	false
1919		zzzzz54,zzzzz82	false
1920		zzzzz54,zzzzz85	false
1921		zzzzz54,zzzzz76	false
1922		zzzzz54,zzzzz71	false
1923		zzzzz54,zzzzz88	false
1924		zzzzz54,zzzzz84	false
1925		zzzzz54,zzzzz73	false
1926		zzzzz54,zzzzz67	false
1927		zzzzz54,zzzzz72	false
1928		zzzzz54,zzzzz74	false
1929		zzzzz54,zzzzz56	false
1930		zzzzz54,zzzzz70	false
1931		zzzzz54,zzzzz93	false
1932		zzzzz54,zzzzz95	false
1933		zzzzz54,zzzzz98	false
1934		zzzzz54,zzzzz99	false
1935		zzzzz54,zzzzz68	false
1936		zzzzz54,zzzzz55	false
1937		zzzzz54,zzzzz69	false
1938		zzzzz54,zzzzz78	false
1939		zzzzz54,zzzzz66	false
1940		zzzzz54,zzzzz63	false
1941		zzzzz54,zzzzz58	false
1942		zzzzz54,zzzzz94	false
1943		zzzzz54,zzzzz65	false
1944		zzzzz54,zzzzz96	false
1945		zzzzz54,zzzzz62	false
1946		zzzzz54,zzzzz64	false
1947		zzzzz54,zzzzz57	false
1948		zzzzz54,zzzzz92	false
1949		zzzzz54,zzzzz97	false
1950		zzzzz54,zzzzz59	false
1951		zzzzz54,zzzzz60	false
1952		zzzzz54,zzzzz61	false
1953		zzzzz53,zzzzz77	false
1954		zzzzz53,zzzzz91	false
1955		zzzzz53,zzzzz90	false
1956		zzzzz53,zzzzz75	false
1957		zzzzz53,zzzzz89	false
1958		zzzzz53,zzzzz80	false
1959		zzzzz53,zzzzz85	false
1960		zzzzz53,zzzzz79	false
1961		zzzzz53,zzzzz83	false
1962		zzzzz53,zzzzz82	false
1963		zzzzz53,zzzzz71	false
1964		zzzzz53,zzzzz76	false
1965		zzzzz53,zzzzz88	false
1966		zzzzz53,zzzzz84	false
1967		zzzzz53,zzzzz67	false
1968		zzzzz53,zzzzz74	false
1969		zzzzz53,zzzzz72	false
1970		zzzzz53,zzzzz73	false
1971		zzzzz53,zzzzz56	false
1972		zzzzz53,zzzzz70	false
1973		zzzzz53,zzzzz55	false
1974		zzzzz53,zzzzz68	false
1975		zzzzz53,zzzzz95	false
1976		zzzzz53,zzzzz69	false
1977		zzzzz53,zzzzz99	false
1978		zzzzz53,zzzzz98	false
1979		zzzzz53,zzzzz96	false
1980		zzzzz53,zzzzz93	false
1981		zzzzz53,zzzzz92	false
1982		zzzzz53,zzzzz65	false
1983		zzzzz53,zzzzz66	false
1984		zzzzz53,zzzzz78	false
1985		zzzzz53,zzzzz94	false
1986		zzzzz53,zzzzz54	false
1987		zzzzz53,zzzzz97	false
1988		zzzzz53,zzzzz62	false
1989		zzzzz53,zzzzz57	false
1990		zzzzz53,zzzzz58	false
1991		zzzzz53,zzzzz64	false
1992		zzzzz53,zzzzz63	false
1993		zzzzz53,zzzzz60	false
1994		zzzzz53,zzzzz61	false
1995		zzzzz53,zzzzz59	false
1996		zzzzz52,zzzzz77	false
1997		zzzzz52,zzzzz91	false
1998		zzzzz52,zzzzz90	false
1999		zzzzz52,zzzzz88	false
2000		zzzzz52,zzzzz75	false
2001		zzzzz52,zzzzz80	false
2002		zzzzz52,zzzzz89	false
2003		zzzzz52,zzzzz85	false
2004		zzzzz52,zzzzz79	false
2005		zzzzz52,zzzzz82	false
2006		zzzzz52,zzzzz83	false
2007		zzzzz52,zzzzz71	false
2008		zzzzz52,zzzzz74	false
2009		zzzzz52,zzzzz76	false
2010		zzzzz52,zzzzz84	false
2011		zzzzz52,zzzzz72	false
2012		zzzzz52,zzzzz73	false
2013		zzzzz52,zzzzz95	false
2014		zzzzz52,zzzzz98	false
2015		zzzzz52,zzzzz96	false
2016		zzzzz52,zzzzz63	false
2017		zzzzz52,zzzzz99	false
2018		zzzzz52,zzzzz70	false
2019		zzzzz52,zzzzz54	false
2020		zzzzz52,zzzzz93	false
2021		zzzzz52,zzzzz78	false
2022		zzzzz52,zzzzz94	false
2023		zzzzz52,zzzzz92	false
2024		zzzzz52,zzzzz97	false
2025		zzzzz52,zzzzz60	false
2026		zzzzz52,zzzzz59	false
2027		zzzzz52,zzzzz62	false
2028		zzzzz52,zzzzz53	false
2029		zzzzz52,zzzzz64	false
2030		zzzzz52,zzzzz58	false
2031		zzzzz52,zzzzz57	false
2032		zzzzz52,zzzzz69	false
2033		zzzzz52,zzzzz61	false
2034		zzzzz52,zzzzz68	false
2035		zzzzz52,zzzzz55	false
2036		zzzzz52,zzzzz65	false
2037		zzzzz52,zzzzz56	false
2038		zzzzz52,zzzzz67	false
2039		zzzzz52,zzzzz66	false
2040		zzzzz51,zzzzz90	false
2041		zzzzz51,zzzzz91	false
2042		zzzzz51,zzzzz89	false
2043		zzzzz51,zzzzz79	false
2044		zzzzz51,zzzzz75	false
2045		zzzzz51,zzzzz85	false
2046		zzzzz51,zzzzz80	false
2047		zzzzz51,zzzzz52	false
2048		zzzzz51,zzzzz76	false
2049		zzzzz51,zzzzz67	false
2050		zzzzz51,zzzzz83	false
2051		zzzzz51,zzzzz71	false
2052		zzzzz51,zzzzz88	false
2053		zzzzz51,zzzzz82	false
2054		zzzzz51,zzzzz84	false
2055		zzzzz51,zzzzz56	false
2056		zzzzz51,zzzzz55	false
2057		zzzzz51,zzzzz69	false
2058		zzzzz51,zzzzz72	false
2059		zzzzz51,zzzzz70	false
2060		zzzzz51,zzzzz73	false
2061		zzzzz51,zzzzz74	false
2062		zzzzz51,zzzzz66	false
2063		zzzzz51,zzzzz68	false
2064		zzzzz51,zzzzz65	false
2065		zzzzz51,zzzzz96	false
2066		zzzzz51,zzzzz92	false
2067		zzzzz51,zzzzz97	false
2068		zzzzz51,zzzzz95	false
2069		zzzzz51,zzzzz61	false
2070		zzzzz51,zzzzz94	false
2071		zzzzz51,zzzzz93	false
2072		zzzzz51,zzzzz78	false
2073		zzzzz51,zzzzz63	false
2074		zzzzz51,zzzzz99	false
2075		zzzzz51,zzzzz54	false
2076		zzzzz51,zzzzz98	false
2077		zzzzz51,zzzzz53	false
2078		zzzzz51,zzzzz60	false
2079		zzzzz51,zzzzz59	false
2080		zzzzz51,zzzzz57	false
2081		zzzzz51,zzzzz64	false
2082		zzzzz51,zzzzz62	false
2083		zzzzz51,zzzzz58	false
2084		zzzzz50,zzzzz77	false
2085		zzzzz50,zzzzz91	false
2086		zzzzz50,zzzzz90	false
2087		zzzzz50,zzzzz51	false
2088		zzzzz50,zzzzz75	false
2089		zzzzz50,zzzzz89	false
2090		zzzzz50,zzzzz80	false
2091		zzzzz50,zzzzz79	false
2092		zzzzz50,zzzzz85	false
2093		zzzzz50,zzzzz82	false
2094		zzzzz50,zzzzz83	false
2095		zzzzz50,zzzzz76	false
2096		zzzzz50,zzzzz52	false
2097		zzzzz50,zzzzz71	false
2098		zzzzz50,zzzzz56	false
2099		zzzzz50,zzzzz67	false
2100		zzzzz50,zzzzz88	false
2101		zzzzz50,zzzzz84	false
2102		zzzzz50,zzzzz74	false
2103		zzzzz50,zzzzz73	false
2104		zzzzz50,zzzzz72	false
2105		zzzzz50,zzzzz70	false
2106		zzzzz50,zzzzz55	false
2107		zzzzz50,zzzzz96	false
2108		zzzzz50,zzzzz99	false
2109		zzzzz50,zzzzz68	false
2110		zzzzz50,zzzzz69	false
2111		zzzzz50,zzzzz98	false
2112		zzzzz50,zzzzz93	false
2113		zzzzz50,zzzzz65	false
2114		zzzzz50,zzzzz95	false
2115		zzzzz50,zzzzz92	false
2116		zzzzz50,zzzzz94	false
2117		zzzzz50,zzzzz66	false
2118		zzzzz50,zzzzz54	false
2119		zzzzz50,zzzzz78	false
2120		zzzzz50,zzzzz97	false
2121		zzzzz50,zzzzz57	false
2122		zzzzz50,zzzzz62	false
2123		zzzzz50,zzzzz59	false
2124		zzzzz50,zzzzz58	false
2125		zzzzz50,zzzzz53	false
2126		zzzzz50,zzzzz63	false
2127		zzzzz50,zzzzz61	false
2128		zzzzz50,zzzzz60	false
2129		zzzzz50,zzzzz64	false
2130		zzzzz49,zzzzz77	false
2131		zzzzz49,zzzzz91	false
2132		zzzzz49,zzzzz90	false
2133		zzzzz49,zzzzz89	false
2134		zzzzz49,zzzzz79	false
2135		zzzzz49,zzzzz85	false
2136		zzzzz49,zzzzz83	false
2137		zzzzz49,zzzzz75	false
2138		zzzzz49,zzzzz51	false
2139		zzzzz49,zzzzz82	false
2140		zzzzz49,zzzzz80	false
2141		zzzzz49,zzzzz71	false
2142		zzzzz49,zzzzz76	false
2143		zzzzz49,zzzzz84	false
2144		zzzzz49,zzzzz88	false
2145		zzzzz49,zzzzz72	false
2146		zzzzz49,zzzzz70	false
2147		zzzzz49,zzzzz52	false
2148		zzzzz49,zzzzz74	false
2149		zzzzz49,zzzzz73	false
2150		zzzzz49,zzzzz96	false
2151		zzzzz49,zzzzz95	false
2152		zzzzz49,zzzzz63	false
2153		zzzzz49,zzzzz62	false
2154		zzzzz49,zzzzz53	false
2155		zzzzz49,zzzzz93	false
2156		zzzzz49,zzzzz94	false
2157		zzzzz49,zzzzz61	false
2158		zzzzz49,zzzzz67	false
2159		zzzzz49,zzzzz59	false
2160		zzzzz49,zzzzz58	false
2161		zzzzz49,zzzzz50	false
2162		zzzzz49,zzzzz97	false
2163		zzzzz49,zzzzz78	false
2164		zzzzz49,zzzzz60	false
2165		zzzzz49,zzzzz57	false
2166		zzzzz49,zzzzz98	false
2167		zzzzz49,zzzzz54	false
2168		zzzzz49,zzzzz99	false
2169		zzzzz49,zzzzz92	false
2170		zzzzz49,zzzzz64	false
2171		zzzzz49,zzzzz55	false
2172		zzzzz49,zzzzz69	false
2173		zzzzz49,zzzzz56	false
2174		zzzzz49,zzzzz68	false
2175		zzzzz49,zzzzz65	false
2176		zzzzz49,zzzzz66	false
2177		zzzzz48,zzzzz77	false
2178		zzzzz48,zzzzz51	false
2179		zzzzz48,zzzzz49	false
2180		zzzzz48,zzzzz91	false
2181		zzzzz48,zzzzz90	false
2182		zzzzz48,zzzzz80	false
2183		zzzzz48,zzzzz75	false
2184		zzzzz48,zzzzz89	false
2185		zzzzz48,zzzzz79	false
2186		zzzzz48,zzzzz85	false
2187		zzzzz48,zzzzz50	false
2188		zzzzz48,zzzzz82	false
2189		zzzzz48,zzzzz83	false
2190		zzzzz48,zzzzz52	false
2191		zzzzz48,zzzzz67	false
2192		zzzzz48,zzzzz71	false
2193		zzzzz48,zzzzz76	false
2194		zzzzz48,zzzzz56	false
2195		zzzzz48,zzzzz88	false
2196		zzzzz48,zzzzz84	false
2197		zzzzz48,zzzzz70	false
2198		zzzzz48,zzzzz55	false
2199		zzzzz48,zzzzz73	false
2200		zzzzz48,zzzzz68	false
2201		zzzzz48,zzzzz69	false
2202		zzzzz48,zzzzz72	false
2203		zzzzz48,zzzzz74	false
2204		zzzzz48,zzzzz63	false
2205		zzzzz48,zzzzz54	false
2206		zzzzz48,zzzzz62	false
2207		zzzzz48,zzzzz65	false
2208		zzzzz48,zzzzz66	false
2209		zzzzz48,zzzzz58	false
2210		zzzzz48,zzzzz99	false
2211		zzzzz48,zzzzz96	false
2212		zzzzz48,zzzzz98	false
2213		zzzzz48,zzzzz95	false
2214		zzzzz48,zzzzz92	false
2215		zzzzz48,zzzzz94	false
2216		zzzzz48,zzzzz78	false
2217		zzzzz48,zzzzz93	false
2218		zzzzz48,zzzzz57	false
2219		zzzzz48,zzzzz59	false
2220		zzzzz48,zzzzz97	false
2221		zzzzz48,zzzzz60	false
2222		zzzzz48,zzzzz61	false
2223		zzzzz48,zzzzz53	false
2224		zzzzz48,zzzzz64	false
2225		zzzzz47,zzzzz77	false
2226		zzzzz47,zzzzz51	false
2227		zzzzz47,zzzzz49	false
2228		zzzzz47,zzzzz91	false
2229		zzzzz47,zzzzz90	false
2230		zzzzz47,zzzzz80	false
2231		zzzzz47,zzzzz75	false
2232		zzzzz47,zzzzz89	false
2233		zzzzz47,zzzzz79	false
2234		zzzzz47,zzzzz50	false
2235		zzzzz47,zzzzz85	false
2236		zzzzz47,zzzzz82	false
2237		zzzzz47,zzzzz83	false
2238		zzzzz47,zzzzz52	false
2239		zzzzz47,zzzzz71	false
2240		zzzzz47,zzzzz67	false
2241		zzzzz47,zzzzz56	false
2242		zzzzz47,zzzzz76	false
2243		zzzzz47,zzzzz84	false
2244		zzzzz47,zzzzz88	false
2245		zzzzz47,zzzzz70	false
2246		zzzzz47,zzzzz73	false
2247		zzzzz47,zzzzz68	false
2248		zzzzz47,zzzzz72	false
2249		zzzzz47,zzzzz55	false
2250		zzzzz47,zzzzz74	false
2251		zzzzz47,zzzzz69	false
2252		zzzzz47,zzzzz63	false
2253		zzzzz47,zzzzz54	false
2254		zzzzz47,zzzzz62	false
2255		zzzzz47,zzzzz58	false
2256		zzzzz47,zzzzz65	false
2257		zzzzz47,zzzzz66	false
2258		zzzzz47,zzzzz98	false
2259		zzzzz47,zzzzz99	false
2260		zzzzz47,zzzzz96	false
2261		zzzzz47,zzzzz95	false
2262		zzzzz47,zzzzz94	false
2263		zzzzz47,zzzzz93	false
2264		zzzzz47,zzzzz92	false
2265		zzzzz47,zzzzz78	false
2266		zzzzz47,zzzzz59	false
2267		zzzzz47,zzzzz60	false
2268		zzzzz47,zzzzz57	false
2269		zzzzz47,zzzzz53	false
2270		zzzzz47,zzzzz97	false
2271		zzzzz47,zzzzz64	false
2272		zzzzz47,zzzzz61	false
2273		zzzzz47,zzzzz48	false
2274		zzzzz42,zzzzz51	false
2275		zzzzz42,zzzzz77	false
2276		zzzzz42,zzzzz49	false
2277		zzzzz42,zzzzz88	false
2278		zzzzz42,zzzzz93	false
2279		zzzzz42,zzzzz50	false
2280		zzzzz42,zzzzz56	false
2281		zzzzz42,zzzzz90	false
2282		zzzzz42,zzzzz52	false
2283		zzzzz42,zzzzz89	false
2284		zzzzz42,zzzzz63	false
2285		zzzzz42,zzzzz58	false
2286		zzzzz42,zzzzz67	false
2287		zzzzz42,zzzzz70	false
2288		zzzzz42,zzzzz60	false
2289		zzzzz42,zzzzz57	false
2290		zzzzz42,zzzzz62	false
2291		zzzzz42,zzzzz91	false
2292		zzzzz42,zzzzz54	false
2293		zzzzz42,zzzzz99	false
2294		zzzzz42,zzzzz80	false
2295		zzzzz42,zzzzz59	false
2296		zzzzz42,zzzzz75	false
2297		zzzzz42,zzzzz95	false
2298		zzzzz42,zzzzz68	false
2299		zzzzz42,zzzzz55	false
2300		zzzzz42,zzzzz53	false
2301		zzzzz42,zzzzz61	false
2302		zzzzz42,zzzzz97	false
2303		zzzzz42,zzzzz66	false
2304		zzzzz42,zzzzz64	false
2305		zzzzz42,zzzzz98	false
2306		zzzzz42,zzzzz47	false
2307		zzzzz42,zzzzz48	false
2308		zzzzz42,zzzzz96	false
2309		zzzzz42,zzzzz69	false
2310		zzzzz42,zzzzz72	false
2311		zzzzz42,zzzzz94	false
2312		zzzzz42,zzzzz74	false
2313		zzzzz42,zzzzz78	false
2314		zzzzz42,zzzzz92	false
2315		zzzzz42,zzzzz73	false
2316		zzzzz42,zzzzz65	false
2317		zzzzz42,zzzzz82	false
2318		zzzzz42,zzzzz83	false
2319		zzzzz42,zzzzz79	false
2320		zzzzz42,zzzzz85	false
2321		zzzzz42,zzzzz76	false
2322		zzzzz42,zzzzz84	false
2323		zzzzz42,zzzzz71	false
2324		zzzzz41,zzzzz81	false
2325		zzzzz41,zzzzz51	false
2326		zzzzz41,zzzzz49	false
2327		zzzzz41,zzzzz77	false
2328		zzzzz41,zzzzz91	false
2329		zzzzz41,zzzzz50	false
2330		zzzzz41,zzzzz42	false
2331		zzzzz41,zzzzz90	false
2332		zzzzz41,zzzzz83	false
2333		zzzzz41,zzzzz52	false
2334		zzzzz41,zzzzz67	false
2335		zzzzz41,zzzzz89	false
2336		zzzzz41,zzzzz79	false
2337		zzzzz41,zzzzz56	false
2338		zzzzz41,zzzzz82	false
2339		zzzzz41,zzzzz70	false
2340		zzzzz41,zzzzz63	false
2341		zzzzz41,zzzzz85	false
2342		zzzzz41,zzzzz76	false
2343		zzzzz41,zzzzz54	false
2344		zzzzz41,zzzzz60	false
2345		zzzzz41,zzzzz59	false
2346		zzzzz41,zzzzz75	false
2347		zzzzz41,zzzzz62	false
2348		zzzzz41,zzzzz80	false
2349		zzzzz41,zzzzz69	false
2350		zzzzz41,zzzzz55	false
2351		zzzzz41,zzzzz53	false
2352		zzzzz41,zzzzz97	false
2353		zzzzz41,zzzzz96	false
2354		zzzzz41,zzzzz92	false
2355		zzzzz41,zzzzz68	false
2356		zzzzz41,zzzzz58	false
2357		zzzzz41,zzzzz61	false
2358		zzzzz41,zzzzz57	false
2359		zzzzz41,zzzzz73	false
2360		zzzzz41,zzzzz71	false
2361		zzzzz41,zzzzz84	false
2362		zzzzz41,zzzzz99	false
2363		zzzzz41,zzzzz64	false
2364		zzzzz41,zzzzz98	false
2365		zzzzz41,zzzzz88	false
2366		zzzzz41,zzzzz47	false
2367		zzzzz41,zzzzz95	false
2368		zzzzz41,zzzzz74	false
2369		zzzzz41,zzzzz66	false
2370		zzzzz41,zzzzz65	false
2371		zzzzz41,zzzzz48	false
2372		zzzzz41,zzzzz72	false
2373		zzzzz41,zzzzz78	false
2374		zzzzz41,zzzzz94	false
2375		zzzzz41,zzzzz93	false
2376		zzzzz40,zzzzz81	false
2377		zzzzz40,zzzzz51	false
2378		zzzzz40,zzzzz49	false
2379		zzzzz40,zzzzz77	false
2380		zzzzz40,zzzzz91	false
2381		zzzzz40,zzzzz42	false
2382		zzzzz40,zzzzz90	false
2383		zzzzz40,zzzzz50	false
2384		zzzzz40,zzzzz89	false
2385		zzzzz40,zzzzz67	false
2386		zzzzz40,zzzzz83	false
2387		zzzzz40,zzzzz52	false
2388		zzzzz40,zzzzz79	false
2389		zzzzz40,zzzzz82	false
2390		zzzzz40,zzzzz76	false
2391		zzzzz40,zzzzz70	false
2392		zzzzz40,zzzzz85	false
2393		zzzzz40,zzzzz75	false
2394		zzzzz40,zzzzz80	false
2395		zzzzz40,zzzzz56	false
2396		zzzzz40,zzzzz63	false
2397		zzzzz40,zzzzz62	false
2398		zzzzz40,zzzzz55	false
2399		zzzzz40,zzzzz57	false
2400		zzzzz40,zzzzz97	false
2401		zzzzz40,zzzzz59	false
2402		zzzzz40,zzzzz96	false
2403		zzzzz40,zzzzz54	false
2404		zzzzz40,zzzzz60	false
2405		zzzzz40,zzzzz68	false
2406		zzzzz40,zzzzz69	false
2407		zzzzz40,zzzzz58	false
2408		zzzzz40,zzzzz64	false
2409		zzzzz40,zzzzz99	false
2410		zzzzz40,zzzzz61	false
2411		zzzzz40,zzzzz53	false
2412		zzzzz40,zzzzz92	false
2413		zzzzz40,zzzzz73	false
2414		zzzzz40,zzzzz84	false
2415		zzzzz40,zzzzz71	false
2416		zzzzz40,zzzzz95	false
2417		zzzzz40,zzzzz72	false
2418		zzzzz40,zzzzz98	false
2419		zzzzz40,zzzzz88	false
2420		zzzzz40,zzzzz47	false
2421		zzzzz40,zzzzz74	false
2422		zzzzz40,zzzzz66	false
2423		zzzzz40,zzzzz65	false
2424		zzzzz40,zzzzz78	false
2425		zzzzz40,zzzzz48	false
2426		zzzzz40,zzzzz94	false
2427		zzzzz40,zzzzz93	false
2428		zzzzz40,zzzzz41	false
2429		zzzzz39,zzzzz77	false
2430		zzzzz39,zzzzz51	false
2431		zzzzz39,zzzzz49	false
2432		zzzzz39,zzzzz90	false
2433		zzzzz39,zzzzz91	false
2434		zzzzz39,zzzzz42	false
2435		zzzzz39,zzzzz89	false
2436		zzzzz39,zzzzz40	false
2437		zzzzz39,zzzzz41	false
2438		zzzzz39,zzzzz80	false
2439		zzzzz39,zzzzz75	false
2440		zzzzz39,zzzzz50	false
2441		zzzzz39,zzzzz52	false
2442		zzzzz39,zzzzz79	false
2443		zzzzz39,zzzzz82	false
2444		zzzzz39,zzzzz83	false
2445		zzzzz39,zzzzz85	false
2446		zzzzz39,zzzzz56	false
2447		zzzzz39,zzzzz67	false
2448		zzzzz39,zzzzz71	false
2449		zzzzz39,zzzzz76	false
2450		zzzzz39,zzzzz73	false
2451		zzzzz39,zzzzz55	false
2452		zzzzz39,zzzzz70	false
2453		zzzzz39,zzzzz74	false
2454		zzzzz39,zzzzz88	false
2455		zzzzz39,zzzzz84	false
2456		zzzzz39,zzzzz72	false
2457		zzzzz39,zzzzz68	false
2458		zzzzz39,zzzzz63	false
2459		zzzzz39,zzzzz99	false
2460		zzzzz39,zzzzz93	false
2461		zzzzz39,zzzzz69	false
2462		zzzzz39,zzzzz65	false
2463		zzzzz39,zzzzz98	false
2464		zzzzz39,zzzzz54	false
2465		zzzzz39,zzzzz95	false
2466		zzzzz39,zzzzz66	false
2467		zzzzz39,zzzzz92	false
2468		zzzzz39,zzzzz78	false
2469		zzzzz39,zzzzz58	false
2470		zzzzz39,zzzzz64	false
2471		zzzzz39,zzzzz96	false
2472		zzzzz39,zzzzz62	false
2473		zzzzz39,zzzzz94	false
2474		zzzzz39,zzzzz47	false
2475		zzzzz39,zzzzz59	false
2476		zzzzz39,zzzzz48	false
2477		zzzzz39,zzzzz60	false
2478		zzzzz39,zzzzz53	false
2479		zzzzz39,zzzzz61	false
2480		zzzzz39,zzzzz57	false
2481		zzzzz39,zzzzz97	false
2482		zzzzz38,zzzzz64	false
2483		zzzzz38,zzzzz82	false
2484		zzzzz38,zzzzz52	false
2485		zzzzz38,zzzzz89	false
2486		zzzzz38,zzzzz56	false
2487		zzzzz38,zzzzz93	false
2488		zzzzz38,zzzzz68	false
2489		zzzzz38,zzzzz76	false
2490		zzzzz38,zzzzz41	false
2491		zzzzz38,zzzzz81	false
2492		zzzzz37,zzzzz77	false
2493		zzzzz37,zzzzz51	false
2494		zzzzz37,zzzzz49	false
2495		zzzzz37,zzzzz91	false
2496		zzzzz37,zzzzz90	false
2497		zzzzz37,zzzzz42	false
2498		zzzzz37,zzzzz89	false
2499		zzzzz37,zzzzz41	false
2500		zzzzz37,zzzzz40	false
2501		zzzzz37,zzzzz80	false
2502		zzzzz37,zzzzz75	false
2503		zzzzz37,zzzzz79	false
2504		zzzzz37,zzzzz83	false
2505		zzzzz37,zzzzz50	false
2506		zzzzz37,zzzzz82	false
2507		zzzzz37,zzzzz85	false
2508		zzzzz37,zzzzz52	false
2509		zzzzz37,zzzzz67	false
2510		zzzzz37,zzzzz76	false
2511		zzzzz37,zzzzz71	false
2512		zzzzz37,zzzzz56	false
2513		zzzzz37,zzzzz84	false
2514		zzzzz37,zzzzz88	false
2515		zzzzz37,zzzzz63	false
2516		zzzzz37,zzzzz70	false
2517		zzzzz37,zzzzz39	false
2518		zzzzz37,zzzzz73	false
2519		zzzzz37,zzzzz72	false
2520		zzzzz37,zzzzz68	false
2521		zzzzz37,zzzzz74	false
2522		zzzzz37,zzzzz54	false
2523		zzzzz37,zzzzz99	false
2524		zzzzz37,zzzzz47	false
2525		zzzzz37,zzzzz55	false
2526		zzzzz37,zzzzz48	false
2527		zzzzz37,zzzzz62	false
2528		zzzzz37,zzzzz59	false
2529		zzzzz37,zzzzz60	false
2530		zzzzz37,zzzzz53	false
2531		zzzzz37,zzzzz57	false
2532		zzzzz37,zzzzz61	false
2533		zzzzz37,zzzzz58	false
2534		zzzzz37,zzzzz69	false
2535		zzzzz37,zzzzz98	false
2536		zzzzz37,zzzzz96	false
2537		zzzzz37,zzzzz93	false
2538		zzzzz37,zzzzz66	false
2539		zzzzz37,zzzzz65	false
2540		zzzzz37,zzzzz95	false
2541		zzzzz37,zzzzz64	false
2542		zzzzz37,zzzzz92	false
2543		zzzzz37,zzzzz78	false
2544		zzzzz37,zzzzz94	false
2545		zzzzz37,zzzzz97	false
2546		zzzzz36,zzzzz51	false
2547		zzzzz36,zzzzz49	false
2548		zzzzz36,zzzzz77	false
2549		zzzzz36,zzzzz91	false
2550		zzzzz36,zzzzz90	false
2551		zzzzz36,zzzzz42	false
2552		zzzzz36,zzzzz89	false
2553		zzzzz36,zzzzz50	false
2554		zzzzz36,zzzzz83	false
2555		zzzzz36,zzzzz82	false
2556		zzzzz36,zzzzz79	false
2557		zzzzz36,zzzzz76	false
2558		zzzzz36,zzzzz75	false
2559		zzzzz36,zzzzz80	false
2560		zzzzz36,zzzzz52	false
2561		zzzzz36,zzzzz85	false
2562		zzzzz36,zzzzz72	false
2563		zzzzz36,zzzzz70	false
2564		zzzzz36,zzzzz99	false
2565		zzzzz36,zzzzz63	false
2566		zzzzz36,zzzzz74	false
2567		zzzzz36,zzzzz84	false
2568		zzzzz36,zzzzz56	false
2569		zzzzz36,zzzzz98	false
2570		zzzzz36,zzzzz96	false
2571		zzzzz36,zzzzz60	false
2572		zzzzz36,zzzzz95	false
2573		zzzzz36,zzzzz73	false
2574		zzzzz36,zzzzz71	false
2575		zzzzz36,zzzzz67	false
2576		zzzzz36,zzzzz92	false
2577		zzzzz36,zzzzz58	false
2578		zzzzz36,zzzzz78	false
2579		zzzzz36,zzzzz48	false
2580		zzzzz36,zzzzz57	false
2581		zzzzz36,zzzzz97	false
2582		zzzzz36,zzzzz62	false
2583		zzzzz36,zzzzz47	false
2584		zzzzz36,zzzzz61	false
2585		zzzzz36,zzzzz59	false
2586		zzzzz36,zzzzz93	false
2587		zzzzz36,zzzzz88	false
2588		zzzzz36,zzzzz68	false
2589		zzzzz36,zzzzz53	false
2590		zzzzz36,zzzzz39	false
2591		zzzzz36,zzzzz94	false
2592		zzzzz36,zzzzz55	false
2593		zzzzz36,zzzzz54	false
2594		zzzzz36,zzzzz37	false
2595		zzzzz36,zzzzz64	false
2596		zzzzz36,zzzzz69	false
2597		zzzzz36,zzzzz66	false
2598		zzzzz36,zzzzz65	false
2599		zzzzz36,zzzzz41	false
2600		zzzzz36,zzzzz40	false
2601		zzzzz35,zzzzz81	false
2602		zzzzz35,zzzzz38	false
2603		zzzzz35,zzzzz49	false
2604		zzzzz35,zzzzz77	false
2605		zzzzz35,zzzzz91	false
2606		zzzzz35,zzzzz90	false
2607		zzzzz35,zzzzz42	false
2608		zzzzz35,zzzzz50	false
2609		zzzzz35,zzzzz85	false
2610		zzzzz35,zzzzz82	false
2611		zzzzz35,zzzzz79	false
2612		zzzzz35,zzzzz75	false
2613		zzzzz35,zzzzz80	false
2614		zzzzz35,zzzzz83	false
2615		zzzzz35,zzzzz74	false
2616		zzzzz35,zzzzz73	false
2617		zzzzz35,zzzzz72	false
2618		zzzzz35,zzzzz70	false
2619		zzzzz35,zzzzz89	false
2620		zzzzz35,zzzzz55	false
2621		zzzzz35,zzzzz76	false
2622		zzzzz35,zzzzz67	false
2623		zzzzz35,zzzzz37	false
2624		zzzzz35,zzzzz58	false
2625		zzzzz35,zzzzz78	false
2626		zzzzz35,zzzzz98	false
2627		zzzzz35,zzzzz88	false
2628		zzzzz35,zzzzz71	false
2629		zzzzz35,zzzzz63	false
2630		zzzzz35,zzzzz92	false
2631		zzzzz35,zzzzz94	false
2632		zzzzz35,zzzzz95	false
2633		zzzzz35,zzzzz52	false
2634		zzzzz35,zzzzz96	false
2635		zzzzz35,zzzzz68	false
2636		zzzzz35,zzzzz84	false
2637		zzzzz35,zzzzz99	false
2638		zzzzz35,zzzzz97	false
2639		zzzzz35,zzzzz59	false
2640		zzzzz35,zzzzz54	false
2641		zzzzz35,zzzzz66	false
2642		zzzzz35,zzzzz47	false
2643		zzzzz35,zzzzz39	false
2644		zzzzz35,zzzzz57	false
2645		zzzzz35,zzzzz62	false
2646		zzzzz35,zzzzz60	false
2647		zzzzz35,zzzzz53	false
2648		zzzzz35,zzzzz93	false
2649		zzzzz35,zzzzz69	false
2650		zzzzz35,zzzzz65	false
2651		zzzzz35,zzzzz56	false
2652		zzzzz35,zzzzz48	false
2653		zzzzz35,zzzzz36	false
2654		zzzzz35,zzzzz61	false
2655		zzzzz35,zzzzz64	false
2656		zzzzz35,zzzzz41	false
2657		zzzzz35,zzzzz40	false
2658		zzzzz34,zzzzz38	false
2659		zzzzz34,zzzzz77	false
2660		zzzzz34,zzzzz51	false
2661		zzzzz34,zzzzz91	false
2662		zzzzz34,zzzzz35	false
2663		zzzzz34,zzzzz90	false
2664		zzzzz34,zzzzz49	false
2665		zzzzz34,zzzzz42	false
2666		zzzzz34,zzzzz40	false
2667		zzzzz34,zzzzz41	false
2668		zzzzz34,zzzzz36	false
2669		zzzzz34,zzzzz89	false
2670		zzzzz34,zzzzz75	false
2671		zzzzz34,zzzzz80	false
2672		zzzzz34,zzzzz79	false
2673		zzzzz34,zzzzz82	false
2674		zzzzz34,zzzzz50	false
2675		zzzzz34,zzzzz85	false
2676		zzzzz34,zzzzz83	false
2677		zzzzz34,zzzzz76	false
2678		zzzzz34,zzzzz71	false
2679		zzzzz34,zzzzz88	false
2680		zzzzz34,zzzzz84	false
2681		zzzzz34,zzzzz39	false
2682		zzzzz34,zzzzz74	false
2683		zzzzz34,zzzzz72	false
2684		zzzzz34,zzzzz73	false
2685		zzzzz34,zzzzz37	false
2686		zzzzz34,zzzzz70	false
2687		zzzzz34,zzzzz52	false
2688		zzzzz34,zzzzz63	false
2689		zzzzz34,zzzzz48	false
2690		zzzzz34,zzzzz47	false
2691		zzzzz34,zzzzz95	false
2692		zzzzz34,zzzzz99	false
2693		zzzzz34,zzzzz98	false
2694		zzzzz34,zzzzz96	false
2695		zzzzz34,zzzzz54	false
2696		zzzzz34,zzzzz67	false
2697		zzzzz34,zzzzz93	false
2698		zzzzz34,zzzzz62	false
2699		zzzzz34,zzzzz97	false
2700		zzzzz34,zzzzz78	false
2701		zzzzz34,zzzzz94	false
2702		zzzzz34,zzzzz59	false
2703		zzzzz34,zzzzz56	false
2704		zzzzz34,zzzzz60	false
2705		zzzzz34,zzzzz92	false
2706		zzzzz34,zzzzz58	false
2707		zzzzz34,zzzzz57	false
2708		zzzzz34,zzzzz53	false
2709		zzzzz34,zzzzz61	false
2710		zzzzz34,zzzzz64	false
2711		zzzzz34,zzzzz69	false
2712		zzzzz34,zzzzz55	false
2713		zzzzz34,zzzzz68	false
2714		zzzzz34,zzzzz65	false
2715		zzzzz34,zzzzz66	false
2716		zzzzz33,zzzzz38	false
2717		zzzzz33,zzzzz77	false
2718		zzzzz33,zzzzz51	false
2719		zzzzz33,zzzzz49	false
2720		zzzzz33,zzzzz35	false
2721		zzzzz33,zzzzz91	false
2722		zzzzz33,zzzzz90	false
2723		zzzzz33,zzzzz42	false
2724		zzzzz33,zzzzz36	false
2725		zzzzz33,zzzzz40	false
2726		zzzzz33,zzzzz50	false
2727		zzzzz33,zzzzz41	false
2728		zzzzz33,zzzzz89	false
2729		zzzzz33,zzzzz75	false
2730		zzzzz33,zzzzz80	false
2731		zzzzz33,zzzzz83	false
2732		zzzzz33,zzzzz82	false
2733		zzzzz33,zzzzz88	false
2734		zzzzz33,zzzzz79	false
2735		zzzzz33,zzzzz85	false
2736		zzzzz33,zzzzz71	false
2737		zzzzz33,zzzzz84	false
2738		zzzzz33,zzzzz52	false
2739		zzzzz33,zzzzz76	false
2740		zzzzz33,zzzzz74	false
2741		zzzzz33,zzzzz73	false
2742		zzzzz33,zzzzz37	false
2743		zzzzz33,zzzzz72	false
2744		zzzzz33,zzzzz67	false
2745		zzzzz33,zzzzz70	false
2746		zzzzz33,zzzzz63	false
2747		zzzzz33,zzzzz39	false
2748		zzzzz33,zzzzz56	false
2749		zzzzz33,zzzzz99	false
2750		zzzzz33,zzzzz95	false
2751		zzzzz33,zzzzz62	false
2752		zzzzz33,zzzzz98	false
2753		zzzzz33,zzzzz68	false
2754		zzzzz33,zzzzz78	false
2755		zzzzz33,zzzzz69	false
2756		zzzzz33,zzzzz54	false
2757		zzzzz33,zzzzz92	false
2758		zzzzz33,zzzzz96	false
2759		zzzzz33,zzzzz47	false
2760		zzzzz33,zzzzz48	false
2761		zzzzz33,zzzzz58	false
2762		zzzzz33,zzzzz94	false
2763		zzzzz33,zzzzz55	false
2764		zzzzz33,zzzzz57	false
2765		zzzzz33,zzzzz34	false
2766		zzzzz33,zzzzz97	false
2767		zzzzz33,zzzzz93	false
2768		zzzzz33,zzzzz61	false
2769		zzzzz33,zzzzz59	false
2770		zzzzz33,zzzzz60	false
2771		zzzzz33,zzzzz65	false
2772		zzzzz33,zzzzz64	false
2773		zzzzz33,zzzzz53	false
2774		zzzzz33,zzzzz66	false
2775		zzzzz32,zzzzz51	false
2776		zzzzz32,zzzzz81	false
2777		zzzzz32,zzzzz49	false
2778		zzzzz32,zzzzz77	false
2779		zzzzz32,zzzzz91	false
2780		zzzzz32,zzzzz90	false
2781		zzzzz32,zzzzz42	false
2782		zzzzz32,zzzzz50	false
2783		zzzzz32,zzzzz85	false
2784		zzzzz32,zzzzz79	false
2785		zzzzz32,zzzzz82	false
2786		zzzzz32,zzzzz75	false
2787		zzzzz32,zzzzz73	false
2788		zzzzz32,zzzzz83	false
2789		zzzzz32,zzzzz80	false
2790		zzzzz32,zzzzz67	false
2791		zzzzz32,zzzzz76	false
2792		zzzzz32,zzzzz68	false
2793		zzzzz32,zzzzz52	false
2794		zzzzz32,zzzzz63	false
2795		zzzzz32,zzzzz33	false
2796		zzzzz32,zzzzz89	false
2797		zzzzz32,zzzzz72	false
2798		zzzzz32,zzzzz57	false
2799		zzzzz32,zzzzz74	false
2800		zzzzz32,zzzzz55	false
2801		zzzzz32,zzzzz56	false
2802		zzzzz32,zzzzz98	false
2803		zzzzz32,zzzzz99	false
2804		zzzzz32,zzzzz36	false
2805		zzzzz32,zzzzz96	false
2806		zzzzz32,zzzzz70	false
2807		zzzzz32,zzzzz95	false
2808		zzzzz32,zzzzz34	false
2809		zzzzz32,zzzzz97	false
2810		zzzzz32,zzzzz92	false
2811		zzzzz32,zzzzz59	false
2812		zzzzz32,zzzzz53	false
2813		zzzzz32,zzzzz37	false
2814		zzzzz32,zzzzz94	false
2815		zzzzz32,zzzzz69	false
2816		zzzzz32,zzzzz58	false
2817		zzzzz32,zzzzz65	false
2818		zzzzz32,zzzzz54	false
2819		zzzzz32,zzzzz66	false
2820		zzzzz32,zzzzz78	false
2821		zzzzz32,zzzzz84	false
2822		zzzzz32,zzzzz88	false
2823		zzzzz32,zzzzz60	false
2824		zzzzz32,zzzzz62	false
2825		zzzzz32,zzzzz61	false
2826		zzzzz32,zzzzz48	false
2827		zzzzz32,zzzzz47	false
2828		zzzzz32,zzzzz71	false
2829		zzzzz32,zzzzz64	false
2830		zzzzz32,zzzzz39	false
2831		zzzzz32,zzzzz93	false
2832		zzzzz32,zzzzz41	false
2833		zzzzz32,zzzzz40	false
2834		zzzzz32,zzzzz35	false
2835		zzzzz31,zzzzz81	false
2836		zzzzz31,zzzzz38	false
2837		zzzzz31,zzzzz51	false
2838		zzzzz31,zzzzz77	false
2839		zzzzz31,zzzzz49	false
2840		zzzzz31,zzzzz91	false
2841		zzzzz31,zzzzz90	false
2842		zzzzz31,zzzzz42	false
2843		zzzzz31,zzzzz50	false
2844		zzzzz31,zzzzz79	false
2845		zzzzz31,zzzzz80	false
2846		zzzzz31,zzzzz75	false
2847		zzzzz31,zzzzz83	false
2848		zzzzz31,zzzzz82	false
2849		zzzzz31,zzzzz67	false
2850		zzzzz31,zzzzz85	false
2851		zzzzz31,zzzzz89	false
2852		zzzzz31,zzzzz76	false
2853		zzzzz31,zzzzz63	false
2854		zzzzz31,zzzzz55	false
2855		zzzzz31,zzzzz33	false
2856		zzzzz31,zzzzz52	false
2857		zzzzz31,zzzzz68	false
2858		zzzzz31,zzzzz56	false
2859		zzzzz31,zzzzz73	false
2860		zzzzz31,zzzzz71	false
2861		zzzzz31,zzzzz37	false
2862		zzzzz31,zzzzz57	false
2863		zzzzz31,zzzzz69	false
2864		zzzzz31,zzzzz34	false
2865		zzzzz31,zzzzz54	false
2866		zzzzz31,zzzzz72	false
2867		zzzzz31,zzzzz74	false
2868		zzzzz31,zzzzz39	false
2869		zzzzz31,zzzzz66	false
2870		zzzzz31,zzzzz59	false
2871		zzzzz31,zzzzz70	false
2872		zzzzz31,zzzzz58	false
2873		zzzzz31,zzzzz53	false
2874		zzzzz31,zzzzz84	false
2875		zzzzz31,zzzzz96	false
2876		zzzzz31,zzzzz98	false
2877		zzzzz31,zzzzz64	false
2878		zzzzz31,zzzzz61	false
2879		zzzzz31,zzzzz99	false
2880		zzzzz31,zzzzz92	false
2881		zzzzz31,zzzzz62	false
2882		zzzzz31,zzzzz60	false
2883		zzzzz31,zzzzz36	false
2884		zzzzz31,zzzzz95	false
2885		zzzzz31,zzzzz47	false
2886		zzzzz31,zzzzz93	false
2887		zzzzz31,zzzzz97	false
2888		zzzzz31,zzzzz65	false
2889		zzzzz31,zzzzz88	false
2890		zzzzz31,zzzzz48	false
2891		zzzzz31,zzzzz94	false
2892		zzzzz31,zzzzz78	false
2893		zzzzz31,zzzzz40	false
2894		zzzzz31,zzzzz41	false
2895		zzzzz31,zzzzz35	false
2896		zzzzz31,zzzzz32	false
2897		zzzzz30,zzzzz81	false
2898		zzzzz30,zzzzz38	false
2899		zzzzz30,zzzzz51	false
2900		zzzzz30,zzzzz49	false
2901		zzzzz30,zzzzz77	false
2902		zzzzz30,zzzzz91	false
2903		zzzzz30,zzzzz90	false
2904		zzzzz30,zzzzz42	false
2905		zzzzz30,zzzzz50	false
2906		zzzzz30,zzzzz79	false
2907		zzzzz30,zzzzz85	false
2908		zzzzz30,zzzzz80	false
2909		zzzzz30,zzzzz83	false
2910		zzzzz30,zzzzz75	false
2911		zzzzz30,zzzzz89	false
2912		zzzzz30,zzzzz52	false
2913		zzzzz30,zzzzz67	false
2914		zzzzz30,zzzzz82	false
2915		zzzzz30,zzzzz76	false
2916		zzzzz30,zzzzz72	false
2917		zzzzz30,zzzzz68	false
2918		zzzzz30,zzzzz58	false
2919		zzzzz30,zzzzz57	false
2920		zzzzz30,zzzzz33	false
2921		zzzzz30,zzzzz47	false
2922		zzzzz30,zzzzz37	false
2923		zzzzz30,zzzzz74	false
2924		zzzzz30,zzzzz56	false
2925		zzzzz30,zzzzz48	false
2926		zzzzz30,zzzzz66	false
2927		zzzzz30,zzzzz63	false
2928		zzzzz30,zzzzz71	false
2929		zzzzz30,zzzzz73	false
2930		zzzzz30,zzzzz96	false
2931		zzzzz30,zzzzz97	false
2932		zzzzz30,zzzzz55	false
2933		zzzzz30,zzzzz34	false
2934		zzzzz30,zzzzz70	false
2935		zzzzz30,zzzzz98	false
2936		zzzzz30,zzzzz54	false
2937		zzzzz30,zzzzz69	false
2938		zzzzz30,zzzzz39	false
2939		zzzzz30,zzzzz88	false
2940		zzzzz30,zzzzz99	false
2941		zzzzz30,zzzzz62	false
2942		zzzzz30,zzzzz64	false
2943		zzzzz30,zzzzz60	false
2944		zzzzz30,zzzzz59	false
2945		zzzzz30,zzzzz65	false
2946		zzzzz30,zzzzz95	false
2947		zzzzz30,zzzzz84	false
2948		zzzzz30,zzzzz53	false
2949		zzzzz30,zzzzz61	false
2950		zzzzz30,zzzzz93	false
2951		zzzzz30,zzzzz78	false
2952		zzzzz30,zzzzz92	false
2953		zzzzz30,zzzzz36	false
2954		zzzzz30,zzzzz94	false
2955		zzzzz30,zzzzz41	false
2956		zzzzz30,zzzzz40	false
2957		zzzzz30,zzzzz32	false
2958		zzzzz30,zzzzz35	false
2959		zzzzz30,zzzzz31	false
2960		zzzzz29,zzzzz51	false
2961		zzzzz29,zzzzz77	false
2962		zzzzz29,zzzzz49	false
2963		zzzzz29,zzzzz42	false
2964		zzzzz29,zzzzz90	false
2965		zzzzz29,zzzzz91	false
2966		zzzzz29,zzzzz50	false
2967		zzzzz29,zzzzz89	false
2968		zzzzz29,zzzzz79	false
2969		zzzzz29,zzzzz85	false
2970		zzzzz29,zzzzz82	false
2971		zzzzz29,zzzzz80	false
2972		zzzzz29,zzzzz75	false
2973		zzzzz29,zzzzz83	false
2974		zzzzz29,zzzzz76	false
2975		zzzzz29,zzzzz70	false
2976		zzzzz29,zzzzz71	false
2977		zzzzz29,zzzzz52	false
2978		zzzzz29,zzzzz84	false
2979		zzzzz29,zzzzz67	false
2980		zzzzz29,zzzzz73	false
2981		zzzzz29,zzzzz63	false
2982		zzzzz29,zzzzz95	false
2983		zzzzz29,zzzzz88	false
2984		zzzzz29,zzzzz48	false
2985		zzzzz29,zzzzz39	false
2986		zzzzz29,zzzzz68	false
2987		zzzzz29,zzzzz96	false
2988		zzzzz29,zzzzz54	false
2989		zzzzz29,zzzzz34	false
2990		zzzzz29,zzzzz47	false
2991		zzzzz29,zzzzz92	false
2992		zzzzz29,zzzzz35	false
2993		zzzzz29,zzzzz33	false
2994		zzzzz29,zzzzz97	false
2995		zzzzz29,zzzzz93	false
2996		zzzzz29,zzzzz72	false
2997		zzzzz29,zzzzz74	false
2998		zzzzz29,zzzzz37	false
2999		zzzzz29,zzzzz69	false
3000		zzzzz29,zzzzz30	false
3001		zzzzz29,zzzzz64	false
3002		zzzzz29,zzzzz56	false
3003		zzzzz29,zzzzz59	false
3004		zzzzz29,zzzzz98	false
3005		zzzzz29,zzzzz78	false
3006		zzzzz29,zzzzz58	false
3007		zzzzz29,zzzzz55	false
3008		zzzzz29,zzzzz99	false
3009		zzzzz29,zzzzz60	false
3010		zzzzz29,zzzzz65	false
3011		zzzzz29,zzzzz32	false
3012		zzzzz29,zzzzz62	false
3013		zzzzz29,zzzzz61	false
3014		zzzzz29,zzzzz57	false
3015		zzzzz29,zzzzz53	false
3016		zzzzz29,zzzzz31	false
3017		zzzzz29,zzzzz94	false
3018		zzzzz29,zzzzz66	false
3019		zzzzz29,zzzzz41	false
3020		zzzzz29,zzzzz40	false
3021		zzzzz29,zzzzz36	false
3022		zzzzz28,zzzzz77	false
3023		zzzzz28,zzzzz91	false
3024		zzzzz28,zzzzz51	false
3025		zzzzz28,zzzzz90	false
3026		zzzzz28,zzzzz35	false
3027		zzzzz28,zzzzz49	false
3028		zzzzz28,zzzzz42	false
3029		zzzzz28,zzzzz32	false
3030		zzzzz28,zzzzz29	false
3031		zzzzz28,zzzzz30	false
3032		zzzzz28,zzzzz36	false
3033		zzzzz28,zzzzz31	false
3034		zzzzz28,zzzzz40	false
3035		zzzzz28,zzzzz41	false
3036		zzzzz28,zzzzz89	false
3037		zzzzz28,zzzzz80	false
3038		zzzzz28,zzzzz75	false
3039		zzzzz28,zzzzz82	false
3040		zzzzz28,zzzzz79	false
3041		zzzzz28,zzzzz83	false
3042		zzzzz28,zzzzz85	false
[truncated: 443,386 more rows]
