# Supplementary material for: Discovery of several thousand highly diverse circular DNA viruses
Source: eLife journal article supplement (doi:10.7554/elife.51971), 2020-02-03
Supplement: fig2-figsupp1-data3 [file elife-51971-fig2-figsupp1-data3-v1.cys › CytoscapeSession-2019_08_05-17_08/views/52-446444-all_my_seqs_genbank_ssDNA1_domains_micro_MCP_fasta+Full+Network.xgmml]

<?xml version="1.0" encoding="UTF-8" standalone="yes"?>
<graph id="446444" label="all_my_seqs_genbank_ssDNA1_domains_micro_MCP_fasta Full Network" cy:view="1" cy:networkId="52" cy:visualStyle="Sample2" cy:rendererId="org.cytoscape.ding" cy:documentVersion="3.0" xmlns:dc="http://purl.org/dc/elements/1.1/" xmlns:xlink="http://www.w3.org/1999/xlink" xmlns:rdf="http://www.w3.org/1999/02/22-rdf-syntax-ns#" xmlns:cy="http://www.cytoscape.org" xmlns="http://www.cs.rpi.edu/XGMML">
  <graphics>
    <att name="NETWORK_WIDTH" value="889.0" type="string" cy:type="String"/>
    <att name="NETWORK_EDGE_SELECTION" value="true" type="string" cy:type="String"/>
    <att name="NETWORK_CENTER_Z_LOCATION" value="0.0" type="string" cy:type="String"/>
    <att name="NETWORK_NODE_SELECTION" value="true" type="string" cy:type="String"/>
    <att name="NETWORK_CENTER_X_LOCATION" value="5.8491973876953125" type="string" cy:type="String"/>
    <att name="NETWORK_SCALE_FACTOR" value="0.31136985446399057" type="string" cy:type="String"/>
    <att name="NETWORK_DEPTH" value="0.0" type="string" cy:type="String"/>
    <att name="NETWORK_TITLE" value="all_my_seqs_genbank_ssDNA1_domains_micro_MCP_fasta Full Network" type="string" cy:type="String"/>
    <att name="NETWORK_ANNOTATION_SELECTION" value="false" type="string" cy:type="String"/>
    <att name="NETWORK_HEIGHT" value="475.0" type="string" cy:type="String"/>
    <att name="NETWORK_CENTER_Y_LOCATION" value="390.1125946044922" type="string" cy:type="String"/>
  </graphics>
  <node id="447430" label="zzzzz99" cy:nodeId="62">
    <graphics x="-5.222677032856495" y="43.64442643524586" z="0.0"/>
  </node>
  <node id="447429" label="zzzzz98" cy:nodeId="63">
    <graphics x="95.07990475425288" y="-25.93647375701488" z="0.0"/>
  </node>
  <node id="447428" label="zzzzz97" cy:nodeId="64">
    <graphics x="3.0747587276415516" y="-28.576023012385974" z="0.0"/>
  </node>
  <node id="447427" label="zzzzz96" cy:nodeId="65">
    <graphics x="-42.44839267006353" y="-37.990987211452136" z="0.0"/>
  </node>
  <node id="447426" label="zzzzz95" cy:nodeId="66">
    <graphics x="-13.813962738422902" y="30.909830182804455" z="0.0"/>
  </node>
  <node id="447425" label="zzzzz94" cy:nodeId="67">
    <graphics x="-60.23431948891118" y="-9.243280321345935" z="0.0"/>
  </node>
  <node id="447424" label="zzzzz93" cy:nodeId="68">
    <graphics x="31.183355529399364" y="-14.995469957576404" z="0.0"/>
  </node>
  <node id="447423" label="zzzzz92" cy:nodeId="69">
    <graphics x="-24.78812960854009" y="-5.4094142019611695" z="0.0"/>
  </node>
  <node id="447422" label="zzzzz91" cy:nodeId="70">
    <graphics x="247.2277700496631" y="-25.79471579192699" z="0.0"/>
  </node>
  <node id="447421" label="zzzzz90" cy:nodeId="71">
    <graphics x="-166.1564920352979" y="152.18033036590992" z="0.0"/>
  </node>
  <node id="447420" label="zzzzz89" cy:nodeId="72">
    <graphics x="167.03400631675288" y="56.385904401554455" z="0.0"/>
  </node>
  <node id="447419" label="zzzzz88" cy:nodeId="73">
    <graphics x="-52.073316376118214" y="71.97970780731617" z="0.0"/>
  </node>
  <node id="447418" label="zzzzz85" cy:nodeId="74">
    <graphics x="161.24085446128413" y="-36.06902113555492" z="0.0"/>
  </node>
  <node id="447417" label="zzzzz84" cy:nodeId="75">
    <graphics x="97.96561642417475" y="-47.02666273711742" z="0.0"/>
  </node>
  <node id="447416" label="zzzzz83" cy:nodeId="76">
    <graphics x="168.9729253841357" y="-1.480504900203357" z="0.0"/>
  </node>
  <node id="447415" label="zzzzz82" cy:nodeId="77">
    <graphics x="170.29184170493647" y="-47.48126783965648" z="0.0"/>
  </node>
  <node id="447414" label="zzzzz81" cy:nodeId="78">
    <graphics x="-156.88375643959478" y="527.7611103952067" z="0.0"/>
  </node>
  <node id="447413" label="zzzzz80" cy:nodeId="79">
    <graphics x="182.1041738582568" y="-19.309945970759998" z="0.0"/>
  </node>
  <node id="447412" label="zzzzz79" cy:nodeId="80">
    <graphics x="156.69246884116694" y="-45.08753672240795" z="0.0"/>
  </node>
  <node id="447411" label="zzzzz78" cy:nodeId="81">
    <graphics x="13.596929748149364" y="-36.12188044189037" z="0.0"/>
  </node>
  <node id="447410" label="zzzzz77" cy:nodeId="82">
    <graphics x="-99.76571444740728" y="365.87164506317555" z="0.0"/>
  </node>
  <node id="447409" label="zzzzz76" cy:nodeId="83">
    <graphics x="111.84062023887202" y="-50.13725653289379" z="0.0"/>
  </node>
  <node id="447408" label="zzzzz75" cy:nodeId="84">
    <graphics x="151.96951504478022" y="19.508966535343518" z="0.0"/>
  </node>
  <node id="447407" label="zzzzz74" cy:nodeId="85">
    <graphics x="69.92922039756343" y="-9.96624556182445" z="0.0"/>
  </node>
  <node id="447406" label="zzzzz73" cy:nodeId="86">
    <graphics x="63.91190167197749" y="-75.98865881560863" z="0.0"/>
  </node>
  <node id="447405" label="zzzzz72" cy:nodeId="87">
    <graphics x="82.26911373862788" y="-2.0108660757404664" z="0.0"/>
  </node>
  <node id="447404" label="zzzzz71" cy:nodeId="88">
    <graphics x="118.85603543052241" y="-33.36380568145336" z="0.0"/>
  </node>
  <node id="447403" label="zzzzz70" cy:nodeId="89">
    <graphics x="-50.182691376118214" y="9.494871228947034" z="0.0"/>
  </node>
  <node id="447402" label="zzzzz69" cy:nodeId="90">
    <graphics x="-59.34603671303228" y="-44.600415617213855" z="0.0"/>
  </node>
  <node id="447401" label="zzzzz68" cy:nodeId="91">
    <graphics x="-58.44207553139165" y="-79.9713000357014" z="0.0"/>
  </node>
  <node id="447400" label="zzzzz67" cy:nodeId="92">
    <graphics x="-85.13921908607915" y="60.36639603973805" z="0.0"/>
  </node>
  <node id="447399" label="zzzzz66" cy:nodeId="93">
    <graphics x="-57.15086154213384" y="-17.894004732356677" z="0.0"/>
  </node>
  <node id="447398" label="zzzzz65" cy:nodeId="94">
    <graphics x="15.950617034526317" y="-17.21014204619945" z="0.0"/>
  </node>
  <node id="447397" label="zzzzz64" cy:nodeId="95">
    <graphics x="39.934366424174755" y="-30.25425520537914" z="0.0"/>
  </node>
  <node id="447396" label="zzzzz63" cy:nodeId="96">
    <graphics x="-30.408284943012745" y="-82.0661486685139" z="0.0"/>
  </node>
  <node id="447395" label="zzzzz62" cy:nodeId="97">
    <graphics x="0.14097805747553593" y="-87.25884810088695" z="0.0"/>
  </node>
  <node id="447394" label="zzzzz61" cy:nodeId="98">
    <graphics x="-18.500272552876027" y="-65.66073790191234" z="0.0"/>
  </node>
  <node id="447393" label="zzzzz60" cy:nodeId="99">
    <graphics x="-54.06728915443853" y="29.58345231415211" z="0.0"/>
  </node>
  <node id="447392" label="zzzzz59" cy:nodeId="100">
    <graphics x="-1.9417627262158703" y="-95.23156920074047" z="0.0"/>
  </node>
  <node id="447391" label="zzzzz58" cy:nodeId="101">
    <graphics x="-50.55618838539556" y="-28.026979356990466" z="0.0"/>
  </node>
  <node id="447390" label="zzzzz57" cy:nodeId="102">
    <graphics x="-33.88866214027837" y="15.648336499943127" z="0.0"/>
  </node>
  <node id="447389" label="zzzzz56" cy:nodeId="103">
    <graphics x="-71.00877169838384" y="57.10384568573414" z="0.0"/>
  </node>
  <node id="447388" label="zzzzz55" cy:nodeId="104">
    <graphics x="26.2297269893603" y="31.981111615909924" z="0.0"/>
  </node>
  <node id="447387" label="zzzzz54" cy:nodeId="105">
    <graphics x="-42.75872592201665" y="44.37603196503102" z="0.0"/>
  </node>
  <node id="447386" label="zzzzz53" cy:nodeId="106">
    <graphics x="-5.916456024555714" y="-19.50563231109203" z="0.0"/>
  </node>
  <node id="447385" label="zzzzz52" cy:nodeId="107">
    <graphics x="-44.319043915180714" y="77.84048661590992" z="0.0"/>
  </node>
  <node id="447384" label="zzzzz51" cy:nodeId="108">
    <graphics x="-175.34458712807134" y="-248.52154341338695" z="0.0"/>
  </node>
  <node id="447383" label="zzzzz50" cy:nodeId="109">
    <graphics x="35.108961303325145" y="-169.18630781768383" z="0.0"/>
  </node>
  <node id="447382" label="zzzzz49" cy:nodeId="110">
    <graphics x="-239.64028720131353" y="173.3695088327068" z="0.0"/>
  </node>
  <node id="447381" label="zzzzz48" cy:nodeId="111">
    <graphics x="72.421066005321" y="-55.251188188777576" z="0.0"/>
  </node>
  <node id="447380" label="zzzzz47" cy:nodeId="112">
    <graphics x="-14.717420380024464" y="67.0134297311443" z="0.0"/>
  </node>
  <node id="447379" label="zzzzz42" cy:nodeId="113">
    <graphics x="250.02249356040528" y="-44.27266922591747" z="0.0"/>
  </node>
  <node id="447378" label="zzzzz41" cy:nodeId="114">
    <graphics x="78.4104721141772" y="136.17325028778492" z="0.0"/>
  </node>
  <node id="447377" label="zzzzz40" cy:nodeId="115">
    <graphics x="22.726873595805614" y="151.74827775360524" z="0.0"/>
  </node>
  <node id="447376" label="zzzzz39" cy:nodeId="116">
    <graphics x="-49.02310733070806" y="1.4077053964275024" z="0.0"/>
  </node>
  <node id="447375" label="zzzzz38" cy:nodeId="117">
    <graphics x="-247.79986361732915" y="432.3724385202068" z="0.0"/>
  </node>
  <node id="447374" label="zzzzz37" cy:nodeId="118">
    <graphics x="28.739469726176708" y="-82.20510664580883" z="0.0"/>
  </node>
  <node id="447373" label="zzzzz36" cy:nodeId="119">
    <graphics x="-14.331983368305714" y="172.73788651825367" z="0.0"/>
  </node>
  <node id="447372" label="zzzzz35" cy:nodeId="120">
    <graphics x="111.32128735312983" y="186.4505635202068" z="0.0"/>
  </node>
  <node id="447371" label="zzzzz34" cy:nodeId="121">
    <graphics x="53.687561233134716" y="-98.07869902251781" z="0.0"/>
  </node>
  <node id="447370" label="zzzzz33" cy:nodeId="122">
    <graphics x="-42.62338046303228" y="52.083719342960705" z="0.0"/>
  </node>
  <node id="447369" label="zzzzz32" cy:nodeId="123">
    <graphics x="117.26288815269038" y="153.22484025360524" z="0.0"/>
  </node>
  <node id="447368" label="zzzzz31" cy:nodeId="124">
    <graphics x="133.44256802329585" y="105.09276017548024" z="0.0"/>
  </node>
  <node id="447367" label="zzzzz30" cy:nodeId="125">
    <graphics x="165.5148183895068" y="134.50998124481617" z="0.0"/>
  </node>
  <node id="447366" label="zzzzz29" cy:nodeId="126">
    <graphics x="207.23211880454585" y="126.05119523407399" z="0.0"/>
  </node>
  <node id="447365" label="zzzzz28" cy:nodeId="127">
    <graphics x="-28.69047335854009" y="-75.09771528838695" z="0.0"/>
  </node>
  <node id="447364" label="zzzzz27" cy:nodeId="128">
    <graphics x="137.8747350765185" y="186.03631791473805" z="0.0"/>
  </node>
  <node id="447363" label="zzzzz26" cy:nodeId="129">
    <graphics x="1.3836309505419422" y="158.8750477731365" z="0.0"/>
  </node>
  <node id="447362" label="zzzzz25" cy:nodeId="130">
    <graphics x="24.985799987407177" y="-91.72760191558422" z="0.0"/>
  </node>
  <node id="447361" label="zzzzz24" cy:nodeId="131">
    <graphics x="50.23701496848628" y="152.23326310516774" z="0.0"/>
  </node>
  <node id="447360" label="zzzzz23" cy:nodeId="132">
    <graphics x="80.01324768790766" y="178.89200028778492" z="0.0"/>
  </node>
  <node id="447359" label="zzzzz22" cy:nodeId="133">
    <graphics x="89.08062191733882" y="161.20169267059742" z="0.0"/>
  </node>
  <node id="447358" label="zzzzz21" cy:nodeId="134">
    <graphics x="85.44950314292475" y="-46.86278143523754" z="0.0"/>
  </node>
  <node id="447357" label="zzzzz20" cy:nodeId="135">
    <graphics x="-49.31267337074712" y="-33.81371393798412" z="0.0"/>
  </node>
  <node id="447356" label="zzzzz19" cy:nodeId="136">
    <graphics x="-31.045781891254933" y="-27.942741304622302" z="0.0"/>
  </node>
  <node id="447355" label="zzzzz18" cy:nodeId="137">
    <graphics x="72.85959168204829" y="5.3806553781169555" z="0.0"/>
  </node>
  <node id="447354" label="zzzzz17" cy:nodeId="138">
    <graphics x="118.6481840206103" y="-33.10606756805004" z="0.0"/>
  </node>
  <node id="447353" label="zzzzz15" cy:nodeId="139">
    <graphics x="31.49210186728999" y="-99.61359587310375" z="0.0"/>
  </node>
  <node id="447352" label="zzzzz14" cy:nodeId="140">
    <graphics x="94.41465588340327" y="27.138834089054455" z="0.0"/>
  </node>
  <node id="447351" label="zzzzz13" cy:nodeId="141">
    <graphics x="185.0926992488818" y="-81.07965651153148" z="0.0"/>
  </node>
  <node id="447350" label="zzzzz12" cy:nodeId="142">
    <graphics x="65.742044646831" y="-107.69922056792797" z="0.0"/>
  </node>
  <node id="447349" label="zzzz999" cy:nodeId="143">
    <graphics x="-270.862577240376" y="-131.15601912139476" z="0.0"/>
  </node>
  <node id="447348" label="zzzz998" cy:nodeId="144">
    <graphics x="24.876016814799755" y="16.432149976505627" z="0.0"/>
  </node>
  <node id="447347" label="zzzz997" cy:nodeId="145">
    <graphics x="22.13388653525874" y="182.44407853485524" z="0.0"/>
  </node>
  <node id="447346" label="zzzz996" cy:nodeId="146">
    <graphics x="151.33824368247554" y="-7.897260576472888" z="0.0"/>
  </node>
  <node id="447345" label="zzzz995" cy:nodeId="147">
    <graphics x="134.34474392661616" y="-40.996032625423084" z="0.0"/>
  </node>
  <node id="447344" label="zzzz994" cy:nodeId="148">
    <graphics x="-262.96392611732915" y="286.2309895455974" z="0.0"/>
  </node>
  <node id="447343" label="zzzz993" cy:nodeId="149">
    <graphics x="-32.471143524555714" y="328.36822709442555" z="0.0"/>
  </node>
  <node id="447342" label="zzzz992" cy:nodeId="150">
    <graphics x="-16.913663666157277" y="-29.473716646419177" z="0.0"/>
  </node>
  <node id="447341" label="zzzz991" cy:nodeId="151">
    <graphics x="-78.50114230385259" y="1.6769772470134399" z="0.0"/>
  </node>
  <node id="447340" label="zzzz990" cy:nodeId="152">
    <graphics x="-67.20370272865728" y="1.8497639596599242" z="0.0"/>
  </node>
  <node id="447339" label="zzzz989" cy:nodeId="153">
    <graphics x="-71.7597635196729" y="17.006387799991955" z="0.0"/>
  </node>
  <node id="447338" label="zzzz988" cy:nodeId="154">
    <graphics x="-72.28117160072759" y="23.83784684540211" z="0.0"/>
  </node>
  <node id="447337" label="zzzz987" cy:nodeId="155">
    <graphics x="20.11090298423335" y="-92.636850267635" z="0.0"/>
  </node>
  <node id="447336" label="zzzz986" cy:nodeId="156">
    <graphics x="-52.88702182045415" y="-23.463306337581287" z="0.0"/>
  </node>
  <node id="447335" label="zzzz985" cy:nodeId="157">
    <graphics x="5.683572967143505" y="-105.43066969512523" z="0.0"/>
  </node>
  <node id="447334" label="zzzz984" cy:nodeId="158">
    <graphics x="-39.79693392982915" y="40.10954484344899" z="0.0"/>
  </node>
  <node id="447333" label="zzzz983" cy:nodeId="159">
    <graphics x="50.23006268271968" y="129.72577103973805" z="0.0"/>
  </node>
  <node id="447332" label="zzzz982" cy:nodeId="160">
    <graphics x="-10.975629608540089" y="-27.49739447234691" z="0.0"/>
  </node>
  <node id="447331" label="zzzz981" cy:nodeId="161">
    <graphics x="42.60317822227046" y="-58.12158766387523" z="0.0"/>
  </node>
  <node id="447330" label="zzzz980" cy:nodeId="162">
    <graphics x="39.26189633140132" y="-0.37658491729320076" z="0.0"/>
  </node>
  <node id="447329" label="zzzz979" cy:nodeId="163">
    <graphics x="-18.75164584389165" y="-83.02233305572094" z="0.0"/>
  </node>
  <node id="447328" label="zzzz978" cy:nodeId="164">
    <graphics x="-41.052205841450245" y="9.813814252628674" z="0.0"/>
  </node>
  <node id="447327" label="zzzz977" cy:nodeId="165">
    <graphics x="-1.7896020816846203" y="-79.50565138457836" z="0.0"/>
  </node>
  <node id="447326" label="zzzz976" cy:nodeId="166">
    <graphics x="20.1656515193896" y="122.83853349090992" z="0.0"/>
  </node>
  <node id="447325" label="zzzz975" cy:nodeId="167">
    <graphics x="2.917303283305614" y="-76.23914518951" z="0.0"/>
  </node>
  <node id="447324" label="zzzz974" cy:nodeId="168">
    <graphics x="9.723722655864208" y="-59.47216311095775" z="0.0"/>
  </node>
  <node id="447323" label="zzzz973" cy:nodeId="169">
    <graphics x="-13.296453277973683" y="24.435724347843518" z="0.0"/>
  </node>
  <node id="447322" label="zzzz972" cy:nodeId="170">
    <graphics x="30.224695403666942" y="-41.842632681117664" z="0.0"/>
  </node>
  <node id="447321" label="zzzz971" cy:nodeId="171">
    <graphics x="-42.38919619789556" y="41.45478257538258" z="0.0"/>
  </node>
  <node id="447320" label="zzzz970" cy:nodeId="172">
    <graphics x="-39.78220156898931" y="63.79187974335133" z="0.0"/>
  </node>
  <node id="447319" label="zzzz969" cy:nodeId="173">
    <graphics x="-22.84983615150884" y="173.51532182098805" z="0.0"/>
  </node>
  <node id="447318" label="zzzz968" cy:nodeId="174">
    <graphics x="-28.084806244282277" y="-95.7439173757893" z="0.0"/>
  </node>
  <node id="447317" label="zzzz967" cy:nodeId="175">
    <graphics x="49.35201855430171" y="-80.87080183623851" z="0.0"/>
  </node>
  <node id="447316" label="zzzz965" cy:nodeId="176">
    <graphics x="-409.74615267982915" y="1125.2053852975505" z="0.0"/>
  </node>
  <node id="447315" label="zzzz964" cy:nodeId="177">
    <graphics x="-60.536512176899464" y="220.49417313934742" z="0.0"/>
  </node>
  <node id="447314" label="zzzz963" cy:nodeId="178">
    <graphics x="45.55743046531245" y="237.8659687936443" z="0.0"/>
  </node>
  <node id="447313" label="zzzz962" cy:nodeId="179">
    <graphics x="-14.27165774574712" y="15.592168897404065" z="0.0"/>
  </node>
  <node id="447312" label="zzzz961" cy:nodeId="180">
    <graphics x="-25.830579559711964" y="207.409105390324" z="0.0"/>
  </node>
  <node id="447311" label="zzzz960" cy:nodeId="181">
    <graphics x="-65.66926364174321" y="-18.00509825347484" z="0.0"/>
  </node>
  <node id="447310" label="zzzz959" cy:nodeId="182">
    <graphics x="-146.10445956459478" y="266.98321732880055" z="0.0"/>
  </node>
  <node id="447309" label="zzzz958" cy:nodeId="183">
    <graphics x="70.77389069327876" y="-66.30469885467113" z="0.0"/>
  </node>
  <node id="447308" label="zzzz957" cy:nodeId="184">
    <graphics x="-102.21902255287603" y="290.1644001901287" z="0.0"/>
  </node>
  <node id="447307" label="zzzz956" cy:nodeId="185">
    <graphics x="-22.439168732075245" y="168.31015214325367" z="0.0"/>
  </node>
  <node id="447306" label="zzzz955" cy:nodeId="186">
    <graphics x="12.023363311381786" y="174.56781205536305" z="0.0"/>
  </node>
  <node id="447305" label="zzzz954" cy:nodeId="187">
    <graphics x="179.78050442466304" y="-27.42955580352367" z="0.0"/>
  </node>
  <node id="447304" label="zzzz953" cy:nodeId="188">
    <graphics x="57.084228713603466" y="374.4226094186443" z="0.0"/>
  </node>
  <node id="447303" label="zzzz952" cy:nodeId="189">
    <graphics x="-99.95402316322759" y="258.1322041452068" z="0.0"/>
  </node>
  <node id="447302" label="zzzz951" cy:nodeId="190">
    <graphics x="-126.72416476479009" y="243.4096699655193" z="0.0"/>
  </node>
  <node id="447301" label="zzzz950" cy:nodeId="191">
    <graphics x="167.10831661948725" y="1.4168530404704711" z="0.0"/>
  </node>
  <node id="447300" label="zzzz949" cy:nodeId="192">
    <graphics x="-155.77325228920415" y="247.77899369598805" z="0.0"/>
  </node>
  <node id="447299" label="zzzz948" cy:nodeId="193">
    <graphics x="-5.363538544086964" y="235.3503437936443" z="0.0"/>
  </node>
  <node id="447298" label="zzzz947" cy:nodeId="194">
    <graphics x="118.01780529746577" y="-14.710445314632068" z="0.0"/>
  </node>
  <node id="447297" label="zzzz946" cy:nodeId="195">
    <graphics x="51.637725074382274" y="3.8937855661052367" z="0.0"/>
  </node>
  <node id="447296" label="zzzz945" cy:nodeId="196">
    <graphics x="103.54913159141108" y="-19.02548208831371" z="0.0"/>
  </node>
  <node id="447295" label="zzzz944" cy:nodeId="197">
    <graphics x="113.38220043906733" y="-63.69630804656566" z="0.0"/>
  </node>
  <node id="447294" label="zzzz943" cy:nodeId="198">
    <graphics x="461.53637905845216" y="128.73590287567555" z="0.0"/>
  </node>
  <node id="447293" label="zzzz942" cy:nodeId="199">
    <graphics x="-38.763082306293995" y="398.7683430612224" z="0.0"/>
  </node>
  <node id="447292" label="zzzz941" cy:nodeId="200">
    <graphics x="299.2252370906787" y="350.8928242623943" z="0.0"/>
  </node>
  <node id="447291" label="zzzz940" cy:nodeId="201">
    <graphics x="200.33505459556147" y="291.3384724557537" z="0.0"/>
  </node>
  <node id="447290" label="zzzz939" cy:nodeId="202">
    <graphics x="-191.68462924232915" y="349.4435139596599" z="0.0"/>
  </node>
  <node id="447289" label="zzzz938" cy:nodeId="203">
    <graphics x="237.32681484946772" y="97.62887772919117" z="0.0"/>
  </node>
  <node id="447288" label="zzzz937" cy:nodeId="204">
    <graphics x="427.67013760337403" y="-43.870127588496814" z="0.0"/>
  </node>
  <node id="447287" label="zzzz936" cy:nodeId="205">
    <graphics x="161.9213659358935" y="564.818544477238" z="0.0"/>
  </node>
  <node id="447286" label="zzzz935" cy:nodeId="206">
    <graphics x="-405.1942422794385" y="-35.220413118587146" z="0.0"/>
  </node>
  <node id="447285" label="zzzz934" cy:nodeId="207">
    <graphics x="-411.9374063419385" y="229.40292558075367" z="0.0"/>
  </node>
  <node id="447284" label="zzzz933" cy:nodeId="208">
    <graphics x="29.954649169536083" y="236.2630635202068" z="0.0"/>
  </node>
  <node id="447283" label="zzzz932" cy:nodeId="209">
    <graphics x="-142.1893747257276" y="277.8018818795818" z="0.0"/>
  </node>
  <node id="447282" label="zzzz931" cy:nodeId="210">
    <graphics x="184.8330862117724" y="-38.132138162837634" z="0.0"/>
  </node>
  <node id="447281" label="zzzz930" cy:nodeId="211">
    <graphics x="47.24067135581538" y="-47.349786669002185" z="0.0"/>
  </node>
  <node id="447280" label="zzzz929" cy:nodeId="212">
    <graphics x="109.55745144614741" y="-35.44467440246166" z="0.0"/>
  </node>
  <node id="447279" label="zzzz928" cy:nodeId="213">
    <graphics x="82.17573185691401" y="-2.795457750545154" z="0.0"/>
  </node>
  <node id="447278" label="zzzz927" cy:nodeId="214">
    <graphics x="109.29869290122554" y="-89.26482191680492" z="0.0"/>
  </node>
  <node id="447277" label="zzzz926" cy:nodeId="215">
    <graphics x="-118.70425204506353" y="166.801927655949" z="0.0"/>
  </node>
  <node id="447276" label="zzzz925" cy:nodeId="216">
    <graphics x="-287.752713959126" y="292.73993119598805" z="0.0"/>
  </node>
  <node id="447275" label="zzzz924" cy:nodeId="217">
    <graphics x="47.257208068461864" y="29.623262494816174" z="0.0"/>
  </node>
  <node id="447274" label="zzzz923" cy:nodeId="218">
    <graphics x="105.24178143271968" y="114.04152116180836" z="0.0"/>
  </node>
  <node id="447273" label="zzzz922" cy:nodeId="219">
    <graphics x="12.35996838340327" y="135.95738419891774" z="0.0"/>
  </node>
  <node id="447272" label="zzzz921" cy:nodeId="220">
    <graphics x="-12.845838348774464" y="-55.57252112029613" z="0.0"/>
  </node>
  <node id="447271" label="zzzz920" cy:nodeId="221">
    <graphics x="-26.100179474262745" y="-23.127096086726795" z="0.0"/>
  </node>
  <node id="447270" label="zzzz919" cy:nodeId="222">
    <graphics x="1.694860656352489" y="248.5866719186443" z="0.0"/>
  </node>
  <node id="447269" label="zzzz918" cy:nodeId="223">
    <graphics x="-2.590062897114308" y="-64.47369185088695" z="0.0"/>
  </node>
  <node id="447268" label="zzzz917" cy:nodeId="224">
    <graphics x="19.695421416850536" y="26.623376935734143" z="0.0"/>
  </node>
  <node id="447267" label="zzzz916" cy:nodeId="225">
    <graphics x="-80.45149020424321" y="44.44153794647633" z="0.0"/>
  </node>
  <node id="447266" label="zzzz915" cy:nodeId="226">
    <graphics x="54.3950216365771" y="15.838682264103284" z="0.0"/>
  </node>
  <node id="447265" label="zzzz914" cy:nodeId="227">
    <graphics x="-46.45548037758306" y="266.07794389130055" z="0.0"/>
  </node>
  <node id="447264" label="zzzz913" cy:nodeId="228">
    <graphics x="51.313792426677196" y="40.74679002167164" z="0.0"/>
  </node>
  <node id="447263" label="zzzz912" cy:nodeId="229">
    <graphics x="-46.35795382729009" y="263.7495137155193" z="0.0"/>
  </node>
  <node id="447262" label="zzzz911" cy:nodeId="230">
    <graphics x="-60.7124002384229" y="251.93124589325367" z="0.0"/>
  </node>
  <node id="447261" label="zzzz910" cy:nodeId="231">
    <graphics x="-74.5194070743604" y="246.5434590280193" z="0.0"/>
  </node>
  <node id="447260" label="zzzz909" cy:nodeId="232">
    <graphics x="141.2194082332568" y="115.85798844696461" z="0.0"/>
  </node>
  <node id="447259" label="zzzz908" cy:nodeId="233">
    <graphics x="87.71621533164546" y="261.3234578073162" z="0.0"/>
  </node>
  <node id="447258" label="zzzz907" cy:nodeId="234">
    <graphics x="-11.830060760883839" y="266.2944355905193" z="0.0"/>
  </node>
  <node id="447257" label="zzzz906" cy:nodeId="235">
    <graphics x="-77.8939187931104" y="808.4268208444255" z="0.0"/>
  </node>
  <node id="447256" label="zzzz905" cy:nodeId="236">
    <graphics x="264.64338894614747" y="84.84628495575367" z="0.0"/>
  </node>
  <node id="447255" label="zzzz904" cy:nodeId="237">
    <graphics x="132.70591946372554" y="-94.6850680410725" z="0.0"/>
  </node>
  <node id="447254" label="zzzz903" cy:nodeId="238">
    <graphics x="1.6193945003466297" y="-3.831548601375232" z="0.0"/>
  </node>
  <node id="447253" label="zzzz902" cy:nodeId="239">
    <graphics x="-15.634481232075245" y="-50.27646341918529" z="0.0"/>
  </node>
  <node id="447252" label="zzzz901" cy:nodeId="240">
    <graphics x="17.867830474467723" y="-15.173231035457263" z="0.0"/>
  </node>
  <node id="447251" label="zzzz900" cy:nodeId="241">
    <graphics x="10.267839629741161" y="-2.153314501033435" z="0.0"/>
  </node>
  <node id="447250" label="zzzz899" cy:nodeId="242">
    <graphics x="-53.7205789493604" y="-38.83912792800487" z="0.0"/>
  </node>
  <node id="447249" label="zzzz898" cy:nodeId="243">
    <graphics x="-23.43084506264165" y="-9.459302812801013" z="0.0"/>
  </node>
  <node id="447248" label="zzzz897" cy:nodeId="244">
    <graphics x="-401.03863314857915" y="264.5493184030193" z="0.0"/>
  </node>
  <node id="447247" label="zzzz896" cy:nodeId="245">
    <graphics x="-399.4660623477979" y="260.8811360299724" z="0.0"/>
  </node>
  <node id="447246" label="zzzz895" cy:nodeId="246">
    <graphics x="-460.9137857364698" y="137.56907853485524" z="0.0"/>
  </node>
  <node id="447245" label="zzzz894" cy:nodeId="247">
    <graphics x="-434.1027505802198" y="78.00007829071461" z="0.0"/>
  </node>
  <node id="447244" label="zzzz893" cy:nodeId="248">
    <graphics x="-401.4578531192823" y="196.14950761200367" z="0.0"/>
  </node>
  <node id="447243" label="zzzz892" cy:nodeId="249">
    <graphics x="-423.8771036075635" y="197.25038346649586" z="0.0"/>
  </node>
  <node id="447242" label="zzzz891" cy:nodeId="250">
    <graphics x="-395.5127847599073" y="282.0340290963787" z="0.0"/>
  </node>
  <node id="447241" label="zzzz890" cy:nodeId="251">
    <graphics x="-224.12008456459478" y="677.8325215280192" z="0.0"/>
  </node>
  <node id="447240" label="zzzz889" cy:nodeId="252">
    <graphics x="145.75347347983882" y="156.07750138641774" z="0.0"/>
  </node>
  <node id="447239" label="zzzz888" cy:nodeId="253">
    <graphics x="167.33131619224116" y="206.12350663544117" z="0.0"/>
  </node>
  <node id="447238" label="zzzz887" cy:nodeId="254">
    <graphics x="71.70340367087886" y="113.17579850555836" z="0.0"/>
  </node>
  <node id="447237" label="zzzz886" cy:nodeId="255">
    <graphics x="107.3154317928271" y="13.44644746185719" z="0.0"/>
  </node>
  <node id="447236" label="zzzz885" cy:nodeId="256">
    <graphics x="73.8945333553271" y="130.95411881805836" z="0.0"/>
  </node>
  <node id="447235" label="zzzz884" cy:nodeId="257">
    <graphics x="15.444994170756786" y="35.48530015350758" z="0.0"/>
  </node>
  <node id="447234" label="zzzz883" cy:nodeId="258">
    <graphics x="66.9109842372851" y="163.58127030731617" z="0.0"/>
  </node>
  <node id="447233" label="zzzz882" cy:nodeId="259">
    <graphics x="-25.879712860493214" y="-27.440519243465076" z="0.0"/>
  </node>
  <node id="447232" label="zzzz881" cy:nodeId="260">
    <graphics x="-15.874715607075245" y="150.505540937199" z="0.0"/>
  </node>
  <node id="447231" label="zzzz880" cy:nodeId="261">
    <graphics x="8.339750487895458" y="15.6713887155193" z="0.0"/>
  </node>
  <node id="447230" label="zzzz879" cy:nodeId="262">
    <graphics x="1.517381866069286" y="54.89723405243336" z="0.0"/>
  </node>
  <node id="447229" label="zzzz878" cy:nodeId="263">
    <graphics x="93.34576626548335" y="121.49917802215992" z="0.0"/>
  </node>
  <node id="447228" label="zzzz877" cy:nodeId="264">
    <graphics x="75.71137638816401" y="193.70309647919117" z="0.0"/>
  </node>
  <node id="447227" label="zzzz876" cy:nodeId="265">
    <graphics x="-101.99427584877446" y="91.7172871530193" z="0.0"/>
  </node>
  <node id="447226" label="zzzz875" cy:nodeId="266">
    <graphics x="28.282709319682567" y="176.44040116669117" z="0.0"/>
  </node>
  <node id="447225" label="zzzz874" cy:nodeId="267">
    <graphics x="110.32667752036616" y="154.29593095184742" z="0.0"/>
  </node>
  <node id="447224" label="zzzz873" cy:nodeId="268">
    <graphics x="1.1724950862841297" y="-47.04339399932445" z="0.0"/>
  </node>
  <node id="447223" label="zzzz872" cy:nodeId="269">
    <graphics x="135.7234365535693" y="129.8442860543865" z="0.0"/>
  </node>
  <node id="447222" label="zzzz871" cy:nodeId="270">
    <graphics x="-27.61997775307134" y="-17.349737077937732" z="0.0"/>
  </node>
  <node id="447221" label="zzzz870" cy:nodeId="271">
    <graphics x="52.288763244243114" y="158.48285111786305" z="0.0"/>
  </node>
  <node id="447220" label="zzzz869" cy:nodeId="272">
    <graphics x="116.45485897788569" y="125.10228165985524" z="0.0"/>
  </node>
  <node id="447219" label="zzzz868" cy:nodeId="273">
    <graphics x="-28.77561740150884" y="-35.0802039205891" z="0.0"/>
  </node>
  <node id="447218" label="zzzz867" cy:nodeId="274">
    <graphics x="-75.58468417396978" y="176.06927689911305" z="0.0"/>
  </node>
  <node id="447217" label="zzzz866" cy:nodeId="275">
    <graphics x="-95.03877047768071" y="66.69722947479664" z="0.0"/>
  </node>
  <node id="447216" label="zzzz865" cy:nodeId="276">
    <graphics x="-37.217969696430714" y="-11.903715044246326" z="0.0"/>
  </node>
  <node id="447215" label="zzzz864" cy:nodeId="277">
    <graphics x="-28.749112884907277" y="23.09718522430836" z="0.0"/>
  </node>
  <node id="447214" label="zzzz863" cy:nodeId="278">
    <graphics x="-7.438733856586964" y="-83.86495009063304" z="0.0"/>
  </node>
  <node id="447213" label="zzzz862" cy:nodeId="279">
    <graphics x="31.745603759379833" y="-43.970336824641834" z="0.0"/>
  </node>
  <node id="447212" label="zzzz861" cy:nodeId="280">
    <graphics x="-32.77580050697759" y="13.686544507755627" z="0.0"/>
  </node>
  <node id="447211" label="zzzz860" cy:nodeId="281">
    <graphics x="-28.946676056293995" y="2.0697842538493774" z="0.0"/>
  </node>
  <node id="447210" label="zzzz859" cy:nodeId="282">
    <graphics x="-20.803167145161183" y="-83.99011793731273" z="0.0"/>
  </node>
  <node id="447209" label="zzzz858" cy:nodeId="283">
    <graphics x="-7.429670135883839" y="-28.0233191549641" z="0.0"/>
  </node>
  <node id="447208" label="zzzz857" cy:nodeId="284">
    <graphics x="-39.07518557777837" y="-30.729037195430408" z="0.0"/>
  </node>
  <node id="447207" label="zzzz856" cy:nodeId="285">
    <graphics x="58.32285328635737" y="177.6220265329021" z="0.0"/>
  </node>
  <node id="447206" label="zzzz855" cy:nodeId="286">
    <graphics x="-2.939649383930714" y="34.33130845428883" z="0.0"/>
  </node>
  <node id="447205" label="zzzz854" cy:nodeId="287">
    <graphics x="-33.93443850746587" y="-49.48900976775707" z="0.0"/>
  </node>
  <node id="447204" label="zzzz853" cy:nodeId="288">
    <graphics x="-5.059453766254933" y="-43.98240986465038" z="0.0"/>
  </node>
  <node id="447203" label="zzzz852" cy:nodeId="289">
    <graphics x="91.75303478965327" y="141.11578568817555" z="0.0"/>
  </node>
  <node id="447202" label="zzzz851" cy:nodeId="290">
    <graphics x="41.386236388774364" y="-16.165759950862537" z="0.0"/>
  </node>
  <node id="447201" label="zzzz850" cy:nodeId="291">
    <graphics x="-2.690160553364308" y="-17.154508501277576" z="0.0"/>
  </node>
  <node id="447200" label="zzzz849" cy:nodeId="292">
    <graphics x="47.68255253562495" y="-49.235951095805774" z="0.0"/>
  </node>
  <node id="447199" label="zzzz848" cy:nodeId="293">
    <graphics x="22.406656463237255" y="-57.44465437530101" z="0.0"/>
  </node>
  <node id="447198" label="zzzz847" cy:nodeId="294">
    <graphics x="23.853670318217723" y="-57.88434401153148" z="0.0"/>
  </node>
  <node id="447197" label="zzzz846" cy:nodeId="295">
    <graphics x="-35.42336825600103" y="7.288080304874768" z="0.0"/>
  </node>
  <node id="447196" label="zzzz845" cy:nodeId="296">
    <graphics x="-38.99780825844243" y="17.748689740909924" z="0.0"/>
  </node>
  <node id="447195" label="zzzz844" cy:nodeId="297">
    <graphics x="-15.941846649555714" y="-17.153695970759998" z="0.0"/>
  </node>
  <node id="447194" label="zzzz843" cy:nodeId="298">
    <graphics x="8.972669799418895" y="-34.47379866241039" z="0.0"/>
  </node>
  <node id="447193" label="zzzz842" cy:nodeId="299">
    <graphics x="14.192579467387645" y="-32.077461153255115" z="0.0"/>
  </node>
  <node id="447192" label="zzzz841" cy:nodeId="300">
    <graphics x="16.567491729350536" y="-101.2453364431721" z="0.0"/>
  </node>
  <node id="447191" label="zzzz840" cy:nodeId="301">
    <graphics x="110.01145764121577" y="252.18368729950367" z="0.0"/>
  </node>
  <node id="447190" label="zzzz839" cy:nodeId="302">
    <graphics x="65.31810971030757" y="-15.75301542876781" z="0.0"/>
  </node>
  <node id="447189" label="zzzz838" cy:nodeId="303">
    <graphics x="-56.913587372211964" y="-1.5544413626057008" z="0.0"/>
  </node>
  <node id="447188" label="zzzz837" cy:nodeId="304">
    <graphics x="25.87953396567866" y="35.02455338837086" z="0.0"/>
  </node>
  <node id="447187" label="zzzz836" cy:nodeId="305">
    <graphics x="24.247461516948192" y="-11.691846758113513" z="0.0"/>
  </node>
  <node id="447186" label="zzzz835" cy:nodeId="306">
    <graphics x="-82.75417880287603" y="6.964815229191174" z="0.0"/>
  </node>
  <node id="447185" label="zzzz834" cy:nodeId="307">
    <graphics x="-6.414335052876027" y="-71.55716505645336" z="0.0"/>
  </node>
  <node id="447184" label="zzzz833" cy:nodeId="308">
    <graphics x="-54.065145294575245" y="29.35589799286305" z="0.0"/>
  </node>
  <node id="447183" label="zzzz832" cy:nodeId="309">
    <graphics x="22.650274474711864" y="52.77358445526539" z="0.0"/>
  </node>
  <node id="447182" label="zzzz831" cy:nodeId="310">
    <graphics x="50.13977547416255" y="11.063959211124768" z="0.0"/>
  </node>
  <node id="447181" label="zzzz830" cy:nodeId="311">
    <graphics x="-18.967305939106495" y="14.297235578312268" z="0.0"/>
  </node>
  <node id="447180" label="zzzz829" cy:nodeId="312">
    <graphics x="56.73824043998286" y="-59.6482667028767" z="0.0"/>
  </node>
  <node id="447179" label="zzzz828" cy:nodeId="313">
    <graphics x="-62.94090060463384" y="-0.039811998592028885" z="0.0"/>
  </node>
  <node id="447178" label="zzzz827" cy:nodeId="314">
    <graphics x="-50.97916201820806" y="29.15521439911305" z="0.0"/>
  </node>
  <node id="447177" label="zzzz826" cy:nodeId="315">
    <graphics x="-45.067098419575245" y="39.30043229462086" z="0.0"/>
  </node>
  <node id="447176" label="zzzz825" cy:nodeId="316">
    <graphics x="66.11419792899653" y="-72.48006048797191" z="0.0"/>
  </node>
  <node id="447175" label="zzzz824" cy:nodeId="317">
    <graphics x="-22.89414767494634" y="-39.610277086482654" z="0.0"/>
  </node>
  <node id="447174" label="zzzz823" cy:nodeId="318">
    <graphics x="-28.7966287540479" y="-41.9805511534077" z="0.0"/>
  </node>
  <node id="447173" label="zzzz822" cy:nodeId="319">
    <graphics x="-69.3984353946729" y="22.541101545109143" z="0.0"/>
  </node>
  <node id="447172" label="zzzz821" cy:nodeId="320">
    <graphics x="-48.16274813881353" y="20.1630879342693" z="0.0"/>
  </node>
  <node id="447171" label="zzzz820" cy:nodeId="321">
    <graphics x="37.40557308921382" y="-23.731134325252185" z="0.0"/>
  </node>
  <node id="447170" label="zzzz819" cy:nodeId="322">
    <graphics x="3.9765531612353016" y="-71.69566145537914" z="0.0"/>
  </node>
  <node id="447169" label="zzzz818" cy:nodeId="323">
    <graphics x="-30.559339325336964" y="-21.535211473689685" z="0.0"/>
  </node>
  <node id="447168" label="zzzz817" cy:nodeId="324">
    <graphics x="220.4514181209521" y="129.74466142059742" z="0.0"/>
  </node>
  <node id="447167" label="zzzz816" cy:nodeId="325">
    <graphics x="-19.816236297993214" y="31.58625230194508" z="0.0"/>
  </node>
  <node id="447166" label="zzzz815" cy:nodeId="326">
    <graphics x="99.48168392905757" y="173.65030106903492" z="0.0"/>
  </node>
  <node id="447165" label="zzzz814" cy:nodeId="327">
    <graphics x="-57.54392031898931" y="-14.672099977718005" z="0.0"/>
  </node>
  <node id="447164" label="zzzz813" cy:nodeId="328">
    <graphics x="-0.8247278141064953" y="-110.8376673757893" z="0.0"/>
  </node>
  <node id="447163" label="zzzz812" cy:nodeId="329">
    <graphics x="47.80233784446284" y="167.72641190887867" z="0.0"/>
  </node>
  <node id="447162" label="zzzz811" cy:nodeId="330">
    <graphics x="77.43122215995356" y="134.4971180856365" z="0.0"/>
  </node>
  <node id="447161" label="zzzz810" cy:nodeId="331">
    <graphics x="9.91980953940913" y="150.56784257294117" z="0.0"/>
  </node>
  <node id="447160" label="zzzz809" cy:nodeId="332">
    <graphics x="67.65470143088862" y="-28.250297456966052" z="0.0"/>
  </node>
  <node id="447159" label="zzzz808" cy:nodeId="333">
    <graphics x="147.66372891196772" y="47.77660569549977" z="0.0"/>
  </node>
  <node id="447158" label="zzzz807" cy:nodeId="334">
    <graphics x="85.31261654624507" y="148.9377919137615" z="0.0"/>
  </node>
  <node id="447157" label="zzzz806" cy:nodeId="335">
    <graphics x="98.73826428184077" y="184.15138444305836" z="0.0"/>
  </node>
  <node id="447156" label="zzzz805" cy:nodeId="336">
    <graphics x="42.33183689841792" y="179.45956620575367" z="0.0"/>
  </node>
  <node id="447155" label="zzzz804" cy:nodeId="337">
    <graphics x="56.00386257895991" y="131.82704362274586" z="0.0"/>
  </node>
  <node id="447154" label="zzzz803" cy:nodeId="338">
    <graphics x="49.16660710105464" y="171.0281544625896" z="0.0"/>
  </node>
  <node id="447153" label="zzzz802" cy:nodeId="339">
    <graphics x="32.93853588828608" y="147.06051835419117" z="0.0"/>
  </node>
  <node id="447152" label="zzzz801" cy:nodeId="340">
    <graphics x="-53.952230255512745" y="143.23382768036305" z="0.0"/>
  </node>
  <node id="447151" label="zzzz800" cy:nodeId="341">
    <graphics x="45.11668797263667" y="-76.22832861541332" z="0.0"/>
  </node>
  <node id="447150" label="zzzz799" cy:nodeId="342">
    <graphics x="-58.414144318012745" y="193.93100175262867" z="0.0"/>
  </node>
  <node id="447149" label="zzzz798" cy:nodeId="343">
    <graphics x="-40.08982638588384" y="171.6126728952068" z="0.0"/>
  </node>
  <node id="447148" label="zzzz797" cy:nodeId="344">
    <graphics x="39.03988095054194" y="178.46698197723805" z="0.0"/>
  </node>
  <node id="447147" label="zzzz796" cy:nodeId="345">
    <graphics x="153.3812276912646" y="24.90052995087086" z="0.0"/>
  </node>
  <node id="447146" label="zzzz795" cy:nodeId="346">
    <graphics x="60.358385284038036" y="144.4938984811443" z="0.0"/>
  </node>
  <node id="447145" label="zzzz794" cy:nodeId="347">
    <graphics x="95.15137310752436" y="104.25648698212086" z="0.0"/>
  </node>
  <node id="447144" label="zzzz793" cy:nodeId="348">
    <graphics x="107.91921444663569" y="148.91317948700367" z="0.0"/>
  </node>
  <node id="447143" label="zzzz792" cy:nodeId="349">
    <graphics x="157.69931240806147" y="22.146165937198987" z="0.0"/>
  </node>
  <node id="447142" label="zzzz791" cy:nodeId="350">
    <graphics x="125.42103024253413" y="122.12368974090992" z="0.0"/>
  </node>
  <node id="447141" label="zzzz790" cy:nodeId="351">
    <graphics x="-51.22903231850103" y="3.4662800729411742" z="0.0"/>
  </node>
  <node id="447140" label="zzzz789" cy:nodeId="352">
    <graphics x="-44.28452853432134" y="136.29002580048024" z="0.0"/>
  </node>
  <node id="447139" label="zzzz788" cy:nodeId="353">
    <graphics x="-19.01377658119634" y="170.2256337106365" z="0.0"/>
  </node>
  <node id="447138" label="zzzz787" cy:nodeId="354">
    <graphics x="69.32589860686824" y="121.68741044403492" z="0.0"/>
  </node>
  <node id="447137" label="zzzz786" cy:nodeId="355">
    <graphics x="38.93191357383296" y="139.2086964547771" z="0.0"/>
  </node>
  <node id="447136" label="zzzz785" cy:nodeId="356">
    <graphics x="-45.09288577309087" y="135.00930985809742" z="0.0"/>
  </node>
  <node id="447135" label="zzzz784" cy:nodeId="357">
    <graphics x="-5.324186127094777" y="-12.95986357329906" z="0.0"/>
  </node>
  <node id="447134" label="zzzz783" cy:nodeId="358">
    <graphics x="80.37955876121089" y="150.83151444794117" z="0.0"/>
  </node>
  <node id="447133" label="zzzz782" cy:nodeId="359">
    <graphics x="50.32519932517573" y="9.376340955509534" z="0.0"/>
  </node>
  <node id="447132" label="zzzz781" cy:nodeId="360">
    <graphics x="59.43240662345454" y="156.25680741669117" z="0.0"/>
  </node>
  <node id="447131" label="zzzz780" cy:nodeId="361">
    <graphics x="49.57855435142085" y="137.0586720407146" z="0.0"/>
  </node>
  <node id="447130" label="zzzz779" cy:nodeId="362">
    <graphics x="88.33699436912104" y="139.34727677704274" z="0.0"/>
  </node>
  <node id="447129" label="zzzz778" cy:nodeId="363">
    <graphics x="25.253648955913036" y="12.466791242374768" z="0.0"/>
  </node>
  <node id="447128" label="zzzz777" cy:nodeId="364">
    <graphics x="96.00102062949702" y="95.15855607391774" z="0.0"/>
  </node>
  <node id="447127" label="zzzz776" cy:nodeId="365">
    <graphics x="52.01541157493159" y="147.5322285592693" z="0.0"/>
  </node>
  <node id="447126" label="zzzz775" cy:nodeId="366">
    <graphics x="-1.9423425602002453" y="-17.848119646297107" z="0.0"/>
  </node>
  <node id="447125" label="zzzz774" cy:nodeId="367">
    <graphics x="9.877531249614208" y="33.58808335663258" z="0.0"/>
  </node>
  <node id="447124" label="zzzz773" cy:nodeId="368">
    <graphics x="22.303716857524364" y="52.64960679413258" z="0.0"/>
  </node>
  <node id="447123" label="zzzz772" cy:nodeId="369">
    <graphics x="12.381693084331005" y="42.6201191842693" z="0.0"/>
  </node>
  <node id="447122" label="zzzz771" cy:nodeId="370">
    <graphics x="2.0976049495653797" y="220.3618184030193" z="0.0"/>
  </node>
  <node id="447121" label="zzzz770" cy:nodeId="371">
    <graphics x="-29.813054840473683" y="146.55748185516774" z="0.0"/>
  </node>
  <node id="447120" label="zzzz769" cy:nodeId="372">
    <graphics x="116.34773464927241" y="145.89401444794117" z="0.0"/>
  </node>
  <node id="447119" label="zzzz768" cy:nodeId="373">
    <graphics x="-14.560628693012745" y="-10.927659898982654" z="0.0"/>
  </node>
  <node id="447118" label="zzzz767" cy:nodeId="374">
    <graphics x="35.02774067649409" y="18.81495103241383" z="0.0"/>
  </node>
  <node id="447117" label="zzzz766" cy:nodeId="375">
    <graphics x="-86.45481662025884" y="177.1114521920818" z="0.0"/>
  </node>
  <node id="447116" label="zzzz765" cy:nodeId="376">
    <graphics x="91.27053662070796" y="120.62497147919117" z="0.0"/>
  </node>
  <node id="447115" label="zzzz764" cy:nodeId="377">
    <graphics x="-41.899976532368214" y="-10.33025160430492" z="0.0"/>
  </node>
  <node id="447114" label="zzzz763" cy:nodeId="378">
    <graphics x="46.34767361411616" y="-62.112094789729724" z="0.0"/>
  </node>
  <node id="447113" label="zzzz762" cy:nodeId="379">
    <graphics x="18.208955962748973" y="-70.74048414825023" z="0.0"/>
  </node>
  <node id="447112" label="zzzz761" cy:nodeId="380">
    <graphics x="-50.7116678165479" y="-48.421285539851795" z="0.0"/>
  </node>
  <node id="447111" label="zzzz760" cy:nodeId="381">
    <graphics x="-0.07906131020024532" y="-16.842557817683826" z="0.0"/>
  </node>
  <node id="447110" label="zzzz759" cy:nodeId="382">
    <graphics x="118.955423553081" y="124.61419877411305" z="0.0"/>
  </node>
  <node id="447109" label="zzzz758" cy:nodeId="383">
    <graphics x="128.0961935115771" y="93.71347245575367" z="0.0"/>
  </node>
  <node id="447108" label="zzzz757" cy:nodeId="384">
    <graphics x="50.83805676230952" y="161.32957658173024" z="0.0"/>
  </node>
  <node id="447107" label="zzzz756" cy:nodeId="385">
    <graphics x="-39.88979892006353" y="-9.30633345244945" z="0.0"/>
  </node>
  <node id="447106" label="zzzz755" cy:nodeId="386">
    <graphics x="59.8326379848437" y="-2.1977442800861695" z="0.0"/>
  </node>
  <node id="447105" label="zzzz754" cy:nodeId="387">
    <graphics x="-15.352361481098683" y="5.422742933048596" z="0.0"/>
  </node>
  <node id="447104" label="zzzz753" cy:nodeId="388">
    <graphics x="118.99349423179194" y="-115.64679518340648" z="0.0"/>
  </node>
  <node id="447103" label="zzzz752" cy:nodeId="389">
    <graphics x="77.32530709037349" y="-9.249429613338123" z="0.0"/>
  </node>
  <node id="447102" label="zzzz751" cy:nodeId="390">
    <graphics x="191.58914395103022" y="105.81920060516774" z="0.0"/>
  </node>
  <node id="447101" label="zzzz750" cy:nodeId="391">
    <graphics x="-58.20429019203618" y="24.537393659366955" z="0.0"/>
  </node>
  <node id="447100" label="zzzz749" cy:nodeId="392">
    <graphics x="15.623747069926708" y="138.93173417450367" z="0.0"/>
  </node>
  <node id="447099" label="zzzz748" cy:nodeId="393">
    <graphics x="23.21338864097163" y="10.572256177677502" z="0.0"/>
  </node>
  <node id="447098" label="zzzz747" cy:nodeId="394">
    <graphics x="137.85878201255366" y="116.25967606903492" z="0.0"/>
  </node>
  <node id="447097" label="zzzz746" cy:nodeId="395">
    <graphics x="-47.25445346107915" y="-42.326707750545154" z="0.0"/>
  </node>
  <node id="447096" label="zzzz745" cy:nodeId="396">
    <graphics x="63.09274407157466" y="15.750959485782971" z="0.0"/>
  </node>
  <node id="447095" label="zzzz744" cy:nodeId="397">
    <graphics x="100.27535076865718" y="126.47369584442555" z="0.0"/>
  </node>
  <node id="447094" label="zzzz743" cy:nodeId="398">
    <graphics x="-20.401143829731495" y="-56.675223261104236" z="0.0"/>
  </node>
  <node id="447093" label="zzzz742" cy:nodeId="399">
    <graphics x="5.786668975444286" y="184.70004472137867" z="0.0"/>
  </node>
  <node id="447092" label="zzzz741" cy:nodeId="400">
    <graphics x="-49.38211611977056" y="58.573953717960705" z="0.0"/>
  </node>
  <node id="447091" label="zzzz740" cy:nodeId="401">
    <graphics x="67.55860372314021" y="153.87831315399586" z="0.0"/>
  </node>
  <node id="447090" label="zzzz739" cy:nodeId="402">
    <graphics x="12.023103911967723" y="-3.6418589651447633" z="0.0"/>
  </node>
  <node id="447089" label="zzzz738" cy:nodeId="403">
    <graphics x="12.87342282065913" y="60.241243451847424" z="0.0"/>
  </node>
  <node id="447088" label="zzzz737" cy:nodeId="404">
    <graphics x="-21.42728976479009" y="-18.415059953914295" z="0.0"/>
  </node>
  <node id="447087" label="zzzz736" cy:nodeId="405">
    <graphics x="23.99638958701655" y="148.4674092233318" z="0.0"/>
  </node>
  <node id="447086" label="zzzz735" cy:nodeId="406">
    <graphics x="-11.190694610981495" y="-39.71541014312328" z="0.0"/>
  </node>
  <node id="447085" label="zzzz734" cy:nodeId="407">
    <graphics x="-48.90829257240728" y="-16.15812483428539" z="0.0"/>
  </node>
  <node id="447084" label="zzzz733" cy:nodeId="408">
    <graphics x="-58.6280496524854" y="-4.730283647761951" z="0.0"/>
  </node>
  <node id="447083" label="zzzz732" cy:nodeId="409">
    <graphics x="-70.21381930580571" y="-20.731576830134998" z="0.0"/>
  </node>
  <node id="447082" label="zzzz731" cy:nodeId="410">
    <graphics x="37.03923435935542" y="-67.45081320403636" z="0.0"/>
  </node>
  <node id="447081" label="zzzz730" cy:nodeId="411">
    <graphics x="-9.445401947407277" y="-40.499755769954334" z="0.0"/>
  </node>
  <node id="447080" label="zzzz729" cy:nodeId="412">
    <graphics x="-14.306402008442433" y="-70.55135717986644" z="0.0"/>
  </node>
  <node id="447079" label="zzzz728" cy:nodeId="413">
    <graphics x="-7.433469574360402" y="-74.50051298736156" z="0.0"/>
  </node>
  <node id="447078" label="zzzz727" cy:nodeId="414">
    <graphics x="51.898796279521434" y="13.501947492374768" z="0.0"/>
  </node>
  <node id="447077" label="zzzz726" cy:nodeId="415">
    <graphics x="8.179056365581005" y="-51.216936975703845" z="0.0"/>
  </node>
  <node id="447076" label="zzzz725" cy:nodeId="416">
    <graphics x="9.043680389018505" y="-14.294286638484607" z="0.0"/>
  </node>
  <node id="447075" label="zzzz724" cy:nodeId="417">
    <graphics x="-41.21285800209478" y="-13.504560381160388" z="0.0"/>
  </node>
  <node id="447074" label="zzzz723" cy:nodeId="418">
    <graphics x="19.200304229350536" y="36.99812516571461" z="0.0"/>
  </node>
  <node id="447073" label="zzzz722" cy:nodeId="419">
    <graphics x="25.926778991313427" y="19.910272687687268" z="0.0"/>
  </node>
  <node id="447072" label="zzzz721" cy:nodeId="420">
    <graphics x="24.52249737510249" y="21.2524434030193" z="0.0"/>
  </node>
  <node id="447071" label="zzzz720" cy:nodeId="421">
    <graphics x="50.95738144645259" y="105.51664933563649" z="0.0"/>
  </node>
  <node id="447070" label="zzzz719" cy:nodeId="422">
    <graphics x="45.934061248393505" y="195.51524552704274" z="0.0"/>
  </node>
  <node id="447069" label="zzzz718" cy:nodeId="423">
    <graphics x="-67.87775973549321" y="-43.97183457015575" z="0.0"/>
  </node>
  <node id="447068" label="zzzz717" cy:nodeId="424">
    <graphics x="-4.568311493305714" y="10.121786206974377" z="0.0"/>
  </node>
  <node id="447067" label="zzzz716" cy:nodeId="425">
    <graphics x="71.0677568508105" y="173.8417988717693" z="0.0"/>
  </node>
  <node id="447066" label="zzzz715" cy:nodeId="426">
    <graphics x="-35.92313937416509" y="-20.42244902251781" z="0.0"/>
  </node>
  <node id="447065" label="zzzz714" cy:nodeId="427">
    <graphics x="147.52424069175288" y="125.13035783173024" z="0.0"/>
  </node>
  <node id="447064" label="zzzz713" cy:nodeId="428">
    <graphics x="-3.637334625629933" y="-99.51904478667797" z="0.0"/>
  </node>
  <node id="447063" label="zzzz712" cy:nodeId="429">
    <graphics x="68.52249642142817" y="148.25413712860524" z="0.0"/>
  </node>
  <node id="447062" label="zzzz711" cy:nodeId="430">
    <graphics x="114.67905255088374" y="179.99325761200367" z="0.0"/>
  </node>
  <node id="447061" label="zzzz710" cy:nodeId="431">
    <graphics x="16.552625854106395" y="-99.28166761992992" z="0.0"/>
  </node>
  <node id="447060" label="zzzz709" cy:nodeId="432">
    <graphics x="36.497123916240184" y="14.402891248478284" z="0.0"/>
  </node>
  <node id="447059" label="zzzz708" cy:nodeId="433">
    <graphics x="-380.9385660099073" y="-32.930440813289295" z="0.0"/>
  </node>
  <node id="447058" label="zzzz707" cy:nodeId="434">
    <graphics x="-41.22931460609868" y="-6.962629228816638" z="0.0"/>
  </node>
  <node id="447057" label="zzzz706" cy:nodeId="435">
    <graphics x="-13.700864593891652" y="-66.22642508147777" z="0.0"/>
  </node>
  <node id="447056" label="zzzz705" cy:nodeId="436">
    <graphics x="-15.189672272114308" y="9.987878888859143" z="0.0"/>
  </node>
  <node id="447055" label="zzzz704" cy:nodeId="437">
    <graphics x="-62.96616915932134" y="159.57211503387867" z="0.0"/>
  </node>
  <node id="447054" label="zzzz703" cy:nodeId="438">
    <graphics x="50.81139298209712" y="121.30049332977711" z="0.0"/>
  </node>
  <node id="447053" label="zzzz702" cy:nodeId="439">
    <graphics x="-44.173963348774464" y="-22.32761374114574" z="0.0"/>
  </node>
  <node id="447052" label="zzzz701" cy:nodeId="440">
    <graphics x="-26.200277130512745" y="-36.01068487762035" z="0.0"/>
  </node>
  <node id="447051" label="zzzz700" cy:nodeId="441">
    <graphics x="74.64987774619624" y="-64.89081946013988" z="0.0"/>
  </node>
  <node id="447050" label="zzzz699" cy:nodeId="442">
    <graphics x="37.21273060569331" y="-62.94579115508617" z="0.0"/>
  </node>
  <node id="447049" label="zzzz698" cy:nodeId="443">
    <graphics x="125.55589123496577" y="-57.469845682368884" z="0.0"/>
  </node>
  <node id="447048" label="zzzz697" cy:nodeId="444">
    <graphics x="107.60440655478999" y="158.51251420380055" z="0.0"/>
  </node>
  <node id="447047" label="zzzz696" cy:nodeId="445">
    <graphics x="-25.039991180805714" y="-58.10706225036205" z="0.0"/>
  </node>
  <node id="447046" label="zzzz695" cy:nodeId="446">
    <graphics x="52.31000538596675" y="-21.495580583797107" z="0.0"/>
  </node>
  <node id="447045" label="zzzz694" cy:nodeId="447">
    <graphics x="14.905565459819286" y="178.68654069305836" z="0.0"/>
  </node>
  <node id="447044" label="zzzz693" cy:nodeId="448">
    <graphics x="-9.656171600727589" y="184.5795460641521" z="0.0"/>
  </node>
  <node id="447043" label="zzzz692" cy:nodeId="449">
    <graphics x="44.07784481772944" y="190.27182206512867" z="0.0"/>
  </node>
  <node id="447042" label="zzzz691" cy:nodeId="450">
    <graphics x="51.49856396445796" y="-8.815572649226795" z="0.0"/>
  </node>
  <node id="447041" label="zzzz690" cy:nodeId="451">
    <graphics x="-53.17112521400884" y="188.2516652047771" z="0.0"/>
  </node>
  <node id="447040" label="zzzz689" cy:nodeId="452">
    <graphics x="20.243196685405223" y="-45.640285164104114" z="0.0"/>
  </node>
  <node id="447039" label="zzzz688" cy:nodeId="453">
    <graphics x="51.606310088725536" y="8.558363050236096" z="0.0"/>
  </node>
  <node id="447038" label="zzzz687" cy:nodeId="454">
    <graphics x="-57.31700686684087" y="-50.36378660796703" z="0.0"/>
  </node>
  <node id="447037" label="zzzz686" cy:nodeId="455">
    <graphics x="158.96177883872554" y="109.16726884247242" z="0.0"/>
  </node>
  <node id="447036" label="zzzz685" cy:nodeId="456">
    <graphics x="13.870401580424755" y="143.70765885712086" z="0.0"/>
  </node>
  <node id="447035" label="zzzz684" cy:nodeId="457">
    <graphics x="-10.328229706196339" y="-37.95700064300121" z="0.0"/>
  </node>
  <node id="447034" label="zzzz683" cy:nodeId="458">
    <graphics x="-0.007139007954151566" y="-32.40023031829418" z="0.0"/>
  </node>
  <node id="447033" label="zzzz682" cy:nodeId="459">
    <graphics x="-9.676725189594777" y="-54.245522409663806" z="0.0"/>
  </node>
  <node id="447032" label="zzzz681" cy:nodeId="460">
    <graphics x="7.677496154399364" y="2.2890797555583617" z="0.0"/>
  </node>
  <node id="447031" label="zzzz680" cy:nodeId="461">
    <graphics x="93.910257537456" y="-0.45286360381663826" z="0.0"/>
  </node>
  <node id="447030" label="zzzz679" cy:nodeId="462">
    <graphics x="8.646990020366161" y="-30.744926363216052" z="0.0"/>
  </node>
  <node id="447029" label="zzzz678" cy:nodeId="463">
    <graphics x="125.74146481284663" y="135.0510731637615" z="0.0"/>
  </node>
  <node id="447028" label="zzzz677" cy:nodeId="464">
    <graphics x="34.333915908427684" y="4.994112104191174" z="0.0"/>
  </node>
  <node id="447027" label="zzzz676" cy:nodeId="465">
    <graphics x="-9.234998505024464" y="23.539468854679455" z="0.0"/>
  </node>
  <node id="447026" label="zzzz675" cy:nodeId="466">
    <graphics x="20.711160857768505" y="-61.34354296325267" z="0.0"/>
  </node>
  <node id="447025" label="zzzz674" cy:nodeId="467">
    <graphics x="-51.40560702553228" y="52.72337540985524" z="0.0"/>
  </node>
  <node id="447024" label="zzzz673" cy:nodeId="468">
    <graphics x="-48.85708407631353" y="-47.92380705474437" z="0.0"/>
  </node>
  <node id="447023" label="zzzz672" cy:nodeId="469">
    <graphics x="-27.667554657368214" y="26.229211896671643" z="0.0"/>
  </node>
  <node id="447022" label="zzzz671" cy:nodeId="470">
    <graphics x="150.06997891196772" y="124.46707352997242" z="0.0"/>
  </node>
  <node id="447021" label="zzzz670" cy:nodeId="471">
    <graphics x="35.71813793906733" y="-89.12986174224437" z="0.0"/>
  </node>
  <node id="447020" label="zzzz669" cy:nodeId="472">
    <graphics x="74.83935566672847" y="133.55374345184742" z="0.0"/>
  </node>
  <node id="447019" label="zzzz668" cy:nodeId="473">
    <graphics x="-19.260083954243214" y="-16.427858263240466" z="0.0"/>
  </node>
  <node id="447018" label="zzzz667" cy:nodeId="474">
    <graphics x="-58.88616732826665" y="-7.123166948543201" z="0.0"/>
  </node>
  <node id="447017" label="zzzz666" cy:nodeId="475">
    <graphics x="-36.12746981850103" y="12.408426374210705" z="0.0"/>
  </node>
  <node id="447016" label="zzzz665" cy:nodeId="476">
    <graphics x="32.54803295859858" y="-39.15334311126293" z="0.0"/>
  </node>
  <node id="447015" label="zzzz664" cy:nodeId="477">
    <graphics x="-41.64105014076665" y="-8.119478136287341" z="0.0"/>
  </node>
  <node id="447014" label="zzzz663" cy:nodeId="478">
    <graphics x="-62.2681863712354" y="37.893228620304455" z="0.0"/>
  </node>
  <node id="447013" label="zzzz662" cy:nodeId="479">
    <graphics x="-62.675611297993214" y="4.7586766183513305" z="0.0"/>
  </node>
  <node id="447012" label="zzzz661" cy:nodeId="480">
    <graphics x="-29.83831576576665" y="211.4302998483318" z="0.0"/>
  </node>
  <node id="447011" label="zzzz660" cy:nodeId="481">
    <graphics x="-83.86839083900884" y="33.92376145721852" z="0.0"/>
  </node>
  <node id="447010" label="zzzz659" cy:nodeId="482">
    <graphics x="-2.9120462345166516" y="-78.99926176665844" z="0.0"/>
  </node>
  <node id="447009" label="zzzz658" cy:nodeId="483">
    <graphics x="170.4526388240771" y="-15.814472109065662" z="0.0"/>
  </node>
  <node id="447008" label="zzzz657" cy:nodeId="484">
    <graphics x="60.237915237040966" y="-70.12859144805492" z="0.0"/>
  </node>
  <node id="447007" label="zzzz656" cy:nodeId="485">
    <graphics x="37.26637860068843" y="-65.94976606963695" z="0.0"/>
  </node>
  <node id="447006" label="zzzz655" cy:nodeId="486">
    <graphics x="34.96726628074214" y="-26.31124296783031" z="0.0"/>
  </node>
  <node id="447005" label="zzzz654" cy:nodeId="487">
    <graphics x="-1.8630044864697766" y="0.23887833954273674" z="0.0"/>
  </node>
  <node id="447004" label="zzzz653" cy:nodeId="488">
    <graphics x="20.568964202495067" y="-57.215421587215076" z="0.0"/>
  </node>
  <node id="447003" label="zzzz652" cy:nodeId="489">
    <graphics x="-16.1033914493604" y="-46.44380369781078" z="0.0"/>
  </node>
  <node id="447002" label="zzzz651" cy:nodeId="490">
    <graphics x="24.102289397807567" y="4.272424787296643" z="0.0"/>
  </node>
  <node id="447001" label="zzzz650" cy:nodeId="491">
    <graphics x="-20.808370392231495" y="4.689302533878674" z="0.0"/>
  </node>
  <node id="447000" label="zzzz649" cy:nodeId="492">
    <graphics x="-5.495679657368214" y="-19.2531718313557" z="0.0"/>
  </node>
  <node id="446999" label="zzzz648" cy:nodeId="493">
    <graphics x="-3.3369348453564953" y="130.34979447723805" z="0.0"/>
  </node>
  <node id="446998" label="zzzz647" cy:nodeId="494">
    <graphics x="1.566026885600536" y="10.96905717255055" z="0.0"/>
  </node>
  <node id="446997" label="zzzz646" cy:nodeId="495">
    <graphics x="-26.854154388813527" y="15.88068589569508" z="0.0"/>
  </node>
  <node id="446996" label="zzzz645" cy:nodeId="496">
    <graphics x="-53.731458465961964" y="-27.92051687835277" z="0.0"/>
  </node>
  <node id="446995" label="zzzz644" cy:nodeId="497">
    <graphics x="45.1353838039355" y="25.077074140323987" z="0.0"/>
  </node>
  <node id="446994" label="zzzz643" cy:nodeId="498">
    <graphics x="-7.132718841938527" y="-61.04744997619213" z="0.0"/>
  </node>
  <node id="446993" label="zzzz642" cy:nodeId="499">
    <graphics x="-27.54009799232915" y="-54.659723192439685" z="0.0"/>
  </node>
  <node id="446992" label="zzzz641" cy:nodeId="500">
    <graphics x="34.324157912822216" y="-90.53189650176586" z="0.0"/>
  </node>
  <node id="446991" label="zzzz640" cy:nodeId="501">
    <graphics x="58.25466652640864" y="-4.367597490535388" z="0.0"/>
  </node>
  <node id="446990" label="zzzz639" cy:nodeId="502">
    <graphics x="-40.908773224262745" y="47.30120286346852" z="0.0"/>
  </node>
  <node id="446989" label="zzzz638" cy:nodeId="503">
    <graphics x="-16.716382782368214" y="12.521082013859143" z="0.0"/>
  </node>
  <node id="446988" label="zzzz637" cy:nodeId="504">
    <graphics x="19.5988790584521" y="195.05197343231617" z="0.0"/>
  </node>
  <node id="446987" label="zzzz636" cy:nodeId="505">
    <graphics x="-1.7885644840283703" y="-55.11942473052562" z="0.0"/>
  </node>
  <node id="446986" label="zzzz635" cy:nodeId="506">
    <graphics x="-21.94126681557134" y="1.1113453805583617" z="0.0"/>
  </node>
  <node id="446985" label="zzzz634" cy:nodeId="507">
    <graphics x="-37.51958255043462" y="-43.635675340877185" z="0.0"/>
  </node>
  <node id="446984" label="zzzz633" cy:nodeId="508">
    <graphics x="168.8895513606982" y="-82.88812819121898" z="0.0"/>
  </node>
  <node id="446983" label="zzzz632" cy:nodeId="509">
    <graphics x="-70.49464205971196" y="5.490980237736096" z="0.0"/>
  </node>
  <node id="446982" label="zzzz631" cy:nodeId="510">
    <graphics x="72.09615870246455" y="209.7281514108318" z="0.0"/>
  </node>
  <node id="446981" label="zzzz630" cy:nodeId="511">
    <graphics x="-13.323667328266652" y="-97.71176329253734" z="0.0"/>
  </node>
  <node id="446980" label="zzzz629" cy:nodeId="512">
    <graphics x="-9.40831546059087" y="49.99205216766774" z="0.0"/>
  </node>
  <node id="446979" label="zzzz628" cy:nodeId="513">
    <graphics x="-79.54185275307134" y="37.05571183563649" z="0.0"/>
  </node>
  <node id="446978" label="zzzz627" cy:nodeId="514">
    <graphics x="-36.408712189106495" y="67.85418900848805" z="0.0"/>
  </node>
  <node id="446977" label="zzzz626" cy:nodeId="515">
    <graphics x="-26.06529025307134" y="-63.877557665095935" z="0.0"/>
  </node>
  <node id="446976" label="zzzz625" cy:nodeId="516">
    <graphics x="17.725916106791942" y="1.0349598825114867" z="0.0"/>
  </node>
  <node id="446975" label="zzzz624" cy:nodeId="517">
    <graphics x="-0.4392145084424328" y="-70.8320521414143" z="0.0"/>
  </node>
  <node id="446974" label="zzzz623" cy:nodeId="518">
    <graphics x="-65.73252658119634" y="-69.06595984099926" z="0.0"/>
  </node>
  <node id="446973" label="zzzz622" cy:nodeId="519">
    <graphics x="-88.21133212318853" y="3.864160627140393" z="0.0"/>
  </node>
  <node id="446972" label="zzzz621" cy:nodeId="520">
    <graphics x="42.48622723350093" y="-21.680942445979724" z="0.0"/>
  </node>
  <node id="446971" label="zzzz620" cy:nodeId="521">
    <graphics x="-12.064679901508839" y="-33.36321058867992" z="0.0"/>
  </node>
  <node id="446970" label="zzzz619" cy:nodeId="522">
    <graphics x="4.062418181987255" y="-1.1270274221760133" z="0.0"/>
  </node>
  <node id="446969" label="zzzz618" cy:nodeId="523">
    <graphics x="-25.9871805118604" y="6.880315870060315" z="0.0"/>
  </node>
  <node id="446968" label="zzzz617" cy:nodeId="524">
    <graphics x="10.086786468120067" y="-73.73411551116527" z="0.0"/>
  </node>
  <node id="446967" label="zzzz616" cy:nodeId="525">
    <graphics x="6.558798034282177" y="19.2315693795818" z="0.0"/>
  </node>
  <node id="446966" label="zzzz615" cy:nodeId="526">
    <graphics x="-56.50249270668462" y="155.790697187199" z="0.0"/>
  </node>
  <node id="446965" label="zzzz614" cy:nodeId="527">
    <graphics x="54.976846892924755" y="-15.332385927425037" z="0.0"/>
  </node>
  <node id="446964" label="zzzz613" cy:nodeId="528">
    <graphics x="147.3862554622607" y="-114.67246809600414" z="0.0"/>
  </node>
  <node id="446963" label="zzzz612" cy:nodeId="529">
    <graphics x="204.86435147056147" y="143.34828385712086" z="0.0"/>
  </node>
  <node id="446962" label="zzzz611" cy:nodeId="530">
    <graphics x="34.14166470298335" y="-53.526183992610584" z="0.0"/>
  </node>
  <node id="446961" label="zzzz610" cy:nodeId="531">
    <graphics x="-56.37779788246587" y="-27.0631083547932" z="0.0"/>
  </node>
  <node id="446960" label="zzzz609" cy:nodeId="532">
    <graphics x="16.450636108012645" y="-90.79829588531078" z="0.0"/>
  </node>
  <node id="446959" label="zzzz608" cy:nodeId="533">
    <graphics x="-52.49363497963384" y="2.1854725778239867" z="0.0"/>
  </node>
  <node id="446958" label="zzzz607" cy:nodeId="534">
    <graphics x="-14.424314300922902" y="-23.527419954524646" z="0.0"/>
  </node>
  <node id="446957" label="zzzz606" cy:nodeId="535">
    <graphics x="-1.484937469868214" y="44.85381516815602" z="0.0"/>
  </node>
  <node id="446956" label="zzzz605" cy:nodeId="536">
    <graphics x="201.17904873618647" y="208.70260819794117" z="0.0"/>
  </node>
  <node id="446955" label="zzzz604" cy:nodeId="537">
    <graphics x="-0.059560577778370316" y="-57.93500319121898" z="0.0"/>
  </node>
  <node id="446954" label="zzzz603" cy:nodeId="538">
    <graphics x="22.907648284526317" y="-7.540346056209216" z="0.0"/>
  </node>
  <node id="446953" label="zzzz602" cy:nodeId="539">
    <graphics x="3.068357665629833" y="14.05026826263844" z="0.0"/>
  </node>
  <node id="446952" label="zzzz601" cy:nodeId="540">
    <graphics x="-74.08675936928228" y="8.465021222843518" z="0.0"/>
  </node>
  <node id="446951" label="zzzz600" cy:nodeId="541">
    <graphics x="4.239214141459911" y="-48.916633516536365" z="0.0"/>
  </node>
  <node id="446950" label="zzzz599" cy:nodeId="542">
    <graphics x="-38.787313263325245" y="-37.59218969939769" z="0.0"/>
  </node>
  <node id="446949" label="zzzz598" cy:nodeId="543">
    <graphics x="37.58501835593745" y="-4.076909929500232" z="0.0"/>
  </node>
  <node id="446948" label="zzzz597" cy:nodeId="544">
    <graphics x="41.97553463706538" y="14.703081220402112" z="0.0"/>
  </node>
  <node id="446947" label="zzzz596" cy:nodeId="545">
    <graphics x="-0.7323053287549328" y="26.2352314889568" z="0.0"/>
  </node>
  <node id="446946" label="zzzz595" cy:nodeId="546">
    <graphics x="-106.44679049721196" y="205.068773359074" z="0.0"/>
  </node>
  <node id="446945" label="zzzz594" cy:nodeId="547">
    <graphics x="105.85906430015132" y="-67.91276541350902" z="0.0"/>
  </node>
  <node id="446944" label="zzzz593" cy:nodeId="548">
    <graphics x="164.1499044490771" y="151.34747514130055" z="0.0"/>
  </node>
  <node id="446943" label="zzzz592" cy:nodeId="549">
    <graphics x="117.19909115562007" y="-62.255935579524646" z="0.0"/>
  </node>
  <node id="446942" label="zzzz591" cy:nodeId="550">
    <graphics x="-38.589376251606495" y="15.812437146915784" z="0.0"/>
  </node>
  <node id="446941" label="zzzz590" cy:nodeId="551">
    <graphics x="-38.27562503090337" y="-49.10122719405712" z="0.0"/>
  </node>
  <node id="446940" label="zzzz589" cy:nodeId="552">
    <graphics x="-18.243627350239308" y="-98.9508036672932" z="0.0"/>
  </node>
  <node id="446939" label="zzzz588" cy:nodeId="553">
    <graphics x="2.994341094584911" y="-50.07386580108226" z="0.0"/>
  </node>
  <node id="446938" label="zzzz587" cy:nodeId="554">
    <graphics x="-41.539808075336964" y="-4.873670488582263" z="0.0"/>
  </node>
  <node id="446937" label="zzzz586" cy:nodeId="555">
    <graphics x="46.36751766929194" y="40.42495164276539" z="0.0"/>
  </node>
  <node id="446936" label="zzzz585" cy:nodeId="556">
    <graphics x="35.79141827353999" y="187.3584004342693" z="0.0"/>
  </node>
  <node id="446935" label="zzzz584" cy:nodeId="557">
    <graphics x="-8.745710174946339" y="9.311761945499768" z="0.0"/>
  </node>
  <node id="446934" label="zzzz583" cy:nodeId="558">
    <graphics x="10.728033263774364" y="29.80976304413258" z="0.0"/>
  </node>
  <node id="446933" label="zzzz582" cy:nodeId="559">
    <graphics x="36.58375569114253" y="-47.12815657256664" z="0.0"/>
  </node>
  <node id="446932" label="zzzz581" cy:nodeId="560">
    <graphics x="29.607183654399364" y="8.456228345646252" z="0.0"/>
  </node>
  <node id="446931" label="zzzz580" cy:nodeId="561">
    <graphics x="-11.933835785297902" y="-73.87139311431469" z="0.0"/>
  </node>
  <node id="446930" label="zzzz579" cy:nodeId="562">
    <graphics x="10.532041747661083" y="-50.247722536311755" z="0.0"/>
  </node>
  <node id="446929" label="zzzz578" cy:nodeId="563">
    <graphics x="76.56984730491206" y="53.32239732147633" z="0.0"/>
  </node>
  <node id="446928" label="zzzz577" cy:nodeId="564">
    <graphics x="72.28983612784907" y="-141.94229689239086" z="0.0"/>
  </node>
  <node id="446927" label="zzzz576" cy:nodeId="565">
    <graphics x="-75.77581576576665" y="15.061670392765393" z="0.0"/>
  </node>
  <node id="446926" label="zzzz575" cy:nodeId="566">
    <graphics x="24.111299712748973" y="-69.34708967803539" z="0.0"/>
  </node>
  <node id="446925" label="zzzz574" cy:nodeId="567">
    <graphics x="-49.26300601234868" y="-48.01293793319286" z="0.0"/>
  </node>
  <node id="446924" label="zzzz573" cy:nodeId="568">
    <graphics x="49.67648335227534" y="-50.843184381709705" z="0.0"/>
  </node>
  <node id="446923" label="zzzz572" cy:nodeId="569">
    <graphics x="-36.33502749672368" y="31.63202103973805" z="0.0"/>
  </node>
  <node id="446922" label="zzzz571" cy:nodeId="570">
    <graphics x="-14.005079071430714" y="-89.76498594878734" z="0.0"/>
  </node>
  <node id="446921" label="zzzz570" cy:nodeId="571">
    <graphics x="34.039434630961864" y="-51.29453459380687" z="0.0"/>
  </node>
  <node id="446920" label="zzzz569" cy:nodeId="572">
    <graphics x="6.13410397300288" y="-46.230441957698474" z="0.0"/>
  </node>
  <node id="446919" label="zzzz568" cy:nodeId="573">
    <graphics x="48.15521450767085" y="-7.106367021785388" z="0.0"/>
  </node>
  <node id="446918" label="zzzz567" cy:nodeId="574">
    <graphics x="-27.5168435977979" y="-64.82841292022289" z="0.0"/>
  </node>
  <node id="446917" label="zzzz566" cy:nodeId="575">
    <graphics x="-20.940313141254933" y="-36.12838640807689" z="0.0"/>
  </node>
  <node id="446916" label="zzzz565" cy:nodeId="576">
    <graphics x="-41.16251925697759" y="-10.625699907527576" z="0.0"/>
  </node>
  <node id="446915" label="zzzz564" cy:nodeId="577">
    <graphics x="53.120995719523876" y="-55.51078787444652" z="0.0"/>
  </node>
  <node id="446914" label="zzzz563" cy:nodeId="578">
    <graphics x="186.1747076106982" y="103.26780900360524" z="0.0"/>
  </node>
  <node id="446913" label="zzzz562" cy:nodeId="579">
    <graphics x="26.458673675151317" y="-55.114554315791736" z="0.0"/>
  </node>
  <node id="446912" label="zzzz561" cy:nodeId="580">
    <graphics x="15.067899901957958" y="-70.40358152984203" z="0.0"/>
  </node>
  <node id="446911" label="zzzz560" cy:nodeId="581">
    <graphics x="80.09482403525874" y="-91.17854490874828" z="0.0"/>
  </node>
  <node id="446910" label="zzzz559" cy:nodeId="582">
    <graphics x="-56.93877963295415" y="18.376138776554455" z="0.0"/>
  </node>
  <node id="446909" label="zzzz558" cy:nodeId="583">
    <graphics x="-45.57583407631353" y="-25.56516829131664" z="0.0"/>
  </node>
  <node id="446908" label="zzzz557" cy:nodeId="584">
    <graphics x="12.631097991557567" y="-39.33153906463207" z="0.0"/>
  </node>
  <node id="446907" label="zzzz556" cy:nodeId="585">
    <graphics x="51.81604405173823" y="-71.18546476958812" z="0.0"/>
  </node>
  <node id="446906" label="zzzz555" cy:nodeId="586">
    <graphics x="-64.37595919838384" y="-7.520502001033435" z="0.0"/>
  </node>
  <node id="446905" label="zzzz554" cy:nodeId="587">
    <graphics x="42.65923901328608" y="-9.554723650203357" z="0.0"/>
  </node>
  <node id="446904" label="zzzz553" cy:nodeId="588">
    <graphics x="2.0832426143603016" y="51.23470506073414" z="0.0"/>
  </node>
  <node id="446903" label="zzzz552" cy:nodeId="589">
    <graphics x="-32.284803192524464" y="-35.60221281646312" z="0.0"/>
  </node>
  <node id="446902" label="zzzz551" cy:nodeId="590">
    <graphics x="-20.404020111469777" y="-75.26922407744945" z="0.0"/>
  </node>
  <node id="446901" label="zzzz550" cy:nodeId="591">
    <graphics x="43.70850582847163" y="-63.761835008845935" z="0.0"/>
  </node>
  <node id="446900" label="zzzz549" cy:nodeId="592">
    <graphics x="365.8040182186084" y="70.3442631662029" z="0.0"/>
  </node>
  <node id="446899" label="zzzz548" cy:nodeId="593">
    <graphics x="33.62066097983882" y="-31.226358324275623" z="0.0"/>
  </node>
  <node id="446898" label="zzzz547" cy:nodeId="594">
    <graphics x="68.79317827949092" y="-104.9067133962971" z="0.0"/>
  </node>
  <node id="446897" label="zzzz546" cy:nodeId="595">
    <graphics x="86.2581922603564" y="-91.75393477080883" z="0.0"/>
  </node>
  <node id="446896" label="zzzz545" cy:nodeId="596">
    <graphics x="-2.722669403461964" y="50.1483174264568" z="0.0"/>
  </node>
  <node id="446895" label="zzzz544" cy:nodeId="597">
    <graphics x="-434.6584146427198" y="194.91615495087086" z="0.0"/>
  </node>
  <node id="446894" label="zzzz543" cy:nodeId="598">
    <graphics x="-421.2061441349073" y="205.4552784860271" z="0.0"/>
  </node>
  <node id="446893" label="zzzz542" cy:nodeId="599">
    <graphics x="-420.7304666446729" y="197.5056172311443" z="0.0"/>
  </node>
  <node id="446892" label="zzzz541" cy:nodeId="600">
    <graphics x="-392.7238443302198" y="216.09250077606617" z="0.0"/>
  </node>
  <node id="446891" label="zzzz540" cy:nodeId="601">
    <graphics x="-474.0718667911573" y="90.3668232858318" z="0.0"/>
  </node>
  <node id="446890" label="zzzz539" cy:nodeId="602">
    <graphics x="-435.315946381001" y="146.2749043405193" z="0.0"/>
  </node>
  <node id="446889" label="zzzz538" cy:nodeId="603">
    <graphics x="-444.006864349751" y="177.47451981903492" z="0.0"/>
  </node>
  <node id="446888" label="zzzz537" cy:nodeId="604">
    <graphics x="217.38864346274897" y="109.62814530731617" z="0.0"/>
  </node>
  <node id="446887" label="zzzz536" cy:nodeId="605">
    <graphics x="-436.11626986732915" y="186.04025468231617" z="0.0"/>
  </node>
  <node id="446886" label="zzzz535" cy:nodeId="606">
    <graphics x="-393.659940521626" y="267.2392292916912" z="0.0"/>
  </node>
  <node id="446885" label="zzzz534" cy:nodeId="607">
    <graphics x="-415.0436075138135" y="173.4785633981365" z="0.0"/>
  </node>
  <node id="446884" label="zzzz533" cy:nodeId="608">
    <graphics x="-465.9793985294385" y="94.25352677704274" z="0.0"/>
  </node>
  <node id="446883" label="zzzz532" cy:nodeId="609">
    <graphics x="-419.30645541420415" y="218.62948808075367" z="0.0"/>
  </node>
  <node id="446882" label="zzzz531" cy:nodeId="610">
    <graphics x="-432.6288125919385" y="138.9845753610271" z="0.0"/>
  </node>
  <node id="446881" label="zzzz530" cy:nodeId="611">
    <graphics x="-412.69964389076665" y="234.2313252389568" z="0.0"/>
  </node>
  <node id="446880" label="zzzz529" cy:nodeId="612">
    <graphics x="-409.65130404701665" y="241.1871357858318" z="0.0"/>
  </node>
  <node id="446879" label="zzzz528" cy:nodeId="613">
    <graphics x="-466.1000039981885" y="142.35780534149586" z="0.0"/>
  </node>
  <node id="446878" label="zzzz527" cy:nodeId="614">
    <graphics x="-423.4222085880323" y="152.38253983856617" z="0.0"/>
  </node>
  <node id="446877" label="zzzz526" cy:nodeId="615">
    <graphics x="-436.24615267982915" y="224.54315385223805" z="0.0"/>
  </node>
  <node id="446876" label="zzzz525" cy:nodeId="616">
    <graphics x="-418.5243204044385" y="174.23153886200367" z="0.0"/>
  </node>
  <node id="446875" label="zzzz524" cy:nodeId="617">
    <graphics x="-462.833280365376" y="147.78404435516774" z="0.0"/>
  </node>
  <node id="446874" label="zzzz523" cy:nodeId="618">
    <graphics x="-135.38406161537603" y="659.0305195748942" z="0.0"/>
  </node>
  <node id="446873" label="zzzz522" cy:nodeId="619">
    <graphics x="-232.33950595131353" y="740.4877949655192" z="0.0"/>
  </node>
  <node id="446872" label="zzzz521" cy:nodeId="620">
    <graphics x="-406.9436929630323" y="742.1347676217692" z="0.0"/>
  </node>
  <node id="446871" label="zzzz520" cy:nodeId="621">
    <graphics x="-107.54386691322759" y="711.9643574655192" z="0.0"/>
  </node>
  <node id="446870" label="zzzz519" cy:nodeId="622">
    <graphics x="-154.59759310951665" y="645.9587422311442" z="0.0"/>
  </node>
  <node id="446869" label="zzzz518" cy:nodeId="623">
    <graphics x="-189.10455111732915" y="572.1047993600505" z="0.0"/>
  </node>
  <node id="446868" label="zzzz517" cy:nodeId="624">
    <graphics x="-126.44294528236821" y="736.181337445988" z="0.0"/>
  </node>
  <node id="446867" label="zzzz516" cy:nodeId="625">
    <graphics x="140.13874264487788" y="125.30311784149586" z="0.0"/>
  </node>
  <node id="446866" label="zzzz515" cy:nodeId="626">
    <graphics x="178.16044064292475" y="-57.070543199763904" z="0.0"/>
  </node>
  <node id="446865" label="zzzz514" cy:nodeId="627">
    <graphics x="-108.54520968666509" y="133.40216264130055" z="0.0"/>
  </node>
  <node id="446864" label="zzzz513" cy:nodeId="628">
    <graphics x="82.22509594687983" y="19.606477826847424" z="0.0"/>
  </node>
  <node id="446863" label="zzzz512" cy:nodeId="629">
    <graphics x="158.9922353816943" y="-65.70907965301097" z="0.0"/>
  </node>
  <node id="446862" label="zzzz511" cy:nodeId="630">
    <graphics x="-86.53217868080571" y="109.1344014108318" z="0.0"/>
  </node>
  <node id="446861" label="zzzz510" cy:nodeId="631">
    <graphics x="399.43591519126466" y="260.5888691842693" z="0.0"/>
  </node>
  <node id="446860" label="zzzz509" cy:nodeId="632">
    <graphics x="466.85656948813966" y="37.66229447723805" z="0.0"/>
  </node>
  <node id="446859" label="zzzz508" cy:nodeId="633">
    <graphics x="77.38588925132319" y="289.3767414987224" z="0.0"/>
  </node>
  <node id="446858" label="zzzz507" cy:nodeId="634">
    <graphics x="-288.263456146626" y="357.6191426217693" z="0.0"/>
  </node>
  <node id="446857" label="zzzz506" cy:nodeId="635">
    <graphics x="53.90187760123774" y="302.8384724557537" z="0.0"/>
  </node>
  <node id="446856" label="zzzz505" cy:nodeId="636">
    <graphics x="-34.57366732826665" y="582.7801533639567" z="0.0"/>
  </node>
  <node id="446855" label="zzzz503" cy:nodeId="637">
    <graphics x="-168.3738992618604" y="859.8187275827067" z="0.0"/>
  </node>
  <node id="446854" label="zzzz502" cy:nodeId="638">
    <graphics x="1.876287658305614" y="66.36024674774586" z="0.0"/>
  </node>
  <node id="446853" label="zzzz501" cy:nodeId="639">
    <graphics x="32.25074215659663" y="-54.08344641326488" z="0.0"/>
  </node>
  <node id="446852" label="zzzz500" cy:nodeId="640">
    <graphics x="-4.498945038227589" y="-12.790670305476795" z="0.0"/>
  </node>
  <node id="446851" label="zzzz499" cy:nodeId="641">
    <graphics x="8.709222991557567" y="-11.981054216609607" z="0.0"/>
  </node>
  <node id="446850" label="zzzz498" cy:nodeId="642">
    <graphics x="303.1115896297412" y="-117.4676264822346" z="0.0"/>
  </node>
  <node id="446849" label="zzzz497" cy:nodeId="643">
    <graphics x="-275.8845193790479" y="291.0747090280193" z="0.0"/>
  </node>
  <node id="446848" label="zzzz496" cy:nodeId="644">
    <graphics x="323.88989468345216" y="-129.24851790069164" z="0.0"/>
  </node>
  <node id="446847" label="zzzz495" cy:nodeId="645">
    <graphics x="-305.84698275795415" y="365.33087357880055" z="0.0"/>
  </node>
  <node id="446846" label="zzzz494" cy:nodeId="646">
    <graphics x="-214.4343240665479" y="348.2719441354412" z="0.0"/>
  </node>
  <node id="446845" label="zzzz493" cy:nodeId="647">
    <graphics x="101.77984829673335" y="-56.88575449584545" z="0.0"/>
  </node>
  <node id="446844" label="zzzz492" cy:nodeId="648">
    <graphics x="34.23602123984858" y="125.4416523873943" z="0.0"/>
  </node>
  <node id="446843" label="zzzz491" cy:nodeId="649">
    <graphics x="-229.5809305118604" y="436.97943314911305" z="0.0"/>
  </node>
  <node id="446842" label="zzzz490" cy:nodeId="650">
    <graphics x="89.17053814658686" y="-60.88852205871166" z="0.0"/>
  </node>
  <node id="446841" label="zzzz489" cy:nodeId="651">
    <graphics x="-122.72633151283696" y="284.9397297799724" z="0.0"/>
  </node>
  <node id="446840" label="zzzz488" cy:nodeId="652">
    <graphics x="140.8453390193896" y="-33.739042192683826" z="0.0"/>
  </node>
  <node id="446839" label="zzzz487" cy:nodeId="653">
    <graphics x="-184.49520663490728" y="255.5133076608318" z="0.0"/>
  </node>
  <node id="446838" label="zzzz486" cy:nodeId="654">
    <graphics x="100.1129285884814" y="0.4379712045329711" z="0.0"/>
  </node>
  <node id="446837" label="zzzz485" cy:nodeId="655">
    <graphics x="74.2888032985644" y="-20.477846056209216" z="0.0"/>
  </node>
  <node id="446836" label="zzzz484" cy:nodeId="656">
    <graphics x="-94.95461825600103" y="76.7154560983318" z="0.0"/>
  </node>
  <node id="446835" label="zzzz483" cy:nodeId="657">
    <graphics x="113.12879391440913" y="-28.388746172176013" z="0.0"/>
  </node>
  <node id="446834" label="zzzz482" cy:nodeId="658">
    <graphics x="221.99717922935054" y="-57.79217329619945" z="0.0"/>
  </node>
  <node id="446833" label="zzzz481" cy:nodeId="659">
    <graphics x="403.26046963462403" y="294.7897664010662" z="0.0"/>
  </node>
  <node id="446832" label="zzzz480" cy:nodeId="660">
    <graphics x="437.1384908748584" y="223.20858964325367" z="0.0"/>
  </node>
  <node id="446831" label="zzzz479" cy:nodeId="661">
    <graphics x="432.03418179282716" y="281.67401322723805" z="0.0"/>
  </node>
  <node id="446830" label="zzzz478" cy:nodeId="662">
    <graphics x="-332.54241732826665" y="305.1627522409099" z="0.0"/>
  </node>
  <node id="446829" label="zzzz477" cy:nodeId="663">
    <graphics x="161.92748471030757" y="-80.50475493072094" z="0.0"/>
  </node>
  <node id="446828" label="zzzz476" cy:nodeId="664">
    <graphics x="165.63639279136225" y="-113.03291884063304" z="0.0"/>
  </node>
  <node id="446827" label="zzzz475" cy:nodeId="665">
    <graphics x="107.36264630088374" y="218.57205399872242" z="0.0"/>
  </node>
  <node id="446826" label="zzzz474" cy:nodeId="666">
    <graphics x="149.37257595786616" y="10.537012189640393" z="0.0"/>
  </node>
  <node id="446825" label="zzzz473" cy:nodeId="667">
    <graphics x="155.4604284358935" y="99.7120381295818" z="0.0"/>
  </node>
  <node id="446824" label="zzzz472" cy:nodeId="668">
    <graphics x="119.59834500083491" y="155.4343739450115" z="0.0"/>
  </node>
  <node id="446823" label="zzzz471" cy:nodeId="669">
    <graphics x="39.44845791587397" y="69.56094560028492" z="0.0"/>
  </node>
  <node id="446822" label="zzzz470" cy:nodeId="670">
    <graphics x="-15.206800262836964" y="76.04496201874196" z="0.0"/>
  </node>
  <node id="446821" label="zzzz469" cy:nodeId="671">
    <graphics x="16.615869720073192" y="-38.34870758651317" z="0.0"/>
  </node>
  <node id="446820" label="zzzz468" cy:nodeId="672">
    <graphics x="-280.33062533607915" y="845.871767133488" z="0.0"/>
  </node>
  <node id="446819" label="zzzz467" cy:nodeId="673">
    <graphics x="-356.4086587833448" y="622.8160420358317" z="0.0"/>
  </node>
  <node id="446818" label="zzzz466" cy:nodeId="674">
    <graphics x="-69.21978549232915" y="32.40401658417164" z="0.0"/>
  </node>
  <node id="446817" label="zzzz465" cy:nodeId="675">
    <graphics x="-68.03165988197759" y="11.50763139130055" z="0.0"/>
  </node>
  <node id="446816" label="zzzz464" cy:nodeId="676">
    <graphics x="85.87994213828608" y="38.21114549042164" z="0.0"/>
  </node>
  <node id="446815" label="zzzz463" cy:nodeId="677">
    <graphics x="-57.51042727699712" y="180.68223771454274" z="0.0"/>
  </node>
  <node id="446814" label="zzzz449" cy:nodeId="678">
    <graphics x="27.027601440043895" y="-34.43999281524242" z="0.0"/>
  </node>
  <node id="446813" label="zzzz448" cy:nodeId="679">
    <graphics x="-73.83633212318853" y="37.18474015594899" z="0.0"/>
  </node>
  <node id="446812" label="zzzz447" cy:nodeId="680">
    <graphics x="485.77026577720216" y="100.12375077606617" z="0.0"/>
  </node>
  <node id="446811" label="zzzz444" cy:nodeId="681">
    <graphics x="67.33191509971186" y="-229.9723338186604" z="0.0"/>
  </node>
  <node id="446810" label="zzzz443" cy:nodeId="682">
    <graphics x="75.07650585898921" y="-245.8307627737385" z="0.0"/>
  </node>
  <node id="446809" label="zzzz442" cy:nodeId="683">
    <graphics x="1.0131322933153797" y="-193.70480147002758" z="0.0"/>
  </node>
  <node id="446808" label="zzzz441" cy:nodeId="684">
    <graphics x="92.51060314902827" y="-234.58657637237133" z="0.0"/>
  </node>
  <node id="446807" label="zzzz440" cy:nodeId="685">
    <graphics x="-206.25961093178228" y="19.236307233585705" z="0.0"/>
  </node>
  <node id="446806" label="zzzz439" cy:nodeId="686">
    <graphics x="-112.78574923744634" y="-121.0288065969807" z="0.0"/>
  </node>
  <node id="446805" label="zzzz438" cy:nodeId="687">
    <graphics x="-62.90810946693853" y="-183.4226512014729" z="0.0"/>
  </node>
  <node id="446804" label="zzzz437" cy:nodeId="688">
    <graphics x="-8.801267425922902" y="-199.1905497610432" z="0.0"/>
  </node>
  <node id="446803" label="zzzz436" cy:nodeId="689">
    <graphics x="-148.1604440616651" y="-94.28426924346508" z="0.0"/>
  </node>
  <node id="446802" label="zzzz435" cy:nodeId="690">
    <graphics x="-37.33622531166509" y="-179.0849131643635" z="0.0"/>
  </node>
  <node id="446801" label="zzzz434" cy:nodeId="691">
    <graphics x="31.536825378032177" y="-206.1612528860432" z="0.0"/>
  </node>
  <node id="446800" label="zzzz433" cy:nodeId="692">
    <graphics x="-85.13700656166509" y="-143.39962568877758" z="0.0"/>
  </node>
  <node id="446799" label="zzzz432" cy:nodeId="693">
    <graphics x="-19.44866732826665" y="-205.5834483206135" z="0.0"/>
  </node>
  <node id="446798" label="zzzz431" cy:nodeId="694">
    <graphics x="-156.24802951088384" y="-77.52777090667308" z="0.0"/>
  </node>
  <node id="446797" label="zzzz430" cy:nodeId="695">
    <graphics x="-173.43076876869634" y="-65.84879484771312" z="0.0"/>
  </node>
  <node id="446796" label="zzzz429" cy:nodeId="696">
    <graphics x="-170.9988229679151" y="-22.828557878718982" z="0.0"/>
  </node>
  <node id="446795" label="zzzz428" cy:nodeId="697">
    <graphics x="5.496988494487255" y="-196.5823191702229" z="0.0"/>
  </node>
  <node id="446794" label="zzzz427" cy:nodeId="698">
    <graphics x="-140.06863192787603" y="-118.11738386748851" z="0.0"/>
  </node>
  <node id="446793" label="zzzz426" cy:nodeId="699">
    <graphics x="-167.59292392006353" y="-99.47516432403148" z="0.0"/>
  </node>
  <node id="446792" label="zzzz425" cy:nodeId="700">
    <graphics x="-102.45437411537603" y="-123.22434797881664" z="0.0"/>
  </node>
  <node id="446791" label="zzzz424" cy:nodeId="701">
    <graphics x="-187.2954080509229" y="5.291772931827893" z="0.0"/>
  </node>
  <node id="446790" label="zzzz423" cy:nodeId="702">
    <graphics x="-188.22860507240728" y="-31.41136160491527" z="0.0"/>
  </node>
  <node id="446789" label="zzzz422" cy:nodeId="703">
    <graphics x="-102.18194369545415" y="-132.1727732717854" z="0.0"/>
  </node>
  <node id="446788" label="zzzz421" cy:nodeId="704">
    <graphics x="-236.72991732826665" y="41.374796003116955" z="0.0"/>
  </node>
  <node id="446787" label="zzzz420" cy:nodeId="705">
    <graphics x="-84.8905008243604" y="-159.75829115508617" z="0.0"/>
  </node>
  <node id="446786" label="zzzz419" cy:nodeId="706">
    <graphics x="-98.44967440834478" y="-146.70147505401195" z="0.0"/>
  </node>
  <node id="446785" label="zzzz418" cy:nodeId="707">
    <graphics x="-148.73272494545415" y="-123.51080885528148" z="0.0"/>
  </node>
  <node id="446784" label="zzzz417" cy:nodeId="708">
    <graphics x="56.45616551169917" y="-254.48245039580883" z="0.0"/>
  </node>
  <node id="446783" label="zzzz416" cy:nodeId="709">
    <graphics x="-118.12237338295415" y="-119.94344893096508" z="0.0"/>
  </node>
  <node id="446782" label="zzzz415" cy:nodeId="710">
    <graphics x="-140.50091342201665" y="-113.05208387969554" z="0.0"/>
  </node>
  <node id="446781" label="zzzz414" cy:nodeId="711">
    <graphics x="-63.4467752384229" y="-165.88865461944164" z="0.0"/>
  </node>
  <node id="446780" label="zzzz413" cy:nodeId="712">
    <graphics x="-3.230687897114308" y="-228.62281599639476" z="0.0"/>
  </node>
  <node id="446779" label="zzzz412" cy:nodeId="713">
    <graphics x="-193.4802225040479" y="-28.493221193538318" z="0.0"/>
  </node>
  <node id="446778" label="zzzz411" cy:nodeId="714">
    <graphics x="-209.9920633243604" y="8.695783704532971" z="0.0"/>
  </node>
  <node id="446777" label="zzzz410" cy:nodeId="715">
    <graphics x="-190.03191928139165" y="-54.47980299590648" z="0.0"/>
  </node>
  <node id="446776" label="zzzz409" cy:nodeId="716">
    <graphics x="-181.14698580971196" y="-75.82579603789867" z="0.0"/>
  </node>
  <node id="446775" label="zzzz408" cy:nodeId="717">
    <graphics x="-200.09243563881353" y="-7.387189775691638" z="0.0"/>
  </node>
  <node id="446774" label="zzzz407" cy:nodeId="718">
    <graphics x="-104.76569918861821" y="-125.80525007842601" z="0.0"/>
  </node>
  <node id="446773" label="zzzz406" cy:nodeId="719">
    <graphics x="73.96579571494624" y="-66.06545248626293" z="0.0"/>
  </node>
  <node id="446772" label="zzzz405" cy:nodeId="720">
    <graphics x="-36.34184054604009" y="-51.52211943267406" z="0.0"/>
  </node>
  <node id="446771" label="zzzz404" cy:nodeId="721">
    <graphics x="-44.210523407368214" y="39.815286725773205" z="0.0"/>
  </node>
  <node id="446770" label="zzzz403" cy:nodeId="722">
    <graphics x="-5.636441986469777" y="-14.359804064021716" z="0.0"/>
  </node>
  <node id="446769" label="zzzz402" cy:nodeId="723">
    <graphics x="-182.4898660587354" y="-222.17352095244945" z="0.0"/>
  </node>
  <node id="446768" label="zzzz401" cy:nodeId="724">
    <graphics x="201.9751760555224" y="-214.4770487844807" z="0.0"/>
  </node>
  <node id="446767" label="zzzz400" cy:nodeId="725">
    <graphics x="-312.4692056583448" y="36.990205854191174" z="0.0"/>
  </node>
  <node id="446766" label="zzzz399" cy:nodeId="726">
    <graphics x="51.06582375297114" y="-334.65398970244945" z="0.0"/>
  </node>
  <node id="446765" label="zzzz398" cy:nodeId="727">
    <graphics x="92.35234471091792" y="-344.9802531301838" z="0.0"/>
  </node>
  <node id="446764" label="zzzz397" cy:nodeId="728">
    <graphics x="40.10658474692866" y="-313.8387736379963" z="0.0"/>
  </node>
  <node id="446763" label="zzzz396" cy:nodeId="729">
    <graphics x="-336.738309662251" y="84.84625443817555" z="0.0"/>
  </node>
  <node id="446762" label="zzzz395" cy:nodeId="730">
    <graphics x="-39.98592929115728" y="-223.19857588409008" z="0.0"/>
  </node>
  <node id="446761" label="zzzz394" cy:nodeId="731">
    <graphics x="-233.92086581459478" y="-20.35225859283031" z="0.0"/>
  </node>
  <node id="446760" label="zzzz393" cy:nodeId="732">
    <graphics x="92.62749310264155" y="-214.5079325735432" z="0.0"/>
  </node>
  <node id="446759" label="zzzz392" cy:nodeId="733">
    <graphics x="-167.8925302433057" y="-179.86849775909008" z="0.0"/>
  </node>
  <node id="446758" label="zzzz391" cy:nodeId="734">
    <graphics x="-158.42391757240728" y="-145.32081404326976" z="0.0"/>
  </node>
  <node id="446757" label="zzzz390" cy:nodeId="735">
    <graphics x="30.05536862144038" y="-235.7043437063557" z="0.0"/>
  </node>
  <node id="446756" label="zzzz389" cy:nodeId="736">
    <graphics x="-51.42319277992681" y="-226.37014570830883" z="0.0"/>
  </node>
  <node id="446755" label="zzzz388" cy:nodeId="737">
    <graphics x="49.634582717509716" y="-243.6724070608479" z="0.0"/>
  </node>
  <node id="446754" label="zzzz387" cy:nodeId="738">
    <graphics x="22.275987823100536" y="-228.78658857940258" z="0.0"/>
  </node>
  <node id="446753" label="zzzz386" cy:nodeId="739">
    <graphics x="-207.2578103946729" y="-4.2574976980549195" z="0.0"/>
  </node>
  <node id="446752" label="zzzz385" cy:nodeId="740">
    <graphics x="150.66079922446772" y="-245.4139384329182" z="0.0"/>
  </node>
  <node id="446751" label="zzzz384" cy:nodeId="741">
    <graphics x="-105.5021951602979" y="-208.63778486846508" z="0.0"/>
  </node>
  <node id="446750" label="zzzz383" cy:nodeId="742">
    <graphics x="-146.3293893741651" y="-171.6190165579182" z="0.0"/>
  </node>
  <node id="446749" label="zzzz382" cy:nodeId="743">
    <graphics x="-64.36372164955571" y="-235.54617109893383" z="0.0"/>
  </node>
  <node id="446748" label="zzzz381" cy:nodeId="744">
    <graphics x="-180.02715853920415" y="-101.98509779571117" z="0.0"/>
  </node>
  <node id="446747" label="zzzz380" cy:nodeId="745">
    <graphics x="-120.41488436928228" y="-157.56300154326976" z="0.0"/>
  </node>
  <node id="446746" label="zzzz379" cy:nodeId="746">
    <graphics x="-113.79621676674321" y="-186.09408369659008" z="0.0"/>
  </node>
  <node id="446745" label="zzzz378" cy:nodeId="747">
    <graphics x="-134.53513888588384" y="-197.10122480987133" z="0.0"/>
  </node>
  <node id="446744" label="zzzz377" cy:nodeId="748">
    <graphics x="-7.574285309223683" y="-209.94357100127758" z="0.0"/>
  </node>
  <node id="446743" label="zzzz376" cy:nodeId="749">
    <graphics x="-172.14898471107915" y="-167.6071528494221" z="0.0"/>
  </node>
  <node id="446742" label="zzzz375" cy:nodeId="750">
    <graphics x="-178.55328158607915" y="-149.09625807403148" z="0.0"/>
  </node>
  <node id="446741" label="zzzz374" cy:nodeId="751">
    <graphics x="-141.80320529213384" y="-177.60934248565258" z="0.0"/>
  </node>
  <node id="446740" label="zzzz373" cy:nodeId="752">
    <graphics x="-145.41976718178228" y="-232.73643293975414" z="0.0"/>
  </node>
  <node id="446739" label="zzzz372" cy:nodeId="753">
    <graphics x="-225.84225253334478" y="-36.99244490264476" z="0.0"/>
  </node>
  <node id="446738" label="zzzz371" cy:nodeId="754">
    <graphics x="-147.37647799721196" y="-194.16555586455883" z="0.0"/>
  </node>
  <node id="446737" label="zzzz370" cy:nodeId="755">
    <graphics x="-183.55367831459478" y="-115.23594465850414" z="0.0"/>
  </node>
  <node id="446736" label="zzzz369" cy:nodeId="756">
    <graphics x="-168.86118869057134" y="-139.44214430450023" z="0.0"/>
  </node>
  <node id="446735" label="zzzz368" cy:nodeId="757">
    <graphics x="-26.079778473286183" y="-247.5903300344807" z="0.0"/>
  </node>
  <node id="446734" label="zzzz367" cy:nodeId="758">
    <graphics x="-221.7669656681104" y="-117.40019789336742" z="0.0"/>
  </node>
  <node id="446733" label="zzzz366" cy:nodeId="759">
    <graphics x="-107.74604586830571" y="-225.14219465850414" z="0.0"/>
  </node>
  <node id="446732" label="zzzz365" cy:nodeId="760">
    <graphics x="-128.32363681068853" y="-280.20603743194164" z="0.0"/>
  </node>
  <node id="446731" label="zzzz364" cy:nodeId="761">
    <graphics x="-91.98370150795415" y="-185.25839033721508" z="0.0"/>
  </node>
  <node id="446730" label="zzzz363" cy:nodeId="762">
    <graphics x="-209.7405984806104" y="-114.79309645293773" z="0.0"/>
  </node>
  <node id="446729" label="zzzz362" cy:nodeId="763">
    <graphics x="-223.79421786537603" y="-57.16919222472728" z="0.0"/>
  </node>
  <node id="446728" label="zzzz361" cy:nodeId="764">
    <graphics x="-54.954786102680714" y="-209.31756392119945" z="0.0"/>
  </node>
  <node id="446727" label="zzzz360" cy:nodeId="765">
    <graphics x="-194.88839511146978" y="-215.4807566702229" z="0.0"/>
  </node>
  <node id="446726" label="zzzz359" cy:nodeId="766">
    <graphics x="-199.98321322670415" y="-84.41101637481273" z="0.0"/>
  </node>
  <node id="446725" label="zzzz358" cy:nodeId="767">
    <graphics x="-109.81107882729009" y="-261.99671736358226" z="0.0"/>
  </node>
  <node id="446724" label="zzzz357" cy:nodeId="768">
    <graphics x="-71.3261697696729" y="-229.0751170217854" z="0.0"/>
  </node>
  <node id="446723" label="zzzz356" cy:nodeId="769">
    <graphics x="-198.78359774818853" y="-43.613553911433826" z="0.0"/>
  </node>
  <node id="446722" label="zzzz355" cy:nodeId="770">
    <graphics x="-170.49509982338384" y="-167.9430369436604" z="0.0"/>
  </node>
  <node id="446721" label="zzzz354" cy:nodeId="771">
    <graphics x="-118.54569796791509" y="-192.32151594756664" z="0.0"/>
  </node>
  <node id="446720" label="zzzz353" cy:nodeId="772">
    <graphics x="-62.8113992618604" y="-204.73313704131664" z="0.0"/>
  </node>
  <node id="446719" label="zzzz352" cy:nodeId="773">
    <graphics x="-229.96944979896978" y="-38.36674872039379" z="0.0"/>
  </node>
  <node id="446718" label="zzzz351" cy:nodeId="774">
    <graphics x="-236.0251443790479" y="-9.74474135039867" z="0.0"/>
  </node>
  <node id="446717" label="zzzz350" cy:nodeId="775">
    <graphics x="-222.20107821693853" y="36.80494889618336" z="0.0"/>
  </node>
  <node id="446716" label="zzzz349" cy:nodeId="776">
    <graphics x="-104.01203707924321" y="-174.2139109670979" z="0.0"/>
  </node>
  <node id="446715" label="zzzz348" cy:nodeId="777">
    <graphics x="-119.33579806557134" y="-206.6582011282307" z="0.0"/>
  </node>
  <node id="446714" label="zzzz347" cy:nodeId="778">
    <graphics x="-157.2414987491651" y="-200.90501204131664" z="0.0"/>
  </node>
  <node id="446713" label="zzzz346" cy:nodeId="779">
    <graphics x="32.91260739097163" y="-236.9476756155354" z="0.0"/>
  </node>
  <node id="446712" label="zzzz345" cy:nodeId="780">
    <graphics x="-227.91512850990728" y="-37.612413316951404" z="0.0"/>
  </node>
  <node id="446711" label="zzzz344" cy:nodeId="781">
    <graphics x="-215.5120828556104" y="-26.258581072078357" z="0.0"/>
  </node>
  <node id="446710" label="zzzz343" cy:nodeId="782">
    <graphics x="-271.53863314857915" y="-106.50980177520336" z="0.0"/>
  </node>
  <node id="446709" label="zzzz342" cy:nodeId="783">
    <graphics x="-28.701795380024464" y="-223.03484907744945" z="0.0"/>
  </node>
  <node id="446708" label="zzzz341" cy:nodeId="784">
    <graphics x="-2.5204141544385266" y="-207.63316145537914" z="0.0"/>
  </node>
  <node id="446707" label="zzzz340" cy:nodeId="785">
    <graphics x="39.41407223472163" y="-237.67669478057445" z="0.0"/>
  </node>
  <node id="446706" label="zzzz339" cy:nodeId="786">
    <graphics x="-223.02731112709478" y="-52.94378557799877" z="0.0"/>
  </node>
  <node id="446705" label="zzzz338" cy:nodeId="787">
    <graphics x="-55.34965304604009" y="-237.96514692901195" z="0.0"/>
  </node>
  <node id="446704" label="zzzz337" cy:nodeId="788">
    <graphics x="-203.21835116615728" y="-140.536695390926" z="0.0"/>
  </node>
  <node id="446703" label="zzzz336" cy:nodeId="789">
    <graphics x="-72.46305636635259" y="-230.9552439749104" z="0.0"/>
  </node>
  <node id="446702" label="zzzz335" cy:nodeId="790">
    <graphics x="-26.735662262348683" y="-236.51380720733226" z="0.0"/>
  </node>
  <node id="446701" label="zzzz334" cy:nodeId="791">
    <graphics x="-169.9217966007276" y="-235.17001143096508" z="0.0"/>
  </node>
  <node id="446700" label="zzzz333" cy:nodeId="792">
    <graphics x="-193.32327059975103" y="-89.67942228911937" z="0.0"/>
  </node>
  <node id="446699" label="zzzz332" cy:nodeId="793">
    <graphics x="-169.56878451576665" y="-155.1425761282307" z="0.0"/>
  </node>
  <node id="446698" label="zzzz331" cy:nodeId="794">
    <graphics x="-136.72225741615728" y="-191.60964766143383" z="0.0"/>
  </node>
  <node id="446697" label="zzzz330" cy:nodeId="795">
    <graphics x="-120.38021640053228" y="-169.26041212676586" z="0.0"/>
  </node>
  <node id="446696" label="zzzz329" cy:nodeId="796">
    <graphics x="-98.32839755287603" y="-200.7577647268635" z="0.0"/>
  </node>
  <node id="446695" label="zzzz328" cy:nodeId="797">
    <graphics x="-186.27210788002446" y="-104.02689543365062" z="0.0"/>
  </node>
  <node id="446694" label="zzzz327" cy:nodeId="798">
    <graphics x="77.42837830314204" y="-263.30259504912914" z="0.0"/>
  </node>
  <node id="446693" label="zzzz326" cy:nodeId="799">
    <graphics x="-321.1147439884229" y="-1.4636172354084351" z="0.0"/>
  </node>
  <node id="446692" label="zzzz325" cy:nodeId="800">
    <graphics x="-233.2305887149854" y="-85.81806364654125" z="0.0"/>
  </node>
  <node id="446691" label="zzzz324" cy:nodeId="801">
    <graphics x="-266.584012787251" y="-71.61103621123851" z="0.0"/>
  </node>
  <node id="446690" label="zzzz323" cy:nodeId="802">
    <graphics x="-112.63857821693853" y="-185.6571024954182" z="0.0"/>
  </node>
  <node id="446689" label="zzzz322" cy:nodeId="803">
    <graphics x="-245.49038485756353" y="0.08030900360523674" z="0.0"/>
  </node>
  <node id="446688" label="zzzz321" cy:nodeId="804">
    <graphics x="-182.0143258976026" y="-170.70499220489086" z="0.0"/>
  </node>
  <node id="446687" label="zzzz320" cy:nodeId="805">
    <graphics x="-266.6525552677198" y="-9.837606340633045" z="0.0"/>
  </node>
  <node id="446686" label="zzzz319" cy:nodeId="806">
    <graphics x="-222.15228060951665" y="-95.78867903350414" z="0.0"/>
  </node>
  <node id="446685" label="zzzz318" cy:nodeId="807">
    <graphics x="-317.9230935977979" y="-64.7549037039143" z="0.0"/>
  </node>
  <node id="446684" label="zzzz317" cy:nodeId="808">
    <graphics x="-167.62241915932134" y="-184.99575605987133" z="0.0"/>
  </node>
  <node id="446683" label="zzzz316" cy:nodeId="809">
    <graphics x="-86.85462741127446" y="-284.8199748098713" z="0.0"/>
  </node>
  <node id="446682" label="zzzz315" cy:nodeId="810">
    <graphics x="-181.2655008243604" y="-179.7161082327229" z="0.0"/>
  </node>
  <node id="446681" label="zzzz314" cy:nodeId="811">
    <graphics x="-156.3995798038526" y="-210.59786787627758" z="0.0"/>
  </node>
  <node id="446680" label="zzzz313" cy:nodeId="812">
    <graphics x="-259.8215005802198" y="-101.68462172149242" z="0.0"/>
  </node>
  <node id="446679" label="zzzz312" cy:nodeId="813">
    <graphics x="-243.5606668399854" y="-81.74002638457836" z="0.0"/>
  </node>
  <node id="446678" label="zzzz311" cy:nodeId="814">
    <graphics x="-250.72128085365728" y="-61.71793833373607" z="0.0"/>
  </node>
  <node id="446677" label="zzzz310" cy:nodeId="815">
    <graphics x="37.93499394187495" y="-274.3522471487385" z="0.0"/>
  </node>
  <node id="446676" label="zzzz309" cy:nodeId="816">
    <graphics x="-173.07398776283696" y="-249.5055674612385" z="0.0"/>
  </node>
  <node id="446675" label="zzzz308" cy:nodeId="817">
    <graphics x="-229.0748269962354" y="-159.2624491751057" z="0.0"/>
  </node>
  <node id="446674" label="zzzz307" cy:nodeId="818">
    <graphics x="-71.87591342201665" y="-193.338209062801" z="0.0"/>
  </node>
  <node id="446673" label="zzzz306" cy:nodeId="819">
    <graphics x="-190.6508768009229" y="-82.0363635122639" z="0.0"/>
  </node>
  <node id="446672" label="zzzz305" cy:nodeId="820">
    <graphics x="-165.38783053627446" y="-230.55210676787914" z="0.0"/>
  </node>
  <node id="446671" label="zzzz304" cy:nodeId="821">
    <graphics x="-82.08993319740728" y="-225.32615461944164" z="0.0"/>
  </node>
  <node id="446670" label="zzzz303" cy:nodeId="822">
    <graphics x="-226.43044833412603" y="-74.32965269683422" z="0.0"/>
  </node>
  <node id="446669" label="zzzz302" cy:nodeId="823">
    <graphics x="-204.68642977943853" y="-150.27468672393383" z="0.0"/>
  </node>
  <node id="446668" label="zzzz301" cy:nodeId="824">
    <graphics x="-161.6314218448682" y="-138.22157087920726" z="0.0"/>
  </node>
  <node id="446667" label="zzzz300" cy:nodeId="825">
    <graphics x="-199.80288485756353" y="-161.4737986624104" z="0.0"/>
  </node>
  <node id="446666" label="zzzz299" cy:nodeId="826">
    <graphics x="-183.10162142982915" y="-136.6263636648518" z="0.0"/>
  </node>
  <node id="446665" label="zzzz298" cy:nodeId="827">
    <graphics x="-186.6694314884229" y="-161.7893046438557" z="0.0"/>
  </node>
  <node id="446664" label="zzzz297" cy:nodeId="828">
    <graphics x="-140.0897195743604" y="-223.66354170440258" z="0.0"/>
  </node>
  <node id="446663" label="zzzz296" cy:nodeId="829">
    <graphics x="78.81373043784663" y="-234.30225935576976" z="0.0"/>
  </node>
  <node id="446662" label="zzzz295" cy:nodeId="830">
    <graphics x="-41.30674533119634" y="-254.95135298369945" z="0.0"/>
  </node>
  <node id="446661" label="zzzz294" cy:nodeId="831">
    <graphics x="142.94068356284663" y="-284.1849040090901" z="0.0"/>
  </node>
  <node id="446660" label="zzzz293" cy:nodeId="832">
    <graphics x="-249.2148416446729" y="-171.66153517364086" z="0.0"/>
  </node>
  <node id="446659" label="zzzz292" cy:nodeId="833">
    <graphics x="-211.59390048256353" y="-169.59100142119945" z="0.0"/>
  </node>
  <node id="446658" label="zzzz291" cy:nodeId="834">
    <graphics x="-242.3492410587354" y="-172.6376475393635" z="0.0"/>
  </node>
  <node id="446657" label="zzzz290" cy:nodeId="835">
    <graphics x="27.124872405620067" y="-254.67654219268383" z="0.0"/>
  </node>
  <node id="446656" label="zzzz289" cy:nodeId="836">
    <graphics x="-241.98428134193853" y="-47.2358378469807" z="0.0"/>
  </node>
  <node id="446655" label="zzzz288" cy:nodeId="837">
    <graphics x="-25.821248810200245" y="-295.9841746389729" z="0.0"/>
  </node>
  <node id="446654" label="zzzz287" cy:nodeId="838">
    <graphics x="-26.685636322407277" y="-243.0968455374104" z="0.0"/>
  </node>
  <node id="446653" label="zzzz286" cy:nodeId="839">
    <graphics x="-178.69053439369634" y="-106.84441938994945" z="0.0"/>
  </node>
  <node id="446652" label="zzzz285" cy:nodeId="840">
    <graphics x="8.010126311870067" y="-277.2288035452229" z="0.0"/>
  </node>
  <node id="446651" label="zzzz284" cy:nodeId="841">
    <graphics x="-43.31692294350103" y="-224.0114268362385" z="0.0"/>
  </node>
  <node id="446650" label="zzzz283" cy:nodeId="842">
    <graphics x="-43.82278231850103" y="-226.98882856963695" z="0.0"/>
  </node>
  <node id="446649" label="zzzz282" cy:nodeId="843">
    <graphics x="-227.7169168399854" y="-113.34803572295726" z="0.0"/>
  </node>
  <node id="446648" label="zzzz281" cy:nodeId="844">
    <graphics x="-105.42767123451665" y="-221.18585005401195" z="0.0"/>
  </node>
  <node id="446647" label="zzzz280" cy:nodeId="845">
    <graphics x="-54.72165469398931" y="-245.0592478811604" z="0.0"/>
  </node>
  <node id="446646" label="zzzz279" cy:nodeId="846">
    <graphics x="-221.66280917396978" y="-86.56949415801586" z="0.0"/>
  </node>
  <node id="446645" label="zzzz278" cy:nodeId="847">
    <graphics x="-220.7480447696729" y="-42.44028750060619" z="0.0"/>
  </node>
  <node id="446644" label="zzzz277" cy:nodeId="848">
    <graphics x="-254.69207553139165" y="-160.09974470733226" z="0.0"/>
  </node>
  <node id="446643" label="zzzz276" cy:nodeId="849">
    <graphics x="-12.230329315571339" y="-224.570386797176" z="0.0"/>
  </node>
  <node id="446642" label="zzzz275" cy:nodeId="850">
    <graphics x="-248.85458163490728" y="-128.47091475127758" z="0.0"/>
  </node>
  <node id="446641" label="zzzz274" cy:nodeId="851">
    <graphics x="-46.98636416664556" y="-250.7832011282307" z="0.0"/>
  </node>
  <node id="446640" label="zzzz273" cy:nodeId="852">
    <graphics x="-158.1977518009229" y="-258.277418047176" z="0.0"/>
  </node>
  <node id="446639" label="zzzz272" cy:nodeId="853">
    <graphics x="-88.6801736759229" y="-264.5635203420979" z="0.0"/>
  </node>
  <node id="446638" label="zzzz271" cy:nodeId="854">
    <graphics x="-5.987470428852589" y="-243.96145430205883" z="0.0"/>
  </node>
  <node id="446637" label="zzzz270" cy:nodeId="855">
    <graphics x="-224.1232889102979" y="-78.31123915313304" z="0.0"/>
  </node>
  <node id="446636" label="zzzz269" cy:nodeId="856">
    <graphics x="-243.98614291420415" y="-143.32598677276195" z="0.0"/>
  </node>
  <node id="446635" label="zzzz268" cy:nodeId="857">
    <graphics x="57.47221012839839" y="-297.56812849639476" z="0.0"/>
  </node>
  <node id="446634" label="zzzz267" cy:nodeId="858">
    <graphics x="-348.29888705482915" y="-3.548967272029529" z="0.0"/>
  </node>
  <node id="446633" label="zzzz266" cy:nodeId="859">
    <graphics x="-215.52419833412603" y="-149.27750197051586" z="0.0"/>
  </node>
  <node id="446632" label="zzzz265" cy:nodeId="860">
    <graphics x="-149.59966830482915" y="-194.08724775909008" z="0.0"/>
  </node>
  <node id="446631" label="zzzz264" cy:nodeId="861">
    <graphics x="-233.99905184975103" y="-120.72276869414867" z="0.0"/>
  </node>
  <node id="446630" label="zzzz263" cy:nodeId="862">
    <graphics x="-269.17974642982915" y="-20.653966814265857" z="0.0"/>
  </node>
  <node id="446629" label="zzzz262" cy:nodeId="863">
    <graphics x="-143.99944857826665" y="-175.61886397002758" z="0.0"/>
  </node>
  <node id="446628" label="zzzz261" cy:nodeId="864">
    <graphics x="-250.17867831459478" y="-48.48690691588939" z="0.0"/>
  </node>
  <node id="446627" label="zzzz260" cy:nodeId="865">
    <graphics x="-88.85975436439946" y="-264.5304850637776" z="0.0"/>
  </node>
  <node id="446626" label="zzzz259" cy:nodeId="866">
    <graphics x="-208.99209384193853" y="-87.80198469756664" z="0.0"/>
  </node>
  <node id="446625" label="zzzz258" cy:nodeId="867">
    <graphics x="-265.63873080482915" y="-129.74053755401195" z="0.0"/>
  </node>
  <node id="446624" label="zzzz257" cy:nodeId="868">
    <graphics x="-257.3281228946729" y="-109.24381056426586" z="0.0"/>
  </node>
  <node id="446623" label="zzzz256" cy:nodeId="869">
    <graphics x="-316.59490756264165" y="-44.08354750274242" z="0.0"/>
  </node>
  <node id="446622" label="zzzz255" cy:nodeId="870">
    <graphics x="-234.34454135170415" y="14.51983842255055" z="0.0"/>
  </node>
  <node id="446621" label="zzzz254" cy:nodeId="871">
    <graphics x="-86.05148104896978" y="-229.1564158499104" z="0.0"/>
  </node>
  <node id="446620" label="zzzz253" cy:nodeId="872">
    <graphics x="-244.45025424232915" y="-2.307367235408435" z="0.0"/>
  </node>
  <node id="446619" label="zzzz252" cy:nodeId="873">
    <graphics x="-207.02215365639165" y="-130.15940657256664" z="0.0"/>
  </node>
  <node id="446618" label="zzzz251" cy:nodeId="874">
    <graphics x="-190.0666940616651" y="-149.9213389456135" z="0.0"/>
  </node>
  <node id="446617" label="zzzz250" cy:nodeId="875">
    <graphics x="-73.24375704994634" y="-198.98447981475414" z="0.0"/>
  </node>
  <node id="446616" label="zzzz249" cy:nodeId="876">
    <graphics x="-139.09133700600103" y="-198.81710615752758" z="0.0"/>
  </node>
  <node id="446615" label="zzzz248" cy:nodeId="877">
    <graphics x="-238.0506570743604" y="23.20759019257008" z="0.0"/>
  </node>
  <node id="446614" label="zzzz247" cy:nodeId="878">
    <graphics x="-209.7968728946729" y="-117.25593367217601" z="0.0"/>
  </node>
  <node id="446613" label="zzzz246" cy:nodeId="879">
    <graphics x="-154.25071505775884" y="-200.74203291534008" z="0.0"/>
  </node>
  <node id="446612" label="zzzz245" cy:nodeId="880">
    <graphics x="-129.12750033607915" y="-156.31480208037914" z="0.0"/>
  </node>
  <node id="446611" label="zzzz244" cy:nodeId="881">
    <graphics x="-159.08355502357915" y="-147.30833235381664" z="0.0"/>
  </node>
  <node id="446610" label="zzzz243" cy:nodeId="882">
    <graphics x="-116.68136386146978" y="-218.6573924124104" z="0.0"/>
  </node>
  <node id="446609" label="zzzz242" cy:nodeId="883">
    <graphics x="-264.257352631001" y="-20.06868353484691" z="0.0"/>
  </node>
  <node id="446608" label="zzzz241" cy:nodeId="884">
    <graphics x="-220.68032626381353" y="5.47690400482594" z="0.0"/>
  </node>
  <node id="446607" label="zzzz240" cy:nodeId="885">
    <graphics x="-53.693921844868214" y="-296.65765181182445" z="0.0"/>
  </node>
  <node id="446606" label="zzzz239" cy:nodeId="886">
    <graphics x="-216.57864169350103" y="-19.112970262752185" z="0.0"/>
  </node>
  <node id="446605" label="zzzz238" cy:nodeId="887">
    <graphics x="-138.96827487221196" y="-182.74610701201976" z="0.0"/>
  </node>
  <node id="446604" label="zzzz237" cy:nodeId="888">
    <graphics x="49.68335934409663" y="-233.47366133330883" z="0.0"/>
  </node>
  <node id="446603" label="zzzz236" cy:nodeId="889">
    <graphics x="-252.6724832462354" y="-82.0847262441975" z="0.0"/>
  </node>
  <node id="446602" label="zzzz235" cy:nodeId="890">
    <graphics x="21.3629171443896" y="-256.16497603057445" z="0.0"/>
  </node>
  <node id="446601" label="zzzz234" cy:nodeId="891">
    <graphics x="13.233770568461864" y="-268.73142805694164" z="0.0"/>
  </node>
  <node id="446600" label="zzzz233" cy:nodeId="892">
    <graphics x="-49.514234344868214" y="-249.75604048369945" z="0.0"/>
  </node>
  <node id="446599" label="zzzz232" cy:nodeId="893">
    <graphics x="-222.16372470131353" y="-30.647428423152576" z="0.0"/>
  </node>
  <node id="446598" label="zzzz231" cy:nodeId="894">
    <graphics x="-78.26653842201665" y="-241.24725142119945" z="0.0"/>
  </node>
  <node id="446597" label="zzzz230" cy:nodeId="895">
    <graphics x="-100.76457003822759" y="-238.0747050344807" z="0.0"/>
  </node>
  <node id="446596" label="zzzz229" cy:nodeId="896">
    <graphics x="-220.4312723087354" y="-83.71233549712719" z="0.0"/>
  </node>
  <node id="446595" label="zzzz228" cy:nodeId="897">
    <graphics x="-35.08286837807134" y="-239.265699297176" z="0.0"/>
  </node>
  <node id="446594" label="zzzz227" cy:nodeId="898">
    <graphics x="-243.3984353946729" y="-17.575012117610584" z="0.0"/>
  </node>
  <node id="446593" label="zzzz226" cy:nodeId="899">
    <graphics x="-123.81220797768071" y="-189.82253828643383" z="0.0"/>
  </node>
  <node id="446592" label="zzzz225" cy:nodeId="900">
    <graphics x="-15.034040253071339" y="-256.1265849172932" z="0.0"/>
  </node>
  <node id="446591" label="zzzz224" cy:nodeId="901">
    <graphics x="-53.89898471107915" y="-272.4763621389729" z="0.0"/>
  </node>
  <node id="446590" label="zzzz223" cy:nodeId="902">
    <graphics x="-73.72317294350103" y="-245.26429548858226" z="0.0"/>
  </node>
  <node id="446589" label="zzzz222" cy:nodeId="903">
    <graphics x="-160.65806369057134" y="-158.45242872832836" z="0.0"/>
  </node>
  <node id="446588" label="zzzz221" cy:nodeId="904">
    <graphics x="-134.4398630069776" y="-192.16311445830883" z="0.0"/>
  </node>
  <node id="446587" label="zzzz220" cy:nodeId="905">
    <graphics x="-210.5838601993604" y="-210.38009443877758" z="0.0"/>
  </node>
  <node id="446586" label="zzzz219" cy:nodeId="906">
    <graphics x="-194.46163729896978" y="-183.58425703643383" z="0.0"/>
  </node>
  <node id="446585" label="zzzz218" cy:nodeId="907">
    <graphics x="-175.4614999698682" y="-136.23861494659008" z="0.0"/>
  </node>
  <node id="446584" label="zzzz217" cy:nodeId="908">
    <graphics x="-252.0218484806104" y="-68.8265246450764" z="0.0"/>
  </node>
  <node id="446583" label="zzzz216" cy:nodeId="909">
    <graphics x="31.693609435649364" y="-274.224439531551" z="0.0"/>
  </node>
  <node id="446582" label="zzzz215" cy:nodeId="910">
    <graphics x="-147.63445834389165" y="-214.3571299612385" z="0.0"/>
  </node>
  <node id="446581" label="zzzz214" cy:nodeId="911">
    <graphics x="-232.74166659584478" y="-119.90914717315258" z="0.0"/>
  </node>
  <node id="446580" label="zzzz213" cy:nodeId="912">
    <graphics x="-101.01319674721196" y="-262.2126139700276" z="0.0"/>
  </node>
  <node id="446579" label="zzzz212" cy:nodeId="913">
    <graphics x="-155.4711130069776" y="-147.71980848907054" z="0.0"/>
  </node>
  <node id="446578" label="zzzz211" cy:nodeId="914">
    <graphics x="-151.40980319252446" y="-204.75924482940258" z="0.0"/>
  </node>
  <node id="446577" label="zzzz210" cy:nodeId="915">
    <graphics x="-45.551778595356495" y="-274.91045942901195" z="0.0"/>
  </node>
  <node id="446576" label="zzzz209" cy:nodeId="916">
    <graphics x="-168.72242526283696" y="-211.934156328426" z="0.0"/>
  </node>
  <node id="446575" label="zzzz208" cy:nodeId="917">
    <graphics x="-81.15980319252446" y="196.98988541962086" z="0.0"/>
  </node>
  <node id="446574" label="zzzz207" cy:nodeId="918">
    <graphics x="-6.322782318501027" y="239.65225419403492" z="0.0"/>
  </node>
  <node id="446573" label="zzzz206" cy:nodeId="919">
    <graphics x="-59.20691470375493" y="42.549959272159924" z="0.0"/>
  </node>
  <node id="446572" label="zzzz205" cy:nodeId="920">
    <graphics x="14.183622558207958" y="130.9787617623943" z="0.0"/>
  </node>
  <node id="446571" label="zzzz204" cy:nodeId="921">
    <graphics x="-130.82961825600103" y="65.33526811005055" z="0.0"/>
  </node>
  <node id="446570" label="zzzz203" cy:nodeId="922">
    <graphics x="-11.301648895649464" y="-20.66890898345531" z="0.0"/>
  </node>
  <node id="446569" label="zzzz202" cy:nodeId="923">
    <graphics x="-24.567533295063527" y="173.8268605172771" z="0.0"/>
  </node>
  <node id="446568" label="zzzz201" cy:nodeId="924">
    <graphics x="27.865385253520458" y="-73.32254400847972" z="0.0"/>
  </node>
  <node id="446567" label="zzzz200" cy:nodeId="925">
    <graphics x="-39.582479278950245" y="-15.328462511287341" z="0.0"/>
  </node>
  <node id="446566" label="zzzz199" cy:nodeId="926">
    <graphics x="42.8018705440478" y="-92.42906752227367" z="0.0"/>
  </node>
  <node id="446565" label="zzzz198" cy:nodeId="927">
    <graphics x="-36.15164736977056" y="217.81064042450367" z="0.0"/>
  </node>
  <node id="446564" label="zzzz197" cy:nodeId="928">
    <graphics x="-62.33700350990728" y="97.09454545380055" z="0.0"/>
  </node>
  <node id="446563" label="zzzz196" cy:nodeId="929">
    <graphics x="-44.9348123477979" y="249.87848100067555" z="0.0"/>
  </node>
  <node id="446562" label="zzzz195" cy:nodeId="930">
    <graphics x="-30.44138888588384" y="-42.27879324554027" z="0.0"/>
  </node>
  <node id="446561" label="zzzz194" cy:nodeId="931">
    <graphics x="-54.26531008949712" y="139.50503739715992" z="0.0"/>
  </node>
  <node id="446560" label="zzzz193" cy:nodeId="932">
    <graphics x="-148.4349801944776" y="174.6745167672771" z="0.0"/>
  </node>
  <node id="446559" label="zzzz192" cy:nodeId="933">
    <graphics x="5.289282043071239" y="-10.412958055720935" z="0.0"/>
  </node>
  <node id="446558" label="zzzz191" cy:nodeId="934">
    <graphics x="-242.00002841225103" y="57.15981492401539" z="0.0"/>
  </node>
  <node id="446557" label="zzzz190" cy:nodeId="935">
    <graphics x="-284.30657748451665" y="147.87796220184742" z="0.0"/>
  </node>
  <node id="446556" label="zzzz189" cy:nodeId="936">
    <graphics x="-163.24383334389165" y="-95.03751936553539" z="0.0"/>
  </node>
  <node id="446555" label="zzzz188" cy:nodeId="937">
    <graphics x="2.4379484249071766" y="-175.67367354034008" z="0.0"/>
  </node>
  <node id="446554" label="zzzz187" cy:nodeId="938">
    <graphics x="-180.43809298744634" y="16.497060865177502" z="0.0"/>
  </node>
  <node id="446553" label="zzzz186" cy:nodeId="939">
    <graphics x="-161.45916537514165" y="-9.929750353084216" z="0.0"/>
  </node>
  <node id="446552" label="zzzz185" cy:nodeId="940">
    <graphics x="29.85865994224116" y="-172.21055403350414" z="0.0"/>
  </node>
  <node id="446551" label="zzzz184" cy:nodeId="941">
    <graphics x="-148.50753573646978" y="-9.64888945220531" z="0.0"/>
  </node>
  <node id="446550" label="zzzz183" cy:nodeId="942">
    <graphics x="-120.51011447182134" y="-35.95614138244213" z="0.0"/>
  </node>
  <node id="446549" label="zzzz182" cy:nodeId="943">
    <graphics x="-101.86907748451665" y="-86.36344709991039" z="0.0"/>
  </node>
  <node id="446548" label="zzzz181" cy:nodeId="944">
    <graphics x="-105.09608248939946" y="-86.64359083770336" z="0.0"/>
  </node>
  <node id="446547" label="zzzz180" cy:nodeId="945">
    <graphics x="-145.8518503116651" y="-37.876960664973865" z="0.0"/>
  </node>
  <node id="446546" label="zzzz179" cy:nodeId="946">
    <graphics x="-237.71810702553228" y="95.53961381317555" z="0.0"/>
  </node>
  <node id="446545" label="zzzz178" cy:nodeId="947">
    <graphics x="-320.7402322696729" y="264.00543412567555" z="0.0"/>
  </node>
  <node id="446544" label="zzzz177" cy:nodeId="948">
    <graphics x="76.81479187736079" y="-196.6551951467854" z="0.0"/>
  </node>
  <node id="446543" label="zzzz176" cy:nodeId="949">
    <graphics x="-82.72906283607915" y="-131.2842234670979" z="0.0"/>
  </node>
  <node id="446542" label="zzzz175" cy:nodeId="950">
    <graphics x="-99.03359774818853" y="-122.56119337676586" z="0.0"/>
  </node>
  <node id="446541" label="zzzz174" cy:nodeId="951">
    <graphics x="-68.22866610756353" y="-150.19705000518383" z="0.0"/>
  </node>
  <node id="446540" label="zzzz173" cy:nodeId="952">
    <graphics x="-139.8773935245557" y="-59.09151449798168" z="0.0"/>
  </node>
  <node id="446539" label="zzzz172" cy:nodeId="953">
    <graphics x="-164.57015780678228" y="-13.813104540095935" z="0.0"/>
  </node>
  <node id="446538" label="zzzz171" cy:nodeId="954">
    <graphics x="-143.7515848087354" y="-57.167048364864" z="0.0"/>
  </node>
  <node id="446537" label="zzzz170" cy:nodeId="955">
    <graphics x="-153.4301278995557" y="-28.263170152888904" z="0.0"/>
  </node>
  <node id="446536" label="zzzz169" cy:nodeId="956">
    <graphics x="116.00054760703608" y="-10.229696184383045" z="0.0"/>
  </node>
  <node id="446535" label="zzzz168" cy:nodeId="957">
    <graphics x="93.23799343833491" y="26.950037091984143" z="0.0"/>
  </node>
  <node id="446534" label="zzzz167" cy:nodeId="958">
    <graphics x="72.88318463096186" y="-33.88438120482982" z="0.0"/>
  </node>
  <node id="446533" label="zzzz166" cy:nodeId="959">
    <graphics x="92.93182583579585" y="9.251390546573987" z="0.0"/>
  </node>
  <node id="446532" label="zzzz165" cy:nodeId="960">
    <graphics x="93.81114407310054" y="-65.22295561431469" z="0.0"/>
  </node>
  <node id="446531" label="zzzz164" cy:nodeId="961">
    <graphics x="110.34789486655757" y="-56.58040228484691" z="0.0"/>
  </node>
  <node id="446530" label="zzzz163" cy:nodeId="962">
    <graphics x="111.98842449912593" y="-36.62169447539867" z="0.0"/>
  </node>
  <node id="446529" label="zzzz162" cy:nodeId="963">
    <graphics x="94.04662915000483" y="-2.879430681453357" z="0.0"/>
  </node>
  <node id="446528" label="zzzz161" cy:nodeId="964">
    <graphics x="118.3647481990771" y="-29.699735552058826" z="0.0"/>
  </node>
  <node id="446527" label="zzzz160" cy:nodeId="965">
    <graphics x="119.45969219932124" y="-79.32777205108226" z="0.0"/>
  </node>
  <node id="446526" label="zzzz159" cy:nodeId="966">
    <graphics x="112.07374020347163" y="-39.57028761504711" z="0.0"/>
  </node>
  <node id="446525" label="zzzz158" cy:nodeId="967">
    <graphics x="89.62873669395015" y="-6.066434770808826" z="0.0"/>
  </node>
  <node id="446524" label="zzzz157" cy:nodeId="968">
    <graphics x="110.28914852866694" y="-50.84461393951" z="0.0"/>
  </node>
  <node id="446523" label="zzzz156" cy:nodeId="969">
    <graphics x="95.4020788265185" y="-20.13955107329906" z="0.0"/>
  </node>
  <node id="446522" label="zzzz155" cy:nodeId="970">
    <graphics x="123.3363058162646" y="-12.823705583797107" z="0.0"/>
  </node>
  <node id="446521" label="zzzz154" cy:nodeId="971">
    <graphics x="108.63555737266108" y="-70.10783186553539" z="0.0"/>
  </node>
  <node id="446520" label="zzzz153" cy:nodeId="972">
    <graphics x="106.21001263389155" y="-92.62572661040844" z="0.0"/>
  </node>
  <node id="446519" label="zzzz152" cy:nodeId="973">
    <graphics x="101.89688702353999" y="-97.76866713164867" z="0.0"/>
  </node>
  <node id="446518" label="zzzz151" cy:nodeId="974">
    <graphics x="113.84133358726069" y="-12.50356474517406" z="0.0"/>
  </node>
  <node id="446517" label="zzzz150" cy:nodeId="975">
    <graphics x="95.53685780295893" y="-44.73002997039379" z="0.0"/>
  </node>
  <node id="446516" label="zzzz149" cy:nodeId="976">
    <graphics x="99.10371990928218" y="-80.7905253469807" z="0.0"/>
  </node>
  <node id="446515" label="zzzz148" cy:nodeId="977">
    <graphics x="108.49008770713374" y="-21.475992113338123" z="0.0"/>
  </node>
  <node id="446514" label="zzzz147" cy:nodeId="978">
    <graphics x="140.84982510337397" y="-12.64056196807445" z="0.0"/>
  </node>
  <node id="446513" label="zzzz146" cy:nodeId="979">
    <graphics x="49.65112705955073" y="40.299593061222424" z="0.0"/>
  </node>
  <node id="446512" label="zzzz145" cy:nodeId="980">
    <graphics x="-116.70843295326665" y="138.2385731637615" z="0.0"/>
  </node>
  <node id="446511" label="zzzz144" cy:nodeId="981">
    <graphics x="186.0409414363818" y="-30.02329245208324" z="0.0"/>
  </node>
  <node id="446510" label="zzzz143" cy:nodeId="982">
    <graphics x="148.81436367759272" y="10.092908948673596" z="0.0"/>
  </node>
  <node id="446509" label="zzzz142" cy:nodeId="983">
    <graphics x="92.4017355037646" y="-66.34848967193187" z="0.0"/>
  </node>
  <node id="446508" label="zzzz141" cy:nodeId="984">
    <graphics x="137.75028439292475" y="-16.93192854522289" z="0.0"/>
  </node>
  <node id="446507" label="zzzz140" cy:nodeId="985">
    <graphics x="147.34341641196772" y="-5.663705736384998" z="0.0"/>
  </node>
  <node id="446506" label="zzzz139" cy:nodeId="986">
    <graphics x="131.38642330894038" y="-54.846432596431384" z="0.0"/>
  </node>
  <node id="446505" label="zzzz138" cy:nodeId="987">
    <graphics x="148.77598782310054" y="-9.091592699275623" z="0.0"/>
  </node>
  <node id="446504" label="zzzz137" cy:nodeId="988">
    <graphics x="146.6778127742724" y="-83.24215498565258" z="0.0"/>
  </node>
  <node id="446503" label="zzzz136" cy:nodeId="989">
    <graphics x="154.06837673911616" y="-10.252015978084216" z="0.0"/>
  </node>
  <node id="446502" label="zzzz135" cy:nodeId="990">
    <graphics x="126.07895107993647" y="-95.83564558623851" z="0.0"/>
  </node>
  <node id="446501" label="zzzz134" cy:nodeId="991">
    <graphics x="144.29439755210444" y="-105.54784193633617" z="0.0"/>
  </node>
  <node id="446500" label="zzzz133" cy:nodeId="992">
    <graphics x="133.68023129233882" y="-73.76046934722484" z="0.0"/>
  </node>
  <node id="446499" label="zzzz132" cy:nodeId="993">
    <graphics x="99.45257015952632" y="-122.78631392119945" z="0.0"/>
  </node>
  <node id="446498" label="zzzz131" cy:nodeId="994">
    <graphics x="125.29548474082515" y="21.999193280948987" z="0.0"/>
  </node>
  <node id="446497" label="zzzz130" cy:nodeId="995">
    <graphics x="155.64959927329585" y="-44.183964639888416" z="0.0"/>
  </node>
  <node id="446496" label="zzzz129" cy:nodeId="996">
    <graphics x="158.40895291099116" y="-53.50395289062084" z="0.0"/>
  </node>
  <node id="446495" label="zzzz128" cy:nodeId="997">
    <graphics x="159.12045498618647" y="-20.530435472713123" z="0.0"/>
  </node>
  <node id="446494" label="zzzz127" cy:nodeId="998">
    <graphics x="95.64397259482905" y="-52.67862597106517" z="0.0"/>
  </node>
  <node id="446493" label="zzzz126" cy:nodeId="999">
    <graphics x="90.18721600303218" y="-66.35458555816234" z="0.0"/>
  </node>
  <node id="446492" label="zzzz125" cy:nodeId="1000">
    <graphics x="103.39690991172358" y="-22.522348314509998" z="0.0"/>
  </node>
  <node id="446491" label="zzzz124" cy:nodeId="1001">
    <graphics x="81.12569733390376" y="7.6357823312419555" z="0.0"/>
  </node>
  <node id="446490" label="zzzz123" cy:nodeId="1002">
    <graphics x="84.40913601645991" y="-66.32264891265453" z="0.0"/>
  </node>
  <node id="446489" label="zzzz122" cy:nodeId="1003">
    <graphics x="105.13365383872554" y="-74.25641432403148" z="0.0"/>
  </node>
  <node id="446488" label="zzzz121" cy:nodeId="1004">
    <graphics x="115.15539379844233" y="3.1544285714763305" z="0.0"/>
  </node>
  <node id="446487" label="zzzz120" cy:nodeId="1005">
    <graphics x="116.96018810996577" y="-68.04365721343578" z="0.0"/>
  </node>
  <node id="446486" label="zzzz119" cy:nodeId="1006">
    <graphics x="166.06094570884272" y="-96.00687590240062" z="0.0"/>
  </node>
  <node id="446485" label="zzzz118" cy:nodeId="1007">
    <graphics x="226.86390896567866" y="-122.67339125274242" z="0.0"/>
  </node>
  <node id="446484" label="zzzz117" cy:nodeId="1008">
    <graphics x="138.6327688289599" y="-24.143699556575427" z="0.0"/>
  </node>
  <node id="446483" label="zzzz116" cy:nodeId="1009">
    <graphics x="126.3333875728564" y="7.614778608097424" z="0.0"/>
  </node>
  <node id="446482" label="zzzz115" cy:nodeId="1010">
    <graphics x="68.26874562034175" y="-10.402269273982654" z="0.0"/>
  </node>
  <node id="446481" label="zzzz114" cy:nodeId="1011">
    <graphics x="72.72667999991938" y="47.019205182804455" z="0.0"/>
  </node>
  <node id="446480" label="zzzz113" cy:nodeId="1012">
    <graphics x="-62.331495087055714" y="11.530939191593518" z="0.0"/>
  </node>
  <node id="446479" label="zzzz112" cy:nodeId="1013">
    <graphics x="-3.150312225727589" y="-14.31462660430492" z="0.0"/>
  </node>
  <node id="446478" label="zzzz111" cy:nodeId="1014">
    <graphics x="53.31745930442378" y="-16.96747198699535" z="0.0"/>
  </node>
  <node id="446477" label="zzzz110" cy:nodeId="1015">
    <graphics x="26.470545013041942" y="-72.44586363433422" z="0.0"/>
  </node>
  <node id="446476" label="zzzz109" cy:nodeId="1016">
    <graphics x="-16.373021881489308" y="13.380327314152112" z="0.0"/>
  </node>
  <node id="446475" label="zzzz108" cy:nodeId="1017">
    <graphics x="11.159475524516552" y="-27.2279032766682" z="0.0"/>
  </node>
  <node id="446474" label="zzzz107" cy:nodeId="1018">
    <graphics x="-4.339338104633839" y="-83.6172961294514" z="0.0"/>
  </node>
  <node id="446473" label="zzzz106" cy:nodeId="1019">
    <graphics x="42.85611744651362" y="35.681978315128674" z="0.0"/>
  </node>
  <node id="446472" label="zzzz105" cy:nodeId="1020">
    <graphics x="-5.722387115864308" y="57.74571427704274" z="0.0"/>
  </node>
  <node id="446471" label="zzzz104" cy:nodeId="1021">
    <graphics x="51.780143935771434" y="32.34196671844899" z="0.0"/>
  </node>
  <node id="446470" label="zzzz103" cy:nodeId="1022">
    <graphics x="61.04006024131343" y="-94.59347334502758" z="0.0"/>
  </node>
  <node id="446469" label="zzzz102" cy:nodeId="1023">
    <graphics x="67.7007176471667" y="48.792757123722424" z="0.0"/>
  </node>
  <node id="446468" label="zzzz101" cy:nodeId="1024">
    <graphics x="83.64885540732905" y="4.555627912296643" z="0.0"/>
  </node>
  <node id="446467" label="zzzz100" cy:nodeId="1025">
    <graphics x="28.6885892940478" y="11.316488355411877" z="0.0"/>
  </node>
  <node id="446466" label="zzz1021" cy:nodeId="1026">
    <graphics x="-47.85967807045415" y="-34.49367895721019" z="0.0"/>
  </node>
  <node id="446465" label="zzz1020" cy:nodeId="1027">
    <graphics x="108.33125515708491" y="-41.10612478850902" z="0.0"/>
  </node>
  <node id="446464" label="zzz1019" cy:nodeId="1028">
    <graphics x="101.3424093318896" y="-22.74178496001781" z="0.0"/>
  </node>
  <node id="446463" label="zzz1017" cy:nodeId="1029">
    <graphics x="23.072714049907177" y="125.32237443329274" z="0.0"/>
  </node>
  <node id="446462" label="zzz1016" cy:nodeId="1030">
    <graphics x="-66.4431131290479" y="25.815965741886487" z="0.0"/>
  </node>
  <node id="446461" label="zzz1015" cy:nodeId="1031">
    <graphics x="-34.4514139102979" y="193.0303975045818" z="0.0"/>
  </node>
  <node id="446460" label="zzz1014" cy:nodeId="1032">
    <graphics x="62.12959213981196" y="-17.282222658382068" z="0.0"/>
  </node>
  <node id="446459" label="zzz1013" cy:nodeId="1033">
    <graphics x="-79.19889621010259" y="-55.44621267913402" z="0.0"/>
  </node>
  <node id="446458" label="zzz1012" cy:nodeId="1034">
    <graphics x="-217.04397372475103" y="130.9777851998943" z="0.0"/>
  </node>
  <node id="446457" label="zzz1011" cy:nodeId="1035">
    <graphics x="124.52404232749507" y="-199.4029978811604" z="0.0"/>
  </node>
  <node id="446456" label="zzz1010" cy:nodeId="1036">
    <graphics x="40.46044369468257" y="-59.63253203033031" z="0.0"/>
  </node>
  <node id="446455" label="zzz1009" cy:nodeId="1037">
    <graphics x="10.101141173930614" y="-21.560548692927966" z="0.0"/>
  </node>
  <node id="446454" label="zzz1008" cy:nodeId="1038">
    <graphics x="39.614114959331005" y="-86.19721022246898" z="0.0"/>
  </node>
  <node id="446453" label="zzz1007" cy:nodeId="1039">
    <graphics x="-6.625394623188527" y="9.353227704777112" z="0.0"/>
  </node>
  <node id="446452" label="zzz1006" cy:nodeId="1040">
    <graphics x="17.093797881694286" y="113.9235859811443" z="0.0"/>
  </node>
  <node id="446451" label="zzz1005" cy:nodeId="1041">
    <graphics x="46.16026135215327" y="-47.76143637298168" z="0.0"/>
  </node>
  <node id="446450" label="zzz1004" cy:nodeId="1042">
    <graphics x="-20.130254547504933" y="26.54426011444508" z="0.0"/>
  </node>
  <node id="446449" label="zzz1003" cy:nodeId="1043">
    <graphics x="-45.545240204243214" y="42.86495408417164" z="0.0"/>
  </node>
  <node id="446448" label="zzz1002" cy:nodeId="1044">
    <graphics x="76.61753483542964" y="-21.309238344417224" z="0.0"/>
  </node>
  <node id="446447" label="zzz1001" cy:nodeId="1045">
    <graphics x="-88.8818338321729" y="-18.780694872127185" z="0.0"/>
  </node>
  <node id="446446" label="zzz1000" cy:nodeId="1046">
    <graphics x="30.057096679301708" y="127.6644307077068" z="0.0"/>
  </node>
</graph>
