# Supplementary material for: Discovery of several thousand highly diverse circular DNA viruses
Source: eLife journal article supplement (doi:10.7554/elife.51971), 2020-02-03
Supplement: fig2-figsupp1-data4 [file elife-51971-fig2-figsupp1-data4-v1.cys]

Archive with 94 entries (94 files):
- CytoscapeSession-2019_08_05-17_02/3.0.0.version
- CytoscapeSession-2019_08_05-17_02/networks/36-all_my_seqs_genbank_ssDNA1_domains_micro_ino_rep_fasta+Full+Network.xgmml
- CytoscapeSession-2019_08_05-17_02/views/252247-481428-all_my_seqs_genbank_ssDNA1_domains_micro_ino_rep_fasta+Full+Network%283%29.xgmml
- CytoscapeSession-2019_08_05-17_02/views/249706-252296-all_my_seqs_genbank_ssDNA1_domains_micro_ino_rep_fasta+Full+Network%2D%2Dclustered.xgmml
- CytoscapeSession-2019_08_05-17_02/views/252227-481223-all_my_seqs_genbank_ssDNA1_domains_micro_ino_rep_fasta+Full+Network%281%29.xgmml
- CytoscapeSession-2019_08_05-17_02/views/52-481752-all_my_seqs_genbank_ssDNA1_domains_micro_ino_rep_fasta+Full+Network.xgmml
- CytoscapeSession-2019_08_05-17_02/views/252237-731398-all_my_seqs_genbank_ssDNA1_domains_micro_ino_rep_fasta+Full+Network%282%29.xgmml
- CytoscapeSession-2019_08_05-17_02/tables/36-all_my_seqs_genbank_ssDNA1_domains_micro_ino_rep_fasta+Full+Network/HIDDEN-org.cytoscape.model.CyNode-36+hidden+node.cytable
- CytoscapeSession-2019_08_05-17_02/tables/252237-all_my_seqs_genbank_ssDNA1_domains_micro_ino_rep_fasta+Full+Network%282%29/LOCAL_ATTRS-org.cytoscape.model.CyEdge-all_my_seqs_genbank_ssDNA1_domains_micro_ino_rep_fasta+Full+Network%282%29+default+edge.cytable
- CytoscapeSession-2019_08_05-17_02/tables/252247-all_my_seqs_genbank_ssDNA1_domains_micro_ino_rep_fasta+Full+Network%283%29/LOCAL_ATTRS-org.cytoscape.model.CyNode-all_my_seqs_genbank_ssDNA1_domains_micro_ino_rep_fasta+Full+Network%283%29+default+node.cytable
- CytoscapeSession-2019_08_05-17_02/tables/36-all_my_seqs_genbank_ssDNA1_domains_micro_ino_rep_fasta+Full+Network/SHARED_ATTRS-org.cytoscape.model.CyEdge-36+shared+edge.cytable
- CytoscapeSession-2019_08_05-17_02/tables/252227-all_my_seqs_genbank_ssDNA1_domains_micro_ino_rep_fasta+Full+Network%281%29/HIDDEN-org.cytoscape.model.CyNode-252227+hidden+node.cytable
- CytoscapeSession-2019_08_05-17_02/tables/52-all_my_seqs_genbank_ssDNA1_domains_micro_ino_rep_fasta+Full+Network/HIDDEN-org.cytoscape.model.CyEdge-52+hidden+edge.cytable
- CytoscapeSession-2019_08_05-17_02/tables/36-all_my_seqs_genbank_ssDNA1_domains_micro_ino_rep_fasta+Full+Network/HIDDEN-org.cytoscape.model.CyEdge-36+hidden+edge.cytable
- CytoscapeSession-2019_08_05-17_02/tables/252247-all_my_seqs_genbank_ssDNA1_domains_micro_ino_rep_fasta+Full+Network%283%29/HIDDEN-org.cytoscape.model.CyEdge-252247+hidden+edge.cytable
- CytoscapeSession-2019_08_05-17_02/tables/36-all_my_seqs_genbank_ssDNA1_domains_micro_ino_rep_fasta+Full+Network/LOCAL_ATTRS-org.cytoscape.model.CyNode-36+default+node.cytable
- CytoscapeSession-2019_08_05-17_02/tables/249706-all_my_seqs_genbank_ssDNA1_domains_micro_ino_rep_fasta+Full+Network%2D%2Dclustered/LOCAL_ATTRS-org.cytoscape.model.CyEdge-all_my_seqs_genbank_ssDNA1_domains_micro_ino_rep_fasta+Full+Network%2D%2Dclustered+default+edge.cytable
- CytoscapeSession-2019_08_05-17_02/tables/252247-all_my_seqs_genbank_ssDNA1_domains_micro_ino_rep_fasta+Full+Network%283%29/LOCAL_ATTRS-org.cytoscape.model.CyEdge-all_my_seqs_genbank_ssDNA1_domains_micro_ino_rep_fasta+Full+Network%283%29+default+edge.cytable
- CytoscapeSession-2019_08_05-17_02/tables/252237-all_my_seqs_genbank_ssDNA1_domains_micro_ino_rep_fasta+Full+Network%282%29/HIDDEN-org.cytoscape.model.CyEdge-252237+hidden+edge.cytable
- CytoscapeSession-2019_08_05-17_02/tables/52-all_my_seqs_genbank_ssDNA1_domains_micro_ino_rep_fasta+Full+Network/HIDDEN-org.cytoscape.model.CyNode-52+hidden+node.cytable
- CytoscapeSession-2019_08_05-17_02/tables/252247-all_my_seqs_genbank_ssDNA1_domains_micro_ino_rep_fasta+Full+Network%283%29/HIDDEN-org.cytoscape.model.CyNetwork-252247+hidden+network.cytable
- CytoscapeSession-2019_08_05-17_02/tables/36-all_my_seqs_genbank_ssDNA1_domains_micro_ino_rep_fasta+Full+Network/LOCAL_ATTRS-org.cytoscape.model.CyNetwork-36+default+network.cytable
- CytoscapeSession-2019_08_05-17_02/tables/249706-all_my_seqs_genbank_ssDNA1_domains_micro_ino_rep_fasta+Full+Network%2D%2Dclustered/LOCAL_ATTRS-org.cytoscape.model.CyNetwork-all_my_seqs_genbank_ssDNA1_domains_micro_ino_rep_fasta+Full+Network%2D%2Dclustered+default+network.cytable
- CytoscapeSession-2019_08_05-17_02/tables/252227-all_my_seqs_genbank_ssDNA1_domains_micro_ino_rep_fasta+Full+Network%281%29/LOCAL_ATTRS-org.cytoscape.model.CyNode-all_my_seqs_genbank_ssDNA1_domains_micro_ino_rep_fasta+Full+Network%281%29+default+node.cytable
- CytoscapeSession-2019_08_05-17_02/tables/249706-all_my_seqs_genbank_ssDNA1_domains_micro_ino_rep_fasta+Full+Network%2D%2Dclustered/HIDDEN-org.cytoscape.model.CyEdge-249706+hidden+edge.cytable
- CytoscapeSession-2019_08_05-17_02/tables/52-all_my_seqs_genbank_ssDNA1_domains_micro_ino_rep_fasta+Full+Network/LOCAL_ATTRS-org.cytoscape.model.CyNetwork-all_my_seqs_genbank_ssDNA1_domains_micro_ino_rep_fasta+Full+Network+default+network.cytable
- CytoscapeSession-2019_08_05-17_02/tables/252237-all_my_seqs_genbank_ssDNA1_domains_micro_ino_rep_fasta+Full+Network%282%29/LOCAL_ATTRS-org.cytoscape.model.CyNode-all_my_seqs_genbank_ssDNA1_domains_micro_ino_rep_fasta+Full+Network%282%29+default+node.cytable
- CytoscapeSession-2019_08_05-17_02/tables/36-all_my_seqs_genbank_ssDNA1_domains_micro_ino_rep_fasta+Full+Network/HIDDEN-org.cytoscape.model.CyNetwork-36+hidden+network.cytable
- CytoscapeSession-2019_08_05-17_02/tables/249706-all_my_seqs_genbank_ssDNA1_domains_micro_ino_rep_fasta+Full+Network%2D%2Dclustered/HIDDEN-org.cytoscape.model.CyNetwork-249706+hidden+network.cytable
- CytoscapeSession-2019_08_05-17_02/tables/52-all_my_seqs_genbank_ssDNA1_domains_micro_ino_rep_fasta+Full+Network/HIDDEN-org.cytoscape.model.CyNetwork-52+hidden+network.cytable
- CytoscapeSession-2019_08_05-17_02/tables/36-all_my_seqs_genbank_ssDNA1_domains_micro_ino_rep_fasta+Full+Network/SHARED_ATTRS-org.cytoscape.model.CyNetwork-36+shared+network.cytable
- CytoscapeSession-2019_08_05-17_02/tables/249706-all_my_seqs_genbank_ssDNA1_domains_micro_ino_rep_fasta+Full+Network%2D%2Dclustered/HIDDEN-org.cytoscape.model.CyNode-249706+hidden+node.cytable
- CytoscapeSession-2019_08_05-17_02/tables/252247-all_my_seqs_genbank_ssDNA1_domains_micro_ino_rep_fasta+Full+Network%283%29/LOCAL_ATTRS-org.cytoscape.model.CyNetwork-all_my_seqs_genbank_ssDNA1_domains_micro_ino_rep_fasta+Full+Network%283%29+default+network.cytable
- CytoscapeSession-2019_08_05-17_02/tables/252227-all_my_seqs_genbank_ssDNA1_domains_micro_ino_rep_fasta+Full+Network%281%29/LOCAL_ATTRS-org.cytoscape.model.CyEdge-all_my_seqs_genbank_ssDNA1_domains_micro_ino_rep_fasta+Full+Network%281%29+default+edge.cytable
- CytoscapeSession-2019_08_05-17_02/tables/252247-all_my_seqs_genbank_ssDNA1_domains_micro_ino_rep_fasta+Full+Network%283%29/HIDDEN-org.cytoscape.model.CyNode-252247+hidden+node.cytable
- CytoscapeSession-2019_08_05-17_02/tables/52-all_my_seqs_genbank_ssDNA1_domains_micro_ino_rep_fasta+Full+Network/LOCAL_ATTRS-org.cytoscape.model.CyNode-all_my_seqs_genbank_ssDNA1_domains_micro_ino_rep_fasta+Full+Network+default+node.cytable
- CytoscapeSession-2019_08_05-17_02/tables/36-all_my_seqs_genbank_ssDNA1_domains_micro_ino_rep_fasta+Full+Network/LOCAL_ATTRS-org.cytoscape.model.CyEdge-36+default+edge.cytable
- CytoscapeSession-2019_08_05-17_02/tables/252237-all_my_seqs_genbank_ssDNA1_domains_micro_ino_rep_fasta+Full+Network%282%29/HIDDEN-org.cytoscape.model.CyNode-252237+hidden+node.cytable
- CytoscapeSession-2019_08_05-17_02/tables/249706-all_my_seqs_genbank_ssDNA1_domains_micro_ino_rep_fasta+Full+Network%2D%2Dclustered/LOCAL_ATTRS-org.cytoscape.model.CyNode-all_my_seqs_genbank_ssDNA1_domains_micro_ino_rep_fasta+Full+Network%2D%2Dclustered+default+node.cytable
- CytoscapeSession-2019_08_05-17_02/tables/252237-all_my_seqs_genbank_ssDNA1_domains_micro_ino_rep_fasta+Full+Network%282%29/HIDDEN-org.cytoscape.model.CyNetwork-252237+hidden+network.cytable
- CytoscapeSession-2019_08_05-17_02/tables/252237-all_my_seqs_genbank_ssDNA1_domains_micro_ino_rep_fasta+Full+Network%282%29/LOCAL_ATTRS-org.cytoscape.model.CyNetwork-all_my_seqs_genbank_ssDNA1_domains_micro_ino_rep_fasta+Full+Network%282%29+default+network.cytable
- CytoscapeSession-2019_08_05-17_02/tables/252227-all_my_seqs_genbank_ssDNA1_domains_micro_ino_rep_fasta+Full+Network%281%29/HIDDEN-org.cytoscape.model.CyEdge-252227+hidden+edge.cytable
- CytoscapeSession-2019_08_05-17_02/tables/52-all_my_seqs_genbank_ssDNA1_domains_micro_ino_rep_fasta+Full+Network/LOCAL_ATTRS-org.cytoscape.model.CyEdge-all_my_seqs_genbank_ssDNA1_domains_micro_ino_rep_fasta+Full+Network+default+edge.cytable
- CytoscapeSession-2019_08_05-17_02/tables/252227-all_my_seqs_genbank_ssDNA1_domains_micro_ino_rep_fasta+Full+Network%281%29/LOCAL_ATTRS-org.cytoscape.model.CyNetwork-all_my_seqs_genbank_ssDNA1_domains_micro_ino_rep_fasta+Full+Network%281%29+default+network.cytable
- CytoscapeSession-2019_08_05-17_02/tables/252227-all_my_seqs_genbank_ssDNA1_domains_micro_ino_rep_fasta+Full+Network%281%29/HIDDEN-org.cytoscape.model.CyNetwork-252227+hidden+network.cytable
- CytoscapeSession-2019_08_05-17_02/tables/36-all_my_seqs_genbank_ssDNA1_domains_micro_ino_rep_fasta+Full+Network/SHARED_ATTRS-org.cytoscape.model.CyNode-36+shared+node.cytable
- CytoscapeSession-2019_08_05-17_02/tables/cytables.xml
- CytoscapeSession-2019_08_05-17_02/session_vizmap.xml
- CytoscapeSession-2019_08_05-17_02/properties/groupSettings.props
- CytoscapeSession-2019_08_05-17_02/properties/session_bookmarks.xml
- CytoscapeSession-2019_08_05-17_02/session_thumbnail.png
- CytoscapeSession-2019_08_05-17_02/apps/org.cytoscape.ding.customgraphicsmgr/image_metadata.props
- CytoscapeSession-2019_08_05-17_02/apps/org.cytoscape.ding.customgraphicsmgr/8.png
- CytoscapeSession-2019_08_05-17_02/apps/org.cytoscape.ding.customgraphicsmgr/9.png
- CytoscapeSession-2019_08_05-17_02/apps/org.cytoscape.ding.customgraphicsmgr/14.png
- CytoscapeSession-2019_08_05-17_02/apps/org.cytoscape.ding.customgraphicsmgr/28.png
- CytoscapeSession-2019_08_05-17_02/apps/org.cytoscape.ding.customgraphicsmgr/29.png
- CytoscapeSession-2019_08_05-17_02/apps/org.cytoscape.ding.customgraphicsmgr/15.png
- CytoscapeSession-2019_08_05-17_02/apps/org.cytoscape.ding.customgraphicsmgr/17.png
- CytoscapeSession-2019_08_05-17_02/apps/org.cytoscape.ding.customgraphicsmgr/16.png
- CytoscapeSession-2019_08_05-17_02/apps/org.cytoscape.ding.customgraphicsmgr/12.png
- CytoscapeSession-2019_08_05-17_02/apps/org.cytoscape.ding.customgraphicsmgr/13.png
- CytoscapeSession-2019_08_05-17_02/apps/org.cytoscape.ding.customgraphicsmgr/11.png
- CytoscapeSession-2019_08_05-17_02/apps/org.cytoscape.ding.customgraphicsmgr/10.png
- CytoscapeSession-2019_08_05-17_02/apps/org.cytoscape.ding.customgraphicsmgr/21.png
- CytoscapeSession-2019_08_05-17_02/apps/org.cytoscape.ding.customgraphicsmgr/20.png
- CytoscapeSession-2019_08_05-17_02/apps/org.cytoscape.ding.customgraphicsmgr/22.png
- CytoscapeSession-2019_08_05-17_02/apps/org.cytoscape.ding.customgraphicsmgr/23.png
- CytoscapeSession-2019_08_05-17_02/apps/org.cytoscape.ding.customgraphicsmgr/27.png
- CytoscapeSession-2019_08_05-17_02/apps/org.cytoscape.ding.customgraphicsmgr/32.png
- CytoscapeSession-2019_08_05-17_02/apps/org.cytoscape.ding.customgraphicsmgr/26.png
- CytoscapeSession-2019_08_05-17_02/apps/org.cytoscape.ding.customgraphicsmgr/18.png
- CytoscapeSession-2019_08_05-17_02/apps/org.cytoscape.ding.customgraphicsmgr/30.png
- CytoscapeSession-2019_08_05-17_02/apps/org.cytoscape.ding.customgraphicsmgr/24.png
- CytoscapeSession-2019_08_05-17_02/apps/org.cytoscape.ding.customgraphicsmgr/25.png
- CytoscapeSession-2019_08_05-17_02/apps/org.cytoscape.ding.customgraphicsmgr/31.png
- CytoscapeSession-2019_08_05-17_02/apps/org.cytoscape.ding.customgraphicsmgr/19.png
- CytoscapeSession-2019_08_05-17_02/apps/org.cytoscape.ding.customgraphicsmgr/4.png
- CytoscapeSession-2019_08_05-17_02/apps/org.cytoscape.ding.customgraphicsmgr/42.png
- CytoscapeSession-2019_08_05-17_02/apps/org.cytoscape.ding.customgraphicsmgr/43.png
- CytoscapeSession-2019_08_05-17_02/apps/org.cytoscape.ding.customgraphicsmgr/5.png
- CytoscapeSession-2019_08_05-17_02/apps/org.cytoscape.ding.customgraphicsmgr/7.png
- CytoscapeSession-2019_08_05-17_02/apps/org.cytoscape.ding.customgraphicsmgr/6.png
- CytoscapeSession-2019_08_05-17_02/apps/org.cytoscape.ding.customgraphicsmgr/2.png
- CytoscapeSession-2019_08_05-17_02/apps/org.cytoscape.ding.customgraphicsmgr/3.png
- CytoscapeSession-2019_08_05-17_02/apps/org.cytoscape.ding.customgraphicsmgr/1.png
- CytoscapeSession-2019_08_05-17_02/apps/org.cytoscape.swing-application/session_state.xml
- CytoscapeSession-2019_08_05-17_02/apps/org.cytoscape.swing-application/network_list.xml
- CytoscapeSession-2019_08_05-17_02/apps/org.cytoscape.filter/filters.json
- CytoscapeSession-2019_08_05-17_02/apps/org.cytoscape.filter/filterChains.json
- CytoscapeSession-2019_08_05-17_02/apps/org.cytoscape.browser/UnassignedTables.props
- CytoscapeSession-2019_08_05-17_02/apps/org.cytoscape.browser/EdgeTable.props
- CytoscapeSession-2019_08_05-17_02/apps/org.cytoscape.browser/NodeTable.props
- CytoscapeSession-2019_08_05-17_02/apps/org.cytoscape.browser/NetworkTable.props
