# Supplementary material for: Discovery of several thousand highly diverse circular DNA viruses
Source: eLife journal article supplement (doi:10.7554/elife.51971), 2020-02-03
Supplement: fig2-figsupp1-data4 [file elife-51971-fig2-figsupp1-data4-v1.cys › CytoscapeSession-2019_08_05-17_02/apps/org.cytoscape.browser/EdgeTable.props]

all_my_seqs_genbank_ssDNA1_domains_micro_ino_rep_fasta Full Network(1) default edge	0	SUID	false
all_my_seqs_genbank_ssDNA1_domains_micro_ino_rep_fasta Full Network(1) default edge	1	selected	false
all_my_seqs_genbank_ssDNA1_domains_micro_ino_rep_fasta Full Network(1) default edge	2	shared name	true
all_my_seqs_genbank_ssDNA1_domains_micro_ino_rep_fasta Full Network(1) default edge	3	shared interaction	true
all_my_seqs_genbank_ssDNA1_domains_micro_ino_rep_fasta Full Network(1) default edge	4	name	true
all_my_seqs_genbank_ssDNA1_domains_micro_ino_rep_fasta Full Network(1) default edge	5	interaction	true
all_my_seqs_genbank_ssDNA1_domains_micro_ino_rep_fasta Full Network(1) default edge	6	__mclCluster	true
all_my_seqs_genbank_ssDNA1_domains_micro_ino_rep_fasta Full Network(1) default edge	7	%id	true
all_my_seqs_genbank_ssDNA1_domains_micro_ino_rep_fasta Full Network(1) default edge	8	alignment_len	true
all_my_seqs_genbank_ssDNA1_domains_micro_ino_rep_fasta Full Network(1) default edge	9	alignment_score	true
all_my_seqs_genbank_ssDNA1_domains_micro_ino_rep_fasta Full Network(2) default edge	0	SUID	false
all_my_seqs_genbank_ssDNA1_domains_micro_ino_rep_fasta Full Network(2) default edge	1	selected	false
all_my_seqs_genbank_ssDNA1_domains_micro_ino_rep_fasta Full Network(2) default edge	2	shared name	true
all_my_seqs_genbank_ssDNA1_domains_micro_ino_rep_fasta Full Network(2) default edge	3	shared interaction	true
all_my_seqs_genbank_ssDNA1_domains_micro_ino_rep_fasta Full Network(2) default edge	4	name	true
all_my_seqs_genbank_ssDNA1_domains_micro_ino_rep_fasta Full Network(2) default edge	5	interaction	true
all_my_seqs_genbank_ssDNA1_domains_micro_ino_rep_fasta Full Network(2) default edge	6	__mclCluster	true
all_my_seqs_genbank_ssDNA1_domains_micro_ino_rep_fasta Full Network(2) default edge	7	%id	true
all_my_seqs_genbank_ssDNA1_domains_micro_ino_rep_fasta Full Network(2) default edge	8	alignment_len	true
all_my_seqs_genbank_ssDNA1_domains_micro_ino_rep_fasta Full Network(2) default edge	9	alignment_score	true
all_my_seqs_genbank_ssDNA1_domains_micro_ino_rep_fasta Full Network(3) default edge	0	SUID	false
all_my_seqs_genbank_ssDNA1_domains_micro_ino_rep_fasta Full Network(3) default edge	1	selected	false
all_my_seqs_genbank_ssDNA1_domains_micro_ino_rep_fasta Full Network(3) default edge	2	shared name	true
all_my_seqs_genbank_ssDNA1_domains_micro_ino_rep_fasta Full Network(3) default edge	3	shared interaction	true
all_my_seqs_genbank_ssDNA1_domains_micro_ino_rep_fasta Full Network(3) default edge	4	%id	true
all_my_seqs_genbank_ssDNA1_domains_micro_ino_rep_fasta Full Network(3) default edge	5	alignment_len	true
all_my_seqs_genbank_ssDNA1_domains_micro_ino_rep_fasta Full Network(3) default edge	6	alignment_score	true
all_my_seqs_genbank_ssDNA1_domains_micro_ino_rep_fasta Full Network(3) default edge	7	name	true
all_my_seqs_genbank_ssDNA1_domains_micro_ino_rep_fasta Full Network(3) default edge	8	interaction	true
all_my_seqs_genbank_ssDNA1_domains_micro_ino_rep_fasta Full Network(3) default edge	9	__mclCluster	true
all_my_seqs_genbank_ssDNA1_domains_micro_ino_rep_fasta Full Network default edge	0	SUID	false
all_my_seqs_genbank_ssDNA1_domains_micro_ino_rep_fasta Full Network default edge	1	selected	false
all_my_seqs_genbank_ssDNA1_domains_micro_ino_rep_fasta Full Network default edge	2	shared name	true
all_my_seqs_genbank_ssDNA1_domains_micro_ino_rep_fasta Full Network default edge	3	shared interaction	true
all_my_seqs_genbank_ssDNA1_domains_micro_ino_rep_fasta Full Network default edge	4	name	true
all_my_seqs_genbank_ssDNA1_domains_micro_ino_rep_fasta Full Network default edge	5	interaction	true
all_my_seqs_genbank_ssDNA1_domains_micro_ino_rep_fasta Full Network default edge	6	__mclCluster	true
all_my_seqs_genbank_ssDNA1_domains_micro_ino_rep_fasta Full Network default edge	7	%id	true
all_my_seqs_genbank_ssDNA1_domains_micro_ino_rep_fasta Full Network default edge	8	alignment_score	true
all_my_seqs_genbank_ssDNA1_domains_micro_ino_rep_fasta Full Network default edge	9	alignment_len	true
