# Supplementary material for: Discovery of several thousand highly diverse circular DNA viruses
Source: eLife journal article supplement (doi:10.7554/elife.51971), 2020-02-03
Supplement: fig2-figsupp1-data4 [file elife-51971-fig2-figsupp1-data4-v1.cys › CytoscapeSession-2019_08_05-17_02/apps/org.cytoscape.swing-application/network_list.xml]

<?xml version="1.0" encoding="UTF-8" standalone="yes"?>
<networkList>
    <network id="252227" order="1"/>
    <network id="52" order="0"/>
    <network id="252247" order="3"/>
    <network id="249706" order="4"/>
    <network id="252237" order="2"/>
</networkList>
