# Supplementary material for: Discovery of several thousand highly diverse circular DNA viruses
Source: eLife journal article supplement (doi:10.7554/elife.51971), 2020-02-03
Supplement: fig2-figsupp1-data4 [file elife-51971-fig2-figsupp1-data4-v1.cys › CytoscapeSession-2019_08_05-17_02/networks/36-all_my_seqs_genbank_ssDNA1_domains_micro_ino_rep_fasta+Full+Network.xgmml]

<?xml version="1.0" encoding="UTF-8" standalone="yes"?>
<graph id="36" label="all_my_seqs_genbank_ssDNA1_domains_micro_ino_rep_fasta Full Network" cy:view="0" cy:registered="0" cy:documentVersion="3.0" xmlns:dc="http://purl.org/dc/elements/1.1/" xmlns:xlink="http://www.w3.org/1999/xlink" xmlns:rdf="http://www.w3.org/1999/02/22-rdf-syntax-ns#" xmlns:cy="http://www.cytoscape.org" xmlns="http://www.cs.rpi.edu/XGMML">
  <att>
    <graph id="52" label="all_my_seqs_genbank_ssDNA1_domains_micro_ino_rep_fasta Full Network" cy:registered="1">
      <node id="943" label="zzzz100"/>
      <node id="942" label="zzzz101"/>
      <node id="941" label="zzzz102"/>
      <node id="940" label="zzzz103"/>
      <node id="939" label="zzzz104"/>
      <node id="938" label="zzzz105"/>
      <node id="937" label="zzzz106"/>
      <node id="936" label="zzzz107"/>
      <node id="935" label="zzzz108"/>
      <node id="934" label="zzzz109"/>
      <node id="933" label="zzzz110"/>
      <node id="932" label="zzzz111"/>
      <node id="931" label="zzzz112"/>
      <node id="930" label="zzzz113"/>
      <node id="929" label="zzzz114"/>
      <node id="928" label="zzzz115"/>
      <node id="927" label="zzzz116"/>
      <node id="926" label="zzzz117"/>
      <node id="925" label="zzzz118"/>
      <node id="924" label="zzzz119"/>
      <node id="923" label="zzzz120"/>
      <node id="922" label="zzzz121"/>
      <node id="921" label="zzzz122"/>
      <node id="920" label="zzzz123"/>
      <node id="919" label="zzzz124"/>
      <node id="918" label="zzzz125"/>
      <node id="917" label="zzzz126"/>
      <node id="916" label="zzzz127"/>
      <node id="915" label="zzzz128"/>
      <node id="914" label="zzzz129"/>
      <node id="913" label="zzzz130"/>
      <node id="912" label="zzzz131"/>
      <node id="911" label="zzzz132"/>
      <node id="910" label="zzzz133"/>
      <node id="909" label="zzzz134"/>
      <node id="908" label="zzzz135"/>
      <node id="907" label="zzzz136"/>
      <node id="906" label="zzzz137"/>
      <node id="905" label="zzzz138"/>
      <node id="904" label="zzzz139"/>
      <node id="903" label="zzzz140"/>
      <node id="902" label="zzzz141"/>
      <node id="901" label="zzzz142"/>
      <node id="900" label="zzzz143"/>
      <node id="899" label="zzzz144"/>
      <node id="898" label="zzzz145"/>
      <node id="897" label="zzzz146"/>
      <node id="896" label="zzzz147"/>
      <node id="895" label="zzzz148"/>
      <node id="894" label="zzzz149"/>
      <node id="893" label="zzzz150"/>
      <node id="892" label="zzzz151"/>
      <node id="891" label="zzzz152"/>
      <node id="890" label="zzzz153"/>
      <node id="889" label="zzzz154"/>
      <node id="888" label="zzzz155"/>
      <node id="887" label="zzzz156"/>
      <node id="886" label="zzzz157"/>
      <node id="885" label="zzzz158"/>
      <node id="884" label="zzzz159"/>
      <node id="883" label="zzzz160"/>
      <node id="882" label="zzzz161"/>
      <node id="881" label="zzzz162"/>
      <node id="880" label="zzzz163"/>
      <node id="879" label="zzzz164"/>
      <node id="878" label="zzzz165"/>
      <node id="877" label="zzzz166"/>
      <node id="876" label="zzzz167"/>
      <node id="875" label="zzzz168"/>
      <node id="874" label="zzzz169"/>
      <node id="873" label="zzzz170"/>
      <node id="872" label="zzzz171"/>
      <node id="871" label="zzzz172"/>
      <node id="870" label="zzzz173"/>
      <node id="869" label="zzzz174"/>
      <node id="868" label="zzzz175"/>
      <node id="867" label="zzzz176"/>
      <node id="866" label="zzzz177"/>
      <node id="865" label="zzzz178"/>
      <node id="864" label="zzzz179"/>
      <node id="863" label="zzzz180"/>
      <node id="862" label="zzzz181"/>
      <node id="861" label="zzzz182"/>
      <node id="860" label="zzzz183"/>
      <node id="859" label="zzzz184"/>
      <node id="858" label="zzzz185"/>
      <node id="857" label="zzzz186"/>
      <node id="856" label="zzzz187"/>
      <node id="855" label="zzzz188"/>
      <node id="854" label="zzzz189"/>
      <node id="853" label="zzzz190"/>
      <node id="852" label="zzzz191"/>
      <node id="851" label="zzzz192"/>
      <node id="850" label="zzzz193"/>
      <node id="849" label="zzzz194"/>
      <node id="848" label="zzzz195"/>
      <node id="847" label="zzzz196"/>
      <node id="846" label="zzzz197"/>
      <node id="845" label="zzzz198"/>
      <node id="844" label="zzzz199"/>
      <node id="843" label="zzzz200"/>
      <node id="842" label="zzzz201"/>
      <node id="841" label="zzzz202"/>
      <node id="840" label="zzzz203"/>
      <node id="839" label="zzzz204"/>
      <node id="838" label="zzzz205"/>
      <node id="837" label="zzzz206"/>
      <node id="836" label="zzzz207"/>
      <node id="835" label="zzzz208"/>
      <node id="834" label="zzzz209"/>
      <node id="833" label="zzzz210"/>
      <node id="832" label="zzzz211"/>
      <node id="831" label="zzzz212"/>
      <node id="830" label="zzzz213"/>
      <node id="829" label="zzzz214"/>
      <node id="828" label="zzzz215"/>
      <node id="827" label="zzzz216"/>
      <node id="826" label="zzzz217"/>
      <node id="825" label="zzzz218"/>
      <node id="824" label="zzzz219"/>
      <node id="823" label="zzzz220"/>
      <node id="822" label="zzzz221"/>
      <node id="821" label="zzzz222"/>
      <node id="820" label="zzzz223"/>
      <node id="819" label="zzzz224"/>
      <node id="818" label="zzzz225"/>
      <node id="817" label="zzzz226"/>
      <node id="816" label="zzzz227"/>
      <node id="815" label="zzzz228"/>
      <node id="814" label="zzzz229"/>
      <node id="813" label="zzzz230"/>
      <node id="812" label="zzzz231"/>
      <node id="811" label="zzzz232"/>
      <node id="810" label="zzzz233"/>
      <node id="809" label="zzzz234"/>
      <node id="808" label="zzzz235"/>
      <node id="807" label="zzzz236"/>
      <node id="806" label="zzzz237"/>
      <node id="805" label="zzzz238"/>
      <node id="804" label="zzzz239"/>
      <node id="803" label="zzzz240"/>
      <node id="802" label="zzzz241"/>
      <node id="801" label="zzzz242"/>
      <node id="800" label="zzzz243"/>
      <node id="799" label="zzzz244"/>
      <node id="798" label="zzzz245"/>
      <node id="797" label="zzzz246"/>
      <node id="796" label="zzzz247"/>
      <node id="795" label="zzzz248"/>
      <node id="794" label="zzzz249"/>
      <node id="793" label="zzzz250"/>
      <node id="792" label="zzzz251"/>
      <node id="791" label="zzzz252"/>
      <node id="790" label="zzzz253"/>
      <node id="789" label="zzzz254"/>
      <node id="788" label="zzzz255"/>
      <node id="787" label="zzzz256"/>
      <node id="786" label="zzzz257"/>
      <node id="785" label="zzzz258"/>
      <node id="784" label="zzzz259"/>
      <node id="783" label="zzzz260"/>
      <node id="782" label="zzzz261"/>
      <node id="781" label="zzzz262"/>
      <node id="780" label="zzzz263"/>
      <node id="779" label="zzzz264"/>
      <node id="778" label="zzzz273"/>
      <node id="777" label="zzzz274"/>
      <node id="776" label="zzzz275"/>
      <node id="775" label="zzzz277"/>
      <node id="774" label="zzzz278"/>
      <node id="773" label="zzzz279"/>
      <node id="772" label="zzzz280"/>
      <node id="771" label="zzzz281"/>
      <node id="770" label="zzzz282"/>
      <node id="769" label="zzzz283"/>
      <node id="768" label="zzzz284"/>
      <node id="767" label="zzzz285"/>
      <node id="766" label="zzzz286"/>
      <node id="765" label="zzzz287"/>
      <node id="764" label="zzzz288"/>
      <node id="763" label="zzzz290"/>
      <node id="762" label="zzzz291"/>
      <node id="761" label="zzzz292"/>
      <node id="760" label="zzzz296"/>
      <node id="759" label="zzzz297"/>
      <node id="758" label="zzzz298"/>
      <node id="757" label="zzzz299"/>
      <node id="756" label="zzzz300"/>
      <node id="755" label="zzzz301"/>
      <node id="754" label="zzzz302"/>
      <node id="753" label="zzzz303"/>
      <node id="752" label="zzzz304"/>
      <node id="751" label="zzzz305"/>
      <node id="750" label="zzzz306"/>
      <node id="749" label="zzzz307"/>
      <node id="748" label="zzzz308"/>
      <node id="747" label="zzzz309"/>
      <node id="746" label="zzzz310"/>
      <node id="745" label="zzzz311"/>
      <node id="744" label="zzzz312"/>
      <node id="743" label="zzzz313"/>
      <node id="742" label="zzzz314"/>
      <node id="741" label="zzzz315"/>
      <node id="740" label="zzzz316"/>
      <node id="739" label="zzzz317"/>
      <node id="738" label="zzzz318"/>
      <node id="737" label="zzzz319"/>
      <node id="736" label="zzzz320"/>
      <node id="735" label="zzzz321"/>
      <node id="734" label="zzzz322"/>
      <node id="733" label="zzzz323"/>
      <node id="732" label="zzzz324"/>
      <node id="731" label="zzzz325"/>
      <node id="730" label="zzzz326"/>
      <node id="729" label="zzzz327"/>
      <node id="728" label="zzzz328"/>
      <node id="727" label="zzzz329"/>
      <node id="726" label="zzzz330"/>
      <node id="725" label="zzzz331"/>
      <node id="724" label="zzzz332"/>
      <node id="723" label="zzzz333"/>
      <node id="722" label="zzzz334"/>
      <node id="721" label="zzzz335"/>
      <node id="720" label="zzzz336"/>
      <node id="719" label="zzzz337"/>
      <node id="718" label="zzzz338"/>
      <node id="717" label="zzzz339"/>
      <node id="716" label="zzzz340"/>
      <node id="715" label="zzzz341"/>
      <node id="714" label="zzzz342"/>
      <node id="713" label="zzzz343"/>
      <node id="712" label="zzzz344"/>
      <node id="711" label="zzzz345"/>
      <node id="710" label="zzzz346"/>
      <node id="709" label="zzzz347"/>
      <node id="708" label="zzzz348"/>
      <node id="707" label="zzzz349"/>
      <node id="706" label="zzzz350"/>
      <node id="705" label="zzzz351"/>
      <node id="704" label="zzzz352"/>
      <node id="703" label="zzzz353"/>
      <node id="702" label="zzzz354"/>
      <node id="701" label="zzzz355"/>
      <node id="700" label="zzzz356"/>
      <node id="699" label="zzzz357"/>
      <node id="698" label="zzzz358"/>
      <node id="697" label="zzzz359"/>
      <node id="696" label="zzzz360"/>
      <node id="695" label="zzzz361"/>
      <node id="694" label="zzzz362"/>
      <node id="693" label="zzzz363"/>
      <node id="692" label="zzzz364"/>
      <node id="691" label="zzzz365"/>
      <node id="690" label="zzzz366"/>
      <node id="689" label="zzzz367"/>
      <node id="688" label="zzzz368"/>
      <node id="687" label="zzzz369"/>
      <node id="686" label="zzzz370"/>
      <node id="685" label="zzzz371"/>
      <node id="684" label="zzzz372"/>
      <node id="683" label="zzzz373"/>
      <node id="682" label="zzzz374"/>
      <node id="681" label="zzzz375"/>
      <node id="680" label="zzzz376"/>
      <node id="679" label="zzzz377"/>
      <node id="678" label="zzzz378"/>
      <node id="677" label="zzzz379"/>
      <node id="676" label="zzzz380"/>
      <node id="675" label="zzzz381"/>
      <node id="674" label="zzzz382"/>
      <node id="673" label="zzzz383"/>
      <node id="672" label="zzzz384"/>
      <node id="671" label="zzzz385"/>
      <node id="670" label="zzzz386"/>
      <node id="669" label="zzzz387"/>
      <node id="668" label="zzzz388"/>
      <node id="667" label="zzzz389"/>
      <node id="666" label="zzzz390"/>
      <node id="665" label="zzzz391"/>
      <node id="664" label="zzzz392"/>
      <node id="663" label="zzzz393"/>
      <node id="662" label="zzzz394"/>
      <node id="661" label="zzzz395"/>
      <node id="660" label="zzzz396"/>
      <node id="659" label="zzzz397"/>
      <node id="658" label="zzzz398"/>
      <node id="657" label="zzzz399"/>
      <node id="656" label="zzzz400"/>
      <node id="655" label="zzzz401"/>
      <node id="654" label="zzzz402"/>
      <node id="653" label="zzzz403"/>
      <node id="652" label="zzzz404"/>
      <node id="651" label="zzzz405"/>
      <node id="650" label="zzzz406"/>
      <node id="649" label="zzzz407"/>
      <node id="648" label="zzzz408"/>
      <node id="647" label="zzzz409"/>
      <node id="646" label="zzzz410"/>
      <node id="645" label="zzzz411"/>
      <node id="644" label="zzzz412"/>
      <node id="643" label="zzzz413"/>
      <node id="642" label="zzzz414"/>
      <node id="641" label="zzzz415"/>
      <node id="640" label="zzzz416"/>
      <node id="639" label="zzzz417"/>
      <node id="638" label="zzzz418"/>
      <node id="637" label="zzzz419"/>
      <node id="636" label="zzzz420"/>
      <node id="635" label="zzzz421"/>
      <node id="634" label="zzzz422"/>
      <node id="633" label="zzzz423"/>
      <node id="632" label="zzzz424"/>
      <node id="631" label="zzzz425"/>
      <node id="630" label="zzzz426"/>
      <node id="629" label="zzzz427"/>
      <node id="628" label="zzzz428"/>
      <node id="627" label="zzzz429"/>
      <node id="626" label="zzzz430"/>
      <node id="625" label="zzzz431"/>
      <node id="624" label="zzzz432"/>
      <node id="623" label="zzzz433"/>
      <node id="622" label="zzzz434"/>
      <node id="621" label="zzzz435"/>
      <node id="620" label="zzzz436"/>
      <node id="619" label="zzzz437"/>
      <node id="618" label="zzzz438"/>
      <node id="617" label="zzzz439"/>
      <node id="616" label="zzzz440"/>
      <node id="615" label="zzzz441"/>
      <node id="614" label="zzzz442"/>
      <node id="613" label="zzzz443"/>
      <node id="612" label="zzzz444"/>
      <node id="611" label="zzzz445"/>
      <node id="610" label="zzzz446"/>
      <node id="609" label="zzzz447"/>
      <node id="608" label="zzzz448"/>
      <node id="607" label="zzzz449"/>
      <node id="606" label="zzzz450"/>
      <node id="605" label="zzzz451"/>
      <node id="604" label="zzzz452"/>
      <node id="603" label="zzzz453"/>
      <node id="602" label="zzzz454"/>
      <node id="601" label="zzzz455"/>
      <node id="600" label="zzzz456"/>
      <node id="599" label="zzzz457"/>
      <node id="598" label="zzzz458"/>
      <node id="597" label="zzzz459"/>
      <node id="596" label="zzzz460"/>
      <node id="595" label="zzzz461"/>
      <node id="594" label="zzzz462"/>
      <node id="593" label="zzzz463"/>
      <node id="592" label="zzzz464"/>
      <node id="591" label="zzzz465"/>
      <node id="590" label="zzzz466"/>
      <node id="589" label="zzzz467"/>
      <node id="588" label="zzzz468"/>
      <node id="587" label="zzzz469"/>
      <node id="586" label="zzzz470"/>
      <node id="585" label="zzzz471"/>
      <node id="584" label="zzzz472"/>
      <node id="583" label="zzzz473"/>
      <node id="582" label="zzzz474"/>
      <node id="581" label="zzzz475"/>
      <node id="580" label="zzzz476"/>
      <node id="579" label="zzzz477"/>
      <node id="578" label="zzzz478"/>
      <node id="577" label="zzzz479"/>
      <node id="576" label="zzzz480"/>
      <node id="575" label="zzzz481"/>
      <node id="574" label="zzzz482"/>
      <node id="573" label="zzzz483"/>
      <node id="572" label="zzzz484"/>
      <node id="571" label="zzzz485"/>
      <node id="570" label="zzzz486"/>
      <node id="569" label="zzzz487"/>
      <node id="568" label="zzzz488"/>
      <node id="567" label="zzzz489"/>
      <node id="566" label="zzzz490"/>
      <node id="565" label="zzzz491"/>
      <node id="564" label="zzzz492"/>
      <node id="563" label="zzzz493"/>
      <node id="562" label="zzzz494"/>
      <node id="561" label="zzzz495"/>
      <node id="560" label="zzzz496"/>
      <node id="559" label="zzzz497"/>
      <node id="558" label="zzzz498"/>
      <node id="557" label="zzzz499"/>
      <node id="556" label="zzzz500"/>
      <node id="555" label="zzzz501"/>
      <node id="554" label="zzzz502"/>
      <node id="553" label="zzzz503"/>
      <node id="552" label="zzzz504"/>
      <node id="551" label="zzzz505"/>
      <node id="550" label="zzzz506"/>
      <node id="549" label="zzzz507"/>
      <node id="548" label="zzzz508"/>
      <node id="547" label="zzzz509"/>
      <node id="546" label="zzzz510"/>
      <node id="545" label="zzzz511"/>
      <node id="544" label="zzzz512"/>
      <node id="543" label="zzzz513"/>
      <node id="542" label="zzzz514"/>
      <node id="541" label="zzzz515"/>
      <node id="540" label="zzzz516"/>
      <node id="539" label="zzzz517"/>
      <node id="538" label="zzzz518"/>
      <node id="537" label="zzzz519"/>
      <node id="536" label="zzzz520"/>
      <node id="535" label="zzzz521"/>
      <node id="534" label="zzzz522"/>
      <node id="533" label="zzzz523"/>
      <node id="532" label="zzzz524"/>
      <node id="531" label="zzzz525"/>
      <node id="530" label="zzzz526"/>
      <node id="529" label="zzzz527"/>
      <node id="528" label="zzzz528"/>
      <node id="527" label="zzzz529"/>
      <node id="526" label="zzzz530"/>
      <node id="525" label="zzzz531"/>
      <node id="524" label="zzzz532"/>
      <node id="523" label="zzzz533"/>
      <node id="522" label="zzzz534"/>
      <node id="521" label="zzzz535"/>
      <node id="520" label="zzzz536"/>
      <node id="519" label="zzzz537"/>
      <node id="518" label="zzzz538"/>
      <node id="517" label="zzzz539"/>
      <node id="516" label="zzzz540"/>
      <node id="515" label="zzzz541"/>
      <node id="514" label="zzzz542"/>
      <node id="513" label="zzzz543"/>
      <node id="512" label="zzzz544"/>
      <node id="511" label="zzzz545"/>
      <node id="510" label="zzzz546"/>
      <node id="509" label="zzzz547"/>
      <node id="508" label="zzzz548"/>
      <node id="507" label="zzzz549"/>
      <node id="506" label="zzzz550"/>
      <node id="505" label="zzzz551"/>
      <node id="504" label="zzzz552"/>
      <node id="503" label="zzzz553"/>
      <node id="502" label="zzzz554"/>
      <node id="501" label="zzzz555"/>
      <node id="500" label="zzzz556"/>
      <node id="499" label="zzzz557"/>
      <node id="498" label="zzzz558"/>
      <node id="497" label="zzzz559"/>
      <node id="496" label="zzzz560"/>
      <node id="495" label="zzzz561"/>
      <node id="494" label="zzzz562"/>
      <node id="493" label="zzzz563"/>
      <node id="492" label="zzzz564"/>
      <node id="491" label="zzzz565"/>
      <node id="490" label="zzzz566"/>
      <node id="489" label="zzzz567"/>
      <node id="488" label="zzzz568"/>
      <node id="487" label="zzzz569"/>
      <node id="486" label="zzzz570"/>
      <node id="485" label="zzzz571"/>
      <node id="484" label="zzzz572"/>
      <node id="483" label="zzzz573"/>
      <node id="482" label="zzzz574"/>
      <node id="481" label="zzzz575"/>
      <node id="480" label="zzzz576"/>
      <node id="479" label="zzzz577"/>
      <node id="478" label="zzzz578"/>
      <node id="477" label="zzzz579"/>
      <node id="476" label="zzzz580"/>
      <node id="475" label="zzzz581"/>
      <node id="474" label="zzzz582"/>
      <node id="473" label="zzzz583"/>
      <node id="472" label="zzzz584"/>
      <node id="471" label="zzzz585"/>
      <node id="470" label="zzzz586"/>
      <node id="469" label="zzzz587"/>
      <node id="468" label="zzzz588"/>
      <node id="467" label="zzzz589"/>
      <node id="466" label="zzzz590"/>
      <node id="465" label="zzzz591"/>
      <node id="464" label="zzzz592"/>
      <node id="463" label="zzzz593"/>
      <node id="462" label="zzzz594"/>
      <node id="461" label="zzzz595"/>
      <node id="460" label="zzzz596"/>
      <node id="459" label="zzzz597"/>
      <node id="458" label="zzzz598"/>
      <node id="457" label="zzzz599"/>
      <node id="456" label="zzzz600"/>
      <node id="455" label="zzzz601"/>
      <node id="454" label="zzzz602"/>
      <node id="453" label="zzzz603"/>
      <node id="452" label="zzzz604"/>
      <node id="451" label="zzzz605"/>
      <node id="450" label="zzzz606"/>
      <node id="449" label="zzzz607"/>
      <node id="448" label="zzzz608"/>
      <node id="447" label="zzzz609"/>
      <node id="446" label="zzzz610"/>
      <node id="445" label="zzzz611"/>
      <node id="444" label="zzzz612"/>
      <node id="443" label="zzzz613"/>
      <node id="442" label="zzzz614"/>
      <node id="441" label="zzzz615"/>
      <node id="440" label="zzzz616"/>
      <node id="439" label="zzzz617"/>
      <node id="438" label="zzzz618"/>
      <node id="437" label="zzzz619"/>
      <node id="436" label="zzzz620"/>
      <node id="435" label="zzzz621"/>
      <node id="434" label="zzzz622"/>
      <node id="433" label="zzzz623"/>
      <node id="432" label="zzzz625"/>
      <node id="431" label="zzzz626"/>
      <node id="430" label="zzzz627"/>
      <node id="429" label="zzzz628"/>
      <node id="428" label="zzzz629"/>
      <node id="427" label="zzzz630"/>
      <node id="426" label="zzzz631"/>
      <node id="425" label="zzzz632"/>
      <node id="424" label="zzzz633"/>
      <node id="423" label="zzzz634"/>
      <node id="422" label="zzzz635"/>
      <node id="421" label="zzzz636"/>
      <node id="420" label="zzzz637"/>
      <node id="419" label="zzzz638"/>
      <node id="418" label="zzzz639"/>
      <node id="417" label="zzzz640"/>
      <node id="416" label="zzzz641"/>
      <node id="415" label="zzzz642"/>
      <node id="414" label="zzzz643"/>
      <node id="413" label="zzzz644"/>
      <node id="412" label="zzzz645"/>
      <node id="411" label="zzzz646"/>
      <node id="410" label="zzzz647"/>
      <node id="409" label="zzzz648"/>
      <node id="408" label="zzzz649"/>
      <node id="407" label="zzzz650"/>
      <node id="406" label="zzzz651"/>
      <node id="405" label="zzzz652"/>
      <node id="404" label="zzzz653"/>
      <node id="403" label="zzzz654"/>
      <node id="402" label="zzzz655"/>
      <node id="401" label="zzzz656"/>
      <node id="400" label="zzzz657"/>
      <node id="399" label="zzzz658"/>
      <node id="398" label="zzzz659"/>
      <node id="397" label="zzzz660"/>
      <node id="396" label="zzzz661"/>
      <node id="395" label="zzzz662"/>
      <node id="394" label="zzzz663"/>
      <node id="393" label="zzzz664"/>
      <node id="392" label="zzzz665"/>
      <node id="391" label="zzzz666"/>
      <node id="390" label="zzzz667"/>
      <node id="389" label="zzzz668"/>
      <node id="388" label="zzzz669"/>
      <node id="387" label="zzzz670"/>
      <node id="386" label="zzzz671"/>
      <node id="385" label="zzzz672"/>
      <node id="384" label="zzzz673"/>
      <node id="383" label="zzzz674"/>
      <node id="382" label="zzzz675"/>
      <node id="381" label="zzzz676"/>
      <node id="380" label="zzzz677"/>
      <node id="379" label="zzzz678"/>
      <node id="378" label="zzzz679"/>
      <node id="377" label="zzzz680"/>
      <node id="376" label="zzzz681"/>
      <node id="375" label="zzzz683"/>
      <node id="374" label="zzzz684"/>
      <node id="373" label="zzzz685"/>
      <node id="372" label="zzzz686"/>
      <node id="371" label="zzzz687"/>
      <node id="370" label="zzzz688"/>
      <node id="369" label="zzzz689"/>
      <node id="368" label="zzzz690"/>
      <node id="367" label="zzzz692"/>
      <node id="366" label="zzzz693"/>
      <node id="365" label="zzzz694"/>
      <node id="364" label="zzzz695"/>
      <node id="363" label="zzzz696"/>
      <node id="362" label="zzzz697"/>
      <node id="361" label="zzzz698"/>
      <node id="360" label="zzzz699"/>
      <node id="359" label="zzzz700"/>
      <node id="358" label="zzzz701"/>
      <node id="357" label="zzzz702"/>
      <node id="356" label="zzzz703"/>
      <node id="355" label="zzzz704"/>
      <node id="354" label="zzzz705"/>
      <node id="353" label="zzzz706"/>
      <node id="352" label="zzzz707"/>
      <node id="351" label="zzzz708"/>
      <node id="350" label="zzzz709"/>
      <node id="349" label="zzzz710"/>
      <node id="348" label="zzzz711"/>
      <node id="347" label="zzzz712"/>
      <node id="346" label="zzzz713"/>
      <node id="345" label="zzzz714"/>
      <node id="344" label="zzzz715"/>
      <node id="343" label="zzzz716"/>
      <node id="342" label="zzzz717"/>
      <node id="341" label="zzzz718"/>
      <node id="340" label="zzzz719"/>
      <node id="339" label="zzzz720"/>
      <node id="338" label="zzzz721"/>
      <node id="337" label="zzzz722"/>
      <node id="336" label="zzzz724"/>
      <node id="335" label="zzzz725"/>
      <node id="334" label="zzzz726"/>
      <node id="333" label="zzzz727"/>
      <node id="332" label="zzzz728"/>
      <node id="331" label="zzzz738"/>
      <node id="330" label="zzzz739"/>
      <node id="329" label="zzzz743"/>
      <node id="328" label="zzzz744"/>
      <node id="327" label="zzzz745"/>
      <node id="326" label="zzzz746"/>
      <node id="325" label="zzzz747"/>
      <node id="324" label="zzzz748"/>
      <node id="323" label="zzzz749"/>
      <node id="322" label="zzzz751"/>
      <node id="321" label="zzzz752"/>
      <node id="320" label="zzzz753"/>
      <node id="319" label="zzzz754"/>
      <node id="318" label="zzzz756"/>
      <node id="317" label="zzzz757"/>
      <node id="316" label="zzzz758"/>
      <node id="315" label="zzzz760"/>
      <node id="314" label="zzzz763"/>
      <node id="313" label="zzzz764"/>
      <node id="312" label="zzzz765"/>
      <node id="311" label="zzzz766"/>
      <node id="310" label="zzzz767"/>
      <node id="309" label="zzzz768"/>
      <node id="308" label="zzzz769"/>
      <node id="307" label="zzzz772"/>
      <node id="306" label="zzzz773"/>
      <node id="305" label="zzzz774"/>
      <node id="304" label="zzzz775"/>
      <node id="303" label="zzzz776"/>
      <node id="302" label="zzzz777"/>
      <node id="301" label="zzzz778"/>
      <node id="300" label="zzzz779"/>
      <node id="299" label="zzzz780"/>
      <node id="298" label="zzzz783"/>
      <node id="297" label="zzzz784"/>
      <node id="296" label="zzzz785"/>
      <node id="295" label="zzzz786"/>
      <node id="294" label="zzzz787"/>
      <node id="293" label="zzzz788"/>
      <node id="292" label="zzzz789"/>
      <node id="291" label="zzzz790"/>
      <node id="290" label="zzzz791"/>
      <node id="289" label="zzzz792"/>
      <node id="288" label="zzzz793"/>
      <node id="287" label="zzzz794"/>
      <node id="286" label="zzzz796"/>
      <node id="285" label="zzzz797"/>
      <node id="284" label="zzzz799"/>
      <node id="283" label="zzzz800"/>
      <node id="282" label="zzzz801"/>
      <node id="281" label="zzzz802"/>
      <node id="280" label="zzzz803"/>
      <node id="279" label="zzzz804"/>
      <node id="278" label="zzzz805"/>
      <node id="277" label="zzzz806"/>
      <node id="276" label="zzzz807"/>
      <node id="275" label="zzzz808"/>
      <node id="274" label="zzzz809"/>
      <node id="273" label="zzzz810"/>
      <node id="272" label="zzzz811"/>
      <node id="271" label="zzzz812"/>
      <node id="270" label="zzzz813"/>
      <node id="269" label="zzzz815"/>
      <node id="268" label="zzzz816"/>
      <node id="267" label="zzzz817"/>
      <node id="266" label="zzzz818"/>
      <node id="265" label="zzzz819"/>
      <node id="264" label="zzzz820"/>
      <node id="263" label="zzzz821"/>
      <node id="262" label="zzzz822"/>
      <node id="261" label="zzzz823"/>
      <node id="260" label="zzzz824"/>
      <node id="259" label="zzzz825"/>
      <node id="258" label="zzzz826"/>
      <node id="257" label="zzzz827"/>
      <node id="256" label="zzzz828"/>
      <node id="255" label="zzzz829"/>
      <node id="254" label="zzzz830"/>
      <node id="253" label="zzzz831"/>
      <node id="252" label="zzzz832"/>
      <node id="251" label="zzzz833"/>
      <node id="250" label="zzzz834"/>
      <node id="249" label="zzzz835"/>
      <node id="248" label="zzzz836"/>
      <node id="247" label="zzzz837"/>
      <node id="246" label="zzzz838"/>
      <node id="245" label="zzzz839"/>
      <node id="244" label="zzzz840"/>
      <node id="243" label="zzzz841"/>
      <node id="242" label="zzzz842"/>
      <node id="241" label="zzzz843"/>
      <node id="240" label="zzzz844"/>
      <node id="239" label="zzzz845"/>
      <node id="238" label="zzzz846"/>
      <node id="237" label="zzzz847"/>
      <node id="236" label="zzzz848"/>
      <node id="235" label="zzzz849"/>
      <node id="234" label="zzzz850"/>
      <node id="233" label="zzzz851"/>
      <node id="232" label="zzzz852"/>
      <node id="231" label="zzzz853"/>
      <node id="230" label="zzzz854"/>
      <node id="229" label="zzzz855"/>
      <node id="228" label="zzzz857"/>
      <node id="227" label="zzzz859"/>
      <node id="226" label="zzzz860"/>
      <node id="225" label="zzzz861"/>
      <node id="224" label="zzzz862"/>
      <node id="223" label="zzzz863"/>
      <node id="222" label="zzzz884"/>
      <node id="221" label="zzzz889"/>
      <node id="220" label="zzzz890"/>
      <node id="219" label="zzzz891"/>
      <node id="218" label="zzzz892"/>
      <node id="217" label="zzzz893"/>
      <node id="216" label="zzzz894"/>
      <node id="215" label="zzzz895"/>
      <node id="214" label="zzzz896"/>
      <node id="213" label="zzzz898"/>
      <node id="212" label="zzzz899"/>
      <node id="211" label="zzzz900"/>
      <node id="210" label="zzzz901"/>
      <node id="209" label="zzzz902"/>
      <node id="208" label="zzzz903"/>
      <node id="207" label="zzzz904"/>
      <node id="206" label="zzzz905"/>
      <node id="205" label="zzzz906"/>
      <node id="204" label="zzzz907"/>
      <node id="203" label="zzzz908"/>
      <node id="202" label="zzzz909"/>
      <node id="201" label="zzzz910"/>
      <node id="200" label="zzzz911"/>
      <node id="199" label="zzzz912"/>
      <node id="198" label="zzzz913"/>
      <node id="197" label="zzzz915"/>
      <node id="196" label="zzzz919"/>
      <node id="195" label="zzzz920"/>
      <node id="194" label="zzzz921"/>
      <node id="193" label="zzzz929"/>
      <node id="192" label="zzzz930"/>
      <node id="191" label="zzzz931"/>
      <node id="190" label="zzzz932"/>
      <node id="189" label="zzzz933"/>
      <node id="188" label="zzzz934"/>
      <node id="187" label="zzzz935"/>
      <node id="186" label="zzzz936"/>
      <node id="185" label="zzzz939"/>
      <node id="184" label="zzzz940"/>
      <node id="183" label="zzzz941"/>
      <node id="182" label="zzzz942"/>
      <node id="181" label="zzzz943"/>
      <node id="180" label="zzzz944"/>
      <node id="179" label="zzzz945"/>
      <node id="178" label="zzzz946"/>
      <node id="177" label="zzzz947"/>
      <node id="176" label="zzzz948"/>
      <node id="175" label="zzzz949"/>
      <node id="174" label="zzzz950"/>
      <node id="173" label="zzzz951"/>
      <node id="172" label="zzzz952"/>
      <node id="171" label="zzzz961"/>
      <node id="170" label="zzzz962"/>
      <node id="169" label="zzzz963"/>
      <node id="168" label="zzzz964"/>
      <node id="167" label="zzzz965"/>
      <node id="166" label="zzzz966"/>
      <node id="165" label="zzzz980"/>
      <node id="164" label="zzzz981"/>
      <node id="163" label="zzzz982"/>
      <node id="162" label="zzzz983"/>
      <node id="161" label="zzzzz10"/>
      <node id="160" label="zzzzz11"/>
      <node id="159" label="zzzzz12"/>
      <node id="158" label="zzzzz13"/>
      <node id="157" label="zzzzz14"/>
      <node id="156" label="zzzzz15"/>
      <node id="155" label="zzzzz16"/>
      <node id="154" label="zzzzz17"/>
      <node id="153" label="zzzzz18"/>
      <node id="152" label="zzzzz19"/>
      <node id="151" label="zzzzz20"/>
      <node id="150" label="zzzzz21"/>
      <node id="149" label="zzzzz22"/>
      <node id="148" label="zzzzz23"/>
      <node id="147" label="zzzzz24"/>
      <node id="146" label="zzzzz25"/>
      <node id="145" label="zzzzz26"/>
      <node id="144" label="zzzzz27"/>
      <node id="143" label="zzzzz28"/>
      <node id="142" label="zzzzz29"/>
      <node id="141" label="zzzzz30"/>
      <node id="140" label="zzzzz31"/>
      <node id="139" label="zzzzz32"/>
      <node id="138" label="zzzzz33"/>
      <node id="137" label="zzzzz34"/>
      <node id="136" label="zzzzz35"/>
      <node id="135" label="zzzzz36"/>
      <node id="134" label="zzzzz37"/>
      <node id="133" label="zzzzz38"/>
      <node id="132" label="zzzzz39"/>
      <node id="131" label="zzzzz40"/>
      <node id="130" label="zzzzz41"/>
      <node id="129" label="zzzzz42"/>
      <node id="128" label="zzzzz43"/>
      <node id="127" label="zzzzz44"/>
      <node id="126" label="zzzzz45"/>
      <node id="125" label="zzzzz46"/>
      <node id="124" label="zzzzz47"/>
      <node id="123" label="zzzzz48"/>
      <node id="122" label="zzzzz49"/>
      <node id="121" label="zzzzz50"/>
      <node id="120" label="zzzzz51"/>
      <node id="119" label="zzzzz52"/>
      <node id="118" label="zzzzz53"/>
      <node id="117" label="zzzzz54"/>
      <node id="116" label="zzzzz55"/>
      <node id="115" label="zzzzz56"/>
      <node id="114" label="zzzzz57"/>
      <node id="113" label="zzzzz58"/>
      <node id="112" label="zzzzz59"/>
      <node id="111" label="zzzzz60"/>
      <node id="110" label="zzzzz61"/>
      <node id="109" label="zzzzz62"/>
      <node id="108" label="zzzzz63"/>
      <node id="107" label="zzzzz64"/>
      <node id="106" label="zzzzz65"/>
      <node id="105" label="zzzzz66"/>
      <node id="104" label="zzzzz67"/>
      <node id="103" label="zzzzz68"/>
      <node id="102" label="zzzzz69"/>
      <node id="101" label="zzzzz70"/>
      <node id="100" label="zzzzz71"/>
      <node id="99" label="zzzzz72"/>
      <node id="98" label="zzzzz73"/>
      <node id="97" label="zzzzz74"/>
      <node id="96" label="zzzzz75"/>
      <node id="95" label="zzzzz76"/>
      <node id="94" label="zzzzz77"/>
      <node id="93" label="zzzzz78"/>
      <node id="92" label="zzzzz79"/>
      <node id="91" label="zzzzz80"/>
      <node id="90" label="zzzzz81"/>
      <node id="89" label="zzzzz82"/>
      <node id="88" label="zzzzz83"/>
      <node id="87" label="zzzzz84"/>
      <node id="86" label="zzzzz85"/>
      <node id="85" label="zzzzz86"/>
      <node id="84" label="zzzzz87"/>
      <node id="83" label="zzzzz88"/>
      <node id="82" label="zzzzz89"/>
      <node id="81" label="zzzzz90"/>
      <node id="80" label="zzzzz91"/>
      <node id="79" label="zzzzz92"/>
      <node id="78" label="zzzzz93"/>
      <node id="77" label="zzzzz94"/>
      <node id="76" label="zzzzz95"/>
      <node id="75" label="zzzzz96"/>
      <node id="74" label="zzzzz97"/>
      <node id="73" label="zzzzz98"/>
      <node id="72" label="zzzzz99"/>
      <node id="71" label="zzzzzz0"/>
      <node id="70" label="zzzzzz1"/>
      <node id="69" label="zzzzzz2"/>
      <node id="68" label="zzzzzz3"/>
      <node id="67" label="zzzzzz4"/>
      <node id="66" label="zzzzzz5"/>
      <node id="65" label="zzzzzz6"/>
      <node id="64" label="zzzzzz7"/>
      <node id="63" label="zzzzzz8"/>
      <node id="62" label="zzzzzz9"/>
      <edge id="249705" label="zzzz100,zzzz114" source="943" target="929" cy:directed="1"/>
      <edge id="249704" label="zzzz100,zzzz362" source="943" target="694" cy:directed="1"/>
      <edge id="249703" label="zzzz100,zzzz945" source="943" target="179" cy:directed="1"/>
      <edge id="249702" label="zzzz100,zzzz418" source="943" target="638" cy:directed="1"/>
      <edge id="249701" label="zzzz100,zzzz912" source="943" target="199" cy:directed="1"/>
      <edge id="249700" label="zzzz100,zzzz189" source="943" target="854" cy:directed="1"/>
      <edge id="249699" label="zzzz100,zzzz421" source="943" target="635" cy:directed="1"/>
      <edge id="249698" label="zzzz100,zzzz433" source="943" target="623" cy:directed="1"/>
      <edge id="249697" label="zzzz100,zzzz642" source="943" target="415" cy:directed="1"/>
      <edge id="249696" label="zzzz100,zzzz724" source="943" target="336" cy:directed="1"/>
      <edge id="249695" label="zzzz100,zzzz627" source="943" target="430" cy:directed="1"/>
      <edge id="249694" label="zzzz100,zzzz197" source="943" target="846" cy:directed="1"/>
      <edge id="249693" label="zzzz100,zzzz445" source="943" target="611" cy:directed="1"/>
      <edge id="249692" label="zzzz100,zzzz450" source="943" target="606" cy:directed="1"/>
      <edge id="249691" label="zzzz100,zzzz454" source="943" target="602" cy:directed="1"/>
      <edge id="249690" label="zzzz100,zzzz907" source="943" target="204" cy:directed="1"/>
      <edge id="249689" label="zzzz100,zzzzz80" source="943" target="91" cy:directed="1"/>
      <edge id="249688" label="zzzz100,zzzz261" source="943" target="782" cy:directed="1"/>
      <edge id="249687" label="zzzz100,zzzz373" source="943" target="683" cy:directed="1"/>
      <edge id="249686" label="zzzz100,zzzz351" source="943" target="705" cy:directed="1"/>
      <edge id="249685" label="zzzz100,zzzz500" source="943" target="556" cy:directed="1"/>
      <edge id="249684" label="zzzz100,zzzz128" source="943" target="915" cy:directed="1"/>
      <edge id="249683" label="zzzz100,zzzz117" source="943" target="926" cy:directed="1"/>
      <edge id="249682" label="zzzz100,zzzz385" source="943" target="671" cy:directed="1"/>
      <edge id="249681" label="zzzz100,zzzz443" source="943" target="613" cy:directed="1"/>
      <edge id="249680" label="zzzz100,zzzz428" source="943" target="628" cy:directed="1"/>
      <edge id="249679" label="zzzz100,zzzz527" source="943" target="529" cy:directed="1"/>
      <edge id="249678" label="zzzz100,zzzz262" source="943" target="781" cy:directed="1"/>
      <edge id="249677" label="zzzz100,zzzz207" source="943" target="836" cy:directed="1"/>
      <edge id="249676" label="zzzz100,zzzz447" source="943" target="609" cy:directed="1"/>
      <edge id="249675" label="zzzz100,zzzz456" source="943" target="600" cy:directed="1"/>
      <edge id="249674" label="zzzz100,zzzz478" source="943" target="578" cy:directed="1"/>
      <edge id="249673" label="zzzz100,zzzz523" source="943" target="533" cy:directed="1"/>
      <edge id="249672" label="zzzz100,zzzz451" source="943" target="605" cy:directed="1"/>
      <edge id="249671" label="zzzz100,zzzz452" source="943" target="604" cy:directed="1"/>
      <edge id="249670" label="zzzz100,zzzz670" source="943" target="387" cy:directed="1"/>
      <edge id="249669" label="zzzz100,zzzz120" source="943" target="923" cy:directed="1"/>
      <edge id="249668" label="zzzz100,zzzz387" source="943" target="669" cy:directed="1"/>
      <edge id="249667" label="zzzz100,zzzz396" source="943" target="660" cy:directed="1"/>
      <edge id="249666" label="zzzz100,zzzz420" source="943" target="636" cy:directed="1"/>
      <edge id="249665" label="zzzz100,zzzz425" source="943" target="631" cy:directed="1"/>
      <edge id="249664" label="zzzz100,zzzz511" source="943" target="545" cy:directed="1"/>
      <edge id="249663" label="zzzz100,zzzz629" source="943" target="428" cy:directed="1"/>
      <edge id="249662" label="zzzz100,zzzz389" source="943" target="667" cy:directed="1"/>
      <edge id="249661" label="zzzz100,zzzz646" source="943" target="411" cy:directed="1"/>
      <edge id="249660" label="zzzz100,zzzz365" source="943" target="691" cy:directed="1"/>
      <edge id="249659" label="zzzz100,zzzz448" source="943" target="608" cy:directed="1"/>
      <edge id="249658" label="zzzz100,zzzz667" source="943" target="390" cy:directed="1"/>
      <edge id="249657" label="zzzz100,zzzz674" source="943" target="383" cy:directed="1"/>
      <edge id="249656" label="zzzz100,zzzz722" source="943" target="337" cy:directed="1"/>
      <edge id="249655" label="zzzz100,zzzz376" source="943" target="680" cy:directed="1"/>
      <edge id="249654" label="zzzz100,zzzz492" source="943" target="564" cy:directed="1"/>
      <edge id="249653" label="zzzz100,zzzz641" source="943" target="416" cy:directed="1"/>
      <edge id="249652" label="zzzz100,zzzzz90" source="943" target="81" cy:directed="1"/>
      <edge id="249651" label="zzzz100,zzzz549" source="943" target="507" cy:directed="1"/>
      <edge id="249650" label="zzzz100,zzzz613" source="943" target="443" cy:directed="1"/>
      <edge id="249649" label="zzzz100,zzzz127" source="943" target="916" cy:directed="1"/>
      <edge id="249648" label="zzzz100,zzzz378" source="943" target="678" cy:directed="1"/>
      <edge id="249647" label="zzzz100,zzzz460" source="943" target="596" cy:directed="1"/>
      <edge id="249646" label="zzzz100,zzzz895" source="943" target="215" cy:directed="1"/>
      <edge id="249645" label="zzzz100,zzzz119" source="943" target="924" cy:directed="1"/>
      <edge id="249644" label="zzzz100,zzzz194" source="943" target="849" cy:directed="1"/>
      <edge id="249643" label="zzzz100,zzzz559" source="943" target="497" cy:directed="1"/>
      <edge id="249642" label="zzzz100,zzzz901" source="943" target="210" cy:directed="1"/>
      <edge id="249641" label="zzzz100,zzzz369" source="943" target="687" cy:directed="1"/>
      <edge id="249640" label="zzzz100,zzzz656" source="943" target="401" cy:directed="1"/>
      <edge id="249639" label="zzzz100,zzzz889" source="943" target="221" cy:directed="1"/>
      <edge id="249638" label="zzzz100,zzzz401" source="943" target="655" cy:directed="1"/>
      <edge id="249637" label="zzzz100,zzzz649" source="943" target="408" cy:directed="1"/>
      <edge id="249636" label="zzzz100,zzzz794" source="943" target="287" cy:directed="1"/>
      <edge id="249635" label="zzzz100,zzzz356" source="943" target="700" cy:directed="1"/>
      <edge id="249634" label="zzzz100,zzzz663" source="943" target="394" cy:directed="1"/>
      <edge id="249633" label="zzzz100,zzzz921" source="943" target="194" cy:directed="1"/>
      <edge id="249632" label="zzzz100,zzzz647" source="943" target="410" cy:directed="1"/>
      <edge id="249631" label="zzzz100,zzzz353" source="943" target="703" cy:directed="1"/>
      <edge id="249630" label="zzzz100,zzzz121" source="943" target="922" cy:directed="1"/>
      <edge id="249629" label="zzzz100,zzzz900" source="943" target="211" cy:directed="1"/>
      <edge id="249628" label="zzzz100,zzzz371" source="943" target="685" cy:directed="1"/>
      <edge id="249627" label="zzzz100,zzzz468" source="943" target="588" cy:directed="1"/>
      <edge id="249626" label="zzzz100,zzzz474" source="943" target="582" cy:directed="1"/>
      <edge id="249625" label="zzzz100,zzzz485" source="943" target="571" cy:directed="1"/>
      <edge id="249624" label="zzzz100,zzzz498" source="943" target="558" cy:directed="1"/>
      <edge id="249623" label="zzzz100,zzzz512" source="943" target="544" cy:directed="1"/>
      <edge id="249622" label="zzzz100,zzzzz64" source="943" target="107" cy:directed="1"/>
      <edge id="249621" label="zzzz100,zzzzz73" source="943" target="98" cy:directed="1"/>
      <edge id="249620" label="zzzz100,zzzzz74" source="943" target="97" cy:directed="1"/>
      <edge id="249619" label="zzzz100,zzzzz84" source="943" target="87" cy:directed="1"/>
      <edge id="249618" label="zzzz100,zzzz224" source="943" target="819" cy:directed="1"/>
      <edge id="249617" label="zzzz100,zzzz458" source="943" target="598" cy:directed="1"/>
      <edge id="249616" label="zzzz100,zzzz963" source="943" target="169" cy:directed="1"/>
      <edge id="249615" label="zzzz100,zzzzz81" source="943" target="90" cy:directed="1"/>
      <edge id="249614" label="zzzz100,zzzzz89" source="943" target="82" cy:directed="1"/>
      <edge id="249613" label="zzzz100,zzzz195" source="943" target="848" cy:directed="1"/>
      <edge id="249612" label="zzzz100,zzzz208" source="943" target="835" cy:directed="1"/>
      <edge id="249611" label="zzzz100,zzzz524" source="943" target="532" cy:directed="1"/>
      <edge id="249610" label="zzzz100,zzzz896" source="943" target="214" cy:directed="1"/>
      <edge id="249609" label="zzzz100,zzzz209" source="943" target="834" cy:directed="1"/>
      <edge id="249608" label="zzzz100,zzzz393" source="943" target="663" cy:directed="1"/>
      <edge id="249607" label="zzzz100,zzzz537" source="943" target="519" cy:directed="1"/>
      <edge id="249606" label="zzzz100,zzzz892" source="943" target="218" cy:directed="1"/>
      <edge id="249605" label="zzzz100,zzzzz45" source="943" target="126" cy:directed="1"/>
      <edge id="249604" label="zzzz100,zzzzz77" source="943" target="94" cy:directed="1"/>
      <edge id="249603" label="zzzz100,zzzzz87" source="943" target="84" cy:directed="1"/>
      <edge id="249602" label="zzzz100,zzzz375" source="943" target="681" cy:directed="1"/>
      <edge id="249601" label="zzzz100,zzzz416" source="943" target="640" cy:directed="1"/>
      <edge id="249600" label="zzzz100,zzzz504" source="943" target="552" cy:directed="1"/>
      <edge id="249599" label="zzzz100,zzzz547" source="943" target="509" cy:directed="1"/>
      <edge id="249598" label="zzzz100,zzzz638" source="943" target="419" cy:directed="1"/>
      <edge id="249597" label="zzzz100,zzzz913" source="943" target="198" cy:directed="1"/>
      <edge id="249596" label="zzzz100,zzzz944" source="943" target="180" cy:directed="1"/>
      <edge id="249595" label="zzzz100,zzzz368" source="943" target="688" cy:directed="1"/>
      <edge id="249594" label="zzzz100,zzzz388" source="943" target="668" cy:directed="1"/>
      <edge id="249593" label="zzzz100,zzzz522" source="943" target="534" cy:directed="1"/>
      <edge id="249592" label="zzzz100,zzzz599" source="943" target="457" cy:directed="1"/>
      <edge id="249591" label="zzzz100,zzzz620" source="943" target="436" cy:directed="1"/>
      <edge id="249590" label="zzzz100,zzzz662" source="943" target="395" cy:directed="1"/>
      <edge id="249589" label="zzzz100,zzzz465" source="943" target="591" cy:directed="1"/>
      <edge id="249588" label="zzzz100,zzzz657" source="943" target="400" cy:directed="1"/>
      <edge id="249587" label="zzzz100,zzzz726" source="943" target="334" cy:directed="1"/>
      <edge id="249586" label="zzzz100,zzzz908" source="943" target="203" cy:directed="1"/>
      <edge id="249585" label="zzzz100,zzzz346" source="943" target="710" cy:directed="1"/>
      <edge id="249584" label="zzzz100,zzzz349" source="943" target="707" cy:directed="1"/>
      <edge id="249583" label="zzzz100,zzzz533" source="943" target="523" cy:directed="1"/>
      <edge id="249582" label="zzzz100,zzzz952" source="943" target="172" cy:directed="1"/>
      <edge id="249581" label="zzzz100,zzzz982" source="943" target="163" cy:directed="1"/>
      <edge id="249580" label="zzzz100,zzzz106" source="943" target="937" cy:directed="1"/>
      <edge id="249579" label="zzzz100,zzzz400" source="943" target="656" cy:directed="1"/>
      <edge id="249578" label="zzzz100,zzzz457" source="943" target="599" cy:directed="1"/>
      <edge id="249577" label="zzzz100,zzzz130" source="943" target="913" cy:directed="1"/>
      <edge id="249576" label="zzzz100,zzzz366" source="943" target="690" cy:directed="1"/>
      <edge id="249575" label="zzzz100,zzzz370" source="943" target="686" cy:directed="1"/>
      <edge id="249574" label="zzzz100,zzzz579" source="943" target="477" cy:directed="1"/>
      <edge id="249573" label="zzzz100,zzzz644" source="943" target="413" cy:directed="1"/>
      <edge id="249572" label="zzzz100,zzzz658" source="943" target="399" cy:directed="1"/>
      <edge id="249571" label="zzzz100,zzzzz53" source="943" target="118" cy:directed="1"/>
      <edge id="249570" label="zzzz100,zzzz631" source="943" target="426" cy:directed="1"/>
      <edge id="249569" label="zzzz100,zzzz845" source="943" target="239" cy:directed="1"/>
      <edge id="249568" label="zzzz100,zzzz894" source="943" target="216" cy:directed="1"/>
      <edge id="249567" label="zzzz100,zzzzz91" source="943" target="80" cy:directed="1"/>
      <edge id="249566" label="zzzz100,zzzz123" source="943" target="920" cy:directed="1"/>
      <edge id="249565" label="zzzz100,zzzz424" source="943" target="632" cy:directed="1"/>
      <edge id="249564" label="zzzz100,zzzz546" source="943" target="510" cy:directed="1"/>
      <edge id="249563" label="zzzz100,zzzz614" source="943" target="442" cy:directed="1"/>
      <edge id="249562" label="zzzz100,zzzz483" source="943" target="573" cy:directed="1"/>
      <edge id="249561" label="zzzz100,zzzz556" source="943" target="500" cy:directed="1"/>
      <edge id="249560" label="zzzz100,zzzz964" source="943" target="168" cy:directed="1"/>
      <edge id="249559" label="zzzz100,zzzz361" source="943" target="695" cy:directed="1"/>
      <edge id="249558" label="zzzz100,zzzz502" source="943" target="554" cy:directed="1"/>
      <edge id="249557" label="zzzz100,zzzz548" source="943" target="508" cy:directed="1"/>
      <edge id="249556" label="zzzz100,zzzz440" source="943" target="616" cy:directed="1"/>
      <edge id="249555" label="zzzz100,zzzz472" source="943" target="584" cy:directed="1"/>
      <edge id="249554" label="zzzz100,zzzz528" source="943" target="528" cy:directed="1"/>
      <edge id="249553" label="zzzz100,zzzz650" source="943" target="407" cy:directed="1"/>
      <edge id="249552" label="zzzz100,zzzz903" source="943" target="208" cy:directed="1"/>
      <edge id="249551" label="zzzz100,zzzz129" source="943" target="914" cy:directed="1"/>
      <edge id="249550" label="zzzz100,zzzz417" source="943" target="639" cy:directed="1"/>
      <edge id="249549" label="zzzz100,zzzz529" source="943" target="527" cy:directed="1"/>
      <edge id="249548" label="zzzz100,zzzz550" source="943" target="506" cy:directed="1"/>
      <edge id="249547" label="zzzz100,zzzz585" source="943" target="471" cy:directed="1"/>
      <edge id="249546" label="zzzz100,zzzz659" source="943" target="398" cy:directed="1"/>
      <edge id="249545" label="zzzz100,zzzz893" source="943" target="217" cy:directed="1"/>
      <edge id="249544" label="zzzz100,zzzz909" source="943" target="202" cy:directed="1"/>
      <edge id="249543" label="zzzz100,zzzz965" source="943" target="167" cy:directed="1"/>
      <edge id="249542" label="zzzz100,zzzzz86" source="943" target="85" cy:directed="1"/>
      <edge id="249541" label="zzzz100,zzzz434" source="943" target="622" cy:directed="1"/>
      <edge id="249540" label="zzzz100,zzzz906" source="943" target="205" cy:directed="1"/>
      <edge id="249539" label="zzzz100,zzzz135" source="943" target="908" cy:directed="1"/>
      <edge id="249538" label="zzzz100,zzzz508" source="943" target="548" cy:directed="1"/>
      <edge id="249537" label="zzzz100,zzzz540" source="943" target="516" cy:directed="1"/>
      <edge id="249536" label="zzzz100,zzzz884" source="943" target="222" cy:directed="1"/>
      <edge id="249535" label="zzzz100,zzzz910" source="943" target="201" cy:directed="1"/>
      <edge id="249534" label="zzzz100,zzzz358" source="943" target="698" cy:directed="1"/>
      <edge id="249533" label="zzzz100,zzzz126" source="943" target="917" cy:directed="1"/>
      <edge id="249532" label="zzzz100,zzzz131" source="943" target="912" cy:directed="1"/>
      <edge id="249531" label="zzzz100,zzzz520" source="943" target="536" cy:directed="1"/>
      <edge id="249530" label="zzzz100,zzzzz55" source="943" target="116" cy:directed="1"/>
      <edge id="249529" label="zzzz100,zzzzz93" source="943" target="78" cy:directed="1"/>
      <edge id="249528" label="zzzz100,zzzz432" source="943" target="624" cy:directed="1"/>
      <edge id="249527" label="zzzz100,zzzzz61" source="943" target="110" cy:directed="1"/>
      <edge id="249526" label="zzzz100,zzzz382" source="943" target="674" cy:directed="1"/>
      <edge id="249525" label="zzzz100,zzzz413" source="943" target="643" cy:directed="1"/>
      <edge id="249524" label="zzzz100,zzzz480" source="943" target="576" cy:directed="1"/>
      <edge id="249523" label="zzzz100,zzzz725" source="943" target="335" cy:directed="1"/>
      <edge id="249522" label="zzzz100,zzzzz96" source="943" target="75" cy:directed="1"/>
      <edge id="249521" label="zzzz100,zzzz518" source="943" target="538" cy:directed="1"/>
      <edge id="249520" label="zzzz100,zzzz525" source="943" target="531" cy:directed="1"/>
      <edge id="249519" label="zzzz100,zzzz727" source="943" target="333" cy:directed="1"/>
      <edge id="249518" label="zzzz100,zzzz849" source="943" target="235" cy:directed="1"/>
      <edge id="249517" label="zzzz100,zzzz406" source="943" target="650" cy:directed="1"/>
      <edge id="249516" label="zzzz100,zzzz544" source="943" target="512" cy:directed="1"/>
      <edge id="249515" label="zzzz100,zzzz618" source="943" target="438" cy:directed="1"/>
      <edge id="249514" label="zzzz100,zzzz643" source="943" target="414" cy:directed="1"/>
      <edge id="249513" label="zzzz100,zzzz125" source="943" target="918" cy:directed="1"/>
      <edge id="249512" label="zzzz100,zzzz172" source="943" target="871" cy:directed="1"/>
      <edge id="249511" label="zzzz100,zzzz377" source="943" target="679" cy:directed="1"/>
      <edge id="249510" label="zzzz100,zzzz395" source="943" target="661" cy:directed="1"/>
      <edge id="249509" label="zzzz100,zzzz444" source="943" target="612" cy:directed="1"/>
      <edge id="249508" label="zzzz100,zzzz555" source="943" target="501" cy:directed="1"/>
      <edge id="249507" label="zzzz100,zzzz597" source="943" target="459" cy:directed="1"/>
      <edge id="249506" label="zzzz100,zzzz640" source="943" target="417" cy:directed="1"/>
      <edge id="249505" label="zzzz100,zzzz940" source="943" target="184" cy:directed="1"/>
      <edge id="249504" label="zzzz100,zzzz264" source="943" target="779" cy:directed="1"/>
      <edge id="249503" label="zzzz100,zzzz364" source="943" target="692" cy:directed="1"/>
      <edge id="249502" label="zzzz100,zzzz793" source="943" target="288" cy:directed="1"/>
      <edge id="249501" label="zzzz100,zzzz210" source="943" target="833" cy:directed="1"/>
      <edge id="249500" label="zzzz100,zzzz217" source="943" target="826" cy:directed="1"/>
      <edge id="249499" label="zzzz100,zzzz654" source="943" target="403" cy:directed="1"/>
      <edge id="249498" label="zzzz100,zzzz951" source="943" target="173" cy:directed="1"/>
      <edge id="249497" label="zzzz100,zzzz132" source="943" target="911" cy:directed="1"/>
      <edge id="249496" label="zzzz100,zzzz372" source="943" target="684" cy:directed="1"/>
      <edge id="249495" label="zzzz100,zzzz407" source="943" target="649" cy:directed="1"/>
      <edge id="249494" label="zzzz100,zzzz422" source="943" target="634" cy:directed="1"/>
      <edge id="249493" label="zzzz100,zzzz487" source="943" target="569" cy:directed="1"/>
      <edge id="249492" label="zzzz100,zzzz515" source="943" target="541" cy:directed="1"/>
      <edge id="249491" label="zzzz100,zzzz573" source="943" target="483" cy:directed="1"/>
      <edge id="249490" label="zzzz100,zzzz590" source="943" target="466" cy:directed="1"/>
      <edge id="249489" label="zzzz100,zzzz380" source="943" target="676" cy:directed="1"/>
      <edge id="249488" label="zzzz100,zzzz477" source="943" target="579" cy:directed="1"/>
      <edge id="249487" label="zzzz100,zzzz501" source="943" target="555" cy:directed="1"/>
      <edge id="249486" label="zzzz100,zzzz653" source="943" target="404" cy:directed="1"/>
      <edge id="249485" label="zzzz100,zzzz891" source="943" target="219" cy:directed="1"/>
      <edge id="249484" label="zzzz100,zzzz116" source="943" target="927" cy:directed="1"/>
      <edge id="249483" label="zzzz100,zzzz354" source="943" target="702" cy:directed="1"/>
      <edge id="249482" label="zzzz100,zzzz464" source="943" target="592" cy:directed="1"/>
      <edge id="249481" label="zzzz100,zzzz497" source="943" target="559" cy:directed="1"/>
      <edge id="249480" label="zzzz100,zzzz553" source="943" target="503" cy:directed="1"/>
      <edge id="249479" label="zzzz100,zzzz124" source="943" target="919" cy:directed="1"/>
      <edge id="249478" label="zzzz100,zzzz352" source="943" target="704" cy:directed="1"/>
      <edge id="249477" label="zzzz100,zzzz531" source="943" target="525" cy:directed="1"/>
      <edge id="249476" label="zzzz100,zzzz554" source="943" target="502" cy:directed="1"/>
      <edge id="249475" label="zzzz100,zzzz567" source="943" target="489" cy:directed="1"/>
      <edge id="249474" label="zzzz100,zzzz626" source="943" target="431" cy:directed="1"/>
      <edge id="249473" label="zzzz100,zzzz678" source="943" target="379" cy:directed="1"/>
      <edge id="249472" label="zzzz100,zzzz911" source="943" target="200" cy:directed="1"/>
      <edge id="249471" label="zzzz100,zzzz133" source="943" target="910" cy:directed="1"/>
      <edge id="249470" label="zzzz100,zzzz414" source="943" target="642" cy:directed="1"/>
      <edge id="249469" label="zzzz100,zzzz436" source="943" target="620" cy:directed="1"/>
      <edge id="249468" label="zzzz100,zzzz535" source="943" target="521" cy:directed="1"/>
      <edge id="249467" label="zzzz100,zzzz616" source="943" target="440" cy:directed="1"/>
      <edge id="249466" label="zzzz100,zzzz619" source="943" target="437" cy:directed="1"/>
      <edge id="249465" label="zzzz100,zzzzz78" source="943" target="93" cy:directed="1"/>
      <edge id="249464" label="zzzz100,zzzzz85" source="943" target="86" cy:directed="1"/>
      <edge id="249463" label="zzzz100,zzzz390" source="943" target="666" cy:directed="1"/>
      <edge id="249462" label="zzzz100,zzzz397" source="943" target="659" cy:directed="1"/>
      <edge id="249461" label="zzzz100,zzzz442" source="943" target="614" cy:directed="1"/>
      <edge id="249460" label="zzzz100,zzzz628" source="943" target="429" cy:directed="1"/>
      <edge id="249459" label="zzzz100,zzzz652" source="943" target="405" cy:directed="1"/>
      <edge id="249458" label="zzzz100,zzzzz79" source="943" target="92" cy:directed="1"/>
      <edge id="249457" label="zzzz100,zzzz645" source="943" target="412" cy:directed="1"/>
      <edge id="249456" label="zzzz100,zzzz792" source="943" target="289" cy:directed="1"/>
      <edge id="249455" label="zzzz100,zzzz802" source="943" target="281" cy:directed="1"/>
      <edge id="249454" label="zzzz100,zzzz950" source="943" target="174" cy:directed="1"/>
      <edge id="249453" label="zzzz100,zzzz206" source="943" target="837" cy:directed="1"/>
      <edge id="249452" label="zzzz100,zzzz453" source="943" target="603" cy:directed="1"/>
      <edge id="249451" label="zzzz100,zzzz635" source="943" target="422" cy:directed="1"/>
      <edge id="249450" label="zzzz100,zzzz949" source="943" target="175" cy:directed="1"/>
      <edge id="249449" label="zzzz100,zzzz134" source="943" target="909" cy:directed="1"/>
      <edge id="249448" label="zzzz100,zzzz449" source="943" target="607" cy:directed="1"/>
      <edge id="249447" label="zzzz100,zzzz521" source="943" target="535" cy:directed="1"/>
      <edge id="249446" label="zzzz100,zzzz622" source="943" target="434" cy:directed="1"/>
      <edge id="249445" label="zzzz100,zzzzz88" source="943" target="83" cy:directed="1"/>
      <edge id="249444" label="zzzz100,zzzz526" source="943" target="530" cy:directed="1"/>
      <edge id="249443" label="zzzz100,zzzz621" source="943" target="435" cy:directed="1"/>
      <edge id="249442" label="zzzz100,zzzz462" source="943" target="594" cy:directed="1"/>
      <edge id="249441" label="zzzz100,zzzz355" source="943" target="701" cy:directed="1"/>
      <edge id="249440" label="zzzz100,zzzz118" source="943" target="925" cy:directed="1"/>
      <edge id="249439" label="zzzz100,zzzz145" source="943" target="898" cy:directed="1"/>
      <edge id="249438" label="zzzz100,zzzz163" source="943" target="880" cy:directed="1"/>
      <edge id="249437" label="zzzz100,zzzz242" source="943" target="801" cy:directed="1"/>
      <edge id="249436" label="zzzz100,zzzz637" source="943" target="420" cy:directed="1"/>
      <edge id="249435" label="zzzz100,zzzz661" source="943" target="396" cy:directed="1"/>
      <edge id="249434" label="zzzz100,zzzz147" source="943" target="896" cy:directed="1"/>
      <edge id="249433" label="zzzz100,zzzz947" source="943" target="177" cy:directed="1"/>
      <edge id="249432" label="zzzz100,zzzz203" source="943" target="840" cy:directed="1"/>
      <edge id="249431" label="zzzz100,zzzz491" source="943" target="565" cy:directed="1"/>
      <edge id="249430" label="zzzz100,zzzz810" source="943" target="273" cy:directed="1"/>
      <edge id="249429" label="zzzz100,zzzz904" source="943" target="207" cy:directed="1"/>
      <edge id="249428" label="zzzz100,zzzz941" source="943" target="183" cy:directed="1"/>
      <edge id="249427" label="zzzz100,zzzz176" source="943" target="867" cy:directed="1"/>
      <edge id="249426" label="zzzz100,zzzz360" source="943" target="696" cy:directed="1"/>
      <edge id="249425" label="zzzz100,zzzz367" source="943" target="689" cy:directed="1"/>
      <edge id="249424" label="zzzz100,zzzz438" source="943" target="618" cy:directed="1"/>
      <edge id="249423" label="zzzz100,zzzz630" source="943" target="427" cy:directed="1"/>
      <edge id="249422" label="zzzz100,zzzz177" source="943" target="866" cy:directed="1"/>
      <edge id="249421" label="zzzz100,zzzz664" source="943" target="393" cy:directed="1"/>
      <edge id="249420" label="zzzz100,zzzzz82" source="943" target="89" cy:directed="1"/>
      <edge id="249419" label="zzzz100,zzzz168" source="943" target="875" cy:directed="1"/>
      <edge id="249418" label="zzzz100,zzzz211" source="943" target="832" cy:directed="1"/>
      <edge id="249417" label="zzzz100,zzzz473" source="943" target="583" cy:directed="1"/>
      <edge id="249416" label="zzzz100,zzzz808" source="943" target="275" cy:directed="1"/>
      <edge id="249415" label="zzzz100,zzzz170" source="943" target="873" cy:directed="1"/>
      <edge id="249414" label="zzzz100,zzzz174" source="943" target="869" cy:directed="1"/>
      <edge id="249413" label="zzzz100,zzzz690" source="943" target="368" cy:directed="1"/>
      <edge id="249412" label="zzzz100,zzzzz48" source="943" target="123" cy:directed="1"/>
      <edge id="249411" label="zzzz100,zzzz159" source="943" target="884" cy:directed="1"/>
      <edge id="249410" label="zzzz100,zzzz386" source="943" target="670" cy:directed="1"/>
      <edge id="249409" label="zzzz100,zzzz505" source="943" target="551" cy:directed="1"/>
      <edge id="249408" label="zzzz100,zzzz183" source="943" target="860" cy:directed="1"/>
      <edge id="249407" label="zzzz100,zzzz660" source="943" target="397" cy:directed="1"/>
      <edge id="249406" label="zzzz100,zzzz199" source="943" target="844" cy:directed="1"/>
      <edge id="249405" label="zzzz100,zzzz348" source="943" target="708" cy:directed="1"/>
      <edge id="249404" label="zzzz100,zzzz475" source="943" target="581" cy:directed="1"/>
      <edge id="249403" label="zzzz100,zzzz634" source="943" target="423" cy:directed="1"/>
      <edge id="249402" label="zzzz100,zzzz636" source="943" target="421" cy:directed="1"/>
      <edge id="249401" label="zzzz100,zzzz158" source="943" target="885" cy:directed="1"/>
      <edge id="249400" label="zzzz100,zzzz167" source="943" target="876" cy:directed="1"/>
      <edge id="249399" label="zzzz100,zzzz173" source="943" target="870" cy:directed="1"/>
      <edge id="249398" label="zzzz100,zzzz175" source="943" target="868" cy:directed="1"/>
      <edge id="249397" label="zzzz100,zzzz357" source="943" target="699" cy:directed="1"/>
      <edge id="249396" label="zzzz100,zzzz632" source="943" target="425" cy:directed="1"/>
      <edge id="249395" label="zzzz100,zzzz807" source="943" target="276" cy:directed="1"/>
      <edge id="249394" label="zzzz100,zzzz108" source="943" target="935" cy:directed="1"/>
      <edge id="249393" label="zzzz100,zzzz216" source="943" target="827" cy:directed="1"/>
      <edge id="249392" label="zzzz100,zzzz410" source="943" target="646" cy:directed="1"/>
      <edge id="249391" label="zzzz100,zzzz479" source="943" target="577" cy:directed="1"/>
      <edge id="249390" label="zzzz100,zzzzz92" source="943" target="79" cy:directed="1"/>
      <edge id="249389" label="zzzz100,zzzz219" source="943" target="824" cy:directed="1"/>
      <edge id="249388" label="zzzz100,zzzz284" source="943" target="768" cy:directed="1"/>
      <edge id="249387" label="zzzz100,zzzz399" source="943" target="657" cy:directed="1"/>
      <edge id="249386" label="zzzz100,zzzz796" source="943" target="286" cy:directed="1"/>
      <edge id="249385" label="zzzz100,zzzz833" source="943" target="251" cy:directed="1"/>
      <edge id="249384" label="zzzz100,zzzzz49" source="943" target="122" cy:directed="1"/>
      <edge id="249383" label="zzzz100,zzzz136" source="943" target="907" cy:directed="1"/>
      <edge id="249382" label="zzzz100,zzzz220" source="943" target="823" cy:directed="1"/>
      <edge id="249381" label="zzzz100,zzzz359" source="943" target="697" cy:directed="1"/>
      <edge id="249380" label="zzzz100,zzzz685" source="943" target="373" cy:directed="1"/>
      <edge id="249379" label="zzzz100,zzzz829" source="943" target="255" cy:directed="1"/>
      <edge id="249378" label="zzzz100,zzzz831" source="943" target="253" cy:directed="1"/>
      <edge id="249377" label="zzzz100,zzzz146" source="943" target="897" cy:directed="1"/>
      <edge id="249376" label="zzzz100,zzzz171" source="943" target="872" cy:directed="1"/>
      <edge id="249375" label="zzzz100,zzzz471" source="943" target="585" cy:directed="1"/>
      <edge id="249374" label="zzzz100,zzzz832" source="943" target="252" cy:directed="1"/>
      <edge id="249373" label="zzzz100,zzzz899" source="943" target="212" cy:directed="1"/>
      <edge id="249372" label="zzzz100,zzzz184" source="943" target="859" cy:directed="1"/>
      <edge id="249371" label="zzzz100,zzzz427" source="943" target="629" cy:directed="1"/>
      <edge id="249370" label="zzzz100,zzzz738" source="943" target="331" cy:directed="1"/>
      <edge id="249369" label="zzzz100,zzzz902" source="943" target="209" cy:directed="1"/>
      <edge id="249368" label="zzzz100,zzzz379" source="943" target="677" cy:directed="1"/>
      <edge id="249367" label="zzzz100,zzzz155" source="943" target="888" cy:directed="1"/>
      <edge id="249366" label="zzzz100,zzzz179" source="943" target="864" cy:directed="1"/>
      <edge id="249365" label="zzzz100,zzzz191" source="943" target="852" cy:directed="1"/>
      <edge id="249364" label="zzzz100,zzzz243" source="943" target="800" cy:directed="1"/>
      <edge id="249363" label="zzzz100,zzzzz60" source="943" target="111" cy:directed="1"/>
      <edge id="249362" label="zzzz100,zzzz112" source="943" target="931" cy:directed="1"/>
      <edge id="249361" label="zzzz100,zzzz286" source="943" target="766" cy:directed="1"/>
      <edge id="249360" label="zzzz100,zzzz374" source="943" target="682" cy:directed="1"/>
      <edge id="249359" label="zzzz100,zzzz405" source="943" target="651" cy:directed="1"/>
      <edge id="249358" label="zzzz100,zzzz466" source="943" target="590" cy:directed="1"/>
      <edge id="249357" label="zzzz100,zzzz943" source="943" target="181" cy:directed="1"/>
      <edge id="249356" label="zzzz100,zzzz946" source="943" target="178" cy:directed="1"/>
      <edge id="249355" label="zzzz100,zzzz165" source="943" target="878" cy:directed="1"/>
      <edge id="249354" label="zzzz100,zzzz166" source="943" target="877" cy:directed="1"/>
      <edge id="249353" label="zzzz100,zzzz245" source="943" target="798" cy:directed="1"/>
      <edge id="249352" label="zzzz100,zzzz441" source="943" target="615" cy:directed="1"/>
      <edge id="249351" label="zzzz100,zzzz494" source="943" target="562" cy:directed="1"/>
      <edge id="249350" label="zzzz100,zzzz517" source="943" target="539" cy:directed="1"/>
      <edge id="249349" label="zzzz100,zzzz841" source="943" target="243" cy:directed="1"/>
      <edge id="249348" label="zzzz100,zzzz381" source="943" target="675" cy:directed="1"/>
      <edge id="249347" label="zzzz100,zzzz728" source="943" target="332" cy:directed="1"/>
      <edge id="249346" label="zzzz100,zzzz144" source="943" target="899" cy:directed="1"/>
      <edge id="249345" label="zzzz100,zzzz151" source="943" target="892" cy:directed="1"/>
      <edge id="249344" label="zzzz100,zzzz164" source="943" target="879" cy:directed="1"/>
      <edge id="249343" label="zzzz100,zzzz252" source="943" target="791" cy:directed="1"/>
      <edge id="249342" label="zzzz100,zzzz415" source="943" target="641" cy:directed="1"/>
      <edge id="249341" label="zzzz100,zzzz692" source="943" target="367" cy:directed="1"/>
      <edge id="249340" label="zzzz100,zzzzz99" source="943" target="72" cy:directed="1"/>
      <edge id="249339" label="zzzz100,zzzz218" source="943" target="825" cy:directed="1"/>
      <edge id="249338" label="zzzz100,zzzz461" source="943" target="595" cy:directed="1"/>
      <edge id="249337" label="zzzz100,zzzz509" source="943" target="547" cy:directed="1"/>
      <edge id="249336" label="zzzz100,zzzz852" source="943" target="232" cy:directed="1"/>
      <edge id="249335" label="zzzz100,zzzz934" source="943" target="188" cy:directed="1"/>
      <edge id="249334" label="zzzz100,zzzzz67" source="943" target="104" cy:directed="1"/>
      <edge id="249333" label="zzzz100,zzzz201" source="943" target="842" cy:directed="1"/>
      <edge id="249332" label="zzzz100,zzzz648" source="943" target="409" cy:directed="1"/>
      <edge id="249331" label="zzzz100,zzzz102" source="943" target="941" cy:directed="1"/>
      <edge id="249330" label="zzzz100,zzzz539" source="943" target="517" cy:directed="1"/>
      <edge id="249329" label="zzzz100,zzzz230" source="943" target="813" cy:directed="1"/>
      <edge id="249328" label="zzzz100,zzzz398" source="943" target="658" cy:directed="1"/>
      <edge id="249327" label="zzzz100,zzzz519" source="943" target="537" cy:directed="1"/>
      <edge id="249326" label="zzzz100,zzzzz83" source="943" target="88" cy:directed="1"/>
      <edge id="249325" label="zzzz100,zzzz180" source="943" target="863" cy:directed="1"/>
      <edge id="249324" label="zzzz100,zzzz383" source="943" target="673" cy:directed="1"/>
      <edge id="249323" label="zzzz100,zzzz563" source="943" target="493" cy:directed="1"/>
      <edge id="249322" label="zzzz100,zzzz665" source="943" target="392" cy:directed="1"/>
      <edge id="249321" label="zzzz100,zzzz186" source="943" target="857" cy:directed="1"/>
      <edge id="249320" label="zzzz100,zzzz437" source="943" target="619" cy:directed="1"/>
      <edge id="249319" label="zzzz100,zzzz791" source="943" target="290" cy:directed="1"/>
      <edge id="249318" label="zzzz100,zzzz809" source="943" target="274" cy:directed="1"/>
      <edge id="249317" label="zzzz100,zzzz288" source="943" target="764" cy:directed="1"/>
      <edge id="249316" label="zzzz100,zzzz589" source="943" target="467" cy:directed="1"/>
      <edge id="249315" label="zzzz100,zzzz143" source="943" target="900" cy:directed="1"/>
      <edge id="249314" label="zzzz100,zzzzz50" source="943" target="121" cy:directed="1"/>
      <edge id="249313" label="zzzz100,zzzz161" source="943" target="882" cy:directed="1"/>
      <edge id="249312" label="zzzz100,zzzz285" source="943" target="767" cy:directed="1"/>
      <edge id="249311" label="zzzz100,zzzz799" source="943" target="284" cy:directed="1"/>
      <edge id="249310" label="zzzz100,zzzzz97" source="943" target="74" cy:directed="1"/>
      <edge id="249309" label="zzzz100,zzzz107" source="943" target="936" cy:directed="1"/>
      <edge id="249308" label="zzzz100,zzzz169" source="943" target="874" cy:directed="1"/>
      <edge id="249307" label="zzzz100,zzzz516" source="943" target="540" cy:directed="1"/>
      <edge id="249306" label="zzzz100,zzzz558" source="943" target="498" cy:directed="1"/>
      <edge id="249305" label="zzzz100,zzzz840" source="943" target="244" cy:directed="1"/>
      <edge id="249304" label="zzzz100,zzzz140" source="943" target="903" cy:directed="1"/>
      <edge id="249303" label="zzzz100,zzzzz94" source="943" target="77" cy:directed="1"/>
      <edge id="249302" label="zzzz100,zzzz113" source="943" target="930" cy:directed="1"/>
      <edge id="249301" label="zzzz100,zzzz157" source="943" target="886" cy:directed="1"/>
      <edge id="249300" label="zzzz100,zzzz592" source="943" target="464" cy:directed="1"/>
      <edge id="249299" label="zzzz100,zzzz141" source="943" target="902" cy:directed="1"/>
      <edge id="249298" label="zzzz100,zzzz181" source="943" target="862" cy:directed="1"/>
      <edge id="249297" label="zzzz100,zzzz287" source="943" target="765" cy:directed="1"/>
      <edge id="249296" label="zzzz100,zzzz811" source="943" target="272" cy:directed="1"/>
      <edge id="249295" label="zzzz100,zzzz152" source="943" target="891" cy:directed="1"/>
      <edge id="249294" label="zzzz100,zzzz935" source="943" target="187" cy:directed="1"/>
      <edge id="249293" label="zzzz100,zzzz104" source="943" target="939" cy:directed="1"/>
      <edge id="249292" label="zzzz100,zzzz153" source="943" target="890" cy:directed="1"/>
      <edge id="249291" label="zzzz100,zzzz495" source="943" target="561" cy:directed="1"/>
      <edge id="249290" label="zzzz100,zzzz611" source="943" target="445" cy:directed="1"/>
      <edge id="249289" label="zzzz100,zzzz625" source="943" target="432" cy:directed="1"/>
      <edge id="249288" label="zzzz100,zzzz148" source="943" target="895" cy:directed="1"/>
      <edge id="249287" label="zzzz100,zzzz149" source="943" target="894" cy:directed="1"/>
      <edge id="249286" label="zzzz100,zzzz564" source="943" target="492" cy:directed="1"/>
      <edge id="249285" label="zzzz100,zzzz623" source="943" target="433" cy:directed="1"/>
      <edge id="249284" label="zzzz100,zzzz812" source="943" target="271" cy:directed="1"/>
      <edge id="249283" label="zzzz100,zzzz843" source="943" target="241" cy:directed="1"/>
      <edge id="249282" label="zzzz100,zzzz162" source="943" target="881" cy:directed="1"/>
      <edge id="249281" label="zzzz100,zzzz463" source="943" target="593" cy:directed="1"/>
      <edge id="249280" label="zzzz100,zzzz577" source="943" target="479" cy:directed="1"/>
      <edge id="249279" label="zzzz100,zzzz936" source="943" target="186" cy:directed="1"/>
      <edge id="249278" label="zzzz100,zzzz142" source="943" target="901" cy:directed="1"/>
      <edge id="249277" label="zzzz100,zzzz154" source="943" target="889" cy:directed="1"/>
      <edge id="249276" label="zzzz100,zzzz241" source="943" target="802" cy:directed="1"/>
      <edge id="249275" label="zzzz100,zzzz249" source="943" target="794" cy:directed="1"/>
      <edge id="249274" label="zzzz100,zzzz160" source="943" target="883" cy:directed="1"/>
      <edge id="249273" label="zzzz100,zzzz240" source="943" target="803" cy:directed="1"/>
      <edge id="249272" label="zzzz100,zzzz391" source="943" target="665" cy:directed="1"/>
      <edge id="249271" label="zzzz100,zzzz455" source="943" target="601" cy:directed="1"/>
      <edge id="249270" label="zzzz100,zzzz532" source="943" target="524" cy:directed="1"/>
      <edge id="249269" label="zzzz100,zzzz536" source="943" target="520" cy:directed="1"/>
      <edge id="249268" label="zzzz100,zzzz606" source="943" target="450" cy:directed="1"/>
      <edge id="249267" label="zzzz100,zzzz103" source="943" target="940" cy:directed="1"/>
      <edge id="249266" label="zzzz100,zzzz115" source="943" target="928" cy:directed="1"/>
      <edge id="249265" label="zzzz100,zzzz139" source="943" target="904" cy:directed="1"/>
      <edge id="249264" label="zzzz100,zzzz150" source="943" target="893" cy:directed="1"/>
      <edge id="249263" label="zzzz100,zzzz178" source="943" target="865" cy:directed="1"/>
      <edge id="249262" label="zzzz100,zzzz188" source="943" target="855" cy:directed="1"/>
      <edge id="249261" label="zzzz100,zzzz138" source="943" target="905" cy:directed="1"/>
      <edge id="249260" label="zzzz100,zzzz233" source="943" target="810" cy:directed="1"/>
      <edge id="249259" label="zzzz100,zzzz347" source="943" target="709" cy:directed="1"/>
      <edge id="249258" label="zzzz100,zzzz423" source="943" target="633" cy:directed="1"/>
      <edge id="249257" label="zzzz100,zzzz694" source="943" target="365" cy:directed="1"/>
      <edge id="249256" label="zzzz100,zzzzz44" source="943" target="127" cy:directed="1"/>
      <edge id="249255" label="zzzz100,zzzz156" source="943" target="887" cy:directed="1"/>
      <edge id="249254" label="zzzz100,zzzz402" source="943" target="654" cy:directed="1"/>
      <edge id="249253" label="zzzz100,zzzz439" source="943" target="617" cy:directed="1"/>
      <edge id="249252" label="zzzz100,zzzz571" source="943" target="485" cy:directed="1"/>
      <edge id="249251" label="zzzz100,zzzz836" source="943" target="248" cy:directed="1"/>
      <edge id="249250" label="zzzz100,zzzz122" source="943" target="921" cy:directed="1"/>
      <edge id="249249" label="zzzz100,zzzz404" source="943" target="652" cy:directed="1"/>
      <edge id="249248" label="zzzz100,zzzz419" source="943" target="637" cy:directed="1"/>
      <edge id="249247" label="zzzz100,zzzz430" source="943" target="626" cy:directed="1"/>
      <edge id="249246" label="zzzz100,zzzz431" source="943" target="625" cy:directed="1"/>
      <edge id="249245" label="zzzz100,zzzz666" source="943" target="391" cy:directed="1"/>
      <edge id="249244" label="zzzz100,zzzz834" source="943" target="250" cy:directed="1"/>
      <edge id="249243" label="zzzz100,zzzz788" source="943" target="293" cy:directed="1"/>
      <edge id="249242" label="zzzz100,zzzz837" source="943" target="247" cy:directed="1"/>
      <edge id="249241" label="zzzz100,zzzz232" source="943" target="811" cy:directed="1"/>
      <edge id="249240" label="zzzz100,zzzz435" source="943" target="621" cy:directed="1"/>
      <edge id="249239" label="zzzz100,zzzz496" source="943" target="560" cy:directed="1"/>
      <edge id="249238" label="zzzz100,zzzz593" source="943" target="463" cy:directed="1"/>
      <edge id="249237" label="zzzz100,zzzz574" source="943" target="482" cy:directed="1"/>
      <edge id="249236" label="zzzz100,zzzz105" source="943" target="938" cy:directed="1"/>
      <edge id="249235" label="zzzz100,zzzz290" source="943" target="763" cy:directed="1"/>
      <edge id="249234" label="zzzz100,zzzz412" source="943" target="644" cy:directed="1"/>
      <edge id="249233" label="zzzz100,zzzzz46" source="943" target="125" cy:directed="1"/>
      <edge id="249232" label="zzzz100,zzzz215" source="943" target="828" cy:directed="1"/>
      <edge id="249231" label="zzzz100,zzzz225" source="943" target="818" cy:directed="1"/>
      <edge id="249230" label="zzzz100,zzzz581" source="943" target="475" cy:directed="1"/>
      <edge id="249229" label="zzzz100,zzzz605" source="943" target="451" cy:directed="1"/>
      <edge id="249228" label="zzzz100,zzzzz43" source="943" target="128" cy:directed="1"/>
      <edge id="249227" label="zzzz100,zzzz226" source="943" target="817" cy:directed="1"/>
      <edge id="249226" label="zzzz100,zzzz588" source="943" target="468" cy:directed="1"/>
      <edge id="249225" label="zzzz100,zzzz633" source="943" target="424" cy:directed="1"/>
      <edge id="249224" label="zzzz100,zzzzz69" source="943" target="102" cy:directed="1"/>
      <edge id="249223" label="zzzz100,zzzz137" source="943" target="906" cy:directed="1"/>
      <edge id="249222" label="zzzz100,zzzz542" source="943" target="514" cy:directed="1"/>
      <edge id="249221" label="zzzz100,zzzz561" source="943" target="495" cy:directed="1"/>
      <edge id="249220" label="zzzz100,zzzzz47" source="943" target="124" cy:directed="1"/>
      <edge id="249219" label="zzzz100,zzzz470" source="943" target="586" cy:directed="1"/>
      <edge id="249218" label="zzzz100,zzzz484" source="943" target="572" cy:directed="1"/>
      <edge id="249217" label="zzzz100,zzzz853" source="943" target="231" cy:directed="1"/>
      <edge id="249216" label="zzzz100,zzzz110" source="943" target="933" cy:directed="1"/>
      <edge id="249215" label="zzzz100,zzzz426" source="943" target="630" cy:directed="1"/>
      <edge id="249214" label="zzzz100,zzzz429" source="943" target="627" cy:directed="1"/>
      <edge id="249213" label="zzzz100,zzzz576" source="943" target="480" cy:directed="1"/>
      <edge id="249212" label="zzzz100,zzzz213" source="943" target="830" cy:directed="1"/>
      <edge id="249211" label="zzzz100,zzzz263" source="943" target="780" cy:directed="1"/>
      <edge id="249210" label="zzzz100,zzzz486" source="943" target="570" cy:directed="1"/>
      <edge id="249209" label="zzzz100,zzzz329" source="943" target="727" cy:directed="1"/>
      <edge id="249208" label="zzzz100,zzzz784" source="943" target="297" cy:directed="1"/>
      <edge id="249207" label="zzzz100,zzzz109" source="943" target="934" cy:directed="1"/>
      <edge id="249206" label="zzzz100,zzzz578" source="943" target="478" cy:directed="1"/>
      <edge id="249205" label="zzzz100,zzzzz51" source="943" target="120" cy:directed="1"/>
      <edge id="249204" label="zzzz100,zzzz259" source="943" target="784" cy:directed="1"/>
      <edge id="249203" label="zzzz100,zzzz459" source="943" target="597" cy:directed="1"/>
      <edge id="249202" label="zzzz100,zzzz562" source="943" target="494" cy:directed="1"/>
      <edge id="249201" label="zzzz100,zzzz838" source="943" target="246" cy:directed="1"/>
      <edge id="249200" label="zzzz100,zzzz198" source="943" target="845" cy:directed="1"/>
      <edge id="249199" label="zzzz100,zzzz586" source="943" target="470" cy:directed="1"/>
      <edge id="249198" label="zzzz100,zzzz948" source="943" target="176" cy:directed="1"/>
      <edge id="249197" label="zzzz100,zzzz966" source="943" target="166" cy:directed="1"/>
      <edge id="249196" label="zzzz100,zzzz844" source="943" target="240" cy:directed="1"/>
      <edge id="249195" label="zzzz100,zzzz848" source="943" target="236" cy:directed="1"/>
      <edge id="249194" label="zzzz100,zzzz482" source="943" target="574" cy:directed="1"/>
      <edge id="249193" label="zzzz100,zzzz394" source="943" target="662" cy:directed="1"/>
      <edge id="249192" label="zzzz100,zzzz683" source="943" target="375" cy:directed="1"/>
      <edge id="249191" label="zzzz100,zzzz898" source="943" target="213" cy:directed="1"/>
      <edge id="249190" label="zzzz100,zzzz530" source="943" target="526" cy:directed="1"/>
      <edge id="249189" label="zzzz100,zzzz687" source="943" target="371" cy:directed="1"/>
      <edge id="249188" label="zzzz100,zzzz890" source="943" target="220" cy:directed="1"/>
      <edge id="249187" label="zzzz100,zzzz981" source="943" target="164" cy:directed="1"/>
      <edge id="249186" label="zzzz100,zzzz255" source="943" target="788" cy:directed="1"/>
      <edge id="249185" label="zzzz100,zzzz583" source="943" target="473" cy:directed="1"/>
      <edge id="249184" label="zzzz100,zzzz595" source="943" target="461" cy:directed="1"/>
      <edge id="249183" label="zzzz100,zzzz672" source="943" target="385" cy:directed="1"/>
      <edge id="249182" label="zzzz100,zzzz800" source="943" target="283" cy:directed="1"/>
      <edge id="249181" label="zzzz100,zzzz830" source="943" target="254" cy:directed="1"/>
      <edge id="249180" label="zzzz100,zzzz408" source="943" target="648" cy:directed="1"/>
      <edge id="249179" label="zzzz100,zzzz205" source="943" target="838" cy:directed="1"/>
      <edge id="249178" label="zzzz100,zzzz565" source="943" target="491" cy:directed="1"/>
      <edge id="249177" label="zzzz100,zzzz806" source="943" target="277" cy:directed="1"/>
      <edge id="249176" label="zzzz100,zzzz673" source="943" target="384" cy:directed="1"/>
      <edge id="249175" label="zzzz100,zzzz239" source="943" target="804" cy:directed="1"/>
      <edge id="249174" label="zzzz100,zzzz545" source="943" target="511" cy:directed="1"/>
      <edge id="249173" label="zzzz100,zzzz655" source="943" target="402" cy:directed="1"/>
      <edge id="249172" label="zzzz100,zzzz182" source="943" target="861" cy:directed="1"/>
      <edge id="249171" label="zzzz100,zzzz244" source="943" target="799" cy:directed="1"/>
      <edge id="249170" label="zzzz100,zzzz204" source="943" target="839" cy:directed="1"/>
      <edge id="249169" label="zzzz100,zzzz570" source="943" target="486" cy:directed="1"/>
      <edge id="249168" label="zzzz100,zzzz693" source="943" target="366" cy:directed="1"/>
      <edge id="249167" label="zzzz100,zzzzz70" source="943" target="101" cy:directed="1"/>
      <edge id="249166" label="zzzz100,zzzz607" source="943" target="449" cy:directed="1"/>
      <edge id="249165" label="zzzz100,zzzz942" source="943" target="182" cy:directed="1"/>
      <edge id="249164" label="zzzz100,zzzz686" source="943" target="372" cy:directed="1"/>
      <edge id="249163" label="zzzz100,zzzz580" source="943" target="476" cy:directed="1"/>
      <edge id="249162" label="zzzz100,zzzz609" source="943" target="447" cy:directed="1"/>
      <edge id="249161" label="zzzz100,zzzz801" source="943" target="282" cy:directed="1"/>
      <edge id="249160" label="zzzz100,zzzz669" source="943" target="388" cy:directed="1"/>
      <edge id="249159" label="zzzz100,zzzz604" source="943" target="452" cy:directed="1"/>
      <edge id="249158" label="zzzz100,zzzz697" source="943" target="362" cy:directed="1"/>
      <edge id="249157" label="zzzz100,zzzz493" source="943" target="563" cy:directed="1"/>
      <edge id="249156" label="zzzz100,zzzz101" source="943" target="942" cy:directed="1"/>
      <edge id="249155" label="zzzz100,zzzz202" source="943" target="841" cy:directed="1"/>
      <edge id="249154" label="zzzz100,zzzz600" source="943" target="456" cy:directed="1"/>
      <edge id="249153" label="zzzz100,zzzz603" source="943" target="453" cy:directed="1"/>
      <edge id="249152" label="zzzz100,zzzz671" source="943" target="386" cy:directed="1"/>
      <edge id="249151" label="zzzz100,zzzz676" source="943" target="381" cy:directed="1"/>
      <edge id="249150" label="zzzz100,zzzz274" source="943" target="777" cy:directed="1"/>
      <edge id="249149" label="zzzz100,zzzz506" source="943" target="550" cy:directed="1"/>
      <edge id="249148" label="zzzz100,zzzz785" source="943" target="296" cy:directed="1"/>
      <edge id="249147" label="zzzz100,zzzz787" source="943" target="294" cy:directed="1"/>
      <edge id="249146" label="zzzz100,zzzz513" source="943" target="543" cy:directed="1"/>
      <edge id="249145" label="zzzz100,zzzz681" source="943" target="376" cy:directed="1"/>
      <edge id="249144" label="zzzz100,zzzz411" source="943" target="645" cy:directed="1"/>
      <edge id="249143" label="zzzz100,zzzz510" source="943" target="546" cy:directed="1"/>
      <edge id="249142" label="zzzz100,zzzz584" source="943" target="472" cy:directed="1"/>
      <edge id="249141" label="zzzz100,zzzz596" source="943" target="460" cy:directed="1"/>
      <edge id="249140" label="zzzz100,zzzz983" source="943" target="162" cy:directed="1"/>
      <edge id="249139" label="zzzz100,zzzz251" source="943" target="792" cy:directed="1"/>
      <edge id="249138" label="zzzz100,zzzz403" source="943" target="653" cy:directed="1"/>
      <edge id="249137" label="zzzz100,zzzz551" source="943" target="505" cy:directed="1"/>
      <edge id="249136" label="zzzz100,zzzz783" source="943" target="298" cy:directed="1"/>
      <edge id="249135" label="zzzz100,zzzz560" source="943" target="496" cy:directed="1"/>
      <edge id="249134" label="zzzz100,zzzz804" source="943" target="279" cy:directed="1"/>
      <edge id="249133" label="zzzz100,zzzzz57" source="943" target="114" cy:directed="1"/>
      <edge id="249132" label="zzzz100,zzzzz58" source="943" target="113" cy:directed="1"/>
      <edge id="249131" label="zzzz100,zzzzz62" source="943" target="109" cy:directed="1"/>
      <edge id="249130" label="zzzz100,zzzz228" source="943" target="815" cy:directed="1"/>
      <edge id="249129" label="zzzz100,zzzz933" source="943" target="189" cy:directed="1"/>
      <edge id="249128" label="zzzz100,zzzzz52" source="943" target="119" cy:directed="1"/>
      <edge id="249127" label="zzzz100,zzzz392" source="943" target="664" cy:directed="1"/>
      <edge id="249126" label="zzzz100,zzzz476" source="943" target="580" cy:directed="1"/>
      <edge id="249125" label="zzzz100,zzzz575" source="943" target="481" cy:directed="1"/>
      <edge id="249124" label="zzzz100,zzzz582" source="943" target="474" cy:directed="1"/>
      <edge id="249123" label="zzzz100,zzzz111" source="943" target="932" cy:directed="1"/>
      <edge id="249122" label="zzzz100,zzzz292" source="943" target="761" cy:directed="1"/>
      <edge id="249121" label="zzzz100,zzzz557" source="943" target="499" cy:directed="1"/>
      <edge id="249120" label="zzzz100,zzzz594" source="943" target="462" cy:directed="1"/>
      <edge id="249119" label="zzzz100,zzzzz59" source="943" target="112" cy:directed="1"/>
      <edge id="249118" label="zzzz100,zzzz499" source="943" target="557" cy:directed="1"/>
      <edge id="249117" label="zzzz100,zzzz566" source="943" target="490" cy:directed="1"/>
      <edge id="249116" label="zzzz100,zzzz615" source="943" target="441" cy:directed="1"/>
      <edge id="249115" label="zzzz100,zzzz651" source="943" target="406" cy:directed="1"/>
      <edge id="249114" label="zzzz100,zzzz695" source="943" target="364" cy:directed="1"/>
      <edge id="249113" label="zzzz100,zzzz514" source="943" target="542" cy:directed="1"/>
      <edge id="249112" label="zzzz100,zzzz541" source="943" target="515" cy:directed="1"/>
      <edge id="249111" label="zzzz100,zzzz568" source="943" target="488" cy:directed="1"/>
      <edge id="249110" label="zzzz100,zzzz384" source="943" target="672" cy:directed="1"/>
      <edge id="249109" label="zzzz100,zzzz227" source="943" target="816" cy:directed="1"/>
      <edge id="249108" label="zzzz100,zzzz481" source="943" target="575" cy:directed="1"/>
      <edge id="249107" label="zzzz100,zzzz680" source="943" target="377" cy:directed="1"/>
      <edge id="249106" label="zzzz100,zzzz187" source="943" target="856" cy:directed="1"/>
      <edge id="249105" label="zzzz100,zzzz612" source="943" target="444" cy:directed="1"/>
      <edge id="249104" label="zzzz100,zzzz688" source="943" target="370" cy:directed="1"/>
      <edge id="249103" label="zzzz100,zzzz850" source="943" target="234" cy:directed="1"/>
      <edge id="249102" label="zzzz100,zzzz569" source="943" target="487" cy:directed="1"/>
      <edge id="249101" label="zzzz100,zzzz677" source="943" target="380" cy:directed="1"/>
      <edge id="249100" label="zzzz100,zzzz679" source="943" target="378" cy:directed="1"/>
      <edge id="249099" label="zzzz100,zzzz790" source="943" target="291" cy:directed="1"/>
      <edge id="249098" label="zzzz100,zzzz839" source="943" target="245" cy:directed="1"/>
      <edge id="249097" label="zzzz100,zzzz507" source="943" target="549" cy:directed="1"/>
      <edge id="249096" label="zzzz100,zzzz222" source="943" target="821" cy:directed="1"/>
      <edge id="249095" label="zzzz100,zzzz237" source="943" target="806" cy:directed="1"/>
      <edge id="249094" label="zzzz100,zzzz490" source="943" target="566" cy:directed="1"/>
      <edge id="249093" label="zzzz100,zzzz538" source="943" target="518" cy:directed="1"/>
      <edge id="249092" label="zzzz100,zzzz905" source="943" target="206" cy:directed="1"/>
      <edge id="249091" label="zzzz100,zzzz534" source="943" target="522" cy:directed="1"/>
      <edge id="249090" label="zzzz100,zzzz572" source="943" target="484" cy:directed="1"/>
      <edge id="249089" label="zzzz100,zzzz931" source="943" target="191" cy:directed="1"/>
      <edge id="249088" label="zzzz100,zzzzz63" source="943" target="108" cy:directed="1"/>
      <edge id="249087" label="zzzz100,zzzz190" source="943" target="853" cy:directed="1"/>
      <edge id="249086" label="zzzz100,zzzz341" source="943" target="715" cy:directed="1"/>
      <edge id="249085" label="zzzz100,zzzz602" source="943" target="454" cy:directed="1"/>
      <edge id="249084" label="zzzz100,zzzz786" source="943" target="295" cy:directed="1"/>
      <edge id="249083" label="zzzz100,zzzz214" source="943" target="829" cy:directed="1"/>
      <edge id="249082" label="zzzz100,zzzz862" source="943" target="224" cy:directed="1"/>
      <edge id="249081" label="zzzz100,zzzz297" source="943" target="759" cy:directed="1"/>
      <edge id="249080" label="zzzz100,zzzz312" source="943" target="744" cy:directed="1"/>
      <edge id="249079" label="zzzz100,zzzz552" source="943" target="504" cy:directed="1"/>
      <edge id="249078" label="zzzz100,zzzz469" source="943" target="587" cy:directed="1"/>
      <edge id="249077" label="zzzz100,zzzz543" source="943" target="513" cy:directed="1"/>
      <edge id="249076" label="zzzz100,zzzz639" source="943" target="418" cy:directed="1"/>
      <edge id="249075" label="zzzz100,zzzz280" source="943" target="772" cy:directed="1"/>
      <edge id="249074" label="zzzz100,zzzz301" source="943" target="755" cy:directed="1"/>
      <edge id="249073" label="zzzz100,zzzz711" source="943" target="348" cy:directed="1"/>
      <edge id="249072" label="zzzz100,zzzz446" source="943" target="610" cy:directed="1"/>
      <edge id="249071" label="zzzz100,zzzzz56" source="943" target="115" cy:directed="1"/>
      <edge id="249070" label="zzzz100,zzzz248" source="943" target="795" cy:directed="1"/>
      <edge id="249069" label="zzzz100,zzzz282" source="943" target="770" cy:directed="1"/>
      <edge id="249068" label="zzzz100,zzzz343" source="943" target="713" cy:directed="1"/>
      <edge id="249067" label="zzzz100,zzzz587" source="943" target="469" cy:directed="1"/>
      <edge id="249066" label="zzzz100,zzzz322" source="943" target="734" cy:directed="1"/>
      <edge id="249065" label="zzzz100,zzzz363" source="943" target="693" cy:directed="1"/>
      <edge id="249064" label="zzzz100,zzzz617" source="943" target="439" cy:directed="1"/>
      <edge id="249063" label="zzzz100,zzzz254" source="943" target="789" cy:directed="1"/>
      <edge id="249062" label="zzzz100,zzzz299" source="943" target="757" cy:directed="1"/>
      <edge id="249061" label="zzzz100,zzzz300" source="943" target="756" cy:directed="1"/>
      <edge id="249060" label="zzzz100,zzzz327" source="943" target="729" cy:directed="1"/>
      <edge id="249059" label="zzzz100,zzzz489" source="943" target="567" cy:directed="1"/>
      <edge id="249058" label="zzzz100,zzzz229" source="943" target="814" cy:directed="1"/>
      <edge id="249057" label="zzzz100,zzzz323" source="943" target="733" cy:directed="1"/>
      <edge id="249056" label="zzzz100,zzzz805" source="943" target="278" cy:directed="1"/>
      <edge id="249055" label="zzzz100,zzzz298" source="943" target="758" cy:directed="1"/>
      <edge id="249054" label="zzzz100,zzzz303" source="943" target="753" cy:directed="1"/>
      <edge id="249053" label="zzzz100,zzzz339" source="943" target="717" cy:directed="1"/>
      <edge id="249052" label="zzzz100,zzzz467" source="943" target="589" cy:directed="1"/>
      <edge id="249051" label="zzzz100,zzzz705" source="943" target="354" cy:directed="1"/>
      <edge id="249050" label="zzzz100,zzzz715" source="943" target="344" cy:directed="1"/>
      <edge id="249049" label="zzzz100,zzzzz98" source="943" target="73" cy:directed="1"/>
      <edge id="249048" label="zzzz100,zzzz760" source="943" target="315" cy:directed="1"/>
      <edge id="249047" label="zzzz100,zzzz313" source="943" target="743" cy:directed="1"/>
      <edge id="249046" label="zzzz100,zzzz350" source="943" target="706" cy:directed="1"/>
      <edge id="249045" label="zzzz100,zzzz709" source="943" target="350" cy:directed="1"/>
      <edge id="249044" label="zzzz100,zzzz234" source="943" target="809" cy:directed="1"/>
      <edge id="249043" label="zzzz100,zzzz675" source="943" target="382" cy:directed="1"/>
      <edge id="249042" label="zzzz100,zzzzz54" source="943" target="117" cy:directed="1"/>
      <edge id="249041" label="zzzz100,zzzz302" source="943" target="754" cy:directed="1"/>
      <edge id="249040" label="zzzz100,zzzz719" source="943" target="340" cy:directed="1"/>
      <edge id="249039" label="zzzz100,zzzz756" source="943" target="318" cy:directed="1"/>
      <edge id="249038" label="zzzz100,zzzz307" source="943" target="749" cy:directed="1"/>
      <edge id="249037" label="zzzz100,zzzz315" source="943" target="741" cy:directed="1"/>
      <edge id="249036" label="zzzz100,zzzzz75" source="943" target="96" cy:directed="1"/>
      <edge id="249035" label="zzzz100,zzzz231" source="943" target="812" cy:directed="1"/>
      <edge id="249034" label="zzzz100,zzzz321" source="943" target="735" cy:directed="1"/>
      <edge id="249033" label="zzzz100,zzzz696" source="943" target="363" cy:directed="1"/>
      <edge id="249032" label="zzzz100,zzzz707" source="943" target="352" cy:directed="1"/>
      <edge id="249031" label="zzzz100,zzzz345" source="943" target="711" cy:directed="1"/>
      <edge id="249030" label="zzzz100,zzzz223" source="943" target="820" cy:directed="1"/>
      <edge id="249029" label="zzzz100,zzzz854" source="943" target="230" cy:directed="1"/>
      <edge id="249028" label="zzzz100,zzzz824" source="943" target="260" cy:directed="1"/>
      <edge id="249027" label="zzzz100,zzzz311" source="943" target="745" cy:directed="1"/>
      <edge id="249026" label="zzzz100,zzzz334" source="943" target="722" cy:directed="1"/>
      <edge id="249025" label="zzzz100,zzzz714" source="943" target="345" cy:directed="1"/>
      <edge id="249024" label="zzzz100,zzzz333" source="943" target="723" cy:directed="1"/>
      <edge id="249023" label="zzzz100,zzzz701" source="943" target="358" cy:directed="1"/>
      <edge id="249022" label="zzzz100,zzzz308" source="943" target="748" cy:directed="1"/>
      <edge id="249021" label="zzzz100,zzzz305" source="943" target="751" cy:directed="1"/>
      <edge id="249020" label="zzzz100,zzzz488" source="943" target="568" cy:directed="1"/>
      <edge id="249019" label="zzzz100,zzzz745" source="943" target="327" cy:directed="1"/>
      <edge id="249018" label="zzzz100,zzzz826" source="943" target="258" cy:directed="1"/>
      <edge id="249017" label="zzzz100,zzzz235" source="943" target="808" cy:directed="1"/>
      <edge id="249016" label="zzzz100,zzzz314" source="943" target="742" cy:directed="1"/>
      <edge id="249015" label="zzzz100,zzzz340" source="943" target="716" cy:directed="1"/>
      <edge id="249014" label="zzzz100,zzzz283" source="943" target="769" cy:directed="1"/>
      <edge id="249013" label="zzzz100,zzzz700" source="943" target="359" cy:directed="1"/>
      <edge id="249012" label="zzzz100,zzzz710" source="943" target="349" cy:directed="1"/>
      <edge id="249011" label="zzzz100,zzzz304" source="943" target="752" cy:directed="1"/>
      <edge id="249010" label="zzzz100,zzzz332" source="943" target="724" cy:directed="1"/>
      <edge id="249009" label="zzzz100,zzzz336" source="943" target="720" cy:directed="1"/>
      <edge id="249008" label="zzzz100,zzzz813" source="943" target="270" cy:directed="1"/>
      <edge id="249007" label="zzzz100,zzzz344" source="943" target="712" cy:directed="1"/>
      <edge id="249006" label="zzzz100,zzzz704" source="943" target="355" cy:directed="1"/>
      <edge id="249005" label="zzzz100,zzzz278" source="943" target="774" cy:directed="1"/>
      <edge id="249004" label="zzzz100,zzzz310" source="943" target="746" cy:directed="1"/>
      <edge id="249003" label="zzzz100,zzzz330" source="943" target="726" cy:directed="1"/>
      <edge id="249002" label="zzzz100,zzzz703" source="943" target="356" cy:directed="1"/>
      <edge id="249001" label="zzzz100,zzzz250" source="943" target="793" cy:directed="1"/>
      <edge id="249000" label="zzzz100,zzzz277" source="943" target="775" cy:directed="1"/>
      <edge id="248999" label="zzzz100,zzzz325" source="943" target="731" cy:directed="1"/>
      <edge id="248998" label="zzzz100,zzzz342" source="943" target="714" cy:directed="1"/>
      <edge id="248997" label="zzzz100,zzzz279" source="943" target="773" cy:directed="1"/>
      <edge id="248996" label="zzzz100,zzzz721" source="943" target="338" cy:directed="1"/>
      <edge id="248995" label="zzzz100,zzzz192" source="943" target="851" cy:directed="1"/>
      <edge id="248994" label="zzzz100,zzzz319" source="943" target="737" cy:directed="1"/>
      <edge id="248993" label="zzzz100,zzzz338" source="943" target="718" cy:directed="1"/>
      <edge id="248992" label="zzzz100,zzzz718" source="943" target="341" cy:directed="1"/>
      <edge id="248991" label="zzzz100,zzzz920" source="943" target="195" cy:directed="1"/>
      <edge id="248990" label="zzzz100,zzzz306" source="943" target="750" cy:directed="1"/>
      <edge id="248989" label="zzzz100,zzzz326" source="943" target="730" cy:directed="1"/>
      <edge id="248988" label="zzzz100,zzzz503" source="943" target="553" cy:directed="1"/>
      <edge id="248987" label="zzzz100,zzzz818" source="943" target="266" cy:directed="1"/>
      <edge id="248986" label="zzzz100,zzzzz76" source="943" target="95" cy:directed="1"/>
      <edge id="248985" label="zzzz100,zzzz291" source="943" target="762" cy:directed="1"/>
      <edge id="248984" label="zzzz100,zzzz699" source="943" target="360" cy:directed="1"/>
      <edge id="248983" label="zzzz100,zzzz318" source="943" target="738" cy:directed="1"/>
      <edge id="248982" label="zzzz100,zzzz712" source="943" target="347" cy:directed="1"/>
      <edge id="248981" label="zzzz100,zzzz744" source="943" target="328" cy:directed="1"/>
      <edge id="248980" label="zzzz100,zzzz815" source="943" target="269" cy:directed="1"/>
      <edge id="248979" label="zzzz100,zzzz698" source="943" target="361" cy:directed="1"/>
      <edge id="248978" label="zzzz100,zzzz316" source="943" target="740" cy:directed="1"/>
      <edge id="248977" label="zzzz100,zzzz253" source="943" target="790" cy:directed="1"/>
      <edge id="248976" label="zzzz100,zzzzz66" source="943" target="105" cy:directed="1"/>
      <edge id="248975" label="zzzz100,zzzz820" source="943" target="264" cy:directed="1"/>
      <edge id="248974" label="zzzz100,zzzz281" source="943" target="771" cy:directed="1"/>
      <edge id="248973" label="zzzz101,zzzz248" source="942" target="795" cy:directed="1"/>
      <edge id="248972" label="zzzz101,zzzz905" source="942" target="206" cy:directed="1"/>
      <edge id="248971" label="zzzz101,zzzz541" source="942" target="515" cy:directed="1"/>
      <edge id="248970" label="zzzz101,zzzz551" source="942" target="505" cy:directed="1"/>
      <edge id="248969" label="zzzz101,zzzz568" source="942" target="488" cy:directed="1"/>
      <edge id="248968" label="zzzz101,zzzz692" source="942" target="367" cy:directed="1"/>
      <edge id="248967" label="zzzz101,zzzz609" source="942" target="447" cy:directed="1"/>
      <edge id="248966" label="zzzz101,zzzz102" source="942" target="941" cy:directed="1"/>
      <edge id="248965" label="zzzz101,zzzz534" source="942" target="522" cy:directed="1"/>
      <edge id="248964" label="zzzz101,zzzz931" source="942" target="191" cy:directed="1"/>
      <edge id="248963" label="zzzz101,zzzzz69" source="942" target="102" cy:directed="1"/>
      <edge id="248962" label="zzzz101,zzzz552" source="942" target="504" cy:directed="1"/>
      <edge id="248961" label="zzzz101,zzzz570" source="942" target="486" cy:directed="1"/>
      <edge id="248960" label="zzzz101,zzzz841" source="942" target="243" cy:directed="1"/>
      <edge id="248959" label="zzzz101,zzzz495" source="942" target="561" cy:directed="1"/>
      <edge id="248958" label="zzzz101,zzzz584" source="942" target="472" cy:directed="1"/>
      <edge id="248957" label="zzzz101,zzzz801" source="942" target="282" cy:directed="1"/>
      <edge id="248956" label="zzzz101,zzzz136" source="942" target="907" cy:directed="1"/>
      <edge id="248955" label="zzzz101,zzzzz94" source="942" target="77" cy:directed="1"/>
      <edge id="248954" label="zzzz101,zzzz165" source="942" target="878" cy:directed="1"/>
      <edge id="248953" label="zzzz101,zzzz423" source="942" target="633" cy:directed="1"/>
      <edge id="248952" label="zzzz101,zzzz507" source="942" target="549" cy:directed="1"/>
      <edge id="248951" label="zzzz101,zzzz898" source="942" target="213" cy:directed="1"/>
      <edge id="248950" label="zzzz101,zzzz119" source="942" target="924" cy:directed="1"/>
      <edge id="248949" label="zzzz101,zzzz228" source="942" target="815" cy:directed="1"/>
      <edge id="248948" label="zzzz101,zzzz433" source="942" target="623" cy:directed="1"/>
      <edge id="248947" label="zzzz101,zzzz580" source="942" target="476" cy:directed="1"/>
      <edge id="248946" label="zzzz101,zzzz948" source="942" target="176" cy:directed="1"/>
      <edge id="248945" label="zzzz101,zzzz124" source="942" target="919" cy:directed="1"/>
      <edge id="248944" label="zzzz101,zzzz171" source="942" target="872" cy:directed="1"/>
      <edge id="248943" label="zzzz101,zzzz125" source="942" target="918" cy:directed="1"/>
      <edge id="248942" label="zzzz101,zzzz161" source="942" target="882" cy:directed="1"/>
      <edge id="248941" label="zzzz101,zzzz166" source="942" target="877" cy:directed="1"/>
      <edge id="248940" label="zzzz101,zzzz943" source="942" target="181" cy:directed="1"/>
      <edge id="248939" label="zzzz101,zzzzz47" source="942" target="124" cy:directed="1"/>
      <edge id="248938" label="zzzz101,zzzz198" source="942" target="845" cy:directed="1"/>
      <edge id="248937" label="zzzz101,zzzz671" source="942" target="386" cy:directed="1"/>
      <edge id="248936" label="zzzz101,zzzz802" source="942" target="281" cy:directed="1"/>
      <edge id="248935" label="zzzz101,zzzzz48" source="942" target="123" cy:directed="1"/>
      <edge id="248934" label="zzzz101,zzzz120" source="942" target="923" cy:directed="1"/>
      <edge id="248933" label="zzzz101,zzzz353" source="942" target="703" cy:directed="1"/>
      <edge id="248932" label="zzzz101,zzzz564" source="942" target="492" cy:directed="1"/>
      <edge id="248931" label="zzzz101,zzzz245" source="942" target="798" cy:directed="1"/>
      <edge id="248930" label="zzzz101,zzzz429" source="942" target="627" cy:directed="1"/>
      <edge id="248929" label="zzzz101,zzzz164" source="942" target="879" cy:directed="1"/>
      <edge id="248928" label="zzzz101,zzzz170" source="942" target="873" cy:directed="1"/>
      <edge id="248927" label="zzzz101,zzzz375" source="942" target="681" cy:directed="1"/>
      <edge id="248926" label="zzzz101,zzzz942" source="942" target="182" cy:directed="1"/>
      <edge id="248925" label="zzzz101,zzzz112" source="942" target="931" cy:directed="1"/>
      <edge id="248924" label="zzzz101,zzzz183" source="942" target="860" cy:directed="1"/>
      <edge id="248923" label="zzzz101,zzzz812" source="942" target="271" cy:directed="1"/>
      <edge id="248922" label="zzzz101,zzzz576" source="942" target="480" cy:directed="1"/>
      <edge id="248921" label="zzzz101,zzzzz96" source="942" target="75" cy:directed="1"/>
      <edge id="248920" label="zzzz101,zzzz156" source="942" target="887" cy:directed="1"/>
      <edge id="248919" label="zzzz101,zzzz676" source="942" target="381" cy:directed="1"/>
      <edge id="248918" label="zzzz101,zzzz130" source="942" target="913" cy:directed="1"/>
      <edge id="248917" label="zzzz101,zzzz378" source="942" target="678" cy:directed="1"/>
      <edge id="248916" label="zzzz101,zzzz489" source="942" target="567" cy:directed="1"/>
      <edge id="248915" label="zzzz101,zzzz154" source="942" target="889" cy:directed="1"/>
      <edge id="248914" label="zzzz101,zzzz169" source="942" target="874" cy:directed="1"/>
      <edge id="248913" label="zzzz101,zzzz233" source="942" target="810" cy:directed="1"/>
      <edge id="248912" label="zzzz101,zzzz560" source="942" target="496" cy:directed="1"/>
      <edge id="248911" label="zzzz101,zzzzz52" source="942" target="119" cy:directed="1"/>
      <edge id="248910" label="zzzz101,zzzz218" source="942" target="825" cy:directed="1"/>
      <edge id="248909" label="zzzz101,zzzz548" source="942" target="508" cy:directed="1"/>
      <edge id="248908" label="zzzz101,zzzz114" source="942" target="929" cy:directed="1"/>
      <edge id="248907" label="zzzz101,zzzz232" source="942" target="811" cy:directed="1"/>
      <edge id="248906" label="zzzz101,zzzz505" source="942" target="551" cy:directed="1"/>
      <edge id="248905" label="zzzz101,zzzz620" source="942" target="436" cy:directed="1"/>
      <edge id="248904" label="zzzz101,zzzz697" source="942" target="362" cy:directed="1"/>
      <edge id="248903" label="zzzz101,zzzz476" source="942" target="580" cy:directed="1"/>
      <edge id="248902" label="zzzz101,zzzz669" source="942" target="388" cy:directed="1"/>
      <edge id="248901" label="zzzz101,zzzz510" source="942" target="546" cy:directed="1"/>
      <edge id="248900" label="zzzz101,zzzz657" source="942" target="400" cy:directed="1"/>
      <edge id="248899" label="zzzz101,zzzz664" source="942" target="393" cy:directed="1"/>
      <edge id="248898" label="zzzz101,zzzz829" source="942" target="255" cy:directed="1"/>
      <edge id="248897" label="zzzz101,zzzz176" source="942" target="867" cy:directed="1"/>
      <edge id="248896" label="zzzz101,zzzz506" source="942" target="550" cy:directed="1"/>
      <edge id="248895" label="zzzz101,zzzz528" source="942" target="528" cy:directed="1"/>
      <edge id="248894" label="zzzz101,zzzz579" source="942" target="477" cy:directed="1"/>
      <edge id="248893" label="zzzz101,zzzz951" source="942" target="173" cy:directed="1"/>
      <edge id="248892" label="zzzz101,zzzz485" source="942" target="571" cy:directed="1"/>
      <edge id="248891" label="zzzz101,zzzz807" source="942" target="276" cy:directed="1"/>
      <edge id="248890" label="zzzz101,zzzz935" source="942" target="187" cy:directed="1"/>
      <edge id="248889" label="zzzz101,zzzz595" source="942" target="461" cy:directed="1"/>
      <edge id="248888" label="zzzz101,zzzz612" source="942" target="444" cy:directed="1"/>
      <edge id="248887" label="zzzz101,zzzz810" source="942" target="273" cy:directed="1"/>
      <edge id="248886" label="zzzz101,zzzz163" source="942" target="880" cy:directed="1"/>
      <edge id="248885" label="zzzz101,zzzz180" source="942" target="863" cy:directed="1"/>
      <edge id="248884" label="zzzz101,zzzz288" source="942" target="764" cy:directed="1"/>
      <edge id="248883" label="zzzz101,zzzz693" source="942" target="366" cy:directed="1"/>
      <edge id="248882" label="zzzz101,zzzz806" source="942" target="277" cy:directed="1"/>
      <edge id="248881" label="zzzz101,zzzz852" source="942" target="232" cy:directed="1"/>
      <edge id="248880" label="zzzz101,zzzzz55" source="942" target="116" cy:directed="1"/>
      <edge id="248879" label="zzzz101,zzzz137" source="942" target="906" cy:directed="1"/>
      <edge id="248878" label="zzzz101,zzzz444" source="942" target="612" cy:directed="1"/>
      <edge id="248877" label="zzzz101,zzzz131" source="942" target="912" cy:directed="1"/>
      <edge id="248876" label="zzzz101,zzzz280" source="942" target="772" cy:directed="1"/>
      <edge id="248875" label="zzzz101,zzzz443" source="942" target="613" cy:directed="1"/>
      <edge id="248874" label="zzzz101,zzzz491" source="942" target="565" cy:directed="1"/>
      <edge id="248873" label="zzzz101,zzzz853" source="942" target="231" cy:directed="1"/>
      <edge id="248872" label="zzzz101,zzzz159" source="942" target="884" cy:directed="1"/>
      <edge id="248871" label="zzzz101,zzzz177" source="942" target="866" cy:directed="1"/>
      <edge id="248870" label="zzzz101,zzzz540" source="942" target="516" cy:directed="1"/>
      <edge id="248869" label="zzzz101,zzzz553" source="942" target="503" cy:directed="1"/>
      <edge id="248868" label="zzzz101,zzzz407" source="942" target="649" cy:directed="1"/>
      <edge id="248867" label="zzzz101,zzzz350" source="942" target="706" cy:directed="1"/>
      <edge id="248866" label="zzzz101,zzzz416" source="942" target="640" cy:directed="1"/>
      <edge id="248865" label="zzzz101,zzzz565" source="942" target="491" cy:directed="1"/>
      <edge id="248864" label="zzzz101,zzzz573" source="942" target="483" cy:directed="1"/>
      <edge id="248863" label="zzzz101,zzzzz58" source="942" target="113" cy:directed="1"/>
      <edge id="248862" label="zzzz101,zzzzz78" source="942" target="93" cy:directed="1"/>
      <edge id="248861" label="zzzz101,zzzzz80" source="942" target="91" cy:directed="1"/>
      <edge id="248860" label="zzzz101,zzzz237" source="942" target="806" cy:directed="1"/>
      <edge id="248859" label="zzzz101,zzzz356" source="942" target="700" cy:directed="1"/>
      <edge id="248858" label="zzzz101,zzzz411" source="942" target="645" cy:directed="1"/>
      <edge id="248857" label="zzzz101,zzzz680" source="942" target="377" cy:directed="1"/>
      <edge id="248856" label="zzzz101,zzzz791" source="942" target="290" cy:directed="1"/>
      <edge id="248855" label="zzzz101,zzzzz45" source="942" target="126" cy:directed="1"/>
      <edge id="248854" label="zzzz101,zzzz197" source="942" target="846" cy:directed="1"/>
      <edge id="248853" label="zzzz101,zzzz432" source="942" target="624" cy:directed="1"/>
      <edge id="248852" label="zzzz101,zzzz454" source="942" target="602" cy:directed="1"/>
      <edge id="248851" label="zzzz101,zzzz459" source="942" target="597" cy:directed="1"/>
      <edge id="248850" label="zzzz101,zzzz504" source="942" target="552" cy:directed="1"/>
      <edge id="248849" label="zzzz101,zzzz532" source="942" target="524" cy:directed="1"/>
      <edge id="248848" label="zzzz101,zzzz949" source="942" target="175" cy:directed="1"/>
      <edge id="248847" label="zzzz101,zzzzz84" source="942" target="87" cy:directed="1"/>
      <edge id="248846" label="zzzz101,zzzz123" source="942" target="920" cy:directed="1"/>
      <edge id="248845" label="zzzz101,zzzz285" source="942" target="767" cy:directed="1"/>
      <edge id="248844" label="zzzz101,zzzz348" source="942" target="708" cy:directed="1"/>
      <edge id="248843" label="zzzz101,zzzz440" source="942" target="616" cy:directed="1"/>
      <edge id="248842" label="zzzz101,zzzz603" source="942" target="453" cy:directed="1"/>
      <edge id="248841" label="zzzz101,zzzz607" source="942" target="449" cy:directed="1"/>
      <edge id="248840" label="zzzz101,zzzz966" source="942" target="166" cy:directed="1"/>
      <edge id="248839" label="zzzz101,zzzz107" source="942" target="936" cy:directed="1"/>
      <edge id="248838" label="zzzz101,zzzz134" source="942" target="909" cy:directed="1"/>
      <edge id="248837" label="zzzz101,zzzz349" source="942" target="707" cy:directed="1"/>
      <edge id="248836" label="zzzz101,zzzz545" source="942" target="511" cy:directed="1"/>
      <edge id="248835" label="zzzz101,zzzz550" source="942" target="506" cy:directed="1"/>
      <edge id="248834" label="zzzz101,zzzz585" source="942" target="471" cy:directed="1"/>
      <edge id="248833" label="zzzz101,zzzz594" source="942" target="462" cy:directed="1"/>
      <edge id="248832" label="zzzz101,zzzz673" source="942" target="384" cy:directed="1"/>
      <edge id="248831" label="zzzz101,zzzzz74" source="942" target="97" cy:directed="1"/>
      <edge id="248830" label="zzzz101,zzzz230" source="942" target="813" cy:directed="1"/>
      <edge id="248829" label="zzzz101,zzzz286" source="942" target="766" cy:directed="1"/>
      <edge id="248828" label="zzzz101,zzzz483" source="942" target="573" cy:directed="1"/>
      <edge id="248827" label="zzzz101,zzzz484" source="942" target="572" cy:directed="1"/>
      <edge id="248826" label="zzzz101,zzzz889" source="942" target="221" cy:directed="1"/>
      <edge id="248825" label="zzzz101,zzzzz44" source="942" target="127" cy:directed="1"/>
      <edge id="248824" label="zzzz101,zzzzz88" source="942" target="83" cy:directed="1"/>
      <edge id="248823" label="zzzz101,zzzz167" source="942" target="876" cy:directed="1"/>
      <edge id="248822" label="zzzz101,zzzz181" source="942" target="862" cy:directed="1"/>
      <edge id="248821" label="zzzz101,zzzz251" source="942" target="792" cy:directed="1"/>
      <edge id="248820" label="zzzz101,zzzz526" source="942" target="530" cy:directed="1"/>
      <edge id="248819" label="zzzz101,zzzz554" source="942" target="502" cy:directed="1"/>
      <edge id="248818" label="zzzz101,zzzz834" source="942" target="250" cy:directed="1"/>
      <edge id="248817" label="zzzz101,zzzz160" source="942" target="883" cy:directed="1"/>
      <edge id="248816" label="zzzz101,zzzz174" source="942" target="869" cy:directed="1"/>
      <edge id="248815" label="zzzz101,zzzz188" source="942" target="855" cy:directed="1"/>
      <edge id="248814" label="zzzz101,zzzz220" source="942" target="823" cy:directed="1"/>
      <edge id="248813" label="zzzz101,zzzz244" source="942" target="799" cy:directed="1"/>
      <edge id="248812" label="zzzz101,zzzz456" source="942" target="600" cy:directed="1"/>
      <edge id="248811" label="zzzz101,zzzz490" source="942" target="566" cy:directed="1"/>
      <edge id="248810" label="zzzz101,zzzz524" source="942" target="532" cy:directed="1"/>
      <edge id="248809" label="zzzz101,zzzz527" source="942" target="529" cy:directed="1"/>
      <edge id="248808" label="zzzz101,zzzz639" source="942" target="418" cy:directed="1"/>
      <edge id="248807" label="zzzz101,zzzz800" source="942" target="283" cy:directed="1"/>
      <edge id="248806" label="zzzz101,zzzz358" source="942" target="698" cy:directed="1"/>
      <edge id="248805" label="zzzz101,zzzz415" source="942" target="641" cy:directed="1"/>
      <edge id="248804" label="zzzz101,zzzz457" source="942" target="599" cy:directed="1"/>
      <edge id="248803" label="zzzz101,zzzz632" source="942" target="425" cy:directed="1"/>
      <edge id="248802" label="zzzz101,zzzz784" source="942" target="297" cy:directed="1"/>
      <edge id="248801" label="zzzz101,zzzz132" source="942" target="911" cy:directed="1"/>
      <edge id="248800" label="zzzz101,zzzz135" source="942" target="908" cy:directed="1"/>
      <edge id="248799" label="zzzz101,zzzz555" source="942" target="501" cy:directed="1"/>
      <edge id="248798" label="zzzz101,zzzz572" source="942" target="484" cy:directed="1"/>
      <edge id="248797" label="zzzz101,zzzz600" source="942" target="456" cy:directed="1"/>
      <edge id="248796" label="zzzz101,zzzz655" source="942" target="402" cy:directed="1"/>
      <edge id="248795" label="zzzz101,zzzz792" source="942" target="289" cy:directed="1"/>
      <edge id="248794" label="zzzz101,zzzz809" source="942" target="274" cy:directed="1"/>
      <edge id="248793" label="zzzz101,zzzz529" source="942" target="527" cy:directed="1"/>
      <edge id="248792" label="zzzz101,zzzz575" source="942" target="481" cy:directed="1"/>
      <edge id="248791" label="zzzz101,zzzz695" source="942" target="364" cy:directed="1"/>
      <edge id="248790" label="zzzz101,zzzz224" source="942" target="819" cy:directed="1"/>
      <edge id="248789" label="zzzz101,zzzz284" source="942" target="768" cy:directed="1"/>
      <edge id="248788" label="zzzz101,zzzz448" source="942" target="608" cy:directed="1"/>
      <edge id="248787" label="zzzz101,zzzz559" source="942" target="497" cy:directed="1"/>
      <edge id="248786" label="zzzz101,zzzz615" source="942" target="441" cy:directed="1"/>
      <edge id="248785" label="zzzz101,zzzz207" source="942" target="836" cy:directed="1"/>
      <edge id="248784" label="zzzz101,zzzz292" source="942" target="761" cy:directed="1"/>
      <edge id="248783" label="zzzz101,zzzz424" source="942" target="632" cy:directed="1"/>
      <edge id="248782" label="zzzz101,zzzz523" source="942" target="533" cy:directed="1"/>
      <edge id="248781" label="zzzz101,zzzz678" source="942" target="379" cy:directed="1"/>
      <edge id="248780" label="zzzz101,zzzz907" source="942" target="204" cy:directed="1"/>
      <edge id="248779" label="zzzz101,zzzz184" source="942" target="859" cy:directed="1"/>
      <edge id="248778" label="zzzz101,zzzz282" source="942" target="770" cy:directed="1"/>
      <edge id="248777" label="zzzz101,zzzz381" source="942" target="675" cy:directed="1"/>
      <edge id="248776" label="zzzz101,zzzz417" source="942" target="639" cy:directed="1"/>
      <edge id="248775" label="zzzz101,zzzz427" source="942" target="629" cy:directed="1"/>
      <edge id="248774" label="zzzz101,zzzz501" source="942" target="555" cy:directed="1"/>
      <edge id="248773" label="zzzz101,zzzz566" source="942" target="490" cy:directed="1"/>
      <edge id="248772" label="zzzz101,zzzz583" source="942" target="473" cy:directed="1"/>
      <edge id="248771" label="zzzz101,zzzzz59" source="942" target="112" cy:directed="1"/>
      <edge id="248770" label="zzzz101,zzzzz73" source="942" target="98" cy:directed="1"/>
      <edge id="248769" label="zzzz101,zzzz329" source="942" target="727" cy:directed="1"/>
      <edge id="248768" label="zzzz101,zzzz480" source="942" target="576" cy:directed="1"/>
      <edge id="248767" label="zzzz101,zzzz493" source="942" target="563" cy:directed="1"/>
      <edge id="248766" label="zzzz101,zzzz525" source="942" target="531" cy:directed="1"/>
      <edge id="248765" label="zzzz101,zzzz567" source="942" target="489" cy:directed="1"/>
      <edge id="248764" label="zzzz101,zzzz115" source="942" target="928" cy:directed="1"/>
      <edge id="248763" label="zzzz101,zzzz128" source="942" target="915" cy:directed="1"/>
      <edge id="248762" label="zzzz101,zzzz845" source="942" target="239" cy:directed="1"/>
      <edge id="248761" label="zzzz101,zzzz941" source="942" target="183" cy:directed="1"/>
      <edge id="248760" label="zzzz101,zzzzz86" source="942" target="85" cy:directed="1"/>
      <edge id="248759" label="zzzz101,zzzz116" source="942" target="927" cy:directed="1"/>
      <edge id="248758" label="zzzz101,zzzz162" source="942" target="881" cy:directed="1"/>
      <edge id="248757" label="zzzz101,zzzz458" source="942" target="598" cy:directed="1"/>
      <edge id="248756" label="zzzz101,zzzz651" source="942" target="406" cy:directed="1"/>
      <edge id="248755" label="zzzz101,zzzz685" source="942" target="373" cy:directed="1"/>
      <edge id="248754" label="zzzz101,zzzz726" source="942" target="334" cy:directed="1"/>
      <edge id="248753" label="zzzz101,zzzz909" source="942" target="202" cy:directed="1"/>
      <edge id="248752" label="zzzz101,zzzz911" source="942" target="200" cy:directed="1"/>
      <edge id="248751" label="zzzz101,zzzz934" source="942" target="188" cy:directed="1"/>
      <edge id="248750" label="zzzz101,zzzz947" source="942" target="177" cy:directed="1"/>
      <edge id="248749" label="zzzz101,zzzzz50" source="942" target="121" cy:directed="1"/>
      <edge id="248748" label="zzzz101,zzzz392" source="942" target="664" cy:directed="1"/>
      <edge id="248747" label="zzzz101,zzzz522" source="942" target="534" cy:directed="1"/>
      <edge id="248746" label="zzzz101,zzzz533" source="942" target="523" cy:directed="1"/>
      <edge id="248745" label="zzzz101,zzzz629" source="942" target="428" cy:directed="1"/>
      <edge id="248744" label="zzzz101,zzzz640" source="942" target="417" cy:directed="1"/>
      <edge id="248743" label="zzzz101,zzzz670" source="942" target="387" cy:directed="1"/>
      <edge id="248742" label="zzzz101,zzzz110" source="942" target="933" cy:directed="1"/>
      <edge id="248741" label="zzzz101,zzzz126" source="942" target="917" cy:directed="1"/>
      <edge id="248740" label="zzzz101,zzzz138" source="942" target="905" cy:directed="1"/>
      <edge id="248739" label="zzzz101,zzzz241" source="942" target="802" cy:directed="1"/>
      <edge id="248738" label="zzzz101,zzzz420" source="942" target="636" cy:directed="1"/>
      <edge id="248737" label="zzzz101,zzzz474" source="942" target="582" cy:directed="1"/>
      <edge id="248736" label="zzzz101,zzzz546" source="942" target="510" cy:directed="1"/>
      <edge id="248735" label="zzzz101,zzzz556" source="942" target="500" cy:directed="1"/>
      <edge id="248734" label="zzzz101,zzzz596" source="942" target="460" cy:directed="1"/>
      <edge id="248733" label="zzzz101,zzzz677" source="942" target="380" cy:directed="1"/>
      <edge id="248732" label="zzzz101,zzzz153" source="942" target="890" cy:directed="1"/>
      <edge id="248731" label="zzzz101,zzzz187" source="942" target="856" cy:directed="1"/>
      <edge id="248730" label="zzzz101,zzzz396" source="942" target="660" cy:directed="1"/>
      <edge id="248729" label="zzzz101,zzzz479" source="942" target="577" cy:directed="1"/>
      <edge id="248728" label="zzzz101,zzzz518" source="942" target="538" cy:directed="1"/>
      <edge id="248727" label="zzzz101,zzzz557" source="942" target="499" cy:directed="1"/>
      <edge id="248726" label="zzzz101,zzzz589" source="942" target="467" cy:directed="1"/>
      <edge id="248725" label="zzzz101,zzzz663" source="942" target="394" cy:directed="1"/>
      <edge id="248724" label="zzzz101,zzzz906" source="942" target="205" cy:directed="1"/>
      <edge id="248723" label="zzzz101,zzzz910" source="942" target="201" cy:directed="1"/>
      <edge id="248722" label="zzzz101,zzzzz57" source="942" target="114" cy:directed="1"/>
      <edge id="248721" label="zzzz101,zzzzz81" source="942" target="90" cy:directed="1"/>
      <edge id="248720" label="zzzz101,zzzzz97" source="942" target="74" cy:directed="1"/>
      <edge id="248719" label="zzzz101,zzzzz99" source="942" target="72" cy:directed="1"/>
      <edge id="248718" label="zzzz101,zzzz384" source="942" target="672" cy:directed="1"/>
      <edge id="248717" label="zzzz101,zzzz445" source="942" target="611" cy:directed="1"/>
      <edge id="248716" label="zzzz101,zzzz494" source="942" target="562" cy:directed="1"/>
      <edge id="248715" label="zzzz101,zzzz498" source="942" target="558" cy:directed="1"/>
      <edge id="248714" label="zzzz101,zzzz838" source="942" target="246" cy:directed="1"/>
      <edge id="248713" label="zzzz101,zzzzz89" source="942" target="82" cy:directed="1"/>
      <edge id="248712" label="zzzz101,zzzz363" source="942" target="693" cy:directed="1"/>
      <edge id="248711" label="zzzz101,zzzz365" source="942" target="691" cy:directed="1"/>
      <edge id="248710" label="zzzz101,zzzz530" source="942" target="526" cy:directed="1"/>
      <edge id="248709" label="zzzz101,zzzz531" source="942" target="525" cy:directed="1"/>
      <edge id="248708" label="zzzz101,zzzz606" source="942" target="450" cy:directed="1"/>
      <edge id="248707" label="zzzz101,zzzz133" source="942" target="910" cy:directed="1"/>
      <edge id="248706" label="zzzz101,zzzz450" source="942" target="606" cy:directed="1"/>
      <edge id="248705" label="zzzz101,zzzz725" source="942" target="335" cy:directed="1"/>
      <edge id="248704" label="zzzz101,zzzzz49" source="942" target="122" cy:directed="1"/>
      <edge id="248703" label="zzzz101,zzzz243" source="942" target="800" cy:directed="1"/>
      <edge id="248702" label="zzzz101,zzzz249" source="942" target="794" cy:directed="1"/>
      <edge id="248701" label="zzzz101,zzzz252" source="942" target="791" cy:directed="1"/>
      <edge id="248700" label="zzzz101,zzzz482" source="942" target="574" cy:directed="1"/>
      <edge id="248699" label="zzzz101,zzzz499" source="942" target="557" cy:directed="1"/>
      <edge id="248698" label="zzzz101,zzzz722" source="942" target="337" cy:directed="1"/>
      <edge id="248697" label="zzzz101,zzzzz43" source="942" target="128" cy:directed="1"/>
      <edge id="248696" label="zzzz101,zzzzz85" source="942" target="86" cy:directed="1"/>
      <edge id="248695" label="zzzz101,zzzz630" source="942" target="427" cy:directed="1"/>
      <edge id="248694" label="zzzz101,zzzz891" source="942" target="219" cy:directed="1"/>
      <edge id="248693" label="zzzz101,zzzz106" source="942" target="937" cy:directed="1"/>
      <edge id="248692" label="zzzz101,zzzz475" source="942" target="581" cy:directed="1"/>
      <edge id="248691" label="zzzz101,zzzz514" source="942" target="542" cy:directed="1"/>
      <edge id="248690" label="zzzz101,zzzz515" source="942" target="541" cy:directed="1"/>
      <edge id="248689" label="zzzz101,zzzz536" source="942" target="520" cy:directed="1"/>
      <edge id="248688" label="zzzz101,zzzz794" source="942" target="287" cy:directed="1"/>
      <edge id="248687" label="zzzz101,zzzz904" source="942" target="207" cy:directed="1"/>
      <edge id="248686" label="zzzz101,zzzz287" source="942" target="765" cy:directed="1"/>
      <edge id="248685" label="zzzz101,zzzz658" source="942" target="399" cy:directed="1"/>
      <edge id="248684" label="zzzz101,zzzz674" source="942" target="383" cy:directed="1"/>
      <edge id="248683" label="zzzz101,zzzz921" source="942" target="194" cy:directed="1"/>
      <edge id="248682" label="zzzz101,zzzz936" source="942" target="186" cy:directed="1"/>
      <edge id="248681" label="zzzz101,zzzz940" source="942" target="184" cy:directed="1"/>
      <edge id="248680" label="zzzz101,zzzz152" source="942" target="891" cy:directed="1"/>
      <edge id="248679" label="zzzz101,zzzz361" source="942" target="695" cy:directed="1"/>
      <edge id="248678" label="zzzz101,zzzz831" source="942" target="253" cy:directed="1"/>
      <edge id="248677" label="zzzz101,zzzz418" source="942" target="638" cy:directed="1"/>
      <edge id="248676" label="zzzz101,zzzz452" source="942" target="604" cy:directed="1"/>
      <edge id="248675" label="zzzz101,zzzz477" source="942" target="579" cy:directed="1"/>
      <edge id="248674" label="zzzz101,zzzz549" source="942" target="507" cy:directed="1"/>
      <edge id="248673" label="zzzz101,zzzz569" source="942" target="487" cy:directed="1"/>
      <edge id="248672" label="zzzz101,zzzz649" source="942" target="408" cy:directed="1"/>
      <edge id="248671" label="zzzz101,zzzz833" source="942" target="251" cy:directed="1"/>
      <edge id="248670" label="zzzz101,zzzz840" source="942" target="244" cy:directed="1"/>
      <edge id="248669" label="zzzz101,zzzz118" source="942" target="925" cy:directed="1"/>
      <edge id="248668" label="zzzz101,zzzz139" source="942" target="904" cy:directed="1"/>
      <edge id="248667" label="zzzz101,zzzz347" source="942" target="709" cy:directed="1"/>
      <edge id="248666" label="zzzz101,zzzz502" source="942" target="554" cy:directed="1"/>
      <edge id="248665" label="zzzz101,zzzz627" source="942" target="430" cy:directed="1"/>
      <edge id="248664" label="zzzz101,zzzz642" source="942" target="415" cy:directed="1"/>
      <edge id="248663" label="zzzz101,zzzz667" source="942" target="390" cy:directed="1"/>
      <edge id="248662" label="zzzz101,zzzz108" source="942" target="935" cy:directed="1"/>
      <edge id="248661" label="zzzz101,zzzz151" source="942" target="892" cy:directed="1"/>
      <edge id="248660" label="zzzz101,zzzz191" source="942" target="852" cy:directed="1"/>
      <edge id="248659" label="zzzz101,zzzz372" source="942" target="684" cy:directed="1"/>
      <edge id="248658" label="zzzz101,zzzz400" source="942" target="656" cy:directed="1"/>
      <edge id="248657" label="zzzz101,zzzz613" source="942" target="443" cy:directed="1"/>
      <edge id="248656" label="zzzz101,zzzz884" source="942" target="222" cy:directed="1"/>
      <edge id="248655" label="zzzz101,zzzz912" source="942" target="199" cy:directed="1"/>
      <edge id="248654" label="zzzz101,zzzz933" source="942" target="189" cy:directed="1"/>
      <edge id="248653" label="zzzz101,zzzz274" source="942" target="777" cy:directed="1"/>
      <edge id="248652" label="zzzz101,zzzz352" source="942" target="704" cy:directed="1"/>
      <edge id="248651" label="zzzz101,zzzz465" source="942" target="591" cy:directed="1"/>
      <edge id="248650" label="zzzz101,zzzz581" source="942" target="475" cy:directed="1"/>
      <edge id="248649" label="zzzz101,zzzz604" source="942" target="452" cy:directed="1"/>
      <edge id="248648" label="zzzz101,zzzz638" source="942" target="419" cy:directed="1"/>
      <edge id="248647" label="zzzz101,zzzz646" source="942" target="411" cy:directed="1"/>
      <edge id="248646" label="zzzz101,zzzz832" source="942" target="252" cy:directed="1"/>
      <edge id="248645" label="zzzz101,zzzz896" source="942" target="214" cy:directed="1"/>
      <edge id="248644" label="zzzz101,zzzz173" source="942" target="870" cy:directed="1"/>
      <edge id="248643" label="zzzz101,zzzz261" source="942" target="782" cy:directed="1"/>
      <edge id="248642" label="zzzz101,zzzz262" source="942" target="781" cy:directed="1"/>
      <edge id="248641" label="zzzz101,zzzz393" source="942" target="663" cy:directed="1"/>
      <edge id="248640" label="zzzz101,zzzz403" source="942" target="653" cy:directed="1"/>
      <edge id="248639" label="zzzz101,zzzz422" source="942" target="634" cy:directed="1"/>
      <edge id="248638" label="zzzz101,zzzz468" source="942" target="588" cy:directed="1"/>
      <edge id="248637" label="zzzz101,zzzz614" source="942" target="442" cy:directed="1"/>
      <edge id="248636" label="zzzz101,zzzz628" source="942" target="429" cy:directed="1"/>
      <edge id="248635" label="zzzz101,zzzz643" source="942" target="414" cy:directed="1"/>
      <edge id="248634" label="zzzz101,zzzz158" source="942" target="885" cy:directed="1"/>
      <edge id="248633" label="zzzz101,zzzz299" source="942" target="757" cy:directed="1"/>
      <edge id="248632" label="zzzz101,zzzz371" source="942" target="685" cy:directed="1"/>
      <edge id="248631" label="zzzz101,zzzz413" source="942" target="643" cy:directed="1"/>
      <edge id="248630" label="zzzz101,zzzz520" source="942" target="536" cy:directed="1"/>
      <edge id="248629" label="zzzz101,zzzz542" source="942" target="514" cy:directed="1"/>
      <edge id="248628" label="zzzz101,zzzz547" source="942" target="509" cy:directed="1"/>
      <edge id="248627" label="zzzz101,zzzz599" source="942" target="457" cy:directed="1"/>
      <edge id="248626" label="zzzz101,zzzzz56" source="942" target="115" cy:directed="1"/>
      <edge id="248625" label="zzzz101,zzzz175" source="942" target="868" cy:directed="1"/>
      <edge id="248624" label="zzzz101,zzzz189" source="942" target="854" cy:directed="1"/>
      <edge id="248623" label="zzzz101,zzzz386" source="942" target="670" cy:directed="1"/>
      <edge id="248622" label="zzzz101,zzzz410" source="942" target="646" cy:directed="1"/>
      <edge id="248621" label="zzzz101,zzzz437" source="942" target="619" cy:directed="1"/>
      <edge id="248620" label="zzzz101,zzzz451" source="942" target="605" cy:directed="1"/>
      <edge id="248619" label="zzzz101,zzzz913" source="942" target="198" cy:directed="1"/>
      <edge id="248618" label="zzzz101,zzzz945" source="942" target="179" cy:directed="1"/>
      <edge id="248617" label="zzzz101,zzzz129" source="942" target="914" cy:directed="1"/>
      <edge id="248616" label="zzzz101,zzzz373" source="942" target="683" cy:directed="1"/>
      <edge id="248615" label="zzzz101,zzzz398" source="942" target="658" cy:directed="1"/>
      <edge id="248614" label="zzzz101,zzzz421" source="942" target="635" cy:directed="1"/>
      <edge id="248613" label="zzzz101,zzzz426" source="942" target="630" cy:directed="1"/>
      <edge id="248612" label="zzzz101,zzzz654" source="942" target="403" cy:directed="1"/>
      <edge id="248611" label="zzzz101,zzzz686" source="942" target="372" cy:directed="1"/>
      <edge id="248610" label="zzzz101,zzzz724" source="942" target="336" cy:directed="1"/>
      <edge id="248609" label="zzzz101,zzzz952" source="942" target="172" cy:directed="1"/>
      <edge id="248608" label="zzzz101,zzzz394" source="942" target="662" cy:directed="1"/>
      <edge id="248607" label="zzzz101,zzzz578" source="942" target="478" cy:directed="1"/>
      <edge id="248606" label="zzzz101,zzzz665" source="942" target="392" cy:directed="1"/>
      <edge id="248605" label="zzzz101,zzzz666" source="942" target="391" cy:directed="1"/>
      <edge id="248604" label="zzzz101,zzzz150" source="942" target="893" cy:directed="1"/>
      <edge id="248603" label="zzzz101,zzzz179" source="942" target="864" cy:directed="1"/>
      <edge id="248602" label="zzzz101,zzzz259" source="942" target="784" cy:directed="1"/>
      <edge id="248601" label="zzzz101,zzzz387" source="942" target="669" cy:directed="1"/>
      <edge id="248600" label="zzzz101,zzzz388" source="942" target="668" cy:directed="1"/>
      <edge id="248599" label="zzzz101,zzzz389" source="942" target="667" cy:directed="1"/>
      <edge id="248598" label="zzzz101,zzzz694" source="942" target="365" cy:directed="1"/>
      <edge id="248597" label="zzzz101,zzzz843" source="942" target="241" cy:directed="1"/>
      <edge id="248596" label="zzzz101,zzzzz87" source="942" target="84" cy:directed="1"/>
      <edge id="248595" label="zzzz101,zzzz140" source="942" target="903" cy:directed="1"/>
      <edge id="248594" label="zzzz101,zzzz168" source="942" target="875" cy:directed="1"/>
      <edge id="248593" label="zzzz101,zzzz205" source="942" target="838" cy:directed="1"/>
      <edge id="248592" label="zzzz101,zzzz219" source="942" target="824" cy:directed="1"/>
      <edge id="248591" label="zzzz101,zzzz577" source="942" target="479" cy:directed="1"/>
      <edge id="248590" label="zzzz101,zzzz641" source="942" target="416" cy:directed="1"/>
      <edge id="248589" label="zzzz101,zzzz650" source="942" target="407" cy:directed="1"/>
      <edge id="248588" label="zzzz101,zzzz836" source="942" target="248" cy:directed="1"/>
      <edge id="248587" label="zzzz101,zzzz849" source="942" target="235" cy:directed="1"/>
      <edge id="248586" label="zzzz101,zzzzz67" source="942" target="104" cy:directed="1"/>
      <edge id="248585" label="zzzz101,zzzz368" source="942" target="688" cy:directed="1"/>
      <edge id="248584" label="zzzz101,zzzz508" source="942" target="548" cy:directed="1"/>
      <edge id="248583" label="zzzz101,zzzz535" source="942" target="521" cy:directed="1"/>
      <edge id="248582" label="zzzz101,zzzz558" source="942" target="498" cy:directed="1"/>
      <edge id="248581" label="zzzz101,zzzz895" source="942" target="215" cy:directed="1"/>
      <edge id="248580" label="zzzz101,zzzzz62" source="942" target="109" cy:directed="1"/>
      <edge id="248579" label="zzzz101,zzzzz90" source="942" target="81" cy:directed="1"/>
      <edge id="248578" label="zzzz101,zzzz122" source="942" target="921" cy:directed="1"/>
      <edge id="248577" label="zzzz101,zzzz351" source="942" target="705" cy:directed="1"/>
      <edge id="248576" label="zzzz101,zzzz362" source="942" target="694" cy:directed="1"/>
      <edge id="248575" label="zzzz101,zzzz563" source="942" target="493" cy:directed="1"/>
      <edge id="248574" label="zzzz101,zzzz588" source="942" target="468" cy:directed="1"/>
      <edge id="248573" label="zzzz101,zzzz656" source="942" target="401" cy:directed="1"/>
      <edge id="248572" label="zzzz101,zzzz982" source="942" target="163" cy:directed="1"/>
      <edge id="248571" label="zzzz101,zzzz395" source="942" target="661" cy:directed="1"/>
      <edge id="248570" label="zzzz101,zzzz636" source="942" target="421" cy:directed="1"/>
      <edge id="248569" label="zzzz101,zzzz727" source="942" target="333" cy:directed="1"/>
      <edge id="248568" label="zzzz101,zzzz805" source="942" target="278" cy:directed="1"/>
      <edge id="248567" label="zzzz101,zzzz844" source="942" target="240" cy:directed="1"/>
      <edge id="248566" label="zzzz101,zzzz104" source="942" target="939" cy:directed="1"/>
      <edge id="248565" label="zzzz101,zzzz141" source="942" target="902" cy:directed="1"/>
      <edge id="248564" label="zzzz101,zzzz194" source="942" target="849" cy:directed="1"/>
      <edge id="248563" label="zzzz101,zzzz215" source="942" target="828" cy:directed="1"/>
      <edge id="248562" label="zzzz101,zzzz469" source="942" target="587" cy:directed="1"/>
      <edge id="248561" label="zzzz101,zzzz512" source="942" target="544" cy:directed="1"/>
      <edge id="248560" label="zzzz101,zzzz539" source="942" target="517" cy:directed="1"/>
      <edge id="248559" label="zzzz101,zzzz605" source="942" target="451" cy:directed="1"/>
      <edge id="248558" label="zzzz101,zzzz617" source="942" target="439" cy:directed="1"/>
      <edge id="248557" label="zzzz101,zzzz634" source="942" target="423" cy:directed="1"/>
      <edge id="248556" label="zzzz101,zzzz690" source="942" target="368" cy:directed="1"/>
      <edge id="248555" label="zzzz101,zzzz964" source="942" target="168" cy:directed="1"/>
      <edge id="248554" label="zzzz101,zzzz983" source="942" target="162" cy:directed="1"/>
      <edge id="248553" label="zzzz101,zzzzz63" source="942" target="108" cy:directed="1"/>
      <edge id="248552" label="zzzz101,zzzz109" source="942" target="934" cy:directed="1"/>
      <edge id="248551" label="zzzz101,zzzz147" source="942" target="896" cy:directed="1"/>
      <edge id="248550" label="zzzz101,zzzz149" source="942" target="894" cy:directed="1"/>
      <edge id="248549" label="zzzz101,zzzz155" source="942" target="888" cy:directed="1"/>
      <edge id="248548" label="zzzz101,zzzz208" source="942" target="835" cy:directed="1"/>
      <edge id="248547" label="zzzz101,zzzz290" source="942" target="763" cy:directed="1"/>
      <edge id="248546" label="zzzz101,zzzz297" source="942" target="759" cy:directed="1"/>
      <edge id="248545" label="zzzz101,zzzz582" source="942" target="474" cy:directed="1"/>
      <edge id="248544" label="zzzz101,zzzz587" source="942" target="469" cy:directed="1"/>
      <edge id="248543" label="zzzz101,zzzz593" source="942" target="463" cy:directed="1"/>
      <edge id="248542" label="zzzz101,zzzz662" source="942" target="395" cy:directed="1"/>
      <edge id="248541" label="zzzz101,zzzz981" source="942" target="164" cy:directed="1"/>
      <edge id="248540" label="zzzz101,zzzz127" source="942" target="916" cy:directed="1"/>
      <edge id="248539" label="zzzz101,zzzz145" source="942" target="898" cy:directed="1"/>
      <edge id="248538" label="zzzz101,zzzz300" source="942" target="756" cy:directed="1"/>
      <edge id="248537" label="zzzz101,zzzz492" source="942" target="564" cy:directed="1"/>
      <edge id="248536" label="zzzz101,zzzz537" source="942" target="519" cy:directed="1"/>
      <edge id="248535" label="zzzz101,zzzz899" source="942" target="212" cy:directed="1"/>
      <edge id="248534" label="zzzz101,zzzz963" source="942" target="169" cy:directed="1"/>
      <edge id="248533" label="zzzz101,zzzz385" source="942" target="671" cy:directed="1"/>
      <edge id="248532" label="zzzz101,zzzz401" source="942" target="655" cy:directed="1"/>
      <edge id="248531" label="zzzz101,zzzz434" source="942" target="622" cy:directed="1"/>
      <edge id="248530" label="zzzz101,zzzz438" source="942" target="618" cy:directed="1"/>
      <edge id="248529" label="zzzz101,zzzz449" source="942" target="607" cy:directed="1"/>
      <edge id="248528" label="zzzz101,zzzz481" source="942" target="575" cy:directed="1"/>
      <edge id="248527" label="zzzz101,zzzz500" source="942" target="556" cy:directed="1"/>
      <edge id="248526" label="zzzz101,zzzz511" source="942" target="545" cy:directed="1"/>
      <edge id="248525" label="zzzz101,zzzz902" source="942" target="209" cy:directed="1"/>
      <edge id="248524" label="zzzz101,zzzz202" source="942" target="841" cy:directed="1"/>
      <edge id="248523" label="zzzz101,zzzz637" source="942" target="420" cy:directed="1"/>
      <edge id="248522" label="zzzz101,zzzz908" source="942" target="203" cy:directed="1"/>
      <edge id="248521" label="zzzz101,zzzz950" source="942" target="174" cy:directed="1"/>
      <edge id="248520" label="zzzz101,zzzzz46" source="942" target="125" cy:directed="1"/>
      <edge id="248519" label="zzzz101,zzzz611" source="942" target="445" cy:directed="1"/>
      <edge id="248518" label="zzzz101,zzzz808" source="942" target="275" cy:directed="1"/>
      <edge id="248517" label="zzzz101,zzzz901" source="942" target="210" cy:directed="1"/>
      <edge id="248516" label="zzzz101,zzzzz61" source="942" target="110" cy:directed="1"/>
      <edge id="248515" label="zzzz101,zzzz144" source="942" target="899" cy:directed="1"/>
      <edge id="248514" label="zzzz101,zzzz199" source="942" target="844" cy:directed="1"/>
      <edge id="248513" label="zzzz101,zzzz255" source="942" target="788" cy:directed="1"/>
      <edge id="248512" label="zzzz101,zzzz367" source="942" target="689" cy:directed="1"/>
      <edge id="248511" label="zzzz101,zzzz679" source="942" target="378" cy:directed="1"/>
      <edge id="248510" label="zzzz101,zzzz787" source="942" target="294" cy:directed="1"/>
      <edge id="248509" label="zzzz101,zzzz900" source="942" target="211" cy:directed="1"/>
      <edge id="248508" label="zzzz101,zzzz117" source="942" target="926" cy:directed="1"/>
      <edge id="248507" label="zzzz101,zzzz148" source="942" target="895" cy:directed="1"/>
      <edge id="248506" label="zzzz101,zzzz182" source="942" target="861" cy:directed="1"/>
      <edge id="248505" label="zzzz101,zzzz242" source="942" target="801" cy:directed="1"/>
      <edge id="248504" label="zzzz101,zzzz355" source="942" target="701" cy:directed="1"/>
      <edge id="248503" label="zzzz101,zzzz402" source="942" target="654" cy:directed="1"/>
      <edge id="248502" label="zzzz101,zzzz467" source="942" target="589" cy:directed="1"/>
      <edge id="248501" label="zzzz101,zzzzz53" source="942" target="118" cy:directed="1"/>
      <edge id="248500" label="zzzz101,zzzz103" source="942" target="940" cy:directed="1"/>
      <edge id="248499" label="zzzz101,zzzz211" source="942" target="832" cy:directed="1"/>
      <edge id="248498" label="zzzz101,zzzz447" source="942" target="609" cy:directed="1"/>
      <edge id="248497" label="zzzz101,zzzz561" source="942" target="495" cy:directed="1"/>
      <edge id="248496" label="zzzz101,zzzz648" source="942" target="409" cy:directed="1"/>
      <edge id="248495" label="zzzz101,zzzz652" source="942" target="405" cy:directed="1"/>
      <edge id="248494" label="zzzz101,zzzz811" source="942" target="272" cy:directed="1"/>
      <edge id="248493" label="zzzz101,zzzz946" source="942" target="178" cy:directed="1"/>
      <edge id="248492" label="zzzz101,zzzz178" source="942" target="865" cy:directed="1"/>
      <edge id="248491" label="zzzz101,zzzz354" source="942" target="702" cy:directed="1"/>
      <edge id="248490" label="zzzz101,zzzz376" source="942" target="680" cy:directed="1"/>
      <edge id="248489" label="zzzz101,zzzz406" source="942" target="650" cy:directed="1"/>
      <edge id="248488" label="zzzz101,zzzz660" source="942" target="397" cy:directed="1"/>
      <edge id="248487" label="zzzz101,zzzz738" source="942" target="331" cy:directed="1"/>
      <edge id="248486" label="zzzz101,zzzzz79" source="942" target="92" cy:directed="1"/>
      <edge id="248485" label="zzzz101,zzzzz93" source="942" target="78" cy:directed="1"/>
      <edge id="248484" label="zzzz101,zzzz195" source="942" target="848" cy:directed="1"/>
      <edge id="248483" label="zzzz101,zzzz431" source="942" target="625" cy:directed="1"/>
      <edge id="248482" label="zzzz101,zzzz516" source="942" target="540" cy:directed="1"/>
      <edge id="248481" label="zzzz101,zzzz824" source="942" target="260" cy:directed="1"/>
      <edge id="248480" label="zzzz101,zzzz890" source="942" target="220" cy:directed="1"/>
      <edge id="248479" label="zzzz101,zzzz113" source="942" target="930" cy:directed="1"/>
      <edge id="248478" label="zzzz101,zzzz206" source="942" target="837" cy:directed="1"/>
      <edge id="248477" label="zzzz101,zzzz364" source="942" target="692" cy:directed="1"/>
      <edge id="248476" label="zzzz101,zzzz369" source="942" target="687" cy:directed="1"/>
      <edge id="248475" label="zzzz101,zzzz391" source="942" target="665" cy:directed="1"/>
      <edge id="248474" label="zzzz101,zzzz472" source="942" target="584" cy:directed="1"/>
      <edge id="248473" label="zzzz101,zzzz592" source="942" target="464" cy:directed="1"/>
      <edge id="248472" label="zzzz101,zzzz346" source="942" target="710" cy:directed="1"/>
      <edge id="248471" label="zzzz101,zzzz497" source="942" target="559" cy:directed="1"/>
      <edge id="248470" label="zzzz101,zzzz204" source="942" target="839" cy:directed="1"/>
      <edge id="248469" label="zzzz101,zzzz619" source="942" target="437" cy:directed="1"/>
      <edge id="248468" label="zzzz101,zzzz793" source="942" target="288" cy:directed="1"/>
      <edge id="248467" label="zzzz101,zzzzz83" source="942" target="88" cy:directed="1"/>
      <edge id="248466" label="zzzz101,zzzz121" source="942" target="922" cy:directed="1"/>
      <edge id="248465" label="zzzz101,zzzz302" source="942" target="754" cy:directed="1"/>
      <edge id="248464" label="zzzz101,zzzz370" source="942" target="686" cy:directed="1"/>
      <edge id="248463" label="zzzz101,zzzz380" source="942" target="676" cy:directed="1"/>
      <edge id="248462" label="zzzz101,zzzz414" source="942" target="642" cy:directed="1"/>
      <edge id="248461" label="zzzz101,zzzz460" source="942" target="596" cy:directed="1"/>
      <edge id="248460" label="zzzz101,zzzz538" source="942" target="518" cy:directed="1"/>
      <edge id="248459" label="zzzz101,zzzz647" source="942" target="410" cy:directed="1"/>
      <edge id="248458" label="zzzz101,zzzz862" source="942" target="224" cy:directed="1"/>
      <edge id="248457" label="zzzz101,zzzz357" source="942" target="699" cy:directed="1"/>
      <edge id="248456" label="zzzz101,zzzz487" source="942" target="569" cy:directed="1"/>
      <edge id="248455" label="zzzz101,zzzz571" source="942" target="485" cy:directed="1"/>
      <edge id="248454" label="zzzz101,zzzz597" source="942" target="459" cy:directed="1"/>
      <edge id="248453" label="zzzz101,zzzz837" source="942" target="247" cy:directed="1"/>
      <edge id="248452" label="zzzz101,zzzz848" source="942" target="236" cy:directed="1"/>
      <edge id="248451" label="zzzz101,zzzz850" source="942" target="234" cy:directed="1"/>
      <edge id="248450" label="zzzz101,zzzzz54" source="942" target="117" cy:directed="1"/>
      <edge id="248449" label="zzzz101,zzzz397" source="942" target="659" cy:directed="1"/>
      <edge id="248448" label="zzzz101,zzzz478" source="942" target="578" cy:directed="1"/>
      <edge id="248447" label="zzzz101,zzzz513" source="942" target="543" cy:directed="1"/>
      <edge id="248446" label="zzzz101,zzzzz82" source="942" target="89" cy:directed="1"/>
      <edge id="248445" label="zzzz101,zzzz146" source="942" target="897" cy:directed="1"/>
      <edge id="248444" label="zzzz101,zzzz172" source="942" target="871" cy:directed="1"/>
      <edge id="248443" label="zzzz101,zzzz313" source="942" target="743" cy:directed="1"/>
      <edge id="248442" label="zzzz101,zzzz377" source="942" target="679" cy:directed="1"/>
      <edge id="248441" label="zzzz101,zzzz623" source="942" target="433" cy:directed="1"/>
      <edge id="248440" label="zzzz101,zzzz785" source="942" target="296" cy:directed="1"/>
      <edge id="248439" label="zzzz101,zzzz142" source="942" target="901" cy:directed="1"/>
      <edge id="248438" label="zzzz101,zzzz441" source="942" target="615" cy:directed="1"/>
      <edge id="248437" label="zzzz101,zzzz590" source="942" target="466" cy:directed="1"/>
      <edge id="248436" label="zzzz101,zzzz201" source="942" target="842" cy:directed="1"/>
      <edge id="248435" label="zzzz101,zzzz239" source="942" target="804" cy:directed="1"/>
      <edge id="248434" label="zzzz101,zzzz435" source="942" target="621" cy:directed="1"/>
      <edge id="248433" label="zzzz101,zzzz661" source="942" target="396" cy:directed="1"/>
      <edge id="248432" label="zzzz101,zzzz210" source="942" target="833" cy:directed="1"/>
      <edge id="248431" label="zzzz101,zzzz213" source="942" target="830" cy:directed="1"/>
      <edge id="248430" label="zzzz101,zzzz383" source="942" target="673" cy:directed="1"/>
      <edge id="248429" label="zzzz101,zzzz470" source="942" target="586" cy:directed="1"/>
      <edge id="248428" label="zzzz101,zzzz471" source="942" target="585" cy:directed="1"/>
      <edge id="248427" label="zzzz101,zzzz543" source="942" target="513" cy:directed="1"/>
      <edge id="248426" label="zzzz101,zzzz574" source="942" target="482" cy:directed="1"/>
      <edge id="248425" label="zzzz101,zzzz496" source="942" target="560" cy:directed="1"/>
      <edge id="248424" label="zzzz101,zzzz509" source="942" target="547" cy:directed="1"/>
      <edge id="248423" label="zzzz101,zzzz644" source="942" target="413" cy:directed="1"/>
      <edge id="248422" label="zzzz101,zzzz965" source="942" target="167" cy:directed="1"/>
      <edge id="248421" label="zzzz101,zzzzz51" source="942" target="120" cy:directed="1"/>
      <edge id="248420" label="zzzz101,zzzz903" source="942" target="208" cy:directed="1"/>
      <edge id="248419" label="zzzz101,zzzz944" source="942" target="180" cy:directed="1"/>
      <edge id="248418" label="zzzz101,zzzz892" source="942" target="218" cy:directed="1"/>
      <edge id="248417" label="zzzz101,zzzz893" source="942" target="217" cy:directed="1"/>
      <edge id="248416" label="zzzz101,zzzzz60" source="942" target="111" cy:directed="1"/>
      <edge id="248415" label="zzzz101,zzzz143" source="942" target="900" cy:directed="1"/>
      <edge id="248414" label="zzzz101,zzzz157" source="942" target="886" cy:directed="1"/>
      <edge id="248413" label="zzzz101,zzzz254" source="942" target="789" cy:directed="1"/>
      <edge id="248412" label="zzzz101,zzzz308" source="942" target="748" cy:directed="1"/>
      <edge id="248411" label="zzzz101,zzzz390" source="942" target="666" cy:directed="1"/>
      <edge id="248410" label="zzzz101,zzzz404" source="942" target="652" cy:directed="1"/>
      <edge id="248409" label="zzzz101,zzzz412" source="942" target="644" cy:directed="1"/>
      <edge id="248408" label="zzzz101,zzzz428" source="942" target="628" cy:directed="1"/>
      <edge id="248407" label="zzzz101,zzzz745" source="942" target="327" cy:directed="1"/>
      <edge id="248406" label="zzzz101,zzzz379" source="942" target="677" cy:directed="1"/>
      <edge id="248405" label="zzzz101,zzzz586" source="942" target="470" cy:directed="1"/>
      <edge id="248404" label="zzzz101,zzzz105" source="942" target="938" cy:directed="1"/>
      <edge id="248403" label="zzzz101,zzzz225" source="942" target="818" cy:directed="1"/>
      <edge id="248402" label="zzzz101,zzzz339" source="942" target="717" cy:directed="1"/>
      <edge id="248401" label="zzzz101,zzzz618" source="942" target="438" cy:directed="1"/>
      <edge id="248400" label="zzzz101,zzzz635" source="942" target="422" cy:directed="1"/>
      <edge id="248399" label="zzzz101,zzzz688" source="942" target="370" cy:directed="1"/>
      <edge id="248398" label="zzzz101,zzzzz64" source="942" target="107" cy:directed="1"/>
      <edge id="248397" label="zzzz101,zzzz203" source="942" target="840" cy:directed="1"/>
      <edge id="248396" label="zzzz101,zzzz264" source="942" target="779" cy:directed="1"/>
      <edge id="248395" label="zzzz101,zzzz486" source="942" target="570" cy:directed="1"/>
      <edge id="248394" label="zzzz101,zzzz705" source="942" target="354" cy:directed="1"/>
      <edge id="248393" label="zzzz101,zzzz382" source="942" target="674" cy:directed="1"/>
      <edge id="248392" label="zzzz101,zzzz790" source="942" target="291" cy:directed="1"/>
      <edge id="248391" label="zzzz101,zzzz894" source="942" target="216" cy:directed="1"/>
      <edge id="248390" label="zzzz101,zzzz277" source="942" target="775" cy:directed="1"/>
      <edge id="248389" label="zzzz101,zzzz312" source="942" target="744" cy:directed="1"/>
      <edge id="248388" label="zzzz101,zzzz439" source="942" target="617" cy:directed="1"/>
      <edge id="248387" label="zzzz101,zzzz562" source="942" target="494" cy:directed="1"/>
      <edge id="248386" label="zzzz101,zzzz622" source="942" target="434" cy:directed="1"/>
      <edge id="248385" label="zzzz101,zzzz659" source="942" target="398" cy:directed="1"/>
      <edge id="248384" label="zzzz101,zzzz783" source="942" target="298" cy:directed="1"/>
      <edge id="248383" label="zzzz101,zzzzz75" source="942" target="96" cy:directed="1"/>
      <edge id="248382" label="zzzz101,zzzz223" source="942" target="820" cy:directed="1"/>
      <edge id="248381" label="zzzz101,zzzz278" source="942" target="774" cy:directed="1"/>
      <edge id="248380" label="zzzz101,zzzz714" source="942" target="345" cy:directed="1"/>
      <edge id="248379" label="zzzz101,zzzz214" source="942" target="829" cy:directed="1"/>
      <edge id="248378" label="zzzz101,zzzz263" source="942" target="780" cy:directed="1"/>
      <edge id="248377" label="zzzz101,zzzz301" source="942" target="755" cy:directed="1"/>
      <edge id="248376" label="zzzz101,zzzz425" source="942" target="631" cy:directed="1"/>
      <edge id="248375" label="zzzz101,zzzz466" source="942" target="590" cy:directed="1"/>
      <edge id="248374" label="zzzz101,zzzz631" source="942" target="426" cy:directed="1"/>
      <edge id="248373" label="zzzz101,zzzz653" source="942" target="404" cy:directed="1"/>
      <edge id="248372" label="zzzz101,zzzz209" source="942" target="834" cy:directed="1"/>
      <edge id="248371" label="zzzz101,zzzz405" source="942" target="651" cy:directed="1"/>
      <edge id="248370" label="zzzz101,zzzz488" source="942" target="568" cy:directed="1"/>
      <edge id="248369" label="zzzz101,zzzz756" source="942" target="318" cy:directed="1"/>
      <edge id="248368" label="zzzz101,zzzzz91" source="942" target="80" cy:directed="1"/>
      <edge id="248367" label="zzzz101,zzzzz98" source="942" target="73" cy:directed="1"/>
      <edge id="248366" label="zzzz101,zzzz360" source="942" target="696" cy:directed="1"/>
      <edge id="248365" label="zzzz101,zzzz616" source="942" target="440" cy:directed="1"/>
      <edge id="248364" label="zzzz101,zzzz796" source="942" target="286" cy:directed="1"/>
      <edge id="248363" label="zzzz101,zzzz920" source="942" target="195" cy:directed="1"/>
      <edge id="248362" label="zzzz101,zzzzz77" source="942" target="94" cy:directed="1"/>
      <edge id="248361" label="zzzz101,zzzz399" source="942" target="657" cy:directed="1"/>
      <edge id="248360" label="zzzz101,zzzz446" source="942" target="610" cy:directed="1"/>
      <edge id="248359" label="zzzz101,zzzz521" source="942" target="535" cy:directed="1"/>
      <edge id="248358" label="zzzz101,zzzz712" source="942" target="347" cy:directed="1"/>
      <edge id="248357" label="zzzz101,zzzz786" source="942" target="295" cy:directed="1"/>
      <edge id="248356" label="zzzz101,zzzz111" source="942" target="932" cy:directed="1"/>
      <edge id="248355" label="zzzz101,zzzz216" source="942" target="827" cy:directed="1"/>
      <edge id="248354" label="zzzz101,zzzz229" source="942" target="814" cy:directed="1"/>
      <edge id="248353" label="zzzz101,zzzz231" source="942" target="812" cy:directed="1"/>
      <edge id="248352" label="zzzz101,zzzz235" source="942" target="808" cy:directed="1"/>
      <edge id="248351" label="zzzz101,zzzz333" source="942" target="723" cy:directed="1"/>
      <edge id="248350" label="zzzz101,zzzz645" source="942" target="412" cy:directed="1"/>
      <edge id="248349" label="zzzz101,zzzz715" source="942" target="344" cy:directed="1"/>
      <edge id="248348" label="zzzz101,zzzz332" source="942" target="724" cy:directed="1"/>
      <edge id="248347" label="zzzz101,zzzz453" source="942" target="603" cy:directed="1"/>
      <edge id="248346" label="zzzz101,zzzz464" source="942" target="592" cy:directed="1"/>
      <edge id="248345" label="zzzz101,zzzz217" source="942" target="826" cy:directed="1"/>
      <edge id="248344" label="zzzz101,zzzz222" source="942" target="821" cy:directed="1"/>
      <edge id="248343" label="zzzz101,zzzz337" source="942" target="719" cy:directed="1"/>
      <edge id="248342" label="zzzz101,zzzz442" source="942" target="614" cy:directed="1"/>
      <edge id="248341" label="zzzz101,zzzz602" source="942" target="454" cy:directed="1"/>
      <edge id="248340" label="zzzz101,zzzz317" source="942" target="739" cy:directed="1"/>
      <edge id="248339" label="zzzz101,zzzz341" source="942" target="715" cy:directed="1"/>
      <edge id="248338" label="zzzz101,zzzz374" source="942" target="682" cy:directed="1"/>
      <edge id="248337" label="zzzz101,zzzz544" source="942" target="512" cy:directed="1"/>
      <edge id="248336" label="zzzz101,zzzz718" source="942" target="341" cy:directed="1"/>
      <edge id="248335" label="zzzz101,zzzz826" source="942" target="258" cy:directed="1"/>
      <edge id="248334" label="zzzz101,zzzz854" source="942" target="230" cy:directed="1"/>
      <edge id="248333" label="zzzz101,zzzz325" source="942" target="731" cy:directed="1"/>
      <edge id="248332" label="zzzz101,zzzz326" source="942" target="730" cy:directed="1"/>
      <edge id="248331" label="zzzz101,zzzz327" source="942" target="729" cy:directed="1"/>
      <edge id="248330" label="zzzz101,zzzz672" source="942" target="385" cy:directed="1"/>
      <edge id="248329" label="zzzz101,zzzz683" source="942" target="375" cy:directed="1"/>
      <edge id="248328" label="zzzz101,zzzz687" source="942" target="371" cy:directed="1"/>
      <edge id="248327" label="zzzz101,zzzz760" source="942" target="315" cy:directed="1"/>
      <edge id="248326" label="zzzz101,zzzz305" source="942" target="751" cy:directed="1"/>
      <edge id="248325" label="zzzz101,zzzz366" source="942" target="690" cy:directed="1"/>
      <edge id="248324" label="zzzz101,zzzz699" source="942" target="360" cy:directed="1"/>
      <edge id="248323" label="zzzz101,zzzz820" source="942" target="264" cy:directed="1"/>
      <edge id="248322" label="zzzz101,zzzz240" source="942" target="803" cy:directed="1"/>
      <edge id="248321" label="zzzz101,zzzz626" source="942" target="431" cy:directed="1"/>
      <edge id="248320" label="zzzz101,zzzz700" source="942" target="359" cy:directed="1"/>
      <edge id="248319" label="zzzz101,zzzzz70" source="942" target="101" cy:directed="1"/>
      <edge id="248318" label="zzzz101,zzzz462" source="942" target="594" cy:directed="1"/>
      <edge id="248317" label="zzzz101,zzzz839" source="942" target="245" cy:directed="1"/>
      <edge id="248316" label="zzzz101,zzzz455" source="942" target="601" cy:directed="1"/>
      <edge id="248315" label="zzzz101,zzzz716" source="942" target="343" cy:directed="1"/>
      <edge id="248314" label="zzzz101,zzzz788" source="942" target="293" cy:directed="1"/>
      <edge id="248313" label="zzzz101,zzzz279" source="942" target="773" cy:directed="1"/>
      <edge id="248312" label="zzzz101,zzzz281" source="942" target="771" cy:directed="1"/>
      <edge id="248311" label="zzzz101,zzzz303" source="942" target="753" cy:directed="1"/>
      <edge id="248310" label="zzzz101,zzzz519" source="942" target="537" cy:directed="1"/>
      <edge id="248309" label="zzzz101,zzzz226" source="942" target="817" cy:directed="1"/>
      <edge id="248308" label="zzzz101,zzzz319" source="942" target="737" cy:directed="1"/>
      <edge id="248307" label="zzzz101,zzzz321" source="942" target="735" cy:directed="1"/>
      <edge id="248306" label="zzzz101,zzzzz76" source="942" target="95" cy:directed="1"/>
      <edge id="248305" label="zzzz101,zzzz711" source="942" target="348" cy:directed="1"/>
      <edge id="248304" label="zzzz101,zzzz825" source="942" target="259" cy:directed="1"/>
      <edge id="248303" label="zzzz101,zzzz322" source="942" target="734" cy:directed="1"/>
      <edge id="248302" label="zzzz101,zzzz336" source="942" target="720" cy:directed="1"/>
      <edge id="248301" label="zzzz101,zzzz698" source="942" target="361" cy:directed="1"/>
      <edge id="248300" label="zzzz101,zzzz708" source="942" target="351" cy:directed="1"/>
      <edge id="248299" label="zzzz101,zzzz316" source="942" target="740" cy:directed="1"/>
      <edge id="248298" label="zzzz101,zzzz190" source="942" target="853" cy:directed="1"/>
      <edge id="248297" label="zzzz101,zzzz804" source="942" target="279" cy:directed="1"/>
      <edge id="248296" label="zzzz101,zzzz283" source="942" target="769" cy:directed="1"/>
      <edge id="248295" label="zzzz101,zzzz323" source="942" target="733" cy:directed="1"/>
      <edge id="248294" label="zzzz101,zzzz473" source="942" target="583" cy:directed="1"/>
      <edge id="248293" label="zzzz101,zzzz340" source="942" target="716" cy:directed="1"/>
      <edge id="248292" label="zzzz101,zzzz344" source="942" target="712" cy:directed="1"/>
      <edge id="248291" label="zzzz101,zzzz704" source="942" target="355" cy:directed="1"/>
      <edge id="248290" label="zzzz101,zzzz823" source="942" target="261" cy:directed="1"/>
      <edge id="248289" label="zzzz101,zzzz298" source="942" target="758" cy:directed="1"/>
      <edge id="248288" label="zzzz101,zzzz310" source="942" target="746" cy:directed="1"/>
      <edge id="248287" label="zzzz101,zzzz633" source="942" target="424" cy:directed="1"/>
      <edge id="248286" label="zzzz101,zzzz709" source="942" target="350" cy:directed="1"/>
      <edge id="248285" label="zzzz101,zzzz818" source="942" target="266" cy:directed="1"/>
      <edge id="248284" label="zzzz101,zzzz696" source="942" target="363" cy:directed="1"/>
      <edge id="248283" label="zzzz101,zzzz334" source="942" target="722" cy:directed="1"/>
      <edge id="248282" label="zzzz101,zzzz343" source="942" target="713" cy:directed="1"/>
      <edge id="248281" label="zzzz101,zzzz728" source="942" target="332" cy:directed="1"/>
      <edge id="248280" label="zzzz101,zzzz307" source="942" target="749" cy:directed="1"/>
      <edge id="248279" label="zzzz101,zzzz706" source="942" target="353" cy:directed="1"/>
      <edge id="248278" label="zzzz101,zzzz719" source="942" target="340" cy:directed="1"/>
      <edge id="248277" label="zzzz101,zzzz721" source="942" target="338" cy:directed="1"/>
      <edge id="248276" label="zzzz101,zzzz461" source="942" target="595" cy:directed="1"/>
      <edge id="248275" label="zzzz101,zzzz253" source="942" target="790" cy:directed="1"/>
      <edge id="248274" label="zzzz101,zzzz815" source="942" target="269" cy:directed="1"/>
      <edge id="248273" label="zzzz101,zzzz320" source="942" target="736" cy:directed="1"/>
      <edge id="248272" label="zzzz101,zzzz250" source="942" target="793" cy:directed="1"/>
      <edge id="248271" label="zzzz101,zzzz306" source="942" target="750" cy:directed="1"/>
      <edge id="248270" label="zzzz101,zzzzz92" source="942" target="79" cy:directed="1"/>
      <edge id="248269" label="zzzz101,zzzz430" source="942" target="626" cy:directed="1"/>
      <edge id="248268" label="zzzz102,zzzz288" source="941" target="764" cy:directed="1"/>
      <edge id="248267" label="zzzz102,zzzz812" source="941" target="271" cy:directed="1"/>
      <edge id="248266" label="zzzz102,zzzz287" source="941" target="765" cy:directed="1"/>
      <edge id="248265" label="zzzz102,zzzz156" source="941" target="887" cy:directed="1"/>
      <edge id="248264" label="zzzz102,zzzz351" source="941" target="705" cy:directed="1"/>
      <edge id="248263" label="zzzz102,zzzz365" source="941" target="691" cy:directed="1"/>
      <edge id="248262" label="zzzz102,zzzz457" source="941" target="599" cy:directed="1"/>
      <edge id="248261" label="zzzz102,zzzz674" source="941" target="383" cy:directed="1"/>
      <edge id="248260" label="zzzz102,zzzz154" source="941" target="889" cy:directed="1"/>
      <edge id="248259" label="zzzz102,zzzz724" source="941" target="336" cy:directed="1"/>
      <edge id="248258" label="zzzz102,zzzz456" source="941" target="600" cy:directed="1"/>
      <edge id="248257" label="zzzz102,zzzz362" source="941" target="694" cy:directed="1"/>
      <edge id="248256" label="zzzz102,zzzz907" source="941" target="204" cy:directed="1"/>
      <edge id="248255" label="zzzz102,zzzz128" source="941" target="915" cy:directed="1"/>
      <edge id="248254" label="zzzz102,zzzz387" source="941" target="669" cy:directed="1"/>
      <edge id="248253" label="zzzz102,zzzz373" source="941" target="683" cy:directed="1"/>
      <edge id="248252" label="zzzz102,zzzz418" source="941" target="638" cy:directed="1"/>
      <edge id="248251" label="zzzz102,zzzz896" source="941" target="214" cy:directed="1"/>
      <edge id="248250" label="zzzz102,zzzz388" source="941" target="668" cy:directed="1"/>
      <edge id="248249" label="zzzz102,zzzz417" source="941" target="639" cy:directed="1"/>
      <edge id="248248" label="zzzz102,zzzz197" source="941" target="846" cy:directed="1"/>
      <edge id="248247" label="zzzz102,zzzz261" source="941" target="782" cy:directed="1"/>
      <edge id="248246" label="zzzz102,zzzz415" source="941" target="641" cy:directed="1"/>
      <edge id="248245" label="zzzz102,zzzz443" source="941" target="613" cy:directed="1"/>
      <edge id="248244" label="zzzz102,zzzz585" source="941" target="471" cy:directed="1"/>
      <edge id="248243" label="zzzz102,zzzz792" source="941" target="289" cy:directed="1"/>
      <edge id="248242" label="zzzz102,zzzz424" source="941" target="632" cy:directed="1"/>
      <edge id="248241" label="zzzz102,zzzz478" source="941" target="578" cy:directed="1"/>
      <edge id="248240" label="zzzz102,zzzz579" source="941" target="477" cy:directed="1"/>
      <edge id="248239" label="zzzz102,zzzz657" source="941" target="400" cy:directed="1"/>
      <edge id="248238" label="zzzz102,zzzz913" source="941" target="198" cy:directed="1"/>
      <edge id="248237" label="zzzz102,zzzzz80" source="941" target="91" cy:directed="1"/>
      <edge id="248236" label="zzzz102,zzzz114" source="941" target="929" cy:directed="1"/>
      <edge id="248235" label="zzzz102,zzzz597" source="941" target="459" cy:directed="1"/>
      <edge id="248234" label="zzzz102,zzzz157" source="941" target="886" cy:directed="1"/>
      <edge id="248233" label="zzzz102,zzzz422" source="941" target="634" cy:directed="1"/>
      <edge id="248232" label="zzzz102,zzzz949" source="941" target="175" cy:directed="1"/>
      <edge id="248231" label="zzzz102,zzzzz55" source="941" target="116" cy:directed="1"/>
      <edge id="248230" label="zzzz102,zzzzz85" source="941" target="86" cy:directed="1"/>
      <edge id="248229" label="zzzz102,zzzz109" source="941" target="934" cy:directed="1"/>
      <edge id="248228" label="zzzz102,zzzz378" source="941" target="678" cy:directed="1"/>
      <edge id="248227" label="zzzz102,zzzz433" source="941" target="623" cy:directed="1"/>
      <edge id="248226" label="zzzz102,zzzz451" source="941" target="605" cy:directed="1"/>
      <edge id="248225" label="zzzz102,zzzz525" source="941" target="531" cy:directed="1"/>
      <edge id="248224" label="zzzz102,zzzz628" source="941" target="429" cy:directed="1"/>
      <edge id="248223" label="zzzz102,zzzz841" source="941" target="243" cy:directed="1"/>
      <edge id="248222" label="zzzz102,zzzz952" source="941" target="172" cy:directed="1"/>
      <edge id="248221" label="zzzz102,zzzz134" source="941" target="909" cy:directed="1"/>
      <edge id="248220" label="zzzz102,zzzz376" source="941" target="680" cy:directed="1"/>
      <edge id="248219" label="zzzz102,zzzz432" source="941" target="624" cy:directed="1"/>
      <edge id="248218" label="zzzz102,zzzz528" source="941" target="528" cy:directed="1"/>
      <edge id="248217" label="zzzz102,zzzz643" source="941" target="414" cy:directed="1"/>
      <edge id="248216" label="zzzz102,zzzz726" source="941" target="334" cy:directed="1"/>
      <edge id="248215" label="zzzz102,zzzz945" source="941" target="179" cy:directed="1"/>
      <edge id="248214" label="zzzz102,zzzz123" source="941" target="920" cy:directed="1"/>
      <edge id="248213" label="zzzz102,zzzz130" source="941" target="913" cy:directed="1"/>
      <edge id="248212" label="zzzz102,zzzz189" source="941" target="854" cy:directed="1"/>
      <edge id="248211" label="zzzz102,zzzz389" source="941" target="667" cy:directed="1"/>
      <edge id="248210" label="zzzz102,zzzz498" source="941" target="558" cy:directed="1"/>
      <edge id="248209" label="zzzz102,zzzz511" source="941" target="545" cy:directed="1"/>
      <edge id="248208" label="zzzz102,zzzz518" source="941" target="538" cy:directed="1"/>
      <edge id="248207" label="zzzz102,zzzz537" source="941" target="519" cy:directed="1"/>
      <edge id="248206" label="zzzz102,zzzz546" source="941" target="510" cy:directed="1"/>
      <edge id="248205" label="zzzz102,zzzz129" source="941" target="914" cy:directed="1"/>
      <edge id="248204" label="zzzz102,zzzz548" source="941" target="508" cy:directed="1"/>
      <edge id="248203" label="zzzz102,zzzz725" source="941" target="335" cy:directed="1"/>
      <edge id="248202" label="zzzz102,zzzz884" source="941" target="222" cy:directed="1"/>
      <edge id="248201" label="zzzz102,zzzz119" source="941" target="924" cy:directed="1"/>
      <edge id="248200" label="zzzz102,zzzz385" source="941" target="671" cy:directed="1"/>
      <edge id="248199" label="zzzz102,zzzz573" source="941" target="483" cy:directed="1"/>
      <edge id="248198" label="zzzz102,zzzz791" source="941" target="290" cy:directed="1"/>
      <edge id="248197" label="zzzz102,zzzz912" source="941" target="199" cy:directed="1"/>
      <edge id="248196" label="zzzz102,zzzzz45" source="941" target="126" cy:directed="1"/>
      <edge id="248195" label="zzzz102,zzzzz53" source="941" target="118" cy:directed="1"/>
      <edge id="248194" label="zzzz102,zzzz356" source="941" target="700" cy:directed="1"/>
      <edge id="248193" label="zzzz102,zzzz358" source="941" target="698" cy:directed="1"/>
      <edge id="248192" label="zzzz102,zzzz369" source="941" target="687" cy:directed="1"/>
      <edge id="248191" label="zzzz102,zzzz420" source="941" target="636" cy:directed="1"/>
      <edge id="248190" label="zzzz102,zzzz477" source="941" target="579" cy:directed="1"/>
      <edge id="248189" label="zzzz102,zzzz647" source="941" target="410" cy:directed="1"/>
      <edge id="248188" label="zzzz102,zzzz678" source="941" target="379" cy:directed="1"/>
      <edge id="248187" label="zzzz102,zzzz910" source="941" target="201" cy:directed="1"/>
      <edge id="248186" label="zzzz102,zzzz940" source="941" target="184" cy:directed="1"/>
      <edge id="248185" label="zzzz102,zzzzz87" source="941" target="84" cy:directed="1"/>
      <edge id="248184" label="zzzz102,zzzz372" source="941" target="684" cy:directed="1"/>
      <edge id="248183" label="zzzz102,zzzz407" source="941" target="649" cy:directed="1"/>
      <edge id="248182" label="zzzz102,zzzz840" source="941" target="244" cy:directed="1"/>
      <edge id="248181" label="zzzz102,zzzz171" source="941" target="872" cy:directed="1"/>
      <edge id="248180" label="zzzz102,zzzz353" source="941" target="703" cy:directed="1"/>
      <edge id="248179" label="zzzz102,zzzz416" source="941" target="640" cy:directed="1"/>
      <edge id="248178" label="zzzz102,zzzz445" source="941" target="611" cy:directed="1"/>
      <edge id="248177" label="zzzz102,zzzz474" source="941" target="582" cy:directed="1"/>
      <edge id="248176" label="zzzz102,zzzz480" source="941" target="576" cy:directed="1"/>
      <edge id="248175" label="zzzz102,zzzz512" source="941" target="544" cy:directed="1"/>
      <edge id="248174" label="zzzz102,zzzz523" source="941" target="533" cy:directed="1"/>
      <edge id="248173" label="zzzz102,zzzz556" source="941" target="500" cy:directed="1"/>
      <edge id="248172" label="zzzz102,zzzz982" source="941" target="163" cy:directed="1"/>
      <edge id="248171" label="zzzz102,zzzzz49" source="941" target="122" cy:directed="1"/>
      <edge id="248170" label="zzzz102,zzzzz74" source="941" target="97" cy:directed="1"/>
      <edge id="248169" label="zzzz102,zzzz381" source="941" target="675" cy:directed="1"/>
      <edge id="248168" label="zzzz102,zzzz460" source="941" target="596" cy:directed="1"/>
      <edge id="248167" label="zzzz102,zzzz492" source="941" target="564" cy:directed="1"/>
      <edge id="248166" label="zzzz102,zzzz906" source="941" target="205" cy:directed="1"/>
      <edge id="248165" label="zzzz102,zzzzz50" source="941" target="121" cy:directed="1"/>
      <edge id="248164" label="zzzz102,zzzzz82" source="941" target="89" cy:directed="1"/>
      <edge id="248163" label="zzzz102,zzzz120" source="941" target="923" cy:directed="1"/>
      <edge id="248162" label="zzzz102,zzzz375" source="941" target="681" cy:directed="1"/>
      <edge id="248161" label="zzzz102,zzzz396" source="941" target="660" cy:directed="1"/>
      <edge id="248160" label="zzzz102,zzzz425" source="941" target="631" cy:directed="1"/>
      <edge id="248159" label="zzzz102,zzzz454" source="941" target="602" cy:directed="1"/>
      <edge id="248158" label="zzzz102,zzzz495" source="941" target="561" cy:directed="1"/>
      <edge id="248157" label="zzzz102,zzzz613" source="941" target="443" cy:directed="1"/>
      <edge id="248156" label="zzzz102,zzzz629" source="941" target="428" cy:directed="1"/>
      <edge id="248155" label="zzzz102,zzzz641" source="941" target="416" cy:directed="1"/>
      <edge id="248154" label="zzzz102,zzzz908" source="941" target="203" cy:directed="1"/>
      <edge id="248153" label="zzzz102,zzzz352" source="941" target="704" cy:directed="1"/>
      <edge id="248152" label="zzzz102,zzzz428" source="941" target="628" cy:directed="1"/>
      <edge id="248151" label="zzzz102,zzzz540" source="941" target="516" cy:directed="1"/>
      <edge id="248150" label="zzzz102,zzzz564" source="941" target="492" cy:directed="1"/>
      <edge id="248149" label="zzzz102,zzzz642" source="941" target="415" cy:directed="1"/>
      <edge id="248148" label="zzzz102,zzzz692" source="941" target="367" cy:directed="1"/>
      <edge id="248147" label="zzzz102,zzzz794" source="941" target="287" cy:directed="1"/>
      <edge id="248146" label="zzzz102,zzzz901" source="941" target="210" cy:directed="1"/>
      <edge id="248145" label="zzzz102,zzzz921" source="941" target="194" cy:directed="1"/>
      <edge id="248144" label="zzzz102,zzzz941" source="941" target="183" cy:directed="1"/>
      <edge id="248143" label="zzzz102,zzzz127" source="941" target="916" cy:directed="1"/>
      <edge id="248142" label="zzzz102,zzzz165" source="941" target="878" cy:directed="1"/>
      <edge id="248141" label="zzzz102,zzzz224" source="941" target="819" cy:directed="1"/>
      <edge id="248140" label="zzzz102,zzzz947" source="941" target="177" cy:directed="1"/>
      <edge id="248139" label="zzzz102,zzzzz73" source="941" target="98" cy:directed="1"/>
      <edge id="248138" label="zzzz102,zzzzz84" source="941" target="87" cy:directed="1"/>
      <edge id="248137" label="zzzz102,zzzz354" source="941" target="702" cy:directed="1"/>
      <edge id="248136" label="zzzz102,zzzz450" source="941" target="606" cy:directed="1"/>
      <edge id="248135" label="zzzz102,zzzz452" source="941" target="604" cy:directed="1"/>
      <edge id="248134" label="zzzz102,zzzz485" source="941" target="571" cy:directed="1"/>
      <edge id="248133" label="zzzz102,zzzz520" source="941" target="536" cy:directed="1"/>
      <edge id="248132" label="zzzz102,zzzz531" source="941" target="525" cy:directed="1"/>
      <edge id="248131" label="zzzz102,zzzz535" source="941" target="521" cy:directed="1"/>
      <edge id="248130" label="zzzz102,zzzz640" source="941" target="417" cy:directed="1"/>
      <edge id="248129" label="zzzz102,zzzz793" source="941" target="288" cy:directed="1"/>
      <edge id="248128" label="zzzz102,zzzz852" source="941" target="232" cy:directed="1"/>
      <edge id="248127" label="zzzz102,zzzz903" source="941" target="208" cy:directed="1"/>
      <edge id="248126" label="zzzz102,zzzz909" source="941" target="202" cy:directed="1"/>
      <edge id="248125" label="zzzz102,zzzzz88" source="941" target="83" cy:directed="1"/>
      <edge id="248124" label="zzzz102,zzzz117" source="941" target="926" cy:directed="1"/>
      <edge id="248123" label="zzzz102,zzzz207" source="941" target="836" cy:directed="1"/>
      <edge id="248122" label="zzzz102,zzzz401" source="941" target="655" cy:directed="1"/>
      <edge id="248121" label="zzzz102,zzzz508" source="941" target="548" cy:directed="1"/>
      <edge id="248120" label="zzzz102,zzzz522" source="941" target="534" cy:directed="1"/>
      <edge id="248119" label="zzzz102,zzzz533" source="941" target="523" cy:directed="1"/>
      <edge id="248118" label="zzzz102,zzzz667" source="941" target="390" cy:directed="1"/>
      <edge id="248117" label="zzzz102,zzzz802" source="941" target="281" cy:directed="1"/>
      <edge id="248116" label="zzzz102,zzzz131" source="941" target="912" cy:directed="1"/>
      <edge id="248115" label="zzzz102,zzzz208" source="941" target="835" cy:directed="1"/>
      <edge id="248114" label="zzzz102,zzzz210" source="941" target="833" cy:directed="1"/>
      <edge id="248113" label="zzzz102,zzzz434" source="941" target="622" cy:directed="1"/>
      <edge id="248112" label="zzzz102,zzzz440" source="941" target="616" cy:directed="1"/>
      <edge id="248111" label="zzzz102,zzzz447" source="941" target="609" cy:directed="1"/>
      <edge id="248110" label="zzzz102,zzzz448" source="941" target="608" cy:directed="1"/>
      <edge id="248109" label="zzzz102,zzzz458" source="941" target="598" cy:directed="1"/>
      <edge id="248108" label="zzzz102,zzzz663" source="941" target="394" cy:directed="1"/>
      <edge id="248107" label="zzzz102,zzzz893" source="941" target="217" cy:directed="1"/>
      <edge id="248106" label="zzzz102,zzzz895" source="941" target="215" cy:directed="1"/>
      <edge id="248105" label="zzzz102,zzzz900" source="941" target="211" cy:directed="1"/>
      <edge id="248104" label="zzzz102,zzzz911" source="941" target="200" cy:directed="1"/>
      <edge id="248103" label="zzzz102,zzzz963" source="941" target="169" cy:directed="1"/>
      <edge id="248102" label="zzzz102,zzzzz90" source="941" target="81" cy:directed="1"/>
      <edge id="248101" label="zzzz102,zzzz132" source="941" target="911" cy:directed="1"/>
      <edge id="248100" label="zzzz102,zzzz166" source="941" target="877" cy:directed="1"/>
      <edge id="248099" label="zzzz102,zzzz245" source="941" target="798" cy:directed="1"/>
      <edge id="248098" label="zzzz102,zzzz348" source="941" target="708" cy:directed="1"/>
      <edge id="248097" label="zzzz102,zzzz475" source="941" target="581" cy:directed="1"/>
      <edge id="248096" label="zzzz102,zzzz521" source="941" target="535" cy:directed="1"/>
      <edge id="248095" label="zzzz102,zzzz627" source="941" target="430" cy:directed="1"/>
      <edge id="248094" label="zzzz102,zzzz935" source="941" target="187" cy:directed="1"/>
      <edge id="248093" label="zzzz102,zzzzz86" source="941" target="85" cy:directed="1"/>
      <edge id="248092" label="zzzz102,zzzz108" source="941" target="935" cy:directed="1"/>
      <edge id="248091" label="zzzz102,zzzz160" source="941" target="883" cy:directed="1"/>
      <edge id="248090" label="zzzz102,zzzz162" source="941" target="881" cy:directed="1"/>
      <edge id="248089" label="zzzz102,zzzz199" source="941" target="844" cy:directed="1"/>
      <edge id="248088" label="zzzz102,zzzz286" source="941" target="766" cy:directed="1"/>
      <edge id="248087" label="zzzz102,zzzz368" source="941" target="688" cy:directed="1"/>
      <edge id="248086" label="zzzz102,zzzz410" source="941" target="646" cy:directed="1"/>
      <edge id="248085" label="zzzz102,zzzz444" source="941" target="612" cy:directed="1"/>
      <edge id="248084" label="zzzz102,zzzz500" source="941" target="556" cy:directed="1"/>
      <edge id="248083" label="zzzz102,zzzz894" source="941" target="216" cy:directed="1"/>
      <edge id="248082" label="zzzz102,zzzz209" source="941" target="834" cy:directed="1"/>
      <edge id="248081" label="zzzz102,zzzz217" source="941" target="826" cy:directed="1"/>
      <edge id="248080" label="zzzz102,zzzz220" source="941" target="823" cy:directed="1"/>
      <edge id="248079" label="zzzz102,zzzz465" source="941" target="591" cy:directed="1"/>
      <edge id="248078" label="zzzz102,zzzz470" source="941" target="586" cy:directed="1"/>
      <edge id="248077" label="zzzz102,zzzz502" source="941" target="554" cy:directed="1"/>
      <edge id="248076" label="zzzz102,zzzz515" source="941" target="541" cy:directed="1"/>
      <edge id="248075" label="zzzz102,zzzz649" source="941" target="408" cy:directed="1"/>
      <edge id="248074" label="zzzz102,zzzz796" source="941" target="286" cy:directed="1"/>
      <edge id="248073" label="zzzz102,zzzz809" source="941" target="274" cy:directed="1"/>
      <edge id="248072" label="zzzz102,zzzz965" source="941" target="167" cy:directed="1"/>
      <edge id="248071" label="zzzz102,zzzzz78" source="941" target="93" cy:directed="1"/>
      <edge id="248070" label="zzzz102,zzzz136" source="941" target="907" cy:directed="1"/>
      <edge id="248069" label="zzzz102,zzzz370" source="941" target="686" cy:directed="1"/>
      <edge id="248068" label="zzzz102,zzzz382" source="941" target="674" cy:directed="1"/>
      <edge id="248067" label="zzzz102,zzzz646" source="941" target="411" cy:directed="1"/>
      <edge id="248066" label="zzzz102,zzzz849" source="941" target="235" cy:directed="1"/>
      <edge id="248065" label="zzzz102,zzzz892" source="941" target="218" cy:directed="1"/>
      <edge id="248064" label="zzzz102,zzzz176" source="941" target="867" cy:directed="1"/>
      <edge id="248063" label="zzzz102,zzzz262" source="941" target="781" cy:directed="1"/>
      <edge id="248062" label="zzzz102,zzzz371" source="941" target="685" cy:directed="1"/>
      <edge id="248061" label="zzzz102,zzzz400" source="941" target="656" cy:directed="1"/>
      <edge id="248060" label="zzzz102,zzzz501" source="941" target="555" cy:directed="1"/>
      <edge id="248059" label="zzzz102,zzzz550" source="941" target="506" cy:directed="1"/>
      <edge id="248058" label="zzzz102,zzzz650" source="941" target="407" cy:directed="1"/>
      <edge id="248057" label="zzzz102,zzzz722" source="941" target="337" cy:directed="1"/>
      <edge id="248056" label="zzzz102,zzzz810" source="941" target="273" cy:directed="1"/>
      <edge id="248055" label="zzzz102,zzzz843" source="941" target="241" cy:directed="1"/>
      <edge id="248054" label="zzzz102,zzzz904" source="941" target="207" cy:directed="1"/>
      <edge id="248053" label="zzzz102,zzzz950" source="941" target="174" cy:directed="1"/>
      <edge id="248052" label="zzzz102,zzzz951" source="941" target="173" cy:directed="1"/>
      <edge id="248051" label="zzzz102,zzzz180" source="941" target="863" cy:directed="1"/>
      <edge id="248050" label="zzzz102,zzzz349" source="941" target="707" cy:directed="1"/>
      <edge id="248049" label="zzzz102,zzzz620" source="941" target="436" cy:directed="1"/>
      <edge id="248048" label="zzzz102,zzzz637" source="941" target="420" cy:directed="1"/>
      <edge id="248047" label="zzzz102,zzzz656" source="941" target="401" cy:directed="1"/>
      <edge id="248046" label="zzzz102,zzzz670" source="941" target="387" cy:directed="1"/>
      <edge id="248045" label="zzzz102,zzzz829" source="941" target="255" cy:directed="1"/>
      <edge id="248044" label="zzzz102,zzzz836" source="941" target="248" cy:directed="1"/>
      <edge id="248043" label="zzzz102,zzzz936" source="941" target="186" cy:directed="1"/>
      <edge id="248042" label="zzzz102,zzzz944" source="941" target="180" cy:directed="1"/>
      <edge id="248041" label="zzzz102,zzzz553" source="941" target="503" cy:directed="1"/>
      <edge id="248040" label="zzzz102,zzzz619" source="941" target="437" cy:directed="1"/>
      <edge id="248039" label="zzzz102,zzzz161" source="941" target="882" cy:directed="1"/>
      <edge id="248038" label="zzzz102,zzzz383" source="941" target="673" cy:directed="1"/>
      <edge id="248037" label="zzzz102,zzzz406" source="941" target="650" cy:directed="1"/>
      <edge id="248036" label="zzzz102,zzzz437" source="941" target="619" cy:directed="1"/>
      <edge id="248035" label="zzzz102,zzzz441" source="941" target="615" cy:directed="1"/>
      <edge id="248034" label="zzzz102,zzzz449" source="941" target="607" cy:directed="1"/>
      <edge id="248033" label="zzzz102,zzzz554" source="941" target="502" cy:directed="1"/>
      <edge id="248032" label="zzzz102,zzzz614" source="941" target="442" cy:directed="1"/>
      <edge id="248031" label="zzzz102,zzzz658" source="941" target="399" cy:directed="1"/>
      <edge id="248030" label="zzzz102,zzzz346" source="941" target="710" cy:directed="1"/>
      <edge id="248029" label="zzzz102,zzzz364" source="941" target="692" cy:directed="1"/>
      <edge id="248028" label="zzzz102,zzzz367" source="941" target="689" cy:directed="1"/>
      <edge id="248027" label="zzzz102,zzzz527" source="941" target="529" cy:directed="1"/>
      <edge id="248026" label="zzzz102,zzzz567" source="941" target="489" cy:directed="1"/>
      <edge id="248025" label="zzzz102,zzzz807" source="941" target="276" cy:directed="1"/>
      <edge id="248024" label="zzzz102,zzzzz91" source="941" target="80" cy:directed="1"/>
      <edge id="248023" label="zzzz102,zzzz164" source="941" target="879" cy:directed="1"/>
      <edge id="248022" label="zzzz102,zzzz179" source="941" target="864" cy:directed="1"/>
      <edge id="248021" label="zzzz102,zzzz379" source="941" target="677" cy:directed="1"/>
      <edge id="248020" label="zzzz102,zzzz395" source="941" target="661" cy:directed="1"/>
      <edge id="248019" label="zzzz102,zzzz413" source="941" target="643" cy:directed="1"/>
      <edge id="248018" label="zzzz102,zzzz636" source="941" target="421" cy:directed="1"/>
      <edge id="248017" label="zzzz102,zzzz665" source="941" target="392" cy:directed="1"/>
      <edge id="248016" label="zzzz102,zzzz889" source="941" target="221" cy:directed="1"/>
      <edge id="248015" label="zzzz102,zzzz891" source="941" target="219" cy:directed="1"/>
      <edge id="248014" label="zzzz102,zzzzz83" source="941" target="88" cy:directed="1"/>
      <edge id="248013" label="zzzz102,zzzz118" source="941" target="925" cy:directed="1"/>
      <edge id="248012" label="zzzz102,zzzz155" source="941" target="888" cy:directed="1"/>
      <edge id="248011" label="zzzz102,zzzz159" source="941" target="884" cy:directed="1"/>
      <edge id="248010" label="zzzz102,zzzz264" source="941" target="779" cy:directed="1"/>
      <edge id="248009" label="zzzz102,zzzz361" source="941" target="695" cy:directed="1"/>
      <edge id="248008" label="zzzz102,zzzz421" source="941" target="635" cy:directed="1"/>
      <edge id="248007" label="zzzz102,zzzz423" source="941" target="633" cy:directed="1"/>
      <edge id="248006" label="zzzz102,zzzz471" source="941" target="585" cy:directed="1"/>
      <edge id="248005" label="zzzz102,zzzz472" source="941" target="584" cy:directed="1"/>
      <edge id="248004" label="zzzz102,zzzz529" source="941" target="527" cy:directed="1"/>
      <edge id="248003" label="zzzz102,zzzz547" source="941" target="509" cy:directed="1"/>
      <edge id="248002" label="zzzz102,zzzz555" source="941" target="501" cy:directed="1"/>
      <edge id="248001" label="zzzz102,zzzz559" source="941" target="497" cy:directed="1"/>
      <edge id="248000" label="zzzz102,zzzz644" source="941" target="413" cy:directed="1"/>
      <edge id="247999" label="zzzz102,zzzz654" source="941" target="403" cy:directed="1"/>
      <edge id="247998" label="zzzz102,zzzz158" source="941" target="885" cy:directed="1"/>
      <edge id="247997" label="zzzz102,zzzz483" source="941" target="573" cy:directed="1"/>
      <edge id="247996" label="zzzz102,zzzz505" source="941" target="551" cy:directed="1"/>
      <edge id="247995" label="zzzz102,zzzz563" source="941" target="493" cy:directed="1"/>
      <edge id="247994" label="zzzz102,zzzz631" source="941" target="426" cy:directed="1"/>
      <edge id="247993" label="zzzz102,zzzzz61" source="941" target="110" cy:directed="1"/>
      <edge id="247992" label="zzzz102,zzzz107" source="941" target="936" cy:directed="1"/>
      <edge id="247991" label="zzzz102,zzzz195" source="941" target="848" cy:directed="1"/>
      <edge id="247990" label="zzzz102,zzzz427" source="941" target="629" cy:directed="1"/>
      <edge id="247989" label="zzzz102,zzzz436" source="941" target="620" cy:directed="1"/>
      <edge id="247988" label="zzzz102,zzzz494" source="941" target="562" cy:directed="1"/>
      <edge id="247987" label="zzzz102,zzzz509" source="941" target="547" cy:directed="1"/>
      <edge id="247986" label="zzzz102,zzzz524" source="941" target="532" cy:directed="1"/>
      <edge id="247985" label="zzzz102,zzzzz81" source="941" target="90" cy:directed="1"/>
      <edge id="247984" label="zzzz102,zzzz116" source="941" target="927" cy:directed="1"/>
      <edge id="247983" label="zzzz102,zzzz230" source="941" target="813" cy:directed="1"/>
      <edge id="247982" label="zzzz102,zzzz397" source="941" target="659" cy:directed="1"/>
      <edge id="247981" label="zzzz102,zzzz468" source="941" target="588" cy:directed="1"/>
      <edge id="247980" label="zzzz102,zzzz491" source="941" target="565" cy:directed="1"/>
      <edge id="247979" label="zzzz102,zzzz497" source="941" target="559" cy:directed="1"/>
      <edge id="247978" label="zzzz102,zzzz549" source="941" target="507" cy:directed="1"/>
      <edge id="247977" label="zzzz102,zzzz618" source="941" target="438" cy:directed="1"/>
      <edge id="247976" label="zzzz102,zzzz661" source="941" target="396" cy:directed="1"/>
      <edge id="247975" label="zzzz102,zzzz662" source="941" target="395" cy:directed="1"/>
      <edge id="247974" label="zzzz102,zzzzz89" source="941" target="82" cy:directed="1"/>
      <edge id="247973" label="zzzz102,zzzzz97" source="941" target="74" cy:directed="1"/>
      <edge id="247972" label="zzzz102,zzzz106" source="941" target="937" cy:directed="1"/>
      <edge id="247971" label="zzzz102,zzzz153" source="941" target="890" cy:directed="1"/>
      <edge id="247970" label="zzzz102,zzzz173" source="941" target="870" cy:directed="1"/>
      <edge id="247969" label="zzzz102,zzzz206" source="941" target="837" cy:directed="1"/>
      <edge id="247968" label="zzzz102,zzzz390" source="941" target="666" cy:directed="1"/>
      <edge id="247967" label="zzzz102,zzzz414" source="941" target="642" cy:directed="1"/>
      <edge id="247966" label="zzzz102,zzzz462" source="941" target="594" cy:directed="1"/>
      <edge id="247965" label="zzzz102,zzzz638" source="941" target="419" cy:directed="1"/>
      <edge id="247964" label="zzzz102,zzzz727" source="941" target="333" cy:directed="1"/>
      <edge id="247963" label="zzzz102,zzzz126" source="941" target="917" cy:directed="1"/>
      <edge id="247962" label="zzzz102,zzzz135" source="941" target="908" cy:directed="1"/>
      <edge id="247961" label="zzzz102,zzzz145" source="941" target="898" cy:directed="1"/>
      <edge id="247960" label="zzzz102,zzzz167" source="941" target="876" cy:directed="1"/>
      <edge id="247959" label="zzzz102,zzzz168" source="941" target="875" cy:directed="1"/>
      <edge id="247958" label="zzzz102,zzzz211" source="941" target="832" cy:directed="1"/>
      <edge id="247957" label="zzzz102,zzzz366" source="941" target="690" cy:directed="1"/>
      <edge id="247956" label="zzzz102,zzzz439" source="941" target="617" cy:directed="1"/>
      <edge id="247955" label="zzzz102,zzzz542" source="941" target="514" cy:directed="1"/>
      <edge id="247954" label="zzzz102,zzzz635" source="941" target="422" cy:directed="1"/>
      <edge id="247953" label="zzzz102,zzzz664" source="941" target="393" cy:directed="1"/>
      <edge id="247952" label="zzzz102,zzzz833" source="941" target="251" cy:directed="1"/>
      <edge id="247951" label="zzzz102,zzzz899" source="941" target="212" cy:directed="1"/>
      <edge id="247950" label="zzzz102,zzzzz96" source="941" target="75" cy:directed="1"/>
      <edge id="247949" label="zzzz102,zzzz125" source="941" target="918" cy:directed="1"/>
      <edge id="247948" label="zzzz102,zzzz163" source="941" target="880" cy:directed="1"/>
      <edge id="247947" label="zzzz102,zzzz216" source="941" target="827" cy:directed="1"/>
      <edge id="247946" label="zzzz102,zzzz357" source="941" target="699" cy:directed="1"/>
      <edge id="247945" label="zzzz102,zzzz377" source="941" target="679" cy:directed="1"/>
      <edge id="247944" label="zzzz102,zzzz526" source="941" target="530" cy:directed="1"/>
      <edge id="247943" label="zzzz102,zzzz738" source="941" target="331" cy:directed="1"/>
      <edge id="247942" label="zzzz102,zzzz832" source="941" target="252" cy:directed="1"/>
      <edge id="247941" label="zzzz102,zzzz964" source="941" target="168" cy:directed="1"/>
      <edge id="247940" label="zzzz102,zzzz174" source="941" target="869" cy:directed="1"/>
      <edge id="247939" label="zzzz102,zzzz175" source="941" target="868" cy:directed="1"/>
      <edge id="247938" label="zzzz102,zzzz194" source="941" target="849" cy:directed="1"/>
      <edge id="247937" label="zzzz102,zzzz219" source="941" target="824" cy:directed="1"/>
      <edge id="247936" label="zzzz102,zzzz252" source="941" target="791" cy:directed="1"/>
      <edge id="247935" label="zzzz102,zzzz484" source="941" target="572" cy:directed="1"/>
      <edge id="247934" label="zzzz102,zzzz487" source="941" target="569" cy:directed="1"/>
      <edge id="247933" label="zzzz102,zzzz504" source="941" target="552" cy:directed="1"/>
      <edge id="247932" label="zzzz102,zzzz621" source="941" target="435" cy:directed="1"/>
      <edge id="247931" label="zzzz102,zzzz170" source="941" target="873" cy:directed="1"/>
      <edge id="247930" label="zzzz102,zzzz243" source="941" target="800" cy:directed="1"/>
      <edge id="247929" label="zzzz102,zzzz831" source="941" target="253" cy:directed="1"/>
      <edge id="247928" label="zzzz102,zzzzz64" source="941" target="107" cy:directed="1"/>
      <edge id="247927" label="zzzz102,zzzzz77" source="941" target="94" cy:directed="1"/>
      <edge id="247926" label="zzzz102,zzzz133" source="941" target="910" cy:directed="1"/>
      <edge id="247925" label="zzzz102,zzzz473" source="941" target="583" cy:directed="1"/>
      <edge id="247924" label="zzzz102,zzzz577" source="941" target="479" cy:directed="1"/>
      <edge id="247923" label="zzzz102,zzzz622" source="941" target="434" cy:directed="1"/>
      <edge id="247922" label="zzzz102,zzzz630" source="941" target="427" cy:directed="1"/>
      <edge id="247921" label="zzzz102,zzzz902" source="941" target="209" cy:directed="1"/>
      <edge id="247920" label="zzzz102,zzzzz60" source="941" target="111" cy:directed="1"/>
      <edge id="247919" label="zzzz102,zzzz177" source="941" target="866" cy:directed="1"/>
      <edge id="247918" label="zzzz102,zzzz479" source="941" target="577" cy:directed="1"/>
      <edge id="247917" label="zzzz102,zzzz516" source="941" target="540" cy:directed="1"/>
      <edge id="247916" label="zzzz102,zzzz544" source="941" target="512" cy:directed="1"/>
      <edge id="247915" label="zzzz102,zzzz659" source="941" target="398" cy:directed="1"/>
      <edge id="247914" label="zzzz102,zzzz115" source="941" target="928" cy:directed="1"/>
      <edge id="247913" label="zzzz102,zzzz429" source="941" target="627" cy:directed="1"/>
      <edge id="247912" label="zzzz102,zzzz808" source="941" target="275" cy:directed="1"/>
      <edge id="247911" label="zzzz102,zzzz845" source="941" target="239" cy:directed="1"/>
      <edge id="247910" label="zzzz102,zzzz946" source="941" target="178" cy:directed="1"/>
      <edge id="247909" label="zzzz102,zzzzz79" source="941" target="92" cy:directed="1"/>
      <edge id="247908" label="zzzz102,zzzz393" source="941" target="663" cy:directed="1"/>
      <edge id="247907" label="zzzz102,zzzz402" source="941" target="654" cy:directed="1"/>
      <edge id="247906" label="zzzz102,zzzz405" source="941" target="651" cy:directed="1"/>
      <edge id="247905" label="zzzz102,zzzz442" source="941" target="614" cy:directed="1"/>
      <edge id="247904" label="zzzz102,zzzz648" source="941" target="409" cy:directed="1"/>
      <edge id="247903" label="zzzz102,zzzz811" source="941" target="272" cy:directed="1"/>
      <edge id="247902" label="zzzz102,zzzzz48" source="941" target="123" cy:directed="1"/>
      <edge id="247901" label="zzzz102,zzzzz94" source="941" target="77" cy:directed="1"/>
      <edge id="247900" label="zzzz102,zzzz124" source="941" target="919" cy:directed="1"/>
      <edge id="247899" label="zzzz102,zzzz360" source="941" target="696" cy:directed="1"/>
      <edge id="247898" label="zzzz102,zzzz398" source="941" target="658" cy:directed="1"/>
      <edge id="247897" label="zzzz102,zzzz412" source="941" target="644" cy:directed="1"/>
      <edge id="247896" label="zzzz102,zzzz466" source="941" target="590" cy:directed="1"/>
      <edge id="247895" label="zzzz102,zzzz539" source="941" target="517" cy:directed="1"/>
      <edge id="247894" label="zzzz102,zzzz660" source="941" target="397" cy:directed="1"/>
      <edge id="247893" label="zzzz102,zzzz169" source="941" target="874" cy:directed="1"/>
      <edge id="247892" label="zzzz102,zzzz284" source="941" target="768" cy:directed="1"/>
      <edge id="247891" label="zzzz102,zzzz347" source="941" target="709" cy:directed="1"/>
      <edge id="247890" label="zzzz102,zzzz453" source="941" target="603" cy:directed="1"/>
      <edge id="247889" label="zzzz102,zzzz464" source="941" target="592" cy:directed="1"/>
      <edge id="247888" label="zzzz102,zzzz113" source="941" target="930" cy:directed="1"/>
      <edge id="247887" label="zzzz102,zzzz184" source="941" target="859" cy:directed="1"/>
      <edge id="247886" label="zzzz102,zzzz249" source="941" target="794" cy:directed="1"/>
      <edge id="247885" label="zzzz102,zzzz259" source="941" target="784" cy:directed="1"/>
      <edge id="247884" label="zzzz102,zzzz426" source="941" target="630" cy:directed="1"/>
      <edge id="247883" label="zzzz102,zzzz455" source="941" target="601" cy:directed="1"/>
      <edge id="247882" label="zzzz102,zzzz611" source="941" target="445" cy:directed="1"/>
      <edge id="247881" label="zzzz102,zzzz632" source="941" target="425" cy:directed="1"/>
      <edge id="247880" label="zzzz102,zzzz653" source="941" target="404" cy:directed="1"/>
      <edge id="247879" label="zzzz102,zzzz122" source="941" target="921" cy:directed="1"/>
      <edge id="247878" label="zzzz102,zzzz138" source="941" target="905" cy:directed="1"/>
      <edge id="247877" label="zzzz102,zzzz146" source="941" target="897" cy:directed="1"/>
      <edge id="247876" label="zzzz102,zzzz147" source="941" target="896" cy:directed="1"/>
      <edge id="247875" label="zzzz102,zzzz242" source="941" target="801" cy:directed="1"/>
      <edge id="247874" label="zzzz102,zzzz399" source="941" target="657" cy:directed="1"/>
      <edge id="247873" label="zzzz102,zzzz172" source="941" target="871" cy:directed="1"/>
      <edge id="247872" label="zzzz102,zzzz188" source="941" target="855" cy:directed="1"/>
      <edge id="247871" label="zzzz102,zzzz404" source="941" target="652" cy:directed="1"/>
      <edge id="247870" label="zzzz102,zzzz496" source="941" target="560" cy:directed="1"/>
      <edge id="247869" label="zzzz102,zzzz690" source="941" target="368" cy:directed="1"/>
      <edge id="247868" label="zzzz102,zzzz112" source="941" target="931" cy:directed="1"/>
      <edge id="247867" label="zzzz102,zzzz241" source="941" target="802" cy:directed="1"/>
      <edge id="247866" label="zzzz102,zzzz461" source="941" target="595" cy:directed="1"/>
      <edge id="247865" label="zzzz102,zzzz604" source="941" target="452" cy:directed="1"/>
      <edge id="247864" label="zzzz102,zzzz218" source="941" target="825" cy:directed="1"/>
      <edge id="247863" label="zzzz102,zzzz232" source="941" target="811" cy:directed="1"/>
      <edge id="247862" label="zzzz102,zzzz285" source="941" target="767" cy:directed="1"/>
      <edge id="247861" label="zzzz102,zzzz386" source="941" target="670" cy:directed="1"/>
      <edge id="247860" label="zzzz102,zzzz435" source="941" target="621" cy:directed="1"/>
      <edge id="247859" label="zzzz102,zzzz536" source="941" target="520" cy:directed="1"/>
      <edge id="247858" label="zzzz102,zzzz593" source="941" target="463" cy:directed="1"/>
      <edge id="247857" label="zzzz102,zzzz652" source="941" target="405" cy:directed="1"/>
      <edge id="247856" label="zzzz102,zzzz943" source="941" target="181" cy:directed="1"/>
      <edge id="247855" label="zzzz102,zzzz948" source="941" target="176" cy:directed="1"/>
      <edge id="247854" label="zzzz102,zzzz966" source="941" target="166" cy:directed="1"/>
      <edge id="247853" label="zzzz102,zzzzz69" source="941" target="102" cy:directed="1"/>
      <edge id="247852" label="zzzz102,zzzz121" source="941" target="922" cy:directed="1"/>
      <edge id="247851" label="zzzz102,zzzz183" source="941" target="860" cy:directed="1"/>
      <edge id="247850" label="zzzz102,zzzz532" source="941" target="524" cy:directed="1"/>
      <edge id="247849" label="zzzz102,zzzz788" source="941" target="293" cy:directed="1"/>
      <edge id="247848" label="zzzz102,zzzz898" source="941" target="213" cy:directed="1"/>
      <edge id="247847" label="zzzz102,zzzz142" source="941" target="901" cy:directed="1"/>
      <edge id="247846" label="zzzz102,zzzz191" source="941" target="852" cy:directed="1"/>
      <edge id="247845" label="zzzz102,zzzz201" source="941" target="842" cy:directed="1"/>
      <edge id="247844" label="zzzz102,zzzz374" source="941" target="682" cy:directed="1"/>
      <edge id="247843" label="zzzz102,zzzz438" source="941" target="618" cy:directed="1"/>
      <edge id="247842" label="zzzz102,zzzz571" source="941" target="485" cy:directed="1"/>
      <edge id="247841" label="zzzz102,zzzz594" source="941" target="462" cy:directed="1"/>
      <edge id="247840" label="zzzz102,zzzz143" source="941" target="900" cy:directed="1"/>
      <edge id="247839" label="zzzz102,zzzz186" source="941" target="857" cy:directed="1"/>
      <edge id="247838" label="zzzz102,zzzz203" source="941" target="840" cy:directed="1"/>
      <edge id="247837" label="zzzz102,zzzz626" source="941" target="431" cy:directed="1"/>
      <edge id="247836" label="zzzz102,zzzz693" source="941" target="366" cy:directed="1"/>
      <edge id="247835" label="zzzz102,zzzzz43" source="941" target="128" cy:directed="1"/>
      <edge id="247834" label="zzzz102,zzzzz67" source="941" target="104" cy:directed="1"/>
      <edge id="247833" label="zzzz102,zzzz255" source="941" target="788" cy:directed="1"/>
      <edge id="247832" label="zzzz102,zzzz853" source="941" target="231" cy:directed="1"/>
      <edge id="247831" label="zzzz102,zzzz103" source="941" target="940" cy:directed="1"/>
      <edge id="247830" label="zzzz102,zzzz144" source="941" target="899" cy:directed="1"/>
      <edge id="247829" label="zzzz102,zzzz588" source="941" target="468" cy:directed="1"/>
      <edge id="247828" label="zzzz102,zzzz645" source="941" target="412" cy:directed="1"/>
      <edge id="247827" label="zzzz102,zzzz666" source="941" target="391" cy:directed="1"/>
      <edge id="247826" label="zzzz102,zzzz800" source="941" target="283" cy:directed="1"/>
      <edge id="247825" label="zzzz102,zzzz806" source="941" target="277" cy:directed="1"/>
      <edge id="247824" label="zzzz102,zzzzz92" source="941" target="79" cy:directed="1"/>
      <edge id="247823" label="zzzz102,zzzz140" source="941" target="903" cy:directed="1"/>
      <edge id="247822" label="zzzz102,zzzz141" source="941" target="902" cy:directed="1"/>
      <edge id="247821" label="zzzz102,zzzz590" source="941" target="466" cy:directed="1"/>
      <edge id="247820" label="zzzz102,zzzz838" source="941" target="246" cy:directed="1"/>
      <edge id="247819" label="zzzz102,zzzzz47" source="941" target="124" cy:directed="1"/>
      <edge id="247818" label="zzzz102,zzzz104" source="941" target="939" cy:directed="1"/>
      <edge id="247817" label="zzzz102,zzzz137" source="941" target="906" cy:directed="1"/>
      <edge id="247816" label="zzzz102,zzzz149" source="941" target="894" cy:directed="1"/>
      <edge id="247815" label="zzzz102,zzzz213" source="941" target="830" cy:directed="1"/>
      <edge id="247814" label="zzzz102,zzzz530" source="941" target="526" cy:directed="1"/>
      <edge id="247813" label="zzzz102,zzzz576" source="941" target="480" cy:directed="1"/>
      <edge id="247812" label="zzzz102,zzzz603" source="941" target="453" cy:directed="1"/>
      <edge id="247811" label="zzzz102,zzzz837" source="941" target="247" cy:directed="1"/>
      <edge id="247810" label="zzzz102,zzzzz93" source="941" target="78" cy:directed="1"/>
      <edge id="247809" label="zzzz102,zzzz150" source="941" target="893" cy:directed="1"/>
      <edge id="247808" label="zzzz102,zzzz152" source="941" target="891" cy:directed="1"/>
      <edge id="247807" label="zzzz102,zzzz181" source="941" target="862" cy:directed="1"/>
      <edge id="247806" label="zzzz102,zzzz355" source="941" target="701" cy:directed="1"/>
      <edge id="247805" label="zzzz102,zzzz380" source="941" target="676" cy:directed="1"/>
      <edge id="247804" label="zzzz102,zzzz561" source="941" target="495" cy:directed="1"/>
      <edge id="247803" label="zzzz102,zzzz562" source="941" target="494" cy:directed="1"/>
      <edge id="247802" label="zzzz102,zzzz586" source="941" target="470" cy:directed="1"/>
      <edge id="247801" label="zzzz102,zzzz605" source="941" target="451" cy:directed="1"/>
      <edge id="247800" label="zzzz102,zzzz616" source="941" target="440" cy:directed="1"/>
      <edge id="247799" label="zzzz102,zzzz634" source="941" target="423" cy:directed="1"/>
      <edge id="247798" label="zzzz102,zzzz205" source="941" target="838" cy:directed="1"/>
      <edge id="247797" label="zzzz102,zzzz239" source="941" target="804" cy:directed="1"/>
      <edge id="247796" label="zzzz102,zzzz510" source="941" target="546" cy:directed="1"/>
      <edge id="247795" label="zzzz102,zzzz673" source="941" target="384" cy:directed="1"/>
      <edge id="247794" label="zzzz102,zzzzz46" source="941" target="125" cy:directed="1"/>
      <edge id="247793" label="zzzz102,zzzz394" source="941" target="662" cy:directed="1"/>
      <edge id="247792" label="zzzz102,zzzz558" source="941" target="498" cy:directed="1"/>
      <edge id="247791" label="zzzz102,zzzz623" source="941" target="433" cy:directed="1"/>
      <edge id="247790" label="zzzz102,zzzz694" source="941" target="365" cy:directed="1"/>
      <edge id="247789" label="zzzz102,zzzz942" source="941" target="182" cy:directed="1"/>
      <edge id="247788" label="zzzz102,zzzz178" source="941" target="865" cy:directed="1"/>
      <edge id="247787" label="zzzz102,zzzz595" source="941" target="461" cy:directed="1"/>
      <edge id="247786" label="zzzz102,zzzz599" source="941" target="457" cy:directed="1"/>
      <edge id="247785" label="zzzz102,zzzz240" source="941" target="803" cy:directed="1"/>
      <edge id="247784" label="zzzz102,zzzz606" source="941" target="450" cy:directed="1"/>
      <edge id="247783" label="zzzz102,zzzz519" source="941" target="537" cy:directed="1"/>
      <edge id="247782" label="zzzz102,zzzz685" source="941" target="373" cy:directed="1"/>
      <edge id="247781" label="zzzz102,zzzz431" source="941" target="625" cy:directed="1"/>
      <edge id="247780" label="zzzz102,zzzz671" source="941" target="386" cy:directed="1"/>
      <edge id="247779" label="zzzz102,zzzz784" source="941" target="297" cy:directed="1"/>
      <edge id="247778" label="zzzz102,zzzz934" source="941" target="188" cy:directed="1"/>
      <edge id="247777" label="zzzz102,zzzz204" source="941" target="839" cy:directed="1"/>
      <edge id="247776" label="zzzz102,zzzz581" source="941" target="475" cy:directed="1"/>
      <edge id="247775" label="zzzz102,zzzzz44" source="941" target="127" cy:directed="1"/>
      <edge id="247774" label="zzzz102,zzzz589" source="941" target="467" cy:directed="1"/>
      <edge id="247773" label="zzzz102,zzzz728" source="941" target="332" cy:directed="1"/>
      <edge id="247772" label="zzzz102,zzzz248" source="941" target="795" cy:directed="1"/>
      <edge id="247771" label="zzzz102,zzzz391" source="941" target="665" cy:directed="1"/>
      <edge id="247770" label="zzzz102,zzzzz99" source="941" target="72" cy:directed="1"/>
      <edge id="247769" label="zzzz102,zzzz251" source="941" target="792" cy:directed="1"/>
      <edge id="247768" label="zzzz102,zzzz489" source="941" target="567" cy:directed="1"/>
      <edge id="247767" label="zzzz102,zzzz482" source="941" target="574" cy:directed="1"/>
      <edge id="247766" label="zzzz102,zzzz633" source="941" target="424" cy:directed="1"/>
      <edge id="247765" label="zzzz102,zzzz570" source="941" target="486" cy:directed="1"/>
      <edge id="247764" label="zzzz102,zzzz801" source="941" target="282" cy:directed="1"/>
      <edge id="247763" label="zzzz102,zzzz187" source="941" target="856" cy:directed="1"/>
      <edge id="247762" label="zzzz102,zzzz392" source="941" target="664" cy:directed="1"/>
      <edge id="247761" label="zzzz102,zzzz419" source="941" target="637" cy:directed="1"/>
      <edge id="247760" label="zzzz102,zzzzz58" source="941" target="113" cy:directed="1"/>
      <edge id="247759" label="zzzz102,zzzz844" source="941" target="240" cy:directed="1"/>
      <edge id="247758" label="zzzz102,zzzz848" source="941" target="236" cy:directed="1"/>
      <edge id="247757" label="zzzz102,zzzz834" source="941" target="250" cy:directed="1"/>
      <edge id="247756" label="zzzz102,zzzz545" source="941" target="511" cy:directed="1"/>
      <edge id="247755" label="zzzz102,zzzz905" source="941" target="206" cy:directed="1"/>
      <edge id="247754" label="zzzz102,zzzz233" source="941" target="810" cy:directed="1"/>
      <edge id="247753" label="zzzz102,zzzz290" source="941" target="763" cy:directed="1"/>
      <edge id="247752" label="zzzz102,zzzzz51" source="941" target="120" cy:directed="1"/>
      <edge id="247751" label="zzzz102,zzzz612" source="941" target="444" cy:directed="1"/>
      <edge id="247750" label="zzzz102,zzzz672" source="941" target="385" cy:directed="1"/>
      <edge id="247749" label="zzzz102,zzzz105" source="941" target="938" cy:directed="1"/>
      <edge id="247748" label="zzzz102,zzzz215" source="941" target="828" cy:directed="1"/>
      <edge id="247747" label="zzzz102,zzzz514" source="941" target="542" cy:directed="1"/>
      <edge id="247746" label="zzzz102,zzzz574" source="941" target="482" cy:directed="1"/>
      <edge id="247745" label="zzzz102,zzzz850" source="941" target="234" cy:directed="1"/>
      <edge id="247744" label="zzzz102,zzzz600" source="941" target="456" cy:directed="1"/>
      <edge id="247743" label="zzzz102,zzzz198" source="941" target="845" cy:directed="1"/>
      <edge id="247742" label="zzzz102,zzzz459" source="941" target="597" cy:directed="1"/>
      <edge id="247741" label="zzzz102,zzzz676" source="941" target="381" cy:directed="1"/>
      <edge id="247740" label="zzzz102,zzzz226" source="941" target="817" cy:directed="1"/>
      <edge id="247739" label="zzzz102,zzzz517" source="941" target="539" cy:directed="1"/>
      <edge id="247738" label="zzzz102,zzzz110" source="941" target="933" cy:directed="1"/>
      <edge id="247737" label="zzzz102,zzzz225" source="941" target="818" cy:directed="1"/>
      <edge id="247736" label="zzzz102,zzzz534" source="941" target="522" cy:directed="1"/>
      <edge id="247735" label="zzzz102,zzzz799" source="941" target="284" cy:directed="1"/>
      <edge id="247734" label="zzzz102,zzzz931" source="941" target="191" cy:directed="1"/>
      <edge id="247733" label="zzzz102,zzzz697" source="941" target="362" cy:directed="1"/>
      <edge id="247732" label="zzzz102,zzzz607" source="941" target="449" cy:directed="1"/>
      <edge id="247731" label="zzzz102,zzzz202" source="941" target="841" cy:directed="1"/>
      <edge id="247730" label="zzzz102,zzzz592" source="941" target="464" cy:directed="1"/>
      <edge id="247729" label="zzzz102,zzzz582" source="941" target="474" cy:directed="1"/>
      <edge id="247728" label="zzzz102,zzzz687" source="941" target="371" cy:directed="1"/>
      <edge id="247727" label="zzzz102,zzzz430" source="941" target="626" cy:directed="1"/>
      <edge id="247726" label="zzzz102,zzzz486" source="941" target="570" cy:directed="1"/>
      <edge id="247725" label="zzzz102,zzzz568" source="941" target="488" cy:directed="1"/>
      <edge id="247724" label="zzzz102,zzzz575" source="941" target="481" cy:directed="1"/>
      <edge id="247723" label="zzzz102,zzzz578" source="941" target="478" cy:directed="1"/>
      <edge id="247722" label="zzzz102,zzzz148" source="941" target="895" cy:directed="1"/>
      <edge id="247721" label="zzzz102,zzzz263" source="941" target="780" cy:directed="1"/>
      <edge id="247720" label="zzzz102,zzzz651" source="941" target="406" cy:directed="1"/>
      <edge id="247719" label="zzzz102,zzzz695" source="941" target="364" cy:directed="1"/>
      <edge id="247718" label="zzzz102,zzzz983" source="941" target="162" cy:directed="1"/>
      <edge id="247717" label="zzzz102,zzzz403" source="941" target="653" cy:directed="1"/>
      <edge id="247716" label="zzzz102,zzzz683" source="941" target="375" cy:directed="1"/>
      <edge id="247715" label="zzzz102,zzzz580" source="941" target="476" cy:directed="1"/>
      <edge id="247714" label="zzzz102,zzzz677" source="941" target="380" cy:directed="1"/>
      <edge id="247713" label="zzzz102,zzzz139" source="941" target="904" cy:directed="1"/>
      <edge id="247712" label="zzzz102,zzzz493" source="941" target="563" cy:directed="1"/>
      <edge id="247711" label="zzzz102,zzzz583" source="941" target="473" cy:directed="1"/>
      <edge id="247710" label="zzzz102,zzzz329" source="941" target="727" cy:directed="1"/>
      <edge id="247709" label="zzzz102,zzzz463" source="941" target="593" cy:directed="1"/>
      <edge id="247708" label="zzzz102,zzzz596" source="941" target="460" cy:directed="1"/>
      <edge id="247707" label="zzzz102,zzzz609" source="941" target="447" cy:directed="1"/>
      <edge id="247706" label="zzzz102,zzzz669" source="941" target="388" cy:directed="1"/>
      <edge id="247705" label="zzzz102,zzzz830" source="941" target="254" cy:directed="1"/>
      <edge id="247704" label="zzzz102,zzzz981" source="941" target="164" cy:directed="1"/>
      <edge id="247703" label="zzzz102,zzzz557" source="941" target="499" cy:directed="1"/>
      <edge id="247702" label="zzzz102,zzzz655" source="941" target="402" cy:directed="1"/>
      <edge id="247701" label="zzzz102,zzzzz52" source="941" target="119" cy:directed="1"/>
      <edge id="247700" label="zzzz102,zzzz560" source="941" target="496" cy:directed="1"/>
      <edge id="247699" label="zzzz102,zzzz688" source="941" target="370" cy:directed="1"/>
      <edge id="247698" label="zzzz102,zzzzz59" source="941" target="112" cy:directed="1"/>
      <edge id="247697" label="zzzz102,zzzz507" source="941" target="549" cy:directed="1"/>
      <edge id="247696" label="zzzz102,zzzz551" source="941" target="505" cy:directed="1"/>
      <edge id="247695" label="zzzz102,zzzz151" source="941" target="892" cy:directed="1"/>
      <edge id="247694" label="zzzz102,zzzz300" source="941" target="756" cy:directed="1"/>
      <edge id="247693" label="zzzz102,zzzz363" source="941" target="693" cy:directed="1"/>
      <edge id="247692" label="zzzz102,zzzz446" source="941" target="610" cy:directed="1"/>
      <edge id="247691" label="zzzz102,zzzz543" source="941" target="513" cy:directed="1"/>
      <edge id="247690" label="zzzz102,zzzz552" source="941" target="504" cy:directed="1"/>
      <edge id="247689" label="zzzz102,zzzz299" source="941" target="757" cy:directed="1"/>
      <edge id="247688" label="zzzz102,zzzz499" source="941" target="557" cy:directed="1"/>
      <edge id="247687" label="zzzz102,zzzz625" source="941" target="432" cy:directed="1"/>
      <edge id="247686" label="zzzz102,zzzz566" source="941" target="490" cy:directed="1"/>
      <edge id="247685" label="zzzz102,zzzz679" source="941" target="378" cy:directed="1"/>
      <edge id="247684" label="zzzz102,zzzz411" source="941" target="645" cy:directed="1"/>
      <edge id="247683" label="zzzz102,zzzz490" source="941" target="566" cy:directed="1"/>
      <edge id="247682" label="zzzz102,zzzz228" source="941" target="815" cy:directed="1"/>
      <edge id="247681" label="zzzz102,zzzz222" source="941" target="821" cy:directed="1"/>
      <edge id="247680" label="zzzz102,zzzz933" source="941" target="189" cy:directed="1"/>
      <edge id="247679" label="zzzz102,zzzz469" source="941" target="587" cy:directed="1"/>
      <edge id="247678" label="zzzz102,zzzz541" source="941" target="515" cy:directed="1"/>
      <edge id="247677" label="zzzz102,zzzz680" source="941" target="377" cy:directed="1"/>
      <edge id="247676" label="zzzz102,zzzz686" source="941" target="372" cy:directed="1"/>
      <edge id="247675" label="zzzz102,zzzz292" source="941" target="761" cy:directed="1"/>
      <edge id="247674" label="zzzz102,zzzz408" source="941" target="648" cy:directed="1"/>
      <edge id="247673" label="zzzz102,zzzz615" source="941" target="441" cy:directed="1"/>
      <edge id="247672" label="zzzz102,zzzz350" source="941" target="706" cy:directed="1"/>
      <edge id="247671" label="zzzz102,zzzz569" source="941" target="487" cy:directed="1"/>
      <edge id="247670" label="zzzz102,zzzzz62" source="941" target="109" cy:directed="1"/>
      <edge id="247669" label="zzzz102,zzzz280" source="941" target="772" cy:directed="1"/>
      <edge id="247668" label="zzzz102,zzzz274" source="941" target="777" cy:directed="1"/>
      <edge id="247667" label="zzzz102,zzzz513" source="941" target="543" cy:directed="1"/>
      <edge id="247666" label="zzzz102,zzzz587" source="941" target="469" cy:directed="1"/>
      <edge id="247665" label="zzzz102,zzzz639" source="941" target="418" cy:directed="1"/>
      <edge id="247664" label="zzzz102,zzzzz70" source="941" target="101" cy:directed="1"/>
      <edge id="247663" label="zzzz102,zzzz244" source="941" target="799" cy:directed="1"/>
      <edge id="247662" label="zzzz102,zzzz538" source="941" target="518" cy:directed="1"/>
      <edge id="247661" label="zzzz102,zzzz572" source="941" target="484" cy:directed="1"/>
      <edge id="247660" label="zzzz102,zzzz359" source="941" target="697" cy:directed="1"/>
      <edge id="247659" label="zzzz102,zzzz467" source="941" target="589" cy:directed="1"/>
      <edge id="247658" label="zzzz102,zzzz476" source="941" target="580" cy:directed="1"/>
      <edge id="247657" label="zzzz102,zzzz681" source="941" target="376" cy:directed="1"/>
      <edge id="247656" label="zzzz102,zzzzz63" source="941" target="108" cy:directed="1"/>
      <edge id="247655" label="zzzz102,zzzz303" source="941" target="753" cy:directed="1"/>
      <edge id="247654" label="zzzz102,zzzz701" source="941" target="358" cy:directed="1"/>
      <edge id="247653" label="zzzz102,zzzz182" source="941" target="861" cy:directed="1"/>
      <edge id="247652" label="zzzz102,zzzz805" source="941" target="278" cy:directed="1"/>
      <edge id="247651" label="zzzz102,zzzz297" source="941" target="759" cy:directed="1"/>
      <edge id="247650" label="zzzz102,zzzzz56" source="941" target="115" cy:directed="1"/>
      <edge id="247649" label="zzzz102,zzzz282" source="941" target="770" cy:directed="1"/>
      <edge id="247648" label="zzzz102,zzzz214" source="941" target="829" cy:directed="1"/>
      <edge id="247647" label="zzzz102,zzzz804" source="941" target="279" cy:directed="1"/>
      <edge id="247646" label="zzzz102,zzzz111" source="941" target="932" cy:directed="1"/>
      <edge id="247645" label="zzzz102,zzzzz57" source="941" target="114" cy:directed="1"/>
      <edge id="247644" label="zzzz102,zzzz584" source="941" target="472" cy:directed="1"/>
      <edge id="247643" label="zzzz102,zzzz506" source="941" target="550" cy:directed="1"/>
      <edge id="247642" label="zzzz102,zzzz565" source="941" target="491" cy:directed="1"/>
      <edge id="247641" label="zzzz102,zzzz756" source="941" target="318" cy:directed="1"/>
      <edge id="247640" label="zzzz102,zzzz481" source="941" target="575" cy:directed="1"/>
      <edge id="247639" label="zzzz102,zzzz839" source="941" target="245" cy:directed="1"/>
      <edge id="247638" label="zzzz102,zzzz301" source="941" target="755" cy:directed="1"/>
      <edge id="247637" label="zzzz102,zzzz785" source="941" target="296" cy:directed="1"/>
      <edge id="247636" label="zzzz102,zzzz787" source="941" target="294" cy:directed="1"/>
      <edge id="247635" label="zzzz102,zzzz862" source="941" target="224" cy:directed="1"/>
      <edge id="247634" label="zzzz102,zzzz312" source="941" target="744" cy:directed="1"/>
      <edge id="247633" label="zzzz102,zzzz322" source="941" target="734" cy:directed="1"/>
      <edge id="247632" label="zzzz102,zzzz237" source="941" target="806" cy:directed="1"/>
      <edge id="247631" label="zzzz102,zzzz384" source="941" target="672" cy:directed="1"/>
      <edge id="247630" label="zzzz102,zzzz696" source="941" target="363" cy:directed="1"/>
      <edge id="247629" label="zzzz102,zzzzz54" source="941" target="117" cy:directed="1"/>
      <edge id="247628" label="zzzz102,zzzzz98" source="941" target="73" cy:directed="1"/>
      <edge id="247627" label="zzzz102,zzzz321" source="941" target="735" cy:directed="1"/>
      <edge id="247626" label="zzzz102,zzzz223" source="941" target="820" cy:directed="1"/>
      <edge id="247625" label="zzzz102,zzzz334" source="941" target="722" cy:directed="1"/>
      <edge id="247624" label="zzzz102,zzzz341" source="941" target="715" cy:directed="1"/>
      <edge id="247623" label="zzzz102,zzzz231" source="941" target="812" cy:directed="1"/>
      <edge id="247622" label="zzzz102,zzzz278" source="941" target="774" cy:directed="1"/>
      <edge id="247621" label="zzzz102,zzzz709" source="941" target="350" cy:directed="1"/>
      <edge id="247620" label="zzzz102,zzzz826" source="941" target="258" cy:directed="1"/>
      <edge id="247619" label="zzzz102,zzzz783" source="941" target="298" cy:directed="1"/>
      <edge id="247618" label="zzzz102,zzzz298" source="941" target="758" cy:directed="1"/>
      <edge id="247617" label="zzzz102,zzzz854" source="941" target="230" cy:directed="1"/>
      <edge id="247616" label="zzzz102,zzzz235" source="941" target="808" cy:directed="1"/>
      <edge id="247615" label="zzzz102,zzzz790" source="941" target="291" cy:directed="1"/>
      <edge id="247614" label="zzzz102,zzzz338" source="941" target="718" cy:directed="1"/>
      <edge id="247613" label="zzzz102,zzzz745" source="941" target="327" cy:directed="1"/>
      <edge id="247612" label="zzzz102,zzzz307" source="941" target="749" cy:directed="1"/>
      <edge id="247611" label="zzzz102,zzzz333" source="941" target="723" cy:directed="1"/>
      <edge id="247610" label="zzzz102,zzzz343" source="941" target="713" cy:directed="1"/>
      <edge id="247609" label="zzzz102,zzzz229" source="941" target="814" cy:directed="1"/>
      <edge id="247608" label="zzzz102,zzzz323" source="941" target="733" cy:directed="1"/>
      <edge id="247607" label="zzzz102,zzzz699" source="941" target="360" cy:directed="1"/>
      <edge id="247606" label="zzzz102,zzzz705" source="941" target="354" cy:directed="1"/>
      <edge id="247605" label="zzzz102,zzzz786" source="941" target="295" cy:directed="1"/>
      <edge id="247604" label="zzzz102,zzzz227" source="941" target="816" cy:directed="1"/>
      <edge id="247603" label="zzzz102,zzzz308" source="941" target="748" cy:directed="1"/>
      <edge id="247602" label="zzzz102,zzzz711" source="941" target="348" cy:directed="1"/>
      <edge id="247601" label="zzzz102,zzzz824" source="941" target="260" cy:directed="1"/>
      <edge id="247600" label="zzzz102,zzzz340" source="941" target="716" cy:directed="1"/>
      <edge id="247599" label="zzzz102,zzzzz75" source="941" target="96" cy:directed="1"/>
      <edge id="247598" label="zzzz102,zzzz488" source="941" target="568" cy:directed="1"/>
      <edge id="247597" label="zzzz102,zzzz712" source="941" target="347" cy:directed="1"/>
      <edge id="247596" label="zzzz102,zzzz714" source="941" target="345" cy:directed="1"/>
      <edge id="247595" label="zzzz102,zzzz325" source="941" target="731" cy:directed="1"/>
      <edge id="247594" label="zzzz102,zzzz706" source="941" target="353" cy:directed="1"/>
      <edge id="247593" label="zzzz102,zzzzz76" source="941" target="95" cy:directed="1"/>
      <edge id="247592" label="zzzz102,zzzz310" source="941" target="746" cy:directed="1"/>
      <edge id="247591" label="zzzz102,zzzz339" source="941" target="717" cy:directed="1"/>
      <edge id="247590" label="zzzz102,zzzz344" source="941" target="712" cy:directed="1"/>
      <edge id="247589" label="zzzz102,zzzz602" source="941" target="454" cy:directed="1"/>
      <edge id="247588" label="zzzz102,zzzz703" source="941" target="356" cy:directed="1"/>
      <edge id="247587" label="zzzz102,zzzz813" source="941" target="270" cy:directed="1"/>
      <edge id="247586" label="zzzz102,zzzz305" source="941" target="751" cy:directed="1"/>
      <edge id="247585" label="zzzz102,zzzz327" source="941" target="729" cy:directed="1"/>
      <edge id="247584" label="zzzz102,zzzz617" source="941" target="439" cy:directed="1"/>
      <edge id="247583" label="zzzz102,zzzz700" source="941" target="359" cy:directed="1"/>
      <edge id="247582" label="zzzz102,zzzz319" source="941" target="737" cy:directed="1"/>
      <edge id="247581" label="zzzz102,zzzz716" source="941" target="343" cy:directed="1"/>
      <edge id="247580" label="zzzz102,zzzz190" source="941" target="853" cy:directed="1"/>
      <edge id="247579" label="zzzz102,zzzz302" source="941" target="754" cy:directed="1"/>
      <edge id="247578" label="zzzz102,zzzz719" source="941" target="340" cy:directed="1"/>
      <edge id="247577" label="zzzz102,zzzz710" source="941" target="349" cy:directed="1"/>
      <edge id="247576" label="zzzz102,zzzzz66" source="941" target="105" cy:directed="1"/>
      <edge id="247575" label="zzzz102,zzzz277" source="941" target="775" cy:directed="1"/>
      <edge id="247574" label="zzzz102,zzzz279" source="941" target="773" cy:directed="1"/>
      <edge id="247573" label="zzzz102,zzzz332" source="941" target="724" cy:directed="1"/>
      <edge id="247572" label="zzzz102,zzzz192" source="941" target="851" cy:directed="1"/>
      <edge id="247571" label="zzzz102,zzzz336" source="941" target="720" cy:directed="1"/>
      <edge id="247570" label="zzzz102,zzzz254" source="941" target="789" cy:directed="1"/>
      <edge id="247569" label="zzzz102,zzzz715" source="941" target="344" cy:directed="1"/>
      <edge id="247568" label="zzzz102,zzzz250" source="941" target="793" cy:directed="1"/>
      <edge id="247567" label="zzzz102,zzzz283" source="941" target="769" cy:directed="1"/>
      <edge id="247566" label="zzzz102,zzzz760" source="941" target="315" cy:directed="1"/>
      <edge id="247565" label="zzzz102,zzzz326" source="941" target="730" cy:directed="1"/>
      <edge id="247564" label="zzzz102,zzzz247" source="941" target="796" cy:directed="1"/>
      <edge id="247563" label="zzzz102,zzzz330" source="941" target="726" cy:directed="1"/>
      <edge id="247562" label="zzzz102,zzzz503" source="941" target="553" cy:directed="1"/>
      <edge id="247561" label="zzzz102,zzzz816" source="941" target="268" cy:directed="1"/>
      <edge id="247560" label="zzzz102,zzzz823" source="941" target="261" cy:directed="1"/>
      <edge id="247559" label="zzzz102,zzzz313" source="941" target="743" cy:directed="1"/>
      <edge id="247558" label="zzzz102,zzzz281" source="941" target="771" cy:directed="1"/>
      <edge id="247557" label="zzzz102,zzzz721" source="941" target="338" cy:directed="1"/>
      <edge id="247556" label="zzzz102,zzzz316" source="941" target="740" cy:directed="1"/>
      <edge id="247555" label="zzzz102,zzzz815" source="941" target="269" cy:directed="1"/>
      <edge id="247554" label="zzzz102,zzzz818" source="941" target="266" cy:directed="1"/>
      <edge id="247553" label="zzzz102,zzzz820" source="941" target="264" cy:directed="1"/>
      <edge id="247552" label="zzzz102,zzzz743" source="941" target="329" cy:directed="1"/>
      <edge id="247551" label="zzzz102,zzzz707" source="941" target="352" cy:directed="1"/>
      <edge id="247550" label="zzzz102,zzzz698" source="941" target="361" cy:directed="1"/>
      <edge id="247549" label="zzzz103,zzzz148" source="940" target="895" cy:directed="1"/>
      <edge id="247548" label="zzzz103,zzzz104" source="940" target="939" cy:directed="1"/>
      <edge id="247547" label="zzzz103,zzzz149" source="940" target="894" cy:directed="1"/>
      <edge id="247546" label="zzzz103,zzzz150" source="940" target="893" cy:directed="1"/>
      <edge id="247545" label="zzzz103,zzzz143" source="940" target="900" cy:directed="1"/>
      <edge id="247544" label="zzzz103,zzzz140" source="940" target="903" cy:directed="1"/>
      <edge id="247543" label="zzzz103,zzzz141" source="940" target="902" cy:directed="1"/>
      <edge id="247542" label="zzzz103,zzzz142" source="940" target="901" cy:directed="1"/>
      <edge id="247541" label="zzzz103,zzzz107" source="940" target="936" cy:directed="1"/>
      <edge id="247540" label="zzzz103,zzzzz97" source="940" target="74" cy:directed="1"/>
      <edge id="247539" label="zzzz103,zzzz807" source="940" target="276" cy:directed="1"/>
      <edge id="247538" label="zzzz103,zzzz153" source="940" target="890" cy:directed="1"/>
      <edge id="247537" label="zzzz103,zzzz829" source="940" target="255" cy:directed="1"/>
      <edge id="247536" label="zzzz103,zzzz934" source="940" target="188" cy:directed="1"/>
      <edge id="247535" label="zzzz103,zzzz158" source="940" target="885" cy:directed="1"/>
      <edge id="247534" label="zzzz103,zzzzz48" source="940" target="123" cy:directed="1"/>
      <edge id="247533" label="zzzz103,zzzzz99" source="940" target="72" cy:directed="1"/>
      <edge id="247532" label="zzzz103,zzzz130" source="940" target="913" cy:directed="1"/>
      <edge id="247531" label="zzzz103,zzzz444" source="940" target="612" cy:directed="1"/>
      <edge id="247530" label="zzzz103,zzzz179" source="940" target="864" cy:directed="1"/>
      <edge id="247529" label="zzzz103,zzzz163" source="940" target="880" cy:directed="1"/>
      <edge id="247528" label="zzzz103,zzzz170" source="940" target="873" cy:directed="1"/>
      <edge id="247527" label="zzzz103,zzzz518" source="940" target="538" cy:directed="1"/>
      <edge id="247526" label="zzzz103,zzzz554" source="940" target="502" cy:directed="1"/>
      <edge id="247525" label="zzzz103,zzzz144" source="940" target="899" cy:directed="1"/>
      <edge id="247524" label="zzzz103,zzzz118" source="940" target="925" cy:directed="1"/>
      <edge id="247523" label="zzzz103,zzzz123" source="940" target="920" cy:directed="1"/>
      <edge id="247522" label="zzzz103,zzzz640" source="940" target="417" cy:directed="1"/>
      <edge id="247521" label="zzzz103,zzzz832" source="940" target="252" cy:directed="1"/>
      <edge id="247520" label="zzzz103,zzzz184" source="940" target="859" cy:directed="1"/>
      <edge id="247519" label="zzzz103,zzzz440" source="940" target="616" cy:directed="1"/>
      <edge id="247518" label="zzzz103,zzzz567" source="940" target="489" cy:directed="1"/>
      <edge id="247517" label="zzzz103,zzzz171" source="940" target="872" cy:directed="1"/>
      <edge id="247516" label="zzzz103,zzzz176" source="940" target="867" cy:directed="1"/>
      <edge id="247515" label="zzzz103,zzzzz94" source="940" target="77" cy:directed="1"/>
      <edge id="247514" label="zzzz103,zzzz147" source="940" target="896" cy:directed="1"/>
      <edge id="247513" label="zzzz103,zzzz174" source="940" target="869" cy:directed="1"/>
      <edge id="247512" label="zzzz103,zzzz794" source="940" target="287" cy:directed="1"/>
      <edge id="247511" label="zzzz103,zzzz168" source="940" target="875" cy:directed="1"/>
      <edge id="247510" label="zzzz103,zzzz175" source="940" target="868" cy:directed="1"/>
      <edge id="247509" label="zzzz103,zzzz502" source="940" target="554" cy:directed="1"/>
      <edge id="247508" label="zzzz103,zzzz549" source="940" target="507" cy:directed="1"/>
      <edge id="247507" label="zzzz103,zzzz895" source="940" target="215" cy:directed="1"/>
      <edge id="247506" label="zzzz103,zzzz641" source="940" target="416" cy:directed="1"/>
      <edge id="247505" label="zzzz103,zzzz810" source="940" target="273" cy:directed="1"/>
      <edge id="247504" label="zzzz103,zzzz833" source="940" target="251" cy:directed="1"/>
      <edge id="247503" label="zzzz103,zzzz112" source="940" target="931" cy:directed="1"/>
      <edge id="247502" label="zzzz103,zzzz145" source="940" target="898" cy:directed="1"/>
      <edge id="247501" label="zzzz103,zzzz167" source="940" target="876" cy:directed="1"/>
      <edge id="247500" label="zzzz103,zzzz585" source="940" target="471" cy:directed="1"/>
      <edge id="247499" label="zzzz103,zzzz831" source="940" target="253" cy:directed="1"/>
      <edge id="247498" label="zzzz103,zzzz947" source="940" target="177" cy:directed="1"/>
      <edge id="247497" label="zzzz103,zzzz128" source="940" target="915" cy:directed="1"/>
      <edge id="247496" label="zzzz103,zzzz164" source="940" target="879" cy:directed="1"/>
      <edge id="247495" label="zzzz103,zzzz230" source="940" target="813" cy:directed="1"/>
      <edge id="247494" label="zzzz103,zzzz243" source="940" target="800" cy:directed="1"/>
      <edge id="247493" label="zzzz103,zzzz520" source="940" target="536" cy:directed="1"/>
      <edge id="247492" label="zzzz103,zzzz548" source="940" target="508" cy:directed="1"/>
      <edge id="247491" label="zzzz103,zzzz667" source="940" target="390" cy:directed="1"/>
      <edge id="247490" label="zzzz103,zzzz921" source="940" target="194" cy:directed="1"/>
      <edge id="247489" label="zzzz103,zzzz138" source="940" target="905" cy:directed="1"/>
      <edge id="247488" label="zzzz103,zzzz169" source="940" target="874" cy:directed="1"/>
      <edge id="247487" label="zzzz103,zzzz173" source="940" target="870" cy:directed="1"/>
      <edge id="247486" label="zzzz103,zzzz249" source="940" target="794" cy:directed="1"/>
      <edge id="247485" label="zzzz103,zzzz353" source="940" target="703" cy:directed="1"/>
      <edge id="247484" label="zzzz103,zzzz498" source="940" target="558" cy:directed="1"/>
      <edge id="247483" label="zzzz103,zzzz573" source="940" target="483" cy:directed="1"/>
      <edge id="247482" label="zzzz103,zzzz808" source="940" target="275" cy:directed="1"/>
      <edge id="247481" label="zzzz103,zzzz242" source="940" target="801" cy:directed="1"/>
      <edge id="247480" label="zzzz103,zzzz361" source="940" target="695" cy:directed="1"/>
      <edge id="247479" label="zzzz103,zzzz177" source="940" target="866" cy:directed="1"/>
      <edge id="247478" label="zzzz103,zzzz189" source="940" target="854" cy:directed="1"/>
      <edge id="247477" label="zzzz103,zzzz445" source="940" target="611" cy:directed="1"/>
      <edge id="247476" label="zzzz103,zzzz183" source="940" target="860" cy:directed="1"/>
      <edge id="247475" label="zzzz103,zzzz194" source="940" target="849" cy:directed="1"/>
      <edge id="247474" label="zzzz103,zzzz424" source="940" target="632" cy:directed="1"/>
      <edge id="247473" label="zzzz103,zzzzz89" source="940" target="82" cy:directed="1"/>
      <edge id="247472" label="zzzz103,zzzz119" source="940" target="924" cy:directed="1"/>
      <edge id="247471" label="zzzz103,zzzz126" source="940" target="917" cy:directed="1"/>
      <edge id="247470" label="zzzz103,zzzz146" source="940" target="897" cy:directed="1"/>
      <edge id="247469" label="zzzz103,zzzz352" source="940" target="704" cy:directed="1"/>
      <edge id="247468" label="zzzz103,zzzz372" source="940" target="684" cy:directed="1"/>
      <edge id="247467" label="zzzz103,zzzz485" source="940" target="571" cy:directed="1"/>
      <edge id="247466" label="zzzz103,zzzz120" source="940" target="923" cy:directed="1"/>
      <edge id="247465" label="zzzz103,zzzz132" source="940" target="911" cy:directed="1"/>
      <edge id="247464" label="zzzz103,zzzz135" source="940" target="908" cy:directed="1"/>
      <edge id="247463" label="zzzz103,zzzz155" source="940" target="888" cy:directed="1"/>
      <edge id="247462" label="zzzz103,zzzz180" source="940" target="863" cy:directed="1"/>
      <edge id="247461" label="zzzz103,zzzz232" source="940" target="811" cy:directed="1"/>
      <edge id="247460" label="zzzz103,zzzz346" source="940" target="710" cy:directed="1"/>
      <edge id="247459" label="zzzz103,zzzz349" source="940" target="707" cy:directed="1"/>
      <edge id="247458" label="zzzz103,zzzz433" source="940" target="623" cy:directed="1"/>
      <edge id="247457" label="zzzz103,zzzz504" source="940" target="552" cy:directed="1"/>
      <edge id="247456" label="zzzz103,zzzz531" source="940" target="525" cy:directed="1"/>
      <edge id="247455" label="zzzz103,zzzz809" source="940" target="274" cy:directed="1"/>
      <edge id="247454" label="zzzz103,zzzz252" source="940" target="791" cy:directed="1"/>
      <edge id="247453" label="zzzz103,zzzz373" source="940" target="683" cy:directed="1"/>
      <edge id="247452" label="zzzz103,zzzz555" source="940" target="501" cy:directed="1"/>
      <edge id="247451" label="zzzz103,zzzz663" source="940" target="394" cy:directed="1"/>
      <edge id="247450" label="zzzz103,zzzzz80" source="940" target="91" cy:directed="1"/>
      <edge id="247449" label="zzzz103,zzzz245" source="940" target="798" cy:directed="1"/>
      <edge id="247448" label="zzzz103,zzzz284" source="940" target="768" cy:directed="1"/>
      <edge id="247447" label="zzzz103,zzzz387" source="940" target="669" cy:directed="1"/>
      <edge id="247446" label="zzzz103,zzzz447" source="940" target="609" cy:directed="1"/>
      <edge id="247445" label="zzzz103,zzzz448" source="940" target="608" cy:directed="1"/>
      <edge id="247444" label="zzzz103,zzzz483" source="940" target="573" cy:directed="1"/>
      <edge id="247443" label="zzzz103,zzzz618" source="940" target="438" cy:directed="1"/>
      <edge id="247442" label="zzzz103,zzzz911" source="940" target="200" cy:directed="1"/>
      <edge id="247441" label="zzzz103,zzzz501" source="940" target="555" cy:directed="1"/>
      <edge id="247440" label="zzzz103,zzzz524" source="940" target="532" cy:directed="1"/>
      <edge id="247439" label="zzzz103,zzzz550" source="940" target="506" cy:directed="1"/>
      <edge id="247438" label="zzzz103,zzzz644" source="940" target="413" cy:directed="1"/>
      <edge id="247437" label="zzzz103,zzzz646" source="940" target="411" cy:directed="1"/>
      <edge id="247436" label="zzzz103,zzzz658" source="940" target="399" cy:directed="1"/>
      <edge id="247435" label="zzzz103,zzzz670" source="940" target="387" cy:directed="1"/>
      <edge id="247434" label="zzzz103,zzzz172" source="940" target="871" cy:directed="1"/>
      <edge id="247433" label="zzzz103,zzzz421" source="940" target="635" cy:directed="1"/>
      <edge id="247432" label="zzzz103,zzzz547" source="940" target="509" cy:directed="1"/>
      <edge id="247431" label="zzzz103,zzzz105" source="940" target="938" cy:directed="1"/>
      <edge id="247430" label="zzzz103,zzzz285" source="940" target="767" cy:directed="1"/>
      <edge id="247429" label="zzzz103,zzzz559" source="940" target="497" cy:directed="1"/>
      <edge id="247428" label="zzzz103,zzzz657" source="940" target="400" cy:directed="1"/>
      <edge id="247427" label="zzzz103,zzzz724" source="940" target="336" cy:directed="1"/>
      <edge id="247426" label="zzzz103,zzzz224" source="940" target="819" cy:directed="1"/>
      <edge id="247425" label="zzzz103,zzzz427" source="940" target="629" cy:directed="1"/>
      <edge id="247424" label="zzzz103,zzzz479" source="940" target="577" cy:directed="1"/>
      <edge id="247423" label="zzzz103,zzzz528" source="940" target="528" cy:directed="1"/>
      <edge id="247422" label="zzzz103,zzzz546" source="940" target="510" cy:directed="1"/>
      <edge id="247421" label="zzzz103,zzzz664" source="940" target="393" cy:directed="1"/>
      <edge id="247420" label="zzzz103,zzzz884" source="940" target="222" cy:directed="1"/>
      <edge id="247419" label="zzzz103,zzzz114" source="940" target="929" cy:directed="1"/>
      <edge id="247418" label="zzzz103,zzzz125" source="940" target="918" cy:directed="1"/>
      <edge id="247417" label="zzzz103,zzzz351" source="940" target="705" cy:directed="1"/>
      <edge id="247416" label="zzzz103,zzzz396" source="940" target="660" cy:directed="1"/>
      <edge id="247415" label="zzzz103,zzzz425" source="940" target="631" cy:directed="1"/>
      <edge id="247414" label="zzzz103,zzzz456" source="940" target="600" cy:directed="1"/>
      <edge id="247413" label="zzzz103,zzzz465" source="940" target="591" cy:directed="1"/>
      <edge id="247412" label="zzzz103,zzzz523" source="940" target="533" cy:directed="1"/>
      <edge id="247411" label="zzzz103,zzzz526" source="940" target="530" cy:directed="1"/>
      <edge id="247410" label="zzzz103,zzzz556" source="940" target="500" cy:directed="1"/>
      <edge id="247409" label="zzzz103,zzzz656" source="940" target="401" cy:directed="1"/>
      <edge id="247408" label="zzzz103,zzzz793" source="940" target="288" cy:directed="1"/>
      <edge id="247407" label="zzzz103,zzzz852" source="940" target="232" cy:directed="1"/>
      <edge id="247406" label="zzzz103,zzzz940" source="940" target="184" cy:directed="1"/>
      <edge id="247405" label="zzzz103,zzzz131" source="940" target="912" cy:directed="1"/>
      <edge id="247404" label="zzzz103,zzzz161" source="940" target="882" cy:directed="1"/>
      <edge id="247403" label="zzzz103,zzzz191" source="940" target="852" cy:directed="1"/>
      <edge id="247402" label="zzzz103,zzzz220" source="940" target="823" cy:directed="1"/>
      <edge id="247401" label="zzzz103,zzzz233" source="940" target="810" cy:directed="1"/>
      <edge id="247400" label="zzzz103,zzzz365" source="940" target="691" cy:directed="1"/>
      <edge id="247399" label="zzzz103,zzzz450" source="940" target="606" cy:directed="1"/>
      <edge id="247398" label="zzzz103,zzzz512" source="940" target="544" cy:directed="1"/>
      <edge id="247397" label="zzzz103,zzzz909" source="940" target="202" cy:directed="1"/>
      <edge id="247396" label="zzzz103,zzzzz87" source="940" target="84" cy:directed="1"/>
      <edge id="247395" label="zzzz103,zzzz165" source="940" target="878" cy:directed="1"/>
      <edge id="247394" label="zzzz103,zzzz195" source="940" target="848" cy:directed="1"/>
      <edge id="247393" label="zzzz103,zzzz432" source="940" target="624" cy:directed="1"/>
      <edge id="247392" label="zzzz103,zzzz726" source="940" target="334" cy:directed="1"/>
      <edge id="247391" label="zzzz103,zzzz941" source="940" target="183" cy:directed="1"/>
      <edge id="247390" label="zzzz103,zzzz982" source="940" target="163" cy:directed="1"/>
      <edge id="247389" label="zzzz103,zzzz375" source="940" target="681" cy:directed="1"/>
      <edge id="247388" label="zzzz103,zzzz443" source="940" target="613" cy:directed="1"/>
      <edge id="247387" label="zzzz103,zzzz527" source="940" target="529" cy:directed="1"/>
      <edge id="247386" label="zzzz103,zzzz692" source="940" target="367" cy:directed="1"/>
      <edge id="247385" label="zzzz103,zzzz900" source="940" target="211" cy:directed="1"/>
      <edge id="247384" label="zzzz103,zzzzz96" source="940" target="75" cy:directed="1"/>
      <edge id="247383" label="zzzz103,zzzz124" source="940" target="919" cy:directed="1"/>
      <edge id="247382" label="zzzz103,zzzz286" source="940" target="766" cy:directed="1"/>
      <edge id="247381" label="zzzz103,zzzz500" source="940" target="556" cy:directed="1"/>
      <edge id="247380" label="zzzz103,zzzz522" source="940" target="534" cy:directed="1"/>
      <edge id="247379" label="zzzz103,zzzz525" source="940" target="531" cy:directed="1"/>
      <edge id="247378" label="zzzz103,zzzz542" source="940" target="514" cy:directed="1"/>
      <edge id="247377" label="zzzz103,zzzz628" source="940" target="429" cy:directed="1"/>
      <edge id="247376" label="zzzz103,zzzz106" source="940" target="937" cy:directed="1"/>
      <edge id="247375" label="zzzz103,zzzz166" source="940" target="877" cy:directed="1"/>
      <edge id="247374" label="zzzz103,zzzz182" source="940" target="861" cy:directed="1"/>
      <edge id="247373" label="zzzz103,zzzz261" source="940" target="782" cy:directed="1"/>
      <edge id="247372" label="zzzz103,zzzz370" source="940" target="686" cy:directed="1"/>
      <edge id="247371" label="zzzz103,zzzz371" source="940" target="685" cy:directed="1"/>
      <edge id="247370" label="zzzz103,zzzz378" source="940" target="678" cy:directed="1"/>
      <edge id="247369" label="zzzz103,zzzz416" source="940" target="640" cy:directed="1"/>
      <edge id="247368" label="zzzz103,zzzz579" source="940" target="477" cy:directed="1"/>
      <edge id="247367" label="zzzz103,zzzz642" source="940" target="415" cy:directed="1"/>
      <edge id="247366" label="zzzz103,zzzz738" source="940" target="331" cy:directed="1"/>
      <edge id="247365" label="zzzz103,zzzz845" source="940" target="239" cy:directed="1"/>
      <edge id="247364" label="zzzz103,zzzz889" source="940" target="221" cy:directed="1"/>
      <edge id="247363" label="zzzz103,zzzz891" source="940" target="219" cy:directed="1"/>
      <edge id="247362" label="zzzz103,zzzz910" source="940" target="201" cy:directed="1"/>
      <edge id="247361" label="zzzz103,zzzz159" source="940" target="884" cy:directed="1"/>
      <edge id="247360" label="zzzz103,zzzz162" source="940" target="881" cy:directed="1"/>
      <edge id="247359" label="zzzz103,zzzz181" source="940" target="862" cy:directed="1"/>
      <edge id="247358" label="zzzz103,zzzz197" source="940" target="846" cy:directed="1"/>
      <edge id="247357" label="zzzz103,zzzz207" source="940" target="836" cy:directed="1"/>
      <edge id="247356" label="zzzz103,zzzz211" source="940" target="832" cy:directed="1"/>
      <edge id="247355" label="zzzz103,zzzz362" source="940" target="694" cy:directed="1"/>
      <edge id="247354" label="zzzz103,zzzz474" source="940" target="582" cy:directed="1"/>
      <edge id="247353" label="zzzz103,zzzz529" source="940" target="527" cy:directed="1"/>
      <edge id="247352" label="zzzz103,zzzz533" source="940" target="523" cy:directed="1"/>
      <edge id="247351" label="zzzz103,zzzz643" source="940" target="414" cy:directed="1"/>
      <edge id="247350" label="zzzz103,zzzz662" source="940" target="395" cy:directed="1"/>
      <edge id="247349" label="zzzz103,zzzzz69" source="940" target="102" cy:directed="1"/>
      <edge id="247348" label="zzzz103,zzzzz86" source="940" target="85" cy:directed="1"/>
      <edge id="247347" label="zzzz103,zzzz434" source="940" target="622" cy:directed="1"/>
      <edge id="247346" label="zzzz103,zzzz458" source="940" target="598" cy:directed="1"/>
      <edge id="247345" label="zzzz103,zzzz906" source="940" target="205" cy:directed="1"/>
      <edge id="247344" label="zzzz103,zzzz156" source="940" target="887" cy:directed="1"/>
      <edge id="247343" label="zzzz103,zzzz356" source="940" target="700" cy:directed="1"/>
      <edge id="247342" label="zzzz103,zzzz631" source="940" target="426" cy:directed="1"/>
      <edge id="247341" label="zzzz103,zzzz678" source="940" target="379" cy:directed="1"/>
      <edge id="247340" label="zzzz103,zzzz841" source="940" target="243" cy:directed="1"/>
      <edge id="247339" label="zzzz103,zzzz943" source="940" target="181" cy:directed="1"/>
      <edge id="247338" label="zzzz103,zzzz178" source="940" target="865" cy:directed="1"/>
      <edge id="247337" label="zzzz103,zzzz457" source="940" target="599" cy:directed="1"/>
      <edge id="247336" label="zzzz103,zzzz540" source="940" target="516" cy:directed="1"/>
      <edge id="247335" label="zzzz103,zzzz614" source="940" target="442" cy:directed="1"/>
      <edge id="247334" label="zzzz103,zzzz629" source="940" target="428" cy:directed="1"/>
      <edge id="247333" label="zzzz103,zzzz725" source="940" target="335" cy:directed="1"/>
      <edge id="247332" label="zzzz103,zzzz901" source="940" target="210" cy:directed="1"/>
      <edge id="247331" label="zzzz103,zzzz904" source="940" target="207" cy:directed="1"/>
      <edge id="247330" label="zzzz103,zzzz908" source="940" target="203" cy:directed="1"/>
      <edge id="247329" label="zzzz103,zzzzz73" source="940" target="98" cy:directed="1"/>
      <edge id="247328" label="zzzz103,zzzzz77" source="940" target="94" cy:directed="1"/>
      <edge id="247327" label="zzzz103,zzzz136" source="940" target="907" cy:directed="1"/>
      <edge id="247326" label="zzzz103,zzzz401" source="940" target="655" cy:directed="1"/>
      <edge id="247325" label="zzzz103,zzzz407" source="940" target="649" cy:directed="1"/>
      <edge id="247324" label="zzzz103,zzzz472" source="940" target="584" cy:directed="1"/>
      <edge id="247323" label="zzzz103,zzzz836" source="940" target="248" cy:directed="1"/>
      <edge id="247322" label="zzzz103,zzzz912" source="940" target="199" cy:directed="1"/>
      <edge id="247321" label="zzzz103,zzzzz74" source="940" target="97" cy:directed="1"/>
      <edge id="247320" label="zzzz103,zzzzz84" source="940" target="87" cy:directed="1"/>
      <edge id="247319" label="zzzz103,zzzz127" source="940" target="916" cy:directed="1"/>
      <edge id="247318" label="zzzz103,zzzz154" source="940" target="889" cy:directed="1"/>
      <edge id="247317" label="zzzz103,zzzz262" source="940" target="781" cy:directed="1"/>
      <edge id="247316" label="zzzz103,zzzz418" source="940" target="638" cy:directed="1"/>
      <edge id="247315" label="zzzz103,zzzz454" source="940" target="602" cy:directed="1"/>
      <edge id="247314" label="zzzz103,zzzz495" source="940" target="561" cy:directed="1"/>
      <edge id="247313" label="zzzz103,zzzz647" source="940" target="410" cy:directed="1"/>
      <edge id="247312" label="zzzz103,zzzz239" source="940" target="804" cy:directed="1"/>
      <edge id="247311" label="zzzz103,zzzz358" source="940" target="698" cy:directed="1"/>
      <edge id="247310" label="zzzz103,zzzz388" source="940" target="668" cy:directed="1"/>
      <edge id="247309" label="zzzz103,zzzz389" source="940" target="667" cy:directed="1"/>
      <edge id="247308" label="zzzz103,zzzz630" source="940" target="427" cy:directed="1"/>
      <edge id="247307" label="zzzz103,zzzz849" source="940" target="235" cy:directed="1"/>
      <edge id="247306" label="zzzz103,zzzzz45" source="940" target="126" cy:directed="1"/>
      <edge id="247305" label="zzzz103,zzzz152" source="940" target="891" cy:directed="1"/>
      <edge id="247304" label="zzzz103,zzzz219" source="940" target="824" cy:directed="1"/>
      <edge id="247303" label="zzzz103,zzzz354" source="940" target="702" cy:directed="1"/>
      <edge id="247302" label="zzzz103,zzzz405" source="940" target="651" cy:directed="1"/>
      <edge id="247301" label="zzzz103,zzzz428" source="940" target="628" cy:directed="1"/>
      <edge id="247300" label="zzzz103,zzzz508" source="940" target="548" cy:directed="1"/>
      <edge id="247299" label="zzzz103,zzzz588" source="940" target="468" cy:directed="1"/>
      <edge id="247298" label="zzzz103,zzzz620" source="940" target="436" cy:directed="1"/>
      <edge id="247297" label="zzzz103,zzzz674" source="940" target="383" cy:directed="1"/>
      <edge id="247296" label="zzzz103,zzzz722" source="940" target="337" cy:directed="1"/>
      <edge id="247295" label="zzzz103,zzzz964" source="940" target="168" cy:directed="1"/>
      <edge id="247294" label="zzzz103,zzzzz81" source="940" target="90" cy:directed="1"/>
      <edge id="247293" label="zzzz103,zzzz208" source="940" target="835" cy:directed="1"/>
      <edge id="247292" label="zzzz103,zzzz381" source="940" target="675" cy:directed="1"/>
      <edge id="247291" label="zzzz103,zzzz426" source="940" target="630" cy:directed="1"/>
      <edge id="247290" label="zzzz103,zzzz460" source="940" target="596" cy:directed="1"/>
      <edge id="247289" label="zzzz103,zzzz491" source="940" target="565" cy:directed="1"/>
      <edge id="247288" label="zzzz103,zzzz505" source="940" target="551" cy:directed="1"/>
      <edge id="247287" label="zzzz103,zzzz511" source="940" target="545" cy:directed="1"/>
      <edge id="247286" label="zzzz103,zzzz590" source="940" target="466" cy:directed="1"/>
      <edge id="247285" label="zzzz103,zzzz963" source="940" target="169" cy:directed="1"/>
      <edge id="247284" label="zzzz103,zzzzz55" source="940" target="116" cy:directed="1"/>
      <edge id="247283" label="zzzz103,zzzzz88" source="940" target="83" cy:directed="1"/>
      <edge id="247282" label="zzzz103,zzzz348" source="940" target="708" cy:directed="1"/>
      <edge id="247281" label="zzzz103,zzzz369" source="940" target="687" cy:directed="1"/>
      <edge id="247280" label="zzzz103,zzzz385" source="940" target="671" cy:directed="1"/>
      <edge id="247279" label="zzzz103,zzzz452" source="940" target="604" cy:directed="1"/>
      <edge id="247278" label="zzzz103,zzzz650" source="940" target="407" cy:directed="1"/>
      <edge id="247277" label="zzzz103,zzzz913" source="940" target="198" cy:directed="1"/>
      <edge id="247276" label="zzzz103,zzzz950" source="940" target="174" cy:directed="1"/>
      <edge id="247275" label="zzzz103,zzzzz91" source="940" target="80" cy:directed="1"/>
      <edge id="247274" label="zzzz103,zzzz240" source="940" target="803" cy:directed="1"/>
      <edge id="247273" label="zzzz103,zzzz386" source="940" target="670" cy:directed="1"/>
      <edge id="247272" label="zzzz103,zzzz539" source="940" target="517" cy:directed="1"/>
      <edge id="247271" label="zzzz103,zzzz544" source="940" target="512" cy:directed="1"/>
      <edge id="247270" label="zzzz103,zzzz553" source="940" target="503" cy:directed="1"/>
      <edge id="247269" label="zzzz103,zzzz837" source="940" target="247" cy:directed="1"/>
      <edge id="247268" label="zzzz103,zzzz951" source="940" target="173" cy:directed="1"/>
      <edge id="247267" label="zzzz103,zzzzz78" source="940" target="93" cy:directed="1"/>
      <edge id="247266" label="zzzz103,zzzz110" source="940" target="933" cy:directed="1"/>
      <edge id="247265" label="zzzz103,zzzz380" source="940" target="676" cy:directed="1"/>
      <edge id="247264" label="zzzz103,zzzz459" source="940" target="597" cy:directed="1"/>
      <edge id="247263" label="zzzz103,zzzz468" source="940" target="588" cy:directed="1"/>
      <edge id="247262" label="zzzz103,zzzz480" source="940" target="576" cy:directed="1"/>
      <edge id="247261" label="zzzz103,zzzz484" source="940" target="572" cy:directed="1"/>
      <edge id="247260" label="zzzz103,zzzz653" source="940" target="404" cy:directed="1"/>
      <edge id="247259" label="zzzz103,zzzzz67" source="940" target="104" cy:directed="1"/>
      <edge id="247258" label="zzzz103,zzzz116" source="940" target="927" cy:directed="1"/>
      <edge id="247257" label="zzzz103,zzzz134" source="940" target="909" cy:directed="1"/>
      <edge id="247256" label="zzzz103,zzzz218" source="940" target="825" cy:directed="1"/>
      <edge id="247255" label="zzzz103,zzzz376" source="940" target="680" cy:directed="1"/>
      <edge id="247254" label="zzzz103,zzzz400" source="940" target="656" cy:directed="1"/>
      <edge id="247253" label="zzzz103,zzzz413" source="940" target="643" cy:directed="1"/>
      <edge id="247252" label="zzzz103,zzzz415" source="940" target="641" cy:directed="1"/>
      <edge id="247251" label="zzzz103,zzzz438" source="940" target="618" cy:directed="1"/>
      <edge id="247250" label="zzzz103,zzzz451" source="940" target="605" cy:directed="1"/>
      <edge id="247249" label="zzzz103,zzzz611" source="940" target="445" cy:directed="1"/>
      <edge id="247248" label="zzzz103,zzzz812" source="940" target="271" cy:directed="1"/>
      <edge id="247247" label="zzzz103,zzzz946" source="940" target="178" cy:directed="1"/>
      <edge id="247246" label="zzzz103,zzzzz90" source="940" target="81" cy:directed="1"/>
      <edge id="247245" label="zzzz103,zzzz121" source="940" target="922" cy:directed="1"/>
      <edge id="247244" label="zzzz103,zzzz264" source="940" target="779" cy:directed="1"/>
      <edge id="247243" label="zzzz103,zzzz288" source="940" target="764" cy:directed="1"/>
      <edge id="247242" label="zzzz103,zzzz393" source="940" target="663" cy:directed="1"/>
      <edge id="247241" label="zzzz103,zzzz436" source="940" target="620" cy:directed="1"/>
      <edge id="247240" label="zzzz103,zzzz519" source="940" target="537" cy:directed="1"/>
      <edge id="247239" label="zzzz103,zzzz637" source="940" target="420" cy:directed="1"/>
      <edge id="247238" label="zzzz103,zzzz648" source="940" target="409" cy:directed="1"/>
      <edge id="247237" label="zzzz103,zzzz899" source="940" target="212" cy:directed="1"/>
      <edge id="247236" label="zzzz103,zzzz944" source="940" target="180" cy:directed="1"/>
      <edge id="247235" label="zzzz103,zzzz949" source="940" target="175" cy:directed="1"/>
      <edge id="247234" label="zzzz103,zzzz952" source="940" target="172" cy:directed="1"/>
      <edge id="247233" label="zzzz103,zzzzz47" source="940" target="124" cy:directed="1"/>
      <edge id="247232" label="zzzz103,zzzz209" source="940" target="834" cy:directed="1"/>
      <edge id="247231" label="zzzz103,zzzz364" source="940" target="692" cy:directed="1"/>
      <edge id="247230" label="zzzz103,zzzz449" source="940" target="607" cy:directed="1"/>
      <edge id="247229" label="zzzz103,zzzz599" source="940" target="457" cy:directed="1"/>
      <edge id="247228" label="zzzz103,zzzz802" source="940" target="281" cy:directed="1"/>
      <edge id="247227" label="zzzz103,zzzz840" source="940" target="244" cy:directed="1"/>
      <edge id="247226" label="zzzz103,zzzzz43" source="940" target="128" cy:directed="1"/>
      <edge id="247225" label="zzzz103,zzzz383" source="940" target="673" cy:directed="1"/>
      <edge id="247224" label="zzzz103,zzzz395" source="940" target="661" cy:directed="1"/>
      <edge id="247223" label="zzzz103,zzzz492" source="940" target="564" cy:directed="1"/>
      <edge id="247222" label="zzzz103,zzzz604" source="940" target="452" cy:directed="1"/>
      <edge id="247221" label="zzzz103,zzzz665" source="940" target="392" cy:directed="1"/>
      <edge id="247220" label="zzzz103,zzzz902" source="940" target="209" cy:directed="1"/>
      <edge id="247219" label="zzzz103,zzzz414" source="940" target="642" cy:directed="1"/>
      <edge id="247218" label="zzzz103,zzzz471" source="940" target="585" cy:directed="1"/>
      <edge id="247217" label="zzzz103,zzzz478" source="940" target="578" cy:directed="1"/>
      <edge id="247216" label="zzzz103,zzzz537" source="940" target="519" cy:directed="1"/>
      <edge id="247215" label="zzzz103,zzzz638" source="940" target="419" cy:directed="1"/>
      <edge id="247214" label="zzzz103,zzzz907" source="940" target="204" cy:directed="1"/>
      <edge id="247213" label="zzzz103,zzzzz83" source="940" target="88" cy:directed="1"/>
      <edge id="247212" label="zzzz103,zzzz406" source="940" target="650" cy:directed="1"/>
      <edge id="247211" label="zzzz103,zzzz422" source="940" target="634" cy:directed="1"/>
      <edge id="247210" label="zzzz103,zzzz571" source="940" target="485" cy:directed="1"/>
      <edge id="247209" label="zzzz103,zzzz645" source="940" target="412" cy:directed="1"/>
      <edge id="247208" label="zzzz103,zzzz649" source="940" target="408" cy:directed="1"/>
      <edge id="247207" label="zzzz103,zzzz685" source="940" target="373" cy:directed="1"/>
      <edge id="247206" label="zzzz103,zzzz843" source="940" target="241" cy:directed="1"/>
      <edge id="247205" label="zzzz103,zzzz935" source="940" target="187" cy:directed="1"/>
      <edge id="247204" label="zzzz103,zzzzz82" source="940" target="89" cy:directed="1"/>
      <edge id="247203" label="zzzz103,zzzzz93" source="940" target="78" cy:directed="1"/>
      <edge id="247202" label="zzzz103,zzzz377" source="940" target="679" cy:directed="1"/>
      <edge id="247201" label="zzzz103,zzzz410" source="940" target="646" cy:directed="1"/>
      <edge id="247200" label="zzzz103,zzzz477" source="940" target="579" cy:directed="1"/>
      <edge id="247199" label="zzzz103,zzzz486" source="940" target="570" cy:directed="1"/>
      <edge id="247198" label="zzzz103,zzzz497" source="940" target="559" cy:directed="1"/>
      <edge id="247197" label="zzzz103,zzzz535" source="940" target="521" cy:directed="1"/>
      <edge id="247196" label="zzzz103,zzzz581" source="940" target="475" cy:directed="1"/>
      <edge id="247195" label="zzzz103,zzzz619" source="940" target="437" cy:directed="1"/>
      <edge id="247194" label="zzzz103,zzzz652" source="940" target="405" cy:directed="1"/>
      <edge id="247193" label="zzzz103,zzzz661" source="940" target="396" cy:directed="1"/>
      <edge id="247192" label="zzzz103,zzzz694" source="940" target="365" cy:directed="1"/>
      <edge id="247191" label="zzzz103,zzzz791" source="940" target="290" cy:directed="1"/>
      <edge id="247190" label="zzzz103,zzzz806" source="940" target="277" cy:directed="1"/>
      <edge id="247189" label="zzzz103,zzzzz61" source="940" target="110" cy:directed="1"/>
      <edge id="247188" label="zzzz103,zzzz139" source="940" target="904" cy:directed="1"/>
      <edge id="247187" label="zzzz103,zzzz151" source="940" target="892" cy:directed="1"/>
      <edge id="247186" label="zzzz103,zzzz355" source="940" target="701" cy:directed="1"/>
      <edge id="247185" label="zzzz103,zzzz367" source="940" target="689" cy:directed="1"/>
      <edge id="247184" label="zzzz103,zzzz382" source="940" target="674" cy:directed="1"/>
      <edge id="247183" label="zzzz103,zzzz417" source="940" target="639" cy:directed="1"/>
      <edge id="247182" label="zzzz103,zzzz509" source="940" target="547" cy:directed="1"/>
      <edge id="247181" label="zzzz103,zzzz578" source="940" target="478" cy:directed="1"/>
      <edge id="247180" label="zzzz103,zzzz609" source="940" target="447" cy:directed="1"/>
      <edge id="247179" label="zzzz103,zzzz627" source="940" target="430" cy:directed="1"/>
      <edge id="247178" label="zzzz103,zzzz632" source="940" target="425" cy:directed="1"/>
      <edge id="247177" label="zzzz103,zzzz892" source="940" target="218" cy:directed="1"/>
      <edge id="247176" label="zzzz103,zzzzz60" source="940" target="111" cy:directed="1"/>
      <edge id="247175" label="zzzz103,zzzzz85" source="940" target="86" cy:directed="1"/>
      <edge id="247174" label="zzzz103,zzzz117" source="940" target="926" cy:directed="1"/>
      <edge id="247173" label="zzzz103,zzzz936" source="940" target="186" cy:directed="1"/>
      <edge id="247172" label="zzzz103,zzzzz79" source="940" target="92" cy:directed="1"/>
      <edge id="247171" label="zzzz103,zzzz199" source="940" target="844" cy:directed="1"/>
      <edge id="247170" label="zzzz103,zzzz213" source="940" target="830" cy:directed="1"/>
      <edge id="247169" label="zzzz103,zzzz215" source="940" target="828" cy:directed="1"/>
      <edge id="247168" label="zzzz103,zzzz368" source="940" target="688" cy:directed="1"/>
      <edge id="247167" label="zzzz103,zzzz423" source="940" target="633" cy:directed="1"/>
      <edge id="247166" label="zzzz103,zzzz482" source="940" target="574" cy:directed="1"/>
      <edge id="247165" label="zzzz103,zzzz493" source="940" target="563" cy:directed="1"/>
      <edge id="247164" label="zzzz103,zzzz635" source="940" target="422" cy:directed="1"/>
      <edge id="247163" label="zzzz103,zzzz659" source="940" target="398" cy:directed="1"/>
      <edge id="247162" label="zzzz103,zzzz728" source="940" target="332" cy:directed="1"/>
      <edge id="247161" label="zzzz103,zzzz898" source="940" target="213" cy:directed="1"/>
      <edge id="247160" label="zzzz103,zzzz157" source="940" target="886" cy:directed="1"/>
      <edge id="247159" label="zzzz103,zzzz241" source="940" target="802" cy:directed="1"/>
      <edge id="247158" label="zzzz103,zzzz494" source="940" target="562" cy:directed="1"/>
      <edge id="247157" label="zzzz103,zzzz561" source="940" target="495" cy:directed="1"/>
      <edge id="247156" label="zzzz103,zzzz584" source="940" target="472" cy:directed="1"/>
      <edge id="247155" label="zzzz103,zzzz586" source="940" target="470" cy:directed="1"/>
      <edge id="247154" label="zzzz103,zzzz606" source="940" target="450" cy:directed="1"/>
      <edge id="247153" label="zzzz103,zzzz612" source="940" target="444" cy:directed="1"/>
      <edge id="247152" label="zzzz103,zzzz616" source="940" target="440" cy:directed="1"/>
      <edge id="247151" label="zzzz103,zzzz654" source="940" target="403" cy:directed="1"/>
      <edge id="247150" label="zzzz103,zzzz660" source="940" target="397" cy:directed="1"/>
      <edge id="247149" label="zzzz103,zzzz965" source="940" target="167" cy:directed="1"/>
      <edge id="247148" label="zzzz103,zzzz129" source="940" target="914" cy:directed="1"/>
      <edge id="247147" label="zzzz103,zzzz329" source="940" target="727" cy:directed="1"/>
      <edge id="247146" label="zzzz103,zzzz357" source="940" target="699" cy:directed="1"/>
      <edge id="247145" label="zzzz103,zzzz374" source="940" target="682" cy:directed="1"/>
      <edge id="247144" label="zzzz103,zzzz429" source="940" target="627" cy:directed="1"/>
      <edge id="247143" label="zzzz103,zzzz593" source="940" target="463" cy:directed="1"/>
      <edge id="247142" label="zzzz103,zzzz597" source="940" target="459" cy:directed="1"/>
      <edge id="247141" label="zzzz103,zzzz626" source="940" target="431" cy:directed="1"/>
      <edge id="247140" label="zzzz103,zzzzz44" source="940" target="127" cy:directed="1"/>
      <edge id="247139" label="zzzz103,zzzz122" source="940" target="921" cy:directed="1"/>
      <edge id="247138" label="zzzz103,zzzz137" source="940" target="906" cy:directed="1"/>
      <edge id="247137" label="zzzz103,zzzz379" source="940" target="677" cy:directed="1"/>
      <edge id="247136" label="zzzz103,zzzz420" source="940" target="636" cy:directed="1"/>
      <edge id="247135" label="zzzz103,zzzz516" source="940" target="540" cy:directed="1"/>
      <edge id="247134" label="zzzz103,zzzz592" source="940" target="464" cy:directed="1"/>
      <edge id="247133" label="zzzz103,zzzz613" source="940" target="443" cy:directed="1"/>
      <edge id="247132" label="zzzz103,zzzz394" source="940" target="662" cy:directed="1"/>
      <edge id="247131" label="zzzz103,zzzz510" source="940" target="546" cy:directed="1"/>
      <edge id="247130" label="zzzz103,zzzz727" source="940" target="333" cy:directed="1"/>
      <edge id="247129" label="zzzz103,zzzz799" source="940" target="284" cy:directed="1"/>
      <edge id="247128" label="zzzz103,zzzz534" source="940" target="522" cy:directed="1"/>
      <edge id="247127" label="zzzz103,zzzz565" source="940" target="491" cy:directed="1"/>
      <edge id="247126" label="zzzz103,zzzz596" source="940" target="460" cy:directed="1"/>
      <edge id="247125" label="zzzz103,zzzz671" source="940" target="386" cy:directed="1"/>
      <edge id="247124" label="zzzz103,zzzz811" source="940" target="272" cy:directed="1"/>
      <edge id="247123" label="zzzz103,zzzz894" source="940" target="216" cy:directed="1"/>
      <edge id="247122" label="zzzz103,zzzz948" source="940" target="176" cy:directed="1"/>
      <edge id="247121" label="zzzz103,zzzzz53" source="940" target="118" cy:directed="1"/>
      <edge id="247120" label="zzzz103,zzzz133" source="940" target="910" cy:directed="1"/>
      <edge id="247119" label="zzzz103,zzzz225" source="940" target="818" cy:directed="1"/>
      <edge id="247118" label="zzzz103,zzzz431" source="940" target="625" cy:directed="1"/>
      <edge id="247117" label="zzzz103,zzzz563" source="940" target="493" cy:directed="1"/>
      <edge id="247116" label="zzzz103,zzzz568" source="940" target="488" cy:directed="1"/>
      <edge id="247115" label="zzzz103,zzzz580" source="940" target="476" cy:directed="1"/>
      <edge id="247114" label="zzzz103,zzzz600" source="940" target="456" cy:directed="1"/>
      <edge id="247113" label="zzzz103,zzzz605" source="940" target="451" cy:directed="1"/>
      <edge id="247112" label="zzzz103,zzzz622" source="940" target="434" cy:directed="1"/>
      <edge id="247111" label="zzzz103,zzzz623" source="940" target="433" cy:directed="1"/>
      <edge id="247110" label="zzzz103,zzzz666" source="940" target="391" cy:directed="1"/>
      <edge id="247109" label="zzzz103,zzzz830" source="940" target="254" cy:directed="1"/>
      <edge id="247108" label="zzzz103,zzzz945" source="940" target="179" cy:directed="1"/>
      <edge id="247107" label="zzzz103,zzzz536" source="940" target="520" cy:directed="1"/>
      <edge id="247106" label="zzzz103,zzzz890" source="940" target="220" cy:directed="1"/>
      <edge id="247105" label="zzzz103,zzzz113" source="940" target="930" cy:directed="1"/>
      <edge id="247104" label="zzzz103,zzzz187" source="940" target="856" cy:directed="1"/>
      <edge id="247103" label="zzzz103,zzzz201" source="940" target="842" cy:directed="1"/>
      <edge id="247102" label="zzzz103,zzzz206" source="940" target="837" cy:directed="1"/>
      <edge id="247101" label="zzzz103,zzzz397" source="940" target="659" cy:directed="1"/>
      <edge id="247100" label="zzzz103,zzzz532" source="940" target="524" cy:directed="1"/>
      <edge id="247099" label="zzzz103,zzzz564" source="940" target="492" cy:directed="1"/>
      <edge id="247098" label="zzzz103,zzzz690" source="940" target="368" cy:directed="1"/>
      <edge id="247097" label="zzzz103,zzzz788" source="940" target="293" cy:directed="1"/>
      <edge id="247096" label="zzzz103,zzzzz49" source="940" target="122" cy:directed="1"/>
      <edge id="247095" label="zzzz103,zzzzz64" source="940" target="107" cy:directed="1"/>
      <edge id="247094" label="zzzz103,zzzz217" source="940" target="826" cy:directed="1"/>
      <edge id="247093" label="zzzz103,zzzz399" source="940" target="657" cy:directed="1"/>
      <edge id="247092" label="zzzz103,zzzz470" source="940" target="586" cy:directed="1"/>
      <edge id="247091" label="zzzz103,zzzz517" source="940" target="539" cy:directed="1"/>
      <edge id="247090" label="zzzz103,zzzz210" source="940" target="833" cy:directed="1"/>
      <edge id="247089" label="zzzz103,zzzz439" source="940" target="617" cy:directed="1"/>
      <edge id="247088" label="zzzz103,zzzz562" source="940" target="494" cy:directed="1"/>
      <edge id="247087" label="zzzz103,zzzz507" source="940" target="549" cy:directed="1"/>
      <edge id="247086" label="zzzz103,zzzz570" source="940" target="486" cy:directed="1"/>
      <edge id="247085" label="zzzz103,zzzz896" source="940" target="214" cy:directed="1"/>
      <edge id="247084" label="zzzz103,zzzz160" source="940" target="883" cy:directed="1"/>
      <edge id="247083" label="zzzz103,zzzz560" source="940" target="496" cy:directed="1"/>
      <edge id="247082" label="zzzz103,zzzz853" source="940" target="231" cy:directed="1"/>
      <edge id="247081" label="zzzz103,zzzz442" source="940" target="614" cy:directed="1"/>
      <edge id="247080" label="zzzz103,zzzz545" source="940" target="511" cy:directed="1"/>
      <edge id="247079" label="zzzz103,zzzz651" source="940" target="406" cy:directed="1"/>
      <edge id="247078" label="zzzz103,zzzz893" source="940" target="217" cy:directed="1"/>
      <edge id="247077" label="zzzz103,zzzz574" source="940" target="482" cy:directed="1"/>
      <edge id="247076" label="zzzz103,zzzz655" source="940" target="402" cy:directed="1"/>
      <edge id="247075" label="zzzz103,zzzz360" source="940" target="696" cy:directed="1"/>
      <edge id="247074" label="zzzz103,zzzz398" source="940" target="658" cy:directed="1"/>
      <edge id="247073" label="zzzz103,zzzz942" source="940" target="182" cy:directed="1"/>
      <edge id="247072" label="zzzz103,zzzzz50" source="940" target="121" cy:directed="1"/>
      <edge id="247071" label="zzzz103,zzzz404" source="940" target="652" cy:directed="1"/>
      <edge id="247070" label="zzzz103,zzzz577" source="940" target="479" cy:directed="1"/>
      <edge id="247069" label="zzzz103,zzzz108" source="940" target="935" cy:directed="1"/>
      <edge id="247068" label="zzzz103,zzzz366" source="940" target="690" cy:directed="1"/>
      <edge id="247067" label="zzzz103,zzzz466" source="940" target="590" cy:directed="1"/>
      <edge id="247066" label="zzzz103,zzzz437" source="940" target="619" cy:directed="1"/>
      <edge id="247065" label="zzzz103,zzzz487" source="940" target="569" cy:directed="1"/>
      <edge id="247064" label="zzzz103,zzzz634" source="940" target="423" cy:directed="1"/>
      <edge id="247063" label="zzzz103,zzzz226" source="940" target="817" cy:directed="1"/>
      <edge id="247062" label="zzzz103,zzzz475" source="940" target="581" cy:directed="1"/>
      <edge id="247061" label="zzzz103,zzzzz92" source="940" target="79" cy:directed="1"/>
      <edge id="247060" label="zzzz103,zzzz188" source="940" target="855" cy:directed="1"/>
      <edge id="247059" label="zzzz103,zzzz453" source="940" target="603" cy:directed="1"/>
      <edge id="247058" label="zzzz103,zzzz566" source="940" target="490" cy:directed="1"/>
      <edge id="247057" label="zzzz103,zzzz607" source="940" target="449" cy:directed="1"/>
      <edge id="247056" label="zzzz103,zzzz636" source="940" target="421" cy:directed="1"/>
      <edge id="247055" label="zzzz103,zzzz287" source="940" target="765" cy:directed="1"/>
      <edge id="247054" label="zzzz103,zzzz463" source="940" target="593" cy:directed="1"/>
      <edge id="247053" label="zzzz103,zzzz552" source="940" target="504" cy:directed="1"/>
      <edge id="247052" label="zzzz103,zzzz695" source="940" target="364" cy:directed="1"/>
      <edge id="247051" label="zzzz103,zzzz216" source="940" target="827" cy:directed="1"/>
      <edge id="247050" label="zzzz103,zzzz595" source="940" target="461" cy:directed="1"/>
      <edge id="247049" label="zzzz103,zzzz792" source="940" target="289" cy:directed="1"/>
      <edge id="247048" label="zzzz103,zzzz804" source="940" target="279" cy:directed="1"/>
      <edge id="247047" label="zzzz103,zzzzz70" source="940" target="101" cy:directed="1"/>
      <edge id="247046" label="zzzz103,zzzz411" source="940" target="645" cy:directed="1"/>
      <edge id="247045" label="zzzz103,zzzz515" source="940" target="541" cy:directed="1"/>
      <edge id="247044" label="zzzz103,zzzz834" source="940" target="250" cy:directed="1"/>
      <edge id="247043" label="zzzz103,zzzz186" source="940" target="857" cy:directed="1"/>
      <edge id="247042" label="zzzz103,zzzz583" source="940" target="473" cy:directed="1"/>
      <edge id="247041" label="zzzz103,zzzz679" source="940" target="378" cy:directed="1"/>
      <edge id="247040" label="zzzz103,zzzz680" source="940" target="377" cy:directed="1"/>
      <edge id="247039" label="zzzz103,zzzz784" source="940" target="297" cy:directed="1"/>
      <edge id="247038" label="zzzz103,zzzz203" source="940" target="840" cy:directed="1"/>
      <edge id="247037" label="zzzz103,zzzz557" source="940" target="499" cy:directed="1"/>
      <edge id="247036" label="zzzz103,zzzz558" source="940" target="498" cy:directed="1"/>
      <edge id="247035" label="zzzz103,zzzz686" source="940" target="372" cy:directed="1"/>
      <edge id="247034" label="zzzz103,zzzz796" source="940" target="286" cy:directed="1"/>
      <edge id="247033" label="zzzz103,zzzzz52" source="940" target="119" cy:directed="1"/>
      <edge id="247032" label="zzzz103,zzzz496" source="940" target="560" cy:directed="1"/>
      <edge id="247031" label="zzzz103,zzzz903" source="940" target="208" cy:directed="1"/>
      <edge id="247030" label="zzzz103,zzzzz59" source="940" target="112" cy:directed="1"/>
      <edge id="247029" label="zzzz103,zzzz521" source="940" target="535" cy:directed="1"/>
      <edge id="247028" label="zzzz103,zzzz390" source="940" target="666" cy:directed="1"/>
      <edge id="247027" label="zzzz103,zzzz530" source="940" target="526" cy:directed="1"/>
      <edge id="247026" label="zzzz103,zzzz576" source="940" target="480" cy:directed="1"/>
      <edge id="247025" label="zzzz103,zzzz514" source="940" target="542" cy:directed="1"/>
      <edge id="247024" label="zzzz103,zzzz603" source="940" target="453" cy:directed="1"/>
      <edge id="247023" label="zzzz103,zzzz403" source="940" target="653" cy:directed="1"/>
      <edge id="247022" label="zzzz103,zzzz435" source="940" target="621" cy:directed="1"/>
      <edge id="247021" label="zzzz103,zzzz506" source="940" target="550" cy:directed="1"/>
      <edge id="247020" label="zzzz103,zzzz473" source="940" target="583" cy:directed="1"/>
      <edge id="247019" label="zzzz103,zzzz625" source="940" target="432" cy:directed="1"/>
      <edge id="247018" label="zzzz103,zzzz693" source="940" target="366" cy:directed="1"/>
      <edge id="247017" label="zzzz103,zzzz848" source="940" target="236" cy:directed="1"/>
      <edge id="247016" label="zzzz103,zzzz391" source="940" target="665" cy:directed="1"/>
      <edge id="247015" label="zzzz103,zzzz594" source="940" target="462" cy:directed="1"/>
      <edge id="247014" label="zzzz103,zzzz621" source="940" target="435" cy:directed="1"/>
      <edge id="247013" label="zzzz103,zzzz966" source="940" target="166" cy:directed="1"/>
      <edge id="247012" label="zzzz103,zzzz461" source="940" target="595" cy:directed="1"/>
      <edge id="247011" label="zzzz103,zzzz476" source="940" target="580" cy:directed="1"/>
      <edge id="247010" label="zzzz103,zzzz933" source="940" target="189" cy:directed="1"/>
      <edge id="247009" label="zzzz103,zzzz844" source="940" target="240" cy:directed="1"/>
      <edge id="247008" label="zzzz103,zzzz800" source="940" target="283" cy:directed="1"/>
      <edge id="247007" label="zzzz103,zzzz109" source="940" target="934" cy:directed="1"/>
      <edge id="247006" label="zzzz103,zzzz462" source="940" target="594" cy:directed="1"/>
      <edge id="247005" label="zzzz103,zzzz543" source="940" target="513" cy:directed="1"/>
      <edge id="247004" label="zzzz103,zzzz673" source="940" target="384" cy:directed="1"/>
      <edge id="247003" label="zzzz103,zzzz697" source="940" target="362" cy:directed="1"/>
      <edge id="247002" label="zzzz103,zzzz430" source="940" target="626" cy:directed="1"/>
      <edge id="247001" label="zzzz103,zzzz198" source="940" target="845" cy:directed="1"/>
      <edge id="247000" label="zzzz103,zzzz202" source="940" target="841" cy:directed="1"/>
      <edge id="246999" label="zzzz103,zzzz467" source="940" target="589" cy:directed="1"/>
      <edge id="246998" label="zzzz103,zzzzz56" source="940" target="115" cy:directed="1"/>
      <edge id="246997" label="zzzz103,zzzz481" source="940" target="575" cy:directed="1"/>
      <edge id="246996" label="zzzz103,zzzz633" source="940" target="424" cy:directed="1"/>
      <edge id="246995" label="zzzz103,zzzz290" source="940" target="763" cy:directed="1"/>
      <edge id="246994" label="zzzz103,zzzz441" source="940" target="615" cy:directed="1"/>
      <edge id="246993" label="zzzz103,zzzz569" source="940" target="487" cy:directed="1"/>
      <edge id="246992" label="zzzz103,zzzz801" source="940" target="282" cy:directed="1"/>
      <edge id="246991" label="zzzz103,zzzz541" source="940" target="515" cy:directed="1"/>
      <edge id="246990" label="zzzz103,zzzz983" source="940" target="162" cy:directed="1"/>
      <edge id="246989" label="zzzz103,zzzz115" source="940" target="928" cy:directed="1"/>
      <edge id="246988" label="zzzz103,zzzz205" source="940" target="838" cy:directed="1"/>
      <edge id="246987" label="zzzz103,zzzz237" source="940" target="806" cy:directed="1"/>
      <edge id="246986" label="zzzz103,zzzz669" source="940" target="388" cy:directed="1"/>
      <edge id="246985" label="zzzz103,zzzz402" source="940" target="654" cy:directed="1"/>
      <edge id="246984" label="zzzz103,zzzz419" source="940" target="637" cy:directed="1"/>
      <edge id="246983" label="zzzz103,zzzz551" source="940" target="505" cy:directed="1"/>
      <edge id="246982" label="zzzz103,zzzz905" source="940" target="206" cy:directed="1"/>
      <edge id="246981" label="zzzz103,zzzz297" source="940" target="759" cy:directed="1"/>
      <edge id="246980" label="zzzz103,zzzz446" source="940" target="610" cy:directed="1"/>
      <edge id="246979" label="zzzz103,zzzzz51" source="940" target="120" cy:directed="1"/>
      <edge id="246978" label="zzzz103,zzzz513" source="940" target="543" cy:directed="1"/>
      <edge id="246977" label="zzzz103,zzzz589" source="940" target="467" cy:directed="1"/>
      <edge id="246976" label="zzzz103,zzzz687" source="940" target="371" cy:directed="1"/>
      <edge id="246975" label="zzzz103,zzzz587" source="940" target="469" cy:directed="1"/>
      <edge id="246974" label="zzzz103,zzzz683" source="940" target="375" cy:directed="1"/>
      <edge id="246973" label="zzzz103,zzzz499" source="940" target="557" cy:directed="1"/>
      <edge id="246972" label="zzzz103,zzzz677" source="940" target="380" cy:directed="1"/>
      <edge id="246971" label="zzzz103,zzzzz46" source="940" target="125" cy:directed="1"/>
      <edge id="246970" label="zzzz103,zzzz639" source="940" target="418" cy:directed="1"/>
      <edge id="246969" label="zzzz103,zzzzz58" source="940" target="113" cy:directed="1"/>
      <edge id="246968" label="zzzz103,zzzz850" source="940" target="234" cy:directed="1"/>
      <edge id="246967" label="zzzz103,zzzz282" source="940" target="770" cy:directed="1"/>
      <edge id="246966" label="zzzz103,zzzz347" source="940" target="709" cy:directed="1"/>
      <edge id="246965" label="zzzz103,zzzz572" source="940" target="484" cy:directed="1"/>
      <edge id="246964" label="zzzz103,zzzz582" source="940" target="474" cy:directed="1"/>
      <edge id="246963" label="zzzz103,zzzz676" source="940" target="381" cy:directed="1"/>
      <edge id="246962" label="zzzz103,zzzz681" source="940" target="376" cy:directed="1"/>
      <edge id="246961" label="zzzz103,zzzz688" source="940" target="370" cy:directed="1"/>
      <edge id="246960" label="zzzz103,zzzz392" source="940" target="664" cy:directed="1"/>
      <edge id="246959" label="zzzz103,zzzz251" source="940" target="792" cy:directed="1"/>
      <edge id="246958" label="zzzz103,zzzz350" source="940" target="706" cy:directed="1"/>
      <edge id="246957" label="zzzz103,zzzz464" source="940" target="592" cy:directed="1"/>
      <edge id="246956" label="zzzz103,zzzz672" source="940" target="385" cy:directed="1"/>
      <edge id="246955" label="zzzz103,zzzz838" source="940" target="246" cy:directed="1"/>
      <edge id="246954" label="zzzz103,zzzz575" source="940" target="481" cy:directed="1"/>
      <edge id="246953" label="zzzz103,zzzz231" source="940" target="812" cy:directed="1"/>
      <edge id="246952" label="zzzz103,zzzz455" source="940" target="601" cy:directed="1"/>
      <edge id="246951" label="zzzz103,zzzz538" source="940" target="518" cy:directed="1"/>
      <edge id="246950" label="zzzz103,zzzz244" source="940" target="799" cy:directed="1"/>
      <edge id="246949" label="zzzz103,zzzz292" source="940" target="761" cy:directed="1"/>
      <edge id="246948" label="zzzz103,zzzz111" source="940" target="932" cy:directed="1"/>
      <edge id="246947" label="zzzz103,zzzz274" source="940" target="777" cy:directed="1"/>
      <edge id="246946" label="zzzz103,zzzz981" source="940" target="164" cy:directed="1"/>
      <edge id="246945" label="zzzz103,zzzz204" source="940" target="839" cy:directed="1"/>
      <edge id="246944" label="zzzz103,zzzz489" source="940" target="567" cy:directed="1"/>
      <edge id="246943" label="zzzz103,zzzzz75" source="940" target="96" cy:directed="1"/>
      <edge id="246942" label="zzzz103,zzzz839" source="940" target="245" cy:directed="1"/>
      <edge id="246941" label="zzzz103,zzzz615" source="940" target="441" cy:directed="1"/>
      <edge id="246940" label="zzzz103,zzzz696" source="940" target="363" cy:directed="1"/>
      <edge id="246939" label="zzzz103,zzzz490" source="940" target="566" cy:directed="1"/>
      <edge id="246938" label="zzzz103,zzzz363" source="940" target="693" cy:directed="1"/>
      <edge id="246937" label="zzzz103,zzzz278" source="940" target="774" cy:directed="1"/>
      <edge id="246936" label="zzzz103,zzzz469" source="940" target="587" cy:directed="1"/>
      <edge id="246935" label="zzzz103,zzzz359" source="940" target="697" cy:directed="1"/>
      <edge id="246934" label="zzzz103,zzzz255" source="940" target="788" cy:directed="1"/>
      <edge id="246933" label="zzzz103,zzzzz62" source="940" target="109" cy:directed="1"/>
      <edge id="246932" label="zzzz103,zzzz301" source="940" target="755" cy:directed="1"/>
      <edge id="246931" label="zzzz103,zzzz854" source="940" target="230" cy:directed="1"/>
      <edge id="246930" label="zzzz103,zzzz228" source="940" target="815" cy:directed="1"/>
      <edge id="246929" label="zzzz103,zzzz617" source="940" target="439" cy:directed="1"/>
      <edge id="246928" label="zzzz103,zzzz384" source="940" target="672" cy:directed="1"/>
      <edge id="246927" label="zzzz103,zzzz408" source="940" target="648" cy:directed="1"/>
      <edge id="246926" label="zzzz103,zzzz259" source="940" target="784" cy:directed="1"/>
      <edge id="246925" label="zzzz103,zzzz190" source="940" target="853" cy:directed="1"/>
      <edge id="246924" label="zzzz103,zzzz412" source="940" target="644" cy:directed="1"/>
      <edge id="246923" label="zzzz103,zzzz235" source="940" target="808" cy:directed="1"/>
      <edge id="246922" label="zzzz103,zzzz334" source="940" target="722" cy:directed="1"/>
      <edge id="246921" label="zzzz103,zzzz826" source="940" target="258" cy:directed="1"/>
      <edge id="246920" label="zzzz103,zzzz920" source="940" target="195" cy:directed="1"/>
      <edge id="246919" label="zzzz103,zzzz303" source="940" target="753" cy:directed="1"/>
      <edge id="246918" label="zzzz103,zzzzz54" source="940" target="117" cy:directed="1"/>
      <edge id="246917" label="zzzz103,zzzz342" source="940" target="714" cy:directed="1"/>
      <edge id="246916" label="zzzz103,zzzzz63" source="940" target="108" cy:directed="1"/>
      <edge id="246915" label="zzzz103,zzzz281" source="940" target="771" cy:directed="1"/>
      <edge id="246914" label="zzzz103,zzzz815" source="940" target="269" cy:directed="1"/>
      <edge id="246913" label="zzzz103,zzzzz57" source="940" target="114" cy:directed="1"/>
      <edge id="246912" label="zzzz103,zzzz248" source="940" target="795" cy:directed="1"/>
      <edge id="246911" label="zzzz103,zzzz317" source="940" target="739" cy:directed="1"/>
      <edge id="246910" label="zzzz103,zzzz805" source="940" target="278" cy:directed="1"/>
      <edge id="246909" label="zzzz103,zzzzz98" source="940" target="73" cy:directed="1"/>
      <edge id="246908" label="zzzz103,zzzz299" source="940" target="757" cy:directed="1"/>
      <edge id="246907" label="zzzz103,zzzz330" source="940" target="726" cy:directed="1"/>
      <edge id="246906" label="zzzz103,zzzz716" source="940" target="343" cy:directed="1"/>
      <edge id="246905" label="zzzz103,zzzz931" source="940" target="191" cy:directed="1"/>
      <edge id="246904" label="zzzz103,zzzz229" source="940" target="814" cy:directed="1"/>
      <edge id="246903" label="zzzz103,zzzz310" source="940" target="746" cy:directed="1"/>
      <edge id="246902" label="zzzz103,zzzz336" source="940" target="720" cy:directed="1"/>
      <edge id="246901" label="zzzz103,zzzz787" source="940" target="294" cy:directed="1"/>
      <edge id="246900" label="zzzz103,zzzz263" source="940" target="780" cy:directed="1"/>
      <edge id="246899" label="zzzz103,zzzz344" source="940" target="712" cy:directed="1"/>
      <edge id="246898" label="zzzz103,zzzz314" source="940" target="742" cy:directed="1"/>
      <edge id="246897" label="zzzz103,zzzz280" source="940" target="772" cy:directed="1"/>
      <edge id="246896" label="zzzz103,zzzz300" source="940" target="756" cy:directed="1"/>
      <edge id="246895" label="zzzz103,zzzz306" source="940" target="750" cy:directed="1"/>
      <edge id="246894" label="zzzz103,zzzz715" source="940" target="344" cy:directed="1"/>
      <edge id="246893" label="zzzz103,zzzz312" source="940" target="744" cy:directed="1"/>
      <edge id="246892" label="zzzz103,zzzz315" source="940" target="741" cy:directed="1"/>
      <edge id="246891" label="zzzz103,zzzz824" source="940" target="260" cy:directed="1"/>
      <edge id="246890" label="zzzz103,zzzz818" source="940" target="266" cy:directed="1"/>
      <edge id="246889" label="zzzz103,zzzz304" source="940" target="752" cy:directed="1"/>
      <edge id="246888" label="zzzz103,zzzz337" source="940" target="719" cy:directed="1"/>
      <edge id="246887" label="zzzz103,zzzz326" source="940" target="730" cy:directed="1"/>
      <edge id="246886" label="zzzz103,zzzz786" source="940" target="295" cy:directed="1"/>
      <edge id="246885" label="zzzz103,zzzz785" source="940" target="296" cy:directed="1"/>
      <edge id="246884" label="zzzz103,zzzz327" source="940" target="729" cy:directed="1"/>
      <edge id="246883" label="zzzz103,zzzz790" source="940" target="291" cy:directed="1"/>
      <edge id="246882" label="zzzz103,zzzz324" source="940" target="732" cy:directed="1"/>
      <edge id="246881" label="zzzz103,zzzz718" source="940" target="341" cy:directed="1"/>
      <edge id="246880" label="zzzz103,zzzz701" source="940" target="358" cy:directed="1"/>
      <edge id="246879" label="zzzz103,zzzz222" source="940" target="821" cy:directed="1"/>
      <edge id="246878" label="zzzz103,zzzz250" source="940" target="793" cy:directed="1"/>
      <edge id="246877" label="zzzz103,zzzz277" source="940" target="775" cy:directed="1"/>
      <edge id="246876" label="zzzz103,zzzz822" source="940" target="262" cy:directed="1"/>
      <edge id="246875" label="zzzz103,zzzz311" source="940" target="745" cy:directed="1"/>
      <edge id="246874" label="zzzz103,zzzz316" source="940" target="740" cy:directed="1"/>
      <edge id="246873" label="zzzz103,zzzz283" source="940" target="769" cy:directed="1"/>
      <edge id="246872" label="zzzz103,zzzz302" source="940" target="754" cy:directed="1"/>
      <edge id="246871" label="zzzz103,zzzz341" source="940" target="715" cy:directed="1"/>
      <edge id="246870" label="zzzz103,zzzz705" source="940" target="354" cy:directed="1"/>
      <edge id="246869" label="zzzz103,zzzz719" source="940" target="340" cy:directed="1"/>
      <edge id="246868" label="zzzz103,zzzz339" source="940" target="717" cy:directed="1"/>
      <edge id="246867" label="zzzz103,zzzz699" source="940" target="360" cy:directed="1"/>
      <edge id="246866" label="zzzz103,zzzz708" source="940" target="351" cy:directed="1"/>
      <edge id="246865" label="zzzz103,zzzz745" source="940" target="327" cy:directed="1"/>
      <edge id="246864" label="zzzz103,zzzz323" source="940" target="733" cy:directed="1"/>
      <edge id="246863" label="zzzz103,zzzz333" source="940" target="723" cy:directed="1"/>
      <edge id="246862" label="zzzz103,zzzz700" source="940" target="359" cy:directed="1"/>
      <edge id="246861" label="zzzz103,zzzz279" source="940" target="773" cy:directed="1"/>
      <edge id="246860" label="zzzz103,zzzz703" source="940" target="356" cy:directed="1"/>
      <edge id="246859" label="zzzz103,zzzz783" source="940" target="298" cy:directed="1"/>
      <edge id="246858" label="zzzz103,zzzz308" source="940" target="748" cy:directed="1"/>
      <edge id="246857" label="zzzz103,zzzz318" source="940" target="738" cy:directed="1"/>
      <edge id="246856" label="zzzz103,zzzz488" source="940" target="568" cy:directed="1"/>
      <edge id="246855" label="zzzz103,zzzz711" source="940" target="348" cy:directed="1"/>
      <edge id="246854" label="zzzz103,zzzz813" source="940" target="270" cy:directed="1"/>
      <edge id="246853" label="zzzz103,zzzz305" source="940" target="751" cy:directed="1"/>
      <edge id="246852" label="zzzz103,zzzz321" source="940" target="735" cy:directed="1"/>
      <edge id="246851" label="zzzz103,zzzz338" source="940" target="718" cy:directed="1"/>
      <edge id="246850" label="zzzz103,zzzz343" source="940" target="713" cy:directed="1"/>
      <edge id="246849" label="zzzz103,zzzz704" source="940" target="355" cy:directed="1"/>
      <edge id="246848" label="zzzz103,zzzz820" source="940" target="264" cy:directed="1"/>
      <edge id="246847" label="zzzz103,zzzz706" source="940" target="353" cy:directed="1"/>
      <edge id="246846" label="zzzz103,zzzzz76" source="940" target="95" cy:directed="1"/>
      <edge id="246845" label="zzzz103,zzzz192" source="940" target="851" cy:directed="1"/>
      <edge id="246844" label="zzzz103,zzzz714" source="940" target="345" cy:directed="1"/>
      <edge id="246843" label="zzzz103,zzzz712" source="940" target="347" cy:directed="1"/>
      <edge id="246842" label="zzzz103,zzzz743" source="940" target="329" cy:directed="1"/>
      <edge id="246841" label="zzzz103,zzzz319" source="940" target="737" cy:directed="1"/>
      <edge id="246840" label="zzzz103,zzzz598" source="940" target="458" cy:directed="1"/>
      <edge id="246839" label="zzzz103,zzzz247" source="940" target="796" cy:directed="1"/>
      <edge id="246838" label="zzzz103,zzzz710" source="940" target="349" cy:directed="1"/>
      <edge id="246837" label="zzzz103,zzzz760" source="940" target="315" cy:directed="1"/>
      <edge id="246836" label="zzzz103,zzzz756" source="940" target="318" cy:directed="1"/>
      <edge id="246835" label="zzzz103,zzzz227" source="940" target="816" cy:directed="1"/>
      <edge id="246834" label="zzzz103,zzzz503" source="940" target="553" cy:directed="1"/>
      <edge id="246833" label="zzzz103,zzzz307" source="940" target="749" cy:directed="1"/>
      <edge id="246832" label="zzzz103,zzzz313" source="940" target="743" cy:directed="1"/>
      <edge id="246831" label="zzzz103,zzzz709" source="940" target="350" cy:directed="1"/>
      <edge id="246830" label="zzzz103,zzzz721" source="940" target="338" cy:directed="1"/>
      <edge id="246829" label="zzzz103,zzzz322" source="940" target="734" cy:directed="1"/>
      <edge id="246828" label="zzzz103,zzzz744" source="940" target="328" cy:directed="1"/>
      <edge id="246827" label="zzzz103,zzzz325" source="940" target="731" cy:directed="1"/>
      <edge id="246826" label="zzzz104,zzzz149" source="939" target="894" cy:directed="1"/>
      <edge id="246825" label="zzzz104,zzzz148" source="939" target="895" cy:directed="1"/>
      <edge id="246824" label="zzzz104,zzzz150" source="939" target="893" cy:directed="1"/>
      <edge id="246823" label="zzzz104,zzzz143" source="939" target="900" cy:directed="1"/>
      <edge id="246822" label="zzzz104,zzzz140" source="939" target="903" cy:directed="1"/>
      <edge id="246821" label="zzzz104,zzzz141" source="939" target="902" cy:directed="1"/>
      <edge id="246820" label="zzzz104,zzzz142" source="939" target="901" cy:directed="1"/>
      <edge id="246819" label="zzzz104,zzzz107" source="939" target="936" cy:directed="1"/>
      <edge id="246818" label="zzzz104,zzzzz97" source="939" target="74" cy:directed="1"/>
      <edge id="246817" label="zzzz104,zzzz153" source="939" target="890" cy:directed="1"/>
      <edge id="246816" label="zzzz104,zzzz934" source="939" target="188" cy:directed="1"/>
      <edge id="246815" label="zzzz104,zzzz807" source="939" target="276" cy:directed="1"/>
      <edge id="246814" label="zzzz104,zzzz829" source="939" target="255" cy:directed="1"/>
      <edge id="246813" label="zzzz104,zzzz158" source="939" target="885" cy:directed="1"/>
      <edge id="246812" label="zzzz104,zzzz128" source="939" target="915" cy:directed="1"/>
      <edge id="246811" label="zzzz104,zzzz144" source="939" target="899" cy:directed="1"/>
      <edge id="246810" label="zzzz104,zzzzz99" source="939" target="72" cy:directed="1"/>
      <edge id="246809" label="zzzz104,zzzz123" source="939" target="920" cy:directed="1"/>
      <edge id="246808" label="zzzz104,zzzz130" source="939" target="913" cy:directed="1"/>
      <edge id="246807" label="zzzz104,zzzz163" source="939" target="880" cy:directed="1"/>
      <edge id="246806" label="zzzz104,zzzz549" source="939" target="507" cy:directed="1"/>
      <edge id="246805" label="zzzz104,zzzz179" source="939" target="864" cy:directed="1"/>
      <edge id="246804" label="zzzz104,zzzz176" source="939" target="867" cy:directed="1"/>
      <edge id="246803" label="zzzz104,zzzz444" source="939" target="612" cy:directed="1"/>
      <edge id="246802" label="zzzz104,zzzz641" source="939" target="416" cy:directed="1"/>
      <edge id="246801" label="zzzz104,zzzz640" source="939" target="417" cy:directed="1"/>
      <edge id="246800" label="zzzz104,zzzz502" source="939" target="554" cy:directed="1"/>
      <edge id="246799" label="zzzz104,zzzz548" source="939" target="508" cy:directed="1"/>
      <edge id="246798" label="zzzz104,zzzz554" source="939" target="502" cy:directed="1"/>
      <edge id="246797" label="zzzz104,zzzz567" source="939" target="489" cy:directed="1"/>
      <edge id="246796" label="zzzz104,zzzzz48" source="939" target="123" cy:directed="1"/>
      <edge id="246795" label="zzzz104,zzzz518" source="939" target="538" cy:directed="1"/>
      <edge id="246794" label="zzzz104,zzzz810" source="939" target="273" cy:directed="1"/>
      <edge id="246793" label="zzzz104,zzzz832" source="939" target="252" cy:directed="1"/>
      <edge id="246792" label="zzzz104,zzzzz89" source="939" target="82" cy:directed="1"/>
      <edge id="246791" label="zzzz104,zzzz118" source="939" target="925" cy:directed="1"/>
      <edge id="246790" label="zzzz104,zzzz170" source="939" target="873" cy:directed="1"/>
      <edge id="246789" label="zzzz104,zzzz126" source="939" target="917" cy:directed="1"/>
      <edge id="246788" label="zzzz104,zzzz171" source="939" target="872" cy:directed="1"/>
      <edge id="246787" label="zzzz104,zzzz353" source="939" target="703" cy:directed="1"/>
      <edge id="246786" label="zzzz104,zzzz440" source="939" target="616" cy:directed="1"/>
      <edge id="246785" label="zzzz104,zzzz138" source="939" target="905" cy:directed="1"/>
      <edge id="246784" label="zzzz104,zzzz175" source="939" target="868" cy:directed="1"/>
      <edge id="246783" label="zzzz104,zzzz230" source="939" target="813" cy:directed="1"/>
      <edge id="246782" label="zzzz104,zzzz831" source="939" target="253" cy:directed="1"/>
      <edge id="246781" label="zzzz104,zzzz895" source="939" target="215" cy:directed="1"/>
      <edge id="246780" label="zzzz104,zzzz424" source="939" target="632" cy:directed="1"/>
      <edge id="246779" label="zzzz104,zzzzz94" source="939" target="77" cy:directed="1"/>
      <edge id="246778" label="zzzz104,zzzz242" source="939" target="801" cy:directed="1"/>
      <edge id="246777" label="zzzz104,zzzz285" source="939" target="767" cy:directed="1"/>
      <edge id="246776" label="zzzz104,zzzz164" source="939" target="879" cy:directed="1"/>
      <edge id="246775" label="zzzz104,zzzz184" source="939" target="859" cy:directed="1"/>
      <edge id="246774" label="zzzz104,zzzz546" source="939" target="510" cy:directed="1"/>
      <edge id="246773" label="zzzz104,zzzz585" source="939" target="471" cy:directed="1"/>
      <edge id="246772" label="zzzz104,zzzz670" source="939" target="387" cy:directed="1"/>
      <edge id="246771" label="zzzz104,zzzz180" source="939" target="863" cy:directed="1"/>
      <edge id="246770" label="zzzz104,zzzz169" source="939" target="874" cy:directed="1"/>
      <edge id="246769" label="zzzz104,zzzz245" source="939" target="798" cy:directed="1"/>
      <edge id="246768" label="zzzz104,zzzz352" source="939" target="704" cy:directed="1"/>
      <edge id="246767" label="zzzz104,zzzz445" source="939" target="611" cy:directed="1"/>
      <edge id="246766" label="zzzz104,zzzz794" source="939" target="287" cy:directed="1"/>
      <edge id="246765" label="zzzz104,zzzz168" source="939" target="875" cy:directed="1"/>
      <edge id="246764" label="zzzz104,zzzz194" source="939" target="849" cy:directed="1"/>
      <edge id="246763" label="zzzz104,zzzz249" source="939" target="794" cy:directed="1"/>
      <edge id="246762" label="zzzz104,zzzz433" source="939" target="623" cy:directed="1"/>
      <edge id="246761" label="zzzz104,zzzz618" source="939" target="438" cy:directed="1"/>
      <edge id="246760" label="zzzz104,zzzz833" source="939" target="251" cy:directed="1"/>
      <edge id="246759" label="zzzz104,zzzz243" source="939" target="800" cy:directed="1"/>
      <edge id="246758" label="zzzz104,zzzz387" source="939" target="669" cy:directed="1"/>
      <edge id="246757" label="zzzz104,zzzz447" source="939" target="609" cy:directed="1"/>
      <edge id="246756" label="zzzz104,zzzz520" source="939" target="536" cy:directed="1"/>
      <edge id="246755" label="zzzz104,zzzz921" source="939" target="194" cy:directed="1"/>
      <edge id="246754" label="zzzz104,zzzz132" source="939" target="911" cy:directed="1"/>
      <edge id="246753" label="zzzz104,zzzz167" source="939" target="876" cy:directed="1"/>
      <edge id="246752" label="zzzz104,zzzz173" source="939" target="870" cy:directed="1"/>
      <edge id="246751" label="zzzz104,zzzz177" source="939" target="866" cy:directed="1"/>
      <edge id="246750" label="zzzz104,zzzz361" source="939" target="695" cy:directed="1"/>
      <edge id="246749" label="zzzz104,zzzz372" source="939" target="684" cy:directed="1"/>
      <edge id="246748" label="zzzz104,zzzz498" source="939" target="558" cy:directed="1"/>
      <edge id="246747" label="zzzz104,zzzz667" source="939" target="390" cy:directed="1"/>
      <edge id="246746" label="zzzz104,zzzz724" source="939" target="336" cy:directed="1"/>
      <edge id="246745" label="zzzz104,zzzz793" source="939" target="288" cy:directed="1"/>
      <edge id="246744" label="zzzz104,zzzz809" source="939" target="274" cy:directed="1"/>
      <edge id="246743" label="zzzz104,zzzz145" source="939" target="898" cy:directed="1"/>
      <edge id="246742" label="zzzz104,zzzz189" source="939" target="854" cy:directed="1"/>
      <edge id="246741" label="zzzz104,zzzz501" source="939" target="555" cy:directed="1"/>
      <edge id="246740" label="zzzz104,zzzz658" source="939" target="399" cy:directed="1"/>
      <edge id="246739" label="zzzz104,zzzzz80" source="939" target="91" cy:directed="1"/>
      <edge id="246738" label="zzzz104,zzzz112" source="939" target="931" cy:directed="1"/>
      <edge id="246737" label="zzzz104,zzzz172" source="939" target="871" cy:directed="1"/>
      <edge id="246736" label="zzzz104,zzzz174" source="939" target="869" cy:directed="1"/>
      <edge id="246735" label="zzzz104,zzzz351" source="939" target="705" cy:directed="1"/>
      <edge id="246734" label="zzzz104,zzzz485" source="939" target="571" cy:directed="1"/>
      <edge id="246733" label="zzzz104,zzzz808" source="939" target="275" cy:directed="1"/>
      <edge id="246732" label="zzzz104,zzzz146" source="939" target="897" cy:directed="1"/>
      <edge id="246731" label="zzzz104,zzzz147" source="939" target="896" cy:directed="1"/>
      <edge id="246730" label="zzzz104,zzzz349" source="939" target="707" cy:directed="1"/>
      <edge id="246729" label="zzzz104,zzzz373" source="939" target="683" cy:directed="1"/>
      <edge id="246728" label="zzzz104,zzzz432" source="939" target="624" cy:directed="1"/>
      <edge id="246727" label="zzzz104,zzzz448" source="939" target="608" cy:directed="1"/>
      <edge id="246726" label="zzzz104,zzzz525" source="939" target="531" cy:directed="1"/>
      <edge id="246725" label="zzzz104,zzzz573" source="939" target="483" cy:directed="1"/>
      <edge id="246724" label="zzzz104,zzzz657" source="939" target="400" cy:directed="1"/>
      <edge id="246723" label="zzzz104,zzzz663" source="939" target="394" cy:directed="1"/>
      <edge id="246722" label="zzzz104,zzzzz84" source="939" target="87" cy:directed="1"/>
      <edge id="246721" label="zzzz104,zzzz183" source="939" target="860" cy:directed="1"/>
      <edge id="246720" label="zzzz104,zzzz252" source="939" target="791" cy:directed="1"/>
      <edge id="246719" label="zzzz104,zzzz346" source="939" target="710" cy:directed="1"/>
      <edge id="246718" label="zzzz104,zzzz523" source="939" target="533" cy:directed="1"/>
      <edge id="246717" label="zzzz104,zzzz531" source="939" target="525" cy:directed="1"/>
      <edge id="246716" label="zzzz104,zzzz555" source="939" target="501" cy:directed="1"/>
      <edge id="246715" label="zzzz104,zzzz644" source="939" target="413" cy:directed="1"/>
      <edge id="246714" label="zzzz104,zzzz646" source="939" target="411" cy:directed="1"/>
      <edge id="246713" label="zzzz104,zzzz135" source="939" target="908" cy:directed="1"/>
      <edge id="246712" label="zzzz104,zzzz155" source="939" target="888" cy:directed="1"/>
      <edge id="246711" label="zzzz104,zzzz191" source="939" target="852" cy:directed="1"/>
      <edge id="246710" label="zzzz104,zzzz261" source="939" target="782" cy:directed="1"/>
      <edge id="246709" label="zzzz104,zzzz284" source="939" target="768" cy:directed="1"/>
      <edge id="246708" label="zzzz104,zzzz396" source="939" target="660" cy:directed="1"/>
      <edge id="246707" label="zzzz104,zzzz425" source="939" target="631" cy:directed="1"/>
      <edge id="246706" label="zzzz104,zzzz456" source="939" target="600" cy:directed="1"/>
      <edge id="246705" label="zzzz104,zzzz465" source="939" target="591" cy:directed="1"/>
      <edge id="246704" label="zzzz104,zzzz547" source="939" target="509" cy:directed="1"/>
      <edge id="246703" label="zzzz104,zzzz559" source="939" target="497" cy:directed="1"/>
      <edge id="246702" label="zzzz104,zzzz119" source="939" target="924" cy:directed="1"/>
      <edge id="246701" label="zzzz104,zzzz378" source="939" target="678" cy:directed="1"/>
      <edge id="246700" label="zzzz104,zzzz421" source="939" target="635" cy:directed="1"/>
      <edge id="246699" label="zzzz104,zzzz120" source="939" target="923" cy:directed="1"/>
      <edge id="246698" label="zzzz104,zzzz233" source="939" target="810" cy:directed="1"/>
      <edge id="246697" label="zzzz104,zzzz524" source="939" target="532" cy:directed="1"/>
      <edge id="246696" label="zzzz104,zzzz526" source="939" target="530" cy:directed="1"/>
      <edge id="246695" label="zzzz104,zzzz528" source="939" target="528" cy:directed="1"/>
      <edge id="246694" label="zzzz104,zzzz656" source="939" target="401" cy:directed="1"/>
      <edge id="246693" label="zzzz104,zzzz375" source="939" target="681" cy:directed="1"/>
      <edge id="246692" label="zzzz104,zzzz385" source="939" target="671" cy:directed="1"/>
      <edge id="246691" label="zzzz104,zzzz450" source="939" target="606" cy:directed="1"/>
      <edge id="246690" label="zzzz104,zzzz500" source="939" target="556" cy:directed="1"/>
      <edge id="246689" label="zzzz104,zzzz427" source="939" target="629" cy:directed="1"/>
      <edge id="246688" label="zzzz104,zzzz479" source="939" target="577" cy:directed="1"/>
      <edge id="246687" label="zzzz104,zzzz512" source="939" target="544" cy:directed="1"/>
      <edge id="246686" label="zzzz104,zzzz982" source="939" target="163" cy:directed="1"/>
      <edge id="246685" label="zzzz104,zzzz114" source="939" target="929" cy:directed="1"/>
      <edge id="246684" label="zzzz104,zzzz195" source="939" target="848" cy:directed="1"/>
      <edge id="246683" label="zzzz104,zzzz232" source="939" target="811" cy:directed="1"/>
      <edge id="246682" label="zzzz104,zzzz365" source="939" target="691" cy:directed="1"/>
      <edge id="246681" label="zzzz104,zzzz542" source="939" target="514" cy:directed="1"/>
      <edge id="246680" label="zzzz104,zzzz662" source="939" target="395" cy:directed="1"/>
      <edge id="246679" label="zzzz104,zzzzz69" source="939" target="102" cy:directed="1"/>
      <edge id="246678" label="zzzz104,zzzz533" source="939" target="523" cy:directed="1"/>
      <edge id="246677" label="zzzz104,zzzz556" source="939" target="500" cy:directed="1"/>
      <edge id="246676" label="zzzz104,zzzz726" source="939" target="334" cy:directed="1"/>
      <edge id="246675" label="zzzz104,zzzz166" source="939" target="877" cy:directed="1"/>
      <edge id="246674" label="zzzz104,zzzz220" source="939" target="823" cy:directed="1"/>
      <edge id="246673" label="zzzz104,zzzz286" source="939" target="766" cy:directed="1"/>
      <edge id="246672" label="zzzz104,zzzz418" source="939" target="638" cy:directed="1"/>
      <edge id="246671" label="zzzz104,zzzz454" source="939" target="602" cy:directed="1"/>
      <edge id="246670" label="zzzz104,zzzz522" source="939" target="534" cy:directed="1"/>
      <edge id="246669" label="zzzz104,zzzz550" source="939" target="506" cy:directed="1"/>
      <edge id="246668" label="zzzz104,zzzz664" source="939" target="393" cy:directed="1"/>
      <edge id="246667" label="zzzz104,zzzz900" source="939" target="211" cy:directed="1"/>
      <edge id="246666" label="zzzz104,zzzzz77" source="939" target="94" cy:directed="1"/>
      <edge id="246665" label="zzzz104,zzzz125" source="939" target="918" cy:directed="1"/>
      <edge id="246664" label="zzzz104,zzzz211" source="939" target="832" cy:directed="1"/>
      <edge id="246663" label="zzzz104,zzzz389" source="939" target="667" cy:directed="1"/>
      <edge id="246662" label="zzzz104,zzzz443" source="939" target="613" cy:directed="1"/>
      <edge id="246661" label="zzzz104,zzzz483" source="939" target="573" cy:directed="1"/>
      <edge id="246660" label="zzzz104,zzzz504" source="939" target="552" cy:directed="1"/>
      <edge id="246659" label="zzzz104,zzzz725" source="939" target="335" cy:directed="1"/>
      <edge id="246658" label="zzzz104,zzzz841" source="939" target="243" cy:directed="1"/>
      <edge id="246657" label="zzzz104,zzzz941" source="939" target="183" cy:directed="1"/>
      <edge id="246656" label="zzzz104,zzzz947" source="939" target="177" cy:directed="1"/>
      <edge id="246655" label="zzzz104,zzzz106" source="939" target="937" cy:directed="1"/>
      <edge id="246654" label="zzzz104,zzzz165" source="939" target="878" cy:directed="1"/>
      <edge id="246653" label="zzzz104,zzzz197" source="939" target="846" cy:directed="1"/>
      <edge id="246652" label="zzzz104,zzzz207" source="939" target="836" cy:directed="1"/>
      <edge id="246651" label="zzzz104,zzzz354" source="939" target="702" cy:directed="1"/>
      <edge id="246650" label="zzzz104,zzzz416" source="939" target="640" cy:directed="1"/>
      <edge id="246649" label="zzzz104,zzzz529" source="939" target="527" cy:directed="1"/>
      <edge id="246648" label="zzzz104,zzzz629" source="939" target="428" cy:directed="1"/>
      <edge id="246647" label="zzzz104,zzzz836" source="939" target="248" cy:directed="1"/>
      <edge id="246646" label="zzzz104,zzzz889" source="939" target="221" cy:directed="1"/>
      <edge id="246645" label="zzzz104,zzzz131" source="939" target="912" cy:directed="1"/>
      <edge id="246644" label="zzzz104,zzzz208" source="939" target="835" cy:directed="1"/>
      <edge id="246643" label="zzzz104,zzzz224" source="939" target="819" cy:directed="1"/>
      <edge id="246642" label="zzzz104,zzzz401" source="939" target="655" cy:directed="1"/>
      <edge id="246641" label="zzzz104,zzzz474" source="939" target="582" cy:directed="1"/>
      <edge id="246640" label="zzzz104,zzzz628" source="939" target="429" cy:directed="1"/>
      <edge id="246639" label="zzzz104,zzzz643" source="939" target="414" cy:directed="1"/>
      <edge id="246638" label="zzzz104,zzzz692" source="939" target="367" cy:directed="1"/>
      <edge id="246637" label="zzzz104,zzzz891" source="939" target="219" cy:directed="1"/>
      <edge id="246636" label="zzzz104,zzzz901" source="939" target="210" cy:directed="1"/>
      <edge id="246635" label="zzzz104,zzzz963" source="939" target="169" cy:directed="1"/>
      <edge id="246634" label="zzzz104,zzzzz86" source="939" target="85" cy:directed="1"/>
      <edge id="246633" label="zzzz104,zzzzz87" source="939" target="84" cy:directed="1"/>
      <edge id="246632" label="zzzz104,zzzz178" source="939" target="865" cy:directed="1"/>
      <edge id="246631" label="zzzz104,zzzz388" source="939" target="668" cy:directed="1"/>
      <edge id="246630" label="zzzz104,zzzz407" source="939" target="649" cy:directed="1"/>
      <edge id="246629" label="zzzz104,zzzz480" source="939" target="576" cy:directed="1"/>
      <edge id="246628" label="zzzz104,zzzz674" source="939" target="383" cy:directed="1"/>
      <edge id="246627" label="zzzz104,zzzz852" source="939" target="232" cy:directed="1"/>
      <edge id="246626" label="zzzz104,zzzz884" source="939" target="222" cy:directed="1"/>
      <edge id="246625" label="zzzz104,zzzz913" source="939" target="198" cy:directed="1"/>
      <edge id="246624" label="zzzz104,zzzz127" source="939" target="916" cy:directed="1"/>
      <edge id="246623" label="zzzz104,zzzz159" source="939" target="884" cy:directed="1"/>
      <edge id="246622" label="zzzz104,zzzz161" source="939" target="882" cy:directed="1"/>
      <edge id="246621" label="zzzz104,zzzz371" source="939" target="685" cy:directed="1"/>
      <edge id="246620" label="zzzz104,zzzz505" source="939" target="551" cy:directed="1"/>
      <edge id="246619" label="zzzz104,zzzz527" source="939" target="529" cy:directed="1"/>
      <edge id="246618" label="zzzz104,zzzz909" source="939" target="202" cy:directed="1"/>
      <edge id="246617" label="zzzz104,zzzz911" source="939" target="200" cy:directed="1"/>
      <edge id="246616" label="zzzz104,zzzzz55" source="939" target="116" cy:directed="1"/>
      <edge id="246615" label="zzzz104,zzzz362" source="939" target="694" cy:directed="1"/>
      <edge id="246614" label="zzzz104,zzzz434" source="939" target="622" cy:directed="1"/>
      <edge id="246613" label="zzzz104,zzzz540" source="939" target="516" cy:directed="1"/>
      <edge id="246612" label="zzzz104,zzzz642" source="939" target="415" cy:directed="1"/>
      <edge id="246611" label="zzzz104,zzzz912" source="939" target="199" cy:directed="1"/>
      <edge id="246610" label="zzzz104,zzzzz96" source="939" target="75" cy:directed="1"/>
      <edge id="246609" label="zzzz104,zzzz358" source="939" target="698" cy:directed="1"/>
      <edge id="246608" label="zzzz104,zzzz370" source="939" target="686" cy:directed="1"/>
      <edge id="246607" label="zzzz104,zzzz105" source="939" target="938" cy:directed="1"/>
      <edge id="246606" label="zzzz104,zzzz156" source="939" target="887" cy:directed="1"/>
      <edge id="246605" label="zzzz104,zzzz181" source="939" target="862" cy:directed="1"/>
      <edge id="246604" label="zzzz104,zzzz386" source="939" target="670" cy:directed="1"/>
      <edge id="246603" label="zzzz104,zzzz944" source="939" target="180" cy:directed="1"/>
      <edge id="246602" label="zzzz104,zzzzz73" source="939" target="98" cy:directed="1"/>
      <edge id="246601" label="zzzz104,zzzzz88" source="939" target="83" cy:directed="1"/>
      <edge id="246600" label="zzzz104,zzzz356" source="939" target="700" cy:directed="1"/>
      <edge id="246599" label="zzzz104,zzzz428" source="939" target="628" cy:directed="1"/>
      <edge id="246598" label="zzzz104,zzzz452" source="939" target="604" cy:directed="1"/>
      <edge id="246597" label="zzzz104,zzzz491" source="939" target="565" cy:directed="1"/>
      <edge id="246596" label="zzzz104,zzzz845" source="939" target="239" cy:directed="1"/>
      <edge id="246595" label="zzzz104,zzzzz81" source="939" target="90" cy:directed="1"/>
      <edge id="246594" label="zzzz104,zzzz121" source="939" target="922" cy:directed="1"/>
      <edge id="246593" label="zzzz104,zzzz124" source="939" target="919" cy:directed="1"/>
      <edge id="246592" label="zzzz104,zzzz136" source="939" target="907" cy:directed="1"/>
      <edge id="246591" label="zzzz104,zzzz154" source="939" target="889" cy:directed="1"/>
      <edge id="246590" label="zzzz104,zzzz162" source="939" target="881" cy:directed="1"/>
      <edge id="246589" label="zzzz104,zzzz457" source="939" target="599" cy:directed="1"/>
      <edge id="246588" label="zzzz104,zzzz459" source="939" target="597" cy:directed="1"/>
      <edge id="246587" label="zzzz104,zzzz508" source="939" target="548" cy:directed="1"/>
      <edge id="246586" label="zzzz104,zzzz588" source="939" target="468" cy:directed="1"/>
      <edge id="246585" label="zzzz104,zzzz614" source="939" target="442" cy:directed="1"/>
      <edge id="246584" label="zzzz104,zzzz647" source="939" target="410" cy:directed="1"/>
      <edge id="246583" label="zzzz104,zzzz653" source="939" target="404" cy:directed="1"/>
      <edge id="246582" label="zzzz104,zzzz722" source="939" target="337" cy:directed="1"/>
      <edge id="246581" label="zzzz104,zzzz910" source="939" target="201" cy:directed="1"/>
      <edge id="246580" label="zzzz104,zzzz182" source="939" target="861" cy:directed="1"/>
      <edge id="246579" label="zzzz104,zzzz376" source="939" target="680" cy:directed="1"/>
      <edge id="246578" label="zzzz104,zzzz460" source="939" target="596" cy:directed="1"/>
      <edge id="246577" label="zzzz104,zzzz579" source="939" target="477" cy:directed="1"/>
      <edge id="246576" label="zzzz104,zzzz631" source="939" target="426" cy:directed="1"/>
      <edge id="246575" label="zzzz104,zzzz738" source="939" target="331" cy:directed="1"/>
      <edge id="246574" label="zzzz104,zzzz892" source="939" target="218" cy:directed="1"/>
      <edge id="246573" label="zzzz104,zzzz964" source="939" target="168" cy:directed="1"/>
      <edge id="246572" label="zzzz104,zzzzz45" source="939" target="126" cy:directed="1"/>
      <edge id="246571" label="zzzz104,zzzzz74" source="939" target="97" cy:directed="1"/>
      <edge id="246570" label="zzzz104,zzzz134" source="939" target="909" cy:directed="1"/>
      <edge id="246569" label="zzzz104,zzzz219" source="939" target="824" cy:directed="1"/>
      <edge id="246568" label="zzzz104,zzzz484" source="939" target="572" cy:directed="1"/>
      <edge id="246567" label="zzzz104,zzzz492" source="939" target="564" cy:directed="1"/>
      <edge id="246566" label="zzzz104,zzzz899" source="939" target="212" cy:directed="1"/>
      <edge id="246565" label="zzzz104,zzzz940" source="939" target="184" cy:directed="1"/>
      <edge id="246564" label="zzzz104,zzzzz47" source="939" target="124" cy:directed="1"/>
      <edge id="246563" label="zzzz104,zzzzz90" source="939" target="81" cy:directed="1"/>
      <edge id="246562" label="zzzz104,zzzz117" source="939" target="926" cy:directed="1"/>
      <edge id="246561" label="zzzz104,zzzz262" source="939" target="781" cy:directed="1"/>
      <edge id="246560" label="zzzz104,zzzz348" source="939" target="708" cy:directed="1"/>
      <edge id="246559" label="zzzz104,zzzz381" source="939" target="675" cy:directed="1"/>
      <edge id="246558" label="zzzz104,zzzz458" source="939" target="598" cy:directed="1"/>
      <edge id="246557" label="zzzz104,zzzz472" source="939" target="584" cy:directed="1"/>
      <edge id="246556" label="zzzz104,zzzz495" source="939" target="561" cy:directed="1"/>
      <edge id="246555" label="zzzz104,zzzz553" source="939" target="503" cy:directed="1"/>
      <edge id="246554" label="zzzz104,zzzz590" source="939" target="466" cy:directed="1"/>
      <edge id="246553" label="zzzz104,zzzz620" source="939" target="436" cy:directed="1"/>
      <edge id="246552" label="zzzz104,zzzz802" source="939" target="281" cy:directed="1"/>
      <edge id="246551" label="zzzz104,zzzz904" source="939" target="207" cy:directed="1"/>
      <edge id="246550" label="zzzz104,zzzz906" source="939" target="205" cy:directed="1"/>
      <edge id="246549" label="zzzz104,zzzz908" source="939" target="203" cy:directed="1"/>
      <edge id="246548" label="zzzz104,zzzz949" source="939" target="175" cy:directed="1"/>
      <edge id="246547" label="zzzz104,zzzz369" source="939" target="687" cy:directed="1"/>
      <edge id="246546" label="zzzz104,zzzz405" source="939" target="651" cy:directed="1"/>
      <edge id="246545" label="zzzz104,zzzz406" source="939" target="650" cy:directed="1"/>
      <edge id="246544" label="zzzz104,zzzz413" source="939" target="643" cy:directed="1"/>
      <edge id="246543" label="zzzz104,zzzz477" source="939" target="579" cy:directed="1"/>
      <edge id="246542" label="zzzz104,zzzz544" source="939" target="512" cy:directed="1"/>
      <edge id="246541" label="zzzz104,zzzz638" source="939" target="419" cy:directed="1"/>
      <edge id="246540" label="zzzz104,zzzz645" source="939" target="412" cy:directed="1"/>
      <edge id="246539" label="zzzz104,zzzz649" source="939" target="408" cy:directed="1"/>
      <edge id="246538" label="zzzz104,zzzz840" source="939" target="244" cy:directed="1"/>
      <edge id="246537" label="zzzz104,zzzz952" source="939" target="172" cy:directed="1"/>
      <edge id="246536" label="zzzz104,zzzz965" source="939" target="167" cy:directed="1"/>
      <edge id="246535" label="zzzz104,zzzzz67" source="939" target="104" cy:directed="1"/>
      <edge id="246534" label="zzzz104,zzzzz78" source="939" target="93" cy:directed="1"/>
      <edge id="246533" label="zzzz104,zzzzz91" source="939" target="80" cy:directed="1"/>
      <edge id="246532" label="zzzz104,zzzz218" source="939" target="825" cy:directed="1"/>
      <edge id="246531" label="zzzz104,zzzz468" source="939" target="588" cy:directed="1"/>
      <edge id="246530" label="zzzz104,zzzz535" source="939" target="521" cy:directed="1"/>
      <edge id="246529" label="zzzz104,zzzz611" source="939" target="445" cy:directed="1"/>
      <edge id="246528" label="zzzz104,zzzz613" source="939" target="443" cy:directed="1"/>
      <edge id="246527" label="zzzz104,zzzz630" source="939" target="427" cy:directed="1"/>
      <edge id="246526" label="zzzz104,zzzz806" source="939" target="277" cy:directed="1"/>
      <edge id="246525" label="zzzz104,zzzz894" source="939" target="216" cy:directed="1"/>
      <edge id="246524" label="zzzz104,zzzz152" source="939" target="891" cy:directed="1"/>
      <edge id="246523" label="zzzz104,zzzz239" source="939" target="804" cy:directed="1"/>
      <edge id="246522" label="zzzz104,zzzz264" source="939" target="779" cy:directed="1"/>
      <edge id="246521" label="zzzz104,zzzz364" source="939" target="692" cy:directed="1"/>
      <edge id="246520" label="zzzz104,zzzz395" source="939" target="661" cy:directed="1"/>
      <edge id="246519" label="zzzz104,zzzz400" source="939" target="656" cy:directed="1"/>
      <edge id="246518" label="zzzz104,zzzz410" source="939" target="646" cy:directed="1"/>
      <edge id="246517" label="zzzz104,zzzz449" source="939" target="607" cy:directed="1"/>
      <edge id="246516" label="zzzz104,zzzz478" source="939" target="578" cy:directed="1"/>
      <edge id="246515" label="zzzz104,zzzz511" source="939" target="545" cy:directed="1"/>
      <edge id="246514" label="zzzz104,zzzz537" source="939" target="519" cy:directed="1"/>
      <edge id="246513" label="zzzz104,zzzz599" source="939" target="457" cy:directed="1"/>
      <edge id="246512" label="zzzz104,zzzz678" source="939" target="379" cy:directed="1"/>
      <edge id="246511" label="zzzz104,zzzz812" source="939" target="271" cy:directed="1"/>
      <edge id="246510" label="zzzz104,zzzz907" source="939" target="204" cy:directed="1"/>
      <edge id="246509" label="zzzz104,zzzz420" source="939" target="636" cy:directed="1"/>
      <edge id="246508" label="zzzz104,zzzz471" source="939" target="585" cy:directed="1"/>
      <edge id="246507" label="zzzz104,zzzz497" source="939" target="559" cy:directed="1"/>
      <edge id="246506" label="zzzz104,zzzz902" source="939" target="209" cy:directed="1"/>
      <edge id="246505" label="zzzz104,zzzz368" source="939" target="688" cy:directed="1"/>
      <edge id="246504" label="zzzz104,zzzz451" source="939" target="605" cy:directed="1"/>
      <edge id="246503" label="zzzz104,zzzz578" source="939" target="478" cy:directed="1"/>
      <edge id="246502" label="zzzz104,zzzz650" source="939" target="407" cy:directed="1"/>
      <edge id="246501" label="zzzz104,zzzz849" source="939" target="235" cy:directed="1"/>
      <edge id="246500" label="zzzz104,zzzzz83" source="939" target="88" cy:directed="1"/>
      <edge id="246499" label="zzzz104,zzzzz93" source="939" target="78" cy:directed="1"/>
      <edge id="246498" label="zzzz104,zzzz116" source="939" target="927" cy:directed="1"/>
      <edge id="246497" label="zzzz104,zzzz209" source="939" target="834" cy:directed="1"/>
      <edge id="246496" label="zzzz104,zzzz377" source="939" target="679" cy:directed="1"/>
      <edge id="246495" label="zzzz104,zzzz426" source="939" target="630" cy:directed="1"/>
      <edge id="246494" label="zzzz104,zzzz648" source="939" target="409" cy:directed="1"/>
      <edge id="246493" label="zzzz104,zzzz110" source="939" target="933" cy:directed="1"/>
      <edge id="246492" label="zzzz104,zzzz539" source="939" target="517" cy:directed="1"/>
      <edge id="246491" label="zzzz104,zzzz561" source="939" target="495" cy:directed="1"/>
      <edge id="246490" label="zzzz104,zzzz627" source="939" target="430" cy:directed="1"/>
      <edge id="246489" label="zzzz104,zzzz632" source="939" target="425" cy:directed="1"/>
      <edge id="246488" label="zzzz104,zzzz637" source="939" target="420" cy:directed="1"/>
      <edge id="246487" label="zzzz104,zzzz943" source="939" target="181" cy:directed="1"/>
      <edge id="246486" label="zzzz104,zzzz946" source="939" target="178" cy:directed="1"/>
      <edge id="246485" label="zzzz104,zzzz950" source="939" target="174" cy:directed="1"/>
      <edge id="246484" label="zzzz104,zzzz139" source="939" target="904" cy:directed="1"/>
      <edge id="246483" label="zzzz104,zzzz382" source="939" target="674" cy:directed="1"/>
      <edge id="246482" label="zzzz104,zzzz393" source="939" target="663" cy:directed="1"/>
      <edge id="246481" label="zzzz104,zzzz415" source="939" target="641" cy:directed="1"/>
      <edge id="246480" label="zzzz104,zzzz417" source="939" target="639" cy:directed="1"/>
      <edge id="246479" label="zzzz104,zzzz431" source="939" target="625" cy:directed="1"/>
      <edge id="246478" label="zzzz104,zzzz665" source="939" target="392" cy:directed="1"/>
      <edge id="246477" label="zzzz104,zzzz685" source="939" target="373" cy:directed="1"/>
      <edge id="246476" label="zzzz104,zzzz728" source="939" target="332" cy:directed="1"/>
      <edge id="246475" label="zzzz104,zzzz791" source="939" target="290" cy:directed="1"/>
      <edge id="246474" label="zzzz104,zzzz843" source="939" target="241" cy:directed="1"/>
      <edge id="246473" label="zzzz104,zzzz935" source="939" target="187" cy:directed="1"/>
      <edge id="246472" label="zzzz104,zzzz936" source="939" target="186" cy:directed="1"/>
      <edge id="246471" label="zzzz104,zzzzz53" source="939" target="118" cy:directed="1"/>
      <edge id="246470" label="zzzz104,zzzzz61" source="939" target="110" cy:directed="1"/>
      <edge id="246469" label="zzzz104,zzzzz79" source="939" target="92" cy:directed="1"/>
      <edge id="246468" label="zzzz104,zzzz122" source="939" target="921" cy:directed="1"/>
      <edge id="246467" label="zzzz104,zzzz374" source="939" target="682" cy:directed="1"/>
      <edge id="246466" label="zzzz104,zzzz593" source="939" target="463" cy:directed="1"/>
      <edge id="246465" label="zzzz104,zzzz619" source="939" target="437" cy:directed="1"/>
      <edge id="246464" label="zzzz104,zzzz652" source="939" target="405" cy:directed="1"/>
      <edge id="246463" label="zzzz104,zzzz893" source="939" target="217" cy:directed="1"/>
      <edge id="246462" label="zzzz104,zzzz896" source="939" target="214" cy:directed="1"/>
      <edge id="246461" label="zzzz104,zzzz951" source="939" target="173" cy:directed="1"/>
      <edge id="246460" label="zzzz104,zzzzz49" source="939" target="122" cy:directed="1"/>
      <edge id="246459" label="zzzz104,zzzz133" source="939" target="910" cy:directed="1"/>
      <edge id="246458" label="zzzz104,zzzz137" source="939" target="906" cy:directed="1"/>
      <edge id="246457" label="zzzz104,zzzz355" source="939" target="701" cy:directed="1"/>
      <edge id="246456" label="zzzz104,zzzz380" source="939" target="676" cy:directed="1"/>
      <edge id="246455" label="zzzz104,zzzz436" source="939" target="620" cy:directed="1"/>
      <edge id="246454" label="zzzz104,zzzz438" source="939" target="618" cy:directed="1"/>
      <edge id="246453" label="zzzz104,zzzz486" source="939" target="570" cy:directed="1"/>
      <edge id="246452" label="zzzz104,zzzz519" source="939" target="537" cy:directed="1"/>
      <edge id="246451" label="zzzz104,zzzz597" source="939" target="459" cy:directed="1"/>
      <edge id="246450" label="zzzz104,zzzzz82" source="939" target="89" cy:directed="1"/>
      <edge id="246449" label="zzzz104,zzzz329" source="939" target="727" cy:directed="1"/>
      <edge id="246448" label="zzzz104,zzzz609" source="939" target="447" cy:directed="1"/>
      <edge id="246447" label="zzzz104,zzzz694" source="939" target="365" cy:directed="1"/>
      <edge id="246446" label="zzzz104,zzzz837" source="939" target="247" cy:directed="1"/>
      <edge id="246445" label="zzzz104,zzzzz85" source="939" target="86" cy:directed="1"/>
      <edge id="246444" label="zzzz104,zzzz157" source="939" target="886" cy:directed="1"/>
      <edge id="246443" label="zzzz104,zzzz199" source="939" target="844" cy:directed="1"/>
      <edge id="246442" label="zzzz104,zzzz240" source="939" target="803" cy:directed="1"/>
      <edge id="246441" label="zzzz104,zzzz383" source="939" target="673" cy:directed="1"/>
      <edge id="246440" label="zzzz104,zzzz635" source="939" target="422" cy:directed="1"/>
      <edge id="246439" label="zzzz104,zzzz661" source="939" target="396" cy:directed="1"/>
      <edge id="246438" label="zzzz104,zzzz210" source="939" target="833" cy:directed="1"/>
      <edge id="246437" label="zzzz104,zzzz422" source="939" target="634" cy:directed="1"/>
      <edge id="246436" label="zzzz104,zzzz482" source="939" target="574" cy:directed="1"/>
      <edge id="246435" label="zzzz104,zzzz494" source="939" target="562" cy:directed="1"/>
      <edge id="246434" label="zzzz104,zzzz129" source="939" target="914" cy:directed="1"/>
      <edge id="246433" label="zzzz104,zzzz151" source="939" target="892" cy:directed="1"/>
      <edge id="246432" label="zzzz104,zzzz216" source="939" target="827" cy:directed="1"/>
      <edge id="246431" label="zzzz104,zzzz357" source="939" target="699" cy:directed="1"/>
      <edge id="246430" label="zzzz104,zzzz367" source="939" target="689" cy:directed="1"/>
      <edge id="246429" label="zzzz104,zzzz394" source="939" target="662" cy:directed="1"/>
      <edge id="246428" label="zzzz104,zzzz414" source="939" target="642" cy:directed="1"/>
      <edge id="246427" label="zzzz104,zzzz604" source="939" target="452" cy:directed="1"/>
      <edge id="246426" label="zzzz104,zzzz606" source="939" target="450" cy:directed="1"/>
      <edge id="246425" label="zzzz104,zzzz659" source="939" target="398" cy:directed="1"/>
      <edge id="246424" label="zzzz104,zzzz690" source="939" target="368" cy:directed="1"/>
      <edge id="246423" label="zzzz104,zzzz799" source="939" target="284" cy:directed="1"/>
      <edge id="246422" label="zzzz104,zzzz811" source="939" target="272" cy:directed="1"/>
      <edge id="246421" label="zzzz104,zzzz945" source="939" target="179" cy:directed="1"/>
      <edge id="246420" label="zzzz104,zzzz577" source="939" target="479" cy:directed="1"/>
      <edge id="246419" label="zzzz104,zzzz616" source="939" target="440" cy:directed="1"/>
      <edge id="246418" label="zzzz104,zzzz660" source="939" target="397" cy:directed="1"/>
      <edge id="246417" label="zzzz104,zzzz898" source="939" target="213" cy:directed="1"/>
      <edge id="246416" label="zzzz104,zzzz397" source="939" target="659" cy:directed="1"/>
      <edge id="246415" label="zzzz104,zzzz493" source="939" target="563" cy:directed="1"/>
      <edge id="246414" label="zzzz104,zzzz586" source="939" target="470" cy:directed="1"/>
      <edge id="246413" label="zzzz104,zzzz622" source="939" target="434" cy:directed="1"/>
      <edge id="246412" label="zzzz104,zzzzz44" source="939" target="127" cy:directed="1"/>
      <edge id="246411" label="zzzz104,zzzz160" source="939" target="883" cy:directed="1"/>
      <edge id="246410" label="zzzz104,zzzz203" source="939" target="840" cy:directed="1"/>
      <edge id="246409" label="zzzz104,zzzz217" source="939" target="826" cy:directed="1"/>
      <edge id="246408" label="zzzz104,zzzz288" source="939" target="764" cy:directed="1"/>
      <edge id="246407" label="zzzz104,zzzz536" source="939" target="520" cy:directed="1"/>
      <edge id="246406" label="zzzz104,zzzz562" source="939" target="494" cy:directed="1"/>
      <edge id="246405" label="zzzz104,zzzz607" source="939" target="449" cy:directed="1"/>
      <edge id="246404" label="zzzz104,zzzz651" source="939" target="406" cy:directed="1"/>
      <edge id="246403" label="zzzz104,zzzz666" source="939" target="391" cy:directed="1"/>
      <edge id="246402" label="zzzz104,zzzz948" source="939" target="176" cy:directed="1"/>
      <edge id="246401" label="zzzz104,zzzzz43" source="939" target="128" cy:directed="1"/>
      <edge id="246400" label="zzzz104,zzzzz50" source="939" target="121" cy:directed="1"/>
      <edge id="246399" label="zzzz104,zzzzz64" source="939" target="107" cy:directed="1"/>
      <edge id="246398" label="zzzz104,zzzz442" source="939" target="614" cy:directed="1"/>
      <edge id="246397" label="zzzz104,zzzz565" source="939" target="491" cy:directed="1"/>
      <edge id="246396" label="zzzz104,zzzz623" source="939" target="433" cy:directed="1"/>
      <edge id="246395" label="zzzz104,zzzz727" source="939" target="333" cy:directed="1"/>
      <edge id="246394" label="zzzz104,zzzzz60" source="939" target="111" cy:directed="1"/>
      <edge id="246393" label="zzzz104,zzzz113" source="939" target="930" cy:directed="1"/>
      <edge id="246392" label="zzzz104,zzzz206" source="939" target="837" cy:directed="1"/>
      <edge id="246391" label="zzzz104,zzzz213" source="939" target="830" cy:directed="1"/>
      <edge id="246390" label="zzzz104,zzzz241" source="939" target="802" cy:directed="1"/>
      <edge id="246389" label="zzzz104,zzzz509" source="939" target="547" cy:directed="1"/>
      <edge id="246388" label="zzzz104,zzzz612" source="939" target="444" cy:directed="1"/>
      <edge id="246387" label="zzzz104,zzzz215" source="939" target="828" cy:directed="1"/>
      <edge id="246386" label="zzzz104,zzzz360" source="939" target="696" cy:directed="1"/>
      <edge id="246385" label="zzzz104,zzzz429" source="939" target="627" cy:directed="1"/>
      <edge id="246384" label="zzzz104,zzzz621" source="939" target="435" cy:directed="1"/>
      <edge id="246383" label="zzzz104,zzzz788" source="939" target="293" cy:directed="1"/>
      <edge id="246382" label="zzzz104,zzzz399" source="939" target="657" cy:directed="1"/>
      <edge id="246381" label="zzzz104,zzzz470" source="939" target="586" cy:directed="1"/>
      <edge id="246380" label="zzzz104,zzzz583" source="939" target="473" cy:directed="1"/>
      <edge id="246379" label="zzzz104,zzzz584" source="939" target="472" cy:directed="1"/>
      <edge id="246378" label="zzzz104,zzzz654" source="939" target="403" cy:directed="1"/>
      <edge id="246377" label="zzzz104,zzzz792" source="939" target="289" cy:directed="1"/>
      <edge id="246376" label="zzzz104,zzzz853" source="939" target="231" cy:directed="1"/>
      <edge id="246375" label="zzzz104,zzzz516" source="939" target="540" cy:directed="1"/>
      <edge id="246374" label="zzzz104,zzzz534" source="939" target="522" cy:directed="1"/>
      <edge id="246373" label="zzzz104,zzzz564" source="939" target="492" cy:directed="1"/>
      <edge id="246372" label="zzzz104,zzzz571" source="939" target="485" cy:directed="1"/>
      <edge id="246371" label="zzzz104,zzzz671" source="939" target="386" cy:directed="1"/>
      <edge id="246370" label="zzzz104,zzzz830" source="939" target="254" cy:directed="1"/>
      <edge id="246369" label="zzzz104,zzzz515" source="939" target="541" cy:directed="1"/>
      <edge id="246368" label="zzzz104,zzzz581" source="939" target="475" cy:directed="1"/>
      <edge id="246367" label="zzzz104,zzzz655" source="939" target="402" cy:directed="1"/>
      <edge id="246366" label="zzzz104,zzzz487" source="939" target="569" cy:directed="1"/>
      <edge id="246365" label="zzzz104,zzzz545" source="939" target="511" cy:directed="1"/>
      <edge id="246364" label="zzzz104,zzzz580" source="939" target="476" cy:directed="1"/>
      <edge id="246363" label="zzzz104,zzzz636" source="939" target="421" cy:directed="1"/>
      <edge id="246362" label="zzzz104,zzzz903" source="939" target="208" cy:directed="1"/>
      <edge id="246361" label="zzzz104,zzzz510" source="939" target="546" cy:directed="1"/>
      <edge id="246360" label="zzzz104,zzzz560" source="939" target="496" cy:directed="1"/>
      <edge id="246359" label="zzzz104,zzzz574" source="939" target="482" cy:directed="1"/>
      <edge id="246358" label="zzzz104,zzzz942" source="939" target="182" cy:directed="1"/>
      <edge id="246357" label="zzzz104,zzzz379" source="939" target="677" cy:directed="1"/>
      <edge id="246356" label="zzzz104,zzzz475" source="939" target="581" cy:directed="1"/>
      <edge id="246355" label="zzzz104,zzzz890" source="939" target="220" cy:directed="1"/>
      <edge id="246354" label="zzzz104,zzzz804" source="939" target="279" cy:directed="1"/>
      <edge id="246353" label="zzzz104,zzzz966" source="939" target="166" cy:directed="1"/>
      <edge id="246352" label="zzzz104,zzzz423" source="939" target="633" cy:directed="1"/>
      <edge id="246351" label="zzzz104,zzzz596" source="939" target="460" cy:directed="1"/>
      <edge id="246350" label="zzzz104,zzzz605" source="939" target="451" cy:directed="1"/>
      <edge id="246349" label="zzzz104,zzzz626" source="939" target="431" cy:directed="1"/>
      <edge id="246348" label="zzzz104,zzzz187" source="939" target="856" cy:directed="1"/>
      <edge id="246347" label="zzzz104,zzzz517" source="939" target="539" cy:directed="1"/>
      <edge id="246346" label="zzzz104,zzzz568" source="939" target="488" cy:directed="1"/>
      <edge id="246345" label="zzzz104,zzzz600" source="939" target="456" cy:directed="1"/>
      <edge id="246344" label="zzzz104,zzzzz70" source="939" target="101" cy:directed="1"/>
      <edge id="246343" label="zzzz104,zzzz366" source="939" target="690" cy:directed="1"/>
      <edge id="246342" label="zzzz104,zzzz287" source="939" target="765" cy:directed="1"/>
      <edge id="246341" label="zzzz104,zzzz435" source="939" target="621" cy:directed="1"/>
      <edge id="246340" label="zzzz104,zzzz461" source="939" target="595" cy:directed="1"/>
      <edge id="246339" label="zzzz104,zzzz521" source="939" target="535" cy:directed="1"/>
      <edge id="246338" label="zzzz104,zzzz566" source="939" target="490" cy:directed="1"/>
      <edge id="246337" label="zzzz104,zzzz403" source="939" target="653" cy:directed="1"/>
      <edge id="246336" label="zzzz104,zzzz404" source="939" target="652" cy:directed="1"/>
      <edge id="246335" label="zzzz104,zzzz201" source="939" target="842" cy:directed="1"/>
      <edge id="246334" label="zzzz104,zzzz225" source="939" target="818" cy:directed="1"/>
      <edge id="246333" label="zzzz104,zzzz558" source="939" target="498" cy:directed="1"/>
      <edge id="246332" label="zzzz104,zzzz680" source="939" target="377" cy:directed="1"/>
      <edge id="246331" label="zzzz104,zzzz784" source="939" target="297" cy:directed="1"/>
      <edge id="246330" label="zzzz104,zzzz453" source="939" target="603" cy:directed="1"/>
      <edge id="246329" label="zzzz104,zzzz496" source="939" target="560" cy:directed="1"/>
      <edge id="246328" label="zzzz104,zzzz437" source="939" target="619" cy:directed="1"/>
      <edge id="246327" label="zzzz104,zzzz563" source="939" target="493" cy:directed="1"/>
      <edge id="246326" label="zzzz104,zzzz188" source="939" target="855" cy:directed="1"/>
      <edge id="246325" label="zzzz104,zzzz390" source="939" target="666" cy:directed="1"/>
      <edge id="246324" label="zzzz104,zzzz466" source="939" target="590" cy:directed="1"/>
      <edge id="246323" label="zzzz104,zzzz473" source="939" target="583" cy:directed="1"/>
      <edge id="246322" label="zzzz104,zzzz532" source="939" target="524" cy:directed="1"/>
      <edge id="246321" label="zzzz104,zzzzz92" source="939" target="79" cy:directed="1"/>
      <edge id="246320" label="zzzz104,zzzz439" source="939" target="617" cy:directed="1"/>
      <edge id="246319" label="zzzz104,zzzz595" source="939" target="461" cy:directed="1"/>
      <edge id="246318" label="zzzz104,zzzz398" source="939" target="658" cy:directed="1"/>
      <edge id="246317" label="zzzz104,zzzz570" source="939" target="486" cy:directed="1"/>
      <edge id="246316" label="zzzz104,zzzz834" source="939" target="250" cy:directed="1"/>
      <edge id="246315" label="zzzz104,zzzzz56" source="939" target="115" cy:directed="1"/>
      <edge id="246314" label="zzzz104,zzzz592" source="939" target="464" cy:directed="1"/>
      <edge id="246313" label="zzzz104,zzzz290" source="939" target="763" cy:directed="1"/>
      <edge id="246312" label="zzzz104,zzzz634" source="939" target="423" cy:directed="1"/>
      <edge id="246311" label="zzzz104,zzzz462" source="939" target="594" cy:directed="1"/>
      <edge id="246310" label="zzzz104,zzzz507" source="939" target="549" cy:directed="1"/>
      <edge id="246309" label="zzzz104,zzzz530" source="939" target="526" cy:directed="1"/>
      <edge id="246308" label="zzzz104,zzzz695" source="939" target="364" cy:directed="1"/>
      <edge id="246307" label="zzzz104,zzzz391" source="939" target="665" cy:directed="1"/>
      <edge id="246306" label="zzzz104,zzzz411" source="939" target="645" cy:directed="1"/>
      <edge id="246305" label="zzzz104,zzzz576" source="939" target="480" cy:directed="1"/>
      <edge id="246304" label="zzzz104,zzzz603" source="939" target="453" cy:directed="1"/>
      <edge id="246303" label="zzzz104,zzzz186" source="939" target="857" cy:directed="1"/>
      <edge id="246302" label="zzzz104,zzzz625" source="939" target="432" cy:directed="1"/>
      <edge id="246301" label="zzzz104,zzzz848" source="939" target="236" cy:directed="1"/>
      <edge id="246300" label="zzzz104,zzzz205" source="939" target="838" cy:directed="1"/>
      <edge id="246299" label="zzzz104,zzzz506" source="939" target="550" cy:directed="1"/>
      <edge id="246298" label="zzzz104,zzzz844" source="939" target="240" cy:directed="1"/>
      <edge id="246297" label="zzzz104,zzzz108" source="939" target="935" cy:directed="1"/>
      <edge id="246296" label="zzzz104,zzzz552" source="939" target="504" cy:directed="1"/>
      <edge id="246295" label="zzzz104,zzzz402" source="939" target="654" cy:directed="1"/>
      <edge id="246294" label="zzzz104,zzzz463" source="939" target="593" cy:directed="1"/>
      <edge id="246293" label="zzzz104,zzzz513" source="939" target="543" cy:directed="1"/>
      <edge id="246292" label="zzzz104,zzzz226" source="939" target="817" cy:directed="1"/>
      <edge id="246291" label="zzzz104,zzzz589" source="939" target="467" cy:directed="1"/>
      <edge id="246290" label="zzzz104,zzzz933" source="939" target="189" cy:directed="1"/>
      <edge id="246289" label="zzzz104,zzzzz46" source="939" target="125" cy:directed="1"/>
      <edge id="246288" label="zzzz104,zzzzz51" source="939" target="120" cy:directed="1"/>
      <edge id="246287" label="zzzz104,zzzz198" source="939" target="845" cy:directed="1"/>
      <edge id="246286" label="zzzz104,zzzz673" source="939" target="384" cy:directed="1"/>
      <edge id="246285" label="zzzz104,zzzz679" source="939" target="378" cy:directed="1"/>
      <edge id="246284" label="zzzz104,zzzz693" source="939" target="366" cy:directed="1"/>
      <edge id="246283" label="zzzz104,zzzz983" source="939" target="162" cy:directed="1"/>
      <edge id="246282" label="zzzz104,zzzz430" source="939" target="626" cy:directed="1"/>
      <edge id="246281" label="zzzz104,zzzz639" source="939" target="418" cy:directed="1"/>
      <edge id="246280" label="zzzz104,zzzz446" source="939" target="610" cy:directed="1"/>
      <edge id="246279" label="zzzz104,zzzz467" source="939" target="589" cy:directed="1"/>
      <edge id="246278" label="zzzz104,zzzz575" source="939" target="481" cy:directed="1"/>
      <edge id="246277" label="zzzz104,zzzz796" source="939" target="286" cy:directed="1"/>
      <edge id="246276" label="zzzz104,zzzzz52" source="939" target="119" cy:directed="1"/>
      <edge id="246275" label="zzzz104,zzzzz58" source="939" target="113" cy:directed="1"/>
      <edge id="246274" label="zzzz104,zzzz202" source="939" target="841" cy:directed="1"/>
      <edge id="246273" label="zzzz104,zzzz688" source="939" target="370" cy:directed="1"/>
      <edge id="246272" label="zzzz104,zzzz905" source="939" target="206" cy:directed="1"/>
      <edge id="246271" label="zzzz104,zzzz109" source="939" target="934" cy:directed="1"/>
      <edge id="246270" label="zzzz104,zzzz582" source="939" target="474" cy:directed="1"/>
      <edge id="246269" label="zzzz104,zzzz587" source="939" target="469" cy:directed="1"/>
      <edge id="246268" label="zzzz104,zzzz686" source="939" target="372" cy:directed="1"/>
      <edge id="246267" label="zzzz104,zzzz115" source="939" target="928" cy:directed="1"/>
      <edge id="246266" label="zzzz104,zzzz347" source="939" target="709" cy:directed="1"/>
      <edge id="246265" label="zzzz104,zzzz594" source="939" target="462" cy:directed="1"/>
      <edge id="246264" label="zzzz104,zzzzz59" source="939" target="112" cy:directed="1"/>
      <edge id="246263" label="zzzz104,zzzz541" source="939" target="515" cy:directed="1"/>
      <edge id="246262" label="zzzz104,zzzz543" source="939" target="513" cy:directed="1"/>
      <edge id="246261" label="zzzz104,zzzz801" source="939" target="282" cy:directed="1"/>
      <edge id="246260" label="zzzz104,zzzz455" source="939" target="601" cy:directed="1"/>
      <edge id="246259" label="zzzz104,zzzz669" source="939" target="388" cy:directed="1"/>
      <edge id="246258" label="zzzz104,zzzz514" source="939" target="542" cy:directed="1"/>
      <edge id="246257" label="zzzz104,zzzz244" source="939" target="799" cy:directed="1"/>
      <edge id="246256" label="zzzz104,zzzz297" source="939" target="759" cy:directed="1"/>
      <edge id="246255" label="zzzz104,zzzz481" source="939" target="575" cy:directed="1"/>
      <edge id="246254" label="zzzz104,zzzz569" source="939" target="487" cy:directed="1"/>
      <edge id="246253" label="zzzz104,zzzz237" source="939" target="806" cy:directed="1"/>
      <edge id="246252" label="zzzz104,zzzz464" source="939" target="592" cy:directed="1"/>
      <edge id="246251" label="zzzz104,zzzz476" source="939" target="580" cy:directed="1"/>
      <edge id="246250" label="zzzz104,zzzz697" source="939" target="362" cy:directed="1"/>
      <edge id="246249" label="zzzz104,zzzz419" source="939" target="637" cy:directed="1"/>
      <edge id="246248" label="zzzz104,zzzz838" source="939" target="246" cy:directed="1"/>
      <edge id="246247" label="zzzz104,zzzz633" source="939" target="424" cy:directed="1"/>
      <edge id="246246" label="zzzz104,zzzz687" source="939" target="371" cy:directed="1"/>
      <edge id="246245" label="zzzz104,zzzz441" source="939" target="615" cy:directed="1"/>
      <edge id="246244" label="zzzz104,zzzz557" source="939" target="499" cy:directed="1"/>
      <edge id="246243" label="zzzz104,zzzz572" source="939" target="484" cy:directed="1"/>
      <edge id="246242" label="zzzz104,zzzz683" source="939" target="375" cy:directed="1"/>
      <edge id="246241" label="zzzz104,zzzz251" source="939" target="792" cy:directed="1"/>
      <edge id="246240" label="zzzz104,zzzz677" source="939" target="380" cy:directed="1"/>
      <edge id="246239" label="zzzz104,zzzz800" source="939" target="283" cy:directed="1"/>
      <edge id="246238" label="zzzz104,zzzz255" source="939" target="788" cy:directed="1"/>
      <edge id="246237" label="zzzz104,zzzz672" source="939" target="385" cy:directed="1"/>
      <edge id="246236" label="zzzz104,zzzz350" source="939" target="706" cy:directed="1"/>
      <edge id="246235" label="zzzz104,zzzz499" source="939" target="557" cy:directed="1"/>
      <edge id="246234" label="zzzz104,zzzz615" source="939" target="441" cy:directed="1"/>
      <edge id="246233" label="zzzz104,zzzz282" source="939" target="770" cy:directed="1"/>
      <edge id="246232" label="zzzz104,zzzz551" source="939" target="505" cy:directed="1"/>
      <edge id="246231" label="zzzz104,zzzz839" source="939" target="245" cy:directed="1"/>
      <edge id="246230" label="zzzz104,zzzz676" source="939" target="381" cy:directed="1"/>
      <edge id="246229" label="zzzz104,zzzz231" source="939" target="812" cy:directed="1"/>
      <edge id="246228" label="zzzz104,zzzz359" source="939" target="697" cy:directed="1"/>
      <edge id="246227" label="zzzz104,zzzz850" source="939" target="234" cy:directed="1"/>
      <edge id="246226" label="zzzz104,zzzz111" source="939" target="932" cy:directed="1"/>
      <edge id="246225" label="zzzz104,zzzz538" source="939" target="518" cy:directed="1"/>
      <edge id="246224" label="zzzz104,zzzz981" source="939" target="164" cy:directed="1"/>
      <edge id="246223" label="zzzz104,zzzz259" source="939" target="784" cy:directed="1"/>
      <edge id="246222" label="zzzz104,zzzz274" source="939" target="777" cy:directed="1"/>
      <edge id="246221" label="zzzz104,zzzzz75" source="939" target="96" cy:directed="1"/>
      <edge id="246220" label="zzzz104,zzzz392" source="939" target="664" cy:directed="1"/>
      <edge id="246219" label="zzzz104,zzzz384" source="939" target="672" cy:directed="1"/>
      <edge id="246218" label="zzzz104,zzzzz62" source="939" target="109" cy:directed="1"/>
      <edge id="246217" label="zzzz104,zzzz204" source="939" target="839" cy:directed="1"/>
      <edge id="246216" label="zzzz104,zzzz469" source="939" target="587" cy:directed="1"/>
      <edge id="246215" label="zzzz104,zzzz408" source="939" target="648" cy:directed="1"/>
      <edge id="246214" label="zzzz104,zzzz681" source="939" target="376" cy:directed="1"/>
      <edge id="246213" label="zzzz104,zzzz696" source="939" target="363" cy:directed="1"/>
      <edge id="246212" label="zzzz104,zzzz229" source="939" target="814" cy:directed="1"/>
      <edge id="246211" label="zzzz104,zzzz292" source="939" target="761" cy:directed="1"/>
      <edge id="246210" label="zzzz104,zzzz489" source="939" target="567" cy:directed="1"/>
      <edge id="246209" label="zzzz104,zzzz299" source="939" target="757" cy:directed="1"/>
      <edge id="246208" label="zzzz104,zzzz278" source="939" target="774" cy:directed="1"/>
      <edge id="246207" label="zzzz104,zzzz805" source="939" target="278" cy:directed="1"/>
      <edge id="246206" label="zzzz104,zzzz412" source="939" target="644" cy:directed="1"/>
      <edge id="246205" label="zzzz104,zzzz815" source="939" target="269" cy:directed="1"/>
      <edge id="246204" label="zzzz104,zzzz303" source="939" target="753" cy:directed="1"/>
      <edge id="246203" label="zzzz104,zzzz363" source="939" target="693" cy:directed="1"/>
      <edge id="246202" label="zzzz104,zzzz490" source="939" target="566" cy:directed="1"/>
      <edge id="246201" label="zzzz104,zzzz235" source="939" target="808" cy:directed="1"/>
      <edge id="246200" label="zzzz104,zzzz617" source="939" target="439" cy:directed="1"/>
      <edge id="246199" label="zzzz104,zzzzz57" source="939" target="114" cy:directed="1"/>
      <edge id="246198" label="zzzz104,zzzzz98" source="939" target="73" cy:directed="1"/>
      <edge id="246197" label="zzzz104,zzzz263" source="939" target="780" cy:directed="1"/>
      <edge id="246196" label="zzzz104,zzzz826" source="939" target="258" cy:directed="1"/>
      <edge id="246195" label="zzzz104,zzzz818" source="939" target="266" cy:directed="1"/>
      <edge id="246194" label="zzzz104,zzzz854" source="939" target="230" cy:directed="1"/>
      <edge id="246193" label="zzzz104,zzzz931" source="939" target="191" cy:directed="1"/>
      <edge id="246192" label="zzzz104,zzzz190" source="939" target="853" cy:directed="1"/>
      <edge id="246191" label="zzzz104,zzzz336" source="939" target="720" cy:directed="1"/>
      <edge id="246190" label="zzzz104,zzzz715" source="939" target="344" cy:directed="1"/>
      <edge id="246189" label="zzzz104,zzzzz63" source="939" target="108" cy:directed="1"/>
      <edge id="246188" label="zzzz104,zzzz301" source="939" target="755" cy:directed="1"/>
      <edge id="246187" label="zzzz104,zzzz824" source="939" target="260" cy:directed="1"/>
      <edge id="246186" label="zzzz104,zzzz277" source="939" target="775" cy:directed="1"/>
      <edge id="246185" label="zzzz104,zzzz701" source="939" target="358" cy:directed="1"/>
      <edge id="246184" label="zzzz104,zzzz302" source="939" target="754" cy:directed="1"/>
      <edge id="246183" label="zzzz104,zzzz228" source="939" target="815" cy:directed="1"/>
      <edge id="246182" label="zzzz104,zzzz786" source="939" target="295" cy:directed="1"/>
      <edge id="246181" label="zzzz104,zzzz787" source="939" target="294" cy:directed="1"/>
      <edge id="246180" label="zzzz104,zzzz790" source="939" target="291" cy:directed="1"/>
      <edge id="246179" label="zzzz104,zzzz248" source="939" target="795" cy:directed="1"/>
      <edge id="246178" label="zzzz104,zzzz281" source="939" target="771" cy:directed="1"/>
      <edge id="246177" label="zzzz104,zzzz675" source="939" target="382" cy:directed="1"/>
      <edge id="246176" label="zzzz104,zzzz745" source="939" target="327" cy:directed="1"/>
      <edge id="246175" label="zzzz104,zzzz280" source="939" target="772" cy:directed="1"/>
      <edge id="246174" label="zzzz104,zzzz330" source="939" target="726" cy:directed="1"/>
      <edge id="246173" label="zzzz104,zzzz334" source="939" target="722" cy:directed="1"/>
      <edge id="246172" label="zzzz104,zzzz312" source="939" target="744" cy:directed="1"/>
      <edge id="246171" label="zzzz104,zzzz785" source="939" target="296" cy:directed="1"/>
      <edge id="246170" label="zzzz104,zzzzz54" source="939" target="117" cy:directed="1"/>
      <edge id="246169" label="zzzz104,zzzz311" source="939" target="745" cy:directed="1"/>
      <edge id="246168" label="zzzz104,zzzz317" source="939" target="739" cy:directed="1"/>
      <edge id="246167" label="zzzz104,zzzz283" source="939" target="769" cy:directed="1"/>
      <edge id="246166" label="zzzz104,zzzz315" source="939" target="741" cy:directed="1"/>
      <edge id="246165" label="zzzz104,zzzz326" source="939" target="730" cy:directed="1"/>
      <edge id="246164" label="zzzz104,zzzzz76" source="939" target="95" cy:directed="1"/>
      <edge id="246163" label="zzzz104,zzzz324" source="939" target="732" cy:directed="1"/>
      <edge id="246162" label="zzzz104,zzzz192" source="939" target="851" cy:directed="1"/>
      <edge id="246161" label="zzzz104,zzzz743" source="939" target="329" cy:directed="1"/>
      <edge id="246160" label="zzzz104,zzzz783" source="939" target="298" cy:directed="1"/>
      <edge id="246159" label="zzzz104,zzzz306" source="939" target="750" cy:directed="1"/>
      <edge id="246158" label="zzzz104,zzzz822" source="939" target="262" cy:directed="1"/>
      <edge id="246157" label="zzzz104,zzzz708" source="939" target="351" cy:directed="1"/>
      <edge id="246156" label="zzzz104,zzzz920" source="939" target="195" cy:directed="1"/>
      <edge id="246155" label="zzzz104,zzzz222" source="939" target="821" cy:directed="1"/>
      <edge id="246154" label="zzzz104,zzzz308" source="939" target="748" cy:directed="1"/>
      <edge id="246153" label="zzzz104,zzzz342" source="939" target="714" cy:directed="1"/>
      <edge id="246152" label="zzzz104,zzzz706" source="939" target="353" cy:directed="1"/>
      <edge id="246151" label="zzzz104,zzzz300" source="939" target="756" cy:directed="1"/>
      <edge id="246150" label="zzzz104,zzzz322" source="939" target="734" cy:directed="1"/>
      <edge id="246149" label="zzzz104,zzzz223" source="939" target="820" cy:directed="1"/>
      <edge id="246148" label="zzzz104,zzzz327" source="939" target="729" cy:directed="1"/>
      <edge id="246147" label="zzzz104,zzzz337" source="939" target="719" cy:directed="1"/>
      <edge id="246146" label="zzzz104,zzzz344" source="939" target="712" cy:directed="1"/>
      <edge id="246145" label="zzzz104,zzzz716" source="939" target="343" cy:directed="1"/>
      <edge id="246144" label="zzzz104,zzzz823" source="939" target="261" cy:directed="1"/>
      <edge id="246143" label="zzzz104,zzzz304" source="939" target="752" cy:directed="1"/>
      <edge id="246142" label="zzzz104,zzzz319" source="939" target="737" cy:directed="1"/>
      <edge id="246141" label="zzzz104,zzzz719" source="939" target="340" cy:directed="1"/>
      <edge id="246140" label="zzzz104,zzzz813" source="939" target="270" cy:directed="1"/>
      <edge id="246139" label="zzzz104,zzzz314" source="939" target="742" cy:directed="1"/>
      <edge id="246138" label="zzzz104,zzzz250" source="939" target="793" cy:directed="1"/>
      <edge id="246137" label="zzzz104,zzzz333" source="939" target="723" cy:directed="1"/>
      <edge id="246136" label="zzzz104,zzzz602" source="939" target="454" cy:directed="1"/>
      <edge id="246135" label="zzzz104,zzzz705" source="939" target="354" cy:directed="1"/>
      <edge id="246134" label="zzzz104,zzzz279" source="939" target="773" cy:directed="1"/>
      <edge id="246133" label="zzzz104,zzzz310" source="939" target="746" cy:directed="1"/>
      <edge id="246132" label="zzzz104,zzzz714" source="939" target="345" cy:directed="1"/>
      <edge id="246131" label="zzzz104,zzzz339" source="939" target="717" cy:directed="1"/>
      <edge id="246130" label="zzzz104,zzzz711" source="939" target="348" cy:directed="1"/>
      <edge id="246129" label="zzzz104,zzzz305" source="939" target="751" cy:directed="1"/>
      <edge id="246128" label="zzzz104,zzzz488" source="939" target="568" cy:directed="1"/>
      <edge id="246127" label="zzzz104,zzzz323" source="939" target="733" cy:directed="1"/>
      <edge id="246126" label="zzzz104,zzzz340" source="939" target="716" cy:directed="1"/>
      <edge id="246125" label="zzzz104,zzzz703" source="939" target="356" cy:directed="1"/>
      <edge id="246124" label="zzzz104,zzzz325" source="939" target="731" cy:directed="1"/>
      <edge id="246123" label="zzzz104,zzzz341" source="939" target="715" cy:directed="1"/>
      <edge id="246122" label="zzzz104,zzzz316" source="939" target="740" cy:directed="1"/>
      <edge id="246121" label="zzzz104,zzzz598" source="939" target="458" cy:directed="1"/>
      <edge id="246120" label="zzzz104,zzzz718" source="939" target="341" cy:directed="1"/>
      <edge id="246119" label="zzzz104,zzzz862" source="939" target="224" cy:directed="1"/>
      <edge id="246118" label="zzzz104,zzzz721" source="939" target="338" cy:directed="1"/>
      <edge id="246117" label="zzzz104,zzzzz95" source="939" target="76" cy:directed="1"/>
      <edge id="246116" label="zzzz104,zzzz700" source="939" target="359" cy:directed="1"/>
      <edge id="246115" label="zzzz104,zzzz760" source="939" target="315" cy:directed="1"/>
      <edge id="246114" label="zzzz104,zzzz321" source="939" target="735" cy:directed="1"/>
      <edge id="246113" label="zzzz104,zzzz820" source="939" target="264" cy:directed="1"/>
      <edge id="246112" label="zzzz104,zzzz343" source="939" target="713" cy:directed="1"/>
      <edge id="246111" label="zzzz104,zzzz744" source="939" target="328" cy:directed="1"/>
      <edge id="246110" label="zzzz104,zzzz712" source="939" target="347" cy:directed="1"/>
      <edge id="246109" label="zzzz104,zzzz699" source="939" target="360" cy:directed="1"/>
      <edge id="246108" label="zzzz104,zzzz704" source="939" target="355" cy:directed="1"/>
      <edge id="246107" label="zzzz104,zzzz756" source="939" target="318" cy:directed="1"/>
      <edge id="246106" label="zzzz104,zzzz318" source="939" target="738" cy:directed="1"/>
      <edge id="246105" label="zzzz104,zzzz227" source="939" target="816" cy:directed="1"/>
      <edge id="246104" label="zzzz104,zzzz247" source="939" target="796" cy:directed="1"/>
      <edge id="246103" label="zzzz104,zzzz313" source="939" target="743" cy:directed="1"/>
      <edge id="246102" label="zzzz104,zzzz332" source="939" target="724" cy:directed="1"/>
      <edge id="246101" label="zzzz104,zzzz214" source="939" target="829" cy:directed="1"/>
      <edge id="246100" label="zzzz104,zzzz307" source="939" target="749" cy:directed="1"/>
      <edge id="246099" label="zzzz104,zzzz709" source="939" target="350" cy:directed="1"/>
      <edge id="246098" label="zzzz104,zzzz503" source="939" target="553" cy:directed="1"/>
      <edge id="246097" label="zzzz105,zzzz243" source="938" target="800" cy:directed="1"/>
      <edge id="246096" label="zzzz105,zzzz174" source="938" target="869" cy:directed="1"/>
      <edge id="246095" label="zzzz105,zzzz177" source="938" target="866" cy:directed="1"/>
      <edge id="246094" label="zzzz105,zzzz173" source="938" target="870" cy:directed="1"/>
      <edge id="246093" label="zzzz105,zzzz170" source="938" target="873" cy:directed="1"/>
      <edge id="246092" label="zzzz105,zzzz832" source="938" target="252" cy:directed="1"/>
      <edge id="246091" label="zzzz105,zzzz175" source="938" target="868" cy:directed="1"/>
      <edge id="246090" label="zzzz105,zzzz176" source="938" target="867" cy:directed="1"/>
      <edge id="246089" label="zzzz105,zzzz810" source="938" target="273" cy:directed="1"/>
      <edge id="246088" label="zzzz105,zzzz833" source="938" target="251" cy:directed="1"/>
      <edge id="246087" label="zzzz105,zzzz831" source="938" target="253" cy:directed="1"/>
      <edge id="246086" label="zzzz105,zzzz178" source="938" target="865" cy:directed="1"/>
      <edge id="246085" label="zzzz105,zzzz183" source="938" target="860" cy:directed="1"/>
      <edge id="246084" label="zzzz105,zzzz179" source="938" target="864" cy:directed="1"/>
      <edge id="246083" label="zzzz105,zzzz252" source="938" target="791" cy:directed="1"/>
      <edge id="246082" label="zzzz105,zzzz181" source="938" target="862" cy:directed="1"/>
      <edge id="246081" label="zzzz105,zzzz180" source="938" target="863" cy:directed="1"/>
      <edge id="246080" label="zzzz105,zzzz169" source="938" target="874" cy:directed="1"/>
      <edge id="246079" label="zzzz105,zzzz171" source="938" target="872" cy:directed="1"/>
      <edge id="246078" label="zzzz105,zzzz830" source="938" target="254" cy:directed="1"/>
      <edge id="246077" label="zzzz105,zzzz184" source="938" target="859" cy:directed="1"/>
      <edge id="246076" label="zzzz105,zzzzz94" source="938" target="77" cy:directed="1"/>
      <edge id="246075" label="zzzz105,zzzz168" source="938" target="875" cy:directed="1"/>
      <edge id="246074" label="zzzz105,zzzzz48" source="938" target="123" cy:directed="1"/>
      <edge id="246073" label="zzzz105,zzzz158" source="938" target="885" cy:directed="1"/>
      <edge id="246072" label="zzzz105,zzzz249" source="938" target="794" cy:directed="1"/>
      <edge id="246071" label="zzzz105,zzzz182" source="938" target="861" cy:directed="1"/>
      <edge id="246070" label="zzzz105,zzzz163" source="938" target="880" cy:directed="1"/>
      <edge id="246069" label="zzzz105,zzzz164" source="938" target="879" cy:directed="1"/>
      <edge id="246068" label="zzzz105,zzzz245" source="938" target="798" cy:directed="1"/>
      <edge id="246067" label="zzzz105,zzzz242" source="938" target="801" cy:directed="1"/>
      <edge id="246066" label="zzzz105,zzzz230" source="938" target="813" cy:directed="1"/>
      <edge id="246065" label="zzzz105,zzzz807" source="938" target="276" cy:directed="1"/>
      <edge id="246064" label="zzzz105,zzzz829" source="938" target="255" cy:directed="1"/>
      <edge id="246063" label="zzzz105,zzzz167" source="938" target="876" cy:directed="1"/>
      <edge id="246062" label="zzzz105,zzzz119" source="938" target="924" cy:directed="1"/>
      <edge id="246061" label="zzzz105,zzzz120" source="938" target="923" cy:directed="1"/>
      <edge id="246060" label="zzzz105,zzzz286" source="938" target="766" cy:directed="1"/>
      <edge id="246059" label="zzzz105,zzzz159" source="938" target="884" cy:directed="1"/>
      <edge id="246058" label="zzzz105,zzzz240" source="938" target="803" cy:directed="1"/>
      <edge id="246057" label="zzzz105,zzzz284" source="938" target="768" cy:directed="1"/>
      <edge id="246056" label="zzzz105,zzzz934" source="938" target="188" cy:directed="1"/>
      <edge id="246055" label="zzzz105,zzzz147" source="938" target="896" cy:directed="1"/>
      <edge id="246054" label="zzzz105,zzzz809" source="938" target="274" cy:directed="1"/>
      <edge id="246053" label="zzzz105,zzzz145" source="938" target="898" cy:directed="1"/>
      <edge id="246052" label="zzzz105,zzzz808" source="938" target="275" cy:directed="1"/>
      <edge id="246051" label="zzzz105,zzzz285" source="938" target="767" cy:directed="1"/>
      <edge id="246050" label="zzzz105,zzzz261" source="938" target="782" cy:directed="1"/>
      <edge id="246049" label="zzzz105,zzzzz99" source="938" target="72" cy:directed="1"/>
      <edge id="246048" label="zzzz105,zzzz118" source="938" target="925" cy:directed="1"/>
      <edge id="246047" label="zzzz105,zzzz136" source="938" target="907" cy:directed="1"/>
      <edge id="246046" label="zzzz105,zzzz172" source="938" target="871" cy:directed="1"/>
      <edge id="246045" label="zzzz105,zzzz128" source="938" target="915" cy:directed="1"/>
      <edge id="246044" label="zzzz105,zzzz161" source="938" target="882" cy:directed="1"/>
      <edge id="246043" label="zzzz105,zzzz146" source="938" target="897" cy:directed="1"/>
      <edge id="246042" label="zzzz105,zzzzz80" source="938" target="91" cy:directed="1"/>
      <edge id="246041" label="zzzz105,zzzz375" source="938" target="681" cy:directed="1"/>
      <edge id="246040" label="zzzz105,zzzzz89" source="938" target="82" cy:directed="1"/>
      <edge id="246039" label="zzzz105,zzzz424" source="938" target="632" cy:directed="1"/>
      <edge id="246038" label="zzzz105,zzzz433" source="938" target="623" cy:directed="1"/>
      <edge id="246037" label="zzzz105,zzzz165" source="938" target="878" cy:directed="1"/>
      <edge id="246036" label="zzzz105,zzzz637" source="938" target="420" cy:directed="1"/>
      <edge id="246035" label="zzzz105,zzzzz61" source="938" target="110" cy:directed="1"/>
      <edge id="246034" label="zzzz105,zzzz428" source="938" target="628" cy:directed="1"/>
      <edge id="246033" label="zzzz105,zzzzz84" source="938" target="87" cy:directed="1"/>
      <edge id="246032" label="zzzz105,zzzz150" source="938" target="893" cy:directed="1"/>
      <edge id="246031" label="zzzz105,zzzz166" source="938" target="877" cy:directed="1"/>
      <edge id="246030" label="zzzz105,zzzz448" source="938" target="608" cy:directed="1"/>
      <edge id="246029" label="zzzz105,zzzz131" source="938" target="912" cy:directed="1"/>
      <edge id="246028" label="zzzz105,zzzz370" source="938" target="686" cy:directed="1"/>
      <edge id="246027" label="zzzz105,zzzz535" source="938" target="521" cy:directed="1"/>
      <edge id="246026" label="zzzz105,zzzz132" source="938" target="911" cy:directed="1"/>
      <edge id="246025" label="zzzz105,zzzz194" source="938" target="849" cy:directed="1"/>
      <edge id="246024" label="zzzz105,zzzz197" source="938" target="846" cy:directed="1"/>
      <edge id="246023" label="zzzz105,zzzz479" source="938" target="577" cy:directed="1"/>
      <edge id="246022" label="zzzz105,zzzz921" source="938" target="194" cy:directed="1"/>
      <edge id="246021" label="zzzz105,zzzz443" source="938" target="613" cy:directed="1"/>
      <edge id="246020" label="zzzz105,zzzz549" source="938" target="507" cy:directed="1"/>
      <edge id="246019" label="zzzz105,zzzz935" source="938" target="187" cy:directed="1"/>
      <edge id="246018" label="zzzz105,zzzz450" source="938" target="606" cy:directed="1"/>
      <edge id="246017" label="zzzz105,zzzz515" source="938" target="541" cy:directed="1"/>
      <edge id="246016" label="zzzz105,zzzz548" source="938" target="508" cy:directed="1"/>
      <edge id="246015" label="zzzz105,zzzzz86" source="938" target="85" cy:directed="1"/>
      <edge id="246014" label="zzzz105,zzzz396" source="938" target="660" cy:directed="1"/>
      <edge id="246013" label="zzzz105,zzzz398" source="938" target="658" cy:directed="1"/>
      <edge id="246012" label="zzzz105,zzzz628" source="938" target="429" cy:directed="1"/>
      <edge id="246011" label="zzzz105,zzzz667" source="938" target="390" cy:directed="1"/>
      <edge id="246010" label="zzzz105,zzzzz64" source="938" target="107" cy:directed="1"/>
      <edge id="246009" label="zzzz105,zzzz519" source="938" target="537" cy:directed="1"/>
      <edge id="246008" label="zzzz105,zzzz585" source="938" target="471" cy:directed="1"/>
      <edge id="246007" label="zzzz105,zzzz373" source="938" target="683" cy:directed="1"/>
      <edge id="246006" label="zzzz105,zzzz627" source="938" target="430" cy:directed="1"/>
      <edge id="246005" label="zzzz105,zzzz659" source="938" target="398" cy:directed="1"/>
      <edge id="246004" label="zzzz105,zzzz908" source="938" target="203" cy:directed="1"/>
      <edge id="246003" label="zzzz105,zzzzz77" source="938" target="94" cy:directed="1"/>
      <edge id="246002" label="zzzz105,zzzz123" source="938" target="920" cy:directed="1"/>
      <edge id="246001" label="zzzz105,zzzz485" source="938" target="571" cy:directed="1"/>
      <edge id="246000" label="zzzz105,zzzzz85" source="938" target="86" cy:directed="1"/>
      <edge id="245999" label="zzzz105,zzzz427" source="938" target="629" cy:directed="1"/>
      <edge id="245998" label="zzzz105,zzzz456" source="938" target="600" cy:directed="1"/>
      <edge id="245997" label="zzzz105,zzzz889" source="938" target="221" cy:directed="1"/>
      <edge id="245996" label="zzzz105,zzzz895" source="938" target="215" cy:directed="1"/>
      <edge id="245995" label="zzzz105,zzzzz78" source="938" target="93" cy:directed="1"/>
      <edge id="245994" label="zzzz105,zzzz107" source="938" target="936" cy:directed="1"/>
      <edge id="245993" label="zzzz105,zzzz117" source="938" target="926" cy:directed="1"/>
      <edge id="245992" label="zzzz105,zzzz162" source="938" target="881" cy:directed="1"/>
      <edge id="245991" label="zzzz105,zzzz727" source="938" target="333" cy:directed="1"/>
      <edge id="245990" label="zzzz105,zzzz454" source="938" target="602" cy:directed="1"/>
      <edge id="245989" label="zzzz105,zzzz567" source="938" target="489" cy:directed="1"/>
      <edge id="245988" label="zzzz105,zzzz674" source="938" target="383" cy:directed="1"/>
      <edge id="245987" label="zzzz105,zzzz207" source="938" target="836" cy:directed="1"/>
      <edge id="245986" label="zzzz105,zzzz458" source="938" target="598" cy:directed="1"/>
      <edge id="245985" label="zzzz105,zzzz523" source="938" target="533" cy:directed="1"/>
      <edge id="245984" label="zzzz105,zzzz527" source="938" target="529" cy:directed="1"/>
      <edge id="245983" label="zzzz105,zzzz554" source="938" target="502" cy:directed="1"/>
      <edge id="245982" label="zzzz105,zzzz724" source="938" target="336" cy:directed="1"/>
      <edge id="245981" label="zzzz105,zzzz794" source="938" target="287" cy:directed="1"/>
      <edge id="245980" label="zzzz105,zzzz127" source="938" target="916" cy:directed="1"/>
      <edge id="245979" label="zzzz105,zzzz362" source="938" target="694" cy:directed="1"/>
      <edge id="245978" label="zzzz105,zzzz641" source="938" target="416" cy:directed="1"/>
      <edge id="245977" label="zzzz105,zzzz901" source="938" target="210" cy:directed="1"/>
      <edge id="245976" label="zzzz105,zzzz907" source="938" target="204" cy:directed="1"/>
      <edge id="245975" label="zzzz105,zzzzz55" source="938" target="116" cy:directed="1"/>
      <edge id="245974" label="zzzz105,zzzz130" source="938" target="913" cy:directed="1"/>
      <edge id="245973" label="zzzz105,zzzz389" source="938" target="667" cy:directed="1"/>
      <edge id="245972" label="zzzz105,zzzz414" source="938" target="642" cy:directed="1"/>
      <edge id="245971" label="zzzz105,zzzz621" source="938" target="435" cy:directed="1"/>
      <edge id="245970" label="zzzz105,zzzz636" source="938" target="421" cy:directed="1"/>
      <edge id="245969" label="zzzz105,zzzz652" source="938" target="405" cy:directed="1"/>
      <edge id="245968" label="zzzz105,zzzzz97" source="938" target="74" cy:directed="1"/>
      <edge id="245967" label="zzzz105,zzzz142" source="938" target="901" cy:directed="1"/>
      <edge id="245966" label="zzzz105,zzzz153" source="938" target="890" cy:directed="1"/>
      <edge id="245965" label="zzzz105,zzzz155" source="938" target="888" cy:directed="1"/>
      <edge id="245964" label="zzzz105,zzzz357" source="938" target="699" cy:directed="1"/>
      <edge id="245963" label="zzzz105,zzzz462" source="938" target="594" cy:directed="1"/>
      <edge id="245962" label="zzzz105,zzzz474" source="938" target="582" cy:directed="1"/>
      <edge id="245961" label="zzzz105,zzzz537" source="938" target="519" cy:directed="1"/>
      <edge id="245960" label="zzzz105,zzzz547" source="938" target="509" cy:directed="1"/>
      <edge id="245959" label="zzzz105,zzzz622" source="938" target="434" cy:directed="1"/>
      <edge id="245958" label="zzzz105,zzzz635" source="938" target="422" cy:directed="1"/>
      <edge id="245957" label="zzzz105,zzzz910" source="938" target="201" cy:directed="1"/>
      <edge id="245956" label="zzzz105,zzzz945" source="938" target="179" cy:directed="1"/>
      <edge id="245955" label="zzzz105,zzzz138" source="938" target="905" cy:directed="1"/>
      <edge id="245954" label="zzzz105,zzzz457" source="938" target="599" cy:directed="1"/>
      <edge id="245953" label="zzzz105,zzzz521" source="938" target="535" cy:directed="1"/>
      <edge id="245952" label="zzzz105,zzzz647" source="938" target="410" cy:directed="1"/>
      <edge id="245951" label="zzzz105,zzzz663" source="938" target="394" cy:directed="1"/>
      <edge id="245950" label="zzzz105,zzzz106" source="938" target="937" cy:directed="1"/>
      <edge id="245949" label="zzzz105,zzzz217" source="938" target="826" cy:directed="1"/>
      <edge id="245948" label="zzzz105,zzzz351" source="938" target="705" cy:directed="1"/>
      <edge id="245947" label="zzzz105,zzzz406" source="938" target="650" cy:directed="1"/>
      <edge id="245946" label="zzzz105,zzzz418" source="938" target="638" cy:directed="1"/>
      <edge id="245945" label="zzzz105,zzzz432" source="938" target="624" cy:directed="1"/>
      <edge id="245944" label="zzzz105,zzzz447" source="938" target="609" cy:directed="1"/>
      <edge id="245943" label="zzzz105,zzzz449" source="938" target="607" cy:directed="1"/>
      <edge id="245942" label="zzzz105,zzzz502" source="938" target="554" cy:directed="1"/>
      <edge id="245941" label="zzzz105,zzzz533" source="938" target="523" cy:directed="1"/>
      <edge id="245940" label="zzzz105,zzzz653" source="938" target="404" cy:directed="1"/>
      <edge id="245939" label="zzzz105,zzzz661" source="938" target="396" cy:directed="1"/>
      <edge id="245938" label="zzzz105,zzzz189" source="938" target="854" cy:directed="1"/>
      <edge id="245937" label="zzzz105,zzzz425" source="938" target="631" cy:directed="1"/>
      <edge id="245936" label="zzzz105,zzzz509" source="938" target="547" cy:directed="1"/>
      <edge id="245935" label="zzzz105,zzzz517" source="938" target="539" cy:directed="1"/>
      <edge id="245934" label="zzzz105,zzzz518" source="938" target="538" cy:directed="1"/>
      <edge id="245933" label="zzzz105,zzzz520" source="938" target="536" cy:directed="1"/>
      <edge id="245932" label="zzzz105,zzzz906" source="938" target="205" cy:directed="1"/>
      <edge id="245931" label="zzzz105,zzzz402" source="938" target="654" cy:directed="1"/>
      <edge id="245930" label="zzzz105,zzzz416" source="938" target="640" cy:directed="1"/>
      <edge id="245929" label="zzzz105,zzzz442" source="938" target="614" cy:directed="1"/>
      <edge id="245928" label="zzzz105,zzzz500" source="938" target="556" cy:directed="1"/>
      <edge id="245927" label="zzzz105,zzzz912" source="938" target="199" cy:directed="1"/>
      <edge id="245926" label="zzzz105,zzzz940" source="938" target="184" cy:directed="1"/>
      <edge id="245925" label="zzzz105,zzzz149" source="938" target="894" cy:directed="1"/>
      <edge id="245924" label="zzzz105,zzzz208" source="938" target="835" cy:directed="1"/>
      <edge id="245923" label="zzzz105,zzzz349" source="938" target="707" cy:directed="1"/>
      <edge id="245922" label="zzzz105,zzzz420" source="938" target="636" cy:directed="1"/>
      <edge id="245921" label="zzzz105,zzzz452" source="938" target="604" cy:directed="1"/>
      <edge id="245920" label="zzzz105,zzzz508" source="938" target="548" cy:directed="1"/>
      <edge id="245919" label="zzzz105,zzzz528" source="938" target="528" cy:directed="1"/>
      <edge id="245918" label="zzzz105,zzzz550" source="938" target="506" cy:directed="1"/>
      <edge id="245917" label="zzzz105,zzzz951" source="938" target="173" cy:directed="1"/>
      <edge id="245916" label="zzzz105,zzzzz88" source="938" target="83" cy:directed="1"/>
      <edge id="245915" label="zzzz105,zzzz143" source="938" target="900" cy:directed="1"/>
      <edge id="245914" label="zzzz105,zzzz364" source="938" target="692" cy:directed="1"/>
      <edge id="245913" label="zzzz105,zzzz367" source="938" target="689" cy:directed="1"/>
      <edge id="245912" label="zzzz105,zzzz395" source="938" target="661" cy:directed="1"/>
      <edge id="245911" label="zzzz105,zzzz445" source="938" target="611" cy:directed="1"/>
      <edge id="245910" label="zzzz105,zzzz559" source="938" target="497" cy:directed="1"/>
      <edge id="245909" label="zzzz105,zzzz573" source="938" target="483" cy:directed="1"/>
      <edge id="245908" label="zzzz105,zzzz369" source="938" target="687" cy:directed="1"/>
      <edge id="245907" label="zzzz105,zzzz451" source="938" target="605" cy:directed="1"/>
      <edge id="245906" label="zzzz105,zzzz477" source="938" target="579" cy:directed="1"/>
      <edge id="245905" label="zzzz105,zzzz623" source="938" target="433" cy:directed="1"/>
      <edge id="245904" label="zzzz105,zzzz640" source="938" target="417" cy:directed="1"/>
      <edge id="245903" label="zzzz105,zzzz836" source="938" target="248" cy:directed="1"/>
      <edge id="245902" label="zzzz105,zzzz963" source="938" target="169" cy:directed="1"/>
      <edge id="245901" label="zzzz105,zzzzz53" source="938" target="118" cy:directed="1"/>
      <edge id="245900" label="zzzz105,zzzzz96" source="938" target="75" cy:directed="1"/>
      <edge id="245899" label="zzzz105,zzzz144" source="938" target="899" cy:directed="1"/>
      <edge id="245898" label="zzzz105,zzzz148" source="938" target="895" cy:directed="1"/>
      <edge id="245897" label="zzzz105,zzzz400" source="938" target="656" cy:directed="1"/>
      <edge id="245896" label="zzzz105,zzzz421" source="938" target="635" cy:directed="1"/>
      <edge id="245895" label="zzzz105,zzzz441" source="938" target="615" cy:directed="1"/>
      <edge id="245894" label="zzzz105,zzzz524" source="938" target="532" cy:directed="1"/>
      <edge id="245893" label="zzzz105,zzzz629" source="938" target="428" cy:directed="1"/>
      <edge id="245892" label="zzzz105,zzzz952" source="938" target="172" cy:directed="1"/>
      <edge id="245891" label="zzzz105,zzzz365" source="938" target="691" cy:directed="1"/>
      <edge id="245890" label="zzzz105,zzzz410" source="938" target="646" cy:directed="1"/>
      <edge id="245889" label="zzzz105,zzzz522" source="938" target="534" cy:directed="1"/>
      <edge id="245888" label="zzzz105,zzzz546" source="938" target="510" cy:directed="1"/>
      <edge id="245887" label="zzzz105,zzzz555" source="938" target="501" cy:directed="1"/>
      <edge id="245886" label="zzzz105,zzzz656" source="938" target="401" cy:directed="1"/>
      <edge id="245885" label="zzzz105,zzzz114" source="938" target="929" cy:directed="1"/>
      <edge id="245884" label="zzzz105,zzzz124" source="938" target="919" cy:directed="1"/>
      <edge id="245883" label="zzzz105,zzzz211" source="938" target="832" cy:directed="1"/>
      <edge id="245882" label="zzzz105,zzzz387" source="938" target="669" cy:directed="1"/>
      <edge id="245881" label="zzzz105,zzzz438" source="938" target="618" cy:directed="1"/>
      <edge id="245880" label="zzzz105,zzzz465" source="938" target="591" cy:directed="1"/>
      <edge id="245879" label="zzzz105,zzzz468" source="938" target="588" cy:directed="1"/>
      <edge id="245878" label="zzzz105,zzzz511" source="938" target="545" cy:directed="1"/>
      <edge id="245877" label="zzzz105,zzzz531" source="938" target="525" cy:directed="1"/>
      <edge id="245876" label="zzzz105,zzzz660" source="938" target="397" cy:directed="1"/>
      <edge id="245875" label="zzzz105,zzzz845" source="938" target="239" cy:directed="1"/>
      <edge id="245874" label="zzzz105,zzzz911" source="938" target="200" cy:directed="1"/>
      <edge id="245873" label="zzzz105,zzzzz60" source="938" target="111" cy:directed="1"/>
      <edge id="245872" label="zzzz105,zzzzz91" source="938" target="80" cy:directed="1"/>
      <edge id="245871" label="zzzz105,zzzz125" source="938" target="918" cy:directed="1"/>
      <edge id="245870" label="zzzz105,zzzz126" source="938" target="917" cy:directed="1"/>
      <edge id="245869" label="zzzz105,zzzz353" source="938" target="703" cy:directed="1"/>
      <edge id="245868" label="zzzz105,zzzz361" source="938" target="695" cy:directed="1"/>
      <edge id="245867" label="zzzz105,zzzz401" source="938" target="655" cy:directed="1"/>
      <edge id="245866" label="zzzz105,zzzz464" source="938" target="592" cy:directed="1"/>
      <edge id="245865" label="zzzz105,zzzz642" source="938" target="415" cy:directed="1"/>
      <edge id="245864" label="zzzz105,zzzz900" source="938" target="211" cy:directed="1"/>
      <edge id="245863" label="zzzz105,zzzz913" source="938" target="198" cy:directed="1"/>
      <edge id="245862" label="zzzz105,zzzz141" source="938" target="902" cy:directed="1"/>
      <edge id="245861" label="zzzz105,zzzz262" source="938" target="781" cy:directed="1"/>
      <edge id="245860" label="zzzz105,zzzz444" source="938" target="612" cy:directed="1"/>
      <edge id="245859" label="zzzz105,zzzz498" source="938" target="558" cy:directed="1"/>
      <edge id="245858" label="zzzz105,zzzz504" source="938" target="552" cy:directed="1"/>
      <edge id="245857" label="zzzz105,zzzz512" source="938" target="544" cy:directed="1"/>
      <edge id="245856" label="zzzz105,zzzz544" source="938" target="512" cy:directed="1"/>
      <edge id="245855" label="zzzz105,zzzz556" source="938" target="500" cy:directed="1"/>
      <edge id="245854" label="zzzz105,zzzz657" source="938" target="400" cy:directed="1"/>
      <edge id="245853" label="zzzz105,zzzz884" source="938" target="222" cy:directed="1"/>
      <edge id="245852" label="zzzz105,zzzz944" source="938" target="180" cy:directed="1"/>
      <edge id="245851" label="zzzz105,zzzz947" source="938" target="177" cy:directed="1"/>
      <edge id="245850" label="zzzz105,zzzz140" source="938" target="903" cy:directed="1"/>
      <edge id="245849" label="zzzz105,zzzz383" source="938" target="673" cy:directed="1"/>
      <edge id="245848" label="zzzz105,zzzz385" source="938" target="671" cy:directed="1"/>
      <edge id="245847" label="zzzz105,zzzz407" source="938" target="649" cy:directed="1"/>
      <edge id="245846" label="zzzz105,zzzz417" source="938" target="639" cy:directed="1"/>
      <edge id="245845" label="zzzz105,zzzz649" source="938" target="408" cy:directed="1"/>
      <edge id="245844" label="zzzz105,zzzz658" source="938" target="399" cy:directed="1"/>
      <edge id="245843" label="zzzz105,zzzz670" source="938" target="387" cy:directed="1"/>
      <edge id="245842" label="zzzz105,zzzz852" source="938" target="232" cy:directed="1"/>
      <edge id="245841" label="zzzz105,zzzz121" source="938" target="922" cy:directed="1"/>
      <edge id="245840" label="zzzz105,zzzz264" source="938" target="779" cy:directed="1"/>
      <edge id="245839" label="zzzz105,zzzz376" source="938" target="680" cy:directed="1"/>
      <edge id="245838" label="zzzz105,zzzz405" source="938" target="651" cy:directed="1"/>
      <edge id="245837" label="zzzz105,zzzz415" source="938" target="641" cy:directed="1"/>
      <edge id="245836" label="zzzz105,zzzz473" source="938" target="583" cy:directed="1"/>
      <edge id="245835" label="zzzz105,zzzz478" source="938" target="578" cy:directed="1"/>
      <edge id="245834" label="zzzz105,zzzz483" source="938" target="573" cy:directed="1"/>
      <edge id="245833" label="zzzz105,zzzz943" source="938" target="181" cy:directed="1"/>
      <edge id="245832" label="zzzz105,zzzzz92" source="938" target="79" cy:directed="1"/>
      <edge id="245831" label="zzzz105,zzzz440" source="938" target="616" cy:directed="1"/>
      <edge id="245830" label="zzzz105,zzzz501" source="938" target="555" cy:directed="1"/>
      <edge id="245829" label="zzzz105,zzzz616" source="938" target="440" cy:directed="1"/>
      <edge id="245828" label="zzzz105,zzzz619" source="938" target="437" cy:directed="1"/>
      <edge id="245827" label="zzzz105,zzzz631" source="938" target="426" cy:directed="1"/>
      <edge id="245826" label="zzzz105,zzzz646" source="938" target="411" cy:directed="1"/>
      <edge id="245825" label="zzzz105,zzzz891" source="938" target="219" cy:directed="1"/>
      <edge id="245824" label="zzzz105,zzzz904" source="938" target="207" cy:directed="1"/>
      <edge id="245823" label="zzzz105,zzzz964" source="938" target="168" cy:directed="1"/>
      <edge id="245822" label="zzzz105,zzzzz90" source="938" target="81" cy:directed="1"/>
      <edge id="245821" label="zzzz105,zzzz525" source="938" target="531" cy:directed="1"/>
      <edge id="245820" label="zzzz105,zzzz540" source="938" target="516" cy:directed="1"/>
      <edge id="245819" label="zzzz105,zzzz579" source="938" target="477" cy:directed="1"/>
      <edge id="245818" label="zzzz105,zzzz650" source="938" target="407" cy:directed="1"/>
      <edge id="245817" label="zzzz105,zzzz662" source="938" target="395" cy:directed="1"/>
      <edge id="245816" label="zzzz105,zzzz841" source="938" target="243" cy:directed="1"/>
      <edge id="245815" label="zzzz105,zzzzz82" source="938" target="89" cy:directed="1"/>
      <edge id="245814" label="zzzz105,zzzz160" source="938" target="883" cy:directed="1"/>
      <edge id="245813" label="zzzz105,zzzz209" source="938" target="834" cy:directed="1"/>
      <edge id="245812" label="zzzz105,zzzz239" source="938" target="804" cy:directed="1"/>
      <edge id="245811" label="zzzz105,zzzz434" source="938" target="622" cy:directed="1"/>
      <edge id="245810" label="zzzz105,zzzz529" source="938" target="527" cy:directed="1"/>
      <edge id="245809" label="zzzz105,zzzz614" source="938" target="442" cy:directed="1"/>
      <edge id="245808" label="zzzz105,zzzz722" source="938" target="337" cy:directed="1"/>
      <edge id="245807" label="zzzz105,zzzz941" source="938" target="183" cy:directed="1"/>
      <edge id="245806" label="zzzz105,zzzzz93" source="938" target="78" cy:directed="1"/>
      <edge id="245805" label="zzzz105,zzzz487" source="938" target="569" cy:directed="1"/>
      <edge id="245804" label="zzzz105,zzzz949" source="938" target="175" cy:directed="1"/>
      <edge id="245803" label="zzzz105,zzzz135" source="938" target="908" cy:directed="1"/>
      <edge id="245802" label="zzzz105,zzzz199" source="938" target="844" cy:directed="1"/>
      <edge id="245801" label="zzzz105,zzzz224" source="938" target="819" cy:directed="1"/>
      <edge id="245800" label="zzzz105,zzzz371" source="938" target="685" cy:directed="1"/>
      <edge id="245799" label="zzzz105,zzzz388" source="938" target="668" cy:directed="1"/>
      <edge id="245798" label="zzzz105,zzzz436" source="938" target="620" cy:directed="1"/>
      <edge id="245797" label="zzzz105,zzzz664" source="938" target="393" cy:directed="1"/>
      <edge id="245796" label="zzzz105,zzzz355" source="938" target="701" cy:directed="1"/>
      <edge id="245795" label="zzzz105,zzzz356" source="938" target="700" cy:directed="1"/>
      <edge id="245794" label="zzzz105,zzzz379" source="938" target="677" cy:directed="1"/>
      <edge id="245793" label="zzzz105,zzzz426" source="938" target="630" cy:directed="1"/>
      <edge id="245792" label="zzzz105,zzzz472" source="938" target="584" cy:directed="1"/>
      <edge id="245791" label="zzzz105,zzzz626" source="938" target="431" cy:directed="1"/>
      <edge id="245790" label="zzzz105,zzzz892" source="938" target="218" cy:directed="1"/>
      <edge id="245789" label="zzzz105,zzzz950" source="938" target="174" cy:directed="1"/>
      <edge id="245788" label="zzzz105,zzzz134" source="938" target="909" cy:directed="1"/>
      <edge id="245787" label="zzzz105,zzzz206" source="938" target="837" cy:directed="1"/>
      <edge id="245786" label="zzzz105,zzzz232" source="938" target="811" cy:directed="1"/>
      <edge id="245785" label="zzzz105,zzzz553" source="938" target="503" cy:directed="1"/>
      <edge id="245784" label="zzzz105,zzzz618" source="938" target="438" cy:directed="1"/>
      <edge id="245783" label="zzzz105,zzzz791" source="938" target="290" cy:directed="1"/>
      <edge id="245782" label="zzzz105,zzzz902" source="938" target="209" cy:directed="1"/>
      <edge id="245781" label="zzzz105,zzzzz73" source="938" target="98" cy:directed="1"/>
      <edge id="245780" label="zzzz105,zzzz133" source="938" target="910" cy:directed="1"/>
      <edge id="245779" label="zzzz105,zzzz390" source="938" target="666" cy:directed="1"/>
      <edge id="245778" label="zzzz105,zzzz399" source="938" target="657" cy:directed="1"/>
      <edge id="245777" label="zzzz105,zzzz597" source="938" target="459" cy:directed="1"/>
      <edge id="245776" label="zzzz105,zzzz909" source="938" target="202" cy:directed="1"/>
      <edge id="245775" label="zzzz105,zzzzz74" source="938" target="97" cy:directed="1"/>
      <edge id="245774" label="zzzz105,zzzzz79" source="938" target="92" cy:directed="1"/>
      <edge id="245773" label="zzzz105,zzzz352" source="938" target="704" cy:directed="1"/>
      <edge id="245772" label="zzzz105,zzzz377" source="938" target="679" cy:directed="1"/>
      <edge id="245771" label="zzzz105,zzzz480" source="938" target="576" cy:directed="1"/>
      <edge id="245770" label="zzzz105,zzzz526" source="938" target="530" cy:directed="1"/>
      <edge id="245769" label="zzzz105,zzzz590" source="938" target="466" cy:directed="1"/>
      <edge id="245768" label="zzzz105,zzzz638" source="938" target="419" cy:directed="1"/>
      <edge id="245767" label="zzzz105,zzzz463" source="938" target="593" cy:directed="1"/>
      <edge id="245766" label="zzzz105,zzzz466" source="938" target="590" cy:directed="1"/>
      <edge id="245765" label="zzzz105,zzzz613" source="938" target="443" cy:directed="1"/>
      <edge id="245764" label="zzzz105,zzzz654" source="938" target="403" cy:directed="1"/>
      <edge id="245763" label="zzzz105,zzzzz81" source="938" target="90" cy:directed="1"/>
      <edge id="245762" label="zzzz105,zzzz220" source="938" target="823" cy:directed="1"/>
      <edge id="245761" label="zzzz105,zzzz497" source="938" target="559" cy:directed="1"/>
      <edge id="245760" label="zzzz105,zzzz644" source="938" target="413" cy:directed="1"/>
      <edge id="245759" label="zzzz105,zzzz965" source="938" target="167" cy:directed="1"/>
      <edge id="245758" label="zzzz105,zzzz378" source="938" target="678" cy:directed="1"/>
      <edge id="245757" label="zzzz105,zzzz380" source="938" target="676" cy:directed="1"/>
      <edge id="245756" label="zzzz105,zzzz475" source="938" target="581" cy:directed="1"/>
      <edge id="245755" label="zzzz105,zzzz792" source="938" target="289" cy:directed="1"/>
      <edge id="245754" label="zzzz105,zzzz802" source="938" target="281" cy:directed="1"/>
      <edge id="245753" label="zzzz105,zzzz849" source="938" target="235" cy:directed="1"/>
      <edge id="245752" label="zzzz105,zzzz946" source="938" target="178" cy:directed="1"/>
      <edge id="245751" label="zzzz105,zzzz982" source="938" target="163" cy:directed="1"/>
      <edge id="245750" label="zzzz105,zzzz358" source="938" target="698" cy:directed="1"/>
      <edge id="245749" label="zzzz105,zzzz360" source="938" target="696" cy:directed="1"/>
      <edge id="245748" label="zzzz105,zzzz413" source="938" target="643" cy:directed="1"/>
      <edge id="245747" label="zzzz105,zzzz893" source="938" target="217" cy:directed="1"/>
      <edge id="245746" label="zzzz105,zzzz894" source="938" target="216" cy:directed="1"/>
      <edge id="245745" label="zzzz105,zzzzz45" source="938" target="126" cy:directed="1"/>
      <edge id="245744" label="zzzz105,zzzz288" source="938" target="764" cy:directed="1"/>
      <edge id="245743" label="zzzz105,zzzz393" source="938" target="663" cy:directed="1"/>
      <edge id="245742" label="zzzz105,zzzz129" source="938" target="914" cy:directed="1"/>
      <edge id="245741" label="zzzz105,zzzz186" source="938" target="857" cy:directed="1"/>
      <edge id="245740" label="zzzz105,zzzz372" source="938" target="684" cy:directed="1"/>
      <edge id="245739" label="zzzz105,zzzz397" source="938" target="659" cy:directed="1"/>
      <edge id="245738" label="zzzz105,zzzz633" source="938" target="424" cy:directed="1"/>
      <edge id="245737" label="zzzz105,zzzzz87" source="938" target="84" cy:directed="1"/>
      <edge id="245736" label="zzzz105,zzzz460" source="938" target="596" cy:directed="1"/>
[truncated: 39,072,582 more chars]
