# Supplementary material for: Discovery of several thousand highly diverse circular DNA viruses
Source: eLife journal article supplement (doi:10.7554/elife.51971), 2020-02-03
Supplement: fig2-figsupp1-data4 [file elife-51971-fig2-figsupp1-data4-v1.cys › CytoscapeSession-2019_08_05-17_02/properties/groupSettings.props]

#Written by: Cytoscape's PropertiesWriterImpl
#Mon Aug 05 17:02:52 EDT 2019
defaultDoubleListAggregation=Average
groupViewType=Compound Node
aggregationEnabled=false
defaultIntegerListAggregation=Average
defaultStringAggregation=Comma-separated Values
defaultLongAggregation=None
doubleClickAction=Expand/Contract
defaultIntegerAggregation=Average
overrideColumnAggregations=
defaultFloatAggregation=Average
defaultLongListAggregation=Average
defaultDoubleAggregation=Average
defaultListAggregation=Unique Values
defaultStringListAggregation=Unique Values
defaultBooleanAggregation=None
useNestedNetworks=false
