# Supplementary material for: Discovery of several thousand highly diverse circular DNA viruses
Source: eLife journal article supplement (doi:10.7554/elife.51971), 2020-02-03
Supplement: fig2-figsupp1-data4 [file elife-51971-fig2-figsupp1-data4-v1.cys › CytoscapeSession-2019_08_05-17_02/tables/36-all_my_seqs_genbank_ssDNA1_domains_micro_ino_rep_fasta+Full+Network/LOCAL_ATTRS-org.cytoscape.model.CyEdge-36+default+edge.cytable]

CyCSV-Version	1
SUID	interaction	name	selected
java.lang.Long	java.lang.String	java.lang.String	java.lang.Boolean
36 default edge
12054		zzzz789,zzzz857	false
12055		zzzz789,zzzzz29	false
12056		zzzz789,zzzz797	false
12057		zzzz789,zzzzz27	false
12050		zzzz789,zzzzz24	false
12051		zzzz789,zzzzz25	false
12052		zzzz789,zzzzzz6	false
12053		zzzz789,zzzzz18	false
12047		zzzz789,zzzz980	false
12048		zzzz789,zzzzz19	false
12049		zzzz789,zzzz915	false
2302		zzzzz14,zzzzzz6	false
2303		zzzzz14,zzzzz18	false
2304		zzzzz14,zzzzz19	false
2305		zzzzz14,zzzzz21	false
2299		zzzzz14,zzzzz29	false
2300		zzzzz14,zzzzz24	false
2301		zzzzz14,zzzzz25	false
2290		zzzzz18,zzzzzz6	false
2291		zzzzz18,zzzzz29	false
2292		zzzzz18,zzzzz24	false
2286		zzzzz18,zzzzz22	false
2287		zzzzz18,zzzzz19	false
2288		zzzzz18,zzzzz21	false
2289		zzzzz18,zzzzz25	false
2282		zzzzz19,zzzzz24	false
2283		zzzzz19,zzzzz21	false
2284		zzzzz18,zzzzz27	false
2285		zzzzz18,zzzzzz1	false
2278		zzzzz19,zzzzzz2	false
2279		zzzzz19,zzzzzz6	false
2280		zzzzz19,zzzzz25	false
2281		zzzzz19,zzzzz29	false
2274		zzzzz21,zzzzzz6	false
2275		zzzzz21,zzzzz24	false
2276		zzzzz19,zzzzz22	false
2277		zzzzz19,zzzzzz1	false
2270		zzzzz21,zzzzz22	false
2271		zzzzz21,zzzzzz1	false
2272		zzzzz21,zzzzz25	false
2273		zzzzz21,zzzzz29	false
2266		zzzzz22,zzzzz29	false
2267		zzzzz22,zzzzzz2	false
2268		zzzzz22,zzzzz27	false
2269		zzzzz22,zzzzzz1	false
2263		zzzzz22,zzzzz25	false
2264		zzzzz22,zzzzzz6	false
2265		zzzzz22,zzzzz24	false
2258		zzzzz24,zzzzzz6	false
13010		zzzz766,zzzz775	false
2259		zzzzz24,zzzzz25	false
2260		zzzzz24,zzzzz29	false
2254		zzzzz25,zzzzzz6	false
13006		zzzz766,zzzz769	false
2255		zzzzz24,zzzzz27	false
13007		zzzz766,zzzz773	false
2256		zzzzz24,zzzzzz1	false
13008		zzzz766,zzzz772	false
2257		zzzzz24,zzzzzz2	false
13009		zzzz766,zzzz779	false
2250		zzzzz27,zzzzzz1	false
13002		zzzz766,zzzz780	false
13003		zzzz766,zzzz932	false
2252		zzzzz25,zzzzzz1	false
13004		zzzz766,zzzz768	false
2253		zzzzz25,zzzzz29	false
13005		zzzz766,zzzz767	false
2246		zzzzz29,zzzzzz1	false
12998		zzzz767,zzzz773	false
2247		zzzzz29,zzzzzz6	false
12999		zzzz767,zzzz772	false
2248		zzzzz27,zzzzz29	false
13000		zzzz766,zzzzz29	false
2249		zzzzz27,zzzzzz2	false
13001		zzzz766,zzzz776	false
12994		zzzz767,zzzz779	false
12995		zzzz767,zzzz775	false
12996		zzzz767,zzzz768	false
12997		zzzz767,zzzz769	false
12990		zzzz767,zzzzz21	false
12991		zzzz767,zzzz776	false
12992		zzzz767,zzzz780	false
12993		zzzz767,zzzz932	false
12986		zzzz768,zzzz769	false
12987		zzzz768,zzzz773	false
12988		zzzz768,zzzz772	false
12989		zzzz767,zzzzz14	false
12982		zzzz768,zzzz780	false
12983		zzzz768,zzzz932	false
12984		zzzz768,zzzz779	false
12985		zzzz768,zzzz775	false
12978		zzzz769,zzzz772	false
12979		zzzz768,zzzzz14	false
12980		zzzz768,zzzzz21	false
12981		zzzz768,zzzz776	false
12974		zzzz769,zzzz932	false
12975		zzzz769,zzzz779	false
12976		zzzz769,zzzz775	false
12977		zzzz769,zzzz773	false
12970		zzzz769,zzzzz14	false
12971		zzzz769,zzzzz21	false
12972		zzzz769,zzzz776	false
12973		zzzz769,zzzz780	false
12966		zzzz772,zzzz932	false
12967		zzzz772,zzzz779	false
12968		zzzz772,zzzz775	false
12969		zzzz772,zzzz773	false
12962		zzzz772,zzzzz14	false
12963		zzzz772,zzzzz21	false
12964		zzzz772,zzzz776	false
12965		zzzz772,zzzz780	false
12958		zzzz773,zzzz780	false
12959		zzzz773,zzzz932	false
12960		zzzz773,zzzz779	false
12961		zzzz773,zzzz775	false
2714		zzzz962,zzzzzz1	false
2715		zzzz962,zzzzzz2	false
12955		zzzz773,zzzzz14	false
12956		zzzz773,zzzzz21	false
12957		zzzz773,zzzz776	false
2710		zzzz962,zzzz980	false
2711		zzzz962,zzzzzz6	false
2712		zzzz962,zzzzz27	false
2713		zzzz962,zzzzz22	false
12946		zzzz775,zzzz779	false
2709		zzzz962,zzzzz25	false
12942		zzzz775,zzzzz29	false
12943		zzzz775,zzzz776	false
12944		zzzz775,zzzz780	false
12945		zzzz775,zzzz932	false
12938		zzzz776,zzzzz29	false
12939		zzzz776,zzzzz24	false
12940		zzzz776,zzzz779	false
12941		zzzz776,zzzz780	false
12934		zzzz776,zzzz932	false
12935		zzzz776,zzzz797	false
12936		zzzz776,zzzzz18	false
12937		zzzz776,zzzz857	false
12933		zzzz776,zzzzz21	false
12922		zzzz779,zzzz932	false
12919		zzzz780,zzzz932	false
12920		zzzz779,zzzzz21	false
12921		zzzz779,zzzz780	false
179290		zzzz212,zzzzzz5	false
179288		zzzz212,zzzz919	false
179289		zzzz212,zzzzzz1	false
179286		zzzz212,zzzzz22	false
179287		zzzz212,zzzz962	false
179284		zzzz212,zzzz789	false
179285		zzzz212,zzzzz27	false
179282		zzzz212,zzzzz19	false
179283		zzzz212,zzzzzz2	false
179280		zzzz212,zzzzzz6	false
179281		zzzz212,zzzz980	false
179278		zzzz212,zzzzz21	false
179279		zzzz212,zzzz857	false
179276		zzzz212,zzzz797	false
179277		zzzz212,zzzzz25	false
179274		zzzz212,zzzz273	false
179275		zzzz212,zzzzz29	false
179272		zzzz212,zzzzz18	false
179273		zzzz212,zzzz915	false
179270		zzzz212,zzzzz24	false
179271		zzzz212,zzzzz14	false
179269		zzzz212,zzzz739	false
4074		zzzz915,zzzzz25	false
4070		zzzz915,zzzzz19	false
4071		zzzz915,zzzzz14	false
4072		zzzz915,zzzz980	false
4073		zzzz915,zzzzzz6	false
4066		zzzz915,zzzzz18	false
4067		zzzz915,zzzzz24	false
4068		zzzz915,zzzzz29	false
4069		zzzz915,zzzzz21	false
4062		zzzz915,zzzz962	false
4063		zzzz915,zzzzzz1	false
4064		zzzz915,zzzzzz2	false
4065		zzzz915,zzzzz22	false
4058		zzzz919,zzzzzz2	false
4059		zzzz919,zzzzzz1	false
4060		zzzz919,zzzz962	false
4061		zzzz915,zzzz919	false
4054		zzzz919,zzzzz25	false
4055		zzzz919,zzzzzz6	false
4056		zzzz919,zzzzz27	false
4057		zzzz919,zzzzz22	false
4053		zzzz919,zzzz980	false
966		zzzzzz1,zzzzzz6	false
967		zzzzzz1,zzzzzz2	false
962		zzzzzz5,zzzz962	false
963		zzzzzz5,zzzz919	false
964		zzzzzz5,zzzzzz1	false
958		zzzzzz5,zzzzzz2	false
959		zzzzzz5,zzzz789	false
960		zzzzzz5,zzzzz27	false
961		zzzzzz5,zzzzz22	false
954		zzzzzz5,zzzz857	false
11194		zzzz797,zzzz857	false
955		zzzzzz5,zzzzzz6	false
956		zzzzzz5,zzzz980	false
957		zzzzzz5,zzzzz19	false
950		zzzzzz5,zzzzz29	false
11190		zzzz797,zzzz980	false
951		zzzzzz5,zzzz797	false
11191		zzzz797,zzzzz25	false
952		zzzzzz5,zzzzz25	false
11192		zzzz797,zzzzz14	false
953		zzzzzz5,zzzzz21	false
11193		zzzz797,zzzz915	false
946		zzzzzz5,zzzzz14	false
11186		zzzz797,zzzzz24	false
947		zzzzzz5,zzzzz18	false
11187		zzzz797,zzzzz29	false
948		zzzzzz5,zzzz915	false
11188		zzzz797,zzzzz18	false
949		zzzzzz5,zzzz273	false
11189		zzzz797,zzzzz21	false
11182		zzzz797,zzzzzz1	false
2478		zzzz980,zzzzz24	false
11183		zzzz797,zzzzzz2	false
2479		zzzz980,zzzzz21	false
944		zzzzzz5,zzzz739	false
11184		zzzz797,zzzzz19	false
2480		zzzz980,zzzzz14	false
945		zzzzzz5,zzzzz24	false
11185		zzzz797,zzzzzz6	false
2481		zzzz980,zzzzz19	false
2474		zzzz980,zzzzz29	false
2475		zzzz980,zzzzzz6	false
2476		zzzz980,zzzzz18	false
11181		zzzz797,zzzzz27	false
2477		zzzz980,zzzzz25	false
2471		zzzz980,zzzzzz2	false
2472		zzzz980,zzzzzz1	false
2473		zzzz980,zzzzz22	false
156490		zzzz273,zzzzz18	false
156488		zzzz273,zzzzz29	false
156489		zzzz273,zzzzz24	false
156486		zzzz273,zzzzzz6	false
156487		zzzz273,zzzz739	false
156484		zzzz273,zzzzz25	false
156485		zzzz273,zzzz857	false
156482		zzzz273,zzzzz21	false
156483		zzzz273,zzzz797	false
156480		zzzz273,zzzzz14	false
6462		zzzz857,zzzzz29	false
156481		zzzz273,zzzzz19	false
6463		zzzz857,zzzz915	false
156478		zzzz273,zzzz789	false
156479		zzzz273,zzzz980	false
156476		zzzz273,zzzzz22	false
6458		zzzz857,zzzzz24	false
156477		zzzz273,zzzz915	false
6459		zzzz857,zzzzz21	false
156474		zzzz273,zzzzz27	false
6460		zzzz857,zzzzz14	false
156475		zzzz273,zzzzzz1	false
6461		zzzz857,zzzzz18	false
6454		zzzz857,zzzzz19	false
156473		zzzz273,zzzz776	false
6455		zzzz857,zzzz980	false
6456		zzzz857,zzzzzz6	false
6457		zzzz857,zzzzz25	false
6450		zzzz857,zzzzz27	false
6451		zzzz857,zzzzz22	false
6452		zzzz857,zzzzzz2	false
6453		zzzz857,zzzzzz1	false
13614		zzzz739,zzzzz18	false
13615		zzzz739,zzzzz29	false
6448		zzzz857,zzzz962	false
6449		zzzz857,zzzz919	false
13610		zzzz739,zzzz797	false
13611		zzzz739,zzzzzz6	false
13612		zzzz739,zzzzz25	false
13613		zzzz739,zzzzz24	false
13606		zzzz739,zzzz915	false
13607		zzzz739,zzzzz19	false
13608		zzzz739,zzzz980	false
13609		zzzz739,zzzz857	false
13602		zzzz739,zzzz776	false
13603		zzzz739,zzzz789	false
13604		zzzz739,zzzzz21	false
13605		zzzz739,zzzzz14	false
12062		zzzz789,zzzzzz2	false
12058		zzzz789,zzzzz22	false
12059		zzzz789,zzzz919	false
12060		zzzz789,zzzzzz1	false
12061		zzzz789,zzzz962	false
249705		zzzz100,zzzz114	false
249704		zzzz100,zzzz362	false
249703		zzzz100,zzzz945	false
249702		zzzz100,zzzz418	false
249701		zzzz100,zzzz912	false
249700		zzzz100,zzzz189	false
249699		zzzz100,zzzz421	false
249698		zzzz100,zzzz433	false
249697		zzzz100,zzzz642	false
249696		zzzz100,zzzz724	false
249695		zzzz100,zzzz627	false
249694		zzzz100,zzzz197	false
249693		zzzz100,zzzz445	false
249692		zzzz100,zzzz450	false
249691		zzzz100,zzzz454	false
249690		zzzz100,zzzz907	false
249689		zzzz100,zzzzz80	false
249688		zzzz100,zzzz261	false
249687		zzzz100,zzzz373	false
249686		zzzz100,zzzz351	false
249685		zzzz100,zzzz500	false
249684		zzzz100,zzzz128	false
249683		zzzz100,zzzz117	false
249682		zzzz100,zzzz385	false
249681		zzzz100,zzzz443	false
249680		zzzz100,zzzz428	false
249679		zzzz100,zzzz527	false
249678		zzzz100,zzzz262	false
249677		zzzz100,zzzz207	false
249676		zzzz100,zzzz447	false
249675		zzzz100,zzzz456	false
249674		zzzz100,zzzz478	false
249673		zzzz100,zzzz523	false
249672		zzzz100,zzzz451	false
249671		zzzz100,zzzz452	false
249670		zzzz100,zzzz670	false
249669		zzzz100,zzzz120	false
249668		zzzz100,zzzz387	false
249667		zzzz100,zzzz396	false
249666		zzzz100,zzzz420	false
249665		zzzz100,zzzz425	false
249664		zzzz100,zzzz511	false
249663		zzzz100,zzzz629	false
249662		zzzz100,zzzz389	false
249661		zzzz100,zzzz646	false
249660		zzzz100,zzzz365	false
249659		zzzz100,zzzz448	false
249658		zzzz100,zzzz667	false
249657		zzzz100,zzzz674	false
249656		zzzz100,zzzz722	false
249655		zzzz100,zzzz376	false
249654		zzzz100,zzzz492	false
249653		zzzz100,zzzz641	false
249652		zzzz100,zzzzz90	false
249651		zzzz100,zzzz549	false
249650		zzzz100,zzzz613	false
249649		zzzz100,zzzz127	false
249648		zzzz100,zzzz378	false
249647		zzzz100,zzzz460	false
249646		zzzz100,zzzz895	false
249645		zzzz100,zzzz119	false
249644		zzzz100,zzzz194	false
249643		zzzz100,zzzz559	false
249642		zzzz100,zzzz901	false
249641		zzzz100,zzzz369	false
249640		zzzz100,zzzz656	false
249639		zzzz100,zzzz889	false
249638		zzzz100,zzzz401	false
249637		zzzz100,zzzz649	false
249636		zzzz100,zzzz794	false
249635		zzzz100,zzzz356	false
249634		zzzz100,zzzz663	false
249633		zzzz100,zzzz921	false
249632		zzzz100,zzzz647	false
249631		zzzz100,zzzz353	false
249630		zzzz100,zzzz121	false
249629		zzzz100,zzzz900	false
249628		zzzz100,zzzz371	false
249627		zzzz100,zzzz468	false
249626		zzzz100,zzzz474	false
249625		zzzz100,zzzz485	false
249624		zzzz100,zzzz498	false
249623		zzzz100,zzzz512	false
249622		zzzz100,zzzzz64	false
249621		zzzz100,zzzzz73	false
249620		zzzz100,zzzzz74	false
249619		zzzz100,zzzzz84	false
249618		zzzz100,zzzz224	false
249617		zzzz100,zzzz458	false
249616		zzzz100,zzzz963	false
249615		zzzz100,zzzzz81	false
249614		zzzz100,zzzzz89	false
249613		zzzz100,zzzz195	false
249612		zzzz100,zzzz208	false
249611		zzzz100,zzzz524	false
249610		zzzz100,zzzz896	false
249609		zzzz100,zzzz209	false
249608		zzzz100,zzzz393	false
249607		zzzz100,zzzz537	false
249606		zzzz100,zzzz892	false
249605		zzzz100,zzzzz45	false
249604		zzzz100,zzzzz77	false
249603		zzzz100,zzzzz87	false
249602		zzzz100,zzzz375	false
249601		zzzz100,zzzz416	false
249600		zzzz100,zzzz504	false
249599		zzzz100,zzzz547	false
249598		zzzz100,zzzz638	false
249597		zzzz100,zzzz913	false
249596		zzzz100,zzzz944	false
249595		zzzz100,zzzz368	false
249594		zzzz100,zzzz388	false
249593		zzzz100,zzzz522	false
249592		zzzz100,zzzz599	false
249591		zzzz100,zzzz620	false
249590		zzzz100,zzzz662	false
249589		zzzz100,zzzz465	false
249588		zzzz100,zzzz657	false
249587		zzzz100,zzzz726	false
249586		zzzz100,zzzz908	false
249585		zzzz100,zzzz346	false
249584		zzzz100,zzzz349	false
249583		zzzz100,zzzz533	false
249582		zzzz100,zzzz952	false
249581		zzzz100,zzzz982	false
249580		zzzz100,zzzz106	false
249579		zzzz100,zzzz400	false
249578		zzzz100,zzzz457	false
249577		zzzz100,zzzz130	false
249576		zzzz100,zzzz366	false
249575		zzzz100,zzzz370	false
249574		zzzz100,zzzz579	false
249573		zzzz100,zzzz644	false
249572		zzzz100,zzzz658	false
249571		zzzz100,zzzzz53	false
249570		zzzz100,zzzz631	false
249569		zzzz100,zzzz845	false
249568		zzzz100,zzzz894	false
249567		zzzz100,zzzzz91	false
249566		zzzz100,zzzz123	false
249565		zzzz100,zzzz424	false
249564		zzzz100,zzzz546	false
249563		zzzz100,zzzz614	false
249562		zzzz100,zzzz483	false
249561		zzzz100,zzzz556	false
249560		zzzz100,zzzz964	false
249559		zzzz100,zzzz361	false
249558		zzzz100,zzzz502	false
249557		zzzz100,zzzz548	false
249556		zzzz100,zzzz440	false
249555		zzzz100,zzzz472	false
249554		zzzz100,zzzz528	false
249553		zzzz100,zzzz650	false
249552		zzzz100,zzzz903	false
249551		zzzz100,zzzz129	false
249550		zzzz100,zzzz417	false
249549		zzzz100,zzzz529	false
249548		zzzz100,zzzz550	false
249547		zzzz100,zzzz585	false
249546		zzzz100,zzzz659	false
249545		zzzz100,zzzz893	false
249544		zzzz100,zzzz909	false
249543		zzzz100,zzzz965	false
249542		zzzz100,zzzzz86	false
249541		zzzz100,zzzz434	false
249540		zzzz100,zzzz906	false
249539		zzzz100,zzzz135	false
249538		zzzz100,zzzz508	false
249537		zzzz100,zzzz540	false
249536		zzzz100,zzzz884	false
249535		zzzz100,zzzz910	false
249534		zzzz100,zzzz358	false
249533		zzzz100,zzzz126	false
249532		zzzz100,zzzz131	false
249531		zzzz100,zzzz520	false
249530		zzzz100,zzzzz55	false
249529		zzzz100,zzzzz93	false
249528		zzzz100,zzzz432	false
249527		zzzz100,zzzzz61	false
249526		zzzz100,zzzz382	false
249525		zzzz100,zzzz413	false
249524		zzzz100,zzzz480	false
249523		zzzz100,zzzz725	false
249522		zzzz100,zzzzz96	false
249521		zzzz100,zzzz518	false
249520		zzzz100,zzzz525	false
249519		zzzz100,zzzz727	false
249518		zzzz100,zzzz849	false
249517		zzzz100,zzzz406	false
249516		zzzz100,zzzz544	false
249515		zzzz100,zzzz618	false
249514		zzzz100,zzzz643	false
249513		zzzz100,zzzz125	false
249512		zzzz100,zzzz172	false
249511		zzzz100,zzzz377	false
249510		zzzz100,zzzz395	false
249509		zzzz100,zzzz444	false
249508		zzzz100,zzzz555	false
249507		zzzz100,zzzz597	false
249506		zzzz100,zzzz640	false
249505		zzzz100,zzzz940	false
249504		zzzz100,zzzz264	false
249503		zzzz100,zzzz364	false
249502		zzzz100,zzzz793	false
249501		zzzz100,zzzz210	false
249500		zzzz100,zzzz217	false
249499		zzzz100,zzzz654	false
249498		zzzz100,zzzz951	false
249497		zzzz100,zzzz132	false
249496		zzzz100,zzzz372	false
249495		zzzz100,zzzz407	false
249494		zzzz100,zzzz422	false
249493		zzzz100,zzzz487	false
249492		zzzz100,zzzz515	false
249491		zzzz100,zzzz573	false
249490		zzzz100,zzzz590	false
249489		zzzz100,zzzz380	false
249488		zzzz100,zzzz477	false
249487		zzzz100,zzzz501	false
249486		zzzz100,zzzz653	false
249485		zzzz100,zzzz891	false
249484		zzzz100,zzzz116	false
249483		zzzz100,zzzz354	false
249482		zzzz100,zzzz464	false
249481		zzzz100,zzzz497	false
249480		zzzz100,zzzz553	false
249479		zzzz100,zzzz124	false
249478		zzzz100,zzzz352	false
249477		zzzz100,zzzz531	false
249476		zzzz100,zzzz554	false
249475		zzzz100,zzzz567	false
249474		zzzz100,zzzz626	false
249473		zzzz100,zzzz678	false
249472		zzzz100,zzzz911	false
249471		zzzz100,zzzz133	false
249470		zzzz100,zzzz414	false
249469		zzzz100,zzzz436	false
249468		zzzz100,zzzz535	false
249467		zzzz100,zzzz616	false
249466		zzzz100,zzzz619	false
249465		zzzz100,zzzzz78	false
249464		zzzz100,zzzzz85	false
249463		zzzz100,zzzz390	false
249462		zzzz100,zzzz397	false
249461		zzzz100,zzzz442	false
249460		zzzz100,zzzz628	false
249459		zzzz100,zzzz652	false
249458		zzzz100,zzzzz79	false
249457		zzzz100,zzzz645	false
249456		zzzz100,zzzz792	false
249455		zzzz100,zzzz802	false
249454		zzzz100,zzzz950	false
249453		zzzz100,zzzz206	false
249452		zzzz100,zzzz453	false
249451		zzzz100,zzzz635	false
249450		zzzz100,zzzz949	false
249449		zzzz100,zzzz134	false
249448		zzzz100,zzzz449	false
249447		zzzz100,zzzz521	false
249446		zzzz100,zzzz622	false
249445		zzzz100,zzzzz88	false
249444		zzzz100,zzzz526	false
249443		zzzz100,zzzz621	false
249442		zzzz100,zzzz462	false
249441		zzzz100,zzzz355	false
249440		zzzz100,zzzz118	false
249439		zzzz100,zzzz145	false
249438		zzzz100,zzzz163	false
249437		zzzz100,zzzz242	false
249436		zzzz100,zzzz637	false
249435		zzzz100,zzzz661	false
249434		zzzz100,zzzz147	false
249433		zzzz100,zzzz947	false
249432		zzzz100,zzzz203	false
249431		zzzz100,zzzz491	false
249430		zzzz100,zzzz810	false
249429		zzzz100,zzzz904	false
249428		zzzz100,zzzz941	false
249427		zzzz100,zzzz176	false
249426		zzzz100,zzzz360	false
249425		zzzz100,zzzz367	false
249424		zzzz100,zzzz438	false
249423		zzzz100,zzzz630	false
249422		zzzz100,zzzz177	false
249421		zzzz100,zzzz664	false
249420		zzzz100,zzzzz82	false
249419		zzzz100,zzzz168	false
249418		zzzz100,zzzz211	false
249417		zzzz100,zzzz473	false
249416		zzzz100,zzzz808	false
249415		zzzz100,zzzz170	false
249414		zzzz100,zzzz174	false
249413		zzzz100,zzzz690	false
249412		zzzz100,zzzzz48	false
249411		zzzz100,zzzz159	false
249410		zzzz100,zzzz386	false
249409		zzzz100,zzzz505	false
249408		zzzz100,zzzz183	false
249407		zzzz100,zzzz660	false
249406		zzzz100,zzzz199	false
249405		zzzz100,zzzz348	false
249404		zzzz100,zzzz475	false
249403		zzzz100,zzzz634	false
249402		zzzz100,zzzz636	false
249401		zzzz100,zzzz158	false
249400		zzzz100,zzzz167	false
249399		zzzz100,zzzz173	false
249398		zzzz100,zzzz175	false
249397		zzzz100,zzzz357	false
249396		zzzz100,zzzz632	false
249395		zzzz100,zzzz807	false
249394		zzzz100,zzzz108	false
249393		zzzz100,zzzz216	false
249392		zzzz100,zzzz410	false
249391		zzzz100,zzzz479	false
249390		zzzz100,zzzzz92	false
249389		zzzz100,zzzz219	false
249388		zzzz100,zzzz284	false
249387		zzzz100,zzzz399	false
249386		zzzz100,zzzz796	false
249385		zzzz100,zzzz833	false
249384		zzzz100,zzzzz49	false
249383		zzzz100,zzzz136	false
249382		zzzz100,zzzz220	false
249381		zzzz100,zzzz359	false
249380		zzzz100,zzzz685	false
249379		zzzz100,zzzz829	false
249378		zzzz100,zzzz831	false
249377		zzzz100,zzzz146	false
249376		zzzz100,zzzz171	false
249375		zzzz100,zzzz471	false
249374		zzzz100,zzzz832	false
249373		zzzz100,zzzz899	false
249372		zzzz100,zzzz184	false
249371		zzzz100,zzzz427	false
249370		zzzz100,zzzz738	false
249369		zzzz100,zzzz902	false
249368		zzzz100,zzzz379	false
249367		zzzz100,zzzz155	false
249366		zzzz100,zzzz179	false
249365		zzzz100,zzzz191	false
249364		zzzz100,zzzz243	false
249363		zzzz100,zzzzz60	false
249362		zzzz100,zzzz112	false
249361		zzzz100,zzzz286	false
249360		zzzz100,zzzz374	false
249359		zzzz100,zzzz405	false
249358		zzzz100,zzzz466	false
249357		zzzz100,zzzz943	false
249356		zzzz100,zzzz946	false
249355		zzzz100,zzzz165	false
249354		zzzz100,zzzz166	false
249353		zzzz100,zzzz245	false
249352		zzzz100,zzzz441	false
249351		zzzz100,zzzz494	false
249350		zzzz100,zzzz517	false
249349		zzzz100,zzzz841	false
249348		zzzz100,zzzz381	false
249347		zzzz100,zzzz728	false
249346		zzzz100,zzzz144	false
249345		zzzz100,zzzz151	false
249344		zzzz100,zzzz164	false
249343		zzzz100,zzzz252	false
249342		zzzz100,zzzz415	false
249341		zzzz100,zzzz692	false
249340		zzzz100,zzzzz99	false
249339		zzzz100,zzzz218	false
249338		zzzz100,zzzz461	false
249337		zzzz100,zzzz509	false
249336		zzzz100,zzzz852	false
249335		zzzz100,zzzz934	false
249334		zzzz100,zzzzz67	false
249333		zzzz100,zzzz201	false
249332		zzzz100,zzzz648	false
249331		zzzz100,zzzz102	false
249330		zzzz100,zzzz539	false
249329		zzzz100,zzzz230	false
249328		zzzz100,zzzz398	false
249327		zzzz100,zzzz519	false
249326		zzzz100,zzzzz83	false
249325		zzzz100,zzzz180	false
249324		zzzz100,zzzz383	false
249323		zzzz100,zzzz563	false
249322		zzzz100,zzzz665	false
249321		zzzz100,zzzz186	false
249320		zzzz100,zzzz437	false
249319		zzzz100,zzzz791	false
249318		zzzz100,zzzz809	false
249317		zzzz100,zzzz288	false
249316		zzzz100,zzzz589	false
249315		zzzz100,zzzz143	false
249314		zzzz100,zzzzz50	false
249313		zzzz100,zzzz161	false
249312		zzzz100,zzzz285	false
249311		zzzz100,zzzz799	false
249310		zzzz100,zzzzz97	false
249309		zzzz100,zzzz107	false
249308		zzzz100,zzzz169	false
249307		zzzz100,zzzz516	false
249306		zzzz100,zzzz558	false
249305		zzzz100,zzzz840	false
249304		zzzz100,zzzz140	false
249303		zzzz100,zzzzz94	false
249302		zzzz100,zzzz113	false
249301		zzzz100,zzzz157	false
249300		zzzz100,zzzz592	false
249299		zzzz100,zzzz141	false
249298		zzzz100,zzzz181	false
249297		zzzz100,zzzz287	false
249296		zzzz100,zzzz811	false
249295		zzzz100,zzzz152	false
249294		zzzz100,zzzz935	false
249293		zzzz100,zzzz104	false
249292		zzzz100,zzzz153	false
249291		zzzz100,zzzz495	false
249290		zzzz100,zzzz611	false
249289		zzzz100,zzzz625	false
249288		zzzz100,zzzz148	false
249287		zzzz100,zzzz149	false
249286		zzzz100,zzzz564	false
249285		zzzz100,zzzz623	false
249284		zzzz100,zzzz812	false
249283		zzzz100,zzzz843	false
249282		zzzz100,zzzz162	false
249281		zzzz100,zzzz463	false
249280		zzzz100,zzzz577	false
249279		zzzz100,zzzz936	false
249278		zzzz100,zzzz142	false
249277		zzzz100,zzzz154	false
249276		zzzz100,zzzz241	false
249275		zzzz100,zzzz249	false
249274		zzzz100,zzzz160	false
249273		zzzz100,zzzz240	false
249272		zzzz100,zzzz391	false
249271		zzzz100,zzzz455	false
249270		zzzz100,zzzz532	false
249269		zzzz100,zzzz536	false
249268		zzzz100,zzzz606	false
249267		zzzz100,zzzz103	false
249266		zzzz100,zzzz115	false
249265		zzzz100,zzzz139	false
249264		zzzz100,zzzz150	false
249263		zzzz100,zzzz178	false
249262		zzzz100,zzzz188	false
249261		zzzz100,zzzz138	false
249260		zzzz100,zzzz233	false
249259		zzzz100,zzzz347	false
249258		zzzz100,zzzz423	false
249257		zzzz100,zzzz694	false
249256		zzzz100,zzzzz44	false
249255		zzzz100,zzzz156	false
249254		zzzz100,zzzz402	false
249253		zzzz100,zzzz439	false
249252		zzzz100,zzzz571	false
249251		zzzz100,zzzz836	false
249250		zzzz100,zzzz122	false
249249		zzzz100,zzzz404	false
249248		zzzz100,zzzz419	false
249247		zzzz100,zzzz430	false
249246		zzzz100,zzzz431	false
249245		zzzz100,zzzz666	false
249244		zzzz100,zzzz834	false
249243		zzzz100,zzzz788	false
249242		zzzz100,zzzz837	false
249241		zzzz100,zzzz232	false
249240		zzzz100,zzzz435	false
249239		zzzz100,zzzz496	false
249238		zzzz100,zzzz593	false
249237		zzzz100,zzzz574	false
249236		zzzz100,zzzz105	false
249235		zzzz100,zzzz290	false
249234		zzzz100,zzzz412	false
249233		zzzz100,zzzzz46	false
249232		zzzz100,zzzz215	false
249231		zzzz100,zzzz225	false
249230		zzzz100,zzzz581	false
249229		zzzz100,zzzz605	false
249228		zzzz100,zzzzz43	false
249227		zzzz100,zzzz226	false
249226		zzzz100,zzzz588	false
249225		zzzz100,zzzz633	false
249224		zzzz100,zzzzz69	false
249223		zzzz100,zzzz137	false
249222		zzzz100,zzzz542	false
249221		zzzz100,zzzz561	false
249220		zzzz100,zzzzz47	false
249219		zzzz100,zzzz470	false
249218		zzzz100,zzzz484	false
249217		zzzz100,zzzz853	false
249216		zzzz100,zzzz110	false
249215		zzzz100,zzzz426	false
249214		zzzz100,zzzz429	false
249213		zzzz100,zzzz576	false
249212		zzzz100,zzzz213	false
249211		zzzz100,zzzz263	false
249210		zzzz100,zzzz486	false
249209		zzzz100,zzzz329	false
249208		zzzz100,zzzz784	false
249207		zzzz100,zzzz109	false
249206		zzzz100,zzzz578	false
249205		zzzz100,zzzzz51	false
249204		zzzz100,zzzz259	false
249203		zzzz100,zzzz459	false
249202		zzzz100,zzzz562	false
249201		zzzz100,zzzz838	false
249200		zzzz100,zzzz198	false
249199		zzzz100,zzzz586	false
249198		zzzz100,zzzz948	false
249197		zzzz100,zzzz966	false
249196		zzzz100,zzzz844	false
249195		zzzz100,zzzz848	false
249194		zzzz100,zzzz482	false
249193		zzzz100,zzzz394	false
249192		zzzz100,zzzz683	false
249191		zzzz100,zzzz898	false
249190		zzzz100,zzzz530	false
249189		zzzz100,zzzz687	false
249188		zzzz100,zzzz890	false
249187		zzzz100,zzzz981	false
249186		zzzz100,zzzz255	false
249185		zzzz100,zzzz583	false
249184		zzzz100,zzzz595	false
249183		zzzz100,zzzz672	false
249182		zzzz100,zzzz800	false
249181		zzzz100,zzzz830	false
249180		zzzz100,zzzz408	false
249179		zzzz100,zzzz205	false
249178		zzzz100,zzzz565	false
249177		zzzz100,zzzz806	false
249176		zzzz100,zzzz673	false
249175		zzzz100,zzzz239	false
249174		zzzz100,zzzz545	false
249173		zzzz100,zzzz655	false
249172		zzzz100,zzzz182	false
249171		zzzz100,zzzz244	false
249170		zzzz100,zzzz204	false
249169		zzzz100,zzzz570	false
249168		zzzz100,zzzz693	false
249167		zzzz100,zzzzz70	false
249166		zzzz100,zzzz607	false
249165		zzzz100,zzzz942	false
249164		zzzz100,zzzz686	false
249163		zzzz100,zzzz580	false
249162		zzzz100,zzzz609	false
249161		zzzz100,zzzz801	false
249160		zzzz100,zzzz669	false
249159		zzzz100,zzzz604	false
249158		zzzz100,zzzz697	false
249157		zzzz100,zzzz493	false
249156		zzzz100,zzzz101	false
249155		zzzz100,zzzz202	false
249154		zzzz100,zzzz600	false
249153		zzzz100,zzzz603	false
249152		zzzz100,zzzz671	false
249151		zzzz100,zzzz676	false
249150		zzzz100,zzzz274	false
249149		zzzz100,zzzz506	false
249148		zzzz100,zzzz785	false
249147		zzzz100,zzzz787	false
249146		zzzz100,zzzz513	false
249145		zzzz100,zzzz681	false
249144		zzzz100,zzzz411	false
249143		zzzz100,zzzz510	false
249142		zzzz100,zzzz584	false
249141		zzzz100,zzzz596	false
249140		zzzz100,zzzz983	false
249139		zzzz100,zzzz251	false
249138		zzzz100,zzzz403	false
249137		zzzz100,zzzz551	false
249136		zzzz100,zzzz783	false
249135		zzzz100,zzzz560	false
249134		zzzz100,zzzz804	false
249133		zzzz100,zzzzz57	false
249132		zzzz100,zzzzz58	false
249131		zzzz100,zzzzz62	false
249130		zzzz100,zzzz228	false
249129		zzzz100,zzzz933	false
249128		zzzz100,zzzzz52	false
249127		zzzz100,zzzz392	false
249126		zzzz100,zzzz476	false
249125		zzzz100,zzzz575	false
249124		zzzz100,zzzz582	false
249123		zzzz100,zzzz111	false
249122		zzzz100,zzzz292	false
249121		zzzz100,zzzz557	false
249120		zzzz100,zzzz594	false
249119		zzzz100,zzzzz59	false
249118		zzzz100,zzzz499	false
249117		zzzz100,zzzz566	false
249116		zzzz100,zzzz615	false
249115		zzzz100,zzzz651	false
249114		zzzz100,zzzz695	false
249113		zzzz100,zzzz514	false
249112		zzzz100,zzzz541	false
249111		zzzz100,zzzz568	false
249110		zzzz100,zzzz384	false
249109		zzzz100,zzzz227	false
249108		zzzz100,zzzz481	false
249107		zzzz100,zzzz680	false
249106		zzzz100,zzzz187	false
249105		zzzz100,zzzz612	false
249104		zzzz100,zzzz688	false
249103		zzzz100,zzzz850	false
249102		zzzz100,zzzz569	false
249101		zzzz100,zzzz677	false
249100		zzzz100,zzzz679	false
249099		zzzz100,zzzz790	false
249098		zzzz100,zzzz839	false
249097		zzzz100,zzzz507	false
249096		zzzz100,zzzz222	false
249095		zzzz100,zzzz237	false
249094		zzzz100,zzzz490	false
249093		zzzz100,zzzz538	false
249092		zzzz100,zzzz905	false
249091		zzzz100,zzzz534	false
249090		zzzz100,zzzz572	false
249089		zzzz100,zzzz931	false
249088		zzzz100,zzzzz63	false
249087		zzzz100,zzzz190	false
249085		zzzz100,zzzz602	false
249084		zzzz100,zzzz786	false
249083		zzzz100,zzzz214	false
249082		zzzz100,zzzz862	false
249081		zzzz100,zzzz297	false
249079		zzzz100,zzzz552	false
249078		zzzz100,zzzz469	false
249077		zzzz100,zzzz543	false
249076		zzzz100,zzzz639	false
249075		zzzz100,zzzz280	false
249074		zzzz100,zzzz301	false
249072		zzzz100,zzzz446	false
249071		zzzz100,zzzzz56	false
249070		zzzz100,zzzz248	false
249069		zzzz100,zzzz282	false
249067		zzzz100,zzzz587	false
249065		zzzz100,zzzz363	false
249064		zzzz100,zzzz617	false
249062		zzzz100,zzzz299	false
249061		zzzz100,zzzz300	false
249059		zzzz100,zzzz489	false
249056		zzzz100,zzzz805	false
249055		zzzz100,zzzz298	false
249054		zzzz100,zzzz303	false
249052		zzzz100,zzzz467	false
249050		zzzz100,zzzz715	false
249049		zzzz100,zzzzz98	false
249048		zzzz100,zzzz760	false
249046		zzzz100,zzzz350	false
249044		zzzz100,zzzz234	false
249043		zzzz100,zzzz675	false
249042		zzzz100,zzzzz54	false
249041		zzzz100,zzzz302	false
249039		zzzz100,zzzz756	false
249036		zzzz100,zzzzz75	false
249035		zzzz100,zzzz231	false
249033		zzzz100,zzzz696	false
249032		zzzz100,zzzz707	false
249030		zzzz100,zzzz223	false
249029		zzzz100,zzzz854	false
249028		zzzz100,zzzz824	false
249023		zzzz100,zzzz701	false
249019		zzzz100,zzzz745	false
249018		zzzz100,zzzz826	false
249017		zzzz100,zzzz235	false
249013		zzzz100,zzzz700	false
249008		zzzz100,zzzz813	false
249005		zzzz100,zzzz278	false
249000		zzzz100,zzzz277	false
248997		zzzz100,zzzz279	false
248995		zzzz100,zzzz192	false
248991		zzzz100,zzzz920	false
248987		zzzz100,zzzz818	false
248986		zzzz100,zzzzz76	false
248985		zzzz100,zzzz291	false
248980		zzzz100,zzzz815	false
248979		zzzz100,zzzz698	false
248977		zzzz100,zzzz253	false
248976		zzzz100,zzzzz66	false
248975		zzzz100,zzzz820	false
248974		zzzz100,zzzz281	false
248973		zzzz101,zzzz248	false
248972		zzzz101,zzzz905	false
248971		zzzz101,zzzz541	false
248970		zzzz101,zzzz551	false
248969		zzzz101,zzzz568	false
248968		zzzz101,zzzz692	false
248967		zzzz101,zzzz609	false
248966		zzzz101,zzzz102	false
248965		zzzz101,zzzz534	false
248964		zzzz101,zzzz931	false
248963		zzzz101,zzzzz69	false
248962		zzzz101,zzzz552	false
248961		zzzz101,zzzz570	false
248960		zzzz101,zzzz841	false
248959		zzzz101,zzzz495	false
248958		zzzz101,zzzz584	false
248957		zzzz101,zzzz801	false
248956		zzzz101,zzzz136	false
248955		zzzz101,zzzzz94	false
248954		zzzz101,zzzz165	false
248953		zzzz101,zzzz423	false
248952		zzzz101,zzzz507	false
248951		zzzz101,zzzz898	false
248950		zzzz101,zzzz119	false
248949		zzzz101,zzzz228	false
248948		zzzz101,zzzz433	false
248947		zzzz101,zzzz580	false
248946		zzzz101,zzzz948	false
248945		zzzz101,zzzz124	false
248944		zzzz101,zzzz171	false
248943		zzzz101,zzzz125	false
248942		zzzz101,zzzz161	false
248941		zzzz101,zzzz166	false
248940		zzzz101,zzzz943	false
248939		zzzz101,zzzzz47	false
248938		zzzz101,zzzz198	false
248937		zzzz101,zzzz671	false
248936		zzzz101,zzzz802	false
248935		zzzz101,zzzzz48	false
248934		zzzz101,zzzz120	false
248933		zzzz101,zzzz353	false
248932		zzzz101,zzzz564	false
248931		zzzz101,zzzz245	false
248930		zzzz101,zzzz429	false
248929		zzzz101,zzzz164	false
248928		zzzz101,zzzz170	false
248927		zzzz101,zzzz375	false
248926		zzzz101,zzzz942	false
248925		zzzz101,zzzz112	false
248924		zzzz101,zzzz183	false
248923		zzzz101,zzzz812	false
248922		zzzz101,zzzz576	false
248921		zzzz101,zzzzz96	false
248920		zzzz101,zzzz156	false
248919		zzzz101,zzzz676	false
248918		zzzz101,zzzz130	false
248917		zzzz101,zzzz378	false
248916		zzzz101,zzzz489	false
248915		zzzz101,zzzz154	false
248914		zzzz101,zzzz169	false
248913		zzzz101,zzzz233	false
248912		zzzz101,zzzz560	false
248911		zzzz101,zzzzz52	false
248910		zzzz101,zzzz218	false
248909		zzzz101,zzzz548	false
248908		zzzz101,zzzz114	false
248907		zzzz101,zzzz232	false
248906		zzzz101,zzzz505	false
248905		zzzz101,zzzz620	false
248904		zzzz101,zzzz697	false
248903		zzzz101,zzzz476	false
248902		zzzz101,zzzz669	false
248901		zzzz101,zzzz510	false
248900		zzzz101,zzzz657	false
248899		zzzz101,zzzz664	false
248898		zzzz101,zzzz829	false
248897		zzzz101,zzzz176	false
248896		zzzz101,zzzz506	false
248895		zzzz101,zzzz528	false
248894		zzzz101,zzzz579	false
248893		zzzz101,zzzz951	false
248892		zzzz101,zzzz485	false
248891		zzzz101,zzzz807	false
248890		zzzz101,zzzz935	false
248889		zzzz101,zzzz595	false
248888		zzzz101,zzzz612	false
248887		zzzz101,zzzz810	false
248886		zzzz101,zzzz163	false
248885		zzzz101,zzzz180	false
248884		zzzz101,zzzz288	false
248883		zzzz101,zzzz693	false
248882		zzzz101,zzzz806	false
248881		zzzz101,zzzz852	false
248880		zzzz101,zzzzz55	false
248879		zzzz101,zzzz137	false
248878		zzzz101,zzzz444	false
248877		zzzz101,zzzz131	false
248876		zzzz101,zzzz280	false
248875		zzzz101,zzzz443	false
248874		zzzz101,zzzz491	false
248873		zzzz101,zzzz853	false
248872		zzzz101,zzzz159	false
248871		zzzz101,zzzz177	false
248870		zzzz101,zzzz540	false
248869		zzzz101,zzzz553	false
248868		zzzz101,zzzz407	false
248867		zzzz101,zzzz350	false
248866		zzzz101,zzzz416	false
248865		zzzz101,zzzz565	false
248864		zzzz101,zzzz573	false
248863		zzzz101,zzzzz58	false
248862		zzzz101,zzzzz78	false
248861		zzzz101,zzzzz80	false
248860		zzzz101,zzzz237	false
248859		zzzz101,zzzz356	false
248858		zzzz101,zzzz411	false
248857		zzzz101,zzzz680	false
248856		zzzz101,zzzz791	false
248855		zzzz101,zzzzz45	false
248854		zzzz101,zzzz197	false
248853		zzzz101,zzzz432	false
248852		zzzz101,zzzz454	false
248851		zzzz101,zzzz459	false
248850		zzzz101,zzzz504	false
248849		zzzz101,zzzz532	false
248848		zzzz101,zzzz949	false
248847		zzzz101,zzzzz84	false
248846		zzzz101,zzzz123	false
248845		zzzz101,zzzz285	false
248844		zzzz101,zzzz348	false
248843		zzzz101,zzzz440	false
248842		zzzz101,zzzz603	false
248841		zzzz101,zzzz607	false
248840		zzzz101,zzzz966	false
248839		zzzz101,zzzz107	false
248838		zzzz101,zzzz134	false
248837		zzzz101,zzzz349	false
248836		zzzz101,zzzz545	false
248835		zzzz101,zzzz550	false
248834		zzzz101,zzzz585	false
248833		zzzz101,zzzz594	false
248832		zzzz101,zzzz673	false
248831		zzzz101,zzzzz74	false
248830		zzzz101,zzzz230	false
248829		zzzz101,zzzz286	false
248828		zzzz101,zzzz483	false
248827		zzzz101,zzzz484	false
248826		zzzz101,zzzz889	false
248825		zzzz101,zzzzz44	false
248824		zzzz101,zzzzz88	false
248823		zzzz101,zzzz167	false
248822		zzzz101,zzzz181	false
248821		zzzz101,zzzz251	false
248820		zzzz101,zzzz526	false
248819		zzzz101,zzzz554	false
248818		zzzz101,zzzz834	false
248817		zzzz101,zzzz160	false
248816		zzzz101,zzzz174	false
248815		zzzz101,zzzz188	false
248814		zzzz101,zzzz220	false
248813		zzzz101,zzzz244	false
248812		zzzz101,zzzz456	false
248811		zzzz101,zzzz490	false
248810		zzzz101,zzzz524	false
248809		zzzz101,zzzz527	false
248808		zzzz101,zzzz639	false
248807		zzzz101,zzzz800	false
248806		zzzz101,zzzz358	false
248805		zzzz101,zzzz415	false
248804		zzzz101,zzzz457	false
248803		zzzz101,zzzz632	false
248802		zzzz101,zzzz784	false
248801		zzzz101,zzzz132	false
248800		zzzz101,zzzz135	false
248799		zzzz101,zzzz555	false
248798		zzzz101,zzzz572	false
248797		zzzz101,zzzz600	false
248796		zzzz101,zzzz655	false
248795		zzzz101,zzzz792	false
248794		zzzz101,zzzz809	false
248793		zzzz101,zzzz529	false
248792		zzzz101,zzzz575	false
248791		zzzz101,zzzz695	false
248790		zzzz101,zzzz224	false
248789		zzzz101,zzzz284	false
248788		zzzz101,zzzz448	false
248787		zzzz101,zzzz559	false
248786		zzzz101,zzzz615	false
248785		zzzz101,zzzz207	false
248784		zzzz101,zzzz292	false
248783		zzzz101,zzzz424	false
248782		zzzz101,zzzz523	false
248781		zzzz101,zzzz678	false
248780		zzzz101,zzzz907	false
248779		zzzz101,zzzz184	false
248778		zzzz101,zzzz282	false
248777		zzzz101,zzzz381	false
248776		zzzz101,zzzz417	false
248775		zzzz101,zzzz427	false
248774		zzzz101,zzzz501	false
248773		zzzz101,zzzz566	false
248772		zzzz101,zzzz583	false
248771		zzzz101,zzzzz59	false
248770		zzzz101,zzzzz73	false
248769		zzzz101,zzzz329	false
248768		zzzz101,zzzz480	false
248767		zzzz101,zzzz493	false
248766		zzzz101,zzzz525	false
248765		zzzz101,zzzz567	false
248764		zzzz101,zzzz115	false
248763		zzzz101,zzzz128	false
248762		zzzz101,zzzz845	false
248761		zzzz101,zzzz941	false
248760		zzzz101,zzzzz86	false
248759		zzzz101,zzzz116	false
248758		zzzz101,zzzz162	false
248757		zzzz101,zzzz458	false
248756		zzzz101,zzzz651	false
248755		zzzz101,zzzz685	false
248754		zzzz101,zzzz726	false
248753		zzzz101,zzzz909	false
248752		zzzz101,zzzz911	false
248751		zzzz101,zzzz934	false
248750		zzzz101,zzzz947	false
248749		zzzz101,zzzzz50	false
248748		zzzz101,zzzz392	false
248747		zzzz101,zzzz522	false
248746		zzzz101,zzzz533	false
248745		zzzz101,zzzz629	false
248744		zzzz101,zzzz640	false
248743		zzzz101,zzzz670	false
248742		zzzz101,zzzz110	false
248741		zzzz101,zzzz126	false
248740		zzzz101,zzzz138	false
248739		zzzz101,zzzz241	false
248738		zzzz101,zzzz420	false
248737		zzzz101,zzzz474	false
248736		zzzz101,zzzz546	false
248735		zzzz101,zzzz556	false
248734		zzzz101,zzzz596	false
248733		zzzz101,zzzz677	false
248732		zzzz101,zzzz153	false
248731		zzzz101,zzzz187	false
248730		zzzz101,zzzz396	false
248729		zzzz101,zzzz479	false
248728		zzzz101,zzzz518	false
248727		zzzz101,zzzz557	false
248726		zzzz101,zzzz589	false
248725		zzzz101,zzzz663	false
248724		zzzz101,zzzz906	false
248723		zzzz101,zzzz910	false
248722		zzzz101,zzzzz57	false
248721		zzzz101,zzzzz81	false
248720		zzzz101,zzzzz97	false
248719		zzzz101,zzzzz99	false
248718		zzzz101,zzzz384	false
248717		zzzz101,zzzz445	false
248716		zzzz101,zzzz494	false
248715		zzzz101,zzzz498	false
248714		zzzz101,zzzz838	false
248713		zzzz101,zzzzz89	false
248712		zzzz101,zzzz363	false
248711		zzzz101,zzzz365	false
248710		zzzz101,zzzz530	false
248709		zzzz101,zzzz531	false
248708		zzzz101,zzzz606	false
248707		zzzz101,zzzz133	false
248706		zzzz101,zzzz450	false
248705		zzzz101,zzzz725	false
248704		zzzz101,zzzzz49	false
248703		zzzz101,zzzz243	false
248702		zzzz101,zzzz249	false
248701		zzzz101,zzzz252	false
248700		zzzz101,zzzz482	false
248699		zzzz101,zzzz499	false
248698		zzzz101,zzzz722	false
248697		zzzz101,zzzzz43	false
248696		zzzz101,zzzzz85	false
248695		zzzz101,zzzz630	false
248694		zzzz101,zzzz891	false
248693		zzzz101,zzzz106	false
248692		zzzz101,zzzz475	false
248691		zzzz101,zzzz514	false
248690		zzzz101,zzzz515	false
248689		zzzz101,zzzz536	false
248688		zzzz101,zzzz794	false
248687		zzzz101,zzzz904	false
248686		zzzz101,zzzz287	false
248685		zzzz101,zzzz658	false
248684		zzzz101,zzzz674	false
248683		zzzz101,zzzz921	false
248682		zzzz101,zzzz936	false
248681		zzzz101,zzzz940	false
248680		zzzz101,zzzz152	false
248679		zzzz101,zzzz361	false
248678		zzzz101,zzzz831	false
248677		zzzz101,zzzz418	false
248676		zzzz101,zzzz452	false
248675		zzzz101,zzzz477	false
248674		zzzz101,zzzz549	false
248673		zzzz101,zzzz569	false
248672		zzzz101,zzzz649	false
248671		zzzz101,zzzz833	false
248670		zzzz101,zzzz840	false
248669		zzzz101,zzzz118	false
248668		zzzz101,zzzz139	false
248667		zzzz101,zzzz347	false
248666		zzzz101,zzzz502	false
248665		zzzz101,zzzz627	false
248664		zzzz101,zzzz642	false
248663		zzzz101,zzzz667	false
248662		zzzz101,zzzz108	false
248661		zzzz101,zzzz151	false
248660		zzzz101,zzzz191	false
248659		zzzz101,zzzz372	false
248658		zzzz101,zzzz400	false
248657		zzzz101,zzzz613	false
248656		zzzz101,zzzz884	false
248655		zzzz101,zzzz912	false
248654		zzzz101,zzzz933	false
248653		zzzz101,zzzz274	false
248652		zzzz101,zzzz352	false
248651		zzzz101,zzzz465	false
248650		zzzz101,zzzz581	false
248649		zzzz101,zzzz604	false
248648		zzzz101,zzzz638	false
248647		zzzz101,zzzz646	false
248646		zzzz101,zzzz832	false
248645		zzzz101,zzzz896	false
248644		zzzz101,zzzz173	false
248643		zzzz101,zzzz261	false
248642		zzzz101,zzzz262	false
248641		zzzz101,zzzz393	false
248640		zzzz101,zzzz403	false
248639		zzzz101,zzzz422	false
248638		zzzz101,zzzz468	false
248637		zzzz101,zzzz614	false
248636		zzzz101,zzzz628	false
248635		zzzz101,zzzz643	false
248634		zzzz101,zzzz158	false
248633		zzzz101,zzzz299	false
248632		zzzz101,zzzz371	false
248631		zzzz101,zzzz413	false
248630		zzzz101,zzzz520	false
248629		zzzz101,zzzz542	false
248628		zzzz101,zzzz547	false
248627		zzzz101,zzzz599	false
248626		zzzz101,zzzzz56	false
248625		zzzz101,zzzz175	false
248624		zzzz101,zzzz189	false
248623		zzzz101,zzzz386	false
248622		zzzz101,zzzz410	false
248621		zzzz101,zzzz437	false
248620		zzzz101,zzzz451	false
248619		zzzz101,zzzz913	false
248618		zzzz101,zzzz945	false
248617		zzzz101,zzzz129	false
248616		zzzz101,zzzz373	false
248615		zzzz101,zzzz398	false
248614		zzzz101,zzzz421	false
248613		zzzz101,zzzz426	false
248612		zzzz101,zzzz654	false
248611		zzzz101,zzzz686	false
248610		zzzz101,zzzz724	false
248609		zzzz101,zzzz952	false
248608		zzzz101,zzzz394	false
248607		zzzz101,zzzz578	false
248606		zzzz101,zzzz665	false
248605		zzzz101,zzzz666	false
248604		zzzz101,zzzz150	false
248603		zzzz101,zzzz179	false
248602		zzzz101,zzzz259	false
248601		zzzz101,zzzz387	false
248600		zzzz101,zzzz388	false
248599		zzzz101,zzzz389	false
248598		zzzz101,zzzz694	false
248597		zzzz101,zzzz843	false
248596		zzzz101,zzzzz87	false
248595		zzzz101,zzzz140	false
248594		zzzz101,zzzz168	false
248593		zzzz101,zzzz205	false
248592		zzzz101,zzzz219	false
248591		zzzz101,zzzz577	false
248590		zzzz101,zzzz641	false
248589		zzzz101,zzzz650	false
248588		zzzz101,zzzz836	false
248587		zzzz101,zzzz849	false
248586		zzzz101,zzzzz67	false
248585		zzzz101,zzzz368	false
248584		zzzz101,zzzz508	false
248583		zzzz101,zzzz535	false
248582		zzzz101,zzzz558	false
248581		zzzz101,zzzz895	false
248580		zzzz101,zzzzz62	false
248579		zzzz101,zzzzz90	false
248578		zzzz101,zzzz122	false
248577		zzzz101,zzzz351	false
248576		zzzz101,zzzz362	false
248575		zzzz101,zzzz563	false
248574		zzzz101,zzzz588	false
248573		zzzz101,zzzz656	false
248572		zzzz101,zzzz982	false
248571		zzzz101,zzzz395	false
248570		zzzz101,zzzz636	false
248569		zzzz101,zzzz727	false
248568		zzzz101,zzzz805	false
248567		zzzz101,zzzz844	false
248566		zzzz101,zzzz104	false
248565		zzzz101,zzzz141	false
248564		zzzz101,zzzz194	false
248563		zzzz101,zzzz215	false
248562		zzzz101,zzzz469	false
248561		zzzz101,zzzz512	false
248560		zzzz101,zzzz539	false
248559		zzzz101,zzzz605	false
248558		zzzz101,zzzz617	false
248557		zzzz101,zzzz634	false
248556		zzzz101,zzzz690	false
248555		zzzz101,zzzz964	false
248554		zzzz101,zzzz983	false
248553		zzzz101,zzzzz63	false
248552		zzzz101,zzzz109	false
248551		zzzz101,zzzz147	false
248550		zzzz101,zzzz149	false
248549		zzzz101,zzzz155	false
248548		zzzz101,zzzz208	false
248547		zzzz101,zzzz290	false
248546		zzzz101,zzzz297	false
248545		zzzz101,zzzz582	false
248544		zzzz101,zzzz587	false
248543		zzzz101,zzzz593	false
248542		zzzz101,zzzz662	false
248541		zzzz101,zzzz981	false
248540		zzzz101,zzzz127	false
248539		zzzz101,zzzz145	false
248538		zzzz101,zzzz300	false
248537		zzzz101,zzzz492	false
248536		zzzz101,zzzz537	false
248535		zzzz101,zzzz899	false
248534		zzzz101,zzzz963	false
248533		zzzz101,zzzz385	false
248532		zzzz101,zzzz401	false
248531		zzzz101,zzzz434	false
248530		zzzz101,zzzz438	false
248529		zzzz101,zzzz449	false
248528		zzzz101,zzzz481	false
248527		zzzz101,zzzz500	false
248526		zzzz101,zzzz511	false
248525		zzzz101,zzzz902	false
248524		zzzz101,zzzz202	false
248523		zzzz101,zzzz637	false
248522		zzzz101,zzzz908	false
248521		zzzz101,zzzz950	false
248520		zzzz101,zzzzz46	false
248519		zzzz101,zzzz611	false
248518		zzzz101,zzzz808	false
248517		zzzz101,zzzz901	false
248516		zzzz101,zzzzz61	false
248515		zzzz101,zzzz144	false
248514		zzzz101,zzzz199	false
248513		zzzz101,zzzz255	false
248512		zzzz101,zzzz367	false
248511		zzzz101,zzzz679	false
248510		zzzz101,zzzz787	false
248509		zzzz101,zzzz900	false
248508		zzzz101,zzzz117	false
248507		zzzz101,zzzz148	false
248506		zzzz101,zzzz182	false
248505		zzzz101,zzzz242	false
248504		zzzz101,zzzz355	false
248503		zzzz101,zzzz402	false
248502		zzzz101,zzzz467	false
248501		zzzz101,zzzzz53	false
248500		zzzz101,zzzz103	false
248499		zzzz101,zzzz211	false
248498		zzzz101,zzzz447	false
248497		zzzz101,zzzz561	false
248496		zzzz101,zzzz648	false
248495		zzzz101,zzzz652	false
248494		zzzz101,zzzz811	false
248493		zzzz101,zzzz946	false
248492		zzzz101,zzzz178	false
248491		zzzz101,zzzz354	false
248490		zzzz101,zzzz376	false
248489		zzzz101,zzzz406	false
248488		zzzz101,zzzz660	false
248487		zzzz101,zzzz738	false
248486		zzzz101,zzzzz79	false
248485		zzzz101,zzzzz93	false
248484		zzzz101,zzzz195	false
248483		zzzz101,zzzz431	false
248482		zzzz101,zzzz516	false
248481		zzzz101,zzzz824	false
248480		zzzz101,zzzz890	false
248479		zzzz101,zzzz113	false
248478		zzzz101,zzzz206	false
248477		zzzz101,zzzz364	false
248476		zzzz101,zzzz369	false
248475		zzzz101,zzzz391	false
248474		zzzz101,zzzz472	false
248473		zzzz101,zzzz592	false
248472		zzzz101,zzzz346	false
248471		zzzz101,zzzz497	false
248470		zzzz101,zzzz204	false
248469		zzzz101,zzzz619	false
248468		zzzz101,zzzz793	false
248467		zzzz101,zzzzz83	false
248466		zzzz101,zzzz121	false
248465		zzzz101,zzzz302	false
248464		zzzz101,zzzz370	false
248463		zzzz101,zzzz380	false
248462		zzzz101,zzzz414	false
248461		zzzz101,zzzz460	false
248460		zzzz101,zzzz538	false
248459		zzzz101,zzzz647	false
248458		zzzz101,zzzz862	false
248457		zzzz101,zzzz357	false
248456		zzzz101,zzzz487	false
248455		zzzz101,zzzz571	false
248454		zzzz101,zzzz597	false
248453		zzzz101,zzzz837	false
248452		zzzz101,zzzz848	false
248451		zzzz101,zzzz850	false
248450		zzzz101,zzzzz54	false
248449		zzzz101,zzzz397	false
248448		zzzz101,zzzz478	false
248447		zzzz101,zzzz513	false
248446		zzzz101,zzzzz82	false
248445		zzzz101,zzzz146	false
248444		zzzz101,zzzz172	false
248442		zzzz101,zzzz377	false
248441		zzzz101,zzzz623	false
248440		zzzz101,zzzz785	false
248439		zzzz101,zzzz142	false
248438		zzzz101,zzzz441	false
248437		zzzz101,zzzz590	false
248436		zzzz101,zzzz201	false
248435		zzzz101,zzzz239	false
248434		zzzz101,zzzz435	false
248433		zzzz101,zzzz661	false
248432		zzzz101,zzzz210	false
248431		zzzz101,zzzz213	false
248430		zzzz101,zzzz383	false
248429		zzzz101,zzzz470	false
248428		zzzz101,zzzz471	false
248427		zzzz101,zzzz543	false
248426		zzzz101,zzzz574	false
248425		zzzz101,zzzz496	false
248424		zzzz101,zzzz509	false
248423		zzzz101,zzzz644	false
248422		zzzz101,zzzz965	false
248421		zzzz101,zzzzz51	false
248420		zzzz101,zzzz903	false
248419		zzzz101,zzzz944	false
248418		zzzz101,zzzz892	false
248417		zzzz101,zzzz893	false
248416		zzzz101,zzzzz60	false
248415		zzzz101,zzzz143	false
248414		zzzz101,zzzz157	false
248411		zzzz101,zzzz390	false
248410		zzzz101,zzzz404	false
248409		zzzz101,zzzz412	false
248408		zzzz101,zzzz428	false
248407		zzzz101,zzzz745	false
248406		zzzz101,zzzz379	false
248405		zzzz101,zzzz586	false
248404		zzzz101,zzzz105	false
248403		zzzz101,zzzz225	false
248401		zzzz101,zzzz618	false
248400		zzzz101,zzzz635	false
248399		zzzz101,zzzz688	false
248398		zzzz101,zzzzz64	false
248397		zzzz101,zzzz203	false
248396		zzzz101,zzzz264	false
248395		zzzz101,zzzz486	false
248393		zzzz101,zzzz382	false
248392		zzzz101,zzzz790	false
248391		zzzz101,zzzz894	false
248390		zzzz101,zzzz277	false
248388		zzzz101,zzzz439	false
248387		zzzz101,zzzz562	false
248386		zzzz101,zzzz622	false
248385		zzzz101,zzzz659	false
248384		zzzz101,zzzz783	false
248383		zzzz101,zzzzz75	false
248382		zzzz101,zzzz223	false
248381		zzzz101,zzzz278	false
248379		zzzz101,zzzz214	false
248378		zzzz101,zzzz263	false
248377		zzzz101,zzzz301	false
248376		zzzz101,zzzz425	false
248375		zzzz101,zzzz466	false
248374		zzzz101,zzzz631	false
248373		zzzz101,zzzz653	false
248372		zzzz101,zzzz209	false
248371		zzzz101,zzzz405	false
248369		zzzz101,zzzz756	false
248368		zzzz101,zzzzz91	false
248367		zzzz101,zzzzz98	false
248366		zzzz101,zzzz360	false
248365		zzzz101,zzzz616	false
248364		zzzz101,zzzz796	false
248363		zzzz101,zzzz920	false
248362		zzzz101,zzzzz77	false
248361		zzzz101,zzzz399	false
248360		zzzz101,zzzz446	false
248359		zzzz101,zzzz521	false
248357		zzzz101,zzzz786	false
248356		zzzz101,zzzz111	false
248355		zzzz101,zzzz216	false
248353		zzzz101,zzzz231	false
248352		zzzz101,zzzz235	false
248350		zzzz101,zzzz645	false
248349		zzzz101,zzzz715	false
248347		zzzz101,zzzz453	false
248346		zzzz101,zzzz464	false
248345		zzzz101,zzzz217	false
248344		zzzz101,zzzz222	false
248342		zzzz101,zzzz442	false
248341		zzzz101,zzzz602	false
248338		zzzz101,zzzz374	false
248337		zzzz101,zzzz544	false
248335		zzzz101,zzzz826	false
248334		zzzz101,zzzz854	false
248330		zzzz101,zzzz672	false
248329		zzzz101,zzzz683	false
248328		zzzz101,zzzz687	false
248327		zzzz101,zzzz760	false
248325		zzzz101,zzzz366	false
248323		zzzz101,zzzz820	false
248322		zzzz101,zzzz240	false
248321		zzzz101,zzzz626	false
248320		zzzz101,zzzz700	false
248319		zzzz101,zzzzz70	false
248318		zzzz101,zzzz462	false
248317		zzzz101,zzzz839	false
248316		zzzz101,zzzz455	false
248314		zzzz101,zzzz788	false
248313		zzzz101,zzzz279	false
248312		zzzz101,zzzz281	false
248311		zzzz101,zzzz303	false
248310		zzzz101,zzzz519	false
248309		zzzz101,zzzz226	false
248306		zzzz101,zzzzz76	false
248304		zzzz101,zzzz825	false
248301		zzzz101,zzzz698	false
248298		zzzz101,zzzz190	false
248297		zzzz101,zzzz804	false
248294		zzzz101,zzzz473	false
248290		zzzz101,zzzz823	false
248289		zzzz101,zzzz298	false
248287		zzzz101,zzzz633	false
248285		zzzz101,zzzz818	false
248284		zzzz101,zzzz696	false
248281		zzzz101,zzzz728	false
248276		zzzz101,zzzz461	false
248275		zzzz101,zzzz253	false
248274		zzzz101,zzzz815	false
248270		zzzz101,zzzzz92	false
248269		zzzz101,zzzz430	false
248268		zzzz102,zzzz288	false
248267		zzzz102,zzzz812	false
248266		zzzz102,zzzz287	false
248265		zzzz102,zzzz156	false
248264		zzzz102,zzzz351	false
248263		zzzz102,zzzz365	false
248262		zzzz102,zzzz457	false
248261		zzzz102,zzzz674	false
248260		zzzz102,zzzz154	false
248259		zzzz102,zzzz724	false
248258		zzzz102,zzzz456	false
248257		zzzz102,zzzz362	false
248256		zzzz102,zzzz907	false
248255		zzzz102,zzzz128	false
248254		zzzz102,zzzz387	false
248253		zzzz102,zzzz373	false
248252		zzzz102,zzzz418	false
248251		zzzz102,zzzz896	false
248250		zzzz102,zzzz388	false
248249		zzzz102,zzzz417	false
248248		zzzz102,zzzz197	false
248247		zzzz102,zzzz261	false
248246		zzzz102,zzzz415	false
248245		zzzz102,zzzz443	false
248244		zzzz102,zzzz585	false
248243		zzzz102,zzzz792	false
248242		zzzz102,zzzz424	false
248241		zzzz102,zzzz478	false
248240		zzzz102,zzzz579	false
248239		zzzz102,zzzz657	false
248238		zzzz102,zzzz913	false
248237		zzzz102,zzzzz80	false
248236		zzzz102,zzzz114	false
248235		zzzz102,zzzz597	false
248234		zzzz102,zzzz157	false
248233		zzzz102,zzzz422	false
248232		zzzz102,zzzz949	false
248231		zzzz102,zzzzz55	false
248230		zzzz102,zzzzz85	false
248229		zzzz102,zzzz109	false
248228		zzzz102,zzzz378	false
248227		zzzz102,zzzz433	false
248226		zzzz102,zzzz451	false
248225		zzzz102,zzzz525	false
248224		zzzz102,zzzz628	false
248223		zzzz102,zzzz841	false
248222		zzzz102,zzzz952	false
248221		zzzz102,zzzz134	false
248220		zzzz102,zzzz376	false
248219		zzzz102,zzzz432	false
248218		zzzz102,zzzz528	false
248217		zzzz102,zzzz643	false
248216		zzzz102,zzzz726	false
248215		zzzz102,zzzz945	false
248214		zzzz102,zzzz123	false
248213		zzzz102,zzzz130	false
248212		zzzz102,zzzz189	false
248211		zzzz102,zzzz389	false
248210		zzzz102,zzzz498	false
248209		zzzz102,zzzz511	false
248208		zzzz102,zzzz518	false
248207		zzzz102,zzzz537	false
248206		zzzz102,zzzz546	false
248205		zzzz102,zzzz129	false
248204		zzzz102,zzzz548	false
248203		zzzz102,zzzz725	false
248202		zzzz102,zzzz884	false
248201		zzzz102,zzzz119	false
248200		zzzz102,zzzz385	false
248199		zzzz102,zzzz573	false
248198		zzzz102,zzzz791	false
248197		zzzz102,zzzz912	false
248196		zzzz102,zzzzz45	false
248195		zzzz102,zzzzz53	false
248194		zzzz102,zzzz356	false
248193		zzzz102,zzzz358	false
248192		zzzz102,zzzz369	false
248191		zzzz102,zzzz420	false
248190		zzzz102,zzzz477	false
248189		zzzz102,zzzz647	false
248188		zzzz102,zzzz678	false
248187		zzzz102,zzzz910	false
248186		zzzz102,zzzz940	false
248185		zzzz102,zzzzz87	false
248184		zzzz102,zzzz372	false
248183		zzzz102,zzzz407	false
248182		zzzz102,zzzz840	false
248181		zzzz102,zzzz171	false
248180		zzzz102,zzzz353	false
248179		zzzz102,zzzz416	false
248178		zzzz102,zzzz445	false
248177		zzzz102,zzzz474	false
248176		zzzz102,zzzz480	false
248175		zzzz102,zzzz512	false
248174		zzzz102,zzzz523	false
248173		zzzz102,zzzz556	false
248172		zzzz102,zzzz982	false
248171		zzzz102,zzzzz49	false
248170		zzzz102,zzzzz74	false
248169		zzzz102,zzzz381	false
248168		zzzz102,zzzz460	false
248167		zzzz102,zzzz492	false
248166		zzzz102,zzzz906	false
248165		zzzz102,zzzzz50	false
248164		zzzz102,zzzzz82	false
248163		zzzz102,zzzz120	false
248162		zzzz102,zzzz375	false
248161		zzzz102,zzzz396	false
248160		zzzz102,zzzz425	false
248159		zzzz102,zzzz454	false
248158		zzzz102,zzzz495	false
248157		zzzz102,zzzz613	false
248156		zzzz102,zzzz629	false
248155		zzzz102,zzzz641	false
248154		zzzz102,zzzz908	false
248153		zzzz102,zzzz352	false
248152		zzzz102,zzzz428	false
248151		zzzz102,zzzz540	false
248150		zzzz102,zzzz564	false
248149		zzzz102,zzzz642	false
248148		zzzz102,zzzz692	false
248147		zzzz102,zzzz794	false
248146		zzzz102,zzzz901	false
248145		zzzz102,zzzz921	false
248144		zzzz102,zzzz941	false
248143		zzzz102,zzzz127	false
248142		zzzz102,zzzz165	false
248141		zzzz102,zzzz224	false
248140		zzzz102,zzzz947	false
248139		zzzz102,zzzzz73	false
248138		zzzz102,zzzzz84	false
248137		zzzz102,zzzz354	false
248136		zzzz102,zzzz450	false
248135		zzzz102,zzzz452	false
248134		zzzz102,zzzz485	false
248133		zzzz102,zzzz520	false
248132		zzzz102,zzzz531	false
248131		zzzz102,zzzz535	false
248130		zzzz102,zzzz640	false
248129		zzzz102,zzzz793	false
248128		zzzz102,zzzz852	false
248127		zzzz102,zzzz903	false
248126		zzzz102,zzzz909	false
248125		zzzz102,zzzzz88	false
248124		zzzz102,zzzz117	false
248123		zzzz102,zzzz207	false
248122		zzzz102,zzzz401	false
248121		zzzz102,zzzz508	false
248120		zzzz102,zzzz522	false
248119		zzzz102,zzzz533	false
248118		zzzz102,zzzz667	false
248117		zzzz102,zzzz802	false
248116		zzzz102,zzzz131	false
248115		zzzz102,zzzz208	false
248114		zzzz102,zzzz210	false
248113		zzzz102,zzzz434	false
248112		zzzz102,zzzz440	false
248111		zzzz102,zzzz447	false
248110		zzzz102,zzzz448	false
248109		zzzz102,zzzz458	false
248108		zzzz102,zzzz663	false
248107		zzzz102,zzzz893	false
248106		zzzz102,zzzz895	false
248105		zzzz102,zzzz900	false
248104		zzzz102,zzzz911	false
248103		zzzz102,zzzz963	false
248102		zzzz102,zzzzz90	false
248101		zzzz102,zzzz132	false
248100		zzzz102,zzzz166	false
248099		zzzz102,zzzz245	false
248098		zzzz102,zzzz348	false
248097		zzzz102,zzzz475	false
248096		zzzz102,zzzz521	false
248095		zzzz102,zzzz627	false
248094		zzzz102,zzzz935	false
248093		zzzz102,zzzzz86	false
248092		zzzz102,zzzz108	false
248091		zzzz102,zzzz160	false
248090		zzzz102,zzzz162	false
248089		zzzz102,zzzz199	false
248088		zzzz102,zzzz286	false
248087		zzzz102,zzzz368	false
248086		zzzz102,zzzz410	false
248085		zzzz102,zzzz444	false
248084		zzzz102,zzzz500	false
248083		zzzz102,zzzz894	false
248082		zzzz102,zzzz209	false
248081		zzzz102,zzzz217	false
248080		zzzz102,zzzz220	false
248079		zzzz102,zzzz465	false
248078		zzzz102,zzzz470	false
248077		zzzz102,zzzz502	false
248076		zzzz102,zzzz515	false
248075		zzzz102,zzzz649	false
248074		zzzz102,zzzz796	false
248073		zzzz102,zzzz809	false
248072		zzzz102,zzzz965	false
248071		zzzz102,zzzzz78	false
248070		zzzz102,zzzz136	false
248069		zzzz102,zzzz370	false
248068		zzzz102,zzzz382	false
248067		zzzz102,zzzz646	false
248066		zzzz102,zzzz849	false
248065		zzzz102,zzzz892	false
248064		zzzz102,zzzz176	false
248063		zzzz102,zzzz262	false
248062		zzzz102,zzzz371	false
248061		zzzz102,zzzz400	false
248060		zzzz102,zzzz501	false
248059		zzzz102,zzzz550	false
248058		zzzz102,zzzz650	false
248057		zzzz102,zzzz722	false
248056		zzzz102,zzzz810	false
248055		zzzz102,zzzz843	false
248054		zzzz102,zzzz904	false
248053		zzzz102,zzzz950	false
248052		zzzz102,zzzz951	false
248051		zzzz102,zzzz180	false
248050		zzzz102,zzzz349	false
248049		zzzz102,zzzz620	false
248048		zzzz102,zzzz637	false
248047		zzzz102,zzzz656	false
248046		zzzz102,zzzz670	false
248045		zzzz102,zzzz829	false
248044		zzzz102,zzzz836	false
248043		zzzz102,zzzz936	false
248042		zzzz102,zzzz944	false
248041		zzzz102,zzzz553	false
248040		zzzz102,zzzz619	false
248039		zzzz102,zzzz161	false
248038		zzzz102,zzzz383	false
248037		zzzz102,zzzz406	false
248036		zzzz102,zzzz437	false
248035		zzzz102,zzzz441	false
248034		zzzz102,zzzz449	false
248033		zzzz102,zzzz554	false
248032		zzzz102,zzzz614	false
248031		zzzz102,zzzz658	false
248030		zzzz102,zzzz346	false
248029		zzzz102,zzzz364	false
248028		zzzz102,zzzz367	false
248027		zzzz102,zzzz527	false
248026		zzzz102,zzzz567	false
248025		zzzz102,zzzz807	false
248024		zzzz102,zzzzz91	false
248023		zzzz102,zzzz164	false
248022		zzzz102,zzzz179	false
248021		zzzz102,zzzz379	false
248020		zzzz102,zzzz395	false
248019		zzzz102,zzzz413	false
248018		zzzz102,zzzz636	false
248017		zzzz102,zzzz665	false
248016		zzzz102,zzzz889	false
248015		zzzz102,zzzz891	false
248014		zzzz102,zzzzz83	false
248013		zzzz102,zzzz118	false
248012		zzzz102,zzzz155	false
248011		zzzz102,zzzz159	false
248010		zzzz102,zzzz264	false
248009		zzzz102,zzzz361	false
248008		zzzz102,zzzz421	false
248007		zzzz102,zzzz423	false
248006		zzzz102,zzzz471	false
248005		zzzz102,zzzz472	false
248004		zzzz102,zzzz529	false
248003		zzzz102,zzzz547	false
248002		zzzz102,zzzz555	false
248001		zzzz102,zzzz559	false
248000		zzzz102,zzzz644	false
247999		zzzz102,zzzz654	false
247998		zzzz102,zzzz158	false
247997		zzzz102,zzzz483	false
247996		zzzz102,zzzz505	false
247995		zzzz102,zzzz563	false
247994		zzzz102,zzzz631	false
247993		zzzz102,zzzzz61	false
247992		zzzz102,zzzz107	false
247991		zzzz102,zzzz195	false
247990		zzzz102,zzzz427	false
247989		zzzz102,zzzz436	false
247988		zzzz102,zzzz494	false
247987		zzzz102,zzzz509	false
247986		zzzz102,zzzz524	false
247985		zzzz102,zzzzz81	false
247984		zzzz102,zzzz116	false
247983		zzzz102,zzzz230	false
247982		zzzz102,zzzz397	false
247981		zzzz102,zzzz468	false
247980		zzzz102,zzzz491	false
247979		zzzz102,zzzz497	false
247978		zzzz102,zzzz549	false
247977		zzzz102,zzzz618	false
247976		zzzz102,zzzz661	false
247975		zzzz102,zzzz662	false
247974		zzzz102,zzzzz89	false
247973		zzzz102,zzzzz97	false
247972		zzzz102,zzzz106	false
247971		zzzz102,zzzz153	false
247970		zzzz102,zzzz173	false
247969		zzzz102,zzzz206	false
247968		zzzz102,zzzz390	false
247967		zzzz102,zzzz414	false
247966		zzzz102,zzzz462	false
247965		zzzz102,zzzz638	false
247964		zzzz102,zzzz727	false
247963		zzzz102,zzzz126	false
247962		zzzz102,zzzz135	false
247961		zzzz102,zzzz145	false
247960		zzzz102,zzzz167	false
247959		zzzz102,zzzz168	false
247958		zzzz102,zzzz211	false
247957		zzzz102,zzzz366	false
247956		zzzz102,zzzz439	false
247955		zzzz102,zzzz542	false
247954		zzzz102,zzzz635	false
247953		zzzz102,zzzz664	false
247952		zzzz102,zzzz833	false
247951		zzzz102,zzzz899	false
247950		zzzz102,zzzzz96	false
247949		zzzz102,zzzz125	false
247948		zzzz102,zzzz163	false
247947		zzzz102,zzzz216	false
247946		zzzz102,zzzz357	false
247945		zzzz102,zzzz377	false
247944		zzzz102,zzzz526	false
247943		zzzz102,zzzz738	false
247942		zzzz102,zzzz832	false
247941		zzzz102,zzzz964	false
247940		zzzz102,zzzz174	false
247939		zzzz102,zzzz175	false
247938		zzzz102,zzzz194	false
247937		zzzz102,zzzz219	false
247936		zzzz102,zzzz252	false
247935		zzzz102,zzzz484	false
247934		zzzz102,zzzz487	false
247933		zzzz102,zzzz504	false
247932		zzzz102,zzzz621	false
247931		zzzz102,zzzz170	false
247930		zzzz102,zzzz243	false
247929		zzzz102,zzzz831	false
247928		zzzz102,zzzzz64	false
247927		zzzz102,zzzzz77	false
247926		zzzz102,zzzz133	false
247925		zzzz102,zzzz473	false
247924		zzzz102,zzzz577	false
247923		zzzz102,zzzz622	false
247922		zzzz102,zzzz630	false
247921		zzzz102,zzzz902	false
247920		zzzz102,zzzzz60	false
247919		zzzz102,zzzz177	false
247918		zzzz102,zzzz479	false
247917		zzzz102,zzzz516	false
247916		zzzz102,zzzz544	false
247915		zzzz102,zzzz659	false
247914		zzzz102,zzzz115	false
247913		zzzz102,zzzz429	false
247912		zzzz102,zzzz808	false
247911		zzzz102,zzzz845	false
247910		zzzz102,zzzz946	false
247909		zzzz102,zzzzz79	false
247908		zzzz102,zzzz393	false
247907		zzzz102,zzzz402	false
247906		zzzz102,zzzz405	false
247905		zzzz102,zzzz442	false
247904		zzzz102,zzzz648	false
247903		zzzz102,zzzz811	false
247902		zzzz102,zzzzz48	false
247901		zzzz102,zzzzz94	false
[truncated: 249,175 more rows]
