# Supplementary material for: Discovery of several thousand highly diverse circular DNA viruses
Source: eLife journal article supplement (doi:10.7554/elife.51971), 2020-02-03
Supplement: fig2-figsupp1-data4 [file elife-51971-fig2-figsupp1-data4-v1.cys › CytoscapeSession-2019_08_05-17_02/tables/36-all_my_seqs_genbank_ssDNA1_domains_micro_ino_rep_fasta+Full+Network/LOCAL_ATTRS-org.cytoscape.model.CyNode-36+default+node.cytable]

CyCSV-Version	1
SUID	name	selected
java.lang.Long	java.lang.String	java.lang.Boolean
36 default node
943	zzzz100	false
942	zzzz101	false
941	zzzz102	false
940	zzzz103	false
939	zzzz104	false
938	zzzz105	false
937	zzzz106	false
936	zzzz107	false
935	zzzz108	false
934	zzzz109	false
933	zzzz110	false
932	zzzz111	false
931	zzzz112	false
930	zzzz113	false
929	zzzz114	false
928	zzzz115	false
927	zzzz116	false
926	zzzz117	false
925	zzzz118	false
924	zzzz119	false
923	zzzz120	false
922	zzzz121	false
921	zzzz122	false
920	zzzz123	false
919	zzzz124	false
918	zzzz125	false
917	zzzz126	false
916	zzzz127	false
915	zzzz128	false
914	zzzz129	false
913	zzzz130	false
912	zzzz131	false
911	zzzz132	false
910	zzzz133	false
909	zzzz134	false
908	zzzz135	false
907	zzzz136	false
906	zzzz137	false
905	zzzz138	false
904	zzzz139	false
903	zzzz140	false
902	zzzz141	false
901	zzzz142	false
900	zzzz143	false
899	zzzz144	false
898	zzzz145	false
897	zzzz146	false
896	zzzz147	false
895	zzzz148	false
894	zzzz149	false
893	zzzz150	false
892	zzzz151	false
891	zzzz152	false
890	zzzz153	false
889	zzzz154	false
888	zzzz155	false
887	zzzz156	false
886	zzzz157	false
885	zzzz158	false
884	zzzz159	false
883	zzzz160	false
882	zzzz161	false
881	zzzz162	false
880	zzzz163	false
879	zzzz164	false
878	zzzz165	false
877	zzzz166	false
876	zzzz167	false
875	zzzz168	false
874	zzzz169	false
873	zzzz170	false
872	zzzz171	false
871	zzzz172	false
870	zzzz173	false
869	zzzz174	false
868	zzzz175	false
867	zzzz176	false
866	zzzz177	false
865	zzzz178	false
864	zzzz179	false
863	zzzz180	false
862	zzzz181	false
861	zzzz182	false
860	zzzz183	false
859	zzzz184	false
858	zzzz185	false
857	zzzz186	false
856	zzzz187	false
855	zzzz188	false
854	zzzz189	false
853	zzzz190	false
852	zzzz191	false
851	zzzz192	false
850	zzzz193	false
849	zzzz194	false
848	zzzz195	false
847	zzzz196	false
846	zzzz197	false
845	zzzz198	false
844	zzzz199	false
843	zzzz200	false
842	zzzz201	false
841	zzzz202	false
840	zzzz203	false
839	zzzz204	false
838	zzzz205	false
837	zzzz206	false
836	zzzz207	false
835	zzzz208	false
834	zzzz209	false
833	zzzz210	false
832	zzzz211	false
831	zzzz212	false
830	zzzz213	false
829	zzzz214	false
828	zzzz215	false
827	zzzz216	false
826	zzzz217	false
825	zzzz218	false
824	zzzz219	false
823	zzzz220	false
822	zzzz221	false
821	zzzz222	false
820	zzzz223	false
819	zzzz224	false
818	zzzz225	false
817	zzzz226	false
816	zzzz227	false
815	zzzz228	false
814	zzzz229	false
813	zzzz230	false
812	zzzz231	false
811	zzzz232	false
810	zzzz233	false
809	zzzz234	false
808	zzzz235	false
807	zzzz236	false
806	zzzz237	false
805	zzzz238	false
804	zzzz239	false
803	zzzz240	false
802	zzzz241	false
801	zzzz242	false
800	zzzz243	false
799	zzzz244	false
798	zzzz245	false
797	zzzz246	false
796	zzzz247	false
795	zzzz248	false
794	zzzz249	false
793	zzzz250	false
792	zzzz251	false
791	zzzz252	false
790	zzzz253	false
789	zzzz254	false
788	zzzz255	false
787	zzzz256	false
786	zzzz257	false
785	zzzz258	false
784	zzzz259	false
783	zzzz260	false
782	zzzz261	false
781	zzzz262	false
780	zzzz263	false
779	zzzz264	false
778	zzzz273	false
777	zzzz274	false
776	zzzz275	false
775	zzzz277	false
774	zzzz278	false
773	zzzz279	false
772	zzzz280	false
771	zzzz281	false
770	zzzz282	false
769	zzzz283	false
768	zzzz284	false
767	zzzz285	false
766	zzzz286	false
765	zzzz287	false
764	zzzz288	false
763	zzzz290	false
762	zzzz291	false
761	zzzz292	false
760	zzzz296	false
759	zzzz297	false
758	zzzz298	false
757	zzzz299	false
756	zzzz300	false
755	zzzz301	false
754	zzzz302	false
753	zzzz303	false
752	zzzz304	false
751	zzzz305	false
750	zzzz306	false
749	zzzz307	false
748	zzzz308	false
747	zzzz309	false
746	zzzz310	false
745	zzzz311	false
744	zzzz312	false
743	zzzz313	false
742	zzzz314	false
741	zzzz315	false
740	zzzz316	false
739	zzzz317	false
738	zzzz318	false
737	zzzz319	false
736	zzzz320	false
735	zzzz321	false
734	zzzz322	false
733	zzzz323	false
732	zzzz324	false
731	zzzz325	false
730	zzzz326	false
729	zzzz327	false
728	zzzz328	false
727	zzzz329	false
726	zzzz330	false
725	zzzz331	false
724	zzzz332	false
723	zzzz333	false
722	zzzz334	false
721	zzzz335	false
720	zzzz336	false
719	zzzz337	false
718	zzzz338	false
717	zzzz339	false
716	zzzz340	false
715	zzzz341	false
714	zzzz342	false
713	zzzz343	false
712	zzzz344	false
711	zzzz345	false
710	zzzz346	false
709	zzzz347	false
708	zzzz348	false
707	zzzz349	false
706	zzzz350	false
705	zzzz351	false
704	zzzz352	false
703	zzzz353	false
702	zzzz354	false
701	zzzz355	false
700	zzzz356	false
699	zzzz357	false
698	zzzz358	false
697	zzzz359	false
696	zzzz360	false
695	zzzz361	false
694	zzzz362	false
693	zzzz363	false
692	zzzz364	false
691	zzzz365	false
690	zzzz366	false
689	zzzz367	false
688	zzzz368	false
687	zzzz369	false
686	zzzz370	false
685	zzzz371	false
684	zzzz372	false
683	zzzz373	false
682	zzzz374	false
681	zzzz375	false
680	zzzz376	false
679	zzzz377	false
678	zzzz378	false
677	zzzz379	false
676	zzzz380	false
675	zzzz381	false
674	zzzz382	false
673	zzzz383	false
672	zzzz384	false
671	zzzz385	false
670	zzzz386	false
669	zzzz387	false
668	zzzz388	false
667	zzzz389	false
666	zzzz390	false
665	zzzz391	false
664	zzzz392	false
663	zzzz393	false
662	zzzz394	false
661	zzzz395	false
660	zzzz396	false
659	zzzz397	false
658	zzzz398	false
657	zzzz399	false
656	zzzz400	false
655	zzzz401	false
654	zzzz402	false
653	zzzz403	false
652	zzzz404	false
651	zzzz405	false
650	zzzz406	false
649	zzzz407	false
648	zzzz408	false
647	zzzz409	false
646	zzzz410	false
645	zzzz411	false
644	zzzz412	false
643	zzzz413	false
642	zzzz414	false
641	zzzz415	false
640	zzzz416	false
639	zzzz417	false
638	zzzz418	false
637	zzzz419	false
636	zzzz420	false
635	zzzz421	false
634	zzzz422	false
633	zzzz423	false
632	zzzz424	false
631	zzzz425	false
630	zzzz426	false
629	zzzz427	false
628	zzzz428	false
627	zzzz429	false
626	zzzz430	false
625	zzzz431	false
624	zzzz432	false
623	zzzz433	false
622	zzzz434	false
621	zzzz435	false
620	zzzz436	false
619	zzzz437	false
618	zzzz438	false
617	zzzz439	false
616	zzzz440	false
615	zzzz441	false
614	zzzz442	false
613	zzzz443	false
612	zzzz444	false
611	zzzz445	false
610	zzzz446	false
609	zzzz447	false
608	zzzz448	false
607	zzzz449	false
606	zzzz450	false
605	zzzz451	false
604	zzzz452	false
603	zzzz453	false
602	zzzz454	false
601	zzzz455	false
600	zzzz456	false
599	zzzz457	false
598	zzzz458	false
597	zzzz459	false
596	zzzz460	false
595	zzzz461	false
594	zzzz462	false
593	zzzz463	false
592	zzzz464	false
591	zzzz465	false
590	zzzz466	false
589	zzzz467	false
588	zzzz468	false
587	zzzz469	false
586	zzzz470	false
585	zzzz471	false
584	zzzz472	false
583	zzzz473	false
582	zzzz474	false
581	zzzz475	false
580	zzzz476	false
579	zzzz477	false
578	zzzz478	false
577	zzzz479	false
576	zzzz480	false
575	zzzz481	false
574	zzzz482	false
573	zzzz483	false
572	zzzz484	false
571	zzzz485	false
570	zzzz486	false
569	zzzz487	false
568	zzzz488	false
567	zzzz489	false
566	zzzz490	false
565	zzzz491	false
564	zzzz492	false
563	zzzz493	false
562	zzzz494	false
561	zzzz495	false
560	zzzz496	false
559	zzzz497	false
558	zzzz498	false
557	zzzz499	false
556	zzzz500	false
555	zzzz501	false
554	zzzz502	false
553	zzzz503	false
552	zzzz504	false
551	zzzz505	false
550	zzzz506	false
549	zzzz507	false
548	zzzz508	false
547	zzzz509	false
546	zzzz510	false
545	zzzz511	false
544	zzzz512	false
543	zzzz513	false
542	zzzz514	false
541	zzzz515	false
540	zzzz516	false
539	zzzz517	false
538	zzzz518	false
537	zzzz519	false
536	zzzz520	false
535	zzzz521	false
534	zzzz522	false
533	zzzz523	false
532	zzzz524	false
531	zzzz525	false
530	zzzz526	false
529	zzzz527	false
528	zzzz528	false
527	zzzz529	false
526	zzzz530	false
525	zzzz531	false
524	zzzz532	false
523	zzzz533	false
522	zzzz534	false
521	zzzz535	false
520	zzzz536	false
519	zzzz537	false
518	zzzz538	false
517	zzzz539	false
516	zzzz540	false
515	zzzz541	false
514	zzzz542	false
513	zzzz543	false
512	zzzz544	false
511	zzzz545	false
510	zzzz546	false
509	zzzz547	false
508	zzzz548	false
507	zzzz549	false
506	zzzz550	false
505	zzzz551	false
504	zzzz552	false
503	zzzz553	false
502	zzzz554	false
501	zzzz555	false
500	zzzz556	false
499	zzzz557	false
498	zzzz558	false
497	zzzz559	false
496	zzzz560	false
495	zzzz561	false
494	zzzz562	false
493	zzzz563	false
492	zzzz564	false
491	zzzz565	false
490	zzzz566	false
489	zzzz567	false
488	zzzz568	false
487	zzzz569	false
486	zzzz570	false
485	zzzz571	false
484	zzzz572	false
483	zzzz573	false
482	zzzz574	false
481	zzzz575	false
480	zzzz576	false
479	zzzz577	false
478	zzzz578	false
477	zzzz579	false
476	zzzz580	false
475	zzzz581	false
474	zzzz582	false
473	zzzz583	false
472	zzzz584	false
471	zzzz585	false
470	zzzz586	false
469	zzzz587	false
468	zzzz588	false
467	zzzz589	false
466	zzzz590	false
465	zzzz591	false
464	zzzz592	false
463	zzzz593	false
462	zzzz594	false
461	zzzz595	false
460	zzzz596	false
459	zzzz597	false
458	zzzz598	false
457	zzzz599	false
456	zzzz600	false
455	zzzz601	false
454	zzzz602	false
453	zzzz603	false
452	zzzz604	false
451	zzzz605	false
450	zzzz606	false
449	zzzz607	false
448	zzzz608	false
447	zzzz609	false
446	zzzz610	false
445	zzzz611	false
444	zzzz612	false
443	zzzz613	false
442	zzzz614	false
441	zzzz615	false
440	zzzz616	false
439	zzzz617	false
438	zzzz618	false
437	zzzz619	false
436	zzzz620	false
435	zzzz621	false
434	zzzz622	false
433	zzzz623	false
432	zzzz625	false
431	zzzz626	false
430	zzzz627	false
429	zzzz628	false
428	zzzz629	false
427	zzzz630	false
426	zzzz631	false
425	zzzz632	false
424	zzzz633	false
423	zzzz634	false
422	zzzz635	false
421	zzzz636	false
420	zzzz637	false
419	zzzz638	false
418	zzzz639	false
417	zzzz640	false
416	zzzz641	false
415	zzzz642	false
414	zzzz643	false
413	zzzz644	false
412	zzzz645	false
411	zzzz646	false
410	zzzz647	false
409	zzzz648	false
408	zzzz649	false
407	zzzz650	false
406	zzzz651	false
405	zzzz652	false
404	zzzz653	false
403	zzzz654	false
402	zzzz655	false
401	zzzz656	false
400	zzzz657	false
399	zzzz658	false
398	zzzz659	false
397	zzzz660	false
396	zzzz661	false
395	zzzz662	false
394	zzzz663	false
393	zzzz664	false
392	zzzz665	false
391	zzzz666	false
390	zzzz667	false
389	zzzz668	false
388	zzzz669	false
387	zzzz670	false
386	zzzz671	false
385	zzzz672	false
384	zzzz673	false
383	zzzz674	false
382	zzzz675	false
381	zzzz676	false
380	zzzz677	false
379	zzzz678	false
378	zzzz679	false
377	zzzz680	false
376	zzzz681	false
375	zzzz683	false
374	zzzz684	false
373	zzzz685	false
372	zzzz686	false
371	zzzz687	false
370	zzzz688	false
369	zzzz689	false
368	zzzz690	false
367	zzzz692	false
366	zzzz693	false
365	zzzz694	false
364	zzzz695	false
363	zzzz696	false
362	zzzz697	false
361	zzzz698	false
360	zzzz699	false
359	zzzz700	false
358	zzzz701	false
357	zzzz702	false
356	zzzz703	false
355	zzzz704	false
354	zzzz705	false
353	zzzz706	false
352	zzzz707	false
351	zzzz708	false
350	zzzz709	false
349	zzzz710	false
348	zzzz711	false
347	zzzz712	false
346	zzzz713	false
345	zzzz714	false
344	zzzz715	false
343	zzzz716	false
342	zzzz717	false
341	zzzz718	false
340	zzzz719	false
339	zzzz720	false
338	zzzz721	false
337	zzzz722	false
336	zzzz724	false
335	zzzz725	false
334	zzzz726	false
333	zzzz727	false
332	zzzz728	false
331	zzzz738	false
330	zzzz739	false
329	zzzz743	false
328	zzzz744	false
327	zzzz745	false
326	zzzz746	false
325	zzzz747	false
324	zzzz748	false
323	zzzz749	false
322	zzzz751	false
321	zzzz752	false
320	zzzz753	false
319	zzzz754	false
318	zzzz756	false
317	zzzz757	false
316	zzzz758	false
315	zzzz760	false
314	zzzz763	false
313	zzzz764	false
312	zzzz765	false
311	zzzz766	false
310	zzzz767	false
309	zzzz768	false
308	zzzz769	false
307	zzzz772	false
306	zzzz773	false
305	zzzz774	false
304	zzzz775	false
303	zzzz776	false
302	zzzz777	false
301	zzzz778	false
300	zzzz779	false
299	zzzz780	false
298	zzzz783	false
297	zzzz784	false
296	zzzz785	false
295	zzzz786	false
294	zzzz787	false
293	zzzz788	false
292	zzzz789	false
291	zzzz790	false
290	zzzz791	false
289	zzzz792	false
288	zzzz793	false
287	zzzz794	false
286	zzzz796	false
285	zzzz797	false
284	zzzz799	false
283	zzzz800	false
282	zzzz801	false
281	zzzz802	false
280	zzzz803	false
279	zzzz804	false
278	zzzz805	false
277	zzzz806	false
276	zzzz807	false
275	zzzz808	false
274	zzzz809	false
273	zzzz810	false
272	zzzz811	false
271	zzzz812	false
270	zzzz813	false
269	zzzz815	false
268	zzzz816	false
267	zzzz817	false
266	zzzz818	false
265	zzzz819	false
264	zzzz820	false
263	zzzz821	false
262	zzzz822	false
261	zzzz823	false
260	zzzz824	false
259	zzzz825	false
258	zzzz826	false
257	zzzz827	false
256	zzzz828	false
255	zzzz829	false
254	zzzz830	false
253	zzzz831	false
252	zzzz832	false
251	zzzz833	false
250	zzzz834	false
249	zzzz835	false
248	zzzz836	false
247	zzzz837	false
246	zzzz838	false
245	zzzz839	false
244	zzzz840	false
243	zzzz841	false
242	zzzz842	false
241	zzzz843	false
240	zzzz844	false
239	zzzz845	false
238	zzzz846	false
237	zzzz847	false
236	zzzz848	false
235	zzzz849	false
234	zzzz850	false
233	zzzz851	false
232	zzzz852	false
231	zzzz853	false
230	zzzz854	false
229	zzzz855	false
228	zzzz857	false
227	zzzz859	false
226	zzzz860	false
225	zzzz861	false
224	zzzz862	false
223	zzzz863	false
222	zzzz884	false
221	zzzz889	false
220	zzzz890	false
219	zzzz891	false
218	zzzz892	false
217	zzzz893	false
216	zzzz894	false
215	zzzz895	false
214	zzzz896	false
213	zzzz898	false
212	zzzz899	false
211	zzzz900	false
210	zzzz901	false
209	zzzz902	false
208	zzzz903	false
207	zzzz904	false
206	zzzz905	false
205	zzzz906	false
204	zzzz907	false
203	zzzz908	false
202	zzzz909	false
201	zzzz910	false
200	zzzz911	false
199	zzzz912	false
198	zzzz913	false
197	zzzz915	false
196	zzzz919	false
195	zzzz920	false
194	zzzz921	false
193	zzzz929	false
192	zzzz930	false
191	zzzz931	false
190	zzzz932	false
189	zzzz933	false
188	zzzz934	false
187	zzzz935	false
186	zzzz936	false
185	zzzz939	false
184	zzzz940	false
183	zzzz941	false
182	zzzz942	false
181	zzzz943	false
180	zzzz944	false
179	zzzz945	false
178	zzzz946	false
177	zzzz947	false
176	zzzz948	false
175	zzzz949	false
174	zzzz950	false
173	zzzz951	false
172	zzzz952	false
171	zzzz961	false
170	zzzz962	false
169	zzzz963	false
168	zzzz964	false
167	zzzz965	false
166	zzzz966	false
165	zzzz980	false
164	zzzz981	false
163	zzzz982	false
162	zzzz983	false
161	zzzzz10	false
160	zzzzz11	false
159	zzzzz12	false
158	zzzzz13	false
157	zzzzz14	false
156	zzzzz15	false
155	zzzzz16	false
154	zzzzz17	false
153	zzzzz18	false
152	zzzzz19	false
151	zzzzz20	false
150	zzzzz21	false
149	zzzzz22	false
148	zzzzz23	false
147	zzzzz24	false
146	zzzzz25	false
145	zzzzz26	false
144	zzzzz27	false
143	zzzzz28	false
142	zzzzz29	false
141	zzzzz30	false
140	zzzzz31	false
139	zzzzz32	false
138	zzzzz33	false
137	zzzzz34	false
136	zzzzz35	false
135	zzzzz36	false
134	zzzzz37	false
133	zzzzz38	false
132	zzzzz39	false
131	zzzzz40	false
130	zzzzz41	false
129	zzzzz42	false
128	zzzzz43	false
127	zzzzz44	false
126	zzzzz45	false
125	zzzzz46	false
124	zzzzz47	false
123	zzzzz48	false
122	zzzzz49	false
121	zzzzz50	false
120	zzzzz51	false
119	zzzzz52	false
118	zzzzz53	false
117	zzzzz54	false
116	zzzzz55	false
115	zzzzz56	false
114	zzzzz57	false
113	zzzzz58	false
112	zzzzz59	false
111	zzzzz60	false
110	zzzzz61	false
109	zzzzz62	false
108	zzzzz63	false
107	zzzzz64	false
106	zzzzz65	false
105	zzzzz66	false
104	zzzzz67	false
103	zzzzz68	false
102	zzzzz69	false
101	zzzzz70	false
100	zzzzz71	false
99	zzzzz72	false
98	zzzzz73	false
97	zzzzz74	false
96	zzzzz75	false
95	zzzzz76	false
94	zzzzz77	false
93	zzzzz78	false
92	zzzzz79	false
91	zzzzz80	false
90	zzzzz81	false
89	zzzzz82	false
88	zzzzz83	false
87	zzzzz84	false
86	zzzzz85	false
85	zzzzz86	false
84	zzzzz87	false
83	zzzzz88	false
82	zzzzz89	false
81	zzzzz90	false
80	zzzzz91	false
79	zzzzz92	false
78	zzzzz93	false
77	zzzzz94	false
76	zzzzz95	false
75	zzzzz96	false
74	zzzzz97	false
73	zzzzz98	false
72	zzzzz99	false
71	zzzzzz0	false
70	zzzzzz1	false
69	zzzzzz2	false
68	zzzzzz3	false
67	zzzzzz4	false
66	zzzzzz5	false
65	zzzzzz6	false
64	zzzzzz7	false
63	zzzzzz8	false
62	zzzzzz9	false
249716	zzzz265	false
249717	zzzz266	false
249718	zzzz267	false
249719	zzzz268	false
249720	zzzz269	false
249721	zzzz270	false
249722	zzzz271	false
249723	zzzz272	false
249724	zzzz276	false
249725	zzzz289	false
249726	zzzz293	false
249727	zzzz294	false
249728	zzzz295	false
249729	zzzz624	false
249730	zzzz682	false
249731	zzzz691	false
249732	zzzz723	false
249733	zzzz729	false
249734	zzzz730	false
249735	zzzz731	false
249736	zzzz732	false
249737	zzzz733	false
249738	zzzz734	false
249739	zzzz735	false
249740	zzzz736	false
249741	zzzz737	false
249742	zzzz740	false
249743	zzzz741	false
249744	zzzz742	false
249745	zzzz750	false
249746	zzzz755	false
249747	zzzz759	false
249748	zzzz761	false
249749	zzzz762	false
249750	zzzz770	false
249751	zzzz771	false
249752	zzzz781	false
249753	zzzz782	false
249754	zzzz795	false
249755	zzzz798	false
249756	zzzz814	false
249757	zzzz856	false
249758	zzzz858	false
249759	zzzz864	false
249760	zzzz865	false
249761	zzzz866	false
249762	zzzz867	false
249763	zzzz868	false
249764	zzzz869	false
249765	zzzz870	false
249766	zzzz871	false
249767	zzzz872	false
249768	zzzz873	false
249769	zzzz874	false
249770	zzzz875	false
249771	zzzz876	false
249772	zzzz877	false
249773	zzzz878	false
249774	zzzz879	false
249775	zzzz880	false
249776	zzzz881	false
249777	zzzz882	false
249778	zzzz883	false
249779	zzzz885	false
249780	zzzz886	false
249781	zzzz887	false
249782	zzzz888	false
249783	zzzz897	false
249784	zzzz914	false
249785	zzzz916	false
249786	zzzz917	false
249787	zzzz918	false
249788	zzzz922	false
249789	zzzz923	false
249790	zzzz924	false
249791	zzzz925	false
249792	zzzz926	false
249793	zzzz927	false
249794	zzzz928	false
249795	zzzz937	false
249796	zzzz938	false
249797	zzzz953	false
249798	zzzz954	false
249799	zzzz955	false
249800	zzzz956	false
249801	zzzz957	false
249802	zzzz958	false
249803	zzzz959	false
249804	zzzz960	false
249805	zzzz967	false
249806	zzzz968	false
249807	zzzz969	false
249808	zzzz970	false
249809	zzzz971	false
249810	zzzz972	false
249811	zzzz973	false
249812	zzzz974	false
249813	zzzz975	false
249814	zzzz976	false
249815	zzzz977	false
249816	zzzz978	false
249817	zzzz979	false
