# Supplementary material for: Discovery of several thousand highly diverse circular DNA viruses
Source: eLife journal article supplement (doi:10.7554/elife.51971), 2020-02-03
Supplement: fig2-figsupp1-data4 [file elife-51971-fig2-figsupp1-data4-v1.cys › CytoscapeSession-2019_08_05-17_02/tables/36-all_my_seqs_genbank_ssDNA1_domains_micro_ino_rep_fasta+Full+Network/SHARED_ATTRS-org.cytoscape.model.CyEdge-36+shared+edge.cytable]

CyCSV-Version	1
SUID	%id	alignment_len	alignment_score	shared interaction	shared name
java.lang.Long	java.lang.Double	java.lang.Integer	java.lang.Double	java.lang.String	java.lang.String
	mutable	mutable	mutable
36 shared edge
12054	25.95	343	21.0		zzzz789,zzzz857
12055	33.94	218	21.0		zzzz789,zzzzz29
12056	29.1	299	22.0		zzzz789,zzzz797
12057	33.02	321	40.0		zzzz789,zzzzz27
12050	28.93	242	15.0		zzzz789,zzzzz24
12051	28.51	242	16.0		zzzz789,zzzzz25
12052	28.92	249	17.0		zzzz789,zzzzzz6
12053	30.49	246	18.0		zzzz789,zzzzz18
12047	28.57	168	9.0		zzzz789,zzzz980
12048	27.97	236	11.0		zzzz789,zzzzz19
12049	27.78	270	13.0		zzzz789,zzzz915
2302	27.62	315	23.0		zzzzz14,zzzzzz6
2303	26.0	350	23.0		zzzzz14,zzzzz18
2304	34.34	265	32.0		zzzzz14,zzzzz19
2305	72.14	384	164.0		zzzzz14,zzzzz21
2299	27.31	249	19.0		zzzzz14,zzzzz29
2300	27.84	255	21.0		zzzzz14,zzzzz24
2301	27.3	315	22.0		zzzzz14,zzzzz25
2290	33.33	225	27.0		zzzzz18,zzzzzz6
2291	72.07	358	158.0		zzzzz18,zzzzz29
2292	77.81	365	175.0		zzzzz18,zzzzz24
2286	23.0	213	9.0		zzzzz18,zzzzz22
2287	27.83	230	20.0		zzzzz18,zzzzz19
2288	25.51	294	22.0		zzzzz18,zzzzz21
2289	33.33	225	26.0		zzzzz18,zzzzz25
2282	29.38	211	21.0		zzzzz19,zzzzz24
2283	35.74	235	31.0		zzzzz19,zzzzz21
2284	25.79	159	8.0		zzzzz18,zzzzz27
2285	21.82	275	9.0		zzzzz18,zzzzzz1
2278	25.54	325	13.0		zzzzz19,zzzzzz2
2279	30.63	222	19.0		zzzzz19,zzzzzz6
2280	31.08	222	20.0		zzzzz19,zzzzz25
2281	29.88	241	21.0		zzzzz19,zzzzz29
2274	28.11	249	21.0		zzzzz21,zzzzzz6
2275	27.2	239	23.0		zzzzz21,zzzzz24
2276	25.82	244	9.0		zzzzz19,zzzzz22
2277	25.82	244	10.0		zzzzz19,zzzzzz1
2270	27.84	176	11.0		zzzzz21,zzzzz22
2271	27.84	176	11.0		zzzzz21,zzzzzz1
2272	27.31	249	21.0		zzzzz21,zzzzz25
2273	27.69	242	21.0		zzzzz21,zzzzz29
2266	23.79	227	10.0		zzzzz22,zzzzz29
2267	44.33	282	61.0		zzzzz22,zzzzzz2
2268	87.04	270	137.0		zzzzz22,zzzzz27
2269	99.25	268	164.0		zzzzz22,zzzzzz1
2263	24.15	236	8.0		zzzzz22,zzzzz25
2264	25.57	219	9.0		zzzzz22,zzzzzz6
2265	25.24	210	9.0		zzzzz22,zzzzz24
2258	30.19	212	21.0		zzzzz24,zzzzzz6
13010	75.28	267	127.0		zzzz766,zzzz775
2259	30.73	218	23.0		zzzzz24,zzzzz25
2260	69.65	346	147.0		zzzzz24,zzzzz29
2254	94.59	351	199.0		zzzzz25,zzzzzz6
13006	59.85	264	89.0		zzzz766,zzzz769
2255	23.08	247	8.0		zzzzz24,zzzzz27
13007	61.36	264	90.0		zzzz766,zzzz773
2256	22.71	273	9.0		zzzzz24,zzzzzz1
13008	61.36	264	97.0		zzzz766,zzzz772
2257	26.35	277	10.0		zzzzz24,zzzzzz2
13009	76.4	267	120.0		zzzz766,zzzz779
2250	89.67	368	198.0		zzzzz27,zzzzzz1
13002	42.47	259	50.0		zzzz766,zzzz780
13003	78.67	150	70.0		zzzz766,zzzz932
2252	24.52	261	11.0		zzzzz25,zzzzzz1
13004	60.98	264	87.0		zzzz766,zzzz768
2253	30.09	226	23.0		zzzzz25,zzzzz29
13005	60.23	264	88.0		zzzz766,zzzz767
2246	23.02	278	10.0		zzzzz29,zzzzzz1
12998	97.04	270	151.0		zzzz767,zzzz773
2247	29.2	226	22.0		zzzzz29,zzzzzz6
12999	94.81	270	157.0		zzzz767,zzzz772
2248	26.38	163	9.0		zzzzz27,zzzzz29
13000	24.83	290	8.0		zzzz766,zzzzz29
2249	35.28	377	53.0		zzzzz27,zzzzzz2
13001	29.96	267	19.0		zzzz766,zzzz776
12994	59.85	264	89.0		zzzz767,zzzz779
12995	62.12	264	100.0		zzzz767,zzzz775
12996	94.44	270	148.0		zzzz767,zzzz768
12997	94.81	270	148.0		zzzz767,zzzz769
12990	30.88	136	11.0		zzzz767,zzzzz21
12991	32.74	226	20.0		zzzz767,zzzz776
12992	40.46	262	45.0		zzzz767,zzzz780
12993	66.67	147	55.0		zzzz767,zzzz932
12986	91.48	270	142.0		zzzz768,zzzz769
12987	95.96	272	150.0		zzzz768,zzzz773
12988	94.81	270	157.0		zzzz768,zzzz772
12989	30.88	136	10.0		zzzz767,zzzzz14
12982	41.89	265	46.0		zzzz768,zzzz780
12983	68.71	147	57.0		zzzz768,zzzz932
12984	60.61	264	87.0		zzzz768,zzzz779
12985	61.74	264	98.0		zzzz768,zzzz775
12978	92.96	270	154.0		zzzz769,zzzz772
12979	30.88	136	11.0		zzzz768,zzzzz14
12980	31.11	135	12.0		zzzz768,zzzzz21
12981	33.17	208	19.0		zzzz768,zzzz776
12974	68.03	147	55.0		zzzz769,zzzz932
12975	60.23	264	89.0		zzzz769,zzzz779
12976	62.5	264	100.0		zzzz769,zzzz775
12977	93.7	270	147.0		zzzz769,zzzz773
12970	29.93	137	9.0		zzzz769,zzzzz14
12971	25.58	215	11.0		zzzz769,zzzzz21
12972	31.07	280	21.0		zzzz769,zzzz776
12973	40.62	256	47.0		zzzz769,zzzz780
12966	68.71	147	56.0		zzzz772,zzzz932
12967	61.36	264	97.0		zzzz772,zzzz779
12968	62.12	264	99.0		zzzz772,zzzz775
12969	94.07	270	156.0		zzzz772,zzzz773
12962	30.88	136	10.0		zzzz772,zzzzz14
12963	30.37	135	11.0		zzzz772,zzzzz21
12964	33.33	207	19.0		zzzz772,zzzz776
12965	41.54	260	45.0		zzzz772,zzzz780
12958	39.85	261	45.0		zzzz773,zzzz780
12959	67.35	147	55.0		zzzz773,zzzz932
12960	59.47	264	89.0		zzzz773,zzzz779
12961	62.5	264	101.0		zzzz773,zzzz775
2714	35.69	367	65.0		zzzz962,zzzzzz1
2715	36.95	387	68.0		zzzz962,zzzzzz2
12955	30.43	138	9.0		zzzz773,zzzzz14
12956	30.15	136	10.0		zzzz773,zzzzz21
12957	31.86	226	20.0		zzzz773,zzzz776
2710	27.96	186	11.0		zzzz962,zzzz980
2711	27.62	239	12.0		zzzz962,zzzzzz6
2712	32.8	372	54.0		zzzz962,zzzzz27
2713	40.88	274	58.0		zzzz962,zzzzz22
12946	90.26	267	147.0		zzzz775,zzzz779
2709	25.79	252	11.0		zzzz962,zzzzz25
12942	25.09	267	7.0		zzzz775,zzzzz29
12943	30.34	234	18.0		zzzz775,zzzz776
12944	39.76	254	45.0		zzzz775,zzzz780
12945	90.0	150	80.0		zzzz775,zzzz932
12938	43.75	48	9.0		zzzz776,zzzzz29
12939	26.13	111	9.0		zzzz776,zzzzz24
12940	29.44	231	18.0		zzzz776,zzzz779
12941	32.81	256	24.0		zzzz776,zzzz780
12934	32.52	123	8.0		zzzz776,zzzz932
12935	26.85	108	8.0		zzzz776,zzzz797
12936	41.67	48	8.0		zzzz776,zzzzz18
12937	23.15	108	8.0		zzzz776,zzzz857
12933	30.0	100	7.0		zzzz776,zzzzz21
12922	94.0	150	84.0		zzzz779,zzzz932
12919	40.36	166	28.0		zzzz780,zzzz932
12920	25.97	154	7.0		zzzz779,zzzzz21
12921	40.24	251	44.0		zzzz779,zzzz780
179290	100.0	359	220.0		zzzz212,zzzzzz5
179288	36.94	360	59.0		zzzz212,zzzz919
179289	38.22	348	65.0		zzzz212,zzzzzz1
179286	40.59	271	56.0		zzzz212,zzzzz22
179287	37.18	355	58.0		zzzz212,zzzz962
179284	36.53	334	55.0		zzzz212,zzzz789
179285	36.16	354	55.0		zzzz212,zzzzz27
179282	29.18	233	19.0		zzzz212,zzzzz19
179283	36.19	373	55.0		zzzz212,zzzzzz2
179280	25.5	251	16.0		zzzz212,zzzzzz6
179281	27.88	226	18.0		zzzz212,zzzz980
179278	28.82	229	15.0		zzzz212,zzzzz21
179279	27.37	285	15.0		zzzz212,zzzz857
179276	25.97	258	13.0		zzzz212,zzzz797
179277	24.34	267	15.0		zzzz212,zzzzz25
179274	23.55	327	12.0		zzzz212,zzzz273
179275	24.91	269	13.0		zzzz212,zzzzz29
179272	24.59	305	12.0		zzzz212,zzzzz18
179273	28.83	222	12.0		zzzz212,zzzz915
179270	23.35	257	10.0		zzzz212,zzzzz24
179271	27.71	231	10.0		zzzz212,zzzzz14
179269	28.03	157	8.0		zzzz212,zzzz739
4074	32.87	289	33.0		zzzz915,zzzzz25
4070	29.41	323	25.0		zzzz915,zzzzz19
4071	27.38	325	26.0		zzzz915,zzzzz14
4072	30.23	301	28.0		zzzz915,zzzz980
4073	32.87	289	31.0		zzzz915,zzzzzz6
4066	26.48	321	19.0		zzzz915,zzzzz18
4067	31.14	228	19.0		zzzz915,zzzzz24
4068	27.53	316	21.0		zzzz915,zzzzz29
4069	26.46	325	22.0		zzzz915,zzzzz21
4062	22.9	310	8.0		zzzz915,zzzz962
4063	25.87	259	11.0		zzzz915,zzzzzz1
4064	25.7	284	12.0		zzzz915,zzzzzz2
4065	25.88	255	12.0		zzzz915,zzzzz22
4058	35.55	391	64.0		zzzz919,zzzzzz2
4059	37.36	364	68.0		zzzz919,zzzzzz1
4060	80.05	386	193.0		zzzz919,zzzz962
4061	25.55	227	8.0		zzzz915,zzzz919
4054	24.63	268	9.0		zzzz919,zzzzz25
4055	25.37	268	9.0		zzzz919,zzzzzz6
4056	34.92	358	57.0		zzzz919,zzzzz27
4057	38.8	317	61.0		zzzz919,zzzzz22
4053	27.27	187	8.0		zzzz919,zzzz980
966	25.51	247	11.0		zzzzzz1,zzzzzz6
967	38.34	373	64.0		zzzzzz1,zzzzzz2
962	37.18	355	58.0		zzzzzz5,zzzz962
963	36.94	360	59.0		zzzzzz5,zzzz919
964	38.22	348	65.0		zzzzzz5,zzzzzz1
958	36.19	373	55.0		zzzzzz5,zzzzzz2
959	36.53	334	55.0		zzzzzz5,zzzz789
960	36.16	354	55.0		zzzzzz5,zzzzz27
961	40.59	271	56.0		zzzzzz5,zzzzz22
954	27.37	285	15.0		zzzzzz5,zzzz857
11194	63.8	453	177.0		zzzz797,zzzz857
955	25.5	251	16.0		zzzzzz5,zzzzzz6
956	27.88	226	18.0		zzzzzz5,zzzz980
957	29.18	233	19.0		zzzzzz5,zzzzz19
950	24.91	269	13.0		zzzzzz5,zzzzz29
11190	28.94	311	24.0		zzzz797,zzzz980
951	25.97	258	13.0		zzzzzz5,zzzz797
11191	30.89	259	24.0		zzzz797,zzzzz25
952	24.34	267	15.0		zzzzzz5,zzzzz25
11192	28.66	307	25.0		zzzz797,zzzzz14
953	28.82	229	15.0		zzzzzz5,zzzzz21
11193	33.09	408	58.0		zzzz797,zzzz915
946	27.71	231	10.0		zzzzzz5,zzzzz14
11186	28.83	281	23.0		zzzz797,zzzzz24
947	24.59	305	12.0		zzzzzz5,zzzzz18
11187	31.28	227	23.0		zzzz797,zzzzz29
948	28.83	222	12.0		zzzzzz5,zzzz915
11188	30.77	195	23.0		zzzz797,zzzzz18
949	23.55	327	12.0		zzzzzz5,zzzz273
11189	27.98	243	24.0		zzzz797,zzzzz21
11182	27.56	254	13.0		zzzz797,zzzzzz1
2478	32.43	185	21.0		zzzz980,zzzzz24
11183	26.95	308	14.0		zzzz797,zzzzzz2
2479	35.74	235	31.0		zzzz980,zzzzz21
944	28.03	157	8.0		zzzzzz5,zzzz739
11184	27.02	396	21.0		zzzz797,zzzzz19
2480	37.02	235	32.0		zzzz980,zzzzz14
945	23.35	257	10.0		zzzzzz5,zzzzz24
11185	30.47	256	23.0		zzzz797,zzzzzz6
2481	57.5	400	137.0		zzzz980,zzzzz19
2474	31.61	193	19.0		zzzz980,zzzzz29
2475	35.23	193	20.0		zzzz980,zzzzzz6
2476	35.5	169	20.0		zzzz980,zzzzz18
11181	24.8	246	11.0		zzzz797,zzzzz27
2477	32.2	236	20.0		zzzz980,zzzzz25
2471	25.83	271	9.0		zzzz980,zzzzzz2
2472	29.29	198	11.0		zzzz980,zzzzzz1
2473	29.29	198	11.0		zzzz980,zzzzz22
156490	94.57	368	211.0		zzzz273,zzzzz18
156488	71.79	358	158.0		zzzz273,zzzzz29
156489	76.99	365	174.0		zzzz273,zzzzz24
156486	32.44	225	26.0		zzzz273,zzzzzz6
156487	35.54	408	61.0		zzzz273,zzzz739
156484	32.44	225	26.0		zzzz273,zzzzz25
156485	25.99	377	26.0		zzzz273,zzzz857
156482	24.83	294	22.0		zzzz273,zzzzz21
156483	34.08	179	24.0		zzzz273,zzzz797
156480	25.14	354	22.0		zzzz273,zzzzz14
6462	27.81	320	28.0		zzzz857,zzzzz29
156481	28.7	230	22.0		zzzz273,zzzzz19
6463	33.65	416	60.0		zzzz857,zzzz915
156478	32.11	246	20.0		zzzz273,zzzz789
156479	28.34	314	21.0		zzzz273,zzzz980
156476	23.44	256	9.0		zzzz273,zzzzz22
6458	30.04	243	23.0		zzzz857,zzzzz24
156477	26.44	329	19.0		zzzz273,zzzz915
6459	26.52	362	23.0		zzzz857,zzzzz21
156474	26.42	159	8.0		zzzz273,zzzzz27
6460	28.23	333	25.0		zzzz857,zzzzz14
156475	22.18	275	9.0		zzzz273,zzzzzz1
6461	26.93	349	26.0		zzzz857,zzzzz18
6454	30.45	266	20.0		zzzz857,zzzzz19
156473	39.58	48	8.0		zzzz273,zzzz776
6455	27.55	294	20.0		zzzz857,zzzz980
6456	31.25	256	21.0		zzzz857,zzzzzz6
6457	31.64	256	22.0		zzzz857,zzzzz25
6450	26.94	245	10.0		zzzz857,zzzzz27
6451	28.38	222	13.0		zzzz857,zzzzz22
6452	26.74	288	14.0		zzzz857,zzzzzz2
6453	28.57	238	15.0		zzzz857,zzzzzz1
13614	35.71	406	62.0		zzzz739,zzzzz18
13615	36.54	405	63.0		zzzz739,zzzzz29
6448	29.8	198	9.0		zzzz857,zzzz962
6449	30.15	199	9.0		zzzz857,zzzz919
13610	34.97	143	17.0		zzzz739,zzzz797
13611	26.97	304	18.0		zzzz739,zzzzzz6
13612	27.47	273	19.0		zzzz739,zzzzz25
13613	34.49	403	58.0		zzzz739,zzzzz24
13606	22.82	333	15.0		zzzz739,zzzz915
13607	28.57	224	16.0		zzzz739,zzzzz19
13608	31.07	177	17.0		zzzz739,zzzz980
13609	26.25	259	17.0		zzzz739,zzzz857
13602	26.78	183	7.0		zzzz739,zzzz776
13603	27.5	160	8.0		zzzz739,zzzz789
13604	27.17	173	14.0		zzzz739,zzzzz21
13605	24.73	186	15.0		zzzz739,zzzzz14
12062	41.34	283	54.0		zzzz789,zzzzzz2
12058	39.91	233	47.0		zzzz789,zzzzz22
12059	40.43	282	50.0		zzzz789,zzzz919
12060	35.56	315	51.0		zzzz789,zzzzzz1
12061	39.15	281	52.0		zzzz789,zzzz962
249705	94.43	305	178.0		zzzz100,zzzz114
249704	47.76	312	76.0		zzzz100,zzzz362
249703	45.57	316	76.0		zzzz100,zzzz945
249702	45.25	305	73.0		zzzz100,zzzz418
249701	44.44	315	73.0		zzzz100,zzzz912
249700	43.73	311	72.0		zzzz100,zzzz189
249699	45.05	313	72.0		zzzz100,zzzz421
249698	43.27	312	72.0		zzzz100,zzzz433
249697	42.95	298	72.0		zzzz100,zzzz642
249696	46.15	299	72.0		zzzz100,zzzz724
249695	44.59	314	70.0		zzzz100,zzzz627
249694	43.41	311	70.0		zzzz100,zzzz197
249693	43.48	299	70.0		zzzz100,zzzz445
249692	45.19	312	70.0		zzzz100,zzzz450
249691	43.89	319	70.0		zzzz100,zzzz454
249690	41.32	317	69.0		zzzz100,zzzz907
249689	43.42	304	70.0		zzzz100,zzzzz80
249688	41.96	317	69.0		zzzz100,zzzz261
249687	47.7	304	69.0		zzzz100,zzzz373
249686	45.82	299	69.0		zzzz100,zzzz351
249685	47.12	278	69.0		zzzz100,zzzz500
249684	43.0	307	68.0		zzzz100,zzzz128
249683	41.84	337	68.0		zzzz100,zzzz117
249682	43.09	311	68.0		zzzz100,zzzz385
249681	41.83	306	68.0		zzzz100,zzzz443
249680	41.94	310	67.0		zzzz100,zzzz428
249679	43.87	310	67.0		zzzz100,zzzz527
249678	43.45	313	67.0		zzzz100,zzzz262
249677	41.16	311	66.0		zzzz100,zzzz207
249676	41.29	310	66.0		zzzz100,zzzz447
249675	43.09	311	66.0		zzzz100,zzzz456
249674	43.99	316	66.0		zzzz100,zzzz478
249673	42.12	311	66.0		zzzz100,zzzz523
249672	42.48	306	66.0		zzzz100,zzzz451
249671	40.65	310	66.0		zzzz100,zzzz452
249670	41.48	311	65.0		zzzz100,zzzz670
249669	42.9	310	65.0		zzzz100,zzzz120
249668	43.89	303	65.0		zzzz100,zzzz387
249667	42.35	307	65.0		zzzz100,zzzz396
249666	42.81	313	65.0		zzzz100,zzzz420
249665	43.81	299	65.0		zzzz100,zzzz425
249664	40.91	308	65.0		zzzz100,zzzz511
249663	40.26	313	65.0		zzzz100,zzzz629
249662	43.49	315	65.0		zzzz100,zzzz389
249661	41.61	310	65.0		zzzz100,zzzz646
249660	44.59	305	64.0		zzzz100,zzzz365
249659	42.31	312	64.0		zzzz100,zzzz448
249658	41.99	312	64.0		zzzz100,zzzz667
249657	40.95	315	64.0		zzzz100,zzzz674
249656	40.97	310	64.0		zzzz100,zzzz722
249655	40.38	317	64.0		zzzz100,zzzz376
249654	54.27	199	64.0		zzzz100,zzzz492
249653	41.8	311	64.0		zzzz100,zzzz641
249652	45.33	300	64.0		zzzz100,zzzzz90
249651	39.27	303	64.0		zzzz100,zzzz549
249650	39.23	311	64.0		zzzz100,zzzz613
249649	39.88	321	63.0		zzzz100,zzzz127
249648	41.39	302	63.0		zzzz100,zzzz378
249647	42.14	299	63.0		zzzz100,zzzz460
249646	42.44	311	63.0		zzzz100,zzzz895
249645	40.97	310	63.0		zzzz100,zzzz119
249644	41.38	319	63.0		zzzz100,zzzz194
249643	41.67	312	63.0		zzzz100,zzzz559
249642	39.74	312	63.0		zzzz100,zzzz901
249641	41.21	313	63.0		zzzz100,zzzz369
249640	38.31	308	63.0		zzzz100,zzzz656
249639	39.18	319	63.0		zzzz100,zzzz889
249638	39.94	323	63.0		zzzz100,zzzz401
249637	41.78	292	63.0		zzzz100,zzzz649
249636	41.48	311	63.0		zzzz100,zzzz794
249635	39.49	314	62.0		zzzz100,zzzz356
249634	42.03	295	62.0		zzzz100,zzzz663
249633	41.16	311	62.0		zzzz100,zzzz921
249632	41.1	309	62.0		zzzz100,zzzz647
249631	40.84	311	62.0		zzzz100,zzzz353
249630	42.63	312	61.0		zzzz100,zzzz121
249629	40.58	313	61.0		zzzz100,zzzz900
249628	38.85	314	61.0		zzzz100,zzzz371
249627	39.87	316	61.0		zzzz100,zzzz468
249626	41.88	308	61.0		zzzz100,zzzz474
249625	43.2	294	61.0		zzzz100,zzzz485
249624	38.85	314	61.0		zzzz100,zzzz498
249623	39.35	310	61.0		zzzz100,zzzz512
249622	45.53	246	61.0		zzzz100,zzzzz64
249621	42.48	266	61.0		zzzz100,zzzzz73
249620	42.11	266	61.0		zzzz100,zzzzz74
249619	40.33	305	61.0		zzzz100,zzzzz84
249618	38.87	319	61.0		zzzz100,zzzz224
249617	41.08	314	61.0		zzzz100,zzzz458
249616	39.87	316	61.0		zzzz100,zzzz963
249615	38.41	328	61.0		zzzz100,zzzzz81
249614	43.68	277	61.0		zzzz100,zzzzz89
249613	38.06	310	60.0		zzzz100,zzzz195
249612	42.96	277	60.0		zzzz100,zzzz208
249611	41.67	312	60.0		zzzz100,zzzz524
249610	53.0	200	61.0		zzzz100,zzzz896
249609	41.32	317	60.0		zzzz100,zzzz209
249608	40.19	316	60.0		zzzz100,zzzz393
249607	40.19	311	60.0		zzzz100,zzzz537
249606	41.72	314	60.0		zzzz100,zzzz892
249605	41.73	266	60.0		zzzz100,zzzzz45
249604	39.05	338	60.0		zzzz100,zzzzz77
249603	40.88	318	60.0		zzzz100,zzzzz87
249602	39.22	306	60.0		zzzz100,zzzz375
249601	41.48	311	60.0		zzzz100,zzzz416
249600	40.89	313	60.0		zzzz100,zzzz504
249599	43.48	276	60.0		zzzz100,zzzz547
249598	38.86	332	60.0		zzzz100,zzzz638
249597	39.87	316	60.0		zzzz100,zzzz913
249596	45.31	256	60.0		zzzz100,zzzz944
249595	39.74	302	60.0		zzzz100,zzzz368
249594	39.74	312	60.0		zzzz100,zzzz388
249593	40.06	312	60.0		zzzz100,zzzz522
249592	41.01	317	60.0		zzzz100,zzzz599
249591	40.07	307	60.0		zzzz100,zzzz620
249590	36.45	310	60.0		zzzz100,zzzz662
249589	38.7	292	59.0		zzzz100,zzzz465
249588	40.84	311	59.0		zzzz100,zzzz657
249587	42.11	304	59.0		zzzz100,zzzz726
249586	39.75	322	59.0		zzzz100,zzzz908
249585	43.59	312	59.0		zzzz100,zzzz346
249584	39.26	298	59.0		zzzz100,zzzz349
249583	37.62	311	59.0		zzzz100,zzzz533
249582	40.06	312	59.0		zzzz100,zzzz952
249581	39.88	331	59.0		zzzz100,zzzz982
249580	38.96	308	59.0		zzzz100,zzzz106
249579	38.51	309	59.0		zzzz100,zzzz400
249578	38.39	323	59.0		zzzz100,zzzz457
249577	40.14	294	58.0		zzzz100,zzzz130
249576	42.12	311	58.0		zzzz100,zzzz366
249575	41.11	287	58.0		zzzz100,zzzz370
249574	39.93	283	58.0		zzzz100,zzzz579
249573	39.55	311	58.0		zzzz100,zzzz644
249572	41.03	312	58.0		zzzz100,zzzz658
249571	39.94	313	58.0		zzzz100,zzzzz53
249570	40.13	309	58.0		zzzz100,zzzz631
249569	42.49	313	58.0		zzzz100,zzzz845
249568	40.0	320	58.0		zzzz100,zzzz894
249567	42.47	299	58.0		zzzz100,zzzzz91
249566	44.07	270	58.0		zzzz100,zzzz123
249565	40.71	312	58.0		zzzz100,zzzz424
249564	38.98	313	58.0		zzzz100,zzzz546
249563	38.12	320	58.0		zzzz100,zzzz614
249562	41.03	312	57.0		zzzz100,zzzz483
249561	40.06	312	57.0		zzzz100,zzzz556
249560	38.89	324	57.0		zzzz100,zzzz964
249559	41.95	267	57.0		zzzz100,zzzz361
249558	38.39	310	57.0		zzzz100,zzzz502
249557	38.59	311	57.0		zzzz100,zzzz548
249556	38.68	287	57.0		zzzz100,zzzz440
249555	39.68	310	57.0		zzzz100,zzzz472
249554	39.05	315	57.0		zzzz100,zzzz528
249553	37.15	323	57.0		zzzz100,zzzz650
249552	39.75	317	57.0		zzzz100,zzzz903
249551	41.18	306	57.0		zzzz100,zzzz129
249550	37.35	324	57.0		zzzz100,zzzz417
249549	40.63	315	57.0		zzzz100,zzzz529
249548	38.17	317	57.0		zzzz100,zzzz550
249547	38.59	311	57.0		zzzz100,zzzz585
249546	40.33	300	57.0		zzzz100,zzzz659
249545	40.0	320	57.0		zzzz100,zzzz893
249544	36.42	335	57.0		zzzz100,zzzz909
249543	40.13	314	57.0		zzzz100,zzzz965
249542	39.26	298	57.0		zzzz100,zzzzz86
249541	37.27	322	56.0		zzzz100,zzzz434
249540	38.49	317	56.0		zzzz100,zzzz906
249539	38.12	320	56.0		zzzz100,zzzz135
249538	39.0	300	56.0		zzzz100,zzzz508
249537	37.82	312	56.0		zzzz100,zzzz540
249536	38.85	314	56.0		zzzz100,zzzz884
249535	37.97	316	56.0		zzzz100,zzzz910
249534	37.67	300	56.0		zzzz100,zzzz358
249533	41.25	303	55.0		zzzz100,zzzz126
249532	38.36	305	55.0		zzzz100,zzzz131
249531	40.13	304	55.0		zzzz100,zzzz520
249530	47.58	227	55.0		zzzz100,zzzzz55
249529	39.56	321	55.0		zzzz100,zzzzz93
249528	40.36	280	55.0		zzzz100,zzzz432
249527	38.82	304	55.0		zzzz100,zzzzz61
249526	40.19	316	55.0		zzzz100,zzzz382
249525	38.46	312	55.0		zzzz100,zzzz413
249524	37.92	327	55.0		zzzz100,zzzz480
249523	40.47	299	55.0		zzzz100,zzzz725
249522	39.6	298	55.0		zzzz100,zzzzz96
249521	41.73	254	54.0		zzzz100,zzzz518
249520	40.82	316	54.0		zzzz100,zzzz525
249519	43.65	252	55.0		zzzz100,zzzz727
249518	37.78	315	54.0		zzzz100,zzzz849
249517	33.73	335	54.0		zzzz100,zzzz406
249516	37.5	312	54.0		zzzz100,zzzz544
249515	38.59	298	54.0		zzzz100,zzzz618
249514	39.01	282	54.0		zzzz100,zzzz643
249513	39.26	298	54.0		zzzz100,zzzz125
249512	36.94	360	54.0		zzzz100,zzzz172
249511	43.7	270	54.0		zzzz100,zzzz377
249510	42.03	295	54.0		zzzz100,zzzz395
249509	37.28	287	54.0		zzzz100,zzzz444
249508	37.34	316	54.0		zzzz100,zzzz555
249507	38.41	315	54.0		zzzz100,zzzz597
249506	37.63	287	54.0		zzzz100,zzzz640
249505	37.18	312	54.0		zzzz100,zzzz940
249504	39.72	287	54.0		zzzz100,zzzz264
249503	45.57	237	54.0		zzzz100,zzzz364
249502	37.37	281	54.0		zzzz100,zzzz793
249501	38.44	320	53.0		zzzz100,zzzz210
249500	42.17	249	53.0		zzzz100,zzzz217
249499	34.77	348	53.0		zzzz100,zzzz654
249498	37.39	329	53.0		zzzz100,zzzz951
249497	36.72	305	53.0		zzzz100,zzzz132
249496	38.61	303	53.0		zzzz100,zzzz372
249495	37.86	309	53.0		zzzz100,zzzz407
249494	42.8	250	53.0		zzzz100,zzzz422
249493	37.86	309	53.0		zzzz100,zzzz487
249492	34.59	344	53.0		zzzz100,zzzz515
249491	37.34	316	53.0		zzzz100,zzzz573
249490	35.37	328	53.0		zzzz100,zzzz590
249489	37.22	317	53.0		zzzz100,zzzz380
249488	38.49	304	53.0		zzzz100,zzzz477
249487	36.86	312	53.0		zzzz100,zzzz501
249486	46.12	245	53.0		zzzz100,zzzz653
249485	39.16	309	53.0		zzzz100,zzzz891
249484	36.75	302	52.0		zzzz100,zzzz116
249483	39.17	314	52.0		zzzz100,zzzz354
249482	45.08	244	52.0		zzzz100,zzzz464
249481	34.44	302	52.0		zzzz100,zzzz497
249480	39.42	312	52.0		zzzz100,zzzz553
249479	38.46	299	52.0		zzzz100,zzzz124
249478	35.41	305	52.0		zzzz100,zzzz352
249477	34.95	309	52.0		zzzz100,zzzz531
249476	37.46	315	52.0		zzzz100,zzzz554
249475	38.89	306	52.0		zzzz100,zzzz567
249474	35.81	310	52.0		zzzz100,zzzz626
249473	37.82	275	52.0		zzzz100,zzzz678
249472	36.51	315	52.0		zzzz100,zzzz911
249471	37.01	308	52.0		zzzz100,zzzz133
249470	41.41	256	52.0		zzzz100,zzzz414
249469	44.35	248	52.0		zzzz100,zzzz436
249468	38.46	299	52.0		zzzz100,zzzz535
249467	40.0	265	52.0		zzzz100,zzzz616
249466	37.34	316	52.0		zzzz100,zzzz619
249465	38.71	310	51.0		zzzz100,zzzzz78
249464	37.21	301	51.0		zzzz100,zzzzz85
249463	43.25	252	51.0		zzzz100,zzzz390
249462	41.46	287	51.0		zzzz100,zzzz397
249461	44.59	231	51.0		zzzz100,zzzz442
249460	37.91	277	51.0		zzzz100,zzzz628
249459	44.4	232	51.0		zzzz100,zzzz652
249458	35.87	315	51.0		zzzz100,zzzzz79
249457	40.82	267	51.0		zzzz100,zzzz645
249456	39.04	292	50.0		zzzz100,zzzz792
249455	40.71	253	51.0		zzzz100,zzzz802
249454	40.74	270	51.0		zzzz100,zzzz950
249453	37.26	314	50.0		zzzz100,zzzz206
249452	43.44	244	50.0		zzzz100,zzzz453
249451	43.08	253	50.0		zzzz100,zzzz635
249450	36.56	320	50.0		zzzz100,zzzz949
249449	40.49	284	50.0		zzzz100,zzzz134
249448	36.69	308	50.0		zzzz100,zzzz449
249447	40.93	259	50.0		zzzz100,zzzz521
249446	41.52	277	50.0		zzzz100,zzzz622
249445	39.53	253	50.0		zzzz100,zzzzz88
249444	35.48	310	50.0		zzzz100,zzzz526
249443	42.86	245	50.0		zzzz100,zzzz621
249442	44.4	250	49.0		zzzz100,zzzz462
249441	41.82	275	49.0		zzzz100,zzzz355
249440	36.9	290	49.0		zzzz100,zzzz118
249439	35.07	345	49.0		zzzz100,zzzz145
249438	34.86	350	49.0		zzzz100,zzzz163
249437	36.15	343	49.0		zzzz100,zzzz242
249436	40.4	250	49.0		zzzz100,zzzz637
249435	38.85	260	49.0		zzzz100,zzzz661
249434	33.14	338	48.0		zzzz100,zzzz147
249433	35.29	323	48.0		zzzz100,zzzz947
249432	33.24	343	48.0		zzzz100,zzzz203
249431	34.73	311	48.0		zzzz100,zzzz491
249430	34.9	341	48.0		zzzz100,zzzz810
249429	35.58	326	48.0		zzzz100,zzzz904
249428	37.76	286	48.0		zzzz100,zzzz941
249427	33.92	342	48.0		zzzz100,zzzz176
249426	36.2	326	48.0		zzzz100,zzzz360
249425	40.68	263	48.0		zzzz100,zzzz367
249424	40.4	250	48.0		zzzz100,zzzz438
249423	36.59	276	48.0		zzzz100,zzzz630
249422	33.53	334	47.0		zzzz100,zzzz177
249421	36.2	279	48.0		zzzz100,zzzz664
249420	38.03	284	48.0		zzzz100,zzzzz82
249419	34.27	286	47.0		zzzz100,zzzz168
249418	37.05	278	47.0		zzzz100,zzzz211
249417	44.05	227	47.0		zzzz100,zzzz473
249416	37.17	304	47.0		zzzz100,zzzz808
249415	37.13	307	47.0		zzzz100,zzzz170
249414	35.78	313	47.0		zzzz100,zzzz174
249413	37.83	304	47.0		zzzz100,zzzz690
249412	39.38	259	47.0		zzzz100,zzzzz48
249411	36.4	283	47.0		zzzz100,zzzz159
249410	34.85	307	47.0		zzzz100,zzzz386
249409	35.08	305	47.0		zzzz100,zzzz505
249408	35.8	338	46.0		zzzz100,zzzz183
249407	36.36	286	46.0		zzzz100,zzzz660
249406	36.8	269	46.0		zzzz100,zzzz199
249405	35.86	290	46.0		zzzz100,zzzz348
249404	37.7	244	46.0		zzzz100,zzzz475
249403	38.58	267	46.0		zzzz100,zzzz634
249402	41.49	241	46.0		zzzz100,zzzz636
249401	42.04	245	45.0		zzzz100,zzzz158
249400	41.28	235	45.0		zzzz100,zzzz167
249399	34.72	337	45.0		zzzz100,zzzz173
249398	35.48	310	45.0		zzzz100,zzzz175
249397	38.06	268	45.0		zzzz100,zzzz357
249396	40.77	233	45.0		zzzz100,zzzz632
249395	38.15	249	45.0		zzzz100,zzzz807
249394	38.68	243	45.0		zzzz100,zzzz108
249393	34.6	315	45.0		zzzz100,zzzz216
249392	38.81	268	45.0		zzzz100,zzzz410
249391	45.32	203	45.0		zzzz100,zzzz479
249390	43.8	258	45.0		zzzz100,zzzzz92
249389	33.22	304	44.0		zzzz100,zzzz219
249388	39.1	266	44.0		zzzz100,zzzz284
249387	37.9	248	45.0		zzzz100,zzzz399
249386	37.86	280	44.0		zzzz100,zzzz796
249385	33.43	335	44.0		zzzz100,zzzz833
249384	34.22	301	45.0		zzzz100,zzzzz49
249383	42.06	214	44.0		zzzz100,zzzz136
249382	33.55	310	44.0		zzzz100,zzzz220
249381	44.27	192	44.0		zzzz100,zzzz359
249380	36.27	306	44.0		zzzz100,zzzz685
249379	37.35	249	44.0		zzzz100,zzzz829
249378	36.68	289	44.0		zzzz100,zzzz831
249377	31.07	338	44.0		zzzz100,zzzz146
249376	36.45	299	44.0		zzzz100,zzzz171
249375	34.45	299	44.0		zzzz100,zzzz471
249374	35.16	310	44.0		zzzz100,zzzz832
249373	35.69	297	44.0		zzzz100,zzzz899
249372	30.98	368	44.0		zzzz100,zzzz184
249371	37.45	267	44.0		zzzz100,zzzz427
249370	34.9	298	44.0		zzzz100,zzzz738
249369	30.89	327	44.0		zzzz100,zzzz902
249368	36.63	273	43.0		zzzz100,zzzz379
249367	34.68	248	43.0		zzzz100,zzzz155
249366	33.33	333	43.0		zzzz100,zzzz179
249365	33.23	310	43.0		zzzz100,zzzz191
249364	34.08	311	43.0		zzzz100,zzzz243
249363	37.12	264	43.0		zzzz100,zzzzz60
249362	36.23	265	43.0		zzzz100,zzzz112
249361	37.77	278	43.0		zzzz100,zzzz286
249360	33.02	324	43.0		zzzz100,zzzz374
249359	42.17	230	43.0		zzzz100,zzzz405
249358	39.34	211	43.0		zzzz100,zzzz466
249357	32.07	343	43.0		zzzz100,zzzz943
249356	30.37	326	43.0		zzzz100,zzzz946
249355	37.14	280	42.0		zzzz100,zzzz165
249354	37.81	283	42.0		zzzz100,zzzz166
249353	36.36	286	42.0		zzzz100,zzzz245
249352	37.84	259	42.0		zzzz100,zzzz441
249351	32.5	280	42.0		zzzz100,zzzz494
249350	42.06	214	43.0		zzzz100,zzzz517
249349	40.74	216	42.0		zzzz100,zzzz841
249348	33.45	293	42.0		zzzz100,zzzz381
249347	41.74	230	42.0		zzzz100,zzzz728
249346	30.91	330	41.0		zzzz100,zzzz144
249345	34.93	292	41.0		zzzz100,zzzz151
249344	35.86	251	41.0		zzzz100,zzzz164
249343	35.43	302	41.0		zzzz100,zzzz252
249342	33.11	302	41.0		zzzz100,zzzz415
249341	31.89	301	42.0		zzzz100,zzzz692
249340	35.13	279	41.0		zzzz100,zzzzz99
249339	35.69	311	41.0		zzzz100,zzzz218
249338	36.43	258	41.0		zzzz100,zzzz461
249337	34.09	264	41.0		zzzz100,zzzz509
249336	37.61	218	41.0		zzzz100,zzzz852
249335	33.22	283	41.0		zzzz100,zzzz934
249334	33.11	305	41.0		zzzz100,zzzzz67
249333	33.54	325	41.0		zzzz100,zzzz201
249332	37.65	255	41.0		zzzz100,zzzz648
249331	39.64	222	41.0		zzzz100,zzzz102
249330	38.03	234	41.0		zzzz100,zzzz539
249329	34.93	292	40.0		zzzz100,zzzz230
249328	38.76	258	40.0		zzzz100,zzzz398
249327	42.29	201	40.0		zzzz100,zzzz519
249326	34.42	276	40.0		zzzz100,zzzzz83
249325	30.88	353	40.0		zzzz100,zzzz180
249324	35.56	270	40.0		zzzz100,zzzz383
249323	34.85	307	40.0		zzzz100,zzzz563
249322	32.08	293	40.0		zzzz100,zzzz665
249321	33.11	305	40.0		zzzz100,zzzz186
249320	41.67	228	40.0		zzzz100,zzzz437
249319	34.08	267	40.0		zzzz100,zzzz791
249318	36.98	265	40.0		zzzz100,zzzz809
249317	36.96	257	39.0		zzzz100,zzzz288
249316	39.2	199	39.0		zzzz100,zzzz589
249315	33.79	293	39.0		zzzz100,zzzz143
249314	32.45	302	39.0		zzzz100,zzzzz50
249313	33.21	274	39.0		zzzz100,zzzz161
249312	33.56	295	39.0		zzzz100,zzzz285
249311	40.38	213	39.0		zzzz100,zzzz799
249310	33.73	252	38.0		zzzz100,zzzzz97
249309	31.62	272	38.0		zzzz100,zzzz107
249308	35.14	296	38.0		zzzz100,zzzz169
249307	35.8	257	38.0		zzzz100,zzzz516
249306	32.85	274	38.0		zzzz100,zzzz558
249305	37.35	249	38.0		zzzz100,zzzz840
249304	35.94	256	38.0		zzzz100,zzzz140
249303	36.43	258	38.0		zzzz100,zzzzz94
249302	42.55	188	38.0		zzzz100,zzzz113
249301	46.36	151	38.0		zzzz100,zzzz157
249300	33.77	302	38.0		zzzz100,zzzz592
249299	36.08	255	37.0		zzzz100,zzzz141
249298	32.11	355	37.0		zzzz100,zzzz181
249297	42.13	216	37.0		zzzz100,zzzz287
249296	34.94	312	37.0		zzzz100,zzzz811
249295	30.88	340	37.0		zzzz100,zzzz152
249294	40.54	185	37.0		zzzz100,zzzz935
249293	34.11	258	37.0		zzzz100,zzzz104
249292	32.94	252	37.0		zzzz100,zzzz153
249291	37.83	230	37.0		zzzz100,zzzz495
249290	30.09	319	37.0		zzzz100,zzzz611
249289	36.55	238	37.0		zzzz100,zzzz625
249288	34.23	260	36.0		zzzz100,zzzz148
249287	34.11	258	36.0		zzzz100,zzzz149
249286	30.07	296	36.0		zzzz100,zzzz564
249285	37.9	248	36.0		zzzz100,zzzz623
249284	35.57	253	36.0		zzzz100,zzzz812
249283	43.72	183	36.0		zzzz100,zzzz843
249282	42.62	183	36.0		zzzz100,zzzz162
249281	39.8	196	36.0		zzzz100,zzzz463
249280	37.31	201	36.0		zzzz100,zzzz577
249279	40.98	183	36.0		zzzz100,zzzz936
249278	31.86	295	36.0		zzzz100,zzzz142
249277	36.44	236	36.0		zzzz100,zzzz154
249276	33.96	268	36.0		zzzz100,zzzz241
249275	32.9	307	36.0		zzzz100,zzzz249
249274	39.3	201	35.0		zzzz100,zzzz160
249273	33.83	266	35.0		zzzz100,zzzz240
249272	35.77	246	35.0		zzzz100,zzzz391
249271	32.43	296	35.0		zzzz100,zzzz455
249270	37.19	199	35.0		zzzz100,zzzz532
249269	36.19	210	35.0		zzzz100,zzzz536
249268	37.04	216	35.0		zzzz100,zzzz606
249267	31.16	292	35.0		zzzz100,zzzz103
249266	49.64	137	35.0		zzzz100,zzzz115
249265	37.5	208	35.0		zzzz100,zzzz139
249264	32.65	294	35.0		zzzz100,zzzz150
249263	35.79	271	35.0		zzzz100,zzzz178
249262	40.96	188	35.0		zzzz100,zzzz188
249261	38.07	218	34.0		zzzz100,zzzz138
249260	31.8	283	34.0		zzzz100,zzzz233
249259	32.36	275	34.0		zzzz100,zzzz347
249258	32.11	246	34.0		zzzz100,zzzz423
249257	40.32	186	34.0		zzzz100,zzzz694
249256	32.03	281	34.0		zzzz100,zzzzz44
249255	36.91	233	34.0		zzzz100,zzzz156
249254	37.8	209	34.0		zzzz100,zzzz402
249253	41.05	190	34.0		zzzz100,zzzz439
249252	35.61	264	34.0		zzzz100,zzzz571
249251	41.08	185	34.0		zzzz100,zzzz836
249250	34.77	256	33.0		zzzz100,zzzz122
249249	29.77	299	33.0		zzzz100,zzzz404
249248	40.09	227	33.0		zzzz100,zzzz419
249247	37.5	200	34.0		zzzz100,zzzz430
249246	32.11	299	33.0		zzzz100,zzzz431
249245	36.07	183	33.0		zzzz100,zzzz666
249244	35.02	257	33.0		zzzz100,zzzz834
249243	32.18	261	33.0		zzzz100,zzzz788
249242	35.02	217	33.0		zzzz100,zzzz837
249241	32.16	255	32.0		zzzz100,zzzz232
249240	35.61	205	33.0		zzzz100,zzzz435
249239	36.13	191	32.0		zzzz100,zzzz496
249238	39.43	175	32.0		zzzz100,zzzz593
249237	36.36	176	32.0		zzzz100,zzzz574
249236	33.08	263	31.0		zzzz100,zzzz105
249235	29.0	331	31.0		zzzz100,zzzz290
249234	36.87	198	31.0		zzzz100,zzzz412
249233	32.88	219	31.0		zzzz100,zzzzz46
249232	33.19	235	31.0		zzzz100,zzzz215
249231	33.75	240	31.0		zzzz100,zzzz225
249230	33.77	231	31.0		zzzz100,zzzz581
249229	35.78	232	31.0		zzzz100,zzzz605
249228	31.74	230	31.0		zzzz100,zzzzz43
249227	34.05	232	30.0		zzzz100,zzzz226
249226	30.47	279	30.0		zzzz100,zzzz588
249225	33.05	239	30.0		zzzz100,zzzz633
249224	33.61	241	30.0		zzzz100,zzzzz69
249223	40.32	186	30.0		zzzz100,zzzz137
249222	30.42	263	30.0		zzzz100,zzzz542
249221	36.87	179	30.0		zzzz100,zzzz561
249220	34.78	230	30.0		zzzz100,zzzzz47
249219	32.34	235	29.0		zzzz100,zzzz470
249218	29.7	266	29.0		zzzz100,zzzz484
249217	34.39	189	29.0		zzzz100,zzzz853
249216	32.08	212	29.0		zzzz100,zzzz110
249215	32.03	281	29.0		zzzz100,zzzz426
249214	33.51	191	29.0		zzzz100,zzzz429
249213	34.04	188	29.0		zzzz100,zzzz576
249212	36.42	173	28.0		zzzz100,zzzz213
249211	29.02	286	28.0		zzzz100,zzzz263
249210	34.41	186	28.0		zzzz100,zzzz486
249209	31.29	278	28.0		zzzz100,zzzz329
249208	36.31	179	28.0		zzzz100,zzzz784
249207	34.57	188	27.0		zzzz100,zzzz109
249206	35.14	185	27.0		zzzz100,zzzz578
249205	35.5	169	27.0		zzzz100,zzzzz51
249204	39.24	158	27.0		zzzz100,zzzz259
249203	34.87	195	27.0		zzzz100,zzzz459
249202	34.03	191	27.0		zzzz100,zzzz562
249201	35.89	209	27.0		zzzz100,zzzz838
249200	31.33	300	26.0		zzzz100,zzzz198
249199	35.6	191	26.0		zzzz100,zzzz586
249198	29.62	260	26.0		zzzz100,zzzz948
249197	31.94	191	26.0		zzzz100,zzzz966
249196	35.79	190	26.0		zzzz100,zzzz844
249195	39.89	188	26.0		zzzz100,zzzz848
249194	30.17	232	26.0		zzzz100,zzzz482
249193	32.54	169	25.0		zzzz100,zzzz394
249192	36.73	196	25.0		zzzz100,zzzz683
249191	33.16	187	25.0		zzzz100,zzzz898
249190	35.53	152	25.0		zzzz100,zzzz530
249189	37.24	196	25.0		zzzz100,zzzz687
249188	34.17	199	25.0		zzzz100,zzzz890
249187	35.91	181	25.0		zzzz100,zzzz981
249186	35.39	178	25.0		zzzz100,zzzz255
249185	35.03	197	25.0		zzzz100,zzzz583
249184	29.15	271	25.0		zzzz100,zzzz595
249183	37.24	196	25.0		zzzz100,zzzz672
249182	30.88	217	25.0		zzzz100,zzzz800
249181	34.1	217	25.0		zzzz100,zzzz830
249180	36.57	216	24.0		zzzz100,zzzz408
249179	33.72	172	24.0		zzzz100,zzzz205
249178	28.12	256	24.0		zzzz100,zzzz565
249177	26.97	241	24.0		zzzz100,zzzz806
249176	26.42	318	24.0		zzzz100,zzzz673
249175	33.8	216	24.0		zzzz100,zzzz239
249174	28.34	247	24.0		zzzz100,zzzz545
249173	33.33	195	24.0		zzzz100,zzzz655
249172	28.27	283	23.0		zzzz100,zzzz182
249171	31.17	247	23.0		zzzz100,zzzz244
249170	32.14	196	23.0		zzzz100,zzzz204
249169	31.28	243	23.0		zzzz100,zzzz570
249168	32.24	183	23.0		zzzz100,zzzz693
249167	31.03	232	23.0		zzzz100,zzzzz70
249166	31.47	197	23.0		zzzz100,zzzz607
249165	28.89	270	23.0		zzzz100,zzzz942
249164	26.07	280	23.0		zzzz100,zzzz686
249163	24.41	299	22.0		zzzz100,zzzz580
249162	30.77	195	23.0		zzzz100,zzzz609
249161	33.33	156	23.0		zzzz100,zzzz801
249160	30.57	193	22.0		zzzz100,zzzz669
249159	32.97	185	22.0		zzzz100,zzzz604
249158	28.24	262	22.0		zzzz100,zzzz697
249157	31.91	188	22.0		zzzz100,zzzz493
249156	30.37	214	22.0		zzzz100,zzzz101
249155	27.33	161	22.0		zzzz100,zzzz202
249154	27.18	287	22.0		zzzz100,zzzz600
249153	26.96	230	22.0		zzzz100,zzzz603
249152	30.0	200	22.0		zzzz100,zzzz671
249151	31.98	172	22.0		zzzz100,zzzz676
249150	32.93	167	21.0		zzzz100,zzzz274
249149	28.52	277	21.0		zzzz100,zzzz506
249148	29.29	198	21.0		zzzz100,zzzz785
249147	28.79	198	21.0		zzzz100,zzzz787
249146	31.47	197	21.0		zzzz100,zzzz513
249145	32.78	180	21.0		zzzz100,zzzz681
249144	31.91	235	21.0		zzzz100,zzzz411
249143	23.89	247	21.0		zzzz100,zzzz510
249142	28.94	273	21.0		zzzz100,zzzz584
249141	32.65	196	21.0		zzzz100,zzzz596
249140	26.46	257	21.0		zzzz100,zzzz983
249139	31.39	223	21.0		zzzz100,zzzz251
249138	29.03	217	20.0		zzzz100,zzzz403
249137	28.08	203	20.0		zzzz100,zzzz551
249136	28.34	187	20.0		zzzz100,zzzz783
249135	29.09	220	20.0		zzzz100,zzzz560
249134	25.83	240	20.0		zzzz100,zzzz804
249133	32.66	199	19.0		zzzz100,zzzzz57
249132	31.58	190	19.0		zzzz100,zzzzz58
249131	36.7	109	19.0		zzzz100,zzzzz62
249130	28.91	256	19.0		zzzz100,zzzz228
249129	34.59	133	19.0		zzzz100,zzzz933
249128	28.92	249	19.0		zzzz100,zzzzz52
249127	28.43	197	19.0		zzzz100,zzzz392
249126	26.12	268	19.0		zzzz100,zzzz476
249125	30.2	255	19.0		zzzz100,zzzz575
249124	24.64	211	19.0		zzzz100,zzzz582
249123	26.72	247	19.0		zzzz100,zzzz111
249122	34.64	153	19.0		zzzz100,zzzz292
249121	27.9	233	19.0		zzzz100,zzzz557
249120	30.77	156	19.0		zzzz100,zzzz594
249119	28.84	215	19.0		zzzz100,zzzzz59
249118	30.59	170	19.0		zzzz100,zzzz499
249117	30.93	194	19.0		zzzz100,zzzz566
249116	29.07	172	19.0		zzzz100,zzzz615
249115	32.0	150	19.0		zzzz100,zzzz651
249114	32.12	165	19.0		zzzz100,zzzz695
249113	27.73	256	19.0		zzzz100,zzzz514
249112	24.82	278	19.0		zzzz100,zzzz541
249111	30.57	157	18.0		zzzz100,zzzz568
249110	29.48	173	19.0		zzzz100,zzzz384
249109	36.11	144	18.0		zzzz100,zzzz227
249108	26.52	279	18.0		zzzz100,zzzz481
249107	29.9	194	18.0		zzzz100,zzzz680
249106	32.26	186	18.0		zzzz100,zzzz187
249105	29.61	152	18.0		zzzz100,zzzz612
249104	24.17	211	18.0		zzzz100,zzzz688
249103	25.48	208	18.0		zzzz100,zzzz850
249102	29.24	171	18.0		zzzz100,zzzz569
249101	39.81	108	18.0		zzzz100,zzzz677
249100	29.14	175	18.0		zzzz100,zzzz679
249099	30.82	146	18.0		zzzz100,zzzz790
249098	31.43	175	18.0		zzzz100,zzzz839
249097	30.26	152	18.0		zzzz100,zzzz507
249096	31.38	188	18.0		zzzz100,zzzz222
249095	29.94	157	17.0		zzzz100,zzzz237
249094	28.24	170	18.0		zzzz100,zzzz490
249093	27.94	204	18.0		zzzz100,zzzz538
249092	25.29	257	18.0		zzzz100,zzzz905
249091	29.59	196	17.0		zzzz100,zzzz534
249090	28.76	226	17.0		zzzz100,zzzz572
249089	31.15	183	17.0		zzzz100,zzzz931
249088	34.03	144	17.0		zzzz100,zzzzz63
249087	30.77	156	17.0		zzzz100,zzzz190
249085	26.67	300	17.0		zzzz100,zzzz602
249084	30.14	146	17.0		zzzz100,zzzz786
249083	26.48	219	17.0		zzzz100,zzzz214
249082	36.84	95	17.0		zzzz100,zzzz862
249081	27.92	197	16.0		zzzz100,zzzz297
249079	35.78	109	16.0		zzzz100,zzzz552
249078	34.36	163	16.0		zzzz100,zzzz469
249077	24.63	203	16.0		zzzz100,zzzz543
249076	28.64	206	16.0		zzzz100,zzzz639
249075	26.26	179	16.0		zzzz100,zzzz280
249074	26.7	191	16.0		zzzz100,zzzz301
249072	27.8	205	16.0		zzzz100,zzzz446
249071	27.93	179	16.0		zzzz100,zzzzz56
249070	29.76	168	15.0		zzzz100,zzzz248
249069	33.01	103	15.0		zzzz100,zzzz282
249067	29.45	163	16.0		zzzz100,zzzz587
249065	27.88	165	15.0		zzzz100,zzzz363
249064	24.47	237	15.0		zzzz100,zzzz617
249062	32.0	150	15.0		zzzz100,zzzz299
249061	29.89	184	15.0		zzzz100,zzzz300
249059	37.25	102	15.0		zzzz100,zzzz489
249056	31.78	129	15.0		zzzz100,zzzz805
249055	29.17	144	14.0		zzzz100,zzzz298
249054	28.76	153	15.0		zzzz100,zzzz303
249052	24.88	209	15.0		zzzz100,zzzz467
249050	30.46	197	14.0		zzzz100,zzzz715
249049	27.01	174	14.0		zzzz100,zzzzz98
249048	29.66	118	14.0		zzzz100,zzzz760
249046	25.44	169	14.0		zzzz100,zzzz350
249044	31.13	151	13.0		zzzz100,zzzz234
249043	24.16	298	14.0		zzzz100,zzzz675
249042	25.76	132	14.0		zzzz100,zzzzz54
249041	29.73	148	14.0		zzzz100,zzzz302
249039	32.41	108	13.0		zzzz100,zzzz756
249036	27.14	199	13.0		zzzz100,zzzzz75
249035	28.48	158	13.0		zzzz100,zzzz231
249033	27.18	195	13.0		zzzz100,zzzz696
249032	31.05	190	13.0		zzzz100,zzzz707
249030	34.41	93	13.0		zzzz100,zzzz223
249029	30.52	154	13.0		zzzz100,zzzz854
249028	27.17	184	12.0		zzzz100,zzzz824
249023	29.03	186	12.0		zzzz100,zzzz701
249019	30.0	100	12.0		zzzz100,zzzz745
249018	35.92	103	12.0		zzzz100,zzzz826
249017	34.95	103	12.0		zzzz100,zzzz235
249013	30.28	109	12.0		zzzz100,zzzz700
249008	25.21	234	12.0		zzzz100,zzzz813
249005	25.12	203	11.0		zzzz100,zzzz278
249000	32.11	109	11.0		zzzz100,zzzz277
248997	26.85	149	11.0		zzzz100,zzzz279
248995	28.09	178	10.0		zzzz100,zzzz192
248991	29.05	148	11.0		zzzz100,zzzz920
248987	30.25	119	10.0		zzzz100,zzzz818
248986	24.76	210	10.0		zzzz100,zzzzz76
248985	27.27	154	10.0		zzzz100,zzzz291
248980	23.77	122	9.0		zzzz100,zzzz815
248979	29.41	102	9.0		zzzz100,zzzz698
248977	28.97	145	8.0		zzzz100,zzzz253
248976	34.02	97	8.0		zzzz100,zzzzz66
248975	37.04	54	7.0		zzzz100,zzzz820
248974	28.04	107	7.0		zzzz100,zzzz281
248973	30.03	313	31.0		zzzz101,zzzz248
248972	33.33	237	27.0		zzzz101,zzzz905
248971	31.78	236	26.0		zzzz101,zzzz541
248970	30.49	223	26.0		zzzz101,zzzz551
248969	30.0	240	25.0		zzzz101,zzzz568
248968	35.29	187	25.0		zzzz101,zzzz692
248967	31.36	236	25.0		zzzz101,zzzz609
248966	34.52	197	24.0		zzzz101,zzzz102
248965	30.0	240	24.0		zzzz101,zzzz534
248964	25.77	326	24.0		zzzz101,zzzz931
248963	30.19	265	24.0		zzzz101,zzzzz69
248962	31.17	231	24.0		zzzz101,zzzz552
248961	29.51	244	24.0		zzzz101,zzzz570
248960	32.23	242	24.0		zzzz101,zzzz841
248959	36.17	188	24.0		zzzz101,zzzz495
248958	32.23	242	24.0		zzzz101,zzzz584
248957	32.49	237	24.0		zzzz101,zzzz801
248956	35.26	190	24.0		zzzz101,zzzz136
248955	29.69	256	24.0		zzzz101,zzzzz94
248954	32.57	218	24.0		zzzz101,zzzz165
248953	35.75	193	24.0		zzzz101,zzzz423
248952	31.6	250	24.0		zzzz101,zzzz507
248951	29.18	257	24.0		zzzz101,zzzz898
248950	33.64	214	24.0		zzzz101,zzzz119
248949	28.94	273	23.0		zzzz101,zzzz228
248948	32.73	220	23.0		zzzz101,zzzz433
248947	29.48	251	23.0		zzzz101,zzzz580
248946	33.51	194	24.0		zzzz101,zzzz948
248945	31.9	210	23.0		zzzz101,zzzz124
248944	30.15	272	23.0		zzzz101,zzzz171
248943	31.9	210	23.0		zzzz101,zzzz125
248942	30.95	294	23.0		zzzz101,zzzz161
248941	33.02	215	23.0		zzzz101,zzzz166
248940	28.45	232	23.0		zzzz101,zzzz943
248939	30.45	266	23.0		zzzz101,zzzzz47
248938	31.05	248	23.0		zzzz101,zzzz198
248937	31.65	218	23.0		zzzz101,zzzz671
248936	28.57	252	23.0		zzzz101,zzzz802
248935	30.58	278	23.0		zzzz101,zzzzz48
248934	33.64	217	22.0		zzzz101,zzzz120
248933	30.65	261	22.0		zzzz101,zzzz353
248932	35.29	187	22.0		zzzz101,zzzz564
248931	28.8	316	22.0		zzzz101,zzzz245
248930	30.17	232	22.0		zzzz101,zzzz429
248929	29.51	288	22.0		zzzz101,zzzz164
248928	27.46	284	22.0		zzzz101,zzzz170
248927	29.61	206	22.0		zzzz101,zzzz375
248926	28.57	238	22.0		zzzz101,zzzz942
248925	32.78	241	22.0		zzzz101,zzzz112
248924	32.18	261	22.0		zzzz101,zzzz183
248923	33.17	199	22.0		zzzz101,zzzz812
248922	30.04	233	22.0		zzzz101,zzzz576
248921	30.95	210	21.0		zzzz101,zzzzz96
248920	35.48	186	21.0		zzzz101,zzzz156
248919	34.48	174	22.0		zzzz101,zzzz676
248918	32.32	198	21.0		zzzz101,zzzz130
248917	27.89	251	21.0		zzzz101,zzzz378
248916	29.27	205	21.0		zzzz101,zzzz489
248915	34.41	186	21.0		zzzz101,zzzz154
248914	31.2	234	21.0		zzzz101,zzzz169
248913	31.63	215	21.0		zzzz101,zzzz233
248912	28.76	233	21.0		zzzz101,zzzz560
248911	27.9	233	21.0		zzzz101,zzzzz52
248910	28.35	261	21.0		zzzz101,zzzz218
248909	33.01	206	21.0		zzzz101,zzzz548
248908	29.58	213	21.0		zzzz101,zzzz114
248907	36.87	179	21.0		zzzz101,zzzz232
248906	32.7	211	21.0		zzzz101,zzzz505
248905	31.47	197	21.0		zzzz101,zzzz620
248904	28.33	240	21.0		zzzz101,zzzz697
248903	27.0	263	21.0		zzzz101,zzzz476
248902	30.89	191	21.0		zzzz101,zzzz669
248901	26.27	236	21.0		zzzz101,zzzz510
248900	31.34	201	21.0		zzzz101,zzzz657
248899	32.04	206	21.0		zzzz101,zzzz664
248898	38.06	134	21.0		zzzz101,zzzz829
248897	28.69	251	20.0		zzzz101,zzzz176
248896	30.65	248	21.0		zzzz101,zzzz506
248895	30.56	216	21.0		zzzz101,zzzz528
248894	31.82	220	21.0		zzzz101,zzzz579
248893	32.14	224	21.0		zzzz101,zzzz951
248892	31.02	216	20.0		zzzz101,zzzz485
248891	29.67	246	20.0		zzzz101,zzzz807
248890	35.71	196	20.0		zzzz101,zzzz935
248889	27.65	264	20.0		zzzz101,zzzz595
248888	33.16	190	20.0		zzzz101,zzzz612
248887	28.29	251	20.0		zzzz101,zzzz810
248886	32.16	227	20.0		zzzz101,zzzz163
248885	27.74	274	20.0		zzzz101,zzzz180
248884	31.94	191	20.0		zzzz101,zzzz288
248883	27.38	263	20.0		zzzz101,zzzz693
248882	28.98	245	20.0		zzzz101,zzzz806
248881	29.63	243	20.0		zzzz101,zzzz852
248880	29.44	231	20.0		zzzz101,zzzzz55
248879	29.84	258	20.0		zzzz101,zzzz137
248878	31.16	199	20.0		zzzz101,zzzz444
248877	30.0	230	20.0		zzzz101,zzzz131
248876	26.54	260	20.0		zzzz101,zzzz280
248875	31.82	198	20.0		zzzz101,zzzz443
248874	31.9	210	20.0		zzzz101,zzzz491
248873	40.3	134	20.0		zzzz101,zzzz853
248872	27.76	245	20.0		zzzz101,zzzz159
248871	29.48	251	20.0		zzzz101,zzzz177
248870	33.5	206	20.0		zzzz101,zzzz540
248869	33.33	204	20.0		zzzz101,zzzz553
248868	31.63	196	20.0		zzzz101,zzzz407
248867	32.42	219	20.0		zzzz101,zzzz350
248866	32.69	208	20.0		zzzz101,zzzz416
248865	27.82	248	20.0		zzzz101,zzzz565
248864	29.25	212	20.0		zzzz101,zzzz573
248863	29.92	254	20.0		zzzz101,zzzzz58
248862	31.75	211	20.0		zzzz101,zzzzz78
248861	30.32	221	20.0		zzzz101,zzzzz80
248860	32.81	128	19.0		zzzz101,zzzz237
248859	28.7	216	20.0		zzzz101,zzzz356
248858	30.04	243	20.0		zzzz101,zzzz411
248857	26.36	258	20.0		zzzz101,zzzz680
248856	30.59	219	19.0		zzzz101,zzzz791
248855	31.03	232	19.0		zzzz101,zzzzz45
248854	28.57	217	19.0		zzzz101,zzzz197
248853	32.04	206	19.0		zzzz101,zzzz432
248852	29.95	217	19.0		zzzz101,zzzz454
248851	29.06	265	19.0		zzzz101,zzzz459
248850	41.35	104	19.0		zzzz101,zzzz504
248849	31.86	204	19.0		zzzz101,zzzz532
248848	31.12	196	19.0		zzzz101,zzzz949
248847	30.05	213	19.0		zzzz101,zzzzz84
248846	31.98	222	19.0		zzzz101,zzzz123
248845	31.4	207	19.0		zzzz101,zzzz285
248844	29.09	220	19.0		zzzz101,zzzz348
248843	31.16	199	19.0		zzzz101,zzzz440
248842	29.27	246	19.0		zzzz101,zzzz603
248841	26.41	231	19.0		zzzz101,zzzz607
248840	34.95	186	19.0		zzzz101,zzzz966
248839	29.82	218	19.0		zzzz101,zzzz107
248838	32.81	192	19.0		zzzz101,zzzz134
248837	31.79	195	19.0		zzzz101,zzzz349
248836	28.05	246	19.0		zzzz101,zzzz545
248835	31.1	209	19.0		zzzz101,zzzz550
248834	30.4	227	19.0		zzzz101,zzzz585
248833	28.09	267	19.0		zzzz101,zzzz594
248832	28.35	254	19.0		zzzz101,zzzz673
248831	29.31	232	19.0		zzzz101,zzzzz74
248830	31.68	202	19.0		zzzz101,zzzz230
248829	29.92	254	19.0		zzzz101,zzzz286
248828	40.57	106	19.0		zzzz101,zzzz483
248827	30.41	217	19.0		zzzz101,zzzz484
248826	31.43	210	19.0		zzzz101,zzzz889
248825	28.94	235	19.0		zzzz101,zzzzz44
248824	25.79	252	19.0		zzzz101,zzzzz88
248823	30.26	228	19.0		zzzz101,zzzz167
248822	39.34	122	19.0		zzzz101,zzzz181
248821	31.95	241	19.0		zzzz101,zzzz251
248820	29.89	261	19.0		zzzz101,zzzz526
248819	28.37	208	19.0		zzzz101,zzzz554
248818	28.75	240	19.0		zzzz101,zzzz834
248817	26.74	258	19.0		zzzz101,zzzz160
248816	27.88	269	19.0		zzzz101,zzzz174
248815	30.91	220	19.0		zzzz101,zzzz188
248814	29.28	263	19.0		zzzz101,zzzz220
248813	37.5	120	19.0		zzzz101,zzzz244
248812	31.19	202	19.0		zzzz101,zzzz456
248811	38.28	128	19.0		zzzz101,zzzz490
248810	42.45	106	19.0		zzzz101,zzzz524
248809	37.84	111	19.0		zzzz101,zzzz527
248808	27.73	256	19.0		zzzz101,zzzz639
248807	29.36	235	19.0		zzzz101,zzzz800
248806	31.84	223	19.0		zzzz101,zzzz358
248805	30.1	206	19.0		zzzz101,zzzz415
248804	33.01	206	19.0		zzzz101,zzzz457
248803	42.59	108	19.0		zzzz101,zzzz632
248802	31.36	169	19.0		zzzz101,zzzz784
248801	27.63	228	19.0		zzzz101,zzzz132
248800	30.6	232	19.0		zzzz101,zzzz135
248799	32.35	204	19.0		zzzz101,zzzz555
248798	37.6	125	19.0		zzzz101,zzzz572
248797	29.09	220	19.0		zzzz101,zzzz600
248796	32.03	256	19.0		zzzz101,zzzz655
248795	32.16	171	19.0		zzzz101,zzzz792
248794	28.08	292	19.0		zzzz101,zzzz809
248793	41.12	107	18.0		zzzz101,zzzz529
248792	28.69	244	18.0		zzzz101,zzzz575
248791	28.63	241	18.0		zzzz101,zzzz695
248790	26.19	252	18.0		zzzz101,zzzz224
248789	31.31	214	18.0		zzzz101,zzzz284
248788	28.92	204	18.0		zzzz101,zzzz448
248787	36.04	111	18.0		zzzz101,zzzz559
248786	28.0	250	18.0		zzzz101,zzzz615
248785	28.85	208	18.0		zzzz101,zzzz207
248784	31.52	184	18.0		zzzz101,zzzz292
248783	29.65	226	18.0		zzzz101,zzzz424
248782	29.44	214	18.0		zzzz101,zzzz523
248781	40.78	103	18.0		zzzz101,zzzz678
248780	28.07	228	18.0		zzzz101,zzzz907
248779	27.08	277	18.0		zzzz101,zzzz184
248778	29.65	172	18.0		zzzz101,zzzz282
248777	33.51	194	18.0		zzzz101,zzzz381
248776	30.41	217	18.0		zzzz101,zzzz417
248775	41.96	112	18.0		zzzz101,zzzz427
248774	30.14	209	18.0		zzzz101,zzzz501
248773	27.09	251	18.0		zzzz101,zzzz566
248772	34.68	124	18.0		zzzz101,zzzz583
248771	27.42	248	18.0		zzzz101,zzzzz59
248770	30.1	196	18.0		zzzz101,zzzzz73
248769	26.64	289	18.0		zzzz101,zzzz329
248768	42.57	101	18.0		zzzz101,zzzz480
248767	28.09	235	18.0		zzzz101,zzzz493
248766	30.28	251	18.0		zzzz101,zzzz525
248765	40.59	101	18.0		zzzz101,zzzz567
248764	44.44	99	18.0		zzzz101,zzzz115
248763	29.0	200	18.0		zzzz101,zzzz128
248762	31.6	231	18.0		zzzz101,zzzz845
248761	32.08	212	18.0		zzzz101,zzzz941
248760	29.63	216	18.0		zzzz101,zzzzz86
248759	27.56	254	18.0		zzzz101,zzzz116
248758	33.17	199	18.0		zzzz101,zzzz162
248757	31.4	207	18.0		zzzz101,zzzz458
248756	28.06	253	18.0		zzzz101,zzzz651
248755	43.14	102	18.0		zzzz101,zzzz685
248754	28.19	259	18.0		zzzz101,zzzz726
248753	29.34	242	18.0		zzzz101,zzzz909
248752	27.9	233	18.0		zzzz101,zzzz911
248751	38.14	118	18.0		zzzz101,zzzz934
248750	28.26	230	18.0		zzzz101,zzzz947
248749	29.0	200	18.0		zzzz101,zzzzz50
248748	25.11	235	18.0		zzzz101,zzzz392
248747	38.46	117	18.0		zzzz101,zzzz522
248746	41.18	102	18.0		zzzz101,zzzz533
248745	29.27	205	18.0		zzzz101,zzzz629
248744	30.65	199	18.0		zzzz101,zzzz640
248743	31.71	205	18.0		zzzz101,zzzz670
248742	39.83	118	18.0		zzzz101,zzzz110
248741	32.99	194	18.0		zzzz101,zzzz126
248740	35.29	136	17.0		zzzz101,zzzz138
248739	28.5	200	17.0		zzzz101,zzzz241
248738	43.69	103	18.0		zzzz101,zzzz420
248737	29.19	209	18.0		zzzz101,zzzz474
248736	29.44	214	18.0		zzzz101,zzzz546
248735	27.67	206	18.0		zzzz101,zzzz556
248734	29.41	204	18.0		zzzz101,zzzz596
248733	34.33	134	18.0		zzzz101,zzzz677
248732	28.9	218	17.0		zzzz101,zzzz153
248731	29.17	264	17.0		zzzz101,zzzz187
248730	41.75	103	17.0		zzzz101,zzzz396
248729	32.35	170	18.0		zzzz101,zzzz479
248728	31.31	198	17.0		zzzz101,zzzz518
248727	33.33	165	17.0		zzzz101,zzzz557
248726	30.81	198	17.0		zzzz101,zzzz589
248725	30.24	205	17.0		zzzz101,zzzz663
248724	29.49	217	17.0		zzzz101,zzzz906
248723	29.47	207	17.0		zzzz101,zzzz910
248722	29.67	209	17.0		zzzz101,zzzzz57
248721	41.18	102	17.0		zzzz101,zzzzz81
248720	29.47	207	17.0		zzzz101,zzzzz97
248719	27.44	266	17.0		zzzz101,zzzzz99
248718	29.89	174	18.0		zzzz101,zzzz384
248717	29.25	212	17.0		zzzz101,zzzz445
248716	36.13	119	17.0		zzzz101,zzzz494
248715	26.67	210	17.0		zzzz101,zzzz498
248714	35.97	139	17.0		zzzz101,zzzz838
248713	26.43	227	17.0		zzzz101,zzzzz89
248712	28.03	239	17.0		zzzz101,zzzz363
248711	29.86	211	17.0		zzzz101,zzzz365
248710	37.38	107	17.0		zzzz101,zzzz530
248709	30.54	203	17.0		zzzz101,zzzz531
248708	29.7	202	17.0		zzzz101,zzzz606
248707	28.36	201	17.0		zzzz101,zzzz133
248706	40.38	104	17.0		zzzz101,zzzz450
248705	28.44	211	17.0		zzzz101,zzzz725
248704	30.05	193	17.0		zzzz101,zzzzz49
248703	29.72	212	17.0		zzzz101,zzzz243
248702	37.61	117	17.0		zzzz101,zzzz249
248701	28.79	264	17.0		zzzz101,zzzz252
248700	29.49	234	17.0		zzzz101,zzzz482
248699	27.06	255	17.0		zzzz101,zzzz499
248698	31.28	195	17.0		zzzz101,zzzz722
248697	29.02	193	17.0		zzzz101,zzzzz43
248696	26.55	226	17.0		zzzz101,zzzzz85
248695	33.16	196	17.0		zzzz101,zzzz630
248694	35.38	130	17.0		zzzz101,zzzz891
248693	27.36	212	17.0		zzzz101,zzzz106
248692	28.0	225	17.0		zzzz101,zzzz475
248691	38.46	117	17.0		zzzz101,zzzz514
248690	26.95	256	17.0		zzzz101,zzzz515
248689	31.38	188	17.0		zzzz101,zzzz536
248688	39.6	101	17.0		zzzz101,zzzz794
248687	27.84	273	17.0		zzzz101,zzzz904
248686	32.43	185	17.0		zzzz101,zzzz287
248685	40.74	108	17.0		zzzz101,zzzz658
248684	29.44	214	17.0		zzzz101,zzzz674
248683	40.0	100	17.0		zzzz101,zzzz921
248682	29.46	258	17.0		zzzz101,zzzz936
248681	30.81	198	17.0		zzzz101,zzzz940
248680	33.15	181	16.0		zzzz101,zzzz152
248679	36.36	99	17.0		zzzz101,zzzz361
248678	26.97	241	16.0		zzzz101,zzzz831
248677	30.57	193	16.0		zzzz101,zzzz418
248676	28.92	204	16.0		zzzz101,zzzz452
248675	41.05	95	16.0		zzzz101,zzzz477
248674	29.84	191	16.0		zzzz101,zzzz549
248673	25.71	245	16.0		zzzz101,zzzz569
248672	28.17	213	16.0		zzzz101,zzzz649
248671	28.24	216	16.0		zzzz101,zzzz833
248670	30.11	186	16.0		zzzz101,zzzz840
248669	31.12	196	16.0		zzzz101,zzzz118
248668	38.53	109	16.0		zzzz101,zzzz139
248667	37.39	115	16.0		zzzz101,zzzz347
248666	28.23	209	16.0		zzzz101,zzzz502
248665	26.61	218	16.0		zzzz101,zzzz627
248664	27.44	215	16.0		zzzz101,zzzz642
248663	39.39	99	16.0		zzzz101,zzzz667
248662	29.9	204	16.0		zzzz101,zzzz108
248661	30.62	209	16.0		zzzz101,zzzz151
248660	28.64	213	16.0		zzzz101,zzzz191
248659	26.57	207	16.0		zzzz101,zzzz372
248658	28.08	203	16.0		zzzz101,zzzz400
248657	41.58	101	16.0		zzzz101,zzzz613
248656	41.03	117	16.0		zzzz101,zzzz884
248655	26.7	206	16.0		zzzz101,zzzz912
248654	33.16	187	16.0		zzzz101,zzzz933
248653	41.0	100	16.0		zzzz101,zzzz274
248652	37.72	114	16.0		zzzz101,zzzz352
248651	38.61	101	16.0		zzzz101,zzzz465
248650	28.14	199	16.0		zzzz101,zzzz581
248649	29.23	195	16.0		zzzz101,zzzz604
248648	25.32	233	16.0		zzzz101,zzzz638
248647	27.54	207	16.0		zzzz101,zzzz646
248646	26.88	253	16.0		zzzz101,zzzz832
248645	37.86	103	16.0		zzzz101,zzzz896
248644	25.72	276	16.0		zzzz101,zzzz173
248643	27.43	226	16.0		zzzz101,zzzz261
248642	31.1	209	16.0		zzzz101,zzzz262
248641	28.02	232	16.0		zzzz101,zzzz393
248640	36.13	119	16.0		zzzz101,zzzz403
248639	29.17	192	16.0		zzzz101,zzzz422
248638	27.88	208	16.0		zzzz101,zzzz468
248637	28.32	226	16.0		zzzz101,zzzz614
248636	39.8	98	16.0		zzzz101,zzzz628
248635	41.18	102	16.0		zzzz101,zzzz643
248634	36.13	119	16.0		zzzz101,zzzz158
248633	32.16	171	16.0		zzzz101,zzzz299
248632	29.44	197	16.0		zzzz101,zzzz371
248631	39.05	105	16.0		zzzz101,zzzz413
248630	32.83	198	16.0		zzzz101,zzzz520
248629	31.22	189	16.0		zzzz101,zzzz542
248628	29.35	201	16.0		zzzz101,zzzz547
248627	35.96	114	16.0		zzzz101,zzzz599
248626	27.63	257	16.0		zzzz101,zzzzz56
248625	25.87	259	16.0		zzzz101,zzzz175
248624	38.0	100	16.0		zzzz101,zzzz189
248623	42.86	98	16.0		zzzz101,zzzz386
248622	29.46	241	16.0		zzzz101,zzzz410
248621	41.41	99	16.0		zzzz101,zzzz437
248620	29.46	224	16.0		zzzz101,zzzz451
248619	28.92	204	16.0		zzzz101,zzzz913
248618	30.29	208	16.0		zzzz101,zzzz945
248617	29.07	227	16.0		zzzz101,zzzz129
248616	30.89	191	16.0		zzzz101,zzzz373
248615	32.54	169	16.0		zzzz101,zzzz398
248614	26.61	218	16.0		zzzz101,zzzz421
248613	24.27	309	16.0		zzzz101,zzzz426
248612	26.61	233	16.0		zzzz101,zzzz654
248611	25.0	244	16.0		zzzz101,zzzz686
248610	39.6	101	16.0		zzzz101,zzzz724
248609	28.5	207	16.0		zzzz101,zzzz952
248608	36.89	122	15.0		zzzz101,zzzz394
248607	38.61	101	15.0		zzzz101,zzzz578
248606	39.39	99	15.0		zzzz101,zzzz665
248605	39.22	102	16.0		zzzz101,zzzz666
248604	27.76	263	15.0		zzzz101,zzzz150
248603	26.43	280	15.0		zzzz101,zzzz179
248602	31.37	204	15.0		zzzz101,zzzz259
248601	29.02	193	15.0		zzzz101,zzzz387
248600	36.75	117	15.0		zzzz101,zzzz388
248599	36.54	104	15.0		zzzz101,zzzz389
248598	33.33	135	15.0		zzzz101,zzzz694
248597	27.49	251	15.0		zzzz101,zzzz843
248596	29.76	205	15.0		zzzz101,zzzzz87
248595	32.26	124	15.0		zzzz101,zzzz140
248594	28.31	219	15.0		zzzz101,zzzz168
248593	42.31	104	15.0		zzzz101,zzzz205
248592	26.49	268	15.0		zzzz101,zzzz219
248591	29.69	192	15.0		zzzz101,zzzz577
248590	35.45	110	15.0		zzzz101,zzzz641
248589	28.31	219	15.0		zzzz101,zzzz650
248588	29.78	225	15.0		zzzz101,zzzz836
248587	28.64	199	15.0		zzzz101,zzzz849
248586	33.58	137	15.0		zzzz101,zzzzz67
248585	28.79	198	15.0		zzzz101,zzzz368
248584	28.45	232	15.0		zzzz101,zzzz508
248583	27.4	219	15.0		zzzz101,zzzz535
248582	31.03	203	15.0		zzzz101,zzzz558
248581	37.14	105	15.0		zzzz101,zzzz895
248580	34.17	120	15.0		zzzz101,zzzzz62
248579	29.5	200	15.0		zzzz101,zzzzz90
248578	30.85	188	15.0		zzzz101,zzzz122
248577	35.29	119	15.0		zzzz101,zzzz351
248576	36.54	104	15.0		zzzz101,zzzz362
248575	29.5	200	15.0		zzzz101,zzzz563
248574	29.35	201	15.0		zzzz101,zzzz588
248573	41.58	101	15.0		zzzz101,zzzz656
248572	29.13	230	15.0		zzzz101,zzzz982
248571	35.19	108	15.0		zzzz101,zzzz395
248570	31.41	156	15.0		zzzz101,zzzz636
248569	32.16	171	15.0		zzzz101,zzzz727
248568	30.73	179	15.0		zzzz101,zzzz805
248567	30.77	182	15.0		zzzz101,zzzz844
248566	27.35	234	15.0		zzzz101,zzzz104
248565	30.65	124	15.0		zzzz101,zzzz141
248564	26.46	257	15.0		zzzz101,zzzz194
248563	31.22	205	15.0		zzzz101,zzzz215
248562	30.54	203	15.0		zzzz101,zzzz469
248561	25.88	255	15.0		zzzz101,zzzz512
248560	37.61	117	15.0		zzzz101,zzzz539
248559	29.35	201	15.0		zzzz101,zzzz605
248558	28.14	263	15.0		zzzz101,zzzz617
248557	30.32	188	15.0		zzzz101,zzzz634
248556	37.37	99	15.0		zzzz101,zzzz690
248555	26.85	216	15.0		zzzz101,zzzz964
248554	35.29	119	15.0		zzzz101,zzzz983
248553	27.39	241	15.0		zzzz101,zzzzz63
248552	27.94	204	15.0		zzzz101,zzzz109
248551	30.0	210	15.0		zzzz101,zzzz147
248550	32.39	142	15.0		zzzz101,zzzz149
248549	27.62	239	15.0		zzzz101,zzzz155
248548	39.42	104	15.0		zzzz101,zzzz208
248547	35.0	120	15.0		zzzz101,zzzz290
248546	28.71	202	15.0		zzzz101,zzzz297
248545	23.72	253	15.0		zzzz101,zzzz582
248544	26.36	258	15.0		zzzz101,zzzz587
248543	26.8	250	15.0		zzzz101,zzzz593
248542	27.66	235	15.0		zzzz101,zzzz662
248541	38.32	107	15.0		zzzz101,zzzz981
248540	26.82	220	15.0		zzzz101,zzzz127
248539	30.95	210	14.0		zzzz101,zzzz145
248538	29.9	194	14.0		zzzz101,zzzz300
248537	33.33	117	15.0		zzzz101,zzzz492
248536	30.82	146	15.0		zzzz101,zzzz537
248535	32.0	125	15.0		zzzz101,zzzz899
248534	39.42	104	15.0		zzzz101,zzzz963
248533	28.14	199	14.0		zzzz101,zzzz385
248532	37.62	101	14.0		zzzz101,zzzz401
248531	27.16	232	14.0		zzzz101,zzzz434
248530	33.33	159	14.0		zzzz101,zzzz438
248529	26.57	207	14.0		zzzz101,zzzz449
248528	26.48	253	14.0		zzzz101,zzzz481
248527	37.25	102	14.0		zzzz101,zzzz500
248526	27.8	205	14.0		zzzz101,zzzz511
248525	34.65	101	14.0		zzzz101,zzzz902
248524	33.61	119	14.0		zzzz101,zzzz202
248523	30.41	171	14.0		zzzz101,zzzz637
248522	28.64	220	14.0		zzzz101,zzzz908
248521	40.21	97	14.0		zzzz101,zzzz950
248520	28.11	185	14.0		zzzz101,zzzzz46
248519	31.9	116	14.0		zzzz101,zzzz611
248518	28.62	276	14.0		zzzz101,zzzz808
248517	38.0	100	14.0		zzzz101,zzzz901
248516	32.65	98	14.0		zzzz101,zzzzz61
248515	29.0	231	14.0		zzzz101,zzzz144
248514	30.93	194	14.0		zzzz101,zzzz199
248513	27.18	206	14.0		zzzz101,zzzz255
248512	30.14	209	14.0		zzzz101,zzzz367
248511	24.42	258	14.0		zzzz101,zzzz679
248510	30.06	173	14.0		zzzz101,zzzz787
248509	27.97	261	14.0		zzzz101,zzzz900
248508	29.0	200	14.0		zzzz101,zzzz117
248507	31.54	130	14.0		zzzz101,zzzz148
248506	26.89	264	14.0		zzzz101,zzzz182
248505	26.07	234	14.0		zzzz101,zzzz242
248504	26.34	205	14.0		zzzz101,zzzz355
248503	27.27	187	14.0		zzzz101,zzzz402
248502	25.58	215	14.0		zzzz101,zzzz467
248501	35.45	110	14.0		zzzz101,zzzzz53
248500	31.54	130	14.0		zzzz101,zzzz103
248499	27.48	222	14.0		zzzz101,zzzz211
248498	34.65	101	14.0		zzzz101,zzzz447
248497	40.82	98	14.0		zzzz101,zzzz561
248496	36.08	97	14.0		zzzz101,zzzz648
248495	32.14	168	14.0		zzzz101,zzzz652
248494	36.89	103	14.0		zzzz101,zzzz811
248493	33.66	101	14.0		zzzz101,zzzz946
248492	29.66	236	14.0		zzzz101,zzzz178
248491	35.71	98	14.0		zzzz101,zzzz354
248490	34.95	103	14.0		zzzz101,zzzz376
248489	29.75	158	14.0		zzzz101,zzzz406
248488	29.91	224	14.0		zzzz101,zzzz660
248487	32.74	113	14.0		zzzz101,zzzz738
248486	26.47	238	14.0		zzzz101,zzzzz79
248485	33.33	111	14.0		zzzz101,zzzzz93
248484	37.38	107	14.0		zzzz101,zzzz195
248483	36.36	110	14.0		zzzz101,zzzz431
248482	30.69	189	14.0		zzzz101,zzzz516
248481	28.72	195	13.0		zzzz101,zzzz824
248480	32.59	135	14.0		zzzz101,zzzz890
248479	35.29	102	13.0		zzzz101,zzzz113
248478	34.95	103	13.0		zzzz101,zzzz206
248477	30.0	170	14.0		zzzz101,zzzz364
248476	26.07	211	13.0		zzzz101,zzzz369
248475	30.4	227	13.0		zzzz101,zzzz391
248474	29.27	164	13.0		zzzz101,zzzz472
248473	39.39	99	13.0		zzzz101,zzzz592
248472	34.69	98	13.0		zzzz101,zzzz346
248471	34.26	108	13.0		zzzz101,zzzz497
248470	27.37	190	13.0		zzzz101,zzzz204
248469	36.11	108	13.0		zzzz101,zzzz619
248468	33.64	107	13.0		zzzz101,zzzz793
248467	29.67	209	13.0		zzzz101,zzzzz83
248466	40.0	100	13.0		zzzz101,zzzz121
248465	29.47	190	13.0		zzzz101,zzzz302
248464	29.95	197	13.0		zzzz101,zzzz370
248463	26.55	226	13.0		zzzz101,zzzz380
248462	38.54	96	13.0		zzzz101,zzzz414
248461	26.91	249	13.0		zzzz101,zzzz460
248460	27.44	215	13.0		zzzz101,zzzz538
248459	33.65	104	13.0		zzzz101,zzzz647
248458	39.18	97	13.0		zzzz101,zzzz862
248457	39.77	88	13.0		zzzz101,zzzz357
248456	25.44	228	13.0		zzzz101,zzzz487
248455	28.5	193	13.0		zzzz101,zzzz571
248454	34.56	136	13.0		zzzz101,zzzz597
248453	26.62	263	13.0		zzzz101,zzzz837
248452	29.1	189	13.0		zzzz101,zzzz848
248451	26.06	188	13.0		zzzz101,zzzz850
248450	25.75	268	13.0		zzzz101,zzzzz54
248449	25.0	288	13.0		zzzz101,zzzz397
248448	24.44	225	13.0		zzzz101,zzzz478
248447	27.09	203	13.0		zzzz101,zzzz513
248446	34.34	99	13.0		zzzz101,zzzzz82
248445	31.93	119	13.0		zzzz101,zzzz146
248444	24.41	254	13.0		zzzz101,zzzz172
248442	36.27	102	13.0		zzzz101,zzzz377
248441	32.02	178	13.0		zzzz101,zzzz623
248440	28.9	173	13.0		zzzz101,zzzz785
248439	31.71	123	13.0		zzzz101,zzzz142
248438	27.59	174	13.0		zzzz101,zzzz441
248437	33.09	139	13.0		zzzz101,zzzz590
248436	36.04	111	12.0		zzzz101,zzzz201
248435	28.57	189	13.0		zzzz101,zzzz239
248434	26.1	249	12.0		zzzz101,zzzz435
248433	29.8	198	13.0		zzzz101,zzzz661
248432	34.65	101	12.0		zzzz101,zzzz210
248431	30.53	190	12.0		zzzz101,zzzz213
248430	37.78	90	12.0		zzzz101,zzzz383
248429	25.42	240	12.0		zzzz101,zzzz470
248428	31.87	160	12.0		zzzz101,zzzz471
248427	30.33	122	12.0		zzzz101,zzzz543
248426	34.0	100	12.0		zzzz101,zzzz574
248425	29.19	209	12.0		zzzz101,zzzz496
248424	36.27	102	12.0		zzzz101,zzzz509
248423	25.87	201	12.0		zzzz101,zzzz644
248422	25.62	203	12.0		zzzz101,zzzz965
248421	28.73	181	12.0		zzzz101,zzzzz51
248420	25.11	227	12.0		zzzz101,zzzz903
248419	24.38	201	12.0		zzzz101,zzzz944
248418	25.12	203	12.0		zzzz101,zzzz892
248417	33.33	99	12.0		zzzz101,zzzz893
248416	45.21	73	12.0		zzzz101,zzzzz60
248415	30.08	123	12.0		zzzz101,zzzz143
248414	34.31	102	12.0		zzzz101,zzzz157
248411	29.76	168	12.0		zzzz101,zzzz390
248410	28.21	195	12.0		zzzz101,zzzz404
248409	26.27	236	12.0		zzzz101,zzzz412
248408	26.64	214	12.0		zzzz101,zzzz428
248407	30.63	111	12.0		zzzz101,zzzz745
248406	39.53	86	12.0		zzzz101,zzzz379
248405	28.93	197	12.0		zzzz101,zzzz586
248404	26.92	208	12.0		zzzz101,zzzz105
248403	28.02	207	12.0		zzzz101,zzzz225
248401	30.39	102	12.0		zzzz101,zzzz618
248400	28.95	190	12.0		zzzz101,zzzz635
248399	27.78	126	12.0		zzzz101,zzzz688
248398	26.67	180	12.0		zzzz101,zzzzz64
248397	31.94	144	11.0		zzzz101,zzzz203
248396	27.52	218	12.0		zzzz101,zzzz264
248395	35.51	107	12.0		zzzz101,zzzz486
248393	26.77	254	11.0		zzzz101,zzzz382
248392	28.74	174	11.0		zzzz101,zzzz790
248391	32.32	99	11.0		zzzz101,zzzz894
248390	29.77	131	11.0		zzzz101,zzzz277
248388	27.22	158	11.0		zzzz101,zzzz439
248387	27.09	203	11.0		zzzz101,zzzz562
248386	31.43	105	11.0		zzzz101,zzzz622
248385	24.2	219	11.0		zzzz101,zzzz659
248384	28.3	159	11.0		zzzz101,zzzz783
248383	32.79	122	11.0		zzzz101,zzzzz75
248382	25.76	229	11.0		zzzz101,zzzz223
248381	39.33	89	11.0		zzzz101,zzzz278
248379	26.32	190	11.0		zzzz101,zzzz214
248378	28.4	169	11.0		zzzz101,zzzz263
248377	32.99	97	11.0		zzzz101,zzzz301
248376	33.01	103	11.0		zzzz101,zzzz425
248375	27.44	164	11.0		zzzz101,zzzz466
248374	27.05	207	11.0		zzzz101,zzzz631
248373	29.21	178	11.0		zzzz101,zzzz653
248372	30.51	118	11.0		zzzz101,zzzz209
248371	25.74	202	11.0		zzzz101,zzzz405
248369	33.66	101	11.0		zzzz101,zzzz756
248368	26.4	197	11.0		zzzz101,zzzzz91
248367	27.81	187	11.0		zzzz101,zzzzz98
248366	32.67	101	11.0		zzzz101,zzzz360
248365	25.63	199	11.0		zzzz101,zzzz616
248364	36.29	124	11.0		zzzz101,zzzz796
248363	26.43	140	11.0		zzzz101,zzzz920
248362	31.47	143	11.0		zzzz101,zzzzz77
248361	26.82	179	11.0		zzzz101,zzzz399
248360	26.92	130	11.0		zzzz101,zzzz446
248359	27.81	187	11.0		zzzz101,zzzz521
248357	28.49	172	11.0		zzzz101,zzzz786
248356	26.05	119	11.0		zzzz101,zzzz111
248355	33.65	104	11.0		zzzz101,zzzz216
248353	25.31	245	10.0		zzzz101,zzzz231
248352	25.88	228	10.0		zzzz101,zzzz235
248350	27.43	175	11.0		zzzz101,zzzz645
248349	27.72	202	10.0		zzzz101,zzzz715
248347	29.69	128	10.0		zzzz101,zzzz453
248346	28.82	170	10.0		zzzz101,zzzz464
248345	42.19	64	10.0		zzzz101,zzzz217
248344	25.13	187	10.0		zzzz101,zzzz222
248342	27.22	180	10.0		zzzz101,zzzz442
248341	29.51	122	10.0		zzzz101,zzzz602
248338	29.6	125	10.0		zzzz101,zzzz374
248337	30.39	102	10.0		zzzz101,zzzz544
248335	25.48	208	10.0		zzzz101,zzzz826
248334	28.92	166	10.0		zzzz101,zzzz854
248330	42.25	71	10.0		zzzz101,zzzz672
248329	42.25	71	10.0		zzzz101,zzzz683
248328	42.25	71	10.0		zzzz101,zzzz687
248327	33.33	99	10.0		zzzz101,zzzz760
248325	36.89	103	10.0		zzzz101,zzzz366
248323	38.46	65	10.0		zzzz101,zzzz820
248322	29.61	179	10.0		zzzz101,zzzz240
248321	23.5	217	10.0		zzzz101,zzzz626
248320	25.66	226	10.0		zzzz101,zzzz700
248319	30.63	111	10.0		zzzz101,zzzzz70
248318	28.14	167	10.0		zzzz101,zzzz462
248317	29.46	112	9.0		zzzz101,zzzz839
248316	28.28	145	9.0		zzzz101,zzzz455
248314	30.93	97	9.0		zzzz101,zzzz788
248313	26.6	188	9.0		zzzz101,zzzz279
248312	38.3	94	9.0		zzzz101,zzzz281
248311	25.13	187	9.0		zzzz101,zzzz303
248310	40.3	67	9.0		zzzz101,zzzz519
248309	38.03	71	9.0		zzzz101,zzzz226
248306	22.81	171	9.0		zzzz101,zzzzz76
248304	30.82	146	9.0		zzzz101,zzzz825
248301	28.06	139	9.0		zzzz101,zzzz698
248298	29.17	96	9.0		zzzz101,zzzz190
248297	29.52	105	9.0		zzzz101,zzzz804
248294	37.88	66	8.0		zzzz101,zzzz473
248290	30.43	115	8.0		zzzz101,zzzz823
248289	28.87	97	8.0		zzzz101,zzzz298
248287	37.88	66	8.0		zzzz101,zzzz633
248285	26.87	134	8.0		zzzz101,zzzz818
248284	25.99	227	8.0		zzzz101,zzzz696
248281	28.19	188	8.0		zzzz101,zzzz728
248276	37.18	78	8.0		zzzz101,zzzz461
248275	25.0	180	7.0		zzzz101,zzzz253
248274	33.87	62	7.0		zzzz101,zzzz815
248270	24.87	189	7.0		zzzz101,zzzzz92
248269	26.8	153	7.0		zzzz101,zzzz430
248268	53.39	251	63.0		zzzz102,zzzz288
248267	41.96	255	50.0		zzzz102,zzzz812
248266	38.98	295	49.0		zzzz102,zzzz287
248265	40.14	284	48.0		zzzz102,zzzz156
248264	37.8	254	48.0		zzzz102,zzzz351
248263	37.88	264	48.0		zzzz102,zzzz365
248262	40.72	221	47.0		zzzz102,zzzz457
248261	39.58	240	46.0		zzzz102,zzzz674
248260	42.15	242	45.0		zzzz102,zzzz154
248259	39.39	231	45.0		zzzz102,zzzz724
248258	44.15	188	45.0		zzzz102,zzzz456
248257	37.41	278	44.0		zzzz102,zzzz362
248256	38.25	251	44.0		zzzz102,zzzz907
248255	40.89	203	44.0		zzzz102,zzzz128
248254	36.48	244	44.0		zzzz102,zzzz387
248253	40.36	223	43.0		zzzz102,zzzz373
248252	37.28	228	43.0		zzzz102,zzzz418
248251	53.06	147	43.0		zzzz102,zzzz896
248250	40.83	218	43.0		zzzz102,zzzz388
248249	35.8	243	43.0		zzzz102,zzzz417
248248	35.37	246	42.0		zzzz102,zzzz197
248247	37.35	257	42.0		zzzz102,zzzz261
248246	34.38	256	42.0		zzzz102,zzzz415
248245	39.35	216	42.0		zzzz102,zzzz443
248244	43.32	187	42.0		zzzz102,zzzz585
248243	35.58	267	42.0		zzzz102,zzzz792
248242	34.98	263	42.0		zzzz102,zzzz424
248241	38.49	252	42.0		zzzz102,zzzz478
248240	38.56	236	42.0		zzzz102,zzzz579
248239	36.8	250	42.0		zzzz102,zzzz657
248238	38.46	247	42.0		zzzz102,zzzz913
248237	40.58	207	42.0		zzzz102,zzzzz80
248236	38.37	245	42.0		zzzz102,zzzz114
248235	38.71	217	42.0		zzzz102,zzzz597
248234	34.94	249	42.0		zzzz102,zzzz157
248233	37.19	242	41.0		zzzz102,zzzz422
248232	40.34	233	41.0		zzzz102,zzzz949
248231	43.01	186	41.0		zzzz102,zzzzz55
248230	34.91	275	41.0		zzzz102,zzzzz85
248229	37.8	254	41.0		zzzz102,zzzz109
248228	42.86	189	41.0		zzzz102,zzzz378
248227	38.83	206	41.0		zzzz102,zzzz433
248226	34.58	295	41.0		zzzz102,zzzz451
248225	37.35	249	41.0		zzzz102,zzzz525
248224	34.68	248	41.0		zzzz102,zzzz628
248223	36.58	257	41.0		zzzz102,zzzz841
248222	40.93	215	41.0		zzzz102,zzzz952
248221	39.45	218	41.0		zzzz102,zzzz134
248220	45.41	185	41.0		zzzz102,zzzz376
248219	39.29	196	41.0		zzzz102,zzzz432
248218	37.3	244	41.0		zzzz102,zzzz528
248217	31.52	276	41.0		zzzz102,zzzz643
248216	39.72	214	41.0		zzzz102,zzzz726
248215	36.1	241	41.0		zzzz102,zzzz945
248214	38.5	213	40.0		zzzz102,zzzz123
248213	40.1	202	40.0		zzzz102,zzzz130
248212	41.5	200	40.0		zzzz102,zzzz189
248211	34.38	256	40.0		zzzz102,zzzz389
248210	37.61	226	40.0		zzzz102,zzzz498
248209	35.86	251	40.0		zzzz102,zzzz511
248208	37.34	241	40.0		zzzz102,zzzz518
248207	39.68	189	40.0		zzzz102,zzzz537
248206	37.5	240	40.0		zzzz102,zzzz546
248205	35.96	292	40.0		zzzz102,zzzz129
248204	37.17	226	40.0		zzzz102,zzzz548
248203	35.68	227	40.0		zzzz102,zzzz725
248202	37.28	228	40.0		zzzz102,zzzz884
248201	37.45	251	40.0		zzzz102,zzzz119
248200	36.19	257	40.0		zzzz102,zzzz385
248199	36.8	250	40.0		zzzz102,zzzz573
248198	42.35	196	40.0		zzzz102,zzzz791
248197	38.73	204	40.0		zzzz102,zzzz912
248196	35.25	244	40.0		zzzz102,zzzzz45
248195	35.66	258	40.0		zzzz102,zzzzz53
248194	35.17	236	39.0		zzzz102,zzzz356
248193	36.63	243	39.0		zzzz102,zzzz358
248192	33.46	254	39.0		zzzz102,zzzz369
248191	40.66	182	39.0		zzzz102,zzzz420
248190	36.49	222	39.0		zzzz102,zzzz477
248189	35.23	264	39.0		zzzz102,zzzz647
248188	34.63	231	39.0		zzzz102,zzzz678
248187	35.55	256	39.0		zzzz102,zzzz910
248186	37.33	225	39.0		zzzz102,zzzz940
248185	38.33	227	39.0		zzzz102,zzzzz87
248184	33.47	248	39.0		zzzz102,zzzz372
248183	33.88	242	39.0		zzzz102,zzzz407
248182	39.74	234	39.0		zzzz102,zzzz840
248181	34.04	285	39.0		zzzz102,zzzz171
248180	37.17	226	39.0		zzzz102,zzzz353
248179	40.7	199	39.0		zzzz102,zzzz416
248178	34.51	226	39.0		zzzz102,zzzz445
248177	35.48	217	39.0		zzzz102,zzzz474
248176	35.43	223	39.0		zzzz102,zzzz480
248175	32.47	271	39.0		zzzz102,zzzz512
248174	36.36	220	39.0		zzzz102,zzzz523
248173	34.11	258	39.0		zzzz102,zzzz556
248172	37.5	240	39.0		zzzz102,zzzz982
248171	40.98	205	39.0		zzzz102,zzzzz49
248170	35.22	247	39.0		zzzz102,zzzzz74
248169	36.49	222	39.0		zzzz102,zzzz381
248168	34.39	285	38.0		zzzz102,zzzz460
248167	45.73	164	39.0		zzzz102,zzzz492
248166	35.66	244	38.0		zzzz102,zzzz906
248165	39.19	222	39.0		zzzz102,zzzzz50
248164	35.98	214	38.0		zzzz102,zzzzz82
248163	36.25	251	38.0		zzzz102,zzzz120
248162	33.73	249	38.0		zzzz102,zzzz375
248161	35.27	224	38.0		zzzz102,zzzz396
248160	37.56	221	38.0		zzzz102,zzzz425
248159	34.36	259	38.0		zzzz102,zzzz454
248158	36.05	233	38.0		zzzz102,zzzz495
248157	34.39	253	38.0		zzzz102,zzzz613
248156	35.19	233	38.0		zzzz102,zzzz629
248155	33.6	253	38.0		zzzz102,zzzz641
248154	41.33	196	38.0		zzzz102,zzzz908
248153	35.15	239	38.0		zzzz102,zzzz352
248152	36.65	221	38.0		zzzz102,zzzz428
248151	35.2	250	38.0		zzzz102,zzzz540
248150	35.87	223	38.0		zzzz102,zzzz564
248149	37.38	214	38.0		zzzz102,zzzz642
248148	36.45	214	38.0		zzzz102,zzzz692
248147	33.33	252	38.0		zzzz102,zzzz794
248146	37.33	225	38.0		zzzz102,zzzz901
248145	34.92	252	38.0		zzzz102,zzzz921
248144	37.86	206	38.0		zzzz102,zzzz941
248143	33.46	266	38.0		zzzz102,zzzz127
248142	40.72	221	38.0		zzzz102,zzzz165
248141	35.24	227	38.0		zzzz102,zzzz224
248140	35.27	241	38.0		zzzz102,zzzz947
248139	36.82	220	38.0		zzzz102,zzzzz73
248138	32.28	285	38.0		zzzz102,zzzzz84
248137	34.65	228	37.0		zzzz102,zzzz354
248136	33.62	232	37.0		zzzz102,zzzz450
248135	33.73	252	37.0		zzzz102,zzzz452
248134	38.12	202	37.0		zzzz102,zzzz485
248133	34.4	218	37.0		zzzz102,zzzz520
248132	33.07	257	37.0		zzzz102,zzzz531
248131	33.99	253	37.0		zzzz102,zzzz535
248130	35.12	242	37.0		zzzz102,zzzz640
248129	32.97	276	37.0		zzzz102,zzzz793
248128	33.84	263	37.0		zzzz102,zzzz852
248127	37.45	235	37.0		zzzz102,zzzz903
248126	31.29	310	37.0		zzzz102,zzzz909
248125	32.68	257	37.0		zzzz102,zzzzz88
248124	38.05	205	37.0		zzzz102,zzzz117
248123	37.23	231	37.0		zzzz102,zzzz207
248122	35.06	231	37.0		zzzz102,zzzz401
248121	37.17	226	37.0		zzzz102,zzzz508
248120	36.65	221	37.0		zzzz102,zzzz522
248119	32.4	250	37.0		zzzz102,zzzz533
248118	34.84	221	37.0		zzzz102,zzzz667
248117	35.59	222	37.0		zzzz102,zzzz802
248116	34.42	215	37.0		zzzz102,zzzz131
248115	34.91	232	37.0		zzzz102,zzzz208
248114	36.22	254	37.0		zzzz102,zzzz210
248113	33.05	239	37.0		zzzz102,zzzz434
248112	36.36	242	37.0		zzzz102,zzzz440
248111	34.55	246	37.0		zzzz102,zzzz447
248110	32.54	252	37.0		zzzz102,zzzz448
248109	38.6	228	37.0		zzzz102,zzzz458
248108	37.28	228	37.0		zzzz102,zzzz663
248107	38.65	207	37.0		zzzz102,zzzz893
248106	34.12	255	37.0		zzzz102,zzzz895
248105	31.84	267	37.0		zzzz102,zzzz900
248104	34.01	247	37.0		zzzz102,zzzz911
248103	35.4	226	37.0		zzzz102,zzzz963
248102	35.84	226	37.0		zzzz102,zzzzz90
248101	34.48	232	36.0		zzzz102,zzzz132
248100	38.91	221	36.0		zzzz102,zzzz166
248099	38.3	235	36.0		zzzz102,zzzz245
248098	30.74	231	36.0		zzzz102,zzzz348
248097	38.62	189	36.0		zzzz102,zzzz475
248096	41.33	196	36.0		zzzz102,zzzz521
248095	37.79	217	36.0		zzzz102,zzzz627
248094	39.13	184	36.0		zzzz102,zzzz935
248093	36.67	210	36.0		zzzz102,zzzzz86
248092	37.1	221	36.0		zzzz102,zzzz108
248091	34.42	276	36.0		zzzz102,zzzz160
248090	36.65	221	36.0		zzzz102,zzzz162
248089	38.16	207	36.0		zzzz102,zzzz199
248088	33.72	258	36.0		zzzz102,zzzz286
248087	40.53	190	36.0		zzzz102,zzzz368
248086	36.12	227	36.0		zzzz102,zzzz410
248085	35.34	232	36.0		zzzz102,zzzz444
248084	36.65	221	36.0		zzzz102,zzzz500
248083	37.68	207	36.0		zzzz102,zzzz894
248082	35.45	268	36.0		zzzz102,zzzz209
248081	41.33	196	36.0		zzzz102,zzzz217
248080	36.67	210	36.0		zzzz102,zzzz220
248079	31.2	266	36.0		zzzz102,zzzz465
248078	36.62	213	36.0		zzzz102,zzzz470
248077	31.52	276	36.0		zzzz102,zzzz502
248076	30.9	288	36.0		zzzz102,zzzz515
248075	36.97	211	36.0		zzzz102,zzzz649
248074	33.59	262	36.0		zzzz102,zzzz796
248073	35.14	259	36.0		zzzz102,zzzz809
248072	37.68	207	36.0		zzzz102,zzzz965
248071	37.19	199	36.0		zzzz102,zzzzz78
248070	35.04	234	35.0		zzzz102,zzzz136
248069	33.46	257	36.0		zzzz102,zzzz370
248068	34.52	252	36.0		zzzz102,zzzz382
248067	38.95	190	35.0		zzzz102,zzzz646
248066	35.29	221	35.0		zzzz102,zzzz849
248065	38.65	207	35.0		zzzz102,zzzz892
248064	35.68	241	35.0		zzzz102,zzzz176
248063	36.25	251	35.0		zzzz102,zzzz262
248062	37.04	216	35.0		zzzz102,zzzz371
248061	31.69	284	35.0		zzzz102,zzzz400
248060	33.59	259	35.0		zzzz102,zzzz501
248059	34.04	235	35.0		zzzz102,zzzz550
248058	32.38	244	35.0		zzzz102,zzzz650
248057	37.62	210	35.0		zzzz102,zzzz722
248056	36.1	241	35.0		zzzz102,zzzz810
248055	37.5	192	35.0		zzzz102,zzzz843
248054	41.27	189	35.0		zzzz102,zzzz904
248053	34.19	234	35.0		zzzz102,zzzz950
248052	36.44	247	35.0		zzzz102,zzzz951
248051	35.98	214	35.0		zzzz102,zzzz180
248050	40.74	189	35.0		zzzz102,zzzz349
248049	35.04	234	35.0		zzzz102,zzzz620
248048	42.94	163	35.0		zzzz102,zzzz637
248047	42.61	176	35.0		zzzz102,zzzz656
248046	33.05	236	35.0		zzzz102,zzzz670
248045	36.36	231	35.0		zzzz102,zzzz829
248044	40.11	182	35.0		zzzz102,zzzz836
248043	39.43	175	35.0		zzzz102,zzzz936
248042	38.46	195	35.0		zzzz102,zzzz944
248041	32.06	262	35.0		zzzz102,zzzz553
248040	37.44	195	35.0		zzzz102,zzzz619
248039	35.75	193	34.0		zzzz102,zzzz161
248038	36.06	208	34.0		zzzz102,zzzz383
248037	38.15	173	34.0		zzzz102,zzzz406
248036	46.62	148	34.0		zzzz102,zzzz437
248035	38.42	190	34.0		zzzz102,zzzz441
248034	32.31	260	34.0		zzzz102,zzzz449
248033	32.38	244	34.0		zzzz102,zzzz554
248032	32.35	238	34.0		zzzz102,zzzz614
248031	32.64	239	34.0		zzzz102,zzzz658
248030	33.84	263	34.0		zzzz102,zzzz346
248029	38.38	185	34.0		zzzz102,zzzz364
248028	40.0	180	34.0		zzzz102,zzzz367
248027	32.16	255	34.0		zzzz102,zzzz527
248026	31.22	237	34.0		zzzz102,zzzz567
248025	35.5	231	34.0		zzzz102,zzzz807
248024	36.36	231	34.0		zzzz102,zzzzz91
248023	36.56	227	34.0		zzzz102,zzzz164
248022	31.44	264	34.0		zzzz102,zzzz179
248021	36.02	211	34.0		zzzz102,zzzz379
248020	43.33	150	34.0		zzzz102,zzzz395
248019	38.58	197	34.0		zzzz102,zzzz413
248018	40.22	179	34.0		zzzz102,zzzz636
248017	38.16	152	34.0		zzzz102,zzzz665
248016	32.55	255	34.0		zzzz102,zzzz889
248015	37.06	197	34.0		zzzz102,zzzz891
248014	35.34	232	34.0		zzzz102,zzzzz83
248013	33.93	224	33.0		zzzz102,zzzz118
248012	33.45	290	33.0		zzzz102,zzzz155
248011	33.04	230	33.0		zzzz102,zzzz159
248010	33.7	273	33.0		zzzz102,zzzz264
248009	32.37	241	33.0		zzzz102,zzzz361
248008	38.07	218	33.0		zzzz102,zzzz421
248007	33.33	210	33.0		zzzz102,zzzz423
248006	32.4	250	33.0		zzzz102,zzzz471
248005	36.07	244	33.0		zzzz102,zzzz472
248004	34.91	232	33.0		zzzz102,zzzz529
248003	40.76	184	33.0		zzzz102,zzzz547
248002	35.68	213	33.0		zzzz102,zzzz555
248001	38.62	189	33.0		zzzz102,zzzz559
248000	36.22	185	33.0		zzzz102,zzzz644
247999	43.45	145	33.0		zzzz102,zzzz654
247998	35.65	230	33.0		zzzz102,zzzz158
247997	33.06	248	33.0		zzzz102,zzzz483
247996	34.72	216	33.0		zzzz102,zzzz505
247995	35.0	220	33.0		zzzz102,zzzz563
247994	35.07	211	33.0		zzzz102,zzzz631
247993	33.22	283	33.0		zzzz102,zzzzz61
247992	35.05	214	33.0		zzzz102,zzzz107
247991	35.56	225	33.0		zzzz102,zzzz195
247990	33.73	255	33.0		zzzz102,zzzz427
247989	33.85	195	33.0		zzzz102,zzzz436
247988	40.94	149	33.0		zzzz102,zzzz494
247987	33.18	211	33.0		zzzz102,zzzz509
247986	33.04	227	33.0		zzzz102,zzzz524
247985	41.03	156	33.0		zzzz102,zzzzz81
247984	35.87	184	33.0		zzzz102,zzzz116
247983	32.13	249	32.0		zzzz102,zzzz230
247982	35.62	233	32.0		zzzz102,zzzz397
247981	32.44	262	32.0		zzzz102,zzzz468
247980	35.35	215	32.0		zzzz102,zzzz491
247979	33.5	203	32.0		zzzz102,zzzz497
247978	33.49	215	32.0		zzzz102,zzzz549
247977	31.01	258	32.0		zzzz102,zzzz618
247976	35.55	211	33.0		zzzz102,zzzz661
247975	37.1	186	32.0		zzzz102,zzzz662
247974	32.13	249	32.0		zzzz102,zzzzz89
247973	35.51	214	32.0		zzzz102,zzzzz97
247972	36.11	216	32.0		zzzz102,zzzz106
247971	35.51	214	32.0		zzzz102,zzzz153
247970	30.74	309	32.0		zzzz102,zzzz173
247969	34.24	257	32.0		zzzz102,zzzz206
247968	42.94	177	32.0		zzzz102,zzzz390
247967	35.75	221	32.0		zzzz102,zzzz414
247966	44.17	163	32.0		zzzz102,zzzz462
247965	29.8	302	32.0		zzzz102,zzzz638
247964	37.76	196	32.0		zzzz102,zzzz727
247963	37.36	174	32.0		zzzz102,zzzz126
247962	29.53	298	32.0		zzzz102,zzzz135
247961	35.19	216	32.0		zzzz102,zzzz145
247960	32.23	242	32.0		zzzz102,zzzz167
247959	32.02	253	32.0		zzzz102,zzzz168
247958	35.64	202	32.0		zzzz102,zzzz211
247957	42.11	190	32.0		zzzz102,zzzz366
247956	43.59	156	32.0		zzzz102,zzzz439
247955	30.83	240	32.0		zzzz102,zzzz542
247954	38.38	198	32.0		zzzz102,zzzz635
247953	33.18	217	32.0		zzzz102,zzzz664
247952	32.37	278	32.0		zzzz102,zzzz833
247951	32.34	269	32.0		zzzz102,zzzz899
247950	34.78	207	32.0		zzzz102,zzzzz96
247949	34.3	207	32.0		zzzz102,zzzz125
247948	32.77	235	31.0		zzzz102,zzzz163
247947	33.04	230	32.0		zzzz102,zzzz216
247946	36.49	211	32.0		zzzz102,zzzz357
247945	34.33	233	32.0		zzzz102,zzzz377
247944	33.95	215	32.0		zzzz102,zzzz526
247943	41.1	163	32.0		zzzz102,zzzz738
247942	36.63	202	32.0		zzzz102,zzzz832
247941	34.87	238	32.0		zzzz102,zzzz964
247940	34.3	207	31.0		zzzz102,zzzz174
247939	36.14	202	31.0		zzzz102,zzzz175
247938	33.48	230	31.0		zzzz102,zzzz194
247937	30.83	253	31.0		zzzz102,zzzz219
247936	32.61	276	31.0		zzzz102,zzzz252
247935	30.71	241	31.0		zzzz102,zzzz484
247934	31.93	238	31.0		zzzz102,zzzz487
247933	31.45	248	31.0		zzzz102,zzzz504
247932	36.36	198	31.0		zzzz102,zzzz621
247931	34.74	213	31.0		zzzz102,zzzz170
247930	35.18	199	31.0		zzzz102,zzzz243
247929	35.82	201	31.0		zzzz102,zzzz831
247928	40.76	157	31.0		zzzz102,zzzzz64
247927	30.59	255	31.0		zzzz102,zzzzz77
247926	31.16	276	31.0		zzzz102,zzzz133
247925	37.22	180	31.0		zzzz102,zzzz473
247924	39.18	171	31.0		zzzz102,zzzz577
247923	42.31	156	31.0		zzzz102,zzzz622
247922	33.19	232	31.0		zzzz102,zzzz630
247921	30.49	246	31.0		zzzz102,zzzz902
247920	36.73	196	31.0		zzzz102,zzzzz60
247919	34.78	207	30.0		zzzz102,zzzz177
247918	36.45	203	30.0		zzzz102,zzzz479
247917	32.18	202	30.0		zzzz102,zzzz516
247916	36.56	186	30.0		zzzz102,zzzz544
247915	30.95	252	30.0		zzzz102,zzzz659
247914	57.45	94	30.0		zzzz102,zzzz115
247913	34.43	244	30.0		zzzz102,zzzz429
247912	32.54	252	30.0		zzzz102,zzzz808
247911	34.29	210	30.0		zzzz102,zzzz845
247910	32.63	236	30.0		zzzz102,zzzz946
247909	29.43	265	30.0		zzzz102,zzzzz79
247908	33.96	212	30.0		zzzz102,zzzz393
247907	33.16	193	30.0		zzzz102,zzzz402
247906	32.71	214	30.0		zzzz102,zzzz405
247905	34.9	192	30.0		zzzz102,zzzz442
247904	36.32	190	30.0		zzzz102,zzzz648
247903	34.24	184	30.0		zzzz102,zzzz811
247902	36.32	201	30.0		zzzz102,zzzzz48
[truncated: 249,176 more rows]
