# Supplementary material for: Discovery of several thousand highly diverse circular DNA viruses
Source: eLife journal article supplement (doi:10.7554/elife.51971), 2020-02-03
Supplement: fig2-figsupp1-data4 [file elife-51971-fig2-figsupp1-data4-v1.cys › CytoscapeSession-2019_08_05-17_02/tables/36-all_my_seqs_genbank_ssDNA1_domains_micro_ino_rep_fasta+Full+Network/SHARED_ATTRS-org.cytoscape.model.CyNetwork-36+shared+network.cytable]

CyCSV-Version	1
SUID	shared name
java.lang.Long	java.lang.String
36 shared network
52	all_my_seqs_genbank_ssDNA1_domains_micro_ino_rep_fasta Full Network
249706	Network
36
252227	all_my_seqs_genbank_ssDNA1_domains_micro_ino_rep_fasta Full Network(1)
252237	all_my_seqs_genbank_ssDNA1_domains_micro_ino_rep_fasta Full Network(2)
252247	all_my_seqs_genbank_ssDNA1_domains_micro_ino_rep_fasta Full Network(3)
