# Supplementary material for: Discovery of several thousand highly diverse circular DNA viruses
Source: eLife journal article supplement (doi:10.7554/elife.51971), 2020-02-03
Supplement: fig2-figsupp1-data4 [file elife-51971-fig2-figsupp1-data4-v1.cys › CytoscapeSession-2019_08_05-17_02/tables/36-all_my_seqs_genbank_ssDNA1_domains_micro_ino_rep_fasta+Full+Network/SHARED_ATTRS-org.cytoscape.model.CyNode-36+shared+node.cytable]

CyCSV-Version	1
SUID	Description	domain	seq_source	Sequence	Sequence Length	Sequence Source	shared name	taxonomy
java.lang.Long	java.util.List<java.lang.String>	java.lang.String	java.lang.String	java.lang.String	java.lang.Integer	java.lang.String	java.lang.String	java.lang.String
	mutable	mutable	mutable	mutable	mutable	mutable		mutable
36 shared node
943	genbank_microviridae_ARQ16014.1_@PF05840.12	PF05840.12	genbank	MPCFHPMTVYRLAGQKTKDGRSNAVTFDPSKAIPFSEFKIPCGQCIGCRLSKSREWAARCVVEAKSHKNNMFLTLTYDDAHLPADGSLHYEHFQLFMKRMRKYFMSRFGQTLRFFMCGEYGEKLGRPHYHAIIFGVTFVDKRLWSIRRGNNLYRSRTLEKLWPFGFSSIGAVNFETAAYVARYVTKKITGPLKLEHYDGKVAEFCHCSLKPGIGHDFCEKYMTDIYTNDRLILSEKIMMNPPAYFDKLLERSDIVRYEEIKRLREKRGRDFEDTGETSPQRLSVRERVQELKAAKLRRVMEENQS	305	USER	zzzz100
942	genbank_microviridae_ARQ16050.1_@PF05840.12	PF05840.12	genbank	MIMARQIMCEHPIFILNPAFRDAILDTGRYFYDGVYVRLSEIDRLSYHYQFPYYKFSPKGIANLQTKQDDYYGIDSDGECVPMFLATPCRKCILCRNRNSNEWMFRAIAETQYSTCVPYFVTLTYDNESLPENGVNKEDLQLFFKRLRQNLSRKFNYTEKVRYFAVSEYGKNTHRAHYHIILWNMPAGYSDISILHVIQDAWSIKQRVYNRDIKRYDWQLVKRIGFCYVKPCNVGGIQYVMKYMRKPCPIPKGQNETFYLSSRRPGIGAKWCMEHSIWFYQNADVLTVELVDKFTGERFCSFLPSYFRRKLYPCPSVLVKKEVRDAIQLLDYYLSLRSLHLHLFNIPMYGDDTDVIKESVTRCHPYYRFYKCRHRFPKYIWTNYKIMYKHLGDDTYFVL…	466	USER	zzzz101
941	genbank_microviridae_ARQ16019.1_@PF05840.12	PF05840.12	genbank	MLKMCLNPKIAGLQESFSVDGELVKKVTFRIGDREIVKSIRVPCRSCVECVIGYSNQWATRVAAEASCHRENCFITLTYNDESLPKDNQVAVREVQLFLKRLRKSLGKKRIRYFACGEYGEKGGRPHYHVIIFGHSFSDRYFLKFDNRKNPIYRSPSLEKLWTKGFSSVGEVNRDSARYAAKYMQKFMPVGERKPAFTLQSRKPAIGYVYAIKHYDEIVKTCGIYQEGKKRSLPPVFKRWYKREGLNIAPIEDAMALRAFPSTREEDLVARRLNFVNKFGFWRKNRKGELISDVYNI	297	USER	zzzz102
940	genbank_microviridae_ARQ16045.1_@PF05840.12	PF05840.12	genbank	MSLARFSELAGKQMKYEDLMYNPKVMLIPCGKCIGCRIRQREDWTTRIELEARGWPKEQVWFITLTYDDDHVPGMIVKTGEIMRKVQYVWKPGEKAPESVQTLLYPDMQKFLKRLRKAYKGQLRYFCAGEYGEQTARPHYHMILYGWQPTDLKQIYKIRHNGYYTSEWMCNLWGMGQIQIAQATPETYRYAAGYVTKKMYEIDGQKANVYYEMGQQKPFACMSLKPGLGDTYYQEHKEEIWRKGYIQCTNGKQAQIPRYYEKMMEAENPERLWRIKRNRQKAVIEQSRLKYENADYEKDLKTKERVIKKSVKLQKGGL	318	USER	zzzz103
939	genbank_microviridae_ARQ16009.1_@PF05840.12	PF05840.12	genbank	MSCYKPLIRLYNPNDKEISGRVYSLSRFSQLAGKQLKYEDLMYKKNVMLIPCGQCIGCRIRQREDWTTRIELEARDYPKEQVWFITLTYDDDHVPGMIINTGEIMRKVQYVWRPGEKRPESVQTLLYTDIQKFLKRLRKAYGGKLRYFVAGEYGEQTARPHYHMILYGWQPTDLEHLYKIQHNGYFTSKWLEDLWGMGQIQIAQAVPETYRYVAGYVTKKMYEIDGQKANAYYELGQTKPFACMSLKPGLGDHYYQEHKAEIWRQGYIQCTNGKHAQIPRYYEKMMEAENPQRLWKIKQNRQAAAIAENRLKYENTDFAEQCKTKERVIKKQMKKKGTL	339	USER	zzzz104
938	genbank_microviridae_ARQ15994.1_@PF05840.12	PF05840.12	genbank	MLELKYHDSSFFCTFTYDDDHVPISYYPDPETGEALPSLTLQKRDFQLLMKRIRKAFPDDHIRFFMSGEYGGDTFRPHYHAILFGLHLDDLKVYKRSPQGFTYYNSPKLQRCWCDRDGKPIGFVVVADVTWETCAYTARYVMKKLKGTEAKFYSDFNIQPEFTLMSRKPGIARQYFDDHPEIYDYDFINISTNKGGKKFRPPRYYDKLFDVDNPEKMQSIKDVRQKLAAEAQKAKLQRSTLTVEELLNAEEAAKAAQIKSLRRNII	266	USER	zzzz105
937	genbank_microviridae_ARQ16034.1_@PF05840.12	PF05840.12	genbank	MVCYNPLIGFKKEGIVTRNGKLRLNILGSLADYQYLEGKSGYEICPCGYCIGCRLEKSRQWAIRCFHEAQMSSSAYFITFTFADPFLPKDLSVSVEFHQKFMKRLRKEFGNDIRFMMCGEYGDRFGRPHYHYCLFNIDLSDKVYSFSRNGFKYYMSARLAKVWFYGNHYFSDVTFDSAAYVARYVTKKQYGESSLIHYNGRHPEFALMSRKPGLGASWLEKYGTNVYDNDRVVIRNRPMKPPKYYDRIFGDKYPEWLEYVKSNRIKAALARAKDSTFQRLFVRELVKRAAITRLVRPLESEI	302	USER	zzzz106
936	genbank_microviridae_ARQ16040.1_@PF05840.12	PF05840.12	genbank	MPCTKPLVFQMDTKKPQLWGSLENLSKQGLQTDIMDGIKKGKFALLPCGKCEYCRKQMADQWATRIELEAKEWDDVIFLTLTYDDDHIPYGEILKGYRSIQSQTVSKRDVQLFIKRLRKAYKKPIKYFLAAEYGDRTKRPHYHAIVFGLKPPDAQWYKNQKGNSYFKSEWLQKIWGKGMIDFSPAQPGSFAYVAQYVNKKAIGAEQAAKYWMEGREPEFRIMSKGIGEKYLNEHKDEILKTDSIICAGGREKRPPRYFDKILDKDTSQDTESYFKAHSDELREVRARRRHSAIQSLVNLEQSTSVDYETYLDIQKEKDKLKQKWREPKA	329	USER	zzzz107
935	genbank_microviridae_ALS03801.1_@PF05840.12	PF05840.12	genbank	MCINPSLIYFIRDYDSREVLFKEVMNLKHEASLSSPFVFHPTFDTPYKKIPGVGEYSLLPPGKHFNNSQLEYFKISCGKCRWCLIRRSAHWAVRCLYETYMHEKSCFLTLTYDEVHLPSDRQLVIRHVQLFLKRLRKYLSQRALPRIRFFGCGEYGAKNYRPHYHLMIFGYDFGISSIPFNVRSVKNYPSWVDNPIVSKLWPYGFHLIGEATYQSARYVAAYIFGKLKNKAEKKDFVVKEYVHSSRRPGVGIPWLEKNWRDVYPLDCVTFPSDNHTVKQLPPPRAFDKWLSLNQPEVFKKVIDRRIEYYESCEDFVYDYEDVLKSTNRDINLSALLSSCSRSL	343	USER	zzzz108
934	genbank_microviridae_ALS03794.1_@PF05840.12	PF05840.12	genbank	MCVSPNWIVPSPDGYKFSFKEPVKKVAFIDGETGEYLEPFPVGCGKCLECLNNHKMQWSIRLYQESTLYERKCFITLTYAQAPDSGVCKAHVQKFIKSLRNRHKDLKIRYFVCGEYGSQGKRPHYHACIFGYDFPDKKEFRRDKKGFIMYRSAELEELWKYGYSSILPINITTLGYTTKDMQKLLPLQDAREPPFTLMSTHPAIGYAAFDKRLSDGKIYVPGGYSCTIPRTYIRKMIAEGDNVSDYYRIWNELPQRELTDDRLKAEDVKRKNFRKKIIKKY	281	USER	zzzz109
933	genbank_microviridae_ALS03791.1_@PF05840.12	PF05840.12	genbank	MSCNKPMRAYISLEKDEEGKKEVIWNNNGMERITKGVTEEAQESLWRKGNKLYKLQMIPCNKCLGCKMDYAKEKAKRLELESKYTIGNWFITLTYDEEHIPKNGRIPTLKKEELIKYIKNIRRYNEYNYNCKIRFLASGEYGGQTKRPHYHIILLNAQIEDLAPLMVKNDTVYYTSKIMSQKWNKGQIMIARANTSTNYYTAGYCEKKAVKQEDFTLKEPEFIIQSRNLGKQYYEDNKEKLFTEEKAIIGGVPMNYPKYFSKLAKENEELIEELEEYKQQQKEIARLQADYQNKEQRINQEFWRREHEEEKLLRKYKERNKI	322	USER	zzzz110
932	genbank_microviridae_ALS03797.1_@PF05840.12	PF05840.12	genbank	MCTSPMLMYYNLKEHKYQINDSPDCDINRAIWVACGKCYECKKARKSNYTVRARAEYSKYGSQRCFLLNLTVNDFCLDRVFPKGQLDHTEFQKFMKRFRKKLETHISKDVKIKYICGAEYGEDNGRPHFHVIVYGWKPEDLKRWTSSQKGFKQYRSQFIEECWRDVEIEKDKKALKKQLKEFKEKYPNMKKANGEDYDYIPLGMVTLGEVYESTVSYVTKYVVKNCDIPKEEYFDEETGEIIRKPYVVFPREMLGYSWFLENYKNLLRLGYCTTKYGKCAIPKNWINKALESDDEDLVKAVELYQNERELYFAEVYRDLYNQGYTTKISMYYKVLEEGKERRETYKNWQRQNTNSVKKI	359	USER	zzzz111
931	genbank_microviridae_ALS03788.1_@PF05840.12	PF05840.12	genbank	MQCVNPMFAFAVPYREDGIFKHKIFFNSPSMLKSKEYRNAHVFSIYELPCGKCICCRENKAREWALRLKCESYLHDVTSFITLTYDDDHLPAGGNLNYKDVQLFLKRLRKSQESKIRFFCAGEYGSTTSRPHYHLIVYNYMPSSARTFSQSESGTLYISESLSSYWGLGNAVFSPANTATMLYTARYAVKKLRDENDAKNDVKNNDKKDLQKVPEFCRMSLRPGIGYNFLSKYQDDFKSGYLVDNNCRFSIPRYFRKKLVEDFSSDFQSIFQQNINYAKLATISHLRNVQINDENEKDVIRYYGNEIYHPEKIRIIRQMVNDVVKSKYDLYDKRNQEL	338	USER	zzzz112
930	genbank_microviridae_ALS03784.1_@PF05840.12	PF05840.12	genbank	MCVSPLTGWWSSSLTENGKRTIVFNPQKALDVDQRIQVPCGHCIQCRLDHAKMWALRCWHESLKYPFSIFVTLTYDDDHLQSPSLVKEDFVLFIKRFRKKYGSGLKYFHCGEYGTLNLRPHHHLIIFGFIFPDQKFNLFSSSGHMRYNSESLNRLWPYGLTDIGLFEPACAAYVARYTDKKQELSTQWFLDHDLVPPYLSMSKGIGLDTFNSNSGVYLSQRFCVDSQGHKIALPRYYKSKFSDDQQKYIQDCTIHDLLEARYRGDFDSDYDFRNPFEPHRRFLKLDRADVLKKVLEDKTNTMSRNNL	307	USER	zzzz113
929	genbank_microviridae_ALS03780.1_@PF05840.12	PF05840.12	genbank	MPCFHPITAYRLAGSKTKDGTRNAVTFDPSKAIPFSEFKIPCGQCIGCRLSKSREWAARCVVEASSHKNNMFLTLTYDDAHLPDDHSLHYEHFQLFMKRMRKYFQTRFGQQLRFFMCGEYGDKLGRPHYHAIIFGVTFVDKKLWSIRRGNNLYRSATLEKLWPFGFSSIGSVNFETAAYVARYVTKKITGPLKLEHYDGKVAEFCHCSLKPGIGHDFCEKYMTDIYTNDRLILSEKIMMSPPTYFDKLLERSDIVRYEEIKRLREKRGRDFEDTGETSPQRLSVRERVQELKAAKLRRVMEENQS	305	USER	zzzz114
928	genbank_microviridae_ALS03775.1_@PF05840.12	PF05840.12	genbank	MACYHPIDCWRVPDASTKSGYRIVFGSPSCPPARGAEPCTIPCGKCIGCRLAHSRQWAVRCVHEASLHDRNCFLTLTFDDLHLPVSGSVNVRDVQLFLKRLRKALSYQNIKIRFFACGEYGDKNLRPHYHLIIFIFLCLVLSMYVMFSFFLNV	153	USER	zzzz115
927	genbank_microviridae_ALS03770.1_@PF05840.12	PF05840.12	genbank	MSCYHPLRAYRRVGGRDPVTGKWPLTFKKSEGWLETAIDIPCGTCVGCRMDYARGWALRCVHESKLHKDNCCITLTYDDDNLPDDGELDKRGMQNWLKILRYHIGSFRYFGCGEYGKMGDRPHYHIILFGYDFPDKRLITTHLGTKQYDSAMLRDIWHRGHISVGQVDFRTAAYIARYCLKKQKGGDNRHQQQEYILMSNRPGIGADWVKQFSSDVFSAGRIVTTNGNYKVPKYYECKLDQIDHERFVEYKRGHDVELVSPLRAAQQEIVKKERLKDFKRSFEDL	285	USER	zzzz116
926	genbank_microviridae_ALS03765.1_@PF05840.12	PF05840.12	genbank	MPCYHPITAYRARNPNPSGKYSLVFHLPRSYKAEEVKIPCGQCIGCRLERSRVWAMRCVHESQMHKDNCFLTLTYDSSRPESFGRDYTLVPGDFVNFMKRLRKQYVDQKIRFFHCGEYGSLNERPHHHAIIFGFDFVDKRLLSVNHGQRIYRSPALERLWPYGYSSIGSVTFESCAYVARYIMKKQTGDKAEQYYNGRVPEYVTMSRRPGIAGDWIRQYKDDVYNYDHVVLPGGIKCRPAKYYDRIFDEIDHEKLEEIKEKRKEENFERNKEHIKHLDQVRESHVKSALEYYSEDSYEYLEQSGKIVPWIKPLEVQEQVKLAQIKKLKRPIEGVL	335	USER	zzzz117
925	genbank_microviridae_ALS03760.1_@PF05840.12	PF05840.12	genbank	MRTDCCKPNGKRAIVFGEPPRKGTWELVFLPCGQCIGCRLKRSRDWAIRCVHEMKMHNQNCYLTLTYDDDHVPWSSVTGEQTLFQKHLTDFIKRLRYYLKDVKIRYFACGEYGDETFRPHYHVIIFGWRPDDIVFYKPSKDGFYYYFSEFLDSVWTHGRVIVADATYETCAYVARYVTKKLNGDAGKAKYEGIQPEFVVMSRRPGIGLEWFKKFYKDIYPYDEVIVNGKSHSAPRYYDEKFAEIDANVLDIIKSKRIEKANRTFDENYGDYFNLGSHRLERREIYQLNKTKEFKRSAY	298	USER	zzzz118
924	genbank_microviridae_ALS03755.1_@PF05840.12	PF05840.12	genbank	MTCYHPITAYQLRQCKPNGKKAIVFGAPPTQPFDVVNLPCGQCIGCRLERSRQWAVRCMHEASLHSCNSFLTLTYDDEHIRWSSVTGEQTLYKRDLQLFMKRLRKHLEPLKVRFFACGEYGDNTYRPHYHLILFGHDFMSDRRLYKMSNAGFPYYISDTLNKLWSFGYCLVADVSFDSCAYVARYVTKKLNGEAGRIKYEGIQPEFVNMSRRPGIGAGWFAKYAGDVYPYDRVIIVDNDKVRKLRPPKYYDKLFDAINHDEMELIKEKRVENAKLHESEIYTPGRLEAKEKFKLAQIKSLERGKTDETLQCVR	313	USER	zzzz119
923	genbank_microviridae_ALS03750.1_@PF05840.12	PF05840.12	genbank	MVCYHPITAYQLRQCKSNGKKAIVFGAPPAQPFDVVNLPCGQCIGCRLERSRQWAVRCLHEASLHSCNSFLTLTYDDAHIRWSPITGEQTLYKRDLQLFMKRLRKYLEPVKVRFFACGEYGDNTYRPHYHLILFGYDFRSDKRLYKLSNAGFPYYISDTLNKLWTHGYCLVADVTFDSCAYVARYVTKKLNGEAGKLKYEGIQPEFVNMSRRPGIGADWFAKYAGDVYPYDRVIIVDNDKVRKLRPPKYYDKLYDAINHDEMELIKEKRVENAKLHEQEIYTPGRLEAKEKFKLAQIKSLERGKTDEALQCI	312	USER	zzzz120
922	genbank_microviridae_ALS03745.1_@PF05840.12	PF05840.12	genbank	MTCYHPITAYWSRTLKTKLGTPAITFKYADADPELGEFQIPCGQCIGCRLDRSLDSAVRAHHESLLYDRNYFLTLTYNPEHLPPFGSLIPRDLTLFWKRIRKRGISLRYMACGEYGSTYGRPHYHAIIFNLPPLELKQIGTTSTGFPTFISDVISECWPFGFHTLNPVSFQTCAYVARYVTKKILGDGKQTYEKFDPITGEVDCRVKEFSRWSTKPGIGHDYFQKYWRDFYKIDCCLINNKRFKIPRYYDRLLLREHPDVFEIVKQKRILSAQDYRLTPDAQKDRLAVREEVKRLRAERLLRPYEAQITEYLENV	315	USER	zzzz121
921	genbank_microviridae_ALS03740.1_@PF05840.12	PF05840.12	genbank	MPCGKCIECRLKLSAEWALRCQHESYYHEHNSFITYTYDDEHLKSPYLVKEDFTRFIKSFRKRLERNEQGSIRFLYSGEYGSNFGRPHFHMLCFGHYPDDVYCPRRQMNGSTLFQSHIHEDIWHKGMITVGSMSGASSAYVAKYSLKKQMQNTASLPVPDFIQMSRMPGIGYDFYQEFKKSMFDRGFCIQAGFKKPIPRYYWRLLREEDKDAFDYYSIKKQGYAKGLQYDLARLDAREKILLHKLDMKSDNLFKLE	256	USER	zzzz122
920	genbank_microviridae_ALS03735.1_@PF05840.12	PF05840.12	genbank	MVCYNPLYAYQLGYNHDTGKPIIHIIGSLSSYGKHLRLEQARKLAGRQDVMQLPCGQCIGCRLKKADEWGLRCMHEAKFHRQNCFVTLTYNDEHLPADGSVSLDDITKFFKRLRKALSGVKIRYFYSAEYGDKLFRPHYHIIIFGWFPDDVRLFKISDKSLNDGGYKLFRSPFLEKIWGKGFITVGAVNFESARYTAKYSLKKLSEERLRLYRTYNLTPEFNHSSTRGGIGIDFFNKYQESIYNHDYCIVNGVKKPVPRYYDKLLESSNPVRFFEISEARKKRACNLKDFEPDRLLIKEALARHRQERFNRMLDAIE	317	USER	zzzz123
919	genbank_microviridae_ALS03730.1_@PF05840.12	PF05840.12	genbank	MVCYNPILMSPVEGAITKNGKQHYSFYGSLAPHPELAPDTRFIRCSCKQCIGCRLENSRQWAVRAVHEARTSSYAYFVTCTFDDYHLPPNKSLSKKFHQTFMKNLRREYGSGIRFLGCGEYGELHGRPHYHYILFNVDFSDKVFRFRTDGYNTYTSARFANMRKYGMHLIGDFSFDAAAYVARYIVKKQTGSQAAVHYKGRTPEFMLASNRPGIGGKWLEEHGEECYANDYVVINGKKMRPPRYYDKKFDETHPDWMQYIRSNRIEKMLHNLENNTFERLIDRCRVQEGKYKHFLGRKLDKVL	303	USER	zzzz124
918	genbank_microviridae_ALS03725.1_@PF05840.12	PF05840.12	genbank	MVCYNPILMYPVEGAITKTGKQHYSFYGSLASHPELAGDSRFIRCSCKQCIGCRLENSRQWAVRAVHEARSSSFAYFVTCTFDDFHLPRDKSLSKKFHQTFMKNLRREYGSGIRFLGCGEYGELHGRPHYHYILFNIDFDDKIFRFRTDGYNTYTSSRFAKIWKYGMHLIGEFSFDAAAYVARYIVKKQTGSKAAAYYKGRTPEFMLASNRPGIGGKWLEEHGEECYANDYVVINGRKMRPPRYYDKKFDETHPHWMEFIRNNRIEKMLHNLENNTFERLIDRCRVQEGKYKHFLGRKLDNVL	303	USER	zzzz125
917	genbank_microviridae_ALS03715.1_@PF05840.12	PF05840.12	genbank	MPCYHPLQLFRTLRGQMCFKRPWPVSNDLPGKNVFVVPCGQCIGCRLERARVWALRCEHERRLHEVSCFLTLTYDEMHLPQNASLVKEDLQKFWKRLRFEISPDKLRYFACGEYGEVTCRPHYHAIVFGWTPPDLERSARSSSGCMLWSSAMLDRIWSFGRVVVGEATFDSAGYVARYVTKKITGDLGKEAYFGRVPPYVVMSRRPGIGEGFFEAYRGHFEATDCTVVDGRPSILPRYYLEKIRLTSPEIFETIKAQRLARALEKPADDSLRLSAREDYRKIKAEKLVRNYE	292	USER	zzzz126
916	genbank_microviridae_ALS03705.1_@PF05840.12	PF05840.12	genbank	MPCYKPLSAFQDANGTVAFTERKGANWIRTLTLPCGRCVGCRLERSRQWAVRCLHESKSNHENCFITLTYSEEHLPENMSLNYDVFQRFMKRLRKHFGSKRVRFYMCGEYGETNPSTGLIDGGIYRPHFHACLFGVDFPDKVLASNKGGKKLYDSKILERLWGFGGVRVGELNFETAAYTARYIMKKITGDPAEEHYSYVVPATGEIVQREPEFCHMSLKPGIGAEWLDKFHQDVYRFDYVVVRGREAKPPRYYDKRYAKRHEDAFATIQDSREVKSYARRLDNTDSRLAVKEVVAKARVSLFKRNL	307	USER	zzzz127
915	genbank_microviridae_ALS03700.1_@PF05840.12	PF05840.12	genbank	MACFHPLKAFKLGGRVHFGTRTTPLAETLSLPCGQCIGCRLERSRQWATRIMFEAQLHEENCFITLTYNDQHLPNPPSLKYEDYQLFMKRLRKTLGHKVRFFACGEYGERTFRPHYHAVIFGHDFPDKVLFSRSDSGHDIFVSPSLQKCWGLGHTTVQDLEFNSAAYVAKYSLKKVTGEAAEAHYQWIDQETGECTQLQPEFARMSLKPGIGGKWFDLYNADVYAGHDYVIVNGHKCRPPRYFDRLLERRNPERFEEIKEERATRAKRLEGDNTPERLAVKEAVKEAQVERSIPRKTL	298	USER	zzzz128
914	genbank_microviridae_ALS03695.1_@PF05840.12	PF05840.12	genbank	MACFNPLHATKSDGGITFVREGDLRIPCGQCLGCRVAKAREWSLRCMHEASQHRDNCFVTLTYRPEDLPKDGSLVLEHWQLFAKRLRFHAGPFRYLHCGEYGDDNFRPHYHALIFGMDFPDKVLWSGRRTYPVYMSRFLEETWGLGFCTIGALTRESAMYVAKYTLKKLSGAMKKERYRRLDPVTGEEWYVRPEYATMSRNPGIGSGWYDKYSGDVFPSDEVVSEGKKFRPPKYYFDKLEKDDPELHAALQEKRRDKVSVPAFPNFSAGDQTDDRLKVRENVLASRLKTYSKRDV	295	USER	zzzz129
913	genbank_microviridae_ALS03690.1_@PF05840.12	PF05840.12	genbank	MPCLKPIEVPKRGFVDLRVTVACGQCIGCRIDRTQDWATRITHEASLHDLNVFLTLTYDDDHLPPGGSLVKKDFQDFMKRLRFQHEGRIRYFACGEYGDQTERPHYHAIIFGADFADKRAHSKNDQGDQLYTSDLLDSLWGKGKCFIGSVSIESAHYVAKYCIKKVNGQLAAGHYGARSPEFALMSLKPGIGAGWFDRYSGDVYPSDFVVLKGRKRSPPRYYDNMLEDIDAKLLQVLKKDRLKAAQKHRADQTPSRLKARMEVTEARVNLKKGVL	275	USER	zzzz130
912	genbank_microviridae_ALS03685.1_@PF05840.12	PF05840.12	genbank	MPCYRPIDGYYAAKKNPNGKRSIVFDVRKALSPAVLKLPCGKCPGCLLERSRQWAVRCMHESKMHPYSSFVTLTYRDDRIPPGGSLRKRDLQLFMKRLRKKYGKVRFYACGEYGTGTKRPHYHLLLFGLRFDDLQRIGTAKGGEPLYCSDKLAEVWPDGYNFIGQVTFESCQYVAKYILKKVDNATKTPDYLTVMTAYGEVIVREPEFTVMSRRPGIGMDWFDQYHSEVYAYDSVISNGHEAKPPRFYDVKYELLDFEAMEVVRRNRRRKALMPNRRADNTKARLRVREAVELRKLATFGKRQFL	305	USER	zzzz131
911	genbank_microviridae_ALS03675.1_@PF05840.12	PF05840.12	genbank	MPCFGPLRAWYSKDVNPETGKRPLVFRVDESFSGIPVTIPCGRCSGCRLERSRQWAMRCLHEKRMHKMSSFITLTYDDDHLPDGNTLVLSDLQNFMKRLRKITGDGLRFYACGEYGEYTARPHYHVLLLNYDFDDRKYYKLAKGGEKLYSSKTLDKVWSLDGKRLGLTVVGDVTFESCAYVARYIMKKRIGKDADTWYGHCPVTGVVRLPEFTCMSRRPGLGTAYFEKYGREVYTHDNVIVNGRPVRPPRFYDTKFEQLDAARLKKLKLERRRAVDRADNTTSRLRVKEIISDARLKLKGNGEL	304	USER	zzzz132
910	genbank_microviridae_ALS03680.1_@PF05840.12	PF05840.12	genbank	MTCFGPIPAYRPQRGAGDRRLVFDKRKSETGIRILIPCGQCTGCRLERSRQWAMRCMHEKQMHNASSFITLTYDDAHLPKFGALSMDHYQRFLKRLRHRFGAGIRFCGCGEYGDITNRPHYHILLLNADFPDRKLYTHSASGHGLYQSKELDALWSEDGSQFGFCNIGNVDFDSCAYVARYVMKKVIGKSNAPDMSMYDENTGEMFWKPGPFMTMSRRPGLGTEWYKKYGPHAYEWDSVVFKGVEVPPPRFYENLRVGPLINDNIKKKRRRQAALKRADNTLTRLRVREVVALAKLKLKGRSL	303	USER	zzzz133
909	genbank_microviridae_ALS03670.1_@PF05840.12	PF05840.12	genbank	MSCFCPIPIALLSAPNGSRSVLFNPTNFHEGKEEERQDGYKVRFMYLPCGKCDACLATRSREWALRCMHEAFDNEHNCFITLTYNDKNLPSDNSLHKEHFQKFMKRLRKRFGKCRFFACGEYGDQGSRPHYHAILFGLDFNATCRLNDGVNWFKYSPELAGLWKFGFSSVGECNFQTCAYVARYCVKKLGKEELGNRVKEFVLMSNRPGIGRSYAEDNVFQNLESGFCVSQGRKIKVPRYYDKVSKQFEPVVYEHYYNERIKKIKPIDWARIEQQEKFCEYLKTLKKDKKL	291	USER	zzzz134
908	genbank_microviridae_ALS03665.1_@PF05840.12	PF05840.12	genbank	MACLNPLIGYRSREGRNEKGNWPVVFNVASGYKDMEVVVPCGKCIGCRLDRSKDWAGRCLQESSLWDNNYFLTLTYEDKCLPDNFSLRSKDLQDFWKRLRKATFSQNGLVKRVPEFDEINGKRTLVNGIRYFACGEYGDRSCRPHYHAICFNLEIPDLIPYKRSFDGSQLWLSNWLSSIWGFGHVVIGAVTFETCAYVARYVTKKIYGLAAPEHYGDREPEFCRSSNRPGIGFNWFIDYADEVARNGFVLINGHKNPVPRYYLKKLEERDKQSYLKYKDKRAIVAKRTKDSPDKTPERLATREELLKYRSTLLRRDKAV	319	USER	zzzz135
907	genbank_microviridae_ALS03660.1_@PF05840.12	PF05840.12	genbank	MINVVFFLHFSRYHLSMSCLHPVLAFDTGLKTDKGKRLILRCSAKEILHGELVSAETIERRLKRPLGTIVFNTDYYKFIEGHYYAYKTVYQPCGNCIGCKLDNSLDWSLRCCLEASYYDHNYFVTFTYDDEHLPKDGKVHKEEFQRLMKRIRKRFGSDIRFFACGEYGSHSLRPHYHAILFNIELKNLIPYKVSSSGNQLYISSDLFDCWKNGFVIVGDCNFQTCAYVARYTAKKVVQSDDFKPFLLMSRRPGIGQRFFVDHPEILSYDKIYFNVDGRPSHSMPKYFDYLAEKVKDMSDVKNKRILISDKMENLRFSLKTFHSYVDYLENNELILNSKIDRLHRDL	346	USER	zzzz136
906	genbank_microviridae_ALS03652.1_@PF05840.12	PF05840.12	genbank	MACNFPLKGFWTGNRTDSGKKELFISKQEGLLISVADVEKAGYKVSSSADLVPVNGVLFLRNPVLIPCGHCSGCRLAISREWTTRGVLESTMHPYNYFLTLTYSDDCLPSFGLVKKDLQDFFKRFRYHLSNAGLSYFKYLACGEYGDTSFRPHYHMILFCDDPLPLIRFGPNRHHCPLVADSWKFGLHEISFSSSSTVAYVCGYVNKKIGDSKDYGSLTPPFRLASRSPAIGRSWLDSHGIDSSFKVYGPFGSKRSSATVPRYFRNVLGDDYDPFKPRLLKDAQRISDLNDSVSGSSNMTSKGCFFEDIQSSLINERKKI	320	USER	zzzz137
905	genbank_microviridae_ALS03656.1_@PF05840.12	PF05840.12	genbank	MIMQCSSPLFFVGSKVLILDNGGEFPAVLRQKLQNHAKGCIISRKDYTFYRDFYHIPEEFFKQVPCGQCVACRINYAKEWAVRCMLEARENPPAYFITLTYDDEHLPVVEYNGDYVGKLEKRDFQLFVKRMRKAYGKLRYFGCGEYGGTTFRPHYHFISFGCDFDDLELLRIQRSKKVIYAYFTSKKLAALWGNGQILISQANEQTCSYTACYSLKKVGSYIARDKALEVLSRLDGRFSEPGEYFDMLVSAEVVPKPFLLCSRRPGIARAAYSDDFVREGLPGFKVSRLRYYDKLFDLDNKDEREWRSEARSVRASLNRDRFTDETADIFERLGAHLPPPRKKV	344	USER	zzzz138
904	genbank_microviridae_ALS03648.1_@PF05840.12	PF05840.12	genbank	MSCNRPLHAFPTGFKTESGKMELIIDNHSSKVIPFWQAEDKLGRPFFRDLTEYIEIPCGRCAGCIADKKRNQAIRCLAEMKDHDPDTCFFFTFTYDDEHLPADGKINKRDPQLFFKLLRRHGDVFGKNIRYFLAGEYGEKTKRPHYHAIIFGINLPDLKKYGKSGKFTIFTSDLINKYWFRGQVMIAPVTYETCFYTAGYCEKKMSDQDVFKIQSKGLGLKFFRESCDTHNKKPIYLGSNNGSFVSASMPRSARSDDWHDPFLDAYKEASRSEMLFNGYDPDVASDLEHYHDFCEYLEQCPQAKKI	306	USER	zzzz139
903	genbank_microviridae_ALS03639.1_@PF05840.12	PF05840.12	genbank	MSCKHPLLRFYNPRDQSDTRAILSLGTAMTKYHFKGYEEVISRTDVMLIPCGKCIGCRIRAKQDWATRLELEARAYKGRAWFITLTYRDETIPTLIRNTGELIEGGVPVWNRGAEVPEQINTLNMDDMTKFWKRLRKYQTTEPDMGKTLRYFYSGEYGEQTARPHYHAIVFGLEIPDLKKVPGRNQYYKSAILEKIWGKGNVTIAYSEPGTYNYVAGYVTKKMYGNDTKEYQNLGLTAPYACMSRKPGIAMPWLEQNIDKLWEQDYIQLAGKTAPIPRAFDKVLEQKDPERLWAKKQARQQSAINGALQAMSRTEQTLLEQYETKDRILMKSFAKSKGKL	340	USER	zzzz140
902	genbank_microviridae_ALS03644.1_@PF05840.12	PF05840.12	genbank	MSCKHPLLRFYNPRDQSETRAILGLGTAMAKYHFKGYEEVISRTDVMLIPCGKCIGCRIRAKQDWATRLELEARAYKGQAWFITLTYRDDTIPLLIRDTGELIEGGISVWSHGAEVPEQINTLNMDDMTRFWKRLRKYQTTEPDMGNGLRYFYSGEYGEQTGRPHYHAIVFGLEIPDLKKVPGRNQYYKSAILEKIWGKGNVTIAYSEPGTYNYVAGYVTKKMYGNDTKEYQNLGLTAPYACMSRKPGIAMPWLEQNLDKLWEQDYIQLAGKTAPIPRAFDKVLEQKDPERLWAKKKKRQWSAINGALQAMSQTEQTLLEQYETKDRVLMKSFAKSKGKL	340	USER	zzzz141
901	genbank_microviridae_ALS03634.1_@PF05840.12	PF05840.12	genbank	MTLETYRERAHNPTATYESLAYRTDVMLLPCGKCLGCRLRQRQDWETRMLMESKTLTPVWFLTLTWNQEYVPGMIRETGEIIRGAVHQWTTGNAPEVVQILLQEDMVRFNKRLRKKQETSNKWGLDLRYFYCGEYGENTGRPHHHGIYYGLEIPDLKKKRGDNPYFESEEINKIWGMGNVIIAEASPETMAYVAGYVTKKTYGNDNKRYRELGLTPPYCCMSRNPGLGYDYYTSHKEQMYADDGLYFNGKKRPIPRYFDKKYEEENPKSLWSIKEKRQSSATNALKLKMSNTGLTIEQEAKVEEETKKQRFRKARGLL	318	USER	zzzz142
900	genbank_microviridae_ALS03629.1_@PF05840.12	PF05840.12	genbank	MSCERPLIRVYNPNDHNITGSIMTLEKYRERAHNPTATYESLAYRKDVMLLPCGKCLGCRLRQRQDWETRMLMESKTLTPAWFFTLTWNQEYVPGMIRATGELIRGAVHQWTTGDAPEVVQILLQEDMVLFNKRLRKKQEMSNKWGTDLRYFYCGEYGETTGRPHHHAIYYGLEIPDLKKKRGNNPYFESETIDKIWGMGNVIIAEASPETMAYVAGYVTKKAYGNDTKRYNELGLPAPYCCMSRNPGLGYDYYQEHKEQMYKDDGLYFNGKKRPIPRYFDKMQETENPKRLWEVKEKRQSSAINALKVKMSNTDVTIEEQGKIKEKNLRERFSKARGIL	340	USER	zzzz143
899	genbank_microviridae_ALS03624.1_@PF05840.12	PF05840.12	genbank	MTHQVGYCAGFQKWERRCRYLACTHPLLYSVRTQKIIGAGDQFPELAKSDNYKLVPCGQCISCRIARSKAWACRNVLENLDSEESCFVTLTYEPGKVPIINHYTGEVGRGQSGIIDQGQIVQNLTLWPEDVQKFIKRLRRRYEYHEGKKLRYYYAGEYGPTTLRPHYHLLLYNYVPRDLEFWKVHNEQNWFLSKELAETWGMGFVSVGLITYQSAAYVARYTTKKLYGEEGKQRQQELGLIPEFSRMSLKPGIGAKYYDENKDTIYKFDKIILPGEKAKVVKPPKFFDDKYKNEHPYEYGIIKAERERIAKEQEAVRSSKSTLDYFSQLRVIEENTQKKLMALVRPLE	348	USER	zzzz144
898	genbank_microviridae_ALS03619.1_@PF05840.12	PF05840.12	genbank	MPCYHPLRRWWWGETDQDGKQINAKITSWEIDTLFERPVGFGKIRGQWSAEEWSEEIPCGKCIGCRLEYSRQWANRCMLEAQEWPENWFITLTYDDAHLPFKERIDTKTGEMMEEFTPSLYPPDITKFMKDLRRYWEYHYGEQNIRFYACGEYGSHTARPHYHIIAFNLKIHDLQPCGRSKSGKMQWDSPAIRKIWGKGLTALGHVEYDSCAYVARYMLKKQKGENAKEYYAEMGLEPEFTRCSRRPGIAAGYFERNKEKIYHYDEIVLPGNKVVRPPKYYDKLYDVEYPKELETIKSARKAAAKEAEKLELAKTTLTKGELLALKERTAKEKVKKLPRELNE	343	USER	zzzz145
897	genbank_microviridae_ALS03616.1_@PF05840.12	PF05840.12	genbank	MPCYSPWVGYYDKGVGRVFYVGKTEGREPLNEALEIWKNSARTSSWKPENMMLLPCGKCLGCRLEYSKEWANRCALEAKTTQNNWFMTLTYDEEHIKECLKPVIDKETGEYGHIESLMPNHLSKFIKEIRRNTEYHKKQQGVRFYGCGEYGSRGGRPHYHLLMYNLPLDDLAEEWKKDGFITFSSENVSRIWGKGIVTINEFSWETAAYTARYMLKKLKGRDAKEQYKGAGIEPEFSRCSRRPGIAYDYYQQNRDKIYQTDSIIIHGTTCKPPTYFDRMFKEECPDRWAEIQEQRAEVSRNEMRMKLNNTTLNYRDQLKVEEANREDKIKLLGRQLEY	338	USER	zzzz146
896	genbank_microviridae_ALS03613.1_@PF05840.12	PF05840.12	genbank	MDLVSWETSSSCRFTSNTSRRPSLGNFSPALLSDEILNFCHSAPLQQAIMELSVNGGPKMPCYSPMIGWRKKDGSVYIYGDLRNENWKTAPESLLSKGVNPYTDERIIIPCGKCTGCRLEYSKQWADRCYLEAKMWKANYWLTLTYDEEHIQHLLVPAVNKKTGEVIKVASLYKKDLQDFMKRIRERWKRVHDNPNVRFYACGEYGEKNHRPHFHVILFNFVIPDLELIANKNGFAVFQSEEISKVWGMGNVTINRNSWLTAAYTARYMMKKRKGKWAKQEYAEAGINPEFCLCSRKPGIGYGYYEAHKNEIYSKDGIAYAKAKGGAQTRKPPKYFDKLFKLENPDKFAEIQALRKEVAEHQFKYRLVGKTTLPRIEYYKIEEQVKQDTIKALRRTL	397	USER	zzzz147
895	genbank_microviridae_ALS03610.1_@PF05840.12	PF05840.12	genbank	MSCYKPLIRIYNPDDKEISGQVYSLARFSERMGKKLRYEDLMYEPRVMLIPCGQCIGCRIRQREDWTTRIELEARQWPKERVWFITLTYDDEHVPGMILKTGELLRKAQYVWKPGEEAPKSVQTLLYTDVQKFLKRLRKAYKAKLRFFCAGEYGEQTARPHYHMILYGWEPTDLKQLYKIHHNGYYTSEWMASIWGMGQIQIAQATPETYRYVAGYVTKKMYEIDGEKANVYYKLGQQKPFACMSLKPGLGDAYYQEHKAEIWRQGYIQCTNGKRAQIPRYYEKMMEKENPERLWRIKRRRQKQIIEQNLLKYENTDFEKDLKSKERVIKKSMKVRKNGL	340	USER	zzzz148
894	genbank_microviridae_ALS03601.1_@PF05840.12	PF05840.12	genbank	MYRKDVMLIPCGQCIGCRIRQREDWTTRIELEARDYPKEEVWFITLTYDDDHVPGMIVNTGEIMRKVQYVWKPGEKHPESVQTLLYPDIQKFLKRLRKAYRGKLRYFVAGEYGEQTARPHYHMILYGWQPTDLKHLYKIQHNGYFTSKWLEDIWGMGQIQIAQAVPETYRYVAGYVTKKMYEIDGQKANVYYEIGQQKPFACMSLKPGLGDNYYKKHKAEIWRQGYIQCTNGKHAQIPRYYEKMMEAENPQRLWRIKQNRQAAAIAENRLKYENTDFAKQCETKERVIKKQMKKKGTL	298	USER	zzzz149
893	genbank_microviridae_ALS03597.1_@PF05840.12	PF05840.12	genbank	MGCNKPLIRFYVPHDREASGRVYSLASFNEIHKTKMTYENLMYRKDVMLIPCGQCTGCRLRKRKDWATRMELEAYGHNKESIWFITLTYDDDHVPTQDTETGEIYKGGINIWKGVSERPRTAQTLSVEDTQLFIKRLRKAVKEPLRYFLAGEYGDNTARPHYHMILYGWHPDDLKPIHKLSRHGHYTSDKLVKIWGQGAVDIAQATPETYNYVAGYVTKKLYGNDKKRYHKMGLIPPFCTMSRKPGLGDKWFEDNQERLWQQGYIQLTNGKRAAIPEYYWRKLEAENPEKAWRIKKYRQEKAIASLIERNAETDKPYEQQLKDKETSMSKKMSKAKGVF	339	USER	zzzz150
892	genbank_microviridae_ALS03583.1_@PF05840.12	PF05840.12	genbank	MECTHPMKVWKPNLNTEDRKIKFTDPKDTNYEQITIPCGHCTACKLNYAQEWAVRCSLETKNWKNSYFLTLTYSNDKLYYTDDQPYHPSLNKKHIQLFIKKLRKKYGKLKYFCCGEYGPTTGRPHYHMILWQDMPINDLKGVNSLISVEASKYMTSNEIEQIWGNGGVTIGYNNYNTANYVAKYTLKKLKQKEKYEDYGLNETFLTCSQGIGYNYLEKKDEWKYDTIIISKKNQQTQSTTKIQTKIPKQLLKKIKELDESTENEIKAQRTQSGINFKREQIRLSQIKDRDSILKQKEQQLKDNINRNKI	309	USER	zzzz151
891	genbank_microviridae_ALS03579.1_@PF05840.12	PF05840.12	genbank	MCTQPKTIWLAYSRPINFNKLTEQQQKNINKAHFKPYPKCYCIEIPCGECEECRLAHANEWATRCTMEAKNWTSNYFVTLTYRPDALPYTKDGKPTLRPKDLTNFFKRLRKHKKGNEKWKNINTEKTEFPIRYFACGEYGEKKGRPHYHVALFNLKLDDLKPLGPSQKTGYMLYKSKTLQNIWGLGFVVIGELTYKSASYISRYVMKKAGLPKQIYYYKDEYDEKEKKWKRRRRIMSRDKNKPEPEFIRMSRGVGLGRTFWEEKKHLLYNGAINLTIYCDDKLKIINIPRYFRKLFEKEDWQAYENWRFKMLQQVERSIEQQLKQTNIDNATDFTKTQFIRSQREKRVHEIYRRLRRNNMLTFDEEFNNLKKKLPTG	377	USER	zzzz152
890	genbank_microviridae_ALS03570.1_@PF05840.12	PF05840.12	genbank	MPCTNPNVFQMNTKKPTMWGSLNYLKKQNLEQTIMDGVKKGNLALLPCGKCEYCRKQIADQWATRIELEAKRWDNVIFVTMTYDEEHIPYGEIVKGYQSIQSQTVSKRDVQLFLKRLRKAYKKPIKYFIAGEYGDRTKRPHYHGIFFGLKPEDGVWYKNQKGNAYFKSEWLTNIWGKGFVDFSPAAPGSYAYVAQYVNKKAIGAEQSAKYWMQGREPEFRIMSKGIGEEYLKEHMNEILKTDNITCAGGRQKRPPRYFDKLLDKDTSKDTESYFRAHSDELREVRVKRRRNAVLSLVNLEQNTNVPYSTYLEIQKEKDKQKQKWREPKETL	331	USER	zzzz153
889	genbank_microviridae_ALS03566.1_@PF05840.12	PF05840.12	genbank	MCLYPKKALINYYEAEHGELVQKMIFCSSEEKRQSLITQFNNLVSVDLPCGKCVECLQQKSIEWSYRIMLEASQYDKVCFITLTYRDSPVTLVKKDLQNFIKRLRKFLMPQKIRYFACGEYGSKHKRPHYHMIIFGWEPDDMICYNKIDKLYGSQILEKIWSKGFVSVGNVELDIAKYCSKYMQKLQDIPDNLVKPFTIMSLKPGIGLIAFLDKKQKYLPTDKIYFEGKYIKIPKYYLDSLKKKSSDLQQIELNRLNRLKKCDIMKKTDAELVLLRKKKESFLK	284	USER	zzzz154
888	genbank_microviridae_ALS03575.1_@PF05840.12	PF05840.12	genbank	MCFRPNVIINGKFKGGLKNQIEGAGPLKKQAEQDMKKMLKSGAAQIVPCGQCLECRINYARNWAARCEVESYYHKNNHFITLTYDDEHVPVRDIHTKEEYRGLRNPLDYYGKGKRYENLTLRKEDMQLFLKRLRKWASKNNYYEDPEKGIRVFYCGEYGSKGERPHYHILVYGLIIPDLKVECRKKGYEHDSSEIIKKLWGNGIIDIGGVDYLSCQYVSRYIVKKQLGKDSDAYYEKKGIDKEFIQMSLKPAIGLEYYLDHSDEIYSIDTIYLKQGRRQRPPRYYDGVEDKKQMRLELGDEEYEYLMELEKAKETFDSEGNYAKPHSAFMTELKMDRREKATESLFAQMEHTTQGLMEYMKAKETKYENNHKRALMRDVEKLK	383	USER	zzzz155
887	genbank_microviridae_ALS03562.1_@PF05840.12	PF05840.12	genbank	MCLYPKKALINYYESDDGELLQKMIFCSSEEKRQSLIEQFENLVSVDLPCGKCVECLQQKSVEWSYRIMLEASQYDKVCFITLTYRDSPVTLVKKDLQNFIKRLRKFVCPLKIRYFACGEYGSKHKRPHYHVIIFGWRPDDMVCYNRTDRLYGSQILEKIWNKGFVSVGNVTLESARYCAKYMQKLQDIPDELVKPFVLMSLKPGIGLTAFLDKKQKYLPTDKIYFEGKYIKVPKYYLDVLKKKACDLQQIEANRLMRLKKCYMMKKKDEELVLLRKKKESFLK	284	USER	zzzz156
886	genbank_microviridae_ALS03558.1_@PF05840.12	PF05840.12	genbank	MCLNPIRKNFEIEDNKFVIDWHSTGSIQAGSVIELSCGQCIECCINRSINWAVRAVLEARTHRDNCFITLTYSKTDGELHKEDFQKFMKRLRKSIYPTQIKYIMCGEYGSKGGRPHYHALIFGWKPKDLTYFYTSGDCPLYQSKTVEKLWGNGFITVGDITFDTALYTSKYLQKFNLIQDKCQKPYNCFSHYLGLSALQSLNYEVDGFYIRGKKYSVPRYYDKKAIELGIITKDELREVRKHVYRYDLRGEYERRIQKIDDFEKNYQYSVDSRFDGLIE	279	USER	zzzz157
885	genbank_microviridae_ALS03550.1_@PF05840.12	PF05840.12	genbank	MGGGCLLSCYHPLKRFILPNGDGIVCGKDVNFVVRDGSKWRGVCSEHATAGRDYITNFQYIPCGQCVGCRLDYSRKWADRMCIEASLHDSNYFLTLTYDDEHLPLPNLIVDEETGEAVESPFRSLHKKDMQDFMKRLRKNSGQKIRFYLAGEYGDQTFRPHYHLILFGLKLADLKPFKRSSQGFYYYVSAFIRKCWPFGNHFVTDFSWDTAAYTARYVMKKLKGRDAQFYNDFGIEPPFTLMSRAPGLGRDYYDEQKDYIYRFDGFYLSNNSGIKIKPPRYFDKLYDIEYPEAMEEVKRKRLIVSESKLQQRMTLTDLSYYDYLAVEEANKLNQLKVLERKEL	343	USER	zzzz158
884	genbank_microviridae_ALS03555.1_@PF05840.12	PF05840.12	genbank	MPCYHPLTALYTEGQKPRFAKRSFQDLQTWTDGAGRVWRPIQIPCGQCIGCRLAYSRTWANRCVCESLSYSEDLNWFITLTYDNDHVPVGSKGALTLRPADLSAWIKRLRRKLEYLGIQADGVRFFGCGEYGGQTLRPHYHVLLFNAPLTTTGVVARNNRGDCFYNCPEIEETWTAGHVLVGKFNWLTAAYTARYVLKKQKGFGKIIYEEFGIEPEFTRMSRRPGIGLDWFLNHYDDIYEHDNIVLPSVDGKKKVVKPPHYFDSKYEILEPERFRQIKDKREELAKISKQARLSRNHMSEEEYLLFTEERVENNLKKLPRNFI	323	USER	zzzz159
883	genbank_microviridae_ALS03540.1_@PF05840.12	PF05840.12	genbank	MSCTNPNLMLFSLDPFTGSVESFFLGPASLHDPLTFGSAADLKTRGYYFQPVPCGHCADCRADYAREWSNRCLLELDDNNGVGCFLTLTYNDFNLPLDDDGPTLRKRDLQLFMKRLRWSFPDKRIRFFACGEYGSHTQRPHYHVILFGLCLSDFGDCLVKKYNKLGQPLWISDRLSKIWPFGYHLIGSVTKESCDYVARYTLKKQFDLDSRGNYPAHILPPFTVCSRRPGIGMLHRDSIILDSDLSERLTCDGHNGSVYSFPIPKAFIKSAKSSGLALDKLFLKSYNDSIVGSTRLLNDLIVEDLSYSDFLEKRRRQRIDRLKLLQERMDFI	332	USER	zzzz160
882	genbank_microviridae_ALS03535.1_@PF05840.12	PF05840.12	genbank	MCNYPLSLFRFYDGSSKICPTGTKSISYKGVTYNNPLNVPCGKCIECRLDYSRSWAFRMVCELQYHETASFLTLTYDDEHVPLTDALHMSLRKDDLQRFIKRLRKRLPDTHLMYYAAGEYGGQTFRPHYHMILYGFYPEDAVFYKVNKFGDVLVTSDFLSKVWSNGYVVIGEVNQKTCGYVSRYCTKKQVGVNAVSTYDAFGIERPFSLSSKRPAIGRRWIDEHIDDIANYSVLTIPTSDGAFTLHPPKYFYDILHLHYPDVYDKLQLINEDNSILRSSIPRSDGLRGDCVYEIDEISSIDKLKKLGERSDI	312	USER	zzzz161
881	genbank_microviridae_ALS03543.1_@PF05840.12	PF05840.12	genbank	MSCFRPNVMRARVDPGTGSIVWTFEGAAGLDNPLEYGSIDNLSIDGQYRAIVPCGRCLGCRIDYSREWANRMCIELDDNPHAVFVTLTYNNDHLPRTESGCPTLDKRDLQLFWKRLRKSFPGRRIRYYVAGEYGPRTLRPHYHAIIYGLSLADFGDLRYDAHNELQQPFYRSDRLASIWLNGYILLSEVSYKTCAYVARYVLKKHYGTDKRLLGDAIPEFSLCSRRPGIGLLHATDYVLSGNNIFPLSTASGVVEVSLPKAFVRHAKSDKSLSPEDLDKVMIVCYDRSKDAYERLASHLRYTDKTYYDFLRSKESNLAGKIKLLPERGDL	330	USER	zzzz162
880	genbank_microviridae_ALS03530.1_@PF05840.12	PF05840.12	genbank	MRELVYICLIVMFFMHLKMMKMKEGVSMSCYHPLKGFKIGLTKNGKPNYMITPYKVDYVWKRIGTDTWYSATGSVPVSMNIIVVSDFIEIPCGKCIGCRLKYSRDWADRCVIESREYKENYFVTLTYDNDNVPLSDFFDNSTGEQMHMNTLKKRDFQLFMKRLRKRGNDGIRFFACGEYGSTTMRPHYHAILFNLHLDDLEKLYEKDGMVYYTSQFLQSVWKKGFVIITSMTWETCAYVARYVCKKQKNDTTDRYLDEFYDSHNIEKEFVLMSRKPGIGRKFYDSNFSEIYKYDEIFLSTAKGSVRRKPPRYFDKLYEEQFPEHFEMIKGQRKEYAELLADLKMKQTSQSYEDMLKSEEENQLSRLKKLSRNKI	374	USER	zzzz163
879	genbank_microviridae_ALS03526.1_@PF05840.12	PF05840.12	genbank	MREKGVMTLCTSPLKGFIKGFTESGKKDLLIVPYTVDHVDIDSFGKRYYRTDAFHAYKDSLDEWIPIPCGQCVECRLQRSRQWADRCMLEMQYHKESYFITLTYDDEHLPKNEIIDEDTGEIISVSTLVKKDLSGFVKRVRRYQEYDGFKQPIRFYGCGEYGSETLRPHFHVILFGLHLPKDGFRLYRQNFNGDNLYNHDFLDRCWKNGYSVVGEVTWQSCAYVARYIMKKQLGKGASDFYEDRGISPEFTLMSRRPGIAREYYDEHKDELFNQDFVHVPTHQGAKRIYPPRYFEKLFDVDYPSDLVDARKEKRKQDAIMSTDLELSKTSLDYLDYLNVKDYNLKCKVESLKRPDV	356	USER	zzzz164
878	genbank_microviridae_ALS03521.1_@PF05840.12	PF05840.12	genbank	MCVRPQRAFAVSHKANGYPEYKLFDNDTKCVIILDNGKYKPLKIMPTFEERSVSGRVITDYIDVPCGKCVECRLARAKEWSNRCLMELPYHKFNQFVTLTYDDEHIPFVNYDGVAYPTLVKRDVQLFLKRLRKNTGQKFRYFGSGEYGSKSGRPHYHLILFGLELNDLEPFGSRNGNKYYISETIMKSWHFKGHCIVGQVNEKSVSYVARYTMKKMGDTNERQLIEKGIQPTYAMMSRNPGIGRQYYDDMVKDGKIREAIATNRIPIELSDGGIVVSPPRYFKNLYNSVDSDFIDVVRSYSVAVSRMKPLERTDLEEDEYLELRARSVENRVDKLKRPL	339	USER	zzzz165
877	genbank_microviridae_ALS03516.1_@PF05840.12	PF05840.12	genbank	MCVRPQRAFAVGHKANGYPEYKLFDNDTKCVIILDNGKYKPLKIMPTFEERSVSGRVITDYINVPCGKCVECRLARSKEWSNRCLMELPYHKFNQFVTLTYDDEHIPFVNYEGVAYPTLVKRDVQLFLKRLRKNTGQKFRYFGSGEYGSTSGRPHYHLILFGLELNDLEPFGSRNGNKYYISETIMKAWHFKGHCIIGQVNEKSVSYVARYTMKKMGDTNEKQLTEKGIQPTYAMMSRNPGIGRYFYDDMLKDGKIREAITTNRIPIELSDGGIVISPPRYFKNLYSSVDSDFIDVVRSHSVAVSRMKPLERTDLGEDEYNELRARSVENRVNKLRRPL	339	USER	zzzz166
876	genbank_microviridae_ALS03511.1_@PF05840.12	PF05840.12	genbank	MCTKPSKGFIISDDEFGKELKIFPYDTTYVSKHNSKFVPHKEPLRRQSADQIYTKFIEIPCGACLQCRLKRSKMWADRCLMESQYHTNNWFLTLTYDEQHLPTEEYIHEDTGELLLAHSLQMRDLQLFLKRLRRHFNSGISYLACGEYGPKTARPHYHIILFSDSVVLSDLRLYRQQPNGMSYYMSETLDNIWQNGGVIIGSVTYESCAYVARYVLKKQTGRFNTEETYKKHHIVPEFNTMSKRPAIGRRFYEDHKEELYSMDFISVSTPTGSKKVTTNPYFDKLYAEEHPEKMMFIKLKRMNSAIETAKQKLNRTDLDYMDYLDVEEANLESRFVNFRDLNKEL	345	USER	zzzz167
875	genbank_microviridae_ALS03507.1_@PF05840.12	PF05840.12	genbank	MTCYHPLRGFPVGVTVNGKPDYLITNSRVHHVEYCHGEWQKALDERLSPYCEKVVYKYEEIPCGNCIGCRLDYSRTWADRCMLEMVDHDNSYFLTITYDDIHVPRTEYIDYDTGAIEPVMTLRKRDWQLFMKRLRKAYSKKYDNKLRFYMAGEYGDQSARPHYHAIVFGLSLDDLQFYKFDGEFRYYTSEFLQKCWTDDEGNSKGYIVVAKANWQTCAYTARYVTKKLKGKAAQFYKDYNIEPEFALMSRRPGIARNYFDEHGTALFDYDSIYLATENGSREIRPPKYFKNLLDKVDSDLYNLNKEKNKIIQHNIHYQNLKQTSQSYLDLLETQEGIKERKIKSLKRSV	349	USER	zzzz168
874	genbank_microviridae_ALS03502.1_@PF05840.12	PF05840.12	genbank	MSCYHPFKAFKVGKRENGKDDLVIRPYTVTKIGLNRHGTWENYYDTDCTFRSDSHSRIVSEFVEIPCNNCIGCRIDRSREWANRMMLELEDHDSAYFLTLTYNEEHVPTTFYPDPETGEALPVMTLNPKDPTDWMKRLRKAFPDDHIRYFLCGEYGTKTHRPHYHAIVYGLHLNDLVPAPGSSDPHYMTSAALQRTWSVKSKGGYAPLGFVLVAPVTWQSCAYVARYVTKKLYGKEAEFYETFNLCPEFTHMSRRPGIGRRYYEEHPDCVQRPFLYLSTEEGGVKFPPPKYFQRIYEVEEPAQAEVLKAKRLRFAELARKARMANTDLDYLEYLEVQERNFKAKTASLLRDKI	353	USER	zzzz169
873	genbank_microviridae_ALS03497.1_@PF05840.12	PF05840.12	genbank	MVDWTQIEGLFLGGFFMACYHPLKGFPIGTTAAGKVDYKITSYSVDHVELRDGLWIPAHTPTRSMAAEAVVRSFIEIPCGQCVGCRLEYSRQWANRCMLELQYHDSAYFVTLTYDDAHVPKSYYGDPNTGEAFTSLTLFKKDFQDFMKRLRKAFPDDKIRYFTAGEYGSKTFRPHYHAIIFGLHLDDLKPWSRSEQGFTYYNSEALQRAWSVKDDDGVVRPIGYAVAAEVTWETCAYTARYVMKKLKGAEACFYDDHNIQPEFTLMSRKPGIAHQYFEDHPDIYKCEYINISTDKGGRKFRPPRYYDRLFDIEYPDEMKEIKEARKRLAEDAKRIKLSKTNLSYIEMLAVEERNLKSRIKSLERSL	366	USER	zzzz170
872	genbank_microviridae_ALS03492.1_@PF05840.12	PF05840.12	genbank	MKAFRVGTNPETGKAINKIVPYGTDHLEKVSGKWIPVSVSDVSILADAVVRKCIEIPCGKCVGCRLEYSRQWANRCMLELQYHQSAYFLTLTYDDCHVPYSYFGRLDTGEAEKVLTLRKRDLQLFFKRLRKRFSDCKIRYFACGEYGETTMRPHYHAIVYGLVLDDLVFARRSKTGNNLYYSQSLQDVWSVIEDDGSRIPLGFAAVAEVNWETCAYTARYVMKKHMGDDAVFYDLHNIEPDFVVMSRRPGIGRQYYDDHPDMFVREKISISTPSGGRSFLPPKYYERLYENDCPEHLAEIKRARREFATARSEYILSQTDLFPEEYFSVQEDVLKARIKSLTRTLL	346	USER	zzzz171
871	genbank_microviridae_ALS03487.1_@PF05840.12	PF05840.12	genbank	MPCYHPLVAFDFGVLPSGKKNLKIYPNGTDHLEFKKGRWCAVTTDFRSPYAERYKDPFSPIPCGKCVGCKLEYSRMWANRCVLESKLHKSSLFLTLTYDDLCVPRVLYGERENGEAREAMTLKKSDFQKFMKRLRRYVAYHIDDTFANSAITIVDDNPTLRFYACGEYGPETLRPHYHALIFGLDLPDKVLLRNERGNAYYTSKILSELWPFGNHIIGDVGFKSAAYVARYCTKKLSGEDAEAAYDFYGIERPFLLMSRKPGIGIPYYEQFLKEKSPDERIVVSTVDGGLAFSWPKYFESKYAEEHSEHLADIKANRKAAQTDFEEISMSLTDISMRELLIVNEESKKLSLKKLRRSL	358	USER	zzzz172
870	genbank_microviridae_ALS03482.1_@PF05840.12	PF05840.12	genbank	MSCYHPVYAYKSKFVNPETGKAVIKFHPRLDQMDKFESIALPCGQCLGCRIEYSRQWANRLMLEREAHDAAWFCTFTYDDDHVPRSYYPDPETGEAIPSLTLRKRDFQLLMKRIRRRFPDDHIRFFACGEYGSQTFRPHYHAIIFGLHLDDLVPYKTVREGGELYTYYNSPKLQSCWLDSDGKPIGFVVVGEVTWESCAYTARYVTKKLNRKEHDFYEKHRICPEFSLMSRRPGIARDYYESHPGIFDTDYINISTPKGGRKFRPPRYFEKLFEIEDSVKSKELKEIKKRLALDAQKSKLSKTSLELDELLAVEEQNFTDKIKPLRRNLL	330	USER	zzzz173
869	genbank_microviridae_ALS03472.1_@PF05840.12	PF05840.12	genbank	MIRRSFVRLLMMMTMYLGFLRFNLTDPDPSKWEPVMLPCGQCIGCRMEYSRQWANRCMLELQSHDSAFFCTFTYDDDHVPWSWYPDPETGEALPSLTLSKRDFQLLMKRIRRRFPDDHIRFFACGEYGSKTFRPHYHAILFGLHLNDLRVYKTVREGGQLYTYYNSPKLQSCWLDDDDKPIGFVVVGEVTWESCAYTARYIMKKLKGKEADFYEKHGIQPEFTLMSRRPGIAHDYYGQHPELFDSDFVCISTPNGGRKFRPPRYFEKLFELDEPLRSAELKEMKKRLAEEATKSKLQKTSLEYEELLAVEEQNFTDRIKPLRRPLL	326	USER	zzzz174
868	genbank_microviridae_ALS03463.1_@PF05840.12	PF05840.12	genbank	MLGYTPDDRETYVEWHNHKYPRSALVPLPCGQCIGCRIDYSRQWANRCLLELKYHDSAWFCTFTYDDDHVPRTYYPDPETGEAIPALTLQKRDFQLLMKRIRKKFGNDKIRFFMSGEYGSQTFRPHYHAILFGLHLDDLQPYKTVKEGGEYYTYYNSPSLQECWPYGYVVVGEVTWESCAYTARYVMKKLKGKEAKFYGDHNIQPEFCLMSRKPGIARQYFDENPHCVEEQYINVSTPKGGKKFRPPRYYDKLFDIECPEKSAELKALRAKLAQQAMEAKLSNTSLDSYELRDVEEEKQSNRLKSLRRNL	310	USER	zzzz175
867	genbank_microviridae_ALS03468.1_@PF05840.12	PF05840.12	genbank	MIWSIGNMPCYHPLLAVDTGRTPEGKKIIKFLGHTPKDSDKAILMDGRYYDRSKLLQIPCGQCVGCRLEYSRQWANRCMLELQYHDSAYFATFTYDDDHVPRTAYGDPETGEAIPALTLDKRDFQLLMKRIRKNFPNDKIRFFMSGEYGSQTFRPHYHAILFGLHLSDLTVYKTVKEGGQYYTYYNSPSLQRCWPKGFVVVGQVTWESCAYTARYVMKKLKGAEAKFYDDHNIIPEFTLMSRKPGIARQYYDEHPELYTQPNPEIIISTEKGGKKFRPPKYFERLFENENPELAEEFREFRKAMASNAEASRLSRTSLDAQEYRRVQESALEARLKSLRRGVE	343	USER	zzzz176
866	genbank_microviridae_ALS03458.1_@PF05840.12	PF05840.12	genbank	MSCYHPIHAYKSKTVDPETGKSMIRFSTPVDMSRWEPVQLPCGGCVGCRLDYSRQWANRCMLELQYHDSAYFCTFTYDDDHVPRSFYPDPETGEALPSLTLDKRDFQLLMKRIRRRFLDDKIRFFACGEYGGKTYRPHYHAILFGLHLNDLVPYKTVREGGELYTYYNSPSLQSCWKDDDGKDIGYVVVGQVTWESCAYVARYVMKKLKGKEADFYDAHGILPEFTLMSRRPGLARQYYDDHPDVFDYNKINISTPKGGKSFKPPRYFEKLFEEDQPEKSAELREIRKRIAADAQRAKLAHTTLELDELLQVEENKQTNKAKKLRRLLDGTS	332	USER	zzzz177
865	genbank_microviridae_ALS03454.1_@PF05840.12	PF05840.12	genbank	MLELQYHDSAYFVTLTYDDFHVPKAYYPDPVTGEAHTSYTLCKRDFQLWMKRLRKKFSDYKIRFFACGEYGGLTKRPHYHAIVFGLHLNDLVKYKTVKEGDSYYTYYNSDSMQETWPNGFVVVGEVTWESCAYVARYVTKKLSGEHADFYKKFNLVPEFLDMSRRPGIARQYYDEHGKDIYDHAYINVSTPKGGRKFKPPRYFDRLFDIDCPGFLDELKERRKRNAQSVLEGKMKRTNLIPLEILKVEEEAFLNKTKKLRRSTV	264	USER	zzzz178
864	genbank_microviridae_ALS03450.1_@PF05840.12	PF05840.12	genbank	MSCYHPLLGIPEYNPRTNRPYLTVNGKPRLRIFRMEGDDDPRALLPDTVQIPCGNCIGCRLEYSRQWANRCMLELKYHESAYFLTLTYNDGNLPIHWHVDEATGEAAPVATLVKRDWQLFMKRLRRAFPDQKLRFFMSGEYGEQNMRPHFHAIVFGLKIDDLKFYKHLDKYDYFTSETINKIWDHDCLPSHEFDGCKMVYDVAKCKYSITPLTTRGLVVIGEVNWDTCAYTARYVMSKMKGPSASFYPDHGLLPPFTLMSRKPGIGRQYYDDHPDIYNSAYINVSTPQGGKKFPPPKYFDRILEQENPELLASLKEQRKAAAQAYQEAKLEQSDLSYLDFLEVQEEAHKDRIKSLQRGL	359	USER	zzzz179
863	genbank_microviridae_ALS03445.1_@PF05840.12	PF05840.12	genbank	MSCYHPLIGVPDYNPRTNTPYKTKNGKIKYRIISQKKYDTEALLKSDDYITIPCGKCLGCRLDYSREWANRLMMELQYHDSAYFITLTYNEDYVPKSYYADPATGEALQSLTLCKRDLQLFMKRLRKAYPDDHIRYYACGEYGSKTQRPHYHLIVFGLHITDGYPWRWNQVEGEIYTYYRSPKLERVWSESRKEGEKTLVFPMGFAEFSDVTWATCAYTARYVTKKLNGPASEFYDTFALDPPFSVMSRKPGIARQYYDDHDDLFDGEYINLSTPKGGVKFRPPKYFERIFEVEYPDEAEQRKEVKKAMAKNALAAKIQQCDLPLDEILSIAEDVKSKRVKSLKRSVI	348	USER	zzzz180
862	genbank_microviridae_ALS03440.1_@PF05840.12	PF05840.12	genbank	MYKITSYEVHHLERRVENGPWIPVCDVHLSPYRVASQCVYITVPCGHCIGCRLEYSRQWANRCLLELDYHSSAYFVTLTYDNSHVRRTLYADPDTGEAAEAYTLAKRDFQLFMKRLRKAFPDQKIRYFAAGEYGSETFRPHYHAILFGLKLDDLQLYKQSPDGFNYYTSESFQRVWSEPASGVPPSEGRPYYTLPDLPFLADSCKGSTTPLTPIGKCLICDVSWETCAYVARYVTKKLTGPESTFYSDHNIEPPFTVMSDVSWETCAYVARYVTKKLTGPESTFYSDHNIEPPFTVMSRKPGIARQWYDDHPDLYDYDYINISTPAGGKKFRPPKYFDKLYDIEYPEESKARKELHKNLAEEAKKAKLQRTDLSYLEMLQVEEDAKLNAVKALRRDKL	398	USER	zzzz181
861	genbank_microviridae_ALS03435.1_@PF05840.12	PF05840.12	genbank	MLEAQYYSPDQVWFATITYNDKYVPRVMSTDPETGKQAPALTLRKRDFQLWMKRLRRHFSDTKIRFFAAGEYGSETLRPHYHAILFGLPLADCEPYEKSGNYQLFTSKSVAKTWSRCYNKDDLPDTCKDSYAPLAEESFEENGVIYEPYGRIVLSSCSWETCAYTARYTSKKSNTFYPRFFESFGLEAPFTLMSRKPGIAGQYYQDHPEVYDYRYINIPGQEGGIKFTVPRYFDRLLEKENPEALARMKEIRQKIVTELDKEKDTKTTYGTKNRLEVEARQKEAVAKMLRRSGV	294	USER	zzzz182
860	genbank_microviridae_ALS03430.1_@PF05840.12	PF05840.12	genbank	MSCYHPLRAWPIGTWPSGKPRYHVTADLTSPPHPGEVLVPCGKCIGCRLDYSREWANRCMCEAQYHDSSYFVTLTYDDIHVPRSWYSDPSTGEAYQALTLRKRDYTLFMKRLRRHFENDKIRFFAAGEYGSITYRPHYHAILFGLHLDDLVPYKQQGEFIYYTSESLQRCWSVVQYSKGSKTPLFEPLGFVVVAPVSWETCAYVARYTAKKSNTFFPEFYKKFNLEAPFTVMSRKPGIGRQYYEDHKDVFDYQNICLPGKNGGLKFKPPRYFEKLLEVDQPDKLEELKESRRMMAEDMEKAKKRLTSLYRIEQSAVDERKKEAQARMLRREL	332	USER	zzzz183
859	genbank_microviridae_ALS03419.1_@PF05840.12	PF05840.12	genbank	MPCYQPLWAIPDINPRTGKPYLTKNGKTKYHIFGSEKPLLDDPHLITIPCGKCIGCRLEYSRQWANRCLLEMKEHDSAYFVTLTYNDWHVPISHYIDQTTGEFCDAQTLRKRDYQLFMKRLRKAFPDQQIRFYAAGEYGPKTYRPHYHAILFGLKLDDLEPYGMSDQNYPYYWSKSLQKAWDEGENLQNLYEKVEKKPLQVYQNVLQYIQGCKESITPLTSRGFVLVADVSWETCAYVARYVTKKLTGEVASFYKEHNIEPPFSLMSRKPGIGRGYYDSNLDSLYDYDYINVSTRQGGVKFRPPRYFNRLLETDNPELSEKLREARKNLAKEISRCKLSQTDKRYMNMLDTEEEVKQEAVKTLRRSKL	368	USER	zzzz184
858	genbank_microviridae_AJK28330.1_@PF05840.12	PF05840.12	genbank	MEKAALKQLRAATAAARQSDREFRIMEELAWAHRQNWYIVFDTLTFNEEIAICDQKRLRSAWRNYLYRWRAAMMVKNDADKSHRYVAIGERGEDTGRFHIHVLHLMDFFPIEWRDPNIGQMLPKYREIAAAKKCWSEGYSAPIAVRTSANDAFGRAGWRWPVVKNEETWEPLEAKGPGPVAGYMAKYVSKSLFSKGEDQTWRDKMTRSFGETAVMMAMQTISSSTLSKYCADLQTTTPLPRLNNKKIPPEMIRKTALRELKRRTNLRKRSLNTLVDLTSRPGFLEQLRTNSQTNEKQIAALRQQNNGSFAHQDCQKEAISELYDALYLIFQELEFSQSFTSGEIDNVS	348	USER	zzzz185
857	genbank_microviridae_AJK28325.1_@PF05840.12	PF05840.12	genbank	CLGCRLDYSRMWAMRIVHEASMHEYTGGNCFVTLTYRDMSECSLKELENRKHVPDDWSLDKAHIRNFIKRLRKAFPDQNIRYFYAGEYGRKCKHGIDTELVGCPLCNCGRPHFHACLFNCSFTDLEAYQSDGGIMRYTSPTLEKIWGYGFVDVGELNFSSASYTARYIVKKIKGVKQPDHYMSFDLNGEITFISPEFVGMSRGNAAYKGQRCGIGAGWYQKYKDDVFPSDEVPVPGAGVMNGVPRYYDDILRDENPEMFEEVKKLRNTFMREHSEEYTHERLLAKHKCKKARLKLKERIL	300	USER	zzzz186
856	genbank_microviridae_AJK28320.1_@PF05840.12	PF05840.12	genbank	MCDSPLHVNCNPIQGESGQVVTQVPIPCGKCGPCIKRRIDTWVFRLLQEDRVSKSGHFVTLTYAPDHLPRSKNNLPTLVKSDLQKFFKRLRKLTGYHIRYYAVGEYGTLFQRPHYHIICFGCPTPMSYALAWAPHRKPIGSIHVGMVSGDSIAYCAGYIQKGRTIPQHARDDRVPQFSVMSNGLGISYLTPSVIRYHKSHLDKLYLTLPGGKRIAMPRYYRDKIFTEDEKALQRKHVLDAMEKKEEKHRKRSVADGFDNYSDWCDMHRKHRYYVEYRKKVYKKRRLE	287	USER	zzzz187
855	genbank_microviridae_AJK28315.1_@PF11726.7	PF11726.7	genbank	MKCAYPVILEKGRAVGCGQCVNCRLNKRREWTNRIMLESTLYEDNAFVTLSYDEKNHPKDGSVSKEELQNFLKRLRARMDYYAEKEGTEPRKVRYFGVGEYGSKSLRPHYHLILFDYPSCIYRLSQYGKRRASCCAVCDTIRDVWGRGHVFLGEVSFQSAAYVAGYVVKGWTRDVPEHIAHLDPEFTLKSNRPGIGHDFAWELASSLLFAEATHVPFSVRHNGRLWPLGRYIRSKVAEFTGGLELEKAPLDQRVHELSEVIYNDTEVLPKQKTWKVREALIAPRYHKAKALEKKLDKSRKDHLI	304	USER	zzzz188
854	genbank_microviridae_AJK28310.1_@PF05840.12	PF05840.12	genbank	MVCYYPLKAYRSKSVNPKTGKRKMVFNYRDSLDGISHTLPCGQCIGCRLEKSRQWAMRCMHEASLHDDNCFITLTYNDENLPENGSLDVSHFQKFMKRLRERIGVSIRFFHCGEYGDTTLRPHYHALIFGYDFPDKTLWSIRNGNRLYVSPFLDKVWKKGHTSVGSLTFESAAYVARYAMKKVTGEQAQEHYRIADPKTGEVFDRLPEYTTMSLRPAIAAGWYKSFKSDVYPRDYVVVNGVKVKPPRFYDILYEIDDPPSFEKIKRARKRAALLHKQNNTPERLRVRERVLKAKISTLKRGLD	303	USER	zzzz189
853	genbank_microviridae_AJK28304.1_@PF05840.12	PF05840.12	genbank	MQFYCTSPIKRKHEVLGGYYYVRCGQCARCVVRRKAIWTGRALCEWNSNGPDGAFCTLTYDDDHVDAASYEDVKLFLKLIRLVYPLRFLAVPDTGDQFGRFHWHLLLFGPQVTPILQDFVQEKWRCGLTDTRPINYERIGYTCGYVTKKIAGETVGRLRSSQFFGRDQLLAICAEYAATFGPITDYPTVLKLGKKRFPIGPTQRKYIADAFGLQPNSRPTWDYSVEGHVQNYRTLSLHGAIREEKQLLSKRGTTIGSTSRTEIRMKELP	269	USER	zzzz190
852	genbank_microviridae_AJK28299.1_@PF05840.12	PF05840.12	genbank	MACYHPVEVAVSRKSVARAGARVSDQVTVPCGSCLGCRADQARTWAVRLVHEGEYPKRPAWFVTLTYRPEEVPQFGTLDPEHPTRFLKRFRKRYGKVSYYLCGEYGETTERPHYHMCVYGARFLDRAHLATRHNAPVFTSETLESTWGHGLVEFTGLTYAGARYVAGYVRKKVRQRDDPEHYTRVDPSTGELVQLRPEYGRMSRRPAIGRRWIEKYWSDVYPRDFVVINGRPLKPPRYYDKFMDLPDEKGGSRERREIMYHVRRQRIEDAIEISDEKLIMKEKVHRAKVALFQQRDGV	298	USER	zzzz191
851	genbank_microviridae_AJK28293.1_@PF05840.12	PF05840.12	genbank	MLSKKHIRNFRQNFTRQQGHAPRYFIAGEYGPLHGRPHYHGILFGEDPQHRYEDAKLVEASIQDAWQKGYTDCREFQTTEHQNSIVTYVAGYVLKETWKPEKELNMERKEWAVMSRRPPIGSGAAEKIAHVLTTQHGVEVLARLETAPATFKYGGRSWIMPYQVRKKICGILDIPFKPLSDTIAIELNTGLFTRAPEKKTYEEARAAEKSLATRLYTKANKHTE	224	USER	zzzz192
850	genbank_microviridae_AJK28287.1_@PF05840.12	PF05840.12	genbank	MLLTHITAVDPYFRLLNNIRSRRKAIQWQAFAQRGHSPQSEKALSELRRHEHILLNVGPNGLHTHDYRYVNQWFKSLGNVEEHCLSLFDIFLRPNPSTQKDELETRFLRNLKLQNSKIRVHELKNRILLETIHRISLGWYPIFNTLTVTNDFYEEVFSPGSRNFQRYIDRFKYAIRRATHDQDKTCLHGGHSYFAVVEEGDERGRLHFHVLHFCQSLPRNTHDPNSGRAIPNYRIISSCRHFWTSGFSSPIAARLNGMDNWARLGWRWPVERKGNRWIAIEASNPLRLANYIAKYITKGIEKDTFQWRTRTSQNFGAHLIKKSLTNLTVAELNHILTMTPQMMKLGDLQLPPNLVKKLTTKELLARLRNAPPNSKRSTKLKSLTHIKPQPSIVERFRTL…	454	USER	zzzz193
849	genbank_microviridae_AJK28281.1_@PF05840.12	PF05840.12	genbank	MPCYHPLTGWPSIHPSPSGKRQIVFNKIYGIASQELKVSCGQCIGCRLERSRQTATRCMHEAQLHEQNSYITLTYSDDNLPPYGSLNKTDIQKFFKRLRKRTKAKIRYLQCGEYGGETFRPHHHAVIFGYDFPNQQLYKPPHMNNGYPLYTSDFLTEVWGLGHCSIGALTFESAAYVSRYVTKKITGKASREVDEKTGLRHYERIDAETGEVVELMPEYTTCSLKPGIGSEWFEKYKSDVYPYDEVIVRGKRAKPPRYYDKRFELHDPDEMQLIKDQRKRLAEQSCHNTPERLQVREKVKEAQIKLLPRNKI	312	USER	zzzz194
848	genbank_microviridae_AJK28276.1_@PF05840.12	PF05840.12	genbank	MPCFHPIEGYRTPSGTITFNRSQGYSDVPVTVPCGQCIGCRIARKKAWAARCIHEAQMHDRNCFLTLTYDEENVPPFASLYRPDLVKFKKRLRERLRAKHGIKIKTFECGEYGESFDRPHYHLNVFGWDFPDKTLWKRRNDNPIFLSDLLEELWPYGYATVGHLTYESAAYTAGYVLKKVTGKAADKHYEIMDVDTGELFRREPEYCTMSKGIGSEYYDKYKTDLYPDDFIIVKGRKHTIPKYYDNKFQAEQDDGVFINAHDRIKLRRRRAATRHKENNTPARLATREEVIKRKLTIFKREL	302	USER	zzzz195
847	genbank_microviridae_AJK28265.1_@PF05840.12	PF05840.12	genbank	MLARRCRWRLNRCERILLDLPYTTTTTRSWRFKICKREYESYGSSKEHMMRLFGEQVKGVGYQSRLEKSFLKRLKVMNTSRRISEIKTRIVLEILEKNKRNWYPVMNNLTVSDHNMTEAFDLDGENHRVFEKYMFSFKRKVKDAVTEQDPTFDEGDDYHTYFAVVERGGKTNRLHYHVLHFCRKLPKGCSDPNYGRDVPNYRVINRLRSCWSHGFSAPIAVRFNGMDVYGRDGWRWPVERTANGFVAVDASTPEQLASYLAKYVTKAYGKEQFKWRTRMSRDFGTNLIALALSQMTNPLLKLLMRVQEPEWLKIRDKQIPKLIVQKLSTRLYLHRMQSSSPSLNRQNSLRSLQSIQPQSSIVQQLRSLTRMKPITSSQSTGHSLTQNMNATDIFRIRQE…	422	USER	zzzz196
846	genbank_microviridae_AJK28271.1_@PF05840.12	PF05840.12	genbank	MPCYYPRDGWRSRSVNPETGRRSVVFDRKAGFEDMPVTVPCGQCIGCRLERSRQWAMRCMHEAQLHDDNCFLTLTYDDEHLPEDGSLDVKHFQDFMKRLRERIKPRKVRFFHCGEYGEQTLRPHYHALLFGFDFPDRVFYTTRNGNSLDISPTLQELWGHGFCTVGALTFESAAYVARYVLKKVTGDGAEDHYTRVNSETGEIVKVRPEYTTMSRRPGIAADWWRKYRQEVIDHDSVILRGREMRPPAFYDRLLEVEEPELHARMKAKRKAQGERFAHDNTTNRLRTREKVKRAQVTFLKRTVE	304	USER	zzzz197
845	genbank_microviridae_AJK28259.1_@PF05840.12	PF05840.12	genbank	MPCDSPIIVNDVKGFERIPVPCGNCPPCKKRRVDAWVFRLKQEDKVSSAAHFVTLTYDTEAIPISKNGFMTLYKKDFQNFMKRLRKLNGKENNIRYYAVGEYGSINERPHYHAIIFNVTEADKYARAWSLTESGYAGRIASMEKDGTVYGGTYRFYGEERISLGKLDVGQVSGDSIAYVAKYMDKKLIIPKHKRDDRTKEFSLMSKGLGKNYITPQTIRYHKNHLDRLYLVNKGGSKIAMPKYYRDKIFDQTEKDAQLDIVAAAMEEKILREKAMVEAKGINYGHWLANGIKGRQRKFDKLNSKKRRL	308	USER	zzzz198
844	genbank_microviridae_AJK28255.1_@PF05840.12	PF05840.12	genbank	MDKAKEWAIRCYHEAQLHEENSYVTFTYRDEDLPEDRSVDVRHFQLFMKRLRKNTGVKVRYFHCGEYGEQTKRPHYHALLFGYRPTDQRFYKRSKGHPIYTSESLDQTWGLGHCNFGNVTFESAGYVARYIMKKVTGEVAEGHYSSFINPDTGELLTVRPEYVTMSRNPGLGADWVRKFREDLNGDYVVVDGKKHSIPRFYDEEIKRLDEKELALRKRNRKAAARKHAANNTRERLAVREKIQYARLNQLRRS	253	USER	zzzz199
843	genbank_microviridae_AJK28247.1_@PF05840.12	PF05840.12	genbank	MIIHTDLIQSDYHALCRNQYVNRIKAIQNTSRKVKHLDKVVASVSNLKRDLLRLDDYYIIRDKNPYLSPKAFQKRFGTTQEHLDRLFKEPVNYEMNGIQAKMKREEEKFLNRQTQKMRNARKYKLIRRLINACEEAYLDGKFVIFNSLTVDDASMEKVFCKGSVEFNLYIKRCAYYFKDHEHLGVYEEGDENGRPHYHVVHIFSGFKNLDIGHTLCPNRYRKRPDYLEFYWMKTLWKHGHSTPMAARVDHGDAWSKHGWAWPVINTNRKKPWLAPNWIPREPKGPGAIANYMGKYISKEKLGKDVETWRRTKVSRGFGMRNLKKAMRNLSELELETIRTRSQIVSKQYRALLNYTSLEMRKAATFETVRRLKMSEKNALRQSRTQRLLNMKNAERLPSM…	467	USER	zzzz200
842	genbank_microviridae_AJK28242.1_@PF05840.12	PF05840.12	genbank	MRCFYPLEAAHKGVGDKPVIYSKGKRPAVLSPGYEPLELRCGQCIGCRLTQSQDWMIRIMHEAKNQYSCFITLTYDDEFLPYGKTLVPYHLELFWKRLRRRLEPIKIKYYAAGEYGSTCEDHAIEDCPLCGSLQRPHYHAVIIGFDFPDKKYLTERDGYPVYTSELLTSLWPSGIHEIGVLTHESAGYVARYCTKVKTGKQKELHYRRYLPGIDLWVDLEPEFGRMSQGLGATWLSTMHDDVYKHDTVPVAGKGVVNKVPRYYDKIYEIAAPREMVDIKIERDRLFREFDERPQPSLVSQEKVAEAKNNQLKRRLK	316	USER	zzzz201
841	genbank_microviridae_AJK28237.1_@PF05840.12	PF05840.12	genbank	MAACLSTIRIRQKDGFADVPCGRCGFCLSNRRKEWSFRLQKEMRCHESASFITLTYSDSNIRYMDDINHDTGECIPYPVLVKKDLQDFIKRVRYYQSKLTNDKIKYYAVGEYGTKTKRPHYHALMFGIHRGVKIDNIWEYGHTDVGTCTLDSIDYVTKYVVNKKDYKHFLVPPFSCISNGIGLQHLEDNYELYKSKDVVRGDRGYNQRCLDITEIKLASRSSVPV	225	USER	zzzz202
840	genbank_microviridae_AJK28232.1_@PF05840.12	PF05840.12	genbank	MPCYSPLKGYKDEETGGLKFRRDNTKETMDVACGQCIGCRLDRSRMWAMRMVHEASLHESTNGSSFVTLTYRDKKVATEEQRKNGWHIPDDWSLRKEDVQKFLKRLRKALPKEQKIKYYHCGEYGSVCKHGFDLTRQECPLCNLGRPHYHICLFNCSFSDLEAYAVQNGTTRYTSPALEETWKHGFVDVGDLTMQSAGYVARYVLKKITGKQAEDHYQAINPDGEVIALEPEYATMSNGLGKGWYEKYSSDVFPSDEVPVPTVGVIKKAPRYYEQMYKESDPVGWELMKAKRVNYRRENEKEYAPERLLAKYKIKKRATETLKRGMNE	328	USER	zzzz203
839	genbank_microviridae_AJK28227.1_@PF05840.12	PF05840.12	genbank	MLCLKPIAHLGTRNIPCRQCMNCRINAQRVWACRIQLEGFFHGSSTFVTLTYSDSSRYMETVLGQDGLVRGTVRPRHLKRFIRRLRNELKENHPNADSNFRQFGVGEYGTKSQRPHYHVMLFGIDPVTAAEAVPKAWTKSGEPIGFTSVAFINADRSAYIAQYTTKKMVNDDDPRDRFMLHGRSPEFMRSSRTRPGGIGITAVPWLARTMSTPAALRQLAIHGDVWNSVRIEGRIWPLGDYLRKKIRDHMGIPQKAQDRSILFEHFDRDTGELYTPPLPESYCPDEDVSEILTPFARQHGKKAFYKETLPELEKRAAKLKRKKNSITKTEFV	332	USER	zzzz204
838	genbank_microviridae_AJK28222.1_@PF05840.12	PF05840.12	genbank	MQCHNPYIPMGHSTPAPCRKCIACRVNWKRLWTHRLILERKAHDKSAFVTLTYDDENLERVKHQVSIREIQKFNKRLRKKFSGIRIRFYAVGEYGDRTWRPHYHIAYFGISCEHHGGCTTLKKKRIAEKLKKYGNVQIQRSWYWDSICDTCKKVEEAWDSGFIQVDELNDTTSGYICGYCTKKMTKDDDDRLYRDGIYFHPEFCTQSQNLGWPGLRMLLDEIVQQKGYERFFTEYGDIPFSLTHNGKSYPIGRHLRQKAREYLKLEEAYDENTGEVIFVSKEAEKRKAKKELQVLQKGAKNPDAKVSLKQFMYDENYQRNKNIEKRNNIFKKEKIL	336	USER	zzzz205
837	genbank_microviridae_AGT39936.1_@PF05840.12	PF05840.12	genbank	MACYHPLLAFRSEGKITFNKPFPFAKGFNLPCGQCVGCRLEYSRQWAVRLVHENQMHKKSCFITLTFNQEELDKRSNPASVDVRDFQLFMKRLRKKHKKIRFFHCGEYGEQNKRPHYHALIFGYEFPDRKLWTTRNKQKYYRSEELENMALWPCCDRRSNIYKLCICSSLHYEKTKGKNAETHYYNPQTGEVIEPEYCTMSRKPGIGYEWFKQYKTDVYPNDYCVINGKKIRPPRYYDNLLSEEELEEIKNKRKENAPEVYAEYDERMDRLFVQEQVKITQLQRLIRDI	289	USER	zzzz206
836	genbank_microviridae_AGT39925.1_@PF05840.12	PF05840.12	genbank	MRLNQCVAVSGFRAGPPMACYFPIDAFRSHAGGVTFSRKGAYLDLPIQIPCNQCIGCRLEKSRQWALRCTHEAKLYKNNSFITLTYNSDHLPLTNNSLPTLNLRHFQLFLKRLRKKYSNKTIRFYHCGEYGDMNHRPHYHALLFNHDFEDKKLWKIHKDQNYYTSEVLDGLWTDPKTKSNMGFSTIGDLTFDSAAYVARYCLKKITGKNAEDYYQGRVPEYATMSRRPGIGNGWLDKFKSDVYPSGFIIHEGQKMQPPKYYDRVTNETDEKAVRRSKILRMQEAKKHAADNTPARLSDRHTVHQARAKLLKRDHDK	316	USER	zzzz207
835	genbank_microviridae_AGT39916.1_@PF05840.12	PF05840.12	genbank	MPCYHPLVAYKCDGKVVFDKPFAFARGFNLPCGQCIGCRLDYSRQWAIRCVHEAQTHEDNCFITLTFDNEHIAKRKNPESLDNTEFQRFMKRLRKKYPHKIRFFHCGEYGDQNKRPHYHALLFGHDFKDKKLWSNKGDFKLFVSQELAELWPYGFHTIGAVSFDTAAYCARYVMKKVTGDAAASHYREVDLETGEVINEIKPEYCTMSRMPGIGYEWYQKYGYHDCHKHDYIVINGYKVRPPRYYDKLCDEEMFAQIKETRVANADEPIINYGEEMDRLWVEEEVNKKA	289	USER	zzzz208
834	genbank_microviridae_AGT39906.1_@PF05840.12	PF05840.12	genbank	MPCFSPLNAWRTQGGEIVFWRRQDVVQEFQLPCGGCEGCLLERSRQWAVRCMHEASQWERNCFITLTYEETPPWNSLRHGDFQKFMKRLRKKFYGHKEYIDVRTGKSSHPIRFYMAGEYGTQRGRPHYHACIFNFSFEDLKFLRRTNSGSNLYRSTQLEGLWPHGFSSVGDVTFESAAYVARYVMKKQYQEADHLLVVDPYTGECVERHPEYNRMSLKPGIGAGFLDKYKSDVFPNDFVVVNGHKAKPPRYYYKRLEQQDPDLYEQVEYSRAMKGLDQCEENTVERLGARQKVLQSEIEKIRKEIMMEKPVVVLFDNVANIYKDPFYPPN	330	USER	zzzz209
833	genbank_microviridae_ADR80656.1_@PF05840.12	PF05840.12	genbank	MFDVNYKVVQAKRSGDRTNWINVGMAFKREDKFSMKLDTYPIPNEKGEVWLQLYERIEDGISEENAKKQEQKRCSQKELWRFSLVTLLNQCGAEYGYNMACYHPLLAYKCDGKVVFNKPFAYAKGFNLPCGQCWGCRLQHSREWAIRCMHEAQMHDHNCFITLTINPETLERRPRPWSLEKKEFQEFVHRLRRKIGKKIKYFHCGEYGDENKRPHYHAIIFGYDFPDKQLWERKLGNELYISPELENLWPHGYHRIGACTYESAHYVARYVMKRAKGEGPPEQYINPETGEVEYDLDNQYATMSRGNKKQPQNGIGNQWYWKYGWTDAHCHDYIVHDGIKMKVPRYYDKELEKYDPEYFQELKAKRKEQSPETIIEYNKAMDDLWVSEEIKIKKLERLV…	402	USER	zzzz210
832	genbank_microviridae_ADR80651.1_@PF05840.12	PF05840.12	genbank	MEVACSQCIGCRLDHAGMWASRIEHESSLYDDSNGNCFITLTYDEEHLPQDWSLDKSHFQKFMKRLRKRYPQKIRYYHCGEYGENCRHGIHTTLCPGCNVGRPHYHAILFNIDFHDRVLVGQSKGIPHFTSDTLTEIWGHGFTQVGDLTAQSAGYVARYALKKVTGTQAEDHYRSIDLTTGEVTYVRPEYATMSRKPGIGKEWYEKYKKDMYPSNQTPSVGGGVKNGIPRFYDKLMEKEDPEQLEIVKEKRKEFALDNMHDNTGPRLLDKATVKLAAIKTLKRDL	285	USER	zzzz211
831	genbank_satellites_WP_000743997.1_@PF02486.18	PF02486.18	genbank	MKKQIFTLDELQLDTNASPFVFVDYLAWSVPYASFRHAHKSDLSSLIWAPLPKPDYRMARTPEQKEKLIELYKQKWNVAMMERLEVFCLHVLGLRMSPWRDKGLYGYENSCHLMSKYSNKHVGFVALGGNRNTCYFQIEGVGCRTVLEHTSLFRLHWWLDLLGCSRLSRIDLAVDDFHGLFGREYAKKAYSDDAFRTARAGRAPNGGERLVSEPNGKIINESFEVGSRESRIYWRIYNKAAQLGLDMHWFRNEVELKDMPIDVLLNIEGYFAGLCAYSASIINSLPVKVVTKKRQVALDIHSRIKWARRQVGKTLFDISKHFGGDLERVFGALISKEIHDDSLNLPDSYMKLIDEIMGD	359	USER	zzzz212
830	genbank_unclassified_ssDNA_viruses_YP_006908225.1_@PF05840.12	PF05840.12	genbank	MVLCIRPFRTGSGEFGCGQCTPCRVNVRRQWTGRILLEANCFADNVFVTLTYRDDPGELVPEDMTNFLKRFRYYLQRKVRYFGVGEYGDLRGRPHFHMALFGVSPLEEGIIAKAWSIGFVHVGDLTKDSAQYLCGYVTKKMTKAEDERLDGRYPEFARMSKDPGIGASALPVLREALAPDGDVTLMHRNGDVPSTMRTRGKELPLGRYLRGKLRESLGWDALQPQPVKVAQALAYQSLTTDQRTRLEKRRVNQYKSARARLKIHRGKGNL	270	USER	zzzz213
829	my_seqs_crucian1_2ct1.6@PF05840.12	PF05840.12	my_seqs	MCISPSVVDVDRGPHWEQVPVPCKRCWQCRTNRVSNYVGRSLCEAQISDWTLALTLTYRDQEDLSHRYITPPHFQKFVRSLRRRGHLVRYLVCGEYGALYGRAHFHVVLFGKGKPPQIPHKKNHHIAEWPHGHVYGDWSSDERALRYVCKYVLKDLPGGAWFQTSKKPAIGTEWFVKKAQRDVALGVLPSTFEYQPPNGHKGRNYLLTGAVRRDYLKAVTDAAKASGRYREGQLSEWVQRIYEKDALTLAKNEALLNPIQEQMDALNAEIMERKRLPEKRLQMQHLYEDFQRDNAIDSPPWYE	303	USER	zzzz214
828	my_seqs_crucian1_2ct11.2@PF05840.12	PF05840.12	my_seqs	MFVTLTYDPEHLPSPPSLQPRDMQLWMKSLRSSVSRKPELWKHNPNSPVRFFLCGEYGTHNKRPHYHAIIYNARPVDEKKCGAMLYTSETLTETWQKGDVRFGNVTPSSAAYVAGYTTKKMEGVPVCDENGEVLTPPFLRMSRRPGIGCGWIRTFAEDVSQGYIVDGDGQQRAIPRYYRKKLEGSAVLDQSDLHVYTRRKGKPPLTPQRLAAKEKIAQSRRALLKGRDL	229	USER	zzzz215
827	my_seqs_crucian1_2ct13.4@PF11726.7	PF11726.7	my_seqs	MPCASPLTQYYNPKDGTWDFKKRAISRIYPERQLDCGVCIECRVRKSREWAIRCYHEQKMHRENSWLTLSYESNPVTLRREDIRVFVKSLRNAGYRFRYFGCGEYGEQTLRPHYHLCIFGLNFPDRYAWKNNHGNILYRSQTLEKYWLHGNSWIGEITDQSAKYTAGYTYKKLNGKARDELDPDTGLKPYERITVDGEIVDVIPEQLFVSNRPGIGHDWFMNYYQEVYPANHVVMNGREYPPPKYYDKLCAKYFPELWEKAHEKRLQHIKENPLTDDDRSRIHEARKAHRKSKRPRSGV	299	USER	zzzz216
826	my_seqs_crucian1_2ct14.2@PF05840.12	PF05840.12	my_seqs	MHESQLHEENQFITLTYDDENIPWDGSLNKKHFQDFMKRYRKYLGDKRISYFMCGEYGEQLNRPHYHALIFGHEFSDRELWFSREGVNTYVSESLQKLWKFGFSTVGNLNWETAAYCARYALKKRTGKEERDHYWRPLATDLEVELQPEYANMSLKPAIGKRWFDKFRNDCFPSDYITYNGRPMRVPEYYDELLKEEDPALLAELKGKRIRQAWKHNADNTDARLKVKNKVLLAKLKRLTRPLEQ	245	USER	zzzz217
825	my_seqs_crucian1_2ct15.3@PF05840.12	PF05840.12	my_seqs	MACKYPQTAYVTRTPSRFGRNRPTWDRDNARLDPSGQPLEMQIPCSHCYLCKRVKSLEWAIRAEHELRKTTNQAGMFLTLTYAEEHKPADGSLNKKHLQDFLKRLRIHLNRKEGGLKIRYLATGEYGEKKGRPHYHALIFGWQVDDLLPIRKNKYGHQIWWSETLEKIWGMGDGRNPSVFVGAIEPKSAHYVARYTTKKVNGPRADTHYETVIPDTGEIVHLVPEFILMSKKPPIGDAWYRANRKWLWAEDEIPFEIGGRLRTFLPPRAYLDMLRKEEPDEYRRVMDARDEKKKTGKELPEEPADGELYADSDDDDIFDAEEKEFAKMIDQMVDEYYDKQRKDP	344	USER	zzzz218
824	my_seqs_crucian1_2ct15.4@PF05840.12	PF05840.12	my_seqs	MGCNNPKKAWHIPGDITPRGKPKLRFAYPGTEADEILLPCNRCTGCYMNIGQDWMTRLINESAMHEWSWFLTLTYDEENLPYGNSLVPEHSHKFARALRDHFRRRGEKIRHYMIGEYGGRFGRPHYHGIVFGPEFSDRKKVATRNGEHTCFESPLIAKLWGKGIHELSLASPDTMAYVSKYVTKKALTREDPFAHHYVVPETGEMIPQEPEFAHMSRRPGIGAKWLDKWTGDVFPSDEIVANGKAMRVPRYYYNRLKERDPELAERVRASRKKKALAVPLIETTTRRRKVKETIAERKALGGTNIGSGRYRNAPGMTGAELQKKAKL	327	USER	zzzz219
823	my_seqs_crucian1_2ct17.5@PF05840.12	PF05840.12	my_seqs	MTCYYPRTAYPIEGGITFEKPSGHSGNYIKIPCKRCVGCRLDHRTDWATRMMHEASLFDSNQFLTLTYDPETLPDHGDLTPRDVSLFWKRLRKHFSGHKIRYVAAGEYGEATSRPHYHAIAFGLDLPDLVGHGRNNRGEILYQSELLNSIWGLGNCIVGDVTYQSCGYVAGYMLKDIKSDYANDGTYQHFNQNTGELTERRKPFARYSNRPGIGYNWLKKYYKDVFPRDFVRTREGPRPVPEYYFRHLAVLDPQLFQQVKEKREAAIWEPYNRWNSTPQRLAVRETCKLAKVSLAKRGSTQTKENRIFVTPKKEALS	317	USER	zzzz220
822	my_seqs_crucian1_2ct17.6@PF05144.13	PF05144.13	my_seqs	MVKFLPMQPNKNHIFCDFLTCSQYHEQEHAPVFGRLSTSIDENGIGSPPFHHPKTLSGEFGSSVQISSDGHLVTFDGNPSRWNRPDNVHGLPLDEAKRVVNQILLANGLPPFHGVNLKFRQTDENRNHLAVTDGAVFSRIDMTTNVITGSPSNLHAFLQYQKTQSFPRLEQRIYGNNTYHGKDSDSRQFLIYDKGLDVKNKLLSKAEDPEYLQSILNFLHSNGVARLEMSYKRFLRKRNRRFWNLATSANLNAQFTKDFKLMAKDIETPDYGDMPTECLKTLGLYMMGMNPKEVLSPKTYYKHKKILKSYGYDIANPNIHLLQGKVKIITLKPCELPDWYRHADTSLLKAVN	352	USER	zzzz221
821	my_seqs_crucian1_2ct2.8@PF05840.12	PF05840.12	my_seqs	MCLSPSFVYVQKGPGFVQQPVPCKHCWQCVANRVSDWEGRCLAEKSTSAFTYFVTLTYRDSSERDKDAAHKIITPPHFQNFMKSLRRDGHLIRYLVAAEYGHLKGRAHFHALLFSDTALPEVPHQSNFHWKHWPHGHTYSVNEPDSSVVRYLTKYLQKDKADGESCWFSMSKKPPLGDAYFRQLAARNAALSANPRHFLYAAPGGVSSRDYQMSGTTRRNYFEYFIQERLKNGAGEINFASLNESAQNALVKIQSAAHEKAFWRLSSADRFDALFGNLDSQRPSDRQVLKIFFDTHPNGGLNVDWDAFQRRWQDV	315	USER	zzzz222
820	my_seqs_crucian1_2ct3.6@PF05840.12	PF05840.12	my_seqs	MTQNGQGQCRKCDQCLKRKRRHWLGRLAAEAFYADHVRFVTLTYSDEHVGTAHGLPNDHMKEYFNTLRRRYAVKHFTVGEYGELKGRPHWHSIQFYYGSAPEFPLNFSTDNYGWKKGNSQYEVPRSIAGSLSYLYDYLDKGGKGLRPSHGMGKQYLLNHSVMMARNKRAITDDFGLPFTVPGVNKKTGGCWQYYIPSGHHFAATMVDAYIEEYLSVWGEHPDYDRLNKVKYG	232	USER	zzzz223
819	my_seqs_crucian1_2ct6.4@PF05840.12	PF05840.12	my_seqs	MPCFYPVPAYRSLVRSPSGKYPLLFKQGPNSGDMVEVPCGGCIGCRIERSQAWAVRLMHEAQMHQENAFLTLTYSPEHLPRDNSLRKEHFQKFMKRYRKYIQPIKIRFFHCGEYGDENHRPHYHAIIFGHDFKDKVHHAKTKTGHWLYTSETLNNLWGFGYCYIGSVTPHSAGYVSRYIMKKITGERAKEHYRALDPETGEIHEIQPEYITMSRRPGIGQTWLNQFGDTDVFSEDFVPLPNGKTAKTPPYYLKQLEKNDLKRFKAIKRNRARKAKEYKASGEASFDRVQAKHQCAHARSLNLKREI	306	USER	zzzz224
818	my_seqs_crucian1_2ct8.3@PF05840.12	PF05840.12	my_seqs	MFVTLTYDPDHLPSPASLQPAHMQSWMKSIRQSVKRYPELWKHNPNSPVRFFLCGEYGTHNKRPHYHAIIYNAKPVDEKKCGASLYTSQTLTATWQKGDVRFGEVTTQSAAYVAGYTTKKMEGVPVCDENGEVLTPPFLRMSRRPGIGLGWVRTFAEDLSQGFTVDGDGQKRPLPRYYRKKLEGSATLDQAELHTYNARKGKPPLTPERLAAKEKIARSLRALMKGRDL	229	USER	zzzz225
817	my_seqs_crucian1_2ct9.2@PF05840.12	PF05840.12	my_seqs	MFVTLTYAPEHLPSPPSLQPAHMQVWMRSLRDSVRRNPEHWKHNPKSPVRFFLCGEYGTHNKRPHYHAIIYNARPVDEKKCGADLYTSETLTATWQKGDVRFGDVTTQSAAYVAGYTTKKMEGVPVCDENGEVLTPPFLRMSRRPGIGLGFLRTFAEDMSQGFTVDGDGQKRPVPRYYRKKLEGSATLDEAELHSYNARKGRPPLTPERLAAKEKIAQSLRALMKGRDL	229	USER	zzzz226
816	my_seqs_lamb_2_2ct197.3@PF05840.12	PF05840.12	my_seqs	MQFFLDNYKICVFLSRVFDIINIMFKNFVNIYTGEIVYPNRLPVKYHANYSHEKYLRIKYGNWVNRLGFEKLGRKGSFITLTYNPENYDGEPHYEHLQKFMKRVRRYMDYHKLPTSDGQPLRYFFCVERGKKTDRLHYHGIIFGLPKIIRTMLGLGKNDPYAGNLWNYGFAQCRALVNRRVLYVCKYIFKQQDGKTYKTLKSRNIGSSLFEDCNKELRDYFRRNLTIELHSGLKHPFRVPRIYRPRLFRDSIYRFKDTLKACFPKSNPWKWQSHYEMFKEKVYNASMSKCHPFFNGGYLELGRFGEYGLVAPICDYDYNKYIDIE	325	USER	zzzz227
815	my_seqs_turkey_2ct24.4@PF05840.12	PF05840.12	my_seqs	MPCYFPFKKKGEQLPLPCGKCPYCLNRRANNWIFRLQQELKRADSAVFVTLTYENPPLSFHYSKPTVYKPDIQKFFKRLRKIPRDYSKQSIKYYLCAEYGETYFRPHYHAIIFNSEREAITEAWRGEFTPSNAVLPLKRSSWKYDIKSFKWEKKEQPFKINLDTNIILGYCHFGDVNEATISYTTKYMQKGKRIPYYLYDDRHPEFQLFSKGLGSNFSDNFAVQRFYMNEPSNNFVTINGYKKALPRYFRDKFFNEDDKELQRKIAHFRAFETFREQENEYISLGLDITFEQWRYEKKKASLSAFLQKVKKRKDI	315	USER	zzzz228
814	my_seqs_turkey_2ct6.9@PF05840.12	PF05840.12	my_seqs	MCLYTKYIMNPKYKPSKKNGGHPPECTDERLRYIPAKCGRCIECRKQKKSEWIMRLSEEVRNDSSCQFVTLTFNDEAFGILRKKMHIWSVEPSNEELHQMVTYAVRRFLENIRHETGKSVKHWLITEKGEDFGRIHLHGIIWGKHLDKWKWGYTYAGKFVNEQTILYITKYMLKIPEKDRSFVGKVFASPGIGRGYLTKAKRNAFKGEETDQTYITRKGSKIALPQYFRRKLYTDEQREKLWIDAQERGYRYICGEKVSTENLEEWENLTEYYQKRAKKLYGEDPEEWDREKQKKRLAKMRQYLRKRARERHAHDTEDDILGDP	324	USER	zzzz229
813	my_seqs_macstool_de1a1_2ct107.4@PF05840.12	PF05840.12	my_seqs	MMSCYHPLTRVVYPVAANINPETGKYNGFVTSWVPFELRRPDYQYTDIPCGKCRGCRLDYAREWANRMFLEAALSPDDSCWFLTLTYDDDHIPLAESGNPTLVKRDVQLYLKRLRRAHESDRVRFFAAGEYGDTTFRPHYHMIVFGLHLDDLQFYRLSKHGYALYNSSSLSRCWTDSDGCPKGFVVVSPASWETMSYTARYTLKKLKGNDGLLYDDLGILPPFSLMSRRPGIGGDAYSPSMFEQEYIYIAGRKISPPKYLKSLYERFDPADYEEYAADRKERANARTEMLIKSLKKPYLEYLKDCESNFGYRTEMLNKRDLSDSL	325	USER	zzzz230
812	my_seqs_macstool_de1a1_2ct111.5@PF05840.12	PF05840.12	my_seqs	MKCLHPINLKRGGQVPCGKCVACQSNLQESWAFRLEEEATQASFIFWLTLTYRDEDISTIDGERVLNKAHIQHFCDNIKHYIRPYKFKYFCGAEYSPVEYRPHYHVLLFFYAPLSEQDRYWRYICEDIGSGNSRAWRYGMVRYKRVHFNAYRYCCKYVNKFDMQTLGGYVPPVLPFRMMSKGLGKSYLDKVAAVVAQNQNFIVKQNGKRKVLPRYYRSALGLGCDSRAVERGLISEEERLRRRSILDDKLLREAYQRDYTIEHDYRGDACAYHRHLRDIEENRKDIVKRYNLKRKNKNG	299	USER	zzzz231
811	my_seqs_macstool_de1a1_2ct118.4@PF05840.12	PF05840.12	my_seqs	MCTSPLYRCSKELLAFYDEKKPWEFPTALKTKLLNKGFAIVGWREYLDYKKRYCLPDWGFVMLPCGRCTECRIRKVKEWSARCVAEKKTSESAWFVTLTYNDEFLRFETVDGVNYPVLVKSDCQKFFKRLRKSLFGSKKGNIRYFLSGEYGEKSLRPHYHAIIYNLSFSDLKIYKVCGKTVYYTSDWLSKIWGLGYVVIGQCNDKTTTYTCAYTLKKVGFLASPELSIERIFDLAPLGPSYELLKAYIGAGVLPRPFALMSRRKAIGREYFDTHTDEVLNGLPSFNVSKVSYYDNLVKKTDEEAFESLKDTRSSIAEAARRKSEVLLSLPEELRILYKEKSEKSDRRKSKI	351	USER	zzzz232
810	my_seqs_macstool_de1a1_2ct123.5@PF05840.12	PF05840.12	my_seqs	MCTSPLYRVTSTVLELEKKAGDIPPLLKQRVLAKGYAVIGWRHYLDYKNRYLIPENFFTMLPCGKCTECRIKKVKEWSARCLAEKKTSENVHFVTLTYSDENLKFREVDGVYFPILCKEDVQKFFKRLRKHFFGNSGGNIRYFLSGEYGENTLRPHYHAIIYNLPLDDLRLYKVVGKTIYYISDLLSSIWGLGHVVVGKVNDKTVSYTCSYTLKKVGFLSSPESALAAIPRLKEAGKPHDLLKAYIAADILPRPFALMSRRKAIGREYYENNRDEILNGLPSFNLSKIGYYDNLLKSEDELLFDDLKDTRSSIAEGARVMSEKNLSLSEEAKFKHREDSDKVERKKTIF	349	USER	zzzz233
809	my_seqs_macstool_de1a1_2ct45.4@PF11726.7	PF11726.7	my_seqs	MYRPLNLGCLHKIHISNTNGDRYVNCGQCISCRLRKSNRLARLGYLDALNCDNIFVTLTYDNDHLPWCDCLLDSFTNELIFYKDDEILSCSYCTEKRYKNTKIISRFYQNVLGLPRDGSFRVPILLQAHQQAYVKRVRERYRKKFRSLLRFQICGEYGPTTQRPHYHILFQIPRACNDSNRDAKTEFLASVAGECWQFGNSYVECSDNAVSSYISTYITSSSSYSIPTHDTCFKPFFRHSNKFGFGYISEESEIYQAIRDGRLPSVARTNKKGQNYEVSLLPYDYLRSLLPLPSSSNGFDDARTFARLQFALRYYTEGYRPSQVAKLIFDDYIFPKTELGIEFRNKFEYKENYLKQNNFELAANNNYLYNWIYRNCMVSYKYYKWWKFFGYNHFVTESF…	480	USER	zzzz234
808	my_seqs_macstool_de1a1_2ct52.5@PF01446.16	PF01446.16	my_seqs	MCKTPIIIKNTNRFYTVGTKSGRAVYRNGRFVSPFAHTTQYAAVPCGVCNDCLVVKQSSWIQRITEMSKNYYLFFGTATYMNSMLPTVVNPAGEEMHYADYSDFRNMIKRIRKSENFPAFRYFAVWEYGHQTHRPHFHYIIFVRKEEGDSPAVPLMLEQEWEQIFIRQWKRNTSKSTRYPNYKPLSLFIKTLGGKSTYDFHYVRPNSTGDITGDVSHYITKYVLKPDDFSRKRQQYLYSLFADDNSTQDWYHQHHKLFMPRIFCSLGIGLDLEPEQTAFEYVQSHPDCDIFKYIKLSYTNEPEKGARYYDYQTGKATYMSRYYKKYFLTLADQLYFAEKSGNQVVWKNEIIWLPDTSYTPEDIAKMEQNNKLWRIRRKKITENDCM	386	USER	zzzz235
807	my_seqs_macstool_de1a1_2ct58.1@4CWC_C	4CWC_C	my_seqs	MIKYFNSIYVEPSIYSIDMIRLKLDFSSSERITNFGNFLSRVDLLYIEQYPQSFKNYSYRNLFKITCENDCSFVIGLSFNGNDSSSRYLGFMEFNPNKVANQDEFKTVFAELLIHCFVAEVVRWDLAIDVPLSRDLCILTKDKRKYTLVQNSEIDKTEYLGSHNKPGFVKLYNKSIESNLDDDLTRLEITVSGKCTYHEFLKYCPCVDVKGEQQTINPYTDLHGTDLVLYELLMKCDLTERKQYCKRLGRYKSEKLKPYIWGSKYDSDKFIVPQIVFLQLKQQLRHYSIGIDWSILDNV	299	USER	zzzz236
806	my_seqs_macstool_de1a1_2ct64.4@PF05840.12	PF05840.12	my_seqs	MCVNPLTISFKGETRRLRQACGLPVSILVPCGKCSECSKKKATSWGVRAYKEFLFAPAGSVRFVTITYDDANIPVTEKGNKTLDSADCKQFLKSLRQNLFRKYGVTIRFMCAGEYGSKTFRPHYHFLFYGIPSRLTNVEFKQIIGSVWHRCKVIDVQFPKNGASSGFYVGKYMSKSGYSRAYKIAQDDVQFCMPFKRASIGFGNQFTDAERAYYLAEDISDLPGDYSSPSLDVTTYTMADLFEDANTSPVISSSVDSSYPPIPRKLPFPSSHVTPSTAKFWHDDYSGSEAMRWLEVFGKSPRFIEIVRRYHQCHRPLKDGSYVNIDFPEYLAIKLYGKDLYKDIRRCIAFARQRQCEIECDPASVLLEPGSFAATHYTDWLRYRSGFSDPYKPLLDFEG…	434	USER	zzzz237
805	my_seqs_macstool_de1a1_2ct65.5@PF01446.16	PF01446.16	my_seqs	MKLPHNHYKRLNVRPSRKFGIFYMYSNTKNSINQEVTEKLSDRKTRTMMLYRRVMPFDYKSAARYYNCGTSIALQNGMIKSANFCRDRLCPMCNFRRSQKMFSQNMAVYHKIKAENPRYRQLFLTLTVPNVKLWQLKDTLKAMSDSWNRFRNHRAFKREPVVGFCKKLEITYNKEQRTYHPHYHVMLTVDGWASRIEEYVKWWSASVQLGRQLVCYIESVQGDAKSVAEMSKYMTKSDDVLESIETEEEWFMYRSAIFAVREMTFGGIWRVYRRELGFVDIEDDDLTDVEKVTYSEEPIYWLSWLHREGCYVVVDVVNEWCFGDMIANDLALLRRKSAS	339	USER	zzzz238
804	my_seqs_macstool_de1a1_2ct68.6@PF05840.12	PF05840.12	my_seqs	MLLEYEYPPDGLPKRTALFITLTYDDEHINMIRCTDGQYRGNLVVRDTQLFIKRLRKFVEPAKLRFFLCGEYGEHTFRPHYHMILFGLPGFADAVEYSIPTPDRATDYFSPSLAALWNKGNVIYSQASYQTFAYVARYVLKKQFGSDGGDSFYRGRKPPFITMSRRPGIGMTYFQSHDDFSAASVFDGSDVKSVARPRASFNQLQRDDPYTFELLQAEKREYARKRQNLVMSQTDLDLLSKLKQDEIVFKGRMKNLHKRDF	261	USER	zzzz239
803	my_seqs_macstool_de1a1_2ct80.4@PF05840.12	PF05840.12	my_seqs	MLEAQEWPENWFITLTYDDAYLPFKERCDTKTGEMMEEFTPSLQPPDLTKFMKDLRRYWEYHYGEQNIRFYACGEYGSKTARPHYHIIAFNLKIHDLKPCGRSKSGKMQWDSPAIRKIWSKGLTALGHVEYDSCAYVARYMLKKQKGENAKEYYAEMGLEPEFTRSSRRPGIAAGYFERNKEKIYHYDEIVLPGNKVVRPPKYYDKLYDIENPKELETIKNARKAAAKEAEKIELAKTTLTKGELLALKERTAKEKVKKLPRQLEE	266	USER	zzzz240
802	my_seqs_macstool_de1a1_2ct82.8@PF05840.12	PF05840.12	my_seqs	MCYNPTVIVVYRSPKYEKKIVKFYKNFPYENYGKFFNEHYKQLELISWKDKETGDLIKDYARCIDITFVPCGNCVGCSLDHSKNWANRLKLENKYHDVGFFITLTYDDDHLPKSHNLVKEDLQKFLKSMKNFYYNNFGVCPKYFAVGEYGGKSGRPHYHLLYWADLRINNFKMDFVGSSELGNKLFSSELVSKFWQNGFNTVAEISDKTIAYVCRYSLKKQSRSRDEKKELKLMHFQPEFLLCSKGLGDQYYIDHFDEILNNDLKIYVNSSSFATTRRFKEIAKKLGREEELDLIVKRRNDELYSQSLNTFSLLENDETYNEYLEKCCENKKKKLKYLKRSN	342	USER	zzzz241
801	my_seqs_macstool_de1a1_2ct83.3@PF05840.12	PF05840.12	my_seqs	MSCYHPLTAFQLGINSETGKKRLAVVKGDPDIYEHSGKIYTEKLKLPCGQCVGCRLDYAREWANRIMLEKQYYPDEECFFLTLTYNDEHLPLAYDCDPDTGELHGCVTSPLNPDDLRRFWMRLRKRFSDCDIRYYACGEYGDLHYRPHYHAIVFGLRLVDVVQKFCRDGNAFYESADLQKCWSVYNPFTQNFEPIGYAVVSSVSWQTAAYVARYVMKKRKGSDSKDFYYDHGLIPEFVRMSLKPALGWKYFRDHADEIYKYDELFIPRKDDVLKAKPPRYFDKLYDFDHPSELAALKENRKRIAEMNVETKLKNTSLNYTELLHVMEEQKLNSAKQLLRPLEV	343	USER	zzzz242
800	my_seqs_macstool_de1a1_2ct86.2@PF05840.12	PF05840.12	my_seqs	MLGYTPDDRETYVEWHNHRYPRSALVPLPCGQCIGCRIDYSRQWANRCMLELKYHDSAYFCTFTYDDDHVPRTYYPDPETGEAIPALTLKKRDFQLLMKRVRKKFDNDKIRFFMSGEYGSTTFRPHYHAIMFGLHLDDLKPYKTVKEGGEYYTYYNSPSLQECWPYGYVVVGEVTWESCAYTARYVMKKLKGKEAQFYESHNIQPEFTLMSRRPGIARQYYDEHPGLYDFDFINISTPKGGKRFRPPRYFDKLFEIDFPEKSAELKALRAKLATEAQEAKLKSTSLDSYELHEVQEEQQTNCLKSLRRNLL	311	USER	zzzz243
799	my_seqs_macstool_de1a1_2ct93.6@PF05840.12	PF05840.12	my_seqs	MLCENPVYVRSTGTTFPCCRCSICRARKAKEWTLRIMAESMLNYQGKTLVVHLTYDNANLPAGANIKISDTQSYLKRLRRRLELAGFKEKIKFFNACEYGERFGRPHYHMLLWNFPLQHLPLLNECWQKGLIKIESPKDYNALSAYVAGYVTKKIGDRNAQSEYYNGRIPPRHHASQGIGLALVAKMPFYSHEVKLFGKRWFLPRYLREKLAERFDIAELVKAQNKQRMYQKALELLDFTGEVHYNLAFLDRSSPQAVEEHFKFFCYKKELLEVLEYVNRGKIREFKTRYGPKPRGYYGTSEFAVVLSA	309	USER	zzzz244
798	my_seqs_macstool_de1a1_2ct94.4@PF05840.12	PF05840.12	my_seqs	MCKHPLKGFQIGITDSGKPKYKIVSYDVDHVEVDSKGHVSVAYDTFTGKYCSDRVDNYIEIPCGKCIECRLDYSRQWANRCMLELSYHDSRYCWFVTLTYNDESMQHLPVGFVNNVEVHSLDKSDIQKFFKLLRRDVDYHNRAVESNIRYYACGEYGTKSFRPHYHAIIYGLNLLDNSPWCRSHHNFQLFRSPYLEKIWKKGFVVVSPVSWETCAYTARYVMKKAKGLTADEYMKCGINPEFVLMSRRPGIGRQYFDEHYKDIYKFDSITVSTSEGGKKFKPPRYFDQLYAQLDSIESEVLKINRRECAEAAIELKLKGTDKSYIDVLQSEEKILQSKVKALRRDHV	347	USER	zzzz245
797	my_seqs_10mus_7_2ct117.17@PF05840.12	PF05840.12	my_seqs	MWDENEQEYFYERIPDKADVWLNPFTGKQEKAPTMFDEKEYERKKQRSLASSMGRTVNAIYRLARANTWDWFITLTFNPDKVDSFDYSATVKKLSLWLNNAKKICPDMGYMIVPEKHPTSGRYHFHGLFKNCDGLGFVQSGHKDKKGRIVYNVGKYKLGWTTATEVTDNSRATKYIGKYINKDLCQVAFGKKRYWASRNLDEPEVTEVILDKDKMQMLVSRLSETASYIKRIENGEVTTTYYELPEGVCDEEW	253	USER	zzzz246
796	my_seqs_10mus_7_2ct198.6@PF05840.12	PF05840.12	my_seqs	MTIEAVEAVARKAILHGMYPAYWRDNLQARRYLEWDVSGGCEKPVPIELYGRHSVRHGIKRPPMTVVLHTRCRCCMWCKNQRRAFWSLRAQNEYNASSRTWFATLTLSPHEQWVAEETARRENWNFDGLREEQKFARIVSVIGRELTRFIKRVRKNSKARIRYLLVAEKHKSGLPHFHMLIHEISPEAPVRKAVLKEAWRSGFSKFALCDDAKGARYLCKYLSKEASTRVRASFRYGISRESGPTHELHSTF	252	USER	zzzz247
795	my_seqs_10mus_7_2ct205.7@PF05840.12	PF05840.12	my_seqs	MCLQPTIIINPRFVKMSSYGTFPCVHMPSRDFFYTRNAFDTFDYKTFSAKRNGVNSKNINDFYAFNDSGEVLPLYLEVACGHCAPCIMRKKNDYKNKLILEQSCHDCPPLLLTLTYNDENLPDDGVSVVDVQLFLKRWRFHIQHNHVVNQRFRYVCHSEYTPTGTRRPHYHLLIFGYSISPRDILRLEDELLPIWGKGFVDVRLCDHGCFNYVSKYVCKGSNVPPGKNPNFRLSSRRGGGLGVPAFNDYTLYFKLLSSPHPLITVKALGRPFQVFVPKSIRERLCRSPRQFLPHRIINTFKLFCHKCCLLRALMDDIPEFSSHVVRACSLEGIKPPLDSLIPRPIFDKFAALEICPINVAVPYYYRSDAVIHTQSRRALLDEYVKLYKILDDFYLDFDK…	450	USER	zzzz248
794	my_seqs_10mus_7_2ct214.2@PF05840.12	PF05840.12	my_seqs	MVLMACFHPLRARITYDDFLGKKVVHILKSLDPDWNSPDVTPIPCGKCIGCKLDKSREWANRCLLELEYHSSAYFVTLTYNERYVPVSTYPGTDGVEFQSYSLCRRDVQLFLKRLRKAKEPAVIRFFGAGEYGETTMRPHYHLILFGLELDDLIPYEKSERGDWYYKSAFLERIWSKRMVNNRLGDVSGAYEPLGEVIVAEVSWETCAYTARYCTKSLNGFDKSVYTKFGMEPPSLYMSRNPGIGNQYFKDHPELYDYQYISVSTSTGGKKFPIPKYFDRLQQEAEEGSLDALKERRQAFARASSQLKASSTTLDEFEYGDIEEQIKKRSVKALTRKV	338	USER	zzzz249
793	my_seqs_10mus_7_2ct250.5@PF05840.12	PF05840.12	my_seqs	MCTCRLSVLNPAYRKAIKEGWMTPDEASQLPDYRISIPCGKCSECRRSFSLTWRSRLLAEYDDFCYQLGYSPFDPINRAPVYFYTLTVDESHRPDAESDPSRVLRLFHERYRAACHKSFRHWCTVEYGDPVLHTGRIHFHGVAFGLDCPFSKFRKLWGLGRVDISRVRERACMTYVSKYVTKFDRDRKRFPFAGKVFASAGIGTSLYLKNASAISDQLLSLTSVSVVYRNYRYPVPYYYARKILLRKHGESALRQRRIYNTILAFARRSIAFFGLTDRFTDFTIHENALLSLSDESFLSPACQRLRHIQKSIDSFIGETVFTYTEKIKQHLKLLNDYVFDYLRPTCSVSRIECALRACI	359	USER	zzzz250
792	my_seqs_10mus_7_2ct269.4@PF05840.12	PF05840.12	my_seqs	MAQCLFPFYVERKLYFRQEDRFTPVPCGKCPECLKRRVQAWAFRLEKEALQHKSQYFITLTYDDRYLTETPNGYYTLVKRDVQLFFKRLRKSLPKDSKIKYYLCGEYGSNTYRPHYHAILFGDENLTEQSIILAWICPYEELYDPVESKLFHPPLGHVHFGDVQDGSIKYTIQYYDKGRLERLQGDDDRLNEFALMSKGLGKNWLTNETARFIRENPDKQFIYSSGYKLALPAYYRRRLYDYRGTETMVNQHPSYVIEMAEREIEKKQRQLITKKLIDEKEQPDPADRSVHEDRKAAIDNYRRRYRKARC	310	USER	zzzz251
791	my_seqs_10mus_7_2ct317.2@PF05840.12	PF05840.12	my_seqs	MACYHPLTGYDLTPKYFTCQETRKIVFNVNPVLASELSRQGRVLSIPCGQCIGCRLEYSRQWANRCMLELPYHDQAWFVTLTYDDAHVPKTFSVDPETGEAISPVMTLRKRHFQLFMKQLRYRFSGDHIRFFAAGEYGTNSLRPHYHAILFGLHLKDLVLYKRSVLDYPYFNSESLSRCWVDSSDGSQRGYVVAGAVSWDTCAYVARYILKKQKGATASVYQELNIEPEFSLMSRKPGIGRQYYDDHPDMFKYDKINVKTPAGGRSFTHPLYLRRLYEIDDPVGSFELSEKRRLNAVDNVSLKTSLTDLDYYDILISSEQRKERSLKSLFRTTI	334	USER	zzzz252
790	my_seqs_10mus_7_2ct329.7@PF11726.7	PF11726.7	my_seqs	MEVRNYLSPCRNSHAVVNSRGNLVFVPCGHCPDCANRKANYYERLCNMEVASRAYTVYFTLTYNDDNVPKAIIRPIQYRDPSSGSLCDHSCLALYDVTARNRYSRVKPGTITSRYRLPEFGSEISQLYTSWSNPLFVKFFNKANSHPSLHYDSSIFRKDTCLRYLRKRDSQEFFKRLRDYINRTCPCKVSYFATGEYGPETFRPHIHVLLSFDEPRLFPLIEGLIRKSWQFGNVDYGGAVSSGSSCTSYVSGYLNSFSHLPSFLRDSGISPFCLHSQNYGSAFNASLRSFVYADPASFTGELVLPIDGTIYTHFPTTSFQNRFFPRCYGYDSLDRSSRHTLYVSYKTFGKQYYGSRYSRKSGIIPSLALKILQEPHRFNNRMFLSALDIHADSDFHEIY…	600	USER	zzzz253
789	my_seqs_10mus_7_2ct346.4@PF05840.12	PF05840.12	my_seqs	MSHCLNPITIKNPRFKKGKKNGLSDPYCSEEARESQRAIDACYPYIPYIQIPCGVCLGCLRDKANEWRVRLFHEQMYGNHTSTLCLTLTVSDEYIEKFKDRKSVALCFRAFHDRLRYYTPGRRTPKHFYISELGEKRGRLHFHGFIWDAEVRDHQIAAAWRYGFICAKPLRSYKQLAYCAKYVTKPAVRWHKPMVFCSPGLGAGYFEQQQWIDWNHSPSDLAPINNCVKFERFVYAMPAYYRSKIFSHVERGNCQKVLFESGGPRTKILGRTSYTDQRSYQEAREALYQVTLRSGKSRVRKKKPHINSDLMQMDRDKLLADFFGSVV	327	USER	zzzz254
788	my_seqs_10mus_7_2ct390.6@PF05840.12	PF05840.12	my_seqs	MMLVVVVIIMCFFPKINSNIHSPAYISGVDSFKCGACPECLSSRANYWALRCFAEAQVHEQNCMICLTYDQFVRDSSGRIVGERVSSFSVSRRDIQLFVKRLRKYLSSVSPGLRIKIFGSAEYGSRTHRPHYHAIIFGWSPPDCVYHKKSKRGNVIFRSSILDKIWGNGICTVDSLRINGAIAAYCSKYCSKTRAEDTFSFFSQGIGDEYLLEKFNGLNYFVDGREHPIPSRIWNKVIEREFPSLAGYNKYLPFVVDSEGSVLNRREKEHQDYQRRLFASVKRSYLPYSRYCEYWREKSILLDRMRPDWLTRLSLLPDAKFLHYKVAAVLCRECRLRGVPASAPGSNERSAIWSYRVALRLSPCLISASDTKQGEEKVLSPLDRFCLGKGFKIFLENDK…	408	USER	zzzz255
787	my_seqs_10mus_7_2ct431.1@PF05840.12 my_seqs_10mus_7_2ct431.7@PF05707.11 my_seqs_10mus_7_2ct431.10@PF05840.12	PF05840.12	my_seqs	MDVSPRYTIHRYSEDIFKVVAFKGVRDSEYIKLREEEQHYETKLNEAFCRARSMVLQYALCNSWDYFFTGTLDKSKFNRYDLDSFQKRLSQFIRDKRKAYGTQVSFLLVPEQHKDGAWHMHGLISGLPESALRRFRPPEPEKLVHSDYLNWPDYMQKFGFCSLGPIRHPVATSFYISKYVSKELSLRGGALGKHLYFHSRPLNKAVHVSNVYFYNSGLDAVCVHEHEFCKTGMVQAAPWYFPYEWEGVELCNELEPFRSSYELEPEPDFCPWEIDPFYEQSVIDGF	286	USER	zzzz256
786	my_seqs_10mus_7_2ct486.8@PF01719.16	PF01719.16	my_seqs	MKPKSNYRSRHWSLTTYSTPQEFSPLLSLCSEYSYIYHNKEESEPHYHILCIFKNAKTFTAVRSYIQGSQNTFGEPARDLNALYRYLTHKDNPDKHQYEDTEIIASNPFYWLQIANQESFAKDGEKALNLLEDINAKKSYRYMVLTYGRDYIKNHVVYEEMAFKLFIQEQDEEKNKQQIYDIF	183	USER	zzzz257
785	my_seqs_10mus_7_2ct500.1@PF05840.12	PF05840.12	my_seqs	MFINTEVKKVFSVSDKFNCRMKVYPDGTYNAVTANQGWFLNGAQRLELREKRAQEHEKYMLQMEEMNKGILQWAKACNPEYEPCAVSFAEPEPLETNKIIEEVIQKAIAMGIPVHCNGVRVLRAETEVKKPDAKNVRRARERIFDMIMLNEFRYFATFTFNPRKVDSFNADAVLKVVKKWIDNHQQRNNLKYVMVPEYHKSGRIHLHMLYSGNLKLKDSGKRTKTGKTIYNCKSWRYGYSTVIPCDDEKAKLAYYVSKYVTKDVQRIFGKYYYSSQGLKRECPVVYCNRDYQSIQSPSVYVDAIDVRFKYDSSFQYSSSDASPDLLKDLGLEAV	334	USER	zzzz258
784	my_seqs_10mus_7_2ct658.4@PF05840.12	PF05840.12	my_seqs	MCLFALPNTMVTSTAYRKGVTAFKCGACPECMRERSSVWALRAVYEAKRHLHNCMITLTYDTFKYDSRGRVIGENPVNSNLIVNKSHIQLFMKRLRKKFGKDIKYIACAEYGSRTHRAHYHLILFNVRFPDLVFYKRSKRGNPIYQSHILTELWMHGICTVDSINVYSAVARYCTKYCAKSRSANTFMLFSQGIGVEKLLEDFNGLYYMVDGRKYTIPRVVWQKYISNKYAGSPVDFDYRYVNFNGSWSDFLSSAERRQRYFVIRDNDSVYQKYIAYWKFYSKLYEAGRDTIEHRIYALADGKYHNYKVAALEANARRCFGVPVPSPGSNQKSAYERYYFETLRKLGLRHLPLGSRPNTASDTKRVDFKDFKELKSFVLMRKALYERLYSEKYLQLSYL	399	USER	zzzz259
783	my_seqs_abalone_6_2ct10.6@PF05144.13	PF05144.13	my_seqs	MLDTLIINVPIHDEFVQMTGNLKSIRGSVEDYQIKAVPSYVKKDIETGDLTLGDSYHPFESLPTSHSGMAIKFYAVNVANSNPYISLNASVKILQGHNVYGGESVLNLASEMLNLLNEVYPAFYSCLNIRGATIAKIDSTFSVSLPSELLVQPCLRFLSNIGDGHRKSDTQRDFYNTVYFGGKTSRYGGAKIYGKGHELKEEITKLQKSAKLGNMRSINKLKVLNPALVDWSKTLLRFESTTKARQLARLRYPTNLWDFINYQRDEDKNVLTKLWRYWFDPILSILKGDIMPDIDDSEVYDLCKANLMSYTKTGKISYTKANNVYNFYILLKRDGYEAIKSRYVRRTFDENVQNLTALGYGKAVLQNLSLDTVKAVPVSEMVKMDFTKQFPDEYEPIIS…	441	USER	zzzz260
782	my_seqs_abalone_6_2ct11.4@PF05840.12	PF05840.12	my_seqs	MPCYKPLVAWYSKEFNPSGKRGIVFNPGRAEQPDDPIDLPCGQCIGCRLERSRQWAVRCIHEAQLHDENCFITLTFSPEHLEKRKQPDSLDKSEFQRFMKRLRKHFGQQKIRFFHCGEYGEKYGRPHYHAILFGLDFADKQLHRVLNGHRLYTSRTLEKIWPYGYSSIGNVTFESAAYVARYILKKVTGDAADTHYANIDSQTGEIINYKTPEYTTMSRRPGIAAGWFDKYADDVYPSDFVTVRGKKVRPPKFYDRLMETTRPYEMEDIKNARTEAAKQHAENNTLERLRTREKVQYIKLKSLPRNLDKES	311	USER	zzzz261
781	my_seqs_abalone_6_2ct12.5@PF05840.12	PF05840.12	my_seqs	MACYHPLLAYKLDGQVTFKKPYPFAVGFNLPCGQCIGCRLNYSRQWAARCVHEAQMHEENCFITLTFNPESLVARAQPENLDLTEFQKFLKRLRKKYKNKKIRFFHCGEYGEQNHRPHYHALLFGHDFADKKIYTKKGEYHLHISEDLQKLWPYGFSTIGQLNFETAAYCARYVVKKITGEQAEKHYQHTDLYSGEIYQKKPEYCTMSRMPGIGYTWYKQYGQTDCHNHDKIILTNGLEINPPKYYDKLCPEEKMVEIKKTRILKQDKPIDGYDERMDRLWVQEEVKTRKVEKMLRDI	298	USER	zzzz262
780	my_seqs_abalone_6_2ct13.3@PF05840.12	PF05840.12	my_seqs	MPCFFPRKAFSYGAGEQLVFSHKDLTLDGAELRYVSCNTCIGCREQQSKHWALRMYHASQMYKDACFYTLTVDPSKLESDELNDLRPDHFKSHIDYLKKKLKRSFGIEDVDWFLSAEYGENGRKAPHYHVCLFGFDFCKYDGADAPMSGRGNKQFSSDLLQSTWPHGFVRVSPYNSKTAKYTSDYMLSKPSPIEVRKGYYNFFDHDRGILRERLAPYHRSSKSLGRSYVERYFSDIFPSDYCVVSQPGKSSYKVKPPRYYLKILREKDLDMYEKVVAKRAEFVQLPDFDRLAVQYEKKLIEINRGSRDGGFSVADDLTSLRTQVGLLSLSREERYRLASLSSHYAFELFLLTNIDYQDTG	360	USER	zzzz263
779	my_seqs_abalone_6_2ct14.3@PF05840.12	PF05840.12	my_seqs	MVPCGQCIGCKLRYALEWTVRCLHEAQTAGSGCFITLTYEDITANPSLHHPDFQKFMKRLRFNHAAAGAIRYYMCGEYGVNQDDIKAGMKKPRLGRKHFHAIIFGTDFPDKYFHETTESGEKLYRSPTLEKCWTLGHSSVGELNYESVSYVTRYILKKQTGVDSKEHYTYIDDHGFMSEVEPEYTRMSLKPGIGANWFNQFKEDIYNYDELVIPTKNGMKKAPIPKYYDELMSRLDPETIEDLKITRQLNAKKFEKEQTLERRSTRQYLRNKQIDKLKRSLQ	282	USER	zzzz264
778	my_seqs_abalone_6_2ct6.1@PF02486.18 my_seqs_abalone_6_2ct6.6@PF12472.7 my_seqs_abalone_6_2ct6.10@PF02486.18	PF02486.18	my_seqs	MAGERVVLAESGLPSSNRGVSEFRNADGTLTVGIDWFSASIDLRAALDELAFRDGDSFEEVRQWIEFSPENARIAALQVFCWFFAGLGLELDETAGGGRFYTWRIKIIDAAKKFVGMIELGGEECRRADGTYTARIELTGDGCKAIGAARCGHAQRWLELRAKLESCAGRITRVDVCADDLVGDYPLRMAQKWYANGDFDNRGQRPKAQLVDDYDSGDGKTFYVGGKKSEKQLRVYEKGREQGDKSSPWVRYEAQFRNSNRKELPLDILRDPASYLLGAYPVLSFLRCVATRIEITKAAVEATWKSVRRHIRRQYGAALNFIAKNCPDDQALRAVIESCTSPSLPKWVTGDTAAHWPEIAAVQPTQKG	368	USER	zzzz273
777	my_seqs_abalone_6_2ct8.7@PF05840.12	PF05840.12	my_seqs	MCISMSDIVVNGQLVSVPCRKCWRCRSNRVNDWVGRCIAESRISDYTLSITLTYSGSDVPEASVLTYSDFQKFIKRLRKDGYSVRYMVAGEYGTKKGRAHWHAILFFTGLCPKIVDVRSISPSVLRLNPSGTSLVPSSDIALSERFLWSYWPHGISFLEEPSYSAFRYCLKYVLKQETKGISVSKVSLSKKPPLGDLYFKKLAIAHVEQGLSPSNFMYSFPDCRDASGVLHKFYLQGTSRDNFIQYFIDQWSLKHDFEFSGNKVVLDWMEGQDFSTAEDLDNKFVSDFNNSRRYSIWSGLVEAAMPTPSRIIVYSSGHTLYKTIYGKWFFRFTNDLGGLEWEKEVKIKEEPLRRV	355	USER	zzzz274
776	my_seqs_abalone_6_2ct9.4@PF05840.12	PF05840.12	my_seqs	MQLSDFPKYQHATLMRSVFSPNDDLPQDLIKQLKPCVKAAGLTYIGLSHPYYQIHKQVQKRLLLLQELKDSIRKREGHLASNDFTLGELTYDLQQAIQWHTDYVLSVDSLLDIYNPIDHASTGVVSLTASDGSIVTGSVMDVVRDWREYITDHPRKALLDYFKMPLKQSAPKDKAAIILIEAQMKSRRTTYVQRLKNAVVSAHQSDWYMVFDTLTLENTGIKRFYEDTNAIRDYTRRIGRLVNKSMGRPARDSYSDVYQYFCVPEYGGQNGRLHFHVIHLLKRLPIGSVDCNYGLARPIRRQLDTLKGLWPYGYSMPIAIRYGGDRFGRDGWRHPLDIKTNQAVLLKPVEAVCNYIAKYVSKNTDYKITMKLGKGLEKWQHTTIQQSGNVQDRTFKVRM…	524	USER	zzzz275
775	my_seqs_mac_stool_D2CW_7_2ct12.6@PF05840.12	PF05840.12	my_seqs	MCINPRTIKNNRYDYHPLWHRAFLQVPCNQCEECRNSARNQLSSRLSVQAWQTILSLGYVLFLTFTYNNAHLPYISYNGKTCPGFSRKDVLQFLRALHRYYDKKGMKFYHFLVCEYGKHTKRPHYHCMFFLPCGFDHQQFAEKARQFWTHMYIKEKDIYTNNGYMFPGKTGVKFGKHLCRSVKSACVYTAKYSCKDLSFYRLPLVKQICSCDELKKQYANYLPKVFQSCNLGYSWFHEYLMANPAAVKCTNPATLQSINIPTYAINKFCYNTYKGDELNSKGERKVIRELNEYGYARRMALLDVFIQNRADKYVHTYGYSPLFAERMAIYHYVYRGLSSRQLYNWFDEIKKYKWWIDENLDDSCGLFSSDVYHHIFSFSLQRFSFLGVDPPVQETLKKM…	490	USER	zzzz277
774	my_seqs_mac_stool_D2CW_7_2ct15.6@PF01446.16	PF01446.16	my_seqs	MCLRPITRKITSHGITKIVTHPCGKCLECVAQYQQDWAYRLSDEFKDWKFAYFGTFTYSNPRVPYVDVVPSDLPDNVHNFLCYQIEKIPFSSALHKARCRNDQYVEYLKPACVRNNLSVRVPMVSKYDIQTFFKRLRINFKRKFHKDFIFKYFVCSEYGPQTLRPHYHIIIFTNEYYERVMSQVSQAYTYGDIRDFHLLKSRNGSISDACAYVAKYCCKPPEFENPYVFAGLIPKPFRLMSKGIGASERGRIVALANSYSNHKLGNYYGYDKKYLEWLDHQLHRLSYGKDNAAYSVKLPRYYVDKCFPQSPHYTHAYNAKKQVFEVRCTLRKNSEHMLCVAYTRLLEDRYIQLCNDKLSELRLQYPDASDNEIIHKFELSRMQNLQERASKKLQNFVKF…	408	USER	zzzz278
773	my_seqs_mac_stool_D2CW_7_2ct16.5@PF05840.12	PF05840.12	my_seqs	MCLSPVIIKNPYFGCDPSKGYNYLHDCNSSKIAVPCGHCKECINTRQSAFAVRCDLEGYNYVAVPFMLTLTYNNSHLPRFSKVGDMLDDFAFPDWIHVQNMMKRLRNKIVREPDTDFARLFVPFQKVEVNGRERLIPPFKYVFVSEYGKVHLRPHFHALIYVKTPYSVQDVRFEHWRNNVEKALFDFFKSAWSINKGTRSEPVYESLFTYIVKGNRKTFDFHAIRHLDNVSDSSPVYYVSKYLFKANNKLETLKKRVYIAYKDGAISPERYKKFREVTSRHLRVSKFFGYPFDDDQIKRINKGFRYAISQKMPFPCYIASDGQQQVFPQYLKCLITPDLATSFCYNIKNSYESDVRELEKISLRDARARVAEDEAARIRRSIRSYDDNLSDFDDYSELR…	462	USER	zzzz279
772	my_seqs_mac_stool_D2CW_7_2ct18.4@PF05840.12	PF05840.12	my_seqs	MCLHIQYIQRLDAHDVFLRGFNSLYQGSNLVCFIGEKSFSSNGYIRLPWIKTWYVNHDDENDIVYTREQRDPQKKYYKEFSEDMTLFSLVNEETGESLPLYNAVPCGNCVVCQDTKRSKTSNRCILQSCVSGKPFFLTLTINDENLYHFRERTQKVQEMQKFLKRLRKRLICTYGIDFKETPLKYVIVSEYGSKSGRFHFHALIWLDNNEMHSYRSFFDTDTQKAYTAPLFSEAVKSCWKFGYCKVENASDMTGKYCFKYMSKQRGNIKLQSKLLGWQKVEEFKEVIFENPQMLSFPVVDLDGQKHEIPITDYMTRKIYPTFARSIDKELRDEIVSLYNEIYPKQLFNKDFKYLQEYLDRHFQDLNFPLKSLGDAREREFAATPLSCLSSSYIERYLNL…	453	USER	zzzz280
771	my_seqs_mac_stool_D2CW_7_2ct19.6@PF05840.12	PF05840.12	my_seqs	MCITPIKIKNKSRVQNPKEYAYRRPLSQLSDLTSQYIEVPCGHCSDCITMRQNYIVQRFRMASLVNDFWFCTLTVKPSLMRSMSFTLDNGSKFTHDIACKDDLQKFFKRLRKRNVFGMPFKYYCVSEYGGKKHRPHYHIIFTTPKMPATVSLAERRALSDSISKKIFEEWSVNVGTRKNPVYEPLCDYHERWINGKLNKNYDFHLVEPYDANDGVDNVAFYVSKYILKVDDYVNKRIGLLKSQIKDPDNLSTALSLFRPFSLVSKHFGDVQCHEISAYIERCIQNSLELSRLGQNPINDALFRTFDGKTFPMSPYYKKKVLTPEVVSRFQLFKHKYSEVNAVSNDMSGVVQFLTDYDNFKVTPKKTPTQIHNSEIHLLKLTDAITKYNE	389	USER	zzzz281
770	my_seqs_mac_stool_D2CW_7_2ct21.4@PF05840.12	PF05840.12	my_seqs	MLVPVLLLCSLMLKFQRINIQRSILLRLCLCLFRCGVYLPLSVVWLCAKIILIVLYMCVNPLTIVFKGDTRRLRESCGLPTSILVPCGTCSECAKKKATSWGIRAYREFLFAPANSVRFVTITYDENNIPKTSLGHKTLDSNDCKQFLKSLRQSLFRKYGVTIRFMCSGEYGSRTFRPHYHFLFYGIPSFMTNVELKKIISSAWHRCSIIDVQYPKNANSSGFYVGKYMAKNGYKRARAIYLDDPEFVMPFKRSSIGFGNQFSRAEIAYYLAEDISDVPAGYVSPSLEWTTYTVGDLFYNDTKEPIIDNSPDIEFTMSSRAPLPFPSSKVTPKQAKFWHDDYSGSEAQRWIDVFSKSPRFLEIVRRYHQCHRPLKDGSYRNMDFPEYLAEKLYGKDLYK…	487	USER	zzzz282
769	my_seqs_mac_stool_D2CW_7_2ct22.4@PF05840.12	PF05840.12	my_seqs	MCLYPKLIKNPKYLPNKKNGGCPPPLLDKRLEYIPARCGKCYECRKEKQREWIVRLSEEIRTEKAYFVTCTIAPEYLDTLLIDWHDIPNQVAKDAIRHFLERVRKKTGKSLRHWFVTELGEDFDRIHIHGFVFGENAAELLREKWLYGYVFIGCYCTEKTIRYCTKYMLKMDEKHKDFTSQVFCSAGIGSQYIERADAYNNRFQGEKTKQTYRTRQGTILALPEYYKRKIYTEDEKEKLWIQMQDSGETYVMGEKCDIESPEYIQLIKYYQQKCMQIHGDNPSDWELQKYVNKLRKQRKARLKAIKKLKG	310	USER	zzzz283
768	my_seqs_mac_stool_D2CW_7_2ct24.8@PF05840.12	PF05840.12	my_seqs	MACKSPIYAYQLKTGGRLIFHINAFSDKDYVPVTIPCGQCIECRKQHAREWANRILMESKYHEHNYFLTLTYDEQHVPRSVSPSSGQSVLTLCPEHLTLFWKRLRKAGFSFRYFAAGEYGDVTFRPHYHAILFGLDLTDLKEVGVSLTGDKYFQSETIEKIWSYGHVLIGAMTWESACYVAQYCLKKQTGVRSDFYINNGIVPEFVRMSRRPGIGYRYFEDHPDCMDYTRINVGSPTGARSFSPPRYFEKLIEKKYLEDNYGWVDNHQIGFRKAFRARSIAVSEQNMTNNTSLDTYDQRKVIADSKNSFKKVRDFS	316	USER	zzzz284
767	my_seqs_mac_stool_D2CW_7_2ct25.7@PF05840.12	PF05840.12	my_seqs	MSCYRPLLGKFQGYENGKPQYKIQAFGAGILAEYPDVNVPCGHCIGCRLDKSRQWADRMMLELDHSKTAIFVTLTYDPFNVPLACVLDDGSPLFTLDKRDVQLFLKRLRKAFSGREIRYYLAGEYGSETHRPHYHAILFGLSLDDFPDLVLLPQKNRFGQSLFTSKRFYEIWKLGNVCLAAVSWQTCAYVARYCVKKLGDDVPRETYEDFSVLPEFSLMSRRPGIAGFYHLEHPDLISRSKQYFSDVDGVTPRTSCQTPRFVFDKLELTNPELYDTIKKQRQAYARDKELIALSRTDLDFCEYNQVKEYSHERRAKGLFRDSL	323	USER	zzzz285
766	my_seqs_mac_stool_D2CW_7_2ct30.4@PF05840.12	PF05840.12	my_seqs	MTVNDKVQYKVTSYQTNHVELINNIWTPTHLSFRSSLATKVVSEYIEIPCGKCLGCKLDYSSRWADRCLLEMQYHSVSCFLTLTYDDEHVPYNDNGLMTLRFTDFQKFMKRLRKCISPVKVRYFACSEYGSKSLRPHYHVIIFGWEPPDKEIIRKGPAGSWYYKSCLLERLWPFGYSLVGDATWKSCAYVARYVTKKLGSHAELEDYDLEPERIVMSRKPGLAYQWFHDHPEFVEWNSIPVTLGEDGGKSIRPPKYFEAKLEEINPELAKQRRLARQEMAKAHKMDYAHFSTQQYLDYLKSREYNLSRRTAALRREL	317	USER	zzzz286
765	my_seqs_mac_stool_D2CW_7_2ct34.6@PF05840.12	PF05840.12	my_seqs	MLFYLIYMCVVTPFFCDSKKSEVCMCLFPITVYRRRSGGSLIFNDMFINGMSKDEYEREYISFQIPCGKCVECVRVYSTHWQVRLLDELSCHDKACFITLTYAVNPGCVSKSDFQKFMKRLRKRFGKVRFFACGEYGKKNNRPHYHAILFGVDFEDKKPFFCSENGDQVYRSATLERLWRLGFSTIGEVTPESCLYVAKYMQKLDRREHSVEPFTLQSRKPAIGLLNGVSASRLRTGSMTVRGHTVPLPRAYLEYARKYDGVDISAITEQRIYRASMRPRASVNELFVRRANCLKSFGVLRKKRKSQKKA	310	USER	zzzz287
764	my_seqs_mac_stool_D2CW_7_2ct36.3@PF05840.12	PF05840.12	my_seqs	MCLAPRHAFINRTSYCTDFFSRYTPFGDFIDDYGGEYKRVLKFQRSKYTEKEVYIPCRKCVECVQAYSNLWALRCMLEAKSHSENCFITLTYDEQHVPELVSVREMQLFLKRLRKALGKKKIRYFCCGEYGEKSGRPHYHLILFGINFSADRQYLKQDKRGNAIFTSPTLSRLWKKGFHSIGDLTFDSAKYCAKYMQKFNIREKRKSFTTQSRKPAIGYQYAIDNVESISKTGKVYVCGKEYSAPWQFKHWYFKRLDTAMYAQSMEELKTIPNQSFDFVLSRALERRKKIFESFGFWNIKTKYKKEFKKIKCIKQEKEFVSPCLPCQLAINLTKRLG	337	USER	zzzz288
763	my_seqs_16minnow_6_2ct1004.4@PF05840.12	PF05840.12	my_seqs	MACFHPRRCWHNLRLGGRPVFQFPVGDDPLDYVEGVARCRQCIGCKADKARDVSLRAGHEAQMVGAASFLTLTYDRESLPWDSRPLSAEGQRLAIARPGLVLPWGGSLRRRDLVLFLKRLRDSLRRSHGVKVRAYQVGEYGGRTARPHYHLCLFGHDFREDRRKYVGDSKSGHAMFTSARLDALWGFGKCWINEMGREVAQYAAKYALKSLGAKLELRQAGGHLVEVEPPFDSLPHGKALGLPWLERYWSDVFPRGLVVLKGGVELPAPLAYMKALKERDEELFEAIAAKRNADGLVRLEHFMPERLKSREVVAFARADQSKRDAL	326	USER	zzzz290
762	my_seqs_16minnow_6_2ct1012.3@PF05840.12	PF05840.12	my_seqs	MPCSNVRQIRGNTVPCGSCRSCKKVKEWKIQSRILMEINQSEKSWFCTLTLRRNMTDALGYRLIQRWFKRIRKRMPVRYACVAEHGSNSTMRLHYHAVVSGPQSLSYRILRNTWRGGFSEVTLISGNAKRAARYSAKTARYVTKAGARFRFSQAYGSQAGKRMIENEFIAPFVSLGIQAIRLNGHNLPLKLFSLPAVGHGWQPYPDDLLLDADRERAKMRREEKERFGREKTLSLLISPKIEKPQAGQELTTGKRPARRRRTTGLPGCPS	270	USER	zzzz291
761	my_seqs_16minnow_6_2ct1024.4@PF05840.12	PF05840.12	my_seqs	MTLLFSAGLLSIRLLCKLVTRFSPTQCTLFVFVVNFRSSEFPLFNMKCDDPFFVYARTGDRVPIRCGKCPPCKLERVNSWVFRLMEEEKRHDCAHFITLTYDTSTVPITENGFMTLRKKDTQDFWKRLRKAHPDLNVKYYLVGEYGTKNNRPHYHAIVFGVPDTQYYADAWSIFGTQLGSLHVGSVTGDSIAYCLKYIDKPHSRRHKRDDREKEFNTSSQGLDVLLLSDTNTSWRTTKAVIMCVQSERQTLVRSEASKPKEAV	263	USER	zzzz292
760	my_seqs_16minnow_6_2ct314.8@PF05840.12	PF05840.12	my_seqs	MPSNLANYPKQQNKIIIPPDGIKPGNDAGLSYLGKQAAADPVLSAWGSWLDQREWQLFTTLTTGRELTLPGARRSVNKLASYLKENGYPAEIFWAAEPFDLKEGYHLHSLIRFADLERSDDNKPAYNYLVNGWRQITSDKTARIHSRRYDPGKGANHYVGKYISKTRSDYDIISPGIINDDQIEDRGIFQDSLEDYKKKRDEELKKHQRRQIVFSNLLEIGINSAQKPQDLPKYESKDITYKQWEEADYKANLHGLILNKIGLPQFKMIRN	271	USER	zzzz296
759	my_seqs_16minnow_6_2ct480.5@PF05840.12	PF05840.12	my_seqs	MCINMRRLTLATGLTVEVPCHLCWQCRADRVRNWTGKCIAESQTSAAVDFVTLTYCDSTSKAAKWIKDPVAPGYAKHLVYADVQKYLKRIRKAGHKVRYVCAGEYGDQKGRAHWHIILFWQDARPARRELYGNEWQDEFWHHGHVNYQPFCEAAAKYVCKYLLDWADEKDIHRKTIFRFSARPGIGFNWLCDKWIQMHLDQKLAPQSAKYRFPDVLDGQGKPREFRMSPHAQIKFVQEFERRWYAQYYCHPPPSSWCDKVLDKAARKIVLDALERRKYQRKPDVPTPNGEPVYFDEKLNAFYFDCGGFRALRYYWSYDDDGARAWSSSLVAPARAASLRAARVSTEVYRTASQARMTSSSSDMAARSASSDGLRSVANVDRCSMPLRSMNRHGLERAFS…	404	USER	zzzz297
758	my_seqs_16minnow_6_2ct483.9@PF05840.12	PF05840.12	my_seqs	MGSRWIDTGKGAELVPFDVSKTCSCWFRVTDRQGREHVVPGGKCDSCKKFRVTNLTGTLMQEAAFSGSTWFVSLTYADEHLPPGDGWNRKHITHLMMRLRYYHPGIRFYCVAELGDKNKRPHWHLLLFFPEYTPVPYLRRGYPARGGRPAVRGELWEHWEYGFSTIRAVKTDSPDDFVAQIRYCALYAQKQWGVEGVPRPRFSCYPVLGHRFLMEQALRYARVNEGKLRLPLYVQFPGVRVCKGGELWKFPILGARRGHYIRAYYAEVERLYGPNQWLGGSEALDKVKTKDLIGQRAADELFRKAQCVLDLRTFEQVANAARSKILSLRERWLAYDDKEARYEHAASFAAYSQEFEFIDSDGVVQCYG	368	USER	zzzz298
757	my_seqs_16minnow_6_2ct492.7@PF05840.12	PF05840.12	my_seqs	MCVMPVTLPDGQSTGCRKCWQCLGNKVSDWVGRNIAEREVSTRSLFATLTYRDHGEGVTPIEAEILTYTDVQHYLKRLRKAGFSVRYFAIGEYGARKGRAHWHMILHFEGASPDWSLNKRVQCKYWTHGFAEYDECNAKSVRYVCKYLNKDTLDNSAQMKARLSTQPPLGREYFRRLAAQYVKQGLAPQNLFYWFSDVLDQNSGLPQKFMLKGASRGHFIGDYLMEWERQRGGFTPTSEVVDEYIDKNCGYQQPIAKRRVMLSPLEPTLPIPKGAIIDWCEKTKHYYYDHLRYRWYWSYDFEGKPSWVGKLRTATEAAVLRAAFERQRAPETYLRAKGLA	340	USER	zzzz299
756	my_seqs_16minnow_6_2ct495.6@PF05840.12	PF05840.12	my_seqs	MCIQKVRAPNGYMIPCRKCWQCVSQYSNDWIGRCLAESKIKVTGCFMLTLTYGRDEEDESLHPRTQTLTYRDVQNFFKILRYYGYDFSYLCVGEYGSLKGRAHWHILMFFRDDLPQHEIHKRFKNDYWPHGWQYWKVMDEANIRYVCKYLMKDIEASRNDVKVHSSTRPPIGYLYFDQLARKYAEAGLAPQNALYSFPDVKSKDKNGGVNAMALPQKFMMSDTTQSNFYDAYLRYWKEIKGTKHPPTSKWLDEMADRRQRAKGDPEWTPDGTPRNLIKPPYRGTLPRVGFDVVLQTQGLYSKDDLGTLWYRKINGEYKWLREAEKDIVAAKAVSYQATPETPSLTPHDLDTMDQMSRAVLRDNPYYRAKQGLQEPRKRKFFPATVARR	388	USER	zzzz300
755	my_seqs_16minnow_6_2ct496.7@PF05840.12	PF05840.12	my_seqs	MKHCMSPYMPTGGAEPPFFNGLTARYERRAVACGRCDACIANRKQDWTGRLVAESLSSASVAFVTLTYKREQKRFDYKHVQVMLRKLRDALRERDREQRVRFFCVGERGDLKGRRHWHLLLFFKRPYDIGRTVPGELWDFWPHGWASLEDVSEDFGLTVKKVRYCVMYCLKDAGSADGERLRCSLKPALGSEYLCQHADNLAKQGFAPDGKYRFESIRWNAGHRAGELQTFTICGAVRKDYVKAFDEAWEFYHGPERRIHSPWLDRWRECRFPWGVQEARALFWKQAASPGLGMIRREHPEQAFTAEQLVLAEAVAAEDTSSAVGVRMLSGRSDKGYWVALLRVYRDGACYVEAMDGKWYFVPGSVADVLVMSPGAVRDADEWIAAMRPDYEANRKAYF…	498	USER	zzzz301
754	my_seqs_16minnow_6_2ct506.6@PF05840.12	PF05840.12	my_seqs	MCINPQVHSETGNEFGCRKCWQCRGHHVSDWVGRCIAETKNRAVVASTTLTLTYGRDDDDSPDHMRAYALTYSDVGEFFLRLRDDGFRFRFFVAGEYGSKKGRAHWHILMFWLTKPPPYEERKNFQEKHWKHGYSYWETVVKPETVSYVMKYLQKTEGDGESRIKTGMSRHPPLGADYFKQLAEKYVKQGLAPQDPFYYSFPDVKDAKGKPFQFHLHKTSLDLFLNHYIRASGGPRLTGNSAKVDDMIDKNANYAPAIKPRIFKGYVPYPFEEVPYASAIRKDDYRNTYYCEVGKSRLYWVTDIDGNWIWRDTATEKAVAKAAARALALKADCETKTI	338	USER	zzzz302
753	my_seqs_16minnow_6_2ct507.7@PF05840.12	PF05840.12	my_seqs	MCISTFAFRTARTSPRGGRLVFLPCKQCWQCIRDYKLDWVGRCIAEHDVAVASHVVTLDYSPQARPDPEAAKTLVYGDVQKWLKLLRRHDYPLRYFIVGEHGAKNGRAHWHAVTFWQSQRIPKMELRETFWNDAYWPHGHAFWDEVSVDSLRYVCKYLLKEDKRSELYMSRRPPLGDGYFRKLAQDYVDQGISPQNGYYYFPEVTTGNKKTPFYMRGVTRDNFCGYFKAAWEAKHGAAHYPASDFMQEYEDASCGYEPFDGKGEPKVGKYPYRTPWERTPNGVEPYFSDRLNSWFCTPDPASLPHFHLFWHWRTGEWRSEIEMMDARGFPRDETFHRLETREENEALSKLGAIYARASQGS	361	USER	zzzz303
752	my_seqs_16minnow_6_2ct509.6@PF05840.12	PF05840.12	my_seqs	MCLYPRLIENRKYKRNKKNGWQVPPIKDQRARYVPVGCGKCIECRKQKSREWLVRLQEDLKVNTNAKFITLTYSTENLRKIIEDDKESIRKKQEKINNLLAEYTSKSHKKAKKLQMEIKKPLAEMTGYQLDNELVTRSIRLFLERWRKKYKKSLRHWLVTELGHGNTEHIHIHGIVWTDKLEELENIWSYGYVWKGKLDIKTGKLENYVNERTVNYIVKYLSKVDEKHLNYQGIVLTSSGIGANYKGRNEYNGIETDETYRTSTGHRISLPIYWRNKIYNDEQKEALWLQRLDKQERWVCGERIDIKNGEKEYYEALKYHRERTSKLGYPTPEFMWSVREYEEQRRKLIQEYRLGPKGTGFTLQSLPNSHEGKGFTLQSGVKTANTNT	388	USER	zzzz304
751	my_seqs_16minnow_6_2ct514.6@PF05840.12	PF05840.12	my_seqs	MCLYPKLIFNPKYKSNNKNGGNPPPVNDKRVLYVPIQCNKCIECRKRISREWQIRLLEEIRHNKNGKFVTLTFSNESIAKICEMEKTFTDKETKRKFKAQIGECEGYERDNQIATIAVRRFLERWRKRFKKSVRHWLVTEIGHNGTENIHLHGIIWTDQPASTIEDIWQYGFVWKGKEEQNGIITNYVNERTVGYITKYITKQDDKHTTYQGIILTSAGIGVGYTTRGDAKNNKYKEYGTREYCRTRTGHKMALPIYWRNKIYTEEEREKLWIEKLDKQVRYVCGEKVDISKGEEEYNKLVEWHRKRSTQLGYGDGYKKYDKEQYEKQRRAIMQETRIKSAKKTLSQT	348	USER	zzzz305
750	my_seqs_16minnow_6_2ct516.5@PF05840.12	PF05840.12	my_seqs	MAKEKVTIKKKQQQTTSKYMCLYPKLIRNKRYVINQKNGGLVPPVYDTRVLVVPAICGKCMECRKQKAREWQIRLMEDIKTNRNGKFITLTLSNESYKELYETGKIIRKNKLTGIKEELNIKDLEGYDIDNSIAKVALRRFNERYRKLTGKAIRHFVITELGSNGTENIHMHGIIWTDKQREEIADIWKYGFIWMGYNKMSGIENYVNEKTINYIIKYIHKQDKKHPQYISKVLTSAGIGGTYNELKRHEFNEDKTKETYVMKNGREGAIPTYYRKKMWNDEEREALWLHKLDKQERWICGERVDISKGEEEYYKLLEYHRKRAQKLGYADNSKEWEKNKYEMERRELLQIKRLQ	355	USER	zzzz306
749	my_seqs_16minnow_6_2ct519.8@PF05840.12	PF05840.12	my_seqs	MCLYPRLIKNRKYTENAKNGGIIPPLMDERLLYVPVGCGRCIECRKQQARQWQVRLLEDIKTNTNGIFVTLTFSDEAIKGLIEQKPTKHWASLTGLDGYNLDNEIATRAVRLFLERWRKKFGKSVRHWFITEIGGHGSENIHLHGIIWTNHSVEDIQERWEYGFTYPNKKQYKGNYVNGKTVNYITKYITKADEKHKEYKSKILSSKGIGANYTKTVDSKSNKFNDKEPDKTKESYRTPTGHKINLPIYWRNKIYTDEEREKLWIIKLDKEERYVMGEKVSVKNGEEEYNKLLKWYQERNKELGYGDYKKDWKKIQYEGDMRNIRRITRINRAKARQNKYNNKKNAEKK	349	USER	zzzz307
748	my_seqs_16minnow_6_2ct523.6@PF05840.12	PF05840.12	my_seqs	MCYYNRLIPNPKYLPNSKNNGIIPKPADQRVLVIPISCGQCLECRKKKARDWSVRLKESLRTEHQKTFITLTFSNESISKLYQDKDINNLTGYDLDNAAARLGVRRFLERWRKKHGKSIKHWLITELGHKGTENIHMHGIIWSKDKEAIEKAWKYGFVYHGKYVNEKTINYCTKYVTKIDVKHRGYKQKIFASAGIGAEYITNGRAITNQYNGIETRETYQCRTGHKIALPQYMRNKLYNDEERENLWLDKLDKNERYINGRKYYIRTEIEIEIWKKALTQAQYDNKKLGLGNGNHNWTLANYEIERRHYLQKKRILQAELKQWEQVFAESDAETEMANLIAPIEARSCTRSSQQPLAGVLPTIADRSYLGAPTIEEEYQQERINNMLNLTKQAR	395	USER	zzzz308
747	my_seqs_16minnow_6_2ct525.8@PF05155.14	PF05155.14	my_seqs	MFFDWLAIEQDFGFQLPLLDGNAYARLVIEEGEVVETGALCSPAFAYKGSFCDLVHLRVNGSSIRMWGNPSRWNRLDNLWGLPTIDTCVAVYNDILRDIYGHCDQIPQFTKCTKVLYAQGSACDHIGTDGAVIRELHITENVSVGAGNTRDYLAGISTLRYRHSAPNPHPNGFTVDWLSKQGNAPLVYPCVYEKANELTLHSLGKIARNFGDDSDEMRHIQNLIGYCNSVGLVRFELKLKNRYLQRNNMQYWGLSDFSPLKQLISDFTNIDQKLSVTSMDFETISERLITLGIVDTTRAANTTAMYALQWMHGQNFDLNKKQVQTHRARLRKLGIDIASKCNISKFSPIFVTARREVKSNIATPPSWYVMPRTLRAVA	378	USER	zzzz309
746	my_seqs_16minnow_6_2ct527.5@PF05840.12	PF05840.12	my_seqs	MCLYPRIIKNKKFQYTQKNGGVIPTVNDVRTTLVPLGCGKCIECRKKYGRAWQVRLLEDIKANRNGKFITLTFSDKSIQELNEAIIIKKNKETGEKYKIKISNIYGYSKDNAIATVGMRRFLERWRKKYKKSLRHWTVTELGHSGTENIHLHGVVWTNESFDEIRKIWQYGFVWPRPEEEKVNYVNERTVNYIIKYVTKTDKDHKNYRSIVLTTPGIGVSYINSYSMRKNQYIAKKTDETYLTESGHKICLPTYYRNKLYTEEQKEKLWIEKLNKGIIYVRGERVDISKDTKNYHKLLKWYQMENKELGYGDDETWKEKENEEARRHMMQMKRINKNKI	339	USER	zzzz310
745	my_seqs_16minnow_6_2ct540.5@PF05840.12	PF05840.12	my_seqs	MCLYPKLIKNRKYTSNKKNGGVIPAVTDIRTQLVAIGCGNCIECRKQKAREWQVRLQEDIKKYTNGKFITLTLNDKSIKELTEDVLKYTNEEIEKLKKQPSTPEINKKIQKQEDKQCGYGLDNEIATRAVRLFLERWRKKYTQSVRHWLVTELGHNGTENIHLHGVIWTDYLQDIEDIWTYGHIWKGKKVAKTISNPNGIENYVNAKTVNYIVKYITKIDEKHTQYKSKILTSPGIGDNYIKQENGNWKKNIYNNTKTNETYRASKGEKLALPIYYRNHIYTDEEKEKLWIMKLDKQERYVLGQKIDISKGEEEYYKALKEAQELNKELGYRDNKKDWEQTEYENMRREYIRKIRIERAGNR	362	USER	zzzz311
744	my_seqs_16minnow_6_2ct541.7@PF05840.12	PF05840.12	my_seqs	MCLYPKLIRNKKYTSNKKNRGVIPPVKDQRTKLVPIGCQNCIECRKQKARAWQVRLLEDIKTHKNGKFITLTFSNKSIKELNAEIDTLEGYERDNQIATLAMRRFLERWRKQYKKSLRHWMVTEIGHQGTENIHLHGIIWTNENLETVEKTWQYGFMWKGKKKQLNKNEYIYENYVNETTIGYITKYVTKIDELHKTYKSKILTSPGIGHNYTNTHDSKKNKFNESKTIETYRTTTGHKISLPIYWRNKIYNEEEREQLWLNKLNQQIRWVRGEKIDISKGEENYYKILKWHQQRNIELGFGNDQKDWSREQYEKERRYLKIKERIIKAEQNERLAGGAVNQKG	344	USER	zzzz312
743	my_seqs_16minnow_6_2ct542.4@PF05840.12	PF05840.12	my_seqs	MCLYPRFYKNRKYEKNKKNGGVIPAINDSRVLYVPVPCENCMECRKKKAREWQIRLQEDIKTNTDARFITFTLSNESIKELHQVLMQNPENWGLENFDLDNAIIKLALRRFNENYRRKFGKALRHWTVTELGHEGTENIHLHGIIWTPKRVVVKRGKGRGSKLIEVDAMDEIERLWGYGYVWKYKMVKGRPVNYVNNRTVNYITKYVSKRDDLYKHYKSKVLCSPGIGKGYTDSHDVKRNQFKPKGTNQTYKTESGHRVGLPKYWKNKIYSDDEKEELWLQALDRKEQWVCGIKVSTKNGNQELFKLIEEYRKKSNRLGYGNYLKDLEREQWEKMRRGKMQRARLEKARS	350	USER	zzzz313
742	my_seqs_16minnow_6_2ct543.4@PF01446.16	PF01446.16	my_seqs	MCLFPKLINNPKYRANKKNGGVIPPVLDERVTMVPIGCGKCIECMKKRAREWQVRLTEDIKEHKNGTFLTLTFSLESLKELYKEVNEKARRLDRNAEIVGYDLDNAVCTLAVRRFLKRWQKETKKSVRHWLVTEIGGKNTEHVHLHGIIYSKNVEMIKRKWGYGYVWAGYEGKETYVNETTIAYVVKYMTKTDEKHPNYKAIILTSPGIGNKYTERHDYKNNAYKPGETKEYYRNAKGTKLALPIYYRNKRYTEEEREKLWIEKLDKGERYVLGNKVDVKQGEEKYIRAVEEARKTNKELGYGGEEEEWDKVEYEKQLRRLKQMERIEKNKKKK	334	USER	zzzz314
741	my_seqs_16minnow_6_2ct545.6@PF05840.12	PF05840.12	my_seqs	MCLYPKLITNPKYKANKKNGGKIPAVLDERVRLVPIGCGKCMECRKQKAREWQVRLLEDIKTNKGGKFITLTFSNSSIKKLSEDIEADRIKKRTKLIEEYNETLDNNTYLEIEKLEEKKGYELDNAIATKAMRMFLERWRKKYKKSLRHWMITELGHNGTENIHLHGIIWTDNEKLKELDNIWQYGHVWKGKEINGQIQNYVNGQTVSYITKYVTKIDEKHKYYKGVILTSAGIGRNYTNTYDSTKNKFNDKNTIETYRTSSGHKIAMPIYWRNKIYSETEREKLWLIKLDKEERWVCGEKIKIKNGDETEYYKLLEHYRRLNRQLGYGDDKLNWERKAYEESRRTIMQRRRMSRAEREELAAMI	365	USER	zzzz315
740	my_seqs_16minnow_6_2ct547.6@PF05840.12	PF05840.12	my_seqs	MCLYTTMACNKRYTPTIKNRGIVPPVPRVYRKSEDGSIKTFEDTRITNVPIPCGKCMECRKKLKRNWQIRLFEELKHNETKAVFVTFTFNTKELSKLHAEVKEDYPKLQGYDIDNKIAKIAVRRYLERWRKSTKKSVRHWFVTELGHGEWEHLHLHGIIWTEKSENFIQDRWQYGNIWTSLTGKTKTGENGYVNEQTINYIVKYVSKIDKSHPNYKQLTLCSPGIGKAYIETTHAKQKHKYKEENTDLMYRKPNGRKSPIPTYYKRKLFDDDQRTELWRDMLDKQKMYIGGEEIDVSTYKGIEDYQKIREHYREINKEFGYGDNKINMLARLTENRRRNLIYFERTILRRKKRGQRTYEIESNLEKLTKSVSQYTGKGFKMKPIYELDLADDKELITLM…	438	USER	zzzz316
739	my_seqs_16minnow_6_2ct548.6@PF01446.16	PF01446.16	my_seqs	MCLYPRLMFNPKYKANKKNGGQVPPVKDKRVLYVPIQCNKCIECRKRISRQWKTRLEEEIRHNTNGKFVTLTFSNKSIAEICEMERYFTDGETGRRFKAKIGETEGYERDNAIATIAVRRFLERWRKKYKKSVRHWLVTEIGHNGTENIHLHGIIWTDDIKEITRIWQYGYVWEGKETVKGEIINYVNEKTIGYITKYITKTDEIHTTYQSIILTSAGMGMGYTTRYDATNNKYKEHGTREYYRTRTGHKMALPIYWRNKIYTEEEREKLWIEKLDKEERYVCGEKVDISKGEEEYNKLVEYYRTINKRMGYSDGYKNYDKEQYEKQRRAIMQETRIKAGRKKIHASGGVING	353	USER	zzzz317
738	my_seqs_16minnow_6_2ct549.5@PF05840.12	PF05840.12	my_seqs	MCLYPRIHRNRKYEKNAKNGGNIPTVQDSRTLHVPAGCGNCIECRKQYARNWQVRLMEDIKENKNGKFIALTFSNQAIKELSEGSIVRIDKKTKEKVTIPISELEGYEKDNAIAKLAVRRFLERWRKTYKKSVRHWLVTELGHKGTENIHLHGIIWTDESMDAVEKHWKYGFIWKGHKRLGKLINYVSEATVNYIVKYIHKVDFQHKTYKAKVLTSAGIGSNYTNTINSKANKYKEEKTDETYRTRSGHKIALPIYWRNKIYSEEERERLWIEKLDKQERWVRGVKIDISKSEKGYYNALETAREENIRLGYGSDKKMWKREHYERQRREALWTYRVQNAQ	341	USER	zzzz318
737	my_seqs_16minnow_6_2ct550.7@PF05840.12	PF05840.12	my_seqs	MCLYSKLIRNKRYQTTIKNGGLIPAVNDERQLYAPIKCRKCLECRKQRGRDWSIRLFEEVKQNKGGIFITLTFNKESYAKINSMSIEKKDKDGNEYTVNINDLEGYEKDNAIATKAVRLFTERYRKATGKQPRRWLVTELGHNGTERIHLHGIIWSKVSREKLKELWGYGFVWDGYNEIQGSVNYVNDTTIKYLTKYLTKIDTKHKNYTSIVLASKGIGGKYDGEFNIYKGEKTNESYTTGTGHKVALPSYYRNKIYSDDEKERLWTAKLDKNIRYVCGEIARTDKEYYELLEYHQKRANQLGYGCKNDWNRITAQEERKIYLQKRELGT	330	USER	zzzz319
736	my_seqs_16minnow_6_2ct551.4@PF05840.12	PF05840.12	my_seqs	MCLYPKLIKNPKYKNNPEAIRDLRTGFVPIACNNCKECYKKKATQWRIRLNEEIKNKDNGRGYFVTLTLSTESLQEIEKELPPEITGYNKDNGIVTYAVRHFLERWRKKYKKSLRHWFITELGHGETEHIHIHGLVWTKENFEKVRNIWKYGFVFPRERQISKNYVNAKTINYIIKYCTKLDTKHKYYKPIILTSNGIGANAKISEYEKIKDKYRNQQGYEMAMPMYYRNKIFTEEERENKWIEKLDKGKRWINGREVDNNNIKLINQLLKQAQEESEAKGYIGDKHNWEEKQHENEQRELLRQIRYKKVEKIFNLNLELPNNNHNFEGKLFIKTYNKI	339	USER	zzzz320
735	my_seqs_16minnow_6_2ct553.6@PF05840.12	PF05840.12	my_seqs	MCLYPKLIKNRKYIANKKNKGIIPEIKDQRVLWVPVGCQKCIECRKQKSRGWSVRLQEEIRTDKTGQFVTLTFSNEAIATLAPEIKGLTGYDLDNEIATLATRKFLENWRSKYKKSVKHWLVTELGHNGTENIHLHGIIFSKEKQEIIKKWKYGFVYIGDYVNEQTVNYITKYITKTDTVHTEYTPIVLTSPGIGGKYTERIDANNNKFKKKDTDETYKTRQGTKLNLPIYYRNKIYTEDEREELWLQKLNKEERWVCGEKVSIKNGDYTEYDKLVKWYRAKNARLKFGDDEINWDKIRYQNERRKLMTEKRIKNEIRATRSETLVGPTARRDGKP	336	USER	zzzz321
734	my_seqs_16minnow_6_2ct554.6@PF05840.12	PF05840.12	my_seqs	MGCVNSAPLNITTMKQRVIKQIMCLYPKLIRNRKYIPNKKNGGKPPEIKDPRTEFVAVGCGKCMECRRQKTREWQLRLNSEIEDNKNGQFVTLSFSDEAIYELQEIAKNENPKLEGYELDNKSATIAVRRFLERWRAETGKSVKHWLVTELGSKETERIHLHGIIFTDKPKLITEKWKYGFTYIGEFVNTKTIRYIAKYIHKQDKIHPNYTPVILTSPGIGSNYTKSRWAELNKFKGDKTQEYTYNRAGFRMAIPPYLRNKIYTDEEREQLWINKLDKMERYVNGIKVDVSKNMDEYYKVLEDQQMLNRKLGYGDNTKDWSKIRYEQQQRQLKNMQRITKLKEKENGNTRRIKGKNKKDN	360	USER	zzzz322
733	my_seqs_16minnow_6_2ct556.8@PF05840.12	PF05840.12	my_seqs	MCLYPTLANNPKYKANSKNGGNIPPVPHPGVRKVPIGCGECMECRKQKAREWQGRMLEDIKEHTNGKFITLTFSNESIQKLIKENKELQETKGYLLDNAIATRATRLFLERWRKEYKKSLRHWFITELGHKGTENIHIHGIVWTDEPMDKIRKHWDYGYMWPRPGCKQKNYVNARTVNYIIKYVTKVDEDHKYYKSQILTSPGIGANYVKRTDWKKNKYNGENTNEAYRTGTGHKIGMPIYWRNKIYSEEEREKLWIQKIEKKERWICGEKVDISKNEESYYRLLEHYREKNRQLGYGTGEKDWDRIEYEKSRREMQQAKRLEQKKETFSKIELKENETYIEIGKWREGFPFPDNDNPDANAPD	364	USER	zzzz323
732	my_seqs_16minnow_6_2ct557.6@PF05840.12	PF05840.12	my_seqs	MCLYPKLIENRKYKPNLKNGGNPPPIKDKRTAYVPVGCGKCMECLKQRSNNWRIRLMEEIREGEKGKFVTMTFEDKYLVQLEYKIHEQNKKKLGRLNAETRRKTKYIPVDGYELENDIATEAVRRFLERYRKKYGTSIKHWLVTELGQNNTERLHIHGIIWTNKNKAEIEKLWKYGNVNKRDKNWENNYCTEQTVNYIVKYVNKTDEKHKYYKPIILTSPGIGAAYIKRADARNNKYKGEETKETYTTRQGYNLALPTYYKNKIYKEEEKEQLWINLLNKEIRYVNGIKVDISQGEEDYENVLKHAREVNKTLGYGNDKVNWEEKKYERQRRNLHRWTRIEGIKRRKEKQRLRSGDMEGRKE	362	USER	zzzz324
731	my_seqs_16minnow_6_2ct560.5@PF05840.12	PF05840.12	my_seqs	MCLYPQYIRNPKFTINAKNGGNVPPVNDMRTMRIPITCGRCSECRKQKASAWMTRIIEEVRHDDQGTFVTFTFTDESILELRQWVLEKKNAKAEGYNLENEIAKRAVELWRERWRKETGKSPKHWLITELGHKNTERIHIHGIVWSQEKKKERDERLQRLWQYGRNNYYGRYMNERTGAYITKYMNKTDLQHPNYTPVILTSPGIGAEYCRTDRAELHRFRGRETRNYYVHRNGFKGTLPTYYKQKLYTDSERELLWIYSMDKNIAWVKGEKIEHLDTVEGLNNYMTALDYHRAHDKMLGYAGRWKSQGEIDYETEKRNELMRKRICKLKNEKYEYTPGKSSICEGDKKTNKSIWQFNSKEESERINRDIRQRFENFVYPEESEQSEYCREEIYERAMR…	426	USER	zzzz325
730	my_seqs_16minnow_6_2ct565.8@PF05840.12	PF05840.12	my_seqs	MCLYPKLIRNKKYTENKKNGGQLPPVVDERTLYVPIGCQNCIECRKKKAREWQVRLQEDIKETGKWIEKENGTKKWIEWGKPKFITLTFSNESIKELTKTITKENSSSPPEGYNMDNTIATKAIRLFLERWRKKYKKSLRHWLVTEIGHNGTENIHMHGIVWTNEPMEEVEKTWQYGYVWKGKKEKGQIINYVNSQTINYIIKYITKADEKHTTYKSIILTSPGIGGNYTKKTIGDWKKNIYKPEETNETYRTTNGNKIALPIYYRNKIYTEEEREKLWIEKLNKEERYVLGIKIDISEGDKEYKEAIEEARRKNIRLGYGTGKTDHNVELYEKERRKIMQLTRIEAAKKNANALK	356	USER	zzzz326
729	my_seqs_16minnow_6_2ct569.5@PF05840.12	PF05840.12	my_seqs	MCLYPRLIDNRKYKVTKKNGGNVPKKKDPRVSMVPVGCGKCIECRKQRGRGWSLRLQEEVRNNKNGHFITLTFSTEGLKEIAEKIHKIGPMEGYILDNEIATVAIREFLEKWRHRYGKSLKHWFITELGQTKTEHIHIHGIIWTRQKASKEQVKKAIGEQWNKGMIWVGDYCTEQTVNYVIKYVTKTDPLHKEYTPKVLTSPGIGAGYMERKDSKRNKYNGDKTKEEYVTRQGYKIAMPTYWRNKIYSEEEREQLWINRLEKKERYVMGTRIDISQGDKEYWATVEYARAKNARLGYGNDEKDWDRINYENQRRKLIQEKRIGKEANKE	329	USER	zzzz327
728	my_seqs_16minnow_6_2ct573.4@PF05840.12	PF05840.12	my_seqs	MERVFPPKGHKSSAWTDYVRSVDRYFGEAAHGSYRKALKSGEDYHSYFAVVEKGSKTGRLHIHVVHCFKTMPRDFTDPNLGVSVPYRREIVALKNFWTYGFSSPIAIRFNAMDSFAQVGWRWPVKLKEDSYVPVMSKPFAAIVSYVGKYLTKALADKEVGCIWRTRTSRNLGKTPLIQTLKKMPLKSRLIMLQNPRLKLKLSQSRLPRLLLRRLLLKSLPLSIFRALYLRALREPVRNLLKLYRDMIENPMLCNLPKCGNTRIRTFRLTAVYNFFQEATYSYGLSGCTYAAA	292	USER	zzzz328
727	my_seqs_16minnow_6_2ct574.6@PF05840.12	PF05840.12	my_seqs	MKCDWGFRVKNRRGEDFEVGCGRCPPCRQRKVDEWAFRLCQEEKRSLNAYFVTLTYDEKSVPISNNKFMTLLKKEVTQKYLYDYSVEPKRRYRNPDFDSKYVKRDLPSFFKRLRKTQAMKIKYYAVGEYGSQTKRPHYHMILYNIEAPMFAIGKDDRGNMKYKCRVIEKCWPFGSVDIGGLSSDSAAYCAKYVSKPRRIPEHKRDDRVKEFSIMSKGLGDNYISDAILKYHQDDLSRNYLTLPGGYMKALPRYYRVRLYDEDQRLVQNRKIVKEVKVLDMKRRDDFARKYGEDFDFDSYDLEMKKGRLRAFWKNLKKRE	319	USER	zzzz329
726	my_seqs_16minnow_6_2ct576.4@PF05840.12	PF05840.12	my_seqs	MCLYPKLIENRKYKPNKKNGGQPPPIKDIRTNFVPIGCGKCMECRKQKSMKWSIRLQEEIRTDKTGEFVTLSFSDEQLNELDKEVQRLNRDIHNKLNSETGKRTKFIEITGYELENEIAKLAVRRFLERWRKIHKTSIKHWLVTELGHVATERIHIHGLIFGNPNEIRKLWKYGNIWIGDYVNESTINYIVKYIYKTDKDHKYYSPVILTSAGIGSNYINRLDSKTNKFKGEDTKDTYTTRQGVKIALPEYYKYKIYSEQEKEQLWLQTLNKEVRYINGLKIDISNGDEEYQTILKEAQKLNTILGYGDDKINYNEKAYEQQRRNIQRYTRKQKEFNKGKGID	343	USER	zzzz330
725	my_seqs_16minnow_6_2ct584.5@PF05840.12	PF05840.12	my_seqs	MCLYPKLIKNPKYKNNPEAIRDLRTGFVPIACNNCKECYKKKATQWRIRLNEEIKNKDNGRGYFVTLTLSTESLQEIEKELPPEITGYNKDNGIVTYAVRHFLERWRKKFKKSLRHWFITELGHGETEHIHIHGLIWTKENFEEVRNIWKYGFVYPRKYQISKNYVNAKTINYIIKYCTKLDTKHKYYKPIILTSNGIGANAKISDYEKNKDKYRNPQGYEMAMPMYYRNKIYTEEERENKWIEKLDKGKRWINGREVDNNNIKLINKLLKQAQEESEAKGYIGDKHNWEEKQHENEQRELLREIRYKKVEKIFNLNLEIPNNEHNFEGKLFIKT	335	USER	zzzz331
724	my_seqs_16minnow_6_2ct585.5@PF05840.12	PF05840.12	my_seqs	MCLYPKLIKNPKYKATKKNGGIIPAVLDNRVKYVPIGCQRCMECRKKKAREWQLRLSEDIKKQTNGKFITLTFSNEDYKKIHAITPNELTPYDKDNYIATYATRHFLERWRKKYKKSLRHWLVTELGHNGTHNIHLHGIIWTNENYNTIAQYWKYGHIWPDKDNYKKTYVNLRTVNYIIKYVSKMDNDHKHYNSIILTSPGIGNNYTNTYNSRLNKYNGQNTIETYRTTTGHKINMPIYWRNKIYSEKEREELWLLKLDKQERWIMKEKVSVKNGEEEYNKLLKWYQQQNIKLGYQTDTINWTEKKYEQEKRQLMQQARIKNKKSKQATNKKIDKNKKKNTITINNRKWQITEFGLTTIE	360	USER	zzzz332
723	my_seqs_16minnow_6_2ct586.6@PF05840.12	PF05840.12	my_seqs	MCLYPKLIKNPKYKPNKKNGGQVPPVNDERVKYVPIGCQNCIECRKQKAREWQIRLQEDIKTNTNAKFITLTFNNESISKIYEILKTNAKTNKIEEPTDYQLDNEAATWATRHFLERWRKKYKKSLRHWLVTELGHNGTENIHMHGIIWTNESMDEVEKQWQYGWIWKGKKINDKIENYVNAKTINYIIKYVNKTDEKHPSYKSIILTSPGIGNNYTNTKDSRKNKYNENKTIETYRTTTGHKMAMPIYYRNKIYTEEEKEKLWINKIDKQERYVLGEKISVKNGEEKYTKALEGAQKINKQLGYGDNIKNWKQEQYEKERRQLKQTERIQKAKQ	335	USER	zzzz333
722	my_seqs_16minnow_6_2ct587.4@PF05840.12	PF05840.12	my_seqs	MCLYPKLIPNRKYLPNKKNKGIVPQCKDERVKIVAVGCGNCMECRKQRKMQWQVRLTEEQRVNKTGKFVTLSFTDESLIKLENEINKDNKLEGYTLDNATATLAIRRFLERWRKSNKKSVKHWLVTELGQNNTERLHIHGIIFTDNVKEIEKRWQYGNVWIGSYVSEITVNYIVKYISKTDPKHLYYKPLVLCSPGIGNKYTERTKENQYRADKTREHYTTRQGVKIALPKYYRNKIYTDEEKEQLWINLLDKKTRYVDGIKIDVSETDEHYWSLLKTKQRENQVLGYGSDKKDWDRVKYERDLRNLKKLHRIAKEMKNTPDKPGERPKKARKAGQSPANPTKESRKNRDKIEAQNSRIAQENEERRKYQEVIQKQRNSF	380	USER	zzzz334
721	my_seqs_16minnow_6_2ct588.5@PF05840.12	PF05840.12	my_seqs	MEYVKESIVISGKYVEHTFYEKNTQKSNRISASRKIQPRFLSEFNHRRANNLSSCKRQFVRYVLSGISTYGPPLFITLTFNQNIYSVRDANYFLRTFFARLRKANMASSYLFVPEFQKSGRVHYHGFLWGFDQSYGDCYKGKNLIQIGKERSTRYFADLWKEGFVDVRITDGDKRLVYYLAKYFVKAYDDKRLSGVRLFYRSRNIPKPFKYSGSMVDQLVDLPTTNATFESSSEFNSKWFGKVVKINYIKL	251	USER	zzzz335
720	my_seqs_16minnow_6_2ct589.6@PF05840.12	PF05840.12	my_seqs	MAKNDRKIIYEILQIMCLYPKLIKNPKYKMNKKNGGNIPPVNDERVTMVPIGCQTCIECRGQKARDWNVRLQEDIKDNTNGQYWVLTYSTESIKKLTTEIQRYKDKKGKPYEGYKLDNAIAIRSMRYFLERWRKKYGKSLRHWAVTELGGKHTEHLHINIIAWTDEQEIVESIWQYGHVWRGYISKKTGKIERTYVTAKTVNYIVKYVSKVDAKHINYQAIVLTSPGIGRRYIEHGDARKNKYNEKKTEERYRAPNGAKMAIPIYWRNKIYTDEEREKLWLQKLDKNERWVCGELVAADDEKTYNNVLDYHRRRTKQIGYPDPDERWNKREYEEARRILIQRNRIQEKE	349	USER	zzzz336
719	my_seqs_16minnow_6_2ct590.7@PF05840.12	PF05840.12	my_seqs	MCLYPRLIDNRKYKPNKKNGGNPPPIIDNRTRLVPIGCGKCIECRKQRTNNWRIRLMEDIRHNENAKFVTMTFSDESLIELENEIHRIAIKQIETLNKEHNKNIKYKPITGYELENEIATLSVRRFLERYRKQHKTSIRHWLVTELGETNTERLHIHGIIWTTKAKSHIEKLWKYGTLNRNQKQWENNYVTERTVNYIVKYINKVDIKHKYYNPIILCSSGIGKEYFKRTDYLKNKYNGENTKETYTTRQGYKLALPTYYRNKIYNEKEKEQLWINLLNKEIRYVNGIKVDISKGEEDYEAVREHMRQENKILGFGDDKQNWNEKEYEKQRRNIQRWTRIQKIKEQIQKQQGNKNYNTGAKS	362	USER	zzzz337
718	my_seqs_16minnow_6_2ct594.4@PF05840.12	PF05840.12	my_seqs	MCLYPKLIRNKKFEPNKKNRGNVVKPTDPRVLYVPIGCQKCEECKKQIARGWRVRLNEEIKTNEATFITLTFNEESLVKLQTETGAETPRENIIATTAVRKFLERYRYKYRTSVKHWLTTELGSKNNKHKGTERIHLHGFIFKKINNEELTKIWGYGYTHTGTYVNERTVNYVIKYVTKTDPEHPNYINKILCSKGIGKRYIKSWNAEQNRYKIEETRETYKTPGGLEISLPIYYRNKIYTDEERQRLWIEKLNKNERYILGRKYITKTTEQMKIYLEDLKHFQKENSQKGYGNRDWKTEKYEEEINKIKNHRPD	315	USER	zzzz338
717	my_seqs_16minnow_6_2ct595.5@PF05840.12	PF05840.12	my_seqs	MCLYPRLIENRKYKPNKKNGGNAPPVKDHRTTFVPIGCQKCIECKNQKAREWQTRLQEDIKENRNGKFITLTYSEEALKAFSDTITRFKEIEYYKLQNEIATMSMRLFLERWRKKYKKSIRHWMVTEIGGKHTERLHMHGIMWTDHPEEIEKIWQYGWVWRGYEEEEKGKYKNYVNAKTINYIIKYVTKSDEKHPDYKSIILTSPGIGDRYTKKGDYRNNKYNGKETDETYRLPTGQKMALPIYWRNKIYTDEEKEKLWLKKLDDGYRYICGEKVHGVERETYYNLLDYHRRRSRKLGYQEPELKWSKAGYEEMQRRMNEEQQLIKSGQIQANAPSAGS	339	USER	zzzz339
716	my_seqs_16minnow_6_2ct596.5@PF05840.12	PF05840.12	my_seqs	MCLYPRLIFNPKYKRNKKNGGIIPPVLDKRVQYVPIGCQTCIECRKQKAREWQLRLAEDIKEFKNGKFITLTFSTESLRKLYDSYEELRSKKGYDLDNAIVTKATRLFLERWRKEKGKSVRHWLVSELGDGTTEHVHLHGIIWTDDVNDIEKHWQYGNVWKGYEVKGKFENYVNGRTVNYITKYVHKVDELHLNYKPVILCSPGIGRYYEKSGVIKENKYKGEKTNEAYRSSTGHRIGMPIYWRNKIYSEKERELLWLMKLDKNERFVCGERIIIRSKKDEDQYYKLVQYYRNKTERLGYPKPEFIWKKKQYEEQRREMMHDRRIRRIEVNEWGEEVQP	339	USER	zzzz340
715	my_seqs_16minnow_6_2ct602.4@PF05840.12	PF05840.12	my_seqs	MCLYPRLIKNPKYKSNKKNGGNIPQLKDDRVKMVPIGCGNCLECRKQKAREWQIRLLEDIKTNKNGKFITLTYTNKSIKELINQKPTKNWPSMQGLEGYDLDNEIATRSVRLFLERWRKKYKKSLRHWLVTEIGHNGTENIHLHGIIWTNENSKTISEIWQYGYVWAGKEHLGNIINYVNEKTINYITKYINKIDEKHKHYKSKILTSPGIGNNYTKTTNSKSNKYNHKKTNETYRTNTGHKISLPIYWRNKIYTEQEREQLWLQKLDKEERWIRGEKIKINQGTEQYFNILKWHQKLNEEIGYGTDQINWQKKQYEQQIRITKQKERINKTWKNIK	337	USER	zzzz341
714	my_seqs_16minnow_6_2ct604.5@PF05840.12	PF05840.12	my_seqs	MCLYPKLIINRKYLPNKKNKGKIPDITDPRVKYVPIGCGKCMECMKQKSMKWSIRLQEEIRHKKDGNFVTLSFSEESLNELDSEVQRINKAEHENVNKQTDRNTKYIEIEGYELENKMATLAVRRFLERWRKENKTSVRHWLVTELGHNNTERIHIHGIIFGDRKQIQKHWKYGNIWIGDYVNEQTVNYIVKYVNKQDTDHKYYNPIILCSSGIGNKYTERQDSKLNKYQGSDTKETYTTRQGKKIALPTYYRNKIYSDEEREKLWLNTLDKETRYINGIKIDVSKGEEDYENTLKYQRELNKKLGYGSRDINEKDKEYERQQRNIRRYTRQQKNKK	337	USER	zzzz342
713	my_seqs_16minnow_6_2ct605.4@PF05840.12	PF05840.12	my_seqs	MCLYPKIIRNRKYTSNKKNNGIVPEIKDKRTEYVPVGCGKCMECKKQKSRAWAVRLQEEIKENKNGVMVTLTFTDEEIVRIEKEIPQGLEPYENDNEVATWAVRHFLERWRKKYNKSVKHWLVTELGHQGTERIHLHGIIFTDHKEEIQEKWKHGYVWMGKYVNMKTVNYIIKYVNKIDKDHPGYNQKVLCSPGIGSRYIGTRNQERNKYNDKKTLETYVTREGVQLNLPIYYRNKIYSDEERERLWIKKLDEGIRYVNGIKCTTDEQYYAVLKYQQARNVRLGYGTDEIEWSKKKYERDRRNLIKQERIKKIKENETQQQETAYKYDLSTIRPLWA	337	USER	zzzz343
712	my_seqs_16minnow_6_2ct606.8@PF01446.16	PF01446.16	my_seqs	MCLYPKLIKNRKYIPNIKNGGHPPIPTDERVLWVPVGCTKCMECKKQKARAWSIRLQEEIRNKEPKQFVTLTFSNESIQQLSKEIEGIDGYERDNELATIAVRRFLERWRKKYKTSVKHWLVTELGHNGTENIHMHGIIWTDQKEDIKQIWGYGYVYIGDYVNDKTVNYCVKYSTKTDLQHKEYNAKILTSPGIGKNYTNRIDAGLNRYKINGETNETYKTRQGQKINLPIYWRNKIYTEDQREQLWLQKLDKKERWVDGQRVDIAKGEETYYKLLESARRKNKRLGYGTDEENWQRKYYEITRRNLLHRKRTETLETLHT	321	USER	zzzz344
711	my_seqs_16minnow_6_2ct610.7@PF05840.12	PF05840.12	my_seqs	MKCLYPITMRNPHYKPNKTNEGFPPTAWDERLEYIQVPCGNCEPCRKKKANEYRIKLIEKLKSKQGKMFTMKFSEEAIDSLEADLMKKNLPYDANAVAKLAWRRFSDRFKKKYGHRPDHWMVPELGQNNTERLHLHGLIFEQVLNTMKADKLKKEIEQLWKYGFVDIGYKCDEQTINYIVKYVSKQDEKHPYFRGEVISTPGHGKTYLKRFDAQQNRFKGNKGDETVQTYRTIKGLKLALPQYLRRKIWTGYEREQLRILSEDKQEIYIQGHKYDLTIPGMSEAAMTDLEWYRQENIRKGYGTNDPKYKKQPYSARGGRIMNNPNNKRNDKRA	333	USER	zzzz345
710	my_seqs_16minnow_6_2ct612.5@PF05840.12	PF05840.12	my_seqs	MACYKPITCWKPPDGGPVVFRELKDHREIQIACGQCIGCRIRKREAWALRCYCESKMHLHNQFLTLTYDDEHLPSDGSLNYKHFQLFMRYMRRRYGQFRFFMCGEYGEKEGRPHYHALLFGLDIPDLVKSNSVYSEFDTFGSESVRELWGKGDISIGAVNYATARYCAVYTTKKITGELAEEHYMRVSRSTGEITHLVPEFARMSLKPGIGMRWLERYWQDIYLRGNCGYPVDGKLKPIPRYFDIMMKDIAPDVLDQESYRRYLAAVERCEDSTLERLAVREEVAIAKSKFEADRSNYAL	300	USER	zzzz346
709	my_seqs_16minnow_6_2ct613.3@PF05840.12	PF05840.12	my_seqs	MCAKPIWLAERQLHVPCGICLLCRNRYARDWAIRCWHEAQLHECDCPGLQCVDPLRHRGNCFGTLTYDDDSLPKHGSLDKVAAQLFMKRLRKGIDPIKVKFYLSGEYGEKNKRPHYHFMLFGYRLERGVEVPSDSGFPVYESPELSEYWKHGIVTVGDVSFASACYVTQYIVNKKDKIARTYKKWNCDPDTGELNEIEVEFSHMSRGGSRKGSSGIGAGWYDKFRPEVERNDNVVVDGNEVMPPRYYDYLLVKRDLAAARVVKLRRERKSKMYNKVGREWSQEYYEDRRDRMAREVIARRELEELERRL	309	USER	zzzz347
708	my_seqs_16minnow_6_2ct615.3@PF05840.12	PF05840.12	my_seqs	MACLYPLKGWRSYAVNPKTGKRSIVFGKGKMARRNPDDAVQVPCGRCIDCRLEHSRQWAIRCEKEAELYDQNCVITLTYDSENLPKNGSIEIADAQKFMKRLREKYEGKVIRSFGCAEYGEKGGRPHYHLLLFNHEFEDKKLDLSMQGLQPEHKYWTSEILDQLWGMGRTQIMPLNFETAAYVARYVMKKIKSPGHTRTKQDPGSLKFVAIADERSICVSRRPGVAADWYKRYKHGLCNSHTIFSRGRSMATPTFFNRRMEIDDPSLYQKIKYQKKLDLKKYQDNLRIQHLNGNHINSAKLGYRPRIEAETICKRATINHLKRGLR	326	USER	zzzz348
707	my_seqs_16minnow_6_2ct617.3@PF05840.12	PF05840.12	my_seqs	MACYHPLGAWRGKLNDKAKRPVVFSSHEGAPGSALLIPCGRCLGCKLERARQWALRAMHESKLHRDNSFVTVTYDDGSLPAGGSLRLRDHQLFLKRLRERLDFPVRFMMCGEYGETTFRPHYHYLLFGYYPGDARLYSKSGGNPVYTSEFLDDIWGFGSVKVGAVTFDSAGYVARYTMKKLGDNKLSQVYDGLEPEFFLMSRRPGIGSDWAKLFYREWYQGDYSVVNGRKVKPPKYYDSLVEKLSPSTLHSVKECRKSARSQDEIDSDYSRGYVREEVKRSAVSTLSRKAL	291	USER	zzzz349
706	my_seqs_16minnow_6_2ct618.5@PF05840.12	PF05840.12	my_seqs	MKCFDQINQKLKKPIWSKYDNKFVESVLLPCGKCAACINRKIMEWTFRLDNERINSRCTYFVTLTYNNYHVPINRYGKMELKKRDVQDFLKRLRYDKDNDPEYGILENYYFQCDLKSEQIKYYAVGEYGTERKRPHYHLVMYNTSKKSIIDNWQYGEVDIQIPRSSQAIGYVIKYLSKRIYNITPKNVTPEFSLMSKGIGLGYIEKMKSWHKKNLDVVYTSNERQTKIPMSRFYRSKLFTDKEREDQIPIIKNNIEENEKQRIKELGSEKAYTSKIESERRAFLKRTKSKNRPRKDPGSNQ	301	USER	zzzz350
705	my_seqs_16minnow_6_2ct619.1@PF05840.12	PF05840.12	my_seqs	MEVVNEMPCYKPIKGYKCSDGTVVFSQLARHDIIGDIKLPCAQCIGCRLDRAREWSVRCMHEAKMHDENCFITLTYKEENLPANNSLQYSDFQKFLKRLRHHSGPIRYFMCGEYGEQLNRPHYHAIIFGYQFPDRYYWGKSPAGYPLYRSELLETLWDNGISLIGSVTRESAGYVARYCLKKINGDLAAAHYGDREPEFAHMSLKPGIGASFFKKYTSDILPNDYVVSDGWKIPVPKYYDKLYKGDLEDVKWEREKYAKKFAANNTPERLEAREVVQHAKIKSLQRNKI	289	USER	zzzz351
704	my_seqs_16minnow_6_2ct624.2@PF05840.12	PF05840.12	my_seqs	MACVKPLKAFWRSRSRDAITFDINKSATRIPFVLPCGRCIGCRMEKARQWGLRCLHEKKLWPHNQYVTLTYNDESLPPGGSVCLRDIQLFMKRLRKAKGSCKENPLRFFLGAEYGDENKRPHYHALLFNCNFPDKLFWTYNKRGEPLYTSRELSDLWGAGHCSLGEVTFDSAVYCAKYAMKKINITEHSSDAARAEYDRRYVVYDEFGEVFERSPEFAVMSRRPGIGSGYYDRFGSEVRTHDNVVVNGREVRPPRFYDSRSEQCDSERFAVVKAQRKAAAVKDSVKADNTPERLRVKEVLLNAAMKKKERSL	312	USER	zzzz352
703	my_seqs_16minnow_6_2ct625.8@PF05840.12	PF05840.12	my_seqs	MPCFRPLTGYPGGPGHPGIVFSRQLSYEGSRPLLIPCGRCIGCRIARSRDWATRMIHESKLHPANSFVTLTYDDAHLPADGSISKRALQLFLKRLRIGLDRGSGPSVRYFGCGEYGDRRGRPHYHVIVFGWFPGDARTWRQQRGNVTYRSAFLETVWPFGQVETGRVTPQSCGYVARYAMKKLTGDRADEFYRRPHPLTGVVYQVMPEFGLMSRRPGLGSGWFDKYHMDAFPSDFLIVDGKKRNVPSFYKKKLAGIEAVRLLQERRKAARTPQRLANSTDARLTAREGVATLREAQLKRDLE	302	USER	zzzz353
702	my_seqs_16minnow_6_2ct626.5@PF05840.12	PF05840.12	my_seqs	MACYKPIVAWKPLEGGALHFSEKKGCREINIACGQCIGCRIAKRDAWAFRCYAESKLHSRNAFVTFTYDDAHLPQYGSLQYRDIQLLHKRMRQKFGPFRFFVCGEYGDKADRPHYHALYFGLSFPDAVKSNSMYAKCDLFQSEMLSDCWGKGQVSIGEVTYESARYCAVYTTKKVSGDLAESHYSRVSPVTGEIYQLEPEFARMSLKPGIGYDWLIKYAPEVLTWGGCHVNNRIQSIPTFFKDKLELLHDDDFQAMKMRLESKVDYSNNSPSRLAVREECAIAKQRFNSERNPNAL	296	USER	zzzz354
701	my_seqs_16minnow_6_2ct627.5@PF05840.12	PF05840.12	my_seqs	MSLACGRCDGCRSERSREWAVRMMHEARYHEVSSFVTFTYRPECIPADLSLDYSDFQGFMRRLRRERMKEWHPPQVLPVTRFFMCGEYGSKKDRPHYHAALFGVDFSGDRKPWKKSGAGFQLYISARLDRLWGRGSCFIGDLSAESAAYMARYTLKKTSLDDPAYESVNRVTGEIFPRKLEFCHMSLKPGIGARWFDEFKSDCFPHDRVVVKGRVQKPPRYYFKRLKQSDPDMHEAIVQDRILAGRARFEDTTVERLAVREVVHKARIAFYKRS	274	USER	zzzz355
700	my_seqs_16minnow_6_2ct628.4@PF05840.12	PF05840.12	my_seqs	MPCYHPLPAWYSKERNASGKRAIVFKIAEAYTDRPLSLPCGRCIGCRLEYARQWAVRCMHEASLWDSNCFLTLTYSDAYLPQNGSLRPRDVVLFLKRLRKQYGAGIRFFQCGEYGEQLARPHHHMLLFNHRFGDAVRVRDSVGTNGTGDALYSSAELSRLWPWGFAGIGEVTFQSAGYVARYSLKKVRGPDADWHYSGRVPEYLTMSRRPGIGSTWIHRFAADVYPSDELIVNGKVTRPPRYYDNAMTKFRPEAIVKSYLDKQMLSRIKTRRRGRAYGDPDSTGKRLLVREAVKVSAVKFLSRKFEGSDDS	311	USER	zzzz356
699	my_seqs_16minnow_6_2ct630.4@PF05840.12	PF05840.12	my_seqs	MDKANQWGLRCLHEKKMWKWNFFATLTYDDESLPPGGTLCLRDVQLFMKKLRFAKNSTVENPVRFFLAGEYGDVNKRPHYHALLFNCPFTDLVRWSSGKRGEPLYTSRELSELWGKGHCSLGEVTYESAVYCAKYGLKKLKVNADSPPAIREEYERRYVVYDADGVVYERVPEFAVMSRRPGIGADYYNKYGKEVRDHDSVVVSGRKVRPPRFYDGRSEVVDPERFEELKAARKREAVKEVNKADNTPERLRVKEEILKAAEKRKERNL	269	USER	zzzz357
698	my_seqs_16minnow_6_2ct632.4@PF05840.12	PF05840.12	my_seqs	MASVIVACFYPVTAFKTAQGAVVFAERGDVVGTLVLPCGKCVGCRLERARQWGIRVMHEASQYEANCFVTLTYDDAHLPFRNSLDYRDFQLFVRRLRKCRDYSVRYFACGEYGGELGRPHYHAALFNEGFLNDRKPWRVTPGGHKVFRSATLDRLWGKGFAEIGSLNVSSARYIARYALKKVTGDLAPDHYRRVTEDGEVYYLAPELLHMSLKPGIGSRWFDRYAGSDVLHRDGVVVDGRVESLPRFYDKLWMRREADSFDDAKAQRIVKALSVADDNTDARLRVKEAIVKARLRFYKRDLK	302	USER	zzzz358
697	my_seqs_16minnow_6_2ct633.3@PF05840.12	PF05840.12	my_seqs	MCGEYGGLVGRPHYHACLFGVDFDDKVHFSRSADGSAIYTSKTLDGIWKKGFCTVGQLNFLTAAYVARYVMKKVTGDLALAHYVDPLTGVIRSSEFNHMSLKPGIGAMWFSKFKSDVFPHDRVVVNGQVMKPPKYYDRLLSKLDGLSFEEIQFLRYEKFSTLESRADSTPERLKVREVVTKARLAFKKRSL	191	USER	zzzz359
696	my_seqs_16minnow_6_2ct634.3@PF05840.12	PF05840.12	my_seqs	MPCFHPVKCWRYTLPCGPNLNRPIVHAQDFEHAMSKRQYPVPLAETVRPCSQCVGCRLEKARQTAMRCVHEASLHSQNCFLTLTYCEGSLPSDRSITYEHMRDFWKRFRDRFDYPKIKYYSAGEYGTKFFRPHYHACLFGFDFPDKFYYKTSEAGSKLYASPLLDEIWGKGNCDIGDVTFESAAYVARYTLSKRYGNDADNYYSRLGVRPEDSWCSQGLGKEWFERYSGDCYPKDWVTLRGMKMRPPKYYDNLLLKYDPELLADLKASREAVGKLNKSGINFDIRHEFEYVSRTCPVDGVTREGYVPVRKAVSELVLDASLRSGRVDFER	330	USER	zzzz360
695	my_seqs_16minnow_6_2ct635.5@PF05840.12	PF05840.12	my_seqs	MPCYHPLPGWRSATLSDTGKRPVTFRMNEGDGTRMEIPCGQCMGCRVEKGRQWALRLTHESRFHRNSAFITLTYDDAHLPPGGSLRPEDWVLFMKRLRFHHQDELRFFQCGEYGETTQRPHHHALLFGWWPDDGVRLNRYSTGTPLWDSKQLRNLWGHGNISVGLVTPETTNYVAGYVTKKLTGPAATEAYGDRVPPYATMSRRPGIGRLAIETWGPVWYRDDAITLPGGTQVRPPRYYDQVMGRLDSDALAHVQMLRDQEKGPWWKKRTEAPVKEANAKSRRSTFRKREPQ	292	USER	zzzz361
694	my_seqs_16minnow_6_2ct638.6@PF05840.12	PF05840.12	my_seqs	MPCYHPVKAFQCADGSVVFSDSFRRHDIRRCLDLPCGQCVGCRLERSRQWALRCLHESKMHKRNCFVTLTYDDAHLPSDLSLDYRHFQLFMKRLRREKGKVRFYMCGEYGEKLGRPHYHALLFGIDFDDKVVISGGKGYKLYRSATLERLWPYGFSSIGEVTFKSAAYCARYIMKKVTGDAAKSHYSGLDLATGEVVSRTPEFNHMSLKPGIGATFADKFRSDVYPSDQCVVNGKPSKPPRYYDNRLKKVDPDLHEEILYKRELDMRKRYEDNTNSRLQVKEQVTKARVEMYKRNKL	297	USER	zzzz362
693	my_seqs_16minnow_6_2ct639.7@PF05840.12	PF05840.12	my_seqs	MCKQPYTVRKEYSSGFRSIPVPCNKCPECISKRVAEWKWRMEQEFKVSTSPLFITLTYNQQSVPRADIDISGVQRSFKVLNPKHLTDYLKLLRFHWDKQSEAKIRYFAVGEYGSKKGRPHYHIILMNCDDVRLICDTWKYGRVDISPVRSIDSVGYCLGYLKKKCKFVPPNHPQFSSKSRGLGRNYINAETISYHNRRLENCTVDLNNGRTIHLPKFMKDKLYTETNRLHLTHYLQTVADKALDEKVLAQVRATGKTEEQVRKEFYVEPFIEKKPKIFPTVF	282	USER	zzzz363
692	my_seqs_16minnow_6_2ct640.3@PF05840.12	PF05840.12	my_seqs	MHEENSFLTLTYSDENLPADGSLNYRHFQLFMKRLRKEYGPVRFFMCGEYGELTKRPHYHAILFGRDFPDKVYHGKSPGGYDMFKSQSLDDLWALGYCTVGQVTKQSAGYVARYCMKKVTGDRAEDHYNGREPEFAHMSLKPGIGASFFDKFVKDMLPCDYVIHDGWKIPVPKYYEKLYKGEDIEDIKYRREVYSRRFKENNTDERLKVREEVAEARVKMLRRSAVE	227	USER	zzzz364
691	my_seqs_16minnow_6_2ct642.1@PF05840.12	PF05840.12	my_seqs	METVMPCYSPAKAFKCADGSIVFSQLKRHGDIVGDIKVPCGQCIGCRIDRAQQWAIRCLHEAKVWQENCFVTLTYTDSDLPADGGLCYRDFQLFMKRLRKELGPLRFFMCGEYGEQTFRPHYHAILFGIDFPDKVYRGKSATGYPVYESELLEKCWQKGRCEIGSVSKESAGYVARYCMKKVTGDLAELRYGNKEPEFCRMSLKPGIGSEFFFKYQGDILPNDYIVMDGFKAPVPKYYDKLYVKNGGDLEEVQYQRELCAMQFRDNQTPERLAVRREVTERKLKMLNRGKVE	292	USER	zzzz365
690	my_seqs_16minnow_6_2ct644.7@PF05840.12	PF05840.12	my_seqs	MPCYFPLTAYQCLDRSIVFVERSFHDTVRTLQLPCGQCVGCRLERSRQWAVRCLHEASLHEHNCFITLTYADESLPAGNSLVYRDFQLFLKRLRRRVKRKVSFYMCGEYGEQFGRPHFHACLFGYDFPDRVYFRTGESGEKLYQSTMLSSLWSSGFSSLGDVTFESAAYVARYVMKKVTGRLADEHYRTVDVSTGEIFDRTPEFCHMSLKPGIGARWLERFRSDVYPEGKVVVRGVKCNPPRFYDKKFKELDEGGYELLRREREFDARKRVDDNTPERLVVKSIVAEARIAALKRTI	297	USER	zzzz366
689	my_seqs_16minnow_6_2ct645.6@PF05840.12	PF05840.12	my_seqs	MEKARQWGLRCLHEKKMHAHNAYVTLTYNDECLPPGGTLVVRDVQLFMKRLRKSREPEKVRFFCGGEYGDANKRPHYHALLFNCRFPDARLWTQNKRGESLYVSDELAALWGLGHCSIGEVTFDSAVYCAKYALKKVNGELSGQHYEVIDGDGVVFDRVPEFAIMSRRPGIGAGYYDKYGAEVRNLDSVVVEGREVRPPRYYDVRSERIEPDKYVFFKRKRKRLAVLNRFDNTSERLRVKERLMEIAAEKKERSL	255	USER	zzzz367
688	my_seqs_16minnow_6_2ct646.5@PF05840.12	PF05840.12	my_seqs	MPCYHPLSGWYSKDKNESGKRSIVFNLQSGYKDKPLQVPCGRCIGCRLEKARQWAVRCTHEASLYDRNCFLTLTYNEDSCPESLVPKHFVDFMKRLRHRYGPGIRFFHCGEYGEKFGRPHHHTLLFNHDFDDKRELRGNGPTKLWESSSLAELWPYGFSSVGRVTFESAGYIARYSLKKVVGPGAADWYMGRVPEYLTMSRRPGIGKGWIERFRKDVYPSDEMVINGVATRPPRYYDDYLDGVAPNTLARLKRRRARKAAADPNGTGKRLLVREVVREARVKFLSRDIEG	290	USER	zzzz368
687	my_seqs_16minnow_6_2ct647.3@PF05840.12	PF05840.12	my_seqs	MACANPLRAFKTALGDVIFVERGDIVGELLLPCGRCTGCRLERSRQWAVRCMHEASLHKKNCFLTLTFDSEHCPRDMSLNYRVFQLFMKRFRKIVSPVPLRFYMCGEYGELFGRPHYHALIFGYDFPDKAYYSKSGAGETVYISDLLSKLWPFGMATIGECTFNSAAYVSRYIMKKVTGDAAVDHYRYVDLETGEIYQRLPEFNCMSRKPGIGTGWYRRYSGDVFPRDYVVARSRPSKPPRFYDKLLKRADPDMYDAVKAQRELDGYSRREDNLPARLAVKEAVAQARVKFYKRSVE	297	USER	zzzz369
686	my_seqs_16minnow_6_2ct648.4@PF05840.12	PF05840.12	my_seqs	MCTSPLLAWQRDNGEVVFSERGAIFRELSLPCGQCMECRLARSRKWAIRCMHEARLSPHNVFATLTYNEQHLPARGQLVYRDFQLFMKRLIKAYGPTRFYMCGEYGGRFGRPHYHALLFGLELRDRVYWKAGSSGFDIYVSPRLSSLWSLGDCFVGDVTFQSAAYVARYCVQKVTGFNAKYYYAREDSEGSYFLQPEFNRMSLRPGIGRGFYERFKSDIYPHDYVIDGGRKLRPPRFYDRLFGKESPLEFERIQFEREREGRSRYLDSTPERLAVRDEVVRARARLLIRNGDA	293	USER	zzzz370
685	my_seqs_16minnow_6_2ct649.4@PF05840.12	PF05840.12	my_seqs	MPCYHPLPAWYGKERNASGKRPLVFSLAEAFKDRPVSLPCGRCIGCRLEYARQWAVRCMHEASLWDSNRFVTLTYEESKLPKVGDVATLRPRDMVLFLKRLRKRYGTGIRFFQCGEYGEELSRPHHHALLFNCSFSDERLHSGSGEAKLYVSDELSKLWGHGFAVIGDVTFESAGYVARYSLKKVRGFHADKHYGGRVPEYLTMSRRPGVGHSWIHRFAADVYPSDELVVNGHITKPPRYYDDVVAKLRPGMLDRIKRKRRAAGYNDADLTNPKANGTGKRLLVREVVKDSATSFLSRKYEVDNGS	306	USER	zzzz371
684	my_seqs_16minnow_6_2ct650.4@PF05840.12	PF05840.12	my_seqs	MAALMPCYKPFKAWQPLAGGAVLFVEAKDCRTITLPCGQCIGCRIERQEMWAVRCYAESKMHEKSCFITTTYDEKNFPRHGSLNYRDFQLFLKRLRKARAPDKIRYFVAGEYGEQLQRPHFHALLFGCDFPDREPLNSVRSVNGLHQSGELQRLWGKGLCSIGEVTYASARYCAAYVLKQHKKSSEDDAHYKTVNYTTGEIVELEPEFAKMSLKPGLGAAWLEKYWRDIYLSGANAVVINGTRKTVPSYFHSLMRKRDPMFMESFDWSREAKALEQWEEYTPERLEVREEVKRAECNFNRERNL	304	USER	zzzz372
683	my_seqs_16minnow_6_2ct652.4@PF05840.12	PF05840.12	my_seqs	MPCYKPINAYRTADGGAVFAQLGRYDIVGDIRLPCGQCIGCRLDRAREWSVRCLHEAKMHDANSFITLTYKDENIPPLGSLQYRDFQLFMKRFRKACGPIRFFMCGEYGEVTLRPHYHAIIFGYQFPDLQYWGRSPSGHPVYRSDILESLWDLGNSLVGQVSKESAGYVARYCLKKITGDLAEDHYKGREPEFARMSLKPGIGASFFHKFTEDILPCDYIIVEGLKIPVPKYYEKLYGGDMDEIKWRREQYGRKHADNNTPERLAVREEVQAAKLRQLKRTNVE	284	USER	zzzz373
682	my_seqs_16minnow_6_2ct653.6@PF05840.12	PF05840.12	my_seqs	MSCYKPLQAWKSLSGGPVMWDPRGAGPQVAIPCGQCIGCRVDRQEAWALRIAKEARMWPAHEKVFATFTYKEEKLPWDLGLHHEHWQKFIRALRDYEFNKALASSRPARAISYFMCGEYGGLFKRPHYHACIFGAVDFMDRKDMGDTWTSPTLEKIWGNGIVRCGDINMTTARYCAAYVIKRTNGKMAEEVNPETGLKRYERFHSQTGEIVEVKPEYAKMSLRPAIGKRWYERYGIDEMKKNGLVENGREWKIPKYFWEKFKETHPEDAEVLAYDRLKKGNRKERTPERLAVRERVHKAKIQFNEER	307	USER	zzzz374
681	my_seqs_16minnow_6_2ct654.4@PF05840.12	PF05840.12	my_seqs	MRLERTTGICLTGCRCVVVSGYSMPCYAPITAWYSRDVGVSGKRGITFRRDFAYSPASIKLPCGKCVGCRLEKSRQWAVRCMHEKKMHDKSAFVTLSYEEKYLPEGMSLCKRDLQLFMKRLRKHFGRGIRFYACGEYGDHNNRPHYHLLFFNLQFEDMTPVGRAKAGQILYTSKVLRDLWPFGFNFIGEVTFDSCAYVARYIMKKVSGDVAESHYQVLTSDGEIIDREPEFTVMSRRPGIGAGWFDRYHSEVYSFDTVITNGREAKPPRFYDLRFELLDAMRLETLKKVRRRKALMNKADNTLRRLRVRETVELRKLAFYKTRVL	325	USER	zzzz375
680	my_seqs_16minnow_6_2ct655.5@PF05840.12	PF05840.12	my_seqs	MTCFRPLNAFKGFSKIPEKTSITFRRSDSWRGQKLQLPCGQCVGCRLERSRQWAIRCMHEASLYENNCFLTLTYNDKNLPSNNSLIKTEFPSFMKRVRKKYGAGIRYYHCGEYGEQFGRPHYHALLFNHDFQDKKPFSEKNGISVYTSSELSSLWTKGFSVIGSVTFESAAYVARYIMKKITGEQAANHYGLRIPEFTTMSRGSKKLGTGGIGKGWFDKFKSDVYPRDAVIVRGHPSRPPRFYDTLLQREDWSTFELLKIKREKAGLRTVEDVIDGVTRQVSDNDSFRLPIREVCKLAEIQNLKRPLEE	309	USER	zzzz376
679	my_seqs_16minnow_6_2ct656.5@PF05840.12	PF05840.12	my_seqs	MNSRPLVLPCGRCIGCRLVRVRSWAIRCVHESQMHKESCFVTLTYDDAHYHPSLNYRDFQLFMYKLRRRLGPTRFFMCGEYGDLNYRPHFHAILFGRSFKRDGVVSGSGECEAYRSSTLEDIWKNGYSSFGGVTYQSAAYVARYALKKITGERADAHYTRIDPFSGEVVKAVPEFAHMSLKPGIGYTWFQKYWKEVYLARDGVVLQGGRTVPSPRYYDQLLVDTCPDLKESKDFERYLKSQDFAADCTVDRLAVREQCAKAKLRFLRRDL	270	USER	zzzz377
678	my_seqs_16minnow_6_2ct657.5@PF05840.12	PF05840.12	my_seqs	MLVRCGVAFGCSMPCYHPIPGYRATVCNPSGKRSIVFSPQEGFKEFALAVPCGRCIGCRLERARQWSIRCVHESSLYERNCFITLTYSDDNLPLDGSLRPRDMTLFLKRLRKMFGSGIRYFQCGEYGEKSLRPHHHAILFNHDFSDKRSMSNPLGPSRLFTSRTLEDLWGYGHCSVGTVTRQSAGYVARYSLKKVYGPSSVDWYAGRVPEYLTMSRRPGIGTGWLAKWHDDIYRGGDSVSELVVDGVRCKPPRFYDKLMERFVPSMMERVNWRRKRESADNPDGSGSRLIVREHVTEAAVKSLTRGI	307	USER	zzzz378
677	my_seqs_16minnow_6_2ct659.5@PF05840.12	PF05840.12	my_seqs	MERARQWGLRCLHEAKLWPHNQYVTLTYSDENLPPGGSVCLRDVQLFMKRLRKAKNSSTANPVRFFLGAEYGDENRRPHYHALLFNCEFRDKRFISENARGEPLFTSAELSELWPHGFNSIGAVTFDSAVYCAKYAMKKLNVSENSSDAAVAAYEARYVVYDADGIVYQRDPEFAVMSRRPGIGAGYYEKYGNEVRAHDTVIVNGREVRPPRFYDTRSERVDADGFARLKKKRKRMAVLAKPDNTPARLRVKQILMEKAAEKKERKL	267	USER	zzzz379
676	my_seqs_16minnow_6_2ct660.3@PF05840.12	PF05840.12	my_seqs	MPCFGPLDGWMSRERTATGKRRMSFKIRESYHDLPITVPCGKCLGCKLERARQWSLRCYHEAKMWGKNSFLTLTYSGENLPLVLGTSIPTLRPRDFVLFMKRLRRQRLERIRFLQCGEYGALGRPHHHCLLFNCDFPDKEAFKIAPSGEVIFRSRELEELWPYGFSSIGAVTVESAAYVARYTTKKISNDDVPCPKEEIEGVLTAEGAVKEYITMSRRPGIGRLWIERYWKDVYPGDRVHTIDGRSHRPPRYYDDYFKEVRPKGYARLKRRRVDSVVRDEQSSGRVIAKQIIAEANVKTRLKRSIE	306	USER	zzzz380
675	my_seqs_16minnow_6_2ct661.3@PF05840.12	PF05840.12	my_seqs	MGCFYPRDAWKSKRLNENGKRELVFSRASGFADMRLQVPCGKCDGCYADRSLTWAIRCYQEASLFRDNAFLTLTYDEDHYPKDGRISKKALQDFFKRLRHEYSVRYFACGEYGDQSGRAHYHALIFGEDFRQGKTVQINDQLYSNFALQEIWGNGNVLCAEFTMETACYVAGYVGKKIGDSESFSLMSRKPGIGKVWLEKYWDDISRTGIVVIEGKEYPVPVRYLQWMEKELEHVKLQRAEKVKEKERRVGYFEVLREQKAKESYHKQRLQERAIKKKV	279	USER	zzzz381
674	my_seqs_16minnow_6_2ct662.3@PF05840.12	PF05840.12	my_seqs	MPCYNPIQGYRASSGAVFFHEQKRHGETTEIKIACGQCIGCKKTKARDNAIRITHEQQLHLESCFLTLTYDNEHLPRDLSLYYPHFQRFMRDLRKKHKVRFYMCGEYGEITGRPHYHAAIFGYGFNEDKYKWSISNGHQLYRSKELEKLWKHGNSTIGALTYDSAQYVAKYIIKKKNGDGEKDYYNILDVTTGEIVPRRKEFSKQSLKPGIAKEWLQLYWPEIQGGTVLLNGKESAIPKYYRRYLKNTERFTDIIDKLQGEIRPEDTTEKRLKEREQYDTITAQLKKRNEE	291	USER	zzzz382
673	my_seqs_16minnow_6_2ct663.6@PF05840.12	PF05840.12	my_seqs	MSKAEQWGMRCVHEAKCWPQSHFVTLTYNDEFMPPGGSLCLRDVQLFMKRLRFEYKSTSASPIRFFLGGEYGDENRRPHYHALLFNLSLDDRMYYATNKRGEKLFTSARLAACWGKGFVTIGAVTLDSAIYCAKYALKALNVTDDSPPEVRRRYEERYVVYDADGVVTERCREFAVMSRRPGIGGYYYEKYGAEVRAHDSVVVNGKERSPPRYYDSKFDAVDADGFARMKRKRKRLAVLAKSDNTPERLRVKERLMVIAAELKERKL	267	USER	zzzz383
672	my_seqs_16minnow_6_2ct666.6@PF05840.12	PF05840.12	my_seqs	MCLTPINLKDRSHPVPCGRCPECRKRRAAGWAFRLQQQLLDSITANFITLTYETAHVPISNSKRLSLCKSHCQSFFKRLREAHPVDYLRETPIKYYLAGEYGTNTWRPHYHVILFNSKLELIQPSWKYGQIHYDTVNSATIAYTLKYICKPKRVPQYQADDRVPEFSLMSKNLA	174	USER	zzzz384
671	my_seqs_16minnow_6_2ct667.3@PF05840.12	PF05840.12	my_seqs	MPCYHPMPAVRLTDGSVKFISRSARNAESAIELPCGQCVGCRLERSRQWAMRVMHEASLYESNSFITLTYDDANLPEGGNLVYSDFQLFMKRFRKRTGHPVRFYMCGEYGEEFNRPHFHACIFGFGFPDKVFYRRTSGGDRLYTSKLLEDLWPKGLSSVGDVTFKSAAYVARYCMGKITGDLAESHYRVVTDEGEIVDRTPEFNHMSLKPGIGARWLAKFRTDVFPRDYVVVNGVKTKPPFYYDELYKREFPGEFSELVAQRELNAYGHYLKGEMTEPRLYAKEQVVNARISSLKRKLK	299	USER	zzzz385
670	my_seqs_16minnow_6_2ct669.5@PF05840.12	PF05840.12	my_seqs	MTCYAPIQAFRAGSVNPATGKRPMQFTLSGSHTGVRQMLPCGRCIGCRLEWARRWAMRLMHEAKMHKENSFVTLTYSNETLPYCGTLVKEHLQGFHKRLHNRLLDSRGYGVRYYGVGEYGDTSRRPHYHSLLFGYQFPDLKKYSQNGNGDVIYSSKLLNEIWGFGDCKIGEVSFKSANYVARYCLKKVDGKKREAGHYVVLDSEGRPFERLPEFAHMSRRPGIATTYFEKYGDEIKKHDNVIVDGRAVPSSRYYDLKIEAVDPSAAELIKKKRRAKSVWSERQVDRRRTKEKLAESTSKLKGTKL	305	USER	zzzz386
669	my_seqs_16minnow_6_2ct670.4@PF05840.12	PF05840.12	my_seqs	MACFHPIDAYKCEDGSIVFAERAKFRITGHVKLPCGQCAGCRIDRAREWTIRCMHEASCHEKNSFVTLTYSDENIPAGNTLVYEDFQLWIKRLRKHTQTPLRYFMCGEYGSQTERPHYHALIFGYQFPDLQPWGITPQGHQTYRSATLEKLWWQGNSLIGQVTKQAAGYIARYSLKKVTGNLADAHYNGRTPEFARMSLKPGIGATWFDKYKSDCLPCDYIIHDGIKMPVPRYYENLYTRKGGDIDPIKESRESYAVKYKDNQTWQRMEVREEVLHAKIKQLKRTL	286	USER	zzzz387
668	my_seqs_16minnow_6_2ct671.1@PF05840.12	PF05840.12	my_seqs	MPCYKPLRAYRTAAGSVVFYEMKRHGETTEIQLSCGQCIGCRLERSRQWAIRIMHESQMHDENCFITLTYNDDKIPEGETLEYRDYQLFMKSLRKKLRTPVRFFMCGEYGSQTRRPHYHAILFGHAFREDRYPWKKSNTSQLWRSPTLEQLWTHGDSNIGEVTFESAAYVARYVVDKITGTEAPNHYGNTDPGTGEITFRLPEFCHMSLKPGIGSTWFNKYRSDVKDGKVVVRGHESNIPKYYKRKLTEEEQITIQSNLDESIDYKDQSWRRLEDKEQVAKARNKQLRRTL	291	USER	zzzz388
667	my_seqs_16minnow_6_2ct673.5@PF05840.12	PF05840.12	my_seqs	MPCYKPLIAYRSSNGSVNFVQNRFHGSGDTLSLPCGRCIGCRLEKSREWAMRCMHEAQMHERNCFVSLTYNDFNLPEDGSLRYKDFQDFMRKLRYEFGKVRFYMCGEYGDDNGRPHFHALLFGVDFDDKVYFKKSPAGFPLYRSRKLEVLWPYGYSSIGSLTFESAGYVARYVMKKVTGDAAEAHYRVVNEDTGEVKERKPEFGHMSLKPGIGAAWLDKFSSDVYPGGRVVVRGAEGMSPRYYDLRWKKSHPDVMEQLAFERDRAARLRYLDNTDERLAVKEKVRLAGIQMLKRKLT	297	USER	zzzz389
666	my_seqs_16minnow_6_2ct675.4@PF05840.12	PF05840.12	my_seqs	MRCVNEASLFKNNCFVTLTYDDNNIPANGSIDVAEIQLFMKRLRKKFSGVECVVNSAGKDSYPIRYFHCGEYGEALKRPHYHVLFFNFDFFDKFYWSTKNGSKLYRSPALEVLWPYGMSTIGDVTFESAAYVSGYIMKKINGDMAESHYKGLKPEYVTMSRRPGIGYRWFQKYKDEIKNFDSVVVRGREVKPAKYYDRLLEVEDVEAYNRNKLARRPVDLGVMLDNINDRLVVKEVVAKAGASQYTRDMEAL	252	USER	zzzz390
665	my_seqs_16minnow_6_2ct677.3@PF05840.12	PF05840.12	my_seqs	MACFYPRPAFRTPSGAVVFGHPRFGEPVKDDLRVGCGKCIGCGLMRSRDWSVRCALEAAQHNLSCWSTLTYDDANLPSTLRPDHLSGFVKRLRSRLAPRKFRVFACGEYGDKFGRPHYHAILFGVRDVRELQKAWGFGIAEEHTLSPEAISYVAGYCAKKLRRPRKPLLSSPIPFGPRLDRRVVEKVDKYTGEVTEHYVEYQPPFLEMSRRPGIGGDARRFTSMWRRSAVFRGKEVPVPRFLHESWKEQATADEILFLEEERKREMRVMSWDEIKASERIAEVQMEHTLSRRSL	294	USER	zzzz391
664	my_seqs_16minnow_6_2ct679.4@PF05840.12	PF05840.12	my_seqs	MKCITPLVVINPRTNQSIPVECGRCPECIQKRTSQWGFRLRKEGDHSSSSYFITLTYDTNHVPISPNGYMTLKPDDVTLWLKRLRKISKQKIKYYYVGEYGTKNWRPHYHMLIYNADMEDIEKTWKEGTVHYGKVTGASIAYSLKYMIKDGRIPQHKNDDRIPEFGRMSKGLGLGYLTADIMYWHTNKDTMLVRLCSEIDGKKVPLARYYKEKIFDNYHKYLIQQYAKELEQKNLIIREKTINLHNEVEAHKAKFNKMLQSKYKNKQL	268	USER	zzzz392
663	my_seqs_16minnow_6_2ct680.3@PF05840.12	PF05840.12	my_seqs	MPCYNPLTMGFDSNGDRTFKQKQHHPEFIPIKIGCGKCIGCRIDRSREWAVRCVHEMQMHNSSCFITLTYEDSQLVKTEEGEPTLFHEHFQLFMKKLRKKYGEQISFFMCGEYGDKTHRPHYHALLFGVDFQDKLLLRQNESGDNIYISKTLDELWGHNNSEQKPNEIGEANFKTAAYIARYVVKKLGGPMESLYNGRTPDYGKASRKYAIGKKWLEKYWEDIFNYNDLRLPDGTRTPIPRYYTKWLEKNHFDRYMQYRARDTSYMDTPEYKHEQSRERLKVKKILKEKSIKRLRRQYEG	300	USER	zzzz393
662	my_seqs_16minnow_6_2ct681.4@PF05840.12	PF05840.12	my_seqs	MARCANPVPLSVEGREWLVGCGKCLACRISRRSMWTMRLMHHQETHPESAFITLTYDKENLPCSINKPDGVLLPSDLQNFWKRLRQALRLKERNTKISYYACGEYGDEFNRPHYHAIVWGIDVQDAFLVDKVWGKGRTSCDHVEHDSIRYVAGYVSKKLGFNNSEARQGYPKPFQTSSGGLGLDWLKANWVECCYDAALEFRGRKAPLPRYYREKLDKYYENFYLGVEQRLCNEKLIGECELLMEVVPELGGRSWAQLSALEKTTVYHALQRHGRLYNENLAKKQEIKLKGLAAKLANINRRRMKI	306	USER	zzzz394
661	my_seqs_16minnow_6_2ct682.4@PF05840.12	PF05840.12	my_seqs	MPYGGVQFQPVGSVGRVLLPCGQCIECRLSKAREWALRCVHESKLYRHSSFVTLTYDDDHLNSYSLDYRDFQLFAKRTRQEIGPFRFFMAGEYGEENWRPHFHALLFGVSFSDRQFLKKSPSGQTIYRSKILSDLWKNGLVSVGDVTFESAGYVARYVVKKRTGVDAQEHYMRVDPRTGEVVQLVPEFCRMSNGGGRGSEKHGGIGARFYWKFKEEMKVRDSVVLGGVEHSMPRYYDKLAERDDSAEFEVRKLARQGLRERGENAPPRLVARRTVAEARLAFKRRGKV	288	USER	zzzz395
660	my_seqs_16minnow_6_2ct683.3@PF05840.12	PF05840.12	my_seqs	MPCYHPITGYRAENGTVVFTELRRHGTTSEITIKCGQCIGCKLENSRVWAMRAVHETKLYKRNCFITLTYDEENLPHRGQLNYDDFQQFMKRLRKKYGENIRFYMCGEYGTLNGRPHYHAILFNHDWTDKKHFKKSESGESIYTSESLQRLWPHGHSSSGEATFESAAYIARYCVQKRTGEDSEEHYKRYDYLGEYQLAPEFNQMSRKPGIGGDWLKFYKEDIFARDIVIINGKETNVPKFYDKLLKKQNPERLQDLKDAREWNGYQQRADNTPERLLVKEMVTKAKIKLLERGKI	296	USER	zzzz396
659	my_seqs_16minnow_6_2ct684.4@PF05840.12	PF05840.12	my_seqs	MCTSPLPARRVGGQIEFLGRSATHRFNSNSSATLQIPCGQCAECRLKRSREWAIRCVHEASMHRDNCFITLTYRDDARAISLDYTDFQLFLKRLRSRYPKDKFGFFCCGEYGETNPVTHEIDGGKYRAHFHAILFGFNFPDRVPCRMLGQSDLFKSKILDELWRHGDCKIGAVSFESAAYVARYAMKKVNGDLAYSTYTIITPDGEMITRTPEMLVMSKRPAIGRGWFEKYGRHIYDRDAVVARGVEMQPPRYYDKLLSPVVRQMVTKAREAKGSVHRADHTDDRNNVRDVVVNAGLRQFSRD	303	USER	zzzz397
658	my_seqs_16minnow_6_2ct685.7@PF05840.12	PF05840.12	my_seqs	MRLLHEKKLHDASCFATLTYDNAHLPEGGTLVKRDLQLFMKRLRKGMGDGVRFFACGEYGDLNKRPHYHVLLLNRDFNDKRQVGANRRGDKYYASDELSSYWSVAGNPIGTTLLGDVTFDSAAYVARYCMKKINGPLADDHYTVTDANGVVTRRAPEFTVMSRRPGIGTGWYAKYGDETYAHDNCIINNRPVRPPRFYDGKRNLLDPDGFAKLKEERRRKALENFKENLVDRRRVKERLLSKHQGKLHREV	251	USER	zzzz398
657	my_seqs_16minnow_6_2ct686.6@PF05840.12	PF05840.12	my_seqs	MSIRVTHEAQMHTANAFLTLTYSDDHLPADRSLDHSHFQLFMKRLRHLEPVRFYMCGEYGETTDRPHYHACLFGIDFSKDQQFFTTNPQGDDVFTSKTLDGLWRLGHCTVGAVTLQSAGYCTRYIVQKKTGDLGTLTYGARTPPYNRMSLRPGLGAGWLARFRPDILTGDYAVTTDGHKDRVPRYYDKLNERYLGPEQFEAIKLARKLSSQEHWEDNTDARLRVKATVKSAAIRQLTRKL	240	USER	zzzz399
656	my_seqs_16minnow_6_2ct688.8@PF05840.12	PF05840.12	my_seqs	MACFHPLQAWKHFNGEVSFRKEAHALSHEISLPCGNCVGCRLERSRQWSVRIMHEASLHDKNCFITLTYDEAHVPFDSGLHYEDFQCFMRKLRRTDKVRFFMCGEYGSLRLRPHFHACLFGIDFDDGKPVAAAASGGFIYSSDKLSVLWPQGYCSVGELTHASAAYVARYTLKKSSNPRVYDFLDVSTGEVISRVPEFVRMSLKPGIGSDWYDKFKSDVYPHDRVIVNGRAVKPPKYYDRKDADFSNSITSLKRWEFAQAHLDDQTPERLSVREAVVKSRLSHLKRSL	288	USER	zzzz400
655	my_seqs_16minnow_6_2ct689.5@PF05840.12	PF05840.12	my_seqs	MPCYHPMPAVRMSDGSVKFVSRNKRGVESTLELPCGQCIGCRLERSRQWAVRCLHEASLHERNAFITLTYDESSVPLGGSLKYRDFQLFMKRLRKLVGKVSFYCGGEYGEQVMRPHYHACIFGYDFPDKVYFKKSSDGSKLYTSKLLEKLWPHGMSSTGDVTFASAAYIARYCVQKVTGDRAAAHYRVITDDGEIIDRVPEFNRMSLNPAVGKRWLEKFQTDVYPRDYVVVNGVKCKPPSYYDTLFEKENPGVFSELVAQRELDTINLQRAYPGEFSRNEYKYYFLGIVDRMSVKEQVHLARSNMLKRSL	310	USER	zzzz401
654	my_seqs_16minnow_6_2ct690.5@PF05840.12	PF05840.12	my_seqs	MRAMHEKQLHSASCFITLTYDDRHLPEGGSLSMDDYQRFMKRLRHRFGAGIRFMGCGEYGDETDRPHYHIVLLNCDFPDRKYLKSSNSGLPLYSSLELERLWSENGELLGHCNIGNVDFDSCAYVARYVMKKFKNKEKIVGFIDGVRVEVCPETGVIREPVFMTMSRRPGLAKDWYNRFGPHAYEWDSVVFKGVEVPPPRYYDSLRVGPCINDDLKKRRRRMAALHRADQTLARLRVREVVALAKLSLKGRKL	253	USER	zzzz402
653	my_seqs_16minnow_6_2ct693.5@PF05840.12	PF05840.12	my_seqs	MCINPIYLEKTGKTFSCGKCKQCHQRYTAHWVFRLQQEQRITNKSVFLTLTYDYEHIPMNKGKFTLFKKDYQDFLKRLRKQISNKIKYVVCGEYGGQNNRPHYHLILFGVDKDDFNIINQAWGKGLIHLGNVQPNSIAYVFKYSIKGDKKTRDWRQTKQFVAMSKGLGENFAFDIQYQKTQHINKHGQTITRQSKIRTPLPHFDKKLKQLILQPYYTIPSQDGGTVKMSMPRFYLKASNYDTTELTETFLDKMASKYQDVPPLQLVKILEIETIQRAEAYKKQEKDVLYSISKEKI	296	USER	zzzz403
652	my_seqs_16minnow_6_2ct697.4@PF05840.12	PF05840.12	my_seqs	MTFIQRRAYVPTFLFWQSKILTNCFSNSSYQSLCSDAWRHPVVMACFFPRDAWKSRRLTEKGKRQVVFNRRDGYEDMQLQVPCGKCGGCRADRAMSWAIRCYHEASLYPQNCFVTLTYADPAPPRLDPKHLSQFFHDLRRCGEKLRWYACGEYGDKTKRPHYHALIFGRDFLEGAIPIDVERQSYLSEFLTDKWGHGMVDLQRFNMATACYVAGYVAKKIGNEQDEDTFQSMSRGLGYGWLQQHWHEIRNNGFVVIEGRKYPIPHAYLRYTDEKMGGVLDSVKRQRKERFEKQTIEQRIDSYRNSRAKKVYYDQRLKHQKDKQKL	325	USER	zzzz404
651	my_seqs_16minnow_6_2ct698.1@PF05840.12	PF05840.12	my_seqs	MACYSPWIKAGAGQSRLISCGQCIGCKLEYARQYATRCYHESKLYDQNCFITLTYAVAPISLSRRDCQLFLKRLRKRFPNARIRYYLGGEYAPETRRPHYHACLFNFDFPDRVYFKRSGEFRLYTSEILSSLWPAGFSTVADFSFETAAYCARYVTEKLTGDVYEHIDLESGEVTPVEREFSLMSLRPGLGAGWVRSYSSDISDSGKIVVNGRENIAPRYYDKLLKDVDDRRYMVMKGNRFMSVAESYLEDNDNGRLEAKAAVARARRARLVSKL	275	USER	zzzz405
650	my_seqs_16minnow_6_2ct699.4@PF05840.12	PF05840.12	my_seqs	MPCYRPLLAFHNAEHGAVYWHESQRNGLCKQISLPCGQCIGCRLQRAHEWATRCMHEAQLHTENCFITLTYNKEKLQTQSLVHRDYQLCMKRLRNALGRIKYANAIAISESLYETADMGLCPIPQLQYYMAGEYGTKTRRPHFHACLFGINFADRQYWQRTSSGSKLYISATLQNIWPHGFSSIGDVNYESAAYIARYIMTKQTGHSASKYYEHVDITTGEITNLKPEYNKMSLRKGIGRDWLKLYLGDVYPKGTTVRKGGQQTKAPKFYDKIYQAQEPDKYEAMKMDRETQALEYRSDNTPERLRTKERVKLASINQLLREL	323	USER	zzzz406
649	my_seqs_16minnow_6_2ct700.5@PF05840.12	PF05840.12	my_seqs	MPCYRPLTAYRTSTGVVFSELSRYDVLGTIELPCGQCIGCRMRRASDWELRVMHEASMWEQNCFVTLTYGRDCLPENGSLDYRDFQLFMKRLRDSFRGRRIRFYMCGEYGEAGGRPHYHACLFNVDFDDKVPAGKSKGGEVYYDSKRLSRLWGHGIVSVQPLVRETAGYCARYIMKKALGEAAKTAHEFTTADGEILQRKSEFAVMSLRPGIGAGWFERFAGDVFPLDSVVADGVKRPVPKYYDRLAKRKKFDRDALEFAREQRAKAHAADNTVERRAVREKVHLAKVRDLKRDSV	296	USER	zzzz407
648	my_seqs_16minnow_6_2ct701.7@PF05840.12	PF05840.12	my_seqs	MKRLRARFPRDRIGFLACGDYGETNPSTGIKDGGKYRAHFHAILFNFNFPDRVPVRMLDETPNPLYNSKLLNDLWGHGDCKIGAVSFESAAYVARYAVKKINGDLARSVYTVVTPDGECIDRTPEMLVMSKRPAIGRRWFEKFGKHVYASDSVVSRGVEVQPPRYYDKLLPPVVLQMVSNERSKGMADTLADHTDARNAVREVVVTAGLKQFSRD	215	USER	zzzz408
647	my_seqs_16minnow_6_2ct702.1@PF05840.12	PF05840.12	my_seqs	MTSGARGNKQGVVRMHQQKLPQSAASVNGGQRDPLSSLAYFDARFKATHQPAKTDWTKTANWNGKRVSPAQNRRLRHASPVKVDVYADMVKVSIPDDRNGKQPRSAAGGASVLEKPMHPFGGVIGLNLPRQSGGVRSAVAGFSRSSRKRMIEFMAKVRHTGSMLFLTMTYDDISLVRDDLDLKAEFEAFRRRFERAFPTWSALWRIELQERKSGIHQGKPVPHYHLLVFTEEKYDDGYLQTIADSFRSWGAVAWQEITTSYDPAHLVYGFHVTPVRSRKQAYAYVSKYVGKAANDNYEIGRRWGRIGRFDTTSSETFTLDDQEHIALRRLIKRWLKNKNRAYAKRFSRQSSSRGFSVFGLGDVTETGSNRGIFAGYAQFIVEVKRQSLEQQIRESTHFS	399	USER	zzzz409
646	my_seqs_16minnow_6_2ct703.3@PF05840.12	PF05840.12	my_seqs	MACYRPIDVWRAAPPGKGILFTTRGAWIDKGRTQIPCGQCIGCRLVRKDEWKTRIILEGKMHECASFVTLTYSQEHLPQDYSLSKRHAQTWLKRLRWMLGDTRIRYFLCGEYGGEKLRPHYHAIIFGFDFPDRTPWRRTPSGEVSYRSELLEKTWNLGHAEVGTFTPASAGYVAGYSVKKVNGDEAPEHYSRLNPDTGEVHTVTPEFILMSSRPGIGKPWLDAYKVDTEESTFVIIDGARKPLPRYFKRHLEGRDLADRKLGRQRVSSRLAKEAARGNPDNHWRRRQDREEYATLIQERRKPGDLEE	307	USER	zzzz410
645	my_seqs_16minnow_6_2ct704.3@PF05840.12	PF05840.12	my_seqs	MAQCISPFKVETGFFAPCGKCVFCRKRRAAGWSFRLQQELINADTAWFVTYTYDNENIEFSQNNMPTLVKKHFQLYMKKLRHDAKKTGIKYYAVGEYGTKSWRPHYHAILINVELEHVIGLANAVFALNNKELALNGTYEFTNENWDKGHMTVGRVNKKTIKYVLKYITKATRVPVHANDYRQKEFSLMSKGLGKRYIDYNKKWHKKDIFNRVYLQDGEHKISMPRYYKDKIYTKLQRQSIGLVSEERQIEKYQEDLSTLTKKQFDDKMTKEAAIIVENYHKGNRKKITDNDKF	294	USER	zzzz411
644	my_seqs_16minnow_6_2ct705.4@PF05840.12	PF05840.12	my_seqs	MGCYDPILVFRSDNRSIYRNWSMASDLIKATAQTIFDCGKCLNCRRKHARQLAIRCVLHASCYQHNSFLTLTYDPSIEGFNNKLDYRHIQLFKKSLRKHAEKTGRKLEIFNVHEYGKNGQKHWHLIVFNYDFSNETDKNGKHVPREVHTVKNGLPLYTHKELERLWPYGFSTIGDVSEGTAMYQAQYTQKDIKNGNTNSDKKSKSNHSGIGKAYFLKHYEQILSLGYIPYNNAKTPLPRYFEKLAHRHYCHYFDQTYFFDTRERKRRYTPFNGENKKNGDLPNKRIADLWLQYLVRKQQFIDEKQEEWNQTVDSYLETKTDPDFKKSGDNALYDLKNKNKQEKF	344	USER	zzzz412
643	my_seqs_16minnow_6_2ct706.5@PF05840.12	PF05840.12	my_seqs	MIRSVLRPPIWRVLRCVVVGVFNVPCYHPQAAWRTPSTGSVVFVGPGQFTNLTLPCGQCIGCRQERSRQWAVRIMHEAALHTDSCFITLTYSEANCPEDMSLDKRDLQKFFKRLRKHHDVRYYACGEYGPLHGRPHFHACVFGWRFPDRVKFGSNFDRSLELESLWRLGNSSVGDVTFDTAGYTAGYICDKKTGFMAKRHYEFVVPSTGEIIQKQPERAWMSLKPGIGSDFYDKYREDIYPHDYVVVRGVKCKPPRYYDKKFEAMFADEFEKIRLQREMDAELRFLDNTPARLAVREQCVRAAVVKRTKEF	311	USER	zzzz413
642	my_seqs_16minnow_6_2ct708.2@PF05840.12	PF05840.12	my_seqs	MCIGCRMRRASDWALRVMHEAQGWRSNCFVTLTYARDCLPPDASLCHEDFQKFMKRVRKHFGGTVRFYMCGEYGPLNQRPHYHACLFNADFVDRVEAGRSESGEVFYRSAVLDKLWPHGRASVQDLTEQTASYTARYIMSKQLGINADYGVRRPEYNAMSLKPGIGAEWFKRYALSDVYAHDFVIQGGVKRRPPKYYDKLFKRSKNVKFDEIEFAREKRAKLSAADNTDERRAVREQVHLAKVDTLKRNSA	251	USER	zzzz414
641	my_seqs_16minnow_6_2ct709.4@PF05840.12	PF05840.12	my_seqs	MSCFAPVHAWYTKEIGPSGKRQITFNRALAHFPGSLKLPCGTCLGCLQARGRTWAIRCLHESRLHEQNCFITLTYDPENIPKGHTLVKRDLQLFMKRFRKSLEPKKVRFYACGEYGRKSYRPHYHVLIFGWSEKREGRKLLSRSSTDNQLYSSDTVNRAWPSGAAVVGDVSLSTCVYVAGYLAKNIGCKREYDVTCDDGEIIRRQKEFSLMSRSPGLGTGYVKKYHAELIAHDSVIIEGREVSIPRFYDEKLIKEGYQTPDQLLETKDYRRRETMAHWSENLIDRRRTRERVAELNLKHFSKGEI	305	USER	zzzz415
640	my_seqs_16minnow_6_2ct710.4@PF05840.12	PF05840.12	my_seqs	MPCFSPLKGFYSAEVNPSGKRSITFDRNRSHSGVSLAIPCGQCIGCRLEKSRQWAMRCLHEKRLSRESCFITLTYDNRHLPLGGTLVKRDLQLFMKRLRKLKGNGIRFFACGEYGDLNLRPHYHVLLFHCDFYDKVRISQNRRGDIYYCSDTLSSIWTVGHSVIGEVTFDSAAYVARYVVKKITGEKAASHYCVQDGDGVVYERLPEFTLMSRRPGLGAGWYDKYGKETYVHDSVIINAREVRPPRFYDSRLAQSDNPLLDIIKRKRRKKAWLLRKDNTPDRRRVKEVLALKRLKMLERCV	301	USER	zzzz416
639	my_seqs_16minnow_6_2ct711.4@PF05840.12	PF05840.12	my_seqs	MACYHPVKAYRPLSKLDGGRLVFDSKKALNPDLPIILPCNQCIGCRLDKSGDWAMRCIHESQMHALNCFVTLTFNDEHLPEDYSVHKRTLQLFFKRLRKHISPARLSFYGCGEYGPENLRPHYHAIIFGYDLPDRVFWKENHQGDRVYTSKLLDEIWGFGFTTVGDVTYQSAGYCSQYVMKKINGEKAVNHYIRTHPRGYIVKVEPEFQAQSTRPAIGLSWFNKYHSDAFPSDFLVVDGKQHRVPAFYLRELIKKEEPPAPDKKYFEGINAVPSNRIKRVRKQKAQPHKANNTPERLAVRHTVKRAKISALKREL	315	USER	zzzz417
638	my_seqs_16minnow_6_2ct712.2@PF05840.12	PF05840.12	my_seqs	MPCFKPLKGYRSRVVNPDTGRRSIVFNVRQGDQAQPVDLPCGQCIGCRLERSRQWAVRCLHEASLHKSNCFITLTYSQDFLPRDGSLCLKHYQDFMKRLRKRFGSGIRFFHCGEYGEKFSRPHYHACLFNFDFDDKVLFKVVGDSRLYVSQALSELWPFGFSTIGDVTFESAAYVARYITKKITGDGAFAHYGDRVPEYTTMSRRPGIGKGWYEKFRSDVYPCDSVTLRGGREMKPPKAYDRYFEIDFPDVMKEVKFKRIEVAKARALLEPWYRLSVKEEAQELSFKRLKRSLENDL	297	USER	zzzz418
637	my_seqs_16minnow_6_2ct713.4@PF05840.12	PF05840.12	my_seqs	MHEASLHKDNCFLTLTFRDDAKAISLQYVDFQAFLKRLRSRYPKDKFSFFACGEYGETNPATKCIDGGKYRAHYHALLFGFNFPDRTPCRLLGGADMFNSEILNATWGHGDCKIGAVTFESAAYVARYAMKKVTGDLAPAAYTVVTEDGEMIERTPEMLVMSKRPAIGKMWFEKFGKHVYYRDKVVARGKEMQPPRYYDKLLPDVVRAMVARARAEQGSLRSEDHTDSRNNVRDVVVQAGMSQFPRD	247	USER	zzzz419
636	my_seqs_16minnow_6_2ct715.4@PF05840.12	PF05840.12	my_seqs	MPCYHPLTAYYSKEIGKSGKRGITFNRSASFSGQALRVPCGQCIGCRLEKSRQWAMRCMHEKRLHKDNCFVTLTYDNEHLPVGGTLVKRDLVLFLKRLRNAKGPGVRFYACGEYGDLNRRPHYHVLLFNASFPDKLLWKHAKRGEPLYTSAELGSYWPFGFHSIGDVTFDSAAYVARYVMKKVTGPKAGSHYDVVDGDGVVHRRIAEFTNMSRGGRSGAGGIGKGWFDKYGAETYAHDSVVMNGRLVRPPRYYDGKFEVADPSAMADIKRLRKRRAALQYKENLIDRRLVREKVQELNLKNLKREV	306	USER	zzzz420
635	my_seqs_16minnow_6_2ct716.6@PF05840.12	PF05840.12	my_seqs	MPCYHPNPAWRTRSGELTLKPGQGVGFQLLLPCGNCIGCRMQRSRETAVRCMHEARMHNDNNAFITLTYDDQHLPADHSLHKEDFQKFMKRLRKWHGGKLLYLMCGEYGETKSRPHFHALLFGCDFPDKTPWRKSRGHTIWRSQVLEKLWTFGYSEIGSVTFQSAAYVARYVLKKQSGPRVYEYTDPATGEVHKLLPEFTTRSLKPGIGESWFRAYKSDVYPHDFCVVKGTKVRTPRFYDVLLERYHGEAELLRVKRDRIKKAYKYKDDQTPERLAVREKVQASQIKLLKRTLD	294	USER	zzzz421
634	my_seqs_16minnow_6_2ct718.7@PF05840.12	PF05840.12	my_seqs	MPCFGPLTAYRPRSDSGDKRLVFKKTDSETGIGIKIPCGKCPGCRLEQSRQWAVRCMHEKRLHNASMFLTLTYSDANLPTDGSLVPSDLTKFLKRLWHVNKSLRYFACGEYGEKTDRPHYHVLVLNQDFNDKRPIKSGSQYTLYESPLLSKLWPYGHNAIGDVNFESAAYVARYCMKKRQNGKTRTDGKTPEYIVMSRNPGLGAGYFDKYQDELINHDTIIVNGLPAALPRFYDNKLAGLTGFTEKCGLYSKFELLKLKRRRKLTSPLSRADRTQRRLRIRELVMLAKLKTKVTEL	296	USER	zzzz422
633	my_seqs_16minnow_6_2ct720.3@PF05840.12	PF05840.12	my_seqs	MSCVYPLEGWRSAKLNDNGKRPITFKVQEAFQDMPLQVPCGKCVGCARDRSMAWTVRNYHEWTQHRQSCFLTLTYQDPAPDKINKRDLQLFFKRLRESIDVPVRYFAVGEYGETTHRPHYHALLYGADLKGKSYALDDKQYGSTFIDRTWHHGSHAIGDVNYASIAYVSGYVLKKAGNEDTFNLMSKRPPIGHGWTEKYIEELERTGHVVIDGHKLPIPRKYIELYPGELQQQLTRRKRFYTTMKPDQVEHHRKARPHREANYQSAFDRRIEKL	274	USER	zzzz423
632	my_seqs_16minnow_6_2ct721.4@PF05840.12	PF05840.12	my_seqs	MPCYHPLTGYYSRVVGKSGKRQITFQRSLSLSGAALRVPCGRCAGCRLEKSRQWAMRILHEKRLHKESCFVTLTYDDAHLPPFGTLVKRDLSLFMKRLRNECGSGVRFYGCGEYGDLNKRPHYHVILFNYSPSDKLFYKNAKRGEPLYNSASLSAIWGAGFVVIGDVTFDSAAYVARYVMKKRDGKLAHTYDVVDGNGEIFRREPEFSLMSRRPGIGLGWFAKYGRETYAHDSVVINGKLVRPPRYYDGKYELENPQHSAKIKKMRKRKAHLQFRDNLVDRRRVKERVLELNLKQLKRNV	300	USER	zzzz424
631	my_seqs_16minnow_6_2ct722.4@PF05840.12	PF05840.12	my_seqs	MTCYHPLTAYRLDNGEISFNEKGKTKQKLTLPCGQCQGCRLERSRSWAVRCIHEAKMHKENCFITLTYNDENHQYDLIYPHFQKFLKRLRKKYPHKNIRYYMAGEYGEENNRPHFHACLFGIDFPDKRLFRALPSGSNLYTSKLLEQLWPFGYSTIGDVTFESAAYVARYVMKKVTGQRAADHYEICCPYTGEIKPITPEFNRMSLKPGIGKPFLEKYCSDIYPNGTIIHNGSKQKPPRFYEKWYAELQPLKYEELQYQRLLKVNYDDQTKQRLADAEKVCKARLTHKKRGFQK	294	USER	zzzz425
630	my_seqs_16minnow_6_2ct723.4@PF05840.12	PF05840.12	my_seqs	MSCYSPNQGYKSRFKTKSGKYPLTFDRDKASVIKPEFLTVPCGKCVGCCLARGKDWSLRSVHEAKYHDQSSFLTLTYNTKGLPSVVSDDGDVLGSGTLRPRDVTLFIKRLRKSMEGTSVRIKYYAAGEYGGGRTKRPHYHLLVFGWMPDDLVFHKYGSNGDPIYTSATLASFWYDEDTRENLGFSSVSHLNARSAGYVAQYSLKKVTDRNNPERYVRFNPLAGEFNVYPEFSRCSQGIGLEWYKANFLSDAFVKGFVTHNGVKYRIPRYYLKRFEIEYPAEFAFFQLLKKDSVRLLYSSKRPIDYLADRERLLEVHSKLKREVNFDEYDIG	331	USER	zzzz426
629	my_seqs_16minnow_6_2ct724.6@PF05840.12	PF05840.12	my_seqs	MSCASPVPQGHLSGGTGTGLAMGLCRPCGQCIGCRLDYARAKAVRCMHELEYHDSASFLTLTYDEKYLPINTEGYPTLVKSDLQKFFKRLRKSLPGKNLRYMASGEYGDQTHRPHYHVILFGYDFCFDRTLWRSAATGNLYNSGHLAAVWPAGQSVIADVTFDSANYVAGYTVKKLTGVLAVEQYDNLGRQRPFGLMSSKPSIGRRWIESNIDEVMQFDSVIVNGHEQRPPRYYDEIVKKMCPDEWFGVLRARRDKQASRPQPDLIARAVRLQNKKSQKYENIV	284	USER	zzzz427
628	my_seqs_16minnow_6_2ct725.2@PF05840.12	PF05840.12	my_seqs	MPCYNPLTAYKTAGGSVVFVENRKAHGDTYQITLACGQCHGCRLERSRQWATRCVHEAAMHKYNAFVTLTYNEDNVPNRSQLQHEDFQKFMKRLRKHTGLDRVRFYMGGEYGPEHGRPHFHAAIFGYDFPDKKYFKRSPSGERIYTSEILEKLWPYGYSSTAELTFESAAYIARYCMQKVTGPMAEEHYKRQDEKGEYQLKPEYNRMSLKPGIGATWLNKYKTDVYTYDHVIINGVQTRPPKYYDKLIKKEDPDKLAKHKEERERKGTENRTDNTPQRLEAKQIVAIAKSKQLLRGKI	298	USER	zzzz428
627	my_seqs_16minnow_6_2ct728.4@PF05840.12	PF05840.12	my_seqs	MRCNDQKLIWPHRSIDWLDAGNEEKAILVPCGKCVACLVSKRNDWTFRLQQEHKVSRSAHFVTLTYDEKHRPSDGSLVKRHLQLYLKRLRRKDETTRIRYYAVGEYGSKTARPHYHILLFNSNEDNIRKAWVDSNGNPVGIVHVGAVTDASVAYVTKYLIQKEYLPGLEKPFATMSRAYGIGAHYLTDEMTNWHRSDDRNYTVRPGGLKGKLPRFYRDKIWYKPKDRERISSKAMALSLANIKKEEDYYKKKHGDNWQNYQKLAQHMEMSRVKTKIQFSQKF	282	USER	zzzz429
626	my_seqs_16minnow_6_2ct729.3@PF05840.12	PF05840.12	my_seqs	MKNLKINYIRYYMCGEYGPKTDRAHYHMIVFGLDFKDKKHHTTSRSTIDAKIYISRTLDKIWGKGDCYIGEVTFESAAYVARYIMKKINGQQAEKHYERIDALTGEIIKRQPEYTRMSLKPGIGSRWLKKYEQDVYPEGTVLARGHKSKAPKYYDLIYKKTKPLEHDDLLAARELQSNRADNVADRLATRERVARAKAAFLKRNDH	206	USER	zzzz430
625	my_seqs_16minnow_6_2ct730.3@PF05840.12	PF05840.12	my_seqs	MACAYPIPAFQASAGAPVKFNPPLGTANLAISCGGCVLCRLERSRQWAVRIEAHRLCFPAEQCHFLTLTYDEAHLPPVVDGRHTLRPKDLSDFWKRLRGRFPGCKISYFACGEYGSRTLRPHYHACVFGVAFNDLVPMGASGGIVRNTDPLAPNAVATRLTRSPVLDETWGFGAVARGEVTFQSAGYVARYIMSKQLGKARFRSDSYRGYFEEFQRQSTKPAIGDLALDKFPSDWFNMFHDFDSRTSIPRRYLKRLKAVSPALYDNYLQTRSASGLVRLSEAQLRALEINRQAKLGTSQGGVV	303	USER	zzzz431
624	my_seqs_16minnow_6_2ct731.6@PF05840.12	PF05840.12	my_seqs	MPCYGPVTAFYSAEIGASGKRGLVFKRELSHSGVSLKIPCGYCIGCRLERARQWSVRCMHEKRMHEHSTFLTLTYDNEHLPRGGTLVKRDLQLFMKRLRKSKGEGVRFYACGEYGDFNGRPHYHLLLFNCLFGDRKFLKENKRGDKLFCSEEVRKLWPVGHNWLGEVTTESANYVARYILKKVTGKKADEHYAVIDAHGEVYDREPEFTVMSRRPGIGAGYYEKYGSEVRIHDSVIVNGREAKPPRYYDVFSELHDSAAFGKVKVQRRRRALLLRSDNTSRRRWVKEVCTLARLKRMERSL	301	USER	zzzz432
623	my_seqs_16minnow_6_2ct732.3@PF05840.12	PF05840.12	my_seqs	MPCYYPLRAFQSKTRADGKVSIAFSPTRACFIRLELPCGRCIGCRLERSRQWAVRIMHEAQLHDLNCFITLTYSSENLPVTGSLRKGHFQLFMKRLRKAISPKKVRFYACGEYGDQLSRPHYHAILFGVSFSDLQFHTETAAGKLYSSQTLEDLWGLGFCTVGSVTFDSAAYVARYCTKKINGPIAKNHYERVDQTTGEVVRLQPEFSLMSRRPGIASDWIEKFQSDVYPSDQVISKGFPAKPPRYYDKILEVKNPEQLTSIKEIRRDRAHARDADNSTARLRVRETVAKAKLNLKRRVLDQ	302	USER	zzzz433
622	my_seqs_16minnow_6_2ct734.3@PF05840.12	PF05840.12	my_seqs	MACYHPLKGFYSRVVNESGKRSIIFNSDNALVDVSVFVPCGRCIGCRLDRSLSWALRCVHEASLYDENCFITLTFSDANLSPNASLKVADFQNFMKRLRQKIAPRQVRFFHCGEYGTKFSRPHHHACLFGFDFPDKKLFKSGRSPIYTSEMLSDLWPFGFSTVGRVTFESAAYVARYVMKKWSKENLEGPELYEAMKGLSNEAAKKLYYGDKHCEYITMSRRPGIGSFWYDKFSSDVYPSGFAVLPGGKKVRLPKFYDSRFELDNFMEFAKLKCDRLDRAQEDPNNSKQRMIVREEIKVLNSNKLIRGFEDGY	313	USER	zzzz434
621	my_seqs_16minnow_6_2ct735.4@PF05840.12	PF05840.12	my_seqs	MLCIRPFKPRKGVEFGCGQCLPCRINRRRVWTARIVLESMCHPPSMFFTLTYSPELVPRDGSLVPSHLDEFRRSLRYQIGPFRYWFVGEYGEVSWRPHYHGVVFGHVLDRDSLAEIWGRGFAHVGLCTVDSAAYIAGYVTKKMTSADHVLLNGRHPEFTRQSLKPGIGAPALEAILNWLFSEEGAKYVGRNSDVPLSVRFNGKIFPLGRYLVSKLREAMDMPASDPGRQAKLAERALDLAVPEMMEKRELLREGQYRKAKAYLKLRKSVVKI	272	USER	zzzz435
620	my_seqs_16minnow_6_2ct736.5@PF05840.12	PF05840.12	my_seqs	MHEVACHENNCWLTLTYDDSHLPANGSLHYPHFQSFMRAFRRAVKPITPRFFMCGEYGEQFSRPHYHACIFGYAFTDQVLHRSTDTGNYIYSSPLLSKLWPYGQATIGQLTRQSAGYTARYALKKVTGQAADSHYSTVDDDGVITRRVPEFARMSLKPGLGANHFHKYRSDFTGGDYSVTDGKKVSLPRYYDKLHRRIDPDLLDQTKEDRVLKALTHADNNTPDRLRVRKTVTEARIASLKRVLT	245	USER	zzzz436
619	my_seqs_16minnow_6_2ct737.5@PF05840.12	PF05840.12	my_seqs	MCSALWIHPSHGPLKCGQCMECRLAYSREWAIRITHEAAMHDRCCFLTLTYDDLSLPRYGQLVKRDLQLFFKRLRKSFGSFRYVACGEYGELKRRPHFHVALFGLDFRDDRVEYGEGIRGDKIYVSPSLAIVWSKSVFPFGHTIGGLSFESAAYIARYITKRVTGVGASPLPLYSDIESGELIMPNSEFLLCSKGIGKAWFREYFFKDVFPHARVITAQGSPAPVPRYYKSLLREYGGDLALDMSYRASSNLDKDLAKRVFEDRPERRAARTVYANARTGLFKRDTKG	288	USER	zzzz437
618	my_seqs_16minnow_6_2ct738.3@PF05840.12	PF05840.12	my_seqs	MHEAQMHKDNSFITLTYSDQHLPPGGTLVKKDFQDFIKRLRKQKQQRIRYYHCGEYGENFNRPHYHALLFGYAPNDLRLFSEHNGIKTYSSDELSELWPYGFSNVGEVTFESAGYVARYAMKKITGGKAIDHYGGLQPEYSTMSRRPGIGADWFHKFTSDVLPRDYVVVRGVRSPVPRYYLDLYSRQNRSNAELIKIKREMAPQKYVNDVLSDGRHIKVSDRSLPRLRVQEVVKIAQLQNLKRPLEVA	248	USER	zzzz438
617	my_seqs_16minnow_6_2ct739.7@PF05840.12	PF05840.12	my_seqs	MAMRISHEAAMHEHSSFLSLTLRDEDLADGLSVRVLQLFHKRLRKLVGQYRHFSIGEYGEKKDRPHYHAIVFGYAFPDRTFWGLSKKGYRMYRSATLEKAWTLGHSTIQDLTPAAAQYVAHYSVKKLSGEQRARYNGRKPEFAIMSSKPGIGGTWIDKFASSVFPRDFVVKADGKRAKVPRYYLLRQPEAMQAIVKADRQAAAARAVELLHQHIYADNPRESLQRASDYHTEIASRREFARHAIRTTNKQRPLENETPRLRHPR	264	USER	zzzz439
616	my_seqs_16minnow_6_2ct740.1@PF05840.12	PF05840.12	my_seqs	MPCFKPISIPKRGYVDLRVTVACGQCIGCRVDRTEDWTTRIMHEVTLHDLCQFVTLTYSDEQLPANGSLVKKDYQDFMKRLRKRHGARIRYFAVGEYGDTFERPHYHAILFGIDFADKRPHSKNEHGDQLFTSDLLDSIWGKGHAFFGKVTVQSARYVAKYCIKKVNGPMAVEHYGAKSPEFAVMSLKPGIGSGWFEKFQADVYPSDFVVLQGKKRSPPRFYDERLSAQDEAALEAIKSRRLKKALEHRADQTPSRLKARQECLKARINLRKGKL	275	USER	zzzz440
615	my_seqs_16minnow_6_2ct743.1@PF05840.12	PF05840.12	my_seqs	MHEAAMHPQNCFITLTFDDEHLPETYSVHKRTYQLFQKKLRKHCHPKTIRFYACGEYGPENLRPHYHALIFNHDFPDKKPYKKTPQGDQLYTSEKLSTLWGFGFCTTGDVTYQSAGYVAQYVQKKITGDKATSHYLRTHPVSGAVVQVEPEFSLQSRNPGLGSAWFDKFQGDCFPSDFLVVDDKQRRVPQFYLSKLKQQEAYDVPTGKLVTKNRSQQVKRKRKGHALTTRANSTPERLRVREQVKKEKLKLLKRTL	256	USER	zzzz441
614	my_seqs_16minnow_6_2ct744.5@PF05840.12	PF05840.12	my_seqs	MHEAQLHKRNCVVTLTYDPEHVPADGSLHYRHFQLFMKKLRKRHGKVRFFVCGEYGDKDWRPHFHACLFGYRPGDLRPWSKSRSGSQLFRSPELESLWPAGHSLVGELDFESAAYIARYIMKKVTGDAAESHYNRINFETGELLSLEPEFIHMSLRPGIGAEWFSKFHTDVYPKGMVVSRGHEARPPKFYDRRFAKLDPDGYAQLQLARETFAADHVADSMPERLAARAVVTAARVSLHKRTL	243	USER	zzzz442
613	my_seqs_16minnow_6_2ct745.3@PF05840.12	PF05840.12	my_seqs	MPCFHPMEAWYAKTANPTGKHSLVFPRKGAEPPASADLSRPITVPCSKCIGCRLERSKKWAIRCEHERQLHEESCFITLTYAPEHLPAEGSLNKRDFQLFLKRLRKYLGEKQIRYYMCGEYGEKRGRPHYHAIVFGVNFHDRSVVGKKNGITYYESATISRIWGMGQTQIGDANFETAAYCARYITKKLTGERAKEYGKKIPEYNNPSRRPGLGKKWIEKYMGDVYPHDQVTLKGKTLKPPKFYDSQYEIIEPKKMEEIKKRRKEFAEANRPTKQRLKQMKEIMKSKFIKLKRGYENV	298	USER	zzzz443
612	my_seqs_16minnow_6_2ct747.1@PF05840.12	PF05840.12	my_seqs	MPCFSPISVPKRGFVDLRVTVACGQCIGCRVDRTEDWTTRIMHEVTLHDLCQFITLTYSDDELPANGSLVKKDFQDFMKRLRHHHKEKVRYFAVGEYGDQLERPHYHAVLFGIDFTDKRPHSKNEHGDQLFTSDLLDSIWGKGHAFFGKVTVQSARYVAKYCIKKVNGPMASEHYGSRSPEFAIMSLKPGIGSGWFEKFQSDVYPSDFVVLNGKKRSPPRFYDERLAAQDEDALQAIKSRRLLKAMEHRSDQTPPRLKARQECLKARINLRKGIL	275	USER	zzzz444
611	my_seqs_16minnow_6_2ct748.5@PF05840.12	PF05840.12	my_seqs	MPCFHPLNGFLHMSGKGISFNPRSGYVDRPMQVPCGKCIGCRLERSRQWAARCMHEASLHPFNCFLTLTYDDDHMPPGQTLVKKHMQDFFKRLRKSIHPHKISHFYCGEYGDQTKRPHYHALLFGYDFPDKRIYKKAAQGYLFRSDTLDSLWSFGLCSIGSLTFESAAYVARYSLKKINGEPAAQHYQGRVPEFLGMSTRPAIGLRWIQKWHADTYPSDTVVTRGHETKPPAYYDKVLKRNDPGLYASIKRERELEALKPENNLHTTPARLAAREEVTKAKTSIYSRNVT	290	USER	zzzz445
610	my_seqs_16minnow_6_2ct750.3@PF05840.12	PF05840.12	my_seqs	MQCYSPLRVNQKGQYILVPCGKCNFCLQNKRVQWAFRNNQELKDALTAHFITLTYDEEHLPTERDRHDTFTYVTLKKNDLIKFHKHLKTCQTRALMKIRKERQLRGEEYKRLKKKWRIKYYSTGEYGTKRKRPHYHCLIFNLHPYVIEKLEENKLWTKGNIHFGDVNQASINYVSKYLIDKDETQQGWDERQQPFALMSKGIGIGYLRKKHYHKARGDHITEYRYYCLDNGHKVKMPRYYKEKIFSKIEREIGAKQAMQRQDEETEKRIQQLELEHGDRQTAVMRYNEQIDHQYNSIRIKSLKLNSL	307	USER	zzzz446
609	my_seqs_16minnow_6_2ct751.4@PF05840.12	PF05840.12	my_seqs	MPCYHPMPAVRMVDGSVKFVSRNKRGVEGDLCLPCGQCVGCRLERSRQWAMRCVHESSLHEANAFITLTYDDSSLPPGGSLVYADFQKFMKRLRKRTRVKISFYVGGEYGEELMRPHFHACLFGYDFPDKEYFKKSASGEKLYTSKLLESLWPFGLSSVGSVSFESAAYIARYCMKKVNGDLAKAHYEVITEDGEIIDRLPEFNHMSLKPAIGKRWLEKFQTDVFPRDYVVMNGVKTKPPKYYDRLFKEENPGVFSDLVAVRELDASLNMADNSYSRLAVKEQVVNARVSLLRRSL	296	USER	zzzz447
608	my_seqs_16minnow_6_2ct752.6@PF05840.12	PF05840.12	my_seqs	MPCYKPLNGYRAQSLTKNGKRKIAFSTSTGYRDLPVTVPCGQCIGCRLERSRQWAVRLMHEAQLHDLSVFLTLTYSDANLPPGGSLRKRDFQLFIKRLRKIHDGKIRYFHVGEYGDATRRPHYHAIIFGCDFADKTFWKKAPSGEKLYISETLQRLWPLGDAYIGQVSIQSAAYVARYCMKKITGEKANEHYKAVDLSTGEIHEIEPEYATMSLKPGIGQGWYDRYASDVFPSDYAVHKGKRLAVPKFYYRKLQVSDPKEAERIKWARVRRASKRKADSTPERLAIREEVKLSQLKSLKRELE	303	USER	zzzz448
607	my_seqs_16minnow_6_2ct753.2@PF05840.12	PF05840.12	my_seqs	MACFYPRDAWYSQRLNPNGKRSLVFKRNEGIVKGDALSISCGLCIGCRLERSRQWAIRCLHESSLYNDNCFVTLTYSPAFIPPYYSLVIRDVQLFVKKLRKRFSSDKIRFFLCGEYGESSKRPHYHALFFNLWFPDARQYGGPRNGFKVYHSDILDSLWGKGRAEFGSVTFESAAYVARYVCKKVLGSSDKAEALRDKEYGMRVDPSTGEVFRPRIPEFVLMSRRPGIGRPWLDRFKSDVFPRDFINLRGKKMRLPDFYSNILSLSDPDKMESLKRLRRASFDRLDNDSFRLPVKERIALSRYNLFSRSLGDDC	314	USER	zzzz449
606	my_seqs_16minnow_6_2ct754.4@PF05840.12	PF05840.12	my_seqs	MTCTSPLRAFRLRDGGVSFIERGDVVSDLALPCGQCTSCRLKRSREWAIRISHEAQLHKDNCFITLTYDDEHLPPDGSLRYADFQQFMRRLRKLHPGRTIRFFMCGEYGSTTRRAHFHACLFGVRFADAQYWKRSTATGAPWIYSSRTLSELWPAGHASVGELNIQTAAYTARYVMKKVTGDAAESHYQVIDQDGVITQLVPEFCRMSLKPGIGAGWFRNYRDDVYTHDLLVDSRSRKGKPPRYYDKLRKREDPNYDENISFPRELRARERAEDTSPERLIAKDEVLRSKIRTLKRTL	298	USER	zzzz450
605	my_seqs_16minnow_6_2ct755.2@PF05840.12	PF05840.12	my_seqs	MTCYYPTVAWQSFSRNSSGKSEILFKSPSGDGFKEIRLPCSRCIGCRLERSRQWAIRCMHEASLWPSNCFITLTYAPEHLPIDVSLDVDHFQRFMKRLRKRFETYDIKTRKLNPIRFYHCGEYGEQGGRPHYHACLFNVDFPDKTLWMRSNGNNVYRSAILESLWPYGFSSIGSLTFQSAGYVARYIMKKQLGKNADEHYFDPYTGVIKRPEYTTMSRRPGIAAHWVEKYSTDVYPRDFVLANGRKMPPPRYYDKLVEKFNPNLWASVFEQRDIIRSSPLDNPNQPSLESKRLNAEARLKQLKRSI	306	USER	zzzz451
604	my_seqs_16minnow_6_2ct756.5@PF05840.12	PF05840.12	my_seqs	MACYHPVQAWKTATGVTMNPRKAAGPPLKLPCGQCIGCRLKRSREWAVRCMHESQLHSDNSFITLTYSDEHLPENSTLVPEHWTVFIRELRRLHSPHQIRYYMCGEYGENFGRPHFHAILFGLDFPDKTPHTRNAQGTLYTSASLEALWGKGFCTVGPVTFESAAYCARYVIKKQLGKSAPAHYTTIDKSTGEVLHRVPEYARMSLRPGIASGWIDQYVDDVYPHDRVILKGRPVETPSYYDRVLKRDDPERLESVKARRVAFAEAHEENNTRDRLKVREKNQLLKLNKLKRTLA	295	USER	zzzz452
603	my_seqs_16minnow_6_2ct757.4@PF05840.12	PF05840.12	my_seqs	MHSANSFITLTYAPEHFPENGSLDYKHFQRFLKRLRARVGPIRFYMAGEYGEQFLRPHFHALIFGYDFPDKVPLGMVSSDNMIYSSDLLFDLWPYGFSSVGECNFQTAAYVARYVMKKITGRQAIPHYEVLNYDTGEITRRVPEFNKMSLKPAIGSTWLAKYFSDVYPHDRVIINSVPTKPPRMYDKILAREFPDIHEDIKYQRFVDSMDKLADNTDARLAVREVCCKARLSQLKRTF	238	USER	zzzz453
602	my_seqs_16minnow_6_2ct758.1@PF05840.12	PF05840.12	my_seqs	MACFNPLVAYRAKMPNAVTGKFSMVFNSRDAACPDDPLKLPCGQCIGCRLERSRQWAIRCVHEASLYERNCFITLTFAPEFLPKSGSLSKRDFQLFMKRLRKRFGAGARYFMCGEYGELNRRPHYHACLFNFDFPDRELWSVRGDVRLYVSRSLSELWPFGFSTIGDVTFDSAAYVARYITKKITGDMASSHYERVDPVSGEVNDLLPEFTTMSRRPGIGRGWFDRFRSDVFPHDRVVLDGRELRPPKYYDRIFDVDFPGVMEDVKEARVKGMKAAAKDFTFERLRTREQHQFLMFDKLKRGYENES	307	USER	zzzz454
601	my_seqs_16minnow_6_2ct759.3@PF05840.12	PF05840.12	my_seqs	MCVKPHFLRSRGEMFPCGFCVECRAKYASEWALRCVHEAALHDASCFGTLTYAKMPERGSLERGALREFMRSLREELAVNVWCSWDPGDGIRHRSCGRMVRRTVSPVKMYGAGEYGEENGRPHYHFLLFGFAFPDRAVLRGGKYPLFRSPLLERVWPHGVSSIGDLSYESAAYVARYVMKKVDQVGRKKKYNVDGETGEMVEIEPEFARMSRGGRTGRGLGYGWFERYGDEVHRNDSIVSGGRELPVPRYYDKVLSERDRAAFDVMKARRARKYADKRLNFGELAARELNAVKRLEMLERSI	302	USER	zzzz455
600	my_seqs_16minnow_6_2ct760.1@PF05840.12	PF05840.12	my_seqs	MTCYFPLAAYRGKSKDASKTSIVFRRSESWKGEKLFLPCGQCVGCRLEYSRQWAVRCMHEAQMHEKNCFLTLTYDHEHVPKDGSLKLEDYQLFMKRLRKEYGPGIRFYHCGEYGEENGRPHYHSLLFNHDFPDRKYFKGSGERSLYTSSSLSKLWPMGHSLIGNVTFESAAYVARYIMKKVKGDEKEAHYGLRKPEYTTMSRRPGIGARWFEVYKGDVYPRDCVVVRGTECRPPRYYDSLLAKEDPSTFELLKIERAKKYSDKYVDDVIDGENRKVSDQDSFRLLVKEEVKRAEANQLIRPLEIE	305	USER	zzzz456
599	my_seqs_16minnow_6_2ct761.4@PF05840.12	PF05840.12	my_seqs	MPCYHPMKAFRPLSDLDGGRLVFNSKKALNPHHPVTVPCGNCIGCRIDRSREWAIRCSHEASMSSTSCFLTLTYSDEYLPHDYSVHVRTWQLFMKRLRKSLRSNKIRFFACGEYGDETLRPHYHALIFNYSPTDKIFYKKTNSDDNLYTSPSLSKIWSYGQVYIGDVTYKSSAYVARYIMKKINGDNAVNHYTRFHPKGHIVTVEPEFCVQSRRPGIGYSWFQKYKTDAFPSDFLVVDGRPHPVPKFYLKLLKQEEAVADETKPYFKALNAVPSAKVVRARIINSLSRATDNTRERLAVREEVKKQKLKTLKRSL	315	USER	zzzz457
598	my_seqs_16minnow_6_2ct762.3@PF05840.12	PF05840.12	my_seqs	MTCYSPMTLYQSKAGPGPNGKTPLRGIMKGDVRKPVTVPCCKCIGCHLERSRQWAIRCVNEMQMQEENGKQNCFITLTYRNEELTYGGEGYTLYPRHLQLFLKRLRKKYGPAIRFFACGEYGDKLGRPHYHAIIFGLDFEDKTIHSVKEDTILYRSNTLDNLWTHGGATIGAANFETAAYVARYVLKKKLGKNREFYKRVGIEPEFVRMSRRPGIGRAWLEKYKSDVYPHDRLIMRGLKMRPPKYYSNIYDLENPEQSAILKERRRKAVEKHAKDNTRSRLAAKLEVKKRQVESLSRKLT	300	USER	zzzz458
597	my_seqs_16minnow_6_2ct763.4@PF05840.12	PF05840.12	my_seqs	MLSCTDPFLSTHGAFPCGKCPACLSTRRRTWAHRIMLETRINPNRSTFLTLTYAEEKCPRTSEGFGTLELKHLQDFWKRLRKNTGLKLRYFAVGEYGELSVRPHYHAALWGLAPCAGSPIIKLPNKGGLQCRCTTCSVVRTSWGFGHVMVGSLTEKSAMYIAGYVVKKMTNSQDPRLNGRAPEFSRMSLKPGIGANAMQEAASTLRQYSLPVPSGFRHERKILPLGRYLRRRLATLISDGTPEGIQKALNTEIPLRANFAAVRTLRQYAWANELHPKEVLKTIIPEIQPARKKETL	296	USER	zzzz459
596	my_seqs_16minnow_6_2ct764.3@PF05840.12	PF05840.12	my_seqs	MACFSPLSGYRARTPNANGRRPIVFNIRDGAADEPIDLACGRCIGCRLERSRQWAIRCVHEASLHENNCFITLTYNPASLPSTNSLVLKHFQDFMKRLRKKFGSNVRFFHCGEYGEVCEHCRKSKYYCECNKYKPYIGRPHYHACLFNIKFPDQEKWKKLKGNQLYTSEILTKLWGKGFCSIGELNFETAAYVARYITKKISGPNAEQHYTIYNHLTGEINKIKPEYITMSRRPGIASGWLTKFKSDIYPSDFVVHAGKKMPLPKFYNRILELDESIDFDLIKRMREIRAKQKNTDLGAARYAALTHHKNLVTKQQLTRSYEYET	325	USER	zzzz460
595	my_seqs_16minnow_6_2ct765.4@PF05840.12	PF05840.12	my_seqs	MHERNCFITLTYNDESLPVGGTLVKKDAQDFLKRLRFWLGSIKISYFLCGEYGDDADRTFRDQYGGQVGRPHYHALIFGYDFREYRPWEQNRAPDSHNYFSQFLEDRWGKGITTVGDLTPATAAYCARYATKKITGPPSAAHYRRTDPNSGECFQILPEFITCSTRPAIGDSWLARYGTDVYPSDEVIHNGKQRKPPRFYDKRLDRRNSRLLRAIKGRRIRRANSRKNRLNSAPERMRVREEVKQGALDNLKRNL	255	USER	zzzz461
594	my_seqs_16minnow_6_2ct766.1@PF05840.12	PF05840.12	my_seqs	MHEAQMHDANSFVTLTYRDEDCPVSLQYRHFQLFMKRLRRSNRNVRFYMCGEYGEEFGRPHYHAILFGKFFADREPLADYAAGQVLYRSAELEKLWPHGFSSIGDVTFDSAAYVARYVMKKVTGDRAEAHYLRETQSGQLVSVSPEFGQMSRRPGIGATWFEKFGSDVFSITRDGCRIGSVERKAPRFYDKCLAKVDPDRVEDLELRRYNKITPEVVAENEPERLAVRQVVAQARLAFKKRSLG	244	USER	zzzz462
593	my_seqs_16minnow_6_2ct767.7@PF05840.12	PF05840.12	my_seqs	MKRLRFKFRDRKIGFFACGEYGGQFERPHYHVLLFGMWFRDCVPFKKSVAGFQLYRSADLDSLWTLGHADIGQLSFESAAYAARYVVDKINGDPAAAHYAGRHPEFVRMSLRPAIGRRWFERFSNDVYPDDFVVVRGRKGRTPLYYDKLLAEREAALLEEAKKARADSAIDLKSLRNRTPKRLAVREEVVRSRLNLYKK	199	USER	zzzz463
592	my_seqs_16minnow_6_2ct768.3@PF05840.12	PF05840.12	my_seqs	MHEAQTTERSCFITLTYDEENLPVDGSLKYRDFQLFMKKLRALTGVKVRFFMCGEYGPLNLRPHYHACIFGDDFRQDRVAAGTSESGERYYESQKLQRLWNKGKSSVQDLTLTSAAYTARYVVDKITGDAAEEHYGGREPEFMHCSLKPGIGYEWFVKFGMGDVYRHDKCVIAGGRMDTAPPKYYDKLYKRTDKTVRVDEWEYARQLRAKAAFEDNTEERLSVKEKVQLARISNQRRTL	239	USER	zzzz464
591	my_seqs_16minnow_6_2ct769.4@PF05840.12	PF05840.12	my_seqs	MPCFRPLTGFKNAHGTGIVFDVSQGFRDRPVTVPCGACIGCRLERQRGWAIRLHHENKMHEHSAFLTLTYDDQHIPEAGTLVKSHVQDFMHALRKHCKRKVDPPCKIRYFLCGEYGEQLERPHYHIILFGYAFEDKRKTAKSQSGEDQWTSETLDSLWQKGKATIAEVTYDSAAYVAGYCVKKITGDQAESHYGDRLPEFIQMSLKPGIGKAWLAMNHNDVYPKDQIVIDGKEIKPPKYYDLQYSKSRPRVYAKVRQKRIHDAQAEHIKQHTTPERLATREELKTRTFNAKKRNLGK	297	USER	zzzz465
590	my_seqs_16minnow_6_2ct770.4@PF05840.12	PF05840.12	my_seqs	MSIRVTHEAQMHKANAFVTLTLDPANVPADGSLDHRHFQLFMKRARFHLKKPIRFYMCGEYGENTDRPHYHACLFGIDFSKDQQYFTTNAQGDDLYTSKTLEGLWQLGHATTGAVTLQSAGYCTRYIMQKKTGSLGELVYGTRTPPYNRMSNRPGLGAAWLQRFRPDVFPCDYVVTTDGHKDRVPRYYDKLNSRLTPEQFDAIKLARNLSSAEHWEDNTDARLAVKATVKAAALKQLSRKTI	242	USER	zzzz466
589	my_seqs_16minnow_6_2ct773.3@PF05840.12	PF05840.12	my_seqs	MQCIAPLRIIQKGSYILVPCGKCNFCLQNRRIQWSFRNQQQLKDSHTAHFITLTYKDEEIPTERDRHNTYTFATLKKEDLKRFHKNLRNAQEKAFKEIKTDRMLNEQEIKRLKKKWQLKYYSTGEYGSKRKRPHYHCLLFNLHPRVLERLEDNEIWNKGTMYFGEVNEASIQYVTKYLIDADTTTQGWDERQRPFSIMSKGIGIGYLRKKHFHKARGDLVTDYRFYCLNNGHKVKMPRYYKEKIYTKIERTIAGQQAMERQEEETEKRIKELEEYYGTRSEAVEKYEEQIQHQYEMIRIKSLNSNKL	307	USER	zzzz467
588	my_seqs_16minnow_6_2ct778.5@PF05840.12	PF05840.12	my_seqs	MPCYHPHEVPKRGFSDLRITVACGQCIGCRLEKTRQWATRCVHEASLHEENAFVTFTYSSKHLPSGGTLDKTHFPAFMKRLRKAHSHTDEFGNHWARPIRFFMSGEYGDDDRRPHYHAILFNYYPKDAVLARRAAGRKEALYTSKELDKLWGMGFCWVGQVSYKSAGYTARYIVKKVTGDLADDHYRSIDPVTGEIHQLLPEFALMSRRTGIGKGWFHKFHTDLYPDDFTISEGRKNGKPPAYYDKLLKRRDAVAHEAIKAKRAEKLLDPKLRANSTPARLAVREEVKQAAVSLRKRNLT	300	USER	zzzz468
587	my_seqs_16minnow_6_2ct779.4@PF05840.12	PF05840.12	my_seqs	MKEQDRHSHAHFITLTYDNRFVPISPNGFMTLDKSAFPLFMKRLRKRLGVSANPVRYYACGEYGSKTHRPHYHAIVFGVPDPELFHQSWTDDGVQIGTVHVGNVSGDSVAYCMKYIDKSNFKANHGRDDRVPEFALMSKGLGSNYLTPAVLSYHHADWSRMCLVKEDGHKIAMPRYYRSRIYSDDDSGFQRSIIQHAMDKKEQDNFDRFSRLYGDSNYTYEEFVDSQRMARYKSFYSNQSSRDGG	245	USER	zzzz469
586	my_seqs_16minnow_6_2ct780.4@PF05840.12	PF05840.12	my_seqs	MAHCLFPVRAILCPIRNRIKFDKEGSLLIPCSRCINCKKNRTLGWVQRVKHELAVHSSNTFITLTYNSDNLKSQSILYDDFKKFILRLRRTTKNKKIKYLVSCEYGTNYLRPHFHAIIFGHQFPNLKLHKTTPRGSKIYRSDQLEKLWNKGFSSIGEANESTAYYIASYCLANTKREILSNDGELIIFKDFMRSSRRPALGLTYFLQNHKNILEQTLHFKQSIPLYYKKKYEQLYPEEHQTLTNHNSEHITSPSCHEKHAKQVIENQKKKLFSEFRDQSVTDEEIAYTKQLEKDRDDYVSYLNGNHI	307	USER	zzzz470
585	my_seqs_16minnow_6_2ct781.4@PF05840.12	PF05840.12	my_seqs	MACISPVTCYWSKKVNPSGKRSLVYSSRGSLDGKPFQRPCGQCVNCRIQITADMTVRLVHESKSHNRNSYLTLTYDKEPEDGSLCHRHFQLFMKRLRQVTGSRLKYYMCGEYGDKNDRPHYHCILFGYDFDDKRYHSQNKNGDKLYTSDELLSYWQLGHCVVGDVAMQSCRYVAGYIQKKIYGEKAADWYMGRKPEYAFGSNGLGLDYLRRYGAQWMDTGFVVVDGAKFRIPRYYDIKYKEIDGLHFDGVKDGRLANGPTNPHELDGSFNRYSAVSESISARLNKRKFDYET	292	USER	zzzz471
584	my_seqs_16minnow_6_2ct782.3@PF05840.12	PF05840.12	my_seqs	MSCFKPVVAYWSRFGKGVTFSYSERSPLNKPLKLPCGKCLGCYKVRINSWANRCVHEASLHEKNCFITLTFNDDYLKPSLDKKDFTLFIKRLRRRVKPLKVRYFHCGEYGDNYFRPHHHALLFGVDFPDKVVHSRKNGVVLYRSDFLESLWPFGFSSIGEVNYATASYIASYINKKVDSNASSFDLSDSDKVDLSAFDPLQPEYVSMSLKPAIGHNWIEKYKDDVYPRDYLVTSKGFKNKPPRAYDKYLQRVNPELYDKVKRNRVEFSALNSIDNTDDRLFVKEECLRAKLMRKFRSYENI	301	USER	zzzz472
583	my_seqs_16minnow_6_2ct785.4@PF05840.12	PF05840.12	my_seqs	MHEASLHDANCSLTLTYSDEFLPVNGSLVPYDTQCFIKRVRKHFGPSRLSFFLCGEYGGAFGRAHYHVLLFGVWFGDSQEFKKSQSGAQLYRSVALDKLWGLGHADIGTLTFESAAYAARYVVEKINGDAAVEHYRGRVPEFVRMSLRPAIGRRWFERFRDDVYPSDTVVVRGHESRPPLYYDKLLGRSEGSLLEEAKAKRASEALKSLPNRSIRRLAVREEVARARLGLYKK	233	USER	zzzz473
582	my_seqs_16minnow_6_2ct786.2@PF05840.12	PF05840.12	my_seqs	MPCYHPVQAWRKSDGVIIFKASRAGGSPLKLPCGQCIGCRLRRSREWAVRSVHEAQMHEENSFITLTYSDDFLPEHSTLVPRHFDLFMKKLRKAIEPRQVRYYMCGEYGENFGRPHYHAILFGLDFPDKEVHQRTSKGITWVSPFLAQLWGMGFCTVGAVTFESAAYCARYVIKKQLGKKAAAHYTKIDRDTGEVIHRVPEYARMSRRPGLGSDWIEKYVDDVYPSDCVILRGRPYEVPGFYDRRLAARAPQALEAIKAERVAYAESHEANNTRARLAVREKVQVSKLKLLKRELA	296	USER	zzzz474
581	my_seqs_16minnow_6_2ct788.2@PF05840.12	PF05840.12	my_seqs	MHADSCYVTLTFDDQYLPEDYGVHVRDLQLFFKRLRKSLGSKKIKFFACGEYGDENLRPHYHSIIFNHDFLDKKLFTTKKGIKLFTSDSLQKLWPYGHTTTGSVTYQSAAYVARYTISKVLDGRAADHYQRIHPLTFKQHQVHPEFMLCSRRPGIGATWLEQYKSDVFPSDFLIVDGKKVPIPKFYTQRLQEAEAIKLKRARRAQANKKRADNTPARLKVRELVLEGRIKQLKREL	236	USER	zzzz475
580	my_seqs_16minnow_6_2ct789.5@PF05840.12	PF05840.12	my_seqs	MCLKPVNLKDANGLQVSVPCGKCPACIKRRASQWSYRLMQQEKNCDSAHFITLTYDNSHVPITPKGFMDLCRKDLQNFFKRLRKAHIPTYKAINGKIHLIPKQQIKYYAVGEYGGKSFRPHYHVILFNADIELIQDAWSYQAPAVKNRKPGKKPIKPCTHNHGKTPGHMGQVHYGKVEAASVGYCLKYMSKTKKIPLHKNDDRTPEFAIMSKGLGKEYLTPNMCRWHLSDKFERMYVNLLDGKKIAMPKYYKDRLYHDYERRMIGEYQRNKMIQKEYAEAAKNATYARDKKESADAAFRRLDWETKKTSII	311	USER	zzzz476
579	my_seqs_16minnow_6_2ct790.4@PF05840.12	PF05840.12	my_seqs	MPCFHPLKGWPSRSVNPTGKRSLTFSEAHGFGSPVEVACGQCIGCRRERARQWAARIMDEAQSHDETSFLTLTYSDDQVPAGNSLDPRALQLFLKRLRRSLAPKRVRFFGCGEYGDLTFRPHYHLVLLGHAFLSDRVFYKRAKTGERLFTSPTLDELWSVDGKSLGFATIGSVTHDSAGYVAGYCLKKVTGDQAKAAAHYGGREPEFMRCSHRIGLEYFKQYRSDLYPDDFQVYKGQKMRIPRYYDKQLPEEELAVYKERRRAKAEAHASNNTPARLKVRETVAKARAAIYSNKEI	296	USER	zzzz477
578	my_seqs_16minnow_6_2ct792.5@PF05840.12	PF05840.12	my_seqs	MPCYSPIKGYRDSSGNLFFHSKPGTNIFKVPCGQCVGCRLERSRQWAARCMNEASLHAENCFITLTYRDAPQSLDYRDFQLFMKRLRKHFPKVRFYMCGEYGEEGNRPHFHACLFGINFPDRVKFSRSLYRSPTLERLWPHGFSSIGEVTFESAAYVARYIMKKVTGDIAEQHYSYVDPDTGEVLQRVPEFSHMSLKPGIGAGWLDKYRSDVYPNGDMVVRGVESKAPRYYDKLYRRHDFQVNLNHDLFEELKAKRRLNARLAWRDSLDSRLVVRRKVAESRIKRLKRSTF	291	USER	zzzz478
577	my_seqs_16minnow_6_2ct793.3@PF05840.12	PF05840.12	my_seqs	MHEKIMHDRSAFVTLTYDDKHLPPGGTLKKQELQLFMKRLRKRRPAGIRFFAAGEYGELTARPHYHLLLLNTDFPDMRFYKPARSGDDLYTSKELEELWPFGHSDIGNVTFNSCAYVARYVVKKITGDKAAAHYAGRDPEFVLMSRRPGIGLTWYIAHGRDAYRHDTTICNGKEQNLPRYYDGKYEAFNPKRLAQLKSLRKRRALLQKHDNNSRRRYVKEMVATAKLNLRKRSEQ	235	USER	zzzz479
576	my_seqs_16minnow_6_2ct796.3@PF05840.12	PF05840.12	my_seqs	MSCYSPMKAYRPLSNIDGGRLVFNPAKALNPNNPISLPCGQCIGCRIASSQETATRCYHESQMHPENAFVTLTFSDDHLPENYSITKRDLQLFIKRLRKHCGTKKIRFFGSGEYGDNYGRPHYHALIFNHDFNDKQHYSTCPHTNQKLYTSNSLSSLWTFGHSTTGAVTYQSAAYVARYIMKKINGDRAVDHYTRLHPLHLTYHQVEPEFVLRSGNLGYSWFQKYKSDCFPSDFLIVDGKHTRVPRYYDQLLKKEEQPRPDAKFFEALNTPLYRLKKQRRISSGAHAEDQTPARLRVREFVKTSQLNRLQRNLKDH	316	USER	zzzz480
575	my_seqs_16minnow_6_2ct797.3@PF05840.12	PF05840.12	my_seqs	MRCISPILAKGTTKMDPTWVPCSRCGYCLATRQISWSFRLQEEFEQSKFPALFLTLTYDNENLPWTLDECPIIRKHFGLLLDEPTLLTRDVQLFNKSLRKENAKHTEEQYRYYAAGEYGETYGRPHYHLIMFNVHPETITRITSFWKHGLLDLRYCDGKKAVYAYVANYVVNGYSQALRVNKRPFSLMSKRPYIGHSYVVRMYDYHKRNEIAYLERGEKKMALPRIFKNKIFTTAELNAMKQPAVEQHEMKLANELHRLRLKNGPDYDGFKYIEKQRIYWEQDYKQKAKHNDKHEFRKGTLRSSIPIGERLNRAFKSAE	319	USER	zzzz481
574	my_seqs_16minnow_6_2ct798.4@PF05840.12	PF05840.12	my_seqs	MECIRPKYISKQDIVVPCGACAFCSSTRRSDWATRLHYEARMHYGSKFITLTYANPHLTWAHGSPQLVKSDLQKWFKRIRKKGYKVRYYAVGEYGSRTYRPHYHIILFGSVSDRDIRNAWPLGQVHIGTVTMASIQYCLGYIVNGKGWTMRHNRVAPFCTMSRRPGIGANYLSDAMKAWHKSGRKNYVLVDGVKRHLPRYYKGKIFSKIDHVRIAVRSQKETFAAMVKWIRSAPIARMKNPLKYRDEQLRRLAKSIRLKSKENLTI	266	USER	zzzz482
573	my_seqs_16minnow_6_2ct799.2@PF05840.12	PF05840.12	my_seqs	MPCYSPLHGYSSRHLTANGKRKIVFDRSAGYTDMPITVPCGACIGCRIDKSRQWALRCVHESKMHPTSCFVTLTYDDEHLPPYSSLDKPELQLFFKTLRNRFGQFRYYGAGEYGENLGRPHYHLILFGLDFSEDRRPYKKNPQGDQLYKSKSLTHAWGKGDVIISAFTYATAAYTARYVMKKVTGKHAYGHYSKIDPYTGECYSITPEFALMSLRPGIGTTWYEKFKSDTFPSDYLVHQGKKHPVPRFYSDKLKKTDEVLYVKIKHARKLSQTENAANSTPDRLFTREQVKLSQLSTLQRNL	302	USER	zzzz483
572	my_seqs_16minnow_6_2ct800.3@PF05840.12	PF05840.12	my_seqs	MDTAPCAAVFACDMPCTNPVHAWQPFGYTDKGKMAPVFKMDKGNKYEPVQLPCSKCPGCRADQRRDWGVRCYHEAQQYTQSSFLTLTYANAPPAINKRDLQLFLKRMRDNYGSLRYFACGEYGGKTNRPHYHMLIFGHDFMAGPHVAHIDADRYINARVERTWGHGQVEISSLTPDRCFYTAGYCMKKAGQADTFSIQSRKPPIGQRWLQDNWDNLSRLGHVVIDGHVNPIPKVYFKWMEQELEPVRLKKRQYLAKQSKALQYQKLKSGESRQINIAAKHSGKGETL	287	USER	zzzz484
571	my_seqs_16minnow_6_2ct801.5@PF05840.12	PF05840.12	my_seqs	MVCYAPLTAYYSKAVNPTGRRSLVFDVRKSHDGFPIKVPCGQCIGCRLARARSWAVRCMHEVRCFDVSSFVTLTYADCSLPTAGTLVKRDLQLFMKRLRKVRPVGLRFFACGEYGERTFRPHYHLLLFNTDFADKRFYKTSSTGFDLFKSDELRGLWPAGDNIIGGVTFESAAYVARYCLKKITGPEAEAHYAGREREFTVMSRRPGIGLSFFEKHGPEMYRHDSAIMSGREVALPRYYDTKFEAVDSVEYDRVKVDRRLRSQDHMEDQTLRRLRVREEFEERKSKLFVRET	292	USER	zzzz485
570	my_seqs_16minnow_6_2ct802.3@PF05840.12	PF05840.12	my_seqs	MKCLSPLYLEQGEVGCGQCMPCRVNKSRLWTGRLLMEQNCWPMHMNYFVTLTYDEEHVPTAPDGTLTLSKPDGVAFRKALYHRIGNKLRYFLVGEYGDDFDRPHFHMMAFGYPEAPDFTTDPTKDPVSAMFKKSWDKGFVTASYATGERAAYICGYTTKKITGAKADTHYGSRLPEYSQMSRRPALGDHFVQRLSLYLKSPQGGRYLVANGDVPNAFTMRGKQWPIGDRHRRMLRNFLDLPPTRREVYADRGELPPLPPVDPAEFSTRSIRYEKTSARRAVFQSRTQRLA	290	USER	zzzz486
569	my_seqs_16minnow_6_2ct803.4@PF11726.7	PF11726.7	my_seqs	MACFRPITAYKLEHGGVTFNRNERGVLCDVQLPCGKCTGCLKARAQGWAVRCMHEASMHDLNCMVTLTYEKHLEPVNGLDHSHFQAFFKRLRQMLRRSDHQVRLSNPSHPYTRIKFFMSGEYRPGLQGPHYHAIIFGMDFLDKKWFKDNERGDPIYISRKLQDLWGHGFCSIVDVTLDSCAYVARYCLDKVHGQLADFHYMGLTPEYSRMSLRPAIGKEWLEKYHRVTYRDDAVVMDGRRYKPPRYYDKLAKSVCADRLEVVKEDRELFALRPEQKWNATPDRLAVREEVALQKLKLRERDLS	303	USER	zzzz487
568	my_seqs_16minnow_6_2ct804.5@PF05840.12	PF05840.12	my_seqs	MCLYPTLIKNKKYTANKKNGGQVPPVYDNRVMYVPIGCGGCIECRKKKSREWKVRLLEEIKREKNGVFITLTFSEESMKDLSEKVQENGKLEGYNLDNAVATQAVRYFLERWRKKYKKSVRHWLVTELGHNGTERIHMHGIIWTDNWKV	149	USER	zzzz488
567	my_seqs_16minnow_6_2ct805.4@PF05840.12	PF05840.12	my_seqs	MTCISPIWVSKVAQFVPCGRCGFCIKKTIDAWCLRLGHEMEYSSSARFITLTYNDESLSYDVRTREPVLVKQHLQSFMRSLRKKNPGIRYFAIGEYGTEGGRPHYHAIVFNLELDFSDDLVTRSWSRGFVSGSPATMGRIRYTVQYMAAPQLASKASWSRPFQIMSRRPGLGAGYLTRSKKGFTEGGVIR	190	USER	zzzz489
566	my_seqs_16minnow_6_2ct807.6@PF05840.12	PF05840.12	my_seqs	MCMTPLNLKRDGANNTIQCGKCPQCVARRTSAWSFRLTQEDKRSKSSLFLTLTYGNSNCPVSKKGYMVLKKRDIQLFIKRLRKANSKHTDMPAIKYYAVGEYGGRTQRPHYHIILFNAKLELIQPAWDLGQIHYGKVSGASIGYTLKYMCKTKRYPLHANDDRISEFALMSKDLAVTT	178	USER	zzzz490
565	my_seqs_16minnow_6_2ct808.3@PF05840.12	PF05840.12	my_seqs	MLQKLTSLMLLLPSCEEVSDCDMACTKPITGYYAKSTNPSGKRSIVFDRKRAFSDLPVVLPCGMCLGCRIDKARQWSLRCVHEAKQHVFNSFVTLTYEDDHLPSDSAVNKRELQLFFKKLRKAGFVFRYYASGEYGTINNRPHYHVLFFGIDFHEDRRLHRIQNEKRYYTSETLTRIWGNGRADITGLNITTAQYVAKYIIGKKLGKDAEDDPVYSRLDLSTGEWFSVNPEFVLMSRRPGIGSDWYDQYHTDAFPSDFLVHEGRTYGVPRYYTNKLRSKDESAFKPIRAKRRREAEINKRTPEQLDAKHIILQQKENQNRRNKV	324	USER	zzzz491
564	my_seqs_16minnow_6_2ct809.4@PF05840.12	PF05840.12	my_seqs	MPCFKPLEAYRPRDTRSKKLIFSYNPKTCDSITPIMLPCGQCVGCRLERSRQWALRCVHESKMHKDNCFITLTYATEHLPPDSSLHYPDFQKFMKRLRKKYGEGIRFYMCGEYGENFGRPHFHACLFGHNFTDLKLWKETNGQKLYRSKELEQLWPFGHSSVGSVTFESAAYVARYIMKKITGEAAEQHYTFRKSFNRGDIKAPCRIYANESQARHCKNLVPKILH	226	USER	zzzz492
563	my_seqs_16minnow_6_2ct810.3@PF05840.12	PF05840.12	my_seqs	MYVGCGRCNFCLQSRRMDWCFRIEWEQKVASSSKFITLTYADEYLPIDLQSGQGTLDKGDLQDFFKRMRHTNKKFEGKDRRPLRYYAVGEYGTDGKRPHYHIILFNAKRETIRRLAKTWPLGQTHVGRVTPASIGYTTGYVISSKQDYGTLASPFATMSRRPGLGNNYLKSNSKWHRPELSLGGVNRFFVQDKGNERRLPRYFKDRIFNSDEKKAYAIQAMKAVDKAYNDELTRLKRYNRDPEALYQEALRTKHNSISHKNKKLRSI	267	USER	zzzz493
562	my_seqs_16minnow_6_2ct811.5@PF05840.12	PF05840.12	my_seqs	MPCEAPIRAYQPAVGGPLQFNPPNPNQRATTYQALDVPCGTCILCRNETARQWAVRIAHEAQQWKENSFITLTYSEENIPKHGSLDYQDLVKFWKRLRKEIGSLKYYAVGEYGDKTQRPHYHACLFGHDFTIGGITTRDVPNKLWMNPMLDRCWGLGQVSIGKLNFETARYTASYVTKKLKSKQKYVRIDETTGELIALVQPRAFMSKNIARDWWDAWKQGVIDHDRVVINAHPQKPPKAYDRWLLNENETKMKEIKDLRKSKAQTLTPEQNRARARNAHARAKSKSKSV	290	USER	zzzz494
561	my_seqs_16minnow_6_2ct812.4@PF05840.12	PF05840.12	my_seqs	MQVPCGKCVGCRADRGMAWMIRMYHESTMHKQNSFLTITYDDNNCPQNINKRDLQLFFKRLRKSEGKLRYFACGEYGERTRRPHYHAVIFGHDFRGGAYAINEKLYGNPKLTQIWGLGQVSIGDVTPESCAYVAGYSVKKITDPETFNLMSRRPGIGAGWINRYWDDIARTGKCIIQGREYVIPKKYLETYDAEFAQIKEKRKAFMKNQHPEFVCRRREQHAVRETNLKSRQSLKHSQEKI	241	USER	zzzz495
560	my_seqs_16minnow_6_2ct813.5@PF05840.12	PF05840.12	my_seqs	MCTREITAYHNPCGGRPIFGWEGIKNGLQELKLPCGKCPECCKDYYTMWATRGSRELARWDTSLFITLTYNEENLPDDNSLDKKHVQDFIKRVKKEFHSSKANPIRQTYCGEYGSTTGRPHYHVILYNCDFTDRKPHYTSNAGHQVFTSKKLTDLWGKGNAEFGFATPASIAYLYKYILKKKSRKEKLAGPLLIETPDGVTHEVAHEFIESSRNPGIGAHLRESESIKKGFLSVNGVRTKLPKYYLNWLKENEPNVFAKIQDKKFDFMSNRPKETSLRKKQKEDAQKKLTDTRKKL	296	USER	zzzz496
559	my_seqs_16minnow_6_2ct815.5@PF05840.12	PF05840.12	my_seqs	MPCFHPLTGWPSRHVNPSGKRSFTFSEAQGFGSPVPLPCGQCIGCRLDRAKAWSLRLMHEAQFHDQSAFITLTYSEEHLPPDRSLSMADYRDFWKRFRRALAPVRVRFLGCGEYGDDFGRPHYHAIVFGHAFLEDRKRHSKGKHGDQIYTSAFLDERWGLGNTYVGSVTQQSCGYVARYCVKKVTGERAAAHYQGRTPEFLTCSKGLGQAWFDQFSSDVFPDDAVIMNGRRNRVPRYYDNQLPEDLLAEYKAARIARAEKYAWNNTPARLAVREEVTKARVTSLKRDLPT	290	USER	zzzz497
558	my_seqs_16minnow_6_2ct816.7@PF05840.12	PF05840.12	my_seqs	MPCYHPLTGYKSQITNKSGKRSLTFSPQHGFVDLSVTVPCGQCIGCRIERSRQWALRCMHEAKLHRGSCFITLTYDDEHMPPGSTLVLADLQKFMKRLRFKLQKPIRFYACGEYGDQLDRPHYHAIIFGEDFTSDRKIHSKGNSKSPNYTSKLLTETWGLGHAMIGQLNYQTAAYTARYIMKKVGGEMAETHYQRTNPDTGEIYQLKPEFATMSKKPGLGSGWYDRYKTDAFPSDFLVFQGKKTTVPKYYLDKLERESLLEHKAVKAKRRTALSKHKANNTPERLAVRKEVKLSQIKTLSRNL	303	USER	zzzz498
557	my_seqs_16minnow_6_2ct817.4@PF05840.12	PF05840.12	my_seqs	MPMTIKGERLFVPCQKCNFCLQNKRNEWAFRISYETKRAKTADFLTFTYDEENLPLADLKPNQYSKQELTYAILVKSDLALLMKSLKQKQARWIKDNPAYRLKVKEWKIKYYAVGEYGTKRNRPHYHAIVFNILPQILKNIKDVWPYGIVHRGDVNADSIGYTAKYVIDRKKDTDFTDPRPKPFALISKGIGEQYIAKRGKWNRDGKRLYVTAADGIKVRLPRYYKDKIFNQEERNELGKKAAEEQEEVQLKKVEELARQNGSWEKGVKAYNERIKHAHDSIKSKSLKQNKL	292	USER	zzzz499
556	my_seqs_16minnow_6_2ct820.5@PF05840.12	PF05840.12	my_seqs	MRRGYSRLQLPCGQCIGCRLERSRQWAVRILHEASLHELSCFVTLTYDDAHVPEGGSLRKRHFQDFMRKLRKVSAFPIRYFHCGEYGELLKRPHYHAILFGVDFADKKLWKQSAAGPLFRSEILEKLWPFGFSSIGAVTFESACYVARYCVKKVSGKKAVRHYESVDRETGVITRLLPEYVTMSLKPGIGHDWFKCFSSDVFPSDEVIVNAKAAKPPRYYEKLHTVVDAAVMEGIKARRLAKADARFDDNSPARLRVKREVAQARLNLKRRSLDALGNDGGV	282	USER	zzzz500
555	my_seqs_16minnow_6_2ct821.4@PF05840.12	PF05840.12	my_seqs	MPCYSPLTGYKSKHLTENGKRKITFSRNHGLTDLVMTVPCGQCIGCRIDRSRMWAIRCVHESKLHEKNCFITLTYDDENLPPDLDLQKTDLQKFFKRLRKQCGEFRYFACGEYGDKGLRPHYHAIIFGLNFSDDRKQHSSSNDKIYFKSDTLTKIWGKGHCLLSTFTYATAAYTARYVMKKQNGKNAGQHSNYTRLTTDGELYQVSPEFACMSLRPGLGSGWYDRYKSDAFPSDFLVHEGKKHPVPRYYLDKLSREAETDSQQIKMKRKMERKKSAPNNTPDRLAVREECKQSQLNQLKRSL	302	USER	zzzz501
554	my_seqs_16minnow_6_2ct822.5@PF05840.12	PF05840.12	my_seqs	MPCYHPIEGYRSRVTTMSGKRALVFNPKDGYVDLPVTVPCGACIGCRLDRARTWSIRLMHEASQHDLSIFVTLTYRPDAEPEGRSLVKSHFQSFMKRLRKSHGSKIRYFHCGEYGDTSARPHYHAILFGIDFADKVKHTTTPLGETLFSSETLEKIWGHGHCLIGSVTPESCNYVARYITKKVTGEKAKAHYETLNLATGEIYSRTPEYITMSLKPGIGADWFKRYASDVFPSDYVVERGKKTSVPKFYTRKHLQENPEAERSLKAKRIKQAALRKHDSTPERLAVRKEVKLAQISQLKRPI	302	USER	zzzz502
553	my_seqs_16minnow_6_2ct823.5@PF05840.12	PF05840.12	my_seqs	MCLYPKLILNRKYLPNKKNKGIVPEITDLRTKYVPIGCGKCMECRKQKKMQWQIRLQEELRTDKTGKFVTLSFSDESIIELENEVNKEAEEPLTGYELDNAIATLGTRRFLENWRSKNKTSVKHWFVTELGQTNTERIHIHGIIFTRNIKHIKLKWTYGNVWIGDYVSERTVNYIVKYISKTDIKHKEFKAIVLTSPGIGKNYINRLDSQRNKYKKKDTDETVENTPFVMITIKDETFGAFGQYRITEVYKTKEECEKELTQITWNRIIQIITLVNEMLNKKN	283	USER	zzzz503
552	my_seqs_16minnow_6_2ct824.3@PF05840.12	PF05840.12	my_seqs	MPCYSPITGFASRVLTANGKRKITFDRSAGYTDMPMTIPCGGCIGCRIDKSRQWALRCVHESKMHPCSSFVTLTYDDAHLPPFSSLDKPELQLFFKTLRNRFGQFRYYASGEYGENLGRPHYHLILFGLNFAEDRRPYKKNPQGDQLYKSKSLTLAWGKGDVIISDFTYATAAYTARYVMKKVTGKLASEHYNKVDPYTGECYSITPEFAVMSLRPGIGSTWYEKYKSDAFPSDFLVHQGKKHPVPRFYSDRLKSQNELLHKDIKFKRKQAQKDNAHDSTPDRLYVRETVKLSKIQTLKRTLQ	303	USER	zzzz504
551	my_seqs_16minnow_6_2ct825.5@PF05840.12	PF05840.12	my_seqs	MACTKPITGFYAKSTNPSGKRSIVFDRKRAFSDLAVTLPCGVCIGCRIDKARQWALRCVHEAKQHVFNSFVTLTYDDDHLPPDGTVSKRELQLFFKKLRKAGFCFRYYAAGEYGTVNKRPHYHILFFGIDFHEDRRLHRIQNDKRYYMSETLTRIWGNGRADITGLNITTAQYVAKYIIGKKLGKDALDDPAYSRLDLSTGEWFSVNPEFVLMSRRPGIGSDWYERNHTDAFPSDFLIHEGRTYGVPRYYTNKLRAKDESAFKPIRAKRRMESHLNKKTPEQLDAKHIILQQKEKLNSRSKV	302	USER	zzzz505
550	my_seqs_16minnow_6_2ct826.4@PF05840.12	PF05840.12	my_seqs	MSCLRPITIRQKGELVTVPCGRCPNCFYNKIAGWTFRLLEEERHSISSQFITLTYDTNHLVCTPYGKASLTKYDLQNFFKRLRKNKCNRGRNIKYYAVGEYGSQTKRPHYHAIIFNAHIDSFQSAWTLDKQLIGDIHYGDVSHASIGYTLKYLNKKSTIGLIGDDDRHPQFSLSSNGLGLSYLSQNILSYHMADLYNRNYLTLPGGQKCPMPRYYYEKIYDGYNRDLLKMSGSLIRQDEFYKNFVTGYFNSPQSLKDEQLRTIRIQAAFDRLYHENQKQLVL	282	USER	zzzz506
549	my_seqs_16minnow_6_2ct827.3@PF05840.12	PF05840.12	my_seqs	MAQCLKPFFVKQNSDSMLVPCGRCPNCLRRRASAWSFRLMEEEKISTSAHFITLTYDTKHVPISRNGYLSCCKRDLQLFFKRLRKAQGKSSAVPIRYYAVGEYGGQTQRPHYHIILFNAELELIPQAWAKVDRSTGEFNMIGDIHYGDVSVKSVGYTLKYISKPKSKIGRTRNDDREPQFSLMSKGLGETYLGDFIRVDRKKVWIEQSNIVKWHRDDLGNRMYLNLTDGKKCSMPRYYKDKLYTDDERKMIADASRDKFVEDILKQLFKLDAKANIREQHNKKESVHAAYRKQIFFEKQLSKI	303	USER	zzzz507
548	my_seqs_16minnow_6_2ct828.3@PF05840.12	PF05840.12	my_seqs	MSCVKPLKAYKGPGGQVVFSPRDGWLDRPVSLPCGQCIGCRIDRSKSWALRACHEAQRSGANSFLTLTYSPNNLPVDLSLDVSHWQSFAKRLRKERGPFRFFHCGEYGEENFRPHYHAMIFGLDFSEDRVLHKVSKGNNIYVSPSLERTWGLGFVTVGELTYESAAYVARYCLKKVTGDQASVRYARVDDVTGELWYVKPEYATMSRRPGIGKLWLEKFEGDVFPSDGVVFAGRRFKVPRYYDKVFAERDPVGFEAVKERRRRSVEDNRENLSPDRLYAREQILRRKFKEYHREV	295	USER	zzzz508
547	my_seqs_16minnow_6_2ct830.2@PF05840.12	PF05840.12	my_seqs	MRRASDWALRVQHESSCWSTSCFVTLTYARDRVPALGSLDHRDFQLFLKRVRKHAGKKTIRFYMCGEYGPQTQRPHYHACLFNIDFSNDKIPAGKSSSGFTLYHSPTLTKLWGHGIATVQDLTKETAGYCARYIMKKALGHNSETAYQDIDRETGEITQRRPEYSAMSLRPGIGATWFEKFEGDVFPLDQVITNDGGKHTVPKYYDKLMRRRGLVDSDQVEYKRQQRAQVAAPDNTDERRKVRETVHTARVKSLKRELE	259	USER	zzzz509
546	my_seqs_16minnow_6_2ct832.5@PF05840.12	PF05840.12	my_seqs	MANLQCKPISLNTCISPFRVIDAELGVIDVPCQKCYMCKRRRVLGWAFRLEQQLKVSSSQSFITLTYNTDTLPILDNLQHTLNPDDITIFMKRLRNYNDKKLKYYVCGEYGDDTKRPHYHMLLYNAKIDTIQKAWDKGIVHYGNVEMPSIVYALKYIMKPGRIPEFNGDKRQKEFQRMSKGLGANYVTEAVKNYHLSDLVENNHITFLDGKKAAMPRYYKNLIYSEYKRKSLNKLIEIKRSNTILETDETLIKNHYEAVNRNIKIQSLKIKKDKL	275	USER	zzzz510
545	my_seqs_16minnow_6_2ct833.5@PF05840.12	PF05840.12	my_seqs	MPCFHPLDSFRGLDGKMHFRKKDELVSRFKARVGSAYIALPCGQCHGCRLERSRQWAVRCLHEASQHNENCYITLTYDDEHLPTDGSLRYQDFQRFMKYLRKECGNGIRFYMAGEYGDIYQRPHYHACIFGYNFKDLVYIGKSEAGFPLYKSDFLARLWKHGYSSVGALTFESAAYVARYIMKKQSGIGALDVRTLNYATGEVDIRKPEFNNMSRRPGIGRTWFDKYFKDVFPNDQVIINNKVAKPPKYYDTLLKTNDLDMSEIVKFYRVQDAVKQSEHTTPARLAVREQVSLANSNRYKRKF	303	USER	zzzz511
544	my_seqs_16minnow_6_2ct834.3@PF05840.12	PF05840.12	my_seqs	MACYHPISGYKSRTLTKNGKRKLTFSTKDGYVDLPLTVPCGQCIGCRIDRSRAWAMRLMHEAQSWEQKCFITLTYDDENLPYGKTLVKSHFQNFMKRLRKKHGGAIKYFHCGEYGTLDNRPHYHAILYGVDFPDRTLHSENHNGNTLWKSETLSQLWGKGFCLIGNVSYQSAAYTARYILKKVTGERASDHYQSVDPETGEIISRTPEYITASNRPGIASDWIEKYHADAFPSDFLVVAGKKHPVPRFYLKRLERDNKAMHDAIKIRRIRRASTKSAKADNTPERLAVREEIKISQINQLKRG	303	USER	zzzz512
543	my_seqs_16minnow_6_2ct835.5@PF11726.7	PF11726.7	my_seqs	MKCSNPYYMKTVGGLVGCGQCLLCRINDRRKWTLRLMLEARTHALSSWYALTYSKEFLPVESVDITTGQLYYSPSGTLDRAQIDGFFNRLRKTLNGKPFRYFLCGEYGDDNTRPHYHLCVFGYGEEIHNLLKQSWSDPVSRRSFGILSYEGALTQENLQYTVGYTTKKLTKADDPRLDGRHPEFTSHSRGIGVGAVPALVRAFATDSATDHISFTGDIPRALRINGRWWPLDRYLRTKILEELDRGDDITKLAFAKYKTQMSIMQNHREADPEVSISQPSKAYLLESSYHKRNAQSLLNATKRAKLRERKTKL	313	USER	zzzz513
542	my_seqs_16minnow_6_2ct836.5@PF05840.12	PF05840.12	my_seqs	MRCYRPMPMDIKHERIWVPCGKCNFCLQNRRNEWAFRIGYEIKRSQTAHFITLTYANENLPLLRDEQTKATYMVLNKPDIQHFHKLLKQAQNRQFKKDKKPRSFRDKWKIKYYAVGEYGTKGQRPHYHSIIFNIHPDVMRKIKYGEIWTKGEIHRGEVNDSTIQYTAKYVIDAKRPEWTYDPRPKPFATMSKGIGEAYIEKRKQWHTDADRLYVSGKGGIKIRMPRYYKDKIFNETERARIGKMAAEEQEKLEDKKIEELIKQFGNEFDALRAYNEQIRVKHESIKTKSHKLNKF	295	USER	zzzz514
541	my_seqs_16minnow_6_2ct837.4@PF05840.12	PF05840.12	my_seqs	MPCFSPLPYKIGNSLTKAGKSSILVLPRTEANLALYPLRVPCGNCQFCRLKRSRHWAIRCMHEASLYLPSFDNPLARSNCFITLTYNNAHLPEHNTLVKDDFKNFMKRLRKRFVPKCPYPKGHSDRSSWFRQNGIRYYMCGEYGSKYSRPHYHALLFNFNFDFDKYFWQKSPSGSDLYRSPSLEAAWSDKNGSIGYSSVADLTFDSAAYVARYVMKKINGDAALTRYAVIDEDSGEVLFDKVPEYNAMSRKPGIARDWISKHYKDVYSNDSVVVKNTEYSPPKFYDNYYELVSPEDLYNIKQARLNKAKSLVLPESRLAVLSKCKSRQVERLYRNLDDYFDNYFDIGIDP	350	USER	zzzz515
540	my_seqs_16minnow_6_2ct838.2@PF05840.12	PF05840.12	my_seqs	MWAVRCVHEASLHDANCCVTLTYDEDHLPEHGNLVYRDFQLFLKRLRKFVAPVKVRFFCGGEYGDRSSRPHFHALLFGYCFPDLVVHSSRDGVARLWTSVIADRLWQNGNVVVGECTFESAAYIARYLLGKQYGVAGQSNYWNVVPETGEIVFERDREFAHMSLRPGIGADWIRLYWRDCLRAGGVVSRGQVVPLPRSYSRYMSGLDDFVVLKQRMRADAQKLWRDNTPRRLKDKARVAAARLGLSRRVL	250	USER	zzzz516
539	my_seqs_16minnow_6_2ct839.1@PF05840.12	PF05840.12	my_seqs	MKRLRRFFDPERVRFFACGEYGETTWRPHYHALLFGVDFPDKVSYRPAKGNQGALYSSPTLARLWGHGFCSIGALTYETAAYTARYCLKKVGGDQADSHYRRVDPETGEIYALEREFARMSLKPGIGAKWFSRYASDLYPDDFVVIDGKRRGKPPAYYDKLLKASSETRLQEVKDKRIAHMQDPKQIENSTPRRLRDRETVKTAQISLKKRNVS	214	USER	zzzz517
538	my_seqs_16minnow_6_2ct840.3@PF05840.12	PF05840.12	my_seqs	MPCLKPISVSKRGFVDLRVTVACGQCVGCRVDRTQDWSTRIVHEASLHELNIFVTLTYDDDHLPPGQSLVKKDFQDFMKRLRKKHGKVRYFAVGEYGDQLERPHYHAILFGIDFADKRPHSKNDHGDQLYTSELLDGIWGKGLCNYGQVSVRSATYVAKYCIKKVNGSMAAGHYGSKSPEFAVMSLKPGIGQGWFDKWKDDVYPSDFIVVEGKKRSPPRFYDEQLQPEVLSDIKSLRLKKALKYRSEQTPERLKARQDCLEARLNLRKPT	270	USER	zzzz518
537	my_seqs_16minnow_6_2ct841.1@PF05840.12	PF05840.12	my_seqs	MHEAQLHDSNWFATLTYKVDPRSLQHEDMQLFFKRLRKIQPIRYFMCGEYGETYSRPHYHAILFGLQLNDLKVYSENHGNTLYESPMLTKVWGLGHINVGRVTVESANYVASYCTKKVTGDKATDHYERLELETGELYALKPEYAKMSLKPAIASQWLKKYGTDVFNHDHVIVSGRAQRPPRYYDKYLDTIDAEKLIAHKLQRALKSKLTAKENTKQRLKAIETYSYAQFKQRTRTL	237	USER	zzzz519
536	my_seqs_16minnow_6_2ct842.3@PF05840.12	PF05840.12	my_seqs	MPCFHPLEGFHKIGGGLTFERNKSTGIPLKVPCGQCFGCRIDYSRMWAARLVHESRLHEQNMFVTLTYDPDCLPTGGTLVKRHLQLFFKTLRFAIRPRRIRYYACGEYGEQNLRPHYHIILFGHWFADAKLLREDGGHRFYTSDALAAHWGRGLSEFGHVTPETCAYTARYVTKKVTGDKAAEHYERVNPITGELYGVIPEFAVMSRRPGIARDFYDRYRSDIYPDDFVILNGHRSKVPRYYDRLLEAASPSQHLAIKTRRIQRARRARANNTPERLAERETCLKAKISISTRNKTS	297	USER	zzzz520
535	my_seqs_16minnow_6_2ct844.6@PF05840.12	PF05840.12	my_seqs	MERSRQWAVRILHEAQLHDESCFVTLTYRDAPFSLEYRDFQLFLKRLRKEFSPRTIRFFMCGEYGGRFGRPHFHACLFGVSFRDRVFHSVSPSGERLYRSPILESLWTLGFSSVGELTSRSAAYVARYCTKKVAGQASARLRVDSSTGEIQVPEFNRMSLRPGIADGWIRKFASDVYAQDCVVIDGRKQRPPKFYSKHLAEVYPKRFADIEFSRWEKAQAGRKDGTPERLAVREQCARARLALKKRELE	249	USER	zzzz521
534	my_seqs_16minnow_6_2ct845.3@PF05840.12	PF05840.12	my_seqs	MPCFHPIKAWRSREINKSGKRSLVFDERYGLATQPVTVPCNNCIGCRIDRSQQWATRIMHENKYHEVSCFLTLTYDDYHLPEGGTLVKKHMQDFLKRLRKKHGTKIRYFLCGEYGDSSCRAHYHAIIFGCDFADKRCHSKAASGEQLYASATLDKLWGKGHCLIGSVTHQSAAYVARYIMKKITGERAEEHYARVNEATGEWYSLLPEYINMSTRPGIGLDYFKQFRTDMYPSDFEIVKGRKVKIPKYYDRKLEEDSPALIKKLKNRRKRRAKLDAANNTPERLAVRKQCLISKTSQLKRTL	302	USER	zzzz522
533	my_seqs_16minnow_6_2ct846.2@PF05840.12	PF05840.12	my_seqs	MPCYHPIQGYRSQTLTKNGKRKLSFSPQTGYVDLPVTVPCGQCIGCRLERSRQWAIRCVHEAQLHELKCFITLTYDDASLPPGRSLVKQDFQKFMKRLRKETGLKIRYFHCGEYGETDQRPHYHAILYGIDFPDKKFYTRNKQKDTLYTSETLDRIWSKGKCWIGNVTFESAAYVARYVLKKVTGEAAIDHYKSVDPNTGEIFDRLPEYITMSLKPGIGGDWYDKYKGDVYPSDFHVLRGKTMRPAKFYDRQLEKTDPAALKKIKYKRIRSASKHKADQTPERLAVRKEVKLSQIKSLSRNL	302	USER	zzzz523
532	my_seqs_16minnow_6_2ct848.1@PF05840.12	PF05840.12	my_seqs	MPCYSPLHGYSSRIRTANGKRKIVFNRSAGLSDMPLTVPCGVCIGCRIDKSRQWALRCVHESKMHLKNCFVTLTYDDDHLPVNSSLDKSELQLFFKTIRNRFGQFRYYAAGEYGENLGRPHYHLILFGLDFADDRKPYKKNPQGDQLYKSRSLTLAWGKGDVIISAFTYATAAYTARYVMKKVTGKLAPSHYSKVNPYTGEIVPVAPEFAVMSLRPGIGSDWYEKYKSDTFPSDFLVHQGKKHPVPRFYTEKLKKTDIELHGEIKSKRKQSQTENAANSTSDRLFIRETVKLSQIKSLKRNL	302	USER	zzzz524
531	my_seqs_16minnow_6_2ct849.2@PF05840.12	PF05840.12	my_seqs	MPTCSHLCYVTPSRLYPTSRRCLYGSTPQNDLFRLSEKLRAVLWDPPEKHERIAHAWGYPPLMTCFRPYSVRHAVKGGITFRLNEAFTDRPSFNIPCGQCIGCRLERSQSWATRLRHEAQYHEATSFLTLTYDDAHLPDDYSVSTRELQLFNKRLRKAIGPFRFFACGEYGEKNLRPHYHMILFGHDFALTRTPWRKTASGFITYRSHLLEKLWTLGHSEIGTVTTASAGYVARYCLKKVGGDLAKEHYSRVHPITGQIVQVAPEFITMSNKPGIGSAWIEEFKSDVYPSDFVTLDGAKRPVPRYYAKRLTEMEQQLLKHERKMEAAKHAANNSDARLDTREQVQQSRLDRLTRELDETQ	360	USER	zzzz525
530	my_seqs_16minnow_6_2ct850.2@PF05840.12	PF05840.12	my_seqs	MACTSPLTAYKSRTVNPSGKRSLVFNSRSGFSDLPVIIPCGMCLGCRIQRARTWALRCVHESKGHTFNSFVTLTYDDQNLPGNEAIEKLTLQRFFKRLRKAGFVFRYFAAGEYGSASNRPHYHVIFFGIDFHEDRRLYKKSETGNLYTSEQLTKIWGFGHAVIANFNYTTAQYVAKYIIGKKLGKDASDHPAYQRLDVSTGEIFQVSPEFVLMSRRPGIGSEWYDKYSTDAFPSDFLIHDGKKFSVPKYYVNKLEKTDEIMHKHIKKQRRYKQAQNAPDEYTLQARQIILAQREKSKKRGKI	302	USER	zzzz526
529	my_seqs_16minnow_6_2ct851.4@PF05840.12	PF05840.12	my_seqs	MPCYKPLQGYRAASINPKTGKRPVVFTTKGAFIDMPVTVPCGACIGCRLERSRQWALRCVHEAKFHELSSFLTLTYDDEHLPADGSLDHRHFQLFMKRLRKFHHGKIKFFMCGEYGDTTRRPHYHAIVYGIDFADKVRHSKNEHGDTLYRSDTLTNLWQLGHAWLGNVSYRSAAYVARYSLKKVTGEKAKEHYQNLDTGTGEIFQIRPEYIAVSKGFGLRWFEAYKSDCYPSDFLTHEGRKFSVPKYYDKLLERTDPKALQRYKARRISRSKRNQADQTPERLAVREVFKKSQIQTLKRKI	301	USER	zzzz527
528	my_seqs_16minnow_6_2ct852.1@PF05840.12	PF05840.12	my_seqs	MPCYSPLHGYKSRLLTASGKRKIVFSAAAGYSDLAMTVPCGQCIGCRIDRSRQWALRCVHESKLHIHNSFVTLTYDDDNLPLGHSLQKRDLQLFFKKLRKNYAPFRYFACGEYGDQTRRPHYHIIFFGIDFHEDRKKHSTGKRGNPLYTSQTLQNAWPYGHSSVGEFNYATAAYTARYIMKKQLGKDSANRDAYTRFDSVTGELFQVTPEFSLMSRKPGIGTGWYEKYSSDAFPSDFLVHEGKKHPVPRFYFNKLEKEAPDVHQLLKTKRAHARKSDYANNTPDRLYTREEVKLSKIKQLTRDL	304	USER	zzzz528
527	my_seqs_16minnow_6_2ct853.3@PF05840.12	PF05840.12	my_seqs	MCKVRRCVAASGYDMPCYSPLVGYKSSRLTDNGKRKFVSKRTHGFVDLSMTVPCGQCIGCRIDRSRSWALRCVHEAKFHTENCFLTLTYDDENVPLGGTLVKKDLQLFFKRCRNAGINFRYFACGEYGEVSNRPHYHALMFGHAFVADRKQHSRTKKGDVLYTSATLSALWPFGHSIITAFSYATAAYTARYVMKKQIGKKNLQHEQYSRFDHVTGEEFFISPEFALMSLKPGLGSSWYEKFKSDAFPSDFLVHEGKKHPVPKYYSDKLKKEAPDEHDEIRKKRVKARSLAEPDNTPERLFTKMEVKKSKLKSLVRSLK	319	USER	zzzz529
526	my_seqs_16minnow_6_2ct854.4@PF05840.12	PF05840.12	my_seqs	MICKSKITFKQPQTGETITIPCGQCVNCLINKQNGWIIRLLEEQKNCSSSHFLTLTYDDETLPIDDKGQGFVLKHECQLFIKRLRKNYKVPGIKYYLVADYGDITKRPHYHCIIFNLPINVNTKLGMKKATHELDNLWQQGHVDIGTVTPKSIRYVTRYVVDKNKNKALGLETWSLISLGIGKAYLSPQIASFHHKTRKFYYTNPGGSKVPLPNYYKDKLFSKMEKQINAKKLLDESIKNYDEEKYKKTELGEYALQIQRQAIERINKQKLRSKL	275	USER	zzzz530
525	my_seqs_16minnow_6_2ct855.2@PF05840.12	PF05840.12	my_seqs	MSCYRPLKAFRTPSGAVFHEKSGHDILGDLELPCGQCIGCRMRRASDWALRVMHEASCYEDNCFVTLTYDQAHLPTDATLNHRDFQLFLKRARKAHKAPIRFYMCGEYGPLNQRPHYHACLFNINYTDRTPQGKSASGELYYSSKVLANQWGLGNVSVQDLNRQTAGYCARYIMKKALGNDAKTAYQAVDPETGEIIQRKPEYAAMSLKPGIGATWFNKWHRDVFPADHVISEGTKHQVPKYYDKLIRRAGVLDTDQLEFKRQQRAAKSAPDQTDARRRVRETVHEARVKTLRRDL	296	USER	zzzz531
524	my_seqs_16minnow_6_2ct856.3@PF05840.12	PF05840.12	my_seqs	MACHHPIPACIQEDPKQDPISGTWTTCRVITLHPPVGDANIELPCSSCLGCLKDRATAWARRAQHEATRWPYNTFLTLTYNDQELPRDGLHPEHLQAFIKRLRERHRRGDPHIRRSTEPSLRYLACGEYGTERGRAHYHMLAFNCGFTNVRQVGKDLWESDLLNTLWPYGQHRIGELTGASANYVAQYTVKKIGAPTPCDADGVVLPKPFLRASLRPALGAYWLQQFSRDLQHGYLVTEGRKGPIPKSYKQKLQQLDPELLESLVSASQRYQTAKQRSASGGHATFRPPTEAENAQQKAELTLTRKQQHQTHADELRARRLAAETIQRASTASRAPRSAL	340	USER	zzzz532
523	my_seqs_16minnow_6_2ct857.6@PF05840.12	PF05840.12	my_seqs	MPCYFPREGFRSRSLTANGKRKIVFNASDGYRDLPVTVPCGQCLGCRLERSRQWSVRLMHENQMHELSAFVTLTYSDQELPESGSLVKSHFQAFMKRLRKFHGSQIRYFHCGEYGETTRRPHYHAILYGIDFADKKPHKKTPQGDQLWTSETLDKIWGKGHCLIGQVSQQSAAYVARYIMKKVNGEAAQEHYRNINLATGEIYDLQPEYVTMSLKPGIGATWYERFRLDVFPSDTVIQGGRENLPPKYYLGLLARESERASQKVKAKRIRRAKKHSADSTPERLRARLTVKQSQISQLKRTL	302	USER	zzzz533
522	my_seqs_16minnow_6_2ct858.4@PF05840.12	PF05840.12	my_seqs	MVPTLYTFKWLTKSMHEEKCQYMVHQPSKEDIQKFEFQRFESTAHPIIKMIMAQCITPYMLKEQQITVPCGKCPPCRARRSAGWAFRMMQEQKISDTSFMLTLTYNSDTIPITKNGYRSLCKTDVQKFIKRLRKASKIKDYGLTKQIRYYACGEYGTQTKRPHYHLLIYNAHPDNIANAWKLDNKEIGSIHLAPLNMATIQYAFKYLQKAPTVGKHERDDRQREFQLFSKGLGANYLSKNMVAWHKANIAERMHIPIEDGKKISMPRYYKNKIYDDFEKLQVKEFMMEIAEKDWQEMINQYGESLQQVLHDRRVHAFTQMHKKSKQNEKL	330	USER	zzzz534
521	my_seqs_16minnow_6_2ct859.6@PF05840.12	PF05840.12	my_seqs	MPCSHPIQAWKTREGIKFDQRTHGGEALQLPCGRCARCKLEHSRQWAVRGMHELQMHEFSSFVNLTYNDEHCPDGLKHEDFQKFMKRLRKARGVKSCSYYMAGEYGERTLRPHYHAILYGIRFPDRYYFQKSPSGFPLYRSPELERLWPLGNSTIGEVSFESVAYVARYIMKKQTLKGTPEGYDRINLETGERVTVAKEYARMSRNPAIGRKWIEKYNAEVYPNDYVVSRANKAKPPRYYDNYLKTTQPELHEQITLQRKAEASTRKEDNSPQRLADKEAVAIARTKLKSRQLE	294	USER	zzzz535
520	my_seqs_16minnow_6_2ct861.4@PF05840.12	PF05840.12	my_seqs	MLCKKPFRNEAGQEYGCGQCQFCRINRLRTWVGRMQLEAMEHQHNCFVTLTFNNDHVPADGGLSKRPLQLFLKRLRHEVGQFRYYAVGEYGDQSWRPHYHLILFGVSPMQERLVAKCWPCGFVQVGTAEAASMSYVCSYVLKKLTNPKDRRLNGKPPEFATMSRRPGIGFGVVKRIKRAYEQRPVEVRTETEGVLNNRIRIAGSKYPLGRYLREKALDACGFSEDEREDYKIRTMCAVYEQETLRPQERAAKVQAQEGKYSIRKGRML	268	USER	zzzz536
519	my_seqs_16minnow_6_2ct862.4@PF05840.12	PF05840.12	my_seqs	MPCNYPTRAYRTASYDDKGKRYVNVVFALTKGMDVLEYIKVPCGQCTGCKLERSRQWALRCMHEASLYEQNCFVTLTYNEEHLPDLKSLDYRAFQLFMKRLRKQNTGKKIKFYMCGEYGDEGDRPHYHAALFNHNFDDREYYKTTPAGNRLYISETLNKLWSDENKEPLGYATIGDITFESAAYIARYIMKKQNGKDKNWNYAVPDVETGEILYKEKEFAHMSLKEGIGLKFYKKWKSDIFPEDTCVINGVKTLPPKYYLLKYKDEHPEEYDNLLQARQLRGISKQADNTEERLLVKETVAKAKVKFYLKRDL	313	USER	zzzz537
518	my_seqs_16minnow_6_2ct863.4@PF05840.12	PF05840.12	my_seqs	MQCIAPLRINQKGQWILVPCAKCNFCLQNRRVQWAFRNNQEMKQALTANFITLTYDDEHLPTQRHTSNTFSFATLRKEDLKKFHKHLTTQQTRALLTQKKKYKYNSTEYKKLKLKWKIKYYSTGEYGTKRNRPHYHAIIFNLHPWVIEKLELNKIWTKGNIHFGEVNGQSINYVSKYLIDADTTTNGWDERQRPFSLMSKGIGIGYLKKRHFHKARGDLPTDYRFYCLDNGHKVKMPRYYKEKIYTKLELQIAAQQAIERQEQETEKRIEQLTNEYGTRETAIRMYNEQIDHQYKMIRIKSLKNNSL	307	USER	zzzz538
517	my_seqs_16minnow_6_2ct865.4@PF05840.12	PF05840.12	my_seqs	MAVVVPCYHPIPAYQGGPGEPLRLYPPVGTASMSVPCGSCIGCRMSRAVEWGRRCEDEAREWRYNSFLTLTYDDDHKVGELVPDDLQAFLKRLRVDAVRHPSCYLRDAAFGVRFFACGEYGESNGRAHYHALLFNCAFSDLSPVGRDVFRSSAIARLWPFGYHVVGTVTGASACYVAKYNCKGSVGCDSDGVVRRPPFLRMSLKPGIGSGYLDKYRGDLRFGYCVDDGKRKRIPRAYKRKVRQIDPELYEVIDERGYEHRRSRGGEGLDVERLEAGERIAERRYELYGQRVL	292	USER	zzzz539
516	my_seqs_16minnow_6_2ct868.2@PF05840.12	PF05840.12	my_seqs	MACYSPITGYMAKTPNATGKRSIVFNRSAGFIDKEVQLPCGNCIGCRIDKSRMWAIRCVHESKMHKKNCFVTLTYKDEELPEDMSLNKKHLQDFFKRLRANYGPFRYYASGEYGDNTKRPHYHVLFFGIDFSEDRKKFSQSKNGDTTYKSELLSRTWGFGLCDIGSFNYSSAAYVARYIVKKMSGDFADSAYSRYDSRTGECFRVAPEFSLMSRNPGIGSTWYDKYKTDVFPSDFLVHKGKKHPVPRYYADKLQKEEKPVYENIKLNRKIAQLKEKPNNTPDRLAVRETCKKAQIKQLTRSL	302	USER	zzzz540
515	my_seqs_16minnow_6_2ct869.4@PF05840.12	PF05840.12	my_seqs	MATCITPYMLKDPEIAVPCGKCPPCRSRRSTGWAFRMIQQQKVSNTSFMVTLTYNSDNIPITQNGYRTIDKTHLQDYFKRLRKHSSIKNYGYGKISYYACGEYGTNTKRPHYHVLLYNAHPDNIAAAWKLGGKEIGTIHIAPLNMATIQYAFKYLQKAPTVGKSKQDDRNREFQLFSKGLGSSYLTPAMVAWHKADLKGRFYCPDLEGKKVAMPRYYKEKLLLHAVEGDLEELELLKYQLSEHFKEKSAEEYQKLVDEYGESLPKVLHERRINSFIQMHKKERQNQKL	288	USER	zzzz541
514	my_seqs_16minnow_6_2ct870.4@PF05840.12	PF05840.12	my_seqs	MPCTNPIHAWQPLSYTDKGKMAPVFKMDKGNKYEPVQLPCSKCPGCRADQRRDWGVRCYHEAQLYEQSSFLTLTYQDAPPAINKLDLQHFLMRMRKHYGPLRYFGCGEYGGKTNRPHYHMLIFGHDFMDGPHVAHIEPDRYINARVERTWGQGQIEISSLTPDRCFYTAGYCMKKAGQTDTFSIQSRKPPIGQRWLQDHWDNLSRLGHVVIDGHINPIPRVYFKWMEQELEPVRLKKRQYLASQPKSLQYQKLKSGESRQTNIAAKHSGKGEKL	274	USER	zzzz542
513	my_seqs_16minnow_6_2ct871.3@PF05840.12	PF05840.12	my_seqs	MQEMQCIRPMPMTVNGERIHVPCNHCNFCLQNRRNEWAYRLTYELKRSQSAKFLTITYNEEHVPKYKDLPVLDKSHLTLLFKTIKQKQKRLLVIQGKQQKLSQVKKNELYDKWKIKYYAVGEYGTQFERPHYHAIVYNLNPFILGKLNIDALWNKGNIHYGDANEKTISYTAKYLIDAQEEEWQKKFRPKPFAIMSKGLGENYIEARKEWHTKDLKFYVNKQGDKVRMPRYYKDRIFNDEQKKEGGAQALAQAEQVQNERIESLILENGGDELKALEQFQAEIEQQHNRIKLKSLKANKL	300	USER	zzzz543
512	my_seqs_16minnow_6_2ct872.2@PF05840.12	PF05840.12	my_seqs	MPCYHPLDLGRGFQGHATMIVACGQCHGCRLERSRQWAVRCMHEASLYEANCSLTLTYDAEHLRSMSLEYPDYQDFMRKLRLAIAPERVRFFMCGEYGELYSRPHFHACIFGFSFPDRVYLRKSPAGFDLFSSKLLSGLWPHGEAAIGDLTFESAAYAARYVMKKLTGDGEKDYYNIYDPSTGEIVVRRKEFCHMSLKPGIGRDWFDRFHTDVREGRVVVNGVEAVAPRYYMRRLEKLFPDRYEDVVSARREFESNQRKAGELRPERVAVKEVVSKARVRQLKRSL	286	USER	zzzz544
511	my_seqs_16minnow_6_2ct873.3@PF05840.12	PF05840.12	my_seqs	MACINPIELKTGDIVPCGYCNFCLQLKRMDWCFRLSEEQRDARSAYFITLTYSPECLPSHGDLVPDDHKNFLKRLRKFQEKLFDGLLSIRYFMAAEYGEIFGRPHYHYIIFNLIPQTVNALEKIWGKGRVDVGSCTGASIGYVTSYCINRFNYPGREPPFSRMSRKPGLGANYLSKKIIRYHVESKVSDVSRNGVSAHMPRYYRHKIFDDSQRRELRKVQLLEMETTYDRDIKRLKRFHSNPYYYYDERRRCAHEQINSQLKYTL	265	USER	zzzz545
510	my_seqs_16minnow_6_2ct874.3@PF05840.12	PF05840.12	my_seqs	MPCYSPLHGYKSKNLTETGKRKITFSRQSGLIDLVMTVPCGQCIGCRIDRSRQWALRCVHEAKLHKENCFVTLTYDDEHLPPADTLLKTDLQYFFRKLRKSGVNFRYYACGEYGDISQRPHYHAIIFGHQFLKDRKRHSTAKNGDVVYISESLNKLWGNGYCTIGSFNYSSAAYVARYCMKKQMGKDAINHTNYTRVDVDSGVLYQVAPEFALMSLKPGIGSGWYDKYKSDAFPSDFLTHQGKKHPVPRYYTEKLKKEDETTHSKIKGKRKKQAKLLADNNTPDRLAVRETCKKAQTSSLKRNI	304	USER	zzzz546
509	my_seqs_16minnow_6_2ct875.4@PF05840.12	PF05840.12	my_seqs	MPCYYPLRLPHLEHSVPCGRCIGCRLERSRMWATRCMNEANLHRDNCFITLTYSDKNLPVGLGGAGNPTLWPWDLTKFFKRLRKKYGRGNDGTGIRYFACGEYGTQTIRPHYHACVFNLDFADKIPWQKTGENILYRSESLEKIWGFGHCLIGAVTFESAAYVARYVVEKLNGPAASYYEEQSIEPEFVRMSRRPGIGQKHFELYQSDIYPHDSCVINGVNTKPPRYYDKLLKNNNVKMYENIKNNRIIKSNKISIYEKMPKRLSVKERIALSKLKSRSVI	281	USER	zzzz547
508	my_seqs_16minnow_6_2ct876.3@PF05840.12	PF05840.12	my_seqs	MSTRALCVVEYGSKMACYSPLHGYKSKVANPNGKRSLTFSMKSGFKDLQVTVPCGVCIGCRIDRSRMWAIRCTHEAKMHEENCFVTLTYDDKYLPENGNLVKEDFQKFFKRLRKNTGREIRYFACGEYGDQTNRPHYHAILFGINFSEDRKKHSEKQGKKYYVSPFLAKTWGLGHALISEFSYSTAAYTARYVLKKMSGKLAEEHYQRVNVITGELVQVQPEFALMSRNPGIGRKWYDKYKKDAFPSDFLVHEGKKHNVPRYYAEILKQENEHVYKEVKQKRINAMNAQKHNSTPDRLHVRETVKKSQLTQLKRSI	316	USER	zzzz548
507	my_seqs_16minnow_6_2ct877.3@PF05840.12	PF05840.12	my_seqs	MPCYHPREAWRSSETNASGKRPLVFDHTKGLSTHPVIIPCGGCIGCRLERARAWSLRLLHEKQDHELSIFVTLTYSDQYLPINRGLNPLHTQRFLKRLRKKHDAGVGNKLRFFLCGEYGEQTLRPHYHAILFGIDFPDKRKHSTNEQGDTLWTSETLEKTWGMGHCLTGNVTKQSCEYVARYILKKVNGELAEQHYQGREPEFIRMSRRPGIGKNYYDQYQKSLYTRDFVTSNGKQAPVPKYYDRLLEKDNPQLLEQKKIQRTKSALLRKADNTPERLTVRKEVRQARIKQLTRKL	296	USER	zzzz549
506	my_seqs_16minnow_6_2ct878.2@PF05840.12	PF05840.12	my_seqs	MPCYSPLYGYKSALVTKNGKRKVVFSRNKGFADLQMTVPCGQCIGCRIDRSRMWAIRCTHEAKLHEANSFITLTYDDEHLPHDNGLSKDHFQKFMKRLRFAIQPAFVRFFACGEYGDLNQRPHYHAVLFGYDFTYDRKVHSKKKKGEQEIIHYTSELLSKAWGMGRCTLTSFNYSAAAYTARYVMKKQNGKNALQHENYSRLNLSTGEIYQVQPEFALMSMRPGLGHGWYEKYKKDAFPSDFLIHEGKKHSVPRYYLDKLKKQNPEMAIKVTDKRKKMRLTTAADNTSDRLAVREECKKAQLSQLTRSL	309	USER	zzzz550
505	my_seqs_16minnow_6_2ct880.3@PF05840.12	PF05840.12	my_seqs	MSPFLVKSKTENPIPVPCGKCPACAARRTSAWSFRLLQEDKHAESSHFITLTYDTQHAPISQNGFMALDKRDLQLFFKRLRKAHSKGVQHGRPQTIGQQRSPGQAKQHVSLKYYAVGEYGGKSYRPHYHIILFNAKVELIQDAWGLGHVHYGDVNGASVGYTLKYISKPKRIPLHRNDDRQPEFSLMSKGLGSSYCKAQTIFVGQTVIHDGEECIEIVKIKKGYGNMVDWHKSSLENRMYCTLPDGKKLAMPRYYKDRIYTTQERARAGFFTRIESLKRQAEAEASDPNYQVNKDKAILAAFEKQKKNATKLDKL	315	USER	zzzz551
504	my_seqs_16minnow_6_2ct882.4@PF05840.12	PF05840.12	my_seqs	MCYRPRYFKSKDATFPCGICPKCKARHVSAWSFRLLQELRVCSSAHFITLTYDQSNVPTDFFGNLNLSKRDLQLFFKRLRKAQKSALSVKYFAVGEYGGNTRRPHYHIILFNAKLELVERCWENGEIHNGKDGVTGASIGYCLKYILKHKHKRCPFGDSSMQPEFALMSKGLGASYLTESMANWHVADLVNRMYCNLTDGKKISMPRYYKDRLYYENERSAIREAFEISIDKEINEKLSKQTLREFRAEQAAIDNAFDRMYMSAQKTKL	269	USER	zzzz552
503	my_seqs_16minnow_6_2ct883.4@PF05840.12	PF05840.12	my_seqs	MACYSPVTGYLARTPNKNGKRPVVFNRSAGFVDKPLTVPCGQCIGCRIDKSRMWAIRCVHESKLHTSNSFVTLTYDDDKLPLHGSLQKKDLQDFFKRARHIYGNFRYYASGEYGDNTQRPHYHIMFFGIDFSEDRKLYKHNQRSDILYKSDSLNKCWGLGFCTIGSFNYATAAYTARYAIKKVSGKLADEHYSRVDPRTGEFLSVEHEFAIMSRRPGIGSGWYDKFKSDAFPSDFLIYQGKKHSVPRFYTDKLKKEDLSTHKEIKYTRKANQEKNKANSTPDRLAVREECKKSQIKSLKRSI	302	USER	zzzz553
502	my_seqs_16minnow_6_2ct884.3@PF05840.12	PF05840.12	my_seqs	MPCYSPLHGYKARKVTHLGKRQFVFSRKNGYSDLAFTVPCGQCIGCRIDRSRHWALRCVHEAKMHSASCFVTLTYDDDHLPKGGTLVKSDLQKFFKRLRKLYPFRYYAAGEYGDEGQRPHYHAILFGINFFDDRKIHTKKKTGTLFTSETLTKTWGLGHCLIADFSYSTAAYTARYIMKKQVGKNGHEAPQYERLDPSTGEIGFALPEFALMSLKPGLGSGWYDKYHKDAFPSDFLVHQGKKHPVPRFYYQKLKISNPELHRKIQLKRIEKRDETKDNSTTERLRTREVVKKSQLSNLQRNLK	303	USER	zzzz554
501	my_seqs_16minnow_6_2ct885.4@PF05840.12	PF05840.12	my_seqs	MPCYSPLHGYASRTPNPSGKRSITFSRNHGFTDIKMTVPCGICIGCRIDRSRTWALRCAHEAKMHPTNCFITLTYDEEHLSEGHTLVKSDLQNFYKRLRKKGFKFRYFSAGEYGETTNRPHYHAVLFGIDFINDRKRFKETPQGHTLYTSETLTKTWGLGHCLIGHFSYQTAAYTARYVLKKVGGKHAPDHYTRVNPCTGELTQALPEFALMSSRPGIGRTWYEKFHTDAFPSDFLVHEGKKHTVPRYYFDQLKRTNESLHNEIKQKRVIAREKNSADSTADRLYVREECKLSRLSQLKRSL	302	USER	zzzz555
500	my_seqs_16minnow_6_2ct887.3@PF05840.12	PF05840.12	my_seqs	MPCYSPLHGWASRSRTINGKRKIVFNQSAGYTDMPMTVPCGNCIGCRIDKSRQWALRCVHEAKLHALNSFVTFTYDENNLPYYNNLYKSELQLLLKRIRKQYGQFRYYACGEYGDTTSRPHFHVIFFGIDFSEDRKYYKQTKGGEKLYKSEKLNSVWGNGFAVIGNFNYATAAYTARYVMKKVTGKSAQSHYTRTDIRTGEVYQLNPEFALMSLKPGLGSGWYEKFKTDAFPSDFLVHQGKKHSVPRFYTDKLKREDETTHTAIKIKRKKAQAANKSECTPDRLRVREDVKLSKIKTLTRSI	302	USER	zzzz556
499	my_seqs_16minnow_6_2ct888.5@PF05840.12	PF05840.12	my_seqs	MCDNLITVRQGKPDEAQVPCGRCTRCFARRISGWSFRLMMEDRHALSSHFITLTYATQYLPRSTNKFATLSKRHVQLFFKRLRKINAHKLKYYCVGEYGTRFRRPHYHIILFNAEVSTISRAWCNKKGRPIGNIYYGTVTGASVGYCLKYMSKPKGNRMHRRDDRQVEFSLMSKALGAAYLTEAMRKWHEAKLEERMYCVLEGGKKISMPRYYKDKIYTENMRKIVSEAQMYRIEQEQLKERQLYLNDDTYWHNKHAAIKASYSRMHFKALQGRE	275	USER	zzzz557
498	my_seqs_16minnow_6_2ct889.3@PF05840.12	PF05840.12	my_seqs	MLCRNPYMQSGLSFGCGQCMHCRINNRRHWANRLMLESTSHEFNCFVTLTYDDDHLPKTCGCKACSGYHETGTLKPKHGTDFLKRLRFDLSTKNRVCRFYWVGEYGDTTQRPHYHALLFGVSEIETSTIQAHWPYGHVMVGECNIHTASYTAQYVTKKLTKSDDPLLNGRHPEYARMSNRPGIGAYAADSIGDTLLTKAGTYVLESTQGEPPSQILVAGKRQPLHRYLKGRIRRRVGLPEYGINSPSAQAAKQRLQDLLGADALLPEMARKQALLNKTEHLARARLKRQSIWQSQQKGKTL	301	USER	zzzz558
497	my_seqs_16minnow_6_2ct891.3@PF05840.12	PF05840.12	my_seqs	MPCYKPLQGYRAASTNPKTGKRPVVFTTKGAFIDMPVTVPCGACIGCRLERSRQWALRCMHEAKFHELTSFLTLTYDDEHLPADGSLDHRHFQLFMKRLRKAHNGKIKFFMCGEYGDTTRRPHYHAIVYGIDFSDKVKHSKNEHGDVLYRSNFLTSVWGLGHGWCGSVSYRSAAYVARYSLKKVTGEKAQEHYQNLDTATGEIFQIRPEYIAVSKGFGSSWFKAFKSDAYPSDFLTHEGRKFPVPKYYDKLLEKENPKALQRYKARRIARAKRNSHDNTPERLAVREIFKKSQISTLRRKL	301	USER	zzzz559
496	my_seqs_16minnow_6_2ct893.6@PF05840.12	PF05840.12	my_seqs	MTPKLLKHRDAIVPCGRCPECKGRRVSSWSFRLMQEAKIAESAHFITLTYDTKNTSVASGRLTLVKSDVQKFVKRLRKAHGLVHRTIKYYAVGEYGSRTYRPHYHIILFNARVELVQTAWDLGQVHYGTVEGASIGYCLKYITKPKRVPQYKGDTRIPEFALMSKGLGLNYLTDQMVQYHGEDLLNRMYCTIEDGKKISMPRYYKDKLYFPEERKAIAQAYQDKYRDLYVEDPLKRDQQIKAAFQKMERDSIKNNKI	257	USER	zzzz560
495	my_seqs_16minnow_6_2ct897.5@PF05840.12	PF05840.12	my_seqs	MPYGCSQCIPCRINRRRVWTHRIMLEAAQYADNTFVTLTYDEENIPENQSVSPAILSAFVKRHRKHGFKFRYFGCGEYGDNTMRPHYHLAMFGHENCRRGITRIRREQPICCDVCEAIKRSWGQGQVMLGTLEPKSMAYIAGYVTKKMTKHDDHRLEGRLPEFARMSLRPGIGLGMMHDLASTLLEYKLDEKMIDVPLTLQHGTKQFPLGRYLRRKLREMIDRDPNMPEAVRRELQEKMLPLRQAAFDNSQSVKSKVLEQSLGKRIQIEAKENRYRKRGTI	281	USER	zzzz561
494	my_seqs_16minnow_6_2ct899.4@PF05840.12	PF05840.12	my_seqs	MQSGLAFGCGQCMHCRINRRRHWANRLMLESSSHEFNAFVTLTYDDEHLPDSCGCKTCQGKHITGTLRPRDPTDWLKRVRFALGEKERVIRFYLVGEYGDENFRPHYHLMLFGASQFDHALLCEKWSKGLVQTAECNQHTCSYIAGYVTKKMTKTDDDRLQGRHPEYSRQSNRPGIGAYAADCIGDTLTTKEGSYGLIQTHGESPSEILVSGKRQPLHPYLKERIRKKVGAPRLGINSYSCQQAKARLQELLGTPEALPSDQAKQALINKTEHLARARLKRQAIWQFNKKGRHL	294	USER	zzzz562
493	my_seqs_16minnow_6_2ct902.2@PF05840.12	PF05840.12	my_seqs	MPCYHPIPAYQDKPGEEVRLWPPVGTANMEIPCGGCLGCKCTKATEWARRAVHEAKTWKYNCFLTLTYNNEELPADGQLVPQDLQKFLKRLRRYRDRRHPALDTERHLPLGLRYLASGEYGSSGGRPHYHLLLFNCAFNDQYQVGADLYESPLVNKTWEKGTHKLASLTGASANYVAQYTVKKMGATHHNPDGVVIPAPFIRMSLKPAIGAQWLNEYKRDLTHGYLVTDGQKGRIPRAYTKRLAAGTRTDSLLAEEIVWRAAQAARGAPTGRDKKQQLQAMERIHAQKIAVNQQRRKL	298	USER	zzzz563
492	my_seqs_16minnow_6_2ct904.3@PF05840.12	PF05840.12	my_seqs	MSCVCPIDCWRSTEVSESGKCPIVFTVCGADLTRPLQVPCGRCVGCCADRALIWSIRVFHESTLHKQNSFLTLTYSDAPESVSKRDLQLFFKRLRKFAKVRYFACGEYGSHTHRPHYHVCLFGVDFLADSYAISDSLYGNRVLDDCWSHGLCSVGSLTLASAMYVAGYVSKKIGDPDTFNLMSTRPAIGRGWLDKFVDDIRRTGKVVIDGQEFTVPKKYLEWYSDELVNVIDARREFARTGDWWLSREQLPAKQLLYESRNQLKVSQI	268	USER	zzzz564
491	my_seqs_16minnow_6_2ct905.6@PF05840.12	PF05840.12	my_seqs	MELQAVSKCLTPYMLKEQQIPVPCGKCPACISRRTSGWSFRLMQEDKRASSALFVTLTYDTDHVPITNNGFMSLQKKDVQLFFKRLRKLEKNKLKYYLAGEYGGKFKRPHYHIILFNAFIDPLAFKNCSPRDIHPKYTNISKAWTLGSIQQGTVTAASVGYTLKYISKDKRPTHKNDDRVSEFQLMSKGLGSNYLTEAMINWHKSDLINRMYCNIELEKKISMPRYYKQKLYDEYELFLIQQKAKEDQSEYYAEMQKKYGDDWEQQLKMIAADKFRQMYKKSLQNQTL	288	USER	zzzz565
490	my_seqs_16minnow_6_2ct906.3@PF05840.12	PF05840.12	my_seqs	MRCVSPMSVARPPGRSATDRIVIPCGQCFACISNLRESWCNRIMAEQKHSSSSNFVTLTYATEHLKFTSAGLPSLCKKDFQNFAKRLRKKLASMPELQTVKLKYYAIGEYGTKKLRPHYHIALFNFPQLGHISKLIDFISDAWGLGSVHVGKIELASVRYVTNYVINKYVHDEFDEREKPFSLISKGMGISYLTPEIIGYHQNNEEFTMRTLQGKAQLPRYYKEKLFHKDQIKLNRERTQPELDKRYEENQKRRSEFSSGNPFFYRMQAETQARIQYFKKLKGGSTF	287	USER	zzzz566
489	my_seqs_16minnow_6_2ct907.3@PF05840.12	PF05840.12	my_seqs	MPCFKPLQGYHKPSGGWTSSHAASNGIPLTLPCGQCIGCRADKRDEWAVRLVHESRLHQDSMFLTLTYDNNHVPIGYGLDKRHVQLFMKRYRQAISPRKIRFFAVGEYGETRLRPHYHLLIFGHWPKDSKRWNTQEKHCLFTSQLVCDLWGKGLAVHGDLTPETCKYVAHYTTKKMTGLMAKDHYTRLDEFGELHQVIPEFSLQSRRPGIGADFYLKNKNDFRSGDFSLLSGKKQRVPKYYDKLLERENEQLLVSIKDTRKLNARKHRANNTPARLAVREACMRAKVALNTRKEIPHDP	299	USER	zzzz567
488	my_seqs_16minnow_6_2ct908.5@PF05840.12	PF05840.12	my_seqs	MAQCITPYMLKELQITVPCGKCPPCRARRSAGWAFRMMQEQKVSETSFMLTLTYNSDTIPITKNGYRSLDKTDVQKFIKRLRKAQKLKPYELTKPIRYYACGEYGTKTQRPHYHLLIYNAHPDNIVAAWKLDLKEIGTIHLAPLNMATIQYAFKYLQKAPSVGKHERDDRQREFQLFSKGLGANYLSPAMVAWHKNSIKDRMHIPIEDGKKISMPRYYKQKIYDDFEKLKVKEYMLELAETEWQNMVEEYGDQLQQVLHDRRVHAFKQMHQKASQKEKL	279	USER	zzzz568
487	my_seqs_16minnow_6_2ct909.3@PF05840.12	PF05840.12	my_seqs	MRIQQKGSPLNVPCGKCNFCLQNRRNEWAFRLNYELRRVESAHFITLTYSTEHVPIKVIGTRAYLVLDKDHLKYFHKQIKQIQSRYFKNNKVSKTEQKKWRIKYYAVGEYGTKFHRPHYHSIILNLHPEVFRKLENKEVWKYGDIHRGDVNDASIQYTAKYLIDKIPHADLLPKQFALMSKGIGDNYIKDKKRWHKQGGRMYVPDGQKRMRMPRYYKDKIFSSMEKEILGEKAYNEQKKYEDEKIEEIAREQCNGNLSQAIDIYCERIEKRHEQIRIKASKNNKI	285	USER	zzzz569
486	my_seqs_16minnow_6_2ct910.4@PF05840.12	PF05840.12	my_seqs	MRCVSPFVKKDSPHAFPCGKCIPCLKRRVSNWSFRLMKEAEVSTSAFFLTLTYEKTPITKNGFMTLDKTDVQKFMKRLRKSGQKNIKYYAVGEYGGDTMRPHYHIIILNLDLELFVGKQINNQIKLGNIPLDGRVYMWPNTWPQGYVTIGTCTIASVGYTLKYVTKDKVIPIHKRDDREKEFSLMSKGMGLSYVTDEMIKWHRNDLKGRMYIPLKDGKKISMPRYYKKHFYSESEREQINNYLENKEVMEYQKLSEKEIRKKEEIRIASGAQKIKRNESL	280	USER	zzzz570
485	my_seqs_16minnow_6_2ct911.5@PF05840.12	PF05840.12	my_seqs	MACYYPTPAAHDPITGTIELWPPVGSANIYLPCGGCLGCKTDRALEWARRATHEASCWTHNSFLTLTYREAPAELQPEDLQGFIKRLRSAHHRQHLAISREPGQLRYLGCGEYGDRNGRPHFHLCLFNCGLNDAYRVGSELTESPLINQLWPHGIHRIGQLEAASANYVAQYTIKKIGATDCDADGVVRQAPFLRASLKPAIGATWLKKFQRDVTNGFLVFNGTPGPVPRYYRKYLAKHNPQLAEASRHAALALRELTKQRSGSAGHADPSDLSRTEQSEKHDRSIVLQQRQATADEQQARRTAGEIIHHSRNTHLHDRRL	321	USER	zzzz571
484	my_seqs_16minnow_6_2ct912.3@PF05840.12	PF05840.12	my_seqs	MCYRPITLKKTGCVVPCGRCHKCIKRRVSAWSFRLLQEEKVSLSAHFLTLTYDTKFVPIKLSGKLSLCKRHIQLFIKRLRKSQCGNGVSPIRYYGVGEYGGHTERPHYHIILFNAKPELIQAAWSMGEIHFGKVSSASVGYTLKYMMKNKKKMKSWLNGREPEFAVMSKGLGISYLSEEMCNWHIADLTGRMFCGLPGGVKIGMPRYYKDKLYFDLERSAISAAYTIIADKAAVEKMDKQSVKDFINEQKAIDASFDRMYSSSLKTIL	268	USER	zzzz572
483	my_seqs_16minnow_6_2ct913.3@PF05840.12	PF05840.12	my_seqs	MPCYFPLSGYKSNRVNEKTGKRSLVFNKNHGFVDLPVTVPCGSCIGCRIDRSRAWALRCVHEAKFHQHSCFLTLTYDDDNKPLGGSLVKSDLQKFFKRLRKQYGSFRYFACGEYGDSTARPHFHCIIFGLDFSHDRKQHSKNKRGDIIYSSNSLSKIWGFGHCTIGKFNYSTASYTARYVMKKQTGKNAQDHSMYTRLDPVTGELYQVTPEFALMSRKPGLGSMWYDQFKDDAFPSDFLIYEGKKHSVPSFYFNKLKVDNPDLHKQIAVKRSLAQIDAAADNTGDRLFSKFVVKTAKISQLQRSI	305	USER	zzzz573
482	my_seqs_16minnow_6_2ct916.4@PF05840.12	PF05840.12	my_seqs	MATHGCGQCMPCRINKRRLWVHRIMLEKQLHDKSCFLTLTYDQSNLPLGATLVPAHYQKFVRSIRKDFSIRYFFVGEYGDNSHRPHYHAAMFGLDETDTDYIRGKWRYGHIMCGSLTDDSAQYIAGYVVKKLTNKNDPWVVKQLNGRAPEFARMSLKPGLGAGSIPSIASVLESYYGPDVLQAYDGLPPVLQHGKKQLPLGRYLKQKLSDEIFFKKKSSPSAKDWETAIKTRLQLQSVKSSPYESDSSAYQKLNSQKILNIESRAKIWSKKGSI	274	USER	zzzz574
481	my_seqs_16minnow_6_2ct918.4@PF05840.12	PF05840.12	my_seqs	MACERPIILKDHLTTVPCRRCIFCLQEKRDNWTFRVGQEYKKARTAYFITLTYDDQHLPIDNKGRAYLDKKQLVGFLKRLRIRNEREIEKYWRARENSTPMPKMAKTKYFACGEYGSKKKRPHYHIIVFNLFPNTLKYLNELWTEGNIDLKIAKAGAIHYTSGYLLKQTAVIKDGHARQFIIASQHMGEHYLKNAMYHSENLTAKCSINGFSIGLPSNFRNKIFTKEQKEIMRNENEKKRLEKDTIWIDQKTKENIDFDKYQTEQKNLLRENANKKTSKKRKL	283	USER	zzzz575
480	my_seqs_16minnow_6_2ct919.4@PF05840.12	PF05840.12	my_seqs	MKCASPMSIPRPKGLGSTDRITVPCGQCIACLLNKQQYWVIRLTEQQKSSETSHFITLTYDDENLPIDDFGGGHTHKNDVQLFLKRLRKYCKKTGIKYFITAEYGDTTNRPHYHGIFFNLPFHNGNLYYKRKAEKILTNVWKNGVVDVEPCTPKTISYVTKYVVNNNKYPEDKLPTFNLISKGIGKSYLTAEIKKYHLKTKNFHYTTLDGGKRSLPRYYKEKIFSKMEIQLNSKKIQKLSDDEWFKKPEDEQSGKYAREIYEAMVNRIKSNKKLRTKL	278	USER	zzzz576
479	my_seqs_16minnow_6_2ct920.6@PF05840.12	PF05840.12	my_seqs	MCKKPYRKGNLSFGCGQCTHCRINRVRVWVGRMMLESSYHPASTFVTLTYNDEHLPNPPYVSKKAVQLFLYKLRAYAPDRKFRYYAVGEYGEKSWRPHYHLIIYGLYPTETALIEKCWPFGFVKLGTVENDSCSYVASYLIKRMTKKADPRLEGRPPEFSLMSLKPGIGHRIVDSIERNYDNDRGDAALKKTLAPPNTIRLGENGVYPLGAYLSSKVADRLGYTKADKKLLTSERSYILFQKQQGRTVTSIESERLSKLSQQNSKVRIKRRYL	273	USER	zzzz577
478	my_seqs_16minnow_6_2ct921.4@PF05840.12	PF05840.12	my_seqs	MLCSDPFVKNGKAFGCGQCLPCRINRRRIWMHRIMLEALVHNTSSFVTLTYDERAIPKTTTGKDTLRPEDLQKFLKRLRKRLAPLRLRFFACGEYGETTWRPHYHVALFGFGPCARGRTRRLPGKSEPRWQECCDTCSIIGEAWGSGIVEVGELCGQSASYIAGYVVKKMTAKDDARLDGRYPEFARMSNRPGLGYGAIPEVAATLRHFGVENRGGDVPAALRHGSKIYPLGRYLTGRLRVEVGYGPEAPAETLQRLDEGLRLVREDAFSRSISLKQAIKEANEGKREALLGRYKIFNSRRVI	303	USER	zzzz578
477	my_seqs_16minnow_6_2ct922.3@PF05840.12	PF05840.12	my_seqs	MPCYHPITGYYSKKPNPLTGKHPLVFSQDNCLVPIPQVVPCGRCIGCRLERSKQWATRCLHEASLHTSNCFLTLTFDDAHLPSDGSLNVSDFQKFMKRLRKFLSPKQVRFFHCGEYGAKFKRPHHHVILFGHDFDDKVQWKDNNGVKTYLSESLIKLWPSGFSTVSDVNYASIAYVSRYVLKKFSIYQTNSPSDNSLLSVSQQKKLHYGDLHPEYVTMSRNPGIGSKWYDQFKTDIYPAGFCVLDGGIKARSPIFYDRKYELEFPLDYAMLQIERSKKASLHDNSRARLLDKEEIVLHNISTKQRGFENGD	311	USER	zzzz579
476	my_seqs_16minnow_6_2ct925.5@PF05840.12	PF05840.12	my_seqs	MQCMQPFNLKLVEQGKTVPVPCGKCPACYKRRVSAWSFRLMQQERIAETSYFITLTYDTRAVPITNSGYMGLQKKDVQLFLKRVRKVHSGSSVSYIKYYCVGEYGGKSYRPHYHIIIFNLQLELMYSRDDLKLLDYSDYDGQVQVKCLQWPHGMTTVGRVTGASVGYTLKYMSKVSKIPMHKNDDRLKEFALMSKGLGVNYLTEQIIQWHKDAPDERMYVPLLDGKKASMPRYYKNKLYTKNELALVNEKVSANIEKQLQQSKTKTTYKEAKAAVDAAFRKMEITHNQNRSL	292	USER	zzzz580
475	my_seqs_16minnow_6_2ct926.4@PF05840.12	PF05840.12	my_seqs	MPCVFPIPAHRPTGLVGKRVVLGAPVRSFSDDRMQGVLDSAELLLPCGSCVGCQISRAREWAIRCSLEQQFHPVTSFVTLTYSDKYVPSTLSRPDLSLFMRYMRRDVGSFRFFGCGEYGERRGRPHYHAILFGTANLEAAQAAWRKGFVTLEPVTPARISYTAGYCAKKLGFHRPKGEEVDFSTGEVYVHQPPFLQMSRRPGIAGDFRKHWRSWRKSAIWQGREFPVPRFLHASYKENASDSELAALELEKLESAMKPTVRELFASEQIAQSRVSLRSERAVL	283	USER	zzzz581
474	my_seqs_16minnow_6_2ct928.3@PF05840.12	PF05840.12	my_seqs	MQCISPLSVRKQNGKSADRITVPCGRCLYCLQKRQSSWAIRLREELKHSRTAHFITITYDEKSIRWGFKDSSLYLTTDQATRHDDFKSMTPRLEKHEIQAFLKRLRYYLPQTDIKYYLISEYGLQTFRPHYHAIFFNIPYDISTTLGLKKMTRMLDKVWGKGHIDIGEVTDASIGYVTKYLINSTDYPEICDTPFAFMSKKIGKKYLTPQMAKFLKTDVRNYYTTDEGIKTALPRYYKDKVFNVVEKQAIQNKAEEQFLQMTDEEYLSKLDRYKQKIYRKKLLNKKGKL	289	USER	zzzz582
473	my_seqs_16minnow_6_2ct929.3@PF05840.12	PF05840.12	my_seqs	MLCVSPMSVPRPGGRGPTDRTIVPCGKCPGCMSAKREGWTFRIMQEYKNCTQALFLTLTYDPEHVPMTESGCQTLRKNHIQLFMKRIRATASRNPELTFPAPLKYYAIGEYGSKKMRPHYHVMAFNIPNFTDRRKLIKFLEDHWTYGHVDIGNVEPASVQYVTSYVINKYVHDEYDEREKPFSLISKGFGMSYLTPEKVRYHQNNGEFLVRNNDNSKIKLPRYYAEKVFTSFDRELNKLKLQPGLDHKHEENTAKAAELSSNNPYFYRMQLETQARAAFYKKVKKGGTL	289	USER	zzzz583
472	my_seqs_16minnow_6_2ct930.5@PF05840.12	PF05840.12	my_seqs	MCMTPIHLKTLVGEYCPVPCGKCPTCLSRRISGWAFRLQQEEKVCTSSHFLTLTYSTLHLPLLANSRNTLVKKDLQLFFKRLRKRNRNQLKYYAVGEYGGQTERAHYHMILFNAELKTIQPSWELGEINYGEVNEASIRYVLNYMEKKKPIADLFGRQAEFSLMSKGLGSNYLTNNMKNWHKSDLLERAYLPDKGGKKIHMPRYYKEKLYNELEREKIATHQMRSHLLDQDPTDLDPYFNRDKSERELAAFKRMSNSKKRKL	262	USER	zzzz584
471	my_seqs_16minnow_6_2ct931.7@PF05840.12	PF05840.12	my_seqs	MACFSPLTAYRNPAGGKPLFSRRDSAGMELKLPCGQCIGCRLEYSRVWAVRITHEASLHDQNCFVTLTYDDVHLPQNNTLVYRDLQLFIKRLRKSLSPRKIRYYGAGEYGDQSGRAHYHVCLFGWRPGDLKYYSANKGNPLYTSDYLSDIWGLGYVTVGDVTFDSAAYVARYVVKKFKGNGVDDKLIIDCDDDGVLNMRAPERALMSRRPGIGRNWIDQYGKYTYDHDHVIVNGRPVLPPRYYDTVYEITDVDKVEFVKRERRKNARTRKSDSTDARLRVRAQVKLAELNSLTRLL	296	USER	zzzz585
470	my_seqs_16minnow_6_2ct932.4@PF05840.12	PF05840.12	my_seqs	MILSKVRDIRLLGSQDADLLLAEAPFLLPCGSCVGCQISRAREWAIRCSLELQLHPVASFVTLTYAEKYVPPTLSRGPDGHLSRFVRYLRRDVGKFRFFGCGEYGDQGGRPHYHAILFGTADREAAQAAWSKGFVTMSEVTPERISYTAGYCAKKLGFFRPKGEEVHFETGEVYVHQPPFLQMSRRPGIAGDFRVHWRSWRSSAIWQQRRFPVPRFLHSSWKEHASVSELAALELEKVESRMVPTVRELDAHRDIALSRMRLKSERSVL	269	USER	zzzz586
469	my_seqs_16minnow_6_2ct937.4@PF05840.12	PF05840.12	my_seqs	MKCYFHKIVDGNYRACGKCFPCKMQRINDWTTRLHFEELNSHSADFVTLTYNYENLKFPSGKARSRNYGTLYKRDVQLFIKRLRRSDKRPKSLLRSHPIKYISCGEYGTKNKRPHYHLIIFNATQNGIDAAWRNGDKPMGQIHYDPVNPQTIAYVVGYIANSWELRRDSRLRDFQLQLPFLTFSKGLGANYVTPAAVSFHTSEKNLLNRCYVTVDGQKRHMPKYLRQKIYSATAWKSIKEHLQVIAEIPPPIPVPDTDPANIKIFNDRILKTFRKETIY	279	USER	zzzz587
468	my_seqs_16minnow_6_2ct938.4@PF05840.12	PF05840.12	my_seqs	MLCASPISVRTGGRHESMLVGCGQCMPCRVNRRRIWVHRLMLEAALHGDKTFVTLTYDNDHLPAGESLVPADLRNFLKRARKAFEPRRLRFFAAGEYGDTTQRPHYHLALFGYPNCSYGQSRYSRSYRDCCPACDLLRDTWGMGSVFLGELSDSSASYVAGYVLKKMTAKDDGRLLGRHPEFARMSNRPGIGADMMHEVASTLMSLDLDETQPDVPSALRHGTRTMALGRYLHRKLRTYVGKSPDSPEAVAAEQKAELQRLQEAQFSHSGRKSLRDVYVEENLQKIRNLEGKQLLRPKKGSL	302	USER	zzzz588
467	my_seqs_16minnow_6_2ct939.5@PF05840.12	PF05840.12	my_seqs	MKCSKPVALETGPVPCGQCMSCRVNKSRKWAGKLILESHSQGDKFNYFVTLTYDEGNLPAGGTLDKEHGKLFRQALRDQLGPVRFFWVGEYGSQLSRPHYHAMLFGIDWSVDILAVLQKCWKRGFVSADHFNTTRAGYIAQYCTKKITGPKADSHYGSRLPEFSQMSRRPALGDHAVDTVLAPFYRTKAGQVFLERNGDVVAGFRHEGAIYPLTNRHTRRLRVFAGLPETLADLRLLNPEAIPPTELPDVGELAGRRQREVQIETRTKIFRQKTHTI	277	USER	zzzz589
466	my_seqs_16minnow_6_2ct942.3@PF05840.12	PF05840.12	my_seqs	MPCFKPLIGFVSGLLPNGRKNIMFSSGLRDAFHRGEKLPDDVVQLPCGRCVGCRLERSRQWAVRCMHESKVWSDNCFLTLTFDNDSIAKRGTWSLLRSDCQNFLKRLRQKYSGISPIINDDGVEVKPIRVFYCGEYGTRDDFGLGRPHYHFILFNFDFSDRAYLKTVNGYRYDTSEQVSELWPFGNNIVGSVTFDSCAYVARYCVTKVNGEHAKEHYSHSLFGEQLLPEFCQASLKPGIGKFWLDKFGRSDCFNHDTVISRGVKCKPPRYYDRYLEKVDPERFQEIKQSRDESAKDDPDSSAARLWAREQCQIARMKLLTRDL	323	USER	zzzz590
465	my_seqs_16minnow_6_2ct943.3@PF05732.10	PF05732.10	my_seqs	MAQNPAKTLALAKLGEEAYRVLMYAIATLDYENLLVMNQTEAAGEMRMKQQNFGRALNKLIAAEVIEKGPKVSGRNTYRMNPSFGWKGSAKSHRDALNARMKHAGLAVIDGGK	113	USER	zzzz591
464	my_seqs_16minnow_6_2ct943.7@PF05840.12	PF05840.12	my_seqs	MPCSRPRFAHLTSDGKVSFSPLTDNVKRFPTPCGKCHLCLRGRKSELMARLVMEGWSHSASICATLTYADEHLPPGGGLSKRHAQLFAKRLRFELAEQGLGPVRIHTVGEYSPKLKRPHYHVIIFGWRPADSVAAGQSRSGRPECSSEQLTRLWGFGRVTFQDFSASAAAYVAKHQASKLRRKGADELAVCDVDGSWRWLPPEFELRPLRPGLGALFFDKYRAQLLAHGYVVVDGQKVGFSRYFNTLAKRADPDRFEELRELRELVALDPARIANSTPERLAVREEVAKARDNFFNRGGALDVPY	305	USER	zzzz592
463	my_seqs_16minnow_6_2ct945.4@PF05840.12	PF05840.12	my_seqs	MLCKKPFVRGLQAFGCAQCLPCRINRRRLWATRMYLESCTHAASSFITLTYSDENIPSDRSLVPGHTALWLKRLRKAVYPTKLRYFLVGEYGEETWRPHYHAAIFGLGLEYSQVFESTWGLGHVHTGDLTQHSASYIAGYVTKKLTSSDDPRLGGKHPEFARMSLNPGIGANAVPVLANALNDRFGAARIADLGDVPGSFRHGGKSLPLGRYLTQKLRDETGVEKGHAKQLLENLEEMRVLRERAGSQKSFEAIAPFIEWERIRQVETRSKINRKKVKL	279	USER	zzzz593
462	my_seqs_16minnow_6_2ct947.4@PF05840.12	PF05840.12	my_seqs	MECLTPKGISNPKTGKSMAVRCGKCPSCQKFTASQWNIRLIEQEKCTKNNYFITLTLTDDNITWGFDSPTLSKRDIQLFLKLLRKRISPQKVKYFAVGEYGETTKRPHYHLLIFDTGIDSPKVLQNVIYTSWIDKNDESKGFCHVGDVTPDSIRYVSGYMEKDQNGEILSEKVQREFRLMSKGIGENYLINSKNYHLSNEKFTYKIGKVDAPLPRYYRDRIFSEQQREAYAARVVESIPKRSPTEEKNHREALANRISSIKKLKTKRK	268	USER	zzzz594
461	my_seqs_16minnow_6_2ct948.4@PF05840.12	PF05840.12	my_seqs	MECLNPKGIVNPKLGVSMRVRCGKCLACKEYRAGQWTIRLIEQEKCTKNNWFVTLTLNDENITWGKYNPTLNKRDVQLFFKKLRKLLETRISYFAVGEYGSQTKRPHYHILLFNTGVDNKEVLLSLLQLAWTDSKSDGKGFIHTGSVTPQSIRYVSGYMEKGINGEAVSEEIQREFNLMSKGIGKEYLEKNFFYHFENEKITYRYKGIEKPLPRYYRDKIFQPNDRERIFQKIADSKPKRTASQEKDDIRSRIQRIRAKKQLKTERK	267	USER	zzzz595
460	my_seqs_16minnow_6_2ct950.3@PF05840.12	PF05840.12	my_seqs	MQCYKEIIIEHNGKKNLVPCGHCNFCLQNRRNDWAFRLLQENKVSNTSHFLTLTYDNQHLPFTWEDDYATGTTLEKKHLYEFHETVKRSQRRLLKKNYDQWKIRYYSVGEYGTRTERPHYHTIMFNLHPITLSKLQDGMIWGKGRVHSGTVTPGSVSYVAKYVIDKQTEYKDEWPEEKQKPFNSMSRNPGIGANYLINRDWHREINDYDPDNFRIYAMQDGKKVRLPRYYKDKIFKETGEWYKDILTTSLELHNMQLSEEFEKTYIAQIEELEEEYGSTLIAIEKYNERKKHHHDSIRIKSHKLNKL	307	USER	zzzz596
459	my_seqs_16minnow_6_2ct951.7@PF05840.12	PF05840.12	my_seqs	MVCFNPMRPSLARERNPVTPQALARGETVGKRGLVFDSRKALIEGSLLTVPCGLCLGCRLDRSQAWGIRCHHEAQMHESAVFLTLTYRDEDLPDDNSVCVNVSQKFMQDLRNALRARGIKVRFLMCGEYGSKKGRAHYHVIVFGYSFPDRVLDRYTNRGDPLYRSAELDGIWPYGFASIGEVSYESARYTASYAMKQYRGEGAEEHYDRQHPFTGEFHRVSPEFATMSRMPGIGQSWLAKYKSDVYPDDFVLVGGRKLKPPRFYDQQLSDAELEPVKRKRKVRAAAMSAVERSKERRGCREKLRGYKMEFWLDRSGGMF	319	USER	zzzz597
458	my_seqs_16minnow_6_2ct952.4@PF05840.12	PF05840.12	my_seqs	MTCPNQIIIKNKSTGEWITIPCNKKGCTACDQRKIDRLQMETGLYTRYENVTSINTLLLTVADEHQTINEENGKWELNKKQVDTFKRIAKQFQRREWIKTKKKIETFNLLHPNHKRQIPEYKEVKFEIAGEYSPDSKRPHYHGLMLNATTELIKHLTKKLVYNKYGNVMYLTPLWPHGMIGVKNAMGKPEAALRYITKYITKAGSIAYTTANNLQKEFFSKPRGLTKKYLSLLEAYHKDRLTSQIKVGYKSNGQPKFRNMTRLMRKQIFTPGENEEITKQLIEKSTTAIEAQLQEIRQEGYTNPEQQLRIREQHKAKMIKKKFHTRKQHA	330	USER	zzzz598
457	my_seqs_16minnow_6_2ct955.7@PF05840.12	PF05840.12	my_seqs	MPCTNPYDAWPAAPGARSRRPVASPGQSYPGAVAFQIGCGQCLGCRLDRAGDWALRCVHEAHSHDAVSFVTLTYSEEFLPRDGSISKRAHQLFMKRLRKLLGRKLRFLMCGEYGEQLGRPHYHYVIFGEAFRADRVPHSRSGSGELLYASEMLSKAWPYGLALLSDFTHATAGYVARYTTKKITGKAAADYYRRDLIDPETGELRTVDLLPPFLAASSKPGLGSDWFAEFKSDALPSDFLILDGHKRRVPPFYVKRLSEPEREALKRQRRERGREHADNNTPERLDVRHESQFLRAQRLSRDLA	304	USER	zzzz599
456	my_seqs_16minnow_6_2ct956.3@PF05840.12	PF05840.12	my_seqs	MKCFHPIHLQNPGGDSPRDIISVSCGKCLACLQTSRFNWTFRLSQELLNSSSAYFITLTYDEKSNRHTLDKREIQLFIKKLRKASQASVFNELGLNHTTLSKKTKVSQIAPEGANLRYYLVGEYGTKTFRPHYHIILFNLCKSLVPEVEKIWSYGMVHIGKVTQASIHYVTKYLVTKPDSKIVWEIEKPFALMSRRPGLGASYLTKTTQYHKTITRNYLTLPGGITQKLPRYYADKIYNKSDKRVINDKSKIANMKREKIIDEYCKKNNLDPFVYEKNLKQQMIDKFEKSLKNNKV	296	USER	zzzz600
455	my_seqs_16minnow_6_2ct957.3@PF05732.10	PF05732.10	my_seqs	MKNKKKTTNSKKEVQIKKEINSAIKKANKEGLDKIKVNHYNPVKTIVGEKRLTDPDTGEQYLVDLVQKNVYGDNGFYKIWLADLLGLMDEIAKGKMKIFFYLMDHMKKDNIILAGTTTEIAKNCKASMRTVYETLDYLHDKDIIRTIQRGVYQLNANLLFKGGSNARRAILVQYNKIDTIELTKDKQLEI	190	USER	zzzz601
454	my_seqs_16minnow_6_2ct957.4@PF05840.12	PF05840.12	my_seqs	MVESELLVDSLAPREFIKCLKPFQVSAKIAKRFKRSIFDVLGCSFLDVGCGQCPYCRAKTALYWSFRLMCELRVCVTADFLTLTYHDQFIPLDHLGRPCFNLKHHQDFIMALRNRVRRMSDREVFLSGRSRAYWKSHPVKFYKIDERGSKFGRVHYHSILFNLPVNLLRSDVISQCWPHGRYYRGDVTMSSVAYVAAYLINVPDGESFNAKHGDIMRPRMQCSKGIGVSYLSTINKLMARDGSLACRDYLIPMDGKMFPLSRYYIDKLNLSLSVRASRIRKAGDDVRKRYVKFFDDQVNHPDPYSYFLLVRSAGAERLLSAKDKSHSHF	329	USER	zzzz602
453	my_seqs_16minnow_6_2ct960.4@PF05840.12	PF05840.12	my_seqs	MQCLKPKQVVNPIKGEIMPVRCGKCLPCRSFKAGQWTVRLKEQEKCSKNSYFITLTLDDENLPWAYDKPTLSKRDLQLWFKTIRNHYPDMKFKYYAVGEYGSQTNRPHYHVLMFNTEIKEKFIFEKLVEYSWNKGFIHVGEITEASIRYVAGYLEKGIMGEKPLEDVQRLFSLMSKGIGKGYIETHKTYHEKTKKFEYSTGGGSYISLPRYYRDKIFSQNDKEAYSEAIKISMDKEKPKGVRAETNHYDALRNRVIAKQNLKNKRK	266	USER	zzzz603
452	my_seqs_16minnow_6_2ct961.4@PF05840.12	PF05840.12	my_seqs	MRCLSPKTVVNPKTGKKMPVACRKCLPCRKYRAHDWTVRLIEHEKTAKNNWFVTLTLSDDNLTWGYDKPTLVKRDVQLFMMRLRKLFDCKLKYYAVGEYGENTKRPHYHLILFNTNCDDKKAIELIVWQAWKNGLVHVGEVTPASIRYVAGYLEKGIYGENNDETIIREFNLQSLKLGSNYVEKNKNYHEETKRYFYVKEGKKTALPRYYKQHCFSDEAKVQIASTIDLSLDQQKPTRNEALNDLKFRLDRINALNNLKNKRK	263	USER	zzzz604
451	my_seqs_16minnow_6_2ct963.4@PF05840.12	PF05840.12	my_seqs	MPCMHPIPAHRPSGLGSKRVVLGTPVRQFEVDRAQDVLDAAELLLPCGSCVGCQISRAREWAIRCSLEQQLHPVCSFLTLTYADRYCPPTLSKRDLSLFMRYLRRDVGSLRFFGCGEYGERRGRPHYHAILFGSADREAAERAWGHKGFVTLEPVTPARISYAAGYCAKKLGFFRPKGEEIDYETGELYQHQPPFLQMSRRPGIAGDFRRHWRSWRRSAIWQGRSFPVPRFLHASYRESASDSDLAALELEKLELRGSVTVRELLASEDIASARVRLKSERAML	284	USER	zzzz605
450	my_seqs_16minnow_6_2ct966.3@PF05840.12	PF05840.12	my_seqs	MPAWRSAAGGVSLGRPREESRAAEFFSVPCGGCVGCRMARARDWSVRCWLESQQHERQCWSTLTYDDAHLPPTLDKVHVSAFLKRLRARLHPRSVRFFASGEYGEKTDRPHYHAILYGVSQGERAVQEAWPHGYARTDALSPAAIAYVAGYCTKKHARAFSKRERVDPETGEVYAFQPPFVLMSRRPGIGAAAREYWTSWRKFAVVKGRKVPVPRYLHAAWLEHASDAEIDKLASENKSSEVARDLFPQRLEAAELIAQARLLFSHAKRSL	271	USER	zzzz606
449	my_seqs_16minnow_6_2ct969.3@PF05840.12	PF05840.12	my_seqs	MPCLRPFTIKKDTGEETMIPCGNCNYCLMDKRVDWTFRIQQEMKVAKSAFFLTLTYDEQNVPLDDDGNGHLSKVDIQKFMRRLRKQNKKIDRNSVIRYYTIGEYGGETLRPHYHSIMFNCDISVMQHLNKIWNKGFVKIGSVTEASIHYVTGYCMTKNDTPKYLTKPFALISKRSGGLGKNYLVKATKWHKENQALFVQNGLFKHRLPRFYKDKIFDKEEKRILSMKSKELFQAMDKQEVERLSKLHNNPYIYMEERKKFNEKLIGKKLTKSKL	274	USER	zzzz607
448	my_seqs_16minnow_6_2ct971.4@PF05144.13	PF05144.13	my_seqs	MSQMAYFLGRVWPMGIVLFDYNCDWITAVDFPAGEVPKGPLRMFLDEASGEISSRGLEPRRVSGLNGSSMLVRFDGVCRVVEVNPSRIDRREAVVGVGVEAAKRAVNALLCRDGQPEMSADARVTRLDLNGLFCYGREAPEFLRFVSQSRYRRLKPTVFEDTGVEFGFKSRSGTLRAYDKSAHLRREMMKFEREDREPLRATIEALASQGAIRLELEMRRMLDGFGLRCWSDLSDERCESVFRKEVLPMAKVERFDLSEFEGVPARLIGALTAHFYGFDLRKMYSPRQFYRIRKELASLGYDVTKAASTRLVPKAIVMEVKPFVPPEGYEYAVGHRLHVPKLEVVR	346	USER	zzzz608
447	my_seqs_16minnow_6_2ct975.4@PF05840.12	PF05840.12	my_seqs	MSTKCMNPFTLSEENGSHVVPCGKCYNCKRRRASSWSVRLVNEGNYSTSAYFLTLTYDTTTVPISDNGFMTLSKTDLQKFFKRLRKWHGKNTTPLKYYAVGEYGGKTKRPHYHIIIFNADLNHFERSWSIDLKPLGLIHIGDVREASIGYTLKYICKESQIPMHKNDDRQKEFALMSKGLGKNYLTDKMVTWHKNNIENRVYIPLKDGKKAPMPRYYKQKIYDESEMERIAYQNKKNNDLLKDKEVAEHGNKLQFFKEQQYLNGNRKLKITDNNQKL	277	USER	zzzz609
446	my_seqs_16minnow_6_2ct988.5@PF05144.13	PF05144.13	my_seqs	MVGVSVDWISVSEVPGVPLPRLSERFSLDASTGELLPRGVEPLQVAGDRGSSVRLWSDGSRYLFDGNPSKGDRLEAVFGLSAVDAVATVQRIVVSQGFPAFSDDAVVTRLDLNRNFCYGAQGAEALRALSTGRYGSLRRSTEVNSVTWGADSRYRELCVYGKATELRRHVSKHRGSDALYLRSLCDWLEPLGVLRFELRLKRSLVDFGLRRLGALNDERCSSVFDEEVLPMTELERISLSELDGVPMRLVGALSAFFLGFDLRTMMSRTQFWRVRKELLALGYDVSVPVTKRFVPKAVYMQAVELERDGAPVYVPPGKADRHLKVV	326	USER	zzzz610
445	my_seqs_16minnow_6_2ct988.6@PF05840.12	PF05840.12	my_seqs	MCDFPMKGYRTTGRLVFTKPAGHSGAFIEVDCGQCLACKLKSRGEWTLRGRCEMQMQERAGRETWFLTVTYDDEHLPRDLNLSLREVQLFLMRLREHFGAGIRVQYCGEYGGQGLRPHYHFTLFGLNLDASDLEIVGRSRMGPPMFTSEVVARLWGKGHVYLGRATPQSIGYVAGHQLKDLTEVYDAHGGYWLFDPLSGELRERVAPFRHQSLKPGIGASWFDKFWSDFFPRGYSYFDGVKVLPPAYFLRLLRRKDVAMWDAVMADREVLVSSDAYQADRTPRRLADRAIVRNARISHKRNARDEFSVGPNVLVRDLSGVPDGGFEVRERLSGRRRAMRELRAAGIELPNGGVVFFDGSVSDE	363	USER	zzzz611
444	my_seqs_16minnow_6_2ct994.4@PF05840.12	PF05840.12	my_seqs	MSMSTHCMNPFELKQHHAGTLVPCGSCYNCKRRMVSSWSIRLINEGDHSHDSHFVTLTYNNDHLPLSKMGFQTLVKKDVQDFMKRLRKAHPIDHKTIKYFAVGEYGGQTKRPHYHLILFNANPLLIEIAWSLKDQAIGSIYVGLVSEASIGYCLKYISKICYIGSDPKKDDRQKNFRLMSKGLGINYLTEKMKAWHKANPTERVYTPLKDGKKAPLSRYYKQKIYDELEKGKIALHFQNKANILLEKLQKEHGDNFQLYLNDQYAHATQKMFKNKNSKL	279	USER	zzzz612
443	my_seqs_18minnow1_2ct1012.5@PF05840.12	PF05840.12	my_seqs	MACYHPIKGYRARTMNSSGKRPIVFNVNAGFADLPVEVPCGQCIGCRIARSRAWAVRCVHEASLHEKNIFVTLTYSNECLPEGGTLVLKHFQDFMKRLRFKYGSGIRFFHCGEYGDEDMRPHYHAILFNHDFEDKYIWKKSGEAEHILWRSPSLEELWPWGHSCFGAVTFQSAAYCARYVMKKMTGPYSVIYEPHMDEVTGEIYGHRLPPYVTMSRRPGLAKGWYEKFAGDVYPDDFVILLDGTKSATPAFYDKQLPEDELRKIKSSRVIAARRHAANNTPDRLAVREVVQEARLSRLKRDL	302	USER	zzzz613
442	my_seqs_18minnow1_2ct1020.6@PF05840.12	PF05840.12	my_seqs	MPCYHPLNAYYSSKLNKKSGKRSLVFNTDQALVPVKIPISCGRCIGCRLDRSLQWALRCVHEASLHDENCFITLTFDEAHVNKEGSLKVSDFQNFMKRLRQKISPTNVRFFHCGEYGANFSRPHHHACLFGYDFPDKVLHSGKGQTAVYTSEILSSLWPFGFHTIGSVTFESAAYVARYVLKKWSKDEMDPHELYNEMRSLTDKEFRDRYYGGRKPEYITMSRRPGIGADWYSKFGSDVYPAGFCLVDGKKVKPPKFYDSKFELDNPLSFAKLKGDRVFAAQVNPHNSRGRLDVREEHKKLITGVLQRGFENGS	314	USER	zzzz614
441	my_seqs_18minnow1_2ct1022.5@PF05840.12	PF05840.12	my_seqs	MAECTSPYIIKDPKKVQLALRDQGASVPVPCGKCPNCRKRYASGWSFRLMQEEKRSINAHFITLTYCSKNVPISNAGYMTLDKTHVQKYMKKVRWNHEQKYGKNILPIRYFAVGEYGGKTNRPHYHLIMYNVDIDLLQPSWEHGGIHYGKVSEASIGYTLKYCMKPGKIPMHARDDRLPEFRLMSQRLGDNYLTPGNIKWHIADVTGRAYCVTADGKKLTMPRYYKDKVYDQVERKRLAHYYATEMTKKTDELIRKNGSDYFRKMREVEKHELQKMWSKAQHGRNKI	287	USER	zzzz615
440	my_seqs_18minnow1_2ct1023.5@PF05840.12	PF05840.12	my_seqs	MERSRQWSVRIMHEASLHEENCFITLTYDDAHIPARGSLDYSDFRAFLRRYRREVGRVRYFVCGEYGGQLGRPHYHAGIFGYAFRGDRKGHRRTALGHYVYRSALLERLWPHGNCELAELTAQSAAYMARYTFKKVCGAVADDHYRRVDSDTGEVFYLQPEFAHMSLKPGIGATWFARYQSDVFPHDRVVIKGVVGRPPRYYDQLLKRVDPDLLENVQQKRILDNVDKWPDCTPERLAVREAVVNARVVHMKRNLK	256	USER	zzzz616
439	my_seqs_18minnow1_2ct1038.4@PF05840.12	PF05840.12	my_seqs	MACDAPLSIRYNPPLEDGKGGHIYSFPADCGKCLKCLTKRKAQWSYRLTEEQRRSFSSYFVTLTYEEANLTFGDNGPVTNKLDHFKFIDQLKELEKSKKLALRSCISEEELNRIRDGIKEEGKLAYYGVSEYGERFGRPHWHYILFNVRDINNIDLAWGLGKVQVDECNVNTIDYVLKYMIKETSPGKYENKTRECSFMSKGLGNVVNTEFINYIQTDSGNMVINSRYQRVPLPRYFRKKYIPGDARTRKNVYIRNMVEEKEKREDESTLARGGNPDQLRQLDKQRRLHQLRTQSKRNLE	300	USER	zzzz617
438	my_seqs_18minnow1_2ct1041.3@PF05840.12	PF05840.12	my_seqs	MPCFRPVKAFSLASGGISFVERGDVRGDIKVPCGRCVGCRVDRARDWTLRIGHESKLHQHNWFITLTYDEDHIPTPPSLNYSDWQQFAKNVRKRCGPFRFFMCGEYGELSWRPHYHAIMFGLDVTDLKRWGGSDAMPTFRSAGLESSWRKGMIVLGAVTPQSANYVARYNLKKVTGDLAKSHYRWIDPQTGEEHQLEPEFCGMSTRPGIGAAWYQKFHADVHTQDYVVADGTKKPVPRYYDKLGQRQGYTLDEIKQARQIKSRTRAQHNTPERLADRETVLKSRLSLSKRPI	292	USER	zzzz618
437	my_seqs_18minnow1_2ct1042.1@PF05840.12	PF05840.12	my_seqs	MSCTSPISAFRLADRPTLAFHVKHGDDVLEELKLPCNWCASCRIRRCRDWSIRVMHEASLYDFNAFVTLTYRDEFLPDNRSLDHSDFQKFMKRLRKIQPAVRFYMCGEYGEHFDRPHFHACLFNCNFADRRVWKRTPAGSVIYRSATLERLWPFGYSSIGDVTAESAAYVAGYVHKKITGDRAESHYESIHPFTGEVFSKHPEYNRMSTGRGATGGIGRAWYDKFGGTDVHVHDGIHLLGKTYLASVPKYYDKLLDRIDPDRLSDLKAERQFNALSFGSEYEPEFASKRLVADASLSIKKRILE	304	USER	zzzz619
436	my_seqs_18minnow1_2ct1044.3@PF05840.12	PF05840.12	my_seqs	MRLRFTARILPPSRCEAGLGFKMPCYHPLPGWYSKEVGKNGKRLVTFRFNDAWTDRPLSLPCGRCIGCQLERSRQWAMRCMHEASLWEYNCFITLTYDDEHLPPSGSLVPEDYVLFMKRLRKRYGNGIRFFHCGEYGAKLQRPHHHAILFNLDFGDTQRVCSGVGGTSRLYQSAELSELWGKGFCTIGAATFQSAGYIARYSLKKVVDKNSAEFYKGRVREYLTMSRRPGIGAGWIRRWASEVLKRDEVFVNGTFSKPTRYYDDYMARVAKARMVRIKMDRRDAGRDSVDNTGRRLVEREEVKKAMITQLTRSYEDGRA	319	USER	zzzz620
435	my_seqs_18minnow1_2ct1045.4@PF05840.12	PF05840.12	my_seqs	MHEASLHEASCFVTLTYDDAHAPVSLDYSHFQLFMKSLRPRLGPLRFRYFVCGEYGGELGRPHFHAGIFGTAFRVDRYPWRKAKSGHQVYRSPLLEEVWDRGLSEVGELTQESAGYMARYVLKKMTGPVASEHYVDRETGEVLLPEFCHMSLRPGIGAQWFRRFQADVFPHDRVIVKGVKTRVPRYYDQLLARDAPDLMEAAREARRIVSQEKGGAENTVERLAVREQVLKARLSNLKRKL	241	USER	zzzz621
434	my_seqs_18minnow1_2ct1047.2@PF05840.12	PF05840.12	my_seqs	MQCTSPVSIRPPSSRRGFFVLVRCGQCTSCRLERSRQWAVRCVHEASLHRMSSFVTLTYGEELSSRSLEYRDFQLFCKKARRKLGPFRFFMAGEYGEKNWRPHFHAAMFGVHFGDRTPWRKSPAGFQMYRSETLESLWTHGNSEIGDVTFESAAYIARYVCKKVTGDEAKPIREDGTPGHYVDFDPVTGQWAELRPEFCRSSLRPGVGADWFERYRSDVFPYDRCVVRGSEQRPPRYYMKLLKKELPLMAAKVREDRLRLVDEVEVERGPSLASRDAVAKARLALRSRKL	290	USER	zzzz622
433	my_seqs_18minnow1_2ct1051.3@PF05840.12	PF05840.12	my_seqs	MHEAQLHPYNSFLTLTYSDDNLPENNSLSKRDHQLFMKRLRKTHSVRFYSAGEYGTQTQRPHYHVCLFGYHFPDRLMNGQNSYSSELEAIWGLGNCDVRDLTFELAAYAARYICDKVTGDRASQHYERENEYGDKIQLQPEFNLMSRGRGIGSGFFNEFKTSMYPHDRVIVNGKPAKPPRYYDKQYEKLEPDKMELIKTQRELDATLRYLDNTPARLAVREKVTLDTLTKKRTV	234	USER	zzzz623
432	my_seqs_18minnow1_2ct1061.1@PF05840.12	PF05840.12	my_seqs	MPPSLRYRDFQLFMKRLRRKVGAVRFFMSGEYGDDEEGLHRGKYGTSVGRPHYHAVLFGYDPADKVYESRSHDGSALYSSKSLAELWGLGIVQVGVVSFSSAAYVARYVMKKVTGDMAEAWYDGLVPEFCRMSLGRKDEDGFSGALGMPWLKRFYTDVFPSGKVVVNGKEVFLPKIYSRYMKKREGGSDQYAELELARESGARAGVVDRTPERLAVREQVLKARVARLKRSL	232	USER	zzzz625
431	my_seqs_18minnow1_2ct1063.3@PF05840.12	PF05840.12	my_seqs	MACFRPLKAYSLEHGGVTFNRNAHGVLYDIQLPCGKCTGCLKTRAQGWAVRCMHESSMHLLNCMVTLTYEKHLEPSCGVYYPHFQRFMKDLRQKIRSADHELQKQNKNHPLTKIKFFVSGEYRPGLQGPHFHALLFGIDFPDKKVHKNNDRGDPIYTSQSLARLWKYGFSAINDVTFESCAYVARYCLDKVHGQFADWHYMGLNPEISRMSLKPGIGAEWLQKYHKTTYRDDTVVMNGFEMKPPRYYDKRMKKIDPDRLGWVKEDREVFALKPSSQKNATPERLAVREEVALSKLKLRQRDLT	303	USER	zzzz626
430	my_seqs_18minnow1_2ct1064.2@PF05840.12	PF05840.12	my_seqs	MALPVPCFHPLKAFRDSNGIRVLNSDADLFNLLLPCGRCIGCRLERSRQWAIRCMHEASLHEFNSFVTLTYDDAHVPADGGLHHAHFQKFMKRLRKRFPQDIRYYMCGEYGPVNNRPHFHVILFGLTFTDLSLWKRTSADEVIFRSATLEKLWPFGFSSIGAVTFQSCAYVARYIMQKQTGDSGAKHYRDKGFIDTETGEVFGLRPEYNRMSLRPAIGKRWFEKFGLTDVFPHDRVVYDGSESKPPRYYDKLFSRIDADGFANIQDKRILDSQENLADSTPARLIDKETVLSARVNRLKRGFT	303	USER	zzzz627
429	my_seqs_18minnow1_2ct1067.3@PF05840.12	PF05840.12	my_seqs	MPCFGPLTAYRPKAGASSRKLVFRLDKSEDGLRVMVPCGRCTGCRLERSRQWAMRCMHEVRMHNMSSFVTLTYNDEWLPEGNTLVLPDLQKFMKRLRKVTGDGLRFYACGEYGDSNGRPHYHVLLLNYDFDDRRYYRLAKRGERLFTSATLDGLWSSDGRNMGLAVVGDVSFDSCAYVARYIMKKRLGGRDFKIDPETGVVLLPEFTVMSRNPGLGTGYVEKYGNEVLAFDSVVVNGREVRPPRFYDTKLDGIDPVRMDAIRCERKARVVPSEGTSRRLRAKEEFLEAALKSKSREL	297	USER	zzzz628
428	my_seqs_18minnow1_2ct1069.5@PF05840.12	PF05840.12	my_seqs	MPCFQPLKAYRSVERNAQTGKYGLTFNGKNALIEGSQIRLPCGQCVGCRLDKARQWAIRCEHEAAMHDRNCFITLTYDQVHVPEDFSVRLRDWQLFMKRLRKRVGHDRVRFLATGEYGDNGLRPHYHALLFGFDFADKRHWTTRRDNRCYKSEMLEDVWGMGQCEIGTVTYKSSSYVARYCMKKMTGTKADEHYFRISPVDGKAYRVATEFCVMSRRPGVGSTWFDRYAADAFPSDFLVVDGRKVRPPDYYWRKLAEEDQDPVKRARRRAQLQSKLNNTPERLAVREELLSSRVNRLQRTLQ	302	USER	zzzz629
427	my_seqs_18minnow1_2ct1071.5@PF05840.12	PF05840.12	my_seqs	MPCYSPLQGWRSRTREASGKRGITFNMREGYINEPLDVPCGQCIGCKIVRARQWALRCCHEASLYDDNMFLTLTYEKAPPTLVKPDLQDFFRRMRDSLRNRGLKFRYFGVGEYGALFDRAHYHALIFGFEFKDKVHWSGSLETRDVQYVSEELNKLWGMGYATIGDLTPKSANYVSKYCVKKLSGPLAKEYYGDKRPEFAIMSRRPGIGKGWIDKFKRDVFPRDFVVVEGGSKVAVPRFYLEAQDEGLRAKIKRARLERMKDDPDARGSRAVAKAACAEARIKRANRRFENEVDRI	296	USER	zzzz630
426	my_seqs_18minnow1_2ct1078.4@PF05840.12	PF05840.12	my_seqs	MACFYPLTAYKLENGQISFNEKGKTLQELSLPCGGCIGCRLERSRSWAIRCIHEAALHTENCFITLTYDEEHHEPSLYYPHFQKFLRSLRKATKKKIRFYMCGEYGDLNGRPHFHACLFGYRPKDLEIFKQSSPGEYIYTSATLQKHWPYGYSSVGNVTIESAAYIARYIFKKQTGKNASDHYQACDSRTGELTPISPEFNRMSLKPGIGMPWLQKYHSDIYPIGTLIHDGIKMKPPKYYDKYFKKLNPDQHEELIHGRLINFNYEDSTVSRLSDREQYTKAKLTHKKRGFK	292	USER	zzzz631
425	my_seqs_18minnow1_2ct1079.3@PF05840.12	PF05840.12	my_seqs	MACYHPIPAHQDVAGGPVRLWPPLGTATLELPCGGCLGCRSARALEWSRRCMHEASLYHYNSFVTLTYDDEHLPVNGHLDKAALQLFMKRLRKRSDSDRRILRDRSKPIRFFACGEYGEKTGRPHYHALLFNGTFDDLVRYDADLFASKVLSELWPFGNVRVGEVSGASANYVAQYSLKKQGVKSDCDADGVVRPPPFLRMSLKPGIGSGWLSKYGSDLRGGFLVVDGTRVGIPRFYRVKLPEQMAEVVDQALYDARVWREDSLPERRVDAEKIHESRNLLFTERSL	287	USER	zzzz632
424	my_seqs_18minnow1_2ct1084.4@PF05840.12	PF05840.12	my_seqs	MHLRNCFVTLTYADCHLARGGTLVKGHLSDFVRRVRETFRPELVRFYGIGEYGTKTQRPHYHALLFGADFPRGAVVAKGEHGCAVYASTALQSHWKYGLVSIGDLTPESAAYCARYALKKQGAMVHKRLSSWTDPDTGEVIYRTPEFALMSRRPGIGKTWLTAYKSDVFPDDFIIIKERKTRVPRYYVKQLSETEAASVKERRKEFAMSSPDNSPGRLDARKAVLQAKLLFKLTKRG	237	USER	zzzz633
423	my_seqs_18minnow1_2ct1085.4@PF05840.12	PF05840.12	my_seqs	MACTSPIRVSKGRSSELFGFLDLPCGYCKSCLLERSRQWSVRIMHEASLWTVNSFVTLTYDDAFVPDRLDYSHFQGFMRSLRRTRSRVRFFMCGEYGSLTNRPHFHACLFNVGFDDGLPVCVGAAGDTVFESAELSKHWKFGFSSYGELSHRSAAYVARYSLKKSPGSDCFVHMSLKPGIGRGWLDKFKSDVYPHDRVIVNGKARKPPKYYDNVMYADSSFDSVEFKHLRAKRARLRLVDSTYDRLGVIAHCVDSRLSQLKRSL	264	USER	zzzz634
422	my_seqs_18minnow1_2ct1090.8@PF05840.12	PF05840.12	my_seqs	MHEASMHERNCFITLTYDDQHLPPYNSLQYSHFQGFMKRLRFENPGVSIRYFVAGEYGEKLSRPHFHACLFGYDFSFLDCPPISRTSAGNVIYQSPVLDRLWGKGFCSIGELNFQSAAYTARYVMKKVTGSNAKFHYAAVDSDSGEVHQRTPEFCKMSLKPGIGAGWFSKYSSDVFNDDHVVINGFPSKPPRYYDVLLKRISPDVLEDNKYGREIEGRKRYLDNTAERLIVREVVAKARLAFKKRVL	247	USER	zzzz635
421	my_seqs_18minnow1_2ct1091.3@PF05840.12	PF05840.12	my_seqs	MHEAKMHDDNCFITLTYDEQNVPSDGSLRPRDYVLFMKKLRKKYGPVRFFHCGEYGDVGERPHHHALLFGFDFDDKSKLPRTNEKYKLYRSAELDRLWGLGFCTIGECNFESAGYVARYAMKKVGGKIDYKGRCPEYLTMSRRPGIGRAWFEKFRRDVYPFDEVIVDGVRSKPPRYYDNVLEKMEPKQLLRLKSKRRAKALHDIDGTGPRLIVREAVRAGAIRTLKRSLEV	231	USER	zzzz636
420	my_seqs_18minnow1_2ct1092.6@PF05840.12	PF05840.12	my_seqs	MRCMHEKRLHRENCFITLTYDNEHLPPFGTLVKRDLQLFMKRLRKEFGDGIRFYGCGEYGDLNKRPHYHVLLFNHDFSDKRKIGANRRGDNYYSSAVLSRLWPMGHNLLGEVTFDSAAYVARYVMKKLTGPPAKGAYDVRDGDGVIHTRIPEFTCMSRRPGIGRGWYDRYGRETYAHDNCVVNGVLVRPPRFYDTKFELEDPARLAVLKSIRRQRALRDWKENLIDRRRVKERVAIAALSKLHREI	246	USER	zzzz637
419	my_seqs_18minnow1_2ct1094.1@PF05840.12	PF05840.12	my_seqs	MPCYAPLVAYQCTNGAIVFTDNLARNDVHKQLLLPCGQCVGCRLERSRVWAARCMHHAQMHTDNAFITLTYDDEHLTSPSLNHRDFQLFMKRLRKSVSVSSNKKQSDPDRVRKSQTVRKISYYMAGEYGDKTRRPHFHACIFGWTPSDKIYWRSTTAGSRLYTSTELTELWKKGFTSIGDVNFESAAYIARYIMNKQTGPGAWKYYEHIDDETGEITDLKPEYNKMSLGKNNAIGKSWLQKYKTDVYPDGEILVRQKKTKTPKYYDKLYKQLEPDNYEEMKNQREIQALQYRDDNTPARLKAKETVKKRQIQSLLRTI	318	USER	zzzz638
418	my_seqs_18minnow1_2ct1095.4@PF05840.12	PF05840.12	my_seqs	MCLKPLTICNRQTQELVRVICGSCPVCVRKRASSWSFRLVNEDFRSLSSYFITLTYDQNIVYPSTLLGENSKCYKRHSISHPGILKKSGYLGLIPNDLQLFFKRLRKTGQIKGCTSEQRIKYYAVGEYGSKTERPHYHAIVFNADRERIIKAWRFGNVYFGSVTGASVGYVLKYLTKECNIPKHKNDDRARGFARMSKELGIGYLSQAMKSWHLADLENRMYCLADDGTKMTMPRYYKEKIYNEAQKMYIGDFFRKKYDREFIEDLEDKNYLAKKHGRDAAITAAYIRKRYLFLQKQKL	299	USER	zzzz639
417	my_seqs_18minnow1_2ct1106.3@PF05840.12	PF05840.12	my_seqs	MPCFNPISVPKRGYVDLRVTVACGQCIGCRVDRTEDWTTRIMHEVTLHDLCQFVTLTYSDDQLPAGGTLVKKDWQDFMKRLRKAHGKLRYFAVGEYGDTTVRPHYHAILFGIDFADKRAHSKNEHGDQLFTSDLLDKIWGKGHAFFGKVTVQSARYVAKYCIKKVNGSMASEHYGARSPEFAVMSLKPGIGSGWFEKYQADVYPSDFVVLQGKKRSPPRFYDERLAMLDVAALEAIKSRRLSKALKHRADQTPSRLKARQECLQARISLRKGTI	274	USER	zzzz640
416	my_seqs_18minnow1_2ct1107.3@PF05840.12	PF05840.12	my_seqs	MPCFHPTTAYRSRHLSASGKRPLVFKADDGLAGSMLQIPCGGCIGCRIDKSQQWATRLMHEAMHHEQKSFITLTYDDVHLPVSGSLDKTHPQKFLKRFRKKHGGKIRYFLCGEYGDSSGRPHYHAIIFGCDWSDKRKHSTNKQGDQLWVSDTLDSLWGMGNCWIGDVTYESCSYVARYIMKKVTGDRAEQHYARLHPETGLPFQLQPEYIAMSLKPGIGQIHYEKYQSDFYPADHAVVKGRKVPVPRYYDRLLEQTNSQQLETIKTERVKRAKLRRSEHTPKRLAAREDCLKSKLSTLTRSL	302	USER	zzzz641
415	my_seqs_18minnow1_2ct1118.6@PF05840.12	PF05840.12	my_seqs	MSCYSPLKGYRSVDVDRSTGKRGIVFTPQKGFKDLPMEVPCGKCIGCKIDRSKEWAVRCVQEASLHKENCFLTLTYAPEQMPSNGSLCPQTFTRFMKRLRKSVLPQKIRFFQCGEYGTRMERPHHHAIIFGWVPKDLKLWRKKGEVSLFRSELVEKLWPFGFVTVGQVTYESSAYIARYILKKVNGPDAEEHYNGKFPEYITMSRMPGIGKGWIEKYHNDVYRNDTLVYGLGRITKPPRFYDKYYQQIEPEHFKEIEAERRKREAESDYNSEYRLKVRKRIQEIKLKNQEREIH	294	USER	zzzz642
414	my_seqs_18minnow1_2ct1121.2@PF05840.12	PF05840.12	my_seqs	MSVCYSPMLAYRNSDGNIIFSDPKNNAAGDLKLPCGQCLGCRLNHAEGWAIRMVHEAQCHEENCFITLTYNDENLPENKNLDYSHVTKFIKRLRKVLSVTKVKIKYYRVGEYGENFSRPHYHIILFGFDFTAKLRYKNKENIHTHWRTKNNNKYYTSTLLTDLWGLGHAELGDVNYNTCMYVAKYVTKRVNGRLKDSHYQRTNSDGEITTVEPERSSMSRKEAIGKQWLERYWTDIYPSDHAIHDGRKLKTPKYYDRWLEKNNLELYESVKIQRESSIHEQNQIDLSRLHEVKILNQNQFIRELDGTTNSTTELDKKILKYHKDQIEVLHKRKKNATKNVHSL	343	USER	zzzz643
413	my_seqs_18minnow1_2ct1122.6@PF05840.12	PF05840.12	my_seqs	MECFHPWKPDKSLGLPPTTKLRCGRCQGCRIEKTREWAMRCVHEAQLHDENTYVTLTLDDHNVNQANSLDYSLFQKFMRRLRKKTGKKIRYYMAGEYGEKFERPHFHAILFGIDFNDKIFKRKNHNGDPLFTSATLDHLWRHGECTIGAVTFQSAAYVARYVMKKITGDLATTHYTWIDEHGEMHNRSPEFNQMSRRPGIGQRWYQRFKSDVFPADHVITNGFPAKTPRYYDKLLKREQPELLEQLKKKRKERANKSWQDNTPRRLAAKEIVAEAKLRKLKRTLS	285	USER	zzzz644
412	my_seqs_18minnow1_2ct1123.4@PF05840.12	PF05840.12	my_seqs	MGFGSPVEVACGQCIGCRLERARQWSVRITDEAQLYDENCFLTVTYEEVHLPAGGSLDRPAYQRFLKRLRARLAPRRVRFFGCGEYGDLTNRPHYHFVLLGHAFLADRVHVKTNNGHRIYTSKFLDDVWGLGNCWIGSVTTDSAGYVARYCTKKVTGDQAKVEAHYQGRTPEFMTCSQGIGREFFERYKSDMYPSDHKVFKGKPMRVPRYYDKQLPEETLAVLKQQRMERALERADNNTPQRLKVRETVAEARLSTYSRREI	262	USER	zzzz645
411	my_seqs_18minnow1_2ct1125.4@PF05840.12	PF05840.12	my_seqs	MSLDLLCVAVGVCEFFMACYHPMPAVRMSDGSVKFISRNKRGVESSLELPCGQCIGCRLERSRQWAMRCLHESSLHDFNSFITLTYDDSHLPSDMSLNYSHFQLFMKRLRKSVGKVSFYCGGEYGEQTARPHYHACLFGYDFPDKVYYSKSHAGDKLYSSKILNDLWGMGNCYVGDVTFASAAYIARYCVAKINGDLAKSHYEYLDDDGVVHSRTPEFNHMSLKPAIGKRWLERFTSDVYPRDYVVVNGVKCRPPKYYDSIFTKLDAGVFSEIVAQREYEALDYRLDSSDSRLFVREQVHLARNSQLKRSL	311	USER	zzzz646
410	my_seqs_18minnow1_2ct1128.4@PF05840.12	PF05840.12	my_seqs	MACFKPLRAFKLSDGSVVFSERGDIVANLWLPCGSCVGCRMESARQWSVRIMHEASLYENNCFITLTYDDLHMPADHGLHYGDFQAFMRDLRRTDKVRFFMCGEYGSLRLRPHFHACLFGVDFPDLVPWKRTDSDGLIYRSARLEKLWPKGFSSVGELTAKSAAYVARYSLKKKSGKFYAAMYDYLDESTGEIFHRVPEFVRMSLKPGIGRGFFDKYHNDIFPHDRVIVNGTSQKPPKYYSRLFQFLNPDSYEDLQFARYLKGLKFSSDNSDDRLSVREQVVKARISHLKRGL	293	USER	zzzz647
409	my_seqs_18minnow1_2ct1130.2@PF05840.12	PF05840.12	my_seqs	MRCTRPRTVGFMADGRTIAWSPKQYIKEYATFQLPCGQCLSCRLEYARQWAVRCVHEAQMHERNSFITLTYSDENLKSTKLIYRDFQLFMKRLRKIQDEPIGVFVTGEYGDQTKRPHWHAIMFNYSPRDAEKKYQTAHGHQVFESESLSSLWGHGLCEFGNVTFESAGYCARYAAKKLGHGIDGSHGYDPISKKSSKYAIGKKWLEKYWYTDCFAQGEIVLPGGRGTTTIPRYYEKWLKDTHPDAWLRYVTEVKIPKMEKSALRAEQENAEYFQTLYARHPSKSNPLTSHQVRDVILKSKFKVLQDNLKL	310	USER	zzzz648
408	my_seqs_18minnow1_2ct1133.2@PF05840.12	PF05840.12	my_seqs	MPCFKPLIAYGLEAGGVTFIKSRGGNEVLLPCGKCVGCQATRAAHWATRCVNEAALHADNCFLTLTYDERNLPPGGTLEKADFQKFIKRLRKRIAPQRISFFHCGEYGEKLGRPHYHAIIFGYDYPDKREGRKSKSGEQTYTSALLERDWPFGDCNIGSVTYESACYIARYTTKKVFGDDADGHYDGKLPEYITMSRNPAIGRKWIEEFLIDTYKDDTIIVSGRPVKPPRYYDKRLKKLDPLLLDDVQQKRAQYAISPSVRADNTPARLAVKNEVKTLTNKLFSRNL	287	USER	zzzz649
407	my_seqs_18minnow1_2ct1134.2@PF05840.12	PF05840.12	my_seqs	MPCYSPLEGFRSRQTTDSGKRKLVFNAVDGFRDLPVTVPCGHCLGCRLERARQWAVRLMHEKSCHELSTFVTLTYDDEHLPESGSLVMAHFQTFLKDLRNFHEKDARKLIRDGHKNVKVPTLRFFHCGEYGETNRRPHYHAILFGIDFADKTKHSKNRQGDQIYKSETLNKIWGRGHCWIGSVTQKSCAYVARYIMKKVTGEAAPAHYRNVNLETGEIYDLHPEYVTMSRRPGIGAAWFEKFRKDVFPSDTVIANGKEQLPPKYYLRKLAETSPKSEAKIKAKRVRRAKKHSADSTPERLRARLICKQSQISQLKRNL	318	USER	zzzz650
406	my_seqs_18minnow1_2ct1141.3@PF05840.12	PF05840.12	my_seqs	MPQCISPNTIRVGKSLITASCGKCNFCLQNRRCDWSFRLQQELKNSDSAWFFTMTYDQENQPLVEIDDQHYGTLDKRDLQLFFKRLRKANGKGKSIKYYAVGEYGSDTFRPHYHAIVFNVKPSALVKASRIWDKGFLSVGNCQPASIHYVAKYVLNSHDNWKPLANPFALISQGIGKSYLTTNGYQHKNSLQNFVVNDSGKKQRIPRYFKTKIFSRKQTESLTKTAIRENDLLYQASLSDLSNEYSSKSRELELRNINAHEKIKNKNPLQTNKL	274	USER	zzzz651
405	my_seqs_18minnow1_2ct1143.2@PF05840.12	PF05840.12	my_seqs	MHEAKLHEDNCFITLTYDDDHLALLPGADDNQPSLYPRHFVLFMKRLRKEYGEGLRFFQCGEYGDNTFRPHHHALLFNLRFPDQRLWNSQSSSRTYTSESLNKLWGHGFCTIGEVNFASASYVARYSMKKVFGPEAESWYQGRVPEYLTMSRRPGIGAGFFDKYQSEIYARDSCLINGREVKPPKFYDNKLERLDQDLFLTIKDSRKLAATSNANNKPERLRVRERNATHRLKQYSERKKL	241	USER	zzzz652
404	my_seqs_18minnow1_2ct1147.2@PF05840.12	PF05840.12	my_seqs	MHDVSCFATLTYSDAHLPSDGSLNYSHFQKFMKRLRKGNASKIRFFMCGEYGEKLRRPHYHALLFGYRPDDCVLHSARQGRNLYSSPSLERIWGLGYVTIGDVSKESAEYCAQYATKKINGPSAEAHYMSLNTATGELHQLTPEFGRMSLKPGIGSTWHEKFSSDIYNYDQVVLNGKKLRPPKFYDKKEAKCRPDAMEYLQYQRTLKRQENSDNNTPDRLAVRAAVLKARLSRKVKTL	238	USER	zzzz653
403	my_seqs_18minnow1_2ct1150.2@PF05840.12	PF05840.12	my_seqs	MPCFHPIKGYFSNRVNKNGKRPLVFSPDNAVFPNPQFIPCSRCFGCRLDRAHQWAVRCMHEASMHDHNCFITLTFDDKHLGDGSLHKDDFQNFMKRLRKKIHPLKVRYFHCGEYGSKHDRPHHHAIIFGYDFKDKIEWQDKNGVKTYLSEELMELWPDGFSTISGVTFDSCAYVTRYVLKKWSSLDLQGEELFETMKQFDISRGCLVKGSWDGVDILESLDIDLKDVVPSVSRRDFYSGKLPEYVSMSLKPGIGEEWFCNFYKDIYPSGFVVINHGRKVKPPKFYDLKYEVDFPFDSAMVKAERAKRSLLKQYTQADLDLKEFIQMQSINQLNRSYENAD	340	USER	zzzz654
402	my_seqs_18minnow1_2ct1151.4@PF05840.12	PF05840.12	my_seqs	MDCINPIFLPKLGHEVGCGACNYCLTSSSLDWCYRLQWEHKKSSSAKFITLTYSDEYLPINYESGEGTLDKADLQKFFKRFRKINDTYSEKNRKPIRYFATGEYGTKLQRPHYHIILFNAKREAINRLHQAWPLGQIDIGRVTPASIGYVASHSFFRQRHYGPLVRPFATMSRKPGIGYDYVKSNSGWHRDPQGNEHRFYVTDNGHRRKLPRYYKEKLFDGEERRVYNVKLQQAREDAYCKAIEAIKLAYKHSDPYLTYEHMAHQGNEAIGRRKKKNRKL	280	USER	zzzz655
401	my_seqs_18minnow1_2ct1152.5@PF05840.12	PF05840.12	my_seqs	MACFHPLTAWKSRDIDDINPSNGKLKMVFKPELGYPNTKTELPCGQCIGCRMDRARDWASRIMNEAQLHPSSCFITLTYQRDNYSLNKRDIQLFLKRLRRKHEDIKIRFFQCGEYGEQFERPHHHVILFGYDFPDKVPFKRGGKHQQYISRELADLWPHGLHSIGTLTIDSAMYTARYVLKKFNGEKKDEHYQGRSPEYITMSRKPGIGKEFFEKFQSDIYNHDKLVINDRLILRPAKYYDRMFEQLNPTQMRRLKVDRKKRAMENPDNLSDRRAVKEEITKLKINKLKRSIEQQSAEA	299	USER	zzzz656
400	my_seqs_18minnow1_2ct1155.2@PF05840.12	PF05840.12	my_seqs	MTCYHPLHGYRSQVTTKTGKRKLTFSPQTGYVDLPQTVPCGQCIGCRIERSRQWALRCVHEAKSHSRSCFVTLTYDDQHLPSGLTLVLEDLQKFIKRLRFHLGVRIRYYACGEYGDHNNRPHYHALIFGEDFQFDRKIHSGLNTKSPNYVSETLNKIWGLGFAMIGQLNYQSAAYTARYIMKKKGGELAKTHYTRIDPSTGEIYVLRPEFSVMSRRPGIGAEWYEKYKADVFPSDFLVHEGKKISVPRYYLNKLEQEASDVHKKVKLKRKSAIRKHRANNTPERLAVREEVKLSKIKTLSRKI	303	USER	zzzz657
399	my_seqs_18minnow1_2ct1163.4@PF05840.12	PF05840.12	my_seqs	MALCSFIGKMYPLTLCAAASVYDMPCYSPLQGYKSKYATANGKHKITFNRAHGFVDIPMSVPCGQCIGCRIDKSREWAIRCVHEAKMHQSNCFLTLTYDDEHLLAGHTLVKEHLQKFLKRLRHHYGSFRFFACGEYGDETKRPHYHAIIFGLDFHEDRKKHSTNGRGDILFKCDKLQEIWGHGHILIGSFNYASAAYTARYCMKKQTGKDSHNHAQYHRIDPTTGEIIQVNPEFACMSLRPGIGSAWYEKYKADAFPSDFLVHAGKQHPVPRYYSDKLKKEDETTYKKIKLKRLKFRDEHKENSTPDRLYTREECKAAQINTLKRKI	327	USER	zzzz658
398	my_seqs_18minnow1_2ct1164.4@PF05840.12	PF05840.12	my_seqs	MPCSYPITAWRTAGGGMSFKRTDGAGRKLELPCGRCTRCRLEKSRQWAVRCMHELQMHDESAFANLTLDDEHWEPSLDHKHFQGFMKRLRHARPDAAISYYMSGEYGEKYGRPHYHAILFGVGFPDKTYYGKSPSGHHLYTSKELDALWQRGECKIGAVTFESAAYVARYVMKKLNGEKAESQYKRVDPATGEQIELKPEYSRMSLKPAIGRRWIEKYHPEVYPNDQVISRGHPAKPPRYYDLYLKTLEPELHAEVTLLREEKASTRKDDETPQRREAKEQVAIAGLKLKTRKLE	295	USER	zzzz659
397	my_seqs_18minnow1_2ct1165.3@PF05840.12	PF05840.12	my_seqs	MPCTSRWSPTIGGSAARTLACGSCTSCRLDYSRSWATRCMDEAQLWEHNEYVTLTYDPENLPPDLNLVHRHYVLFQKRLVNHFARLKQNAIDGRPNYKLKNRYYMSGEYGEENGRPHYHAILFNTWFEDRKYHCKTDAGAKLYTSELLTRLWGLGFASTGDVTWESAAYVARYVMKKINEKGKTKTENKYREIINPETGEIIKRIQPYSQMSRSPGIGKKWIEKYAADVYPHGLKVVNGHEIRPPRYYDEHFKKLHPQKYKQLSAKRAEEGLKKFDDNTNTRLNAKEIVTDRKLTLLKRKI	301	USER	zzzz660
396	my_seqs_18minnow1_2ct1167.3@PF05840.12	PF05840.12	my_seqs	MGCRVDYSRNWALRCSHELQFHSEACVVTLTYDDEHLPPGQTLVKKDFQEFIHALRNRCRSKNRHGKWIQSRVTYFASGEYGENLGRPHYHAILYGVDFPDKIRVDTAADGSPLYSSEACKQIWGKGNITVGVVTYASAAYIARYIMKKITGEHAPYWYEHRIPEFALMSTRPAIGKRWVDEFLSDIYPSDFIIYKGKKHKVPRYYDKQLKKREVEKHKAIKQTRFKTGLKKEIILNNRPARLAVREEVHRSRVTHLKRNL	261	USER	zzzz661
395	my_seqs_18minnow1_2ct1171.6@PF05840.12	PF05840.12	my_seqs	MTCYHPLTAWKSRDVDDINRLTGKLKMVFKAELGYPNTKTELPCGQCIGCRLDRARDWSARIMHEAKLHPTSCFLTLTYQREEYSLNKRDITLFFKKLRFAHPDIKIRYFQCGEYGEQFQRPHHHVILFGYDFPDKHPFKKLGKYQQFISRELADLWPHGLHSIGSLTLDSAMYTARYVLKKINGEKQEEHYQGRLPEYTTMSRRPGLGKDFYDQFTDDIYNHDKIVINDHTILRPAKYYDRMFEQLHPAKMRRLKTARKKRALENPDNSPLRREVKKEIQQLKQKKLQRTFELQTPEA	299	USER	zzzz662
394	my_seqs_18minnow1_2ct1172.1@PF05840.12	PF05840.12	my_seqs	MPCYHPLPGWFSRTINASGKRSIVFNIRDGQSDLKAEIPCGRCLGCRLERSRQWAIRCMHEARLHPDNCFITLTYDEDHAAQLPFAETGRPGLDPRHFVLFMKRLRKAYGEGIRFFQCGEYGEQTLRPHHHALLFNHRFPDQRVWNTNSKHSTYVSESLESLWGHGLCSIDEVNFATASYVARYSMKKIYGPEAEAHYQGRQPEYLTMSRRPGIGSGFFDKYEQEIYNRDSCLVNAKEVKPPSYYDDKLAKLDNDRYLLIKDARKLAATSNANNKPARLRVRERTATHRLKQYSERKKL	299	USER	zzzz663
393	my_seqs_18minnow1_2ct1173.3@PF05840.12	PF05840.12	my_seqs	MACTNPITAYKSRNVNPSGKRSLIFNKVSPLAFADLPVTIPCGMCIGCRIQRARTWALRCVHESKGHTFNSFVTLTYDDANIPDSQAIEKSTLQLFFKRLRKAGYVFRYFAAGEYGSTTNRPHYHVLFFGIDFHDDRKLYKRSETGNLYTSEKLSQIWGLGHAIIAGFNYTTAQYVAKYIIGKKLGKDSADSAVYSRLDLSTGECFQVSPEFVLMSRRPGIGAEWYAQFADDAFPSDFLVHDGKKFTVPKYYLNKLEKSDENMHKSVKKKRRIEQYKNPTDHRTLQARALILSQREKQKSRAKI	304	USER	zzzz664
392	my_seqs_18minnow1_2ct1175.5@PF05840.12	PF05840.12	my_seqs	MPCESPIRAYRPATGGPLLFTAPDPNRSPQIYQALDIPCGNCILCKEEHARQWAVRIAHEATLHEANSFLTLTYTNEQMPRHNSLDYSHLQKFWKRLRKQIGELAYYAVGEYGDNTLRPHYHACIFGHDFTEGSIIVAEEPHRLWENPWLNTAWGHGRVTIGQLNYKTARYTASYVTKKLKSTQQYVRMDDETGELIRVTQPRAFMSRNIGKEWWLRYGAHTTAHDFVVIDGAKQKPPKAYDKWLGEVNPAKLEQIKENRKEKTQQLTPNENHARARNAHARVHKKSKKV	290	USER	zzzz665
391	my_seqs_18minnow1_2ct1181.3@PF05840.12	PF05840.12	my_seqs	MLCEFPYRKGSLELGCGRCEGCRRNRNRLWTGRMLLESYEHEFNCFVTLTYNERHVPWNGYLVKEDLQGFLKRLRLACSGRTIRYYGVGEYGEKSSRPHYHMVLFGVSPLEEVTIRKSWPYGFVHVGTAEAKSMSYVSSYIMKGWTKDNVGRLGDRPPEFSIMSLKPGIGMGVVERIVQAFNHHPTADKLSVDKMRTDGYKYPLGAYIKSKLRERLGITDAERGEKLFALVEELFQRKVQEGSNYHQKRKARILAGYGRIRRKEKVL	267	USER	zzzz666
390	my_seqs_18minnow1_2ct1182.3@PF05840.12	PF05840.12	my_seqs	MTCYHPIDIPRKGYVDLRQNVPCGQCIGCRLERSRQWALRCMHEAQMHDLSTFITLTYDDKYLPEGSTLVKRHFQLFMKRLRKLHKSKIKFFHCGEYGDRDRRPHYHAILFGIDFADKKKHSTSKSGKTLYISETLDNLWGLGHTWIGDVTIESAGYVARYALKKITGDLADKHYENLDINTGEIHQLQPEYATMSTRPAIGKEWYEKYKSDVYPSDFAVFKGKQMAIPRYYDKLLKRENPELIQEIKEKRIEKHLHNKADSTPERLAVREEVKLSKLKSLQRTL	285	USER	zzzz667
389	my_seqs_18minnow1_2ct1183.2@PF05732.10	PF05732.10	my_seqs	MKNYFKEHETNPFRGIEFEQKMKAFAKSKLRTKEILTERETGPNEVIADQTAYDSEPFIKLYCIQLAVLNSLTITGLKILTHIMQNLEMNNELVRIVPPRIKREYELTQQGYYNGLKNLLENNIIARAKDDDKRTYFINPNILWNGKRETLIKNFKNIKKQTPMQVHRRRAA	172	USER	zzzz668
388	my_seqs_18minnow1_2ct1185.5@PF05840.12	PF05840.12	my_seqs	MCLTPITITNKRTDEKTSVPCGKCPKCLARRISGWSFRLMQEDKQSSSSYFITLTYDTTTVPISPSGYMSLSKEHLQLFFKRLRKKNSNQLKYYVCGEYGGRTMRPHYHLLLFNADKNTVQDAWGHGAIDIGTVSAASVGYTLKYMCKPSKVPVHRNDDRLPEFALMSKNLGLTTSPLKWYAGTTRTN	188	USER	zzzz669
387	my_seqs_18minnow1_2ct1193.7@PF05840.12	PF05840.12	my_seqs	MRCRHCAPAALPALARRASRQICSPIGSSPRYLRAPGQFLPLFLTVLVTPLVVSLMGVRGHPPQEPAGGPMTCFHPLKAYRSAEVNPSTGKRGITFNGSKALIEGGHLRLPCGQCSGCRIDRSREWALRCSHEAATSSASCFVTLTYDQQHVPTDFSVKLRDWQLFMKRLRKRFGAGVRFFGCGEYGDQTARPHYHALLFGLDFPDKTYWCKRGDHRVYTSEALEEVWGMGQCEVGSVTPASAGYVARYCTKKITGARADDHYSRVSPIDGQTYRVAPEFATMSLRPGLGLEWFARYGGDAFPSDFVVSDGRKVRPPGYYLRKLDEPGQEAIKRLRKRRAAQPAARWNSTSERLRVREEIHALRMKRLVRPL	372	USER	zzzz670
386	my_seqs_18minnow1_2ct1194.4@PF05840.12	PF05840.12	my_seqs	MICQSPESVPRPKGRGVTDRITVPCGKCLYCLKKRQSEWSFRLSQELRESISSIFVTLTYDDQNLPRNELGTPTLNKRDLQLHFKRLRVHLSRDHTLVSKMEKVSENALKVPKFRYYLCGEYGTKTKRPHYHVIMFNLPFNRKNPRDYRDLVALLGSTWKMGNVHIGNVTPKSINYTTKYITTVQQYPEGTERPFNLMSIGIGATYLDKNTNFHLDGKKFYSYLDGNKIKLPRYYTDRIFNDHERRLQAIKSRSAYDEEYTRENEKIAATGQNPFLYRNIAYQQEVERFNHKRSKKL	297	USER	zzzz671
385	my_seqs_18minnow1_2ct1196.4@PF05840.12	PF05840.12	my_seqs	MHSVSCMLNLTYEDAWLPEHGQLWKDDLQRFFKRLRKAGFRFRYVASGEYGEKNRRPHFHIALFGVDFSGDRRVFGRSNTGDRTFVSDAVSRAWHKGNHLICTLNFETAAYIARYIMKKAKGTHVAPPLAVLDDGEIIRPNPEFLIMSKGIGKSWFREFFMTDVFPRASVITQKGSSAPVPRYYKTLLKEVGADLALDMQFRSTARADLALEHSAFENQPHRKVARKTVSDSRLSLSKRSL	241	USER	zzzz672
384	my_seqs_18minnow1_2ct1197.3@PF05840.12	PF05840.12	my_seqs	MPCLRPITVKDRNGHATQIRCRSCRECKIRDVKDWGFRNRAELRQSYNAYFITLTYSDESTHFTGKLEISHVREYLKTLRNKVGYLYDRGEKVPTIERNASNLRFFAVGEYGDKFGRPHYHMILYNIPTFKHPQDKYFNEHKEVYKLISESWKEGLVHVGDVNMSSINYVCKYIFKQDGFRIMSKNPAIGKVYLTEKTLMYHQADKRFYVTLENGIRQALPEYYNKFLFDDADRCEHREKNQELRDDISRSAEQNIEELRKKILRQTAEERIFNKLKTREL	281	USER	zzzz673
383	my_seqs_18minnow1_2ct1198.1@PF05840.12	PF05840.12	my_seqs	MACYKPIEAYRGLRRTKNGKLPVVFDRRESNGQAIKLPCGRCIGCRIDHSRAWAVRCVHEAQMHDDNSFITLTYNTENLPGDNGLCIEHFQKFMKRLRKAIAPKKIRFFHCGEYGEQLSRPHYHSLIFGYAFPDRMIWKKDGDFAIYRSPQLEMLWPFGFSTIAECNFETAAYVSRYVLKKQNGEKAESHYRKVDPETGEEFQIQPEYITMSRNKGIAYKWFEKYGSDVFPSDEVILQGKKLKTPEYYSRLFEEREPERMVPIVKARKERAQKYKKDNTRERLDTRHKVAKQRLKNLHRTYEKGES	306	USER	zzzz674
382	my_seqs_18minnow1_2ct1200.4@PF05840.12	PF05840.12	my_seqs	MACDSPLEVYRRKGVKRPDGSPAYTMTVTPDRLDDWPTPVPCGSCTGCLLDKRSEWIDRAVEETRGVSAIAAILITYRDAPLVDAFGDLVKGFRAEHCIASCEFGPRSRVGELPHWTLVYRHVQLALKHLRREVDRLWRRAIGCALSERRLRLAVRFARERPSFKFLLNGEYSPTSGRPHFHLLLSGWYPGASEWERWFLMQEGKRGWIEGYRPVVVRQGTRKAASGLPVSESAWFNRTIWKYGYARFQRVDGVAGAAGYVAGYLMKRDEYPRDGRRPPFIQASMRYGAAPFRERADGSEPHGWQWIRTDSYVRMAGGKPPREVVVNRYWLRFAERFDPFGVRELKERRRVKFLMDPRNHPEVRRHWRDLAREVRRLRIASQRDEVASFRRDGVGDVYG	399	USER	zzzz675
381	my_seqs_18minnow1_2ct1202.7@PF05840.12	PF05840.12	my_seqs	MKCLKPFYKKTGEGPYPCGKCPECRKRRASDWSFRLMEEEKLHQNSLFITLTYDTKNVQLSKNGFMSLNKRDVQLFLKRLRKSHKDPNSPIKYYAVGEYGGRSRRPHYHIIAFSTDISKVQPAWGLGNVHYGTVNGASIGYTLKYITKPKTVPKHMNDDREPEFSLMSKNWGSHISQTT	179	USER	zzzz676
380	my_seqs_18minnow1_2ct1203.3@PF05840.12	PF05840.12	my_seqs	MAECLTPYSVRDKISNKLIPVPCGKCPDCIGKRLSGWSFRLQQEAKFSYSSYFITLTYDTEFIPICATGQFTLDKTDLQKYFKRLRKAHEKRYHSSLAPIKYFAVGEYGTKNGRPHYHALIFNAHIDDIENSWRKKVTTSNKLDKYTAEQLHPLQSDILSNTCVNLYPTPQPNFQLISQGIGISYLIQKNEKWHHDALTDRMYIPIEEGKKIAMPRYYKEKIYEKSQRKKIGVAMAEISAQSPELTELEKINTLNAKIKKLKKSRINERL	270	USER	zzzz677
379	my_seqs_18minnow1_2ct1204.4@PF05840.12	PF05840.12	my_seqs	MPCEHPITAYRPSKGGPVSFKRPQHTTYEELQLPCGQCILCRQESARQWAVRITHEASLWEQNCFVTLTYDETNLPKDGNLRYRDLQLFWKKLRKEIGELRYYAVGEYGDKTNRPHYHACIFGHAFTKHRVILRTEPTLLWTSPQLAETWGLGHVSVGALNFQTAMYTAAYVTKKLGYNKRYMQLDPETGELEEMIQPKAMMSLRPAIGREWLQKYGHQVYAFDEVIVDGRKQKPPKYYDRWLKQRSEIAEQMIKEERKKKAIKQTPQQTHARAENARARARQKKKTV	288	USER	zzzz678
378	my_seqs_18minnow1_2ct1208.4@PF05840.12	PF05840.12	my_seqs	MKCYNPITTTKHTDLPCGKCFACKLTRISDWCTRLHFEEMYSHSSYFITLTYNYANLKFTSARARQANAATLYKRDVQLFLKRLRKADAKNRSAANRRTHPIKFISAGEYGTRNKRPHYHLLIFNATQDGILNAWKRGDSSMGHVHFGQVNTTTIGYTVGYIAEAAARRTDVRISHYGLQLPFLTYSKGLGAAYITASSVRYHTASQNLIHRCYVMVDGKKKHMPRYYRNRIYSAQAFNQVKKHLADLELQKAPKQVEITHPRNLRIFNSRMLEAYRKETVH	282	USER	zzzz679
377	my_seqs_18minnow1_2ct1209.3@PF05840.12	PF05840.12	my_seqs	MRCVSPMSVPRPPGRCATDRIIIPCGQCFACIANLRESWCNRIMAEQKHSSSSNFITLTYATEHLKFTSAGLPTLCKKDFQNFAKRLRKKLASMPEFKTVKLKYYAIGEYGTKKLRPHYHIALFNFPQLGHIAKLIDFISDSWGLGSVHVGKIELASVRYVTNYVINKYVHDEFDEREKPFSLISKGMGLSYLTPEIIGYHQNNEEFTMRTIQGKALLPRYYKEKLFHKDQIKLNRERTQPEIDKRYEENQKRRSEFSSGNPFFYRMQAETQARIQYFKKLKGGSTF	287	USER	zzzz680
376	my_seqs_18minnow1_2ct1212.7@PF05840.12	PF05840.12	my_seqs	MRYFACGEYGEHTGRPHYHALLFNCAFKDLHRVGKRLFASERLARLWPAGQHALGECTGASANYIAQYSLKKQGRSLECDADGVVRQAPFLRMSTNPAIGARWLFRYADDLKGGFLVAEGRKVPIPRYYRSQLQEFFPVYAESLELSRAQSGVTFKSDSNLPARLADAEAIHVARKRLTESRSL	184	USER	zzzz681
375	my_seqs_18minnow1_2ct1217.4@PF05840.12	PF05840.12	my_seqs	MHSVSCMLNLTYEDAWLPEHGQLWKDDLQRFFKRLRKAGFRFRYVASGEYGEKNRRPHFHIALFGVDFAADRRVFGRSSSGDRTFISDAVSRAWHKGNHLICTLNFETAAYIARYIMKKAKGTHVAEPLAVLEDGEIIRPNPEFLIMSKGIGKSWFREFFMSDVFPRASVVTSKGTSAPVPRYYKSLLKEVGADLALDMQFRSTARADMDLERQAFENQPHRKVARKTVSDSRLSLSKRSL	241	USER	zzzz683
374	my_seqs_18minnow1_2ct1224.3@PF05732.10	PF05732.10	my_seqs	MNKNRGAEQYAHILMPDGELHAIPLPPARKAKRPEAFFMGFKDAFEALATNQDMKGADLRLAMYLAGKTDFENWLNFTPKQAAADLKTARPNIYAALQRLAKAGVLEKVEQTDDRRGGWRFANTFLWRGKVKNLHDERARRLKAVTKDPAPEGA	154	USER	zzzz684
373	my_seqs_18minnow1_2ct1224.7@PF05840.12	PF05840.12	my_seqs	MEGAERAERFSERVAPPRRRPGGFPSPRSRSMPCSSPREAWLRYDRNASGKRSIQFSPRNAFGDAFHIPCGRCASCRLEWSADWGGRIDLEVRTLASRGFEGAIFATLTYDDEHLPPNGSLRKVDVQGFMKRVREYAHRKFNGRRVRFFCGAEYGERLSRPHYHIILIGHDFREDRRQWRKSEGGIQQYRSEAFEKLWPFGSVEFGDCGPGAGAYVAQYSLKKVYGDQADSWYQGREPEFLLCSHSLGRDGFEVDLASNIAGDHVILTGGARRRIPKGFERFIPADQLAALKEKREARARERWRDNTPERLKVREEVRLARMRLYRNRV	329	USER	zzzz685
372	my_seqs_18minnow1_2ct1228.3@PF05840.12	PF05840.12	my_seqs	MRCKHPISPRGQPVPCGKCNFCLSNGRGDWTFRLKQELKSNVSAIFLTLTYDNEHLVYGNSELPTLNKYDLRGFIKKIRNYERTIPEHSRHRSTVRYYACGEYGSETERPHYHAIMFGLQMQTIGQLPLLWDKGNIHIGRVTGASIHYTTKYVITRQKKYEGRQKPFNAISNRSGGLGKNYLINADLHIKNAQTFIRNAEGIQRLPRYYKERIFTDPEQKQMMYEETDKQLREQYKKEIQRLARIHPHPTRYYQEIQDYHYDNLTKRLTKTETI	274	USER	zzzz686
371	my_seqs_18minnow1_2ct1230.4@PF05840.12	PF05840.12	my_seqs	MHSVSCMLNLTYEDAWLPEHGQLWKDDLQRFFKRLRKAGFKFRYVASGEYGEKNRRPHFHIALFGVDFSGDRRVFGRSNTGDRTFVSDAVSRAWHKGNHLICTLNFETAAYIARYIMKKAKGTHVAEPLAVLDDGEIIRPNPEFLIMSKGIGKSWFREFFMSDVFPRASVITSKGSSAPVPRYYKTLLKEVGADLALDMQFRSTARADMDLERNAFENLPHRKVARKTVSDSRLSLSKRSL	241	USER	zzzz687
370	my_seqs_18minnow1_2ct1231.3@PF05840.12	PF05840.12	my_seqs	MQCISPLSVRKQNGKSAERITVPCGRCLYCLQKRQSSWAIRLREELKHSKTAHFLTITYDEKSIRWGFKDSSLYLTTDQATRHDDFASMTPRLEKHEIQAFLKRLRYYCPQMDIKYYLVSEYGLQTFRPHYHGIFFNLPYDTSCTLGLKKMTRELDDVWGKGHIDIGEVTDASIGYVTKYLINSTDYPEICDTPFSLMSKKIGKKYLTPAMSKFLKTDVRNYYTTTDGIKTTLPRYYKDKVFNVVEKQAIQNKAEEQFLQITDEEYLSLQEKYEQKFYRKKLLNKKGKL	289	USER	zzzz688
369	my_seqs_18minnow1_2ct1237.4@PF05732.10	PF05732.10	my_seqs	MDTEKHWNPLQDGIEWIDPDTGDIRKARVHSYGPSKAPKEPYIMALLDTLNELAQNRELQGTDLRVLLIMLGHTVYGGRIAITAKNVGAELNLAMPTVYKSIRKLRDAELIVKNETDGLWYVHPRVAKRGDEEPRRRKPTRRDFKNARKRDAETA	155	USER	zzzz689
368	my_seqs_18minnow1_2ct1237.8@PF05840.12	PF05840.12	my_seqs	MTCRFPRDAWYSQSKTAAGKRRVQFSPNGAFGDVFKIACQRCDMCRIDKAAAVGARVDLEMQTALSCGFEGAIFLTLTYSDEHLPSGGSLRPLDVQLFMKRLRAYLGRTFGGKRIRFFLAGEYGEALSRPHYHAIIIGHDFREDRRKWSKPGADQLYRSESLEKLWPYGTALFGDAGPGSGKYVAQYSLKKVFGDRAAAHYAGREPEFMRSSQGLGRNAFELDMASNLAMDGVVTSDGKINPIPRGLERYIPPEDLERVKAARVERSRDLVRRRNRTPARLHVRAEVKLARMRLYRSDRF	300	USER	zzzz690
367	my_seqs_18minnow1_2ct1250.2@PF05840.12	PF05840.12	my_seqs	MACVYPIDCWISQKSNENKKYPITFNLSDANTDEPMQIPCGKCVGCAKQKSIEWGVRMYHEASLHAQNSFVTLTYNDENCPTGINKRDVQLFLKRLRKLCPLRYFACGEYGENTHRPHYHLAVFGQDFLGGAYRINDQLHGHEWMDKTWGLGQVAIAPLNLQTCMYVAGYVNKKIGDKETFNMMSTRPGIGHKWIDKYHDDIYRTGKICINGQEFQVPNRYLKWKPHDLEVIRQQKQDFMKNATPQQIWDRRIQLRGKEINIKAKLKQKVETI	273	USER	zzzz692
366	my_seqs_18minnow1_2ct1256.4@PF05840.12	PF05840.12	my_seqs	MECINPKGIVNPRTGKSMRVRCGKCLPCKKFRAGQWTIRLIEQEKCTKNNYFITLTYHDDYLTWGFQNPTLNKRDLQLFFKKLRKMLDNKLIYFVVGEYGTHTKRPHYHALLFNTGINSQEVLLNLIYLAWTNEKGESKGFAHCGNVTMESIRYVAGYMEKGIDGEVLDENIQREFNLMSKGIGKEYIKHNFYYHQENEKFTYKNGKKDEPLPRYYKERIFSDADRQAYVEKVEASIPKRTPTEEKNNIRARIERIRALNNLKSKRK	267	USER	zzzz693
365	my_seqs_18minnow1_2ct1267.5@PF05840.12	PF05840.12	my_seqs	MPASRTPTGNLSLRRSDIDSHGQRYLLPCGSCLGCRLANALSWAVRCTLEHSTHDYSNWLTLTYDEAHVPKTLDRAHLQRFLRRVRKISSPGRVRFFGCGEYGETTGRPHYHLLLWGPTRSDADLQRCWPHGHIKFAEVTPQRIAYTAGYVVKKVGPRELRKEHVDPATGEWWKYQPPFLQMSRRPGIGGEARMNFPDSWRSHAIYKSRPVPVPRFLHQAWKSKATPSQIIQLQEEQLSKPRPDLSPEHLDAAFKIAYAKYTQRLSLRSL	270	USER	zzzz694
364	my_seqs_18minnow1_2ct1275.3@PF05840.12	PF05840.12	my_seqs	MQCLSPIILKNKRATLCHTKQVPCGKCAPCLEKKRADWSIRLREELRVSVSAIFLTLTYSDEYLPFDEKIGIPTLKKSDLQNFMKRLRANVDYAYPNDDDFNVTDFIKLKYFACGEYGTKKERPHYHIILFNLPKELENLVLKSWTLGNVHFGECNHATIHYTSGYLITKNDPYFSDLQKPFALMSKGLGFAYINRMGNFHRKNDVSHYTALGGEKLALPKYIRHKIFDEKQRIVINAKNNRFYQRSQKVIQDDILSTDDGKKHFFDIVDQRKNQYQLSREKFLNKSKKL	290	USER	zzzz695
363	my_seqs_18minnow1_2ct1281.4@PF05840.12	PF05840.12	my_seqs	MSCSNPRTNYSCGQCLFCRVVNHSNWLQRLQLEFGKRPNSVFLTWTYSDEFLPVFEVSKRAQLYKPDLVQELDRLRSALRPKKITIFAVGEYGGYLFGSSKAKRPIHPHYHVMIFCDQPFSQLDLLYMQRSFKFGHSHVLQTTKNLMSYITGYTLKKLTNDKSMNRIGFYNLRPEFIYSSRRPAIGDIVEQLEQIEEIQGLDIQSIRIDGEVKPLARYLRLKKRYQKDKVFLNLKNEGDYLIYETRRYFNSERRMDELRKKKEEEDVQLLSDPCNAKKTIYEIRSDLLKQKRKNFTARFKARRNDERDL	309	USER	zzzz696
362	my_seqs_18minnow1_2ct1285.3@PF11726.7	PF11726.7	my_seqs	MECISPRSIKNPKKGAENMFLSVPCGTCPICLENHRASWTFRLTQEQNAALTSLFITLTYDELKSPSLEIRDIQGFLKRLRYYMDVDYQKRLKMPEIAPEMPKMKYFIVGEYGTKYKRPHYHGIFFNLPMNCSELINQAWKHGFIRVDPLNDARINYVTGYILSKRDYPEGTKKPFATMSLKPPIGMQYLEKNMNYHKNGKKFIAVLKGGKRVNLPRIYKHKIFDENERSEHYNEVKEIRYKKGLELRRECYKNKIPFYQNQDMIIREIYRKHEERKLKHNKNEDTNIQFGSIKETKNKPL	301	USER	zzzz697
361	my_seqs_18minnow1_2ct1392.3@PF05840.12	PF05840.12	my_seqs	MLDFINNPKVLAECQDSIRKEQDYEALWWAEFSAKARENLETARSQQLDQLRDRVAATACTEKDTGRFPHLCRKCAYCLRQRQTQWVKRARHEFHSHERTWFVTLTYRGSTEKSYKEVQKWLKRLRLKASSLRFMATEERGSKRSRKHWHVLLHCSGTVTKRMVKSEWKLGRCQLDLVKKASGAAAYAAKYLSPHDAPSRIRASVAYGNSLLAIQRARPDLCDVYDGWLFRGYSRPKWVRCWGRISQHAIEEWWLAPDCTPPF	263	USER	zzzz698
360	my_seqs_18minnow1_2ct1509.4@PF05840.12	PF05840.12	my_seqs	MCLYGRIMRNPKYRANKKNNGNVPEMRDSRVQYVPVSCGVCFECMKQKANEWKVRLMEEVRDNPGGKFVTLTFTEEALVKLGKKIKGMEGYALDNEIATRAIRFFTERWRKKFKKAPRHWLITELGHEGTHRKHLHGKNWPDDARDIEERWNAGKYRYGWVWKEKVVNEIAVNYVNEETVGYMMKYVTKTDPIHKTYKPIILCSKGIGKGFVKRYGFERSKYNEDETKDEYVTTSGHKIGLPVYYRNKRYTEEEREKLWIQRLDKNERWVGGERVKADDDKEYYGLLEYYRRLNREMGYGSPEDWDVVQYENDRRKIIQAKRLEGYEE	328	USER	zzzz699
359	my_seqs_18minnow1_2ct817.8@PF05840.12	PF05840.12	my_seqs	MLTLCIAPSSVMVPKGPEMVPQEVPCRLCWQCKLNRRNDYIGRCLCEVATSDWVYIVRLSYRDGWVEPEDVRNVNLDAHGSVWVTPRHAQNFFRALRDRHLKVRYFCVGEYGSLKGRAHFHAILFGCGRNPDWVVDENIHIDEWPHGHVYFQRLAEQHQIAYVVKYLFKDTELKQKWFVLSKKPPLGSVFFAEKARYLASQGVWPSSFAYLPPGADEASGDTQYKGGKVVKGKRKAYMMSGASRRDFMIELLRAHGVEPEDAIAGRNEHVARWITVVDKYLREKRMAPVDWAEAFKGLLRPRVFDLRQDEPVDDVRAARRSRADKNFLTARRMIATEYLEELDAGCEVHYYD	352	USER	zzzz700
358	my_seqs_18minnow1_2ct828.6@PF05840.12	PF05840.12	my_seqs	MCVTPRFLTLESGMTVEVACRNCWQCCENKINDWVGRCIAEEQDAVHTTVYTLTYGGDDKVTGVPTELGASILIYSDVQKWLKRLRFAGYPLRFLLCGENGSLKGRVHWHVICFWQDKVPDYKNGIRNFNDPFWHHGFTMAEDLYEPKEKAIRYVCKYLQKSEGNSSFLRMSKKPPLGDGYFRRRAETFASQGILPKDAFYSFADVRDKDDMPVKYMMSGVTLDNFMETFINAWKKRYGIHPLDVQHSDFLLEWLDGVAPRVSGDSLEGRVFAPAPVEPPHFAYSVSFNEKLNTYVAVCDSDVMFWCKVQGVWIWSDFFVAAGSSPLVPRLVVEKTERKLIQ	342	USER	zzzz701
357	my_seqs_18minnow1_2ct865.7@PF05840.12	PF05840.12	my_seqs	MCIYPTVVKNPKYKPNKKNGGNVPDLQDKRIGYVPVACGMCMQCMEQKAREWRVRLLEEVKHQKLKGNFVTFTFSDEGYKELVERAKKEIPGIKGYDLDNQVATIAVHKWRERWRKHNKKSPRHWFITELGHGETEHLHLHGIVWTDMPEEIDKRWRYEQVDKNKWKYGWCTLGDGKGRNYVNEETISYITKYITKADFEHKYYKPKILTSPGIGKQFAETFNAQRCKYKGEDTKTTYTTPQGYEINLNVYWRNKIYTEEEREKLWIAKLDKGEQWIYGEKIKADDSENRAKLLKYYQKVSERLGYGSPGNWEAKKYEEERRGLYQNKRIIEKREEEEKEEKTPSVVKIGKIETGFQEPGLEDW	364	USER	zzzz702
356	my_seqs_18minnow1_2ct871.7@PF01446.16	PF01446.16	my_seqs	MCLYPKLIRNRKYTKTKKNGGNIPEMKDQRVQFVPVGCQKCIECRKQKGREWSLRLQEEIRTDKTGKFVTLTFSNEAIHELEQAVTEQIGQITGYDLDNEIATLAIRRYLERWRKKHKKSVKHWFITELGQGKNWKWQGTENLHLHGIMFTNETEDIKEIWKYGFVFIGKYVTEKTVNYMAKYMTKVDQLHREYTPKILTSAGMGSAYTTRADAQTNKYNNGSTDETYTTRQGNKMSLPVYWRNKIYTEEQREKLWLQKLDKQERWVDKQRIDVSKGEEAYNNILKIAQEKNERLGYGNDKKNWDRQNYELMRRELKQKQRIQAFEVKRTKG	332	USER	zzzz703
355	my_seqs_18minnow1_2ct896.5@PF05840.12	PF05840.12	my_seqs	MCLYPTQYRNRKYLKNKKNGGIIPPIFDSRTGWVPGNCGNCMECRKEKAREWRLRLLEDIKTNTNGKFITLTFSNEWYKELHKITTERYKTYTPYEIDNEIATLAMRRFNERWRKKFKKAIRHWTVTELGHNGTENIHLHGILWTDKDIDEIKQIWKYGYTWPKSTMHAKEERIKGRYYVNDKTINYTTKYINKIDLKHKYYKSIILTSPGIGANYINSVNATLNQYKGKETNLTYITKNGNKIAMPAYWKRKLYTEEERERLWINKMDEDHRYVNGEKVSIKNGTEQYEKLIEWNRKINKELGYRGNEIENEKQKEEYKQRYKIQNKRIK	331	USER	zzzz704
354	my_seqs_18minnow1_2ct899.5@PF05840.12	PF05840.12	my_seqs	MCLYPRLIENRKYKPNKKNGGNAPPVKDHRTTFVPIGCQKCIECKNMKSREWQTRLQEDIKENRNGKFITLTYSEEALKAFTKTITRFKEIKYYDLQNEIATISIRLFLERWRKKYKKSIRHWMVTEIGGKHTERLHMHGIMWTDHPEEIEKIWQYGWVWRGYEQEEKGKYENYVNAKTINYIIKYVTKIDEKHPDYKSIILTSPGIGDRYTKKGDHYNNKYNGKETDETYRLPTGQKMALPIYWRNKIYTDEEREKLWLHKLDEGYRYICGEKVHGMERETYYNLLEYHRRRTRKLGYQEPELKWSKAGYEEMQRRMNEEQQLIKSEHIQANAPSAGS	339	USER	zzzz705
353	my_seqs_18minnow1_2ct904.5@PF05840.12	PF05840.12	my_seqs	MCLYPKLIDNPKYKPNKKNGGKPPIMIDERVRYVPIGCQKCKECYKKKANEWRVRLKEEIKNKEHGKAWFITLTTSTEGLKEIDDKVDKKYTGYDRDNAIATKAVRLWLERWRKHKGKSIRHWLITEIGEGATEHMHIHGIIWTNEQFEDIRSTWKYGYVYPREWEIKKNYVNSKSVNYIIKYVTQLDKRHIYYKSIIMTSSGIGNKYKKPTGDIQTDKYRTEQGYKITLPIYYRNKMYTDEEREKLWIEKLNEPYRWVAGKKVKSNDTETINKLLEQARVIDKKDGYIGGDLDYIEEEYQNKLRDLIRLKRFAQITKNN	320	USER	zzzz706
352	my_seqs_18minnow1_2ct905.7@PF05840.12	PF05840.12	my_seqs	MKVDRLETFDEAVKASAEPAFRPAPFRVLGRSRHNFGPGGKMTDRRRAVACSDPGYMHLPAGPTFVKMPRNCGKCAFCVKQKKAAFANACRMELEHSDWALFLTLTIAPGPERATDNLDKFLQIKVLQDFQKRCRINIDRQVGSFVGVNVTGWRYAQVGELGTLRGRPHYHMIVFGKGDRPNFPIGDRVYIPEWPFGHVSVRTDVDGATAFYIGKYIAKDHLTRCCSVSKVPALGSAYLIDLALYWATQGTFGLARDFSFSMPGLIGRYRGVVKGARRRDYIVGVAALAGRDILSYLNETPESMHASIFAAERWKREREMKAQGFDAFFERFAEEVRQKAALARRKEQVFTDEERERTINHLVNRGEYVPARLLPLPHAERTYEMDRAASRSAAARRDA…	408	USER	zzzz707
351	my_seqs_18minnow1_2ct906.7@PF05840.12	PF05840.12	my_seqs	MCLYPTLIKNRKYTANKKNGGNVPPIPDERVKYVAVGCQQCIECRKQKARGWQVRLLEDIKTNTNGKFITLTFSNESIKHLTEIVANKTDIDKETGEVTETILEGYELDNEIATKAIRLFLERWRKKYKVSLRHWLVTEIGHNGTENVHLHGIVWTDKDLEEVTKIWSYGYVWTGKKENGKIINYVSSRTVNYIVKYIHKVDEHHKTFKSKVLTSSGIGGNYINRVDSKNNKYKGENTITTYKTTTGHKIAMPVYWRNKIYSEQEREKLWLQLLDKQERWVCGEKIKINDSLEEYYKTLEFHREKNIRLGYGTGEKDWSREQYERQRRQLMNSKRIQSAAAGRPSGRGNSKDIGTNTNTYETRRPTTRTKIHNSKT	376	USER	zzzz708
350	my_seqs_18minnow1_2ct907.5@PF05840.12	PF05840.12	my_seqs	MCLYPKLIKNRKYLPNKKNGGKPPTIKDPRTAWVPVGCQKCIECKKQKARAWTIRLQEEIRTNKNGQFVTLTFSNESIKQLTDILYEENGGEEITGYQLDNEIATLATRRFLERWRKEHGKSIKHWLVTELGHNGTENIHIHGLIFTKNKKEIKKRWKYGFVFVGDYVNDKTINYISKYILKADEKHKQYQSIVLTSPGIGSNYIKRADATLNKYKVTGETKETYTTRSGTKINLPIYFRNKIYTEEERELLWLQKLDKNERWVCGSRVDMSREPIQYYELLKYHRERNARLGYGNDEKNWEQHKYEEQRRNLLIKKRITNVDTNDKAQRLHRKRTKGNLGNHSNDRIKYLESIGVRQTDQSTSRN	366	USER	zzzz709
349	my_seqs_18minnow1_2ct909.7@PF05840.12	PF05840.12	my_seqs	MCLYPKLIKNRKYVPNKKNNGNPPTCTDNRVLYVPVGCQKCIECKNQKARAWGVRLHEEIKTDKTGKFVTLTFSNESIRHITQEIAKENDGIIPEGYIMDNEIATMAVRRFLERWRKKHKVSVKHWLITEIGQGKNWKYQGTENIHLHGIIWTDNVEDIKKIWQYGFIFTGKYVNESTMNYITKYITKVDKLHKEYQPKILTSAGIGKNYTNTLNARDNKYNTEKETKETYTMKDGIKINLPIYYRNKIYTETERENLWIQKIDKGIRWVMGSQTKDINQYFKLLIQARHKNKRLGYGDDTKNWDRIKYENQLRKINLEKRINKANLAETKQ	332	USER	zzzz710
348	my_seqs_18minnow1_2ct911.4@PF05840.12	PF05840.12	my_seqs	MCLFKRRIRNPKYEPNKKNGGIIPPVNDYRTLHVEIDCNECMECRKKKAREWQVRMLEDIKHNKNGKFVTLTLSNEEINKLVKEADIKETGYEKDNKIAKVAVRRFLERWRKKYKKSVRHWLVTELGHKGTENIHLHGIIWTNEKFETIEKIWNYGWIYPRYESERSINFVNEKTVNYIIKYVSKMDEKHKYYKSKVLCSAGIGRDYTTKGDYKNNKFNYEKTEETYRTRTGHKIAMPKYWRNKLYTDEEREILWRIKMDMGVKWVVGEKVKENNEDEYWKLIKWYQQINRELGYRGWRKDVQEETEENRIREIMYERRI	320	USER	zzzz711
347	my_seqs_18minnow1_2ct912.5@PF05840.12	PF05840.12	my_seqs	MQGEHQNNKTMCLYPTMIKNPKYKKNKKNGGNPPPVTNQGTYMIPVPCGNCIECKRQKANNWRIRLIEEFKTEKRGKFVTMTFSDESIKKLEEIVIEERRKKLEEAEEELNKEIPRKNQYLTGYELENEIAIKAVRMFSDRYKAKYKKRIKHWLVTELGQESTERIHIHGILYTETSLEEIRRLWSYGNINKKDKDWSQQYCNEMTIGYVVKYINKTDPVHKAYKPVILTTPGIGAGYINTLNAKNNKYNGENTQEYYLTRKGAKISLPTYYRNKLYTDEQKEQLWINKLNSKVKWVNKVKIQITAEKTEEDEDYKRQLDYARQENTKLGYGGITSKEAKKHEADKRKIRTANRLKRQRDEMRKKSNNDCNLE	373	USER	zzzz712
346	my_seqs_18minnow1_2ct913.7@PF05840.12	PF05840.12	my_seqs	MECKKQKSMQWNIRLQEEIRTNRNGQFVTLSFTDEALNELDKEIQNNIEKSINEINNNHNKYLETKEITGYNLDNDIAKLAVRKYLERYRKENKKSLKHWLVTELGHTNTERIHIHGIIFGNPKQIIKHWKYGRVWIGEYVNESTIQYIVKYIYKTDTDHKYYNPIVMTSPGIGNNYINRSDAQRNKFNGKQTKDTYTTRQGKKISLPTYYKYKIYSEDEKERLWINLLDKEERWVNGTKTDISKDETDYNRVLEHARNINRKLGYGEREINPDDKEYERQKRNIKRYTRLVKENQEVIKGKGRDKEPLQKPKRS	315	USER	zzzz713
345	my_seqs_18minnow1_2ct921.5@PF05840.12	PF05840.12	my_seqs	MCLYPKLIKNRKYQANKKNKGIIPAMTDPRTAFVPVPCGKCMECMKQRANAWRIRLIEEIKVNKNGKFVTMTFSEESLNELDKAVQEAAAKNIVELNKETGRKYKPVEITGYELDNEIATLAVRRFLERWRKRYGVSVRHWLVTELGQEKTERLHIHGVIWTDVNKNKVEEIWKYGNVNKREKNWEDNYCNEQTISYIVKYLNKADEIHREYKPITLCSPGIGANYIKDTDARRHQFKGNETKQDYINRQGYKLALPTYYRKKIYNDEEREALWINLLDKEERWVNGIKVDVSQDNKDYERVLEHARRINKILGYADDKKNWNRTEYERQRRNIKRYTRMKKDENQKKKFLGGKSND	357	USER	zzzz714
344	my_seqs_18minnow1_2ct923.8@PF05840.12	PF05840.12	my_seqs	MQCDAPLRIERDGYEIVGLCGSCKKCRDNRRRDMIGRCLAEVQDPSCRAVTFVTLTYGHDPSVTAKIDHPHARSLYYEDVQKWLKRIRTRQMPGSKKRYRCRYVAAGEMGSQKGRAHWHCLLFWQTDPPNFPAVDRWSEDPFWSLGFTNWQLVTKDKNHRAVAYVAKYVAGGDLKSTQETCFHGSYRPLLGGAYLARWADRHVEAGLGLTQNRIYQVDGSYKRNGKLFDYFMNISGAKWVARHYLERWKETREGHRPYSRLVEWYEDLDARDRVESIRDDAAIERIAAGKPLSPGRRKVKSPTAGPPRGYESWWDDSLQVFVAVCGDGRPELKWNWKRQSWDRKITLRSDDPQEDPLPDLPGEAPREFRRVADIPDFVPGEPLDLSKRRRAPGSREVYA…	432	USER	zzzz715
343	my_seqs_18minnow1_2ct934.6@PF05840.12	PF05840.12	my_seqs	MCLYPRIIINRKYITNKKNGGIPPIAPDPRVKFVPVGCGKCVECKKQRSNNWRIRLMEETRSKRHGRFINMTFSEESLIELENDIQQQSKINIQKLNEEHNKKTQWLPITGYELDNEIATLAVRRFLERYRKKYKKSIRHWLVTELGQNNTERLHIHGIIWTQDHEEEINGKLIIRHDTKNEIEQLWKYGNVNPRDKNWENNYCNERTVNYIVKYINKTDKKHKYYNPIILTSSGIGNQYIKRPDSNSNKYKNENTKETYTTRQGVKMGLPMYYRNKLYTDNQKEQLWLNKLNKEERWVIGIKVDTSKGEEDYNNVLKHAREVNKKLGYGNDKIRYEDKAAERQRRNLQRWIRISKIKEIIEEQALRSIDKGETKEQRTTKIKNKPSELKRLLTEIRHN…	432	USER	zzzz716
342	my_seqs_18minnow1_2ct936.5@PF05840.12	PF05840.12	my_seqs	MECKKQRANNWRIRLMEEIRHNKDGKFVTMTFTDEELIKLEYEIHKKNKKNLGQLNKITKKNTKYIPVNGYDLDNEIATLAVRRFLERYRKQHGTSIKHWLVTELGQESTERLHIHGIIWTSKAKTHIEKIWKYGTVNRNQKQWEDNYCTERTINYIVKYINKTDEIHKYYNPIILTSSGIGKQYVNRPDSQKNKFKGEDTKESYITRQGYKLPLPTYYRNKIYTEDEREMLWINLLNKEVRWVNGIKVDISKGEEDYNNLVKHARTVNKTLGYGNNIIKWDELKYEQQRRNIKKWTREQKQKRSF	306	USER	zzzz717
341	my_seqs_18minnow1_2ct941.4@PF05840.12	PF05840.12	my_seqs	MCLYPRAVQNKRYTATMKNGGVIPPVNNLKLMTVQVPCGKCMECKKQKYNGWRIRIIEELKHDSQAHFVTLTLSTESLRELTEAVHTKQPGIYGYTLDHAVATVATRRFLERIRKQTKRSVKHWLVTELGHEATEHLHLHGFIWTPDKALIENQWKYGFVWIGEYTNARTASYVTKYILKTDQQHKTYNPIILTSKGIGRAYIHTRRAKENRYNGANTVQTYTAPNGRKLALPTYYRNKLYTEEQREALWADKLEKGKRYVLGVEVNSDSLDYITAMALARRKNHRLGYGSNYMNLPKIEAEKQKRQEIQKKRLEDDTK	319	USER	zzzz718
340	my_seqs_18minnow1_2ct945.5@PF05840.12	PF05840.12	my_seqs	MCLYPIQVNNPKYKANKKNGGRIPALRDQRLLTVPVPCGNCMECRANKARSWRVRLCEEIKQPGRAHFVTLTFNTKSLIDLSTEIQEADKTIYGYKLDNAIATLAIRRFRMRWKKKFGKSIKHWLVTELGKENTEHIHLHGFLWTENPQEINNIWGYGYTHVGTYTNERTIAYCTKYVLKVDPKHKHYRPIILTTPGIGKAYLHTPHAALNTYKGEQTRLHYTTRQGIRLNMPRYLRNKLYTDEQREALWITQLDKGNRYILGQEVNINDKDRRYTVILHNAKAKNSRLGYGSNRNDPIEYLRENQRRAKLQEQRKREHLDNKPRKE	327	USER	zzzz719
339	my_seqs_18minnow1_2ct961.4@PF01446.16	PF01446.16	my_seqs	MSTKLIQNIDTKTTSIPQLVTMYQEGVEKKTLNTGTALKPEDSPWRKESKRKFLTGLYVDQLLLLDSPAKKEYEKILKCANFRRWNGELDVYENFTCKSKLCIGCMNKRTFKLIRRYKIIITEMPNLFAQVLTLKNVPCSVESLRGTYKIMQKVFRQIADLARKSNIPFNTIRVIECTIGEDGTLHPHFHLIVENEETAAFIQKHWTRILNDMEEGTCNQKAQWYEPVTEGTINEVIKYSLKILKQEKRGENENFTTYKINPVKADIMYRAMKGIRTLQTTGLFMKLLDSFEETEEQQAEREKFKLSYKGNHLIYSKEERTWINEYGYEAYKNKFNEQIIMKVTH	345	USER	zzzz720
338	my_seqs_18minnow1_2ct961.8@PF05840.12	PF05840.12	my_seqs	MCLYEGTLRNPRFKPNKKNQGRPPMPKDIRLLRIPKICGHCIECRQDRYNYWRPRMIEEVRYYQGYKMMLLSFDDASIDEIETYLKDKNLPFDANSITHRAIVLFTKRWEKKYGHKPRHIFITELGPNNTERVHIHGLMILEPSMLRPRHQMKKTIEEVEKIWKYGKVFIGHTTNEKTVNYIAKYILKPDPVHPNFVGDVRASKGIGKTYLNKWDADQNRFRGEETVETYKTPSGRRIALPPYYRNKIYNIDQRETLRLIKEDKETRYMMGHKYEMKTDEQREIFERDREYFRMENIRKGYGTNDEKYKKQSYNARGGKIMNNPRIKGKGINDVDKNNPKIKRNDKRA	348	USER	zzzz721
337	my_seqs_18minnow1_2ct976.2@PF05840.12	PF05840.12	my_seqs	MPCYHPLPAWYGKERNASGKRPLVFKIAEAFKDRPVSLPCGRCIGCRLEYARQWAVRCMHEASQHDSNRFVTLTYSDAYLDIYNSLNPRDMVLFLKRLRKAKGPGVRFFQCGEYGENLSRPHHHALLFNCSFPDERLHSGSGEAKLYVSDELSKLWGFGFAVIGDVTFESAGYVARYTLKKIRGPDADRHYGGRVPEYLTMSRRPGIGSSWIHRFASDVYPSDELVVNGHITKPPRYYDDVVAKLRPGVLDRIKRRRRAAGYNDADLSNPDANGTGKRLLVREVVKESATSFLSRKFEANNDS	303	USER	zzzz722
336	my_seqs_18minnow1_2ct987.4@PF05840.12	PF05840.12	my_seqs	MEIVVPCYKPIRGYKCSDGSVVWNQLSKYDIVGDIKLPCAQCIGCRLDRAREWSVRCLHEAKLHEQNSFITLTYNDENLPTGNTLVYRDYQLFMKRLRKITPPVRFFMCGEYGEGTARPHYHAIIFGYQFPDLQYWGTSPTGHPVYRSSQLEQLWTLGNSLIGNVTKQSAGYVARYCMKKVTGDLADEHYKGRTPEFAHMSLKPGIGANFFRKFTSDILPNDYVIEDGYKIPVPKYYDKLYKGNDIEDIKWKREQYAQKFAQNNTPERLTARETVQQARANMLLRGKIQ	289	USER	zzzz724
335	my_seqs_18minnow1_2ct991.6@PF05840.12	PF05840.12	my_seqs	MACYKPIVAWKPLEGGALHFSEKKGCREIKIPCGQCIGCRISKRDAWAFRCYAESKLHKDNCFVTLTYDPEFMPQYGSLNYRDIQLFHKKLRQKLGPFRFFVCGEYGEQFSRPHYHGLYFGLSFPDAVKSNSVQSKYDIYKSEILSELWGKGFCSIGQVTYESARYCAVYTTKKVTGELAESHYSRVVPETGEIVQIEPEFGRMSLKPGIGHDWLVKYAPELLTHGAVHVYNRKAPIPRFFMDKLALLHEDDFNAMKLRLESKVDYDNNSPSRLAVREECAIGKQRFNSDRRGPSAL	297	USER	zzzz725
334	my_seqs_18minnow1_2ct992.2@PF05840.12	PF05840.12	my_seqs	MPCYRPLTAFKPLEGGSVVFHEIKGCREIKLPCGQCIGCRISKRDAWAFRCYAESKFHAENSFVTLTYDDENLPSDCGLHYSHIQLFHKRLRQRLGSFRFFVCGEYGDDTKRPHYHGLYFGLSFPDAVKCNSLYSQSDIYTSEILSKLWGKGFCSIGAVTFESARYCAVYTTKKVNGDLAEARYSRVIAETGEIVQVAPEFGRMSLKPGIGYDWLVKYAPEVLTHGGVFIGNRKQAVPRYYMDKLALLSEDEFNALKLRLESQVDYDNNTRTRLEVRERVAHGKSRFNAERINRNAL	297	USER	zzzz726
333	my_seqs_18minnow1_2ct995.4@PF05840.12	PF05840.12	my_seqs	MHEAQFHEFNCFITLTYNDESLPAGGTLVKKHFQDFMKRLRYHVKEKYGISRVSYFHCGEYGERLRRPHYHAILFGMDFSDKKEWKRSETGTLYRSEELDSLWQLGFCSVGAVTLQSCAYVARYVMKKITGAKASEHYISVDSDTGEISDLQPEYITMSLKPAIGERWFAKYQGDVYPDDFAVMDGKKLRVPRYYDKKLELVDEDLYKDMKRERVARASTRKARLENGPIRLAVREECKEAALSTLKREFEDD	253	USER	zzzz727
332	my_seqs_18minnow1_2ct996.4@PF05840.12	PF05840.12	my_seqs	MPEGGSLRYRDFQLFMKRLRKQTRTRVRYFVCGEYGEQLQRPHYHACLFGYDPPDKRPVILLAKEYKSWRSKELERLWPHGHIHIGELNVRSAGYAARYCLKKITGFQAATHYQRVDADGVVHNLLPEFARMSLRPGIAALWFNRYRSDVCTQDYVVHDGRKFSVPKYYDRLNEREDPDDYAKWKEDRESRALAFRQDATPERLAVREVVEAARIAQLKRGYET	224	USER	zzzz728
331	my_seqs_apo1_1_2ct45.7@PF05840.12	PF05840.12	my_seqs	MACFHPMTLWIRKDRPIYFPKLNQQEQARYNKTRFQPRKGYIPIEVPCGKCLGCKLDKADQWATRMCLEAKQWHSNYFLTLTYRDDQLPLQGGKMSLNKRDVQNFWKRLRYEFKGEIPWENPKNGKIENPIRYFVCGEYGPKGGRPHYHAAVFNLKLTDLKPYKQNREGDWLYNSPTLERIWGHGYVVIGLLQPKSANYIARYVQKKAGIAGKTRMWIYDNKKCERHIMVRKNQPQEEYVNMSTGVGLGRTWWEENKQKVKKLGSILLKIGDKVKAKAIPRYFKKLWEAEDWEDYEFNKYENMIKALESRKKILDKELTEGNEDLRWKKHLEKQERLLTEKAKYLKRSNFI	351	USER	zzzz738
330	my_seqs_axolotl_blastema1_2ct2.1@PF02486.18 my_seqs_axolotl_blastema1_2ct2.1@PF02303.16 my_seqs_axolotl_blastema1_2ct2.15@PF02486.18	PF02486.18	my_seqs	MASAANLNASPHPGSQSGLPLSNRGVGKSDRRETELARAVSSERRTWAGIDWVAGSVDLFDLLEASGWDGGDDWKGPGISELLESFGPRARRKGDDADENGELVTARQNVFVPPPALVQEMAAEAFSYLFADTGLVLSKEARAGKFYAFRWMVTNVFDEPAGMIEMGGQLTLRKGSRPSLRFELTGLGSAIYETRGDASADHAQRWCAFAAKLQRVRAQLSRVDIAFDDFDGVRNLALARTMWEVGEFDYKFAGEMHRPKARSLDDHGSGEGSTFYVGHSSSEKQLRVYEKGKQLGDRESNWTRWELQMRSSTRRALALDVLRDPMAYMRGAFACLDWISSCMARLEVTREATKACVKSVMRHAKRMYGATLRHLHRLAPSDGEVLDLLHFLGEERVPR…	424	USER	zzzz739
329	my_seqs_beef_bd3_1_2ct46.6@PF05840.12	PF05840.12	my_seqs	MDVESIQRLFAEAMSSETFDRHGTRLGTWDISGTCDKPVPITHYSRASGLAKSLSKGAKMPPGIGITLLTPCRQCEACLKFIAYHWRMRAQTELQAAQRTWMVTFTCRPDFHVWIDHVCATRKGNFWAQPPDKIFAARTKVFGEEITKYLKRLRKQSGAKIRYLLIAETHDGLATSDFLRGRPHFHMLLHETETKLSKSFIQGQWHHGHTGCKLADSGASWYVSKYITKAKQARVRASLRYGLIKHEVIKSIYDL	255	USER	zzzz743
328	my_seqs_beef_bd3_1_2ct52.5@PF05840.12	PF05840.12	my_seqs	MSSTFSIATPFGSPERLPNGECGGEFVKGLERQRPLTNDGGDSPLTPCAERGEATDLIISAQVTPAFRAVLQERQRRARKARRRYRLYDLKSLARIAASGIGRGFVQETPQRGSWDMSGDCASPVPVQMDAASSRLQGEYRVRTAGPIFGLTMHTRCRRCPPCLRNRSAKWAYRATEEIAGSARTWFATFTLSPHHHALMRMRASARLRPRGVDLELLPVEERIREVGAEYTRELTKWVKRIRKNSGAALRYMLVQEQHKSGLPHFHAVIHEVNTDEPVRHATLTSGWKLGFSKFKLVEGPKAAWYVAKYLAKDVLSRVRASIGYGKTAYAAGGVSKRPPRQKTSPPATTSQLNEVLTGSIKSDVSWLMSNHPAYAKKGEPDASCSQTSNLSRRGGPAS…	479	USER	zzzz744
327	my_seqs_ct_4fly1_ps_NODE_x4.7@PF05840.12	PF05840.12	my_seqs	MCNNPTTLPDGTIVACRSCDICNDNLTNDWVGRCLAESRTAVGTHSVTLTYGRDKDGVDRHERTAVLTYSDIQIWLKRLRNHGYPARYLVAGEYGTLKGRAHWHVIVFWQEKVMPVKMYRRYWDAHWEHGHQVWKRPEPSHVKYCCKYIRKDQKDTNAQSKFQFSKVPPIGAHYFVNKAKLMVENGLVPHDRLYTFPEARRKKSRELIKFYLKGATWDLFMGAYCEAWEKKHPWKDFPPSEILHEWVGKHWHNRQLFVANPKHYKPVDEALLQEAQKRKEYREAHDLYYFGKNRVGFYNSDWTPDEQKEVGPFLGTQFYDPQDQVADLVAATGGAKSLASAIYD	344	USER	zzzz745
326	my_seqs_haddock_1_2ct1.6@PF05144.13 my_seqs_haddock_1_2ct107.2@2L53_B my_seqs_haddock_1_2ct11.1@PF01446.16	PF01446.16	my_seqs	MNYKTNKTIPQRVATPTDRRSAAGGGAAASLVTVTKSASPFGNSAFEIVSNDGEIHSFNRDDDGTLKVIKTPEAARALRWSLKSIVNKILTQSRTAKCQVFRAPIPNGLRNIEIRKTVEHNKAFYTGLYACGNVWACPVCATKVSERRRAELVTAISIAKAKGWQINFITLTIPHGISDDLKVMKDLQQKALRKISSGKNSVKNLLEKQGVEVHGYIRAYEVTHGLNGFHPHFHIIYFTSEIEHRYIERIYTKKWQQACSSVGLPTPSDEHGFHIQDGSFAAEYAVKWGIVDEMLKANTKITKRKGVSPFGLLKAVLDGDNEDYPADYARKLFAVYVESMKGARQLYWSNGLRLKLGLAQEMRDQEIAQAETEESSRYLATILPEQWKIIHKKRISPVR…	436	USER	zzzz746
325	my_seqs_haddock_1_2ct12.4@PF01446.16	PF01446.16	my_seqs	MSFAAAASAPLGIIGKCSSTKHKAARVERYQALSQARYWLRSLTVENKAKAFGKDVHLTTTCRYTPIGSFVSVHHDRKHDAAFFGSVATCGSVWSCPLCAAKIQSRRREELAQLVEWAYSKGYQVSMVTFTFPHTKFDNLNTLTLRQADSFRRLRSGRAWQDFRSNYGLVGFVRSLEVTYGKNGWHPHTHELWITKNLTPLNRGDFYQYIVNRWKRSCVSSGLLDLTNEAQVHGFLNHSVDCSFDVSSSDYLVKQDASRNWGVDAEMTGSLAKKSDGSVHPHEFLIRGDSGDRERFIHYSVAMKGKRQIFWSRGLKKLVNLEEKDDDQLALESLEDADLLGLLTKSQWSVVRGNDARAELLTVAELEGWLGVVKFLKTLGFEP	383	USER	zzzz747
324	my_seqs_haddock_1_2ct13.5@PF05144.13	PF05144.13	my_seqs	MIDMIKISIPFKLEYCETTTPLNGKSVSYVNLKECAVRGVDLESKSLSVTGHDQMGNYIIEADNLRHPYEALPTSFTAIAFKIFSGTVTRFPCVELKASPAKIIQGHNLFGSDDLELGVLELIAALSHSYPDIIEMLEIQDSVLDLIDATYSCRVDNEYISKQVIAQLKNISNGHLRRAVKNEYETTCYFNKGSRHVDRKVYLKEHEYLSQIKKYTALAEKGNSHAQYIVDAMSDPRLINYSRNLVRFEASIKRRYLDDFGVPQRLFDSVDRFDVKQIGAINFFKLYLKNENVSIVQSMWKKAFCQLFKTFQGAKMNLFDDSLVRDELRLRYSSVTKTGKVSFAKPDRLFRFYRSIMSDGYDNVQDTFSRSTFHKSVAELSEIGLSKAQLQQINGISTD…	448	USER	zzzz748
323	my_seqs_haddock_1_2ct14.9@PF05144.13	PF05144.13	my_seqs	MIDMTGIYIPFRPETYGYTDIDKIKIDSGLYDNTARLKVFDFIKICKECGIEPNAYGLSFDFEDGIETVSVSGLNAPFEQLQSSFAGIALKINHAPTIGTPHIILKASPAKLLLGHNIYGFDDIQSGIVIILYTLIKTYPFLAQYLDFNSAELRMLDINYSFRMRSKADCIYLLDYLRNVSYRQTQANEVENNRFKETTYFGNKNSKHKFIRMYYKHDEVLKTVQSKTKQQLNNVTKHQIEVLSNPELIEFSKNLLRVEAALRKVWIEKKFGSTLLSCVLSSDVCISDLWMDAMSDLFKAVGDVTLKNQSDESVREQINKLYVTYTRKGTESFTTANNIYAFYRLIISDGYKSVKDTTAHNTFYTRIKQLESIGISRAQLQNYNSLDSSTRNIIPFVKI…	435	USER	zzzz749
322	my_seqs_haddock_1_2ct17.8@PF05144.13	PF05144.13	my_seqs	MIDMTGIYIPFRPETYGYTGVDKIKIESGLYDQTARLKVFDFIKICKTEGIEPNAYGISFDFEDGIETVSVQGLNAPFEQLESSFAGIALKINHAPTIGRPHIILKASPAKLLLGHNIYGYDDIQSGIVIILHTLIKTYPFLSQYLDFNSAELRMLDINYSFRMKSKEDCIYLLDYLRNVSYRQTQANEVENNRFKETTYFGNKGSKHKFIRMYYKHDEVLKTIQSKTKQQLNNVTQHQINVLSNPELVEFSKNLLRVEAALRKVWIEKKFGSTLLSCVLASDVCISDLWMDAMSDLFKAVGDVTLKNQSDESVREQINKLYVSYTRSGKESYTTANNIYAFYRLIISDGYKSVQDTTAESTFFKRIKQLESVGISRAQLQNYNSLDSSTRNIIPFVKI…	435	USER	zzzz751
321	my_seqs_haddock_1_2ct19.2@PF01446.16	PF01446.16	my_seqs	MNPTSSQILGSLGTITKSRSAINLNSVSGGTPEFSFSSSRIADYMLQDQSGKILQKKFRVQICLKRKINKSENVKVCWNESDKKAHFGNVIRCGSVWVCPVCAKKITEKRREELALVNELWKFGVAIKTFDFKSLPFYAELKKDKKKFVGPIVPSITYVRGHTYLITLTNPHYANDDLSDLRLKQKDAMHSFFSDRFGKSIFSRMGRRYQVTNYEVTYGQNGWHPHHHILVFSDRYLSVHEFSQLHSDLSDHWANCIAKAGLRVLKYSEKFIACDLQDGTYADQYIAKWGIEHELTKGHIKKGKEGGLTPFDMLRLSFEDKPIKSSYLNLFTGDFVHQEKKPSELFKEFAYAFKGARQLFWSQGLKDVFGLRDIDDSEIMDEVTEEAVILTTLEDLVFY…	459	USER	zzzz752
320	my_seqs_haddock_1_2ct20.7@PF05144.13	PF05144.13	my_seqs	MLDMLVIRLPVKPEFIVKHGDLFSVLGDVADYGLASATRFIKRDPVTKEVTHGELYHPYESLPSSYSSMAIKFYDTCRLCPPYMELKASPAKLLQGHNVYGGESIYNGAAEMFAILESVYPWFFSECLDIEKADVRQIDTTFHACLPSQNLVLPALRFLSSVSNGQRKNDTQKRDFINTVYYGGATSRLVRSKIYAKHNEVKNTIEKLQKKSNRGCVASFDALKIYTPELIEYSKGLLRFEHSVMARKLERSGLPTNLWRLIEYQNSNPDLLQQLWLDGFKPILKALEGEVMEHADDKEIQNLCMKKLVTITPSGKESFTKANNAFNFYQLLKMNGWLDVKSRYTVSQFNRNVKALVDIGVPKALLQNLGKERGKVILMIDLLKIDFFNQAPEGYKPPN…	423	USER	zzzz753
319	my_seqs_haddock_1_2ct21.4@PF05144.13	PF05144.13	my_seqs	MLDFLRLAIPIIPTHVRSFDNHHQFNGDIRDYGIPAATRHVSKTDDGQTITGDLYHPYEALPSDYTDMAVKFYTNTMNTVPYVELKASPLKLLQGHNVYGFESIELGAMHMLGMFFEAFPKLSAILDQDKTEVLCLDTTYLFRLPHQNMVQPVLDYMANLASGHRKARQVKYDNYITWGNDGASVRPKAYGKFEEVKAQLNKVQKQADKGCQRSKSLVMAMHDALPFANAVLRLEARITKTYLTKNGYPSNLFQLINLQHEQPELLLRLWHVAFDPILDTMKGKYMNFSSDGEILDLLKSKLVTYTKTGKPSYTKANNAMKFYSLVRQMGLQATKELYNERTFYHALNSLLDVGISKSHLQNLAKNPNGKVIPFVRMFELKMCDQQPSDYQIPVSQYSP…	407	USER	zzzz754
318	my_seqs_haddock_1_2ct23.6@PF05840.12	PF05840.12	my_seqs	MCISPSYIWKEQGPKWVQLPVPCRRCWMCAQNRVNDLVGRALCEAAYSDWTVTVSLTYADRDDGADKILTPRHFQEFIKNLRNERRGHPSYDKNHKLRYIVVGEYGDLKGRSHFHAVLFGEGPPLDISKNNREPWPHHRRFWPSAWDHGHVWADHNSDEKSLRYVCKYLLKNEPGKYWFSLSKKPTLGSAFFKERAALCAELGVLPSAFSYSPPGSSRTKNYLMTGATRRDFLQDVIDRWREKRPLDSTRLSEWMAEAVRKLDVKAHEARYNALPDAEKMEALLESLEHKRPSDRAVLRSLLDTLDFHDY	310	USER	zzzz756
317	my_seqs_haddock_1_2ct24.6@PF05144.13	PF05144.13	my_seqs	MLDMLVIRLPVKPKFIVKHGDLFSVLGDVADYGLASATRFIKRDPVTKEVTHGELYHPYESLPSSYSSMAIKFYDTCRLCPPYMELKASPAKLLQGHNVYGGESIYNGAAEMFAILESVYPWFFSECLDIEKADVRQIDTTFHARLPSQNLVLPALRFLSSVSNGQRKNDTQKRDFINTVYYGGATSRLVRSKIYAKHNEVKNTVEKLQKKSDRGCVASFDALKVYTPELIEYSKGLLRFEHSVMARKLERSGLPTNLWRLIEYQNSNPDLLQQLWLDGFKPILKALEGEVMEHADDKEIQNLCMKKLVTITPTGKQSYTKANNAFNFYQLLKMNGWLDVKSRYSVAQFNKNVKALVDIGVPKALLQNLGKERGKVILMVDLLKIDFFNQAPEGYKPPN…	423	USER	zzzz757
316	my_seqs_haddock_1_2ct25.6@PF05144.13	PF05144.13	my_seqs	MVILFCFQHLPFGVLMLDHLRILIPVHENYLTRVSDGGSFIVGNVGDFGFEMASRCVEPNENGVLVPKDLYAPYESLPSSYSGLAVKFFDKCTLIDPYVEIKASPAKLLQGHNVYGGENVGNAACEMLGILFQSIPELAERLDVSLATIGHIDTTFSSTVTNEAIIPKIIDYLSRISNGQTRAQKNKKYETTAYWGGETSRLLQLKAYAKHPELLVTIEKLKKEAKAHNAKAQMLLDTVYTPELLNYSKRLLRWEARIKARKLERLGIPTGLLDFIKYQQENPDILTVLWRQAFTPIFDTFKGQAMPYSTDDDLHQLLKDKLKTVTPTGRISYTRANNAMNFFHLIRDVGLNVVKSRYASRTYYDNLKNLTDAGLSKAWLQNLHTKKKGDIIPLVNFCH…	423	USER	zzzz758
315	my_seqs_haddock_1_2ct27.5@PF05840.12	PF05840.12	my_seqs	MRCRKESNQMCINPSFIWFERGPKYEQIPVPCKKCWRCNSNRVNDYVGRALCEASVSDSTLSLTLTYAPRDDLAERVITPYHFQDFIRAIRRRGHSVRYIVVGEYGELTARAHFHCILFFKGTSPDIPEQTNTHIPEWPHGHVWAEWSATEKAVRYVCKYLLKNEPGKYWFSLSKKPSIGNGFFMKKAAIMAELGTFPSSFEYLPPGGSKNRPYLMTGASRRDYIAEIVRLIATRHRISESKLSEWVARALQKVERWQLLKSFEDHDPNEVFENMKERLDQGRMSDEQAFTAQLYAHAFHDDSPEPLSKEHLDRHRRFVLELETRSTLQEEFTEWLGSPEARLR	344	USER	zzzz760
314	my_seqs_haddock_1_2ct29.1@PF01446.16	PF01446.16	my_seqs	MSKSFLNPFDDVSTGSLGILTKSASTPETKGLALSVVRRAAKYSLQNESVKLLPSERVRFCLRHRVDASKGVKVRYNENRQQAHYSNVQRCGSVWTCPICSAQISEGRRAELALGIKNFQTVGGFGVSGGMVYLLTLTNPHHHGDNLTQLLEGQKKALKYLWSDRKSKEKFKELGKVGHITSTEVTHGKNGWHPHYHILLFFPSPIDMKELEQFLAVAWQNCCKKSGLKIPSLEHGVDLRDGKYADSYVSKWGLEDEMTKGHIKTGRAESLTPWDLLRLSESGCERSGYLFQVFAAAFKGKRQLTWTKGLKALLKIDVIEDEELAQVTEKDSIEVDDLALELWSLLLRYKSRAEYLAAKEHDILYGSRRCYNLLNSLAEKYIEYITTNSNTF	392	USER	zzzz763
313	my_seqs_haddock_1_2ct3.4@PF05840.12 my_seqs_haddock_1_2ct3.5@PF02305.16 my_seqs_haddock_1_2ct30.8@PF05144.13	PF05840.12	my_seqs	MIDLLEISIQFDASLVETVDERYAFVGVDFKEMNIPLGAKSIHFRDDDTIGTCGLYHPYESLPTSFTGIAMKVNFDGHFFPHITIKGSPAKILQGHNVFGSDDLYLCITEMLFWVQDAYPDLYGMLSIQTAEIRKMDVTYMSRVGSPKLVRSAIDYMSRISNGQTKPTKSKKYETTMYWGGATSRLIRQKCYAKFDEYLAQLEKFKKLSEKGDSHALVIVNVMSDERLIDIARTSLRWECTFMKRWLERNDIPVNAWELIKYQNANPDFLQRIWSKGFEKIFDAMKGLDMTIVNDDKVLARLKAEFGKPLASGRTSYRKAINLFGFYTQLKSMGYQEIKNQELYSLSQFNRLVGELRSAGFSLSFLQNLHVSDPNTKTVPFVNLINIDFSQQTPDWYVE…	411	USER	zzzz764
312	my_seqs_haddock_1_2ct301.1@PF11726.7	PF11726.7	my_seqs	MRIITLSLHGCKAGTDAHSGKIRPSGIRDAIGGWSGGSTRRNVDFLRSVEYSQLTGMGVCFTGTLKHCPPTSDHWHRIRKAYFDRLRRMGVIRIHWVTEWQRRGVPHLHGMFFFPVTMCSMNVRMTLIKHWIELTTAYGALPVSQHAIMMHDALGWAQYSAKHASRGVGHYQRSPENVPTEWQHKTGRVWGKTGEWPTRDPMKFHVADDVYYRFRRMARSWRISDARVSKSRYRIKAARRCLVANTRTLSDVRGVSEWLPLDTATALLFWASTLSDRDNAVCQV	284	USER	zzzz765
311	my_seqs_haddock_1_2ct31.5@4CIJ_C	4CIJ	my_seqs	MFLKFDAFVFRIELDVFDVCQLFENLGFSLEAGSPQYGYRYCYKLELAGAHHGIIQYGGDSVGSGVYVSIMGSHSGRVRDAVLSAGWAGVLIRADVALDFNGAHYFDVLSDELIALAKDKSLKTATVGDWVQGVDGRTLYVGSRTSAFMIRLYEKYKQRGVDTGGDETIRLELEIKPYKHARIAAFTLTASELIGSSSVYSPIYEKYIEINEGLTLNNIRKQTNHESALRQLVIQYQATIKKQLAIDGGCVHTFFQTLTTHEKWKNE	267	USER	zzzz766
310	my_seqs_haddock_1_2ct32.6@4CIJ_C	4CIJ	my_seqs	MSNITPRFDAFVFNANLDVARVCEHFELLGFSLLAHSATLGYRYAYILELGGLNHGLIQYGGDNVGTGVYVSVTGSHSERVRDSVQHWDAKLLRADVALDFDGDKYFSSIALDLVNLAKEKKLKTSTVGDWAQRIGGRTLYIGSRQSTYMIRLYEKYKQKGVDCGDSELIRLELEIKPALHARITSFTMTALELLSCAKTYAPIYEKYLQLTDAQSLTKPRKMTNHEKAFAQMIKQYQKTIQKQLDLSGGCLDTFYRSLTDHPNWKNENE	270	USER	zzzz767
309	my_seqs_haddock_1_2ct33.9@4CIJ_C	4CIJ	my_seqs	MKMRNIKPRFDAFVFNANLDVSRVCEHFELLGFSLLAHSATLGYRYAYILELGGLNHGLIQYGGDNVGTGVYVSVTGSHSGRVRDSVQDWDAKLLRADVALDFDGSKYFSALALDLVNLAKDKKLKTSTVGDWAQRIGGRTLYIGSRQSTYMMRLYEKYKQKGVDCGDSELIRLELEIKPALHARISSFTMTALELLSCAKTYSSIYEKYLDLTDAQSLTKPRKMTNHEKAFAQMIKQYQKTIEKQLDLSGGCLDTFYRSLTDHPNWKNENE	272	USER	zzzz768
308	my_seqs_haddock_1_2ct34.8@4CIJ_C	4CIJ	my_seqs	MSSITPKFDAFVFNVNLDIVRVCKHFELLGFSLLPHNATLGYRYAYILELGGLNHGLIQYGGDNVGTGVYVSVTGSHSERVRDSVQHWDAKLLRADVALDFDGSKYFSSIALDLVNLAKDKKLKTSTVGDWAQRIGGRTLYIGSRQSTYMIRLYEKYKQKGVDCGGSELIRLELEIKPALHARILSFTMTALELLSCAKTYAPIYDKYLQLTDAQSLTKPRKMTNHEKAFAQMIKQYQKTIQKQLDLSGGCLDTFYRSLTEHPNWKNENE	270	USER	zzzz769
307	my_seqs_haddock_1_2ct36.7@4CIJ_B	4CIJ	my_seqs	MRNIQPRFDAFVFNANLDIARVCEHFEFLGFSLLAHSATLGYRYAYILELGGLNHGLIQYGGDNVGIGVYVSVTGSHSGRVRDSVQHWDAKLLRADVALDFDGSKYFSTLALDLVNLAKDKKLKTSTVGDWAQRIGGRTLYIGSRQSTYMIRLYEKYKQKGVDCGDSELIRLELEIKPALHARISSFTMTALELLSCAKTYAPIYEKYLELTDAQSLTKPRKMTNHEKAFAQMIKQYQKTIQKQLDFSGGCLDTFYRSLTEHPNWKNENE	270	USER	zzzz772
306	my_seqs_haddock_1_2ct37.9@4CIJ_C	4CIJ	my_seqs	MKMRNIKPRFDAFVFNANLDVSRVCEHFELLGFSLLAHSATLGYRYAYILELGGLNHGLIQYGGDNVGTGVYVSVTGSHSERVRDSVQHWDAKLLRADVALDFDGDKYFSAIALDLVNLAKDKKLKTSTVGDWAQRIGGRTLYIGSRQSTYMIRLYEKYKQKGVDCGGSELIRLELEIKPALHARITSFTMTALELLSCAKTYAPIYEKYLQLTEAQSLTKPRKMTNHEKAFAQMIKQYQKTIEKQLDLSGGCLDTFYRSLTDHPNWKNENE	272	USER	zzzz773
305	my_seqs_haddock_1_2ct39.4@PF05144.13	PF05144.13	my_seqs	MLDTLIINIPLQDEFFTTCGNLHSIRGSVEDYQIKAVPSYVKKDMLTGEKTLGDSYHPFESLPSSHSGMAIKFYAVNVANTKPYIALNASVKILQGHNVYGGESVLNLASEMLNLLNDVYPEFYACLNIPHASISRLDSTYSVSLRNEGLVQPCLRFLSNVSNGHRKTDQRRDFFNTVYFGGKTSRYGGAKCYGKGAELNNEILKLQKSAKMGNSQALSKLSILTPELVQWSKNLLRFESSTKTRQLERLQLPTNLWSFIDYQINVDKNVLTKLWRYWFDPILNTLKGDIMPDIDDTQVYDKCKLNLVSYTKSGNISYAKANNAYNFYKLLKQDGYDQVKTRYNTRTFNHNVQSLIAIGFPKAVLQNLSLDTVKAVPVIDVINLNFTKQCPDFYEPLIS…	434	USER	zzzz774
304	my_seqs_haddock_1_2ct4.4@PF05840.12 my_seqs_haddock_1_2ct4.5@PF02305.16 my_seqs_haddock_1_2ct40.10@4CIJ_B	4CIJ	my_seqs	MILKFDAFVFRVELDIAIVCQLFENIGFSLPAGSGRFGYRYCYELELGGLKHGLIQYGGDSVGTGVYVQVMGSHSERVRDAVLSAGWSGHLIRADIALDFNGSKYFKKISTDLVDLAKNKNLKTSTVGDWVQGVGGRTLYVGSRQSAFMVRLYEKYKQKGIDTGGEETIRLELEIKPYTHARLSAFALTASQLVGSSSIYSPIYEKYLKLNEGITLNNIRKETSHEAALRQMVIQYQNTLKKELAIHGGCVYSLFQSLTKHENWKND	267	USER	zzzz775
303	my_seqs_haddock_1_2ct41.7@4CIJ_B	4CIJ	my_seqs	MFKFSYKECFFMSLSSNTPNPENFLFYDWYSVAIELCGVDFYFNYLMSSFHYSEFFKQECTPRNGYTSGYKLVDSSGKTWLTVYYGGDSQGGKLNAFATGDTAERFHHFLNNEVALEYALVRADVALDFNESGVWSSLYDVCINAADLFKIKKLFVGSPESLTGDSEEGRTLYLGSRQSVSFLRLYEKGKKDNPLHKDWVRLELEFKPKNSQARIEFAKASKADILNASAFVDTIFGSIIQVGISPCSAGTVRSMSDYEKTLLHLFKQYGNFFDTGLAKHKGDLMGFFDEGKAIVDKYKIG	301	USER	zzzz776
302	my_seqs_haddock_1_2ct42.4@PF05144.13	PF05144.13	my_seqs	MLDTLIINIPIYDEFVQITGNLKSIRGSVEDYQIKAVPSYVKKDIETGNLTLGDSYHPFESLPTSHSGMAIKFYAVNVANSNPYISLNASVKILQGHNVYGGESVLNLASEMLNLLNEVYPAFYSCLNIRGATIAKIDSTFSVSLPSELLVQPCLRFLSNIGDGHRKSDTQRDFYNTVYFGGKTSRYGGAKIYGKGHELKEEITKLQKSAKLGNMQSINKLKVLNPSLVDWSKTLLRFESTTKARQLARLRYPTNLWDFINYQRDEDKDVLTKLWRYWFDPILSILKGDIMPDIDDSEVYDLCKANLMSYTKTGKVSYTKANNAYNFYILLKRDGYEAVKSRYQRRAFDINVQNLTALGYGKAVLQNLSLDTVKAVPVSEMVKMDFTKQFPDKYTPLIS…	438	USER	zzzz777
301	my_seqs_haddock_1_2ct43.3@PF01446.16	PF01446.16	my_seqs	MNYTHLAQNVQSSSVSGAAERPLGTTAKSSSTSQENLKRRERFEALMTARQFLSTAPAAQRSDVKFVGDVYRTHDCKWAMLSSYVHCYRDPVNNAAHYGSLVTCGSVWACPVCASKIQQRRRGELVELMAYTADAGKGRSMVTFTFPHVKTDSLSDLLLLQRDAFRRLRSGRGWLEIKKLMKYEGLVRSLEITHGANGWHPHTHELWISSVPVLLSDRPEVQSLIIDRWEKACISAGLLDPLDDLKVKAFRIRSVDIRWEVDSTDYLAKQDSSRAWGVESELALSRTKKGRAAGVHPHEFLIRQAPGDREKYIELVDTMKKLRTRQLYWSPGLKAACGLTDKTDEELADENQQIAVFFASLTSDQWSYVRGNGVRAHVLEAVAYDDMSGFLRLLLRIGA…	453	USER	zzzz778
300	my_seqs_haddock_1_2ct44.6@4CIJ_C	4CIJ	my_seqs	MILKFDAFAFRVELDIAIVCQLFESIGFSLPAGSPKYGYRYCYDLELGGLKHGLIQYGGDSVGSGVYVSIMGSHSGRVRDAVLSAGWSGHLIRADIALDFNGSKYFKKLSSDLVELAKNKNLKTSTVGDWVQGVGGRTLYVGSRTSAFMVRLYEKYKQKGIDTGGEETIRLELEVKPYKHARLAAFALSASELVGSSSIYSPIYEKYLKLADGITLNNLRKETNHETALRQMVIQYQNILKKELAIHCGCVYSLFQSLTKHENWKND	267	USER	zzzz779
299	my_seqs_haddock_1_2ct45.3@PF02486.18	PF02486.18	my_seqs	MMTLPPPLSNTGVTYDLVIITRFVMLKSFKDLFVFDAYTVTIEASPIDVFDYLSNALLLSLEPAKSSLGYDYSYRIFSGADSVGFLQYGGDNTGGRVYVSILGSYSHIFYGHISKSDFVYYVVRADVKFDYIGSDVFDKLYSKLVTLAKQKFLKTSLVGDWVQQNDGRTLYIGSRSSVYMLRMYEKFKQTQLLTSEEVCRLELEVKPKGEQRLRAREFTPLDFISSCGWASEFFNSLNFGVDVIPALGTIRKQTDHERSYAWLKKQYLTTLRKQFDIVGGCEKTFINDLLGLNDDD	296	USER	zzzz780
298	my_seqs_haddock_1_2ct53.5@PF05840.12	PF05840.12	my_seqs	MPCINPLKLKTDSGHTIRAKCKQCRSCRIAKHSALRFRSLLEYRESTSAEFISMSYKDEIRPLNGTHSPFQDFCKRLRTHNSYRQNPNKIRYLSCGEFGDKSGHFHHHALLFNSVPIWDTNFTIQNSDQTLTKLWQLGRCDSGSVTHASINYVTRYCTKSTLESPDKKPFAHWSNHFGSAGMVSILKQLEKNKTPLKSMPTSMTVKNVSYTLDGFLRNVITDFYKWPETKNIDLEIKNFLQNTVDTNSTGFFPQDYIDHETGDTIIIEEKHLPDLDLTTKTETARQKAFHEQCSVDQLKLKTKI	304	USER	zzzz783
297	my_seqs_haddock_1_2ct54.3@PF05840.12	PF05840.12	my_seqs	MCIAPVPIKNPAKFFKKETAMIDVPCGSCIECRQSRTHSWYIRLYEELKTATSADFITLTYDSNNLPIIEDTGEVSLNYEDLQRFWKRLRSYTPKDHIRKIKYYACGEYGTKTGRPHYHAIVFNNPDKNAYERAWAQGLTHVGEANSATIYYTLKYVVKRLGKIRKSDHSKVLERGLMSKNLGIDFINNESKKYYKEHLTAGYVLPGGVTYPLPKYYVQKIFTESERKARASLLEIENLDRLYKRQMDPLRKQRAQYKEMESERKNYETD	270	USER	zzzz784
296	my_seqs_haddock_1_2ct55.4@PF05840.12	PF05840.12	my_seqs	MPCEGPITIKTPTGHNIKVKCKQCRSCRIAKHSALRFRSLLEFQHSLSAEFISMTYKPENLPLNGSHTPFQHFLSRLRAHNKRRGNPNKIRYLCCGEYGDLSGEFHHHALLFNSLPTWNKLFTTQNSDQTLTKLWQLGRCDSGEVNTTTIDYVTNYCTKSTKDSPDKKHFAHWSNHFGFYGMEHLCQRYKNKGTHFTSMPTLISVNGKTYTLDSAMQKIIKQQFNLPESDNIDLEMRNYAQSCVEQGFIPHSYQDHATGEIRLYDEKTMPDLDLTEKTRNAIHKTRILLDSPDFRKLKRKL	301	USER	zzzz785
295	my_seqs_haddock_1_2ct56.4@PF05840.12	PF05840.12	my_seqs	MPCEFPIKIKTSSGHNIRTKCKQCRSCRIAKHSSLKLRAKLEFQQCLSAEFISMTYRPDILPLNGTHSPFQAFCKRLRDHNSYRQNPNKIRYLSCGEFGDTSGNFHHHALLFNSVPLWDTNFTTQNGDQRLTKLWQLGRCHSGTVTPKSISYVTNYCTKSTLDCPDKKPFAHWSNHFGSNGMAALCQQLKKSNQLITSMPRFLNYKGETHALDRAMRLVIQKEFNLPETEDVDLEIKNYLQNLSDMNILPGDVTYNDHVTGKTIVIEEKHLPDYDLTDKTLAAIHKSYQENLFSDPLKQKHKI	303	USER	zzzz786
294	my_seqs_haddock_1_2ct57.4@PF05840.12	PF05840.12	my_seqs	MPCEGPITIKTPSGHNIQVKCKQCRSCRIAKHSALRFRSLLEFQHSLSAEFISMTYKPENLPLNGSHTPFQSFLKRLRQHNKRHHNPNKIRYLCCGEYGDLSGEFHHHALLFNSLPTWNKLFTTQNSDQLLTKLWQLGRCDSGEVNTTTIDYVTNYCTKSTLDSPDKKHFAHWSNHFGSYGMENLCQRYKNKGTHFTSMPTLISVNGKTYSLDAAMQKIIKKQFNLPDTENIDLEMRNYAQSCIDSGFMPHSYQDHETGLTRIYDEKTMPNLDLTQKTTNAILKTRKLLDSPDFRKLKRKI	301	USER	zzzz787
293	my_seqs_haddock_1_2ct59.2@PF05840.12	PF05840.12	my_seqs	MHCIRPIKVSQTFDGTLTYKQKSAIPGLVGWQLPCRKCLPCRLKIGREKAIRAYHESKMHEDNIFLTLTYNDDHCPPRLLYEHWQTFIKDLRDRVGYSPDVRISTMVTGEYGDKSKRPHWHALIFNFRPHDQPVKPFRETDFGPVYRSPFLQELWGMGNTEYGSVTMDSASYVGRYAAKKLSHGNDQDHDYHPIHKTSSKNALGKSWIEKYWKQTLNHGYVTLPNGAKASIPRYYLDWAKKNRPSAYETYVTQTLPQIMHDAELRARKEEIDFFTYSMNPQGTVWPLDRSLVKHTVLKQKFKKLQEHLKL	310	USER	zzzz788
292	my_seqs_haddock_1_2ct6.4@4CIJ_B	4CIJ	my_seqs	MQASNLLNRFWLTDRFGNLCQSKPLNPDSVVYSQDDSKAKFFRGTRTPLLPCFADKSITYAQRLGQIGFDHLAFTIRLNKFEKLPCDAWVKLPVYKSYTDDTAGLEAFQEHVVMVRHLRLEQFVNRVLGLKLGSTRNYGRFFYTQSRELMDKKGKVSVGFIAFGGNDDTVYFQISGTGCKHVFTHTNGHRLHHWLSYFDVKVLRRADLFYDDFDGNFDCDYARLAYRDGAFKRNNGGRNPKISETVDRDDTGVLGEIVRVGSRTSLVYWRIYDKGREQGVDSPWYRTEVELKDISIDVLLAPAKHFAGLCPFSESINLSDKHALSTVFKHKKSAMLTLEAKTKWLRRQCGRAIYDLVEDWKLSAEETLIALVGNNPKHGGKLSAPEYYSDIIRF	394	USER	zzzz789
291	my_seqs_haddock_1_2ct60.5@PF05840.12	PF05840.12	my_seqs	MPCEFPIKIKTSTGYNIRTKCKQCRSCRIAKHSSLKLRAKLEFQQCLSAEFISMTYRPDILPLNGTHSPFQDFSKRLRRHNNYRLNPNKIRYLSCGEFGDTSGNFHHHALLFNSLPLWDTNFTIQNGDQQLTKLWQLGRCHSGTVTPKSISYVTNYCTKSTLDCPDKKPFAHWSNHFGSNGMEALCQQLKKSNQHISSMPKFLNYKGETHALDRAMRLVIQQQFNLPETEDVDLELKNYLQNLSDMNILPGDATYQDYLTGKTIIIEEKHLPDYDLTNKTLAAIHKSYQENLFTDPLKQKHKI	303	USER	zzzz790
290	my_seqs_haddock_1_2ct61.4@PF05840.12	PF05840.12	my_seqs	MCTVPLAAWYKNTVNEETGKTGITFSRKEANLDRPLMLPCGKCIECRRNHINQWTLRCVLEAAEYRDTCFITLTYSDEHLPKYDESGHYGKTLRHKDFQDFMKRFRKHLGDYHDHKKIKYFMCGEYGGKTARPHYHAIIFGHRFDDLVIHEQRSNHTIYRSETLARLWSKGFVTVGDCHRGTIKYVAKYAAKRFGGEDAQYGKKLEEIQHHYTKNNQNLRMEYLRASQGMGKRWCLSNAKSILLTDKVAMGGKTHQTPKQFLNWLTPDYPDAVQRIKDNRALLMKAQTQWKLTEKTFVNRKTGEVYTRSHYVALPVDKEANARRHYLQLIEAGIAHLYPLSKPIHYQWDLKNVTYERIEPDRRAIQIIRRKIKDVWDTHYGHIRGGCTFLSDDFSKYKR	399	USER	zzzz791
289	my_seqs_haddock_1_2ct63.2@PF05840.12	PF05840.12	my_seqs	MCTRPMHAWYKAQSNDNGKFGITFKRSDANLDRELLLPCGKCLDCKRHHVNEWALRCVLEASQHEDSMFVTLTYNDANLPKFDESGHYGTTLRHKDFQDFMKRLRKHLDSYHDGKKVKYFMCGEYGGKTGRPHYHAIIFGHMFDDVFVHESRARFNIYRSPTLERLWNKGFSTIGECHYGTCAYVAKYSAKRFGGEDSHVGKKVSELEHYYKTDGEHRRMEYLRASQGIGKDFCLANADSILRTDKIPLRAYMHSTPRQFLNWLSVDYPVEVQAIKDKRMQVFADNAVYLARVREFVNRGTGELRVVPVLVKQPVDRYKLVVKEWKQLLEMGISHNFPHLNPKFFGDNVNVDN	353	USER	zzzz792
288	my_seqs_haddock_1_2ct64.3@PF05840.12	PF05840.12	my_seqs	MELPCGRCVGCLLERAQSWMLRCMHEAQMHEHNSFLTLTYSTDQLPQDNSLNHKDFQKFIRALRKSTGQKIRYFMCGEYGEPTEKNNYIARPHFHCILFGYDFADKTMWRYENGNRIYRSATLEKFWKKGHSEIGNVSEASCGYVARYCLKKQHGETGKREYAIIEPETGELLDEQRKHPYLCMSKKPGIGESWYKKYKSDVFPHDYCVSADGRQLPVPRYYRKLLEREDPKLSQELRQARIEKSINNPDNTPERLATREFCKQKQADRLIRSL	274	USER	zzzz793
287	my_seqs_haddock_1_2ct65.2@PF05840.12	PF05840.12	my_seqs	MPCYKPVPTWRSKQMNPSGKRSLVFSENQGIDGTRLDIPCGGCIGCRLDRAAEWQARLIHESKTHPINCFLTCTYDDQHLPRDGSLNKKHFQDFLKRLRKHTNGGIRFFACGEYGDTTRRPHYHAIIFGYDFPDKRKYSKGSKGDYLYSSETLNSLWTHGNCLIGSVSPDSCGYVARYIMKKVRGQMADEHYKTVDITTGEIHQLYPEYIHMSTRPAIGLTFYEAFKDEITESDFVLVKGKKRKTPRYYDKRLEKENPDRFEELKYLRTLKAQERRYDSTDERLAVREQVKLATIKPLTRNL	302	USER	zzzz794
286	my_seqs_haddock_1_2ct69.1@PF05840.12	PF05840.12	my_seqs	MACFYPINGYHQIGGGLTFKKSSSNASTLTVPCGQCLGCRMARSKEWAIRIMHEAQMHDDNCFLTLTYEDAPHSVNLKHFQNFMKRLRKQNEPKKIRLFHCGEYGQVYTIPGDPTSEPVEHPLLPEKNAIGRAHYHAILFGHDFMDKIVHKYNHLKQPLYTSETLTKLWGHGFASVGTVTEQSAAYTARYIFKKVTGDLSDTYYSKVDEQGEIHSIKPEYVTMSRGNNYPRGHPLKTGGIGHSWLEKYGEDIFSYDECVINGKKRQFPDITSITSKKNSLIVGWTSTINGSHTSNKATKTIPLNAWQLKHAVLQRNLNT	319	USER	zzzz796
285	my_seqs_haddock_1_2ct7.6@PF02486.18	PF02486.18	my_seqs	MTKKVDQKTTQTRKNTVESPKSVQFFSAESSRLTDFSTPIYNMGVTTLDPRLQYDEFTFPRRLDNCKMVLTEKGNVPVLHSVPCDEYGIASHDWITFGFCQSTLGQEYYSLDPMTADSELTYGIETFLDHHLHEIFGFGLGEKRQNGMHNYKFAYELQDKMGMVLYGHSSRRISIQINGTGCALARKGWQVRLYQYLTSYQKFYDPQTGFLKETGPREPKLTRVDLAYDDFEGQYITVDQADEWDDVGGFWCGGRQPKIEKIGPWKRPNGKGRTFAVGDRTSGKYARFYERGKKEGSPLSPWVRAEVEFKSKDRYIPLDILLSPSQYFLGAYPCFEWLAKQLEKDFCTPEKTKVVKKQSEISWDKAIDVLKVQFGKYIRQFAKVVEPQELINMISSDKD…	453	USER	zzzz797
284	my_seqs_haddock_1_2ct72.1@PF05840.12	PF05840.12	my_seqs	MKRLRKKYGAGIRYLHCGEYGDKDRRPHYHACIFGWEPADKVLWKIINGNPLYISKILQKVWGLGFCSVGALTYQSAAYVARYNLKKVTGKNAENHYTWADRYTGEIHEHVPEYATMSRRPGLGSGWYLKFRNDVYPGDFVITKGKKAMPPKYYDKMEDKYNAEEMERTRAARVNNAEARAHDNTEARLKVREKVKLEQLKQLKRE	206	USER	zzzz799
283	my_seqs_haddock_1_2ct73.4@PF05840.12	PF05840.12	my_seqs	MCLTPVTFKKTKITQYIKDSSPVQSVPCGKCLDCKKSRVNSWFVRLKNELKNATSAHFVTLTYDDETLPHSETWIPTLDYKDYQRTIKRLRKNYKTKIPIKYFAVGEYGTNGQRPHYHAIIFNMENPENLATEWKYGFTHVGEVTDASIYYTLKYCLKNLNTDKEKIDRLPEKALISKKLGIGYLTPQMQKYHTNDVSRSMTLAGNKKIALPRYYRDKLFTDAQKAHRAKLMEPIIKEKYEKTLDPLYTQKIAKAYDDERKKLAKTN	267	USER	zzzz800
282	my_seqs_haddock_1_2ct74.5@PF05840.12	PF05840.12	my_seqs	MCDSPFYILPKAAFEKIPVPCGRCPPCKLRRVNSWVFRLLQEEKISNTAHFVTLTYDTRTVPISENGFLTLRKRDFQLFMKRLRKLVPDTIKYYAVGEYGTNKSRPHYHAIIFNVPDPAHFHTAWQLGYVHIGQVSTNSIAYTMKYIDKLSYKKLHARDDREPEFPLMSKSLGANYLSEAVINYHQADLSRLYVTKEGGHKIALPRYYRQKIYTDVQLKQQLSIIKAAADEKELLQVHEFQSLNYPSNYTYEDWKNSKAFGRYHSFYDQQLPREC	275	USER	zzzz801
281	my_seqs_haddock_1_2ct75.4@PF05840.12	PF05840.12	my_seqs	MTCHRPIPAYRSQYVNPETGKRQITFSRNNAYTDMPLYLPCGKCLGCQSKKTNEWALRCTHEAAQYDKNCFITLTYSDEYLPANGGLDHSDFQKFMKRLRKHFTGTKIRYFMCGEYGSLKERPHFHAIIFGIDFEDMELLHTNQKGNILNYTSKTLSKLWPFGFHTIGPVHYGTVKYVAKYSMKRLEENGIDLNGRRPEYRRMSQGIGSEYAKTYRRDIEIHDNIMINGHKNPVPKYYEKFLCPVKLQLMKDNRIKLMAKRPRMFLSDYHILEVMSKKKAKLYENRTYH	289	USER	zzzz802
280	my_seqs_haddock_1_2ct9.7@PF05144.13	PF05144.13	my_seqs	MIDMLRIAIPFNEKFVAGDTSSERISGLIDLKECHLRGAKLESGNITFNDGQFDFESLRHPYESLPSSWSTLSFKIHQGGSTYWPFVEIKASPAKLLQGHNVFGSCDVRLCIESLVTSFTLAIPALTDMLDFKLSEIKAIDVTFTAHLESDSQARSTINALRNLSSGQTRSSKSSHDTTAYWGTKNSSGGKSASRHKQLKAYLKHHELQHSIKETESKLERTKQDLYQKQLDVLNSPIVSAFAKNSLRFEATILPRMLTRLGFPIHVGSFVEHCENMQKKYCPIQYLWSHAWDDIFKTFEGQHVNIYNDDEVQKVLRANYFSVTKSGKVVYSKADRLFRFVRSLKNEGWEEIKATTPEKTFYRNVKEVSDVIPRSYLQNLQAQAASNVVPLIRLINVDF…	425	USER	zzzz803
279	my_seqs_macstool_cl86_1_2ct10.6@PF05840.12	PF05840.12	my_seqs	MRCLYSNIVPDAHDYRGNPIYSPCGHCFACRLSLQTSLVNRMWCAWKSHSCAAFVTFTYSDEFLPIPPGINSPSLCKDDVHKYLDKIRHFLKGYNFEYFLCGEYGDSFGRPHYHCVFFGLDYEKHSKFFKSSWKKGSVKVLPVTAQSFRYVSKYLTANSNKNGYFDLGIEPPFYKMSRGLGVSMYLKHLREIRENGYFVVGSRRIYPNKYYFNKFVQFNSDLIDLKDYQFDERNLKLLRESQFYNADFCSYEVNKAVNLENNSLSKFLNNKS	272	USER	zzzz804
278	my_seqs_macstool_cl86_1_2ct11.5@PF05840.12	PF05840.12	my_seqs	MCLNPIVIGNHSVYKSRDFSFERYSVPCNKCAECRSSVQTEWRTRISYEISALYRNGGVAIFLTFTYSDACLPHFREDNQDIICFNHNDVKKFLNRLKVLAYRKFGASSYKYFFTSEYGKNTKRPHYHGLFFLAPGVSWLDFALLAKSAWTYGFMFPKYDANRSCFVDDKYNYSEIRIRSLVGGAKYVSKYVTKDLSFYELPEVESYLNTSNGFKLKPYLPKHWQSNLLGLSAIDEVNLMDDDSVKYVLSNGVLNPLTFKYEPLPRFIINKLCYKNVFRGRFNADGKRLYDRALTGFGFRYFKFVYASRIARSQAKVMELFSQIDNGTLSVDVPLPTHAPLATEYISMAVSFFHHLWANVSIDVFEHFMIQQVGCLDDLFSIDATFRIWLHAKDSLFLK…	472	USER	zzzz805
277	my_seqs_macstool_cl86_1_2ct12.5@PF05840.12	PF05840.12	my_seqs	MLGIGNDCMAPIYLPLSHVDPKYNDKTKYLRMRCGHCLNCKVARTKEWSLRLAMEATQYQPGEIAFVTLTFSEENVWTVNQETGELVKTLWVRDVQTYMKRVRTNLKRTFGFTGKVRYYACGEYGPKTHRPHYHLLVFGIPTIFQSVLDESWNYGFTCIKPFFPETCIYVAGYIQKKLYGEVGSFVYEGIEPPFSCCSHHLGEDWFFKPSNYDNIVHNGFVMFQGYKHAIPKAFRRKMIALGDLTKMDAYDLYLQQKDEVVKLGDACRAQGISLSHYFKCFREDSVARHLRYNVKRNKEFEL	302	USER	zzzz806
276	my_seqs_macstool_cl86_1_2ct13.1@PF05840.12	PF05840.12	my_seqs	MCKKPLKAWQIGFTDSGKRKMHITDYNVKYILVRDGHVLDCYDDKLGAHNYDLIVKKYVEIPCGQCLECRINYSRSWADRCLAETQYHANNWFITFTYDDDHVPFTGDVVNSDTGEITNVQTLVKKDMQLFWKKLRRSLYHKFDGDPPKIMYFACGEYGSQTKRPHYHAIVFGLPIDDLTLYKKARTGNYYNSEWLQRIWCNGYVVVADATWQSCAYTARYILKKQYGQESKELKKIGVQPEFTAMSLKPAIGKKFYEDHKEEIYGSGAFVSTPDGGRQIRPNRYFDKLLEREEPERLLRLKEKRIQSMKARTDLKLSQTDKDYIQMLESELETLEARISKLPRKEI	347	USER	zzzz807
275	my_seqs_macstool_cl86_1_2ct14.4@PF05840.12	PF05840.12	my_seqs	MNDFNTWFKDRQDYSFLKNKLSDPSKFLLLPCGQCVGCRLDHSREWAVRCMLEAREHQFNWFVTFTYDDEHLKPLLFNHPKQIDLITGEVTKYQKYANLCPKDMTDFIKRLRMHWKRNHDWDGIKYFLCGEYGSLNGRPHYHAIIFNLPLFDLKKSCLMKSRSGKGLLYESKELSSLWNKGIVAIGDVNFQTCAYTARYILKKHKGFDREYYEQNGIVPEFVRMSLKPAIAKKYYDEHKDDIYKHDVFYMTDKDNHVFACKPPSYFDKLYDVDNPDVLQHLKEVRKQTAEKLKGQPLTDLNERDYLQVQEYNKLFSVKSLTRSL	324	USER	zzzz808
274	my_seqs_macstool_cl86_1_2ct15.4@PF05840.12	PF05840.12	my_seqs	MSCTNPYHAFRVGTNFGTGKAKLKLTPRDTHHIELRNGSWHAVNVPTLSAAAENVRYNYEVVPCGKCLGCRMDYAREWSNRCLIELSQHDESCFVTLTYDDDHVPVSYAADADGCAVPVHTLRKVDFQLFMKRLRKGRAPIRFFACGEYGGQTFRPHYHAILFGYRPSDLEYWSKSGSGMSLFRSAELDRIWSKGNVLIGDVSAASAGYVARYVTKKAYRDVGDWCDIHNIEPEFMLSSRRPGIGACRYNSSGYGVDSLVVADADGAKRIPIPKYYRRKISLDNPDLYDKMKLKASKLAERRANLISSGTDLSPLDYQDVCAQRLEQSFKLLPRKEV	337	USER	zzzz809
273	my_seqs_macstool_cl86_1_2ct16.4@PF05840.12	PF05840.12	my_seqs	MPCYHPLLAVDTGRTPEGKKIIKFLGHTPKDSDKAILMDGRYYDRSKLLQIPCGQCVGCRLEYSRQWANRCMLELQYHDSAYFATFTYDDDHVPRTAYGDPATGEAIPALTLDKRDFQLLMKRIRKNFPNDKIRFFMSGEYGSQTFRPHYHAILFGLHLSDLTVYKTVKEGGQYYTYYNSPSLQKCWPKGFVVVGQVTWESCAYTARYVMKKLKGNEAKFYEEHNIIPEFTLMSRKPGIARQYYEDHPELYTQPNPEIIISTEKGGKKFRPPKYFERLFENENPELAEEFREFRKVMASNAEACRLSRTSLDAQEYRRVQESALEARLKSLRRGVE	336	USER	zzzz810
272	my_seqs_macstool_cl86_1_2ct17.3@PF05840.12	PF05840.12	my_seqs	MCVTPLTGWWSASLTENGKRTIVFNPTKALDVDQRIQVPCGKCIECRLDHAKMWALRCWHESLKYPFSSFVTLTYDDDHLNSPSLIKEDFVLFIKRFRKKYGSGLKYFHCGEYGNLNFRPHHHLIIFGFIFPDQKFNLFSSSGHMRYNSDSLDRLWSHGLTDIGLFEPACAAYVARYTDKKQELSTQWYLDRDLVPPYLSMSKGIGLDTFNQNSGIYLNQRFCVDSQGHKLALPRYYKSKFSDDQQRYIQDCTIHDLLDARYRGDFDIDYEFRNPFEPHRRFLRLDRADILKKVIEDKTNTMSRNNL	307	USER	zzzz811
271	my_seqs_macstool_cl86_1_2ct19.5@PF05840.12	PF05840.12	my_seqs	MCQVTQIRQEFVKMCLYPKEFYVNDKARLLYTDTEGKPVYMTKKVTVACGKCVECLRKRSEEWSFRIMDECSVWKDNCFVTLTYNDENLPLNGTLVKADLQKFLKRLRRAVEPAKIRFFACGEYGSKGMRPHYHVIVFNWCPSDMKFFKTDKSGCELFRSATIEKLWTFGFSSVGKVTLQSAKYCSKYMQKLNTLRVGCIPSYTVMSNRPGIGYWKIDCADLSDDKLYRDGKSIHLPRYYLKVLEREGHDLTEFIERRCTVGKMREDPELLAQRRKKAKEFCKNLLTKA	289	USER	zzzz812
270	my_seqs_macstool_cl86_1_2ct20.4@PF05840.12	PF05840.12	my_seqs	MSRWRSRLYFESVTSEPDSVLFCTFTFNDDSLNYILDNNISWRSLHTPILKRFRRFLDYTYGAKARYWFAFELGSKTKRPHFHAVIFLDGIKVNNRIIYELERNWQYGFSKIEPLRDSSRGMRYVSKYNVKQEFYEQENLELGVDYPKPFSMKSKALGIKIIQWYLKNRILTDRVKINGQEWYLDRFLYSKLRAGILTYKEIQAEKERFLENLQHTMIYFCLAQIGSLVHSSEWSVHAYCAIRDASQGKADILRTRVSNMRAKEVL	266	USER	zzzz813
269	my_seqs_macstool_cl86_1_2ct6.4@PF05840.12	PF05840.12	my_seqs	MALFPRCNNPVPVAGRHGVTLVGCHSCIQCRVAAQEHLCKLLEVEASKHKYVEFLTITYDDLHLPYIDTSYLYPFGYALRIPNRVIKKYNRKTKSFYFVEDKISKSFKLVDFSTIDTASMLRDYYSRIDKYYSRFPSRSRGIRNNSVVPILWYDDIRKYIGRLRKWFLKEYDEKIRYYIICEYGTQSFRPHYHILLFHDSPKARADFRIVRTLPQSTKENPREICVQLDLADLWVYGDTTSKVTDGNMQEYVSKYLTQHSNFPRVLDKFPQKSFHSILLGGKNRTEVKELLTARDFESLTTDYVVNKKGVRRSVAMSDAYYSQFAVRFTGSSSFNCDQTASLFHSVVYVARRFFATKGEIYDDGNVREFLLWLLQPSTSLLYKNIYQFRAIRWYAETIA…	517	USER	zzzz815
268	my_seqs_macstool_cl86_1_2ct7.7@PF05840.12	PF05840.12	my_seqs	MDKPVITPYIKCRHPTYFWKDGIKFYQPCGTCDICKALKGNKYAQMLMREEGSSKYSFFITLTYAPEWLPSYEIVDLQDEHIIYDKLHRPHHMKWNWEKEVYRYNNALHHVALVPSFVRLYPKKGTEDYQVLDAQSDYDVIEIKDDYFAQNIEYYYKHRELYEKEFCKTNFRNYRGFIDLCPKRDLETFLLRLKNYAVRKCNKASFRYFAVADYGTNGCAPHWHILLFTDSNELAKVMSDVEERGTARKPSPCAKVIRSLWRYGIGNSSKVRKSCASYIASYLNTPSNFPKVFKGAIRPKCFHSVRLGSVVAEKDAYQHLAVGNFQYFQRLSYSDYEGYVLPYKWTKKDYNGFLPTLPYVGRANLLPYRLFVEEILRFINQCLKDYPKCTYKDISIALY…	535	USER	zzzz816
267	my_seqs_macstool_cl86_1_2ct8.5@PF01719.16	PF01719.16	my_seqs	MKSRCPMSTISYNTEQFLIRELNKLVEERVIEFYAFIYHFAEQDEKKGHRHLYIIPSTLVDSFTLNERLSQVDLSNPDKPPLGCINWKHSKFGDWYLYCLHDKDYLATMCEERQFHYNKEDFVVSDWDYFNELIHTSDLVKYKSFAKFREMVASGVNFRELFSNGFIPVQQIVQYKKAYNLMKYGNMDFMPHLRDTRTEKSVMGGEGCLPFLINEEGEIVYGSAEDM	227	USER	zzzz817
266	my_seqs_macstool_cl86_1_2ct9.6@PF05840.12	PF05840.12	my_seqs	MCLAPIYVKNPSAYASGLSYYGSECNCGKCDACLYEIKRDWHTRFAFEIKDIRAKGGEVVFLTFTFNDRHLPHFPSEIKELCDDNGNPLPCFDNEEVQKFKEVLRARFNRAYPDDYYRFFIASEYGKTTRRPHLHGMFFLSAGVDPDAFGLMCRDAWNDFENNNARGFMFPAWDGTKWVDDKGEKSRIKIQSDIAATNYVQKYVLKDMSFYGLDAVDKYLHTEDGRIDKAHKDRIKNCLPKHWQSVQLGYSMFDALDTDAKKIQALEKGIVNPTTFKVVPLPTFAVNRLIYKNVKSERLSKTLKTRKRNGDYYPNLYDRYLSEFGKKYMEKCFNERISKYKGKVLDFLNNYGANHGLVSASGVDVDGIAHAVACSGLSVEDIAYRTAMYHVALSKFSNE…	536	USER	zzzz818
265	my_seqs_macstool_de2c2_2ct12.13@4CIJ_C	4CIJ	my_seqs	MDIAKKCVNLDWLEVFCIEDGIKNANYYKNLGWQVNEREYGTPLYREMFTLLNEHGKPFLEIRRNPYSLKEKGGIFEKGSCHIRLSNRTLYTYNPIHQLQEFLLKYNYQLKGITRIDIACDQLVFDNGMNPETLIAKYMAGSILKNRNSRINVHGTEKADGRNWNSIKWGAASSPLSTKIYDKTLELKEQSDKLYIKDSWVKEGLCDLQKVVYDYKDKKSGKVEKRAKMIIVKAGTKTDGERTLDEVEQVKIWRVEFSIKSEARNWITLDGGHTLSIGLTKFQTKERCLLMFLLLAKWCMNFVKAEQNEDGKQIRKDRCTPIVLYSEKNLSKTFKPHRITEKEDPSRTEKIIYNRLVRMSNDKNYKLPSDIKNMCLRLANYLSLRHGNYYMTDKEMKKA…	496	USER	zzzz819
264	my_seqs_macstool_de2c2_2ct20.3@PF11726.7	PF11726.7	my_seqs	MCLYQRYIKNPYTGKDVFVKCGHCNACMQEKASKRTSRIRNNVSSDTTALFVTLTYANMFIPYVRRSDLKAFEFSVPVYRDATIRRNRVGSDYTFFQTINRKTSKIADIEYDNSINFPDEGRSVAEVDCLPNLKKYSKDKIGVILYSDLQRFYKRLRVILQRKYKTSSTFTYFGCAEYGPSTKRPHFHVLIFVPTSETQLFITAISEAWQFDSIARKRKGIQIARNASSYVSAYVNSNTRLSKFYSQHSIRQRHSYSQNFGFANPSFSFEAIVSASEKSDFSYNKTLIRNSAPTVVNCAIPQYVVNKYFPIFKGYTSMSDNSLLQLLQCPTYNNCLSYLGSYYRTNYPNDGFHLSCDGSALDIAHSAHLLSVKLLNWQRKMLERGYDAISASYLHLSVH…	489	USER	zzzz820
263	my_seqs_macstool_de2c2_2ct22.2@PF05840.12	PF05840.12	my_seqs	MYNVKIKNYGNGQVQTRIYSHLIYTGDKEKTEKEELEHNPFDGEPTKEVRDFEELEKERERSLNSNMKRAKGKIYDYSRANVWDWFVTLTFAPDTVNRYDYTSCTKKLSEWLHNMRRDTETNFKYIVVPERHKDGAYHFHGLFAGCDSLGITFSGHCTNEGEKIYNIGRYKLGFTTATRVRQNEAVTKYITKYTTKDLMEHIKGKKKYWVSRNLNLPVETTYSLEDVEKQSLHNELAQDGCLFYKSCMYEVGTAVRNVRYYEHMIPEETENKRFVRKKVIGKK	283	USER	zzzz821
262	my_seqs_macstool_de2c2_2ct24.4@PF05840.12	PF05840.12	my_seqs	MCKGHGIYKCGKCYSCRARKRNDIMIRLTEHYRGLYRHFIQPHIAVMFGVMTFDDNFIPNVNLNLDVVCDWQRPVQKFLANVRAKYPFLNFQYFISAEFGGKTGRLHLHPLFMVTPKYDILESVGNYKNLSQLKRKLDCISALEDGSLYTRVSPLFNSHKYGVTTRHHDNLTAFQAYIYDLLQEEWYFGMSDIEPVLSVNAVKYVTKYTLKATDPRFARHYWRLKSDFWKPLKKSVIPHNVLNKCKSKSKFDVGFDVEKHTMYKQYLISNGIGMYFFESQQAKELLHNLAFVEQRVKVPVNLHDDIEVSLIRPNKRLVYRDPTYIGKDKNEYSLPTSFKQHILDLYFGNFSMERAVVGQSLQFQFKLSSICKFAQICRAYNYPFNIDYLFNCGDLRPYD…	437	USER	zzzz822
261	my_seqs_macstool_de2c2_2ct25.4@PF05840.12	PF05840.12	my_seqs	MDKLKIKYSCLNPRYVRNRYTGETFIANCGVCKACLTRLANAASYKCRLHGADYKYQMFVTLTYDNDNIPLLHAEPSQFDLEVATEHSSIIDNCQSYDLYDVTDRFNSTSFGGQVVARCFVKPSYLKSLQDKYKYFGDRIPYLSVYDSQCFLKRFRKNLKKYSDEKITYYLVGEYGPVHFRPHFHILFFFNSDKTLADFGQVLRESWTLGRIDYSLSRGKCAHYVAKYVNCNCNIPRVYSARSVRPFAHHSRNFAKSLFTSKKTEIYEASPKAFDEACAEVFGPDVDVYPWRSIVSLFYPKCKRFNASNYSELSYTYSILSTAQSAYSLKRVSELVNAVLKDIIDFHHDSQSVYNLKIKVSSHTREYISAFICNLIYPLDKDGFPVFGFEFSKLTHKEI…	535	USER	zzzz823
260	my_seqs_macstool_de2c2_2ct27.6@PF05840.12	PF05840.12	my_seqs	MCRRPIIVRNPILDYDCVKDRAWLEVPCGHCEQCKDRKRNDIYIRLYYEYLHNQRVNKGKTYYLTLTYNNKCIPRLPLSDGSEIYAFSKKHIQNYLKRVRIRCSRELGVKDGIRYFISSENGDKYHRPHYHILFFYPDHRTYLRFKGIARQEWYYGFTKAGKFNNGDVLSVGALKYCGKYVCKSVAITEYYENKAKYAVDLKSFEDALPFNLYSKGLGLYALDVCDPVLLKMGYIKAPKKNGLEIMQLPRYLDIKAHYRPQLNINGNVQYVLTDAGVDAMLKRYNRKKELLYKTCCSLRSSSVDIDLINKYSLEKFQNYDAFVSSFMSLSDNLSQAYLDYMLNYRGFSVNQNLVNYALKNFDGYVPPCDEVYARRLLRVRHSVYSFLDTSILANLVLVS…	439	USER	zzzz824
259	my_seqs_macstool_de2c2_2ct28.4@PF05840.12	PF05840.12	my_seqs	MLSPLQNYIERNKPLINPSPSIKCEKPLRVWNKYLQQYVIVACRKCNACLYLRGVNLTQRAKAMVSNYAYNLFFTLTYDNEHIPMMYLANTYGKPLYVGNKPIGFNRLTGNYIYPTVEDPDCYDTYNLLPRHMESDKPCFAYVNKRDVQLFMMRIRTALLRGRDYVDGDFVINDEIKNLSKNEKKFKYFLCSEYGPTTFRPHYHGIFSTNSQRVAEFLARNVSALWSMCDASRVDVQYVSGSACAYVAKYVNGITHLPKILRGKFTAPFYLSSKNCHFNFDDDLYKTLGDIIVNGHVESLEYNEQEQNITYVPYTHTYYTRYFPTCKGFGLSSVDYQLRVFEKYLNKNYVVHKYLDKDGIKKVDSHLNTINTACPADYLSKDDFIYQDYRFARMVSFWC…	559	USER	zzzz825
258	my_seqs_macstool_de2c2_2ct29.7@PF01446.16	PF01446.16	my_seqs	MCKTPIIIKNTNRFYTVGTKSGRAVYRNGRFVSPFAHTTQYAAVPCGVCNDCLVVKQSSWIQRITEMSKNYYLFFGTATYMNSMLPTVVNPAGEEMHYADYSDFRNMIKRIRKSENFPLFRYFAVWEYGHKTHRPHFHYIIFVRKEEGDSPALPLMLEQEWEKIFIRQWKRNTSKSTRYPNYKPLSLFIKTLGGKSTYDFHYVRPNSTGDVAGDVSHYITKYVLKPDDFSRKRQQYLYGMFADDNSTHDWYHQYYKLFMPRIFCSLGIGLDLESGQTAFEYVQSHPDCDIFKYIKLSYANEPEKGARYYDYQTGKATYMSRYYKKHFLTLADQMYFAEKSGNQVVWKNEIIWLPDTSYTPEDVAKMEQNNNLWRIRRKKITENDCM	386	USER	zzzz826
257	my_seqs_macstool_de2c2_2ct31.1@PF05840.12	PF05840.12	my_seqs	MLQREYANGMKEIRLYKKGIVRGTTREPPQTNYFIEPFEQKKIYCSKFVDNDGFSIAKDKRISQQKSLSRTISKIYDYANAYAWEWFCTFTFSDDKINRYDFDSVAKYMSKWLNNMRSKYCPDMKYVLVPELHKDGAFHFHGLFADCEGLNFVPAINNKKDSKFYKCLLVRKGQQVYNIARFKCFSDCTKIKDTKKAGSYITKYVTKDLIVKTPGRKRYWCSRGLKTPEEKTLLAVYDDFEEFKNKVVLYLSQFYDEVFTNAVDLQHGDFENQILYIRYSDANYNGVIPEEKIDGIFEVE	300	USER	zzzz827
256	my_seqs_macstool_de2c2_2ct32.8@PF01719.16	PF01719.16	my_seqs	MGARKQKDRLTDKDRKFCAVLYPDAEDYDCEVALNNLRSNFPRWAYCLHDKDTTDDGELKKPHYHFVMGTGQSPYLISAVSNKLGVPANYIQFCDSFRGSVRYLIHLDHPDKYQYSATDISANFNPKKFFGDVDGEQMAREVFEYLDNHIGCDWLGVMRWAMASGNYAVFRRDYRLFQDYYNLIFGGKNHV	191	USER	zzzz828
255	my_seqs_macstool_de2c2_2ct36.3@PF05840.12	PF05840.12	my_seqs	MCKKPLKAWQIGFTDSGKRKMHITDYNVKCILIRDGHVLDCYDDKLGARNYDRIVKKYVEVPCGQCLECRINYSRTWADRCLAETQYHANNWFITFTYDDDHVPFTGDVVNPDTGEITNVQTLVKKDMQLFWKKLRRSLYHKFDGNPPKIMYFACGEYGSQTKRPHYHAIVFGLPIDDLTLYKKAPTGNYYNSEWLQRIWSNGYVVVADATWQSCAYTARYILKKQYGQESKELKKIGVQPEFTAMSLKPAIGKKFYYDHKEEIYGSGAFVSTPDGGRQIRPNRYFDKLLEREDPERLLRLKEKRIQSMKARTDLKLSQTDKDYMQMLESELEVLEARISKLPRKEI	347	USER	zzzz829
254	my_seqs_macstool_de2c2_2ct38.4@PF05840.12	PF05840.12	my_seqs	MKRIRKKFENDKIRFFMSGEYGSQTFRPHYHAILFGLHLDDLQPYKTVKEGGEYYTYYNSPSLQECWPNGYVVVGEVTWESCAYTARYVMKKLKGKEAKFYGDHHIQPEFTLMSRKPGIARQYFDENPHCVENQYINVSTPKGGKKFRPPRYYDKLYDVECPEKSAELKALRAKLAQQAMEAKLFNTSLDSYELRDVEEEKQSNRLKSLRRNL	213	USER	zzzz830
253	my_seqs_macstool_de2c2_2ct39.5@PF05840.12	PF05840.12	my_seqs	MLGYRPDDRETSIEWHNHQYPRSALVPLPCGQCVGCRIDYSRQWANRCMLELGYHDSAWFCTFTYDDDHVPRTWYSDPDTGEAHPALTLQKRDFQLLMKRIRKRFGDDKIRFFMSGEYGSETFRPHYHAILFGLHLTDLVPYKTVKEAGEYYTYYNSPALQECWPFGYVVVGAVTWESCAYTARYVMKKLKGKEADFYEKHNIQPEFTLMSRRPGIARQYYDTHPDIYDYDFINVSTPKGGRKFRPPRYFDKLFDVDQPEKSAELKALRAKLAQEAQAAKLASTSLNSYELMQVQEDKLSNRLKSLRRSL	310	USER	zzzz831
252	my_seqs_macstool_de2c2_2ct41.3@PF05840.12	PF05840.12	my_seqs	MLGYTPDDRETYVEWHNHKYPRSALVPLPCGQCVGCRIDYSRQWANRCLLELKYHDSAWFCTFTYDDDHVPRTYYSDPETGEAIPALTLQKRDFQLLMKRIRKKFDNDKIRFFMSGEYGSQTFRPHYHAILFGLHLDDLQPYKTVKEGGEYYTYYNSPSLQECWPNGFVVVGQVTWESCAYTARYVMKKLKGKEAKFYADHNIQPEFTLMSRKPGIARQYFDENPNCVENQYINVSTPKGGKKFRPPRYYDKLFDVENPEKSAELKALRAKLAQLAMEAKLSNTSLDSYELRDVEEEKQSNRLKSLRRNL	310	USER	zzzz832
251	my_seqs_macstool_de2c2_2ct42.5@PF05840.12	PF05840.12	my_seqs	MLVQGRCGDFDVSCYHPIYAVRIGTKENGKADLRMLGYRPDDRETYVTWHNHQYSRDALVPLPCGQCIGCRIDYSRQWANRCMLELGYHDAAWFATFTYDDDHVPRTYYPDPETGEAIPALTLKKRDFQLLMKRIRKRFENDHIRFFMAGEYGSQTFRPHYHAILFGLHLDDLVPYKTVKEADQYYTYYNSPSLQECWPFGYVVVGEVTWESCAYTARYVMKKLKGKEAKFYESHNIQPEFTLMSRRPGIARQYYDEHPGLYDFDFINISTPKGGKRFRPPRYFDKLFEIDFPEKSAELKALRAKLAREAQEARLASTSLQSDELMQVQEDKLSNRLKSLRRSL	344	USER	zzzz833
250	my_seqs_macstool_de2c2_2ct44.4@PF05840.12	PF05840.12	my_seqs	MCENPYFVMSQFCYVPCGKCLFCRKARGRSWLVRCMLESNYWAFAQFVTLTYDDDHLGDSLLHKEHLQLFFKRMRKAGLQFSYYACGEYGETTYRPHYHAIIFSNWYQASEIEKHWQNGNVMVYVANNAMMAYVCGYVTNKFSIGNNTIMSMLEREQRQFSLMSRRPALGLRSVNDLVKYCNGIDVLDGVRIAGDYYGLPRYLRDKLRKEIFSEADIERLREARIANYKDSLQEKVKEWYNDRGIEMPLGFREAYKKFAEQNVRNVHAFHSLKNR	275	USER	zzzz834
249	my_seqs_macstool_de2c2_2ct45.9@4CIJ_B	4CIJ	my_seqs	MRYGQKWLNHAVLRGVRNVKKIDVRFLVDYFCFTISRSDFFSVEADEQFIFERILGKLFLGGLDYQLRRSFYGYNVTQMSCGICICYGGRDDIYIQMSGQGCRAFESLHPGLTWEKYIGYLQLTYTSFHVSRLDIACDTFDLLRLDKIQRYTMEHRFVSKWRTYLCQIGSNENSVIWGSSASDFRCRIYDKSQERREKTGSEDVPENWVRVEFQLRNDRAQSFLYSWFSLGDLSQCFLGVLRNQLIYYSKFDGVHYDRVEIVSWWERLLGTAGRVKMAYCGGLEYNLESLKDYVVRQAGGAVRAYVELYGVQKLIDDVKYHPMNQKQADLVDRFSGL	337	USER	zzzz835
248	my_seqs_macstool_de2c2_2ct46.4@PF05840.12	PF05840.12	my_seqs	MSCFHPRVMACRVSPSGAVSYKFIGLAESGYDPFLSGDISTLSSDGSYHFLVPCRKCLGCQIDYSREWRDRMIFELHDNPKAIFLTLTYNDEHLTFSNKGCPTLVVADVQKFMKRLRKHFNGTRIRFYLAGEYGSRNLRPHYHAIIYGIDLSDFPDLYPRGYNELKQAYYSSPTMEKIWKNGFIIMSEVTSRTCAYVARYVTKKQGNNSVFHVSRETLPEFNLSSRNPGLGLLNSRDYVMSGNNMFSFDGRDGSISVSLPKSMLRNVRRTASQKDLDIIDDIVYNRSMDAAARLRSNLQSLDLDFGGFIKGKERALTSKIKLLPERNV	328	USER	zzzz836
247	my_seqs_macstool_de2c2_2ct47.5@PF05840.12	PF05840.12	my_seqs	MRCFYMQKTKPAADGSYKIHPCGHCIACRKAQATEWGIRNCFESLLHEKTVFLDLTYDDEHLPASNCPYFSGSLVKEHIPTFMKDLRYYCGSGIRYFCGAEYGEKTYRPHYHLLVFGIDYHNEVFYDLFYSKSKDLYVGYCKAWPYGNVTIGNVTPQSCFYVSKYSLKQTKEDYDFLRSYKQQPPFRLMSRNPGIGFDYLEKIKYQLVQDGFIRFKGSKIRIPRYYFDKLFPPGSDDREAVQMEKQKALIKINDDFYKNYRGLGKTEYFINNRLGEQQEKNFLRR	285	USER	zzzz837
246	my_seqs_macstool_de2c2_2ct48.3@PF05840.12	PF05840.12	my_seqs	MPCFNPYFGTPKGNEEYRVPLPCGHCEYCRSYQSKIWSFRLTCELDSHNNQALFVTLTYNDENLPEGANLSKSHLVGFFKRLRYYLDGRRIKYYACGEYGDRFGRPHYHAIIYGMTEADIPLLNLAWTFGFVRKPSAVRGESAIKYVTGYVQKKIGKLEEHKASYCNREPMFAIMSKGLGLAILDKLPHFTPFVYVGKKIQMLGRYLTRKCAEKFGVLEEYSKMAYQQFYHRWVEFYQSLGLAVLPLVLPWRECPERVAYLKANVQFERDFMSRYKIYTKNRSLDEKIKVQFIA	294	USER	zzzz838
245	my_seqs_macstool_de2c2_2ct50.4@PF05840.12	PF05840.12	my_seqs	MCLSPITMTRTYCGLRTQQWVPCGKCEECIKDKQNEYVIRTIEEAMKVKGNIYFLTLTYSDANVPLAVDPDGELIDEDTGEVLSTLKSLDNRDITLWKKRCTRSIYYHSKRSCKFSYLICGEYGPQTHRPHYHGLFIGISPEDMEVFKKDWEKNYGFTCVKQISRFDIERTARYVAKYITKVKSLEDENVKNGKVVKPRKISSKGYGMPSKERWHRMKVDVMGEDYTVEDLKNLTEGPGKSVKKVCEVVNKISKSMKYKNNGREYKLPRYYRQKMFYAKDCFGKMRSTTISFMVSNALQRQAQSDYSRKLVEMATRMHAGESFEEKCRVAAHLQDVEEATRQSRGKAIFETNITALRKSIF	361	USER	zzzz839
244	my_seqs_macstool_de2c2_2ct51.5@PF05840.12	PF05840.12	my_seqs	MCFNPKTISVCRKSTNTLESIKVPCGYCYECIMQHSKEWSYRIMDEASLYDKNCFITLTYNDENLQSKSLVKSDYQKFLKRLRKKVGKVRYFGCGEYGSKNMRPHFHFIIFGWCPDDLVKWCFDNKGTQLYRSATLEKLWQFGFSTVGEVTEQSALYCSKYLQKMQDYPFDLVKPFVTMSLKPGIGLGAFNVQSLKSDKLYRNGKYIKLPRYYLDQAEKSFGFVDEVQEIRENRLTMAELMEKTPEELKEKQFRILKLFSRKSVKKV	267	USER	zzzz840
243	my_seqs_macstool_de2c2_2ct52.7@PF05840.12	PF05840.12	my_seqs	MICTSPIKIKNKSTGEELTVPCGQCLSCRLNHGREWALRICHEMLYHNKSCFLTLTYDDQHLPENDSLCKDDIQLFFKRLRKNTGLRLRYFVSGEYGDMFGRPHYHYIIFGLSSDDAVFMNKHYSKKAKGYQCLMKEWPNGHCFVGEVSPDSAAYVAKYQLKKVKGKNAKEYYESLGIIPEFALMSRNPGIGYDFVVEHQKFLFDKYGIRFKGKITKLPRYYESKIFDDDQKSERMAEKEYFRAEQLKQDYDDFIKYKLKTKDTKEYYQFCEEALKATEINIKSQFGRRFK	291	USER	zzzz841
242	my_seqs_macstool_de2c2_2ct53.6@PF01446.16	PF01446.16	my_seqs	MLYDTTSLMKCQAKKYSGLNFARKIRLVAPDIASKIWYCGTSIGLTYDGLIASANFCRNRFCPTCQWRRSVKLFRQNYECFEWIKAMYPGCRFVFLTLTVRNVPIDSLASRLTDMSVAWNRFTQRRDFKSLGLLGWLRVLEVTRNAHTGTYHPHFHVVLVVPAGRWLPDHDWWLRCWKLAARDDSIMFVNLRVLDGSKSSLEEISKYVVKDSDFSGSAWVQEFPKLYRALSHVRCFSPAGCWRDSRRALGFVDPDSDTLTDDVSIGGKIKDFVYLYNFKMFACIGFH	287	USER	zzzz842
241	my_seqs_macstool_de2c2_2ct55.4@PF05840.12	PF05840.12	my_seqs	MQCSYPRLFNGIKCPCGMCMACRVNRKRLWTHRIMLESFCHEENIFLTLTYDPDHLPSDGCLQPRDMQLFLKRLRKAVSPVRFRYYLAGEYGERNRRPHYHLCLFGLGIRYESTIQKCWDKGFIHIGTLTDKSAAYVAGYVTKKLTSNEIGDLTPEFTRMSLKPGIGANALSLVSEALSSHGITGDVPTVLRHGKRLLPLGRYLRSKLRDLLGIEYDPEQVKKEAKEEMRALFIHTFGLEAYIGLTEGAKDYALEMHFRNQQQECNLIVKEKLKVRKL	278	USER	zzzz843
240	my_seqs_mice_vagnl_1_2ct10.5@PF05840.12	PF05840.12	my_seqs	MTCFSPYFGQVAGSALPVPFPCGKCLACRESQASIWKLRCQFEAIECDTFAFVTLTYADEHLPYGNSLCPAHLSSFIKRLRKSLDYPIRYFACGEYGSRFGRPHYHLILFGLKREDYHLVKRHWPYADLKKYSRAIDVQEGHLESLGYVAGYVGKKLPVREYYKKIIEPPFHRCSLGLGLQGYLKRTLGAFQPVVLDLKNKKRYVGRYLRNKACEILGILEEVKELGIEDLSLKMVRILEAVPEHLALKKYFDHYGIRMPRLQEKMMSIWKFHFETTIDQFIKIHMDLSRKKQRLDL	297	USER	zzzz844
239	my_seqs_mice_vagnl_1_2ct12.3@PF05840.12	PF05840.12	my_seqs	MTCYHPIPCYWHKYRKTKLGTPDITFNPLESDPDLPEFAIPCGQCIGCRLDRSIDSAVRAYHESQLWEHNCFITLTYDDEHLPLYNSLMPPDLTKFWKRLRKRRSGERIRYMACGEYGTNYSRPHYHAILFNCEFPDQSPFSRTKTGFINYVSAELRDLWRFGFHTINNVSFETCAYVARYVTKKITGGDDRLFYTYLDDETGEYITRYKEFSRWSSKPGIGADYFRRYWRDFVHLDRCVVNGKKFPIPRYYDKLLALEHSEEFAILKGKRLVNSEVYKLTPDAKKDRLVVREQVKELKAAKLFRPFEAALKDY	314	USER	zzzz845
238	my_seqs_mice_vagnl_1_2ct14.5@PF01719.16	PF01719.16	my_seqs	MTKSPNELKPETLINRVMSGKKEYRTPDYLQAFAKISCSDLHHSNYSYFEVVKLWNSLQSVPKKQRYFTTVEFKNYSHIIANLKKYVPKWAYICHDKDKTAERKHYHFYLEYPNEVSFRSVAEDLEIPVTMLEKVRFRKFFLDYLTHENDPNKHHYSIDEIQSNFDIVQAKEEDQPVTVERVKEEFRMYCAMVDGEISKEQFFDYMSRYIVRHSASQRISVYHSIKFDSRPFMDLTKRSAVNCHTPVNTVFPFARKSSIPQIIDGKRVDLDIPPAPKQSYRSYRKANARSDLNDVE	296	USER	zzzz846
237	my_seqs_mice_vagnl_1_2ct4.17@PF05840.12	PF05840.12	my_seqs	MAPTQWKDDDEMRDDAEKKRKRSIASSMGRTVNSVYHIARSNIWDWFVTLTFNPEKVDSFDYCLVTKKLSDWLSNMRRSSSSFGYIIVPEQHKSGRYHFHGLFRDCEGLQFIPSGKTSSSGVPIYNMGSYRFGWSTATRVTDQAKVTKYISKYITKDLCQVSFGKRRYWASRNLQDVEVQEAVLDNDKLRRLVARLERESSYIKRIECAEVTTTYYELPEEVLLDEDP	228	USER	zzzz847
236	my_seqs_mice_vagnl_1_2ct9.5@PF05840.12	PF05840.12	my_seqs	METFLMTCFSPYFGQVAGSVLPVPFPCGKCLACRESQASIWKLRCQFEAVECDTFAFVTLTYADKYLPYGKSLVPSHLSSFIKRLRKALDYPIRYFACGEYGSKFGRPHYHLIIFGLQRKDYHLVRANWHFADLTRYSRGVDVQEGHLESLGYVAGYVGKKLPVKEYYDKLLEPPFHRCSLGFGLKGYLKRTLGTFQPIVLDLKNKKRYVGRYLRNKACEALGILEEVKQLGIEDLSLKMSRILDAVPESLALKKYFEHYQIRKPRLQERLMAIWKFHFETNIDQFIQIHKQLVLKKERLDL	302	USER	zzzz848
235	my_seqs_rainbowtrout1_2ct11.6@PF05840.12	PF05840.12	my_seqs	MSCFFPWKAFRHLGYKPGGDLPFLTTNPANALNRNHPITLPCNRCNGCIADRQQEWGTRCVHEAKMHQHTTGNSFITLTLDDEHYPASGSLTKRDWQLFMKRLRREFPHKIRFFMCSEYGDQGRRAHFHALLFGEDFRLDRKIWRTTKSGPVYRSATLEKVWPYGQSEIGTVTLASARYCAGYIQKKLYGARHPVHYEHIHPVTGQPFKAEPEFALMSNKPGIGHAWFERYKSDAFPSDFLVVDGQQMAVPRYYLRKLNEKEQKPVKRARARERLANRDNNTTERLMVRAEVHDLRRSLKKRTL	304	USER	zzzz849
234	my_seqs_rainbowtrout1_2ct12.5@PF05840.12	PF05840.12	my_seqs	MQCTSPGQMRHPKTRLWLPYPCGQCLNCRIKKQSSWTLRNLMEFRTAHSGQYWTLTLDEPSMPTLDATGPKKMMRTFFNRLRHSEAQANNPNQIRYYGCYEHGDLSDRPHFHLLLYNMQKNLLQQTTNNTSWAGQHTKLWPHGHVDVGHITPASVRYVSDYMMKFSPKDTEPSSIPFRTRRPAIGYYGILHTLLRHAGPKYELQSKPAYFQINGRKYPLDNWTRKTWEKLRKKYKIKYREVLEPIDRKLEALAFELAKDEHYYHLEFLRNRELKSRMELAHGKKEAKRLSFQLRKTLLSSKPS	303	USER	zzzz850
233	my_seqs_rainbowtrout1_2ct134.1@PF05840.12	PF05840.12	my_seqs	MDKLVEQAIVHLANNTYSDWAWAHKEVVKSSTFRELLQKEIKRIKNEAQQKEYHYMITFTVSPTLHPTIDNETEKQIEDYIRSQSDRTGLHVKEMHYVKELHKNGRPHWHVSVTTTKAIKKALFSYYQKIYGNIDFSRSKGKNNQDALAYMSKSGTPTKLKKVAL	165	USER	zzzz851
232	my_seqs_rainbowtrout1_2ct16.5@PF05840.12	PF05840.12	my_seqs	MPCYFPLPAIRYLDLQGEYRVKVFTCQTEKFTRHSSGTMLYSNNVYWGDQYSSREAVFQHIEESFYNNPGKYTPLPSHRSRDKSSVFTVPCTKCIGCKQDHARNWSIRCEHEQLYHDKSCFLTLTYANEHLPENGTLVKRDLTLFFKRLRKRYGEGIRYIACGEYGDKFGRPHYHIMLYGLDFTDLKRFYKPNSLYPLYTSESLHSIWTYGNAIIANATRETAGYICRYTLKKQFVKYYTDKIPEFLVMSRRPGIGFRYFQDNLNKIFPVDKVCTLVKGVFKKFPVPPYYLKQLKIVNPDLYDLVKARRFAASVEQAAHNDIGFFHLLRMKYEVAVSRLDSLVRVYDAVT	350	USER	zzzz852
231	my_seqs_rainbowtrout1_2ct19.4@PF05840.12	PF05840.12	my_seqs	MNCRNPFYLNRGSGKVSYERLRNLSPELRLLHTPLPCGRCIACRVFKAQCWTTRILLESTHYENNTFTTLTYDDEHLPENGHLKKEDLTLWLKRLRKEVPQKLRFFAVGEYGGESLRPHFHVMLFNLAFTEEEVISDTWGKGNIKNGEVNSRSARYVTEYCVKKWTKNSFDRPSDLPPEFMRSSRQHPGGIGTVALEELSANLRRIYGVRNGEPYTGPPIHMVQFQNKWYFLDRYLKTKLNELMYLDPEVSRQKLYEHQTKIFEKHLTVDNYFDKKNLKFKNRKQSDRSERKKRKLKPRREL	302	USER	zzzz853
230	my_seqs_rainbowtrout1_2ct20.4@PF05840.12	PF05840.12	my_seqs	MMEWHTHPEISYFITLTYDDDHVPMTVEGVQTLERKKTAKWIQNLPAEIGAFRYYLVGEYGDESHRPHYHMALFPDSYSQVLQLTEKWKRGFTSTYPMAETRALYLAQYTTKKLTHYSDERLAHGQEPEFRTSSRTPPIGAPYVPILVSAYRSRAGQSVITERGDIERSIRFGGKILPIPRFILDRVRKELGIPLLHSERMAHPGYYEIQSGKEYAEWQPDEALAQEIQNAQKKKILSTIGSKV	244	USER	zzzz854
229	my_seqs_rainbowtrout1_2ct3.8@PF01446.16	PF01446.16	my_seqs	MTTIVSKPPQEAPGALGGEAALGSIAKSSPTSDLKVAKAARAQRYQALSQSRGWLKPLARKNPNKAYGWDLHRTQDCRYKRVGIGVTVHFDQKHQTAFYGDVATCGSVWACPVCATIIQNRRRPEVQQLVDWAYDQGYQVTMLTFTFPHKAFDRLKFMLNSQADAFTRLRKGNSWDLFRKRFGFVGLVRSLENTHGANGWHPHTHEIWITKDLTPVARGDFEAFVKRRWKMACIKAGLLDDTNKAQVFAFDLHAVDVRYDVSTSDYLVKQDNSRKWGVDREMTAQVAKVAPDGVTPTVHPHEFLIRQSQGDDARYREYVTGMHGKRQLYWSQGLKDLCGLKDISDEEISKEHTEKADLLAHLTDGQWNVVRGNDALAELLDAAERGGWPAICCLLKSLG…	423	USER	zzzz855
228	my_seqs_rainbowtrout1_2ct5.6@4CIJ_C	4CIJ	my_seqs	MSKSTFPMNLDENGRLIMTPTYDQKTIKTCKNTQESPLISTEISVESTPFYNMGVTNFDSRLTCDHFTFPRKLDNLKMVMTDQGVVPVVHSVSCDIHGIASVDWVTFSFDQDTLGKEFSSIDPENAEETLTYAIEQWLDQHLYEIFGFGLLTKREKGMHFYKFSYELQDNLGIVLYGHKSRRISIQINGTGCALARKGWEEQLYKFLTTFAKRPKLNRIDLAHDDFLGEHLSVDLADDWDDKGGFWCGGRQPNILKFGNWKRPNGKGRSFCVGDRTSSKYLRIYERGKKEGSCLSPWCRAEVEFKANDRNLPLDMLLSPSQYFIGAYPCFEWLSTQLQQDFVSPEKTEIIKEQSQINWDRSIEIVKEQFGKYIRQFAKIIEPNELVAMLSSSKDEIPKR…	445	USER	zzzz857
227	my_seqs_rainbowtrout1_2ct6.1@PF01446.16	PF01446.16	my_seqs	MNASTSQISAPLGTITKSPSAIHLSTLSDGTSDFSYSASRIADYMLQDQSGKILQKKFRVQICLKRKIQKDLNVQVCWNESDKKAHFGNVIRCGSVWVCPVCAKKITEKRREELSIANDLWKFGVAVKTFNFKTVPFATEFKKLKKKFVGPIIPDIKYVRGYTYLVTLTNPHYANDSLEDLREKQKNAMDSFFSDRRGISIFKRMGRHYHITNYEVTYGQNGWHPHHHILVFSDRYLSIQDFSQLHDDLSNHWANCISKAGLRNLKDTEKHIACDLQDGTYAAEYVAKWGIEHELTKGHIKKGKEGGLTPFDLLRLSFEDKPIKSSYFNLFTGEQVEQEKKPSELFKEFAYAFKGARQLFWSQGLKDVFGFRDIQDSEIMDEVTEEAVILTTVEDIVFY…	458	USER	zzzz859
226	my_seqs_rainbowtrout1_2ct8.5@PF05144.13	PF05144.13	my_seqs	MLDHLCIRIPFDASHISCDDSGKYVFVDFDIHKFDIALAARSVHKNEDESISANALFHPYESLPTHFTGMAVKVFFDSMYEPYVEIKASPAKLLQGHNVFGSDNIEQGAMEMIGYLQEAYPILTSMLAIQSSTVAHIDVTYSAKLKDQNLAQKVLDFLGRVSNGQTRLSQKRYDTSVYWGGQTSRLINHKCYLKHDEFMAQFEEYKRRALKNDKSAQRVLGVMSNQNLINWTVGLVRFESRMKKRWLERNNIPTNLWELIKLQRSQPNLLQSLWQKATHSIFEALRGQTMKLTDDSSVLKAIESSEIVITKSGKISPTKVRNLFAMFCIIREKGMEEVKATFGKSQFHNLINQLCECGFSKAYLQNLHDEKASNIIPFMKLVEIDFNQQLPEWYQEPQS…	406	USER	zzzz860
225	my_seqs_redsnapper1_2ct11.6@PF05144.13	PF05144.13	my_seqs	MIDMIKISIPFKLDYCNTTKAMNGKSVSYVNLKECSVRGVTLESKSLSVTGHDEMGNYIVEADNLRHPYEALPTSFTAIAFKIFSGTITRFPCIELKASPAKIIQGHNLFGSDDLELGVLELIAALAHSYPDIIEMLDVQDSVLDLIDATYSCRVDNSFIANQVIAQLKNVSNGHLRRAVKNEFETTCYFNKNSRHVDRKVYLKEHEYLAQIKKYTALAEKGNSHAQYIVDAMSDPRLINYSRNLVRFEASIKRRYLDEFAVPQRLFDSVDRFGVDQIGAISFFKLYSEKENVSIVQRMWEKAFSQLFKTFQGAKMNLFDDSLVRDELRLKYSSITKTGKVSYAKPDRLFRFYRSIMSDGYDNVKDTFHIATFNKSLVQLSEIGLSKAQLQQINGIATD…	448	USER	zzzz861
224	my_seqs_redsnapper1_2ct13.6@PF05840.12	PF05840.12	my_seqs	MCITPSHVWVERGPKYEKQVVPCRKCWRCRSNRVNDYVGRCLCEAETSVKTIAVTLTYAPRDDLAEKVINPRHFQLFMKSLRASGHKVRYLVVAEYGELRGRVHFHAILFFQAGPKAPPEYPQQTNFHSKEWPHGHMFADNNSDEKALRYTCKYVLKGEAGTFWMSVSKNPALGWGYFKKKAQLSASYDVMPASFSYQPPNATVGRPYMLRGAVRRDYLALIKNLIEFNRIIKRSSLNEWVLKAVEKLELWQAQREIAKNPISDHEFMERMKEDIDKSRISVQSAATVVFHSHWAQLLRLNDDKMIKVLKEWRKRLHQEVEDRAQLALLALQETPLLNPSAPILAVQHSGYIRQT	355	USER	zzzz862
223	my_seqs_redsnapper1_2ct16.8@PF05840.12	PF05840.12	my_seqs	MTYIRDFEYEIPQDVRDLVTPLIEACGLSQLTSFRSFEVHTQAKNRLYFLKDLERFAEEMGHLSFDESLKLEQHIRYCQSVLSQLDIYNTIDQPLSKGFSKQWRKYYSTSTIKDLRIEFRFPKKAARKDEAYKMLEQMTYKVRHTQIVQRLHNAMRIAHEDGWYFVFDTLTLSNDRIEAFYNADTALRDYFRNCSRAVLRAEKRKVHESSSDCYQYFCVPEYGAEKGRLHFHVIHMMRTLPNGVIDPNHGRRIADRRQLPLFSGMWEYGHSMPIAVRYSNDKFTRDGWRWPTEPATIRGKANKKAGQPVKCPHYEAVAYYVSKYVSKSIEQKKIADGKGTSQWNNQLTQAFKTINPKLFRVRMSRSFGLQMPDMTHFTEQELIQLMRLDFTVSRFTMIL…	488	USER	zzzz863
222	my_seqs_redsnapper1_2ct25.1@PF05840.12	PF05840.12	my_seqs	MPCFHPNSAWYLPQTRTVSWEDRFGKQIPGVRNSIQLACGQCTGCRSEYSRQWAMRIVLEQSLWLNNIFITLTYDNEHLPEHNTLIKKDFQDFMKRLRWNKQSTKENPVRFFHCGEYGDKFGRPHYHAILFNTNFSDRNQLQGHKGLTTSDTLSKLWGKGHSSIGDVTFQSAAYVAGYVQKKINGKQKDSHYAIIDTETGQYLGQRQQEYSTMSRNPGIAGNWLAKYKDDVYPSDNIHINGKEMQPPKSFDRLYEIDHKDEMLTIKDKRMEEAEKSAHLRTPEALRQAEKTHKARMSLYKRGKL	304	USER	zzzz884
221	my_seqs_redsnapper1_2ct35.3@PF05840.12	PF05840.12	my_seqs	MPCYKPIEAWYSKSLNPTGKRSLVFNAKQALQPDAPIEIACGQCIGCRVERSRQWAVRCCHEASLYTVNSFVTLTFDNEHLHQREKPWSLDKSDLQKFMKRLRKFYFGSKKSDIRYYACGEYGDKNSRPHYHILLFNFDFPDKELFNISNGNRYYISEQLSKIWPYGFCIIGDVTYQSAAYVARYINKKITGDGAEDHYQAVDIETGEIYEVLPEFNLMSRRPAIGRDWFDTFSGDVYPSDFVVIDGKRHRPPKYYDKLFESLDAEHLEYIKDMRNIKAQRFNDENTRSRLDVREQVFARKIDKLVRPLGDNDNGNS	317	USER	zzzz889
220	my_seqs_redsnapper1_2ct37.4@PF11726.7	PF11726.7	my_seqs	MLCKSPNYIKKVGGLTPCGQCLPFRINKVRKWTFRLMLEYLGSKEACWVTLTYNDEHLPHAYFDKTTSRIFEGTNQSGTLAPEHMQLFIKRLRRKLPKKIRFFYCGEYGDHTKRPHYHLCIFGVGKHWVDTIRSAWMNPDTKMPIGLIHITDLTPENIKYTCGYALKKMTKKTDFRLNGSYPEFIRCSQGIGKHSISKIAESLNCKSAQLYYLTQNDIPRTFTVMGKDYPIDRYTRTKILQFLNKEDHAKEHGEKRFKKEMQDLHQRALMAPKLRSQYPSKGFALEYQYKQENAQKILNATNRATMFLQAKEKTI	315	USER	zzzz890
219	my_seqs_redsnapper1_2ct4.1@PF05144.13 my_seqs_redsnapper1_2ct4.1@3WYH_B my_seqs_redsnapper1_2ct42.3@PF05840.12	PF05840.12	my_seqs	MSCTSPIVGYQPLDGGSLKFGKEPPNHRSVTIACGQCADCRLKKSREWAIRCVHESQLHDRNCFITLTYSDDNLPPHGSLFKPHLQKFFKRLRKHYCSAAIRYYACGEYGDNTNRPHYHACLFGIDFEDKLHFRRIGEHNLYISQKLTDIWGHGQTSVGSLTFETAAYTARYVMKKTMGKGCKRYVRLDEESGELIPLVQPFAAMSLRPAIAKEWIEKYYADIYGADKDFLVWRTKKLKPPAYYDKIYDNIDNDRLSFLKAKRKTDAQPATSAQLRARAKNTHARLIARTQV	292	USER	zzzz891
218	my_seqs_redsnapper1_2ct43.3@PF05840.12	PF05840.12	my_seqs	MACYHPLLAFKCDGKVVFNKPFAFAKGFNLPCGQCWGCRLQHSREWAIRCMHEAQMHEHNSFITLTINPETLEQRDRPWSLDITEFQKFMKRLRKQTGKDIRFFHCGEYGDENKRPHYHALIFGYDFPDKQLWEKKLGNNLYISPELEKLWPYGFHRIGSCTYESAAYVARYVMKKAKGEVTPEQYINEETGEIEYDLDNQYATMSRRAGIGESWYWKYGWTDAHRHDYIVHENIKMKVPRYYDKQLEKYDPDYYQELKQTRKEQAPETITEYNKAMDDLWVSEEIKIKKLERLIRNL	298	USER	zzzz892
217	my_seqs_redsnapper1_2ct47.1@PF05840.12	PF05840.12	my_seqs	MACYHPLLAFKCDGKVVFNKPFAFAKGFNLPCGQCWGCRLQHSREWAIRCMHEAQMHEHNSFITLTINPETLEQRPRPWSLDVTEFQKFMKRLRKKIGKEVKFFHCGEYGDENKRPHYHAIIFGYDFPDKVLWEKKLGNELYISPELEQLWPHGFHRIGSCTYESAAYVARYVMKKAKGEASPEQYINTETGEIEYDLDSQYATMSRGNRYQPENGIGNQWYWKYGWSDAHCHDYIVHDNVKMKVPRYYDKELEKYDPDYYQELKNKRKAEAPEVITEYNKAMDQLWVSEEIKIKKLERLIRNL	304	USER	zzzz893
216	my_seqs_redsnapper1_2ct48.2@PF05840.12	PF05840.12	my_seqs	MACYHPLLAFKIDGKVVFNKPFAFAKGFNLPCGQCWGCRLQHSREWAIRCMHEAQMHEHNSFITLTINPETLERRPRPWSLDVTEFQKFMKRLRKKIGKEVKFFHCGEYGDENKRPHYHALIFGYDFPDKQLWETKLGNNLYVSPELEELWPHGYHRIGSCTYESAAYVARYVMKKAKGEVSPEQYINQETGEIEYDLDSQYATMSRGNRYQPENGIGNQWYWKYGWTDAHRHDYIVHDNVKMKVPRYYDKELEKYDPEYYQELKNKRKAEAPEVITEYNKAMDQLWVSEEIKIKKLERLIRNL	304	USER	zzzz894
215	my_seqs_redsnapper1_2ct51.3@PF05840.12	PF05840.12	my_seqs	MPCYKPVPVWRSKQVNPSGKRSLVFSENQGIDGTRMDIPCGGCIGCRLDRAAEWQTRLIHESKMHILNSFITCTYDDAHLPKGGTLVKKHFQDFMKRLRKHTGGGIRFFACGEYGEITRRPHYHAIIFGYDFGDKRKYSKGSRGDYLYVSDTLNQLWGLGNCLIGSVSPDSCGYVARYIMKKVRGQMAEEHYKNVDTTTGEILPILPEYIHMSTRPAIGLNFYEKFKNEITQSDYVIVKGKKRKTPRYYDKRLEQENPQLHEDIKYLRSQKALDRAQDNTDERLAVREEVKLATIKPLKRNLS	303	USER	zzzz895
214	my_seqs_redsnapper1_2ct54.5@PF05840.12	PF05840.12	my_seqs	MPCFKPLDAWRDPSNPSGKLIFSYNAKRCGSPAPDLKVPCGQCVGCRLERSRQWAIRCVHEASLHKKNCFITLTYNDEHLPENSSLDYRVFQLFMKRLRKKYGDNIRFYMCGEYGENFGRPHFHACLFNHDFSDKKLWKTVNKMPLFRSAELEELWPFGFSSIGSVTFESAAYVARYIMKKITGEAAEKHYTFRRPFNRGDILPPSRIYQNVSETRSRRRVVRKVPF	227	USER	zzzz896
213	my_seqs_redsnapper1_2ct59.4@PF05840.12	PF05840.12	my_seqs	MCITPITLKNTYRPMVSRYTQGAKRVPCGKCVQCLKRRQNGWAFRLKQESKISESAIFLTLTYDDENIPITPMGLHTLRKSDFQKFMKRLRKTIKNSNIKYYACGEYGTQTQRPHYHAIMFNLPRLWTQDTAKLYETWGQGHLYFGEANIQTMHYVIGYMQKPAISNEIIDYRTGEIITTDRQKEFSLMSKRMGIGYLTPQMQRYHQQKLISYVTLQGGEKTSLPRYFRDKIFNQAQRKIMNEAADAARDIHFEKFFNNDYKHLTSWKQQEIIKHEKKIRLSREKI	286	USER	zzzz898
212	my_seqs_redsnapper1_2ct6.4@PF05840.12 my_seqs_redsnapper1_2ct614.2@PF01057.16 my_seqs_redsnapper1_2ct64.3@PF05840.12	PF05840.12	my_seqs	MPCYYPVEGYSRPNGQWTSLDEDNYPHATRPCGMCTGCRFKKQQEWTVRNMNEASHWGKNNCFITLTYKDDQLPENNSLDYTHWQKFIRSLKKRNKGKTIRYFAVGEYGDQRGRPHFHALLFNHRFTDLEPLQGRGMKNLYKSKKLQEAWVTADQAPRGYVSVGDVNVKTASYVSGYVFKKIFKHNDPEYTSAYQSIDPQTGKYSDSGICLREPEKPLMSRRPGIGYPFYKKFHSDMYRMDGDCIHDLEGRKFPIPHYYDTKFKSDFPLEYEEIKSQREEKALIYTADDLIQHEKNFKARQALYSRTKLK	310	USER	zzzz899
211	my_seqs_redsnapper1_2ct66.4@PF05840.12	PF05840.12	my_seqs	MACFHPIIGYRTPSGTLTQSRSGAYIDRPMTVACGQCIGCRLSRSHAWAIRCVHEASQRPQNHFVTLTYDEANQPPGGTLYHPHFQKFIKRLRKQLEPHRISFFMCGEYGDNLARPHYHALIFGYAFKELSLWKNNSQGDPIFTSPELSRLWGHGIATAQDVNFKTAAYCARYITKKITGKNAEAHYTRTNPDTLETIQLQNEYASMSKKPAIGATWQAKYDSDLYPSDFIIIEGRKCPIPSYYDRLKERVSPEALEKIKLQRIRNAIKHKPNNTPERLAVRKIVLQAKLTKLSRPLEAPPAGGGGVGVV	310	USER	zzzz900
210	my_seqs_redsnapper1_2ct67.5@PF05840.12	PF05840.12	my_seqs	MPCFHPVEMWVHNEKKTDNGKRLVIHSYNHRLCADARLVLRKCGQCSGCRLQRSAEWATRCMHEASLYKDNCLITLTYSNDHLPADGSLNKHHIQKFLKRLRKKYGPNIRYYYCGEYGEKFGRPHYHLCLFNFDFKDKTFWRKTDQGFPAYRSASLETLWPFGQSEIGSVTFESAAYVARYIMKKVLGKDAAAHYERHTDSGIVYTIQPEYTDMSRRPGIASAWFDKFHSDVFPHDYCVINGRKIPPPKYYSNRFELLDPLEMEQIKFARQDNALLHIDNNTPERLIIREQVHFAKLNRLTRTLD	305	USER	zzzz901
209	my_seqs_redsnapper1_2ct68.2@PF05840.12	PF05840.12	my_seqs	MPCYHPVQGYRKPNGQHTPIDQDNYPRMTRPCGYCTGCRFKQQQQWTVRCLNEQTTHNETSSFITLTYNPQQLPPNAGLDYTHWQKFIRSLKKRNNGKSIRYFGVGEYGDNFGRPHFHAILFGHHFDDKIPLQGKTKNLYKSQSLQSAWCTSDQEPRGYVSVGDVTPESISYVCGYVQKKIYGQMKGQHYKYIDLDTGEQTTHQPYNYKYLRAPEKAFMSRRPGIGSTYYDKYHSDMYRMQNNCIHLNGKEIAVPSYYNNKFKKSNPAEWLLLQQQKEENMREFTPEALIQHEKTFKARMSIYKRGKLK	309	USER	zzzz902
208	my_seqs_redsnapper1_2ct69.2@PF05840.12	PF05840.12	my_seqs	MNYMNCAPLKTRPKRPKEGSYEASTDEEARFQKKLQKRRWEPSEEPRRPPDAGGLADLVACFHPLTAWRKQGGGITFTRGDAWSDRPLEIQCGKCRGCRVEKSRQWALRCVHEQQMHDRNSFITLTYNPESMPADGSLNIKHWQLFAKKLRHRIGPFRFFMCGEYTEKKRPHYHAAIFGVDFTHDREHFRMSKGNPLYRSGSLEAAWGRGYAAVGELTYESAAYVAGYIQKKISPGHDEASRAKFRKAYERTNPDGTTYLVKPEFVSMSRRPGLGTKWFEEYRTDVYPEDEIIHRGRRFRPPRFYDEKLSEEELKKMKLERVRKVLLKSEELTPERLETRERCLEEKLKAKQRNLET	357	USER	zzzz903
207	my_seqs_redsnapper1_2ct70.2@PF05840.12	PF05840.12	my_seqs	MPCYNPLLAWRVGGKIVFHPPPGSIGLLKPFNLPCSKCIGCRLNYARSWALRCQLEAHENTHNCFITLTLSPETLEKRKNPWSVDKVDFQLFMKKLRKKHGEHIRYFHCGEYGEKTHRPHYHALIFGHDFRNQTNANKVQKYGKGKYPLYNSEELNTLWSNGHCTVGDLNFTTASYTARYVTKKIKGDGQKTHIDPITKSVTNIEDVYCTMSRGNKKTKFNGIGEAYYHKHKHTIYGTNDFIVPDKNGVKMKPPRYFDKLYEKEFPEKFAKIKKARKDTIDIVGYSIKDPKYKRLRDIEEVKLLKLKETFRELDI	315	USER	zzzz904
206	my_seqs_redsnapper1_2ct71.4@PF05840.12	PF05840.12	my_seqs	MCVKTIYLKTKELSVPCGKCPECKKSRVNSWLFRLDKELERSSNPLFVTLTYSNDNLTWTNDGKQTLVKNDLQLFFKRLRHNYGKHSQKKIKYYAVGEYGTRTRRPHYHIILFNMDNTELIQPSWQQGHTLSLPLVAGGTAYVLKYLNKAPTYHKKNEEQQREFSLMSKKMGENYLTPAMIKYHKNSVNNTHVTTQSGHKLALPKYYKEKLYNETERKAVTEYLQNRIIEKFAADVKRLKSRYPKQDENFILNHYDHIKTLVKFDKRKNDVL	272	USER	zzzz905
205	my_seqs_redsnapper1_2ct73.4@PF05840.12	PF05840.12	my_seqs	MPCFHPITAYNKIGGGLTWKLHESNGTKTTVSCKQCTGCRQEYSRQWALRNMHEASLWLNNIFITLTYDNEHLPEHGTLVKKDFQDFMKRLRKKKGANQHQPIRYYQCGEYGDKFGRPHYHAILFNTNFRDREIIQGQKGLTQSETLSKLWGKGHSSIGDVTFQSAAYVAGYVQKKINGKQKDAINENGLKHYEIITPNGEIIEKQQEYSTMSRRPGIAGSWFAKHKDDVYPSDNIHINGVEMRPPKYYDRLYEIEYPEDMAQIKESRVKEMKKTAHLRTPEALRQAEKTHKARMSIYKRNKL	303	USER	zzzz906
204	my_seqs_redsnapper1_2ct75.3@PF05840.12	PF05840.12	my_seqs	MACFHPLKGYRSRERTQTGKRKIVFNVSQAYADLPLTVPCGQCTGCRLERSRQWAIRCVHEAQLHPDNCFITLTYNDENLPDDRSVDHPAFQRFFKRLRKKYEPKKIRYYMCGEYGEKFGRPHYHACVFGHDFDDKVLWKMVKDQPLYTSKKLGALWSDENGDEIGFSTVGGVTFQSAAYVARYIMKKITGPRADDHYQWVDPETGEIHKRAAEYTQQSRRPGIASGWLKKYHADVYPSDFVVLNGKKVKPPKAYDRSYELLNPTELERLKHARVRKSKKNLADQTPERLKVREIVQHSKVTQLKRTIQ	309	USER	zzzz907
203	my_seqs_redsnapper1_2ct77.3@PF05840.12	PF05840.12	my_seqs	MPCYFPIQGYPVTVANANGKKPLQFSRPHGYKGEAVEIPCGRCIGCRLERSRQWALRCMHEAQCYEDNMFITLTYSPENTPEHGTLVLKDFQDFMKRYRKRFSGTTIRFFMCGEYGENLEHSKNGKLGHPHYHACIFNHSFPDRKLFKARDNIRLYTSDILSKLWPYGFSTIGDVTFESAAYTARYVLKKQLGKSAKDFYTVVNKETGEYAELKPEFTTMSRRPGIGKTWYDLYKGDLKKDFITARGVKMKPPTYYDKQLEIEDPETYEKLKEERKQNAIENEQPEKYARLRDAHKIKLKKIKQLPRNLDNAS	313	USER	zzzz908
202	my_seqs_redsnapper1_2ct79.2@PF05840.12	PF05840.12	my_seqs	MECTRPLTGYHARGGGFTSNQKQAIRVGNVLAKLVVPCGKCYACRERKASDWAIRMYHEAQMHHASTFITLTYDNEHLPENGTLKIEHFQKFMKRFRKSIQPARIRFYHCGEYGKVLNTLGDSRRREYLPHPIQGDREAHGRPHYHAIIFGWDFPDKTQWSIRNGHPTYRSKHLEKLWPFGISELGTVTYDSAKYVAGYIQKKINGDQSEDYYKRVDYNTGQIHVLQKEYATMSRRPGIGMPWLEKHHQEIWGYDECIIDGKNKPVPRAYTTRLKIDDPETYKKILHQRQKAAKLRKDERSPERLAIKDKIGIIRLNKKKRELPQ	325	USER	zzzz909
201	my_seqs_redsnapper1_2ct89.3@PF05840.12	PF05840.12	my_seqs	MPCFHPITAYNKIGGGLTWKLHESNGTKTTVSCKQCTGCRQEYSRQWALRNMHEASLWLNNIFITLTYDNEHLPEHGTLVKKDFQDFMKRLRKKKGANQHQPIRYYQCGEYGEKFGRPHYHAILFNTNFRDREIIQGQKGLTQSETLSKLWGKGHSSIGDVTFQSAAYVAGYVQKKINGQRKDAINQSNGLKHYEIMTPNGEIIEKQQEYSTMSRRPGIAGSWFAKHKNDVYPSDNIHINGKEMRPPKYYDRLYEIEYPEDMAQIKDSRVKEMKKTAHLRTPEALRQAEKTHKARMSLYKRNKL	304	USER	zzzz910
200	my_seqs_redsnapper1_2ct90.1@PF05840.12	PF05840.12	my_seqs	MPCFHPMHGYKSPGTGKWISYKSTNNFNLEPLTVPCGKCTGCRTEYSRQWAMRNMHEASLWDYNSFVTLTYNDENLPRQGNSTTLIKKDFQDFMKRLREPNQELDWTPPTPIRYYHCGEYGDQFGRPHYHAILFNTTFPDLEQIQGKKDLKTSRILDSIWGKGFTSVGAVTFESASYVAGYVQKKINGEQKQEHYQIVDEETGEYFGQRQQEYSTMSRRPGIAGLWFAKHKNDVYPSDNIHIRGKEMRPPKYYDRLYEIECPGDMEKIKENRKEAMKETEHLRTPEALRQAEKTHKARMAIYKRNKL	307	USER	zzzz911
199	my_seqs_redsnapper1_2ct94.4@PF05840.12	PF05840.12	my_seqs	MPCYSPLTGYRSKDLTAKNKRKIVFNLKYALDDSEVTIPCGSCIGCRFEKSRQWALRCVHEASLHDDNCFITLTYNNENLPTDHSLDKTHFQKFMKRLRKKFTGQTIRFYHCGEYGEKNNRPHYHACIFGMDFPDKVLHTTTKNGDKLYRSKLLTQIWGKGEQNYIGELNFKTAAYTARYIMKKINGDKADEHYRFTDEKTGEQHQIIPEYTTMSRRPGIAANWYKNFKTDVYPSDEVIIKGIPMQPPKYYDSILEKENPFLYDDIKHDRLLNAQKYQHDNTPERLHVKHKVKQAQAKLLSRTLEEN	307	USER	zzzz912
198	my_seqs_redsnapper1_2ct97.1@PF05840.12	PF05840.12	my_seqs	MKCYHPLTAFRIDGKIVFNSPFPYAKGFNLPCGQCVGCRLNYSRQWATRIMHEAQMHDKSCFITLTFNPESLNNREVPTSLDVREFQRFMKRLRKKHGKHIRFFHCGEYGEQNQRPHYHAIIFGYDFPDKTLHTERNGYKIYESKELQTLWPYGFNTIGNCELESASYVARYVMKKQKGTEEQTKIDPLTGEVTQNKHEYCTMSRKPGIGYDWFKKYITDVFPHDYVVIKEKKTTVPRYYLELLNNPLHKETYNPELYEKIKQARKQKQKDNPVYDGYDENLDRLWVEEEVKLQSLKQLIRDL	303	USER	zzzz913
197	my_seqs_seabass1_1_2ct152.2@4CIJ_B	4CIJ	my_seqs	MVTSNSNSQKYSDTQAIQNDYPTVSPSVFGSSITSVDTLINNMRVNNKINPQFKTQWLKKRQKVIDSAISTTDTIIINGKKPLLQTIKRPVNGQVAIIDWLNITFDISTINEKYRRTNEDDDQYMALCQAAVADFAPMLARIFGKKYSTISQNQNGANFYKYSFNFGENYGKICIGGQRDTVLIMLNGTGCSLAPQGWETYMYQFLSSLDDKKQKPKITRIDLAHDDLKGEYLDVHVLDQLETDDLFHCGGAPHTVGHLGNWKYDDPNNNGLTLNIGKRDSGKFARFYEKGKKLGDKDGEYSRWVRAEVEFKANDRFIPFDVLKDPSAYFMGAYPVFADLFDYERINKLEIIQKISEITLQHSFDWLKTQGGKYFSYYSTFMSPEEILEMIKSDDPEDI…	423	USER	zzzz915
196	my_seqs_seabass1_1_2ct37.5@4CIJ_B	4CIJ	my_seqs	MHYKYSDTAQNLIDNRIKRFKKHEANQTIIDHLSFSFPLSDLRHCKRAGSIGSTVDTQTLFPVVPNIKEEFSTEGLTPDEVLKSLETQKQRINSRMSDFYINTLRVFSRYVLGFDLSAPRDKGFHGYHNSMNLVTSQGNKVGFVGIGGQRDTVYFQISGEGCKHLWSHTTPFILHHWLSKVLSISNLSRIDIARDCYDDVFNCVNAEKDFFNSAFRRNKGGPSPKMGNHDSISIDRVFDVEMKSFGKRTSPVYWRVYNKKLEQGIDDDSLVWYRNEVELKKWSVDCLLDPDSAFAGICAFSQQMINTDGVQTSSSSKVSKAGTDLASRVKWVRRMCGKALADILEITEGDMQTVLGLLVPHKYVTGKSLDVPNIYKHILTEQLRSH	386	USER	zzzz919
195	my_seqs_seabass1_1_2ct48.9@PF05840.12	PF05840.12	my_seqs	MDYSKRCLHPTFDPYKTGSFRPCRKCPECLRRKRWTWYFKGLRELDTWPRTWFITLTFSRIPTEPYKEVQKWLKRIRKNNKGKIKFLCTTEYGSKNGRLHYHLLVHCEESLKRRDVELKWSMGFSKATLVSKQLVKDADTKRRSHNREISYVTKYLLKDSQKLRASQQYGKGYENIPF	178	USER	zzzz920
194	my_seqs_seabass2_1_2ct1.1@PF05840.12	PF05840.12	my_seqs	MPCYKPVPVWRSRQVNPSGKRSIVFSENLGIDGTRSDIPCGYCIGCRLDRASEWQARLIHESKMHLSSCFLTCTYDDDHLPRDGSLNKKHFQDFLKRLRKSTNGGIRFFACGEYGDSTRRPHYHALIFGYDFPDKRPYSKGAKGDTLYTSKILQKLWGHGNCLIGSVSPDSCGYVARYIMKKITGQMAADHYRTVNTQTGEVHDLLPEYIHMSTRPAIGLTFYEKFKNEITQSDFVLVKGKKRKTPRYYDKRLETENPFLHEDLKFLRAEKAQLRAQDSTPERLAVREEVKRAAIKPLTRNL	302	USER	zzzz921
193	my_seqs_seabass4_6_2ct24.7@PF05144.13	PF05144.13	my_seqs	MFIMIDTIELVIPFGVDFVQVVNGRHEFVDVDLKELDIPLGAKAVYWNEEGEQKTEALYSPYTSLETSFTGMACKVNLEGYFFPHVLIKGSPAKIMQGHNVFGSDNLESCVTEMLWFLKEAYPTLYSMLSISTAEISRLDITYMSKVASPKQVRQAIDFLARIQNGHTKPTKSKKYETTAYWGGATSRLIRQKCYSKYDEFMAQLEDYKKKAEKGDPHAKVVVTAMSDERIIEIARNSLRWECTFLKRYLERNDIPTNVWALIDHQKQNDDLFPNMWQKGFQKIFDAIGGQTMTYVNDEELLKKLKFNFQTETAKGKISYRKAVNLYGFYNQIKAIGYAEIKGQALYSSSQFNRLIADLCTVGFSKAYLQNLHVKNDETKIIPFVQMINIDFATQTPDW…	414	USER	zzzz929
192	my_seqs_seabass4_6_2ct25.8@PF05144.13	PF05144.13	my_seqs	MIDWATVKIELVHEPIPSDRFIKVASTGEIEFETVCRSHVRGSYESSISVRSLGSDGNGNATILQIDGNPSKFIQGHNVFGSNDFVALVLHTFIHVTGLLNLTYTPDEYWGVYNGKYSVSRVDINESFELENLLNVRSWLKAAELKSKTRHGRPTSKGGTVYWGQHSRRWALKAYCKYDEINSGKKHNLPDHLKKTDIADWAQSKLRIELVLRGKQLEQDGVFQGSDLTTERVIELYNTYLSRLEMAKNVTLTSNKVIDLPRKLQSTYLLWTQGHDLKTLLPKPTFYRHRKELMGHDIDINMSCDQPDQSNVIPLLRVLEAKPVGVPTWALEQGLVYQWENHKTHVSYLKRVS	353	USER	zzzz930
191	my_seqs_10mus_r1_2ct002.3@PF05840.12	PF05840.12	my_seqs	MCLTPSIIVNPKFVKEHNTYAFGFMNGREYNFNWSCHAPFPYDLINKRRFGVTLENLDKFVACDISGDCIPVFISVPCGRCLECIRSRRNQLFSRMVCEQYSHGDIPAIFFTLTYNEANLPSDKSVSVDDVRMFFNRFYLYLRREGYDTDSNSVRHIYFSEYCPSSGRPHYHGMIFGLDTTKAWPFYLNFVDWLEKCWGKGFVHAKHFQPRGFKYVCKYLLKDSNVPEGRKPNFWCGSRVGGGIGTPALACSEFVHQALHSKNFKMTLCVNGQLIKFTLPKFLRDKLLPSLRALFPEEVIHRIKRLSRNLALYHAYRSAFGSAFCQFDFDYVFPPNLAEKFPWFSYMYDDSIEKAISCIDVNHINNDIFAIESSIIDDQSFLDDYTFDLSRIQDIVITR…	441	USER	zzzz931
190	my_seqs_bison1_r1_2ct000.4@4CIJ_C	4CIJ	my_seqs	MLLKFDAFAFRVELDISIVCQLFENIGFSLPAGSPRYGYRYCYDLELGGLNHGLIQYGGDSVGTGVYVSVMGSHSGRVRDAVLSAGWSGHLIRADIALDFNGSKYFKKLSSDLVELAKNKNLKTSTVGDWVQGVGGRTLYVGSRTSAQMIGANKNGLIFKLSHLINRIMSFINQVRFIRINLKYLEN	187	USER	zzzz932
189	my_seqs_macstl_de1a_r1_2ct000.4@PF05840.12	PF05840.12	my_seqs	MDLIKHIFGHCFNPVKIKVRNPVTLADELREVPCGKCYHCRITKVNEWCTRMVLESKARKYTYFVTLTYSPRSLHTDVFRETHPMTNRCNTYGKEQPMPLVLRKDHLQKFFKRLRKNTGIKFKYFACGEYGHKYARPHYHMILWTDVPISKIAIYKAWSTVDDYGRRVIIGDIDYHLISENHLLNKEQMSAFKYVCKYLQKGEFDFKKLPTYQYHNKLKDLLYGQSEWSIANYSPKQWIDGRPIENADQVDDLYSKRFSPFMLCSKSPAIGFDYLSENIDRFKTGDFRLFGLPKDGNFILPAYYVRKTKESLCPYCRINEETENLRTNATIPDLAAVLVQIQNCIDFMAGFSSVQPLVYQDPVTDKIVYENASNIGERSPSFRPQYFTVFDKLHREWFA…	497	USER	zzzz933
188	my_seqs_macstl_de1a_r1_2ct001.4@PF05840.12	PF05840.12	my_seqs	MGCTRPLVRLNNGQIISLKIYLLRTGKYFQTEGNELNKKQHEKELLKMLQKEEAQLLPCGHCTGCKMQNASSWANRMEMELPYHENAWFLTLTYDNEHVPWSYNQGLGVNKRTGEIEIENLTLNYEDMQKFWKRLRRWLEYHSRNTGKLMYYQAGEYGGQTHRPHYHAIVYDLPIKKEELKEYKRKNGVIYYNIEWLEKIWGMGHVVVTDATWKAMAYTARYTTKKIYGKESAKYYEELGVLPERCMMSKKPAIGMRYYEEHKDEIYAKDEIQLKNGRRTKPPRYFDKLFDLEHSHAKPLTDAESEGIEDTIIKAESDELKAIKRERRRIANDALFAQLKQTGLSMQEYYDLKDKKNQEKFTKLLRQEI	369	USER	zzzz934
187	my_seqs_macstl_de1a_r1_2ct002.4@PF05840.12	PF05840.12	my_seqs	MSCKVDPASGQLVYTFEGKAKYTNPLEYGDISSLSTDGSYRFIVPCRKCLGCQIDYSRDWANRMIIELQDNSSAIFLTLTYNNEHLPISSKGYSTLCKEDLQLFWKRLRKHFPGKRIRYYIAGEYGPTTFRPHYHAIVYGIGLSDFPDISYRGCNERKDPFYSSPTMERIWSNGFILMSDVTWKTCAYVARYVLKKQGKASDFHLSRDSVPEFNLSSRRPGIGLLHSRDYVLSGNNMFDLDGRDGVHSVSLPKSMLRNVRRIEQIDVDKINDIVYNRSMDAAARLRSNLLFSEKSFKDFLESKEFNLAGKIKLLPERSSI	320	USER	zzzz935
186	my_seqs_macstl_de1a_r1_2ct003.4@PF05840.12	PF05840.12	my_seqs	MQCSYPRLFNGIKCPCGMCMACRVNRKRLWTHRIILESFCHEENIFLTLTYDPDHLPSDGCLQPRDVQLFLKRLRKAVSPVRFRYYLAGEYGERNRRPHYHLCLFGLGIRYEATIQKCWDKGFIHIGTLTDKSAGYVAGYVTKKLTSSEIGNLTPEFTRMSLKPGIGANALSLVSKALSEHGITGDVPTVLRHGKRLLPLGRYLRSKLRDLLGIQHDPEQVKKEAQEEMRALFIHTFGLAPYLGLTEGTKDYALEIHFRNEQQERNLIAKEKLKVRKL	278	USER	zzzz936
185	my_seqs_redsnapper_r1_2ct001.5@PF05840.12	PF05840.12	my_seqs	MYVCRSSVDFGLTEFAVSKHSRLIRSLVVARNRLSSRFSSKAPPEGRSMASHRAGVAFLRSIQGIFGRLDNLSLITVPSVYAALYKEAQPILSFVRHDQGSHGIRVECDVIKRVRETLVHSRKAARLSSYRRRLNNELREAARYDRFVVFNTVTVRDRDYRKVFVKGSRFWNIFTEKVKGAVQDAAEDAGSMDTSYFAHFGVVEEGSETGRLHIHCVWVMSHLPPGCRDPNGGRGGVNREIDALRSLWRFGTSTPIAVRWANDPYSHLGWVWPSVRVKDLEGNFVLTPAVSSLERICSYLTKYITKPSKTSWRIRISHRFGLREITSRLQKLPLKTLIALASLWPPRLMPGFPLVRRAAVRLAALRIFQQSSATFSDHQMVNQFLLMLTPRESLFHRLK…	452	USER	zzzz939
184	my_seqs_redsnapper_r1_2ct002.1@PF05840.12	PF05840.12	my_seqs	MPCFHPITAYNKIYGGLTWKLSESNGTTTTVSCKQCTGCRQEYSRQWAMRNMHEASLWLNNIFVTLTYDNENLSKHNTLIKKDFQDFMKRLRKKKKANQDNPIRYYQCGEYGEKFGRPHYHAILFNTNFRDREIIQGHKGLTQSETLSKLWGKGHSSIGDVTFQSAAYVAGYVQKKINGKQKDTHYAIVDQQTGEYFGQRQQEYSTMSRRPGIAGSWFAKHKDDVYPSDNIHINGKEMRPPKYYDRLYEIDHRSTMEKIKQNRIKQMQETAHLRTPEALLQAEKTHKARMSIYKRGKL	298	USER	zzzz940
183	my_seqs_redsnapper_r1_2ct003.5@PF05840.12	PF05840.12	my_seqs	MRCTRPVLAYAKPGGGITFGKKHSLALDMHIRCNQCIGCRLYRSREWAIRITHEAQLHQDNSFLTLTYSDENLPLDGSLVPEDHRNFIKRLRKRLSPLQLRYFHCGEYGEENLRPHYHCILFGYRDPDQIPWTKTPTGDTLYRSPLLEETWDLGHCLVGEVTPESAQYVASYTTKKLTVSKQSTEADYRKWSSRYLRADPYTGEIIEIAPEYSTSSNRPGIGKPWYDLYKSEVFPSDFVVIKGQKMPVPRYYEILLERENPTLHAEVKRNRIKNRDRSHDSEHRLQSMETCALARSTLHGKRNDTSDLRSS	311	USER	zzzz941
182	my_seqs_redsnapper_r1_2ct004.5@PF11726.7	PF11726.7	my_seqs	MAQCAHTLEVFNKSKDMYDQNLMMNVPCGKCINCLKRRASEWSFRLQQEVNVSSSACFLTLTYENPPTTDLGYHTLKKRDFQTFLKRLRKLVPVKMENNKNVNKLKYYACGEYGTKTQRPHYHAVLFNLPHSIISSPEQISDTWKNGHIHIANNNIKTINYVVGYMQKQGMVKLRKDDNRKPEFSLMSKGLGNAYLTAAMIQYYRKRKLFCITKEEGHIISMPRYYKNIIYSKEELSELYQIWLDEYNYDFLQDWELSKIEREKVEQQKAKQHQHDKQLKLNRITL	286	USER	zzzz942
181	my_seqs_redsnapper_r1_2ct005.1@PF05840.12	PF05840.12	my_seqs	MPCFHPLHGYKAPLNGKWISEANAPLLHNWEPLTIPCNKCTGCRTEHSRQWAMRLVHEKKHQEEVEKNRTVFITLTYNDDYLPQSGTLIKKDFQKFIKRLRHQLKKIPGWQPPLRYYAAGEYGEKSSRPHYHAILYNCPLDRLQTFKKKGHKPLNTSKILSKAWSQYIKPTKENPKEKFISMGFTSWGEVTFNSAAYVANYVQKKINGQQKDLHYKRHYDVNKNGEFIMHSKGKRTLQLQQEFALMSRKPGIASDWLTLHKDDVYPSDFITMNGIKMKPPKSYDRIYERTHKEEMDIIKELRKESLEQSAHLRTPEALKYQEQKHKRRMSLYKRKIL	337	USER	zzzz943
180	my_seqs_redsnapper_r1_2ct006.3@PF05840.12	PF05840.12	my_seqs	MGCRIKYATQWAIRCVHESLMHKQSCFITLTYDDDHLPVDGSLNPKHFTDFMKRFRKEISPIKIRFFMCGEYGDLLSRPHFHALIFGYDFNDKIEHQYRAQSILYTSKQLERLWPFGFNTIGAVTYSSAAYTARYATKKITGDMALSHYGGKTPEYVRMSRMPGIGQSYFEKHRTELFRNDNIVINGKKHPLPKYYNLQFTKLELEDLQRRRNKFFRSQESENTTDRLRTRETVLKSKLKTYKRNL	246	USER	zzzz944
179	my_seqs_redsnapper_r1_2ct007.1@PF05840.12	PF05840.12	my_seqs	MTCYHPLVGYRSRAGRNPNGRWPLVFNTSEGYIDLPVTMKCGKCIGCRLAHSKEWAVRCVHEASLHTNNCFVTLTYRDEALPEYGSLNKRHFVLFMKSLRKKFGAGIRFFHCGEYGEKLRRPHHHACIFNHQFEDKKLWTVRRGVKLYRSPSLEKIWKHGYSSIGDVNFQTAAYCARYIMKKINGPLALEHYNTFDKTTGEIFKELVPEYITMSRCPGIAKEWFKKWSSDVYPSDMVKLFNQVPCKPPRYYDNLYDIENPVQMKIIKQRRLKKFNSENNTSQRLKARKTVLQLKTKSLKRSYEQEKNSNE	310	USER	zzzz945
178	my_seqs_redsnapper_r1_2ct008.1@PF05840.12	PF05840.12	my_seqs	MPCYHPVQGYRKENGQWTGKDALWPHMYPPMTRPCGYCTGCRFKQQQQWTIRCLNEQITHNETSSFITLTYNQQQLPAHAGLDYTHWQKFIRSLKKRNNGKSIRYFGVGEYGDNFGRPHFHAILFGHHFDDKIPLLGKKTKNLYKSESLQSAWCTSDQEPRGYVSVGDVTPESISYVCGYVQKKIYGQMQGDHYKYIDLKTGEQTAHKPDKYKWLRAPEKAFMSRRPGIGSTYYDKYHSDMYRMHNNCIHLNGKEIAVPTYYNNKFKKSNPAEWLLLQQQKEENMREYTPEALMQHEKTFKARMSIYKRGKLK	313	USER	zzzz946
177	my_seqs_redsnapper_r1_2ct009.1@PF05840.12	PF05840.12	my_seqs	MPCFHPKSCWYLPQQKLISFSDQYSKPIPGIRESIQLPCRKCIGCRLEYSRQWAMRIYHEQSLWPNSIFVTLTYNNDNLPKIGKKGNLIKKDFQDFMKRLRQPNQELDWYPPKTIRYFHAGEYGEKNDRPHYHAVIFNCNFSDRKPLKGFKGLSTSETLKSIWGKGYESIGDVTFESASYVAGYIQKKINGKLKDSHYAVIDPQTGEYFGQRQQEYATMSRRPGIAGLWLAQHKSDIYPSDNIHINGREMRPPKYYDRLYEIDNPDIMSEIKKNRKEHMQQNAHLHTPEALAQAKLNLKARMSIYKRGKL	310	USER	zzzz947
176	my_seqs_redsnapper_r1_2ct010.4@PF05840.12	PF05840.12	my_seqs	MQCFTPFRVRNKSKDHNNQNLMVNVPCGKCLACKKRRASHWSFRLNEEAKSSSSACFITLTYENAPISENGFRTLDKRDFQLFLKRLRKTCPTNKLKYYACGEYGTQTHRPHYHAIIFNLPKSLISNPQKIADTWQNGHIHLANNNQLTINYVVGYMTKSNFTRFNNQDDRLPEFSLMSKKMGLGYLTEAMKNYYKKREIFCIVRESGQIISMPRYYKEKIFEKKQLKAMYKKYIEEQETNFEQMFNSAKDEHEHYKNIIRRDNKQKLLTRQKI	274	USER	zzzz948
175	my_seqs_redsnapper_r1_2ct011.1@PF05840.12	PF05840.12	my_seqs	MSCFHPLYGFKSSSGKWLSTSNNINAEPMTVPCGQCTGCRSEYSRQWALRNMHEASLYNNNCFITLTYNEENLPQDNSLQKKAFPKFIRSLRKRNKGKQIRYYACGEYGDNFGRPHYHAILFNYFPDDTVHLKKDLYTSKSLSDAWRHKGHVSVGNVTFQSAAYVSNYVQKKINGKQKLDHYSKYNKTTGELISWREPEFSLMSRKPGIGKKWFDKYYKDIYQTGKDGLHMNGKFMKPPKYYDIKYKEDFPDLMEILKQNRIEKFEEIAHLFTPESLAAAEQTHKARMSQYKRKLK	296	USER	zzzz949
174	my_seqs_redsnapper_r1_2ct012.1@PF05840.12	PF05840.12	my_seqs	MPCFKPNKVWKTSNGIQWYNPYSDVDHGFQISCKQCRGCRKEYARQWAMRILHEQSLWLNNIFITLTYDDKHLPENKTLVKKDYQDFTKRLRKYKKSNTQNPIRFYHCGEYGEKFARPHYHAILFNCNFRDRETLQSHRGLTTSQTLNKLWGKGHSSIGEVTFNSASYVAGYVQKKINGSMKNHIDPKTNLRHYERLTPDGEIITLQQEYSTMSRRPGIAGLWFAKHKNDCYPSDNIHIDGREMRPPKYYDRLFIESSPENKKTFEDLILPKRLDGMKHTAHLRTPEALAQAELNSIARDRIYKRGKL	308	USER	zzzz950
173	my_seqs_redsnapper_r1_2ct013.1@PF05840.12	PF05840.12	my_seqs	MPCFHPLDGYKSSTGKWISEKTHHLQEELTIPCGKCTGCRTEYSRQWAIRIAHEEQWWKKKDKYSTFITLTYNDKWLPPHNTLIKEDFQKFMKRLRKKKHSTKDNPLRFYACGEYGEKNERPHYHAILFNCSFSKDADISNGKNKLYFSQELQDAWSHYDKKTETYEPIGFVSWGEVTFDSAAYVANYVQKKINGKKKDEHYQIENPVCPNTGEYRTHRQQEFSLMSRKPGIASDWLTHYKDDVYPSDYITIKGRKIRPPKAYDKIYERTHKQELEAIKEIRKQEMEKTAHLRTPEALAFQERTHKAKMALYKRNKL	317	USER	zzzz951
172	my_seqs_redsnapper_r1_2ct014.2@PF05840.12	PF05840.12	my_seqs	MKCYHPLTAYRWEGKIIFNSPFPYAKGFNLPCGQCVGCRLNYSRQWATRIMHEAQMHETSCFITLTFNPESLNNREVPSSLDVREFQRFMKRLRKKHGKHIRFFHCGEYGELNQRPHYHAIIFGYDFPDKTLHTERNGYKIYESKELAKIWPYGFSTIGNCELESASYVARYVMKKQKGTQEPTKIDPLSGEVTQNKHEYCTMSRKPGIGYNWFKKYIEDVFPHDYVVIKEKKTTVPRYYLELLNNPLHKDTYNPELYEKIKEARKEKQKDKPLYNGYDENLDRLWVEEECKLQSLKQLIRDI	303	USER	zzzz952
171	my_seqs_seabass_ms2_2ct138.8@PF05155.14	PF05155.14	my_seqs	MYTWTPMFFDWLTVEQDFGFDLPFLADVGYQRVRIETGETSSLNQAPFVHKGSFCDTVLIQIRGSVLKFSGNPSRWGRLDNLFGLRTVDACFSVYNSICRDLNLPEFSRCTRLLPKQTKDGTKQEWTSDGAIIKELHITENIAVGAGNVDDYLSGVSTQPYRRSVPRLHSNGKSVDWLSPKGNAALIYPTIYDKANEMELHSLTKIKNFFGVDSDEYNYIKSIIVYCRNIGLVRFEQKLKSRYLQKNDFCYWGMSDLSRLNELHNEFINVDKKLQVTAMDFESISERLLTLGIVDTTRASNTTALYALQWMHGHTFDPSKSQFKTHRARLRKIGIDIAQRCNISKFSPIYITATREVKPSQVHIPSWYKMPNYLSAVA	378	USER	zzzz961
170	my_seqs_seabass_ms2_2ct147.7@4CIJ_B	4CIJ	my_seqs	MNYSYTDRATQLINNRLERFKKHEQNQTIIDHLSFSFGLSDLRHCKRAGFIGSTVDTQTLFPDVPTISDDFKTEGLTSDEVLTAIETQKQRLNSKMSDFYVNTLRVFSRYVLGLELSTPRDKGFHGYNNSMNLVTQEGTKVGFVGIGGQRDTVYFQISGEGCKHLWSHTTPFILHHWLSKVLTISFLSRIDIARDCYDNVFNCTNAEKDFFQKAFARKKGGPNPTMAPRHSFNIHGEFDVEMTTVGKRTSPVYWRIYDKKLEQGIEEDSLTWYRNEVELKKWTVDCLLDPDSAFAGICDFSQQMINSKGVHTSTSPKVSTAATDLASRVKWVRRMCGKALSDILEITEGDIKTVLGLIVPDKYITGKSLDIPNIYKNILTEQLRSY	386	USER	zzzz962
169	my_seqs_seabass_ms2_2ct198.3@PF05840.12	PF05840.12	my_seqs	MPCYHPLVAYKCDGKVVFDKPFAFARGFNLPCGQCIGCRLDYSRQWAIRCVHEAQTHEDNCFITLTFDNEHIAKRKNPESLDNTEFQRFMKRLRKKYPHKIRFFHCGEYGDQNKRPHYHALLFGHDFKDKKLWSNKGDFKLFVSQELAELWPYGFHTIGAVSFDTAAYCARYVMKKVTGDAAAAHYREVDLETGEVINEIKPEYCTMSRMPGIGYEWYQTYGYHDCHKHDYIVINGYKVRPPRYYDKLCEEGFFAKIKETRVANAEEPIINYGEQMDRLWVEEEVKIKKLERLIRNL	297	USER	zzzz963
168	my_seqs_seabass_ms2_2ct200.4@PF05840.12	PF05840.12	my_seqs	MPCYHPLQAYQSTPGVKPKFKPFPNSSLILLPCGRCVGCRLERSRQWALRCVHEASLYEDNSFLTLTYSPESLGVKANPYSLDKSDFQKFMKRLRKSCNSRIIRYYMCGEYGDALLRPHFHVCLFNYQFPDLELHTVVNGQRLFTSRMLSDLWPFGFSSIGSLTFESAAYVARYVMKKVNGNLSDKVCSVSGLRHYERVNYSTGEIFEVLPEYNDMSRRPGIGTDWWKKYRKDLEKDFITSRGVKLMPPRFYDRLLKRDGFDGAVSHWRIKQKRSAGTAEAMEEALFTDRLIVKEKVKLKRISLLKRSLD	310	USER	zzzz964
167	my_seqs_seabass_ms2_2ct201.1@PF05840.12	PF05840.12	my_seqs	MACYHPLLAYKCDGKVVFNKPFAYAKGFNLPCGQCWGCRLQHSREWAIRCMHEAQMHEHNSFITLTINPETLERRPRPWSLDITEFQKFMKRLRKKTGKEVRFFHCGEYGDENKRPHYHALIFGYDFPDKTLWEEKLGNKLYISPELEELWPHGFHRIGSCTYESAAYVARYVMKKAKGEASPEQYINQETGEIEYNLDNQYATMSRRAGIGESWYWKYGWSDAHRHDFIVHDNLKMKVPRYYDKQLEKYDPDYHAQLKQKRREQAPDTIIEYNKAMDDLWVSEEIKIKKLERLVRNL	298	USER	zzzz965
166	my_seqs_seabass_ms2_2ct213.5@PF05840.12	PF05840.12	my_seqs	MLCKKPYRQGIEAHPCGRCAPCLVNRQQQWSVRCTLESYLWGNSIFITLTYDDESLPKTQKELKRSVQLWLKRFRKALPQKIRYFIALEYGKQGRAHFHGIIFNASQFDAKALQDTWGMGFTHVGECNPKTINYVTKYITKGDSRAKEDSGKKTFAIMSRNKGIGYGAVQVIGKSLLAHDSVTKQIQLGDVPKGTRVSSRIRPLGRYLTGKLRLATGHASHTEPESVRRSRLNLEAESARRSGTIRFLQRDANRRNNDQLTAEARIKIAASKEKL	275	USER	zzzz966
165	my_seqs_squid_r1_2ct000.10@PF02486.18	PF02486.18	my_seqs	MSKQHCIIDYVSFSGTPVLLQRCKEMAKERYLFSDSTFQFQSAHPLAVAQREQKKIAYFAESLAVALGCTEEYNYANRDLYFASLDKKLADCDIEIAQDCSFKECYDQLISNIGIDMLDTLCHYEIESFVELLNDEITYAGNHWTLQKRGGYSGYSHSANLLCNGTQAGKVAWGASNFGFYVSFSGTGCAAIKLDVLHKCLNQMPDTKITRVDIAYDDLHGVVSVPELRERYENGDFITRGAPPSYCYIESGTLVPNDVTKKYGSVPSKGRTLYVGNRENGKMFRGYEKGLQLDSEEYPDWVRHEVQIGNKSRVIPLDVLINPDSYFAGAYTVLASILSEVQPIRICISRIISNAQLDKYLKIAKTQYGKFVNFLNLIYDNPETVIKKMTSGLTINDIP…	417	USER	zzzz980
164	my_seqs_QBQ83338.1@PF05840.12	PF05840.12	my_seqs	MIQIKGCLRPYFAYLEGSEYRYPLPCGNCEYCRWKSSRVWSFRLSQELLSWNGKALYVTLTYNDENLPDGANLCPSHISGFFKRLRYYLKKFNTEIKFYACGEYGDRYGRPHYHAIIFGLTTEYIEIVRRCWKFGYIRKPSNVRGMECMNYVCGYVQKKIGSLATHKHEYGDREPFFARMSKGLGIGLIDRMPCFSPFVRDAKKRTMYIGRYLTKKLAEKFGVVDEYAKLTKQFFMDKWNDIWYSLGLPQAEQRYGSRMLMACEYAWYESAEARAYEQLICQHRRDFETRQRIFNISRSLDEKIKIQPIA	310	USER	zzzz981
163	my_seqs_QBQ83339.1@PF05840.12	PF05840.12	my_seqs	MNAWRNTTLKMQCFYPIKGFRRIGGGFTFIKHESASIKMEVPCGQCLGCRLRRSQEWATRMVHEAQMHEENSFITLTYAEEPADKSINVEHFQKFMKRLRKHYNGTKIRFFHCGEYGKVYQADGLTPSPHPISDGREALGRAHYHAILFGLDFKDKELLKVDKGNKHYKSETLRKLWGHGHVVVGDVTRESAAYVARYVMKKVNGEMAGDYYKKVGEDGEVFPVKPEYTTMSRRPGIGESWYRKYKNDLFPHDECIVDGKKVPVPQYYLKKLKEEQPHTHEVIKEKRYKKAMKRKLDNTPERLKVKETCLQAKVYKLKRGLK	322	USER	zzzz982
162	my_seqs_QBQ83337.1@PF05840.12	PF05840.12	my_seqs	MLSELQEAEYVYNIMCLTPITLYRNYSSMDGKKTNVVPCGKCPECKRDRQNAWIFRLGQEQKHSNSAAFITLTYENAPKSFNGHDTLCPKHLTNFWKRLRKQNNSSKTIRYYAVGEYGTKFLRPHYHAIAFNINPNILQHHEKLQNIWSHGHVDIAKSEGASQRYTLGYIMQSNWEPTQDDDDRYPQFQRQSKNLGSGYLTPEIKNYYHSNKLPCITQAGGQILKMPRYYKEKIFTKSERQKMAAEWQKHNALTWEQFQQYDYNMELQQKLNKYRQHEKTNRENKKHAF	289	USER	zzzz983
161	genbank_inoviridae_NP_039615.1_@PF05144.13	PF05144.13	genbank	MIDWVTAVLPCLHVPVDAGRVLSVAPDGSVEWESVKFSRVTGSFQSSISVRSQGSDGNGKATHLYVDGNPSKWLQGHNIVGSDDLNGLMIAFYARMLSLLNIPHHLESYRQVLSGQYELKRVDINYMFELPTLIDVRSWLHAAEFKAKTRHGRPATAKGTLYFGKNSRRWSIKAYSKYDEVNCGKKAHGVPEEIKKTGLVEWSKNKLRLELTLRALQLTDINLNFAKNWSTETAYTVFKEYMGRIEMSGNTLLTDTQVINLPSALRMTYVCWKQGICVTDMVSRATYFRHRKVLKEFGIDIAVTVDRVDNSNVVPLIRVLEAKPASIPSQYDNLIFSSNRVSSF	344	USER	zzzzz10
160	genbank_inoviridae_NP_040570.1_@PF05144.13	PF05144.13	genbank	MIDMLVLRIPFKSSLVSERLDSKGNYVSHVNLAEVARLSGLTLAAHTVEYAIDGDLTVSGLKHPYESLPSHYAGIALKIFEGGKNFEPCVELKASPAKLLQGHNVFGPTSFELCGLEFFGAFAAAMPELYDLCDVTNTVVGRIDVTFSAKVANDHIANQVISFLRNVSNGQTKKTRALDYETTVMWNEGSRHRTLVAYLKHHEVQAQIKRLQKKKSSHLTIYEKNCLEVLSNPDLQLYAVGLVRFEARLHTRFFENFGLPRKFFDIVKYQDNYESGSFNLICDLWKKSFKDLFDAFKGSDMNVYDDSKVYDALINNFSSVTKSGNISNSKANRLFGFYRRLVNEGYDNVAQTMERTTFWRSLKELTSVGLSKAQLMNLSTDNNVVPLVQMINVDFSQQY…	421	USER	zzzzz11
159	genbank_inoviridae_WP_004027674.1_@PF05840.12	PF05840.12	genbank	MNNVFIQDNLTNKRHNVFMNALNYVKKEYYLKKVFYGNYVKNIVLPLELVNNNPRNKMGVKNTGKNDKKLWNSRIRSQGNCIRKAYENFWNCKNLSFLTLTYAVNEKDVKKCKNDLKLFFNNINRWWNNPIRSKNHKGILKYMYTYEYQKRGAVHFHIILNQKIPNSVVQQYWKHGINKNIKVRAGSNEDVVKYLAKYIVKTANNDKSQNHYDLNIKAYQFSKNCKNPKVKVGVIELSEQDLIYSVKDNLNYFSFCDKNGYKIGFSCDSYYGLDKFREFKKYVSADRKIFRNLVKNTNFTVNKNTNLRC	309	USER	zzzzz12
158	genbank_inoviridae_WP_010889951.1_@PF10723.8	PF10723.8	genbank	MESSNREPNMRDVTDNVTVDLPGMEQKRGRGRPRKAHAMTNAERQAAFRARRKAEQPSDRSVTVTKKVAEVDAYDDCQEQVDALRFELAETVQAHNQVVAQLDEVRREKDIAWRGMREQRDKAEELGREVLQLKKRLLQEKSVTPSNGNPVSFAAMVDLLSQAAKARSKSALLDIREGISWKDGVVGNTKVTDNQLAQLIAAMTRRQA	208	USER	zzzzz13
157	genbank_inoviridae_WP_015984156.1_@4CIJ_C	4CIJ	genbank	MRVRPTPSRHLDRTGIAYGVHGPALARENGMAADRAERSEAGRPTGRSPGPVKPGESPERKAGAIVDWFKFTFLPDGSISDALEQLRKYFHLVFSVPVTMKPAGKGFRRYEFSYDLLAFINGETMKLGIVACGGEHVGGTILVDWPGQGCTAIGDWQAVYAMVQDLDARITRCDLAMDFCQGEVSIAQMEELYYAGDFNAGGRIPTYRKIESGVAGSKGCRGTTFEIGRRANGKMLRAYEKGRQLGNQDSEWVRLEIEFGAKDRVIPHEILIKRDQYFAGAYKALEAFMAADPQRVPTDQVKALELQDETIRERKLKHIQTQFGPTVDYELRCTEEDIAALVVAIRRQGVPAQLHKSALARHVYGTHDPVPKPEE	375	USER	zzzzz14
156	genbank_inoviridae_YP_009103106.1_@PF10723.8	PF10723.8	genbank	MRDVTDNVTGDLPGMEIKRGRGRPRKAHAMTNAERQAAYRARRKAQRPVDRSVTVTKMLADVDAYDECRLEVDQFREQLDEVRREKDIAWRGMREQRDKAEELGREVLQLKKRLLQEKSVTPSNGNLTEIEALRRQLMTCEDGRQEALRYAGALKERLAQFELQQKSVTPSNGNSLSWIDMCELVALASRARTYAQRDAIRDTELWREFVVRAVAVSQDQMAMLSRALTGGAPTRLRGI	239	USER	zzzzz15
155	genbank_inoviridae_YP_009126694.1_@4CIJ_B	4CIJ	genbank	MKIVVKLDYATFAFEQGSISISKIEDALAQCDLHFSQTSNASENSPYNSPAGLFYKPNNGAKLSPHSLQVSGHGCELFRPTLPRLASLMQEGHEFGHFSRLDFCFDVVMTKQRWREFYLGVISASVDEMNYPEKARKVRKFMYQGYGDSTTVYIGRRTSSAVFCRIYNKSLQDPEKKLCVASGELLDCPDDSYIIRYEMELKYTSRVNSSGRTVYDPSPLFWSYYEDPEKLFAYLRKVWNRYGNETLLPDGWDDMQFVTDIEALGIRYTDDFWCPLSDDLAKKFSVSIHTEEQKMSYVANVFGHRIIDILLYRPELLFLACCKWEQYYNERLPFSPLALTQEVAQFSESSRIAVEEFREVADDPSPFSEDGFDDISLF	378	USER	zzzzz16
154	genbank_inoviridae_YP_009126686.1_@4CIJ_C	4CIJ	genbank	MVTFSHGNERWFFHMKVVVKLDYATFAFEQGSISIPKIEDALAQCDLHFAQTSNASENSPYNSPAGLFYKPNNGAKQSPHSLQVSGHGCELFRSTLPRLASLMQEGHEFGHFSRLDFCFDVVMTKQRWREFYLGVIFASVDEMNNPEKARKVRKFMYQGYGDSTTVYIGRRTSSAVFCRIYNKSLQDPEKKLCAASGELLDCPDDSYVIRYEMELKFASRVRAGSRSVYDPSPLFWFYYEDAEKLFAYLRKVWNRYGNETLLPDGWEDMEFVTDIEARNIQFTKDLLHPLSDDLAQKFSVSIHTEEQKMSYVANVFGHRIIDILLYRPELLFLACCKWEQFYDERLPFSPLALTQEVAQFSESSRIADEEFKEVTDDPSPFSEVGFDDITLFL	393	USER	zzzzz17
153	genbank_inoviridae_YP_008130366.1_@PF02486.18	PF02486.18	genbank	MVGDRAVPAGSGLPSSNRGVSEFRNPEGTLTVGIDWFSASIDLRAALDEVAFRDGDSFEEVRQWIEFSPENARVAALQVFCWFFAGLGLELDEAAGGGRFYMWRIKIIDAAKKFVGMIELGGEKCRRADGTYTARIELTGDGCKAIGAARCGHAQRWLELRAKLESCAGRITRVDVCADDLIGEYPLRLAQKWYAAGEFDNRGQRPKAQLVDDYDSGDGKTLYIGGKKSEKQLRVYEKGREQGDKSSPWVRYEAQFRNSNRKELPLDILRDPASYLLGAYPVLSFLRCVATRIEITKAAVEATWKSVRRHIRRQYGAALNFIAKNCPDDQALRAVIESCTSPSLPKWVTGDTAAHWPEIAAVQPTSKG	368	USER	zzzzz18
152	genbank_inoviridae_YP_004934224.1_@PF02486.18	PF02486.18	genbank	MSRTLIDYVSFSATPELLQRCKDMAKERFIAQMPLNPKTYPTFTYQRDENLKIMHFAKNVASVLGCVEENDFANKDLYFKFLQDTLDRAELEIAYNTSFDECYQLLISNLGIDMLDVLCHGEVESFLELLNQEISYPDNVWTLERRGGYCGYTYSANLLCNGTQAGKVAWGAKNYGFYVSFSGKGCEAVNMVQLHKALKQMVGAKLTRVDIALDDLQGSVSIDEIIERYQDGHFITQGTPPGWGLFMGGSGATADDKRKCGLIPDRGRTFYVGARDNGKVFRAYHKGAQVRSEEYPNWNRFEVQIGNRFRVIPFDVLIDPDPYFAGAYPALASLISEVEPVRIPTTKILLNVTLENAIKHAKTQYGKLINALRLIYGDSQYIVETLTKGLDENDIPDRL…	418	USER	zzzzz19
151	genbank_inoviridae_YP_009123860.1_@4CIJ_B	4CIJ	genbank	MKSVVKLDYATFAFEQGSISISKIEDALAQCDLHFAQTSNASENSPYNSPAGLFYKPNNGAKHSPHSLQVSGHGCELFRSTLPRLALLMQDGHEFGHFSRLDFCFDVVMTKQRWREFYLGVISASVDEMNYPEKARKVRKFMYQGYGDSTTIYIGRRTSSAVFCRIYNKSLQDPEKKLCVASGELLDCPDDSYIIRYEMELKYTSRVNSSGRTVYDPSPLFWSYYEDPDMLFAYFRKVWNRYGNETLLPDGWDDMEFLTDLVARRIPFIKDYFHPLSDDLAQKFSVSIHTEEQKMSYVANVFGHRIIDILLYRSELLFLACCRWEQYYNERLPFSPLALTQEVSQFFESSRIAVGEFEEFADDPSPFSEVGFDDISLF	378	USER	zzzzz20
150	genbank_inoviridae_YP_004327588.1_@4CIJ_B	4CIJ	genbank	MRVRPTSACHLDPTSAAYAVHGTSVRAPADGCADAHRAERSDARGRGSASPRRGSASPRPVIRGESTEREAGAIVDWLRFTFLPDGSIGDALEHLRRYFHLWFSIPVTMKPSVRGFRGYEFSHDLLAFVNGETIRLGIVACGGENVGGTMLVDLSGQGCVVVRDWMAVFATMQDLDARITRCDLAVDFCQGEVTIEQVEQMYFDGEFNAGGRIPKYRRVESGVANAEASGGRTFEIGRRVNGKLLRAYEKGRQLGKQDSDWLRIEIEFGNKDRVIPHEIVLKRDHYFAGAYKALEAFIAADPQRVPTDQRDALEQQDAIVRERKLAHMKQQFGPTVDYELRSTNEDFAALVVAIRRQGVPAQLHKSALAKHVYGAHDPVPRPEE	384	USER	zzzzz21
149	genbank_inoviridae_YP_002925188.1_@4CIJ_B	4CIJ	genbank	MIRFALSKLTTWLLLSPMRICATWTKATTKTLSIYRCPFTTSQKLKPRNKARFALPWNKSSIIWKRTKTKCQRCFFIASICSCPKSWLSLSPMRGRGLHGYNDSMVILDMTGQVECGLVGIGGNNDTVFVQINGTGCTKLFDRIDSKNLHWWLAQVLGITRLVRLDLAVDDYTGNFDAKYAEKCFYEGAFRTAPRGQGPSMVPHKRITENGALMEEATIVGSRSSAIYWRIYNKKLEQKITDPDLIWYRNEVELKKCDIELLANPAASFAGICPFAASIECTPPVKFSRNKKAQGLEFMARIAWVRRQCGVALAEVIAMTQGDLGEAFGMLIPHKHRRPDFELLGVPDSYTQLKNTILELR	361	USER	zzzzz22
148	genbank_inoviridae_WP_012435532.1_@PF10723.8	PF10723.8	genbank	MRDVTDNVTGELPGVEQKRGRGRPRKAHALTNAERQAAFRARRKKEQGGSDRSVTVTKKPADVDAYDECRLEVEELRERVDELLFELREATAQHNEMVEQLALARRTIHSYKHELLKAYGKVGGGDPVKSVTRRRVTKKPAEEKVVTKVCTLEEWPFPVDPKRP	164	USER	zzzzz23
147	genbank_inoviridae_YP_001718368.1_@PF02486.18	PF02486.18	genbank	MVGDRAVLAGSGLPSSNRGVSEFRNADGTLTVGIDWFSASVDMFAVLNELAFRDGDSFEEVRNWIDYSADNARVVALQMFCWFFAGLGLELDEVAGGGASTCGASRIINAEKKFVGMIELGGDNCRRADGTYTARIELTGEGCKSIAAARCGHAQRWLELRAKLESCGGRITRLDVCADDLMGKYPLRLAQKWYDEGEFDNRGQRPKAQLVDDYDSGDGKTLYVGGKKSEKQLRVYEKGRELGDKASPWVRYEAQFRASNRKELPLDLLRDPAAYLLGAYPVLRFLRCISSRIDVTKAAAVATFKSACRHFKRQYGGFVNFVFRTCPDEEVAVAVFKSCTSPKLPKWATGDVAANWATSVVIQPT	365	USER	zzzzz24
146	genbank_inoviridae_YP_257146.1_@4CIJ_B	4CIJ	genbank	MAVDRARFRMAVEGGAGGFSPLSPGEKGRRAAAEIGPGSNTGQKGQQDAIIDYLTIVVPLSALEEVNCKKLDLLLFRIFGFRGEVVAGAIREKNWNFYEQSAVLIDRENEVVGRVGIGGKKSTVCLSLTGMGCKWIRDWARVYKQCAMLDAKITRVDCAHDDYEGERLDVHALREVAAQGGFTEGGCPPRHRFISDEGHNTGCTLYVGGKGHKELCVYEKGKAEGLPSSRWVRAEVRLYGKHMEIPLDVLLNPGAYLRGSYSALQDLIKGVCTRLRTIRKHVEVSAEAAVNWLSRQGGPFLNVLHGAFGDSFTDFLLARVVRDGHPGRFRGIAKGEPLHRYVREELCLSAA	351	USER	zzzzz25
145	genbank_inoviridae_NP_047364.1_@PF05840.12	PF05840.12	genbank	MAYQQVIDLATGKREVIDFLPAVTSIANPDHKLWTGRQSPNPSLSVADYDKSYRPEIVAHNRKLSVISNSLDNLIPSQDRTESHSSPLSLAPCQDVAQYIRRHGDFAPHMQRAFTNILERRDYTTALSMHSKDAHDRLSRDGIRFARTDDECVELAKAKAKAFSKTLSKFDEIEEPFTKACELLASLGLSFRPELIKQKRQSNELECLTSRAMCENWLRRQLRRRYFAEVEAVRDLLLVSKNENPYCSAHGLEVMKSRKSATEQVLSNTVCYVEDNPETWFTLQELAAKSLSNPTIRRAEMFVRLKAFEDICKESGHVAMFYTVTAPSRFHVFKGDDINPKWLEAGKPSAIDAHHHLMGVTNAFRKALDKAKIKIYGLRIVEPHHDGTPHNHFLFFMLP…	716	USER	zzzzz26
144	genbank_inoviridae_NP_542355.1_@PF02486.18	PF02486.18	genbank	MPCNHPHHDTVRPVKVDHLAFTFAYADLRHLDKSNDQDFINLQMPVYHEPKTRTKEQGAVCSTLEQIEHHMEAHRNKVSKMLFHRFDLFMSKIMGFRLSPMRGRGLHGYNDSMVISIMTGQVECGLVGIGGNNDTAFCPNQRHGVHPNTFRPYRTLRSFIGARSGLGITRLVRLDLAVDDYTGNFDAKYAEKCFYEGAFRTAPRGQGPSMVPHKRITGPGALMEEATIVGSRSSAIYWRIYNKKLEQKITDPDLIWYRNEVELKKCDIELLANPAASFAGICPFRPSIECTPPVKFSRNKKAQGLEFMARIAWVRRQCGVALAEVIAMTQGDLGEAFGMLIPHKHRRPDFELLGVPDSYAQLKNTLWS	368	USER	zzzzz27
143	genbank_inoviridae_NP_604429.1_@PF01446.16	PF01446.16	genbank	MWYQHMSQTSTIIHADGSNRRRRVRWSARRTLWTGSGLQRVRNCGRVPRSLSSGVAIMVRRDSSTGNVIDAGYSGLQHCNSVWACPVCAAQIASQRQMLVSEVLSRWHARGGRAMMITLTVRHDRTQSLKIVWDAVAKGWSKATNGRSWDVLGSLFGVDGRLPWLRFVEVTHGKSGWHVHVHALVLLGEGARGREADAVEQIRARMWGSWNRAVVRQGLKSGLESLSEAHLIEPDAGDGLGGLAAYFSKAAFELTLGGATKAAQGDNCTPFEILRLLTGDLNGEVGLRLSGKERTRLWRVWHEWEEFSSGRRQMGVSKGLFDMLGLDSSWTPSDDEIIEDNDLDGDELFVIGHEEWTALRDRGLALDVLEAVAGDLEKQEAERVLVAALGLQPARAVID…	405	USER	zzzzz28
142	genbank_inoviridae_AAY49180.1_@PF02486.18	PF02486.18	genbank	MSGLPSSNRGVSEFRNSDGTLTVIIDWFSASVDLFAVLRQVGYLDRDDAEEVRQWSDACAENAMVIAINLFAFFFAGLGMELDKQAGPGSFYTWRVRVLDREGKHVGIIEFGGEECRRKDGTYTARIELTGAGCAMVSAARCGHAKRWLELRAKLESCAGRLTRVDTAADDLLGKYPLKLAQTWYTDGEFDNRGQRPKAQLIDDYDSGDGKTLYVGTKKSEKQLRVYEKGREQGDKESPWVRYEAQFKASNRKDLSLDILRDPAGYLLGAYPVLNFLQCVALRMDITKAAVDATWKSARRHIKRQYGATLNFIVRHCSTPDALHAVISTCTSHRLPAWATADVANQWPEIAGVNQTLQGVTP	362	USER	zzzzz29
141	genbank_inoviridae_ARK07729.1_@PF05840.12	PF05840.12	genbank	MSDGTCSFCGDPTAYFFPGGLCVACTSKNARIRMQDQPTQSRELSAFDASVGVMQAATRRTEIAAEKIQKDKRVVGTSVREFDAAHPVALTAEGQRAALALGLVHYKTSDTRASTTGTVTIEIDPLQARAQRLRKSVITGARLHDQEAKKGSFRGAWYFLTLTYRDGSDSSPRDVSELFKRMRGHFNRLKSGRARWNRESFRYVWVGELTQRFRPHYHVMLWVPTGMYFGKVDQRGWWPHGTTQIEKARNCVGYLAKYASKFTALTAGAFPKGFRTHGIGGLDTESKRELRWWKAPKDAREALGGEADIRKAKGGWFDRLTGEFWPSPWKVTFIFGRTFAWKVVHYESPSHELRCRCSFLSCA	363	USER	zzzzz30
140	genbank_inoviridae_BAX02598.1_@PF02486.18	PF02486.18	genbank	MRLLGHGVDTLVLNFYWADGAYTLPEGLPEKLDLLKDQYRVNPEEAIFWGVDAYLPIPNPALEDALYEAALVRPTRHYPWQLSFGADALLVSLSAVKDATRRRTFPAVRVEVTGRFMMYARRDAQAVVSWLLDALQNLTGSRPERVQVSRADLFVDVEVEPGTLKVQDVDRFTSRSRIRGLYFVGEAEGRQAPAPHGEGGPMSNTPPATSVRVPPSWEEGPEHVAAYMRGREWSGFTFGRGPLMARVYSKSVEAKSKPLTRVLLKAYEEAHGPISGEVVRVEYQLRTEALSEMVVPGDGSDVRDWDTFLWAVPHIWEYLTGSWLLLRDKGNYTHAWHAPVDSFWLLVQGAFKKGGENEGFGPVVRDKRLGVVDPWALVKQSLGAFMTAVVSAGISADFS…	446	USER	zzzzz31
139	genbank_inoviridae_ABC47903.1_@PF05840.12	PF05840.12	genbank	MAFERVLDLKTGRESWVDFLPASTWISSEDAHWKNWTGRRPNNATLSDLGSDKSYRPEVVARNRHLSFVSNSLETLIPTKVGKKTRFVKHSLRINIQDRTESHAVAPSPALCVQVSRILGRHYDFARHMQRAFTDCLSTRTAVESFRAIEEAHVRLTQNGYSYAMPDDDLCAMAKDKAHYHTLELAKYDSDIEGKFAKVCTLLSFLGLSFSAPIIKAKRESNELHSLIARACDETWLRRQLRKKCAIEVERIARDLELVQRSKQAYCSDFSVHRQRQQKRRNRAMLESMVVFNKEDPDQYFELAELHDHSIANPEIRRGEMFVRLRGFESIAIEQGHSALFVTSTAPSRFHAVSKGKVNQAWLDAGKPDAKAAHTHLMSVWKSFRKTIDKAQIKVYGMR…	709	USER	zzzzz32
138	genbank_inoviridae_BAS04454.1_@PF10723.8	PF10723.8	genbank	MESSNREPNMRDVTDNVTVDLPGMEQKRGRGRPRKAHAMTNAERQAAYRARRRAQQPADRSVTVTKMPVEVDAYDECRLEVERLRAELVALRLKAERHEVERNNVFALADLKEDQRQEALAEVEGLRIQLSKALGEVQRLNSKKSVTPSNGNPVSFAAMVDLLSQAAKARSKSALLDIREGISWKDGVVGNTKVTDNQLAQLIAAMTRRQA	211	USER	zzzzz33
137	genbank_inoviridae_BAP81902.1_@PF10723.8	PF10723.8	genbank	MESSNREPNMRDVTDNVTVDLPGMEQKRGRGRPRKAHAMTNAERQAAYRARRRAQQPADRSVTVTKMHEKVTKNRKAVRIAGLFCVQRRECPRLERRAEGAPLGTWER	108	USER	zzzzz34
136	genbank_inoviridae_BAP16706.1_@PF05840.12	PF05840.12	genbank	MLLMHVTLPWSSIVADGTCSFCGDTTAYFFPGGLCVACTSKNARIRMHEQPTQSRELSAFDASVGVMQAATRRTEIAAEKIQKNKRVVGTSVREFDAAHPIALTAEGQRAALALGLVHYKTSDTRASTTGTVTIEIDPLQARAQRLRKSVITGARLHDQEAKKGSFRGAWYFLTLTYRDGSDSSPRDVSELFKRMRGHFNRLKSGRARWNRESFRYVWVGELTQRFRPHYHVMLWVPTGMYFGKVDQRGWWPHGTTQIEKARNCVGYLAKYASKFTALTAGAFPKGFRTHGIGGLDTESKRELRWWKAPKDAREALGGEADIRKAKGGWFDRLTGEFWPSPWKVTFIFGRTFAWKVVPL	359	USER	zzzzz35
135	genbank_inoviridae_CAI94586.1_@PF05840.12	PF05840.12	genbank	MNVNINPYNRLTGEVLYRPYIDSSNFVNQKYYVKKVYYGPYIKTVVLPLECINKFGKGNPTGIKNTGENDIKLHNSRVRSQRNCIQKAIHNFGGCQNLGFTTLTYAENLQDVKKANHQFKLFIKKIKYHFSKYKKNKYENLKYLVAYEYQQRGAVHFHIIFSEYIPNKLIRKYWPYGYNKNLPVKTGTNEFVSKYVAKYVVKAYSQEKSKNIYDLNTKAYRFSANCTDPVVKVGIIEMCEMELIASLKGTKHNFMFNNKDGYLMGVSIDSDWNKDYFWQMEEYIPYDKKIFRFFKKISNLDMYRIRKRYDKYLNLGKQRYIKKSTIPKNDTFWRDIDLEQPIPHN	345	USER	zzzzz36
134	genbank_inoviridae_ACY07136.1_@PF05144.13	PF05144.13	genbank	MIDMLVLRLPFIDSLVCSRLSGNDLITFVDLSKIATLSGMNLSARTVEYHIDGDLTVSGLSHPFESLPTHYSGIAFKIYEGSKNFYPCVEIKASPAKVLQGHNVFGTTDLALCSXXXXXXXXXXXXXXXXXXXXNATTISRIDATFSARAPNENIAKQVIDHLRNVSNGQTKSTRSQNWESTVTWNETSRHRTLVAYLKHVELQHQIQQLSSKPSAKMTSYQKEQLKVLSNPDLLEFASGLVRFEARIKTRYLKSFGLPLNLFNAIRFASDYNSQGKDLIFDLWSFSFSELFKAFEGDSMNIYDDSAVLDAIQSKHFTITPSGKTSFAKASRYFGFYRRLVNEGYDSVALTMPRNSFWRYVSALVECGIPKSQLMNLSTCNNVIPLVRFINVDFSSQRP…	410	USER	zzzzz37
133	genbank_inoviridae_AAC54631.1_@PF11726.7	PF11726.7	genbank	MRGHFNRLKSGRARWNRESFRYVWVGELTQRFRPHYHVMLWVPQGMFFGKVDQRGWWPHGSSQIEKARNCVGYLAKYASKFTAITAAAFPKGFRTHGCGGLNTESKRELRWWKAPKDAREALGGEADIRKAKGGWFDRLTGEFWPSPWKVTFIFGRTFAWKVVQL	165	USER	zzzzz38
132	genbank_microviridae_YP_512449.1_@PF05840.12	PF05840.12	genbank	MFKTHSDYFNKPNIDAIKPLVETAGMSVLTQSPNLRIWKQCNTRIKLLEEILAHYTNGIRRDDNGDFWMNPNSQLATTIAYRAHQKGHNPKFKQYPESFTLDDIITGKPIPQTAPDELQLSDEIGEDYRLTVLSIIEELQECYDVLGQLDINNTIDHKPLGNTHWDLLYEKPVYKHWTQLVSKRPLKDIRADYNYAKAKGIKDECSKILEESTMKSRRGFTVQRLMNAMRTAHTQGWYVVFDTLTLADDRLKDFYDNPNALRDYFRGIGRMVLTAEGRSVHESSADCYQYFCVPEYGTQHGRLHFHAVHLMRTLPLGSLDPNFGKLVRTNRQINSLQNTWPYGYSMPIAVRYSQDAFSRAGWLWPVDAKGEPLKATSYMAVGFYVAKYVNKKSDIDMAA…	554	USER	zzzzz39
131	genbank_microviridae_YP_512470.1_@PF05840.12	PF05840.12	genbank	MATENFFDVVKTVWSHATAKHAHLRMAVQVDNRSRLLSDLVYQLEKRLSEETHLDDETYSLYESQTGFLEDHMSLVRKCAAQLDNSNTIDHRTSLDAECVFLFEMICPGVRYGKTLNSLWTKYVAQWPEKLIRQELDMVKPLSFKDEVARYMEKMQEKTRKNRMTQKVINEMRIAHQKGWFFVFDTLTLADDRLQAFNENPNALRDYFRTVGRAVLRAEGRSVKDSYNDCYRYLCVPEFGGQHGRLHWHVVHMVRTLPLGSHDPNFGRKVRNYRQINSFRGMWPYGFTQPIAVRYQHDAYSRKGWLWPVDKSGKAMQSKPYQAVAWYVTKYVAKQSDQRQKAITERQKKCKNPLMAICLKKEFRVRSSRKLGMELPSMAHLSNKVLLELSRISFDSSPL…	494	USER	zzzzz40
130	genbank_microviridae_P07928.1_@PF05840.12	PF05840.12	genbank	MPPNFGGFFMVRSYYPSECHADYFDFERIEALKPAIEACGISTLSQSPMLGFHKQMDNRIKLLEEILSFRMQGVEFDNGDMYVYGHKAASDVRDEFVSVTEKLMDELAQCYNVLPQLDINNTIDHPPEGDEKWFLENEKTVTQFCRKLAAERPLKDIRDEYNYPKKKGIKDECSRLLEASTMKSRRGFTIQRLMNAMRQAHADGWFIVFDTLTLADDRLEAFYDNPNALRDYFRDIGRMVLAAERRKANDSHADCYQYFCVPEYGTANGRLHFHAVHFMRTLPSGSVDPNFGRRVRNRRQLNSLQNTWPYGYSMPIAVRYTQDAFSRSGWLWPVDAKGEPLKATSYMAVGFYVAKYVNKKSDMDLAAKGLGAKEWNNSLKTKLSLLPKKLFRIRMSRNF…	522	USER	zzzzz41
129	genbank_microviridae_NP_598341.1_@PF05155.14	PF05155.14	genbank	MGPLLGMVGAGAAGSAIGEGLGMLRDKWNRDFQERMSNTQYQRARKDMEAAGINPLAQFGSGQASSPSGGVSGSSFGSNITSMLGSSANMLMQLSKLKEDAERANFGSKTVQTINDARNNMVRSVITLSKRVK	133	USER	zzzzz42
128	genbank_microviridae_NP_073537.1_@PF05840.12	PF05840.12	genbank	MHCIRPIKAGFNATGDIVYSSKKISKELASFAFPCRKCIPCRLNMAREKAIRAYHESQMWDDNIFLTLTYDDEHLKSDRLQWIDFDLFIKRLNEKLNRGLSKENRRPLPYMVTGEYGDKTKRPHWHVLIFNFRPDDAKKHYVTELGEQVYTSEFIRDLWTHGNIEFGSVTLDSASYVARYAAKKLAHGNDQDHDYHPIHNTSKKHAIGKKWIEKYHEQTFSRGYVVLPNGSQGPIPRYYQDWYKKNHPEKWMEYDAKVKLKSKELAEMQSRKDQLDDFANFINYRGGTNYPLSRTQVKLAILKSKFKQLQEKLKL	315	USER	zzzzz43
127	genbank_microviridae_NP_598335.1_@PF05840.12	PF05840.12	genbank	MACLRPLQVHNLKKGEKVNFKHYSNGDVARYDMNKNYIVNDSVPCRKCVGCRLDNSAEWGVRASLEIKSNPKHNWFVTLTYSDEHLVYNALGRPNCVPEHITKFIKSLRKYFERRGHIGIKYLASNEYGTKRMRPHYHICFFNLPLDDLEKTIDSQKGYQQWTSKTISRFWDKGFHTIGELTYHSANYTARYTTKKLGVKDYKALQLVPEKLRMSKGIGLKYFMENKERIYKEDSVLISTDKGIKRFKVPKYFDRRMEREWQDEFYLDYIKEKREKVAKRTLFQRQIVSSRSYTDYLGDEQKKLNNIVKRLTRPLKTGKK	320	USER	zzzzz44
126	genbank_microviridae_YP_338244.1_@PF05840.12	PF05840.12	genbank	MTCISPFVCFIDPCNQLWFPKGEKSSKPWDKVRELNAFEQTQPEEYRKRWILMPCRRCKFCRVQNAKIWSYRCMHEASLYSQNCFLTLTYEDQHLPENGSLVRNHPTLFLRRLREHISPHKIRYFGCGEYGSKLQRPHYHLLIYNYDFPDKKLLSKKRGNPLFVSEKLMQLWPYGFSTVGSVTRQSAGYVARYSLKKVSRDISQDHYGQRLPEFLMCSLKPGIGADWYEKYKRDVYPQDYLVVQDKGKSFTTRPPRYYDKLHSRFDPEEMDEVKQKRVEKVMALPELSQDKAEVKQYIFNDRTKRLFRDYEEESY	315	USER	zzzzz45
125	genbank_microviridae_NP_044320.1_@PF05840.12	PF05840.12	genbank	MRYSLDSYLISVYIRLTQRKSDYMCTNPIIPIVQYKVPVKSSLDVVDWSKFRSNFKANLFFFEKNVVRRAVSNVDEAFRFTEQLKQVSYLSTFDLDGYHQVKQFSFPLPCRKCSECLQKRSKDLAVQATMEARSHEENSVLILTYDNDHLGDNILDYDHIRVFQKRLRRYVDYHYGKKIKFLTVGEYGDKKGRMHWHMIVFGWKPKSEEQLEPYLGGKYRTDVRYRSRKLKELWKFGYVDVDEATDGNIFYVARYVQKKFVVGCDLDSSKSSSRREKKTASQALGLDYFFSYLRQFLKTKRIVLNGFRYGFPRYFKDLLRKLVSEDSEFDTEYYNALRKRLLSVCSYSMVNKYFTYLECLVEVLPVLNFHDLYQRALRYMDQSILKPHASDHDGEYNTT	399	USER	zzzzz46
124	genbank_microviridae_WP_122204416.1_@PF05840.12	PF05840.12	genbank	MAKCLHPMYLASVEAKVPCGWCVNCRQNKRQSWVYRLQAEAKEYPLSLFVTLTYDDEHLPIERIGSDLFQTNVAVVSKRDVQLFMKRLRKKYEDYKMRYFVTSEYGAKNGRPHYHMILFGFPFTGKMAGDLLAECWQNGFVQAHPLTIKEIAYVCKYMYEKSMCPEILRDEKKYKPFMLCSRNPGIGFGFMKADIIEFYRRHPRDYVRAWAGHKMAMPRYYADKLYDDDMKAFLKEMREEFFRHKMFNEWIDYCARENPILTDLMQLEQREEYEKRMNERLRCKM	285	USER	zzzzz47
123	genbank_microviridae_YP_009259740.1_@PF05840.12	PF05840.12	genbank	MISPYAREVHKKYLVLPCGRCIGCRLDYSRDWANRCMLELQYHDSAYFVTLTYDDLHLPINHYADSETGEIGVTATLDKKEFQDFMKRLREHHCRKFGNDATLRFFAAGEYGSKTRRPHYHAIIYGLKLDDLKFYKRNSFPENYDLYNSEWISKIWGKGHVVVGKVNWDTCAYTARYIVKKQYGNSSQIYEKYNFVPEFTLMSRRPGIGRDYFEEKKESIKNKLRDNDVILISDGDRVREARPPKYYERLLEPDEPELMSELKETRQRIAADLVEAKLDQTSLDYLEMLKSEEANKLASISALKRKEI	308	USER	zzzzz48
122	genbank_microviridae_YP_009259686.1_@PF05840.12	PF05840.12	genbank	MCFHPLNAWLHEVEKNGVKKRAVFFSPPNDLAMPIQLPCGKCLGCRMDKARTWAIRCLHESQMHEDNCFLTLTFSDDNLHDLDKRDLQLFFKRLRKALNGKRISYYAVGEYGSLTARPHYHALVFGWFPSDAYYWTGNGPTSLFRSSFLETLWPFGNSLVGSVSYESACYVSRYCAKALGSGGFALMSRNPAIGKDWYRRYGPEVSAHDGCHIPSTDCFVRPPRYYDGLSDPDDLLERKARRLAYSVKAHAHDTVSRLLDREESLRLRLERKARIGEFDAFE	282	USER	zzzzz49
121	genbank_microviridae_YP_009259725.1_@PF05840.12	PF05840.12	genbank	MCFHPLMAWLVNGKPQFTFPKFAVDTPLSVQLPCGKCLGCRMDKARTWAMRCLHESQMHEDNSFITLTMSDEHLHDIDKRDLQLFFKRLRKALGGKRVSYYAVGEYGELSRRPHYHALVFGWFPSDAYYWSGSGDTRLFRSPMLERLWTLGNSLVGMVSYNSACYCTRYCVKALDDNGFALMSRNPAIGRTWYEKYGCEVEAHDGVHIPFTDCWVRVPRYYDGLANPLDLEFRKAHRREVHEGEYLSPSRMRDMEECLRLRLERKARIGEFDSFE	275	USER	zzzzz50
120	genbank_microviridae_YP_009160416.1_@PF05840.12	PF05840.12	genbank	MPCRFNKRRTWVHRLMLEQMCHGASSFVTLTYAPDKVPASGSLQPDDLSAWLKRFRRRVEPRKIRFFACGEYGDQTQRPHYHAAIFNHASCVGGVRNIEGECQCPQCLDVRETWGFGHVMVGSLTEQSAQYIAGYVVKKMTSSTDARLAGRTPEFARMSLRPGIGANALWDVASELMRHNLENRHHSRLAHGARLLPLGRYLRGRLSSYLGQSDEKFASLSDQALQRCYEELQLVRAVAWATDKAVRSVYREV	253	USER	zzzzz51
119	genbank_microviridae_YP_009160408.1_@PF05840.12	PF05840.12	genbank	MAHCITPLVLQDKPQARTISVACGRCPACHANRISGWSFRLMQESKISTSSFFVTLTYEKTIHTKNGLSTLVKSDIQKFFKRLRKNHTGKPIKYYCAGEYGGTSWRPHYHIILFNSTRDDIRRAWHLDNTLIGNIHIGTVNGASVGYTLKYINKTQRIPLFEGDDRAPEFSLMSKGLGKNYINKRTIKWHRNDMENRLHLPLAGGSKAYMPRYYKQKIYAKYEVNLIVEKLQEKNIAQTERNTLLNPKLPSETIEHHFNQFRKDHLKSKKSEKL	274	USER	zzzzz52
118	genbank_microviridae_YP_009160400.1_@PF05840.12	PF05840.12	genbank	MPCKCPLPAFQLSNGSVVFSERRGQDVVRSLFLPCGQCTLCRLARAKGWAIRCLHEASLFPRNCFLTLTYRTEELPERGSLNYSDFQLFMKRFRKRVSPVQPRFYMCGEYGDQDGRPHFHACIFGYDFEDKVPWKKTDSGSLICRSSLLETLWTKGHSSIGEVNFQTAAYVARYCMKKVTGSRAQEHYTRIDLQTGELYSLEPEFTHMSLKPGIGREWFDKYFSDVYPHDYVVVNGRTIKPPKYYDQKFKELEPLGFEQLQYQRELDAALRAADNTPERLLVKEVCAAAALSRFKRSI	298	USER	zzzzz53
117	genbank_microviridae_YP_009160387.1_@PF11726.7	PF11726.7	genbank	MCSTPYIAHGNPVPCGNCPQCLVRRTQSWAFRIEQQLLVSTTVIWMRLSYDTAHVPITANKHMNLSKRDCQLFIKRLRAAHYDAGKRQAKAKHMPNEVLFDYTVPIKYLLCGEYGSRKHRPHYHVTLLNADIQLVEQCWRDKRGYPIGEIWFDDRPFTTGCVAYTLGYMFKRFGRSFGSSDDRQKEFHLFSSQLGLNYLSSAIRRYHLDDLERCYVTLDGGVKLSMPRYYRDKLFKATGHYVPRALVDPATGEVKQVNCLFICPVSQLWADLVKRDRSLLMPDVHLKAYTSSRQRYFDAFGTYDGYFRAQEEARKAAVRNFRNRSKARVDHE	332	USER	zzzzz54
116	genbank_microviridae_YP_009160383.1_@PF05840.12	PF05840.12	genbank	MTFRRDASWSGVPIKVPCGQCVGCRLEKSRQWAMRCMHEKKLHNNNCFITLTYDNDHLPPGGTLVKRDLQLFMKRLRKERGAGVRFYACGEYGDFNARPHYHAILFNCDFFDRRLFSRGAGAKHPVFTSVGLSELWTAGLSVVGDVTFESAAYVARYVMKKITGSKAADHYAVVDGDGVVTDRLPEFTVMSRRPGIGFEWFRRYGVESYAHDSVIVNGRPVRPPRYYDTKYELTDAEHLAYWKVVRRRRAMKMRADNTPDRRRVKEVLQIKLLKMKERLL	280	USER	zzzzz55
115	genbank_microviridae_YP_009160377.1_@PF05840.12	PF05840.12	genbank	MYVPCGKCGNCLRRKIADYTARLQFEARKSDDCYFLTLTFADDPTNFFLDNYSDSFNPFKHQLQKFFKRLRKAGYRFKYFALGDYGDTFGRPHYHVVTFSKASFPVETIHSIWAAGDSLGRGFIDLKPLTPGRISYVVRYGFLAKLDWDKRDDRPPPFFLMSRRPAVGAGYVTPAKIKYHLANQFWFFPDGKYRKALPRYWRDKIFLCPALRKCHLIVYNYQAAVDRQVDILYFKSPEKWQEAHRKQADLYLDLLRKQKNLNKKSYYNEK	270	USER	zzzzz56
114	genbank_microviridae_YP_009160369.1_@PF05840.12	PF05840.12	genbank	MIVFLGLISCGSISFLTLFLLITPVIVLTLLIRSFLSLGVIMTVGLTSLFALSGRKKKYELSFSIMAKKTLINMQQITNIYMPCRFPFQTKDGAIVPCGKCDSCLTRMANGWAFRVMQEEKKAKCSMWITLTYDTDHVPLTNNGYMTLNRVHTQLFFKRLRRFQNIHNINQERIYDTGDRFGRLQYPIKYFGCGEYGTKYRRPHYHICLLNCDERALWYSWQDGETGLPFGDVYIDDRPLSAAAIAYTCFYMNKPKRVPEHKNDDREREFRMMSTKMGLGYLTPDTLAYHKADLSRSYFTTEGGGKAALPRYLADRIFTPEEKASQQPLINERNSLQFNLEFDEHKRRTGGNRQTFQQETNDRRRESIRSFQRKARPDGM	380	USER	zzzzz57
113	genbank_microviridae_YP_009160364.1_@PF05840.12	PF05840.12	genbank	MACMFPFFVDDVPVPCGKCPACLVRRTNNWVFRIMQEERHSVSSLWITLTYDNYHLPISPNGFATLCKRDVQLFFKRYRKALGKDHPKIKYYACGEYGSKGQRPHYHLLIINGVDRCLASSWRDSEGVQIGDIYIDDRPLNSSAIGYTVGYMNKTKITGRYQRDDRVSEFALMSKKMGLSYLTPEVVAWHKADLSRNYVILPGGVKSALPRYFADRIYSDEDKEARIAILKLLFVKLLSLNMMTMFVNLVMLMDLLSLKMRPGMLQLLTFKKRLMAVSTYDKNFCAFGAYH	291	USER	zzzzz58
112	genbank_microviridae_YP_009160360.1_@PF05840.12	PF05840.12	genbank	GSSLTCCYGLFFPFSNRDGQPVPCGRCPPCRKSRVNGWVFRLLQESHRSGAPFFVTLTYDNEHLQFTSRGYATLCVRHVQLFFKRLRKMQPHASIKYYCAGEYGTQKQRPHYHIILFGSDLASIYKCWDHGSVDISLEPVTASAIAYTAGYVLKGHRYTMSKSDDRLPEYAQMSKGLGSNYIYRDTIDYHQNGLIPFLTLSGGVKVAMPRYYKERIFHNASFRDTLQAAAADSGYANYTRHYDEYVRAHGSDDGYFHQLVNDRRAAIKQFLLHTKKSRKL	280	USER	zzzzz59
111	genbank_microviridae_YP_009160357.1_@PF05840.12	PF05840.12	genbank	MHEADSYDYNCFITLTYSPEHLPKYGSLVKRDFQLFIKRLREWISDAPDLFLKSNHSNLRYYMCGEYGESSGRPHYHAILFNLQFVDRKYLKDCNGIPLYTSDTLSRIWGKGLVSIGSVTFDSAAYVARYILKKAHGEQALLKYQIADYFSGVIPEDSQGRPLTLVPEYTTMSRRPGIGKAFYDKYCQIIYRDDSVYFKDSPLPPPRYYDRLYELDHPSHFVSLRRQRVRKAIKYSVDNTRDRLSVKLELLKMRIKKLIRPLD	263	USER	zzzzz60
110	genbank_microviridae_YP_009160351.1_@PF05840.12	PF05840.12	genbank	VPCYSPLKAYQGRGGNISFSPLPDSGRSIQLPCGQCIGCKLERSRQWAVRCVHESKMHESSVFGTFTYSGDLPPLASLEYRDFQLFLKRLRKRFSPRRIRFFVGGEYGGASRRPHFHACLFGLSLPDRRYWRKSSAGFSLYRSSILEELWPHGSVEVGDVTFESAAYIARYCLDKLSGVRVLVRDYGRIDLDTGEVLPSVPEFGHMSLKPGIGGSWFDQFYVSDVLHRDAVVIRGKEVNPPRYYDRRLAQVSPAAKSAVTFLKAARQEKAALRASDNTRARLKVKEAVVKAGLQFFHRDLK	301	USER	zzzzz61
109	genbank_microviridae_YP_009160343.1_@PF05840.12	PF05840.12	genbank	MLLMPSVAGHFWFMSCWNPMICNSTGKPFACGRCVGCTQKRSNSWAFRCAQQYELAHSSSWITLTYDPGHMPVTPNGLYTLDKKAVPLFLKRLRKAQFGNKGGDIKYLAAGEYGGKRGRPHYHVLLFNADDSLYHDAWGQGDVWIDPRPFSPDSVGYTVGYSMKNKSVFAPRNVTQQHHMPFDPRRGLKVPVRIPLGMDDRQAEFHLFSKGLGLNYLTPQIVDWHLADYTRNYVVMPGGRKSALPRYFADRLYTNTCDVAAKVPVRELQELPMLEQMEKSVKRSQDAHILAYGDLSDWYRASGEGRRQGLLNYQRRAKTRNDF	323	USER	zzzzz62
108	genbank_microviridae_YP_009160340.1_@PF05840.12	PF05840.12	genbank	MCPYPFYLKKYNIFVPCGKCGSCLKRKISDWTIRLQNEFKRSKTSAFLTLTYQEAPDQLDKTHLQKFFRRLRKKGVNFSYFALGDYGDTFGRPHYHVLAFERTSYLRDVLNQSWRSGKDEVLMGFTHYKPMSFGRIHYVVKYGLLAKLDWNKEQETRKPPFFLMSQSIGSCYLTDDILDYHKKRGVWHYQDGRYKKPLPRYYRDKLFTAAYRQIHNLKYQAIVDEQYDLKRVYFASQGFHDEIDQKIYEQITATADNYLKELRKQKQLKVKILKN	275	USER	zzzzz63
107	genbank_microviridae_YP_009160333.1_@PF05840.12	PF05840.12	genbank	MWAVRCVHEASLYENNCFITLTFSSEYLDSKVSLVKSDFQLFMKRLRKKFGSGIRFYHCGEYGSQGDRPHHHALLFNFDFPDKVLWTVRKKIPLYRSEILEELWPYGFCVIGNVTFESAAYVARYIMKKQTGKDAKEHYNGRLPEYNTMSRRPGIARDWFEKFKTDVYPDDFLVIKNGIKCKPPRYYDKIYGLTNPDGFDIIKQRRDGKRALHASENTPERLSAREQVQLARLQSLKRGYENGS	244	USER	zzzzz64
106	genbank_microviridae_YP_009126954.1_@PF05840.12	PF05840.12	genbank	MLSIIKNQKLKKLIIRYKMRSLRLSISKSLKNLKENSLKARKAELLTRLEYELEYRIKNGWYCIFNTLTVNESSIEKVFEKGSRIFSDYVRSLDRGVGIAIHKNWRQAVTKRKEGNEFHTYFAVVERGTKNGRLHIHVIHMMKELPNGCVDPNAGRAIPNRREVTYLKRYWKYGYSAPIAVRFNTNDAFGKKYWRFPVKEVAKNRFESLECKDAGSIIGYIGKYMTKEYDKPLEKEYVTWRTRLTRTLGTQIMKSLCRVVTKNQLLLLMTMKSTKEMKVLEKPLPLYKLRTIATQEYMRRSLTNQPLKIWESLICLTPRMSLLTHVKSMIQEKWTYRLQNYGITMTQIMSNMEGSNINKILNNLEKQIYGKKEIKYYARGVSMETLC	387	USER	zzzzz65
105	genbank_microviridae_YP_009113038.1_@PF05840.12	PF05840.12	genbank	MFIRSKQYYPVSSGNFISDSTLISSNSRQSDFCTRLCVETHHTYNIGGVVCLLTLTYSNDCLPYAINSATSERFPCFSRLDIRKFLNLLKVRMYRANVSYKYFLCCEFGDKTKRPHYHLLGFLHNKDHIKIFLDTIREIWSYGIVFPAPYGNPYAAAVLRSPRNGAAYASKYVCKDLSFWSLPALKTLC	189	USER	zzzzz66
104	genbank_microviridae_YP_008798246.1_@PF05840.12	PF05840.12	genbank	MPCYHPVEGYRKPNGQWSPKDGDWPEMYPPMTRPCGYCKGCRFKKQQEWTVRCLNEQQILETKGRSSSFITLTYDNKHLPPNNSLDYTHWQKFIRSLKKRNNGKSIRYFGVGEYGENFGRPHFHAILFGHTFNDLIPMHSNISKSQQLLSAWCEPLTQEPRGFVSVGDVTPESISYVCGYVQKKIFGQGQAAHYKYIDKDSGEITTKKPTNGKIYRLLKSFMSRRPGIGSEFYDLHKDDMYNIKENNIHIKGKPVAIPSYYNNKYKIDNPAEWQQLQLKKEEEMREYTAEALIQHEKNFTARMSLYKRGKLQ	312	USER	zzzzz67
103	genbank_microviridae_YP_008242202.1_@4CIJ_C	4CIJ	genbank	MFKEAIKNANVPIQYNGDLLDNKLMFVTDYMILSLKGIPIVQDTNGLKFSPRDYGTAIFKDVLDVTIDGNIFGTISCSPRSPIVPFDTVHFKLENSLFYTKPGFQLLHYCNRLLNTLQIEFKGVNRLDLAVDYTDTSITKNVLTCLTSKSFRMSGRKKEVKFFSVTDTGYIDFQGVQIGKRTSSRFCRIYNKTLEMNTQKMKPYIANAWRSHGMQGEIWRFEYQLNSKFMSEIKGLTLNNLFQKDFLISLLEMARKNHFEIKFNTNKSEINKEKTFDFMPMSIIRELAKIPFLYVEKIKRCISESLIGQKRLIKGLMRGYASTAQNIKYLSPLKQILNDFVLSEWFFQKVGYYFDEFKKQQLSKNLSFTLFTKHFREL	378	USER	zzzzz68
102	genbank_microviridae_YP_009218538.1_@PF05840.12	PF05840.12	genbank	MECLHRIHLPDRGAVPCGRCVNCRKNKRQSWVYRLQAEADEYPFSLFVTLTYDDEHMPTAMIGEDLFKSTVGVVSKRDIQLFMKRLRKKYDQYRLRYFLTSEYGSQGGRPHYHMILFGFPFTGKHGGDLLAECWKNGFVQAHPLTTKEIAYVTKYMYEKSMVPDILKDVKEYQPFMLCSRIPGIGYHFLREQILDFYRLHPRDYVRAFNGMRMAMPRYYADKLYDDDMKEYLKELREAFFINQMQQEWHHYINTSPRLRYIADQLETESKLDYERRAEEKLKLK	284	USER	zzzzz69
101	genbank_microviridae_YP_004732988.1_@PF05840.12	PF05840.12	genbank	MTIQHCLMPKRIFKIGKMIKKDGSEGTEILYRSYDTKYVYCQNGKWINVSRREDPHEVYKLRMKYNLIDGITVPCGRCHYCKLIKSYDRAKQAWCDSRYFKYQYFITITYDDDNLPMQDFCNSDGVIERVPVLNKAEIRHFKEILRDRARKRHYQNIEYMLSGEYGEQNGRPHYHMILLTDDPEIELSLYPAGRTRTGYNLYGSTALDEIWDKKGIIKLSRASTACMAYTARYTMKKAYKGNEKAERMKYLNYQQEFITSTPGIGHRYLKEHLDQILEKPTLQMPQTKGVSLPKYFINKLEKMGYSEWVQNLKEDNIERQIECIKDTENLHNMHYDEFVKHQQFKITKKQYEM	353	USER	zzzzz70
100	genbank_microviridae_YP_512368.1_@PF05840.12	PF05840.12	genbank	MQQASDFYNKPHIDAIKPLVETAGMSVLSQSPNLRIWKQVNSRIKLLEEILAHYTNGIRRDDNGDFWMNPNSQLATTIAYRAHQKGHNPKLIQYPDTFTLDDIIRKKPLPQNAPDELKLSDEIGEDYRLTIISLIEEMQEIYDVLGQLDINNTIDHKPIGNAHWNLLYEKPVYKHWYELVSKRPLKSIRDDYNYAKAKGIKDECSKILEESTMKSRRGFTVQRLMNAMRTAHTEGWYVVFDTLTLADDRLKDFYDNPNALRDYFRDIGRMVLTAEGRSVHDSSSDCYQYFCVPEYGTQHGRLHFHAVHLMRTLPLGSIDPNFGKLVRTNRQINSLQNTWPYGYSMPIAVRYSQDAFSRAGWLWPVDTKGEPLKATSYMAVGFYVAKYVNKKSDIDMASK…	553	USER	zzzzz71
99	genbank_microviridae_YP_512788.1_@PF05840.12	PF05840.12	genbank	MQQHLTASDFYRKPIIDAIKPLVETAGMSVLTQSPNLRIWKQCNTRVKLLEEILNHYTNGIRRDDNGDFFLNPECQLATTIAYRAHKKGHNPRFKQYPESFTLDDIITGKPIPQTAPSELQLTDEIGEDYRLTVLSIIEELDECYNVLGQLDINNTIDHKPIGNAKWDLMYEKPVYKHWYELVSKRPLKSIREDYNYAKAKGTKDECSKILEESTMKSRRGFTVQRLMNAMRTAHTDGWYVVFDTLTLADDRIKDFYANPNALRDYFRDIGRMVLTAEGRSVHDSSSDCYQYFCVPEYGTQHGRLHFHAVHLMRTLPLGSLDPNFGKLVRTNRQINSLQNTWPYGYSMPIAVRYSQDAFSRAGWLWPVDTKGEPLKSTSYMAVGFYVAKYVNKKSDVDI…	556	USER	zzzzz72
98	genbank_microviridae_NP_063900.1_@PF05840.12	PF05840.12	genbank	MVCCNFNLIQAFMACVSPFVCFIDSYNQLWFPKGKKSPKPWDKVRELNSFEQTQPEEYRKRWVVMPCLKCRFCRVRNAKIWSYRCMHEASLYSQNCFLTLTYEDRYLPENGSLVRNHPRLFLMRLRKEIYPHKIRYFGCGEYGSKLQRPHYHLLIYNYDFPDKKLLSKKRGNPLFVSEKLMRLWPFGFSTVGSVTRQSAGYVARYSLKKVNGDISQDHYGQRLPEFLMCSLKPGIGADWYEKYKRDVYPQDYLVVQDKGKSFKTRPPRYYDKLHSRFDPEEMEEIKQKRVEKFMALPELTQDKAEVKQYIFNDRTKRLFRDYEEESY	327	USER	zzzzz73
97	genbank_microviridae_NP_054653.1_@PF05840.12	PF05840.12	genbank	MLIFNVLAFIFGLLYLLNEALMICAYPFVCFIDSDNQLFFPKGVKSSKPWDKVRELNALEQAQPEEYRVRWVLMPCRRCKFCRVQNAKIWSYRCMHEASLYSQNCFLTLTYEDRHLPENGSLVRDHPRLFLMRLREHIYPHKIRYFGCGEYGSKLQRPHYHLLIYNYDFPDKKLLSKKRGNPLFVSEKLMRLWPFGFSTVGSVTRQSAGYVARYSLKKVNGDISQDHYGQRLPEFLMCSLKPGIGADWYEKYKCDVYPQDYLVVQDKGKSFKTRPPRYYDKLHSRFDPEEMDEVKQKRIEKVMALPELTQDKAEVKQYIFNDRTKRLFRDYEEESY	336	USER	zzzzz74
96	genbank_microviridae_ASJ79150.1_@PF05840.12	PF05840.12	genbank	MIRNAQVTPTLTGVLVKGYFGDVKYPTDGKYLPPIERACPKERAAYKIAGKAMTTGKAIKQGCHYQTTWVPFCDAPVKVFMAARGSNSPLYGSERPVEVSLLAPCRKCSKCMRVRRTRWFNRALAECKATHAQGKRTWSVTLTFDPVHLAGVLGEARGLPGHDWQARIERAAYGHVQKYYKRLRKALSCKLRYMGVAEYGEETGRLHFHVLIHEVNKPITKRTIEKLWRSNVHARLVRNPDRQAGYIVKYLTKDASSRMRASRYYGSEKKEKKQSIEHRRPPPGGSLPSIFDRNQTKVSLYERHPEIPVHTRFGLGNAPAGNGGAAVSRPPDIARECPVQGRGDFGVHLDGNAARNSDTLSRLARNPDAKASQSRDKAKKLAKIYASAGPRPYTLKSGA…	451	USER	zzzzz75
95	genbank_microviridae_SPH01781.1_@PF05840.12	PF05840.12	genbank	MCLSPIWIRNRAYSSRTIGLTDRKVLLMNRPWDYFTQRLMVPCGRCEECLRQQRNDWYVRLERETKYQKSLHRNSVFVTITIAPEYYDSALQNPSSFIRLWFERIRRRFGRSIKHAVFQEFGMHPNQGGEPRLHFHGVLWDVSCSYNALREAVKDLGFVWIASITDKRLRYVVKYVGKSVYMDERSAAFAKSLPITVGKLKTNLYDFLQNSRYRRKFVSPGVGDYFGDFEAPGVSSGLWSYTDYKTGVVYRYRIPRYYDKYLSQDALFFRKISTAWTYASAFCGSLALGFLREVAERVLRPSDFSRIVKGGFSRLVKLREFLSKVKYRQRFILVTSDVIDFWVDCFGVNSSNLFFNKIVYG	361	USER	zzzzz76
94	genbank_microviridae_AVQ10279.1_@PF05840.12	PF05840.12	genbank	MACYHPMRAWRTEEGEVSFNRGAIQMRLPCNQCIGCRLRRSGVWAARCVNEAQLHHHNCFLTLTYDDDHLVDKYWTGLLYDQGPNKGEKAYAGNLHYPDIQRFHKRLLRALGRKNTPIVGSADTSAATFRFYLGAEYGPKYGRPHYHTCLFGIEFSDKKYHGKSPAGYKLYRSEQLEKLWRHGYSSIGELNYETAAYTARYVMKKINGQQQKKHYQKIDHNTGEIKTLEPEFNQMSRDQGIGHHWYQQYKTDVYPHDYLVLKNGRKIQPPRYYDNLYKKIHPQQWEQIIADRQERAKQHWQEQKPSRLAVRETIAQAQLKMLKRKI	326	USER	zzzzz77
93	genbank_microviridae_AVQ10285.1_@PF05840.12	PF05840.12	genbank	MGCWCPITGYYSKVIGPSGKRGITFQRSAAHTGVPIRLPCGRCTGCRLETSRQWAIRILHEKKLHDASCFGTLTYDNENLPEGGTLVKRDFQLFMKRLRKGMGDGIRFFACGEYGDLNKRPHYHFLLLNRDFGDKRQVGANRRGDKYYDSVELRSYWPIGHVLLGDVTFDSAAYVARYCMKKINGDGADAHYTVVDANGVVTRRAAEFTVMSRRPGIGTGWYERYGNETYAHDNCIINNRPVRPPRFYDGKRNLLDPDGFAKLKEERRRKALANFKENLVDRRRVKERLLSKHQGKLHREI	301	USER	zzzzz78
92	genbank_microviridae_AVQ10323.1_@PF05840.12	PF05840.12	genbank	MPCAKPGRGRQAPNGTVTYYGHLQVAAGKLPPLPPNYKDFPLPCGKCTMCKLERSRQWAVRLMHEAQLHERNSFVTLTYKDTELPDTPARAAADSARATSALGLPQRIDSHARAETHTHEIQPAAASLSKADLQAFTKRLNEDCRRRFGNGVKYYACGEYGDRTQRPHYHIAIFGEDFSDDRFPWKLSNGKQLWRSSRLERLWPHGDAYIGDLTYESAAYVARYVMKKITGSRAVDHYMRENERGEKYWLTPEFNVMSRRPGIAKKWFDKNKHDVFPHDHVITRGHPAKPPRAYDKWLEQIDPYLHATIKEARENAPHNPEDETNARLEVRETVALAKLNQTKRSLE	347	USER	zzzzz79
91	genbank_microviridae_AVQ10273.1_@PF05840.12	PF05840.12	genbank	MPCYSPLTAYRDAGGGITFNRNASPSAIALKLPCGQCVGCRLERSRQWAVRCVHEAKMHERNCVVTLTYNDAHLPDDGGLVKRHLQLFMKRLRKEFGNGIRFYACGEYGENTKRPHYHCILFNFDFADKRFYKKSKTGDNLYTSDTAERVWAKGFCVVGEVTFESCAYIARYIVDKMTGEKADEWYTTNDGVIVQSEFTNMSRRPGIGRSYYDKYGAEVLRHDSVIIRAMPVRPPRYYDVLSEAVDPKRMAVIKRKRQREALKHLADNSPERRRVKETVAVLNLNMWKRNVS	292	USER	zzzzz80
90	genbank_microviridae_AVQ10235.1_@PF05840.12	PF05840.12	genbank	MPCFSPLKGYKLPTPNPATGKHSIKILGAAKRFTQKGDRYFDYVEIPCGQCIGCKLKKSKEWAIRIMLEASLYDHNSFITLTYDNNHLPPNGSINKQDPVDFMKRLREFYGSGIRSYGCAEYGENFGRPHYHICLFNHHFPDAKQWTTRRGFPVYRSEKLEQLWPLGISEIGTLTFQSAAYVARYIMKKFTGPESESHYEVPDMETGELTPIEPERPICISRGGDPLKGGGGIGRPWLEKFKTDVFPKDFITINGQKMHPPKYFDYRLEIDNPEEYAIIKAQRRRNLDEALAREPDQRLDVKEFCMKQKLNLLKRNLENEPERHSQPKTRTK	332	USER	zzzzz81
89	genbank_microviridae_AVQ10210.1_@PF05840.12	PF05840.12	genbank	MACDHPLAGYTAREFGPNGKRGITFNPLLSLTGKSFPIPCGRCMQCRIKYCRDWSVRCMHEKLLHADNVFLTLTYNDDKLPHGGTLVRNDPVLFLKRLRTAISPIRYRFYGCGEYGTKSWRPHYHMILFGIDFNDKKFYKMTNRGHKLYTSEFISTLWPNGFNVLGDVDYDSCAYVAGYVTSKINGDKAEAHYERILPSGEIVNLLPEFSMMSRGSGKDDPDPTYRGGIGSGWFLKYGTHAYAHDSVIFKGKEVSPPRYYDTRYEVLDEARLRKLKVKRRAKARLRAADNTSSRRHVKEELLRLNLKAKSKEF	313	USER	zzzzz82
88	genbank_microviridae_AVQ10267.1_@PF05840.12	PF05840.12	genbank	MAHSPMELPCGRCLGCRLEYSRRWAVRLMHENKMHAESCFVTWTYNNDCLPTAGTLVPRDLQGVHKRLHNRLLDKRGYGIRYYGCGEYGDLNKRPHYHSLIFGFRPTDGVLFGKNGRDESIFDSAYLTDVWGDKGAVRFGEVSFDSAAYVARYCTKKVSGKKREDGHYLVYDSDGLVHERVPEFAHMSRRPGIGATYYAKYGAEIRAHDTVIVNAKEVPSTRYYDNLGAGVDPARMKALKFKRRAAVDPAEQLVDRRATKRILRQKMHSLKERKI	275	USER	zzzzz83
87	genbank_microviridae_AVQ10216.1_@PF05840.12	PF05840.12	genbank	MGCAQPLIAYRSKEIGPSGKRGITFNRNASFSGISFEVPCGQCIGCRLEHSRQWAMRCMHEKQMHANNVFVTLTYDDKNLPFGGTLVRKDPQLFLKRLRFEYGKGIRFYGCGEYGELSRRPHYHFILFNYAAADKKFYKRTKSGENLFTSPSLERLWPFGFNVVGDVSFKSCAYVARYVTGKIKGDNAEEHYSTVTTDGEIVNLLPEFSMMSRRPGIGSDWFKKFGAHVYEWDSVIMNGKEVRPPRFYDTRFEVVDSDRLAVVKSKRRRAAVLNKADNTTARRIVKEQVSRLNLLKREF	299	USER	zzzzz84
86	genbank_microviridae_AVQ10263.1_@PF05840.12	PF05840.12	genbank	MGCDEPLTAYFGNEVNPATGKRPMVFDIRRAHSPVPVKLPCQRCIGCRLEHSRQWAMRCMHEKRMHDESCFLTVTYNDANLPTGGTLVRSDPQLFLKRLRTALAPKRFRFYGCGEYGGQTLRPHYHILIFGHDFTDKKFYKMTDRGERLYTSAFVEKQWGKGFNVIGDVTFKSCAYVSRYVTDKITGDDAERHYTKITADGEVVPILPEFSMMSRNGGIGASWFDKFGKHAYQFDSVVMNEREVRPPRFYDTRYAALDSMHMAELKLVRRRKAMANRADNTSARRHVKEEVLRLNLVGKKGV	302	USER	zzzzz85
85	genbank_microviridae_AVQ10256.1_@PF05840.12	PF05840.12	genbank	MGCDEPLTAYYSREVGLSGKRGITFKKDASLSGVPIPVPCGRCMGCRLEHSRQWAIRCMHERQLHDDATFLTLTYDDKHLPEGKTLVRSHPQAFLKRLRTAVSPVKFRLYGCGEYGELNLRPHYHIILFGIDFPDKKFYKNAKDGTPLYYSDFVDKYWGMGFNVLGSVTFESCAYVARYVTKKVKGPTAEAYYNGRLPEFSMFSLKPGIGAGWFDKYGPHAYEWDSVIMNGREVRPPRFYDTRYEVIDSDRLEALKSERRRKLNRADNTRKRRHVKEDLLRLNLQKREL	289	USER	zzzzz86
84	genbank_microviridae_AVQ10243.1_@PF05840.12	PF05840.12	genbank	MTCFHPIPAYRSSEINPATGKRGLVFNSKHPLRLAEGKSMSVPCGKCIGCRLDRSRDWAVRCMHEAQSHSENCFLTLTYDPKKLPEDYSVSKVVHQHFVKRLRESAGRPLRFFACGEYGSEDGALPLQPHYHYLIFGYRPTDLKLHTKTNNIPLYTSQKISKLWPFGFSTVGNVNYQTAAYCARYVVKKIGGDMAAEHYTRIHPITGKICQVEPEFALQSRKPGIGYSWYQTFKNDIYPSDFCVVDTKRHPVPKFYIKLFEEEERQRVKRRRKAIANKHREDATPSRLRVREAVQLDRAKQLKRSL	306	USER	zzzzz87
83	genbank_microviridae_AVQ10247.1_@PF05840.12	PF05840.12	genbank	MGCDEPLIGFHSKEFGPSGKRRITFDRNSAFSGIPIPLPCQRCMGCRMKYTRDWAIRCMHEKQMHEVSTFLTLTYDNEHLPECGTLVRKHPAAFLKRLRDAVSPRRFRFYGCGEYGEKTFRPHYHLLLFGMEFNDKKYYKMADGGQKLYTSKFVEKYWTCGYNVLGDVDFDSCAYVAGYITKKITGDKAADHYMRVTSDGELMQLLPEFSMMSRMPGVGSTWFEKYGAHAYQFDSVIMKGREVSPPRFYDSRYEVVDSDHFALLKSLRRRKSVLRKADNTSARRHVKEDLLRLNLKANQREF	302	USER	zzzzz88
82	genbank_microviridae_AVQ10207.1_@PF05840.12	PF05840.12	genbank	MPCYSPLTAYYSREIGKSGKRGITFSRSASFSGQPLKLPCGQCVGCRLERSRQWAMRCMHEKRFHEFSWFVTLTYDDDHLPKDGSLVKSDFQKFCKRLRFHRHPFRFYMCGEYGEKNRRPHYHMILYGMDFPDKRFYKKAGESTLYTSVELSEIWQNGFVVIGDVTFESCAYVARYVVDKMTGPKAESWYSWVDDDGVVHSVLPEYNDMSRRPGIGQKYFEKYGAEVYAHDRVVINGREVRPPRFYDVKLDAIDPKRMEVLKRKRRRMALLHREDNTPERRRVRERVVELNLAERLKRDKT	301	USER	zzzzz89
81	genbank_microviridae_AVQ10185.1_@PF05840.12	PF05840.12	genbank	MPCYSPLPACREEGGGPLRFGVRKENADLMLPCGQCIGCRLDRSVSWAVRVMAEAQGHFMSSFITLTYDDAHLPYGGSLHYRHFQLFMKRLRFKIGPRRFFMCGEYGGELGRPHYHAALFGVEFGDRYPWRKSPAGFQLYRSALLDSLWDLGNAEIGDLSFDSAAYIARYCTKKITGNMAEHHYAKLVPDTGEIIQLEPEFARMSLKPGIGAEWFDKYKSDCIPRDAVILEGRSVPIPRYFLDRLSEDERSEYALRQFAKHGNVWPEIDGESSPERLRVREAVARAGLLSNTTNRSLE	298	USER	zzzzz90
80	genbank_microviridae_AVQ10173.1_@PF05840.12	PF05840.12	genbank	MASGFDGMPCYSPLRAFQVGSGKPVFSPPALLARAIFLPCGRCVGCLLERSRQWAVRCMHEARLYDRNCFITLTFRDCSIDSLNLDYVFFQKFMKRLRFHYSPNLIRFFMCGEYGDINSRAHYHACLFNHDFDDKVVFRGELFRSPTLERLWPFGFSTIGALTFESAAYVARYVMKKEHGTPVRQILDVTTGELIEREHEFCAMSLKPGIGRGFIEKFVSDVYPEDHVVINGKDSKPPRYYDTYFESIRPEEFGRIKERRRKAADRQFDDNSPRRLRVKAAVAGARLGLKKRGKSF	296	USER	zzzzz91
79	genbank_microviridae_AVQ10198.1_@PF05840.12	PF05840.12	genbank	MVHEAQLHQVNSYITLTYADTGPSLNYEDFQKFMKRLRRKLNCFDVTTGQWVPRFFCAGEYGDKNRRPHFHAILFGVLFPRSSSLGKSPAGFPLWRSELLESFWPYGYSSIGDVSFESAAYVARYVMKKVNGKEQEAHYRVVDRETGEVEDLVPEFCHMSLKPGIGARWLEQHHRDIYGVDGYVRVRGGKKSLPPKYYDKWFKRIDPLALEGFLEQRALDGEARLLSGEESYARLRVREQVSIARSQLSLRRIEK	255	USER	zzzzz92
78	genbank_microviridae_AVQ10180.1_@PF05840.12	PF05840.12	genbank	MACSSPIPAFQLEDGAVVMVERGRVQRSLFLPCGRCAMCRLERARQWAVRCVHESKLYDHNAFVTLTYDDRHLPIDRGLRYRDFQLFMKRLRKRFFFAPIRFYMCGEYGEDRDERGRVTGRLGRPHYHALLFNCHFPDQLYFKRSGDITLYTSRILSELWPEGNHLIGSVTFQSAGYCARYCMEKINGPDAKRHYEIVDSVTGEVYDRAPEFSRMSLKPGIGAGWLKRFQSDVYPRGEVLINGHHAKAPRYYDILFERNGGDTGEMSYLRYKRSSEQAFDNTDERLLVKEQVAVARLDRLIRSL	304	USER	zzzzz93
77	genbank_microviridae_AVA31643.1_@PF05840.12	PF05840.12	genbank	MRNGNWTDIYTDFISAAAERVCQNWVEIPCGKCLGCRLEYSRQWANRCLLENEYHESSYFVTLTYDQEHVPETWYPDPSTGEALRALTLRKRDFQLFMKRLRKHTGQEIRYFAAGEYGTKTFRPHYHAIIFGLKLDDLTIVKKSPLGYPYYTSQTILRAWSVQQQGGSYAPLGQIIVAPVTWETCAYTARYTAKKNGTQGSEYFASMNLEPPFVLMSRRPGIGNQWYVEHADLFDHAFINISTETGGKKFRPPKYFYNLLEKDNPKFAECLKDIRKANMDKYHKDKLLNTDLDYLDLLEVEERALQNRTKSLERRL	316	USER	zzzzz94
76	genbank_microviridae_ATW62975.1_@PF05840.12	PF05840.12	genbank	MARDDARDYLWRQQLGDGHNCSRPVELPSIGLPSMLEPDRTPLPVTIMARCRKCPECLAHRRRLWTARAVDEVQASSRTWFGTLTVAPAHRVRLAYRAEAKVLRAGGESLSSLDRSERYRILANELGQEVTKWLKRVRKQSGASLRYLLVAEAHKSGDPHMHILVHEDGDPVTKRMLQDQWRIGFSQWKLVDQDPGAAVYVCKYLAKDALTRVRASRRYGQPQLVRSLTERIHKMRDAVHEASSRREPD	249	USER	zzzzz95
75	genbank_microviridae_ARQ16003.1_@PF05840.12	PF05840.12	genbank	MINMVCYNPILMCPVEGAITKNGKQHYSFYGSLASHPELAGDSRFIRCSCKQCIGCRLENSRQWAVRAVHEARSSSSAYFVTCTFDDYHLPRDKSLSKKFHQTFMKNLRREYGSGIRFLGCGEYGELHGRPHYHYILFNIDFDDKVFRFRTDGYNTYTSSRFAKVWKYGMHLIGEFSFDSAAYVARYIVKKQTGKDAPSHYKGRIPEFMVASNRPGIGAKWLEDHGEECYANDYVVINGKKMRPPRYYDKKFDETHPHWMEFIRNNRIEKMLHNLENNTFERLVDRCRVQEGKYKHFLGRKLDKVL	306	USER	zzzzz96
74	genbank_microviridae_ARQ15992.1_@PF05840.12	PF05840.12	genbank	MPCTNPNVFVMNEKKPRMWGSLRNLKKQNLEATIMDGVKKGNLALLPCGQCEYCRKQMADQWATRIELEAKDWEDVIFVTMTYDEEHIPYGEILKGYQSIQSQTVSKRDVQLFLKRLRKAYKKPIKYFIAGEYGDRTKRPHYHGIFFGLKPEDGQWYKNQKGNSYFKSEWLTNLWGKGFVDFSPAAPGSYAYVAQYVNKKAIGAEQSAKYWMQGREPEFRIMSKGIGEKYLKEHMSEILETDNITCAGGRQKRPPRYFDKLLDKDTNQDTESYFKAHSEELREVRAKRRRNAILSLVNLEQNTTVPYSTYLEIQKEKDKQKQKWREPIKEKTGI	334	USER	zzzzz97
73	genbank_microviridae_ARQ16054.1_@PF05840.12	PF05840.12	genbank	MCTSPISIKNNSVYKVGFNQPTRYDVPCGHCLECRSLAMAEWQSRLSYEIKDLYDRKGVAVFLTFTYNEENLPKIDLGDIVQACFDRKAVLRFLNQLKVRAYRAFGKHSYKYFFTSEYGSHTKRPHYHALFFLESYVDIVQFCEMCRDLWSYGFMFPKYDKKRACYVDNFGKVSQVTIRSLAGGAKYVSKYITKDMSFYDLPHVARHLSCNKDCDKNFLPKHWQSNGLGYSLVRELQANSLDSVYINNALHDGLFNPLFGKNMPLPRYVLNKLMYDNVYTGRMSVDGRKMYDRQLSAFGRAYMRDKISVKLSKTTGDFYSFLSNLSEYDKLIKEFGYEKLYKLSSKYTNQVSDCKPLATYMLVWKYIPHTELVYHCNHFYGDLDFIGNFDLAASQYVIQ…	477	USER	zzzzz98
72	genbank_microviridae_ARQ16030.1_@PF05840.12	PF05840.12	genbank	MSCTRPLVRIPTKDGDYRVVSLKGYLSHSDKNLEMIANKKRQDLNEKKIKELIRDQEAQLLPCGQCPGCKMAAASSWANRMELELPYHQNAWFITFTYDDENIPYRMTWDEGTGEVLVENYSLRYEDMQKFWKRLRRYMEYHKINNGKLMYFQCGEYGGKTHRPHYHAIVYDIPFTKEELKVYKKKNGAVYYNVDWFTELWGMGHVVIAAAEWKAMAYTARYTTKKVYGKEGKEFYKELGILPEKCSMSKRPAIGAKYFEEHSEEIYAKDKIQLKNGKVCKPPRYFDKLYDAQCLRKPLTDKEVEDIELTIEKAESDELKAIKRKRRKLANDALFAKLKQNNGLTMQEYYNKEEQKIQDRFRKLIREEI	369	USER	zzzzz99
71	genbank_circoviridae_YP_009126886.1_@PF01446.16	PF01446.16	genbank	MLQESIVRTPRFPPNVCWGVSGKWEDQCMKVEATPDGCLNARQFLNDRSLCPRWRLCPGCEKVRAKRNQYKIAKRLEFDLEWAKEADIPLKVGVLTTTLPGKESWIRNASLGEQYSYLTERRTMSGYTGWHSMRGLNTKLKEWGISGGSHYLEFTNKGTTWNTHMHSILVGFQDDWQVPLKETTKQLEWNDDLTMRLQTEKAENKTRSNKRILEPLGLGRLYTLDIASDDELASIARYSAKVEYVTKPVKVPEGKLVDVTNFLAGGFEHGKERSGHGRHLPRLARPFGDWMKNGPERRYA	300	USER	zzzzzz0
70	genbank_inoviridae_WP_001112192.1_@4CIJ_C	4CIJ	genbank	MPCKHPHHDTVRPVKVDHLAFTFAYADLRHLDKSNDQDFINLQMPVYHEPKTKTKEQGAVCSTLEQIERHMEAHKNKVSKMLFHRFDLFMSKIMGFRLSPMRGRGLHGYNDSMVILDMTGQVECGLVGIGGNNDTVFVQINGTGCTKLFDRIDSKKLHWWLAQVLGITRLVRLDLAVDDYTGNFDAKYAEKCFYEGAFRTAPRGQGPSMVPHKRITENGALMEEATIVGSRSSAIYWRIYNKKLEQKITDPDLIWYRNEVELKKCDIELLANPAASFAGICPFAASIECTPPVKFSRNKKAQGLEFMARIAWVRRQCGVALAEVIAMTQGDLGEAFGMLIPHKHRRPDFELLGVPDSYTQLKNTLWS	367	USER	zzzzzz1
69	genbank_inoviridae_WP_010892522.1_@4CIJ_C	4CIJ	genbank	MSWCPSPTRPLNNVSTWGCLMTTATNILKSFDEQSVHIDYLCFTFAVKDLRHCHDAVRRLHKHEEYKGFAKSGLLQRHCRAPKFPAPPVFNPTVAQTSDEIDAYNKAFDICYRNYLEDCLRIFTNQVLGLSLSAPRGLGFQFYTESMKLTSPDGEDFCGFVGIGGNNDTVHFQINGTGCKHVFARRPTWSLHDWLTNVLGVQTLARVDLAYDDYDGIFDCEYAYKAWRDDCFRTAERGRGPVLHEDMTIASIGKDGKPIYTKEQYSIGSRTSRIYWRIYNKALEQKLANTGLVWYRSEVELKKWNVDVLLNPAGAYAALNDFAASISTAKKFNTKPVPTKRAALDLLASAHWMRRQYGKILNSLIEFHEGDIETVVGSLVRDGTKFTFPDTYGKLVTHI…	402	USER	zzzzzz2
68	genbank_inoviridae_WP_003140497.1_@4CWC_C	4CWC_C	genbank	MKKVKPIHQNRLLLQPDGQLLDSPKGRLFVDSITGAFTDLSGVRILRCGVDTVRQLYNGKLRPEVMALFDLSVDVVEFAGYEWSKGRIGRDSGYQYRLQNAEMGLILLIKNHNIKVDTIGSHLKIEVSPHALDGADPRILQGVLDDLAAAVLSHCETNQAAVHIALDVQGWKPPRDLVDRMHCRSRRVRQISGIERIEFDGNASVYGRGETYMFGSANGLQLSIYNKTLQARATDKLDYWESVWATLNGDPFGDGDPAYNPLETVWRIEFRFHHSVVQQFSEGSRMASGEVMGCRTYEGLCPHLQGLWGYACESFKLLSRSAVYDPFWSLISQDARVQVECDPLIERAEYRRYYKTAKGFSGRNCEMFLGQFVSLIARERIPAKKAIESARKLEFWHVI…	432	USER	zzzzzz3
67	genbank_inoviridae_P69546.1_@PF05144.13	PF05144.13	genbank	MIDMLVLRLPFIDSLVCSRLSGNDLIAFVDLSKIATLSGMNLSARTVEYHIDGDLTVSGLSHPFESLPTHYSGIAFKIYEGSKNFYPCVEIKASPAKVLQGHNVFGTTDLALCSEALLLNFANSLPCLYDLLDVNATTISRIDATFSARAPNENIAKQVIDHLRNVSNGQTKSTRSQNWESTVTWNETSRHRTLVAYLKHVELQHQIQQLSSKPSAKMTSYQKEQLKVLSNPDLLEFASGLVRFEARIETRYLKSFGLPLNLFDAIRFASDYNSQGKDLIFDLWSFSFSELFKAFEGDSMNIYDDSAVLDAIQSKHFTITPSGKTSFAKASRYFGFYRRLVNEGYDSVALTMPRNSFWRYVSALVECGIPKSQLMNLSTCNNVVPLVRFINVDFSSQRP…	410	USER	zzzzzz4
66	genbank_inoviridae_WP_000743997.1_@PF02486.18	PF02486.18	genbank	MKKQIFTLDELQLDTNASPFVFVDYLAWSVPYASFRHAHKSDLSSLIWAPLPKPDYRMARTPEQKEKLIELYKQKWNVAMMERLEVFCLHVLGLRMSPWRDKGLYGYENSCHLMSKYSNKHVGFVALGGNRNTCYFQIEGVGCRTVLEHTSLFRLHWWLDLLGCSRLSRIDLAVDDFHGLFGREYAKKAYSDDAFRTARAGRAPNGGERLVSEPNGKIINESFEVGSRESRIYWRIYNKAAQLGLDMHWFRNEVELKDMPIDVLLNIEGYFAGLCAYSASIINSLPVKVVTKKRQVALDIHSRIKWARRQVGKTLFDISKHFGGDLERVFGALISKEIHDDSLNLPDSYMKLIDEIMGD	359	USER	zzzzzz5
65	genbank_inoviridae_YP_009664526.1_@PF02486.18	PF02486.18	genbank	MAVDRARFRMAVEGGAGGFSPLSPGEKGQRAAAEIGPGSNTGQKGQQDAIIDYLTIVVPLSALEEVNCKKLDLLLFRIFGFRGEVVAGAIREKNWNFYEQSAVLIDRENEVVGRVGIGGKKSTVCLSLTGMGCKWIRDWARVYKQCSMLDAKITRVDCAHDDYEGERLDVHALREVAAQGGFTEGGCPPRHRFISDEGHNTGCTLYVGGKGHKELCVYEKGKAEGLPSSRWVRAEVRLYGKHMEIPLDVLLNPGAYLRGSYSALQDLIKGVCTRLRTIRKHVEVSAEAMVLWMERQVGPALSVLRGAFGDSWSDFCEARIVRDGHPGRFRGIAKGDALHRFVREELCPSAA	351	USER	zzzzzz6
64	genbank_inoviridae_NP_040657.1_@PF05840.12	PF05840.12	genbank	MRCLKSFRHGFTLGTNCYEPGAKRPRGDRSTVGGWSHGSTSRNIAFLRSIDEAKLTGHALALTLTVRDCPDTSDDWYKVRRAFEMRLRRLGLIRMHWVIEWQRRGVPHLHCAAFFDDTAPALLPAVIMRSWCDLVSDYNASPLSQYVLPITDAIGWFQYVSKHAARGVNHYQRSPENIPPQWQKKTGRMWGKVGEWPVVEKAEIFMGDATFYQLRRIVKRWRFADARASGSIHRIRSAKKYLQVPETLSRVLGASEWMPENELLSILYFLKSQGYEFL	278	USER	zzzzzz7
63	genbank_inoviridae_WP_015979089.1_@4CWC_C	4CWC_C	genbank	MKTPIHPTRLVLEENGDFHKSPKGMLFMDPLNGQFTDLSGVRILRCGVDTVRQLYNGKLRPEVMALFDLSVDVVEFAGYEWSKGRIGRDSGYQYRLQNAEMGLILLIKNHNIKVDTIGSHLKIEVSPHAIDGADPRILQGVLDDLAAAVLSHCETNQAAVHIALDVQGWTPPADLVDRMHCRSRRVRQISGIERIEFDGNASVYGRGETYMFGSANGLQLSIYNKTLQARATDKLDYWESVWATLNGDPFGDGDPAYNPLETVWRIEFRYHHSIVQQFSEGSRMASGEVIGCRTYEGLCPHLQGLWNYACEAFRVLSREGMYDAFWSLISLDARVQVECDPLIERTEYRRYYKTAKGFSGRNCEMFLGQFVSLIARERVPAKKAIESARKLEFWHVIED…	430	USER	zzzzzz8
62	genbank_inoviridae_NP_047361.1_@PF05155.14	PF05155.14	genbank	MVVSISIRGSLLKVSGNPSRWGRLDNLFGLPTLDSCVSVFNTILAEIGLPQFTKCKRLMPGQAKENEKAPLVADGAIIKEVHITSNRAAGKGNEDDYISGLSTQPYRNSVPRLHSNGKSVDWLSKKGNVNLIYPTVYNKAHEMELHSLTKIKNRFSEQSREYNYLLDIISFCKENGVVRFEQKLKSRFLQKNALNYWGLSDYSILNKLHSDFLELDKKLSVNAMDFETISDHLVSSGVVETTRAANTTAMYAIQWFHGHVFDFNKKQVQTHRARLRKIGIDIAQKCNVSKFSPVIVKQTREIKVQECVAPSWYVRPSHLRVA	322	USER	zzzzzz9
249716	my_seqs_abalone_6_2ct26.3@PF01446.16	PF01446.16	my_seqs	MIGFEGFRLDHLPVQSMSWNIPRSPYQPGMSFLFRIQKTGVVILEPMINKTRWKYVCKNCPFVPDKVPAFCGSYVRPLTTWRMRWIPDAPDYVQTMRISKRTGELGKRPMNLPDRCLNCKAQYRRATRMGKRMDRIHAVAKTYKDGRKIPKLLTFALPSQWFCWDGSITSREDEIRSLSMLLPKARKTLLDHGVEGGSYVLECTYKWTPDLDNFTHPKYKFHAHVHMVAIAPYIHYSKLSEWCQQLMPIGLGRINYQAVKNRRKTAVYVSKYLVKDKVQCRTFGIMRSIQPKP	293	USER	zzzz265	circular_genetic_element
249717	my_seqs_abalone_6_2ct27.6@PF01446.16	PF01446.16	my_seqs	MINKRGNHWKYTCPKCPFVPDKVPIIYDEFEDGHWTVEWRPDEPDYVRTMRISKRTGELGKRPLNLPDRCLECKARYRRASRMGKRMDRIHEVAESYEDGRKIPKLLTFALPSKWFSWDGCLTSREDEIRSLGKLLPKARATLLKNGVEGGSYVLECTYKWIPDLDNFTHPQYKFHAHVHMVVVAPYIHRTKLSEWCAQLMPIGLGRINYEAVRNRRRTAVYVSKYLVKDKVQCRTFGIMRNNHAMR	247	USER	zzzz266	circular_genetic_element
249718	my_seqs_abalone_6_2ct31.4@PF01446.16	PF01446.16	my_seqs	MIFSSGSVNRNNDKVGLAICKGAWLGRPDEAWKHKCARWLACPSCERKRAGKRAHEIKERLKVAKHYFGNDIQVGVLTVTLPGQKHESGIRFKSLKEQYDYAVSRTTLPGLTGWHSMRGMNRLLCGKHMKQGHTDYGLGADGGTHFLEFTYNNNKSWWNVHMHSLFFGPEKLDRLKETSLHVEVDGELLLQKENKGRSCSALAKLGYGTRYTLDYCEAHELDKLIQYSSKVAYVTKPFKAPKHMMPEVEEFMYTNPRLSRPFGRNQYKIDLLPDAYGEETLLEKR	285	USER	zzzz267	cress virus
249719	my_seqs_abalone_6_2ct33.2@PF01446.16	PF01446.16	my_seqs	MQLHEIGHVQLRHDWSNMKGDSFRRMQSSSHPFAKLTQSGLPAYETTPCRSRGCWACQYKARRKLRNKVQRFVDDVVLKAKRSWRFVTLTLPGEWYEVRSNTVAEQLHTVRRAFASWRLKMQRRGRRLHGFYTIEFEGSEKENWHTHVHMLMKWKHADYNELKKLWTESVDRKMRKQLENWTEGTMTNDQRVVQVDKITSQGIADYCTKVTNYVTKGPKSVLNKAEIGKLLYRKRTTGWLGEYHGNKKETGSGS	254	USER	zzzz268	cress virus
249720	my_seqs_abalone_6_2ct39.3@PF01446.16	PF01446.16	my_seqs	MGNHCRTLTRGVRVLTPLTSKEHEPDRPWGWTCPSCPHLPERGGEVDYASYPIGRNMWKSVALHVPHRCRDCDRTKKRQTRMRNRVRKAFRIGRKHGSYYSRPKLITFALPSTTSRDYEDRYAQLRLLNSRLPRARSILKDQGVLGGIYVLECTSRLLPFGEGNLLEWKHHAHVHMVGIAPYMRRDRFVKFSGCLVQLGLGRLNVEALANKTHNADQARMAVAVYISKYLNKDGGRCRSFGEMRETKT	248	USER	zzzz269	circular_genetic_element
249721	my_seqs_abalone_6_2ct42.4@PF01446.16	PF01446.16	my_seqs	MNMKWKIADPIEYASIGCLGSSRYRDDTSMCSRHTMCPKCESRRAANRAWRLGRKLNSELELMEDEGSDLQVGILTTTLPGLKHWSGIRRANLRKQYDYLTERTNFSGRSGSHSMRGLNTLLRDMGVHAGCHNLEFTWNDKKNWWNVHNHSIILADKLSWSNEISETKDRIWEPGDLLDRTEVTGGNSPLLENLGLGRRYSLDWAERSEFEQTIRYTAKVAYMTKPIKAPKNKRFELSKFFNGFGGSYPRLSRPYGMWMRSEPLP	265	USER	zzzz270	cress virus
249722	my_seqs_abalone_6_2ct55.1@PF03432.13	PF03432.13	my_seqs	MAYPWDDAVRTAHICQHTTIDLGSGKIPVNAKAYKLSCCNRCVCEGMYNEFFVEKPTNEEVQKFCQDLYIKGERAKQYAEDRRKALFNSLQESAQIITINFDKGTSPEIIQDVLQEIANVNYNWLASDAIACIEFFSSQSPDKPENPHVHIATKRQNDKNGKPIKATNIAQQIRRKYKNLQCVYGVNGQERTWNIAKSYVDGSCASKSDGNPPGDKWVYTEQDIKHRLMHDIPHPISMKSIDEILTTL	248	USER	zzzz271	cress virus
249723	my_seqs_abalone_6_2ct56.2@PF01446.16	PF01446.16	my_seqs	MQMKLDASPENCTSVRKYLNDRSLCPRWRLCPGCEKVRAKRNQWKIARSLQYDIDLAQEQEAPIKIGVLTSTLPGKSSKIRSASLSEQYDYLTKRTTMSGYTGWHSMRGLNTRLKEWGISGGSHFIEFTNKSGNQWNTHMHSVLVGFEEDWNVPLKESTAVREWNDDLTMKLQIEKLENKTRSNKRVLEPLGLGRLYTLDIATPDELASIARYSAKVEYVTKPVKVPNNKLPEVSDFLSGKMNRSDVTFTEDLVSITSSKFSRSIPRLARPFGDWMKNGPERQYANFL	288	USER	zzzz272	cress virus
249724	my_seqs_apo2_7_2ct26.1@PF05840.12	PF05840.12	my_seqs	MLQQFDYISTQVLQLRPNCLIHYQKITNHGSRLMSSTAFQQNIDNLKEVVKYTGTMTIGAQKRLTKAINIMVQSSPTQKIYNPVSKKKQNFKLSFITLTIPELTDITLNDCNKKMLEPFLRWMRQVHNTTLYIWKAERQKRGVIHYHITSNKFIHYQELRNKWNWLLSKHGLNESYVKEHQHNNANSTDVHSVKNIKNLAPYLIKYFTKSEQNPTNEKGKIWDCSMILKKAKYYEITATEDIMYNLSIAESQKKITVIQKDRCNFIRLGKTQIDFLMPNEVITHYRNYTYKISIGQLPEQQQLHQTITNQTIYHNEKGQQQQSSIRCISKRCTNESHQSKQKLYQSQLCLQFSTNGVYYSG	361	USER	zzzz276	circular_genetic_element
249725	my_seqs_16minnow_6_2ct1002.1@PF05840.12	PF05840.12	my_seqs	MNIIDSVTRNSSDASRVSNPLNSYGLSAFGSAPEGGSSFPCLNSHISIENVADWSKSALPVLSTNHRKSAFILSESVRQVAGKFGLSQLGFLTLTFADHVLCPKEAQRRLNSLISNVINDRYLTYLGCFERQKSGRIHYHLLVVLPVDIRTGFDFQAAADRDYRTANKALRAEWAFWRATARRYGFGRTELLPVRTNTAAIAKYVGKYISKHCAVRGDSDKGVRLVRYGRGARAGTCHFQFLSSGSFEWRRKVATFAGVVQAKHPETLVCSMRDLTRVLGPRWAYRNRDYILSL	294	USER	zzzz289	circular_genetic_element
249726	my_seqs_16minnow_6_2ct1051.3@PF05840.12	PF05840.12	my_seqs	MAPFDGTSYAAAAAAAAAAGPGNWVHGETGEVFTGDRAEAISRARVARSRLIRPSRMSELLAKARKSKGFRIVAVPQLDVRAGVEAEWNCAGGCEHPVPVRLECADHPAVSVLRIAAPCRKCAWCIWSRSKDWENRALAEIAHSERSRLVTFTVTDSTLRTWRREFGSKDEWVALSSADRRGVYVKAFQAELRAFLARLRRFSDAVTDIAYMRAIQFGEQKGRIHAHYLLHESAGRLTEEFIKNEWSRYPVGVRVRRKTVNGLRVHFDFEESKRRGVRRLGRVDFRKKFDLADYPDLKVGDELPAVAKFAAAYVPRYIGRDANGLRLASSRGYGAPAERRERKIRERVLVALHPEQVELRRAERRAKKEAARLREIEKLGLRYFTGAAAPAVREKHLRE…	497	USER	zzzz293	cress virus
249727	my_seqs_16minnow_6_2ct1181.3@PF02486.18	PF02486.18	my_seqs	MHSAAKLEFLSSGIDWITVTSTDRKNNISMATKAAQLVRYEIQNGNIRKPWGMSGFTGWKAGSIQFGKRDDELIVRLGSNLAHDNWRFFYALANNCSRIDLECTTRTDADAHRRVRRHWKEATRYQQQRARQAFVGHYSGNDKSETLYLGRRVSDIFGRIYDKGRESKLDHYQNAVRYEIELKGARARDTAAQLYAEPSEIPAVCSRVAGFLKKRGVVLPRCWASEYHLGRPRPACDRDRMLAWMQKAIRPSAIALASSGSLDLLLDALGLSGLVQPVPQPCAHTSKGRKEYVC	294	USER	zzzz294	circular_genetic_element
249728	my_seqs_16minnow_6_2ct1453.1@3DKX_A	3DKX_A	my_seqs	MVDQPLPILDSEESDSDNSENELHYYMLRITPCDKFDFDTLQKFLSEEYMIYKYVVAREEKPQEHYHIVFAVDHSVSEETLRDVVKWFLLKFWNNPKTGKFTRGFGNKQYNLQRVDDLDQSLRYILKCHDYRFENWDVDRLRALESESFEKKKPSDFQHEYREMCDKFHEDDNLDIRWFMTEYCKLKAKYGQMVIMSQVHGYALSNYIKRDPDQACSFVNNFLSSH	226	USER	zzzz295	cress virus
249729	my_seqs_18minnow1_2ct1055.5@4CIJ_C	4CIJ	my_seqs	MAIERFVDYMQFSSHKVNAMACIELEYTPINPVRNYAIGYRTPLGIRVYFSTNPKNTPLIIASGEALQNLRDYGHSDVKILNWALEIEGKFSRIDLAVTESKTEHDPSIFTMSDVKRWVSEGLIDSPLVTGGARGIVEYAPKSAVSDSKDTIQTIYVGDMSKRGEKGIFRAYDKGIELGIEAENVISRIELEIKRDRAKVTGRLLANDYNIGGNFRARFNVNDPVFDRLMDSEVVEIKRGNGVKNKEENEALDKRWKWLIDTVAPSLKQAIESDKKLGRSDNLQRFLRGAGLSKEMGKLVEAMAIKRVSELKNEVLDRELFDISK	325	USER	zzzz624	myovirus
249730	my_seqs_18minnow1_2ct1216.3@PF05840.12	PF05840.12	my_seqs	MPVSEQEKQYLRARYNSVTVLVKQGELVELSYVNSKPAPRRPGKRKAITGFSPSSRLRVLKRMATIHWPSVGKSLFCTATYPDDDAIRTYQERSIDRHRLFRDMEKHLGKEISLAWRIEWVPRKSGKHVGLLLPHVHLIVFNCRWLDCQVFNALWRGVLHADGYVRTEVQRIENERDVAKYVGKYIGKPEEDRSLVIASKLNTVGRAWGFHRPSGIPWCQRTSEWALTQEEIDLLENAACSKIPYFPRGTRSGFSLFGPIVKKVMEEIRLRRIDRLKAGR	280	USER	zzzz682	circular_genetic_element
249731	my_seqs_18minnow1_2ct1238.4@PF11726.7	PF11726.7	my_seqs	MPAPGPGSARGTPASPPPDGGGQGLPCVPPWAANAARVRRGEDLPLFTGIVPMGRLSQDFGFARFFQAHSRRLEEVGKGDTASAHGRVPWLPILTKVPLGGPVPFAKQGHGRCHGDCDAPWFLRFWASPVASPRDSQSTLPWMGGEADVSVRCRKCDKCLFMRKREWFARACREAVNAERTWVFTGTFASEPSSEEDVTGEVQRFIKRLRKGLRSGLSVGGKKRAVPPATVRYLATVERGEGGRLHCHLLVTGDARWLQLRAAWHAGFSKTKLVRVVVRNGRITPPGVRAIGYVVKYLTKEGGRVRASLKYGKALSLCAVGPREDGGHATRSVSQQTEATWDATPRPLQFIVPRQAHNSQGCGLTCEAVGRAVCEQGEQQPCQLE	385	USER	zzzz691	circular_genetic_element
249732	my_seqs_18minnow1_2ct979.4@PF02486.18	PF02486.18	my_seqs	MQPPYISLDYYAGTRDYDTTPHIWFGELPPIWQQLHGRQGYKIREQELFTGLEFMYNPDRQIMGCHIDLSGAVLQRFVGCHPYLTPIDALDKSGISAYKPSRIDVAIDIPDAGLFARDLYNQFVKVPAPVGRRKVTLIHSTGDRGGKTVYVGSRTSPLFLRIYDKDAQSAGKNPVSRIEFELKGAAAKKIHSELWTVKRSLSEVAAGLLLTVGTIGAVPELAALIDGQRAIEWEPREPAQTSTEKWLVRQVLPTFVQDALVNGYPLLLDWFFELVWERIRTSMPVGELDALITQTDQSQSREL	303	USER	zzzz723	circular_genetic_element
249733	my_seqs_abalone_6_2ct109.2@PF10723.8	PF10723.8	my_seqs	MNLTPEEQAFILRMIADRLVTEAAKQIPLSAAATAAAPRVVRGVSEFVGEQLGFIGQPAAAKPKRRRRKDTKMSKALKQANSRYRKKDGSLRAGRTQADIMKYAHKLRRKM	111	USER	zzzz729	circular_genetic_element
249734	my_seqs_abalone_6_2ct112.2@PF01446.16	PF01446.16	my_seqs	MLRAKLKCGMPLMEFLEHIMPKAEWDAFENQILIKENKKIKPLGITVRKSLAMETDEFITICQQLTKYKWFKDYVYSVEFYTENGYYPHIHILLKKWDKTTLPRCDLIRNLKRIFKQSNNSQIEVKELSSIHANNYEEYLGGNKENIDKQERNKKDIEERIKFSISNTYSDS	172	USER	zzzz730	circular_genetic_element
249735	my_seqs_abalone_6_2ct146.2@PF03432.13	PF03432.13	my_seqs	MFNTEVYDLLMKTYTDDHDDWEERTEEEKRNVRLTLEWVASQHNVAPSKQITLRKYKLSALPKKSHRFITVSVKKDANPKDLATFMERFIRKHNYSQNIEVYTLEFTNAEMEYHPHIHILFNGTDKPQKGNIIRDFSRLFKIEPNFIDIQTSNDPLLYEKRRQYCFGEKQNIKEKQVKQDMEIRKANNLLSHYSI	195	USER	zzzz731	cress virus
249736	my_seqs_abalone_6_2ct174.1@PF11726.7	PF11726.7	my_seqs	MFEEPLLFSNFHEAETYYRDIAEYHNICTKLYEKYNYNSKLEIVSTRKVVKQYTHLFITINPPPTLKLDIFINTINKTLSKNWIEGYIYVIEQRGENQEELGKGFHTHILIRLVQHKKQSEINREIKNTWKKILDIDNYHILNIKYIDDAEQKRKQGYILGEKAEEIKHLKQKMDIIYRQNNNLQKYYYLNYIIEDKYASKENV	204	USER	zzzz732	cress virus
249737	my_seqs_abalone_6_2ct239.2@4CIJ_B	4CIJ	my_seqs	MQGDSGVTPRLTSLISLPRSSSFRGASSMSLSIDAATDPFCDWLDITAPPAEEDRLSRSLGSILCAAGAEKVDDGYYRMNGGTVKLGLKYRVFRASVSGSAIRLLEVQGLWGTFLSEIGDGPHRVTRLDAAIDLPLDGADALAALRLEYPRGQVRISQRPVRVTEMTCVRADGRTTGTWYAGHRSGAEVTCRVYDKAQQLLDTRGEVIPPRTRVELTVRKGSTLRDAMEPARIFWHYIAPSILKPPVGVPEWSSGWAEGWTMDKVDILPAQRLKNRIERSPELAAIIELADSLGPAGRDMALRLIEQRVRSTPVGESPAGLEEAS	325	USER	zzzz733	circular_genetic_element
249738	my_seqs_abalone_6_2ct240.3@PF01719.16	PF01719.16	my_seqs	MKQKSQARSGPRARQFSIVIHDVKPQAKAHFEKLLPPLMLDWSLVAEEPYNHQSGSHIHIFLKYPNPQAKFRILEYIQKQNQGGRVQVDIGRGAFQDCKKYLTNPDKEKLIDNDINEIATTLTLTEKYPDESDKCIKCGVLFYNPVVPQFNLKFSDYCEQCERENSQARMNEYLRRRIPDPDFFSQ	186	USER	zzzz734	cress virus
249739	my_seqs_abalone_6_2ct82.1@PF01446.16	PF01446.16	my_seqs	MAGGPVIEDSLLIDTNLTEPTWVTAVRDVEMCTLRLEKRPTWQTSGSELAYDKQSAWFTCKLCPQPHRYERDLILRSKTKSYDPKTSYILDFKIVNGSELNPIQYWDIVWGDVIRCKKCNRTRSRYRRGKKTLDKIVKVWLNSDQWEKFRPKFVTLTTTNDFIPFETDGTIAPGAMADLARSFKSKITNFRRTKTFKQNVIGGVDYIEQVYNIKSDGIDVNTHSHHVWLGKYWKQKDFQDSWGHGIVQIQDCTSVRSVMKYISKYITKDDVKGSRCKETFGVIRGE	286	USER	zzzz735	cress virus
249740	my_seqs_abalone_6_2ct96.2@PF03432.13	PF03432.13	my_seqs	MVNKNFEILDEGKNKFLPVSHINMTKIDLYQLCLQKCSKVISIRGNLCPETLEYEWNRQANPSYKEPSLKIRYGLKKTQDLMNDIMLHNSDKSNKKWKVDVNKRFSKFCGGDDVIYDFLEIIPFVPSVMINISPDWKQSELKTEFGKSTVLKKIIDDYLAEGWYSKWSYVIENGSNGNHIHAHIVAQMDGRKTLKSCETHLRKGAHTPQLIKYAGKVKGIKGCIKGVSIQKTFLRNETLVSDKLKYLIEENKPEGHKNKSVIPNGFVSGGL	271	USER	zzzz736	circular_genetic_element
249741	my_seqs_abalone_6_2ct97.2@PF01446.16	PF01446.16	my_seqs	MEILGERILNGVPTVTDEFAGYTCNHCFNASRPHENIHEFGGYTNTHRCTQCSREIKSWQRASLLADELIEFRNDQGVRLRFITLTLPNYQDELVGLADLKRKIKNFRRSKAYQAKVIGGVDFYEWTTNANDGSKNVHYHGIWAGKYWKQKDLLEAWPHGGAWIELVKAKHEAADTIRYCTKYLTKMKEFGIRTKQKFGDFYNYSGQGTGTAG	213	USER	zzzz737	cress virus
249742	my_seqs_axolotl_blastema1_2ct31.2@PF05840.12	PF05840.12	my_seqs	MAGSLSRLAWATHVLEHHGVKPTHMITLTLPPEAWERVIEAEGEEVAVQKFLGARARFLDALRQRLRRGGGSGSWLWFLEFQQRGAPHTHILLDLGGYLPDEAYEEWTEWITAEWSRALGVPAPYATRFERLKRADFRYARKYATKPKQKTFPFSARWGRSWDTAGSWRELLRESRHTPTSTYEFSTEELWRVLRSFYEVLAYQVPVLKVALTLRSIVEGVPGPEVYRGRLALPPHWITLLLIVLSEGPEAVPWNYALDEEPP	263	USER	zzzz740	circular_genetic_element
249743	my_seqs_axolotl_blastema1_2ct5.8@PF05840.12	PF05840.12	my_seqs	MPKLSQDILRSNMDMAKQAKESMASWVKELGLWRLFVTLTMAPPSQSTGLGVTGSYDRRGYGAIRRAWGRFLELAETEVGAPVSYFFVIEEHESGVPHIHALVGPKRDGSADFDSRELSELARRLQNEATRDIGFSRVKPLDPDKGAEQYVCKYCVKGDTLWEYRE	166	USER	zzzz741	circular_genetic_element
249744	my_seqs_beef_bd3_1_2ct151.1@4CIJ_B	4CIJ	my_seqs	MTFSRSSVFCDWLDVTCHPDNSFLPSVEAFLAYFFYPVIFSDDGKTGYKVGEGVLVVESKRMWHRSSCSGAAVRELESKNLFRDYVNVLGSVGHNVTRLDAAVDLLIDAPIFLRRLEAKYPDDLFSFGRKALRVSRLYSARALDRAQTGTWYAGHRSAARVTARVYDKQAESLEKRGEKLPPTTRIELTFKKDYNCSLYDVLMPESLFYSHASPKLLEAPEGVYIAPWCVKGLVPWVSSPKDYTLTLDRFDYRVSHSPELIKLAELGSQFGDTGKAVVLRHFERLLMSAISARAELPEDTN	301	USER	zzzz742	circular_genetic_element
249745	my_seqs_haddock_1_2ct143.3@PF01446.16	PF01446.16	my_seqs	MSWKIADPIQFAHEGCLGSAKDRYDTSLCARYTMCPKCEQRRASKRAWRLNNRLKSEIEMAEDAGTKLKVGVLTTTLPGQHHSSGIRHKSLRDQYGYMTKRTNLYGLSGAKSMRGLNHALAQNGIHAGCHNVEFTFNEQAGWWNVHNHSILIADESSWSGFIPETKDRLWEKSELLDRSELTHGNLPWLQSAHGLGSRYTLDWAEPTEFEQTIRYAAKVAYMTKPIKAPEGKRLELSQFFNGFAGRTYPRLSRPFGMWMRQQSLP	265	USER	zzzz750	cress virus
249746	my_seqs_haddock_1_2ct227.1@PF01446.16	PF01446.16	my_seqs	MYSQTQAAAIAAANQFEIYSIMRRHGWSSEATNDMIYKMEELADRRANIEKKLQHQRVFGDVLTVMITVSFDNKMEETPENTVADMKKFIRLFKESNYKWCENACYTFEFFSAEGWNPHLHLVCDKNDAPSTIAKAIRRSPAYKQTGSYRVDVKAGTDGTQIKYIQGDKKESKEENVKKDIKFRETQKLKSYYIL	195	USER	zzzz755	cress virus
249747	my_seqs_haddock_1_2ct268.3@4CIJ_B	4CIJ	my_seqs	MTYSRSKVFCDWLDVTCHPELSFIPTVEAFLAYHFFPVIFSADGRTGYKIGEGVLILECKRMWHRSSCSGSSVRELEAKGIFRDYVNILGSVGHNVTRLDAAVDLGIDAPGFLRKLEQAYPDDLFSFGRKALRVTRLYSARATDRALTGTWYAGHRSSARVTGRVYDKQAEAFEKRGELLPPTTRIELTFKKDYNCSLYDVLMPESLFYSHASPKLLDAPEGVYIPDWASRGLVPWVSEPKDYTLTLERFDYRVSSSPELLKLAELGAQFGDGGKAIIMRHFEKLLSSALHAAQEVV	297	USER	zzzz759	circular_genetic_element
249748	my_seqs_haddock_1_2ct276.2@4CIJ_B	4CIJ	my_seqs	MTFSRSRVFCDWLDVTCHPELSFIPTVEAFLAYHFFPVIFSADGRTGYKIGEGVLILECKRMWHRSSCSGSSVRELEAKGIFRDYVNILGSVGHNVTRLDAAVDLGIDAPGFLRKLEQTYPDDLFSFGRKALRVTRLYSARATDRALTGTWYAGHRSSARVTGRVYDKQAEAFEKRGELLPPTTRIELTFKKDYNCSLYDVLMPESLFYSHASPKLLDAPEGVYIPDWASRGLVPWVSEPKDYTLTLERFDYRVSSSPELLKLAELGAQFGDGGKAIIMRHFEKLLSSALHATKEVV	297	USER	zzzz761	circular_genetic_element
249749	my_seqs_haddock_1_2ct279.2@4CIJ_C	4CIJ	my_seqs	MICSRSDVFCDWLDVTCHPEASFLPLLESFLAFHFYPVLFSEAGRIAYRVGTGVLTLDSKRLFHRASASGSCIRDFESKGIFRDYVNTLGSVGHNITRLDAAVDIFTDAPPFLRGLEAQYPDDLFSFGRKALRVSRLYSARALDRALTGTWYAGHRSSARVTARVYDKQAEALEKRGEILPPTTRIELTFRKDYNCSLYDVLMPKSLFYTHASPRLLNAPEGELIPEWSPKGLVPWVSTPVDYTLTLERFDYRVSSSPELLKLAELGAQFGDTGKAVVMRHFERLLTSAINASGEAD	297	USER	zzzz762	circular_genetic_element
249750	my_seqs_haddock_1_2ct341.2@4CIJ_C	4CIJ	my_seqs	MTCLVSDVFCDWLDVTCSPESSFIADLRLFCDVNLWPVAYADHERILIAVGHGKLVLDIKKRYHRASASGSVLALLRTTGLLKPFLALLGRVPHRVTRLDAAVDVAVDGPVVLRTLEARYPMDRVSLSRKSLGVVRMYSARESDGQLTGTWYVGHRSSARVTARVYDKQAEILSRTGLDSPPLTRYELTFKKDLGCTLRDCLMPASLFYEYASGKLLAPPRAIPAWVPNKDSDWSSVPVDLALPYEVFCQRVERSPEIARLVELAAEFGPVGRPVLIRAFTRALDEQMGLLLEADTTA	298	USER	zzzz770	circular_genetic_element
249751	my_seqs_haddock_1_2ct35.1@PF05840.12	PF05840.12	my_seqs	MHTTVKISKDLKRAIMLRSHHQRDTKKTVSSKPRTRSEAEYGTKAYRDGLQRAFAKAKEQIYFNPDMTYFITLTYRGKNQTPEDVLRDVKLLIKQETRANERNSPAGSGRNSPKYIYVMEYQKRGSIHVHMIANNGFTLQVNANGHKELTYWRKGFSSVLTIQDFDRNFRPYLYLFKYMRKAQRIGRSFLHSSRNLGTYDTLHDASIDLLYWRTITQEYTHTTVETTNFHFYKNYLEYDDTMTSQPSNLGDHKQWHEQVKLHSNKALEQILASRILRSN	279	USER	zzzz771	circular_genetic_element
249752	my_seqs_haddock_1_2ct47.3@PF05144.13	PF05144.13	my_seqs	MIPQDVALIDSFTTLTPYQLFVKIPIALTELWHITNTNTGELSTPINMPLSVDDKGVRFRVSVVEYFGKKYIRSTFTTKFLFKNYFDGLNYDNFKTAFDYFIFATGFEIDFNTFFENSLINDIDICKNFYATDKDLKLIFDSYAHYAGIKKFNSVAPNALQSSSLIGFQFTNRKDASVSSPFVKFYSKYYEMHHEKNANFLPNILGENLTNLRRVEVTIKNKKHLESICKAKKLKVPTNLKDFLLFLPSQLNDLFESVYLRYSPRAVINLKEIDKDAKKSPFTPANALSVRFLWELMKTGLTFQQCINMLDDFPYFNDNAKSRLKQRLATALIKYVRFAELSELKVSKKDAFYIPKKRYCKKRKYRRPPPIEPDLFTIF	379	USER	zzzz781	circular_genetic_element
249753	my_seqs_haddock_1_2ct52.5@PF05840.12	PF05840.12	my_seqs	MPCEGPITIKTPSGHNIKVKCTQCRSCRIAKHSALRFRSLLEFQHSLSAEFISLTYKPENLPLNGSHTPFQSFLKRLRRHNHYRQNPNKIRYLCCGEYGDLSGEFHHHALLFNSLPTWDKLFTVQNSDQTLTKLWQLGRCDSGEVNTTTIDYVTNYCTKSTQDSPDKKPFAHWSNHFGSYGMENLCQRYKNKGTHFTSMPTLISVNGKTYSLDAAMQKIIKQQFNLPDPENIDLEMQNYAQKCIDQGFMPHSYIDHETGIQRIYTEKTMPDIDLTQKRKDAILKTRILLDSPDFRKLKRKL	301	USER	zzzz782	cress virus
249754	my_seqs_haddock_1_2ct66.4@PF05840.12	PF05840.12	my_seqs	MPKCRKSIRIVKNVKHPVYVRCSQCFNCRKIRRSSLVLMMILEHAFSQHSQFITLTFDPKFYDDPEFDYYAKKHFQKFIKRLRKNHKTPKGVSPIRYLIAGEHGDDFNRWHYHLIFFHLPEPLEIEEWTKLWGFGIVYVGTVTPASMNYTAGYVTKMDFYDKDHKHHDPMDRTYSSWSQQMGVEGILFIARDFAKQEIILPEYMYTLTFQGQQYLPTSRLRDLFHEEYTRLTGVVPYKDNEYATYLKQMAEVALRDQTEVDRLEQNYQNDIYKHHMERKHELTYPTETSESEQIASNPYLSTEDKNKIHTRETLQTLFYEDIKYFRENAHKHQHTPIKKRKKSS	344	USER	zzzz795	cress virus
249755	my_seqs_haddock_1_2ct70.5@PF05840.12	PF05840.12	my_seqs	MQVFFNPDMKYFVTLTYKGATHKIDDVMYDMKIWLKHERRNHENLKYIWVAEYQARGSIHVHMITNANFSMRKNKNGYDEITYWADKIGFTSVLHITNFDRNFKPYLYLFKYMRKAQRIGKSFLHTSRNINNFEKTDTPLKIENYSVVNQERTQHTYPNNPDKTLTFLRYYLIHDNVEERTKYIKQLRESQKWKNLLLQSTRVQEKKAENHIQH	214	USER	zzzz798	circular_genetic_element
249756	my_seqs_macstool_cl86_1_2ct21.5@PF05840.12	PF05840.12	my_seqs	MGFNPTDGIPFPCGQCLACRINKRRVWTLRLMLENYYHEKSCFVTLTYRDDDLPFNLCSGVPVLEKRDCQLWLKRLRKYFSGTGIRYYLAGEYGTRNKRPHYHAILFGIGPEQLDPQFFLYGGKSGGEKGLEKRSTPLSEIWSYGMVHVGEVSRESIQYVAGYVTKKFTKKGDGYVPEFSLMSRKPGIGSQAVDEIAAVLKQYNLEERTKRQLRIDGKTWPLGRYLQGKLADTLGVTFGIEEYVQRLGECWVQANRRGTPFIDYLVQQDAGRYELLEVKDKIFNKRPEL	289	USER	zzzz814	cress virus
249757	my_seqs_rainbowtrout1_2ct42.2@PF01446.16	PF01446.16	my_seqs	MINKTRWKYVCRNCPFVPDKVPAFCGSYVRPLQTWKMRWIPDAPDYVRTMRISKRTGELGKRPMNLPDRCLACKAQYRRATRMGKRMDRIHAVAKTYKDGRKIPKLLTFALPSQWFSWDECLTSREDEIRALGKLLPRARAILQKNGVEGGSYVLECTYKWTPDLENFTHPKYKFHAHVHMVAIAPYIHYSKLSEWCCQLMPIGLGRINYQAVKNRRKTAVYVSKYLVKDKVQCRTFGIMRNSPPMQ	247	USER	zzzz856	circular_genetic_element
249758	my_seqs_rainbowtrout1_2ct52.4@PF01446.16	PF01446.16	my_seqs	MCPKCEKRRASKRAWGLNNRLKSEIEMAEDEGSKLKVGVLTTTLPGQHHVSGIRHKSLRDQYEYLVSRTNLFGLGGAKSMRGLNYALAQNGVHSGCHNVEFTYNEQAGWWNVHNHSILIADETSWSGFIPETKDRVWEKSELLDRSELVHGNLPWLQSAHGLGTRYTLDWADSSEFEQTIRYAAKVAYMTKPIKAPEGKRMELSKFFNGFGGRTYPRLSRPFGMWMRQQSLP	232	USER	zzzz858	cress virus
249759	my_seqs_redsnapper1_2ct162.3@PF01446.16	PF01446.16	my_seqs	MTSSYVIEHTKNSSSGNWHLHSHDLVASGDEYTDFSGRVNELQKAWLQCIDKSTTNHLLNFDVPLEVIGGRSIDVQRVSDSGLASYMSKATRYMTKGSSVQHDRDCTEVSEAMYGKHVFGTTGSLWGTKYGRM	133	USER	zzzz864	cress virus
249760	my_seqs_redsnapper1_2ct175.2@PF01446.16	PF01446.16	my_seqs	MTTDFFSLTCEKCSHRGDKNADFDWQKIVASTESGYKWVEVHHLPDRCSKCDAARSRFKRTRRALEKMFRLSRDIYGEYPLSDKQIAANVLIQDIIDNAEEGSQKSHRKLIEPRPKNYPKMVTISLPSIPDDPRSFQEQLLELKRKWIKFRKYYQKLGIFHGGIYVIECTHKVNFDRDKGNWFGVKYHVHIHAAIVMPFLNRHRLLAFSDSGVKFGLGRASVTGRPTDLKEGEHYSPAQHLAHYLSKYITKGSVGNRCSNFGKLIGYRHKPALHGKD	277	USER	zzzz865	circular_genetic_element
249761	my_seqs_redsnapper1_2ct183.3@PF01446.16	PF01446.16	my_seqs	MTFSSGSATGLGICKGAWLGRPDEAWKHKCARWLACPTCERKRAGKRAHEIKERLKVARHYLGNDLTLGVLTVTLPGQKHESGIRYKSLKEQYDYAVSRTTIPGLPGIHSMRGMNRLLCGKPDHNGYGKKSSGYGLGADGGTHFMEFTYNNTKQWWNVHMHSLFFAAMPLDRLKSTSSHVVDGDNLLLKKENKGRTSIALERLGYGPRYTLDYAEDHELDKMIQYSSKVAYVTKPFKAPKSKFGEIEDFMYTNPRLSRPFGRNQHKLDSLPDGYGEEKLLEAI	283	USER	zzzz866	cress virus
249762	my_seqs_redsnapper1_2ct185.3@PF01446.16	PF01446.16	my_seqs	MRERVSELYALCYAYFSSRVVGDQEMKGFQDFQVHEKLPLGRLHHRSELCQYCSNEAARRKAAQLIDQLKAIEYLYGITDWGLLTVTLPGKARTIRRASLITQYEYLSWKRAGRYPVRGLHDRLISKGAFGGITFFEITQNEKTKWWNMHLHVLVATMGPSSELDQEPSEVTWSCCGKPLTQGEDCDCSLLEPVHRKVQGYNDYSYMELGFGPRVSWDPDAEEEDSIAYCTKLAYATKPIQYQNETEDGKVKIHDLPQLGRFFWKSRRMVRAWGKARFSALDSNIWKDVKADYTT	295	USER	zzzz867	cress virus
249763	my_seqs_redsnapper1_2ct190.3@PF01446.16	PF01446.16	my_seqs	MNRSRMSGFMPLSSDCIQDKEKPLYGFFCKDCEIYDNLLGTVDKPNGWENRDYIRQHCRPNRCTKCDRELKRWQREMNGIEQIKKQFNWERHKFLKFGTIGLAGSKEFPIDMAEDQIKPYREELVAKFKILRRKPIWKDCVDGGKWFFEVTTRTHVTQKQLDDGEYTVSVKLNPHLHILFMGPKKINYDQLQLACKKVGLGKFHFSKSTSGTKFQNVLRYISGYLKKDNQFQGVNRGSFGFLQGNKK	247	USER	zzzz868	circular_genetic_element
249764	my_seqs_redsnapper1_2ct191.3@PF01446.16	PF01446.16	my_seqs	MAAGNMAILSETSKKQQSTFSSGSATGLAICKGAWLGRPDEAWKHKCARWLACPTCEGKRAGKRAHEMKERLKVARHYLGNDMTVGVLTVTLPGQKHESGIRYKSLKEQYDYAVSRTTLPGLPGWHSMRGMNRLLCGKPDHKGFGKNSQGYGLGADGGTHFMEFTYNNKKSWWNVHMHSLFYAAEPLDRLKSTSRHIVDGDNLLMKKENKGRTNVGLARLGYGPRYTLDYADTHELDQIIKYSSKVAYVTKPFKAPKHKFGEIEDFMYTNPRLSRPFGRNQYKIDSLPDGYGEEKILEQI	300	USER	zzzz869	cress virus
249765	my_seqs_redsnapper1_2ct196.2@PF01446.16	PF01446.16	my_seqs	MQLASKEITLKNSDELVPQTSIGGEWTFVCKNCHWKGDKTGEVEYHRIPVRNPDVWKYTRFIEVGKYPHRCYDCDRNRKRYERMKKALKTLDSWNHHLERNLGPPKMYTIGLISQPDDPRTLQEQILEIKSKWKILRNHLLEEFPNTWRGGISNVEVTHKINFDRSKGNWFGVKYHVHIHAAVLMGYLPPAAFTQFAELPLAFGLGRANIVVRQRGENYGKYKSHLANYMAKYITKGAVSQRSIRFGIMDKRWRRINDYPLEEPKRKEVGTPT	273	USER	zzzz870	circular_genetic_element
249766	my_seqs_redsnapper1_2ct197.3@PF01446.16	PF01446.16	my_seqs	MAKAMVLKTRQIWGPIKGPPLTSKEEVQAPPFAEHGQKRAFSTCIHCEYPYKWYEIDHKITPTNWWTDSIWNGPGFCITYTNSQGNRTHAMLPIRCTDCDTRYRRYKRCKEAVAKLRDITEELKLRGLRKLSDRYMYKHLKLITFALPSVETTRASWEPEMDLLKSKMPKAIKILQTNGVIQGTYVPEVTSRESYCEMEWPNRTFYKHHAHIHAICVAPKVPEEHYTEFLEILKPLGLGKLDYRGIDSKVKVNNDQVIEYVTKYLTKDGLRRHSFGFTRTKTKTCNSVTK	290	USER	zzzz871	circular_genetic_element
249767	my_seqs_redsnapper1_2ct201.3@PF01446.16	PF01446.16	my_seqs	MAEENTVIWNAPWGKSKQTFSSGSATGLAICKGAWLGRPDEAWKHKCARWLACPTCERKRAGKRAHEMKERLKVARHYLGNDMTVGVLTVTLPGQKHESGIRYKSLKEQYDYAVARTTLTGLPGWHSMRGMNRLLCGKPDHKGFGRKSQGTGLGADGGTHFMEFTYNNKKNWWNVHMHSLFFAAEKLDRLRSTSKHVLDGDNLIMKKENKGRTNVALARLGYGPRYTLDYAETHELDQMIQYSSKVAYVTKPFKAPKSKFGEIEEFMYTNPRLSRPFGRNQYKIDSLPDGYGEEKLLEAI	300	USER	zzzz872	cress virus
249768	my_seqs_redsnapper1_2ct207.2@PF01446.16	PF01446.16	my_seqs	MPYQPIELVPHTSKVREYGFTCPKCIWKGDRSGEIDLIRLPVGTNWLGFTKTIEVGKYPNRCLQCDRNRKRHSRMWRSLETLDNWNHHLERNLGPPKMYTVGLISVPDDPRTLEEQILEIKSKWKDLRNHLLEKYPATWRGGISNVEVTHKINFDREKGNWFGIKYHVHIHAAVLMKYLPPEAFEQFSAIPRAFGLGFANIVSRQRGDDYKAYRGHLANYLAKYITKGNLRQRSIRFGIMDKRWRRLNDYPLEEPKRKEVETPT	264	USER	zzzz873	circular_genetic_element
249769	my_seqs_redsnapper1_2ct210.3@PF01446.16	PF01446.16	my_seqs	MLSREEKYSWLPSEWTFCIEEDGKWERIKDNDKNYYYIVDGALIQQPRGYYCRECAQTQWRSEYGMTFDDGSPSKFWTQCKDCKLASARSYAARKWTNVIKNIDPELNHTRLATFTIPNVEWDLKELGTNWEFHDHDFVFMKWVKENCRFTKDKRFKYLGEIPYLVEQASNAMRDKLKLRLKNMRHKHKRFSKNVLGGIVCYEATINIDVKNRKMSLHPHLHAILHGRYYQQSDLQEDWGLGICHIRKIENQWIAQLEVAKYVGKDGSRRTAWGSLRKERSKMLSELKVSQNEKHSKNHHQA	302	USER	zzzz874	circular_genetic_element
249770	my_seqs_redsnapper1_2ct212.3@PF01446.16	PF01446.16	my_seqs	MEQLPVWAIVAQEHLQYTPETVTGTVSSKEEEYRRWGFFNPKCCQCAYIKDGHMTQLSPQAEWHHNRMTLLEENYKEYPRKRCSKHRSQLRKWQHAKRVFVRLDELRMNMEEDHLRFVTLTRESWNILVPLEELHNLVIIQEKHKQYCTRSFRNFRDRNDWWKSKEALGQLWPECKHNAEWNGVEFVGIRLHFHVHCIIVSKHLCNRPVRSCCERACYCPKDMQGEVIDNSRFFKEWGGIVDVRSVKDYQVKYQHKGETRRGCGRKACMRYLSKYITKADNWKSVKIGKW	290	USER	zzzz875	circular_genetic_element
249771	my_seqs_redsnapper1_2ct215.1@PF01446.16	PF01446.16	my_seqs	MSFHSMISLCEIGHYQLTHKWTNYLQDKISNSQTRECWFPLRTSNGFIAYETKRCGQRTCWACQYRNRSKLRSTVSDFIQKEVKPNTLKYRFVTLTLPGSWYSVRHASVEEQLQVIRKSFRSLRTKLKRRGFPISGFYCIEIESSNSQYWHTHVHMIIRWKNQDYSELKEMWTKSVDRKTLAHLVNWELDPNNQRTVQVDRISDSKIADYLTKVTNYVTKVNDFSHNRRDIGEALYRRRTTGWLGEHYGFKKENNGSGSSAPPI	264	USER	zzzz876	cress virus
249772	my_seqs_redsnapper1_2ct216.4@PF01446.16	PF01446.16	my_seqs	MCPKCEKRRASKRAWGLNNRLKSEIEMAEDEGSNLKVGVLTTTLPGIHHSSGIRHQNLRSQYDYLTSRTNLKGLGGAKSMRGLNHVLAQNGIHAGCHNVEFTYNEDKSWWNVHNHSILIADEESWSGFLTETKDRVWESSDLLDRFELTHGFSQGLETSHGLGRRYTLDWAEPSEFEQSIRYASKVAYMTKPIKAPRSKRLELSKFFNGFGGSYPRLSRPFGMWMRSISLP	231	USER	zzzz877	cress virus
249773	my_seqs_redsnapper1_2ct217.1@PF01446.16	PF01446.16	my_seqs	MSTGTISSPIINKEWSFTCKDCKYVPEHTFQDDFIKVQKRNLKETDKSETVSMNLRFPIRCRKCDTNKKRSDRRRKAINRVWGMSQGIGCFNKSYNNPKLITFALPVQPSEDYNERENQKQLLISKLKDVRKSLLKTGTLGGTMVVECTSRLANLDVYPEAFMHWKHHAHIHAVCVSKYVHHSKMKEYCEQLLPLGLGRINLKAPKDSRNVSKYISKYLSKEHQRHRTFGIMRKVPKHERQCVCRHEDMQINHYACECLT	260	USER	zzzz878	cress virus
249774	my_seqs_redsnapper1_2ct225.3@PF01446.16	PF01446.16	my_seqs	MRIMGQPAVEMAEPILTPITSKEPSANFTLEYNPQAGFTCDKCSNRIYDPNPDYARIKKSVLKGKSDFKTISLHLPSRCARCDGIYTRYKRMQRRTTKIWKHCQNLGHHEWRYQYPKLITFALQSEKSESTEAVSEMKVLRSKMRPAKKLLLEKIGVRGGTYVLESTTKIYGIRNGEDWVKDQAFMSFSHHAHCHMVGVAPYINKDKLPEKTETILEEIGLGTVNYRCVTERKQVASYITKYLTKGKTRSVTYGCMRNTHPS	262	USER	zzzz879	circular_genetic_element
249775	my_seqs_redsnapper1_2ct228.5@PF01446.16	PF01446.16	my_seqs	MSSWKIADPIAYAHEGCLGSSSDRNDTSLCARYTMCPKCEKRRASKRAWGLNNRLKSELEMAEDESSKLKVGVLTTTLPGQHHSSGIRHKSLRDQYEYLVSRTNLFGLGGAKSMRGLNYALAQNGVHAGCHNVEFTYNEQAGWWNVHNHSILIADETSWSGFIPETKDRVWEKSELLDRSELVHGSLPWLQSAHGLGTRYTLDWADSSEFEQTIRYAAKVAYMTKPIKAPEGKRMELSKFFNGFGGRTYPRLSRPFGMWMRQQSLP	266	USER	zzzz880	cress virus
249776	my_seqs_redsnapper1_2ct231.1@PF01446.16	PF01446.16	my_seqs	MTVHFSPGMFELARIGHYQLTVKWSNMSGDKISNTQTRECWWPLESELGHVVYGTKRCGRRTCWACQYRARSKLRSTVDDFFHRHVIPNPSRYRFVTLTLPGAWYEIRHASVEDQLLTLRKSFRSLRSKLKRRGFTISGFYTIEVESVNSEYWHAHVHMICKWQNQDYSELKEMWTKSVDRKTLAHLVNWELDPNNQRTVQVDRFSNEKLADYLTKVTNYVTKVNDMPHNRRDIGEALYRRRTTGWLGEHYGFKKENINSGSEIPPV	267	USER	zzzz881	cress virus
249777	my_seqs_redsnapper1_2ct232.2@PF01446.16	PF01446.16	my_seqs	MCPKCEKRRASKRAWGLNNRLKSELEMAEDEGSKLKVGVLTTTLPGKHHVSGIRHKSLRDQYEYLVSRTNLFGLGGAKSMRGLNYALAQNGVHAGCHNVEFTFNEQAGWWNVHNHSILIADETSWSGFIPETKDRVWENSELLDRSELVHGNLPWLQSAHGLGTRYTLDWADSSEFEQTIRYASKVAYMTKPIKAPEGKRMELSKFFNGFGGRTYPRLSRPFGMWMRQQSLP	232	USER	zzzz882	cress virus
249778	my_seqs_redsnapper1_2ct238.3@PF01446.16	PF01446.16	my_seqs	MKWKIADPIAYAHEGCLGSSKDRYDTSLCSRHLMCPKCEQRRASKRAWQLTKKLTAEINLMEDEGSDLKVGVLTTTLPGLKHRSGIRRGSLRQQYAYMTDRTNFSGRTGSHSMRGLNTALRDMGVHAGCHNLEFTWNDKGNWWNVHNHSILLADKESWSNDISETKDRIWESSELLDRSEVVGGTNNQFEHYGLGRRYSLDWAEPHEFAQTIKYAAKVAYMTKPIKAPRQKRLELSKFFNGFSGKYPRLSRPFGLWMRSEPLE	263	USER	zzzz883	cress virus
249779	my_seqs_redsnapper1_2ct27.1@PF02486.18	PF02486.18	my_seqs	MEYSQNYKENNLVSFPLKNLFNQINTKSFFIDYISVNWQMQITKFNQYDAKKAQTWFYDFFRILEERIKILKLNSPELYNIFLQKDSHYNIKIDFKGKFFKDETYSDDINHFYKWFIEFDNMFKVYWAKAKINHNYPRATISRLDLATHKEDTFLKTFTPIRSNKGENMVKYESHKTLNFFTGITIGRRDSNWTYFRAYDKRFEELGHQHCLNRFHTVDVVRKEWVLKSKFLRHNSIDTVNSFIEFFKNKKLVNSLIRKIRIGKDVILSKDNSLYKSLHDYRYNSSVNPDSIPLKEFRKAVRETKNIFLNKVKEGDEMTTTHKWNPYKNMKGLIKYIGNMKRNEFFEFQRNMLRHLESERFESCNLKSLNKNSEFIDWDQKDFEAVTNMLGILSTIKIK…	404	USER	zzzz885	circular_genetic_element
249780	my_seqs_redsnapper1_2ct320.4@PF01446.16	PF01446.16	my_seqs	MKTEATPDGCTNARSFLNDRSLCARWRLCPGCERVRAKRNQYKIAKRLEYDLEWAKEADLELTVGVLTTTLPGNEKSIRHASLGEQYSYFTERRTMSGYTGWHSMRGLNTKLKEWGVSGGSHFLEFTNKGSTWNTHMHSVLVGFQDDWKVPLKETTKQLEWNDDLTMKLQTEKLDNKGRMNKRIFEPLGLGRLYTLDIASADELASIARYSAKVEYVTKPVKVPAGKLPEVSGFLAGGYDHGKERSGHGRHLPRLARPFGDWMRNGPERRYA	272	USER	zzzz886	cress virus
249781	my_seqs_redsnapper1_2ct324.2@PF01446.16	PF01446.16	my_seqs	MKTDVSPDGCTSVRKYLNDRSLCPRWRLCSGCERVRAKRNQWKIAKSLQYDIDLAEEQGTPIKIGVLTSTLPGKSSKIRSASLSEQFDYLTKRTTMSGYTGWHSMRGINTKLKEWGISGGSHFIEFTNKSGNQWNTHMHSVLVGFEEDWNVPLKETSAVREWNDDLTMKLRTEKLENKTRSNKRVLEPLGLGRLYTLDIASDDELASIARYSAKVEYVTKPVKVPDNKLPEVSDFLNGKVSLKDVTFGGITSSKSTRSIPRLARPFGDWMKNGPERQFTNFL	282	USER	zzzz887	cress virus
249782	my_seqs_redsnapper1_2ct334.3@PF01446.16	PF01446.16	my_seqs	MGGSVMKTEATLDGCTNARSYLNDRSLCARWRLCPGCERVRAKRNQYKIAKRLEYDLEWAKEADLELTVGVLTTTLPGNEKSIRHASLGEQYNYLTERRTMSGYTGWHSMRGLNTKLKEWGVSGGSHFLEFTNKGTTWNTHMHSVLVGFQDDWQVPLKETTKQLEWNDDLTMRLQTEKAENKTRSNKRVLEPLGLGRLYTLDIASDDELASIARYSAKVEYVTKPVKVPDGKLPEVSGFLAGGYDHGKERSGHGRHLPRLARPFGDWMRNGPERRYA	277	USER	zzzz888	cress virus
249783	my_seqs_redsnapper1_2ct553.2@PF03432.13	PF03432.13	my_seqs	MNLQSDFCRNRSNFKGLLCGCCGGCSRLMEACDSNACEVNFDEYRQMVCQIYYRRIEMERIYIEECKFLSTGKRYHNFITLNFPPDYNILTAIAILKQWSIDWLRKAKFVVEFHTKSGGHPHIHLISYVVRKKTILIRDLSNKFKAKPECFDVVQRPDLYTTHINYINGVKTDRKDWQITADESWRETLNIQSLYTLL	198	USER	zzzz897	cress virus
249784	my_seqs_seabass1_1_2ct146.2@PF02486.18	PF02486.18	my_seqs	MAPLLELQSTGAHESCRTDWLTHSFKFTTEDEEQDLFAYFNDLSEKVLPVGGFKPPSGGKHYQFVYKHDSGVSFETTPIDSRRATKGQALVNIPGSVWGSLHAEERNCLITDIRYWPGAFRCTRWDPQITVLKSPIDVAQVVADVQAGKLWAAGFSQQNPYGRTKADGSWVSPPTQYFGSPESNIRLRIYDHGVQPGWSEPSFRVEGQIRKRYADDHFRRMAARCMEQREMGPLLIDAEERSVKDALVQHADFRDTSKWAGRVRPTKWRQSAPQAKWWKEILDHRADPAQLSHRPEVSLKRTRAACNQQYGRKLAMDDIYDMAVSNAPLQQVLFMKYLETCAFLRQEDLLELLKQVPPEFHDRLRTLFHMSFEQAEDWADFAGPPS	386	USER	zzzz914	circular_genetic_element
249785	my_seqs_seabass1_1_2ct206.1@PF03432.13	PF03432.13	my_seqs	MYNMRRIYEVKTPKYSDGICNGEHLWCGYCQACLWLFKYDSCDEIMEFRKKNYTYAKKCEKRQRELEQAVQLSISDNIPHFFITCTFDEKQVSAKEVFNLKEEIQNSHSLDGGCSVIEYHSDKHPKGGHLHFHLAAPRVGTYKPNAIIKYIQKITKLAPNFIDIGRPCNNFTKRVEYICGMKRSEKEIHLENDRDWRDFHGFPHVSHRFSDEMLLKYEYAIKYALR	226	USER	zzzz916	cress virus
249786	my_seqs_seabass1_1_2ct220.2@4CIJ_C	4CIJ	my_seqs	MTYSISDPFCDWLDVTCHPEVSFLTEVTQFLAYHFYPVAFVKDSGMGKTTGYRVGSGILVLEVSKNFHRASASGSCVGEFVKLGVFRDYVNILGSVGHNVTRLDVAVDILRDAPEMLRGLEAKYPDDLFAFGRKSLRITRLYSARATDRALTGTWYIGHRSSARVTARVYDKQAEALEKRGEILPPTTRIELTFRKDYNCSLYDVLMPESLFYSHASPKLLEVPDKYIAPWCPRGLVPWVSTPKDHTLTLDRFDARVSHSPELLKIAELGAQFGDAGKAAVMRHFERLLTSALSEASPVTSELD	304	USER	zzzz917	circular_genetic_element
249787	my_seqs_seabass1_1_2ct229.2@4CIJ_C	4CIJ	my_seqs	MTYSRSNVFCDWLDVTCHPELSFISTVEAFLAYHFYPVLFSADGRTGYKVGEGVLIIECKRMWHRSSCSGSSIRELEAKGIFRDYVNVLGSVGHNITRLDAAVDLFLDAPAFLRKLEHMYPDDLFSFGRKALRVTRLYSARAVDRALTGTWYAGHRSSARVTARVYDKQAEAFEKRFEVLPPTTRIELTFKKDYNCSLYDVLMPESLFYSHASPKLLDAPEGVYIPDWSSRGLVPWVSEPRDYTLTLERFDYRVSSSPELRKLAELGAQFGDGGKAVIMRHFEKLLSSALHATEKVD	297	USER	zzzz918	circular_genetic_element
249788	my_seqs_seabass2_1_2ct32.1@PF03432.13	PF03432.13	my_seqs	MTIKNWFVRSERVKDKHHGLIKYSKYLVNLEHSNHKSTSSIIPIYGTIENFIRTCSNEAVSLDLDNSQKKGGRPVQSYAQSFVFSLPPSVTKPTPDEWRSITSDILKELAKKLGIDVNDFKGRVFANVHDQDNPHLNLVVSRVVHGKALKALDQKGTIGVAKKAFNAASLARCGLDVSEYEPLQTNVGPHLAKWQLQQQNSEKALKTIEFKSQSFDLDVEKVKEFGKYSAMLNNQIVKWILSISSGDITNENRQKHRIDKTTDALSSLNVPKEQADLLNGLFDMAERKTGRAIENRVKHKI	301	USER	zzzz922	circular_genetic_element
249789	my_seqs_seabass3_1_2ct20.1@PF03432.13	PF03432.13	my_seqs	MTIVKKIKNWFVRSERVHSKSSGLIKYGSYLIDKEHSNHKSKTSAIHNMYGNVTNFIQTAAREAIELDLKNAQAKGGRPVDSYAQSFVLTLPSGVNQPTPEQWKAITKDVLLDAFKKLNKTPEEMKGHFFANVHEQTNPHLNILIAKVVDGQSLRAVNQVGIIGTMKKSFNASVLKHCGLNYKDYEPLQTNLGKSLPRWQLEQQNKISEKLSELDIKETVLDTKINDLKKLNKLSFMLNNQLIKWMHAVKTSDIKDESRQENRIKKTVEELSELNISDAQMTQFNELFELAEEETSHKIPVRVAKKFKP	309	USER	zzzz923	circular_genetic_element
249790	my_seqs_seabass4_6_2ct111.2@4CIJ_B	4CIJ	my_seqs	MTCSRSKVFCDWLDVTCHPELSFIPTVEAFLAYHFFPVIFSADGRTGYKIGEGVLILECKRMWHRSSCSGSSVRELEAKGIFRDYVNILGSVGHNVTRLDAAVDLSIDAPGFLRKLEQTYPDDLFSFGRKALRVTRLYSARASDRALTGTWYAGHRSSARVTGRVYDKQAEAFEKRGELLPPTTRIELTFKKDYNCSLYDVLMPESLFYSHASPKLLDAPEGVYIPDWASRGLVPWVSEPKDYTLTLERFDYRVSSSPELLKLAELGAQFGDGGKAIIMRHFEKLLSSALHAAQEVV	297	USER	zzzz924	circular_genetic_element
249791	my_seqs_seabass4_6_2ct117.2@4CIJ_C	4CIJ	my_seqs	MTYSRSNVFCDWLDVTCHPELSFISTVEAFLAYHFFPVLFSADGRTGYKIGEGVLIIECKRMWHRSSCSGSSIRELESKGIFRDYVNILGSVGHNITRLDAAVDLFIDAPAFLRKLEHTYPDDLFSFGRKALRVTRLYSARAIDRALTGTWYAGHRSSARVTARVYDKQAEAFEKRFEVLPPTTRIELTFKKDYNCSLYDVLMPESLFYSHASPKLLDAPEGVYIPDWSSRGLVPWVSEPRDYTLTLERFDYRVSSSPELQKLAELGAQFGDGGKAVIMRHFEKLLSSALHATEKVD	297	USER	zzzz925	circular_genetic_element
249792	my_seqs_seabass4_6_2ct142.1@PF01446.16	PF01446.16	my_seqs	MYKKLREELINENILLLERCKAMGINIWPGTDRTVEDVMVEVDKNSQEILKQKFGYGESGKQLKEKDLKSYYFITINLEGNKEQVKELYDKMGEAIHRYKWLRKSIFNIEYYTKKGGHPHTHIYVDTDKRRDTIIHLLSKFFKIKENYLDIKRYYGNPINHINYIKGIKKEESKEEYIDKDDKLRDEYNIPKFIDNMGGNELIVNGSE	208	USER	zzzz926	cress virus
249793	my_seqs_seabass4_6_2ct144.2@4CIJ_C	4CIJ	my_seqs	MDVKLPNLNEPFCDWLDITFSPEAFDYTEFCLAICDIYPHFSEKKHKDPSSHLLLAGSGTLLISFKKTFIRLSLSGGALATLRESGSFLPLLGWVSDFHHRVTRIDVSMDMAKSGGHVVADLWSRYKDGVSIGQRSLSTSTITAVDDRKRTTGTFYAGYKSKATRTFKVYDKRWELFSKSGIVIADRTRYEFTMRGGKSKTNAQPSIRDAATPEALFWDMAKSILKAPKGVSEWFDTSMAPWSYDRPQELTTWQKLTGLLESSADIARINSLAAELGEPGLQMVLSAVSKGILKPATLAS	300	USER	zzzz927	circular_genetic_element
249794	my_seqs_seabass4_6_2ct165.2@4CIJ_C	4CIJ	my_seqs	MTCSRSDVFTDWLDVTCHPEASFLPLVESFLAYHFFPVMFAENGRTAYKVGDGVLVLETKRLFHRASCSGSCIRQLTADNLFRDYVNVLGTVGHNVTRLDAAVDMYTDAPPFLRKLESAYPDDYFSFGRKALRVSRLYSARQSDRALTGTWYAGHRSSARVTARVYDKQAEAMDKRFELLPPTTRIELTFRKDYNCSLYDVLMPESLFYTHASPKLLDAPEGVNIPKWEPRGLVPWVSSPVDYTLTLDRFDYRVSSSPEMQKLADLAAQFGDAGKAAVMRHFERMLTSALAEKSQTSDAA	300	USER	zzzz928	circular_genetic_element
249795	my_seqs_pompano_r1_2ct001.3@4CIJ_C	4CIJ	my_seqs	MLKIMNYACSDVFCDAVCVTYDPDDSVCDDAYSFLEASGFSLTTYTEDYALFYANEHAMVRLETKPQYHKVEIKGKALEHFRSLGLFSECLAFLASRNHKVTRLDLALDVQRDFPNVLHGVRSRFPDGYCRVSRKRGKITELLEPRDSDGKRSGTLYIGSHGGKARKFARVYDKQLEALSKRGEVLPPTTRYEFVIREDVTLRDAACPAPCFWHFMSIELLKAPQGVEPWVKGSVFGWQRKTPEKLPVELLLGYLDRSPQLARMVQLADLCGDKGRSFLLSQLTKRISSDRTLGVTPP	298	USER	zzzz937	circular_genetic_element
249796	my_seqs_redsnapper_r1_2ct000.5@PF01446.16	PF01446.16	my_seqs	MAKVNFLTCLYTELAKSYFLIGLLMAEENTVIWNAPWGKTKQTFSSGSATGLAICKGAWLGRPDEAWKHKCARWLACPTCEGKRAGKRAHEMKERLKVARHYLGNDMTVGVLTVTLPGQKHESGIRYKSLKEQYDYAVSRTTLPGLPGWHSMRGMNRLLCGKPDHKGYGKNSQGYGLGADGGTHFMEFTYNNKKSWWNVHMHSLFYAAEPLDRLKSTSRHVVDGDNLLMKKENKGRTNVGLAKLGYGPRYTLDYADTHEMDQIIRYSSKVAYVTKPFKAPKHKFGEIEDFMYTNPRLSRPFGRNQYKIDTLPDGYGEEKILEQI	324	USER	zzzz938	cress virus
249797	my_seqs_redsnapper_r1_2ct018.3@PF01446.16	PF01446.16	my_seqs	MAEENTVIWNAPWGKTKQTFSSGSATGLAICKGAWLGRPDEAWKHKCARWLACPTCESKRAGKRAHEMKERLKVARHYLGNDMTVGVLTVTLPGQKHESGIRYKSLKEQYDYAVSRTTLPGLPGWHSMRGMNRLLCGKPDHKGFGKNSQGYGLGADGGTHFMEFTYNNKKSWWNVHMHSLFYAAEPLDRLKSTSRHIVDGDNLLMKKENKGRTNVGLARLGYGPRYTLDYADTHEMDQIIRYSSKVAYVTKPFKAPKHKFGEIEDFMYTNPRLSRPFGRNQYKIDTLPDGYGEEKILEQV	300	USER	zzzz953	cress virus
249798	my_seqs_redsnapper_r1_2ct028.1@PF01446.16	PF01446.16	my_seqs	MCVESLSYFLNDWGQADDWAALKPCLLEGRSILPFLNTTNQKKPHVFVTIGLDKKKDPPSLFRQVKGITPRVTQIIGGIGVLEFIPHPHVHILVDKPEKYHKGNLIKVLARYLGIERTTLIDIAISNKKSDYDARLAYVSGTKACGTKMERVAEDEAIRDKYNIPHTIEW	170	USER	zzzz954	cress virus
249799	my_seqs_seabass1_r1_2ct005.3@4CIJ_B	4CIJ	my_seqs	MFHCTSNCLQYAIAVPPPLKFVLALLSCTATVGVLMSSQTFVDCLDVTFAPTDVPEPEINTLLLSAGFDPAYMKGGGKLYRTPDKRGTVRVDVTGKFGRISCSGASCRHLRDLDLWMDYLSILSTSPHSVTRLDVALDLAMDGADLVEKMRLRHPTGDVFLGRKAIKSSVILGVRADGRESGTWYAGYGSSAKATAKVYDKAKQVLDLYGEVIPPRGRVEVTAWKDYGATLRDAALPNSIFWHIASPALISKPEGVPMWQANTDGGWQAPRKEINPAEVMRRRVEESAEIDRLIELSRTFSGGASYLEHLIHKRMQQQNLPEAVPEAS	328	USER	zzzz955	circular_genetic_element
249800	my_seqs_seabass3_r1_2ct000.2@PF01446.16	PF01446.16	my_seqs	MVVMKTEATPDGCTSVRKYLNDRSLCPRWRLCSGCERVRAKRNQWKIAKSLQYDIDLSEEQGAPLKVGILTSTLPGKDSAIRAASLSEQYAYLTKRTTMSGYTGWHSMRGLNTKLKEWGISGGSHFIEFTNGSGNQWNTHMHSVLVGFEEDWKVPLKETTVVREWNDDLTMKLQTEKLENKTRSNKRVLSPLGLGRLYTLDIASADEMASIARYSAKVEYVTKPVKVPKGQLPEVSDFLNGSVLMKDVTFGGITSSKATRSIPRLARPFGDWMRNGPERQFSWS	284	USER	zzzz956	cress virus
249801	my_seqs_seabass4_r1_2ct002.1@PF03432.13	PF03432.13	my_seqs	MVCKLFEILDENEIKQLSKIEYIMAKPEYIYDFEDEIRKYKMQCLRAEWDKNAMIVTVPGRGQGFKYPFTQSDYDTACTEYNTLINNDFMQKWLLEWECNKNSLPKMFWKYKTICDYMNVIPFTPSVMINISPDWSESKLTTEFGRTAVLKKLIDSYMQEQWYEKWEYVIENGSDGKHIHAHIVAKMNTKRLKSVESHLKRGNNTQQLKKYAKGIKGIQGCIKGNSVQKVFLRTEEIVKDKLLYLHEDTKPQGHKNQSIIKDGYIVGCL	269	USER	zzzz957	circular_genetic_element
249802	my_seqs_seabass4_r1_2ct011.2@4CIJ_C	4CIJ	my_seqs	MTAFCDWLDVTYAPDDVPEPELRTLLLGCGFGLARDTGGAVVYTSEPRGIVKVTYAKRYARISLSGGALAALRSAGHFHESLSILSTSPHKVTRLDAALDVPIDAADAIQRLRNRHSSGFVALGRKALPVTVFLSTRPDGRESGTYYVGHRTAARMTARVYDKSFEALSKRGEVYPSHVTRYEVTARKDSGATLRDAATPNSIFWHIAAPALIPSKPKGVDMWTPHGDLTGWEHVPRSFTPAEVLERRIEYSAELEALIALADQLGAYGRSHLMYMLQRRVSPEDAQVSKVS	292	USER	zzzz958	circular_genetic_element
249803	my_seqs_seabass4_r1_2ct012.2@4CIJ_B	4CIJ	my_seqs	MTCLVSDVFCDWLDVTCSPESSFVADLRRFCDVNLWPVAYADHERIMIIVGEGKLVIDVKKRYHRASASGSVLALLRTTGLLKPYLALLASVPHRVTRLDAAVDVAVDGPIVLRSLEARHPTDRVALTRKSLGVVRMYSARESDCQLTGTWYVGHRSNARVTARVYDKQAEILSRTGLDSPPLTRYELTFKKDLGCTLRDCLMPASLFYEYASGQLLAPPRPMPAWVPNKDSDWSSVPVDLALPYEVFCQRVERSPEISRLVELAAEFGPVGRPVLLRAFARALDEQMGFLLDAAAAAELAE	302	USER	zzzz959	circular_genetic_element
249804	my_seqs_seabass4_r1_2ct016.2@4CIJ_B	4CIJ	my_seqs	MTCSQSDRVFCDWLDVTFAPHDTPYPEVNRLLLDAGFDVESPDRTAFSYRHPDHPSSLLLVAPSRGTMRFSASGSACGALRDLGLWHDYLSALSSSPHRVTRVDAALDLPMDGADLVQLMRDRYPSGEVNLSRKSVRTTTFLEVRPDGRESGTWYAGHKSKARYTARVYDKALEALSKRGQLLPPTARIEVTAKGGDSGATLRDAAMPAALFWSIASPALLTAPEDAPVWTPNHDLGWTAEPREFDPAMVLRRRVEGMALLDALALVADDLGPNGRAYLLNLISKRLEASPALADEAAA	299	USER	zzzz960	circular_genetic_element
249805	my_seqs_seabass_ms2_2ct348.2@PF01446.16	PF01446.16	my_seqs	MCNQDAEGYVVTMSVAGFLELQEIGHYKLKHRWQNMKGTSVAKHQSATHWWPEVNEAGRTIYYTERCGNRGCWACQYRARRKLRDKVSSFIASTVEPSSDKWRFVTLTLPGSWYNVRSADLENQFSTIRRAFKSWRLKMKRRQRSVSGFYTIELVQNSNSSNWHAHVHLIMPWKNMDYGEIRKCWTESVDKPMRKQLASWTDDQFTNDNRAIQVDPITSSGIGEYLTKVTNYVTKGSKDFRNPAEVAKVLYRRRTTGWLGKYHGTKKN	268	USER	zzzz967	cress virus
249806	my_seqs_seabass_ms2_2ct349.1@PF01446.16	PF01446.16	my_seqs	MPMSVAGFLELQEIGHYRLKHRWQNMKGTSVAKHQSATHWWPEVNEAGRTVYYTERCGSRGCWACQYRARAKLRDKVENFVRTTVEPDLTKWRFVTLTLPGSWYDVRHADLETQFAEIRRAFRSWRLKMKRRQRPVSGFYTIELVQNSNSSNWHAHVHLIMQWKKLDYGEIRKCWTESVDRPMRKQLSEWTNKRFTNDSRAIQVDPITSSGIGEYLTKVTNYVTKGNKDFRNPAEVAKTLYRRRTTGWLGEQYGFKEK	258	USER	zzzz968	cress virus
249807	my_seqs_seabass_ms2_2ct404.3@PF01446.16	PF01446.16	my_seqs	MAFTCKNCSFIPDPRNDDDYVRTHKISEKTGERSYKNLRFPVRCTRCEREKKRYQRMRRRLEKIWEKSWAEPAQIYRRPKLITFALPSIMTDDPNPEVEVKKLNKLLPKARKILFENRIKGGSYVLECTTRFVVADYQGNLVFKWKHHAHVHMVAVAPFIHRSKLKEFCEILMPIGLGRINYVAPKGPYKEAVQQVARYIGKYLVKDKRQSRTFGIMRGITPPIHSDKSRK	231	USER	zzzz969	cress virus
249808	my_seqs_seabass_ms2_2ct408.1@PF05840.12	PF05840.12	my_seqs	MDSNSSEWQGDINPFYPKRCRTCETDKKRNQRMKQRTRKVWRLAEEIIKPTYHYPKLITFSLLTDEYYSDTWSKRYELLDKLGSKLPGAVKTLMKNGMLGCTLVMECNSRLQPMDEGQPLWTWRHHPHVHAVAISPFIHHTKLKVWCEQLMPMGLGRINYKAPRHYGSTARYVSKYLAKQNLNVRSFGIIRKIPAIENECRCRHDDMLVGQAYCDCFS	218	USER	zzzz970	circular_genetic_element
249809	my_seqs_seabass_ms2_2ct451.2@PF01446.16	PF01446.16	my_seqs	MWQETFVRTPQVPPNACLGGSGQMGGSEMKVEATPDGCTNARAFLNDRSLCARWRLCPGCERVRAKRNQYKIAKRLEYDLEWAKEADLELTVGVLTTTLPGNEKSIRHASLGEQYRYLTERRTMSGYTGWHSMRGLNTKLKEWGVSGGSHFLEFTNKGSTWNTHMHSVLVGFQDDWQVPLKETTKQLEWNDDLTMRLQTEKAENKTRSNKRILEPLGLGRLYTLDIASDDELASIARYSAKVEYVTKPVKVPEGKLPEVSGFLAGGYDHGKERSGHGRHLPRLARPFGDWMRNGPERRYA	300	USER	zzzz971	cress virus
249810	my_seqs_seabass_ms2_2ct573.2@PF11726.7	PF11726.7	my_seqs	MPEMIDIDFNDAIMYRQTIHDYWESKPEGCTCYEHISTGVRTDNGPFRCKVCYPTKDKLVDNTYKGWTFITIAPSKLKTGGLKMKDEELLEQFCHRWFAKYNFSEYFWVIEYGKDEENPFLHVHALFKGIVNKKFKKEGQYKFLRSEWNKLLPCKITNIKSWMEKKANPHIDADVLHQRINDKTLWELKYNYLHNDLKGTHQNFSGGTQGVISSN	215	USER	zzzz972	circular_genetic_element
249811	my_seqs_seabass_ms2_2ct615.2@PF01446.16	PF01446.16	my_seqs	MLKAKLKCGMPLMDFLEHIMPKAEWDAFENQILIKENKKIKPLGITVRKSLAMETDEFITICQHLTKYKWFKDYVYSVEFYTQNGYYPHIHILLKKWDKTTLPRCDLIRNLKRIFKQSNNSQIEVKELSSIHANNYEEYLGGNKQDTSKQERVQKDIEERIKFSISNIYSDI	172	USER	zzzz973	circular_genetic_element
249812	my_seqs_seabass_ms2_2ct625.2@PF01446.16	PF01446.16	my_seqs	MKSACLQPHICAHRLAPITHHTKRNTYECEDLGECKYGTDFNELFKKRPTEPEIHDLQEWLLIKGNLAQQETRKRRARLFAKHNEEGQLISIMLDQEYKQIPELMGDILNELKSYKMITENDGIASVEIEGDGGWNPHIHVAIKKTKAPSLVAQPLYLKFVKDKHGNKREKYQCYRISVDPMPYGAAAKYVYGEKSDPEKLEKCKKDEEWRIKNGMKAVYHINNI	225	USER	zzzz974	cress virus
249813	my_seqs_seabass_ms2_2ct630.1@3DKX_A	3DKX_A	my_seqs	MDFSVVYFVSNFDILYQRYTYLLFFLLLYMDKYITFFIDGSEEYFDQIEKLILLPTYSISFWLVSHELFNSKMEKKPHYHFIIKSTEKAYNALFKRLKELLGAKCDSTKGGYRPYGRLKVPIRDITKLKQYCSKDGNVRSSCAPAELKALYEASYKKKDKEVFLNELFDWIAKNSYHPTFPTSHVWRDTTDRIRGGIIHFCLDKKHRITRPSVESYFLQFIRSDYCPLSPEKKKTYLFNHFYG	243	USER	zzzz975	circular_genetic_element
249814	my_seqs_seabass_ms2_2ct689.1@PF01719.16	PF01719.16	my_seqs	MYKTWFFDESISKFDEVENIIISYSFPEWLICHEKFNSNGEPKPHYHILVKLGNDGDIKPWNAMMSRIKKHYKLIEKNKLLRAGKTKGGTTCFGILKKQLTDIDTFKRYLCKDGNVRSNMSEETLKHITQQGQAVARQKEFKVKCLNYVEAWYHKIYKSKFTYEPYHDELQIKTLILEFYIKERAPWCKSSILSLYNYCIAFSTIPPVKLSPKNIILRLELLTKLGNNF	229	USER	zzzz976	cress virus
249815	my_seqs_seabass_ms2_2ct739.2@PF01446.16	PF01446.16	my_seqs	MFNTEVYDLLMKTYTDDHDDWEERTEEEKRNVRLTLEWVASQHNVAPSKQITLRKYKLSALPKKSHRFITVSVKKDANPKDLATFMERFISKHNYSHNIEVYTLEFTNAEMEYHPHIHILFNGTDKPQKGNIIRDFSRLFKIEPNFIDIQTSNDPLLYETRRQYCFGEKQNIKEKQVKQDMEIRKANNLLSYYSI	195	USER	zzzz977	cress virus
249816	my_seqs_seabass_ms2_2ct742.2@PF03432.13	PF03432.13	my_seqs	MYKNMWDIYRDKREPGGSCGGQKGWCGYCGVCDYIWNIGKYSNWKGMTKDEWRKSNYKNNLKTARHEREQIQEVKDEVELEMGGGLKHTFWTIGLKEDYDLGKMHEKTEELLNKDKFGMGKSCAVYEYHSESKPDGGNLHIHILVPEHGSKTRAGKQIQKVAEHYGVKENFVDREFGNRKDFKNRMNYILGNKINDEKRKYVEKDKEWRAMQKLPDFASTLSKKIEEAFKN	231	USER	zzzz978	cress virus
249817	my_seqs_seabass_ms2_2ct793.1@3DKX_A	3DKX_A	my_seqs	MLKTFFIDYNITIADQLIKIIETYTGVKEYLLSHEEFNKKGEHKPHFHFYFKVDNEKTYNNLIKKIIGDYKLKELGIEYRKQTGKKGYRNYGTLTKKIYDEDYYKTYLCKDGTVWGSYSKEELQGYIDASFKAQSETELKEKIYKYVELNYLKDRFKDIINKNNLFTSKYKDTNIKLCIMEYFRENQMTITKTKINNQFNHFVSKSLKFSLGDIFTIMDF	220	USER	zzzz979	cress virus
