# Supplementary material for: Discovery of several thousand highly diverse circular DNA viruses
Source: eLife journal article supplement (doi:10.7554/elife.51971), 2020-02-03
Supplement: fig2-figsupp1-data4 [file elife-51971-fig2-figsupp1-data4-v1.cys › CytoscapeSession-2019_08_05-17_02/tables/52-all_my_seqs_genbank_ssDNA1_domains_micro_ino_rep_fasta+Full+Network/LOCAL_ATTRS-org.cytoscape.model.CyEdge-all_my_seqs_genbank_ssDNA1_domains_micro_ino_rep_fasta+Full+Network+default+edge.cytable]

CyCSV-Version	1
SUID	__mclCluster	interaction	name	selected
java.lang.Long	java.lang.Integer	java.lang.String	java.lang.String	java.lang.Boolean
	mutable
all_my_seqs_genbank_ssDNA1_domains_micro_ino_rep_fasta Full Network default edge
944			zzzzzz5,zzzz739	false
945			zzzzzz5,zzzzz24	false
946			zzzzzz5,zzzzz14	false
947			zzzzzz5,zzzzz18	false
948			zzzzzz5,zzzz915	false
949			zzzzzz5,zzzz273	false
950			zzzzzz5,zzzzz29	false
951			zzzzzz5,zzzz797	false
952			zzzzzz5,zzzzz25	false
953			zzzzzz5,zzzzz21	false
954			zzzzzz5,zzzz857	false
955			zzzzzz5,zzzzzz6	false
956			zzzzzz5,zzzz980	false
957			zzzzzz5,zzzzz19	false
958	1		zzzzzz5,zzzzzz2	false
959	1		zzzzzz5,zzzz789	false
960	1		zzzzzz5,zzzzz27	false
961	1		zzzzzz5,zzzzz22	false
962	1		zzzzzz5,zzzz962	false
963	1		zzzzzz5,zzzz919	false
964	1		zzzzzz5,zzzzzz1	false
965	1		zzzzzz3,zzzzzz8	false
966			zzzzzz1,zzzzzz6	false
967	1		zzzzzz1,zzzzzz2	false
968	1		zzzzz98,zzzzz99	false
969	1		zzzzz97,zzzzz98	false
970	1		zzzzz97,zzzzz99	false
971	1		zzzzz96,zzzzz97	false
972	1		zzzzz96,zzzzz99	false
973	1		zzzzz94,zzzzz98	false
974	1		zzzzz94,zzzzz96	false
975	1		zzzzz94,zzzzz97	false
976	1		zzzzz94,zzzzz99	false
977	1		zzzzz93,zzzzz98	false
978	1		zzzzz93,zzzzz97	false
979	1		zzzzz93,zzzzz94	false
980	1		zzzzz93,zzzzz99	false
981	1		zzzzz93,zzzzz96	false
982	1		zzzzz92,zzzzz97	false
983	1		zzzzz92,zzzzz94	false
984	1		zzzzz92,zzzzz99	false
985	1		zzzzz92,zzzzz96	false
986	1		zzzzz92,zzzzz93	false
987	1		zzzzz91,zzzzz98	false
988	1		zzzzz91,zzzzz97	false
989	1		zzzzz91,zzzzz99	false
990	1		zzzzz91,zzzzz94	false
991	1		zzzzz91,zzzzz92	false
992	1		zzzzz91,zzzzz96	false
993	1		zzzzz91,zzzzz93	false
994	1		zzzzz90,zzzzz98	false
995	1		zzzzz90,zzzzz97	false
996	1		zzzzz90,zzzzz99	false
997	1		zzzzz90,zzzzz94	false
998	1		zzzzz90,zzzzz92	false
999	1		zzzzz90,zzzzz96	false
1000	1		zzzzz90,zzzzz91	false
1001	1		zzzzz90,zzzzz93	false
1002	1		zzzzz89,zzzzz98	false
1003	1		zzzzz89,zzzzz97	false
1004	1		zzzzz89,zzzzz92	false
1005	1		zzzzz89,zzzzz94	false
1006	1		zzzzz89,zzzzz99	false
1007	1		zzzzz89,zzzzz90	false
1008	1		zzzzz89,zzzzz91	false
1009	1		zzzzz89,zzzzz96	false
1010	1		zzzzz89,zzzzz93	false
1011	1		zzzzz88,zzzzz98	false
1012	1		zzzzz88,zzzzz97	false
1013	1		zzzzz88,zzzzz99	false
1014	1		zzzzz88,zzzzz92	false
1015	1		zzzzz88,zzzzz94	false
1016	1		zzzzz88,zzzzz93	false
1017	1		zzzzz88,zzzzz91	false
1018	1		zzzzz88,zzzzz96	false
1019	1		zzzzz88,zzzzz90	false
1020	1		zzzzz88,zzzzz89	false
1021	1		zzzzz87,zzzzz98	false
1022	1		zzzzz87,zzzzz99	false
1023	1		zzzzz87,zzzzz97	false
1024	1		zzzzz87,zzzzz92	false
1025	1		zzzzz87,zzzzz94	false
1026	1		zzzzz87,zzzzz96	false
1027	1		zzzzz87,zzzzz91	false
1028	1		zzzzz87,zzzzz88	false
1029	1		zzzzz87,zzzzz93	false
1030	1		zzzzz87,zzzzz90	false
1031	1		zzzzz87,zzzzz89	false
1032	1		zzzzz86,zzzzz98	false
1033	1		zzzzz86,zzzzz97	false
1034	1		zzzzz86,zzzzz92	false
1035	1		zzzzz86,zzzzz99	false
1036	1		zzzzz86,zzzzz94	false
1037	1		zzzzz86,zzzzz90	false
1038	1		zzzzz86,zzzzz87	false
1039	1		zzzzz86,zzzzz93	false
1040	1		zzzzz86,zzzzz91	false
1041	1		zzzzz86,zzzzz96	false
1042	1		zzzzz86,zzzzz89	false
1043	1		zzzzz86,zzzzz88	false
1044	1		zzzzz85,zzzzz98	false
1045	1		zzzzz85,zzzzz97	false
1046	1		zzzzz85,zzzzz92	false
1047	1		zzzzz85,zzzzz99	false
1048	1		zzzzz85,zzzzz94	false
1049	1		zzzzz85,zzzzz96	false
1050	1		zzzzz85,zzzzz91	false
1051	1		zzzzz85,zzzzz93	false
1052	1		zzzzz85,zzzzz90	false
1053	1		zzzzz85,zzzzz87	false
1054	1		zzzzz85,zzzzz89	false
1055	1		zzzzz85,zzzzz86	false
1056	1		zzzzz85,zzzzz88	false
1057	1		zzzzz84,zzzzz98	false
1058	1		zzzzz84,zzzzz99	false
1059	1		zzzzz84,zzzzz97	false
1060	1		zzzzz84,zzzzz92	false
1061	1		zzzzz84,zzzzz94	false
1062	1		zzzzz84,zzzzz90	false
1063	1		zzzzz84,zzzzz93	false
1064	1		zzzzz84,zzzzz96	false
1065	1		zzzzz84,zzzzz91	false
1066	1		zzzzz84,zzzzz87	false
1067	1		zzzzz84,zzzzz89	false
1068	1		zzzzz84,zzzzz86	false
1069	1		zzzzz84,zzzzz85	false
1070	1		zzzzz84,zzzzz88	false
1071	1		zzzzz83,zzzzz98	false
1072	1		zzzzz83,zzzzz99	false
1073	1		zzzzz83,zzzzz92	false
1074	1		zzzzz83,zzzzz97	false
1075	1		zzzzz83,zzzzz94	false
1076	1		zzzzz83,zzzzz91	false
1077	1		zzzzz83,zzzzz96	false
1078	1		zzzzz83,zzzzz87	false
1079	1		zzzzz83,zzzzz93	false
1080	1		zzzzz83,zzzzz90	false
1081	1		zzzzz83,zzzzz86	false
1082	1		zzzzz83,zzzzz88	false
1083	1		zzzzz83,zzzzz85	false
1084	1		zzzzz83,zzzzz84	false
1085	1		zzzzz83,zzzzz89	false
1086	1		zzzzz82,zzzzz98	false
1087	1		zzzzz82,zzzzz99	false
1088	1		zzzzz82,zzzzz97	false
1089	1		zzzzz82,zzzzz92	false
1090	1		zzzzz82,zzzzz94	false
1091	1		zzzzz82,zzzzz96	false
1092	1		zzzzz82,zzzzz91	false
1093	1		zzzzz82,zzzzz93	false
1094	1		zzzzz82,zzzzz83	false
1095	1		zzzzz82,zzzzz90	false
1096	1		zzzzz82,zzzzz87	false
1097	1		zzzzz82,zzzzz89	false
1098	1		zzzzz82,zzzzz86	false
1099	1		zzzzz82,zzzzz84	false
1100	1		zzzzz82,zzzzz85	false
1101	1		zzzzz82,zzzzz88	false
1102	1		zzzzz81,zzzzz98	false
1103	1		zzzzz81,zzzzz99	false
1104	1		zzzzz81,zzzzz97	false
1105	1		zzzzz81,zzzzz92	false
1106	1		zzzzz81,zzzzz83	false
1107	1		zzzzz81,zzzzz94	false
1108	1		zzzzz81,zzzzz82	false
1109	1		zzzzz81,zzzzz88	false
1110	1		zzzzz81,zzzzz96	false
1111	1		zzzzz81,zzzzz87	false
1112	1		zzzzz81,zzzzz85	false
1113	1		zzzzz81,zzzzz86	false
1114	1		zzzzz81,zzzzz90	false
1115	1		zzzzz81,zzzzz89	false
1116	1		zzzzz81,zzzzz93	false
1117	1		zzzzz81,zzzzz91	false
1118	1		zzzzz81,zzzzz84	false
1119	1		zzzzz80,zzzzz98	false
1120	1		zzzzz80,zzzzz92	false
1121	1		zzzzz80,zzzzz99	false
1122	1		zzzzz80,zzzzz97	false
1123	1		zzzzz80,zzzzz94	false
1124	1		zzzzz80,zzzzz87	false
1125	1		zzzzz80,zzzzz81	false
1126	1		zzzzz80,zzzzz96	false
1127	1		zzzzz80,zzzzz83	false
1128	1		zzzzz80,zzzzz93	false
1129	1		zzzzz80,zzzzz90	false
1130	1		zzzzz80,zzzzz82	false
1131	1		zzzzz80,zzzzz91	false
1132	1		zzzzz80,zzzzz86	false
1133	1		zzzzz80,zzzzz88	false
1134	1		zzzzz80,zzzzz85	false
1135	1		zzzzz80,zzzzz84	false
1136	1		zzzzz80,zzzzz89	false
1137	1		zzzzz79,zzzzz99	false
1138	1		zzzzz79,zzzzz97	false
1139	1		zzzzz79,zzzzz94	false
1140	1		zzzzz79,zzzzz83	false
1141	1		zzzzz79,zzzzz92	false
1142	1		zzzzz79,zzzzz96	false
1143	1		zzzzz79,zzzzz86	false
1144	1		zzzzz79,zzzzz82	false
1145	1		zzzzz79,zzzzz87	false
1146	1		zzzzz79,zzzzz93	false
1147	1		zzzzz79,zzzzz85	false
1148	1		zzzzz79,zzzzz81	false
1149	1		zzzzz79,zzzzz90	false
1150	1		zzzzz79,zzzzz88	false
1151	1		zzzzz79,zzzzz89	false
1152	1		zzzzz79,zzzzz91	false
1153	1		zzzzz79,zzzzz84	false
1154	1		zzzzz79,zzzzz80	false
1155	1		zzzzz78,zzzzz98	false
1156	1		zzzzz78,zzzzz99	false
1157	1		zzzzz78,zzzzz97	false
1158	1		zzzzz78,zzzzz92	false
1159	1		zzzzz78,zzzzz94	false
1160	1		zzzzz78,zzzzz90	false
1161	1		zzzzz78,zzzzz91	false
1162	1		zzzzz78,zzzzz81	false
1163	1		zzzzz78,zzzzz79	false
1164	1		zzzzz78,zzzzz93	false
1165	1		zzzzz78,zzzzz87	false
1166	1		zzzzz78,zzzzz96	false
1167	1		zzzzz78,zzzzz83	false
1168	1		zzzzz78,zzzzz82	false
1169	1		zzzzz78,zzzzz86	false
1170	1		zzzzz78,zzzzz80	false
1171	1		zzzzz78,zzzzz85	false
1172	1		zzzzz78,zzzzz88	false
1173	1		zzzzz78,zzzzz89	false
1174	1		zzzzz78,zzzzz84	false
1175	1		zzzzz77,zzzzz97	false
1176	1		zzzzz77,zzzzz99	false
1177	1		zzzzz77,zzzzz83	false
1178	1		zzzzz77,zzzzz94	false
1179	1		zzzzz77,zzzzz96	false
1180	1		zzzzz77,zzzzz86	false
1181	1		zzzzz77,zzzzz78	false
1182	1		zzzzz77,zzzzz82	false
1183	1		zzzzz77,zzzzz85	false
1184	1		zzzzz77,zzzzz88	false
1185	1		zzzzz77,zzzzz79	false
1186	1		zzzzz77,zzzzz93	false
1187	1		zzzzz77,zzzzz92	false
1188	1		zzzzz77,zzzzz81	false
1189	1		zzzzz77,zzzzz89	false
1190	1		zzzzz77,zzzzz84	false
1191	1		zzzzz77,zzzzz91	false
1192	1		zzzzz77,zzzzz87	false
1193	1		zzzzz77,zzzzz90	false
1194	1		zzzzz77,zzzzz80	false
1195	1		zzzzz76,zzzzz85	false
1196	1		zzzzz76,zzzzz99	false
1197	1		zzzzz76,zzzzz93	false
1198	1		zzzzz76,zzzzz81	false
1199	1		zzzzz76,zzzzz91	false
1200	1		zzzzz76,zzzzz78	false
1201	1		zzzzz76,zzzzz87	false
1202	1		zzzzz76,zzzzz80	false
1203	1		zzzzz76,zzzzz90	false
1204	1		zzzzz76,zzzzz82	false
1205	1		zzzzz76,zzzzz89	false
1206	1		zzzzz76,zzzzz97	false
1207	1		zzzzz76,zzzzz86	false
1208	1		zzzzz76,zzzzz84	false
1209	1		zzzzz75,zzzzz76	false
1210	1		zzzzz75,zzzzz84	false
1211	1		zzzzz75,zzzzz81	false
1212	1		zzzzz75,zzzzz79	false
1213	1		zzzzz75,zzzzz85	false
1214	1		zzzzz75,zzzzz86	false
1215	1		zzzzz75,zzzzz97	false
1216	1		zzzzz75,zzzzz89	false
1217	1		zzzzz75,zzzzz94	false
1218	1		zzzzz75,zzzzz77	false
1219	1		zzzzz75,zzzzz88	false
1220	1		zzzzz75,zzzzz99	false
1221	1		zzzzz75,zzzzz93	false
1222	1		zzzzz75,zzzzz90	false
1223	1		zzzzz75,zzzzz87	false
1224	1		zzzzz75,zzzzz91	false
1225	1		zzzzz75,zzzzz96	false
1226	1		zzzzz75,zzzzz80	false
1227			zzzzz75,zzzzz95	false
1228	1		zzzzz74,zzzzz75	false
1229	1		zzzzz74,zzzzz76	false
1230	1		zzzzz74,zzzzz98	false
1231	1		zzzzz74,zzzzz97	false
1232	1		zzzzz74,zzzzz99	false
1233	1		zzzzz74,zzzzz94	false
1234	1		zzzzz74,zzzzz92	false
1235	1		zzzzz74,zzzzz83	false
1236	1		zzzzz74,zzzzz90	false
1237	1		zzzzz74,zzzzz79	false
1238	1		zzzzz74,zzzzz77	false
1239	1		zzzzz74,zzzzz89	false
1240	1		zzzzz74,zzzzz96	false
1241	1		zzzzz74,zzzzz82	false
1242	1		zzzzz74,zzzzz93	false
1243	1		zzzzz74,zzzzz91	false
1244	1		zzzzz74,zzzzz88	false
1245	1		zzzzz74,zzzzz81	false
1246	1		zzzzz74,zzzzz80	false
1247	1		zzzzz74,zzzzz78	false
1248	1		zzzzz74,zzzzz87	false
1249	1		zzzzz74,zzzzz85	false
1250	1		zzzzz74,zzzzz84	false
1251	1		zzzzz74,zzzzz86	false
1252	1		zzzzz73,zzzzz76	false
1253	1		zzzzz73,zzzzz75	false
1254	1		zzzzz73,zzzzz98	false
1255	1		zzzzz73,zzzzz97	false
1256	1		zzzzz73,zzzzz99	false
1257	1		zzzzz73,zzzzz94	false
1258	1		zzzzz73,zzzzz92	false
1259	1		zzzzz73,zzzzz83	false
1260	1		zzzzz73,zzzzz90	false
1261	1		zzzzz73,zzzzz79	false
1262	1		zzzzz73,zzzzz77	false
1263	1		zzzzz73,zzzzz89	false
1264	1		zzzzz73,zzzzz96	false
1265	1		zzzzz73,zzzzz91	false
1266	1		zzzzz73,zzzzz93	false
1267	1		zzzzz73,zzzzz88	false
1268	1		zzzzz73,zzzzz82	false
1269	1		zzzzz73,zzzzz81	false
1270	1		zzzzz73,zzzzz78	false
1271	1		zzzzz73,zzzzz87	false
1272	1		zzzzz73,zzzzz80	false
1273	1		zzzzz73,zzzzz85	false
1274	1		zzzzz73,zzzzz84	false
1275	1		zzzzz73,zzzzz86	false
1276	1		zzzzz73,zzzzz74	false
1277	1		zzzzz71,zzzzz72	false
1278	1		zzzzz70,zzzzz98	false
1279	1		zzzzz70,zzzzz85	false
1280	1		zzzzz70,zzzzz88	false
1281	1		zzzzz70,zzzzz82	false
1282	1		zzzzz70,zzzzz92	false
1283	1		zzzzz70,zzzzz91	false
1284	1		zzzzz70,zzzzz74	false
1285	1		zzzzz70,zzzzz73	false
1286	1		zzzzz70,zzzzz86	false
1287	1		zzzzz70,zzzzz93	false
1288	1		zzzzz70,zzzzz87	false
1289	1		zzzzz70,zzzzz78	false
1290	1		zzzzz70,zzzzz79	false
1291	1		zzzzz70,zzzzz83	false
1292	1		zzzzz70,zzzzz81	false
1293	1		zzzzz70,zzzzz80	false
1294	1		zzzzz70,zzzzz84	false
1295	1		zzzzz70,zzzzz77	false
1296	1		zzzzz70,zzzzz90	false
1297	1		zzzzz70,zzzzz89	false
1298	1		zzzzz70,zzzzz96	false
1299	1		zzzzz70,zzzzz99	false
1300	1		zzzzz70,zzzzz94	false
1301	1		zzzzz70,zzzzz97	false
1302	1		zzzzz69,zzzzz75	false
1303	1		zzzzz69,zzzzz76	false
1304	1		zzzzz69,zzzzz92	false
1305	1		zzzzz69,zzzzz79	false
1306	1		zzzzz69,zzzzz98	false
1307	1		zzzzz69,zzzzz83	false
1308	1		zzzzz69,zzzzz78	false
1309	1		zzzzz69,zzzzz88	false
1310	1		zzzzz69,zzzzz82	false
1311	1		zzzzz69,zzzzz91	false
1312	1		zzzzz69,zzzzz70	false
1313	1		zzzzz69,zzzzz87	false
1314	1		zzzzz69,zzzzz86	false
1315	1		zzzzz69,zzzzz84	false
1316	1		zzzzz69,zzzzz85	false
1317	1		zzzzz69,zzzzz99	false
1318	1		zzzzz69,zzzzz73	false
1319	1		zzzzz69,zzzzz74	false
1320	1		zzzzz69,zzzzz93	false
1321	1		zzzzz69,zzzzz96	false
1322	1		zzzzz69,zzzzz81	false
1323	1		zzzzz69,zzzzz77	false
1324	1		zzzzz69,zzzzz80	false
1325	1		zzzzz69,zzzzz94	false
1326	1		zzzzz69,zzzzz89	false
1327	1		zzzzz69,zzzzz90	false
1328	1		zzzzz69,zzzzz97	false
1329	1		zzzzz67,zzzzz76	false
1330	1		zzzzz67,zzzzz98	false
1331	1		zzzzz67,zzzzz75	false
1332	1		zzzzz67,zzzzz70	false
1333	1		zzzzz67,zzzzz99	false
1334	1		zzzzz67,zzzzz97	false
1335	1		zzzzz67,zzzzz69	false
1336	1		zzzzz67,zzzzz79	false
1337	1		zzzzz67,zzzzz96	false
1338	1		zzzzz67,zzzzz83	false
1339	1		zzzzz67,zzzzz94	false
1340	1		zzzzz67,zzzzz92	false
1341	1		zzzzz67,zzzzz74	false
1342	1		zzzzz67,zzzzz73	false
1343	1		zzzzz67,zzzzz82	false
1344	1		zzzzz67,zzzzz93	false
1345	1		zzzzz67,zzzzz85	false
1346	1		zzzzz67,zzzzz87	false
1347	1		zzzzz67,zzzzz86	false
1348	1		zzzzz67,zzzzz84	false
1349	1		zzzzz67,zzzzz91	false
1350	1		zzzzz67,zzzzz89	false
1351	1		zzzzz67,zzzzz88	false
1352	1		zzzzz67,zzzzz81	false
1353	1		zzzzz67,zzzzz77	false
1354	1		zzzzz67,zzzzz80	false
1355	1		zzzzz67,zzzzz78	false
1356	1		zzzzz67,zzzzz90	false
1357	1		zzzzz66,zzzzz89	false
1358	1		zzzzz66,zzzzz82	false
1359	1		zzzzz66,zzzzz99	false
1360	1		zzzzz66,zzzzz69	false
1361	1		zzzzz66,zzzzz85	false
1362	1		zzzzz66,zzzzz78	false
1363	1		zzzzz66,zzzzz74	false
1364	1		zzzzz66,zzzzz73	false
1365	1		zzzzz66,zzzzz79	false
1366	1		zzzzz66,zzzzz70	false
1367	1		zzzzz66,zzzzz83	false
1368	1		zzzzz66,zzzzz97	false
1369	1		zzzzz66,zzzzz98	false
1370	1		zzzzz65,zzzzz71	false
1371	1		zzzzz65,zzzzz72	false
1372	1		zzzzz64,zzzzz98	false
1373	1		zzzzz64,zzzzz70	false
1374	1		zzzzz64,zzzzz76	false
1375	1		zzzzz64,zzzzz69	false
1376	1		zzzzz64,zzzzz67	false
1377	1		zzzzz64,zzzzz97	false
1378	1		zzzzz64,zzzzz94	false
1379	1		zzzzz64,zzzzz99	false
1380	1		zzzzz64,zzzzz83	false
1381	1		zzzzz64,zzzzz90	false
1382	1		zzzzz64,zzzzz82	false
1383	1		zzzzz64,zzzzz88	false
1384	1		zzzzz64,zzzzz85	false
1385	1		zzzzz64,zzzzz92	false
1386	1		zzzzz64,zzzzz87	false
1387	1		zzzzz64,zzzzz86	false
1388	1		zzzzz64,zzzzz77	false
1389	1		zzzzz64,zzzzz89	false
1390	1		zzzzz64,zzzzz79	false
1391	1		zzzzz64,zzzzz78	false
1392	1		zzzzz64,zzzzz96	false
1393	1		zzzzz64,zzzzz93	false
1394	1		zzzzz64,zzzzz91	false
1395	1		zzzzz64,zzzzz81	false
1396	1		zzzzz64,zzzzz84	false
1397	1		zzzzz64,zzzzz74	false
1398	1		zzzzz64,zzzzz73	false
1399	1		zzzzz64,zzzzz80	false
1400	1		zzzzz63,zzzzz70	false
1401	1		zzzzz63,zzzzz64	false
1402	1		zzzzz63,zzzzz75	false
1403	1		zzzzz63,zzzzz77	false
1404	1		zzzzz63,zzzzz98	false
1405	1		zzzzz63,zzzzz92	false
1406	1		zzzzz63,zzzzz99	false
1407	1		zzzzz63,zzzzz82	false
1408	1		zzzzz63,zzzzz74	false
1409	1		zzzzz63,zzzzz85	false
1410	1		zzzzz63,zzzzz76	false
1411	1		zzzzz63,zzzzz96	false
1412	1		zzzzz63,zzzzz84	false
1413	1		zzzzz63,zzzzz73	false
1414	1		zzzzz63,zzzzz93	false
1415	1		zzzzz63,zzzzz94	false
1416	1		zzzzz63,zzzzz79	false
1417	1		zzzzz63,zzzzz88	false
1418	1		zzzzz63,zzzzz89	false
1419	1		zzzzz63,zzzzz83	false
1420	1		zzzzz63,zzzzz87	false
1421	1		zzzzz63,zzzzz81	false
1422	1		zzzzz63,zzzzz86	false
1423	1		zzzzz63,zzzzz91	false
1424	1		zzzzz63,zzzzz78	false
1425	1		zzzzz63,zzzzz90	false
1426	1		zzzzz63,zzzzz80	false
1427	1		zzzzz63,zzzzz97	false
1428	1		zzzzz63,zzzzz67	false
1429	1		zzzzz63,zzzzz69	false
1430	1		zzzzz62,zzzzz92	false
1431	1		zzzzz62,zzzzz75	false
1432	1		zzzzz62,zzzzz98	false
1433	1		zzzzz62,zzzzz70	false
1434	1		zzzzz62,zzzzz64	false
1435	1		zzzzz62,zzzzz83	false
1436	1		zzzzz62,zzzzz99	false
1437	1		zzzzz62,zzzzz82	false
1438	1		zzzzz62,zzzzz79	false
1439	1		zzzzz62,zzzzz73	false
1440	1		zzzzz62,zzzzz77	false
1441	1		zzzzz62,zzzzz87	false
1442	1		zzzzz62,zzzzz89	false
1443	1		zzzzz62,zzzzz91	false
1444	1		zzzzz62,zzzzz85	false
1445	1		zzzzz62,zzzzz74	false
1446	1		zzzzz62,zzzzz86	false
1447	1		zzzzz62,zzzzz96	false
1448	1		zzzzz62,zzzzz67	false
1449	1		zzzzz62,zzzzz84	false
1450	1		zzzzz62,zzzzz88	false
1451	1		zzzzz62,zzzzz81	false
1452	1		zzzzz62,zzzzz78	false
1453	1		zzzzz62,zzzzz93	false
1454	1		zzzzz62,zzzzz94	false
1455	1		zzzzz62,zzzzz97	false
1456	1		zzzzz62,zzzzz63	false
1457	1		zzzzz62,zzzzz80	false
1458	1		zzzzz62,zzzzz90	false
1459	1		zzzzz62,zzzzz69	false
1460	1		zzzzz61,zzzzz75	false
1461	1		zzzzz61,zzzzz76	false
1462	1		zzzzz61,zzzzz98	false
1463	1		zzzzz61,zzzzz63	false
1464	1		zzzzz61,zzzzz70	false
1465	1		zzzzz61,zzzzz62	false
1466	1		zzzzz61,zzzzz69	false
1467	1		zzzzz61,zzzzz99	false
1468	1		zzzzz61,zzzzz97	false
1469	1		zzzzz61,zzzzz67	false
1470	1		zzzzz61,zzzzz94	false
1471	1		zzzzz61,zzzzz73	false
1472	1		zzzzz61,zzzzz74	false
1473	1		zzzzz61,zzzzz96	false
1474	1		zzzzz61,zzzzz87	false
1475	1		zzzzz61,zzzzz92	false
1476	1		zzzzz61,zzzzz64	false
1477	1		zzzzz61,zzzzz83	false
1478	1		zzzzz61,zzzzz81	false
1479	1		zzzzz61,zzzzz78	false
1480	1		zzzzz61,zzzzz82	false
1481	1		zzzzz61,zzzzz86	false
1482	1		zzzzz61,zzzzz79	false
1483	1		zzzzz61,zzzzz77	false
1484	1		zzzzz61,zzzzz88	false
1485	1		zzzzz61,zzzzz84	false
1486	1		zzzzz61,zzzzz91	false
1487	1		zzzzz61,zzzzz85	false
1488	1		zzzzz61,zzzzz93	false
1489	1		zzzzz61,zzzzz89	false
1490	1		zzzzz61,zzzzz80	false
1491	1		zzzzz61,zzzzz90	false
1492	1		zzzzz60,zzzzz63	false
1493	1		zzzzz60,zzzzz98	false
1494	1		zzzzz60,zzzzz66	false
1495	1		zzzzz60,zzzzz62	false
1496	1		zzzzz60,zzzzz70	false
1497	1		zzzzz60,zzzzz69	false
1498	1		zzzzz60,zzzzz94	false
1499	1		zzzzz60,zzzzz97	false
1500	1		zzzzz60,zzzzz67	false
1501	1		zzzzz60,zzzzz99	false
1502	1		zzzzz60,zzzzz92	false
1503	1		zzzzz60,zzzzz83	false
1504	1		zzzzz60,zzzzz79	false
1505	1		zzzzz60,zzzzz87	false
1506	1		zzzzz60,zzzzz90	false
1507	1		zzzzz60,zzzzz77	false
1508	1		zzzzz60,zzzzz96	false
1509	1		zzzzz60,zzzzz91	false
1510	1		zzzzz60,zzzzz81	false
1511	1		zzzzz60,zzzzz93	false
1512	1		zzzzz60,zzzzz82	false
1513	1		zzzzz60,zzzzz61	false
1514	1		zzzzz60,zzzzz73	false
1515	1		zzzzz60,zzzzz74	false
1516	1		zzzzz60,zzzzz86	false
1517	1		zzzzz60,zzzzz84	false
1518	1		zzzzz60,zzzzz88	false
1519	1		zzzzz60,zzzzz85	false
1520	1		zzzzz60,zzzzz89	false
1521	1		zzzzz60,zzzzz78	false
1522	1		zzzzz60,zzzzz64	false
1523	1		zzzzz60,zzzzz80	false
1524	1		zzzzz59,zzzzz66	false
1525	1		zzzzz59,zzzzz76	false
1526	1		zzzzz59,zzzzz75	false
1527	1		zzzzz59,zzzzz98	false
1528	1		zzzzz59,zzzzz92	false
1529	1		zzzzz59,zzzzz87	false
1530	1		zzzzz59,zzzzz81	false
1531	1		zzzzz59,zzzzz91	false
1532	1		zzzzz59,zzzzz60	false
1533	1		zzzzz59,zzzzz96	false
1534	1		zzzzz59,zzzzz70	false
1535	1		zzzzz59,zzzzz77	false
1536	1		zzzzz59,zzzzz79	false
1537	1		zzzzz59,zzzzz99	false
1538	1		zzzzz59,zzzzz83	false
1539	1		zzzzz59,zzzzz85	false
1540	1		zzzzz59,zzzzz67	false
1541	1		zzzzz59,zzzzz73	false
1542	1		zzzzz59,zzzzz78	false
1543	1		zzzzz59,zzzzz74	false
1544	1		zzzzz59,zzzzz64	false
1545	1		zzzzz59,zzzzz61	false
1546	1		zzzzz59,zzzzz80	false
1547	1		zzzzz59,zzzzz82	false
1548	1		zzzzz59,zzzzz93	false
1549	1		zzzzz59,zzzzz84	false
1550	1		zzzzz59,zzzzz89	false
1551	1		zzzzz59,zzzzz90	false
1552	1		zzzzz59,zzzzz86	false
1553	1		zzzzz59,zzzzz88	false
1554	1		zzzzz59,zzzzz94	false
1555	1		zzzzz59,zzzzz63	false
1556	1		zzzzz59,zzzzz97	false
1557	1		zzzzz59,zzzzz69	false
1558	1		zzzzz59,zzzzz62	false
1559	1		zzzzz58,zzzzz92	false
1560	1		zzzzz58,zzzzz98	false
1561	1		zzzzz58,zzzzz66	false
1562	1		zzzzz58,zzzzz76	false
1563	1		zzzzz58,zzzzz75	false
1564	1		zzzzz58,zzzzz91	false
1565	1		zzzzz58,zzzzz70	false
1566	1		zzzzz58,zzzzz77	false
1567	1		zzzzz58,zzzzz60	false
1568	1		zzzzz58,zzzzz67	false
1569	1		zzzzz58,zzzzz99	false
1570	1		zzzzz58,zzzzz87	false
1571	1		zzzzz58,zzzzz64	false
1572	1		zzzzz58,zzzzz61	false
1573	1		zzzzz58,zzzzz96	false
1574	1		zzzzz58,zzzzz93	false
1575	1		zzzzz58,zzzzz86	false
1576	1		zzzzz58,zzzzz81	false
1577	1		zzzzz58,zzzzz82	false
1578	1		zzzzz58,zzzzz85	false
1579	1		zzzzz58,zzzzz89	false
1580	1		zzzzz58,zzzzz80	false
1581	1		zzzzz58,zzzzz74	false
1582	1		zzzzz58,zzzzz73	false
1583	1		zzzzz58,zzzzz94	false
1584	1		zzzzz58,zzzzz88	false
1585	1		zzzzz58,zzzzz79	false
1586	1		zzzzz58,zzzzz84	false
1587	1		zzzzz58,zzzzz83	false
1588	1		zzzzz58,zzzzz90	false
1589	1		zzzzz58,zzzzz78	false
1590	1		zzzzz58,zzzzz97	false
1591	1		zzzzz58,zzzzz63	false
1592	1		zzzzz58,zzzzz69	false
1593	1		zzzzz58,zzzzz59	false
1594	1		zzzzz58,zzzzz62	false
1595	1		zzzzz57,zzzzz98	false
1596	1		zzzzz57,zzzzz92	false
1597	1		zzzzz57,zzzzz77	false
1598	1		zzzzz57,zzzzz60	false
1599	1		zzzzz57,zzzzz70	false
1600	1		zzzzz57,zzzzz64	false
1601	1		zzzzz57,zzzzz87	false
1602	1		zzzzz57,zzzzz85	false
1603	1		zzzzz57,zzzzz96	false
1604	1		zzzzz57,zzzzz83	false
1605	1		zzzzz57,zzzzz91	false
1606	1		zzzzz57,zzzzz82	false
1607	1		zzzzz57,zzzzz79	false
1608	1		zzzzz57,zzzzz61	false
1609	1		zzzzz57,zzzzz80	false
1610	1		zzzzz57,zzzzz99	false
1611	1		zzzzz57,zzzzz88	false
1612	1		zzzzz57,zzzzz93	false
1613	1		zzzzz57,zzzzz89	false
1614	1		zzzzz57,zzzzz67	false
1615	1		zzzzz57,zzzzz78	false
1616	1		zzzzz57,zzzzz73	false
1617	1		zzzzz57,zzzzz74	false
1618	1		zzzzz57,zzzzz81	false
1619	1		zzzzz57,zzzzz94	false
1620	1		zzzzz57,zzzzz84	false
1621	1		zzzzz57,zzzzz86	false
1622	1		zzzzz57,zzzzz90	false
1623	1		zzzzz57,zzzzz69	false
1624	1		zzzzz57,zzzzz97	false
1625	1		zzzzz57,zzzzz63	false
1626	1		zzzzz57,zzzzz62	false
1627	1		zzzzz57,zzzzz59	false
1628	1		zzzzz57,zzzzz58	false
1629	1		zzzzz56,zzzzz66	false
1630	1		zzzzz56,zzzzz76	false
1631	1		zzzzz56,zzzzz60	false
1632	1		zzzzz56,zzzzz92	false
1633	1		zzzzz56,zzzzz70	false
1634	1		zzzzz56,zzzzz98	false
1635	1		zzzzz56,zzzzz64	false
1636	1		zzzzz56,zzzzz88	false
1637	1		zzzzz56,zzzzz77	false
1638	1		zzzzz56,zzzzz82	false
1639	1		zzzzz56,zzzzz93	false
1640	1		zzzzz56,zzzzz96	false
1641	1		zzzzz56,zzzzz84	false
1642	1		zzzzz56,zzzzz61	false
1643	1		zzzzz56,zzzzz90	false
1644	1		zzzzz56,zzzzz85	false
1645	1		zzzzz56,zzzzz87	false
1646	1		zzzzz56,zzzzz79	false
1647	1		zzzzz56,zzzzz74	false
1648	1		zzzzz56,zzzzz99	false
1649	1		zzzzz56,zzzzz73	false
1650	1		zzzzz56,zzzzz81	false
1651	1		zzzzz56,zzzzz89	false
1652	1		zzzzz56,zzzzz83	false
1653	1		zzzzz56,zzzzz78	false
1654	1		zzzzz56,zzzzz91	false
1655	1		zzzzz56,zzzzz86	false
1656	1		zzzzz56,zzzzz80	false
1657	1		zzzzz56,zzzzz67	false
1658	1		zzzzz56,zzzzz94	false
1659	1		zzzzz56,zzzzz62	false
1660	1		zzzzz56,zzzzz97	false
1661	1		zzzzz56,zzzzz59	false
1662	1		zzzzz56,zzzzz57	false
1663	1		zzzzz56,zzzzz69	false
1664	1		zzzzz56,zzzzz58	false
1665	1		zzzzz56,zzzzz63	false
1666	1		zzzzz55,zzzzz75	false
1667	1		zzzzz55,zzzzz76	false
1668	1		zzzzz55,zzzzz98	false
1669	1		zzzzz55,zzzzz56	false
1670	1		zzzzz55,zzzzz63	false
1671	1		zzzzz55,zzzzz57	false
1672	1		zzzzz55,zzzzz70	false
1673	1		zzzzz55,zzzzz62	false
1674	1		zzzzz55,zzzzz59	false
1675	1		zzzzz55,zzzzz58	false
1676	1		zzzzz55,zzzzz69	false
1677	1		zzzzz55,zzzzz97	false
1678	1		zzzzz55,zzzzz99	false
1679	1		zzzzz55,zzzzz92	false
1680	1		zzzzz55,zzzzz67	false
1681	1		zzzzz55,zzzzz94	false
1682	1		zzzzz55,zzzzz74	false
1683	1		zzzzz55,zzzzz73	false
1684	1		zzzzz55,zzzzz77	false
1685	1		zzzzz55,zzzzz60	false
1686	1		zzzzz55,zzzzz87	false
1687	1		zzzzz55,zzzzz90	false
1688	1		zzzzz55,zzzzz91	false
1689	1		zzzzz55,zzzzz79	false
1690	1		zzzzz55,zzzzz61	false
1691	1		zzzzz55,zzzzz81	false
1692	1		zzzzz55,zzzzz96	false
1693	1		zzzzz55,zzzzz64	false
1694	1		zzzzz55,zzzzz93	false
1695	1		zzzzz55,zzzzz83	false
1696	1		zzzzz55,zzzzz82	false
1697	1		zzzzz55,zzzzz86	false
1698	1		zzzzz55,zzzzz85	false
1699	1		zzzzz55,zzzzz88	false
1700	1		zzzzz55,zzzzz89	false
1701	1		zzzzz55,zzzzz80	false
1702	1		zzzzz55,zzzzz78	false
1703	1		zzzzz55,zzzzz84	false
1704	1		zzzzz54,zzzzz67	false
1705	1		zzzzz54,zzzzz64	false
1706	1		zzzzz54,zzzzz83	false
1707	1		zzzzz54,zzzzz87	false
1708	1		zzzzz54,zzzzz61	false
1709	1		zzzzz54,zzzzz91	false
1710	1		zzzzz54,zzzzz77	false
1711	1		zzzzz54,zzzzz88	false
1712	1		zzzzz54,zzzzz73	false
1713	1		zzzzz54,zzzzz74	false
1714	1		zzzzz54,zzzzz60	false
1715	1		zzzzz54,zzzzz70	false
1716	1		zzzzz54,zzzzz96	false
1717	1		zzzzz54,zzzzz85	false
1718	1		zzzzz54,zzzzz79	false
1719	1		zzzzz54,zzzzz99	false
1720	1		zzzzz54,zzzzz89	false
1721	1		zzzzz54,zzzzz80	false
1722	1		zzzzz54,zzzzz82	false
1723	1		zzzzz54,zzzzz81	false
1724	1		zzzzz54,zzzzz86	false
1725	1		zzzzz54,zzzzz93	false
1726	1		zzzzz54,zzzzz84	false
1727	1		zzzzz54,zzzzz94	false
1728	1		zzzzz54,zzzzz55	false
1729	1		zzzzz54,zzzzz90	false
1730	1		zzzzz54,zzzzz63	false
1731	1		zzzzz54,zzzzz78	false
1732	1		zzzzz54,zzzzz56	false
1733	1		zzzzz54,zzzzz69	false
1734	1		zzzzz54,zzzzz97	false
1735	1		zzzzz54,zzzzz59	false
1736	1		zzzzz54,zzzzz62	false
1737	1		zzzzz54,zzzzz57	false
1738	1		zzzzz54,zzzzz58	false
1739	1		zzzzz53,zzzzz76	false
1740	1		zzzzz53,zzzzz98	false
1741	1		zzzzz53,zzzzz75	false
1742	1		zzzzz53,zzzzz56	false
1743	1		zzzzz53,zzzzz54	false
1744	1		zzzzz53,zzzzz62	false
1745	1		zzzzz53,zzzzz63	false
1746	1		zzzzz53,zzzzz58	false
1747	1		zzzzz53,zzzzz57	false
1748	1		zzzzz53,zzzzz70	false
1749	1		zzzzz53,zzzzz59	false
1750	1		zzzzz53,zzzzz69	false
1751	1		zzzzz53,zzzzz97	false
1752	1		zzzzz53,zzzzz99	false
1753	1		zzzzz53,zzzzz94	false
1754	1		zzzzz53,zzzzz67	false
1755	1		zzzzz53,zzzzz96	false
1756	1		zzzzz53,zzzzz60	false
1757	1		zzzzz53,zzzzz83	false
1758	1		zzzzz53,zzzzz73	false
1759	1		zzzzz53,zzzzz92	false
1760	1		zzzzz53,zzzzz74	false
1761	1		zzzzz53,zzzzz86	false
1762	1		zzzzz53,zzzzz87	false
1763	1		zzzzz53,zzzzz82	false
1764	1		zzzzz53,zzzzz81	false
1765	1		zzzzz53,zzzzz84	false
1766	1		zzzzz53,zzzzz88	false
1767	1		zzzzz53,zzzzz78	false
1768	1		zzzzz53,zzzzz64	false
1769	1		zzzzz53,zzzzz55	false
1770	1		zzzzz53,zzzzz89	false
1771	1		zzzzz53,zzzzz79	false
1772	1		zzzzz53,zzzzz85	false
1773	1		zzzzz53,zzzzz80	false
1774	1		zzzzz53,zzzzz77	false
1775	1		zzzzz53,zzzzz90	false
1776	1		zzzzz53,zzzzz91	false
1777	1		zzzzz53,zzzzz93	false
1778	1		zzzzz53,zzzzz61	false
1779	1		zzzzz52,zzzzz98	false
1780			zzzzz52,zzzzz95	false
1781	1		zzzzz52,zzzzz76	false
1782	1		zzzzz52,zzzzz75	false
1783	1		zzzzz52,zzzzz70	false
1784	1		zzzzz52,zzzzz92	false
1785	1		zzzzz52,zzzzz77	false
1786	1		zzzzz52,zzzzz60	false
1787	1		zzzzz52,zzzzz99	false
1788	1		zzzzz52,zzzzz90	false
1789	1		zzzzz52,zzzzz81	false
1790	1		zzzzz52,zzzzz87	false
1791	1		zzzzz52,zzzzz67	false
1792	1		zzzzz52,zzzzz64	false
1793	1		zzzzz52,zzzzz88	false
1794	1		zzzzz52,zzzzz83	false
1795	1		zzzzz52,zzzzz96	false
1796	1		zzzzz52,zzzzz53	false
1797	1		zzzzz52,zzzzz91	false
1798	1		zzzzz52,zzzzz74	false
1799	1		zzzzz52,zzzzz85	false
1800	1		zzzzz52,zzzzz80	false
1801	1		zzzzz52,zzzzz73	false
1802	1		zzzzz52,zzzzz79	false
1803	1		zzzzz52,zzzzz78	false
1804	1		zzzzz52,zzzzz82	false
1805	1		zzzzz52,zzzzz84	false
1806	1		zzzzz52,zzzzz86	false
1807	1		zzzzz52,zzzzz93	false
1808	1		zzzzz52,zzzzz89	false
1809	1		zzzzz52,zzzzz69	false
1810	1		zzzzz52,zzzzz94	false
1811	1		zzzzz52,zzzzz97	false
1812	1		zzzzz52,zzzzz56	false
1813	1		zzzzz52,zzzzz55	false
1814	1		zzzzz52,zzzzz61	false
1815	1		zzzzz52,zzzzz63	false
1816	1		zzzzz52,zzzzz54	false
1817	1		zzzzz52,zzzzz62	false
1818	1		zzzzz52,zzzzz57	false
1819	1		zzzzz52,zzzzz58	false
1820	1		zzzzz52,zzzzz59	false
1821	1		zzzzz51,zzzzz54	false
1822	1		zzzzz51,zzzzz57	false
1823	1		zzzzz51,zzzzz63	false
1824	1		zzzzz51,zzzzz62	false
1825	1		zzzzz51,zzzzz56	false
1826	1		zzzzz51,zzzzz77	false
1827	1		zzzzz51,zzzzz58	false
1828	1		zzzzz51,zzzzz97	false
1829	1		zzzzz51,zzzzz59	false
1830	1		zzzzz51,zzzzz94	false
1831	1		zzzzz51,zzzzz52	false
1832	1		zzzzz51,zzzzz92	false
1833	1		zzzzz51,zzzzz99	false
1834	1		zzzzz51,zzzzz69	false
1835	1		zzzzz51,zzzzz67	false
1836	1		zzzzz51,zzzzz60	false
1837	1		zzzzz51,zzzzz81	false
1838	1		zzzzz51,zzzzz96	false
1839	1		zzzzz51,zzzzz82	false
1840	1		zzzzz51,zzzzz79	false
1841	1		zzzzz51,zzzzz87	false
1842	1		zzzzz51,zzzzz64	false
1843	1		zzzzz51,zzzzz91	false
1844	1		zzzzz51,zzzzz80	false
1845	1		zzzzz51,zzzzz61	false
1846	1		zzzzz51,zzzzz93	false
1847	1		zzzzz51,zzzzz85	false
1848	1		zzzzz51,zzzzz84	false
1849	1		zzzzz51,zzzzz78	false
1850	1		zzzzz51,zzzzz90	false
1851	1		zzzzz51,zzzzz86	false
1852	1		zzzzz51,zzzzz83	false
1853	1		zzzzz51,zzzzz88	false
1854	1		zzzzz51,zzzzz73	false
1855	1		zzzzz51,zzzzz89	false
1856	1		zzzzz51,zzzzz74	false
1857	1		zzzzz51,zzzzz55	false
1858	1		zzzzz51,zzzzz53	false
1859	1		zzzzz50,zzzzz75	false
1860	1		zzzzz50,zzzzz54	false
1861	1		zzzzz50,zzzzz98	false
1862	1		zzzzz50,zzzzz70	false
1863	1		zzzzz50,zzzzz57	false
1864	1		zzzzz50,zzzzz63	false
1865	1		zzzzz50,zzzzz56	false
1866	1		zzzzz50,zzzzz62	false
1867	1		zzzzz50,zzzzz51	false
1868	1		zzzzz50,zzzzz69	false
1869	1		zzzzz50,zzzzz58	false
1870	1		zzzzz50,zzzzz59	false
1871	1		zzzzz50,zzzzz52	false
1872	1		zzzzz50,zzzzz67	false
1873	1		zzzzz50,zzzzz99	false
1874	1		zzzzz50,zzzzz92	false
1875	1		zzzzz50,zzzzz60	false
1876	1		zzzzz50,zzzzz97	false
1877	1		zzzzz50,zzzzz96	false
1878	1		zzzzz50,zzzzz94	false
1879	1		zzzzz50,zzzzz81	false
1880	1		zzzzz50,zzzzz73	false
1881	1		zzzzz50,zzzzz74	false
1882	1		zzzzz50,zzzzz77	false
1883	1		zzzzz50,zzzzz82	false
1884	1		zzzzz50,zzzzz79	false
1885	1		zzzzz50,zzzzz64	false
1886	1		zzzzz50,zzzzz90	false
1887	1		zzzzz50,zzzzz93	false
1888	1		zzzzz50,zzzzz53	false
1889	1		zzzzz50,zzzzz91	false
1890	1		zzzzz50,zzzzz87	false
1891	1		zzzzz50,zzzzz83	false
1892	1		zzzzz50,zzzzz88	false
1893	1		zzzzz50,zzzzz89	false
1894	1		zzzzz50,zzzzz85	false
1895	1		zzzzz50,zzzzz61	false
1896	1		zzzzz50,zzzzz86	false
1897	1		zzzzz50,zzzzz78	false
1898	1		zzzzz50,zzzzz55	false
1899	1		zzzzz50,zzzzz84	false
1900	1		zzzzz50,zzzzz80	false
1901	1		zzzzz49,zzzzz76	false
1902	1		zzzzz49,zzzzz75	false
1903	1		zzzzz49,zzzzz98	false
1904	1		zzzzz49,zzzzz54	false
1905	1		zzzzz49,zzzzz70	false
1906	1		zzzzz49,zzzzz57	false
1907	1		zzzzz49,zzzzz63	false
1908	1		zzzzz49,zzzzz56	false
1909	1		zzzzz49,zzzzz58	false
1910	1		zzzzz49,zzzzz62	false
1911	1		zzzzz49,zzzzz59	false
1912	1		zzzzz49,zzzzz69	false
1913	1		zzzzz49,zzzzz52	false
1914	1		zzzzz49,zzzzz51	false
1915	1		zzzzz49,zzzzz67	false
1916	1		zzzzz49,zzzzz60	false
1917	1		zzzzz49,zzzzz92	false
1918	1		zzzzz49,zzzzz99	false
1919	1		zzzzz49,zzzzz97	false
1920	1		zzzzz49,zzzzz81	false
1921	1		zzzzz49,zzzzz96	false
1922	1		zzzzz49,zzzzz94	false
1923	1		zzzzz49,zzzzz90	false
1924	1		zzzzz49,zzzzz77	false
1925	1		zzzzz49,zzzzz93	false
1926	1		zzzzz49,zzzzz74	false
1927	1		zzzzz49,zzzzz79	false
1928	1		zzzzz49,zzzzz73	false
1929	1		zzzzz49,zzzzz82	false
1930	1		zzzzz49,zzzzz91	false
1931	1		zzzzz49,zzzzz64	false
1932	1		zzzzz49,zzzzz53	false
1933	1		zzzzz49,zzzzz88	false
1934	1		zzzzz49,zzzzz89	false
1935	1		zzzzz49,zzzzz83	false
1936	1		zzzzz49,zzzzz87	false
1937	1		zzzzz49,zzzzz86	false
1938	1		zzzzz49,zzzzz61	false
1939	1		zzzzz49,zzzzz85	false
1940	1		zzzzz49,zzzzz80	false
1941	1		zzzzz49,zzzzz55	false
1942	1		zzzzz49,zzzzz84	false
1943	1		zzzzz49,zzzzz78	false
1944	1		zzzzz49,zzzzz50	false
1945	1		zzzzz48,zzzzz75	false
1946	1		zzzzz48,zzzzz54	false
1947	1		zzzzz48,zzzzz63	false
1948	1		zzzzz48,zzzzz57	false
1949	1		zzzzz48,zzzzz98	false
1950	1		zzzzz48,zzzzz56	false
1951	1		zzzzz48,zzzzz58	false
1952	1		zzzzz48,zzzzz62	false
1953	1		zzzzz48,zzzzz59	false
1954	1		zzzzz48,zzzzz51	false
1955	1		zzzzz48,zzzzz52	false
1956	1		zzzzz48,zzzzz69	false
1957	1		zzzzz48,zzzzz70	false
1958	1		zzzzz48,zzzzz92	false
1959	1		zzzzz48,zzzzz67	false
1960	1		zzzzz48,zzzzz50	false
1961	1		zzzzz48,zzzzz81	false
1962	1		zzzzz48,zzzzz49	false
1963	1		zzzzz48,zzzzz60	false
1964	1		zzzzz48,zzzzz93	false
1965	1		zzzzz48,zzzzz64	false
1966	1		zzzzz48,zzzzz73	false
1967	1		zzzzz48,zzzzz53	false
1968	1		zzzzz48,zzzzz91	false
1969	1		zzzzz48,zzzzz97	false
1970	1		zzzzz48,zzzzz82	false
1971	1		zzzzz48,zzzzz74	false
1972	1		zzzzz48,zzzzz90	false
1973	1		zzzzz48,zzzzz83	false
1974	1		zzzzz48,zzzzz77	false
1975	1		zzzzz48,zzzzz78	false
1976	1		zzzzz48,zzzzz96	false
1977	1		zzzzz48,zzzzz61	false
1978	1		zzzzz48,zzzzz79	false
1979	1		zzzzz48,zzzzz55	false
1980	1		zzzzz48,zzzzz87	false
1981	1		zzzzz48,zzzzz88	false
1982	1		zzzzz48,zzzzz85	false
1983	1		zzzzz48,zzzzz86	false
1984	1		zzzzz48,zzzzz84	false
1985	1		zzzzz48,zzzzz99	false
1986	1		zzzzz48,zzzzz89	false
1987	1		zzzzz48,zzzzz80	false
1988	1		zzzzz48,zzzzz94	false
1989	1		zzzzz47,zzzzz66	false
1990	1		zzzzz47,zzzzz76	false
1991	1		zzzzz47,zzzzz75	false
1992	1		zzzzz47,zzzzz92	false
1993	1		zzzzz47,zzzzz98	false
1994	1		zzzzz47,zzzzz70	false
1995	1		zzzzz47,zzzzz83	false
1996	1		zzzzz47,zzzzz51	false
1997	1		zzzzz47,zzzzz67	false
1998	1		zzzzz47,zzzzz82	false
1999	1		zzzzz47,zzzzz79	false
2000	1		zzzzz47,zzzzz87	false
2001	1		zzzzz47,zzzzz88	false
2002	1		zzzzz47,zzzzz77	false
2003	1		zzzzz47,zzzzz64	false
2004	1		zzzzz47,zzzzz50	false
2005	1		zzzzz47,zzzzz60	false
2006	1		zzzzz47,zzzzz54	false
2007	1		zzzzz47,zzzzz49	false
2008	1		zzzzz47,zzzzz91	false
2009	1		zzzzz47,zzzzz84	false
2010	1		zzzzz47,zzzzz81	false
2011	1		zzzzz47,zzzzz99	false
2012	1		zzzzz47,zzzzz53	false
2013	1		zzzzz47,zzzzz85	false
2014	1		zzzzz47,zzzzz63	false
2015	1		zzzzz47,zzzzz78	false
2016	1		zzzzz47,zzzzz56	false
2017	1		zzzzz47,zzzzz86	false
2018	1		zzzzz47,zzzzz74	false
2019	1		zzzzz47,zzzzz73	false
2020	1		zzzzz47,zzzzz96	false
2021	1		zzzzz47,zzzzz61	false
2022	1		zzzzz47,zzzzz52	false
2023	1		zzzzz47,zzzzz48	false
2024	1		zzzzz47,zzzzz94	false
2025	1		zzzzz47,zzzzz80	false
2026	1		zzzzz47,zzzzz93	false
2027	1		zzzzz47,zzzzz57	false
2028	1		zzzzz47,zzzzz62	false
2029	1		zzzzz47,zzzzz55	false
2030	1		zzzzz47,zzzzz90	false
2031	1		zzzzz47,zzzzz89	false
2032	1		zzzzz47,zzzzz59	false
2033	1		zzzzz47,zzzzz97	false
2034	1		zzzzz47,zzzzz58	false
2035	1		zzzzz47,zzzzz69	false
2036	1		zzzzz46,zzzzz76	false
2037	1		zzzzz46,zzzzz52	false
2038	1		zzzzz46,zzzzz75	false
2039	1		zzzzz46,zzzzz60	false
2040	1		zzzzz46,zzzzz54	false
2041	1		zzzzz46,zzzzz57	false
2042	1		zzzzz46,zzzzz63	false
2043	1		zzzzz46,zzzzz51	false
2044	1		zzzzz46,zzzzz56	false
2045	1		zzzzz46,zzzzz94	false
2046	1		zzzzz46,zzzzz85	false
2047	1		zzzzz46,zzzzz83	false
2048	1		zzzzz46,zzzzz64	false
2049	1		zzzzz46,zzzzz58	false
2050	1		zzzzz46,zzzzz48	false
2051	1		zzzzz46,zzzzz92	false
2052	1		zzzzz46,zzzzz59	false
2053	1		zzzzz46,zzzzz62	false
2054	1		zzzzz46,zzzzz93	false
2055	1		zzzzz46,zzzzz86	false
2056	1		zzzzz46,zzzzz82	false
2057	1		zzzzz46,zzzzz67	false
2058	1		zzzzz46,zzzzz47	false
2059	1		zzzzz46,zzzzz99	false
2060	1		zzzzz46,zzzzz61	false
2061	1		zzzzz46,zzzzz77	false
2062	1		zzzzz46,zzzzz78	false
2063	1		zzzzz46,zzzzz96	false
2064	1		zzzzz46,zzzzz69	false
2065	1		zzzzz46,zzzzz70	false
2066	1		zzzzz46,zzzzz53	false
2067	1		zzzzz46,zzzzz79	false
2068	1		zzzzz46,zzzzz84	false
2069	1		zzzzz46,zzzzz89	false
2070	1		zzzzz46,zzzzz91	false
2071	1		zzzzz46,zzzzz88	false
2072	1		zzzzz46,zzzzz90	false
2073	1		zzzzz46,zzzzz73	false
2074	1		zzzzz46,zzzzz55	false
2075	1		zzzzz46,zzzzz50	false
2076	1		zzzzz46,zzzzz74	false
2077	1		zzzzz46,zzzzz81	false
2078	1		zzzzz46,zzzzz80	false
2079	1		zzzzz46,zzzzz87	false
2080	1		zzzzz46,zzzzz49	false
2081	1		zzzzz46,zzzzz97	false
2082	1		zzzzz45,zzzzz75	false
2083	1		zzzzz45,zzzzz66	false
2084	1		zzzzz45,zzzzz76	false
2085	1		zzzzz45,zzzzz98	false
2086	1		zzzzz45,zzzzz63	false
2087	1		zzzzz45,zzzzz54	false
2088	1		zzzzz45,zzzzz56	false
2089	1		zzzzz45,zzzzz70	false
2090	1		zzzzz45,zzzzz62	false
2091	1		zzzzz45,zzzzz57	false
2092	1		zzzzz45,zzzzz59	false
2093	1		zzzzz45,zzzzz58	false
2094	1		zzzzz45,zzzzz46	false
2095	1		zzzzz45,zzzzz52	false
2096	1		zzzzz45,zzzzz47	false
2097	1		zzzzz45,zzzzz69	false
2098	1		zzzzz45,zzzzz51	false
2099	1		zzzzz45,zzzzz97	false
2100	1		zzzzz45,zzzzz67	false
2101	1		zzzzz45,zzzzz99	false
2102	1		zzzzz45,zzzzz50	false
2103	1		zzzzz45,zzzzz94	false
2104	1		zzzzz45,zzzzz92	false
2105	1		zzzzz45,zzzzz48	false
2106	1		zzzzz45,zzzzz83	false
2107	1		zzzzz45,zzzzz49	false
2108	1		zzzzz45,zzzzz61	false
2109	1		zzzzz45,zzzzz77	false
2110	1		zzzzz45,zzzzz79	false
2111	1		zzzzz45,zzzzz60	false
2112	1		zzzzz45,zzzzz90	false
2113	1		zzzzz45,zzzzz89	false
2114	1		zzzzz45,zzzzz96	false
2115	1		zzzzz45,zzzzz93	false
2116	1		zzzzz45,zzzzz91	false
2117	1		zzzzz45,zzzzz82	false
2118	1		zzzzz45,zzzzz81	false
2119	1		zzzzz45,zzzzz88	false
2120	1		zzzzz45,zzzzz87	false
2121	1		zzzzz45,zzzzz80	false
2122	1		zzzzz45,zzzzz78	false
2123	1		zzzzz45,zzzzz55	false
2124	1		zzzzz45,zzzzz84	false
2125	1		zzzzz45,zzzzz53	false
2126	1		zzzzz45,zzzzz85	false
2127	1		zzzzz45,zzzzz86	false
2128	1		zzzzz45,zzzzz64	false
2129	1		zzzzz45,zzzzz73	false
2130	1		zzzzz45,zzzzz74	false
2131	1		zzzzz44,zzzzz56	false
2132	1		zzzzz44,zzzzz63	false
2133	1		zzzzz44,zzzzz75	false
2134	1		zzzzz44,zzzzz98	false
2135	1		zzzzz44,zzzzz54	false
2136	1		zzzzz44,zzzzz51	false
2137	1		zzzzz44,zzzzz62	false
2138	1		zzzzz44,zzzzz58	false
2139	1		zzzzz44,zzzzz57	false
2140	1		zzzzz44,zzzzz69	false
2141	1		zzzzz44,zzzzz67	false
2142	1		zzzzz44,zzzzz46	false
2143	1		zzzzz44,zzzzz52	false
2144	1		zzzzz44,zzzzz47	false
2145	1		zzzzz44,zzzzz50	false
2146	1		zzzzz44,zzzzz49	false
2147	1		zzzzz44,zzzzz92	false
2148	1		zzzzz44,zzzzz64	false
2149	1		zzzzz44,zzzzz83	false
2150	1		zzzzz44,zzzzz70	false
2151	1		zzzzz44,zzzzz59	false
2152	1		zzzzz44,zzzzz78	false
2153	1		zzzzz44,zzzzz53	false
2154	1		zzzzz44,zzzzz82	false
2155	1		zzzzz44,zzzzz61	false
2156	1		zzzzz44,zzzzz85	false
2157	1		zzzzz44,zzzzz60	false
2158	1		zzzzz44,zzzzz97	false
2159	1		zzzzz44,zzzzz91	false
2160	1		zzzzz44,zzzzz86	false
2161	1		zzzzz44,zzzzz93	false
2162	1		zzzzz44,zzzzz87	false
2163	1		zzzzz44,zzzzz73	false
2164	1		zzzzz44,zzzzz55	false
2165	1		zzzzz44,zzzzz89	false
2166	1		zzzzz44,zzzzz79	false
2167	1		zzzzz44,zzzzz77	false
2168	1		zzzzz44,zzzzz88	false
2169	1		zzzzz44,zzzzz74	false
2170	1		zzzzz44,zzzzz45	false
2171	1		zzzzz44,zzzzz90	false
2172	1		zzzzz44,zzzzz81	false
2173	1		zzzzz44,zzzzz84	false
2174	1		zzzzz44,zzzzz80	false
2175	1		zzzzz44,zzzzz96	false
2176	1		zzzzz44,zzzzz99	false
2177	1		zzzzz44,zzzzz94	false
2178	1		zzzzz44,zzzzz48	false
2179	1		zzzzz43,zzzzz75	false
2180	1		zzzzz43,zzzzz66	false
2181	1		zzzzz43,zzzzz63	false
2182	1		zzzzz43,zzzzz57	false
2183	1		zzzzz43,zzzzz98	false
2184	1		zzzzz43,zzzzz54	false
2185	1		zzzzz43,zzzzz56	false
2186	1		zzzzz43,zzzzz62	false
2187	1		zzzzz43,zzzzz58	false
2188	1		zzzzz43,zzzzz51	false
2189	1		zzzzz43,zzzzz59	false
2190	1		zzzzz43,zzzzz67	false
2191	1		zzzzz43,zzzzz52	false
2192	1		zzzzz43,zzzzz47	false
2193	1		zzzzz43,zzzzz69	false
2194	1		zzzzz43,zzzzz70	false
2195	1		zzzzz43,zzzzz99	false
2196	1		zzzzz43,zzzzz44	false
2197	1		zzzzz43,zzzzz94	false
2198	1		zzzzz43,zzzzz46	false
2199	1		zzzzz43,zzzzz92	false
2200	1		zzzzz43,zzzzz48	false
2201	1		zzzzz43,zzzzz60	false
2202	1		zzzzz43,zzzzz83	false
2203	1		zzzzz43,zzzzz82	false
2204	1		zzzzz43,zzzzz79	false
2205	1		zzzzz43,zzzzz86	false
2206	1		zzzzz43,zzzzz81	false
2207	1		zzzzz43,zzzzz73	false
2208	1		zzzzz43,zzzzz64	false
2209	1		zzzzz43,zzzzz74	false
2210	1		zzzzz43,zzzzz55	false
2211	1		zzzzz43,zzzzz97	false
2212	1		zzzzz43,zzzzz89	false
2213	1		zzzzz43,zzzzz85	false
2214	1		zzzzz43,zzzzz96	false
2215	1		zzzzz43,zzzzz88	false
2216	1		zzzzz43,zzzzz50	false
2217	1		zzzzz43,zzzzz87	false
2218	1		zzzzz43,zzzzz45	false
2219	1		zzzzz43,zzzzz91	false
2220	1		zzzzz43,zzzzz84	false
2221	1		zzzzz43,zzzzz78	false
2222	1		zzzzz43,zzzzz61	false
2223	1		zzzzz43,zzzzz49	false
2224	1		zzzzz43,zzzzz80	false
2225	1		zzzzz43,zzzzz90	false
2226	1		zzzzz43,zzzzz53	false
2227	1		zzzzz43,zzzzz93	false
2228	1		zzzzz43,zzzzz77	false
2229	1		zzzzz41,zzzzz65	false
2230	1		zzzzz41,zzzzz71	false
2231	1		zzzzz41,zzzzz72	false
2232	1		zzzzz40,zzzzz65	false
2233	1		zzzzz40,zzzzz41	false
2234	1		zzzzz40,zzzzz72	false
2235	1		zzzzz40,zzzzz71	false
2236	1		zzzzz39,zzzzz65	false
2237	1		zzzzz39,zzzzz40	false
2238	1		zzzzz39,zzzzz41	false
2239	1		zzzzz39,zzzzz72	false
2240	1		zzzzz39,zzzzz71	false
2241	1		zzzzz37,zzzzzz4	false
2242	1		zzzzz35,zzzzz38	false
2243	1		zzzzz33,zzzzz34	false
2244	1		zzzzz30,zzzzz38	false
2245	1		zzzzz30,zzzzz35	false
2246			zzzzz29,zzzzzz1	false
2247			zzzzz29,zzzzzz6	false
2248			zzzzz27,zzzzz29	false
2249	1		zzzzz27,zzzzzz2	false
2250	1		zzzzz27,zzzzzz1	false
2251	1		zzzzz26,zzzzz32	false
2252			zzzzz25,zzzzzz1	false
2253			zzzzz25,zzzzz29	false
2254	1		zzzzz25,zzzzzz6	false
2255			zzzzz24,zzzzz27	false
2256			zzzzz24,zzzzzz1	false
2257			zzzzz24,zzzzzz2	false
2258			zzzzz24,zzzzzz6	false
2259			zzzzz24,zzzzz25	false
2260	1		zzzzz24,zzzzz29	false
2261	1		zzzzz23,zzzzz34	false
2262	1		zzzzz23,zzzzz33	false
2263			zzzzz22,zzzzz25	false
2264			zzzzz22,zzzzzz6	false
2265			zzzzz22,zzzzz24	false
2266			zzzzz22,zzzzz29	false
2267	1		zzzzz22,zzzzzz2	false
2268	1		zzzzz22,zzzzz27	false
2269	1		zzzzz22,zzzzzz1	false
2270			zzzzz21,zzzzz22	false
2271			zzzzz21,zzzzzz1	false
2272			zzzzz21,zzzzz25	false
2273			zzzzz21,zzzzz29	false
2274			zzzzz21,zzzzzz6	false
2275			zzzzz21,zzzzz24	false
2276			zzzzz19,zzzzz22	false
2277			zzzzz19,zzzzzz1	false
2278			zzzzz19,zzzzzz2	false
2279			zzzzz19,zzzzzz6	false
2280			zzzzz19,zzzzz25	false
2281			zzzzz19,zzzzz29	false
2282			zzzzz19,zzzzz24	false
2283			zzzzz19,zzzzz21	false
2284			zzzzz18,zzzzz27	false
2285			zzzzz18,zzzzzz1	false
2286			zzzzz18,zzzzz22	false
2287			zzzzz18,zzzzz19	false
2288			zzzzz18,zzzzz21	false
2289			zzzzz18,zzzzz25	false
2290			zzzzz18,zzzzzz6	false
2291	1		zzzzz18,zzzzz29	false
2292	1		zzzzz18,zzzzz24	false
2293	1		zzzzz17,zzzzz20	false
2294	1		zzzzz16,zzzzz17	false
2295	1		zzzzz16,zzzzz20	false
2296	1		zzzzz15,zzzzz34	false
2297	1		zzzzz15,zzzzz23	false
2298	1		zzzzz15,zzzzz33	false
2299			zzzzz14,zzzzz29	false
2300			zzzzz14,zzzzz24	false
2301			zzzzz14,zzzzz25	false
2302			zzzzz14,zzzzzz6	false
2303			zzzzz14,zzzzz18	false
2304			zzzzz14,zzzzz19	false
2305	1		zzzzz14,zzzzz21	false
2306	1		zzzzz13,zzzzz34	false
2307	1		zzzzz13,zzzzz23	false
2308	1		zzzzz13,zzzzz15	false
2309	1		zzzzz13,zzzzz33	false
2310	1		zzzzz12,zzzzz36	false
2311	1		zzzzz11,zzzzz37	false
2312	1		zzzzz11,zzzzzz4	false
2313	1		zzzz983,zzzzz70	false
2314	1		zzzz983,zzzzz75	false
2315	1		zzzz983,zzzzz92	false
2316	1		zzzz983,zzzzz76	false
2317	1		zzzz983,zzzzz60	false
2318	1		zzzz983,zzzzz98	false
2319	1		zzzz983,zzzzz43	false
2320	1		zzzz983,zzzzz64	false
2321	1		zzzz983,zzzzz77	false
2322	1		zzzz983,zzzzz85	false
2323	1		zzzz983,zzzzz79	false
2324	1		zzzz983,zzzzz91	false
2325	1		zzzz983,zzzzz46	false
2326	1		zzzz983,zzzzz96	false
2327	1		zzzz983,zzzzz53	false
2328	1		zzzz983,zzzzz82	false
2329	1		zzzz983,zzzzz83	false
2330	1		zzzz983,zzzzz78	false
2331	1		zzzz983,zzzzz88	false
2332	1		zzzz983,zzzzz50	false
2333	1		zzzz983,zzzzz93	false
2334	1		zzzz983,zzzzz94	false
2335	1		zzzz983,zzzzz84	false
2336	1		zzzz983,zzzzz87	false
2337	1		zzzz983,zzzzz89	false
2338	1		zzzz983,zzzzz74	false
2339	1		zzzz983,zzzzz86	false
2340	1		zzzz983,zzzzz81	false
2341	1		zzzz983,zzzzz61	false
2342	1		zzzz983,zzzzz49	false
2343	1		zzzz983,zzzzz90	false
2344	1		zzzz983,zzzzz73	false
2345	1		zzzz983,zzzzz67	false
2346	1		zzzz983,zzzzz45	false
2347	1		zzzz983,zzzzz99	false
2348	1		zzzz983,zzzzz51	false
2349	1		zzzz983,zzzzz44	false
2350	1		zzzz983,zzzzz80	false
2351	1		zzzz983,zzzzz55	false
2352	1		zzzz983,zzzzz69	false
2353	1		zzzz983,zzzzz48	false
2354	1		zzzz983,zzzzz97	false
2355	1		zzzz983,zzzzz56	false
2356	1		zzzz983,zzzzz47	false
2357	1		zzzz983,zzzzz54	false
2358	1		zzzz983,zzzzz62	false
2359	1		zzzz983,zzzzz63	false
2360	1		zzzz983,zzzzz57	false
2361	1		zzzz983,zzzzz58	false
2362	1		zzzz983,zzzzz52	false
2363	1		zzzz983,zzzzz59	false
2364	1		zzzz982,zzzzz75	false
2365	1		zzzz982,zzzzz98	false
2366	1		zzzz982,zzzzz76	false
2367	1		zzzz982,zzzzz54	false
2368	1		zzzz982,zzzzz57	false
2369	1		zzzz982,zzzzz58	false
2370	1		zzzz982,zzzzz70	false
2371	1		zzzz982,zzzzz62	false
2372	1		zzzz982,zzzzz63	false
2373	1		zzzz982,zzzzz52	false
2374	1		zzzz982,zzzzz56	false
2375	1		zzzz982,zzzz983	false
2376	1		zzzz982,zzzzz59	false
2377	1		zzzz982,zzzzz47	false
2378	1		zzzz982,zzzzz69	false
2379	1		zzzz982,zzzzz44	false
2380	1		zzzz982,zzzzz46	false
2381	1		zzzz982,zzzzz51	false
2382	1		zzzz982,zzzzz43	false
2383	1		zzzz982,zzzzz97	false
2384	1		zzzz982,zzzzz99	false
2385	1		zzzz982,zzzzz50	false
2386	1		zzzz982,zzzzz49	false
2387	1		zzzz982,zzzzz92	false
2388	1		zzzz982,zzzzz94	false
2389	1		zzzz982,zzzzz83	false
2390	1		zzzz982,zzzzz48	false
2391	1		zzzz982,zzzzz67	false
2392	1		zzzz982,zzzzz60	false
2393	1		zzzz982,zzzzz45	false
2394	1		zzzz982,zzzzz82	false
2395	1		zzzz982,zzzzz74	false
2396	1		zzzz982,zzzzz96	false
2397	1		zzzz982,zzzzz73	false
2398	1		zzzz982,zzzzz81	false
2399	1		zzzz982,zzzzz86	false
2400	1		zzzz982,zzzzz88	false
2401	1		zzzz982,zzzzz85	false
2402	1		zzzz982,zzzzz93	false
2403	1		zzzz982,zzzzz64	false
2404	1		zzzz982,zzzzz77	false
2405	1		zzzz982,zzzzz91	false
2406	1		zzzz982,zzzzz84	false
2407	1		zzzz982,zzzzz79	false
2408	1		zzzz982,zzzzz90	false
2409	1		zzzz982,zzzzz87	false
2410	1		zzzz982,zzzzz78	false
2411	1		zzzz982,zzzzz55	false
2412	1		zzzz982,zzzzz89	false
2413	1		zzzz982,zzzzz61	false
2414	1		zzzz982,zzzzz53	false
2415	1		zzzz982,zzzzz80	false
2416			zzzz981,zzzzz30	false
2417			zzzz981,zzzzz35	false
2418	1		zzzz981,zzzzz76	false
2419	1		zzzz981,zzzzz66	false
2420	1		zzzz981,zzzzz70	false
2421	1		zzzz981,zzzzz92	false
2422	1		zzzz981,zzzzz43	false
2423	1		zzzz981,zzzzz61	false
2424	1		zzzz981,zzzzz60	false
2425	1		zzzz981,zzzzz56	false
2426	1		zzzz981,zzzzz98	false
2427	1		zzzz981,zzzzz62	false
2428	1		zzzz981,zzzzz64	false
2429	1		zzzz981,zzzzz50	false
2430	1		zzzz981,zzzzz96	false
2431	1		zzzz981,zzzzz91	false
2432	1		zzzz981,zzzzz49	false
2433	1		zzzz981,zzzzz99	false
2434	1		zzzz981,zzzzz77	false
2435	1		zzzz981,zzzzz87	false
2436	1		zzzz981,zzzzz57	false
2437	1		zzzz981,zzzzz63	false
2438	1		zzzz981,zzzzz81	false
2439	1		zzzz981,zzzzz69	false
2440	1		zzzz981,zzzz982	false
2441	1		zzzz981,zzzzz94	false
2442	1		zzzz981,zzzzz52	false
2443	1		zzzz981,zzzzz46	false
2444	1		zzzz981,zzzzz44	false
2445	1		zzzz981,zzzzz54	false
2446	1		zzzz981,zzzzz53	false
2447	1		zzzz981,zzzzz79	false
2448	1		zzzz981,zzzzz48	false
2449	1		zzzz981,zzzzz47	false
2450	1		zzzz981,zzzzz93	false
2451	1		zzzz981,zzzzz85	false
2452	1		zzzz981,zzzzz78	false
2453	1		zzzz981,zzzzz89	false
2454	1		zzzz981,zzzzz83	false
2455	1		zzzz981,zzzzz67	false
2456	1		zzzz981,zzzzz90	false
2457	1		zzzz981,zzzzz84	false
2458	1		zzzz981,zzzzz55	false
2459	1		zzzz981,zzzzz88	false
2460	1		zzzz981,zzzzz73	false
2461	1		zzzz981,zzzzz45	false
2462	1		zzzz981,zzzzz80	false
2463	1		zzzz981,zzzzz74	false
2464	1		zzzz981,zzzzz82	false
2465	1		zzzz981,zzzzz58	false
2466	1		zzzz981,zzzzz86	false
2467	1		zzzz981,zzzzz97	false
2468	1		zzzz981,zzzzz59	false
2469	1		zzzz981,zzzzz51	false
2470	1		zzzz981,zzzz983	false
2471			zzzz980,zzzzzz2	false
2472			zzzz980,zzzzzz1	false
2473			zzzz980,zzzzz22	false
2474			zzzz980,zzzzz29	false
2475			zzzz980,zzzzzz6	false
2476			zzzz980,zzzzz18	false
2477			zzzz980,zzzzz25	false
2478			zzzz980,zzzzz24	false
2479			zzzz980,zzzzz21	false
2480			zzzz980,zzzzz14	false
2481	1		zzzz980,zzzzz19	false
2482			zzzz966,zzzzz36	false
2483	1		zzzz966,zzzzz92	false
2484	1		zzzz966,zzzzz70	false
2485	1		zzzz966,zzzzz75	false
2486			zzzz966,zzzzz95	false
2487	1		zzzz966,zzzzz46	false
2488	1		zzzz966,zzzzz98	false
2489	1		zzzz966,zzzzz44	false
2490	1		zzzz966,zzzzz57	false
2491	1		zzzz966,zzzz983	false
2492	1		zzzz966,zzzzz79	false
2493	1		zzzz966,zzzzz54	false
2494	1		zzzz966,zzzzz63	false
2495	1		zzzz966,zzzzz60	false
2496	1		zzzz966,zzzzz76	false
2497	1		zzzz966,zzzzz99	false
2498	1		zzzz966,zzzzz77	false
2499	1		zzzz966,zzzzz56	false
2500	1		zzzz966,zzzzz43	false
2501	1		zzzz966,zzzz981	false
2502	1		zzzz966,zzzzz67	false
2503	1		zzzz966,zzzzz96	false
2504	1		zzzz966,zzzz982	false
2505	1		zzzz966,zzzzz90	false
2506	1		zzzz966,zzzzz64	false
2507	1		zzzz966,zzzzz48	false
2508	1		zzzz966,zzzzz62	false
2509	1		zzzz966,zzzzz94	false
2510	1		zzzz966,zzzzz81	false
2511	1		zzzz966,zzzzz52	false
2512	1		zzzz966,zzzzz88	false
2513	1		zzzz966,zzzzz74	false
2514	1		zzzz966,zzzzz59	false
2515	1		zzzz966,zzzzz61	false
2516	1		zzzz966,zzzzz73	false
2517	1		zzzz966,zzzzz93	false
2518	1		zzzz966,zzzzz89	false
2519	1		zzzz966,zzzzz83	false
2520	1		zzzz966,zzzzz82	false
2521	1		zzzz966,zzzzz45	false
2522	1		zzzz966,zzzzz91	false
2523	1		zzzz966,zzzzz58	false
2524	1		zzzz966,zzzzz53	false
2525	1		zzzz966,zzzzz50	false
2526	1		zzzz966,zzzzz49	false
2527	1		zzzz966,zzzzz87	false
2528	1		zzzz966,zzzzz86	false
2529	1		zzzz966,zzzzz78	false
2530	1		zzzz966,zzzzz51	false
2531	1		zzzz966,zzzzz85	false
2532	1		zzzz966,zzzzz69	false
2533	1		zzzz966,zzzzz47	false
2534	1		zzzz966,zzzzz80	false
2535	1		zzzz966,zzzzz97	false
2536	1		zzzz966,zzzzz84	false
2537	1		zzzz966,zzzzz55	false
2538	1		zzzz965,zzzzz66	false
2539	1		zzzz965,zzzzz54	false
2540	1		zzzz965,zzzzz75	false
2541	1		zzzz965,zzzzz76	false
2542	1		zzzz965,zzzzz98	false
2543	1		zzzz965,zzzzz56	false
2544	1		zzzz965,zzzzz57	false
2545	1		zzzz965,zzzz983	false
2546	1		zzzz965,zzzzz58	false
2547	1		zzzz965,zzzzz52	false
2548	1		zzzz965,zzzzz63	false
2549	1		zzzz965,zzzz981	false
2550	1		zzzz965,zzzzz70	false
2551	1		zzzz965,zzzzz59	false
2552	1		zzzz965,zzzz966	false
2553	1		zzzz965,zzzzz62	false
2554	1		zzzz965,zzzzz69	false
2555	1		zzzz965,zzzzz47	false
2556	1		zzzz965,zzzzz46	false
2557	1		zzzz965,zzzzz44	false
2558	1		zzzz965,zzzzz51	false
2559	1		zzzz965,zzzzz99	false
2560	1		zzzz965,zzzzz97	false
2561	1		zzzz965,zzzzz43	false
2562	1		zzzz965,zzzzz67	false
2563	1		zzzz965,zzzzz48	false
2564	1		zzzz965,zzzzz92	false
2565	1		zzzz965,zzzzz94	false
2566	1		zzzz965,zzzzz60	false
2567	1		zzzz965,zzzzz83	false
2568	1		zzzz965,zzzzz49	false
2569	1		zzzz965,zzzzz96	false
2570	1		zzzz965,zzzzz90	false
2571	1		zzzz965,zzzzz45	false
2572	1		zzzz965,zzzzz74	false
2573	1		zzzz965,zzzzz73	false
2574	1		zzzz965,zzzzz82	false
2575	1		zzzz965,zzzzz50	false
2576	1		zzzz965,zzzzz88	false
2577	1		zzzz965,zzzzz81	false
2578	1		zzzz965,zzzzz77	false
2579	1		zzzz965,zzzzz86	false
2580	1		zzzz965,zzzzz85	false
2581	1		zzzz965,zzzzz93	false
2582	1		zzzz965,zzzzz79	false
2583	1		zzzz965,zzzzz61	false
2584	1		zzzz965,zzzzz64	false
2585	1		zzzz965,zzzzz55	false
2586	1		zzzz965,zzzzz87	false
2587	1		zzzz965,zzzzz78	false
2588	1		zzzz965,zzzzz53	false
2589	1		zzzz965,zzzzz89	false
2590	1		zzzz965,zzzzz91	false
2591	1		zzzz965,zzzz982	false
2592	1		zzzz965,zzzzz84	false
2593	1		zzzz965,zzzzz80	false
2594	1		zzzz964,zzzzz75	false
2595			zzzz964,zzzzz95	false
2596	1		zzzz964,zzzzz76	false
2597	1		zzzz964,zzzzz98	false
2598	1		zzzz964,zzzzz54	false
2599	1		zzzz964,zzzzz56	false
2600	1		zzzz964,zzzzz58	false
2601	1		zzzz964,zzzzz57	false
2602	1		zzzz964,zzzz981	false
2603	1		zzzz964,zzzzz70	false
2604	1		zzzz964,zzzzz63	false
2605	1		zzzz964,zzzz983	false
2606	1		zzzz964,zzzzz46	false
2607	1		zzzz964,zzzz966	false
2608	1		zzzz964,zzzzz59	false
2609	1		zzzz964,zzzzz47	false
2610	1		zzzz964,zzzzz62	false
2611	1		zzzz964,zzzzz69	false
2612	1		zzzz964,zzzzz52	false
2613	1		zzzz964,zzzzz51	false
2614	1		zzzz964,zzzzz99	false
2615	1		zzzz964,zzzzz97	false
2616	1		zzzz964,zzzzz44	false
2617	1		zzzz964,zzzzz43	false
2618	1		zzzz964,zzzzz94	false
2619	1		zzzz964,zzzzz83	false
2620	1		zzzz964,zzzzz67	false
2621	1		zzzz964,zzzzz48	false
2622	1		zzzz964,zzzzz50	false
2623	1		zzzz964,zzzzz96	false
2624	1		zzzz964,zzzzz60	false
2625	1		zzzz964,zzzzz92	false
2626	1		zzzz964,zzzzz49	false
2627	1		zzzz964,zzzzz82	false
2628	1		zzzz964,zzzzz86	false
2629	1		zzzz964,zzzzz88	false
2630	1		zzzz964,zzzzz45	false
2631	1		zzzz964,zzzzz74	false
2632	1		zzzz964,zzzzz73	false
2633	1		zzzz964,zzzzz90	false
2634	1		zzzz964,zzzzz78	false
2635	1		zzzz964,zzzzz85	false
2636	1		zzzz964,zzzzz81	false
2637	1		zzzz964,zzzzz55	false
2638	1		zzzz964,zzzzz80	false
2639	1		zzzz964,zzzzz89	false
2640	1		zzzz964,zzzzz77	false
2641	1		zzzz964,zzzzz79	false
2642	1		zzzz964,zzzz982	false
2643	1		zzzz964,zzzzz64	false
2644	1		zzzz964,zzzzz84	false
2645	1		zzzz964,zzzzz93	false
2646	1		zzzz964,zzzzz53	false
2647	1		zzzz964,zzzzz87	false
2648	1		zzzz964,zzzzz61	false
2649	1		zzzz964,zzzzz91	false
2650	1		zzzz964,zzzz965	false
2651	1		zzzz963,zzzzz75	false
2652	1		zzzz963,zzzzz66	false
2653	1		zzzz963,zzzzz76	false
2654	1		zzzz963,zzzzz56	false
2655	1		zzzz963,zzzzz54	false
2656	1		zzzz963,zzzzz98	false
2657	1		zzzz963,zzzzz63	false
2658	1		zzzz963,zzzz983	false
2659	1		zzzz963,zzzzz70	false
2660	1		zzzz963,zzzzz57	false
2661	1		zzzz963,zzzz981	false
2662	1		zzzz963,zzzzz58	false
2663	1		zzzz963,zzzzz52	false
2664	1		zzzz963,zzzzz62	false
2665	1		zzzz963,zzzzz46	false
2666	1		zzzz963,zzzz966	false
2667	1		zzzz963,zzzzz59	false
2668	1		zzzz963,zzzzz51	false
2669	1		zzzz963,zzzzz44	false
2670	1		zzzz963,zzzzz47	false
2671	1		zzzz963,zzzzz69	false
2672	1		zzzz963,zzzzz43	false
2673	1		zzzz963,zzzzz99	false
2674	1		zzzz963,zzzzz97	false
2675	1		zzzz963,zzzzz67	false
2676	1		zzzz963,zzzzz60	false
2677	1		zzzz963,zzzzz94	false
2678	1		zzzz963,zzzzz48	false
2679	1		zzzz963,zzzzz83	false
2680	1		zzzz963,zzzzz92	false
2681	1		zzzz963,zzzzz50	false
2682	1		zzzz963,zzzzz49	false
2683	1		zzzz963,zzzzz79	false
2684	1		zzzz963,zzzzz45	false
2685	1		zzzz963,zzzzz74	false
2686	1		zzzz963,zzzzz73	false
2687	1		zzzz963,zzzzz82	false
2688	1		zzzz963,zzzzz86	false
2689	1		zzzz963,zzzzz81	false
2690	1		zzzz963,zzzzz96	false
2691	1		zzzz963,zzzzz90	false
2692	1		zzzz963,zzzzz85	false
2693	1		zzzz963,zzzzz88	false
2694	1		zzzz963,zzzz982	false
2695	1		zzzz963,zzzzz77	false
2696	1		zzzz963,zzzzz64	false
2697	1		zzzz963,zzzzz61	false
2698	1		zzzz963,zzzzz93	false
2699	1		zzzz963,zzzzz80	false
2700	1		zzzz963,zzzzz84	false
2701	1		zzzz963,zzzzz78	false
2702	1		zzzz963,zzzzz89	false
2703	1		zzzz963,zzzzz91	false
2704	1		zzzz963,zzzzz53	false
2705	1		zzzz963,zzzzz55	false
2706	1		zzzz963,zzzzz87	false
2707	1		zzzz963,zzzz964	false
2708	1		zzzz963,zzzz965	false
2709			zzzz962,zzzzz25	false
2710			zzzz962,zzzz980	false
2711			zzzz962,zzzzzz6	false
2712	1		zzzz962,zzzzz27	false
2713	1		zzzz962,zzzzz22	false
2714	1		zzzz962,zzzzzz1	false
2715	1		zzzz962,zzzzzz2	false
2716	1		zzzz961,zzzzzz9	false
2717	1		zzzz952,zzzzz66	false
2718	1		zzzz952,zzzzz75	false
2719	1		zzzz952,zzzzz76	false
2720	1		zzzz952,zzzzz54	false
2721	1		zzzz952,zzzzz56	false
2722	1		zzzz952,zzzzz98	false
2723	1		zzzz952,zzzzz57	false
2724	1		zzzz952,zzzzz63	false
2725	1		zzzz952,zzzz981	false
2726	1		zzzz952,zzzzz58	false
2727	1		zzzz952,zzzzz62	false
2728	1		zzzz952,zzzz983	false
2729	1		zzzz952,zzzzz59	false
2730	1		zzzz952,zzzzz46	false
2731	1		zzzz952,zzzzz52	false
2732	1		zzzz952,zzzzz70	false
2733	1		zzzz952,zzzzz44	false
2734	1		zzzz952,zzzz966	false
2735	1		zzzz952,zzzzz51	false
2736	1		zzzz952,zzzzz69	false
2737	1		zzzz952,zzzzz47	false
2738	1		zzzz952,zzzzz99	false
2739	1		zzzz952,zzzzz43	false
2740	1		zzzz952,zzzzz97	false
2741	1		zzzz952,zzzzz67	false
2742	1		zzzz952,zzzzz92	false
2743	1		zzzz952,zzzzz60	false
2744	1		zzzz952,zzzzz94	false
2745	1		zzzz952,zzzzz48	false
2746	1		zzzz952,zzzzz50	false
2747	1		zzzz952,zzzzz88	false
2748	1		zzzz952,zzzzz83	false
2749	1		zzzz952,zzzzz82	false
2750	1		zzzz952,zzzzz86	false
2751	1		zzzz952,zzzzz49	false
2752	1		zzzz952,zzzzz85	false
2753	1		zzzz952,zzzzz81	false
2754	1		zzzz952,zzzzz45	false
2755	1		zzzz952,zzzzz74	false
2756	1		zzzz952,zzzzz73	false
2757	1		zzzz952,zzzzz93	false
2758	1		zzzz952,zzzzz79	false
2759	1		zzzz952,zzzzz96	false
2760	1		zzzz952,zzzzz90	false
2761	1		zzzz952,zzzzz77	false
2762	1		zzzz952,zzzzz89	false
2763	1		zzzz952,zzzzz53	false
2764	1		zzzz952,zzzzz64	false
2765	1		zzzz952,zzzzz84	false
2766	1		zzzz952,zzzzz61	false
2767	1		zzzz952,zzzzz55	false
2768	1		zzzz952,zzzzz78	false
2769	1		zzzz952,zzzzz80	false
2770	1		zzzz952,zzzz982	false
2771	1		zzzz952,zzzz964	false
2772	1		zzzz952,zzzzz87	false
2773	1		zzzz952,zzzzz91	false
2774	1		zzzz952,zzzz963	false
2775	1		zzzz952,zzzz965	false
2776	1		zzzz951,zzzzz75	false
2777	1		zzzz951,zzzzz76	false
2778	1		zzzz951,zzzzz46	false
2779	1		zzzz951,zzzzz56	false
2780	1		zzzz951,zzzzz63	false
2781	1		zzzz951,zzzzz98	false
2782	1		zzzz951,zzzzz59	false
2783	1		zzzz951,zzzzz54	false
2784	1		zzzz951,zzzzz70	false
2785	1		zzzz951,zzzz966	false
2786	1		zzzz951,zzzzz52	false
2787	1		zzzz951,zzzzz62	false
2788	1		zzzz951,zzzzz51	false
2789	1		zzzz951,zzzz981	false
2790	1		zzzz951,zzzz983	false
2791	1		zzzz951,zzzzz57	false
2792	1		zzzz951,zzzzz44	false
2793	1		zzzz951,zzzzz58	false
2794	1		zzzz951,zzzzz47	false
2795	1		zzzz951,zzzzz69	false
2796	1		zzzz951,zzzzz43	false
2797	1		zzzz951,zzzzz99	false
2798	1		zzzz951,zzzzz50	false
2799	1		zzzz951,zzzzz97	false
2800	1		zzzz951,zzzzz49	false
2801	1		zzzz951,zzzzz48	false
2802	1		zzzz951,zzzzz60	false
2803	1		zzzz951,zzzzz92	false
2804	1		zzzz951,zzzzz94	false
2805	1		zzzz951,zzzzz45	false
2806	1		zzzz951,zzzzz61	false
2807	1		zzzz951,zzzzz96	false
2808	1		zzzz951,zzzzz74	false
2809	1		zzzz951,zzzzz85	false
2810	1		zzzz951,zzzzz83	false
2811	1		zzzz951,zzzzz73	false
2812	1		zzzz951,zzzz965	false
2813	1		zzzz951,zzzzz90	false
2814	1		zzzz951,zzzzz82	false
2815	1		zzzz951,zzzzz79	false
2816	1		zzzz951,zzzzz77	false
2817	1		zzzz951,zzzzz87	false
2818	1		zzzz951,zzzz982	false
2819	1		zzzz951,zzzzz81	false
2820	1		zzzz951,zzzzz64	false
2821	1		zzzz951,zzzzz88	false
2822	1		zzzz951,zzzz952	false
2823	1		zzzz951,zzzzz86	false
2824	1		zzzz951,zzzzz84	false
2825	1		zzzz951,zzzzz53	false
2826	1		zzzz951,zzzz964	false
2827	1		zzzz951,zzzzz93	false
2828	1		zzzz951,zzzzz91	false
2829	1		zzzz951,zzzzz67	false
2830	1		zzzz951,zzzz963	false
2831	1		zzzz951,zzzzz89	false
2832	1		zzzz951,zzzzz80	false
2833	1		zzzz951,zzzzz55	false
2834	1		zzzz951,zzzzz78	false
2835	1		zzzz950,zzzzz98	false
2836	1		zzzz950,zzzzz75	false
2837	1		zzzz950,zzzzz56	false
2838	1		zzzz950,zzzzz70	false
2839	1		zzzz950,zzzzz63	false
2840	1		zzzz950,zzzzz54	false
2841	1		zzzz950,zzzzz46	false
2842	1		zzzz950,zzzzz57	false
2843	1		zzzz950,zzzzz59	false
2844	1		zzzz950,zzzzz47	false
2845	1		zzzz950,zzzzz69	false
2846	1		zzzz950,zzzzz52	false
2847	1		zzzz950,zzzzz62	false
2848	1		zzzz950,zzzz966	false
2849	1		zzzz950,zzzzz58	false
2850	1		zzzz950,zzzz983	false
2851	1		zzzz950,zzzzz51	false
2852	1		zzzz950,zzzz981	false
2853	1		zzzz950,zzzzz44	false
2854	1		zzzz950,zzzzz43	false
2855	1		zzzz950,zzzzz99	false
2856	1		zzzz950,zzzzz49	false
2857	1		zzzz950,zzzzz50	false
2858	1		zzzz950,zzzzz92	false
2859	1		zzzz950,zzzzz94	false
2860	1		zzzz950,zzzzz97	false
2861	1		zzzz950,zzzzz83	false
2862	1		zzzz950,zzzzz48	false
2863	1		zzzz950,zzzz965	false
2864	1		zzzz950,zzzzz87	false
2865	1		zzzz950,zzzzz45	false
2866	1		zzzz950,zzzzz73	false
2867	1		zzzz950,zzzzz77	false
2868	1		zzzz950,zzzzz74	false
2869	1		zzzz950,zzzzz81	false
2870	1		zzzz950,zzzzz60	false
2871	1		zzzz950,zzzz952	false
2872	1		zzzz950,zzzzz79	false
2873	1		zzzz950,zzzzz67	false
2874	1		zzzz950,zzzzz86	false
2875	1		zzzz950,zzzzz61	false
2876	1		zzzz950,zzzzz96	false
2877	1		zzzz950,zzzzz64	false
2878	1		zzzz950,zzzzz91	false
2879	1		zzzz950,zzzzz82	false
2880	1		zzzz950,zzzzz85	false
2881	1		zzzz950,zzzzz80	false
2882	1		zzzz950,zzzzz78	false
2883	1		zzzz950,zzzzz88	false
2884	1		zzzz950,zzzz963	false
2885	1		zzzz950,zzzzz93	false
2886	1		zzzz950,zzzzz90	false
2887	1		zzzz950,zzzzz89	false
2888	1		zzzz950,zzzz982	false
2889	1		zzzz950,zzzz964	false
2890	1		zzzz950,zzzzz53	false
2891	1		zzzz950,zzzzz84	false
2892	1		zzzz950,zzzzz55	false
2893	1		zzzz950,zzzz951	false
2894	1		zzzz949,zzzzz75	false
2895	1		zzzz949,zzzzz66	false
2896	1		zzzz949,zzzzz76	false
2897	1		zzzz949,zzzzz54	false
2898	1		zzzz949,zzzzz98	false
2899	1		zzzz949,zzzzz57	false
2900	1		zzzz949,zzzzz46	false
2901	1		zzzz949,zzzzz56	false
2902	1		zzzz949,zzzzz59	false
2903	1		zzzz949,zzzzz58	false
2904	1		zzzz949,zzzzz63	false
2905	1		zzzz949,zzzzz70	false
2906	1		zzzz949,zzzz966	false
2907	1		zzzz949,zzzzz62	false
2908	1		zzzz949,zzzz983	false
2909	1		zzzz949,zzzzz44	false
2910	1		zzzz949,zzzz981	false
2911	1		zzzz949,zzzzz47	false
2912	1		zzzz949,zzzzz52	false
2913	1		zzzz949,zzzzz69	false
2914	1		zzzz949,zzzzz51	false
2915	1		zzzz949,zzzzz99	false
2916	1		zzzz949,zzzzz97	false
2917	1		zzzz949,zzzzz92	false
2918	1		zzzz949,zzzzz43	false
2919	1		zzzz949,zzzzz50	false
2920	1		zzzz949,zzzzz94	false
2921	1		zzzz949,zzzzz48	false
2922	1		zzzz949,zzzzz49	false
2923	1		zzzz949,zzzzz82	false
2924	1		zzzz949,zzzzz60	false
2925	1		zzzz949,zzzzz79	false
2926	1		zzzz949,zzzzz90	false
2927	1		zzzz949,zzzzz74	false
2928	1		zzzz949,zzzzz45	false
2929	1		zzzz949,zzzzz83	false
2930	1		zzzz949,zzzzz73	false
2931	1		zzzz949,zzzzz86	false
2932	1		zzzz949,zzzzz61	false
2933	1		zzzz949,zzzzz96	false
2934	1		zzzz949,zzzzz81	false
2935	1		zzzz949,zzzzz85	false
2936	1		zzzz949,zzzzz77	false
2937	1		zzzz949,zzzzz88	false
2938	1		zzzz949,zzzzz64	false
[truncated: 246,767 more rows]
