# Supplementary material for: Discovery of several thousand highly diverse circular DNA viruses
Source: eLife journal article supplement (doi:10.7554/elife.51971), 2020-02-03
Supplement: fig2-figsupp1-data4 [file elife-51971-fig2-figsupp1-data4-v1.cys › CytoscapeSession-2019_08_05-17_02/tables/52-all_my_seqs_genbank_ssDNA1_domains_micro_ino_rep_fasta+Full+Network/LOCAL_ATTRS-org.cytoscape.model.CyNode-all_my_seqs_genbank_ssDNA1_domains_micro_ino_rep_fasta+Full+Network+default+node.cytable]

CyCSV-Version	1
SUID	__mclCluster	name	selected
java.lang.Long	java.lang.Integer	java.lang.String	java.lang.Boolean
	mutable
all_my_seqs_genbank_ssDNA1_domains_micro_ino_rep_fasta Full Network default node
62	18	zzzzzz9	false
63	26	zzzzzz8	false
64	27	zzzzzz7	false
65	28	zzzzzz6	false
66	8	zzzzzz5	false
67	4	zzzzzz4	false
68	26	zzzzzz3	false
69	8	zzzzzz2	false
70	8	zzzzzz1	false
71	3	zzzzzz0	false
72	1	zzzzz99	false
73	1	zzzzz98	false
74	1	zzzzz97	false
75	1	zzzzz96	false
76	12	zzzzz95	false
77	1	zzzzz94	false
78	1	zzzzz93	false
79	1	zzzzz92	false
80	1	zzzzz91	false
81	1	zzzzz90	false
82	1	zzzzz89	false
83	1	zzzzz88	false
84	1	zzzzz87	false
85	1	zzzzz86	false
86	1	zzzzz85	false
87	1	zzzzz84	false
88	1	zzzzz83	false
89	1	zzzzz82	false
90	1	zzzzz81	false
91	1	zzzzz80	false
92	1	zzzzz79	false
93	1	zzzzz78	false
94	1	zzzzz77	false
95	1	zzzzz76	false
96	1	zzzzz75	false
97	1	zzzzz74	false
98	1	zzzzz73	false
99	6	zzzzz72	false
100	6	zzzzz71	false
101	1	zzzzz70	false
102	1	zzzzz69	false
103	29	zzzzz68	false
104	1	zzzzz67	false
105	1	zzzzz66	false
106	6	zzzzz65	false
107	1	zzzzz64	false
108	1	zzzzz63	false
109	1	zzzzz62	false
110	1	zzzzz61	false
111	1	zzzzz60	false
112	1	zzzzz59	false
113	1	zzzzz58	false
114	1	zzzzz57	false
115	1	zzzzz56	false
116	1	zzzzz55	false
117	1	zzzzz54	false
118	1	zzzzz53	false
119	1	zzzzz52	false
120	1	zzzzz51	false
121	1	zzzzz50	false
122	1	zzzzz49	false
123	1	zzzzz48	false
124	1	zzzzz47	false
125	1	zzzzz46	false
126	1	zzzzz45	false
127	1	zzzzz44	false
128	1	zzzzz43	false
129		zzzzz42	false
130	6	zzzzz41	false
131	6	zzzzz40	false
132	6	zzzzz39	false
133	20	zzzzz38	false
134	4	zzzzz37	false
135	21	zzzzz36	false
136	20	zzzzz35	false
137	14	zzzzz34	false
138	14	zzzzz33	false
139	30	zzzzz32	false
140		zzzzz31	false
141	20	zzzzz30	false
142	15	zzzzz29	false
143	10	zzzzz28	false
144	8	zzzzz27	false
145	30	zzzzz26	false
146	28	zzzzz25	false
147	15	zzzzz24	false
148	14	zzzzz23	false
149	8	zzzzz22	false
150	31	zzzzz21	false
151	22	zzzzz20	false
152	32	zzzzz19	false
153	15	zzzzz18	false
154	22	zzzzz17	false
155	22	zzzzz16	false
156	14	zzzzz15	false
157	31	zzzzz14	false
158	14	zzzzz13	false
159	21	zzzzz12	false
160	4	zzzzz11	false
161	33	zzzzz10	false
162	1	zzzz983	false
163	1	zzzz982	false
164	1	zzzz981	false
165	32	zzzz980	false
166	1	zzzz966	false
167	1	zzzz965	false
168	1	zzzz964	false
169	1	zzzz963	false
170	8	zzzz962	false
171	18	zzzz961	false
172	1	zzzz952	false
173	1	zzzz951	false
174	1	zzzz950	false
175	1	zzzz949	false
176	1	zzzz948	false
177	1	zzzz947	false
178	1	zzzz946	false
179	1	zzzz945	false
180	1	zzzz944	false
181	1	zzzz943	false
182	1	zzzz942	false
183	1	zzzz941	false
184	1	zzzz940	false
185	6	zzzz939	false
186	1	zzzz936	false
187	1	zzzz935	false
188	1	zzzz934	false
189	1	zzzz933	false
190	7	zzzz932	false
191	1	zzzz931	false
192	33	zzzz930	false
193	4	zzzz929	false
194	1	zzzz921	false
195	1	zzzz920	false
196	8	zzzz919	false
197	24	zzzz915	false
198	1	zzzz913	false
199	1	zzzz912	false
200	1	zzzz911	false
201	1	zzzz910	false
202	1	zzzz909	false
203	1	zzzz908	false
204	1	zzzz907	false
205	1	zzzz906	false
206	1	zzzz905	false
207	1	zzzz904	false
208	1	zzzz903	false
209	1	zzzz902	false
210	1	zzzz901	false
211	1	zzzz900	false
212	1	zzzz899	false
213	1	zzzz898	false
214	1	zzzz896	false
215	1	zzzz895	false
216	1	zzzz894	false
217	1	zzzz893	false
218	1	zzzz892	false
219	1	zzzz891	false
220	1	zzzz890	false
221	1	zzzz889	false
222	1	zzzz884	false
223	6	zzzz863	false
224	1	zzzz862	false
225	4	zzzz861	false
226	4	zzzz860	false
227	10	zzzz859	false
228	24	zzzz857	false
229	10	zzzz855	false
230	1	zzzz854	false
231	1	zzzz853	false
232	1	zzzz852	false
233		zzzz851	false
234	1	zzzz850	false
235	1	zzzz849	false
236	1	zzzz848	false
237	11	zzzz847	false
238	37	zzzz846	false
239	1	zzzz845	false
240	1	zzzz844	false
241	1	zzzz843	false
242	38	zzzz842	false
243	1	zzzz841	false
244	1	zzzz840	false
245	1	zzzz839	false
246	1	zzzz838	false
247	1	zzzz837	false
248	1	zzzz836	false
249		zzzz835	false
250	1	zzzz834	false
251	1	zzzz833	false
252	1	zzzz832	false
253	1	zzzz831	false
254	1	zzzz830	false
255	1	zzzz829	false
256	37	zzzz828	false
257	11	zzzz827	false
258	1	zzzz826	false
259	1	zzzz825	false
260	1	zzzz824	false
261	1	zzzz823	false
262	1	zzzz822	false
263	11	zzzz821	false
264	1	zzzz820	false
265	29	zzzz819	false
266	1	zzzz818	false
267		zzzz817	false
268	1	zzzz816	false
269	1	zzzz815	false
270	1	zzzz813	false
271	1	zzzz812	false
272	1	zzzz811	false
273	1	zzzz810	false
274	1	zzzz809	false
275	1	zzzz808	false
276	1	zzzz807	false
277	1	zzzz806	false
278	1	zzzz805	false
279	1	zzzz804	false
280	4	zzzz803	false
281	1	zzzz802	false
282	1	zzzz801	false
283	1	zzzz800	false
284	1	zzzz799	false
285	24	zzzz797	false
286	1	zzzz796	false
287	1	zzzz794	false
288	1	zzzz793	false
289	1	zzzz792	false
290	1	zzzz791	false
291	1	zzzz790	false
292	8	zzzz789	false
293	1	zzzz788	false
294	1	zzzz787	false
295	1	zzzz786	false
296	1	zzzz785	false
297	1	zzzz784	false
298	1	zzzz783	false
299	7	zzzz780	false
300	7	zzzz779	false
301	10	zzzz778	false
302	4	zzzz777	false
303	7	zzzz776	false
304	7	zzzz775	false
305	4	zzzz774	false
306	7	zzzz773	false
307	7	zzzz772	false
308	7	zzzz769	false
309	7	zzzz768	false
310	7	zzzz767	false
311	7	zzzz766	false
312	27	zzzz765	false
313	4	zzzz764	false
314	10	zzzz763	false
315	1	zzzz760	false
316	4	zzzz758	false
317	4	zzzz757	false
318	1	zzzz756	false
319	4	zzzz754	false
320	4	zzzz753	false
321	10	zzzz752	false
322	4	zzzz751	false
323	4	zzzz749	false
324	4	zzzz748	false
325	10	zzzz747	false
326	10	zzzz746	false
327	1	zzzz745	false
328	11	zzzz744	false
329	12	zzzz743	false
330	15	zzzz739	false
331	1	zzzz738	false
332	1	zzzz728	false
333	1	zzzz727	false
334	1	zzzz726	false
335	1	zzzz725	false
336	1	zzzz724	false
337	1	zzzz722	false
338	2	zzzz721	false
339		zzzz720	false
340	2	zzzz719	false
341	2	zzzz718	false
342	2	zzzz717	false
343	2	zzzz716	false
344	1	zzzz715	false
345	2	zzzz714	false
346	2	zzzz713	false
347	2	zzzz712	false
348	2	zzzz711	false
349	2	zzzz710	false
350	2	zzzz709	false
351	2	zzzz708	false
352	1	zzzz707	false
353	2	zzzz706	false
354	2	zzzz705	false
355	2	zzzz704	false
356	2	zzzz703	false
357	2	zzzz702	false
358	1	zzzz701	false
359	1	zzzz700	false
360	2	zzzz699	false
361	1	zzzz698	false
362	1	zzzz697	false
363	1	zzzz696	false
364	1	zzzz695	false
365	1	zzzz694	false
366	1	zzzz693	false
367	1	zzzz692	false
368	1	zzzz690	false
369		zzzz689	false
370	1	zzzz688	false
371	1	zzzz687	false
372	1	zzzz686	false
373	1	zzzz685	false
374	40	zzzz684	false
375	1	zzzz683	false
376	1	zzzz681	false
377	1	zzzz680	false
378	1	zzzz679	false
379	1	zzzz678	false
380	1	zzzz677	false
381	1	zzzz676	false
382	1	zzzz675	false
383	1	zzzz674	false
384	1	zzzz673	false
385	1	zzzz672	false
386	1	zzzz671	false
387	1	zzzz670	false
388	1	zzzz669	false
389		zzzz668	false
390	1	zzzz667	false
391	1	zzzz666	false
392	1	zzzz665	false
393	1	zzzz664	false
394	1	zzzz663	false
395	1	zzzz662	false
396	1	zzzz661	false
397	1	zzzz660	false
398	1	zzzz659	false
399	1	zzzz658	false
400	1	zzzz657	false
401	1	zzzz656	false
402	1	zzzz655	false
403	1	zzzz654	false
404	1	zzzz653	false
405	1	zzzz652	false
406	1	zzzz651	false
407	1	zzzz650	false
408	1	zzzz649	false
409	1	zzzz648	false
410	1	zzzz647	false
411	1	zzzz646	false
412	1	zzzz645	false
413	1	zzzz644	false
414	1	zzzz643	false
415	1	zzzz642	false
416	1	zzzz641	false
417	1	zzzz640	false
418	1	zzzz639	false
419	1	zzzz638	false
420	1	zzzz637	false
421	1	zzzz636	false
422	1	zzzz635	false
423	1	zzzz634	false
424	1	zzzz633	false
425	1	zzzz632	false
426	1	zzzz631	false
427	1	zzzz630	false
428	1	zzzz629	false
429	1	zzzz628	false
430	1	zzzz627	false
431	1	zzzz626	false
432	1	zzzz625	false
433	1	zzzz623	false
434	1	zzzz622	false
435	1	zzzz621	false
436	1	zzzz620	false
437	1	zzzz619	false
438	1	zzzz618	false
439	1	zzzz617	false
440	1	zzzz616	false
441	1	zzzz615	false
442	1	zzzz614	false
443	1	zzzz613	false
444	1	zzzz612	false
445	1	zzzz611	false
446	42	zzzz610	false
447	1	zzzz609	false
448	42	zzzz608	false
449	1	zzzz607	false
450	1	zzzz606	false
451	1	zzzz605	false
452	1	zzzz604	false
453	1	zzzz603	false
454	1	zzzz602	false
455		zzzz601	false
456	1	zzzz600	false
457	1	zzzz599	false
458	1	zzzz598	false
459	1	zzzz597	false
460	1	zzzz596	false
461	1	zzzz595	false
462	1	zzzz594	false
463	1	zzzz593	false
464	1	zzzz592	false
465	40	zzzz591	false
466	1	zzzz590	false
467	1	zzzz589	false
468	1	zzzz588	false
469	1	zzzz587	false
470	1	zzzz586	false
471	1	zzzz585	false
472	1	zzzz584	false
473	1	zzzz583	false
474	1	zzzz582	false
475	1	zzzz581	false
476	1	zzzz580	false
477	1	zzzz579	false
478	1	zzzz578	false
479	1	zzzz577	false
480	1	zzzz576	false
481	1	zzzz575	false
482	1	zzzz574	false
483	1	zzzz573	false
484	1	zzzz572	false
485	1	zzzz571	false
486	1	zzzz570	false
487	1	zzzz569	false
488	1	zzzz568	false
489	1	zzzz567	false
490	1	zzzz566	false
491	1	zzzz565	false
492	1	zzzz564	false
493	1	zzzz563	false
494	1	zzzz562	false
495	1	zzzz561	false
496	1	zzzz560	false
497	1	zzzz559	false
498	1	zzzz558	false
499	1	zzzz557	false
500	1	zzzz556	false
501	1	zzzz555	false
502	1	zzzz554	false
503	1	zzzz553	false
504	1	zzzz552	false
505	1	zzzz551	false
506	1	zzzz550	false
507	1	zzzz549	false
508	1	zzzz548	false
509	1	zzzz547	false
510	1	zzzz546	false
511	1	zzzz545	false
512	1	zzzz544	false
513	1	zzzz543	false
514	1	zzzz542	false
515	1	zzzz541	false
516	1	zzzz540	false
517	1	zzzz539	false
518	1	zzzz538	false
519	1	zzzz537	false
520	1	zzzz536	false
521	1	zzzz535	false
522	1	zzzz534	false
523	1	zzzz533	false
524	1	zzzz532	false
525	1	zzzz531	false
526	1	zzzz530	false
527	1	zzzz529	false
528	1	zzzz528	false
529	1	zzzz527	false
530	1	zzzz526	false
531	1	zzzz525	false
532	1	zzzz524	false
533	1	zzzz523	false
534	1	zzzz522	false
535	1	zzzz521	false
536	1	zzzz520	false
537	1	zzzz519	false
538	1	zzzz518	false
539	1	zzzz517	false
540	1	zzzz516	false
541	1	zzzz515	false
542	1	zzzz514	false
543	1	zzzz513	false
544	1	zzzz512	false
545	1	zzzz511	false
546	1	zzzz510	false
547	1	zzzz509	false
548	1	zzzz508	false
549	1	zzzz507	false
550	1	zzzz506	false
551	1	zzzz505	false
552	1	zzzz504	false
553	2	zzzz503	false
554	1	zzzz502	false
555	1	zzzz501	false
556	1	zzzz500	false
557	1	zzzz499	false
558	1	zzzz498	false
559	1	zzzz497	false
560	1	zzzz496	false
561	1	zzzz495	false
562	1	zzzz494	false
563	1	zzzz493	false
564	1	zzzz492	false
565	1	zzzz491	false
566	1	zzzz490	false
567	1	zzzz489	false
568	2	zzzz488	false
569	1	zzzz487	false
570	1	zzzz486	false
571	1	zzzz485	false
572	1	zzzz484	false
573	1	zzzz483	false
574	1	zzzz482	false
575	1	zzzz481	false
576	1	zzzz480	false
577	1	zzzz479	false
578	1	zzzz478	false
579	1	zzzz477	false
580	1	zzzz476	false
581	1	zzzz475	false
582	1	zzzz474	false
583	1	zzzz473	false
584	1	zzzz472	false
585	1	zzzz471	false
586	1	zzzz470	false
587	1	zzzz469	false
588	1	zzzz468	false
589	1	zzzz467	false
590	1	zzzz466	false
591	1	zzzz465	false
592	1	zzzz464	false
593	1	zzzz463	false
594	1	zzzz462	false
595	1	zzzz461	false
596	1	zzzz460	false
597	1	zzzz459	false
598	1	zzzz458	false
599	1	zzzz457	false
600	1	zzzz456	false
601	1	zzzz455	false
602	1	zzzz454	false
603	1	zzzz453	false
604	1	zzzz452	false
605	1	zzzz451	false
606	1	zzzz450	false
607	1	zzzz449	false
608	1	zzzz448	false
609	1	zzzz447	false
610	1	zzzz446	false
611	1	zzzz445	false
612	1	zzzz444	false
613	1	zzzz443	false
614	1	zzzz442	false
615	1	zzzz441	false
616	1	zzzz440	false
617	1	zzzz439	false
618	1	zzzz438	false
619	1	zzzz437	false
620	1	zzzz436	false
621	1	zzzz435	false
622	1	zzzz434	false
623	1	zzzz433	false
624	1	zzzz432	false
625	1	zzzz431	false
626	1	zzzz430	false
627	1	zzzz429	false
628	1	zzzz428	false
629	1	zzzz427	false
630	1	zzzz426	false
631	1	zzzz425	false
632	1	zzzz424	false
633	1	zzzz423	false
634	1	zzzz422	false
635	1	zzzz421	false
636	1	zzzz420	false
637	1	zzzz419	false
638	1	zzzz418	false
639	1	zzzz417	false
640	1	zzzz416	false
641	1	zzzz415	false
642	1	zzzz414	false
643	1	zzzz413	false
644	1	zzzz412	false
645	1	zzzz411	false
646	1	zzzz410	false
647	41	zzzz409	false
648	1	zzzz408	false
649	1	zzzz407	false
650	1	zzzz406	false
651	1	zzzz405	false
652	1	zzzz404	false
653	1	zzzz403	false
654	1	zzzz402	false
655	1	zzzz401	false
656	1	zzzz400	false
657	1	zzzz399	false
658	1	zzzz398	false
659	1	zzzz397	false
660	1	zzzz396	false
661	1	zzzz395	false
662	1	zzzz394	false
663	1	zzzz393	false
664	1	zzzz392	false
665	1	zzzz391	false
666	1	zzzz390	false
667	1	zzzz389	false
668	1	zzzz388	false
669	1	zzzz387	false
670	1	zzzz386	false
671	1	zzzz385	false
672	1	zzzz384	false
673	1	zzzz383	false
674	1	zzzz382	false
675	1	zzzz381	false
676	1	zzzz380	false
677	1	zzzz379	false
678	1	zzzz378	false
679	1	zzzz377	false
680	1	zzzz376	false
681	1	zzzz375	false
682	1	zzzz374	false
683	1	zzzz373	false
684	1	zzzz372	false
685	1	zzzz371	false
686	1	zzzz370	false
687	1	zzzz369	false
688	1	zzzz368	false
689	1	zzzz367	false
690	1	zzzz366	false
691	1	zzzz365	false
692	1	zzzz364	false
693	1	zzzz363	false
694	1	zzzz362	false
695	1	zzzz361	false
696	1	zzzz360	false
697	1	zzzz359	false
698	1	zzzz358	false
699	1	zzzz357	false
700	1	zzzz356	false
701	1	zzzz355	false
702	1	zzzz354	false
703	1	zzzz353	false
704	1	zzzz352	false
705	1	zzzz351	false
706	1	zzzz350	false
707	1	zzzz349	false
708	1	zzzz348	false
709	1	zzzz347	false
710	1	zzzz346	false
711	2	zzzz345	false
712	2	zzzz344	false
713	2	zzzz343	false
714	2	zzzz342	false
715	2	zzzz341	false
716	2	zzzz340	false
717	2	zzzz339	false
718	2	zzzz338	false
719	2	zzzz337	false
720	2	zzzz336	false
721	11	zzzz335	false
722	2	zzzz334	false
723	2	zzzz333	false
724	2	zzzz332	false
725	2	zzzz331	false
726	2	zzzz330	false
727	1	zzzz329	false
728	6	zzzz328	false
729	2	zzzz327	false
730	2	zzzz326	false
731	2	zzzz325	false
732	2	zzzz324	false
733	2	zzzz323	false
734	2	zzzz322	false
735	2	zzzz321	false
736	2	zzzz320	false
737	2	zzzz319	false
738	2	zzzz318	false
739	2	zzzz317	false
740	2	zzzz316	false
741	2	zzzz315	false
742	2	zzzz314	false
743	2	zzzz313	false
744	2	zzzz312	false
745	2	zzzz311	false
746	2	zzzz310	false
747	18	zzzz309	false
748	2	zzzz308	false
749	2	zzzz307	false
750	2	zzzz306	false
751	2	zzzz305	false
752	2	zzzz304	false
753	1	zzzz303	false
754	1	zzzz302	false
755	1	zzzz301	false
756	1	zzzz300	false
757	1	zzzz299	false
758	1	zzzz298	false
759	1	zzzz297	false
760		zzzz296	false
761	1	zzzz292	false
762	1	zzzz291	false
763	1	zzzz290	false
764	1	zzzz288	false
765	1	zzzz287	false
766	1	zzzz286	false
767	1	zzzz285	false
768	1	zzzz284	false
769	2	zzzz283	false
770	1	zzzz282	false
771	1	zzzz281	false
772	1	zzzz280	false
773	1	zzzz279	false
774	1	zzzz278	false
775	1	zzzz277	false
776	6	zzzz275	false
777	1	zzzz274	false
778	15	zzzz273	false
779	1	zzzz264	false
780	1	zzzz263	false
781	1	zzzz262	false
782	1	zzzz261	false
783	4	zzzz260	false
784	1	zzzz259	false
785	11	zzzz258	false
786		zzzz257	false
787	11	zzzz256	false
788	1	zzzz255	false
789	2	zzzz254	false
790	1	zzzz253	false
791	1	zzzz252	false
792	1	zzzz251	false
793	2	zzzz250	false
794	1	zzzz249	false
795	1	zzzz248	false
796	12	zzzz247	false
797	11	zzzz246	false
798	1	zzzz245	false
799	1	zzzz244	false
800	1	zzzz243	false
801	1	zzzz242	false
802	1	zzzz241	false
803	1	zzzz240	false
804	1	zzzz239	false
805	38	zzzz238	false
806	1	zzzz237	false
807		zzzz236	false
808	1	zzzz235	false
809	1	zzzz234	false
810	1	zzzz233	false
811	1	zzzz232	false
812	1	zzzz231	false
813	1	zzzz230	false
814	2	zzzz229	false
815	1	zzzz228	false
816	1	zzzz227	false
817	1	zzzz226	false
818	1	zzzz225	false
819	1	zzzz224	false
820	1	zzzz223	false
821	1	zzzz222	false
822	18	zzzz221	false
823	1	zzzz220	false
824	1	zzzz219	false
825	1	zzzz218	false
826	1	zzzz217	false
827	1	zzzz216	false
828	1	zzzz215	false
829	1	zzzz214	false
830	1	zzzz213	false
831	8	zzzz212	false
832	1	zzzz211	false
833	1	zzzz210	false
834	1	zzzz209	false
835	1	zzzz208	false
836	1	zzzz207	false
837	1	zzzz206	false
838	1	zzzz205	false
839	1	zzzz204	false
840	1	zzzz203	false
841	1	zzzz202	false
842	1	zzzz201	false
843	6	zzzz200	false
844	1	zzzz199	false
845	1	zzzz198	false
846	1	zzzz197	false
847	6	zzzz196	false
848	1	zzzz195	false
849	1	zzzz194	false
850	6	zzzz193	false
851	1	zzzz192	false
852	1	zzzz191	false
853	1	zzzz190	false
854	1	zzzz189	false
855	1	zzzz188	false
856	1	zzzz187	false
857	1	zzzz186	false
858	6	zzzz185	false
859	1	zzzz184	false
860	1	zzzz183	false
861	1	zzzz182	false
862	1	zzzz181	false
863	1	zzzz180	false
864	1	zzzz179	false
865	1	zzzz178	false
866	1	zzzz177	false
867	1	zzzz176	false
868	1	zzzz175	false
869	1	zzzz174	false
870	1	zzzz173	false
871	1	zzzz172	false
872	1	zzzz171	false
873	1	zzzz170	false
874	1	zzzz169	false
875	1	zzzz168	false
876	1	zzzz167	false
877	1	zzzz166	false
878	1	zzzz165	false
879	1	zzzz164	false
880	1	zzzz163	false
881	1	zzzz162	false
882	1	zzzz161	false
883	1	zzzz160	false
884	1	zzzz159	false
885	1	zzzz158	false
886	1	zzzz157	false
887	1	zzzz156	false
888	1	zzzz155	false
889	1	zzzz154	false
890	1	zzzz153	false
891	1	zzzz152	false
892	1	zzzz151	false
893	1	zzzz150	false
894	1	zzzz149	false
895	1	zzzz148	false
896	1	zzzz147	false
897	1	zzzz146	false
898	1	zzzz145	false
899	1	zzzz144	false
900	1	zzzz143	false
901	1	zzzz142	false
902	1	zzzz141	false
903	1	zzzz140	false
904	1	zzzz139	false
905	1	zzzz138	false
906	1	zzzz137	false
907	1	zzzz136	false
908	1	zzzz135	false
909	1	zzzz134	false
910	1	zzzz133	false
911	1	zzzz132	false
912	1	zzzz131	false
913	1	zzzz130	false
914	1	zzzz129	false
915	1	zzzz128	false
916	1	zzzz127	false
917	1	zzzz126	false
918	1	zzzz125	false
919	1	zzzz124	false
920	1	zzzz123	false
921	1	zzzz122	false
922	1	zzzz121	false
923	1	zzzz120	false
924	1	zzzz119	false
925	1	zzzz118	false
926	1	zzzz117	false
927	1	zzzz116	false
928	1	zzzz115	false
929	1	zzzz114	false
930	1	zzzz113	false
931	1	zzzz112	false
932	1	zzzz111	false
933	1	zzzz110	false
934	1	zzzz109	false
935	1	zzzz108	false
936	1	zzzz107	false
937	1	zzzz106	false
938	1	zzzz105	false
939	1	zzzz104	false
940	1	zzzz103	false
941	1	zzzz102	false
942	1	zzzz101	false
943	1	zzzz100	false
