# Supplementary material for: Discovery of several thousand highly diverse circular DNA viruses
Source: eLife journal article supplement (doi:10.7554/elife.51971), 2020-02-03
Supplement: fig2-figsupp1-data4 [file elife-51971-fig2-figsupp1-data4-v1.cys › CytoscapeSession-2019_08_05-17_02/tables/249706-all_my_seqs_genbank_ssDNA1_domains_micro_ino_rep_fasta+Full+Network%2D%2Dclustered/LOCAL_ATTRS-org.cytoscape.model.CyEdge-all_my_seqs_genbank_ssDNA1_domains_micro_ino_rep_fasta+Full+Network%2D%2Dclustered+default+edge.cytable]

CyCSV-Version	1
SUID	interaction	name	selected
java.lang.Long	java.lang.String	java.lang.String	java.lang.Boolean
all_my_seqs_genbank_ssDNA1_domains_micro_ino_rep_fasta Full Network--clustered default edge
249818		zzzz100,zzzz795	false
249819		zzzz100,zzzz814	false
249820		zzzz100,zzzz782	false
249821		zzzz101,zzzz782	false
249822		zzzz101,zzzz795	false
249823		zzzz101,zzzz814	false
249824		zzzz102,zzzz782	false
249825		zzzz102,zzzz795	false
249826		zzzz102,zzzz814	false
249827		zzzz103,zzzz795	false
249828		zzzz103,zzzz782	false
249829		zzzz103,zzzz814	false
249830		zzzz104,zzzz795	false
249831		zzzz104,zzzz782	false
249832		zzzz104,zzzz814	false
249833		zzzz105,zzzz795	false
249834		zzzz105,zzzz814	false
249835		zzzz106,zzzz795	false
249836		zzzz106,zzzz814	false
249837		zzzz106,zzzz782	false
249838		zzzz107,zzzz782	false
249839		zzzz107,zzzz814	false
249840		zzzz107,zzzz795	false
249841		zzzz108,zzzz782	false
249842		zzzz108,zzzz795	false
249843		zzzz108,zzzz814	false
249844		zzzz109,zzzz795	false
249845		zzzz109,zzzz782	false
249846		zzzz109,zzzz814	false
249847		zzzz110,zzzz795	false
249848		zzzz110,zzzz814	false
249849		zzzz110,zzzz782	false
249850		zzzz111,zzzz795	false
249851		zzzz111,zzzz814	false
249852		zzzz111,zzzz782	false
249853		zzzz112,zzzz795	false
249854		zzzz112,zzzz814	false
249855		zzzz112,zzzz782	false
249856		zzzz113,zzzz795	false
249857		zzzz113,zzzz782	false
249858		zzzz113,zzzz814	false
249859		zzzz114,zzzz814	false
249860		zzzz114,zzzz782	false
249861		zzzz114,zzzz795	false
249862		zzzz115,zzzz782	false
249863		zzzz115,zzzz795	false
249864		zzzz115,zzzz814	false
249865		zzzz116,zzzz782	false
249866		zzzz116,zzzz795	false
249867		zzzz116,zzzz814	false
249868		zzzz117,zzzz795	false
249869		zzzz117,zzzz814	false
249870		zzzz117,zzzz782	false
249871		zzzz118,zzzz795	false
249872		zzzz118,zzzz814	false
249873		zzzz118,zzzz782	false
249874		zzzz119,zzzz795	false
249875		zzzz119,zzzz814	false
249876		zzzz119,zzzz782	false
249877		zzzz120,zzzz795	false
249878		zzzz120,zzzz814	false
249879		zzzz120,zzzz782	false
249880		zzzz121,zzzz782	false
249881		zzzz121,zzzz814	false
249882		zzzz121,zzzz795	false
249883		zzzz122,zzzz795	false
249884		zzzz122,zzzz782	false
249885		zzzz122,zzzz814	false
249886		zzzz123,zzzz782	false
249887		zzzz123,zzzz795	false
249888		zzzz123,zzzz814	false
249889		zzzz124,zzzz782	false
249890		zzzz124,zzzz795	false
249891		zzzz124,zzzz814	false
249892		zzzz125,zzzz795	false
249893		zzzz125,zzzz814	false
249894		zzzz125,zzzz782	false
249895		zzzz126,zzzz795	false
249896		zzzz126,zzzz814	false
249897		zzzz126,zzzz782	false
249898		zzzz127,zzzz795	false
249899		zzzz127,zzzz814	false
249900		zzzz127,zzzz782	false
249901		zzzz128,zzzz782	false
249902		zzzz128,zzzz795	false
249903		zzzz128,zzzz814	false
249904		zzzz129,zzzz814	false
249905		zzzz129,zzzz782	false
249906		zzzz129,zzzz795	false
249907		zzzz130,zzzz814	false
249908		zzzz130,zzzz782	false
249909		zzzz130,zzzz795	false
249910		zzzz131,zzzz782	false
249911		zzzz131,zzzz795	false
249912		zzzz131,zzzz814	false
249913		zzzz132,zzzz782	false
249914		zzzz132,zzzz795	false
249915		zzzz132,zzzz814	false
249916		zzzz133,zzzz814	false
249917		zzzz133,zzzz782	false
249918		zzzz133,zzzz795	false
249919		zzzz134,zzzz814	false
249920		zzzz134,zzzz782	false
249921		zzzz134,zzzz795	false
249922		zzzz135,zzzz782	false
249923		zzzz135,zzzz814	false
249924		zzzz135,zzzz795	false
249925		zzzz136,zzzz782	false
249926		zzzz136,zzzz795	false
249927		zzzz136,zzzz814	false
249928		zzzz137,zzzz782	false
249929		zzzz137,zzzz814	false
249930		zzzz137,zzzz795	false
249931		zzzz138,zzzz782	false
249932		zzzz138,zzzz795	false
249933		zzzz138,zzzz814	false
249934		zzzz139,zzzz782	false
249935		zzzz139,zzzz795	false
249936		zzzz139,zzzz814	false
249937		zzzz140,zzzz795	false
249938		zzzz140,zzzz782	false
249939		zzzz140,zzzz814	false
249940		zzzz141,zzzz795	false
249941		zzzz141,zzzz782	false
249942		zzzz141,zzzz814	false
249943		zzzz142,zzzz782	false
249944		zzzz142,zzzz814	false
249945		zzzz142,zzzz795	false
249946		zzzz143,zzzz795	false
249947		zzzz143,zzzz782	false
249948		zzzz143,zzzz814	false
249949		zzzz144,zzzz814	false
249950		zzzz144,zzzz782	false
249951		zzzz144,zzzz795	false
249952		zzzz145,zzzz782	false
249953		zzzz145,zzzz795	false
249954		zzzz145,zzzz814	false
249955		zzzz146,zzzz782	false
249956		zzzz146,zzzz814	false
249957		zzzz146,zzzz795	false
249958		zzzz147,zzzz782	false
249959		zzzz147,zzzz795	false
249960		zzzz147,zzzz814	false
249961		zzzz148,zzzz795	false
249962		zzzz148,zzzz782	false
249963		zzzz148,zzzz814	false
249964		zzzz149,zzzz795	false
249965		zzzz149,zzzz782	false
249966		zzzz149,zzzz814	false
249967		zzzz150,zzzz782	false
249968		zzzz150,zzzz814	false
249969		zzzz150,zzzz795	false
249970		zzzz151,zzzz782	false
249971		zzzz151,zzzz795	false
249972		zzzz151,zzzz814	false
249973		zzzz152,zzzz795	false
249974		zzzz152,zzzz814	false
249975		zzzz152,zzzz782	false
249976		zzzz153,zzzz782	false
249977		zzzz153,zzzz814	false
249978		zzzz153,zzzz795	false
249979		zzzz154,zzzz795	false
249980		zzzz154,zzzz814	false
249981		zzzz154,zzzz782	false
249982		zzzz155,zzzz782	false
249983		zzzz155,zzzz795	false
249984		zzzz155,zzzz814	false
249985		zzzz156,zzzz795	false
249986		zzzz156,zzzz814	false
249987		zzzz156,zzzz782	false
249988		zzzz157,zzzz795	false
249989		zzzz157,zzzz814	false
249990		zzzz157,zzzz782	false
249991		zzzz158,zzzz795	false
249992		zzzz158,zzzz782	false
249993		zzzz158,zzzz814	false
249994		zzzz159,zzzz782	false
249995		zzzz159,zzzz795	false
249996		zzzz159,zzzz814	false
249997		zzzz160,zzzz782	false
249998		zzzz160,zzzz795	false
249999		zzzz160,zzzz814	false
250000		zzzz161,zzzz795	false
250001		zzzz161,zzzz814	false
250002		zzzz161,zzzz782	false
250003		zzzz162,zzzz782	false
250004		zzzz162,zzzz795	false
250005		zzzz162,zzzz814	false
250006		zzzz163,zzzz795	false
250007		zzzz163,zzzz814	false
250008		zzzz163,zzzz782	false
250009		zzzz164,zzzz782	false
250010		zzzz164,zzzz795	false
250011		zzzz164,zzzz814	false
250012		zzzz165,zzzz795	false
250013		zzzz165,zzzz814	false
250014		zzzz165,zzzz782	false
250015		zzzz166,zzzz795	false
250016		zzzz166,zzzz814	false
250017		zzzz166,zzzz782	false
250018		zzzz167,zzzz782	false
250019		zzzz167,zzzz795	false
250020		zzzz167,zzzz814	false
250021		zzzz168,zzzz782	false
250022		zzzz168,zzzz795	false
250023		zzzz168,zzzz814	false
250024		zzzz169,zzzz795	false
250025		zzzz169,zzzz782	false
250026		zzzz169,zzzz814	false
250027		zzzz170,zzzz782	false
250028		zzzz170,zzzz795	false
250029		zzzz170,zzzz814	false
250030		zzzz171,zzzz782	false
250031		zzzz171,zzzz795	false
250032		zzzz171,zzzz814	false
250033		zzzz172,zzzz782	false
250034		zzzz172,zzzz795	false
250035		zzzz172,zzzz814	false
250036		zzzz173,zzzz782	false
250037		zzzz173,zzzz795	false
250038		zzzz173,zzzz814	false
250039		zzzz174,zzzz782	false
250040		zzzz174,zzzz795	false
250041		zzzz174,zzzz814	false
250042		zzzz175,zzzz795	false
250043		zzzz175,zzzz782	false
250044		zzzz175,zzzz814	false
250045		zzzz176,zzzz782	false
250046		zzzz176,zzzz795	false
250047		zzzz176,zzzz814	false
250048		zzzz177,zzzz782	false
250049		zzzz177,zzzz795	false
250050		zzzz177,zzzz814	false
250051		zzzz178,zzzz782	false
250052		zzzz178,zzzz795	false
250053		zzzz178,zzzz814	false
250054		zzzz179,zzzz782	false
250055		zzzz179,zzzz795	false
250056		zzzz179,zzzz814	false
250057		zzzz180,zzzz782	false
250058		zzzz180,zzzz795	false
250059		zzzz180,zzzz814	false
250060		zzzz181,zzzz795	false
250061		zzzz181,zzzz782	false
250062		zzzz181,zzzz814	false
250063		zzzz182,zzzz795	false
250064		zzzz182,zzzz814	false
250065		zzzz183,zzzz782	false
250066		zzzz183,zzzz795	false
250067		zzzz183,zzzz814	false
250068		zzzz184,zzzz782	false
250069		zzzz184,zzzz795	false
250070		zzzz184,zzzz814	false
250071		zzzz186,zzzz795	false
250072		zzzz186,zzzz782	false
250073		zzzz186,zzzz814	false
250074		zzzz187,zzzz782	false
250075		zzzz187,zzzz814	false
250076		zzzz187,zzzz795	false
250077		zzzz188,zzzz814	false
250078		zzzz188,zzzz795	false
250079		zzzz188,zzzz782	false
250080		zzzz189,zzzz795	false
250081		zzzz189,zzzz814	false
250082		zzzz189,zzzz782	false
250083		zzzz190,zzzz814	false
250084		zzzz190,zzzz782	false
250085		zzzz190,zzzz795	false
250086		zzzz191,zzzz795	false
250087		zzzz191,zzzz782	false
250088		zzzz191,zzzz814	false
250089		zzzz192,zzzz814	false
250090		zzzz192,zzzz782	false
250091		zzzz194,zzzz814	false
250092		zzzz194,zzzz782	false
250093		zzzz194,zzzz795	false
250094		zzzz195,zzzz782	false
250095		zzzz195,zzzz814	false
250096		zzzz195,zzzz795	false
250097		zzzz197,zzzz814	false
250098		zzzz197,zzzz782	false
250099		zzzz197,zzzz795	false
250100		zzzz198,zzzz795	false
250101		zzzz198,zzzz814	false
250102		zzzz198,zzzz782	false
250103		zzzz199,zzzz795	false
250104		zzzz199,zzzz814	false
250105		zzzz199,zzzz782	false
250106		zzzz201,zzzz782	false
250107		zzzz201,zzzz795	false
250108		zzzz201,zzzz814	false
250109		zzzz202,zzzz782	false
250110		zzzz202,zzzz795	false
250111		zzzz202,zzzz814	false
250112		zzzz203,zzzz782	false
250113		zzzz203,zzzz795	false
250114		zzzz203,zzzz814	false
250115		zzzz204,zzzz795	false
250116		zzzz204,zzzz782	false
250117		zzzz204,zzzz814	false
250118		zzzz205,zzzz782	false
250119		zzzz205,zzzz795	false
250120		zzzz205,zzzz814	false
250121		zzzz206,zzzz782	false
250122		zzzz206,zzzz795	false
250123		zzzz206,zzzz814	false
250124		zzzz207,zzzz795	false
250125		zzzz207,zzzz814	false
250126		zzzz207,zzzz782	false
250127		zzzz208,zzzz795	false
250128		zzzz208,zzzz814	false
250129		zzzz208,zzzz782	false
250130		zzzz209,zzzz795	false
250131		zzzz209,zzzz782	false
250132		zzzz209,zzzz814	false
250133		zzzz210,zzzz782	false
250134		zzzz210,zzzz795	false
250135		zzzz210,zzzz814	false
250136		zzzz211,zzzz795	false
250137		zzzz211,zzzz814	false
250138		zzzz211,zzzz782	false
250139		zzzz213,zzzz795	false
250140		zzzz213,zzzz782	false
250141		zzzz213,zzzz814	false
250142		zzzz214,zzzz782	false
250143		zzzz214,zzzz795	false
250144		zzzz214,zzzz814	false
250145		zzzz215,zzzz795	false
250146		zzzz215,zzzz814	false
250147		zzzz215,zzzz782	false
250148		zzzz216,zzzz782	false
250149		zzzz216,zzzz795	false
250150		zzzz216,zzzz814	false
250151		zzzz217,zzzz782	false
250152		zzzz217,zzzz795	false
250153		zzzz217,zzzz814	false
250154		zzzz218,zzzz814	false
250155		zzzz218,zzzz782	false
250156		zzzz218,zzzz795	false
250157		zzzz219,zzzz795	false
250158		zzzz219,zzzz814	false
250159		zzzz219,zzzz782	false
250160		zzzz220,zzzz814	false
250161		zzzz220,zzzz782	false
250162		zzzz220,zzzz795	false
250163		zzzz222,zzzz814	false
250164		zzzz222,zzzz782	false
250165		zzzz222,zzzz795	false
250166		zzzz223,zzzz814	false
250167		zzzz224,zzzz814	false
250168		zzzz224,zzzz795	false
250169		zzzz224,zzzz782	false
250170		zzzz225,zzzz795	false
250171		zzzz225,zzzz814	false
250172		zzzz225,zzzz782	false
250173		zzzz226,zzzz795	false
250174		zzzz226,zzzz814	false
250175		zzzz226,zzzz782	false
250176		zzzz227,zzzz782	false
250177		zzzz227,zzzz795	false
250178		zzzz227,zzzz814	false
250179		zzzz228,zzzz782	false
250180		zzzz228,zzzz795	false
250181		zzzz228,zzzz814	false
250182		zzzz230,zzzz782	false
250183		zzzz230,zzzz795	false
250184		zzzz230,zzzz814	false
250185		zzzz231,zzzz782	false
250186		zzzz231,zzzz814	false
250187		zzzz232,zzzz814	false
250188		zzzz232,zzzz782	false
250189		zzzz232,zzzz795	false
250190		zzzz233,zzzz814	false
250191		zzzz233,zzzz782	false
250192		zzzz233,zzzz795	false
250193		zzzz235,zzzz814	false
250194		zzzz237,zzzz782	false
250195		zzzz237,zzzz795	false
250196		zzzz237,zzzz814	false
250197		zzzz239,zzzz782	false
250198		zzzz239,zzzz795	false
250199		zzzz239,zzzz814	false
250200		zzzz240,zzzz782	false
250201		zzzz240,zzzz814	false
250202		zzzz241,zzzz782	false
250203		zzzz241,zzzz795	false
250204		zzzz241,zzzz814	false
250205		zzzz242,zzzz782	false
250206		zzzz242,zzzz814	false
250207		zzzz243,zzzz795	false
250208		zzzz243,zzzz782	false
250209		zzzz243,zzzz814	false
250210		zzzz244,zzzz782	false
250211		zzzz244,zzzz795	false
250212		zzzz244,zzzz814	false
250213		zzzz245,zzzz795	false
250214		zzzz245,zzzz782	false
250215		zzzz245,zzzz814	false
250216		zzzz247,zzzz691	false
250217		zzzz247,zzzz293	false
250218		zzzz247,zzzz741	false
250219		zzzz248,zzzz814	false
250220		zzzz248,zzzz782	false
250221		zzzz249,zzzz782	false
250222		zzzz249,zzzz795	false
250223		zzzz249,zzzz814	false
250224		zzzz251,zzzz795	false
250225		zzzz251,zzzz782	false
250226		zzzz251,zzzz814	false
250227		zzzz252,zzzz782	false
250228		zzzz252,zzzz795	false
250229		zzzz252,zzzz814	false
250230		zzzz253,zzzz782	false
250231		zzzz253,zzzz814	false
250232		zzzz255,zzzz795	false
250233		zzzz255,zzzz782	false
250234		zzzz255,zzzz814	false
250235		zzzz259,zzzz782	false
250236		zzzz259,zzzz795	false
250237		zzzz259,zzzz814	false
250238		zzzz261,zzzz814	false
250239		zzzz261,zzzz782	false
250240		zzzz261,zzzz795	false
250241		zzzz262,zzzz795	false
250242		zzzz262,zzzz814	false
250243		zzzz262,zzzz782	false
250244		zzzz263,zzzz814	false
250245		zzzz263,zzzz795	false
250246		zzzz264,zzzz795	false
250247		zzzz264,zzzz814	false
250248		zzzz264,zzzz782	false
250249		zzzz265,zzzz856	false
250250		zzzz265,zzzz266	false
250251		zzzz265,zzzz969	false
250252		zzzz265,zzzz878	false
250253		zzzz265,zzzz269	false
250254		zzzz265,zzzz970	false
250255		zzzz265,zzzz879	false
250256		zzzz265,zzzz871	false
250257		zzzz266,zzzz856	false
250258		zzzz266,zzzz969	false
250259		zzzz266,zzzz878	false
250260		zzzz266,zzzz269	false
250261		zzzz266,zzzz970	false
250262		zzzz266,zzzz879	false
250263		zzzz266,zzzz871	false
250264		zzzz267,zzzz869	false
250265		zzzz267,zzzz872	false
250266		zzzz267,zzzz938	false
250267		zzzz267,zzzz953	false
250268		zzzz267,zzzz866	false
250269		zzzz267,zzzz270	false
250270		zzzz267,zzzz883	false
250271		zzzz267,zzzz880	false
250272		zzzz267,zzzz750	false
250273		zzzz267,zzzz877	false
250274		zzzz267,zzzz858	false
250275		zzzz267,zzzz882	false
250276		zzzz267,zzzz888	false
250277		zzzz267,zzzz886	false
250278		zzzz267,zzzz971	false
250279		zzzz267,zzzz956	false
250280		zzzz267,zzzz887	false
250281		zzzz267,zzzz272	false
250282		zzzz267,zzzzzz0	false
250283		zzzz267,zzzz867	false
250284		zzzz268,zzzz864	false
250285		zzzz268,zzzz967	false
250286		zzzz268,zzzz968	false
250287		zzzz268,zzzz876	false
250288		zzzz268,zzzz881	false
250289		zzzz269,zzzz969	false
250290		zzzz269,zzzz878	false
250291		zzzz269,zzzz856	false
250292		zzzz269,zzzz879	false
250293		zzzz269,zzzz970	false
250294		zzzz269,zzzz871	false
250295		zzzz270,zzzz883	false
250296		zzzz270,zzzz750	false
250297		zzzz270,zzzz880	false
250298		zzzz270,zzzz877	false
250299		zzzz270,zzzz858	false
250300		zzzz270,zzzz882	false
250301		zzzz270,zzzz887	false
250302		zzzz270,zzzz956	false
250303		zzzz270,zzzz272	false
250304		zzzz270,zzzzzz0	false
250305		zzzz270,zzzz971	false
250306		zzzz270,zzzz888	false
250307		zzzz270,zzzz872	false
250308		zzzz270,zzzz886	false
250309		zzzz270,zzzz953	false
250310		zzzz270,zzzz866	false
250311		zzzz270,zzzz938	false
250312		zzzz270,zzzz869	false
250313		zzzz270,zzzz867	false
250314		zzzz271,zzzz974	false
250315		zzzz272,zzzz867	false
250316		zzzz272,zzzz887	false
250317		zzzz272,zzzz956	false
250318		zzzz272,zzzzzz0	false
250319		zzzz272,zzzz888	false
250320		zzzz272,zzzz971	false
250321		zzzz272,zzzz886	false
250322		zzzz272,zzzz883	false
250323		zzzz272,zzzz750	false
250324		zzzz272,zzzz880	false
250325		zzzz272,zzzz877	false
250326		zzzz272,zzzz858	false
250327		zzzz272,zzzz882	false
250328		zzzz272,zzzz872	false
250329		zzzz272,zzzz938	false
250330		zzzz272,zzzz869	false
250331		zzzz272,zzzz953	false
250332		zzzz272,zzzz866	false
250333		zzzz274,zzzz795	false
250334		zzzz274,zzzz782	false
250335		zzzz274,zzzz814	false
250336		zzzz277,zzzz814	false
250337		zzzz278,zzzz814	false
250338		zzzz280,zzzz814	false
250339		zzzz280,zzzz795	false
250340		zzzz280,zzzz782	false
250341		zzzz281,zzzz814	false
250342		zzzz281,zzzz795	false
250343		zzzz282,zzzz814	false
250344		zzzz282,zzzz782	false
250345		zzzz282,zzzz795	false
250346		zzzz284,zzzz795	false
250347		zzzz284,zzzz782	false
250348		zzzz284,zzzz814	false
250349		zzzz285,zzzz795	false
250350		zzzz285,zzzz814	false
250351		zzzz285,zzzz782	false
250352		zzzz286,zzzz795	false
250353		zzzz286,zzzz814	false
250354		zzzz286,zzzz782	false
250355		zzzz287,zzzz795	false
250356		zzzz287,zzzz814	false
250357		zzzz287,zzzz782	false
250358		zzzz288,zzzz795	false
250359		zzzz288,zzzz814	false
250360		zzzz288,zzzz782	false
250361		zzzz289,zzzzz36	false
250362		zzzz290,zzzz782	false
250363		zzzz290,zzzz814	false
250364		zzzz291,zzzz814	false
250365		zzzz291,zzzz795	false
250366		zzzz291,zzzz782	false
250367		zzzz292,zzzz782	false
250368		zzzz292,zzzz814	false
250369		zzzz292,zzzz795	false
250370		zzzz293,zzzz743	false
250371		zzzz293,zzzzz95	false
250372		zzzz294,zzzz723	false
250373		zzzz297,zzzz814	false
250374		zzzz297,zzzz782	false
250375		zzzz297,zzzz795	false
250376		zzzz298,zzzz814	false
250377		zzzz298,zzzz795	false
250378		zzzz299,zzzz782	false
250379		zzzz299,zzzz795	false
250380		zzzz299,zzzz814	false
250381		zzzz300,zzzz814	false
250382		zzzz301,zzzz782	false
250383		zzzz301,zzzz814	false
250384		zzzz301,zzzz795	false
250385		zzzz302,zzzz814	false
250386		zzzz302,zzzz795	false
250387		zzzz303,zzzz814	false
250388		zzzz303,zzzz795	false
250389		zzzz303,zzzz782	false
250390		zzzz329,zzzz795	false
250391		zzzz329,zzzz782	false
250392		zzzz329,zzzz814	false
250393		zzzz346,zzzz814	false
250394		zzzz346,zzzz782	false
250395		zzzz346,zzzz795	false
250396		zzzz347,zzzz782	false
250397		zzzz347,zzzz795	false
250398		zzzz347,zzzz814	false
250399		zzzz348,zzzz782	false
250400		zzzz348,zzzz795	false
250401		zzzz348,zzzz814	false
250402		zzzz349,zzzz795	false
250403		zzzz349,zzzz814	false
250404		zzzz349,zzzz782	false
250405		zzzz350,zzzz782	false
250406		zzzz350,zzzz795	false
250407		zzzz350,zzzz814	false
250408		zzzz351,zzzz814	false
250409		zzzz351,zzzz782	false
250410		zzzz351,zzzz795	false
250411		zzzz352,zzzz814	false
250412		zzzz352,zzzz782	false
250413		zzzz352,zzzz795	false
250414		zzzz353,zzzz814	false
250415		zzzz353,zzzz782	false
250416		zzzz353,zzzz795	false
250417		zzzz354,zzzz814	false
250418		zzzz354,zzzz782	false
250419		zzzz354,zzzz795	false
250420		zzzz355,zzzz795	false
250421		zzzz355,zzzz814	false
250422		zzzz355,zzzz782	false
250423		zzzz356,zzzz795	false
250424		zzzz356,zzzz814	false
250425		zzzz356,zzzz782	false
250426		zzzz357,zzzz782	false
250427		zzzz357,zzzz795	false
250428		zzzz357,zzzz814	false
250429		zzzz358,zzzz795	false
250430		zzzz358,zzzz814	false
250431		zzzz358,zzzz782	false
250432		zzzz359,zzzz814	false
250433		zzzz359,zzzz782	false
250434		zzzz360,zzzz795	false
250435		zzzz360,zzzz782	false
250436		zzzz360,zzzz814	false
250437		zzzz361,zzzz814	false
250438		zzzz361,zzzz782	false
250439		zzzz361,zzzz795	false
250440		zzzz362,zzzz814	false
250441		zzzz362,zzzz782	false
250442		zzzz362,zzzz795	false
250443		zzzz363,zzzz782	false
250444		zzzz363,zzzz795	false
250445		zzzz363,zzzz814	false
250446		zzzz364,zzzz795	false
250447		zzzz364,zzzz814	false
250448		zzzz364,zzzz782	false
250449		zzzz365,zzzz814	false
250450		zzzz365,zzzz782	false
250451		zzzz365,zzzz795	false
250452		zzzz366,zzzz782	false
250453		zzzz366,zzzz795	false
250454		zzzz366,zzzz814	false
250455		zzzz367,zzzz795	false
250456		zzzz367,zzzz814	false
250457		zzzz367,zzzz782	false
250458		zzzz368,zzzz782	false
250459		zzzz368,zzzz795	false
250460		zzzz368,zzzz814	false
250461		zzzz369,zzzz795	false
250462		zzzz369,zzzz814	false
250463		zzzz369,zzzz782	false
250464		zzzz370,zzzz795	false
250465		zzzz370,zzzz814	false
250466		zzzz370,zzzz782	false
250467		zzzz371,zzzz782	false
250468		zzzz371,zzzz795	false
250469		zzzz371,zzzz814	false
250470		zzzz372,zzzz814	false
250471		zzzz372,zzzz782	false
250472		zzzz372,zzzz795	false
250473		zzzz373,zzzz795	false
250474		zzzz373,zzzz814	false
250475		zzzz373,zzzz782	false
250476		zzzz374,zzzz795	false
250477		zzzz374,zzzz814	false
250478		zzzz374,zzzz782	false
250479		zzzz375,zzzz782	false
250480		zzzz375,zzzz814	false
250481		zzzz375,zzzz795	false
250482		zzzz376,zzzz814	false
250483		zzzz376,zzzz782	false
250484		zzzz376,zzzz795	false
250485		zzzz377,zzzz795	false
250486		zzzz377,zzzz782	false
250487		zzzz377,zzzz814	false
250488		zzzz378,zzzz795	false
250489		zzzz378,zzzz814	false
250490		zzzz378,zzzz782	false
250491		zzzz379,zzzz782	false
250492		zzzz379,zzzz795	false
250493		zzzz379,zzzz814	false
250494		zzzz380,zzzz795	false
250495		zzzz380,zzzz814	false
250496		zzzz380,zzzz782	false
250497		zzzz381,zzzz795	false
250498		zzzz381,zzzz814	false
250499		zzzz381,zzzz782	false
250500		zzzz382,zzzz814	false
250501		zzzz382,zzzz782	false
250502		zzzz382,zzzz795	false
250503		zzzz383,zzzz795	false
250504		zzzz383,zzzz782	false
250505		zzzz383,zzzz814	false
250506		zzzz384,zzzz795	false
250507		zzzz384,zzzz814	false
250508		zzzz384,zzzz782	false
250509		zzzz385,zzzz814	false
250510		zzzz385,zzzz782	false
250511		zzzz385,zzzz795	false
250512		zzzz386,zzzz795	false
250513		zzzz386,zzzz814	false
250514		zzzz386,zzzz782	false
250515		zzzz387,zzzz814	false
250516		zzzz387,zzzz782	false
250517		zzzz387,zzzz795	false
250518		zzzz388,zzzz782	false
250519		zzzz388,zzzz795	false
250520		zzzz388,zzzz814	false
250521		zzzz389,zzzz795	false
250522		zzzz389,zzzz814	false
250523		zzzz389,zzzz782	false
250524		zzzz390,zzzz782	false
250525		zzzz390,zzzz795	false
250526		zzzz390,zzzz814	false
250527		zzzz391,zzzz814	false
250528		zzzz391,zzzz795	false
250529		zzzz391,zzzz782	false
250530		zzzz392,zzzz782	false
250531		zzzz392,zzzz795	false
250532		zzzz392,zzzz814	false
250533		zzzz393,zzzz795	false
250534		zzzz393,zzzz814	false
250535		zzzz393,zzzz782	false
250536		zzzz394,zzzz814	false
250537		zzzz394,zzzz782	false
250538		zzzz394,zzzz795	false
250539		zzzz395,zzzz782	false
250540		zzzz395,zzzz814	false
250541		zzzz395,zzzz795	false
250542		zzzz396,zzzz795	false
250543		zzzz396,zzzz814	false
250544		zzzz396,zzzz782	false
250545		zzzz397,zzzz795	false
250546		zzzz397,zzzz814	false
250547		zzzz397,zzzz782	false
250548		zzzz398,zzzz782	false
250549		zzzz398,zzzz814	false
250550		zzzz399,zzzz782	false
250551		zzzz399,zzzz795	false
250552		zzzz399,zzzz814	false
250553		zzzz400,zzzz782	false
250554		zzzz400,zzzz795	false
250555		zzzz400,zzzz814	false
250556		zzzz401,zzzz795	false
250557		zzzz401,zzzz814	false
250558		zzzz401,zzzz782	false
250559		zzzz402,zzzz782	false
250560		zzzz402,zzzz795	false
250561		zzzz402,zzzz814	false
250562		zzzz403,zzzz782	false
250563		zzzz403,zzzz814	false
250564		zzzz403,zzzz795	false
250565		zzzz404,zzzz795	false
250566		zzzz404,zzzz782	false
250567		zzzz404,zzzz814	false
250568		zzzz405,zzzz782	false
250569		zzzz405,zzzz795	false
250570		zzzz405,zzzz814	false
250571		zzzz406,zzzz782	false
250572		zzzz406,zzzz814	false
250573		zzzz407,zzzz795	false
250574		zzzz407,zzzz814	false
250575		zzzz407,zzzz782	false
250576		zzzz408,zzzz814	false
250577		zzzz409,zzzz682	false
250578		zzzz410,zzzz814	false
250579		zzzz410,zzzz795	false
250580		zzzz410,zzzz782	false
250581		zzzz411,zzzz795	false
250582		zzzz411,zzzz814	false
250583		zzzz411,zzzz782	false
250584		zzzz412,zzzz814	false
250585		zzzz412,zzzz795	false
250586		zzzz412,zzzz782	false
250587		zzzz413,zzzz814	false
250588		zzzz413,zzzz782	false
250589		zzzz413,zzzz795	false
250590		zzzz414,zzzz782	false
250591		zzzz414,zzzz795	false
250592		zzzz414,zzzz814	false
250593		zzzz415,zzzz782	false
250594		zzzz415,zzzz795	false
250595		zzzz415,zzzz814	false
250596		zzzz416,zzzz814	false
250597		zzzz416,zzzz782	false
250598		zzzz416,zzzz795	false
250599		zzzz417,zzzz782	false
250600		zzzz417,zzzz795	false
250601		zzzz417,zzzz814	false
250602		zzzz418,zzzz814	false
250603		zzzz418,zzzz795	false
250604		zzzz418,zzzz782	false
250605		zzzz419,zzzz782	false
250606		zzzz419,zzzz814	false
250607		zzzz420,zzzz795	false
250608		zzzz420,zzzz814	false
250609		zzzz420,zzzz782	false
250610		zzzz421,zzzz795	false
250611		zzzz421,zzzz814	false
250612		zzzz421,zzzz782	false
250613		zzzz422,zzzz795	false
250614		zzzz422,zzzz814	false
250615		zzzz422,zzzz782	false
250616		zzzz423,zzzz795	false
250617		zzzz423,zzzz782	false
250618		zzzz423,zzzz814	false
250619		zzzz424,zzzz795	false
250620		zzzz424,zzzz814	false
250621		zzzz424,zzzz782	false
250622		zzzz425,zzzz814	false
250623		zzzz425,zzzz782	false
250624		zzzz425,zzzz795	false
250625		zzzz426,zzzz782	false
250626		zzzz426,zzzz795	false
250627		zzzz426,zzzz814	false
250628		zzzz427,zzzz795	false
250629		zzzz427,zzzz814	false
250630		zzzz427,zzzz782	false
250631		zzzz428,zzzz795	false
250632		zzzz428,zzzz814	false
250633		zzzz428,zzzz782	false
250634		zzzz429,zzzz814	false
250635		zzzz429,zzzz795	false
250636		zzzz429,zzzz782	false
250637		zzzz430,zzzz814	false
250638		zzzz430,zzzz782	false
250639		zzzz430,zzzz795	false
250640		zzzz431,zzzz782	false
250641		zzzz431,zzzz814	false
250642		zzzz432,zzzz814	false
250643		zzzz432,zzzz782	false
250644		zzzz432,zzzz795	false
250645		zzzz433,zzzz814	false
250646		zzzz433,zzzz782	false
250647		zzzz433,zzzz795	false
250648		zzzz434,zzzz782	false
250649		zzzz434,zzzz795	false
250650		zzzz434,zzzz814	false
250651		zzzz435,zzzz814	false
250652		zzzz435,zzzz795	false
250653		zzzz435,zzzz782	false
250654		zzzz436,zzzz782	false
250655		zzzz436,zzzz795	false
250656		zzzz436,zzzz814	false
250657		zzzz437,zzzz795	false
250658		zzzz437,zzzz782	false
250659		zzzz437,zzzz814	false
250660		zzzz438,zzzz814	false
250661		zzzz438,zzzz782	false
250662		zzzz438,zzzz795	false
250663		zzzz439,zzzz782	false
250664		zzzz439,zzzz795	false
250665		zzzz439,zzzz814	false
250666		zzzz440,zzzz814	false
250667		zzzz440,zzzz782	false
250668		zzzz440,zzzz795	false
250669		zzzz441,zzzz782	false
250670		zzzz441,zzzz795	false
250671		zzzz441,zzzz814	false
250672		zzzz442,zzzz782	false
250673		zzzz442,zzzz795	false
250674		zzzz442,zzzz814	false
250675		zzzz443,zzzz814	false
250676		zzzz443,zzzz782	false
250677		zzzz443,zzzz795	false
250678		zzzz444,zzzz814	false
250679		zzzz444,zzzz782	false
250680		zzzz444,zzzz795	false
250681		zzzz445,zzzz782	false
250682		zzzz445,zzzz795	false
250683		zzzz445,zzzz814	false
250684		zzzz446,zzzz795	false
250685		zzzz446,zzzz814	false
250686		zzzz446,zzzz782	false
250687		zzzz447,zzzz782	false
250688		zzzz447,zzzz795	false
250689		zzzz447,zzzz814	false
250690		zzzz448,zzzz814	false
250691		zzzz448,zzzz782	false
250692		zzzz448,zzzz795	false
250693		zzzz449,zzzz795	false
250694		zzzz449,zzzz814	false
250695		zzzz449,zzzz782	false
250696		zzzz450,zzzz795	false
250697		zzzz450,zzzz814	false
250698		zzzz450,zzzz782	false
250699		zzzz451,zzzz814	false
250700		zzzz451,zzzz782	false
250701		zzzz451,zzzz795	false
250702		zzzz452,zzzz814	false
250703		zzzz452,zzzz782	false
250704		zzzz452,zzzz795	false
250705		zzzz453,zzzz782	false
250706		zzzz453,zzzz795	false
250707		zzzz453,zzzz814	false
250708		zzzz454,zzzz814	false
250709		zzzz454,zzzz795	false
250710		zzzz454,zzzz782	false
250711		zzzz455,zzzz795	false
250712		zzzz455,zzzz814	false
250713		zzzz456,zzzz795	false
250714		zzzz456,zzzz814	false
250715		zzzz456,zzzz782	false
250716		zzzz457,zzzz814	false
250717		zzzz457,zzzz782	false
250718		zzzz457,zzzz795	false
250719		zzzz458,zzzz782	false
250720		zzzz458,zzzz795	false
250721		zzzz458,zzzz814	false
250722		zzzz459,zzzz795	false
250723		zzzz459,zzzz782	false
250724		zzzz459,zzzz814	false
250725		zzzz460,zzzz814	false
250726		zzzz460,zzzz782	false
250727		zzzz460,zzzz795	false
250728		zzzz461,zzzz782	false
250729		zzzz461,zzzz795	false
250730		zzzz461,zzzz814	false
250731		zzzz462,zzzz782	false
250732		zzzz462,zzzz795	false
250733		zzzz462,zzzz814	false
250734		zzzz463,zzzz814	false
250735		zzzz464,zzzz782	false
250736		zzzz464,zzzz814	false
250737		zzzz465,zzzz814	false
250738		zzzz465,zzzz795	false
250739		zzzz465,zzzz782	false
250740		zzzz466,zzzz782	false
250741		zzzz466,zzzz795	false
250742		zzzz466,zzzz814	false
250743		zzzz467,zzzz782	false
250744		zzzz467,zzzz795	false
250745		zzzz467,zzzz814	false
250746		zzzz468,zzzz814	false
250747		zzzz468,zzzz795	false
250748		zzzz468,zzzz782	false
250749		zzzz469,zzzz795	false
250750		zzzz469,zzzz782	false
250751		zzzz469,zzzz814	false
250752		zzzz470,zzzz795	false
250753		zzzz470,zzzz782	false
250754		zzzz470,zzzz814	false
250755		zzzz471,zzzz814	false
250756		zzzz471,zzzz782	false
250757		zzzz471,zzzz795	false
250758		zzzz472,zzzz814	false
250759		zzzz472,zzzz795	false
250760		zzzz472,zzzz782	false
250761		zzzz473,zzzz795	false
250762		zzzz473,zzzz814	false
250763		zzzz473,zzzz782	false
250764		zzzz474,zzzz814	false
250765		zzzz474,zzzz795	false
250766		zzzz474,zzzz782	false
250767		zzzz475,zzzz782	false
250768		zzzz475,zzzz795	false
250769		zzzz475,zzzz814	false
250770		zzzz476,zzzz782	false
250771		zzzz476,zzzz795	false
250772		zzzz476,zzzz814	false
250773		zzzz477,zzzz795	false
250774		zzzz477,zzzz814	false
250775		zzzz477,zzzz782	false
250776		zzzz478,zzzz795	false
250777		zzzz478,zzzz814	false
250778		zzzz478,zzzz782	false
250779		zzzz479,zzzz782	false
250780		zzzz479,zzzz795	false
250781		zzzz479,zzzz814	false
250782		zzzz480,zzzz814	false
250783		zzzz480,zzzz782	false
250784		zzzz480,zzzz795	false
250785		zzzz481,zzzz782	false
250786		zzzz481,zzzz795	false
250787		zzzz481,zzzz814	false
250788		zzzz482,zzzz782	false
250789		zzzz482,zzzz814	false
250790		zzzz482,zzzz795	false
250791		zzzz483,zzzz795	false
250792		zzzz483,zzzz782	false
250793		zzzz483,zzzz814	false
250794		zzzz484,zzzz795	false
250795		zzzz484,zzzz782	false
250796		zzzz484,zzzz814	false
250797		zzzz485,zzzz795	false
250798		zzzz485,zzzz814	false
250799		zzzz485,zzzz782	false
250800		zzzz486,zzzz795	false
250801		zzzz486,zzzz782	false
250802		zzzz486,zzzz814	false
250803		zzzz487,zzzz782	false
250804		zzzz487,zzzz795	false
250805		zzzz487,zzzz814	false
250806		zzzz489,zzzz782	false
250807		zzzz489,zzzz795	false
250808		zzzz489,zzzz814	false
250809		zzzz490,zzzz795	false
250810		zzzz490,zzzz814	false
250811		zzzz490,zzzz782	false
250812		zzzz491,zzzz795	false
250813		zzzz491,zzzz814	false
250814		zzzz491,zzzz782	false
250815		zzzz492,zzzz814	false
250816		zzzz492,zzzz782	false
250817		zzzz492,zzzz795	false
250818		zzzz493,zzzz814	false
250819		zzzz493,zzzz795	false
250820		zzzz493,zzzz782	false
250821		zzzz494,zzzz782	false
250822		zzzz494,zzzz795	false
250823		zzzz494,zzzz814	false
250824		zzzz495,zzzz814	false
250825		zzzz495,zzzz782	false
250826		zzzz495,zzzz795	false
250827		zzzz496,zzzz782	false
250828		zzzz496,zzzz795	false
250829		zzzz496,zzzz814	false
250830		zzzz497,zzzz814	false
250831		zzzz497,zzzz782	false
250832		zzzz497,zzzz795	false
250833		zzzz498,zzzz795	false
250834		zzzz498,zzzz814	false
250835		zzzz498,zzzz782	false
250836		zzzz499,zzzz795	false
250837		zzzz499,zzzz814	false
250838		zzzz499,zzzz782	false
250839		zzzz500,zzzz814	false
250840		zzzz500,zzzz795	false
250841		zzzz500,zzzz782	false
250842		zzzz501,zzzz814	false
250843		zzzz501,zzzz782	false
250844		zzzz501,zzzz795	false
250845		zzzz502,zzzz814	false
250846		zzzz502,zzzz795	false
250847		zzzz502,zzzz782	false
250848		zzzz504,zzzz795	false
250849		zzzz504,zzzz782	false
250850		zzzz504,zzzz814	false
250851		zzzz505,zzzz795	false
250852		zzzz505,zzzz814	false
250853		zzzz505,zzzz782	false
250854		zzzz506,zzzz795	false
250855		zzzz506,zzzz814	false
250856		zzzz506,zzzz782	false
250857		zzzz507,zzzz782	false
250858		zzzz507,zzzz814	false
250859		zzzz507,zzzz795	false
250860		zzzz508,zzzz795	false
250861		zzzz508,zzzz814	false
250862		zzzz508,zzzz782	false
250863		zzzz509,zzzz782	false
250864		zzzz509,zzzz795	false
250865		zzzz509,zzzz814	false
250866		zzzz510,zzzz795	false
250867		zzzz510,zzzz814	false
250868		zzzz510,zzzz782	false
250869		zzzz511,zzzz795	false
250870		zzzz511,zzzz814	false
250871		zzzz511,zzzz782	false
250872		zzzz512,zzzz814	false
250873		zzzz512,zzzz795	false
250874		zzzz512,zzzz782	false
250875		zzzz513,zzzz782	false
250876		zzzz513,zzzz814	false
250877		zzzz513,zzzz795	false
250878		zzzz514,zzzz795	false
250879		zzzz514,zzzz814	false
250880		zzzz514,zzzz782	false
250881		zzzz515,zzzz782	false
250882		zzzz515,zzzz795	false
250883		zzzz515,zzzz814	false
250884		zzzz516,zzzz782	false
250885		zzzz516,zzzz795	false
250886		zzzz516,zzzz814	false
250887		zzzz517,zzzz782	false
250888		zzzz517,zzzz814	false
250889		zzzz518,zzzz814	false
250890		zzzz518,zzzz782	false
250891		zzzz518,zzzz795	false
250892		zzzz519,zzzz782	false
250893		zzzz519,zzzz795	false
250894		zzzz519,zzzz814	false
250895		zzzz520,zzzz782	false
250896		zzzz520,zzzz814	false
250897		zzzz520,zzzz795	false
250898		zzzz521,zzzz795	false
250899		zzzz521,zzzz814	false
250900		zzzz521,zzzz782	false
250901		zzzz522,zzzz814	false
250902		zzzz522,zzzz795	false
250903		zzzz522,zzzz782	false
250904		zzzz523,zzzz814	false
250905		zzzz523,zzzz782	false
250906		zzzz523,zzzz795	false
250907		zzzz524,zzzz795	false
250908		zzzz524,zzzz782	false
250909		zzzz524,zzzz814	false
250910		zzzz525,zzzz814	false
250911		zzzz525,zzzz795	false
250912		zzzz525,zzzz782	false
250913		zzzz526,zzzz782	false
250914		zzzz526,zzzz814	false
250915		zzzz526,zzzz795	false
250916		zzzz527,zzzz814	false
250917		zzzz527,zzzz782	false
250918		zzzz527,zzzz795	false
250919		zzzz528,zzzz814	false
250920		zzzz528,zzzz795	false
250921		zzzz528,zzzz782	false
250922		zzzz529,zzzz795	false
250923		zzzz529,zzzz814	false
250924		zzzz529,zzzz782	false
250925		zzzz530,zzzz814	false
250926		zzzz530,zzzz782	false
250927		zzzz530,zzzz795	false
250928		zzzz531,zzzz782	false
250929		zzzz531,zzzz795	false
250930		zzzz531,zzzz814	false
250931		zzzz532,zzzz795	false
250932		zzzz532,zzzz782	false
250933		zzzz532,zzzz814	false
250934		zzzz533,zzzz814	false
250935		zzzz533,zzzz782	false
250936		zzzz533,zzzz795	false
250937		zzzz534,zzzz782	false
250938		zzzz534,zzzz795	false
250939		zzzz534,zzzz814	false
250940		zzzz535,zzzz795	false
250941		zzzz535,zzzz814	false
250942		zzzz535,zzzz782	false
250943		zzzz536,zzzz814	false
250944		zzzz536,zzzz795	false
250945		zzzz536,zzzz782	false
250946		zzzz537,zzzz795	false
250947		zzzz537,zzzz814	false
250948		zzzz537,zzzz782	false
250949		zzzz538,zzzz782	false
250950		zzzz538,zzzz795	false
250951		zzzz538,zzzz814	false
250952		zzzz539,zzzz782	false
250953		zzzz539,zzzz795	false
250954		zzzz539,zzzz814	false
250955		zzzz540,zzzz814	false
250956		zzzz540,zzzz795	false
250957		zzzz540,zzzz782	false
250958		zzzz541,zzzz795	false
250959		zzzz541,zzzz814	false
250960		zzzz541,zzzz782	false
250961		zzzz542,zzzz795	false
250962		zzzz542,zzzz782	false
250963		zzzz542,zzzz814	false
250964		zzzz543,zzzz782	false
250965		zzzz543,zzzz795	false
250966		zzzz543,zzzz814	false
250967		zzzz544,zzzz782	false
250968		zzzz544,zzzz795	false
250969		zzzz544,zzzz814	false
250970		zzzz545,zzzz814	false
250971		zzzz545,zzzz782	false
250972		zzzz545,zzzz795	false
250973		zzzz546,zzzz795	false
250974		zzzz546,zzzz814	false
250975		zzzz546,zzzz782	false
250976		zzzz547,zzzz795	false
250977		zzzz547,zzzz814	false
250978		zzzz547,zzzz782	false
250979		zzzz548,zzzz814	false
250980		zzzz548,zzzz795	false
250981		zzzz548,zzzz782	false
250982		zzzz549,zzzz814	false
250983		zzzz549,zzzz782	false
250984		zzzz549,zzzz795	false
250985		zzzz550,zzzz795	false
250986		zzzz550,zzzz814	false
250987		zzzz550,zzzz782	false
250988		zzzz551,zzzz814	false
250989		zzzz551,zzzz795	false
250990		zzzz551,zzzz782	false
250991		zzzz552,zzzz782	false
250992		zzzz552,zzzz795	false
250993		zzzz552,zzzz814	false
250994		zzzz553,zzzz782	false
250995		zzzz553,zzzz795	false
250996		zzzz553,zzzz814	false
250997		zzzz554,zzzz814	false
250998		zzzz554,zzzz795	false
250999		zzzz554,zzzz782	false
251000		zzzz555,zzzz782	false
251001		zzzz555,zzzz795	false
251002		zzzz555,zzzz814	false
251003		zzzz556,zzzz795	false
251004		zzzz556,zzzz782	false
251005		zzzz556,zzzz814	false
251006		zzzz557,zzzz814	false
251007		zzzz557,zzzz795	false
251008		zzzz557,zzzz782	false
251009		zzzz558,zzzz795	false
251010		zzzz558,zzzz782	false
251011		zzzz558,zzzz814	false
251012		zzzz559,zzzz814	false
251013		zzzz559,zzzz795	false
251014		zzzz559,zzzz782	false
251015		zzzz560,zzzz782	false
251016		zzzz560,zzzz814	false
251017		zzzz560,zzzz795	false
251018		zzzz561,zzzz814	false
251019		zzzz561,zzzz795	false
251020		zzzz561,zzzz782	false
251021		zzzz562,zzzz795	false
251022		zzzz562,zzzz782	false
251023		zzzz562,zzzz814	false
251024		zzzz563,zzzz782	false
251025		zzzz563,zzzz795	false
251026		zzzz563,zzzz814	false
251027		zzzz564,zzzz795	false
251028		zzzz564,zzzz782	false
251029		zzzz564,zzzz814	false
251030		zzzz565,zzzz782	false
251031		zzzz565,zzzz814	false
251032		zzzz565,zzzz795	false
251033		zzzz566,zzzz814	false
251034		zzzz566,zzzz795	false
251035		zzzz566,zzzz782	false
251036		zzzz567,zzzz782	false
251037		zzzz567,zzzz814	false
251038		zzzz567,zzzz795	false
251039		zzzz568,zzzz782	false
251040		zzzz568,zzzz795	false
251041		zzzz568,zzzz814	false
251042		zzzz569,zzzz795	false
251043		zzzz569,zzzz782	false
251044		zzzz569,zzzz814	false
251045		zzzz570,zzzz782	false
251046		zzzz570,zzzz814	false
251047		zzzz570,zzzz795	false
251048		zzzz571,zzzz782	false
251049		zzzz571,zzzz795	false
251050		zzzz571,zzzz814	false
251051		zzzz572,zzzz782	false
251052		zzzz572,zzzz814	false
251053		zzzz572,zzzz795	false
251054		zzzz573,zzzz814	false
251055		zzzz573,zzzz795	false
251056		zzzz573,zzzz782	false
251057		zzzz574,zzzz782	false
251058		zzzz574,zzzz814	false
251059		zzzz574,zzzz795	false
251060		zzzz575,zzzz795	false
251061		zzzz575,zzzz814	false
251062		zzzz575,zzzz782	false
251063		zzzz576,zzzz814	false
251064		zzzz576,zzzz782	false
251065		zzzz576,zzzz795	false
251066		zzzz577,zzzz782	false
251067		zzzz577,zzzz814	false
251068		zzzz577,zzzz795	false
251069		zzzz578,zzzz795	false
251070		zzzz578,zzzz782	false
251071		zzzz578,zzzz814	false
251072		zzzz579,zzzz795	false
251073		zzzz579,zzzz814	false
251074		zzzz579,zzzz782	false
251075		zzzz580,zzzz814	false
251076		zzzz580,zzzz795	false
251077		zzzz580,zzzz782	false
251078		zzzz581,zzzz795	false
251079		zzzz581,zzzz782	false
251080		zzzz581,zzzz814	false
251081		zzzz582,zzzz795	false
251082		zzzz582,zzzz814	false
251083		zzzz582,zzzz782	false
251084		zzzz583,zzzz814	false
251085		zzzz583,zzzz782	false
251086		zzzz583,zzzz795	false
251087		zzzz584,zzzz795	false
251088		zzzz584,zzzz814	false
251089		zzzz584,zzzz782	false
251090		zzzz585,zzzz814	false
251091		zzzz585,zzzz782	false
251092		zzzz585,zzzz795	false
251093		zzzz586,zzzz782	false
251094		zzzz586,zzzz814	false
251095		zzzz586,zzzz795	false
251096		zzzz587,zzzz795	false
251097		zzzz587,zzzz782	false
251098		zzzz587,zzzz814	false
251099		zzzz588,zzzz814	false
251100		zzzz588,zzzz795	false
251101		zzzz588,zzzz782	false
251102		zzzz589,zzzz782	false
251103		zzzz589,zzzz795	false
251104		zzzz589,zzzz814	false
251105		zzzz590,zzzz782	false
251106		zzzz590,zzzz795	false
251107		zzzz590,zzzz814	false
251108		zzzz592,zzzz795	false
251109		zzzz592,zzzz782	false
251110		zzzz592,zzzz814	false
251111		zzzz593,zzzz814	false
251112		zzzz593,zzzz782	false
251113		zzzz593,zzzz795	false
251114		zzzz594,zzzz795	false
251115		zzzz594,zzzz782	false
251116		zzzz594,zzzz814	false
251117		zzzz595,zzzz795	false
251118		zzzz595,zzzz782	false
251119		zzzz595,zzzz814	false
251120		zzzz596,zzzz782	false
251121		zzzz596,zzzz814	false
251122		zzzz596,zzzz795	false
251123		zzzz597,zzzz795	false
251124		zzzz597,zzzz814	false
251125		zzzz597,zzzz782	false
251126		zzzz599,zzzz795	false
251127		zzzz599,zzzz814	false
251128		zzzz599,zzzz782	false
251129		zzzz600,zzzz782	false
251130		zzzz600,zzzz814	false
251131		zzzz600,zzzz795	false
251132		zzzz602,zzzz795	false
251133		zzzz602,zzzz782	false
251134		zzzz602,zzzz814	false
251135		zzzz603,zzzz782	false
251136		zzzz603,zzzz814	false
251137		zzzz603,zzzz795	false
251138		zzzz604,zzzz782	false
251139		zzzz604,zzzz814	false
251140		zzzz604,zzzz795	false
251141		zzzz605,zzzz795	false
251142		zzzz605,zzzz782	false
251143		zzzz605,zzzz814	false
251144		zzzz606,zzzz795	false
251145		zzzz606,zzzz814	false
251146		zzzz606,zzzz782	false
251147		zzzz607,zzzz782	false
251148		zzzz607,zzzz814	false
251149		zzzz607,zzzz795	false
251150		zzzz609,zzzz814	false
251151		zzzz609,zzzz795	false
251152		zzzz609,zzzz782	false
251153		zzzz611,zzzz782	false
251154		zzzz611,zzzz795	false
251155		zzzz611,zzzz814	false
251156		zzzz612,zzzz782	false
251157		zzzz612,zzzz814	false
251158		zzzz612,zzzz795	false
251159		zzzz613,zzzz814	false
251160		zzzz613,zzzz782	false
251161		zzzz613,zzzz795	false
251162		zzzz614,zzzz795	false
251163		zzzz614,zzzz782	false
251164		zzzz614,zzzz814	false
251165		zzzz615,zzzz814	false
251166		zzzz615,zzzz795	false
251167		zzzz615,zzzz782	false
251168		zzzz616,zzzz782	false
251169		zzzz616,zzzz814	false
251170		zzzz617,zzzz782	false
251171		zzzz617,zzzz814	false
251172		zzzz617,zzzz795	false
251173		zzzz618,zzzz782	false
251174		zzzz618,zzzz814	false
251175		zzzz618,zzzz795	false
251176		zzzz619,zzzz795	false
251177		zzzz619,zzzz814	false
251178		zzzz619,zzzz782	false
251179		zzzz620,zzzz782	false
251180		zzzz620,zzzz795	false
251181		zzzz620,zzzz814	false
251182		zzzz621,zzzz782	false
251183		zzzz621,zzzz795	false
251184		zzzz621,zzzz814	false
251185		zzzz622,zzzz795	false
251186		zzzz622,zzzz814	false
251187		zzzz622,zzzz782	false
251188		zzzz623,zzzz782	false
251189		zzzz623,zzzz795	false
251190		zzzz623,zzzz814	false
251191		zzzz625,zzzz782	false
251192		zzzz625,zzzz795	false
251193		zzzz625,zzzz814	false
251194		zzzz626,zzzz782	false
251195		zzzz626,zzzz795	false
251196		zzzz626,zzzz814	false
251197		zzzz627,zzzz814	false
251198		zzzz627,zzzz782	false
251199		zzzz627,zzzz795	false
251200		zzzz628,zzzz795	false
251201		zzzz628,zzzz814	false
251202		zzzz628,zzzz782	false
251203		zzzz629,zzzz795	false
251204		zzzz629,zzzz814	false
251205		zzzz629,zzzz782	false
251206		zzzz630,zzzz814	false
251207		zzzz630,zzzz795	false
251208		zzzz630,zzzz782	false
251209		zzzz631,zzzz814	false
251210		zzzz631,zzzz795	false
251211		zzzz631,zzzz782	false
251212		zzzz632,zzzz814	false
251213		zzzz632,zzzz782	false
251214		zzzz632,zzzz795	false
251215		zzzz633,zzzz814	false
251216		zzzz634,zzzz795	false
251217		zzzz634,zzzz814	false
251218		zzzz634,zzzz782	false
251219		zzzz635,zzzz782	false
251220		zzzz635,zzzz795	false
251221		zzzz635,zzzz814	false
251222		zzzz636,zzzz795	false
251223		zzzz636,zzzz814	false
251224		zzzz636,zzzz782	false
251225		zzzz637,zzzz782	false
251226		zzzz637,zzzz795	false
251227		zzzz637,zzzz814	false
251228		zzzz638,zzzz782	false
251229		zzzz638,zzzz795	false
251230		zzzz638,zzzz814	false
251231		zzzz639,zzzz782	false
251232		zzzz639,zzzz814	false
251233		zzzz639,zzzz795	false
251234		zzzz640,zzzz814	false
251235		zzzz640,zzzz782	false
251236		zzzz640,zzzz795	false
251237		zzzz641,zzzz814	false
251238		zzzz641,zzzz782	false
251239		zzzz641,zzzz795	false
251240		zzzz642,zzzz814	false
251241		zzzz642,zzzz782	false
251242		zzzz642,zzzz795	false
251243		zzzz643,zzzz782	false
251244		zzzz643,zzzz814	false
251245		zzzz643,zzzz795	false
251246		zzzz644,zzzz795	false
251247		zzzz644,zzzz814	false
251248		zzzz644,zzzz782	false
251249		zzzz645,zzzz795	false
251250		zzzz645,zzzz814	false
251251		zzzz645,zzzz782	false
251252		zzzz646,zzzz814	false
251253		zzzz646,zzzz782	false
251254		zzzz646,zzzz795	false
251255		zzzz647,zzzz782	false
251256		zzzz647,zzzz795	false
251257		zzzz647,zzzz814	false
251258		zzzz648,zzzz782	false
251259		zzzz648,zzzz814	false
251260		zzzz648,zzzz795	false
251261		zzzz649,zzzz814	false
251262		zzzz649,zzzz782	false
251263		zzzz649,zzzz795	false
251264		zzzz650,zzzz814	false
251265		zzzz650,zzzz795	false
251266		zzzz650,zzzz782	false
251267		zzzz651,zzzz782	false
251268		zzzz651,zzzz814	false
251269		zzzz651,zzzz795	false
251270		zzzz652,zzzz782	false
251271		zzzz652,zzzz795	false
251272		zzzz652,zzzz814	false
251273		zzzz653,zzzz795	false
251274		zzzz653,zzzz814	false
251275		zzzz653,zzzz782	false
251276		zzzz654,zzzz795	false
251277		zzzz654,zzzz782	false
251278		zzzz654,zzzz814	false
251279		zzzz655,zzzz814	false
251280		zzzz655,zzzz795	false
251281		zzzz655,zzzz782	false
251282		zzzz656,zzzz782	false
251283		zzzz656,zzzz814	false
251284		zzzz656,zzzz795	false
251285		zzzz657,zzzz814	false
251286		zzzz657,zzzz782	false
251287		zzzz657,zzzz795	false
251288		zzzz658,zzzz782	false
251289		zzzz658,zzzz814	false
251290		zzzz658,zzzz795	false
251291		zzzz659,zzzz795	false
251292		zzzz659,zzzz814	false
251293		zzzz659,zzzz782	false
251294		zzzz660,zzzz795	false
251295		zzzz660,zzzz814	false
251296		zzzz660,zzzz782	false
251297		zzzz661,zzzz795	false
251298		zzzz661,zzzz782	false
251299		zzzz661,zzzz814	false
251300		zzzz662,zzzz795	false
251301		zzzz662,zzzz782	false
251302		zzzz662,zzzz814	false
251303		zzzz663,zzzz782	false
251304		zzzz663,zzzz795	false
251305		zzzz663,zzzz814	false
251306		zzzz664,zzzz795	false
251307		zzzz664,zzzz782	false
251308		zzzz664,zzzz814	false
251309		zzzz665,zzzz795	false
251310		zzzz665,zzzz782	false
251311		zzzz665,zzzz814	false
251312		zzzz666,zzzz814	false
251313		zzzz666,zzzz795	false
251314		zzzz666,zzzz782	false
251315		zzzz667,zzzz814	false
251316		zzzz667,zzzz795	false
251317		zzzz667,zzzz782	false
251318		zzzz669,zzzz814	false
251319		zzzz669,zzzz782	false
251320		zzzz669,zzzz795	false
251321		zzzz670,zzzz814	false
251322		zzzz670,zzzz782	false
251323		zzzz670,zzzz795	false
251324		zzzz671,zzzz814	false
251325		zzzz671,zzzz782	false
251326		zzzz671,zzzz795	false
251327		zzzz672,zzzz814	false
251328		zzzz672,zzzz782	false
251329		zzzz673,zzzz795	false
251330		zzzz673,zzzz782	false
251331		zzzz673,zzzz814	false
251332		zzzz674,zzzz795	false
251333		zzzz674,zzzz814	false
251334		zzzz674,zzzz782	false
251335		zzzz676,zzzz782	false
251336		zzzz676,zzzz814	false
251337		zzzz676,zzzz795	false
251338		zzzz677,zzzz782	false
251339		zzzz677,zzzz795	false
251340		zzzz677,zzzz814	false
251341		zzzz678,zzzz814	false
251342		zzzz678,zzzz782	false
251343		zzzz678,zzzz795	false
251344		zzzz679,zzzz782	false
251345		zzzz679,zzzz814	false
251346		zzzz679,zzzz795	false
251347		zzzz680,zzzz814	false
251348		zzzz680,zzzz795	false
251349		zzzz680,zzzz782	false
251350		zzzz681,zzzz814	false
251351		zzzz681,zzzz782	false
251352		zzzz683,zzzz782	false
251353		zzzz683,zzzz814	false
251354		zzzz685,zzzz795	false
251355		zzzz685,zzzz814	false
251356		zzzz685,zzzz782	false
251357		zzzz686,zzzz795	false
251358		zzzz686,zzzz814	false
251359		zzzz686,zzzz782	false
251360		zzzz687,zzzz814	false
251361		zzzz687,zzzz782	false
251362		zzzz688,zzzz795	false
251363		zzzz688,zzzz814	false
251364		zzzz688,zzzz782	false
251365		zzzz690,zzzz795	false
251366		zzzz690,zzzz814	false
251367		zzzz690,zzzz782	false
251368		zzzz691,zzzzz95	false
251369		zzzz691,zzzz743	false
251370		zzzz692,zzzz782	false
251371		zzzz692,zzzz814	false
251372		zzzz692,zzzz795	false
251373		zzzz693,zzzz795	false
251374		zzzz693,zzzz782	false
251375		zzzz693,zzzz814	false
251376		zzzz694,zzzz814	false
251377		zzzz694,zzzz795	false
251378		zzzz694,zzzz782	false
251379		zzzz695,zzzz795	false
251380		zzzz695,zzzz814	false
251381		zzzz695,zzzz782	false
251382		zzzz696,zzzz814	false
251383		zzzz697,zzzz795	false
251384		zzzz697,zzzz782	false
251385		zzzz697,zzzz814	false
251386		zzzz698,zzzz814	false
251387		zzzz700,zzzz814	false
251388		zzzz700,zzzz782	false
251389		zzzz700,zzzz795	false
251390		zzzz701,zzzz814	false
251391		zzzz701,zzzz782	false
251392		zzzz707,zzzz814	false
251393		zzzz707,zzzz795	false
251394		zzzz715,zzzz814	false
251395		zzzz715,zzzz795	false
251396		zzzz715,zzzz782	false
251397		zzzz722,zzzz782	false
251398		zzzz722,zzzz814	false
251399		zzzz722,zzzz795	false
251400		zzzz723,zzzz776	false
251401		zzzz723,zzzz780	false
251402		zzzz723,zzzz768	false
251403		zzzz723,zzzz772	false
251404		zzzz723,zzzz767	false
251405		zzzz723,zzzz769	false
251406		zzzz723,zzzz773	false
251407		zzzz724,zzzz814	false
251408		zzzz724,zzzz782	false
251409		zzzz724,zzzz795	false
251410		zzzz725,zzzz814	false
251411		zzzz725,zzzz795	false
251412		zzzz725,zzzz782	false
251413		zzzz726,zzzz814	false
251414		zzzz726,zzzz782	false
251415		zzzz726,zzzz795	false
251416		zzzz727,zzzz795	false
251417		zzzz727,zzzz814	false
251418		zzzz727,zzzz782	false
251419		zzzz728,zzzz782	false
251420		zzzz728,zzzz795	false
251421		zzzz728,zzzz814	false
251422		zzzz730,zzzz926	false
251423		zzzz730,zzzz973	false
251424		zzzz731,zzzz954	false
251425		zzzz731,zzzz755	false
251426		zzzz731,zzzz897	false
251427		zzzz731,zzzz977	false
251428		zzzz733,zzzz955	false
251429		zzzz733,zzzz960	false
251430		zzzz733,zzzz959	false
251431		zzzz733,zzzz770	false
251432		zzzz733,zzzz762	false
251433		zzzz733,zzzz958	false
251434		zzzz733,zzzz924	false
251435		zzzz733,zzzz918	false
251436		zzzz733,zzzz759	false
251437		zzzz733,zzzz925	false
251438		zzzz733,zzzz761	false
251439		zzzz733,zzzz928	false
251440		zzzz733,zzzz937	false
251441		zzzz733,zzzz742	false
251442		zzzz733,zzzz917	false
251443		zzzz733,zzzz927	false
251444		zzzz735,zzzz874	false
251445		zzzz735,zzzz737	false
251446		zzzz736,zzzz957	false
251447		zzzz737,zzzz874	false
251448		zzzz738,zzzz795	false
251449		zzzz738,zzzz814	false
251450		zzzz738,zzzz782	false
251451		zzzz741,zzzzz95	false
251452		zzzz742,zzzz924	false
251453		zzzz742,zzzz761	false
251454		zzzz742,zzzz759	false
251455		zzzz742,zzzz918	false
251456		zzzz742,zzzz925	false
251457		zzzz742,zzzz762	false
251458		zzzz742,zzzz928	false
251459		zzzz742,zzzz917	false
251460		zzzz742,zzzz770	false
251461		zzzz742,zzzz959	false
251462		zzzz742,zzzz960	false
251463		zzzz742,zzzz958	false
251464		zzzz742,zzzz955	false
251465		zzzz742,zzzz937	false
251466		zzzz742,zzzz927	false
251467		zzzz745,zzzz814	false
251468		zzzz745,zzzz782	false
251469		zzzz750,zzzz867	false
251470		zzzz750,zzzz880	false
251471		zzzz750,zzzz858	false
251472		zzzz750,zzzz882	false
251473		zzzz750,zzzz877	false
251474		zzzz750,zzzz883	false
251475		zzzz750,zzzz956	false
251476		zzzz750,zzzz887	false
251477		zzzz750,zzzzzz0	false
251478		zzzz750,zzzz872	false
251479		zzzz750,zzzz953	false
251480		zzzz750,zzzz938	false
251481		zzzz750,zzzz869	false
251482		zzzz750,zzzz971	false
251483		zzzz750,zzzz888	false
251484		zzzz750,zzzz886	false
251485		zzzz750,zzzz866	false
251486		zzzz755,zzzz977	false
251487		zzzz755,zzzz897	false
251488		zzzz756,zzzz814	false
251489		zzzz756,zzzz795	false
251490		zzzz756,zzzz782	false
251491		zzzz759,zzzz761	false
251492		zzzz759,zzzz924	false
251493		zzzz759,zzzz925	false
251494		zzzz759,zzzz918	false
251495		zzzz759,zzzz928	false
251496		zzzz759,zzzz762	false
251497		zzzz759,zzzz917	false
251498		zzzz759,zzzz770	false
251499		zzzz759,zzzz959	false
251500		zzzz759,zzzz960	false
251501		zzzz759,zzzz958	false
251502		zzzz759,zzzz955	false
251503		zzzz759,zzzz937	false
251504		zzzz759,zzzz927	false
251505		zzzz760,zzzz795	false
251506		zzzz760,zzzz814	false
251507		zzzz760,zzzz782	false
251508		zzzz761,zzzz924	false
251509		zzzz761,zzzz925	false
251510		zzzz761,zzzz918	false
251511		zzzz761,zzzz928	false
251512		zzzz761,zzzz762	false
251513		zzzz761,zzzz917	false
251514		zzzz761,zzzz770	false
251515		zzzz761,zzzz959	false
251516		zzzz761,zzzz960	false
251517		zzzz761,zzzz955	false
251518		zzzz761,zzzz958	false
251519		zzzz761,zzzz937	false
251520		zzzz761,zzzz927	false
251521		zzzz762,zzzz928	false
251522		zzzz762,zzzz924	false
251523		zzzz762,zzzz925	false
251524		zzzz762,zzzz918	false
251525		zzzz762,zzzz917	false
251526		zzzz762,zzzz770	false
251527		zzzz762,zzzz959	false
251528		zzzz762,zzzz960	false
251529		zzzz762,zzzz958	false
251530		zzzz762,zzzz937	false
251531		zzzz762,zzzz955	false
251532		zzzz762,zzzz927	false
251533		zzzz770,zzzz959	false
251534		zzzz770,zzzz928	false
251535		zzzz770,zzzz924	false
251536		zzzz770,zzzz917	false
251537		zzzz770,zzzz925	false
251538		zzzz770,zzzz918	false
251539		zzzz770,zzzz960	false
251540		zzzz770,zzzz937	false
251541		zzzz770,zzzz958	false
251542		zzzz770,zzzz955	false
251543		zzzz770,zzzz927	false
251544		zzzz771,zzzz798	false
251545		zzzz782,zzzz809	false
251546		zzzz782,zzzz912	false
251547		zzzz782,zzzz808	false
251548		zzzz782,zzzz843	false
251549		zzzz782,zzzzz73	false
251550		zzzz782,zzzz947	false
251551		zzzz782,zzzz966	false
251552		zzzz782,zzzz903	false
251553		zzzz782,zzzz893	false
251554		zzzz782,zzzz936	false
251555		zzzz782,zzzzz67	false
251556		zzzz782,zzzzz88	false
251557		zzzz782,zzzz946	false
251558		zzzz782,zzzzz81	false
251559		zzzz782,zzzz894	false
251560		zzzz782,zzzz943	false
251561		zzzz782,zzzzz93	false
251562		zzzz782,zzzz829	false
251563		zzzz782,zzzz913	false
251564		zzzz782,zzzz951	false
251565		zzzz782,zzzzz47	false
251566		zzzz782,zzzzz58	false
251567		zzzz782,zzzz848	false
251568		zzzz782,zzzzz85	false
251569		zzzz782,zzzz788	false
251570		zzzz782,zzzz807	false
251571		zzzz782,zzzz905	false
251572		zzzz782,zzzz810	false
251573		zzzz782,zzzzz62	false
251574		zzzz782,zzzz844	false
251575		zzzz782,zzzz935	false
251576		zzzz782,zzzzz69	false
251577		zzzz782,zzzz833	false
251578		zzzz782,zzzzz94	false
251579		zzzz782,zzzz834	false
251580		zzzz782,zzzz831	false
251581		zzzz782,zzzzz63	false
251582		zzzz782,zzzz852	false
251583		zzzz782,zzzzz64	false
251584		zzzz782,zzzzz97	false
251585		zzzz782,zzzz832	false
251586		zzzz782,zzzz862	false
251587		zzzz782,zzzzz46	false
251588		zzzz782,zzzzz82	false
251589		zzzz782,zzzz981	false
251590		zzzz782,zzzz931	false
251591		zzzz782,zzzzz44	false
251592		zzzz782,zzzz934	false
251593		zzzz782,zzzzz59	false
251594		zzzz782,zzzzz43	false
251595		zzzz782,zzzz811	false
251596		zzzz782,zzzz837	false
251597		zzzz782,zzzz804	false
251598		zzzz782,zzzz799	false
251599		zzzz782,zzzz933	false
251600		zzzz782,zzzzz92	false
251601		zzzz782,zzzzz57	false
251602		zzzz782,zzzzz56	false
251603		zzzz782,zzzzz79	false
251604		zzzz782,zzzz920	false
251605		zzzz782,zzzzz77	false
251606		zzzz782,zzzz806	false
251607		zzzz782,zzzz823	false
251608		zzzz782,zzzzz54	false
251609		zzzz782,zzzzz70	false
251610		zzzz782,zzzz787	false
251611		zzzz782,zzzz785	false
251612		zzzz782,zzzz790	false
251613		zzzz782,zzzz786	false
251614		zzzz782,zzzz783	false
251615		zzzz782,zzzz850	false
251616		zzzz782,zzzz906	false
251617		zzzz782,zzzz941	false
251618		zzzz782,zzzz910	false
251619		zzzz782,zzzz795	false
251620		zzzz782,zzzz853	false
251621		zzzz782,zzzz940	false
251622		zzzz782,zzzz812	false
251623		zzzz782,zzzz950	false
251624		zzzz782,zzzz900	false
251625		zzzz782,zzzz841	false
251626		zzzz782,zzzzz53	false
251627		zzzz782,zzzz802	false
251628		zzzz782,zzzz784	false
251629		zzzz782,zzzz884	false
251630		zzzz782,zzzz948	false
251631		zzzz782,zzzz911	false
251632		zzzz782,zzzzz90	false
251633		zzzz782,zzzz889	false
251634		zzzz782,zzzz898	false
251635		zzzz782,zzzz891	false
251636		zzzz782,zzzzz55	false
251637		zzzz782,zzzz792	false
251638		zzzz782,zzzz895	false
251639		zzzz782,zzzz949	false
251640		zzzz782,zzzzz84	false
251641		zzzz782,zzzz942	false
251642		zzzz782,zzzz921	false
251643		zzzz782,zzzz794	false
251644		zzzz782,zzzz814	false
251645		zzzz782,zzzzz51	false
251646		zzzz782,zzzz907	false
251647		zzzz782,zzzzz89	false
251648		zzzz782,zzzzz87	false
251649		zzzz782,zzzz908	false
251650		zzzz782,zzzz896	false
251651		zzzz782,zzzzz96	false
251652		zzzz782,zzzz904	false
251653		zzzz782,zzzz845	false
251654		zzzz782,zzzzz80	false
251655		zzzz782,zzzz963	false
251656		zzzz782,zzzz801	false
251657		zzzz782,zzzzz61	false
251658		zzzz782,zzzzz91	false
251659		zzzz782,zzzzz52	false
251660		zzzz782,zzzz982	false
251661		zzzz782,zzzz791	false
251662		zzzz782,zzzz902	false
251663		zzzz782,zzzz901	false
251664		zzzz782,zzzz892	false
251665		zzzz782,zzzz945	false
251666		zzzz782,zzzzz83	false
251667		zzzz782,zzzz849	false
251668		zzzz782,zzzz838	false
251669		zzzz782,zzzz793	false
251670		zzzz782,zzzzz78	false
251671		zzzz782,zzzzz50	false
251672		zzzz782,zzzz964	false
251673		zzzz782,zzzz965	false
251674		zzzz782,zzzzz49	false
251675		zzzz782,zzzz890	false
251676		zzzz782,zzzz840	false
251677		zzzz782,zzzz836	false
251678		zzzz782,zzzz944	false
251679		zzzz782,zzzz899	false
251680		zzzz782,zzzzz86	false
251681		zzzz782,zzzzz45	false
251682		zzzz782,zzzz952	false
251683		zzzz782,zzzz983	false
251684		zzzz782,zzzz800	false
251685		zzzz782,zzzzz74	false
251686		zzzz782,zzzz909	false
251687		zzzz782,zzzz796	false
251688		zzzz782,zzzzz99	false
251689		zzzz782,zzzzz48	false
251690		zzzz782,zzzzz60	false
251691		zzzz783,zzzz814	false
251692		zzzz783,zzzz795	false
251693		zzzz784,zzzz814	false
251694		zzzz784,zzzz795	false
251695		zzzz785,zzzz795	false
251696		zzzz785,zzzz814	false
251697		zzzz786,zzzz795	false
251698		zzzz786,zzzz814	false
251699		zzzz787,zzzz795	false
251700		zzzz787,zzzz814	false
251701		zzzz788,zzzz795	false
251702		zzzz788,zzzz814	false
251703		zzzz790,zzzz795	false
251704		zzzz790,zzzz814	false
251705		zzzz791,zzzz814	false
251706		zzzz791,zzzz795	false
251707		zzzz792,zzzz795	false
251708		zzzz792,zzzz814	false
251709		zzzz793,zzzz795	false
251710		zzzz793,zzzz814	false
251711		zzzz794,zzzz814	false
251712		zzzz794,zzzz795	false
251713		zzzz795,zzzz845	false
251714		zzzz795,zzzz907	false
251715		zzzz795,zzzz952	false
251716		zzzz795,zzzzz86	false
251717		zzzz795,zzzz913	false
251718		zzzz795,zzzzz67	false
251719		zzzz795,zzzz892	false
251720		zzzz795,zzzz912	false
251721		zzzz795,zzzzz87	false
251722		zzzz795,zzzzz90	false
251723		zzzz795,zzzz831	false
251724		zzzz795,zzzz943	false
251725		zzzz795,zzzz802	false
251726		zzzz795,zzzz901	false
251727		zzzz795,zzzzz51	false
251728		zzzz795,zzzzz91	false
251729		zzzz795,zzzz893	false
251730		zzzz795,zzzz965	false
251731		zzzz795,zzzzz99	false
251732		zzzz795,zzzz808	false
251733		zzzz795,zzzz812	false
251734		zzzz795,zzzz944	false
251735		zzzz795,zzzzz55	false
251736		zzzz795,zzzz908	false
251737		zzzz795,zzzz946	false
251738		zzzz795,zzzzz44	false
251739		zzzz795,zzzz833	false
251740		zzzz795,zzzz890	false
251741		zzzz795,zzzz903	false
251742		zzzz795,zzzzz60	false
251743		zzzz795,zzzz806	false
251744		zzzz795,zzzz894	false
251745		zzzz795,zzzz804	false
251746		zzzz795,zzzz829	false
251747		zzzz795,zzzzz56	false
251748		zzzz795,zzzzz78	false
251749		zzzz795,zzzz945	false
251750		zzzz795,zzzzz93	false
251751		zzzz795,zzzz824	false
251752		zzzz795,zzzz899	false
251753		zzzz795,zzzz934	false
251754		zzzz795,zzzzz88	false
251755		zzzz795,zzzzz96	false
251756		zzzz795,zzzz832	false
251757		zzzz795,zzzzz46	false
251758		zzzz795,zzzzz73	false
251759		zzzz795,zzzz848	false
251760		zzzz795,zzzzz80	false
251761		zzzz795,zzzz807	false
251762		zzzz795,zzzz853	false
251763		zzzz795,zzzz951	false
251764		zzzz795,zzzz963	false
251765		zzzz795,zzzzz64	false
251766		zzzz795,zzzz810	false
251767		zzzz795,zzzzz43	false
251768		zzzz795,zzzz905	false
251769		zzzz795,zzzz811	false
251770		zzzz795,zzzz844	false
251771		zzzz795,zzzzz61	false
251772		zzzz795,zzzzz84	false
251773		zzzz795,zzzzz63	false
251774		zzzz795,zzzz837	false
251775		zzzz795,zzzz852	false
251776		zzzz795,zzzzz45	false
251777		zzzz795,zzzzz47	false
251778		zzzz795,zzzzz94	false
251779		zzzz795,zzzzz49	false
251780		zzzz795,zzzzz69	false
251781		zzzz795,zzzzz75	false
251782		zzzz795,zzzz862	false
251783		zzzz795,zzzzz74	false
251784		zzzz795,zzzz838	false
251785		zzzz795,zzzz933	false
251786		zzzz795,zzzzz58	false
251787		zzzz795,zzzz981	false
251788		zzzz795,zzzzz77	false
251789		zzzz795,zzzzz53	false
251790		zzzz795,zzzzz50	false
251791		zzzz795,zzzzz92	false
251792		zzzz795,zzzzz82	false
251793		zzzz795,zzzzz85	false
251794		zzzz795,zzzz935	false
251795		zzzz795,zzzz836	false
251796		zzzz795,zzzzz57	false
251797		zzzz795,zzzz799	false
251798		zzzz795,zzzzz70	false
251799		zzzz795,zzzz920	false
251800		zzzz795,zzzzz83	false
251801		zzzz795,zzzzz79	false
251802		zzzz795,zzzz931	false
251803		zzzz795,zzzzz54	false
251804		zzzz795,zzzz830	false
251805		zzzz795,zzzz884	false
251806		zzzz795,zzzz950	false
251807		zzzz795,zzzz800	false
251808		zzzz795,zzzz906	false
251809		zzzz795,zzzz936	false
251810		zzzz795,zzzz910	false
251811		zzzz795,zzzz911	false
251812		zzzz795,zzzz843	false
251813		zzzz795,zzzz940	false
[truncated: 225,945 more rows]
