# Supplementary material for: Discovery of several thousand highly diverse circular DNA viruses
Source: eLife journal article supplement (doi:10.7554/elife.51971), 2020-02-03
Supplement: fig2-figsupp1-data4 [file elife-51971-fig2-figsupp1-data4-v1.cys › CytoscapeSession-2019_08_05-17_02/tables/252227-all_my_seqs_genbank_ssDNA1_domains_micro_ino_rep_fasta+Full+Network%281%29/LOCAL_ATTRS-org.cytoscape.model.CyEdge-all_my_seqs_genbank_ssDNA1_domains_micro_ino_rep_fasta+Full+Network%281%29+default+edge.cytable]

CyCSV-Version	1
SUID	__mclCluster	interaction	name	selected
java.lang.Long	java.lang.Integer	java.lang.String	java.lang.String	java.lang.Boolean
	mutable
all_my_seqs_genbank_ssDNA1_domains_micro_ino_rep_fasta Full Network(1) default edge
13334	1		zzzz754,zzzz860	false
13335	1		zzzz754,zzzz758	false
13336	1		zzzz754,zzzz757	false
13337	1		zzzz753,zzzz861	false
13330	1		zzzz754,zzzz929	false
13331	1		zzzz754,zzzz764	false
13332	1		zzzz754,zzzz774	false
13333	1		zzzz754,zzzz777	false
13326	1		zzzz754,zzzz803	false
13327	1		zzzz754,zzzzz37	false
13328	1		zzzz754,zzzzzz4	false
13329	1		zzzz754,zzzzz11	false
13325	1		zzzz754,zzzz861	false
2311	1		zzzzz11,zzzzz37	false
2312	1		zzzzz11,zzzzzz4	false
158690	1		zzzz260,zzzz774	false
158691	1		zzzz260,zzzz777	false
158688	1		zzzz260,zzzz757	false
13022	1		zzzz764,zzzz929	false
158689	1		zzzz260,zzzz753	false
158686	1		zzzz260,zzzz754	false
158687	1		zzzz260,zzzz758	false
158684	1		zzzz260,zzzz929	false
13018	1		zzzz764,zzzzzz4	false
158685	1		zzzz260,zzzz860	false
13019	1		zzzz764,zzzzz11	false
158682	1		zzzz260,zzzzzz4	false
13020	1		zzzz764,zzzz861	false
158683	1		zzzz260,zzzz764	false
13021	1		zzzz764,zzzz860	false
158680	1		zzzz260,zzzz748	false
13014	1		zzzz764,zzzz777	false
158681	1		zzzz260,zzzzz11	false
13015	1		zzzz764,zzzz803	false
158678	1		zzzz260,zzzzz37	false
13016	1		zzzz764,zzzzz37	false
158679	1		zzzz260,zzzz861	false
13017	1		zzzz764,zzzz774	false
158676	1		zzzz260,zzzz751	false
158677	1		zzzz260,zzzz803	false
13012			zzzz764,zzzz930	false
158675	1		zzzz260,zzzz749	false
13013			zzzz764,zzzzz10	false
144070	1		zzzz309,zzzzzz9	false
144071	1		zzzz309,zzzz961	false
144069			zzzz309,zzzz610	false
2241	1		zzzzz37,zzzzzz4	false
12954	1		zzzz774,zzzz777	false
2716	1		zzzz961,zzzzzz9	false
12950	1		zzzz774,zzzz861	false
12951	1		zzzz774,zzzzz11	false
12952	1		zzzz774,zzzz860	false
174742			zzzz221,zzzz608	false
12953	1		zzzz774,zzzz929	false
174740	1		zzzz221,zzzzzz9	false
12947	1		zzzz774,zzzz803	false
174741			zzzz221,zzzz610	false
12948	1		zzzz774,zzzzz37	false
174738	1		zzzz221,zzzz309	false
12949	1		zzzz774,zzzzzz4	false
174739	1		zzzz221,zzzz961	false
174737			zzzz221,zzzzz10	false
10626	1		zzzz803,zzzzzz4	false
12930	1		zzzz777,zzzzzz4	false
13186	1		zzzz757,zzzz774	false
12931	1		zzzz777,zzzz929	false
12932	1		zzzz777,zzzz860	false
10622	1		zzzz803,zzzz860	false
12926	1		zzzz777,zzzz803	false
13182	1		zzzz757,zzzz764	false
10623	1		zzzz803,zzzz861	false
12927	1		zzzz777,zzzz861	false
13183	1		zzzz757,zzzz860	false
10624	1		zzzz803,zzzzz37	false
12928	1		zzzz777,zzzzz37	false
13184	1		zzzz757,zzzz758	false
10625	1		zzzz803,zzzzz11	false
12929	1		zzzz777,zzzzz11	false
13185	1		zzzz757,zzzz777	false
13178	1		zzzz757,zzzzz37	false
13179	1		zzzz757,zzzzz11	false
10620			zzzz803,zzzz930	false
13180	1		zzzz757,zzzzzz4	false
10621	1		zzzz803,zzzz929	false
13181	1		zzzz757,zzzz929	false
13174	1		zzzz758,zzzz777	false
13175	1		zzzz758,zzzz860	false
13176	1		zzzz757,zzzz861	false
13177	1		zzzz757,zzzz803	false
13170	1		zzzz758,zzzz764	false
13171	1		zzzz758,zzzzz11	false
13172	1		zzzz758,zzzz774	false
13173	1		zzzz758,zzzz929	false
13166	1		zzzz758,zzzzz37	false
13167	1		zzzz758,zzzz861	false
13168	1		zzzz758,zzzz803	false
13169	1		zzzz758,zzzzzz4	false
34406			zzzz608,zzzz930	false
34407	1		zzzz608,zzzz610	false
13398	1		zzzz748,zzzzz37	false
34134			zzzz610,zzzz930	false
13399	1		zzzz748,zzzzzz4	false
13400	1		zzzz748,zzzzz11	false
13401	1		zzzz748,zzzz861	false
13394	1		zzzz748,zzzz929	false
13395	1		zzzz748,zzzz860	false
13396	1		zzzz748,zzzz803	false
34132			zzzz610,zzzzzz9	false
13397	1		zzzz748,zzzz764	false
34133			zzzz610,zzzz961	false
3918	1		zzzz929,zzzzz11	false
13390	1		zzzz748,zzzz749	false
13391	1		zzzz748,zzzz751	false
13392	1		zzzz748,zzzz774	false
13393	1		zzzz748,zzzz758	false
3914			zzzz929,zzzz930	false
13386	1		zzzz748,zzzz753	false
3915			zzzz929,zzzzz10	false
13387	1		zzzz748,zzzz757	false
3916	1		zzzz929,zzzzz37	false
13388	1		zzzz748,zzzz754	false
3917	1		zzzz929,zzzzzz4	false
13389	1		zzzz748,zzzz777	false
13382	1		zzzz749,zzzz860	false
13383	1		zzzz749,zzzz861	false
3912			zzzz930,zzzzz11	false
13384	1		zzzz749,zzzzzz4	false
3913	1		zzzz930,zzzzz10	false
13385	1		zzzz749,zzzz751	false
13378	1		zzzz749,zzzz758	false
13379	1		zzzz749,zzzzz11	false
13380	1		zzzz749,zzzz803	false
13381	1		zzzz749,zzzzz37	false
13374	1		zzzz749,zzzz764	false
13375	1		zzzz749,zzzz757	false
13376	1		zzzz749,zzzz753	false
13377	1		zzzz749,zzzz929	false
13370			zzzz749,zzzzz10	false
13371	1		zzzz749,zzzz777	false
13372	1		zzzz749,zzzz774	false
13373	1		zzzz749,zzzz754	false
13366	1		zzzz751,zzzz860	false
13367	1		zzzz751,zzzz803	false
13368	1		zzzz751,zzzzzz4	false
13369	1		zzzz751,zzzz861	false
13362	1		zzzz751,zzzz758	false
13363	1		zzzz751,zzzz757	false
13364	1		zzzz751,zzzzz37	false
13365	1		zzzz751,zzzzz11	false
13358	1		zzzz751,zzzz754	false
6446	1		zzzz860,zzzz929	false
13359	1		zzzz751,zzzz764	false
13360	1		zzzz751,zzzz753	false
13361	1		zzzz751,zzzz929	false
6442	1		zzzz860,zzzz861	false
13355			zzzz751,zzzzz10	false
6443	1		zzzz860,zzzzz37	false
13356	1		zzzz751,zzzz777	false
6444	1		zzzz860,zzzzzz4	false
13357	1		zzzz751,zzzz774	false
6445	1		zzzz860,zzzzz11	false
6438	1		zzzz861,zzzz929	false
6439	1		zzzz861,zzzzz37	false
6440	1		zzzz861,zzzzzz4	false
6441	1		zzzz861,zzzzz11	false
13346	1		zzzz753,zzzz758	false
13347	1		zzzz753,zzzz777	false
13348	1		zzzz753,zzzz774	false
13349	1		zzzz753,zzzz757	false
13342	1		zzzz753,zzzz929	false
13343	1		zzzz753,zzzz764	false
13344	1		zzzz753,zzzz860	false
13345	1		zzzz753,zzzz754	false
13338	1		zzzz753,zzzz803	false
13339	1		zzzz753,zzzzz37	false
13340	1		zzzz753,zzzzz11	false
13341	1		zzzz753,zzzzzz4	false
