# Supplementary material for: Discovery of several thousand highly diverse circular DNA viruses
Source: eLife journal article supplement (doi:10.7554/elife.51971), 2020-02-03
Supplement: fig2-figsupp1-data4 [file elife-51971-fig2-figsupp1-data4-v1.cys › CytoscapeSession-2019_08_05-17_02/tables/252227-all_my_seqs_genbank_ssDNA1_domains_micro_ino_rep_fasta+Full+Network%281%29/LOCAL_ATTRS-org.cytoscape.model.CyNode-all_my_seqs_genbank_ssDNA1_domains_micro_ino_rep_fasta+Full+Network%281%29+default+node.cytable]

CyCSV-Version	1
SUID	__mclCluster	name	selected
java.lang.Long	java.lang.Integer	java.lang.String	java.lang.Boolean
	mutable
all_my_seqs_genbank_ssDNA1_domains_micro_ino_rep_fasta Full Network(1) default node
319	4	zzzz754	false
192	33	zzzz930	false
448	42	zzzz608	false
320	4	zzzz753	false
193	4	zzzz929	false
322	4	zzzz751	false
67	4	zzzzzz4	false
323	4	zzzz749	false
324	4	zzzz748	false
134	4	zzzzz37	false
783	4	zzzz260	false
280	4	zzzz803	false
160	4	zzzzz11	false
161	33	zzzzz10	false
225	4	zzzz861	false
226	4	zzzz860	false
747	18	zzzz309	false
171	18	zzzz961	false
302	4	zzzz777	false
305	4	zzzz774	false
822	18	zzzz221	false
313	4	zzzz764	false
316	4	zzzz758	false
317	4	zzzz757	false
446	42	zzzz610	false
62	18	zzzzzz9	false
