# Supplementary material for: Discovery of several thousand highly diverse circular DNA viruses
Source: eLife journal article supplement (doi:10.7554/elife.51971), 2020-02-03
Supplement: fig2-figsupp1-data4 [file elife-51971-fig2-figsupp1-data4-v1.cys › CytoscapeSession-2019_08_05-17_02/tables/252237-all_my_seqs_genbank_ssDNA1_domains_micro_ino_rep_fasta+Full+Network%282%29/LOCAL_ATTRS-org.cytoscape.model.CyEdge-all_my_seqs_genbank_ssDNA1_domains_micro_ino_rep_fasta+Full+Network%282%29+default+edge.cytable]

CyCSV-Version	1
SUID	__mclCluster	interaction	name	selected
java.lang.Long	java.lang.Integer	java.lang.String	java.lang.String	java.lang.Boolean
	mutable
all_my_seqs_genbank_ssDNA1_domains_micro_ino_rep_fasta Full Network(2) default edge
249705	1		zzzz100,zzzz114	false
249704	1		zzzz100,zzzz362	false
249703	1		zzzz100,zzzz945	false
249702	1		zzzz100,zzzz418	false
249701	1		zzzz100,zzzz912	false
249700	1		zzzz100,zzzz189	false
249699	1		zzzz100,zzzz421	false
249698	1		zzzz100,zzzz433	false
249697	1		zzzz100,zzzz642	false
249696	1		zzzz100,zzzz724	false
249695	1		zzzz100,zzzz627	false
249694	1		zzzz100,zzzz197	false
249693	1		zzzz100,zzzz445	false
249692	1		zzzz100,zzzz450	false
249691	1		zzzz100,zzzz454	false
249690	1		zzzz100,zzzz907	false
249689	1		zzzz100,zzzzz80	false
249688	1		zzzz100,zzzz261	false
249687	1		zzzz100,zzzz373	false
249686	1		zzzz100,zzzz351	false
249685	1		zzzz100,zzzz500	false
249684	1		zzzz100,zzzz128	false
249683	1		zzzz100,zzzz117	false
249682	1		zzzz100,zzzz385	false
249681	1		zzzz100,zzzz443	false
249680	1		zzzz100,zzzz428	false
249679	1		zzzz100,zzzz527	false
249678	1		zzzz100,zzzz262	false
249677	1		zzzz100,zzzz207	false
249676	1		zzzz100,zzzz447	false
249675	1		zzzz100,zzzz456	false
249674	1		zzzz100,zzzz478	false
249673	1		zzzz100,zzzz523	false
249672	1		zzzz100,zzzz451	false
249671	1		zzzz100,zzzz452	false
249670	1		zzzz100,zzzz670	false
249669	1		zzzz100,zzzz120	false
249668	1		zzzz100,zzzz387	false
249667	1		zzzz100,zzzz396	false
249666	1		zzzz100,zzzz420	false
249665	1		zzzz100,zzzz425	false
249664	1		zzzz100,zzzz511	false
249663	1		zzzz100,zzzz629	false
249662	1		zzzz100,zzzz389	false
249661	1		zzzz100,zzzz646	false
249660	1		zzzz100,zzzz365	false
249659	1		zzzz100,zzzz448	false
249658	1		zzzz100,zzzz667	false
249657	1		zzzz100,zzzz674	false
249656	1		zzzz100,zzzz722	false
249655	1		zzzz100,zzzz376	false
249654	1		zzzz100,zzzz492	false
249653	1		zzzz100,zzzz641	false
249652	1		zzzz100,zzzzz90	false
249651	1		zzzz100,zzzz549	false
249650	1		zzzz100,zzzz613	false
249649	1		zzzz100,zzzz127	false
249648	1		zzzz100,zzzz378	false
249647	1		zzzz100,zzzz460	false
249646	1		zzzz100,zzzz895	false
249645	1		zzzz100,zzzz119	false
249644	1		zzzz100,zzzz194	false
249643	1		zzzz100,zzzz559	false
249642	1		zzzz100,zzzz901	false
249641	1		zzzz100,zzzz369	false
249640	1		zzzz100,zzzz656	false
249639	1		zzzz100,zzzz889	false
249638	1		zzzz100,zzzz401	false
249637	1		zzzz100,zzzz649	false
249636	1		zzzz100,zzzz794	false
249635	1		zzzz100,zzzz356	false
249634	1		zzzz100,zzzz663	false
249633	1		zzzz100,zzzz921	false
249632	1		zzzz100,zzzz647	false
249631	1		zzzz100,zzzz353	false
249630	1		zzzz100,zzzz121	false
249629	1		zzzz100,zzzz900	false
249628	1		zzzz100,zzzz371	false
249627	1		zzzz100,zzzz468	false
249626	1		zzzz100,zzzz474	false
249625	1		zzzz100,zzzz485	false
249624	1		zzzz100,zzzz498	false
249623	1		zzzz100,zzzz512	false
249622	1		zzzz100,zzzzz64	false
249621	1		zzzz100,zzzzz73	false
249620	1		zzzz100,zzzzz74	false
249619	1		zzzz100,zzzzz84	false
249618	1		zzzz100,zzzz224	false
249617	1		zzzz100,zzzz458	false
249616	1		zzzz100,zzzz963	false
249615	1		zzzz100,zzzzz81	false
249614	1		zzzz100,zzzzz89	false
249613	1		zzzz100,zzzz195	false
249612	1		zzzz100,zzzz208	false
249611	1		zzzz100,zzzz524	false
249610	1		zzzz100,zzzz896	false
249609	1		zzzz100,zzzz209	false
249608	1		zzzz100,zzzz393	false
249607	1		zzzz100,zzzz537	false
249606	1		zzzz100,zzzz892	false
249605	1		zzzz100,zzzzz45	false
249604	1		zzzz100,zzzzz77	false
249603	1		zzzz100,zzzzz87	false
249602	1		zzzz100,zzzz375	false
249601	1		zzzz100,zzzz416	false
249600	1		zzzz100,zzzz504	false
249599	1		zzzz100,zzzz547	false
249598	1		zzzz100,zzzz638	false
249597	1		zzzz100,zzzz913	false
249596	1		zzzz100,zzzz944	false
249595	1		zzzz100,zzzz368	false
249594	1		zzzz100,zzzz388	false
249593	1		zzzz100,zzzz522	false
249592	1		zzzz100,zzzz599	false
249591	1		zzzz100,zzzz620	false
249590	1		zzzz100,zzzz662	false
249589	1		zzzz100,zzzz465	false
249588	1		zzzz100,zzzz657	false
249587	1		zzzz100,zzzz726	false
249586	1		zzzz100,zzzz908	false
249585	1		zzzz100,zzzz346	false
249584	1		zzzz100,zzzz349	false
249583	1		zzzz100,zzzz533	false
249582	1		zzzz100,zzzz952	false
249581	1		zzzz100,zzzz982	false
249580	1		zzzz100,zzzz106	false
249579	1		zzzz100,zzzz400	false
249578	1		zzzz100,zzzz457	false
249577	1		zzzz100,zzzz130	false
249576	1		zzzz100,zzzz366	false
249575	1		zzzz100,zzzz370	false
249574	1		zzzz100,zzzz579	false
249573	1		zzzz100,zzzz644	false
249572	1		zzzz100,zzzz658	false
249571	1		zzzz100,zzzzz53	false
249570	1		zzzz100,zzzz631	false
249569	1		zzzz100,zzzz845	false
249568	1		zzzz100,zzzz894	false
249567	1		zzzz100,zzzzz91	false
249566	1		zzzz100,zzzz123	false
249565	1		zzzz100,zzzz424	false
249564	1		zzzz100,zzzz546	false
249563	1		zzzz100,zzzz614	false
249562	1		zzzz100,zzzz483	false
249561	1		zzzz100,zzzz556	false
249560	1		zzzz100,zzzz964	false
249559	1		zzzz100,zzzz361	false
249558	1		zzzz100,zzzz502	false
249557	1		zzzz100,zzzz548	false
249556	1		zzzz100,zzzz440	false
249555	1		zzzz100,zzzz472	false
249554	1		zzzz100,zzzz528	false
249553	1		zzzz100,zzzz650	false
249552	1		zzzz100,zzzz903	false
249551	1		zzzz100,zzzz129	false
249550	1		zzzz100,zzzz417	false
249549	1		zzzz100,zzzz529	false
249548	1		zzzz100,zzzz550	false
249547	1		zzzz100,zzzz585	false
249546	1		zzzz100,zzzz659	false
249545	1		zzzz100,zzzz893	false
249544	1		zzzz100,zzzz909	false
249543	1		zzzz100,zzzz965	false
249542	1		zzzz100,zzzzz86	false
249541	1		zzzz100,zzzz434	false
249540	1		zzzz100,zzzz906	false
249539	1		zzzz100,zzzz135	false
249538	1		zzzz100,zzzz508	false
249537	1		zzzz100,zzzz540	false
249536	1		zzzz100,zzzz884	false
249535	1		zzzz100,zzzz910	false
249534	1		zzzz100,zzzz358	false
249533	1		zzzz100,zzzz126	false
249532	1		zzzz100,zzzz131	false
249531	1		zzzz100,zzzz520	false
249530	1		zzzz100,zzzzz55	false
249529	1		zzzz100,zzzzz93	false
249528	1		zzzz100,zzzz432	false
249527	1		zzzz100,zzzzz61	false
249526	1		zzzz100,zzzz382	false
249525	1		zzzz100,zzzz413	false
249524	1		zzzz100,zzzz480	false
249523	1		zzzz100,zzzz725	false
249522	1		zzzz100,zzzzz96	false
249521	1		zzzz100,zzzz518	false
249520	1		zzzz100,zzzz525	false
249519	1		zzzz100,zzzz727	false
249518	1		zzzz100,zzzz849	false
249517	1		zzzz100,zzzz406	false
249516	1		zzzz100,zzzz544	false
249515	1		zzzz100,zzzz618	false
249514	1		zzzz100,zzzz643	false
249513	1		zzzz100,zzzz125	false
249512	1		zzzz100,zzzz172	false
249511	1		zzzz100,zzzz377	false
249510	1		zzzz100,zzzz395	false
249509	1		zzzz100,zzzz444	false
249508	1		zzzz100,zzzz555	false
249507	1		zzzz100,zzzz597	false
249506	1		zzzz100,zzzz640	false
249505	1		zzzz100,zzzz940	false
249504	1		zzzz100,zzzz264	false
249503	1		zzzz100,zzzz364	false
249502	1		zzzz100,zzzz793	false
249501	1		zzzz100,zzzz210	false
249500	1		zzzz100,zzzz217	false
249499	1		zzzz100,zzzz654	false
249498	1		zzzz100,zzzz951	false
249497	1		zzzz100,zzzz132	false
249496	1		zzzz100,zzzz372	false
249495	1		zzzz100,zzzz407	false
249494	1		zzzz100,zzzz422	false
249493	1		zzzz100,zzzz487	false
249492	1		zzzz100,zzzz515	false
249491	1		zzzz100,zzzz573	false
249490	1		zzzz100,zzzz590	false
249489	1		zzzz100,zzzz380	false
249488	1		zzzz100,zzzz477	false
249487	1		zzzz100,zzzz501	false
249486	1		zzzz100,zzzz653	false
249485	1		zzzz100,zzzz891	false
249484	1		zzzz100,zzzz116	false
249483	1		zzzz100,zzzz354	false
249482	1		zzzz100,zzzz464	false
249481	1		zzzz100,zzzz497	false
249480	1		zzzz100,zzzz553	false
249479	1		zzzz100,zzzz124	false
249478	1		zzzz100,zzzz352	false
249477	1		zzzz100,zzzz531	false
249476	1		zzzz100,zzzz554	false
249475	1		zzzz100,zzzz567	false
249474	1		zzzz100,zzzz626	false
249473	1		zzzz100,zzzz678	false
249472	1		zzzz100,zzzz911	false
249471	1		zzzz100,zzzz133	false
249470	1		zzzz100,zzzz414	false
249469	1		zzzz100,zzzz436	false
249468	1		zzzz100,zzzz535	false
249467	1		zzzz100,zzzz616	false
249466	1		zzzz100,zzzz619	false
249465	1		zzzz100,zzzzz78	false
249464	1		zzzz100,zzzzz85	false
249463	1		zzzz100,zzzz390	false
249462	1		zzzz100,zzzz397	false
249461	1		zzzz100,zzzz442	false
249460	1		zzzz100,zzzz628	false
249459	1		zzzz100,zzzz652	false
249458	1		zzzz100,zzzzz79	false
249457	1		zzzz100,zzzz645	false
249456	1		zzzz100,zzzz792	false
249455	1		zzzz100,zzzz802	false
249454	1		zzzz100,zzzz950	false
249453	1		zzzz100,zzzz206	false
249452	1		zzzz100,zzzz453	false
249451	1		zzzz100,zzzz635	false
249450	1		zzzz100,zzzz949	false
249449	1		zzzz100,zzzz134	false
249448	1		zzzz100,zzzz449	false
249447	1		zzzz100,zzzz521	false
249446	1		zzzz100,zzzz622	false
249445	1		zzzz100,zzzzz88	false
249444	1		zzzz100,zzzz526	false
249443	1		zzzz100,zzzz621	false
249442	1		zzzz100,zzzz462	false
249441	1		zzzz100,zzzz355	false
249440	1		zzzz100,zzzz118	false
249439	1		zzzz100,zzzz145	false
249438	1		zzzz100,zzzz163	false
249437	1		zzzz100,zzzz242	false
249436	1		zzzz100,zzzz637	false
249435	1		zzzz100,zzzz661	false
249434	1		zzzz100,zzzz147	false
249433	1		zzzz100,zzzz947	false
249432	1		zzzz100,zzzz203	false
249431	1		zzzz100,zzzz491	false
249430	1		zzzz100,zzzz810	false
249429	1		zzzz100,zzzz904	false
249428	1		zzzz100,zzzz941	false
249427	1		zzzz100,zzzz176	false
249426	1		zzzz100,zzzz360	false
249425	1		zzzz100,zzzz367	false
249424	1		zzzz100,zzzz438	false
249423	1		zzzz100,zzzz630	false
249422	1		zzzz100,zzzz177	false
249421	1		zzzz100,zzzz664	false
249420	1		zzzz100,zzzzz82	false
249419	1		zzzz100,zzzz168	false
249418	1		zzzz100,zzzz211	false
249417	1		zzzz100,zzzz473	false
249416	1		zzzz100,zzzz808	false
249415	1		zzzz100,zzzz170	false
249414	1		zzzz100,zzzz174	false
249413	1		zzzz100,zzzz690	false
249412	1		zzzz100,zzzzz48	false
249411	1		zzzz100,zzzz159	false
249410	1		zzzz100,zzzz386	false
249409	1		zzzz100,zzzz505	false
249408	1		zzzz100,zzzz183	false
249407	1		zzzz100,zzzz660	false
249406	1		zzzz100,zzzz199	false
249405	1		zzzz100,zzzz348	false
249404	1		zzzz100,zzzz475	false
249403	1		zzzz100,zzzz634	false
249402	1		zzzz100,zzzz636	false
249401	1		zzzz100,zzzz158	false
249400	1		zzzz100,zzzz167	false
249399	1		zzzz100,zzzz173	false
249398	1		zzzz100,zzzz175	false
249397	1		zzzz100,zzzz357	false
249396	1		zzzz100,zzzz632	false
249395	1		zzzz100,zzzz807	false
249394	1		zzzz100,zzzz108	false
249393	1		zzzz100,zzzz216	false
249392	1		zzzz100,zzzz410	false
249391	1		zzzz100,zzzz479	false
249390	1		zzzz100,zzzzz92	false
249389	1		zzzz100,zzzz219	false
249388	1		zzzz100,zzzz284	false
249387	1		zzzz100,zzzz399	false
249386	1		zzzz100,zzzz796	false
249385	1		zzzz100,zzzz833	false
249384	1		zzzz100,zzzzz49	false
249383	1		zzzz100,zzzz136	false
249382	1		zzzz100,zzzz220	false
249381	1		zzzz100,zzzz359	false
249380	1		zzzz100,zzzz685	false
249379	1		zzzz100,zzzz829	false
249378	1		zzzz100,zzzz831	false
249377	1		zzzz100,zzzz146	false
249376	1		zzzz100,zzzz171	false
249375	1		zzzz100,zzzz471	false
249374	1		zzzz100,zzzz832	false
249373	1		zzzz100,zzzz899	false
249372	1		zzzz100,zzzz184	false
249371	1		zzzz100,zzzz427	false
249370	1		zzzz100,zzzz738	false
249369	1		zzzz100,zzzz902	false
249368	1		zzzz100,zzzz379	false
249367	1		zzzz100,zzzz155	false
249366	1		zzzz100,zzzz179	false
249365	1		zzzz100,zzzz191	false
249364	1		zzzz100,zzzz243	false
249363	1		zzzz100,zzzzz60	false
249362	1		zzzz100,zzzz112	false
249361	1		zzzz100,zzzz286	false
249360	1		zzzz100,zzzz374	false
249359	1		zzzz100,zzzz405	false
249358	1		zzzz100,zzzz466	false
249357	1		zzzz100,zzzz943	false
249356	1		zzzz100,zzzz946	false
249355	1		zzzz100,zzzz165	false
249354	1		zzzz100,zzzz166	false
249353	1		zzzz100,zzzz245	false
249352	1		zzzz100,zzzz441	false
249351	1		zzzz100,zzzz494	false
249350	1		zzzz100,zzzz517	false
249349	1		zzzz100,zzzz841	false
249348	1		zzzz100,zzzz381	false
249347	1		zzzz100,zzzz728	false
249346	1		zzzz100,zzzz144	false
249345	1		zzzz100,zzzz151	false
249344	1		zzzz100,zzzz164	false
249343	1		zzzz100,zzzz252	false
249342	1		zzzz100,zzzz415	false
249341	1		zzzz100,zzzz692	false
249340	1		zzzz100,zzzzz99	false
249339	1		zzzz100,zzzz218	false
249338	1		zzzz100,zzzz461	false
249337	1		zzzz100,zzzz509	false
249336	1		zzzz100,zzzz852	false
249335	1		zzzz100,zzzz934	false
249334	1		zzzz100,zzzzz67	false
249333	1		zzzz100,zzzz201	false
249332	1		zzzz100,zzzz648	false
249331	1		zzzz100,zzzz102	false
249330	1		zzzz100,zzzz539	false
249329	1		zzzz100,zzzz230	false
249328	1		zzzz100,zzzz398	false
249327	1		zzzz100,zzzz519	false
249326	1		zzzz100,zzzzz83	false
249325	1		zzzz100,zzzz180	false
249324	1		zzzz100,zzzz383	false
249323	1		zzzz100,zzzz563	false
249322	1		zzzz100,zzzz665	false
249321	1		zzzz100,zzzz186	false
249320	1		zzzz100,zzzz437	false
249319	1		zzzz100,zzzz791	false
249318	1		zzzz100,zzzz809	false
249317	1		zzzz100,zzzz288	false
249316	1		zzzz100,zzzz589	false
249315	1		zzzz100,zzzz143	false
249314	1		zzzz100,zzzzz50	false
249313	1		zzzz100,zzzz161	false
249312	1		zzzz100,zzzz285	false
249311	1		zzzz100,zzzz799	false
249310	1		zzzz100,zzzzz97	false
249309	1		zzzz100,zzzz107	false
249308	1		zzzz100,zzzz169	false
249307	1		zzzz100,zzzz516	false
249306	1		zzzz100,zzzz558	false
249305	1		zzzz100,zzzz840	false
249304	1		zzzz100,zzzz140	false
249303	1		zzzz100,zzzzz94	false
249302	1		zzzz100,zzzz113	false
249301	1		zzzz100,zzzz157	false
249300	1		zzzz100,zzzz592	false
249299	1		zzzz100,zzzz141	false
249298	1		zzzz100,zzzz181	false
249297	1		zzzz100,zzzz287	false
249296	1		zzzz100,zzzz811	false
249295	1		zzzz100,zzzz152	false
249294	1		zzzz100,zzzz935	false
249293	1		zzzz100,zzzz104	false
249292	1		zzzz100,zzzz153	false
249291	1		zzzz100,zzzz495	false
249290	1		zzzz100,zzzz611	false
249289	1		zzzz100,zzzz625	false
249288	1		zzzz100,zzzz148	false
249287	1		zzzz100,zzzz149	false
249286	1		zzzz100,zzzz564	false
249285	1		zzzz100,zzzz623	false
249284	1		zzzz100,zzzz812	false
249283	1		zzzz100,zzzz843	false
249282	1		zzzz100,zzzz162	false
249281	1		zzzz100,zzzz463	false
249280	1		zzzz100,zzzz577	false
249279	1		zzzz100,zzzz936	false
249278	1		zzzz100,zzzz142	false
249277	1		zzzz100,zzzz154	false
249276	1		zzzz100,zzzz241	false
249275	1		zzzz100,zzzz249	false
249274	1		zzzz100,zzzz160	false
249273	1		zzzz100,zzzz240	false
249272	1		zzzz100,zzzz391	false
249271	1		zzzz100,zzzz455	false
249270	1		zzzz100,zzzz532	false
249269	1		zzzz100,zzzz536	false
249268	1		zzzz100,zzzz606	false
249267	1		zzzz100,zzzz103	false
249266	1		zzzz100,zzzz115	false
249265	1		zzzz100,zzzz139	false
249264	1		zzzz100,zzzz150	false
249263	1		zzzz100,zzzz178	false
249262	1		zzzz100,zzzz188	false
249261	1		zzzz100,zzzz138	false
249260	1		zzzz100,zzzz233	false
249259	1		zzzz100,zzzz347	false
249258	1		zzzz100,zzzz423	false
249257	1		zzzz100,zzzz694	false
249256	1		zzzz100,zzzzz44	false
249255	1		zzzz100,zzzz156	false
249254	1		zzzz100,zzzz402	false
249253	1		zzzz100,zzzz439	false
249252	1		zzzz100,zzzz571	false
249251	1		zzzz100,zzzz836	false
249250	1		zzzz100,zzzz122	false
249249	1		zzzz100,zzzz404	false
249248	1		zzzz100,zzzz419	false
249247	1		zzzz100,zzzz430	false
249246	1		zzzz100,zzzz431	false
249245	1		zzzz100,zzzz666	false
249244	1		zzzz100,zzzz834	false
249243	1		zzzz100,zzzz788	false
249242	1		zzzz100,zzzz837	false
249241	1		zzzz100,zzzz232	false
249240	1		zzzz100,zzzz435	false
249239	1		zzzz100,zzzz496	false
249238	1		zzzz100,zzzz593	false
249237	1		zzzz100,zzzz574	false
249236	1		zzzz100,zzzz105	false
249235	1		zzzz100,zzzz290	false
249234	1		zzzz100,zzzz412	false
249233	1		zzzz100,zzzzz46	false
249232	1		zzzz100,zzzz215	false
249231	1		zzzz100,zzzz225	false
249230	1		zzzz100,zzzz581	false
249229	1		zzzz100,zzzz605	false
249228	1		zzzz100,zzzzz43	false
249227	1		zzzz100,zzzz226	false
249226	1		zzzz100,zzzz588	false
249225	1		zzzz100,zzzz633	false
249224	1		zzzz100,zzzzz69	false
249223	1		zzzz100,zzzz137	false
249222	1		zzzz100,zzzz542	false
249221	1		zzzz100,zzzz561	false
249220	1		zzzz100,zzzzz47	false
249219	1		zzzz100,zzzz470	false
249218	1		zzzz100,zzzz484	false
249217	1		zzzz100,zzzz853	false
249216	1		zzzz100,zzzz110	false
249215	1		zzzz100,zzzz426	false
249214	1		zzzz100,zzzz429	false
249213	1		zzzz100,zzzz576	false
249212	1		zzzz100,zzzz213	false
249211	1		zzzz100,zzzz263	false
249210	1		zzzz100,zzzz486	false
249209	1		zzzz100,zzzz329	false
249208	1		zzzz100,zzzz784	false
249207	1		zzzz100,zzzz109	false
249206	1		zzzz100,zzzz578	false
249205	1		zzzz100,zzzzz51	false
249204	1		zzzz100,zzzz259	false
249203	1		zzzz100,zzzz459	false
249202	1		zzzz100,zzzz562	false
249201	1		zzzz100,zzzz838	false
249200	1		zzzz100,zzzz198	false
249199	1		zzzz100,zzzz586	false
249198	1		zzzz100,zzzz948	false
249197	1		zzzz100,zzzz966	false
249196	1		zzzz100,zzzz844	false
249195	1		zzzz100,zzzz848	false
249194	1		zzzz100,zzzz482	false
249193	1		zzzz100,zzzz394	false
249192	1		zzzz100,zzzz683	false
249191	1		zzzz100,zzzz898	false
249190	1		zzzz100,zzzz530	false
249189	1		zzzz100,zzzz687	false
249188	1		zzzz100,zzzz890	false
249187	1		zzzz100,zzzz981	false
249186	1		zzzz100,zzzz255	false
249185	1		zzzz100,zzzz583	false
249184	1		zzzz100,zzzz595	false
249183	1		zzzz100,zzzz672	false
249182	1		zzzz100,zzzz800	false
249181	1		zzzz100,zzzz830	false
249180	1		zzzz100,zzzz408	false
249179	1		zzzz100,zzzz205	false
249178	1		zzzz100,zzzz565	false
249177	1		zzzz100,zzzz806	false
249176	1		zzzz100,zzzz673	false
249175	1		zzzz100,zzzz239	false
249174	1		zzzz100,zzzz545	false
249173	1		zzzz100,zzzz655	false
249172	1		zzzz100,zzzz182	false
249171	1		zzzz100,zzzz244	false
249170	1		zzzz100,zzzz204	false
249169	1		zzzz100,zzzz570	false
249168	1		zzzz100,zzzz693	false
249167	1		zzzz100,zzzzz70	false
249166	1		zzzz100,zzzz607	false
249165	1		zzzz100,zzzz942	false
249164	1		zzzz100,zzzz686	false
249163	1		zzzz100,zzzz580	false
249162	1		zzzz100,zzzz609	false
249161	1		zzzz100,zzzz801	false
249160	1		zzzz100,zzzz669	false
249159	1		zzzz100,zzzz604	false
249158	1		zzzz100,zzzz697	false
249157	1		zzzz100,zzzz493	false
249156	1		zzzz100,zzzz101	false
249155	1		zzzz100,zzzz202	false
249154	1		zzzz100,zzzz600	false
249153	1		zzzz100,zzzz603	false
249152	1		zzzz100,zzzz671	false
249151	1		zzzz100,zzzz676	false
249150	1		zzzz100,zzzz274	false
249149	1		zzzz100,zzzz506	false
249148	1		zzzz100,zzzz785	false
249147	1		zzzz100,zzzz787	false
249146	1		zzzz100,zzzz513	false
249145	1		zzzz100,zzzz681	false
249144	1		zzzz100,zzzz411	false
249143	1		zzzz100,zzzz510	false
249142	1		zzzz100,zzzz584	false
249141	1		zzzz100,zzzz596	false
249140	1		zzzz100,zzzz983	false
249139	1		zzzz100,zzzz251	false
249138	1		zzzz100,zzzz403	false
249137	1		zzzz100,zzzz551	false
249136	1		zzzz100,zzzz783	false
249135	1		zzzz100,zzzz560	false
249134	1		zzzz100,zzzz804	false
249133	1		zzzz100,zzzzz57	false
249132	1		zzzz100,zzzzz58	false
249131	1		zzzz100,zzzzz62	false
249130	1		zzzz100,zzzz228	false
249129	1		zzzz100,zzzz933	false
249128	1		zzzz100,zzzzz52	false
249127	1		zzzz100,zzzz392	false
249126	1		zzzz100,zzzz476	false
249125	1		zzzz100,zzzz575	false
249124	1		zzzz100,zzzz582	false
249123	1		zzzz100,zzzz111	false
249122	1		zzzz100,zzzz292	false
249121	1		zzzz100,zzzz557	false
249120	1		zzzz100,zzzz594	false
249119	1		zzzz100,zzzzz59	false
249118	1		zzzz100,zzzz499	false
249117	1		zzzz100,zzzz566	false
249116	1		zzzz100,zzzz615	false
249115	1		zzzz100,zzzz651	false
249114	1		zzzz100,zzzz695	false
249113	1		zzzz100,zzzz514	false
249112	1		zzzz100,zzzz541	false
249111	1		zzzz100,zzzz568	false
249110	1		zzzz100,zzzz384	false
249109	1		zzzz100,zzzz227	false
249108	1		zzzz100,zzzz481	false
249107	1		zzzz100,zzzz680	false
249106	1		zzzz100,zzzz187	false
249105	1		zzzz100,zzzz612	false
249104	1		zzzz100,zzzz688	false
249103	1		zzzz100,zzzz850	false
249102	1		zzzz100,zzzz569	false
249101	1		zzzz100,zzzz677	false
249100	1		zzzz100,zzzz679	false
249099	1		zzzz100,zzzz790	false
249098	1		zzzz100,zzzz839	false
249097	1		zzzz100,zzzz507	false
249096	1		zzzz100,zzzz222	false
249095	1		zzzz100,zzzz237	false
249094	1		zzzz100,zzzz490	false
249093	1		zzzz100,zzzz538	false
249092	1		zzzz100,zzzz905	false
249091	1		zzzz100,zzzz534	false
249090	1		zzzz100,zzzz572	false
249089	1		zzzz100,zzzz931	false
249088	1		zzzz100,zzzzz63	false
249087	1		zzzz100,zzzz190	false
249086			zzzz100,zzzz341	false
249085	1		zzzz100,zzzz602	false
249084	1		zzzz100,zzzz786	false
249083	1		zzzz100,zzzz214	false
249082	1		zzzz100,zzzz862	false
249081	1		zzzz100,zzzz297	false
249080			zzzz100,zzzz312	false
249079	1		zzzz100,zzzz552	false
249078	1		zzzz100,zzzz469	false
249077	1		zzzz100,zzzz543	false
249076	1		zzzz100,zzzz639	false
249075	1		zzzz100,zzzz280	false
249074	1		zzzz100,zzzz301	false
249073			zzzz100,zzzz711	false
249072	1		zzzz100,zzzz446	false
249071	1		zzzz100,zzzzz56	false
249070	1		zzzz100,zzzz248	false
249069	1		zzzz100,zzzz282	false
249068			zzzz100,zzzz343	false
249067	1		zzzz100,zzzz587	false
249066			zzzz100,zzzz322	false
249065	1		zzzz100,zzzz363	false
249064	1		zzzz100,zzzz617	false
249063			zzzz100,zzzz254	false
249062	1		zzzz100,zzzz299	false
249061	1		zzzz100,zzzz300	false
249060			zzzz100,zzzz327	false
249059	1		zzzz100,zzzz489	false
249058			zzzz100,zzzz229	false
249057			zzzz100,zzzz323	false
249056	1		zzzz100,zzzz805	false
249055	1		zzzz100,zzzz298	false
249054	1		zzzz100,zzzz303	false
249053			zzzz100,zzzz339	false
249052	1		zzzz100,zzzz467	false
249051			zzzz100,zzzz705	false
249050	1		zzzz100,zzzz715	false
249049	1		zzzz100,zzzzz98	false
249048	1		zzzz100,zzzz760	false
249047			zzzz100,zzzz313	false
249046	1		zzzz100,zzzz350	false
249045			zzzz100,zzzz709	false
249044	1		zzzz100,zzzz234	false
249043	1		zzzz100,zzzz675	false
249042	1		zzzz100,zzzzz54	false
249041	1		zzzz100,zzzz302	false
249040			zzzz100,zzzz719	false
249039	1		zzzz100,zzzz756	false
249038			zzzz100,zzzz307	false
249037			zzzz100,zzzz315	false
249036	1		zzzz100,zzzzz75	false
249035	1		zzzz100,zzzz231	false
249034			zzzz100,zzzz321	false
249033	1		zzzz100,zzzz696	false
249032	1		zzzz100,zzzz707	false
249031			zzzz100,zzzz345	false
249030	1		zzzz100,zzzz223	false
249029	1		zzzz100,zzzz854	false
249028	1		zzzz100,zzzz824	false
249027			zzzz100,zzzz311	false
249026			zzzz100,zzzz334	false
249025			zzzz100,zzzz714	false
249024			zzzz100,zzzz333	false
249023	1		zzzz100,zzzz701	false
249022			zzzz100,zzzz308	false
249021			zzzz100,zzzz305	false
249020			zzzz100,zzzz488	false
249019	1		zzzz100,zzzz745	false
249018	1		zzzz100,zzzz826	false
249017	1		zzzz100,zzzz235	false
249016			zzzz100,zzzz314	false
249015			zzzz100,zzzz340	false
249014			zzzz100,zzzz283	false
249013	1		zzzz100,zzzz700	false
249012			zzzz100,zzzz710	false
249011			zzzz100,zzzz304	false
249010			zzzz100,zzzz332	false
249009			zzzz100,zzzz336	false
249008	1		zzzz100,zzzz813	false
249007			zzzz100,zzzz344	false
249006			zzzz100,zzzz704	false
249005	1		zzzz100,zzzz278	false
249004			zzzz100,zzzz310	false
249003			zzzz100,zzzz330	false
249002			zzzz100,zzzz703	false
249001			zzzz100,zzzz250	false
249000	1		zzzz100,zzzz277	false
248999			zzzz100,zzzz325	false
248998			zzzz100,zzzz342	false
248997	1		zzzz100,zzzz279	false
248996			zzzz100,zzzz721	false
248995	1		zzzz100,zzzz192	false
248994			zzzz100,zzzz319	false
248993			zzzz100,zzzz338	false
248992			zzzz100,zzzz718	false
248991	1		zzzz100,zzzz920	false
248990			zzzz100,zzzz306	false
248989			zzzz100,zzzz326	false
248988			zzzz100,zzzz503	false
248987	1		zzzz100,zzzz818	false
248986	1		zzzz100,zzzzz76	false
248985	1		zzzz100,zzzz291	false
248984			zzzz100,zzzz699	false
248983			zzzz100,zzzz318	false
248982			zzzz100,zzzz712	false
248981			zzzz100,zzzz744	false
248980	1		zzzz100,zzzz815	false
248979	1		zzzz100,zzzz698	false
248978			zzzz100,zzzz316	false
248977	1		zzzz100,zzzz253	false
248976	1		zzzz100,zzzzz66	false
248975	1		zzzz100,zzzz820	false
248974	1		zzzz100,zzzz281	false
248973	1		zzzz101,zzzz248	false
248972	1		zzzz101,zzzz905	false
248971	1		zzzz101,zzzz541	false
248970	1		zzzz101,zzzz551	false
248969	1		zzzz101,zzzz568	false
248968	1		zzzz101,zzzz692	false
248967	1		zzzz101,zzzz609	false
248966	1		zzzz101,zzzz102	false
248965	1		zzzz101,zzzz534	false
248964	1		zzzz101,zzzz931	false
248963	1		zzzz101,zzzzz69	false
248962	1		zzzz101,zzzz552	false
248961	1		zzzz101,zzzz570	false
248960	1		zzzz101,zzzz841	false
248959	1		zzzz101,zzzz495	false
248958	1		zzzz101,zzzz584	false
248957	1		zzzz101,zzzz801	false
248956	1		zzzz101,zzzz136	false
248955	1		zzzz101,zzzzz94	false
248954	1		zzzz101,zzzz165	false
248953	1		zzzz101,zzzz423	false
248952	1		zzzz101,zzzz507	false
248951	1		zzzz101,zzzz898	false
248950	1		zzzz101,zzzz119	false
248949	1		zzzz101,zzzz228	false
248948	1		zzzz101,zzzz433	false
248947	1		zzzz101,zzzz580	false
248946	1		zzzz101,zzzz948	false
248945	1		zzzz101,zzzz124	false
248944	1		zzzz101,zzzz171	false
248943	1		zzzz101,zzzz125	false
248942	1		zzzz101,zzzz161	false
248941	1		zzzz101,zzzz166	false
248940	1		zzzz101,zzzz943	false
248939	1		zzzz101,zzzzz47	false
248938	1		zzzz101,zzzz198	false
248937	1		zzzz101,zzzz671	false
248936	1		zzzz101,zzzz802	false
248935	1		zzzz101,zzzzz48	false
248934	1		zzzz101,zzzz120	false
248933	1		zzzz101,zzzz353	false
248932	1		zzzz101,zzzz564	false
248931	1		zzzz101,zzzz245	false
248930	1		zzzz101,zzzz429	false
248929	1		zzzz101,zzzz164	false
248928	1		zzzz101,zzzz170	false
248927	1		zzzz101,zzzz375	false
248926	1		zzzz101,zzzz942	false
248925	1		zzzz101,zzzz112	false
248924	1		zzzz101,zzzz183	false
248923	1		zzzz101,zzzz812	false
248922	1		zzzz101,zzzz576	false
248921	1		zzzz101,zzzzz96	false
248920	1		zzzz101,zzzz156	false
248919	1		zzzz101,zzzz676	false
248918	1		zzzz101,zzzz130	false
248917	1		zzzz101,zzzz378	false
248916	1		zzzz101,zzzz489	false
248915	1		zzzz101,zzzz154	false
248914	1		zzzz101,zzzz169	false
248913	1		zzzz101,zzzz233	false
248912	1		zzzz101,zzzz560	false
248911	1		zzzz101,zzzzz52	false
248910	1		zzzz101,zzzz218	false
248909	1		zzzz101,zzzz548	false
248908	1		zzzz101,zzzz114	false
248907	1		zzzz101,zzzz232	false
248906	1		zzzz101,zzzz505	false
248905	1		zzzz101,zzzz620	false
248904	1		zzzz101,zzzz697	false
248903	1		zzzz101,zzzz476	false
248902	1		zzzz101,zzzz669	false
248901	1		zzzz101,zzzz510	false
248900	1		zzzz101,zzzz657	false
248899	1		zzzz101,zzzz664	false
248898	1		zzzz101,zzzz829	false
248897	1		zzzz101,zzzz176	false
248896	1		zzzz101,zzzz506	false
248895	1		zzzz101,zzzz528	false
248894	1		zzzz101,zzzz579	false
248893	1		zzzz101,zzzz951	false
248892	1		zzzz101,zzzz485	false
248891	1		zzzz101,zzzz807	false
248890	1		zzzz101,zzzz935	false
248889	1		zzzz101,zzzz595	false
248888	1		zzzz101,zzzz612	false
248887	1		zzzz101,zzzz810	false
248886	1		zzzz101,zzzz163	false
248885	1		zzzz101,zzzz180	false
248884	1		zzzz101,zzzz288	false
248883	1		zzzz101,zzzz693	false
248882	1		zzzz101,zzzz806	false
248881	1		zzzz101,zzzz852	false
248880	1		zzzz101,zzzzz55	false
248879	1		zzzz101,zzzz137	false
248878	1		zzzz101,zzzz444	false
248877	1		zzzz101,zzzz131	false
248876	1		zzzz101,zzzz280	false
248875	1		zzzz101,zzzz443	false
248874	1		zzzz101,zzzz491	false
248873	1		zzzz101,zzzz853	false
248872	1		zzzz101,zzzz159	false
248871	1		zzzz101,zzzz177	false
248870	1		zzzz101,zzzz540	false
248869	1		zzzz101,zzzz553	false
248868	1		zzzz101,zzzz407	false
248867	1		zzzz101,zzzz350	false
248866	1		zzzz101,zzzz416	false
248865	1		zzzz101,zzzz565	false
248864	1		zzzz101,zzzz573	false
248863	1		zzzz101,zzzzz58	false
248862	1		zzzz101,zzzzz78	false
248861	1		zzzz101,zzzzz80	false
248860	1		zzzz101,zzzz237	false
248859	1		zzzz101,zzzz356	false
248858	1		zzzz101,zzzz411	false
248857	1		zzzz101,zzzz680	false
248856	1		zzzz101,zzzz791	false
248855	1		zzzz101,zzzzz45	false
248854	1		zzzz101,zzzz197	false
248853	1		zzzz101,zzzz432	false
248852	1		zzzz101,zzzz454	false
248851	1		zzzz101,zzzz459	false
248850	1		zzzz101,zzzz504	false
248849	1		zzzz101,zzzz532	false
248848	1		zzzz101,zzzz949	false
248847	1		zzzz101,zzzzz84	false
248846	1		zzzz101,zzzz123	false
248845	1		zzzz101,zzzz285	false
248844	1		zzzz101,zzzz348	false
248843	1		zzzz101,zzzz440	false
248842	1		zzzz101,zzzz603	false
248841	1		zzzz101,zzzz607	false
248840	1		zzzz101,zzzz966	false
248839	1		zzzz101,zzzz107	false
248838	1		zzzz101,zzzz134	false
248837	1		zzzz101,zzzz349	false
248836	1		zzzz101,zzzz545	false
248835	1		zzzz101,zzzz550	false
248834	1		zzzz101,zzzz585	false
248833	1		zzzz101,zzzz594	false
248832	1		zzzz101,zzzz673	false
248831	1		zzzz101,zzzzz74	false
248830	1		zzzz101,zzzz230	false
248829	1		zzzz101,zzzz286	false
248828	1		zzzz101,zzzz483	false
248827	1		zzzz101,zzzz484	false
248826	1		zzzz101,zzzz889	false
248825	1		zzzz101,zzzzz44	false
248824	1		zzzz101,zzzzz88	false
248823	1		zzzz101,zzzz167	false
248822	1		zzzz101,zzzz181	false
248821	1		zzzz101,zzzz251	false
248820	1		zzzz101,zzzz526	false
248819	1		zzzz101,zzzz554	false
248818	1		zzzz101,zzzz834	false
248817	1		zzzz101,zzzz160	false
248816	1		zzzz101,zzzz174	false
248815	1		zzzz101,zzzz188	false
248814	1		zzzz101,zzzz220	false
248813	1		zzzz101,zzzz244	false
248812	1		zzzz101,zzzz456	false
248811	1		zzzz101,zzzz490	false
248810	1		zzzz101,zzzz524	false
248809	1		zzzz101,zzzz527	false
248808	1		zzzz101,zzzz639	false
248807	1		zzzz101,zzzz800	false
248806	1		zzzz101,zzzz358	false
248805	1		zzzz101,zzzz415	false
248804	1		zzzz101,zzzz457	false
248803	1		zzzz101,zzzz632	false
248802	1		zzzz101,zzzz784	false
248801	1		zzzz101,zzzz132	false
248800	1		zzzz101,zzzz135	false
248799	1		zzzz101,zzzz555	false
248798	1		zzzz101,zzzz572	false
248797	1		zzzz101,zzzz600	false
248796	1		zzzz101,zzzz655	false
248795	1		zzzz101,zzzz792	false
248794	1		zzzz101,zzzz809	false
248793	1		zzzz101,zzzz529	false
248792	1		zzzz101,zzzz575	false
248791	1		zzzz101,zzzz695	false
248790	1		zzzz101,zzzz224	false
248789	1		zzzz101,zzzz284	false
248788	1		zzzz101,zzzz448	false
248787	1		zzzz101,zzzz559	false
248786	1		zzzz101,zzzz615	false
248785	1		zzzz101,zzzz207	false
248784	1		zzzz101,zzzz292	false
248783	1		zzzz101,zzzz424	false
248782	1		zzzz101,zzzz523	false
248781	1		zzzz101,zzzz678	false
248780	1		zzzz101,zzzz907	false
248779	1		zzzz101,zzzz184	false
248778	1		zzzz101,zzzz282	false
248777	1		zzzz101,zzzz381	false
248776	1		zzzz101,zzzz417	false
248775	1		zzzz101,zzzz427	false
248774	1		zzzz101,zzzz501	false
248773	1		zzzz101,zzzz566	false
248772	1		zzzz101,zzzz583	false
248771	1		zzzz101,zzzzz59	false
248770	1		zzzz101,zzzzz73	false
248769	1		zzzz101,zzzz329	false
248768	1		zzzz101,zzzz480	false
248767	1		zzzz101,zzzz493	false
248766	1		zzzz101,zzzz525	false
248765	1		zzzz101,zzzz567	false
248764	1		zzzz101,zzzz115	false
248763	1		zzzz101,zzzz128	false
248762	1		zzzz101,zzzz845	false
248761	1		zzzz101,zzzz941	false
248760	1		zzzz101,zzzzz86	false
248759	1		zzzz101,zzzz116	false
248758	1		zzzz101,zzzz162	false
248757	1		zzzz101,zzzz458	false
248756	1		zzzz101,zzzz651	false
248755	1		zzzz101,zzzz685	false
248754	1		zzzz101,zzzz726	false
248753	1		zzzz101,zzzz909	false
248752	1		zzzz101,zzzz911	false
248751	1		zzzz101,zzzz934	false
248750	1		zzzz101,zzzz947	false
248749	1		zzzz101,zzzzz50	false
248748	1		zzzz101,zzzz392	false
248747	1		zzzz101,zzzz522	false
248746	1		zzzz101,zzzz533	false
248745	1		zzzz101,zzzz629	false
248744	1		zzzz101,zzzz640	false
248743	1		zzzz101,zzzz670	false
248742	1		zzzz101,zzzz110	false
248741	1		zzzz101,zzzz126	false
248740	1		zzzz101,zzzz138	false
248739	1		zzzz101,zzzz241	false
248738	1		zzzz101,zzzz420	false
248737	1		zzzz101,zzzz474	false
248736	1		zzzz101,zzzz546	false
248735	1		zzzz101,zzzz556	false
248734	1		zzzz101,zzzz596	false
248733	1		zzzz101,zzzz677	false
248732	1		zzzz101,zzzz153	false
248731	1		zzzz101,zzzz187	false
248730	1		zzzz101,zzzz396	false
248729	1		zzzz101,zzzz479	false
248728	1		zzzz101,zzzz518	false
248727	1		zzzz101,zzzz557	false
248726	1		zzzz101,zzzz589	false
248725	1		zzzz101,zzzz663	false
248724	1		zzzz101,zzzz906	false
248723	1		zzzz101,zzzz910	false
248722	1		zzzz101,zzzzz57	false
248721	1		zzzz101,zzzzz81	false
248720	1		zzzz101,zzzzz97	false
248719	1		zzzz101,zzzzz99	false
248718	1		zzzz101,zzzz384	false
248717	1		zzzz101,zzzz445	false
248716	1		zzzz101,zzzz494	false
248715	1		zzzz101,zzzz498	false
248714	1		zzzz101,zzzz838	false
248713	1		zzzz101,zzzzz89	false
248712	1		zzzz101,zzzz363	false
248711	1		zzzz101,zzzz365	false
248710	1		zzzz101,zzzz530	false
248709	1		zzzz101,zzzz531	false
248708	1		zzzz101,zzzz606	false
248707	1		zzzz101,zzzz133	false
248706	1		zzzz101,zzzz450	false
248705	1		zzzz101,zzzz725	false
248704	1		zzzz101,zzzzz49	false
248703	1		zzzz101,zzzz243	false
248702	1		zzzz101,zzzz249	false
248701	1		zzzz101,zzzz252	false
248700	1		zzzz101,zzzz482	false
248699	1		zzzz101,zzzz499	false
248698	1		zzzz101,zzzz722	false
248697	1		zzzz101,zzzzz43	false
248696	1		zzzz101,zzzzz85	false
248695	1		zzzz101,zzzz630	false
248694	1		zzzz101,zzzz891	false
248693	1		zzzz101,zzzz106	false
248692	1		zzzz101,zzzz475	false
248691	1		zzzz101,zzzz514	false
248690	1		zzzz101,zzzz515	false
248689	1		zzzz101,zzzz536	false
248688	1		zzzz101,zzzz794	false
248687	1		zzzz101,zzzz904	false
248686	1		zzzz101,zzzz287	false
248685	1		zzzz101,zzzz658	false
248684	1		zzzz101,zzzz674	false
248683	1		zzzz101,zzzz921	false
248682	1		zzzz101,zzzz936	false
248681	1		zzzz101,zzzz940	false
248680	1		zzzz101,zzzz152	false
248679	1		zzzz101,zzzz361	false
248678	1		zzzz101,zzzz831	false
248677	1		zzzz101,zzzz418	false
248676	1		zzzz101,zzzz452	false
248675	1		zzzz101,zzzz477	false
248674	1		zzzz101,zzzz549	false
248673	1		zzzz101,zzzz569	false
248672	1		zzzz101,zzzz649	false
248671	1		zzzz101,zzzz833	false
248670	1		zzzz101,zzzz840	false
248669	1		zzzz101,zzzz118	false
248668	1		zzzz101,zzzz139	false
248667	1		zzzz101,zzzz347	false
248666	1		zzzz101,zzzz502	false
248665	1		zzzz101,zzzz627	false
248664	1		zzzz101,zzzz642	false
248663	1		zzzz101,zzzz667	false
248662	1		zzzz101,zzzz108	false
248661	1		zzzz101,zzzz151	false
248660	1		zzzz101,zzzz191	false
248659	1		zzzz101,zzzz372	false
248658	1		zzzz101,zzzz400	false
248657	1		zzzz101,zzzz613	false
248656	1		zzzz101,zzzz884	false
248655	1		zzzz101,zzzz912	false
248654	1		zzzz101,zzzz933	false
248653	1		zzzz101,zzzz274	false
248652	1		zzzz101,zzzz352	false
248651	1		zzzz101,zzzz465	false
248650	1		zzzz101,zzzz581	false
248649	1		zzzz101,zzzz604	false
248648	1		zzzz101,zzzz638	false
248647	1		zzzz101,zzzz646	false
248646	1		zzzz101,zzzz832	false
248645	1		zzzz101,zzzz896	false
248644	1		zzzz101,zzzz173	false
248643	1		zzzz101,zzzz261	false
248642	1		zzzz101,zzzz262	false
248641	1		zzzz101,zzzz393	false
248640	1		zzzz101,zzzz403	false
248639	1		zzzz101,zzzz422	false
248638	1		zzzz101,zzzz468	false
248637	1		zzzz101,zzzz614	false
248636	1		zzzz101,zzzz628	false
248635	1		zzzz101,zzzz643	false
248634	1		zzzz101,zzzz158	false
248633	1		zzzz101,zzzz299	false
248632	1		zzzz101,zzzz371	false
248631	1		zzzz101,zzzz413	false
248630	1		zzzz101,zzzz520	false
248629	1		zzzz101,zzzz542	false
248628	1		zzzz101,zzzz547	false
248627	1		zzzz101,zzzz599	false
248626	1		zzzz101,zzzzz56	false
248625	1		zzzz101,zzzz175	false
248624	1		zzzz101,zzzz189	false
248623	1		zzzz101,zzzz386	false
248622	1		zzzz101,zzzz410	false
248621	1		zzzz101,zzzz437	false
248620	1		zzzz101,zzzz451	false
248619	1		zzzz101,zzzz913	false
248618	1		zzzz101,zzzz945	false
248617	1		zzzz101,zzzz129	false
248616	1		zzzz101,zzzz373	false
248615	1		zzzz101,zzzz398	false
248614	1		zzzz101,zzzz421	false
248613	1		zzzz101,zzzz426	false
248612	1		zzzz101,zzzz654	false
248611	1		zzzz101,zzzz686	false
248610	1		zzzz101,zzzz724	false
248609	1		zzzz101,zzzz952	false
248608	1		zzzz101,zzzz394	false
248607	1		zzzz101,zzzz578	false
248606	1		zzzz101,zzzz665	false
248605	1		zzzz101,zzzz666	false
248604	1		zzzz101,zzzz150	false
248603	1		zzzz101,zzzz179	false
248602	1		zzzz101,zzzz259	false
248601	1		zzzz101,zzzz387	false
248600	1		zzzz101,zzzz388	false
248599	1		zzzz101,zzzz389	false
248598	1		zzzz101,zzzz694	false
248597	1		zzzz101,zzzz843	false
248596	1		zzzz101,zzzzz87	false
248595	1		zzzz101,zzzz140	false
248594	1		zzzz101,zzzz168	false
248593	1		zzzz101,zzzz205	false
248592	1		zzzz101,zzzz219	false
248591	1		zzzz101,zzzz577	false
248590	1		zzzz101,zzzz641	false
248589	1		zzzz101,zzzz650	false
248588	1		zzzz101,zzzz836	false
248587	1		zzzz101,zzzz849	false
248586	1		zzzz101,zzzzz67	false
248585	1		zzzz101,zzzz368	false
248584	1		zzzz101,zzzz508	false
248583	1		zzzz101,zzzz535	false
248582	1		zzzz101,zzzz558	false
248581	1		zzzz101,zzzz895	false
248580	1		zzzz101,zzzzz62	false
248579	1		zzzz101,zzzzz90	false
248578	1		zzzz101,zzzz122	false
248577	1		zzzz101,zzzz351	false
248576	1		zzzz101,zzzz362	false
248575	1		zzzz101,zzzz563	false
248574	1		zzzz101,zzzz588	false
248573	1		zzzz101,zzzz656	false
248572	1		zzzz101,zzzz982	false
248571	1		zzzz101,zzzz395	false
248570	1		zzzz101,zzzz636	false
248569	1		zzzz101,zzzz727	false
248568	1		zzzz101,zzzz805	false
248567	1		zzzz101,zzzz844	false
248566	1		zzzz101,zzzz104	false
248565	1		zzzz101,zzzz141	false
248564	1		zzzz101,zzzz194	false
248563	1		zzzz101,zzzz215	false
248562	1		zzzz101,zzzz469	false
248561	1		zzzz101,zzzz512	false
248560	1		zzzz101,zzzz539	false
248559	1		zzzz101,zzzz605	false
248558	1		zzzz101,zzzz617	false
248557	1		zzzz101,zzzz634	false
248556	1		zzzz101,zzzz690	false
248555	1		zzzz101,zzzz964	false
248554	1		zzzz101,zzzz983	false
248553	1		zzzz101,zzzzz63	false
248552	1		zzzz101,zzzz109	false
248551	1		zzzz101,zzzz147	false
248550	1		zzzz101,zzzz149	false
248549	1		zzzz101,zzzz155	false
248548	1		zzzz101,zzzz208	false
248547	1		zzzz101,zzzz290	false
248546	1		zzzz101,zzzz297	false
248545	1		zzzz101,zzzz582	false
248544	1		zzzz101,zzzz587	false
248543	1		zzzz101,zzzz593	false
248542	1		zzzz101,zzzz662	false
248541	1		zzzz101,zzzz981	false
248540	1		zzzz101,zzzz127	false
248539	1		zzzz101,zzzz145	false
248538	1		zzzz101,zzzz300	false
248537	1		zzzz101,zzzz492	false
248536	1		zzzz101,zzzz537	false
248535	1		zzzz101,zzzz899	false
248534	1		zzzz101,zzzz963	false
248533	1		zzzz101,zzzz385	false
248532	1		zzzz101,zzzz401	false
248531	1		zzzz101,zzzz434	false
248530	1		zzzz101,zzzz438	false
248529	1		zzzz101,zzzz449	false
248528	1		zzzz101,zzzz481	false
248527	1		zzzz101,zzzz500	false
248526	1		zzzz101,zzzz511	false
248525	1		zzzz101,zzzz902	false
248524	1		zzzz101,zzzz202	false
248523	1		zzzz101,zzzz637	false
248522	1		zzzz101,zzzz908	false
248521	1		zzzz101,zzzz950	false
248520	1		zzzz101,zzzzz46	false
248519	1		zzzz101,zzzz611	false
248518	1		zzzz101,zzzz808	false
248517	1		zzzz101,zzzz901	false
248516	1		zzzz101,zzzzz61	false
248515	1		zzzz101,zzzz144	false
248514	1		zzzz101,zzzz199	false
248513	1		zzzz101,zzzz255	false
248512	1		zzzz101,zzzz367	false
248511	1		zzzz101,zzzz679	false
248510	1		zzzz101,zzzz787	false
248509	1		zzzz101,zzzz900	false
248508	1		zzzz101,zzzz117	false
248507	1		zzzz101,zzzz148	false
248506	1		zzzz101,zzzz182	false
248505	1		zzzz101,zzzz242	false
248504	1		zzzz101,zzzz355	false
248503	1		zzzz101,zzzz402	false
248502	1		zzzz101,zzzz467	false
248501	1		zzzz101,zzzzz53	false
248500	1		zzzz101,zzzz103	false
248499	1		zzzz101,zzzz211	false
248498	1		zzzz101,zzzz447	false
248497	1		zzzz101,zzzz561	false
248496	1		zzzz101,zzzz648	false
248495	1		zzzz101,zzzz652	false
248494	1		zzzz101,zzzz811	false
248493	1		zzzz101,zzzz946	false
248492	1		zzzz101,zzzz178	false
248491	1		zzzz101,zzzz354	false
248490	1		zzzz101,zzzz376	false
248489	1		zzzz101,zzzz406	false
248488	1		zzzz101,zzzz660	false
248487	1		zzzz101,zzzz738	false
248486	1		zzzz101,zzzzz79	false
248485	1		zzzz101,zzzzz93	false
248484	1		zzzz101,zzzz195	false
248483	1		zzzz101,zzzz431	false
248482	1		zzzz101,zzzz516	false
248481	1		zzzz101,zzzz824	false
248480	1		zzzz101,zzzz890	false
248479	1		zzzz101,zzzz113	false
248478	1		zzzz101,zzzz206	false
248477	1		zzzz101,zzzz364	false
248476	1		zzzz101,zzzz369	false
248475	1		zzzz101,zzzz391	false
248474	1		zzzz101,zzzz472	false
248473	1		zzzz101,zzzz592	false
248472	1		zzzz101,zzzz346	false
248471	1		zzzz101,zzzz497	false
248470	1		zzzz101,zzzz204	false
248469	1		zzzz101,zzzz619	false
248468	1		zzzz101,zzzz793	false
248467	1		zzzz101,zzzzz83	false
248466	1		zzzz101,zzzz121	false
248465	1		zzzz101,zzzz302	false
248464	1		zzzz101,zzzz370	false
248463	1		zzzz101,zzzz380	false
248462	1		zzzz101,zzzz414	false
248461	1		zzzz101,zzzz460	false
248460	1		zzzz101,zzzz538	false
248459	1		zzzz101,zzzz647	false
248458	1		zzzz101,zzzz862	false
248457	1		zzzz101,zzzz357	false
248456	1		zzzz101,zzzz487	false
248455	1		zzzz101,zzzz571	false
248454	1		zzzz101,zzzz597	false
248453	1		zzzz101,zzzz837	false
248452	1		zzzz101,zzzz848	false
248451	1		zzzz101,zzzz850	false
248450	1		zzzz101,zzzzz54	false
248449	1		zzzz101,zzzz397	false
248448	1		zzzz101,zzzz478	false
248447	1		zzzz101,zzzz513	false
248446	1		zzzz101,zzzzz82	false
248445	1		zzzz101,zzzz146	false
248444	1		zzzz101,zzzz172	false
248443			zzzz101,zzzz313	false
248442	1		zzzz101,zzzz377	false
248441	1		zzzz101,zzzz623	false
248440	1		zzzz101,zzzz785	false
248439	1		zzzz101,zzzz142	false
248438	1		zzzz101,zzzz441	false
248437	1		zzzz101,zzzz590	false
248436	1		zzzz101,zzzz201	false
248435	1		zzzz101,zzzz239	false
248434	1		zzzz101,zzzz435	false
248433	1		zzzz101,zzzz661	false
248432	1		zzzz101,zzzz210	false
248431	1		zzzz101,zzzz213	false
248430	1		zzzz101,zzzz383	false
248429	1		zzzz101,zzzz470	false
248428	1		zzzz101,zzzz471	false
248427	1		zzzz101,zzzz543	false
248426	1		zzzz101,zzzz574	false
248425	1		zzzz101,zzzz496	false
248424	1		zzzz101,zzzz509	false
248423	1		zzzz101,zzzz644	false
248422	1		zzzz101,zzzz965	false
248421	1		zzzz101,zzzzz51	false
248420	1		zzzz101,zzzz903	false
248419	1		zzzz101,zzzz944	false
248418	1		zzzz101,zzzz892	false
248417	1		zzzz101,zzzz893	false
248416	1		zzzz101,zzzzz60	false
248415	1		zzzz101,zzzz143	false
248414	1		zzzz101,zzzz157	false
248413			zzzz101,zzzz254	false
248412			zzzz101,zzzz308	false
248411	1		zzzz101,zzzz390	false
248410	1		zzzz101,zzzz404	false
248409	1		zzzz101,zzzz412	false
248408	1		zzzz101,zzzz428	false
248407	1		zzzz101,zzzz745	false
248406	1		zzzz101,zzzz379	false
248405	1		zzzz101,zzzz586	false
248404	1		zzzz101,zzzz105	false
248403	1		zzzz101,zzzz225	false
248402			zzzz101,zzzz339	false
248401	1		zzzz101,zzzz618	false
248400	1		zzzz101,zzzz635	false
248399	1		zzzz101,zzzz688	false
248398	1		zzzz101,zzzzz64	false
248397	1		zzzz101,zzzz203	false
248396	1		zzzz101,zzzz264	false
248395	1		zzzz101,zzzz486	false
248394			zzzz101,zzzz705	false
248393	1		zzzz101,zzzz382	false
248392	1		zzzz101,zzzz790	false
248391	1		zzzz101,zzzz894	false
248390	1		zzzz101,zzzz277	false
248389			zzzz101,zzzz312	false
248388	1		zzzz101,zzzz439	false
248387	1		zzzz101,zzzz562	false
248386	1		zzzz101,zzzz622	false
248385	1		zzzz101,zzzz659	false
248384	1		zzzz101,zzzz783	false
248383	1		zzzz101,zzzzz75	false
248382	1		zzzz101,zzzz223	false
248381	1		zzzz101,zzzz278	false
248380			zzzz101,zzzz714	false
248379	1		zzzz101,zzzz214	false
248378	1		zzzz101,zzzz263	false
248377	1		zzzz101,zzzz301	false
248376	1		zzzz101,zzzz425	false
248375	1		zzzz101,zzzz466	false
248374	1		zzzz101,zzzz631	false
248373	1		zzzz101,zzzz653	false
248372	1		zzzz101,zzzz209	false
248371	1		zzzz101,zzzz405	false
248370			zzzz101,zzzz488	false
248369	1		zzzz101,zzzz756	false
248368	1		zzzz101,zzzzz91	false
248367	1		zzzz101,zzzzz98	false
248366	1		zzzz101,zzzz360	false
248365	1		zzzz101,zzzz616	false
248364	1		zzzz101,zzzz796	false
248363	1		zzzz101,zzzz920	false
248362	1		zzzz101,zzzzz77	false
248361	1		zzzz101,zzzz399	false
248360	1		zzzz101,zzzz446	false
248359	1		zzzz101,zzzz521	false
248358			zzzz101,zzzz712	false
248357	1		zzzz101,zzzz786	false
248356	1		zzzz101,zzzz111	false
248355	1		zzzz101,zzzz216	false
248354			zzzz101,zzzz229	false
248353	1		zzzz101,zzzz231	false
248352	1		zzzz101,zzzz235	false
248351			zzzz101,zzzz333	false
248350	1		zzzz101,zzzz645	false
248349	1		zzzz101,zzzz715	false
248348			zzzz101,zzzz332	false
248347	1		zzzz101,zzzz453	false
248346	1		zzzz101,zzzz464	false
248345	1		zzzz101,zzzz217	false
248344	1		zzzz101,zzzz222	false
248343			zzzz101,zzzz337	false
248342	1		zzzz101,zzzz442	false
248341	1		zzzz101,zzzz602	false
248340			zzzz101,zzzz317	false
248339			zzzz101,zzzz341	false
248338	1		zzzz101,zzzz374	false
248337	1		zzzz101,zzzz544	false
248336			zzzz101,zzzz718	false
248335	1		zzzz101,zzzz826	false
248334	1		zzzz101,zzzz854	false
248333			zzzz101,zzzz325	false
248332			zzzz101,zzzz326	false
248331			zzzz101,zzzz327	false
248330	1		zzzz101,zzzz672	false
248329	1		zzzz101,zzzz683	false
248328	1		zzzz101,zzzz687	false
248327	1		zzzz101,zzzz760	false
248326			zzzz101,zzzz305	false
248325	1		zzzz101,zzzz366	false
248324			zzzz101,zzzz699	false
248323	1		zzzz101,zzzz820	false
248322	1		zzzz101,zzzz240	false
248321	1		zzzz101,zzzz626	false
248320	1		zzzz101,zzzz700	false
248319	1		zzzz101,zzzzz70	false
248318	1		zzzz101,zzzz462	false
248317	1		zzzz101,zzzz839	false
248316	1		zzzz101,zzzz455	false
248315			zzzz101,zzzz716	false
248314	1		zzzz101,zzzz788	false
248313	1		zzzz101,zzzz279	false
248312	1		zzzz101,zzzz281	false
248311	1		zzzz101,zzzz303	false
248310	1		zzzz101,zzzz519	false
248309	1		zzzz101,zzzz226	false
248308			zzzz101,zzzz319	false
248307			zzzz101,zzzz321	false
248306	1		zzzz101,zzzzz76	false
248305			zzzz101,zzzz711	false
248304	1		zzzz101,zzzz825	false
248303			zzzz101,zzzz322	false
248302			zzzz101,zzzz336	false
248301	1		zzzz101,zzzz698	false
248300			zzzz101,zzzz708	false
248299			zzzz101,zzzz316	false
248298	1		zzzz101,zzzz190	false
248297	1		zzzz101,zzzz804	false
248296			zzzz101,zzzz283	false
248295			zzzz101,zzzz323	false
248294	1		zzzz101,zzzz473	false
248293			zzzz101,zzzz340	false
248292			zzzz101,zzzz344	false
248291			zzzz101,zzzz704	false
248290	1		zzzz101,zzzz823	false
248289	1		zzzz101,zzzz298	false
248288			zzzz101,zzzz310	false
248287	1		zzzz101,zzzz633	false
248286			zzzz101,zzzz709	false
248285	1		zzzz101,zzzz818	false
248284	1		zzzz101,zzzz696	false
248283			zzzz101,zzzz334	false
248282			zzzz101,zzzz343	false
248281	1		zzzz101,zzzz728	false
248280			zzzz101,zzzz307	false
248279			zzzz101,zzzz706	false
248278			zzzz101,zzzz719	false
248277			zzzz101,zzzz721	false
248276	1		zzzz101,zzzz461	false
248275	1		zzzz101,zzzz253	false
248274	1		zzzz101,zzzz815	false
248273			zzzz101,zzzz320	false
248272			zzzz101,zzzz250	false
248271			zzzz101,zzzz306	false
248270	1		zzzz101,zzzzz92	false
248269	1		zzzz101,zzzz430	false
248268	1		zzzz102,zzzz288	false
248267	1		zzzz102,zzzz812	false
248266	1		zzzz102,zzzz287	false
248265	1		zzzz102,zzzz156	false
248264	1		zzzz102,zzzz351	false
248263	1		zzzz102,zzzz365	false
248262	1		zzzz102,zzzz457	false
248261	1		zzzz102,zzzz674	false
248260	1		zzzz102,zzzz154	false
248259	1		zzzz102,zzzz724	false
248258	1		zzzz102,zzzz456	false
248257	1		zzzz102,zzzz362	false
248256	1		zzzz102,zzzz907	false
248255	1		zzzz102,zzzz128	false
248254	1		zzzz102,zzzz387	false
248253	1		zzzz102,zzzz373	false
248252	1		zzzz102,zzzz418	false
248251	1		zzzz102,zzzz896	false
248250	1		zzzz102,zzzz388	false
248249	1		zzzz102,zzzz417	false
248248	1		zzzz102,zzzz197	false
248247	1		zzzz102,zzzz261	false
248246	1		zzzz102,zzzz415	false
248245	1		zzzz102,zzzz443	false
248244	1		zzzz102,zzzz585	false
248243	1		zzzz102,zzzz792	false
248242	1		zzzz102,zzzz424	false
248241	1		zzzz102,zzzz478	false
248240	1		zzzz102,zzzz579	false
248239	1		zzzz102,zzzz657	false
248238	1		zzzz102,zzzz913	false
248237	1		zzzz102,zzzzz80	false
248236	1		zzzz102,zzzz114	false
248235	1		zzzz102,zzzz597	false
248234	1		zzzz102,zzzz157	false
248233	1		zzzz102,zzzz422	false
248232	1		zzzz102,zzzz949	false
248231	1		zzzz102,zzzzz55	false
248230	1		zzzz102,zzzzz85	false
248229	1		zzzz102,zzzz109	false
248228	1		zzzz102,zzzz378	false
248227	1		zzzz102,zzzz433	false
248226	1		zzzz102,zzzz451	false
248225	1		zzzz102,zzzz525	false
248224	1		zzzz102,zzzz628	false
248223	1		zzzz102,zzzz841	false
248222	1		zzzz102,zzzz952	false
248221	1		zzzz102,zzzz134	false
248220	1		zzzz102,zzzz376	false
248219	1		zzzz102,zzzz432	false
248218	1		zzzz102,zzzz528	false
248217	1		zzzz102,zzzz643	false
248216	1		zzzz102,zzzz726	false
248215	1		zzzz102,zzzz945	false
248214	1		zzzz102,zzzz123	false
248213	1		zzzz102,zzzz130	false
248212	1		zzzz102,zzzz189	false
248211	1		zzzz102,zzzz389	false
248210	1		zzzz102,zzzz498	false
248209	1		zzzz102,zzzz511	false
248208	1		zzzz102,zzzz518	false
248207	1		zzzz102,zzzz537	false
248206	1		zzzz102,zzzz546	false
248205	1		zzzz102,zzzz129	false
248204	1		zzzz102,zzzz548	false
248203	1		zzzz102,zzzz725	false
248202	1		zzzz102,zzzz884	false
248201	1		zzzz102,zzzz119	false
248200	1		zzzz102,zzzz385	false
248199	1		zzzz102,zzzz573	false
248198	1		zzzz102,zzzz791	false
248197	1		zzzz102,zzzz912	false
248196	1		zzzz102,zzzzz45	false
248195	1		zzzz102,zzzzz53	false
248194	1		zzzz102,zzzz356	false
248193	1		zzzz102,zzzz358	false
248192	1		zzzz102,zzzz369	false
248191	1		zzzz102,zzzz420	false
248190	1		zzzz102,zzzz477	false
248189	1		zzzz102,zzzz647	false
248188	1		zzzz102,zzzz678	false
248187	1		zzzz102,zzzz910	false
248186	1		zzzz102,zzzz940	false
248185	1		zzzz102,zzzzz87	false
248184	1		zzzz102,zzzz372	false
248183	1		zzzz102,zzzz407	false
248182	1		zzzz102,zzzz840	false
248181	1		zzzz102,zzzz171	false
248180	1		zzzz102,zzzz353	false
248179	1		zzzz102,zzzz416	false
248178	1		zzzz102,zzzz445	false
248177	1		zzzz102,zzzz474	false
248176	1		zzzz102,zzzz480	false
248175	1		zzzz102,zzzz512	false
248174	1		zzzz102,zzzz523	false
248173	1		zzzz102,zzzz556	false
248172	1		zzzz102,zzzz982	false
248171	1		zzzz102,zzzzz49	false
248170	1		zzzz102,zzzzz74	false
248169	1		zzzz102,zzzz381	false
248168	1		zzzz102,zzzz460	false
248167	1		zzzz102,zzzz492	false
248166	1		zzzz102,zzzz906	false
248165	1		zzzz102,zzzzz50	false
248164	1		zzzz102,zzzzz82	false
248163	1		zzzz102,zzzz120	false
248162	1		zzzz102,zzzz375	false
248161	1		zzzz102,zzzz396	false
248160	1		zzzz102,zzzz425	false
248159	1		zzzz102,zzzz454	false
248158	1		zzzz102,zzzz495	false
248157	1		zzzz102,zzzz613	false
248156	1		zzzz102,zzzz629	false
248155	1		zzzz102,zzzz641	false
248154	1		zzzz102,zzzz908	false
248153	1		zzzz102,zzzz352	false
248152	1		zzzz102,zzzz428	false
248151	1		zzzz102,zzzz540	false
248150	1		zzzz102,zzzz564	false
248149	1		zzzz102,zzzz642	false
248148	1		zzzz102,zzzz692	false
248147	1		zzzz102,zzzz794	false
248146	1		zzzz102,zzzz901	false
248145	1		zzzz102,zzzz921	false
248144	1		zzzz102,zzzz941	false
248143	1		zzzz102,zzzz127	false
248142	1		zzzz102,zzzz165	false
248141	1		zzzz102,zzzz224	false
248140	1		zzzz102,zzzz947	false
248139	1		zzzz102,zzzzz73	false
248138	1		zzzz102,zzzzz84	false
248137	1		zzzz102,zzzz354	false
248136	1		zzzz102,zzzz450	false
248135	1		zzzz102,zzzz452	false
248134	1		zzzz102,zzzz485	false
248133	1		zzzz102,zzzz520	false
248132	1		zzzz102,zzzz531	false
248131	1		zzzz102,zzzz535	false
248130	1		zzzz102,zzzz640	false
248129	1		zzzz102,zzzz793	false
248128	1		zzzz102,zzzz852	false
248127	1		zzzz102,zzzz903	false
248126	1		zzzz102,zzzz909	false
248125	1		zzzz102,zzzzz88	false
248124	1		zzzz102,zzzz117	false
248123	1		zzzz102,zzzz207	false
248122	1		zzzz102,zzzz401	false
248121	1		zzzz102,zzzz508	false
248120	1		zzzz102,zzzz522	false
248119	1		zzzz102,zzzz533	false
248118	1		zzzz102,zzzz667	false
248117	1		zzzz102,zzzz802	false
248116	1		zzzz102,zzzz131	false
248115	1		zzzz102,zzzz208	false
248114	1		zzzz102,zzzz210	false
248113	1		zzzz102,zzzz434	false
248112	1		zzzz102,zzzz440	false
248111	1		zzzz102,zzzz447	false
248110	1		zzzz102,zzzz448	false
248109	1		zzzz102,zzzz458	false
248108	1		zzzz102,zzzz663	false
248107	1		zzzz102,zzzz893	false
248106	1		zzzz102,zzzz895	false
248105	1		zzzz102,zzzz900	false
248104	1		zzzz102,zzzz911	false
248103	1		zzzz102,zzzz963	false
248102	1		zzzz102,zzzzz90	false
248101	1		zzzz102,zzzz132	false
248100	1		zzzz102,zzzz166	false
248099	1		zzzz102,zzzz245	false
248098	1		zzzz102,zzzz348	false
248097	1		zzzz102,zzzz475	false
248096	1		zzzz102,zzzz521	false
248095	1		zzzz102,zzzz627	false
248094	1		zzzz102,zzzz935	false
248093	1		zzzz102,zzzzz86	false
248092	1		zzzz102,zzzz108	false
248091	1		zzzz102,zzzz160	false
248090	1		zzzz102,zzzz162	false
248089	1		zzzz102,zzzz199	false
248088	1		zzzz102,zzzz286	false
248087	1		zzzz102,zzzz368	false
248086	1		zzzz102,zzzz410	false
248085	1		zzzz102,zzzz444	false
248084	1		zzzz102,zzzz500	false
248083	1		zzzz102,zzzz894	false
248082	1		zzzz102,zzzz209	false
248081	1		zzzz102,zzzz217	false
248080	1		zzzz102,zzzz220	false
248079	1		zzzz102,zzzz465	false
248078	1		zzzz102,zzzz470	false
248077	1		zzzz102,zzzz502	false
248076	1		zzzz102,zzzz515	false
248075	1		zzzz102,zzzz649	false
248074	1		zzzz102,zzzz796	false
248073	1		zzzz102,zzzz809	false
248072	1		zzzz102,zzzz965	false
248071	1		zzzz102,zzzzz78	false
248070	1		zzzz102,zzzz136	false
248069	1		zzzz102,zzzz370	false
248068	1		zzzz102,zzzz382	false
248067	1		zzzz102,zzzz646	false
248066	1		zzzz102,zzzz849	false
248065	1		zzzz102,zzzz892	false
248064	1		zzzz102,zzzz176	false
248063	1		zzzz102,zzzz262	false
248062	1		zzzz102,zzzz371	false
248061	1		zzzz102,zzzz400	false
248060	1		zzzz102,zzzz501	false
248059	1		zzzz102,zzzz550	false
248058	1		zzzz102,zzzz650	false
248057	1		zzzz102,zzzz722	false
248056	1		zzzz102,zzzz810	false
248055	1		zzzz102,zzzz843	false
248054	1		zzzz102,zzzz904	false
248053	1		zzzz102,zzzz950	false
248052	1		zzzz102,zzzz951	false
248051	1		zzzz102,zzzz180	false
248050	1		zzzz102,zzzz349	false
248049	1		zzzz102,zzzz620	false
248048	1		zzzz102,zzzz637	false
248047	1		zzzz102,zzzz656	false
248046	1		zzzz102,zzzz670	false
248045	1		zzzz102,zzzz829	false
248044	1		zzzz102,zzzz836	false
248043	1		zzzz102,zzzz936	false
248042	1		zzzz102,zzzz944	false
248041	1		zzzz102,zzzz553	false
248040	1		zzzz102,zzzz619	false
248039	1		zzzz102,zzzz161	false
248038	1		zzzz102,zzzz383	false
248037	1		zzzz102,zzzz406	false
248036	1		zzzz102,zzzz437	false
248035	1		zzzz102,zzzz441	false
248034	1		zzzz102,zzzz449	false
248033	1		zzzz102,zzzz554	false
248032	1		zzzz102,zzzz614	false
248031	1		zzzz102,zzzz658	false
248030	1		zzzz102,zzzz346	false
248029	1		zzzz102,zzzz364	false
248028	1		zzzz102,zzzz367	false
248027	1		zzzz102,zzzz527	false
248026	1		zzzz102,zzzz567	false
248025	1		zzzz102,zzzz807	false
248024	1		zzzz102,zzzzz91	false
248023	1		zzzz102,zzzz164	false
248022	1		zzzz102,zzzz179	false
248021	1		zzzz102,zzzz379	false
248020	1		zzzz102,zzzz395	false
248019	1		zzzz102,zzzz413	false
248018	1		zzzz102,zzzz636	false
248017	1		zzzz102,zzzz665	false
248016	1		zzzz102,zzzz889	false
248015	1		zzzz102,zzzz891	false
248014	1		zzzz102,zzzzz83	false
248013	1		zzzz102,zzzz118	false
248012	1		zzzz102,zzzz155	false
248011	1		zzzz102,zzzz159	false
248010	1		zzzz102,zzzz264	false
248009	1		zzzz102,zzzz361	false
248008	1		zzzz102,zzzz421	false
248007	1		zzzz102,zzzz423	false
248006	1		zzzz102,zzzz471	false
248005	1		zzzz102,zzzz472	false
248004	1		zzzz102,zzzz529	false
248003	1		zzzz102,zzzz547	false
248002	1		zzzz102,zzzz555	false
248001	1		zzzz102,zzzz559	false
248000	1		zzzz102,zzzz644	false
247999	1		zzzz102,zzzz654	false
247998	1		zzzz102,zzzz158	false
247997	1		zzzz102,zzzz483	false
247996	1		zzzz102,zzzz505	false
247995	1		zzzz102,zzzz563	false
247994	1		zzzz102,zzzz631	false
247993	1		zzzz102,zzzzz61	false
247992	1		zzzz102,zzzz107	false
247991	1		zzzz102,zzzz195	false
247990	1		zzzz102,zzzz427	false
247989	1		zzzz102,zzzz436	false
247988	1		zzzz102,zzzz494	false
247987	1		zzzz102,zzzz509	false
247986	1		zzzz102,zzzz524	false
247985	1		zzzz102,zzzzz81	false
247984	1		zzzz102,zzzz116	false
247983	1		zzzz102,zzzz230	false
247982	1		zzzz102,zzzz397	false
247981	1		zzzz102,zzzz468	false
247980	1		zzzz102,zzzz491	false
247979	1		zzzz102,zzzz497	false
247978	1		zzzz102,zzzz549	false
247977	1		zzzz102,zzzz618	false
247976	1		zzzz102,zzzz661	false
247975	1		zzzz102,zzzz662	false
247974	1		zzzz102,zzzzz89	false
247973	1		zzzz102,zzzzz97	false
247972	1		zzzz102,zzzz106	false
247971	1		zzzz102,zzzz153	false
247970	1		zzzz102,zzzz173	false
247969	1		zzzz102,zzzz206	false
247968	1		zzzz102,zzzz390	false
247967	1		zzzz102,zzzz414	false
247966	1		zzzz102,zzzz462	false
247965	1		zzzz102,zzzz638	false
247964	1		zzzz102,zzzz727	false
247963	1		zzzz102,zzzz126	false
247962	1		zzzz102,zzzz135	false
247961	1		zzzz102,zzzz145	false
247960	1		zzzz102,zzzz167	false
247959	1		zzzz102,zzzz168	false
247958	1		zzzz102,zzzz211	false
247957	1		zzzz102,zzzz366	false
247956	1		zzzz102,zzzz439	false
247955	1		zzzz102,zzzz542	false
247954	1		zzzz102,zzzz635	false
247953	1		zzzz102,zzzz664	false
247952	1		zzzz102,zzzz833	false
247951	1		zzzz102,zzzz899	false
247950	1		zzzz102,zzzzz96	false
247949	1		zzzz102,zzzz125	false
247948	1		zzzz102,zzzz163	false
247947	1		zzzz102,zzzz216	false
247946	1		zzzz102,zzzz357	false
247945	1		zzzz102,zzzz377	false
247944	1		zzzz102,zzzz526	false
247943	1		zzzz102,zzzz738	false
247942	1		zzzz102,zzzz832	false
247941	1		zzzz102,zzzz964	false
247940	1		zzzz102,zzzz174	false
247939	1		zzzz102,zzzz175	false
247938	1		zzzz102,zzzz194	false
247937	1		zzzz102,zzzz219	false
247936	1		zzzz102,zzzz252	false
247935	1		zzzz102,zzzz484	false
247934	1		zzzz102,zzzz487	false
247933	1		zzzz102,zzzz504	false
247932	1		zzzz102,zzzz621	false
247931	1		zzzz102,zzzz170	false
247930	1		zzzz102,zzzz243	false
247929	1		zzzz102,zzzz831	false
247928	1		zzzz102,zzzzz64	false
247927	1		zzzz102,zzzzz77	false
247926	1		zzzz102,zzzz133	false
247925	1		zzzz102,zzzz473	false
247924	1		zzzz102,zzzz577	false
247923	1		zzzz102,zzzz622	false
247922	1		zzzz102,zzzz630	false
247921	1		zzzz102,zzzz902	false
247920	1		zzzz102,zzzzz60	false
247919	1		zzzz102,zzzz177	false
247918	1		zzzz102,zzzz479	false
247917	1		zzzz102,zzzz516	false
247916	1		zzzz102,zzzz544	false
247915	1		zzzz102,zzzz659	false
247914	1		zzzz102,zzzz115	false
247913	1		zzzz102,zzzz429	false
247912	1		zzzz102,zzzz808	false
247911	1		zzzz102,zzzz845	false
247910	1		zzzz102,zzzz946	false
247909	1		zzzz102,zzzzz79	false
247908	1		zzzz102,zzzz393	false
247907	1		zzzz102,zzzz402	false
247906	1		zzzz102,zzzz405	false
247905	1		zzzz102,zzzz442	false
247904	1		zzzz102,zzzz648	false
247903	1		zzzz102,zzzz811	false
247902	1		zzzz102,zzzzz48	false
247901	1		zzzz102,zzzzz94	false
247900	1		zzzz102,zzzz124	false
247899	1		zzzz102,zzzz360	false
247898	1		zzzz102,zzzz398	false
247897	1		zzzz102,zzzz412	false
247896	1		zzzz102,zzzz466	false
247895	1		zzzz102,zzzz539	false
247894	1		zzzz102,zzzz660	false
247893	1		zzzz102,zzzz169	false
247892	1		zzzz102,zzzz284	false
247891	1		zzzz102,zzzz347	false
247890	1		zzzz102,zzzz453	false
247889	1		zzzz102,zzzz464	false
247888	1		zzzz102,zzzz113	false
247887	1		zzzz102,zzzz184	false
247886	1		zzzz102,zzzz249	false
247885	1		zzzz102,zzzz259	false
247884	1		zzzz102,zzzz426	false
247883	1		zzzz102,zzzz455	false
247882	1		zzzz102,zzzz611	false
247881	1		zzzz102,zzzz632	false
247880	1		zzzz102,zzzz653	false
247879	1		zzzz102,zzzz122	false
247878	1		zzzz102,zzzz138	false
247877	1		zzzz102,zzzz146	false
247876	1		zzzz102,zzzz147	false
247875	1		zzzz102,zzzz242	false
247874	1		zzzz102,zzzz399	false
247873	1		zzzz102,zzzz172	false
247872	1		zzzz102,zzzz188	false
247871	1		zzzz102,zzzz404	false
247870	1		zzzz102,zzzz496	false
247869	1		zzzz102,zzzz690	false
247868	1		zzzz102,zzzz112	false
247867	1		zzzz102,zzzz241	false
247866	1		zzzz102,zzzz461	false
247865	1		zzzz102,zzzz604	false
247864	1		zzzz102,zzzz218	false
247863	1		zzzz102,zzzz232	false
247862	1		zzzz102,zzzz285	false
247861	1		zzzz102,zzzz386	false
247860	1		zzzz102,zzzz435	false
247859	1		zzzz102,zzzz536	false
247858	1		zzzz102,zzzz593	false
247857	1		zzzz102,zzzz652	false
247856	1		zzzz102,zzzz943	false
247855	1		zzzz102,zzzz948	false
247854	1		zzzz102,zzzz966	false
247853	1		zzzz102,zzzzz69	false
247852	1		zzzz102,zzzz121	false
247851	1		zzzz102,zzzz183	false
247850	1		zzzz102,zzzz532	false
247849	1		zzzz102,zzzz788	false
247848	1		zzzz102,zzzz898	false
247847	1		zzzz102,zzzz142	false
247846	1		zzzz102,zzzz191	false
247845	1		zzzz102,zzzz201	false
247844	1		zzzz102,zzzz374	false
247843	1		zzzz102,zzzz438	false
247842	1		zzzz102,zzzz571	false
247841	1		zzzz102,zzzz594	false
247840	1		zzzz102,zzzz143	false
247839	1		zzzz102,zzzz186	false
247838	1		zzzz102,zzzz203	false
247837	1		zzzz102,zzzz626	false
247836	1		zzzz102,zzzz693	false
247835	1		zzzz102,zzzzz43	false
247834	1		zzzz102,zzzzz67	false
247833	1		zzzz102,zzzz255	false
247832	1		zzzz102,zzzz853	false
247831	1		zzzz102,zzzz103	false
247830	1		zzzz102,zzzz144	false
247829	1		zzzz102,zzzz588	false
247828	1		zzzz102,zzzz645	false
247827	1		zzzz102,zzzz666	false
247826	1		zzzz102,zzzz800	false
247825	1		zzzz102,zzzz806	false
247824	1		zzzz102,zzzzz92	false
247823	1		zzzz102,zzzz140	false
247822	1		zzzz102,zzzz141	false
247821	1		zzzz102,zzzz590	false
247820	1		zzzz102,zzzz838	false
247819	1		zzzz102,zzzzz47	false
247818	1		zzzz102,zzzz104	false
247817	1		zzzz102,zzzz137	false
247816	1		zzzz102,zzzz149	false
247815	1		zzzz102,zzzz213	false
247814	1		zzzz102,zzzz530	false
247813	1		zzzz102,zzzz576	false
247812	1		zzzz102,zzzz603	false
247811	1		zzzz102,zzzz837	false
247810	1		zzzz102,zzzzz93	false
247809	1		zzzz102,zzzz150	false
247808	1		zzzz102,zzzz152	false
247807	1		zzzz102,zzzz181	false
247806	1		zzzz102,zzzz355	false
247805	1		zzzz102,zzzz380	false
247804	1		zzzz102,zzzz561	false
247803	1		zzzz102,zzzz562	false
247802	1		zzzz102,zzzz586	false
247801	1		zzzz102,zzzz605	false
247800	1		zzzz102,zzzz616	false
247799	1		zzzz102,zzzz634	false
247798	1		zzzz102,zzzz205	false
247797	1		zzzz102,zzzz239	false
247796	1		zzzz102,zzzz510	false
247795	1		zzzz102,zzzz673	false
247794	1		zzzz102,zzzzz46	false
247793	1		zzzz102,zzzz394	false
247792	1		zzzz102,zzzz558	false
247791	1		zzzz102,zzzz623	false
247790	1		zzzz102,zzzz694	false
247789	1		zzzz102,zzzz942	false
247788	1		zzzz102,zzzz178	false
247787	1		zzzz102,zzzz595	false
247786	1		zzzz102,zzzz599	false
247785	1		zzzz102,zzzz240	false
247784	1		zzzz102,zzzz606	false
247783	1		zzzz102,zzzz519	false
247782	1		zzzz102,zzzz685	false
247781	1		zzzz102,zzzz431	false
247780	1		zzzz102,zzzz671	false
247779	1		zzzz102,zzzz784	false
247778	1		zzzz102,zzzz934	false
247777	1		zzzz102,zzzz204	false
247776	1		zzzz102,zzzz581	false
247775	1		zzzz102,zzzzz44	false
247774	1		zzzz102,zzzz589	false
247773	1		zzzz102,zzzz728	false
247772	1		zzzz102,zzzz248	false
247771	1		zzzz102,zzzz391	false
247770	1		zzzz102,zzzzz99	false
247769	1		zzzz102,zzzz251	false
247768	1		zzzz102,zzzz489	false
247767	1		zzzz102,zzzz482	false
247766	1		zzzz102,zzzz633	false
247765	1		zzzz102,zzzz570	false
247764	1		zzzz102,zzzz801	false
247763	1		zzzz102,zzzz187	false
247762	1		zzzz102,zzzz392	false
247761	1		zzzz102,zzzz419	false
247760	1		zzzz102,zzzzz58	false
247759	1		zzzz102,zzzz844	false
247758	1		zzzz102,zzzz848	false
247757	1		zzzz102,zzzz834	false
247756	1		zzzz102,zzzz545	false
247755	1		zzzz102,zzzz905	false
247754	1		zzzz102,zzzz233	false
247753	1		zzzz102,zzzz290	false
247752	1		zzzz102,zzzzz51	false
247751	1		zzzz102,zzzz612	false
247750	1		zzzz102,zzzz672	false
247749	1		zzzz102,zzzz105	false
247748	1		zzzz102,zzzz215	false
247747	1		zzzz102,zzzz514	false
247746	1		zzzz102,zzzz574	false
247745	1		zzzz102,zzzz850	false
247744	1		zzzz102,zzzz600	false
247743	1		zzzz102,zzzz198	false
247742	1		zzzz102,zzzz459	false
247741	1		zzzz102,zzzz676	false
247740	1		zzzz102,zzzz226	false
247739	1		zzzz102,zzzz517	false
247738	1		zzzz102,zzzz110	false
247737	1		zzzz102,zzzz225	false
247736	1		zzzz102,zzzz534	false
247735	1		zzzz102,zzzz799	false
247734	1		zzzz102,zzzz931	false
247733	1		zzzz102,zzzz697	false
247732	1		zzzz102,zzzz607	false
247731	1		zzzz102,zzzz202	false
247730	1		zzzz102,zzzz592	false
247729	1		zzzz102,zzzz582	false
247728	1		zzzz102,zzzz687	false
247727	1		zzzz102,zzzz430	false
247726	1		zzzz102,zzzz486	false
247725	1		zzzz102,zzzz568	false
247724	1		zzzz102,zzzz575	false
247723	1		zzzz102,zzzz578	false
247722	1		zzzz102,zzzz148	false
247721	1		zzzz102,zzzz263	false
247720	1		zzzz102,zzzz651	false
247719	1		zzzz102,zzzz695	false
247718	1		zzzz102,zzzz983	false
247717	1		zzzz102,zzzz403	false
247716	1		zzzz102,zzzz683	false
247715	1		zzzz102,zzzz580	false
247714	1		zzzz102,zzzz677	false
247713	1		zzzz102,zzzz139	false
247712	1		zzzz102,zzzz493	false
247711	1		zzzz102,zzzz583	false
[truncated: 246,255 more rows]
