# Supplementary material for: Discovery of several thousand highly diverse circular DNA viruses
Source: eLife journal article supplement (doi:10.7554/elife.51971), 2020-02-03
Supplement: fig2-figsupp1-data4 [file elife-51971-fig2-figsupp1-data4-v1.cys › CytoscapeSession-2019_08_05-17_02/tables/252247-all_my_seqs_genbank_ssDNA1_domains_micro_ino_rep_fasta+Full+Network%283%29/HIDDEN-org.cytoscape.model.CyNetwork-252247+hidden+network.cytable]

"CyCSV-Version","1"
"SUID","__parentNetwork.SUID"
"java.lang.Long","java.lang.Long"
"",""
"252247 hidden network",""
"252247","52"
