# Supplementary material for: Discovery of several thousand highly diverse circular DNA viruses
Source: eLife journal article supplement (doi:10.7554/elife.51971), 2020-02-03
Supplement: fig2-figsupp1-data4 [file elife-51971-fig2-figsupp1-data4-v1.cys › CytoscapeSession-2019_08_05-17_02/tables/252247-all_my_seqs_genbank_ssDNA1_domains_micro_ino_rep_fasta+Full+Network%283%29/LOCAL_ATTRS-org.cytoscape.model.CyEdge-all_my_seqs_genbank_ssDNA1_domains_micro_ino_rep_fasta+Full+Network%283%29+default+edge.cytable]

CyCSV-Version	1
SUID	__mclCluster	interaction	name	selected
java.lang.Long	java.lang.Integer	java.lang.String	java.lang.String	java.lang.Boolean
	mutable
all_my_seqs_genbank_ssDNA1_domains_micro_ino_rep_fasta Full Network(3) default edge
12054			zzzz789,zzzz857	false
12055			zzzz789,zzzzz29	false
12056			zzzz789,zzzz797	false
12057	1		zzzz789,zzzzz27	false
12050			zzzz789,zzzzz24	false
12051			zzzz789,zzzzz25	false
12052			zzzz789,zzzzzz6	false
12053			zzzz789,zzzzz18	false
12047			zzzz789,zzzz980	false
12048			zzzz789,zzzzz19	false
12049			zzzz789,zzzz915	false
2302			zzzzz14,zzzzzz6	false
2303			zzzzz14,zzzzz18	false
2304			zzzzz14,zzzzz19	false
2305	1		zzzzz14,zzzzz21	false
2299			zzzzz14,zzzzz29	false
2300			zzzzz14,zzzzz24	false
2301			zzzzz14,zzzzz25	false
2290			zzzzz18,zzzzzz6	false
2291	1		zzzzz18,zzzzz29	false
2292	1		zzzzz18,zzzzz24	false
2286			zzzzz18,zzzzz22	false
2287			zzzzz18,zzzzz19	false
2288			zzzzz18,zzzzz21	false
2289			zzzzz18,zzzzz25	false
2282			zzzzz19,zzzzz24	false
2283			zzzzz19,zzzzz21	false
2284			zzzzz18,zzzzz27	false
2285			zzzzz18,zzzzzz1	false
2278			zzzzz19,zzzzzz2	false
2279			zzzzz19,zzzzzz6	false
2280			zzzzz19,zzzzz25	false
2281			zzzzz19,zzzzz29	false
2274			zzzzz21,zzzzzz6	false
2275			zzzzz21,zzzzz24	false
2276			zzzzz19,zzzzz22	false
2277			zzzzz19,zzzzzz1	false
2270			zzzzz21,zzzzz22	false
2271			zzzzz21,zzzzzz1	false
2272			zzzzz21,zzzzz25	false
2273			zzzzz21,zzzzz29	false
2266			zzzzz22,zzzzz29	false
2267	1		zzzzz22,zzzzzz2	false
2268	1		zzzzz22,zzzzz27	false
2269	1		zzzzz22,zzzzzz1	false
2263			zzzzz22,zzzzz25	false
2264			zzzzz22,zzzzzz6	false
2265			zzzzz22,zzzzz24	false
2258			zzzzz24,zzzzzz6	false
13010	1		zzzz766,zzzz775	false
2259			zzzzz24,zzzzz25	false
2260	1		zzzzz24,zzzzz29	false
2254	1		zzzzz25,zzzzzz6	false
13006	1		zzzz766,zzzz769	false
2255			zzzzz24,zzzzz27	false
13007	1		zzzz766,zzzz773	false
2256			zzzzz24,zzzzzz1	false
13008	1		zzzz766,zzzz772	false
2257			zzzzz24,zzzzzz2	false
13009	1		zzzz766,zzzz779	false
2250	1		zzzzz27,zzzzzz1	false
13002	1		zzzz766,zzzz780	false
13003	1		zzzz766,zzzz932	false
2252			zzzzz25,zzzzzz1	false
13004	1		zzzz766,zzzz768	false
2253			zzzzz25,zzzzz29	false
13005	1		zzzz766,zzzz767	false
2246			zzzzz29,zzzzzz1	false
12998	1		zzzz767,zzzz773	false
2247			zzzzz29,zzzzzz6	false
12999	1		zzzz767,zzzz772	false
2248			zzzzz27,zzzzz29	false
13000			zzzz766,zzzzz29	false
2249	1		zzzzz27,zzzzzz2	false
13001	1		zzzz766,zzzz776	false
12994	1		zzzz767,zzzz779	false
12995	1		zzzz767,zzzz775	false
12996	1		zzzz767,zzzz768	false
12997	1		zzzz767,zzzz769	false
12990			zzzz767,zzzzz21	false
12991	1		zzzz767,zzzz776	false
12992	1		zzzz767,zzzz780	false
12993	1		zzzz767,zzzz932	false
12986	1		zzzz768,zzzz769	false
12987	1		zzzz768,zzzz773	false
12988	1		zzzz768,zzzz772	false
12989			zzzz767,zzzzz14	false
12982	1		zzzz768,zzzz780	false
12983	1		zzzz768,zzzz932	false
12984	1		zzzz768,zzzz779	false
12985	1		zzzz768,zzzz775	false
12978	1		zzzz769,zzzz772	false
12979			zzzz768,zzzzz14	false
12980			zzzz768,zzzzz21	false
12981	1		zzzz768,zzzz776	false
12974	1		zzzz769,zzzz932	false
12975	1		zzzz769,zzzz779	false
12976	1		zzzz769,zzzz775	false
12977	1		zzzz769,zzzz773	false
12970			zzzz769,zzzzz14	false
12971			zzzz769,zzzzz21	false
12972	1		zzzz769,zzzz776	false
12973	1		zzzz769,zzzz780	false
12966	1		zzzz772,zzzz932	false
12967	1		zzzz772,zzzz779	false
12968	1		zzzz772,zzzz775	false
12969	1		zzzz772,zzzz773	false
12962			zzzz772,zzzzz14	false
12963			zzzz772,zzzzz21	false
12964	1		zzzz772,zzzz776	false
12965	1		zzzz772,zzzz780	false
12958	1		zzzz773,zzzz780	false
12959	1		zzzz773,zzzz932	false
12960	1		zzzz773,zzzz779	false
12961	1		zzzz773,zzzz775	false
2714	1		zzzz962,zzzzzz1	false
2715	1		zzzz962,zzzzzz2	false
12955			zzzz773,zzzzz14	false
12956			zzzz773,zzzzz21	false
12957	1		zzzz773,zzzz776	false
2710			zzzz962,zzzz980	false
2711			zzzz962,zzzzzz6	false
2712	1		zzzz962,zzzzz27	false
2713	1		zzzz962,zzzzz22	false
12946	1		zzzz775,zzzz779	false
2709			zzzz962,zzzzz25	false
12942			zzzz775,zzzzz29	false
12943	1		zzzz775,zzzz776	false
12944	1		zzzz775,zzzz780	false
12945	1		zzzz775,zzzz932	false
12938			zzzz776,zzzzz29	false
12939			zzzz776,zzzzz24	false
12940	1		zzzz776,zzzz779	false
12941	1		zzzz776,zzzz780	false
12934	1		zzzz776,zzzz932	false
12935			zzzz776,zzzz797	false
12936			zzzz776,zzzzz18	false
12937			zzzz776,zzzz857	false
12933			zzzz776,zzzzz21	false
12922	1		zzzz779,zzzz932	false
12919	1		zzzz780,zzzz932	false
12920			zzzz779,zzzzz21	false
12921	1		zzzz779,zzzz780	false
179290	1		zzzz212,zzzzzz5	false
179288	1		zzzz212,zzzz919	false
179289	1		zzzz212,zzzzzz1	false
179286	1		zzzz212,zzzzz22	false
179287	1		zzzz212,zzzz962	false
179284	1		zzzz212,zzzz789	false
179285	1		zzzz212,zzzzz27	false
179282			zzzz212,zzzzz19	false
179283	1		zzzz212,zzzzzz2	false
179280			zzzz212,zzzzzz6	false
179281			zzzz212,zzzz980	false
179278			zzzz212,zzzzz21	false
179279			zzzz212,zzzz857	false
179276			zzzz212,zzzz797	false
179277			zzzz212,zzzzz25	false
179274			zzzz212,zzzz273	false
179275			zzzz212,zzzzz29	false
179272			zzzz212,zzzzz18	false
179273			zzzz212,zzzz915	false
179270			zzzz212,zzzzz24	false
179271			zzzz212,zzzzz14	false
179269			zzzz212,zzzz739	false
4074			zzzz915,zzzzz25	false
4070			zzzz915,zzzzz19	false
4071			zzzz915,zzzzz14	false
4072			zzzz915,zzzz980	false
4073			zzzz915,zzzzzz6	false
4066			zzzz915,zzzzz18	false
4067			zzzz915,zzzzz24	false
4068			zzzz915,zzzzz29	false
4069			zzzz915,zzzzz21	false
4062			zzzz915,zzzz962	false
4063			zzzz915,zzzzzz1	false
4064			zzzz915,zzzzzz2	false
4065			zzzz915,zzzzz22	false
4058	1		zzzz919,zzzzzz2	false
4059	1		zzzz919,zzzzzz1	false
4060	1		zzzz919,zzzz962	false
4061			zzzz915,zzzz919	false
4054			zzzz919,zzzzz25	false
4055			zzzz919,zzzzzz6	false
4056	1		zzzz919,zzzzz27	false
4057	1		zzzz919,zzzzz22	false
4053			zzzz919,zzzz980	false
966			zzzzzz1,zzzzzz6	false
967	1		zzzzzz1,zzzzzz2	false
962	1		zzzzzz5,zzzz962	false
963	1		zzzzzz5,zzzz919	false
964	1		zzzzzz5,zzzzzz1	false
958	1		zzzzzz5,zzzzzz2	false
959	1		zzzzzz5,zzzz789	false
960	1		zzzzzz5,zzzzz27	false
961	1		zzzzzz5,zzzzz22	false
954			zzzzzz5,zzzz857	false
11194	1		zzzz797,zzzz857	false
955			zzzzzz5,zzzzzz6	false
956			zzzzzz5,zzzz980	false
957			zzzzzz5,zzzzz19	false
950			zzzzzz5,zzzzz29	false
11190			zzzz797,zzzz980	false
951			zzzzzz5,zzzz797	false
11191			zzzz797,zzzzz25	false
952			zzzzzz5,zzzzz25	false
11192			zzzz797,zzzzz14	false
953			zzzzzz5,zzzzz21	false
11193	1		zzzz797,zzzz915	false
946			zzzzzz5,zzzzz14	false
11186			zzzz797,zzzzz24	false
947			zzzzzz5,zzzzz18	false
11187			zzzz797,zzzzz29	false
948			zzzzzz5,zzzz915	false
11188			zzzz797,zzzzz18	false
949			zzzzzz5,zzzz273	false
11189			zzzz797,zzzzz21	false
11182			zzzz797,zzzzzz1	false
2478			zzzz980,zzzzz24	false
11183			zzzz797,zzzzzz2	false
2479			zzzz980,zzzzz21	false
944			zzzzzz5,zzzz739	false
11184			zzzz797,zzzzz19	false
2480			zzzz980,zzzzz14	false
945			zzzzzz5,zzzzz24	false
11185			zzzz797,zzzzzz6	false
2481	1		zzzz980,zzzzz19	false
2474			zzzz980,zzzzz29	false
2475			zzzz980,zzzzzz6	false
2476			zzzz980,zzzzz18	false
11181			zzzz797,zzzzz27	false
2477			zzzz980,zzzzz25	false
2471			zzzz980,zzzzzz2	false
2472			zzzz980,zzzzzz1	false
2473			zzzz980,zzzzz22	false
156490	1		zzzz273,zzzzz18	false
156488	1		zzzz273,zzzzz29	false
156489	1		zzzz273,zzzzz24	false
156486			zzzz273,zzzzzz6	false
156487	1		zzzz273,zzzz739	false
156484			zzzz273,zzzzz25	false
156485			zzzz273,zzzz857	false
156482			zzzz273,zzzzz21	false
156483			zzzz273,zzzz797	false
156480			zzzz273,zzzzz14	false
6462			zzzz857,zzzzz29	false
156481			zzzz273,zzzzz19	false
6463	1		zzzz857,zzzz915	false
156478			zzzz273,zzzz789	false
156479			zzzz273,zzzz980	false
156476			zzzz273,zzzzz22	false
6458			zzzz857,zzzzz24	false
156477			zzzz273,zzzz915	false
6459			zzzz857,zzzzz21	false
156474			zzzz273,zzzzz27	false
6460			zzzz857,zzzzz14	false
156475			zzzz273,zzzzzz1	false
6461			zzzz857,zzzzz18	false
6454			zzzz857,zzzzz19	false
156473			zzzz273,zzzz776	false
6455			zzzz857,zzzz980	false
6456			zzzz857,zzzzzz6	false
6457			zzzz857,zzzzz25	false
6450			zzzz857,zzzzz27	false
6451			zzzz857,zzzzz22	false
6452			zzzz857,zzzzzz2	false
6453			zzzz857,zzzzzz1	false
13614	1		zzzz739,zzzzz18	false
13615	1		zzzz739,zzzzz29	false
6448			zzzz857,zzzz962	false
6449			zzzz857,zzzz919	false
13610			zzzz739,zzzz797	false
13611			zzzz739,zzzzzz6	false
13612			zzzz739,zzzzz25	false
13613	1		zzzz739,zzzzz24	false
13606			zzzz739,zzzz915	false
13607			zzzz739,zzzzz19	false
13608			zzzz739,zzzz980	false
13609			zzzz739,zzzz857	false
13602			zzzz739,zzzz776	false
13603			zzzz739,zzzz789	false
13604			zzzz739,zzzzz21	false
13605			zzzz739,zzzzz14	false
12062	1		zzzz789,zzzzzz2	false
12058	1		zzzz789,zzzzz22	false
12059	1		zzzz789,zzzz919	false
12060	1		zzzz789,zzzzzz1	false
12061	1		zzzz789,zzzz962	false
