# Supplementary material for: Discovery of several thousand highly diverse circular DNA viruses
Source: eLife journal article supplement (doi:10.7554/elife.51971), 2020-02-03
Supplement: fig2-figsupp1-data4 [file elife-51971-fig2-figsupp1-data4-v1.cys › CytoscapeSession-2019_08_05-17_02/tables/252247-all_my_seqs_genbank_ssDNA1_domains_micro_ino_rep_fasta+Full+Network%283%29/LOCAL_ATTRS-org.cytoscape.model.CyNode-all_my_seqs_genbank_ssDNA1_domains_micro_ino_rep_fasta+Full+Network%283%29+default+node.cytable]

CyCSV-Version	1
SUID	__mclCluster	name	selected
java.lang.Long	java.lang.Integer	java.lang.String	java.lang.Boolean
	mutable
all_my_seqs_genbank_ssDNA1_domains_micro_ino_rep_fasta Full Network(3) default node
831	8	zzzz212	false
65	28	zzzzzz6	false
66	8	zzzzzz5	false
196	8	zzzz919	false
69	8	zzzzzz2	false
197	24	zzzz915	false
70	8	zzzzzz1	false
778	15	zzzz273	false
330	15	zzzz739	false
142	15	zzzzz29	false
144	8	zzzzz27	false
146	28	zzzzz25	false
147	15	zzzzz24	false
149	8	zzzzz22	false
150	31	zzzzz21	false
152	32	zzzzz19	false
153	15	zzzzz18	false
285	24	zzzz797	false
157	31	zzzzz14	false
228	24	zzzz857	false
292	8	zzzz789	false
165	32	zzzz980	false
170	8	zzzz962	false
299	7	zzzz780	false
300	7	zzzz779	false
303	7	zzzz776	false
304	7	zzzz775	false
306	7	zzzz773	false
307	7	zzzz772	false
308	7	zzzz769	false
309	7	zzzz768	false
310	7	zzzz767	false
311	7	zzzz766	false
190	7	zzzz932	false
