# Supplementary material for: Discovery of several thousand highly diverse circular DNA viruses
Source: eLife journal article supplement (doi:10.7554/elife.51971), 2020-02-03
Supplement: fig2-figsupp1-data4 [file elife-51971-fig2-figsupp1-data4-v1.cys › CytoscapeSession-2019_08_05-17_02/views/249706-252296-all_my_seqs_genbank_ssDNA1_domains_micro_ino_rep_fasta+Full+Network%2D%2Dclustered.xgmml]

<?xml version="1.0" encoding="UTF-8" standalone="yes"?>
<graph id="252296" label="252296" cy:view="1" cy:networkId="249706" cy:visualStyle="Solid" cy:rendererId="org.cytoscape.ding" cy:documentVersion="3.0" xmlns:dc="http://purl.org/dc/elements/1.1/" xmlns:xlink="http://www.w3.org/1999/xlink" xmlns:rdf="http://www.w3.org/1999/02/22-rdf-syntax-ns#" xmlns:cy="http://www.cytoscape.org" xmlns="http://www.cs.rpi.edu/XGMML">
  <graphics>
    <att name="NETWORK_NODE_SELECTION" value="true" type="string" cy:type="String"/>
    <att name="NETWORK_CENTER_X_LOCATION" value="1294.7845095992275" type="string" cy:type="String"/>
    <att name="NETWORK_DEPTH" value="0.0" type="string" cy:type="String"/>
    <att name="NETWORK_SCALE_FACTOR" value="0.25418658283290013" type="string" cy:type="String"/>
    <att name="NETWORK_EDGE_SELECTION" value="true" type="string" cy:type="String"/>
    <att name="NETWORK_CENTER_Y_LOCATION" value="181.1098347006908" type="string" cy:type="String"/>
    <att name="NETWORK_TITLE" value="" type="string" cy:type="String"/>
    <att name="NETWORK_CENTER_Z_LOCATION" value="0.0" type="string" cy:type="String"/>
    <att name="NETWORK_ANNOTATION_SELECTION" value="false" type="string" cy:type="String"/>
    <att name="NETWORK_HEIGHT" value="588.0" type="string" cy:type="String"/>
    <att name="NETWORK_WIDTH" value="964.0" type="string" cy:type="String"/>
  </graphics>
  <node id="252298" label="zzzzzz9" cy:nodeId="62">
    <graphics x="926.0570467916446" y="213.16835847908888" z="0.0"/>
  </node>
  <node id="252299" label="zzzzzz8" cy:nodeId="63">
    <graphics x="859.5393446889834" y="546.7102176290217" z="0.0"/>
  </node>
  <node id="252300" label="zzzzzz7" cy:nodeId="64">
    <graphics x="-64.6002732309384" y="438.97086826378734" z="0.0"/>
  </node>
  <node id="252301" label="zzzzzz6" cy:nodeId="65">
    <graphics x="759.5393446889834" y="438.97086826378734" z="0.0"/>
  </node>
  <node id="252302" label="zzzzzz5" cy:nodeId="66">
    <graphics x="1723.778417488666" y="-90.35277685111132" z="0.0"/>
  </node>
  <node id="252303" label="zzzzzz4" cy:nodeId="67">
    <graphics x="541.4821509328799" y="-89.49678739493456" z="0.0"/>
  </node>
  <node id="252304" label="zzzzzz3" cy:nodeId="68">
    <graphics x="861.8609351125674" y="438.97086826378734" z="0.0"/>
  </node>
  <node id="252305" label="zzzzzz2" cy:nodeId="69">
    <graphics x="1699.4770564046817" y="-159.9697488207158" z="0.0"/>
  </node>
  <node id="252306" label="zzzzzz1" cy:nodeId="70">
    <graphics x="1757.412679573627" y="-24.892831172400378" z="0.0"/>
  </node>
  <node id="252307" label="zzzzzz0" cy:nodeId="71">
    <graphics x="249.37129773768953" y="-159.7038796800908" z="0.0"/>
  </node>
  <node id="252308" label="zzzzz99" cy:nodeId="72">
    <graphics x="-377.59452066746184" y="5.02480379158888" z="0.0"/>
  </node>
  <node id="252309" label="zzzzz98" cy:nodeId="73">
    <graphics x="-325.25044641819426" y="15.805861149376966" z="0.0"/>
  </node>
  <node id="252310" label="zzzzz97" cy:nodeId="74">
    <graphics x="-364.7826596292538" y="-52.43885358756151" z="0.0"/>
  </node>
  <node id="252311" label="zzzzz96" cy:nodeId="75">
    <graphics x="-340.57872782078215" y="-57.473143901282214" z="0.0"/>
  </node>
  <node id="252312" label="zzzzz95" cy:nodeId="76">
    <graphics x="2700.2901743856387" y="-49.12129911368456" z="0.0"/>
  </node>
  <node id="252313" label="zzzzz94" cy:nodeId="77">
    <graphics x="-402.03103266087004" y="-4.354159678870104" z="0.0"/>
  </node>
  <node id="252314" label="zzzzz93" cy:nodeId="78">
    <graphics x="-392.8408871683163" y="-2.9003313440617546" z="0.0"/>
  </node>
  <node id="252315" label="zzzzz92" cy:nodeId="79">
    <graphics x="-415.7165661844296" y="6.369244251793958" z="0.0"/>
  </node>
  <node id="252316" label="zzzzz91" cy:nodeId="80">
    <graphics x="-370.65655527439543" y="18.49370256478224" z="0.0"/>
  </node>
  <node id="252317" label="zzzzz90" cy:nodeId="81">
    <graphics x="-415.26072893467375" y="24.08948007637892" z="0.0"/>
  </node>
  <node id="252318" label="zzzzz89" cy:nodeId="82">
    <graphics x="-408.24630747166105" y="-94.66178068106737" z="0.0"/>
  </node>
  <node id="252319" label="zzzzz88" cy:nodeId="83">
    <graphics x="-273.9715539011044" y="-24.059068049841784" z="0.0"/>
  </node>
  <node id="252320" label="zzzzz87" cy:nodeId="84">
    <graphics x="-379.0459304842038" y="-104.74732145255174" z="0.0"/>
  </node>
  <node id="252321" label="zzzzz86" cy:nodeId="85">
    <graphics x="-379.30658731785246" y="-133.88620695059862" z="0.0"/>
  </node>
  <node id="252322" label="zzzzz85" cy:nodeId="86">
    <graphics x="-330.0483170541806" y="-48.95028623526659" z="0.0"/>
  </node>
  <node id="252323" label="zzzzz84" cy:nodeId="87">
    <graphics x="-387.9778119119687" y="0.2896620374384895" z="0.0"/>
  </node>
  <node id="252324" label="zzzzz83" cy:nodeId="88">
    <graphics x="-301.13970575657316" y="-6.989745463782214" z="0.0"/>
  </node>
  <node id="252325" label="zzzzz82" cy:nodeId="89">
    <graphics x="-299.5881234201474" y="-41.288405742102526" z="0.0"/>
  </node>
  <node id="252326" label="zzzzz81" cy:nodeId="90">
    <graphics x="-389.99120555248686" y="-28.66693433707323" z="0.0"/>
  </node>
  <node id="252327" label="zzzzz80" cy:nodeId="91">
    <graphics x="-448.55228433933684" y="6.617530022210218" z="0.0"/>
  </node>
  <node id="252328" label="zzzzz79" cy:nodeId="92">
    <graphics x="-425.2272149118466" y="-65.83496793692674" z="0.0"/>
  </node>
  <node id="252329" label="zzzzz78" cy:nodeId="93">
    <graphics x="-297.7019921335263" y="-38.689860667639635" z="0.0"/>
  </node>
  <node id="252330" label="zzzzz77" cy:nodeId="94">
    <graphics x="-412.75247965183684" y="-45.97889265006151" z="0.0"/>
  </node>
  <node id="252331" label="zzzzz76" cy:nodeId="95">
    <graphics x="-453.4711876901669" y="-22.166451777869128" z="0.0"/>
  </node>
  <node id="252332" label="zzzzz75" cy:nodeId="96">
    <graphics x="-307.73962793674895" y="-72.17998441641893" z="0.0"/>
  </node>
  <node id="252333" label="zzzzz74" cy:nodeId="97">
    <graphics x="-327.6214257272763" y="-29.542262401038073" z="0.0"/>
  </node>
  <node id="252334" label="zzzzz73" cy:nodeId="98">
    <graphics x="-341.35459528294035" y="11.209355030602552" z="0.0"/>
  </node>
  <node id="252335" label="zzzzz72" cy:nodeId="99">
    <graphics x="1132.9889124837832" y="-51.65261777823534" z="0.0"/>
  </node>
  <node id="252336" label="zzzzz71" cy:nodeId="100">
    <graphics x="1140.8981532064395" y="-93.44704374259081" z="0.0"/>
  </node>
  <node id="252337" label="zzzzz70" cy:nodeId="101">
    <graphics x="-401.30419836368986" y="51.81450334603224" z="0.0"/>
  </node>
  <node id="252338" label="zzzzz69" cy:nodeId="102">
    <graphics x="-377.564220527081" y="-96.07518705313768" z="0.0"/>
  </node>
  <node id="252339" label="zzzzz68" cy:nodeId="103">
    <graphics x="38.417179009051836" y="438.97086826378734" z="0.0"/>
  </node>
  <node id="252340" label="zzzzz67" cy:nodeId="104">
    <graphics x="-252.35630426731535" y="-23.74317487662401" z="0.0"/>
  </node>
  <node id="252341" label="zzzzz66" cy:nodeId="105">
    <graphics x="-430.4051819833798" y="-95.81716093009081" z="0.0"/>
  </node>
  <node id="252342" label="zzzzz65" cy:nodeId="106">
    <graphics x="1071.0200709310488" y="-55.71263059561815" z="0.0"/>
  </node>
  <node id="252343" label="zzzzz64" cy:nodeId="107">
    <graphics x="-426.1620179208798" y="24.198736820763685" z="0.0"/>
  </node>
  <node id="252344" label="zzzzz63" cy:nodeId="108">
    <graphics x="-314.1750374826474" y="-30.961570109778307" z="0.0"/>
  </node>
  <node id="252345" label="zzzzz62" cy:nodeId="109">
    <graphics x="-395.9034663232846" y="-102.9247506517705" z="0.0"/>
  </node>
  <node id="252346" label="zzzzz61" cy:nodeId="110">
    <graphics x="-395.5634423288388" y="35.55700365120802" z="0.0"/>
  </node>
  <node id="252347" label="zzzzz60" cy:nodeId="111">
    <graphics x="-402.81381140079924" y="-59.61116346304979" z="0.0"/>
  </node>
  <node id="252348" label="zzzzz59" cy:nodeId="112">
    <graphics x="-421.014659980206" y="-98.71807798331346" z="0.0"/>
  </node>
  <node id="252349" label="zzzzz58" cy:nodeId="113">
    <graphics x="-369.7790585550351" y="-74.73654874747362" z="0.0"/>
  </node>
  <node id="252350" label="zzzzz57" cy:nodeId="114">
    <graphics x="-430.9755517038388" y="-89.22739347403612" z="0.0"/>
  </node>
  <node id="252351" label="zzzzz56" cy:nodeId="115">
    <graphics x="-364.78317270603605" y="-76.68135007804003" z="0.0"/>
  </node>
  <node id="252352" label="zzzzz55" cy:nodeId="116">
    <graphics x="-351.3085366281552" y="-10.646327342444323" z="0.0"/>
  </node>
  <node id="252353" label="zzzzz54" cy:nodeId="117">
    <graphics x="-329.51382837620207" y="0.38225666100416333" z="0.0"/>
  </node>
  <node id="252354" label="zzzzz53" cy:nodeId="118">
    <graphics x="-415.205671409039" y="-30.44495710318651" z="0.0"/>
  </node>
  <node id="252355" label="zzzzz52" cy:nodeId="119">
    <graphics x="-335.60918054905363" y="-26.042529429846667" z="0.0"/>
  </node>
  <node id="252356" label="zzzzz51" cy:nodeId="120">
    <graphics x="-361.43787012424895" y="-77.38088163321581" z="0.0"/>
  </node>
  <node id="252357" label="zzzzz50" cy:nodeId="121">
    <graphics x="-312.57326898899504" y="-94.06155332511034" z="0.0"/>
  </node>
  <node id="252358" label="zzzzz49" cy:nodeId="122">
    <graphics x="-302.3024636301083" y="-66.90096219962206" z="0.0"/>
  </node>
  <node id="252359" label="zzzzz48" cy:nodeId="123">
    <graphics x="-324.9685364755673" y="-54.629550303870104" z="0.0"/>
  </node>
  <node id="252360" label="zzzzz47" cy:nodeId="124">
    <graphics x="-300.4459878000302" y="-58.864989604407214" z="0.0"/>
  </node>
  <node id="252361" label="zzzzz46" cy:nodeId="125">
    <graphics x="-351.0372963937802" y="-82.32228788321581" z="0.0"/>
  </node>
  <node id="252362" label="zzzzz45" cy:nodeId="126">
    <graphics x="-434.6713944467587" y="4.860747252053358" z="0.0"/>
  </node>
  <node id="252363" label="zzzzz44" cy:nodeId="127">
    <graphics x="-391.9440690073056" y="-78.12229093497362" z="0.0"/>
  </node>
  <node id="252364" label="zzzzz43" cy:nodeId="128">
    <graphics x="-423.3385315927548" y="-21.78027090018358" z="0.0"/>
  </node>
  <node id="252365" label="zzzzz42" cy:nodeId="129">
    <graphics x="21.00832738551668" y="646.7102176290217" z="0.0"/>
  </node>
  <node id="252366" label="zzzzz41" cy:nodeId="130">
    <graphics x="1010.2025965658145" y="-145.2245324510869" z="0.0"/>
  </node>
  <node id="252367" label="zzzzz40" cy:nodeId="131">
    <graphics x="1062.2375697103457" y="-4.209914531165026" z="0.0"/>
  </node>
  <node id="252368" label="zzzzz39" cy:nodeId="132">
    <graphics x="1076.8938502279238" y="-107.86229642813768" z="0.0"/>
  </node>
  <node id="252369" label="zzzzz38" cy:nodeId="133">
    <graphics x="2348.634796043964" y="287.9036718946162" z="0.0"/>
  </node>
  <node id="252370" label="zzzzz37" cy:nodeId="134">
    <graphics x="552.0026759115176" y="-27.327628459387682" z="0.0"/>
  </node>
  <node id="252371" label="zzzzz36" cy:nodeId="135">
    <graphics x="1330.0315264669375" y="243.4495398145381" z="0.0"/>
  </node>
  <node id="252372" label="zzzzz35" cy:nodeId="136">
    <graphics x="2432.551154991718" y="220.22807375008497" z="0.0"/>
  </node>
  <node id="252373" label="zzzzz34" cy:nodeId="137">
    <graphics x="707.5265101400332" y="278.160217915124" z="0.0"/>
  </node>
  <node id="252374" label="zzzzz33" cy:nodeId="138">
    <graphics x="583.454744240375" y="248.8728796582881" z="0.0"/>
  </node>
  <node id="252375" label="zzzzz32" cy:nodeId="139">
    <graphics x="656.5218924489932" y="438.97086826378734" z="0.0"/>
  </node>
  <node id="252376" label="zzzzz31" cy:nodeId="140">
    <graphics x="-78.99167261448332" y="646.7102176290217" z="0.0"/>
  </node>
  <node id="252377" label="zzzzz30" cy:nodeId="141">
    <graphics x="2331.992721459003" y="181.41661134774122" z="0.0"/>
  </node>
  <node id="252378" label="zzzzz29" cy:nodeId="142">
    <graphics x="-113.72164545383879" y="278.160217915124" z="0.0"/>
  </node>
  <node id="252379" label="zzzzz28" cy:nodeId="143">
    <graphics x="2455.1762141195254" y="-118.29054960196581" z="0.0"/>
  </node>
  <node id="252380" label="zzzzz27" cy:nodeId="144">
    <graphics x="1793.138021370502" y="-116.77907689993944" z="0.0"/>
  </node>
  <node id="252381" label="zzzzz26" cy:nodeId="145">
    <graphics x="653.504440209003" y="546.6930362325373" z="0.0"/>
  </node>
  <node id="252382" label="zzzzz25" cy:nodeId="146">
    <graphics x="756.5218924489932" y="546.6930362325373" z="0.0"/>
  </node>
  <node id="252383" label="zzzzz24" cy:nodeId="147">
    <graphics x="-237.793411353497" y="248.8728796582881" z="0.0"/>
  </node>
  <node id="252384" label="zzzzz23" cy:nodeId="148">
    <graphics x="701.0608347860293" y="199.37864748055372" z="0.0"/>
  </node>
  <node id="252385" label="zzzzz22" cy:nodeId="149">
    <graphics x="1795.4969843831973" y="-62.92860540335741" z="0.0"/>
  </node>
  <node id="252386" label="zzzzz21" cy:nodeId="150">
    <graphics x="553.504440209003" y="438.97086826378734" z="0.0"/>
  </node>
  <node id="252387" label="zzzzz20" cy:nodeId="151">
    <graphics x="2126.1475752798037" y="181.41661134774122" z="0.0"/>
  </node>
  <node id="252388" label="zzzzz19" cy:nodeId="152">
    <graphics x="450.4869879690128" y="438.97086826378734" z="0.0"/>
  </node>
  <node id="252389" label="zzzzz18" cy:nodeId="153">
    <graphics x="-120.1873208078427" y="199.37864748055372" z="0.0"/>
  </node>
  <node id="252390" label="zzzzz17" cy:nodeId="154">
    <graphics x="2161.4543456045108" y="283.25859132820995" z="0.0"/>
  </node>
  <node id="252391" label="zzzzz16" cy:nodeId="155">
    <graphics x="2231.992721459003" y="201.73643556649122" z="0.0"/>
  </node>
  <node id="252392" label="zzzzz15" cy:nodeId="156">
    <graphics x="624.1923016515689" y="181.41661134774122" z="0.0"/>
  </node>
  <node id="252393" label="zzzzz14" cy:nodeId="157">
    <graphics x="550.4869879690127" y="546.6930362325373" z="0.0"/>
  </node>
  <node id="252394" label="zzzzz13" cy:nodeId="158">
    <graphics x="634.8764537778811" y="308.5344549756709" z="0.0"/>
  </node>
  <node id="252395" label="zzzzz12" cy:nodeId="159">
    <graphics x="1412.9836749044375" y="312.27485719735057" z="0.0"/>
  </node>
  <node id="252396" label="zzzzz11" cy:nodeId="160">
    <graphics x="624.0225733724551" y="-102.16942533438768" z="0.0"/>
  </node>
  <node id="252397" label="zzzzz10" cy:nodeId="161">
    <graphics x="347.46953572902254" y="438.97086826378734" z="0.0"/>
  </node>
  <node id="252398" label="zzzz983" cy:nodeId="162">
    <graphics x="-299.429210761456" y="31.306992207116224" z="0.0"/>
  </node>
  <node id="252399" label="zzzz982" cy:nodeId="163">
    <graphics x="-408.7498341592831" y="-0.7646039385136589" z="0.0"/>
  </node>
  <node id="252400" label="zzzz981" cy:nodeId="164">
    <graphics x="-338.2831994089169" y="16.089661274499036" z="0.0"/>
  </node>
  <node id="252401" label="zzzz980" cy:nodeId="165">
    <graphics x="447.46953572902254" y="546.6930362325373" z="0.0"/>
  </node>
  <node id="252415" label="zzzz966" cy:nodeId="166">
    <graphics x="-290.06668482151457" y="41.50326982552443" z="0.0"/>
  </node>
  <node id="252416" label="zzzz965" cy:nodeId="167">
    <graphics x="-387.8529120477719" y="50.78092256600294" z="0.0"/>
  </node>
  <node id="252417" label="zzzz964" cy:nodeId="168">
    <graphics x="-427.1163331064267" y="2.768791828698255" z="0.0"/>
  </node>
  <node id="252418" label="zzzz963" cy:nodeId="169">
    <graphics x="-332.59374246921965" y="-107.116523112708" z="0.0"/>
  </node>
  <node id="252419" label="zzzz962" cy:nodeId="170">
    <graphics x="1756.2064875570254" y="-158.3691743273076" z="0.0"/>
  </node>
  <node id="252420" label="zzzz961" cy:nodeId="171">
    <graphics x="807.5265101400332" y="268.13646951729686" z="0.0"/>
  </node>
  <node id="252429" label="zzzz952" cy:nodeId="172">
    <graphics x="-274.7999230417294" y="-90.92429288809862" z="0.0"/>
  </node>
  <node id="252430" label="zzzz951" cy:nodeId="173">
    <graphics x="-417.5089589151425" y="11.875399265832044" z="0.0"/>
  </node>
  <node id="252431" label="zzzz950" cy:nodeId="174">
    <graphics x="-372.46386442509123" y="-34.649630870276354" z="0.0"/>
  </node>
  <node id="252432" label="zzzz949" cy:nodeId="175">
    <graphics x="-398.74772081699797" y="-34.68078931754198" z="0.0"/>
  </node>
  <node id="252433" label="zzzz948" cy:nodeId="176">
    <graphics x="-255.43873224583098" y="-33.99394544547167" z="0.0"/>
  </node>
  <node id="252434" label="zzzz947" cy:nodeId="177">
    <graphics x="-328.653087714581" y="-83.38014158194628" z="0.0"/>
  </node>
  <node id="252435" label="zzzz946" cy:nodeId="178">
    <graphics x="-334.11267481174895" y="8.460692081994154" z="0.0"/>
  </node>
  <node id="252436" label="zzzz945" cy:nodeId="179">
    <graphics x="-288.517719367413" y="26.61367097908888" z="0.0"/>
  </node>
  <node id="252437" label="zzzz944" cy:nodeId="180">
    <graphics x="-343.2484246286435" y="-147.24613126700487" z="0.0"/>
  </node>
  <node id="252438" label="zzzz943" cy:nodeId="181">
    <graphics x="-410.1252232584042" y="-105.8839562792119" z="0.0"/>
  </node>
  <node id="252439" label="zzzz942" cy:nodeId="182">
    <graphics x="-418.14896402683684" y="-52.74036725943651" z="0.0"/>
  </node>
  <node id="252440" label="zzzz941" cy:nodeId="183">
    <graphics x="-352.4710770639462" y="-100.85884794180956" z="0.0"/>
  </node>
  <node id="252441" label="zzzz940" cy:nodeId="184">
    <graphics x="-360.246572593121" y="-61.25070127432909" z="0.0"/>
  </node>
  <node id="252442" label="zzzz939" cy:nodeId="185">
    <graphics x="992.3279932943301" y="-55.008422221594714" z="0.0"/>
  </node>
  <node id="252445" label="zzzz936" cy:nodeId="186">
    <graphics x="-398.7870408090634" y="-55.15941556876268" z="0.0"/>
  </node>
  <node id="252446" label="zzzz935" cy:nodeId="187">
    <graphics x="-375.8826809915585" y="-21.519400920325182" z="0.0"/>
  </node>
  <node id="252447" label="zzzz934" cy:nodeId="188">
    <graphics x="-297.2967949899716" y="5.5933260064784065" z="0.0"/>
  </node>
  <node id="252448" label="zzzz933" cy:nodeId="189">
    <graphics x="-320.6297265085263" y="-98.9165490526494" z="0.0"/>
  </node>
  <node id="252449" label="zzzz932" cy:nodeId="190">
    <graphics x="1499.7364710775332" y="0.9472815137568489" z="0.0"/>
  </node>
  <node id="252450" label="zzzz931" cy:nodeId="191">
    <graphics x="-401.2815648111386" y="-63.650161113196276" z="0.0"/>
  </node>
  <node id="252451" label="zzzz930" cy:nodeId="192">
    <graphics x="344.4520834890323" y="546.6930362325373" z="0.0"/>
  </node>
  <node id="252452" label="zzzz929" cy:nodeId="193">
    <graphics x="530.4350449052768" y="-159.9697488207158" z="0.0"/>
  </node>
  <node id="252460" label="zzzz921" cy:nodeId="194">
    <graphics x="-425.07471094456145" y="-25.056588496619128" z="0.0"/>
  </node>
  <node id="252461" label="zzzz920" cy:nodeId="195">
    <graphics x="-366.82270059910246" y="-117.5941842455205" z="0.0"/>
  </node>
  <node id="252462" label="zzzz919" cy:nodeId="196">
    <graphics x="1702.1028193441348" y="-20.629220332556628" z="0.0"/>
  </node>
  <node id="252466" label="zzzz915" cy:nodeId="197">
    <graphics x="1736.3860701528506" y="287.9036718946162" z="0.0"/>
  </node>
  <node id="252468" label="zzzz913" cy:nodeId="198">
    <graphics x="-296.53741083469816" y="-13.250590648108385" z="0.0"/>
  </node>
  <node id="252469" label="zzzz912" cy:nodeId="199">
    <graphics x="-322.54016504612395" y="45.36422792488966" z="0.0"/>
  </node>
  <node id="252470" label="zzzz911" cy:nodeId="200">
    <graphics x="-287.01511774387785" y="-49.2972863573369" z="0.0"/>
  </node>
  <node id="252471" label="zzzz910" cy:nodeId="201">
    <graphics x="-418.2996140512509" y="-80.12874540274706" z="0.0"/>
  </node>
  <node id="252472" label="zzzz909" cy:nodeId="202">
    <graphics x="-324.7188225778622" y="-36.47264799063768" z="0.0"/>
  </node>
  <node id="252473" label="zzzz908" cy:nodeId="203">
    <graphics x="-298.6717034372372" y="39.52561632210646" z="0.0"/>
  </node>
  <node id="252474" label="zzzz907" cy:nodeId="204">
    <graphics x="-425.94143305149504" y="-71.894599284583" z="0.0"/>
  </node>
  <node id="252475" label="zzzz906" cy:nodeId="205">
    <graphics x="-348.724750617413" y="66.00206819588576" z="0.0"/>
  </node>
  <node id="252476" label="zzzz905" cy:nodeId="206">
    <graphics x="-351.8428841623349" y="-45.98395093863573" z="0.0"/>
  </node>
  <node id="252477" label="zzzz904" cy:nodeId="207">
    <graphics x="-385.8280132803006" y="-46.51549467032518" z="0.0"/>
  </node>
  <node id="252478" label="zzzz903" cy:nodeId="208">
    <graphics x="-330.64199457493254" y="12.776501331872083" z="0.0"/>
  </node>
  <node id="252479" label="zzzz902" cy:nodeId="209">
    <graphics x="-317.82058344212004" y="-109.84365781729784" z="0.0"/>
  </node>
  <node id="252480" label="zzzz901" cy:nodeId="210">
    <graphics x="-355.42941866245695" y="-71.08023008292284" z="0.0"/>
  </node>
  <node id="252481" label="zzzz900" cy:nodeId="211">
    <graphics x="-425.6549378427548" y="-115.05052122061815" z="0.0"/>
  </node>
  <node id="252482" label="zzzz899" cy:nodeId="212">
    <graphics x="-346.4928284677548" y="-125.50852140372362" z="0.0"/>
  </node>
  <node id="252483" label="zzzz898" cy:nodeId="213">
    <graphics x="-351.24721918430754" y="-85.90421232169237" z="0.0"/>
  </node>
  <node id="252485" label="zzzz896" cy:nodeId="214">
    <graphics x="-378.4990016016049" y="7.173239384240247" z="0.0"/>
  </node>
  <node id="252486" label="zzzz895" cy:nodeId="215">
    <graphics x="-406.5075417551083" y="-79.73352750723924" z="0.0"/>
  </node>
  <node id="252487" label="zzzz894" cy:nodeId="216">
    <graphics x="-384.8439026865048" y="-32.38927015250292" z="0.0"/>
  </node>
  <node id="252488" label="zzzz893" cy:nodeId="217">
    <graphics x="-331.2761651071591" y="-116.54426511710253" z="0.0"/>
  </node>
  <node id="252489" label="zzzz892" cy:nodeId="218">
    <graphics x="-306.2342949899716" y="-82.52108701651659" z="0.0"/>
  </node>
  <node id="252490" label="zzzz891" cy:nodeId="219">
    <graphics x="-423.21030817356535" y="-4.069959010535143" z="0.0"/>
  </node>
  <node id="252491" label="zzzz890" cy:nodeId="220">
    <graphics x="-325.16534052219816" y="51.47779146248732" z="0.0"/>
  </node>
  <node id="252492" label="zzzz889" cy:nodeId="221">
    <graphics x="-444.20007715549895" y="-85.39916166251268" z="0.0"/>
  </node>
  <node id="252497" label="zzzz884" cy:nodeId="222">
    <graphics x="-318.2146874460263" y="-60.611396159582995" z="0.0"/>
  </node>
  <node id="252518" label="zzzz863" cy:nodeId="223">
    <graphics x="1030.6452845540957" y="-90.36170133536424" z="0.0"/>
  </node>
  <node id="252519" label="zzzz862" cy:nodeId="224">
    <graphics x="-270.96401605930754" y="12.3584696393672" z="0.0"/>
  </node>
  <node id="252520" label="zzzz861" cy:nodeId="225">
    <graphics x="436.3268336263614" y="-87.65434965079393" z="0.0"/>
  </node>
  <node id="252521" label="zzzz860" cy:nodeId="226">
    <graphics x="460.26866712245516" y="-122.32576688712206" z="0.0"/>
  </node>
  <node id="252522" label="zzzz859" cy:nodeId="227">
    <graphics x="2598.168279549213" y="-98.97484525626268" z="0.0"/>
  </node>
  <node id="252524" label="zzzz857" cy:nodeId="228">
    <graphics x="1820.3024291006045" y="220.22807375008497" z="0.0"/>
  </node>
  <node id="252526" label="zzzz855" cy:nodeId="229">
    <graphics x="2500.032598396869" y="-159.9697488207158" z="0.0"/>
  </node>
  <node id="252527" label="zzzz854" cy:nodeId="230">
    <graphics x="-341.1031914743466" y="-103.75302823966112" z="0.0"/>
  </node>
  <node id="252528" label="zzzz853" cy:nodeId="231">
    <graphics x="-403.110212424664" y="-86.72112974112596" z="0.0"/>
  </node>
  <node id="252529" label="zzzz852" cy:nodeId="232">
    <graphics x="-410.51007280674406" y="46.03004137093458" z="0.0"/>
  </node>
  <node id="252530" label="zzzz851" cy:nodeId="233">
    <graphics x="2661.8609351125674" y="438.97086826378734" z="0.0"/>
  </node>
  <node id="252531" label="zzzz850" cy:nodeId="234">
    <graphics x="-370.9756165536923" y="-104.79549344962206" z="0.0"/>
  </node>
  <node id="252532" label="zzzz849" cy:nodeId="235">
    <graphics x="-333.17216883030363" y="-33.209147777014635" z="0.0"/>
  </node>
  <node id="252533" label="zzzz848" cy:nodeId="236">
    <graphics x="-374.68840418186613" y="-101.33350309317674" z="0.0"/>
  </node>
  <node id="252534" label="zzzz847" cy:nodeId="237">
    <graphics x="2244.8320368734317" y="-101.36130460684862" z="0.0"/>
  </node>
  <node id="252535" label="zzzz846" cy:nodeId="238">
    <graphics x="141.43463124904207" y="438.97086826378734" z="0.0"/>
  </node>
  <node id="252536" label="zzzz845" cy:nodeId="239">
    <graphics x="-372.2870293649716" y="-116.66455015128221" z="0.0"/>
  </node>
  <node id="252537" label="zzzz844" cy:nodeId="240">
    <graphics x="-340.1474610361142" y="-51.87692197745409" z="0.0"/>
  </node>
  <node id="252538" label="zzzz843" cy:nodeId="241">
    <graphics x="-401.84575090733" y="-90.84917386954393" z="0.0"/>
  </node>
  <node id="252539" label="zzzz842" cy:nodeId="242">
    <graphics x="2535.568607231708" y="181.41661134774122" z="0.0"/>
  </node>
  <node id="252540" label="zzzz841" cy:nodeId="243">
    <graphics x="-376.48354158726164" y="36.37580171639357" z="0.0"/>
  </node>
  <node id="252541" label="zzzz840" cy:nodeId="244">
    <graphics x="-382.84095774021574" y="-122.333075847083" z="0.0"/>
  </node>
  <node id="252542" label="zzzz839" cy:nodeId="245">
    <graphics x="-270.0361290964169" y="-32.88767179434862" z="0.0"/>
  </node>
  <node id="252543" label="zzzz838" cy:nodeId="246">
    <graphics x="-436.826183417706" y="-91.55751737540331" z="0.0"/>
  </node>
  <node id="252544" label="zzzz837" cy:nodeId="247">
    <graphics x="-460.58650598850676" y="0.25724187905225904" z="0.0"/>
  </node>
  <node id="252545" label="zzzz836" cy:nodeId="248">
    <graphics x="-344.3860817941708" y="-7.168155040198229" z="0.0"/>
  </node>
  <node id="252546" label="zzzz835" cy:nodeId="249">
    <graphics x="2561.8609351125674" y="438.97086826378734" z="0.0"/>
  </node>
  <node id="252547" label="zzzz834" cy:nodeId="250">
    <graphics x="-322.39139185276457" y="9.691125546044447" z="0.0"/>
  </node>
  <node id="252548" label="zzzz833" cy:nodeId="251">
    <graphics x="-277.8433953317685" y="-36.930114116125964" z="0.0"/>
  </node>
  <node id="252549" label="zzzz832" cy:nodeId="252">
    <graphics x="-394.89821539249846" y="-77.92569669669237" z="0.0"/>
  </node>
  <node id="252550" label="zzzz831" cy:nodeId="253">
    <graphics x="-287.6604195627255" y="-50.44499525015917" z="0.0"/>
  </node>
  <node id="252551" label="zzzz830" cy:nodeId="254">
    <graphics x="-249.63880548801848" y="-67.73052152579393" z="0.0"/>
  </node>
  <node id="252552" label="zzzz829" cy:nodeId="255">
    <graphics x="-338.4367333444638" y="-136.38162931387987" z="0.0"/>
  </node>
  <node id="252553" label="zzzz828" cy:nodeId="256">
    <graphics x="138.41717900905184" y="546.6930362325373" z="0.0"/>
  </node>
  <node id="252554" label="zzzz827" cy:nodeId="257">
    <graphics x="2192.0727595296817" y="-23.943984355383776" z="0.0"/>
  </node>
  <node id="252555" label="zzzz826" cy:nodeId="258">
    <graphics x="-275.645160773663" y="10.865782414025404" z="0.0"/>
  </node>
  <node id="252556" label="zzzz825" cy:nodeId="259">
    <graphics x="-267.96079645481535" y="-126.74199613516893" z="0.0"/>
  </node>
  <node id="252557" label="zzzz824" cy:nodeId="260">
    <graphics x="-284.70339594212004" y="18.744558964318372" z="0.0"/>
  </node>
  <node id="252558" label="zzzz823" cy:nodeId="261">
    <graphics x="-287.1893197092099" y="19.3336893659297" z="0.0"/>
  </node>
  <node id="252559" label="zzzz822" cy:nodeId="262">
    <graphics x="-260.8865624460263" y="-159.9697488207158" z="0.0"/>
  </node>
  <node id="252560" label="zzzz821" cy:nodeId="263">
    <graphics x="2242.8239191976504" y="-159.9697488207158" z="0.0"/>
  </node>
  <node id="252561" label="zzzz820" cy:nodeId="264">
    <graphics x="-449.4316292795224" y="-81.9801705736455" z="0.0"/>
  </node>
  <node id="252562" label="zzzz819" cy:nodeId="265">
    <graphics x="35.3997267690616" y="546.6930362325373" z="0.0"/>
  </node>
  <node id="252563" label="zzzz818" cy:nodeId="266">
    <graphics x="-464.4725228342099" y="-55.5183671373662" z="0.0"/>
  </node>
  <node id="252564" label="zzzz817" cy:nodeId="267">
    <graphics x="2461.8609351125674" y="438.97086826378734" z="0.0"/>
  </node>
  <node id="252565" label="zzzz816" cy:nodeId="268">
    <graphics x="-463.1529961618466" y="-120.51404508536424" z="0.0"/>
  </node>
  <node id="252566" label="zzzz815" cy:nodeId="269">
    <graphics x="-447.5249444040341" y="-64.68466886466112" z="0.0"/>
  </node>
  <node id="252568" label="zzzz813" cy:nodeId="270">
    <graphics x="-446.65279016819426" y="-4.23024877493944" z="0.0"/>
  </node>
  <node id="252569" label="zzzz812" cy:nodeId="271">
    <graphics x="-417.68058786716887" y="-63.30419095938768" z="0.0"/>
  </node>
  <node id="252570" label="zzzz811" cy:nodeId="272">
    <graphics x="-434.9856186899228" y="2.9909435849848762" z="0.0"/>
  </node>
  <node id="252571" label="zzzz810" cy:nodeId="273">
    <graphics x="-331.7219964059872" y="3.1445461850825325" z="0.0"/>
  </node>
  <node id="252572" label="zzzz809" cy:nodeId="274">
    <graphics x="-332.57446680393645" y="-77.16207059805956" z="0.0"/>
  </node>
  <node id="252573" label="zzzz808" cy:nodeId="275">
    <graphics x="-353.1312562021298" y="29.13725725228224" z="0.0"/>
  </node>
  <node id="252574" label="zzzz807" cy:nodeId="276">
    <graphics x="-353.3637581857724" y="-133.427314128333" z="0.0"/>
  </node>
  <node id="252575" label="zzzz806" cy:nodeId="277">
    <graphics x="-309.27810297337004" y="-42.1910851854619" z="0.0"/>
  </node>
  <node id="252576" label="zzzz805" cy:nodeId="278">
    <graphics x="-312.76933679905363" y="-17.770541514807604" z="0.0"/>
  </node>
  <node id="252577" label="zzzz804" cy:nodeId="279">
    <graphics x="-384.06876263943144" y="-43.24846204703417" z="0.0"/>
  </node>
  <node id="252578" label="zzzz803" cy:nodeId="280">
    <graphics x="554.6353701559024" y="-46.90822538321581" z="0.0"/>
  </node>
  <node id="252579" label="zzzz802" cy:nodeId="281">
    <graphics x="-305.68863306370207" y="-20.25789770072069" z="0.0"/>
  </node>
  <node id="252580" label="zzzz801" cy:nodeId="282">
    <graphics x="-363.4592133554501" y="3.190436516350843" z="0.0"/>
  </node>
  <node id="252581" label="zzzz800" cy:nodeId="283">
    <graphics x="-313.5699425729794" y="-39.640685405188464" z="0.0"/>
  </node>
  <node id="252582" label="zzzz799" cy:nodeId="284">
    <graphics x="-405.09915552463957" y="-70.46296628897753" z="0.0"/>
  </node>
  <node id="252584" label="zzzz797" cy:nodeId="285">
    <graphics x="1719.7439955678897" y="181.41661134774122" z="0.0"/>
  </node>
  <node id="252585" label="zzzz796" cy:nodeId="286">
    <graphics x="-434.309524634747" y="-25.886985148840807" z="0.0"/>
  </node>
  <node id="252587" label="zzzz794" cy:nodeId="287">
    <graphics x="-324.315025428204" y="-62.059951152258776" z="0.0"/>
  </node>
  <node id="252588" label="zzzz793" cy:nodeId="288">
    <graphics x="-343.2021103891415" y="-115.45616086905565" z="0.0"/>
  </node>
  <node id="252589" label="zzzz792" cy:nodeId="289">
    <graphics x="-366.84185991611906" y="-35.17901929801073" z="0.0"/>
  </node>
  <node id="252590" label="zzzz791" cy:nodeId="290">
    <graphics x="-376.58653555241057" y="9.174717579430677" z="0.0"/>
  </node>
  <node id="252591" label="zzzz790" cy:nodeId="291">
    <graphics x="-363.7038517984433" y="-59.01914152091112" z="0.0"/>
  </node>
  <node id="252592" label="zzzz789" cy:nodeId="292">
    <graphics x="1657.520330330463" y="-58.20436223929491" z="0.0"/>
  </node>
  <node id="252593" label="zzzz788" cy:nodeId="293">
    <graphics x="-422.45010767307707" y="-51.18252500479784" z="0.0"/>
  </node>
  <node id="252594" label="zzzz787" cy:nodeId="294">
    <graphics x="-304.2872200998349" y="-45.351691569739245" z="0.0"/>
  </node>
  <node id="252595" label="zzzz786" cy:nodeId="295">
    <graphics x="-478.9916726144833" y="-57.061225261145495" z="0.0"/>
  </node>
  <node id="252596" label="zzzz785" cy:nodeId="296">
    <graphics x="-395.7198554071469" y="-102.44007047598924" z="0.0"/>
  </node>
  <node id="252597" label="zzzz784" cy:nodeId="297">
    <graphics x="-349.8754197153134" y="22.60237375313673" z="0.0"/>
  </node>
  <node id="252598" label="zzzz783" cy:nodeId="298">
    <graphics x="-364.2469903024716" y="-107.19663175528612" z="0.0"/>
  </node>
  <node id="252601" label="zzzz780" cy:nodeId="299">
    <graphics x="1407.939077278705" y="-48.097052897864245" z="0.0"/>
  </node>
  <node id="252602" label="zzzz779" cy:nodeId="300">
    <graphics x="1543.3368586507754" y="-124.06017240470018" z="0.0"/>
  </node>
  <node id="252603" label="zzzz778" cy:nodeId="301">
    <graphics x="2527.568731209369" y="-86.13587888663378" z="0.0"/>
  </node>
  <node id="252604" label="zzzz777" cy:nodeId="302">
    <graphics x="592.762979408832" y="-145.4605935472783" z="0.0"/>
  </node>
  <node id="252605" label="zzzz776" cy:nodeId="303">
    <graphics x="1427.1945399251895" y="-94.69902738516893" z="0.0"/>
  </node>
  <node id="252606" label="zzzz775" cy:nodeId="304">
    <graphics x="1557.520330330463" y="-73.94846280997362" z="0.0"/>
  </node>
  <node id="252607" label="zzzz774" cy:nodeId="305">
    <graphics x="443.62594403895906" y="-21.997763957434557" z="0.0"/>
  </node>
  <node id="252608" label="zzzz773" cy:nodeId="306">
    <graphics x="1472.0057581869082" y="-53.19480070059862" z="0.0"/>
  </node>
  <node id="252609" label="zzzz772" cy:nodeId="307">
    <graphics x="1440.17467298183" y="-10.408820475989245" z="0.0"/>
  </node>
  <node id="252612" label="zzzz769" cy:nodeId="308">
    <graphics x="1490.57066907558" y="-153.40535673087206" z="0.0"/>
  </node>
  <node id="252613" label="zzzz768" cy:nodeId="309">
    <graphics x="1486.5956629720645" y="-100.9501412767705" z="0.0"/>
  </node>
  <node id="252614" label="zzzz767" cy:nodeId="310">
    <graphics x="1440.509847542377" y="-143.6975320238408" z="0.0"/>
  </node>
  <node id="252615" label="zzzz766" cy:nodeId="311">
    <graphics x="1542.1103571859317" y="-28.417594279700182" z="0.0"/>
  </node>
  <node id="252616" label="zzzz765" cy:nodeId="312">
    <graphics x="-67.61772547092863" y="546.6930362325373" z="0.0"/>
  </node>
  <node id="252617" label="zzzz764" cy:nodeId="313">
    <graphics x="616.4774912801699" y="-51.90615018790331" z="0.0"/>
  </node>
  <node id="252618" label="zzzz763" cy:nodeId="314">
    <graphics x="2561.256414314838" y="-154.2556374925908" z="0.0"/>
  </node>
  <node id="252621" label="zzzz760" cy:nodeId="315">
    <graphics x="-360.9578305276913" y="33.65049425179396" z="0.0"/>
  </node>
  <node id="252623" label="zzzz758" cy:nodeId="316">
    <graphics x="532.5610789266543" y="-121.53624662345018" z="0.0"/>
  </node>
  <node id="252624" label="zzzz757" cy:nodeId="317">
    <graphics x="533.5532163587527" y="17.214516316002943" z="0.0"/>
  </node>
  <node id="252625" label="zzzz756" cy:nodeId="318">
    <graphics x="-403.08639536228605" y="-113.57480558341112" z="0.0"/>
  </node>
  <node id="252627" label="zzzz754" cy:nodeId="319">
    <graphics x="525.4123095479922" y="-5.957145060950182" z="0.0"/>
  </node>
  <node id="252628" label="zzzz753" cy:nodeId="320">
    <graphics x="485.0717066732364" y="-94.94487699454393" z="0.0"/>
  </node>
  <node id="252629" label="zzzz752" cy:nodeId="321">
    <graphics x="2457.5512751546817" y="-56.53464445059862" z="0.0"/>
  </node>
  <node id="252630" label="zzzz751" cy:nodeId="322">
    <graphics x="487.72000684413484" y="-154.71678861563768" z="0.0"/>
  </node>
  <node id="252632" label="zzzz749" cy:nodeId="323">
    <graphics x="488.0556696859317" y="-75.01094755118456" z="0.0"/>
  </node>
  <node id="252633" label="zzzz748" cy:nodeId="324">
    <graphics x="548.0939692464785" y="-125.82894071524706" z="0.0"/>
  </node>
  <node id="252634" label="zzzz747" cy:nodeId="325">
    <graphics x="2510.592840096088" y="-16.42771657889452" z="0.0"/>
  </node>
  <node id="252635" label="zzzz746" cy:nodeId="326">
    <graphics x="2573.373174568744" y="-37.621154155188464" z="0.0"/>
  </node>
  <node id="252636" label="zzzz745" cy:nodeId="327">
    <graphics x="-274.21419153538176" y="-6.8927672762211785" z="0.0"/>
  </node>
  <node id="252637" label="zzzz744" cy:nodeId="328">
    <graphics x="2355.1762141195254" y="-92.42436918204393" z="0.0"/>
  </node>
  <node id="252638" label="zzzz743" cy:nodeId="329">
    <graphics x="2816.866096874805" y="-116.67793973868456" z="0.0"/>
  </node>
  <node id="252642" label="zzzz739" cy:nodeId="330">
    <graphics x="-197.05585394230314" y="181.41661134774122" z="0.0"/>
  </node>
  <node id="252643" label="zzzz738" cy:nodeId="331">
    <graphics x="-315.41888056126066" y="-82.7903283495244" z="0.0"/>
  </node>
  <node id="252653" label="zzzz728" cy:nodeId="332">
    <graphics x="-385.23758707371184" y="-68.68409666007128" z="0.0"/>
  </node>
  <node id="252654" label="zzzz727" cy:nodeId="333">
    <graphics x="-328.73637399998137" y="54.32117525154982" z="0.0"/>
  </node>
  <node id="252655" label="zzzz726" cy:nodeId="334">
    <graphics x="-390.9864216836972" y="-63.11974271720018" z="0.0"/>
  </node>
  <node id="252656" label="zzzz725" cy:nodeId="335">
    <graphics x="-410.33980760899016" y="-99.52015623038378" z="0.0"/>
  </node>
  <node id="252657" label="zzzz724" cy:nodeId="336">
    <graphics x="-422.79299555149504" y="7.108029995507337" z="0.0"/>
  </node>
  <node id="252659" label="zzzz722" cy:nodeId="337">
    <graphics x="-300.18411646213957" y="-59.83670743887987" z="0.0"/>
  </node>
  <node id="252660" label="zzzz721" cy:nodeId="338">
    <graphics x="48.05454053554109" y="-69.59942468588915" z="0.0"/>
  </node>
  <node id="252661" label="zzzz720" cy:nodeId="339">
    <graphics x="1861.8609351125674" y="438.97086826378734" z="0.0"/>
  </node>
  <node id="252662" label="zzzz719" cy:nodeId="340">
    <graphics x="-87.99072084751555" y="-96.28781255667772" z="0.0"/>
  </node>
  <node id="252663" label="zzzz718" cy:nodeId="341">
    <graphics x="26.791982552142656" y="-27.784720744543932" z="0.0"/>
  </node>
  <node id="252664" label="zzzz717" cy:nodeId="342">
    <graphics x="0.040876289935624754" y="6.423874531334974" z="0.0"/>
  </node>
  <node id="252665" label="zzzz716" cy:nodeId="343">
    <graphics x="-41.68491564121672" y="-159.9697488207158" z="0.0"/>
  </node>
  <node id="252666" label="zzzz715" cy:nodeId="344">
    <graphics x="-458.8212777170224" y="-49.19233259146776" z="0.0"/>
  </node>
  <node id="252667" label="zzzz714" cy:nodeId="345">
    <graphics x="-5.4095707925839065" y="-133.0903008837041" z="0.0"/>
  </node>
  <node id="252668" label="zzzz713" cy:nodeId="346">
    <graphics x="36.45717420253328" y="26.209480915612318" z="0.0"/>
  </node>
  <node id="252669" label="zzzz712" cy:nodeId="347">
    <graphics x="-62.872392753033125" y="21.94972292000685" z="0.0"/>
  </node>
  <node id="252670" label="zzzz711" cy:nodeId="348">
    <graphics x="-0.21048174229093775" y="-85.06458028739061" z="0.0"/>
  </node>
  <node id="252671" label="zzzz710" cy:nodeId="349">
    <graphics x="-64.16078386631438" y="-44.16008314078417" z="0.0"/>
  </node>
  <node id="252672" label="zzzz709" cy:nodeId="350">
    <graphics x="-37.46325884190031" y="-111.14449247305956" z="0.0"/>
  </node>
  <node id="252673" label="zzzz708" cy:nodeId="351">
    <graphics x="32.57704724940828" y="-104.6939042467412" z="0.0"/>
  </node>
  <node id="252674" label="zzzz707" cy:nodeId="352">
    <graphics x="-284.1117821725888" y="-106.21224912589159" z="0.0"/>
  </node>
  <node id="252675" label="zzzz706" cy:nodeId="353">
    <graphics x="-47.59936724033781" y="23.201836262292005" z="0.0"/>
  </node>
  <node id="252676" label="zzzz705" cy:nodeId="354">
    <graphics x="-76.76989946690031" y="-124.78395017569628" z="0.0"/>
  </node>
  <node id="252677" label="zzzz704" cy:nodeId="355">
    <graphics x="-102.80945978489348" y="-3.2177956957158074" z="0.0"/>
  </node>
  <node id="252678" label="zzzz703" cy:nodeId="356">
    <graphics x="-28.18486986484953" y="-31.113322581702135" z="0.0"/>
  </node>
  <node id="252679" label="zzzz702" cy:nodeId="357">
    <graphics x="-44.856828788189375" y="-70.96293481772508" z="0.0"/>
  </node>
  <node id="252680" label="zzzz701" cy:nodeId="358">
    <graphics x="-422.5209809335751" y="-63.971076335364245" z="0.0"/>
  </node>
  <node id="252681" label="zzzz700" cy:nodeId="359">
    <graphics x="-329.3308831247372" y="-118.91623624747362" z="0.0"/>
  </node>
  <node id="252682" label="zzzz699" cy:nodeId="360">
    <graphics x="-132.4994202646298" y="-83.68580755179491" z="0.0"/>
  </node>
  <node id="252683" label="zzzz698" cy:nodeId="361">
    <graphics x="-450.34637079563566" y="-58.51360258048143" z="0.0"/>
  </node>
  <node id="252684" label="zzzz697" cy:nodeId="362">
    <graphics x="-342.546772101788" y="-93.56926664298143" z="0.0"/>
  </node>
  <node id="252685" label="zzzz696" cy:nodeId="363">
    <graphics x="-438.95831308689543" y="-16.994372691565417" z="0.0"/>
  </node>
  <node id="252686" label="zzzz695" cy:nodeId="364">
    <graphics x="-338.6334229501767" y="36.629414234704115" z="0.0"/>
  </node>
  <node id="252687" label="zzzz694" cy:nodeId="365">
    <graphics x="-433.4444008859677" y="-57.761420573645495" z="0.0"/>
  </node>
  <node id="252688" label="zzzz693" cy:nodeId="366">
    <graphics x="-273.1762658151669" y="2.1964937787714973" z="0.0"/>
  </node>
  <node id="252689" label="zzzz692" cy:nodeId="367">
    <graphics x="-258.4602471384091" y="-3.722377147131823" z="0.0"/>
  </node>
  <node id="252691" label="zzzz690" cy:nodeId="368">
    <graphics x="-267.8889580759091" y="-45.80801328604784" z="0.0"/>
  </node>
  <node id="252692" label="zzzz689" cy:nodeId="369">
    <graphics x="1761.8609351125674" y="438.97086826378734" z="0.0"/>
  </node>
  <node id="252693" label="zzzz688" cy:nodeId="370">
    <graphics x="-291.47769556370207" y="15.254620228356458" z="0.0"/>
  </node>
  <node id="252694" label="zzzz687" cy:nodeId="371">
    <graphics x="-324.8446770700497" y="-15.42972501700487" z="0.0"/>
  </node>
  <node id="252695" label="zzzz686" cy:nodeId="372">
    <graphics x="-326.96272669163176" y="-79.34676298087206" z="0.0"/>
  </node>
  <node id="252696" label="zzzz685" cy:nodeId="373">
    <graphics x="-307.73514185276457" y="5.427786503380872" z="0.0"/>
  </node>
  <node id="252697" label="zzzz684" cy:nodeId="374">
    <graphics x="-475.9742203744931" y="438.97086826378734" z="0.0"/>
  </node>
  <node id="252698" label="zzzz683" cy:nodeId="375">
    <graphics x="-352.1840668710751" y="8.844896469658948" z="0.0"/>
  </node>
  <node id="252700" label="zzzz681" cy:nodeId="376">
    <graphics x="-314.6594658884091" y="-104.98393949454393" z="0.0"/>
  </node>
  <node id="252701" label="zzzz680" cy:nodeId="377">
    <graphics x="-326.03121958103605" y="-38.375502910071276" z="0.0"/>
  </node>
  <node id="252702" label="zzzz679" cy:nodeId="378">
    <graphics x="-264.4288216623349" y="-1.7398579973515496" z="0.0"/>
  </node>
  <node id="252703" label="zzzz678" cy:nodeId="379">
    <graphics x="-308.9955483469052" y="27.893383656090833" z="0.0"/>
  </node>
  <node id="252704" label="zzzz677" cy:nodeId="380">
    <graphics x="-342.5348549875302" y="-140.67342313712206" z="0.0"/>
  </node>
  <node id="252705" label="zzzz676" cy:nodeId="381">
    <graphics x="-345.425003150372" y="-4.65024503653612" z="0.0"/>
  </node>
  <node id="252706" label="zzzz675" cy:nodeId="382">
    <graphics x="-254.70623407688566" y="50.16129365975294" z="0.0"/>
  </node>
  <node id="252707" label="zzzz674" cy:nodeId="383">
    <graphics x="-322.98489771213957" y="-112.83375486319628" z="0.0"/>
  </node>
  <node id="252708" label="zzzz673" cy:nodeId="384">
    <graphics x="-276.91814050999113" y="-61.52529844229784" z="0.0"/>
  </node>
  <node id="252709" label="zzzz672" cy:nodeId="385">
    <graphics x="-313.63665399876066" y="-22.737576808386706" z="0.0"/>
  </node>
  <node id="252710" label="zzzz671" cy:nodeId="386">
    <graphics x="-291.4029961618466" y="-114.92894681876268" z="0.0"/>
  </node>
  <node id="252711" label="zzzz670" cy:nodeId="387">
    <graphics x="-343.28999719944426" y="-4.961882914954089" z="0.0"/>
  </node>
  <node id="252712" label="zzzz669" cy:nodeId="388">
    <graphics x="-314.82432184544035" y="3.364140186852552" z="0.0"/>
  </node>
  <node id="252713" label="zzzz668" cy:nodeId="389">
    <graphics x="1661.8609351125674" y="438.97086826378734" z="0.0"/>
  </node>
  <node id="252714" label="zzzz667" cy:nodeId="390">
    <graphics x="-422.51654062595793" y="-10.090592708044909" z="0.0"/>
  </node>
  <node id="252715" label="zzzz666" cy:nodeId="391">
    <graphics x="-426.5711785348935" y="-97.59132322257128" z="0.0"/>
  </node>
  <node id="252716" label="zzzz665" cy:nodeId="392">
    <graphics x="-338.6703721078915" y="-13.011243190222643" z="0.0"/>
  </node>
  <node id="252717" label="zzzz664" cy:nodeId="393">
    <graphics x="-360.3073979410214" y="-93.08249601309862" z="0.0"/>
  </node>
  <node id="252718" label="zzzz663" cy:nodeId="394">
    <graphics x="-388.3479081186337" y="-68.388495768958" z="0.0"/>
  </node>
  <node id="252719" label="zzzz662" cy:nodeId="395">
    <graphics x="-289.4973336252255" y="25.781498585290052" z="0.0"/>
  </node>
  <node id="252720" label="zzzz661" cy:nodeId="396">
    <graphics x="-365.3725262674374" y="81.41661134774122" z="0.0"/>
  </node>
  <node id="252721" label="zzzz660" cy:nodeId="397">
    <graphics x="-380.652729133038" y="13.655632649010755" z="0.0"/>
  </node>
  <node id="252722" label="zzzz659" cy:nodeId="398">
    <graphics x="-416.7139340433163" y="-56.92868741934862" z="0.0"/>
  </node>
  <node id="252723" label="zzzz658" cy:nodeId="399">
    <graphics x="-366.1810971292538" y="5.2363525968256965" z="0.0"/>
  </node>
  <node id="252724" label="zzzz657" cy:nodeId="400">
    <graphics x="-381.8825646432919" y="-130.7464822191533" z="0.0"/>
  </node>
  <node id="252725" label="zzzz656" cy:nodeId="401">
    <graphics x="-325.3329926523251" y="-89.093818034583" z="0.0"/>
  </node>
  <node id="252726" label="zzzz655" cy:nodeId="402">
    <graphics x="-345.19229517307707" y="-3.8016208071049675" z="0.0"/>
  </node>
  <node id="252727" label="zzzz654" cy:nodeId="403">
    <graphics x="-448.11297235813566" y="-73.49398740714159" z="0.0"/>
  </node>
  <node id="252728" label="zzzz653" cy:nodeId="404">
    <graphics x="-350.8113671335263" y="53.56211534554396" z="0.0"/>
  </node>
  <node id="252729" label="zzzz652" cy:nodeId="405">
    <graphics x="-391.3106437715573" y="-130.04102262442674" z="0.0"/>
  </node>
  <node id="252730" label="zzzz651" cy:nodeId="406">
    <graphics x="-277.86285028782316" y="6.433640633172132" z="0.0"/>
  </node>
  <node id="252731" label="zzzz650" cy:nodeId="407">
    <graphics x="-335.79851923313566" y="48.21046510750685" z="0.0"/>
  </node>
  <node id="252732" label="zzzz649" cy:nodeId="408">
    <graphics x="-366.2799149545712" y="-1.1987031359013542" z="0.0"/>
  </node>
  <node id="252733" label="zzzz648" cy:nodeId="409">
    <graphics x="-280.1550942453427" y="-5.774031009131335" z="0.0"/>
  </node>
  <node id="252734" label="zzzz647" cy:nodeId="410">
    <graphics x="-260.04423914280363" y="11.94537321144972" z="0.0"/>
  </node>
  <node id="252735" label="zzzz646" cy:nodeId="411">
    <graphics x="-300.63565454807707" y="24.530239735192396" z="0.0"/>
  </node>
  <node id="252736" label="zzzz645" cy:nodeId="412">
    <graphics x="-341.43073282566496" y="-119.67529996817674" z="0.0"/>
  </node>
  <node id="252737" label="zzzz644" cy:nodeId="413">
    <graphics x="-325.597366431622" y="-51.06883176749315" z="0.0"/>
  </node>
  <node id="252738" label="zzzz643" cy:nodeId="414">
    <graphics x="-301.8067132028622" y="-51.707457866125964" z="0.0"/>
  </node>
  <node id="252739" label="zzzz642" cy:nodeId="415">
    <graphics x="-419.04455957737395" y="-25.662318553381823" z="0.0"/>
  </node>
  <node id="252740" label="zzzz641" cy:nodeId="416">
    <graphics x="-407.40126047459074" y="-98.26697477286424" z="0.0"/>
  </node>
  <node id="252741" label="zzzz640" cy:nodeId="417">
    <graphics x="-382.6090756448788" y="29.83713403756056" z="0.0"/>
  </node>
  <node id="252742" label="zzzz639" cy:nodeId="418">
    <graphics x="-271.35020075169035" y="-2.615873660498522" z="0.0"/>
  </node>
  <node id="252743" label="zzzz638" cy:nodeId="419">
    <graphics x="-283.78115473118254" y="-67.97751554434862" z="0.0"/>
  </node>
  <node id="252744" label="zzzz637" cy:nodeId="420">
    <graphics x="-291.0945778879208" y="-113.69808896964159" z="0.0"/>
  </node>
  <node id="252745" label="zzzz636" cy:nodeId="421">
    <graphics x="-416.65688715305754" y="-58.87620862906542" z="0.0"/>
  </node>
  <node id="252746" label="zzzz635" cy:nodeId="422">
    <graphics x="-341.4473076852841" y="-122.89901670401659" z="0.0"/>
  </node>
  <node id="252747" label="zzzz634" cy:nodeId="423">
    <graphics x="-407.3092862161679" y="33.642719898766615" z="0.0"/>
  </node>
  <node id="252748" label="zzzz633" cy:nodeId="424">
    <graphics x="-280.88589105930754" y="-64.05020078604784" z="0.0"/>
  </node>
  <node id="252749" label="zzzz632" cy:nodeId="425">
    <graphics x="-411.02892313328215" y="-19.679072703772448" z="0.0"/>
  </node>
  <node id="252750" label="zzzz631" cy:nodeId="426">
    <graphics x="-398.89727983799406" y="-94.28950437491503" z="0.0"/>
  </node>
  <node id="252751" label="zzzz630" cy:nodeId="427">
    <graphics x="-327.5587273630185" y="-100.10463651602831" z="0.0"/>
  </node>
  <node id="252752" label="zzzz629" cy:nodeId="428">
    <graphics x="-320.40334711399504" y="-106.55299314444628" z="0.0"/>
  </node>
  <node id="252753" label="zzzz628" cy:nodeId="429">
    <graphics x="-347.4216614755673" y="41.82869783455763" z="0.0"/>
  </node>
  <node id="252754" label="zzzz627" cy:nodeId="430">
    <graphics x="-418.5533734354062" y="-29.58180555289354" z="0.0"/>
  </node>
  <node id="252755" label="zzzz626" cy:nodeId="431">
    <graphics x="-332.2742005380673" y="-37.552489604407214" z="0.0"/>
  </node>
  <node id="252756" label="zzzz625" cy:nodeId="432">
    <graphics x="-357.8372918161435" y="-81.88687070792284" z="0.0"/>
  </node>
  <node id="252758" label="zzzz623" cy:nodeId="433">
    <graphics x="-404.2121716531796" y="-55.48646100943651" z="0.0"/>
  </node>
  <node id="252759" label="zzzz622" cy:nodeId="434">
    <graphics x="-288.77883539524504" y="-25.529839839392565" z="0.0"/>
  </node>
  <node id="252760" label="zzzz621" cy:nodeId="435">
    <graphics x="-415.7271843942685" y="10.730650578087904" z="0.0"/>
  </node>
  <node id="252761" label="zzzz620" cy:nodeId="436">
    <graphics x="-405.6683770212216" y="-112.4241174120244" z="0.0"/>
  </node>
  <node id="252762" label="zzzz619" cy:nodeId="437">
    <graphics x="-450.326915839581" y="-92.39556821768846" z="0.0"/>
  </node>
  <node id="252763" label="zzzz618" cy:nodeId="438">
    <graphics x="-433.7092171701474" y="-11.982674922400378" z="0.0"/>
  </node>
  <node id="252764" label="zzzz617" cy:nodeId="439">
    <graphics x="-354.9996071847958" y="-74.43900236075487" z="0.0"/>
  </node>
  <node id="252765" label="zzzz616" cy:nodeId="440">
    <graphics x="-382.92671594944426" y="-32.899840678625964" z="0.0"/>
  </node>
  <node id="252766" label="zzzz615" cy:nodeId="441">
    <graphics x="-268.41670618381926" y="-49.05145582144823" z="0.0"/>
  </node>
  <node id="252767" label="zzzz614" cy:nodeId="442">
    <graphics x="-311.9108391794247" y="-40.680297221594714" z="0.0"/>
  </node>
  <node id="252768" label="zzzz613" cy:nodeId="443">
    <graphics x="-347.8254586252255" y="56.381760273522474" z="0.0"/>
  </node>
  <node id="252769" label="zzzz612" cy:nodeId="444">
    <graphics x="-304.5785866769833" y="-110.78869565909471" z="0.0"/>
  </node>
  <node id="252770" label="zzzz611" cy:nodeId="445">
    <graphics x="-288.37385950413176" y="-75.14381345694628" z="0.0"/>
  </node>
  <node id="252771" label="zzzz610" cy:nodeId="446">
    <graphics x="-375.9742203744931" y="546.7102176290217" z="0.0"/>
  </node>
  <node id="252772" label="zzzz609" cy:nodeId="447">
    <graphics x="-368.87152109470793" y="-3.5496419328984246" z="0.0"/>
  </node>
  <node id="252773" label="zzzz608" cy:nodeId="448">
    <graphics x="-373.6526299509091" y="438.97086826378734" z="0.0"/>
  </node>
  <node id="252774" label="zzzz607" cy:nodeId="449">
    <graphics x="-287.60976801243254" y="-13.443229045325182" z="0.0"/>
  </node>
  <node id="252775" label="zzzz606" cy:nodeId="450">
    <graphics x="-353.78870020237395" y="-102.93161710684862" z="0.0"/>
  </node>
  <node id="252776" label="zzzz605" cy:nodeId="451">
    <graphics x="-338.82082758274504" y="30.826292667931654" z="0.0"/>
  </node>
  <node id="252777" label="zzzz604" cy:nodeId="452">
    <graphics x="-336.2709733041806" y="21.795368824547865" z="0.0"/>
  </node>
  <node id="252778" label="zzzz603" cy:nodeId="453">
    <graphics x="-340.7341958078427" y="-64.87398466055956" z="0.0"/>
  </node>
  <node id="252779" label="zzzz602" cy:nodeId="454">
    <graphics x="-249.78998957004973" y="-46.94281324332323" z="0.0"/>
  </node>
  <node id="252780" label="zzzz601" cy:nodeId="455">
    <graphics x="1461.8609351125674" y="438.97086826378734" z="0.0"/>
  </node>
  <node id="252781" label="zzzz600" cy:nodeId="456">
    <graphics x="-429.7618294748349" y="-19.783191050940417" z="0.0"/>
  </node>
  <node id="252782" label="zzzz599" cy:nodeId="457">
    <graphics x="-325.19426355686613" y="-47.65549405997362" z="0.0"/>
  </node>
  <node id="252783" label="zzzz598" cy:nodeId="458">
    <graphics x="-475.4336815866513" y="-79.28414853995409" z="0.0"/>
  </node>
  <node id="252784" label="zzzz597" cy:nodeId="459">
    <graphics x="-382.8290387186093" y="-59.21717390006151" z="0.0"/>
  </node>
  <node id="252785" label="zzzz596" cy:nodeId="460">
    <graphics x="-355.983747580914" y="1.4451147657099739" z="0.0"/>
  </node>
  <node id="252786" label="zzzz595" cy:nodeId="461">
    <graphics x="-313.742687323956" y="-8.10713037436571" z="0.0"/>
  </node>
  <node id="252787" label="zzzz594" cy:nodeId="462">
    <graphics x="-359.4108506235165" y="-34.48533948844042" z="0.0"/>
  </node>
  <node id="252788" label="zzzz593" cy:nodeId="463">
    <graphics x="-356.810199836163" y="-137.13040861075487" z="0.0"/>
  </node>
  <node id="252789" label="zzzz592" cy:nodeId="464">
    <graphics x="-342.96780786838957" y="-72.56707700675096" z="0.0"/>
  </node>
  <node id="252790" label="zzzz591" cy:nodeId="465">
    <graphics x="-478.9916726144833" y="546.6930362325373" z="0.0"/>
  </node>
  <node id="252791" label="zzzz590" cy:nodeId="466">
    <graphics x="-320.10557184544035" y="-35.1773026842412" z="0.0"/>
  </node>
  <node id="252792" label="zzzz589" cy:nodeId="467">
    <graphics x="-388.87225351658293" y="-36.095290507727526" z="0.0"/>
  </node>
  <node id="252793" label="zzzz588" cy:nodeId="468">
    <graphics x="-296.6931115182919" y="0.32776990944776685" z="0.0"/>
  </node>
  <node id="252794" label="zzzz587" cy:nodeId="469">
    <graphics x="-303.58716211643645" y="-58.55464872305956" z="0.0"/>
  </node>
  <node id="252795" label="zzzz586" cy:nodeId="470">
    <graphics x="-312.3322640451474" y="40.023430500573255" z="0.0"/>
  </node>
  <node id="252796" label="zzzz585" cy:nodeId="471">
    <graphics x="-342.01376352634855" y="28.301140461510755" z="0.0"/>
  </node>
  <node id="252797" label="zzzz584" cy:nodeId="472">
    <graphics x="-428.8034287485165" y="-57.694533671790026" z="0.0"/>
  </node>
  <node id="252798" label="zzzz583" cy:nodeId="473">
    <graphics x="-318.62060938206145" y="-87.82605680411424" z="0.0"/>
  </node>
  <node id="252799" label="zzzz582" cy:nodeId="474">
    <graphics x="-332.90276728001066" y="-10.50704606955614" z="0.0"/>
  </node>
  <node id="252800" label="zzzz581" cy:nodeId="475">
    <graphics x="-310.29304895725676" y="-15.454451884680651" z="0.0"/>
  </node>
  <node id="252801" label="zzzz580" cy:nodeId="476">
    <graphics x="-353.1208458932919" y="48.28122392708693" z="0.0"/>
  </node>
  <node id="252802" label="zzzz579" cy:nodeId="477">
    <graphics x="-410.93920145359465" y="-112.92163785880174" z="0.0"/>
  </node>
  <node id="252803" label="zzzz578" cy:nodeId="478">
    <graphics x="-367.8228894266171" y="39.001816425866224" z="0.0"/>
  </node>
  <node id="252804" label="zzzz577" cy:nodeId="479">
    <graphics x="-365.51116953220793" y="-58.61014493887987" z="0.0"/>
  </node>
  <node id="252805" label="zzzz576" cy:nodeId="480">
    <graphics x="-389.4614087137265" y="-85.58029874747362" z="0.0"/>
  </node>
  <node id="252806" label="zzzz575" cy:nodeId="481">
    <graphics x="-411.0527058633847" y="11.551440868920423" z="0.0"/>
  </node>
  <node id="252807" label="zzzz574" cy:nodeId="482">
    <graphics x="-373.5519686731381" y="-16.300490703040026" z="0.0"/>
  </node>
  <node id="252808" label="zzzz573" cy:nodeId="483">
    <graphics x="-380.15873537388273" y="-62.99950345938768" z="0.0"/>
  </node>
  <node id="252809" label="zzzz572" cy:nodeId="484">
    <graphics x="-259.1942254098935" y="-0.4411116499241814" z="0.0"/>
  </node>
  <node id="252810" label="zzzz571" cy:nodeId="485">
    <graphics x="-297.30125055637785" y="25.6344763379756" z="0.0"/>
  </node>
  <node id="252811" label="zzzz570" cy:nodeId="486">
    <graphics x="-313.29461298313566" y="-52.37210020011034" z="0.0"/>
  </node>
  <node id="252812" label="zzzz569" cy:nodeId="487">
    <graphics x="-315.43303308811613" y="-21.246060695105456" z="0.0"/>
  </node>
  <node id="252813" label="zzzz568" cy:nodeId="488">
    <graphics x="-339.4257012399716" y="-99.795478190833" z="0.0"/>
  </node>
  <node id="252814" label="zzzz567" cy:nodeId="489">
    <graphics x="-327.33364496555754" y="-42.47065290396776" z="0.0"/>
  </node>
  <node id="252815" label="zzzz566" cy:nodeId="490">
    <graphics x="-365.73858080234953" y="-43.14602598136034" z="0.0"/>
  </node>
  <node id="252816" label="zzzz565" cy:nodeId="491">
    <graphics x="-372.9287301096005" y="-106.12123807852831" z="0.0"/>
  </node>
  <node id="252817" label="zzzz564" cy:nodeId="492">
    <graphics x="-423.8606720956845" y="-85.24124845450487" z="0.0"/>
  </node>
  <node id="252818" label="zzzz563" cy:nodeId="493">
    <graphics x="-357.97001467075773" y="45.60141435677443" z="0.0"/>
  </node>
  <node id="252819" label="zzzz562" cy:nodeId="494">
    <graphics x="-386.74069891300627" y="3.1057230573359504" z="0.0"/>
  </node>
  <node id="252820" label="zzzz561" cy:nodeId="495">
    <graphics x="-385.8948069604916" y="31.01747957283888" z="0.0"/>
  </node>
  <node id="252821" label="zzzz560" cy:nodeId="496">
    <graphics x="-359.2309800180478" y="-18.110202159338854" z="0.0"/>
  </node>
  <node id="252822" label="zzzz559" cy:nodeId="497">
    <graphics x="-410.0455494913144" y="31.76743761116896" z="0.0"/>
  </node>
  <node id="252823" label="zzzz558" cy:nodeId="498">
    <graphics x="-390.5930758508725" y="7.313639317101575" z="0.0"/>
  </node>
  <node id="252824" label="zzzz557" cy:nodeId="499">
    <graphics x="-311.71545801487395" y="-101.22337278311815" z="0.0"/>
  </node>
  <node id="252825" label="zzzz556" cy:nodeId="500">
    <graphics x="-419.05036173191496" y="24.44087472969923" z="0.0"/>
  </node>
  <node id="252826" label="zzzz555" cy:nodeId="501">
    <graphics x="-407.305130103497" y="-46.76615079825487" z="0.0"/>
  </node>
  <node id="252827" label="zzzz554" cy:nodeId="502">
    <graphics x="-377.3566571268124" y="-123.81866392081346" z="0.0"/>
  </node>
  <node id="252828" label="zzzz553" cy:nodeId="503">
    <graphics x="-385.6661635431332" y="-15.47010358756151" z="0.0"/>
  </node>
  <node id="252829" label="zzzz552" cy:nodeId="504">
    <graphics x="-278.6396370920224" y="-64.21058591788378" z="0.0"/>
  </node>
  <node id="252830" label="zzzz551" cy:nodeId="505">
    <graphics x="-362.61307726231047" y="-89.63744291251268" z="0.0"/>
  </node>
  <node id="252831" label="zzzz550" cy:nodeId="506">
    <graphics x="-420.5858117136044" y="5.220494900292493" z="0.0"/>
  </node>
  <node id="252832" label="zzzz549" cy:nodeId="507">
    <graphics x="-438.05076227512785" y="-38.267314280920885" z="0.0"/>
  </node>
  <node id="252833" label="zzzz548" cy:nodeId="508">
    <graphics x="-327.3097878488583" y="-102.21443113272753" z="0.0"/>
  </node>
  <node id="252834" label="zzzz547" cy:nodeId="509">
    <graphics x="-345.9528237375302" y="37.26307741219435" z="0.0"/>
  </node>
  <node id="252835" label="zzzz546" cy:nodeId="510">
    <graphics x="-370.390766242413" y="-33.30210050528612" z="0.0"/>
  </node>
  <node id="252836" label="zzzz545" cy:nodeId="511">
    <graphics x="-390.46204457607695" y="-77.903388347083" z="0.0"/>
  </node>
  <node id="252837" label="zzzz544" cy:nodeId="512">
    <graphics x="-444.64611063328215" y="-12.147496547156237" z="0.0"/>
  </node>
  <node id="252838" label="zzzz543" cy:nodeId="513">
    <graphics x="-265.40053949680754" y="-18.34557851737108" z="0.0"/>
  </node>
  <node id="252839" label="zzzz542" cy:nodeId="514">
    <graphics x="-398.2580357584042" y="-64.88825925772753" z="0.0"/>
  </node>
  <node id="252840" label="zzzz541" cy:nodeId="515">
    <graphics x="-368.799026587872" y="-16.56942686026659" z="0.0"/>
  </node>
  <node id="252841" label="zzzz540" cy:nodeId="516">
    <graphics x="-327.8179665597958" y="-59.1420129198369" z="0.0"/>
  </node>
  <node id="252842" label="zzzz539" cy:nodeId="517">
    <graphics x="-332.2875405344052" y="-11.59527334158983" z="0.0"/>
  </node>
  <node id="252843" label="zzzz538" cy:nodeId="518">
    <graphics x="-388.06542120304533" y="-13.793183650427721" z="0.0"/>
  </node>
  <node id="252844" label="zzzz537" cy:nodeId="519">
    <graphics x="-240.8332177194638" y="-27.22263273184862" z="0.0"/>
  </node>
  <node id="252845" label="zzzz536" cy:nodeId="520">
    <graphics x="-283.23665247288176" y="-13.802354182654284" z="0.0"/>
  </node>
  <node id="252846" label="zzzz535" cy:nodeId="521">
    <graphics x="-285.2504311594052" y="-103.29272397940721" z="0.0"/>
  </node>
  <node id="252847" label="zzzz534" cy:nodeId="522">
    <graphics x="-369.6090508493466" y="-17.91933568900194" z="0.0"/>
  </node>
  <node id="252848" label="zzzz533" cy:nodeId="523">
    <graphics x="-337.1280022653622" y="-1.660151805334948" z="0.0"/>
  </node>
  <node id="252849" label="zzzz532" cy:nodeId="524">
    <graphics x="-338.3552437814755" y="-26.76779111807909" z="0.0"/>
  </node>
  <node id="252850" label="zzzz531" cy:nodeId="525">
    <graphics x="-270.3979683908505" y="-81.8945763963994" z="0.0"/>
  </node>
  <node id="252851" label="zzzz530" cy:nodeId="526">
    <graphics x="-434.3189927133603" y="-32.93483671134081" z="0.0"/>
  </node>
  <node id="252852" label="zzzz529" cy:nodeId="527">
    <graphics x="-334.8072625192685" y="-20.177190150671862" z="0.0"/>
  </node>
  <node id="252853" label="zzzz528" cy:nodeId="528">
    <graphics x="-349.4875565561337" y="-132.5351022142705" z="0.0"/>
  </node>
  <node id="252854" label="zzzz527" cy:nodeId="529">
    <graphics x="-299.8110772165341" y="10.500519428795911" z="0.0"/>
  </node>
  <node id="252855" label="zzzz526" cy:nodeId="530">
    <graphics x="-360.9342061075253" y="-2.6212008852299675" z="0.0"/>
  </node>
  <node id="252856" label="zzzz525" cy:nodeId="531">
    <graphics x="-403.79388056126066" y="14.199087772912122" z="0.0"/>
  </node>
  <node id="252857" label="zzzz524" cy:nodeId="532">
    <graphics x="-365.8850346597714" y="-40.206054057532214" z="0.0"/>
  </node>
  <node id="252858" label="zzzz523" cy:nodeId="533">
    <graphics x="-375.9524880441708" y="-33.93258603995409" z="0.0"/>
  </node>
  <node id="252859" label="zzzz522" cy:nodeId="534">
    <graphics x="-419.4291192087216" y="-106.32842954581346" z="0.0"/>
  </node>
  <node id="252860" label="zzzz521" cy:nodeId="535">
    <graphics x="-397.96648130741545" y="-51.797805156165026" z="0.0"/>
  </node>
  <node id="252861" label="zzzz520" cy:nodeId="536">
    <graphics x="-325.69981012669035" y="19.868284855431654" z="0.0"/>
  </node>
  <node id="252862" label="zzzz519" cy:nodeId="537">
    <graphics x="-297.5228997262997" y="-158.42760404532518" z="0.0"/>
  </node>
  <node id="252863" label="zzzz518" cy:nodeId="538">
    <graphics x="-403.4703541788144" y="-51.170173015051745" z="0.0"/>
  </node>
  <node id="252864" label="zzzz517" cy:nodeId="539">
    <graphics x="-408.9959736856503" y="-94.01406034415331" z="0.0"/>
  </node>
  <node id="252865" label="zzzz516" cy:nodeId="540">
    <graphics x="-333.47479257908293" y="-72.84099515860643" z="0.0"/>
  </node>
  <node id="252866" label="zzzz515" cy:nodeId="541">
    <graphics x="-366.69795618381926" y="25.894299183434583" z="0.0"/>
  </node>
  <node id="252867" label="zzzz514" cy:nodeId="542">
    <graphics x="-398.3479252847714" y="-2.9618829149540886" z="0.0"/>
  </node>
  <node id="252868" label="zzzz513" cy:nodeId="543">
    <graphics x="-339.5951577219052" y="-94.09100278800096" z="0.0"/>
  </node>
  <node id="252869" label="zzzz512" cy:nodeId="544">
    <graphics x="-455.85418329563566" y="-40.884616221838854" z="0.0"/>
  </node>
  <node id="252870" label="zzzz511" cy:nodeId="545">
    <graphics x="-289.3555794748349" y="29.822971973961927" z="0.0"/>
  </node>
  <node id="252871" label="zzzz510" cy:nodeId="546">
    <graphics x="-351.65134821262785" y="-62.66509183829393" z="0.0"/>
  </node>
  <node id="252872" label="zzzz509" cy:nodeId="547">
    <graphics x="-335.58761606541105" y="-73.23074277823534" z="0.0"/>
  </node>
  <node id="252873" label="zzzz508" cy:nodeId="548">
    <graphics x="-376.2088824304623" y="13.552630100792982" z="0.0"/>
  </node>
  <node id="252874" label="zzzz507" cy:nodeId="549">
    <graphics x="-381.74259958591887" y="-104.38367399161424" z="0.0"/>
  </node>
  <node id="252875" label="zzzz506" cy:nodeId="550">
    <graphics x="-365.9772835763974" y="-41.422499980383776" z="0.0"/>
  </node>
  <node id="252876" label="zzzz505" cy:nodeId="551">
    <graphics x="-277.9252434762997" y="-64.55682310050096" z="0.0"/>
  </node>
  <node id="252877" label="zzzz504" cy:nodeId="552">
    <graphics x="-324.5963212045712" y="37.30515733773146" z="0.0"/>
  </node>
  <node id="252878" label="zzzz503" cy:nodeId="553">
    <graphics x="-73.50388536777922" y="-145.91594633048143" z="0.0"/>
  </node>
  <node id="252879" label="zzzz502" cy:nodeId="554">
    <graphics x="-320.17932520237395" y="-73.94802030509081" z="0.0"/>
  </node>
  <node id="252880" label="zzzz501" cy:nodeId="555">
    <graphics x="-268.96821985569426" y="-59.4288781542119" z="0.0"/>
  </node>
  <node id="252881" label="zzzz500" cy:nodeId="556">
    <graphics x="-380.5859132799191" y="-114.52014860098924" z="0.0"/>
  </node>
  <node id="252882" label="zzzz499" cy:nodeId="557">
    <graphics x="-350.02031336155363" y="-72.2497018236455" z="0.0"/>
  </node>
  <node id="252883" label="zzzz498" cy:nodeId="558">
    <graphics x="-378.29140291538664" y="-63.743041362219714" z="0.0"/>
  </node>
  <node id="252884" label="zzzz497" cy:nodeId="559">
    <graphics x="-356.02181444492766" y="-80.94117673819628" z="0.0"/>
  </node>
  <node id="252885" label="zzzz496" cy:nodeId="560">
    <graphics x="-351.29473505344816" y="14.522907887047865" z="0.0"/>
  </node>
  <node id="252886" label="zzzz495" cy:nodeId="561">
    <graphics x="-390.9555283578915" y="-66.16097196524706" z="0.0"/>
  </node>
  <node id="252887" label="zzzz494" cy:nodeId="562">
    <graphics x="-387.2604657205624" y="-29.622536982947253" z="0.0"/>
  </node>
  <node id="252888" label="zzzz493" cy:nodeId="563">
    <graphics x="-426.85894403782316" y="-16.74449666922655" z="0.0"/>
  </node>
  <node id="252889" label="zzzz492" cy:nodeId="564">
    <graphics x="-291.24834070530363" y="24.129673634118177" z="0.0"/>
  </node>
  <node id="252890" label="zzzz491" cy:nodeId="565">
    <graphics x="-323.9466515573544" y="-35.95133146231737" z="0.0"/>
  </node>
  <node id="252891" label="zzzz490" cy:nodeId="566">
    <graphics x="-310.30466852512785" y="-68.494208659583" z="0.0"/>
  </node>
  <node id="252892" label="zzzz489" cy:nodeId="567">
    <graphics x="-444.3903466257138" y="-59.574076976233385" z="0.0"/>
  </node>
  <node id="252893" label="zzzz488" cy:nodeId="568">
    <graphics x="65.74458875331453" y="-60.50583013480272" z="0.0"/>
  </node>
  <node id="252894" label="zzzz487" cy:nodeId="569">
    <graphics x="-371.89066324558684" y="-112.71717008536424" z="0.0"/>
  </node>
  <node id="252895" label="zzzz486" cy:nodeId="570">
    <graphics x="-314.7753335031552" y="-97.80256589835253" z="0.0"/>
  </node>
  <node id="252896" label="zzzz485" cy:nodeId="571">
    <graphics x="-373.50070200291105" y="-118.28714689200487" z="0.0"/>
  </node>
  <node id="252897" label="zzzz484" cy:nodeId="572">
    <graphics x="-319.782726386456" y="-61.176005687170885" z="0.0"/>
  </node>
  <node id="252898" label="zzzz483" cy:nodeId="573">
    <graphics x="-442.21019754734465" y="-43.254977549963854" z="0.0"/>
  </node>
  <node id="252899" label="zzzz482" cy:nodeId="574">
    <graphics x="-375.68955622044035" y="-63.84536680167284" z="0.0"/>
  </node>
  <node id="252900" label="zzzz481" cy:nodeId="575">
    <graphics x="-345.2404747995419" y="39.50313631112013" z="0.0"/>
  </node>
  <node id="252901" label="zzzz480" cy:nodeId="576">
    <graphics x="-289.1391259225888" y="-42.966018046790026" z="0.0"/>
  </node>
  <node id="252902" label="zzzz479" cy:nodeId="577">
    <graphics x="-424.24795923557707" y="-3.0342639345463738" z="0.0"/>
  </node>
  <node id="252903" label="zzzz478" cy:nodeId="578">
    <graphics x="-408.1715813669247" y="-78.48613676016893" z="0.0"/>
  </node>
  <node id="252904" label="zzzz477" cy:nodeId="579">
    <graphics x="-317.92336664524504" y="-12.347752894812487" z="0.0"/>
  </node>
  <node id="252905" label="zzzz476" cy:nodeId="580">
    <graphics x="-388.8462058099789" y="6.57266870552931" z="0.0"/>
  </node>
  <node id="252906" label="zzzz475" cy:nodeId="581">
    <graphics x="-312.7333947214169" y="-81.8732369798955" z="0.0"/>
  </node>
  <node id="252907" label="zzzz474" cy:nodeId="582">
    <graphics x="-260.76643762913176" y="-11.716887797766589" z="0.0"/>
  </node>
  <node id="252908" label="zzzz473" cy:nodeId="583">
    <graphics x="-403.7692185434384" y="-69.19922574942674" z="0.0"/>
  </node>
  <node id="252909" label="zzzz472" cy:nodeId="584">
    <graphics x="-413.46087656345793" y="-34.733352031165026" z="0.0"/>
  </node>
  <node id="252910" label="zzzz471" cy:nodeId="585">
    <graphics x="-329.7863503488583" y="-123.9967492479619" z="0.0"/>
  </node>
  <node id="252911" label="zzzz470" cy:nodeId="586">
    <graphics x="-369.1082726511044" y="46.34998003060255" z="0.0"/>
  </node>
  <node id="252912" label="zzzz469" cy:nodeId="587">
    <graphics x="-315.5499917062802" y="-1.5862143892582878" z="0.0"/>
  </node>
  <node id="252913" label="zzzz468" cy:nodeId="588">
    <graphics x="-286.26226435032316" y="-74.02942594473924" z="0.0"/>
  </node>
  <node id="252914" label="zzzz467" cy:nodeId="589">
    <graphics x="-420.1204720529599" y="-3.334235515051745" z="0.0"/>
  </node>
  <node id="252915" label="zzzz466" cy:nodeId="590">
    <graphics x="-336.1358147653622" y="26.514233265465833" z="0.0"/>
  </node>
  <node id="252916" label="zzzz465" cy:nodeId="591">
    <graphics x="-311.6285286935849" y="10.368798885888197" z="0.0"/>
  </node>
  <node id="252917" label="zzzz464" cy:nodeId="592">
    <graphics x="-327.3161393198056" y="13.304585133141615" z="0.0"/>
  </node>
  <node id="252918" label="zzzz463" cy:nodeId="593">
    <graphics x="-398.4335204156918" y="-112.49960264151659" z="0.0"/>
  </node>
  <node id="252919" label="zzzz462" cy:nodeId="594">
    <graphics x="-287.09199915256926" y="-10.91933568900194" z="0.0"/>
  </node>
  <node id="252920" label="zzzz461" cy:nodeId="595">
    <graphics x="-348.7309456857724" y="25.665276203698255" z="0.0"/>
  </node>
  <node id="252921" label="zzzz460" cy:nodeId="596">
    <graphics x="-370.09721765842863" y="-44.46663602774706" z="0.0"/>
  </node>
  <node id="252922" label="zzzz459" cy:nodeId="597">
    <graphics x="-421.8482094797177" y="-34.15285428946581" z="0.0"/>
  </node>
  <node id="252923" label="zzzz458" cy:nodeId="598">
    <graphics x="-431.5661355051083" y="-1.728196467810534" z="0.0"/>
  </node>
  <node id="252924" label="zzzz457" cy:nodeId="599">
    <graphics x="-381.11017761555144" y="43.863144550866224" z="0.0"/>
  </node>
  <node id="252925" label="zzzz456" cy:nodeId="600">
    <graphics x="-377.83604727116057" y="26.80370775277052" z="0.0"/>
  </node>
  <node id="252926" label="zzzz455" cy:nodeId="601">
    <graphics x="-421.7514306100888" y="-35.344130839758776" z="0.0"/>
  </node>
  <node id="252927" label="zzzz454" cy:nodeId="602">
    <graphics x="-382.557580569653" y="26.91231027657423" z="0.0"/>
  </node>
  <node id="252928" label="zzzz453" cy:nodeId="603">
    <graphics x="-308.69743738499113" y="20.49680772835646" z="0.0"/>
  </node>
  <node id="252929" label="zzzz452" cy:nodeId="604">
    <graphics x="-420.38381586399504" y="-53.30315336173143" z="0.0"/>
  </node>
  <node id="252930" label="zzzz451" cy:nodeId="605">
    <graphics x="-323.6984368356747" y="29.614412937707044" z="0.0"/>
  </node>
  <node id="252931" label="zzzz450" cy:nodeId="606">
    <graphics x="-392.7650280984921" y="-64.7443078417119" z="0.0"/>
  </node>
  <node id="252932" label="zzzz449" cy:nodeId="607">
    <graphics x="-320.75911341038176" y="-78.1600793260869" z="0.0"/>
  </node>
  <node id="252933" label="zzzz448" cy:nodeId="608">
    <graphics x="-278.1669350656552" y="-32.52773984854784" z="0.0"/>
  </node>
  <node id="252934" label="zzzz447" cy:nodeId="609">
    <graphics x="-370.2001019510312" y="32.24071374947462" z="0.0"/>
  </node>
  <node id="252935" label="zzzz446" cy:nodeId="610">
    <graphics x="-374.0205451044125" y="22.321345005578138" z="0.0"/>
  </node>
  <node id="252936" label="zzzz445" cy:nodeId="611">
    <graphics x="-320.52964411106535" y="-50.828254069739245" z="0.0"/>
  </node>
  <node id="252937" label="zzzz444" cy:nodeId="612">
    <graphics x="-356.04593286838957" y="-100.36303647940721" z="0.0"/>
  </node>
  <node id="252938" label="zzzz443" cy:nodeId="613">
    <graphics x="-276.65398035374113" y="-99.48976835196581" z="0.0"/>
  </node>
  <node id="252939" label="zzzz442" cy:nodeId="614">
    <graphics x="-343.77398691502043" y="-6.875892962866686" z="0.0"/>
  </node>
  <node id="252940" label="zzzz441" cy:nodeId="615">
    <graphics x="-350.79513559666105" y="-37.26639493887987" z="0.0"/>
  </node>
  <node id="252941" label="zzzz440" cy:nodeId="616">
    <graphics x="-410.13858805027434" y="-45.461493815832995" z="0.0"/>
  </node>
  <node id="252942" label="zzzz439" cy:nodeId="617">
    <graphics x="-403.79618082371184" y="-20.39042409842577" z="0.0"/>
  </node>
  <node id="252943" label="zzzz438" cy:nodeId="618">
    <graphics x="-367.1434441598935" y="63.30375352913771" z="0.0"/>
  </node>
  <node id="252944" label="zzzz437" cy:nodeId="619">
    <graphics x="-324.92744837131926" y="-48.70457776969042" z="0.0"/>
  </node>
  <node id="252945" label="zzzz436" cy:nodeId="620">
    <graphics x="-278.32680902805754" y="2.892756138390638" z="0.0"/>
  </node>
  <node id="252946" label="zzzz435" cy:nodeId="621">
    <graphics x="-412.9308110269589" y="-91.94470914786424" z="0.0"/>
  </node>
  <node id="252947" label="zzzz434" cy:nodeId="622">
    <graphics x="-432.1194573434872" y="6.632580433434583" z="0.0"/>
  </node>
  <node id="252948" label="zzzz433" cy:nodeId="623">
    <graphics x="-312.2119561227841" y="-55.435424174719714" z="0.0"/>
  </node>
  <node id="252949" label="zzzz432" cy:nodeId="624">
    <graphics x="-277.2749978097958" y="-45.585185374670885" z="0.0"/>
  </node>
  <node id="252950" label="zzzz431" cy:nodeId="625">
    <graphics x="-305.5359765085263" y="-97.34348234122362" z="0.0"/>
  </node>
  <node id="252951" label="zzzz430" cy:nodeId="626">
    <graphics x="-339.2451020273251" y="-118.3064416307744" z="0.0"/>
  </node>
  <node id="252952" label="zzzz429" cy:nodeId="627">
    <graphics x="-431.93208704319426" y="-73.94467863028612" z="0.0"/>
  </node>
  <node id="252953" label="zzzz428" cy:nodeId="628">
    <graphics x="-278.735363105206" y="-50.42751249259081" z="0.0"/>
  </node>
  <node id="252954" label="zzzz427" cy:nodeId="629">
    <graphics x="-300.18416223850676" y="-48.99904951041307" z="0.0"/>
  </node>
  <node id="252955" label="zzzz426" cy:nodeId="630">
    <graphics x="-304.0108376535458" y="-54.48987134879198" z="0.0"/>
  </node>
  <node id="252956" label="zzzz425" cy:nodeId="631">
    <graphics x="-421.60418329563566" y="-87.08660062735643" z="0.0"/>
  </node>
  <node id="252957" label="zzzz424" cy:nodeId="632">
    <graphics x="-287.67178736057707" y="-83.54077085440721" z="0.0"/>
  </node>
  <node id="252958" label="zzzz423" cy:nodeId="633">
    <graphics x="-310.34143457737395" y="-112.74254545157518" z="0.0"/>
  </node>
  <node id="252959" label="zzzz422" cy:nodeId="634">
    <graphics x="-301.86096582737395" y="5.726897392815687" z="0.0"/>
  </node>
  <node id="252960" label="zzzz421" cy:nodeId="635">
    <graphics x="-329.3334389719052" y="-30.748465861731432" z="0.0"/>
  </node>
  <node id="252961" label="zzzz420" cy:nodeId="636">
    <graphics x="-367.81187067356535" y="-42.46611722891893" z="0.0"/>
  </node>
  <node id="252962" label="zzzz419" cy:nodeId="637">
    <graphics x="-325.63230524387785" y="26.064173374718763" z="0.0"/>
  </node>
  <node id="252963" label="zzzz418" cy:nodeId="638">
    <graphics x="-395.75243387546965" y="27.323368702477552" z="0.0"/>
  </node>
  <node id="252964" label="zzzz417" cy:nodeId="639">
    <graphics x="-293.1316338571591" y="8.385034237450697" z="0.0"/>
  </node>
  <node id="252965" label="zzzz416" cy:nodeId="640">
    <graphics x="-326.2874413522763" y="1.0544439893427864" z="0.0"/>
  </node>
  <node id="252966" label="zzzz415" cy:nodeId="641">
    <graphics x="-341.58489618626066" y="-6.336095179968737" z="0.0"/>
  </node>
  <node id="252967" label="zzzz414" cy:nodeId="642">
    <graphics x="-314.4055062326474" y="-61.11790784781542" z="0.0"/>
  </node>
  <node id="252968" label="zzzz413" cy:nodeId="643">
    <graphics x="-375.01512346592375" y="53.67090669686232" z="0.0"/>
  </node>
  <node id="252969" label="zzzz412" cy:nodeId="644">
    <graphics x="-286.5760003122372" y="-79.26270231192674" z="0.0"/>
  </node>
  <node id="252970" label="zzzz411" cy:nodeId="645">
    <graphics x="-353.52946863499113" y="-82.3650353807744" z="0.0"/>
  </node>
  <node id="252971" label="zzzz410" cy:nodeId="646">
    <graphics x="-345.10655985203215" y="-48.01171049063768" z="0.0"/>
  </node>
  <node id="252972" label="zzzz409" cy:nodeId="647">
    <graphics x="2738.5860594716983" y="289.1387793164912" z="0.0"/>
  </node>
  <node id="252973" label="zzzz408" cy:nodeId="648">
    <graphics x="-252.35436640110441" y="-40.093139018469714" z="0.0"/>
  </node>
  <node id="252974" label="zzzz407" cy:nodeId="649">
    <graphics x="-365.8806382211728" y="-95.68989499991503" z="0.0"/>
  </node>
  <node id="252975" label="zzzz406" cy:nodeId="650">
    <graphics x="-441.15325556126066" y="-99.46434720938768" z="0.0"/>
  </node>
  <node id="252976" label="zzzz405" cy:nodeId="651">
    <graphics x="-385.25751839008757" y="-102.71746763175096" z="0.0"/>
  </node>
  <node id="252977" label="zzzz404" cy:nodeId="652">
    <graphics x="-281.68848047581145" y="-98.88297208731737" z="0.0"/>
  </node>
  <node id="252978" label="zzzz403" cy:nodeId="653">
    <graphics x="-422.8475991281552" y="-7.117062892371081" z="0.0"/>
  </node>
  <node id="252979" label="zzzz402" cy:nodeId="654">
    <graphics x="-321.20450220432707" y="-33.31230482047167" z="0.0"/>
  </node>
  <node id="252980" label="zzzz401" cy:nodeId="655">
    <graphics x="-283.467296698956" y="-32.58772596304979" z="0.0"/>
  </node>
  <node id="252981" label="zzzz400" cy:nodeId="656">
    <graphics x="-336.0760384592099" y="-75.947821940833" z="0.0"/>
  </node>
  <node id="252982" label="zzzz399" cy:nodeId="657">
    <graphics x="-358.2439900430722" y="-24.709485377722643" z="0.0"/>
  </node>
  <node id="252983" label="zzzz398" cy:nodeId="658">
    <graphics x="-327.6414109262509" y="-65.66073545401659" z="0.0"/>
  </node>
  <node id="252984" label="zzzz397" cy:nodeId="659">
    <graphics x="-285.1464806589169" y="-51.968730296545885" z="0.0"/>
  </node>
  <node id="252985" label="zzzz396" cy:nodeId="660">
    <graphics x="-425.7674637826962" y="-27.257163371497057" z="0.0"/>
  </node>
  <node id="252986" label="zzzz395" cy:nodeId="661">
    <graphics x="-410.23451242771574" y="28.452074680871107" z="0.0"/>
  </node>
  <node id="252987" label="zzzz394" cy:nodeId="662">
    <graphics x="-434.241108039288" y="-46.992106761389635" z="0.0"/>
  </node>
  <node id="252988" label="zzzz393" cy:nodeId="663">
    <graphics x="-352.3963395151181" y="41.021042500084974" z="0.0"/>
  </node>
  <node id="252989" label="zzzz392" cy:nodeId="664">
    <graphics x="-360.4293156656308" y="-23.03607496207323" z="0.0"/>
  </node>
  <node id="252990" label="zzzz391" cy:nodeId="665">
    <graphics x="-377.2959157022519" y="-12.931368197852038" z="0.0"/>
  </node>
  <node id="252991" label="zzzz390" cy:nodeId="666">
    <graphics x="-324.08598718967863" y="-25.45253118460741" z="0.0"/>
  </node>
  <node id="252992" label="zzzz389" cy:nodeId="667">
    <graphics x="-390.97724161472746" y="-36.45299848502245" z="0.0"/>
  </node>
  <node id="252993" label="zzzz388" cy:nodeId="668">
    <graphics x="-390.6887227090878" y="22.30075136238966" z="0.0"/>
  </node>
  <node id="252994" label="zzzz387" cy:nodeId="669">
    <graphics x="-383.3680177721066" y="11.72174325997267" z="0.0"/>
  </node>
  <node id="252995" label="zzzz386" cy:nodeId="670">
    <graphics x="-351.06575403538176" y="59.07215181404982" z="0.0"/>
  </node>
  <node id="252996" label="zzzz385" cy:nodeId="671">
    <graphics x="-326.5202065500302" y="40.428528461999036" z="0.0"/>
  </node>
  <node id="252997" label="zzzz384" cy:nodeId="672">
    <graphics x="-327.6590233835263" y="-84.00406583731737" z="0.0"/>
  </node>
  <node id="252998" label="zzzz383" cy:nodeId="673">
    <graphics x="-405.90080843296477" y="-69.4371789354619" z="0.0"/>
  </node>
  <node id="252999" label="zzzz382" cy:nodeId="674">
    <graphics x="-350.54669962253996" y="-42.87385114615526" z="0.0"/>
  </node>
  <node id="253000" label="zzzz381" cy:nodeId="675">
    <graphics x="-394.31121263828703" y="-89.67709287589159" z="0.0"/>
  </node>
  <node id="253001" label="zzzz380" cy:nodeId="676">
    <graphics x="-404.0197182687802" y="-63.53169950430956" z="0.0"/>
  </node>
  <node id="253002" label="zzzz379" cy:nodeId="677">
    <graphics x="-290.47795496311613" y="-21.712849940710925" z="0.0"/>
  </node>
  <node id="253003" label="zzzz378" cy:nodeId="678">
    <graphics x="-306.949962714581" y="-18.00222143118944" z="0.0"/>
  </node>
  <node id="253004" label="zzzz377" cy:nodeId="679">
    <graphics x="-373.1647320779843" y="-98.43617948477831" z="0.0"/>
  </node>
  <node id="253005" label="zzzz376" cy:nodeId="680">
    <graphics x="-298.9449349435849" y="-59.54187330191698" z="0.0"/>
  </node>
  <node id="253006" label="zzzz375" cy:nodeId="681">
    <graphics x="-282.5178872140927" y="-23.89474615042772" z="0.0"/>
  </node>
  <node id="253007" label="zzzz374" cy:nodeId="682">
    <graphics x="-287.87249384251066" y="-49.2378381151494" z="0.0"/>
  </node>
  <node id="253008" label="zzzz373" cy:nodeId="683">
    <graphics x="-344.1964226755185" y="-26.594029750281237" z="0.0"/>
  </node>
  <node id="253009" label="zzzz372" cy:nodeId="684">
    <graphics x="-381.19545564976164" y="39.62693086678419" z="0.0"/>
  </node>
  <node id="253010" label="zzzz371" cy:nodeId="685">
    <graphics x="-341.83787165012785" y="24.91637865120802" z="0.0"/>
  </node>
  <node id="253011" label="zzzz370" cy:nodeId="686">
    <graphics x="-365.7537804636044" y="-77.94941648429003" z="0.0"/>
  </node>
  <node id="253012" label="zzzz369" cy:nodeId="687">
    <graphics x="-409.7798729929013" y="-35.338439311438464" z="0.0"/>
  </node>
  <node id="253013" label="zzzz368" cy:nodeId="688">
    <graphics x="-279.4658928903622" y="-13.489771212988757" z="0.0"/>
  </node>
  <node id="253014" label="zzzz367" cy:nodeId="689">
    <graphics x="-391.9797030481381" y="49.970276508874036" z="0.0"/>
  </node>
  <node id="253015" label="zzzz366" cy:nodeId="690">
    <graphics x="-404.4756642374081" y="8.08586565071974" z="0.0"/>
  </node>
  <node id="253016" label="zzzz365" cy:nodeId="691">
    <graphics x="-294.75503168430754" y="-30.18103345816698" z="0.0"/>
  </node>
  <node id="253017" label="zzzz364" cy:nodeId="692">
    <graphics x="-321.76140222874113" y="10.463648472375013" z="0.0"/>
  </node>
  <node id="253018" label="zzzz363" cy:nodeId="693">
    <graphics x="-387.3627644571347" y="-13.155478801184557" z="0.0"/>
  </node>
  <node id="253019" label="zzzz362" cy:nodeId="694">
    <graphics x="-311.7789269479794" y="-28.601672496252917" z="0.0"/>
  </node>
  <node id="253020" label="zzzz361" cy:nodeId="695">
    <graphics x="-370.6099911722226" y="-13.234821643286608" z="0.0"/>
  </node>
  <node id="253021" label="zzzz360" cy:nodeId="696">
    <graphics x="-362.6788559946103" y="-117.88886960929003" z="0.0"/>
  </node>
  <node id="253022" label="zzzz359" cy:nodeId="697">
    <graphics x="-299.2884255441708" y="-91.297919597083" z="0.0"/>
  </node>
  <node id="253023" label="zzzz358" cy:nodeId="698">
    <graphics x="-321.2111321481747" y="-15.950759257727526" z="0.0"/>
  </node>
  <node id="253024" label="zzzz357" cy:nodeId="699">
    <graphics x="-351.48818598118254" y="-43.50034269278612" z="0.0"/>
  </node>
  <node id="253025" label="zzzz356" cy:nodeId="700">
    <graphics x="-386.2213393243832" y="31.506657276696302" z="0.0"/>
  </node>
  <node id="253026" label="zzzz355" cy:nodeId="701">
    <graphics x="-404.21660433140227" y="21.013670597619154" z="0.0"/>
  </node>
  <node id="253027" label="zzzz354" cy:nodeId="702">
    <graphics x="-393.06990347233244" y="-105.09590848868456" z="0.0"/>
  </node>
  <node id="253028" label="zzzz353" cy:nodeId="703">
    <graphics x="-406.8804017099423" y="36.77219453865919" z="0.0"/>
  </node>
  <node id="253029" label="zzzz352" cy:nodeId="704">
    <graphics x="-266.57446680393645" y="0.20636752659711988" z="0.0"/>
  </node>
  <node id="253030" label="zzzz351" cy:nodeId="705">
    <graphics x="-368.3515072855038" y="-113.54498228018846" z="0.0"/>
  </node>
  <node id="253031" label="zzzz350" cy:nodeId="706">
    <graphics x="-334.1970444711728" y="35.95905366951857" z="0.0"/>
  </node>
  <node id="253032" label="zzzz349" cy:nodeId="707">
    <graphics x="-343.178119758038" y="15.561833057946302" z="0.0"/>
  </node>
  <node id="253033" label="zzzz348" cy:nodeId="708">
    <graphics x="-316.3711892160458" y="-24.780124034338854" z="0.0"/>
  </node>
  <node id="253034" label="zzzz347" cy:nodeId="709">
    <graphics x="-400.4041539224667" y="-21.654528941565417" z="0.0"/>
  </node>
  <node id="253035" label="zzzz346" cy:nodeId="710">
    <graphics x="-334.6985512765927" y="-89.42089017813768" z="0.0"/>
  </node>
  <node id="253036" label="zzzz345" cy:nodeId="711">
    <graphics x="0.18073835048249975" y="-38.204488124304675" z="0.0"/>
  </node>
  <node id="253037" label="zzzz344" cy:nodeId="712">
    <graphics x="54.33960523280672" y="-61.921282138281725" z="0.0"/>
  </node>
  <node id="253038" label="zzzz343" cy:nodeId="713">
    <graphics x="-77.6548558267636" y="-97.25960668509569" z="0.0"/>
  </node>
  <node id="253039" label="zzzz342" cy:nodeId="714">
    <graphics x="21.552099129291094" y="-127.85275968497362" z="0.0"/>
  </node>
  <node id="253040" label="zzzz341" cy:nodeId="715">
    <graphics x="33.34663953456453" y="-33.6211388963994" z="0.0"/>
  </node>
  <node id="253041" label="zzzz340" cy:nodeId="716">
    <graphics x="-79.2407933267636" y="-35.082465495520495" z="0.0"/>
  </node>
  <node id="253042" label="zzzz339" cy:nodeId="717">
    <graphics x="-102.2412358316464" y="-71.52728017752733" z="0.0"/>
  </node>
  <node id="253043" label="zzzz338" cy:nodeId="718">
    <graphics x="-16.233057120708906" y="-8.138240184241198" z="0.0"/>
  </node>
  <node id="253044" label="zzzz337" cy:nodeId="719">
    <graphics x="-29.83225450840422" y="-73.5356052774724" z="0.0"/>
  </node>
  <node id="253045" label="zzzz336" cy:nodeId="720">
    <graphics x="14.664373299212969" y="-59.25004610007372" z="0.0"/>
  </node>
  <node id="253046" label="zzzz335" cy:nodeId="721">
    <graphics x="2340.033574959369" y="-158.2168191332158" z="0.0"/>
  </node>
  <node id="253047" label="zzzz334" cy:nodeId="722">
    <graphics x="26.016469856830156" y="-47.31116041129198" z="0.0"/>
  </node>
  <node id="253048" label="zzzz333" cy:nodeId="723">
    <graphics x="-25.18657121983" y="-136.64202817862596" z="0.0"/>
  </node>
  <node id="253049" label="zzzz332" cy:nodeId="724">
    <graphics x="-73.49007616367766" y="-134.42286619132128" z="0.0"/>
  </node>
  <node id="253050" label="zzzz331" cy:nodeId="725">
    <graphics x="-6.084817984966719" y="33.94522920662794" z="0.0"/>
  </node>
  <node id="253051" label="zzzz330" cy:nodeId="726">
    <graphics x="-64.59884081211516" y="11.140907917565443" z="0.0"/>
  </node>
  <node id="253052" label="zzzz329" cy:nodeId="727">
    <graphics x="-300.74979029026457" y="15.555693302697279" z="0.0"/>
  </node>
  <node id="253053" label="zzzz328" cy:nodeId="728">
    <graphics x="1126.758413216205" y="-132.18501218741503" z="0.0"/>
  </node>
  <node id="253054" label="zzzz327" cy:nodeId="729">
    <graphics x="-87.20278177586027" y="35.96534792000685" z="0.0"/>
  </node>
  <node id="253055" label="zzzz326" cy:nodeId="730">
    <graphics x="-9.239252189068281" y="4.811043415612318" z="0.0"/>
  </node>
  <node id="253056" label="zzzz325" cy:nodeId="731">
    <graphics x="-11.887674430279219" y="-88.26763853018846" z="0.0"/>
  </node>
  <node id="253057" label="zzzz324" cy:nodeId="732">
    <graphics x="47.23990430507234" y="-35.8451379198369" z="0.0"/>
  </node>
  <node id="253058" label="zzzz323" cy:nodeId="733">
    <graphics x="-6.7839909585995315" y="13.728165302819349" z="0.0"/>
  </node>
  <node id="253059" label="zzzz322" cy:nodeId="734">
    <graphics x="-91.0504799875302" y="-15.637046183997057" z="0.0"/>
  </node>
  <node id="253060" label="zzzz321" cy:nodeId="735">
    <graphics x="50.62447156581453" y="-115.2193940538701" z="0.0"/>
  </node>
  <node id="253061" label="zzzz320" cy:nodeId="736">
    <graphics x="-16.52410326328703" y="-157.05086454337206" z="0.0"/>
  </node>
  <node id="253062" label="zzzz319" cy:nodeId="737">
    <graphics x="-99.04312525120207" y="-73.57782491629686" z="0.0"/>
  </node>
  <node id="253063" label="zzzz318" cy:nodeId="738">
    <graphics x="-12.062402823833906" y="-138.17529996817674" z="0.0"/>
  </node>
  <node id="253064" label="zzzz317" cy:nodeId="739">
    <graphics x="-29.67716417637297" y="16.93360963875685" z="0.0"/>
  </node>
  <node id="253065" label="zzzz316" cy:nodeId="740">
    <graphics x="-115.64388475742766" y="13.522095356530286" z="0.0"/>
  </node>
  <node id="253066" label="zzzz315" cy:nodeId="741">
    <graphics x="14.961431404681719" y="4.686722431725599" z="0.0"/>
  </node>
  <node id="253067" label="zzzz314" cy:nodeId="742">
    <graphics x="-82.77104769077727" y="-4.968165721350573" z="0.0"/>
  </node>
  <node id="253068" label="zzzz313" cy:nodeId="743">
    <graphics x="-60.38465700474211" y="-102.58628400748339" z="0.0"/>
  </node>
  <node id="253069" label="zzzz312" cy:nodeId="744">
    <graphics x="-21.962778190044844" y="-63.226057376318835" z="0.0"/>
  </node>
  <node id="253070" label="zzzz311" cy:nodeId="745">
    <graphics x="-115.27810488071867" y="-103.02601179068651" z="0.0"/>
  </node>
  <node id="253071" label="zzzz310" cy:nodeId="746">
    <graphics x="-63.3096295389218" y="12.317001972741224" z="0.0"/>
  </node>
  <node id="253072" label="zzzz309" cy:nodeId="747">
    <graphics x="839.3115023580508" y="181.41661134774122" z="0.0"/>
  </node>
  <node id="253073" label="zzzz308" cy:nodeId="748">
    <graphics x="-31.737825492290938" y="-84.11589178031053" z="0.0"/>
  </node>
  <node id="253074" label="zzzz307" cy:nodeId="749">
    <graphics x="-125.80105696049162" y="-82.2095931429204" z="0.0"/>
  </node>
  <node id="253075" label="zzzz306" cy:nodeId="750">
    <graphics x="-90.67661485996672" y="-35.415160502844714" z="0.0"/>
  </node>
  <node id="253076" label="zzzz305" cy:nodeId="751">
    <graphics x="-57.67104540195891" y="-122.80993589346971" z="0.0"/>
  </node>
  <node id="253077" label="zzzz304" cy:nodeId="752">
    <graphics x="49.259878059955156" y="-111.71871122305956" z="0.0"/>
  </node>
  <node id="253078" label="zzzz303" cy:nodeId="753">
    <graphics x="-363.5906487497372" y="-113.15577634757128" z="0.0"/>
  </node>
  <node id="253079" label="zzzz302" cy:nodeId="754">
    <graphics x="-264.27885828342863" y="-85.86812528555956" z="0.0"/>
  </node>
  <node id="253080" label="zzzz301" cy:nodeId="755">
    <graphics x="-453.2578011545224" y="-39.799453105383776" z="0.0"/>
  </node>
  <node id="253081" label="zzzz300" cy:nodeId="756">
    <graphics x="-314.7560997995419" y="22.48113695198927" z="0.0"/>
  </node>
  <node id="253082" label="zzzz299" cy:nodeId="757">
    <graphics x="-280.0373726877255" y="-50.97172864859667" z="0.0"/>
  </node>
  <node id="253083" label="zzzz298" cy:nodeId="758">
    <graphics x="-351.3933106454892" y="20.45314851815138" z="0.0"/>
  </node>
  <node id="253084" label="zzzz297" cy:nodeId="759">
    <graphics x="-305.4719887765927" y="50.981011066979505" z="0.0"/>
  </node>
  <node id="253085" label="zzzz296" cy:nodeId="760">
    <graphics x="1261.8609351125674" y="438.97086826378734" z="0.0"/>
  </node>
  <node id="253089" label="zzzz292" cy:nodeId="761">
    <graphics x="-413.30274401035734" y="-21.204402293616198" z="0.0"/>
  </node>
  <node id="253090" label="zzzz291" cy:nodeId="762">
    <graphics x="-245.96441278782316" y="-71.908759440833" z="0.0"/>
  </node>
  <node id="253091" label="zzzz290" cy:nodeId="763">
    <graphics x="-300.90408716526457" y="-58.00509199088182" z="0.0"/>
  </node>
  <node id="253093" label="zzzz288" cy:nodeId="764">
    <graphics x="-309.44011316624113" y="-69.69951566641893" z="0.0"/>
  </node>
  <node id="253094" label="zzzz287" cy:nodeId="765">
    <graphics x="-328.7631341012997" y="-139.20691617911424" z="0.0"/>
  </node>
  <node id="253095" label="zzzz286" cy:nodeId="766">
    <graphics x="-333.0486069711728" y="-9.976119365149401" z="0.0"/>
  </node>
  <node id="253096" label="zzzz285" cy:nodeId="767">
    <graphics x="-326.36911020603605" y="25.340319309777357" z="0.0"/>
  </node>
  <node id="253097" label="zzzz284" cy:nodeId="768">
    <graphics x="-363.61050043430754" y="-93.31948026602831" z="0.0"/>
  </node>
  <node id="253098" label="zzzz283" cy:nodeId="769">
    <graphics x="29.86493482265047" y="-18.324328746252917" z="0.0"/>
  </node>
  <node id="253099" label="zzzz282" cy:nodeId="770">
    <graphics x="-405.7412167581601" y="-39.560302104407214" z="0.0"/>
  </node>
  <node id="253100" label="zzzz281" cy:nodeId="771">
    <graphics x="-464.56460199680754" y="-26.653010692053698" z="0.0"/>
  </node>
  <node id="253101" label="zzzz280" cy:nodeId="772">
    <graphics x="-417.6125050577206" y="-39.96268400137987" z="0.0"/>
  </node>
  <node id="253102" label="zzzz279" cy:nodeId="773">
    <graphics x="-390.905357459454" y="-96.48620542471971" z="0.0"/>
  </node>
  <node id="253103" label="zzzz278" cy:nodeId="774">
    <graphics x="-448.76171121921965" y="-47.80691465323534" z="0.0"/>
  </node>
  <node id="253104" label="zzzz277" cy:nodeId="775">
    <graphics x="-334.97362528171965" y="71.13610139901076" z="0.0"/>
  </node>
  <node id="253106" label="zzzz275" cy:nodeId="776">
    <graphics x="1050.6168726888613" y="-159.03155454581346" z="0.0"/>
  </node>
  <node id="253107" label="zzzz274" cy:nodeId="777">
    <graphics x="-407.17691812839934" y="-30.75186094229784" z="0.0"/>
  </node>
  <node id="253108" label="zzzz273" cy:nodeId="778">
    <graphics x="-186.3717018159909" y="308.5344549756709" z="0.0"/>
  </node>
  <node id="253117" label="zzzz264" cy:nodeId="779">
    <graphics x="-402.3760052713437" y="-100.88368925040331" z="0.0"/>
  </node>
  <node id="253118" label="zzzz263" cy:nodeId="780">
    <graphics x="-342.64151392307707" y="-34.717238749915026" z="0.0"/>
  </node>
  <node id="253119" label="zzzz262" cy:nodeId="781">
    <graphics x="-312.781147101788" y="-23.748656596594714" z="0.0"/>
  </node>
  <node id="253120" label="zzzz261" cy:nodeId="782">
    <graphics x="-293.24129114475676" y="2.301141057557203" z="0.0"/>
  </node>
  <node id="253121" label="zzzz260" cy:nodeId="783">
    <graphics x="583.2227457967715" y="-0.40318998282518237" z="0.0"/>
  </node>
  <node id="253122" label="zzzz259" cy:nodeId="784">
    <graphics x="-386.09611902561613" y="-8.026948298865221" z="0.0"/>
  </node>
  <node id="253123" label="zzzz258" cy:nodeId="785">
    <graphics x="2270.407842537494" y="-48.34279569571581" z="0.0"/>
  </node>
  <node id="253124" label="zzzz257" cy:nodeId="786">
    <graphics x="1061.8609351125674" y="438.97086826378734" z="0.0"/>
  </node>
  <node id="253125" label="zzzz256" cy:nodeId="787">
    <graphics x="2161.068242928119" y="-144.31413968985643" z="0.0"/>
  </node>
  <node id="253126" label="zzzz255" cy:nodeId="788">
    <graphics x="-350.78392801609465" y="-8.62890943472948" z="0.0"/>
  </node>
  <node id="253127" label="zzzz254" cy:nodeId="789">
    <graphics x="-121.49863634434172" y="-33.915908183508776" z="0.0"/>
  </node>
  <node id="253128" label="zzzz253" cy:nodeId="790">
    <graphics x="-381.37980661716887" y="54.15659776741896" z="0.0"/>
  </node>
  <node id="253129" label="zzzz252" cy:nodeId="791">
    <graphics x="-287.6442070993466" y="56.00541368538771" z="0.0"/>
  </node>
  <node id="253130" label="zzzz251" cy:nodeId="792">
    <graphics x="-320.0901986154599" y="43.48902956063185" z="0.0"/>
  </node>
  <node id="253131" label="zzzz250" cy:nodeId="793">
    <graphics x="-140.8332177194638" y="-51.65682157462206" z="0.0"/>
  </node>
  <node id="253132" label="zzzz249" cy:nodeId="794">
    <graphics x="-245.3743096384091" y="-46.93178113883104" z="0.0"/>
  </node>
  <node id="253133" label="zzzz248" cy:nodeId="795">
    <graphics x="-425.1821251901669" y="65.5531660657588" z="0.0"/>
  </node>
  <node id="253134" label="zzzz247" cy:nodeId="796">
    <graphics x="2781.7392386403994" y="-39.59993680899706" z="0.0"/>
  </node>
  <node id="253135" label="zzzz246" cy:nodeId="797">
    <graphics x="2140.4367732015567" y="-74.94527372305956" z="0.0"/>
  </node>
  <node id="253136" label="zzzz245" cy:nodeId="798">
    <graphics x="-345.72582254734465" y="-10.357390727454089" z="0.0"/>
  </node>
  <node id="253137" label="zzzz244" cy:nodeId="799">
    <graphics x="-336.55083093967863" y="-129.49924405997362" z="0.0"/>
  </node>
  <node id="253138" label="zzzz243" cy:nodeId="800">
    <graphics x="-370.6785775217099" y="1.639312420434095" z="0.0"/>
  </node>
  <node id="253139" label="zzzz242" cy:nodeId="801">
    <graphics x="-335.9509278329892" y="48.629151020592786" z="0.0"/>
  </node>
  <node id="253140" label="zzzz241" cy:nodeId="802">
    <graphics x="-422.5464974435849" y="-83.23422941153612" z="0.0"/>
  </node>
  <node id="253141" label="zzzz240" cy:nodeId="803">
    <graphics x="-282.8151742013974" y="-69.44976743643846" z="0.0"/>
  </node>
  <node id="253142" label="zzzz239" cy:nodeId="804">
    <graphics x="-323.8056641611142" y="-37.19228300040331" z="0.0"/>
  </node>
  <node id="253143" label="zzzz238" cy:nodeId="805">
    <graphics x="2532.551154991718" y="289.1387793164912" z="0.0"/>
  </node>
  <node id="253144" label="zzzz237" cy:nodeId="806">
    <graphics x="-308.34643946018645" y="10.235525761193372" z="0.0"/>
  </node>
  <node id="253145" label="zzzz236" cy:nodeId="807">
    <graphics x="961.8609351125674" y="438.97086826378734" z="0.0"/>
  </node>
  <node id="253146" label="zzzz235" cy:nodeId="808">
    <graphics x="-298.48061762180754" y="-119.34591611807909" z="0.0"/>
  </node>
  <node id="253147" label="zzzz234" cy:nodeId="809">
    <graphics x="-393.9470997842831" y="-80.42343076651659" z="0.0"/>
  </node>
  <node id="253148" label="zzzz233" cy:nodeId="810">
    <graphics x="-322.493175605206" y="-125.29832395499315" z="0.0"/>
  </node>
  <node id="253149" label="zzzz232" cy:nodeId="811">
    <graphics x="-416.6419812234921" y="24.960741673058607" z="0.0"/>
  </node>
  <node id="253150" label="zzzz231" cy:nodeId="812">
    <graphics x="-425.86761484470793" y="-34.004271830969714" z="0.0"/>
  </node>
  <node id="253151" label="zzzz230" cy:nodeId="813">
    <graphics x="-372.9440766367001" y="-42.835769023352526" z="0.0"/>
  </node>
  <node id="253152" label="zzzz229" cy:nodeId="814">
    <graphics x="-96.19160471287199" y="-88.78100332205858" z="0.0"/>
  </node>
  <node id="253153" label="zzzz228" cy:nodeId="815">
    <graphics x="-445.0075341257138" y="-34.86558469718065" z="0.0"/>
  </node>
  <node id="253154" label="zzzz227" cy:nodeId="816">
    <graphics x="-411.22270212498137" y="-72.36202939932909" z="0.0"/>
  </node>
  <node id="253155" label="zzzz226" cy:nodeId="817">
    <graphics x="-370.6372319253964" y="-141.91719755118456" z="0.0"/>
  </node>
  <node id="253156" label="zzzz225" cy:nodeId="818">
    <graphics x="-335.499652961163" y="-10.443612422400378" z="0.0"/>
  </node>
  <node id="253157" label="zzzz224" cy:nodeId="819">
    <graphics x="-314.2195778879208" y="-56.07498105948534" z="0.0"/>
  </node>
  <node id="253158" label="zzzz223" cy:nodeId="820">
    <graphics x="-366.5326882394833" y="-60.675246562415026" z="0.0"/>
  </node>
  <node id="253159" label="zzzz222" cy:nodeId="821">
    <graphics x="-431.29568109837004" y="-15.962552394324206" z="0.0"/>
  </node>
  <node id="253160" label="zzzz221" cy:nodeId="822">
    <graphics x="894.1906451192813" y="299.97841135079295" z="0.0"/>
  </node>
  <node id="253161" label="zzzz220" cy:nodeId="823">
    <graphics x="-371.07597170200773" y="-69.23961576407518" z="0.0"/>
  </node>
  <node id="253162" label="zzzz219" cy:nodeId="824">
    <graphics x="-336.8582078012509" y="32.002991352624036" z="0.0"/>
  </node>
  <node id="253163" label="zzzz218" cy:nodeId="825">
    <graphics x="-401.5159932169003" y="-15.317674006873034" z="0.0"/>
  </node>
  <node id="253164" label="zzzz217" cy:nodeId="826">
    <graphics x="-368.52398119297453" y="-127.5712350267705" z="0.0"/>
  </node>
  <node id="253165" label="zzzz216" cy:nodeId="827">
    <graphics x="-378.5877972635312" y="43.03780427987013" z="0.0"/>
  </node>
  <node id="253166" label="zzzz215" cy:nodeId="828">
    <graphics x="-421.78491602268645" y="23.914517078942396" z="0.0"/>
  </node>
  <node id="253167" label="zzzz214" cy:nodeId="829">
    <graphics x="-288.54512415256926" y="-94.85803159659471" z="0.0"/>
  </node>
  <node id="253168" label="zzzz213" cy:nodeId="830">
    <graphics x="-407.25285158482023" y="-43.703593577795885" z="0.0"/>
  </node>
  <node id="253169" label="zzzz212" cy:nodeId="831">
    <graphics x="1658.8475398031192" y="-117.27203878348436" z="0.0"/>
  </node>
  <node id="253170" label="zzzz211" cy:nodeId="832">
    <graphics x="-274.0529976877255" y="-35.5118974108037" z="0.0"/>
  </node>
  <node id="253171" label="zzzz210" cy:nodeId="833">
    <graphics x="-346.172203162579" y="-11.934327449255846" z="0.0"/>
  </node>
  <node id="253172" label="zzzz209" cy:nodeId="834">
    <graphics x="-298.1061974557919" y="-23.362426127844714" z="0.0"/>
  </node>
  <node id="253173" label="zzzz208" cy:nodeId="835">
    <graphics x="-352.9997864755673" y="-89.44919523184862" z="0.0"/>
  </node>
  <node id="253174" label="zzzz207" cy:nodeId="836">
    <graphics x="-342.58527384128996" y="-121.09700712149706" z="0.0"/>
  </node>
  <node id="253175" label="zzzz206" cy:nodeId="837">
    <graphics x="-420.5510254892392" y="-78.79150327628221" z="0.0"/>
  </node>
  <node id="253176" label="zzzz205" cy:nodeId="838">
    <graphics x="-442.6154519113583" y="-86.46492704337206" z="0.0"/>
  </node>
  <node id="253177" label="zzzz204" cy:nodeId="839">
    <graphics x="-386.8964673074765" y="-91.2230904955205" z="0.0"/>
  </node>
  <node id="253178" label="zzzz203" cy:nodeId="840">
    <graphics x="-388.5455375703854" y="-23.92309316580858" z="0.0"/>
  </node>
  <node id="253179" label="zzzz202" cy:nodeId="841">
    <graphics x="-398.8773661645932" y="5.084786091393568" z="0.0"/>
  </node>
  <node id="253180" label="zzzz201" cy:nodeId="842">
    <graphics x="-377.30053530064055" y="-99.86980375235643" z="0.0"/>
  </node>
  <node id="253181" label="zzzz200" cy:nodeId="843">
    <graphics x="1018.753988167377" y="-20.69766172354784" z="0.0"/>
  </node>
  <node id="253182" label="zzzz199" cy:nodeId="844">
    <graphics x="-293.41373071995207" y="-46.267585124426745" z="0.0"/>
  </node>
  <node id="253183" label="zzzz198" cy:nodeId="845">
    <graphics x="-365.52420435276457" y="-44.425795878821276" z="0.0"/>
  </node>
  <node id="253184" label="zzzz197" cy:nodeId="846">
    <graphics x="-353.482505896954" y="-10.423604335242175" z="0.0"/>
  </node>
  <node id="253185" label="zzzz196" cy:nodeId="847">
    <graphics x="1107.4740809408145" y="-20.975463237219714" z="0.0"/>
  </node>
  <node id="253186" label="zzzz195" cy:nodeId="848">
    <graphics x="-442.61420450535246" y="1.3093134504023567" z="0.0"/>
  </node>
  <node id="253187" label="zzzz194" cy:nodeId="849">
    <graphics x="-396.1630745920224" y="-56.162124003821276" z="0.0"/>
  </node>
  <node id="253188" label="zzzz193" cy:nodeId="850">
    <graphics x="983.938070198627" y="-101.690741862708" z="0.0"/>
  </node>
  <node id="253189" label="zzzz192" cy:nodeId="851">
    <graphics x="-305.4963341745419" y="-94.8658898729619" z="0.0"/>
  </node>
  <node id="253190" label="zzzz191" cy:nodeId="852">
    <graphics x="-394.1900521310849" y="38.09727922493849" z="0.0"/>
  </node>
  <node id="253191" label="zzzz190" cy:nodeId="853">
    <graphics x="-287.21755609837004" y="-40.138243998938464" z="0.0"/>
  </node>
  <node id="253192" label="zzzz189" cy:nodeId="854">
    <graphics x="-332.06522379246184" y="-93.90183957999315" z="0.0"/>
  </node>
  <node id="253193" label="zzzz188" cy:nodeId="855">
    <graphics x="-299.5530892404599" y="-69.13040861075487" z="0.0"/>
  </node>
  <node id="253194" label="zzzz187" cy:nodeId="856">
    <graphics x="-332.62273798313566" y="-121.79094633048143" z="0.0"/>
  </node>
  <node id="253195" label="zzzz186" cy:nodeId="857">
    <graphics x="-297.1142540964169" y="19.067818317956068" z="0.0"/>
  </node>
  <node id="253196" label="zzzz185" cy:nodeId="858">
    <graphics x="1092.818685433002" y="-159.9697488207158" z="0.0"/>
  </node>
  <node id="253197" label="zzzz184" cy:nodeId="859">
    <graphics x="-356.0827294382138" y="-28.897048320227526" z="0.0"/>
  </node>
  <node id="253198" label="zzzz183" cy:nodeId="860">
    <graphics x="-433.18013391819426" y="-95.41149839346971" z="0.0"/>
  </node>
  <node id="253199" label="zzzz182" cy:nodeId="861">
    <graphics x="-306.0338097604794" y="-105.27818235343065" z="0.0"/>
  </node>
  <node id="253200" label="zzzz181" cy:nodeId="862">
    <graphics x="-369.8432332071347" y="43.57209077889357" z="0.0"/>
  </node>
  <node id="253201" label="zzzz180" cy:nodeId="863">
    <graphics x="-364.35087595310637" y="-36.38518461173143" z="0.0"/>
  </node>
  <node id="253202" label="zzzz179" cy:nodeId="864">
    <graphics x="-368.69389734592863" y="-65.89829954093065" z="0.0"/>
  </node>
  <node id="253203" label="zzzz178" cy:nodeId="865">
    <graphics x="-367.5415173563046" y="-7.168123568945788" z="0.0"/>
  </node>
  <node id="253204" label="zzzz177" cy:nodeId="866">
    <graphics x="-395.8867131265683" y="-20.50625547354784" z="0.0"/>
  </node>
  <node id="253205" label="zzzz176" cy:nodeId="867">
    <graphics x="-374.2660923990292" y="-68.61447843497362" z="0.0"/>
  </node>
  <node id="253206" label="zzzz175" cy:nodeId="868">
    <graphics x="-448.432571509747" y="-51.56454404776659" z="0.0"/>
  </node>
  <node id="253207" label="zzzz174" cy:nodeId="869">
    <graphics x="-422.32772837009855" y="22.7984110456172" z="0.0"/>
  </node>
  <node id="253208" label="zzzz173" cy:nodeId="870">
    <graphics x="-311.8321190866513" y="-26.76853116934862" z="0.0"/>
  </node>
  <node id="253209" label="zzzz172" cy:nodeId="871">
    <graphics x="-343.3891602548642" y="32.264309559411146" z="0.0"/>
  </node>
  <node id="253210" label="zzzz171" cy:nodeId="872">
    <graphics x="-333.2078820261044" y="14.689819965905286" z="0.0"/>
  </node>
  <node id="253211" label="zzzz170" cy:nodeId="873">
    <graphics x="-364.9454995187802" y="2.5654279332819954" z="0.0"/>
  </node>
  <node id="253212" label="zzzz169" cy:nodeId="874">
    <graphics x="-332.73051462498137" y="2.3380200010005012" z="0.0"/>
  </node>
  <node id="253213" label="zzzz168" cy:nodeId="875">
    <graphics x="-310.96282587376066" y="-38.83609708731737" z="0.0"/>
  </node>
  <node id="253214" label="zzzz167" cy:nodeId="876">
    <graphics x="-391.7379971536679" y="35.16297212654982" z="0.0"/>
  </node>
  <node id="253215" label="zzzz166" cy:nodeId="877">
    <graphics x="-332.5191422494931" y="-59.33158048575487" z="0.0"/>
  </node>
  <node id="253216" label="zzzz165" cy:nodeId="878">
    <graphics x="-414.10398493137785" y="-51.1160233873662" z="0.0"/>
  </node>
  <node id="253217" label="zzzz164" cy:nodeId="879">
    <graphics x="-273.26651392307707" y="-82.47771390860643" z="0.0"/>
  </node>
  <node id="253218" label="zzzz163" cy:nodeId="880">
    <graphics x="-434.02606973972746" y="-27.60031827872362" z="0.0"/>
  </node>
  <node id="253219" label="zzzz162" cy:nodeId="881">
    <graphics x="-367.6269265207333" y="-27.440852488928698" z="0.0"/>
  </node>
  <node id="253220" label="zzzz161" cy:nodeId="882">
    <graphics x="-368.20476351108977" y="58.966911945885755" z="0.0"/>
  </node>
  <node id="253221" label="zzzz160" cy:nodeId="883">
    <graphics x="-304.61650476780363" y="15.008828793114759" z="0.0"/>
  </node>
  <node id="253222" label="zzzz159" cy:nodeId="884">
    <graphics x="-320.2005120309872" y="-52.98699125235643" z="0.0"/>
  </node>
  <node id="253223" label="zzzz158" cy:nodeId="885">
    <graphics x="-401.35940180149504" y="-28.19508489554491" z="0.0"/>
  </node>
  <node id="253224" label="zzzz157" cy:nodeId="886">
    <graphics x="-323.295307258038" y="-101.05101713126268" z="0.0"/>
  </node>
  <node id="253225" label="zzzz156" cy:nodeId="887">
    <graphics x="-395.8785630258603" y="11.532435093468763" z="0.0"/>
  </node>
  <node id="253226" label="zzzz155" cy:nodeId="888">
    <graphics x="-314.92102442112395" y="-1.4940231699284539" z="0.0"/>
  </node>
  <node id="253227" label="zzzz154" cy:nodeId="889">
    <graphics x="-367.1827508005185" y="-78.0844186205205" z="0.0"/>
  </node>
  <node id="253228" label="zzzz153" cy:nodeId="890">
    <graphics x="-378.34997377720305" y="15.494392071313001" z="0.0"/>
  </node>
  <node id="253229" label="zzzz152" cy:nodeId="891">
    <graphics x="-322.5676232370419" y="-150.9650338548955" z="0.0"/>
  </node>
  <node id="253230" label="zzzz151" cy:nodeId="892">
    <graphics x="-273.63872919407316" y="-45.60594877188768" z="0.0"/>
  </node>
  <node id="253231" label="zzzz150" cy:nodeId="893">
    <graphics x="-270.15305719700285" y="-61.27661451285448" z="0.0"/>
  </node>
  <node id="253232" label="zzzz149" cy:nodeId="894">
    <graphics x="-311.1180535348935" y="23.410555515832044" z="0.0"/>
  </node>
  <node id="253233" label="zzzz148" cy:nodeId="895">
    <graphics x="-355.70039759006926" y="55.80820146614943" z="0.0"/>
  </node>
  <node id="253234" label="zzzz147" cy:nodeId="896">
    <graphics x="-347.682140448956" y="-23.1653283495244" z="0.0"/>
  </node>
  <node id="253235" label="zzzz146" cy:nodeId="897">
    <graphics x="-261.61722193088957" y="22.256834660119154" z="0.0"/>
  </node>
  <node id="253236" label="zzzz145" cy:nodeId="898">
    <graphics x="-325.8879815134091" y="-81.07401212637987" z="0.0"/>
  </node>
  <node id="253237" label="zzzz144" cy:nodeId="899">
    <graphics x="-373.30453977909514" y="23.26249376351271" z="0.0"/>
  </node>
  <node id="253238" label="zzzz143" cy:nodeId="900">
    <graphics x="-309.47591028538176" y="35.23500124031935" z="0.0"/>
  </node>
  <node id="253239" label="zzzz142" cy:nodeId="901">
    <graphics x="-322.22906122532316" y="40.11613908821974" z="0.0"/>
  </node>
  <node id="253240" label="zzzz141" cy:nodeId="902">
    <graphics x="-388.39233789768645" y="-56.9242509264287" z="0.0"/>
  </node>
  <node id="253241" label="zzzz140" cy:nodeId="903">
    <graphics x="-372.32108412113615" y="16.68816057259474" z="0.0"/>
  </node>
  <node id="253242" label="zzzz139" cy:nodeId="904">
    <graphics x="-375.2117920908017" y="-137.04061063712206" z="0.0"/>
  </node>
  <node id="253243" label="zzzz138" cy:nodeId="905">
    <graphics x="-407.6361084970517" y="-59.92757352774706" z="0.0"/>
  </node>
  <node id="253244" label="zzzz137" cy:nodeId="906">
    <graphics x="-285.7167397531552" y="-20.399890269690417" z="0.0"/>
  </node>
  <node id="253245" label="zzzz136" cy:nodeId="907">
    <graphics x="-389.2488785776181" y="-120.76562437003221" z="0.0"/>
  </node>
  <node id="253246" label="zzzz135" cy:nodeId="908">
    <graphics x="-423.0760804208798" y="-23.726346339636706" z="0.0"/>
  </node>
  <node id="253247" label="zzzz134" cy:nodeId="909">
    <graphics x="-295.14104853001066" y="-17.40346654837694" z="0.0"/>
  </node>
  <node id="253248" label="zzzz133" cy:nodeId="910">
    <graphics x="-382.65953169193693" y="-101.12016996329393" z="0.0"/>
  </node>
  <node id="253249" label="zzzz132" cy:nodeId="911">
    <graphics x="-285.84073267307707" y="-48.95888837760057" z="0.0"/>
  </node>
  <node id="253250" label="zzzz131" cy:nodeId="912">
    <graphics x="-403.2789555582089" y="8.72685686165724" z="0.0"/>
  </node>
  <node id="253251" label="zzzz130" cy:nodeId="913">
    <graphics x="-352.82182321873137" y="3.1356112104121223" z="0.0"/>
  </node>
  <node id="253252" label="zzzz129" cy:nodeId="914">
    <graphics x="-278.43609247532316" y="-129.97078641837206" z="0.0"/>
  </node>
  <node id="253253" label="zzzz128" cy:nodeId="915">
    <graphics x="-317.9509240182919" y="-93.70191129630174" z="0.0"/>
  </node>
  <node id="253254" label="zzzz127" cy:nodeId="916">
    <graphics x="-279.21844110813566" y="-27.131720866614245" z="0.0"/>
  </node>
  <node id="253255" label="zzzz126" cy:nodeId="917">
    <graphics x="-333.2366143259091" y="-75.86672147696581" z="0.0"/>
  </node>
  <node id="253256" label="zzzz125" cy:nodeId="918">
    <graphics x="-335.32153711643645" y="-24.369323100500964" z="0.0"/>
  </node>
  <node id="253257" label="zzzz124" cy:nodeId="919">
    <graphics x="-302.3995324167294" y="-106.74448331778612" z="0.0"/>
  </node>
  <node id="253258" label="zzzz123" cy:nodeId="920">
    <graphics x="-373.731098273663" y="-61.612120952063464" z="0.0"/>
  </node>
  <node id="253259" label="zzzz122" cy:nodeId="921">
    <graphics x="-287.02676019993254" y="-103.89645322745409" z="0.0"/>
  </node>
  <node id="253260" label="zzzz121" cy:nodeId="922">
    <graphics x="-355.4496022256894" y="37.371113453454115" z="0.0"/>
  </node>
  <node id="253261" label="zzzz120" cy:nodeId="923">
    <graphics x="-387.2023297342343" y="-23.3018029588994" z="0.0"/>
  </node>
  <node id="253262" label="zzzz119" cy:nodeId="924">
    <graphics x="-297.9663811716122" y="-81.99516996329393" z="0.0"/>
  </node>
  <node id="253263" label="zzzz118" cy:nodeId="925">
    <graphics x="-302.9775353464169" y="-73.64537748282518" z="0.0"/>
  </node>
  <node id="253264" label="zzzz117" cy:nodeId="926">
    <graphics x="-323.7055970224423" y="-74.70642789786424" z="0.0"/>
  </node>
  <node id="253265" label="zzzz116" cy:nodeId="927">
    <graphics x="-343.859703162579" y="2.1458696466151252" z="0.0"/>
  </node>
  <node id="253266" label="zzzz115" cy:nodeId="928">
    <graphics x="-295.3327828439755" y="-46.053054179602526" z="0.0"/>
  </node>
  <node id="253267" label="zzzz114" cy:nodeId="929">
    <graphics x="-403.5958157571835" y="-29.19443448966112" z="0.0"/>
  </node>
  <node id="253268" label="zzzz113" cy:nodeId="930">
    <graphics x="-397.3714552911801" y="-43.70670255606737" z="0.0"/>
  </node>
  <node id="253269" label="zzzz112" cy:nodeId="931">
    <graphics x="-322.058117011456" y="-117.24466642325487" z="0.0"/>
  </node>
  <node id="253270" label="zzzz111" cy:nodeId="932">
    <graphics x="-333.610981086163" y="-68.64635404532518" z="0.0"/>
  </node>
  <node id="253271" label="zzzz110" cy:nodeId="933">
    <graphics x="-448.5882798227353" y="-60.99547895377245" z="0.0"/>
  </node>
  <node id="253272" label="zzzz109" cy:nodeId="934">
    <graphics x="-367.97294626560637" y="7.006385002678968" z="0.0"/>
  </node>
  <node id="253273" label="zzzz108" cy:nodeId="935">
    <graphics x="-402.131057837872" y="-0.9409249681767449" z="0.0"/>
  </node>
  <node id="253274" label="zzzz107" cy:nodeId="936">
    <graphics x="-354.5612221750302" y="56.10965410286818" z="0.0"/>
  </node>
  <node id="253275" label="zzzz106" cy:nodeId="937">
    <graphics x="-256.6903039011044" y="-24.312846507483385" z="0.0"/>
  </node>
  <node id="253276" label="zzzz105" cy:nodeId="938">
    <graphics x="-321.46329126682707" y="19.78874651009474" z="0.0"/>
  </node>
  <node id="253277" label="zzzz104" cy:nodeId="939">
    <graphics x="-395.07111940708586" y="-49.38181241934862" z="0.0"/>
  </node>
  <node id="253278" label="zzzz103" cy:nodeId="940">
    <graphics x="-386.94876752224394" y="-1.4908593553837761" z="0.0"/>
  </node>
  <node id="253279" label="zzzz102" cy:nodeId="941">
    <graphics x="-313.8366662057919" y="-37.783969249182604" z="0.0"/>
  </node>
  <node id="253280" label="zzzz101" cy:nodeId="942">
    <graphics x="-326.743175605206" y="30.748913441247083" z="0.0"/>
  </node>
  <node id="253281" label="zzzz100" cy:nodeId="943">
    <graphics x="-348.3662873300595" y="-34.04615339224901" z="0.0"/>
  </node>
  <node id="253114" label="zzzz267" cy:nodeId="249718">
    <graphics x="315.42113294276766" y="-75.04566129630174" z="0.0"/>
  </node>
  <node id="253115" label="zzzz266" cy:nodeId="249717">
    <graphics x="2005.6848200765567" y="-152.02275785391893" z="0.0"/>
  </node>
  <node id="253116" label="zzzz265" cy:nodeId="249716">
    <graphics x="1982.4140681234317" y="-14.980491008215807" z="0.0"/>
  </node>
  <node id="253110" label="zzzz271" cy:nodeId="249722">
    <graphics x="2635.568607231708" y="289.1387793164912" z="0.0"/>
  </node>
  <node id="253111" label="zzzz270" cy:nodeId="249721">
    <graphics x="209.4165553060489" y="-159.9697488207158" z="0.0"/>
  </node>
  <node id="253112" label="zzzz269" cy:nodeId="249720">
    <graphics x="1952.3360957113223" y="-159.9697488207158" z="0.0"/>
  </node>
  <node id="253113" label="zzzz268" cy:nodeId="249719">
    <graphics x="-359.03470621433684" y="312.64201417977245" z="0.0"/>
  </node>
  <node id="253088" label="zzzz293" cy:nodeId="249726">
    <graphics x="2746.5904520955996" y="-159.9697488207158" z="0.0"/>
  </node>
  <node id="253092" label="zzzz289" cy:nodeId="249725">
    <graphics x="1240.8739947286563" y="181.41661134774122" z="0.0"/>
  </node>
  <node id="253105" label="zzzz276" cy:nodeId="249724">
    <graphics x="1161.8609351125674" y="438.97086826378734" z="0.0"/>
  </node>
  <node id="253109" label="zzzz272" cy:nodeId="249723">
    <graphics x="273.57625379237703" y="-144.8366921800908" z="0.0"/>
  </node>
  <node id="252699" label="zzzz682" cy:nodeId="249730">
    <graphics x="2741.6035117116885" y="181.41661134774122" z="0.0"/>
  </node>
  <node id="252757" label="zzzz624" cy:nodeId="249729">
    <graphics x="1561.8609351125674" y="438.97086826378734" z="0.0"/>
  </node>
  <node id="253086" label="zzzz295" cy:nodeId="249728">
    <graphics x="1361.8609351125674" y="438.97086826378734" z="0.0"/>
  </node>
  <node id="253087" label="zzzz294" cy:nodeId="249727">
    <graphics x="1240.8981532064395" y="-159.9697488207158" z="0.0"/>
  </node>
  <node id="252651" label="zzzz730" cy:nodeId="249734">
    <graphics x="204.66844548854402" y="283.863342915124" z="0.0"/>
  </node>
  <node id="252652" label="zzzz729" cy:nodeId="249733">
    <graphics x="1961.8609351125674" y="438.97086826378734" z="0.0"/>
  </node>
  <node id="252658" label="zzzz723" cy:nodeId="249732">
    <graphics x="1356.224721809955" y="-118.68236478751268" z="0.0"/>
  </node>
  <node id="252690" label="zzzz691" cy:nodeId="249731">
    <graphics x="2698.168279549213" y="-133.08113798087206" z="0.0"/>
  </node>
  <node id="252647" label="zzzz734" cy:nodeId="249738">
    <graphics x="2261.8609351125674" y="438.97086826378734" z="0.0"/>
  </node>
  <node id="252648" label="zzzz733" cy:nodeId="249737">
    <graphics x="881.7287806478457" y="-98.40438016837206" z="0.0"/>
  </node>
  <node id="252649" label="zzzz732" cy:nodeId="249736">
    <graphics x="2061.8609351125674" y="438.97086826378734" z="0.0"/>
  </node>
  <node id="252650" label="zzzz731" cy:nodeId="249735">
    <graphics x="435.90043821010164" y="239.9994894605342" z="0.0"/>
  </node>
  <node id="252641" label="zzzz740" cy:nodeId="249742">
    <graphics x="2161.8609351125674" y="438.97086826378734" z="0.0"/>
  </node>
  <node id="252644" label="zzzz737" cy:nodeId="249741">
    <graphics x="1512.9836749044375" y="181.41661134774122" z="0.0"/>
  </node>
  <node id="252645" label="zzzz736" cy:nodeId="249740">
    <graphics x="-273.6526299509091" y="546.6930362325373" z="0.0"/>
  </node>
  <node id="252646" label="zzzz735" cy:nodeId="249739">
    <graphics x="1553.5773161855655" y="281.27067628914745" z="0.0"/>
  </node>
  <node id="252626" label="zzzz755" cy:nodeId="249746">
    <graphics x="362.96503247890047" y="181.41661134774122" z="0.0"/>
  </node>
  <node id="252631" label="zzzz750" cy:nodeId="249745">
    <graphics x="208.91759290370516" y="-127.99138578360643" z="0.0"/>
  </node>
  <node id="252639" label="zzzz742" cy:nodeId="249744">
    <graphics x="761.1610926595645" y="-7.237937297278307" z="0.0"/>
  </node>
  <node id="252640" label="zzzz741" cy:nodeId="249743">
    <graphics x="2729.2239054647403" y="58.17527071053419" z="0.0"/>
  </node>
  <node id="252611" label="zzzz770" cy:nodeId="249750">
    <graphics x="855.5648402181582" y="-9.834372844153307" z="0.0"/>
  </node>
  <node id="252619" label="zzzz762" cy:nodeId="249749">
    <graphics x="807.4162196126895" y="7.700112019127943" z="0.0"/>
  </node>
  <node id="252620" label="zzzz761" cy:nodeId="249748">
    <graphics x="742.5968531576113" y="-124.74794706290331" z="0.0"/>
  </node>
  <node id="252622" label="zzzz759" cy:nodeId="249747">
    <graphics x="819.6331690755801" y="-159.9697488207158" z="0.0"/>
  </node>
  <node id="252586" label="zzzz795" cy:nodeId="249754">
    <graphics x="-388.4396477731747" y="8.781681690758802" z="0.0"/>
  </node>
  <node id="252599" label="zzzz782" cy:nodeId="249753">
    <graphics x="-379.3677874597592" y="10.880797062462904" z="0.0"/>
  </node>
  <node id="252600" label="zzzz781" cy:nodeId="249752">
    <graphics x="2361.8609351125674" y="438.97086826378734" z="0.0"/>
  </node>
  <node id="252610" label="zzzz771" cy:nodeId="249751">
    <graphics x="-170.63517771091887" y="546.6930362325373" z="0.0"/>
  </node>
  <node id="252523" label="zzzz858" cy:nodeId="249758">
    <graphics x="248.0328883138614" y="-69.25508817618456" z="0.0"/>
  </node>
  <node id="252525" label="zzzz856" cy:nodeId="249757">
    <graphics x="2031.2867793050723" y="-47.96022733634081" z="0.0"/>
  </node>
  <node id="252567" label="zzzz814" cy:nodeId="249756">
    <graphics x="-382.1124440225644" y="-103.84822782462206" z="0.0"/>
  </node>
  <node id="252583" label="zzzz798" cy:nodeId="249755">
    <graphics x="-167.61772547092863" y="438.97086826378734" z="0.0"/>
  </node>
  <node id="252514" label="zzzz867" cy:nodeId="249762">
    <graphics x="190.71907605800203" y="-114.44765409415331" z="0.0"/>
  </node>
  <node id="252515" label="zzzz866" cy:nodeId="249761">
    <graphics x="276.23375501308016" y="6.222527180260755" z="0.0"/>
  </node>
  <node id="252516" label="zzzz865" cy:nodeId="249760">
    <graphics x="1140.8739947286563" y="333.024346027917" z="0.0"/>
  </node>
  <node id="252517" label="zzzz864" cy:nodeId="249759">
    <graphics x="-446.2514523061795" y="318.56684938485057" z="0.0"/>
  </node>
  <node id="252510" label="zzzz871" cy:nodeId="249766">
    <graphics x="1925.5734919515567" y="-27.736167277747057" z="0.0"/>
  </node>
  <node id="252511" label="zzzz870" cy:nodeId="249765">
    <graphics x="1041.0217913595156" y="289.37025133187205" z="0.0"/>
  </node>
  <node id="252512" label="zzzz869" cy:nodeId="249764">
    <graphics x="254.86311902675203" y="-27.21829923575487" z="0.0"/>
  </node>
  <node id="252513" label="zzzz868" cy:nodeId="249763">
    <graphics x="1026.0570467916446" y="181.41661134774122" z="0.0"/>
  </node>
  <node id="252506" label="zzzz875" cy:nodeId="249770">
    <graphics x="-478.9916726144833" y="646.7102176290217" z="0.0"/>
  </node>
  <node id="252507" label="zzzz874" cy:nodeId="249769">
    <graphics x="1619.7439955678897" y="196.16374269539747" z="0.0"/>
  </node>
  <node id="252508" label="zzzz873" cy:nodeId="249768">
    <graphics x="1125.9749316183047" y="225.0791851621333" z="0.0"/>
  </node>
  <node id="252509" label="zzzz872" cy:nodeId="249767">
    <graphics x="294.0282496419864" y="-120.11679777091112" z="0.0"/>
  </node>
  <node id="252502" label="zzzz879" cy:nodeId="249774">
    <graphics x="1895.4969843831973" y="-77.10939725821581" z="0.0"/>
  </node>
  <node id="252503" label="zzzz878" cy:nodeId="249773">
    <graphics x="1907.8267878499942" y="-129.35210355704393" z="0.0"/>
  </node>
  <node id="252504" label="zzzz877" cy:nodeId="249772">
    <graphics x="195.78236951503328" y="-67.40013822501268" z="0.0"/>
  </node>
  <node id="252505" label="zzzz876" cy:nodeId="249771">
    <graphics x="-411.8294125589413" y="181.41661134774122" z="0.0"/>
  </node>
  <node id="252498" label="zzzz883" cy:nodeId="249778">
    <graphics x="301.49913587245516" y="-43.53360685294237" z="0.0"/>
  </node>
  <node id="252499" label="zzzz882" cy:nodeId="249777">
    <graphics x="330.4398707357364" y="-40.90134366934862" z="0.0"/>
  </node>
  <node id="252500" label="zzzz881" cy:nodeId="249776">
    <graphics x="-478.9916726144833" y="237.57505861336622" z="0.0"/>
  </node>
  <node id="252501" label="zzzz880" cy:nodeId="249775">
    <graphics x="177.34117688808016" y="-79.157538737708" z="0.0"/>
  </node>
  <node id="252493" label="zzzz888" cy:nodeId="249782">
    <graphics x="244.70787610683016" y="-5.073119487219714" z="0.0"/>
  </node>
  <node id="252494" label="zzzz887" cy:nodeId="249781">
    <graphics x="279.7516077962833" y="-60.34799894278612" z="0.0"/>
  </node>
  <node id="252495" label="zzzz886" cy:nodeId="249780">
    <graphics x="165.74458875331453" y="-35.468451823645495" z="0.0"/>
  </node>
  <node id="252496" label="zzzz885" cy:nodeId="249779">
    <graphics x="-378.9916726144833" y="646.7102176290217" z="0.0"/>
  </node>
  <node id="252464" label="zzzz917" cy:nodeId="249786">
    <graphics x="842.321370979877" y="-46.53481229727831" z="0.0"/>
  </node>
  <node id="252465" label="zzzz916" cy:nodeId="249785">
    <graphics x="-13.72164545383879" y="235.44950929695997" z="0.0"/>
  </node>
  <node id="252467" label="zzzz914" cy:nodeId="249784">
    <graphics x="-278.9916726144833" y="646.7102176290217" z="0.0"/>
  </node>
  <node id="252484" label="zzzz897" cy:nodeId="249783">
    <graphics x="304.668445488544" y="252.72203889901076" z="0.0"/>
  </node>
  <node id="252457" label="zzzz924" cy:nodeId="249790">
    <graphics x="796.8848780599551" y="-34.26729520743456" z="0.0"/>
  </node>
  <node id="252458" label="zzzz923" cy:nodeId="249789">
    <graphics x="244.4520834890323" y="438.97086826378734" z="0.0"/>
  </node>
  <node id="252459" label="zzzz922" cy:nodeId="249788">
    <graphics x="241.43463124904207" y="546.6930362325373" z="0.0"/>
  </node>
  <node id="252463" label="zzzz918" cy:nodeId="249787">
    <graphics x="810.9102076497988" y="-122.70326932852831" z="0.0"/>
  </node>
  <node id="252453" label="zzzz928" cy:nodeId="249794">
    <graphics x="838.2702235189395" y="-88.67336210196581" z="0.0"/>
  </node>
  <node id="252454" label="zzzz927" cy:nodeId="249793">
    <graphics x="883.938070198627" y="-52.60176786368456" z="0.0"/>
  </node>
  <node id="252455" label="zzzz926" cy:nodeId="249792">
    <graphics x="95.4993590322452" y="259.72250429207713" z="0.0"/>
  </node>
  <node id="252456" label="zzzz925" cy:nodeId="249791">
    <graphics x="724.4673060384707" y="-89.37612089102831" z="0.0"/>
  </node>
  <node id="252427" label="zzzz954" cy:nodeId="249798">
    <graphics x="483.4547442403751" y="338.97086826378734" z="0.0"/>
  </node>
  <node id="252428" label="zzzz953" cy:nodeId="249797">
    <graphics x="336.3268336263614" y="-101.22348722403612" z="0.0"/>
  </node>
  <node id="252443" label="zzzz938" cy:nodeId="249796">
    <graphics x="217.04588880214266" y="3.0905539136591926" z="0.0"/>
  </node>
  <node id="252444" label="zzzz937" cy:nodeId="249795">
    <graphics x="724.0225733724551" y="-42.11849149649706" z="0.0"/>
  </node>
  <node id="252423" label="zzzz958" cy:nodeId="249802">
    <graphics x="759.3050440755801" y="-54.53304227774706" z="0.0"/>
  </node>
  <node id="252424" label="zzzz957" cy:nodeId="249801">
    <graphics x="-270.63517771091887" y="438.97086826378734" z="0.0"/>
  </node>
  <node id="252425" label="zzzz956" cy:nodeId="249800">
    <graphics x="227.67299451503328" y="-67.6898873705205" z="0.0"/>
  </node>
  <node id="252426" label="zzzz955" cy:nodeId="249799">
    <graphics x="784.931966683002" y="-87.38613065665331" z="0.0"/>
  </node>
  <node id="252413" label="zzzz968" cy:nodeId="249806">
    <graphics x="-407.0248681100888" y="255.39347902352247" z="0.0"/>
  </node>
  <node id="252414" label="zzzz967" cy:nodeId="249805">
    <graphics x="-337.793411353497" y="227.7563025098506" z="0.0"/>
  </node>
  <node id="252421" label="zzzz960" cy:nodeId="249804">
    <graphics x="860.3244837728457" y="-135.6101296800908" z="0.0"/>
  </node>
  <node id="252422" label="zzzz959" cy:nodeId="249803">
    <graphics x="773.8497828451113" y="-150.9231179613408" z="0.0"/>
  </node>
  <node id="252409" label="zzzz972" cy:nodeId="249810">
    <graphics x="-178.99167261448332" y="646.7102176290217" z="0.0"/>
  </node>
  <node id="252410" label="zzzz971" cy:nodeId="249809">
    <graphics x="308.4657496419864" y="-152.51756986563768" z="0.0"/>
  </node>
  <node id="252411" label="zzzz970" cy:nodeId="249808">
    <graphics x="1971.470769783588" y="-83.94417509024706" z="0.0"/>
  </node>
  <node id="252412" label="zzzz969" cy:nodeId="249807">
    <graphics x="2040.4367732015567" y="-105.69417509024706" z="0.0"/>
  </node>
  <node id="252405" label="zzzz976" cy:nodeId="249814">
    <graphics x="1955.6091994253115" y="283.25859132820995" z="0.0"/>
  </node>
  <node id="252406" label="zzzz975" cy:nodeId="249813">
    <graphics x="2026.1475752798037" y="201.73643556649122" z="0.0"/>
  </node>
  <node id="252407" label="zzzz974" cy:nodeId="249812">
    <graphics x="2638.5860594716983" y="181.41661134774122" z="0.0"/>
  </node>
  <node id="252408" label="zzzz973" cy:nodeId="249811">
    <graphics x="175.21061315211824" y="181.41661134774122" z="0.0"/>
  </node>
  <node id="252402" label="zzzz979" cy:nodeId="249817">
    <graphics x="1920.3024291006045" y="181.41661134774122" z="0.0"/>
  </node>
  <node id="252403" label="zzzz978" cy:nodeId="249816">
    <graphics x="15.69009771022371" y="338.14897218758495" z="0.0"/>
  </node>
  <node id="252404" label="zzzz977" cy:nodeId="249815">
    <graphics x="376.70881833705477" y="312.6405397992793" z="0.0"/>
  </node>
</graph>
