# Supplementary material for: Discovery of several thousand highly diverse circular DNA viruses
Source: eLife journal article supplement (doi:10.7554/elife.51971), 2020-02-03
Supplement: fig2-figsupp1-data4 [file elife-51971-fig2-figsupp1-data4-v1.cys › CytoscapeSession-2019_08_05-17_02/views/252227-481223-all_my_seqs_genbank_ssDNA1_domains_micro_ino_rep_fasta+Full+Network%281%29.xgmml]

<?xml version="1.0" encoding="UTF-8" standalone="yes"?>
<graph id="481223" label="all_my_seqs_genbank_ssDNA1_domains_micro_ino_rep_fasta Full Network(1)" cy:view="1" cy:networkId="252227" cy:visualStyle="Solid" cy:rendererId="org.cytoscape.ding" cy:documentVersion="3.0" xmlns:dc="http://purl.org/dc/elements/1.1/" xmlns:xlink="http://www.w3.org/1999/xlink" xmlns:rdf="http://www.w3.org/1999/02/22-rdf-syntax-ns#" xmlns:cy="http://www.cytoscape.org" xmlns="http://www.cs.rpi.edu/XGMML">
  <graphics>
    <att name="NETWORK_NODE_SELECTION" value="true" type="string" cy:type="String"/>
    <att name="NETWORK_CENTER_X_LOCATION" value="-1097.2496032714844" type="string" cy:type="String"/>
    <att name="NETWORK_DEPTH" value="0.0" type="string" cy:type="String"/>
    <att name="NETWORK_SCALE_FACTOR" value="0.685580520499316" type="string" cy:type="String"/>
    <att name="NETWORK_EDGE_SELECTION" value="true" type="string" cy:type="String"/>
    <att name="NETWORK_CENTER_Y_LOCATION" value="1073.3997192382812" type="string" cy:type="String"/>
    <att name="NETWORK_TITLE" value="all_my_seqs_genbank_ssDNA1_domains_micro_ino_rep_fasta Full Network(1)" type="string" cy:type="String"/>
    <att name="NETWORK_CENTER_Z_LOCATION" value="0.0" type="string" cy:type="String"/>
    <att name="NETWORK_ANNOTATION_SELECTION" value="false" type="string" cy:type="String"/>
    <att name="NETWORK_HEIGHT" value="588.0" type="string" cy:type="String"/>
    <att name="NETWORK_WIDTH" value="964.0" type="string" cy:type="String"/>
  </graphics>
  <node id="481231" label="zzzz774" cy:nodeId="305">
    <graphics x="-1409.1300048828125" y="886.4028930664062" z="0.0"/>
  </node>
  <node id="481230" label="zzzz221" cy:nodeId="822">
    <graphics x="-1265.0025634765625" y="1129.299072265625" z="0.0"/>
  </node>
  <node id="481229" label="zzzz764" cy:nodeId="313">
    <graphics x="-1276.0186767578125" y="981.5809326171875" z="0.0"/>
  </node>
  <node id="481228" label="zzzz758" cy:nodeId="316">
    <graphics x="-1262.77734375" y="813.147216796875" z="0.0"/>
  </node>
  <node id="481227" label="zzzz757" cy:nodeId="317">
    <graphics x="-1400.2603759765625" y="824.7090454101562" z="0.0"/>
  </node>
  <node id="481225" label="zzzzzz9" cy:nodeId="62">
    <graphics x="-1042.6055908203125" y="1478.6719970703125" z="0.0"/>
  </node>
  <node id="481226" label="zzzz610" cy:nodeId="446">
    <graphics x="-992.724853515625" y="991.81494140625" z="0.0"/>
  </node>
  <node id="481250" label="zzzz754" cy:nodeId="319">
    <graphics x="-1311.257080078125" y="725.1272583007812" z="0.0"/>
  </node>
  <node id="481247" label="zzzz753" cy:nodeId="320">
    <graphics x="-1375.22216796875" y="802.0269165039062" z="0.0"/>
  </node>
  <node id="481248" label="zzzz608" cy:nodeId="448">
    <graphics x="-1002.843994140625" y="836.5052490234375" z="0.0"/>
  </node>
  <node id="481249" label="zzzz930" cy:nodeId="192">
    <graphics x="-785.3692016601562" y="1233.4908447265625" z="0.0"/>
  </node>
  <node id="481246" label="zzzz929" cy:nodeId="193">
    <graphics x="-1261.7362060546875" y="1000.8447265625" z="0.0"/>
  </node>
  <node id="481245" label="zzzz751" cy:nodeId="322">
    <graphics x="-1132.1837158203125" y="668.12744140625" z="0.0"/>
  </node>
  <node id="481243" label="zzzz749" cy:nodeId="323">
    <graphics x="-1079.9183349609375" y="687.267578125" z="0.0"/>
  </node>
  <node id="481244" label="zzzzzz4" cy:nodeId="67">
    <graphics x="-1131.0294189453125" y="917.7034912109375" z="0.0"/>
  </node>
  <node id="481242" label="zzzz748" cy:nodeId="324">
    <graphics x="-1132.49658203125" y="829.6512451171875" z="0.0"/>
  </node>
  <node id="481241" label="zzzzz37" cy:nodeId="134">
    <graphics x="-1100.814697265625" y="932.3762817382812" z="0.0"/>
  </node>
  <node id="481240" label="zzzz260" cy:nodeId="783">
    <graphics x="-1347.2900390625" y="918.5128173828125" z="0.0"/>
  </node>
  <node id="481239" label="zzzz803" cy:nodeId="280">
    <graphics x="-1151.7841796875" y="1008.1236572265625" z="0.0"/>
  </node>
  <node id="481238" label="zzzzz11" cy:nodeId="160">
    <graphics x="-1156.7470703125" y="940.7472534179688" z="0.0"/>
  </node>
  <node id="481237" label="zzzzz10" cy:nodeId="161">
    <graphics x="-808.4144897460938" y="1044.762939453125" z="0.0"/>
  </node>
  <node id="481236" label="zzzz861" cy:nodeId="225">
    <graphics x="-1099.8828125" y="845.9154663085938" z="0.0"/>
  </node>
  <node id="481235" label="zzzz860" cy:nodeId="226">
    <graphics x="-1248.189697265625" y="912.8444213867188" z="0.0"/>
  </node>
  <node id="481233" label="zzzz961" cy:nodeId="171">
    <graphics x="-1008.277099609375" y="1395.0516357421875" z="0.0"/>
  </node>
  <node id="481234" label="zzzz309" cy:nodeId="747">
    <graphics x="-1132.9296875" y="1450.15478515625" z="0.0"/>
  </node>
  <node id="481232" label="zzzz777" cy:nodeId="302">
    <graphics x="-1374.6842041015625" y="855.3721923828125" z="0.0"/>
  </node>
</graph>
