# Supplementary material for: Discovery of several thousand highly diverse circular DNA viruses
Source: eLife journal article supplement (doi:10.7554/elife.51971), 2020-02-03
Supplement: fig2-figsupp1-data4 [file elife-51971-fig2-figsupp1-data4-v1.cys › CytoscapeSession-2019_08_05-17_02/views/252237-731398-all_my_seqs_genbank_ssDNA1_domains_micro_ino_rep_fasta+Full+Network%282%29.xgmml]

<?xml version="1.0" encoding="UTF-8" standalone="yes"?>
<graph id="731398" label="all_my_seqs_genbank_ssDNA1_domains_micro_ino_rep_fasta Full Network(2)" cy:view="1" cy:networkId="252237" cy:visualStyle="Solid" cy:rendererId="org.cytoscape.ding" cy:documentVersion="3.0" xmlns:dc="http://purl.org/dc/elements/1.1/" xmlns:xlink="http://www.w3.org/1999/xlink" xmlns:rdf="http://www.w3.org/1999/02/22-rdf-syntax-ns#" xmlns:cy="http://www.cytoscape.org" xmlns="http://www.cs.rpi.edu/XGMML">
  <graphics>
    <att name="NETWORK_NODE_SELECTION" value="true" type="string" cy:type="String"/>
    <att name="NETWORK_CENTER_X_LOCATION" value="-241.55294799804688" type="string" cy:type="String"/>
    <att name="NETWORK_DEPTH" value="0.0" type="string" cy:type="String"/>
    <att name="NETWORK_SCALE_FACTOR" value="0.32854038039014344" type="string" cy:type="String"/>
    <att name="NETWORK_EDGE_SELECTION" value="true" type="string" cy:type="String"/>
    <att name="NETWORK_CENTER_Y_LOCATION" value="-321.04296875" type="string" cy:type="String"/>
    <att name="NETWORK_TITLE" value="all_my_seqs_genbank_ssDNA1_domains_micro_ino_rep_fasta Full Network(2)" type="string" cy:type="String"/>
    <att name="NETWORK_CENTER_Z_LOCATION" value="0.0" type="string" cy:type="String"/>
    <att name="NETWORK_ANNOTATION_SELECTION" value="false" type="string" cy:type="String"/>
    <att name="NETWORK_HEIGHT" value="588.0" type="string" cy:type="String"/>
    <att name="NETWORK_WIDTH" value="964.0" type="string" cy:type="String"/>
  </graphics>
  <node id="732182" label="zzzzzz7" cy:nodeId="64">
    <graphics x="-1194.984619140625" y="-302.7394714355469" z="0.0"/>
  </node>
  <node id="732181" label="zzzzz99" cy:nodeId="72">
    <graphics x="-117.89457702636719" y="66.41301727294922" z="0.0"/>
  </node>
  <node id="732180" label="zzzzz98" cy:nodeId="73">
    <graphics x="-30.147506713867188" y="223.36431884765625" z="0.0"/>
  </node>
  <node id="732179" label="zzzzz97" cy:nodeId="74">
    <graphics x="18.516860961914062" y="-106.57369995117188" z="0.0"/>
  </node>
  <node id="732178" label="zzzzz96" cy:nodeId="75">
    <graphics x="-197.23777770996094" y="-34.775367736816406" z="0.0"/>
  </node>
  <node id="732177" label="zzzzz95" cy:nodeId="76">
    <graphics x="-96.16239929199219" y="335.669921875" z="0.0"/>
  </node>
  <node id="732176" label="zzzzz94" cy:nodeId="77">
    <graphics x="-23.724349975585938" y="-57.49652862548828" z="0.0"/>
  </node>
  <node id="732175" label="zzzzz93" cy:nodeId="78">
    <graphics x="-217.76177978515625" y="-272.52410888671875" z="0.0"/>
  </node>
  <node id="732174" label="zzzzz92" cy:nodeId="79">
    <graphics x="-368.01776123046875" y="-129.8466033935547" z="0.0"/>
  </node>
  <node id="732173" label="zzzzz91" cy:nodeId="80">
    <graphics x="-267.8208312988281" y="-127.79556274414062" z="0.0"/>
  </node>
  <node id="732172" label="zzzzz90" cy:nodeId="81">
    <graphics x="-188.57823181152344" y="-275.8673095703125" z="0.0"/>
  </node>
  <node id="732171" label="zzzzz89" cy:nodeId="82">
    <graphics x="-139.1038055419922" y="-110.18338012695312" z="0.0"/>
  </node>
  <node id="732170" label="zzzzz88" cy:nodeId="83">
    <graphics x="-241.39663696289062" y="-169.99867248535156" z="0.0"/>
  </node>
  <node id="732169" label="zzzzz87" cy:nodeId="84">
    <graphics x="-201.0417938232422" y="-91.67877197265625" z="0.0"/>
  </node>
  <node id="732168" label="zzzzz86" cy:nodeId="85">
    <graphics x="-171.0626678466797" y="-87.84326934814453" z="0.0"/>
  </node>
  <node id="732167" label="zzzzz85" cy:nodeId="86">
    <graphics x="-263.9706115722656" y="-99.21969604492188" z="0.0"/>
  </node>
  <node id="732166" label="zzzzz84" cy:nodeId="87">
    <graphics x="-144.2665252685547" y="-130.6923370361328" z="0.0"/>
  </node>
  <node id="732165" label="zzzzz83" cy:nodeId="88">
    <graphics x="-188.67832946777344" y="-335.24493408203125" z="0.0"/>
  </node>
  <node id="732164" label="zzzzz82" cy:nodeId="89">
    <graphics x="-247.28250122070312" y="-88.235595703125" z="0.0"/>
  </node>
  <node id="732163" label="zzzzz81" cy:nodeId="90">
    <graphics x="-287.3134460449219" y="-108.53582763671875" z="0.0"/>
  </node>
  <node id="732162" label="zzzzz80" cy:nodeId="91">
    <graphics x="-163.82508850097656" y="-124.56785583496094" z="0.0"/>
  </node>
  <node id="732161" label="zzzzz79" cy:nodeId="92">
    <graphics x="-237.41754150390625" y="-76.03878021240234" z="0.0"/>
  </node>
  <node id="732160" label="zzzzz78" cy:nodeId="93">
    <graphics x="-226.90435791015625" y="-235.21099853515625" z="0.0"/>
  </node>
  <node id="732159" label="zzzzz77" cy:nodeId="94">
    <graphics x="-288.6792297363281" y="-123.68443298339844" z="0.0"/>
  </node>
  <node id="732158" label="zzzzz76" cy:nodeId="95">
    <graphics x="378.8251647949219" y="-199.95382690429688" z="0.0"/>
  </node>
  <node id="732157" label="zzzzz75" cy:nodeId="96">
    <graphics x="165.37916564941406" y="200.98313903808594" z="0.0"/>
  </node>
  <node id="732156" label="zzzzz74" cy:nodeId="97">
    <graphics x="-254.7362060546875" y="-244.62518310546875" z="0.0"/>
  </node>
  <node id="732155" label="zzzzz73" cy:nodeId="98">
    <graphics x="-218.15496826171875" y="-314.05450439453125" z="0.0"/>
  </node>
  <node id="732154" label="zzzzz72" cy:nodeId="99">
    <graphics x="-173.11146545410156" y="-934.4301147460938" z="0.0"/>
  </node>
  <node id="732153" label="zzzzz71" cy:nodeId="100">
    <graphics x="-192.28648376464844" y="-905.487548828125" z="0.0"/>
  </node>
  <node id="732152" label="zzzzz70" cy:nodeId="101">
    <graphics x="42.21333312988281" y="147.2245635986328" z="0.0"/>
  </node>
  <node id="732151" label="zzzzz69" cy:nodeId="102">
    <graphics x="112.23738098144531" y="-151.33399963378906" z="0.0"/>
  </node>
  <node id="732150" label="zzzzz67" cy:nodeId="104">
    <graphics x="-141.8613739013672" y="-386.7122802734375" z="0.0"/>
  </node>
  <node id="732149" label="zzzzz66" cy:nodeId="105">
    <graphics x="293.7207946777344" y="65.9764633178711" z="0.0"/>
  </node>
  <node id="732148" label="zzzzz65" cy:nodeId="106">
    <graphics x="-370.9541015625" y="-1077.006103515625" z="0.0"/>
  </node>
  <node id="732147" label="zzzzz64" cy:nodeId="107">
    <graphics x="-283.3180847167969" y="-202.9600372314453" z="0.0"/>
  </node>
  <node id="732146" label="zzzzz63" cy:nodeId="108">
    <graphics x="204.89112854003906" y="-396.5279846191406" z="0.0"/>
  </node>
  <node id="732145" label="zzzzz62" cy:nodeId="109">
    <graphics x="229.49298095703125" y="-130.882080078125" z="0.0"/>
  </node>
  <node id="732144" label="zzzzz61" cy:nodeId="110">
    <graphics x="-263.1020812988281" y="-177.47647094726562" z="0.0"/>
  </node>
  <node id="732143" label="zzzzz60" cy:nodeId="111">
    <graphics x="-356.0187072753906" y="-166.6432647705078" z="0.0"/>
  </node>
  <node id="732142" label="zzzzz59" cy:nodeId="112">
    <graphics x="205.9851837158203" y="-281.921142578125" z="0.0"/>
  </node>
  <node id="732141" label="zzzzz58" cy:nodeId="113">
    <graphics x="185.3778839111328" y="-332.12054443359375" z="0.0"/>
  </node>
  <node id="732140" label="zzzzz57" cy:nodeId="114">
    <graphics x="260.2713928222656" y="-173.0635528564453" z="0.0"/>
  </node>
  <node id="732139" label="zzzzz56" cy:nodeId="115">
    <graphics x="169.90284729003906" y="-422.8209533691406" z="0.0"/>
  </node>
  <node id="732138" label="zzzzz55" cy:nodeId="116">
    <graphics x="-105.22477722167969" y="-156.3629150390625" z="0.0"/>
  </node>
  <node id="732137" label="zzzzz54" cy:nodeId="117">
    <graphics x="286.2423400878906" y="-103.641845703125" z="0.0"/>
  </node>
  <node id="732136" label="zzzzz53" cy:nodeId="118">
    <graphics x="-257.1200256347656" y="-191.08566284179688" z="0.0"/>
  </node>
  <node id="732135" label="zzzzz52" cy:nodeId="119">
    <graphics x="197.17103576660156" y="-250.26123046875" z="0.0"/>
  </node>
  <node id="732134" label="zzzzz51" cy:nodeId="120">
    <graphics x="97.43586730957031" y="-15.201820373535156" z="0.0"/>
  </node>
  <node id="732133" label="zzzzz50" cy:nodeId="121">
    <graphics x="-36.93400573730469" y="-312.11785888671875" z="0.0"/>
  </node>
  <node id="732132" label="zzzzz49" cy:nodeId="122">
    <graphics x="-178.19996643066406" y="-15.151588439941406" z="0.0"/>
  </node>
  <node id="732131" label="zzzzz48" cy:nodeId="123">
    <graphics x="-79.41459655761719" y="-29.096534729003906" z="0.0"/>
  </node>
  <node id="732130" label="zzzzz47" cy:nodeId="124">
    <graphics x="118.72303771972656" y="-144.7599334716797" z="0.0"/>
  </node>
  <node id="732129" label="zzzzz46" cy:nodeId="125">
    <graphics x="-167.7913360595703" y="158.86082458496094" z="0.0"/>
  </node>
  <node id="732128" label="zzzzz45" cy:nodeId="126">
    <graphics x="-272.1687316894531" y="-215.41976928710938" z="0.0"/>
  </node>
  <node id="732127" label="zzzzz44" cy:nodeId="127">
    <graphics x="-93.50724792480469" y="89.07876586914062" z="0.0"/>
  </node>
  <node id="732126" label="zzzzz43" cy:nodeId="128">
    <graphics x="-303.6427001953125" y="24.25768280029297" z="0.0"/>
  </node>
  <node id="732125" label="zzzzz41" cy:nodeId="130">
    <graphics x="-152.1967010498047" y="-840.0716552734375" z="0.0"/>
  </node>
  <node id="732124" label="zzzzz40" cy:nodeId="131">
    <graphics x="-269.6715393066406" y="-896.9228515625" z="0.0"/>
  </node>
  <node id="732123" label="zzzzz39" cy:nodeId="132">
    <graphics x="-214.97227478027344" y="-820.471923828125" z="0.0"/>
  </node>
  <node id="732122" label="zzzzz38" cy:nodeId="133">
    <graphics x="-629.4400634765625" y="-220.12692260742188" z="0.0"/>
  </node>
  <node id="732121" label="zzzzz36" cy:nodeId="135">
    <graphics x="54.18074035644531" y="-685.6143798828125" z="0.0"/>
  </node>
  <node id="732120" label="zzzzz35" cy:nodeId="136">
    <graphics x="-488.6683349609375" y="-302.0152282714844" z="0.0"/>
  </node>
  <node id="732119" label="zzzzz32" cy:nodeId="139">
    <graphics x="757.5581665039062" y="67.00774383544922" z="0.0"/>
  </node>
  <node id="732118" label="zzzzz30" cy:nodeId="141">
    <graphics x="-512.5857543945312" y="-231.8955078125" z="0.0"/>
  </node>
  <node id="732117" label="zzzzz26" cy:nodeId="145">
    <graphics x="926.0241088867188" y="85.45885467529297" z="0.0"/>
  </node>
  <node id="732116" label="zzzzz12" cy:nodeId="159">
    <graphics x="342.4024963378906" y="-690.1484375" z="0.0"/>
  </node>
  <node id="732115" label="zzzz983" cy:nodeId="162">
    <graphics x="203.9623565673828" y="-315.1120300292969" z="0.0"/>
  </node>
  <node id="732114" label="zzzz982" cy:nodeId="163">
    <graphics x="-263.6683654785156" y="-140.26890563964844" z="0.0"/>
  </node>
  <node id="732113" label="zzzz981" cy:nodeId="164">
    <graphics x="-37.98765563964844" y="136.5754852294922" z="0.0"/>
  </node>
  <node id="732112" label="zzzz966" cy:nodeId="166">
    <graphics x="95.55891418457031" y="-346.0387878417969" z="0.0"/>
  </node>
  <node id="732111" label="zzzz965" cy:nodeId="167">
    <graphics x="-195.6508026123047" y="-70.08338165283203" z="0.0"/>
  </node>
  <node id="732110" label="zzzz964" cy:nodeId="168">
    <graphics x="-142.60362243652344" y="-92.42678833007812" z="0.0"/>
  </node>
  <node id="732109" label="zzzz963" cy:nodeId="169">
    <graphics x="-126.35227966308594" y="-128.0304718017578" z="0.0"/>
  </node>
  <node id="732108" label="zzzz952" cy:nodeId="172">
    <graphics x="-115.10197448730469" y="-115.36361694335938" z="0.0"/>
  </node>
  <node id="732107" label="zzzz951" cy:nodeId="173">
    <graphics x="-130.81163024902344" y="-320.9055480957031" z="0.0"/>
  </node>
  <node id="732106" label="zzzz950" cy:nodeId="174">
    <graphics x="-167.1491241455078" y="-313.4093933105469" z="0.0"/>
  </node>
  <node id="732105" label="zzzz949" cy:nodeId="175">
    <graphics x="-125.50779724121094" y="-266.9816589355469" z="0.0"/>
  </node>
  <node id="732104" label="zzzz948" cy:nodeId="176">
    <graphics x="106.70716857910156" y="-232.24685668945312" z="0.0"/>
  </node>
  <node id="732103" label="zzzz947" cy:nodeId="177">
    <graphics x="-143.83494567871094" y="-253.63931274414062" z="0.0"/>
  </node>
  <node id="732102" label="zzzz946" cy:nodeId="178">
    <graphics x="-164.4874725341797" y="-372.0777587890625" z="0.0"/>
  </node>
  <node id="732101" label="zzzz945" cy:nodeId="179">
    <graphics x="-228.17828369140625" y="-104.941162109375" z="0.0"/>
  </node>
  <node id="732100" label="zzzz944" cy:nodeId="180">
    <graphics x="-304.1003112792969" y="-136.2390899658203" z="0.0"/>
  </node>
  <node id="732099" label="zzzz943" cy:nodeId="181">
    <graphics x="-142.7950897216797" y="-328.3313903808594" z="0.0"/>
  </node>
  <node id="732098" label="zzzz942" cy:nodeId="182">
    <graphics x="129.1255645751953" y="-263.1036376953125" z="0.0"/>
  </node>
  <node id="732097" label="zzzz941" cy:nodeId="183">
    <graphics x="-195.7013397216797" y="-263.8167724609375" z="0.0"/>
  </node>
  <node id="732096" label="zzzz940" cy:nodeId="184">
    <graphics x="-100.60978698730469" y="-228.00726318359375" z="0.0"/>
  </node>
  <node id="732095" label="zzzz939" cy:nodeId="185">
    <graphics x="-377.0407409667969" y="-1210.21337890625" z="0.0"/>
  </node>
  <node id="732094" label="zzzz936" cy:nodeId="186">
    <graphics x="35.04347229003906" y="-317.24517822265625" z="0.0"/>
  </node>
  <node id="732093" label="zzzz935" cy:nodeId="187">
    <graphics x="14.708755493164062" y="-79.85059356689453" z="0.0"/>
  </node>
  <node id="732092" label="zzzz934" cy:nodeId="188">
    <graphics x="-114.42039489746094" y="57.535362243652344" z="0.0"/>
  </node>
  <node id="732091" label="zzzz933" cy:nodeId="189">
    <graphics x="164.38526916503906" y="-439.630859375" z="0.0"/>
  </node>
  <node id="732090" label="zzzz931" cy:nodeId="191">
    <graphics x="250.27688598632812" y="9.898674011230469" z="0.0"/>
  </node>
  <node id="732089" label="zzzz921" cy:nodeId="194">
    <graphics x="-155.3485565185547" y="-136.5823211669922" z="0.0"/>
  </node>
  <node id="732088" label="zzzz920" cy:nodeId="195">
    <graphics x="299.3437194824219" y="57.01024627685547" z="0.0"/>
  </node>
  <node id="732087" label="zzzz913" cy:nodeId="198">
    <graphics x="-230.03564453125" y="-76.70764923095703" z="0.0"/>
  </node>
  <node id="732086" label="zzzz912" cy:nodeId="199">
    <graphics x="-172.2408905029297" y="-150.5341339111328" z="0.0"/>
  </node>
  <node id="732085" label="zzzz911" cy:nodeId="200">
    <graphics x="-63.73411560058594" y="-173.0983123779297" z="0.0"/>
  </node>
  <node id="732084" label="zzzz910" cy:nodeId="201">
    <graphics x="-172.5579376220703" y="-275.9173278808594" z="0.0"/>
  </node>
  <node id="732083" label="zzzz909" cy:nodeId="202">
    <graphics x="-210.82557678222656" y="-259.4373474121094" z="0.0"/>
  </node>
  <node id="732082" label="zzzz908" cy:nodeId="203">
    <graphics x="-198.2974090576172" y="-102.60186767578125" z="0.0"/>
  </node>
  <node id="732081" label="zzzz907" cy:nodeId="204">
    <graphics x="-214.2071990966797" y="-190.57923889160156" z="0.0"/>
  </node>
  <node id="732080" label="zzzz906" cy:nodeId="205">
    <graphics x="-116.74217224121094" y="-269.3056640625" z="0.0"/>
  </node>
  <node id="732079" label="zzzz905" cy:nodeId="206">
    <graphics x="208.0330352783203" y="-211.78028869628906" z="0.0"/>
  </node>
  <node id="732078" label="zzzz904" cy:nodeId="207">
    <graphics x="-215.1079559326172" y="-14.321052551269531" z="0.0"/>
  </node>
  <node id="732077" label="zzzz903" cy:nodeId="208">
    <graphics x="-239.245849609375" y="-314.5509948730469" z="0.0"/>
  </node>
  <node id="732076" label="zzzz902" cy:nodeId="209">
    <graphics x="-101.14811706542969" y="-369.9060363769531" z="0.0"/>
  </node>
  <node id="732075" label="zzzz901" cy:nodeId="210">
    <graphics x="-230.93115234375" y="-138.61907958984375" z="0.0"/>
  </node>
  <node id="732074" label="zzzz900" cy:nodeId="211">
    <graphics x="-231.71990966796875" y="-188.3009033203125" z="0.0"/>
  </node>
  <node id="732073" label="zzzz899" cy:nodeId="212">
    <graphics x="-129.8574676513672" y="-376.859130859375" z="0.0"/>
  </node>
  <node id="732072" label="zzzz898" cy:nodeId="213">
    <graphics x="104.95899963378906" y="-193.4312744140625" z="0.0"/>
  </node>
  <node id="732071" label="zzzz896" cy:nodeId="214">
    <graphics x="-184.4668731689453" y="-33.166175842285156" z="0.0"/>
  </node>
  <node id="732070" label="zzzz895" cy:nodeId="215">
    <graphics x="-130.1352996826172" y="-176.00900268554688" z="0.0"/>
  </node>
  <node id="732069" label="zzzz894" cy:nodeId="216">
    <graphics x="-220.918701171875" y="-53.49665069580078" z="0.0"/>
  </node>
  <node id="732068" label="zzzz893" cy:nodeId="217">
    <graphics x="-187.7308807373047" y="-145.9921417236328" z="0.0"/>
  </node>
  <node id="732067" label="zzzz892" cy:nodeId="218">
    <graphics x="-227.34356689453125" y="-92.76910400390625" z="0.0"/>
  </node>
  <node id="732066" label="zzzz891" cy:nodeId="219">
    <graphics x="-71.77720642089844" y="-166.28981018066406" z="0.0"/>
  </node>
  <node id="732065" label="zzzz890" cy:nodeId="220">
    <graphics x="76.53645324707031" y="-431.5007629394531" z="0.0"/>
  </node>
  <node id="732064" label="zzzz889" cy:nodeId="221">
    <graphics x="-145.94029235839844" y="-131.2322235107422" z="0.0"/>
  </node>
  <node id="732063" label="zzzz884" cy:nodeId="222">
    <graphics x="-91.92326354980469" y="-281.7466735839844" z="0.0"/>
  </node>
  <node id="732062" label="zzzz863" cy:nodeId="223">
    <graphics x="-246.4332275390625" y="-776.4613037109375" z="0.0"/>
  </node>
  <node id="732061" label="zzzz862" cy:nodeId="224">
    <graphics x="136.6968536376953" y="150.10499572753906" z="0.0"/>
  </node>
  <node id="732060" label="zzzz854" cy:nodeId="230">
    <graphics x="-24.038803100585938" y="-556.5955200195312" z="0.0"/>
  </node>
  <node id="732059" label="zzzz853" cy:nodeId="231">
    <graphics x="39.36970520019531" y="-362.2542419433594" z="0.0"/>
  </node>
  <node id="732058" label="zzzz852" cy:nodeId="232">
    <graphics x="-13.605758666992188" y="-155.20664978027344" z="0.0"/>
  </node>
  <node id="732057" label="zzzz850" cy:nodeId="234">
    <graphics x="56.30799865722656" y="-498.77069091796875" z="0.0"/>
  </node>
  <node id="732056" label="zzzz849" cy:nodeId="235">
    <graphics x="-122.95292663574219" y="-304.4703063964844" z="0.0"/>
  </node>
  <node id="732055" label="zzzz848" cy:nodeId="236">
    <graphics x="163.80445861816406" y="-74.19290924072266" z="0.0"/>
  </node>
  <node id="732054" label="zzzz847" cy:nodeId="237">
    <graphics x="272.8408508300781" y="264.8590087890625" z="0.0"/>
  </node>
  <node id="732053" label="zzzz845" cy:nodeId="239">
    <graphics x="-259.302734375" y="-111.39129638671875" z="0.0"/>
  </node>
  <node id="732052" label="zzzz844" cy:nodeId="240">
    <graphics x="141.31971740722656" y="-103.570556640625" z="0.0"/>
  </node>
  <node id="732051" label="zzzz843" cy:nodeId="241">
    <graphics x="-20.378829956054688" y="-342.2848205566406" z="0.0"/>
  </node>
  <node id="732050" label="zzzz841" cy:nodeId="243">
    <graphics x="-12.011703491210938" y="-208.19700622558594" z="0.0"/>
  </node>
  <node id="732049" label="zzzz840" cy:nodeId="244">
    <graphics x="-0.6886444091796875" y="-264.39520263671875" z="0.0"/>
  </node>
  <node id="732048" label="zzzz839" cy:nodeId="245">
    <graphics x="-73.25993347167969" y="226.24456787109375" z="0.0"/>
  </node>
  <node id="732047" label="zzzz838" cy:nodeId="246">
    <graphics x="87.23310852050781" y="-415.05816650390625" z="0.0"/>
  </node>
  <node id="732046" label="zzzz837" cy:nodeId="247">
    <graphics x="21.358901977539062" y="-356.4488220214844" z="0.0"/>
  </node>
  <node id="732045" label="zzzz836" cy:nodeId="248">
    <graphics x="-39.61491394042969" y="57.79228973388672" z="0.0"/>
  </node>
  <node id="732044" label="zzzz834" cy:nodeId="250">
    <graphics x="48.89515686035156" y="-383.40142822265625" z="0.0"/>
  </node>
  <node id="732043" label="zzzz833" cy:nodeId="251">
    <graphics x="-105.60978698730469" y="-13.306373596191406" z="0.0"/>
  </node>
  <node id="732042" label="zzzz832" cy:nodeId="252">
    <graphics x="-122.51951599121094" y="-21.50800323486328" z="0.0"/>
  </node>
  <node id="732041" label="zzzz831" cy:nodeId="253">
    <graphics x="-92.14421081542969" y="-41.329505920410156" z="0.0"/>
  </node>
  <node id="732040" label="zzzz830" cy:nodeId="254">
    <graphics x="-188.4983367919922" y="131.79258728027344" z="0.0"/>
  </node>
  <node id="732039" label="zzzz829" cy:nodeId="255">
    <graphics x="-89.61766052246094" y="18.32927703857422" z="0.0"/>
  </node>
  <node id="732038" label="zzzz827" cy:nodeId="257">
    <graphics x="439.9720153808594" y="568.12744140625" z="0.0"/>
  </node>
  <node id="732037" label="zzzz826" cy:nodeId="258">
    <graphics x="224.14202880859375" y="131.5484161376953" z="0.0"/>
  </node>
  <node id="732036" label="zzzz825" cy:nodeId="259">
    <graphics x="178.2138214111328" y="236.3031005859375" z="0.0"/>
  </node>
  <node id="732035" label="zzzz824" cy:nodeId="260">
    <graphics x="129.92701721191406" y="195.03184509277344" z="0.0"/>
  </node>
  <node id="732034" label="zzzz823" cy:nodeId="261">
    <graphics x="279.1847839355469" y="123.65492248535156" z="0.0"/>
  </node>
  <node id="732033" label="zzzz822" cy:nodeId="262">
    <graphics x="325.4082946777344" y="-487.9052734375" z="0.0"/>
  </node>
  <node id="732032" label="zzzz821" cy:nodeId="263">
    <graphics x="432.0096130371094" y="348.1728515625" z="0.0"/>
  </node>
  <node id="732031" label="zzzz820" cy:nodeId="264">
    <graphics x="21.478775024414062" y="275.6588134765625" z="0.0"/>
  </node>
  <node id="732030" label="zzzz818" cy:nodeId="266">
    <graphics x="376.5511169433594" y="-61.353050231933594" z="0.0"/>
  </node>
  <node id="732029" label="zzzz816" cy:nodeId="268">
    <graphics x="-72.45695495605469" y="-646.3071899414062" z="0.0"/>
  </node>
  <node id="732028" label="zzzz815" cy:nodeId="269">
    <graphics x="-201.12696838378906" y="-558.4398193359375" z="0.0"/>
  </node>
  <node id="732027" label="zzzz813" cy:nodeId="270">
    <graphics x="386.3622741699219" y="-66.27362823486328" z="0.0"/>
  </node>
  <node id="732026" label="zzzz812" cy:nodeId="271">
    <graphics x="27.946670532226562" y="-193.73118591308594" z="0.0"/>
  </node>
  <node id="732025" label="zzzz811" cy:nodeId="272">
    <graphics x="-153.11790466308594" y="71.68196868896484" z="0.0"/>
  </node>
  <node id="732024" label="zzzz810" cy:nodeId="273">
    <graphics x="-82.19377136230469" y="-53.133705139160156" z="0.0"/>
  </node>
  <node id="732023" label="zzzz809" cy:nodeId="274">
    <graphics x="7.4671173095703125" y="-158.36412048339844" z="0.0"/>
  </node>
  <node id="732022" label="zzzz808" cy:nodeId="275">
    <graphics x="-194.9846649169922" y="14.017997741699219" z="0.0"/>
  </node>
  <node id="732021" label="zzzz807" cy:nodeId="276">
    <graphics x="-35.25431823730469" y="-51.752830505371094" z="0.0"/>
  </node>
  <node id="732020" label="zzzz806" cy:nodeId="277">
    <graphics x="-104.46647644042969" y="145.10472106933594" z="0.0"/>
  </node>
  <node id="732019" label="zzzz805" cy:nodeId="278">
    <graphics x="-58.26109313964844" y="251.12017822265625" z="0.0"/>
  </node>
  <node id="732018" label="zzzz804" cy:nodeId="279">
    <graphics x="164.3355255126953" y="25.329124450683594" z="0.0"/>
  </node>
  <node id="732017" label="zzzz802" cy:nodeId="281">
    <graphics x="-37.24876403808594" y="-130.2991180419922" z="0.0"/>
  </node>
  <node id="732016" label="zzzz801" cy:nodeId="282">
    <graphics x="146.4683380126953" y="-188.27755737304688" z="0.0"/>
  </node>
  <node id="732015" label="zzzz800" cy:nodeId="283">
    <graphics x="141.3653106689453" y="-162.65667724609375" z="0.0"/>
  </node>
  <node id="732014" label="zzzz799" cy:nodeId="284">
    <graphics x="-374.8848571777344" y="-242.69314575195312" z="0.0"/>
  </node>
  <node id="732013" label="zzzz796" cy:nodeId="286">
    <graphics x="-332.5147705078125" y="-99.53250122070312" z="0.0"/>
  </node>
  <node id="732012" label="zzzz794" cy:nodeId="287">
    <graphics x="-175.6043243408203" y="-178.83770751953125" z="0.0"/>
  </node>
  <node id="732011" label="zzzz793" cy:nodeId="288">
    <graphics x="-179.6075897216797" y="-220.2176513671875" z="0.0"/>
  </node>
  <node id="732010" label="zzzz792" cy:nodeId="289">
    <graphics x="-178.9863739013672" y="52.27593231201172" z="0.0"/>
  </node>
  <node id="732009" label="zzzz791" cy:nodeId="290">
    <graphics x="-161.9652862548828" y="44.71697235107422" z="0.0"/>
  </node>
  <node id="732008" label="zzzz790" cy:nodeId="291">
    <graphics x="166.8296661376953" y="72.60149383544922" z="0.0"/>
  </node>
  <node id="732007" label="zzzz788" cy:nodeId="293">
    <graphics x="-306.7580261230469" y="7.365013122558594" z="0.0"/>
  </node>
  <node id="732006" label="zzzz787" cy:nodeId="294">
    <graphics x="173.7383575439453" y="59.52629852294922" z="0.0"/>
  </node>
  <node id="732005" label="zzzz786" cy:nodeId="295">
    <graphics x="-95.27708435058594" y="-568.6681518554688" z="0.0"/>
  </node>
  <node id="732004" label="zzzz785" cy:nodeId="296">
    <graphics x="128.3733673095703" y="107.33935546875" z="0.0"/>
  </node>
  <node id="732003" label="zzzz784" cy:nodeId="297">
    <graphics x="141.79872131347656" y="-206.1439666748047" z="0.0"/>
  </node>
  <node id="732002" label="zzzz783" cy:nodeId="298">
    <graphics x="187.9102325439453" y="40.401512145996094" z="0.0"/>
  </node>
  <node id="732001" label="zzzz765" cy:nodeId="312">
    <graphics x="-1409.1300048828125" y="-234.749755859375" z="0.0"/>
  </node>
  <node id="732000" label="zzzz760" cy:nodeId="315">
    <graphics x="22.472183227539062" y="219.65386962890625" z="0.0"/>
  </node>
  <node id="731999" label="zzzz756" cy:nodeId="318">
    <graphics x="272.5276184082031" y="29.38939666748047" z="0.0"/>
  </node>
  <node id="731998" label="zzzz745" cy:nodeId="327">
    <graphics x="291.0780944824219" y="44.346580505371094" z="0.0"/>
  </node>
  <node id="731997" label="zzzz744" cy:nodeId="328">
    <graphics x="-10.104598999023438" y="307.91265869140625" z="0.0"/>
  </node>
  <node id="731996" label="zzzz743" cy:nodeId="329">
    <graphics x="416.4510192871094" y="-98.41180419921875" z="0.0"/>
  </node>
  <node id="731995" label="zzzz738" cy:nodeId="331">
    <graphics x="-129.6222381591797" y="45.577537536621094" z="0.0"/>
  </node>
  <node id="731994" label="zzzz728" cy:nodeId="332">
    <graphics x="-354.58843994140625" y="-232.22564697265625" z="0.0"/>
  </node>
  <node id="731993" label="zzzz727" cy:nodeId="333">
    <graphics x="-311.42633056640625" y="-240.74307250976562" z="0.0"/>
  </node>
  <node id="731992" label="zzzz726" cy:nodeId="334">
    <graphics x="-160.4318084716797" y="-303.3625793457031" z="0.0"/>
  </node>
  <node id="731991" label="zzzz725" cy:nodeId="335">
    <graphics x="-234.49822998046875" y="-275.35345458984375" z="0.0"/>
  </node>
  <node id="731990" label="zzzz724" cy:nodeId="336">
    <graphics x="-116.83030700683594" y="-192.63726806640625" z="0.0"/>
  </node>
  <node id="731989" label="zzzz722" cy:nodeId="337">
    <graphics x="-120.92362976074219" y="-148.21128845214844" z="0.0"/>
  </node>
  <node id="731988" label="zzzz721" cy:nodeId="338">
    <graphics x="138.6542510986328" y="220.86614990234375" z="0.0"/>
  </node>
  <node id="731987" label="zzzz719" cy:nodeId="340">
    <graphics x="205.37379455566406" y="120.32130432128906" z="0.0"/>
  </node>
  <node id="731986" label="zzzz718" cy:nodeId="341">
    <graphics x="252.98129272460938" y="54.67125701904297" z="0.0"/>
  </node>
  <node id="731985" label="zzzz717" cy:nodeId="342">
    <graphics x="381.0019226074219" y="133.75404357910156" z="0.0"/>
  </node>
  <node id="731984" label="zzzz716" cy:nodeId="343">
    <graphics x="301.2946472167969" y="94.9874267578125" z="0.0"/>
  </node>
  <node id="731983" label="zzzz715" cy:nodeId="344">
    <graphics x="282.8871765136719" y="12.574943542480469" z="0.0"/>
  </node>
  <node id="731982" label="zzzz714" cy:nodeId="345">
    <graphics x="246.19302368164062" y="104.39926147460938" z="0.0"/>
  </node>
  <node id="731981" label="zzzz713" cy:nodeId="346">
    <graphics x="394.4848327636719" y="74.42034149169922" z="0.0"/>
  </node>
  <node id="731980" label="zzzz712" cy:nodeId="347">
    <graphics x="280.8509216308594" y="81.71929168701172" z="0.0"/>
  </node>
  <node id="731979" label="zzzz711" cy:nodeId="348">
    <graphics x="222.5830078125" y="122.39289855957031" z="0.0"/>
  </node>
  <node id="731978" label="zzzz710" cy:nodeId="349">
    <graphics x="311.0012512207031" y="77.62032318115234" z="0.0"/>
  </node>
  <node id="731977" label="zzzz709" cy:nodeId="350">
    <graphics x="295.4909973144531" y="51.777366638183594" z="0.0"/>
  </node>
  <node id="731976" label="zzzz708" cy:nodeId="351">
    <graphics x="278.4361267089844" y="131.6001739501953" z="0.0"/>
  </node>
  <node id="731975" label="zzzz707" cy:nodeId="352">
    <graphics x="152.3772735595703" y="187.81605529785156" z="0.0"/>
  </node>
  <node id="731974" label="zzzz706" cy:nodeId="353">
    <graphics x="375.3995056152344" y="122.82279968261719" z="0.0"/>
  </node>
  <node id="731973" label="zzzz705" cy:nodeId="354">
    <graphics x="282.0572204589844" y="82.57527923583984" z="0.0"/>
  </node>
  <node id="731972" label="zzzz704" cy:nodeId="355">
    <graphics x="235.59588623046875" y="155.2060089111328" z="0.0"/>
  </node>
  <node id="731971" label="zzzz703" cy:nodeId="356">
    <graphics x="271.2198181152344" y="72.50988006591797" z="0.0"/>
  </node>
  <node id="731970" label="zzzz702" cy:nodeId="357">
    <graphics x="204.25209045410156" y="229.50274658203125" z="0.0"/>
  </node>
  <node id="731969" label="zzzz701" cy:nodeId="358">
    <graphics x="188.43238830566406" y="133.29713439941406" z="0.0"/>
  </node>
  <node id="731968" label="zzzz700" cy:nodeId="359">
    <graphics x="-19.451278686523438" y="-579.8238525390625" z="0.0"/>
  </node>
  <node id="731967" label="zzzz699" cy:nodeId="360">
    <graphics x="238.19342041015625" y="152.82469177246094" z="0.0"/>
  </node>
  <node id="731966" label="zzzz698" cy:nodeId="361">
    <graphics x="255.23239135742188" y="112.34786987304688" z="0.0"/>
  </node>
  <node id="731965" label="zzzz697" cy:nodeId="362">
    <graphics x="184.9693145751953" y="-343.5596923828125" z="0.0"/>
  </node>
  <node id="731964" label="zzzz696" cy:nodeId="363">
    <graphics x="-92.55033874511719" y="-571.8701782226562" z="0.0"/>
  </node>
  <node id="731963" label="zzzz695" cy:nodeId="364">
    <graphics x="207.4898223876953" y="-186.53184509277344" z="0.0"/>
  </node>
  <node id="731962" label="zzzz694" cy:nodeId="365">
    <graphics x="66.90370178222656" y="-25.92121124267578" z="0.0"/>
  </node>
  <node id="731961" label="zzzz693" cy:nodeId="366">
    <graphics x="117.83326721191406" y="-310.4600830078125" z="0.0"/>
  </node>
  <node id="731960" label="zzzz692" cy:nodeId="367">
    <graphics x="-19.170822143554688" y="-265.63226318359375" z="0.0"/>
  </node>
  <node id="731959" label="zzzz690" cy:nodeId="368">
    <graphics x="-330.6624450683594" y="0.6798629760742188" z="0.0"/>
  </node>
  <node id="731958" label="zzzz688" cy:nodeId="370">
    <graphics x="196.9604034423828" y="-172.40208435058594" z="0.0"/>
  </node>
  <node id="731957" label="zzzz687" cy:nodeId="371">
    <graphics x="-285.2407531738281" y="-432.0801086425781" z="0.0"/>
  </node>
  <node id="731956" label="zzzz686" cy:nodeId="372">
    <graphics x="152.32472229003906" y="-321.9079895019531" z="0.0"/>
  </node>
  <node id="731955" label="zzzz685" cy:nodeId="373">
    <graphics x="-201.3569793701172" y="81.71355438232422" z="0.0"/>
  </node>
  <node id="731954" label="zzzz683" cy:nodeId="375">
    <graphics x="-284.9380187988281" y="-408.1561279296875" z="0.0"/>
  </node>
  <node id="731953" label="zzzz681" cy:nodeId="376">
    <graphics x="-252.77688598632812" y="-502.54571533203125" z="0.0"/>
  </node>
  <node id="731952" label="zzzz680" cy:nodeId="377">
    <graphics x="163.3314971923828" y="-349.77423095703125" z="0.0"/>
  </node>
  <node id="731951" label="zzzz679" cy:nodeId="378">
    <graphics x="193.9505157470703" y="-346.1457214355469" z="0.0"/>
  </node>
  <node id="731950" label="zzzz678" cy:nodeId="379">
    <graphics x="-82.67936706542969" y="-269.1382751464844" z="0.0"/>
  </node>
  <node id="731949" label="zzzz677" cy:nodeId="380">
    <graphics x="226.4459228515625" y="-190.0686798095703" z="0.0"/>
  </node>
  <node id="731948" label="zzzz676" cy:nodeId="381">
    <graphics x="178.5843048095703" y="-222.30615234375" z="0.0"/>
  </node>
  <node id="731947" label="zzzz675" cy:nodeId="382">
    <graphics x="203.1376495361328" y="209.45387268066406" z="0.0"/>
  </node>
  <node id="731946" label="zzzz674" cy:nodeId="383">
    <graphics x="-214.5544891357422" y="-130.1343994140625" z="0.0"/>
  </node>
  <node id="731945" label="zzzz673" cy:nodeId="384">
    <graphics x="156.36659240722656" y="-388.47564697265625" z="0.0"/>
  </node>
  <node id="731944" label="zzzz672" cy:nodeId="385">
    <graphics x="-301.9681091308594" y="-424.46881103515625" z="0.0"/>
  </node>
  <node id="731943" label="zzzz671" cy:nodeId="386">
    <graphics x="159.1302032470703" y="-208.9907684326172" z="0.0"/>
  </node>
  <node id="731942" label="zzzz670" cy:nodeId="387">
    <graphics x="-150.18345642089844" y="-184.48793029785156" z="0.0"/>
  </node>
  <node id="731941" label="zzzz669" cy:nodeId="388">
    <graphics x="161.7209014892578" y="-302.6031494140625" z="0.0"/>
  </node>
  <node id="731940" label="zzzz667" cy:nodeId="390">
    <graphics x="-165.32872009277344" y="-162.0746612548828" z="0.0"/>
  </node>
  <node id="731939" label="zzzz666" cy:nodeId="391">
    <graphics x="39.43574523925781" y="-336.54071044921875" z="0.0"/>
  </node>
  <node id="731938" label="zzzz665" cy:nodeId="392">
    <graphics x="-252.81655883789062" y="-7.061866760253906" z="0.0"/>
  </node>
  <node id="731937" label="zzzz664" cy:nodeId="393">
    <graphics x="-95.91136169433594" y="-239.59912109375" z="0.0"/>
  </node>
  <node id="731936" label="zzzz663" cy:nodeId="394">
    <graphics x="-146.4526824951172" y="-77.4286880493164" z="0.0"/>
  </node>
  <node id="731935" label="zzzz662" cy:nodeId="395">
    <graphics x="-195.0872039794922" y="-58.012351989746094" z="0.0"/>
  </node>
  <node id="731934" label="zzzz661" cy:nodeId="396">
    <graphics x="-294.4703369140625" y="-243.63546752929688" z="0.0"/>
  </node>
  <node id="731933" label="zzzz660" cy:nodeId="397">
    <graphics x="-314.19464111328125" y="-173.54151916503906" z="0.0"/>
  </node>
  <node id="731932" label="zzzz659" cy:nodeId="398">
    <graphics x="-251.350341796875" y="-249.27474975585938" z="0.0"/>
  </node>
  <node id="731931" label="zzzz658" cy:nodeId="399">
    <graphics x="-112.87168884277344" y="-216.00250244140625" z="0.0"/>
  </node>
  <node id="731930" label="zzzz657" cy:nodeId="400">
    <graphics x="-109.50279235839844" y="-210.4119110107422" z="0.0"/>
  </node>
  <node id="731929" label="zzzz656" cy:nodeId="401">
    <graphics x="-167.20167541503906" y="-66.3215103149414" z="0.0"/>
  </node>
  <node id="731928" label="zzzz655" cy:nodeId="402">
    <graphics x="136.11268615722656" y="-351.8730773925781" z="0.0"/>
  </node>
  <node id="731927" label="zzzz654" cy:nodeId="403">
    <graphics x="-263.0498962402344" y="-56.49811553955078" z="0.0"/>
  </node>
  <node id="731926" label="zzzz653" cy:nodeId="404">
    <graphics x="-266.7449035644531" y="-296.63287353515625" z="0.0"/>
  </node>
  <node id="731925" label="zzzz652" cy:nodeId="405">
    <graphics x="-277.2116394042969" y="-298.6112976074219" z="0.0"/>
  </node>
  <node id="731924" label="zzzz651" cy:nodeId="406">
    <graphics x="186.52076721191406" y="-189.1984100341797" z="0.0"/>
  </node>
  <node id="731923" label="zzzz650" cy:nodeId="407">
    <graphics x="-194.9675750732422" y="-161.70989990234375" z="0.0"/>
  </node>
  <node id="731922" label="zzzz649" cy:nodeId="408">
    <graphics x="-167.7519073486328" y="-302.1207580566406" z="0.0"/>
  </node>
  <node id="731921" label="zzzz648" cy:nodeId="409">
    <graphics x="-91.75724792480469" y="-339.55999755859375" z="0.0"/>
  </node>
  <node id="731920" label="zzzz647" cy:nodeId="410">
    <graphics x="-272.5196228027344" y="-187.20028686523438" z="0.0"/>
  </node>
  <node id="731919" label="zzzz646" cy:nodeId="411">
    <graphics x="-221.90167236328125" y="-208.32591247558594" z="0.0"/>
  </node>
  <node id="731918" label="zzzz645" cy:nodeId="412">
    <graphics x="-284.4936828613281" y="-252.44430541992188" z="0.0"/>
  </node>
  <node id="731917" label="zzzz644" cy:nodeId="413">
    <graphics x="-210.0690155029297" y="-190.40530395507812" z="0.0"/>
  </node>
  <node id="731916" label="zzzz643" cy:nodeId="414">
    <graphics x="-234.08074951171875" y="-108.2015380859375" z="0.0"/>
  </node>
  <node id="731915" label="zzzz642" cy:nodeId="415">
    <graphics x="-119.05168151855469" y="-149.5232696533203" z="0.0"/>
  </node>
  <node id="731914" label="zzzz641" cy:nodeId="416">
    <graphics x="-101.37449645996094" y="-165.2608184814453" z="0.0"/>
  </node>
  <node id="731913" label="zzzz640" cy:nodeId="417">
    <graphics x="-81.22410583496094" y="-250.10348510742188" z="0.0"/>
  </node>
  <node id="731912" label="zzzz639" cy:nodeId="418">
    <graphics x="236.82904052734375" y="-282.3717041015625" z="0.0"/>
  </node>
  <node id="731911" label="zzzz638" cy:nodeId="419">
    <graphics x="-213.24232482910156" y="-221.63458251953125" z="0.0"/>
  </node>
  <node id="731910" label="zzzz637" cy:nodeId="420">
    <graphics x="-285.5731201171875" y="-281.203857421875" z="0.0"/>
  </node>
  <node id="731909" label="zzzz636" cy:nodeId="421">
    <graphics x="-356.0191955566406" y="-190.02085876464844" z="0.0"/>
  </node>
  <node id="731908" label="zzzz635" cy:nodeId="422">
    <graphics x="-333.9244689941406" y="-176.495849609375" z="0.0"/>
  </node>
  <node id="731907" label="zzzz634" cy:nodeId="423">
    <graphics x="-193.98033142089844" y="-369.1871643066406" z="0.0"/>
  </node>
  <node id="731906" label="zzzz633" cy:nodeId="424">
    <graphics x="-294.46337890625" y="-340.8658752441406" z="0.0"/>
  </node>
  <node id="731905" label="zzzz632" cy:nodeId="425">
    <graphics x="-32.60734558105469" y="-254.21853637695312" z="0.0"/>
  </node>
  <node id="731904" label="zzzz631" cy:nodeId="426">
    <graphics x="-244.5635986328125" y="-236.84765625" z="0.0"/>
  </node>
  <node id="731903" label="zzzz630" cy:nodeId="427">
    <graphics x="-107.67759704589844" y="-303.58245849609375" z="0.0"/>
  </node>
  <node id="731902" label="zzzz629" cy:nodeId="428">
    <graphics x="-158.26158142089844" y="-153.59014892578125" z="0.0"/>
  </node>
  <node id="731901" label="zzzz628" cy:nodeId="429">
    <graphics x="-98.68864440917969" y="-145.6531524658203" z="0.0"/>
  </node>
  <node id="731900" label="zzzz627" cy:nodeId="430">
    <graphics x="-156.4182586669922" y="-216.63623046875" z="0.0"/>
  </node>
  <node id="731899" label="zzzz626" cy:nodeId="431">
    <graphics x="-324.5547180175781" y="-170.49278259277344" z="0.0"/>
  </node>
  <node id="731898" label="zzzz625" cy:nodeId="432">
    <graphics x="-412.5616455078125" y="-295.1097717285156" z="0.0"/>
  </node>
  <node id="731897" label="zzzz623" cy:nodeId="433">
    <graphics x="-319.8659973144531" y="-284.0726623535156" z="0.0"/>
  </node>
  <node id="731896" label="zzzz622" cy:nodeId="434">
    <graphics x="-286.749267578125" y="-152.48240661621094" z="0.0"/>
  </node>
  <node id="731895" label="zzzz621" cy:nodeId="435">
    <graphics x="-346.04193115234375" y="-237.1248779296875" z="0.0"/>
  </node>
  <node id="731894" label="zzzz620" cy:nodeId="436">
    <graphics x="-189.7963104248047" y="-86.64331817626953" z="0.0"/>
  </node>
  <node id="731893" label="zzzz619" cy:nodeId="437">
    <graphics x="-251.58465576171875" y="-280.8937072753906" z="0.0"/>
  </node>
  <node id="731892" label="zzzz618" cy:nodeId="438">
    <graphics x="-162.61329650878906" y="-270.78466796875" z="0.0"/>
  </node>
  <node id="731891" label="zzzz617" cy:nodeId="439">
    <graphics x="299.3072814941406" y="-280.9761047363281" z="0.0"/>
  </node>
  <node id="731890" label="zzzz616" cy:nodeId="440">
    <graphics x="-331.1679382324219" y="-206.574462890625" z="0.0"/>
  </node>
  <node id="731889" label="zzzz615" cy:nodeId="441">
    <graphics x="217.23089599609375" y="-214.14259338378906" z="0.0"/>
  </node>
  <node id="731888" label="zzzz614" cy:nodeId="442">
    <graphics x="-235.049072265625" y="-84.92464447021484" z="0.0"/>
  </node>
  <node id="731887" label="zzzz613" cy:nodeId="443">
    <graphics x="-222.0889892578125" y="-70.17980194091797" z="0.0"/>
  </node>
  <node id="731886" label="zzzz612" cy:nodeId="444">
    <graphics x="210.50782775878906" y="-255.89450073242188" z="0.0"/>
  </node>
  <node id="731885" label="zzzz611" cy:nodeId="445">
    <graphics x="-168.0668182373047" y="-414.89990234375" z="0.0"/>
  </node>
  <node id="731884" label="zzzz609" cy:nodeId="447">
    <graphics x="166.12672424316406" y="-220.78439331054688" z="0.0"/>
  </node>
  <node id="731883" label="zzzz607" cy:nodeId="449">
    <graphics x="115.45246887207031" y="-292.81988525390625" z="0.0"/>
  </node>
  <node id="731882" label="zzzz606" cy:nodeId="450">
    <graphics x="-36.22453308105469" y="-381.6813049316406" z="0.0"/>
  </node>
  <node id="731881" label="zzzz605" cy:nodeId="451">
    <graphics x="-86.64317321777344" y="-433.6534729003906" z="0.0"/>
  </node>
  <node id="731880" label="zzzz604" cy:nodeId="452">
    <graphics x="166.0951690673828" y="-139.47830200195312" z="0.0"/>
  </node>
  <node id="731879" label="zzzz603" cy:nodeId="453">
    <graphics x="130.9364776611328" y="-282.13433837890625" z="0.0"/>
  </node>
  <node id="731878" label="zzzz602" cy:nodeId="454">
    <graphics x="22.204727172851562" y="162.2624969482422" z="0.0"/>
  </node>
  <node id="731877" label="zzzz600" cy:nodeId="456">
    <graphics x="153.8705596923828" y="-286.8813171386719" z="0.0"/>
  </node>
  <node id="731876" label="zzzz599" cy:nodeId="457">
    <graphics x="-136.8385467529297" y="-300.65496826171875" z="0.0"/>
  </node>
  <node id="731875" label="zzzz598" cy:nodeId="458">
    <graphics x="-180.1815643310547" y="-550.6880493164062" z="0.0"/>
  </node>
  <node id="731874" label="zzzz597" cy:nodeId="459">
    <graphics x="-183.3904266357422" y="-294.92144775390625" z="0.0"/>
  </node>
  <node id="731873" label="zzzz596" cy:nodeId="460">
    <graphics x="152.3817901611328" y="-254.65298461914062" z="0.0"/>
  </node>
  <node id="731872" label="zzzz595" cy:nodeId="461">
    <graphics x="112.45869445800781" y="-327.63433837890625" z="0.0"/>
  </node>
  <node id="731871" label="zzzz594" cy:nodeId="462">
    <graphics x="144.2694854736328" y="-343.2618103027344" z="0.0"/>
  </node>
  <node id="731870" label="zzzz593" cy:nodeId="463">
    <graphics x="16.326248168945312" y="-387.7406311035156" z="0.0"/>
  </node>
  <node id="731869" label="zzzz592" cy:nodeId="464">
    <graphics x="-230.42657470703125" y="-442.2162170410156" z="0.0"/>
  </node>
  <node id="731868" label="zzzz590" cy:nodeId="466">
    <graphics x="-274.11712646484375" y="-75.99114227294922" z="0.0"/>
  </node>
  <node id="731867" label="zzzz589" cy:nodeId="467">
    <graphics x="-40.58763122558594" y="-421.7428283691406" z="0.0"/>
  </node>
  <node id="731866" label="zzzz588" cy:nodeId="468">
    <graphics x="-12.967819213867188" y="-367.1001281738281" z="0.0"/>
  </node>
  <node id="731865" label="zzzz587" cy:nodeId="469">
    <graphics x="218.3370361328125" y="-315.06182861328125" z="0.0"/>
  </node>
  <node id="731864" label="zzzz586" cy:nodeId="470">
    <graphics x="-49.31132507324219" y="-444.3435974121094" z="0.0"/>
  </node>
  <node id="731863" label="zzzz585" cy:nodeId="471">
    <graphics x="-114.54216003417969" y="-110.7686767578125" z="0.0"/>
  </node>
  <node id="731862" label="zzzz584" cy:nodeId="472">
    <graphics x="178.03529357910156" y="-220.76434326171875" z="0.0"/>
  </node>
  <node id="731861" label="zzzz583" cy:nodeId="473">
    <graphics x="173.52650451660156" y="-285.83990478515625" z="0.0"/>
  </node>
  <node id="731860" label="zzzz582" cy:nodeId="474">
    <graphics x="195.48426818847656" y="-154.29905700683594" z="0.0"/>
  </node>
  <node id="731859" label="zzzz581" cy:nodeId="475">
    <graphics x="-60.21604919433594" y="-423.9925231933594" z="0.0"/>
  </node>
  <node id="731858" label="zzzz580" cy:nodeId="476">
    <graphics x="179.53541564941406" y="-265.51873779296875" z="0.0"/>
  </node>
  <node id="731857" label="zzzz579" cy:nodeId="477">
    <graphics x="-133.43626403808594" y="-56.609230041503906" z="0.0"/>
  </node>
  <node id="731856" label="zzzz578" cy:nodeId="478">
    <graphics x="92.27980041503906" y="-62.22400665283203" z="0.0"/>
  </node>
  <node id="731855" label="zzzz577" cy:nodeId="479">
    <graphics x="35.86195373535156" y="-368.5367431640625" z="0.0"/>
  </node>
  <node id="731854" label="zzzz576" cy:nodeId="480">
    <graphics x="140.3050079345703" y="-205.81451416015625" z="0.0"/>
  </node>
  <node id="731853" label="zzzz575" cy:nodeId="481">
    <graphics x="223.02020263671875" y="-300.60736083984375" z="0.0"/>
  </node>
  <node id="731852" label="zzzz574" cy:nodeId="482">
    <graphics x="47.93757629394531" y="-305.91796875" z="0.0"/>
  </node>
  <node id="731851" label="zzzz573" cy:nodeId="483">
    <graphics x="-123.38291931152344" y="-186.954833984375" z="0.0"/>
  </node>
  <node id="731850" label="zzzz572" cy:nodeId="484">
    <graphics x="204.94288635253906" y="-289.12908935546875" z="0.0"/>
  </node>
  <node id="731849" label="zzzz571" cy:nodeId="485">
    <graphics x="-328.853271484375" y="-50.71833038330078" z="0.0"/>
  </node>
  <node id="731848" label="zzzz570" cy:nodeId="486">
    <graphics x="154.76515197753906" y="-219.44390869140625" z="0.0"/>
  </node>
  <node id="731847" label="zzzz569" cy:nodeId="487">
    <graphics x="229.4456787109375" y="-262.1767272949219" z="0.0"/>
  </node>
  <node id="731846" label="zzzz568" cy:nodeId="488">
    <graphics x="177.92396545410156" y="-316.3175048828125" z="0.0"/>
  </node>
  <node id="731845" label="zzzz567" cy:nodeId="489">
    <graphics x="-100.87510681152344" y="-233.79592895507812" z="0.0"/>
  </node>
  <node id="731844" label="zzzz566" cy:nodeId="490">
    <graphics x="130.5469512939453" y="-334.6007385253906" z="0.0"/>
  </node>
  <node id="731843" label="zzzz565" cy:nodeId="491">
    <graphics x="166.1132354736328" y="-257.10565185546875" z="0.0"/>
  </node>
  <node id="731842" label="zzzz564" cy:nodeId="492">
    <graphics x="-96.55186462402344" y="-387.3759460449219" z="0.0"/>
  </node>
  <node id="731841" label="zzzz563" cy:nodeId="493">
    <graphics x="-148.69615173339844" y="-396.731689453125" z="0.0"/>
  </node>
  <node id="731840" label="zzzz562" cy:nodeId="494">
    <graphics x="16.089736938476562" y="-433.36114501953125" z="0.0"/>
  </node>
  <node id="731839" label="zzzz561" cy:nodeId="495">
    <graphics x="98.08992004394531" y="-85.21324920654297" z="0.0"/>
  </node>
  <node id="731838" label="zzzz560" cy:nodeId="496">
    <graphics x="174.3579864501953" y="-224.34292602539062" z="0.0"/>
  </node>
  <node id="731837" label="zzzz559" cy:nodeId="497">
    <graphics x="-124.28941345214844" y="-209.3907470703125" z="0.0"/>
  </node>
  <node id="731836" label="zzzz558" cy:nodeId="498">
    <graphics x="-67.90586853027344" y="86.99398040771484" z="0.0"/>
  </node>
  <node id="731835" label="zzzz557" cy:nodeId="499">
    <graphics x="218.07611083984375" y="-242.97360229492188" z="0.0"/>
  </node>
  <node id="731834" label="zzzz556" cy:nodeId="500">
    <graphics x="-153.26963806152344" y="-179.06797790527344" z="0.0"/>
  </node>
  <node id="731833" label="zzzz555" cy:nodeId="501">
    <graphics x="-154.95481872558594" y="-204.80728149414062" z="0.0"/>
  </node>
  <node id="731832" label="zzzz554" cy:nodeId="502">
    <graphics x="-109.38139343261719" y="-242.97958374023438" z="0.0"/>
  </node>
  <node id="731831" label="zzzz553" cy:nodeId="503">
    <graphics x="-173.97251892089844" y="-249.34109497070312" z="0.0"/>
  </node>
  <node id="731830" label="zzzz552" cy:nodeId="504">
    <graphics x="187.45118713378906" y="-184.72579956054688" z="0.0"/>
  </node>
  <node id="731829" label="zzzz551" cy:nodeId="505">
    <graphics x="184.8705596923828" y="-236.615966796875" z="0.0"/>
  </node>
  <node id="731828" label="zzzz550" cy:nodeId="506">
    <graphics x="-119.34214782714844" y="-225.10455322265625" z="0.0"/>
  </node>
  <node id="731827" label="zzzz549" cy:nodeId="507">
    <graphics x="-87.36668395996094" y="-193.21505737304688" z="0.0"/>
  </node>
  <node id="731826" label="zzzz548" cy:nodeId="508">
    <graphics x="-120.46812438964844" y="-197.38873291015625" z="0.0"/>
  </node>
  <node id="731825" label="zzzz547" cy:nodeId="509">
    <graphics x="-91.59843444824219" y="-108.31900024414062" z="0.0"/>
  </node>
  <node id="731824" label="zzzz546" cy:nodeId="510">
    <graphics x="-109.90715026855469" y="-209.1776580810547" z="0.0"/>
  </node>
  <node id="731823" label="zzzz545" cy:nodeId="511">
    <graphics x="117.07868957519531" y="-357.12615966796875" z="0.0"/>
  </node>
  <node id="731822" label="zzzz544" cy:nodeId="512">
    <graphics x="-270.2596740722656" y="-224.3656005859375" z="0.0"/>
  </node>
  <node id="731821" label="zzzz543" cy:nodeId="513">
    <graphics x="241.42306518554688" y="-240.70269775390625" z="0.0"/>
  </node>
  <node id="731820" label="zzzz542" cy:nodeId="514">
    <graphics x="-236.41827392578125" y="56.368553161621094" z="0.0"/>
  </node>
  <node id="731819" label="zzzz541" cy:nodeId="515">
    <graphics x="186.9290313720703" y="-280.3807678222656" z="0.0"/>
  </node>
  <node id="731818" label="zzzz540" cy:nodeId="516">
    <graphics x="-145.07127380371094" y="-209.90374755859375" z="0.0"/>
  </node>
  <node id="731817" label="zzzz539" cy:nodeId="517">
    <graphics x="-95.74943542480469" y="-394.0647277832031" z="0.0"/>
  </node>
  <node id="731816" label="zzzz538" cy:nodeId="518">
    <graphics x="240.708984375" y="-222.724853515625" z="0.0"/>
  </node>
  <node id="731815" label="zzzz537" cy:nodeId="519">
    <graphics x="-219.95953369140625" y="-182.7998809814453" z="0.0"/>
  </node>
  <node id="731814" label="zzzz536" cy:nodeId="520">
    <graphics x="20.376052856445312" y="-378.3568115234375" z="0.0"/>
  </node>
  <node id="731813" label="zzzz535" cy:nodeId="521">
    <graphics x="-229.78912353515625" y="-189.1363525390625" z="0.0"/>
  </node>
  <node id="731812" label="zzzz534" cy:nodeId="522">
    <graphics x="188.8897247314453" y="-243.35455322265625" z="0.0"/>
  </node>
  <node id="731811" label="zzzz533" cy:nodeId="523">
    <graphics x="-102.71299743652344" y="-155.64230346679688" z="0.0"/>
  </node>
  <node id="731810" label="zzzz532" cy:nodeId="524">
    <graphics x="-304.0971984863281" y="19.41973114013672" z="0.0"/>
  </node>
  <node id="731809" label="zzzz531" cy:nodeId="525">
    <graphics x="-161.1572723388672" y="-228.68594360351562" z="0.0"/>
  </node>
  <node id="731808" label="zzzz530" cy:nodeId="526">
    <graphics x="141.3391876220703" y="-144.2944793701172" z="0.0"/>
  </node>
  <node id="731807" label="zzzz529" cy:nodeId="527">
    <graphics x="-98.63914489746094" y="-272.9843444824219" z="0.0"/>
  </node>
  <node id="731806" label="zzzz528" cy:nodeId="528">
    <graphics x="-116.15409851074219" y="-223.51531982421875" z="0.0"/>
  </node>
  <node id="731805" label="zzzz527" cy:nodeId="529">
    <graphics x="-142.21409606933594" y="-105.46832275390625" z="0.0"/>
  </node>
  <node id="731804" label="zzzz526" cy:nodeId="530">
    <graphics x="-79.39476013183594" y="-195.0165557861328" z="0.0"/>
  </node>
  <node id="731803" label="zzzz525" cy:nodeId="531">
    <graphics x="-133.84141540527344" y="-199.67552185058594" z="0.0"/>
  </node>
  <node id="731802" label="zzzz524" cy:nodeId="532">
    <graphics x="-191.4521026611328" y="-250.0927734375" z="0.0"/>
  </node>
  <node id="731801" label="zzzz523" cy:nodeId="533">
    <graphics x="-157.70164489746094" y="-173.38377380371094" z="0.0"/>
  </node>
  <node id="731800" label="zzzz522" cy:nodeId="534">
    <graphics x="-163.34300231933594" y="-197.42662048339844" z="0.0"/>
  </node>
  <node id="731799" label="zzzz521" cy:nodeId="535">
    <graphics x="-321.73388671875" y="-234.31597900390625" z="0.0"/>
  </node>
  <node id="731798" label="zzzz520" cy:nodeId="536">
    <graphics x="-154.0167694091797" y="-269.8883361816406" z="0.0"/>
  </node>
  <node id="731797" label="zzzz519" cy:nodeId="537">
    <graphics x="-321.9325866699219" y="-282.91864013671875" z="0.0"/>
  </node>
  <node id="731796" label="zzzz518" cy:nodeId="538">
    <graphics x="-73.82316589355469" y="-165.82791137695312" z="0.0"/>
  </node>
  <node id="731795" label="zzzz517" cy:nodeId="539">
    <graphics x="-344.6124267578125" y="-291.5502014160156" z="0.0"/>
  </node>
  <node id="731794" label="zzzz516" cy:nodeId="540">
    <graphics x="-278.5813903808594" y="-360.2125244140625" z="0.0"/>
  </node>
  <node id="731793" label="zzzz515" cy:nodeId="541">
    <graphics x="-311.8534851074219" y="-106.39208984375" z="0.0"/>
  </node>
  <node id="731792" label="zzzz514" cy:nodeId="542">
    <graphics x="210.33558654785156" y="-210.22682189941406" z="0.0"/>
  </node>
  <node id="731791" label="zzzz513" cy:nodeId="543">
    <graphics x="69.92195129394531" y="-461.7091064453125" z="0.0"/>
  </node>
  <node id="731790" label="zzzz512" cy:nodeId="544">
    <graphics x="-163.83726501464844" y="-181.69349670410156" z="0.0"/>
  </node>
  <node id="731789" label="zzzz511" cy:nodeId="545">
    <graphics x="-221.1246337890625" y="-188.98126220703125" z="0.0"/>
  </node>
  <node id="731788" label="zzzz510" cy:nodeId="546">
    <graphics x="159.7024688720703" y="-210.49562072753906" z="0.0"/>
  </node>
  <node id="731787" label="zzzz509" cy:nodeId="547">
    <graphics x="-295.7068786621094" y="-289.96112060546875" z="0.0"/>
  </node>
  <node id="731786" label="zzzz508" cy:nodeId="548">
    <graphics x="-197.95033264160156" y="-274.9193420410156" z="0.0"/>
  </node>
  <node id="731785" label="zzzz507" cy:nodeId="549">
    <graphics x="195.83644104003906" y="-226.76412963867188" z="0.0"/>
  </node>
  <node id="731784" label="zzzz506" cy:nodeId="550">
    <graphics x="170.81031799316406" y="-292.30712890625" z="0.0"/>
  </node>
  <node id="731783" label="zzzz505" cy:nodeId="551">
    <graphics x="-100.04582214355469" y="-297.2990417480469" z="0.0"/>
  </node>
  <node id="731782" label="zzzz504" cy:nodeId="552">
    <graphics x="-174.3846893310547" y="-237.25909423828125" z="0.0"/>
  </node>
  <node id="731781" label="zzzz503" cy:nodeId="553">
    <graphics x="330.1423645019531" y="28.721031188964844" z="0.0"/>
  </node>
  <node id="731780" label="zzzz502" cy:nodeId="554">
    <graphics x="-143.8212127685547" y="-148.5177001953125" z="0.0"/>
  </node>
  <node id="731779" label="zzzz501" cy:nodeId="555">
    <graphics x="-108.69438171386719" y="-225.2939453125" z="0.0"/>
  </node>
  <node id="731778" label="zzzz500" cy:nodeId="556">
    <graphics x="-207.38243103027344" y="-144.76551818847656" z="0.0"/>
  </node>
  <node id="731777" label="zzzz499" cy:nodeId="557">
    <graphics x="227.43017578125" y="-207.16493225097656" z="0.0"/>
  </node>
  <node id="731776" label="zzzz498" cy:nodeId="558">
    <graphics x="-117.25352478027344" y="-172.73654174804688" z="0.0"/>
  </node>
  <node id="731775" label="zzzz497" cy:nodeId="559">
    <graphics x="-72.43540954589844" y="-249.25314331054688" z="0.0"/>
  </node>
  <node id="731774" label="zzzz496" cy:nodeId="560">
    <graphics x="-262.9697570800781" y="24.816734313964844" z="0.0"/>
  </node>
  <node id="731773" label="zzzz495" cy:nodeId="561">
    <graphics x="-39.10740661621094" y="-330.3306884765625" z="0.0"/>
  </node>
  <node id="731772" label="zzzz494" cy:nodeId="562">
    <graphics x="-73.44316101074219" y="-341.4352111816406" z="0.0"/>
  </node>
  <node id="731771" label="zzzz493" cy:nodeId="563">
    <graphics x="148.29005432128906" y="-317.32464599609375" z="0.0"/>
  </node>
  <node id="731770" label="zzzz492" cy:nodeId="564">
    <graphics x="-163.52919006347656" y="-49.62604522705078" z="0.0"/>
  </node>
  <node id="731769" label="zzzz491" cy:nodeId="565">
    <graphics x="-105.06230163574219" y="-273.7762451171875" z="0.0"/>
  </node>
  <node id="731768" label="zzzz490" cy:nodeId="566">
    <graphics x="194.38990783691406" y="-308.9332275390625" z="0.0"/>
  </node>
  <node id="731767" label="zzzz489" cy:nodeId="567">
    <graphics x="107.72743225097656" y="-397.9221496582031" z="0.0"/>
  </node>
  <node id="731766" label="zzzz488" cy:nodeId="568">
    <graphics x="121.00312805175781" y="224.63226318359375" z="0.0"/>
  </node>
  <node id="731765" label="zzzz487" cy:nodeId="569">
    <graphics x="-334.84857177734375" y="-114.43379211425781" z="0.0"/>
  </node>
  <node id="731764" label="zzzz486" cy:nodeId="570">
    <graphics x="119.61671447753906" y="-20.664833068847656" z="0.0"/>
  </node>
  <node id="731763" label="zzzz485" cy:nodeId="571">
    <graphics x="-112.38462829589844" y="-117.68229675292969" z="0.0"/>
  </node>
  <node id="731762" label="zzzz484" cy:nodeId="572">
    <graphics x="-57.38505554199219" y="-395.02490234375" z="0.0"/>
  </node>
  <node id="731761" label="zzzz483" cy:nodeId="573">
    <graphics x="-102.73362731933594" y="-242.40087890625" z="0.0"/>
  </node>
  <node id="731760" label="zzzz482" cy:nodeId="574">
    <graphics x="108.95100402832031" y="-325.06243896484375" z="0.0"/>
  </node>
  <node id="731759" label="zzzz481" cy:nodeId="575">
    <graphics x="230.24737548828125" y="-372.4784851074219" z="0.0"/>
  </node>
  <node id="731758" label="zzzz480" cy:nodeId="576">
    <graphics x="-242.80044555664062" y="-224.6429443359375" z="0.0"/>
  </node>
  <node id="731757" label="zzzz479" cy:nodeId="577">
    <graphics x="-269.1126403808594" y="-284.2190246582031" z="0.0"/>
  </node>
  <node id="731756" label="zzzz478" cy:nodeId="578">
    <graphics x="-212.4496307373047" y="-215.0780487060547" z="0.0"/>
  </node>
  <node id="731755" label="zzzz477" cy:nodeId="579">
    <graphics x="-71.28355407714844" y="-214.59584045410156" z="0.0"/>
  </node>
  <node id="731754" label="zzzz476" cy:nodeId="580">
    <graphics x="172.4815216064453" y="-261.5101318359375" z="0.0"/>
  </node>
  <node id="731753" label="zzzz475" cy:nodeId="581">
    <graphics x="-310.8339538574219" y="-287.5638427734375" z="0.0"/>
  </node>
  <node id="731752" label="zzzz474" cy:nodeId="582">
    <graphics x="-178.9340057373047" y="-227.5672607421875" z="0.0"/>
  </node>
  <node id="731751" label="zzzz473" cy:nodeId="583">
    <graphics x="-339.1780090332031" y="-140.5040740966797" z="0.0"/>
  </node>
  <node id="731750" label="zzzz472" cy:nodeId="584">
    <graphics x="-272.5968322753906" y="-97.28094482421875" z="0.0"/>
  </node>
  <node id="731749" label="zzzz471" cy:nodeId="585">
    <graphics x="-276.6069030761719" y="-25.756324768066406" z="0.0"/>
  </node>
  <node id="731748" label="zzzz470" cy:nodeId="586">
    <graphics x="-258.1401672363281" y="60.944358825683594" z="0.0"/>
  </node>
  <node id="731747" label="zzzz469" cy:nodeId="587">
    <graphics x="161.84132385253906" y="-375.2215270996094" z="0.0"/>
  </node>
  <node id="731746" label="zzzz468" cy:nodeId="588">
    <graphics x="-166.6720428466797" y="-269.8082275390625" z="0.0"/>
  </node>
  <node id="731745" label="zzzz467" cy:nodeId="589">
    <graphics x="227.20294189453125" y="-254.2320556640625" z="0.0"/>
  </node>
  <node id="731744" label="zzzz466" cy:nodeId="590">
    <graphics x="-350.9327697753906" y="-213.60411071777344" z="0.0"/>
  </node>
  <node id="731743" label="zzzz465" cy:nodeId="591">
    <graphics x="-136.91123962402344" y="-254.4129638671875" z="0.0"/>
  </node>
  <node id="731742" label="zzzz464" cy:nodeId="592">
    <graphics x="-353.98065185546875" y="-242.06515502929688" z="0.0"/>
  </node>
  <node id="731741" label="zzzz463" cy:nodeId="593">
    <graphics x="-417.2455749511719" y="-212.91688537597656" z="0.0"/>
  </node>
  <node id="731740" label="zzzz462" cy:nodeId="594">
    <graphics x="-342.3766784667969" y="-182.00445556640625" z="0.0"/>
  </node>
  <node id="731739" label="zzzz461" cy:nodeId="595">
    <graphics x="-349.0951232910156" y="-322.7222595214844" z="0.0"/>
  </node>
  <node id="731738" label="zzzz460" cy:nodeId="596">
    <graphics x="-223.36639404296875" y="-101.40460205078125" z="0.0"/>
  </node>
  <node id="731737" label="zzzz459" cy:nodeId="597">
    <graphics x="109.94483947753906" y="-77.5840835571289" z="0.0"/>
  </node>
  <node id="731736" label="zzzz458" cy:nodeId="598">
    <graphics x="-156.69541931152344" y="-72.72785186767578" z="0.0"/>
  </node>
  <node id="731735" label="zzzz457" cy:nodeId="599">
    <graphics x="-203.5514373779297" y="-89.38482666015625" z="0.0"/>
  </node>
  <node id="731734" label="zzzz456" cy:nodeId="600">
    <graphics x="-141.8761444091797" y="-144.89955139160156" z="0.0"/>
  </node>
  <node id="731733" label="zzzz455" cy:nodeId="601">
    <graphics x="-270.30682373046875" y="-373.4951171875" z="0.0"/>
  </node>
  <node id="731732" label="zzzz454" cy:nodeId="602">
    <graphics x="-176.1157989501953" y="-166.11643981933594" z="0.0"/>
  </node>
  <node id="731731" label="zzzz453" cy:nodeId="603">
    <graphics x="-354.1830139160156" y="-205.89553833007812" z="0.0"/>
  </node>
  <node id="731730" label="zzzz452" cy:nodeId="604">
    <graphics x="-177.1480255126953" y="-165.3453826904297" z="0.0"/>
  </node>
  <node id="731729" label="zzzz451" cy:nodeId="605">
    <graphics x="-202.04539489746094" y="-202.09886169433594" z="0.0"/>
  </node>
  <node id="731728" label="zzzz450" cy:nodeId="606">
    <graphics x="-154.45323181152344" y="-194.1592254638672" z="0.0"/>
  </node>
  <node id="731727" label="zzzz449" cy:nodeId="607">
    <graphics x="-162.8652801513672" y="-135.663818359375" z="0.0"/>
  </node>
  <node id="731726" label="zzzz448" cy:nodeId="608">
    <graphics x="-128.8274383544922" y="-172.56683349609375" z="0.0"/>
  </node>
  <node id="731725" label="zzzz447" cy:nodeId="609">
    <graphics x="-230.29339599609375" y="-179.2911834716797" z="0.0"/>
  </node>
  <node id="731724" label="zzzz446" cy:nodeId="610">
    <graphics x="238.94677734375" y="-194.78988647460938" z="0.0"/>
  </node>
  <node id="731723" label="zzzz445" cy:nodeId="611">
    <graphics x="-216.958251953125" y="-151.56658935546875" z="0.0"/>
  </node>
  <node id="731722" label="zzzz444" cy:nodeId="612">
    <graphics x="-92.41819763183594" y="-249.9749755859375" z="0.0"/>
  </node>
  <node id="731721" label="zzzz443" cy:nodeId="613">
    <graphics x="-106.02555847167969" y="-101.30612182617188" z="0.0"/>
  </node>
  <node id="731720" label="zzzz442" cy:nodeId="614">
    <graphics x="-348.5180358886719" y="-215.8789825439453" z="0.0"/>
  </node>
  <node id="731719" label="zzzz441" cy:nodeId="615">
    <graphics x="-330.2981262207031" y="-251.58279418945312" z="0.0"/>
  </node>
  <node id="731718" label="zzzz440" cy:nodeId="616">
    <graphics x="-62.85221862792969" y="-222.07662963867188" z="0.0"/>
  </node>
  <node id="731717" label="zzzz439" cy:nodeId="617">
    <graphics x="-317.6122131347656" y="-384.3561706542969" z="0.0"/>
  </node>
  <node id="731716" label="zzzz438" cy:nodeId="618">
    <graphics x="-265.9542236328125" y="-298.2756042480469" z="0.0"/>
  </node>
  <node id="731715" label="zzzz437" cy:nodeId="619">
    <graphics x="-283.4676208496094" y="-19.34973907470703" z="0.0"/>
  </node>
  <node id="731714" label="zzzz436" cy:nodeId="620">
    <graphics x="-351.69915771484375" y="-224.7388916015625" z="0.0"/>
  </node>
  <node id="731713" label="zzzz435" cy:nodeId="621">
    <graphics x="86.33259582519531" y="-85.09778594970703" z="0.0"/>
  </node>
  <node id="731712" label="zzzz434" cy:nodeId="622">
    <graphics x="-206.7173309326172" y="-85.95563507080078" z="0.0"/>
  </node>
  <node id="731711" label="zzzz433" cy:nodeId="623">
    <graphics x="-117.45957946777344" y="-169.78868103027344" z="0.0"/>
  </node>
  <node id="731710" label="zzzz432" cy:nodeId="624">
    <graphics x="-76.76133728027344" y="-207.6184844970703" z="0.0"/>
  </node>
  <node id="731709" label="zzzz431" cy:nodeId="625">
    <graphics x="47.76844787597656" y="25.96764373779297" z="0.0"/>
  </node>
  <node id="731708" label="zzzz430" cy:nodeId="626">
    <graphics x="-395.16864013671875" y="-305.6314392089844" z="0.0"/>
  </node>
  <node id="731707" label="zzzz429" cy:nodeId="627">
    <graphics x="117.64906311035156" y="-230.82147216796875" z="0.0"/>
  </node>
  <node id="731706" label="zzzz428" cy:nodeId="628">
    <graphics x="-238.94049072265625" y="-122.61399841308594" z="0.0"/>
  </node>
  <node id="731705" label="zzzz427" cy:nodeId="629">
    <graphics x="-11.467514038085938" y="-119.21182250976562" z="0.0"/>
  </node>
  <node id="731704" label="zzzz426" cy:nodeId="630">
    <graphics x="-202.47520446777344" y="40.24376678466797" z="0.0"/>
  </node>
  <node id="731703" label="zzzz425" cy:nodeId="631">
    <graphics x="-219.7117919921875" y="-165.11395263671875" z="0.0"/>
  </node>
  <node id="731702" label="zzzz424" cy:nodeId="632">
    <graphics x="-137.5974578857422" y="-215.84716796875" z="0.0"/>
  </node>
  <node id="731701" label="zzzz423" cy:nodeId="633">
    <graphics x="-70.94334411621094" y="-357.491943359375" z="0.0"/>
  </node>
  <node id="731700" label="zzzz422" cy:nodeId="634">
    <graphics x="-35.22062683105469" y="-208.2505645751953" z="0.0"/>
  </node>
  <node id="731699" label="zzzz421" cy:nodeId="635">
    <graphics x="-203.44737243652344" y="-151.54476928710938" z="0.0"/>
  </node>
  <node id="731698" label="zzzz420" cy:nodeId="636">
    <graphics x="-208.1074676513672" y="-157.9032440185547" z="0.0"/>
  </node>
  <node id="731697" label="zzzz419" cy:nodeId="637">
    <graphics x="-421.6823425292969" y="-183.10440063476562" z="0.0"/>
  </node>
  <node id="731696" label="zzzz418" cy:nodeId="638">
    <graphics x="-149.9945526123047" y="-91.444091796875" z="0.0"/>
  </node>
  <node id="731695" label="zzzz417" cy:nodeId="639">
    <graphics x="-207.03053283691406" y="-226.78814697265625" z="0.0"/>
  </node>
  <node id="731694" label="zzzz416" cy:nodeId="640">
    <graphics x="-133.37535095214844" y="-150.80966186523438" z="0.0"/>
  </node>
  <node id="731693" label="zzzz415" cy:nodeId="641">
    <graphics x="-47.79936218261719" y="-287.66766357421875" z="0.0"/>
  </node>
  <node id="731692" label="zzzz414" cy:nodeId="642">
    <graphics x="-292.1565246582031" y="-148.4473114013672" z="0.0"/>
  </node>
  <node id="731691" label="zzzz413" cy:nodeId="643">
    <graphics x="-207.2747344970703" y="-260.3749694824219" z="0.0"/>
  </node>
  <node id="731690" label="zzzz412" cy:nodeId="644">
    <graphics x="-334.6596374511719" y="68.32552337646484" z="0.0"/>
  </node>
  <node id="731689" label="zzzz411" cy:nodeId="645">
    <graphics x="175.03236389160156" y="-251.67727661132812" z="0.0"/>
  </node>
  <node id="731688" label="zzzz410" cy:nodeId="646">
    <graphics x="-62.06584167480469" y="-214.71817016601562" z="0.0"/>
  </node>
  <node id="731687" label="zzzz409" cy:nodeId="647">
    <graphics x="-671.1134033203125" y="-390.3726806640625" z="0.0"/>
  </node>
  <node id="731686" label="zzzz408" cy:nodeId="648">
    <graphics x="-452.9618225097656" y="-154.82904052734375" z="0.0"/>
  </node>
  <node id="731685" label="zzzz407" cy:nodeId="649">
    <graphics x="-164.45338439941406" y="-250.79766845703125" z="0.0"/>
  </node>
  <node id="731684" label="zzzz406" cy:nodeId="650">
    <graphics x="-257.1385192871094" y="-152.02255249023438" z="0.0"/>
  </node>
  <node id="731683" label="zzzz405" cy:nodeId="651">
    <graphics x="-272.982666015625" y="-284.726806640625" z="0.0"/>
  </node>
  <node id="731682" label="zzzz404" cy:nodeId="652">
    <graphics x="-83.09556579589844" y="-392.7879333496094" z="0.0"/>
  </node>
  <node id="731681" label="zzzz403" cy:nodeId="653">
    <graphics x="101.38075256347656" y="-370.350830078125" z="0.0"/>
  </node>
  <node id="731680" label="zzzz402" cy:nodeId="654">
    <graphics x="-327.3261413574219" y="-283.6752624511719" z="0.0"/>
  </node>
  <node id="731679" label="zzzz401" cy:nodeId="655">
    <graphics x="-203.6622772216797" y="-166.61383056640625" z="0.0"/>
  </node>
  <node id="731678" label="zzzz400" cy:nodeId="656">
    <graphics x="-197.4868927001953" y="-274.6089172363281" z="0.0"/>
  </node>
  <node id="731677" label="zzzz399" cy:nodeId="657">
    <graphics x="-308.6234130859375" y="-304.2195129394531" z="0.0"/>
  </node>
  <node id="731676" label="zzzz398" cy:nodeId="658">
    <graphics x="-275.21258544921875" y="-341.9424133300781" z="0.0"/>
  </node>
  <node id="731675" label="zzzz397" cy:nodeId="659">
    <graphics x="-290.7104797363281" y="-120.59626770019531" z="0.0"/>
  </node>
  <node id="731674" label="zzzz396" cy:nodeId="660">
    <graphics x="-195.8830108642578" y="-157.44801330566406" z="0.0"/>
  </node>
  <node id="731673" label="zzzz395" cy:nodeId="661">
    <graphics x="-222.6741943359375" y="-49.546607971191406" z="0.0"/>
  </node>
  <node id="731672" label="zzzz394" cy:nodeId="662">
    <graphics x="62.57881164550781" y="-364.380615234375" z="0.0"/>
  </node>
  <node id="731671" label="zzzz393" cy:nodeId="663">
    <graphics x="-159.62120056152344" y="-30.52271270751953" z="0.0"/>
  </node>
  <node id="731670" label="zzzz392" cy:nodeId="664">
    <graphics x="192.4512481689453" y="-262.9443359375" z="0.0"/>
  </node>
  <node id="731669" label="zzzz391" cy:nodeId="665">
    <graphics x="-50.80497741699219" y="-430.9218444824219" z="0.0"/>
  </node>
  <node id="731668" label="zzzz390" cy:nodeId="666">
    <graphics x="-329.45965576171875" y="-190.33204650878906" z="0.0"/>
  </node>
  <node id="731667" label="zzzz389" cy:nodeId="667">
    <graphics x="-231.6158447265625" y="-157.53036499023438" z="0.0"/>
  </node>
  <node id="731666" label="zzzz388" cy:nodeId="668">
    <graphics x="-205.3716583251953" y="-149.08973693847656" z="0.0"/>
  </node>
  <node id="731665" label="zzzz387" cy:nodeId="669">
    <graphics x="-115.82603454589844" y="-157.7620086669922" z="0.0"/>
  </node>
  <node id="731664" label="zzzz386" cy:nodeId="670">
    <graphics x="-73.43156433105469" y="-242.51992797851562" z="0.0"/>
  </node>
  <node id="731663" label="zzzz385" cy:nodeId="671">
    <graphics x="-210.72715759277344" y="-218.3837890625" z="0.0"/>
  </node>
  <node id="731662" label="zzzz384" cy:nodeId="672">
    <graphics x="236.74017333984375" y="-256.96575927734375" z="0.0"/>
  </node>
  <node id="731661" label="zzzz383" cy:nodeId="673">
    <graphics x="-255.31353759765625" y="-343.525146484375" z="0.0"/>
  </node>
  <node id="731660" label="zzzz382" cy:nodeId="674">
    <graphics x="-228.28765869140625" y="-326.6012268066406" z="0.0"/>
  </node>
  <node id="731659" label="zzzz381" cy:nodeId="675">
    <graphics x="-216.57794189453125" y="2.0402145385742188" z="0.0"/>
  </node>
  <node id="731658" label="zzzz380" cy:nodeId="676">
    <graphics x="-243.6810302734375" y="-58.127464294433594" z="0.0"/>
  </node>
  <node id="731657" label="zzzz379" cy:nodeId="677">
    <graphics x="-280.6827087402344" y="-326.8403625488281" z="0.0"/>
  </node>
  <node id="731656" label="zzzz378" cy:nodeId="678">
    <graphics x="-107.37779235839844" y="-148.02938842773438" z="0.0"/>
  </node>
  <node id="731655" label="zzzz377" cy:nodeId="679">
    <graphics x="-252.70278930664062" y="-217.27151489257812" z="0.0"/>
  </node>
  <node id="731654" label="zzzz376" cy:nodeId="680">
    <graphics x="-189.65760803222656" y="-84.99803924560547" z="0.0"/>
  </node>
  <node id="731653" label="zzzz375" cy:nodeId="681">
    <graphics x="-157.78807067871094" y="-156.03819274902344" z="0.0"/>
  </node>
  <node id="731652" label="zzzz374" cy:nodeId="682">
    <graphics x="-219.11529541015625" y="-372.5975341796875" z="0.0"/>
  </node>
  <node id="731651" label="zzzz373" cy:nodeId="683">
    <graphics x="-101.58531188964844" y="-158.3212127685547" z="0.0"/>
  </node>
  <node id="731650" label="zzzz372" cy:nodeId="684">
    <graphics x="-167.53111267089844" y="-298.0282897949219" z="0.0"/>
  </node>
  <node id="731649" label="zzzz371" cy:nodeId="685">
    <graphics x="-202.00877380371094" y="-108.37646484375" z="0.0"/>
  </node>
  <node id="731648" label="zzzz370" cy:nodeId="686">
    <graphics x="-199.48451232910156" y="-114.73930358886719" z="0.0"/>
  </node>
  <node id="731647" label="zzzz369" cy:nodeId="687">
    <graphics x="-248.58197021484375" y="-158.0413055419922" z="0.0"/>
  </node>
  <node id="731646" label="zzzz368" cy:nodeId="688">
    <graphics x="-260.3244323730469" y="-103.17532348632812" z="0.0"/>
  </node>
  <node id="731645" label="zzzz367" cy:nodeId="689">
    <graphics x="-263.4394836425781" y="-314.5322570800781" z="0.0"/>
  </node>
  <node id="731644" label="zzzz366" cy:nodeId="690">
    <graphics x="-286.0232849121094" y="-202.26976013183594" z="0.0"/>
  </node>
  <node id="731643" label="zzzz365" cy:nodeId="691">
    <graphics x="-125.08164978027344" y="-181.72911071777344" z="0.0"/>
  </node>
  <node id="731642" label="zzzz364" cy:nodeId="692">
    <graphics x="-321.6350402832031" y="-271.5691833496094" z="0.0"/>
  </node>
  <node id="731641" label="zzzz363" cy:nodeId="693">
    <graphics x="260.2994079589844" y="-238.79263305664062" z="0.0"/>
  </node>
  <node id="731640" label="zzzz362" cy:nodeId="694">
    <graphics x="-186.18589782714844" y="-201.91024780273438" z="0.0"/>
  </node>
  <node id="731639" label="zzzz361" cy:nodeId="695">
    <graphics x="-28.874862670898438" y="-225.13223266601562" z="0.0"/>
  </node>
  <node id="731638" label="zzzz360" cy:nodeId="696">
    <graphics x="-322.4416809082031" y="-87.05040740966797" z="0.0"/>
  </node>
  <node id="731637" label="zzzz359" cy:nodeId="697">
    <graphics x="-433.8457336425781" y="-216.61749267578125" z="0.0"/>
  </node>
  <node id="731636" label="zzzz358" cy:nodeId="698">
    <graphics x="-161.1578826904297" y="-272.66552734375" z="0.0"/>
  </node>
  <node id="731635" label="zzzz357" cy:nodeId="699">
    <graphics x="-251.71502685546875" y="-342.2159118652344" z="0.0"/>
  </node>
  <node id="731634" label="zzzz356" cy:nodeId="700">
    <graphics x="-207.18470764160156" y="-149.40867614746094" z="0.0"/>
  </node>
  <node id="731633" label="zzzz355" cy:nodeId="701">
    <graphics x="-285.2498474121094" y="-216.64971923828125" z="0.0"/>
  </node>
  <node id="731632" label="zzzz354" cy:nodeId="702">
    <graphics x="-199.93247985839844" y="-330.7069396972656" z="0.0"/>
  </node>
  <node id="731631" label="zzzz353" cy:nodeId="703">
    <graphics x="-66.39097595214844" y="-138.37269592285156" z="0.0"/>
  </node>
  <node id="731630" label="zzzz352" cy:nodeId="704">
    <graphics x="-194.73793029785156" y="-249.07186889648438" z="0.0"/>
  </node>
  <node id="731629" label="zzzz351" cy:nodeId="705">
    <graphics x="-221.05218505859375" y="-176.27499389648438" z="0.0"/>
  </node>
  <node id="731628" label="zzzz350" cy:nodeId="706">
    <graphics x="212.7570343017578" y="-353.3720703125" z="0.0"/>
  </node>
  <node id="731627" label="zzzz349" cy:nodeId="707">
    <graphics x="-154.28660583496094" y="-95.49008178710938" z="0.0"/>
  </node>
  <node id="731626" label="zzzz348" cy:nodeId="708">
    <graphics x="-124.21165466308594" y="-325.0652160644531" z="0.0"/>
  </node>
  <node id="731625" label="zzzz347" cy:nodeId="709">
    <graphics x="-209.9116668701172" y="-397.35089111328125" z="0.0"/>
  </node>
  <node id="731624" label="zzzz346" cy:nodeId="710">
    <graphics x="-177.5058135986328" y="-322.1968688964844" z="0.0"/>
  </node>
  <node id="731623" label="zzzz345" cy:nodeId="711">
    <graphics x="121.71034240722656" y="236.54296875" z="0.0"/>
  </node>
  <node id="731622" label="zzzz344" cy:nodeId="712">
    <graphics x="280.3971252441406" y="65.7678451538086" z="0.0"/>
  </node>
  <node id="731621" label="zzzz343" cy:nodeId="713">
    <graphics x="285.3772888183594" y="11.105125427246094" z="0.0"/>
  </node>
  <node id="731620" label="zzzz342" cy:nodeId="714">
    <graphics x="279.7904357910156" y="76.97142791748047" z="0.0"/>
  </node>
  <node id="731619" label="zzzz341" cy:nodeId="715">
    <graphics x="205.4551544189453" y="83.61089324951172" z="0.0"/>
  </node>
  <node id="731618" label="zzzz340" cy:nodeId="716">
    <graphics x="247.92819213867188" y="115.28984069824219" z="0.0"/>
  </node>
  <node id="731617" label="zzzz339" cy:nodeId="717">
    <graphics x="274.6152648925781" y="28.03960418701172" z="0.0"/>
  </node>
  <node id="731616" label="zzzz338" cy:nodeId="718">
    <graphics x="195.74891662597656" y="164.6280059814453" z="0.0"/>
  </node>
  <node id="731615" label="zzzz337" cy:nodeId="719">
    <graphics x="248.67745971679688" y="115.40934753417969" z="0.0"/>
  </node>
  <node id="731614" label="zzzz336" cy:nodeId="720">
    <graphics x="248.50613403320312" y="183.3828582763672" z="0.0"/>
  </node>
  <node id="731613" label="zzzz335" cy:nodeId="721">
    <graphics x="440.6626892089844" y="-234.00341796875" z="0.0"/>
  </node>
  <node id="731612" label="zzzz334" cy:nodeId="722">
    <graphics x="230.64593505859375" y="80.18456268310547" z="0.0"/>
  </node>
  <node id="731611" label="zzzz333" cy:nodeId="723">
    <graphics x="290.2285461425781" y="86.64800262451172" z="0.0"/>
  </node>
  <node id="731610" label="zzzz332" cy:nodeId="724">
    <graphics x="222.88323974609375" y="175.77650451660156" z="0.0"/>
  </node>
  <node id="731609" label="zzzz331" cy:nodeId="725">
    <graphics x="403.3472595214844" y="99.04595947265625" z="0.0"/>
  </node>
  <node id="731608" label="zzzz330" cy:nodeId="726">
    <graphics x="270.3507995605469" y="65.4781723022461" z="0.0"/>
  </node>
  <node id="731607" label="zzzz329" cy:nodeId="727">
    <graphics x="164.99879455566406" y="-179.38954162597656" z="0.0"/>
  </node>
  <node id="731606" label="zzzz328" cy:nodeId="728">
    <graphics x="-228.49169921875" y="-1148.48486328125" z="0.0"/>
  </node>
  <node id="731605" label="zzzz327" cy:nodeId="729">
    <graphics x="231.9837646484375" y="90.05096435546875" z="0.0"/>
  </node>
  <node id="731604" label="zzzz326" cy:nodeId="730">
    <graphics x="220.0064697265625" y="180.3334503173828" z="0.0"/>
  </node>
  <node id="731603" label="zzzz325" cy:nodeId="731">
    <graphics x="278.6170959472656" y="119.72334289550781" z="0.0"/>
  </node>
  <node id="731602" label="zzzz324" cy:nodeId="732">
    <graphics x="210.81092834472656" y="162.19065856933594" z="0.0"/>
  </node>
  <node id="731601" label="zzzz323" cy:nodeId="733">
    <graphics x="256.0017395019531" y="105.36410522460938" z="0.0"/>
  </node>
  <node id="731600" label="zzzz322" cy:nodeId="734">
    <graphics x="294.1640930175781" y="13.163536071777344" z="0.0"/>
  </node>
  <node id="731599" label="zzzz321" cy:nodeId="735">
    <graphics x="302.1413879394531" y="20.44738006591797" z="0.0"/>
  </node>
  <node id="731598" label="zzzz320" cy:nodeId="736">
    <graphics x="371.0418395996094" y="136.1008758544922" z="0.0"/>
  </node>
  <node id="731597" label="zzzz319" cy:nodeId="737">
    <graphics x="206.8036651611328" y="173.2251434326172" z="0.0"/>
  </node>
  <node id="731596" label="zzzz318" cy:nodeId="738">
    <graphics x="312.7404479980469" y="138.44468688964844" z="0.0"/>
  </node>
  <node id="731595" label="zzzz317" cy:nodeId="739">
    <graphics x="322.2391662597656" y="158.60658264160156" z="0.0"/>
  </node>
  <node id="731594" label="zzzz316" cy:nodeId="740">
    <graphics x="304.5667419433594" y="47.918418884277344" z="0.0"/>
  </node>
  <node id="731593" label="zzzz315" cy:nodeId="741">
    <graphics x="211.68544006347656" y="185.60997009277344" z="0.0"/>
  </node>
  <node id="731592" label="zzzz314" cy:nodeId="742">
    <graphics x="277.0268249511719" y="75.0321273803711" z="0.0"/>
  </node>
  <node id="731591" label="zzzz313" cy:nodeId="743">
    <graphics x="191.75282287597656" y="188.34681701660156" z="0.0"/>
  </node>
  <node id="731590" label="zzzz312" cy:nodeId="744">
    <graphics x="243.30947875976562" y="104.5875244140625" z="0.0"/>
  </node>
  <node id="731589" label="zzzz311" cy:nodeId="745">
    <graphics x="196.60426330566406" y="187.8846893310547" z="0.0"/>
  </node>
  <node id="731588" label="zzzz310" cy:nodeId="746">
    <graphics x="247.08242797851562" y="140.15232849121094" z="0.0"/>
  </node>
  <node id="731587" label="zzzz308" cy:nodeId="748">
    <graphics x="215.78663635253906" y="119.08665466308594" z="0.0"/>
  </node>
  <node id="731586" label="zzzz307" cy:nodeId="749">
    <graphics x="273.1060485839844" y="83.92940521240234" z="0.0"/>
  </node>
  <node id="731585" label="zzzz306" cy:nodeId="750">
    <graphics x="189.9031524658203" y="153.40943908691406" z="0.0"/>
  </node>
  <node id="731584" label="zzzz305" cy:nodeId="751">
    <graphics x="276.4537048339844" y="98.10910034179688" z="0.0"/>
  </node>
  <node id="731583" label="zzzz304" cy:nodeId="752">
    <graphics x="225.02191162109375" y="166.23387145996094" z="0.0"/>
  </node>
  <node id="731582" label="zzzz303" cy:nodeId="753">
    <graphics x="159.30982971191406" y="140.0593719482422" z="0.0"/>
  </node>
  <node id="731581" label="zzzz302" cy:nodeId="754">
    <graphics x="245.29458618164062" y="82.3061752319336" z="0.0"/>
  </node>
  <node id="731580" label="zzzz301" cy:nodeId="755">
    <graphics x="101.39686584472656" y="178.42747497558594" z="0.0"/>
  </node>
  <node id="731579" label="zzzz300" cy:nodeId="756">
    <graphics x="-68.18431091308594" y="-550.5385131835938" z="0.0"/>
  </node>
  <node id="731578" label="zzzz299" cy:nodeId="757">
    <graphics x="80.44557189941406" y="155.2100372314453" z="0.0"/>
  </node>
  <node id="731577" label="zzzz298" cy:nodeId="758">
    <graphics x="204.54273986816406" y="105.88626098632812" z="0.0"/>
  </node>
  <node id="731576" label="zzzz297" cy:nodeId="759">
    <graphics x="-28.041976928710938" y="187.0646514892578" z="0.0"/>
  </node>
  <node id="731575" label="zzzz292" cy:nodeId="761">
    <graphics x="131.42982482910156" y="-384.070556640625" z="0.0"/>
  </node>
  <node id="731574" label="zzzz291" cy:nodeId="762">
    <graphics x="28.678787231445312" y="-606.7342529296875" z="0.0"/>
  </node>
  <node id="731573" label="zzzz290" cy:nodeId="763">
    <graphics x="-382.159423828125" y="-59.448829650878906" z="0.0"/>
  </node>
  <node id="731572" label="zzzz288" cy:nodeId="764">
    <graphics x="-199.53578186035156" y="55.79039764404297" z="0.0"/>
  </node>
  <node id="731571" label="zzzz287" cy:nodeId="765">
    <graphics x="-204.0145721435547" y="63.920738220214844" z="0.0"/>
  </node>
  <node id="731570" label="zzzz286" cy:nodeId="766">
    <graphics x="-26.856307983398438" y="-66.46685028076172" z="0.0"/>
  </node>
  <node id="731569" label="zzzz285" cy:nodeId="767">
    <graphics x="5.0982208251953125" y="-28.18952178955078" z="0.0"/>
  </node>
  <node id="731568" label="zzzz284" cy:nodeId="768">
    <graphics x="-34.73161315917969" y="-51.227699279785156" z="0.0"/>
  </node>
  <node id="731567" label="zzzz283" cy:nodeId="769">
    <graphics x="316.9355163574219" y="-31.56812286376953" z="0.0"/>
  </node>
  <node id="731566" label="zzzz282" cy:nodeId="770">
    <graphics x="252.07852172851562" y="-34.62189483642578" z="0.0"/>
  </node>
  <node id="731565" label="zzzz281" cy:nodeId="771">
    <graphics x="328.4839782714844" y="19.89623260498047" z="0.0"/>
  </node>
  <node id="731564" label="zzzz280" cy:nodeId="772">
    <graphics x="-32.85130310058594" y="-576.6988525390625" z="0.0"/>
  </node>
  <node id="731563" label="zzzz279" cy:nodeId="773">
    <graphics x="323.2709655761719" y="60.292015075683594" z="0.0"/>
  </node>
  <node id="731562" label="zzzz278" cy:nodeId="774">
    <graphics x="23.912368774414062" y="-569.1279296875" z="0.0"/>
  </node>
  <node id="731561" label="zzzz277" cy:nodeId="775">
    <graphics x="211.81910705566406" y="198.6681365966797" z="0.0"/>
  </node>
  <node id="731560" label="zzzz275" cy:nodeId="776">
    <graphics x="-318.4447937011719" y="-798.2858276367188" z="0.0"/>
  </node>
  <node id="731559" label="zzzz274" cy:nodeId="777">
    <graphics x="-78.08763122558594" y="-514.3151245117188" z="0.0"/>
  </node>
  <node id="731558" label="zzzz264" cy:nodeId="779">
    <graphics x="-313.68365478515625" y="-143.94564819335938" z="0.0"/>
  </node>
  <node id="731557" label="zzzz263" cy:nodeId="780">
    <graphics x="-396.2938232421875" y="-0.7121047973632812" z="0.0"/>
  </node>
  <node id="731556" label="zzzz262" cy:nodeId="781">
    <graphics x="-215.4712371826172" y="-60.29192352294922" z="0.0"/>
  </node>
  <node id="731555" label="zzzz261" cy:nodeId="782">
    <graphics x="-181.4542999267578" y="-134.54898071289062" z="0.0"/>
  </node>
  <node id="731554" label="zzzz259" cy:nodeId="784">
    <graphics x="-247.34774780273438" y="120.37818908691406" z="0.0"/>
  </node>
  <node id="731553" label="zzzz258" cy:nodeId="785">
    <graphics x="471.6734313964844" y="72.66863250732422" z="0.0"/>
  </node>
  <node id="731552" label="zzzz256" cy:nodeId="787">
    <graphics x="660.5856323242188" y="346.78497314453125" z="0.0"/>
  </node>
  <node id="731551" label="zzzz255" cy:nodeId="788">
    <graphics x="-147.4493865966797" y="141.2445526123047" z="0.0"/>
  </node>
  <node id="731550" label="zzzz254" cy:nodeId="789">
    <graphics x="35.40504455566406" y="248.99456787109375" z="0.0"/>
  </node>
  <node id="731549" label="zzzz253" cy:nodeId="790">
    <graphics x="256.9721984863281" y="201.7765350341797" z="0.0"/>
  </node>
  <node id="731548" label="zzzz252" cy:nodeId="791">
    <graphics x="-44.44425964355469" y="-11.148963928222656" z="0.0"/>
  </node>
  <node id="731547" label="zzzz251" cy:nodeId="792">
    <graphics x="153.24903869628906" y="-285.90289306640625" z="0.0"/>
  </node>
  <node id="731546" label="zzzz250" cy:nodeId="793">
    <graphics x="-79.94584655761719" y="296.5687255859375" z="0.0"/>
  </node>
  <node id="731545" label="zzzz249" cy:nodeId="794">
    <graphics x="-80.48930358886719" y="39.806846618652344" z="0.0"/>
  </node>
  <node id="731544" label="zzzz248" cy:nodeId="795">
    <graphics x="187.6958770751953" y="114.19117736816406" z="0.0"/>
  </node>
  <node id="731543" label="zzzz247" cy:nodeId="796">
    <graphics x="14.462417602539062" y="285.03277587890625" z="0.0"/>
  </node>
  <node id="731542" label="zzzz246" cy:nodeId="797">
    <graphics x="264.8832702636719" y="481.36871337890625" z="0.0"/>
  </node>
  <node id="731541" label="zzzz245" cy:nodeId="798">
    <graphics x="-141.97972106933594" y="5.066459655761719" z="0.0"/>
  </node>
  <node id="731540" label="zzzz244" cy:nodeId="799">
    <graphics x="53.87196350097656" y="-472.9735107421875" z="0.0"/>
  </node>
  <node id="731539" label="zzzz243" cy:nodeId="800">
    <graphics x="-94.20378112792969" y="-16.45520782470703" z="0.0"/>
  </node>
  <node id="731538" label="zzzz242" cy:nodeId="801">
    <graphics x="-145.1794891357422" y="55.42052459716797" z="0.0"/>
  </node>
  <node id="731537" label="zzzz241" cy:nodeId="802">
    <graphics x="-19.514328002929688" y="61.305747985839844" z="0.0"/>
  </node>
  <node id="731536" label="zzzz240" cy:nodeId="803">
    <graphics x="-194.1113739013672" y="100.47390747070312" z="0.0"/>
  </node>
  <node id="731535" label="zzzz239" cy:nodeId="804">
    <graphics x="10.642532348632812" y="72.35369110107422" z="0.0"/>
  </node>
  <node id="731534" label="zzzz237" cy:nodeId="806">
    <graphics x="79.60322570800781" y="126.71125793457031" z="0.0"/>
  </node>
  <node id="731533" label="zzzz235" cy:nodeId="808">
    <graphics x="230.12689208984375" y="110.58062744140625" z="0.0"/>
  </node>
  <node id="731532" label="zzzz234" cy:nodeId="809">
    <graphics x="-131.61009216308594" y="291.31219482421875" z="0.0"/>
  </node>
  <node id="731531" label="zzzz233" cy:nodeId="810">
    <graphics x="86.76594543457031" y="-129.1141357421875" z="0.0"/>
  </node>
  <node id="731530" label="zzzz232" cy:nodeId="811">
    <graphics x="58.00190734863281" y="-85.4600601196289" z="0.0"/>
  </node>
  <node id="731529" label="zzzz231" cy:nodeId="812">
    <graphics x="308.6294860839844" y="-166.11643981933594" z="0.0"/>
  </node>
  <node id="731528" label="zzzz230" cy:nodeId="813">
    <graphics x="-34.03910827636719" y="-18.26636505126953" z="0.0"/>
  </node>
  <node id="731527" label="zzzz229" cy:nodeId="814">
    <graphics x="305.8201599121094" y="-12.500984191894531" z="0.0"/>
  </node>
  <node id="731526" label="zzzz228" cy:nodeId="815">
    <graphics x="209.17054748535156" y="-232.39175415039062" z="0.0"/>
  </node>
  <node id="731525" label="zzzz227" cy:nodeId="816">
    <graphics x="-130.7678680419922" y="-613.6846313476562" z="0.0"/>
  </node>
  <node id="731524" label="zzzz226" cy:nodeId="817">
    <graphics x="-169.6736602783203" y="-444.5228576660156" z="0.0"/>
  </node>
  <node id="731523" label="zzzz225" cy:nodeId="818">
    <graphics x="-188.0054168701172" y="-460.62738037109375" z="0.0"/>
  </node>
  <node id="731522" label="zzzz224" cy:nodeId="819">
    <graphics x="-91.11747741699219" y="-229.369873046875" z="0.0"/>
  </node>
  <node id="731521" label="zzzz223" cy:nodeId="820">
    <graphics x="36.42359924316406" y="-552.11181640625" z="0.0"/>
  </node>
  <node id="731520" label="zzzz222" cy:nodeId="821">
    <graphics x="91.46607971191406" y="-489.92071533203125" z="0.0"/>
  </node>
  <node id="731519" label="zzzz220" cy:nodeId="823">
    <graphics x="-63.08641052246094" y="-168.33151245117188" z="0.0"/>
  </node>
  <node id="731518" label="zzzz219" cy:nodeId="824">
    <graphics x="-164.2541046142578" y="-362.3389587402344" z="0.0"/>
  </node>
  <node id="731517" label="zzzz218" cy:nodeId="825">
    <graphics x="-243.68569946289062" y="7.476341247558594" z="0.0"/>
  </node>
  <node id="731516" label="zzzz217" cy:nodeId="826">
    <graphics x="-308.1830749511719" y="-131.3372039794922" z="0.0"/>
  </node>
  <node id="731515" label="zzzz216" cy:nodeId="827">
    <graphics x="-232.3057861328125" y="-347.5364990234375" z="0.0"/>
  </node>
  <node id="731514" label="zzzz215" cy:nodeId="828">
    <graphics x="72.76283264160156" y="11.984184265136719" z="0.0"/>
  </node>
  <node id="731513" label="zzzz214" cy:nodeId="829">
    <graphics x="58.68629455566406" y="158.70130920410156" z="0.0"/>
  </node>
  <node id="731512" label="zzzz213" cy:nodeId="830">
    <graphics x="29.662734985351562" y="-421.1672058105469" z="0.0"/>
  </node>
  <node id="731511" label="zzzz211" cy:nodeId="832">
    <graphics x="-271.92584228515625" y="-136.8812713623047" z="0.0"/>
  </node>
  <node id="731510" label="zzzz210" cy:nodeId="833">
    <graphics x="-263.19256591796875" y="-68.79027557373047" z="0.0"/>
  </node>
  <node id="731509" label="zzzz209" cy:nodeId="834">
    <graphics x="-245.6129150390625" y="-207.63650512695312" z="0.0"/>
  </node>
  <node id="731508" label="zzzz208" cy:nodeId="835">
    <graphics x="-140.9984588623047" y="-111.97357177734375" z="0.0"/>
  </node>
  <node id="731507" label="zzzz207" cy:nodeId="836">
    <graphics x="-158.8796844482422" y="-208.70057678222656" z="0.0"/>
  </node>
  <node id="731506" label="zzzz206" cy:nodeId="837">
    <graphics x="-279.005615234375" y="-53.902626037597656" z="0.0"/>
  </node>
  <node id="731505" label="zzzz205" cy:nodeId="838">
    <graphics x="-50.27983093261719" y="122.23008728027344" z="0.0"/>
  </node>
  <node id="731504" label="zzzz204" cy:nodeId="839">
    <graphics x="118.20796203613281" y="49.48131561279297" z="0.0"/>
  </node>
  <node id="731503" label="zzzz203" cy:nodeId="840">
    <graphics x="-268.4482116699219" y="-284.3996887207031" z="0.0"/>
  </node>
  <node id="731502" label="zzzz202" cy:nodeId="841">
    <graphics x="153.4889678955078" y="-322.2833251953125" z="0.0"/>
  </node>
  <node id="731501" label="zzzz201" cy:nodeId="842">
    <graphics x="-332.9001770019531" y="-111.30776977539062" z="0.0"/>
  </node>
  <node id="731500" label="zzzz200" cy:nodeId="843">
    <graphics x="-640.4803466796875" y="-935.0458984375" z="0.0"/>
  </node>
  <node id="731499" label="zzzz199" cy:nodeId="844">
    <graphics x="-305.3880615234375" y="-228.81622314453125" z="0.0"/>
  </node>
  <node id="731498" label="zzzz198" cy:nodeId="845">
    <graphics x="144.79957580566406" y="-197.0918731689453" z="0.0"/>
  </node>
  <node id="731497" label="zzzz197" cy:nodeId="846">
    <graphics x="-170.2957000732422" y="-147.1484375" z="0.0"/>
  </node>
  <node id="731496" label="zzzz196" cy:nodeId="847">
    <graphics x="-465.98583984375" y="-1058.7366943359375" z="0.0"/>
  </node>
  <node id="731495" label="zzzz195" cy:nodeId="848">
    <graphics x="-184.0466766357422" y="-230.60003662109375" z="0.0"/>
  </node>
  <node id="731494" label="zzzz194" cy:nodeId="849">
    <graphics x="-220.2420654296875" y="-194.60301208496094" z="0.0"/>
  </node>
  <node id="731493" label="zzzz193" cy:nodeId="850">
    <graphics x="-498.171142578125" y="-992.384033203125" z="0.0"/>
  </node>
  <node id="731492" label="zzzz192" cy:nodeId="851">
    <graphics x="346.1046447753906" y="-139.64759826660156" z="0.0"/>
  </node>
  <node id="731491" label="zzzz191" cy:nodeId="852">
    <graphics x="-148.0852508544922" y="-331.38543701171875" z="0.0"/>
  </node>
  <node id="731490" label="zzzz190" cy:nodeId="853">
    <graphics x="334.2853088378906" y="-74.2612075805664" z="0.0"/>
  </node>
  <node id="731489" label="zzzz189" cy:nodeId="854">
    <graphics x="-170.79966735839844" y="-130.6338653564453" z="0.0"/>
  </node>
  <node id="731488" label="zzzz188" cy:nodeId="855">
    <graphics x="-17.452133178710938" y="-382.4727783203125" z="0.0"/>
  </node>
  <node id="731487" label="zzzz187" cy:nodeId="856">
    <graphics x="178.1060333251953" y="-174.23802185058594" z="0.0"/>
  </node>
  <node id="731486" label="zzzz186" cy:nodeId="857">
    <graphics x="-370.14306640625" y="-97.19851684570312" z="0.0"/>
  </node>
  <node id="731485" label="zzzz185" cy:nodeId="858">
    <graphics x="-484.1920166015625" y="-777.466796875" z="0.0"/>
  </node>
  <node id="731484" label="zzzz184" cy:nodeId="859">
    <graphics x="-81.95121765136719" y="-11.820381164550781" z="0.0"/>
  </node>
  <node id="731483" label="zzzz183" cy:nodeId="860">
    <graphics x="-13.717575073242188" y="-25.319923400878906" z="0.0"/>
  </node>
  <node id="731482" label="zzzz182" cy:nodeId="861">
    <graphics x="9.272537231445312" y="125.66838073730469" z="0.0"/>
  </node>
  <node id="731481" label="zzzz181" cy:nodeId="862">
    <graphics x="-89.92637634277344" y="47.82012176513672" z="0.0"/>
  </node>
  <node id="731480" label="zzzz180" cy:nodeId="863">
    <graphics x="-36.35899353027344" y="-31.957313537597656" z="0.0"/>
  </node>
  <node id="731479" label="zzzz179" cy:nodeId="864">
    <graphics x="-98.71354675292969" y="14.946128845214844" z="0.0"/>
  </node>
  <node id="731478" label="zzzz178" cy:nodeId="865">
    <graphics x="-83.34611511230469" y="53.522239685058594" z="0.0"/>
  </node>
  <node id="731477" label="zzzz177" cy:nodeId="866">
    <graphics x="-57.38639831542969" y="-39.240028381347656" z="0.0"/>
  </node>
  <node id="731476" label="zzzz176" cy:nodeId="867">
    <graphics x="-105.59025573730469" y="-25.43488311767578" z="0.0"/>
  </node>
  <node id="731475" label="zzzz175" cy:nodeId="868">
    <graphics x="-80.46537780761719" y="-17.37665557861328" z="0.0"/>
  </node>
  <node id="731474" label="zzzz174" cy:nodeId="869">
    <graphics x="-58.05558776855469" y="-18.679420471191406" z="0.0"/>
  </node>
  <node id="731473" label="zzzz173" cy:nodeId="870">
    <graphics x="-34.38395690917969" y="-19.392555236816406" z="0.0"/>
  </node>
  <node id="731472" label="zzzz172" cy:nodeId="871">
    <graphics x="-145.9707489013672" y="20.295127868652344" z="0.0"/>
  </node>
  <node id="731471" label="zzzz171" cy:nodeId="872">
    <graphics x="-74.35935974121094" y="-35.028053283691406" z="0.0"/>
  </node>
  <node id="731470" label="zzzz170" cy:nodeId="873">
    <graphics x="-57.92881774902344" y="-33.504249572753906" z="0.0"/>
  </node>
  <node id="731469" label="zzzz169" cy:nodeId="874">
    <graphics x="-48.10044860839844" y="14.392204284667969" z="0.0"/>
  </node>
  <node id="731468" label="zzzz168" cy:nodeId="875">
    <graphics x="-100.97471618652344" y="-5.930885314941406" z="0.0"/>
  </node>
  <node id="731467" label="zzzz167" cy:nodeId="876">
    <graphics x="-162.90306091308594" y="-15.513160705566406" z="0.0"/>
  </node>
  <node id="731466" label="zzzz166" cy:nodeId="877">
    <graphics x="18.938919067382812" y="-92.49444580078125" z="0.0"/>
  </node>
  <node id="731465" label="zzzz165" cy:nodeId="878">
    <graphics x="5.9607086181640625" y="-83.95104217529297" z="0.0"/>
  </node>
  <node id="731464" label="zzzz164" cy:nodeId="879">
    <graphics x="-19.389694213867188" y="-110.83383178710938" z="0.0"/>
  </node>
  <node id="731463" label="zzzz163" cy:nodeId="880">
    <graphics x="-45.46574401855469" y="-91.35922241210938" z="0.0"/>
  </node>
  <node id="731462" label="zzzz162" cy:nodeId="881">
    <graphics x="26.635574340820312" y="-47.292503356933594" z="0.0"/>
  </node>
  <node id="731461" label="zzzz161" cy:nodeId="882">
    <graphics x="33.83644104003906" y="-137.97779846191406" z="0.0"/>
  </node>
  <node id="731460" label="zzzz160" cy:nodeId="883">
    <graphics x="3.4583282470703125" y="8.389640808105469" z="0.0"/>
  </node>
  <node id="731459" label="zzzz159" cy:nodeId="884">
    <graphics x="-30.291000366210938" y="-24.08057403564453" z="0.0"/>
  </node>
  <node id="731458" label="zzzz158" cy:nodeId="885">
    <graphics x="-79.05119323730469" y="-21.11420440673828" z="0.0"/>
  </node>
  <node id="731457" label="zzzz157" cy:nodeId="886">
    <graphics x="-200.13023376464844" y="43.08214569091797" z="0.0"/>
  </node>
  <node id="731456" label="zzzz156" cy:nodeId="887">
    <graphics x="43.37989807128906" y="-251.48513793945312" z="0.0"/>
  </node>
  <node id="731455" label="zzzz155" cy:nodeId="888">
    <graphics x="-108.25065612792969" y="26.85417938232422" z="0.0"/>
  </node>
  <node id="731454" label="zzzz154" cy:nodeId="889">
    <graphics x="38.89625549316406" y="-284.9207458496094" z="0.0"/>
  </node>
  <node id="731453" label="zzzz153" cy:nodeId="890">
    <graphics x="34.44099426269531" y="-161.64413452148438" z="0.0"/>
  </node>
  <node id="731452" label="zzzz152" cy:nodeId="891">
    <graphics x="60.47981262207031" y="-56.478355407714844" z="0.0"/>
  </node>
  <node id="731451" label="zzzz151" cy:nodeId="892">
    <graphics x="69.32344055175781" y="-239.50717163085938" z="0.0"/>
  </node>
  <node id="731450" label="zzzz150" cy:nodeId="893">
    <graphics x="24.788040161132812" y="-87.40901947021484" z="0.0"/>
  </node>
  <node id="731449" label="zzzz149" cy:nodeId="894">
    <graphics x="19.209304809570312" y="-132.0769805908203" z="0.0"/>
  </node>
  <node id="731448" label="zzzz148" cy:nodeId="895">
    <graphics x="39.32514953613281" y="-90.26123046875" z="0.0"/>
  </node>
  <node id="731447" label="zzzz147" cy:nodeId="896">
    <graphics x="-181.46058654785156" y="19.404197692871094" z="0.0"/>
  </node>
  <node id="731446" label="zzzz146" cy:nodeId="897">
    <graphics x="-171.7380828857422" y="18.78179168701172" z="0.0"/>
  </node>
  <node id="731445" label="zzzz145" cy:nodeId="898">
    <graphics x="-107.62913513183594" y="8.689048767089844" z="0.0"/>
  </node>
  <node id="731444" label="zzzz144" cy:nodeId="899">
    <graphics x="-160.2606658935547" y="39.35552215576172" z="0.0"/>
  </node>
  <node id="731443" label="zzzz143" cy:nodeId="900">
    <graphics x="-84.03202819824219" y="63.431419372558594" z="0.0"/>
  </node>
  <node id="731442" label="zzzz142" cy:nodeId="901">
    <graphics x="-116.41014099121094" y="73.02962493896484" z="0.0"/>
  </node>
  <node id="731441" label="zzzz141" cy:nodeId="902">
    <graphics x="-120.83531188964844" y="91.869140625" z="0.0"/>
  </node>
  <node id="731440" label="zzzz140" cy:nodeId="903">
    <graphics x="-108.27952575683594" y="56.36296844482422" z="0.0"/>
  </node>
  <node id="731439" label="zzzz139" cy:nodeId="904">
    <graphics x="14.392654418945312" y="59.81536102294922" z="0.0"/>
  </node>
  <node id="731438" label="zzzz138" cy:nodeId="905">
    <graphics x="-54.23558044433594" y="53.72020721435547" z="0.0"/>
  </node>
  <node id="731437" label="zzzz137" cy:nodeId="906">
    <graphics x="72.43165588378906" y="-18.818336486816406" z="0.0"/>
  </node>
  <node id="731436" label="zzzz136" cy:nodeId="907">
    <graphics x="-140.58714294433594" y="17.519615173339844" z="0.0"/>
  </node>
  <node id="731435" label="zzzz135" cy:nodeId="908">
    <graphics x="-35.86192321777344" y="-222.90969848632812" z="0.0"/>
  </node>
  <node id="731434" label="zzzz134" cy:nodeId="909">
    <graphics x="-20.847885131835938" y="-198.94635009765625" z="0.0"/>
  </node>
  <node id="731433" label="zzzz133" cy:nodeId="910">
    <graphics x="-211.09632873535156" y="-274.6588134765625" z="0.0"/>
  </node>
  <node id="731432" label="zzzz132" cy:nodeId="911">
    <graphics x="-114.34495544433594" y="-140.5550994873047" z="0.0"/>
  </node>
  <node id="731431" label="zzzz131" cy:nodeId="912">
    <graphics x="-108.95957946777344" y="-172.880615234375" z="0.0"/>
  </node>
  <node id="731430" label="zzzz130" cy:nodeId="913">
    <graphics x="-133.2886199951172" y="-237.82632446289062" z="0.0"/>
  </node>
  <node id="731429" label="zzzz129" cy:nodeId="914">
    <graphics x="-230.4036865234375" y="-245.67831420898438" z="0.0"/>
  </node>
  <node id="731428" label="zzzz128" cy:nodeId="915">
    <graphics x="-168.04066467285156" y="-161.22598266601562" z="0.0"/>
  </node>
  <node id="731427" label="zzzz127" cy:nodeId="916">
    <graphics x="-190.14573669433594" y="-172.55776977539062" z="0.0"/>
  </node>
  <node id="731426" label="zzzz126" cy:nodeId="917">
    <graphics x="-39.39213562011719" y="-188.42904663085938" z="0.0"/>
  </node>
  <node id="731425" label="zzzz125" cy:nodeId="918">
    <graphics x="-244.55734252929688" y="-33.37903594970703" z="0.0"/>
  </node>
  <node id="731424" label="zzzz124" cy:nodeId="919">
    <graphics x="-281.3409729003906" y="-36.46253204345703" z="0.0"/>
  </node>
  <node id="731423" label="zzzz123" cy:nodeId="920">
    <graphics x="-54.76689147949219" y="-113.65974426269531" z="0.0"/>
  </node>
  <node id="731422" label="zzzz122" cy:nodeId="921">
    <graphics x="-111.73905944824219" y="-404.5172119140625" z="0.0"/>
  </node>
  <node id="731421" label="zzzz121" cy:nodeId="922">
    <graphics x="-191.5651397705078" y="-313.28643798828125" z="0.0"/>
  </node>
  <node id="731420" label="zzzz120" cy:nodeId="923">
    <graphics x="-119.35441589355469" y="-104.18283081054688" z="0.0"/>
  </node>
  <node id="731419" label="zzzz119" cy:nodeId="924">
    <graphics x="-97.06327819824219" y="-109.06182861328125" z="0.0"/>
  </node>
  <node id="731418" label="zzzz118" cy:nodeId="925">
    <graphics x="-123.97044372558594" y="-72.07259368896484" z="0.0"/>
  </node>
  <node id="731417" label="zzzz117" cy:nodeId="926">
    <graphics x="-178.20692443847656" y="-71.94034576416016" z="0.0"/>
  </node>
  <node id="731416" label="zzzz116" cy:nodeId="927">
    <graphics x="-268.1837463378906" y="-42.476783752441406" z="0.0"/>
  </node>
  <node id="731415" label="zzzz115" cy:nodeId="928">
    <graphics x="-144.06980895996094" y="85.5534896850586" z="0.0"/>
  </node>
  <node id="731414" label="zzzz114" cy:nodeId="929">
    <graphics x="-126.24449157714844" y="-103.58413696289062" z="0.0"/>
  </node>
  <node id="731413" label="zzzz113" cy:nodeId="930">
    <graphics x="-32.81266784667969" y="-14.584053039550781" z="0.0"/>
  </node>
  <node id="731412" label="zzzz112" cy:nodeId="931">
    <graphics x="6.4702301025390625" y="-277.754638671875" z="0.0"/>
  </node>
  <node id="731411" label="zzzz111" cy:nodeId="932">
    <graphics x="20.090713500976562" y="214.61338806152344" z="0.0"/>
  </node>
  <node id="731410" label="zzzz110" cy:nodeId="933">
    <graphics x="68.84687805175781" y="43.338462829589844" z="0.0"/>
  </node>
  <node id="731409" label="zzzz109" cy:nodeId="934">
    <graphics x="-200.37864685058594" y="81.72734832763672" z="0.0"/>
  </node>
  <node id="731408" label="zzzz108" cy:nodeId="935">
    <graphics x="-248.26583862304688" y="6.330955505371094" z="0.0"/>
  </node>
  <node id="731407" label="zzzz107" cy:nodeId="936">
    <graphics x="27.267898559570312" y="-137.0606231689453" z="0.0"/>
  </node>
  <node id="731406" label="zzzz106" cy:nodeId="937">
    <graphics x="-217.0740966796875" y="-57.557899475097656" z="0.0"/>
  </node>
  <node id="731405" label="zzzz105" cy:nodeId="938">
    <graphics x="-18.638778686523438" y="64.45842742919922" z="0.0"/>
  </node>
  <node id="731404" label="zzzz104" cy:nodeId="939">
    <graphics x="-3.4924163818359375" y="-32.960060119628906" z="0.0"/>
  </node>
  <node id="731403" label="zzzz103" cy:nodeId="940">
    <graphics x="-43.40196228027344" y="6.769767761230469" z="0.0"/>
  </node>
  <node id="731402" label="zzzz102" cy:nodeId="941">
    <graphics x="-23.321273803710938" y="-325.0534973144531" z="0.0"/>
  </node>
  <node id="731401" label="zzzz101" cy:nodeId="942">
    <graphics x="-105.99205017089844" y="169.40940856933594" z="0.0"/>
  </node>
  <node id="731400" label="zzzz100" cy:nodeId="943">
    <graphics x="-121.02976989746094" y="-103.31591796875" z="0.0"/>
  </node>
</graph>
