# Supplementary material for: Discovery of several thousand highly diverse circular DNA viruses
Source: eLife journal article supplement (doi:10.7554/elife.51971), 2020-02-03
Supplement: fig2-figsupp1-data4 [file elife-51971-fig2-figsupp1-data4-v1.cys › CytoscapeSession-2019_08_05-17_02/views/252247-481428-all_my_seqs_genbank_ssDNA1_domains_micro_ino_rep_fasta+Full+Network%283%29.xgmml]

<?xml version="1.0" encoding="UTF-8" standalone="yes"?>
<graph id="481428" label="all_my_seqs_genbank_ssDNA1_domains_micro_ino_rep_fasta Full Network(3)" cy:view="1" cy:networkId="252247" cy:visualStyle="Solid" cy:rendererId="org.cytoscape.ding" cy:documentVersion="3.0" xmlns:dc="http://purl.org/dc/elements/1.1/" xmlns:xlink="http://www.w3.org/1999/xlink" xmlns:rdf="http://www.w3.org/1999/02/22-rdf-syntax-ns#" xmlns:cy="http://www.cytoscape.org" xmlns="http://www.cs.rpi.edu/XGMML">
  <graphics>
    <att name="NETWORK_NODE_SELECTION" value="true" type="string" cy:type="String"/>
    <att name="NETWORK_CENTER_X_LOCATION" value="1361.7721557617188" type="string" cy:type="String"/>
    <att name="NETWORK_DEPTH" value="0.0" type="string" cy:type="String"/>
    <att name="NETWORK_SCALE_FACTOR" value="0.7541363190326874" type="string" cy:type="String"/>
    <att name="NETWORK_EDGE_SELECTION" value="true" type="string" cy:type="String"/>
    <att name="NETWORK_CENTER_Y_LOCATION" value="-845.419189453125" type="string" cy:type="String"/>
    <att name="NETWORK_TITLE" value="all_my_seqs_genbank_ssDNA1_domains_micro_ino_rep_fasta Full Network(3)" type="string" cy:type="String"/>
    <att name="NETWORK_CENTER_Z_LOCATION" value="0.0" type="string" cy:type="String"/>
    <att name="NETWORK_ANNOTATION_SELECTION" value="false" type="string" cy:type="String"/>
    <att name="NETWORK_HEIGHT" value="588.0" type="string" cy:type="String"/>
    <att name="NETWORK_WIDTH" value="964.0" type="string" cy:type="String"/>
  </graphics>
  <node id="481438" label="zzzz776" cy:nodeId="303">
    <graphics x="1487.9107666015625" y="-1033.5247802734375" z="0.0"/>
  </node>
  <node id="481437" label="zzzz775" cy:nodeId="304">
    <graphics x="1580.87646484375" y="-595.5614013671875" z="0.0"/>
  </node>
  <node id="481436" label="zzzz773" cy:nodeId="306">
    <graphics x="1493.7615966796875" y="-697.103515625" z="0.0"/>
  </node>
  <node id="481435" label="zzzz772" cy:nodeId="307">
    <graphics x="1464.8681640625" y="-641.0925903320312" z="0.0"/>
  </node>
  <node id="481434" label="zzzz769" cy:nodeId="308">
    <graphics x="1521.814697265625" y="-730.1729125976562" z="0.0"/>
  </node>
  <node id="481433" label="zzzz768" cy:nodeId="309">
    <graphics x="1414.5682373046875" y="-632.02978515625" z="0.0"/>
  </node>
  <node id="481432" label="zzzz767" cy:nodeId="310">
    <graphics x="1466.5263671875" y="-687.4578247070312" z="0.0"/>
  </node>
  <node id="481431" label="zzzz766" cy:nodeId="311">
    <graphics x="1621.7745361328125" y="-643.2532348632812" z="0.0"/>
  </node>
  <node id="481430" label="zzzz932" cy:nodeId="190">
    <graphics x="1573.6314697265625" y="-480.625" z="0.0"/>
  </node>
  <node id="481463" label="zzzz212" cy:nodeId="831">
    <graphics x="1268.324951171875" y="-1139.454833984375" z="0.0"/>
  </node>
  <node id="481462" label="zzzzzz6" cy:nodeId="65">
    <graphics x="1399.1427001953125" y="-832.5430908203125" z="0.0"/>
  </node>
  <node id="481461" label="zzzzzz5" cy:nodeId="66">
    <graphics x="1265.352783203125" y="-1124.66552734375" z="0.0"/>
  </node>
  <node id="481460" label="zzzz919" cy:nodeId="196">
    <graphics x="1031.26025390625" y="-1131.79443359375" z="0.0"/>
  </node>
  <node id="481458" label="zzzz915" cy:nodeId="197">
    <graphics x="1364.23095703125" y="-747.2473754882812" z="0.0"/>
  </node>
  <node id="481459" label="zzzzzz2" cy:nodeId="69">
    <graphics x="1026.024169921875" y="-1018.7286376953125" z="0.0"/>
  </node>
  <node id="481457" label="zzzzzz1" cy:nodeId="70">
    <graphics x="1151.3643798828125" y="-1180.3331298828125" z="0.0"/>
  </node>
  <node id="481455" label="zzzz739" cy:nodeId="330">
    <graphics x="1124.50634765625" y="-577.97705078125" z="0.0"/>
  </node>
  <node id="481456" label="zzzz273" cy:nodeId="778">
    <graphics x="1042.272216796875" y="-693.1321411132812" z="0.0"/>
  </node>
  <node id="481454" label="zzzzz29" cy:nodeId="142">
    <graphics x="1086.434814453125" y="-744.8939819335938" z="0.0"/>
  </node>
  <node id="481453" label="zzzzz27" cy:nodeId="144">
    <graphics x="1190.8514404296875" y="-1193.737060546875" z="0.0"/>
  </node>
  <node id="481452" label="zzzzz25" cy:nodeId="146">
    <graphics x="1436.27197265625" y="-806.6964111328125" z="0.0"/>
  </node>
  <node id="481451" label="zzzzz24" cy:nodeId="147">
    <graphics x="1072.3765869140625" y="-700.0374145507812" z="0.0"/>
  </node>
  <node id="481450" label="zzzzz22" cy:nodeId="149">
    <graphics x="1125.2584228515625" y="-1210.21337890625" z="0.0"/>
  </node>
  <node id="481449" label="zzzzz21" cy:nodeId="150">
    <graphics x="1067.4742431640625" y="-941.4181518554688" z="0.0"/>
  </node>
  <node id="481448" label="zzzzz19" cy:nodeId="152">
    <graphics x="1433.864501953125" y="-990.71484375" z="0.0"/>
  </node>
  <node id="481447" label="zzzzz18" cy:nodeId="153">
    <graphics x="1082.4100341796875" y="-736.4739990234375" z="0.0"/>
  </node>
  <node id="481445" label="zzzzz14" cy:nodeId="157">
    <graphics x="1117.343505859375" y="-961.9560546875" z="0.0"/>
  </node>
  <node id="481446" label="zzzz797" cy:nodeId="285">
    <graphics x="1312.5455322265625" y="-656.5938720703125" z="0.0"/>
  </node>
  <node id="481443" label="zzzz789" cy:nodeId="292">
    <graphics x="1116.232666015625" y="-1013.278076171875" z="0.0"/>
  </node>
  <node id="481444" label="zzzz857" cy:nodeId="228">
    <graphics x="1279.753662109375" y="-711.4363403320312" z="0.0"/>
  </node>
  <node id="481442" label="zzzz980" cy:nodeId="165">
    <graphics x="1425.784912109375" y="-949.5384521484375" z="0.0"/>
  </node>
  <node id="481441" label="zzzz962" cy:nodeId="170">
    <graphics x="1035.1409912109375" y="-1082.232666015625" z="0.0"/>
  </node>
  <node id="481440" label="zzzz780" cy:nodeId="299">
    <graphics x="1697.5201416015625" y="-781.67138671875" z="0.0"/>
  </node>
  <node id="481439" label="zzzz779" cy:nodeId="300">
    <graphics x="1509.23876953125" y="-585.2037353515625" z="0.0"/>
  </node>
</graph>
