# Supplementary material for: Discovery of several thousand highly diverse circular DNA viruses
Source: eLife journal article supplement (doi:10.7554/elife.51971), 2020-02-03
Supplement: fig3-data1 [file elife-51971-fig3-data1-v1.cys]

Archive with 75 entries (75 files):
- CytoscapeSession-2019_08_03-06_44/3.0.0.version
- CytoscapeSession-2019_08_03-06_44/networks/41-Mike_class_reps60+Full+Network.xgmml
- CytoscapeSession-2019_08_03-06_44/views/57-114643-Mike_class_reps60+Full+Network.xgmml
- CytoscapeSession-2019_08_03-06_44/tables/41-Mike_class_reps60+Full+Network/LOCAL_ATTRS-org.cytoscape.model.CyNode-41+default+node.cytable
- CytoscapeSession-2019_08_03-06_44/tables/57-Mike_class_reps60+Full+Network/HIDDEN-org.cytoscape.model.CyNode-57+hidden+node.cytable
- CytoscapeSession-2019_08_03-06_44/tables/global/229228-NodeProperties.cytable
- CytoscapeSession-2019_08_03-06_44/tables/57-Mike_class_reps60+Full+Network/org.baderlab.autoannotate.annotationSet-org.cytoscape.model.CyNetwork-org.baderlab.autoannotate.annotationSet.cytable
- CytoscapeSession-2019_08_03-06_44/tables/41-Mike_class_reps60+Full+Network/HIDDEN-org.cytoscape.model.CyEdge-41+hidden+edge.cytable
- CytoscapeSession-2019_08_03-06_44/tables/global/229393-GeneMANIA.Views.cytable
- CytoscapeSession-2019_08_03-06_44/tables/global/229227-NetworkMappings.cytable
- CytoscapeSession-2019_08_03-06_44/tables/57-Mike_class_reps60+Full+Network/org.baderlab.autoannotate.cluster-org.cytoscape.model.CyNetwork-org.baderlab.autoannotate.cluster.cytable
- CytoscapeSession-2019_08_03-06_44/tables/41-Mike_class_reps60+Full+Network/HIDDEN-org.cytoscape.model.CyNode-41+hidden+node.cytable
- CytoscapeSession-2019_08_03-06_44/tables/41-Mike_class_reps60+Full+Network/LOCAL_ATTRS-org.cytoscape.model.CyNetwork-41+default+network.cytable
- CytoscapeSession-2019_08_03-06_44/tables/41-Mike_class_reps60+Full+Network/SHARED_ATTRS-org.cytoscape.model.CyEdge-41+shared+edge.cytable
- CytoscapeSession-2019_08_03-06_44/tables/41-Mike_class_reps60+Full+Network/SHARED_ATTRS-org.cytoscape.model.CyNetwork-41+shared+network.cytable
- CytoscapeSession-2019_08_03-06_44/tables/global/229225-Properties.cytable
- CytoscapeSession-2019_08_03-06_44/tables/41-Mike_class_reps60+Full+Network/SHARED_ATTRS-org.cytoscape.model.CyNode-41+shared+node.cytable
- CytoscapeSession-2019_08_03-06_44/tables/41-Mike_class_reps60+Full+Network/LOCAL_ATTRS-org.cytoscape.model.CyEdge-41+default+edge.cytable
- CytoscapeSession-2019_08_03-06_44/tables/41-Mike_class_reps60+Full+Network/HIDDEN-org.cytoscape.model.CyNetwork-41+hidden+network.cytable
- CytoscapeSession-2019_08_03-06_44/tables/57-Mike_class_reps60+Full+Network/LOCAL_ATTRS-org.cytoscape.model.CyNetwork-Mike_class_reps60+Full+Network+default+network.cytable
- CytoscapeSession-2019_08_03-06_44/tables/57-Mike_class_reps60+Full+Network/LOCAL_ATTRS-org.cytoscape.model.CyEdge-Mike_class_reps60+Full+Network+default+edge.cytable
- CytoscapeSession-2019_08_03-06_44/tables/global/229229-EdgeProperties.cytable
- CytoscapeSession-2019_08_03-06_44/tables/57-Mike_class_reps60+Full+Network/HIDDEN-org.cytoscape.model.CyNetwork-57+hidden+network.cytable
- CytoscapeSession-2019_08_03-06_44/tables/57-Mike_class_reps60+Full+Network/HIDDEN-org.cytoscape.model.CyEdge-57+hidden+edge.cytable
- CytoscapeSession-2019_08_03-06_44/tables/global/229226-Keywords.cytable
- CytoscapeSession-2019_08_03-06_44/tables/57-Mike_class_reps60+Full+Network/LOCAL_ATTRS-org.cytoscape.model.CyNode-Mike_class_reps60+Full+Network+default+node.cytable
- CytoscapeSession-2019_08_03-06_44/tables/cytables.xml
- CytoscapeSession-2019_08_03-06_44/session_vizmap.xml
- CytoscapeSession-2019_08_03-06_44/properties/session_bookmarks.xml
- CytoscapeSession-2019_08_03-06_44/properties/groupSettings.props
- CytoscapeSession-2019_08_03-06_44/properties/stringApp.props
- CytoscapeSession-2019_08_03-06_44/session_thumbnail.png
- CytoscapeSession-2019_08_03-06_44/apps/org.cytoscape.ding.customgraphicsmgr/1.png
- CytoscapeSession-2019_08_03-06_44/apps/org.cytoscape.ding.customgraphicsmgr/10.png
- CytoscapeSession-2019_08_03-06_44/apps/org.cytoscape.ding.customgraphicsmgr/11.png
- CytoscapeSession-2019_08_03-06_44/apps/org.cytoscape.ding.customgraphicsmgr/12.png
- CytoscapeSession-2019_08_03-06_44/apps/org.cytoscape.ding.customgraphicsmgr/13.png
- CytoscapeSession-2019_08_03-06_44/apps/org.cytoscape.ding.customgraphicsmgr/14.png
- CytoscapeSession-2019_08_03-06_44/apps/org.cytoscape.ding.customgraphicsmgr/15.png
- CytoscapeSession-2019_08_03-06_44/apps/org.cytoscape.ding.customgraphicsmgr/16.png
- CytoscapeSession-2019_08_03-06_44/apps/org.cytoscape.ding.customgraphicsmgr/17.png
- CytoscapeSession-2019_08_03-06_44/apps/org.cytoscape.ding.customgraphicsmgr/18.png
- CytoscapeSession-2019_08_03-06_44/apps/org.cytoscape.ding.customgraphicsmgr/19.png
- CytoscapeSession-2019_08_03-06_44/apps/org.cytoscape.ding.customgraphicsmgr/2.png
- CytoscapeSession-2019_08_03-06_44/apps/org.cytoscape.ding.customgraphicsmgr/20.png
- CytoscapeSession-2019_08_03-06_44/apps/org.cytoscape.ding.customgraphicsmgr/21.png
- CytoscapeSession-2019_08_03-06_44/apps/org.cytoscape.ding.customgraphicsmgr/22.png
- CytoscapeSession-2019_08_03-06_44/apps/org.cytoscape.ding.customgraphicsmgr/23.png
- CytoscapeSession-2019_08_03-06_44/apps/org.cytoscape.ding.customgraphicsmgr/24.png
- CytoscapeSession-2019_08_03-06_44/apps/org.cytoscape.ding.customgraphicsmgr/25.png
- CytoscapeSession-2019_08_03-06_44/apps/org.cytoscape.ding.customgraphicsmgr/26.png
- CytoscapeSession-2019_08_03-06_44/apps/org.cytoscape.ding.customgraphicsmgr/27.png
- CytoscapeSession-2019_08_03-06_44/apps/org.cytoscape.ding.customgraphicsmgr/28.png
- CytoscapeSession-2019_08_03-06_44/apps/org.cytoscape.ding.customgraphicsmgr/29.png
- CytoscapeSession-2019_08_03-06_44/apps/org.cytoscape.ding.customgraphicsmgr/3.png
- CytoscapeSession-2019_08_03-06_44/apps/org.cytoscape.ding.customgraphicsmgr/30.png
- CytoscapeSession-2019_08_03-06_44/apps/org.cytoscape.ding.customgraphicsmgr/31.png
- CytoscapeSession-2019_08_03-06_44/apps/org.cytoscape.ding.customgraphicsmgr/32.png
- CytoscapeSession-2019_08_03-06_44/apps/org.cytoscape.ding.customgraphicsmgr/4.png
- CytoscapeSession-2019_08_03-06_44/apps/org.cytoscape.ding.customgraphicsmgr/42.png
- CytoscapeSession-2019_08_03-06_44/apps/org.cytoscape.ding.customgraphicsmgr/43.png
- CytoscapeSession-2019_08_03-06_44/apps/org.cytoscape.ding.customgraphicsmgr/5.png
- CytoscapeSession-2019_08_03-06_44/apps/org.cytoscape.ding.customgraphicsmgr/6.png
- CytoscapeSession-2019_08_03-06_44/apps/org.cytoscape.ding.customgraphicsmgr/7.png
- CytoscapeSession-2019_08_03-06_44/apps/org.cytoscape.ding.customgraphicsmgr/8.png
- CytoscapeSession-2019_08_03-06_44/apps/org.cytoscape.ding.customgraphicsmgr/9.png
- CytoscapeSession-2019_08_03-06_44/apps/org.cytoscape.ding.customgraphicsmgr/image_metadata.props
- CytoscapeSession-2019_08_03-06_44/apps/org.cytoscape.swing-application/session_state.xml
- CytoscapeSession-2019_08_03-06_44/apps/org.cytoscape.swing-application/network_list.xml
- CytoscapeSession-2019_08_03-06_44/apps/org.cytoscape.filter/filters.json
- CytoscapeSession-2019_08_03-06_44/apps/org.cytoscape.filter/filterChains.json
- CytoscapeSession-2019_08_03-06_44/apps/org.cytoscape.browser/UnassignedTables.props
- CytoscapeSession-2019_08_03-06_44/apps/org.cytoscape.browser/NodeTable.props
- CytoscapeSession-2019_08_03-06_44/apps/org.cytoscape.browser/EdgeTable.props
- CytoscapeSession-2019_08_03-06_44/apps/org.cytoscape.browser/NetworkTable.props
