# Supplementary material for: Discovery of several thousand highly diverse circular DNA viruses
Source: eLife journal article supplement (doi:10.7554/elife.51971), 2020-02-03
Supplement: fig3-data1 [file elife-51971-fig3-data1-v1.cys › CytoscapeSession-2019_08_03-06_44/apps/org.cytoscape.browser/NetworkTable.props]

Mike_class_reps60 Full Network default network	0	SUID	false
Mike_class_reps60 Full Network default network	1	selected	false
Mike_class_reps60 Full Network default network	2	shared name	true
Mike_class_reps60 Full Network default network	3	name	true
Mike_class_reps60 Full Network default network	4	__Annotations	true
