# Supplementary material for: Discovery of several thousand highly diverse circular DNA viruses
Source: eLife journal article supplement (doi:10.7554/elife.51971), 2020-02-03
Supplement: fig3-data1 [file elife-51971-fig3-data1-v1.cys › CytoscapeSession-2019_08_03-06_44/networks/41-Mike_class_reps60+Full+Network.xgmml]

<?xml version="1.0" encoding="UTF-8" standalone="yes"?>
<graph id="41" label="Mike_class_reps60 Full Network" cy:view="0" cy:registered="0" cy:documentVersion="3.0" xmlns:dc="http://purl.org/dc/elements/1.1/" xmlns:xlink="http://www.w3.org/1999/xlink" xmlns:rdf="http://www.w3.org/1999/02/22-rdf-syntax-ns#" xmlns:cy="http://www.cytoscape.org" xmlns="http://www.cs.rpi.edu/XGMML">
  <att>
    <graph id="57" label="Mike_class_reps60 Full Network" cy:registered="1">
      <node id="2729" label="zzz1000"/>
      <node id="2728" label="zzz1001"/>
      <node id="2727" label="zzz1002"/>
      <node id="2726" label="zzz1003"/>
      <node id="2725" label="zzz1004"/>
      <node id="2724" label="zzz1005"/>
      <node id="2723" label="zzz1006"/>
      <node id="2722" label="zzz1007"/>
      <node id="2721" label="zzz1008"/>
      <node id="2720" label="zzz1009"/>
      <node id="2719" label="zzz1010"/>
      <node id="2718" label="zzz1011"/>
      <node id="2717" label="zzz1012"/>
      <node id="2716" label="zzz1013"/>
      <node id="2715" label="zzz1014"/>
      <node id="2714" label="zzz1015"/>
      <node id="2713" label="zzz1016"/>
      <node id="2712" label="zzz1017"/>
      <node id="2711" label="zzz1018"/>
      <node id="2710" label="zzz1019"/>
      <node id="2709" label="zzz1020"/>
      <node id="2708" label="zzz1021"/>
      <node id="2707" label="zzz1022"/>
      <node id="2706" label="zzz1023"/>
      <node id="2705" label="zzz1024"/>
      <node id="2704" label="zzz1025"/>
      <node id="2703" label="zzz1026"/>
      <node id="2702" label="zzz1027"/>
      <node id="2701" label="zzz1028"/>
      <node id="2700" label="zzz1029"/>
      <node id="2699" label="zzz1030"/>
      <node id="2698" label="zzz1031"/>
      <node id="2697" label="zzz1032"/>
      <node id="2696" label="zzz1033"/>
      <node id="2695" label="zzz1034"/>
      <node id="2694" label="zzz1035"/>
      <node id="2693" label="zzz1036"/>
      <node id="2692" label="zzz1037"/>
      <node id="2691" label="zzz1038"/>
      <node id="2690" label="zzz1039"/>
      <node id="2689" label="zzz1040"/>
      <node id="2688" label="zzz1041"/>
      <node id="2687" label="zzz1042"/>
      <node id="2686" label="zzz1043"/>
      <node id="2685" label="zzz1044"/>
      <node id="2684" label="zzz1045"/>
      <node id="2683" label="zzz1046"/>
      <node id="2682" label="zzz1047"/>
      <node id="2681" label="zzz1048"/>
      <node id="2680" label="zzz1049"/>
      <node id="2679" label="zzz1050"/>
      <node id="2678" label="zzz1051"/>
      <node id="2677" label="zzz1052"/>
      <node id="2676" label="zzz1053"/>
      <node id="2675" label="zzz1054"/>
      <node id="2674" label="zzz1055"/>
      <node id="2673" label="zzz1056"/>
      <node id="2672" label="zzz1057"/>
      <node id="2671" label="zzz1058"/>
      <node id="2670" label="zzz1059"/>
      <node id="2669" label="zzz1060"/>
      <node id="2668" label="zzz1061"/>
      <node id="2667" label="zzz1062"/>
      <node id="2666" label="zzz1063"/>
      <node id="2665" label="zzz1064"/>
      <node id="2664" label="zzz1065"/>
      <node id="2663" label="zzz1066"/>
      <node id="2662" label="zzz1067"/>
      <node id="2661" label="zzz1068"/>
      <node id="2660" label="zzz1069"/>
      <node id="2659" label="zzz1070"/>
      <node id="2658" label="zzz1071"/>
      <node id="2657" label="zzz1072"/>
      <node id="2656" label="zzz1073"/>
      <node id="2655" label="zzz1074"/>
      <node id="2654" label="zzz1075"/>
      <node id="2653" label="zzz1076"/>
      <node id="2652" label="zzz1077"/>
      <node id="2651" label="zzz1078"/>
      <node id="2650" label="zzz1079"/>
      <node id="2649" label="zzz1080"/>
      <node id="2648" label="zzz1081"/>
      <node id="2647" label="zzz1082"/>
      <node id="2646" label="zzz1083"/>
      <node id="2645" label="zzz1084"/>
      <node id="2644" label="zzz1085"/>
      <node id="2643" label="zzz1086"/>
      <node id="2642" label="zzz1087"/>
      <node id="2641" label="zzz1088"/>
      <node id="2640" label="zzz1089"/>
      <node id="2639" label="zzz1090"/>
      <node id="2638" label="zzz1091"/>
      <node id="2637" label="zzz1092"/>
      <node id="2636" label="zzz1093"/>
      <node id="2635" label="zzz1094"/>
      <node id="2634" label="zzz1095"/>
      <node id="2633" label="zzz1096"/>
      <node id="2632" label="zzz1097"/>
      <node id="2631" label="zzz1098"/>
      <node id="2630" label="zzz1099"/>
      <node id="2629" label="zzz1100"/>
      <node id="2628" label="zzz1101"/>
      <node id="2627" label="zzz1102"/>
      <node id="2626" label="zzz1103"/>
      <node id="2625" label="zzz1104"/>
      <node id="2624" label="zzz1105"/>
      <node id="2623" label="zzz1106"/>
      <node id="2622" label="zzz1107"/>
      <node id="2621" label="zzz1108"/>
      <node id="2620" label="zzz1109"/>
      <node id="2619" label="zzz1110"/>
      <node id="2618" label="zzz1111"/>
      <node id="2617" label="zzz1112"/>
      <node id="2616" label="zzz1113"/>
      <node id="2615" label="zzz1114"/>
      <node id="2614" label="zzz1115"/>
      <node id="2613" label="zzz1116"/>
      <node id="2612" label="zzz1117"/>
      <node id="2611" label="zzz1118"/>
      <node id="2610" label="zzz1119"/>
      <node id="2609" label="zzz1120"/>
      <node id="2608" label="zzz1121"/>
      <node id="2607" label="zzz1122"/>
      <node id="2606" label="zzz1123"/>
      <node id="2605" label="zzz1124"/>
      <node id="2604" label="zzz1125"/>
      <node id="2603" label="zzz1126"/>
      <node id="2602" label="zzz1127"/>
      <node id="2601" label="zzz1128"/>
      <node id="2600" label="zzz1129"/>
      <node id="2599" label="zzz1130"/>
      <node id="2598" label="zzz1131"/>
      <node id="2597" label="zzz1132"/>
      <node id="2596" label="zzz1133"/>
      <node id="2595" label="zzz1134"/>
      <node id="2594" label="zzz1135"/>
      <node id="2593" label="zzz1136"/>
      <node id="2592" label="zzz1137"/>
      <node id="2591" label="zzz1138"/>
      <node id="2590" label="zzz1139"/>
      <node id="2589" label="zzz1140"/>
      <node id="2588" label="zzz1141"/>
      <node id="2587" label="zzz1142"/>
      <node id="2586" label="zzz1143"/>
      <node id="2585" label="zzz1144"/>
      <node id="2584" label="zzz1145"/>
      <node id="2583" label="zzz1146"/>
      <node id="2582" label="zzz1147"/>
      <node id="2581" label="zzz1148"/>
      <node id="2580" label="zzz1149"/>
      <node id="2579" label="zzz1150"/>
      <node id="2578" label="zzz1151"/>
      <node id="2577" label="zzz1152"/>
      <node id="2576" label="zzz1153"/>
      <node id="2575" label="zzz1154"/>
      <node id="2574" label="zzz1155"/>
      <node id="2573" label="zzz1156"/>
      <node id="2572" label="zzz1157"/>
      <node id="2571" label="zzz1158"/>
      <node id="2570" label="zzz1159"/>
      <node id="2569" label="zzz1160"/>
      <node id="2568" label="zzz1161"/>
      <node id="2567" label="zzz1162"/>
      <node id="2566" label="zzz1163"/>
      <node id="2565" label="zzz1164"/>
      <node id="2564" label="zzz1165"/>
      <node id="2563" label="zzz1166"/>
      <node id="2562" label="zzz1167"/>
      <node id="2561" label="zzz1168"/>
      <node id="2560" label="zzz1169"/>
      <node id="2559" label="zzz1170"/>
      <node id="2558" label="zzz1171"/>
      <node id="2557" label="zzz1172"/>
      <node id="2556" label="zzz1173"/>
      <node id="2555" label="zzz1174"/>
      <node id="2554" label="zzz1175"/>
      <node id="2553" label="zzz1176"/>
      <node id="2552" label="zzz1177"/>
      <node id="2551" label="zzz1178"/>
      <node id="2550" label="zzz1179"/>
      <node id="2549" label="zzz1180"/>
      <node id="2548" label="zzz1181"/>
      <node id="2547" label="zzz1182"/>
      <node id="2546" label="zzz1183"/>
      <node id="2545" label="zzz1184"/>
      <node id="2544" label="zzz1185"/>
      <node id="2543" label="zzz1186"/>
      <node id="2542" label="zzz1187"/>
      <node id="2541" label="zzz1188"/>
      <node id="2540" label="zzz1189"/>
      <node id="2539" label="zzz1190"/>
      <node id="2538" label="zzz1191"/>
      <node id="2537" label="zzz1192"/>
      <node id="2536" label="zzz1193"/>
      <node id="2535" label="zzz1194"/>
      <node id="2534" label="zzz1195"/>
      <node id="2533" label="zzz1196"/>
      <node id="2532" label="zzz1197"/>
      <node id="2531" label="zzz1198"/>
      <node id="2530" label="zzz1199"/>
      <node id="2529" label="zzz1200"/>
      <node id="2528" label="zzz1201"/>
      <node id="2527" label="zzz1202"/>
      <node id="2526" label="zzz1203"/>
      <node id="2525" label="zzz1204"/>
      <node id="2524" label="zzz1205"/>
      <node id="2523" label="zzz1206"/>
      <node id="2522" label="zzz1207"/>
      <node id="2521" label="zzz1208"/>
      <node id="2520" label="zzz1209"/>
      <node id="2519" label="zzz1210"/>
      <node id="2518" label="zzz1211"/>
      <node id="2517" label="zzz1212"/>
      <node id="2516" label="zzz1213"/>
      <node id="2515" label="zzz1214"/>
      <node id="2514" label="zzz1215"/>
      <node id="2513" label="zzz1216"/>
      <node id="2512" label="zzz1217"/>
      <node id="2511" label="zzz1218"/>
      <node id="2510" label="zzz1219"/>
      <node id="2509" label="zzz1220"/>
      <node id="2508" label="zzz1221"/>
      <node id="2507" label="zzz1222"/>
      <node id="2506" label="zzz1223"/>
      <node id="2505" label="zzz1224"/>
      <node id="2504" label="zzz1225"/>
      <node id="2503" label="zzz1226"/>
      <node id="2502" label="zzz1227"/>
      <node id="2501" label="zzz1228"/>
      <node id="2500" label="zzz1229"/>
      <node id="2499" label="zzz1230"/>
      <node id="2498" label="zzz1231"/>
      <node id="2497" label="zzz1232"/>
      <node id="2496" label="zzz1233"/>
      <node id="2495" label="zzz1234"/>
      <node id="2494" label="zzz1235"/>
      <node id="2493" label="zzz1236"/>
      <node id="2492" label="zzz1237"/>
      <node id="2491" label="zzz1238"/>
      <node id="2490" label="zzz1239"/>
      <node id="2489" label="zzz1240"/>
      <node id="2488" label="zzz1241"/>
      <node id="2487" label="zzz1242"/>
      <node id="2486" label="zzz1243"/>
      <node id="2485" label="zzz1244"/>
      <node id="2484" label="zzz1245"/>
      <node id="2483" label="zzz1246"/>
      <node id="2482" label="zzz1247"/>
      <node id="2481" label="zzz1248"/>
      <node id="2480" label="zzz1249"/>
      <node id="2479" label="zzz1250"/>
      <node id="2478" label="zzz1251"/>
      <node id="2477" label="zzz1252"/>
      <node id="2476" label="zzz1253"/>
      <node id="2475" label="zzz1254"/>
      <node id="2474" label="zzz1255"/>
      <node id="2473" label="zzz1256"/>
      <node id="2472" label="zzz1257"/>
      <node id="2471" label="zzz1258"/>
      <node id="2470" label="zzz1259"/>
      <node id="2469" label="zzz1260"/>
      <node id="2468" label="zzz1261"/>
      <node id="2467" label="zzz1262"/>
      <node id="2466" label="zzz1263"/>
      <node id="2465" label="zzz1264"/>
      <node id="2464" label="zzz1265"/>
      <node id="2463" label="zzz1266"/>
      <node id="2462" label="zzz1267"/>
      <node id="2461" label="zzz1268"/>
      <node id="2460" label="zzz1269"/>
      <node id="2459" label="zzz1270"/>
      <node id="2458" label="zzz1271"/>
      <node id="2457" label="zzz1272"/>
      <node id="2456" label="zzz1273"/>
      <node id="2455" label="zzz1274"/>
      <node id="2454" label="zzz1275"/>
      <node id="2453" label="zzz1276"/>
      <node id="2452" label="zzz1277"/>
      <node id="2451" label="zzz1278"/>
      <node id="2450" label="zzz1279"/>
      <node id="2449" label="zzz1280"/>
      <node id="2448" label="zzz1281"/>
      <node id="2447" label="zzz1282"/>
      <node id="2446" label="zzz1283"/>
      <node id="2445" label="zzz1284"/>
      <node id="2444" label="zzz1285"/>
      <node id="2443" label="zzz1286"/>
      <node id="2442" label="zzz1287"/>
      <node id="2441" label="zzz1288"/>
      <node id="2440" label="zzz1289"/>
      <node id="2439" label="zzz1290"/>
      <node id="2438" label="zzz1291"/>
      <node id="2437" label="zzz1292"/>
      <node id="2436" label="zzz1293"/>
      <node id="2435" label="zzz1294"/>
      <node id="2434" label="zzz1295"/>
      <node id="2433" label="zzz1296"/>
      <node id="2432" label="zzz1297"/>
      <node id="2431" label="zzz1298"/>
      <node id="2430" label="zzz1299"/>
      <node id="2429" label="zzz1300"/>
      <node id="2428" label="zzz1301"/>
      <node id="2427" label="zzz1302"/>
      <node id="2426" label="zzz1303"/>
      <node id="2425" label="zzz1304"/>
      <node id="2424" label="zzz1305"/>
      <node id="2423" label="zzz1306"/>
      <node id="2422" label="zzz1307"/>
      <node id="2421" label="zzz1308"/>
      <node id="2420" label="zzz1309"/>
      <node id="2419" label="zzz1310"/>
      <node id="2418" label="zzz1311"/>
      <node id="2417" label="zzz1312"/>
      <node id="2416" label="zzz1313"/>
      <node id="2415" label="zzz1314"/>
      <node id="2414" label="zzz1315"/>
      <node id="2413" label="zzz1316"/>
      <node id="2412" label="zzz1317"/>
      <node id="2411" label="zzz1318"/>
      <node id="2410" label="zzz1319"/>
      <node id="2409" label="zzz1320"/>
      <node id="2408" label="zzz1321"/>
      <node id="2407" label="zzz1322"/>
      <node id="2406" label="zzz1323"/>
      <node id="2405" label="zzz1324"/>
      <node id="2404" label="zzz1325"/>
      <node id="2403" label="zzz1326"/>
      <node id="2402" label="zzz1327"/>
      <node id="2401" label="zzz1328"/>
      <node id="2400" label="zzz1329"/>
      <node id="2399" label="zzz1330"/>
      <node id="2398" label="zzz1331"/>
      <node id="2397" label="zzz1332"/>
      <node id="2396" label="zzz1333"/>
      <node id="2395" label="zzz1334"/>
      <node id="2394" label="zzz1335"/>
      <node id="2393" label="zzz1336"/>
      <node id="2392" label="zzz1337"/>
      <node id="2391" label="zzz1338"/>
      <node id="2390" label="zzz1339"/>
      <node id="2389" label="zzz1340"/>
      <node id="2388" label="zzz1341"/>
      <node id="2387" label="zzz1342"/>
      <node id="2386" label="zzz1343"/>
      <node id="2385" label="zzz1344"/>
      <node id="2384" label="zzz1345"/>
      <node id="2383" label="zzz1346"/>
      <node id="2382" label="zzz1347"/>
      <node id="2381" label="zzz1348"/>
      <node id="2380" label="zzz1349"/>
      <node id="2379" label="zzz1350"/>
      <node id="2378" label="zzz1351"/>
      <node id="2377" label="zzz1352"/>
      <node id="2376" label="zzz1353"/>
      <node id="2375" label="zzz1354"/>
      <node id="2374" label="zzz1355"/>
      <node id="2373" label="zzz1356"/>
      <node id="2372" label="zzz1357"/>
      <node id="2371" label="zzz1358"/>
      <node id="2370" label="zzz1359"/>
      <node id="2369" label="zzz1360"/>
      <node id="2368" label="zzz1361"/>
      <node id="2367" label="zzz1362"/>
      <node id="2366" label="zzz1363"/>
      <node id="2365" label="zzz1364"/>
      <node id="2364" label="zzz1365"/>
      <node id="2363" label="zzz1366"/>
      <node id="2362" label="zzz1367"/>
      <node id="2361" label="zzz1368"/>
      <node id="2360" label="zzz1369"/>
      <node id="2359" label="zzz1370"/>
      <node id="2358" label="zzz1371"/>
      <node id="2357" label="zzz1372"/>
      <node id="2356" label="zzz1373"/>
      <node id="2355" label="zzz1374"/>
      <node id="2354" label="zzz1375"/>
      <node id="2353" label="zzz1376"/>
      <node id="2352" label="zzz1377"/>
      <node id="2351" label="zzz1378"/>
      <node id="2350" label="zzz1379"/>
      <node id="2349" label="zzz1380"/>
      <node id="2348" label="zzz1381"/>
      <node id="2347" label="zzz1382"/>
      <node id="2346" label="zzz1383"/>
      <node id="2345" label="zzz1384"/>
      <node id="2344" label="zzz1385"/>
      <node id="2343" label="zzz1386"/>
      <node id="2342" label="zzz1387"/>
      <node id="2341" label="zzz1388"/>
      <node id="2340" label="zzz1389"/>
      <node id="2339" label="zzz1390"/>
      <node id="2338" label="zzz1391"/>
      <node id="2337" label="zzz1392"/>
      <node id="2336" label="zzz1393"/>
      <node id="2335" label="zzz1394"/>
      <node id="2334" label="zzz1395"/>
      <node id="2333" label="zzz1396"/>
      <node id="2332" label="zzz1397"/>
      <node id="2331" label="zzz1398"/>
      <node id="2330" label="zzz1399"/>
      <node id="2329" label="zzz1400"/>
      <node id="2328" label="zzz1401"/>
      <node id="2327" label="zzz1402"/>
      <node id="2326" label="zzz1403"/>
      <node id="2325" label="zzz1404"/>
      <node id="2324" label="zzz1405"/>
      <node id="2323" label="zzz1406"/>
      <node id="2322" label="zzz1407"/>
      <node id="2321" label="zzz1408"/>
      <node id="2320" label="zzz1409"/>
      <node id="2319" label="zzz1410"/>
      <node id="2318" label="zzz1411"/>
      <node id="2317" label="zzz1412"/>
      <node id="2316" label="zzz1413"/>
      <node id="2315" label="zzz1414"/>
      <node id="2314" label="zzz1415"/>
      <node id="2313" label="zzz1416"/>
      <node id="2312" label="zzz1417"/>
      <node id="2311" label="zzz1418"/>
      <node id="2310" label="zzz1419"/>
      <node id="2309" label="zzz1420"/>
      <node id="2308" label="zzz1421"/>
      <node id="2307" label="zzz1422"/>
      <node id="2306" label="zzz1423"/>
      <node id="2305" label="zzz1424"/>
      <node id="2304" label="zzz1425"/>
      <node id="2303" label="zzz1426"/>
      <node id="2302" label="zzz1427"/>
      <node id="2301" label="zzz1428"/>
      <node id="2300" label="zzz1429"/>
      <node id="2299" label="zzz1430"/>
      <node id="2298" label="zzz1431"/>
      <node id="2297" label="zzz1432"/>
      <node id="2296" label="zzz1433"/>
      <node id="2295" label="zzz1434"/>
      <node id="2294" label="zzz1435"/>
      <node id="2293" label="zzz1436"/>
      <node id="2292" label="zzz1437"/>
      <node id="2291" label="zzz1438"/>
      <node id="2290" label="zzz1439"/>
      <node id="2289" label="zzz1440"/>
      <node id="2288" label="zzz1441"/>
      <node id="2287" label="zzz1442"/>
      <node id="2286" label="zzz1443"/>
      <node id="2285" label="zzz1444"/>
      <node id="2284" label="zzz1445"/>
      <node id="2283" label="zzz1446"/>
      <node id="2282" label="zzz1447"/>
      <node id="2281" label="zzz1448"/>
      <node id="2280" label="zzz1449"/>
      <node id="2279" label="zzz1450"/>
      <node id="2278" label="zzz1451"/>
      <node id="2277" label="zzz1452"/>
      <node id="2276" label="zzz1453"/>
      <node id="2275" label="zzz1454"/>
      <node id="2274" label="zzz1455"/>
      <node id="2273" label="zzz1456"/>
      <node id="2272" label="zzz1457"/>
      <node id="2271" label="zzz1458"/>
      <node id="2270" label="zzz1459"/>
      <node id="2269" label="zzz1460"/>
      <node id="2268" label="zzz1461"/>
      <node id="2267" label="zzz1462"/>
      <node id="2266" label="zzz1463"/>
      <node id="2265" label="zzz1464"/>
      <node id="2264" label="zzz1465"/>
      <node id="2263" label="zzz1466"/>
      <node id="2262" label="zzz1467"/>
      <node id="2261" label="zzz1468"/>
      <node id="2260" label="zzz1469"/>
      <node id="2259" label="zzz1470"/>
      <node id="2258" label="zzz1471"/>
      <node id="2257" label="zzz1472"/>
      <node id="2256" label="zzz1473"/>
      <node id="2255" label="zzz1474"/>
      <node id="2254" label="zzz1475"/>
      <node id="2253" label="zzz1476"/>
      <node id="2252" label="zzz1477"/>
      <node id="2251" label="zzz1478"/>
      <node id="2250" label="zzz1479"/>
      <node id="2249" label="zzz1480"/>
      <node id="2248" label="zzz1481"/>
      <node id="2247" label="zzz1482"/>
      <node id="2246" label="zzz1483"/>
      <node id="2245" label="zzz1484"/>
      <node id="2244" label="zzz1485"/>
      <node id="2243" label="zzz1486"/>
      <node id="2242" label="zzz1487"/>
      <node id="2241" label="zzz1488"/>
      <node id="2240" label="zzz1489"/>
      <node id="2239" label="zzz1490"/>
      <node id="2238" label="zzz1491"/>
      <node id="2237" label="zzz1492"/>
      <node id="2236" label="zzz1493"/>
      <node id="2235" label="zzz1494"/>
      <node id="2234" label="zzz1495"/>
      <node id="2233" label="zzz1496"/>
      <node id="2232" label="zzz1497"/>
      <node id="2231" label="zzz1498"/>
      <node id="2230" label="zzz1499"/>
      <node id="2229" label="zzz1500"/>
      <node id="2228" label="zzz1501"/>
      <node id="2227" label="zzz1502"/>
      <node id="2226" label="zzz1503"/>
      <node id="2225" label="zzz1504"/>
      <node id="2224" label="zzz1505"/>
      <node id="2223" label="zzz1506"/>
      <node id="2222" label="zzz1507"/>
      <node id="2221" label="zzz1508"/>
      <node id="2220" label="zzz1509"/>
      <node id="2219" label="zzz1510"/>
      <node id="2218" label="zzz1511"/>
      <node id="2217" label="zzz1512"/>
      <node id="2216" label="zzz1513"/>
      <node id="2215" label="zzz1514"/>
      <node id="2214" label="zzz1515"/>
      <node id="2213" label="zzz1516"/>
      <node id="2212" label="zzz1517"/>
      <node id="2211" label="zzz1518"/>
      <node id="2210" label="zzz1519"/>
      <node id="2209" label="zzz1520"/>
      <node id="2208" label="zzz1521"/>
      <node id="2207" label="zzz1522"/>
      <node id="2206" label="zzz1523"/>
      <node id="2205" label="zzz1524"/>
      <node id="2204" label="zzz1525"/>
      <node id="2203" label="zzz1526"/>
      <node id="2202" label="zzz1527"/>
      <node id="2201" label="zzz1528"/>
      <node id="2200" label="zzz1529"/>
      <node id="2199" label="zzz1530"/>
      <node id="2198" label="zzz1531"/>
      <node id="2197" label="zzz1532"/>
      <node id="2196" label="zzz1533"/>
      <node id="2195" label="zzz1534"/>
      <node id="2194" label="zzz1535"/>
      <node id="2193" label="zzz1536"/>
      <node id="2192" label="zzz1537"/>
      <node id="2191" label="zzz1538"/>
      <node id="2190" label="zzz1539"/>
      <node id="2189" label="zzz1540"/>
      <node id="2188" label="zzz1541"/>
      <node id="2187" label="zzz1542"/>
      <node id="2186" label="zzz1543"/>
      <node id="2185" label="zzz1544"/>
      <node id="2184" label="zzz1545"/>
      <node id="2183" label="zzz1546"/>
      <node id="2182" label="zzz1547"/>
      <node id="2181" label="zzz1548"/>
      <node id="2180" label="zzz1549"/>
      <node id="2179" label="zzz1550"/>
      <node id="2178" label="zzz1551"/>
      <node id="2177" label="zzz1552"/>
      <node id="2176" label="zzz1553"/>
      <node id="2175" label="zzz1554"/>
      <node id="2174" label="zzz1555"/>
      <node id="2173" label="zzz1556"/>
      <node id="2172" label="zzz1557"/>
      <node id="2171" label="zzz1558"/>
      <node id="2170" label="zzz1559"/>
      <node id="2169" label="zzz1560"/>
      <node id="2168" label="zzz1561"/>
      <node id="2167" label="zzz1562"/>
      <node id="2166" label="zzz1563"/>
      <node id="2165" label="zzz1564"/>
      <node id="2164" label="zzz1565"/>
      <node id="2163" label="zzz1566"/>
      <node id="2162" label="zzz1567"/>
      <node id="2161" label="zzz1568"/>
      <node id="2160" label="zzz1569"/>
      <node id="2159" label="zzz1570"/>
      <node id="2158" label="zzz1571"/>
      <node id="2157" label="zzz1572"/>
      <node id="2156" label="zzz1573"/>
      <node id="2155" label="zzz1574"/>
      <node id="2154" label="zzz1575"/>
      <node id="2153" label="zzz1576"/>
      <node id="2152" label="zzz1577"/>
      <node id="2151" label="zzz1578"/>
      <node id="2150" label="zzz1579"/>
      <node id="2149" label="zzz1580"/>
      <node id="2148" label="zzz1581"/>
      <node id="2147" label="zzz1582"/>
      <node id="2146" label="zzz1583"/>
      <node id="2145" label="zzz1584"/>
      <node id="2144" label="zzz1585"/>
      <node id="2143" label="zzz1586"/>
      <node id="2142" label="zzz1587"/>
      <node id="2141" label="zzz1588"/>
      <node id="2140" label="zzz1589"/>
      <node id="2139" label="zzz1590"/>
      <node id="2138" label="zzz1591"/>
      <node id="2137" label="zzz1592"/>
      <node id="2136" label="zzz1593"/>
      <node id="2135" label="zzz1594"/>
      <node id="2134" label="zzz1595"/>
      <node id="2133" label="zzz1596"/>
      <node id="2132" label="zzz1597"/>
      <node id="2131" label="zzz1598"/>
      <node id="2130" label="zzz1599"/>
      <node id="2129" label="zzz1600"/>
      <node id="2128" label="zzz1601"/>
      <node id="2127" label="zzz1602"/>
      <node id="2126" label="zzz1603"/>
      <node id="2125" label="zzz1604"/>
      <node id="2124" label="zzz1605"/>
      <node id="2123" label="zzz1606"/>
      <node id="2122" label="zzz1607"/>
      <node id="2121" label="zzz1608"/>
      <node id="2120" label="zzz1609"/>
      <node id="2119" label="zzz1610"/>
      <node id="2118" label="zzz1611"/>
      <node id="2117" label="zzz1612"/>
      <node id="2116" label="zzz1613"/>
      <node id="2115" label="zzz1614"/>
      <node id="2114" label="zzz1615"/>
      <node id="2113" label="zzz1616"/>
      <node id="2112" label="zzz1617"/>
      <node id="2111" label="zzz1618"/>
      <node id="2110" label="zzz1619"/>
      <node id="2109" label="zzz1620"/>
      <node id="2108" label="zzz1621"/>
      <node id="2107" label="zzz1622"/>
      <node id="2106" label="zzz1623"/>
      <node id="2105" label="zzz1624"/>
      <node id="2104" label="zzz1625"/>
      <node id="2103" label="zzz1626"/>
      <node id="2102" label="zzz1627"/>
      <node id="2101" label="zzz1628"/>
      <node id="2100" label="zzz1629"/>
      <node id="2099" label="zzz1630"/>
      <node id="2098" label="zzz1631"/>
      <node id="2097" label="zzz1632"/>
      <node id="2096" label="zzz1633"/>
      <node id="2095" label="zzz1634"/>
      <node id="2094" label="zzz1635"/>
      <node id="2093" label="zzz1636"/>
      <node id="2092" label="zzz1637"/>
      <node id="2091" label="zzz1638"/>
      <node id="2090" label="zzz1639"/>
      <node id="2089" label="zzz1640"/>
      <node id="2088" label="zzz1641"/>
      <node id="2087" label="zzz1642"/>
      <node id="2086" label="zzz1643"/>
      <node id="2085" label="zzz1644"/>
      <node id="2084" label="zzz1645"/>
      <node id="2083" label="zzz1646"/>
      <node id="2082" label="zzz1647"/>
      <node id="2081" label="zzz1648"/>
      <node id="2080" label="zzz1649"/>
      <node id="2079" label="zzz1650"/>
      <node id="2078" label="zzz1651"/>
      <node id="2077" label="zzz1652"/>
      <node id="2076" label="zzz1653"/>
      <node id="2075" label="zzz1654"/>
      <node id="2074" label="zzz1655"/>
      <node id="2073" label="zzz1656"/>
      <node id="2072" label="zzz1657"/>
      <node id="2071" label="zzz1658"/>
      <node id="2070" label="zzz1659"/>
      <node id="2069" label="zzz1660"/>
      <node id="2068" label="zzz1661"/>
      <node id="2067" label="zzz1662"/>
      <node id="2066" label="zzz1663"/>
      <node id="2065" label="zzz1664"/>
      <node id="2064" label="zzz1665"/>
      <node id="2063" label="zzz1666"/>
      <node id="2062" label="zzz1667"/>
      <node id="2061" label="zzz1668"/>
      <node id="2060" label="zzz1669"/>
      <node id="2059" label="zzz1670"/>
      <node id="2058" label="zzz1671"/>
      <node id="2057" label="zzz1672"/>
      <node id="2056" label="zzz1673"/>
      <node id="2055" label="zzz1674"/>
      <node id="2054" label="zzz1675"/>
      <node id="2053" label="zzz1676"/>
      <node id="2052" label="zzz1677"/>
      <node id="2051" label="zzz1678"/>
      <node id="2050" label="zzz1679"/>
      <node id="2049" label="zzz1680"/>
      <node id="2048" label="zzz1681"/>
      <node id="2047" label="zzz1682"/>
      <node id="2046" label="zzz1683"/>
      <node id="2045" label="zzz1684"/>
      <node id="2044" label="zzz1685"/>
      <node id="2043" label="zzz1686"/>
      <node id="2042" label="zzz1687"/>
      <node id="2041" label="zzz1688"/>
      <node id="2040" label="zzz1689"/>
      <node id="2039" label="zzz1690"/>
      <node id="2038" label="zzz1691"/>
      <node id="2037" label="zzz1692"/>
      <node id="2036" label="zzz1693"/>
      <node id="2035" label="zzz1694"/>
      <node id="2034" label="zzz1695"/>
      <node id="2033" label="zzz1696"/>
      <node id="2032" label="zzz1697"/>
      <node id="2031" label="zzz1698"/>
      <node id="2030" label="zzz1699"/>
      <node id="2029" label="zzz1700"/>
      <node id="2028" label="zzz1701"/>
      <node id="2027" label="zzz1702"/>
      <node id="2026" label="zzz1703"/>
      <node id="2025" label="zzz1704"/>
      <node id="2024" label="zzz1705"/>
      <node id="2023" label="zzz1706"/>
      <node id="2022" label="zzz1707"/>
      <node id="2021" label="zzz1708"/>
      <node id="2020" label="zzz1709"/>
      <node id="2019" label="zzz1710"/>
      <node id="2018" label="zzz1711"/>
      <node id="2017" label="zzz1712"/>
      <node id="2016" label="zzz1713"/>
      <node id="2015" label="zzz1714"/>
      <node id="2014" label="zzz1715"/>
      <node id="2013" label="zzz1716"/>
      <node id="2012" label="zzz1717"/>
      <node id="2011" label="zzz1718"/>
      <node id="2010" label="zzz1719"/>
      <node id="2009" label="zzz1720"/>
      <node id="2008" label="zzz1721"/>
      <node id="2007" label="zzz1722"/>
      <node id="2006" label="zzz1723"/>
      <node id="2005" label="zzz1724"/>
      <node id="2004" label="zzz1725"/>
      <node id="2003" label="zzz1726"/>
      <node id="2002" label="zzz1727"/>
      <node id="2001" label="zzz1728"/>
      <node id="2000" label="zzz1729"/>
      <node id="1999" label="zzz1730"/>
      <node id="1998" label="zzz1731"/>
      <node id="1997" label="zzz1732"/>
      <node id="1996" label="zzz1733"/>
      <node id="1995" label="zzz1734"/>
      <node id="1994" label="zzz1735"/>
      <node id="1993" label="zzz1736"/>
      <node id="1992" label="zzz1737"/>
      <node id="1991" label="zzz1738"/>
      <node id="1990" label="zzz1739"/>
      <node id="1989" label="zzz1740"/>
      <node id="1988" label="zzz1741"/>
      <node id="1987" label="zzz1742"/>
      <node id="1986" label="zzz1743"/>
      <node id="1985" label="zzz1744"/>
      <node id="1984" label="zzz1745"/>
      <node id="1983" label="zzz1746"/>
      <node id="1982" label="zzz1747"/>
      <node id="1981" label="zzz1748"/>
      <node id="1980" label="zzz1749"/>
      <node id="1979" label="zzz1750"/>
      <node id="1978" label="zzz1751"/>
      <node id="1977" label="zzz1752"/>
      <node id="1976" label="zzz1753"/>
      <node id="1975" label="zzz1754"/>
      <node id="1974" label="zzz1755"/>
      <node id="1973" label="zzz1756"/>
      <node id="1972" label="zzz1757"/>
      <node id="1971" label="zzz1758"/>
      <node id="1970" label="zzz1759"/>
      <node id="1969" label="zzz1760"/>
      <node id="1968" label="zzz1761"/>
      <node id="1967" label="zzz1762"/>
      <node id="1966" label="zzz1763"/>
      <node id="1965" label="zzz1764"/>
      <node id="1964" label="zzz1765"/>
      <node id="1963" label="zzz1766"/>
      <node id="1962" label="zzz1767"/>
      <node id="1961" label="zzz1768"/>
      <node id="1960" label="zzz1769"/>
      <node id="1959" label="zzz1770"/>
      <node id="1958" label="zzz1771"/>
      <node id="1957" label="zzz1772"/>
      <node id="1956" label="zzz1773"/>
      <node id="1955" label="zzz1774"/>
      <node id="1954" label="zzz1775"/>
      <node id="1953" label="zzz1776"/>
      <node id="1952" label="zzz1777"/>
      <node id="1951" label="zzz1778"/>
      <node id="1950" label="zzz1779"/>
      <node id="1949" label="zzz1780"/>
      <node id="1948" label="zzz1781"/>
      <node id="1947" label="zzz1782"/>
      <node id="1946" label="zzz1783"/>
      <node id="1945" label="zzz1784"/>
      <node id="1944" label="zzz1785"/>
      <node id="1943" label="zzz1786"/>
      <node id="1942" label="zzz1787"/>
      <node id="1941" label="zzz1788"/>
      <node id="1940" label="zzz1789"/>
      <node id="1939" label="zzz1790"/>
      <node id="1938" label="zzz1791"/>
      <node id="1937" label="zzz1792"/>
      <node id="1936" label="zzz1793"/>
      <node id="1935" label="zzz1794"/>
      <node id="1934" label="zzz1795"/>
      <node id="1933" label="zzz1796"/>
      <node id="1932" label="zzz1797"/>
      <node id="1931" label="zzz1798"/>
      <node id="1930" label="zzz1799"/>
      <node id="1929" label="zzz1800"/>
      <node id="1928" label="zzz1801"/>
      <node id="1927" label="zzz1802"/>
      <node id="1926" label="zzz1803"/>
      <node id="1925" label="zzz1804"/>
      <node id="1924" label="zzz1805"/>
      <node id="1923" label="zzz1806"/>
      <node id="1922" label="zzz1807"/>
      <node id="1921" label="zzz1808"/>
      <node id="1920" label="zzz1809"/>
      <node id="1919" label="zzz1810"/>
      <node id="1918" label="zzz1811"/>
      <node id="1917" label="zzz1812"/>
      <node id="1916" label="zzz1813"/>
      <node id="1915" label="zzz1814"/>
      <node id="1914" label="zzz1815"/>
      <node id="1913" label="zzz1816"/>
      <node id="1912" label="zzz1817"/>
      <node id="1911" label="zzz1818"/>
      <node id="1910" label="zzz1819"/>
      <node id="1909" label="zzz1820"/>
      <node id="1908" label="zzz1821"/>
      <node id="1907" label="zzz1822"/>
      <node id="1906" label="zzz1823"/>
      <node id="1905" label="zzz1824"/>
      <node id="1904" label="zzz1825"/>
      <node id="1903" label="zzz1826"/>
      <node id="1902" label="zzz1827"/>
      <node id="1901" label="zzz1828"/>
      <node id="1900" label="zzz1829"/>
      <node id="1899" label="zzz1830"/>
      <node id="1898" label="zzz1831"/>
      <node id="1897" label="zzz1832"/>
      <node id="1896" label="zzz1833"/>
      <node id="1895" label="zzz1834"/>
      <node id="1894" label="zzz1835"/>
      <node id="1893" label="zzz1836"/>
      <node id="1892" label="zzz1837"/>
      <node id="1891" label="zzz1838"/>
      <node id="1890" label="zzz1839"/>
      <node id="1889" label="zzz1840"/>
      <node id="1888" label="zzz1841"/>
      <node id="1887" label="zzz1842"/>
      <node id="1886" label="zzz1843"/>
      <node id="1885" label="zzz1844"/>
      <node id="1884" label="zzz1845"/>
      <node id="1883" label="zzz1846"/>
      <node id="1882" label="zzz1847"/>
      <node id="1881" label="zzz1848"/>
      <node id="1880" label="zzz1849"/>
      <node id="1879" label="zzz1850"/>
      <node id="1878" label="zzz1851"/>
      <node id="1877" label="zzz1852"/>
      <node id="1876" label="zzz1853"/>
      <node id="1875" label="zzz1854"/>
      <node id="1874" label="zzz1855"/>
      <node id="1873" label="zzz1856"/>
      <node id="1872" label="zzz1857"/>
      <node id="1871" label="zzz1858"/>
      <node id="1870" label="zzz1859"/>
      <node id="1869" label="zzz1860"/>
      <node id="1868" label="zzz1861"/>
      <node id="1867" label="zzz1862"/>
      <node id="1866" label="zzz1863"/>
      <node id="1865" label="zzz1864"/>
      <node id="1864" label="zzz1865"/>
      <node id="1863" label="zzz1866"/>
      <node id="1862" label="zzz1867"/>
      <node id="1861" label="zzz1868"/>
      <node id="1860" label="zzz1869"/>
      <node id="1859" label="zzz1870"/>
      <node id="1858" label="zzz1871"/>
      <node id="1857" label="zzz1872"/>
      <node id="1856" label="zzz1873"/>
      <node id="1855" label="zzz1874"/>
      <node id="1854" label="zzz1875"/>
      <node id="1853" label="zzz1876"/>
      <node id="1852" label="zzz1877"/>
      <node id="1851" label="zzz1878"/>
      <node id="1850" label="zzz1879"/>
      <node id="1849" label="zzz1880"/>
      <node id="1848" label="zzz1881"/>
      <node id="1847" label="zzz1882"/>
      <node id="1846" label="zzz1883"/>
      <node id="1845" label="zzz1884"/>
      <node id="1844" label="zzz1885"/>
      <node id="1843" label="zzz1886"/>
      <node id="1842" label="zzz1887"/>
      <node id="1841" label="zzz1888"/>
      <node id="1840" label="zzz1889"/>
      <node id="1839" label="zzz1890"/>
      <node id="1838" label="zzz1891"/>
      <node id="1837" label="zzz1892"/>
      <node id="1836" label="zzz1893"/>
      <node id="1835" label="zzz1894"/>
      <node id="1834" label="zzz1895"/>
      <node id="1833" label="zzz1896"/>
      <node id="1832" label="zzz1897"/>
      <node id="1831" label="zzz1898"/>
      <node id="1830" label="zzz1899"/>
      <node id="1829" label="zzz1900"/>
      <node id="1828" label="zzz1901"/>
      <node id="1827" label="zzz1902"/>
      <node id="1826" label="zzz1903"/>
      <node id="1825" label="zzz1904"/>
      <node id="1824" label="zzz1905"/>
      <node id="1823" label="zzz1906"/>
      <node id="1822" label="zzz1907"/>
      <node id="1821" label="zzz1908"/>
      <node id="1820" label="zzz1909"/>
      <node id="1819" label="zzz1910"/>
      <node id="1818" label="zzz1911"/>
      <node id="1817" label="zzz1912"/>
      <node id="1816" label="zzz1913"/>
      <node id="1815" label="zzz1914"/>
      <node id="1814" label="zzz1915"/>
      <node id="1813" label="zzz1916"/>
      <node id="1812" label="zzz1917"/>
      <node id="1811" label="zzz1918"/>
      <node id="1810" label="zzz1919"/>
      <node id="1809" label="zzz1920"/>
      <node id="1808" label="zzz1921"/>
      <node id="1807" label="zzz1922"/>
      <node id="1806" label="zzz1923"/>
      <node id="1805" label="zzz1924"/>
      <node id="1804" label="zzz1925"/>
      <node id="1803" label="zzz1926"/>
      <node id="1802" label="zzz1927"/>
      <node id="1801" label="zzz1928"/>
      <node id="1800" label="zzz1929"/>
      <node id="1799" label="zzz1930"/>
      <node id="1798" label="zzz1931"/>
      <node id="1797" label="zzz1932"/>
      <node id="1796" label="zzz1933"/>
      <node id="1795" label="zzz1934"/>
      <node id="1794" label="zzz1935"/>
      <node id="1793" label="zzz1936"/>
      <node id="1792" label="zzz1937"/>
      <node id="1791" label="zzz1938"/>
      <node id="1790" label="zzz1939"/>
      <node id="1789" label="zzz1940"/>
      <node id="1788" label="zzz1941"/>
      <node id="1787" label="zzz1942"/>
      <node id="1786" label="zzz1943"/>
      <node id="1785" label="zzz1944"/>
      <node id="1784" label="zzz1945"/>
      <node id="1783" label="zzz1946"/>
      <node id="1782" label="zzz1947"/>
      <node id="1781" label="zzz1948"/>
      <node id="1780" label="zzz1949"/>
      <node id="1779" label="zzz1950"/>
      <node id="1778" label="zzz1951"/>
      <node id="1777" label="zzz1952"/>
      <node id="1776" label="zzz1953"/>
      <node id="1775" label="zzz1954"/>
      <node id="1774" label="zzz1955"/>
      <node id="1773" label="zzz1956"/>
      <node id="1772" label="zzz1957"/>
      <node id="1771" label="zzz1958"/>
      <node id="1770" label="zzz1959"/>
      <node id="1769" label="zzz1960"/>
      <node id="1768" label="zzz1961"/>
      <node id="1767" label="zzz1962"/>
      <node id="1766" label="zzz1963"/>
      <node id="1765" label="zzz1964"/>
      <node id="1764" label="zzz1965"/>
      <node id="1763" label="zzz1966"/>
      <node id="1762" label="zzz1967"/>
      <node id="1761" label="zzz1968"/>
      <node id="1760" label="zzz1969"/>
      <node id="1759" label="zzz1970"/>
      <node id="1758" label="zzz1971"/>
      <node id="1757" label="zzz1972"/>
      <node id="1756" label="zzz1973"/>
      <node id="1755" label="zzz1974"/>
      <node id="1754" label="zzz1975"/>
      <node id="1753" label="zzz1976"/>
      <node id="1752" label="zzz1977"/>
      <node id="1751" label="zzz1978"/>
      <node id="1750" label="zzz1979"/>
      <node id="1749" label="zzz1980"/>
      <node id="1748" label="zzz1981"/>
      <node id="1747" label="zzz1982"/>
      <node id="1746" label="zzz1983"/>
      <node id="1745" label="zzz1984"/>
      <node id="1744" label="zzz1985"/>
      <node id="1743" label="zzz1986"/>
      <node id="1742" label="zzz1987"/>
      <node id="1741" label="zzz1988"/>
      <node id="1740" label="zzz1989"/>
      <node id="1739" label="zzz1990"/>
      <node id="1738" label="zzz1991"/>
      <node id="1737" label="zzz1992"/>
      <node id="1736" label="zzz1993"/>
      <node id="1735" label="zzz1994"/>
      <node id="1734" label="zzz1995"/>
      <node id="1733" label="zzz1996"/>
      <node id="1732" label="zzz1997"/>
      <node id="1731" label="zzz1998"/>
      <node id="1730" label="zzz1999"/>
      <node id="1729" label="zzz2000"/>
      <node id="1728" label="zzz2001"/>
      <node id="1727" label="zzz2002"/>
      <node id="1726" label="zzz2003"/>
      <node id="1725" label="zzz2004"/>
      <node id="1724" label="zzz2005"/>
      <node id="1723" label="zzz2006"/>
      <node id="1722" label="zzz2007"/>
      <node id="1721" label="zzz2008"/>
      <node id="1720" label="zzz2009"/>
      <node id="1719" label="zzz2010"/>
      <node id="1718" label="zzz2011"/>
      <node id="1717" label="zzz2012"/>
      <node id="1716" label="zzz2013"/>
      <node id="1715" label="zzz2014"/>
      <node id="1714" label="zzz2015"/>
      <node id="1713" label="zzz2016"/>
      <node id="1712" label="zzz2017"/>
      <node id="1711" label="zzz2018"/>
      <node id="1710" label="zzz2019"/>
      <node id="1709" label="zzz2020"/>
      <node id="1708" label="zzz2021"/>
      <node id="1707" label="zzz2022"/>
      <node id="1706" label="zzz2023"/>
      <node id="1705" label="zzz2024"/>
      <node id="1704" label="zzz2025"/>
      <node id="1703" label="zzz2026"/>
      <node id="1702" label="zzz2027"/>
      <node id="1701" label="zzz2028"/>
      <node id="1700" label="zzz2029"/>
      <node id="1699" label="zzz2030"/>
      <node id="1698" label="zzz2031"/>
      <node id="1697" label="zzz2032"/>
      <node id="1696" label="zzz2033"/>
      <node id="1695" label="zzz2034"/>
      <node id="1694" label="zzz2035"/>
      <node id="1693" label="zzz2036"/>
      <node id="1692" label="zzz2037"/>
      <node id="1691" label="zzz2038"/>
      <node id="1690" label="zzz2039"/>
      <node id="1689" label="zzz2040"/>
      <node id="1688" label="zzz2041"/>
      <node id="1687" label="zzz2042"/>
      <node id="1686" label="zzz2043"/>
      <node id="1685" label="zzz2044"/>
      <node id="1684" label="zzz2045"/>
      <node id="1683" label="zzz2046"/>
      <node id="1682" label="zzz2047"/>
      <node id="1681" label="zzz2048"/>
      <node id="1680" label="zzz2049"/>
      <node id="1679" label="zzz2050"/>
      <node id="1678" label="zzz2051"/>
      <node id="1677" label="zzz2052"/>
      <node id="1676" label="zzz2053"/>
      <node id="1675" label="zzz2054"/>
      <node id="1674" label="zzz2055"/>
      <node id="1673" label="zzz2056"/>
      <node id="1672" label="zzz2057"/>
      <node id="1671" label="zzz2058"/>
      <node id="1670" label="zzz2059"/>
      <node id="1669" label="zzz2060"/>
      <node id="1668" label="zzz2061"/>
      <node id="1667" label="zzz2062"/>
      <node id="1666" label="zzz2063"/>
      <node id="1665" label="zzz2064"/>
      <node id="1664" label="zzz2065"/>
      <node id="1663" label="zzz2066"/>
      <node id="1662" label="zzz2067"/>
      <node id="1661" label="zzz2068"/>
      <node id="1660" label="zzz2069"/>
      <node id="1659" label="zzz2070"/>
      <node id="1658" label="zzz2071"/>
      <node id="1657" label="zzz2072"/>
      <node id="1656" label="zzz2073"/>
      <node id="1655" label="zzz2074"/>
      <node id="1654" label="zzz2075"/>
      <node id="1653" label="zzz2076"/>
      <node id="1652" label="zzz2077"/>
      <node id="1651" label="zzz2078"/>
      <node id="1650" label="zzz2079"/>
      <node id="1649" label="zzz2080"/>
      <node id="1648" label="zzz2081"/>
      <node id="1647" label="zzz2082"/>
      <node id="1646" label="zzz2083"/>
      <node id="1645" label="zzz2084"/>
      <node id="1644" label="zzz2085"/>
      <node id="1643" label="zzz2086"/>
      <node id="1642" label="zzz2087"/>
      <node id="1641" label="zzz2088"/>
      <node id="1640" label="zzz2089"/>
      <node id="1639" label="zzz2090"/>
      <node id="1638" label="zzz2091"/>
      <node id="1637" label="zzz2092"/>
      <node id="1636" label="zzz2093"/>
      <node id="1635" label="zzz2094"/>
      <node id="1634" label="zzz2095"/>
      <node id="1633" label="zzz2096"/>
      <node id="1632" label="zzz2097"/>
      <node id="1631" label="zzz2098"/>
      <node id="1630" label="zzz2099"/>
      <node id="1629" label="zzz2100"/>
      <node id="1628" label="zzz2101"/>
      <node id="1627" label="zzz2102"/>
      <node id="1626" label="zzz2103"/>
      <node id="1625" label="zzz2104"/>
      <node id="1624" label="zzz2105"/>
      <node id="1623" label="zzz2106"/>
      <node id="1622" label="zzz2107"/>
      <node id="1621" label="zzz2108"/>
      <node id="1620" label="zzz2109"/>
      <node id="1619" label="zzz2110"/>
      <node id="1618" label="zzz2111"/>
      <node id="1617" label="zzz2112"/>
      <node id="1616" label="zzz2113"/>
      <node id="1615" label="zzz2114"/>
      <node id="1614" label="zzz2115"/>
      <node id="1613" label="zzz2116"/>
      <node id="1612" label="zzz2117"/>
      <node id="1611" label="zzz2118"/>
      <node id="1610" label="zzz2119"/>
      <node id="1609" label="zzz2120"/>
      <node id="1608" label="zzz2121"/>
      <node id="1607" label="zzz2122"/>
      <node id="1606" label="zzz2123"/>
      <node id="1605" label="zzz2124"/>
      <node id="1604" label="zzz2125"/>
      <node id="1603" label="zzz2126"/>
      <node id="1602" label="zzz2127"/>
      <node id="1601" label="zzz2128"/>
      <node id="1600" label="zzz2129"/>
      <node id="1599" label="zzz2130"/>
      <node id="1598" label="zzz2131"/>
      <node id="1597" label="zzz2132"/>
      <node id="1596" label="zzz2133"/>
      <node id="1595" label="zzz2134"/>
      <node id="1594" label="zzz2135"/>
      <node id="1593" label="zzz2136"/>
      <node id="1592" label="zzz2137"/>
      <node id="1591" label="zzz2138"/>
      <node id="1590" label="zzz2139"/>
      <node id="1589" label="zzz2140"/>
      <node id="1588" label="zzz2141"/>
      <node id="1587" label="zzz2142"/>
      <node id="1586" label="zzz2143"/>
      <node id="1585" label="zzz2144"/>
      <node id="1584" label="zzz2145"/>
      <node id="1583" label="zzz2146"/>
      <node id="1582" label="zzz2147"/>
      <node id="1581" label="zzz2148"/>
      <node id="1580" label="zzz2149"/>
      <node id="1579" label="zzz2150"/>
      <node id="1578" label="zzz2151"/>
      <node id="1577" label="zzz2152"/>
      <node id="1576" label="zzz2153"/>
      <node id="1575" label="zzz2154"/>
      <node id="1574" label="zzz2155"/>
      <node id="1573" label="zzz2156"/>
      <node id="1572" label="zzz2157"/>
      <node id="1571" label="zzz2158"/>
      <node id="1570" label="zzz2159"/>
      <node id="1569" label="zzz2160"/>
      <node id="1568" label="zzz2161"/>
      <node id="1567" label="zzz2162"/>
      <node id="1566" label="zzz2163"/>
      <node id="1565" label="zzz2164"/>
      <node id="1564" label="zzz2165"/>
      <node id="1563" label="zzz2166"/>
      <node id="1562" label="zzz2167"/>
      <node id="1561" label="zzz2168"/>
      <node id="1560" label="zzz2169"/>
      <node id="1559" label="zzz2170"/>
      <node id="1558" label="zzz2171"/>
      <node id="1557" label="zzz2172"/>
      <node id="1556" label="zzz2173"/>
      <node id="1555" label="zzz2174"/>
      <node id="1554" label="zzz2175"/>
      <node id="1553" label="zzz2176"/>
      <node id="1552" label="zzz2177"/>
      <node id="1551" label="zzz2178"/>
      <node id="1550" label="zzz2179"/>
      <node id="1549" label="zzz2180"/>
      <node id="1548" label="zzz2181"/>
      <node id="1547" label="zzz2182"/>
      <node id="1546" label="zzz2183"/>
      <node id="1545" label="zzz2184"/>
      <node id="1544" label="zzz2185"/>
      <node id="1543" label="zzz2186"/>
      <node id="1542" label="zzz2187"/>
      <node id="1541" label="zzz2188"/>
      <node id="1540" label="zzz2189"/>
      <node id="1539" label="zzz2190"/>
      <node id="1538" label="zzz2191"/>
      <node id="1537" label="zzz2192"/>
      <node id="1536" label="zzz2193"/>
      <node id="1535" label="zzz2194"/>
      <node id="1534" label="zzz2195"/>
      <node id="1533" label="zzz2196"/>
      <node id="1532" label="zzz2197"/>
      <node id="1531" label="zzz2198"/>
      <node id="1530" label="zzz2199"/>
      <node id="1529" label="zzz2200"/>
      <node id="1528" label="zzz2201"/>
      <node id="1527" label="zzz2202"/>
      <node id="1526" label="zzz2203"/>
      <node id="1525" label="zzz2204"/>
      <node id="1524" label="zzz2205"/>
      <node id="1523" label="zzz2206"/>
      <node id="1522" label="zzz2207"/>
      <node id="1521" label="zzz2208"/>
      <node id="1520" label="zzz2209"/>
      <node id="1519" label="zzz2210"/>
      <node id="1518" label="zzz2211"/>
      <node id="1517" label="zzz2212"/>
      <node id="1516" label="zzz2213"/>
      <node id="1515" label="zzz2214"/>
      <node id="1514" label="zzz2215"/>
      <node id="1513" label="zzz2216"/>
      <node id="1512" label="zzz2217"/>
      <node id="1511" label="zzz2218"/>
      <node id="1510" label="zzz2219"/>
      <node id="1509" label="zzz2220"/>
      <node id="1508" label="zzz2221"/>
      <node id="1507" label="zzz2222"/>
      <node id="1506" label="zzz2223"/>
      <node id="1505" label="zzz2224"/>
      <node id="1504" label="zzz2225"/>
      <node id="1503" label="zzz2226"/>
      <node id="1502" label="zzz2227"/>
      <node id="1501" label="zzz2228"/>
      <node id="1500" label="zzz2229"/>
      <node id="1499" label="zzz2230"/>
      <node id="1498" label="zzz2231"/>
      <node id="1497" label="zzz2232"/>
      <node id="1496" label="zzz2233"/>
      <node id="1495" label="zzz2234"/>
      <node id="1494" label="zzz2235"/>
      <node id="1493" label="zzz2236"/>
      <node id="1492" label="zzz2237"/>
      <node id="1491" label="zzz2238"/>
      <node id="1490" label="zzz2239"/>
      <node id="1489" label="zzz2240"/>
      <node id="1488" label="zzz2241"/>
      <node id="1487" label="zzz2242"/>
      <node id="1486" label="zzz2243"/>
      <node id="1485" label="zzz2244"/>
      <node id="1484" label="zzz2245"/>
      <node id="1483" label="zzz2246"/>
      <node id="1482" label="zzz2247"/>
      <node id="1481" label="zzz2248"/>
      <node id="1480" label="zzz2249"/>
      <node id="1479" label="zzz2250"/>
      <node id="1478" label="zzz2251"/>
      <node id="1477" label="zzz2252"/>
      <node id="1476" label="zzz2253"/>
      <node id="1475" label="zzz2254"/>
      <node id="1474" label="zzz2255"/>
      <node id="1473" label="zzz2256"/>
      <node id="1472" label="zzz2257"/>
      <node id="1471" label="zzz2258"/>
      <node id="1470" label="zzz2259"/>
      <node id="1469" label="zzz2260"/>
      <node id="1468" label="zzz2261"/>
      <node id="1467" label="zzz2262"/>
      <node id="1466" label="zzz2263"/>
      <node id="1465" label="zzz2264"/>
      <node id="1464" label="zzz2265"/>
      <node id="1463" label="zzz2266"/>
      <node id="1462" label="zzz2267"/>
      <node id="1461" label="zzz2268"/>
      <node id="1460" label="zzz2269"/>
      <node id="1459" label="zzz2270"/>
      <node id="1458" label="zzz2271"/>
      <node id="1457" label="zzz2272"/>
      <node id="1456" label="zzz2273"/>
      <node id="1455" label="zzz2274"/>
      <node id="1454" label="zzz2275"/>
      <node id="1453" label="zzz2276"/>
      <node id="1452" label="zzz2277"/>
      <node id="1451" label="zzz2278"/>
      <node id="1450" label="zzz2279"/>
      <node id="1449" label="zzz2280"/>
      <node id="1448" label="zzz2281"/>
      <node id="1447" label="zzz2282"/>
      <node id="1446" label="zzz2283"/>
      <node id="1445" label="zzz2284"/>
      <node id="1444" label="zzz2285"/>
      <node id="1443" label="zzz2286"/>
      <node id="1442" label="zzz2287"/>
      <node id="1441" label="zzz2288"/>
      <node id="1440" label="zzz2289"/>
      <node id="1439" label="zzz2290"/>
      <node id="1438" label="zzz2291"/>
      <node id="1437" label="zzz2292"/>
      <node id="1436" label="zzz2293"/>
      <node id="1435" label="zzz2294"/>
      <node id="1434" label="zzz2295"/>
      <node id="1433" label="zzz2296"/>
      <node id="1432" label="zzz2297"/>
      <node id="1431" label="zzz2298"/>
      <node id="1430" label="zzz2299"/>
      <node id="1429" label="zzz2300"/>
      <node id="1428" label="zzz2301"/>
      <node id="1427" label="zzz2302"/>
      <node id="1426" label="zzz2303"/>
      <node id="1425" label="zzz2304"/>
      <node id="1424" label="zzz2305"/>
      <node id="1423" label="zzz2306"/>
      <node id="1422" label="zzz2307"/>
      <node id="1421" label="zzz2308"/>
      <node id="1420" label="zzz2309"/>
      <node id="1419" label="zzz2310"/>
      <node id="1418" label="zzz2311"/>
      <node id="1417" label="zzz2312"/>
      <node id="1416" label="zzz2313"/>
      <node id="1415" label="zzz2314"/>
      <node id="1414" label="zzz2315"/>
      <node id="1413" label="zzz2316"/>
      <node id="1412" label="zzz2317"/>
      <node id="1411" label="zzz2318"/>
      <node id="1410" label="zzz2319"/>
      <node id="1409" label="zzz2320"/>
      <node id="1408" label="zzz2321"/>
      <node id="1407" label="zzz2322"/>
      <node id="1406" label="zzz2323"/>
      <node id="1405" label="zzz2324"/>
      <node id="1404" label="zzz2325"/>
      <node id="1403" label="zzz2326"/>
      <node id="1402" label="zzz2327"/>
      <node id="1401" label="zzz2328"/>
      <node id="1400" label="zzz2329"/>
      <node id="1399" label="zzz2330"/>
      <node id="1398" label="zzz2331"/>
      <node id="1397" label="zzz2332"/>
      <node id="1396" label="zzz2333"/>
      <node id="1395" label="zzz2334"/>
      <node id="1394" label="zzz2335"/>
      <node id="1393" label="zzz2336"/>
      <node id="1392" label="zzz2337"/>
      <node id="1391" label="zzz2338"/>
      <node id="1390" label="zzz2339"/>
      <node id="1389" label="zzz2340"/>
      <node id="1388" label="zzz2341"/>
      <node id="1387" label="zzz2342"/>
      <node id="1386" label="zzz2343"/>
      <node id="1385" label="zzz2344"/>
      <node id="1384" label="zzz2345"/>
      <node id="1383" label="zzz2346"/>
      <node id="1382" label="zzz2347"/>
      <node id="1381" label="zzz2348"/>
      <node id="1380" label="zzz2349"/>
      <node id="1379" label="zzz2350"/>
      <node id="1378" label="zzz2351"/>
      <node id="1377" label="zzz2352"/>
      <node id="1376" label="zzz2353"/>
      <node id="1375" label="zzz2354"/>
      <node id="1374" label="zzz2355"/>
      <node id="1373" label="zzz2356"/>
      <node id="1372" label="zzz2357"/>
      <node id="1371" label="zzz2358"/>
      <node id="1370" label="zzz2359"/>
      <node id="1369" label="zzz2360"/>
      <node id="1368" label="zzz2361"/>
      <node id="1367" label="zzz2362"/>
      <node id="1366" label="zzz2363"/>
      <node id="1365" label="zzz2364"/>
      <node id="1364" label="zzz2365"/>
      <node id="1363" label="zzz2366"/>
      <node id="1362" label="zzz2367"/>
      <node id="1361" label="zzz2368"/>
      <node id="1360" label="zzz2369"/>
      <node id="1359" label="zzz2370"/>
      <node id="1358" label="zzz2371"/>
      <node id="1357" label="zzz2372"/>
      <node id="1356" label="zzz2373"/>
      <node id="1355" label="zzz2374"/>
      <node id="1354" label="zzz2375"/>
      <node id="1353" label="zzz2376"/>
      <node id="1352" label="zzz2377"/>
      <node id="1351" label="zzz2378"/>
      <node id="1350" label="zzz2379"/>
      <node id="1349" label="zzz2380"/>
      <node id="1348" label="zzz2381"/>
      <node id="1347" label="zzz2382"/>
      <node id="1346" label="zzz2383"/>
      <node id="1345" label="zzz2384"/>
      <node id="1344" label="zzz2385"/>
      <node id="1343" label="zzz2386"/>
      <node id="1342" label="zzz2387"/>
      <node id="1341" label="zzz2388"/>
      <node id="1340" label="zzz2389"/>
      <node id="1339" label="zzz2390"/>
      <node id="1338" label="zzz2391"/>
      <node id="1337" label="zzz2392"/>
      <node id="1336" label="zzz2393"/>
      <node id="1335" label="zzz2394"/>
      <node id="1334" label="zzz2395"/>
      <node id="1333" label="zzz2396"/>
      <node id="1332" label="zzz2397"/>
      <node id="1331" label="zzz2398"/>
      <node id="1330" label="zzz2399"/>
      <node id="1329" label="zzz2400"/>
      <node id="1328" label="zzz2401"/>
      <node id="1327" label="zzz2402"/>
      <node id="1326" label="zzz2403"/>
      <node id="1325" label="zzz2404"/>
      <node id="1324" label="zzz2405"/>
      <node id="1323" label="zzz2406"/>
      <node id="1322" label="zzz2407"/>
      <node id="1321" label="zzz2408"/>
      <node id="1320" label="zzz2409"/>
      <node id="1319" label="zzz2410"/>
      <node id="1318" label="zzz2411"/>
      <node id="1317" label="zzz2412"/>
      <node id="1316" label="zzz2413"/>
      <node id="1315" label="zzz2414"/>
      <node id="1314" label="zzz2415"/>
      <node id="1313" label="zzz2416"/>
      <node id="1312" label="zzz2417"/>
      <node id="1311" label="zzz2418"/>
      <node id="1310" label="zzz2419"/>
      <node id="1309" label="zzz2420"/>
      <node id="1308" label="zzz2421"/>
      <node id="1307" label="zzz2422"/>
      <node id="1306" label="zzz2423"/>
      <node id="1305" label="zzz2424"/>
      <node id="1304" label="zzz2425"/>
      <node id="1303" label="zzz2426"/>
      <node id="1302" label="zzz2427"/>
      <node id="1301" label="zzz2428"/>
      <node id="1300" label="zzz2429"/>
      <node id="1299" label="zzz2430"/>
      <node id="1298" label="zzz2431"/>
      <node id="1297" label="zzz2432"/>
      <node id="1296" label="zzz2433"/>
      <node id="1295" label="zzz2434"/>
      <node id="1294" label="zzz2435"/>
      <node id="1293" label="zzz2436"/>
      <node id="1292" label="zzz2437"/>
      <node id="1291" label="zzz2438"/>
      <node id="1290" label="zzz2439"/>
      <node id="1289" label="zzz2440"/>
      <node id="1288" label="zzz2441"/>
      <node id="1287" label="zzz2442"/>
      <node id="1286" label="zzz2443"/>
      <node id="1285" label="zzz2444"/>
      <node id="1284" label="zzz2445"/>
      <node id="1283" label="zzz2446"/>
      <node id="1282" label="zzz2447"/>
      <node id="1281" label="zzz2448"/>
      <node id="1280" label="zzz2449"/>
      <node id="1279" label="zzz2450"/>
      <node id="1278" label="zzz2451"/>
      <node id="1277" label="zzz2452"/>
      <node id="1276" label="zzz2453"/>
      <node id="1275" label="zzz2454"/>
      <node id="1274" label="zzz2455"/>
      <node id="1273" label="zzz2456"/>
      <node id="1272" label="zzz2457"/>
      <node id="1271" label="zzz2458"/>
      <node id="1270" label="zzz2459"/>
      <node id="1269" label="zzz2460"/>
      <node id="1268" label="zzz2461"/>
      <node id="1267" label="zzz2462"/>
      <node id="1266" label="zzz2463"/>
      <node id="1265" label="zzz2464"/>
      <node id="1264" label="zzz2465"/>
      <node id="1263" label="zzz2466"/>
      <node id="1262" label="zzz2467"/>
      <node id="1261" label="zzz2468"/>
      <node id="1260" label="zzz2469"/>
      <node id="1259" label="zzz2470"/>
      <node id="1258" label="zzz2471"/>
      <node id="1257" label="zzz2472"/>
      <node id="1256" label="zzz2473"/>
      <node id="1255" label="zzz2474"/>
      <node id="1254" label="zzz2475"/>
      <node id="1253" label="zzz2476"/>
      <node id="1252" label="zzz2477"/>
      <node id="1251" label="zzz2478"/>
      <node id="1250" label="zzz2479"/>
      <node id="1249" label="zzz2480"/>
      <node id="1248" label="zzz2481"/>
      <node id="1247" label="zzz2482"/>
      <node id="1246" label="zzz2483"/>
      <node id="1245" label="zzz2484"/>
      <node id="1244" label="zzz2485"/>
      <node id="1243" label="zzz2486"/>
      <node id="1242" label="zzz2487"/>
      <node id="1241" label="zzz2488"/>
      <node id="1240" label="zzz2489"/>
      <node id="1239" label="zzz2490"/>
      <node id="1238" label="zzz2491"/>
      <node id="1237" label="zzz2492"/>
      <node id="1236" label="zzz2493"/>
      <node id="1235" label="zzz2494"/>
      <node id="1234" label="zzz2495"/>
      <node id="1233" label="zzz2496"/>
      <node id="1232" label="zzz2497"/>
      <node id="1231" label="zzz2498"/>
      <node id="1230" label="zzz2499"/>
      <node id="1229" label="zzz2500"/>
      <node id="1228" label="zzz2501"/>
      <node id="1227" label="zzz2502"/>
      <node id="1226" label="zzz2503"/>
      <node id="1225" label="zzz2504"/>
      <node id="1224" label="zzz2505"/>
      <node id="1223" label="zzz2506"/>
      <node id="1222" label="zzz2507"/>
      <node id="1221" label="zzz2508"/>
      <node id="1220" label="zzz2509"/>
      <node id="1219" label="zzz2510"/>
      <node id="1218" label="zzz2511"/>
      <node id="1217" label="zzz2512"/>
      <node id="1216" label="zzz2513"/>
      <node id="1215" label="zzz2514"/>
      <node id="1214" label="zzz2515"/>
      <node id="1213" label="zzz2516"/>
      <node id="1212" label="zzz2517"/>
      <node id="1211" label="zzz2518"/>
      <node id="1210" label="zzz2519"/>
      <node id="1209" label="zzz2520"/>
      <node id="1208" label="zzz2521"/>
      <node id="1207" label="zzz2522"/>
      <node id="1206" label="zzz2523"/>
      <node id="1205" label="zzz2524"/>
      <node id="1204" label="zzz2525"/>
      <node id="1203" label="zzz2526"/>
      <node id="1202" label="zzz2527"/>
      <node id="1201" label="zzz2528"/>
      <node id="1200" label="zzz2529"/>
      <node id="1199" label="zzz2530"/>
      <node id="1198" label="zzz2531"/>
      <node id="1197" label="zzz2532"/>
      <node id="1196" label="zzz2533"/>
      <node id="1195" label="zzz2534"/>
      <node id="1194" label="zzz2535"/>
      <node id="1193" label="zzz2536"/>
      <node id="1192" label="zzz2537"/>
      <node id="1191" label="zzz2538"/>
      <node id="1190" label="zzz2539"/>
      <node id="1189" label="zzz2540"/>
      <node id="1188" label="zzz2541"/>
      <node id="1187" label="zzz2542"/>
      <node id="1186" label="zzz2543"/>
      <node id="1185" label="zzz2544"/>
      <node id="1184" label="zzz2545"/>
      <node id="1183" label="zzz2546"/>
      <node id="1182" label="zzz2547"/>
      <node id="1181" label="zzz2548"/>
      <node id="1180" label="zzz2549"/>
      <node id="1179" label="zzz2550"/>
      <node id="1178" label="zzz2551"/>
      <node id="1177" label="zzz2552"/>
      <node id="1176" label="zzz2553"/>
      <node id="1175" label="zzz2554"/>
      <node id="1174" label="zzz2555"/>
      <node id="1173" label="zzz2556"/>
      <node id="1172" label="zzz2557"/>
      <node id="1171" label="zzz2558"/>
      <node id="1170" label="zzz2559"/>
      <node id="1169" label="zzz2560"/>
      <node id="1168" label="zzz2561"/>
      <node id="1167" label="zzz2562"/>
      <node id="1166" label="zzz2563"/>
      <node id="1165" label="zzz2564"/>
      <node id="1164" label="zzz2565"/>
      <node id="1163" label="zzz2566"/>
      <node id="1162" label="zzz2567"/>
      <node id="1161" label="zzz2568"/>
      <node id="1160" label="zzz2569"/>
      <node id="1159" label="zzz2570"/>
      <node id="1158" label="zzz2571"/>
      <node id="1157" label="zzz2572"/>
      <node id="1156" label="zzz2573"/>
      <node id="1155" label="zzz2574"/>
      <node id="1154" label="zzz2575"/>
      <node id="1153" label="zzz2576"/>
      <node id="1152" label="zzz2577"/>
      <node id="1151" label="zzz2578"/>
      <node id="1150" label="zzz2579"/>
      <node id="1149" label="zzz2580"/>
      <node id="1148" label="zzz2581"/>
      <node id="1147" label="zzz2582"/>
      <node id="1146" label="zzz2583"/>
      <node id="1145" label="zzz2584"/>
      <node id="1144" label="zzz2585"/>
      <node id="1143" label="zzz2586"/>
      <node id="1142" label="zzz2587"/>
      <node id="1141" label="zzz2588"/>
      <node id="1140" label="zzz2589"/>
      <node id="1139" label="zzz2590"/>
      <node id="1138" label="zzz2591"/>
      <node id="1137" label="zzz2592"/>
      <node id="1136" label="zzz2593"/>
      <node id="1135" label="zzz2594"/>
      <node id="1134" label="zzz2595"/>
      <node id="1133" label="zzz2596"/>
      <node id="1132" label="zzz2597"/>
      <node id="1131" label="zzz2598"/>
      <node id="1130" label="zzz2599"/>
      <node id="1129" label="zzz2600"/>
      <node id="1128" label="zzz2601"/>
      <node id="1127" label="zzz2602"/>
      <node id="1126" label="zzz2603"/>
      <node id="1125" label="zzz2604"/>
      <node id="1124" label="zzz2605"/>
      <node id="1123" label="zzz2606"/>
      <node id="1122" label="zzz2607"/>
      <node id="1121" label="zzz2608"/>
      <node id="1120" label="zzz2609"/>
      <node id="1119" label="zzz2610"/>
      <node id="1118" label="zzz2611"/>
      <node id="1117" label="zzz2612"/>
      <node id="1116" label="zzz2613"/>
      <node id="1115" label="zzz2614"/>
      <node id="1114" label="zzz2615"/>
      <node id="1113" label="zzz2616"/>
      <node id="1112" label="zzz2617"/>
      <node id="1111" label="zzz2618"/>
      <node id="1110" label="zzz2619"/>
      <node id="1109" label="zzz2620"/>
      <node id="1108" label="zzz2621"/>
      <node id="1107" label="zzz2622"/>
      <node id="1106" label="zzz2623"/>
      <node id="1105" label="zzz2624"/>
      <node id="1104" label="zzz2625"/>
      <node id="1103" label="zzz2626"/>
      <node id="1102" label="zzz2627"/>
      <node id="1101" label="zzz2628"/>
      <node id="1100" label="zzz2629"/>
      <node id="1099" label="zzz2630"/>
      <node id="1098" label="zzz2631"/>
      <node id="1097" label="zzz2632"/>
      <node id="1096" label="zzz2633"/>
      <node id="1095" label="zzz2634"/>
      <node id="1094" label="zzz2635"/>
      <node id="1093" label="zzz2636"/>
      <node id="1092" label="zzz2637"/>
      <node id="1091" label="zzz2638"/>
      <node id="1090" label="zzz2639"/>
      <node id="1089" label="zzz2640"/>
      <node id="1088" label="zzz2641"/>
      <node id="1087" label="zzz2642"/>
      <node id="1086" label="zzz2643"/>
      <node id="1085" label="zzz2644"/>
      <node id="1084" label="zzz2645"/>
      <node id="1083" label="zzz2646"/>
      <node id="1082" label="zzz2647"/>
      <node id="1081" label="zzz2648"/>
      <node id="1080" label="zzz2649"/>
      <node id="1079" label="zzz2650"/>
      <node id="1078" label="zzz2651"/>
      <node id="1077" label="zzz2652"/>
      <node id="1076" label="zzz2653"/>
      <node id="1075" label="zzz2654"/>
      <node id="1074" label="zzz2655"/>
      <node id="1073" label="zzz2656"/>
      <node id="1072" label="zzz2657"/>
      <node id="1071" label="zzz2658"/>
      <node id="1070" label="zzz2659"/>
      <node id="1069" label="zzz2660"/>
      <node id="1068" label="zzz2661"/>
      <node id="1067" label="zzz2662"/>
      <node id="1066" label="zzzz100"/>
      <node id="1065" label="zzzz101"/>
      <node id="1064" label="zzzz102"/>
      <node id="1063" label="zzzz103"/>
      <node id="1062" label="zzzz104"/>
      <node id="1061" label="zzzz105"/>
      <node id="1060" label="zzzz106"/>
      <node id="1059" label="zzzz107"/>
      <node id="1058" label="zzzz108"/>
      <node id="1057" label="zzzz109"/>
      <node id="1056" label="zzzz110"/>
      <node id="1055" label="zzzz111"/>
      <node id="1054" label="zzzz112"/>
      <node id="1053" label="zzzz113"/>
      <node id="1052" label="zzzz114"/>
      <node id="1051" label="zzzz115"/>
      <node id="1050" label="zzzz116"/>
      <node id="1049" label="zzzz117"/>
      <node id="1048" label="zzzz118"/>
      <node id="1047" label="zzzz119"/>
      <node id="1046" label="zzzz120"/>
      <node id="1045" label="zzzz121"/>
      <node id="1044" label="zzzz122"/>
      <node id="1043" label="zzzz123"/>
      <node id="1042" label="zzzz124"/>
      <node id="1041" label="zzzz125"/>
      <node id="1040" label="zzzz126"/>
      <node id="1039" label="zzzz127"/>
      <node id="1038" label="zzzz128"/>
      <node id="1037" label="zzzz129"/>
      <node id="1036" label="zzzz130"/>
      <node id="1035" label="zzzz131"/>
      <node id="1034" label="zzzz132"/>
      <node id="1033" label="zzzz133"/>
      <node id="1032" label="zzzz134"/>
      <node id="1031" label="zzzz135"/>
      <node id="1030" label="zzzz136"/>
      <node id="1029" label="zzzz137"/>
      <node id="1028" label="zzzz138"/>
      <node id="1027" label="zzzz139"/>
      <node id="1026" label="zzzz140"/>
      <node id="1025" label="zzzz141"/>
      <node id="1024" label="zzzz142"/>
      <node id="1023" label="zzzz143"/>
      <node id="1022" label="zzzz144"/>
      <node id="1021" label="zzzz145"/>
      <node id="1020" label="zzzz146"/>
      <node id="1019" label="zzzz147"/>
      <node id="1018" label="zzzz148"/>
      <node id="1017" label="zzzz149"/>
      <node id="1016" label="zzzz150"/>
      <node id="1015" label="zzzz151"/>
      <node id="1014" label="zzzz152"/>
      <node id="1013" label="zzzz153"/>
      <node id="1012" label="zzzz154"/>
      <node id="1011" label="zzzz155"/>
      <node id="1010" label="zzzz156"/>
      <node id="1009" label="zzzz157"/>
      <node id="1008" label="zzzz158"/>
      <node id="1007" label="zzzz159"/>
      <node id="1006" label="zzzz160"/>
      <node id="1005" label="zzzz161"/>
      <node id="1004" label="zzzz162"/>
      <node id="1003" label="zzzz163"/>
      <node id="1002" label="zzzz164"/>
      <node id="1001" label="zzzz165"/>
      <node id="1000" label="zzzz166"/>
      <node id="999" label="zzzz167"/>
      <node id="998" label="zzzz168"/>
      <node id="997" label="zzzz169"/>
      <node id="996" label="zzzz170"/>
      <node id="995" label="zzzz171"/>
      <node id="994" label="zzzz172"/>
      <node id="993" label="zzzz173"/>
      <node id="992" label="zzzz174"/>
      <node id="991" label="zzzz175"/>
      <node id="990" label="zzzz176"/>
      <node id="989" label="zzzz177"/>
      <node id="988" label="zzzz178"/>
      <node id="987" label="zzzz179"/>
      <node id="986" label="zzzz180"/>
      <node id="985" label="zzzz181"/>
      <node id="984" label="zzzz182"/>
      <node id="983" label="zzzz183"/>
      <node id="982" label="zzzz184"/>
      <node id="981" label="zzzz185"/>
      <node id="980" label="zzzz186"/>
      <node id="979" label="zzzz187"/>
      <node id="978" label="zzzz188"/>
      <node id="977" label="zzzz189"/>
      <node id="976" label="zzzz190"/>
      <node id="975" label="zzzz191"/>
      <node id="974" label="zzzz192"/>
      <node id="973" label="zzzz193"/>
      <node id="972" label="zzzz194"/>
      <node id="971" label="zzzz195"/>
      <node id="970" label="zzzz196"/>
      <node id="969" label="zzzz197"/>
      <node id="968" label="zzzz198"/>
      <node id="967" label="zzzz199"/>
      <node id="966" label="zzzz200"/>
      <node id="965" label="zzzz201"/>
      <node id="964" label="zzzz202"/>
      <node id="963" label="zzzz203"/>
      <node id="962" label="zzzz204"/>
      <node id="961" label="zzzz205"/>
      <node id="960" label="zzzz206"/>
      <node id="959" label="zzzz207"/>
      <node id="958" label="zzzz208"/>
      <node id="957" label="zzzz209"/>
      <node id="956" label="zzzz210"/>
      <node id="955" label="zzzz211"/>
      <node id="954" label="zzzz212"/>
      <node id="953" label="zzzz213"/>
      <node id="952" label="zzzz214"/>
      <node id="951" label="zzzz215"/>
      <node id="950" label="zzzz216"/>
      <node id="949" label="zzzz217"/>
      <node id="948" label="zzzz218"/>
      <node id="947" label="zzzz219"/>
      <node id="946" label="zzzz220"/>
      <node id="945" label="zzzz221"/>
      <node id="944" label="zzzz222"/>
      <node id="943" label="zzzz223"/>
      <node id="942" label="zzzz224"/>
      <node id="941" label="zzzz225"/>
      <node id="940" label="zzzz226"/>
      <node id="939" label="zzzz227"/>
      <node id="938" label="zzzz228"/>
      <node id="937" label="zzzz229"/>
      <node id="936" label="zzzz230"/>
      <node id="935" label="zzzz231"/>
      <node id="934" label="zzzz232"/>
      <node id="933" label="zzzz233"/>
      <node id="932" label="zzzz234"/>
      <node id="931" label="zzzz235"/>
      <node id="930" label="zzzz236"/>
      <node id="929" label="zzzz237"/>
      <node id="928" label="zzzz238"/>
      <node id="927" label="zzzz239"/>
      <node id="926" label="zzzz240"/>
      <node id="925" label="zzzz241"/>
      <node id="924" label="zzzz242"/>
      <node id="923" label="zzzz243"/>
      <node id="922" label="zzzz244"/>
      <node id="921" label="zzzz245"/>
      <node id="920" label="zzzz246"/>
      <node id="919" label="zzzz247"/>
      <node id="918" label="zzzz248"/>
      <node id="917" label="zzzz249"/>
      <node id="916" label="zzzz250"/>
      <node id="915" label="zzzz251"/>
      <node id="914" label="zzzz252"/>
      <node id="913" label="zzzz253"/>
      <node id="912" label="zzzz254"/>
      <node id="911" label="zzzz255"/>
      <node id="910" label="zzzz256"/>
      <node id="909" label="zzzz257"/>
      <node id="908" label="zzzz258"/>
      <node id="907" label="zzzz259"/>
      <node id="906" label="zzzz260"/>
      <node id="905" label="zzzz261"/>
      <node id="904" label="zzzz262"/>
      <node id="903" label="zzzz263"/>
      <node id="902" label="zzzz264"/>
      <node id="901" label="zzzz265"/>
      <node id="900" label="zzzz266"/>
      <node id="899" label="zzzz267"/>
      <node id="898" label="zzzz268"/>
      <node id="897" label="zzzz269"/>
      <node id="896" label="zzzz270"/>
      <node id="895" label="zzzz271"/>
      <node id="894" label="zzzz272"/>
      <node id="893" label="zzzz273"/>
      <node id="892" label="zzzz274"/>
      <node id="891" label="zzzz275"/>
      <node id="890" label="zzzz276"/>
      <node id="889" label="zzzz277"/>
      <node id="888" label="zzzz278"/>
      <node id="887" label="zzzz279"/>
      <node id="886" label="zzzz280"/>
      <node id="885" label="zzzz281"/>
      <node id="884" label="zzzz282"/>
      <node id="883" label="zzzz283"/>
      <node id="882" label="zzzz284"/>
      <node id="881" label="zzzz285"/>
      <node id="880" label="zzzz286"/>
      <node id="879" label="zzzz287"/>
      <node id="878" label="zzzz288"/>
      <node id="877" label="zzzz289"/>
      <node id="876" label="zzzz290"/>
      <node id="875" label="zzzz291"/>
      <node id="874" label="zzzz292"/>
      <node id="873" label="zzzz293"/>
      <node id="872" label="zzzz294"/>
      <node id="871" label="zzzz295"/>
      <node id="870" label="zzzz296"/>
      <node id="869" label="zzzz297"/>
      <node id="868" label="zzzz298"/>
      <node id="867" label="zzzz299"/>
      <node id="866" label="zzzz300"/>
      <node id="865" label="zzzz301"/>
      <node id="864" label="zzzz302"/>
      <node id="863" label="zzzz303"/>
      <node id="862" label="zzzz304"/>
      <node id="861" label="zzzz305"/>
      <node id="860" label="zzzz306"/>
      <node id="859" label="zzzz307"/>
      <node id="858" label="zzzz308"/>
      <node id="857" label="zzzz309"/>
      <node id="856" label="zzzz310"/>
      <node id="855" label="zzzz311"/>
      <node id="854" label="zzzz312"/>
      <node id="853" label="zzzz313"/>
      <node id="852" label="zzzz314"/>
      <node id="851" label="zzzz315"/>
      <node id="850" label="zzzz316"/>
      <node id="849" label="zzzz317"/>
      <node id="848" label="zzzz318"/>
      <node id="847" label="zzzz319"/>
      <node id="846" label="zzzz320"/>
      <node id="845" label="zzzz321"/>
      <node id="844" label="zzzz322"/>
      <node id="843" label="zzzz323"/>
      <node id="842" label="zzzz324"/>
      <node id="841" label="zzzz325"/>
      <node id="840" label="zzzz326"/>
      <node id="839" label="zzzz327"/>
      <node id="838" label="zzzz328"/>
      <node id="837" label="zzzz329"/>
      <node id="836" label="zzzz330"/>
      <node id="835" label="zzzz331"/>
      <node id="834" label="zzzz332"/>
      <node id="833" label="zzzz333"/>
      <node id="832" label="zzzz334"/>
      <node id="831" label="zzzz335"/>
      <node id="830" label="zzzz336"/>
      <node id="829" label="zzzz337"/>
      <node id="828" label="zzzz338"/>
      <node id="827" label="zzzz339"/>
      <node id="826" label="zzzz340"/>
      <node id="825" label="zzzz341"/>
      <node id="824" label="zzzz342"/>
      <node id="823" label="zzzz343"/>
      <node id="822" label="zzzz344"/>
      <node id="821" label="zzzz345"/>
      <node id="820" label="zzzz346"/>
      <node id="819" label="zzzz347"/>
      <node id="818" label="zzzz348"/>
      <node id="817" label="zzzz349"/>
      <node id="816" label="zzzz350"/>
      <node id="815" label="zzzz351"/>
      <node id="814" label="zzzz352"/>
      <node id="813" label="zzzz353"/>
      <node id="812" label="zzzz354"/>
      <node id="811" label="zzzz355"/>
      <node id="810" label="zzzz356"/>
      <node id="809" label="zzzz357"/>
      <node id="808" label="zzzz358"/>
      <node id="807" label="zzzz359"/>
      <node id="806" label="zzzz360"/>
      <node id="805" label="zzzz361"/>
      <node id="804" label="zzzz362"/>
      <node id="803" label="zzzz363"/>
      <node id="802" label="zzzz364"/>
      <node id="801" label="zzzz365"/>
      <node id="800" label="zzzz366"/>
      <node id="799" label="zzzz367"/>
      <node id="798" label="zzzz368"/>
      <node id="797" label="zzzz369"/>
      <node id="796" label="zzzz370"/>
      <node id="795" label="zzzz371"/>
      <node id="794" label="zzzz372"/>
      <node id="793" label="zzzz373"/>
      <node id="792" label="zzzz374"/>
      <node id="791" label="zzzz375"/>
      <node id="790" label="zzzz376"/>
      <node id="789" label="zzzz377"/>
      <node id="788" label="zzzz378"/>
      <node id="787" label="zzzz379"/>
      <node id="786" label="zzzz380"/>
      <node id="785" label="zzzz381"/>
      <node id="784" label="zzzz382"/>
      <node id="783" label="zzzz383"/>
      <node id="782" label="zzzz384"/>
      <node id="781" label="zzzz385"/>
      <node id="780" label="zzzz386"/>
      <node id="779" label="zzzz387"/>
      <node id="778" label="zzzz388"/>
      <node id="777" label="zzzz389"/>
      <node id="776" label="zzzz390"/>
      <node id="775" label="zzzz391"/>
      <node id="774" label="zzzz392"/>
      <node id="773" label="zzzz393"/>
      <node id="772" label="zzzz394"/>
      <node id="771" label="zzzz395"/>
      <node id="770" label="zzzz396"/>
      <node id="769" label="zzzz397"/>
      <node id="768" label="zzzz398"/>
      <node id="767" label="zzzz399"/>
      <node id="766" label="zzzz400"/>
      <node id="765" label="zzzz401"/>
      <node id="764" label="zzzz402"/>
      <node id="763" label="zzzz403"/>
      <node id="762" label="zzzz404"/>
      <node id="761" label="zzzz405"/>
      <node id="760" label="zzzz406"/>
      <node id="759" label="zzzz407"/>
      <node id="758" label="zzzz408"/>
      <node id="757" label="zzzz409"/>
      <node id="756" label="zzzz410"/>
      <node id="755" label="zzzz411"/>
      <node id="754" label="zzzz412"/>
      <node id="753" label="zzzz413"/>
      <node id="752" label="zzzz414"/>
      <node id="751" label="zzzz415"/>
      <node id="750" label="zzzz416"/>
      <node id="749" label="zzzz417"/>
      <node id="748" label="zzzz418"/>
      <node id="747" label="zzzz419"/>
      <node id="746" label="zzzz420"/>
      <node id="745" label="zzzz421"/>
      <node id="744" label="zzzz422"/>
      <node id="743" label="zzzz423"/>
      <node id="742" label="zzzz424"/>
      <node id="741" label="zzzz425"/>
      <node id="740" label="zzzz426"/>
      <node id="739" label="zzzz427"/>
      <node id="738" label="zzzz428"/>
      <node id="737" label="zzzz429"/>
      <node id="736" label="zzzz430"/>
      <node id="735" label="zzzz431"/>
      <node id="734" label="zzzz432"/>
      <node id="733" label="zzzz433"/>
      <node id="732" label="zzzz434"/>
      <node id="731" label="zzzz435"/>
      <node id="730" label="zzzz436"/>
      <node id="729" label="zzzz437"/>
      <node id="728" label="zzzz438"/>
      <node id="727" label="zzzz439"/>
      <node id="726" label="zzzz440"/>
      <node id="725" label="zzzz441"/>
      <node id="724" label="zzzz442"/>
      <node id="723" label="zzzz443"/>
      <node id="722" label="zzzz444"/>
      <node id="721" label="zzzz445"/>
      <node id="720" label="zzzz446"/>
      <node id="719" label="zzzz447"/>
      <node id="718" label="zzzz448"/>
      <node id="717" label="zzzz449"/>
      <node id="716" label="zzzz450"/>
      <node id="715" label="zzzz451"/>
      <node id="714" label="zzzz452"/>
      <node id="713" label="zzzz453"/>
      <node id="712" label="zzzz454"/>
      <node id="711" label="zzzz455"/>
      <node id="710" label="zzzz456"/>
      <node id="709" label="zzzz457"/>
      <node id="708" label="zzzz458"/>
      <node id="707" label="zzzz459"/>
      <node id="706" label="zzzz460"/>
      <node id="705" label="zzzz461"/>
      <node id="704" label="zzzz462"/>
      <node id="703" label="zzzz463"/>
      <node id="702" label="zzzz464"/>
      <node id="701" label="zzzz465"/>
      <node id="700" label="zzzz466"/>
      <node id="699" label="zzzz467"/>
      <node id="698" label="zzzz468"/>
      <node id="697" label="zzzz469"/>
      <node id="696" label="zzzz470"/>
      <node id="695" label="zzzz471"/>
      <node id="694" label="zzzz472"/>
      <node id="693" label="zzzz473"/>
      <node id="692" label="zzzz474"/>
      <node id="691" label="zzzz475"/>
      <node id="690" label="zzzz476"/>
      <node id="689" label="zzzz477"/>
      <node id="688" label="zzzz478"/>
      <node id="687" label="zzzz479"/>
      <node id="686" label="zzzz480"/>
      <node id="685" label="zzzz481"/>
      <node id="684" label="zzzz482"/>
      <node id="683" label="zzzz483"/>
      <node id="682" label="zzzz484"/>
      <node id="681" label="zzzz485"/>
      <node id="680" label="zzzz486"/>
      <node id="679" label="zzzz487"/>
      <node id="678" label="zzzz488"/>
      <node id="677" label="zzzz489"/>
      <node id="676" label="zzzz490"/>
      <node id="675" label="zzzz491"/>
      <node id="674" label="zzzz492"/>
      <node id="673" label="zzzz493"/>
      <node id="672" label="zzzz494"/>
      <node id="671" label="zzzz495"/>
      <node id="670" label="zzzz496"/>
      <node id="669" label="zzzz497"/>
      <node id="668" label="zzzz498"/>
      <node id="667" label="zzzz499"/>
      <node id="666" label="zzzz500"/>
      <node id="665" label="zzzz501"/>
      <node id="664" label="zzzz502"/>
      <node id="663" label="zzzz503"/>
      <node id="662" label="zzzz504"/>
      <node id="661" label="zzzz505"/>
      <node id="660" label="zzzz506"/>
      <node id="659" label="zzzz507"/>
      <node id="658" label="zzzz508"/>
      <node id="657" label="zzzz509"/>
      <node id="656" label="zzzz510"/>
      <node id="655" label="zzzz511"/>
      <node id="654" label="zzzz512"/>
      <node id="653" label="zzzz513"/>
      <node id="652" label="zzzz514"/>
      <node id="651" label="zzzz515"/>
      <node id="650" label="zzzz516"/>
      <node id="649" label="zzzz517"/>
      <node id="648" label="zzzz518"/>
      <node id="647" label="zzzz519"/>
      <node id="646" label="zzzz520"/>
      <node id="645" label="zzzz521"/>
      <node id="644" label="zzzz522"/>
      <node id="643" label="zzzz523"/>
      <node id="642" label="zzzz524"/>
      <node id="641" label="zzzz525"/>
      <node id="640" label="zzzz526"/>
      <node id="639" label="zzzz527"/>
      <node id="638" label="zzzz528"/>
      <node id="637" label="zzzz529"/>
      <node id="636" label="zzzz530"/>
      <node id="635" label="zzzz531"/>
      <node id="634" label="zzzz532"/>
      <node id="633" label="zzzz533"/>
      <node id="632" label="zzzz534"/>
      <node id="631" label="zzzz535"/>
      <node id="630" label="zzzz536"/>
      <node id="629" label="zzzz537"/>
      <node id="628" label="zzzz538"/>
      <node id="627" label="zzzz539"/>
      <node id="626" label="zzzz540"/>
      <node id="625" label="zzzz541"/>
      <node id="624" label="zzzz542"/>
      <node id="623" label="zzzz543"/>
      <node id="622" label="zzzz544"/>
      <node id="621" label="zzzz545"/>
      <node id="620" label="zzzz546"/>
      <node id="619" label="zzzz547"/>
      <node id="618" label="zzzz548"/>
      <node id="617" label="zzzz549"/>
      <node id="616" label="zzzz550"/>
      <node id="615" label="zzzz551"/>
      <node id="614" label="zzzz552"/>
      <node id="613" label="zzzz553"/>
      <node id="612" label="zzzz554"/>
      <node id="611" label="zzzz555"/>
      <node id="610" label="zzzz556"/>
      <node id="609" label="zzzz557"/>
      <node id="608" label="zzzz558"/>
      <node id="607" label="zzzz559"/>
      <node id="606" label="zzzz560"/>
      <node id="605" label="zzzz561"/>
      <node id="604" label="zzzz562"/>
      <node id="603" label="zzzz563"/>
      <node id="602" label="zzzz564"/>
      <node id="601" label="zzzz565"/>
      <node id="600" label="zzzz566"/>
      <node id="599" label="zzzz567"/>
      <node id="598" label="zzzz568"/>
      <node id="597" label="zzzz569"/>
      <node id="596" label="zzzz570"/>
      <node id="595" label="zzzz571"/>
      <node id="594" label="zzzz572"/>
      <node id="593" label="zzzz573"/>
      <node id="592" label="zzzz574"/>
      <node id="591" label="zzzz575"/>
      <node id="590" label="zzzz576"/>
      <node id="589" label="zzzz577"/>
      <node id="588" label="zzzz578"/>
      <node id="587" label="zzzz579"/>
      <node id="586" label="zzzz580"/>
      <node id="585" label="zzzz581"/>
      <node id="584" label="zzzz582"/>
      <node id="583" label="zzzz583"/>
      <node id="582" label="zzzz584"/>
      <node id="581" label="zzzz585"/>
      <node id="580" label="zzzz586"/>
      <node id="579" label="zzzz587"/>
      <node id="578" label="zzzz588"/>
      <node id="577" label="zzzz589"/>
      <node id="576" label="zzzz590"/>
      <node id="575" label="zzzz591"/>
      <node id="574" label="zzzz592"/>
      <node id="573" label="zzzz593"/>
      <node id="572" label="zzzz594"/>
      <node id="571" label="zzzz595"/>
      <node id="570" label="zzzz596"/>
      <node id="569" label="zzzz597"/>
      <node id="568" label="zzzz598"/>
      <node id="567" label="zzzz599"/>
      <node id="566" label="zzzz600"/>
      <node id="565" label="zzzz601"/>
      <node id="564" label="zzzz602"/>
      <node id="563" label="zzzz603"/>
      <node id="562" label="zzzz604"/>
      <node id="561" label="zzzz605"/>
      <node id="560" label="zzzz606"/>
      <node id="559" label="zzzz607"/>
      <node id="558" label="zzzz608"/>
      <node id="557" label="zzzz609"/>
      <node id="556" label="zzzz610"/>
      <node id="555" label="zzzz611"/>
      <node id="554" label="zzzz612"/>
      <node id="553" label="zzzz613"/>
      <node id="552" label="zzzz614"/>
      <node id="551" label="zzzz615"/>
      <node id="550" label="zzzz616"/>
      <node id="549" label="zzzz617"/>
      <node id="548" label="zzzz618"/>
      <node id="547" label="zzzz619"/>
      <node id="546" label="zzzz620"/>
      <node id="545" label="zzzz621"/>
      <node id="544" label="zzzz622"/>
      <node id="543" label="zzzz623"/>
      <node id="542" label="zzzz624"/>
      <node id="541" label="zzzz625"/>
      <node id="540" label="zzzz626"/>
      <node id="539" label="zzzz627"/>
      <node id="538" label="zzzz628"/>
      <node id="537" label="zzzz629"/>
      <node id="536" label="zzzz630"/>
      <node id="535" label="zzzz631"/>
      <node id="534" label="zzzz632"/>
      <node id="533" label="zzzz633"/>
      <node id="532" label="zzzz634"/>
      <node id="531" label="zzzz635"/>
      <node id="530" label="zzzz636"/>
      <node id="529" label="zzzz637"/>
      <node id="528" label="zzzz638"/>
      <node id="527" label="zzzz639"/>
      <node id="526" label="zzzz640"/>
      <node id="525" label="zzzz641"/>
      <node id="524" label="zzzz642"/>
      <node id="523" label="zzzz643"/>
      <node id="522" label="zzzz644"/>
      <node id="521" label="zzzz645"/>
      <node id="520" label="zzzz646"/>
      <node id="519" label="zzzz647"/>
      <node id="518" label="zzzz648"/>
      <node id="517" label="zzzz649"/>
      <node id="516" label="zzzz650"/>
      <node id="515" label="zzzz651"/>
      <node id="514" label="zzzz652"/>
      <node id="513" label="zzzz653"/>
      <node id="512" label="zzzz654"/>
      <node id="511" label="zzzz655"/>
      <node id="510" label="zzzz656"/>
      <node id="509" label="zzzz657"/>
      <node id="508" label="zzzz658"/>
      <node id="507" label="zzzz659"/>
      <node id="506" label="zzzz660"/>
      <node id="505" label="zzzz661"/>
      <node id="504" label="zzzz662"/>
      <node id="503" label="zzzz663"/>
      <node id="502" label="zzzz664"/>
      <node id="501" label="zzzz665"/>
      <node id="500" label="zzzz666"/>
      <node id="499" label="zzzz667"/>
      <node id="498" label="zzzz668"/>
      <node id="497" label="zzzz669"/>
      <node id="496" label="zzzz670"/>
      <node id="495" label="zzzz671"/>
      <node id="494" label="zzzz672"/>
      <node id="493" label="zzzz673"/>
      <node id="492" label="zzzz674"/>
      <node id="491" label="zzzz675"/>
      <node id="490" label="zzzz676"/>
      <node id="489" label="zzzz677"/>
      <node id="488" label="zzzz678"/>
      <node id="487" label="zzzz679"/>
      <node id="486" label="zzzz680"/>
      <node id="485" label="zzzz681"/>
      <node id="484" label="zzzz682"/>
      <node id="483" label="zzzz683"/>
      <node id="482" label="zzzz684"/>
      <node id="481" label="zzzz685"/>
      <node id="480" label="zzzz686"/>
      <node id="479" label="zzzz687"/>
      <node id="478" label="zzzz688"/>
      <node id="477" label="zzzz689"/>
      <node id="476" label="zzzz690"/>
      <node id="475" label="zzzz691"/>
      <node id="474" label="zzzz692"/>
      <node id="473" label="zzzz693"/>
      <node id="472" label="zzzz694"/>
      <node id="471" label="zzzz695"/>
      <node id="470" label="zzzz696"/>
      <node id="469" label="zzzz697"/>
      <node id="468" label="zzzz698"/>
      <node id="467" label="zzzz699"/>
      <node id="466" label="zzzz700"/>
      <node id="465" label="zzzz701"/>
      <node id="464" label="zzzz702"/>
      <node id="463" label="zzzz703"/>
      <node id="462" label="zzzz704"/>
      <node id="461" label="zzzz705"/>
      <node id="460" label="zzzz706"/>
      <node id="459" label="zzzz707"/>
      <node id="458" label="zzzz708"/>
      <node id="457" label="zzzz709"/>
      <node id="456" label="zzzz710"/>
      <node id="455" label="zzzz711"/>
      <node id="454" label="zzzz712"/>
      <node id="453" label="zzzz713"/>
      <node id="452" label="zzzz714"/>
      <node id="451" label="zzzz715"/>
      <node id="450" label="zzzz716"/>
      <node id="449" label="zzzz717"/>
      <node id="448" label="zzzz718"/>
      <node id="447" label="zzzz719"/>
      <node id="446" label="zzzz720"/>
      <node id="445" label="zzzz721"/>
      <node id="444" label="zzzz722"/>
      <node id="443" label="zzzz723"/>
      <node id="442" label="zzzz724"/>
      <node id="441" label="zzzz725"/>
      <node id="440" label="zzzz726"/>
      <node id="439" label="zzzz727"/>
      <node id="438" label="zzzz728"/>
      <node id="437" label="zzzz729"/>
      <node id="436" label="zzzz730"/>
      <node id="435" label="zzzz731"/>
      <node id="434" label="zzzz732"/>
      <node id="433" label="zzzz733"/>
      <node id="432" label="zzzz734"/>
      <node id="431" label="zzzz735"/>
      <node id="430" label="zzzz736"/>
      <node id="429" label="zzzz737"/>
      <node id="428" label="zzzz738"/>
      <node id="427" label="zzzz739"/>
      <node id="426" label="zzzz740"/>
      <node id="425" label="zzzz741"/>
      <node id="424" label="zzzz742"/>
      <node id="423" label="zzzz743"/>
      <node id="422" label="zzzz744"/>
      <node id="421" label="zzzz745"/>
      <node id="420" label="zzzz746"/>
      <node id="419" label="zzzz747"/>
      <node id="418" label="zzzz748"/>
      <node id="417" label="zzzz749"/>
      <node id="416" label="zzzz750"/>
      <node id="415" label="zzzz751"/>
      <node id="414" label="zzzz752"/>
      <node id="413" label="zzzz753"/>
      <node id="412" label="zzzz754"/>
      <node id="411" label="zzzz755"/>
      <node id="410" label="zzzz756"/>
      <node id="409" label="zzzz757"/>
      <node id="408" label="zzzz758"/>
      <node id="407" label="zzzz759"/>
      <node id="406" label="zzzz760"/>
      <node id="405" label="zzzz761"/>
      <node id="404" label="zzzz762"/>
      <node id="403" label="zzzz763"/>
      <node id="402" label="zzzz764"/>
      <node id="401" label="zzzz765"/>
      <node id="400" label="zzzz766"/>
      <node id="399" label="zzzz767"/>
      <node id="398" label="zzzz768"/>
      <node id="397" label="zzzz769"/>
      <node id="396" label="zzzz770"/>
      <node id="395" label="zzzz771"/>
      <node id="394" label="zzzz772"/>
      <node id="393" label="zzzz773"/>
      <node id="392" label="zzzz774"/>
      <node id="391" label="zzzz775"/>
      <node id="390" label="zzzz776"/>
      <node id="389" label="zzzz777"/>
      <node id="388" label="zzzz778"/>
      <node id="387" label="zzzz779"/>
      <node id="386" label="zzzz780"/>
      <node id="385" label="zzzz781"/>
      <node id="384" label="zzzz782"/>
      <node id="383" label="zzzz783"/>
      <node id="382" label="zzzz784"/>
      <node id="381" label="zzzz785"/>
      <node id="380" label="zzzz786"/>
      <node id="379" label="zzzz787"/>
      <node id="378" label="zzzz788"/>
      <node id="377" label="zzzz789"/>
      <node id="376" label="zzzz790"/>
      <node id="375" label="zzzz791"/>
      <node id="374" label="zzzz792"/>
      <node id="373" label="zzzz793"/>
      <node id="372" label="zzzz794"/>
      <node id="371" label="zzzz795"/>
      <node id="370" label="zzzz796"/>
      <node id="369" label="zzzz797"/>
      <node id="368" label="zzzz798"/>
      <node id="367" label="zzzz799"/>
      <node id="366" label="zzzz800"/>
      <node id="365" label="zzzz801"/>
      <node id="364" label="zzzz802"/>
      <node id="363" label="zzzz803"/>
      <node id="362" label="zzzz804"/>
      <node id="361" label="zzzz805"/>
      <node id="360" label="zzzz806"/>
      <node id="359" label="zzzz807"/>
      <node id="358" label="zzzz808"/>
      <node id="357" label="zzzz809"/>
      <node id="356" label="zzzz810"/>
      <node id="355" label="zzzz811"/>
      <node id="354" label="zzzz812"/>
      <node id="353" label="zzzz813"/>
      <node id="352" label="zzzz814"/>
      <node id="351" label="zzzz815"/>
      <node id="350" label="zzzz816"/>
      <node id="349" label="zzzz817"/>
      <node id="348" label="zzzz818"/>
      <node id="347" label="zzzz819"/>
      <node id="346" label="zzzz820"/>
      <node id="345" label="zzzz821"/>
      <node id="344" label="zzzz822"/>
      <node id="343" label="zzzz823"/>
      <node id="342" label="zzzz824"/>
      <node id="341" label="zzzz825"/>
      <node id="340" label="zzzz826"/>
      <node id="339" label="zzzz827"/>
      <node id="338" label="zzzz828"/>
      <node id="337" label="zzzz829"/>
      <node id="336" label="zzzz830"/>
      <node id="335" label="zzzz831"/>
      <node id="334" label="zzzz832"/>
      <node id="333" label="zzzz833"/>
      <node id="332" label="zzzz834"/>
      <node id="331" label="zzzz835"/>
      <node id="330" label="zzzz836"/>
      <node id="329" label="zzzz837"/>
      <node id="328" label="zzzz838"/>
      <node id="327" label="zzzz839"/>
      <node id="326" label="zzzz840"/>
      <node id="325" label="zzzz841"/>
      <node id="324" label="zzzz842"/>
      <node id="323" label="zzzz843"/>
      <node id="322" label="zzzz844"/>
      <node id="321" label="zzzz845"/>
      <node id="320" label="zzzz846"/>
      <node id="319" label="zzzz847"/>
      <node id="318" label="zzzz848"/>
      <node id="317" label="zzzz849"/>
      <node id="316" label="zzzz850"/>
      <node id="315" label="zzzz851"/>
      <node id="314" label="zzzz852"/>
      <node id="313" label="zzzz853"/>
      <node id="312" label="zzzz854"/>
      <node id="311" label="zzzz855"/>
      <node id="310" label="zzzz856"/>
      <node id="309" label="zzzz857"/>
      <node id="308" label="zzzz858"/>
      <node id="307" label="zzzz859"/>
      <node id="306" label="zzzz860"/>
      <node id="305" label="zzzz861"/>
      <node id="304" label="zzzz862"/>
      <node id="303" label="zzzz863"/>
      <node id="302" label="zzzz864"/>
      <node id="301" label="zzzz865"/>
      <node id="300" label="zzzz866"/>
      <node id="299" label="zzzz867"/>
      <node id="298" label="zzzz868"/>
      <node id="297" label="zzzz869"/>
      <node id="296" label="zzzz870"/>
      <node id="295" label="zzzz871"/>
      <node id="294" label="zzzz872"/>
      <node id="293" label="zzzz873"/>
      <node id="292" label="zzzz874"/>
      <node id="291" label="zzzz875"/>
      <node id="290" label="zzzz876"/>
      <node id="289" label="zzzz877"/>
      <node id="288" label="zzzz878"/>
      <node id="287" label="zzzz879"/>
      <node id="286" label="zzzz880"/>
      <node id="285" label="zzzz881"/>
      <node id="284" label="zzzz882"/>
      <node id="283" label="zzzz883"/>
      <node id="282" label="zzzz884"/>
      <node id="281" label="zzzz885"/>
      <node id="280" label="zzzz886"/>
      <node id="279" label="zzzz887"/>
      <node id="278" label="zzzz888"/>
      <node id="277" label="zzzz889"/>
      <node id="276" label="zzzz890"/>
      <node id="275" label="zzzz891"/>
      <node id="274" label="zzzz892"/>
      <node id="273" label="zzzz893"/>
      <node id="272" label="zzzz894"/>
      <node id="271" label="zzzz895"/>
      <node id="270" label="zzzz896"/>
      <node id="269" label="zzzz897"/>
      <node id="268" label="zzzz898"/>
      <node id="267" label="zzzz899"/>
      <node id="266" label="zzzz900"/>
      <node id="265" label="zzzz901"/>
      <node id="264" label="zzzz902"/>
      <node id="263" label="zzzz903"/>
      <node id="262" label="zzzz904"/>
      <node id="261" label="zzzz905"/>
      <node id="260" label="zzzz906"/>
      <node id="259" label="zzzz907"/>
      <node id="258" label="zzzz908"/>
      <node id="257" label="zzzz909"/>
      <node id="256" label="zzzz910"/>
      <node id="255" label="zzzz911"/>
      <node id="254" label="zzzz912"/>
      <node id="253" label="zzzz913"/>
      <node id="252" label="zzzz914"/>
      <node id="251" label="zzzz915"/>
      <node id="250" label="zzzz916"/>
      <node id="249" label="zzzz917"/>
      <node id="248" label="zzzz918"/>
      <node id="247" label="zzzz919"/>
      <node id="246" label="zzzz920"/>
      <node id="245" label="zzzz921"/>
      <node id="244" label="zzzz922"/>
      <node id="243" label="zzzz923"/>
      <node id="242" label="zzzz924"/>
      <node id="241" label="zzzz925"/>
      <node id="240" label="zzzz926"/>
      <node id="239" label="zzzz927"/>
      <node id="238" label="zzzz928"/>
      <node id="237" label="zzzz929"/>
      <node id="236" label="zzzz930"/>
      <node id="235" label="zzzz931"/>
      <node id="234" label="zzzz932"/>
      <node id="233" label="zzzz933"/>
      <node id="232" label="zzzz934"/>
      <node id="231" label="zzzz935"/>
      <node id="230" label="zzzz936"/>
      <node id="229" label="zzzz937"/>
      <node id="228" label="zzzz938"/>
      <node id="227" label="zzzz939"/>
      <node id="226" label="zzzz940"/>
      <node id="225" label="zzzz941"/>
      <node id="224" label="zzzz942"/>
      <node id="223" label="zzzz943"/>
      <node id="222" label="zzzz944"/>
      <node id="221" label="zzzz945"/>
      <node id="220" label="zzzz946"/>
      <node id="219" label="zzzz947"/>
      <node id="218" label="zzzz948"/>
      <node id="217" label="zzzz949"/>
      <node id="216" label="zzzz950"/>
      <node id="215" label="zzzz951"/>
      <node id="214" label="zzzz952"/>
      <node id="213" label="zzzz953"/>
      <node id="212" label="zzzz954"/>
      <node id="211" label="zzzz955"/>
      <node id="210" label="zzzz956"/>
      <node id="209" label="zzzz957"/>
      <node id="208" label="zzzz958"/>
      <node id="207" label="zzzz959"/>
      <node id="206" label="zzzz960"/>
      <node id="205" label="zzzz961"/>
      <node id="204" label="zzzz962"/>
      <node id="203" label="zzzz963"/>
      <node id="202" label="zzzz964"/>
      <node id="201" label="zzzz965"/>
      <node id="200" label="zzzz966"/>
      <node id="199" label="zzzz967"/>
      <node id="198" label="zzzz968"/>
      <node id="197" label="zzzz969"/>
      <node id="196" label="zzzz970"/>
      <node id="195" label="zzzz971"/>
      <node id="194" label="zzzz972"/>
      <node id="193" label="zzzz973"/>
      <node id="192" label="zzzz974"/>
      <node id="191" label="zzzz975"/>
      <node id="190" label="zzzz976"/>
      <node id="189" label="zzzz977"/>
      <node id="188" label="zzzz978"/>
      <node id="187" label="zzzz979"/>
      <node id="186" label="zzzz980"/>
      <node id="185" label="zzzz981"/>
      <node id="184" label="zzzz982"/>
      <node id="183" label="zzzz983"/>
      <node id="182" label="zzzz984"/>
      <node id="181" label="zzzz985"/>
      <node id="180" label="zzzz986"/>
      <node id="179" label="zzzz987"/>
      <node id="178" label="zzzz988"/>
      <node id="177" label="zzzz989"/>
      <node id="176" label="zzzz990"/>
      <node id="175" label="zzzz991"/>
      <node id="174" label="zzzz992"/>
      <node id="173" label="zzzz993"/>
      <node id="172" label="zzzz994"/>
      <node id="171" label="zzzz995"/>
      <node id="170" label="zzzz996"/>
      <node id="169" label="zzzz997"/>
      <node id="168" label="zzzz998"/>
      <node id="167" label="zzzz999"/>
      <node id="166" label="zzzzz10"/>
      <node id="165" label="zzzzz11"/>
      <node id="164" label="zzzzz12"/>
      <node id="163" label="zzzzz13"/>
      <node id="162" label="zzzzz14"/>
      <node id="161" label="zzzzz15"/>
      <node id="160" label="zzzzz16"/>
      <node id="159" label="zzzzz17"/>
      <node id="158" label="zzzzz18"/>
      <node id="157" label="zzzzz19"/>
      <node id="156" label="zzzzz20"/>
      <node id="155" label="zzzzz21"/>
      <node id="154" label="zzzzz22"/>
      <node id="153" label="zzzzz23"/>
      <node id="152" label="zzzzz24"/>
      <node id="151" label="zzzzz25"/>
      <node id="150" label="zzzzz26"/>
      <node id="149" label="zzzzz27"/>
      <node id="148" label="zzzzz28"/>
      <node id="147" label="zzzzz29"/>
      <node id="146" label="zzzzz30"/>
      <node id="145" label="zzzzz31"/>
      <node id="144" label="zzzzz32"/>
      <node id="143" label="zzzzz33"/>
      <node id="142" label="zzzzz34"/>
      <node id="141" label="zzzzz35"/>
      <node id="140" label="zzzzz36"/>
      <node id="139" label="zzzzz37"/>
      <node id="138" label="zzzzz38"/>
      <node id="137" label="zzzzz39"/>
      <node id="136" label="zzzzz40"/>
      <node id="135" label="zzzzz41"/>
      <node id="134" label="zzzzz42"/>
      <node id="133" label="zzzzz43"/>
      <node id="132" label="zzzzz44"/>
      <node id="131" label="zzzzz45"/>
      <node id="130" label="zzzzz46"/>
      <node id="129" label="zzzzz47"/>
      <node id="128" label="zzzzz48"/>
      <node id="127" label="zzzzz49"/>
      <node id="126" label="zzzzz50"/>
      <node id="125" label="zzzzz51"/>
      <node id="124" label="zzzzz52"/>
      <node id="123" label="zzzzz53"/>
      <node id="122" label="zzzzz54"/>
      <node id="121" label="zzzzz55"/>
      <node id="120" label="zzzzz56"/>
      <node id="119" label="zzzzz57"/>
      <node id="118" label="zzzzz58"/>
      <node id="117" label="zzzzz59"/>
      <node id="116" label="zzzzz60"/>
      <node id="115" label="zzzzz61"/>
      <node id="114" label="zzzzz62"/>
      <node id="113" label="zzzzz63"/>
      <node id="112" label="zzzzz64"/>
      <node id="111" label="zzzzz65"/>
      <node id="110" label="zzzzz66"/>
      <node id="109" label="zzzzz67"/>
      <node id="108" label="zzzzz68"/>
      <node id="107" label="zzzzz69"/>
      <node id="106" label="zzzzz70"/>
      <node id="105" label="zzzzz71"/>
      <node id="104" label="zzzzz72"/>
      <node id="103" label="zzzzz73"/>
      <node id="102" label="zzzzz74"/>
      <node id="101" label="zzzzz75"/>
      <node id="100" label="zzzzz76"/>
      <node id="99" label="zzzzz77"/>
      <node id="98" label="zzzzz78"/>
      <node id="97" label="zzzzz79"/>
      <node id="96" label="zzzzz80"/>
      <node id="95" label="zzzzz81"/>
      <node id="94" label="zzzzz82"/>
      <node id="93" label="zzzzz83"/>
      <node id="92" label="zzzzz84"/>
      <node id="91" label="zzzzz85"/>
      <node id="90" label="zzzzz86"/>
      <node id="89" label="zzzzz87"/>
      <node id="88" label="zzzzz88"/>
      <node id="87" label="zzzzz89"/>
      <node id="86" label="zzzzz90"/>
      <node id="85" label="zzzzz91"/>
      <node id="84" label="zzzzz92"/>
      <node id="83" label="zzzzz93"/>
      <node id="82" label="zzzzz94"/>
      <node id="81" label="zzzzz95"/>
      <node id="80" label="zzzzz96"/>
      <node id="79" label="zzzzz97"/>
      <node id="78" label="zzzzz98"/>
      <node id="77" label="zzzzz99"/>
      <node id="76" label="zzzzzz0"/>
      <node id="75" label="zzzzzz1"/>
      <node id="74" label="zzzzzz2"/>
      <node id="73" label="zzzzzz3"/>
      <node id="72" label="zzzzzz4"/>
      <node id="71" label="zzzzzz5"/>
      <node id="70" label="zzzzzz6"/>
      <node id="69" label="zzzzzz7"/>
      <node id="68" label="zzzzzz8"/>
      <node id="67" label="zzzzzz9"/>
      <edge id="114619" label="zzz1000,zzz1001" source="2729" target="2728" cy:directed="1"/>
      <edge id="114618" label="zzz1000,zzzz999" source="2729" target="167" cy:directed="1"/>
      <edge id="114617" label="zzz1000,zzz1208" source="2729" target="2521" cy:directed="1"/>
      <edge id="114616" label="zzz1000,zzz1009" source="2729" target="2720" cy:directed="1"/>
      <edge id="114615" label="zzz1000,zzz1086" source="2729" target="2643" cy:directed="1"/>
      <edge id="114614" label="zzz1000,zzzzz11" source="2729" target="165" cy:directed="1"/>
      <edge id="114613" label="zzz1000,zzz1333" source="2729" target="2396" cy:directed="1"/>
      <edge id="114612" label="zzz1000,zzz1010" source="2729" target="2719" cy:directed="1"/>
      <edge id="114611" label="zzz1000,zzz1042" source="2729" target="2687" cy:directed="1"/>
      <edge id="114610" label="zzz1000,zzz1066" source="2729" target="2663" cy:directed="1"/>
      <edge id="114609" label="zzz1000,zzz1040" source="2729" target="2689" cy:directed="1"/>
      <edge id="114608" label="zzz1000,zzz1206" source="2729" target="2523" cy:directed="1"/>
      <edge id="114607" label="zzz1000,zzz1233" source="2729" target="2496" cy:directed="1"/>
      <edge id="114606" label="zzz1000,zzz1315" source="2729" target="2414" cy:directed="1"/>
      <edge id="114605" label="zzz1000,zzz1331" source="2729" target="2398" cy:directed="1"/>
      <edge id="114604" label="zzz1000,zzz1322" source="2729" target="2407" cy:directed="1"/>
      <edge id="114603" label="zzz1000,zzz1011" source="2729" target="2718" cy:directed="1"/>
      <edge id="114602" label="zzz1000,zzz1215" source="2729" target="2514" cy:directed="1"/>
      <edge id="114601" label="zzz1000,zzz1080" source="2729" target="2649" cy:directed="1"/>
      <edge id="114600" label="zzz1000,zzz1081" source="2729" target="2648" cy:directed="1"/>
      <edge id="114599" label="zzz1000,zzzz951" source="2729" target="215" cy:directed="1"/>
      <edge id="114598" label="zzz1000,zzz1033" source="2729" target="2696" cy:directed="1"/>
      <edge id="114597" label="zzz1000,zzz1087" source="2729" target="2642" cy:directed="1"/>
      <edge id="114596" label="zzz1000,zzzz953" source="2729" target="213" cy:directed="1"/>
      <edge id="114595" label="zzz1000,zzz1317" source="2729" target="2412" cy:directed="1"/>
      <edge id="114594" label="zzz1000,zzzz955" source="2729" target="211" cy:directed="1"/>
      <edge id="114593" label="zzz1000,zzzz952" source="2729" target="214" cy:directed="1"/>
      <edge id="114592" label="zzz1000,zzzzz25" source="2729" target="151" cy:directed="1"/>
      <edge id="114591" label="zzz1000,zzzz956" source="2729" target="210" cy:directed="1"/>
      <edge id="114590" label="zzz1000,zzz1063" source="2729" target="2666" cy:directed="1"/>
      <edge id="114589" label="zzz1000,zzz1123" source="2729" target="2606" cy:directed="1"/>
      <edge id="114588" label="zzz1000,zzz1132" source="2729" target="2597" cy:directed="1"/>
      <edge id="114587" label="zzz1000,zzz1318" source="2729" target="2411" cy:directed="1"/>
      <edge id="114586" label="zzz1000,zzz1036" source="2729" target="2693" cy:directed="1"/>
      <edge id="114585" label="zzz1000,zzz1035" source="2729" target="2694" cy:directed="1"/>
      <edge id="114584" label="zzz1000,zzz1038" source="2729" target="2691" cy:directed="1"/>
      <edge id="114583" label="zzz1000,zzzzz95" source="2729" target="81" cy:directed="1"/>
      <edge id="114582" label="zzz1000,zzzz966" source="2729" target="200" cy:directed="1"/>
      <edge id="114581" label="zzz1000,zzzz971" source="2729" target="195" cy:directed="1"/>
      <edge id="114580" label="zzz1000,zzz1313" source="2729" target="2416" cy:directed="1"/>
      <edge id="114579" label="zzz1000,zzz1004" source="2729" target="2725" cy:directed="1"/>
      <edge id="114578" label="zzz1000,zzz1253" source="2729" target="2476" cy:directed="1"/>
      <edge id="114577" label="zzz1000,zzz1295" source="2729" target="2434" cy:directed="1"/>
      <edge id="114576" label="zzz1000,zzz1300" source="2729" target="2429" cy:directed="1"/>
      <edge id="114575" label="zzz1000,zzz1263" source="2729" target="2466" cy:directed="1"/>
      <edge id="114574" label="zzz1000,zzz1267" source="2729" target="2462" cy:directed="1"/>
      <edge id="114573" label="zzz1000,zzz1277" source="2729" target="2452" cy:directed="1"/>
      <edge id="114572" label="zzz1000,zzz1282" source="2729" target="2447" cy:directed="1"/>
      <edge id="114571" label="zzz1000,zzz1286" source="2729" target="2443" cy:directed="1"/>
      <edge id="114570" label="zzz1000,zzz1308" source="2729" target="2421" cy:directed="1"/>
      <edge id="114569" label="zzz1000,zzz1288" source="2729" target="2441" cy:directed="1"/>
      <edge id="114568" label="zzz1000,zzz1110" source="2729" target="2619" cy:directed="1"/>
      <edge id="114567" label="zzz1000,zzzzz29" source="2729" target="147" cy:directed="1"/>
      <edge id="114566" label="zzz1000,zzz2375" source="2729" target="1354" cy:directed="1"/>
      <edge id="114565" label="zzz1000,zzz1037" source="2729" target="2692" cy:directed="1"/>
      <edge id="114564" label="zzz1000,zzz1039" source="2729" target="2690" cy:directed="1"/>
      <edge id="114563" label="zzz1000,zzz1285" source="2729" target="2444" cy:directed="1"/>
      <edge id="114562" label="zzz1000,zzz1287" source="2729" target="2442" cy:directed="1"/>
      <edge id="114561" label="zzz1000,zzzz954" source="2729" target="212" cy:directed="1"/>
      <edge id="114560" label="zzz1000,zzz1240" source="2729" target="2489" cy:directed="1"/>
      <edge id="114559" label="zzz1000,zzz1271" source="2729" target="2458" cy:directed="1"/>
      <edge id="114558" label="zzz1000,zzz1079" source="2729" target="2650" cy:directed="1"/>
      <edge id="114557" label="zzz1000,zzz1270" source="2729" target="2459" cy:directed="1"/>
      <edge id="114556" label="zzz1000,zzz1242" source="2729" target="2487" cy:directed="1"/>
      <edge id="114555" label="zzz1000,zzz1252" source="2729" target="2477" cy:directed="1"/>
      <edge id="114554" label="zzz1000,zzz1254" source="2729" target="2475" cy:directed="1"/>
      <edge id="114553" label="zzz1000,zzz1262" source="2729" target="2467" cy:directed="1"/>
      <edge id="114552" label="zzz1000,zzz1272" source="2729" target="2457" cy:directed="1"/>
      <edge id="114551" label="zzz1000,zzz1264" source="2729" target="2465" cy:directed="1"/>
      <edge id="114550" label="zzz1000,zzz1283" source="2729" target="2446" cy:directed="1"/>
      <edge id="114549" label="zzz1000,zzz1082" source="2729" target="2647" cy:directed="1"/>
      <edge id="114548" label="zzz1000,zzz1127" source="2729" target="2602" cy:directed="1"/>
      <edge id="114547" label="zzz1000,zzz1133" source="2729" target="2596" cy:directed="1"/>
      <edge id="114546" label="zzz1000,zzz1029" source="2729" target="2700" cy:directed="1"/>
      <edge id="114545" label="zzz1000,zzz1045" source="2729" target="2684" cy:directed="1"/>
      <edge id="114544" label="zzz1000,zzz1289" source="2729" target="2440" cy:directed="1"/>
      <edge id="114543" label="zzz1000,zzz1304" source="2729" target="2425" cy:directed="1"/>
      <edge id="114542" label="zzz1000,zzzzz27" source="2729" target="149" cy:directed="1"/>
      <edge id="114541" label="zzz1000,zzzzz28" source="2729" target="148" cy:directed="1"/>
      <edge id="114540" label="zzz1000,zzz1115" source="2729" target="2614" cy:directed="1"/>
      <edge id="114539" label="zzz1000,zzzz931" source="2729" target="235" cy:directed="1"/>
      <edge id="114538" label="zzz1000,zzz1134" source="2729" target="2595" cy:directed="1"/>
      <edge id="114537" label="zzz1000,zzz1296" source="2729" target="2433" cy:directed="1"/>
      <edge id="114536" label="zzz1000,zzz2386" source="2729" target="1343" cy:directed="1"/>
      <edge id="114535" label="zzz1000,zzz1128" source="2729" target="2601" cy:directed="1"/>
      <edge id="114534" label="zzz1000,zzz1135" source="2729" target="2594" cy:directed="1"/>
      <edge id="114533" label="zzz1000,zzz1159" source="2729" target="2570" cy:directed="1"/>
      <edge id="114532" label="zzz1000,zzz1160" source="2729" target="2569" cy:directed="1"/>
      <edge id="114531" label="zzz1000,zzz1165" source="2729" target="2564" cy:directed="1"/>
      <edge id="114530" label="zzz1000,zzz1213" source="2729" target="2516" cy:directed="1"/>
      <edge id="114529" label="zzz1000,zzz1229" source="2729" target="2500" cy:directed="1"/>
      <edge id="114528" label="zzz1000,zzz1354" source="2729" target="2375" cy:directed="1"/>
      <edge id="114527" label="zzz1000,zzzz939" source="2729" target="227" cy:directed="1"/>
      <edge id="114526" label="zzz1000,zzzz940" source="2729" target="226" cy:directed="1"/>
      <edge id="114525" label="zzz1000,zzzz941" source="2729" target="225" cy:directed="1"/>
      <edge id="114524" label="zzz1000,zzzz942" source="2729" target="224" cy:directed="1"/>
      <edge id="114523" label="zzz1000,zzzz976" source="2729" target="190" cy:directed="1"/>
      <edge id="114522" label="zzz1000,zzzz977" source="2729" target="189" cy:directed="1"/>
      <edge id="114521" label="zzz1000,zzzz962" source="2729" target="204" cy:directed="1"/>
      <edge id="114520" label="zzz1000,zzzz978" source="2729" target="188" cy:directed="1"/>
      <edge id="114519" label="zzz1000,zzzzz33" source="2729" target="143" cy:directed="1"/>
      <edge id="114518" label="zzz1000,zzz1125" source="2729" target="2604" cy:directed="1"/>
      <edge id="114517" label="zzz1000,zzz1228" source="2729" target="2501" cy:directed="1"/>
      <edge id="114516" label="zzz1000,zzz1007" source="2729" target="2722" cy:directed="1"/>
      <edge id="114515" label="zzz1000,zzz1008" source="2729" target="2721" cy:directed="1"/>
      <edge id="114514" label="zzz1000,zzz1232" source="2729" target="2497" cy:directed="1"/>
      <edge id="114513" label="zzz1000,zzzz937" source="2729" target="229" cy:directed="1"/>
      <edge id="114512" label="zzz1000,zzzz961" source="2729" target="205" cy:directed="1"/>
      <edge id="114511" label="zzz1000,zzz1101" source="2729" target="2628" cy:directed="1"/>
      <edge id="114510" label="zzz1000,zzz1319" source="2729" target="2410" cy:directed="1"/>
      <edge id="114509" label="zzz1000,zzz1113" source="2729" target="2616" cy:directed="1"/>
      <edge id="114508" label="zzz1000,zzz1161" source="2729" target="2568" cy:directed="1"/>
      <edge id="114507" label="zzz1000,zzzz934" source="2729" target="232" cy:directed="1"/>
      <edge id="114506" label="zzz1000,zzzz935" source="2729" target="231" cy:directed="1"/>
      <edge id="114505" label="zzz1000,zzzzz37" source="2729" target="139" cy:directed="1"/>
      <edge id="114504" label="zzz1000,zzz1139" source="2729" target="2590" cy:directed="1"/>
      <edge id="114503" label="zzz1000,zzz2370" source="2729" target="1359" cy:directed="1"/>
      <edge id="114502" label="zzz1000,zzz1114" source="2729" target="2615" cy:directed="1"/>
      <edge id="114501" label="zzz1000,zzz1136" source="2729" target="2593" cy:directed="1"/>
      <edge id="114500" label="zzz1000,zzz1158" source="2729" target="2571" cy:directed="1"/>
      <edge id="114499" label="zzz1000,zzz1361" source="2729" target="2368" cy:directed="1"/>
      <edge id="114498" label="zzz1000,zzz1363" source="2729" target="2366" cy:directed="1"/>
      <edge id="114497" label="zzz1000,zzzz975" source="2729" target="191" cy:directed="1"/>
      <edge id="114496" label="zzz1000,zzzzz80" source="2729" target="96" cy:directed="1"/>
      <edge id="114495" label="zzz1000,zzz1104" source="2729" target="2625" cy:directed="1"/>
      <edge id="114494" label="zzz1000,zzz1118" source="2729" target="2611" cy:directed="1"/>
      <edge id="114493" label="zzz1000,zzzzzz5" source="2729" target="71" cy:directed="1"/>
      <edge id="114492" label="zzz1000,zzz1102" source="2729" target="2627" cy:directed="1"/>
      <edge id="114491" label="zzz1000,zzz1364" source="2729" target="2365" cy:directed="1"/>
      <edge id="114490" label="zzz1000,zzz1089" source="2729" target="2640" cy:directed="1"/>
      <edge id="114489" label="zzz1000,zzz1091" source="2729" target="2638" cy:directed="1"/>
      <edge id="114488" label="zzz1000,zzz1096" source="2729" target="2633" cy:directed="1"/>
      <edge id="114487" label="zzz1000,zzz1116" source="2729" target="2613" cy:directed="1"/>
      <edge id="114486" label="zzz1000,zzz1366" source="2729" target="2363" cy:directed="1"/>
      <edge id="114485" label="zzz1000,zzz1097" source="2729" target="2632" cy:directed="1"/>
      <edge id="114484" label="zzz1000,zzz1117" source="2729" target="2612" cy:directed="1"/>
      <edge id="114483" label="zzz1000,zzz1092" source="2729" target="2637" cy:directed="1"/>
      <edge id="114482" label="zzz1000,zzzzzz0" source="2729" target="76" cy:directed="1"/>
      <edge id="114481" label="zzz1000,zzz1314" source="2729" target="2415" cy:directed="1"/>
      <edge id="114480" label="zzz1000,zzz1111" source="2729" target="2618" cy:directed="1"/>
      <edge id="114479" label="zzz1000,zzz1098" source="2729" target="2631" cy:directed="1"/>
      <edge id="114478" label="zzz1000,zzz1138" source="2729" target="2591" cy:directed="1"/>
      <edge id="114477" label="zzz1000,zzzz965" source="2729" target="201" cy:directed="1"/>
      <edge id="114476" label="zzz1000,zzzz991" source="2729" target="175" cy:directed="1"/>
      <edge id="114475" label="zzz1000,zzz1100" source="2729" target="2629" cy:directed="1"/>
      <edge id="114474" label="zzz1000,zzz1094" source="2729" target="2635" cy:directed="1"/>
      <edge id="114473" label="zzz1000,zzzz983" source="2729" target="183" cy:directed="1"/>
      <edge id="114472" label="zzz1000,zzzzz39" source="2729" target="137" cy:directed="1"/>
      <edge id="114471" label="zzz1000,zzz1106" source="2729" target="2623" cy:directed="1"/>
      <edge id="114470" label="zzz1000,zzz1217" source="2729" target="2512" cy:directed="1"/>
      <edge id="114469" label="zzz1000,zzzz963" source="2729" target="203" cy:directed="1"/>
      <edge id="114468" label="zzz1000,zzz1021" source="2729" target="2708" cy:directed="1"/>
      <edge id="114467" label="zzz1000,zzz1141" source="2729" target="2588" cy:directed="1"/>
      <edge id="114466" label="zzz1000,zzzz964" source="2729" target="202" cy:directed="1"/>
      <edge id="114465" label="zzz1000,zzz1247" source="2729" target="2482" cy:directed="1"/>
      <edge id="114464" label="zzz1000,zzz1278" source="2729" target="2451" cy:directed="1"/>
      <edge id="114463" label="zzz1000,zzz1041" source="2729" target="2688" cy:directed="1"/>
      <edge id="114462" label="zzz1000,zzzz973" source="2729" target="193" cy:directed="1"/>
      <edge id="114461" label="zzz1000,zzz1043" source="2729" target="2686" cy:directed="1"/>
      <edge id="114460" label="zzz1000,zzz1067" source="2729" target="2662" cy:directed="1"/>
      <edge id="114459" label="zzz1000,zzz1226" source="2729" target="2503" cy:directed="1"/>
      <edge id="114458" label="zzz1000,zzz1340" source="2729" target="2389" cy:directed="1"/>
      <edge id="114457" label="zzz1000,zzz1069" source="2729" target="2660" cy:directed="1"/>
      <edge id="114456" label="zzz1000,zzz1070" source="2729" target="2659" cy:directed="1"/>
      <edge id="114455" label="zzz1000,zzz1119" source="2729" target="2610" cy:directed="1"/>
      <edge id="114454" label="zzz1000,zzzzz32" source="2729" target="144" cy:directed="1"/>
      <edge id="114453" label="zzz1000,zzz1022" source="2729" target="2707" cy:directed="1"/>
      <edge id="114452" label="zzz1000,zzz1061" source="2729" target="2668" cy:directed="1"/>
      <edge id="114451" label="zzz1000,zzz1062" source="2729" target="2667" cy:directed="1"/>
      <edge id="114450" label="zzz1000,zzzzz12" source="2729" target="164" cy:directed="1"/>
      <edge id="114449" label="zzz1000,zzz1024" source="2729" target="2705" cy:directed="1"/>
      <edge id="114448" label="zzz1000,zzz1223" source="2729" target="2506" cy:directed="1"/>
      <edge id="114447" label="zzz1000,zzzzz23" source="2729" target="153" cy:directed="1"/>
      <edge id="114446" label="zzz1000,zzz1028" source="2729" target="2701" cy:directed="1"/>
      <edge id="114445" label="zzz1000,zzz1073" source="2729" target="2656" cy:directed="1"/>
      <edge id="114444" label="zzz1000,zzz1150" source="2729" target="2579" cy:directed="1"/>
      <edge id="114443" label="zzz1000,zzzz946" source="2729" target="220" cy:directed="1"/>
      <edge id="114442" label="zzz1000,zzz1012" source="2729" target="2717" cy:directed="1"/>
      <edge id="114441" label="zzz1000,zzz1025" source="2729" target="2704" cy:directed="1"/>
      <edge id="114440" label="zzz1000,zzz1120" source="2729" target="2609" cy:directed="1"/>
      <edge id="114439" label="zzz1000,zzz1329" source="2729" target="2400" cy:directed="1"/>
      <edge id="114438" label="zzz1000,zzzzz22" source="2729" target="154" cy:directed="1"/>
      <edge id="114437" label="zzz1000,zzzz988" source="2729" target="178" cy:directed="1"/>
      <edge id="114436" label="zzz1000,zzzz989" source="2729" target="177" cy:directed="1"/>
      <edge id="114435" label="zzz1000,zzzzz30" source="2729" target="146" cy:directed="1"/>
      <edge id="114434" label="zzz1000,zzz1095" source="2729" target="2634" cy:directed="1"/>
      <edge id="114433" label="zzz1000,zzz1177" source="2729" target="2552" cy:directed="1"/>
      <edge id="114432" label="zzz1000,zzzz970" source="2729" target="196" cy:directed="1"/>
      <edge id="114431" label="zzz1000,zzzz987" source="2729" target="179" cy:directed="1"/>
      <edge id="114430" label="zzz1000,zzzzz35" source="2729" target="141" cy:directed="1"/>
      <edge id="114429" label="zzz1000,zzz1084" source="2729" target="2645" cy:directed="1"/>
      <edge id="114428" label="zzz1000,zzz1099" source="2729" target="2630" cy:directed="1"/>
      <edge id="114427" label="zzz1000,zzz1178" source="2729" target="2551" cy:directed="1"/>
      <edge id="114426" label="zzz1000,zzzz100" source="2729" target="1066" cy:directed="1"/>
      <edge id="114425" label="zzz1000,zzzz984" source="2729" target="182" cy:directed="1"/>
      <edge id="114424" label="zzz1000,zzzz985" source="2729" target="181" cy:directed="1"/>
      <edge id="114423" label="zzz1000,zzzz986" source="2729" target="180" cy:directed="1"/>
      <edge id="114422" label="zzz1000,zzzzz36" source="2729" target="140" cy:directed="1"/>
      <edge id="114421" label="zzz1000,zzz1059" source="2729" target="2670" cy:directed="1"/>
      <edge id="114420" label="zzz1000,zzz1074" source="2729" target="2655" cy:directed="1"/>
      <edge id="114419" label="zzz1000,zzz1048" source="2729" target="2681" cy:directed="1"/>
      <edge id="114418" label="zzz1000,zzz1140" source="2729" target="2589" cy:directed="1"/>
      <edge id="114417" label="zzz1000,zzzz969" source="2729" target="197" cy:directed="1"/>
      <edge id="114416" label="zzz1000,zzzzz81" source="2729" target="95" cy:directed="1"/>
      <edge id="114415" label="zzz1000,zzz1026" source="2729" target="2703" cy:directed="1"/>
      <edge id="114414" label="zzz1000,zzzz949" source="2729" target="217" cy:directed="1"/>
      <edge id="114413" label="zzz1000,zzzz957" source="2729" target="209" cy:directed="1"/>
      <edge id="114412" label="zzz1000,zzzzz34" source="2729" target="142" cy:directed="1"/>
      <edge id="114411" label="zzz1000,zzz1071" source="2729" target="2658" cy:directed="1"/>
      <edge id="114410" label="zzz1000,zzz1124" source="2729" target="2605" cy:directed="1"/>
      <edge id="114409" label="zzz1000,zzz1227" source="2729" target="2502" cy:directed="1"/>
      <edge id="114408" label="zzz1000,zzzz990" source="2729" target="176" cy:directed="1"/>
      <edge id="114407" label="zzz1000,zzz1193" source="2729" target="2536" cy:directed="1"/>
      <edge id="114406" label="zzz1000,zzz1192" source="2729" target="2537" cy:directed="1"/>
      <edge id="114405" label="zzz1000,zzz1196" source="2729" target="2533" cy:directed="1"/>
      <edge id="114404" label="zzz1000,zzz1336" source="2729" target="2393" cy:directed="1"/>
      <edge id="114403" label="zzz1000,zzz1362" source="2729" target="2367" cy:directed="1"/>
      <edge id="114402" label="zzz1000,zzzz972" source="2729" target="194" cy:directed="1"/>
      <edge id="114401" label="zzz1000,zzz1137" source="2729" target="2592" cy:directed="1"/>
      <edge id="114400" label="zzz1000,zzzzzz6" source="2729" target="70" cy:directed="1"/>
      <edge id="114399" label="zzz1000,zzz1337" source="2729" target="2392" cy:directed="1"/>
      <edge id="114398" label="zzz1000,zzzzz13" source="2729" target="163" cy:directed="1"/>
      <edge id="114397" label="zzz1000,zzzzz16" source="2729" target="160" cy:directed="1"/>
      <edge id="114396" label="zzz1000,zzz1023" source="2729" target="2706" cy:directed="1"/>
      <edge id="114395" label="zzz1000,zzz1195" source="2729" target="2534" cy:directed="1"/>
      <edge id="114394" label="zzz1000,zzz1328" source="2729" target="2401" cy:directed="1"/>
      <edge id="114393" label="zzz1000,zzzz945" source="2729" target="221" cy:directed="1"/>
      <edge id="114392" label="zzz1000,zzzz950" source="2729" target="216" cy:directed="1"/>
      <edge id="114391" label="zzz1000,zzzzz26" source="2729" target="150" cy:directed="1"/>
      <edge id="114390" label="zzz1000,zzz1144" source="2729" target="2585" cy:directed="1"/>
      <edge id="114389" label="zzz1000,zzz1145" source="2729" target="2584" cy:directed="1"/>
      <edge id="114388" label="zzz1000,zzz1146" source="2729" target="2583" cy:directed="1"/>
      <edge id="114387" label="zzz1000,zzz1147" source="2729" target="2582" cy:directed="1"/>
      <edge id="114386" label="zzz1000,zzz1194" source="2729" target="2535" cy:directed="1"/>
      <edge id="114385" label="zzz1000,zzz1197" source="2729" target="2532" cy:directed="1"/>
      <edge id="114384" label="zzz1000,zzz1234" source="2729" target="2495" cy:directed="1"/>
      <edge id="114383" label="zzz1000,zzz1348" source="2729" target="2381" cy:directed="1"/>
      <edge id="114382" label="zzz1000,zzz1034" source="2729" target="2695" cy:directed="1"/>
      <edge id="114381" label="zzz1000,zzz1060" source="2729" target="2669" cy:directed="1"/>
      <edge id="114380" label="zzz1000,zzzz938" source="2729" target="228" cy:directed="1"/>
      <edge id="114379" label="zzz1000,zzz1027" source="2729" target="2702" cy:directed="1"/>
      <edge id="114378" label="zzz1000,zzz1077" source="2729" target="2652" cy:directed="1"/>
      <edge id="114377" label="zzz1000,zzz1326" source="2729" target="2403" cy:directed="1"/>
      <edge id="114376" label="zzz1000,zzzzz21" source="2729" target="155" cy:directed="1"/>
      <edge id="114375" label="zzz1000,zzz1056" source="2729" target="2673" cy:directed="1"/>
      <edge id="114374" label="zzz1000,zzz1365" source="2729" target="2364" cy:directed="1"/>
      <edge id="114373" label="zzz1000,zzz1085" source="2729" target="2644" cy:directed="1"/>
      <edge id="114372" label="zzz1000,zzz1057" source="2729" target="2672" cy:directed="1"/>
      <edge id="114371" label="zzz1000,zzz1083" source="2729" target="2646" cy:directed="1"/>
      <edge id="114370" label="zzz1000,zzz1088" source="2729" target="2641" cy:directed="1"/>
      <edge id="114369" label="zzz1000,zzz1107" source="2729" target="2622" cy:directed="1"/>
      <edge id="114368" label="zzz1000,zzz1323" source="2729" target="2406" cy:directed="1"/>
      <edge id="114367" label="zzz1000,zzz1334" source="2729" target="2395" cy:directed="1"/>
      <edge id="114366" label="zzz1000,zzz1219" source="2729" target="2510" cy:directed="1"/>
      <edge id="114365" label="zzz1000,zzz1324" source="2729" target="2405" cy:directed="1"/>
      <edge id="114364" label="zzz1000,zzz1356" source="2729" target="2373" cy:directed="1"/>
      <edge id="114363" label="zzz1000,zzzzz93" source="2729" target="83" cy:directed="1"/>
      <edge id="114362" label="zzz1000,zzz1064" source="2729" target="2665" cy:directed="1"/>
      <edge id="114361" label="zzz1000,zzz1002" source="2729" target="2727" cy:directed="1"/>
      <edge id="114360" label="zzz1000,zzzz981" source="2729" target="185" cy:directed="1"/>
      <edge id="114359" label="zzz1000,zzz1019" source="2729" target="2710" cy:directed="1"/>
      <edge id="114358" label="zzz1000,zzz1220" source="2729" target="2509" cy:directed="1"/>
      <edge id="114357" label="zzz1000,zzzz979" source="2729" target="187" cy:directed="1"/>
      <edge id="114356" label="zzz1000,zzzzz31" source="2729" target="145" cy:directed="1"/>
      <edge id="114355" label="zzz1000,zzz1046" source="2729" target="2683" cy:directed="1"/>
      <edge id="114354" label="zzz1000,zzz1076" source="2729" target="2653" cy:directed="1"/>
      <edge id="114353" label="zzz1000,zzzz994" source="2729" target="172" cy:directed="1"/>
      <edge id="114352" label="zzz1000,zzz1020" source="2729" target="2709" cy:directed="1"/>
      <edge id="114351" label="zzz1000,zzz1055" source="2729" target="2674" cy:directed="1"/>
      <edge id="114350" label="zzz1000,zzz1274" source="2729" target="2455" cy:directed="1"/>
      <edge id="114349" label="zzz1000,zzz1292" source="2729" target="2437" cy:directed="1"/>
      <edge id="114348" label="zzz1000,zzz1293" source="2729" target="2436" cy:directed="1"/>
      <edge id="114347" label="zzz1000,zzz1349" source="2729" target="2380" cy:directed="1"/>
      <edge id="114346" label="zzz1000,zzz1355" source="2729" target="2374" cy:directed="1"/>
      <edge id="114345" label="zzz1000,zzzz980" source="2729" target="186" cy:directed="1"/>
      <edge id="114344" label="zzz1000,zzzz982" source="2729" target="184" cy:directed="1"/>
      <edge id="114343" label="zzz1000,zzz1244" source="2729" target="2485" cy:directed="1"/>
      <edge id="114342" label="zzz1000,zzz1248" source="2729" target="2481" cy:directed="1"/>
      <edge id="114341" label="zzz1000,zzz1251" source="2729" target="2478" cy:directed="1"/>
      <edge id="114340" label="zzz1000,zzz1257" source="2729" target="2472" cy:directed="1"/>
      <edge id="114339" label="zzz1000,zzz1261" source="2729" target="2468" cy:directed="1"/>
      <edge id="114338" label="zzz1000,zzz1273" source="2729" target="2456" cy:directed="1"/>
      <edge id="114337" label="zzz1000,zzz1280" source="2729" target="2449" cy:directed="1"/>
      <edge id="114336" label="zzz1000,zzz1307" source="2729" target="2422" cy:directed="1"/>
      <edge id="114335" label="zzz1000,zzz1030" source="2729" target="2699" cy:directed="1"/>
      <edge id="114334" label="zzz1000,zzz1031" source="2729" target="2698" cy:directed="1"/>
      <edge id="114333" label="zzz1000,zzz1312" source="2729" target="2417" cy:directed="1"/>
      <edge id="114332" label="zzz1000,zzz1316" source="2729" target="2413" cy:directed="1"/>
      <edge id="114331" label="zzz1000,zzzz960" source="2729" target="206" cy:directed="1"/>
      <edge id="114330" label="zzz1000,zzz1236" source="2729" target="2493" cy:directed="1"/>
      <edge id="114329" label="zzz1000,zzz1279" source="2729" target="2450" cy:directed="1"/>
      <edge id="114328" label="zzz1000,zzz1290" source="2729" target="2439" cy:directed="1"/>
      <edge id="114327" label="zzz1000,zzz1297" source="2729" target="2432" cy:directed="1"/>
      <edge id="114326" label="zzz1000,zzz1310" source="2729" target="2419" cy:directed="1"/>
      <edge id="114325" label="zzz1000,zzzz933" source="2729" target="233" cy:directed="1"/>
      <edge id="114324" label="zzz1000,zzz1003" source="2729" target="2726" cy:directed="1"/>
      <edge id="114323" label="zzz1000,zzz1142" source="2729" target="2587" cy:directed="1"/>
      <edge id="114322" label="zzz1000,zzz1143" source="2729" target="2586" cy:directed="1"/>
      <edge id="114321" label="zzz1000,zzz1148" source="2729" target="2581" cy:directed="1"/>
      <edge id="114320" label="zzz1000,zzz1149" source="2729" target="2580" cy:directed="1"/>
      <edge id="114319" label="zzz1000,zzz1152" source="2729" target="2577" cy:directed="1"/>
      <edge id="114318" label="zzz1000,zzz1154" source="2729" target="2575" cy:directed="1"/>
      <edge id="114317" label="zzz1000,zzz1299" source="2729" target="2430" cy:directed="1"/>
      <edge id="114316" label="zzz1000,zzz1321" source="2729" target="2408" cy:directed="1"/>
      <edge id="114315" label="zzz1000,zzzz998" source="2729" target="168" cy:directed="1"/>
      <edge id="114314" label="zzz1000,zzzzz18" source="2729" target="158" cy:directed="1"/>
      <edge id="114313" label="zzz1000,zzz1005" source="2729" target="2724" cy:directed="1"/>
      <edge id="114312" label="zzz1000,zzz1153" source="2729" target="2576" cy:directed="1"/>
      <edge id="114311" label="zzz1000,zzz1235" source="2729" target="2494" cy:directed="1"/>
      <edge id="114310" label="zzz1000,zzz1237" source="2729" target="2492" cy:directed="1"/>
      <edge id="114309" label="zzz1000,zzz1245" source="2729" target="2484" cy:directed="1"/>
      <edge id="114308" label="zzz1000,zzz1249" source="2729" target="2480" cy:directed="1"/>
      <edge id="114307" label="zzz1000,zzz1255" source="2729" target="2474" cy:directed="1"/>
      <edge id="114306" label="zzz1000,zzz1258" source="2729" target="2471" cy:directed="1"/>
      <edge id="114305" label="zzz1000,zzz1265" source="2729" target="2464" cy:directed="1"/>
      <edge id="114304" label="zzz1000,zzz1268" source="2729" target="2461" cy:directed="1"/>
      <edge id="114303" label="zzz1000,zzz1275" source="2729" target="2454" cy:directed="1"/>
      <edge id="114302" label="zzz1000,zzz1302" source="2729" target="2427" cy:directed="1"/>
      <edge id="114301" label="zzz1000,zzz1309" source="2729" target="2420" cy:directed="1"/>
      <edge id="114300" label="zzz1000,zzz1311" source="2729" target="2418" cy:directed="1"/>
      <edge id="114299" label="zzz1000,zzz1303" source="2729" target="2426" cy:directed="1"/>
      <edge id="114298" label="zzz1000,zzz1360" source="2729" target="2369" cy:directed="1"/>
      <edge id="114297" label="zzz1000,zzz1241" source="2729" target="2488" cy:directed="1"/>
      <edge id="114296" label="zzz1000,zzz1246" source="2729" target="2483" cy:directed="1"/>
      <edge id="114295" label="zzz1000,zzz1256" source="2729" target="2473" cy:directed="1"/>
      <edge id="114294" label="zzz1000,zzz1260" source="2729" target="2469" cy:directed="1"/>
      <edge id="114293" label="zzz1000,zzz1276" source="2729" target="2453" cy:directed="1"/>
      <edge id="114292" label="zzz1000,zzz1281" source="2729" target="2448" cy:directed="1"/>
      <edge id="114291" label="zzz1000,zzz1284" source="2729" target="2445" cy:directed="1"/>
      <edge id="114290" label="zzz1000,zzz1291" source="2729" target="2438" cy:directed="1"/>
      <edge id="114289" label="zzz1000,zzz1306" source="2729" target="2423" cy:directed="1"/>
      <edge id="114288" label="zzz1000,zzz1345" source="2729" target="2384" cy:directed="1"/>
      <edge id="114287" label="zzz1000,zzz1347" source="2729" target="2382" cy:directed="1"/>
      <edge id="114286" label="zzz1000,zzz1350" source="2729" target="2379" cy:directed="1"/>
      <edge id="114285" label="zzz1000,zzzz947" source="2729" target="219" cy:directed="1"/>
      <edge id="114284" label="zzz1000,zzzz948" source="2729" target="218" cy:directed="1"/>
      <edge id="114283" label="zzz1000,zzz1006" source="2729" target="2723" cy:directed="1"/>
      <edge id="114282" label="zzz1000,zzz1103" source="2729" target="2626" cy:directed="1"/>
      <edge id="114281" label="zzz1000,zzz1108" source="2729" target="2621" cy:directed="1"/>
      <edge id="114280" label="zzz1000,zzz1238" source="2729" target="2491" cy:directed="1"/>
      <edge id="114279" label="zzz1000,zzz1298" source="2729" target="2431" cy:directed="1"/>
      <edge id="114278" label="zzz1000,zzz1305" source="2729" target="2424" cy:directed="1"/>
      <edge id="114277" label="zzz1000,zzz1344" source="2729" target="2385" cy:directed="1"/>
      <edge id="114276" label="zzz1000,zzz1346" source="2729" target="2383" cy:directed="1"/>
      <edge id="114275" label="zzz1000,zzz1351" source="2729" target="2378" cy:directed="1"/>
      <edge id="114274" label="zzz1000,zzzz967" source="2729" target="199" cy:directed="1"/>
      <edge id="114273" label="zzz1000,zzz1105" source="2729" target="2624" cy:directed="1"/>
      <edge id="114272" label="zzz1000,zzz1341" source="2729" target="2388" cy:directed="1"/>
      <edge id="114271" label="zzz1000,zzz1342" source="2729" target="2387" cy:directed="1"/>
      <edge id="114270" label="zzz1000,zzz1352" source="2729" target="2377" cy:directed="1"/>
      <edge id="114269" label="zzz1000,zzz2390" source="2729" target="1339" cy:directed="1"/>
      <edge id="114268" label="zzz1000,zzzzz38" source="2729" target="138" cy:directed="1"/>
      <edge id="114267" label="zzz1000,zzzzz84" source="2729" target="92" cy:directed="1"/>
      <edge id="114266" label="zzz1000,zzz1269" source="2729" target="2460" cy:directed="1"/>
      <edge id="114265" label="zzz1000,zzz1301" source="2729" target="2428" cy:directed="1"/>
      <edge id="114264" label="zzz1000,zzz1343" source="2729" target="2386" cy:directed="1"/>
      <edge id="114263" label="zzz1000,zzz1358" source="2729" target="2371" cy:directed="1"/>
      <edge id="114262" label="zzz1000,zzz1359" source="2729" target="2370" cy:directed="1"/>
      <edge id="114261" label="zzz1000,zzzzz24" source="2729" target="152" cy:directed="1"/>
      <edge id="114260" label="zzz1000,zzzz932" source="2729" target="234" cy:directed="1"/>
      <edge id="114259" label="zzz1000,zzz1049" source="2729" target="2680" cy:directed="1"/>
      <edge id="114258" label="zzz1000,zzz1109" source="2729" target="2620" cy:directed="1"/>
      <edge id="114257" label="zzz1000,zzzz958" source="2729" target="208" cy:directed="1"/>
      <edge id="114256" label="zzz1000,zzz1212" source="2729" target="2517" cy:directed="1"/>
      <edge id="114255" label="zzz1000,zzz1032" source="2729" target="2697" cy:directed="1"/>
      <edge id="114254" label="zzz1000,zzz1047" source="2729" target="2682" cy:directed="1"/>
      <edge id="114253" label="zzz1000,zzz1044" source="2729" target="2685" cy:directed="1"/>
      <edge id="114252" label="zzz1000,zzz1129" source="2729" target="2600" cy:directed="1"/>
      <edge id="114251" label="zzz1000,zzzzz91" source="2729" target="85" cy:directed="1"/>
      <edge id="114250" label="zzz1000,zzz1054" source="2729" target="2675" cy:directed="1"/>
      <edge id="114249" label="zzz1000,zzzz936" source="2729" target="230" cy:directed="1"/>
      <edge id="114248" label="zzz1000,zzzz993" source="2729" target="173" cy:directed="1"/>
      <edge id="114247" label="zzz1000,zzz1367" source="2729" target="2362" cy:directed="1"/>
      <edge id="114246" label="zzz1000,zzzzzz4" source="2729" target="72" cy:directed="1"/>
      <edge id="114245" label="zzz1000,zzz1018" source="2729" target="2711" cy:directed="1"/>
      <edge id="114244" label="zzz1000,zzzz968" source="2729" target="198" cy:directed="1"/>
      <edge id="114243" label="zzz1000,zzzz992" source="2729" target="174" cy:directed="1"/>
      <edge id="114242" label="zzz1000,zzz1320" source="2729" target="2409" cy:directed="1"/>
      <edge id="114241" label="zzz1000,zzz1017" source="2729" target="2712" cy:directed="1"/>
      <edge id="114240" label="zzz1000,zzz1330" source="2729" target="2399" cy:directed="1"/>
      <edge id="114239" label="zzz1000,zzz1335" source="2729" target="2394" cy:directed="1"/>
      <edge id="114238" label="zzz1000,zzz1016" source="2729" target="2713" cy:directed="1"/>
      <edge id="114237" label="zzz1000,zzz1325" source="2729" target="2404" cy:directed="1"/>
      <edge id="114236" label="zzz1000,zzz1339" source="2729" target="2390" cy:directed="1"/>
      <edge id="114235" label="zzz1000,zzzz997" source="2729" target="169" cy:directed="1"/>
      <edge id="114234" label="zzz1000,zzz1090" source="2729" target="2639" cy:directed="1"/>
      <edge id="114233" label="zzz1001,zzzz999" source="2728" target="167" cy:directed="1"/>
      <edge id="114232" label="zzz1001,zzz1208" source="2728" target="2521" cy:directed="1"/>
      <edge id="114231" label="zzz1001,zzz1009" source="2728" target="2720" cy:directed="1"/>
      <edge id="114230" label="zzz1001,zzz1086" source="2728" target="2643" cy:directed="1"/>
      <edge id="114229" label="zzz1001,zzzzz11" source="2728" target="165" cy:directed="1"/>
      <edge id="114228" label="zzz1001,zzz1333" source="2728" target="2396" cy:directed="1"/>
      <edge id="114227" label="zzz1001,zzz1010" source="2728" target="2719" cy:directed="1"/>
      <edge id="114226" label="zzz1001,zzz1042" source="2728" target="2687" cy:directed="1"/>
      <edge id="114225" label="zzz1001,zzz1066" source="2728" target="2663" cy:directed="1"/>
      <edge id="114224" label="zzz1001,zzz1040" source="2728" target="2689" cy:directed="1"/>
      <edge id="114223" label="zzz1001,zzz1206" source="2728" target="2523" cy:directed="1"/>
      <edge id="114222" label="zzz1001,zzz1233" source="2728" target="2496" cy:directed="1"/>
      <edge id="114221" label="zzz1001,zzz1315" source="2728" target="2414" cy:directed="1"/>
      <edge id="114220" label="zzz1001,zzz1331" source="2728" target="2398" cy:directed="1"/>
      <edge id="114219" label="zzz1001,zzz1322" source="2728" target="2407" cy:directed="1"/>
      <edge id="114218" label="zzz1001,zzz1011" source="2728" target="2718" cy:directed="1"/>
      <edge id="114217" label="zzz1001,zzz1215" source="2728" target="2514" cy:directed="1"/>
      <edge id="114216" label="zzz1001,zzz1080" source="2728" target="2649" cy:directed="1"/>
      <edge id="114215" label="zzz1001,zzz1081" source="2728" target="2648" cy:directed="1"/>
      <edge id="114214" label="zzz1001,zzzz951" source="2728" target="215" cy:directed="1"/>
      <edge id="114213" label="zzz1001,zzz1033" source="2728" target="2696" cy:directed="1"/>
      <edge id="114212" label="zzz1001,zzz1087" source="2728" target="2642" cy:directed="1"/>
      <edge id="114211" label="zzz1001,zzzz953" source="2728" target="213" cy:directed="1"/>
      <edge id="114210" label="zzz1001,zzz1317" source="2728" target="2412" cy:directed="1"/>
      <edge id="114209" label="zzz1001,zzzz955" source="2728" target="211" cy:directed="1"/>
      <edge id="114208" label="zzz1001,zzzz952" source="2728" target="214" cy:directed="1"/>
      <edge id="114207" label="zzz1001,zzzzz25" source="2728" target="151" cy:directed="1"/>
      <edge id="114206" label="zzz1001,zzzz956" source="2728" target="210" cy:directed="1"/>
      <edge id="114205" label="zzz1001,zzz1063" source="2728" target="2666" cy:directed="1"/>
      <edge id="114204" label="zzz1001,zzz1123" source="2728" target="2606" cy:directed="1"/>
      <edge id="114203" label="zzz1001,zzz1132" source="2728" target="2597" cy:directed="1"/>
      <edge id="114202" label="zzz1001,zzz1318" source="2728" target="2411" cy:directed="1"/>
      <edge id="114201" label="zzz1001,zzz1036" source="2728" target="2693" cy:directed="1"/>
      <edge id="114200" label="zzz1001,zzz1035" source="2728" target="2694" cy:directed="1"/>
      <edge id="114199" label="zzz1001,zzz1038" source="2728" target="2691" cy:directed="1"/>
      <edge id="114198" label="zzz1001,zzzzz95" source="2728" target="81" cy:directed="1"/>
      <edge id="114197" label="zzz1001,zzzz966" source="2728" target="200" cy:directed="1"/>
      <edge id="114196" label="zzz1001,zzzz971" source="2728" target="195" cy:directed="1"/>
      <edge id="114195" label="zzz1001,zzz1313" source="2728" target="2416" cy:directed="1"/>
      <edge id="114194" label="zzz1001,zzz1004" source="2728" target="2725" cy:directed="1"/>
      <edge id="114193" label="zzz1001,zzz1253" source="2728" target="2476" cy:directed="1"/>
      <edge id="114192" label="zzz1001,zzz1295" source="2728" target="2434" cy:directed="1"/>
      <edge id="114191" label="zzz1001,zzz1300" source="2728" target="2429" cy:directed="1"/>
      <edge id="114190" label="zzz1001,zzz1263" source="2728" target="2466" cy:directed="1"/>
      <edge id="114189" label="zzz1001,zzz1267" source="2728" target="2462" cy:directed="1"/>
      <edge id="114188" label="zzz1001,zzz1277" source="2728" target="2452" cy:directed="1"/>
      <edge id="114187" label="zzz1001,zzz1282" source="2728" target="2447" cy:directed="1"/>
      <edge id="114186" label="zzz1001,zzz1286" source="2728" target="2443" cy:directed="1"/>
      <edge id="114185" label="zzz1001,zzz1308" source="2728" target="2421" cy:directed="1"/>
      <edge id="114184" label="zzz1001,zzz1288" source="2728" target="2441" cy:directed="1"/>
      <edge id="114183" label="zzz1001,zzz1110" source="2728" target="2619" cy:directed="1"/>
      <edge id="114182" label="zzz1001,zzzzz29" source="2728" target="147" cy:directed="1"/>
      <edge id="114181" label="zzz1001,zzz2375" source="2728" target="1354" cy:directed="1"/>
      <edge id="114180" label="zzz1001,zzz1037" source="2728" target="2692" cy:directed="1"/>
      <edge id="114179" label="zzz1001,zzz1039" source="2728" target="2690" cy:directed="1"/>
      <edge id="114178" label="zzz1001,zzz1285" source="2728" target="2444" cy:directed="1"/>
      <edge id="114177" label="zzz1001,zzz1287" source="2728" target="2442" cy:directed="1"/>
      <edge id="114176" label="zzz1001,zzzz954" source="2728" target="212" cy:directed="1"/>
      <edge id="114175" label="zzz1001,zzz1240" source="2728" target="2489" cy:directed="1"/>
      <edge id="114174" label="zzz1001,zzz1271" source="2728" target="2458" cy:directed="1"/>
      <edge id="114173" label="zzz1001,zzz1079" source="2728" target="2650" cy:directed="1"/>
      <edge id="114172" label="zzz1001,zzz1270" source="2728" target="2459" cy:directed="1"/>
      <edge id="114171" label="zzz1001,zzz1242" source="2728" target="2487" cy:directed="1"/>
      <edge id="114170" label="zzz1001,zzz1252" source="2728" target="2477" cy:directed="1"/>
      <edge id="114169" label="zzz1001,zzz1254" source="2728" target="2475" cy:directed="1"/>
      <edge id="114168" label="zzz1001,zzz1262" source="2728" target="2467" cy:directed="1"/>
      <edge id="114167" label="zzz1001,zzz1272" source="2728" target="2457" cy:directed="1"/>
      <edge id="114166" label="zzz1001,zzz1264" source="2728" target="2465" cy:directed="1"/>
      <edge id="114165" label="zzz1001,zzz1283" source="2728" target="2446" cy:directed="1"/>
      <edge id="114164" label="zzz1001,zzz1082" source="2728" target="2647" cy:directed="1"/>
      <edge id="114163" label="zzz1001,zzz1127" source="2728" target="2602" cy:directed="1"/>
      <edge id="114162" label="zzz1001,zzz1133" source="2728" target="2596" cy:directed="1"/>
      <edge id="114161" label="zzz1001,zzz1029" source="2728" target="2700" cy:directed="1"/>
      <edge id="114160" label="zzz1001,zzz1045" source="2728" target="2684" cy:directed="1"/>
      <edge id="114159" label="zzz1001,zzz1289" source="2728" target="2440" cy:directed="1"/>
      <edge id="114158" label="zzz1001,zzz1304" source="2728" target="2425" cy:directed="1"/>
      <edge id="114157" label="zzz1001,zzzzz27" source="2728" target="149" cy:directed="1"/>
      <edge id="114156" label="zzz1001,zzzzz28" source="2728" target="148" cy:directed="1"/>
      <edge id="114155" label="zzz1001,zzz1115" source="2728" target="2614" cy:directed="1"/>
      <edge id="114154" label="zzz1001,zzzz931" source="2728" target="235" cy:directed="1"/>
      <edge id="114153" label="zzz1001,zzz1134" source="2728" target="2595" cy:directed="1"/>
      <edge id="114152" label="zzz1001,zzz1296" source="2728" target="2433" cy:directed="1"/>
      <edge id="114151" label="zzz1001,zzz2386" source="2728" target="1343" cy:directed="1"/>
      <edge id="114150" label="zzz1001,zzz1128" source="2728" target="2601" cy:directed="1"/>
      <edge id="114149" label="zzz1001,zzz1135" source="2728" target="2594" cy:directed="1"/>
      <edge id="114148" label="zzz1001,zzz1159" source="2728" target="2570" cy:directed="1"/>
      <edge id="114147" label="zzz1001,zzz1160" source="2728" target="2569" cy:directed="1"/>
      <edge id="114146" label="zzz1001,zzz1165" source="2728" target="2564" cy:directed="1"/>
      <edge id="114145" label="zzz1001,zzz1213" source="2728" target="2516" cy:directed="1"/>
      <edge id="114144" label="zzz1001,zzz1229" source="2728" target="2500" cy:directed="1"/>
      <edge id="114143" label="zzz1001,zzz1354" source="2728" target="2375" cy:directed="1"/>
      <edge id="114142" label="zzz1001,zzzz939" source="2728" target="227" cy:directed="1"/>
      <edge id="114141" label="zzz1001,zzzz940" source="2728" target="226" cy:directed="1"/>
      <edge id="114140" label="zzz1001,zzzz941" source="2728" target="225" cy:directed="1"/>
      <edge id="114139" label="zzz1001,zzzz942" source="2728" target="224" cy:directed="1"/>
      <edge id="114138" label="zzz1001,zzzz976" source="2728" target="190" cy:directed="1"/>
      <edge id="114137" label="zzz1001,zzzz977" source="2728" target="189" cy:directed="1"/>
      <edge id="114136" label="zzz1001,zzzz962" source="2728" target="204" cy:directed="1"/>
      <edge id="114135" label="zzz1001,zzzz978" source="2728" target="188" cy:directed="1"/>
      <edge id="114134" label="zzz1001,zzzzz33" source="2728" target="143" cy:directed="1"/>
      <edge id="114133" label="zzz1001,zzz1125" source="2728" target="2604" cy:directed="1"/>
      <edge id="114132" label="zzz1001,zzz1228" source="2728" target="2501" cy:directed="1"/>
      <edge id="114131" label="zzz1001,zzz1007" source="2728" target="2722" cy:directed="1"/>
      <edge id="114130" label="zzz1001,zzz1008" source="2728" target="2721" cy:directed="1"/>
      <edge id="114129" label="zzz1001,zzz1232" source="2728" target="2497" cy:directed="1"/>
      <edge id="114128" label="zzz1001,zzzz937" source="2728" target="229" cy:directed="1"/>
      <edge id="114127" label="zzz1001,zzzz961" source="2728" target="205" cy:directed="1"/>
      <edge id="114126" label="zzz1001,zzz1101" source="2728" target="2628" cy:directed="1"/>
      <edge id="114125" label="zzz1001,zzz1319" source="2728" target="2410" cy:directed="1"/>
      <edge id="114124" label="zzz1001,zzz1113" source="2728" target="2616" cy:directed="1"/>
      <edge id="114123" label="zzz1001,zzz1161" source="2728" target="2568" cy:directed="1"/>
      <edge id="114122" label="zzz1001,zzzz934" source="2728" target="232" cy:directed="1"/>
      <edge id="114121" label="zzz1001,zzzz935" source="2728" target="231" cy:directed="1"/>
      <edge id="114120" label="zzz1001,zzzzz37" source="2728" target="139" cy:directed="1"/>
      <edge id="114119" label="zzz1001,zzz1139" source="2728" target="2590" cy:directed="1"/>
      <edge id="114118" label="zzz1001,zzz2370" source="2728" target="1359" cy:directed="1"/>
      <edge id="114117" label="zzz1001,zzz1114" source="2728" target="2615" cy:directed="1"/>
      <edge id="114116" label="zzz1001,zzz1136" source="2728" target="2593" cy:directed="1"/>
      <edge id="114115" label="zzz1001,zzz1158" source="2728" target="2571" cy:directed="1"/>
      <edge id="114114" label="zzz1001,zzz1361" source="2728" target="2368" cy:directed="1"/>
      <edge id="114113" label="zzz1001,zzz1363" source="2728" target="2366" cy:directed="1"/>
      <edge id="114112" label="zzz1001,zzzz975" source="2728" target="191" cy:directed="1"/>
      <edge id="114111" label="zzz1001,zzzzz80" source="2728" target="96" cy:directed="1"/>
      <edge id="114110" label="zzz1001,zzz1104" source="2728" target="2625" cy:directed="1"/>
      <edge id="114109" label="zzz1001,zzz1118" source="2728" target="2611" cy:directed="1"/>
      <edge id="114108" label="zzz1001,zzzzzz5" source="2728" target="71" cy:directed="1"/>
      <edge id="114107" label="zzz1001,zzz1102" source="2728" target="2627" cy:directed="1"/>
      <edge id="114106" label="zzz1001,zzz1364" source="2728" target="2365" cy:directed="1"/>
      <edge id="114105" label="zzz1001,zzz1089" source="2728" target="2640" cy:directed="1"/>
      <edge id="114104" label="zzz1001,zzz1091" source="2728" target="2638" cy:directed="1"/>
      <edge id="114103" label="zzz1001,zzz1096" source="2728" target="2633" cy:directed="1"/>
      <edge id="114102" label="zzz1001,zzz1116" source="2728" target="2613" cy:directed="1"/>
      <edge id="114101" label="zzz1001,zzz1366" source="2728" target="2363" cy:directed="1"/>
      <edge id="114100" label="zzz1001,zzz1097" source="2728" target="2632" cy:directed="1"/>
      <edge id="114099" label="zzz1001,zzz1117" source="2728" target="2612" cy:directed="1"/>
      <edge id="114098" label="zzz1001,zzz1092" source="2728" target="2637" cy:directed="1"/>
      <edge id="114097" label="zzz1001,zzzzzz0" source="2728" target="76" cy:directed="1"/>
      <edge id="114096" label="zzz1001,zzz1314" source="2728" target="2415" cy:directed="1"/>
      <edge id="114095" label="zzz1001,zzz1111" source="2728" target="2618" cy:directed="1"/>
      <edge id="114094" label="zzz1001,zzz1098" source="2728" target="2631" cy:directed="1"/>
      <edge id="114093" label="zzz1001,zzz1138" source="2728" target="2591" cy:directed="1"/>
      <edge id="114092" label="zzz1001,zzzz965" source="2728" target="201" cy:directed="1"/>
      <edge id="114091" label="zzz1001,zzzz991" source="2728" target="175" cy:directed="1"/>
      <edge id="114090" label="zzz1001,zzz1100" source="2728" target="2629" cy:directed="1"/>
      <edge id="114089" label="zzz1001,zzz1094" source="2728" target="2635" cy:directed="1"/>
      <edge id="114088" label="zzz1001,zzzz983" source="2728" target="183" cy:directed="1"/>
      <edge id="114087" label="zzz1001,zzzzz39" source="2728" target="137" cy:directed="1"/>
      <edge id="114086" label="zzz1001,zzz1106" source="2728" target="2623" cy:directed="1"/>
      <edge id="114085" label="zzz1001,zzz1217" source="2728" target="2512" cy:directed="1"/>
      <edge id="114084" label="zzz1001,zzzz963" source="2728" target="203" cy:directed="1"/>
      <edge id="114083" label="zzz1001,zzz1021" source="2728" target="2708" cy:directed="1"/>
      <edge id="114082" label="zzz1001,zzz1141" source="2728" target="2588" cy:directed="1"/>
      <edge id="114081" label="zzz1001,zzzz964" source="2728" target="202" cy:directed="1"/>
      <edge id="114080" label="zzz1001,zzz1247" source="2728" target="2482" cy:directed="1"/>
      <edge id="114079" label="zzz1001,zzz1278" source="2728" target="2451" cy:directed="1"/>
      <edge id="114078" label="zzz1001,zzz1041" source="2728" target="2688" cy:directed="1"/>
      <edge id="114077" label="zzz1001,zzzz973" source="2728" target="193" cy:directed="1"/>
      <edge id="114076" label="zzz1001,zzz1043" source="2728" target="2686" cy:directed="1"/>
      <edge id="114075" label="zzz1001,zzz1067" source="2728" target="2662" cy:directed="1"/>
      <edge id="114074" label="zzz1001,zzz1226" source="2728" target="2503" cy:directed="1"/>
      <edge id="114073" label="zzz1001,zzz1340" source="2728" target="2389" cy:directed="1"/>
      <edge id="114072" label="zzz1001,zzz1069" source="2728" target="2660" cy:directed="1"/>
      <edge id="114071" label="zzz1001,zzz1070" source="2728" target="2659" cy:directed="1"/>
      <edge id="114070" label="zzz1001,zzz1119" source="2728" target="2610" cy:directed="1"/>
      <edge id="114069" label="zzz1001,zzzzz32" source="2728" target="144" cy:directed="1"/>
      <edge id="114068" label="zzz1001,zzz1022" source="2728" target="2707" cy:directed="1"/>
      <edge id="114067" label="zzz1001,zzz1061" source="2728" target="2668" cy:directed="1"/>
      <edge id="114066" label="zzz1001,zzz1062" source="2728" target="2667" cy:directed="1"/>
      <edge id="114065" label="zzz1001,zzzzz12" source="2728" target="164" cy:directed="1"/>
      <edge id="114064" label="zzz1001,zzz1024" source="2728" target="2705" cy:directed="1"/>
      <edge id="114063" label="zzz1001,zzz1223" source="2728" target="2506" cy:directed="1"/>
      <edge id="114062" label="zzz1001,zzzzz23" source="2728" target="153" cy:directed="1"/>
      <edge id="114061" label="zzz1001,zzz1028" source="2728" target="2701" cy:directed="1"/>
      <edge id="114060" label="zzz1001,zzz1073" source="2728" target="2656" cy:directed="1"/>
      <edge id="114059" label="zzz1001,zzz1150" source="2728" target="2579" cy:directed="1"/>
      <edge id="114058" label="zzz1001,zzzz946" source="2728" target="220" cy:directed="1"/>
      <edge id="114057" label="zzz1001,zzz1012" source="2728" target="2717" cy:directed="1"/>
      <edge id="114056" label="zzz1001,zzz1025" source="2728" target="2704" cy:directed="1"/>
      <edge id="114055" label="zzz1001,zzz1120" source="2728" target="2609" cy:directed="1"/>
      <edge id="114054" label="zzz1001,zzz1329" source="2728" target="2400" cy:directed="1"/>
      <edge id="114053" label="zzz1001,zzzzz22" source="2728" target="154" cy:directed="1"/>
      <edge id="114052" label="zzz1001,zzzz988" source="2728" target="178" cy:directed="1"/>
      <edge id="114051" label="zzz1001,zzzz989" source="2728" target="177" cy:directed="1"/>
      <edge id="114050" label="zzz1001,zzzzz30" source="2728" target="146" cy:directed="1"/>
      <edge id="114049" label="zzz1001,zzz1095" source="2728" target="2634" cy:directed="1"/>
      <edge id="114048" label="zzz1001,zzz1177" source="2728" target="2552" cy:directed="1"/>
      <edge id="114047" label="zzz1001,zzzz970" source="2728" target="196" cy:directed="1"/>
      <edge id="114046" label="zzz1001,zzzz987" source="2728" target="179" cy:directed="1"/>
      <edge id="114045" label="zzz1001,zzzzz35" source="2728" target="141" cy:directed="1"/>
      <edge id="114044" label="zzz1001,zzz1084" source="2728" target="2645" cy:directed="1"/>
      <edge id="114043" label="zzz1001,zzz1099" source="2728" target="2630" cy:directed="1"/>
      <edge id="114042" label="zzz1001,zzz1178" source="2728" target="2551" cy:directed="1"/>
      <edge id="114041" label="zzz1001,zzzz100" source="2728" target="1066" cy:directed="1"/>
      <edge id="114040" label="zzz1001,zzzz984" source="2728" target="182" cy:directed="1"/>
      <edge id="114039" label="zzz1001,zzzz985" source="2728" target="181" cy:directed="1"/>
      <edge id="114038" label="zzz1001,zzzz986" source="2728" target="180" cy:directed="1"/>
      <edge id="114037" label="zzz1001,zzzzz36" source="2728" target="140" cy:directed="1"/>
      <edge id="114036" label="zzz1001,zzz1059" source="2728" target="2670" cy:directed="1"/>
      <edge id="114035" label="zzz1001,zzz1074" source="2728" target="2655" cy:directed="1"/>
      <edge id="114034" label="zzz1001,zzz1048" source="2728" target="2681" cy:directed="1"/>
      <edge id="114033" label="zzz1001,zzz1140" source="2728" target="2589" cy:directed="1"/>
      <edge id="114032" label="zzz1001,zzzz969" source="2728" target="197" cy:directed="1"/>
      <edge id="114031" label="zzz1001,zzzzz81" source="2728" target="95" cy:directed="1"/>
      <edge id="114030" label="zzz1001,zzz1026" source="2728" target="2703" cy:directed="1"/>
      <edge id="114029" label="zzz1001,zzzz949" source="2728" target="217" cy:directed="1"/>
      <edge id="114028" label="zzz1001,zzzz957" source="2728" target="209" cy:directed="1"/>
      <edge id="114027" label="zzz1001,zzzzz34" source="2728" target="142" cy:directed="1"/>
      <edge id="114026" label="zzz1001,zzz1071" source="2728" target="2658" cy:directed="1"/>
      <edge id="114025" label="zzz1001,zzz1124" source="2728" target="2605" cy:directed="1"/>
      <edge id="114024" label="zzz1001,zzz1227" source="2728" target="2502" cy:directed="1"/>
      <edge id="114023" label="zzz1001,zzzz990" source="2728" target="176" cy:directed="1"/>
      <edge id="114022" label="zzz1001,zzz1193" source="2728" target="2536" cy:directed="1"/>
      <edge id="114021" label="zzz1001,zzz1192" source="2728" target="2537" cy:directed="1"/>
      <edge id="114020" label="zzz1001,zzz1196" source="2728" target="2533" cy:directed="1"/>
      <edge id="114019" label="zzz1001,zzz1336" source="2728" target="2393" cy:directed="1"/>
      <edge id="114018" label="zzz1001,zzz1362" source="2728" target="2367" cy:directed="1"/>
      <edge id="114017" label="zzz1001,zzzz972" source="2728" target="194" cy:directed="1"/>
      <edge id="114016" label="zzz1001,zzz1137" source="2728" target="2592" cy:directed="1"/>
      <edge id="114015" label="zzz1001,zzzzzz6" source="2728" target="70" cy:directed="1"/>
      <edge id="114014" label="zzz1001,zzz1337" source="2728" target="2392" cy:directed="1"/>
      <edge id="114013" label="zzz1001,zzzzz13" source="2728" target="163" cy:directed="1"/>
      <edge id="114012" label="zzz1001,zzzzz16" source="2728" target="160" cy:directed="1"/>
      <edge id="114011" label="zzz1001,zzz1023" source="2728" target="2706" cy:directed="1"/>
      <edge id="114010" label="zzz1001,zzz1195" source="2728" target="2534" cy:directed="1"/>
      <edge id="114009" label="zzz1001,zzz1328" source="2728" target="2401" cy:directed="1"/>
      <edge id="114008" label="zzz1001,zzzz945" source="2728" target="221" cy:directed="1"/>
      <edge id="114007" label="zzz1001,zzzz950" source="2728" target="216" cy:directed="1"/>
      <edge id="114006" label="zzz1001,zzzzz26" source="2728" target="150" cy:directed="1"/>
      <edge id="114005" label="zzz1001,zzz1144" source="2728" target="2585" cy:directed="1"/>
      <edge id="114004" label="zzz1001,zzz1145" source="2728" target="2584" cy:directed="1"/>
      <edge id="114003" label="zzz1001,zzz1146" source="2728" target="2583" cy:directed="1"/>
      <edge id="114002" label="zzz1001,zzz1147" source="2728" target="2582" cy:directed="1"/>
      <edge id="114001" label="zzz1001,zzz1194" source="2728" target="2535" cy:directed="1"/>
      <edge id="114000" label="zzz1001,zzz1197" source="2728" target="2532" cy:directed="1"/>
      <edge id="113999" label="zzz1001,zzz1234" source="2728" target="2495" cy:directed="1"/>
      <edge id="113998" label="zzz1001,zzz1348" source="2728" target="2381" cy:directed="1"/>
      <edge id="113997" label="zzz1001,zzz1034" source="2728" target="2695" cy:directed="1"/>
      <edge id="113996" label="zzz1001,zzz1060" source="2728" target="2669" cy:directed="1"/>
      <edge id="113995" label="zzz1001,zzzz938" source="2728" target="228" cy:directed="1"/>
      <edge id="113994" label="zzz1001,zzz1027" source="2728" target="2702" cy:directed="1"/>
      <edge id="113993" label="zzz1001,zzz1077" source="2728" target="2652" cy:directed="1"/>
      <edge id="113992" label="zzz1001,zzz1326" source="2728" target="2403" cy:directed="1"/>
      <edge id="113991" label="zzz1001,zzzzz21" source="2728" target="155" cy:directed="1"/>
      <edge id="113990" label="zzz1001,zzz1056" source="2728" target="2673" cy:directed="1"/>
      <edge id="113989" label="zzz1001,zzz1365" source="2728" target="2364" cy:directed="1"/>
      <edge id="113988" label="zzz1001,zzz1085" source="2728" target="2644" cy:directed="1"/>
      <edge id="113987" label="zzz1001,zzz1057" source="2728" target="2672" cy:directed="1"/>
      <edge id="113986" label="zzz1001,zzz1083" source="2728" target="2646" cy:directed="1"/>
      <edge id="113985" label="zzz1001,zzz1088" source="2728" target="2641" cy:directed="1"/>
      <edge id="113984" label="zzz1001,zzz1107" source="2728" target="2622" cy:directed="1"/>
      <edge id="113983" label="zzz1001,zzz1323" source="2728" target="2406" cy:directed="1"/>
      <edge id="113982" label="zzz1001,zzz1334" source="2728" target="2395" cy:directed="1"/>
      <edge id="113981" label="zzz1001,zzz1219" source="2728" target="2510" cy:directed="1"/>
      <edge id="113980" label="zzz1001,zzz1324" source="2728" target="2405" cy:directed="1"/>
      <edge id="113979" label="zzz1001,zzz1356" source="2728" target="2373" cy:directed="1"/>
      <edge id="113978" label="zzz1001,zzzzz93" source="2728" target="83" cy:directed="1"/>
      <edge id="113977" label="zzz1001,zzz1064" source="2728" target="2665" cy:directed="1"/>
      <edge id="113976" label="zzz1001,zzz1002" source="2728" target="2727" cy:directed="1"/>
      <edge id="113975" label="zzz1001,zzzz981" source="2728" target="185" cy:directed="1"/>
      <edge id="113974" label="zzz1001,zzz1019" source="2728" target="2710" cy:directed="1"/>
      <edge id="113973" label="zzz1001,zzz1220" source="2728" target="2509" cy:directed="1"/>
      <edge id="113972" label="zzz1001,zzzz979" source="2728" target="187" cy:directed="1"/>
      <edge id="113971" label="zzz1001,zzzzz31" source="2728" target="145" cy:directed="1"/>
      <edge id="113970" label="zzz1001,zzz1046" source="2728" target="2683" cy:directed="1"/>
      <edge id="113969" label="zzz1001,zzz1076" source="2728" target="2653" cy:directed="1"/>
      <edge id="113968" label="zzz1001,zzzz994" source="2728" target="172" cy:directed="1"/>
      <edge id="113967" label="zzz1001,zzz1020" source="2728" target="2709" cy:directed="1"/>
      <edge id="113966" label="zzz1001,zzz1055" source="2728" target="2674" cy:directed="1"/>
      <edge id="113965" label="zzz1001,zzz1274" source="2728" target="2455" cy:directed="1"/>
      <edge id="113964" label="zzz1001,zzz1292" source="2728" target="2437" cy:directed="1"/>
      <edge id="113963" label="zzz1001,zzz1293" source="2728" target="2436" cy:directed="1"/>
      <edge id="113962" label="zzz1001,zzz1349" source="2728" target="2380" cy:directed="1"/>
      <edge id="113961" label="zzz1001,zzz1355" source="2728" target="2374" cy:directed="1"/>
      <edge id="113960" label="zzz1001,zzzz980" source="2728" target="186" cy:directed="1"/>
      <edge id="113959" label="zzz1001,zzzz982" source="2728" target="184" cy:directed="1"/>
      <edge id="113958" label="zzz1001,zzz1244" source="2728" target="2485" cy:directed="1"/>
      <edge id="113957" label="zzz1001,zzz1248" source="2728" target="2481" cy:directed="1"/>
      <edge id="113956" label="zzz1001,zzz1251" source="2728" target="2478" cy:directed="1"/>
      <edge id="113955" label="zzz1001,zzz1257" source="2728" target="2472" cy:directed="1"/>
      <edge id="113954" label="zzz1001,zzz1261" source="2728" target="2468" cy:directed="1"/>
      <edge id="113953" label="zzz1001,zzz1273" source="2728" target="2456" cy:directed="1"/>
      <edge id="113952" label="zzz1001,zzz1280" source="2728" target="2449" cy:directed="1"/>
      <edge id="113951" label="zzz1001,zzz1307" source="2728" target="2422" cy:directed="1"/>
      <edge id="113950" label="zzz1001,zzz1030" source="2728" target="2699" cy:directed="1"/>
      <edge id="113949" label="zzz1001,zzz1031" source="2728" target="2698" cy:directed="1"/>
      <edge id="113948" label="zzz1001,zzz1312" source="2728" target="2417" cy:directed="1"/>
      <edge id="113947" label="zzz1001,zzz1316" source="2728" target="2413" cy:directed="1"/>
      <edge id="113946" label="zzz1001,zzzz960" source="2728" target="206" cy:directed="1"/>
      <edge id="113945" label="zzz1001,zzz1236" source="2728" target="2493" cy:directed="1"/>
      <edge id="113944" label="zzz1001,zzz1279" source="2728" target="2450" cy:directed="1"/>
      <edge id="113943" label="zzz1001,zzz1290" source="2728" target="2439" cy:directed="1"/>
      <edge id="113942" label="zzz1001,zzz1297" source="2728" target="2432" cy:directed="1"/>
      <edge id="113941" label="zzz1001,zzz1310" source="2728" target="2419" cy:directed="1"/>
      <edge id="113940" label="zzz1001,zzzz933" source="2728" target="233" cy:directed="1"/>
      <edge id="113939" label="zzz1001,zzz1003" source="2728" target="2726" cy:directed="1"/>
      <edge id="113938" label="zzz1001,zzz1142" source="2728" target="2587" cy:directed="1"/>
      <edge id="113937" label="zzz1001,zzz1143" source="2728" target="2586" cy:directed="1"/>
      <edge id="113936" label="zzz1001,zzz1148" source="2728" target="2581" cy:directed="1"/>
      <edge id="113935" label="zzz1001,zzz1149" source="2728" target="2580" cy:directed="1"/>
      <edge id="113934" label="zzz1001,zzz1152" source="2728" target="2577" cy:directed="1"/>
      <edge id="113933" label="zzz1001,zzz1154" source="2728" target="2575" cy:directed="1"/>
      <edge id="113932" label="zzz1001,zzz1299" source="2728" target="2430" cy:directed="1"/>
      <edge id="113931" label="zzz1001,zzz1321" source="2728" target="2408" cy:directed="1"/>
      <edge id="113930" label="zzz1001,zzzz998" source="2728" target="168" cy:directed="1"/>
      <edge id="113929" label="zzz1001,zzzzz18" source="2728" target="158" cy:directed="1"/>
      <edge id="113928" label="zzz1001,zzz1005" source="2728" target="2724" cy:directed="1"/>
      <edge id="113927" label="zzz1001,zzz1153" source="2728" target="2576" cy:directed="1"/>
      <edge id="113926" label="zzz1001,zzz1235" source="2728" target="2494" cy:directed="1"/>
      <edge id="113925" label="zzz1001,zzz1237" source="2728" target="2492" cy:directed="1"/>
      <edge id="113924" label="zzz1001,zzz1245" source="2728" target="2484" cy:directed="1"/>
      <edge id="113923" label="zzz1001,zzz1249" source="2728" target="2480" cy:directed="1"/>
      <edge id="113922" label="zzz1001,zzz1255" source="2728" target="2474" cy:directed="1"/>
      <edge id="113921" label="zzz1001,zzz1258" source="2728" target="2471" cy:directed="1"/>
      <edge id="113920" label="zzz1001,zzz1265" source="2728" target="2464" cy:directed="1"/>
      <edge id="113919" label="zzz1001,zzz1268" source="2728" target="2461" cy:directed="1"/>
      <edge id="113918" label="zzz1001,zzz1275" source="2728" target="2454" cy:directed="1"/>
      <edge id="113917" label="zzz1001,zzz1302" source="2728" target="2427" cy:directed="1"/>
      <edge id="113916" label="zzz1001,zzz1309" source="2728" target="2420" cy:directed="1"/>
      <edge id="113915" label="zzz1001,zzz1311" source="2728" target="2418" cy:directed="1"/>
      <edge id="113914" label="zzz1001,zzz1303" source="2728" target="2426" cy:directed="1"/>
      <edge id="113913" label="zzz1001,zzz1360" source="2728" target="2369" cy:directed="1"/>
      <edge id="113912" label="zzz1001,zzz1241" source="2728" target="2488" cy:directed="1"/>
      <edge id="113911" label="zzz1001,zzz1246" source="2728" target="2483" cy:directed="1"/>
      <edge id="113910" label="zzz1001,zzz1256" source="2728" target="2473" cy:directed="1"/>
      <edge id="113909" label="zzz1001,zzz1260" source="2728" target="2469" cy:directed="1"/>
      <edge id="113908" label="zzz1001,zzz1276" source="2728" target="2453" cy:directed="1"/>
      <edge id="113907" label="zzz1001,zzz1281" source="2728" target="2448" cy:directed="1"/>
      <edge id="113906" label="zzz1001,zzz1284" source="2728" target="2445" cy:directed="1"/>
      <edge id="113905" label="zzz1001,zzz1291" source="2728" target="2438" cy:directed="1"/>
      <edge id="113904" label="zzz1001,zzz1306" source="2728" target="2423" cy:directed="1"/>
      <edge id="113903" label="zzz1001,zzz1345" source="2728" target="2384" cy:directed="1"/>
      <edge id="113902" label="zzz1001,zzz1347" source="2728" target="2382" cy:directed="1"/>
      <edge id="113901" label="zzz1001,zzz1350" source="2728" target="2379" cy:directed="1"/>
      <edge id="113900" label="zzz1001,zzzz947" source="2728" target="219" cy:directed="1"/>
      <edge id="113899" label="zzz1001,zzzz948" source="2728" target="218" cy:directed="1"/>
      <edge id="113898" label="zzz1001,zzz1006" source="2728" target="2723" cy:directed="1"/>
      <edge id="113897" label="zzz1001,zzz1103" source="2728" target="2626" cy:directed="1"/>
      <edge id="113896" label="zzz1001,zzz1108" source="2728" target="2621" cy:directed="1"/>
      <edge id="113895" label="zzz1001,zzz1238" source="2728" target="2491" cy:directed="1"/>
      <edge id="113894" label="zzz1001,zzz1298" source="2728" target="2431" cy:directed="1"/>
      <edge id="113893" label="zzz1001,zzz1305" source="2728" target="2424" cy:directed="1"/>
      <edge id="113892" label="zzz1001,zzz1344" source="2728" target="2385" cy:directed="1"/>
      <edge id="113891" label="zzz1001,zzz1346" source="2728" target="2383" cy:directed="1"/>
      <edge id="113890" label="zzz1001,zzz1351" source="2728" target="2378" cy:directed="1"/>
      <edge id="113889" label="zzz1001,zzzz967" source="2728" target="199" cy:directed="1"/>
      <edge id="113888" label="zzz1001,zzz1105" source="2728" target="2624" cy:directed="1"/>
      <edge id="113887" label="zzz1001,zzz1341" source="2728" target="2388" cy:directed="1"/>
      <edge id="113886" label="zzz1001,zzz1342" source="2728" target="2387" cy:directed="1"/>
      <edge id="113885" label="zzz1001,zzz1352" source="2728" target="2377" cy:directed="1"/>
      <edge id="113884" label="zzz1001,zzz2390" source="2728" target="1339" cy:directed="1"/>
      <edge id="113883" label="zzz1001,zzzzz38" source="2728" target="138" cy:directed="1"/>
      <edge id="113882" label="zzz1001,zzzzz84" source="2728" target="92" cy:directed="1"/>
      <edge id="113881" label="zzz1001,zzz1269" source="2728" target="2460" cy:directed="1"/>
      <edge id="113880" label="zzz1001,zzz1301" source="2728" target="2428" cy:directed="1"/>
      <edge id="113879" label="zzz1001,zzz1343" source="2728" target="2386" cy:directed="1"/>
      <edge id="113878" label="zzz1001,zzz1358" source="2728" target="2371" cy:directed="1"/>
      <edge id="113877" label="zzz1001,zzz1359" source="2728" target="2370" cy:directed="1"/>
      <edge id="113876" label="zzz1001,zzzzz24" source="2728" target="152" cy:directed="1"/>
      <edge id="113875" label="zzz1001,zzzz932" source="2728" target="234" cy:directed="1"/>
      <edge id="113874" label="zzz1001,zzz1049" source="2728" target="2680" cy:directed="1"/>
      <edge id="113873" label="zzz1001,zzz1109" source="2728" target="2620" cy:directed="1"/>
      <edge id="113872" label="zzz1001,zzzz958" source="2728" target="208" cy:directed="1"/>
      <edge id="113871" label="zzz1001,zzz1212" source="2728" target="2517" cy:directed="1"/>
      <edge id="113870" label="zzz1001,zzz1032" source="2728" target="2697" cy:directed="1"/>
      <edge id="113869" label="zzz1001,zzz1047" source="2728" target="2682" cy:directed="1"/>
      <edge id="113868" label="zzz1001,zzz1044" source="2728" target="2685" cy:directed="1"/>
      <edge id="113867" label="zzz1001,zzz1129" source="2728" target="2600" cy:directed="1"/>
      <edge id="113866" label="zzz1001,zzzzz91" source="2728" target="85" cy:directed="1"/>
      <edge id="113865" label="zzz1001,zzz1054" source="2728" target="2675" cy:directed="1"/>
      <edge id="113864" label="zzz1001,zzzz936" source="2728" target="230" cy:directed="1"/>
      <edge id="113863" label="zzz1001,zzzz993" source="2728" target="173" cy:directed="1"/>
      <edge id="113862" label="zzz1001,zzz1367" source="2728" target="2362" cy:directed="1"/>
      <edge id="113861" label="zzz1001,zzzzzz4" source="2728" target="72" cy:directed="1"/>
      <edge id="113860" label="zzz1001,zzz1018" source="2728" target="2711" cy:directed="1"/>
      <edge id="113859" label="zzz1001,zzzz968" source="2728" target="198" cy:directed="1"/>
      <edge id="113858" label="zzz1001,zzzz992" source="2728" target="174" cy:directed="1"/>
      <edge id="113857" label="zzz1001,zzz1320" source="2728" target="2409" cy:directed="1"/>
      <edge id="113856" label="zzz1001,zzz1017" source="2728" target="2712" cy:directed="1"/>
      <edge id="113855" label="zzz1001,zzz1330" source="2728" target="2399" cy:directed="1"/>
      <edge id="113854" label="zzz1001,zzz1335" source="2728" target="2394" cy:directed="1"/>
      <edge id="113853" label="zzz1001,zzz1016" source="2728" target="2713" cy:directed="1"/>
      <edge id="113852" label="zzz1001,zzz1325" source="2728" target="2404" cy:directed="1"/>
      <edge id="113851" label="zzz1001,zzz1339" source="2728" target="2390" cy:directed="1"/>
      <edge id="113850" label="zzz1001,zzzz997" source="2728" target="169" cy:directed="1"/>
      <edge id="113849" label="zzz1001,zzz1090" source="2728" target="2639" cy:directed="1"/>
      <edge id="113848" label="zzz1002,zzz1088" source="2727" target="2641" cy:directed="1"/>
      <edge id="113847" label="zzz1002,zzzzz31" source="2727" target="145" cy:directed="1"/>
      <edge id="113846" label="zzz1002,zzz1019" source="2727" target="2710" cy:directed="1"/>
      <edge id="113845" label="zzz1002,zzz1020" source="2727" target="2709" cy:directed="1"/>
      <edge id="113844" label="zzz1002,zzz1316" source="2727" target="2413" cy:directed="1"/>
      <edge id="113843" label="zzz1002,zzz1085" source="2727" target="2644" cy:directed="1"/>
      <edge id="113842" label="zzz1002,zzz1077" source="2727" target="2652" cy:directed="1"/>
      <edge id="113841" label="zzz1002,zzz1083" source="2727" target="2646" cy:directed="1"/>
      <edge id="113840" label="zzz1002,zzz1098" source="2727" target="2631" cy:directed="1"/>
      <edge id="113839" label="zzz1002,zzz1096" source="2727" target="2633" cy:directed="1"/>
      <edge id="113838" label="zzz1002,zzz1118" source="2727" target="2611" cy:directed="1"/>
      <edge id="113837" label="zzz1002,zzz1223" source="2727" target="2506" cy:directed="1"/>
      <edge id="113836" label="zzz1002,zzz1314" source="2727" target="2415" cy:directed="1"/>
      <edge id="113835" label="zzz1002,zzz1097" source="2727" target="2632" cy:directed="1"/>
      <edge id="113834" label="zzz1002,zzz1117" source="2727" target="2612" cy:directed="1"/>
      <edge id="113833" label="zzz1002,zzz1226" source="2727" target="2503" cy:directed="1"/>
      <edge id="113832" label="zzz1002,zzz1094" source="2727" target="2635" cy:directed="1"/>
      <edge id="113831" label="zzz1002,zzz1114" source="2727" target="2615" cy:directed="1"/>
      <edge id="113830" label="zzz1002,zzz1120" source="2727" target="2609" cy:directed="1"/>
      <edge id="113829" label="zzz1002,zzz1111" source="2727" target="2618" cy:directed="1"/>
      <edge id="113828" label="zzz1002,zzz1100" source="2727" target="2629" cy:directed="1"/>
      <edge id="113827" label="zzz1002,zzz1119" source="2727" target="2610" cy:directed="1"/>
      <edge id="113826" label="zzz1002,zzz1116" source="2727" target="2613" cy:directed="1"/>
      <edge id="113825" label="zzz1002,zzz1217" source="2727" target="2512" cy:directed="1"/>
      <edge id="113824" label="zzz1002,zzzzz33" source="2727" target="143" cy:directed="1"/>
      <edge id="113823" label="zzz1002,zzz1021" source="2727" target="2708" cy:directed="1"/>
      <edge id="113822" label="zzz1002,zzz1304" source="2727" target="2425" cy:directed="1"/>
      <edge id="113821" label="zzz1002,zzz1128" source="2727" target="2601" cy:directed="1"/>
      <edge id="113820" label="zzz1002,zzz1242" source="2727" target="2487" cy:directed="1"/>
      <edge id="113819" label="zzz1002,zzz1252" source="2727" target="2477" cy:directed="1"/>
      <edge id="113818" label="zzz1002,zzz1254" source="2727" target="2475" cy:directed="1"/>
      <edge id="113817" label="zzz1002,zzz1262" source="2727" target="2467" cy:directed="1"/>
      <edge id="113816" label="zzz1002,zzz1272" source="2727" target="2457" cy:directed="1"/>
      <edge id="113815" label="zzz1002,zzz1264" source="2727" target="2465" cy:directed="1"/>
      <edge id="113814" label="zzz1002,zzz1283" source="2727" target="2446" cy:directed="1"/>
      <edge id="113813" label="zzz1002,zzz1289" source="2727" target="2440" cy:directed="1"/>
      <edge id="113812" label="zzz1002,zzz1296" source="2727" target="2433" cy:directed="1"/>
      <edge id="113811" label="zzz1002,zzz1240" source="2727" target="2489" cy:directed="1"/>
      <edge id="113810" label="zzz1002,zzz1079" source="2727" target="2650" cy:directed="1"/>
      <edge id="113809" label="zzz1002,zzz1247" source="2727" target="2482" cy:directed="1"/>
      <edge id="113808" label="zzz1002,zzz1278" source="2727" target="2451" cy:directed="1"/>
      <edge id="113807" label="zzz1002,zzz1271" source="2727" target="2458" cy:directed="1"/>
      <edge id="113806" label="zzz1002,zzzz966" source="2727" target="200" cy:directed="1"/>
      <edge id="113805" label="zzz1002,zzz1024" source="2727" target="2705" cy:directed="1"/>
      <edge id="113804" label="zzz1002,zzz1037" source="2727" target="2692" cy:directed="1"/>
      <edge id="113803" label="zzz1002,zzz1039" source="2727" target="2690" cy:directed="1"/>
      <edge id="113802" label="zzz1002,zzz1022" source="2727" target="2707" cy:directed="1"/>
      <edge id="113801" label="zzz1002,zzz1082" source="2727" target="2647" cy:directed="1"/>
      <edge id="113800" label="zzz1002,zzz1270" source="2727" target="2459" cy:directed="1"/>
      <edge id="113799" label="zzz1002,zzzz937" source="2727" target="229" cy:directed="1"/>
      <edge id="113798" label="zzz1002,zzzzz28" source="2727" target="148" cy:directed="1"/>
      <edge id="113797" label="zzz1002,zzz1287" source="2727" target="2442" cy:directed="1"/>
      <edge id="113796" label="zzz1002,zzz1025" source="2727" target="2704" cy:directed="1"/>
      <edge id="113795" label="zzz1002,zzz1336" source="2727" target="2393" cy:directed="1"/>
      <edge id="113794" label="zzz1002,zzz1127" source="2727" target="2602" cy:directed="1"/>
      <edge id="113793" label="zzz1002,zzzzz13" source="2727" target="163" cy:directed="1"/>
      <edge id="113792" label="zzz1002,zzz1008" source="2727" target="2721" cy:directed="1"/>
      <edge id="113791" label="zzz1002,zzz1007" source="2727" target="2722" cy:directed="1"/>
      <edge id="113790" label="zzz1002,zzz1253" source="2727" target="2476" cy:directed="1"/>
      <edge id="113789" label="zzz1002,zzz1295" source="2727" target="2434" cy:directed="1"/>
      <edge id="113788" label="zzz1002,zzz1300" source="2727" target="2429" cy:directed="1"/>
      <edge id="113787" label="zzz1002,zzz1110" source="2727" target="2619" cy:directed="1"/>
      <edge id="113786" label="zzz1002,zzz1115" source="2727" target="2614" cy:directed="1"/>
      <edge id="113785" label="zzz1002,zzz1263" source="2727" target="2466" cy:directed="1"/>
      <edge id="113784" label="zzz1002,zzz1267" source="2727" target="2462" cy:directed="1"/>
      <edge id="113783" label="zzz1002,zzz1277" source="2727" target="2452" cy:directed="1"/>
      <edge id="113782" label="zzz1002,zzz1282" source="2727" target="2447" cy:directed="1"/>
      <edge id="113781" label="zzz1002,zzz1286" source="2727" target="2443" cy:directed="1"/>
      <edge id="113780" label="zzz1002,zzz1308" source="2727" target="2421" cy:directed="1"/>
      <edge id="113779" label="zzz1002,zzz1288" source="2727" target="2441" cy:directed="1"/>
      <edge id="113778" label="zzz1002,zzz2375" source="2727" target="1354" cy:directed="1"/>
      <edge id="113777" label="zzz1002,zzzzz80" source="2727" target="96" cy:directed="1"/>
      <edge id="113776" label="zzz1002,zzzzz95" source="2727" target="81" cy:directed="1"/>
      <edge id="113775" label="zzz1002,zzz1362" source="2727" target="2367" cy:directed="1"/>
      <edge id="113774" label="zzz1002,zzz1035" source="2727" target="2694" cy:directed="1"/>
      <edge id="113773" label="zzz1002,zzz1038" source="2727" target="2691" cy:directed="1"/>
      <edge id="113772" label="zzz1002,zzz1139" source="2727" target="2590" cy:directed="1"/>
      <edge id="113771" label="zzz1002,zzzz931" source="2727" target="235" cy:directed="1"/>
      <edge id="113770" label="zzz1002,zzzz939" source="2727" target="227" cy:directed="1"/>
      <edge id="113769" label="zzz1002,zzzz940" source="2727" target="226" cy:directed="1"/>
      <edge id="113768" label="zzz1002,zzzz941" source="2727" target="225" cy:directed="1"/>
      <edge id="113767" label="zzz1002,zzzz942" source="2727" target="224" cy:directed="1"/>
      <edge id="113766" label="zzz1002,zzzz976" source="2727" target="190" cy:directed="1"/>
      <edge id="113765" label="zzz1002,zzzz977" source="2727" target="189" cy:directed="1"/>
      <edge id="113764" label="zzz1002,zzz1036" source="2727" target="2693" cy:directed="1"/>
      <edge id="113763" label="zzz1002,zzz1285" source="2727" target="2444" cy:directed="1"/>
      <edge id="113762" label="zzz1002,zzzz961" source="2727" target="205" cy:directed="1"/>
      <edge id="113761" label="zzz1002,zzzz978" source="2727" target="188" cy:directed="1"/>
      <edge id="113760" label="zzz1002,zzz1029" source="2727" target="2700" cy:directed="1"/>
      <edge id="113759" label="zzz1002,zzz1113" source="2727" target="2616" cy:directed="1"/>
      <edge id="113758" label="zzz1002,zzz1080" source="2727" target="2649" cy:directed="1"/>
      <edge id="113757" label="zzz1002,zzz1081" source="2727" target="2648" cy:directed="1"/>
      <edge id="113756" label="zzz1002,zzz1089" source="2727" target="2640" cy:directed="1"/>
      <edge id="113755" label="zzz1002,zzz1091" source="2727" target="2638" cy:directed="1"/>
      <edge id="113754" label="zzz1002,zzzzzz5" source="2727" target="71" cy:directed="1"/>
      <edge id="113753" label="zzz1002,zzz1069" source="2727" target="2660" cy:directed="1"/>
      <edge id="113752" label="zzz1002,zzz1070" source="2727" target="2659" cy:directed="1"/>
      <edge id="113751" label="zzz1002,zzz1354" source="2727" target="2375" cy:directed="1"/>
      <edge id="113750" label="zzz1002,zzz1356" source="2727" target="2373" cy:directed="1"/>
      <edge id="113749" label="zzz1002,zzz1026" source="2727" target="2703" cy:directed="1"/>
      <edge id="113748" label="zzz1002,zzz1313" source="2727" target="2416" cy:directed="1"/>
      <edge id="113747" label="zzz1002,zzz1319" source="2727" target="2410" cy:directed="1"/>
      <edge id="113746" label="zzz1002,zzz1067" source="2727" target="2662" cy:directed="1"/>
      <edge id="113745" label="zzz1002,zzz1133" source="2727" target="2596" cy:directed="1"/>
      <edge id="113744" label="zzz1002,zzz1165" source="2727" target="2564" cy:directed="1"/>
      <edge id="113743" label="zzz1002,zzzz957" source="2727" target="209" cy:directed="1"/>
      <edge id="113742" label="zzz1002,zzz1348" source="2727" target="2381" cy:directed="1"/>
      <edge id="113741" label="zzz1002,zzzz934" source="2727" target="232" cy:directed="1"/>
      <edge id="113740" label="zzz1002,zzz1063" source="2727" target="2666" cy:directed="1"/>
      <edge id="113739" label="zzz1002,zzz1106" source="2727" target="2623" cy:directed="1"/>
      <edge id="113738" label="zzz1002,zzz1136" source="2727" target="2593" cy:directed="1"/>
      <edge id="113737" label="zzz1002,zzzz935" source="2727" target="231" cy:directed="1"/>
      <edge id="113736" label="zzz1002,zzz1041" source="2727" target="2688" cy:directed="1"/>
      <edge id="113735" label="zzz1002,zzzzz22" source="2727" target="154" cy:directed="1"/>
      <edge id="113734" label="zzz1002,zzz1023" source="2727" target="2706" cy:directed="1"/>
      <edge id="113733" label="zzz1002,zzz1043" source="2727" target="2686" cy:directed="1"/>
      <edge id="113732" label="zzz1002,zzz1092" source="2727" target="2637" cy:directed="1"/>
      <edge id="113731" label="zzz1002,zzz1135" source="2727" target="2594" cy:directed="1"/>
      <edge id="113730" label="zzz1002,zzzz100" source="2727" target="1066" cy:directed="1"/>
      <edge id="113729" label="zzz1002,zzzzz91" source="2727" target="85" cy:directed="1"/>
      <edge id="113728" label="zzz1002,zzz1045" source="2727" target="2684" cy:directed="1"/>
      <edge id="113727" label="zzz1002,zzz1318" source="2727" target="2411" cy:directed="1"/>
      <edge id="113726" label="zzz1002,zzz1329" source="2727" target="2400" cy:directed="1"/>
      <edge id="113725" label="zzz1002,zzzz998" source="2727" target="168" cy:directed="1"/>
      <edge id="113724" label="zzz1002,zzz1073" source="2727" target="2656" cy:directed="1"/>
      <edge id="113723" label="zzz1002,zzz1134" source="2727" target="2595" cy:directed="1"/>
      <edge id="113722" label="zzz1002,zzzzz23" source="2727" target="153" cy:directed="1"/>
      <edge id="113721" label="zzz1002,zzzzz25" source="2727" target="151" cy:directed="1"/>
      <edge id="113720" label="zzz1002,zzz1159" source="2727" target="2570" cy:directed="1"/>
      <edge id="113719" label="zzz1002,zzz1160" source="2727" target="2569" cy:directed="1"/>
      <edge id="113718" label="zzz1002,zzzzz24" source="2727" target="152" cy:directed="1"/>
      <edge id="113717" label="zzz1002,zzzzz29" source="2727" target="147" cy:directed="1"/>
      <edge id="113716" label="zzz1002,zzz1095" source="2727" target="2634" cy:directed="1"/>
      <edge id="113715" label="zzz1002,zzz1123" source="2727" target="2606" cy:directed="1"/>
      <edge id="113714" label="zzz1002,zzz1132" source="2727" target="2597" cy:directed="1"/>
      <edge id="113713" label="zzz1002,zzz1161" source="2727" target="2568" cy:directed="1"/>
      <edge id="113712" label="zzz1002,zzz1279" source="2727" target="2450" cy:directed="1"/>
      <edge id="113711" label="zzz1002,zzz1290" source="2727" target="2439" cy:directed="1"/>
      <edge id="113710" label="zzz1002,zzz1297" source="2727" target="2432" cy:directed="1"/>
      <edge id="113709" label="zzz1002,zzzzz12" source="2727" target="164" cy:directed="1"/>
      <edge id="113708" label="zzz1002,zzz1027" source="2727" target="2702" cy:directed="1"/>
      <edge id="113707" label="zzz1002,zzz1141" source="2727" target="2588" cy:directed="1"/>
      <edge id="113706" label="zzz1002,zzz1245" source="2727" target="2484" cy:directed="1"/>
      <edge id="113705" label="zzz1002,zzz1249" source="2727" target="2480" cy:directed="1"/>
      <edge id="113704" label="zzz1002,zzz1255" source="2727" target="2474" cy:directed="1"/>
      <edge id="113703" label="zzz1002,zzz1258" source="2727" target="2471" cy:directed="1"/>
      <edge id="113702" label="zzz1002,zzz1265" source="2727" target="2464" cy:directed="1"/>
      <edge id="113701" label="zzz1002,zzz1268" source="2727" target="2461" cy:directed="1"/>
      <edge id="113700" label="zzz1002,zzz1275" source="2727" target="2454" cy:directed="1"/>
      <edge id="113699" label="zzz1002,zzz1302" source="2727" target="2427" cy:directed="1"/>
      <edge id="113698" label="zzz1002,zzz1309" source="2727" target="2420" cy:directed="1"/>
      <edge id="113697" label="zzz1002,zzz1311" source="2727" target="2418" cy:directed="1"/>
      <edge id="113696" label="zzz1002,zzzzz11" source="2727" target="165" cy:directed="1"/>
      <edge id="113695" label="zzz1002,zzz1059" source="2727" target="2670" cy:directed="1"/>
      <edge id="113694" label="zzz1002,zzz1087" source="2727" target="2642" cy:directed="1"/>
      <edge id="113693" label="zzz1002,zzz1303" source="2727" target="2426" cy:directed="1"/>
      <edge id="113692" label="zzz1002,zzz1340" source="2727" target="2389" cy:directed="1"/>
      <edge id="113691" label="zzz1002,zzz2386" source="2727" target="1343" cy:directed="1"/>
      <edge id="113690" label="zzz1002,zzz1012" source="2727" target="2717" cy:directed="1"/>
      <edge id="113689" label="zzz1002,zzz1048" source="2727" target="2681" cy:directed="1"/>
      <edge id="113688" label="zzz1002,zzzz970" source="2727" target="196" cy:directed="1"/>
      <edge id="113687" label="zzz1002,zzz1125" source="2727" target="2604" cy:directed="1"/>
      <edge id="113686" label="zzz1002,zzz1178" source="2727" target="2551" cy:directed="1"/>
      <edge id="113685" label="zzz1002,zzzzz37" source="2727" target="139" cy:directed="1"/>
      <edge id="113684" label="zzz1002,zzz1269" source="2727" target="2460" cy:directed="1"/>
      <edge id="113683" label="zzz1002,zzzzz39" source="2727" target="137" cy:directed="1"/>
      <edge id="113682" label="zzz1002,zzz1028" source="2727" target="2701" cy:directed="1"/>
      <edge id="113681" label="zzz1002,zzz1102" source="2727" target="2627" cy:directed="1"/>
      <edge id="113680" label="zzz1002,zzz1177" source="2727" target="2552" cy:directed="1"/>
      <edge id="113679" label="zzz1002,zzz1233" source="2727" target="2496" cy:directed="1"/>
      <edge id="113678" label="zzz1002,zzzzz35" source="2727" target="141" cy:directed="1"/>
      <edge id="113677" label="zzz1002,zzz1074" source="2727" target="2655" cy:directed="1"/>
      <edge id="113676" label="zzz1002,zzz1086" source="2727" target="2643" cy:directed="1"/>
      <edge id="113675" label="zzz1002,zzz1220" source="2727" target="2509" cy:directed="1"/>
      <edge id="113674" label="zzz1002,zzzz951" source="2727" target="215" cy:directed="1"/>
      <edge id="113673" label="zzz1002,zzz1101" source="2727" target="2628" cy:directed="1"/>
      <edge id="113672" label="zzz1002,zzz1158" source="2727" target="2571" cy:directed="1"/>
      <edge id="113671" label="zzz1002,zzzz948" source="2727" target="218" cy:directed="1"/>
      <edge id="113670" label="zzz1002,zzzz969" source="2727" target="197" cy:directed="1"/>
      <edge id="113669" label="zzz1002,zzz1033" source="2727" target="2696" cy:directed="1"/>
      <edge id="113668" label="zzz1002,zzz1219" source="2727" target="2510" cy:directed="1"/>
      <edge id="113667" label="zzz1002,zzzzz93" source="2727" target="83" cy:directed="1"/>
      <edge id="113666" label="zzz1002,zzzzzz6" source="2727" target="70" cy:directed="1"/>
      <edge id="113665" label="zzz1002,zzz1104" source="2727" target="2625" cy:directed="1"/>
      <edge id="113664" label="zzz1002,zzz1328" source="2727" target="2401" cy:directed="1"/>
      <edge id="113663" label="zzz1002,zzz1337" source="2727" target="2392" cy:directed="1"/>
      <edge id="113662" label="zzz1002,zzzz962" source="2727" target="204" cy:directed="1"/>
      <edge id="113661" label="zzz1002,zzz1124" source="2727" target="2605" cy:directed="1"/>
      <edge id="113660" label="zzz1002,zzz1147" source="2727" target="2582" cy:directed="1"/>
      <edge id="113659" label="zzz1002,zzz1194" source="2727" target="2535" cy:directed="1"/>
      <edge id="113658" label="zzz1002,zzz1152" source="2727" target="2577" cy:directed="1"/>
      <edge id="113657" label="zzz1002,zzz1154" source="2727" target="2575" cy:directed="1"/>
      <edge id="113656" label="zzz1002,zzz1193" source="2727" target="2536" cy:directed="1"/>
      <edge id="113655" label="zzz1002,zzz1305" source="2727" target="2424" cy:directed="1"/>
      <edge id="113654" label="zzz1002,zzz1346" source="2727" target="2383" cy:directed="1"/>
      <edge id="113653" label="zzz1002,zzz1358" source="2727" target="2371" cy:directed="1"/>
      <edge id="113652" label="zzz1002,zzz1359" source="2727" target="2370" cy:directed="1"/>
      <edge id="113651" label="zzz1002,zzzz990" source="2727" target="176" cy:directed="1"/>
      <edge id="113650" label="zzz1002,zzzzz16" source="2727" target="160" cy:directed="1"/>
      <edge id="113649" label="zzz1002,zzz1137" source="2727" target="2592" cy:directed="1"/>
      <edge id="113648" label="zzz1002,zzz1142" source="2727" target="2587" cy:directed="1"/>
      <edge id="113647" label="zzz1002,zzz1143" source="2727" target="2586" cy:directed="1"/>
      <edge id="113646" label="zzz1002,zzz1148" source="2727" target="2581" cy:directed="1"/>
      <edge id="113645" label="zzz1002,zzz1149" source="2727" target="2580" cy:directed="1"/>
      <edge id="113644" label="zzz1002,zzz1195" source="2727" target="2534" cy:directed="1"/>
      <edge id="113643" label="zzz1002,zzz1197" source="2727" target="2532" cy:directed="1"/>
      <edge id="113642" label="zzz1002,zzz1317" source="2727" target="2412" cy:directed="1"/>
      <edge id="113641" label="zzz1002,zzzz946" source="2727" target="220" cy:directed="1"/>
      <edge id="113640" label="zzz1002,zzzzzz0" source="2727" target="76" cy:directed="1"/>
      <edge id="113639" label="zzz1002,zzz1060" source="2727" target="2669" cy:directed="1"/>
      <edge id="113638" label="zzz1002,zzz1196" source="2727" target="2533" cy:directed="1"/>
      <edge id="113637" label="zzz1002,zzz1244" source="2727" target="2485" cy:directed="1"/>
      <edge id="113636" label="zzz1002,zzz1248" source="2727" target="2481" cy:directed="1"/>
      <edge id="113635" label="zzz1002,zzz1251" source="2727" target="2478" cy:directed="1"/>
      <edge id="113634" label="zzz1002,zzz1257" source="2727" target="2472" cy:directed="1"/>
      <edge id="113633" label="zzz1002,zzz1261" source="2727" target="2468" cy:directed="1"/>
      <edge id="113632" label="zzz1002,zzz1273" source="2727" target="2456" cy:directed="1"/>
      <edge id="113631" label="zzz1002,zzz1280" source="2727" target="2449" cy:directed="1"/>
      <edge id="113630" label="zzz1002,zzz1307" source="2727" target="2422" cy:directed="1"/>
      <edge id="113629" label="zzz1002,zzz1274" source="2727" target="2455" cy:directed="1"/>
      <edge id="113628" label="zzz1002,zzz1292" source="2727" target="2437" cy:directed="1"/>
      <edge id="113627" label="zzz1002,zzz1293" source="2727" target="2436" cy:directed="1"/>
      <edge id="113626" label="zzz1002,zzz1355" source="2727" target="2374" cy:directed="1"/>
      <edge id="113625" label="zzz1002,zzz1363" source="2727" target="2366" cy:directed="1"/>
      <edge id="113624" label="zzz1002,zzz1144" source="2727" target="2585" cy:directed="1"/>
      <edge id="113623" label="zzz1002,zzz1145" source="2727" target="2584" cy:directed="1"/>
      <edge id="113622" label="zzz1002,zzz1153" source="2727" target="2576" cy:directed="1"/>
      <edge id="113621" label="zzz1002,zzz1192" source="2727" target="2537" cy:directed="1"/>
      <edge id="113620" label="zzz1002,zzz1213" source="2727" target="2516" cy:directed="1"/>
      <edge id="113619" label="zzz1002,zzz1229" source="2727" target="2500" cy:directed="1"/>
      <edge id="113618" label="zzz1002,zzz1326" source="2727" target="2403" cy:directed="1"/>
      <edge id="113617" label="zzz1002,zzz1349" source="2727" target="2380" cy:directed="1"/>
      <edge id="113616" label="zzz1002,zzz1364" source="2727" target="2365" cy:directed="1"/>
      <edge id="113615" label="zzz1002,zzzz949" source="2727" target="217" cy:directed="1"/>
      <edge id="113614" label="zzz1002,zzzz975" source="2727" target="191" cy:directed="1"/>
      <edge id="113613" label="zzz1002,zzz1146" source="2727" target="2583" cy:directed="1"/>
      <edge id="113612" label="zzz1002,zzz1312" source="2727" target="2417" cy:directed="1"/>
      <edge id="113611" label="zzz1002,zzzz972" source="2727" target="194" cy:directed="1"/>
      <edge id="113610" label="zzz1002,zzz1049" source="2727" target="2680" cy:directed="1"/>
      <edge id="113609" label="zzz1002,zzz1138" source="2727" target="2591" cy:directed="1"/>
      <edge id="113608" label="zzz1002,zzzz965" source="2727" target="201" cy:directed="1"/>
      <edge id="113607" label="zzz1002,zzz1234" source="2727" target="2495" cy:directed="1"/>
      <edge id="113606" label="zzz1002,zzz1235" source="2727" target="2494" cy:directed="1"/>
      <edge id="113605" label="zzz1002,zzz1237" source="2727" target="2492" cy:directed="1"/>
      <edge id="113604" label="zzz1002,zzz1241" source="2727" target="2488" cy:directed="1"/>
      <edge id="113603" label="zzz1002,zzz1246" source="2727" target="2483" cy:directed="1"/>
      <edge id="113602" label="zzz1002,zzz1256" source="2727" target="2473" cy:directed="1"/>
      <edge id="113601" label="zzz1002,zzz1260" source="2727" target="2469" cy:directed="1"/>
      <edge id="113600" label="zzz1002,zzz1276" source="2727" target="2453" cy:directed="1"/>
      <edge id="113599" label="zzz1002,zzz1281" source="2727" target="2448" cy:directed="1"/>
      <edge id="113598" label="zzz1002,zzz1284" source="2727" target="2445" cy:directed="1"/>
      <edge id="113597" label="zzz1002,zzz1291" source="2727" target="2438" cy:directed="1"/>
      <edge id="113596" label="zzz1002,zzz1306" source="2727" target="2423" cy:directed="1"/>
      <edge id="113595" label="zzz1002,zzz1310" source="2727" target="2419" cy:directed="1"/>
      <edge id="113594" label="zzz1002,zzz2370" source="2727" target="1359" cy:directed="1"/>
      <edge id="113593" label="zzz1002,zzzz983" source="2727" target="183" cy:directed="1"/>
      <edge id="113592" label="zzz1002,zzz1042" source="2727" target="2687" cy:directed="1"/>
      <edge id="113591" label="zzz1002,zzz1055" source="2727" target="2674" cy:directed="1"/>
      <edge id="113590" label="zzz1002,zzz1232" source="2727" target="2497" cy:directed="1"/>
      <edge id="113589" label="zzz1002,zzz1361" source="2727" target="2368" cy:directed="1"/>
      <edge id="113588" label="zzz1002,zzz1321" source="2727" target="2408" cy:directed="1"/>
      <edge id="113587" label="zzz1002,zzz1347" source="2727" target="2382" cy:directed="1"/>
      <edge id="113586" label="zzz1002,zzz1345" source="2727" target="2384" cy:directed="1"/>
      <edge id="113585" label="zzz1002,zzz1350" source="2727" target="2379" cy:directed="1"/>
      <edge id="113584" label="zzz1002,zzzz938" source="2727" target="228" cy:directed="1"/>
      <edge id="113583" label="zzz1002,zzzz953" source="2727" target="213" cy:directed="1"/>
      <edge id="113582" label="zzz1002,zzz1228" source="2727" target="2501" cy:directed="1"/>
      <edge id="113581" label="zzz1002,zzz1298" source="2727" target="2431" cy:directed="1"/>
      <edge id="113580" label="zzz1002,zzz1344" source="2727" target="2385" cy:directed="1"/>
      <edge id="113579" label="zzz1002,zzzz947" source="2727" target="219" cy:directed="1"/>
      <edge id="113578" label="zzz1002,zzz1208" source="2727" target="2521" cy:directed="1"/>
      <edge id="113577" label="zzz1002,zzz1236" source="2727" target="2493" cy:directed="1"/>
      <edge id="113576" label="zzz1002,zzz1323" source="2727" target="2406" cy:directed="1"/>
      <edge id="113575" label="zzz1002,zzz1342" source="2727" target="2387" cy:directed="1"/>
      <edge id="113574" label="zzz1002,zzz1351" source="2727" target="2378" cy:directed="1"/>
      <edge id="113573" label="zzz1002,zzz1352" source="2727" target="2377" cy:directed="1"/>
      <edge id="113572" label="zzz1002,zzz1360" source="2727" target="2369" cy:directed="1"/>
      <edge id="113571" label="zzz1002,zzz1366" source="2727" target="2363" cy:directed="1"/>
      <edge id="113570" label="zzz1002,zzzz989" source="2727" target="177" cy:directed="1"/>
      <edge id="113569" label="zzz1002,zzzzz36" source="2727" target="140" cy:directed="1"/>
      <edge id="113568" label="zzz1002,zzz1064" source="2727" target="2665" cy:directed="1"/>
      <edge id="113567" label="zzz1002,zzz1150" source="2727" target="2579" cy:directed="1"/>
      <edge id="113566" label="zzz1002,zzz1341" source="2727" target="2388" cy:directed="1"/>
      <edge id="113565" label="zzz1002,zzzz984" source="2727" target="182" cy:directed="1"/>
      <edge id="113564" label="zzz1002,zzzz985" source="2727" target="181" cy:directed="1"/>
      <edge id="113563" label="zzz1002,zzzz986" source="2727" target="180" cy:directed="1"/>
      <edge id="113562" label="zzz1002,zzzzz81" source="2727" target="95" cy:directed="1"/>
      <edge id="113561" label="zzz1002,zzz1301" source="2727" target="2428" cy:directed="1"/>
      <edge id="113560" label="zzz1002,zzz1324" source="2727" target="2405" cy:directed="1"/>
      <edge id="113559" label="zzz1002,zzzz987" source="2727" target="179" cy:directed="1"/>
      <edge id="113558" label="zzz1002,zzz1212" source="2727" target="2517" cy:directed="1"/>
      <edge id="113557" label="zzz1002,zzz1238" source="2727" target="2491" cy:directed="1"/>
      <edge id="113556" label="zzz1002,zzz1315" source="2727" target="2414" cy:directed="1"/>
      <edge id="113555" label="zzz1002,zzzz988" source="2727" target="178" cy:directed="1"/>
      <edge id="113554" label="zzz1002,zzzzz32" source="2727" target="144" cy:directed="1"/>
      <edge id="113553" label="zzz1002,zzz1040" source="2727" target="2689" cy:directed="1"/>
      <edge id="113552" label="zzz1002,zzzz952" source="2727" target="214" cy:directed="1"/>
      <edge id="113551" label="zzz1002,zzzz971" source="2727" target="195" cy:directed="1"/>
      <edge id="113550" label="zzz1002,zzzz991" source="2727" target="175" cy:directed="1"/>
      <edge id="113549" label="zzz1002,zzz1071" source="2727" target="2658" cy:directed="1"/>
      <edge id="113548" label="zzz1002,zzz1299" source="2727" target="2430" cy:directed="1"/>
      <edge id="113547" label="zzz1002,zzzz955" source="2727" target="211" cy:directed="1"/>
      <edge id="113546" label="zzz1002,zzzzz34" source="2727" target="142" cy:directed="1"/>
      <edge id="113545" label="zzz1002,zzzz968" source="2727" target="198" cy:directed="1"/>
      <edge id="113544" label="zzz1002,zzz1334" source="2727" target="2395" cy:directed="1"/>
      <edge id="113543" label="zzz1002,zzz1343" source="2727" target="2386" cy:directed="1"/>
      <edge id="113542" label="zzz1002,zzz1365" source="2727" target="2364" cy:directed="1"/>
      <edge id="113541" label="zzz1002,zzzz963" source="2727" target="203" cy:directed="1"/>
      <edge id="113540" label="zzz1002,zzzz967" source="2727" target="199" cy:directed="1"/>
      <edge id="113539" label="zzz1002,zzzzz40" source="2727" target="136" cy:directed="1"/>
      <edge id="113538" label="zzz1002,zzz1032" source="2727" target="2697" cy:directed="1"/>
      <edge id="113537" label="zzz1002,zzzz945" source="2727" target="221" cy:directed="1"/>
      <edge id="113536" label="zzz1002,zzzzz90" source="2727" target="86" cy:directed="1"/>
      <edge id="113535" label="zzz1002,zzz1047" source="2727" target="2682" cy:directed="1"/>
      <edge id="113534" label="zzz1002,zzz1090" source="2727" target="2639" cy:directed="1"/>
      <edge id="113533" label="zzz1002,zzzz932" source="2727" target="234" cy:directed="1"/>
      <edge id="113532" label="zzz1002,zzzz964" source="2727" target="202" cy:directed="1"/>
      <edge id="113531" label="zzz1002,zzz1009" source="2727" target="2720" cy:directed="1"/>
      <edge id="113530" label="zzz1002,zzz1044" source="2727" target="2685" cy:directed="1"/>
      <edge id="113529" label="zzz1002,zzz1076" source="2727" target="2653" cy:directed="1"/>
      <edge id="113528" label="zzz1002,zzzz973" source="2727" target="193" cy:directed="1"/>
      <edge id="113527" label="zzz1002,zzzz979" source="2727" target="187" cy:directed="1"/>
      <edge id="113526" label="zzz1002,zzzzz38" source="2727" target="138" cy:directed="1"/>
      <edge id="113525" label="zzz1002,zzz1004" source="2727" target="2725" cy:directed="1"/>
      <edge id="113524" label="zzz1002,zzzz950" source="2727" target="216" cy:directed="1"/>
      <edge id="113523" label="zzz1002,zzzzz18" source="2727" target="158" cy:directed="1"/>
      <edge id="113522" label="zzz1002,zzzzz27" source="2727" target="149" cy:directed="1"/>
      <edge id="113521" label="zzz1002,zzz1338" source="2727" target="2391" cy:directed="1"/>
      <edge id="113520" label="zzz1002,zzzz980" source="2727" target="186" cy:directed="1"/>
      <edge id="113519" label="zzz1002,zzz1322" source="2727" target="2407" cy:directed="1"/>
      <edge id="113518" label="zzz1002,zzz1066" source="2727" target="2663" cy:directed="1"/>
      <edge id="113517" label="zzz1002,zzz1331" source="2727" target="2398" cy:directed="1"/>
      <edge id="113516" label="zzz1002,zzz1339" source="2727" target="2390" cy:directed="1"/>
      <edge id="113515" label="zzz1002,zzzz956" source="2727" target="210" cy:directed="1"/>
      <edge id="113514" label="zzz1002,zzzz996" source="2727" target="170" cy:directed="1"/>
      <edge id="113513" label="zzz1002,zzzz981" source="2727" target="185" cy:directed="1"/>
      <edge id="113512" label="zzz1002,zzzzz26" source="2727" target="150" cy:directed="1"/>
      <edge id="113511" label="zzz1002,zzz1056" source="2727" target="2673" cy:directed="1"/>
      <edge id="113510" label="zzz1002,zzzz936" source="2727" target="230" cy:directed="1"/>
      <edge id="113509" label="zzz1002,zzz1010" source="2727" target="2719" cy:directed="1"/>
      <edge id="113508" label="zzz1002,zzz1057" source="2727" target="2672" cy:directed="1"/>
      <edge id="113507" label="zzz1002,zzz1140" source="2727" target="2589" cy:directed="1"/>
      <edge id="113506" label="zzz1002,zzz1200" source="2727" target="2529" cy:directed="1"/>
      <edge id="113505" label="zzz1002,zzz1202" source="2727" target="2527" cy:directed="1"/>
      <edge id="113504" label="zzz1002,zzz1227" source="2727" target="2502" cy:directed="1"/>
      <edge id="113503" label="zzz1002,zzz1099" source="2727" target="2630" cy:directed="1"/>
      <edge id="113502" label="zzz1002,zzz1201" source="2727" target="2528" cy:directed="1"/>
      <edge id="113501" label="zzz1002,zzz1203" source="2727" target="2526" cy:directed="1"/>
      <edge id="113500" label="zzz1002,zzz1205" source="2727" target="2524" cy:directed="1"/>
      <edge id="113499" label="zzz1002,zzz1204" source="2727" target="2525" cy:directed="1"/>
      <edge id="113498" label="zzz1002,zzz1333" source="2727" target="2396" cy:directed="1"/>
      <edge id="113497" label="zzz1002,zzz1016" source="2727" target="2713" cy:directed="1"/>
      <edge id="113496" label="zzz1002,zzz1034" source="2727" target="2695" cy:directed="1"/>
      <edge id="113495" label="zzz1002,zzz1198" source="2727" target="2531" cy:directed="1"/>
      <edge id="113494" label="zzz1002,zzz1199" source="2727" target="2530" cy:directed="1"/>
      <edge id="113493" label="zzz1002,zzz1017" source="2727" target="2712" cy:directed="1"/>
      <edge id="113492" label="zzz1002,zzz1103" source="2727" target="2626" cy:directed="1"/>
      <edge id="113491" label="zzz1002,zzz1108" source="2727" target="2621" cy:directed="1"/>
      <edge id="113490" label="zzz1002,zzz1105" source="2727" target="2624" cy:directed="1"/>
      <edge id="113489" label="zzz1002,zzz1084" source="2727" target="2645" cy:directed="1"/>
      <edge id="113488" label="zzz1002,zzz1107" source="2727" target="2622" cy:directed="1"/>
      <edge id="113487" label="zzz1002,zzz1325" source="2727" target="2404" cy:directed="1"/>
      <edge id="113486" label="zzz1002,zzzz993" source="2727" target="173" cy:directed="1"/>
      <edge id="113485" label="zzz1002,zzzzz21" source="2727" target="155" cy:directed="1"/>
      <edge id="113484" label="zzz1002,zzz1129" source="2727" target="2600" cy:directed="1"/>
      <edge id="113483" label="zzz1002,zzz1206" source="2727" target="2523" cy:directed="1"/>
      <edge id="113482" label="zzz1002,zzz1054" source="2727" target="2675" cy:directed="1"/>
      <edge id="113481" label="zzz1002,zzz1109" source="2727" target="2620" cy:directed="1"/>
      <edge id="113480" label="zzz1002,zzzzz30" source="2727" target="146" cy:directed="1"/>
      <edge id="113479" label="zzz1002,zzz1061" source="2727" target="2668" cy:directed="1"/>
      <edge id="113478" label="zzz1002,zzz1062" source="2727" target="2667" cy:directed="1"/>
      <edge id="113477" label="zzz1002,zzzz982" source="2727" target="184" cy:directed="1"/>
      <edge id="113476" label="zzz1002,zzzz997" source="2727" target="169" cy:directed="1"/>
      <edge id="113475" label="zzz1002,zzzzzz3" source="2727" target="73" cy:directed="1"/>
      <edge id="113474" label="zzz1002,zzz1335" source="2727" target="2394" cy:directed="1"/>
      <edge id="113473" label="zzz1002,zzz1367" source="2727" target="2362" cy:directed="1"/>
      <edge id="113472" label="zzz1002,zzz1011" source="2727" target="2718" cy:directed="1"/>
      <edge id="113471" label="zzz1002,zzz1018" source="2727" target="2711" cy:directed="1"/>
      <edge id="113470" label="zzz1002,zzzz994" source="2727" target="172" cy:directed="1"/>
      <edge id="113469" label="zzz1002,zzzzz84" source="2727" target="92" cy:directed="1"/>
      <edge id="113468" label="zzz1002,zzz1330" source="2727" target="2399" cy:directed="1"/>
      <edge id="113467" label="zzz1002,zzzz992" source="2727" target="174" cy:directed="1"/>
      <edge id="113466" label="zzz1002,zzz1003" source="2727" target="2726" cy:directed="1"/>
      <edge id="113465" label="zzz1002,zzz1006" source="2727" target="2723" cy:directed="1"/>
      <edge id="113464" label="zzz1002,zzz1320" source="2727" target="2409" cy:directed="1"/>
      <edge id="113463" label="zzz1002,zzz1068" source="2727" target="2661" cy:directed="1"/>
      <edge id="113462" label="zzz1002,zzz1151" source="2727" target="2578" cy:directed="1"/>
      <edge id="113461" label="zzz1002,zzzz958" source="2727" target="208" cy:directed="1"/>
      <edge id="113460" label="zzz1002,zzz1005" source="2727" target="2724" cy:directed="1"/>
      <edge id="113459" label="zzz1002,zzz1327" source="2727" target="2402" cy:directed="1"/>
      <edge id="113458" label="zzz1002,zzz1046" source="2727" target="2683" cy:directed="1"/>
      <edge id="113457" label="zzz1002,zzz2390" source="2727" target="1339" cy:directed="1"/>
      <edge id="113456" label="zzz1002,zzzz960" source="2727" target="206" cy:directed="1"/>
      <edge id="113455" label="zzz1002,zzzzzz4" source="2727" target="72" cy:directed="1"/>
      <edge id="113454" label="zzz1002,zzz1030" source="2727" target="2699" cy:directed="1"/>
      <edge id="113453" label="zzz1002,zzz1031" source="2727" target="2698" cy:directed="1"/>
      <edge id="113452" label="zzz1002,zzz1058" source="2727" target="2671" cy:directed="1"/>
      <edge id="113451" label="zzz1002,zzzz933" source="2727" target="233" cy:directed="1"/>
      <edge id="113450" label="zzz1002,zzz1215" source="2727" target="2514" cy:directed="1"/>
      <edge id="113449" label="zzz1002,zzzz954" source="2727" target="212" cy:directed="1"/>
      <edge id="113448" label="zzz1003,zzzz946" source="2726" target="220" cy:directed="1"/>
      <edge id="113447" label="zzz1003,zzz1028" source="2726" target="2701" cy:directed="1"/>
      <edge id="113446" label="zzz1003,zzzz970" source="2726" target="196" cy:directed="1"/>
      <edge id="113445" label="zzz1003,zzz1073" source="2726" target="2656" cy:directed="1"/>
      <edge id="113444" label="zzz1003,zzz1048" source="2726" target="2681" cy:directed="1"/>
      <edge id="113443" label="zzz1003,zzzz969" source="2726" target="197" cy:directed="1"/>
      <edge id="113442" label="zzz1003,zzz1095" source="2726" target="2634" cy:directed="1"/>
      <edge id="113441" label="zzz1003,zzz1329" source="2726" target="2400" cy:directed="1"/>
      <edge id="113440" label="zzz1003,zzzz100" source="2726" target="1066" cy:directed="1"/>
      <edge id="113439" label="zzz1003,zzzzz32" source="2726" target="144" cy:directed="1"/>
      <edge id="113438" label="zzz1003,zzz1150" source="2726" target="2579" cy:directed="1"/>
      <edge id="113437" label="zzz1003,zzzz987" source="2726" target="179" cy:directed="1"/>
      <edge id="113436" label="zzz1003,zzzz988" source="2726" target="178" cy:directed="1"/>
      <edge id="113435" label="zzz1003,zzzz989" source="2726" target="177" cy:directed="1"/>
      <edge id="113434" label="zzz1003,zzzz984" source="2726" target="182" cy:directed="1"/>
      <edge id="113433" label="zzz1003,zzzz985" source="2726" target="181" cy:directed="1"/>
      <edge id="113432" label="zzz1003,zzzz986" source="2726" target="180" cy:directed="1"/>
      <edge id="113431" label="zzz1003,zzz1234" source="2726" target="2495" cy:directed="1"/>
      <edge id="113430" label="zzz1003,zzzzz81" source="2726" target="95" cy:directed="1"/>
      <edge id="113429" label="zzz1003,zzz1092" source="2726" target="2637" cy:directed="1"/>
      <edge id="113428" label="zzz1003,zzzzz34" source="2726" target="142" cy:directed="1"/>
      <edge id="113427" label="zzz1003,zzzzzz6" source="2726" target="70" cy:directed="1"/>
      <edge id="113426" label="zzz1003,zzzz973" source="2726" target="193" cy:directed="1"/>
      <edge id="113425" label="zzz1003,zzz1349" source="2726" target="2380" cy:directed="1"/>
      <edge id="113424" label="zzz1003,zzzz972" source="2726" target="194" cy:directed="1"/>
      <edge id="113423" label="zzz1003,zzzz990" source="2726" target="176" cy:directed="1"/>
      <edge id="113422" label="zzz1003,zzzzz36" source="2726" target="140" cy:directed="1"/>
      <edge id="113421" label="zzz1003,zzz1340" source="2726" target="2389" cy:directed="1"/>
      <edge id="113420" label="zzz1003,zzz1274" source="2726" target="2455" cy:directed="1"/>
      <edge id="113419" label="zzz1003,zzz1292" source="2726" target="2437" cy:directed="1"/>
      <edge id="113418" label="zzz1003,zzz1293" source="2726" target="2436" cy:directed="1"/>
      <edge id="113417" label="zzz1003,zzz1312" source="2726" target="2417" cy:directed="1"/>
      <edge id="113416" label="zzz1003,zzz1355" source="2726" target="2374" cy:directed="1"/>
      <edge id="113415" label="zzz1003,zzz1244" source="2726" target="2485" cy:directed="1"/>
      <edge id="113414" label="zzz1003,zzz1248" source="2726" target="2481" cy:directed="1"/>
      <edge id="113413" label="zzz1003,zzz1251" source="2726" target="2478" cy:directed="1"/>
      <edge id="113412" label="zzz1003,zzz1257" source="2726" target="2472" cy:directed="1"/>
      <edge id="113411" label="zzz1003,zzz1261" source="2726" target="2468" cy:directed="1"/>
      <edge id="113410" label="zzz1003,zzz1273" source="2726" target="2456" cy:directed="1"/>
      <edge id="113409" label="zzz1003,zzz1280" source="2726" target="2449" cy:directed="1"/>
      <edge id="113408" label="zzz1003,zzz1307" source="2726" target="2422" cy:directed="1"/>
      <edge id="113407" label="zzz1003,zzzz991" source="2726" target="175" cy:directed="1"/>
      <edge id="113406" label="zzz1003,zzz1305" source="2726" target="2424" cy:directed="1"/>
      <edge id="113405" label="zzz1003,zzz1344" source="2726" target="2385" cy:directed="1"/>
      <edge id="113404" label="zzz1003,zzz1345" source="2726" target="2384" cy:directed="1"/>
      <edge id="113403" label="zzz1003,zzz1137" source="2726" target="2592" cy:directed="1"/>
      <edge id="113402" label="zzz1003,zzz1236" source="2726" target="2493" cy:directed="1"/>
      <edge id="113401" label="zzz1003,zzz1301" source="2726" target="2428" cy:directed="1"/>
      <edge id="113400" label="zzz1003,zzz1342" source="2726" target="2387" cy:directed="1"/>
      <edge id="113399" label="zzz1003,zzz1235" source="2726" target="2494" cy:directed="1"/>
      <edge id="113398" label="zzz1003,zzz1237" source="2726" target="2492" cy:directed="1"/>
      <edge id="113397" label="zzz1003,zzz1241" source="2726" target="2488" cy:directed="1"/>
      <edge id="113396" label="zzz1003,zzz1246" source="2726" target="2483" cy:directed="1"/>
      <edge id="113395" label="zzz1003,zzz1256" source="2726" target="2473" cy:directed="1"/>
      <edge id="113394" label="zzz1003,zzz1260" source="2726" target="2469" cy:directed="1"/>
      <edge id="113393" label="zzz1003,zzz1276" source="2726" target="2453" cy:directed="1"/>
      <edge id="113392" label="zzz1003,zzz1281" source="2726" target="2448" cy:directed="1"/>
      <edge id="113391" label="zzz1003,zzz1284" source="2726" target="2445" cy:directed="1"/>
      <edge id="113390" label="zzz1003,zzz1291" source="2726" target="2438" cy:directed="1"/>
      <edge id="113389" label="zzz1003,zzz1306" source="2726" target="2423" cy:directed="1"/>
      <edge id="113388" label="zzz1003,zzz1341" source="2726" target="2388" cy:directed="1"/>
      <edge id="113387" label="zzz1003,zzz1347" source="2726" target="2382" cy:directed="1"/>
      <edge id="113386" label="zzz1003,zzz1350" source="2726" target="2379" cy:directed="1"/>
      <edge id="113385" label="zzz1003,zzz1351" source="2726" target="2378" cy:directed="1"/>
      <edge id="113384" label="zzz1003,zzz1352" source="2726" target="2377" cy:directed="1"/>
      <edge id="113383" label="zzz1003,zzz1360" source="2726" target="2369" cy:directed="1"/>
      <edge id="113382" label="zzz1003,zzz1298" source="2726" target="2431" cy:directed="1"/>
      <edge id="113381" label="zzz1003,zzz1219" source="2726" target="2510" cy:directed="1"/>
      <edge id="113380" label="zzz1003,zzz1238" source="2726" target="2491" cy:directed="1"/>
      <edge id="113379" label="zzz1003,zzz1220" source="2726" target="2509" cy:directed="1"/>
      <edge id="113378" label="zzz1003,zzz1343" source="2726" target="2386" cy:directed="1"/>
      <edge id="113377" label="zzz1003,zzz1060" source="2726" target="2669" cy:directed="1"/>
      <edge id="113376" label="zzz1003,zzz1035" source="2726" target="2694" cy:directed="1"/>
      <edge id="113375" label="zzz1003,zzz1038" source="2726" target="2691" cy:directed="1"/>
      <edge id="113374" label="zzz1003,zzz1193" source="2726" target="2536" cy:directed="1"/>
      <edge id="113373" label="zzz1003,zzz1196" source="2726" target="2533" cy:directed="1"/>
      <edge id="113372" label="zzz1003,zzz1337" source="2726" target="2392" cy:directed="1"/>
      <edge id="113371" label="zzz1003,zzzzz16" source="2726" target="160" cy:directed="1"/>
      <edge id="113370" label="zzz1003,zzz1036" source="2726" target="2693" cy:directed="1"/>
      <edge id="113369" label="zzz1003,zzz1326" source="2726" target="2403" cy:directed="1"/>
      <edge id="113368" label="zzz1003,zzz1144" source="2726" target="2585" cy:directed="1"/>
      <edge id="113367" label="zzz1003,zzz1145" source="2726" target="2584" cy:directed="1"/>
      <edge id="113366" label="zzz1003,zzz1195" source="2726" target="2534" cy:directed="1"/>
      <edge id="113365" label="zzz1003,zzz1328" source="2726" target="2401" cy:directed="1"/>
      <edge id="113364" label="zzz1003,zzz1064" source="2726" target="2665" cy:directed="1"/>
      <edge id="113363" label="zzz1003,zzz1147" source="2726" target="2582" cy:directed="1"/>
      <edge id="113362" label="zzz1003,zzz1194" source="2726" target="2535" cy:directed="1"/>
      <edge id="113361" label="zzz1003,zzz1192" source="2726" target="2537" cy:directed="1"/>
      <edge id="113360" label="zzz1003,zzz1245" source="2726" target="2484" cy:directed="1"/>
      <edge id="113359" label="zzz1003,zzz1249" source="2726" target="2480" cy:directed="1"/>
      <edge id="113358" label="zzz1003,zzz1255" source="2726" target="2474" cy:directed="1"/>
      <edge id="113357" label="zzz1003,zzz1258" source="2726" target="2471" cy:directed="1"/>
      <edge id="113356" label="zzz1003,zzz1265" source="2726" target="2464" cy:directed="1"/>
      <edge id="113355" label="zzz1003,zzz1268" source="2726" target="2461" cy:directed="1"/>
      <edge id="113354" label="zzz1003,zzz1275" source="2726" target="2454" cy:directed="1"/>
      <edge id="113353" label="zzz1003,zzz1302" source="2726" target="2427" cy:directed="1"/>
      <edge id="113352" label="zzz1003,zzz1309" source="2726" target="2420" cy:directed="1"/>
      <edge id="113351" label="zzz1003,zzz1311" source="2726" target="2418" cy:directed="1"/>
      <edge id="113350" label="zzz1003,zzz1299" source="2726" target="2430" cy:directed="1"/>
      <edge id="113349" label="zzz1003,zzz1303" source="2726" target="2426" cy:directed="1"/>
      <edge id="113348" label="zzz1003,zzz1323" source="2726" target="2406" cy:directed="1"/>
      <edge id="113347" label="zzz1003,zzz1346" source="2726" target="2383" cy:directed="1"/>
      <edge id="113346" label="zzz1003,zzzz967" source="2726" target="199" cy:directed="1"/>
      <edge id="113345" label="zzz1003,zzz1089" source="2726" target="2640" cy:directed="1"/>
      <edge id="113344" label="zzz1003,zzz1091" source="2726" target="2638" cy:directed="1"/>
      <edge id="113343" label="zzz1003,zzz1197" source="2726" target="2532" cy:directed="1"/>
      <edge id="113342" label="zzz1003,zzz1279" source="2726" target="2450" cy:directed="1"/>
      <edge id="113341" label="zzz1003,zzz1290" source="2726" target="2439" cy:directed="1"/>
      <edge id="113340" label="zzz1003,zzz1297" source="2726" target="2432" cy:directed="1"/>
      <edge id="113339" label="zzz1003,zzz1358" source="2726" target="2371" cy:directed="1"/>
      <edge id="113338" label="zzz1003,zzz1359" source="2726" target="2370" cy:directed="1"/>
      <edge id="113337" label="zzz1003,zzzz938" source="2726" target="228" cy:directed="1"/>
      <edge id="113336" label="zzz1003,zzz1123" source="2726" target="2606" cy:directed="1"/>
      <edge id="113335" label="zzz1003,zzz1132" source="2726" target="2597" cy:directed="1"/>
      <edge id="113334" label="zzz1003,zzz1269" source="2726" target="2460" cy:directed="1"/>
      <edge id="113333" label="zzz1003,zzz1310" source="2726" target="2419" cy:directed="1"/>
      <edge id="113332" label="zzz1003,zzz1324" source="2726" target="2405" cy:directed="1"/>
      <edge id="113331" label="zzz1003,zzz1063" source="2726" target="2666" cy:directed="1"/>
      <edge id="113330" label="zzz1003,zzzz947" source="2726" target="219" cy:directed="1"/>
      <edge id="113329" label="zzz1003,zzzzz93" source="2726" target="83" cy:directed="1"/>
      <edge id="113328" label="zzz1003,zzz1146" source="2726" target="2583" cy:directed="1"/>
      <edge id="113327" label="zzz1003,zzzz996" source="2726" target="170" cy:directed="1"/>
      <edge id="113326" label="zzz1003,zzzzz38" source="2726" target="138" cy:directed="1"/>
      <edge id="113325" label="zzz1003,zzzz971" source="2726" target="195" cy:directed="1"/>
      <edge id="113324" label="zzz1003,zzz1055" source="2726" target="2674" cy:directed="1"/>
      <edge id="113323" label="zzz1003,zzzzz23" source="2726" target="153" cy:directed="1"/>
      <edge id="113322" label="zzz1003,zzz1080" source="2726" target="2649" cy:directed="1"/>
      <edge id="113321" label="zzz1003,zzz1081" source="2726" target="2648" cy:directed="1"/>
      <edge id="113320" label="zzz1003,zzz1096" source="2726" target="2633" cy:directed="1"/>
      <edge id="113319" label="zzz1003,zzz1348" source="2726" target="2381" cy:directed="1"/>
      <edge id="113318" label="zzz1003,zzzzz28" source="2726" target="148" cy:directed="1"/>
      <edge id="113317" label="zzz1003,zzz1334" source="2726" target="2395" cy:directed="1"/>
      <edge id="113316" label="zzz1003,zzz1128" source="2726" target="2601" cy:directed="1"/>
      <edge id="113315" label="zzz1003,zzz1314" source="2726" target="2415" cy:directed="1"/>
      <edge id="113314" label="zzz1003,zzz1042" source="2726" target="2687" cy:directed="1"/>
      <edge id="113313" label="zzz1003,zzz1049" source="2726" target="2680" cy:directed="1"/>
      <edge id="113312" label="zzz1003,zzz1356" source="2726" target="2373" cy:directed="1"/>
      <edge id="113311" label="zzz1003,zzzz966" source="2726" target="200" cy:directed="1"/>
      <edge id="113310" label="zzz1003,zzz1097" source="2726" target="2632" cy:directed="1"/>
      <edge id="113309" label="zzz1003,zzz1118" source="2726" target="2611" cy:directed="1"/>
      <edge id="113308" label="zzz1003,zzzzz95" source="2726" target="81" cy:directed="1"/>
      <edge id="113307" label="zzz1003,zzz1098" source="2726" target="2631" cy:directed="1"/>
      <edge id="113306" label="zzz1003,zzz1101" source="2726" target="2628" cy:directed="1"/>
      <edge id="113305" label="zzz1003,zzz1079" source="2726" target="2650" cy:directed="1"/>
      <edge id="113304" label="zzz1003,zzz1082" source="2726" target="2647" cy:directed="1"/>
      <edge id="113303" label="zzz1003,zzz1117" source="2726" target="2612" cy:directed="1"/>
      <edge id="113302" label="zzz1003,zzzz968" source="2726" target="198" cy:directed="1"/>
      <edge id="113301" label="zzz1003,zzz1071" source="2726" target="2658" cy:directed="1"/>
      <edge id="113300" label="zzz1003,zzz1114" source="2726" target="2615" cy:directed="1"/>
      <edge id="113299" label="zzz1003,zzz1047" source="2726" target="2682" cy:directed="1"/>
      <edge id="113298" label="zzz1003,zzz1100" source="2726" target="2629" cy:directed="1"/>
      <edge id="113297" label="zzz1003,zzz1362" source="2726" target="2367" cy:directed="1"/>
      <edge id="113296" label="zzz1003,zzzz937" source="2726" target="229" cy:directed="1"/>
      <edge id="113295" label="zzz1003,zzzz961" source="2726" target="205" cy:directed="1"/>
      <edge id="113294" label="zzz1003,zzzzz91" source="2726" target="85" cy:directed="1"/>
      <edge id="113293" label="zzz1003,zzz1032" source="2726" target="2697" cy:directed="1"/>
      <edge id="113292" label="zzz1003,zzz1037" source="2726" target="2692" cy:directed="1"/>
      <edge id="113291" label="zzz1003,zzz1039" source="2726" target="2690" cy:directed="1"/>
      <edge id="113290" label="zzz1003,zzz1104" source="2726" target="2625" cy:directed="1"/>
      <edge id="113289" label="zzz1003,zzz1119" source="2726" target="2610" cy:directed="1"/>
      <edge id="113288" label="zzz1003,zzz1285" source="2726" target="2444" cy:directed="1"/>
      <edge id="113287" label="zzz1003,zzz1288" source="2726" target="2441" cy:directed="1"/>
      <edge id="113286" label="zzz1003,zzzz997" source="2726" target="169" cy:directed="1"/>
      <edge id="113285" label="zzz1003,zzzzz29" source="2726" target="147" cy:directed="1"/>
      <edge id="113284" label="zzz1003,zzzzz84" source="2726" target="92" cy:directed="1"/>
      <edge id="113283" label="zzz1003,zzz1040" source="2726" target="2689" cy:directed="1"/>
      <edge id="113282" label="zzz1003,zzz1044" source="2726" target="2685" cy:directed="1"/>
      <edge id="113281" label="zzz1003,zzz1111" source="2726" target="2618" cy:directed="1"/>
      <edge id="113280" label="zzz1003,zzz1152" source="2726" target="2577" cy:directed="1"/>
      <edge id="113279" label="zzz1003,zzz1154" source="2726" target="2575" cy:directed="1"/>
      <edge id="113278" label="zzz1003,zzz1253" source="2726" target="2476" cy:directed="1"/>
      <edge id="113277" label="zzz1003,zzz1295" source="2726" target="2434" cy:directed="1"/>
      <edge id="113276" label="zzz1003,zzz1300" source="2726" target="2429" cy:directed="1"/>
      <edge id="113275" label="zzz1003,zzzz939" source="2726" target="227" cy:directed="1"/>
      <edge id="113274" label="zzz1003,zzzz940" source="2726" target="226" cy:directed="1"/>
      <edge id="113273" label="zzz1003,zzzz941" source="2726" target="225" cy:directed="1"/>
      <edge id="113272" label="zzz1003,zzzz942" source="2726" target="224" cy:directed="1"/>
      <edge id="113271" label="zzz1003,zzzz976" source="2726" target="190" cy:directed="1"/>
      <edge id="113270" label="zzz1003,zzzz977" source="2726" target="189" cy:directed="1"/>
      <edge id="113269" label="zzz1003,zzzz978" source="2726" target="188" cy:directed="1"/>
      <edge id="113268" label="zzz1003,zzzzz13" source="2726" target="163" cy:directed="1"/>
      <edge id="113267" label="zzz1003,zzz1041" source="2726" target="2688" cy:directed="1"/>
      <edge id="113266" label="zzz1003,zzz1046" source="2726" target="2683" cy:directed="1"/>
      <edge id="113265" label="zzz1003,zzz1142" source="2726" target="2587" cy:directed="1"/>
      <edge id="113264" label="zzz1003,zzz1143" source="2726" target="2586" cy:directed="1"/>
      <edge id="113263" label="zzz1003,zzz1148" source="2726" target="2581" cy:directed="1"/>
      <edge id="113262" label="zzz1003,zzz1149" source="2726" target="2580" cy:directed="1"/>
      <edge id="113261" label="zzz1003,zzz1153" source="2726" target="2576" cy:directed="1"/>
      <edge id="113260" label="zzz1003,zzz1263" source="2726" target="2466" cy:directed="1"/>
      <edge id="113259" label="zzz1003,zzz1267" source="2726" target="2462" cy:directed="1"/>
      <edge id="113258" label="zzz1003,zzz1277" source="2726" target="2452" cy:directed="1"/>
      <edge id="113257" label="zzz1003,zzz1282" source="2726" target="2447" cy:directed="1"/>
      <edge id="113256" label="zzz1003,zzz1286" source="2726" target="2443" cy:directed="1"/>
      <edge id="113255" label="zzz1003,zzz1308" source="2726" target="2421" cy:directed="1"/>
      <edge id="113254" label="zzz1003,zzz1287" source="2726" target="2442" cy:directed="1"/>
      <edge id="113253" label="zzz1003,zzzz931" source="2726" target="235" cy:directed="1"/>
      <edge id="113252" label="zzz1003,zzzzz80" source="2726" target="96" cy:directed="1"/>
      <edge id="113251" label="zzz1003,zzz1010" source="2726" target="2719" cy:directed="1"/>
      <edge id="113250" label="zzz1003,zzz1043" source="2726" target="2686" cy:directed="1"/>
      <edge id="113249" label="zzz1003,zzz1066" source="2726" target="2663" cy:directed="1"/>
      <edge id="113248" label="zzz1003,zzz1074" source="2726" target="2655" cy:directed="1"/>
      <edge id="113247" label="zzz1003,zzz1087" source="2726" target="2642" cy:directed="1"/>
      <edge id="113246" label="zzz1003,zzz1247" source="2726" target="2482" cy:directed="1"/>
      <edge id="113245" label="zzz1003,zzz1278" source="2726" target="2451" cy:directed="1"/>
      <edge id="113244" label="zzz1003,zzz1313" source="2726" target="2416" cy:directed="1"/>
      <edge id="113243" label="zzz1003,zzz1318" source="2726" target="2411" cy:directed="1"/>
      <edge id="113242" label="zzz1003,zzz1330" source="2726" target="2399" cy:directed="1"/>
      <edge id="113241" label="zzz1003,zzz1338" source="2726" target="2391" cy:directed="1"/>
      <edge id="113240" label="zzz1003,zzzz993" source="2726" target="173" cy:directed="1"/>
      <edge id="113239" label="zzz1003,zzzzz11" source="2726" target="165" cy:directed="1"/>
      <edge id="113238" label="zzz1003,zzzzz25" source="2726" target="151" cy:directed="1"/>
      <edge id="113237" label="zzz1003,zzzzzz4" source="2726" target="72" cy:directed="1"/>
      <edge id="113236" label="zzz1003,zzz1339" source="2726" target="2390" cy:directed="1"/>
      <edge id="113235" label="zzz1003,zzzz934" source="2726" target="232" cy:directed="1"/>
      <edge id="113234" label="zzz1003,zzz1033" source="2726" target="2696" cy:directed="1"/>
      <edge id="113233" label="zzz1003,zzz1165" source="2726" target="2564" cy:directed="1"/>
      <edge id="113232" label="zzz1003,zzz2390" source="2726" target="1339" cy:directed="1"/>
      <edge id="113231" label="zzz1003,zzzz935" source="2726" target="231" cy:directed="1"/>
      <edge id="113230" label="zzz1003,zzz1021" source="2726" target="2708" cy:directed="1"/>
      <edge id="113229" label="zzz1003,zzz1206" source="2726" target="2523" cy:directed="1"/>
      <edge id="113228" label="zzz1003,zzz1335" source="2726" target="2394" cy:directed="1"/>
      <edge id="113227" label="zzz1003,zzz1336" source="2726" target="2393" cy:directed="1"/>
      <edge id="113226" label="zzz1003,zzz1102" source="2726" target="2627" cy:directed="1"/>
      <edge id="113225" label="zzz1003,zzz1320" source="2726" target="2409" cy:directed="1"/>
      <edge id="113224" label="zzz1003,zzz2375" source="2726" target="1354" cy:directed="1"/>
      <edge id="113223" label="zzz1003,zzz1007" source="2726" target="2722" cy:directed="1"/>
      <edge id="113222" label="zzz1003,zzz1289" source="2726" target="2440" cy:directed="1"/>
      <edge id="113221" label="zzz1003,zzz1333" source="2726" target="2396" cy:directed="1"/>
      <edge id="113220" label="zzz1003,zzz1354" source="2726" target="2375" cy:directed="1"/>
      <edge id="113219" label="zzz1003,zzzz951" source="2726" target="215" cy:directed="1"/>
      <edge id="113218" label="zzz1003,zzzzz12" source="2726" target="164" cy:directed="1"/>
      <edge id="113217" label="zzz1003,zzzzz33" source="2726" target="143" cy:directed="1"/>
      <edge id="113216" label="zzz1003,zzzzz39" source="2726" target="137" cy:directed="1"/>
      <edge id="113215" label="zzz1003,zzzzz40" source="2726" target="136" cy:directed="1"/>
      <edge id="113214" label="zzz1003,zzzzz90" source="2726" target="86" cy:directed="1"/>
      <edge id="113213" label="zzz1003,zzz1008" source="2726" target="2721" cy:directed="1"/>
      <edge id="113212" label="zzz1003,zzz1086" source="2726" target="2643" cy:directed="1"/>
      <edge id="113211" label="zzz1003,zzz1094" source="2726" target="2635" cy:directed="1"/>
      <edge id="113210" label="zzz1003,zzz1120" source="2726" target="2609" cy:directed="1"/>
      <edge id="113209" label="zzz1003,zzz1217" source="2726" target="2512" cy:directed="1"/>
      <edge id="113208" label="zzz1003,zzz1242" source="2726" target="2487" cy:directed="1"/>
      <edge id="113207" label="zzz1003,zzz1252" source="2726" target="2477" cy:directed="1"/>
      <edge id="113206" label="zzz1003,zzz1254" source="2726" target="2475" cy:directed="1"/>
      <edge id="113205" label="zzz1003,zzz1262" source="2726" target="2467" cy:directed="1"/>
      <edge id="113204" label="zzz1003,zzz1272" source="2726" target="2457" cy:directed="1"/>
      <edge id="113203" label="zzz1003,zzz1264" source="2726" target="2465" cy:directed="1"/>
      <edge id="113202" label="zzz1003,zzz1283" source="2726" target="2446" cy:directed="1"/>
      <edge id="113201" label="zzz1003,zzz1270" source="2726" target="2459" cy:directed="1"/>
      <edge id="113200" label="zzz1003,zzz1304" source="2726" target="2425" cy:directed="1"/>
      <edge id="113199" label="zzz1003,zzzzz22" source="2726" target="154" cy:directed="1"/>
      <edge id="113198" label="zzz1003,zzz1011" source="2726" target="2718" cy:directed="1"/>
      <edge id="113197" label="zzz1003,zzz1022" source="2726" target="2707" cy:directed="1"/>
      <edge id="113196" label="zzz1003,zzz1045" source="2726" target="2684" cy:directed="1"/>
      <edge id="113195" label="zzz1003,zzz1110" source="2726" target="2619" cy:directed="1"/>
      <edge id="113194" label="zzz1003,zzz1125" source="2726" target="2604" cy:directed="1"/>
      <edge id="113193" label="zzz1003,zzz1141" source="2726" target="2588" cy:directed="1"/>
      <edge id="113192" label="zzz1003,zzz1161" source="2726" target="2568" cy:directed="1"/>
      <edge id="113191" label="zzz1003,zzz1296" source="2726" target="2433" cy:directed="1"/>
      <edge id="113190" label="zzz1003,zzz1331" source="2726" target="2398" cy:directed="1"/>
      <edge id="113189" label="zzz1003,zzz2386" source="2726" target="1343" cy:directed="1"/>
      <edge id="113188" label="zzz1003,zzzz949" source="2726" target="217" cy:directed="1"/>
      <edge id="113187" label="zzz1003,zzz1025" source="2726" target="2704" cy:directed="1"/>
      <edge id="113186" label="zzz1003,zzz1029" source="2726" target="2700" cy:directed="1"/>
      <edge id="113185" label="zzz1003,zzz1240" source="2726" target="2489" cy:directed="1"/>
      <edge id="113184" label="zzz1003,zzz1024" source="2726" target="2705" cy:directed="1"/>
      <edge id="113183" label="zzz1003,zzz1030" source="2726" target="2699" cy:directed="1"/>
      <edge id="113182" label="zzz1003,zzz1031" source="2726" target="2698" cy:directed="1"/>
      <edge id="113181" label="zzz1003,zzz1124" source="2726" target="2605" cy:directed="1"/>
      <edge id="113180" label="zzz1003,zzz1106" source="2726" target="2623" cy:directed="1"/>
      <edge id="113179" label="zzz1003,zzz1178" source="2726" target="2551" cy:directed="1"/>
      <edge id="113178" label="zzz1003,zzz1208" source="2726" target="2521" cy:directed="1"/>
      <edge id="113177" label="zzz1003,zzzz933" source="2726" target="233" cy:directed="1"/>
      <edge id="113176" label="zzz1003,zzz1067" source="2726" target="2662" cy:directed="1"/>
      <edge id="113175" label="zzz1003,zzz1116" source="2726" target="2613" cy:directed="1"/>
      <edge id="113174" label="zzz1003,zzz1271" source="2726" target="2458" cy:directed="1"/>
      <edge id="113173" label="zzz1003,zzz1327" source="2726" target="2402" cy:directed="1"/>
      <edge id="113172" label="zzz1003,zzzz955" source="2726" target="211" cy:directed="1"/>
      <edge id="113171" label="zzz1003,zzz1115" source="2726" target="2614" cy:directed="1"/>
      <edge id="113170" label="zzz1003,zzz1129" source="2726" target="2600" cy:directed="1"/>
      <edge id="113169" label="zzz1003,zzz1151" source="2726" target="2578" cy:directed="1"/>
      <edge id="113168" label="zzz1003,zzz1213" source="2726" target="2516" cy:directed="1"/>
      <edge id="113167" label="zzz1003,zzz1229" source="2726" target="2500" cy:directed="1"/>
      <edge id="113166" label="zzz1003,zzzz936" source="2726" target="230" cy:directed="1"/>
      <edge id="113165" label="zzz1003,zzz1069" source="2726" target="2660" cy:directed="1"/>
      <edge id="113164" label="zzz1003,zzz1070" source="2726" target="2659" cy:directed="1"/>
      <edge id="113163" label="zzz1003,zzz1076" source="2726" target="2653" cy:directed="1"/>
      <edge id="113162" label="zzz1003,zzz1090" source="2726" target="2639" cy:directed="1"/>
      <edge id="113161" label="zzz1003,zzz1134" source="2726" target="2595" cy:directed="1"/>
      <edge id="113160" label="zzz1003,zzz1139" source="2726" target="2590" cy:directed="1"/>
      <edge id="113159" label="zzz1003,zzz1177" source="2726" target="2552" cy:directed="1"/>
      <edge id="113158" label="zzz1003,zzz1315" source="2726" target="2414" cy:directed="1"/>
      <edge id="113157" label="zzz1003,zzz1317" source="2726" target="2412" cy:directed="1"/>
      <edge id="113156" label="zzz1003,zzzz953" source="2726" target="213" cy:directed="1"/>
      <edge id="113155" label="zzz1003,zzzzz35" source="2726" target="141" cy:directed="1"/>
      <edge id="113154" label="zzz1003,zzzzzz5" source="2726" target="71" cy:directed="1"/>
      <edge id="113153" label="zzz1003,zzz1054" source="2726" target="2675" cy:directed="1"/>
      <edge id="113152" label="zzz1003,zzz2370" source="2726" target="1359" cy:directed="1"/>
      <edge id="113151" label="zzz1003,zzzz960" source="2726" target="206" cy:directed="1"/>
      <edge id="113150" label="zzz1003,zzzz992" source="2726" target="174" cy:directed="1"/>
      <edge id="113149" label="zzz1003,zzz1088" source="2726" target="2641" cy:directed="1"/>
      <edge id="113148" label="zzz1003,zzz1135" source="2726" target="2594" cy:directed="1"/>
      <edge id="113147" label="zzz1003,zzz1159" source="2726" target="2570" cy:directed="1"/>
      <edge id="113146" label="zzz1003,zzz1160" source="2726" target="2569" cy:directed="1"/>
      <edge id="113145" label="zzz1003,zzz1228" source="2726" target="2501" cy:directed="1"/>
      <edge id="113144" label="zzz1003,zzz1232" source="2726" target="2497" cy:directed="1"/>
      <edge id="113143" label="zzz1003,zzz1058" source="2726" target="2671" cy:directed="1"/>
      <edge id="113142" label="zzz1003,zzz1198" source="2726" target="2531" cy:directed="1"/>
      <edge id="113141" label="zzz1003,zzz1226" source="2726" target="2503" cy:directed="1"/>
      <edge id="113140" label="zzz1003,zzzz957" source="2726" target="209" cy:directed="1"/>
      <edge id="113139" label="zzz1003,zzzz975" source="2726" target="191" cy:directed="1"/>
      <edge id="113138" label="zzz1003,zzz1009" source="2726" target="2720" cy:directed="1"/>
      <edge id="113137" label="zzz1003,zzz1133" source="2726" target="2596" cy:directed="1"/>
      <edge id="113136" label="zzz1003,zzz1201" source="2726" target="2528" cy:directed="1"/>
      <edge id="113135" label="zzz1003,zzz1203" source="2726" target="2526" cy:directed="1"/>
      <edge id="113134" label="zzz1003,zzz1205" source="2726" target="2524" cy:directed="1"/>
      <edge id="113133" label="zzz1003,zzz1204" source="2726" target="2525" cy:directed="1"/>
      <edge id="113132" label="zzz1003,zzz1012" source="2726" target="2717" cy:directed="1"/>
      <edge id="113131" label="zzz1003,zzz1023" source="2726" target="2706" cy:directed="1"/>
      <edge id="113130" label="zzz1003,zzz1026" source="2726" target="2703" cy:directed="1"/>
      <edge id="113129" label="zzz1003,zzz1200" source="2726" target="2529" cy:directed="1"/>
      <edge id="113128" label="zzz1003,zzz1202" source="2726" target="2527" cy:directed="1"/>
      <edge id="113127" label="zzz1003,zzzz962" source="2726" target="204" cy:directed="1"/>
      <edge id="113126" label="zzz1003,zzzzz37" source="2726" target="139" cy:directed="1"/>
      <edge id="113125" label="zzz1003,zzz1059" source="2726" target="2670" cy:directed="1"/>
      <edge id="113124" label="zzz1003,zzz1199" source="2726" target="2530" cy:directed="1"/>
      <edge id="113123" label="zzz1003,zzz1223" source="2726" target="2506" cy:directed="1"/>
      <edge id="113122" label="zzz1003,zzzzzz3" source="2726" target="73" cy:directed="1"/>
      <edge id="113121" label="zzz1003,zzz1113" source="2726" target="2616" cy:directed="1"/>
      <edge id="113120" label="zzz1003,zzz1325" source="2726" target="2404" cy:directed="1"/>
      <edge id="113119" label="zzz1003,zzzz958" source="2726" target="208" cy:directed="1"/>
      <edge id="113118" label="zzz1003,zzz1027" source="2726" target="2702" cy:directed="1"/>
      <edge id="113117" label="zzz1003,zzz1140" source="2726" target="2589" cy:directed="1"/>
      <edge id="113116" label="zzz1003,zzz1233" source="2726" target="2496" cy:directed="1"/>
      <edge id="113115" label="zzz1003,zzz1322" source="2726" target="2407" cy:directed="1"/>
      <edge id="113114" label="zzz1003,zzzz981" source="2726" target="185" cy:directed="1"/>
      <edge id="113113" label="zzz1003,zzz1016" source="2726" target="2713" cy:directed="1"/>
      <edge id="113112" label="zzz1003,zzz1019" source="2726" target="2710" cy:directed="1"/>
      <edge id="113111" label="zzz1003,zzz1020" source="2726" target="2709" cy:directed="1"/>
      <edge id="113110" label="zzz1003,zzz1136" source="2726" target="2593" cy:directed="1"/>
      <edge id="113109" label="zzz1003,zzz1158" source="2726" target="2571" cy:directed="1"/>
      <edge id="113108" label="zzz1003,zzz1316" source="2726" target="2413" cy:directed="1"/>
      <edge id="113107" label="zzz1003,zzz1068" source="2726" target="2661" cy:directed="1"/>
      <edge id="113106" label="zzz1003,zzz1321" source="2726" target="2408" cy:directed="1"/>
      <edge id="113105" label="zzz1003,zzz1077" source="2726" target="2652" cy:directed="1"/>
      <edge id="113104" label="zzz1003,zzz1083" source="2726" target="2646" cy:directed="1"/>
      <edge id="113103" label="zzz1003,zzz1085" source="2726" target="2644" cy:directed="1"/>
      <edge id="113102" label="zzz1003,zzz1127" source="2726" target="2602" cy:directed="1"/>
      <edge id="113101" label="zzz1003,zzz1363" source="2726" target="2366" cy:directed="1"/>
      <edge id="113100" label="zzz1003,zzzz945" source="2726" target="221" cy:directed="1"/>
      <edge id="113099" label="zzz1003,zzz1365" source="2726" target="2364" cy:directed="1"/>
      <edge id="113098" label="zzz1003,zzz1005" source="2726" target="2724" cy:directed="1"/>
      <edge id="113097" label="zzz1003,zzz1017" source="2726" target="2712" cy:directed="1"/>
      <edge id="113096" label="zzz1003,zzz1227" source="2726" target="2502" cy:directed="1"/>
      <edge id="113095" label="zzz1003,zzz1319" source="2726" target="2410" cy:directed="1"/>
      <edge id="113094" label="zzz1003,zzz1364" source="2726" target="2365" cy:directed="1"/>
      <edge id="113093" label="zzz1003,zzzz982" source="2726" target="184" cy:directed="1"/>
      <edge id="113092" label="zzz1003,zzzzzz0" source="2726" target="76" cy:directed="1"/>
      <edge id="113091" label="zzz1003,zzz1361" source="2726" target="2368" cy:directed="1"/>
      <edge id="113090" label="zzz1003,zzzz956" source="2726" target="210" cy:directed="1"/>
      <edge id="113089" label="zzz1003,zzzzz18" source="2726" target="158" cy:directed="1"/>
      <edge id="113088" label="zzz1003,zzzzz21" source="2726" target="155" cy:directed="1"/>
      <edge id="113087" label="zzz1003,zzz1099" source="2726" target="2630" cy:directed="1"/>
      <edge id="113086" label="zzz1003,zzzz994" source="2726" target="172" cy:directed="1"/>
      <edge id="113085" label="zzz1003,zzz1107" source="2726" target="2622" cy:directed="1"/>
      <edge id="113084" label="zzz1003,zzz1366" source="2726" target="2363" cy:directed="1"/>
      <edge id="113083" label="zzz1003,zzzz963" source="2726" target="203" cy:directed="1"/>
      <edge id="113082" label="zzz1003,zzzz983" source="2726" target="183" cy:directed="1"/>
      <edge id="113081" label="zzz1003,zzzz952" source="2726" target="214" cy:directed="1"/>
      <edge id="113080" label="zzz1003,zzz1018" source="2726" target="2711" cy:directed="1"/>
      <edge id="113079" label="zzz1003,zzz1138" source="2726" target="2591" cy:directed="1"/>
      <edge id="113078" label="zzz1003,zzzz965" source="2726" target="201" cy:directed="1"/>
      <edge id="113077" label="zzz1003,zzz1006" source="2726" target="2723" cy:directed="1"/>
      <edge id="113076" label="zzz1003,zzzzz30" source="2726" target="146" cy:directed="1"/>
      <edge id="113075" label="zzz1004,zzzzz27" source="2725" target="149" cy:directed="1"/>
      <edge id="113074" label="zzz1004,zzzzz11" source="2725" target="165" cy:directed="1"/>
      <edge id="113073" label="zzz1004,zzz1042" source="2725" target="2687" cy:directed="1"/>
      <edge id="113072" label="zzz1004,zzz1040" source="2725" target="2689" cy:directed="1"/>
      <edge id="113071" label="zzz1004,zzz1080" source="2725" target="2649" cy:directed="1"/>
      <edge id="113070" label="zzz1004,zzz1081" source="2725" target="2648" cy:directed="1"/>
      <edge id="113069" label="zzz1004,zzz1086" source="2725" target="2643" cy:directed="1"/>
      <edge id="113068" label="zzz1004,zzz1087" source="2725" target="2642" cy:directed="1"/>
      <edge id="113067" label="zzz1004,zzz1033" source="2725" target="2696" cy:directed="1"/>
      <edge id="113066" label="zzz1004,zzz1315" source="2725" target="2414" cy:directed="1"/>
      <edge id="113065" label="zzz1004,zzz1208" source="2725" target="2521" cy:directed="1"/>
      <edge id="113064" label="zzz1004,zzzz951" source="2725" target="215" cy:directed="1"/>
      <edge id="113063" label="zzz1004,zzz1066" source="2725" target="2663" cy:directed="1"/>
      <edge id="113062" label="zzz1004,zzz1233" source="2725" target="2496" cy:directed="1"/>
      <edge id="113061" label="zzz1004,zzz1322" source="2725" target="2407" cy:directed="1"/>
      <edge id="113060" label="zzz1004,zzz1331" source="2725" target="2398" cy:directed="1"/>
      <edge id="113059" label="zzz1004,zzzz955" source="2725" target="211" cy:directed="1"/>
      <edge id="113058" label="zzz1004,zzz1333" source="2725" target="2396" cy:directed="1"/>
      <edge id="113057" label="zzz1004,zzzz953" source="2725" target="213" cy:directed="1"/>
      <edge id="113056" label="zzz1004,zzz1317" source="2725" target="2412" cy:directed="1"/>
      <edge id="113055" label="zzz1004,zzz1010" source="2725" target="2719" cy:directed="1"/>
      <edge id="113054" label="zzz1004,zzz1009" source="2725" target="2720" cy:directed="1"/>
      <edge id="113053" label="zzz1004,zzz1206" source="2725" target="2523" cy:directed="1"/>
      <edge id="113052" label="zzz1004,zzz1036" source="2725" target="2693" cy:directed="1"/>
      <edge id="113051" label="zzz1004,zzz1123" source="2725" target="2606" cy:directed="1"/>
      <edge id="113050" label="zzz1004,zzz1132" source="2725" target="2597" cy:directed="1"/>
      <edge id="113049" label="zzz1004,zzz1035" source="2725" target="2694" cy:directed="1"/>
      <edge id="113048" label="zzz1004,zzz1038" source="2725" target="2691" cy:directed="1"/>
      <edge id="113047" label="zzz1004,zzz1063" source="2725" target="2666" cy:directed="1"/>
      <edge id="113046" label="zzz1004,zzzz952" source="2725" target="214" cy:directed="1"/>
      <edge id="113045" label="zzz1004,zzzz950" source="2725" target="216" cy:directed="1"/>
      <edge id="113044" label="zzz1004,zzzzz26" source="2725" target="150" cy:directed="1"/>
      <edge id="113043" label="zzz1004,zzz1099" source="2725" target="2630" cy:directed="1"/>
      <edge id="113042" label="zzz1004,zzzzz30" source="2725" target="146" cy:directed="1"/>
      <edge id="113041" label="zzz1004,zzzz956" source="2725" target="210" cy:directed="1"/>
      <edge id="113040" label="zzz1004,zzzzz25" source="2725" target="151" cy:directed="1"/>
      <edge id="113039" label="zzz1004,zzz1215" source="2725" target="2514" cy:directed="1"/>
      <edge id="113038" label="zzz1004,zzz1037" source="2725" target="2692" cy:directed="1"/>
      <edge id="113037" label="zzz1004,zzz1039" source="2725" target="2690" cy:directed="1"/>
      <edge id="113036" label="zzz1004,zzz1056" source="2725" target="2673" cy:directed="1"/>
      <edge id="113035" label="zzz1004,zzz1098" source="2725" target="2631" cy:directed="1"/>
      <edge id="113034" label="zzz1004,zzz1057" source="2725" target="2672" cy:directed="1"/>
      <edge id="113033" label="zzz1004,zzz1084" source="2725" target="2645" cy:directed="1"/>
      <edge id="113032" label="zzz1004,zzz1110" source="2725" target="2619" cy:directed="1"/>
      <edge id="113031" label="zzz1004,zzz1313" source="2725" target="2416" cy:directed="1"/>
      <edge id="113030" label="zzz1004,zzz1034" source="2725" target="2695" cy:directed="1"/>
      <edge id="113029" label="zzz1004,zzz1253" source="2725" target="2476" cy:directed="1"/>
      <edge id="113028" label="zzz1004,zzz1295" source="2725" target="2434" cy:directed="1"/>
      <edge id="113027" label="zzz1004,zzz1300" source="2725" target="2429" cy:directed="1"/>
      <edge id="113026" label="zzz1004,zzz1011" source="2725" target="2718" cy:directed="1"/>
      <edge id="113025" label="zzz1004,zzz1096" source="2725" target="2633" cy:directed="1"/>
      <edge id="113024" label="zzz1004,zzz1288" source="2725" target="2441" cy:directed="1"/>
      <edge id="113023" label="zzz1004,zzz1101" source="2725" target="2628" cy:directed="1"/>
      <edge id="113022" label="zzz1004,zzz1263" source="2725" target="2466" cy:directed="1"/>
      <edge id="113021" label="zzz1004,zzz1267" source="2725" target="2462" cy:directed="1"/>
      <edge id="113020" label="zzz1004,zzz1277" source="2725" target="2452" cy:directed="1"/>
      <edge id="113019" label="zzz1004,zzz1282" source="2725" target="2447" cy:directed="1"/>
      <edge id="113018" label="zzz1004,zzz1286" source="2725" target="2443" cy:directed="1"/>
      <edge id="113017" label="zzz1004,zzz1308" source="2725" target="2421" cy:directed="1"/>
      <edge id="113016" label="zzz1004,zzz1264" source="2725" target="2465" cy:directed="1"/>
      <edge id="113015" label="zzz1004,zzz1283" source="2725" target="2446" cy:directed="1"/>
      <edge id="113014" label="zzz1004,zzzz954" source="2725" target="212" cy:directed="1"/>
      <edge id="113013" label="zzz1004,zzz1102" source="2725" target="2627" cy:directed="1"/>
      <edge id="113012" label="zzz1004,zzz1240" source="2725" target="2489" cy:directed="1"/>
      <edge id="113011" label="zzz1004,zzz1242" source="2725" target="2487" cy:directed="1"/>
      <edge id="113010" label="zzz1004,zzz1252" source="2725" target="2477" cy:directed="1"/>
      <edge id="113009" label="zzz1004,zzz1254" source="2725" target="2475" cy:directed="1"/>
      <edge id="113008" label="zzz1004,zzz1262" source="2725" target="2467" cy:directed="1"/>
      <edge id="113007" label="zzz1004,zzz1272" source="2725" target="2457" cy:directed="1"/>
      <edge id="113006" label="zzz1004,zzz1289" source="2725" target="2440" cy:directed="1"/>
      <edge id="113005" label="zzz1004,zzz1318" source="2725" target="2411" cy:directed="1"/>
      <edge id="113004" label="zzz1004,zzz1067" source="2725" target="2662" cy:directed="1"/>
      <edge id="113003" label="zzz1004,zzz1270" source="2725" target="2459" cy:directed="1"/>
      <edge id="113002" label="zzz1004,zzz1285" source="2725" target="2444" cy:directed="1"/>
      <edge id="113001" label="zzz1004,zzz1287" source="2725" target="2442" cy:directed="1"/>
      <edge id="113000" label="zzz1004,zzz1304" source="2725" target="2425" cy:directed="1"/>
      <edge id="112999" label="zzz1004,zzz1097" source="2725" target="2632" cy:directed="1"/>
      <edge id="112998" label="zzz1004,zzz1118" source="2725" target="2611" cy:directed="1"/>
      <edge id="112997" label="zzz1004,zzz1271" source="2725" target="2458" cy:directed="1"/>
      <edge id="112996" label="zzz1004,zzz1340" source="2725" target="2389" cy:directed="1"/>
      <edge id="112995" label="zzz1004,zzzzz33" source="2725" target="143" cy:directed="1"/>
      <edge id="112994" label="zzz1004,zzz1114" source="2725" target="2615" cy:directed="1"/>
      <edge id="112993" label="zzz1004,zzz1117" source="2725" target="2612" cy:directed="1"/>
      <edge id="112992" label="zzz1004,zzz1296" source="2725" target="2433" cy:directed="1"/>
      <edge id="112991" label="zzz1004,zzzz966" source="2725" target="200" cy:directed="1"/>
      <edge id="112990" label="zzz1004,zzz1069" source="2725" target="2660" cy:directed="1"/>
      <edge id="112989" label="zzz1004,zzz1070" source="2725" target="2659" cy:directed="1"/>
      <edge id="112988" label="zzz1004,zzz1074" source="2725" target="2655" cy:directed="1"/>
      <edge id="112987" label="zzz1004,zzz1247" source="2725" target="2482" cy:directed="1"/>
      <edge id="112986" label="zzz1004,zzz1278" source="2725" target="2451" cy:directed="1"/>
      <edge id="112985" label="zzz1004,zzz1314" source="2725" target="2415" cy:directed="1"/>
      <edge id="112984" label="zzz1004,zzz1354" source="2725" target="2375" cy:directed="1"/>
      <edge id="112983" label="zzz1004,zzz1104" source="2725" target="2625" cy:directed="1"/>
      <edge id="112982" label="zzz1004,zzz1115" source="2725" target="2614" cy:directed="1"/>
      <edge id="112981" label="zzz1004,zzz1041" source="2725" target="2688" cy:directed="1"/>
      <edge id="112980" label="zzz1004,zzz1094" source="2725" target="2635" cy:directed="1"/>
      <edge id="112979" label="zzz1004,zzz1165" source="2725" target="2564" cy:directed="1"/>
      <edge id="112978" label="zzz1004,zzz1043" source="2725" target="2686" cy:directed="1"/>
      <edge id="112977" label="zzz1004,zzz1045" source="2725" target="2684" cy:directed="1"/>
      <edge id="112976" label="zzz1004,zzz1079" source="2725" target="2650" cy:directed="1"/>
      <edge id="112975" label="zzz1004,zzz1061" source="2725" target="2668" cy:directed="1"/>
      <edge id="112974" label="zzz1004,zzzz961" source="2725" target="205" cy:directed="1"/>
      <edge id="112973" label="zzz1004,zzzzz22" source="2725" target="154" cy:directed="1"/>
      <edge id="112972" label="zzz1004,zzz1062" source="2725" target="2667" cy:directed="1"/>
      <edge id="112971" label="zzz1004,zzz1100" source="2725" target="2629" cy:directed="1"/>
      <edge id="112970" label="zzz1004,zzz1337" source="2725" target="2392" cy:directed="1"/>
      <edge id="112969" label="zzz1004,zzz1082" source="2725" target="2647" cy:directed="1"/>
      <edge id="112968" label="zzz1004,zzz1113" source="2725" target="2616" cy:directed="1"/>
      <edge id="112967" label="zzz1004,zzz1120" source="2725" target="2609" cy:directed="1"/>
      <edge id="112966" label="zzz1004,zzz1106" source="2725" target="2623" cy:directed="1"/>
      <edge id="112965" label="zzz1004,zzz1128" source="2725" target="2601" cy:directed="1"/>
      <edge id="112964" label="zzz1004,zzz1226" source="2725" target="2503" cy:directed="1"/>
      <edge id="112963" label="zzz1004,zzz1111" source="2725" target="2618" cy:directed="1"/>
      <edge id="112962" label="zzz1004,zzz1139" source="2725" target="2590" cy:directed="1"/>
      <edge id="112961" label="zzz1004,zzz1328" source="2725" target="2401" cy:directed="1"/>
      <edge id="112960" label="zzz1004,zzzz934" source="2725" target="232" cy:directed="1"/>
      <edge id="112959" label="zzz1004,zzzz971" source="2725" target="195" cy:directed="1"/>
      <edge id="112958" label="zzz1004,zzzz937" source="2725" target="229" cy:directed="1"/>
      <edge id="112957" label="zzz1004,zzzzz12" source="2725" target="164" cy:directed="1"/>
      <edge id="112956" label="zzz1004,zzzzzz5" source="2725" target="71" cy:directed="1"/>
      <edge id="112955" label="zzz1004,zzz1125" source="2725" target="2604" cy:directed="1"/>
      <edge id="112954" label="zzz1004,zzz2370" source="2725" target="1359" cy:directed="1"/>
      <edge id="112953" label="zzz1004,zzzz935" source="2725" target="231" cy:directed="1"/>
      <edge id="112952" label="zzz1004,zzzzz28" source="2725" target="148" cy:directed="1"/>
      <edge id="112951" label="zzz1004,zzz1119" source="2725" target="2610" cy:directed="1"/>
      <edge id="112950" label="zzz1004,zzz1127" source="2725" target="2602" cy:directed="1"/>
      <edge id="112949" label="zzz1004,zzzz931" source="2725" target="235" cy:directed="1"/>
      <edge id="112948" label="zzz1004,zzzz994" source="2725" target="172" cy:directed="1"/>
      <edge id="112947" label="zzz1004,zzz1141" source="2725" target="2588" cy:directed="1"/>
      <edge id="112946" label="zzz1004,zzz1223" source="2725" target="2506" cy:directed="1"/>
      <edge id="112945" label="zzz1004,zzz1319" source="2725" target="2410" cy:directed="1"/>
      <edge id="112944" label="zzz1004,zzzzz80" source="2725" target="96" cy:directed="1"/>
      <edge id="112943" label="zzz1004,zzz1213" source="2725" target="2516" cy:directed="1"/>
      <edge id="112942" label="zzz1004,zzz1229" source="2725" target="2500" cy:directed="1"/>
      <edge id="112941" label="zzz1004,zzzzz35" source="2725" target="141" cy:directed="1"/>
      <edge id="112940" label="zzz1004,zzz1007" source="2725" target="2722" cy:directed="1"/>
      <edge id="112939" label="zzz1004,zzz1008" source="2725" target="2721" cy:directed="1"/>
      <edge id="112938" label="zzz1004,zzz1161" source="2725" target="2568" cy:directed="1"/>
      <edge id="112937" label="zzz1004,zzz1228" source="2725" target="2501" cy:directed="1"/>
      <edge id="112936" label="zzz1004,zzz1232" source="2725" target="2497" cy:directed="1"/>
      <edge id="112935" label="zzz1004,zzz2386" source="2725" target="1343" cy:directed="1"/>
      <edge id="112934" label="zzz1004,zzzz939" source="2725" target="227" cy:directed="1"/>
      <edge id="112933" label="zzz1004,zzzz940" source="2725" target="226" cy:directed="1"/>
      <edge id="112932" label="zzz1004,zzzz941" source="2725" target="225" cy:directed="1"/>
      <edge id="112931" label="zzz1004,zzzz942" source="2725" target="224" cy:directed="1"/>
      <edge id="112930" label="zzz1004,zzzz976" source="2725" target="190" cy:directed="1"/>
      <edge id="112929" label="zzz1004,zzzz977" source="2725" target="189" cy:directed="1"/>
      <edge id="112928" label="zzz1004,zzzzz13" source="2725" target="163" cy:directed="1"/>
      <edge id="112927" label="zzz1004,zzzzz95" source="2725" target="81" cy:directed="1"/>
      <edge id="112926" label="zzz1004,zzzz978" source="2725" target="188" cy:directed="1"/>
      <edge id="112925" label="zzz1004,zzz1021" source="2725" target="2708" cy:directed="1"/>
      <edge id="112924" label="zzz1004,zzz1152" source="2725" target="2577" cy:directed="1"/>
      <edge id="112923" label="zzz1004,zzz1154" source="2725" target="2575" cy:directed="1"/>
      <edge id="112922" label="zzz1004,zzzz949" source="2725" target="217" cy:directed="1"/>
      <edge id="112921" label="zzz1004,zzzzz21" source="2725" target="155" cy:directed="1"/>
      <edge id="112920" label="zzz1004,zzzzz29" source="2725" target="147" cy:directed="1"/>
      <edge id="112919" label="zzz1004,zzz1088" source="2725" target="2641" cy:directed="1"/>
      <edge id="112918" label="zzz1004,zzz1153" source="2725" target="2576" cy:directed="1"/>
      <edge id="112917" label="zzz1004,zzz2375" source="2725" target="1354" cy:directed="1"/>
      <edge id="112916" label="zzz1004,zzzz946" source="2725" target="220" cy:directed="1"/>
      <edge id="112915" label="zzz1004,zzz1092" source="2725" target="2637" cy:directed="1"/>
      <edge id="112914" label="zzz1004,zzzzz39" source="2725" target="137" cy:directed="1"/>
      <edge id="112913" label="zzz1004,zzzzz81" source="2725" target="95" cy:directed="1"/>
      <edge id="112912" label="zzz1004,zzz1136" source="2725" target="2593" cy:directed="1"/>
      <edge id="112911" label="zzz1004,zzz1142" source="2725" target="2587" cy:directed="1"/>
      <edge id="112910" label="zzz1004,zzz1143" source="2725" target="2586" cy:directed="1"/>
      <edge id="112909" label="zzz1004,zzz1148" source="2725" target="2581" cy:directed="1"/>
      <edge id="112908" label="zzz1004,zzz1149" source="2725" target="2580" cy:directed="1"/>
      <edge id="112907" label="zzz1004,zzzz989" source="2725" target="177" cy:directed="1"/>
      <edge id="112906" label="zzz1004,zzz1077" source="2725" target="2652" cy:directed="1"/>
      <edge id="112905" label="zzz1004,zzz1217" source="2725" target="2512" cy:directed="1"/>
      <edge id="112904" label="zzz1004,zzz1348" source="2725" target="2381" cy:directed="1"/>
      <edge id="112903" label="zzz1004,zzzz957" source="2725" target="209" cy:directed="1"/>
      <edge id="112902" label="zzz1004,zzzzz23" source="2725" target="153" cy:directed="1"/>
      <edge id="112901" label="zzz1004,zzz1137" source="2725" target="2592" cy:directed="1"/>
      <edge id="112900" label="zzz1004,zzz1356" source="2725" target="2373" cy:directed="1"/>
      <edge id="112899" label="zzz1004,zzzz987" source="2725" target="179" cy:directed="1"/>
      <edge id="112898" label="zzz1004,zzzzz36" source="2725" target="140" cy:directed="1"/>
      <edge id="112897" label="zzz1004,zzz1085" source="2725" target="2644" cy:directed="1"/>
      <edge id="112896" label="zzz1004,zzz1124" source="2725" target="2605" cy:directed="1"/>
      <edge id="112895" label="zzz1004,zzz1159" source="2725" target="2570" cy:directed="1"/>
      <edge id="112894" label="zzz1004,zzz1160" source="2725" target="2569" cy:directed="1"/>
      <edge id="112893" label="zzz1004,zzz1234" source="2725" target="2495" cy:directed="1"/>
      <edge id="112892" label="zzz1004,zzz1329" source="2725" target="2400" cy:directed="1"/>
      <edge id="112891" label="zzz1004,zzz1361" source="2725" target="2368" cy:directed="1"/>
      <edge id="112890" label="zzz1004,zzzz984" source="2725" target="182" cy:directed="1"/>
      <edge id="112889" label="zzz1004,zzzz985" source="2725" target="181" cy:directed="1"/>
      <edge id="112888" label="zzz1004,zzzz986" source="2725" target="180" cy:directed="1"/>
      <edge id="112887" label="zzz1004,zzzz988" source="2725" target="178" cy:directed="1"/>
      <edge id="112886" label="zzz1004,zzzzz37" source="2725" target="139" cy:directed="1"/>
      <edge id="112885" label="zzz1004,zzz1022" source="2725" target="2707" cy:directed="1"/>
      <edge id="112884" label="zzz1004,zzz1073" source="2725" target="2656" cy:directed="1"/>
      <edge id="112883" label="zzz1004,zzz1083" source="2725" target="2646" cy:directed="1"/>
      <edge id="112882" label="zzz1004,zzz1150" source="2725" target="2579" cy:directed="1"/>
      <edge id="112881" label="zzz1004,zzzz962" source="2725" target="204" cy:directed="1"/>
      <edge id="112880" label="zzz1004,zzzz975" source="2725" target="191" cy:directed="1"/>
      <edge id="112879" label="zzz1004,zzzz990" source="2725" target="176" cy:directed="1"/>
      <edge id="112878" label="zzz1004,zzzzz32" source="2725" target="144" cy:directed="1"/>
      <edge id="112877" label="zzz1004,zzz1024" source="2725" target="2705" cy:directed="1"/>
      <edge id="112876" label="zzz1004,zzz1048" source="2725" target="2681" cy:directed="1"/>
      <edge id="112875" label="zzz1004,zzz1362" source="2725" target="2367" cy:directed="1"/>
      <edge id="112874" label="zzz1004,zzz1365" source="2725" target="2364" cy:directed="1"/>
      <edge id="112873" label="zzz1004,zzz1019" source="2725" target="2710" cy:directed="1"/>
      <edge id="112872" label="zzz1004,zzz1076" source="2725" target="2653" cy:directed="1"/>
      <edge id="112871" label="zzz1004,zzz1316" source="2725" target="2413" cy:directed="1"/>
      <edge id="112870" label="zzz1004,zzz1363" source="2725" target="2366" cy:directed="1"/>
      <edge id="112869" label="zzz1004,zzz1364" source="2725" target="2365" cy:directed="1"/>
      <edge id="112868" label="zzz1004,zzzz991" source="2725" target="175" cy:directed="1"/>
      <edge id="112867" label="zzz1004,zzz1012" source="2725" target="2717" cy:directed="1"/>
      <edge id="112866" label="zzz1004,zzz1133" source="2725" target="2596" cy:directed="1"/>
      <edge id="112865" label="zzz1004,zzz1177" source="2725" target="2552" cy:directed="1"/>
      <edge id="112864" label="zzz1004,zzz1366" source="2725" target="2363" cy:directed="1"/>
      <edge id="112863" label="zzz1004,zzz1138" source="2725" target="2591" cy:directed="1"/>
      <edge id="112862" label="zzz1004,zzzz965" source="2725" target="201" cy:directed="1"/>
      <edge id="112861" label="zzz1004,zzzz100" source="2725" target="1066" cy:directed="1"/>
      <edge id="112860" label="zzz1004,zzz1025" source="2725" target="2704" cy:directed="1"/>
      <edge id="112859" label="zzz1004,zzz1059" source="2725" target="2670" cy:directed="1"/>
      <edge id="112858" label="zzz1004,zzz1095" source="2725" target="2634" cy:directed="1"/>
      <edge id="112857" label="zzz1004,zzz1116" source="2725" target="2613" cy:directed="1"/>
      <edge id="112856" label="zzz1004,zzz1219" source="2725" target="2510" cy:directed="1"/>
      <edge id="112855" label="zzz1004,zzz1336" source="2725" target="2393" cy:directed="1"/>
      <edge id="112854" label="zzz1004,zzzz970" source="2725" target="196" cy:directed="1"/>
      <edge id="112853" label="zzz1004,zzzzzz0" source="2725" target="76" cy:directed="1"/>
      <edge id="112852" label="zzz1004,zzz1026" source="2725" target="2703" cy:directed="1"/>
      <edge id="112851" label="zzz1004,zzz1028" source="2725" target="2701" cy:directed="1"/>
      <edge id="112850" label="zzz1004,zzz1158" source="2725" target="2571" cy:directed="1"/>
      <edge id="112849" label="zzz1004,zzzz945" source="2725" target="221" cy:directed="1"/>
      <edge id="112848" label="zzz1004,zzzz969" source="2725" target="197" cy:directed="1"/>
      <edge id="112847" label="zzz1004,zzzzz34" source="2725" target="142" cy:directed="1"/>
      <edge id="112846" label="zzz1004,zzz1029" source="2725" target="2700" cy:directed="1"/>
      <edge id="112845" label="zzz1004,zzz1055" source="2725" target="2674" cy:directed="1"/>
      <edge id="112844" label="zzz1004,zzz1089" source="2725" target="2640" cy:directed="1"/>
      <edge id="112843" label="zzz1004,zzz1091" source="2725" target="2638" cy:directed="1"/>
      <edge id="112842" label="zzz1004,zzz1140" source="2725" target="2589" cy:directed="1"/>
      <edge id="112841" label="zzz1004,zzz1178" source="2725" target="2551" cy:directed="1"/>
      <edge id="112840" label="zzz1004,zzzz983" source="2725" target="183" cy:directed="1"/>
      <edge id="112839" label="zzz1004,zzz1134" source="2725" target="2595" cy:directed="1"/>
      <edge id="112838" label="zzz1004,zzz1144" source="2725" target="2585" cy:directed="1"/>
      <edge id="112837" label="zzz1004,zzz1145" source="2725" target="2584" cy:directed="1"/>
      <edge id="112836" label="zzz1004,zzzz972" source="2725" target="194" cy:directed="1"/>
      <edge id="112835" label="zzz1004,zzzzz31" source="2725" target="145" cy:directed="1"/>
      <edge id="112834" label="zzz1004,zzz1020" source="2725" target="2709" cy:directed="1"/>
      <edge id="112833" label="zzz1004,zzz1135" source="2725" target="2594" cy:directed="1"/>
      <edge id="112832" label="zzz1004,zzz1147" source="2725" target="2582" cy:directed="1"/>
      <edge id="112831" label="zzz1004,zzz1194" source="2725" target="2535" cy:directed="1"/>
      <edge id="112830" label="zzz1004,zzz1193" source="2725" target="2536" cy:directed="1"/>
      <edge id="112829" label="zzz1004,zzz1195" source="2725" target="2534" cy:directed="1"/>
      <edge id="112828" label="zzz1004,zzz1196" source="2725" target="2533" cy:directed="1"/>
      <edge id="112827" label="zzz1004,zzz1197" source="2725" target="2532" cy:directed="1"/>
      <edge id="112826" label="zzz1004,zzz1220" source="2725" target="2509" cy:directed="1"/>
      <edge id="112825" label="zzz1004,zzzz963" source="2725" target="203" cy:directed="1"/>
      <edge id="112824" label="zzz1004,zzzz973" source="2725" target="193" cy:directed="1"/>
      <edge id="112823" label="zzz1004,zzzzz93" source="2725" target="83" cy:directed="1"/>
      <edge id="112822" label="zzz1004,zzz1146" source="2725" target="2583" cy:directed="1"/>
      <edge id="112821" label="zzz1004,zzz1192" source="2725" target="2537" cy:directed="1"/>
      <edge id="112820" label="zzz1004,zzzzz16" source="2725" target="160" cy:directed="1"/>
      <edge id="112819" label="zzz1004,zzz1023" source="2725" target="2706" cy:directed="1"/>
      <edge id="112818" label="zzz1004,zzz1107" source="2725" target="2622" cy:directed="1"/>
      <edge id="112817" label="zzz1004,zzzz964" source="2725" target="202" cy:directed="1"/>
      <edge id="112816" label="zzz1004,zzz1323" source="2725" target="2406" cy:directed="1"/>
      <edge id="112815" label="zzz1004,zzzz981" source="2725" target="185" cy:directed="1"/>
      <edge id="112814" label="zzz1004,zzzzzz4" source="2725" target="72" cy:directed="1"/>
      <edge id="112813" label="zzz1004,zzz1071" source="2725" target="2658" cy:directed="1"/>
      <edge id="112812" label="zzz1004,zzz1105" source="2725" target="2624" cy:directed="1"/>
      <edge id="112811" label="zzz1004,zzz1064" source="2725" target="2665" cy:directed="1"/>
      <edge id="112810" label="zzz1004,zzz1103" source="2725" target="2626" cy:directed="1"/>
      <edge id="112809" label="zzz1004,zzz1108" source="2725" target="2621" cy:directed="1"/>
      <edge id="112808" label="zzz1004,zzz1324" source="2725" target="2405" cy:directed="1"/>
      <edge id="112807" label="zzz1004,zzz1321" source="2725" target="2408" cy:directed="1"/>
      <edge id="112806" label="zzz1004,zzz1330" source="2725" target="2399" cy:directed="1"/>
      <edge id="112805" label="zzz1004,zzzz936" source="2725" target="230" cy:directed="1"/>
      <edge id="112804" label="zzz1004,zzz1109" source="2725" target="2620" cy:directed="1"/>
      <edge id="112803" label="zzz1004,zzzzz84" source="2725" target="92" cy:directed="1"/>
      <edge id="112802" label="zzz1004,zzz1299" source="2725" target="2430" cy:directed="1"/>
      <edge id="112801" label="zzz1004,zzz1046" source="2725" target="2683" cy:directed="1"/>
      <edge id="112800" label="zzz1004,zzz1060" source="2725" target="2669" cy:directed="1"/>
      <edge id="112799" label="zzz1004,zzzz982" source="2725" target="184" cy:directed="1"/>
      <edge id="112798" label="zzz1004,zzz1335" source="2725" target="2394" cy:directed="1"/>
      <edge id="112797" label="zzz1004,zzzz947" source="2725" target="219" cy:directed="1"/>
      <edge id="112796" label="zzz1004,zzzz938" source="2725" target="228" cy:directed="1"/>
      <edge id="112795" label="zzz1004,zzz1027" source="2725" target="2702" cy:directed="1"/>
      <edge id="112794" label="zzz1004,zzz1018" source="2725" target="2711" cy:directed="1"/>
      <edge id="112793" label="zzz1004,zzz1245" source="2725" target="2484" cy:directed="1"/>
      <edge id="112792" label="zzz1004,zzz1249" source="2725" target="2480" cy:directed="1"/>
      <edge id="112791" label="zzz1004,zzz1255" source="2725" target="2474" cy:directed="1"/>
      <edge id="112790" label="zzz1004,zzz1258" source="2725" target="2471" cy:directed="1"/>
      <edge id="112789" label="zzz1004,zzz1265" source="2725" target="2464" cy:directed="1"/>
      <edge id="112788" label="zzz1004,zzz1268" source="2725" target="2461" cy:directed="1"/>
      <edge id="112787" label="zzz1004,zzz1275" source="2725" target="2454" cy:directed="1"/>
      <edge id="112786" label="zzz1004,zzz1302" source="2725" target="2427" cy:directed="1"/>
      <edge id="112785" label="zzz1004,zzz1309" source="2725" target="2420" cy:directed="1"/>
      <edge id="112784" label="zzz1004,zzz1311" source="2725" target="2418" cy:directed="1"/>
      <edge id="112783" label="zzz1004,zzz1326" source="2725" target="2403" cy:directed="1"/>
      <edge id="112782" label="zzz1004,zzz1327" source="2725" target="2402" cy:directed="1"/>
      <edge id="112781" label="zzz1004,zzzz979" source="2725" target="187" cy:directed="1"/>
      <edge id="112780" label="zzz1004,zzz1129" source="2725" target="2600" cy:directed="1"/>
      <edge id="112779" label="zzz1004,zzz1200" source="2725" target="2529" cy:directed="1"/>
      <edge id="112778" label="zzz1004,zzz1202" source="2725" target="2527" cy:directed="1"/>
      <edge id="112777" label="zzz1004,zzz1204" source="2725" target="2525" cy:directed="1"/>
      <edge id="112776" label="zzz1004,zzz1279" source="2725" target="2450" cy:directed="1"/>
      <edge id="112775" label="zzz1004,zzz1290" source="2725" target="2439" cy:directed="1"/>
      <edge id="112774" label="zzz1004,zzz1297" source="2725" target="2432" cy:directed="1"/>
      <edge id="112773" label="zzz1004,zzz1303" source="2725" target="2426" cy:directed="1"/>
      <edge id="112772" label="zzz1004,zzz2390" source="2725" target="1339" cy:directed="1"/>
      <edge id="112771" label="zzz1004,zzzz992" source="2725" target="174" cy:directed="1"/>
      <edge id="112770" label="zzz1004,zzzz993" source="2725" target="173" cy:directed="1"/>
      <edge id="112769" label="zzz1004,zzzz998" source="2725" target="168" cy:directed="1"/>
      <edge id="112768" label="zzz1004,zzz1198" source="2725" target="2531" cy:directed="1"/>
      <edge id="112767" label="zzz1004,zzz1201" source="2725" target="2528" cy:directed="1"/>
      <edge id="112766" label="zzz1004,zzz1203" source="2725" target="2526" cy:directed="1"/>
      <edge id="112765" label="zzz1004,zzz1205" source="2725" target="2524" cy:directed="1"/>
      <edge id="112764" label="zzz1004,zzzz980" source="2725" target="186" cy:directed="1"/>
      <edge id="112763" label="zzz1004,zzzzzz6" source="2725" target="70" cy:directed="1"/>
      <edge id="112762" label="zzz1004,zzz1030" source="2725" target="2699" cy:directed="1"/>
      <edge id="112761" label="zzz1004,zzz1031" source="2725" target="2698" cy:directed="1"/>
      <edge id="112760" label="zzz1004,zzz1054" source="2725" target="2675" cy:directed="1"/>
      <edge id="112759" label="zzz1004,zzz1227" source="2725" target="2502" cy:directed="1"/>
      <edge id="112758" label="zzz1004,zzz1269" source="2725" target="2460" cy:directed="1"/>
      <edge id="112757" label="zzz1004,zzzz997" source="2725" target="169" cy:directed="1"/>
      <edge id="112756" label="zzz1004,zzz1199" source="2725" target="2530" cy:directed="1"/>
      <edge id="112755" label="zzz1004,zzz1212" source="2725" target="2517" cy:directed="1"/>
      <edge id="112754" label="zzz1004,zzz1325" source="2725" target="2404" cy:directed="1"/>
      <edge id="112753" label="zzz1004,zzzz933" source="2725" target="233" cy:directed="1"/>
      <edge id="112752" label="zzz1004,zzzz967" source="2725" target="199" cy:directed="1"/>
      <edge id="112751" label="zzz1004,zzz1049" source="2725" target="2680" cy:directed="1"/>
      <edge id="112750" label="zzz1004,zzz1367" source="2725" target="2362" cy:directed="1"/>
      <edge id="112749" label="zzz1004,zzzzz24" source="2725" target="152" cy:directed="1"/>
      <edge id="112748" label="zzz1004,zzz1005" source="2725" target="2724" cy:directed="1"/>
      <edge id="112747" label="zzz1004,zzz1006" source="2725" target="2723" cy:directed="1"/>
      <edge id="112746" label="zzz1004,zzz1334" source="2725" target="2395" cy:directed="1"/>
      <edge id="112745" label="zzz1004,zzz1032" source="2725" target="2697" cy:directed="1"/>
      <edge id="112744" label="zzz1004,zzzz960" source="2725" target="206" cy:directed="1"/>
      <edge id="112743" label="zzz1004,zzz1044" source="2725" target="2685" cy:directed="1"/>
      <edge id="112742" label="zzz1004,zzz1047" source="2725" target="2682" cy:directed="1"/>
      <edge id="112741" label="zzz1004,zzz1312" source="2725" target="2417" cy:directed="1"/>
      <edge id="112740" label="zzz1004,zzz1349" source="2725" target="2380" cy:directed="1"/>
      <edge id="112739" label="zzz1004,zzzz958" source="2725" target="208" cy:directed="1"/>
      <edge id="112738" label="zzz1004,zzzzz18" source="2725" target="158" cy:directed="1"/>
      <edge id="112737" label="zzz1004,zzz1068" source="2725" target="2661" cy:directed="1"/>
      <edge id="112736" label="zzz1004,zzz1351" source="2725" target="2378" cy:directed="1"/>
      <edge id="112735" label="zzz1004,zzz1360" source="2725" target="2369" cy:directed="1"/>
      <edge id="112734" label="zzz1004,zzzzz91" source="2725" target="85" cy:directed="1"/>
      <edge id="112733" label="zzz1005,zzz1006" source="2724" target="2723" cy:directed="1"/>
      <edge id="112732" label="zzz1005,zzzz960" source="2724" target="206" cy:directed="1"/>
      <edge id="112731" label="zzz1005,zzzz958" source="2724" target="208" cy:directed="1"/>
      <edge id="112730" label="zzz1005,zzzz933" source="2724" target="233" cy:directed="1"/>
      <edge id="112729" label="zzz1005,zzz1030" source="2724" target="2699" cy:directed="1"/>
      <edge id="112728" label="zzz1005,zzz1031" source="2724" target="2698" cy:directed="1"/>
      <edge id="112727" label="zzz1005,zzz2390" source="2724" target="1339" cy:directed="1"/>
      <edge id="112726" label="zzz1005,zzz1046" source="2724" target="2683" cy:directed="1"/>
      <edge id="112725" label="zzz1005,zzzz945" source="2724" target="221" cy:directed="1"/>
      <edge id="112724" label="zzz1005,zzz1337" source="2724" target="2392" cy:directed="1"/>
      <edge id="112723" label="zzz1005,zzz1328" source="2724" target="2401" cy:directed="1"/>
      <edge id="112722" label="zzz1005,zzz1152" source="2724" target="2577" cy:directed="1"/>
      <edge id="112721" label="zzz1005,zzz1154" source="2724" target="2575" cy:directed="1"/>
      <edge id="112720" label="zzz1005,zzz1153" source="2724" target="2576" cy:directed="1"/>
      <edge id="112719" label="zzz1005,zzz1142" source="2724" target="2587" cy:directed="1"/>
      <edge id="112718" label="zzz1005,zzz1143" source="2724" target="2586" cy:directed="1"/>
      <edge id="112717" label="zzz1005,zzz1148" source="2724" target="2581" cy:directed="1"/>
      <edge id="112716" label="zzz1005,zzz1149" source="2724" target="2580" cy:directed="1"/>
      <edge id="112715" label="zzz1005,zzz1028" source="2724" target="2701" cy:directed="1"/>
      <edge id="112714" label="zzz1005,zzzz970" source="2724" target="196" cy:directed="1"/>
      <edge id="112713" label="zzz1005,zzzz969" source="2724" target="197" cy:directed="1"/>
      <edge id="112712" label="zzz1005,zzz1073" source="2724" target="2656" cy:directed="1"/>
      <edge id="112711" label="zzz1005,zzz1048" source="2724" target="2681" cy:directed="1"/>
      <edge id="112710" label="zzz1005,zzz1305" source="2724" target="2424" cy:directed="1"/>
      <edge id="112709" label="zzz1005,zzz1274" source="2724" target="2455" cy:directed="1"/>
      <edge id="112708" label="zzz1005,zzz1292" source="2724" target="2437" cy:directed="1"/>
      <edge id="112707" label="zzz1005,zzz1293" source="2724" target="2436" cy:directed="1"/>
      <edge id="112706" label="zzz1005,zzz1312" source="2724" target="2417" cy:directed="1"/>
      <edge id="112705" label="zzz1005,zzz1244" source="2724" target="2485" cy:directed="1"/>
      <edge id="112704" label="zzz1005,zzz1248" source="2724" target="2481" cy:directed="1"/>
      <edge id="112703" label="zzz1005,zzz1251" source="2724" target="2478" cy:directed="1"/>
      <edge id="112702" label="zzz1005,zzz1257" source="2724" target="2472" cy:directed="1"/>
      <edge id="112701" label="zzz1005,zzz1261" source="2724" target="2468" cy:directed="1"/>
      <edge id="112700" label="zzz1005,zzz1273" source="2724" target="2456" cy:directed="1"/>
      <edge id="112699" label="zzz1005,zzz1280" source="2724" target="2449" cy:directed="1"/>
      <edge id="112698" label="zzz1005,zzz1307" source="2724" target="2422" cy:directed="1"/>
      <edge id="112697" label="zzz1005,zzz1301" source="2724" target="2428" cy:directed="1"/>
      <edge id="112696" label="zzz1005,zzz1349" source="2724" target="2380" cy:directed="1"/>
      <edge id="112695" label="zzz1005,zzz1355" source="2724" target="2374" cy:directed="1"/>
      <edge id="112694" label="zzz1005,zzz1326" source="2724" target="2403" cy:directed="1"/>
      <edge id="112693" label="zzz1005,zzz1360" source="2724" target="2369" cy:directed="1"/>
      <edge id="112692" label="zzz1005,zzz1060" source="2724" target="2669" cy:directed="1"/>
      <edge id="112691" label="zzz1005,zzz1298" source="2724" target="2431" cy:directed="1"/>
      <edge id="112690" label="zzz1005,zzz1064" source="2724" target="2665" cy:directed="1"/>
      <edge id="112689" label="zzz1005,zzz1323" source="2724" target="2406" cy:directed="1"/>
      <edge id="112688" label="zzz1005,zzz1329" source="2724" target="2400" cy:directed="1"/>
      <edge id="112687" label="zzz1005,zzz1344" source="2724" target="2385" cy:directed="1"/>
      <edge id="112686" label="zzz1005,zzz1345" source="2724" target="2384" cy:directed="1"/>
      <edge id="112685" label="zzz1005,zzz1346" source="2724" target="2383" cy:directed="1"/>
      <edge id="112684" label="zzz1005,zzz1347" source="2724" target="2382" cy:directed="1"/>
      <edge id="112683" label="zzz1005,zzz1358" source="2724" target="2371" cy:directed="1"/>
      <edge id="112682" label="zzz1005,zzz1359" source="2724" target="2370" cy:directed="1"/>
      <edge id="112681" label="zzz1005,zzzz972" source="2724" target="194" cy:directed="1"/>
      <edge id="112680" label="zzz1005,zzzzz93" source="2724" target="83" cy:directed="1"/>
      <edge id="112679" label="zzz1005,zzz1095" source="2724" target="2634" cy:directed="1"/>
      <edge id="112678" label="zzz1005,zzz1192" source="2724" target="2537" cy:directed="1"/>
      <edge id="112677" label="zzz1005,zzz1196" source="2724" target="2533" cy:directed="1"/>
      <edge id="112676" label="zzz1005,zzz1235" source="2724" target="2494" cy:directed="1"/>
      <edge id="112675" label="zzz1005,zzz1237" source="2724" target="2492" cy:directed="1"/>
      <edge id="112674" label="zzz1005,zzz1241" source="2724" target="2488" cy:directed="1"/>
      <edge id="112673" label="zzz1005,zzz1246" source="2724" target="2483" cy:directed="1"/>
      <edge id="112672" label="zzz1005,zzz1256" source="2724" target="2473" cy:directed="1"/>
      <edge id="112671" label="zzz1005,zzz1260" source="2724" target="2469" cy:directed="1"/>
      <edge id="112670" label="zzz1005,zzz1276" source="2724" target="2453" cy:directed="1"/>
      <edge id="112669" label="zzz1005,zzz1281" source="2724" target="2448" cy:directed="1"/>
      <edge id="112668" label="zzz1005,zzz1284" source="2724" target="2445" cy:directed="1"/>
      <edge id="112667" label="zzz1005,zzz1291" source="2724" target="2438" cy:directed="1"/>
      <edge id="112666" label="zzz1005,zzz1306" source="2724" target="2423" cy:directed="1"/>
      <edge id="112665" label="zzz1005,zzz1342" source="2724" target="2387" cy:directed="1"/>
      <edge id="112664" label="zzz1005,zzz1350" source="2724" target="2379" cy:directed="1"/>
      <edge id="112663" label="zzz1005,zzz1236" source="2724" target="2493" cy:directed="1"/>
      <edge id="112662" label="zzz1005,zzz1324" source="2724" target="2405" cy:directed="1"/>
      <edge id="112661" label="zzz1005,zzz1341" source="2724" target="2388" cy:directed="1"/>
      <edge id="112660" label="zzz1005,zzzz100" source="2724" target="1066" cy:directed="1"/>
      <edge id="112659" label="zzz1005,zzz1193" source="2724" target="2536" cy:directed="1"/>
      <edge id="112658" label="zzz1005,zzz1195" source="2724" target="2534" cy:directed="1"/>
      <edge id="112657" label="zzz1005,zzz1351" source="2724" target="2378" cy:directed="1"/>
      <edge id="112656" label="zzz1005,zzz1352" source="2724" target="2377" cy:directed="1"/>
      <edge id="112655" label="zzz1005,zzz1147" source="2724" target="2582" cy:directed="1"/>
      <edge id="112654" label="zzz1005,zzz1194" source="2724" target="2535" cy:directed="1"/>
      <edge id="112653" label="zzz1005,zzz1299" source="2724" target="2430" cy:directed="1"/>
      <edge id="112652" label="zzz1005,zzz1049" source="2724" target="2680" cy:directed="1"/>
      <edge id="112651" label="zzz1005,zzz1197" source="2724" target="2532" cy:directed="1"/>
      <edge id="112650" label="zzz1005,zzz1340" source="2724" target="2389" cy:directed="1"/>
      <edge id="112649" label="zzz1005,zzzz947" source="2724" target="219" cy:directed="1"/>
      <edge id="112648" label="zzz1005,zzz1144" source="2724" target="2585" cy:directed="1"/>
      <edge id="112647" label="zzz1005,zzz1145" source="2724" target="2584" cy:directed="1"/>
      <edge id="112646" label="zzz1005,zzz1310" source="2724" target="2419" cy:directed="1"/>
      <edge id="112645" label="zzz1005,zzz1146" source="2724" target="2583" cy:directed="1"/>
      <edge id="112644" label="zzz1005,zzz1238" source="2724" target="2491" cy:directed="1"/>
      <edge id="112643" label="zzz1005,zzz1343" source="2724" target="2386" cy:directed="1"/>
      <edge id="112642" label="zzz1005,zzzzz91" source="2724" target="85" cy:directed="1"/>
      <edge id="112641" label="zzz1005,zzz1021" source="2724" target="2708" cy:directed="1"/>
      <edge id="112640" label="zzz1005,zzz1247" source="2724" target="2482" cy:directed="1"/>
      <edge id="112639" label="zzz1005,zzz1278" source="2724" target="2451" cy:directed="1"/>
      <edge id="112638" label="zzz1005,zzzzzz6" source="2724" target="70" cy:directed="1"/>
      <edge id="112637" label="zzz1005,zzz1092" source="2724" target="2637" cy:directed="1"/>
      <edge id="112636" label="zzz1005,zzzzz38" source="2724" target="138" cy:directed="1"/>
      <edge id="112635" label="zzz1005,zzz1047" source="2724" target="2682" cy:directed="1"/>
      <edge id="112634" label="zzz1005,zzz1279" source="2724" target="2450" cy:directed="1"/>
      <edge id="112633" label="zzz1005,zzz1290" source="2724" target="2439" cy:directed="1"/>
      <edge id="112632" label="zzz1005,zzz1297" source="2724" target="2432" cy:directed="1"/>
      <edge id="112631" label="zzz1005,zzz1032" source="2724" target="2697" cy:directed="1"/>
      <edge id="112630" label="zzz1005,zzz1044" source="2724" target="2685" cy:directed="1"/>
      <edge id="112629" label="zzz1005,zzz1245" source="2724" target="2484" cy:directed="1"/>
      <edge id="112628" label="zzz1005,zzz1249" source="2724" target="2480" cy:directed="1"/>
      <edge id="112627" label="zzz1005,zzz1255" source="2724" target="2474" cy:directed="1"/>
      <edge id="112626" label="zzz1005,zzz1258" source="2724" target="2471" cy:directed="1"/>
      <edge id="112625" label="zzz1005,zzz1265" source="2724" target="2464" cy:directed="1"/>
      <edge id="112624" label="zzz1005,zzz1268" source="2724" target="2461" cy:directed="1"/>
      <edge id="112623" label="zzz1005,zzz1275" source="2724" target="2454" cy:directed="1"/>
      <edge id="112622" label="zzz1005,zzz1302" source="2724" target="2427" cy:directed="1"/>
      <edge id="112621" label="zzz1005,zzz1309" source="2724" target="2420" cy:directed="1"/>
      <edge id="112620" label="zzz1005,zzz1311" source="2724" target="2418" cy:directed="1"/>
      <edge id="112619" label="zzz1005,zzzz938" source="2724" target="228" cy:directed="1"/>
      <edge id="112618" label="zzz1005,zzz1269" source="2724" target="2460" cy:directed="1"/>
      <edge id="112617" label="zzz1005,zzzz946" source="2724" target="220" cy:directed="1"/>
      <edge id="112616" label="zzz1005,zzz1219" source="2724" target="2510" cy:directed="1"/>
      <edge id="112615" label="zzz1005,zzz1022" source="2724" target="2707" cy:directed="1"/>
      <edge id="112614" label="zzz1005,zzz1303" source="2724" target="2426" cy:directed="1"/>
      <edge id="112613" label="zzz1005,zzz1354" source="2724" target="2375" cy:directed="1"/>
      <edge id="112612" label="zzz1005,zzzz968" source="2724" target="198" cy:directed="1"/>
      <edge id="112611" label="zzz1005,zzz1024" source="2724" target="2705" cy:directed="1"/>
      <edge id="112610" label="zzz1005,zzz1025" source="2724" target="2704" cy:directed="1"/>
      <edge id="112609" label="zzz1005,zzz1220" source="2724" target="2509" cy:directed="1"/>
      <edge id="112608" label="zzz1005,zzzz990" source="2724" target="176" cy:directed="1"/>
      <edge id="112607" label="zzz1005,zzzzz34" source="2724" target="142" cy:directed="1"/>
      <edge id="112606" label="zzz1005,zzz1055" source="2724" target="2674" cy:directed="1"/>
      <edge id="112605" label="zzz1005,zzz1063" source="2724" target="2666" cy:directed="1"/>
      <edge id="112604" label="zzz1005,zzzz991" source="2724" target="175" cy:directed="1"/>
      <edge id="112603" label="zzz1005,zzz1035" source="2724" target="2694" cy:directed="1"/>
      <edge id="112602" label="zzz1005,zzz1038" source="2724" target="2691" cy:directed="1"/>
      <edge id="112601" label="zzz1005,zzzzz32" source="2724" target="144" cy:directed="1"/>
      <edge id="112600" label="zzz1005,zzz1036" source="2724" target="2693" cy:directed="1"/>
      <edge id="112599" label="zzz1005,zzz1087" source="2724" target="2642" cy:directed="1"/>
      <edge id="112598" label="zzz1005,zzzzzz5" source="2724" target="71" cy:directed="1"/>
      <edge id="112597" label="zzz1005,zzz1026" source="2724" target="2703" cy:directed="1"/>
      <edge id="112596" label="zzz1005,zzz1165" source="2724" target="2564" cy:directed="1"/>
      <edge id="112595" label="zzz1005,zzzzz16" source="2724" target="160" cy:directed="1"/>
      <edge id="112594" label="zzz1005,zzz1334" source="2724" target="2395" cy:directed="1"/>
      <edge id="112593" label="zzz1005,zzzzz81" source="2724" target="95" cy:directed="1"/>
      <edge id="112592" label="zzz1005,zzz1335" source="2724" target="2394" cy:directed="1"/>
      <edge id="112591" label="zzz1005,zzzz971" source="2724" target="195" cy:directed="1"/>
      <edge id="112590" label="zzz1005,zzzz973" source="2724" target="193" cy:directed="1"/>
      <edge id="112589" label="zzz1005,zzz1033" source="2724" target="2696" cy:directed="1"/>
      <edge id="112588" label="zzz1005,zzz1285" source="2724" target="2444" cy:directed="1"/>
      <edge id="112587" label="zzz1005,zzzz967" source="2724" target="199" cy:directed="1"/>
      <edge id="112586" label="zzz1005,zzz1027" source="2724" target="2702" cy:directed="1"/>
      <edge id="112585" label="zzz1005,zzz1253" source="2724" target="2476" cy:directed="1"/>
      <edge id="112584" label="zzz1005,zzz1295" source="2724" target="2434" cy:directed="1"/>
      <edge id="112583" label="zzz1005,zzz1300" source="2724" target="2429" cy:directed="1"/>
      <edge id="112582" label="zzz1005,zzz1288" source="2724" target="2441" cy:directed="1"/>
      <edge id="112581" label="zzz1005,zzz1330" source="2724" target="2399" cy:directed="1"/>
      <edge id="112580" label="zzz1005,zzz1338" source="2724" target="2391" cy:directed="1"/>
      <edge id="112579" label="zzz1005,zzz1101" source="2724" target="2628" cy:directed="1"/>
      <edge id="112578" label="zzz1005,zzz1102" source="2724" target="2627" cy:directed="1"/>
      <edge id="112577" label="zzz1005,zzz1137" source="2724" target="2592" cy:directed="1"/>
      <edge id="112576" label="zzz1005,zzz1023" source="2724" target="2706" cy:directed="1"/>
      <edge id="112575" label="zzz1005,zzz1264" source="2724" target="2465" cy:directed="1"/>
      <edge id="112574" label="zzz1005,zzz1283" source="2724" target="2446" cy:directed="1"/>
      <edge id="112573" label="zzz1005,zzz1270" source="2724" target="2459" cy:directed="1"/>
      <edge id="112572" label="zzz1005,zzz1304" source="2724" target="2425" cy:directed="1"/>
      <edge id="112571" label="zzz1005,zzzz951" source="2724" target="215" cy:directed="1"/>
      <edge id="112570" label="zzz1005,zzzz957" source="2724" target="209" cy:directed="1"/>
      <edge id="112569" label="zzz1005,zzzzzz4" source="2724" target="72" cy:directed="1"/>
      <edge id="112568" label="zzz1005,zzz1104" source="2724" target="2625" cy:directed="1"/>
      <edge id="112567" label="zzz1005,zzz1240" source="2724" target="2489" cy:directed="1"/>
      <edge id="112566" label="zzz1005,zzz1242" source="2724" target="2487" cy:directed="1"/>
      <edge id="112565" label="zzz1005,zzz1252" source="2724" target="2477" cy:directed="1"/>
      <edge id="112564" label="zzz1005,zzz1254" source="2724" target="2475" cy:directed="1"/>
      <edge id="112563" label="zzz1005,zzz1262" source="2724" target="2467" cy:directed="1"/>
      <edge id="112562" label="zzz1005,zzz1272" source="2724" target="2457" cy:directed="1"/>
      <edge id="112561" label="zzz1005,zzz1287" source="2724" target="2442" cy:directed="1"/>
      <edge id="112560" label="zzz1005,zzz1263" source="2724" target="2466" cy:directed="1"/>
      <edge id="112559" label="zzz1005,zzz1267" source="2724" target="2462" cy:directed="1"/>
      <edge id="112558" label="zzz1005,zzz1277" source="2724" target="2452" cy:directed="1"/>
      <edge id="112557" label="zzz1005,zzz1282" source="2724" target="2447" cy:directed="1"/>
      <edge id="112556" label="zzz1005,zzz1286" source="2724" target="2443" cy:directed="1"/>
      <edge id="112555" label="zzz1005,zzz1308" source="2724" target="2421" cy:directed="1"/>
      <edge id="112554" label="zzz1005,zzz1356" source="2724" target="2373" cy:directed="1"/>
      <edge id="112553" label="zzz1005,zzzzz84" source="2724" target="92" cy:directed="1"/>
      <edge id="112552" label="zzz1005,zzz1080" source="2724" target="2649" cy:directed="1"/>
      <edge id="112551" label="zzz1005,zzz1081" source="2724" target="2648" cy:directed="1"/>
      <edge id="112550" label="zzz1005,zzz1123" source="2724" target="2606" cy:directed="1"/>
      <edge id="112549" label="zzz1005,zzz1132" source="2724" target="2597" cy:directed="1"/>
      <edge id="112548" label="zzz1005,zzz1289" source="2724" target="2440" cy:directed="1"/>
      <edge id="112547" label="zzz1005,zzz1012" source="2724" target="2717" cy:directed="1"/>
      <edge id="112546" label="zzz1005,zzz1178" source="2724" target="2551" cy:directed="1"/>
      <edge id="112545" label="zzz1005,zzz1296" source="2724" target="2433" cy:directed="1"/>
      <edge id="112544" label="zzz1005,zzz1336" source="2724" target="2393" cy:directed="1"/>
      <edge id="112543" label="zzz1005,zzz1348" source="2724" target="2381" cy:directed="1"/>
      <edge id="112542" label="zzz1005,zzzzz36" source="2724" target="140" cy:directed="1"/>
      <edge id="112541" label="zzz1005,zzz1271" source="2724" target="2458" cy:directed="1"/>
      <edge id="112540" label="zzz1005,zzzz961" source="2724" target="205" cy:directed="1"/>
      <edge id="112539" label="zzz1005,zzzz966" source="2724" target="200" cy:directed="1"/>
      <edge id="112538" label="zzz1005,zzz1079" source="2724" target="2650" cy:directed="1"/>
      <edge id="112537" label="zzz1005,zzz1177" source="2724" target="2552" cy:directed="1"/>
      <edge id="112536" label="zzz1005,zzz1362" source="2724" target="2367" cy:directed="1"/>
      <edge id="112535" label="zzz1005,zzzz953" source="2724" target="213" cy:directed="1"/>
      <edge id="112534" label="zzz1005,zzzz962" source="2724" target="204" cy:directed="1"/>
      <edge id="112533" label="zzz1005,zzzzz13" source="2724" target="163" cy:directed="1"/>
      <edge id="112532" label="zzz1005,zzz1082" source="2724" target="2647" cy:directed="1"/>
      <edge id="112531" label="zzz1005,zzz1150" source="2724" target="2579" cy:directed="1"/>
      <edge id="112530" label="zzz1005,zzz1317" source="2724" target="2412" cy:directed="1"/>
      <edge id="112529" label="zzz1005,zzz1318" source="2724" target="2411" cy:directed="1"/>
      <edge id="112528" label="zzz1005,zzzzz40" source="2724" target="136" cy:directed="1"/>
      <edge id="112527" label="zzz1005,zzz1134" source="2724" target="2595" cy:directed="1"/>
      <edge id="112526" label="zzz1005,zzzz992" source="2724" target="174" cy:directed="1"/>
      <edge id="112525" label="zzz1005,zzz1045" source="2724" target="2684" cy:directed="1"/>
      <edge id="112524" label="zzz1005,zzz1089" source="2724" target="2640" cy:directed="1"/>
      <edge id="112523" label="zzz1005,zzz1091" source="2724" target="2638" cy:directed="1"/>
      <edge id="112522" label="zzz1005,zzz1135" source="2724" target="2594" cy:directed="1"/>
      <edge id="112521" label="zzz1005,zzzz987" source="2724" target="179" cy:directed="1"/>
      <edge id="112520" label="zzz1005,zzzz989" source="2724" target="177" cy:directed="1"/>
      <edge id="112519" label="zzz1005,zzzz993" source="2724" target="173" cy:directed="1"/>
      <edge id="112518" label="zzz1005,zzzz997" source="2724" target="169" cy:directed="1"/>
      <edge id="112517" label="zzz1005,zzzzz12" source="2724" target="164" cy:directed="1"/>
      <edge id="112516" label="zzz1005,zzzzz39" source="2724" target="137" cy:directed="1"/>
      <edge id="112515" label="zzz1005,zzz1037" source="2724" target="2692" cy:directed="1"/>
      <edge id="112514" label="zzz1005,zzz1039" source="2724" target="2690" cy:directed="1"/>
      <edge id="112513" label="zzz1005,zzz1042" source="2724" target="2687" cy:directed="1"/>
      <edge id="112512" label="zzz1005,zzz1069" source="2724" target="2660" cy:directed="1"/>
      <edge id="112511" label="zzz1005,zzz1070" source="2724" target="2659" cy:directed="1"/>
      <edge id="112510" label="zzz1005,zzzz984" source="2724" target="182" cy:directed="1"/>
      <edge id="112509" label="zzz1005,zzzz985" source="2724" target="181" cy:directed="1"/>
      <edge id="112508" label="zzz1005,zzzz986" source="2724" target="180" cy:directed="1"/>
      <edge id="112507" label="zzz1005,zzzzz28" source="2724" target="148" cy:directed="1"/>
      <edge id="112506" label="zzz1005,zzzzz95" source="2724" target="81" cy:directed="1"/>
      <edge id="112505" label="zzz1005,zzz1067" source="2724" target="2662" cy:directed="1"/>
      <edge id="112504" label="zzz1005,zzz1071" source="2724" target="2658" cy:directed="1"/>
      <edge id="112503" label="zzz1005,zzz1086" source="2724" target="2643" cy:directed="1"/>
      <edge id="112502" label="zzz1005,zzz1110" source="2724" target="2619" cy:directed="1"/>
      <edge id="112501" label="zzz1005,zzz1128" source="2724" target="2601" cy:directed="1"/>
      <edge id="112500" label="zzz1005,zzz1138" source="2724" target="2591" cy:directed="1"/>
      <edge id="112499" label="zzz1005,zzzz965" source="2724" target="201" cy:directed="1"/>
      <edge id="112498" label="zzz1005,zzz1159" source="2724" target="2570" cy:directed="1"/>
      <edge id="112497" label="zzz1005,zzz1160" source="2724" target="2569" cy:directed="1"/>
      <edge id="112496" label="zzz1005,zzz1213" source="2724" target="2516" cy:directed="1"/>
      <edge id="112495" label="zzz1005,zzz1229" source="2724" target="2500" cy:directed="1"/>
      <edge id="112494" label="zzz1005,zzzz937" source="2724" target="229" cy:directed="1"/>
      <edge id="112493" label="zzz1005,zzzz955" source="2724" target="211" cy:directed="1"/>
      <edge id="112492" label="zzz1005,zzzz988" source="2724" target="178" cy:directed="1"/>
      <edge id="112491" label="zzz1005,zzzzz29" source="2724" target="147" cy:directed="1"/>
      <edge id="112490" label="zzz1005,zzzzz33" source="2724" target="143" cy:directed="1"/>
      <edge id="112489" label="zzz1005,zzzzz90" source="2724" target="86" cy:directed="1"/>
      <edge id="112488" label="zzz1005,zzz1029" source="2724" target="2700" cy:directed="1"/>
      <edge id="112487" label="zzz1005,zzz1133" source="2724" target="2596" cy:directed="1"/>
      <edge id="112486" label="zzz1005,zzz1136" source="2724" target="2593" cy:directed="1"/>
      <edge id="112485" label="zzz1005,zzzzz22" source="2724" target="154" cy:directed="1"/>
      <edge id="112484" label="zzz1005,zzzzz37" source="2724" target="139" cy:directed="1"/>
      <edge id="112483" label="zzz1005,zzz1059" source="2724" target="2670" cy:directed="1"/>
      <edge id="112482" label="zzz1005,zzz1228" source="2724" target="2501" cy:directed="1"/>
      <edge id="112481" label="zzz1005,zzz1234" source="2724" target="2495" cy:directed="1"/>
      <edge id="112480" label="zzz1005,zzz1320" source="2724" target="2409" cy:directed="1"/>
      <edge id="112479" label="zzz1005,zzz1325" source="2724" target="2404" cy:directed="1"/>
      <edge id="112478" label="zzz1005,zzzzz80" source="2724" target="96" cy:directed="1"/>
      <edge id="112477" label="zzz1005,zzz1040" source="2724" target="2689" cy:directed="1"/>
      <edge id="112476" label="zzz1005,zzz1141" source="2724" target="2588" cy:directed="1"/>
      <edge id="112475" label="zzz1005,zzz1161" source="2724" target="2568" cy:directed="1"/>
      <edge id="112474" label="zzz1005,zzz1232" source="2724" target="2497" cy:directed="1"/>
      <edge id="112473" label="zzz1005,zzz1313" source="2724" target="2416" cy:directed="1"/>
      <edge id="112472" label="zzz1005,zzz1339" source="2724" target="2390" cy:directed="1"/>
      <edge id="112471" label="zzz1005,zzz2375" source="2724" target="1354" cy:directed="1"/>
      <edge id="112470" label="zzz1005,zzzz975" source="2724" target="191" cy:directed="1"/>
      <edge id="112469" label="zzz1005,zzz1054" source="2724" target="2675" cy:directed="1"/>
      <edge id="112468" label="zzz1005,zzz1319" source="2724" target="2410" cy:directed="1"/>
      <edge id="112467" label="zzz1005,zzzzz25" source="2724" target="151" cy:directed="1"/>
      <edge id="112466" label="zzz1005,zzz1139" source="2724" target="2590" cy:directed="1"/>
      <edge id="112465" label="zzz1005,zzz1331" source="2724" target="2398" cy:directed="1"/>
      <edge id="112464" label="zzz1005,zzzz983" source="2724" target="183" cy:directed="1"/>
      <edge id="112463" label="zzz1005,zzzzz23" source="2724" target="153" cy:directed="1"/>
      <edge id="112462" label="zzz1005,zzz1090" source="2724" target="2639" cy:directed="1"/>
      <edge id="112461" label="zzz1005,zzz1115" source="2724" target="2614" cy:directed="1"/>
      <edge id="112460" label="zzz1005,zzz1208" source="2724" target="2521" cy:directed="1"/>
      <edge id="112459" label="zzz1005,zzzz936" source="2724" target="230" cy:directed="1"/>
      <edge id="112458" label="zzz1005,zzz1066" source="2724" target="2663" cy:directed="1"/>
      <edge id="112457" label="zzz1005,zzz1125" source="2724" target="2604" cy:directed="1"/>
      <edge id="112456" label="zzz1005,zzz1127" source="2724" target="2602" cy:directed="1"/>
      <edge id="112455" label="zzz1005,zzz1129" source="2724" target="2600" cy:directed="1"/>
      <edge id="112454" label="zzz1005,zzz1217" source="2724" target="2512" cy:directed="1"/>
      <edge id="112453" label="zzz1005,zzzz931" source="2724" target="235" cy:directed="1"/>
      <edge id="112452" label="zzz1005,zzzz934" source="2724" target="232" cy:directed="1"/>
      <edge id="112451" label="zzz1005,zzzz935" source="2724" target="231" cy:directed="1"/>
      <edge id="112450" label="zzz1005,zzzzz11" source="2724" target="165" cy:directed="1"/>
      <edge id="112449" label="zzz1005,zzz1007" source="2724" target="2722" cy:directed="1"/>
      <edge id="112448" label="zzz1005,zzz1018" source="2724" target="2711" cy:directed="1"/>
      <edge id="112447" label="zzz1005,zzz1124" source="2724" target="2605" cy:directed="1"/>
      <edge id="112446" label="zzz1005,zzz1158" source="2724" target="2571" cy:directed="1"/>
      <edge id="112445" label="zzz1005,zzzz952" source="2724" target="214" cy:directed="1"/>
      <edge id="112444" label="zzz1005,zzzz956" source="2724" target="210" cy:directed="1"/>
      <edge id="112443" label="zzz1005,zzz1227" source="2724" target="2502" cy:directed="1"/>
      <edge id="112442" label="zzz1005,zzz2370" source="2724" target="1359" cy:directed="1"/>
      <edge id="112441" label="zzz1005,zzzz939" source="2724" target="227" cy:directed="1"/>
      <edge id="112440" label="zzz1005,zzzz940" source="2724" target="226" cy:directed="1"/>
      <edge id="112439" label="zzz1005,zzzz941" source="2724" target="225" cy:directed="1"/>
      <edge id="112438" label="zzz1005,zzzz942" source="2724" target="224" cy:directed="1"/>
      <edge id="112437" label="zzz1005,zzzz976" source="2724" target="190" cy:directed="1"/>
      <edge id="112436" label="zzz1005,zzzz977" source="2724" target="189" cy:directed="1"/>
      <edge id="112435" label="zzz1005,zzz1008" source="2724" target="2721" cy:directed="1"/>
      <edge id="112434" label="zzz1005,zzz1068" source="2724" target="2661" cy:directed="1"/>
      <edge id="112433" label="zzz1005,zzzz978" source="2724" target="188" cy:directed="1"/>
      <edge id="112432" label="zzz1005,zzzzzz0" source="2724" target="76" cy:directed="1"/>
      <edge id="112431" label="zzz1005,zzz1315" source="2724" target="2414" cy:directed="1"/>
      <edge id="112430" label="zzz1005,zzz1016" source="2724" target="2713" cy:directed="1"/>
      <edge id="112429" label="zzz1005,zzz1103" source="2724" target="2626" cy:directed="1"/>
      <edge id="112428" label="zzz1005,zzz1108" source="2724" target="2621" cy:directed="1"/>
      <edge id="112427" label="zzz1005,zzz1198" source="2724" target="2531" cy:directed="1"/>
      <edge id="112426" label="zzz1005,zzz1333" source="2724" target="2396" cy:directed="1"/>
      <edge id="112425" label="zzz1005,zzz1017" source="2724" target="2712" cy:directed="1"/>
      <edge id="112424" label="zzz1005,zzz1105" source="2724" target="2624" cy:directed="1"/>
      <edge id="112423" label="zzz1005,zzz1200" source="2724" target="2529" cy:directed="1"/>
      <edge id="112422" label="zzz1005,zzz1202" source="2724" target="2527" cy:directed="1"/>
      <edge id="112421" label="zzz1005,zzz1203" source="2724" target="2526" cy:directed="1"/>
      <edge id="112420" label="zzz1005,zzz1205" source="2724" target="2524" cy:directed="1"/>
      <edge id="112419" label="zzz1005,zzz1361" source="2724" target="2368" cy:directed="1"/>
      <edge id="112418" label="zzz1005,zzzz963" source="2724" target="203" cy:directed="1"/>
      <edge id="112417" label="zzz1005,zzzzz24" source="2724" target="152" cy:directed="1"/>
      <edge id="112416" label="zzz1005,zzzzzz2" source="2724" target="74" cy:directed="1"/>
      <edge id="112415" label="zzz1005,zzz1201" source="2724" target="2528" cy:directed="1"/>
      <edge id="112414" label="zzz1005,zzz1204" source="2724" target="2525" cy:directed="1"/>
      <edge id="112413" label="zzz1005,zzz1113" source="2724" target="2616" cy:directed="1"/>
      <edge id="112412" label="zzz1005,zzz1099" source="2724" target="2630" cy:directed="1"/>
      <edge id="112411" label="zzz1005,zzz1116" source="2724" target="2613" cy:directed="1"/>
      <edge id="112410" label="zzz1005,zzz1199" source="2724" target="2530" cy:directed="1"/>
      <edge id="112409" label="zzz1005,zzz1010" source="2724" target="2719" cy:directed="1"/>
      <edge id="112408" label="zzz1005,zzz1100" source="2724" target="2629" cy:directed="1"/>
      <edge id="112407" label="zzz1005,zzz1109" source="2724" target="2620" cy:directed="1"/>
      <edge id="112406" label="zzz1005,zzz1111" source="2724" target="2618" cy:directed="1"/>
      <edge id="112405" label="zzz1005,zzz1206" source="2724" target="2523" cy:directed="1"/>
      <edge id="112404" label="zzz1005,zzz1233" source="2724" target="2496" cy:directed="1"/>
      <edge id="112403" label="zzz1005,zzzz948" source="2724" target="218" cy:directed="1"/>
      <edge id="112402" label="zzz1005,zzzz996" source="2724" target="170" cy:directed="1"/>
      <edge id="112401" label="zzz1005,zzz1212" source="2724" target="2517" cy:directed="1"/>
      <edge id="112400" label="zzz1005,zzzz998" source="2724" target="168" cy:directed="1"/>
      <edge id="112399" label="zzz1005,zzz1009" source="2724" target="2720" cy:directed="1"/>
      <edge id="112398" label="zzz1005,zzz1114" source="2724" target="2615" cy:directed="1"/>
      <edge id="112397" label="zzz1005,zzzz964" source="2724" target="202" cy:directed="1"/>
      <edge id="112396" label="zzz1005,zzzzz35" source="2724" target="141" cy:directed="1"/>
      <edge id="112395" label="zzz1005,zzzzzz3" source="2724" target="73" cy:directed="1"/>
      <edge id="112394" label="zzz1005,zzz1096" source="2724" target="2633" cy:directed="1"/>
      <edge id="112393" label="zzz1005,zzz1118" source="2724" target="2611" cy:directed="1"/>
      <edge id="112392" label="zzz1005,zzz1367" source="2724" target="2362" cy:directed="1"/>
      <edge id="112391" label="zzz1005,zzz1011" source="2724" target="2718" cy:directed="1"/>
      <edge id="112390" label="zzz1005,zzz1043" source="2724" target="2686" cy:directed="1"/>
      <edge id="112389" label="zzz1005,zzz1041" source="2724" target="2688" cy:directed="1"/>
      <edge id="112388" label="zzz1005,zzz1363" source="2724" target="2366" cy:directed="1"/>
      <edge id="112387" label="zzz1005,zzz1364" source="2724" target="2365" cy:directed="1"/>
      <edge id="112386" label="zzz1005,zzz2386" source="2724" target="1343" cy:directed="1"/>
      <edge id="112385" label="zzz1005,zzzzz21" source="2724" target="155" cy:directed="1"/>
      <edge id="112384" label="zzz1005,zzz1321" source="2724" target="2408" cy:directed="1"/>
      <edge id="112383" label="zzz1005,zzzzz20" source="2724" target="156" cy:directed="1"/>
      <edge id="112382" label="zzz1005,zzz1074" source="2724" target="2655" cy:directed="1"/>
      <edge id="112381" label="zzz1005,zzz1119" source="2724" target="2610" cy:directed="1"/>
      <edge id="112380" label="zzz1005,zzz1226" source="2724" target="2503" cy:directed="1"/>
      <edge id="112379" label="zzz1005,zzz1314" source="2724" target="2415" cy:directed="1"/>
      <edge id="112378" label="zzz1005,zzz1327" source="2724" target="2402" cy:directed="1"/>
      <edge id="112377" label="zzz1005,zzz1106" source="2724" target="2623" cy:directed="1"/>
      <edge id="112376" label="zzz1005,zzz1366" source="2724" target="2363" cy:directed="1"/>
      <edge id="112375" label="zzz1005,zzz1151" source="2724" target="2578" cy:directed="1"/>
      <edge id="112374" label="zzz1005,zzz1098" source="2724" target="2631" cy:directed="1"/>
      <edge id="112373" label="zzz1005,zzz1117" source="2724" target="2612" cy:directed="1"/>
      <edge id="112372" label="zzz1005,zzz1223" source="2724" target="2506" cy:directed="1"/>
      <edge id="112371" label="zzz1005,zzzzz30" source="2724" target="146" cy:directed="1"/>
      <edge id="112370" label="zzz1005,zzz1084" source="2724" target="2645" cy:directed="1"/>
      <edge id="112369" label="zzz1005,zzz1322" source="2724" target="2407" cy:directed="1"/>
      <edge id="112368" label="zzz1005,zzzzz18" source="2724" target="158" cy:directed="1"/>
      <edge id="112367" label="zzz1005,zzz1056" source="2724" target="2673" cy:directed="1"/>
      <edge id="112366" label="zzz1005,zzz1097" source="2724" target="2632" cy:directed="1"/>
      <edge id="112365" label="zzz1005,zzzz949" source="2724" target="217" cy:directed="1"/>
      <edge id="112364" label="zzz1005,zzz1057" source="2724" target="2672" cy:directed="1"/>
      <edge id="112363" label="zzz1005,zzz1058" source="2724" target="2671" cy:directed="1"/>
      <edge id="112362" label="zzz1005,zzzz994" source="2724" target="172" cy:directed="1"/>
      <edge id="112361" label="zzz1005,zzz1093" source="2724" target="2636" cy:directed="1"/>
      <edge id="112360" label="zzz1005,zzzzz10" source="2724" target="166" cy:directed="1"/>
      <edge id="112359" label="zzz1005,zzz1034" source="2724" target="2695" cy:directed="1"/>
      <edge id="112358" label="zzz1005,zzzzz26" source="2724" target="150" cy:directed="1"/>
      <edge id="112357" label="zzz1005,zzz1120" source="2724" target="2609" cy:directed="1"/>
      <edge id="112356" label="zzz1005,zzz1239" source="2724" target="2490" cy:directed="1"/>
      <edge id="112355" label="zzz1005,zzz1088" source="2724" target="2641" cy:directed="1"/>
      <edge id="112354" label="zzz1005,zzz1094" source="2724" target="2635" cy:directed="1"/>
      <edge id="112353" label="zzz1005,zzz1019" source="2724" target="2710" cy:directed="1"/>
      <edge id="112352" label="zzz1005,zzzz932" source="2724" target="234" cy:directed="1"/>
      <edge id="112351" label="zzz1005,zzz1365" source="2724" target="2364" cy:directed="1"/>
      <edge id="112350" label="zzz1005,zzz1107" source="2724" target="2622" cy:directed="1"/>
      <edge id="112349" label="zzz1005,zzz1078" source="2724" target="2651" cy:directed="1"/>
      <edge id="112348" label="zzz1005,zzz1140" source="2724" target="2589" cy:directed="1"/>
      <edge id="112347" label="zzz1005,zzzz950" source="2724" target="216" cy:directed="1"/>
      <edge id="112346" label="zzz1005,zzz1076" source="2724" target="2653" cy:directed="1"/>
      <edge id="112345" label="zzz1005,zzzz974" source="2724" target="192" cy:directed="1"/>
      <edge id="112344" label="zzz1005,zzzzz82" source="2724" target="94" cy:directed="1"/>
      <edge id="112343" label="zzz1005,zzzzz85" source="2724" target="91" cy:directed="1"/>
      <edge id="112342" label="zzz1005,zzz1020" source="2724" target="2709" cy:directed="1"/>
      <edge id="112341" label="zzz1005,zzz1072" source="2724" target="2657" cy:directed="1"/>
      <edge id="112340" label="zzz1005,zzz1126" source="2724" target="2603" cy:directed="1"/>
      <edge id="112339" label="zzz1005,zzz1294" source="2724" target="2435" cy:directed="1"/>
      <edge id="112338" label="zzz1005,zzzz981" source="2724" target="185" cy:directed="1"/>
      <edge id="112337" label="zzz1005,zzz1053" source="2724" target="2676" cy:directed="1"/>
      <edge id="112336" label="zzz1005,zzz1353" source="2724" target="2376" cy:directed="1"/>
      <edge id="112335" label="zzz1005,zzz1243" source="2724" target="2486" cy:directed="1"/>
      <edge id="112334" label="zzz1005,zzz1316" source="2724" target="2413" cy:directed="1"/>
      <edge id="112333" label="zzz1005,zzzz979" source="2724" target="187" cy:directed="1"/>
      <edge id="112332" label="zzz1005,zzzz980" source="2724" target="186" cy:directed="1"/>
      <edge id="112331" label="zzz1005,zzzzz27" source="2724" target="149" cy:directed="1"/>
      <edge id="112330" label="zzz1005,zzzzz31" source="2724" target="145" cy:directed="1"/>
      <edge id="112329" label="zzz1005,zzz1061" source="2724" target="2668" cy:directed="1"/>
      <edge id="112328" label="zzz1005,zzz1062" source="2724" target="2667" cy:directed="1"/>
      <edge id="112327" label="zzz1005,zzzz101" source="2724" target="1065" cy:directed="1"/>
      <edge id="112326" label="zzz1005,zzz1122" source="2724" target="2607" cy:directed="1"/>
      <edge id="112325" label="zzz1005,zzzz954" source="2724" target="212" cy:directed="1"/>
      <edge id="112324" label="zzz1005,zzz1077" source="2724" target="2652" cy:directed="1"/>
      <edge id="112323" label="zzz1005,zzz1083" source="2724" target="2646" cy:directed="1"/>
      <edge id="112322" label="zzz1005,zzz1156" source="2724" target="2573" cy:directed="1"/>
      <edge id="112321" label="zzz1005,zzz1157" source="2724" target="2572" cy:directed="1"/>
      <edge id="112320" label="zzz1006,zzzz960" source="2723" target="206" cy:directed="1"/>
      <edge id="112319" label="zzz1006,zzzz958" source="2723" target="208" cy:directed="1"/>
      <edge id="112318" label="zzz1006,zzzz933" source="2723" target="233" cy:directed="1"/>
      <edge id="112317" label="zzz1006,zzz1030" source="2723" target="2699" cy:directed="1"/>
      <edge id="112316" label="zzz1006,zzz1031" source="2723" target="2698" cy:directed="1"/>
      <edge id="112315" label="zzz1006,zzz2390" source="2723" target="1339" cy:directed="1"/>
      <edge id="112314" label="zzz1006,zzz1046" source="2723" target="2683" cy:directed="1"/>
      <edge id="112313" label="zzz1006,zzzz945" source="2723" target="221" cy:directed="1"/>
      <edge id="112312" label="zzz1006,zzz1337" source="2723" target="2392" cy:directed="1"/>
      <edge id="112311" label="zzz1006,zzz1328" source="2723" target="2401" cy:directed="1"/>
      <edge id="112310" label="zzz1006,zzz1152" source="2723" target="2577" cy:directed="1"/>
      <edge id="112309" label="zzz1006,zzz1154" source="2723" target="2575" cy:directed="1"/>
      <edge id="112308" label="zzz1006,zzz1153" source="2723" target="2576" cy:directed="1"/>
      <edge id="112307" label="zzz1006,zzz1142" source="2723" target="2587" cy:directed="1"/>
      <edge id="112306" label="zzz1006,zzz1143" source="2723" target="2586" cy:directed="1"/>
      <edge id="112305" label="zzz1006,zzz1148" source="2723" target="2581" cy:directed="1"/>
      <edge id="112304" label="zzz1006,zzz1149" source="2723" target="2580" cy:directed="1"/>
      <edge id="112303" label="zzz1006,zzz1028" source="2723" target="2701" cy:directed="1"/>
      <edge id="112302" label="zzz1006,zzzz970" source="2723" target="196" cy:directed="1"/>
      <edge id="112301" label="zzz1006,zzzz969" source="2723" target="197" cy:directed="1"/>
      <edge id="112300" label="zzz1006,zzz1073" source="2723" target="2656" cy:directed="1"/>
      <edge id="112299" label="zzz1006,zzz1048" source="2723" target="2681" cy:directed="1"/>
      <edge id="112298" label="zzz1006,zzz1274" source="2723" target="2455" cy:directed="1"/>
      <edge id="112297" label="zzz1006,zzz1292" source="2723" target="2437" cy:directed="1"/>
      <edge id="112296" label="zzz1006,zzz1293" source="2723" target="2436" cy:directed="1"/>
      <edge id="112295" label="zzz1006,zzz1305" source="2723" target="2424" cy:directed="1"/>
      <edge id="112294" label="zzz1006,zzz1244" source="2723" target="2485" cy:directed="1"/>
      <edge id="112293" label="zzz1006,zzz1248" source="2723" target="2481" cy:directed="1"/>
      <edge id="112292" label="zzz1006,zzz1251" source="2723" target="2478" cy:directed="1"/>
      <edge id="112291" label="zzz1006,zzz1257" source="2723" target="2472" cy:directed="1"/>
      <edge id="112290" label="zzz1006,zzz1261" source="2723" target="2468" cy:directed="1"/>
      <edge id="112289" label="zzz1006,zzz1273" source="2723" target="2456" cy:directed="1"/>
      <edge id="112288" label="zzz1006,zzz1280" source="2723" target="2449" cy:directed="1"/>
      <edge id="112287" label="zzz1006,zzz1307" source="2723" target="2422" cy:directed="1"/>
      <edge id="112286" label="zzz1006,zzz1312" source="2723" target="2417" cy:directed="1"/>
      <edge id="112285" label="zzz1006,zzz1349" source="2723" target="2380" cy:directed="1"/>
      <edge id="112284" label="zzz1006,zzz1301" source="2723" target="2428" cy:directed="1"/>
      <edge id="112283" label="zzz1006,zzz1326" source="2723" target="2403" cy:directed="1"/>
      <edge id="112282" label="zzz1006,zzz1355" source="2723" target="2374" cy:directed="1"/>
      <edge id="112281" label="zzz1006,zzz1360" source="2723" target="2369" cy:directed="1"/>
      <edge id="112280" label="zzz1006,zzzzz93" source="2723" target="83" cy:directed="1"/>
      <edge id="112279" label="zzz1006,zzzz972" source="2723" target="194" cy:directed="1"/>
      <edge id="112278" label="zzz1006,zzz1060" source="2723" target="2669" cy:directed="1"/>
      <edge id="112277" label="zzz1006,zzz1064" source="2723" target="2665" cy:directed="1"/>
      <edge id="112276" label="zzz1006,zzz1298" source="2723" target="2431" cy:directed="1"/>
      <edge id="112275" label="zzz1006,zzz1323" source="2723" target="2406" cy:directed="1"/>
      <edge id="112274" label="zzz1006,zzz1346" source="2723" target="2383" cy:directed="1"/>
      <edge id="112273" label="zzz1006,zzz1358" source="2723" target="2371" cy:directed="1"/>
      <edge id="112272" label="zzz1006,zzz1359" source="2723" target="2370" cy:directed="1"/>
      <edge id="112271" label="zzz1006,zzz1049" source="2723" target="2680" cy:directed="1"/>
      <edge id="112270" label="zzz1006,zzz1192" source="2723" target="2537" cy:directed="1"/>
      <edge id="112269" label="zzz1006,zzz1196" source="2723" target="2533" cy:directed="1"/>
      <edge id="112268" label="zzz1006,zzz1235" source="2723" target="2494" cy:directed="1"/>
      <edge id="112267" label="zzz1006,zzz1237" source="2723" target="2492" cy:directed="1"/>
      <edge id="112266" label="zzz1006,zzz1329" source="2723" target="2400" cy:directed="1"/>
      <edge id="112265" label="zzz1006,zzz1344" source="2723" target="2385" cy:directed="1"/>
      <edge id="112264" label="zzz1006,zzz1345" source="2723" target="2384" cy:directed="1"/>
      <edge id="112263" label="zzz1006,zzz1347" source="2723" target="2382" cy:directed="1"/>
      <edge id="112262" label="zzz1006,zzz1095" source="2723" target="2634" cy:directed="1"/>
      <edge id="112261" label="zzz1006,zzz1193" source="2723" target="2536" cy:directed="1"/>
      <edge id="112260" label="zzz1006,zzz1241" source="2723" target="2488" cy:directed="1"/>
      <edge id="112259" label="zzz1006,zzz1246" source="2723" target="2483" cy:directed="1"/>
      <edge id="112258" label="zzz1006,zzz1256" source="2723" target="2473" cy:directed="1"/>
      <edge id="112257" label="zzz1006,zzz1260" source="2723" target="2469" cy:directed="1"/>
      <edge id="112256" label="zzz1006,zzz1276" source="2723" target="2453" cy:directed="1"/>
      <edge id="112255" label="zzz1006,zzz1281" source="2723" target="2448" cy:directed="1"/>
      <edge id="112254" label="zzz1006,zzz1284" source="2723" target="2445" cy:directed="1"/>
      <edge id="112253" label="zzz1006,zzz1291" source="2723" target="2438" cy:directed="1"/>
      <edge id="112252" label="zzz1006,zzz1306" source="2723" target="2423" cy:directed="1"/>
      <edge id="112251" label="zzz1006,zzz1342" source="2723" target="2387" cy:directed="1"/>
      <edge id="112250" label="zzz1006,zzz1147" source="2723" target="2582" cy:directed="1"/>
      <edge id="112249" label="zzz1006,zzz1194" source="2723" target="2535" cy:directed="1"/>
      <edge id="112248" label="zzz1006,zzz1195" source="2723" target="2534" cy:directed="1"/>
      <edge id="112247" label="zzz1006,zzz1236" source="2723" target="2493" cy:directed="1"/>
      <edge id="112246" label="zzz1006,zzz1299" source="2723" target="2430" cy:directed="1"/>
      <edge id="112245" label="zzz1006,zzz1324" source="2723" target="2405" cy:directed="1"/>
      <edge id="112244" label="zzz1006,zzz1341" source="2723" target="2388" cy:directed="1"/>
      <edge id="112243" label="zzz1006,zzz1350" source="2723" target="2379" cy:directed="1"/>
      <edge id="112242" label="zzz1006,zzz1351" source="2723" target="2378" cy:directed="1"/>
      <edge id="112241" label="zzz1006,zzzz100" source="2723" target="1066" cy:directed="1"/>
      <edge id="112240" label="zzz1006,zzzz947" source="2723" target="219" cy:directed="1"/>
      <edge id="112239" label="zzz1006,zzz1352" source="2723" target="2377" cy:directed="1"/>
      <edge id="112238" label="zzz1006,zzz1197" source="2723" target="2532" cy:directed="1"/>
      <edge id="112237" label="zzz1006,zzzzz91" source="2723" target="85" cy:directed="1"/>
      <edge id="112236" label="zzz1006,zzz1144" source="2723" target="2585" cy:directed="1"/>
      <edge id="112235" label="zzz1006,zzz1145" source="2723" target="2584" cy:directed="1"/>
      <edge id="112234" label="zzz1006,zzz1340" source="2723" target="2389" cy:directed="1"/>
      <edge id="112233" label="zzz1006,zzz1146" source="2723" target="2583" cy:directed="1"/>
      <edge id="112232" label="zzz1006,zzz1310" source="2723" target="2419" cy:directed="1"/>
      <edge id="112231" label="zzz1006,zzz1021" source="2723" target="2708" cy:directed="1"/>
      <edge id="112230" label="zzz1006,zzz1247" source="2723" target="2482" cy:directed="1"/>
      <edge id="112229" label="zzz1006,zzz1278" source="2723" target="2451" cy:directed="1"/>
      <edge id="112228" label="zzz1006,zzz1238" source="2723" target="2491" cy:directed="1"/>
      <edge id="112227" label="zzz1006,zzz1343" source="2723" target="2386" cy:directed="1"/>
      <edge id="112226" label="zzz1006,zzzzzz6" source="2723" target="70" cy:directed="1"/>
      <edge id="112225" label="zzz1006,zzz1047" source="2723" target="2682" cy:directed="1"/>
      <edge id="112224" label="zzz1006,zzzzz38" source="2723" target="138" cy:directed="1"/>
      <edge id="112223" label="zzz1006,zzz1032" source="2723" target="2697" cy:directed="1"/>
      <edge id="112222" label="zzz1006,zzz1044" source="2723" target="2685" cy:directed="1"/>
      <edge id="112221" label="zzz1006,zzz1092" source="2723" target="2637" cy:directed="1"/>
      <edge id="112220" label="zzz1006,zzz1245" source="2723" target="2484" cy:directed="1"/>
      <edge id="112219" label="zzz1006,zzz1249" source="2723" target="2480" cy:directed="1"/>
      <edge id="112218" label="zzz1006,zzz1255" source="2723" target="2474" cy:directed="1"/>
      <edge id="112217" label="zzz1006,zzz1258" source="2723" target="2471" cy:directed="1"/>
      <edge id="112216" label="zzz1006,zzz1265" source="2723" target="2464" cy:directed="1"/>
      <edge id="112215" label="zzz1006,zzz1268" source="2723" target="2461" cy:directed="1"/>
      <edge id="112214" label="zzz1006,zzz1275" source="2723" target="2454" cy:directed="1"/>
      <edge id="112213" label="zzz1006,zzz1302" source="2723" target="2427" cy:directed="1"/>
      <edge id="112212" label="zzz1006,zzz1309" source="2723" target="2420" cy:directed="1"/>
      <edge id="112211" label="zzz1006,zzz1311" source="2723" target="2418" cy:directed="1"/>
      <edge id="112210" label="zzz1006,zzz1279" source="2723" target="2450" cy:directed="1"/>
      <edge id="112209" label="zzz1006,zzz1290" source="2723" target="2439" cy:directed="1"/>
      <edge id="112208" label="zzz1006,zzz1297" source="2723" target="2432" cy:directed="1"/>
      <edge id="112207" label="zzz1006,zzz1269" source="2723" target="2460" cy:directed="1"/>
      <edge id="112206" label="zzz1006,zzzz938" source="2723" target="228" cy:directed="1"/>
      <edge id="112205" label="zzz1006,zzzz946" source="2723" target="220" cy:directed="1"/>
      <edge id="112204" label="zzz1006,zzzz968" source="2723" target="198" cy:directed="1"/>
      <edge id="112203" label="zzz1006,zzzz990" source="2723" target="176" cy:directed="1"/>
      <edge id="112202" label="zzz1006,zzz1022" source="2723" target="2707" cy:directed="1"/>
      <edge id="112201" label="zzz1006,zzz1303" source="2723" target="2426" cy:directed="1"/>
      <edge id="112200" label="zzz1006,zzz1354" source="2723" target="2375" cy:directed="1"/>
      <edge id="112199" label="zzz1006,zzz1219" source="2723" target="2510" cy:directed="1"/>
      <edge id="112198" label="zzz1006,zzz1024" source="2723" target="2705" cy:directed="1"/>
      <edge id="112197" label="zzz1006,zzz1025" source="2723" target="2704" cy:directed="1"/>
      <edge id="112196" label="zzz1006,zzzz991" source="2723" target="175" cy:directed="1"/>
      <edge id="112195" label="zzz1006,zzz1220" source="2723" target="2509" cy:directed="1"/>
      <edge id="112194" label="zzz1006,zzz1334" source="2723" target="2395" cy:directed="1"/>
      <edge id="112193" label="zzz1006,zzzzz34" source="2723" target="142" cy:directed="1"/>
      <edge id="112192" label="zzz1006,zzz1055" source="2723" target="2674" cy:directed="1"/>
      <edge id="112191" label="zzz1006,zzz1063" source="2723" target="2666" cy:directed="1"/>
      <edge id="112190" label="zzz1006,zzz1335" source="2723" target="2394" cy:directed="1"/>
      <edge id="112189" label="zzz1006,zzzzz16" source="2723" target="160" cy:directed="1"/>
      <edge id="112188" label="zzz1006,zzzzzz5" source="2723" target="71" cy:directed="1"/>
      <edge id="112187" label="zzz1006,zzz1026" source="2723" target="2703" cy:directed="1"/>
      <edge id="112186" label="zzz1006,zzz1035" source="2723" target="2694" cy:directed="1"/>
      <edge id="112185" label="zzz1006,zzz1038" source="2723" target="2691" cy:directed="1"/>
      <edge id="112184" label="zzz1006,zzz1087" source="2723" target="2642" cy:directed="1"/>
      <edge id="112183" label="zzz1006,zzz1165" source="2723" target="2564" cy:directed="1"/>
      <edge id="112182" label="zzz1006,zzzzz32" source="2723" target="144" cy:directed="1"/>
      <edge id="112181" label="zzz1006,zzz1036" source="2723" target="2693" cy:directed="1"/>
      <edge id="112180" label="zzz1006,zzz1330" source="2723" target="2399" cy:directed="1"/>
      <edge id="112179" label="zzz1006,zzz1338" source="2723" target="2391" cy:directed="1"/>
      <edge id="112178" label="zzz1006,zzzz971" source="2723" target="195" cy:directed="1"/>
      <edge id="112177" label="zzz1006,zzzz973" source="2723" target="193" cy:directed="1"/>
      <edge id="112176" label="zzz1006,zzzzz81" source="2723" target="95" cy:directed="1"/>
      <edge id="112175" label="zzz1006,zzz1253" source="2723" target="2476" cy:directed="1"/>
      <edge id="112174" label="zzz1006,zzz1295" source="2723" target="2434" cy:directed="1"/>
      <edge id="112173" label="zzz1006,zzz1300" source="2723" target="2429" cy:directed="1"/>
      <edge id="112172" label="zzz1006,zzz1285" source="2723" target="2444" cy:directed="1"/>
      <edge id="112171" label="zzz1006,zzz1288" source="2723" target="2441" cy:directed="1"/>
      <edge id="112170" label="zzz1006,zzzzzz4" source="2723" target="72" cy:directed="1"/>
      <edge id="112169" label="zzz1006,zzz1027" source="2723" target="2702" cy:directed="1"/>
      <edge id="112168" label="zzz1006,zzz1264" source="2723" target="2465" cy:directed="1"/>
      <edge id="112167" label="zzz1006,zzz1283" source="2723" target="2446" cy:directed="1"/>
      <edge id="112166" label="zzz1006,zzz1270" source="2723" target="2459" cy:directed="1"/>
      <edge id="112165" label="zzz1006,zzz1304" source="2723" target="2425" cy:directed="1"/>
      <edge id="112164" label="zzz1006,zzzz967" source="2723" target="199" cy:directed="1"/>
      <edge id="112163" label="zzz1006,zzz1033" source="2723" target="2696" cy:directed="1"/>
      <edge id="112162" label="zzz1006,zzz1080" source="2723" target="2649" cy:directed="1"/>
      <edge id="112161" label="zzz1006,zzz1081" source="2723" target="2648" cy:directed="1"/>
      <edge id="112160" label="zzz1006,zzz1240" source="2723" target="2489" cy:directed="1"/>
      <edge id="112159" label="zzz1006,zzz1242" source="2723" target="2487" cy:directed="1"/>
      <edge id="112158" label="zzz1006,zzz1252" source="2723" target="2477" cy:directed="1"/>
      <edge id="112157" label="zzz1006,zzz1254" source="2723" target="2475" cy:directed="1"/>
      <edge id="112156" label="zzz1006,zzz1262" source="2723" target="2467" cy:directed="1"/>
      <edge id="112155" label="zzz1006,zzz1272" source="2723" target="2457" cy:directed="1"/>
      <edge id="112154" label="zzz1006,zzz1289" source="2723" target="2440" cy:directed="1"/>
      <edge id="112153" label="zzz1006,zzz1023" source="2723" target="2706" cy:directed="1"/>
      <edge id="112152" label="zzz1006,zzz1101" source="2723" target="2628" cy:directed="1"/>
      <edge id="112151" label="zzz1006,zzz1102" source="2723" target="2627" cy:directed="1"/>
      <edge id="112150" label="zzz1006,zzz1137" source="2723" target="2592" cy:directed="1"/>
      <edge id="112149" label="zzz1006,zzz1287" source="2723" target="2442" cy:directed="1"/>
      <edge id="112148" label="zzz1006,zzzz951" source="2723" target="215" cy:directed="1"/>
      <edge id="112147" label="zzz1006,zzz1012" source="2723" target="2717" cy:directed="1"/>
      <edge id="112146" label="zzz1006,zzz1263" source="2723" target="2466" cy:directed="1"/>
      <edge id="112145" label="zzz1006,zzz1267" source="2723" target="2462" cy:directed="1"/>
      <edge id="112144" label="zzz1006,zzz1277" source="2723" target="2452" cy:directed="1"/>
      <edge id="112143" label="zzz1006,zzz1282" source="2723" target="2447" cy:directed="1"/>
      <edge id="112142" label="zzz1006,zzz1286" source="2723" target="2443" cy:directed="1"/>
      <edge id="112141" label="zzz1006,zzz1308" source="2723" target="2421" cy:directed="1"/>
      <edge id="112140" label="zzz1006,zzzz957" source="2723" target="209" cy:directed="1"/>
      <edge id="112139" label="zzz1006,zzzzz84" source="2723" target="92" cy:directed="1"/>
      <edge id="112138" label="zzz1006,zzz1104" source="2723" target="2625" cy:directed="1"/>
      <edge id="112137" label="zzz1006,zzz1123" source="2723" target="2606" cy:directed="1"/>
      <edge id="112136" label="zzz1006,zzz1132" source="2723" target="2597" cy:directed="1"/>
      <edge id="112135" label="zzz1006,zzz1296" source="2723" target="2433" cy:directed="1"/>
      <edge id="112134" label="zzz1006,zzz1271" source="2723" target="2458" cy:directed="1"/>
      <edge id="112133" label="zzz1006,zzz1356" source="2723" target="2373" cy:directed="1"/>
      <edge id="112132" label="zzz1006,zzzzz36" source="2723" target="140" cy:directed="1"/>
      <edge id="112131" label="zzz1006,zzzzz40" source="2723" target="136" cy:directed="1"/>
      <edge id="112130" label="zzz1006,zzzz966" source="2723" target="200" cy:directed="1"/>
      <edge id="112129" label="zzz1006,zzz1042" source="2723" target="2687" cy:directed="1"/>
      <edge id="112128" label="zzz1006,zzz1318" source="2723" target="2411" cy:directed="1"/>
      <edge id="112127" label="zzz1006,zzz1348" source="2723" target="2381" cy:directed="1"/>
      <edge id="112126" label="zzz1006,zzz1150" source="2723" target="2579" cy:directed="1"/>
      <edge id="112125" label="zzz1006,zzz1336" source="2723" target="2393" cy:directed="1"/>
      <edge id="112124" label="zzz1006,zzzz961" source="2723" target="205" cy:directed="1"/>
      <edge id="112123" label="zzz1006,zzzz962" source="2723" target="204" cy:directed="1"/>
      <edge id="112122" label="zzz1006,zzz1178" source="2723" target="2551" cy:directed="1"/>
      <edge id="112121" label="zzz1006,zzzz989" source="2723" target="177" cy:directed="1"/>
      <edge id="112120" label="zzz1006,zzz1079" source="2723" target="2650" cy:directed="1"/>
      <edge id="112119" label="zzz1006,zzz1082" source="2723" target="2647" cy:directed="1"/>
      <edge id="112118" label="zzz1006,zzz1134" source="2723" target="2595" cy:directed="1"/>
      <edge id="112117" label="zzz1006,zzz1135" source="2723" target="2594" cy:directed="1"/>
      <edge id="112116" label="zzz1006,zzz1177" source="2723" target="2552" cy:directed="1"/>
      <edge id="112115" label="zzz1006,zzz1317" source="2723" target="2412" cy:directed="1"/>
      <edge id="112114" label="zzz1006,zzz1362" source="2723" target="2367" cy:directed="1"/>
      <edge id="112113" label="zzz1006,zzzz953" source="2723" target="213" cy:directed="1"/>
      <edge id="112112" label="zzz1006,zzzz987" source="2723" target="179" cy:directed="1"/>
      <edge id="112111" label="zzz1006,zzzz992" source="2723" target="174" cy:directed="1"/>
      <edge id="112110" label="zzz1006,zzzz997" source="2723" target="169" cy:directed="1"/>
      <edge id="112109" label="zzz1006,zzzzz13" source="2723" target="163" cy:directed="1"/>
      <edge id="112108" label="zzz1006,zzzzz33" source="2723" target="143" cy:directed="1"/>
      <edge id="112107" label="zzz1006,zzzzz90" source="2723" target="86" cy:directed="1"/>
      <edge id="112106" label="zzz1006,zzz1045" source="2723" target="2684" cy:directed="1"/>
      <edge id="112105" label="zzz1006,zzz1086" source="2723" target="2643" cy:directed="1"/>
      <edge id="112104" label="zzz1006,zzz1089" source="2723" target="2640" cy:directed="1"/>
      <edge id="112103" label="zzz1006,zzz1091" source="2723" target="2638" cy:directed="1"/>
      <edge id="112102" label="zzz1006,zzz1313" source="2723" target="2416" cy:directed="1"/>
      <edge id="112101" label="zzz1006,zzz1320" source="2723" target="2409" cy:directed="1"/>
      <edge id="112100" label="zzz1006,zzz1325" source="2723" target="2404" cy:directed="1"/>
      <edge id="112099" label="zzz1006,zzzz984" source="2723" target="182" cy:directed="1"/>
      <edge id="112098" label="zzz1006,zzzz985" source="2723" target="181" cy:directed="1"/>
      <edge id="112097" label="zzz1006,zzzz986" source="2723" target="180" cy:directed="1"/>
      <edge id="112096" label="zzz1006,zzzz988" source="2723" target="178" cy:directed="1"/>
      <edge id="112095" label="zzz1006,zzzz993" source="2723" target="173" cy:directed="1"/>
      <edge id="112094" label="zzz1006,zzzzz28" source="2723" target="148" cy:directed="1"/>
      <edge id="112093" label="zzz1006,zzzzz95" source="2723" target="81" cy:directed="1"/>
      <edge id="112092" label="zzz1006,zzz1069" source="2723" target="2660" cy:directed="1"/>
      <edge id="112091" label="zzz1006,zzz1070" source="2723" target="2659" cy:directed="1"/>
      <edge id="112090" label="zzz1006,zzz1159" source="2723" target="2570" cy:directed="1"/>
      <edge id="112089" label="zzz1006,zzz1160" source="2723" target="2569" cy:directed="1"/>
      <edge id="112088" label="zzz1006,zzz1339" source="2723" target="2390" cy:directed="1"/>
      <edge id="112087" label="zzz1006,zzzzz12" source="2723" target="164" cy:directed="1"/>
      <edge id="112086" label="zzz1006,zzz1037" source="2723" target="2692" cy:directed="1"/>
      <edge id="112085" label="zzz1006,zzz1039" source="2723" target="2690" cy:directed="1"/>
      <edge id="112084" label="zzz1006,zzz1059" source="2723" target="2670" cy:directed="1"/>
      <edge id="112083" label="zzz1006,zzz1067" source="2723" target="2662" cy:directed="1"/>
      <edge id="112082" label="zzz1006,zzzz937" source="2723" target="229" cy:directed="1"/>
      <edge id="112081" label="zzz1006,zzzzz39" source="2723" target="137" cy:directed="1"/>
      <edge id="112080" label="zzz1006,zzz1071" source="2723" target="2658" cy:directed="1"/>
      <edge id="112079" label="zzz1006,zzz1133" source="2723" target="2596" cy:directed="1"/>
      <edge id="112078" label="zzz1006,zzz1136" source="2723" target="2593" cy:directed="1"/>
      <edge id="112077" label="zzz1006,zzz1138" source="2723" target="2591" cy:directed="1"/>
      <edge id="112076" label="zzz1006,zzzz965" source="2723" target="201" cy:directed="1"/>
      <edge id="112075" label="zzz1006,zzz1213" source="2723" target="2516" cy:directed="1"/>
      <edge id="112074" label="zzz1006,zzz1229" source="2723" target="2500" cy:directed="1"/>
      <edge id="112073" label="zzz1006,zzz1234" source="2723" target="2495" cy:directed="1"/>
      <edge id="112072" label="zzz1006,zzz1319" source="2723" target="2410" cy:directed="1"/>
      <edge id="112071" label="zzz1006,zzzz975" source="2723" target="191" cy:directed="1"/>
      <edge id="112070" label="zzz1006,zzzzz22" source="2723" target="154" cy:directed="1"/>
      <edge id="112069" label="zzz1006,zzzzz80" source="2723" target="96" cy:directed="1"/>
      <edge id="112068" label="zzz1006,zzz1090" source="2723" target="2639" cy:directed="1"/>
      <edge id="112067" label="zzz1006,zzz1110" source="2723" target="2619" cy:directed="1"/>
      <edge id="112066" label="zzz1006,zzz1128" source="2723" target="2601" cy:directed="1"/>
      <edge id="112065" label="zzz1006,zzz2375" source="2723" target="1354" cy:directed="1"/>
      <edge id="112064" label="zzz1006,zzzz936" source="2723" target="230" cy:directed="1"/>
      <edge id="112063" label="zzz1006,zzzz955" source="2723" target="211" cy:directed="1"/>
      <edge id="112062" label="zzz1006,zzzzz11" source="2723" target="165" cy:directed="1"/>
      <edge id="112061" label="zzz1006,zzzzz29" source="2723" target="147" cy:directed="1"/>
      <edge id="112060" label="zzz1006,zzzzz37" source="2723" target="139" cy:directed="1"/>
      <edge id="112059" label="zzz1006,zzz1029" source="2723" target="2700" cy:directed="1"/>
      <edge id="112058" label="zzz1006,zzz1161" source="2723" target="2568" cy:directed="1"/>
      <edge id="112057" label="zzz1006,zzz1208" source="2723" target="2521" cy:directed="1"/>
      <edge id="112056" label="zzz1006,zzz1040" source="2723" target="2689" cy:directed="1"/>
      <edge id="112055" label="zzz1006,zzz1054" source="2723" target="2675" cy:directed="1"/>
      <edge id="112054" label="zzz1006,zzz1141" source="2723" target="2588" cy:directed="1"/>
      <edge id="112053" label="zzz1006,zzz1228" source="2723" target="2501" cy:directed="1"/>
      <edge id="112052" label="zzz1006,zzz1232" source="2723" target="2497" cy:directed="1"/>
      <edge id="112051" label="zzz1006,zzzz931" source="2723" target="235" cy:directed="1"/>
      <edge id="112050" label="zzz1006,zzz1018" source="2723" target="2711" cy:directed="1"/>
      <edge id="112049" label="zzz1006,zzz1068" source="2723" target="2661" cy:directed="1"/>
      <edge id="112048" label="zzz1006,zzz1139" source="2723" target="2590" cy:directed="1"/>
      <edge id="112047" label="zzz1006,zzz1331" source="2723" target="2398" cy:directed="1"/>
      <edge id="112046" label="zzz1006,zzz2370" source="2723" target="1359" cy:directed="1"/>
      <edge id="112045" label="zzz1006,zzzz934" source="2723" target="232" cy:directed="1"/>
      <edge id="112044" label="zzz1006,zzzz983" source="2723" target="183" cy:directed="1"/>
      <edge id="112043" label="zzz1006,zzzzz23" source="2723" target="153" cy:directed="1"/>
      <edge id="112042" label="zzz1006,zzzzz25" source="2723" target="151" cy:directed="1"/>
      <edge id="112041" label="zzz1006,zzz1066" source="2723" target="2663" cy:directed="1"/>
      <edge id="112040" label="zzz1006,zzz1129" source="2723" target="2600" cy:directed="1"/>
      <edge id="112039" label="zzz1006,zzz1217" source="2723" target="2512" cy:directed="1"/>
      <edge id="112038" label="zzz1006,zzzz935" source="2723" target="231" cy:directed="1"/>
      <edge id="112037" label="zzz1006,zzz1115" source="2723" target="2614" cy:directed="1"/>
      <edge id="112036" label="zzz1006,zzz1125" source="2723" target="2604" cy:directed="1"/>
      <edge id="112035" label="zzz1006,zzz1158" source="2723" target="2571" cy:directed="1"/>
      <edge id="112034" label="zzz1006,zzz1198" source="2723" target="2531" cy:directed="1"/>
      <edge id="112033" label="zzz1006,zzzz939" source="2723" target="227" cy:directed="1"/>
      <edge id="112032" label="zzz1006,zzzz940" source="2723" target="226" cy:directed="1"/>
      <edge id="112031" label="zzz1006,zzzz941" source="2723" target="225" cy:directed="1"/>
      <edge id="112030" label="zzz1006,zzzz942" source="2723" target="224" cy:directed="1"/>
      <edge id="112029" label="zzz1006,zzzz976" source="2723" target="190" cy:directed="1"/>
      <edge id="112028" label="zzz1006,zzzz977" source="2723" target="189" cy:directed="1"/>
      <edge id="112027" label="zzz1006,zzzzz24" source="2723" target="152" cy:directed="1"/>
      <edge id="112026" label="zzz1006,zzz1016" source="2723" target="2713" cy:directed="1"/>
      <edge id="112025" label="zzz1006,zzz1103" source="2723" target="2626" cy:directed="1"/>
      <edge id="112024" label="zzz1006,zzz1108" source="2723" target="2621" cy:directed="1"/>
      <edge id="112023" label="zzz1006,zzz1124" source="2723" target="2605" cy:directed="1"/>
      <edge id="112022" label="zzz1006,zzz1127" source="2723" target="2602" cy:directed="1"/>
      <edge id="112021" label="zzz1006,zzz1315" source="2723" target="2414" cy:directed="1"/>
      <edge id="112020" label="zzz1006,zzzz952" source="2723" target="214" cy:directed="1"/>
      <edge id="112019" label="zzz1006,zzzz978" source="2723" target="188" cy:directed="1"/>
      <edge id="112018" label="zzz1006,zzz1007" source="2723" target="2722" cy:directed="1"/>
      <edge id="112017" label="zzz1006,zzz1017" source="2723" target="2712" cy:directed="1"/>
      <edge id="112016" label="zzz1006,zzz1200" source="2723" target="2529" cy:directed="1"/>
      <edge id="112015" label="zzz1006,zzz1202" source="2723" target="2527" cy:directed="1"/>
      <edge id="112014" label="zzz1006,zzz1201" source="2723" target="2528" cy:directed="1"/>
      <edge id="112013" label="zzz1006,zzz1203" source="2723" target="2526" cy:directed="1"/>
      <edge id="112012" label="zzz1006,zzz1205" source="2723" target="2524" cy:directed="1"/>
      <edge id="112011" label="zzz1006,zzz1204" source="2723" target="2525" cy:directed="1"/>
      <edge id="112010" label="zzz1006,zzzz956" source="2723" target="210" cy:directed="1"/>
      <edge id="112009" label="zzz1006,zzz1008" source="2723" target="2721" cy:directed="1"/>
      <edge id="112008" label="zzz1006,zzz1105" source="2723" target="2624" cy:directed="1"/>
      <edge id="112007" label="zzz1006,zzz1116" source="2723" target="2613" cy:directed="1"/>
      <edge id="112006" label="zzz1006,zzz1227" source="2723" target="2502" cy:directed="1"/>
      <edge id="112005" label="zzz1006,zzz1099" source="2723" target="2630" cy:directed="1"/>
      <edge id="112004" label="zzz1006,zzzzzz0" source="2723" target="76" cy:directed="1"/>
      <edge id="112003" label="zzz1006,zzzzzz2" source="2723" target="74" cy:directed="1"/>
      <edge id="112002" label="zzz1006,zzz1199" source="2723" target="2530" cy:directed="1"/>
      <edge id="112001" label="zzz1006,zzzz948" source="2723" target="218" cy:directed="1"/>
      <edge id="112000" label="zzz1006,zzz1100" source="2723" target="2629" cy:directed="1"/>
      <edge id="111999" label="zzz1006,zzz1212" source="2723" target="2517" cy:directed="1"/>
      <edge id="111998" label="zzz1006,zzz1333" source="2723" target="2396" cy:directed="1"/>
      <edge id="111997" label="zzz1006,zzz1361" source="2723" target="2368" cy:directed="1"/>
      <edge id="111996" label="zzz1006,zzzz963" source="2723" target="203" cy:directed="1"/>
      <edge id="111995" label="zzz1006,zzzz996" source="2723" target="170" cy:directed="1"/>
      <edge id="111994" label="zzz1006,zzz1109" source="2723" target="2620" cy:directed="1"/>
      <edge id="111993" label="zzz1006,zzz1111" source="2723" target="2618" cy:directed="1"/>
      <edge id="111992" label="zzz1006,zzz1114" source="2723" target="2615" cy:directed="1"/>
      <edge id="111991" label="zzz1006,zzz1118" source="2723" target="2611" cy:directed="1"/>
      <edge id="111990" label="zzz1006,zzz1233" source="2723" target="2496" cy:directed="1"/>
      <edge id="111989" label="zzz1006,zzzzz35" source="2723" target="141" cy:directed="1"/>
      <edge id="111988" label="zzz1006,zzz1113" source="2723" target="2616" cy:directed="1"/>
      <edge id="111987" label="zzz1006,zzzzzz3" source="2723" target="73" cy:directed="1"/>
      <edge id="111986" label="zzz1006,zzz1009" source="2723" target="2720" cy:directed="1"/>
      <edge id="111985" label="zzz1006,zzz1096" source="2723" target="2633" cy:directed="1"/>
      <edge id="111984" label="zzz1006,zzz1367" source="2723" target="2362" cy:directed="1"/>
      <edge id="111983" label="zzz1006,zzz2386" source="2723" target="1343" cy:directed="1"/>
      <edge id="111982" label="zzz1006,zzz1010" source="2723" target="2719" cy:directed="1"/>
      <edge id="111981" label="zzz1006,zzzz998" source="2723" target="168" cy:directed="1"/>
      <edge id="111980" label="zzz1006,zzz1206" source="2723" target="2523" cy:directed="1"/>
      <edge id="111979" label="zzz1006,zzz1119" source="2723" target="2610" cy:directed="1"/>
      <edge id="111978" label="zzz1006,zzz1226" source="2723" target="2503" cy:directed="1"/>
      <edge id="111977" label="zzz1006,zzz1314" source="2723" target="2415" cy:directed="1"/>
      <edge id="111976" label="zzz1006,zzz1321" source="2723" target="2408" cy:directed="1"/>
      <edge id="111975" label="zzz1006,zzz1327" source="2723" target="2402" cy:directed="1"/>
      <edge id="111974" label="zzz1006,zzzz964" source="2723" target="202" cy:directed="1"/>
      <edge id="111973" label="zzz1006,zzzzz20" source="2723" target="156" cy:directed="1"/>
      <edge id="111972" label="zzz1006,zzz1011" source="2723" target="2718" cy:directed="1"/>
      <edge id="111971" label="zzz1006,zzz1043" source="2723" target="2686" cy:directed="1"/>
      <edge id="111970" label="zzz1006,zzz1117" source="2723" target="2612" cy:directed="1"/>
      <edge id="111969" label="zzz1006,zzz1151" source="2723" target="2578" cy:directed="1"/>
      <edge id="111968" label="zzz1006,zzz1363" source="2723" target="2366" cy:directed="1"/>
      <edge id="111967" label="zzz1006,zzz1364" source="2723" target="2365" cy:directed="1"/>
      <edge id="111966" label="zzz1006,zzzzz21" source="2723" target="155" cy:directed="1"/>
      <edge id="111965" label="zzz1006,zzz1041" source="2723" target="2688" cy:directed="1"/>
      <edge id="111964" label="zzz1006,zzz1098" source="2723" target="2631" cy:directed="1"/>
      <edge id="111963" label="zzz1006,zzz1223" source="2723" target="2506" cy:directed="1"/>
      <edge id="111962" label="zzz1006,zzz1058" source="2723" target="2671" cy:directed="1"/>
      <edge id="111961" label="zzz1006,zzz1074" source="2723" target="2655" cy:directed="1"/>
      <edge id="111960" label="zzz1006,zzz1097" source="2723" target="2632" cy:directed="1"/>
      <edge id="111959" label="zzz1006,zzz1106" source="2723" target="2623" cy:directed="1"/>
      <edge id="111958" label="zzz1006,zzz1366" source="2723" target="2363" cy:directed="1"/>
      <edge id="111957" label="zzz1006,zzzz994" source="2723" target="172" cy:directed="1"/>
      <edge id="111956" label="zzz1006,zzz1056" source="2723" target="2673" cy:directed="1"/>
      <edge id="111955" label="zzz1006,zzz1322" source="2723" target="2407" cy:directed="1"/>
      <edge id="111954" label="zzz1006,zzzzz10" source="2723" target="166" cy:directed="1"/>
      <edge id="111953" label="zzz1006,zzzzz30" source="2723" target="146" cy:directed="1"/>
      <edge id="111952" label="zzz1006,zzz1084" source="2723" target="2645" cy:directed="1"/>
      <edge id="111951" label="zzz1006,zzz1057" source="2723" target="2672" cy:directed="1"/>
      <edge id="111950" label="zzz1006,zzz1093" source="2723" target="2636" cy:directed="1"/>
      <edge id="111949" label="zzz1006,zzzz949" source="2723" target="217" cy:directed="1"/>
      <edge id="111948" label="zzz1006,zzzzz18" source="2723" target="158" cy:directed="1"/>
      <edge id="111947" label="zzz1006,zzzzz26" source="2723" target="150" cy:directed="1"/>
      <edge id="111946" label="zzz1006,zzz1088" source="2723" target="2641" cy:directed="1"/>
      <edge id="111945" label="zzz1006,zzz1239" source="2723" target="2490" cy:directed="1"/>
      <edge id="111944" label="zzz1006,zzz1120" source="2723" target="2609" cy:directed="1"/>
      <edge id="111943" label="zzz1006,zzzz932" source="2723" target="234" cy:directed="1"/>
      <edge id="111942" label="zzz1006,zzz1019" source="2723" target="2710" cy:directed="1"/>
      <edge id="111941" label="zzz1006,zzz1094" source="2723" target="2635" cy:directed="1"/>
      <edge id="111940" label="zzz1006,zzz1034" source="2723" target="2695" cy:directed="1"/>
      <edge id="111939" label="zzz1006,zzz1078" source="2723" target="2651" cy:directed="1"/>
      <edge id="111938" label="zzz1006,zzzz981" source="2723" target="185" cy:directed="1"/>
      <edge id="111937" label="zzz1006,zzzzz82" source="2723" target="94" cy:directed="1"/>
      <edge id="111936" label="zzz1006,zzz1020" source="2723" target="2709" cy:directed="1"/>
      <edge id="111935" label="zzz1006,zzz1072" source="2723" target="2657" cy:directed="1"/>
      <edge id="111934" label="zzz1006,zzz1107" source="2723" target="2622" cy:directed="1"/>
      <edge id="111933" label="zzz1006,zzz1294" source="2723" target="2435" cy:directed="1"/>
      <edge id="111932" label="zzz1006,zzz1365" source="2723" target="2364" cy:directed="1"/>
      <edge id="111931" label="zzz1006,zzzz950" source="2723" target="216" cy:directed="1"/>
      <edge id="111930" label="zzz1006,zzz1126" source="2723" target="2603" cy:directed="1"/>
      <edge id="111929" label="zzz1006,zzzz974" source="2723" target="192" cy:directed="1"/>
      <edge id="111928" label="zzz1006,zzzzz85" source="2723" target="91" cy:directed="1"/>
      <edge id="111927" label="zzz1006,zzz1053" source="2723" target="2676" cy:directed="1"/>
      <edge id="111926" label="zzz1006,zzz1316" source="2723" target="2413" cy:directed="1"/>
      <edge id="111925" label="zzz1006,zzz1243" source="2723" target="2486" cy:directed="1"/>
      <edge id="111924" label="zzz1006,zzzzz31" source="2723" target="145" cy:directed="1"/>
      <edge id="111923" label="zzz1006,zzz1122" source="2723" target="2607" cy:directed="1"/>
      <edge id="111922" label="zzz1006,zzz1140" source="2723" target="2589" cy:directed="1"/>
      <edge id="111921" label="zzz1006,zzzzz27" source="2723" target="149" cy:directed="1"/>
      <edge id="111920" label="zzz1006,zzz1076" source="2723" target="2653" cy:directed="1"/>
      <edge id="111919" label="zzz1006,zzz1077" source="2723" target="2652" cy:directed="1"/>
      <edge id="111918" label="zzz1006,zzz1083" source="2723" target="2646" cy:directed="1"/>
      <edge id="111917" label="zzz1006,zzz1085" source="2723" target="2644" cy:directed="1"/>
      <edge id="111916" label="zzz1007,zzz1008" source="2722" target="2721" cy:directed="1"/>
      <edge id="111915" label="zzz1007,zzzzz29" source="2722" target="147" cy:directed="1"/>
      <edge id="111914" label="zzz1007,zzz1035" source="2722" target="2694" cy:directed="1"/>
      <edge id="111913" label="zzz1007,zzz1038" source="2722" target="2691" cy:directed="1"/>
      <edge id="111912" label="zzz1007,zzz1036" source="2722" target="2693" cy:directed="1"/>
      <edge id="111911" label="zzz1007,zzzzz95" source="2722" target="81" cy:directed="1"/>
      <edge id="111910" label="zzz1007,zzzzz28" source="2722" target="148" cy:directed="1"/>
      <edge id="111909" label="zzz1007,zzz1242" source="2722" target="2487" cy:directed="1"/>
      <edge id="111908" label="zzz1007,zzz1252" source="2722" target="2477" cy:directed="1"/>
      <edge id="111907" label="zzz1007,zzz1254" source="2722" target="2475" cy:directed="1"/>
      <edge id="111906" label="zzz1007,zzz1262" source="2722" target="2467" cy:directed="1"/>
      <edge id="111905" label="zzz1007,zzz1272" source="2722" target="2457" cy:directed="1"/>
      <edge id="111904" label="zzz1007,zzz1285" source="2722" target="2444" cy:directed="1"/>
      <edge id="111903" label="zzz1007,zzz1264" source="2722" target="2465" cy:directed="1"/>
      <edge id="111902" label="zzz1007,zzz1283" source="2722" target="2446" cy:directed="1"/>
      <edge id="111901" label="zzz1007,zzz1287" source="2722" target="2442" cy:directed="1"/>
      <edge id="111900" label="zzz1007,zzz1289" source="2722" target="2440" cy:directed="1"/>
      <edge id="111899" label="zzz1007,zzz1263" source="2722" target="2466" cy:directed="1"/>
      <edge id="111898" label="zzz1007,zzz1267" source="2722" target="2462" cy:directed="1"/>
      <edge id="111897" label="zzz1007,zzz1277" source="2722" target="2452" cy:directed="1"/>
      <edge id="111896" label="zzz1007,zzz1282" source="2722" target="2447" cy:directed="1"/>
      <edge id="111895" label="zzz1007,zzz1286" source="2722" target="2443" cy:directed="1"/>
      <edge id="111894" label="zzz1007,zzz1308" source="2722" target="2421" cy:directed="1"/>
      <edge id="111893" label="zzz1007,zzz1288" source="2722" target="2441" cy:directed="1"/>
      <edge id="111892" label="zzz1007,zzz1304" source="2722" target="2425" cy:directed="1"/>
      <edge id="111891" label="zzz1007,zzz1240" source="2722" target="2489" cy:directed="1"/>
      <edge id="111890" label="zzz1007,zzzz966" source="2722" target="200" cy:directed="1"/>
      <edge id="111889" label="zzz1007,zzz1253" source="2722" target="2476" cy:directed="1"/>
      <edge id="111888" label="zzz1007,zzz1295" source="2722" target="2434" cy:directed="1"/>
      <edge id="111887" label="zzz1007,zzz1300" source="2722" target="2429" cy:directed="1"/>
      <edge id="111886" label="zzz1007,zzz1270" source="2722" target="2459" cy:directed="1"/>
      <edge id="111885" label="zzz1007,zzz1271" source="2722" target="2458" cy:directed="1"/>
      <edge id="111884" label="zzz1007,zzz1296" source="2722" target="2433" cy:directed="1"/>
      <edge id="111883" label="zzz1007,zzz1318" source="2722" target="2411" cy:directed="1"/>
      <edge id="111882" label="zzz1007,zzz1037" source="2722" target="2692" cy:directed="1"/>
      <edge id="111881" label="zzz1007,zzz1039" source="2722" target="2690" cy:directed="1"/>
      <edge id="111880" label="zzz1007,zzz1128" source="2722" target="2601" cy:directed="1"/>
      <edge id="111879" label="zzz1007,zzzz937" source="2722" target="229" cy:directed="1"/>
      <edge id="111878" label="zzz1007,zzz1363" source="2722" target="2366" cy:directed="1"/>
      <edge id="111877" label="zzz1007,zzz1364" source="2722" target="2365" cy:directed="1"/>
      <edge id="111876" label="zzz1007,zzz1361" source="2722" target="2368" cy:directed="1"/>
      <edge id="111875" label="zzz1007,zzz1366" source="2722" target="2363" cy:directed="1"/>
      <edge id="111874" label="zzz1007,zzz1079" source="2722" target="2650" cy:directed="1"/>
      <edge id="111873" label="zzz1007,zzz2375" source="2722" target="1354" cy:directed="1"/>
      <edge id="111872" label="zzz1007,zzz1313" source="2722" target="2416" cy:directed="1"/>
      <edge id="111871" label="zzz1007,zzz2370" source="2722" target="1359" cy:directed="1"/>
      <edge id="111870" label="zzz1007,zzz1213" source="2722" target="2516" cy:directed="1"/>
      <edge id="111869" label="zzz1007,zzz1229" source="2722" target="2500" cy:directed="1"/>
      <edge id="111868" label="zzz1007,zzz1082" source="2722" target="2647" cy:directed="1"/>
      <edge id="111867" label="zzz1007,zzzz931" source="2722" target="235" cy:directed="1"/>
      <edge id="111866" label="zzz1007,zzzzz37" source="2722" target="139" cy:directed="1"/>
      <edge id="111865" label="zzz1007,zzz1232" source="2722" target="2497" cy:directed="1"/>
      <edge id="111864" label="zzz1007,zzz1138" source="2722" target="2591" cy:directed="1"/>
      <edge id="111863" label="zzz1007,zzzz965" source="2722" target="201" cy:directed="1"/>
      <edge id="111862" label="zzz1007,zzzz939" source="2722" target="227" cy:directed="1"/>
      <edge id="111861" label="zzz1007,zzzz940" source="2722" target="226" cy:directed="1"/>
      <edge id="111860" label="zzz1007,zzzz941" source="2722" target="225" cy:directed="1"/>
      <edge id="111859" label="zzz1007,zzzz942" source="2722" target="224" cy:directed="1"/>
      <edge id="111858" label="zzz1007,zzzz976" source="2722" target="190" cy:directed="1"/>
      <edge id="111857" label="zzz1007,zzzz977" source="2722" target="189" cy:directed="1"/>
      <edge id="111856" label="zzz1007,zzz1125" source="2722" target="2604" cy:directed="1"/>
      <edge id="111855" label="zzz1007,zzzz978" source="2722" target="188" cy:directed="1"/>
      <edge id="111854" label="zzz1007,zzz2386" source="2722" target="1343" cy:directed="1"/>
      <edge id="111853" label="zzz1007,zzzz975" source="2722" target="191" cy:directed="1"/>
      <edge id="111852" label="zzz1007,zzzz934" source="2722" target="232" cy:directed="1"/>
      <edge id="111851" label="zzz1007,zzz1110" source="2722" target="2619" cy:directed="1"/>
      <edge id="111850" label="zzz1007,zzzz964" source="2722" target="202" cy:directed="1"/>
      <edge id="111849" label="zzz1007,zzzz935" source="2722" target="231" cy:directed="1"/>
      <edge id="111848" label="zzz1007,zzz1059" source="2722" target="2670" cy:directed="1"/>
      <edge id="111847" label="zzz1007,zzz1161" source="2722" target="2568" cy:directed="1"/>
      <edge id="111846" label="zzz1007,zzz1228" source="2722" target="2501" cy:directed="1"/>
      <edge id="111845" label="zzz1007,zzzzzz0" source="2722" target="76" cy:directed="1"/>
      <edge id="111844" label="zzz1007,zzz1127" source="2722" target="2602" cy:directed="1"/>
      <edge id="111843" label="zzz1007,zzz1045" source="2722" target="2684" cy:directed="1"/>
      <edge id="111842" label="zzz1007,zzz1102" source="2722" target="2627" cy:directed="1"/>
      <edge id="111841" label="zzz1007,zzzz962" source="2722" target="204" cy:directed="1"/>
      <edge id="111840" label="zzz1007,zzzz957" source="2722" target="209" cy:directed="1"/>
      <edge id="111839" label="zzz1007,zzzz983" source="2722" target="183" cy:directed="1"/>
      <edge id="111838" label="zzz1007,zzz1177" source="2722" target="2552" cy:directed="1"/>
      <edge id="111837" label="zzz1007,zzz1135" source="2722" target="2594" cy:directed="1"/>
      <edge id="111836" label="zzz1007,zzz1124" source="2722" target="2605" cy:directed="1"/>
      <edge id="111835" label="zzz1007,zzz1159" source="2722" target="2570" cy:directed="1"/>
      <edge id="111834" label="zzz1007,zzz1160" source="2722" target="2569" cy:directed="1"/>
      <edge id="111833" label="zzz1007,zzzz963" source="2722" target="203" cy:directed="1"/>
      <edge id="111832" label="zzz1007,zzz1134" source="2722" target="2595" cy:directed="1"/>
      <edge id="111831" label="zzz1007,zzz1139" source="2722" target="2590" cy:directed="1"/>
      <edge id="111830" label="zzz1007,zzz1136" source="2722" target="2593" cy:directed="1"/>
      <edge id="111829" label="zzz1007,zzzzz80" source="2722" target="96" cy:directed="1"/>
      <edge id="111828" label="zzz1007,zzz1101" source="2722" target="2628" cy:directed="1"/>
      <edge id="111827" label="zzz1007,zzz1133" source="2722" target="2596" cy:directed="1"/>
      <edge id="111826" label="zzz1007,zzz1012" source="2722" target="2717" cy:directed="1"/>
      <edge id="111825" label="zzz1007,zzz1178" source="2722" target="2551" cy:directed="1"/>
      <edge id="111824" label="zzz1007,zzzzz39" source="2722" target="137" cy:directed="1"/>
      <edge id="111823" label="zzz1007,zzzz961" source="2722" target="205" cy:directed="1"/>
      <edge id="111822" label="zzz1007,zzz1104" source="2722" target="2625" cy:directed="1"/>
      <edge id="111821" label="zzz1007,zzz1115" source="2722" target="2614" cy:directed="1"/>
      <edge id="111820" label="zzz1007,zzz1158" source="2722" target="2571" cy:directed="1"/>
      <edge id="111819" label="zzz1007,zzz1113" source="2722" target="2616" cy:directed="1"/>
      <edge id="111818" label="zzz1007,zzz1029" source="2722" target="2700" cy:directed="1"/>
      <edge id="111817" label="zzz1007,zzz1080" source="2722" target="2649" cy:directed="1"/>
      <edge id="111816" label="zzz1007,zzz1081" source="2722" target="2648" cy:directed="1"/>
      <edge id="111815" label="zzz1007,zzz1319" source="2722" target="2410" cy:directed="1"/>
      <edge id="111814" label="zzz1007,zzz1247" source="2722" target="2482" cy:directed="1"/>
      <edge id="111813" label="zzz1007,zzz1278" source="2722" target="2451" cy:directed="1"/>
      <edge id="111812" label="zzz1007,zzz1354" source="2722" target="2375" cy:directed="1"/>
      <edge id="111811" label="zzz1007,zzzzz13" source="2722" target="163" cy:directed="1"/>
      <edge id="111810" label="zzz1007,zzz1165" source="2722" target="2564" cy:directed="1"/>
      <edge id="111809" label="zzz1007,zzz1123" source="2722" target="2606" cy:directed="1"/>
      <edge id="111808" label="zzz1007,zzz1132" source="2722" target="2597" cy:directed="1"/>
      <edge id="111807" label="zzz1007,zzz1021" source="2722" target="2708" cy:directed="1"/>
      <edge id="111806" label="zzz1007,zzzzzz5" source="2722" target="71" cy:directed="1"/>
      <edge id="111805" label="zzz1007,zzz1086" source="2722" target="2643" cy:directed="1"/>
      <edge id="111804" label="zzz1007,zzz1227" source="2722" target="2502" cy:directed="1"/>
      <edge id="111803" label="zzz1007,zzz1348" source="2722" target="2381" cy:directed="1"/>
      <edge id="111802" label="zzz1007,zzzzz11" source="2722" target="165" cy:directed="1"/>
      <edge id="111801" label="zzz1007,zzz1022" source="2722" target="2707" cy:directed="1"/>
      <edge id="111800" label="zzz1007,zzz1042" source="2722" target="2687" cy:directed="1"/>
      <edge id="111799" label="zzz1007,zzz1336" source="2722" target="2393" cy:directed="1"/>
      <edge id="111798" label="zzz1007,zzzzz25" source="2722" target="151" cy:directed="1"/>
      <edge id="111797" label="zzz1007,zzz1024" source="2722" target="2705" cy:directed="1"/>
      <edge id="111796" label="zzz1007,zzz1362" source="2722" target="2367" cy:directed="1"/>
      <edge id="111795" label="zzz1007,zzz1365" source="2722" target="2364" cy:directed="1"/>
      <edge id="111794" label="zzz1007,zzz1317" source="2722" target="2412" cy:directed="1"/>
      <edge id="111793" label="zzz1007,zzz1356" source="2722" target="2373" cy:directed="1"/>
      <edge id="111792" label="zzz1007,zzz1063" source="2722" target="2666" cy:directed="1"/>
      <edge id="111791" label="zzz1007,zzz1106" source="2722" target="2623" cy:directed="1"/>
      <edge id="111790" label="zzz1007,zzzz979" source="2722" target="187" cy:directed="1"/>
      <edge id="111789" label="zzz1007,zzz1025" source="2722" target="2704" cy:directed="1"/>
      <edge id="111788" label="zzz1007,zzz1033" source="2722" target="2696" cy:directed="1"/>
      <edge id="111787" label="zzz1007,zzz1217" source="2722" target="2512" cy:directed="1"/>
      <edge id="111786" label="zzz1007,zzz1233" source="2722" target="2496" cy:directed="1"/>
      <edge id="111785" label="zzz1007,zzz1040" source="2722" target="2689" cy:directed="1"/>
      <edge id="111784" label="zzz1007,zzz1087" source="2722" target="2642" cy:directed="1"/>
      <edge id="111783" label="zzz1007,zzz1066" source="2722" target="2663" cy:directed="1"/>
      <edge id="111782" label="zzz1007,zzzz951" source="2722" target="215" cy:directed="1"/>
      <edge id="111781" label="zzz1007,zzzz980" source="2722" target="186" cy:directed="1"/>
      <edge id="111780" label="zzz1007,zzz1026" source="2722" target="2703" cy:directed="1"/>
      <edge id="111779" label="zzz1007,zzz1074" source="2722" target="2655" cy:directed="1"/>
      <edge id="111778" label="zzz1007,zzz1141" source="2722" target="2588" cy:directed="1"/>
      <edge id="111777" label="zzz1007,zzz1322" source="2722" target="2407" cy:directed="1"/>
      <edge id="111776" label="zzz1007,zzz1315" source="2722" target="2414" cy:directed="1"/>
      <edge id="111775" label="zzz1007,zzzzz33" source="2722" target="143" cy:directed="1"/>
      <edge id="111774" label="zzz1007,zzzz953" source="2722" target="213" cy:directed="1"/>
      <edge id="111773" label="zzz1007,zzz1041" source="2722" target="2688" cy:directed="1"/>
      <edge id="111772" label="zzz1007,zzz1043" source="2722" target="2686" cy:directed="1"/>
      <edge id="111771" label="zzz1007,zzz1333" source="2722" target="2396" cy:directed="1"/>
      <edge id="111770" label="zzz1007,zzz1010" source="2722" target="2719" cy:directed="1"/>
      <edge id="111769" label="zzz1007,zzz1118" source="2722" target="2611" cy:directed="1"/>
      <edge id="111768" label="zzz1007,zzz1331" source="2722" target="2398" cy:directed="1"/>
      <edge id="111767" label="zzz1007,zzzz955" source="2722" target="211" cy:directed="1"/>
      <edge id="111766" label="zzz1007,zzzzz23" source="2722" target="153" cy:directed="1"/>
      <edge id="111765" label="zzz1007,zzz1096" source="2722" target="2633" cy:directed="1"/>
      <edge id="111764" label="zzz1007,zzz1114" source="2722" target="2615" cy:directed="1"/>
      <edge id="111763" label="zzz1007,zzz1206" source="2722" target="2523" cy:directed="1"/>
      <edge id="111762" label="zzz1007,zzz1208" source="2722" target="2521" cy:directed="1"/>
      <edge id="111761" label="zzz1007,zzz1117" source="2722" target="2612" cy:directed="1"/>
      <edge id="111760" label="zzz1007,zzz1023" source="2722" target="2706" cy:directed="1"/>
      <edge id="111759" label="zzz1007,zzz1009" source="2722" target="2720" cy:directed="1"/>
      <edge id="111758" label="zzz1007,zzz1340" source="2722" target="2389" cy:directed="1"/>
      <edge id="111757" label="zzz1007,zzz1111" source="2722" target="2618" cy:directed="1"/>
      <edge id="111756" label="zzz1007,zzz1119" source="2722" target="2610" cy:directed="1"/>
      <edge id="111755" label="zzz1007,zzzz949" source="2722" target="217" cy:directed="1"/>
      <edge id="111754" label="zzz1007,zzz1116" source="2722" target="2613" cy:directed="1"/>
      <edge id="111753" label="zzz1007,zzz1100" source="2722" target="2629" cy:directed="1"/>
      <edge id="111752" label="zzz1007,zzz1089" source="2722" target="2640" cy:directed="1"/>
      <edge id="111751" label="zzz1007,zzz1091" source="2722" target="2638" cy:directed="1"/>
      <edge id="111750" label="zzz1007,zzzz971" source="2722" target="195" cy:directed="1"/>
      <edge id="111749" label="zzz1007,zzz1019" source="2722" target="2710" cy:directed="1"/>
      <edge id="111748" label="zzz1007,zzz1088" source="2722" target="2641" cy:directed="1"/>
      <edge id="111747" label="zzz1007,zzz1098" source="2722" target="2631" cy:directed="1"/>
      <edge id="111746" label="zzz1007,zzzzz35" source="2722" target="141" cy:directed="1"/>
      <edge id="111745" label="zzz1007,zzz1027" source="2722" target="2702" cy:directed="1"/>
      <edge id="111744" label="zzz1007,zzz1196" source="2722" target="2533" cy:directed="1"/>
      <edge id="111743" label="zzz1007,zzz1226" source="2722" target="2503" cy:directed="1"/>
      <edge id="111742" label="zzz1007,zzz1316" source="2722" target="2413" cy:directed="1"/>
      <edge id="111741" label="zzz1007,zzzz952" source="2722" target="214" cy:directed="1"/>
      <edge id="111740" label="zzz1007,zzz1192" source="2722" target="2537" cy:directed="1"/>
      <edge id="111739" label="zzz1007,zzz1193" source="2722" target="2536" cy:directed="1"/>
      <edge id="111738" label="zzz1007,zzz1328" source="2722" target="2401" cy:directed="1"/>
      <edge id="111737" label="zzz1007,zzzz998" source="2722" target="168" cy:directed="1"/>
      <edge id="111736" label="zzz1007,zzzzz22" source="2722" target="154" cy:directed="1"/>
      <edge id="111735" label="zzz1007,zzz1140" source="2722" target="2589" cy:directed="1"/>
      <edge id="111734" label="zzz1007,zzz1147" source="2722" target="2582" cy:directed="1"/>
      <edge id="111733" label="zzz1007,zzz1194" source="2722" target="2535" cy:directed="1"/>
      <edge id="111732" label="zzz1007,zzz1195" source="2722" target="2534" cy:directed="1"/>
      <edge id="111731" label="zzz1007,zzzz938" source="2722" target="228" cy:directed="1"/>
      <edge id="111730" label="zzz1007,zzz1197" source="2722" target="2532" cy:directed="1"/>
      <edge id="111729" label="zzz1007,zzzz946" source="2722" target="220" cy:directed="1"/>
      <edge id="111728" label="zzz1007,zzzzz12" source="2722" target="164" cy:directed="1"/>
      <edge id="111727" label="zzz1007,zzz1060" source="2722" target="2669" cy:directed="1"/>
      <edge id="111726" label="zzz1007,zzz1146" source="2722" target="2583" cy:directed="1"/>
      <edge id="111725" label="zzz1007,zzz1223" source="2722" target="2506" cy:directed="1"/>
      <edge id="111724" label="zzz1007,zzz1011" source="2722" target="2718" cy:directed="1"/>
      <edge id="111723" label="zzz1007,zzz1067" source="2722" target="2662" cy:directed="1"/>
      <edge id="111722" label="zzz1007,zzz1077" source="2722" target="2652" cy:directed="1"/>
      <edge id="111721" label="zzz1007,zzz1097" source="2722" target="2632" cy:directed="1"/>
      <edge id="111720" label="zzz1007,zzz1144" source="2722" target="2585" cy:directed="1"/>
      <edge id="111719" label="zzz1007,zzz1145" source="2722" target="2584" cy:directed="1"/>
      <edge id="111718" label="zzz1007,zzz1314" source="2722" target="2415" cy:directed="1"/>
      <edge id="111717" label="zzz1007,zzz1094" source="2722" target="2635" cy:directed="1"/>
      <edge id="111716" label="zzz1007,zzzz956" source="2722" target="210" cy:directed="1"/>
      <edge id="111715" label="zzz1007,zzzzz31" source="2722" target="145" cy:directed="1"/>
      <edge id="111714" label="zzz1007,zzz1069" source="2722" target="2660" cy:directed="1"/>
      <edge id="111713" label="zzz1007,zzz1070" source="2722" target="2659" cy:directed="1"/>
      <edge id="111712" label="zzz1007,zzz1020" source="2722" target="2709" cy:directed="1"/>
      <edge id="111711" label="zzz1007,zzz1073" source="2722" target="2656" cy:directed="1"/>
      <edge id="111710" label="zzz1007,zzz1137" source="2722" target="2592" cy:directed="1"/>
      <edge id="111709" label="zzz1007,zzz1337" source="2722" target="2392" cy:directed="1"/>
      <edge id="111708" label="zzz1007,zzz1083" source="2722" target="2646" cy:directed="1"/>
      <edge id="111707" label="zzz1007,zzz1085" source="2722" target="2644" cy:directed="1"/>
      <edge id="111706" label="zzz1007,zzz1092" source="2722" target="2637" cy:directed="1"/>
      <edge id="111705" label="zzz1007,zzz1120" source="2722" target="2609" cy:directed="1"/>
      <edge id="111704" label="zzz1007,zzzz969" source="2722" target="197" cy:directed="1"/>
      <edge id="111703" label="zzz1007,zzz1329" source="2722" target="2400" cy:directed="1"/>
      <edge id="111702" label="zzz1007,zzzzz32" source="2722" target="144" cy:directed="1"/>
      <edge id="111701" label="zzz1007,zzz1048" source="2722" target="2681" cy:directed="1"/>
      <edge id="111700" label="zzz1007,zzz1064" source="2722" target="2665" cy:directed="1"/>
      <edge id="111699" label="zzz1007,zzz1095" source="2722" target="2634" cy:directed="1"/>
      <edge id="111698" label="zzz1007,zzz1323" source="2722" target="2406" cy:directed="1"/>
      <edge id="111697" label="zzz1007,zzz1326" source="2722" target="2403" cy:directed="1"/>
      <edge id="111696" label="zzz1007,zzzz970" source="2722" target="196" cy:directed="1"/>
      <edge id="111695" label="zzz1007,zzz1055" source="2722" target="2674" cy:directed="1"/>
      <edge id="111694" label="zzz1007,zzzz100" source="2722" target="1066" cy:directed="1"/>
      <edge id="111693" label="zzz1007,zzz1142" source="2722" target="2587" cy:directed="1"/>
      <edge id="111692" label="zzz1007,zzz1143" source="2722" target="2586" cy:directed="1"/>
      <edge id="111691" label="zzz1007,zzz1148" source="2722" target="2581" cy:directed="1"/>
      <edge id="111690" label="zzz1007,zzz1149" source="2722" target="2580" cy:directed="1"/>
      <edge id="111689" label="zzz1007,zzz1152" source="2722" target="2577" cy:directed="1"/>
      <edge id="111688" label="zzz1007,zzz1154" source="2722" target="2575" cy:directed="1"/>
      <edge id="111687" label="zzz1007,zzzz972" source="2722" target="194" cy:directed="1"/>
      <edge id="111686" label="zzz1007,zzzzz21" source="2722" target="155" cy:directed="1"/>
      <edge id="111685" label="zzz1007,zzz1153" source="2722" target="2576" cy:directed="1"/>
      <edge id="111684" label="zzz1007,zzz1324" source="2722" target="2405" cy:directed="1"/>
      <edge id="111683" label="zzz1007,zzzzz84" source="2722" target="92" cy:directed="1"/>
      <edge id="111682" label="zzz1007,zzz1099" source="2722" target="2630" cy:directed="1"/>
      <edge id="111681" label="zzz1007,zzzzz81" source="2722" target="95" cy:directed="1"/>
      <edge id="111680" label="zzz1007,zzzz967" source="2722" target="199" cy:directed="1"/>
      <edge id="111679" label="zzz1007,zzzz945" source="2722" target="221" cy:directed="1"/>
      <edge id="111678" label="zzz1007,zzzzz34" source="2722" target="142" cy:directed="1"/>
      <edge id="111677" label="zzz1007,zzz1150" source="2722" target="2579" cy:directed="1"/>
      <edge id="111676" label="zzz1007,zzz1028" source="2722" target="2701" cy:directed="1"/>
      <edge id="111675" label="zzz1007,zzz1212" source="2722" target="2517" cy:directed="1"/>
      <edge id="111674" label="zzz1007,zzz1352" source="2722" target="2377" cy:directed="1"/>
      <edge id="111673" label="zzz1007,zzz1129" source="2722" target="2600" cy:directed="1"/>
      <edge id="111672" label="zzz1007,zzz1238" source="2722" target="2491" cy:directed="1"/>
      <edge id="111671" label="zzz1007,zzz1350" source="2722" target="2379" cy:directed="1"/>
      <edge id="111670" label="zzz1007,zzz1351" source="2722" target="2378" cy:directed="1"/>
      <edge id="111669" label="zzz1007,zzz1360" source="2722" target="2369" cy:directed="1"/>
      <edge id="111668" label="zzz1007,zzz1236" source="2722" target="2493" cy:directed="1"/>
      <edge id="111667" label="zzz1007,zzz1312" source="2722" target="2417" cy:directed="1"/>
      <edge id="111666" label="zzz1007,zzz1344" source="2722" target="2385" cy:directed="1"/>
      <edge id="111665" label="zzz1007,zzz1349" source="2722" target="2380" cy:directed="1"/>
      <edge id="111664" label="zzz1007,zzzz990" source="2722" target="176" cy:directed="1"/>
      <edge id="111663" label="zzz1007,zzz1054" source="2722" target="2675" cy:directed="1"/>
      <edge id="111662" label="zzz1007,zzz1220" source="2722" target="2509" cy:directed="1"/>
      <edge id="111661" label="zzz1007,zzz1235" source="2722" target="2494" cy:directed="1"/>
      <edge id="111660" label="zzz1007,zzz1237" source="2722" target="2492" cy:directed="1"/>
      <edge id="111659" label="zzz1007,zzz1244" source="2722" target="2485" cy:directed="1"/>
      <edge id="111658" label="zzz1007,zzz1248" source="2722" target="2481" cy:directed="1"/>
      <edge id="111657" label="zzz1007,zzz1251" source="2722" target="2478" cy:directed="1"/>
      <edge id="111656" label="zzz1007,zzz1257" source="2722" target="2472" cy:directed="1"/>
      <edge id="111655" label="zzz1007,zzz1261" source="2722" target="2468" cy:directed="1"/>
      <edge id="111654" label="zzz1007,zzz1273" source="2722" target="2456" cy:directed="1"/>
      <edge id="111653" label="zzz1007,zzz1280" source="2722" target="2449" cy:directed="1"/>
      <edge id="111652" label="zzz1007,zzz1307" source="2722" target="2422" cy:directed="1"/>
      <edge id="111651" label="zzz1007,zzz1274" source="2722" target="2455" cy:directed="1"/>
      <edge id="111650" label="zzz1007,zzz1292" source="2722" target="2437" cy:directed="1"/>
      <edge id="111649" label="zzz1007,zzz1293" source="2722" target="2436" cy:directed="1"/>
      <edge id="111648" label="zzz1007,zzz1298" source="2722" target="2431" cy:directed="1"/>
      <edge id="111647" label="zzz1007,zzz1342" source="2722" target="2387" cy:directed="1"/>
      <edge id="111646" label="zzz1007,zzz1345" source="2722" target="2384" cy:directed="1"/>
      <edge id="111645" label="zzz1007,zzz1355" source="2722" target="2374" cy:directed="1"/>
      <edge id="111644" label="zzz1007,zzz1241" source="2722" target="2488" cy:directed="1"/>
      <edge id="111643" label="zzz1007,zzz1246" source="2722" target="2483" cy:directed="1"/>
      <edge id="111642" label="zzz1007,zzz1256" source="2722" target="2473" cy:directed="1"/>
      <edge id="111641" label="zzz1007,zzz1260" source="2722" target="2469" cy:directed="1"/>
      <edge id="111640" label="zzz1007,zzz1276" source="2722" target="2453" cy:directed="1"/>
      <edge id="111639" label="zzz1007,zzz1281" source="2722" target="2448" cy:directed="1"/>
      <edge id="111638" label="zzz1007,zzz1284" source="2722" target="2445" cy:directed="1"/>
      <edge id="111637" label="zzz1007,zzz1291" source="2722" target="2438" cy:directed="1"/>
      <edge id="111636" label="zzz1007,zzz1306" source="2722" target="2423" cy:directed="1"/>
      <edge id="111635" label="zzz1007,zzz1301" source="2722" target="2428" cy:directed="1"/>
      <edge id="111634" label="zzz1007,zzz1341" source="2722" target="2388" cy:directed="1"/>
      <edge id="111633" label="zzz1007,zzz1347" source="2722" target="2382" cy:directed="1"/>
      <edge id="111632" label="zzz1007,zzzz987" source="2722" target="179" cy:directed="1"/>
      <edge id="111631" label="zzz1007,zzzz989" source="2722" target="177" cy:directed="1"/>
      <edge id="111630" label="zzz1007,zzz1076" source="2722" target="2653" cy:directed="1"/>
      <edge id="111629" label="zzz1007,zzz1299" source="2722" target="2430" cy:directed="1"/>
      <edge id="111628" label="zzz1007,zzzz984" source="2722" target="182" cy:directed="1"/>
      <edge id="111627" label="zzz1007,zzzz985" source="2722" target="181" cy:directed="1"/>
      <edge id="111626" label="zzz1007,zzzz986" source="2722" target="180" cy:directed="1"/>
      <edge id="111625" label="zzz1007,zzzzz93" source="2722" target="83" cy:directed="1"/>
      <edge id="111624" label="zzz1007,zzz1215" source="2722" target="2514" cy:directed="1"/>
      <edge id="111623" label="zzz1007,zzz1219" source="2722" target="2510" cy:directed="1"/>
      <edge id="111622" label="zzz1007,zzz1343" source="2722" target="2386" cy:directed="1"/>
      <edge id="111621" label="zzz1007,zzz1358" source="2722" target="2371" cy:directed="1"/>
      <edge id="111620" label="zzz1007,zzz1359" source="2722" target="2370" cy:directed="1"/>
      <edge id="111619" label="zzz1007,zzzz973" source="2722" target="193" cy:directed="1"/>
      <edge id="111618" label="zzz1007,zzzz988" source="2722" target="178" cy:directed="1"/>
      <edge id="111617" label="zzz1007,zzzzz36" source="2722" target="140" cy:directed="1"/>
      <edge id="111616" label="zzz1007,zzzzz38" source="2722" target="138" cy:directed="1"/>
      <edge id="111615" label="zzz1007,zzzzzz6" source="2722" target="70" cy:directed="1"/>
      <edge id="111614" label="zzz1007,zzz1305" source="2722" target="2424" cy:directed="1"/>
      <edge id="111613" label="zzz1007,zzz1346" source="2722" target="2383" cy:directed="1"/>
      <edge id="111612" label="zzz1007,zzz1234" source="2722" target="2495" cy:directed="1"/>
      <edge id="111611" label="zzz1007,zzzz991" source="2722" target="175" cy:directed="1"/>
      <edge id="111610" label="zzz1007,zzzzz24" source="2722" target="152" cy:directed="1"/>
      <edge id="111609" label="zzz1007,zzz1245" source="2722" target="2484" cy:directed="1"/>
      <edge id="111608" label="zzz1007,zzz1249" source="2722" target="2480" cy:directed="1"/>
      <edge id="111607" label="zzz1007,zzz1255" source="2722" target="2474" cy:directed="1"/>
      <edge id="111606" label="zzz1007,zzz1258" source="2722" target="2471" cy:directed="1"/>
      <edge id="111605" label="zzz1007,zzz1265" source="2722" target="2464" cy:directed="1"/>
      <edge id="111604" label="zzz1007,zzz1268" source="2722" target="2461" cy:directed="1"/>
      <edge id="111603" label="zzz1007,zzz1275" source="2722" target="2454" cy:directed="1"/>
      <edge id="111602" label="zzz1007,zzz1302" source="2722" target="2427" cy:directed="1"/>
      <edge id="111601" label="zzz1007,zzz1309" source="2722" target="2420" cy:directed="1"/>
      <edge id="111600" label="zzz1007,zzz1311" source="2722" target="2418" cy:directed="1"/>
      <edge id="111599" label="zzz1007,zzzz994" source="2722" target="172" cy:directed="1"/>
      <edge id="111598" label="zzz1007,zzz1279" source="2722" target="2450" cy:directed="1"/>
      <edge id="111597" label="zzz1007,zzz1290" source="2722" target="2439" cy:directed="1"/>
      <edge id="111596" label="zzz1007,zzz1297" source="2722" target="2432" cy:directed="1"/>
      <edge id="111595" label="zzz1007,zzzzz91" source="2722" target="85" cy:directed="1"/>
      <edge id="111594" label="zzz1007,zzz1034" source="2722" target="2695" cy:directed="1"/>
      <edge id="111593" label="zzz1007,zzz1303" source="2722" target="2426" cy:directed="1"/>
      <edge id="111592" label="zzz1007,zzzz948" source="2722" target="218" cy:directed="1"/>
      <edge id="111591" label="zzz1007,zzzz954" source="2722" target="212" cy:directed="1"/>
      <edge id="111590" label="zzz1007,zzzzz16" source="2722" target="160" cy:directed="1"/>
      <edge id="111589" label="zzz1007,zzz1269" source="2722" target="2460" cy:directed="1"/>
      <edge id="111588" label="zzz1007,zzzz947" source="2722" target="219" cy:directed="1"/>
      <edge id="111587" label="zzz1007,zzzzz27" source="2722" target="149" cy:directed="1"/>
      <edge id="111586" label="zzz1007,zzz1046" source="2722" target="2683" cy:directed="1"/>
      <edge id="111585" label="zzz1007,zzz1056" source="2722" target="2673" cy:directed="1"/>
      <edge id="111584" label="zzz1007,zzz1334" source="2722" target="2395" cy:directed="1"/>
      <edge id="111583" label="zzz1007,zzz2390" source="2722" target="1339" cy:directed="1"/>
      <edge id="111582" label="zzz1007,zzzzz18" source="2722" target="158" cy:directed="1"/>
      <edge id="111581" label="zzz1007,zzz1310" source="2722" target="2419" cy:directed="1"/>
      <edge id="111580" label="zzz1007,zzz1321" source="2722" target="2408" cy:directed="1"/>
      <edge id="111579" label="zzz1007,zzzz992" source="2722" target="174" cy:directed="1"/>
      <edge id="111578" label="zzz1007,zzz1057" source="2722" target="2672" cy:directed="1"/>
      <edge id="111577" label="zzz1007,zzz1090" source="2722" target="2639" cy:directed="1"/>
      <edge id="111576" label="zzz1007,zzzz981" source="2722" target="185" cy:directed="1"/>
      <edge id="111575" label="zzz1007,zzzz993" source="2722" target="173" cy:directed="1"/>
      <edge id="111574" label="zzz1007,zzzz997" source="2722" target="169" cy:directed="1"/>
      <edge id="111573" label="zzz1007,zzz1049" source="2722" target="2680" cy:directed="1"/>
      <edge id="111572" label="zzz1007,zzz1017" source="2722" target="2712" cy:directed="1"/>
      <edge id="111571" label="zzz1007,zzz1061" source="2722" target="2668" cy:directed="1"/>
      <edge id="111570" label="zzz1007,zzz1062" source="2722" target="2667" cy:directed="1"/>
      <edge id="111569" label="zzz1007,zzzzz30" source="2722" target="146" cy:directed="1"/>
      <edge id="111568" label="zzz1007,zzzz968" source="2722" target="198" cy:directed="1"/>
      <edge id="111567" label="zzz1007,zzz1044" source="2722" target="2685" cy:directed="1"/>
      <edge id="111566" label="zzz1007,zzz1084" source="2722" target="2645" cy:directed="1"/>
      <edge id="111565" label="zzz1007,zzz1032" source="2722" target="2697" cy:directed="1"/>
      <edge id="111564" label="zzz1007,zzz1047" source="2722" target="2682" cy:directed="1"/>
      <edge id="111563" label="zzz1007,zzzz982" source="2722" target="184" cy:directed="1"/>
      <edge id="111562" label="zzz1007,zzzzz26" source="2722" target="150" cy:directed="1"/>
      <edge id="111561" label="zzz1007,zzzz932" source="2722" target="234" cy:directed="1"/>
      <edge id="111560" label="zzz1007,zzz1016" source="2722" target="2713" cy:directed="1"/>
      <edge id="111559" label="zzz1007,zzz1071" source="2722" target="2658" cy:directed="1"/>
      <edge id="111558" label="zzz1007,zzzz933" source="2722" target="233" cy:directed="1"/>
      <edge id="111557" label="zzz1007,zzzz950" source="2722" target="216" cy:directed="1"/>
      <edge id="111556" label="zzz1007,zzzz960" source="2722" target="206" cy:directed="1"/>
      <edge id="111555" label="zzz1007,zzz1018" source="2722" target="2711" cy:directed="1"/>
      <edge id="111554" label="zzz1007,zzz1367" source="2722" target="2362" cy:directed="1"/>
      <edge id="111553" label="zzz1007,zzz1030" source="2722" target="2699" cy:directed="1"/>
      <edge id="111552" label="zzz1007,zzz1031" source="2722" target="2698" cy:directed="1"/>
      <edge id="111551" label="zzz1007,zzz1103" source="2722" target="2626" cy:directed="1"/>
      <edge id="111550" label="zzz1007,zzz1108" source="2722" target="2621" cy:directed="1"/>
      <edge id="111549" label="zzz1007,zzzz958" source="2722" target="208" cy:directed="1"/>
      <edge id="111548" label="zzz1007,zzz1105" source="2722" target="2624" cy:directed="1"/>
      <edge id="111547" label="zzz1007,zzzz936" source="2722" target="230" cy:directed="1"/>
      <edge id="111546" label="zzz1007,zzz1109" source="2722" target="2620" cy:directed="1"/>
      <edge id="111545" label="zzz1007,zzz1338" source="2722" target="2391" cy:directed="1"/>
      <edge id="111544" label="zzz1007,zzz1107" source="2722" target="2622" cy:directed="1"/>
      <edge id="111543" label="zzz1007,zzz1320" source="2722" target="2409" cy:directed="1"/>
      <edge id="111542" label="zzz1007,zzzzzz3" source="2722" target="73" cy:directed="1"/>
      <edge id="111541" label="zzz1007,zzz1198" source="2722" target="2531" cy:directed="1"/>
      <edge id="111540" label="zzz1007,zzz1093" source="2722" target="2636" cy:directed="1"/>
      <edge id="111539" label="zzz1007,zzz1203" source="2722" target="2526" cy:directed="1"/>
      <edge id="111538" label="zzz1007,zzz1205" source="2722" target="2524" cy:directed="1"/>
      <edge id="111537" label="zzz1007,zzz1325" source="2722" target="2404" cy:directed="1"/>
      <edge id="111536" label="zzz1007,zzzz996" source="2722" target="170" cy:directed="1"/>
      <edge id="111535" label="zzz1007,zzzzz40" source="2722" target="136" cy:directed="1"/>
      <edge id="111534" label="zzz1007,zzz1200" source="2722" target="2529" cy:directed="1"/>
      <edge id="111533" label="zzz1007,zzz1202" source="2722" target="2527" cy:directed="1"/>
      <edge id="111532" label="zzz1007,zzz1201" source="2722" target="2528" cy:directed="1"/>
      <edge id="111531" label="zzz1007,zzz1204" source="2722" target="2525" cy:directed="1"/>
      <edge id="111530" label="zzz1007,zzz1339" source="2722" target="2390" cy:directed="1"/>
      <edge id="111529" label="zzz1007,zzz1068" source="2722" target="2661" cy:directed="1"/>
      <edge id="111528" label="zzz1007,zzz1199" source="2722" target="2530" cy:directed="1"/>
      <edge id="111527" label="zzz1007,zzzzz90" source="2722" target="86" cy:directed="1"/>
      <edge id="111526" label="zzz1007,zzz1151" source="2722" target="2578" cy:directed="1"/>
      <edge id="111525" label="zzz1007,zzz1335" source="2722" target="2394" cy:directed="1"/>
      <edge id="111524" label="zzz1007,zzz1330" source="2722" target="2399" cy:directed="1"/>
      <edge id="111523" label="zzz1007,zzzz105" source="2722" target="1061" cy:directed="1"/>
      <edge id="111522" label="zzz1007,zzzzzz4" source="2722" target="72" cy:directed="1"/>
      <edge id="111521" label="zzz1007,zzz1327" source="2722" target="2402" cy:directed="1"/>
      <edge id="111520" label="zzz1008,zzzzz29" source="2721" target="147" cy:directed="1"/>
      <edge id="111519" label="zzz1008,zzz1036" source="2721" target="2693" cy:directed="1"/>
      <edge id="111518" label="zzz1008,zzz1035" source="2721" target="2694" cy:directed="1"/>
      <edge id="111517" label="zzz1008,zzz1038" source="2721" target="2691" cy:directed="1"/>
      <edge id="111516" label="zzz1008,zzzzz95" source="2721" target="81" cy:directed="1"/>
      <edge id="111515" label="zzz1008,zzzzz28" source="2721" target="148" cy:directed="1"/>
      <edge id="111514" label="zzz1008,zzz1242" source="2721" target="2487" cy:directed="1"/>
      <edge id="111513" label="zzz1008,zzz1252" source="2721" target="2477" cy:directed="1"/>
      <edge id="111512" label="zzz1008,zzz1254" source="2721" target="2475" cy:directed="1"/>
      <edge id="111511" label="zzz1008,zzz1262" source="2721" target="2467" cy:directed="1"/>
      <edge id="111510" label="zzz1008,zzz1272" source="2721" target="2457" cy:directed="1"/>
      <edge id="111509" label="zzz1008,zzz1264" source="2721" target="2465" cy:directed="1"/>
      <edge id="111508" label="zzz1008,zzz1283" source="2721" target="2446" cy:directed="1"/>
      <edge id="111507" label="zzz1008,zzz1285" source="2721" target="2444" cy:directed="1"/>
      <edge id="111506" label="zzz1008,zzz1287" source="2721" target="2442" cy:directed="1"/>
      <edge id="111505" label="zzz1008,zzz1289" source="2721" target="2440" cy:directed="1"/>
      <edge id="111504" label="zzz1008,zzz1288" source="2721" target="2441" cy:directed="1"/>
      <edge id="111503" label="zzz1008,zzz1304" source="2721" target="2425" cy:directed="1"/>
      <edge id="111502" label="zzz1008,zzz1240" source="2721" target="2489" cy:directed="1"/>
      <edge id="111501" label="zzz1008,zzz1253" source="2721" target="2476" cy:directed="1"/>
      <edge id="111500" label="zzz1008,zzz1295" source="2721" target="2434" cy:directed="1"/>
      <edge id="111499" label="zzz1008,zzz1300" source="2721" target="2429" cy:directed="1"/>
      <edge id="111498" label="zzz1008,zzzz966" source="2721" target="200" cy:directed="1"/>
      <edge id="111497" label="zzz1008,zzz1263" source="2721" target="2466" cy:directed="1"/>
      <edge id="111496" label="zzz1008,zzz1267" source="2721" target="2462" cy:directed="1"/>
      <edge id="111495" label="zzz1008,zzz1277" source="2721" target="2452" cy:directed="1"/>
      <edge id="111494" label="zzz1008,zzz1282" source="2721" target="2447" cy:directed="1"/>
      <edge id="111493" label="zzz1008,zzz1286" source="2721" target="2443" cy:directed="1"/>
      <edge id="111492" label="zzz1008,zzz1308" source="2721" target="2421" cy:directed="1"/>
      <edge id="111491" label="zzz1008,zzz1270" source="2721" target="2459" cy:directed="1"/>
      <edge id="111490" label="zzz1008,zzz1296" source="2721" target="2433" cy:directed="1"/>
      <edge id="111489" label="zzz1008,zzz1271" source="2721" target="2458" cy:directed="1"/>
      <edge id="111488" label="zzz1008,zzz1128" source="2721" target="2601" cy:directed="1"/>
      <edge id="111487" label="zzz1008,zzz1318" source="2721" target="2411" cy:directed="1"/>
      <edge id="111486" label="zzz1008,zzz1037" source="2721" target="2692" cy:directed="1"/>
      <edge id="111485" label="zzz1008,zzz1039" source="2721" target="2690" cy:directed="1"/>
      <edge id="111484" label="zzz1008,zzzz937" source="2721" target="229" cy:directed="1"/>
[truncated: 10,040,084 more chars]
