# Supplementary material for: Discovery of several thousand highly diverse circular DNA viruses
Source: eLife journal article supplement (doi:10.7554/elife.51971), 2020-02-03
Supplement: fig3-data1 [file elife-51971-fig3-data1-v1.cys › CytoscapeSession-2019_08_03-06_44/properties/stringApp.props]

#Written by: Cytoscape's PropertiesWriterImpl
#Sat Aug 03 06:44:47 MST 2019
showStructureImages=true
showGlassBallEffect=true
showEnhancedLabels=true
