# Supplementary material for: Discovery of several thousand highly diverse circular DNA viruses
Source: eLife journal article supplement (doi:10.7554/elife.51971), 2020-02-03
Supplement: fig3-data1 [file elife-51971-fig3-data1-v1.cys › CytoscapeSession-2019_08_03-06_44/session_vizmap.xml]

<?xml version="1.0" encoding="UTF-8" standalone="yes"?>
<vizmap id="VizMap-2019_08_03-06_44" documentVersion="3.0">
    <visualStyle name="BioPAX">
        <network/>
        <node>
            <dependency value="true" name="nodeCustomGraphicsSizeSync"/>
            <dependency value="false" name="nodeSizeLocked"/>
            <visualProperty name="NODE_LABEL">
                <passthroughMapping attributeName="name" attributeType="string"/>
            </visualProperty>
            <visualProperty default="ELLIPSE" name="NODE_SHAPE">
                <discreteMapping attributeName="BIOPAX_TYPE" attributeType="string">
                    <discreteMappingEntry attributeValue="SimplePhysicalEntity" value="ELLIPSE"/>
                    <discreteMappingEntry attributeValue="Rna" value="ELLIPSE"/>
                    <discreteMappingEntry attributeValue="GeneticInteraction" value="RECTANGLE"/>
                    <discreteMappingEntry attributeValue="BiochemicalReaction" value="RECTANGLE"/>
                    <discreteMappingEntry attributeValue="Interaction" value="RECTANGLE"/>
                    <discreteMappingEntry attributeValue="TransportWithBiochemicalReaction" value="RECTANGLE"/>
                    <discreteMappingEntry attributeValue="Conversion" value="RECTANGLE"/>
                    <discreteMappingEntry attributeValue="ComplexAssembly" value="RECTANGLE"/>
                    <discreteMappingEntry attributeValue="Protein" value="ELLIPSE"/>
                    <discreteMappingEntry attributeValue="RnaRegion" value="ELLIPSE"/>
                    <discreteMappingEntry attributeValue="Complex" value="DIAMOND"/>
                    <discreteMappingEntry attributeValue="Degradation" value="RECTANGLE"/>
                    <discreteMappingEntry attributeValue="TemplateReactionRegulation" value="TRIANGLE"/>
                    <discreteMappingEntry attributeValue="Control" value="TRIANGLE"/>
                    <discreteMappingEntry attributeValue="DnaRegion" value="ELLIPSE"/>
                    <discreteMappingEntry attributeValue="PhysicalEntity" value="ELLIPSE"/>
                    <discreteMappingEntry attributeValue="SmallMolecule" value="ELLIPSE"/>
                    <discreteMappingEntry attributeValue="Dna" value="ELLIPSE"/>
                    <discreteMappingEntry attributeValue="MolecularInteraction" value="RECTANGLE"/>
                    <discreteMappingEntry attributeValue="Modulation" value="TRIANGLE"/>
                    <discreteMappingEntry attributeValue="TemplateReaction" value="RECTANGLE"/>
                    <discreteMappingEntry attributeValue="Catalysis" value="TRIANGLE"/>
                    <discreteMappingEntry attributeValue="Transport" value="RECTANGLE"/>
                    <discreteMappingEntry attributeValue="Protein-phosphorylated" value="ELLIPSE"/>
                </discreteMapping>
            </visualProperty>
            <visualProperty default="#FFFFFF" name="NODE_FILL_COLOR">
                <discreteMapping attributeName="BIOPAX_TYPE" attributeType="string">
                    <discreteMappingEntry attributeValue="Complex" value="#FFFFFF"/>
                </discreteMapping>
            </visualProperty>
            <visualProperty default="#006666" name="NODE_BORDER_PAINT">
                <discreteMapping attributeName="BIOPAX_TYPE" attributeType="string">
                    <discreteMappingEntry attributeValue="Complex" value="#006666"/>
                </discreteMapping>
            </visualProperty>
            <visualProperty default="20.0" name="NODE_HEIGHT">
                <discreteMapping attributeName="BIOPAX_TYPE" attributeType="string">
                    <discreteMappingEntry attributeValue="GeneticInteraction" value="13.4"/>
                    <discreteMappingEntry attributeValue="BiochemicalReaction" value="13.4"/>
                    <discreteMappingEntry attributeValue="Interaction" value="13.4"/>
                    <discreteMappingEntry attributeValue="TransportWithBiochemicalReaction" value="13.4"/>
                    <discreteMappingEntry attributeValue="Conversion" value="13.4"/>
                    <discreteMappingEntry attributeValue="ComplexAssembly" value="13.4"/>
                    <discreteMappingEntry attributeValue="Complex" value="13.4"/>
                    <discreteMappingEntry attributeValue="Degradation" value="13.4"/>
                    <discreteMappingEntry attributeValue="TemplateReactionRegulation" value="13.4"/>
                    <discreteMappingEntry attributeValue="Control" value="13.4"/>
                    <discreteMappingEntry attributeValue="MolecularInteraction" value="13.4"/>
                    <discreteMappingEntry attributeValue="Modulation" value="13.4"/>
                    <discreteMappingEntry attributeValue="TemplateReaction" value="13.4"/>
                    <discreteMappingEntry attributeValue="Catalysis" value="13.4"/>
                    <discreteMappingEntry attributeValue="Transport" value="13.4"/>
                </discreteMapping>
            </visualProperty>
            <visualProperty default="20.0" name="NODE_WIDTH">
                <discreteMapping attributeName="BIOPAX_TYPE" attributeType="string">
                    <discreteMappingEntry attributeValue="GeneticInteraction" value="13.4"/>
                    <discreteMappingEntry attributeValue="BiochemicalReaction" value="13.4"/>
                    <discreteMappingEntry attributeValue="Interaction" value="13.4"/>
                    <discreteMappingEntry attributeValue="TransportWithBiochemicalReaction" value="13.4"/>
                    <discreteMappingEntry attributeValue="Conversion" value="13.4"/>
                    <discreteMappingEntry attributeValue="ComplexAssembly" value="13.4"/>
                    <discreteMappingEntry attributeValue="Complex" value="13.4"/>
                    <discreteMappingEntry attributeValue="Degradation" value="13.4"/>
                    <discreteMappingEntry attributeValue="TemplateReactionRegulation" value="13.4"/>
                    <discreteMappingEntry attributeValue="Control" value="13.4"/>
                    <discreteMappingEntry attributeValue="MolecularInteraction" value="13.4"/>
                    <discreteMappingEntry attributeValue="Modulation" value="13.4"/>
                    <discreteMappingEntry attributeValue="TemplateReaction" value="13.4"/>
                    <discreteMappingEntry attributeValue="Catalysis" value="13.4"/>
                    <discreteMappingEntry attributeValue="Transport" value="13.4"/>
                </discreteMapping>
            </visualProperty>
        </node>
        <edge>
            <dependency value="true" name="arrowColorMatchesEdge"/>
            <visualProperty name="EDGE_TARGET_ARROW_SHAPE">
                <discreteMapping attributeName="interaction" attributeType="string">
                    <discreteMappingEntry attributeValue="INHIBITION_NONCOMPETITIVE" value="T"/>
                    <discreteMappingEntry attributeValue="INHIBITION_OTHER" value="T"/>
                    <discreteMappingEntry attributeValue="ACTIVATION" value="DELTA"/>
                    <discreteMappingEntry attributeValue="INHIBITION_UNCOMPETITIVE" value="T"/>
                    <discreteMappingEntry attributeValue="cofactor" value="DELTA"/>
                    <discreteMappingEntry attributeValue="ACTIVATION_ALLOSTERIC" value="DELTA"/>
                    <discreteMappingEntry attributeValue="right" value="DELTA"/>
                    <discreteMappingEntry attributeValue="INHIBITION_ALLOSTERIC" value="T"/>
                    <discreteMappingEntry attributeValue="controlled" value="DELTA"/>
                    <discreteMappingEntry attributeValue="contains" value="CIRCLE"/>
                    <discreteMappingEntry attributeValue="INHIBITION" value="T"/>
                    <discreteMappingEntry attributeValue="INHIBITION_UNKMECH" value="T"/>
                    <discreteMappingEntry attributeValue="INHIBITION_IRREVERSIBLE" value="T"/>
                    <discreteMappingEntry attributeValue="INHIBITION_COMPETITIVE" value="T"/>
                    <discreteMappingEntry attributeValue="ACTIVATION_UNKMECH" value="DELTA"/>
                    <discreteMappingEntry attributeValue="ACTIVATION_NONALLOSTERIC" value="DELTA"/>
                </discreteMapping>
            </visualProperty>
        </edge>
    </visualStyle>
    <visualStyle name="Nested Network Style">
        <network>
            <visualProperty default="400.0" name="NETWORK_HEIGHT"/>
            <visualProperty default="0.0" name="NETWORK_CENTER_X_LOCATION"/>
            <visualProperty default="#FFFFFF" name="NETWORK_BACKGROUND_PAINT"/>
            <visualProperty default="0.0" name="NETWORK_CENTER_Z_LOCATION"/>
            <visualProperty default="1.0" name="NETWORK_SCALE_FACTOR"/>
            <visualProperty default="true" name="NETWORK_NODE_SELECTION"/>
            <visualProperty default="550.0" name="NETWORK_WIDTH"/>
            <visualProperty default="" name="NETWORK_TITLE"/>
            <visualProperty default="0.0" name="NETWORK_CENTER_Y_LOCATION"/>
            <visualProperty default="true" name="NETWORK_EDGE_SELECTION"/>
            <visualProperty default="0.0" name="NETWORK_DEPTH"/>
        </network>
        <node>
            <dependency value="false" name="nodeCustomGraphicsSizeSync"/>
            <dependency value="false" name="nodeSizeLocked"/>
            <visualProperty default="C,C,c,0.00,0.00" name="NODE_CUSTOMGRAPHICS_POSITION_8"/>
            <visualProperty default="true" name="NODE_NESTED_NETWORK_IMAGE_VISIBLE"/>
            <visualProperty default="org.cytoscape.ding.customgraphics.NullCustomGraphics,0,[ Remove Graphics ]," name="NODE_CUSTOMGRAPHICS_9"/>
            <visualProperty default="C,C,c,0.00,0.00" name="NODE_CUSTOMGRAPHICS_POSITION_4"/>
            <visualProperty default="" name="NODE_TOOLTIP"/>
            <visualProperty default="50.0" name="NODE_CUSTOMGRAPHICS_SIZE_9"/>
            <visualProperty default="50.0" name="NODE_CUSTOMGRAPHICS_SIZE_1"/>
            <visualProperty default="org.cytoscape.ding.customgraphics.NullCustomGraphics,0,[ Remove Graphics ]," name="NODE_CUSTOMGRAPHICS_5"/>
            <visualProperty default="C,C,c,0.00,0.00" name="NODE_CUSTOMGRAPHICS_POSITION_5"/>
            <visualProperty default="org.cytoscape.ding.customgraphics.NullCustomGraphics,0,[ Remove Graphics ]," name="NODE_CUSTOMGRAPHICS_8"/>
            <visualProperty default="50.0" name="NODE_CUSTOMGRAPHICS_SIZE_8"/>
            <visualProperty default="2.0" name="NODE_BORDER_WIDTH">
                <discreteMapping attributeName="has_nested_network" attributeType="boolean"/>
            </visualProperty>
            <visualProperty default="0.0" name="NODE_X_LOCATION"/>
            <visualProperty default="50.0" name="NODE_CUSTOMGRAPHICS_SIZE_5"/>
            <visualProperty default="50.0" name="NODE_CUSTOMGRAPHICS_SIZE_6"/>
            <visualProperty default="org.cytoscape.ding.customgraphics.NullCustomGraphics,0,[ Remove Graphics ]," name="NODE_CUSTOMGRAPHICS_1"/>
            <visualProperty default="org.cytoscape.ding.customgraphics.NullCustomGraphics,0,[ Remove Graphics ]," name="NODE_CUSTOMGRAPHICS_7"/>
            <visualProperty default="" name="NODE_LABEL">
                <passthroughMapping attributeName="shared name" attributeType="string"/>
            </visualProperty>
            <visualProperty default="C,C,c,0.00,0.00" name="NODE_CUSTOMGRAPHICS_POSITION_9"/>
            <visualProperty default="50.0" name="NODE_CUSTOMGRAPHICS_SIZE_2"/>
            <visualProperty default="255" name="NODE_BORDER_TRANSPARENCY"/>
            <visualProperty default="ELLIPSE" name="NODE_SHAPE">
                <discreteMapping attributeName="has_nested_network" attributeType="boolean">
                    <discreteMappingEntry attributeValue="true" value="RECTANGLE"/>
                </discreteMapping>
            </visualProperty>
            <visualProperty default="12" name="NODE_LABEL_FONT_SIZE"/>
            <visualProperty default="SansSerif.plain,plain,12" name="NODE_LABEL_FONT_FACE"/>
            <visualProperty default="10.0" name="COMPOUND_NODE_PADDING"/>
            <visualProperty default="true" name="NODE_VISIBLE"/>
            <visualProperty default="#FFFFFF" name="NODE_FILL_COLOR">
                <discreteMapping attributeName="has_nested_network" attributeType="boolean">
                    <discreteMappingEntry attributeValue="true" value="#FFFFFF"/>
                </discreteMapping>
            </visualProperty>
            <visualProperty default="#000000" name="NODE_BORDER_PAINT">
                <discreteMapping attributeName="has_nested_network" attributeType="boolean">
                    <discreteMappingEntry attributeValue="true" value="#0066CC"/>
                </discreteMapping>
            </visualProperty>
            <visualProperty default="0.0" name="NODE_Y_LOCATION"/>
            <visualProperty default="0.0" name="NODE_Z_LOCATION"/>
            <visualProperty default="50.0" name="NODE_CUSTOMGRAPHICS_SIZE_3"/>
            <visualProperty default="C,C,c,0.00,0.00" name="NODE_CUSTOMGRAPHICS_POSITION_1"/>
            <visualProperty default="C,C,c,0.00,0.00" name="NODE_CUSTOMGRAPHICS_POSITION_7"/>
            <visualProperty default="C,C,c,0.00,0.00" name="NODE_CUSTOMGRAPHICS_POSITION_6"/>
            <visualProperty default="org.cytoscape.ding.customgraphics.NullCustomGraphics,0,[ Remove Graphics ]," name="NODE_CUSTOMGRAPHICS_2"/>
            <visualProperty default="C,C,c,0.00,0.00" name="NODE_CUSTOMGRAPHICS_POSITION_3"/>
            <visualProperty default="255" name="NODE_LABEL_TRANSPARENCY"/>
            <visualProperty default="50.0" name="NODE_CUSTOMGRAPHICS_SIZE_4"/>
            <visualProperty default="200.0" name="NODE_LABEL_WIDTH"/>
            <visualProperty default="SOLID" name="NODE_BORDER_STROKE"/>
            <visualProperty default="#FFFF00" name="NODE_SELECTED_PAINT"/>
            <visualProperty default="org.cytoscape.ding.customgraphics.NullCustomGraphics,0,[ Remove Graphics ]," name="NODE_CUSTOMGRAPHICS_6"/>
            <visualProperty default="false" name="NODE_SELECTED"/>
            <visualProperty default="0.0" name="NODE_DEPTH"/>
            <visualProperty default="org.cytoscape.ding.customgraphics.NullCustomGraphics,0,[ Remove Graphics ]," name="NODE_CUSTOMGRAPHICS_4"/>
            <visualProperty default="#000000" name="NODE_LABEL_COLOR">
                <discreteMapping attributeName="has_nested_network" attributeType="boolean">
                    <discreteMappingEntry attributeValue="true" value="#0066CC"/>
                </discreteMapping>
            </visualProperty>
            <visualProperty default="org.cytoscape.ding.customgraphics.NullCustomGraphics,0,[ Remove Graphics ]," name="NODE_CUSTOMGRAPHICS_3"/>
            <visualProperty default="C,C,c,0.00,0.00" name="NODE_LABEL_POSITION">
                <discreteMapping attributeName="has_nested_network" attributeType="boolean">
                    <discreteMappingEntry attributeValue="true" value="SE,NW,c,0.00,0.00"/>
                </discreteMapping>
            </visualProperty>
            <visualProperty default="C,C,c,0.00,0.00" name="NODE_CUSTOMGRAPHICS_POSITION_2"/>
            <visualProperty default="40.0" name="NODE_HEIGHT"/>
            <visualProperty default="ROUND_RECTANGLE" name="COMPOUND_NODE_SHAPE"/>
            <visualProperty default="255" name="NODE_TRANSPARENCY"/>
            <visualProperty default="50.0" name="NODE_CUSTOMGRAPHICS_SIZE_7"/>
            <visualProperty default="60.0" name="NODE_WIDTH"/>
        </node>
        <edge>
            <dependency value="false" name="arrowColorMatchesEdge"/>
            <visualProperty default="#FFFF00" name="EDGE_TARGET_ARROW_SELECTED_PAINT"/>
            <visualProperty default="SansSerif.plain,plain,10" name="EDGE_LABEL_FONT_FACE"/>
            <visualProperty default="1.0" name="EDGE_WIDTH"/>
            <visualProperty default="" name="EDGE_LABEL"/>
            <visualProperty default="255" name="EDGE_LABEL_TRANSPARENCY"/>
            <visualProperty default="SOLID" name="EDGE_LINE_TYPE"/>
            <visualProperty default="NONE" name="EDGE_TARGET_ARROW_SHAPE"/>
            <visualProperty default="NONE" name="EDGE_SOURCE_ARROW_SHAPE"/>
            <visualProperty default="#000000" name="EDGE_LABEL_COLOR"/>
            <visualProperty default="#000000" name="EDGE_SOURCE_ARROW_UNSELECTED_PAINT"/>
            <visualProperty default="255" name="EDGE_TRANSPARENCY"/>
            <visualProperty default="#FFFF00" name="EDGE_SOURCE_ARROW_SELECTED_PAINT"/>
            <visualProperty default="10" name="EDGE_LABEL_FONT_SIZE"/>
            <visualProperty default="true" name="EDGE_CURVED"/>
            <visualProperty default="#FF0000" name="EDGE_STROKE_SELECTED_PAINT"/>
            <visualProperty default="false" name="EDGE_SELECTED"/>
            <visualProperty default="true" name="EDGE_VISIBLE"/>
            <visualProperty default="200.0" name="EDGE_LABEL_WIDTH"/>
            <visualProperty default="" name="EDGE_TOOLTIP"/>
            <visualProperty default="#404040" name="EDGE_STROKE_UNSELECTED_PAINT"/>
            <visualProperty default="#000000" name="EDGE_TARGET_ARROW_UNSELECTED_PAINT"/>
        </edge>
    </visualStyle>
    <visualStyle name="Solid">
        <network>
            <visualProperty default="400.0" name="NETWORK_HEIGHT"/>
            <visualProperty default="0.0" name="NETWORK_CENTER_X_LOCATION"/>
            <visualProperty default="#FFFFFF" name="NETWORK_BACKGROUND_PAINT"/>
            <visualProperty default="0.0" name="NETWORK_CENTER_Z_LOCATION"/>
            <visualProperty default="1.0" name="NETWORK_SCALE_FACTOR"/>
            <visualProperty default="true" name="NETWORK_NODE_SELECTION"/>
            <visualProperty default="550.0" name="NETWORK_WIDTH"/>
            <visualProperty default="" name="NETWORK_TITLE"/>
            <visualProperty default="550.0" name="NETWORK_SIZE"/>
            <visualProperty default="0.0" name="NETWORK_CENTER_Y_LOCATION"/>
            <visualProperty default="true" name="NETWORK_EDGE_SELECTION"/>
            <visualProperty default="0.0" name="NETWORK_DEPTH"/>
        </network>
        <node>
            <dependency value="true" name="nodeCustomGraphicsSizeSync"/>
            <dependency value="true" name="nodeSizeLocked"/>
            <visualProperty default="C,C,c,0.00,0.00" name="NODE_CUSTOMGRAPHICS_POSITION_8"/>
            <visualProperty default="true" name="NODE_NESTED_NETWORK_IMAGE_VISIBLE"/>
            <visualProperty default="DefaultVisualizableVisualProperty(id=NODE_CUSTOMPAINT_5, name=Node Custom Paint 5)" name="NODE_CUSTOMPAINT_5"/>
            <visualProperty default="org.cytoscape.ding.customgraphics.NullCustomGraphics,0,[ Remove Graphics ]," name="NODE_CUSTOMGRAPHICS_9"/>
            <visualProperty default="C,C,c,0.00,0.00" name="NODE_CUSTOMGRAPHICS_POSITION_4"/>
            <visualProperty default="" name="NODE_TOOLTIP"/>
            <visualProperty default="50.0" name="NODE_CUSTOMGRAPHICS_SIZE_9"/>
            <visualProperty default="50.0" name="NODE_CUSTOMGRAPHICS_SIZE_1"/>
            <visualProperty default="org.cytoscape.ding.customgraphics.NullCustomGraphics,0,[ Remove Graphics ]," name="NODE_CUSTOMGRAPHICS_5"/>
            <visualProperty default="C,C,c,0.00,0.00" name="NODE_CUSTOMGRAPHICS_POSITION_5"/>
            <visualProperty default="org.cytoscape.ding.customgraphics.NullCustomGraphics,0,[ Remove Graphics ]," name="NODE_CUSTOMGRAPHICS_8"/>
            <visualProperty default="50.0" name="NODE_CUSTOMGRAPHICS_SIZE_8"/>
            <visualProperty default="0.0" name="NODE_BORDER_WIDTH"/>
            <visualProperty default="0.0" name="NODE_X_LOCATION"/>
            <visualProperty default="DefaultVisualizableVisualProperty(id=NODE_CUSTOMPAINT_1, name=Node Custom Paint 1)" name="NODE_CUSTOMPAINT_1"/>
            <visualProperty default="50.0" name="NODE_CUSTOMGRAPHICS_SIZE_5"/>
            <visualProperty default="40.0" name="NODE_SIZE"/>
            <visualProperty default="50.0" name="NODE_CUSTOMGRAPHICS_SIZE_6"/>
            <visualProperty default="org.cytoscape.ding.customgraphics.NullCustomGraphics,0,[ Remove Graphics ]," name="NODE_CUSTOMGRAPHICS_1"/>
            <visualProperty default="org.cytoscape.ding.customgraphics.NullCustomGraphics,0,[ Remove Graphics ]," name="NODE_CUSTOMGRAPHICS_7"/>
            <visualProperty default="" name="NODE_LABEL">
                <passthroughMapping attributeName="name" attributeType="string"/>
            </visualProperty>
            <visualProperty default="C,C,c,0.00,0.00" name="NODE_CUSTOMGRAPHICS_POSITION_9"/>
            <visualProperty default="DefaultVisualizableVisualProperty(id=NODE_CUSTOMPAINT_3, name=Node Custom Paint 3)" name="NODE_CUSTOMPAINT_3"/>
            <visualProperty default="50.0" name="NODE_CUSTOMGRAPHICS_SIZE_2"/>
            <visualProperty default="255" name="NODE_BORDER_TRANSPARENCY"/>
            <visualProperty default="ELLIPSE" name="NODE_SHAPE"/>
            <visualProperty default="#787878" name="NODE_PAINT"/>
            <visualProperty default="14" name="NODE_LABEL_FONT_SIZE"/>
            <visualProperty default="Dialog.plain,plain,12" name="NODE_LABEL_FONT_FACE"/>
            <visualProperty default="10.0" name="COMPOUND_NODE_PADDING"/>
            <visualProperty default="true" name="NODE_VISIBLE"/>
            <visualProperty default="#666666" name="NODE_FILL_COLOR"/>
            <visualProperty default="#000000" name="NODE_BORDER_PAINT"/>
            <visualProperty default="0.0" name="NODE_Y_LOCATION"/>
            <visualProperty default="0.0" name="NODE_Z_LOCATION"/>
            <visualProperty default="DefaultVisualizableVisualProperty(id=NODE_CUSTOMPAINT_9, name=Node Custom Paint 9)" name="NODE_CUSTOMPAINT_9"/>
            <visualProperty default="50.0" name="NODE_CUSTOMGRAPHICS_SIZE_3"/>
            <visualProperty default="C,C,c,0.00,0.00" name="NODE_CUSTOMGRAPHICS_POSITION_1"/>
            <visualProperty default="C,C,c,0.00,0.00" name="NODE_CUSTOMGRAPHICS_POSITION_7"/>
            <visualProperty default="C,C,c,0.00,0.00" name="NODE_CUSTOMGRAPHICS_POSITION_6"/>
            <visualProperty default="DefaultVisualizableVisualProperty(id=NODE_CUSTOMPAINT_6, name=Node Custom Paint 6)" name="NODE_CUSTOMPAINT_6"/>
            <visualProperty default="org.cytoscape.ding.customgraphics.NullCustomGraphics,0,[ Remove Graphics ]," name="NODE_CUSTOMGRAPHICS_2"/>
            <visualProperty default="C,C,c,0.00,0.00" name="NODE_CUSTOMGRAPHICS_POSITION_3"/>
            <visualProperty default="255" name="NODE_LABEL_TRANSPARENCY"/>
            <visualProperty default="50.0" name="NODE_CUSTOMGRAPHICS_SIZE_4"/>
            <visualProperty default="200.0" name="NODE_LABEL_WIDTH"/>
            <visualProperty default="SOLID" name="NODE_BORDER_STROKE"/>
            <visualProperty default="#FFFF00" name="NODE_SELECTED_PAINT"/>
            <visualProperty default="org.cytoscape.ding.customgraphics.NullCustomGraphics,0,[ Remove Graphics ]," name="NODE_CUSTOMGRAPHICS_6"/>
            <visualProperty default="false" name="NODE_SELECTED"/>
            <visualProperty default="0.0" name="NODE_DEPTH"/>
            <visualProperty default="org.cytoscape.ding.customgraphics.NullCustomGraphics,0,[ Remove Graphics ]," name="NODE_CUSTOMGRAPHICS_4"/>
            <visualProperty default="#000000" name="NODE_LABEL_COLOR"/>
            <visualProperty default="DefaultVisualizableVisualProperty(id=NODE_CUSTOMPAINT_4, name=Node Custom Paint 4)" name="NODE_CUSTOMPAINT_4"/>
            <visualProperty default="org.cytoscape.ding.customgraphics.NullCustomGraphics,0,[ Remove Graphics ]," name="NODE_CUSTOMGRAPHICS_3"/>
            <visualProperty default="C,C,c,0.00,0.00" name="NODE_LABEL_POSITION"/>
            <visualProperty default="DefaultVisualizableVisualProperty(id=NODE_CUSTOMPAINT_7, name=Node Custom Paint 7)" name="NODE_CUSTOMPAINT_7"/>
            <visualProperty default="DefaultVisualizableVisualProperty(id=NODE_CUSTOMPAINT_2, name=Node Custom Paint 2)" name="NODE_CUSTOMPAINT_2"/>
            <visualProperty default="C,C,c,0.00,0.00" name="NODE_CUSTOMGRAPHICS_POSITION_2"/>
            <visualProperty default="70.0" name="NODE_HEIGHT"/>
            <visualProperty default="ROUND_RECTANGLE" name="COMPOUND_NODE_SHAPE"/>
            <visualProperty default="255" name="NODE_TRANSPARENCY"/>
            <visualProperty default="50.0" name="NODE_CUSTOMGRAPHICS_SIZE_7"/>
            <visualProperty default="DefaultVisualizableVisualProperty(id=NODE_CUSTOMPAINT_8, name=Node Custom Paint 8)" name="NODE_CUSTOMPAINT_8"/>
            <visualProperty default="70.0" name="NODE_WIDTH"/>
        </node>
        <edge>
            <dependency value="false" name="arrowColorMatchesEdge"/>
            <visualProperty default="#FFFF00" name="EDGE_TARGET_ARROW_SELECTED_PAINT"/>
            <visualProperty default="Dialog.plain,plain,10" name="EDGE_LABEL_FONT_FACE"/>
            <visualProperty default="12.0" name="EDGE_WIDTH"/>
            <visualProperty default="" name="EDGE_LABEL">
                <passthroughMapping attributeName="interaction" attributeType="string"/>
            </visualProperty>
            <visualProperty default="255" name="EDGE_LABEL_TRANSPARENCY"/>
            <visualProperty default="" name="EDGE_BEND"/>
            <visualProperty default="SOLID" name="EDGE_LINE_TYPE"/>
            <visualProperty default="NONE" name="EDGE_TARGET_ARROW_SHAPE"/>
            <visualProperty default="NONE" name="EDGE_SOURCE_ARROW_SHAPE"/>
            <visualProperty default="#000000" name="EDGE_LABEL_COLOR"/>
            <visualProperty default="#000000" name="EDGE_SOURCE_ARROW_UNSELECTED_PAINT"/>
            <visualProperty default="255" name="EDGE_TRANSPARENCY"/>
            <visualProperty default="#FFFF00" name="EDGE_SOURCE_ARROW_SELECTED_PAINT"/>
            <visualProperty default="10" name="EDGE_LABEL_FONT_SIZE"/>
            <visualProperty default="#404040" name="EDGE_UNSELECTED_PAINT"/>
            <visualProperty default="true" name="EDGE_CURVED"/>
            <visualProperty default="#FF0000" name="EDGE_STROKE_SELECTED_PAINT"/>
            <visualProperty default="false" name="EDGE_SELECTED"/>
            <visualProperty default="true" name="EDGE_VISIBLE"/>
            <visualProperty default="200.0" name="EDGE_LABEL_WIDTH"/>
            <visualProperty default="" name="EDGE_TOOLTIP"/>
            <visualProperty default="#CCCCCC" name="EDGE_STROKE_UNSELECTED_PAINT"/>
            <visualProperty default="#323232" name="EDGE_PAINT"/>
            <visualProperty default="#FF0000" name="EDGE_SELECTED_PAINT"/>
            <visualProperty default="#000000" name="EDGE_TARGET_ARROW_UNSELECTED_PAINT"/>
        </edge>
    </visualStyle>
    <visualStyle name="BioPAX_SIF">
        <network>
            <visualProperty default="#FFFFFF" name="NETWORK_BACKGROUND_PAINT"/>
        </network>
        <node>
            <dependency value="true" name="nodeCustomGraphicsSizeSync"/>
            <dependency value="false" name="nodeSizeLocked"/>
            <visualProperty name="NODE_LABEL">
                <passthroughMapping attributeName="name" attributeType="string"/>
            </visualProperty>
            <visualProperty default="ELLIPSE" name="NODE_SHAPE">
                <discreteMapping attributeName="BIOPAX_TYPE" attributeType="string">
                    <discreteMappingEntry attributeValue="Complex" value="HEXAGON"/>
                </discreteMapping>
            </visualProperty>
            <visualProperty default="#FF9999" name="NODE_FILL_COLOR">
                <discreteMapping attributeName="BIOPAX_TYPE" attributeType="string">
                    <discreteMappingEntry attributeValue="Complex" value="#99CCFF"/>
                </discreteMapping>
            </visualProperty>
            <visualProperty default="125" name="NODE_TRANSPARENCY"/>
        </node>
        <edge>
            <dependency value="true" name="arrowColorMatchesEdge"/>
            <visualProperty default="4.0" name="EDGE_WIDTH"/>
            <visualProperty name="EDGE_TARGET_ARROW_SHAPE">
                <discreteMapping attributeName="interaction" attributeType="string">
                    <discreteMappingEntry attributeValue="controls-expression-of" value="ARROW"/>
                    <discreteMappingEntry attributeValue="chemical-affects" value="ARROW"/>
                    <discreteMappingEntry attributeValue="controls-state-change-of" value="ARROW"/>
                    <discreteMappingEntry attributeValue="controls-phosphorylation-of" value="ARROW"/>
                    <discreteMappingEntry attributeValue="controls-transport-of-chemical" value="ARROW"/>
                    <discreteMappingEntry attributeValue="used-to-produce" value="ARROW"/>
                    <discreteMappingEntry attributeValue="controls-transport-of" value="ARROW"/>
                    <discreteMappingEntry attributeValue="consumption-controled-by" value="ARROW"/>
                    <discreteMappingEntry attributeValue="controls-production-of" value="ARROW"/>
                    <discreteMappingEntry attributeValue="catalysis-precedes" value="ARROW"/>
                </discreteMapping>
            </visualProperty>
            <visualProperty default="#000000" name="EDGE_UNSELECTED_PAINT">
                <discreteMapping attributeName="interaction" attributeType="string">
                    <discreteMappingEntry attributeValue="interacts-with" value="#005500"/>
                    <discreteMappingEntry attributeValue="chemical-affects" value="#F09000"/>
                    <discreteMappingEntry attributeValue="controls-state-change-of" value="#0000C0"/>
                    <discreteMappingEntry attributeValue="controls-transport-of" value="#700000"/>
                    <discreteMappingEntry attributeValue="consumption-controled-by" value="#FF3300"/>
                    <discreteMappingEntry attributeValue="reacts-with" value="#00FF00"/>
                    <discreteMappingEntry attributeValue="neighbor-of" value="#00AA00"/>
                    <discreteMappingEntry attributeValue="controls-expression-of" value="#00A0A0"/>
                    <discreteMappingEntry attributeValue="controls-phosphorylation-of" value="#0000FF"/>
                    <discreteMappingEntry attributeValue="controls-transport-of-chemical" value="#A00000"/>
                    <discreteMappingEntry attributeValue="used-to-produce" value="#F75500"/>
                    <discreteMappingEntry attributeValue="in-complex-with" value="#F000A0"/>
                    <discreteMappingEntry attributeValue="controls-production-of" value="#00CCF0"/>
                    <discreteMappingEntry attributeValue="catalysis-precedes" value="#7000A0"/>
                </discreteMapping>
            </visualProperty>
            <visualProperty default="#000000" name="EDGE_STROKE_UNSELECTED_PAINT">
                <discreteMapping attributeName="interaction" attributeType="string">
                    <discreteMappingEntry attributeValue="interacts-with" value="#005500"/>
                    <discreteMappingEntry attributeValue="chemical-affects" value="#F09000"/>
                    <discreteMappingEntry attributeValue="controls-state-change-of" value="#0000C0"/>
                    <discreteMappingEntry attributeValue="controls-transport-of" value="#700000"/>
                    <discreteMappingEntry attributeValue="consumption-controled-by" value="#FF3300"/>
                    <discreteMappingEntry attributeValue="reacts-with" value="#00FF00"/>
                    <discreteMappingEntry attributeValue="neighbor-of" value="#00AA00"/>
                    <discreteMappingEntry attributeValue="controls-expression-of" value="#00A0A0"/>
                    <discreteMappingEntry attributeValue="controls-phosphorylation-of" value="#0000FF"/>
                    <discreteMappingEntry attributeValue="controls-transport-of-chemical" value="#A00000"/>
                    <discreteMappingEntry attributeValue="used-to-produce" value="#F75500"/>
                    <discreteMappingEntry attributeValue="in-complex-with" value="#F000A0"/>
                    <discreteMappingEntry attributeValue="controls-production-of" value="#00CCF0"/>
                    <discreteMappingEntry attributeValue="catalysis-precedes" value="#7000A0"/>
                </discreteMapping>
            </visualProperty>
        </edge>
    </visualStyle>
    <visualStyle name="default black">
        <network>
            <visualProperty default="400.0" name="NETWORK_HEIGHT"/>
            <visualProperty default="0.0" name="NETWORK_CENTER_X_LOCATION"/>
            <visualProperty default="#000000" name="NETWORK_BACKGROUND_PAINT"/>
            <visualProperty default="0.0" name="NETWORK_CENTER_Z_LOCATION"/>
            <visualProperty default="1.0" name="NETWORK_SCALE_FACTOR"/>
            <visualProperty default="true" name="NETWORK_NODE_SELECTION"/>
            <visualProperty default="550.0" name="NETWORK_WIDTH"/>
            <visualProperty default="" name="NETWORK_TITLE"/>
            <visualProperty default="550.0" name="NETWORK_SIZE"/>
            <visualProperty default="0.0" name="NETWORK_CENTER_Y_LOCATION"/>
            <visualProperty default="true" name="NETWORK_EDGE_SELECTION"/>
            <visualProperty default="0.0" name="NETWORK_DEPTH"/>
        </network>
        <node>
            <dependency value="true" name="nodeCustomGraphicsSizeSync"/>
            <dependency value="true" name="nodeSizeLocked"/>
            <visualProperty default="C,C,c,0.00,0.00" name="NODE_CUSTOMGRAPHICS_POSITION_8"/>
            <visualProperty default="true" name="NODE_NESTED_NETWORK_IMAGE_VISIBLE"/>
            <visualProperty default="DefaultVisualizableVisualProperty(id=NODE_CUSTOMPAINT_5, name=Node Custom Paint 5)" name="NODE_CUSTOMPAINT_5"/>
            <visualProperty default="org.cytoscape.ding.customgraphics.NullCustomGraphics,0,[ Remove Graphics ]," name="NODE_CUSTOMGRAPHICS_9"/>
            <visualProperty default="C,C,c,0.00,0.00" name="NODE_CUSTOMGRAPHICS_POSITION_4"/>
            <visualProperty default="" name="NODE_TOOLTIP"/>
            <visualProperty default="50.0" name="NODE_CUSTOMGRAPHICS_SIZE_9"/>
            <visualProperty default="50.0" name="NODE_CUSTOMGRAPHICS_SIZE_1"/>
            <visualProperty default="org.cytoscape.ding.customgraphics.NullCustomGraphics,0,[ Remove Graphics ]," name="NODE_CUSTOMGRAPHICS_5"/>
            <visualProperty default="C,C,c,0.00,0.00" name="NODE_CUSTOMGRAPHICS_POSITION_5"/>
            <visualProperty default="org.cytoscape.ding.customgraphics.NullCustomGraphics,0,[ Remove Graphics ]," name="NODE_CUSTOMGRAPHICS_8"/>
            <visualProperty default="50.0" name="NODE_CUSTOMGRAPHICS_SIZE_8"/>
            <visualProperty default="0.0" name="NODE_BORDER_WIDTH"/>
            <visualProperty default="0.0" name="NODE_X_LOCATION"/>
            <visualProperty default="DefaultVisualizableVisualProperty(id=NODE_CUSTOMPAINT_1, name=Node Custom Paint 1)" name="NODE_CUSTOMPAINT_1"/>
            <visualProperty default="50.0" name="NODE_CUSTOMGRAPHICS_SIZE_5"/>
            <visualProperty default="15.0" name="NODE_SIZE"/>
            <visualProperty default="50.0" name="NODE_CUSTOMGRAPHICS_SIZE_6"/>
            <visualProperty default="org.cytoscape.ding.customgraphics.NullCustomGraphics,0,[ Remove Graphics ]," name="NODE_CUSTOMGRAPHICS_1"/>
            <visualProperty default="org.cytoscape.ding.customgraphics.NullCustomGraphics,0,[ Remove Graphics ]," name="NODE_CUSTOMGRAPHICS_7"/>
            <visualProperty default="" name="NODE_LABEL">
                <passthroughMapping attributeName="name" attributeType="string"/>
            </visualProperty>
            <visualProperty default="C,C,c,0.00,0.00" name="NODE_CUSTOMGRAPHICS_POSITION_9"/>
            <visualProperty default="DefaultVisualizableVisualProperty(id=NODE_CUSTOMPAINT_3, name=Node Custom Paint 3)" name="NODE_CUSTOMPAINT_3"/>
            <visualProperty default="50.0" name="NODE_CUSTOMGRAPHICS_SIZE_2"/>
            <visualProperty default="255" name="NODE_BORDER_TRANSPARENCY"/>
            <visualProperty default="ELLIPSE" name="NODE_SHAPE"/>
            <visualProperty default="#1E90FF" name="NODE_PAINT"/>
            <visualProperty default="12" name="NODE_LABEL_FONT_SIZE"/>
            <visualProperty default="SansSerif.plain,plain,12" name="NODE_LABEL_FONT_FACE"/>
            <visualProperty default="10.0" name="COMPOUND_NODE_PADDING"/>
            <visualProperty default="true" name="NODE_VISIBLE"/>
            <visualProperty default="#FFFFFF" name="NODE_FILL_COLOR"/>
            <visualProperty default="#009900" name="NODE_BORDER_PAINT"/>
            <visualProperty default="0.0" name="NODE_Y_LOCATION"/>
            <visualProperty default="0.0" name="NODE_Z_LOCATION"/>
            <visualProperty default="DefaultVisualizableVisualProperty(id=NODE_CUSTOMPAINT_9, name=Node Custom Paint 9)" name="NODE_CUSTOMPAINT_9"/>
            <visualProperty default="50.0" name="NODE_CUSTOMGRAPHICS_SIZE_3"/>
            <visualProperty default="C,C,c,0.00,0.00" name="NODE_CUSTOMGRAPHICS_POSITION_1"/>
            <visualProperty default="C,C,c,0.00,0.00" name="NODE_CUSTOMGRAPHICS_POSITION_7"/>
            <visualProperty default="C,C,c,0.00,0.00" name="NODE_CUSTOMGRAPHICS_POSITION_6"/>
            <visualProperty default="DefaultVisualizableVisualProperty(id=NODE_CUSTOMPAINT_6, name=Node Custom Paint 6)" name="NODE_CUSTOMPAINT_6"/>
            <visualProperty default="org.cytoscape.ding.customgraphics.NullCustomGraphics,0,[ Remove Graphics ]," name="NODE_CUSTOMGRAPHICS_2"/>
            <visualProperty default="C,C,c,0.00,0.00" name="NODE_CUSTOMGRAPHICS_POSITION_3"/>
            <visualProperty default="255" name="NODE_LABEL_TRANSPARENCY"/>
            <visualProperty default="50.0" name="NODE_CUSTOMGRAPHICS_SIZE_4"/>
            <visualProperty default="200.0" name="NODE_LABEL_WIDTH"/>
            <visualProperty default="SOLID" name="NODE_BORDER_STROKE"/>
            <visualProperty default="#FFFF00" name="NODE_SELECTED_PAINT"/>
            <visualProperty default="org.cytoscape.ding.customgraphics.NullCustomGraphics,0,[ Remove Graphics ]," name="NODE_CUSTOMGRAPHICS_6"/>
            <visualProperty default="false" name="NODE_SELECTED"/>
            <visualProperty default="0.0" name="NODE_DEPTH"/>
            <visualProperty default="org.cytoscape.ding.customgraphics.NullCustomGraphics,0,[ Remove Graphics ]," name="NODE_CUSTOMGRAPHICS_4"/>
            <visualProperty default="#CCCCCC" name="NODE_LABEL_COLOR"/>
            <visualProperty default="DefaultVisualizableVisualProperty(id=NODE_CUSTOMPAINT_4, name=Node Custom Paint 4)" name="NODE_CUSTOMPAINT_4"/>
            <visualProperty default="org.cytoscape.ding.customgraphics.NullCustomGraphics,0,[ Remove Graphics ]," name="NODE_CUSTOMGRAPHICS_3"/>
            <visualProperty default="S,NW,c,0.00,0.00" name="NODE_LABEL_POSITION"/>
            <visualProperty default="DefaultVisualizableVisualProperty(id=NODE_CUSTOMPAINT_7, name=Node Custom Paint 7)" name="NODE_CUSTOMPAINT_7"/>
            <visualProperty default="DefaultVisualizableVisualProperty(id=NODE_CUSTOMPAINT_2, name=Node Custom Paint 2)" name="NODE_CUSTOMPAINT_2"/>
            <visualProperty default="C,C,c,0.00,0.00" name="NODE_CUSTOMGRAPHICS_POSITION_2"/>
            <visualProperty default="30.0" name="NODE_HEIGHT"/>
            <visualProperty default="ROUND_RECTANGLE" name="COMPOUND_NODE_SHAPE"/>
            <visualProperty default="255" name="NODE_TRANSPARENCY"/>
            <visualProperty default="50.0" name="NODE_CUSTOMGRAPHICS_SIZE_7"/>
            <visualProperty default="DefaultVisualizableVisualProperty(id=NODE_CUSTOMPAINT_8, name=Node Custom Paint 8)" name="NODE_CUSTOMPAINT_8"/>
            <visualProperty default="70.0" name="NODE_WIDTH"/>
        </node>
        <edge>
            <dependency value="false" name="arrowColorMatchesEdge"/>
            <visualProperty default="#FFFF00" name="EDGE_TARGET_ARROW_SELECTED_PAINT"/>
            <visualProperty default="Dialog.plain,plain,10" name="EDGE_LABEL_FONT_FACE"/>
            <visualProperty default="2.0" name="EDGE_WIDTH"/>
            <visualProperty default="" name="EDGE_LABEL"/>
            <visualProperty default="255" name="EDGE_LABEL_TRANSPARENCY"/>
            <visualProperty default="" name="EDGE_BEND"/>
            <visualProperty default="SOLID" name="EDGE_LINE_TYPE"/>
            <visualProperty default="NONE" name="EDGE_TARGET_ARROW_SHAPE"/>
            <visualProperty default="NONE" name="EDGE_SOURCE_ARROW_SHAPE"/>
            <visualProperty default="#000000" name="EDGE_LABEL_COLOR"/>
            <visualProperty default="#000000" name="EDGE_SOURCE_ARROW_UNSELECTED_PAINT"/>
            <visualProperty default="255" name="EDGE_TRANSPARENCY"/>
            <visualProperty default="#FFFF00" name="EDGE_SOURCE_ARROW_SELECTED_PAINT"/>
            <visualProperty default="10" name="EDGE_LABEL_FONT_SIZE"/>
            <visualProperty default="#404040" name="EDGE_UNSELECTED_PAINT"/>
            <visualProperty default="true" name="EDGE_CURVED"/>
            <visualProperty default="#FF0000" name="EDGE_STROKE_SELECTED_PAINT"/>
            <visualProperty default="false" name="EDGE_SELECTED"/>
            <visualProperty default="true" name="EDGE_VISIBLE"/>
            <visualProperty default="200.0" name="EDGE_LABEL_WIDTH"/>
            <visualProperty default="" name="EDGE_TOOLTIP"/>
            <visualProperty default="#009900" name="EDGE_STROKE_UNSELECTED_PAINT"/>
            <visualProperty default="#323232" name="EDGE_PAINT"/>
            <visualProperty default="#FF0000" name="EDGE_SELECTED_PAINT"/>
            <visualProperty default="#000000" name="EDGE_TARGET_ARROW_UNSELECTED_PAINT"/>
        </edge>
    </visualStyle>
    <visualStyle name="Directed">
        <network>
            <visualProperty default="400.0" name="NETWORK_HEIGHT"/>
            <visualProperty default="0.0" name="NETWORK_CENTER_X_LOCATION"/>
            <visualProperty default="#FFFFFF" name="NETWORK_BACKGROUND_PAINT"/>
            <visualProperty default="0.0" name="NETWORK_CENTER_Z_LOCATION"/>
            <visualProperty default="1.0" name="NETWORK_SCALE_FACTOR"/>
            <visualProperty default="true" name="NETWORK_NODE_SELECTION"/>
            <visualProperty default="550.0" name="NETWORK_WIDTH"/>
            <visualProperty default="" name="NETWORK_TITLE"/>
            <visualProperty default="550.0" name="NETWORK_SIZE"/>
            <visualProperty default="0.0" name="NETWORK_CENTER_Y_LOCATION"/>
            <visualProperty default="true" name="NETWORK_EDGE_SELECTION"/>
            <visualProperty default="0.0" name="NETWORK_DEPTH"/>
        </network>
        <node>
            <dependency value="true" name="nodeCustomGraphicsSizeSync"/>
            <dependency value="true" name="nodeSizeLocked"/>
            <visualProperty default="C,C,c,0.00,0.00" name="NODE_CUSTOMGRAPHICS_POSITION_8"/>
            <visualProperty default="true" name="NODE_NESTED_NETWORK_IMAGE_VISIBLE"/>
            <visualProperty default="DefaultVisualizableVisualProperty(id=NODE_CUSTOMPAINT_5, name=Node Custom Paint 5)" name="NODE_CUSTOMPAINT_5"/>
            <visualProperty default="org.cytoscape.ding.customgraphics.NullCustomGraphics,0,[ Remove Graphics ]," name="NODE_CUSTOMGRAPHICS_9"/>
            <visualProperty default="C,C,c,0.00,0.00" name="NODE_CUSTOMGRAPHICS_POSITION_4"/>
            <visualProperty default="" name="NODE_TOOLTIP"/>
            <visualProperty default="50.0" name="NODE_CUSTOMGRAPHICS_SIZE_9"/>
            <visualProperty default="50.0" name="NODE_CUSTOMGRAPHICS_SIZE_1"/>
            <visualProperty default="org.cytoscape.ding.customgraphics.NullCustomGraphics,0,[ Remove Graphics ]," name="NODE_CUSTOMGRAPHICS_5"/>
            <visualProperty default="C,C,c,0.00,0.00" name="NODE_CUSTOMGRAPHICS_POSITION_5"/>
            <visualProperty default="org.cytoscape.ding.customgraphics.NullCustomGraphics,0,[ Remove Graphics ]," name="NODE_CUSTOMGRAPHICS_8"/>
            <visualProperty default="50.0" name="NODE_CUSTOMGRAPHICS_SIZE_8"/>
            <visualProperty default="5.0" name="NODE_BORDER_WIDTH"/>
            <visualProperty default="0.0" name="NODE_X_LOCATION"/>
            <visualProperty default="DefaultVisualizableVisualProperty(id=NODE_CUSTOMPAINT_1, name=Node Custom Paint 1)" name="NODE_CUSTOMPAINT_1"/>
            <visualProperty default="50.0" name="NODE_CUSTOMGRAPHICS_SIZE_5"/>
            <visualProperty default="45.0" name="NODE_SIZE"/>
            <visualProperty default="50.0" name="NODE_CUSTOMGRAPHICS_SIZE_6"/>
            <visualProperty default="org.cytoscape.ding.customgraphics.NullCustomGraphics,0,[ Remove Graphics ]," name="NODE_CUSTOMGRAPHICS_1"/>
            <visualProperty default="org.cytoscape.ding.customgraphics.NullCustomGraphics,0,[ Remove Graphics ]," name="NODE_CUSTOMGRAPHICS_7"/>
            <visualProperty default="" name="NODE_LABEL">
                <passthroughMapping attributeName="name" attributeType="string"/>
            </visualProperty>
            <visualProperty default="C,C,c,0.00,0.00" name="NODE_CUSTOMGRAPHICS_POSITION_9"/>
            <visualProperty default="DefaultVisualizableVisualProperty(id=NODE_CUSTOMPAINT_3, name=Node Custom Paint 3)" name="NODE_CUSTOMPAINT_3"/>
            <visualProperty default="50.0" name="NODE_CUSTOMGRAPHICS_SIZE_2"/>
            <visualProperty default="255" name="NODE_BORDER_TRANSPARENCY"/>
            <visualProperty default="ELLIPSE" name="NODE_SHAPE"/>
            <visualProperty default="#787878" name="NODE_PAINT"/>
            <visualProperty default="8" name="NODE_LABEL_FONT_SIZE"/>
            <visualProperty default="SansSerif.plain,plain,12" name="NODE_LABEL_FONT_FACE"/>
            <visualProperty default="10.0" name="COMPOUND_NODE_PADDING"/>
            <visualProperty default="true" name="NODE_VISIBLE"/>
            <visualProperty default="#FFFFFF" name="NODE_FILL_COLOR"/>
            <visualProperty default="#919191" name="NODE_BORDER_PAINT"/>
            <visualProperty default="0.0" name="NODE_Y_LOCATION"/>
            <visualProperty default="0.0" name="NODE_Z_LOCATION"/>
            <visualProperty default="DefaultVisualizableVisualProperty(id=NODE_CUSTOMPAINT_9, name=Node Custom Paint 9)" name="NODE_CUSTOMPAINT_9"/>
            <visualProperty default="50.0" name="NODE_CUSTOMGRAPHICS_SIZE_3"/>
            <visualProperty default="C,C,c,0.00,0.00" name="NODE_CUSTOMGRAPHICS_POSITION_1"/>
            <visualProperty default="C,C,c,0.00,0.00" name="NODE_CUSTOMGRAPHICS_POSITION_7"/>
            <visualProperty default="C,C,c,0.00,0.00" name="NODE_CUSTOMGRAPHICS_POSITION_6"/>
            <visualProperty default="DefaultVisualizableVisualProperty(id=NODE_CUSTOMPAINT_6, name=Node Custom Paint 6)" name="NODE_CUSTOMPAINT_6"/>
            <visualProperty default="org.cytoscape.ding.customgraphics.NullCustomGraphics,0,[ Remove Graphics ]," name="NODE_CUSTOMGRAPHICS_2"/>
            <visualProperty default="C,C,c,0.00,0.00" name="NODE_CUSTOMGRAPHICS_POSITION_3"/>
            <visualProperty default="255" name="NODE_LABEL_TRANSPARENCY"/>
            <visualProperty default="50.0" name="NODE_CUSTOMGRAPHICS_SIZE_4"/>
            <visualProperty default="200.0" name="NODE_LABEL_WIDTH"/>
            <visualProperty default="SOLID" name="NODE_BORDER_STROKE"/>
            <visualProperty default="#FF0066" name="NODE_SELECTED_PAINT"/>
            <visualProperty default="org.cytoscape.ding.customgraphics.NullCustomGraphics,0,[ Remove Graphics ]," name="NODE_CUSTOMGRAPHICS_6"/>
            <visualProperty default="false" name="NODE_SELECTED"/>
            <visualProperty default="0.0" name="NODE_DEPTH"/>
            <visualProperty default="org.cytoscape.ding.customgraphics.NullCustomGraphics,0,[ Remove Graphics ]," name="NODE_CUSTOMGRAPHICS_4"/>
            <visualProperty default="#3399FF" name="NODE_LABEL_COLOR"/>
            <visualProperty default="DefaultVisualizableVisualProperty(id=NODE_CUSTOMPAINT_4, name=Node Custom Paint 4)" name="NODE_CUSTOMPAINT_4"/>
            <visualProperty default="org.cytoscape.ding.customgraphics.NullCustomGraphics,0,[ Remove Graphics ]," name="NODE_CUSTOMGRAPHICS_3"/>
            <visualProperty default="C,C,c,0.00,0.00" name="NODE_LABEL_POSITION"/>
            <visualProperty default="DefaultVisualizableVisualProperty(id=NODE_CUSTOMPAINT_7, name=Node Custom Paint 7)" name="NODE_CUSTOMPAINT_7"/>
            <visualProperty default="DefaultVisualizableVisualProperty(id=NODE_CUSTOMPAINT_2, name=Node Custom Paint 2)" name="NODE_CUSTOMPAINT_2"/>
            <visualProperty default="C,C,c,0.00,0.00" name="NODE_CUSTOMGRAPHICS_POSITION_2"/>
            <visualProperty default="50.0" name="NODE_HEIGHT"/>
            <visualProperty default="ROUND_RECTANGLE" name="COMPOUND_NODE_SHAPE"/>
            <visualProperty default="255" name="NODE_TRANSPARENCY"/>
            <visualProperty default="50.0" name="NODE_CUSTOMGRAPHICS_SIZE_7"/>
            <visualProperty default="DefaultVisualizableVisualProperty(id=NODE_CUSTOMPAINT_8, name=Node Custom Paint 8)" name="NODE_CUSTOMPAINT_8"/>
            <visualProperty default="50.0" name="NODE_WIDTH"/>
        </node>
        <edge>
            <dependency value="true" name="arrowColorMatchesEdge"/>
            <visualProperty default="#FFFF00" name="EDGE_TARGET_ARROW_SELECTED_PAINT"/>
            <visualProperty default="SansSerif.plain,plain,12" name="EDGE_LABEL_FONT_FACE"/>
            <visualProperty default="5.0" name="EDGE_WIDTH"/>
            <visualProperty default="" name="EDGE_LABEL">
                <passthroughMapping attributeName="interaction" attributeType="string"/>
            </visualProperty>
            <visualProperty default="255" name="EDGE_LABEL_TRANSPARENCY"/>
            <visualProperty default="" name="EDGE_BEND"/>
            <visualProperty default="SOLID" name="EDGE_LINE_TYPE"/>
            <visualProperty default="ARROW" name="EDGE_TARGET_ARROW_SHAPE"/>
            <visualProperty default="NONE" name="EDGE_SOURCE_ARROW_SHAPE"/>
            <visualProperty default="#3399FF" name="EDGE_LABEL_COLOR"/>
            <visualProperty default="#000000" name="EDGE_SOURCE_ARROW_UNSELECTED_PAINT"/>
            <visualProperty default="255" name="EDGE_TRANSPARENCY"/>
            <visualProperty default="#FFFF00" name="EDGE_SOURCE_ARROW_SELECTED_PAINT"/>
            <visualProperty default="12" name="EDGE_LABEL_FONT_SIZE"/>
            <visualProperty default="#CCCCCC" name="EDGE_UNSELECTED_PAINT"/>
            <visualProperty default="true" name="EDGE_CURVED"/>
            <visualProperty default="#FF0000" name="EDGE_STROKE_SELECTED_PAINT"/>
            <visualProperty default="false" name="EDGE_SELECTED"/>
            <visualProperty default="true" name="EDGE_VISIBLE"/>
            <visualProperty default="200.0" name="EDGE_LABEL_WIDTH"/>
            <visualProperty default="" name="EDGE_TOOLTIP"/>
            <visualProperty default="#969696" name="EDGE_STROKE_UNSELECTED_PAINT"/>
            <visualProperty default="#808080" name="EDGE_PAINT"/>
            <visualProperty default="#FF0000" name="EDGE_SELECTED_PAINT"/>
            <visualProperty default="#333333" name="EDGE_TARGET_ARROW_UNSELECTED_PAINT"/>
        </edge>
    </visualStyle>
    <visualStyle name="size_rank_0">
        <network>
            <visualProperty default="400.0" name="NETWORK_HEIGHT"/>
            <visualProperty default="0.0" name="NETWORK_CENTER_X_LOCATION"/>
            <visualProperty default="#EBEBEB" name="NETWORK_BACKGROUND_PAINT"/>
            <visualProperty default="0.0" name="NETWORK_CENTER_Z_LOCATION"/>
            <visualProperty default="1.0" name="NETWORK_SCALE_FACTOR"/>
            <visualProperty default="true" name="NETWORK_NODE_SELECTION"/>
            <visualProperty default="550.0" name="NETWORK_WIDTH"/>
            <visualProperty default="" name="NETWORK_TITLE"/>
            <visualProperty default="550.0" name="NETWORK_SIZE"/>
            <visualProperty default="0.0" name="NETWORK_CENTER_Y_LOCATION"/>
            <visualProperty default="true" name="NETWORK_EDGE_SELECTION"/>
            <visualProperty default="0.0" name="NETWORK_DEPTH"/>
        </network>
        <node>
            <dependency value="true" name="nodeCustomGraphicsSizeSync"/>
            <dependency value="true" name="nodeSizeLocked"/>
            <visualProperty default="C,C,c,0.00,0.00" name="NODE_CUSTOMGRAPHICS_POSITION_8"/>
            <visualProperty default="true" name="NODE_NESTED_NETWORK_IMAGE_VISIBLE"/>
            <visualProperty default="DefaultVisualizableVisualProperty(id=NODE_CUSTOMPAINT_5, name=Node Custom Paint 5)" name="NODE_CUSTOMPAINT_5"/>
            <visualProperty default="org.cytoscape.ding.customgraphics.NullCustomGraphics,0,[ Remove Graphics ]," name="NODE_CUSTOMGRAPHICS_9"/>
            <visualProperty default="C,C,c,0.00,0.00" name="NODE_CUSTOMGRAPHICS_POSITION_4"/>
            <visualProperty default="" name="NODE_TOOLTIP"/>
            <visualProperty default="50.0" name="NODE_CUSTOMGRAPHICS_SIZE_9"/>
            <visualProperty default="50.0" name="NODE_CUSTOMGRAPHICS_SIZE_1"/>
            <visualProperty default="org.cytoscape.ding.customgraphics.NullCustomGraphics,0,[ Remove Graphics ]," name="NODE_CUSTOMGRAPHICS_5"/>
            <visualProperty default="C,C,c,0.00,0.00" name="NODE_CUSTOMGRAPHICS_POSITION_5"/>
            <visualProperty default="org.cytoscape.ding.customgraphics.NullCustomGraphics,0,[ Remove Graphics ]," name="NODE_CUSTOMGRAPHICS_8"/>
            <visualProperty default="50.0" name="NODE_CUSTOMGRAPHICS_SIZE_8"/>
            <visualProperty default="0.0" name="NODE_BORDER_WIDTH"/>
            <visualProperty default="0.0" name="NODE_X_LOCATION"/>
            <visualProperty default="DefaultVisualizableVisualProperty(id=NODE_CUSTOMPAINT_1, name=Node Custom Paint 1)" name="NODE_CUSTOMPAINT_1"/>
            <visualProperty default="50.0" name="NODE_CUSTOMGRAPHICS_SIZE_5"/>
            <visualProperty default="12.0" name="NODE_SIZE">
                <continuousMapping attributeName="diffusion_output_rank" attributeType="float">
                    <continuousMappingPoint attrValue="0.0" equalValue="39.11245096536507" greaterValue="39.11245096536507" lesserValue="1.0"/>
                    <continuousMappingPoint attrValue="99.0" equalValue="13.821692732043733" greaterValue="1.0" lesserValue="13.821692732043733"/>
                </continuousMapping>
            </visualProperty>
            <visualProperty default="50.0" name="NODE_CUSTOMGRAPHICS_SIZE_6"/>
            <visualProperty default="org.cytoscape.ding.customgraphics.NullCustomGraphics,0,[ Remove Graphics ]," name="NODE_CUSTOMGRAPHICS_1"/>
            <visualProperty default="org.cytoscape.ding.customgraphics.NullCustomGraphics,0,[ Remove Graphics ]," name="NODE_CUSTOMGRAPHICS_7"/>
            <visualProperty default="" name="NODE_LABEL">
                <passthroughMapping attributeName="name" attributeType="string"/>
            </visualProperty>
            <visualProperty default="C,C,c,0.00,0.00" name="NODE_CUSTOMGRAPHICS_POSITION_9"/>
            <visualProperty default="DefaultVisualizableVisualProperty(id=NODE_CUSTOMPAINT_3, name=Node Custom Paint 3)" name="NODE_CUSTOMPAINT_3"/>
            <visualProperty default="50.0" name="NODE_CUSTOMGRAPHICS_SIZE_2"/>
            <visualProperty default="255" name="NODE_BORDER_TRANSPARENCY"/>
            <visualProperty default="RECTANGLE" name="NODE_SHAPE"/>
            <visualProperty default="#787878" name="NODE_PAINT"/>
            <visualProperty default="9" name="NODE_LABEL_FONT_SIZE"/>
            <visualProperty default="SansSerif.plain,plain,12" name="NODE_LABEL_FONT_FACE"/>
            <visualProperty default="10.0" name="COMPOUND_NODE_PADDING"/>
            <visualProperty default="true" name="NODE_VISIBLE"/>
            <visualProperty default="#CCCCFF" name="NODE_FILL_COLOR"/>
            <visualProperty default="#000000" name="NODE_BORDER_PAINT"/>
            <visualProperty default="0.0" name="NODE_Y_LOCATION"/>
            <visualProperty default="0.0" name="NODE_Z_LOCATION"/>
            <visualProperty default="DefaultVisualizableVisualProperty(id=NODE_CUSTOMPAINT_9, name=Node Custom Paint 9)" name="NODE_CUSTOMPAINT_9"/>
            <visualProperty default="50.0" name="NODE_CUSTOMGRAPHICS_SIZE_3"/>
            <visualProperty default="C,C,c,0.00,0.00" name="NODE_CUSTOMGRAPHICS_POSITION_1"/>
            <visualProperty default="C,C,c,0.00,0.00" name="NODE_CUSTOMGRAPHICS_POSITION_7"/>
            <visualProperty default="C,C,c,0.00,0.00" name="NODE_CUSTOMGRAPHICS_POSITION_6"/>
            <visualProperty default="DefaultVisualizableVisualProperty(id=NODE_CUSTOMPAINT_6, name=Node Custom Paint 6)" name="NODE_CUSTOMPAINT_6"/>
            <visualProperty default="org.cytoscape.ding.customgraphics.NullCustomGraphics,0,[ Remove Graphics ]," name="NODE_CUSTOMGRAPHICS_2"/>
            <visualProperty default="C,C,c,0.00,0.00" name="NODE_CUSTOMGRAPHICS_POSITION_3"/>
            <visualProperty default="255" name="NODE_LABEL_TRANSPARENCY"/>
            <visualProperty default="50.0" name="NODE_CUSTOMGRAPHICS_SIZE_4"/>
            <visualProperty default="200.0" name="NODE_LABEL_WIDTH"/>
            <visualProperty default="SOLID" name="NODE_BORDER_STROKE"/>
            <visualProperty default="#FFFF00" name="NODE_SELECTED_PAINT"/>
            <visualProperty default="org.cytoscape.ding.customgraphics.NullCustomGraphics,0,[ Remove Graphics ]," name="NODE_CUSTOMGRAPHICS_6"/>
            <visualProperty default="false" name="NODE_SELECTED"/>
            <visualProperty default="0.0" name="NODE_DEPTH"/>
            <visualProperty default="org.cytoscape.ding.customgraphics.NullCustomGraphics,0,[ Remove Graphics ]," name="NODE_CUSTOMGRAPHICS_4"/>
            <visualProperty default="#333333" name="NODE_LABEL_COLOR"/>
            <visualProperty default="DefaultVisualizableVisualProperty(id=NODE_CUSTOMPAINT_4, name=Node Custom Paint 4)" name="NODE_CUSTOMPAINT_4"/>
            <visualProperty default="org.cytoscape.ding.customgraphics.NullCustomGraphics,0,[ Remove Graphics ]," name="NODE_CUSTOMGRAPHICS_3"/>
            <visualProperty default="C,C,c,0.00,0.00" name="NODE_LABEL_POSITION"/>
            <visualProperty default="DefaultVisualizableVisualProperty(id=NODE_CUSTOMPAINT_7, name=Node Custom Paint 7)" name="NODE_CUSTOMPAINT_7"/>
            <visualProperty default="DefaultVisualizableVisualProperty(id=NODE_CUSTOMPAINT_2, name=Node Custom Paint 2)" name="NODE_CUSTOMPAINT_2"/>
            <visualProperty default="C,C,c,0.00,0.00" name="NODE_CUSTOMGRAPHICS_POSITION_2"/>
            <visualProperty default="50.0" name="NODE_HEIGHT"/>
            <visualProperty default="ROUND_RECTANGLE" name="COMPOUND_NODE_SHAPE"/>
            <visualProperty default="255" name="NODE_TRANSPARENCY"/>
            <visualProperty default="50.0" name="NODE_CUSTOMGRAPHICS_SIZE_7"/>
            <visualProperty default="DefaultVisualizableVisualProperty(id=NODE_CUSTOMPAINT_8, name=Node Custom Paint 8)" name="NODE_CUSTOMPAINT_8"/>
            <visualProperty default="50.0" name="NODE_WIDTH"/>
        </node>
        <edge>
            <dependency value="false" name="arrowColorMatchesEdge"/>
            <visualProperty default="#FFFF00" name="EDGE_TARGET_ARROW_SELECTED_PAINT"/>
            <visualProperty default="SansSerif.plain,plain,10" name="EDGE_LABEL_FONT_FACE"/>
            <visualProperty default="2.0" name="EDGE_WIDTH"/>
            <visualProperty default="" name="EDGE_LABEL"/>
            <visualProperty default="255" name="EDGE_LABEL_TRANSPARENCY"/>
            <visualProperty default="" name="EDGE_BEND"/>
            <visualProperty default="SOLID" name="EDGE_LINE_TYPE"/>
            <visualProperty default="NONE" name="EDGE_TARGET_ARROW_SHAPE"/>
            <visualProperty default="NONE" name="EDGE_SOURCE_ARROW_SHAPE"/>
            <visualProperty default="#000000" name="EDGE_LABEL_COLOR"/>
            <visualProperty default="#000000" name="EDGE_SOURCE_ARROW_UNSELECTED_PAINT"/>
            <visualProperty default="255" name="EDGE_TRANSPARENCY"/>
            <visualProperty default="#FFFF00" name="EDGE_SOURCE_ARROW_SELECTED_PAINT"/>
            <visualProperty default="10" name="EDGE_LABEL_FONT_SIZE"/>
            <visualProperty default="#404040" name="EDGE_UNSELECTED_PAINT"/>
            <visualProperty default="true" name="EDGE_CURVED"/>
            <visualProperty default="#FF0000" name="EDGE_STROKE_SELECTED_PAINT"/>
            <visualProperty default="false" name="EDGE_SELECTED"/>
            <visualProperty default="true" name="EDGE_VISIBLE"/>
            <visualProperty default="200.0" name="EDGE_LABEL_WIDTH"/>
            <visualProperty default="" name="EDGE_TOOLTIP"/>
            <visualProperty default="#4C4C4C" name="EDGE_STROKE_UNSELECTED_PAINT"/>
            <visualProperty default="#808080" name="EDGE_PAINT"/>
            <visualProperty default="#FF0000" name="EDGE_SELECTED_PAINT"/>
            <visualProperty default="#000000" name="EDGE_TARGET_ARROW_UNSELECTED_PAINT"/>
        </edge>
    </visualStyle>
    <visualStyle name="Sample2">
        <network>
            <visualProperty default="400.0" name="NETWORK_HEIGHT"/>
            <visualProperty default="0.0" name="NETWORK_CENTER_X_LOCATION"/>
            <visualProperty default="#EBE8E1" name="NETWORK_BACKGROUND_PAINT"/>
            <visualProperty default="0.0" name="NETWORK_CENTER_Z_LOCATION"/>
            <visualProperty default="1.0" name="NETWORK_SCALE_FACTOR"/>
            <visualProperty default="true" name="NETWORK_NODE_SELECTION"/>
            <visualProperty default="550.0" name="NETWORK_WIDTH"/>
            <visualProperty default="" name="NETWORK_TITLE"/>
            <visualProperty default="0.0" name="NETWORK_CENTER_Y_LOCATION"/>
            <visualProperty default="true" name="NETWORK_EDGE_SELECTION"/>
            <visualProperty default="0.0" name="NETWORK_DEPTH"/>
        </network>
        <node>
            <dependency value="true" name="nodeCustomGraphicsSizeSync"/>
            <dependency value="true" name="nodeSizeLocked"/>
            <visualProperty default="C,C,c,0.00,0.00" name="NODE_CUSTOMGRAPHICS_POSITION_8"/>
            <visualProperty default="true" name="NODE_NESTED_NETWORK_IMAGE_VISIBLE"/>
            <visualProperty default="org.cytoscape.ding.customgraphics.NullCustomGraphics,0,[ Remove Graphics ]," name="NODE_CUSTOMGRAPHICS_9"/>
            <visualProperty default="C,C,c,0.00,0.00" name="NODE_CUSTOMGRAPHICS_POSITION_4"/>
            <visualProperty default="" name="NODE_TOOLTIP"/>
            <visualProperty default="0.0" name="NODE_CUSTOMGRAPHICS_SIZE_9"/>
            <visualProperty default="0.0" name="NODE_CUSTOMGRAPHICS_SIZE_1"/>
            <visualProperty default="org.cytoscape.ding.customgraphics.NullCustomGraphics,0,[ Remove Graphics ]," name="NODE_CUSTOMGRAPHICS_5"/>
            <visualProperty default="C,C,c,0.00,0.00" name="NODE_CUSTOMGRAPHICS_POSITION_5"/>
            <visualProperty default="org.cytoscape.ding.customgraphics.NullCustomGraphics,0,[ Remove Graphics ]," name="NODE_CUSTOMGRAPHICS_8"/>
            <visualProperty default="0.0" name="NODE_CUSTOMGRAPHICS_SIZE_8"/>
            <visualProperty default="15.0" name="NODE_BORDER_WIDTH"/>
            <visualProperty default="0.0" name="NODE_X_LOCATION"/>
            <visualProperty default="0.0" name="NODE_CUSTOMGRAPHICS_SIZE_5"/>
            <visualProperty default="50.0" name="NODE_SIZE"/>
            <visualProperty default="0.0" name="NODE_CUSTOMGRAPHICS_SIZE_6"/>
            <visualProperty default="org.cytoscape.ding.customgraphics.NullCustomGraphics,0,[ Remove Graphics ]," name="NODE_CUSTOMGRAPHICS_1"/>
            <visualProperty default="org.cytoscape.ding.customgraphics.NullCustomGraphics,0,[ Remove Graphics ]," name="NODE_CUSTOMGRAPHICS_7"/>
            <visualProperty default="" name="NODE_LABEL">
                <passthroughMapping attributeName="name" attributeType="string"/>
            </visualProperty>
            <visualProperty default="C,C,c,0.00,0.00" name="NODE_CUSTOMGRAPHICS_POSITION_9"/>
            <visualProperty default="0.0" name="NODE_CUSTOMGRAPHICS_SIZE_2"/>
            <visualProperty default="255" name="NODE_BORDER_TRANSPARENCY"/>
            <visualProperty default="ELLIPSE" name="NODE_SHAPE"/>
            <visualProperty default="20" name="NODE_LABEL_FONT_SIZE"/>
            <visualProperty default="Dialog.plain,plain,12" name="NODE_LABEL_FONT_FACE"/>
            <visualProperty default="10.0" name="COMPOUND_NODE_PADDING"/>
            <visualProperty default="true" name="NODE_VISIBLE"/>
            <visualProperty default="#3A7FB6" name="NODE_FILL_COLOR"/>
            <visualProperty default="#FFFFFF" name="NODE_BORDER_PAINT"/>
            <visualProperty default="0.0" name="NODE_Y_LOCATION"/>
            <visualProperty default="0.0" name="NODE_Z_LOCATION"/>
            <visualProperty default="0.0" name="NODE_CUSTOMGRAPHICS_SIZE_3"/>
            <visualProperty default="C,C,c,0.00,0.00" name="NODE_CUSTOMGRAPHICS_POSITION_1"/>
            <visualProperty default="C,C,c,0.00,0.00" name="NODE_CUSTOMGRAPHICS_POSITION_7"/>
            <visualProperty default="C,C,c,0.00,0.00" name="NODE_CUSTOMGRAPHICS_POSITION_6"/>
            <visualProperty default="org.cytoscape.ding.customgraphics.NullCustomGraphics,0,[ Remove Graphics ]," name="NODE_CUSTOMGRAPHICS_2"/>
            <visualProperty default="C,C,c,0.00,0.00" name="NODE_CUSTOMGRAPHICS_POSITION_3"/>
            <visualProperty default="255" name="NODE_LABEL_TRANSPARENCY"/>
            <visualProperty default="0.0" name="NODE_CUSTOMGRAPHICS_SIZE_4"/>
            <visualProperty default="200.0" name="NODE_LABEL_WIDTH"/>
            <visualProperty default="SOLID" name="NODE_BORDER_STROKE"/>
            <visualProperty default="#FFFF00" name="NODE_SELECTED_PAINT"/>
            <visualProperty default="org.cytoscape.ding.customgraphics.NullCustomGraphics,0,[ Remove Graphics ]," name="NODE_CUSTOMGRAPHICS_6"/>
            <visualProperty default="false" name="NODE_SELECTED"/>
            <visualProperty default="0.0" name="NODE_DEPTH"/>
            <visualProperty default="org.cytoscape.ding.customgraphics.NullCustomGraphics,0,[ Remove Graphics ]," name="NODE_CUSTOMGRAPHICS_4"/>
            <visualProperty default="#666666" name="NODE_LABEL_COLOR"/>
            <visualProperty default="org.cytoscape.ding.customgraphics.NullCustomGraphics,0,[ Remove Graphics ]," name="NODE_CUSTOMGRAPHICS_3"/>
            <visualProperty default="E,W,c,5.00,0.00" name="NODE_LABEL_POSITION"/>
            <visualProperty default="C,C,c,0.00,0.00" name="NODE_CUSTOMGRAPHICS_POSITION_2"/>
            <visualProperty default="40.0" name="NODE_HEIGHT"/>
            <visualProperty default="ROUND_RECTANGLE" name="COMPOUND_NODE_SHAPE"/>
            <visualProperty default="255" name="NODE_TRANSPARENCY"/>
            <visualProperty default="0.0" name="NODE_CUSTOMGRAPHICS_SIZE_7"/>
            <visualProperty default="60.0" name="NODE_WIDTH"/>
        </node>
        <edge>
            <dependency value="false" name="arrowColorMatchesEdge"/>
            <visualProperty default="#FFFF00" name="EDGE_TARGET_ARROW_SELECTED_PAINT"/>
            <visualProperty default="SansSerif.plain,plain,10" name="EDGE_LABEL_FONT_FACE"/>
            <visualProperty default="20.0" name="EDGE_WIDTH"/>
            <visualProperty default="" name="EDGE_LABEL"/>
            <visualProperty default="255" name="EDGE_LABEL_TRANSPARENCY"/>
            <visualProperty default="SOLID" name="EDGE_LINE_TYPE"/>
            <visualProperty default="NONE" name="EDGE_TARGET_ARROW_SHAPE"/>
            <visualProperty default="NONE" name="EDGE_SOURCE_ARROW_SHAPE"/>
            <visualProperty default="#000000" name="EDGE_LABEL_COLOR"/>
            <visualProperty default="#000000" name="EDGE_SOURCE_ARROW_UNSELECTED_PAINT"/>
            <visualProperty default="255" name="EDGE_TRANSPARENCY"/>
            <visualProperty default="#FFFF00" name="EDGE_SOURCE_ARROW_SELECTED_PAINT"/>
            <visualProperty default="10" name="EDGE_LABEL_FONT_SIZE"/>
            <visualProperty default="true" name="EDGE_CURVED"/>
            <visualProperty default="#FF0000" name="EDGE_STROKE_SELECTED_PAINT"/>
            <visualProperty default="false" name="EDGE_SELECTED"/>
            <visualProperty default="true" name="EDGE_VISIBLE"/>
            <visualProperty default="200.0" name="EDGE_LABEL_WIDTH"/>
            <visualProperty default="" name="EDGE_TOOLTIP"/>
            <visualProperty default="#FFFFFF" name="EDGE_STROKE_UNSELECTED_PAINT"/>
            <visualProperty default="#000000" name="EDGE_TARGET_ARROW_UNSELECTED_PAINT"/>
        </edge>
    </visualStyle>
    <visualStyle name="size_rank">
        <network>
            <visualProperty default="400.0" name="NETWORK_HEIGHT"/>
            <visualProperty default="0.0" name="NETWORK_CENTER_X_LOCATION"/>
            <visualProperty default="#EBEBEB" name="NETWORK_BACKGROUND_PAINT"/>
            <visualProperty default="0.0" name="NETWORK_CENTER_Z_LOCATION"/>
            <visualProperty default="1.0" name="NETWORK_SCALE_FACTOR"/>
            <visualProperty default="true" name="NETWORK_NODE_SELECTION"/>
            <visualProperty default="550.0" name="NETWORK_WIDTH"/>
            <visualProperty default="" name="NETWORK_TITLE"/>
            <visualProperty default="550.0" name="NETWORK_SIZE"/>
            <visualProperty default="0.0" name="NETWORK_CENTER_Y_LOCATION"/>
            <visualProperty default="true" name="NETWORK_EDGE_SELECTION"/>
            <visualProperty default="0.0" name="NETWORK_DEPTH"/>
        </network>
        <node>
            <dependency value="true" name="nodeCustomGraphicsSizeSync"/>
            <dependency value="true" name="nodeSizeLocked"/>
            <visualProperty default="C,C,c,0.00,0.00" name="NODE_CUSTOMGRAPHICS_POSITION_8"/>
            <visualProperty default="true" name="NODE_NESTED_NETWORK_IMAGE_VISIBLE"/>
            <visualProperty default="DefaultVisualizableVisualProperty(id=NODE_CUSTOMPAINT_5, name=Node Custom Paint 5)" name="NODE_CUSTOMPAINT_5"/>
            <visualProperty default="org.cytoscape.ding.customgraphics.NullCustomGraphics,0,[ Remove Graphics ]," name="NODE_CUSTOMGRAPHICS_9"/>
            <visualProperty default="C,C,c,0.00,0.00" name="NODE_CUSTOMGRAPHICS_POSITION_4"/>
            <visualProperty default="" name="NODE_TOOLTIP"/>
            <visualProperty default="50.0" name="NODE_CUSTOMGRAPHICS_SIZE_9"/>
            <visualProperty default="50.0" name="NODE_CUSTOMGRAPHICS_SIZE_1"/>
            <visualProperty default="org.cytoscape.ding.customgraphics.NullCustomGraphics,0,[ Remove Graphics ]," name="NODE_CUSTOMGRAPHICS_5"/>
            <visualProperty default="C,C,c,0.00,0.00" name="NODE_CUSTOMGRAPHICS_POSITION_5"/>
            <visualProperty default="org.cytoscape.ding.customgraphics.NullCustomGraphics,0,[ Remove Graphics ]," name="NODE_CUSTOMGRAPHICS_8"/>
            <visualProperty default="50.0" name="NODE_CUSTOMGRAPHICS_SIZE_8"/>
            <visualProperty default="0.0" name="NODE_BORDER_WIDTH"/>
            <visualProperty default="0.0" name="NODE_X_LOCATION"/>
            <visualProperty default="DefaultVisualizableVisualProperty(id=NODE_CUSTOMPAINT_1, name=Node Custom Paint 1)" name="NODE_CUSTOMPAINT_1"/>
            <visualProperty default="50.0" name="NODE_CUSTOMGRAPHICS_SIZE_5"/>
            <visualProperty default="12.0" name="NODE_SIZE">
                <continuousMapping attributeName="diffusion_output_rank" attributeType="float">
                    <continuousMappingPoint attrValue="0.0" equalValue="39.11245096536507" greaterValue="39.11245096536507" lesserValue="1.0"/>
                    <continuousMappingPoint attrValue="99.0" equalValue="13.821692732043733" greaterValue="1.0" lesserValue="13.821692732043733"/>
                </continuousMapping>
            </visualProperty>
            <visualProperty default="50.0" name="NODE_CUSTOMGRAPHICS_SIZE_6"/>
            <visualProperty default="org.cytoscape.ding.customgraphics.NullCustomGraphics,0,[ Remove Graphics ]," name="NODE_CUSTOMGRAPHICS_1"/>
            <visualProperty default="org.cytoscape.ding.customgraphics.NullCustomGraphics,0,[ Remove Graphics ]," name="NODE_CUSTOMGRAPHICS_7"/>
            <visualProperty default="" name="NODE_LABEL">
                <passthroughMapping attributeName="name" attributeType="string"/>
            </visualProperty>
            <visualProperty default="C,C,c,0.00,0.00" name="NODE_CUSTOMGRAPHICS_POSITION_9"/>
            <visualProperty default="DefaultVisualizableVisualProperty(id=NODE_CUSTOMPAINT_3, name=Node Custom Paint 3)" name="NODE_CUSTOMPAINT_3"/>
            <visualProperty default="50.0" name="NODE_CUSTOMGRAPHICS_SIZE_2"/>
            <visualProperty default="255" name="NODE_BORDER_TRANSPARENCY"/>
            <visualProperty default="RECTANGLE" name="NODE_SHAPE"/>
            <visualProperty default="#787878" name="NODE_PAINT"/>
            <visualProperty default="9" name="NODE_LABEL_FONT_SIZE"/>
            <visualProperty default="SansSerif.plain,plain,12" name="NODE_LABEL_FONT_FACE"/>
            <visualProperty default="10.0" name="COMPOUND_NODE_PADDING"/>
            <visualProperty default="true" name="NODE_VISIBLE"/>
            <visualProperty default="#CCCCFF" name="NODE_FILL_COLOR"/>
            <visualProperty default="#000000" name="NODE_BORDER_PAINT"/>
            <visualProperty default="0.0" name="NODE_Y_LOCATION"/>
            <visualProperty default="0.0" name="NODE_Z_LOCATION"/>
            <visualProperty default="DefaultVisualizableVisualProperty(id=NODE_CUSTOMPAINT_9, name=Node Custom Paint 9)" name="NODE_CUSTOMPAINT_9"/>
            <visualProperty default="50.0" name="NODE_CUSTOMGRAPHICS_SIZE_3"/>
            <visualProperty default="C,C,c,0.00,0.00" name="NODE_CUSTOMGRAPHICS_POSITION_1"/>
            <visualProperty default="C,C,c,0.00,0.00" name="NODE_CUSTOMGRAPHICS_POSITION_7"/>
            <visualProperty default="C,C,c,0.00,0.00" name="NODE_CUSTOMGRAPHICS_POSITION_6"/>
            <visualProperty default="DefaultVisualizableVisualProperty(id=NODE_CUSTOMPAINT_6, name=Node Custom Paint 6)" name="NODE_CUSTOMPAINT_6"/>
            <visualProperty default="org.cytoscape.ding.customgraphics.NullCustomGraphics,0,[ Remove Graphics ]," name="NODE_CUSTOMGRAPHICS_2"/>
            <visualProperty default="C,C,c,0.00,0.00" name="NODE_CUSTOMGRAPHICS_POSITION_3"/>
            <visualProperty default="255" name="NODE_LABEL_TRANSPARENCY"/>
            <visualProperty default="50.0" name="NODE_CUSTOMGRAPHICS_SIZE_4"/>
            <visualProperty default="200.0" name="NODE_LABEL_WIDTH"/>
            <visualProperty default="SOLID" name="NODE_BORDER_STROKE"/>
            <visualProperty default="#FFFF00" name="NODE_SELECTED_PAINT"/>
            <visualProperty default="org.cytoscape.ding.customgraphics.NullCustomGraphics,0,[ Remove Graphics ]," name="NODE_CUSTOMGRAPHICS_6"/>
            <visualProperty default="false" name="NODE_SELECTED"/>
            <visualProperty default="0.0" name="NODE_DEPTH"/>
            <visualProperty default="org.cytoscape.ding.customgraphics.NullCustomGraphics,0,[ Remove Graphics ]," name="NODE_CUSTOMGRAPHICS_4"/>
            <visualProperty default="#333333" name="NODE_LABEL_COLOR"/>
            <visualProperty default="DefaultVisualizableVisualProperty(id=NODE_CUSTOMPAINT_4, name=Node Custom Paint 4)" name="NODE_CUSTOMPAINT_4"/>
            <visualProperty default="org.cytoscape.ding.customgraphics.NullCustomGraphics,0,[ Remove Graphics ]," name="NODE_CUSTOMGRAPHICS_3"/>
            <visualProperty default="C,C,c,0.00,0.00" name="NODE_LABEL_POSITION"/>
            <visualProperty default="DefaultVisualizableVisualProperty(id=NODE_CUSTOMPAINT_7, name=Node Custom Paint 7)" name="NODE_CUSTOMPAINT_7"/>
            <visualProperty default="DefaultVisualizableVisualProperty(id=NODE_CUSTOMPAINT_2, name=Node Custom Paint 2)" name="NODE_CUSTOMPAINT_2"/>
            <visualProperty default="C,C,c,0.00,0.00" name="NODE_CUSTOMGRAPHICS_POSITION_2"/>
            <visualProperty default="50.0" name="NODE_HEIGHT"/>
            <visualProperty default="ROUND_RECTANGLE" name="COMPOUND_NODE_SHAPE"/>
            <visualProperty default="255" name="NODE_TRANSPARENCY"/>
            <visualProperty default="50.0" name="NODE_CUSTOMGRAPHICS_SIZE_7"/>
            <visualProperty default="DefaultVisualizableVisualProperty(id=NODE_CUSTOMPAINT_8, name=Node Custom Paint 8)" name="NODE_CUSTOMPAINT_8"/>
            <visualProperty default="50.0" name="NODE_WIDTH"/>
        </node>
        <edge>
            <dependency value="false" name="arrowColorMatchesEdge"/>
            <visualProperty default="#FFFF00" name="EDGE_TARGET_ARROW_SELECTED_PAINT"/>
            <visualProperty default="SansSerif.plain,plain,10" name="EDGE_LABEL_FONT_FACE"/>
            <visualProperty default="2.0" name="EDGE_WIDTH"/>
            <visualProperty default="" name="EDGE_LABEL"/>
            <visualProperty default="255" name="EDGE_LABEL_TRANSPARENCY"/>
            <visualProperty default="" name="EDGE_BEND"/>
            <visualProperty default="SOLID" name="EDGE_LINE_TYPE"/>
            <visualProperty default="NONE" name="EDGE_TARGET_ARROW_SHAPE"/>
            <visualProperty default="NONE" name="EDGE_SOURCE_ARROW_SHAPE"/>
            <visualProperty default="#000000" name="EDGE_LABEL_COLOR"/>
            <visualProperty default="#000000" name="EDGE_SOURCE_ARROW_UNSELECTED_PAINT"/>
            <visualProperty default="255" name="EDGE_TRANSPARENCY"/>
            <visualProperty default="#FFFF00" name="EDGE_SOURCE_ARROW_SELECTED_PAINT"/>
            <visualProperty default="10" name="EDGE_LABEL_FONT_SIZE"/>
            <visualProperty default="#404040" name="EDGE_UNSELECTED_PAINT"/>
            <visualProperty default="true" name="EDGE_CURVED"/>
            <visualProperty default="#FF0000" name="EDGE_STROKE_SELECTED_PAINT"/>
            <visualProperty default="false" name="EDGE_SELECTED"/>
            <visualProperty default="true" name="EDGE_VISIBLE"/>
            <visualProperty default="200.0" name="EDGE_LABEL_WIDTH"/>
            <visualProperty default="" name="EDGE_TOOLTIP"/>
            <visualProperty default="#4C4C4C" name="EDGE_STROKE_UNSELECTED_PAINT"/>
            <visualProperty default="#808080" name="EDGE_PAINT"/>
            <visualProperty default="#FF0000" name="EDGE_SELECTED_PAINT"/>
            <visualProperty default="#000000" name="EDGE_TARGET_ARROW_UNSELECTED_PAINT"/>
        </edge>
    </visualStyle>
    <visualStyle name="default">
        <network>
            <visualProperty default="400.0" name="NETWORK_HEIGHT"/>
            <visualProperty default="0.0" name="NETWORK_CENTER_X_LOCATION"/>
            <visualProperty default="false" name="NETWORK_ANNOTATION_SELECTION"/>
            <visualProperty default="#FFFFFF" name="NETWORK_BACKGROUND_PAINT"/>
            <visualProperty default="0.0" name="NETWORK_CENTER_Z_LOCATION"/>
            <visualProperty default="1.0" name="NETWORK_SCALE_FACTOR"/>
            <visualProperty default="true" name="NETWORK_NODE_SELECTION"/>
            <visualProperty default="550.0" name="NETWORK_WIDTH"/>
            <visualProperty default="" name="NETWORK_TITLE"/>
            <visualProperty default="550.0" name="NETWORK_SIZE"/>
            <visualProperty default="0.0" name="NETWORK_CENTER_Y_LOCATION"/>
            <visualProperty default="true" name="NETWORK_EDGE_SELECTION"/>
            <visualProperty default="0.0" name="NETWORK_DEPTH"/>
        </network>
        <node>
            <dependency value="true" name="nodeCustomGraphicsSizeSync"/>
            <dependency value="false" name="nodeSizeLocked"/>
            <visualProperty default="C,C,c,0.00,0.00" name="NODE_CUSTOMGRAPHICS_POSITION_8"/>
            <visualProperty default="true" name="NODE_NESTED_NETWORK_IMAGE_VISIBLE"/>
            <visualProperty default="DefaultVisualizableVisualProperty(id=NODE_CUSTOMPAINT_5, name=Node Custom Paint 5)" name="NODE_CUSTOMPAINT_5"/>
            <visualProperty default="org.cytoscape.ding.customgraphics.NullCustomGraphics,0,[ Remove Graphics ]," name="NODE_CUSTOMGRAPHICS_9"/>
            <visualProperty default="C,C,c,0.00,0.00" name="NODE_CUSTOMGRAPHICS_POSITION_4"/>
            <visualProperty default="" name="NODE_TOOLTIP"/>
            <visualProperty default="50.0" name="NODE_CUSTOMGRAPHICS_SIZE_9"/>
            <visualProperty default="50.0" name="NODE_CUSTOMGRAPHICS_SIZE_1"/>
            <visualProperty default="org.cytoscape.ding.customgraphics.NullCustomGraphics,0,[ Remove Graphics ]," name="NODE_CUSTOMGRAPHICS_5"/>
            <visualProperty default="C,C,c,0.00,0.00" name="NODE_CUSTOMGRAPHICS_POSITION_5"/>
            <visualProperty default="org.cytoscape.ding.customgraphics.NullCustomGraphics,0,[ Remove Graphics ]," name="NODE_CUSTOMGRAPHICS_8"/>
            <visualProperty default="50.0" name="NODE_CUSTOMGRAPHICS_SIZE_8"/>
            <visualProperty default="0.0" name="NODE_BORDER_WIDTH"/>
            <visualProperty default="0.0" name="NODE_X_LOCATION"/>
            <visualProperty default="DefaultVisualizableVisualProperty(id=NODE_CUSTOMPAINT_1, name=Node Custom Paint 1)" name="NODE_CUSTOMPAINT_1"/>
            <visualProperty default="50.0" name="NODE_CUSTOMGRAPHICS_SIZE_5"/>
            <visualProperty default="35.0" name="NODE_SIZE"/>
            <visualProperty default="50.0" name="NODE_CUSTOMGRAPHICS_SIZE_6"/>
            <visualProperty default="org.cytoscape.ding.customgraphics.NullCustomGraphics,0,[ Remove Graphics ]," name="NODE_CUSTOMGRAPHICS_1"/>
            <visualProperty default="org.cytoscape.ding.customgraphics.NullCustomGraphics,0,[ Remove Graphics ]," name="NODE_CUSTOMGRAPHICS_7"/>
            <visualProperty default="" name="NODE_LABEL">
                <passthroughMapping attributeName="name" attributeType="string"/>
            </visualProperty>
            <visualProperty default="C,C,c,0.00,0.00" name="NODE_CUSTOMGRAPHICS_POSITION_9"/>
            <visualProperty default="DefaultVisualizableVisualProperty(id=NODE_CUSTOMPAINT_3, name=Node Custom Paint 3)" name="NODE_CUSTOMPAINT_3"/>
            <visualProperty default="50.0" name="NODE_CUSTOMGRAPHICS_SIZE_2"/>
            <visualProperty default="255" name="NODE_BORDER_TRANSPARENCY"/>
            <visualProperty default="ELLIPSE" name="NODE_SHAPE"/>
            <visualProperty default="#1E90FF" name="NODE_PAINT"/>
            <visualProperty default="12" name="NODE_LABEL_FONT_SIZE"/>
            <visualProperty default="SansSerif.plain,plain,12" name="NODE_LABEL_FONT_FACE"/>
            <visualProperty default="10.0" name="COMPOUND_NODE_PADDING"/>
            <visualProperty default="true" name="NODE_VISIBLE"/>
            <visualProperty default="#89D0F5" name="NODE_FILL_COLOR">
                <discreteMapping attributeName="Description" attributeType="string">
                    <discreteMappingEntry attributeValue="MS_18minnow1_2ct2067.3@2HW0_A" value="#66CC00"/>
                    <discreteMappingEntry attributeValue="MS_haddock_1_2ct353.2@1L2M_A" value="#66CC00"/>
                    <discreteMappingEntry attributeValue="MS_haddock_1_2ct132.4@2HW0_A" value="#66CC00"/>
                    <discreteMappingEntry attributeValue="MS_redsnapper1_2ct515.2@PF01057.16" value="#66CC00"/>
                    <discreteMappingEntry attributeValue="MS_redsnapper1_2ct359.2@PF01057.16" value="#66CC00"/>
                    <discreteMappingEntry attributeValue="MS_redsnapper1_2ct65.4@PF01057.16" value="#66CC00"/>
                    <discreteMappingEntry attributeValue="MS_16minnow_6_2ct1234.3@PF01057.16" value="#66CC00"/>
                    <discreteMappingEntry attributeValue="MS_redsnapper1_2ct528.3@2HWT_A" value="#66CC00"/>
                    <discreteMappingEntry attributeValue="MS_seabass_ms2_2ct692.2@PF01057.16" value="#66CC00"/>
                    <discreteMappingEntry attributeValue="MS_turkey_2ct63.4@1L2M_A" value="#66CC00"/>
                    <discreteMappingEntry attributeValue="MS_redsnapper_r1_2ct023.2@PF01057.16" value="#66CC00"/>
                    <discreteMappingEntry attributeValue="MS_16minnow_6_2ct1073.4@2HW0_A" value="#66CC00"/>
                    <discreteMappingEntry attributeValue="MS_seabass_ms2_2ct679.1@2HWT_A" value="#66CC00"/>
                    <discreteMappingEntry attributeValue="MS_haddock_1_2ct28.3@PF01057.16" value="#66CC00"/>
                    <discreteMappingEntry attributeValue="MS_macstool_de2c2_2ct72.4@1S9H_A" value="#66CC00"/>
                    <discreteMappingEntry attributeValue="MS_16minnow_6_2ct1040.5@PF01057.16" value="#66CC00"/>
                    <discreteMappingEntry attributeValue="MS_haddock_1_2ct245.2@2HW0_A" value="#66CC00"/>
                    <discreteMappingEntry attributeValue="MS_redsnapper1_2ct757.1@PF01057.16" value="#66CC00"/>
                    <discreteMappingEntry attributeValue="MS_seabass3_1_2ct18.2@2HW0_A" value="#66CC00"/>
                    <discreteMappingEntry attributeValue="MS_haddock_1_2ct212.2@PF08283.10" value="#66CC00"/>
                    <discreteMappingEntry attributeValue="MS_redsnapper1_2ct443.2@1L2M_A" value="#66CC00"/>
                    <discreteMappingEntry attributeValue="MS_18minnow1_2ct2007.2@2HW0_A" value="#66CC00"/>
                    <discreteMappingEntry attributeValue="MS_18minnow1_2ct1806.1@PF08283.10" value="#66CC00"/>
                    <discreteMappingEntry attributeValue="MS_beef_bd3_1_2ct123.2@PF01057.16" value="#66CC00"/>
                    <discreteMappingEntry attributeValue="MS_ct_minnow_6_2ct1282.3@PF01057.16" value="#66CC00"/>
                    <discreteMappingEntry attributeValue="MS_macstool_de2c2_2ct30.6@PF01057.16" value="#66CC00"/>
                    <discreteMappingEntry attributeValue="MS_seabass_ms2_2ct893.2@2HW0_A" value="#66CC00"/>
                    <discreteMappingEntry attributeValue="MS_haddock_1_2ct114.2@PF01057.16" value="#66CC00"/>
                    <discreteMappingEntry attributeValue="MS_crucian1_2ct29.4@PF01057.16" value="#66CC00"/>
                    <discreteMappingEntry attributeValue="MS_seabass_ms2_2ct497.3@PF01057.16" value="#66CC00"/>
                    <discreteMappingEntry attributeValue="MS_redsnapper1_2ct425.2@PF01057.16" value="#66CC00"/>
                    <discreteMappingEntry attributeValue="MS_lamb_2_2ct367.1@PF08283.10" value="#66CC00"/>
                    <discreteMappingEntry attributeValue="MS_seabass_ms2_2ct456.1@PF02407.15" value="#66CC00"/>
                    <discreteMappingEntry attributeValue="MS_seabass_ms2_2ct462.1@1L2M_A" value="#66CC00"/>
                    <discreteMappingEntry attributeValue="MS_raccoonskin1_2ct28.3@1L2M_A" value="#66CC00"/>
                    <discreteMappingEntry attributeValue="MS_apo1_1_2ct82.2@PF08283.10" value="#66CC00"/>
                    <discreteMappingEntry attributeValue="MS_haddock_1_2ct217.2@2HW0_A" value="#66CC00"/>
                    <discreteMappingEntry attributeValue="MS_redsnapper1_2ct526.2@PF01057.16" value="#66CC00"/>
                    <discreteMappingEntry attributeValue="MS_abalone_6_2ct70.2@2HWT_A" value="#66CC00"/>
                    <discreteMappingEntry attributeValue="MS_redsnapper1_2ct219.4@2HW0_A" value="#66CC00"/>
                    <discreteMappingEntry attributeValue="MS_seabass_ms2_2ct506.2@PF02407.15" value="#66CC00"/>
                    <discreteMappingEntry attributeValue="MS_abalone_6_2ct147.2@2HWT_A" value="#66CC00"/>
                    <discreteMappingEntry attributeValue="MS_apo1_1_2ct83.2@PF08283.10" value="#66CC00"/>
                    <discreteMappingEntry attributeValue="MS_beef_bd4_1_2ct128.1@PF01057.16" value="#66CC00"/>
                    <discreteMappingEntry attributeValue="MS_seabass_ms2_2ct428.2@2HW0_A" value="#66CC00"/>
                    <discreteMappingEntry attributeValue="MS_seabass_ms2_2ct750.2@2HW0_A" value="#66CC00"/>
                    <discreteMappingEntry attributeValue="MS_apo1_1_2ct75.2@PF01057.16" value="#66CC00"/>
                    <discreteMappingEntry attributeValue="MS_raccoonskin1_2ct29.1@PF08283.10" value="#66CC00"/>
                    <discreteMappingEntry attributeValue="MS_crucian1_2ct27.3@PF02407.15" value="#66CC00"/>
                    <discreteMappingEntry attributeValue="MS_18minnow1_2ct1817.1@PF08283.10" value="#66CC00"/>
                    <discreteMappingEntry attributeValue="MS_seabass1_r1_2ct003.3@2HWT_A" value="#66CC00"/>
                    <discreteMappingEntry attributeValue="MS_haddock_1_2ct152.3@PF01057.16" value="#66CC00"/>
                    <discreteMappingEntry attributeValue="MS_redsnapper1_2ct560.2@2HWT_A" value="#66CC00"/>
                    <discreteMappingEntry attributeValue="MS_seabass_ms2_2ct590.2@PF01057.16" value="#66CC00"/>
                    <discreteMappingEntry attributeValue="MS_haddock_1_2ct150.3@PF01057.16" value="#66CC00"/>
                    <discreteMappingEntry attributeValue="MS_redsnapper1_2ct756.1@PF01057.16" value="#66CC00"/>
                    <discreteMappingEntry attributeValue="MS_haddock_1_2ct286.2@2HW0_A" value="#66CC00"/>
                    <discreteMappingEntry attributeValue="MS_haddock_1_2ct340.2@1L2M_A" value="#66CC00"/>
                    <discreteMappingEntry attributeValue="MS_abalone_6_2ct66.2@PF02407.15" value="#66CC00"/>
                    <discreteMappingEntry attributeValue="MS_redsnapper1_2ct10.7@PF01057.16" value="#66CC00"/>
                    <discreteMappingEntry attributeValue="MS_lamb_2_2ct406.3@1L2M_A" value="#66CC00"/>
                    <discreteMappingEntry attributeValue="MS_raccoonskin1_2ct37.2@PF01057.16" value="#66CC00"/>
                    <discreteMappingEntry attributeValue="MS_redsnapper_r1_2ct041.1@PF01057.16" value="#66CC00"/>
                    <discreteMappingEntry attributeValue="MS_16minnow_6_2ct1040.4@2HW0_A" value="#66CC00"/>
                    <discreteMappingEntry attributeValue="MS_redsnapper1_2ct540.3@PF01057.16" value="#66CC00"/>
                    <discreteMappingEntry attributeValue="MS_redsnapper1_2ct83.3@PF01057.16" value="#66CC00"/>
                    <discreteMappingEntry attributeValue="MS_crucian1_2ct90.2@2HWT_A" value="#66CC00"/>
                    <discreteMappingEntry attributeValue="MS_rainbowtrout_r1_2ct009.2@PF01057.16" value="#66CC00"/>
                    <discreteMappingEntry attributeValue="MS_redsnapper1_2ct492.1@2HWT_A" value="#66CC00"/>
                    <discreteMappingEntry attributeValue="MS_seabass1_1_2ct241.1@PF02407.15" value="#66CC00"/>
                    <discreteMappingEntry attributeValue="MS_rainbowtrout1_2ct45.2@2HWT_A" value="#66CC00"/>
                    <discreteMappingEntry attributeValue="MS_redsnapper_r1_2ct048.1@2HW0_A" value="#66CC00"/>
                    <discreteMappingEntry attributeValue="MS_seabass_ms2_2ct716.2@PF01057.16" value="#66CC00"/>
                    <discreteMappingEntry attributeValue="MS_apo1_1_2ct139.2@2HW0_A" value="#66CC00"/>
                    <discreteMappingEntry attributeValue="MS_seabass1_1_2ct155.2@PF01057.16" value="#66CC00"/>
                    <discreteMappingEntry attributeValue="MS_crucian1_2ct44.3@PF01057.16" value="#66CC00"/>
                    <discreteMappingEntry attributeValue="MS_seabass_ms2_2ct583.2@2HWT_A" value="#66CC00"/>
                    <discreteMappingEntry attributeValue="MS_macstool_de2c2_2ct71.3@PF01057.16" value="#66CC00"/>
                    <discreteMappingEntry attributeValue="MS_rainbowtrout1_2ct89.2@2HW0_A" value="#66CC00"/>
                    <discreteMappingEntry attributeValue="MS_seabass2_1_2ct41.3@PF01057.16" value="#66CC00"/>
                    <discreteMappingEntry attributeValue="MS_seabass_ms2_2ct813.1@PF01057.16" value="#66CC00"/>
                    <discreteMappingEntry attributeValue="MS_abalone_6_2ct160.3@2HW0_A" value="#66CC00"/>
                    <discreteMappingEntry attributeValue="MS_redsnapper1_2ct758.1@2HW0_A" value="#66CC00"/>
                    <discreteMappingEntry attributeValue="MS_seabass2_r1_2ct002.3@PF01057.16" value="#66CC00"/>
                    <discreteMappingEntry attributeValue="MS_16minnow_6_2ct555.4@1S9H_A" value="#66CC00"/>
                    <discreteMappingEntry attributeValue="MS_seabass_ms2_2ct1003.2@PF00799.19" value="#66CC00"/>
                    <discreteMappingEntry attributeValue="MS_crucian1_2ct75.2@PF02407.15" value="#66CC00"/>
                    <discreteMappingEntry attributeValue="MS_abalone_6_2ct91.2@1L2M_A" value="#66CC00"/>
                    <discreteMappingEntry attributeValue="MS_crab_r1_2ct008.1@PF01057.16" value="#66CC00"/>
                    <discreteMappingEntry attributeValue="MS_redsnapper1_2ct123.2@PF02407.15" value="#66CC00"/>
                    <discreteMappingEntry attributeValue="MS_crucian1_2ct99.2@PF01057.16" value="#66CC00"/>
                    <discreteMappingEntry attributeValue="MS_redsnapper1_2ct181.3@2HW0_A" value="#66CC00"/>
                    <discreteMappingEntry attributeValue="MS_ct_trout_ps_NODE_x1.2@2HW0_A" value="#66CC00"/>
                    <discreteMappingEntry attributeValue="MS_rainbowtrout1_2ct41.2@PF01057.16" value="#66CC00"/>
                    <discreteMappingEntry attributeValue="MS_16minnow_6_2ct1269.4@1L2M_A" value="#66CC00"/>
                    <discreteMappingEntry attributeValue="MS_seabass_ms2_2ct620.3@PF01057.16" value="#66CC00"/>
                    <discreteMappingEntry attributeValue="MS_redsnapper_r1_2ct043.1@2HW0_A" value="#66CC00"/>
                    <discreteMappingEntry attributeValue="MS_16minnow_6_2ct1036.4@PF01057.16" value="#66CC00"/>
                    <discreteMappingEntry attributeValue="MS_18minnow1_2ct1355.2@PF01057.16" value="#66CC00"/>
                    <discreteMappingEntry attributeValue="MS_16minnow_6_2ct1277.1@PF08283.10" value="#66CC00"/>
                    <discreteMappingEntry attributeValue="Nano_MK039132" value="#FF0066"/>
                    <discreteMappingEntry attributeValue="MS_rainbowtrout1_2ct44.3@PF01057.16" value="#66CC00"/>
                    <discreteMappingEntry attributeValue="MS_crab_r1_2ct002.2@PF02407.15" value="#66CC00"/>
                    <discreteMappingEntry attributeValue="MS_redsnapper1_2ct510.2@2HW0_A" value="#66CC00"/>
                    <discreteMappingEntry attributeValue="MS_abalone_6_2ct159.2@2HW0_A" value="#66CC00"/>
                    <discreteMappingEntry attributeValue="MS_haddock_1_2ct259.2@2HWT_A" value="#66CC00"/>
                    <discreteMappingEntry attributeValue="MS_redsnapper_r1_2ct015.2@2HWT_A" value="#66CC00"/>
                    <discreteMappingEntry attributeValue="MS_seabass_ms2_2ct631.2@2HW0_A" value="#66CC00"/>
                    <discreteMappingEntry attributeValue="MS_lamb_2_2ct382.2@PF01057.16" value="#66CC00"/>
                    <discreteMappingEntry attributeValue="MS_pig1_2ct8.1@PF08283.10" value="#66CC00"/>
                    <discreteMappingEntry attributeValue="MS_seabass4_6_2ct145.1@PF02407.15" value="#66CC00"/>
                    <discreteMappingEntry attributeValue="MS_rainbowtrout1_2ct92.2@2HW0_A" value="#66CC00"/>
                    <discreteMappingEntry attributeValue="MS_redsnapper1_2ct578.1@2HWT_A" value="#66CC00"/>
                    <discreteMappingEntry attributeValue="MS_seabass_ms2_2ct492.2@PF01057.16" value="#66CC00"/>
                    <discreteMappingEntry attributeValue="MS_seabass_ms2_2ct710.3@PF01057.16" value="#66CC00"/>
                    <discreteMappingEntry attributeValue="MS_redsnapper1_2ct593.2@PF02407.15" value="#66CC00"/>
                    <discreteMappingEntry attributeValue="MS_redsnapper1_2ct419.3@PF01057.16" value="#66CC00"/>
                    <discreteMappingEntry attributeValue="MS_16minnow_6_2ct1173.4@1L2M_A" value="#66CC00"/>
                    <discreteMappingEntry attributeValue="MS_seabass_ms2_2ct319.2@2HWT_A" value="#66CC00"/>
                    <discreteMappingEntry attributeValue="MS_redsnapper1_2ct296.3@PF01057.16" value="#66CC00"/>
                    <discreteMappingEntry attributeValue="MS_seabass_ms2_2ct501.1@PF02407.15" value="#66CC00"/>
                    <discreteMappingEntry attributeValue="MS_crucian1_2ct20.2@2HW0_A" value="#66CC00"/>
                    <discreteMappingEntry attributeValue="MS_16minnow_6_2ct1122.3@PF01057.16" value="#66CC00"/>
                    <discreteMappingEntry attributeValue="MS_haddock_1_2ct110.4@PF01057.16" value="#66CC00"/>
                    <discreteMappingEntry attributeValue="MS_haddock_1_2ct253.2@2HW0_A" value="#66CC00"/>
                    <discreteMappingEntry attributeValue="MS_beef_bd3_1_2ct106.3@PF01057.16" value="#66CC00"/>
                    <discreteMappingEntry attributeValue="MS_crucian1_2ct32.2@2HW0_A" value="#66CC00"/>
                    <discreteMappingEntry attributeValue="MS_haddock_1_2ct216.2@PF01057.16" value="#66CC00"/>
                    <discreteMappingEntry attributeValue="MS_redsnapper1_2ct17.5@PF01057.16" value="#66CC00"/>
                    <discreteMappingEntry attributeValue="MS_seabass_ms2_2ct773.2@PF01057.16" value="#66CC00"/>
                    <discreteMappingEntry attributeValue="MS_haddock_1_2ct281.3@1L2M_A" value="#66CC00"/>
                    <discreteMappingEntry attributeValue="MS_16minnow_6_2ct1049.4@PF01057.16" value="#66CC00"/>
                    <discreteMappingEntry attributeValue="MS_redsnapper_r1_2ct022.2@PF01057.16" value="#66CC00"/>
                    <discreteMappingEntry attributeValue="MS_seabass3_r1_2ct002.1@PF02407.15" value="#66CC00"/>
                    <discreteMappingEntry attributeValue="MS_redsnapper1_2ct468.2@2HWT_A" value="#66CC00"/>
                    <discreteMappingEntry attributeValue="MS_seabass_ms2_2ct678.1@PF00799.19" value="#66CC00"/>
                    <discreteMappingEntry attributeValue="MS_18minnow1_2ct2000.2@PF02407.15" value="#66CC00"/>
                    <discreteMappingEntry attributeValue="MS_16minnow_6_2ct592.8@2HW0_A" value="#66CC00"/>
                    <discreteMappingEntry attributeValue="MS_beef_bd4_r1_2ct000.1@PF01057.16" value="#66CC00"/>
                    <discreteMappingEntry attributeValue="MS_crucian1_2ct57.3@PF01057.16" value="#66CC00"/>
                    <discreteMappingEntry attributeValue="MS_abalone_6_2ct77.2@PF02407.15" value="#66CC00"/>
                    <discreteMappingEntry attributeValue="MS_haddock_1_2ct163.3@PF01057.16" value="#66CC00"/>
                    <discreteMappingEntry attributeValue="MS_macstool_de1a1_2ct449.1@PF01057.16" value="#66CC00"/>
                    <discreteMappingEntry attributeValue="MS_seabass1_1_2ct205.3@1L2M_A" value="#66CC00"/>
                    <discreteMappingEntry attributeValue="MS_turkey_2ct43.3@PF01057.16" value="#66CC00"/>
                    <discreteMappingEntry attributeValue="MS_16minnow_6_2ct1231.3@PF01057.16" value="#66CC00"/>
                    <discreteMappingEntry attributeValue="MS_redsnapper1_2ct539.2@PF00799.19" value="#66CC00"/>
                    <discreteMappingEntry attributeValue="MS_redsnapper1_2ct101.5@PF01057.16" value="#66CC00"/>
                    <discreteMappingEntry attributeValue="MS_seabass_ms2_2ct691.3@1U0J_A" value="#66CC00"/>
                    <discreteMappingEntry attributeValue="MS_seabass_ms2_2ct560.2@PF02407.15" value="#66CC00"/>
                    <discreteMappingEntry attributeValue="MS_redsnapper1_2ct625.2@2HW0_A" value="#66CC00"/>
                    <discreteMappingEntry attributeValue="MS_apo1_1_2ct78.1@PF08283.10" value="#66CC00"/>
                    <discreteMappingEntry attributeValue="MS_18minnow1_2ct1511.2@2HWT_A" value="#66CC00"/>
                    <discreteMappingEntry attributeValue="MS_crab_r1_2ct005.1@PF01057.16" value="#66CC00"/>
                    <discreteMappingEntry attributeValue="MS_haddock_1_2ct348.3@PF00799.19" value="#66CC00"/>
                    <discreteMappingEntry attributeValue="MS_macstool_cl86_1_2ct25.3@PF01057.16" value="#66CC00"/>
                    <discreteMappingEntry attributeValue="MS_haddock_1_2ct173.3@PF02407.15" value="#66CC00"/>
                    <discreteMappingEntry attributeValue="MS_redsnapper1_2ct447.2@PF00799.19" value="#66CC00"/>
                    <discreteMappingEntry attributeValue="MS_redsnapper1_2ct218.4@2HW0_A" value="#66CC00"/>
                    <discreteMappingEntry attributeValue="MS_seabass_ms2_2ct687.2@PF00799.19" value="#66CC00"/>
                    <discreteMappingEntry attributeValue="MS_rainbowtrout1_2ct112.2@2HW0_A" value="#66CC00"/>
                    <discreteMappingEntry attributeValue="Redon_MK059768" value="#0000FF"/>
                    <discreteMappingEntry attributeValue="Redon_MK059769" value="#0000FF"/>
                    <discreteMappingEntry attributeValue="MS_18minnow1_2ct1966.3@PF01057.16" value="#66CC00"/>
                    <discreteMappingEntry attributeValue="Redon_MK059767" value="#0000FF"/>
                    <discreteMappingEntry attributeValue="MS_redsnapper1_2ct164.2@PF01057.16" value="#66CC00"/>
                    <discreteMappingEntry attributeValue="MS_haddock_1_2ct205.1@PF08283.10" value="#66CC00"/>
                    <discreteMappingEntry attributeValue="MS_seabass1_1_2ct171.2@2HWT_A" value="#66CC00"/>
                    <discreteMappingEntry attributeValue="Redon_MK059760" value="#0000FF"/>
                    <discreteMappingEntry attributeValue="MS_lamb_2_2ct374.1@PF08283.10" value="#66CC00"/>
                    <discreteMappingEntry attributeValue="MS_redsnapper1_2ct19.4@PF01057.16" value="#66CC00"/>
                    <discreteMappingEntry attributeValue="MS_16minnow_6_2ct1266.5@2HW0_A" value="#66CC00"/>
                    <discreteMappingEntry attributeValue="MS_abalone_6_2ct193.2@2HW0_A" value="#66CC00"/>
                    <discreteMappingEntry attributeValue="MS_haddock_1_2ct92.4@2HW0_A" value="#66CC00"/>
                    <discreteMappingEntry attributeValue="MS_seabass3_1_2ct12.4@2HW0_A" value="#66CC00"/>
                    <discreteMappingEntry attributeValue="MS_crucian1_2ct25.4@PF01057.16" value="#66CC00"/>
                    <discreteMappingEntry attributeValue="MS_abalone_6_2ct128.2@PF01057.16" value="#66CC00"/>
                    <discreteMappingEntry attributeValue="MS_redsnapper1_2ct269.1@PF00799.19" value="#66CC00"/>
                    <discreteMappingEntry attributeValue="MS_seabass_ms2_2ct825.2@PF01057.16" value="#66CC00"/>
                    <discreteMappingEntry attributeValue="MS_crab_r1_2ct000.2@PF01057.16" value="#66CC00"/>
                    <discreteMappingEntry attributeValue="MS_haddock_1_2ct325.1@2HW0_A" value="#66CC00"/>
                    <discreteMappingEntry attributeValue="MS_haddock_1_2ct236.2@2HW0_A" value="#66CC00"/>
                    <discreteMappingEntry attributeValue="MS_axolotl_blastema1_2ct10.4@PF01057.16" value="#66CC00"/>
                    <discreteMappingEntry attributeValue="MS_16minnow_6_2ct1299.3@1L2M_A" value="#66CC00"/>
                    <discreteMappingEntry attributeValue="Redon_KY052047" value="#0000FF"/>
                    <discreteMappingEntry attributeValue="MS_seabass_ms2_2ct728.2@PF02407.15" value="#66CC00"/>
                    <discreteMappingEntry attributeValue="MS_abalone_6_2ct166.2@PF01057.16" value="#66CC00"/>
                    <discreteMappingEntry attributeValue="MS_apo1_1_2ct80.1@PF08283.10" value="#66CC00"/>
                    <discreteMappingEntry attributeValue="MS_redsnapper1_2ct245.2@PF02407.15" value="#66CC00"/>
                    <discreteMappingEntry attributeValue="MS_seabass_ms2_2ct701.1@1L2M_A" value="#66CC00"/>
                    <discreteMappingEntry attributeValue="Nano_LC019722" value="#FF0066"/>
                    <discreteMappingEntry attributeValue="MS_redsnapper1_2ct590.2@PF02407.15" value="#66CC00"/>
                    <discreteMappingEntry attributeValue="Redon_MK059771" value="#0000FF"/>
                    <discreteMappingEntry attributeValue="Redon_MK059772" value="#0000FF"/>
                    <discreteMappingEntry attributeValue="Redon_MK059770" value="#0000FF"/>
                    <discreteMappingEntry attributeValue="MS_16minnow_6_2ct1059.3@PF01057.16" value="#66CC00"/>
                    <discreteMappingEntry attributeValue="MS_crucian1_2ct58.3@2HW0_A" value="#66CC00"/>
                    <discreteMappingEntry attributeValue="MS_16minnow_6_2ct1223.3@PF08283.10" value="#66CC00"/>
                    <discreteMappingEntry attributeValue="MS_haddock_1_2ct269.2@PF01057.16" value="#66CC00"/>
                    <discreteMappingEntry attributeValue="MS_abalone_6_2ct124.2@1L2M_A" value="#66CC00"/>
                    <discreteMappingEntry attributeValue="MS_apo1_1_2ct89.2@PF01057.16" value="#66CC00"/>
                    <discreteMappingEntry attributeValue="MS_beef_bd3_1_2ct120.2@PF01057.16" value="#66CC00"/>
                    <discreteMappingEntry attributeValue="MS_bison1_1_2ct52.3@1L2M_A" value="#66CC00"/>
                    <discreteMappingEntry attributeValue="MS_redsnapper1_2ct805.1@2HWT_A" value="#66CC00"/>
                    <discreteMappingEntry attributeValue="MS_seabass_ms2_2ct686.3@2HWT_A" value="#66CC00"/>
                    <discreteMappingEntry attributeValue="MS_redsnapper1_2ct422.2@2HW0_A" value="#66CC00"/>
                    <discreteMappingEntry attributeValue="MS_abalone_6_2ct153.3@PF01057.16" value="#66CC00"/>
                    <discreteMappingEntry attributeValue="MS_seabass2_1_2ct41.4@PF01057.16" value="#66CC00"/>
                    <discreteMappingEntry attributeValue="MS_seabass_ms2_2ct688.2@2HW0_A" value="#66CC00"/>
                    <discreteMappingEntry attributeValue="MS_abalone_6_2ct208.2@2HWT_A" value="#66CC00"/>
                    <discreteMappingEntry attributeValue="MS_seabass_ms2_2ct805.4@1L2M_A" value="#66CC00"/>
                    <discreteMappingEntry attributeValue="MS_16minnow_6_2ct1375.2@PF02407.15" value="#66CC00"/>
                    <discreteMappingEntry attributeValue="MS_redsnapper1_2ct655.1@PF00799.19" value="#66CC00"/>
                    <discreteMappingEntry attributeValue="MS_lamb_2_2ct274.3@PF01057.16" value="#66CC00"/>
                    <discreteMappingEntry attributeValue="MS_apo2_7_2ct29.4@PF01057.16" value="#66CC00"/>
                    <discreteMappingEntry attributeValue="MS_abalone_6_2ct83.3@2HWT_A" value="#66CC00"/>
                    <discreteMappingEntry attributeValue="MS_crucian1_2ct54.3@PF01057.16" value="#66CC00"/>
                    <discreteMappingEntry attributeValue="MS_18minnow1_2ct1815.2@PF01057.16" value="#66CC00"/>
                    <discreteMappingEntry attributeValue="MS_ct_haddock_1_2ct293.3@PF01057.16" value="#66CC00"/>
                    <discreteMappingEntry attributeValue="MS_redsnapper1_2ct544.3@1L2M_A" value="#66CC00"/>
                    <discreteMappingEntry attributeValue="MS_redsnapper1_2ct662.1@1L2M_A" value="#66CC00"/>
                    <discreteMappingEntry attributeValue="Nano_L32166" value="#FF0066"/>
                    <discreteMappingEntry attributeValue="MS_mice_vagnl_1_2ct5.7@2HWT_A" value="#66CC00"/>
                    <discreteMappingEntry attributeValue="MS_apo1_1_2ct55.3@PF01057.16" value="#66CC00"/>
                    <discreteMappingEntry attributeValue="MS_redsnapper1_2ct516.3@2HW0_A" value="#66CC00"/>
                    <discreteMappingEntry attributeValue="Redon_MK059757" value="#0000FF"/>
                    <discreteMappingEntry attributeValue="MS_18minnow1_2ct2010.4@PF01057.16" value="#66CC00"/>
                    <discreteMappingEntry attributeValue="MS_redsnapper_r1_2ct045.1@PF01057.16" value="#66CC00"/>
                    <discreteMappingEntry attributeValue="MS_abalone_6_2ct138.3@PF01057.16" value="#66CC00"/>
                    <discreteMappingEntry attributeValue="Redon_MK059754" value="#0000FF"/>
                    <discreteMappingEntry attributeValue="MS_seabass_ms2_2ct894.1@PF02407.15" value="#66CC00"/>
                    <discreteMappingEntry attributeValue="MS_16minnow_6_2ct1252.2@PF08283.10" value="#66CC00"/>
                    <discreteMappingEntry attributeValue="MS_redsnapper1_2ct537.2@PF02407.15" value="#66CC00"/>
                    <discreteMappingEntry attributeValue="MS_redsnapper1_2ct509.2@PF01057.16" value="#66CC00"/>
                    <discreteMappingEntry attributeValue="MS_18minnow1_2ct2272.2@PF02407.15" value="#66CC00"/>
                    <discreteMappingEntry attributeValue="MS_redsnapper1_2ct159.1@1L2M_A" value="#66CC00"/>
                    <discreteMappingEntry attributeValue="MS_16minnow_6_2ct466.6@1U0J_A" value="#66CC00"/>
                    <discreteMappingEntry attributeValue="MS_raccoonskin1_2ct40.2@PF02407.15" value="#66CC00"/>
                    <discreteMappingEntry attributeValue="MS_redsnapper1_2ct431.2@PF01057.16" value="#66CC00"/>
                    <discreteMappingEntry attributeValue="MS_haddock_1_2ct234.2@2HWT_A" value="#66CC00"/>
                    <discreteMappingEntry attributeValue="MS_seabass_ms2_2ct693.2@2HW0_A" value="#66CC00"/>
                    <discreteMappingEntry attributeValue="MS_haddock_1_2ct181.1@PF02407.15" value="#66CC00"/>
                    <discreteMappingEntry attributeValue="MS_seabass_ms2_2ct880.2@PF02407.15" value="#66CC00"/>
                    <discreteMappingEntry attributeValue="MS_abalone_6_2ct127.2@2HWT_A" value="#66CC00"/>
                    <discreteMappingEntry attributeValue="MS_abalone_6_2ct129.3@PF01057.16" value="#66CC00"/>
                    <discreteMappingEntry attributeValue="MS_rainbowtrout1_2ct78.1@PF08283.10" value="#66CC00"/>
                    <discreteMappingEntry attributeValue="MS_18minnow1_2ct1306.4@PF01057.16" value="#66CC00"/>
                    <discreteMappingEntry attributeValue="MS_seabass1_1_2ct147.1@2HWT_A" value="#66CC00"/>
                    <discreteMappingEntry attributeValue="MS_apo1_1_2ct66.1@PF08283.10" value="#66CC00"/>
                    <discreteMappingEntry attributeValue="MS_abalone_6_2ct107.2@PF01057.16" value="#66CC00"/>
                    <discreteMappingEntry attributeValue="MS_ct_abalone_6_2ct180.3@PF01057.16" value="#66CC00"/>
                    <discreteMappingEntry attributeValue="MS_seabass_ms2_2ct314.2@PF01057.16" value="#66CC00"/>
                    <discreteMappingEntry attributeValue="MS_18minnow1_2ct1860.2@2HW0_A" value="#66CC00"/>
                    <discreteMappingEntry attributeValue="MS_haddock_1_2ct220.2@PF01057.16" value="#66CC00"/>
                    <discreteMappingEntry attributeValue="MS_abalone_6_2ct20.5@2HW0_A" value="#66CC00"/>
                    <discreteMappingEntry attributeValue="MS_18minnow1_2ct2039.1@PF01057.16" value="#66CC00"/>
                    <discreteMappingEntry attributeValue="MS_abalone_6_2ct126.2@PF01057.16" value="#66CC00"/>
                    <discreteMappingEntry attributeValue="MS_redsnapper_r1_2ct052.1@2HW0_A" value="#66CC00"/>
                    <discreteMappingEntry attributeValue="MS_redsnapper1_2ct638.2@PF01057.16" value="#66CC00"/>
                    <discreteMappingEntry attributeValue="MS_16minnow_6_2ct1485.1@2HWT_A" value="#66CC00"/>
                    <discreteMappingEntry attributeValue="MS_haddock_1_2ct229.2@PF01057.16" value="#66CC00"/>
                    <discreteMappingEntry attributeValue="MS_redsnapper1_2ct213.2@PF01057.16" value="#66CC00"/>
                    <discreteMappingEntry attributeValue="MS_haddock_1_2ct111.2@PF01057.16" value="#66CC00"/>
                    <discreteMappingEntry attributeValue="MS_raccoonskin1_2ct30.2@PF01057.16" value="#66CC00"/>
                    <discreteMappingEntry attributeValue="MS_18minnow1_2ct1955.2@2HW0_A" value="#66CC00"/>
                    <discreteMappingEntry attributeValue="MS_apo2_7_2ct38.1@PF08283.10" value="#66CC00"/>
                    <discreteMappingEntry attributeValue="MS_haddock_1_2ct258.2@PF02407.15" value="#66CC00"/>
                    <discreteMappingEntry attributeValue="MS_redsnapper1_2ct551.2@PF02407.15" value="#66CC00"/>
                    <discreteMappingEntry attributeValue="MS_redsnapper1_2ct521.2@PF01057.16" value="#66CC00"/>
                    <discreteMappingEntry attributeValue="MS_turkey_2ct70.2@PF01057.16" value="#66CC00"/>
                    <discreteMappingEntry attributeValue="MS_redsnapper1_2ct529.2@PF01057.16" value="#66CC00"/>
                    <discreteMappingEntry attributeValue="MS_crucian1_2ct88.1@2HWT_A" value="#66CC00"/>
                    <discreteMappingEntry attributeValue="MS_seabass_ms2_2ct610.2@PF01057.16" value="#66CC00"/>
                    <discreteMappingEntry attributeValue="MS_apo2_7_2ct37.1@PF08283.10" value="#66CC00"/>
                    <discreteMappingEntry attributeValue="MS_seabass1_1_2ct164.2@PF02407.15" value="#66CC00"/>
                    <discreteMappingEntry attributeValue="MS_abalone_6_2ct19.5@2HWT_A" value="#66CC00"/>
                    <discreteMappingEntry attributeValue="MS_rainbowtrout_r1_2ct003.2@PF02407.15" value="#66CC00"/>
                    <discreteMappingEntry attributeValue="MS_abalone_6_2ct141.3@PF01057.16" value="#66CC00"/>
                    <discreteMappingEntry attributeValue="MS_redsnapper1_2ct496.3@2HWT_A" value="#66CC00"/>
                    <discreteMappingEntry attributeValue="MS_rainbowtrout1_2ct98.2@2HW0_A" value="#66CC00"/>
                    <discreteMappingEntry attributeValue="MS_16minnow_6_2ct1225.2@PF01057.16" value="#66CC00"/>
                    <discreteMappingEntry attributeValue="MS_crucian1_2ct21.5@PF01057.16" value="#66CC00"/>
                    <discreteMappingEntry attributeValue="MS_abalone_6_2ct168.2@1L2M_A" value="#66CC00"/>
                    <discreteMappingEntry attributeValue="MS_abalone_6_2ct81.2@PF02407.15" value="#66CC00"/>
                    <discreteMappingEntry attributeValue="MS_crucian1_2ct94.2@PF01057.16" value="#66CC00"/>
                    <discreteMappingEntry attributeValue="MS_16minnow_6_2ct1364.2@PF01057.16" value="#66CC00"/>
                    <discreteMappingEntry attributeValue="MS_crucian1_2ct80.1@PF00799.19" value="#66CC00"/>
                    <discreteMappingEntry attributeValue="MS_seabass_ms2_2ct641.2@PF01057.16" value="#66CC00"/>
                    <discreteMappingEntry attributeValue="MS_16minnow_6_2ct1286.2@PF01057.16" value="#66CC00"/>
                    <discreteMappingEntry attributeValue="MS_macstool_de2c2_2ct70.3@PF01057.16" value="#66CC00"/>
                    <discreteMappingEntry attributeValue="MS_seabass_ms2_2ct708.3@PF02407.15" value="#66CC00"/>
                    <discreteMappingEntry attributeValue="MS_redsnapper1_2ct547.2@2HW0_A" value="#66CC00"/>
                    <discreteMappingEntry attributeValue="MS_redsnapper1_2ct771.1@2HW0_A" value="#66CC00"/>
                    <discreteMappingEntry attributeValue="MS_haddock_1_2ct214.1@PF08283.10" value="#66CC00"/>
                    <discreteMappingEntry attributeValue="MS_haddock_1_2ct248.2@PF02407.15" value="#66CC00"/>
                    <discreteMappingEntry attributeValue="MS_abalone_6_2ct71.2@2HWT_A" value="#66CC00"/>
                    <discreteMappingEntry attributeValue="MS_abalone_6_2ct103.2@2HW0_A" value="#66CC00"/>
                    <discreteMappingEntry attributeValue="MS_redsnapper1_2ct109.4@PF01057.16" value="#66CC00"/>
                    <discreteMappingEntry attributeValue="MS_abalone_6_2ct52.3@2HW0_A" value="#66CC00"/>
                    <discreteMappingEntry attributeValue="MS_redsnapper1_2ct205.4@2HWT_A" value="#66CC00"/>
                    <discreteMappingEntry attributeValue="MS_redsnapper1_2ct29.3@PF01057.16" value="#66CC00"/>
                    <discreteMappingEntry attributeValue="MS_rainbowtrout1_2ct88.2@2HW0_A" value="#66CC00"/>
                    <discreteMappingEntry attributeValue="MS_rainbowtrout1_2ct72.1@PF01057.16" value="#66CC00"/>
                    <discreteMappingEntry attributeValue="MS_abalone_6_2ct135.2@PF00799.19" value="#66CC00"/>
                    <discreteMappingEntry attributeValue="MS_seabass_ms2_2ct748.2@PF01057.16" value="#66CC00"/>
                    <discreteMappingEntry attributeValue="MS_haddock_1_2ct185.3@PF01057.16" value="#66CC00"/>
                    <discreteMappingEntry attributeValue="MS_crucian1_2ct64.2@2HWT_A" value="#66CC00"/>
                    <discreteMappingEntry attributeValue="MS_16minnow_6_2ct1015.3@2HWT_A" value="#66CC00"/>
                    <discreteMappingEntry attributeValue="MS_18minnow1_2ct1782.2@1L2M_A" value="#66CC00"/>
                    <discreteMappingEntry attributeValue="MS_redsnapper1_2ct76.5@PF01057.16" value="#66CC00"/>
                    <discreteMappingEntry attributeValue="MS_abalone_6_2ct80.2@PF08283.10" value="#66CC00"/>
                    <discreteMappingEntry attributeValue="MS_seabass_ms2_2ct799.2@PF01057.16" value="#66CC00"/>
                    <discreteMappingEntry attributeValue="MS_haddock_1_2ct285.2@1L2M_A" value="#66CC00"/>
                    <discreteMappingEntry attributeValue="MS_raccoonskin1_2ct58.2@PF02407.15" value="#66CC00"/>
                    <discreteMappingEntry attributeValue="MS_redsnapper_r1_2ct029.3@2HW0_A" value="#66CC00"/>
                    <discreteMappingEntry attributeValue="MS_abalone_6_2ct139.3@PF01057.16" value="#66CC00"/>
                    <discreteMappingEntry attributeValue="MS_seabass2_1_2ct51.2@2HWT_A" value="#66CC00"/>
                    <discreteMappingEntry attributeValue="MS_crucian1_2ct81.2@2HW0_A" value="#66CC00"/>
                    <discreteMappingEntry attributeValue="MS_abalone_6_2ct186.1@PF01057.16" value="#66CC00"/>
                    <discreteMappingEntry attributeValue="MS_crucian1_2ct43.2@PF01057.16" value="#66CC00"/>
                    <discreteMappingEntry attributeValue="MS_haddock_1_2ct261.2@PF02407.15" value="#66CC00"/>
                    <discreteMappingEntry attributeValue="MS_redsnapper1_2ct199.2@2HWT_A" value="#66CC00"/>
                    <discreteMappingEntry attributeValue="MS_seabass3_1_2ct8.2@2HWT_A" value="#66CC00"/>
                    <discreteMappingEntry attributeValue="MS_redsnapper1_2ct202.3@2HW0_A" value="#66CC00"/>
                    <discreteMappingEntry attributeValue="MS_seabass_ms2_2ct758.2@PF01057.16" value="#66CC00"/>
                    <discreteMappingEntry attributeValue="MS_16minnow_6_2ct1037.5@PF01057.16" value="#66CC00"/>
                    <discreteMappingEntry attributeValue="MS_16minnow_6_2ct1280.2@PF02407.15" value="#66CC00"/>
                    <discreteMappingEntry attributeValue="MS_redsnapper1_2ct546.2@2HW0_A" value="#66CC00"/>
                    <discreteMappingEntry attributeValue="MS_redsnapper_r1_2ct050.2@PF01057.16" value="#66CC00"/>
                    <discreteMappingEntry attributeValue="MS_apo1_1_2ct72.1@PF08283.10" value="#66CC00"/>
                    <discreteMappingEntry attributeValue="MS_16minnow_6_2ct1218.1@PF08283.10" value="#66CC00"/>
                    <discreteMappingEntry attributeValue="MS_apo1_1_2ct63.3@2HW0_A" value="#66CC00"/>
                    <discreteMappingEntry attributeValue="MS_seabass_ms2_2ct645.2@PF02407.15" value="#66CC00"/>
                    <discreteMappingEntry attributeValue="MS_18minnow1_2ct1485.5@PF01057.16" value="#66CC00"/>
                    <discreteMappingEntry attributeValue="MS_seabass_ms2_2ct576.2@PF01057.16" value="#66CC00"/>
                    <discreteMappingEntry attributeValue="MS_seabass_ms2_2ct619.1@PF00799.19" value="#66CC00"/>
                    <discreteMappingEntry attributeValue="MS_crucian1_2ct19.3@PF01057.16" value="#66CC00"/>
                    <discreteMappingEntry attributeValue="MS_redsnapper1_2ct545.2@PF02407.15" value="#66CC00"/>
                    <discreteMappingEntry attributeValue="MS_seabass_ms2_2ct593.2@2HWT_A" value="#66CC00"/>
                    <discreteMappingEntry attributeValue="MS_seabass1_r1_2ct011.1@PF01057.16" value="#66CC00"/>
                    <discreteMappingEntry attributeValue="MS_seabass3_1_2ct27.3@2HW0_A" value="#66CC00"/>
                    <discreteMappingEntry attributeValue="MS_redsnapper1_2ct156.3@2HW0_A" value="#66CC00"/>
                    <discreteMappingEntry attributeValue="MS_seabass_ms2_2ct697.2@1L2M_A" value="#66CC00"/>
                    <discreteMappingEntry attributeValue="MS_16minnow_6_2ct1087.5@2HW0_A" value="#66CC00"/>
                    <discreteMappingEntry attributeValue="MS_16minnow_6_2ct1270.3@1L2M_A" value="#66CC00"/>
                    <discreteMappingEntry attributeValue="MS_crucian1_2ct78.1@PF00799.19" value="#66CC00"/>
                    <discreteMappingEntry attributeValue="MS_rainbowtrout1_2ct84.3@PF01057.16" value="#66CC00"/>
                    <discreteMappingEntry attributeValue="MS_abalone_6_2ct217.2@PF00799.19" value="#66CC00"/>
                    <discreteMappingEntry attributeValue="MS_abalone_6_2ct226.2@PF01057.16" value="#66CC00"/>
                    <discreteMappingEntry attributeValue="MS_crucian1_2ct50.3@PF01057.16" value="#66CC00"/>
                    <discreteMappingEntry attributeValue="MS_seabass3_r1_2ct007.1@PF01057.16" value="#66CC00"/>
                    <discreteMappingEntry attributeValue="MS_seabass_ms2_2ct821.2@PF01057.16" value="#66CC00"/>
                    <discreteMappingEntry attributeValue="MS_redsnapper1_2ct358.3@PF01057.16" value="#66CC00"/>
                    <discreteMappingEntry attributeValue="MS_redsnapper1_2ct80.4@PF01057.16" value="#66CC00"/>
                    <discreteMappingEntry attributeValue="MS_16minnow_6_2ct1169.2@PF01057.16" value="#66CC00"/>
                    <discreteMappingEntry attributeValue="MS_redsnapper1_2ct300.3@PF01057.16" value="#66CC00"/>
                    <discreteMappingEntry attributeValue="MS_redsnapper1_2ct142.4@2HW0_A" value="#66CC00"/>
                    <discreteMappingEntry attributeValue="MS_rainbowtrout1_2ct137.1@PF02407.15" value="#66CC00"/>
                    <discreteMappingEntry attributeValue="MS_rainbowtrout1_2ct47.2@PF01057.16" value="#66CC00"/>
                    <discreteMappingEntry attributeValue="MS_18minnow1_2ct2152.2@2HWT_A" value="#66CC00"/>
                    <discreteMappingEntry attributeValue="MS_raccoonskin1_2ct42.1@2HWT_A" value="#66CC00"/>
                    <discreteMappingEntry attributeValue="MS_seabass_ms2_2ct663.2@2HWT_A" value="#66CC00"/>
                    <discreteMappingEntry attributeValue="MS_16minnow_6_2ct1362.3@PF01057.16" value="#66CC00"/>
                    <discreteMappingEntry attributeValue="MS_bison2_7_2ct77.2@PF08283.10" value="#66CC00"/>
                    <discreteMappingEntry attributeValue="MS_seabass1_1_2ct128.2@PF01057.16" value="#66CC00"/>
                    <discreteMappingEntry attributeValue="MS_haddock_1_2ct207.2@PF08283.10" value="#66CC00"/>
                    <discreteMappingEntry attributeValue="MS_18minnow1_2ct1329.5@PF01057.16" value="#66CC00"/>
                    <discreteMappingEntry attributeValue="MS_18minnow1_2ct1823.1@PF08283.10" value="#66CC00"/>
                    <discreteMappingEntry attributeValue="MS_apo1_1_2ct71.1@PF08283.10" value="#66CC00"/>
                    <discreteMappingEntry attributeValue="MS_crucian1_2ct22.4@PF01057.16" value="#66CC00"/>
                    <discreteMappingEntry attributeValue="MS_16minnow_6_2ct1242.2@PF08283.10" value="#66CC00"/>
                    <discreteMappingEntry attributeValue="MS_16minnow_6_2ct1312.2@PF01057.16" value="#66CC00"/>
                    <discreteMappingEntry attributeValue="MS_redsnapper1_2ct622.2@PF02407.15" value="#66CC00"/>
                    <discreteMappingEntry attributeValue="MS_16minnow_6_2ct1008.6@PF01057.16" value="#66CC00"/>
                    <discreteMappingEntry attributeValue="MS_haddock_1_2ct312.2@PF02407.15" value="#66CC00"/>
                    <discreteMappingEntry attributeValue="MS_16minnow_6_2ct978.3@PF01057.16" value="#66CC00"/>
                    <discreteMappingEntry attributeValue="MS_redsnapper1_2ct589.2@PF01057.16" value="#66CC00"/>
                    <discreteMappingEntry attributeValue="MS_seabass_ms2_2ct743.3@2HW0_A" value="#66CC00"/>
                    <discreteMappingEntry attributeValue="MS_apo1_1_2ct79.2@PF08283.10" value="#66CC00"/>
                    <discreteMappingEntry attributeValue="MS_abalone_6_2ct163.3@PF01057.16" value="#66CC00"/>
                    <discreteMappingEntry attributeValue="MS_16minnow_6_2ct1184.3@PF01057.16" value="#66CC00"/>
                    <discreteMappingEntry attributeValue="MS_abalone_6_2ct115.2@2HW0_A" value="#66CC00"/>
                    <discreteMappingEntry attributeValue="MS_seabass_ms2_2ct564.2@2HW0_A" value="#66CC00"/>
                    <discreteMappingEntry attributeValue="MS_abalone_6_2ct67.4@2HWT_A" value="#66CC00"/>
                    <discreteMappingEntry attributeValue="MS_apo1_1_2ct73.1@PF08283.10" value="#66CC00"/>
                    <discreteMappingEntry attributeValue="MS_16minnow_6_2ct940.5@PF01057.16" value="#66CC00"/>
                    <discreteMappingEntry attributeValue="MS_redsnapper1_2ct26.4@PF01057.16" value="#66CC00"/>
                    <discreteMappingEntry attributeValue="MS_redsnapper1_2ct110.3@PF01057.16" value="#66CC00"/>
                    <discreteMappingEntry attributeValue="MS_redsnapper1_2ct161.2@PF01057.16" value="#66CC00"/>
                    <discreteMappingEntry attributeValue="MS_seabass_ms2_2ct579.2@PF02407.15" value="#66CC00"/>
                    <discreteMappingEntry attributeValue="MS_seabass_ms2_2ct919.2@1L2M_A" value="#66CC00"/>
                    <discreteMappingEntry attributeValue="MS_redsnapper1_2ct534.2@PF00799.19" value="#66CC00"/>
                    <discreteMappingEntry attributeValue="MS_seabass_ms2_2ct840.1@PF00799.19" value="#66CC00"/>
                    <discreteMappingEntry attributeValue="MS_abalone_6_2ct219.1@2HW0_A" value="#66CC00"/>
                    <discreteMappingEntry attributeValue="MS_ct_seabass2_1_2ct54.3@PF01057.16" value="#66CC00"/>
                    <discreteMappingEntry attributeValue="MS_apo1_1_2ct69.2@PF08283.10" value="#66CC00"/>
                    <discreteMappingEntry attributeValue="MS_abalone_6_2ct73.2@2HWT_A" value="#66CC00"/>
                    <discreteMappingEntry attributeValue="MS_bison1_1_2ct84.1@PF01057.16" value="#66CC00"/>
                    <discreteMappingEntry attributeValue="MS_haddock_1_2ct356.1@1L2M_A" value="#66CC00"/>
                    <discreteMappingEntry attributeValue="MS_crucian1_2ct4.5@PF01057.16" value="#66CC00"/>
                    <discreteMappingEntry attributeValue="MS_redsnapper1_2ct567.2@PF01057.16" value="#66CC00"/>
                    <discreteMappingEntry attributeValue="MS_apo1_1_2ct70.1@PF08283.10" value="#66CC00"/>
                    <discreteMappingEntry attributeValue="MS_redsnapper1_2ct298.2@PF01057.16" value="#66CC00"/>
                    <discreteMappingEntry attributeValue="MS_seabass2_1_2ct41.3@2HWT_A" value="#66CC00"/>
                    <discreteMappingEntry attributeValue="MS_apo1_1_2ct86.3@PF01057.16" value="#66CC00"/>
                    <discreteMappingEntry attributeValue="MS_16minnow_6_2ct749.2@PF01057.16" value="#66CC00"/>
                    <discreteMappingEntry attributeValue="MS_QCW23735.1@PF08283.10" value="#66CC00"/>
                    <discreteMappingEntry attributeValue="MS_10mus_7_2ct88.1@PF08283.10" value="#66CC00"/>
                    <discreteMappingEntry attributeValue="MS_16minnow_6_2ct1370.2@1L2M_A" value="#66CC00"/>
                    <discreteMappingEntry attributeValue="MS_abalone_6_2ct44.4@PF01057.16" value="#66CC00"/>
                    <discreteMappingEntry attributeValue="MS_abalone_6_2ct164.3@1L2M_A" value="#66CC00"/>
                    <discreteMappingEntry attributeValue="MS_crucian1_2ct34.2@PF01057.16" value="#66CC00"/>
                    <discreteMappingEntry attributeValue="MS_redsnapper1_2ct399.2@PF02407.15" value="#66CC00"/>
                    <discreteMappingEntry attributeValue="MS_seabass_ms2_2ct668.2@PF01057.16" value="#66CC00"/>
                    <discreteMappingEntry attributeValue="MS_abalone_6_2ct130.2@2HW0_A" value="#66CC00"/>
                    <discreteMappingEntry attributeValue="MS_18minnow1_2ct1318.3@1L2M_A" value="#66CC00"/>
                    <discreteMappingEntry attributeValue="MS_abalone_6_2ct111.2@PF01057.16" value="#66CC00"/>
                    <discreteMappingEntry attributeValue="MS_haddock_1_2ct313.2@PF00799.19" value="#66CC00"/>
                    <discreteMappingEntry attributeValue="MS_rainbowtrout_r1_2ct002.4@PF01057.16" value="#66CC00"/>
                    <discreteMappingEntry attributeValue="MS_apo1_1_2ct81.1@PF08283.10" value="#66CC00"/>
                    <discreteMappingEntry attributeValue="MS_crucian1_2ct38.2@PF01057.16" value="#66CC00"/>
                    <discreteMappingEntry attributeValue="MS_abalone_6_2ct206.2@PF00799.19" value="#66CC00"/>
                    <discreteMappingEntry attributeValue="MS_abalone_6_2ct89.2@PF08283.10" value="#66CC00"/>
                    <discreteMappingEntry attributeValue="MS_abalone_6_2ct18.3@PF01057.16" value="#66CC00"/>
                    <discreteMappingEntry attributeValue="MS_QCW23737.1@1L2M_A" value="#66CC00"/>
                    <discreteMappingEntry attributeValue="MS_redsnapper_r1_2ct017.3@2HWT_A" value="#66CC00"/>
                    <discreteMappingEntry attributeValue="MS_seabass4_6_2ct130.1@PF02407.15" value="#66CC00"/>
                    <discreteMappingEntry attributeValue="MS_seabass_ms2_2ct664.2@PF01057.16" value="#66CC00"/>
                    <discreteMappingEntry attributeValue="MS_haddock_1_2ct375.1@2HWT_A" value="#66CC00"/>
                    <discreteMappingEntry attributeValue="MS_beef_bd4_1_2ct88.2@PF08283.10" value="#66CC00"/>
                    <discreteMappingEntry attributeValue="MS_seabass_ms2_2ct296.3@2HW0_A" value="#66CC00"/>
                    <discreteMappingEntry attributeValue="Redon_KY349925" value="#0000FF"/>
                    <discreteMappingEntry attributeValue="MS_redsnapper_r1_2ct047.1@2HW0_A" value="#66CC00"/>
                    <discreteMappingEntry attributeValue="MS_16minnow_6_2ct1109.3@PF01057.16" value="#66CC00"/>
                    <discreteMappingEntry attributeValue="MS_macstool_de1a1_2ct254.3@PF01057.16" value="#66CC00"/>
                    <discreteMappingEntry attributeValue="MS_crucian1_2ct7.8@PF01057.16" value="#66CC00"/>
                    <discreteMappingEntry attributeValue="MS_rainbowtrout1_2ct56.2@PF01057.16" value="#66CC00"/>
                    <discreteMappingEntry attributeValue="MS_abalone_6_2ct47.4@2HWT_A" value="#66CC00"/>
                    <discreteMappingEntry attributeValue="MS_16minnow_6_2ct1275.2@PF08283.10" value="#66CC00"/>
                    <discreteMappingEntry attributeValue="MS_seabass_ms2_2ct365.5@PF01057.16" value="#66CC00"/>
                    <discreteMappingEntry attributeValue="MS_haddock_1_2ct107.5@2HWT_A" value="#66CC00"/>
                    <discreteMappingEntry attributeValue="MS_abalone_6_2ct157.2@PF08283.10" value="#66CC00"/>
                    <discreteMappingEntry attributeValue="MS_abalone_6_2ct237.2@PF02407.15" value="#66CC00"/>
                    <discreteMappingEntry attributeValue="MS_rainbowtrout1_2ct46.4@PF01057.16" value="#66CC00"/>
                    <discreteMappingEntry attributeValue="MS_crucian1_2ct59.4@PF01057.16" value="#66CC00"/>
                    <discreteMappingEntry attributeValue="MS_seabass_ms2_2ct858.2@PF02407.15" value="#66CC00"/>
                    <discreteMappingEntry attributeValue="MS_haddock_1_2ct231.2@PF00799.19" value="#66CC00"/>
                    <discreteMappingEntry attributeValue="MS_seabass_ms2_2ct458.3@2HW0_A" value="#66CC00"/>
                    <discreteMappingEntry attributeValue="MS_redsnapper1_2ct396.2@PF01057.16" value="#66CC00"/>
                    <discreteMappingEntry attributeValue="MS_seabass_ms2_2ct496.2@1L2M_A" value="#66CC00"/>
                    <discreteMappingEntry attributeValue="MS_seabass_ms2_2ct588.2@PF02407.15" value="#66CC00"/>
                    <discreteMappingEntry attributeValue="MS_redsnapper1_2ct347.2@2HWT_A" value="#66CC00"/>
                    <discreteMappingEntry attributeValue="MS_apo1_1_2ct76.2@PF08283.10" value="#66CC00"/>
                    <discreteMappingEntry attributeValue="MS_crucian1_2ct55.2@PF01057.16" value="#66CC00"/>
                    <discreteMappingEntry attributeValue="MS_16minnow_6_2ct1219.2@2HWT_A" value="#66CC00"/>
                    <discreteMappingEntry attributeValue="MS_abalone_6_2ct114.2@PF02407.15" value="#66CC00"/>
                    <discreteMappingEntry attributeValue="MS_seabass_ms2_2ct659.2@2HWT_A" value="#66CC00"/>
                    <discreteMappingEntry attributeValue="MS_apo1_1_2ct74.1@PF08283.10" value="#66CC00"/>
                    <discreteMappingEntry attributeValue="MS_apo2_7_2ct58.1@PF01057.16" value="#66CC00"/>
                    <discreteMappingEntry attributeValue="MS_16minnow_6_2ct469.6@PF01057.16" value="#66CC00"/>
                    <discreteMappingEntry attributeValue="MS_seabass_ms2_2ct698.2@PF01057.16" value="#66CC00"/>
                    <discreteMappingEntry attributeValue="MS_16minnow_6_2ct1175.3@PF01057.16" value="#66CC00"/>
                    <discreteMappingEntry attributeValue="MS_haddock_1_2ct424.1@2HWT_A" value="#66CC00"/>
                    <discreteMappingEntry attributeValue="MS_redsnapper1_2ct336.5@PF01057.16" value="#66CC00"/>
                    <discreteMappingEntry attributeValue="MS_crucian1_2ct28.2@PF01057.16" value="#66CC00"/>
                    <discreteMappingEntry attributeValue="MS_abalone_6_2ct185.2@PF02407.15" value="#66CC00"/>
                    <discreteMappingEntry attributeValue="MS_seabass_ms2_2ct623.2@PF01057.16" value="#66CC00"/>
                    <discreteMappingEntry attributeValue="MS_18minnow1_2ct1910.2@2HW0_A" value="#66CC00"/>
                    <discreteMappingEntry attributeValue="MS_pig_r1_2ct000.2@PF01057.16" value="#66CC00"/>
                    <discreteMappingEntry attributeValue="MS_16minnow_6_2ct933.6@PF01057.16" value="#66CC00"/>
                    <discreteMappingEntry attributeValue="MS_abalone_6_2ct132.2@PF01057.16" value="#66CC00"/>
                    <discreteMappingEntry attributeValue="MS_10mus_7_2ct541.2@2HW0_A" value="#66CC00"/>
                    <discreteMappingEntry attributeValue="MS_16minnow_6_2ct1239.2@PF01057.16" value="#66CC00"/>
                    <discreteMappingEntry attributeValue="MS_ct_4fly1_ps_NODE_x5.2@PF08283.10" value="#66CC00"/>
                    <discreteMappingEntry attributeValue="MS_seabass_ms2_2ct586.2@PF02407.15" value="#66CC00"/>
                    <discreteMappingEntry attributeValue="Nano_KM607601" value="#FF0066"/>
                    <discreteMappingEntry attributeValue="Nano_KX534390" value="#FF0066"/>
                    <discreteMappingEntry attributeValue="Nano_KX534391" value="#FF0066"/>
                    <discreteMappingEntry attributeValue="MS_16minnow_6_2ct1194.2@PF02407.15" value="#66CC00"/>
                    <discreteMappingEntry attributeValue="MS_16minnow_6_2ct1328.3@PF01057.16" value="#66CC00"/>
                    <discreteMappingEntry attributeValue="MS_seabass_ms2_2ct828.2@PF02407.15" value="#66CC00"/>
                    <discreteMappingEntry attributeValue="Nano_KX534389" value="#FF0066"/>
                    <discreteMappingEntry attributeValue="MS_haddock_1_2ct116.3@PF01057.16" value="#66CC00"/>
                    <discreteMappingEntry attributeValue="MS_seabass4_6_2ct73.3@2HW0_A" value="#66CC00"/>
                    <discreteMappingEntry attributeValue="MS_ct_crucian1_2ct72.6@PF01057.16" value="#66CC00"/>
                    <discreteMappingEntry attributeValue="Nano_KX534388" value="#FF0066"/>
                    <discreteMappingEntry attributeValue="MS_rainbowtrout1_2ct81.2@PF01057.16" value="#66CC00"/>
                    <discreteMappingEntry attributeValue="MS_redsnapper1_2ct302.1@PF02407.15" value="#66CC00"/>
                    <discreteMappingEntry attributeValue="MS_redsnapper_r1_2ct040.1@2HW0_A" value="#66CC00"/>
                    <discreteMappingEntry attributeValue="MS_seabass2_1_2ct21.2@PF01057.16" value="#66CC00"/>
                    <discreteMappingEntry attributeValue="MS_seabass_ms2_2ct597.3@PF02407.15" value="#66CC00"/>
                    <discreteMappingEntry attributeValue="MS_18minnow1_2ct796.6@2HW0_A" value="#66CC00"/>
                    <discreteMappingEntry attributeValue="MS_redsnapper1_2ct654.2@PF02407.15" value="#66CC00"/>
                    <discreteMappingEntry attributeValue="MS_redsnapper1_2ct131.4@2HW0_A" value="#66CC00"/>
                    <discreteMappingEntry attributeValue="MS_16minnow_6_2ct1228.2@PF01057.16" value="#66CC00"/>
                    <discreteMappingEntry attributeValue="MS_apo1_1_2ct77.3@PF01057.16" value="#66CC00"/>
                    <discreteMappingEntry attributeValue="MS_redsnapper1_2ct290.2@2HW0_A" value="#66CC00"/>
                    <discreteMappingEntry attributeValue="MS_crab_r1_2ct003.2@PF02407.15" value="#66CC00"/>
                    <discreteMappingEntry attributeValue="MS_squid_r1_2ct004.1@PF01057.16" value="#66CC00"/>
                    <discreteMappingEntry attributeValue="MS_16minnow_6_2ct1103.2@1L2M_A" value="#66CC00"/>
                    <discreteMappingEntry attributeValue="MS_apo1_1_2ct85.2@PF08283.10" value="#66CC00"/>
                    <discreteMappingEntry attributeValue="MS_seabass_ms2_2ct591.1@2HWT_A" value="#66CC00"/>
                    <discreteMappingEntry attributeValue="MS_seabass_ms2_2ct486.2@PF02407.15" value="#66CC00"/>
                    <discreteMappingEntry attributeValue="MS_18minnow1_2ct1747.1@PF08283.10" value="#66CC00"/>
                    <discreteMappingEntry attributeValue="MS_abalone_6_2ct156.2@2HWT_A" value="#66CC00"/>
                    <discreteMappingEntry attributeValue="MS_redsnapper1_2ct18.4@PF01057.16" value="#66CC00"/>
                    <discreteMappingEntry attributeValue="MS_abalone_6_2ct119.2@PF02407.15" value="#66CC00"/>
                    <discreteMappingEntry attributeValue="MS_redsnapper1_2ct410.2@2HWT_A" value="#66CC00"/>
                    <discreteMappingEntry attributeValue="MS_16minnow_6_2ct1080.2@2HW0_A" value="#66CC00"/>
                    <discreteMappingEntry attributeValue="MS_macstool_de1a1_2ct27.14@PF01057.16" value="#66CC00"/>
                    <discreteMappingEntry attributeValue="MS_redsnapper1_2ct630.2@1L2M_A" value="#66CC00"/>
                    <discreteMappingEntry attributeValue="MS_seabass_ms2_2ct636.2@PF01057.16" value="#66CC00"/>
                    <discreteMappingEntry attributeValue="MS_16minnow_6_2ct479.9@1L2M_A" value="#66CC00"/>
                    <discreteMappingEntry attributeValue="MS_crucian1_2ct24.4@PF01057.16" value="#66CC00"/>
                    <discreteMappingEntry attributeValue="MS_crucian1_2ct65.2@2HW0_A" value="#66CC00"/>
                    <discreteMappingEntry attributeValue="MS_seabass_ms2_2ct849.1@1L2M_A" value="#66CC00"/>
                    <discreteMappingEntry attributeValue="MS_seabass_ms2_2ct313.3@PF01057.16" value="#66CC00"/>
                    <discreteMappingEntry attributeValue="MS_abalone_6_2ct93.1@PF08283.10" value="#66CC00"/>
                    <discreteMappingEntry attributeValue="MS_turkey_2ct64.4@1L2M_A" value="#66CC00"/>
                    <discreteMappingEntry attributeValue="MS_redsnapper_r1_2ct025.3@2HW0_A" value="#66CC00"/>
                    <discreteMappingEntry attributeValue="MS_abalone_6_2ct201.1@2HW0_A" value="#66CC00"/>
                    <discreteMappingEntry attributeValue="MS_redsnapper1_2ct242.3@2HW0_A" value="#66CC00"/>
                    <discreteMappingEntry attributeValue="MS_redsnapper1_2ct34.3@PF01057.16" value="#66CC00"/>
                    <discreteMappingEntry attributeValue="MS_redsnapper1_2ct204.3@1S9H_A" value="#66CC00"/>
                    <discreteMappingEntry attributeValue="MS_crucian1_2ct31.3@2HW0_A" value="#66CC00"/>
                    <discreteMappingEntry attributeValue="MS_ct_minnow_6_2ct1588.2@1L2M_A" value="#66CC00"/>
                    <discreteMappingEntry attributeValue="MS_abalone_6_2ct46.2@PF01057.16" value="#66CC00"/>
                    <discreteMappingEntry attributeValue="MS_rainbowtrout1_2ct75.2@PF08283.10" value="#66CC00"/>
                    <discreteMappingEntry attributeValue="MS_seabass4_6_2ct72.2@PF01057.16" value="#66CC00"/>
                    <discreteMappingEntry attributeValue="MS_raccoonskin1_2ct31.1@PF08283.10" value="#66CC00"/>
                    <discreteMappingEntry attributeValue="MS_haddock_1_2ct370.1@PF00799.19" value="#66CC00"/>
                    <discreteMappingEntry attributeValue="MS_seabass_ms2_2ct572.3@PF01057.16" value="#66CC00"/>
                    <discreteMappingEntry attributeValue="MS_mice_vagnl_1_2ct13.6@PF01057.16" value="#66CC00"/>
                    <discreteMappingEntry attributeValue="MS_abalone_6_2ct104.2@2HW0_A" value="#66CC00"/>
                    <discreteMappingEntry attributeValue="MS_redsnapper_r1_2ct024.4@2HW0_A" value="#66CC00"/>
                    <discreteMappingEntry attributeValue="MS_16minnow_6_2ct1529.1@PF00799.19" value="#66CC00"/>
                    <discreteMappingEntry attributeValue="MS_18minnow1_2ct1503.2@PF01057.16" value="#66CC00"/>
                    <discreteMappingEntry attributeValue="MS_rainbowtrout_r1_2ct001.3@2HWT_A" value="#66CC00"/>
                    <discreteMappingEntry attributeValue="MS_seabass_ms2_2ct365.4@2HW0_A" value="#66CC00"/>
                    <discreteMappingEntry attributeValue="MS_seabass3_1_2ct22.2@PF00799.19" value="#66CC00"/>
                    <discreteMappingEntry attributeValue="MS_apo1_1_2ct84.2@PF08283.10" value="#66CC00"/>
                    <discreteMappingEntry attributeValue="MS_haddock_1_2ct250.3@PF01057.16" value="#66CC00"/>
                    <discreteMappingEntry attributeValue="MS_rainbowtrout_r1_2ct000.2@PF01057.16" value="#66CC00"/>
                    <discreteMappingEntry attributeValue="MS_seabass_ms2_2ct342.4@2HWT_A" value="#66CC00"/>
                    <discreteMappingEntry attributeValue="MS_redsnapper1_2ct614.2@PF01057.16" value="#66CC00"/>
                    <discreteMappingEntry attributeValue="MS_redsnapper_r1_2ct027.7@PF01057.16" value="#66CC00"/>
                    <discreteMappingEntry attributeValue="MS_redsnapper_r1_2ct049.1@2HW0_A" value="#66CC00"/>
                    <discreteMappingEntry attributeValue="MS_rainbowtrout1_2ct15.5@PF01057.16" value="#66CC00"/>
                    <discreteMappingEntry attributeValue="MS_abalone_6_2ct140.2@2HWT_A" value="#66CC00"/>
                    <discreteMappingEntry attributeValue="MS_abalone_6_2ct191.2@2HW0_A" value="#66CC00"/>
                    <discreteMappingEntry attributeValue="MS_16minnow_6_2ct977.3@PF01057.16" value="#66CC00"/>
                    <discreteMappingEntry attributeValue="MS_seabass_ms2_2ct483.3@PF01057.16" value="#66CC00"/>
                    <discreteMappingEntry attributeValue="MS_redsnapper1_2ct206.4@2HW0_A" value="#66CC00"/>
                    <discreteMappingEntry attributeValue="MS_16minnow_6_2ct1220.2@1L2M_A" value="#66CC00"/>
                    <discreteMappingEntry attributeValue="MS_18minnow1_2ct1930.2@PF01057.16" value="#66CC00"/>
                    <discreteMappingEntry attributeValue="MS_seabass3_1_2ct26.3@PF01057.16" value="#66CC00"/>
                    <discreteMappingEntry attributeValue="MS_seabass_ms2_2ct534.2@2HWT_A" value="#66CC00"/>
                    <discreteMappingEntry attributeValue="MS_18minnow1_2ct2163.2@2HW0_A" value="#66CC00"/>
                    <discreteMappingEntry attributeValue="MS_haddock_1_2ct124.1@PF01057.16" value="#66CC00"/>
                    <discreteMappingEntry attributeValue="MS_redsnapper_r1_2ct051.1@2HW0_A" value="#66CC00"/>
                    <discreteMappingEntry attributeValue="MS_redsnapper1_2ct498.2@2HWT_A" value="#66CC00"/>
                    <discreteMappingEntry attributeValue="MS_rainbowtrout1_2ct32.3@PF01057.16" value="#66CC00"/>
                    <discreteMappingEntry attributeValue="MS_seabass_ms2_2ct458.2@PF01057.16" value="#66CC00"/>
                    <discreteMappingEntry attributeValue="MS_seabass_ms2_2ct657.3@PF02407.15" value="#66CC00"/>
                    <discreteMappingEntry attributeValue="MS_rainbowtrout1_2ct62.3@PF02407.15" value="#66CC00"/>
                    <discreteMappingEntry attributeValue="MS_redsnapper1_2ct222.3@PF02407.15" value="#66CC00"/>
                    <discreteMappingEntry attributeValue="MS_redsnapper_r1_2ct026.2@2HWT_A" value="#66CC00"/>
                    <discreteMappingEntry attributeValue="MS_16minnow_6_2ct1288.2@PF08283.10" value="#66CC00"/>
                    <discreteMappingEntry attributeValue="MS_seabass_ms2_2ct491.2@2HWT_A" value="#66CC00"/>
                    <discreteMappingEntry attributeValue="MS_ct_4fly1_ps_NODE_x6.2@PF01057.16" value="#66CC00"/>
                    <discreteMappingEntry attributeValue="MS_16minnow_6_2ct1056.3@PF01057.16" value="#66CC00"/>
                    <discreteMappingEntry attributeValue="MS_abalone_6_2ct105.3@PF01057.16" value="#66CC00"/>
                    <discreteMappingEntry attributeValue="MS_macstool_de2c2_2ct69.2@PF01057.16" value="#66CC00"/>
                    <discreteMappingEntry attributeValue="MS_redsnapper1_2ct272.3@PF02407.15" value="#66CC00"/>
                    <discreteMappingEntry attributeValue="MS_pig1_2ct7.2@PF08283.10" value="#66CC00"/>
                    <discreteMappingEntry attributeValue="MS_rainbowtrout1_2ct94.2@2HW0_A" value="#66CC00"/>
                    <discreteMappingEntry attributeValue="MS_crucian1_2ct26.2@PF02407.15" value="#66CC00"/>
                    <discreteMappingEntry attributeValue="MS_haddock_1_2ct178.3@PF02407.15" value="#66CC00"/>
                    <discreteMappingEntry attributeValue="MS_abalone_6_2ct235.1@2HW0_A" value="#66CC00"/>
                    <discreteMappingEntry attributeValue="MS_bison2_7_2ct98.1@PF02407.15" value="#66CC00"/>
                    <discreteMappingEntry attributeValue="MS_abalone_6_2ct102.2@PF01057.16" value="#66CC00"/>
                    <discreteMappingEntry attributeValue="MS_10mus_7_2ct55.3@PF01057.16" value="#66CC00"/>
                    <discreteMappingEntry attributeValue="MS_16minnow_6_2ct1354.4@PF01057.16" value="#66CC00"/>
                    <discreteMappingEntry attributeValue="MS_rainbowtrout1_2ct93.3@PF01057.16" value="#66CC00"/>
                    <discreteMappingEntry attributeValue="MS_redsnapper1_2ct618.1@1L2M_A" value="#66CC00"/>
                    <discreteMappingEntry attributeValue="MS_seabass1_1_2ct175.4@PF01057.16" value="#66CC00"/>
                    <discreteMappingEntry attributeValue="MS_abalone_6_2ct123.2@PF01057.16" value="#66CC00"/>
                    <discreteMappingEntry attributeValue="MS_abalone_6_2ct85.2@PF02407.15" value="#66CC00"/>
                    <discreteMappingEntry attributeValue="MS_crucian1_2ct18.3@PF01057.16" value="#66CC00"/>
                    <discreteMappingEntry attributeValue="MS_redsnapper1_2ct23.6@PF01057.16" value="#66CC00"/>
                    <discreteMappingEntry attributeValue="MS_turkey_2ct77.2@2HW0_A" value="#66CC00"/>
                    <discreteMappingEntry attributeValue="MS_crucian1_2ct39.3@PF01057.16" value="#66CC00"/>
                    <discreteMappingEntry attributeValue="MS_lamb_2_2ct384.2@PF01057.16" value="#66CC00"/>
                    <discreteMappingEntry attributeValue="MS_ct_eef_bd3_1_2ct127.3@PF01057.16" value="#66CC00"/>
                    <discreteMappingEntry attributeValue="MS_abalone_6_2ct79.1@PF08283.10" value="#66CC00"/>
                    <discreteMappingEntry attributeValue="MS_redsnapper_r1_2ct042.1@PF01057.16" value="#66CC00"/>
                    <discreteMappingEntry attributeValue="MS_redsnapper1_2ct555.2@PF01057.16" value="#66CC00"/>
                    <discreteMappingEntry attributeValue="MS_seabass1_1_2ct193.3@2HWT_A" value="#66CC00"/>
                    <discreteMappingEntry attributeValue="MS_18minnow1_2ct741.7@PF02407.15" value="#66CC00"/>
                    <discreteMappingEntry attributeValue="MS_seabass_ms2_2ct869.1@1L2M_A" value="#66CC00"/>
                    <discreteMappingEntry attributeValue="MS_rainbowtrout_r1_2ct006.1@PF01057.16" value="#66CC00"/>
                    <discreteMappingEntry attributeValue="MS_redsnapper1_2ct342.2@2HWT_A" value="#66CC00"/>
                    <discreteMappingEntry attributeValue="MS_18minnow1_2ct1536.3@PF01057.16" value="#66CC00"/>
                    <discreteMappingEntry attributeValue="MS_18minnow1_2ct1686.3@PF01057.16" value="#66CC00"/>
                    <discreteMappingEntry attributeValue="MS_seabass_ms2_2ct294.3@2HW0_A" value="#66CC00"/>
                    <discreteMappingEntry attributeValue="MS_redsnapper_r1_2ct044.2@PF01057.16" value="#66CC00"/>
                    <discreteMappingEntry attributeValue="MS_seabass_ms2_2ct934.1@2HW0_A" value="#66CC00"/>
                    <discreteMappingEntry attributeValue="MS_rainbowtrout1_2ct111.1@2HW0_A" value="#66CC00"/>
                    <discreteMappingEntry attributeValue="MS_redsnapper1_2ct367.2@PF02407.15" value="#66CC00"/>
                    <discreteMappingEntry attributeValue="MS_seabass_ms2_2ct571.3@PF01057.16" value="#66CC00"/>
                    <discreteMappingEntry attributeValue="MS_seabass_ms2_2ct650.3@2HW0_A" value="#66CC00"/>
                    <discreteMappingEntry attributeValue="MS_redsnapper1_2ct370.2@PF01057.16" value="#66CC00"/>
                    <discreteMappingEntry attributeValue="MS_16minnow_6_2ct1183.2@PF01057.16" value="#66CC00"/>
                    <discreteMappingEntry attributeValue="MS_seabass_ms2_2ct908.2@PF02407.15" value="#66CC00"/>
                </discreteMapping>
            </visualProperty>
            <visualProperty default="#CCCCCC" name="NODE_BORDER_PAINT"/>
            <visualProperty default="0.0" name="NODE_Y_LOCATION"/>
            <visualProperty default="0.0" name="NODE_Z_LOCATION"/>
            <visualProperty default="DefaultVisualizableVisualProperty(id=NODE_CUSTOMPAINT_9, name=Node Custom Paint 9)" name="NODE_CUSTOMPAINT_9"/>
            <visualProperty default="50.0" name="NODE_CUSTOMGRAPHICS_SIZE_3"/>
            <visualProperty default="C,C,c,0.00,0.00" name="NODE_CUSTOMGRAPHICS_POSITION_1"/>
            <visualProperty default="C,C,c,0.00,0.00" name="NODE_CUSTOMGRAPHICS_POSITION_7"/>
            <visualProperty default="C,C,c,0.00,0.00" name="NODE_CUSTOMGRAPHICS_POSITION_6"/>
            <visualProperty default="DefaultVisualizableVisualProperty(id=NODE_CUSTOMPAINT_6, name=Node Custom Paint 6)" name="NODE_CUSTOMPAINT_6"/>
            <visualProperty default="org.cytoscape.ding.customgraphics.NullCustomGraphics,0,[ Remove Graphics ]," name="NODE_CUSTOMGRAPHICS_2"/>
            <visualProperty default="C,C,c,0.00,0.00" name="NODE_CUSTOMGRAPHICS_POSITION_3"/>
            <visualProperty default="255" name="NODE_LABEL_TRANSPARENCY"/>
            <visualProperty default="50.0" name="NODE_CUSTOMGRAPHICS_SIZE_4"/>
            <visualProperty default="200.0" name="NODE_LABEL_WIDTH"/>
            <visualProperty default="SOLID" name="NODE_BORDER_STROKE"/>
            <visualProperty default="#FFFF00" name="NODE_SELECTED_PAINT"/>
            <visualProperty default="org.cytoscape.ding.customgraphics.NullCustomGraphics,0,[ Remove Graphics ]," name="NODE_CUSTOMGRAPHICS_6"/>
            <visualProperty default="false" name="NODE_SELECTED"/>
            <visualProperty default="0.0" name="NODE_DEPTH"/>
            <visualProperty default="org.cytoscape.ding.customgraphics.NullCustomGraphics,0,[ Remove Graphics ]," name="NODE_CUSTOMGRAPHICS_4"/>
            <visualProperty default="#000000" name="NODE_LABEL_COLOR"/>
            <visualProperty default="DefaultVisualizableVisualProperty(id=NODE_CUSTOMPAINT_4, name=Node Custom Paint 4)" name="NODE_CUSTOMPAINT_4"/>
            <visualProperty default="org.cytoscape.ding.customgraphics.NullCustomGraphics,0,[ Remove Graphics ]," name="NODE_CUSTOMGRAPHICS_3"/>
            <visualProperty default="C,C,c,0.00,0.00" name="NODE_LABEL_POSITION"/>
            <visualProperty default="DefaultVisualizableVisualProperty(id=NODE_CUSTOMPAINT_7, name=Node Custom Paint 7)" name="NODE_CUSTOMPAINT_7"/>
            <visualProperty default="DefaultVisualizableVisualProperty(id=NODE_CUSTOMPAINT_2, name=Node Custom Paint 2)" name="NODE_CUSTOMPAINT_2"/>
            <visualProperty default="C,C,c,0.00,0.00" name="NODE_CUSTOMGRAPHICS_POSITION_2"/>
            <visualProperty default="50.0" name="NODE_HEIGHT"/>
            <visualProperty default="ROUND_RECTANGLE" name="COMPOUND_NODE_SHAPE"/>
            <visualProperty default="255" name="NODE_TRANSPARENCY"/>
            <visualProperty default="50.0" name="NODE_CUSTOMGRAPHICS_SIZE_7"/>
            <visualProperty default="DefaultVisualizableVisualProperty(id=NODE_CUSTOMPAINT_8, name=Node Custom Paint 8)" name="NODE_CUSTOMPAINT_8"/>
            <visualProperty default="50.0" name="NODE_WIDTH"/>
        </node>
        <edge>
            <dependency value="false" name="arrowColorMatchesEdge"/>
            <visualProperty default="#FFFF00" name="EDGE_TARGET_ARROW_SELECTED_PAINT"/>
            <visualProperty default="Dialog.plain,plain,10" name="EDGE_LABEL_FONT_FACE"/>
            <visualProperty default="2.0" name="EDGE_WIDTH"/>
            <visualProperty default="" name="EDGE_LABEL"/>
            <visualProperty default="255" name="EDGE_LABEL_TRANSPARENCY"/>
            <visualProperty default="" name="EDGE_BEND"/>
            <visualProperty default="SOLID" name="EDGE_LINE_TYPE"/>
            <visualProperty default="NONE" name="EDGE_TARGET_ARROW_SHAPE"/>
            <visualProperty default="6.0" name="EDGE_TARGET_ARROW_SIZE"/>
            <visualProperty default="NONE" name="EDGE_SOURCE_ARROW_SHAPE"/>
            <visualProperty default="#000000" name="EDGE_LABEL_COLOR"/>
            <visualProperty default="#000000" name="EDGE_SOURCE_ARROW_UNSELECTED_PAINT"/>
            <visualProperty default="255" name="EDGE_TRANSPARENCY"/>
            <visualProperty default="6.0" name="EDGE_SOURCE_ARROW_SIZE"/>
            <visualProperty default="#FFFF00" name="EDGE_SOURCE_ARROW_SELECTED_PAINT"/>
            <visualProperty default="10" name="EDGE_LABEL_FONT_SIZE"/>
            <visualProperty default="#404040" name="EDGE_UNSELECTED_PAINT"/>
            <visualProperty default="true" name="EDGE_CURVED"/>
            <visualProperty default="#FF0000" name="EDGE_STROKE_SELECTED_PAINT"/>
            <visualProperty default="false" name="EDGE_SELECTED"/>
            <visualProperty default="true" name="EDGE_VISIBLE"/>
            <visualProperty default="200.0" name="EDGE_LABEL_WIDTH"/>
            <visualProperty default="" name="EDGE_TOOLTIP"/>
            <visualProperty default="#848484" name="EDGE_STROKE_UNSELECTED_PAINT"/>
            <visualProperty default="#323232" name="EDGE_PAINT"/>
            <visualProperty default="#FF0000" name="EDGE_SELECTED_PAINT"/>
            <visualProperty default="#000000" name="EDGE_TARGET_ARROW_UNSELECTED_PAINT"/>
        </edge>
    </visualStyle>
    <visualStyle name="Universe">
        <network>
            <visualProperty default="400.0" name="NETWORK_HEIGHT"/>
            <visualProperty default="0.0" name="NETWORK_CENTER_X_LOCATION"/>
            <visualProperty default="#000000" name="NETWORK_BACKGROUND_PAINT"/>
            <visualProperty default="0.0" name="NETWORK_CENTER_Z_LOCATION"/>
            <visualProperty default="1.0" name="NETWORK_SCALE_FACTOR"/>
            <visualProperty default="true" name="NETWORK_NODE_SELECTION"/>
            <visualProperty default="550.0" name="NETWORK_WIDTH"/>
            <visualProperty default="" name="NETWORK_TITLE"/>
            <visualProperty default="550.0" name="NETWORK_SIZE"/>
            <visualProperty default="0.0" name="NETWORK_CENTER_Y_LOCATION"/>
            <visualProperty default="true" name="NETWORK_EDGE_SELECTION"/>
            <visualProperty default="0.0" name="NETWORK_DEPTH"/>
        </network>
        <node>
            <dependency value="true" name="nodeCustomGraphicsSizeSync"/>
            <dependency value="true" name="nodeSizeLocked"/>
            <visualProperty default="C,C,c,0.00,0.00" name="NODE_CUSTOMGRAPHICS_POSITION_8"/>
            <visualProperty default="true" name="NODE_NESTED_NETWORK_IMAGE_VISIBLE"/>
            <visualProperty default="DefaultVisualizableVisualProperty(id=NODE_CUSTOMPAINT_5, name=Node Custom Paint 5)" name="NODE_CUSTOMPAINT_5"/>
            <visualProperty default="org.cytoscape.ding.customgraphics.NullCustomGraphics,0,[ Remove Graphics ]," name="NODE_CUSTOMGRAPHICS_9"/>
            <visualProperty default="C,C,c,0.00,0.00" name="NODE_CUSTOMGRAPHICS_POSITION_4"/>
            <visualProperty default="" name="NODE_TOOLTIP"/>
            <visualProperty default="50.0" name="NODE_CUSTOMGRAPHICS_SIZE_9"/>
            <visualProperty default="50.0" name="NODE_CUSTOMGRAPHICS_SIZE_1"/>
            <visualProperty default="org.cytoscape.ding.customgraphics.NullCustomGraphics,0,[ Remove Graphics ]," name="NODE_CUSTOMGRAPHICS_5"/>
            <visualProperty default="C,C,c,0.00,0.00" name="NODE_CUSTOMGRAPHICS_POSITION_5"/>
            <visualProperty default="org.cytoscape.ding.customgraphics.NullCustomGraphics,0,[ Remove Graphics ]," name="NODE_CUSTOMGRAPHICS_8"/>
            <visualProperty default="50.0" name="NODE_CUSTOMGRAPHICS_SIZE_8"/>
            <visualProperty default="0.0" name="NODE_BORDER_WIDTH"/>
            <visualProperty default="0.0" name="NODE_X_LOCATION"/>
            <visualProperty default="DefaultVisualizableVisualProperty(id=NODE_CUSTOMPAINT_1, name=Node Custom Paint 1)" name="NODE_CUSTOMPAINT_1"/>
            <visualProperty default="50.0" name="NODE_CUSTOMGRAPHICS_SIZE_5"/>
            <visualProperty default="40.0" name="NODE_SIZE"/>
            <visualProperty default="50.0" name="NODE_CUSTOMGRAPHICS_SIZE_6"/>
            <visualProperty default="org.cytoscape.ding.customgraphics.NullCustomGraphics,0,[ Remove Graphics ]," name="NODE_CUSTOMGRAPHICS_1"/>
            <visualProperty default="org.cytoscape.ding.customgraphics.NullCustomGraphics,0,[ Remove Graphics ]," name="NODE_CUSTOMGRAPHICS_7"/>
            <visualProperty default="" name="NODE_LABEL">
                <passthroughMapping attributeName="name" attributeType="string"/>
            </visualProperty>
            <visualProperty default="C,C,c,0.00,0.00" name="NODE_CUSTOMGRAPHICS_POSITION_9"/>
            <visualProperty default="DefaultVisualizableVisualProperty(id=NODE_CUSTOMPAINT_3, name=Node Custom Paint 3)" name="NODE_CUSTOMPAINT_3"/>
            <visualProperty default="50.0" name="NODE_CUSTOMGRAPHICS_SIZE_2"/>
            <visualProperty default="255" name="NODE_BORDER_TRANSPARENCY"/>
            <visualProperty default="ELLIPSE" name="NODE_SHAPE"/>
            <visualProperty default="#787878" name="NODE_PAINT"/>
            <visualProperty default="18" name="NODE_LABEL_FONT_SIZE"/>
            <visualProperty default="Monospaced.plain,plain,12" name="NODE_LABEL_FONT_FACE"/>
            <visualProperty default="10.0" name="COMPOUND_NODE_PADDING"/>
            <visualProperty default="true" name="NODE_VISIBLE"/>
            <visualProperty default="#000000" name="NODE_FILL_COLOR"/>
            <visualProperty default="#000000" name="NODE_BORDER_PAINT"/>
            <visualProperty default="0.0" name="NODE_Y_LOCATION"/>
            <visualProperty default="0.0" name="NODE_Z_LOCATION"/>
            <visualProperty default="DefaultVisualizableVisualProperty(id=NODE_CUSTOMPAINT_9, name=Node Custom Paint 9)" name="NODE_CUSTOMPAINT_9"/>
            <visualProperty default="50.0" name="NODE_CUSTOMGRAPHICS_SIZE_3"/>
            <visualProperty default="C,C,c,0.00,0.00" name="NODE_CUSTOMGRAPHICS_POSITION_1"/>
            <visualProperty default="C,C,c,0.00,0.00" name="NODE_CUSTOMGRAPHICS_POSITION_7"/>
            <visualProperty default="C,C,c,0.00,0.00" name="NODE_CUSTOMGRAPHICS_POSITION_6"/>
            <visualProperty default="DefaultVisualizableVisualProperty(id=NODE_CUSTOMPAINT_6, name=Node Custom Paint 6)" name="NODE_CUSTOMPAINT_6"/>
            <visualProperty default="org.cytoscape.ding.customgraphics.NullCustomGraphics,0,[ Remove Graphics ]," name="NODE_CUSTOMGRAPHICS_2"/>
            <visualProperty default="C,C,c,0.00,0.00" name="NODE_CUSTOMGRAPHICS_POSITION_3"/>
            <visualProperty default="255" name="NODE_LABEL_TRANSPARENCY"/>
            <visualProperty default="50.0" name="NODE_CUSTOMGRAPHICS_SIZE_4"/>
            <visualProperty default="200.0" name="NODE_LABEL_WIDTH"/>
            <visualProperty default="SOLID" name="NODE_BORDER_STROKE"/>
            <visualProperty default="#FFFF00" name="NODE_SELECTED_PAINT"/>
            <visualProperty default="org.cytoscape.ding.customgraphics.NullCustomGraphics,0,[ Remove Graphics ]," name="NODE_CUSTOMGRAPHICS_6"/>
            <visualProperty default="false" name="NODE_SELECTED"/>
            <visualProperty default="0.0" name="NODE_DEPTH"/>
            <visualProperty default="org.cytoscape.ding.customgraphics.NullCustomGraphics,0,[ Remove Graphics ]," name="NODE_CUSTOMGRAPHICS_4"/>
            <visualProperty default="#FFFFFF" name="NODE_LABEL_COLOR"/>
            <visualProperty default="DefaultVisualizableVisualProperty(id=NODE_CUSTOMPAINT_4, name=Node Custom Paint 4)" name="NODE_CUSTOMPAINT_4"/>
            <visualProperty default="org.cytoscape.ding.customgraphics.NullCustomGraphics,0,[ Remove Graphics ]," name="NODE_CUSTOMGRAPHICS_3"/>
            <visualProperty default="C,C,c,0.00,0.00" name="NODE_LABEL_POSITION"/>
            <visualProperty default="DefaultVisualizableVisualProperty(id=NODE_CUSTOMPAINT_7, name=Node Custom Paint 7)" name="NODE_CUSTOMPAINT_7"/>
            <visualProperty default="DefaultVisualizableVisualProperty(id=NODE_CUSTOMPAINT_2, name=Node Custom Paint 2)" name="NODE_CUSTOMPAINT_2"/>
            <visualProperty default="C,C,c,0.00,0.00" name="NODE_CUSTOMGRAPHICS_POSITION_2"/>
            <visualProperty default="20.0" name="NODE_HEIGHT"/>
            <visualProperty default="ROUND_RECTANGLE" name="COMPOUND_NODE_SHAPE"/>
            <visualProperty default="255" name="NODE_TRANSPARENCY"/>
            <visualProperty default="50.0" name="NODE_CUSTOMGRAPHICS_SIZE_7"/>
            <visualProperty default="DefaultVisualizableVisualProperty(id=NODE_CUSTOMPAINT_8, name=Node Custom Paint 8)" name="NODE_CUSTOMPAINT_8"/>
            <visualProperty default="20.0" name="NODE_WIDTH"/>
        </node>
        <edge>
            <dependency value="false" name="arrowColorMatchesEdge"/>
            <visualProperty default="#FFFF00" name="EDGE_TARGET_ARROW_SELECTED_PAINT"/>
            <visualProperty default="Dialog.plain,plain,10" name="EDGE_LABEL_FONT_FACE"/>
            <visualProperty default="2.0" name="EDGE_WIDTH"/>
            <visualProperty default="" name="EDGE_LABEL"/>
            <visualProperty default="255" name="EDGE_LABEL_TRANSPARENCY"/>
            <visualProperty default="" name="EDGE_BEND"/>
            <visualProperty default="LONG_DASH" name="EDGE_LINE_TYPE"/>
            <visualProperty default="NONE" name="EDGE_TARGET_ARROW_SHAPE"/>
            <visualProperty default="NONE" name="EDGE_SOURCE_ARROW_SHAPE"/>
            <visualProperty default="#000000" name="EDGE_LABEL_COLOR"/>
            <visualProperty default="#000000" name="EDGE_SOURCE_ARROW_UNSELECTED_PAINT"/>
            <visualProperty default="255" name="EDGE_TRANSPARENCY"/>
            <visualProperty default="#FFFF00" name="EDGE_SOURCE_ARROW_SELECTED_PAINT"/>
            <visualProperty default="10" name="EDGE_LABEL_FONT_SIZE"/>
            <visualProperty default="#404040" name="EDGE_UNSELECTED_PAINT"/>
            <visualProperty default="true" name="EDGE_CURVED"/>
            <visualProperty default="#FF0000" name="EDGE_STROKE_SELECTED_PAINT"/>
            <visualProperty default="false" name="EDGE_SELECTED"/>
            <visualProperty default="true" name="EDGE_VISIBLE"/>
            <visualProperty default="200.0" name="EDGE_LABEL_WIDTH"/>
            <visualProperty default="" name="EDGE_TOOLTIP"/>
            <visualProperty default="#999999" name="EDGE_STROKE_UNSELECTED_PAINT"/>
            <visualProperty default="#323232" name="EDGE_PAINT"/>
            <visualProperty default="#FF0000" name="EDGE_SELECTED_PAINT"/>
            <visualProperty default="#000000" name="EDGE_TARGET_ARROW_UNSELECTED_PAINT"/>
        </edge>
    </visualStyle>
    <visualStyle name="Curved">
        <network>
            <visualProperty default="400.0" name="NETWORK_HEIGHT"/>
            <visualProperty default="0.0" name="NETWORK_CENTER_X_LOCATION"/>
            <visualProperty default="#DAD6CD" name="NETWORK_BACKGROUND_PAINT"/>
            <visualProperty default="0.0" name="NETWORK_CENTER_Z_LOCATION"/>
            <visualProperty default="1.0" name="NETWORK_SCALE_FACTOR"/>
            <visualProperty default="true" name="NETWORK_NODE_SELECTION"/>
            <visualProperty default="550.0" name="NETWORK_WIDTH"/>
            <visualProperty default="" name="NETWORK_TITLE"/>
            <visualProperty default="0.0" name="NETWORK_CENTER_Y_LOCATION"/>
            <visualProperty default="true" name="NETWORK_EDGE_SELECTION"/>
            <visualProperty default="0.0" name="NETWORK_DEPTH"/>
        </network>
        <node>
            <dependency value="true" name="nodeCustomGraphicsSizeSync"/>
            <dependency value="true" name="nodeSizeLocked"/>
            <visualProperty default="C,C,c,0.00,0.00" name="NODE_CUSTOMGRAPHICS_POSITION_8"/>
            <visualProperty default="true" name="NODE_NESTED_NETWORK_IMAGE_VISIBLE"/>
            <visualProperty default="org.cytoscape.ding.customgraphics.NullCustomGraphics,0,[ Remove Graphics ]," name="NODE_CUSTOMGRAPHICS_9"/>
            <visualProperty default="C,C,c,0.00,0.00" name="NODE_CUSTOMGRAPHICS_POSITION_4"/>
            <visualProperty default="" name="NODE_TOOLTIP"/>
            <visualProperty default="0.0" name="NODE_CUSTOMGRAPHICS_SIZE_9"/>
            <visualProperty default="0.0" name="NODE_CUSTOMGRAPHICS_SIZE_1"/>
            <visualProperty default="org.cytoscape.ding.customgraphics.NullCustomGraphics,0,[ Remove Graphics ]," name="NODE_CUSTOMGRAPHICS_5"/>
            <visualProperty default="C,C,c,0.00,0.00" name="NODE_CUSTOMGRAPHICS_POSITION_5"/>
            <visualProperty default="org.cytoscape.ding.customgraphics.NullCustomGraphics,0,[ Remove Graphics ]," name="NODE_CUSTOMGRAPHICS_8"/>
            <visualProperty default="0.0" name="NODE_CUSTOMGRAPHICS_SIZE_8"/>
            <visualProperty default="7.0" name="NODE_BORDER_WIDTH"/>
            <visualProperty default="0.0" name="NODE_X_LOCATION"/>
            <visualProperty default="0.0" name="NODE_CUSTOMGRAPHICS_SIZE_5"/>
            <visualProperty default="18.0" name="NODE_SIZE"/>
            <visualProperty default="0.0" name="NODE_CUSTOMGRAPHICS_SIZE_6"/>
            <visualProperty default="org.cytoscape.ding.customgraphics.NullCustomGraphics,0,[ Remove Graphics ]," name="NODE_CUSTOMGRAPHICS_1"/>
            <visualProperty default="org.cytoscape.ding.customgraphics.NullCustomGraphics,0,[ Remove Graphics ]," name="NODE_CUSTOMGRAPHICS_7"/>
            <visualProperty default="" name="NODE_LABEL">
                <passthroughMapping attributeName="name" attributeType="string"/>
            </visualProperty>
            <visualProperty default="C,C,c,0.00,0.00" name="NODE_CUSTOMGRAPHICS_POSITION_9"/>
            <visualProperty default="0.0" name="NODE_CUSTOMGRAPHICS_SIZE_2"/>
            <visualProperty default="255" name="NODE_BORDER_TRANSPARENCY"/>
            <visualProperty default="ELLIPSE" name="NODE_SHAPE"/>
            <visualProperty default="14" name="NODE_LABEL_FONT_SIZE"/>
            <visualProperty default="SansSerif.plain,plain,12" name="NODE_LABEL_FONT_FACE"/>
            <visualProperty default="10.0" name="COMPOUND_NODE_PADDING"/>
            <visualProperty default="true" name="NODE_VISIBLE"/>
            <visualProperty default="#FEC44F" name="NODE_FILL_COLOR"/>
            <visualProperty default="#FFFFFF" name="NODE_BORDER_PAINT"/>
            <visualProperty default="0.0" name="NODE_Y_LOCATION"/>
            <visualProperty default="0.0" name="NODE_Z_LOCATION"/>
            <visualProperty default="0.0" name="NODE_CUSTOMGRAPHICS_SIZE_3"/>
            <visualProperty default="C,C,c,0.00,0.00" name="NODE_CUSTOMGRAPHICS_POSITION_1"/>
            <visualProperty default="C,C,c,0.00,0.00" name="NODE_CUSTOMGRAPHICS_POSITION_7"/>
            <visualProperty default="C,C,c,0.00,0.00" name="NODE_CUSTOMGRAPHICS_POSITION_6"/>
            <visualProperty default="org.cytoscape.ding.customgraphics.NullCustomGraphics,0,[ Remove Graphics ]," name="NODE_CUSTOMGRAPHICS_2"/>
            <visualProperty default="C,C,c,0.00,0.00" name="NODE_CUSTOMGRAPHICS_POSITION_3"/>
            <visualProperty default="255" name="NODE_LABEL_TRANSPARENCY"/>
            <visualProperty default="0.0" name="NODE_CUSTOMGRAPHICS_SIZE_4"/>
            <visualProperty default="200.0" name="NODE_LABEL_WIDTH"/>
            <visualProperty default="SOLID" name="NODE_BORDER_STROKE"/>
            <visualProperty default="#FFFF00" name="NODE_SELECTED_PAINT"/>
            <visualProperty default="org.cytoscape.ding.customgraphics.NullCustomGraphics,0,[ Remove Graphics ]," name="NODE_CUSTOMGRAPHICS_6"/>
            <visualProperty default="false" name="NODE_SELECTED"/>
            <visualProperty default="0.0" name="NODE_DEPTH"/>
            <visualProperty default="org.cytoscape.ding.customgraphics.NullCustomGraphics,0,[ Remove Graphics ]," name="NODE_CUSTOMGRAPHICS_4"/>
            <visualProperty default="#666666" name="NODE_LABEL_COLOR"/>
            <visualProperty default="org.cytoscape.ding.customgraphics.NullCustomGraphics,0,[ Remove Graphics ]," name="NODE_CUSTOMGRAPHICS_3"/>
            <visualProperty default="SE,NW,c,-2.00,3.00" name="NODE_LABEL_POSITION"/>
            <visualProperty default="C,C,c,0.00,0.00" name="NODE_CUSTOMGRAPHICS_POSITION_2"/>
            <visualProperty default="40.0" name="NODE_HEIGHT"/>
            <visualProperty default="ROUND_RECTANGLE" name="COMPOUND_NODE_SHAPE"/>
            <visualProperty default="255" name="NODE_TRANSPARENCY"/>
            <visualProperty default="0.0" name="NODE_CUSTOMGRAPHICS_SIZE_7"/>
            <visualProperty default="60.0" name="NODE_WIDTH"/>
        </node>
        <edge>
            <dependency value="true" name="arrowColorMatchesEdge"/>
            <visualProperty default="#FFFF00" name="EDGE_TARGET_ARROW_SELECTED_PAINT"/>
            <visualProperty default="SansSerif.plain,plain,10" name="EDGE_LABEL_FONT_FACE"/>
            <visualProperty default="3.0" name="EDGE_WIDTH"/>
            <visualProperty default="" name="EDGE_LABEL"/>
            <visualProperty default="255" name="EDGE_LABEL_TRANSPARENCY"/>
            <visualProperty default="0.728545744495502,-0.684997151948455,0.6456513365424503" name="EDGE_BEND"/>
            <visualProperty default="SOLID" name="EDGE_LINE_TYPE"/>
            <visualProperty default="DELTA" name="EDGE_TARGET_ARROW_SHAPE"/>
            <visualProperty default="NONE" name="EDGE_SOURCE_ARROW_SHAPE"/>
            <visualProperty default="#000000" name="EDGE_LABEL_COLOR"/>
            <visualProperty default="#000000" name="EDGE_SOURCE_ARROW_UNSELECTED_PAINT"/>
            <visualProperty default="255" name="EDGE_TRANSPARENCY"/>
            <visualProperty default="#FFFF00" name="EDGE_SOURCE_ARROW_SELECTED_PAINT"/>
            <visualProperty default="10" name="EDGE_LABEL_FONT_SIZE"/>
            <visualProperty default="#FFFFFF" name="EDGE_UNSELECTED_PAINT"/>
            <visualProperty default="true" name="EDGE_CURVED"/>
            <visualProperty default="#FF0000" name="EDGE_STROKE_SELECTED_PAINT"/>
            <visualProperty default="false" name="EDGE_SELECTED"/>
            <visualProperty default="true" name="EDGE_VISIBLE"/>
            <visualProperty default="200.0" name="EDGE_LABEL_WIDTH"/>
            <visualProperty default="" name="EDGE_TOOLTIP"/>
            <visualProperty default="#FFFFFF" name="EDGE_STROKE_UNSELECTED_PAINT"/>
            <visualProperty default="#000000" name="EDGE_TARGET_ARROW_UNSELECTED_PAINT"/>
        </edge>
    </visualStyle>
    <visualStyle name="Big Labels">
        <network>
            <visualProperty default="400.0" name="NETWORK_HEIGHT"/>
            <visualProperty default="0.0" name="NETWORK_CENTER_X_LOCATION"/>
            <visualProperty default="#FFFFFF" name="NETWORK_BACKGROUND_PAINT"/>
            <visualProperty default="0.0" name="NETWORK_CENTER_Z_LOCATION"/>
            <visualProperty default="1.0" name="NETWORK_SCALE_FACTOR"/>
            <visualProperty default="true" name="NETWORK_NODE_SELECTION"/>
            <visualProperty default="550.0" name="NETWORK_WIDTH"/>
            <visualProperty default="" name="NETWORK_TITLE"/>
            <visualProperty default="550.0" name="NETWORK_SIZE"/>
            <visualProperty default="0.0" name="NETWORK_CENTER_Y_LOCATION"/>
            <visualProperty default="true" name="NETWORK_EDGE_SELECTION"/>
            <visualProperty default="0.0" name="NETWORK_DEPTH"/>
        </network>
        <node>
            <dependency value="true" name="nodeCustomGraphicsSizeSync"/>
            <dependency value="true" name="nodeSizeLocked"/>
            <visualProperty default="C,C,c,0.00,0.00" name="NODE_CUSTOMGRAPHICS_POSITION_8"/>
            <visualProperty default="true" name="NODE_NESTED_NETWORK_IMAGE_VISIBLE"/>
            <visualProperty default="DefaultVisualizableVisualProperty(id=NODE_CUSTOMPAINT_5, name=Node Custom Paint 5)" name="NODE_CUSTOMPAINT_5"/>
            <visualProperty default="org.cytoscape.ding.customgraphics.NullCustomGraphics,0,[ Remove Graphics ]," name="NODE_CUSTOMGRAPHICS_9"/>
            <visualProperty default="C,C,c,0.00,0.00" name="NODE_CUSTOMGRAPHICS_POSITION_4"/>
            <visualProperty default="" name="NODE_TOOLTIP"/>
            <visualProperty default="50.0" name="NODE_CUSTOMGRAPHICS_SIZE_9"/>
            <visualProperty default="50.0" name="NODE_CUSTOMGRAPHICS_SIZE_1"/>
            <visualProperty default="org.cytoscape.ding.customgraphics.NullCustomGraphics,0,[ Remove Graphics ]," name="NODE_CUSTOMGRAPHICS_5"/>
            <visualProperty default="C,C,c,0.00,0.00" name="NODE_CUSTOMGRAPHICS_POSITION_5"/>
            <visualProperty default="org.cytoscape.ding.customgraphics.NullCustomGraphics,0,[ Remove Graphics ]," name="NODE_CUSTOMGRAPHICS_8"/>
            <visualProperty default="50.0" name="NODE_CUSTOMGRAPHICS_SIZE_8"/>
            <visualProperty default="0.0" name="NODE_BORDER_WIDTH"/>
            <visualProperty default="0.0" name="NODE_X_LOCATION"/>
            <visualProperty default="DefaultVisualizableVisualProperty(id=NODE_CUSTOMPAINT_1, name=Node Custom Paint 1)" name="NODE_CUSTOMPAINT_1"/>
            <visualProperty default="50.0" name="NODE_CUSTOMGRAPHICS_SIZE_5"/>
            <visualProperty default="5.0" name="NODE_SIZE"/>
            <visualProperty default="50.0" name="NODE_CUSTOMGRAPHICS_SIZE_6"/>
            <visualProperty default="org.cytoscape.ding.customgraphics.NullCustomGraphics,0,[ Remove Graphics ]," name="NODE_CUSTOMGRAPHICS_1"/>
            <visualProperty default="org.cytoscape.ding.customgraphics.NullCustomGraphics,0,[ Remove Graphics ]," name="NODE_CUSTOMGRAPHICS_7"/>
            <visualProperty default="" name="NODE_LABEL">
                <passthroughMapping attributeName="name" attributeType="string"/>
            </visualProperty>
            <visualProperty default="C,C,c,0.00,0.00" name="NODE_CUSTOMGRAPHICS_POSITION_9"/>
            <visualProperty default="DefaultVisualizableVisualProperty(id=NODE_CUSTOMPAINT_3, name=Node Custom Paint 3)" name="NODE_CUSTOMPAINT_3"/>
            <visualProperty default="50.0" name="NODE_CUSTOMGRAPHICS_SIZE_2"/>
            <visualProperty default="255" name="NODE_BORDER_TRANSPARENCY"/>
            <visualProperty default="ELLIPSE" name="NODE_SHAPE"/>
            <visualProperty default="#787878" name="NODE_PAINT"/>
            <visualProperty default="24" name="NODE_LABEL_FONT_SIZE"/>
            <visualProperty default="SansSerif.plain,plain,12" name="NODE_LABEL_FONT_FACE"/>
            <visualProperty default="10.0" name="COMPOUND_NODE_PADDING"/>
            <visualProperty default="true" name="NODE_VISIBLE"/>
            <visualProperty default="#FFFFFF" name="NODE_FILL_COLOR"/>
            <visualProperty default="#000000" name="NODE_BORDER_PAINT"/>
            <visualProperty default="0.0" name="NODE_Y_LOCATION"/>
            <visualProperty default="0.0" name="NODE_Z_LOCATION"/>
            <visualProperty default="DefaultVisualizableVisualProperty(id=NODE_CUSTOMPAINT_9, name=Node Custom Paint 9)" name="NODE_CUSTOMPAINT_9"/>
            <visualProperty default="50.0" name="NODE_CUSTOMGRAPHICS_SIZE_3"/>
            <visualProperty default="C,C,c,0.00,0.00" name="NODE_CUSTOMGRAPHICS_POSITION_1"/>
            <visualProperty default="C,C,c,0.00,0.00" name="NODE_CUSTOMGRAPHICS_POSITION_7"/>
            <visualProperty default="C,C,c,0.00,0.00" name="NODE_CUSTOMGRAPHICS_POSITION_6"/>
            <visualProperty default="DefaultVisualizableVisualProperty(id=NODE_CUSTOMPAINT_6, name=Node Custom Paint 6)" name="NODE_CUSTOMPAINT_6"/>
            <visualProperty default="org.cytoscape.ding.customgraphics.NullCustomGraphics,0,[ Remove Graphics ]," name="NODE_CUSTOMGRAPHICS_2"/>
            <visualProperty default="C,C,c,0.00,0.00" name="NODE_CUSTOMGRAPHICS_POSITION_3"/>
            <visualProperty default="255" name="NODE_LABEL_TRANSPARENCY"/>
            <visualProperty default="50.0" name="NODE_CUSTOMGRAPHICS_SIZE_4"/>
            <visualProperty default="200.0" name="NODE_LABEL_WIDTH"/>
            <visualProperty default="SOLID" name="NODE_BORDER_STROKE"/>
            <visualProperty default="#FF0066" name="NODE_SELECTED_PAINT"/>
            <visualProperty default="org.cytoscape.ding.customgraphics.NullCustomGraphics,0,[ Remove Graphics ]," name="NODE_CUSTOMGRAPHICS_6"/>
            <visualProperty default="false" name="NODE_SELECTED"/>
            <visualProperty default="0.0" name="NODE_DEPTH"/>
            <visualProperty default="org.cytoscape.ding.customgraphics.NullCustomGraphics,0,[ Remove Graphics ]," name="NODE_CUSTOMGRAPHICS_4"/>
            <visualProperty default="#333333" name="NODE_LABEL_COLOR"/>
            <visualProperty default="DefaultVisualizableVisualProperty(id=NODE_CUSTOMPAINT_4, name=Node Custom Paint 4)" name="NODE_CUSTOMPAINT_4"/>
            <visualProperty default="org.cytoscape.ding.customgraphics.NullCustomGraphics,0,[ Remove Graphics ]," name="NODE_CUSTOMGRAPHICS_3"/>
            <visualProperty default="C,C,c,0.00,0.00" name="NODE_LABEL_POSITION"/>
            <visualProperty default="DefaultVisualizableVisualProperty(id=NODE_CUSTOMPAINT_7, name=Node Custom Paint 7)" name="NODE_CUSTOMPAINT_7"/>
            <visualProperty default="DefaultVisualizableVisualProperty(id=NODE_CUSTOMPAINT_2, name=Node Custom Paint 2)" name="NODE_CUSTOMPAINT_2"/>
            <visualProperty default="C,C,c,0.00,0.00" name="NODE_CUSTOMGRAPHICS_POSITION_2"/>
            <visualProperty default="30.0" name="NODE_HEIGHT"/>
            <visualProperty default="ROUND_RECTANGLE" name="COMPOUND_NODE_SHAPE"/>
            <visualProperty default="255" name="NODE_TRANSPARENCY"/>
            <visualProperty default="50.0" name="NODE_CUSTOMGRAPHICS_SIZE_7"/>
            <visualProperty default="DefaultVisualizableVisualProperty(id=NODE_CUSTOMPAINT_8, name=Node Custom Paint 8)" name="NODE_CUSTOMPAINT_8"/>
            <visualProperty default="30.0" name="NODE_WIDTH"/>
        </node>
        <edge>
            <dependency value="false" name="arrowColorMatchesEdge"/>
            <visualProperty default="#FFFF00" name="EDGE_TARGET_ARROW_SELECTED_PAINT"/>
            <visualProperty default="SansSerif.plain,plain,10" name="EDGE_LABEL_FONT_FACE"/>
            <visualProperty default="1.0" name="EDGE_WIDTH"/>
            <visualProperty default="" name="EDGE_LABEL"/>
            <visualProperty default="255" name="EDGE_LABEL_TRANSPARENCY"/>
            <visualProperty default="" name="EDGE_BEND"/>
            <visualProperty default="SOLID" name="EDGE_LINE_TYPE"/>
            <visualProperty default="NONE" name="EDGE_TARGET_ARROW_SHAPE"/>
            <visualProperty default="NONE" name="EDGE_SOURCE_ARROW_SHAPE"/>
            <visualProperty default="#000000" name="EDGE_LABEL_COLOR"/>
            <visualProperty default="#000000" name="EDGE_SOURCE_ARROW_UNSELECTED_PAINT"/>
            <visualProperty default="255" name="EDGE_TRANSPARENCY"/>
            <visualProperty default="#FFFF00" name="EDGE_SOURCE_ARROW_SELECTED_PAINT"/>
            <visualProperty default="10" name="EDGE_LABEL_FONT_SIZE"/>
            <visualProperty default="#404040" name="EDGE_UNSELECTED_PAINT"/>
            <visualProperty default="true" name="EDGE_CURVED"/>
            <visualProperty default="#FF0000" name="EDGE_STROKE_SELECTED_PAINT"/>
            <visualProperty default="false" name="EDGE_SELECTED"/>
            <visualProperty default="true" name="EDGE_VISIBLE"/>
            <visualProperty default="200.0" name="EDGE_LABEL_WIDTH"/>
            <visualProperty default="" name="EDGE_TOOLTIP"/>
            <visualProperty default="#B7B7B7" name="EDGE_STROKE_UNSELECTED_PAINT"/>
            <visualProperty default="#808080" name="EDGE_PAINT"/>
            <visualProperty default="#FF0000" name="EDGE_SELECTED_PAINT"/>
            <visualProperty default="#000000" name="EDGE_TARGET_ARROW_UNSELECTED_PAINT"/>
        </edge>
    </visualStyle>
    <visualStyle name="Sample1">
        <network>
            <visualProperty default="400.0" name="NETWORK_HEIGHT"/>
            <visualProperty default="0.0" name="NETWORK_CENTER_X_LOCATION"/>
            <visualProperty default="#FFFFFF" name="NETWORK_BACKGROUND_PAINT"/>
            <visualProperty default="0.0" name="NETWORK_CENTER_Z_LOCATION"/>
            <visualProperty default="1.0" name="NETWORK_SCALE_FACTOR"/>
            <visualProperty default="true" name="NETWORK_NODE_SELECTION"/>
            <visualProperty default="550.0" name="NETWORK_WIDTH"/>
            <visualProperty default="" name="NETWORK_TITLE"/>
            <visualProperty default="550.0" name="NETWORK_SIZE"/>
            <visualProperty default="0.0" name="NETWORK_CENTER_Y_LOCATION"/>
            <visualProperty default="true" name="NETWORK_EDGE_SELECTION"/>
            <visualProperty default="0.0" name="NETWORK_DEPTH"/>
        </network>
        <node>
            <dependency value="true" name="nodeCustomGraphicsSizeSync"/>
            <dependency value="true" name="nodeSizeLocked"/>
            <visualProperty default="C,C,c,0.00,0.00" name="NODE_CUSTOMGRAPHICS_POSITION_8"/>
            <visualProperty default="true" name="NODE_NESTED_NETWORK_IMAGE_VISIBLE"/>
            <visualProperty default="DefaultVisualizableVisualProperty(id=NODE_CUSTOMPAINT_5, name=Node Custom Paint 5)" name="NODE_CUSTOMPAINT_5"/>
            <visualProperty default="org.cytoscape.ding.customgraphics.NullCustomGraphics,0,[ Remove Graphics ]," name="NODE_CUSTOMGRAPHICS_9"/>
            <visualProperty default="C,C,c,0.00,0.00" name="NODE_CUSTOMGRAPHICS_POSITION_4"/>
            <visualProperty default="" name="NODE_TOOLTIP"/>
            <visualProperty default="50.0" name="NODE_CUSTOMGRAPHICS_SIZE_9"/>
            <visualProperty default="50.0" name="NODE_CUSTOMGRAPHICS_SIZE_1"/>
            <visualProperty default="org.cytoscape.ding.customgraphics.NullCustomGraphics,0,[ Remove Graphics ]," name="NODE_CUSTOMGRAPHICS_5"/>
            <visualProperty default="C,C,c,0.00,0.00" name="NODE_CUSTOMGRAPHICS_POSITION_5"/>
            <visualProperty default="org.cytoscape.ding.customgraphics.NullCustomGraphics,0,[ Remove Graphics ]," name="NODE_CUSTOMGRAPHICS_8"/>
            <visualProperty default="50.0" name="NODE_CUSTOMGRAPHICS_SIZE_8"/>
            <visualProperty default="0.0" name="NODE_BORDER_WIDTH"/>
            <visualProperty default="0.0" name="NODE_X_LOCATION"/>
            <visualProperty default="DefaultVisualizableVisualProperty(id=NODE_CUSTOMPAINT_1, name=Node Custom Paint 1)" name="NODE_CUSTOMPAINT_1"/>
            <visualProperty default="50.0" name="NODE_CUSTOMGRAPHICS_SIZE_5"/>
            <visualProperty default="25.0" name="NODE_SIZE"/>
            <visualProperty default="50.0" name="NODE_CUSTOMGRAPHICS_SIZE_6"/>
            <visualProperty default="org.cytoscape.ding.customgraphics.NullCustomGraphics,0,[ Remove Graphics ]," name="NODE_CUSTOMGRAPHICS_1"/>
            <visualProperty default="org.cytoscape.ding.customgraphics.NullCustomGraphics,0,[ Remove Graphics ]," name="NODE_CUSTOMGRAPHICS_7"/>
            <visualProperty default="" name="NODE_LABEL">
                <passthroughMapping attributeName="name" attributeType="string"/>
            </visualProperty>
            <visualProperty default="C,C,c,0.00,0.00" name="NODE_CUSTOMGRAPHICS_POSITION_9"/>
            <visualProperty default="DefaultVisualizableVisualProperty(id=NODE_CUSTOMPAINT_3, name=Node Custom Paint 3)" name="NODE_CUSTOMPAINT_3"/>
            <visualProperty default="50.0" name="NODE_CUSTOMGRAPHICS_SIZE_2"/>
            <visualProperty default="255" name="NODE_BORDER_TRANSPARENCY"/>
            <visualProperty default="ELLIPSE" name="NODE_SHAPE"/>
            <visualProperty default="#787878" name="NODE_PAINT"/>
            <visualProperty default="10" name="NODE_LABEL_FONT_SIZE"/>
            <visualProperty default="Dialog.plain,plain,12" name="NODE_LABEL_FONT_FACE"/>
            <visualProperty default="10.0" name="COMPOUND_NODE_PADDING"/>
            <visualProperty default="true" name="NODE_VISIBLE"/>
            <visualProperty default="#7FCDBB" name="NODE_FILL_COLOR"/>
            <visualProperty default="#000000" name="NODE_BORDER_PAINT"/>
            <visualProperty default="0.0" name="NODE_Y_LOCATION"/>
            <visualProperty default="0.0" name="NODE_Z_LOCATION"/>
            <visualProperty default="DefaultVisualizableVisualProperty(id=NODE_CUSTOMPAINT_9, name=Node Custom Paint 9)" name="NODE_CUSTOMPAINT_9"/>
            <visualProperty default="50.0" name="NODE_CUSTOMGRAPHICS_SIZE_3"/>
            <visualProperty default="C,C,c,0.00,0.00" name="NODE_CUSTOMGRAPHICS_POSITION_1"/>
            <visualProperty default="C,C,c,0.00,0.00" name="NODE_CUSTOMGRAPHICS_POSITION_7"/>
            <visualProperty default="C,C,c,0.00,0.00" name="NODE_CUSTOMGRAPHICS_POSITION_6"/>
            <visualProperty default="DefaultVisualizableVisualProperty(id=NODE_CUSTOMPAINT_6, name=Node Custom Paint 6)" name="NODE_CUSTOMPAINT_6"/>
            <visualProperty default="org.cytoscape.ding.customgraphics.NullCustomGraphics,0,[ Remove Graphics ]," name="NODE_CUSTOMGRAPHICS_2"/>
            <visualProperty default="C,C,c,0.00,0.00" name="NODE_CUSTOMGRAPHICS_POSITION_3"/>
            <visualProperty default="255" name="NODE_LABEL_TRANSPARENCY"/>
            <visualProperty default="50.0" name="NODE_CUSTOMGRAPHICS_SIZE_4"/>
            <visualProperty default="200.0" name="NODE_LABEL_WIDTH"/>
            <visualProperty default="SOLID" name="NODE_BORDER_STROKE"/>
            <visualProperty default="#FFFF00" name="NODE_SELECTED_PAINT"/>
            <visualProperty default="org.cytoscape.ding.customgraphics.NullCustomGraphics,0,[ Remove Graphics ]," name="NODE_CUSTOMGRAPHICS_6"/>
            <visualProperty default="false" name="NODE_SELECTED"/>
            <visualProperty default="0.0" name="NODE_DEPTH"/>
            <visualProperty default="org.cytoscape.ding.customgraphics.NullCustomGraphics,0,[ Remove Graphics ]," name="NODE_CUSTOMGRAPHICS_4"/>
            <visualProperty default="#333333" name="NODE_LABEL_COLOR"/>
            <visualProperty default="DefaultVisualizableVisualProperty(id=NODE_CUSTOMPAINT_4, name=Node Custom Paint 4)" name="NODE_CUSTOMPAINT_4"/>
            <visualProperty default="org.cytoscape.ding.customgraphics.NullCustomGraphics,0,[ Remove Graphics ]," name="NODE_CUSTOMGRAPHICS_3"/>
            <visualProperty default="C,C,c,0.00,0.00" name="NODE_LABEL_POSITION"/>
            <visualProperty default="DefaultVisualizableVisualProperty(id=NODE_CUSTOMPAINT_7, name=Node Custom Paint 7)" name="NODE_CUSTOMPAINT_7"/>
            <visualProperty default="DefaultVisualizableVisualProperty(id=NODE_CUSTOMPAINT_2, name=Node Custom Paint 2)" name="NODE_CUSTOMPAINT_2"/>
            <visualProperty default="C,C,c,0.00,0.00" name="NODE_CUSTOMGRAPHICS_POSITION_2"/>
            <visualProperty default="30.0" name="NODE_HEIGHT"/>
            <visualProperty default="ROUND_RECTANGLE" name="COMPOUND_NODE_SHAPE"/>
            <visualProperty default="255" name="NODE_TRANSPARENCY"/>
            <visualProperty default="50.0" name="NODE_CUSTOMGRAPHICS_SIZE_7"/>
            <visualProperty default="DefaultVisualizableVisualProperty(id=NODE_CUSTOMPAINT_8, name=Node Custom Paint 8)" name="NODE_CUSTOMPAINT_8"/>
            <visualProperty default="70.0" name="NODE_WIDTH"/>
        </node>
        <edge>
            <dependency value="false" name="arrowColorMatchesEdge"/>
            <visualProperty default="#FFFF00" name="EDGE_TARGET_ARROW_SELECTED_PAINT"/>
            <visualProperty default="Dialog.plain,plain,10" name="EDGE_LABEL_FONT_FACE"/>
            <visualProperty default="1.0" name="EDGE_WIDTH"/>
            <visualProperty default="" name="EDGE_LABEL">
                <passthroughMapping attributeName="interaction" attributeType="string"/>
            </visualProperty>
            <visualProperty default="255" name="EDGE_LABEL_TRANSPARENCY"/>
            <visualProperty default="" name="EDGE_BEND"/>
            <visualProperty default="SOLID" name="EDGE_LINE_TYPE">
                <discreteMapping attributeName="interaction" attributeType="string">
                    <discreteMappingEntry attributeValue="pp" value="SOLID"/>
                    <discreteMappingEntry attributeValue="pd" value="LONG_DASH"/>
                </discreteMapping>
            </visualProperty>
            <visualProperty default="NONE" name="EDGE_TARGET_ARROW_SHAPE"/>
            <visualProperty default="NONE" name="EDGE_SOURCE_ARROW_SHAPE"/>
            <visualProperty default="#333333" name="EDGE_LABEL_COLOR"/>
            <visualProperty default="#000000" name="EDGE_SOURCE_ARROW_UNSELECTED_PAINT"/>
            <visualProperty default="255" name="EDGE_TRANSPARENCY"/>
            <visualProperty default="#FFFF00" name="EDGE_SOURCE_ARROW_SELECTED_PAINT"/>
            <visualProperty default="10" name="EDGE_LABEL_FONT_SIZE"/>
            <visualProperty default="#404040" name="EDGE_UNSELECTED_PAINT"/>
            <visualProperty default="true" name="EDGE_CURVED"/>
            <visualProperty default="#FF0000" name="EDGE_STROKE_SELECTED_PAINT"/>
            <visualProperty default="false" name="EDGE_SELECTED"/>
            <visualProperty default="true" name="EDGE_VISIBLE"/>
            <visualProperty default="200.0" name="EDGE_LABEL_WIDTH"/>
            <visualProperty default="" name="EDGE_TOOLTIP"/>
            <visualProperty default="#999999" name="EDGE_STROKE_UNSELECTED_PAINT"/>
            <visualProperty default="#323232" name="EDGE_PAINT"/>
            <visualProperty default="#FF0000" name="EDGE_SELECTED_PAINT"/>
            <visualProperty default="#000000" name="EDGE_TARGET_ARROW_UNSELECTED_PAINT"/>
        </edge>
    </visualStyle>
    <visualStyle name="KAM Visualization">
        <network>
            <visualProperty default="400.0" name="NETWORK_HEIGHT"/>
            <visualProperty default="0.0" name="NETWORK_CENTER_X_LOCATION"/>
            <visualProperty default="#FFFFFF" name="NETWORK_BACKGROUND_PAINT"/>
            <visualProperty default="0.0" name="NETWORK_CENTER_Z_LOCATION"/>
            <visualProperty default="1.0" name="NETWORK_SCALE_FACTOR"/>
            <visualProperty default="true" name="NETWORK_NODE_SELECTION"/>
            <visualProperty default="550.0" name="NETWORK_WIDTH"/>
            <visualProperty default="" name="NETWORK_TITLE"/>
            <visualProperty default="0.0" name="NETWORK_CENTER_Y_LOCATION"/>
            <visualProperty default="true" name="NETWORK_EDGE_SELECTION"/>
            <visualProperty default="0.0" name="NETWORK_DEPTH"/>
        </network>
        <node>
            <dependency value="true" name="nodeCustomGraphicsSizeSync"/>
            <dependency value="false" name="nodeSizeLocked"/>
            <visualProperty default="C,C,c,0.00,0.00" name="NODE_CUSTOMGRAPHICS_POSITION_8"/>
            <visualProperty default="true" name="NODE_NESTED_NETWORK_IMAGE_VISIBLE"/>
            <visualProperty default="org.cytoscape.ding.customgraphics.NullCustomGraphics,0,[ Remove Graphics ]," name="NODE_CUSTOMGRAPHICS_9"/>
            <visualProperty default="C,C,c,0.00,0.00" name="NODE_CUSTOMGRAPHICS_POSITION_4"/>
            <visualProperty default="" name="NODE_TOOLTIP"/>
            <visualProperty default="0.0" name="NODE_CUSTOMGRAPHICS_SIZE_9"/>
            <visualProperty default="0.0" name="NODE_CUSTOMGRAPHICS_SIZE_1"/>
            <visualProperty default="org.cytoscape.ding.customgraphics.NullCustomGraphics,0,[ Remove Graphics ]," name="NODE_CUSTOMGRAPHICS_5"/>
            <visualProperty default="C,C,c,0.00,0.00" name="NODE_CUSTOMGRAPHICS_POSITION_5"/>
            <visualProperty default="org.cytoscape.ding.customgraphics.NullCustomGraphics,0,[ Remove Graphics ]," name="NODE_CUSTOMGRAPHICS_8"/>
            <visualProperty default="0.0" name="NODE_CUSTOMGRAPHICS_SIZE_8"/>
            <visualProperty default="1.0" name="NODE_BORDER_WIDTH"/>
            <visualProperty default="0.0" name="NODE_X_LOCATION"/>
            <visualProperty default="0.0" name="NODE_CUSTOMGRAPHICS_SIZE_5"/>
            <visualProperty default="35.0" name="NODE_SIZE">
                <discreteMapping attributeName="bel.function" attributeType="string">
                    <discreteMappingEntry attributeValue="transcriptionalActivity" value="100.0"/>
                </discreteMapping>
            </visualProperty>
            <visualProperty default="0.0" name="NODE_CUSTOMGRAPHICS_SIZE_6"/>
            <visualProperty default="org.cytoscape.ding.customgraphics.NullCustomGraphics,0,[ Remove Graphics ]," name="NODE_CUSTOMGRAPHICS_1"/>
            <visualProperty default="org.cytoscape.ding.customgraphics.NullCustomGraphics,0,[ Remove Graphics ]," name="NODE_CUSTOMGRAPHICS_7"/>
            <visualProperty default="" name="NODE_LABEL">
                <passthroughMapping attributeName="name" attributeType="string"/>
            </visualProperty>
            <visualProperty default="C,C,c,0.00,0.00" name="NODE_CUSTOMGRAPHICS_POSITION_9"/>
            <visualProperty default="0.0" name="NODE_CUSTOMGRAPHICS_SIZE_2"/>
            <visualProperty default="255" name="NODE_BORDER_TRANSPARENCY">
                <discreteMapping attributeName="linked" attributeType="boolean">
                    <discreteMappingEntry attributeValue="false" value="100"/>
                    <discreteMappingEntry attributeValue="true" value="255"/>
                </discreteMapping>
            </visualProperty>
            <visualProperty default="RECTANGLE" name="NODE_SHAPE">
                <discreteMapping attributeName="bel.function" attributeType="string">
                    <discreteMappingEntry attributeValue="transportActivity" value="ROUND_RECTANGLE"/>
                    <discreteMappingEntry attributeValue="cellSecretion" value="VEE"/>
                    <discreteMappingEntry attributeValue="catalyticActivity" value="HEXAGON"/>
                    <discreteMappingEntry attributeValue="reaction" value="PARALLELOGRAM"/>
                    <discreteMappingEntry attributeValue="pathology" value="PARALLELOGRAM"/>
                    <discreteMappingEntry attributeValue="gtpBoundActivity" value="HEXAGON"/>
                    <discreteMappingEntry attributeValue="translocation" value="VEE"/>
                    <discreteMappingEntry attributeValue="kinaseActivity" value="HEXAGON"/>
                    <discreteMappingEntry attributeValue="proteinAbundance" value="ROUND_RECTANGLE"/>
                    <discreteMappingEntry attributeValue="peptidaseActivity" value="HEXAGON"/>
                    <discreteMappingEntry attributeValue="abundance" value="DIAMOND"/>
                    <discreteMappingEntry attributeValue="degradation" value="ROUND_RECTANGLE"/>
                    <discreteMappingEntry attributeValue="compositeAbundance" value="ROUND_RECTANGLE"/>
                    <discreteMappingEntry attributeValue="molecularActivity" value="HEXAGON"/>
                    <discreteMappingEntry attributeValue="rnaAbundance" value="ELLIPSE"/>
                    <discreteMappingEntry attributeValue="biologicalProcess" value="PARALLELOGRAM"/>
                    <discreteMappingEntry attributeValue="microRNAAbundance" value="ELLIPSE"/>
                    <discreteMappingEntry attributeValue="geneAbundance" value="ELLIPSE"/>
                    <discreteMappingEntry attributeValue="ribosylationActivity" value="HEXAGON"/>
                    <discreteMappingEntry attributeValue="cellSurfaceExpression" value="VEE"/>
                    <discreteMappingEntry attributeValue="chaperoneActivity" value="HEXAGON"/>
                    <discreteMappingEntry attributeValue="transcriptionalActivity" value="HEXAGON"/>
                    <discreteMappingEntry attributeValue="phosphataseActivity" value="HEXAGON"/>
                    <discreteMappingEntry attributeValue="complexAbundance" value="ROUND_RECTANGLE"/>
                </discreteMapping>
            </visualProperty>
            <visualProperty default="12" name="NODE_LABEL_FONT_SIZE"/>
            <visualProperty default="Dialog.plain,plain,12" name="NODE_LABEL_FONT_FACE"/>
            <visualProperty default="true" name="NODE_VISIBLE"/>
            <visualProperty default="#FFFFFF" name="NODE_FILL_COLOR">
                <discreteMapping attributeName="bel.function" attributeType="string">
                    <discreteMappingEntry attributeValue="transportActivity" value="#6464FF"/>
                    <discreteMappingEntry attributeValue="cellSecretion" value="#C8C8FF"/>
                    <discreteMappingEntry attributeValue="catalyticActivity" value="#6464FF"/>
                    <discreteMappingEntry attributeValue="reaction" value="#9696FF"/>
                    <discreteMappingEntry attributeValue="pathology" value="#FF3264"/>
                    <discreteMappingEntry attributeValue="gtpBoundActivity" value="#6464FF"/>
                    <discreteMappingEntry attributeValue="translocation" value="#C8C8FF"/>
                    <discreteMappingEntry attributeValue="kinaseActivity" value="#6464FF"/>
                    <discreteMappingEntry attributeValue="proteinAbundance" value="#64FFFF"/>
                    <discreteMappingEntry attributeValue="peptidaseActivity" value="#6464FF"/>
                    <discreteMappingEntry attributeValue="abundance" value="#64C8FF"/>
                    <discreteMappingEntry attributeValue="degradation" value="#FF3264"/>
                    <discreteMappingEntry attributeValue="compositeAbundance" value="#C8FFFF"/>
                    <discreteMappingEntry attributeValue="molecularActivity" value="#6464FF"/>
                    <discreteMappingEntry attributeValue="rnaAbundance" value="#64FF64"/>
                    <discreteMappingEntry attributeValue="biologicalProcess" value="#FF64FF"/>
                    <discreteMappingEntry attributeValue="microRNAAbundance" value="#96FF96"/>
                    <discreteMappingEntry attributeValue="geneAbundance" value="#C8FFC8"/>
                    <discreteMappingEntry attributeValue="ribosylationActivity" value="#6464FF"/>
                    <discreteMappingEntry attributeValue="cellSurfaceExpression" value="#C8C8FF"/>
                    <discreteMappingEntry attributeValue="chaperoneActivity" value="#6464FF"/>
                    <discreteMappingEntry attributeValue="transcriptionalActivity" value="#6464FF"/>
                    <discreteMappingEntry attributeValue="phosphataseActivity" value="#6464FF"/>
                    <discreteMappingEntry attributeValue="complexAbundance" value="#6496FF"/>
                </discreteMapping>
            </visualProperty>
            <visualProperty default="#000000" name="NODE_BORDER_PAINT"/>
            <visualProperty default="0.0" name="NODE_Y_LOCATION"/>
            <visualProperty default="0.0" name="NODE_Z_LOCATION"/>
            <visualProperty default="0.0" name="NODE_CUSTOMGRAPHICS_SIZE_3"/>
            <visualProperty default="C,C,c,0.00,0.00" name="NODE_CUSTOMGRAPHICS_POSITION_1"/>
            <visualProperty default="C,C,c,0.00,0.00" name="NODE_CUSTOMGRAPHICS_POSITION_7"/>
            <visualProperty default="C,C,c,0.00,0.00" name="NODE_CUSTOMGRAPHICS_POSITION_6"/>
            <visualProperty default="org.cytoscape.ding.customgraphics.NullCustomGraphics,0,[ Remove Graphics ]," name="NODE_CUSTOMGRAPHICS_2"/>
            <visualProperty default="C,C,c,0.00,0.00" name="NODE_CUSTOMGRAPHICS_POSITION_3"/>
            <visualProperty default="255" name="NODE_LABEL_TRANSPARENCY">
                <discreteMapping attributeName="linked" attributeType="boolean">
                    <discreteMappingEntry attributeValue="false" value="100"/>
                    <discreteMappingEntry attributeValue="true" value="255"/>
                </discreteMapping>
            </visualProperty>
            <visualProperty default="0.0" name="NODE_CUSTOMGRAPHICS_SIZE_4"/>
            <visualProperty default="100.0" name="NODE_LABEL_WIDTH"/>
            <visualProperty default="SOLID" name="NODE_BORDER_STROKE"/>
            <visualProperty default="#FFFF00" name="NODE_SELECTED_PAINT"/>
            <visualProperty default="org.cytoscape.ding.customgraphics.NullCustomGraphics,0,[ Remove Graphics ]," name="NODE_CUSTOMGRAPHICS_6"/>
            <visualProperty default="false" name="NODE_SELECTED"/>
            <visualProperty default="0.0" name="NODE_DEPTH"/>
            <visualProperty default="org.cytoscape.ding.customgraphics.NullCustomGraphics,0,[ Remove Graphics ]," name="NODE_CUSTOMGRAPHICS_4"/>
            <visualProperty default="#000000" name="NODE_LABEL_COLOR"/>
            <visualProperty default="org.cytoscape.ding.customgraphics.NullCustomGraphics,0,[ Remove Graphics ]," name="NODE_CUSTOMGRAPHICS_3"/>
            <visualProperty default="C,C,c,0.00,0.00" name="NODE_LABEL_POSITION"/>
            <visualProperty default="C,C,c,0.00,0.00" name="NODE_CUSTOMGRAPHICS_POSITION_2"/>
            <visualProperty default="30.0" name="NODE_HEIGHT"/>
            <visualProperty default="255" name="NODE_TRANSPARENCY">
                <discreteMapping attributeName="linked" attributeType="boolean">
                    <discreteMappingEntry attributeValue="false" value="100"/>
                    <discreteMappingEntry attributeValue="true" value="255"/>
                </discreteMapping>
            </visualProperty>
            <visualProperty default="0.0" name="NODE_CUSTOMGRAPHICS_SIZE_7"/>
            <visualProperty default="70.0" name="NODE_WIDTH">
                <discreteMapping attributeName="bel.function" attributeType="string">
                    <discreteMappingEntry attributeValue="transportActivity" value="110.0"/>
                    <discreteMappingEntry attributeValue="cellSecretion" value="110.0"/>
                    <discreteMappingEntry attributeValue="catalyticActivity" value="110.0"/>
                    <discreteMappingEntry attributeValue="reaction" value="150.0"/>
                    <discreteMappingEntry attributeValue="pathology" value="125.0"/>
                    <discreteMappingEntry attributeValue="gtpBoundActivity" value="110.0"/>
                    <discreteMappingEntry attributeValue="translocation" value="110.0"/>
                    <discreteMappingEntry attributeValue="kinaseActivity" value="110.0"/>
                    <discreteMappingEntry attributeValue="proteinAbundance" value="75.0"/>
                    <discreteMappingEntry attributeValue="peptidaseActivity" value="110.0"/>
                    <discreteMappingEntry attributeValue="abundance" value="75.0"/>
                    <discreteMappingEntry attributeValue="degradation" value="110.0"/>
                    <discreteMappingEntry attributeValue="compositeAbundance" value="150.0"/>
                    <discreteMappingEntry attributeValue="molecularActivity" value="110.0"/>
                    <discreteMappingEntry attributeValue="rnaAbundance" value="75.0"/>
                    <discreteMappingEntry attributeValue="biologicalProcess" value="125.0"/>
                    <discreteMappingEntry attributeValue="microRNAAbundance" value="75.0"/>
                    <discreteMappingEntry attributeValue="geneAbundance" value="75.0"/>
                    <discreteMappingEntry attributeValue="ribosylationActivity" value="110.0"/>
                    <discreteMappingEntry attributeValue="cellSurfaceExpression" value="110.0"/>
                    <discreteMappingEntry attributeValue="chaperoneActivity" value="110.0"/>
                    <discreteMappingEntry attributeValue="transcriptionalActivity" value="110.0"/>
                    <discreteMappingEntry attributeValue="phosphataseActivity" value="110.0"/>
                    <discreteMappingEntry attributeValue="complexAbundance" value="150.0"/>
                </discreteMapping>
            </visualProperty>
        </node>
        <edge>
            <dependency value="true" name="arrowColorMatchesEdge"/>
            <visualProperty default="#FFFF00" name="EDGE_TARGET_ARROW_SELECTED_PAINT"/>
            <visualProperty default="Dialog.plain,plain,10" name="EDGE_LABEL_FONT_FACE"/>
            <visualProperty default="1.0" name="EDGE_WIDTH">
                <discreteMapping attributeName="interaction" attributeType="string">
                    <discreteMappingEntry attributeValue="translatedTo" value="3.0"/>
                    <discreteMappingEntry attributeValue="hasProduct" value="3.0"/>
                    <discreteMappingEntry attributeValue="reactantIn" value="3.0"/>
                    <discreteMappingEntry attributeValue="orthologous" value="3.0"/>
                    <discreteMappingEntry attributeValue="actsIn" value="3.0"/>
                    <discreteMappingEntry attributeValue="association" value="1.0"/>
                    <discreteMappingEntry attributeValue="hasVariant" value="3.0"/>
                    <discreteMappingEntry attributeValue="directlyIncreases" value="3.0"/>
                    <discreteMappingEntry attributeValue="increases" value="1.0"/>
                    <discreteMappingEntry attributeValue="prognosticBiomarkerFor" value="1.0"/>
                    <discreteMappingEntry attributeValue="hasComponent" value="3.0"/>
                    <discreteMappingEntry attributeValue="hasModification" value="3.0"/>
                    <discreteMappingEntry attributeValue="subProcess_OF" value="3.0"/>
                    <discreteMappingEntry attributeValue="isA" value="3.0"/>
                    <discreteMappingEntry attributeValue="rateLimitingStepOf" value="3.0"/>
                    <discreteMappingEntry attributeValue="biomarkerFor" value="1.0"/>
                    <discreteMappingEntry attributeValue="translocates" value="3.0"/>
                    <discreteMappingEntry attributeValue="transcribedTo" value="3.0"/>
                    <discreteMappingEntry attributeValue="causesNoChange" value="3.0"/>
                    <discreteMappingEntry attributeValue="positiveCorrelation" value="1.0"/>
                    <discreteMappingEntry attributeValue="subProcessOf" value="3.0"/>
                    <discreteMappingEntry attributeValue="hasMember" value="3.0"/>
                    <discreteMappingEntry attributeValue="includes" value="3.0"/>
                    <discreteMappingEntry attributeValue="directlyDecreases" value="3.0"/>
                    <discreteMappingEntry attributeValue="negativeCorrelation" value="1.0"/>
                    <discreteMappingEntry attributeValue="decreases" value="1.0"/>
                </discreteMapping>
            </visualProperty>
            <visualProperty default="" name="EDGE_LABEL"/>
            <visualProperty default="255" name="EDGE_LABEL_TRANSPARENCY"/>
            <visualProperty default="SOLID" name="EDGE_LINE_TYPE">
                <discreteMapping attributeName="interaction" attributeType="string">
                    <discreteMappingEntry attributeValue="transcribedTo" value="LONG_DASH"/>
                    <discreteMappingEntry attributeValue="causesNoChange" value="BACKWARD_SLASH"/>
                    <discreteMappingEntry attributeValue="translatedTo" value="LONG_DASH"/>
                    <discreteMappingEntry attributeValue="hasProduct" value="EQUAL_DASH"/>
                    <discreteMappingEntry attributeValue="positiveCorrelation" value="DOT"/>
                    <discreteMappingEntry attributeValue="reactantIn" value="EQUAL_DASH"/>
                    <discreteMappingEntry attributeValue="subProcessOf" value="EQUAL_DASH"/>
                    <discreteMappingEntry attributeValue="hasMember" value="EQUAL_DASH"/>
                    <discreteMappingEntry attributeValue="orthologous" value="EQUAL_DASH"/>
                    <discreteMappingEntry attributeValue="association" value="DOT"/>
                    <discreteMappingEntry attributeValue="actsIn" value="LONG_DASH"/>
                    <discreteMappingEntry attributeValue="includes" value="EQUAL_DASH"/>
                    <discreteMappingEntry attributeValue="hasVariant" value="EQUAL_DASH"/>
                    <discreteMappingEntry attributeValue="directlyDecreases" value="SOLID"/>
                    <discreteMappingEntry attributeValue="negativeCorrelation" value="DOT"/>
                    <discreteMappingEntry attributeValue="directlyIncreases" value="SOLID"/>
                    <discreteMappingEntry attributeValue="prognosticBiomarkerFor" value="DOT"/>
                    <discreteMappingEntry attributeValue="hasComponent" value="EQUAL_DASH"/>
                    <discreteMappingEntry attributeValue="hasModification" value="EQUAL_DASH"/>
                    <discreteMappingEntry attributeValue="subProcess_OF" value="EQUAL_DASH"/>
                    <discreteMappingEntry attributeValue="isA" value="EQUAL_DASH"/>
                    <discreteMappingEntry attributeValue="rateLimitingStepOf" value="EQUAL_DASH"/>
                    <discreteMappingEntry attributeValue="biomarkerFor" value="DOT"/>
                    <discreteMappingEntry attributeValue="translocates" value="EQUAL_DASH"/>
                </discreteMapping>
            </visualProperty>
            <visualProperty default="NONE" name="EDGE_TARGET_ARROW_SHAPE">
                <discreteMapping attributeName="interaction" attributeType="string">
                    <discreteMappingEntry attributeValue="translatedTo" value="DIAMOND"/>
                    <discreteMappingEntry attributeValue="hasProduct" value="DIAMOND"/>
                    <discreteMappingEntry attributeValue="reactantIn" value="DIAMOND"/>
                    <discreteMappingEntry attributeValue="orthologous" value="NONE"/>
                    <discreteMappingEntry attributeValue="actsIn" value="DIAMOND"/>
                    <discreteMappingEntry attributeValue="association" value="NONE"/>
                    <discreteMappingEntry attributeValue="hasVariant" value="DIAMOND"/>
                    <discreteMappingEntry attributeValue="directlyIncreases" value="ARROW"/>
                    <discreteMappingEntry attributeValue="unknown" value="ARROW"/>
                    <discreteMappingEntry attributeValue="increases" value="ARROW"/>
                    <discreteMappingEntry attributeValue="prognosticBiomarkerFor" value="ARROW"/>
                    <discreteMappingEntry attributeValue="hasComponent" value="DIAMOND"/>
                    <discreteMappingEntry attributeValue="hasModification" value="DIAMOND"/>
                    <discreteMappingEntry attributeValue="subProcess_OF" value="DIAMOND"/>
                    <discreteMappingEntry attributeValue="isA" value="DIAMOND"/>
                    <discreteMappingEntry attributeValue="rateLimitingStepOf" value="ARROW"/>
                    <discreteMappingEntry attributeValue="biomarkerFor" value="ARROW"/>
                    <discreteMappingEntry attributeValue="translocates" value="DIAMOND"/>
                    <discreteMappingEntry attributeValue="analogous" value="ARROW"/>
                    <discreteMappingEntry attributeValue="transcribedTo" value="DIAMOND"/>
                    <discreteMappingEntry attributeValue="positiveCorrelation" value="ARROW"/>
                    <discreteMappingEntry attributeValue="subProcessOf" value="DIAMOND"/>
                    <discreteMappingEntry attributeValue="hasMember" value="DIAMOND"/>
                    <discreteMappingEntry attributeValue="includes" value="DIAMOND"/>
                    <discreteMappingEntry attributeValue="directlyDecreases" value="CIRCLE"/>
                    <discreteMappingEntry attributeValue="negativeCorrelation" value="CIRCLE"/>
                    <discreteMappingEntry attributeValue="decreases" value="CIRCLE"/>
                </discreteMapping>
            </visualProperty>
            <visualProperty default="NONE" name="EDGE_SOURCE_ARROW_SHAPE">
                <discreteMapping attributeName="interaction" attributeType="string">
                    <discreteMappingEntry attributeValue="positiveCorrelation" value="ARROW"/>
                    <discreteMappingEntry attributeValue="hasMember" value="NONE"/>
                    <discreteMappingEntry attributeValue="orthologous" value="NONE"/>
                    <discreteMappingEntry attributeValue="association" value="NONE"/>
                    <discreteMappingEntry attributeValue="negativeCorrelation" value="CIRCLE"/>
                </discreteMapping>
            </visualProperty>
            <visualProperty default="#000000" name="EDGE_LABEL_COLOR"/>
            <visualProperty default="#000000" name="EDGE_SOURCE_ARROW_UNSELECTED_PAINT"/>
            <visualProperty default="255" name="EDGE_TRANSPARENCY">
                <discreteMapping attributeName="linked" attributeType="boolean">
                    <discreteMappingEntry attributeValue="false" value="50"/>
                    <discreteMappingEntry attributeValue="true" value="255"/>
                </discreteMapping>
            </visualProperty>
            <visualProperty default="#FFFF00" name="EDGE_SOURCE_ARROW_SELECTED_PAINT"/>
            <visualProperty default="10" name="EDGE_LABEL_FONT_SIZE"/>
            <visualProperty default="#000000" name="EDGE_UNSELECTED_PAINT">
                <discreteMapping attributeName="interaction" attributeType="string">
                    <discreteMappingEntry attributeValue="transcribedTo" value="#999999"/>
                    <discreteMappingEntry attributeValue="translatedTo" value="#999999"/>
                    <discreteMappingEntry attributeValue="hasProduct" value="#999999"/>
                    <discreteMappingEntry attributeValue="reactantIn" value="#999999"/>
                    <discreteMappingEntry attributeValue="subProcessOf" value="#999999"/>
                    <discreteMappingEntry attributeValue="hasMember" value="#999999"/>
                    <discreteMappingEntry attributeValue="orthologous" value="#999999"/>
                    <discreteMappingEntry attributeValue="actsIn" value="#999999"/>
                    <discreteMappingEntry attributeValue="includes" value="#999999"/>
                    <discreteMappingEntry attributeValue="hasVariant" value="#999999"/>
                    <discreteMappingEntry attributeValue="hasComponent" value="#999999"/>
                    <discreteMappingEntry attributeValue="hasModification" value="#999999"/>
                    <discreteMappingEntry attributeValue="subProcess_OF" value="#999999"/>
                    <discreteMappingEntry attributeValue="isA" value="#999999"/>
                    <discreteMappingEntry attributeValue="translocates" value="#999999"/>
                </discreteMapping>
            </visualProperty>
            <visualProperty default="true" name="EDGE_CURVED"/>
            <visualProperty default="#FF0000" name="EDGE_STROKE_SELECTED_PAINT"/>
            <visualProperty default="false" name="EDGE_SELECTED"/>
            <visualProperty default="true" name="EDGE_VISIBLE"/>
            <visualProperty default="" name="EDGE_TOOLTIP"/>
            <visualProperty default="#000000" name="EDGE_STROKE_UNSELECTED_PAINT">
                <discreteMapping attributeName="interaction" attributeType="string">
                    <discreteMappingEntry attributeValue="transcribedTo" value="#999999"/>
                    <discreteMappingEntry attributeValue="translatedTo" value="#999999"/>
                    <discreteMappingEntry attributeValue="hasProduct" value="#999999"/>
                    <discreteMappingEntry attributeValue="reactantIn" value="#999999"/>
                    <discreteMappingEntry attributeValue="subProcessOf" value="#999999"/>
                    <discreteMappingEntry attributeValue="hasMember" value="#999999"/>
                    <discreteMappingEntry attributeValue="orthologous" value="#999999"/>
                    <discreteMappingEntry attributeValue="actsIn" value="#999999"/>
                    <discreteMappingEntry attributeValue="includes" value="#999999"/>
                    <discreteMappingEntry attributeValue="hasVariant" value="#999999"/>
                    <discreteMappingEntry attributeValue="hasComponent" value="#999999"/>
                    <discreteMappingEntry attributeValue="hasModification" value="#999999"/>
                    <discreteMappingEntry attributeValue="subProcess_OF" value="#999999"/>
                    <discreteMappingEntry attributeValue="isA" value="#999999"/>
                    <discreteMappingEntry attributeValue="translocates" value="#999999"/>
                </discreteMapping>
            </visualProperty>
            <visualProperty default="#000000" name="EDGE_TARGET_ARROW_UNSELECTED_PAINT"/>
        </edge>
    </visualStyle>
    <visualStyle name="Marquee">
        <network>
            <visualProperty default="400.0" name="NETWORK_HEIGHT"/>
            <visualProperty default="0.0" name="NETWORK_CENTER_X_LOCATION"/>
            <visualProperty default="#DCD7CA" name="NETWORK_BACKGROUND_PAINT"/>
            <visualProperty default="0.0" name="NETWORK_CENTER_Z_LOCATION"/>
            <visualProperty default="1.0" name="NETWORK_SCALE_FACTOR"/>
            <visualProperty default="true" name="NETWORK_NODE_SELECTION"/>
            <visualProperty default="550.0" name="NETWORK_WIDTH"/>
            <visualProperty default="" name="NETWORK_TITLE"/>
            <visualProperty default="550.0" name="NETWORK_SIZE"/>
            <visualProperty default="0.0" name="NETWORK_CENTER_Y_LOCATION"/>
            <visualProperty default="true" name="NETWORK_EDGE_SELECTION"/>
            <visualProperty default="0.0" name="NETWORK_DEPTH"/>
        </network>
        <node>
            <dependency value="true" name="nodeCustomGraphicsSizeSync"/>
            <dependency value="true" name="nodeSizeLocked"/>
            <visualProperty default="C,C,c,0.00,0.00" name="NODE_CUSTOMGRAPHICS_POSITION_8"/>
            <visualProperty default="true" name="NODE_NESTED_NETWORK_IMAGE_VISIBLE"/>
            <visualProperty default="DefaultVisualizableVisualProperty(id=NODE_CUSTOMPAINT_5, name=Node Custom Paint 5)" name="NODE_CUSTOMPAINT_5"/>
            <visualProperty default="org.cytoscape.ding.customgraphics.NullCustomGraphics,0,[ Remove Graphics ]," name="NODE_CUSTOMGRAPHICS_9"/>
            <visualProperty default="C,C,c,0.00,0.00" name="NODE_CUSTOMGRAPHICS_POSITION_4"/>
            <visualProperty default="" name="NODE_TOOLTIP"/>
            <visualProperty default="50.0" name="NODE_CUSTOMGRAPHICS_SIZE_9"/>
            <visualProperty default="50.0" name="NODE_CUSTOMGRAPHICS_SIZE_1"/>
            <visualProperty default="org.cytoscape.ding.customgraphics.NullCustomGraphics,0,[ Remove Graphics ]," name="NODE_CUSTOMGRAPHICS_5"/>
            <visualProperty default="C,C,c,0.00,0.00" name="NODE_CUSTOMGRAPHICS_POSITION_5"/>
            <visualProperty default="org.cytoscape.ding.customgraphics.NullCustomGraphics,0,[ Remove Graphics ]," name="NODE_CUSTOMGRAPHICS_8"/>
            <visualProperty default="50.0" name="NODE_CUSTOMGRAPHICS_SIZE_8"/>
            <visualProperty default="10.0" name="NODE_BORDER_WIDTH"/>
            <visualProperty default="0.0" name="NODE_X_LOCATION"/>
            <visualProperty default="DefaultVisualizableVisualProperty(id=NODE_CUSTOMPAINT_1, name=Node Custom Paint 1)" name="NODE_CUSTOMPAINT_1"/>
            <visualProperty default="50.0" name="NODE_CUSTOMGRAPHICS_SIZE_5"/>
            <visualProperty default="20.0" name="NODE_SIZE"/>
            <visualProperty default="50.0" name="NODE_CUSTOMGRAPHICS_SIZE_6"/>
            <visualProperty default="org.cytoscape.ding.customgraphics.NullCustomGraphics,0,[ Remove Graphics ]," name="NODE_CUSTOMGRAPHICS_1"/>
            <visualProperty default="org.cytoscape.ding.customgraphics.NullCustomGraphics,0,[ Remove Graphics ]," name="NODE_CUSTOMGRAPHICS_7"/>
            <visualProperty default="" name="NODE_LABEL">
                <passthroughMapping attributeName="name" attributeType="string"/>
            </visualProperty>
            <visualProperty default="C,C,c,0.00,0.00" name="NODE_CUSTOMGRAPHICS_POSITION_9"/>
            <visualProperty default="DefaultVisualizableVisualProperty(id=NODE_CUSTOMPAINT_3, name=Node Custom Paint 3)" name="NODE_CUSTOMPAINT_3"/>
            <visualProperty default="50.0" name="NODE_CUSTOMGRAPHICS_SIZE_2"/>
            <visualProperty default="255" name="NODE_BORDER_TRANSPARENCY"/>
            <visualProperty default="ELLIPSE" name="NODE_SHAPE"/>
            <visualProperty default="#787878" name="NODE_PAINT"/>
            <visualProperty default="12" name="NODE_LABEL_FONT_SIZE"/>
            <visualProperty default="SansSerif.plain,plain,12" name="NODE_LABEL_FONT_FACE"/>
            <visualProperty default="10.0" name="COMPOUND_NODE_PADDING"/>
            <visualProperty default="true" name="NODE_VISIBLE"/>
            <visualProperty default="#00CCFF" name="NODE_FILL_COLOR"/>
            <visualProperty default="#FFFFFF" name="NODE_BORDER_PAINT"/>
            <visualProperty default="0.0" name="NODE_Y_LOCATION"/>
            <visualProperty default="0.0" name="NODE_Z_LOCATION"/>
            <visualProperty default="DefaultVisualizableVisualProperty(id=NODE_CUSTOMPAINT_9, name=Node Custom Paint 9)" name="NODE_CUSTOMPAINT_9"/>
            <visualProperty default="50.0" name="NODE_CUSTOMGRAPHICS_SIZE_3"/>
            <visualProperty default="C,C,c,0.00,0.00" name="NODE_CUSTOMGRAPHICS_POSITION_1"/>
            <visualProperty default="C,C,c,0.00,0.00" name="NODE_CUSTOMGRAPHICS_POSITION_7"/>
            <visualProperty default="C,C,c,0.00,0.00" name="NODE_CUSTOMGRAPHICS_POSITION_6"/>
            <visualProperty default="DefaultVisualizableVisualProperty(id=NODE_CUSTOMPAINT_6, name=Node Custom Paint 6)" name="NODE_CUSTOMPAINT_6"/>
            <visualProperty default="org.cytoscape.ding.customgraphics.NullCustomGraphics,0,[ Remove Graphics ]," name="NODE_CUSTOMGRAPHICS_2"/>
            <visualProperty default="C,C,c,0.00,0.00" name="NODE_CUSTOMGRAPHICS_POSITION_3"/>
            <visualProperty default="255" name="NODE_LABEL_TRANSPARENCY"/>
            <visualProperty default="50.0" name="NODE_CUSTOMGRAPHICS_SIZE_4"/>
            <visualProperty default="200.0" name="NODE_LABEL_WIDTH"/>
            <visualProperty default="SOLID" name="NODE_BORDER_STROKE"/>
            <visualProperty default="#FF0066" name="NODE_SELECTED_PAINT"/>
            <visualProperty default="org.cytoscape.ding.customgraphics.NullCustomGraphics,0,[ Remove Graphics ]," name="NODE_CUSTOMGRAPHICS_6"/>
            <visualProperty default="false" name="NODE_SELECTED"/>
            <visualProperty default="0.0" name="NODE_DEPTH"/>
            <visualProperty default="org.cytoscape.ding.customgraphics.NullCustomGraphics,0,[ Remove Graphics ]," name="NODE_CUSTOMGRAPHICS_4"/>
            <visualProperty default="#666666" name="NODE_LABEL_COLOR"/>
            <visualProperty default="DefaultVisualizableVisualProperty(id=NODE_CUSTOMPAINT_4, name=Node Custom Paint 4)" name="NODE_CUSTOMPAINT_4"/>
            <visualProperty default="org.cytoscape.ding.customgraphics.NullCustomGraphics,0,[ Remove Graphics ]," name="NODE_CUSTOMGRAPHICS_3"/>
            <visualProperty default="S,N,c,0.00,0.00" name="NODE_LABEL_POSITION"/>
            <visualProperty default="DefaultVisualizableVisualProperty(id=NODE_CUSTOMPAINT_7, name=Node Custom Paint 7)" name="NODE_CUSTOMPAINT_7"/>
            <visualProperty default="DefaultVisualizableVisualProperty(id=NODE_CUSTOMPAINT_2, name=Node Custom Paint 2)" name="NODE_CUSTOMPAINT_2"/>
            <visualProperty default="C,C,c,0.00,0.00" name="NODE_CUSTOMGRAPHICS_POSITION_2"/>
            <visualProperty default="50.0" name="NODE_HEIGHT"/>
            <visualProperty default="ROUND_RECTANGLE" name="COMPOUND_NODE_SHAPE"/>
            <visualProperty default="255" name="NODE_TRANSPARENCY"/>
            <visualProperty default="50.0" name="NODE_CUSTOMGRAPHICS_SIZE_7"/>
            <visualProperty default="DefaultVisualizableVisualProperty(id=NODE_CUSTOMPAINT_8, name=Node Custom Paint 8)" name="NODE_CUSTOMPAINT_8"/>
            <visualProperty default="50.0" name="NODE_WIDTH"/>
        </node>
        <edge>
            <dependency value="true" name="arrowColorMatchesEdge"/>
            <visualProperty default="#FFFF00" name="EDGE_TARGET_ARROW_SELECTED_PAINT"/>
            <visualProperty default="SansSerif.plain,plain,12" name="EDGE_LABEL_FONT_FACE"/>
            <visualProperty default="2.0" name="EDGE_WIDTH"/>
            <visualProperty default="" name="EDGE_LABEL">
                <passthroughMapping attributeName="interaction" attributeType="string"/>
            </visualProperty>
            <visualProperty default="255" name="EDGE_LABEL_TRANSPARENCY"/>
            <visualProperty default="" name="EDGE_BEND"/>
            <visualProperty default="MARQUEE_EQUAL" name="EDGE_LINE_TYPE"/>
            <visualProperty default="ARROW" name="EDGE_TARGET_ARROW_SHAPE"/>
            <visualProperty default="NONE" name="EDGE_SOURCE_ARROW_SHAPE"/>
            <visualProperty default="#666666" name="EDGE_LABEL_COLOR"/>
            <visualProperty default="#000000" name="EDGE_SOURCE_ARROW_UNSELECTED_PAINT"/>
            <visualProperty default="255" name="EDGE_TRANSPARENCY"/>
            <visualProperty default="#FFFF00" name="EDGE_SOURCE_ARROW_SELECTED_PAINT"/>
            <visualProperty default="8" name="EDGE_LABEL_FONT_SIZE"/>
            <visualProperty default="#FFFFFF" name="EDGE_UNSELECTED_PAINT"/>
            <visualProperty default="true" name="EDGE_CURVED"/>
            <visualProperty default="#FF0000" name="EDGE_STROKE_SELECTED_PAINT"/>
            <visualProperty default="false" name="EDGE_SELECTED"/>
            <visualProperty default="true" name="EDGE_VISIBLE"/>
            <visualProperty default="200.0" name="EDGE_LABEL_WIDTH"/>
            <visualProperty default="" name="EDGE_TOOLTIP"/>
            <visualProperty default="#969696" name="EDGE_STROKE_UNSELECTED_PAINT"/>
            <visualProperty default="#808080" name="EDGE_PAINT"/>
            <visualProperty default="#FF0000" name="EDGE_SELECTED_PAINT"/>
            <visualProperty default="#333333" name="EDGE_TARGET_ARROW_UNSELECTED_PAINT"/>
        </edge>
    </visualStyle>
    <visualStyle name="KAM Visualization Minimal">
        <network>
            <visualProperty default="400.0" name="NETWORK_HEIGHT"/>
            <visualProperty default="0.0" name="NETWORK_CENTER_X_LOCATION"/>
            <visualProperty default="#FFFFFF" name="NETWORK_BACKGROUND_PAINT"/>
            <visualProperty default="0.0" name="NETWORK_CENTER_Z_LOCATION"/>
            <visualProperty default="1.0" name="NETWORK_SCALE_FACTOR"/>
            <visualProperty default="true" name="NETWORK_NODE_SELECTION"/>
            <visualProperty default="550.0" name="NETWORK_WIDTH"/>
            <visualProperty default="" name="NETWORK_TITLE"/>
            <visualProperty default="0.0" name="NETWORK_CENTER_Y_LOCATION"/>
            <visualProperty default="true" name="NETWORK_EDGE_SELECTION"/>
            <visualProperty default="0.0" name="NETWORK_DEPTH"/>
        </network>
        <node>
            <dependency value="true" name="nodeCustomGraphicsSizeSync"/>
            <dependency value="false" name="nodeSizeLocked"/>
            <visualProperty default="C,C,c,0.00,0.00" name="NODE_CUSTOMGRAPHICS_POSITION_8"/>
            <visualProperty default="true" name="NODE_NESTED_NETWORK_IMAGE_VISIBLE"/>
            <visualProperty default="org.cytoscape.ding.customgraphics.NullCustomGraphics,0,[ Remove Graphics ]," name="NODE_CUSTOMGRAPHICS_9"/>
            <visualProperty default="C,C,c,0.00,0.00" name="NODE_CUSTOMGRAPHICS_POSITION_4"/>
            <visualProperty default="" name="NODE_TOOLTIP"/>
            <visualProperty default="0.0" name="NODE_CUSTOMGRAPHICS_SIZE_9"/>
            <visualProperty default="0.0" name="NODE_CUSTOMGRAPHICS_SIZE_1"/>
            <visualProperty default="org.cytoscape.ding.customgraphics.NullCustomGraphics,0,[ Remove Graphics ]," name="NODE_CUSTOMGRAPHICS_5"/>
            <visualProperty default="C,C,c,0.00,0.00" name="NODE_CUSTOMGRAPHICS_POSITION_5"/>
            <visualProperty default="org.cytoscape.ding.customgraphics.NullCustomGraphics,0,[ Remove Graphics ]," name="NODE_CUSTOMGRAPHICS_8"/>
            <visualProperty default="0.0" name="NODE_CUSTOMGRAPHICS_SIZE_8"/>
            <visualProperty default="1.0" name="NODE_BORDER_WIDTH"/>
            <visualProperty default="0.0" name="NODE_X_LOCATION"/>
            <visualProperty default="0.0" name="NODE_CUSTOMGRAPHICS_SIZE_5"/>
            <visualProperty default="35.0" name="NODE_SIZE">
                <discreteMapping attributeName="bel.function" attributeType="string">
                    <discreteMappingEntry attributeValue="transcriptionalActivity" value="100.0"/>
                </discreteMapping>
            </visualProperty>
            <visualProperty default="0.0" name="NODE_CUSTOMGRAPHICS_SIZE_6"/>
            <visualProperty default="org.cytoscape.ding.customgraphics.NullCustomGraphics,0,[ Remove Graphics ]," name="NODE_CUSTOMGRAPHICS_1"/>
            <visualProperty default="org.cytoscape.ding.customgraphics.NullCustomGraphics,0,[ Remove Graphics ]," name="NODE_CUSTOMGRAPHICS_7"/>
            <visualProperty default="" name="NODE_LABEL">
                <passthroughMapping attributeName="name" attributeType="string"/>
            </visualProperty>
            <visualProperty default="C,C,c,0.00,0.00" name="NODE_CUSTOMGRAPHICS_POSITION_9"/>
            <visualProperty default="0.0" name="NODE_CUSTOMGRAPHICS_SIZE_2"/>
            <visualProperty default="255" name="NODE_BORDER_TRANSPARENCY">
                <discreteMapping attributeName="linked" attributeType="boolean">
                    <discreteMappingEntry attributeValue="false" value="100"/>
                    <discreteMappingEntry attributeValue="true" value="255"/>
                </discreteMapping>
            </visualProperty>
            <visualProperty default="RECTANGLE" name="NODE_SHAPE">
                <discreteMapping attributeName="bel.function" attributeType="string">
                    <discreteMappingEntry attributeValue="transportActivity" value="ROUND_RECTANGLE"/>
                    <discreteMappingEntry attributeValue="cellSecretion" value="VEE"/>
                    <discreteMappingEntry attributeValue="catalyticActivity" value="HEXAGON"/>
                    <discreteMappingEntry attributeValue="reaction" value="PARALLELOGRAM"/>
                    <discreteMappingEntry attributeValue="pathology" value="PARALLELOGRAM"/>
                    <discreteMappingEntry attributeValue="gtpBoundActivity" value="HEXAGON"/>
                    <discreteMappingEntry attributeValue="translocation" value="VEE"/>
                    <discreteMappingEntry attributeValue="kinaseActivity" value="HEXAGON"/>
                    <discreteMappingEntry attributeValue="proteinAbundance" value="ROUND_RECTANGLE"/>
                    <discreteMappingEntry attributeValue="peptidaseActivity" value="HEXAGON"/>
                    <discreteMappingEntry attributeValue="abundance" value="DIAMOND"/>
                    <discreteMappingEntry attributeValue="degradation" value="ROUND_RECTANGLE"/>
                    <discreteMappingEntry attributeValue="compositeAbundance" value="ROUND_RECTANGLE"/>
                    <discreteMappingEntry attributeValue="molecularActivity" value="HEXAGON"/>
                    <discreteMappingEntry attributeValue="rnaAbundance" value="ELLIPSE"/>
                    <discreteMappingEntry attributeValue="biologicalProcess" value="PARALLELOGRAM"/>
                    <discreteMappingEntry attributeValue="microRNAAbundance" value="ELLIPSE"/>
                    <discreteMappingEntry attributeValue="geneAbundance" value="ELLIPSE"/>
                    <discreteMappingEntry attributeValue="ribosylationActivity" value="HEXAGON"/>
                    <discreteMappingEntry attributeValue="cellSurfaceExpression" value="VEE"/>
                    <discreteMappingEntry attributeValue="chaperoneActivity" value="HEXAGON"/>
                    <discreteMappingEntry attributeValue="transcriptionalActivity" value="HEXAGON"/>
                    <discreteMappingEntry attributeValue="phosphataseActivity" value="HEXAGON"/>
                    <discreteMappingEntry attributeValue="complexAbundance" value="ROUND_RECTANGLE"/>
                </discreteMapping>
            </visualProperty>
            <visualProperty default="12" name="NODE_LABEL_FONT_SIZE"/>
            <visualProperty default="Dialog.plain,plain,12" name="NODE_LABEL_FONT_FACE"/>
            <visualProperty default="true" name="NODE_VISIBLE"/>
            <visualProperty default="#FFFFFF" name="NODE_FILL_COLOR">
                <discreteMapping attributeName="bel.function" attributeType="string"/>
            </visualProperty>
            <visualProperty default="#000000" name="NODE_BORDER_PAINT"/>
            <visualProperty default="0.0" name="NODE_Y_LOCATION"/>
            <visualProperty default="0.0" name="NODE_Z_LOCATION"/>
            <visualProperty default="0.0" name="NODE_CUSTOMGRAPHICS_SIZE_3"/>
            <visualProperty default="C,C,c,0.00,0.00" name="NODE_CUSTOMGRAPHICS_POSITION_1"/>
            <visualProperty default="C,C,c,0.00,0.00" name="NODE_CUSTOMGRAPHICS_POSITION_7"/>
            <visualProperty default="C,C,c,0.00,0.00" name="NODE_CUSTOMGRAPHICS_POSITION_6"/>
            <visualProperty default="org.cytoscape.ding.customgraphics.NullCustomGraphics,0,[ Remove Graphics ]," name="NODE_CUSTOMGRAPHICS_2"/>
            <visualProperty default="C,C,c,0.00,0.00" name="NODE_CUSTOMGRAPHICS_POSITION_3"/>
            <visualProperty default="255" name="NODE_LABEL_TRANSPARENCY">
                <discreteMapping attributeName="linked" attributeType="boolean">
                    <discreteMappingEntry attributeValue="false" value="100"/>
                    <discreteMappingEntry attributeValue="true" value="255"/>
                </discreteMapping>
            </visualProperty>
            <visualProperty default="0.0" name="NODE_CUSTOMGRAPHICS_SIZE_4"/>
            <visualProperty default="100.0" name="NODE_LABEL_WIDTH"/>
            <visualProperty default="SOLID" name="NODE_BORDER_STROKE"/>
            <visualProperty default="#FFFF00" name="NODE_SELECTED_PAINT"/>
            <visualProperty default="org.cytoscape.ding.customgraphics.NullCustomGraphics,0,[ Remove Graphics ]," name="NODE_CUSTOMGRAPHICS_6"/>
            <visualProperty default="false" name="NODE_SELECTED"/>
            <visualProperty default="0.0" name="NODE_DEPTH"/>
            <visualProperty default="org.cytoscape.ding.customgraphics.NullCustomGraphics,0,[ Remove Graphics ]," name="NODE_CUSTOMGRAPHICS_4"/>
            <visualProperty default="#000000" name="NODE_LABEL_COLOR"/>
            <visualProperty default="org.cytoscape.ding.customgraphics.NullCustomGraphics,0,[ Remove Graphics ]," name="NODE_CUSTOMGRAPHICS_3"/>
            <visualProperty default="C,C,c,0.00,0.00" name="NODE_LABEL_POSITION"/>
            <visualProperty default="C,C,c,0.00,0.00" name="NODE_CUSTOMGRAPHICS_POSITION_2"/>
            <visualProperty default="30.0" name="NODE_HEIGHT"/>
            <visualProperty default="255" name="NODE_TRANSPARENCY">
                <discreteMapping attributeName="linked" attributeType="boolean">
                    <discreteMappingEntry attributeValue="false" value="100"/>
                    <discreteMappingEntry attributeValue="true" value="255"/>
                </discreteMapping>
            </visualProperty>
            <visualProperty default="0.0" name="NODE_CUSTOMGRAPHICS_SIZE_7"/>
            <visualProperty default="70.0" name="NODE_WIDTH">
                <discreteMapping attributeName="bel.function" attributeType="string">
                    <discreteMappingEntry attributeValue="transportActivity" value="110.0"/>
                    <discreteMappingEntry attributeValue="cellSecretion" value="110.0"/>
                    <discreteMappingEntry attributeValue="catalyticActivity" value="110.0"/>
                    <discreteMappingEntry attributeValue="reaction" value="150.0"/>
                    <discreteMappingEntry attributeValue="pathology" value="125.0"/>
                    <discreteMappingEntry attributeValue="gtpBoundActivity" value="110.0"/>
                    <discreteMappingEntry attributeValue="translocation" value="110.0"/>
                    <discreteMappingEntry attributeValue="kinaseActivity" value="110.0"/>
                    <discreteMappingEntry attributeValue="proteinAbundance" value="75.0"/>
                    <discreteMappingEntry attributeValue="peptidaseActivity" value="110.0"/>
                    <discreteMappingEntry attributeValue="abundance" value="75.0"/>
                    <discreteMappingEntry attributeValue="degradation" value="110.0"/>
                    <discreteMappingEntry attributeValue="compositeAbundance" value="150.0"/>
                    <discreteMappingEntry attributeValue="molecularActivity" value="110.0"/>
                    <discreteMappingEntry attributeValue="rnaAbundance" value="75.0"/>
                    <discreteMappingEntry attributeValue="biologicalProcess" value="125.0"/>
                    <discreteMappingEntry attributeValue="microRNAAbundance" value="75.0"/>
                    <discreteMappingEntry attributeValue="geneAbundance" value="75.0"/>
                    <discreteMappingEntry attributeValue="ribosylationActivity" value="110.0"/>
                    <discreteMappingEntry attributeValue="cellSurfaceExpression" value="110.0"/>
                    <discreteMappingEntry attributeValue="chaperoneActivity" value="110.0"/>
                    <discreteMappingEntry attributeValue="transcriptionalActivity" value="110.0"/>
                    <discreteMappingEntry attributeValue="phosphataseActivity" value="110.0"/>
                    <discreteMappingEntry attributeValue="complexAbundance" value="150.0"/>
                </discreteMapping>
            </visualProperty>
        </node>
        <edge>
            <dependency value="true" name="arrowColorMatchesEdge"/>
            <visualProperty default="#FFFF00" name="EDGE_TARGET_ARROW_SELECTED_PAINT"/>
            <visualProperty default="Dialog.plain,plain,10" name="EDGE_LABEL_FONT_FACE"/>
            <visualProperty default="1.0" name="EDGE_WIDTH">
                <discreteMapping attributeName="interaction" attributeType="string">
                    <discreteMappingEntry attributeValue="translatedTo" value="3.0"/>
                    <discreteMappingEntry attributeValue="hasProduct" value="3.0"/>
                    <discreteMappingEntry attributeValue="reactantIn" value="3.0"/>
                    <discreteMappingEntry attributeValue="orthologous" value="3.0"/>
                    <discreteMappingEntry attributeValue="actsIn" value="3.0"/>
                    <discreteMappingEntry attributeValue="association" value="1.0"/>
                    <discreteMappingEntry attributeValue="hasVariant" value="3.0"/>
                    <discreteMappingEntry attributeValue="directlyIncreases" value="3.0"/>
                    <discreteMappingEntry attributeValue="increases" value="1.0"/>
                    <discreteMappingEntry attributeValue="prognosticBiomarkerFor" value="1.0"/>
                    <discreteMappingEntry attributeValue="hasComponent" value="3.0"/>
                    <discreteMappingEntry attributeValue="hasModification" value="3.0"/>
                    <discreteMappingEntry attributeValue="subProcess_OF" value="3.0"/>
                    <discreteMappingEntry attributeValue="isA" value="3.0"/>
                    <discreteMappingEntry attributeValue="rateLimitingStepOf" value="3.0"/>
                    <discreteMappingEntry attributeValue="biomarkerFor" value="1.0"/>
                    <discreteMappingEntry attributeValue="translocates" value="3.0"/>
                    <discreteMappingEntry attributeValue="transcribedTo" value="3.0"/>
                    <discreteMappingEntry attributeValue="causesNoChange" value="3.0"/>
                    <discreteMappingEntry attributeValue="positiveCorrelation" value="1.0"/>
                    <discreteMappingEntry attributeValue="subProcessOf" value="3.0"/>
                    <discreteMappingEntry attributeValue="hasMember" value="3.0"/>
                    <discreteMappingEntry attributeValue="includes" value="3.0"/>
                    <discreteMappingEntry attributeValue="directlyDecreases" value="3.0"/>
                    <discreteMappingEntry attributeValue="negativeCorrelation" value="1.0"/>
                    <discreteMappingEntry attributeValue="decreases" value="1.0"/>
                </discreteMapping>
            </visualProperty>
            <visualProperty default="" name="EDGE_LABEL"/>
            <visualProperty default="255" name="EDGE_LABEL_TRANSPARENCY"/>
            <visualProperty default="SOLID" name="EDGE_LINE_TYPE">
                <discreteMapping attributeName="interaction" attributeType="string">
                    <discreteMappingEntry attributeValue="transcribedTo" value="LONG_DASH"/>
                    <discreteMappingEntry attributeValue="causesNoChange" value="BACKWARD_SLASH"/>
                    <discreteMappingEntry attributeValue="translatedTo" value="LONG_DASH"/>
                    <discreteMappingEntry attributeValue="hasProduct" value="EQUAL_DASH"/>
                    <discreteMappingEntry attributeValue="positiveCorrelation" value="DOT"/>
                    <discreteMappingEntry attributeValue="reactantIn" value="EQUAL_DASH"/>
                    <discreteMappingEntry attributeValue="subProcessOf" value="EQUAL_DASH"/>
                    <discreteMappingEntry attributeValue="hasMember" value="EQUAL_DASH"/>
                    <discreteMappingEntry attributeValue="orthologous" value="EQUAL_DASH"/>
                    <discreteMappingEntry attributeValue="association" value="DOT"/>
                    <discreteMappingEntry attributeValue="actsIn" value="LONG_DASH"/>
                    <discreteMappingEntry attributeValue="includes" value="EQUAL_DASH"/>
                    <discreteMappingEntry attributeValue="hasVariant" value="EQUAL_DASH"/>
                    <discreteMappingEntry attributeValue="directlyDecreases" value="SOLID"/>
                    <discreteMappingEntry attributeValue="negativeCorrelation" value="DOT"/>
                    <discreteMappingEntry attributeValue="directlyIncreases" value="SOLID"/>
                    <discreteMappingEntry attributeValue="prognosticBiomarkerFor" value="DOT"/>
                    <discreteMappingEntry attributeValue="hasComponent" value="EQUAL_DASH"/>
                    <discreteMappingEntry attributeValue="hasModification" value="EQUAL_DASH"/>
                    <discreteMappingEntry attributeValue="subProcess_OF" value="EQUAL_DASH"/>
                    <discreteMappingEntry attributeValue="isA" value="EQUAL_DASH"/>
                    <discreteMappingEntry attributeValue="rateLimitingStepOf" value="EQUAL_DASH"/>
                    <discreteMappingEntry attributeValue="biomarkerFor" value="DOT"/>
                    <discreteMappingEntry attributeValue="translocates" value="EQUAL_DASH"/>
                </discreteMapping>
            </visualProperty>
            <visualProperty default="NONE" name="EDGE_TARGET_ARROW_SHAPE">
                <discreteMapping attributeName="interaction" attributeType="string">
                    <discreteMappingEntry attributeValue="translatedTo" value="DIAMOND"/>
                    <discreteMappingEntry attributeValue="hasProduct" value="DIAMOND"/>
                    <discreteMappingEntry attributeValue="reactantIn" value="DIAMOND"/>
                    <discreteMappingEntry attributeValue="orthologous" value="NONE"/>
                    <discreteMappingEntry attributeValue="actsIn" value="DIAMOND"/>
                    <discreteMappingEntry attributeValue="association" value="NONE"/>
                    <discreteMappingEntry attributeValue="hasVariant" value="DIAMOND"/>
                    <discreteMappingEntry attributeValue="directlyIncreases" value="ARROW"/>
                    <discreteMappingEntry attributeValue="unknown" value="ARROW"/>
                    <discreteMappingEntry attributeValue="increases" value="ARROW"/>
                    <discreteMappingEntry attributeValue="prognosticBiomarkerFor" value="ARROW"/>
                    <discreteMappingEntry attributeValue="hasComponent" value="DIAMOND"/>
                    <discreteMappingEntry attributeValue="hasModification" value="DIAMOND"/>
                    <discreteMappingEntry attributeValue="subProcess_OF" value="DIAMOND"/>
                    <discreteMappingEntry attributeValue="isA" value="DIAMOND"/>
                    <discreteMappingEntry attributeValue="rateLimitingStepOf" value="ARROW"/>
                    <discreteMappingEntry attributeValue="biomarkerFor" value="ARROW"/>
                    <discreteMappingEntry attributeValue="translocates" value="DIAMOND"/>
                    <discreteMappingEntry attributeValue="analogous" value="ARROW"/>
                    <discreteMappingEntry attributeValue="transcribedTo" value="DIAMOND"/>
                    <discreteMappingEntry attributeValue="positiveCorrelation" value="ARROW"/>
                    <discreteMappingEntry attributeValue="subProcessOf" value="DIAMOND"/>
                    <discreteMappingEntry attributeValue="hasMember" value="DIAMOND"/>
                    <discreteMappingEntry attributeValue="includes" value="DIAMOND"/>
                    <discreteMappingEntry attributeValue="directlyDecreases" value="CIRCLE"/>
                    <discreteMappingEntry attributeValue="negativeCorrelation" value="CIRCLE"/>
                    <discreteMappingEntry attributeValue="decreases" value="CIRCLE"/>
                </discreteMapping>
            </visualProperty>
            <visualProperty default="NONE" name="EDGE_SOURCE_ARROW_SHAPE">
                <discreteMapping attributeName="interaction" attributeType="string">
                    <discreteMappingEntry attributeValue="positiveCorrelation" value="ARROW"/>
                    <discreteMappingEntry attributeValue="hasMember" value="NONE"/>
                    <discreteMappingEntry attributeValue="orthologous" value="NONE"/>
                    <discreteMappingEntry attributeValue="association" value="NONE"/>
                    <discreteMappingEntry attributeValue="negativeCorrelation" value="CIRCLE"/>
                </discreteMapping>
            </visualProperty>
            <visualProperty default="#000000" name="EDGE_LABEL_COLOR"/>
            <visualProperty default="#000000" name="EDGE_SOURCE_ARROW_UNSELECTED_PAINT"/>
            <visualProperty default="255" name="EDGE_TRANSPARENCY">
                <discreteMapping attributeName="linked" attributeType="boolean">
                    <discreteMappingEntry attributeValue="false" value="50"/>
                    <discreteMappingEntry attributeValue="true" value="255"/>
                </discreteMapping>
            </visualProperty>
            <visualProperty default="#FFFF00" name="EDGE_SOURCE_ARROW_SELECTED_PAINT"/>
            <visualProperty default="10" name="EDGE_LABEL_FONT_SIZE"/>
            <visualProperty default="#000000" name="EDGE_UNSELECTED_PAINT">
                <discreteMapping attributeName="interaction" attributeType="string">
                    <discreteMappingEntry attributeValue="transcribedTo" value="#999999"/>
                    <discreteMappingEntry attributeValue="translatedTo" value="#999999"/>
                    <discreteMappingEntry attributeValue="hasProduct" value="#999999"/>
                    <discreteMappingEntry attributeValue="reactantIn" value="#999999"/>
                    <discreteMappingEntry attributeValue="subProcessOf" value="#999999"/>
                    <discreteMappingEntry attributeValue="hasMember" value="#999999"/>
                    <discreteMappingEntry attributeValue="orthologous" value="#999999"/>
                    <discreteMappingEntry attributeValue="actsIn" value="#999999"/>
                    <discreteMappingEntry attributeValue="includes" value="#999999"/>
                    <discreteMappingEntry attributeValue="hasVariant" value="#999999"/>
                    <discreteMappingEntry attributeValue="hasComponent" value="#999999"/>
                    <discreteMappingEntry attributeValue="hasModification" value="#999999"/>
                    <discreteMappingEntry attributeValue="subProcess_OF" value="#999999"/>
                    <discreteMappingEntry attributeValue="isA" value="#999999"/>
                    <discreteMappingEntry attributeValue="translocates" value="#999999"/>
                </discreteMapping>
            </visualProperty>
            <visualProperty default="true" name="EDGE_CURVED"/>
            <visualProperty default="#FF0000" name="EDGE_STROKE_SELECTED_PAINT"/>
            <visualProperty default="false" name="EDGE_SELECTED"/>
            <visualProperty default="true" name="EDGE_VISIBLE"/>
            <visualProperty default="" name="EDGE_TOOLTIP"/>
            <visualProperty default="#000000" name="EDGE_STROKE_UNSELECTED_PAINT">
                <discreteMapping attributeName="interaction" attributeType="string">
                    <discreteMappingEntry attributeValue="transcribedTo" value="#999999"/>
                    <discreteMappingEntry attributeValue="translatedTo" value="#999999"/>
                    <discreteMappingEntry attributeValue="hasProduct" value="#999999"/>
                    <discreteMappingEntry attributeValue="reactantIn" value="#999999"/>
                    <discreteMappingEntry attributeValue="subProcessOf" value="#999999"/>
                    <discreteMappingEntry attributeValue="hasMember" value="#999999"/>
                    <discreteMappingEntry attributeValue="orthologous" value="#999999"/>
                    <discreteMappingEntry attributeValue="actsIn" value="#999999"/>
                    <discreteMappingEntry attributeValue="includes" value="#999999"/>
                    <discreteMappingEntry attributeValue="hasVariant" value="#999999"/>
                    <discreteMappingEntry attributeValue="hasComponent" value="#999999"/>
                    <discreteMappingEntry attributeValue="hasModification" value="#999999"/>
                    <discreteMappingEntry attributeValue="subProcess_OF" value="#999999"/>
                    <discreteMappingEntry attributeValue="isA" value="#999999"/>
                    <discreteMappingEntry attributeValue="translocates" value="#999999"/>
                </discreteMapping>
            </visualProperty>
            <visualProperty default="#000000" name="EDGE_TARGET_ARROW_UNSELECTED_PAINT"/>
        </edge>
    </visualStyle>
    <visualStyle name="Gradient1">
        <network>
            <visualProperty default="400.0" name="NETWORK_HEIGHT"/>
            <visualProperty default="0.0" name="NETWORK_CENTER_X_LOCATION"/>
            <visualProperty default="#000000" name="NETWORK_BACKGROUND_PAINT"/>
            <visualProperty default="0.0" name="NETWORK_CENTER_Z_LOCATION"/>
            <visualProperty default="1.0" name="NETWORK_SCALE_FACTOR"/>
            <visualProperty default="true" name="NETWORK_NODE_SELECTION"/>
            <visualProperty default="550.0" name="NETWORK_WIDTH"/>
            <visualProperty default="" name="NETWORK_TITLE"/>
            <visualProperty default="0.0" name="NETWORK_CENTER_Y_LOCATION"/>
            <visualProperty default="true" name="NETWORK_EDGE_SELECTION"/>
            <visualProperty default="0.0" name="NETWORK_DEPTH"/>
        </network>
        <node>
            <dependency value="true" name="nodeCustomGraphicsSizeSync"/>
            <dependency value="true" name="nodeSizeLocked"/>
            <visualProperty default="C,C,c,0.00,0.00" name="NODE_CUSTOMGRAPHICS_POSITION_8"/>
            <visualProperty default="true" name="NODE_NESTED_NETWORK_IMAGE_VISIBLE"/>
            <visualProperty default="org.cytoscape.ding.customgraphics.NullCustomGraphics,0,[ Remove Graphics ]," name="NODE_CUSTOMGRAPHICS_9"/>
            <visualProperty default="C,C,c,0.00,0.00" name="NODE_CUSTOMGRAPHICS_POSITION_4"/>
            <visualProperty default="" name="NODE_TOOLTIP"/>
            <visualProperty default="0.0" name="NODE_CUSTOMGRAPHICS_SIZE_9"/>
            <visualProperty default="0.0" name="NODE_CUSTOMGRAPHICS_SIZE_1"/>
            <visualProperty default="org.cytoscape.ding.customgraphics.NullCustomGraphics,0,[ Remove Graphics ]," name="NODE_CUSTOMGRAPHICS_5"/>
            <visualProperty default="C,C,c,0.00,0.00" name="NODE_CUSTOMGRAPHICS_POSITION_5"/>
            <visualProperty default="org.cytoscape.ding.customgraphics.NullCustomGraphics,0,[ Remove Graphics ]," name="NODE_CUSTOMGRAPHICS_8"/>
            <visualProperty default="0.0" name="NODE_CUSTOMGRAPHICS_SIZE_8"/>
            <visualProperty default="0.0" name="NODE_BORDER_WIDTH"/>
            <visualProperty default="0.0" name="NODE_X_LOCATION"/>
            <visualProperty default="0.0" name="NODE_CUSTOMGRAPHICS_SIZE_5"/>
            <visualProperty default="30.0" name="NODE_SIZE"/>
            <visualProperty default="0.0" name="NODE_CUSTOMGRAPHICS_SIZE_6"/>
            <visualProperty default="org.cytoscape.RadialGradient:{&quot;cy_gradientFractions&quot;:[0.0,0.39688042,1.0],&quot;cy_gradientColors&quot;:[&quot;#FFFFFF&quot;,&quot;#666666&quot;,&quot;#000000&quot;],&quot;cy_center&quot;:{&quot;x&quot;:0.25,&quot;y&quot;:0.2619047619047619}}" name="NODE_CUSTOMGRAPHICS_1"/>
            <visualProperty default="org.cytoscape.ding.customgraphics.NullCustomGraphics,0,[ Remove Graphics ]," name="NODE_CUSTOMGRAPHICS_7"/>
            <visualProperty default="" name="NODE_LABEL">
                <passthroughMapping attributeName="name" attributeType="string"/>
            </visualProperty>
            <visualProperty default="C,C,c,0.00,0.00" name="NODE_CUSTOMGRAPHICS_POSITION_9"/>
            <visualProperty default="0.0" name="NODE_CUSTOMGRAPHICS_SIZE_2"/>
            <visualProperty default="255" name="NODE_BORDER_TRANSPARENCY"/>
            <visualProperty default="ELLIPSE" name="NODE_SHAPE"/>
            <visualProperty default="8" name="NODE_LABEL_FONT_SIZE"/>
            <visualProperty default="SansSerif.plain,plain,12" name="NODE_LABEL_FONT_FACE"/>
            <visualProperty default="10.0" name="COMPOUND_NODE_PADDING"/>
            <visualProperty default="true" name="NODE_VISIBLE"/>
            <visualProperty default="#000000" name="NODE_FILL_COLOR"/>
            <visualProperty default="#000000" name="NODE_BORDER_PAINT"/>
            <visualProperty default="0.0" name="NODE_Y_LOCATION"/>
            <visualProperty default="0.0" name="NODE_Z_LOCATION"/>
            <visualProperty default="0.0" name="NODE_CUSTOMGRAPHICS_SIZE_3"/>
            <visualProperty default="C,C,c,0.00,0.00" name="NODE_CUSTOMGRAPHICS_POSITION_1"/>
            <visualProperty default="C,C,c,0.00,0.00" name="NODE_CUSTOMGRAPHICS_POSITION_7"/>
            <visualProperty default="C,C,c,0.00,0.00" name="NODE_CUSTOMGRAPHICS_POSITION_6"/>
            <visualProperty default="org.cytoscape.ding.customgraphics.NullCustomGraphics,0,[ Remove Graphics ]," name="NODE_CUSTOMGRAPHICS_2"/>
            <visualProperty default="C,C,c,0.00,0.00" name="NODE_CUSTOMGRAPHICS_POSITION_3"/>
            <visualProperty default="255" name="NODE_LABEL_TRANSPARENCY"/>
            <visualProperty default="0.0" name="NODE_CUSTOMGRAPHICS_SIZE_4"/>
            <visualProperty default="200.0" name="NODE_LABEL_WIDTH"/>
            <visualProperty default="SOLID" name="NODE_BORDER_STROKE"/>
            <visualProperty default="#FFFF00" name="NODE_SELECTED_PAINT"/>
            <visualProperty default="org.cytoscape.ding.customgraphics.NullCustomGraphics,0,[ Remove Graphics ]," name="NODE_CUSTOMGRAPHICS_6"/>
            <visualProperty default="false" name="NODE_SELECTED"/>
            <visualProperty default="0.0" name="NODE_DEPTH"/>
            <visualProperty default="org.cytoscape.ding.customgraphics.NullCustomGraphics,0,[ Remove Graphics ]," name="NODE_CUSTOMGRAPHICS_4"/>
            <visualProperty default="#CCCCCC" name="NODE_LABEL_COLOR"/>
            <visualProperty default="org.cytoscape.ding.customgraphics.NullCustomGraphics,0,[ Remove Graphics ]," name="NODE_CUSTOMGRAPHICS_3"/>
            <visualProperty default="S,NW,c,0.00,3.00" name="NODE_LABEL_POSITION"/>
            <visualProperty default="C,C,c,0.00,0.00" name="NODE_CUSTOMGRAPHICS_POSITION_2"/>
            <visualProperty default="40.0" name="NODE_HEIGHT"/>
            <visualProperty default="ROUND_RECTANGLE" name="COMPOUND_NODE_SHAPE"/>
            <visualProperty default="255" name="NODE_TRANSPARENCY"/>
            <visualProperty default="0.0" name="NODE_CUSTOMGRAPHICS_SIZE_7"/>
            <visualProperty default="60.0" name="NODE_WIDTH"/>
        </node>
        <edge>
            <dependency value="false" name="arrowColorMatchesEdge"/>
            <visualProperty default="#FFFF00" name="EDGE_TARGET_ARROW_SELECTED_PAINT"/>
            <visualProperty default="SansSerif.plain,plain,10" name="EDGE_LABEL_FONT_FACE"/>
            <visualProperty default="1.0" name="EDGE_WIDTH"/>
            <visualProperty default="" name="EDGE_LABEL"/>
            <visualProperty default="255" name="EDGE_LABEL_TRANSPARENCY"/>
            <visualProperty default="SOLID" name="EDGE_LINE_TYPE"/>
            <visualProperty default="NONE" name="EDGE_TARGET_ARROW_SHAPE"/>
            <visualProperty default="NONE" name="EDGE_SOURCE_ARROW_SHAPE"/>
            <visualProperty default="#000000" name="EDGE_LABEL_COLOR"/>
            <visualProperty default="#000000" name="EDGE_SOURCE_ARROW_UNSELECTED_PAINT"/>
            <visualProperty default="255" name="EDGE_TRANSPARENCY"/>
            <visualProperty default="#FFFF00" name="EDGE_SOURCE_ARROW_SELECTED_PAINT"/>
            <visualProperty default="10" name="EDGE_LABEL_FONT_SIZE"/>
            <visualProperty default="true" name="EDGE_CURVED"/>
            <visualProperty default="#FF0000" name="EDGE_STROKE_SELECTED_PAINT"/>
            <visualProperty default="false" name="EDGE_SELECTED"/>
            <visualProperty default="true" name="EDGE_VISIBLE"/>
            <visualProperty default="200.0" name="EDGE_LABEL_WIDTH"/>
            <visualProperty default="" name="EDGE_TOOLTIP"/>
            <visualProperty default="#666666" name="EDGE_STROKE_UNSELECTED_PAINT"/>
            <visualProperty default="#000000" name="EDGE_TARGET_ARROW_UNSELECTED_PAINT"/>
        </edge>
    </visualStyle>
    <visualStyle name="Sample3">
        <network>
            <visualProperty default="400.0" name="NETWORK_HEIGHT"/>
            <visualProperty default="0.0" name="NETWORK_CENTER_X_LOCATION"/>
            <visualProperty default="#3E3E3E" name="NETWORK_BACKGROUND_PAINT"/>
            <visualProperty default="0.0" name="NETWORK_CENTER_Z_LOCATION"/>
            <visualProperty default="1.0" name="NETWORK_SCALE_FACTOR"/>
            <visualProperty default="true" name="NETWORK_NODE_SELECTION"/>
            <visualProperty default="550.0" name="NETWORK_WIDTH"/>
            <visualProperty default="" name="NETWORK_TITLE"/>
            <visualProperty default="0.0" name="NETWORK_CENTER_Y_LOCATION"/>
            <visualProperty default="true" name="NETWORK_EDGE_SELECTION"/>
            <visualProperty default="0.0" name="NETWORK_DEPTH"/>
        </network>
        <node>
            <dependency value="true" name="nodeCustomGraphicsSizeSync"/>
            <dependency value="true" name="nodeSizeLocked"/>
            <visualProperty default="C,C,c,0.00,0.00" name="NODE_CUSTOMGRAPHICS_POSITION_8"/>
            <visualProperty default="true" name="NODE_NESTED_NETWORK_IMAGE_VISIBLE"/>
            <visualProperty default="org.cytoscape.ding.customgraphics.NullCustomGraphics,0,[ Remove Graphics ]," name="NODE_CUSTOMGRAPHICS_9"/>
            <visualProperty default="C,C,c,0.00,0.00" name="NODE_CUSTOMGRAPHICS_POSITION_4"/>
            <visualProperty default="" name="NODE_TOOLTIP"/>
            <visualProperty default="0.0" name="NODE_CUSTOMGRAPHICS_SIZE_9"/>
            <visualProperty default="0.0" name="NODE_CUSTOMGRAPHICS_SIZE_1"/>
            <visualProperty default="org.cytoscape.ding.customgraphics.NullCustomGraphics,0,[ Remove Graphics ]," name="NODE_CUSTOMGRAPHICS_5"/>
            <visualProperty default="C,C,c,0.00,0.00" name="NODE_CUSTOMGRAPHICS_POSITION_5"/>
            <visualProperty default="org.cytoscape.ding.customgraphics.NullCustomGraphics,0,[ Remove Graphics ]," name="NODE_CUSTOMGRAPHICS_8"/>
            <visualProperty default="0.0" name="NODE_CUSTOMGRAPHICS_SIZE_8"/>
            <visualProperty default="8.0" name="NODE_BORDER_WIDTH"/>
            <visualProperty default="0.0" name="NODE_X_LOCATION"/>
            <visualProperty default="0.0" name="NODE_CUSTOMGRAPHICS_SIZE_5"/>
            <visualProperty default="20.0" name="NODE_SIZE"/>
            <visualProperty default="0.0" name="NODE_CUSTOMGRAPHICS_SIZE_6"/>
            <visualProperty default="org.cytoscape.ding.customgraphics.NullCustomGraphics,0,[ Remove Graphics ]," name="NODE_CUSTOMGRAPHICS_1"/>
            <visualProperty default="org.cytoscape.ding.customgraphics.NullCustomGraphics,0,[ Remove Graphics ]," name="NODE_CUSTOMGRAPHICS_7"/>
            <visualProperty default="" name="NODE_LABEL">
                <passthroughMapping attributeName="name" attributeType="string"/>
            </visualProperty>
            <visualProperty default="C,C,c,0.00,0.00" name="NODE_CUSTOMGRAPHICS_POSITION_9"/>
            <visualProperty default="0.0" name="NODE_CUSTOMGRAPHICS_SIZE_2"/>
            <visualProperty default="255" name="NODE_BORDER_TRANSPARENCY"/>
            <visualProperty default="ELLIPSE" name="NODE_SHAPE"/>
            <visualProperty default="14" name="NODE_LABEL_FONT_SIZE"/>
            <visualProperty default="SansSerif.plain,plain,12" name="NODE_LABEL_FONT_FACE"/>
            <visualProperty default="10.0" name="COMPOUND_NODE_PADDING"/>
            <visualProperty default="true" name="NODE_VISIBLE"/>
            <visualProperty default="#3D9AFF" name="NODE_FILL_COLOR"/>
            <visualProperty default="#FFFFFF" name="NODE_BORDER_PAINT"/>
            <visualProperty default="0.0" name="NODE_Y_LOCATION"/>
            <visualProperty default="0.0" name="NODE_Z_LOCATION"/>
            <visualProperty default="0.0" name="NODE_CUSTOMGRAPHICS_SIZE_3"/>
            <visualProperty default="C,C,c,0.00,0.00" name="NODE_CUSTOMGRAPHICS_POSITION_1"/>
            <visualProperty default="C,C,c,0.00,0.00" name="NODE_CUSTOMGRAPHICS_POSITION_7"/>
            <visualProperty default="C,C,c,0.00,0.00" name="NODE_CUSTOMGRAPHICS_POSITION_6"/>
            <visualProperty default="org.cytoscape.ding.customgraphics.NullCustomGraphics,0,[ Remove Graphics ]," name="NODE_CUSTOMGRAPHICS_2"/>
            <visualProperty default="C,C,c,0.00,0.00" name="NODE_CUSTOMGRAPHICS_POSITION_3"/>
            <visualProperty default="255" name="NODE_LABEL_TRANSPARENCY"/>
            <visualProperty default="0.0" name="NODE_CUSTOMGRAPHICS_SIZE_4"/>
            <visualProperty default="200.0" name="NODE_LABEL_WIDTH"/>
            <visualProperty default="SOLID" name="NODE_BORDER_STROKE"/>
            <visualProperty default="#FFFF00" name="NODE_SELECTED_PAINT"/>
            <visualProperty default="org.cytoscape.ding.customgraphics.NullCustomGraphics,0,[ Remove Graphics ]," name="NODE_CUSTOMGRAPHICS_6"/>
            <visualProperty default="false" name="NODE_SELECTED"/>
            <visualProperty default="0.0" name="NODE_DEPTH"/>
            <visualProperty default="org.cytoscape.ding.customgraphics.NullCustomGraphics,0,[ Remove Graphics ]," name="NODE_CUSTOMGRAPHICS_4"/>
            <visualProperty default="#CECECE" name="NODE_LABEL_COLOR"/>
            <visualProperty default="org.cytoscape.ding.customgraphics.NullCustomGraphics,0,[ Remove Graphics ]," name="NODE_CUSTOMGRAPHICS_3"/>
            <visualProperty default="S,NW,c,0.00,3.00" name="NODE_LABEL_POSITION"/>
            <visualProperty default="C,C,c,0.00,0.00" name="NODE_CUSTOMGRAPHICS_POSITION_2"/>
            <visualProperty default="40.0" name="NODE_HEIGHT"/>
            <visualProperty default="ROUND_RECTANGLE" name="COMPOUND_NODE_SHAPE"/>
            <visualProperty default="255" name="NODE_TRANSPARENCY"/>
            <visualProperty default="0.0" name="NODE_CUSTOMGRAPHICS_SIZE_7"/>
            <visualProperty default="60.0" name="NODE_WIDTH"/>
        </node>
        <edge>
            <dependency value="false" name="arrowColorMatchesEdge"/>
            <visualProperty default="#FFFF00" name="EDGE_TARGET_ARROW_SELECTED_PAINT"/>
            <visualProperty default="SansSerif.plain,plain,10" name="EDGE_LABEL_FONT_FACE"/>
            <visualProperty default="2.0" name="EDGE_WIDTH"/>
            <visualProperty default="" name="EDGE_LABEL"/>
            <visualProperty default="255" name="EDGE_LABEL_TRANSPARENCY"/>
            <visualProperty default="SOLID" name="EDGE_LINE_TYPE"/>
            <visualProperty default="NONE" name="EDGE_TARGET_ARROW_SHAPE"/>
            <visualProperty default="NONE" name="EDGE_SOURCE_ARROW_SHAPE"/>
            <visualProperty default="#000000" name="EDGE_LABEL_COLOR"/>
            <visualProperty default="#000000" name="EDGE_SOURCE_ARROW_UNSELECTED_PAINT"/>
            <visualProperty default="255" name="EDGE_TRANSPARENCY"/>
            <visualProperty default="#FFFF00" name="EDGE_SOURCE_ARROW_SELECTED_PAINT"/>
            <visualProperty default="10" name="EDGE_LABEL_FONT_SIZE"/>
            <visualProperty default="true" name="EDGE_CURVED"/>
            <visualProperty default="#FF0000" name="EDGE_STROKE_SELECTED_PAINT"/>
            <visualProperty default="false" name="EDGE_SELECTED"/>
            <visualProperty default="true" name="EDGE_VISIBLE"/>
            <visualProperty default="200.0" name="EDGE_LABEL_WIDTH"/>
            <visualProperty default="" name="EDGE_TOOLTIP"/>
            <visualProperty default="#FFFFFF" name="EDGE_STROKE_UNSELECTED_PAINT"/>
            <visualProperty default="#000000" name="EDGE_TARGET_ARROW_UNSELECTED_PAINT"/>
        </edge>
    </visualStyle>
    <visualStyle name="Ripple">
        <network>
            <visualProperty default="400.0" name="NETWORK_HEIGHT"/>
            <visualProperty default="0.0" name="NETWORK_CENTER_X_LOCATION"/>
            <visualProperty default="#FFFFFF" name="NETWORK_BACKGROUND_PAINT"/>
            <visualProperty default="0.0" name="NETWORK_CENTER_Z_LOCATION"/>
            <visualProperty default="1.0" name="NETWORK_SCALE_FACTOR"/>
            <visualProperty default="true" name="NETWORK_NODE_SELECTION"/>
            <visualProperty default="550.0" name="NETWORK_WIDTH"/>
            <visualProperty default="" name="NETWORK_TITLE"/>
            <visualProperty default="550.0" name="NETWORK_SIZE"/>
            <visualProperty default="0.0" name="NETWORK_CENTER_Y_LOCATION"/>
            <visualProperty default="true" name="NETWORK_EDGE_SELECTION"/>
            <visualProperty default="0.0" name="NETWORK_DEPTH"/>
        </network>
        <node>
            <dependency value="true" name="nodeCustomGraphicsSizeSync"/>
            <dependency value="true" name="nodeSizeLocked"/>
            <visualProperty default="C,C,c,0.00,0.00" name="NODE_CUSTOMGRAPHICS_POSITION_8"/>
            <visualProperty default="true" name="NODE_NESTED_NETWORK_IMAGE_VISIBLE"/>
            <visualProperty default="DefaultVisualizableVisualProperty(id=NODE_CUSTOMPAINT_5, name=Node Custom Paint 5)" name="NODE_CUSTOMPAINT_5"/>
            <visualProperty default="org.cytoscape.ding.customgraphics.NullCustomGraphics,0,[ Remove Graphics ]," name="NODE_CUSTOMGRAPHICS_9"/>
            <visualProperty default="C,C,c,0.00,0.00" name="NODE_CUSTOMGRAPHICS_POSITION_4"/>
            <visualProperty default="" name="NODE_TOOLTIP"/>
            <visualProperty default="50.0" name="NODE_CUSTOMGRAPHICS_SIZE_9"/>
            <visualProperty default="50.0" name="NODE_CUSTOMGRAPHICS_SIZE_1"/>
            <visualProperty default="org.cytoscape.ding.customgraphics.NullCustomGraphics,0,[ Remove Graphics ]," name="NODE_CUSTOMGRAPHICS_5"/>
            <visualProperty default="C,C,c,0.00,0.00" name="NODE_CUSTOMGRAPHICS_POSITION_5"/>
            <visualProperty default="org.cytoscape.ding.customgraphics.NullCustomGraphics,0,[ Remove Graphics ]," name="NODE_CUSTOMGRAPHICS_8"/>
            <visualProperty default="50.0" name="NODE_CUSTOMGRAPHICS_SIZE_8"/>
            <visualProperty default="20.0" name="NODE_BORDER_WIDTH"/>
            <visualProperty default="0.0" name="NODE_X_LOCATION"/>
            <visualProperty default="DefaultVisualizableVisualProperty(id=NODE_CUSTOMPAINT_1, name=Node Custom Paint 1)" name="NODE_CUSTOMPAINT_1"/>
            <visualProperty default="50.0" name="NODE_CUSTOMGRAPHICS_SIZE_5"/>
            <visualProperty default="50.0" name="NODE_SIZE"/>
            <visualProperty default="50.0" name="NODE_CUSTOMGRAPHICS_SIZE_6"/>
            <visualProperty default="org.cytoscape.ding.customgraphics.NullCustomGraphics,0,[ Remove Graphics ]," name="NODE_CUSTOMGRAPHICS_1"/>
            <visualProperty default="org.cytoscape.ding.customgraphics.NullCustomGraphics,0,[ Remove Graphics ]," name="NODE_CUSTOMGRAPHICS_7"/>
            <visualProperty default="" name="NODE_LABEL">
                <passthroughMapping attributeName="name" attributeType="string"/>
            </visualProperty>
            <visualProperty default="C,C,c,0.00,0.00" name="NODE_CUSTOMGRAPHICS_POSITION_9"/>
            <visualProperty default="DefaultVisualizableVisualProperty(id=NODE_CUSTOMPAINT_3, name=Node Custom Paint 3)" name="NODE_CUSTOMPAINT_3"/>
            <visualProperty default="50.0" name="NODE_CUSTOMGRAPHICS_SIZE_2"/>
            <visualProperty default="255" name="NODE_BORDER_TRANSPARENCY"/>
            <visualProperty default="ELLIPSE" name="NODE_SHAPE"/>
            <visualProperty default="#787878" name="NODE_PAINT"/>
            <visualProperty default="8" name="NODE_LABEL_FONT_SIZE"/>
            <visualProperty default="SansSerif.plain,plain,12" name="NODE_LABEL_FONT_FACE"/>
            <visualProperty default="10.0" name="COMPOUND_NODE_PADDING"/>
            <visualProperty default="true" name="NODE_VISIBLE"/>
            <visualProperty default="#FFFFFF" name="NODE_FILL_COLOR"/>
            <visualProperty default="#3399FF" name="NODE_BORDER_PAINT"/>
            <visualProperty default="0.0" name="NODE_Y_LOCATION"/>
            <visualProperty default="0.0" name="NODE_Z_LOCATION"/>
            <visualProperty default="DefaultVisualizableVisualProperty(id=NODE_CUSTOMPAINT_9, name=Node Custom Paint 9)" name="NODE_CUSTOMPAINT_9"/>
            <visualProperty default="50.0" name="NODE_CUSTOMGRAPHICS_SIZE_3"/>
            <visualProperty default="C,C,c,0.00,0.00" name="NODE_CUSTOMGRAPHICS_POSITION_1"/>
            <visualProperty default="C,C,c,0.00,0.00" name="NODE_CUSTOMGRAPHICS_POSITION_7"/>
            <visualProperty default="C,C,c,0.00,0.00" name="NODE_CUSTOMGRAPHICS_POSITION_6"/>
            <visualProperty default="DefaultVisualizableVisualProperty(id=NODE_CUSTOMPAINT_6, name=Node Custom Paint 6)" name="NODE_CUSTOMPAINT_6"/>
            <visualProperty default="org.cytoscape.ding.customgraphics.NullCustomGraphics,0,[ Remove Graphics ]," name="NODE_CUSTOMGRAPHICS_2"/>
            <visualProperty default="C,C,c,0.00,0.00" name="NODE_CUSTOMGRAPHICS_POSITION_3"/>
            <visualProperty default="255" name="NODE_LABEL_TRANSPARENCY"/>
            <visualProperty default="50.0" name="NODE_CUSTOMGRAPHICS_SIZE_4"/>
            <visualProperty default="200.0" name="NODE_LABEL_WIDTH"/>
            <visualProperty default="SOLID" name="NODE_BORDER_STROKE"/>
            <visualProperty default="#FFFFCC" name="NODE_SELECTED_PAINT"/>
            <visualProperty default="org.cytoscape.ding.customgraphics.NullCustomGraphics,0,[ Remove Graphics ]," name="NODE_CUSTOMGRAPHICS_6"/>
            <visualProperty default="false" name="NODE_SELECTED"/>
            <visualProperty default="0.0" name="NODE_DEPTH"/>
            <visualProperty default="org.cytoscape.ding.customgraphics.NullCustomGraphics,0,[ Remove Graphics ]," name="NODE_CUSTOMGRAPHICS_4"/>
            <visualProperty default="#133A60" name="NODE_LABEL_COLOR"/>
            <visualProperty default="DefaultVisualizableVisualProperty(id=NODE_CUSTOMPAINT_4, name=Node Custom Paint 4)" name="NODE_CUSTOMPAINT_4"/>
            <visualProperty default="org.cytoscape.ding.customgraphics.NullCustomGraphics,0,[ Remove Graphics ]," name="NODE_CUSTOMGRAPHICS_3"/>
            <visualProperty default="C,C,c,0.00,0.00" name="NODE_LABEL_POSITION"/>
            <visualProperty default="DefaultVisualizableVisualProperty(id=NODE_CUSTOMPAINT_7, name=Node Custom Paint 7)" name="NODE_CUSTOMPAINT_7"/>
            <visualProperty default="DefaultVisualizableVisualProperty(id=NODE_CUSTOMPAINT_2, name=Node Custom Paint 2)" name="NODE_CUSTOMPAINT_2"/>
            <visualProperty default="C,C,c,0.00,0.00" name="NODE_CUSTOMGRAPHICS_POSITION_2"/>
            <visualProperty default="80.0" name="NODE_HEIGHT"/>
            <visualProperty default="ROUND_RECTANGLE" name="COMPOUND_NODE_SHAPE"/>
            <visualProperty default="255" name="NODE_TRANSPARENCY"/>
            <visualProperty default="50.0" name="NODE_CUSTOMGRAPHICS_SIZE_7"/>
            <visualProperty default="DefaultVisualizableVisualProperty(id=NODE_CUSTOMPAINT_8, name=Node Custom Paint 8)" name="NODE_CUSTOMPAINT_8"/>
            <visualProperty default="80.0" name="NODE_WIDTH"/>
        </node>
        <edge>
            <dependency value="false" name="arrowColorMatchesEdge"/>
            <visualProperty default="#FFFF00" name="EDGE_TARGET_ARROW_SELECTED_PAINT"/>
            <visualProperty default="SansSerif.plain,plain,10" name="EDGE_LABEL_FONT_FACE"/>
            <visualProperty default="3.0" name="EDGE_WIDTH"/>
            <visualProperty default="" name="EDGE_LABEL"/>
            <visualProperty default="255" name="EDGE_LABEL_TRANSPARENCY"/>
            <visualProperty default="" name="EDGE_BEND"/>
            <visualProperty default="SOLID" name="EDGE_LINE_TYPE"/>
            <visualProperty default="NONE" name="EDGE_TARGET_ARROW_SHAPE"/>
            <visualProperty default="NONE" name="EDGE_SOURCE_ARROW_SHAPE"/>
            <visualProperty default="#000000" name="EDGE_LABEL_COLOR"/>
            <visualProperty default="#000000" name="EDGE_SOURCE_ARROW_UNSELECTED_PAINT"/>
            <visualProperty default="255" name="EDGE_TRANSPARENCY"/>
            <visualProperty default="#FFFF00" name="EDGE_SOURCE_ARROW_SELECTED_PAINT"/>
            <visualProperty default="10" name="EDGE_LABEL_FONT_SIZE"/>
            <visualProperty default="#404040" name="EDGE_UNSELECTED_PAINT"/>
            <visualProperty default="true" name="EDGE_CURVED"/>
            <visualProperty default="#FF0000" name="EDGE_STROKE_SELECTED_PAINT"/>
            <visualProperty default="false" name="EDGE_SELECTED"/>
            <visualProperty default="true" name="EDGE_VISIBLE"/>
            <visualProperty default="200.0" name="EDGE_LABEL_WIDTH"/>
            <visualProperty default="" name="EDGE_TOOLTIP"/>
            <visualProperty default="#3399FF" name="EDGE_STROKE_UNSELECTED_PAINT"/>
            <visualProperty default="#808080" name="EDGE_PAINT"/>
            <visualProperty default="#FF0000" name="EDGE_SELECTED_PAINT"/>
            <visualProperty default="#000000" name="EDGE_TARGET_ARROW_UNSELECTED_PAINT"/>
        </edge>
    </visualStyle>
    <visualStyle name="Minimal">
        <network>
            <visualProperty default="400.0" name="NETWORK_HEIGHT"/>
            <visualProperty default="0.0" name="NETWORK_CENTER_X_LOCATION"/>
            <visualProperty default="#EBEBEB" name="NETWORK_BACKGROUND_PAINT"/>
            <visualProperty default="0.0" name="NETWORK_CENTER_Z_LOCATION"/>
            <visualProperty default="1.0" name="NETWORK_SCALE_FACTOR"/>
            <visualProperty default="true" name="NETWORK_NODE_SELECTION"/>
            <visualProperty default="550.0" name="NETWORK_WIDTH"/>
            <visualProperty default="" name="NETWORK_TITLE"/>
            <visualProperty default="550.0" name="NETWORK_SIZE"/>
            <visualProperty default="0.0" name="NETWORK_CENTER_Y_LOCATION"/>
            <visualProperty default="true" name="NETWORK_EDGE_SELECTION"/>
            <visualProperty default="0.0" name="NETWORK_DEPTH"/>
        </network>
        <node>
            <dependency value="true" name="nodeCustomGraphicsSizeSync"/>
            <dependency value="true" name="nodeSizeLocked"/>
            <visualProperty default="C,C,c,0.00,0.00" name="NODE_CUSTOMGRAPHICS_POSITION_8"/>
            <visualProperty default="true" name="NODE_NESTED_NETWORK_IMAGE_VISIBLE"/>
            <visualProperty default="DefaultVisualizableVisualProperty(id=NODE_CUSTOMPAINT_5, name=Node Custom Paint 5)" name="NODE_CUSTOMPAINT_5"/>
            <visualProperty default="org.cytoscape.ding.customgraphics.NullCustomGraphics,0,[ Remove Graphics ]," name="NODE_CUSTOMGRAPHICS_9"/>
            <visualProperty default="C,C,c,0.00,0.00" name="NODE_CUSTOMGRAPHICS_POSITION_4"/>
            <visualProperty default="" name="NODE_TOOLTIP"/>
            <visualProperty default="50.0" name="NODE_CUSTOMGRAPHICS_SIZE_9"/>
            <visualProperty default="50.0" name="NODE_CUSTOMGRAPHICS_SIZE_1"/>
            <visualProperty default="org.cytoscape.ding.customgraphics.NullCustomGraphics,0,[ Remove Graphics ]," name="NODE_CUSTOMGRAPHICS_5"/>
            <visualProperty default="C,C,c,0.00,0.00" name="NODE_CUSTOMGRAPHICS_POSITION_5"/>
            <visualProperty default="org.cytoscape.ding.customgraphics.NullCustomGraphics,0,[ Remove Graphics ]," name="NODE_CUSTOMGRAPHICS_8"/>
            <visualProperty default="50.0" name="NODE_CUSTOMGRAPHICS_SIZE_8"/>
            <visualProperty default="0.0" name="NODE_BORDER_WIDTH"/>
            <visualProperty default="0.0" name="NODE_X_LOCATION"/>
            <visualProperty default="DefaultVisualizableVisualProperty(id=NODE_CUSTOMPAINT_1, name=Node Custom Paint 1)" name="NODE_CUSTOMPAINT_1"/>
            <visualProperty default="50.0" name="NODE_CUSTOMGRAPHICS_SIZE_5"/>
            <visualProperty default="42.0" name="NODE_SIZE"/>
            <visualProperty default="50.0" name="NODE_CUSTOMGRAPHICS_SIZE_6"/>
            <visualProperty default="org.cytoscape.ding.customgraphics.NullCustomGraphics,0,[ Remove Graphics ]," name="NODE_CUSTOMGRAPHICS_1"/>
            <visualProperty default="org.cytoscape.ding.customgraphics.NullCustomGraphics,0,[ Remove Graphics ]," name="NODE_CUSTOMGRAPHICS_7"/>
            <visualProperty default="" name="NODE_LABEL">
                <passthroughMapping attributeName="name" attributeType="string"/>
            </visualProperty>
            <visualProperty default="C,C,c,0.00,0.00" name="NODE_CUSTOMGRAPHICS_POSITION_9"/>
            <visualProperty default="DefaultVisualizableVisualProperty(id=NODE_CUSTOMPAINT_3, name=Node Custom Paint 3)" name="NODE_CUSTOMPAINT_3"/>
            <visualProperty default="50.0" name="NODE_CUSTOMGRAPHICS_SIZE_2"/>
            <visualProperty default="255" name="NODE_BORDER_TRANSPARENCY"/>
            <visualProperty default="RECTANGLE" name="NODE_SHAPE"/>
            <visualProperty default="#787878" name="NODE_PAINT"/>
            <visualProperty default="9" name="NODE_LABEL_FONT_SIZE"/>
            <visualProperty default="SansSerif.plain,plain,12" name="NODE_LABEL_FONT_FACE"/>
            <visualProperty default="10.0" name="COMPOUND_NODE_PADDING"/>
            <visualProperty default="true" name="NODE_VISIBLE"/>
            <visualProperty default="#FFFFFF" name="NODE_FILL_COLOR"/>
            <visualProperty default="#000000" name="NODE_BORDER_PAINT"/>
            <visualProperty default="0.0" name="NODE_Y_LOCATION"/>
            <visualProperty default="0.0" name="NODE_Z_LOCATION"/>
            <visualProperty default="DefaultVisualizableVisualProperty(id=NODE_CUSTOMPAINT_9, name=Node Custom Paint 9)" name="NODE_CUSTOMPAINT_9"/>
            <visualProperty default="50.0" name="NODE_CUSTOMGRAPHICS_SIZE_3"/>
            <visualProperty default="C,C,c,0.00,0.00" name="NODE_CUSTOMGRAPHICS_POSITION_1"/>
            <visualProperty default="C,C,c,0.00,0.00" name="NODE_CUSTOMGRAPHICS_POSITION_7"/>
            <visualProperty default="C,C,c,0.00,0.00" name="NODE_CUSTOMGRAPHICS_POSITION_6"/>
            <visualProperty default="DefaultVisualizableVisualProperty(id=NODE_CUSTOMPAINT_6, name=Node Custom Paint 6)" name="NODE_CUSTOMPAINT_6"/>
            <visualProperty default="org.cytoscape.ding.customgraphics.NullCustomGraphics,0,[ Remove Graphics ]," name="NODE_CUSTOMGRAPHICS_2"/>
            <visualProperty default="C,C,c,0.00,0.00" name="NODE_CUSTOMGRAPHICS_POSITION_3"/>
            <visualProperty default="255" name="NODE_LABEL_TRANSPARENCY"/>
            <visualProperty default="50.0" name="NODE_CUSTOMGRAPHICS_SIZE_4"/>
            <visualProperty default="200.0" name="NODE_LABEL_WIDTH"/>
            <visualProperty default="SOLID" name="NODE_BORDER_STROKE"/>
            <visualProperty default="#FFFF00" name="NODE_SELECTED_PAINT"/>
            <visualProperty default="org.cytoscape.ding.customgraphics.NullCustomGraphics,0,[ Remove Graphics ]," name="NODE_CUSTOMGRAPHICS_6"/>
            <visualProperty default="false" name="NODE_SELECTED"/>
            <visualProperty default="0.0" name="NODE_DEPTH"/>
            <visualProperty default="org.cytoscape.ding.customgraphics.NullCustomGraphics,0,[ Remove Graphics ]," name="NODE_CUSTOMGRAPHICS_4"/>
            <visualProperty default="#333333" name="NODE_LABEL_COLOR"/>
            <visualProperty default="DefaultVisualizableVisualProperty(id=NODE_CUSTOMPAINT_4, name=Node Custom Paint 4)" name="NODE_CUSTOMPAINT_4"/>
            <visualProperty default="org.cytoscape.ding.customgraphics.NullCustomGraphics,0,[ Remove Graphics ]," name="NODE_CUSTOMGRAPHICS_3"/>
            <visualProperty default="C,C,c,0.00,0.00" name="NODE_LABEL_POSITION"/>
            <visualProperty default="DefaultVisualizableVisualProperty(id=NODE_CUSTOMPAINT_7, name=Node Custom Paint 7)" name="NODE_CUSTOMPAINT_7"/>
            <visualProperty default="DefaultVisualizableVisualProperty(id=NODE_CUSTOMPAINT_2, name=Node Custom Paint 2)" name="NODE_CUSTOMPAINT_2"/>
            <visualProperty default="C,C,c,0.00,0.00" name="NODE_CUSTOMGRAPHICS_POSITION_2"/>
            <visualProperty default="50.0" name="NODE_HEIGHT"/>
            <visualProperty default="ROUND_RECTANGLE" name="COMPOUND_NODE_SHAPE"/>
            <visualProperty default="255" name="NODE_TRANSPARENCY"/>
            <visualProperty default="50.0" name="NODE_CUSTOMGRAPHICS_SIZE_7"/>
            <visualProperty default="DefaultVisualizableVisualProperty(id=NODE_CUSTOMPAINT_8, name=Node Custom Paint 8)" name="NODE_CUSTOMPAINT_8"/>
            <visualProperty default="50.0" name="NODE_WIDTH"/>
        </node>
        <edge>
            <dependency value="false" name="arrowColorMatchesEdge"/>
            <visualProperty default="#FFFF00" name="EDGE_TARGET_ARROW_SELECTED_PAINT"/>
            <visualProperty default="SansSerif.plain,plain,10" name="EDGE_LABEL_FONT_FACE"/>
            <visualProperty default="2.0" name="EDGE_WIDTH"/>
            <visualProperty default="" name="EDGE_LABEL"/>
            <visualProperty default="255" name="EDGE_LABEL_TRANSPARENCY"/>
            <visualProperty default="" name="EDGE_BEND"/>
            <visualProperty default="SOLID" name="EDGE_LINE_TYPE"/>
            <visualProperty default="NONE" name="EDGE_TARGET_ARROW_SHAPE"/>
            <visualProperty default="NONE" name="EDGE_SOURCE_ARROW_SHAPE"/>
            <visualProperty default="#000000" name="EDGE_LABEL_COLOR"/>
            <visualProperty default="#000000" name="EDGE_SOURCE_ARROW_UNSELECTED_PAINT"/>
            <visualProperty default="255" name="EDGE_TRANSPARENCY"/>
            <visualProperty default="#FFFF00" name="EDGE_SOURCE_ARROW_SELECTED_PAINT"/>
            <visualProperty default="10" name="EDGE_LABEL_FONT_SIZE"/>
            <visualProperty default="#404040" name="EDGE_UNSELECTED_PAINT"/>
            <visualProperty default="true" name="EDGE_CURVED"/>
            <visualProperty default="#FF0000" name="EDGE_STROKE_SELECTED_PAINT"/>
            <visualProperty default="false" name="EDGE_SELECTED"/>
            <visualProperty default="true" name="EDGE_VISIBLE"/>
            <visualProperty default="200.0" name="EDGE_LABEL_WIDTH"/>
            <visualProperty default="" name="EDGE_TOOLTIP"/>
            <visualProperty default="#4C4C4C" name="EDGE_STROKE_UNSELECTED_PAINT"/>
            <visualProperty default="#808080" name="EDGE_PAINT"/>
            <visualProperty default="#FF0000" name="EDGE_SELECTED_PAINT"/>
            <visualProperty default="#000000" name="EDGE_TARGET_ARROW_UNSELECTED_PAINT"/>
        </edge>
    </visualStyle>
</vizmap>
