# Supplementary material for: Discovery of several thousand highly diverse circular DNA viruses
Source: eLife journal article supplement (doi:10.7554/elife.51971), 2020-02-03
Supplement: fig3-data1 [file elife-51971-fig3-data1-v1.cys › CytoscapeSession-2019_08_03-06_44/tables/41-Mike_class_reps60+Full+Network/HIDDEN-org.cytoscape.model.CyEdge-41+hidden+edge.cytable]

"CyCSV-Version","1"
"SUID"
"java.lang.Long"
""
"41 hidden edge",""
