# Supplementary material for: Discovery of several thousand highly diverse circular DNA viruses
Source: eLife journal article supplement (doi:10.7554/elife.51971), 2020-02-03
Supplement: fig3-data1 [file elife-51971-fig3-data1-v1.cys › CytoscapeSession-2019_08_03-06_44/tables/41-Mike_class_reps60+Full+Network/LOCAL_ATTRS-org.cytoscape.model.CyEdge-41+default+edge.cytable]

CyCSV-Version	1
SUID	interaction	name	selected
java.lang.Long	java.lang.String	java.lang.String	java.lang.Boolean
41 default edge
27084		zzz2145,zzz2146	false
27083		zzz2145,zzz2147	false
27082		zzz2146,zzz2147	false
27111		zzz2133,zzz2134	false
27087		zzz2144,zzz2145	false
27086		zzz2144,zzz2146	false
27085		zzz2144,zzz2147	false
31375		zzz1694,zzz2389	false
27110		zzz2136,zzz2137	false
29375		zzz1903,zzz1904	false
26839		zzz2204,zzz2277	false
29973		zzz1812,zzz1813	false
30680		zzz1747,zzz1748	false
30690		zzz1746,zzz1747	false
30689		zzz1746,zzz1748	false
25681		zzz2442,zzz2443	false
26500		zzz2324,zzz2563	false
23408		zzzz117,zzzz281	false
26620		zzz2273,zzz2382	false
24025		zzz2520,zzzzz96	false
29559		zzz1876,zzz1880	false
33532		zzz1478,zzz1479	false
29558		zzz1876,zzz1878	false
30838		zzz1733,zzz1734	false
30837		zzz1733,zzz1735	false
30831		zzz1734,zzz1735	false
29552		zzz1878,zzz1880	false
29549		zzz1881,zzz1882	false
31832		zzz1644,zzz1645	false
30836		zzz1733,zzz1736	false
30830		zzz1734,zzz1736	false
30825		zzz1735,zzz1736	false
30835		zzz1733,zzz1737	false
30829		zzz1734,zzz1737	false
30824		zzz1735,zzz1737	false
27613		zzz2050,zzz2052	false
25801		zzz2407,zzz2409	false
30820		zzz1736,zzz1737	false
29536		zzz1882,zzz1883	false
29548		zzz1881,zzz1883	false
29398		zzz1898,zzz1899	false
22014		zzzz627,zzzz629	false
26466		zzz2336,zzz2364	false
29374		zzz1905,zzz1906	false
29373		zzz1905,zzz1908	false
29368		zzz1906,zzz1908	false
27123		zzz2118,zzz2120	false
25734		zzz2419,zzz2421	false
25815		zzz2406,zzz2407	false
23942		zzz2556,zzz2559	false
33671		zzz1466,zzz1467	false
33670		zzz1466,zzz1468	false
33664		zzz1467,zzz1468	false
25846		zzz2404,zzz2421	false
25814		zzz2406,zzz2409	false
27122		zzz2118,zzz2121	false
27119		zzz2120,zzz2121	false
25845		zzz2404,zzz2409	false
26932		zzz2181,zzz2345	false
25844		zzz2404,zzz2407	false
26642		zzz2272,zzz2362	false
23682		zzz2629,zzz2643	false
75868		zzz1123,zzz1132	false
30679		zzz1747,zzz1749	false
30671		zzz1748,zzz1749	false
29524		zzz1883,zzz1884	false
29151		zzz1931,zzz1932	false
30688		zzz1746,zzz1749	false
29535		zzz1882,zzz1884	false
29372		zzz1905,zzz1907	false
29367		zzz1906,zzz1907	false
29360		zzz1908,zzz1907	false
29141		zzz1932,zzz1933	false
29547		zzz1881,zzz1884	false
27501		zzz2073,zzz2411	false
29513		zzz1884,zzz1885	false
58046		zzz1219,zzz1220	false
29150		zzz1931,zzz1933	false
25843		zzz2404,zzz2406	false
26962		zzz2174,zzz2385	false
25813		zzz2406,zzz2421	false
53379		zzz1247,zzz1278	false
32604		zzz1595,zzz1933	false
26581		zzz2283,zzz2363	false
25842		zzz2404,zzz2419	false
27102		zzz2138,zzz2139	false
27101		zzz2138,zzz2140	false
27100		zzz2138,zzz2141	false
27099		zzz2138,zzz2142	false
27098		zzz2138,zzz2143	false
27097		zzz2139,zzz2140	false
27096		zzz2139,zzz2141	false
27095		zzz2139,zzz2142	false
27094		zzz2139,zzz2143	false
27093		zzz2140,zzz2141	false
27092		zzz2140,zzz2142	false
27091		zzz2140,zzz2143	false
27090		zzz2141,zzz2142	false
27089		zzz2141,zzz2143	false
27088		zzz2142,zzz2143	false
31374		zzz1694,zzz2379	false
32603		zzz1595,zzz1934	false
25800		zzz2407,zzz2421	false
25707		zzz2428,zzz2430	false
111916		zzz1007,zzz1008	false
72065		zzz1138,zzzz965	false
29132		zzz1933,zzz1935	false
29131		zzz1933,zzz1936	false
26933		zzz2179,zzz2274	false
26841		zzz2203,zzz2276	false
33653		zzz1469,zzz1478	false
33652		zzz1469,zzz1479	false
32602		zzz1595,zzz1932	false
27121		zzz2118,zzz2119	false
27118		zzz2120,zzz2119	false
29551		zzz1878,zzz1879	false
29557		zzz1876,zzz1879	false
29117		zzz1935,zzz1936	false
27500		zzz2073,zzz2422	false
26897		zzz2197,zzz2278	false
25776		zzz2409,zzz2421	false
32601		zzz1595,zzz1931	false
29550		zzz1879,zzz1880	false
29140		zzz1932,zzz1935	false
27120		zzz2119,zzz2121	false
96585		zzz1050,zzz1051	false
96584		zzz1050,zzz1052	false
96444		zzz1051,zzz1052	false
29955		zzz1822,zzz1823	false
29139		zzz1932,zzz1936	false
29130		zzz1933,zzz1934	false
26564		zzz2299,zzz2335	false
26135		zzz2379,zzz2389	false
25812		zzz2406,zzz2419	false
27113		zzz2132,zzz2133	false
27112		zzz2132,zzz2134	false
95409		zzz1056,zzz1057	false
32600		zzz1595,zzz1936	false
29149		zzz1931,zzz1935	false
29148		zzz1931,zzz1936	false
88322		zzz1080,zzz1081	false
32599		zzz1595,zzz1935	false
29138		zzz1932,zzz1934	false
30478		zzz1781,zzz1782	false
25841		zzz2404,zzz2411	false
25840		zzz2404,zzz2422	false
25799		zzz2407,zzz2419	false
102874		zzz1033,zzzz951	false
25775		zzz2409,zzz2419	false
23601		zzz2657,zzz2658	false
91264		zzz1069,zzz1070	false
67079		zzz1156,zzz1157	false
67078		zzz1156,zzz1191	false
29147		zzz1931,zzz1934	false
64931		zzz1171,zzz1210	false
59049		zzz1211,zzz1218	false
23616		zzz2650,zzz2651	false
4643		zzzz981,zzzz982	false
85359		zzz1089,zzz1091	false
66937		zzz1157,zzz1191	false
64015		zzz1179,zzz1188	false
29534		zzz1882,zzz1885	false
29124		zzz1934,zzz1936	false
26550		zzz2301,zzz2361	false
91887		zzz1067,zzz1069	false
91886		zzz1067,zzz1070	false
64795		zzz1173,zzz1189	false
64794		zzz1173,zzz1190	false
29546		zzz1881,zzz1885	false
29523		zzz1883,zzz1885	false
63869		zzz1182,zzz1187	false
29123		zzz1934,zzz1935	false
64930		zzz1171,zzz1179	false
63428		zzz1189,zzz1190	false
25755		zzz2411,zzz2422	false
64014		zzz1179,zzz1210	false
27499		zzz2073,zzz2404	false
22742		zzzz328,zzzz376	false
65696		zzz1163,zzz1164	false
64929		zzz1171,zzz1188	false
64928		zzz1171,zzz1211	false
63508		zzz1188,zzz1210	false
59184		zzz1209,zzz1211	false
59118		zzz1210,zzz1211	false
32591		zzz1596,zzz1934	false
30470		zzz1785,zzz1786	false
25712		zzz2423,zzz2501	false
64927		zzz1171,zzz1218	false
64793		zzz1173,zzz1183	false
59183		zzz1209,zzz1218	false
52758		zzz1250,zzz1266	false
32598		zzz1595,zzz1596	false
93756		zzz1061,zzz1062	false
65695		zzz1163,zzz1179	false
65146		zzz1168,zzz1169	false
63788		zzz1183,zzz1189	false
59117		zzz1210,zzz1218	false
32590		zzz1596,zzz1933	false
27498		zzz2073,zzz2421	false
25798		zzz2407,zzz2422	false
25774		zzz2409,zzz2422	false
102145		zzz1035,zzz1038	false
65694		zzz1163,zzz1188	false
65234		zzz1167,zzz1168	false
65233		zzz1167,zzz1169	false
64926		zzz1171,zzz1209	false
64792		zzz1173,zzz1175	false
64013		zzz1179,zzz1218	false
63787		zzz1183,zzz1190	false
63507		zzz1188,zzz1218	false
59182		zzz1209,zzz1210	false
8014		zzzz934,zzzz935	false
102144		zzz1035,zzz1036	false
101031		zzz1038,zzz1036	false
67227		zzz1155,zzz1156	false
66531		zzz1159,zzz1160	false
103251		zzz1032,zzz1047	false
64925		zzz1171,zzz1175	false
64791		zzz1173,zzz1187	false
64659		zzz1175,zzz1189	false
64658		zzz1175,zzz1190	false
64657		zzz1175,zzz1210	false
64012		zzz1179,zzz1211	false
63601		zzz1187,zzz1190	false
63506		zzz1188,zzz1211	false
52323		zzz1253,zzz1295	false
52322		zzz1253,zzz1300	false
44599		zzz1295,zzz1300	false
27497		zzz2073,zzz2419	false
26939		zzz2178,zzz2275	false
25811		zzz2406,zzz2411	false
25754		zzz2411,zzz2421	false
70400		zzz1144,zzz1145	false
52321		zzz1253,zzz1288	false
44598		zzz1295,zzz1288	false
43718		zzz1300,zzz1288	false
67226		zzz1155,zzz1157	false
65600		zzz1164,zzz1211	false
64656		zzz1175,zzz1211	false
63600		zzz1187,zzz1189	false
35551		zzz1358,zzz1359	false
32589		zzz1596,zzz1932	false
29752		zzz1841,zzz1842	false
29751		zzz1841,zzz1843	false
29750		zzz1842,zzz1843	false
25773		zzz2409,zzz2411	false
89105		zzz1077,zzz1083	false
65599		zzz1164,zzz1218	false
64790		zzz1173,zzz1182	false
64655		zzz1175,zzz1187	false
64654		zzz1175,zzz1218	false
64011		zzz1179,zzz1209	false
63868		zzz1182,zzz1190	false
36825		zzz1346,zzz1358	false
34970		zzz1363,zzz1364	false
32588		zzz1596,zzz1936	false
25721		zzz2421,zzz2422	false
23411		zzzz115,zzzz275	false
7551		zzzz939,zzzz940	false
7550		zzzz939,zzzz941	false
7549		zzzz939,zzzz942	false
7548		zzzz939,zzzz976	false
7547		zzzz939,zzzz977	false
7461		zzzz940,zzzz941	false
7460		zzzz940,zzzz942	false
7459		zzzz940,zzzz976	false
7458		zzzz940,zzzz977	false
7372		zzzz941,zzzz942	false
7371		zzzz941,zzzz976	false
7370		zzzz941,zzzz977	false
7284		zzzz942,zzzz976	false
7283		zzzz942,zzzz977	false
4956		zzzz976,zzzz977	false
65693		zzz1163,zzz1171	false
65692		zzz1163,zzz1210	false
65598		zzz1164,zzz1171	false
65597		zzz1164,zzz1209	false
63867		zzz1182,zzz1189	false
63505		zzz1188,zzz1209	false
32587		zzz1596,zzz1935	false
30118		zzz1802,zzz1803	false
30117		zzz1802,zzz1804	false
30116		zzz1802,zzz1805	false
30115		zzz1802,zzz1806	false
30114		zzz1803,zzz1804	false
30113		zzz1803,zzz1805	false
30112		zzz1803,zzz1806	false
30111		zzz1804,zzz1805	false
30110		zzz1804,zzz1806	false
30109		zzz1805,zzz1806	false
25797		zzz2407,zzz2411	false
23977		zzz2535,zzz2536	false
109595		zzz1013,zzz1014	false
73225		zzz1134,zzz1135	false
65596		zzz1164,zzz1210	false
64653		zzz1175,zzz1179	false
64652		zzz1175,zzz1183	false
64651		zzz1175,zzz1209	false
50400		zzz1263,zzz1267	false
50399		zzz1263,zzz1277	false
50398		zzz1263,zzz1282	false
50397		zzz1263,zzz1286	false
50396		zzz1263,zzz1308	false
49818		zzz1267,zzz1277	false
49817		zzz1267,zzz1282	false
49816		zzz1267,zzz1286	false
49815		zzz1267,zzz1308	false
47840		zzz1277,zzz1282	false
47839		zzz1277,zzz1286	false
47838		zzz1277,zzz1308	false
46840		zzz1282,zzz1286	false
46839		zzz1282,zzz1308	false
46077		zzz1286,zzz1308	false
36824		zzz1346,zzz1359	false
32586		zzz1596,zzz1931	false
7546		zzzz939,zzzz978	false
7457		zzzz940,zzzz978	false
7369		zzzz941,zzzz978	false
7282		zzzz942,zzzz978	false
4955		zzzz976,zzzz978	false
4870		zzzz977,zzzz978	false
98835		zzz1044,zzz1047	false
64650		zzz1175,zzz1182	false
64649		zzz1175,zzz1188	false
8305		zzzz931,zzzz939	false
8304		zzzz931,zzzz940	false
8303		zzzz931,zzzz941	false
8302		zzzz931,zzzz942	false
8301		zzzz931,zzzz976	false
8300		zzzz931,zzzz977	false
103250		zzz1032,zzz1044	false
88658		zzz1079,zzz1082	false
65595		zzz1164,zzz1179	false
63786		zzz1183,zzz1187	false
31129		zzz1711,zzz1712	false
31128		zzz1711,zzz1713	false
31127		zzz1712,zzz1713	false
29309		zzz1911,zzz1912	false
29308		zzz1911,zzz1913	false
29307		zzz1912,zzz1913	false
89104		zzz1077,zzz1085	false
66795		zzz1158,zzz1159	false
66794		zzz1158,zzz1160	false
65691		zzz1163,zzz1218	false
65594		zzz1164,zzz1188	false
64924		zzz1171,zzz1190	false
64010		zzz1179,zzz1190	false
63336		zzz1190,zzz1210	false
46248		zzz1285,zzz1288	false
27617		zzz2042,zzz2043	false
8299		zzzz931,zzzz978	false
64923		zzz1171,zzz1173	false
52320		zzz1253,zzz1285	false
44597		zzz1295,zzz1285	false
43717		zzz1300,zzz1285	false
87320		zzz1083,zzz1085	false
65690		zzz1163,zzz1211	false
64789		zzz1173,zzz1179	false
64788		zzz1173,zzz1210	false
63866		zzz1182,zzz1183	false
63504		zzz1188,zzz1190	false
52319		zzz1253,zzz1263	false
52318		zzz1253,zzz1267	false
52317		zzz1253,zzz1277	false
52316		zzz1253,zzz1282	false
52315		zzz1253,zzz1286	false
52314		zzz1253,zzz1308	false
44596		zzz1295,zzz1263	false
44595		zzz1295,zzz1267	false
44594		zzz1295,zzz1277	false
44593		zzz1295,zzz1282	false
44592		zzz1295,zzz1286	false
44591		zzz1295,zzz1308	false
43716		zzz1300,zzz1263	false
43715		zzz1300,zzz1267	false
43714		zzz1300,zzz1277	false
43713		zzz1300,zzz1282	false
43712		zzz1300,zzz1286	false
43711		zzz1300,zzz1308	false
32790		zzz1582,zzz2392	false
25810		zzz2406,zzz2422	false
4501		zzzz984,zzzz985	false
4500		zzzz984,zzzz986	false
4446		zzzz985,zzzz986	false
65593		zzz1164,zzz1175	false
64922		zzz1171,zzz1189	false
64009		zzz1179,zzz1187	false
50395		zzz1263,zzz1288	false
49814		zzz1267,zzz1288	false
47837		zzz1277,zzz1288	false
46838		zzz1282,zzz1288	false
46076		zzz1286,zzz1288	false
42222		zzz1308,zzz1288	false
27653		zzz2036,zzz2037	false
25796		zzz2407,zzz2420	false
74999		zzz1126,zzzzz85	false
64787		zzz1173,zzz1188	false
64786		zzz1173,zzz1211	false
64008		zzz1179,zzz1189	false
63599		zzz1187,zzz1188	false
63427		zzz1189,zzz1210	false
63335		zzz1190,zzz1211	false
34413		zzz1378,zzz2553	false
27663		zzz2035,zzz2036	false
27662		zzz2035,zzz2037	false
25753		zzz2411,zzz2419	false
97724		zzz1047,zzzz968	false
65689		zzz1163,zzz1209	false
64921		zzz1171,zzz1187	false
64785		zzz1173,zzz1218	false
63503		zzz1188,zzz1189	false
63426		zzz1189,zzz1211	false
63334		zzz1190,zzz1218	false
25772		zzz2409,zzz2420	false
23943		zzz2554,zzz2555	false
4499		zzzz984,zzzz987	false
4445		zzzz985,zzzz987	false
4392		zzzz986,zzzz987	false
4339		zzzz987,zzzz989	false
64007		zzz1179,zzz1182	false
63865		zzz1182,zzz1188	false
63598		zzz1187,zzz1210	false
63425		zzz1189,zzz1218	false
30877		zzz1729,zzz1731	false
25706		zzz2429,zzz2431	false
23911		zzz2569,zzz2570	false
23910		zzz2569,zzz2571	false
23907		zzz2570,zzz2571	false
23909		zzz2569,zzz2572	false
23908		zzz2569,zzz2573	false
23906		zzz2570,zzz2572	false
23905		zzz2570,zzz2573	false
23904		zzz2571,zzz2572	false
23903		zzz2571,zzz2573	false
23902		zzz2572,zzz2573	false
4498		zzzz984,zzzz989	false
4444		zzzz985,zzzz989	false
4391		zzzz986,zzzz989	false
67225		zzz1155,zzz1191	false
65688		zzz1163,zzz1175	false
64784		zzz1173,zzz1209	false
63597		zzz1187,zzz1211	false
63333		zzz1190,zzz1209	false
53820		zzz1245,zzz1249	false
53819		zzz1245,zzz1255	false
53818		zzz1245,zzz1258	false
53817		zzz1245,zzz1265	false
53816		zzz1245,zzz1268	false
53815		zzz1245,zzz1275	false
53814		zzz1245,zzz1302	false
53813		zzz1245,zzz1309	false
53812		zzz1245,zzz1311	false
52968		zzz1249,zzz1255	false
52967		zzz1249,zzz1258	false
52966		zzz1249,zzz1265	false
52965		zzz1249,zzz1268	false
52964		zzz1249,zzz1275	false
52963		zzz1249,zzz1302	false
52962		zzz1249,zzz1309	false
52961		zzz1249,zzz1311	false
51917		zzz1255,zzz1258	false
51916		zzz1255,zzz1265	false
51915		zzz1255,zzz1268	false
51914		zzz1255,zzz1275	false
51913		zzz1255,zzz1302	false
51912		zzz1255,zzz1309	false
51911		zzz1255,zzz1311	false
51265		zzz1258,zzz1265	false
51264		zzz1258,zzz1268	false
51263		zzz1258,zzz1275	false
51262		zzz1258,zzz1302	false
51261		zzz1258,zzz1309	false
51260		zzz1258,zzz1311	false
50029		zzz1265,zzz1268	false
50028		zzz1265,zzz1275	false
50027		zzz1265,zzz1302	false
50026		zzz1265,zzz1309	false
50025		zzz1265,zzz1311	false
49630		zzz1268,zzz1275	false
49629		zzz1268,zzz1302	false
49628		zzz1268,zzz1309	false
49627		zzz1268,zzz1311	false
48272		zzz1275,zzz1302	false
48271		zzz1275,zzz1309	false
48270		zzz1275,zzz1311	false
43359		zzz1302,zzz1309	false
43358		zzz1302,zzz1311	false
42038		zzz1309,zzz1311	false
47459		zzz1279,zzz1290	false
47458		zzz1279,zzz1297	false
45384		zzz1290,zzz1297	false
45892		zzz1287,zzz1289	false
34863		zzz1364,zzz1366	false
25684		zzz2439,zzz2440	false
25683		zzz2439,zzz2441	false
25682		zzz2440,zzz2441	false
23736		zzz2611,zzz2628	false
4497		zzzz984,zzzz988	false
4443		zzzz985,zzzz988	false
4390		zzzz986,zzzz988	false
4338		zzzz987,zzzz988	false
4287		zzzz988,zzzz989	false
104042		zzz1030,zzz1031	false
103249		zzz1032,zzzz968	false
64920		zzz1171,zzz1182	false
63864		zzz1182,zzz1210	false
63596		zzz1187,zzz1218	false
63424		zzz1189,zzz1209	false
36567		zzz1348,zzz1356	false
30876		zzz1729,zzz1732	false
30857		zzz1731,zzz1732	false
64919		zzz1171,zzz1183	false
64006		zzz1179,zzz1183	false
63863		zzz1182,zzz1211	false
63785		zzz1183,zzz1210	false
63595		zzz1187,zzz1209	false
53811		zzz1245,zzz1279	false
53810		zzz1245,zzz1290	false
53809		zzz1245,zzz1297	false
52960		zzz1249,zzz1279	false
52959		zzz1249,zzz1290	false
52958		zzz1249,zzz1297	false
51910		zzz1255,zzz1279	false
51909		zzz1255,zzz1290	false
51908		zzz1255,zzz1297	false
51259		zzz1258,zzz1279	false
51258		zzz1258,zzz1290	false
51257		zzz1258,zzz1297	false
50024		zzz1265,zzz1279	false
50023		zzz1265,zzz1290	false
50022		zzz1265,zzz1297	false
49626		zzz1268,zzz1279	false
49625		zzz1268,zzz1290	false
49624		zzz1268,zzz1297	false
48269		zzz1275,zzz1279	false
48268		zzz1275,zzz1290	false
48267		zzz1275,zzz1297	false
43357		zzz1302,zzz1279	false
43356		zzz1302,zzz1290	false
43355		zzz1302,zzz1297	false
42037		zzz1309,zzz1279	false
42036		zzz1309,zzz1290	false
42035		zzz1309,zzz1297	false
41672		zzz1311,zzz1279	false
41671		zzz1311,zzz1290	false
41670		zzz1311,zzz1297	false
34969		zzz1363,zzz1366	false
29662		zzz1868,zzz1869	false
29661		zzz1868,zzz1870	false
29648		zzz1869,zzz1870	false
27496		zzz2073,zzz2420	false
65687		zzz1163,zzz1190	false
63784		zzz1183,zzz1188	false
53808		zzz1245,zzz1303	false
52957		zzz1249,zzz1303	false
51907		zzz1255,zzz1303	false
51256		zzz1258,zzz1303	false
50021		zzz1265,zzz1303	false
49623		zzz1268,zzz1303	false
48266		zzz1275,zzz1303	false
43354		zzz1302,zzz1303	false
42034		zzz1309,zzz1303	false
41669		zzz1311,zzz1303	false
32037		zzz1638,zzz1640	false
32036		zzz1638,zzz1642	false
32035		zzz1638,zzz1948	false
32034		zzz1638,zzz1950	false
32033		zzz1638,zzz1951	false
32032		zzz1638,zzz1952	false
32031		zzz1638,zzz1953	false
32030		zzz1638,zzz1954	false
32029		zzz1638,zzz1955	false
32028		zzz1638,zzz1958	false
32027		zzz1638,zzz1959	false
32026		zzz1638,zzz1978	false
32025		zzz1638,zzz1979	false
32024		zzz1638,zzz1980	false
32023		zzz1638,zzz1981	false
32022		zzz1638,zzz1982	false
32021		zzz1638,zzz1983	false
32020		zzz1638,zzz1984	false
32019		zzz1638,zzz1985	false
31957		zzz1640,zzz1642	false
31956		zzz1640,zzz1948	false
31955		zzz1640,zzz1950	false
31954		zzz1640,zzz1951	false
31953		zzz1640,zzz1952	false
31952		zzz1640,zzz1953	false
31951		zzz1640,zzz1954	false
31950		zzz1640,zzz1955	false
31949		zzz1640,zzz1958	false
31948		zzz1640,zzz1959	false
31947		zzz1640,zzz1978	false
31946		zzz1640,zzz1979	false
31945		zzz1640,zzz1980	false
31944		zzz1640,zzz1981	false
31943		zzz1640,zzz1982	false
31942		zzz1640,zzz1983	false
31941		zzz1640,zzz1984	false
31940		zzz1640,zzz1985	false
31880		zzz1642,zzz1948	false
31879		zzz1642,zzz1950	false
31878		zzz1642,zzz1951	false
31877		zzz1642,zzz1952	false
31876		zzz1642,zzz1953	false
31875		zzz1642,zzz1954	false
31874		zzz1642,zzz1955	false
31873		zzz1642,zzz1958	false
31872		zzz1642,zzz1959	false
31871		zzz1642,zzz1978	false
31870		zzz1642,zzz1979	false
31869		zzz1642,zzz1980	false
31868		zzz1642,zzz1981	false
31867		zzz1642,zzz1982	false
31866		zzz1642,zzz1983	false
31865		zzz1642,zzz1984	false
31864		zzz1642,zzz1985	false
29060		zzz1948,zzz1950	false
29059		zzz1948,zzz1951	false
29058		zzz1948,zzz1952	false
29057		zzz1948,zzz1953	false
29056		zzz1948,zzz1954	false
29055		zzz1948,zzz1955	false
29054		zzz1948,zzz1958	false
29053		zzz1948,zzz1959	false
29052		zzz1948,zzz1978	false
29051		zzz1948,zzz1979	false
29050		zzz1948,zzz1980	false
29049		zzz1948,zzz1981	false
29048		zzz1948,zzz1982	false
29047		zzz1948,zzz1983	false
29046		zzz1948,zzz1984	false
29045		zzz1948,zzz1985	false
28984		zzz1950,zzz1951	false
28983		zzz1950,zzz1952	false
28982		zzz1950,zzz1953	false
28981		zzz1950,zzz1954	false
28980		zzz1950,zzz1955	false
28979		zzz1950,zzz1958	false
28978		zzz1950,zzz1959	false
28977		zzz1950,zzz1978	false
28976		zzz1950,zzz1979	false
28975		zzz1950,zzz1980	false
28974		zzz1950,zzz1981	false
28973		zzz1950,zzz1982	false
28972		zzz1950,zzz1983	false
28971		zzz1950,zzz1984	false
28970		zzz1950,zzz1985	false
28938		zzz1951,zzz1952	false
28937		zzz1951,zzz1953	false
28936		zzz1951,zzz1954	false
28935		zzz1951,zzz1955	false
28934		zzz1951,zzz1958	false
28933		zzz1951,zzz1959	false
28932		zzz1951,zzz1978	false
28931		zzz1951,zzz1979	false
28930		zzz1951,zzz1980	false
28929		zzz1951,zzz1981	false
28928		zzz1951,zzz1982	false
28927		zzz1951,zzz1983	false
28926		zzz1951,zzz1984	false
28925		zzz1951,zzz1985	false
28893		zzz1952,zzz1953	false
28892		zzz1952,zzz1954	false
28891		zzz1952,zzz1955	false
28890		zzz1952,zzz1958	false
28889		zzz1952,zzz1959	false
28888		zzz1952,zzz1978	false
28887		zzz1952,zzz1979	false
28886		zzz1952,zzz1980	false
28885		zzz1952,zzz1981	false
28884		zzz1952,zzz1982	false
28883		zzz1952,zzz1983	false
28882		zzz1952,zzz1984	false
28881		zzz1952,zzz1985	false
28849		zzz1953,zzz1954	false
28848		zzz1953,zzz1955	false
28847		zzz1953,zzz1958	false
28846		zzz1953,zzz1959	false
28845		zzz1953,zzz1978	false
28844		zzz1953,zzz1979	false
28843		zzz1953,zzz1980	false
28842		zzz1953,zzz1981	false
28841		zzz1953,zzz1982	false
28840		zzz1953,zzz1983	false
28839		zzz1953,zzz1984	false
28838		zzz1953,zzz1985	false
28806		zzz1954,zzz1955	false
28805		zzz1954,zzz1958	false
28804		zzz1954,zzz1959	false
28803		zzz1954,zzz1978	false
28802		zzz1954,zzz1979	false
28801		zzz1954,zzz1980	false
28800		zzz1954,zzz1981	false
28799		zzz1954,zzz1982	false
28798		zzz1954,zzz1983	false
28797		zzz1954,zzz1984	false
28796		zzz1954,zzz1985	false
28764		zzz1955,zzz1958	false
28763		zzz1955,zzz1959	false
28762		zzz1955,zzz1978	false
28761		zzz1955,zzz1979	false
28760		zzz1955,zzz1980	false
28759		zzz1955,zzz1981	false
28758		zzz1955,zzz1982	false
28757		zzz1955,zzz1983	false
28756		zzz1955,zzz1984	false
28755		zzz1955,zzz1985	false
28708		zzz1958,zzz1959	false
28707		zzz1958,zzz1978	false
28706		zzz1958,zzz1979	false
28705		zzz1958,zzz1980	false
28704		zzz1958,zzz1981	false
28703		zzz1958,zzz1982	false
28702		zzz1958,zzz1983	false
28701		zzz1958,zzz1984	false
28700		zzz1958,zzz1985	false
28668		zzz1959,zzz1978	false
28667		zzz1959,zzz1979	false
28666		zzz1959,zzz1980	false
28665		zzz1959,zzz1981	false
28664		zzz1959,zzz1982	false
28663		zzz1959,zzz1983	false
28662		zzz1959,zzz1984	false
28661		zzz1959,zzz1985	false
28300		zzz1978,zzz1979	false
28299		zzz1978,zzz1980	false
28298		zzz1978,zzz1981	false
28297		zzz1978,zzz1982	false
28296		zzz1978,zzz1983	false
28295		zzz1978,zzz1984	false
28294		zzz1978,zzz1985	false
28262		zzz1979,zzz1980	false
28261		zzz1979,zzz1981	false
28260		zzz1979,zzz1982	false
28259		zzz1979,zzz1983	false
28258		zzz1979,zzz1984	false
28257		zzz1979,zzz1985	false
28225		zzz1980,zzz1981	false
28224		zzz1980,zzz1982	false
28223		zzz1980,zzz1983	false
28222		zzz1980,zzz1984	false
28221		zzz1980,zzz1985	false
28189		zzz1981,zzz1982	false
28188		zzz1981,zzz1983	false
28187		zzz1981,zzz1984	false
28186		zzz1981,zzz1985	false
28154		zzz1982,zzz1983	false
28153		zzz1982,zzz1984	false
28152		zzz1982,zzz1985	false
28120		zzz1983,zzz1984	false
28119		zzz1983,zzz1985	false
28087		zzz1984,zzz1985	false
31987		zzz1639,zzz1949	false
27495		zzz2073,zzz2406	false
25830		zzz2405,zzz2408	false
22406		zzzz463,zzzz504	false
108238		zzz1019,zzz1020	false
63862		zzz1182,zzz1218	false
63783		zzz1183,zzz1211	false
58361		zzz1216,zzz1225	false
54269		zzz1242,zzz1287	false
52538		zzz1252,zzz1287	false
52131		zzz1254,zzz1287	false
50613		zzz1262,zzz1287	false
48879		zzz1272,zzz1287	false
32018		zzz1638,zzz1639	false
32017		zzz1638,zzz1949	false
31939		zzz1640,zzz1639	false
31938		zzz1640,zzz1949	false
31863		zzz1642,zzz1639	false
31862		zzz1642,zzz1949	false
29044		zzz1948,zzz1639	false
29043		zzz1948,zzz1949	false
28969		zzz1950,zzz1639	false
28968		zzz1950,zzz1949	false
28924		zzz1951,zzz1639	false
28923		zzz1951,zzz1949	false
28880		zzz1952,zzz1639	false
28879		zzz1952,zzz1949	false
28837		zzz1953,zzz1639	false
28836		zzz1953,zzz1949	false
28795		zzz1954,zzz1639	false
28794		zzz1954,zzz1949	false
28754		zzz1955,zzz1639	false
28753		zzz1955,zzz1949	false
28699		zzz1958,zzz1639	false
28698		zzz1958,zzz1949	false
28660		zzz1959,zzz1639	false
28659		zzz1959,zzz1949	false
28293		zzz1978,zzz1639	false
28292		zzz1978,zzz1949	false
28256		zzz1979,zzz1639	false
28255		zzz1979,zzz1949	false
28220		zzz1980,zzz1639	false
28219		zzz1980,zzz1949	false
28185		zzz1981,zzz1639	false
28184		zzz1981,zzz1949	false
28151		zzz1982,zzz1639	false
28150		zzz1982,zzz1949	false
28118		zzz1983,zzz1639	false
28117		zzz1983,zzz1949	false
28086		zzz1984,zzz1639	false
28085		zzz1984,zzz1949	false
28055		zzz1985,zzz1639	false
28054		zzz1985,zzz1949	false
31908		zzz1641,zzz1960	false
31907		zzz1641,zzz1961	false
31906		zzz1641,zzz1962	false
31905		zzz1641,zzz1963	false
31904		zzz1641,zzz1964	false
31903		zzz1641,zzz1965	false
31902		zzz1641,zzz1966	false
31901		zzz1641,zzz1967	false
31900		zzz1641,zzz1968	false
31899		zzz1641,zzz1969	false
31898		zzz1641,zzz1970	false
31897		zzz1641,zzz1971	false
31896		zzz1641,zzz1972	false
31895		zzz1641,zzz1973	false
31894		zzz1641,zzz1974	false
31893		zzz1641,zzz1975	false
31892		zzz1641,zzz1976	false
28629		zzz1960,zzz1961	false
28628		zzz1960,zzz1962	false
28627		zzz1960,zzz1963	false
28626		zzz1960,zzz1964	false
28625		zzz1960,zzz1965	false
28624		zzz1960,zzz1966	false
28623		zzz1960,zzz1967	false
28622		zzz1960,zzz1968	false
28621		zzz1960,zzz1969	false
28620		zzz1960,zzz1970	false
28619		zzz1960,zzz1971	false
28618		zzz1960,zzz1972	false
28617		zzz1960,zzz1973	false
28616		zzz1960,zzz1974	false
28615		zzz1960,zzz1975	false
28614		zzz1960,zzz1976	false
28602		zzz1961,zzz1962	false
28601		zzz1961,zzz1963	false
28600		zzz1961,zzz1964	false
28599		zzz1961,zzz1965	false
28598		zzz1961,zzz1966	false
28597		zzz1961,zzz1967	false
28596		zzz1961,zzz1968	false
28595		zzz1961,zzz1969	false
28594		zzz1961,zzz1970	false
28593		zzz1961,zzz1971	false
28592		zzz1961,zzz1972	false
28591		zzz1961,zzz1973	false
28590		zzz1961,zzz1974	false
28589		zzz1961,zzz1975	false
28588		zzz1961,zzz1976	false
28576		zzz1962,zzz1963	false
28575		zzz1962,zzz1964	false
28574		zzz1962,zzz1965	false
28573		zzz1962,zzz1966	false
28572		zzz1962,zzz1967	false
28571		zzz1962,zzz1968	false
28570		zzz1962,zzz1969	false
28569		zzz1962,zzz1970	false
28568		zzz1962,zzz1971	false
28567		zzz1962,zzz1972	false
28566		zzz1962,zzz1973	false
28565		zzz1962,zzz1974	false
28564		zzz1962,zzz1975	false
28563		zzz1962,zzz1976	false
28551		zzz1963,zzz1964	false
28550		zzz1963,zzz1965	false
28549		zzz1963,zzz1966	false
28548		zzz1963,zzz1967	false
28547		zzz1963,zzz1968	false
28546		zzz1963,zzz1969	false
28545		zzz1963,zzz1970	false
28544		zzz1963,zzz1971	false
28543		zzz1963,zzz1972	false
28542		zzz1963,zzz1973	false
28541		zzz1963,zzz1974	false
28540		zzz1963,zzz1975	false
28539		zzz1963,zzz1976	false
28527		zzz1964,zzz1965	false
28526		zzz1964,zzz1966	false
28525		zzz1964,zzz1967	false
28524		zzz1964,zzz1968	false
28523		zzz1964,zzz1969	false
28522		zzz1964,zzz1970	false
28521		zzz1964,zzz1971	false
28520		zzz1964,zzz1972	false
28519		zzz1964,zzz1973	false
28518		zzz1964,zzz1974	false
28517		zzz1964,zzz1975	false
28516		zzz1964,zzz1976	false
28504		zzz1965,zzz1966	false
28503		zzz1965,zzz1967	false
28502		zzz1965,zzz1968	false
28501		zzz1965,zzz1969	false
28500		zzz1965,zzz1970	false
28499		zzz1965,zzz1971	false
28498		zzz1965,zzz1972	false
28497		zzz1965,zzz1973	false
28496		zzz1965,zzz1974	false
28495		zzz1965,zzz1975	false
28494		zzz1965,zzz1976	false
28482		zzz1966,zzz1967	false
28481		zzz1966,zzz1968	false
28480		zzz1966,zzz1969	false
28479		zzz1966,zzz1970	false
28478		zzz1966,zzz1971	false
28477		zzz1966,zzz1972	false
28476		zzz1966,zzz1973	false
28475		zzz1966,zzz1974	false
28474		zzz1966,zzz1975	false
28473		zzz1966,zzz1976	false
28461		zzz1967,zzz1968	false
28460		zzz1967,zzz1969	false
28459		zzz1967,zzz1970	false
28458		zzz1967,zzz1971	false
28457		zzz1967,zzz1972	false
28456		zzz1967,zzz1973	false
28455		zzz1967,zzz1974	false
28454		zzz1967,zzz1975	false
28453		zzz1967,zzz1976	false
28441		zzz1968,zzz1969	false
28440		zzz1968,zzz1970	false
28439		zzz1968,zzz1971	false
28438		zzz1968,zzz1972	false
28437		zzz1968,zzz1973	false
28436		zzz1968,zzz1974	false
28435		zzz1968,zzz1975	false
28434		zzz1968,zzz1976	false
28422		zzz1969,zzz1970	false
28421		zzz1969,zzz1971	false
28420		zzz1969,zzz1972	false
28419		zzz1969,zzz1973	false
28418		zzz1969,zzz1974	false
28417		zzz1969,zzz1975	false
28416		zzz1969,zzz1976	false
28404		zzz1970,zzz1971	false
28403		zzz1970,zzz1972	false
28402		zzz1970,zzz1973	false
28401		zzz1970,zzz1974	false
28400		zzz1970,zzz1975	false
28399		zzz1970,zzz1976	false
28387		zzz1971,zzz1972	false
28386		zzz1971,zzz1973	false
28385		zzz1971,zzz1974	false
28384		zzz1971,zzz1975	false
28383		zzz1971,zzz1976	false
28371		zzz1972,zzz1973	false
28370		zzz1972,zzz1974	false
28369		zzz1972,zzz1975	false
28368		zzz1972,zzz1976	false
28356		zzz1973,zzz1974	false
28355		zzz1973,zzz1975	false
28354		zzz1973,zzz1976	false
28342		zzz1974,zzz1975	false
28341		zzz1974,zzz1976	false
28329		zzz1975,zzz1976	false
27494		zzz2073,zzz2407	false
27493		zzz2073,zzz2409	false
25809		zzz2406,zzz2420	false
15052		zzzz761,zzzz834	false
4729		zzzz979,zzzz980	false
69425		zzz1147,zzz1194	false
69424		zzz1147,zzz1197	false
62577		zzz1194,zzz1197	false
65686		zzz1163,zzz1173	false
65685		zzz1163,zzz1187	false
64694		zzz1174,zzz1185	false
63861		zzz1182,zzz1209	false
63782		zzz1183,zzz1218	false
53807		zzz1245,zzz1269	false
52956		zzz1249,zzz1269	false
51906		zzz1255,zzz1269	false
51255		zzz1258,zzz1269	false
50020		zzz1265,zzz1269	false
49622		zzz1268,zzz1269	false
48265		zzz1275,zzz1269	false
43353		zzz1302,zzz1269	false
42033		zzz1309,zzz1269	false
41668		zzz1311,zzz1269	false
50394		zzz1263,zzz1285	false
49813		zzz1267,zzz1285	false
47836		zzz1277,zzz1285	false
46837		zzz1282,zzz1285	false
46075		zzz1286,zzz1285	false
42221		zzz1308,zzz1285	false
50211		zzz1264,zzz1287	false
46654		zzz1283,zzz1287	false
47457		zzz1279,zzz1303	false
45383		zzz1290,zzz1303	false
44241		zzz1297,zzz1303	false
31891		zzz1641,zzz1977	false
28613		zzz1960,zzz1977	false
28587		zzz1961,zzz1977	false
28562		zzz1962,zzz1977	false
28538		zzz1963,zzz1977	false
28515		zzz1964,zzz1977	false
28493		zzz1965,zzz1977	false
28472		zzz1966,zzz1977	false
28452		zzz1967,zzz1977	false
28433		zzz1968,zzz1977	false
28415		zzz1969,zzz1977	false
28398		zzz1970,zzz1977	false
28382		zzz1971,zzz1977	false
28367		zzz1972,zzz1977	false
28353		zzz1973,zzz1977	false
28340		zzz1974,zzz1977	false
28328		zzz1975,zzz1977	false
28317		zzz1976,zzz1977	false
96135		zzz1054,zzz1129	false
69423		zzz1147,zzz1195	false
62576		zzz1194,zzz1195	false
65592		zzz1164,zzz1173	false
65591		zzz1164,zzz1190	false
64836		zzz1172,zzz1176	false
64835		zzz1172,zzz1184	false
64834		zzz1172,zzz1186	false
64559		zzz1176,zzz1184	false
64558		zzz1176,zzz1186	false
63712		zzz1184,zzz1186	false
45891		zzz1287,zzz1296	false
32919		zzz1565,zzz1578	false
98834		zzz1044,zzzz968	false
73513		zzz1133,zzz1134	false
73512		zzz1133,zzz1135	false
65684		zzz1163,zzz1189	false
65590		zzz1164,zzz1187	false
64833		zzz1172,zzz1174	false
64832		zzz1172,zzz1185	false
64557		zzz1176,zzz1174	false
64556		zzz1176,zzz1185	false
63711		zzz1184,zzz1174	false
63710		zzz1184,zzz1185	false
63639		zzz1186,zzz1174	false
63638		zzz1186,zzz1185	false
63781		zzz1183,zzz1209	false
62255		zzz1195,zzz1197	false
57555		zzz1222,zzz1224	false
54053		zzz1243,zzz1294	false
49424		zzz1269,zzz1279	false
49423		zzz1269,zzz1290	false
49422		zzz1269,zzz1297	false
31986		zzz1639,zzz1641	false
31985		zzz1639,zzz1960	false
31984		zzz1639,zzz1961	false
31983		zzz1639,zzz1962	false
31982		zzz1639,zzz1963	false
31981		zzz1639,zzz1964	false
31980		zzz1639,zzz1965	false
31979		zzz1639,zzz1966	false
31978		zzz1639,zzz1967	false
31977		zzz1639,zzz1968	false
31976		zzz1639,zzz1969	false
31975		zzz1639,zzz1970	false
31974		zzz1639,zzz1971	false
31973		zzz1639,zzz1972	false
31972		zzz1639,zzz1973	false
31971		zzz1639,zzz1974	false
31970		zzz1639,zzz1975	false
31969		zzz1639,zzz1976	false
29013		zzz1949,zzz1641	false
29012		zzz1949,zzz1960	false
29011		zzz1949,zzz1961	false
29010		zzz1949,zzz1962	false
29009		zzz1949,zzz1963	false
29008		zzz1949,zzz1964	false
29007		zzz1949,zzz1965	false
29006		zzz1949,zzz1966	false
29005		zzz1949,zzz1967	false
29004		zzz1949,zzz1968	false
29003		zzz1949,zzz1969	false
29002		zzz1949,zzz1970	false
29001		zzz1949,zzz1971	false
29000		zzz1949,zzz1972	false
28999		zzz1949,zzz1973	false
28998		zzz1949,zzz1974	false
28997		zzz1949,zzz1975	false
28996		zzz1949,zzz1976	false
25709		zzz2426,zzz2430	false
25696		zzz2436,zzz2439	false
25695		zzz2436,zzz2440	false
25694		zzz2436,zzz2441	false
65683		zzz1163,zzz1182	false
65589		zzz1164,zzz1189	false
64693		zzz1174,zzz1224	false
63673		zzz1185,zzz1224	false
57565		zzz1221,zzz1230	false
49421		zzz1269,zzz1303	false
45890		zzz1287,zzz1304	false
33444		zzz1489,zzz1490	false
32073		zzz1635,zzzz377	false
32016		zzz1638,zzz1641	false
32015		zzz1638,zzz1960	false
32014		zzz1638,zzz1961	false
32013		zzz1638,zzz1962	false
32012		zzz1638,zzz1963	false
32011		zzz1638,zzz1964	false
32010		zzz1638,zzz1965	false
32009		zzz1638,zzz1966	false
32008		zzz1638,zzz1967	false
32007		zzz1638,zzz1968	false
32006		zzz1638,zzz1969	false
32005		zzz1638,zzz1970	false
32004		zzz1638,zzz1971	false
32003		zzz1638,zzz1972	false
32002		zzz1638,zzz1973	false
32001		zzz1638,zzz1974	false
32000		zzz1638,zzz1975	false
31999		zzz1638,zzz1976	false
31937		zzz1640,zzz1641	false
31936		zzz1640,zzz1960	false
31935		zzz1640,zzz1961	false
31934		zzz1640,zzz1962	false
31933		zzz1640,zzz1963	false
31932		zzz1640,zzz1964	false
31931		zzz1640,zzz1965	false
31930		zzz1640,zzz1966	false
31929		zzz1640,zzz1967	false
31928		zzz1640,zzz1968	false
31927		zzz1640,zzz1969	false
31926		zzz1640,zzz1970	false
31925		zzz1640,zzz1971	false
31924		zzz1640,zzz1972	false
31923		zzz1640,zzz1973	false
31922		zzz1640,zzz1974	false
31921		zzz1640,zzz1975	false
31920		zzz1640,zzz1976	false
31861		zzz1642,zzz1641	false
31860		zzz1642,zzz1960	false
31859		zzz1642,zzz1961	false
31858		zzz1642,zzz1962	false
31857		zzz1642,zzz1963	false
31856		zzz1642,zzz1964	false
31855		zzz1642,zzz1965	false
31854		zzz1642,zzz1966	false
31853		zzz1642,zzz1967	false
31852		zzz1642,zzz1968	false
31851		zzz1642,zzz1969	false
31850		zzz1642,zzz1970	false
31849		zzz1642,zzz1971	false
31848		zzz1642,zzz1972	false
31847		zzz1642,zzz1973	false
31846		zzz1642,zzz1974	false
31845		zzz1642,zzz1975	false
31844		zzz1642,zzz1976	false
29042		zzz1948,zzz1641	false
29041		zzz1948,zzz1960	false
29040		zzz1948,zzz1961	false
29039		zzz1948,zzz1962	false
29038		zzz1948,zzz1963	false
29037		zzz1948,zzz1964	false
29036		zzz1948,zzz1965	false
29035		zzz1948,zzz1966	false
29034		zzz1948,zzz1967	false
29033		zzz1948,zzz1968	false
29032		zzz1948,zzz1969	false
29031		zzz1948,zzz1970	false
29030		zzz1948,zzz1971	false
29029		zzz1948,zzz1972	false
29028		zzz1948,zzz1973	false
29027		zzz1948,zzz1974	false
29026		zzz1948,zzz1975	false
29025		zzz1948,zzz1976	false
28967		zzz1950,zzz1641	false
28966		zzz1950,zzz1960	false
28965		zzz1950,zzz1961	false
28964		zzz1950,zzz1962	false
28963		zzz1950,zzz1963	false
28962		zzz1950,zzz1964	false
28961		zzz1950,zzz1965	false
28960		zzz1950,zzz1966	false
28959		zzz1950,zzz1967	false
28958		zzz1950,zzz1968	false
28957		zzz1950,zzz1969	false
28956		zzz1950,zzz1970	false
28955		zzz1950,zzz1971	false
28954		zzz1950,zzz1972	false
28953		zzz1950,zzz1973	false
28952		zzz1950,zzz1974	false
28951		zzz1950,zzz1975	false
28950		zzz1950,zzz1976	false
28922		zzz1951,zzz1641	false
28921		zzz1951,zzz1960	false
28920		zzz1951,zzz1961	false
28919		zzz1951,zzz1962	false
28918		zzz1951,zzz1963	false
28917		zzz1951,zzz1964	false
28916		zzz1951,zzz1965	false
28915		zzz1951,zzz1966	false
28914		zzz1951,zzz1967	false
28913		zzz1951,zzz1968	false
28912		zzz1951,zzz1969	false
28911		zzz1951,zzz1970	false
28910		zzz1951,zzz1971	false
28909		zzz1951,zzz1972	false
28908		zzz1951,zzz1973	false
28907		zzz1951,zzz1974	false
28906		zzz1951,zzz1975	false
28905		zzz1951,zzz1976	false
28878		zzz1952,zzz1641	false
28877		zzz1952,zzz1960	false
28876		zzz1952,zzz1961	false
28875		zzz1952,zzz1962	false
28874		zzz1952,zzz1963	false
28873		zzz1952,zzz1964	false
28872		zzz1952,zzz1965	false
28871		zzz1952,zzz1966	false
28870		zzz1952,zzz1967	false
28869		zzz1952,zzz1968	false
28868		zzz1952,zzz1969	false
28867		zzz1952,zzz1970	false
28866		zzz1952,zzz1971	false
28865		zzz1952,zzz1972	false
28864		zzz1952,zzz1973	false
28863		zzz1952,zzz1974	false
28862		zzz1952,zzz1975	false
28861		zzz1952,zzz1976	false
28835		zzz1953,zzz1641	false
28834		zzz1953,zzz1960	false
28833		zzz1953,zzz1961	false
28832		zzz1953,zzz1962	false
28831		zzz1953,zzz1963	false
28830		zzz1953,zzz1964	false
28829		zzz1953,zzz1965	false
28828		zzz1953,zzz1966	false
28827		zzz1953,zzz1967	false
28826		zzz1953,zzz1968	false
28825		zzz1953,zzz1969	false
28824		zzz1953,zzz1970	false
28823		zzz1953,zzz1971	false
28822		zzz1953,zzz1972	false
28821		zzz1953,zzz1973	false
28820		zzz1953,zzz1974	false
28819		zzz1953,zzz1975	false
28818		zzz1953,zzz1976	false
28793		zzz1954,zzz1641	false
28792		zzz1954,zzz1960	false
28791		zzz1954,zzz1961	false
28790		zzz1954,zzz1962	false
28789		zzz1954,zzz1963	false
28788		zzz1954,zzz1964	false
28787		zzz1954,zzz1965	false
28786		zzz1954,zzz1966	false
28785		zzz1954,zzz1967	false
28784		zzz1954,zzz1968	false
28783		zzz1954,zzz1969	false
28782		zzz1954,zzz1970	false
28781		zzz1954,zzz1971	false
28780		zzz1954,zzz1972	false
28779		zzz1954,zzz1973	false
28778		zzz1954,zzz1974	false
28777		zzz1954,zzz1975	false
28776		zzz1954,zzz1976	false
28752		zzz1955,zzz1641	false
28751		zzz1955,zzz1960	false
28750		zzz1955,zzz1961	false
28749		zzz1955,zzz1962	false
28748		zzz1955,zzz1963	false
28747		zzz1955,zzz1964	false
28746		zzz1955,zzz1965	false
28745		zzz1955,zzz1966	false
28744		zzz1955,zzz1967	false
28743		zzz1955,zzz1968	false
28742		zzz1955,zzz1969	false
28741		zzz1955,zzz1970	false
28740		zzz1955,zzz1971	false
28739		zzz1955,zzz1972	false
28738		zzz1955,zzz1973	false
28737		zzz1955,zzz1974	false
28736		zzz1955,zzz1975	false
28735		zzz1955,zzz1976	false
28697		zzz1958,zzz1641	false
28696		zzz1958,zzz1960	false
28695		zzz1958,zzz1961	false
28694		zzz1958,zzz1962	false
28693		zzz1958,zzz1963	false
28692		zzz1958,zzz1964	false
28691		zzz1958,zzz1965	false
28690		zzz1958,zzz1966	false
28689		zzz1958,zzz1967	false
28688		zzz1958,zzz1968	false
28687		zzz1958,zzz1969	false
28686		zzz1958,zzz1970	false
28685		zzz1958,zzz1971	false
28684		zzz1958,zzz1972	false
28683		zzz1958,zzz1973	false
28682		zzz1958,zzz1974	false
28681		zzz1958,zzz1975	false
28680		zzz1958,zzz1976	false
28658		zzz1959,zzz1641	false
28657		zzz1959,zzz1960	false
28656		zzz1959,zzz1961	false
28655		zzz1959,zzz1962	false
28654		zzz1959,zzz1963	false
28653		zzz1959,zzz1964	false
28652		zzz1959,zzz1965	false
28651		zzz1959,zzz1966	false
28650		zzz1959,zzz1967	false
28649		zzz1959,zzz1968	false
28648		zzz1959,zzz1969	false
28647		zzz1959,zzz1970	false
28646		zzz1959,zzz1971	false
28645		zzz1959,zzz1972	false
28644		zzz1959,zzz1973	false
28643		zzz1959,zzz1974	false
28642		zzz1959,zzz1975	false
28641		zzz1959,zzz1976	false
28291		zzz1978,zzz1641	false
28290		zzz1978,zzz1960	false
28289		zzz1978,zzz1961	false
28288		zzz1978,zzz1962	false
28287		zzz1978,zzz1963	false
28286		zzz1978,zzz1964	false
28285		zzz1978,zzz1965	false
28284		zzz1978,zzz1966	false
28283		zzz1978,zzz1967	false
28282		zzz1978,zzz1968	false
28281		zzz1978,zzz1969	false
28280		zzz1978,zzz1970	false
28279		zzz1978,zzz1971	false
28278		zzz1978,zzz1972	false
28277		zzz1978,zzz1973	false
28276		zzz1978,zzz1974	false
28275		zzz1978,zzz1975	false
28274		zzz1978,zzz1976	false
28254		zzz1979,zzz1641	false
28253		zzz1979,zzz1960	false
28252		zzz1979,zzz1961	false
28251		zzz1979,zzz1962	false
28250		zzz1979,zzz1963	false
28249		zzz1979,zzz1964	false
28248		zzz1979,zzz1965	false
28247		zzz1979,zzz1966	false
28246		zzz1979,zzz1967	false
28245		zzz1979,zzz1968	false
28244		zzz1979,zzz1969	false
28243		zzz1979,zzz1970	false
28242		zzz1979,zzz1971	false
28241		zzz1979,zzz1972	false
28240		zzz1979,zzz1973	false
28239		zzz1979,zzz1974	false
28238		zzz1979,zzz1975	false
28237		zzz1979,zzz1976	false
28218		zzz1980,zzz1641	false
28217		zzz1980,zzz1960	false
28216		zzz1980,zzz1961	false
28215		zzz1980,zzz1962	false
28214		zzz1980,zzz1963	false
28213		zzz1980,zzz1964	false
28212		zzz1980,zzz1965	false
28211		zzz1980,zzz1966	false
28210		zzz1980,zzz1967	false
28209		zzz1980,zzz1968	false
28208		zzz1980,zzz1969	false
28207		zzz1980,zzz1970	false
28206		zzz1980,zzz1971	false
28205		zzz1980,zzz1972	false
28204		zzz1980,zzz1973	false
28203		zzz1980,zzz1974	false
28202		zzz1980,zzz1975	false
28201		zzz1980,zzz1976	false
28183		zzz1981,zzz1641	false
28182		zzz1981,zzz1960	false
28181		zzz1981,zzz1961	false
28180		zzz1981,zzz1962	false
28179		zzz1981,zzz1963	false
28178		zzz1981,zzz1964	false
28177		zzz1981,zzz1965	false
28176		zzz1981,zzz1966	false
28175		zzz1981,zzz1967	false
28174		zzz1981,zzz1968	false
28173		zzz1981,zzz1969	false
28172		zzz1981,zzz1970	false
28171		zzz1981,zzz1971	false
28170		zzz1981,zzz1972	false
28169		zzz1981,zzz1973	false
28168		zzz1981,zzz1974	false
28167		zzz1981,zzz1975	false
28166		zzz1981,zzz1976	false
28149		zzz1982,zzz1641	false
28148		zzz1982,zzz1960	false
28147		zzz1982,zzz1961	false
28146		zzz1982,zzz1962	false
28145		zzz1982,zzz1963	false
28144		zzz1982,zzz1964	false
28143		zzz1982,zzz1965	false
28142		zzz1982,zzz1966	false
28141		zzz1982,zzz1967	false
28140		zzz1982,zzz1968	false
28139		zzz1982,zzz1969	false
28138		zzz1982,zzz1970	false
28137		zzz1982,zzz1971	false
28136		zzz1982,zzz1972	false
28135		zzz1982,zzz1973	false
28134		zzz1982,zzz1974	false
28133		zzz1982,zzz1975	false
28132		zzz1982,zzz1976	false
28116		zzz1983,zzz1641	false
28115		zzz1983,zzz1960	false
28114		zzz1983,zzz1961	false
28113		zzz1983,zzz1962	false
28112		zzz1983,zzz1963	false
28111		zzz1983,zzz1964	false
28110		zzz1983,zzz1965	false
28109		zzz1983,zzz1966	false
28108		zzz1983,zzz1967	false
28107		zzz1983,zzz1968	false
28106		zzz1983,zzz1969	false
28105		zzz1983,zzz1970	false
28104		zzz1983,zzz1971	false
28103		zzz1983,zzz1972	false
28102		zzz1983,zzz1973	false
28101		zzz1983,zzz1974	false
28100		zzz1983,zzz1975	false
28099		zzz1983,zzz1976	false
28084		zzz1984,zzz1641	false
28083		zzz1984,zzz1960	false
28082		zzz1984,zzz1961	false
28081		zzz1984,zzz1962	false
28080		zzz1984,zzz1963	false
28079		zzz1984,zzz1964	false
28078		zzz1984,zzz1965	false
28077		zzz1984,zzz1966	false
28076		zzz1984,zzz1967	false
28075		zzz1984,zzz1968	false
28074		zzz1984,zzz1969	false
28073		zzz1984,zzz1970	false
28072		zzz1984,zzz1971	false
28071		zzz1984,zzz1972	false
28070		zzz1984,zzz1973	false
28069		zzz1984,zzz1974	false
28068		zzz1984,zzz1975	false
28067		zzz1984,zzz1976	false
28053		zzz1985,zzz1641	false
28052		zzz1985,zzz1960	false
28051		zzz1985,zzz1961	false
28050		zzz1985,zzz1962	false
28049		zzz1985,zzz1963	false
28048		zzz1985,zzz1964	false
28047		zzz1985,zzz1965	false
28046		zzz1985,zzz1966	false
28045		zzz1985,zzz1967	false
28044		zzz1985,zzz1968	false
28043		zzz1985,zzz1969	false
28042		zzz1985,zzz1970	false
28041		zzz1985,zzz1971	false
28040		zzz1985,zzz1972	false
28039		zzz1985,zzz1973	false
28038		zzz1985,zzz1974	false
28037		zzz1985,zzz1975	false
28036		zzz1985,zzz1976	false
2850		zzzzz40,zzzzz90	false
74598		zzz1128,zzzz937	false
68535		zzz1150,zzzz984	false
68534		zzz1150,zzzz985	false
68533		zzz1150,zzzz986	false
68532		zzz1150,zzzz987	false
68531		zzz1150,zzzz989	false
65588		zzz1164,zzz1182	false
64831		zzz1172,zzz1224	false
64555		zzz1176,zzz1224	false
63709		zzz1184,zzz1224	false
63637		zzz1186,zzz1224	false
64692		zzz1174,zzz1222	false
63672		zzz1185,zzz1222	false
64005		zzz1179,zzz1207	false
63135		zzz1192,zzz1196	false
54726		zzz1240,zzz1287	false
54268		zzz1242,zzz1252	false
54267		zzz1242,zzz1254	false
54266		zzz1242,zzz1262	false
54265		zzz1242,zzz1272	false
52537		zzz1252,zzz1254	false
52536		zzz1252,zzz1262	false
52535		zzz1252,zzz1272	false
52130		zzz1254,zzz1262	false
52129		zzz1254,zzz1272	false
50612		zzz1262,zzz1272	false
50210		zzz1264,zzz1283	false
44061		zzz1298,zzz1343	false
37222		zzz1343,zzz1350	false
31968		zzz1639,zzz1977	false
28995		zzz1949,zzz1977	false
25839		zzz2404,zzz2420	false
25765		zzz2410,zzz2423	false
25693		zzz2436,zzz2438	false
25687		zzz2438,zzz2439	false
25686		zzz2438,zzz2440	false
25685		zzz2438,zzz2441	false
104041		zzz1030,zzzz933	false
103646		zzz1031,zzzz933	false
80940		zzz1103,zzz1108	false
64973		zzz1170,zzz1180	false
64830		zzz1172,zzz1181	false
64554		zzz1176,zzz1181	false
63708		zzz1184,zzz1181	false
63636		zzz1186,zzz1181	false
63502		zzz1188,zzz1207	false
57544		zzz1223,zzz1226	false
54264		zzz1242,zzz1264	false
54263		zzz1242,zzz1283	false
52534		zzz1252,zzz1264	false
52533		zzz1252,zzz1283	false
52128		zzz1254,zzz1264	false
52127		zzz1254,zzz1283	false
50611		zzz1262,zzz1264	false
50610		zzz1262,zzz1283	false
48878		zzz1272,zzz1264	false
48877		zzz1272,zzz1283	false
49236		zzz1270,zzz1287	false
37358		zzz1342,zzz1343	false
37221		zzz1343,zzz1344	false
35188		zzz1361,zzz1366	false
31998		zzz1638,zzz1977	false
31919		zzz1640,zzz1977	false
31843		zzz1642,zzz1977	false
29024		zzz1948,zzz1977	false
28949		zzz1950,zzz1977	false
28904		zzz1951,zzz1977	false
28860		zzz1952,zzz1977	false
28817		zzz1953,zzz1977	false
28775		zzz1954,zzz1977	false
28734		zzz1955,zzz1977	false
28679		zzz1958,zzz1977	false
28640		zzz1959,zzz1977	false
28273		zzz1978,zzz1977	false
28236		zzz1979,zzz1977	false
28200		zzz1980,zzz1977	false
28165		zzz1981,zzz1977	false
28131		zzz1982,zzz1977	false
28098		zzz1983,zzz1977	false
28066		zzz1984,zzz1977	false
28035		zzz1985,zzz1977	false
25691		zzz2437,zzz2439	false
25690		zzz2437,zzz2440	false
25689		zzz2437,zzz2441	false
102873		zzz1033,zzz1087	false
64829		zzz1172,zzz1222	false
64553		zzz1176,zzz1222	false
63707		zzz1184,zzz1222	false
63635		zzz1186,zzz1222	false
64691		zzz1174,zzz1181	false
63671		zzz1185,zzz1181	false
61424		zzz1198,zzz1200	false
61423		zzz1198,zzz1202	false
61422		zzz1198,zzz1203	false
61421		zzz1198,zzz1205	false
25764		zzz2410,zzz2501	false
25688		zzz2437,zzz2438	false
114619		zzz1000,zzz1001	false
114618		zzz1000,zzzz999	false
114233		zzz1001,zzzz999	false
68530		zzz1150,zzzz988	false
65682		zzz1163,zzz1183	false
61420		zzz1198,zzz1201	false
61419		zzz1198,zzz1204	false
54262		zzz1242,zzz1289	false
52532		zzz1252,zzz1289	false
52126		zzz1254,zzz1289	false
50609		zzz1262,zzz1289	false
48876		zzz1272,zzz1289	false
37493		zzz1341,zzz1343	false
65587		zzz1164,zzz1183	false
64918		zzz1171,zzz1207	false
59484		zzz1207,zzz1210	false
50209		zzz1264,zzz1270	false
46653		zzz1283,zzz1270	false
50208		zzz1264,zzz1289	false
46652		zzz1283,zzz1289	false
38800		zzz1330,zzz1335	false
35187		zzz1361,zzz1364	false
25733		zzz2419,zzz2422	false
25692		zzz2436,zzz2437	false
23941		zzz2557,zzz2558	false
101401		zzz1037,zzz1039	false
69749		zzz1146,zzz1147	false
69748		zzz1146,zzz1194	false
63900		zzz1181,zzz1224	false
61418		zzz1198,zzz1199	false
54261		zzz1242,zzz1270	false
52531		zzz1252,zzz1270	false
52125		zzz1254,zzz1270	false
50608		zzz1262,zzz1270	false
48875		zzz1272,zzz1270	false
39803		zzz1323,zzz1324	false
33591		zzz1473,zzz1474	false
33590		zzz1473,zzz1475	false
33589		zzz1473,zzz1476	false
33580		zzz1474,zzz1475	false
33579		zzz1474,zzz1476	false
33570		zzz1475,zzz1476	false
92232		zzz1066,zzz1331	false
80368		zzz1105,zzz1109	false
69747		zzz1146,zzz1195	false
69746		zzz1146,zzz1197	false
65744		zzz1162,zzz1174	false
65743		zzz1162,zzz1185	false
65505		zzz1165,zzz1354	false
64972		zzz1170,zzz1174	false
64971		zzz1170,zzz1185	false
63899		zzz1181,zzz1222	false
54725		zzz1240,zzz1264	false
54724		zzz1240,zzz1283	false
54260		zzz1242,zzz1304	false
52530		zzz1252,zzz1304	false
52124		zzz1254,zzz1304	false
50607		zzz1262,zzz1304	false
48874		zzz1272,zzz1304	false
50207		zzz1264,zzz1304	false
46651		zzz1283,zzz1304	false
35186		zzz1361,zzz1363	false
64970		zzz1170,zzz1172	false
64969		zzz1170,zzz1176	false
64968		zzz1170,zzz1184	false
64967		zzz1170,zzz1186	false
64966		zzz1170,zzz1224	false
60989		zzz1200,zzz1202	false
60354		zzz1203,zzz1205	false
44408		zzz1296,zzz1304	false
27414		zzz2090,zzz2430	false
23720		zzz2615,zzz2635	false
65742		zzz1162,zzz1172	false
65741		zzz1162,zzz1176	false
65740		zzz1162,zzz1184	false
65739		zzz1162,zzz1186	false
65738		zzz1162,zzz1224	false
62856		zzz1193,zzz1196	false
58505		zzz1214,zzz1222	false
54723		zzz1240,zzz1242	false
54722		zzz1240,zzz1252	false
54721		zzz1240,zzz1254	false
54720		zzz1240,zzz1262	false
54719		zzz1240,zzz1272	false
49235		zzz1270,zzz1289	false
45552		zzz1289,zzz1296	false
30517		zzz1770,zzz1771	false
99927		zzz1041,zzz1043	false
70399		zzz1144,zzz1195	false
70074		zzz1145,zzz1195	false
64690		zzz1174,zzz1180	false
63670		zzz1185,zzz1180	false
60776		zzz1201,zzz1203	false
60775		zzz1201,zzz1205	false
54718		zzz1240,zzz1304	false
27413		zzz2090,zzz2428	false
80939		zzz1103,zzz1105	false
79524		zzz1108,zzz1105	false
72938		zzz1135,zzz1159	false
72937		zzz1135,zzz1160	false
70398		zzz1144,zzz1147	false
70397		zzz1144,zzz1194	false
70073		zzz1145,zzz1147	false
70072		zzz1145,zzz1194	false
65737		zzz1162,zzz1222	false
65681		zzz1163,zzz1207	false
64965		zzz1170,zzz1222	false
61201		zzz1199,zzz1203	false
61200		zzz1199,zzz1205	false
60988		zzz1200,zzz1203	false
60987		zzz1200,zzz1205	false
60566		zzz1202,zzz1203	false
60565		zzz1202,zzz1205	false
59483		zzz1207,zzz1218	false
58504		zzz1214,zzz1224	false
54037		zzz1244,zzz1248	false
54036		zzz1244,zzz1251	false
54035		zzz1244,zzz1257	false
54034		zzz1244,zzz1261	false
54033		zzz1244,zzz1273	false
54032		zzz1244,zzz1280	false
54031		zzz1244,zzz1307	false
53184		zzz1248,zzz1251	false
53183		zzz1248,zzz1257	false
53182		zzz1248,zzz1261	false
53181		zzz1248,zzz1273	false
53180		zzz1248,zzz1280	false
53179		zzz1248,zzz1307	false
52753		zzz1251,zzz1257	false
52752		zzz1251,zzz1261	false
52751		zzz1251,zzz1273	false
52750		zzz1251,zzz1280	false
52749		zzz1251,zzz1307	false
51479		zzz1257,zzz1261	false
51478		zzz1257,zzz1273	false
51477		zzz1257,zzz1280	false
51476		zzz1257,zzz1307	false
50826		zzz1261,zzz1273	false
50825		zzz1261,zzz1280	false
50824		zzz1261,zzz1307	false
48667		zzz1273,zzz1280	false
48666		zzz1273,zzz1307	false
47277		zzz1280,zzz1307	false
48455		zzz1274,zzz1292	false
48454		zzz1274,zzz1293	false
44979		zzz1292,zzz1293	false
45551		zzz1289,zzz1304	false
37220		zzz1343,zzz1352	false
26896		zzz2197,zzz2204	false
26613		zzz2278,zzz2204	false
26895		zzz2197,zzz2277	false
26612		zzz2278,zzz2277	false
25727		zzz2420,zzz2422	false
70396		zzz1144,zzz1197	false
70071		zzz1145,zzz1197	false
69422		zzz1147,zzz1193	false
62575		zzz1194,zzz1193	false
64964		zzz1170,zzz1181	false
64828		zzz1172,zzz1180	false
64552		zzz1176,zzz1180	false
63706		zzz1184,zzz1180	false
63634		zzz1186,zzz1180	false
63930		zzz1180,zzz1224	false
63134		zzz1192,zzz1193	false
60986		zzz1200,zzz1204	false
60564		zzz1202,zzz1204	false
60353		zzz1203,zzz1204	false
59934		zzz1205,zzz1204	false
59482		zzz1207,zzz1209	false
59481		zzz1207,zzz1211	false
54717		zzz1240,zzz1289	false
54259		zzz1242,zzz1296	false
52529		zzz1252,zzz1296	false
52123		zzz1254,zzz1296	false
50606		zzz1262,zzz1296	false
48873		zzz1272,zzz1296	false
49234		zzz1270,zzz1304	false
37219		zzz1343,zzz1351	false
6784		zzzz950,zzzzz26	false
65736		zzz1162,zzz1181	false
64689		zzz1174,zzz1214	false
63669		zzz1185,zzz1214	false
61199		zzz1199,zzz1201	false
60985		zzz1200,zzz1201	false
60563		zzz1202,zzz1201	false
55687		zzz1235,zzz1237	false
54716		zzz1240,zzz1270	false
54715		zzz1240,zzz1296	false
54500		zzz1241,zzz1246	false
54499		zzz1241,zzz1256	false
54498		zzz1241,zzz1260	false
54497		zzz1241,zzz1276	false
54496		zzz1241,zzz1281	false
54495		zzz1241,zzz1284	false
54494		zzz1241,zzz1291	false
54493		zzz1241,zzz1306	false
53609		zzz1246,zzz1256	false
53608		zzz1246,zzz1260	false
53607		zzz1246,zzz1276	false
53606		zzz1246,zzz1281	false
53605		zzz1246,zzz1284	false
53604		zzz1246,zzz1291	false
53603		zzz1246,zzz1306	false
51708		zzz1256,zzz1260	false
51707		zzz1256,zzz1276	false
51706		zzz1256,zzz1281	false
51705		zzz1256,zzz1284	false
51704		zzz1256,zzz1291	false
51703		zzz1256,zzz1306	false
51054		zzz1260,zzz1276	false
51053		zzz1260,zzz1281	false
51052		zzz1260,zzz1284	false
51051		zzz1260,zzz1291	false
51050		zzz1260,zzz1306	false
48067		zzz1276,zzz1281	false
48066		zzz1276,zzz1284	false
48065		zzz1276,zzz1291	false
48064		zzz1276,zzz1306	false
47066		zzz1281,zzz1284	false
47065		zzz1281,zzz1291	false
47064		zzz1281,zzz1306	false
46473		zzz1284,zzz1291	false
46472		zzz1284,zzz1306	false
45203		zzz1291,zzz1306	false
54030		zzz1244,zzz1274	false
54029		zzz1244,zzz1292	false
54028		zzz1244,zzz1293	false
53178		zzz1248,zzz1274	false
53177		zzz1248,zzz1292	false
53176		zzz1248,zzz1293	false
52748		zzz1251,zzz1274	false
52747		zzz1251,zzz1292	false
52746		zzz1251,zzz1293	false
51475		zzz1257,zzz1274	false
51474		zzz1257,zzz1292	false
51473		zzz1257,zzz1293	false
50823		zzz1261,zzz1274	false
50822		zzz1261,zzz1292	false
50821		zzz1261,zzz1293	false
48665		zzz1273,zzz1274	false
48664		zzz1273,zzz1292	false
48663		zzz1273,zzz1293	false
47276		zzz1280,zzz1274	false
47275		zzz1280,zzz1292	false
47274		zzz1280,zzz1293	false
42432		zzz1307,zzz1274	false
42431		zzz1307,zzz1292	false
42430		zzz1307,zzz1293	false
37357		zzz1342,zzz1344	false
35677		zzz1356,zzzzz13	false
25726		zzz2420,zzz2421	false
86015		zzz1087,zzzz951	false
83476		zzz1095,zzzz100	false
63929		zzz1180,zzz1222	false
62855		zzz1193,zzz1197	false
61198		zzz1199,zzz1200	false
61197		zzz1199,zzz1202	false
60774		zzz1201,zzz1204	false
50206		zzz1264,zzz1296	false
46650		zzz1283,zzz1296	false
78390		zzz1112,zzz1121	false
73224		zzz1134,zzz1159	false
73223		zzz1134,zzz1160	false
64827		zzz1172,zzz1214	false
64551		zzz1176,zzz1214	false
63705		zzz1184,zzz1214	false
63633		zzz1186,zzz1214	false
62854		zzz1193,zzz1195	false
61196		zzz1199,zzz1204	false
49057		zzz1271,zzz1287	false
41470		zzz1312,zzz1349	false
37492		zzz1341,zzz1344	false
96165		zzz1053,zzz1122	false
84043		zzz1093,zzz1367	false
65735		zzz1162,zzz1170	false
64648		zzz1175,zzz1207	false
63928		zzz1180,zzz1181	false
37491		zzz1341,zzz1342	false
37088		zzz1344,zzz1350	false
32569		zzz1598,zzz2085	false
6430		zzzz955,zzzz956	false
112733		zzz1005,zzz1006	false
80938		zzz1103,zzz1109	false
79523		zzz1108,zzz1109	false
37356		zzz1342,zzz1350	false
36566		zzz1348,zzzzz13	false
25900		zzz2393,zzz2394	false
102500		zzz1034,zzz1057	false
73511		zzz1133,zzz1159	false
73510		zzz1133,zzz1160	false
65586		zzz1164,zzz1207	false
55452		zzz1236,zzz1237	false
55219		zzz1237,zzz1241	false
55218		zzz1237,zzz1246	false
55217		zzz1237,zzz1256	false
55216		zzz1237,zzz1260	false
55215		zzz1237,zzz1276	false
55214		zzz1237,zzz1281	false
55213		zzz1237,zzz1284	false
55212		zzz1237,zzz1291	false
55211		zzz1237,zzz1306	false
27887		zzz1999,zzz2000	false
17681		zzzz738,zzzz824	false
102499		zzz1034,zzz1056	false
74998		zzz1126,zzzz974	false
72936		zzz1135,zzz1158	false
70395		zzz1144,zzz1193	false
70070		zzz1145,zzz1193	false
63898		zzz1181,zzz1214	false
55686		zzz1235,zzz1236	false
55685		zzz1235,zzz1241	false
55684		zzz1235,zzz1246	false
55683		zzz1235,zzz1256	false
55682		zzz1235,zzz1260	false
55681		zzz1235,zzz1276	false
55680		zzz1235,zzz1281	false
55679		zzz1235,zzz1284	false
55678		zzz1235,zzz1291	false
55677		zzz1235,zzz1306	false
49233		zzz1270,zzz1296	false
44060		zzz1298,zzz1350	false
37490		zzz1341,zzz1350	false
36954		zzz1345,zzz1347	false
25899		zzz2393,zzz2395	false
25894		zzz2394,zzz2395	false
25752		zzz2411,zzz2420	false
65734		zzz1162,zzz1180	false
63332		zzz1190,zzz1207	false
109594		zzz1013,zzz1050	false
109593		zzz1013,zzz1051	false
109592		zzz1013,zzz1052	false
70394		zzz1144,zzz1146	false
70069		zzz1145,zzz1146	false
55451		zzz1236,zzz1343	false
54492		zzz1241,zzz1343	false
53602		zzz1246,zzz1343	false
51702		zzz1256,zzz1343	false
51049		zzz1260,zzz1343	false
48063		zzz1276,zzz1343	false
47063		zzz1281,zzz1343	false
46471		zzz1284,zzz1343	false
45202		zzz1291,zzz1343	false
42655		zzz1306,zzz1343	false
44059		zzz1298,zzz1342	false
44058		zzz1298,zzz1344	false
69745		zzz1146,zzz1193	false
64963		zzz1170,zzz1214	false
64783		zzz1173,zzz1207	false
63594		zzz1187,zzz1207	false
58739		zzz1213,zzz1229	false
43528		zzz1301,zzz1343	false
36190		zzz1351,zzz1352	false
24017		zzz2522,zzzz259	false
73222		zzz1134,zzz1158	false
70971		zzz1142,zzz1143	false
70970		zzz1142,zzz1148	false
70969		zzz1142,zzz1149	false
70685		zzz1143,zzz1148	false
70684		zzz1143,zzz1149	false
69102		zzz1148,zzz1149	false
65733		zzz1162,zzz1214	false
63423		zzz1189,zzz1207	false
54714		zzz1240,zzz1271	false
44057		zzz1298,zzz1341	false
24643		zzz2471,zzz2477	false
68048		zzz1152,zzz1154	false
55450		zzz1236,zzz1241	false
55449		zzz1236,zzz1246	false
55448		zzz1236,zzz1256	false
55447		zzz1236,zzz1260	false
55446		zzz1236,zzz1276	false
55445		zzz1236,zzz1281	false
55444		zzz1236,zzz1284	false
55443		zzz1236,zzz1291	false
55442		zzz1236,zzz1306	false
55210		zzz1237,zzz1343	false
40686		zzz1317,zzzz953	false
25732		zzz2419,zzz2420	false
69421		zzz1147,zzz1196	false
62574		zzz1194,zzz1196	false
63860		zzz1182,zzz1207	false
62254		zzz1195,zzz1196	false
58738		zzz1213,zzz1232	false
56615		zzz1229,zzz1232	false
55676		zzz1235,zzz1343	false
107077		zzz1022,zzz1024	false
73509		zzz1133,zzz1158	false
72935		zzz1135,zzz1136	false
72651		zzz1136,zzz1159	false
72650		zzz1136,zzz1160	false
68047		zzz1152,zzz1153	false
67501		zzz1154,zzz1153	false
67077		zzz1156,zzzzz79	false
63927		zzz1180,zzz1214	false
63247		zzz1191,zzzzz79	false
61977		zzz1196,zzz1197	false
54027		zzz1244,zzz1312	false
53175		zzz1248,zzz1312	false
52745		zzz1251,zzz1312	false
51472		zzz1257,zzz1312	false
50820		zzz1261,zzz1312	false
48662		zzz1273,zzz1312	false
47273		zzz1280,zzz1312	false
42429		zzz1307,zzz1312	false
30483		zzz1779,zzz1780	false
27484		zzz2074,zzz2076	false
23901		zzz2574,zzz2575	false
89482		zzz1075,zzz1162	false
89481		zzz1075,zzz1224	false
70393		zzz1144,zzz1196	false
70068		zzz1145,zzz1196	false
48453		zzz1274,zzz1349	false
44978		zzz1292,zzz1349	false
44797		zzz1293,zzz1349	false
17680		zzzz738,zzzz839	false
91885		zzz1067,zzzzz12	false
69420		zzz1147,zzz1192	false
62573		zzz1194,zzz1192	false
66936		zzz1157,zzzzz79	false
63780		zzz1183,zzz1207	false
63133		zzz1192,zzz1195	false
48452		zzz1274,zzz1355	false
44977		zzz1292,zzz1355	false
44796		zzz1293,zzz1355	false
29079		zzz1946,zzz1947	false
29078		zzz1946,zzz1957	false
29069		zzz1947,zzz1957	false
91263		zzz1069,zzzzz12	false
90927		zzz1070,zzzzz12	false
89480		zzz1075,zzz1174	false
89479		zzz1075,zzz1185	false
89478		zzz1075,zzz1222	false
78328		zzz1113,zzz1115	false
63132		zzz1192,zzz1197	false
59724		zzz1206,zzz1333	false
48451		zzz1274,zzz1312	false
44976		zzz1292,zzz1312	false
44795		zzz1293,zzz1312	false
37218		zzz1343,zzz1360	false
15260		zzzz759,zzzz835	false
73221		zzz1134,zzz1136	false
70392		zzz1144,zzz1192	false
70067		zzz1145,zzz1192	false
54258		zzz1242,zzz1271	false
52528		zzz1252,zzz1271	false
[truncated: 109,894 more rows]
