# Supplementary material for: Discovery of several thousand highly diverse circular DNA viruses
Source: eLife journal article supplement (doi:10.7554/elife.51971), 2020-02-03
Supplement: fig3-data1 [file elife-51971-fig3-data1-v1.cys › CytoscapeSession-2019_08_03-06_44/tables/41-Mike_class_reps60+Full+Network/LOCAL_ATTRS-org.cytoscape.model.CyNode-41+default+node.cytable]

CyCSV-Version	1
SUID	name	selected
java.lang.Long	java.lang.String	java.lang.Boolean
41 default node
2729	zzz1000	false
2728	zzz1001	false
2727	zzz1002	false
2726	zzz1003	false
2725	zzz1004	false
2724	zzz1005	false
2723	zzz1006	false
2722	zzz1007	false
2721	zzz1008	false
2720	zzz1009	false
2719	zzz1010	false
2718	zzz1011	false
2717	zzz1012	false
2716	zzz1013	false
2715	zzz1014	false
2714	zzz1015	false
2713	zzz1016	false
2712	zzz1017	false
2711	zzz1018	false
2710	zzz1019	false
2709	zzz1020	false
2708	zzz1021	false
2707	zzz1022	false
2706	zzz1023	false
2705	zzz1024	false
2704	zzz1025	false
2703	zzz1026	false
2702	zzz1027	false
2701	zzz1028	false
2700	zzz1029	false
2699	zzz1030	false
2698	zzz1031	false
2697	zzz1032	false
2696	zzz1033	false
2695	zzz1034	false
2694	zzz1035	false
2693	zzz1036	false
2692	zzz1037	false
2691	zzz1038	false
2690	zzz1039	false
2689	zzz1040	false
2688	zzz1041	false
2687	zzz1042	false
2686	zzz1043	false
2685	zzz1044	false
2684	zzz1045	false
2683	zzz1046	false
2682	zzz1047	false
2681	zzz1048	false
2680	zzz1049	false
2679	zzz1050	false
2678	zzz1051	false
2677	zzz1052	false
2676	zzz1053	false
2675	zzz1054	false
2674	zzz1055	false
2673	zzz1056	false
2672	zzz1057	false
2671	zzz1058	false
2670	zzz1059	false
2669	zzz1060	false
2668	zzz1061	false
2667	zzz1062	false
2666	zzz1063	false
2665	zzz1064	false
2664	zzz1065	false
2663	zzz1066	false
2662	zzz1067	false
2661	zzz1068	false
2660	zzz1069	false
2659	zzz1070	false
2658	zzz1071	false
2657	zzz1072	false
2656	zzz1073	false
2655	zzz1074	false
2654	zzz1075	false
2653	zzz1076	false
2652	zzz1077	false
2651	zzz1078	false
2650	zzz1079	false
2649	zzz1080	false
2648	zzz1081	false
2647	zzz1082	false
2646	zzz1083	false
2645	zzz1084	false
2644	zzz1085	false
2643	zzz1086	false
2642	zzz1087	false
2641	zzz1088	false
2640	zzz1089	false
2639	zzz1090	false
2638	zzz1091	false
2637	zzz1092	false
2636	zzz1093	false
2635	zzz1094	false
2634	zzz1095	false
2633	zzz1096	false
2632	zzz1097	false
2631	zzz1098	false
2630	zzz1099	false
2629	zzz1100	false
2628	zzz1101	false
2627	zzz1102	false
2626	zzz1103	false
2625	zzz1104	false
2624	zzz1105	false
2623	zzz1106	false
2622	zzz1107	false
2621	zzz1108	false
2620	zzz1109	false
2619	zzz1110	false
2618	zzz1111	false
2617	zzz1112	false
2616	zzz1113	false
2615	zzz1114	false
2614	zzz1115	false
2613	zzz1116	false
2612	zzz1117	false
2611	zzz1118	false
2610	zzz1119	false
2609	zzz1120	false
2608	zzz1121	false
2607	zzz1122	false
2606	zzz1123	false
2605	zzz1124	false
2604	zzz1125	false
2603	zzz1126	false
2602	zzz1127	false
2601	zzz1128	false
2600	zzz1129	false
2599	zzz1130	false
2598	zzz1131	false
2597	zzz1132	false
2596	zzz1133	false
2595	zzz1134	false
2594	zzz1135	false
2593	zzz1136	false
2592	zzz1137	false
2591	zzz1138	false
2590	zzz1139	false
2589	zzz1140	false
2588	zzz1141	false
2587	zzz1142	false
2586	zzz1143	false
2585	zzz1144	false
2584	zzz1145	false
2583	zzz1146	false
2582	zzz1147	false
2581	zzz1148	false
2580	zzz1149	false
2579	zzz1150	false
2578	zzz1151	false
2577	zzz1152	false
2576	zzz1153	false
2575	zzz1154	false
2574	zzz1155	false
2573	zzz1156	false
2572	zzz1157	false
2571	zzz1158	false
2570	zzz1159	false
2569	zzz1160	false
2568	zzz1161	false
2567	zzz1162	false
2566	zzz1163	false
2565	zzz1164	false
2564	zzz1165	false
2563	zzz1166	false
2562	zzz1167	false
2561	zzz1168	false
2560	zzz1169	false
2559	zzz1170	false
2558	zzz1171	false
2557	zzz1172	false
2556	zzz1173	false
2555	zzz1174	false
2554	zzz1175	false
2553	zzz1176	false
2552	zzz1177	false
2551	zzz1178	false
2550	zzz1179	false
2549	zzz1180	false
2548	zzz1181	false
2547	zzz1182	false
2546	zzz1183	false
2545	zzz1184	false
2544	zzz1185	false
2543	zzz1186	false
2542	zzz1187	false
2541	zzz1188	false
2540	zzz1189	false
2539	zzz1190	false
2538	zzz1191	false
2537	zzz1192	false
2536	zzz1193	false
2535	zzz1194	false
2534	zzz1195	false
2533	zzz1196	false
2532	zzz1197	false
2531	zzz1198	false
2530	zzz1199	false
2529	zzz1200	false
2528	zzz1201	false
2527	zzz1202	false
2526	zzz1203	false
2525	zzz1204	false
2524	zzz1205	false
2523	zzz1206	false
2522	zzz1207	false
2521	zzz1208	false
2520	zzz1209	false
2519	zzz1210	false
2518	zzz1211	false
2517	zzz1212	false
2516	zzz1213	false
2515	zzz1214	false
2514	zzz1215	false
2513	zzz1216	false
2512	zzz1217	false
2511	zzz1218	false
2510	zzz1219	false
2509	zzz1220	false
2508	zzz1221	false
2507	zzz1222	false
2506	zzz1223	false
2505	zzz1224	false
2504	zzz1225	false
2503	zzz1226	false
2502	zzz1227	false
2501	zzz1228	false
2500	zzz1229	false
2499	zzz1230	false
2498	zzz1231	false
2497	zzz1232	false
2496	zzz1233	false
2495	zzz1234	false
2494	zzz1235	false
2493	zzz1236	false
2492	zzz1237	false
2491	zzz1238	false
2490	zzz1239	false
2489	zzz1240	false
2488	zzz1241	false
2487	zzz1242	false
2486	zzz1243	false
2485	zzz1244	false
2484	zzz1245	false
2483	zzz1246	false
2482	zzz1247	false
2481	zzz1248	false
2480	zzz1249	false
2479	zzz1250	false
2478	zzz1251	false
2477	zzz1252	false
2476	zzz1253	false
2475	zzz1254	false
2474	zzz1255	false
2473	zzz1256	false
2472	zzz1257	false
2471	zzz1258	false
2470	zzz1259	false
2469	zzz1260	false
2468	zzz1261	false
2467	zzz1262	false
2466	zzz1263	false
2465	zzz1264	false
2464	zzz1265	false
2463	zzz1266	false
2462	zzz1267	false
2461	zzz1268	false
2460	zzz1269	false
2459	zzz1270	false
2458	zzz1271	false
2457	zzz1272	false
2456	zzz1273	false
2455	zzz1274	false
2454	zzz1275	false
2453	zzz1276	false
2452	zzz1277	false
2451	zzz1278	false
2450	zzz1279	false
2449	zzz1280	false
2448	zzz1281	false
2447	zzz1282	false
2446	zzz1283	false
2445	zzz1284	false
2444	zzz1285	false
2443	zzz1286	false
2442	zzz1287	false
2441	zzz1288	false
2440	zzz1289	false
2439	zzz1290	false
2438	zzz1291	false
2437	zzz1292	false
2436	zzz1293	false
2435	zzz1294	false
2434	zzz1295	false
2433	zzz1296	false
2432	zzz1297	false
2431	zzz1298	false
2430	zzz1299	false
2429	zzz1300	false
2428	zzz1301	false
2427	zzz1302	false
2426	zzz1303	false
2425	zzz1304	false
2424	zzz1305	false
2423	zzz1306	false
2422	zzz1307	false
2421	zzz1308	false
2420	zzz1309	false
2419	zzz1310	false
2418	zzz1311	false
2417	zzz1312	false
2416	zzz1313	false
2415	zzz1314	false
2414	zzz1315	false
2413	zzz1316	false
2412	zzz1317	false
2411	zzz1318	false
2410	zzz1319	false
2409	zzz1320	false
2408	zzz1321	false
2407	zzz1322	false
2406	zzz1323	false
2405	zzz1324	false
2404	zzz1325	false
2403	zzz1326	false
2402	zzz1327	false
2401	zzz1328	false
2400	zzz1329	false
2399	zzz1330	false
2398	zzz1331	false
2397	zzz1332	false
2396	zzz1333	false
2395	zzz1334	false
2394	zzz1335	false
2393	zzz1336	false
2392	zzz1337	false
2391	zzz1338	false
2390	zzz1339	false
2389	zzz1340	false
2388	zzz1341	false
2387	zzz1342	false
2386	zzz1343	false
2385	zzz1344	false
2384	zzz1345	false
2383	zzz1346	false
2382	zzz1347	false
2381	zzz1348	false
2380	zzz1349	false
2379	zzz1350	false
2378	zzz1351	false
2377	zzz1352	false
2376	zzz1353	false
2375	zzz1354	false
2374	zzz1355	false
2373	zzz1356	false
2372	zzz1357	false
2371	zzz1358	false
2370	zzz1359	false
2369	zzz1360	false
2368	zzz1361	false
2367	zzz1362	false
2366	zzz1363	false
2365	zzz1364	false
2364	zzz1365	false
2363	zzz1366	false
2362	zzz1367	false
2361	zzz1368	false
2360	zzz1369	false
2359	zzz1370	false
2358	zzz1371	false
2357	zzz1372	false
2356	zzz1373	false
2355	zzz1374	false
2354	zzz1375	false
2353	zzz1376	false
2352	zzz1377	false
2351	zzz1378	false
2350	zzz1379	false
2349	zzz1380	false
2348	zzz1381	false
2347	zzz1382	false
2346	zzz1383	false
2345	zzz1384	false
2344	zzz1385	false
2343	zzz1386	false
2342	zzz1387	false
2341	zzz1388	false
2340	zzz1389	false
2339	zzz1390	false
2338	zzz1391	false
2337	zzz1392	false
2336	zzz1393	false
2335	zzz1394	false
2334	zzz1395	false
2333	zzz1396	false
2332	zzz1397	false
2331	zzz1398	false
2330	zzz1399	false
2329	zzz1400	false
2328	zzz1401	false
2327	zzz1402	false
2326	zzz1403	false
2325	zzz1404	false
2324	zzz1405	false
2323	zzz1406	false
2322	zzz1407	false
2321	zzz1408	false
2320	zzz1409	false
2319	zzz1410	false
2318	zzz1411	false
2317	zzz1412	false
2316	zzz1413	false
2315	zzz1414	false
2314	zzz1415	false
2313	zzz1416	false
2312	zzz1417	false
2311	zzz1418	false
2310	zzz1419	false
2309	zzz1420	false
2308	zzz1421	false
2307	zzz1422	false
2306	zzz1423	false
2305	zzz1424	false
2304	zzz1425	false
2303	zzz1426	false
2302	zzz1427	false
2301	zzz1428	false
2300	zzz1429	false
2299	zzz1430	false
2298	zzz1431	false
2297	zzz1432	false
2296	zzz1433	false
2295	zzz1434	false
2294	zzz1435	false
2293	zzz1436	false
2292	zzz1437	false
2291	zzz1438	false
2290	zzz1439	false
2289	zzz1440	false
2288	zzz1441	false
2287	zzz1442	false
2286	zzz1443	false
2285	zzz1444	false
2284	zzz1445	false
2283	zzz1446	false
2282	zzz1447	false
2281	zzz1448	false
2280	zzz1449	false
2279	zzz1450	false
2278	zzz1451	false
2277	zzz1452	false
2276	zzz1453	false
2275	zzz1454	false
2274	zzz1455	false
2273	zzz1456	false
2272	zzz1457	false
2271	zzz1458	false
2270	zzz1459	false
2269	zzz1460	false
2268	zzz1461	false
2267	zzz1462	false
2266	zzz1463	false
2265	zzz1464	false
2264	zzz1465	false
2263	zzz1466	false
2262	zzz1467	false
2261	zzz1468	false
2260	zzz1469	false
2259	zzz1470	false
2258	zzz1471	false
2257	zzz1472	false
2256	zzz1473	false
2255	zzz1474	false
2254	zzz1475	false
2253	zzz1476	false
2252	zzz1477	false
2251	zzz1478	false
2250	zzz1479	false
2249	zzz1480	false
2248	zzz1481	false
2247	zzz1482	false
2246	zzz1483	false
2245	zzz1484	false
2244	zzz1485	false
2243	zzz1486	false
2242	zzz1487	false
2241	zzz1488	false
2240	zzz1489	false
2239	zzz1490	false
2238	zzz1491	false
2237	zzz1492	false
2236	zzz1493	false
2235	zzz1494	false
2234	zzz1495	false
2233	zzz1496	false
2232	zzz1497	false
2231	zzz1498	false
2230	zzz1499	false
2229	zzz1500	false
2228	zzz1501	false
2227	zzz1502	false
2226	zzz1503	false
2225	zzz1504	false
2224	zzz1505	false
2223	zzz1506	false
2222	zzz1507	false
2221	zzz1508	false
2220	zzz1509	false
2219	zzz1510	false
2218	zzz1511	false
2217	zzz1512	false
2216	zzz1513	false
2215	zzz1514	false
2214	zzz1515	false
2213	zzz1516	false
2212	zzz1517	false
2211	zzz1518	false
2210	zzz1519	false
2209	zzz1520	false
2208	zzz1521	false
2207	zzz1522	false
2206	zzz1523	false
2205	zzz1524	false
2204	zzz1525	false
2203	zzz1526	false
2202	zzz1527	false
2201	zzz1528	false
2200	zzz1529	false
2199	zzz1530	false
2198	zzz1531	false
2197	zzz1532	false
2196	zzz1533	false
2195	zzz1534	false
2194	zzz1535	false
2193	zzz1536	false
2192	zzz1537	false
2191	zzz1538	false
2190	zzz1539	false
2189	zzz1540	false
2188	zzz1541	false
2187	zzz1542	false
2186	zzz1543	false
2185	zzz1544	false
2184	zzz1545	false
2183	zzz1546	false
2182	zzz1547	false
2181	zzz1548	false
2180	zzz1549	false
2179	zzz1550	false
2178	zzz1551	false
2177	zzz1552	false
2176	zzz1553	false
2175	zzz1554	false
2174	zzz1555	false
2173	zzz1556	false
2172	zzz1557	false
2171	zzz1558	false
2170	zzz1559	false
2169	zzz1560	false
2168	zzz1561	false
2167	zzz1562	false
2166	zzz1563	false
2165	zzz1564	false
2164	zzz1565	false
2163	zzz1566	false
2162	zzz1567	false
2161	zzz1568	false
2160	zzz1569	false
2159	zzz1570	false
2158	zzz1571	false
2157	zzz1572	false
2156	zzz1573	false
2155	zzz1574	false
2154	zzz1575	false
2153	zzz1576	false
2152	zzz1577	false
2151	zzz1578	false
2150	zzz1579	false
2149	zzz1580	false
2148	zzz1581	false
2147	zzz1582	false
2146	zzz1583	false
2145	zzz1584	false
2144	zzz1585	false
2143	zzz1586	false
2142	zzz1587	false
2141	zzz1588	false
2140	zzz1589	false
2139	zzz1590	false
2138	zzz1591	false
2137	zzz1592	false
2136	zzz1593	false
2135	zzz1594	false
2134	zzz1595	false
2133	zzz1596	false
2132	zzz1597	false
2131	zzz1598	false
2130	zzz1599	false
2129	zzz1600	false
2128	zzz1601	false
2127	zzz1602	false
2126	zzz1603	false
2125	zzz1604	false
2124	zzz1605	false
2123	zzz1606	false
2122	zzz1607	false
2121	zzz1608	false
2120	zzz1609	false
2119	zzz1610	false
2118	zzz1611	false
2117	zzz1612	false
2116	zzz1613	false
2115	zzz1614	false
2114	zzz1615	false
2113	zzz1616	false
2112	zzz1617	false
2111	zzz1618	false
2110	zzz1619	false
2109	zzz1620	false
2108	zzz1621	false
2107	zzz1622	false
2106	zzz1623	false
2105	zzz1624	false
2104	zzz1625	false
2103	zzz1626	false
2102	zzz1627	false
2101	zzz1628	false
2100	zzz1629	false
2099	zzz1630	false
2098	zzz1631	false
2097	zzz1632	false
2096	zzz1633	false
2095	zzz1634	false
2094	zzz1635	false
2093	zzz1636	false
2092	zzz1637	false
2091	zzz1638	false
2090	zzz1639	false
2089	zzz1640	false
2088	zzz1641	false
2087	zzz1642	false
2086	zzz1643	false
2085	zzz1644	false
2084	zzz1645	false
2083	zzz1646	false
2082	zzz1647	false
2081	zzz1648	false
2080	zzz1649	false
2079	zzz1650	false
2078	zzz1651	false
2077	zzz1652	false
2076	zzz1653	false
2075	zzz1654	false
2074	zzz1655	false
2073	zzz1656	false
2072	zzz1657	false
2071	zzz1658	false
2070	zzz1659	false
2069	zzz1660	false
2068	zzz1661	false
2067	zzz1662	false
2066	zzz1663	false
2065	zzz1664	false
2064	zzz1665	false
2063	zzz1666	false
2062	zzz1667	false
2061	zzz1668	false
2060	zzz1669	false
2059	zzz1670	false
2058	zzz1671	false
2057	zzz1672	false
2056	zzz1673	false
2055	zzz1674	false
2054	zzz1675	false
2053	zzz1676	false
2052	zzz1677	false
2051	zzz1678	false
2050	zzz1679	false
2049	zzz1680	false
2048	zzz1681	false
2047	zzz1682	false
2046	zzz1683	false
2045	zzz1684	false
2044	zzz1685	false
2043	zzz1686	false
2042	zzz1687	false
2041	zzz1688	false
2040	zzz1689	false
2039	zzz1690	false
2038	zzz1691	false
2037	zzz1692	false
2036	zzz1693	false
2035	zzz1694	false
2034	zzz1695	false
2033	zzz1696	false
2032	zzz1697	false
2031	zzz1698	false
2030	zzz1699	false
2029	zzz1700	false
2028	zzz1701	false
2027	zzz1702	false
2026	zzz1703	false
2025	zzz1704	false
2024	zzz1705	false
2023	zzz1706	false
2022	zzz1707	false
2021	zzz1708	false
2020	zzz1709	false
2019	zzz1710	false
2018	zzz1711	false
2017	zzz1712	false
2016	zzz1713	false
2015	zzz1714	false
2014	zzz1715	false
2013	zzz1716	false
2012	zzz1717	false
2011	zzz1718	false
2010	zzz1719	false
2009	zzz1720	false
2008	zzz1721	false
2007	zzz1722	false
2006	zzz1723	false
2005	zzz1724	false
2004	zzz1725	false
2003	zzz1726	false
2002	zzz1727	false
2001	zzz1728	false
2000	zzz1729	false
1999	zzz1730	false
1998	zzz1731	false
1997	zzz1732	false
1996	zzz1733	false
1995	zzz1734	false
1994	zzz1735	false
1993	zzz1736	false
1992	zzz1737	false
1991	zzz1738	false
1990	zzz1739	false
1989	zzz1740	false
1988	zzz1741	false
1987	zzz1742	false
1986	zzz1743	false
1985	zzz1744	false
1984	zzz1745	false
1983	zzz1746	false
1982	zzz1747	false
1981	zzz1748	false
1980	zzz1749	false
1979	zzz1750	false
1978	zzz1751	false
1977	zzz1752	false
1976	zzz1753	false
1975	zzz1754	false
1974	zzz1755	false
1973	zzz1756	false
1972	zzz1757	false
1971	zzz1758	false
1970	zzz1759	false
1969	zzz1760	false
1968	zzz1761	false
1967	zzz1762	false
1966	zzz1763	false
1965	zzz1764	false
1964	zzz1765	false
1963	zzz1766	false
1962	zzz1767	false
1961	zzz1768	false
1960	zzz1769	false
1959	zzz1770	false
1958	zzz1771	false
1957	zzz1772	false
1956	zzz1773	false
1955	zzz1774	false
1954	zzz1775	false
1953	zzz1776	false
1952	zzz1777	false
1951	zzz1778	false
1950	zzz1779	false
1949	zzz1780	false
1948	zzz1781	false
1947	zzz1782	false
1946	zzz1783	false
1945	zzz1784	false
1944	zzz1785	false
1943	zzz1786	false
1942	zzz1787	false
1941	zzz1788	false
1940	zzz1789	false
1939	zzz1790	false
1938	zzz1791	false
1937	zzz1792	false
1936	zzz1793	false
1935	zzz1794	false
1934	zzz1795	false
1933	zzz1796	false
1932	zzz1797	false
1931	zzz1798	false
1930	zzz1799	false
1929	zzz1800	false
1928	zzz1801	false
1927	zzz1802	false
1926	zzz1803	false
1925	zzz1804	false
1924	zzz1805	false
1923	zzz1806	false
1922	zzz1807	false
1921	zzz1808	false
1920	zzz1809	false
1919	zzz1810	false
1918	zzz1811	false
1917	zzz1812	false
1916	zzz1813	false
1915	zzz1814	false
1914	zzz1815	false
1913	zzz1816	false
1912	zzz1817	false
1911	zzz1818	false
1910	zzz1819	false
1909	zzz1820	false
1908	zzz1821	false
1907	zzz1822	false
1906	zzz1823	false
1905	zzz1824	false
1904	zzz1825	false
1903	zzz1826	false
1902	zzz1827	false
1901	zzz1828	false
1900	zzz1829	false
1899	zzz1830	false
1898	zzz1831	false
1897	zzz1832	false
1896	zzz1833	false
1895	zzz1834	false
1894	zzz1835	false
1893	zzz1836	false
1892	zzz1837	false
1891	zzz1838	false
1890	zzz1839	false
1889	zzz1840	false
1888	zzz1841	false
1887	zzz1842	false
1886	zzz1843	false
1885	zzz1844	false
1884	zzz1845	false
1883	zzz1846	false
1882	zzz1847	false
1881	zzz1848	false
1880	zzz1849	false
1879	zzz1850	false
1878	zzz1851	false
1877	zzz1852	false
1876	zzz1853	false
1875	zzz1854	false
1874	zzz1855	false
1873	zzz1856	false
1872	zzz1857	false
1871	zzz1858	false
1870	zzz1859	false
1869	zzz1860	false
1868	zzz1861	false
1867	zzz1862	false
1866	zzz1863	false
1865	zzz1864	false
1864	zzz1865	false
1863	zzz1866	false
1862	zzz1867	false
1861	zzz1868	false
1860	zzz1869	false
1859	zzz1870	false
1858	zzz1871	false
1857	zzz1872	false
1856	zzz1873	false
1855	zzz1874	false
1854	zzz1875	false
1853	zzz1876	false
1852	zzz1877	false
1851	zzz1878	false
1850	zzz1879	false
1849	zzz1880	false
1848	zzz1881	false
1847	zzz1882	false
1846	zzz1883	false
1845	zzz1884	false
1844	zzz1885	false
1843	zzz1886	false
1842	zzz1887	false
1841	zzz1888	false
1840	zzz1889	false
1839	zzz1890	false
1838	zzz1891	false
1837	zzz1892	false
1836	zzz1893	false
1835	zzz1894	false
1834	zzz1895	false
1833	zzz1896	false
1832	zzz1897	false
1831	zzz1898	false
1830	zzz1899	false
1829	zzz1900	false
1828	zzz1901	false
1827	zzz1902	false
1826	zzz1903	false
1825	zzz1904	false
1824	zzz1905	false
1823	zzz1906	false
1822	zzz1907	false
1821	zzz1908	false
1820	zzz1909	false
1819	zzz1910	false
1818	zzz1911	false
1817	zzz1912	false
1816	zzz1913	false
1815	zzz1914	false
1814	zzz1915	false
1813	zzz1916	false
1812	zzz1917	false
1811	zzz1918	false
1810	zzz1919	false
1809	zzz1920	false
1808	zzz1921	false
1807	zzz1922	false
1806	zzz1923	false
1805	zzz1924	false
1804	zzz1925	false
1803	zzz1926	false
1802	zzz1927	false
1801	zzz1928	false
1800	zzz1929	false
1799	zzz1930	false
1798	zzz1931	false
1797	zzz1932	false
1796	zzz1933	false
1795	zzz1934	false
1794	zzz1935	false
1793	zzz1936	false
1792	zzz1937	false
1791	zzz1938	false
1790	zzz1939	false
1789	zzz1940	false
1788	zzz1941	false
1787	zzz1942	false
1786	zzz1943	false
1785	zzz1944	false
1784	zzz1945	false
1783	zzz1946	false
1782	zzz1947	false
1781	zzz1948	false
1780	zzz1949	false
1779	zzz1950	false
1778	zzz1951	false
1777	zzz1952	false
1776	zzz1953	false
1775	zzz1954	false
1774	zzz1955	false
1773	zzz1956	false
1772	zzz1957	false
1771	zzz1958	false
1770	zzz1959	false
1769	zzz1960	false
1768	zzz1961	false
1767	zzz1962	false
1766	zzz1963	false
1765	zzz1964	false
1764	zzz1965	false
1763	zzz1966	false
1762	zzz1967	false
1761	zzz1968	false
1760	zzz1969	false
1759	zzz1970	false
1758	zzz1971	false
1757	zzz1972	false
1756	zzz1973	false
1755	zzz1974	false
1754	zzz1975	false
1753	zzz1976	false
1752	zzz1977	false
1751	zzz1978	false
1750	zzz1979	false
1749	zzz1980	false
1748	zzz1981	false
1747	zzz1982	false
1746	zzz1983	false
1745	zzz1984	false
1744	zzz1985	false
1743	zzz1986	false
1742	zzz1987	false
1741	zzz1988	false
1740	zzz1989	false
1739	zzz1990	false
1738	zzz1991	false
1737	zzz1992	false
1736	zzz1993	false
1735	zzz1994	false
1734	zzz1995	false
1733	zzz1996	false
1732	zzz1997	false
1731	zzz1998	false
1730	zzz1999	false
1729	zzz2000	false
1728	zzz2001	false
1727	zzz2002	false
1726	zzz2003	false
1725	zzz2004	false
1724	zzz2005	false
1723	zzz2006	false
1722	zzz2007	false
1721	zzz2008	false
1720	zzz2009	false
1719	zzz2010	false
1718	zzz2011	false
1717	zzz2012	false
1716	zzz2013	false
1715	zzz2014	false
1714	zzz2015	false
1713	zzz2016	false
1712	zzz2017	false
1711	zzz2018	false
1710	zzz2019	false
1709	zzz2020	false
1708	zzz2021	false
1707	zzz2022	false
1706	zzz2023	false
1705	zzz2024	false
1704	zzz2025	false
1703	zzz2026	false
1702	zzz2027	false
1701	zzz2028	false
1700	zzz2029	false
1699	zzz2030	false
1698	zzz2031	false
1697	zzz2032	false
1696	zzz2033	false
1695	zzz2034	false
1694	zzz2035	false
1693	zzz2036	false
1692	zzz2037	false
1691	zzz2038	false
1690	zzz2039	false
1689	zzz2040	false
1688	zzz2041	false
1687	zzz2042	false
1686	zzz2043	false
1685	zzz2044	false
1684	zzz2045	false
1683	zzz2046	false
1682	zzz2047	false
1681	zzz2048	false
1680	zzz2049	false
1679	zzz2050	false
1678	zzz2051	false
1677	zzz2052	false
1676	zzz2053	false
1675	zzz2054	false
1674	zzz2055	false
1673	zzz2056	false
1672	zzz2057	false
1671	zzz2058	false
1670	zzz2059	false
1669	zzz2060	false
1668	zzz2061	false
1667	zzz2062	false
1666	zzz2063	false
1665	zzz2064	false
1664	zzz2065	false
1663	zzz2066	false
1662	zzz2067	false
1661	zzz2068	false
1660	zzz2069	false
1659	zzz2070	false
1658	zzz2071	false
1657	zzz2072	false
1656	zzz2073	false
1655	zzz2074	false
1654	zzz2075	false
1653	zzz2076	false
1652	zzz2077	false
1651	zzz2078	false
1650	zzz2079	false
1649	zzz2080	false
1648	zzz2081	false
1647	zzz2082	false
1646	zzz2083	false
1645	zzz2084	false
1644	zzz2085	false
1643	zzz2086	false
1642	zzz2087	false
1641	zzz2088	false
1640	zzz2089	false
1639	zzz2090	false
1638	zzz2091	false
1637	zzz2092	false
1636	zzz2093	false
1635	zzz2094	false
1634	zzz2095	false
1633	zzz2096	false
1632	zzz2097	false
1631	zzz2098	false
1630	zzz2099	false
1629	zzz2100	false
1628	zzz2101	false
1627	zzz2102	false
1626	zzz2103	false
1625	zzz2104	false
1624	zzz2105	false
1623	zzz2106	false
1622	zzz2107	false
1621	zzz2108	false
1620	zzz2109	false
1619	zzz2110	false
1618	zzz2111	false
1617	zzz2112	false
1616	zzz2113	false
1615	zzz2114	false
1614	zzz2115	false
1613	zzz2116	false
1612	zzz2117	false
1611	zzz2118	false
1610	zzz2119	false
1609	zzz2120	false
1608	zzz2121	false
1607	zzz2122	false
1606	zzz2123	false
1605	zzz2124	false
1604	zzz2125	false
1603	zzz2126	false
1602	zzz2127	false
1601	zzz2128	false
1600	zzz2129	false
1599	zzz2130	false
1598	zzz2131	false
1597	zzz2132	false
1596	zzz2133	false
1595	zzz2134	false
1594	zzz2135	false
1593	zzz2136	false
1592	zzz2137	false
1591	zzz2138	false
1590	zzz2139	false
1589	zzz2140	false
1588	zzz2141	false
1587	zzz2142	false
1586	zzz2143	false
1585	zzz2144	false
1584	zzz2145	false
1583	zzz2146	false
1582	zzz2147	false
1581	zzz2148	false
1580	zzz2149	false
1579	zzz2150	false
1578	zzz2151	false
1577	zzz2152	false
1576	zzz2153	false
1575	zzz2154	false
1574	zzz2155	false
1573	zzz2156	false
1572	zzz2157	false
1571	zzz2158	false
1570	zzz2159	false
1569	zzz2160	false
1568	zzz2161	false
1567	zzz2162	false
1566	zzz2163	false
1565	zzz2164	false
1564	zzz2165	false
1563	zzz2166	false
1562	zzz2167	false
1561	zzz2168	false
1560	zzz2169	false
1559	zzz2170	false
1558	zzz2171	false
1557	zzz2172	false
1556	zzz2173	false
1555	zzz2174	false
1554	zzz2175	false
1553	zzz2176	false
1552	zzz2177	false
1551	zzz2178	false
1550	zzz2179	false
1549	zzz2180	false
1548	zzz2181	false
1547	zzz2182	false
1546	zzz2183	false
1545	zzz2184	false
1544	zzz2185	false
1543	zzz2186	false
1542	zzz2187	false
1541	zzz2188	false
1540	zzz2189	false
1539	zzz2190	false
1538	zzz2191	false
1537	zzz2192	false
1536	zzz2193	false
1535	zzz2194	false
1534	zzz2195	false
1533	zzz2196	false
1532	zzz2197	false
1531	zzz2198	false
1530	zzz2199	false
1529	zzz2200	false
1528	zzz2201	false
1527	zzz2202	false
1526	zzz2203	false
1525	zzz2204	false
1524	zzz2205	false
1523	zzz2206	false
1522	zzz2207	false
1521	zzz2208	false
1520	zzz2209	false
1519	zzz2210	false
1518	zzz2211	false
1517	zzz2212	false
1516	zzz2213	false
1515	zzz2214	false
1514	zzz2215	false
1513	zzz2216	false
1512	zzz2217	false
1511	zzz2218	false
1510	zzz2219	false
1509	zzz2220	false
1508	zzz2221	false
1507	zzz2222	false
1506	zzz2223	false
1505	zzz2224	false
1504	zzz2225	false
1503	zzz2226	false
1502	zzz2227	false
1501	zzz2228	false
1500	zzz2229	false
1499	zzz2230	false
1498	zzz2231	false
1497	zzz2232	false
1496	zzz2233	false
1495	zzz2234	false
1494	zzz2235	false
1493	zzz2236	false
1492	zzz2237	false
1491	zzz2238	false
1490	zzz2239	false
1489	zzz2240	false
1488	zzz2241	false
1487	zzz2242	false
1486	zzz2243	false
1485	zzz2244	false
1484	zzz2245	false
1483	zzz2246	false
1482	zzz2247	false
1481	zzz2248	false
1480	zzz2249	false
1479	zzz2250	false
1478	zzz2251	false
1477	zzz2252	false
1476	zzz2253	false
1475	zzz2254	false
1474	zzz2255	false
1473	zzz2256	false
1472	zzz2257	false
1471	zzz2258	false
1470	zzz2259	false
1469	zzz2260	false
1468	zzz2261	false
1467	zzz2262	false
1466	zzz2263	false
1465	zzz2264	false
1464	zzz2265	false
1463	zzz2266	false
1462	zzz2267	false
1461	zzz2268	false
1460	zzz2269	false
1459	zzz2270	false
1458	zzz2271	false
1457	zzz2272	false
1456	zzz2273	false
1455	zzz2274	false
1454	zzz2275	false
1453	zzz2276	false
1452	zzz2277	false
1451	zzz2278	false
1450	zzz2279	false
1449	zzz2280	false
1448	zzz2281	false
1447	zzz2282	false
1446	zzz2283	false
1445	zzz2284	false
1444	zzz2285	false
1443	zzz2286	false
1442	zzz2287	false
1441	zzz2288	false
1440	zzz2289	false
1439	zzz2290	false
1438	zzz2291	false
1437	zzz2292	false
1436	zzz2293	false
1435	zzz2294	false
1434	zzz2295	false
1433	zzz2296	false
1432	zzz2297	false
1431	zzz2298	false
1430	zzz2299	false
1429	zzz2300	false
1428	zzz2301	false
1427	zzz2302	false
1426	zzz2303	false
1425	zzz2304	false
1424	zzz2305	false
1423	zzz2306	false
1422	zzz2307	false
1421	zzz2308	false
1420	zzz2309	false
1419	zzz2310	false
1418	zzz2311	false
1417	zzz2312	false
1416	zzz2313	false
1415	zzz2314	false
1414	zzz2315	false
1413	zzz2316	false
1412	zzz2317	false
1411	zzz2318	false
1410	zzz2319	false
1409	zzz2320	false
1408	zzz2321	false
1407	zzz2322	false
1406	zzz2323	false
1405	zzz2324	false
1404	zzz2325	false
1403	zzz2326	false
1402	zzz2327	false
1401	zzz2328	false
1400	zzz2329	false
1399	zzz2330	false
1398	zzz2331	false
1397	zzz2332	false
1396	zzz2333	false
1395	zzz2334	false
1394	zzz2335	false
1393	zzz2336	false
1392	zzz2337	false
1391	zzz2338	false
1390	zzz2339	false
1389	zzz2340	false
1388	zzz2341	false
1387	zzz2342	false
1386	zzz2343	false
1385	zzz2344	false
1384	zzz2345	false
1383	zzz2346	false
1382	zzz2347	false
1381	zzz2348	false
1380	zzz2349	false
1379	zzz2350	false
1378	zzz2351	false
1377	zzz2352	false
1376	zzz2353	false
1375	zzz2354	false
1374	zzz2355	false
1373	zzz2356	false
1372	zzz2357	false
1371	zzz2358	false
1370	zzz2359	false
1369	zzz2360	false
1368	zzz2361	false
1367	zzz2362	false
1366	zzz2363	false
1365	zzz2364	false
1364	zzz2365	false
1363	zzz2366	false
1362	zzz2367	false
1361	zzz2368	false
1360	zzz2369	false
1359	zzz2370	false
1358	zzz2371	false
1357	zzz2372	false
1356	zzz2373	false
1355	zzz2374	false
1354	zzz2375	false
1353	zzz2376	false
1352	zzz2377	false
1351	zzz2378	false
1350	zzz2379	false
1349	zzz2380	false
1348	zzz2381	false
1347	zzz2382	false
1346	zzz2383	false
1345	zzz2384	false
1344	zzz2385	false
1343	zzz2386	false
1342	zzz2387	false
1341	zzz2388	false
1340	zzz2389	false
1339	zzz2390	false
1338	zzz2391	false
1337	zzz2392	false
1336	zzz2393	false
1335	zzz2394	false
1334	zzz2395	false
1333	zzz2396	false
1332	zzz2397	false
1331	zzz2398	false
1330	zzz2399	false
1329	zzz2400	false
1328	zzz2401	false
1327	zzz2402	false
1326	zzz2403	false
1325	zzz2404	false
1324	zzz2405	false
1323	zzz2406	false
1322	zzz2407	false
1321	zzz2408	false
1320	zzz2409	false
1319	zzz2410	false
1318	zzz2411	false
1317	zzz2412	false
1316	zzz2413	false
1315	zzz2414	false
1314	zzz2415	false
1313	zzz2416	false
1312	zzz2417	false
1311	zzz2418	false
1310	zzz2419	false
1309	zzz2420	false
1308	zzz2421	false
1307	zzz2422	false
1306	zzz2423	false
1305	zzz2424	false
1304	zzz2425	false
1303	zzz2426	false
1302	zzz2427	false
1301	zzz2428	false
1300	zzz2429	false
1299	zzz2430	false
1298	zzz2431	false
1297	zzz2432	false
1296	zzz2433	false
1295	zzz2434	false
1294	zzz2435	false
1293	zzz2436	false
1292	zzz2437	false
1291	zzz2438	false
1290	zzz2439	false
1289	zzz2440	false
1288	zzz2441	false
1287	zzz2442	false
1286	zzz2443	false
1285	zzz2444	false
1284	zzz2445	false
1283	zzz2446	false
1282	zzz2447	false
1281	zzz2448	false
1280	zzz2449	false
1279	zzz2450	false
1278	zzz2451	false
1277	zzz2452	false
1276	zzz2453	false
1275	zzz2454	false
1274	zzz2455	false
1273	zzz2456	false
1272	zzz2457	false
1271	zzz2458	false
1270	zzz2459	false
1269	zzz2460	false
1268	zzz2461	false
1267	zzz2462	false
1266	zzz2463	false
1265	zzz2464	false
1264	zzz2465	false
1263	zzz2466	false
1262	zzz2467	false
1261	zzz2468	false
1260	zzz2469	false
1259	zzz2470	false
1258	zzz2471	false
1257	zzz2472	false
1256	zzz2473	false
1255	zzz2474	false
1254	zzz2475	false
1253	zzz2476	false
1252	zzz2477	false
1251	zzz2478	false
1250	zzz2479	false
1249	zzz2480	false
1248	zzz2481	false
1247	zzz2482	false
1246	zzz2483	false
1245	zzz2484	false
1244	zzz2485	false
1243	zzz2486	false
1242	zzz2487	false
1241	zzz2488	false
1240	zzz2489	false
1239	zzz2490	false
1238	zzz2491	false
1237	zzz2492	false
1236	zzz2493	false
1235	zzz2494	false
1234	zzz2495	false
1233	zzz2496	false
1232	zzz2497	false
1231	zzz2498	false
1230	zzz2499	false
1229	zzz2500	false
1228	zzz2501	false
1227	zzz2502	false
1226	zzz2503	false
1225	zzz2504	false
1224	zzz2505	false
1223	zzz2506	false
1222	zzz2507	false
1221	zzz2508	false
1220	zzz2509	false
1219	zzz2510	false
1218	zzz2511	false
1217	zzz2512	false
1216	zzz2513	false
1215	zzz2514	false
1214	zzz2515	false
1213	zzz2516	false
1212	zzz2517	false
1211	zzz2518	false
1210	zzz2519	false
1209	zzz2520	false
1208	zzz2521	false
1207	zzz2522	false
1206	zzz2523	false
1205	zzz2524	false
1204	zzz2525	false
1203	zzz2526	false
1202	zzz2527	false
1201	zzz2528	false
1200	zzz2529	false
1199	zzz2530	false
1198	zzz2531	false
1197	zzz2532	false
1196	zzz2533	false
1195	zzz2534	false
1194	zzz2535	false
1193	zzz2536	false
1192	zzz2537	false
1191	zzz2538	false
1190	zzz2539	false
1189	zzz2540	false
1188	zzz2541	false
1187	zzz2542	false
1186	zzz2543	false
1185	zzz2544	false
1184	zzz2545	false
1183	zzz2546	false
1182	zzz2547	false
1181	zzz2548	false
1180	zzz2549	false
1179	zzz2550	false
1178	zzz2551	false
1177	zzz2552	false
1176	zzz2553	false
1175	zzz2554	false
1174	zzz2555	false
1173	zzz2556	false
1172	zzz2557	false
1171	zzz2558	false
1170	zzz2559	false
1169	zzz2560	false
1168	zzz2561	false
1167	zzz2562	false
1166	zzz2563	false
1165	zzz2564	false
1164	zzz2565	false
1163	zzz2566	false
1162	zzz2567	false
1161	zzz2568	false
1160	zzz2569	false
1159	zzz2570	false
1158	zzz2571	false
1157	zzz2572	false
1156	zzz2573	false
1155	zzz2574	false
1154	zzz2575	false
1153	zzz2576	false
1152	zzz2577	false
1151	zzz2578	false
1150	zzz2579	false
1149	zzz2580	false
1148	zzz2581	false
1147	zzz2582	false
1146	zzz2583	false
1145	zzz2584	false
1144	zzz2585	false
1143	zzz2586	false
1142	zzz2587	false
1141	zzz2588	false
1140	zzz2589	false
1139	zzz2590	false
1138	zzz2591	false
1137	zzz2592	false
1136	zzz2593	false
1135	zzz2594	false
1134	zzz2595	false
1133	zzz2596	false
1132	zzz2597	false
1131	zzz2598	false
1130	zzz2599	false
1129	zzz2600	false
1128	zzz2601	false
1127	zzz2602	false
1126	zzz2603	false
1125	zzz2604	false
1124	zzz2605	false
1123	zzz2606	false
1122	zzz2607	false
1121	zzz2608	false
1120	zzz2609	false
1119	zzz2610	false
1118	zzz2611	false
1117	zzz2612	false
1116	zzz2613	false
1115	zzz2614	false
1114	zzz2615	false
1113	zzz2616	false
1112	zzz2617	false
1111	zzz2618	false
1110	zzz2619	false
1109	zzz2620	false
1108	zzz2621	false
1107	zzz2622	false
1106	zzz2623	false
1105	zzz2624	false
1104	zzz2625	false
1103	zzz2626	false
1102	zzz2627	false
1101	zzz2628	false
1100	zzz2629	false
1099	zzz2630	false
1098	zzz2631	false
1097	zzz2632	false
1096	zzz2633	false
1095	zzz2634	false
1094	zzz2635	false
1093	zzz2636	false
1092	zzz2637	false
1091	zzz2638	false
1090	zzz2639	false
1089	zzz2640	false
1088	zzz2641	false
1087	zzz2642	false
1086	zzz2643	false
1085	zzz2644	false
1084	zzz2645	false
1083	zzz2646	false
1082	zzz2647	false
1081	zzz2648	false
1080	zzz2649	false
1079	zzz2650	false
1078	zzz2651	false
1077	zzz2652	false
1076	zzz2653	false
1075	zzz2654	false
1074	zzz2655	false
1073	zzz2656	false
1072	zzz2657	false
1071	zzz2658	false
1070	zzz2659	false
1069	zzz2660	false
1068	zzz2661	false
1067	zzz2662	false
1066	zzzz100	false
1065	zzzz101	false
1064	zzzz102	false
1063	zzzz103	false
1062	zzzz104	false
1061	zzzz105	false
1060	zzzz106	false
1059	zzzz107	false
1058	zzzz108	false
1057	zzzz109	false
1056	zzzz110	false
1055	zzzz111	false
1054	zzzz112	false
1053	zzzz113	false
1052	zzzz114	false
1051	zzzz115	false
1050	zzzz116	false
1049	zzzz117	false
1048	zzzz118	false
1047	zzzz119	false
1046	zzzz120	false
1045	zzzz121	false
1044	zzzz122	false
1043	zzzz123	false
1042	zzzz124	false
1041	zzzz125	false
1040	zzzz126	false
1039	zzzz127	false
1038	zzzz128	false
1037	zzzz129	false
1036	zzzz130	false
1035	zzzz131	false
1034	zzzz132	false
1033	zzzz133	false
1032	zzzz134	false
1031	zzzz135	false
1030	zzzz136	false
1029	zzzz137	false
1028	zzzz138	false
1027	zzzz139	false
1026	zzzz140	false
1025	zzzz141	false
1024	zzzz142	false
1023	zzzz143	false
1022	zzzz144	false
1021	zzzz145	false
1020	zzzz146	false
1019	zzzz147	false
1018	zzzz148	false
1017	zzzz149	false
1016	zzzz150	false
1015	zzzz151	false
1014	zzzz152	false
1013	zzzz153	false
1012	zzzz154	false
1011	zzzz155	false
1010	zzzz156	false
1009	zzzz157	false
1008	zzzz158	false
1007	zzzz159	false
1006	zzzz160	false
1005	zzzz161	false
1004	zzzz162	false
1003	zzzz163	false
1002	zzzz164	false
1001	zzzz165	false
1000	zzzz166	false
999	zzzz167	false
998	zzzz168	false
997	zzzz169	false
996	zzzz170	false
995	zzzz171	false
994	zzzz172	false
993	zzzz173	false
992	zzzz174	false
991	zzzz175	false
990	zzzz176	false
989	zzzz177	false
988	zzzz178	false
987	zzzz179	false
986	zzzz180	false
985	zzzz181	false
984	zzzz182	false
983	zzzz183	false
982	zzzz184	false
981	zzzz185	false
980	zzzz186	false
979	zzzz187	false
978	zzzz188	false
977	zzzz189	false
976	zzzz190	false
975	zzzz191	false
974	zzzz192	false
973	zzzz193	false
972	zzzz194	false
971	zzzz195	false
970	zzzz196	false
969	zzzz197	false
968	zzzz198	false
967	zzzz199	false
966	zzzz200	false
965	zzzz201	false
964	zzzz202	false
963	zzzz203	false
962	zzzz204	false
961	zzzz205	false
960	zzzz206	false
959	zzzz207	false
958	zzzz208	false
957	zzzz209	false
956	zzzz210	false
955	zzzz211	false
954	zzzz212	false
953	zzzz213	false
952	zzzz214	false
951	zzzz215	false
950	zzzz216	false
949	zzzz217	false
948	zzzz218	false
947	zzzz219	false
946	zzzz220	false
945	zzzz221	false
944	zzzz222	false
943	zzzz223	false
942	zzzz224	false
941	zzzz225	false
940	zzzz226	false
939	zzzz227	false
938	zzzz228	false
937	zzzz229	false
936	zzzz230	false
935	zzzz231	false
934	zzzz232	false
933	zzzz233	false
932	zzzz234	false
931	zzzz235	false
930	zzzz236	false
929	zzzz237	false
928	zzzz238	false
927	zzzz239	false
926	zzzz240	false
925	zzzz241	false
924	zzzz242	false
923	zzzz243	false
922	zzzz244	false
921	zzzz245	false
920	zzzz246	false
919	zzzz247	false
918	zzzz248	false
917	zzzz249	false
916	zzzz250	false
915	zzzz251	false
914	zzzz252	false
913	zzzz253	false
912	zzzz254	false
911	zzzz255	false
910	zzzz256	false
909	zzzz257	false
908	zzzz258	false
907	zzzz259	false
906	zzzz260	false
905	zzzz261	false
904	zzzz262	false
903	zzzz263	false
902	zzzz264	false
901	zzzz265	false
900	zzzz266	false
899	zzzz267	false
898	zzzz268	false
897	zzzz269	false
896	zzzz270	false
895	zzzz271	false
894	zzzz272	false
893	zzzz273	false
892	zzzz274	false
891	zzzz275	false
890	zzzz276	false
889	zzzz277	false
888	zzzz278	false
887	zzzz279	false
886	zzzz280	false
885	zzzz281	false
884	zzzz282	false
883	zzzz283	false
882	zzzz284	false
881	zzzz285	false
880	zzzz286	false
879	zzzz287	false
878	zzzz288	false
877	zzzz289	false
876	zzzz290	false
875	zzzz291	false
874	zzzz292	false
873	zzzz293	false
872	zzzz294	false
871	zzzz295	false
870	zzzz296	false
869	zzzz297	false
868	zzzz298	false
867	zzzz299	false
866	zzzz300	false
865	zzzz301	false
864	zzzz302	false
863	zzzz303	false
862	zzzz304	false
861	zzzz305	false
860	zzzz306	false
859	zzzz307	false
858	zzzz308	false
857	zzzz309	false
856	zzzz310	false
855	zzzz311	false
854	zzzz312	false
853	zzzz313	false
852	zzzz314	false
851	zzzz315	false
850	zzzz316	false
849	zzzz317	false
848	zzzz318	false
847	zzzz319	false
846	zzzz320	false
845	zzzz321	false
844	zzzz322	false
843	zzzz323	false
842	zzzz324	false
841	zzzz325	false
840	zzzz326	false
839	zzzz327	false
838	zzzz328	false
837	zzzz329	false
836	zzzz330	false
835	zzzz331	false
834	zzzz332	false
833	zzzz333	false
832	zzzz334	false
831	zzzz335	false
830	zzzz336	false
829	zzzz337	false
828	zzzz338	false
827	zzzz339	false
826	zzzz340	false
825	zzzz341	false
824	zzzz342	false
823	zzzz343	false
822	zzzz344	false
821	zzzz345	false
820	zzzz346	false
819	zzzz347	false
818	zzzz348	false
817	zzzz349	false
816	zzzz350	false
815	zzzz351	false
814	zzzz352	false
813	zzzz353	false
812	zzzz354	false
811	zzzz355	false
810	zzzz356	false
809	zzzz357	false
808	zzzz358	false
807	zzzz359	false
806	zzzz360	false
805	zzzz361	false
804	zzzz362	false
803	zzzz363	false
802	zzzz364	false
801	zzzz365	false
800	zzzz366	false
799	zzzz367	false
798	zzzz368	false
797	zzzz369	false
796	zzzz370	false
795	zzzz371	false
794	zzzz372	false
793	zzzz373	false
792	zzzz374	false
791	zzzz375	false
790	zzzz376	false
789	zzzz377	false
788	zzzz378	false
787	zzzz379	false
786	zzzz380	false
785	zzzz381	false
784	zzzz382	false
783	zzzz383	false
782	zzzz384	false
781	zzzz385	false
780	zzzz386	false
779	zzzz387	false
778	zzzz388	false
777	zzzz389	false
776	zzzz390	false
775	zzzz391	false
774	zzzz392	false
773	zzzz393	false
772	zzzz394	false
771	zzzz395	false
770	zzzz396	false
769	zzzz397	false
768	zzzz398	false
767	zzzz399	false
766	zzzz400	false
765	zzzz401	false
764	zzzz402	false
763	zzzz403	false
762	zzzz404	false
761	zzzz405	false
760	zzzz406	false
759	zzzz407	false
758	zzzz408	false
757	zzzz409	false
756	zzzz410	false
755	zzzz411	false
754	zzzz412	false
753	zzzz413	false
752	zzzz414	false
751	zzzz415	false
750	zzzz416	false
749	zzzz417	false
748	zzzz418	false
747	zzzz419	false
746	zzzz420	false
745	zzzz421	false
744	zzzz422	false
743	zzzz423	false
742	zzzz424	false
741	zzzz425	false
740	zzzz426	false
739	zzzz427	false
738	zzzz428	false
737	zzzz429	false
736	zzzz430	false
735	zzzz431	false
734	zzzz432	false
[truncated: 667 more rows]
