# Supplementary material for: Discovery of several thousand highly diverse circular DNA viruses
Source: eLife journal article supplement (doi:10.7554/elife.51971), 2020-02-03
Supplement: fig3-data1 [file elife-51971-fig3-data1-v1.cys › CytoscapeSession-2019_08_03-06_44/tables/41-Mike_class_reps60+Full+Network/SHARED_ATTRS-org.cytoscape.model.CyEdge-41+shared+edge.cytable]

CyCSV-Version	1
SUID	%id	alignment_len	alignment_score	shared interaction	shared name
java.lang.Long	java.lang.Double	java.lang.Integer	java.lang.Double	java.lang.String	java.lang.String
	mutable	mutable	mutable
41 shared edge
27084	100.0	482	298.0		zzz2145,zzz2146
27083	100.0	482	298.0		zzz2145,zzz2147
27082	100.0	482	298.0		zzz2146,zzz2147
27111	100.0	456	272.0		zzz2133,zzz2134
27087	100.0	423	262.0		zzz2144,zzz2145
27086	100.0	423	262.0		zzz2144,zzz2146
27085	100.0	423	262.0		zzz2144,zzz2147
31375	87.86	486	243.0		zzz1694,zzz2389
27110	97.22	396	237.0		zzz2136,zzz2137
29375	99.75	403	235.0		zzz1903,zzz1904
26839	99.36	470	234.0		zzz2204,zzz2277
29973	100.0	399	233.0		zzz1812,zzz1813
30680	100.0	412	232.0		zzz1747,zzz1748
30690	99.51	412	231.0		zzz1746,zzz1747
30689	99.51	412	231.0		zzz1746,zzz1748
25681	95.54	448	228.0		zzz2442,zzz2443
26500	92.52	441	228.0		zzz2324,zzz2563
23408	98.65	371	227.0		zzzz117,zzzz281
26620	100.0	406	226.0		zzz2273,zzz2382
24025	100.0	368	226.0		zzz2520,zzzzz96
29559	99.74	378	224.0		zzz1876,zzz1880
33532	100.0	380	223.0		zzz1478,zzz1479
29558	98.68	378	221.0		zzz1876,zzz1878
30838	100.0	357	221.0		zzz1733,zzz1734
30837	100.0	357	221.0		zzz1733,zzz1735
30831	100.0	357	221.0		zzz1734,zzz1735
29552	98.41	378	221.0		zzz1878,zzz1880
29549	99.74	387	221.0		zzz1881,zzz1882
31832	99.72	361	220.0		zzz1644,zzz1645
30836	99.72	357	220.0		zzz1733,zzz1736
30830	99.72	357	220.0		zzz1734,zzz1736
30825	99.72	357	220.0		zzz1735,zzz1736
30835	99.72	357	220.0		zzz1733,zzz1737
30829	99.72	357	220.0		zzz1734,zzz1737
30824	99.72	357	220.0		zzz1735,zzz1737
27613	99.45	363	220.0		zzz2050,zzz2052
25801	97.55	367	220.0		zzz2407,zzz2409
30820	99.44	357	220.0		zzz1736,zzz1737
29536	99.48	387	220.0		zzz1882,zzz1883
29548	99.22	387	219.0		zzz1881,zzz1883
29398	99.73	367	218.0		zzz1898,zzz1899
22014	77.85	447	218.0		zzzz627,zzzz629
26466	93.87	375	217.0		zzz2336,zzz2364
29374	100.0	370	216.0		zzz1905,zzz1906
29373	100.0	370	216.0		zzz1905,zzz1908
29368	100.0	370	216.0		zzz1906,zzz1908
27123	100.0	347	215.0		zzz2118,zzz2120
25734	95.05	364	215.0		zzz2419,zzz2421
25815	94.55	367	214.0		zzz2406,zzz2407
23942	100.0	361	214.0		zzz2556,zzz2559
33671	100.0	349	214.0		zzz1466,zzz1467
33670	100.0	349	214.0		zzz1466,zzz1468
33664	100.0	349	214.0		zzz1467,zzz1468
25846	93.46	367	214.0		zzz2404,zzz2421
25814	94.82	367	214.0		zzz2406,zzz2409
27122	99.42	347	214.0		zzz2118,zzz2121
27119	99.42	347	214.0		zzz2120,zzz2121
25845	93.73	367	214.0		zzz2404,zzz2409
26932	100.0	348	213.0		zzz2181,zzz2345
25844	92.92	367	213.0		zzz2404,zzz2407
26642	100.0	357	212.0		zzz2272,zzz2362
23682	92.57	377	212.0		zzz2629,zzz2643
75868	100.0	348	212.0		zzz1123,zzz1132
30679	89.05	411	212.0		zzz1747,zzz1749
30671	89.05	411	212.0		zzz1748,zzz1749
29524	96.9	387	212.0		zzz1883,zzz1884
29151	99.73	365	212.0		zzz1931,zzz1932
30688	89.05	411	211.0		zzz1746,zzz1749
29535	96.64	387	211.0		zzz1882,zzz1884
29372	97.57	370	211.0		zzz1905,zzz1907
29367	97.57	370	211.0		zzz1906,zzz1907
29360	97.57	370	211.0		zzz1908,zzz1907
29141	99.45	365	211.0		zzz1932,zzz1933
29547	96.38	387	210.0		zzz1881,zzz1884
27501	92.9	366	210.0		zzz2073,zzz2411
29513	89.95	388	210.0		zzz1884,zzz1885
58046	97.47	356	210.0		zzz1219,zzz1220
29150	99.18	365	210.0		zzz1931,zzz1933
25843	92.37	367	210.0		zzz2404,zzz2406
26962	97.09	378	209.0		zzz2174,zzz2385
25813	92.64	367	209.0		zzz2406,zzz2421
53379	100.0	342	208.0		zzz1247,zzz1278
32604	98.08	365	208.0		zzz1595,zzz1933
26581	98.88	356	208.0		zzz2283,zzz2363
25842	91.76	364	208.0		zzz2404,zzz2419
27102	100.0	357	208.0		zzz2138,zzz2139
27101	100.0	357	208.0		zzz2138,zzz2140
27100	100.0	357	208.0		zzz2138,zzz2141
27099	100.0	357	208.0		zzz2138,zzz2142
27098	100.0	357	208.0		zzz2138,zzz2143
27097	100.0	357	208.0		zzz2139,zzz2140
27096	100.0	357	208.0		zzz2139,zzz2141
27095	100.0	357	208.0		zzz2139,zzz2142
27094	100.0	357	208.0		zzz2139,zzz2143
27093	100.0	357	208.0		zzz2140,zzz2141
27092	100.0	357	208.0		zzz2140,zzz2142
27091	100.0	357	208.0		zzz2140,zzz2143
27090	100.0	357	208.0		zzz2141,zzz2142
27089	100.0	357	208.0		zzz2141,zzz2143
27088	100.0	357	208.0		zzz2142,zzz2143
31374	76.09	481	208.0		zzz1694,zzz2379
32603	98.08	365	208.0		zzz1595,zzz1934
25800	91.01	367	207.0		zzz2407,zzz2421
25707	99.71	340	208.0		zzz2428,zzz2430
111916	98.84	344	207.0		zzz1007,zzz1008
72065	100.0	340	207.0		zzz1138,zzzz965
29132	96.71	365	207.0		zzz1933,zzz1935
29131	96.44	365	207.0		zzz1933,zzz1936
26933	100.0	340	207.0		zzz2179,zzz2274
26841	100.0	340	207.0		zzz2203,zzz2276
33653	100.0	353	207.0		zzz1469,zzz1478
33652	100.0	353	207.0		zzz1469,zzz1479
32602	97.53	365	207.0		zzz1595,zzz1932
27121	100.0	334	207.0		zzz2118,zzz2119
27118	100.0	334	207.0		zzz2120,zzz2119
29551	91.53	378	207.0		zzz1878,zzz1879
29557	91.27	378	206.0		zzz1876,zzz1879
29117	96.16	365	206.0		zzz1935,zzz1936
27500	91.16	362	206.0		zzz2073,zzz2422
26897	100.0	465	206.0		zzz2197,zzz2278
25776	90.46	367	206.0		zzz2409,zzz2421
32601	97.26	365	206.0		zzz1595,zzz1931
29550	91.01	378	206.0		zzz1879,zzz1880
29140	96.16	365	206.0		zzz1932,zzz1935
27120	99.4	334	206.0		zzz2119,zzz2121
96585	100.0	337	205.0		zzz1050,zzz1051
96584	100.0	337	205.0		zzz1050,zzz1052
96444	100.0	337	205.0		zzz1051,zzz1052
29955	99.71	350	205.0		zzz1822,zzz1823
29139	95.89	365	205.0		zzz1932,zzz1936
29130	96.71	365	205.0		zzz1933,zzz1934
26564	100.0	348	205.0		zzz2299,zzz2335
26135	74.04	493	205.0		zzz2379,zzz2389
25812	90.68	365	205.0		zzz2406,zzz2419
27113	95.56	360	205.0		zzz2132,zzz2133
27112	95.56	360	205.0		zzz2132,zzz2134
95409	99.7	335	205.0		zzz1056,zzz1057
32600	95.62	365	205.0		zzz1595,zzz1936
29149	95.89	365	205.0		zzz1931,zzz1935
29148	95.62	365	205.0		zzz1931,zzz1936
88322	100.0	337	205.0		zzz1080,zzz1081
32599	95.34	365	204.0		zzz1595,zzz1935
29138	96.16	365	204.0		zzz1932,zzz1934
30478	90.68	354	203.0		zzz1781,zzz1782
25841	89.7	369	203.0		zzz2404,zzz2411
25840	89.65	367	203.0		zzz2404,zzz2422
25799	90.11	364	203.0		zzz2407,zzz2419
102874	98.53	341	203.0		zzz1033,zzzz951
25775	90.11	364	203.0		zzz2409,zzz2419
23601	99.12	340	203.0		zzz2657,zzz2658
91264	100.0	331	203.0		zzz1069,zzz1070
67079	99.7	334	203.0		zzz1156,zzz1157
67078	99.4	334	203.0		zzz1156,zzz1191
29147	95.89	365	203.0		zzz1931,zzz1934
64931	99.7	332	202.0		zzz1171,zzz1210
59049	99.7	332	202.0		zzz1211,zzz1218
23616	100.0	329	202.0		zzz2650,zzz2651
4643	97.94	340	202.0		zzzz981,zzzz982
85359	100.0	328	202.0		zzz1089,zzz1091
66937	99.1	334	202.0		zzz1157,zzz1191
64015	99.7	332	202.0		zzz1179,zzz1188
29534	87.11	388	202.0		zzz1882,zzz1885
29124	94.25	365	202.0		zzz1934,zzz1936
26550	100.0	362	202.0		zzz2301,zzz2361
91887	99.09	331	202.0		zzz1067,zzz1069
91886	99.09	331	202.0		zzz1067,zzz1070
64795	99.7	331	202.0		zzz1173,zzz1189
64794	99.09	331	202.0		zzz1173,zzz1190
29546	86.86	388	201.0		zzz1881,zzz1885
29523	87.11	388	201.0		zzz1883,zzz1885
63869	99.7	332	201.0		zzz1182,zzz1187
29123	93.97	365	201.0		zzz1934,zzz1935
64930	98.8	332	201.0		zzz1171,zzz1179
63428	98.79	331	201.0		zzz1189,zzz1190
25755	95.1	367	201.0		zzz2411,zzz2422
64014	98.49	332	201.0		zzz1179,zzz1210
27499	89.01	364	201.0		zzz2073,zzz2404
22742	60.73	573	200.0		zzzz328,zzzz376
65696	98.2	333	200.0		zzz1163,zzz1164
64929	98.49	332	200.0		zzz1171,zzz1188
64928	98.49	332	200.0		zzz1171,zzz1211
63508	98.19	332	200.0		zzz1188,zzz1210
59184	98.49	332	200.0		zzz1209,zzz1211
59118	98.19	332	200.0		zzz1210,zzz1211
32591	95.89	365	200.0		zzz1596,zzz1934
30470	100.0	325	200.0		zzz1785,zzz1786
25712	98.3	352	200.0		zzz2423,zzz2501
64927	98.19	332	200.0		zzz1171,zzz1218
64793	99.09	331	200.0		zzz1173,zzz1183
59183	98.19	332	200.0		zzz1209,zzz1218
52758	100.0	327	200.0		zzz1250,zzz1266
32598	93.97	365	200.0		zzz1595,zzz1596
93756	99.7	328	200.0		zzz1061,zzz1062
65695	99.1	333	200.0		zzz1163,zzz1179
65146	100.0	328	200.0		zzz1168,zzz1169
63788	98.79	331	200.0		zzz1183,zzz1189
59117	97.89	332	200.0		zzz1210,zzz1218
32590	93.42	365	200.0		zzz1596,zzz1933
27498	89.01	364	200.0		zzz2073,zzz2421
25798	88.83	367	200.0		zzz2407,zzz2422
25774	88.83	367	200.0		zzz2409,zzz2422
102145	100.0	327	199.0		zzz1035,zzz1038
65694	98.8	333	199.0		zzz1163,zzz1188
65234	99.7	328	199.0		zzz1167,zzz1168
65233	99.7	328	199.0		zzz1167,zzz1169
64926	98.19	332	199.0		zzz1171,zzz1209
64792	98.19	331	199.0		zzz1173,zzz1175
64013	97.59	332	199.0		zzz1179,zzz1218
63787	98.19	331	199.0		zzz1183,zzz1190
63507	97.59	332	199.0		zzz1188,zzz1218
59182	97.89	332	199.0		zzz1209,zzz1210
8014	99.39	329	199.0		zzzz934,zzzz935
102144	99.69	327	199.0		zzz1035,zzz1036
101031	99.69	327	199.0		zzz1038,zzz1036
67227	97.01	334	199.0		zzz1155,zzz1156
66531	100.0	329	199.0		zzz1159,zzz1160
103251	99.4	331	199.0		zzz1032,zzz1047
64925	97.59	332	199.0		zzz1171,zzz1175
64791	97.28	331	199.0		zzz1173,zzz1187
64659	97.89	331	199.0		zzz1175,zzz1189
64658	97.28	331	199.0		zzz1175,zzz1190
64657	97.29	332	199.0		zzz1175,zzz1210
64012	97.29	332	199.0		zzz1179,zzz1211
63601	97.58	331	199.0		zzz1187,zzz1190
63506	97.29	332	199.0		zzz1188,zzz1211
52323	100.0	328	199.0		zzz1253,zzz1295
52322	100.0	328	199.0		zzz1253,zzz1300
44599	100.0	328	199.0		zzz1295,zzz1300
27497	88.77	365	199.0		zzz2073,zzz2419
26939	100.0	350	199.0		zzz2178,zzz2275
25811	88.35	369	199.0		zzz2406,zzz2411
25754	87.8	369	199.0		zzz2411,zzz2421
70400	100.0	327	199.0		zzz1144,zzz1145
52321	99.7	328	199.0		zzz1253,zzz1288
44598	99.7	328	199.0		zzz1295,zzz1288
43718	99.7	328	199.0		zzz1300,zzz1288
67226	96.71	334	198.0		zzz1155,zzz1157
65600	98.2	333	198.0		zzz1164,zzz1211
64656	97.29	332	198.0		zzz1175,zzz1211
63600	96.98	331	198.0		zzz1187,zzz1189
35551	99.69	326	198.0		zzz1358,zzz1359
32589	92.88	365	198.0		zzz1596,zzz1932
29752	100.0	353	198.0		zzz1841,zzz1842
29751	100.0	353	198.0		zzz1841,zzz1843
29750	100.0	353	198.0		zzz1842,zzz1843
25773	87.53	369	198.0		zzz2409,zzz2411
89105	99.7	331	198.0		zzz1077,zzz1083
65599	97.9	333	198.0		zzz1164,zzz1218
64790	96.98	331	198.0		zzz1173,zzz1182
64655	95.78	332	198.0		zzz1175,zzz1187
64654	96.99	332	198.0		zzz1175,zzz1218
64011	96.99	332	198.0		zzz1179,zzz1209
63868	97.28	331	198.0		zzz1182,zzz1190
36825	99.08	326	198.0		zzz1346,zzz1358
34970	98.78	327	198.0		zzz1363,zzz1364
32588	92.33	365	198.0		zzz1596,zzz1936
25721	87.19	367	198.0		zzz2421,zzz2422
23411	93.82	340	198.0		zzzz115,zzzz275
7551	100.0	324	198.0		zzzz939,zzzz940
7550	100.0	324	198.0		zzzz939,zzzz941
7549	100.0	324	198.0		zzzz939,zzzz942
7548	100.0	324	198.0		zzzz939,zzzz976
7547	100.0	324	198.0		zzzz939,zzzz977
7461	100.0	324	198.0		zzzz940,zzzz941
7460	100.0	324	198.0		zzzz940,zzzz942
7459	100.0	324	198.0		zzzz940,zzzz976
7458	100.0	324	198.0		zzzz940,zzzz977
7372	100.0	324	198.0		zzzz941,zzzz942
7371	100.0	324	198.0		zzzz941,zzzz976
7370	100.0	324	198.0		zzzz941,zzzz977
7284	100.0	324	198.0		zzzz942,zzzz976
7283	100.0	324	198.0		zzzz942,zzzz977
4956	100.0	324	198.0		zzzz976,zzzz977
65693	97.9	333	198.0		zzz1163,zzz1171
65692	97.6	333	198.0		zzz1163,zzz1210
65598	97.9	333	198.0		zzz1164,zzz1171
65597	97.9	333	198.0		zzz1164,zzz1209
63867	96.68	331	198.0		zzz1182,zzz1189
63505	96.69	332	198.0		zzz1188,zzz1209
32587	92.88	365	198.0		zzz1596,zzz1935
30118	100.0	330	198.0		zzz1802,zzz1803
30117	100.0	330	198.0		zzz1802,zzz1804
30116	100.0	330	198.0		zzz1802,zzz1805
30115	100.0	330	198.0		zzz1802,zzz1806
30114	100.0	330	198.0		zzz1803,zzz1804
30113	100.0	330	198.0		zzz1803,zzz1805
30112	100.0	330	198.0		zzz1803,zzz1806
30111	100.0	330	198.0		zzz1804,zzz1805
30110	100.0	330	198.0		zzz1804,zzz1806
30109	100.0	330	198.0		zzz1805,zzz1806
25797	87.26	369	198.0		zzz2407,zzz2411
23977	98.17	327	198.0		zzz2535,zzz2536
109595	97.33	337	197.0		zzz1013,zzz1014
73225	98.78	327	197.0		zzz1134,zzz1135
65596	97.6	333	197.0		zzz1164,zzz1210
64653	96.39	332	197.0		zzz1175,zzz1179
64652	97.28	331	197.0		zzz1175,zzz1183
64651	96.99	332	197.0		zzz1175,zzz1209
50400	100.0	325	197.0		zzz1263,zzz1267
50399	100.0	325	197.0		zzz1263,zzz1277
50398	100.0	325	197.0		zzz1263,zzz1282
50397	100.0	325	197.0		zzz1263,zzz1286
50396	100.0	325	197.0		zzz1263,zzz1308
49818	100.0	325	197.0		zzz1267,zzz1277
49817	100.0	325	197.0		zzz1267,zzz1282
49816	100.0	325	197.0		zzz1267,zzz1286
49815	100.0	325	197.0		zzz1267,zzz1308
47840	100.0	325	197.0		zzz1277,zzz1282
47839	100.0	325	197.0		zzz1277,zzz1286
47838	100.0	325	197.0		zzz1277,zzz1308
46840	100.0	325	197.0		zzz1282,zzz1286
46839	100.0	325	197.0		zzz1282,zzz1308
46077	100.0	325	197.0		zzz1286,zzz1308
36824	98.77	326	197.0		zzz1346,zzz1359
32586	92.6	365	197.0		zzz1596,zzz1931
7546	99.69	324	197.0		zzzz939,zzzz978
7457	99.69	324	197.0		zzzz940,zzzz978
7369	99.69	324	197.0		zzzz941,zzzz978
7282	99.69	324	197.0		zzzz942,zzzz978
4955	99.69	324	197.0		zzzz976,zzzz978
4870	99.69	324	197.0		zzzz977,zzzz978
98835	98.49	331	197.0		zzz1044,zzz1047
64650	95.48	332	197.0		zzz1175,zzz1182
64649	96.08	332	197.0		zzz1175,zzz1188
8305	99.38	324	197.0		zzzz931,zzzz939
8304	99.38	324	197.0		zzzz931,zzzz940
8303	99.38	324	197.0		zzzz931,zzzz941
8302	99.38	324	197.0		zzzz931,zzzz942
8301	99.38	324	197.0		zzzz931,zzzz976
8300	99.38	324	197.0		zzzz931,zzzz977
103250	98.49	331	197.0		zzz1032,zzz1044
88658	100.0	325	197.0		zzz1079,zzz1082
65595	97.3	333	197.0		zzz1164,zzz1179
63786	96.37	331	197.0		zzz1183,zzz1187
31129	100.0	319	197.0		zzz1711,zzz1712
31128	100.0	319	197.0		zzz1711,zzz1713
31127	100.0	319	197.0		zzz1712,zzz1713
29309	100.0	320	197.0		zzz1911,zzz1912
29308	100.0	320	197.0		zzz1911,zzz1913
29307	100.0	320	197.0		zzz1912,zzz1913
89104	97.89	331	196.0		zzz1077,zzz1085
66795	99.39	329	196.0		zzz1158,zzz1159
66794	99.39	329	196.0		zzz1158,zzz1160
65691	96.7	333	196.0		zzz1163,zzz1218
65594	97.0	333	196.0		zzz1164,zzz1188
64924	96.68	331	196.0		zzz1171,zzz1190
64010	96.68	331	196.0		zzz1179,zzz1190
63336	96.37	331	196.0		zzz1190,zzz1210
46248	97.87	328	196.0		zzz1285,zzz1288
27617	97.87	328	196.0		zzz2042,zzz2043
8299	99.07	324	196.0		zzzz931,zzzz978
64923	95.77	331	196.0		zzz1171,zzz1173
52320	97.56	328	196.0		zzz1253,zzz1285
44597	97.56	328	196.0		zzz1295,zzz1285
43717	97.56	328	196.0		zzz1300,zzz1285
87320	97.89	331	196.0		zzz1083,zzz1085
65690	96.4	333	196.0		zzz1163,zzz1211
64789	95.77	331	196.0		zzz1173,zzz1179
64788	95.47	331	196.0		zzz1173,zzz1210
63866	96.07	331	196.0		zzz1182,zzz1183
63504	96.37	331	196.0		zzz1188,zzz1190
52319	99.09	328	196.0		zzz1253,zzz1263
52318	99.09	328	196.0		zzz1253,zzz1267
52317	99.09	328	196.0		zzz1253,zzz1277
52316	99.09	328	196.0		zzz1253,zzz1282
52315	99.09	328	196.0		zzz1253,zzz1286
52314	99.09	328	196.0		zzz1253,zzz1308
44596	99.09	328	196.0		zzz1295,zzz1263
44595	99.09	328	196.0		zzz1295,zzz1267
44594	99.09	328	196.0		zzz1295,zzz1277
44593	99.09	328	196.0		zzz1295,zzz1282
44592	99.09	328	196.0		zzz1295,zzz1286
44591	99.09	328	196.0		zzz1295,zzz1308
43716	99.09	328	196.0		zzz1300,zzz1263
43715	99.09	328	196.0		zzz1300,zzz1267
43714	99.09	328	196.0		zzz1300,zzz1277
43713	99.09	328	196.0		zzz1300,zzz1282
43712	99.09	328	196.0		zzz1300,zzz1286
43711	99.09	328	196.0		zzz1300,zzz1308
32790	90.57	350	196.0		zzz1582,zzz2392
25810	87.47	367	196.0		zzz2406,zzz2422
4501	100.0	320	196.0		zzzz984,zzzz985
4500	100.0	320	196.0		zzzz984,zzzz986
4446	100.0	320	196.0		zzzz985,zzzz986
65593	96.7	333	196.0		zzz1164,zzz1175
64922	95.47	331	196.0		zzz1171,zzz1189
64009	95.18	332	196.0		zzz1179,zzz1187
50395	98.78	328	196.0		zzz1263,zzz1288
49814	98.78	328	196.0		zzz1267,zzz1288
47837	98.78	328	196.0		zzz1277,zzz1288
46838	98.78	328	196.0		zzz1282,zzz1288
46076	98.78	328	196.0		zzz1286,zzz1288
42222	98.78	328	196.0		zzz1308,zzz1288
27653	99.69	320	196.0		zzz2036,zzz2037
25796	87.19	367	195.0		zzz2407,zzz2420
74999	95.74	329	195.0		zzz1126,zzzzz85
64787	95.47	331	195.0		zzz1173,zzz1188
64786	95.47	331	195.0		zzz1173,zzz1211
64008	95.47	331	195.0		zzz1179,zzz1189
63599	94.88	332	195.0		zzz1187,zzz1188
63427	95.17	331	195.0		zzz1189,zzz1210
63335	95.77	331	195.0		zzz1190,zzz1211
34413	99.7	336	195.0		zzz1378,zzz2553
27663	99.69	320	195.0		zzz2035,zzz2036
27662	99.38	320	195.0		zzz2035,zzz2037
25753	86.85	365	195.0		zzz2411,zzz2419
97724	96.15	338	195.0		zzz1047,zzzz968
65689	96.1	333	195.0		zzz1163,zzz1209
64921	94.58	332	195.0		zzz1171,zzz1187
64785	95.17	331	195.0		zzz1173,zzz1218
63503	95.17	331	195.0		zzz1188,zzz1189
63426	95.17	331	195.0		zzz1189,zzz1211
63334	95.47	331	195.0		zzz1190,zzz1218
25772	87.19	367	195.0		zzz2409,zzz2420
23943	99.68	317	195.0		zzz2554,zzz2555
4499	99.38	320	195.0		zzzz984,zzzz987
4445	99.38	320	195.0		zzzz985,zzzz987
4392	99.38	320	195.0		zzzz986,zzzz987
4339	99.38	320	195.0		zzzz987,zzzz989
64007	94.88	332	195.0		zzz1179,zzz1182
63865	94.58	332	195.0		zzz1182,zzz1188
63598	94.28	332	195.0		zzz1187,zzz1210
63425	94.86	331	195.0		zzz1189,zzz1218
30877	100.0	330	195.0		zzz1729,zzz1731
25706	100.0	320	195.0		zzz2429,zzz2431
23911	100.0	316	195.0		zzz2569,zzz2570
23910	100.0	316	195.0		zzz2569,zzz2571
23907	100.0	316	195.0		zzz2570,zzz2571
23909	99.68	316	195.0		zzz2569,zzz2572
23908	99.68	316	195.0		zzz2569,zzz2573
23906	99.68	316	195.0		zzz2570,zzz2572
23905	99.68	316	195.0		zzz2570,zzz2573
23904	99.68	316	195.0		zzz2571,zzz2572
23903	99.68	316	195.0		zzz2571,zzz2573
23902	100.0	316	195.0		zzz2572,zzz2573
4498	99.38	320	195.0		zzzz984,zzzz989
4444	99.38	320	195.0		zzzz985,zzzz989
4391	99.38	320	195.0		zzzz986,zzzz989
67225	97.01	334	194.0		zzz1155,zzz1191
65688	95.5	333	194.0		zzz1163,zzz1175
64784	95.17	331	194.0		zzz1173,zzz1209
63597	94.28	332	194.0		zzz1187,zzz1211
63333	95.47	331	194.0		zzz1190,zzz1209
53820	100.0	319	194.0		zzz1245,zzz1249
53819	100.0	319	194.0		zzz1245,zzz1255
53818	100.0	319	194.0		zzz1245,zzz1258
53817	100.0	319	194.0		zzz1245,zzz1265
53816	100.0	319	194.0		zzz1245,zzz1268
53815	100.0	319	194.0		zzz1245,zzz1275
53814	100.0	319	194.0		zzz1245,zzz1302
53813	100.0	319	194.0		zzz1245,zzz1309
53812	100.0	319	194.0		zzz1245,zzz1311
52968	100.0	319	194.0		zzz1249,zzz1255
52967	100.0	319	194.0		zzz1249,zzz1258
52966	100.0	319	194.0		zzz1249,zzz1265
52965	100.0	319	194.0		zzz1249,zzz1268
52964	100.0	319	194.0		zzz1249,zzz1275
52963	100.0	319	194.0		zzz1249,zzz1302
52962	100.0	319	194.0		zzz1249,zzz1309
52961	100.0	319	194.0		zzz1249,zzz1311
51917	100.0	319	194.0		zzz1255,zzz1258
51916	100.0	319	194.0		zzz1255,zzz1265
51915	100.0	319	194.0		zzz1255,zzz1268
51914	100.0	319	194.0		zzz1255,zzz1275
51913	100.0	319	194.0		zzz1255,zzz1302
51912	100.0	319	194.0		zzz1255,zzz1309
51911	100.0	319	194.0		zzz1255,zzz1311
51265	100.0	319	194.0		zzz1258,zzz1265
51264	100.0	319	194.0		zzz1258,zzz1268
51263	100.0	319	194.0		zzz1258,zzz1275
51262	100.0	319	194.0		zzz1258,zzz1302
51261	100.0	319	194.0		zzz1258,zzz1309
51260	100.0	319	194.0		zzz1258,zzz1311
50029	100.0	319	194.0		zzz1265,zzz1268
50028	100.0	319	194.0		zzz1265,zzz1275
50027	100.0	319	194.0		zzz1265,zzz1302
50026	100.0	319	194.0		zzz1265,zzz1309
50025	100.0	319	194.0		zzz1265,zzz1311
49630	100.0	319	194.0		zzz1268,zzz1275
49629	100.0	319	194.0		zzz1268,zzz1302
49628	100.0	319	194.0		zzz1268,zzz1309
49627	100.0	319	194.0		zzz1268,zzz1311
48272	100.0	319	194.0		zzz1275,zzz1302
48271	100.0	319	194.0		zzz1275,zzz1309
48270	100.0	319	194.0		zzz1275,zzz1311
43359	100.0	319	194.0		zzz1302,zzz1309
43358	100.0	319	194.0		zzz1302,zzz1311
42038	100.0	319	194.0		zzz1309,zzz1311
47459	100.0	319	194.0		zzz1279,zzz1290
47458	100.0	319	194.0		zzz1279,zzz1297
45384	100.0	319	194.0		zzz1290,zzz1297
45892	95.72	327	194.0		zzz1287,zzz1289
34863	96.94	327	194.0		zzz1364,zzz1366
25684	100.0	319	194.0		zzz2439,zzz2440
25683	100.0	319	194.0		zzz2439,zzz2441
25682	100.0	319	194.0		zzz2440,zzz2441
23736	84.86	383	194.0		zzz2611,zzz2628
4497	99.06	320	194.0		zzzz984,zzzz988
4443	99.06	320	194.0		zzzz985,zzzz988
4390	99.06	320	194.0		zzzz986,zzzz988
4338	99.06	320	194.0		zzzz987,zzzz988
4287	99.06	320	194.0		zzzz988,zzzz989
104042	100.0	318	194.0		zzz1030,zzz1031
103249	95.56	338	194.0		zzz1032,zzzz968
64920	94.28	332	194.0		zzz1171,zzz1182
63864	93.98	332	194.0		zzz1182,zzz1210
63596	93.98	332	194.0		zzz1187,zzz1218
63424	94.86	331	194.0		zzz1189,zzz1209
36567	93.99	333	194.0		zzz1348,zzz1356
30876	99.7	330	194.0		zzz1729,zzz1732
30857	99.7	330	194.0		zzz1731,zzz1732
64919	94.86	331	194.0		zzz1171,zzz1183
64006	94.86	331	194.0		zzz1179,zzz1183
63863	93.98	332	194.0		zzz1182,zzz1211
63785	94.56	331	194.0		zzz1183,zzz1210
63595	93.98	332	194.0		zzz1187,zzz1209
53811	99.37	319	194.0		zzz1245,zzz1279
53810	99.37	319	194.0		zzz1245,zzz1290
53809	99.37	319	194.0		zzz1245,zzz1297
52960	99.37	319	194.0		zzz1249,zzz1279
52959	99.37	319	194.0		zzz1249,zzz1290
52958	99.37	319	194.0		zzz1249,zzz1297
51910	99.37	319	194.0		zzz1255,zzz1279
51909	99.37	319	194.0		zzz1255,zzz1290
51908	99.37	319	194.0		zzz1255,zzz1297
51259	99.37	319	194.0		zzz1258,zzz1279
51258	99.37	319	194.0		zzz1258,zzz1290
51257	99.37	319	194.0		zzz1258,zzz1297
50024	99.37	319	194.0		zzz1265,zzz1279
50023	99.37	319	194.0		zzz1265,zzz1290
50022	99.37	319	194.0		zzz1265,zzz1297
49626	99.37	319	194.0		zzz1268,zzz1279
49625	99.37	319	194.0		zzz1268,zzz1290
49624	99.37	319	194.0		zzz1268,zzz1297
48269	99.37	319	194.0		zzz1275,zzz1279
48268	99.37	319	194.0		zzz1275,zzz1290
48267	99.37	319	194.0		zzz1275,zzz1297
43357	99.37	319	194.0		zzz1302,zzz1279
43356	99.37	319	194.0		zzz1302,zzz1290
43355	99.37	319	194.0		zzz1302,zzz1297
42037	99.37	319	194.0		zzz1309,zzz1279
42036	99.37	319	194.0		zzz1309,zzz1290
42035	99.37	319	194.0		zzz1309,zzz1297
41672	99.37	319	194.0		zzz1311,zzz1279
41671	99.37	319	194.0		zzz1311,zzz1290
41670	99.37	319	194.0		zzz1311,zzz1297
34969	96.94	327	194.0		zzz1363,zzz1366
29662	100.0	316	194.0		zzz1868,zzz1869
29661	100.0	316	194.0		zzz1868,zzz1870
29648	100.0	316	194.0		zzz1869,zzz1870
27496	85.91	362	194.0		zzz2073,zzz2420
65687	95.78	332	193.0		zzz1163,zzz1190
63784	94.56	331	193.0		zzz1183,zzz1188
53808	99.37	319	193.0		zzz1245,zzz1303
52957	99.37	319	193.0		zzz1249,zzz1303
51907	99.37	319	193.0		zzz1255,zzz1303
51256	99.37	319	193.0		zzz1258,zzz1303
50021	99.37	319	193.0		zzz1265,zzz1303
49623	99.37	319	193.0		zzz1268,zzz1303
48266	99.37	319	193.0		zzz1275,zzz1303
43354	99.37	319	193.0		zzz1302,zzz1303
42034	99.37	319	193.0		zzz1309,zzz1303
41669	99.37	319	193.0		zzz1311,zzz1303
32037	100.0	314	193.0		zzz1638,zzz1640
32036	100.0	314	193.0		zzz1638,zzz1642
32035	100.0	314	193.0		zzz1638,zzz1948
32034	100.0	314	193.0		zzz1638,zzz1950
32033	100.0	314	193.0		zzz1638,zzz1951
32032	100.0	314	193.0		zzz1638,zzz1952
32031	100.0	314	193.0		zzz1638,zzz1953
32030	100.0	314	193.0		zzz1638,zzz1954
32029	100.0	314	193.0		zzz1638,zzz1955
32028	100.0	314	193.0		zzz1638,zzz1958
32027	100.0	314	193.0		zzz1638,zzz1959
32026	100.0	314	193.0		zzz1638,zzz1978
32025	100.0	314	193.0		zzz1638,zzz1979
32024	100.0	314	193.0		zzz1638,zzz1980
32023	100.0	314	193.0		zzz1638,zzz1981
32022	100.0	314	193.0		zzz1638,zzz1982
32021	100.0	314	193.0		zzz1638,zzz1983
32020	100.0	314	193.0		zzz1638,zzz1984
32019	100.0	314	193.0		zzz1638,zzz1985
31957	100.0	314	193.0		zzz1640,zzz1642
31956	100.0	314	193.0		zzz1640,zzz1948
31955	100.0	314	193.0		zzz1640,zzz1950
31954	100.0	314	193.0		zzz1640,zzz1951
31953	100.0	314	193.0		zzz1640,zzz1952
31952	100.0	314	193.0		zzz1640,zzz1953
31951	100.0	314	193.0		zzz1640,zzz1954
31950	100.0	314	193.0		zzz1640,zzz1955
31949	100.0	314	193.0		zzz1640,zzz1958
31948	100.0	314	193.0		zzz1640,zzz1959
31947	100.0	314	193.0		zzz1640,zzz1978
31946	100.0	314	193.0		zzz1640,zzz1979
31945	100.0	314	193.0		zzz1640,zzz1980
31944	100.0	314	193.0		zzz1640,zzz1981
31943	100.0	314	193.0		zzz1640,zzz1982
31942	100.0	314	193.0		zzz1640,zzz1983
31941	100.0	314	193.0		zzz1640,zzz1984
31940	100.0	314	193.0		zzz1640,zzz1985
31880	100.0	314	193.0		zzz1642,zzz1948
31879	100.0	314	193.0		zzz1642,zzz1950
31878	100.0	314	193.0		zzz1642,zzz1951
31877	100.0	314	193.0		zzz1642,zzz1952
31876	100.0	314	193.0		zzz1642,zzz1953
31875	100.0	314	193.0		zzz1642,zzz1954
31874	100.0	314	193.0		zzz1642,zzz1955
31873	100.0	314	193.0		zzz1642,zzz1958
31872	100.0	314	193.0		zzz1642,zzz1959
31871	100.0	314	193.0		zzz1642,zzz1978
31870	100.0	314	193.0		zzz1642,zzz1979
31869	100.0	314	193.0		zzz1642,zzz1980
31868	100.0	314	193.0		zzz1642,zzz1981
31867	100.0	314	193.0		zzz1642,zzz1982
31866	100.0	314	193.0		zzz1642,zzz1983
31865	100.0	314	193.0		zzz1642,zzz1984
31864	100.0	314	193.0		zzz1642,zzz1985
29060	100.0	314	193.0		zzz1948,zzz1950
29059	100.0	314	193.0		zzz1948,zzz1951
29058	100.0	314	193.0		zzz1948,zzz1952
29057	100.0	314	193.0		zzz1948,zzz1953
29056	100.0	314	193.0		zzz1948,zzz1954
29055	100.0	314	193.0		zzz1948,zzz1955
29054	100.0	314	193.0		zzz1948,zzz1958
29053	100.0	314	193.0		zzz1948,zzz1959
29052	100.0	314	193.0		zzz1948,zzz1978
29051	100.0	314	193.0		zzz1948,zzz1979
29050	100.0	314	193.0		zzz1948,zzz1980
29049	100.0	314	193.0		zzz1948,zzz1981
29048	100.0	314	193.0		zzz1948,zzz1982
29047	100.0	314	193.0		zzz1948,zzz1983
29046	100.0	314	193.0		zzz1948,zzz1984
29045	100.0	314	193.0		zzz1948,zzz1985
28984	100.0	314	193.0		zzz1950,zzz1951
28983	100.0	314	193.0		zzz1950,zzz1952
28982	100.0	314	193.0		zzz1950,zzz1953
28981	100.0	314	193.0		zzz1950,zzz1954
28980	100.0	314	193.0		zzz1950,zzz1955
28979	100.0	314	193.0		zzz1950,zzz1958
28978	100.0	314	193.0		zzz1950,zzz1959
28977	100.0	314	193.0		zzz1950,zzz1978
28976	100.0	314	193.0		zzz1950,zzz1979
28975	100.0	314	193.0		zzz1950,zzz1980
28974	100.0	314	193.0		zzz1950,zzz1981
28973	100.0	314	193.0		zzz1950,zzz1982
28972	100.0	314	193.0		zzz1950,zzz1983
28971	100.0	314	193.0		zzz1950,zzz1984
28970	100.0	314	193.0		zzz1950,zzz1985
28938	100.0	314	193.0		zzz1951,zzz1952
28937	100.0	314	193.0		zzz1951,zzz1953
28936	100.0	314	193.0		zzz1951,zzz1954
28935	100.0	314	193.0		zzz1951,zzz1955
28934	100.0	314	193.0		zzz1951,zzz1958
28933	100.0	314	193.0		zzz1951,zzz1959
28932	100.0	314	193.0		zzz1951,zzz1978
28931	100.0	314	193.0		zzz1951,zzz1979
28930	100.0	314	193.0		zzz1951,zzz1980
28929	100.0	314	193.0		zzz1951,zzz1981
28928	100.0	314	193.0		zzz1951,zzz1982
28927	100.0	314	193.0		zzz1951,zzz1983
28926	100.0	314	193.0		zzz1951,zzz1984
28925	100.0	314	193.0		zzz1951,zzz1985
28893	100.0	314	193.0		zzz1952,zzz1953
28892	100.0	314	193.0		zzz1952,zzz1954
28891	100.0	314	193.0		zzz1952,zzz1955
28890	100.0	314	193.0		zzz1952,zzz1958
28889	100.0	314	193.0		zzz1952,zzz1959
28888	100.0	314	193.0		zzz1952,zzz1978
28887	100.0	314	193.0		zzz1952,zzz1979
28886	100.0	314	193.0		zzz1952,zzz1980
28885	100.0	314	193.0		zzz1952,zzz1981
28884	100.0	314	193.0		zzz1952,zzz1982
28883	100.0	314	193.0		zzz1952,zzz1983
28882	100.0	314	193.0		zzz1952,zzz1984
28881	100.0	314	193.0		zzz1952,zzz1985
28849	100.0	314	193.0		zzz1953,zzz1954
28848	100.0	314	193.0		zzz1953,zzz1955
28847	100.0	314	193.0		zzz1953,zzz1958
28846	100.0	314	193.0		zzz1953,zzz1959
28845	100.0	314	193.0		zzz1953,zzz1978
28844	100.0	314	193.0		zzz1953,zzz1979
28843	100.0	314	193.0		zzz1953,zzz1980
28842	100.0	314	193.0		zzz1953,zzz1981
28841	100.0	314	193.0		zzz1953,zzz1982
28840	100.0	314	193.0		zzz1953,zzz1983
28839	100.0	314	193.0		zzz1953,zzz1984
28838	100.0	314	193.0		zzz1953,zzz1985
28806	100.0	314	193.0		zzz1954,zzz1955
28805	100.0	314	193.0		zzz1954,zzz1958
28804	100.0	314	193.0		zzz1954,zzz1959
28803	100.0	314	193.0		zzz1954,zzz1978
28802	100.0	314	193.0		zzz1954,zzz1979
28801	100.0	314	193.0		zzz1954,zzz1980
28800	100.0	314	193.0		zzz1954,zzz1981
28799	100.0	314	193.0		zzz1954,zzz1982
28798	100.0	314	193.0		zzz1954,zzz1983
28797	100.0	314	193.0		zzz1954,zzz1984
28796	100.0	314	193.0		zzz1954,zzz1985
28764	100.0	314	193.0		zzz1955,zzz1958
28763	100.0	314	193.0		zzz1955,zzz1959
28762	100.0	314	193.0		zzz1955,zzz1978
28761	100.0	314	193.0		zzz1955,zzz1979
28760	100.0	314	193.0		zzz1955,zzz1980
28759	100.0	314	193.0		zzz1955,zzz1981
28758	100.0	314	193.0		zzz1955,zzz1982
28757	100.0	314	193.0		zzz1955,zzz1983
28756	100.0	314	193.0		zzz1955,zzz1984
28755	100.0	314	193.0		zzz1955,zzz1985
28708	100.0	314	193.0		zzz1958,zzz1959
28707	100.0	314	193.0		zzz1958,zzz1978
28706	100.0	314	193.0		zzz1958,zzz1979
28705	100.0	314	193.0		zzz1958,zzz1980
28704	100.0	314	193.0		zzz1958,zzz1981
28703	100.0	314	193.0		zzz1958,zzz1982
28702	100.0	314	193.0		zzz1958,zzz1983
28701	100.0	314	193.0		zzz1958,zzz1984
28700	100.0	314	193.0		zzz1958,zzz1985
28668	100.0	314	193.0		zzz1959,zzz1978
28667	100.0	314	193.0		zzz1959,zzz1979
28666	100.0	314	193.0		zzz1959,zzz1980
28665	100.0	314	193.0		zzz1959,zzz1981
28664	100.0	314	193.0		zzz1959,zzz1982
28663	100.0	314	193.0		zzz1959,zzz1983
28662	100.0	314	193.0		zzz1959,zzz1984
28661	100.0	314	193.0		zzz1959,zzz1985
28300	100.0	314	193.0		zzz1978,zzz1979
28299	100.0	314	193.0		zzz1978,zzz1980
28298	100.0	314	193.0		zzz1978,zzz1981
28297	100.0	314	193.0		zzz1978,zzz1982
28296	100.0	314	193.0		zzz1978,zzz1983
28295	100.0	314	193.0		zzz1978,zzz1984
28294	100.0	314	193.0		zzz1978,zzz1985
28262	100.0	314	193.0		zzz1979,zzz1980
28261	100.0	314	193.0		zzz1979,zzz1981
28260	100.0	314	193.0		zzz1979,zzz1982
28259	100.0	314	193.0		zzz1979,zzz1983
28258	100.0	314	193.0		zzz1979,zzz1984
28257	100.0	314	193.0		zzz1979,zzz1985
28225	100.0	314	193.0		zzz1980,zzz1981
28224	100.0	314	193.0		zzz1980,zzz1982
28223	100.0	314	193.0		zzz1980,zzz1983
28222	100.0	314	193.0		zzz1980,zzz1984
28221	100.0	314	193.0		zzz1980,zzz1985
28189	100.0	314	193.0		zzz1981,zzz1982
28188	100.0	314	193.0		zzz1981,zzz1983
28187	100.0	314	193.0		zzz1981,zzz1984
28186	100.0	314	193.0		zzz1981,zzz1985
28154	100.0	314	193.0		zzz1982,zzz1983
28153	100.0	314	193.0		zzz1982,zzz1984
28152	100.0	314	193.0		zzz1982,zzz1985
28120	100.0	314	193.0		zzz1983,zzz1984
28119	100.0	314	193.0		zzz1983,zzz1985
28087	100.0	314	193.0		zzz1984,zzz1985
31987	100.0	314	193.0		zzz1639,zzz1949
27495	85.48	365	193.0		zzz2073,zzz2406
25830	86.28	379	193.0		zzz2405,zzz2408
22406	94.24	347	193.0		zzzz463,zzzz504
108238	97.62	336	193.0		zzz1019,zzz1020
63862	93.67	332	193.0		zzz1182,zzz1218
63783	94.56	331	193.0		zzz1183,zzz1211
58361	99.06	320	193.0		zzz1216,zzz1225
54269	95.11	327	193.0		zzz1242,zzz1287
52538	95.11	327	193.0		zzz1252,zzz1287
52131	95.11	327	193.0		zzz1254,zzz1287
50613	95.11	327	193.0		zzz1262,zzz1287
48879	95.11	327	193.0		zzz1272,zzz1287
32018	99.68	314	193.0		zzz1638,zzz1639
32017	99.68	314	193.0		zzz1638,zzz1949
31939	99.68	314	193.0		zzz1640,zzz1639
31938	99.68	314	193.0		zzz1640,zzz1949
31863	99.68	314	193.0		zzz1642,zzz1639
31862	99.68	314	193.0		zzz1642,zzz1949
29044	99.68	314	193.0		zzz1948,zzz1639
29043	99.68	314	193.0		zzz1948,zzz1949
28969	99.68	314	193.0		zzz1950,zzz1639
28968	99.68	314	193.0		zzz1950,zzz1949
28924	99.68	314	193.0		zzz1951,zzz1639
28923	99.68	314	193.0		zzz1951,zzz1949
28880	99.68	314	193.0		zzz1952,zzz1639
28879	99.68	314	193.0		zzz1952,zzz1949
28837	99.68	314	193.0		zzz1953,zzz1639
28836	99.68	314	193.0		zzz1953,zzz1949
28795	99.68	314	193.0		zzz1954,zzz1639
28794	99.68	314	193.0		zzz1954,zzz1949
28754	99.68	314	193.0		zzz1955,zzz1639
28753	99.68	314	193.0		zzz1955,zzz1949
28699	99.68	314	193.0		zzz1958,zzz1639
28698	99.68	314	193.0		zzz1958,zzz1949
28660	99.68	314	193.0		zzz1959,zzz1639
28659	99.68	314	193.0		zzz1959,zzz1949
28293	99.68	314	193.0		zzz1978,zzz1639
28292	99.68	314	193.0		zzz1978,zzz1949
28256	99.68	314	193.0		zzz1979,zzz1639
28255	99.68	314	193.0		zzz1979,zzz1949
28220	99.68	314	193.0		zzz1980,zzz1639
28219	99.68	314	193.0		zzz1980,zzz1949
28185	99.68	314	193.0		zzz1981,zzz1639
28184	99.68	314	193.0		zzz1981,zzz1949
28151	99.68	314	193.0		zzz1982,zzz1639
28150	99.68	314	193.0		zzz1982,zzz1949
28118	99.68	314	193.0		zzz1983,zzz1639
28117	99.68	314	193.0		zzz1983,zzz1949
28086	99.68	314	193.0		zzz1984,zzz1639
28085	99.68	314	193.0		zzz1984,zzz1949
28055	99.68	314	193.0		zzz1985,zzz1639
28054	99.68	314	193.0		zzz1985,zzz1949
31908	100.0	314	193.0		zzz1641,zzz1960
31907	100.0	314	193.0		zzz1641,zzz1961
31906	100.0	314	193.0		zzz1641,zzz1962
31905	100.0	314	193.0		zzz1641,zzz1963
31904	100.0	314	193.0		zzz1641,zzz1964
31903	100.0	314	193.0		zzz1641,zzz1965
31902	100.0	314	193.0		zzz1641,zzz1966
31901	100.0	314	193.0		zzz1641,zzz1967
31900	100.0	314	193.0		zzz1641,zzz1968
31899	100.0	314	193.0		zzz1641,zzz1969
31898	100.0	314	193.0		zzz1641,zzz1970
31897	100.0	314	193.0		zzz1641,zzz1971
31896	100.0	314	193.0		zzz1641,zzz1972
31895	100.0	314	193.0		zzz1641,zzz1973
31894	100.0	314	193.0		zzz1641,zzz1974
31893	100.0	314	193.0		zzz1641,zzz1975
31892	100.0	314	193.0		zzz1641,zzz1976
28629	100.0	314	193.0		zzz1960,zzz1961
28628	100.0	314	193.0		zzz1960,zzz1962
28627	100.0	314	193.0		zzz1960,zzz1963
28626	100.0	314	193.0		zzz1960,zzz1964
28625	100.0	314	193.0		zzz1960,zzz1965
28624	100.0	314	193.0		zzz1960,zzz1966
28623	100.0	314	193.0		zzz1960,zzz1967
28622	100.0	314	193.0		zzz1960,zzz1968
28621	100.0	314	193.0		zzz1960,zzz1969
28620	100.0	314	193.0		zzz1960,zzz1970
28619	100.0	314	193.0		zzz1960,zzz1971
28618	100.0	314	193.0		zzz1960,zzz1972
28617	100.0	314	193.0		zzz1960,zzz1973
28616	100.0	314	193.0		zzz1960,zzz1974
28615	100.0	314	193.0		zzz1960,zzz1975
28614	100.0	314	193.0		zzz1960,zzz1976
28602	100.0	314	193.0		zzz1961,zzz1962
28601	100.0	314	193.0		zzz1961,zzz1963
28600	100.0	314	193.0		zzz1961,zzz1964
28599	100.0	314	193.0		zzz1961,zzz1965
28598	100.0	314	193.0		zzz1961,zzz1966
28597	100.0	314	193.0		zzz1961,zzz1967
28596	100.0	314	193.0		zzz1961,zzz1968
28595	100.0	314	193.0		zzz1961,zzz1969
28594	100.0	314	193.0		zzz1961,zzz1970
28593	100.0	314	193.0		zzz1961,zzz1971
28592	100.0	314	193.0		zzz1961,zzz1972
28591	100.0	314	193.0		zzz1961,zzz1973
28590	100.0	314	193.0		zzz1961,zzz1974
28589	100.0	314	193.0		zzz1961,zzz1975
28588	100.0	314	193.0		zzz1961,zzz1976
28576	100.0	314	193.0		zzz1962,zzz1963
28575	100.0	314	193.0		zzz1962,zzz1964
28574	100.0	314	193.0		zzz1962,zzz1965
28573	100.0	314	193.0		zzz1962,zzz1966
28572	100.0	314	193.0		zzz1962,zzz1967
28571	100.0	314	193.0		zzz1962,zzz1968
28570	100.0	314	193.0		zzz1962,zzz1969
28569	100.0	314	193.0		zzz1962,zzz1970
28568	100.0	314	193.0		zzz1962,zzz1971
28567	100.0	314	193.0		zzz1962,zzz1972
28566	100.0	314	193.0		zzz1962,zzz1973
28565	100.0	314	193.0		zzz1962,zzz1974
28564	100.0	314	193.0		zzz1962,zzz1975
28563	100.0	314	193.0		zzz1962,zzz1976
28551	100.0	314	193.0		zzz1963,zzz1964
28550	100.0	314	193.0		zzz1963,zzz1965
28549	100.0	314	193.0		zzz1963,zzz1966
28548	100.0	314	193.0		zzz1963,zzz1967
28547	100.0	314	193.0		zzz1963,zzz1968
28546	100.0	314	193.0		zzz1963,zzz1969
28545	100.0	314	193.0		zzz1963,zzz1970
28544	100.0	314	193.0		zzz1963,zzz1971
28543	100.0	314	193.0		zzz1963,zzz1972
28542	100.0	314	193.0		zzz1963,zzz1973
28541	100.0	314	193.0		zzz1963,zzz1974
28540	100.0	314	193.0		zzz1963,zzz1975
28539	100.0	314	193.0		zzz1963,zzz1976
28527	100.0	314	193.0		zzz1964,zzz1965
28526	100.0	314	193.0		zzz1964,zzz1966
28525	100.0	314	193.0		zzz1964,zzz1967
28524	100.0	314	193.0		zzz1964,zzz1968
28523	100.0	314	193.0		zzz1964,zzz1969
28522	100.0	314	193.0		zzz1964,zzz1970
28521	100.0	314	193.0		zzz1964,zzz1971
28520	100.0	314	193.0		zzz1964,zzz1972
28519	100.0	314	193.0		zzz1964,zzz1973
28518	100.0	314	193.0		zzz1964,zzz1974
28517	100.0	314	193.0		zzz1964,zzz1975
28516	100.0	314	193.0		zzz1964,zzz1976
28504	100.0	314	193.0		zzz1965,zzz1966
28503	100.0	314	193.0		zzz1965,zzz1967
28502	100.0	314	193.0		zzz1965,zzz1968
28501	100.0	314	193.0		zzz1965,zzz1969
28500	100.0	314	193.0		zzz1965,zzz1970
28499	100.0	314	193.0		zzz1965,zzz1971
28498	100.0	314	193.0		zzz1965,zzz1972
28497	100.0	314	193.0		zzz1965,zzz1973
28496	100.0	314	193.0		zzz1965,zzz1974
28495	100.0	314	193.0		zzz1965,zzz1975
28494	100.0	314	193.0		zzz1965,zzz1976
28482	100.0	314	193.0		zzz1966,zzz1967
28481	100.0	314	193.0		zzz1966,zzz1968
28480	100.0	314	193.0		zzz1966,zzz1969
28479	100.0	314	193.0		zzz1966,zzz1970
28478	100.0	314	193.0		zzz1966,zzz1971
28477	100.0	314	193.0		zzz1966,zzz1972
28476	100.0	314	193.0		zzz1966,zzz1973
28475	100.0	314	193.0		zzz1966,zzz1974
28474	100.0	314	193.0		zzz1966,zzz1975
28473	100.0	314	193.0		zzz1966,zzz1976
28461	100.0	314	193.0		zzz1967,zzz1968
28460	100.0	314	193.0		zzz1967,zzz1969
28459	100.0	314	193.0		zzz1967,zzz1970
28458	100.0	314	193.0		zzz1967,zzz1971
28457	100.0	314	193.0		zzz1967,zzz1972
28456	100.0	314	193.0		zzz1967,zzz1973
28455	100.0	314	193.0		zzz1967,zzz1974
28454	100.0	314	193.0		zzz1967,zzz1975
28453	100.0	314	193.0		zzz1967,zzz1976
28441	100.0	314	193.0		zzz1968,zzz1969
28440	100.0	314	193.0		zzz1968,zzz1970
28439	100.0	314	193.0		zzz1968,zzz1971
28438	100.0	314	193.0		zzz1968,zzz1972
28437	100.0	314	193.0		zzz1968,zzz1973
28436	100.0	314	193.0		zzz1968,zzz1974
28435	100.0	314	193.0		zzz1968,zzz1975
28434	100.0	314	193.0		zzz1968,zzz1976
28422	100.0	314	193.0		zzz1969,zzz1970
28421	100.0	314	193.0		zzz1969,zzz1971
28420	100.0	314	193.0		zzz1969,zzz1972
28419	100.0	314	193.0		zzz1969,zzz1973
28418	100.0	314	193.0		zzz1969,zzz1974
28417	100.0	314	193.0		zzz1969,zzz1975
28416	100.0	314	193.0		zzz1969,zzz1976
28404	100.0	314	193.0		zzz1970,zzz1971
28403	100.0	314	193.0		zzz1970,zzz1972
28402	100.0	314	193.0		zzz1970,zzz1973
28401	100.0	314	193.0		zzz1970,zzz1974
28400	100.0	314	193.0		zzz1970,zzz1975
28399	100.0	314	193.0		zzz1970,zzz1976
28387	100.0	314	193.0		zzz1971,zzz1972
28386	100.0	314	193.0		zzz1971,zzz1973
28385	100.0	314	193.0		zzz1971,zzz1974
28384	100.0	314	193.0		zzz1971,zzz1975
28383	100.0	314	193.0		zzz1971,zzz1976
28371	100.0	314	193.0		zzz1972,zzz1973
28370	100.0	314	193.0		zzz1972,zzz1974
28369	100.0	314	193.0		zzz1972,zzz1975
28368	100.0	314	193.0		zzz1972,zzz1976
28356	100.0	314	193.0		zzz1973,zzz1974
28355	100.0	314	193.0		zzz1973,zzz1975
28354	100.0	314	193.0		zzz1973,zzz1976
28342	100.0	314	193.0		zzz1974,zzz1975
28341	100.0	314	193.0		zzz1974,zzz1976
28329	100.0	314	193.0		zzz1975,zzz1976
27494	85.99	364	193.0		zzz2073,zzz2407
27493	85.71	364	193.0		zzz2073,zzz2409
25809	86.65	367	193.0		zzz2406,zzz2420
15052	82.87	362	193.0		zzzz761,zzzz834
4729	99.69	323	193.0		zzzz979,zzzz980
69425	100.0	319	193.0		zzz1147,zzz1194
69424	99.69	319	193.0		zzz1147,zzz1197
62577	99.69	319	193.0		zzz1194,zzz1197
65686	94.88	332	193.0		zzz1163,zzz1173
65685	94.29	333	193.0		zzz1163,zzz1187
64694	100.0	333	193.0		zzz1174,zzz1185
63861	93.67	332	193.0		zzz1182,zzz1209
63782	94.26	331	193.0		zzz1183,zzz1218
53807	99.06	319	193.0		zzz1245,zzz1269
52956	99.06	319	193.0		zzz1249,zzz1269
51906	99.06	319	193.0		zzz1255,zzz1269
51255	99.06	319	193.0		zzz1258,zzz1269
50020	99.06	319	193.0		zzz1265,zzz1269
49622	99.06	319	193.0		zzz1268,zzz1269
48265	99.06	319	193.0		zzz1275,zzz1269
43353	99.06	319	193.0		zzz1302,zzz1269
42033	99.06	319	193.0		zzz1309,zzz1269
41668	99.06	319	193.0		zzz1311,zzz1269
50394	96.95	328	193.0		zzz1263,zzz1285
49813	96.95	328	193.0		zzz1267,zzz1285
47836	96.95	328	193.0		zzz1277,zzz1285
46837	96.95	328	193.0		zzz1282,zzz1285
46075	96.95	328	193.0		zzz1286,zzz1285
42221	96.95	328	193.0		zzz1308,zzz1285
50211	94.8	327	193.0		zzz1264,zzz1287
46654	94.8	327	193.0		zzz1283,zzz1287
47457	98.75	319	193.0		zzz1279,zzz1303
45383	98.75	319	193.0		zzz1290,zzz1303
44241	98.75	319	193.0		zzz1297,zzz1303
31891	99.68	314	193.0		zzz1641,zzz1977
28613	99.68	314	193.0		zzz1960,zzz1977
28587	99.68	314	193.0		zzz1961,zzz1977
28562	99.68	314	193.0		zzz1962,zzz1977
28538	99.68	314	193.0		zzz1963,zzz1977
28515	99.68	314	193.0		zzz1964,zzz1977
28493	99.68	314	193.0		zzz1965,zzz1977
28472	99.68	314	193.0		zzz1966,zzz1977
28452	99.68	314	193.0		zzz1967,zzz1977
28433	99.68	314	193.0		zzz1968,zzz1977
28415	99.68	314	193.0		zzz1969,zzz1977
28398	99.68	314	193.0		zzz1970,zzz1977
28382	99.68	314	193.0		zzz1971,zzz1977
28367	99.68	314	193.0		zzz1972,zzz1977
28353	99.68	314	193.0		zzz1973,zzz1977
28340	99.68	314	193.0		zzz1974,zzz1977
28328	99.68	314	193.0		zzz1975,zzz1977
28317	99.68	314	193.0		zzz1976,zzz1977
96135	97.85	325	193.0		zzz1054,zzz1129
69423	99.69	319	193.0		zzz1147,zzz1195
62576	99.69	319	193.0		zzz1194,zzz1195
65592	94.88	332	193.0		zzz1164,zzz1173
65591	95.18	332	193.0		zzz1164,zzz1190
64836	100.0	333	193.0		zzz1172,zzz1176
64835	100.0	333	193.0		zzz1172,zzz1184
64834	100.0	333	193.0		zzz1172,zzz1186
64559	100.0	333	193.0		zzz1176,zzz1184
64558	100.0	333	193.0		zzz1176,zzz1186
63712	100.0	333	193.0		zzz1184,zzz1186
45891	94.51	328	193.0		zzz1287,zzz1296
32919	100.0	393	192.0		zzz1565,zzz1578
98834	94.67	338	192.0		zzz1044,zzzz968
73513	94.82	328	192.0		zzz1133,zzz1134
73512	95.41	327	192.0		zzz1133,zzz1135
65684	94.58	332	192.0		zzz1163,zzz1189
65590	94.29	333	192.0		zzz1164,zzz1187
64833	99.7	333	192.0		zzz1172,zzz1174
64832	99.7	333	192.0		zzz1172,zzz1185
64557	99.7	333	192.0		zzz1176,zzz1174
64556	99.7	333	192.0		zzz1176,zzz1185
63711	99.7	333	192.0		zzz1184,zzz1174
63710	99.7	333	192.0		zzz1184,zzz1185
63639	99.7	333	192.0		zzz1186,zzz1174
63638	99.7	333	192.0		zzz1186,zzz1185
63781	94.26	331	192.0		zzz1183,zzz1209
62255	99.37	319	192.0		zzz1195,zzz1197
57555	99.7	333	192.0		zzz1222,zzz1224
54053	99.7	329	192.0		zzz1243,zzz1294
49424	98.43	319	192.0		zzz1269,zzz1279
49423	98.43	319	192.0		zzz1269,zzz1290
49422	98.43	319	192.0		zzz1269,zzz1297
31986	99.36	314	192.0		zzz1639,zzz1641
31985	99.36	314	192.0		zzz1639,zzz1960
31984	99.36	314	192.0		zzz1639,zzz1961
31983	99.36	314	192.0		zzz1639,zzz1962
31982	99.36	314	192.0		zzz1639,zzz1963
31981	99.36	314	192.0		zzz1639,zzz1964
31980	99.36	314	192.0		zzz1639,zzz1965
31979	99.36	314	192.0		zzz1639,zzz1966
31978	99.36	314	192.0		zzz1639,zzz1967
31977	99.36	314	192.0		zzz1639,zzz1968
31976	99.36	314	192.0		zzz1639,zzz1969
31975	99.36	314	192.0		zzz1639,zzz1970
31974	99.36	314	192.0		zzz1639,zzz1971
31973	99.36	314	192.0		zzz1639,zzz1972
31972	99.36	314	192.0		zzz1639,zzz1973
31971	99.36	314	192.0		zzz1639,zzz1974
31970	99.36	314	192.0		zzz1639,zzz1975
31969	99.36	314	192.0		zzz1639,zzz1976
29013	99.36	314	192.0		zzz1949,zzz1641
29012	99.36	314	192.0		zzz1949,zzz1960
29011	99.36	314	192.0		zzz1949,zzz1961
29010	99.36	314	192.0		zzz1949,zzz1962
29009	99.36	314	192.0		zzz1949,zzz1963
29008	99.36	314	192.0		zzz1949,zzz1964
29007	99.36	314	192.0		zzz1949,zzz1965
29006	99.36	314	192.0		zzz1949,zzz1966
29005	99.36	314	192.0		zzz1949,zzz1967
29004	99.36	314	192.0		zzz1949,zzz1968
29003	99.36	314	192.0		zzz1949,zzz1969
29002	99.36	314	192.0		zzz1949,zzz1970
29001	99.36	314	192.0		zzz1949,zzz1971
29000	99.36	314	192.0		zzz1949,zzz1972
28999	99.36	314	192.0		zzz1949,zzz1973
28998	99.36	314	192.0		zzz1949,zzz1974
28997	99.36	314	192.0		zzz1949,zzz1975
28996	99.36	314	192.0		zzz1949,zzz1976
25709	99.68	315	192.0		zzz2426,zzz2430
25696	98.75	319	192.0		zzz2436,zzz2439
25695	98.75	319	192.0		zzz2436,zzz2440
25694	98.75	319	192.0		zzz2436,zzz2441
65683	93.99	333	192.0		zzz1163,zzz1182
65589	94.58	332	192.0		zzz1164,zzz1189
64693	99.7	333	192.0		zzz1174,zzz1224
63673	99.7	333	192.0		zzz1185,zzz1224
57565	98.44	321	192.0		zzz1221,zzz1230
49421	98.75	319	192.0		zzz1269,zzz1303
45890	94.21	328	192.0		zzz1287,zzz1304
33444	99.7	329	192.0		zzz1489,zzz1490
32073	97.49	319	192.0		zzz1635,zzzz377
32016	99.04	314	192.0		zzz1638,zzz1641
32015	99.04	314	192.0		zzz1638,zzz1960
32014	99.04	314	192.0		zzz1638,zzz1961
32013	99.04	314	192.0		zzz1638,zzz1962
32012	99.04	314	192.0		zzz1638,zzz1963
32011	99.04	314	192.0		zzz1638,zzz1964
32010	99.04	314	192.0		zzz1638,zzz1965
32009	99.04	314	192.0		zzz1638,zzz1966
32008	99.04	314	192.0		zzz1638,zzz1967
32007	99.04	314	192.0		zzz1638,zzz1968
32006	99.04	314	192.0		zzz1638,zzz1969
32005	99.04	314	192.0		zzz1638,zzz1970
32004	99.04	314	192.0		zzz1638,zzz1971
32003	99.04	314	192.0		zzz1638,zzz1972
32002	99.04	314	192.0		zzz1638,zzz1973
32001	99.04	314	192.0		zzz1638,zzz1974
32000	99.04	314	192.0		zzz1638,zzz1975
31999	99.04	314	192.0		zzz1638,zzz1976
31937	99.04	314	192.0		zzz1640,zzz1641
31936	99.04	314	192.0		zzz1640,zzz1960
31935	99.04	314	192.0		zzz1640,zzz1961
31934	99.04	314	192.0		zzz1640,zzz1962
31933	99.04	314	192.0		zzz1640,zzz1963
31932	99.04	314	192.0		zzz1640,zzz1964
31931	99.04	314	192.0		zzz1640,zzz1965
31930	99.04	314	192.0		zzz1640,zzz1966
31929	99.04	314	192.0		zzz1640,zzz1967
31928	99.04	314	192.0		zzz1640,zzz1968
31927	99.04	314	192.0		zzz1640,zzz1969
31926	99.04	314	192.0		zzz1640,zzz1970
31925	99.04	314	192.0		zzz1640,zzz1971
31924	99.04	314	192.0		zzz1640,zzz1972
31923	99.04	314	192.0		zzz1640,zzz1973
31922	99.04	314	192.0		zzz1640,zzz1974
31921	99.04	314	192.0		zzz1640,zzz1975
31920	99.04	314	192.0		zzz1640,zzz1976
31861	99.04	314	192.0		zzz1642,zzz1641
31860	99.04	314	192.0		zzz1642,zzz1960
31859	99.04	314	192.0		zzz1642,zzz1961
31858	99.04	314	192.0		zzz1642,zzz1962
31857	99.04	314	192.0		zzz1642,zzz1963
31856	99.04	314	192.0		zzz1642,zzz1964
31855	99.04	314	192.0		zzz1642,zzz1965
31854	99.04	314	192.0		zzz1642,zzz1966
31853	99.04	314	192.0		zzz1642,zzz1967
31852	99.04	314	192.0		zzz1642,zzz1968
31851	99.04	314	192.0		zzz1642,zzz1969
31850	99.04	314	192.0		zzz1642,zzz1970
31849	99.04	314	192.0		zzz1642,zzz1971
31848	99.04	314	192.0		zzz1642,zzz1972
31847	99.04	314	192.0		zzz1642,zzz1973
31846	99.04	314	192.0		zzz1642,zzz1974
31845	99.04	314	192.0		zzz1642,zzz1975
31844	99.04	314	192.0		zzz1642,zzz1976
29042	99.04	314	192.0		zzz1948,zzz1641
29041	99.04	314	192.0		zzz1948,zzz1960
29040	99.04	314	192.0		zzz1948,zzz1961
29039	99.04	314	192.0		zzz1948,zzz1962
29038	99.04	314	192.0		zzz1948,zzz1963
29037	99.04	314	192.0		zzz1948,zzz1964
29036	99.04	314	192.0		zzz1948,zzz1965
29035	99.04	314	192.0		zzz1948,zzz1966
29034	99.04	314	192.0		zzz1948,zzz1967
29033	99.04	314	192.0		zzz1948,zzz1968
29032	99.04	314	192.0		zzz1948,zzz1969
29031	99.04	314	192.0		zzz1948,zzz1970
29030	99.04	314	192.0		zzz1948,zzz1971
29029	99.04	314	192.0		zzz1948,zzz1972
29028	99.04	314	192.0		zzz1948,zzz1973
29027	99.04	314	192.0		zzz1948,zzz1974
29026	99.04	314	192.0		zzz1948,zzz1975
29025	99.04	314	192.0		zzz1948,zzz1976
28967	99.04	314	192.0		zzz1950,zzz1641
28966	99.04	314	192.0		zzz1950,zzz1960
28965	99.04	314	192.0		zzz1950,zzz1961
28964	99.04	314	192.0		zzz1950,zzz1962
28963	99.04	314	192.0		zzz1950,zzz1963
28962	99.04	314	192.0		zzz1950,zzz1964
28961	99.04	314	192.0		zzz1950,zzz1965
28960	99.04	314	192.0		zzz1950,zzz1966
28959	99.04	314	192.0		zzz1950,zzz1967
28958	99.04	314	192.0		zzz1950,zzz1968
28957	99.04	314	192.0		zzz1950,zzz1969
28956	99.04	314	192.0		zzz1950,zzz1970
28955	99.04	314	192.0		zzz1950,zzz1971
28954	99.04	314	192.0		zzz1950,zzz1972
28953	99.04	314	192.0		zzz1950,zzz1973
28952	99.04	314	192.0		zzz1950,zzz1974
28951	99.04	314	192.0		zzz1950,zzz1975
28950	99.04	314	192.0		zzz1950,zzz1976
28922	99.04	314	192.0		zzz1951,zzz1641
28921	99.04	314	192.0		zzz1951,zzz1960
28920	99.04	314	192.0		zzz1951,zzz1961
28919	99.04	314	192.0		zzz1951,zzz1962
28918	99.04	314	192.0		zzz1951,zzz1963
28917	99.04	314	192.0		zzz1951,zzz1964
28916	99.04	314	192.0		zzz1951,zzz1965
28915	99.04	314	192.0		zzz1951,zzz1966
28914	99.04	314	192.0		zzz1951,zzz1967
28913	99.04	314	192.0		zzz1951,zzz1968
28912	99.04	314	192.0		zzz1951,zzz1969
28911	99.04	314	192.0		zzz1951,zzz1970
28910	99.04	314	192.0		zzz1951,zzz1971
28909	99.04	314	192.0		zzz1951,zzz1972
28908	99.04	314	192.0		zzz1951,zzz1973
28907	99.04	314	192.0		zzz1951,zzz1974
28906	99.04	314	192.0		zzz1951,zzz1975
28905	99.04	314	192.0		zzz1951,zzz1976
28878	99.04	314	192.0		zzz1952,zzz1641
28877	99.04	314	192.0		zzz1952,zzz1960
28876	99.04	314	192.0		zzz1952,zzz1961
28875	99.04	314	192.0		zzz1952,zzz1962
28874	99.04	314	192.0		zzz1952,zzz1963
28873	99.04	314	192.0		zzz1952,zzz1964
28872	99.04	314	192.0		zzz1952,zzz1965
28871	99.04	314	192.0		zzz1952,zzz1966
28870	99.04	314	192.0		zzz1952,zzz1967
28869	99.04	314	192.0		zzz1952,zzz1968
28868	99.04	314	192.0		zzz1952,zzz1969
28867	99.04	314	192.0		zzz1952,zzz1970
28866	99.04	314	192.0		zzz1952,zzz1971
28865	99.04	314	192.0		zzz1952,zzz1972
28864	99.04	314	192.0		zzz1952,zzz1973
28863	99.04	314	192.0		zzz1952,zzz1974
28862	99.04	314	192.0		zzz1952,zzz1975
28861	99.04	314	192.0		zzz1952,zzz1976
28835	99.04	314	192.0		zzz1953,zzz1641
28834	99.04	314	192.0		zzz1953,zzz1960
28833	99.04	314	192.0		zzz1953,zzz1961
28832	99.04	314	192.0		zzz1953,zzz1962
28831	99.04	314	192.0		zzz1953,zzz1963
28830	99.04	314	192.0		zzz1953,zzz1964
28829	99.04	314	192.0		zzz1953,zzz1965
28828	99.04	314	192.0		zzz1953,zzz1966
28827	99.04	314	192.0		zzz1953,zzz1967
28826	99.04	314	192.0		zzz1953,zzz1968
28825	99.04	314	192.0		zzz1953,zzz1969
28824	99.04	314	192.0		zzz1953,zzz1970
28823	99.04	314	192.0		zzz1953,zzz1971
28822	99.04	314	192.0		zzz1953,zzz1972
28821	99.04	314	192.0		zzz1953,zzz1973
28820	99.04	314	192.0		zzz1953,zzz1974
28819	99.04	314	192.0		zzz1953,zzz1975
28818	99.04	314	192.0		zzz1953,zzz1976
28793	99.04	314	192.0		zzz1954,zzz1641
28792	99.04	314	192.0		zzz1954,zzz1960
28791	99.04	314	192.0		zzz1954,zzz1961
28790	99.04	314	192.0		zzz1954,zzz1962
28789	99.04	314	192.0		zzz1954,zzz1963
28788	99.04	314	192.0		zzz1954,zzz1964
28787	99.04	314	192.0		zzz1954,zzz1965
28786	99.04	314	192.0		zzz1954,zzz1966
28785	99.04	314	192.0		zzz1954,zzz1967
28784	99.04	314	192.0		zzz1954,zzz1968
28783	99.04	314	192.0		zzz1954,zzz1969
28782	99.04	314	192.0		zzz1954,zzz1970
28781	99.04	314	192.0		zzz1954,zzz1971
28780	99.04	314	192.0		zzz1954,zzz1972
28779	99.04	314	192.0		zzz1954,zzz1973
28778	99.04	314	192.0		zzz1954,zzz1974
28777	99.04	314	192.0		zzz1954,zzz1975
28776	99.04	314	192.0		zzz1954,zzz1976
28752	99.04	314	192.0		zzz1955,zzz1641
28751	99.04	314	192.0		zzz1955,zzz1960
28750	99.04	314	192.0		zzz1955,zzz1961
28749	99.04	314	192.0		zzz1955,zzz1962
28748	99.04	314	192.0		zzz1955,zzz1963
28747	99.04	314	192.0		zzz1955,zzz1964
28746	99.04	314	192.0		zzz1955,zzz1965
28745	99.04	314	192.0		zzz1955,zzz1966
28744	99.04	314	192.0		zzz1955,zzz1967
28743	99.04	314	192.0		zzz1955,zzz1968
28742	99.04	314	192.0		zzz1955,zzz1969
28741	99.04	314	192.0		zzz1955,zzz1970
28740	99.04	314	192.0		zzz1955,zzz1971
28739	99.04	314	192.0		zzz1955,zzz1972
28738	99.04	314	192.0		zzz1955,zzz1973
28737	99.04	314	192.0		zzz1955,zzz1974
28736	99.04	314	192.0		zzz1955,zzz1975
28735	99.04	314	192.0		zzz1955,zzz1976
28697	99.04	314	192.0		zzz1958,zzz1641
28696	99.04	314	192.0		zzz1958,zzz1960
28695	99.04	314	192.0		zzz1958,zzz1961
28694	99.04	314	192.0		zzz1958,zzz1962
28693	99.04	314	192.0		zzz1958,zzz1963
28692	99.04	314	192.0		zzz1958,zzz1964
28691	99.04	314	192.0		zzz1958,zzz1965
28690	99.04	314	192.0		zzz1958,zzz1966
28689	99.04	314	192.0		zzz1958,zzz1967
28688	99.04	314	192.0		zzz1958,zzz1968
28687	99.04	314	192.0		zzz1958,zzz1969
28686	99.04	314	192.0		zzz1958,zzz1970
28685	99.04	314	192.0		zzz1958,zzz1971
28684	99.04	314	192.0		zzz1958,zzz1972
28683	99.04	314	192.0		zzz1958,zzz1973
28682	99.04	314	192.0		zzz1958,zzz1974
28681	99.04	314	192.0		zzz1958,zzz1975
28680	99.04	314	192.0		zzz1958,zzz1976
28658	99.04	314	192.0		zzz1959,zzz1641
28657	99.04	314	192.0		zzz1959,zzz1960
28656	99.04	314	192.0		zzz1959,zzz1961
28655	99.04	314	192.0		zzz1959,zzz1962
28654	99.04	314	192.0		zzz1959,zzz1963
28653	99.04	314	192.0		zzz1959,zzz1964
28652	99.04	314	192.0		zzz1959,zzz1965
28651	99.04	314	192.0		zzz1959,zzz1966
28650	99.04	314	192.0		zzz1959,zzz1967
28649	99.04	314	192.0		zzz1959,zzz1968
28648	99.04	314	192.0		zzz1959,zzz1969
28647	99.04	314	192.0		zzz1959,zzz1970
28646	99.04	314	192.0		zzz1959,zzz1971
28645	99.04	314	192.0		zzz1959,zzz1972
28644	99.04	314	192.0		zzz1959,zzz1973
28643	99.04	314	192.0		zzz1959,zzz1974
28642	99.04	314	192.0		zzz1959,zzz1975
28641	99.04	314	192.0		zzz1959,zzz1976
28291	99.04	314	192.0		zzz1978,zzz1641
28290	99.04	314	192.0		zzz1978,zzz1960
28289	99.04	314	192.0		zzz1978,zzz1961
28288	99.04	314	192.0		zzz1978,zzz1962
28287	99.04	314	192.0		zzz1978,zzz1963
28286	99.04	314	192.0		zzz1978,zzz1964
28285	99.04	314	192.0		zzz1978,zzz1965
28284	99.04	314	192.0		zzz1978,zzz1966
28283	99.04	314	192.0		zzz1978,zzz1967
28282	99.04	314	192.0		zzz1978,zzz1968
28281	99.04	314	192.0		zzz1978,zzz1969
28280	99.04	314	192.0		zzz1978,zzz1970
28279	99.04	314	192.0		zzz1978,zzz1971
28278	99.04	314	192.0		zzz1978,zzz1972
28277	99.04	314	192.0		zzz1978,zzz1973
28276	99.04	314	192.0		zzz1978,zzz1974
28275	99.04	314	192.0		zzz1978,zzz1975
28274	99.04	314	192.0		zzz1978,zzz1976
28254	99.04	314	192.0		zzz1979,zzz1641
28253	99.04	314	192.0		zzz1979,zzz1960
28252	99.04	314	192.0		zzz1979,zzz1961
28251	99.04	314	192.0		zzz1979,zzz1962
28250	99.04	314	192.0		zzz1979,zzz1963
28249	99.04	314	192.0		zzz1979,zzz1964
28248	99.04	314	192.0		zzz1979,zzz1965
28247	99.04	314	192.0		zzz1979,zzz1966
28246	99.04	314	192.0		zzz1979,zzz1967
28245	99.04	314	192.0		zzz1979,zzz1968
28244	99.04	314	192.0		zzz1979,zzz1969
28243	99.04	314	192.0		zzz1979,zzz1970
28242	99.04	314	192.0		zzz1979,zzz1971
28241	99.04	314	192.0		zzz1979,zzz1972
28240	99.04	314	192.0		zzz1979,zzz1973
28239	99.04	314	192.0		zzz1979,zzz1974
28238	99.04	314	192.0		zzz1979,zzz1975
28237	99.04	314	192.0		zzz1979,zzz1976
28218	99.04	314	192.0		zzz1980,zzz1641
28217	99.04	314	192.0		zzz1980,zzz1960
28216	99.04	314	192.0		zzz1980,zzz1961
28215	99.04	314	192.0		zzz1980,zzz1962
28214	99.04	314	192.0		zzz1980,zzz1963
28213	99.04	314	192.0		zzz1980,zzz1964
28212	99.04	314	192.0		zzz1980,zzz1965
28211	99.04	314	192.0		zzz1980,zzz1966
28210	99.04	314	192.0		zzz1980,zzz1967
28209	99.04	314	192.0		zzz1980,zzz1968
28208	99.04	314	192.0		zzz1980,zzz1969
28207	99.04	314	192.0		zzz1980,zzz1970
28206	99.04	314	192.0		zzz1980,zzz1971
28205	99.04	314	192.0		zzz1980,zzz1972
28204	99.04	314	192.0		zzz1980,zzz1973
28203	99.04	314	192.0		zzz1980,zzz1974
28202	99.04	314	192.0		zzz1980,zzz1975
28201	99.04	314	192.0		zzz1980,zzz1976
28183	99.04	314	192.0		zzz1981,zzz1641
28182	99.04	314	192.0		zzz1981,zzz1960
28181	99.04	314	192.0		zzz1981,zzz1961
28180	99.04	314	192.0		zzz1981,zzz1962
28179	99.04	314	192.0		zzz1981,zzz1963
28178	99.04	314	192.0		zzz1981,zzz1964
28177	99.04	314	192.0		zzz1981,zzz1965
28176	99.04	314	192.0		zzz1981,zzz1966
28175	99.04	314	192.0		zzz1981,zzz1967
28174	99.04	314	192.0		zzz1981,zzz1968
28173	99.04	314	192.0		zzz1981,zzz1969
28172	99.04	314	192.0		zzz1981,zzz1970
28171	99.04	314	192.0		zzz1981,zzz1971
28170	99.04	314	192.0		zzz1981,zzz1972
28169	99.04	314	192.0		zzz1981,zzz1973
28168	99.04	314	192.0		zzz1981,zzz1974
28167	99.04	314	192.0		zzz1981,zzz1975
28166	99.04	314	192.0		zzz1981,zzz1976
28149	99.04	314	192.0		zzz1982,zzz1641
28148	99.04	314	192.0		zzz1982,zzz1960
28147	99.04	314	192.0		zzz1982,zzz1961
28146	99.04	314	192.0		zzz1982,zzz1962
28145	99.04	314	192.0		zzz1982,zzz1963
28144	99.04	314	192.0		zzz1982,zzz1964
28143	99.04	314	192.0		zzz1982,zzz1965
28142	99.04	314	192.0		zzz1982,zzz1966
28141	99.04	314	192.0		zzz1982,zzz1967
28140	99.04	314	192.0		zzz1982,zzz1968
28139	99.04	314	192.0		zzz1982,zzz1969
28138	99.04	314	192.0		zzz1982,zzz1970
28137	99.04	314	192.0		zzz1982,zzz1971
28136	99.04	314	192.0		zzz1982,zzz1972
28135	99.04	314	192.0		zzz1982,zzz1973
28134	99.04	314	192.0		zzz1982,zzz1974
28133	99.04	314	192.0		zzz1982,zzz1975
28132	99.04	314	192.0		zzz1982,zzz1976
28116	99.04	314	192.0		zzz1983,zzz1641
28115	99.04	314	192.0		zzz1983,zzz1960
28114	99.04	314	192.0		zzz1983,zzz1961
28113	99.04	314	192.0		zzz1983,zzz1962
28112	99.04	314	192.0		zzz1983,zzz1963
28111	99.04	314	192.0		zzz1983,zzz1964
28110	99.04	314	192.0		zzz1983,zzz1965
28109	99.04	314	192.0		zzz1983,zzz1966
28108	99.04	314	192.0		zzz1983,zzz1967
28107	99.04	314	192.0		zzz1983,zzz1968
28106	99.04	314	192.0		zzz1983,zzz1969
28105	99.04	314	192.0		zzz1983,zzz1970
28104	99.04	314	192.0		zzz1983,zzz1971
28103	99.04	314	192.0		zzz1983,zzz1972
28102	99.04	314	192.0		zzz1983,zzz1973
28101	99.04	314	192.0		zzz1983,zzz1974
28100	99.04	314	192.0		zzz1983,zzz1975
28099	99.04	314	192.0		zzz1983,zzz1976
28084	99.04	314	192.0		zzz1984,zzz1641
28083	99.04	314	192.0		zzz1984,zzz1960
28082	99.04	314	192.0		zzz1984,zzz1961
28081	99.04	314	192.0		zzz1984,zzz1962
28080	99.04	314	192.0		zzz1984,zzz1963
28079	99.04	314	192.0		zzz1984,zzz1964
28078	99.04	314	192.0		zzz1984,zzz1965
28077	99.04	314	192.0		zzz1984,zzz1966
28076	99.04	314	192.0		zzz1984,zzz1967
28075	99.04	314	192.0		zzz1984,zzz1968
28074	99.04	314	192.0		zzz1984,zzz1969
28073	99.04	314	192.0		zzz1984,zzz1970
28072	99.04	314	192.0		zzz1984,zzz1971
28071	99.04	314	192.0		zzz1984,zzz1972
28070	99.04	314	192.0		zzz1984,zzz1973
28069	99.04	314	192.0		zzz1984,zzz1974
28068	99.04	314	192.0		zzz1984,zzz1975
28067	99.04	314	192.0		zzz1984,zzz1976
28053	99.04	314	192.0		zzz1985,zzz1641
28052	99.04	314	192.0		zzz1985,zzz1960
28051	99.04	314	192.0		zzz1985,zzz1961
28050	99.04	314	192.0		zzz1985,zzz1962
28049	99.04	314	192.0		zzz1985,zzz1963
28048	99.04	314	192.0		zzz1985,zzz1964
28047	99.04	314	192.0		zzz1985,zzz1965
28046	99.04	314	192.0		zzz1985,zzz1966
28045	99.04	314	192.0		zzz1985,zzz1967
28044	99.04	314	192.0		zzz1985,zzz1968
28043	99.04	314	192.0		zzz1985,zzz1969
28042	99.04	314	192.0		zzz1985,zzz1970
28041	99.04	314	192.0		zzz1985,zzz1971
28040	99.04	314	192.0		zzz1985,zzz1972
28039	99.04	314	192.0		zzz1985,zzz1973
28038	99.04	314	192.0		zzz1985,zzz1974
28037	99.04	314	192.0		zzz1985,zzz1975
28036	99.04	314	192.0		zzz1985,zzz1976
2850	97.22	324	192.0		zzzzz40,zzzzz90
74598	96.06	330	192.0		zzz1128,zzzz937
68535	98.44	320	192.0		zzz1150,zzzz984
68534	98.44	320	192.0		zzz1150,zzzz985
68533	98.44	320	192.0		zzz1150,zzzz986
68532	98.44	320	192.0		zzz1150,zzzz987
68531	98.44	320	192.0		zzz1150,zzzz989
65588	93.99	333	192.0		zzz1164,zzz1182
64831	99.4	333	192.0		zzz1172,zzz1224
64555	99.4	333	192.0		zzz1176,zzz1224
63709	99.4	333	192.0		zzz1184,zzz1224
63637	99.4	333	192.0		zzz1186,zzz1224
64692	99.4	333	192.0		zzz1174,zzz1222
63672	99.4	333	192.0		zzz1185,zzz1222
64005	95.18	332	192.0		zzz1179,zzz1207
63135	99.37	319	192.0		zzz1192,zzz1196
54726	93.9	328	192.0		zzz1240,zzz1287
54268	100.0	328	192.0		zzz1242,zzz1252
54267	100.0	328	192.0		zzz1242,zzz1254
54266	100.0	328	192.0		zzz1242,zzz1262
54265	100.0	328	192.0		zzz1242,zzz1272
52537	100.0	328	192.0		zzz1252,zzz1254
52536	100.0	328	192.0		zzz1252,zzz1262
52535	100.0	328	192.0		zzz1252,zzz1272
52130	100.0	328	192.0		zzz1254,zzz1262
52129	100.0	328	192.0		zzz1254,zzz1272
50612	100.0	328	192.0		zzz1262,zzz1272
50210	100.0	328	192.0		zzz1264,zzz1283
44061	97.23	325	192.0		zzz1298,zzz1343
37222	97.23	325	192.0		zzz1343,zzz1350
31968	99.04	314	192.0		zzz1639,zzz1977
28995	99.04	314	192.0		zzz1949,zzz1977
25839	84.47	367	192.0		zzz2404,zzz2420
25765	89.05	347	192.0		zzz2410,zzz2423
25693	98.43	319	192.0		zzz2436,zzz2438
25687	98.43	319	192.0		zzz2438,zzz2439
25686	98.43	319	192.0		zzz2438,zzz2440
25685	98.43	319	192.0		zzz2438,zzz2441
104041	98.74	318	191.0		zzz1030,zzzz933
103646	98.74	318	191.0		zzz1031,zzzz933
80940	100.0	317	191.0		zzz1103,zzz1108
64973	99.4	333	191.0		zzz1170,zzz1180
64830	99.7	333	191.0		zzz1172,zzz1181
64554	99.7	333	191.0		zzz1176,zzz1181
63708	99.7	333	191.0		zzz1184,zzz1181
63636	99.7	333	191.0		zzz1186,zzz1181
63502	94.88	332	191.0		zzz1188,zzz1207
57544	98.75	319	191.0		zzz1223,zzz1226
54264	99.7	328	191.0		zzz1242,zzz1264
54263	99.7	328	191.0		zzz1242,zzz1283
52534	99.7	328	191.0		zzz1252,zzz1264
52533	99.7	328	191.0		zzz1252,zzz1283
52128	99.7	328	191.0		zzz1254,zzz1264
52127	99.7	328	191.0		zzz1254,zzz1283
50611	99.7	328	191.0		zzz1262,zzz1264
50610	99.7	328	191.0		zzz1262,zzz1283
48878	99.7	328	191.0		zzz1272,zzz1264
48877	99.7	328	191.0		zzz1272,zzz1283
49236	94.21	328	191.0		zzz1270,zzz1287
37358	96.92	325	191.0		zzz1342,zzz1343
37221	97.23	325	191.0		zzz1343,zzz1344
35188	94.8	327	191.0		zzz1361,zzz1366
31998	98.73	314	191.0		zzz1638,zzz1977
31919	98.73	314	191.0		zzz1640,zzz1977
31843	98.73	314	191.0		zzz1642,zzz1977
29024	98.73	314	191.0		zzz1948,zzz1977
28949	98.73	314	191.0		zzz1950,zzz1977
28904	98.73	314	191.0		zzz1951,zzz1977
28860	98.73	314	191.0		zzz1952,zzz1977
28817	98.73	314	191.0		zzz1953,zzz1977
28775	98.73	314	191.0		zzz1954,zzz1977
28734	98.73	314	191.0		zzz1955,zzz1977
28679	98.73	314	191.0		zzz1958,zzz1977
28640	98.73	314	191.0		zzz1959,zzz1977
28273	98.73	314	191.0		zzz1978,zzz1977
28236	98.73	314	191.0		zzz1979,zzz1977
28200	98.73	314	191.0		zzz1980,zzz1977
28165	98.73	314	191.0		zzz1981,zzz1977
28131	98.73	314	191.0		zzz1982,zzz1977
28098	98.73	314	191.0		zzz1983,zzz1977
28066	98.73	314	191.0		zzz1984,zzz1977
28035	98.73	314	191.0		zzz1985,zzz1977
25691	98.75	319	191.0		zzz2437,zzz2439
25690	98.75	319	191.0		zzz2437,zzz2440
25689	98.75	319	191.0		zzz2437,zzz2441
102873	90.32	341	191.0		zzz1033,zzz1087
64829	99.1	333	191.0		zzz1172,zzz1222
64553	99.1	333	191.0		zzz1176,zzz1222
63707	99.1	333	191.0		zzz1184,zzz1222
63635	99.1	333	191.0		zzz1186,zzz1222
64691	99.4	333	191.0		zzz1174,zzz1181
63671	99.4	333	191.0		zzz1185,zzz1181
61424	96.9	323	191.0		zzz1198,zzz1200
61423	96.9	323	191.0		zzz1198,zzz1202
61422	96.9	323	191.0		zzz1198,zzz1203
61421	96.9	323	191.0		zzz1198,zzz1205
25764	89.05	347	191.0		zzz2410,zzz2501
25688	98.43	319	191.0		zzz2437,zzz2438
114619	100.0	335	191.0		zzz1000,zzz1001
114618	100.0	335	191.0		zzz1000,zzzz999
114233	100.0	335	191.0		zzz1001,zzzz999
68530	98.12	320	191.0		zzz1150,zzzz988
65682	93.98	332	191.0		zzz1163,zzz1183
61420	96.59	323	191.0		zzz1198,zzz1201
61419	96.59	323	191.0		zzz1198,zzz1204
54262	99.39	328	191.0		zzz1242,zzz1289
52532	99.39	328	191.0		zzz1252,zzz1289
52126	99.39	328	191.0		zzz1254,zzz1289
50609	99.39	328	191.0		zzz1262,zzz1289
48876	99.39	328	191.0		zzz1272,zzz1289
37493	96.92	325	191.0		zzz1341,zzz1343
65587	93.98	332	190.0		zzz1164,zzz1183
64918	94.28	332	190.0		zzz1171,zzz1207
59484	93.98	332	190.0		zzz1207,zzz1210
50209	99.39	329	190.0		zzz1264,zzz1270
46653	99.39	329	190.0		zzz1283,zzz1270
50208	99.09	328	190.0		zzz1264,zzz1289
46652	99.09	328	190.0		zzz1283,zzz1289
38800	96.87	319	190.0		zzz1330,zzz1335
35187	94.5	327	190.0		zzz1361,zzz1364
25733	84.34	364	190.0		zzz2419,zzz2422
25692	98.12	319	190.0		zzz2436,zzz2437
23941	100.0	335	190.0		zzz2557,zzz2558
101401	100.0	326	190.0		zzz1037,zzz1039
69749	99.37	319	190.0		zzz1146,zzz1147
69748	99.37	319	190.0		zzz1146,zzz1194
63900	99.1	333	190.0		zzz1181,zzz1224
61418	96.59	323	190.0		zzz1198,zzz1199
54261	99.09	329	190.0		zzz1242,zzz1270
52531	99.09	329	190.0		zzz1252,zzz1270
52125	99.09	329	190.0		zzz1254,zzz1270
50608	99.09	329	190.0		zzz1262,zzz1270
48875	99.09	329	190.0		zzz1272,zzz1270
39803	98.75	319	190.0		zzz1323,zzz1324
33591	100.0	313	190.0		zzz1473,zzz1474
33590	100.0	313	190.0		zzz1473,zzz1475
33589	100.0	313	190.0		zzz1473,zzz1476
33580	100.0	313	190.0		zzz1474,zzz1475
33579	100.0	313	190.0		zzz1474,zzz1476
33570	100.0	313	190.0		zzz1475,zzz1476
92232	97.93	338	190.0		zzz1066,zzz1331
80368	99.68	317	190.0		zzz1105,zzz1109
69747	99.06	319	190.0		zzz1146,zzz1195
69746	99.06	319	190.0		zzz1146,zzz1197
65744	99.1	334	190.0		zzz1162,zzz1174
65743	99.1	334	190.0		zzz1162,zzz1185
65505	92.42	330	190.0		zzz1165,zzz1354
64972	98.2	333	190.0		zzz1170,zzz1174
64971	98.2	333	190.0		zzz1170,zzz1185
63899	98.8	333	190.0		zzz1181,zzz1222
54725	99.08	326	190.0		zzz1240,zzz1264
54724	99.08	326	190.0		zzz1240,zzz1283
54260	99.39	326	190.0		zzz1242,zzz1304
52530	99.39	326	190.0		zzz1252,zzz1304
52124	99.39	326	190.0		zzz1254,zzz1304
50607	99.39	326	190.0		zzz1262,zzz1304
48874	99.39	326	190.0		zzz1272,zzz1304
50207	99.69	326	190.0		zzz1264,zzz1304
46651	99.69	326	190.0		zzz1283,zzz1304
35186	94.5	327	190.0		zzz1361,zzz1363
64970	97.9	333	190.0		zzz1170,zzz1172
64969	97.9	333	190.0		zzz1170,zzz1176
64968	97.9	333	190.0		zzz1170,zzz1184
64967	97.9	333	190.0		zzz1170,zzz1186
64966	97.9	333	190.0		zzz1170,zzz1224
60989	100.0	323	190.0		zzz1200,zzz1202
60354	100.0	323	190.0		zzz1203,zzz1205
44408	98.17	328	190.0		zzz1296,zzz1304
27414	90.38	343	189.0		zzz2090,zzz2430
23720	100.0	307	190.0		zzz2615,zzz2635
65742	98.8	334	189.0		zzz1162,zzz1172
65741	98.8	334	189.0		zzz1162,zzz1176
65740	98.8	334	189.0		zzz1162,zzz1184
65739	98.8	334	189.0		zzz1162,zzz1186
65738	98.8	334	189.0		zzz1162,zzz1224
62856	98.12	319	189.0		zzz1193,zzz1196
58505	98.5	333	189.0		zzz1214,zzz1222
54723	98.77	326	189.0		zzz1240,zzz1242
54722	98.77	326	189.0		zzz1240,zzz1252
54721	98.77	326	189.0		zzz1240,zzz1254
54720	98.77	326	189.0		zzz1240,zzz1262
54719	98.77	326	189.0		zzz1240,zzz1272
49235	98.48	329	189.0		zzz1270,zzz1289
45552	98.77	326	189.0		zzz1289,zzz1296
30517	100.0	307	189.0		zzz1770,zzz1771
99927	96.13	336	189.0		zzz1041,zzz1043
70399	96.55	319	189.0		zzz1144,zzz1195
70074	96.55	319	189.0		zzz1145,zzz1195
64690	97.6	333	189.0		zzz1174,zzz1180
63670	97.6	333	189.0		zzz1185,zzz1180
60776	99.69	323	189.0		zzz1201,zzz1203
60775	99.69	323	189.0		zzz1201,zzz1205
54718	98.48	328	189.0		zzz1240,zzz1304
27413	90.09	343	189.0		zzz2090,zzz2428
80939	98.1	316	189.0		zzz1103,zzz1105
79524	98.1	316	189.0		zzz1108,zzz1105
72938	92.07	328	189.0		zzz1135,zzz1159
72937	92.07	328	189.0		zzz1135,zzz1160
70398	96.24	319	189.0		zzz1144,zzz1147
70397	96.24	319	189.0		zzz1144,zzz1194
70073	96.24	319	189.0		zzz1145,zzz1147
70072	96.24	319	189.0		zzz1145,zzz1194
65737	98.5	334	189.0		zzz1162,zzz1222
65681	94.29	333	189.0		zzz1163,zzz1207
64965	97.6	333	189.0		zzz1170,zzz1222
61201	99.69	323	189.0		zzz1199,zzz1203
61200	99.69	323	189.0		zzz1199,zzz1205
60988	99.38	323	189.0		zzz1200,zzz1203
60987	99.38	323	189.0		zzz1200,zzz1205
60566	99.38	323	189.0		zzz1202,zzz1203
60565	99.38	323	189.0		zzz1202,zzz1205
59483	92.77	332	189.0		zzz1207,zzz1218
58504	98.2	333	189.0		zzz1214,zzz1224
54037	100.0	325	189.0		zzz1244,zzz1248
54036	100.0	325	189.0		zzz1244,zzz1251
54035	100.0	325	189.0		zzz1244,zzz1257
54034	100.0	325	189.0		zzz1244,zzz1261
54033	100.0	325	189.0		zzz1244,zzz1273
54032	100.0	325	189.0		zzz1244,zzz1280
54031	100.0	325	189.0		zzz1244,zzz1307
53184	100.0	325	189.0		zzz1248,zzz1251
53183	100.0	325	189.0		zzz1248,zzz1257
53182	100.0	325	189.0		zzz1248,zzz1261
53181	100.0	325	189.0		zzz1248,zzz1273
53180	100.0	325	189.0		zzz1248,zzz1280
53179	100.0	325	189.0		zzz1248,zzz1307
52753	100.0	325	189.0		zzz1251,zzz1257
52752	100.0	325	189.0		zzz1251,zzz1261
52751	100.0	325	189.0		zzz1251,zzz1273
52750	100.0	325	189.0		zzz1251,zzz1280
52749	100.0	325	189.0		zzz1251,zzz1307
51479	100.0	325	189.0		zzz1257,zzz1261
51478	100.0	325	189.0		zzz1257,zzz1273
51477	100.0	325	189.0		zzz1257,zzz1280
51476	100.0	325	189.0		zzz1257,zzz1307
50826	100.0	325	189.0		zzz1261,zzz1273
50825	100.0	325	189.0		zzz1261,zzz1280
50824	100.0	325	189.0		zzz1261,zzz1307
48667	100.0	325	189.0		zzz1273,zzz1280
48666	100.0	325	189.0		zzz1273,zzz1307
47277	100.0	325	189.0		zzz1280,zzz1307
48455	100.0	325	189.0		zzz1274,zzz1292
48454	100.0	325	189.0		zzz1274,zzz1293
44979	100.0	325	189.0		zzz1292,zzz1293
45551	98.77	326	189.0		zzz1289,zzz1304
37220	95.38	325	189.0		zzz1343,zzz1352
26896	88.11	370	188.0		zzz2197,zzz2204
26613	88.11	370	188.0		zzz2278,zzz2204
26895	88.38	370	188.0		zzz2197,zzz2277
26612	88.38	370	188.0		zzz2278,zzz2277
25727	89.32	365	189.0		zzz2420,zzz2422
70396	95.92	319	188.0		zzz1144,zzz1197
70071	95.92	319	188.0		zzz1145,zzz1197
69422	96.87	319	188.0		zzz1147,zzz1193
62575	96.87	319	188.0		zzz1194,zzz1193
64964	97.6	333	188.0		zzz1170,zzz1181
64828	97.3	333	188.0		zzz1172,zzz1180
64552	97.3	333	188.0		zzz1176,zzz1180
63706	97.3	333	188.0		zzz1184,zzz1180
63634	97.3	333	188.0		zzz1186,zzz1180
63930	97.3	333	188.0		zzz1180,zzz1224
63134	97.49	319	188.0		zzz1192,zzz1193
60986	99.07	323	188.0		zzz1200,zzz1204
60564	99.07	323	188.0		zzz1202,zzz1204
60353	99.07	323	188.0		zzz1203,zzz1204
59934	99.07	323	188.0		zzz1205,zzz1204
59482	92.77	332	188.0		zzz1207,zzz1209
59481	92.77	332	188.0		zzz1207,zzz1211
54717	98.16	326	188.0		zzz1240,zzz1289
54259	98.16	326	188.0		zzz1242,zzz1296
52529	98.16	326	188.0		zzz1252,zzz1296
52123	98.16	326	188.0		zzz1254,zzz1296
50606	98.16	326	188.0		zzz1262,zzz1296
48873	98.16	326	188.0		zzz1272,zzz1296
49234	99.08	327	188.0		zzz1270,zzz1304
37219	95.08	325	188.0		zzz1343,zzz1351
6784	88.73	346	188.0		zzzz950,zzzzz26
65736	98.5	334	188.0		zzz1162,zzz1181
64689	97.9	333	188.0		zzz1174,zzz1214
63669	97.9	333	188.0		zzz1185,zzz1214
61199	99.38	323	188.0		zzz1199,zzz1201
60985	99.07	323	188.0		zzz1200,zzz1201
60563	99.07	323	188.0		zzz1202,zzz1201
55687	99.69	325	188.0		zzz1235,zzz1237
54716	98.47	327	188.0		zzz1240,zzz1270
54715	97.87	328	188.0		zzz1240,zzz1296
54500	100.0	325	188.0		zzz1241,zzz1246
54499	100.0	325	188.0		zzz1241,zzz1256
54498	100.0	325	188.0		zzz1241,zzz1260
54497	100.0	325	188.0		zzz1241,zzz1276
54496	100.0	325	188.0		zzz1241,zzz1281
54495	100.0	325	188.0		zzz1241,zzz1284
54494	100.0	325	188.0		zzz1241,zzz1291
54493	100.0	325	188.0		zzz1241,zzz1306
53609	100.0	325	188.0		zzz1246,zzz1256
53608	100.0	325	188.0		zzz1246,zzz1260
53607	100.0	325	188.0		zzz1246,zzz1276
53606	100.0	325	188.0		zzz1246,zzz1281
53605	100.0	325	188.0		zzz1246,zzz1284
53604	100.0	325	188.0		zzz1246,zzz1291
53603	100.0	325	188.0		zzz1246,zzz1306
51708	100.0	325	188.0		zzz1256,zzz1260
51707	100.0	325	188.0		zzz1256,zzz1276
51706	100.0	325	188.0		zzz1256,zzz1281
51705	100.0	325	188.0		zzz1256,zzz1284
51704	100.0	325	188.0		zzz1256,zzz1291
51703	100.0	325	188.0		zzz1256,zzz1306
51054	100.0	325	188.0		zzz1260,zzz1276
51053	100.0	325	188.0		zzz1260,zzz1281
51052	100.0	325	188.0		zzz1260,zzz1284
51051	100.0	325	188.0		zzz1260,zzz1291
51050	100.0	325	188.0		zzz1260,zzz1306
48067	100.0	325	188.0		zzz1276,zzz1281
48066	100.0	325	188.0		zzz1276,zzz1284
48065	100.0	325	188.0		zzz1276,zzz1291
48064	100.0	325	188.0		zzz1276,zzz1306
47066	100.0	325	188.0		zzz1281,zzz1284
47065	100.0	325	188.0		zzz1281,zzz1291
47064	100.0	325	188.0		zzz1281,zzz1306
46473	100.0	325	188.0		zzz1284,zzz1291
46472	100.0	325	188.0		zzz1284,zzz1306
45203	100.0	325	188.0		zzz1291,zzz1306
54030	99.69	325	188.0		zzz1244,zzz1274
54029	99.69	325	188.0		zzz1244,zzz1292
54028	99.69	325	188.0		zzz1244,zzz1293
53178	99.69	325	188.0		zzz1248,zzz1274
53177	99.69	325	188.0		zzz1248,zzz1292
53176	99.69	325	188.0		zzz1248,zzz1293
52748	99.69	325	188.0		zzz1251,zzz1274
52747	99.69	325	188.0		zzz1251,zzz1292
52746	99.69	325	188.0		zzz1251,zzz1293
51475	99.69	325	188.0		zzz1257,zzz1274
51474	99.69	325	188.0		zzz1257,zzz1292
51473	99.69	325	188.0		zzz1257,zzz1293
50823	99.69	325	188.0		zzz1261,zzz1274
50822	99.69	325	188.0		zzz1261,zzz1292
50821	99.69	325	188.0		zzz1261,zzz1293
48665	99.69	325	188.0		zzz1273,zzz1274
48664	99.69	325	188.0		zzz1273,zzz1292
48663	99.69	325	188.0		zzz1273,zzz1293
47276	99.69	325	188.0		zzz1280,zzz1274
47275	99.69	325	188.0		zzz1280,zzz1292
47274	99.69	325	188.0		zzz1280,zzz1293
42432	99.69	325	188.0		zzz1307,zzz1274
42431	99.69	325	188.0		zzz1307,zzz1292
42430	99.69	325	188.0		zzz1307,zzz1293
37357	99.69	325	188.0		zzz1342,zzz1344
35677	90.69	333	188.0		zzz1356,zzzzz13
25726	83.38	367	188.0		zzz2420,zzz2421
86015	89.44	341	188.0		zzz1087,zzzz951
83476	99.05	316	188.0		zzz1095,zzzz100
63929	97.0	333	188.0		zzz1180,zzz1222
62855	96.55	319	188.0		zzz1193,zzz1197
61198	99.07	323	188.0		zzz1199,zzz1200
61197	99.07	323	188.0		zzz1199,zzz1202
60774	98.76	323	188.0		zzz1201,zzz1204
50206	97.85	326	188.0		zzz1264,zzz1296
46650	97.85	326	188.0		zzz1283,zzz1296
78390	95.62	320	187.0		zzz1112,zzz1121
73224	91.74	327	187.0		zzz1134,zzz1159
73223	91.74	327	187.0		zzz1134,zzz1160
64827	97.6	333	187.0		zzz1172,zzz1214
64551	97.6	333	187.0		zzz1176,zzz1214
63705	97.6	333	187.0		zzz1184,zzz1214
63633	97.6	333	187.0		zzz1186,zzz1214
62854	96.55	319	187.0		zzz1193,zzz1195
61196	98.76	323	187.0		zzz1199,zzz1204
49057	92.99	328	187.0		zzz1271,zzz1287
41470	99.08	325	187.0		zzz1312,zzz1349
37492	99.69	325	187.0		zzz1341,zzz1344
96165	96.45	338	187.0		zzz1053,zzz1122
84043	92.79	333	187.0		zzz1093,zzz1367
65735	97.31	334	187.0		zzz1162,zzz1170
64648	91.87	332	187.0		zzz1175,zzz1207
63928	97.0	333	187.0		zzz1180,zzz1181
37491	99.38	325	187.0		zzz1341,zzz1342
37088	99.38	325	187.0		zzz1344,zzz1350
32569	90.62	352	187.0		zzz1598,zzz2085
6430	95.56	338	187.0		zzzz955,zzzz956
112733	99.36	312	187.0		zzz1005,zzz1006
80938	97.78	316	187.0		zzz1103,zzz1109
79523	97.78	316	187.0		zzz1108,zzz1109
37356	99.08	325	187.0		zzz1342,zzz1350
36566	90.69	333	187.0		zzz1348,zzzzz13
25900	100.0	319	187.0		zzz2393,zzz2394
102500	88.36	335	187.0		zzz1034,zzz1057
73511	91.44	327	187.0		zzz1133,zzz1159
73510	91.44	327	187.0		zzz1133,zzz1160
65586	92.79	333	187.0		zzz1164,zzz1207
55452	99.08	325	187.0		zzz1236,zzz1237
55219	98.46	325	187.0		zzz1237,zzz1241
55218	98.46	325	187.0		zzz1237,zzz1246
55217	98.46	325	187.0		zzz1237,zzz1256
55216	98.46	325	187.0		zzz1237,zzz1260
55215	98.46	325	187.0		zzz1237,zzz1276
55214	98.46	325	187.0		zzz1237,zzz1281
55213	98.46	325	187.0		zzz1237,zzz1284
55212	98.46	325	187.0		zzz1237,zzz1291
55211	98.46	325	187.0		zzz1237,zzz1306
27887	100.0	304	187.0		zzz1999,zzz2000
17681	80.11	372	186.0		zzzz738,zzzz824
102499	88.36	335	186.0		zzz1034,zzz1056
74998	91.21	330	186.0		zzz1126,zzzz974
72936	91.46	328	186.0		zzz1135,zzz1158
70395	94.98	319	186.0		zzz1144,zzz1193
70070	94.98	319	186.0		zzz1145,zzz1193
63898	97.3	333	186.0		zzz1181,zzz1214
55686	98.77	325	186.0		zzz1235,zzz1236
55685	98.15	325	186.0		zzz1235,zzz1241
55684	98.15	325	186.0		zzz1235,zzz1246
55683	98.15	325	186.0		zzz1235,zzz1256
55682	98.15	325	186.0		zzz1235,zzz1260
55681	98.15	325	186.0		zzz1235,zzz1276
55680	98.15	325	186.0		zzz1235,zzz1281
55679	98.15	325	186.0		zzz1235,zzz1284
55678	98.15	325	186.0		zzz1235,zzz1291
55677	98.15	325	186.0		zzz1235,zzz1306
49233	97.25	327	186.0		zzz1270,zzz1296
44060	98.77	325	186.0		zzz1298,zzz1350
37490	99.08	325	186.0		zzz1341,zzz1350
36954	98.77	325	186.0		zzz1345,zzz1347
25899	99.69	319	186.0		zzz2393,zzz2395
25894	99.69	319	186.0		zzz2394,zzz2395
25752	88.01	367	186.0		zzz2411,zzz2420
65734	96.71	334	186.0		zzz1162,zzz1180
63332	92.15	331	186.0		zzz1190,zzz1207
109594	87.83	337	186.0		zzz1013,zzz1050
109593	87.83	337	186.0		zzz1013,zzz1051
109592	87.83	337	186.0		zzz1013,zzz1052
70394	95.61	319	186.0		zzz1144,zzz1146
70069	95.61	319	186.0		zzz1145,zzz1146
55451	94.38	320	186.0		zzz1236,zzz1343
54492	95.0	320	186.0		zzz1241,zzz1343
53602	95.0	320	186.0		zzz1246,zzz1343
51702	95.0	320	186.0		zzz1256,zzz1343
51049	95.0	320	186.0		zzz1260,zzz1343
48063	95.0	320	186.0		zzz1276,zzz1343
47063	95.0	320	186.0		zzz1281,zzz1343
46471	95.0	320	186.0		zzz1284,zzz1343
45202	95.0	320	186.0		zzz1291,zzz1343
42655	95.0	320	186.0		zzz1306,zzz1343
44059	98.46	325	186.0		zzz1298,zzz1342
44058	98.77	325	186.0		zzz1298,zzz1344
69745	96.24	319	185.0		zzz1146,zzz1193
64963	96.1	333	185.0		zzz1170,zzz1214
64783	91.24	331	185.0		zzz1173,zzz1207
63594	90.66	332	185.0		zzz1187,zzz1207
58739	100.0	325	185.0		zzz1213,zzz1229
43528	94.15	325	185.0		zzz1301,zzz1343
36190	97.23	325	185.0		zzz1351,zzz1352
24017	100.0	334	185.0		zzz2522,zzzz259
73222	91.13	327	185.0		zzz1134,zzz1158
70971	100.0	321	185.0		zzz1142,zzz1143
70970	100.0	321	185.0		zzz1142,zzz1148
70969	100.0	321	185.0		zzz1142,zzz1149
70685	100.0	321	185.0		zzz1143,zzz1148
70684	100.0	321	185.0		zzz1143,zzz1149
69102	100.0	321	185.0		zzz1148,zzz1149
65733	97.01	334	185.0		zzz1162,zzz1214
63423	90.94	331	185.0		zzz1189,zzz1207
54714	97.26	328	185.0		zzz1240,zzz1271
44057	98.46	325	185.0		zzz1298,zzz1341
24643	99.35	306	185.0		zzz2471,zzz2477
68048	100.0	321	185.0		zzz1152,zzz1154
55450	97.54	325	185.0		zzz1236,zzz1241
55449	97.54	325	185.0		zzz1236,zzz1246
55448	97.54	325	185.0		zzz1236,zzz1256
55447	97.54	325	185.0		zzz1236,zzz1260
55446	97.54	325	185.0		zzz1236,zzz1276
55445	97.54	325	185.0		zzz1236,zzz1281
55444	97.54	325	185.0		zzz1236,zzz1284
55443	97.54	325	185.0		zzz1236,zzz1291
55442	97.54	325	185.0		zzz1236,zzz1306
55210	94.06	320	185.0		zzz1237,zzz1343
40686	94.15	342	185.0		zzz1317,zzzz953
25732	82.69	364	185.0		zzz2419,zzz2420
69421	94.98	319	184.0		zzz1147,zzz1196
62574	94.98	319	184.0		zzz1194,zzz1196
63860	90.36	332	184.0		zzz1182,zzz1207
62254	94.98	319	184.0		zzz1195,zzz1196
58738	99.69	325	184.0		zzz1213,zzz1232
56615	99.69	325	184.0		zzz1229,zzz1232
55676	93.75	320	184.0		zzz1235,zzz1343
107077	99.68	317	184.0		zzz1022,zzz1024
73509	90.83	327	184.0		zzz1133,zzz1158
72935	89.33	328	184.0		zzz1135,zzz1136
72651	89.97	329	184.0		zzz1136,zzz1159
72650	89.97	329	184.0		zzz1136,zzz1160
68047	99.69	321	184.0		zzz1152,zzz1153
67501	99.69	321	184.0		zzz1154,zzz1153
67077	88.89	333	184.0		zzz1156,zzzzz79
63927	95.5	333	184.0		zzz1180,zzz1214
63247	88.89	333	184.0		zzz1191,zzzzz79
61977	94.67	319	184.0		zzz1196,zzz1197
54027	97.85	325	184.0		zzz1244,zzz1312
53175	97.85	325	184.0		zzz1248,zzz1312
52745	97.85	325	184.0		zzz1251,zzz1312
51472	97.85	325	184.0		zzz1257,zzz1312
50820	97.85	325	184.0		zzz1261,zzz1312
48662	97.85	325	184.0		zzz1273,zzz1312
47273	97.85	325	184.0		zzz1280,zzz1312
42429	97.85	325	184.0		zzz1307,zzz1312
30483	99.67	301	184.0		zzz1779,zzz1780
27484	96.3	324	184.0		zzz2074,zzz2076
23901	99.69	325	184.0		zzz2574,zzz2575
89482	94.96	337	184.0		zzz1075,zzz1162
89481	94.96	337	184.0		zzz1075,zzz1224
70393	94.04	319	184.0		zzz1144,zzz1196
70068	94.04	319	184.0		zzz1145,zzz1196
48453	97.23	325	184.0		zzz1274,zzz1349
44978	97.23	325	184.0		zzz1292,zzz1349
44797	97.23	325	184.0		zzz1293,zzz1349
17680	85.67	349	184.0		zzzz738,zzzz839
91885	89.43	331	184.0		zzz1067,zzzzz12
69420	94.36	319	184.0		zzz1147,zzz1192
62573	94.36	319	184.0		zzz1194,zzz1192
66936	88.59	333	183.0		zzz1157,zzzzz79
63780	90.33	331	184.0		zzz1183,zzz1207
63133	94.36	319	184.0		zzz1192,zzz1195
48452	99.06	319	184.0		zzz1274,zzz1355
44977	99.06	319	184.0		zzz1292,zzz1355
44796	99.06	319	184.0		zzz1293,zzz1355
29079	100.0	299	184.0		zzz1946,zzz1947
29078	100.0	299	184.0		zzz1946,zzz1957
29069	100.0	299	184.0		zzz1947,zzz1957
91263	88.82	331	183.0		zzz1069,zzzzz12
90927	88.82	331	183.0		zzz1070,zzzzz12
89480	94.66	337	183.0		zzz1075,zzz1174
89479	94.66	337	183.0		zzz1075,zzz1185
89478	94.66	337	183.0		zzz1075,zzz1222
78328	98.06	310	183.0		zzz1113,zzz1115
63132	94.04	319	183.0		zzz1192,zzz1197
59724	94.38	338	183.0		zzz1206,zzz1333
48451	97.54	325	183.0		zzz1274,zzz1312
44976	97.54	325	183.0		zzz1292,zzz1312
44795	97.54	325	183.0		zzz1293,zzz1312
37218	94.34	318	183.0		zzz1343,zzz1360
15260	81.74	356	183.0		zzzz759,zzzz835
73221	88.69	327	183.0		zzz1134,zzz1136
70392	93.42	319	183.0		zzz1144,zzz1192
70067	93.42	319	183.0		zzz1145,zzz1192
54258	96.32	326	183.0		zzz1242,zzz1271
[truncated: 109,895 more rows]
