# Supplementary material for: Discovery of several thousand highly diverse circular DNA viruses
Source: eLife journal article supplement (doi:10.7554/elife.51971), 2020-02-03
Supplement: fig3-data1 [file elife-51971-fig3-data1-v1.cys › CytoscapeSession-2019_08_03-06_44/tables/41-Mike_class_reps60+Full+Network/SHARED_ATTRS-org.cytoscape.model.CyNode-41+shared+node.cytable]

CyCSV-Version	1
SUID	bel.function	Description	Sequence	Sequence Length	Sequence Source	shared name
java.lang.Long	java.lang.String	java.util.List<java.lang.String>	java.lang.String	java.lang.Integer	java.lang.String	java.lang.String
	mutable	mutable	mutable	mutable	mutable
41 shared node
2729		Genomo_KT253578	mthfifsaryvlltyaqsgdlsewdildhisslgaeciigredhadggthlhvfvdfgrkkqsrrsdffdvgghhpnitpsrgrpecgydyaikdgdvvagglarpgggglpsladkwrtivsaesreeffdllreldpktlvtrwselcryadhayeskpepyvgpsgvefelgmvpelvrwrgdtladdselvlcyfgasrlgktlwarslgphvytmgilsghvllrdmpevnyavfddmrggigmfpsfkewlgaqavvsvkklyrdpvqvpwgrpciwlsnadprdqiksglsdrssrgqielvendiawledncifvellepifrasig*	336	USER	zzz1000
2728		Genomo_KT253579	mthfifsaryvlltyaqsgdlsewdildhisslgaeciigredhadggthlhvfvdfgrkkqsrrsdffdvgghhpnitpsrgrpecgydyaikdgdvvagglarpgggglpsladkwrtivsaesreeffdllreldpktlvtrwselcryadhayeskpepyvgpsgvefelgmvpelvrwrgdtladdselvlcyfgasrlgktlwarslgphvytmgilsghvllrdmpevnyavfddmrggigmfpsfkewlgaqavvsvkklyrdpvqvpwgrpciwlsnadprdqiksglsdrssrgqielvendiawledncifvellepifrasig*	336	USER	zzz1001
2727		Genomo_KT309029	mpsihfcaqhflltyahsegndvkpeldpfrivevlgalgaecivareyypttvgfhlhvfcsferrfrsrkidvfdvdgyhpnaepsrknalggydyaikdgevvagglerpsgvsgrrgpnrsadewaeitasetveefwrlceeldpkslvcnfpallrfsewrfrpveipyatpdgvfdlagypdladwrdnvlfgggsgespflwaeqrkslvlfgptrlgktvwarslgshmffgglfsagealghpeadyavlddiaggikffprfkdwlgcqmqfqlkvlykepalfnwgrpciwcsnvdpragldtvdqewlegncifveittpifhastg*	341	USER	zzz1002
2726		Genomo_KT363839	mssfkfqsryvlltypqcgdldpwavsdhlsspraecivgrevhrdggihlhcfadfgkrfssrntkifdvgghhpntspskgrpgvgydyaikdgdvvaeglgrpggdgdqeklptnaerwaeivaaesaeefleyywrrldpsamvrsftqcrairraslpstfrkptkfsdrsiirnlqewrdsvnglkvilwghtgggklscpalatslvlwgpsrlggtlwarslgnhayfgglfsmeeditnvgyavfddigglkflstykfwlshqkefyvtdrykgkklvqwgepaiwvnntdpreehgirdeeiewlnancqfvyigesii*	331	USER	zzz1003
2725		Genomo_KT598248	mpdfhcnakyflitysqsagldewavndhfsslgaeciiaredhadrgthlhafvaferkfrsrrpdifdvggfhpniapsrgnpaggydyatkhgdvvagglerpggggvsktstpwhwiiaassggelrdlvrelapkeailrwreiegyignefaeerpayvhpigfefelgmvpelvewrrntldadrvegvrykslvifgpsqtgkstwarslgnhffargkfngrefvkveqsvdyyvlddmegglrffpgwkhflgmqtwfnvrqfhrdppmvkggkpciwlcnldprdemyanlrhnesrvqvdndvawleancifvevhepifrania*	338	USER	zzz1004
2724		Genomo_KT732790	madssfrvqtryvlltysqcgdldpwvvhdlivgypaeciigredhadggthlhafvdfgrrvnirdprrfdvegfhpniqpcgrtpqkmldyaikdgdvvaggldptidsavqgsgdvwsrianaptvdefwdlarelaprallcnhqslrayaewhyrpeavayqhpdtlqlstagvpgldewvlgrprslilwgetrlgktvwarslgphiyccpqwnvddlkagledakyavlddiqgnfqffpsykgwlggqstftvtdkyrgkttiqwgrptiwlmnddpeevghvdlnwlrgncdiihltdtlll*	313	USER	zzz1005
2723		Genomo_KT732791	madssfrvqtryvlltysqggeldpwvvhdlivgypaeciigredhadggthlhafvdfgrrvnirdprrfdvegfhpniqpcgrtpqkmldyaikdgdvvaggldptidsavqgsgdvwsrianaptvdefwdlarelaprallcnhqslrayaewhyrpeavayqhpdtlqlstagvpgldewvlgrprslilwgetrlgktvwarslgphiyccpqwnvddlkagledakyavlddiqgnfqffpsykgwlggqstftvtdkyrgkttiqwgrptiwlmnddpeevghvdlnwlrgncdiihltdtlll*	313	USER	zzz1006
2722		Genomo_KT732792	msfyfcaryglftysqcadlnhwavldlfsglgaeciigrelhedggthlhvfadfgrrfrsrsskifdcegrhpnvsasrgkpdegwdyaikdgdvvagglerpdgvtrrsgdstsdqkwgeiagaedrdefwrlvheldpkslvihfpaiskycdwkfsprqveyvhpinidfvggevdgrdhwlaqagiglggtgkspqmntwgprfhpaglrgmkslcvygksrtgktlwarslgrhiyciglvsgaecaraeevdyavfddirggikffhaykewmgaqavvsvkllyrdpklvrwgkpsiwlsnkdprcdmsqedvewledncifvecnetifrante*	345	USER	zzz1007
2721		Genomo_KT732793	msfyfcaryglftysqcadlnhwsvldlfsglgaeciigrelhedggthlhvfadfgrrfrsrsskifdcegrhpnvsasrgkpdegwdyavkdgdvvagglerpdgvtrrsgdstsdqkwgeiagaedrdefwrlvheldpkslvihfpaiskycdwkfsprqveyvhpinidfvggevdgrdhwlaqagiglggtgkspqmntwgprfhpvglrgmkslcvygksrtgktlwarslgrhiyciglvsgaecaraeevdyavfddirggikffhaykewmgaqamvsvkllyrdpklvrwgkpsiwlsnkdprcdmsqedvewledncifvecnetifrante*	345	USER	zzz1008
2720		Genomo_KT732794	mtfhfsaryvlltyaqsgdlsewsvldhisslgaecivaredhadggthlhvfcdfgrkkqsrrpdyfdveghhpnivpsrgragegwdyatkdgnivagglerpgggglpstpdkwreivgaesreeffdllrqldpktlitrwselnryadaayatraepyvgptgiefelgmvpelarwgrelpvlygpsrlgktlwarslgphayimgmvsghvltrdmpdaqyavfddmrggismfpsfkewfgaqevvtvktlyrdpvqmkwgkpciwlanadprdqlkaditdrtpkgridliyndiewmeancifvglqeaifraste*	327	USER	zzz1009
2719		Genomo_KT732795	mtflfsaryvlltypqcgtldgwavsdhlsalgaecivgrenhsdggthlhafvdfgrkkqsrrsdffdvgghhpniapsrgrpergydyaikdgdvvagglarpgggglpeiankwseivsaesreqffdllrqldpktlvtlwtelnkyadaayaptpepyvgsdgkqfelgmvpelarwgeqlvandpvegnlvlygpsrlgktvwarslgphvysmgivsgklllrdapeakyavfddmrggigyfhswkewlgaqsvvtvkelyrdpvqlvwgrpciwlanrdprlelwadltdrsaaskrdmiqsdvdwleancifveldqpifrantd*	336	USER	zzz1010
2718		Genomo_KT732796	mtflfsaryvlltypqcgtldgwavsdhlsalgaecivgrenhsdggthlhafvdfgrkkqsrrsdffdvgghhpniapsrgrpergydyaikdgdvvagglarpgggglpeiankwseivsaesreqffdllrqldpktlvtrwtelnkyadaayaptpepyvgsdgkqfelgmvpelarwgeqlvandpvegnlvlygpsrlgktvwarslgphvysmgivsgklllrdapeakyavfddmrggigyfhswkewlgaqsvvtvkelyrdpvqlvwgrpciwlanrdprlelgayftarstpnkgalfqsdwawletncyfwgarttlffrpntd*	337	USER	zzz1011
2717		Genomo_KT732797	mpqflhnyryvlvtypqsgnldpwrvmerfsylgaeciigrehhedgglhlhvfadfgrkfrsrktnifdvdgrhpnrapskgtpekgydyaikdgdvvcgglgrpepssvgpgpsadkwaritqasdrdefwdlvhqldpkaaacsfnalskyadwrfaeiapeyehdgrikfvpgdadgrddwlsqsgigldepflgsrvkslvlfggtrtgkttwarslgphiyciglvsgtecakgtdakyavfddirggfgffhgykewlgaqphvsikqlyrepfymkwgkptiwvcntdprldsypnnarpdfdwmegnvdfievtssliesishantg*	337	USER	zzz1012
2716		Genomo_KT732798	mpakykledeqyfmltyptipdgfdtdalisvlerlgcdyrigrelhqdgkphihvmccfddpytdrdaratfkigtrvpnirvrrakpqrgwdyvakhagqkeghyiigekgtrpggdgdgserpsndawfeiilartreeffdaaarlaprqlacnfssltayadwkyrpvnvewstpdgefsvpfelrdwvddnvrgcsgrpkglvlfgatrlgktvwarslgshyycgglwdlasfsdsveyaifddmvnglragyfsykdwlggqfefmvqdkykgkrrvkwgkpaificnrdprdeigmddhnktkiewdwleencvfyevrepifrante*	338	USER	zzz1013
2715		Genomo_KT732799	mpakykledeqyfmltyptipdgfdtdalisvlerlgcdyrigrelhqdgkphihvmccfddpytdrdaratfkigtrvpnirvrrakpqrgwdyvakhagqkeghyiigekgtrpggdgdgserpsndawfeiilartreeffdaaarlaprqlacnfssltayadwkyrpvnvewstpdgefsvpfelrdwvddnglvlfgatrlgktvwarslgshyycgglwdlasfsdsveyaifddmvnglragyfsykdwlggqfefmvqdkykgkrrvkwgkpaificnrdprdeigmddhnktkiewdwleencvfyevrepifrante*	329	USER	zzz1014
2714		Genomo_KT732800	mpakykldneqffmvtfvrtpddwpvcdlitildrlgcdyrvgrelhadgkphyhamcvfdepysdtdarktfqvagrspnirvrrsrpdrgwnyvgkhagtkegheivaergecpmgdeedrpsndvwheiilartreeffekcatmaprqlaccfgqlssyadwkyakpkevyeppvgefleipeeltswvernltnpngrpkslilwggsrfgkttwarslghhfsiedqwdmklfdetasyavfndmkgglhagyfgykqwlggmpsltlqdkymrkktvkwlkptiwtcnkdpredplhhdidwdwmeinceiyevkapifraste*	332	USER	zzz1015
2713		Genomo_KT732801	mpssfhlknrryvlftysqagpdfdywavvdllgdmgaeciigrevhadggihfhvftdfgrlfstrkvrvfdvggkhpnikpigrtpaqaydyaikdgdvvagglgrpggdcdwdpdnfwaaathtgsseeflhfcdqlaprdfirgftnfraysnwkfnpgipeydqpdgatydtsaapgidewlsqrkslvlfgpygcgktlwarslarhiyfgsswsgelafagidtaeyaifddwagglkclpkykdwfgaqwhisvrrlhhdaklvewgrpiiwlcnrdprilsherddidwewmetachfvevtgklvtfhante*	323	USER	zzz1016
2712		Genomo_KT732802	mpsnfhlknrryvlftyaqsgqdfdywavvdllgdlgaeciigrelhedggihyhvfadfgrlfstrkvrifdvggkhpnikpigrtpaqaydyaikdgdvvagglgrpggdcdwdpdnfwsaathagsadeflhfcdqlaprdlvrgfpnfrayanwkwndrvavydqpdgavfdttaapgidewlsqrkslvlfgpygcgktlwarslarhiyfgsswsgelafagidtaeyaifddwagglkclpkykdwfgaqwhisvrrlhhdaklvewgrpiiwlcnrdprilsherddidwewmetachfvevtgklvtfhante*	323	USER	zzz1017
2711		Genomo_KT732803	mpsdfhlknrryvlftysqagpdfdywavvdllgdlgaeciigreehadggihfhvftdfgrlfstrkvrvfdvggkhpniqpigrtpakaydyaikdgdvvagglgrpggdcdwdpdnfwssaahcgsadeflhfcdqlaprdlirsfpnfrayanwkwdtgvpeysqpvgavfdttaapgidewlrkslvlfgpygcgktvwarslnthiyfgsqwsgkvafqgiesaeyaifddwkgglkglpgykdwfgaqwhvsmrqlhhdarlvewgrpiiwlcnrdprilsherdeidwewmeracdfvevtgllttfraste*	321	USER	zzz1018
2710		Genomo_KT732804	mplavnaqhflltyahvegnddkpeldpfrivdvlgakgaecivarefypntggfhfhvfcsfernfrsrkadvfdvdgyhpniepsrknaaggfdyatkdgdivagglerpsrtrgragttgaqatwgeitaaesaeefwrlceeldpksmvcnfpalskfaewrfrpipvpyaspdgvfdtsgypiieewrssvfdeysgrgesytyltslvlfgptrlgkttwarslgshiyfgglfsageamrcpeaeyaimddiaggikffprfkdwlgcqaqfqlkvlykepalydwgkpciwcynvdpragmsvediewlegncvfveitspifhante*	337	USER	zzz1019
2709		Genomo_KT732805	mplavnaqhflltyahvegnddnpeldpfrivdvlgakgaecivarefypntggfhfhvfcsfernfrsrkadvfdvdgyhpniepsrknaaggfdyatkdgdivagglerpsrtrgrtgttgaqatwgeitaaesaeefwrlceeldpksmvcnfpalskfaewrfrpipvpyaspdgvfdtsgypiieewrtsvfdeysgrgesytyltslvlfgptrlgkttwarslgshiyfgglfsageamrcpeaeyaimddiaggikffprfkdwlgcqaqfqlkvlykepalydwgkpciwcsnvdpragmsvediewlegncfflgitspifhantk*	337	USER	zzz1020
2708		Genomo_KT732806	mapfilknvrralltysqcgtldpfavsdhfsnlgaecivgrerhadgglhlhvfvdfgrqfssrktdvfdvgghhpniakcgrtpwkaydyaikdgdvvaggldrpieesgdgsgtidstwhsilaaetpeefwalchdlaprdlarsfpslqkycdwryrpvtrpyctpdgyefdtsrapelnewllqanlglrgnwdqgrpkslvlygdtrlgktvwarshgphiyfcglysgaeamkhdgadyavfddiqggikffhgfknwlgaqaefqvkilykdpviiqwgkpsiwlsnsdprldlspsdatwlegncifvelsvplftsranta*	333	USER	zzz1021
2707		Genomo_KT732807	mapfilknvrralitysqcgnldpfevsnhfsnlgaecivgrerhsdggihlhvfvdfgrqfssrktdvfdvggchpniakcgrtpwkaydyaikdgdvvagglerpdeesgdgsgsvdstwhsilaaetpeefwslchdlaprdlarsfpslqkycdwryrpvtrpystpagydfdtscapeldewlpkslvlygdtrlgktvwarshgphiyfcglysgaeamkhdgadyavfddiqggikffhgfknwlgaqaefqvkvlykdpvliqwgkpsiwlsnsdprydlspsevtwmegnclfveltaplftsraste*	318	USER	zzz1022
2706		Genomo_KT732808	mapfilknvrralitysqcgnldpfevsnhfsnlgaecivgrerhsdggihlhvfvdfgrqfssrktdvfdvggchpniakcgrtpwkaydyaikdgdvvagglerpdeesgdgsgsvdstwhsilaaetpeefwslchdlaprdlarsfpslqkycdwryrpvtrpystpagydfdtscapeldewlpkslvlygdtrlgktvwarshgphiyfcglysgaeamkhdgadyavfddiqggikffhgfknwlgaqaefqvkvlykdpvliqwgkpsiwlsnsdprydlspsevtwewrgivlfvelrrliyslvpvqsrvypqs*	325	USER	zzz1023
2705		Genomo_KT732809	mapfilknvrralitysqcgnldpfevsnhfsnlgaecivgrerhsnggihlhvfvdfgrqfssrktdvfdvggchpniakcgrtpwkaydyaikdgdvvagglerpdeesgdgsgsvdstwhsilaaetpeefwslchdlaprdlarsfpslqkycdwryrpvtrpystpagydfdtscapeldewlpkslvlygdtrlgktvwarshgphiyfcglysgaeamkhdgadyavfddiqggikffhgfknwlgaqaefqvkvlykdpvliqwgkpsiwlsnsdprydlspsevtwmegnclfveltaplftsraste*	318	USER	zzz1024
2704		Genomo_KT732810	mapfilknvrrafitysqcgdldpfevsnhfsnlgaecivgrerhsnggihlhvfvdfgrqfssrktdvfdvggchpniakcgrtpwkaydyaikdgdvvagglerpdeesgdgsgsvdstwhsilaaetpeefwslchdlaprdlarsfpslqkycdwryrpvtrpystpagydfdtscapeldewlpkslvlygdtrlgktvwarshgphiyfcglysgaeamkhdgadyavfddiqggikffhgfknwlgaqaefqvkvlykdpvliqwgkpsiwlsnsdprydlspsevtwmegnclfveltaplstsraste*	318	USER	zzz1025
2703		Genomo_KT732811	mapfilknvrralltysqcgtldpftvsdhfsnlgaecivgrerhsdggihlhvfvdfgrqfssrktdvfdvggchpniakcgrtpwkaydyaikdgdvvagglerpieasgdgagtvdptwhsileaetpeefwalchdlaprdlarsfpslqkycdwryrpvdephrtpdgyqfdtsrapelnewllqanlglrqlglrpkslvlygdtrlgktvwarshgphiyfcglysgaeamkhdgadyavfddiqggikffhgfknwlgaqaefqvkvlykdpvriqwgkpsiwlsnsdprfdltpsdvtgwretvlfvelteplftshante*	331	USER	zzz1026
2702		Genomo_KT732812	mvpfilkkvrrailtysqcgtldpftvsdhfsnlgaecivgrerhsdggihlhvfvdfgrqfssrktdvfdvggyppniakcgrtpwkaydyaikdgdvvagglerpieasgdgagtvdptwhsileaetpeefwalchdlaprdlarsfpslqkycdwryrpvdephrtpdgyqfdtsrapelnewlpkslvlygdtrlgktvwarshgphiyfcglysgaeamkhdgadyavfddiqggikffhgfknwlgaqaefqvkvlykdpvriqwgkpsiwlsnsdprydlspsevtwewrgivlfvelrrliyslvpvqsrvypqs*	325	USER	zzz1027
2701		Genomo_KT732813	mstfrfqaryalltyaqcgdldpfavvnhlaelaaeciigredhadggihlhafvdfgkkyrtrntrtfdvegyhpnispsrrtpeegydyaikdgdivagglerpvperlpatsdiwpeivnassesefwalceslapralvtqftqlraftawkfppirvpyetpqgiilntdwvpelngwvrdnlqssqngrklsctkslvlygpsrmgktiwarslgdhayfgglfsmdedldnvkyavfddfggikffpsykfwlghqnqfyvtdkykgkklvhwarpsiwlsnsdprdepgvevdwlnancdfvyldspiveveqd*	323	USER	zzz1028
2700		Genomo_KT732814	mpsnglfvnsryklltyaqcgdldpfdivdllsglqgecivgrelhsdggihlhvfvdfgrkfrsrsvgifdvggrhpnvvaswgtpeegydyaikdgdvvagglerptpresragngsaaakwatiadaddreqffelvksldpktfvtrlqdlqrfadwkfrsdpepyitpnnihfpddgtdgraewvhsslclygesrlgktlwarslghhvyfcglfsgkellnnldadyavfddmqggisffhgwknwfgcqlnfqvkqmyrdpvnvtwgksciwgsnddprdsmkqvdvdwinkncifvevtqpifhante*	318	USER	zzz1029
2699		Genomo_KT862238	msqptfrlqsryvlltyaqcgdldpwlvhnhvvafpaeciigrenhadggihlhafvdfgkrvdirdnrrfdvggfhpniapcgrtpqkmldyaikdgdvvagglnpildvsdaetdsiwhrianapsvdefwaitrelaprallcnhqslrayaewhyrpvatryehphglllrtdhvpqldewvrdnlsgsgrprslilwgetrlgktiwarslgahiycclqgnvddfkagledakyavlddmqgnfqffpsykgwlgaqqtftvtdkyrgkttiqwgrptiwlmnedpeevghvdlnwlrgnctivhlteslia*	319	USER	zzz1030
2698		Genomo_KT862239	msqptfrlqsryvlltyaqcgdldpwlvhnhvvafpaeciigrenhadggihlhafvdfgkrvdirdnrrfdvggfhpniapcgrtpqkmldyaikdgdvvagglnpildvsdaetdsiwhrianapsvdefwaitrelaprallcnhqslrayaewhyrpvatryehphglllrtdhvpqldewvrdnlsgsgrprslilwgetrlgktiwarslgahiycclqgnvddfkagledakyavlddmqgnfqffpsykgwlgaqqtftvtdkyrgkttiqwgrptiwlmnedpeevghvdlnwlrgnctivhlteslia*	319	USER	zzz1031
2697		Genomo_KT862240	mtfrfaakyglltyaqigdrdveefgwrvsdmlgslgaecivgreshadgglhihaffmferkfqsrnvrvfdmdgchpnivrgystpedgaryaikegdviaggldvdslgssvagsktvwaqiilaesrddffaacaelaprallcsftslrcyadwkyredpapyrhpedvsfdtsrfpeldrwvqdslrgaqrgrrrslilygptklgktlwarslgnhayfgglfsmdesiddvdyavfddmqgglkffhsykfwlgaqsqfyvtekykgkrlvhwgkpciylynhnplcdegadhdwllgncdivgldaddsllvpeegslgger*	332	USER	zzz1032
2696		Genomo_KT862241	mppkqfqfqaryvlltyaqcgdldawavndhlaflggeciigrehhadggthlhafcdfsrkfrsrrpdvfdvggfhpnieasrgrpeggydyaikdgdvvagglsrpggrgvyedvsswsiivsqesegdfwecvarldprslctnynslrayanwkyrptpvqyvhpagvefelgmvpelavwreialganrqrgrakslviygdtrlgktlwarslgphiytigqmsgevilrdgpdadyvvfddmrggldffhgwkewfgcqtvvtvkklykdpmqmpwgkpviwlanrdpreelrdsitchtslgkqaaiegdikwldgncifveldhaifrante*	342	USER	zzz1033
2695		Genomo_KT862242	mtfilnaryflvtypqcgtldewavndhfgslgaeclvgreihadggthlhvfcdfgrkfrsrradifdvqghhpnierskrnprkgasyaakdgdivagglaveslptkivsgpqdpgstlvccesraefyevaddicpwdlitrfgsfhayakwkwpevgmgyerpaglvlsdgafpdlvsyregildvrgkvktlviygppltgkttwaqslgnhvymkktfnakeaslceskdycviddisggikffphwkdwfggqpyvqirllyrdelllrwgkptiwlnnrdprdqlrdmvgrdysdeqyqndvewmdancifvyvdspivtfhante*	336	USER	zzz1034
2694		Genomo_KT862243	msafqvnsryvlltyaqcgdldpwavndllstlgaeciigrerhedggihlhafvdfnrkfrtrrsdifdvdghhpnisqsrgtpekgydyaikdgdvvagglgrpegksgggdgsthakwtaitqaenreqfwelcheldpkaaatsftqlskyadwrfapdppvyehpigisftdgdldgrrewldqagigggerrgrckslclfgrsrtgktlwarslgqhiycvglvsgdecmkapdvdyaifddirggmkffpsfkewlgaqawvtvkrlyrepalvqwgkpsiwlansdprndmsqddvqwmedncifvecnetifranie*	328	USER	zzz1035
2693		Genomo_KT862244	msafqvnsryvlltyaqcgdldpwavndllstlgaeciigrerhedggihlhafvdfnrkfrtrrsdifdvdghhpnisqsrgtpekgydyaikdgdvvagglgrpegksgggdgsthakwtaitqaenreqfwelcheldpkaaatsftqlskyadwrfapdppvyehpigisftdgdldgrrewldqagigggerrgrckslcifgrsrtgktlwarslgqhiycvglvsgdecmkapdvdyaifddirggmkffpsfkewlgaqawvtvkrlyrepalvqwgkpsiwlansdprndmsqddvqwmedncifvecnetifranie*	328	USER	zzz1036
2692		Genomo_KT862245	mtfainakyvlltyaqcgdldgfavmdriselggecivarethadggthlhvfcdfgrkfrsrktdvfdvlgyhpniepsrgtpekgydyaikdgdvicgglarpttsrtgdssanskwteitsatnrdefwelvhlldpksaacsfgqlqkycdwkfavapptytsptgvefddgsidgrldwlqqsgvgsgqpllgrcmslclygesrtgktlwarslgahiycvglvsgdecmkaddadyaifddirggikffpsfkewlgcqawvtvkclyrepklikwgkpsiwisntdprdnmetsdvhwmnkncifvavdspifrante*	327	USER	zzz1037
2691		Genomo_KT862246	msafqvnsryvlltyaqcgdldpwavndllstlgaeciigrerhedggihlhafvdfnrkfrtrrsdifdvdghhpnisqsrgtpekgydyaikdgdvvagglgrpegksgggdgsthakwtaitqaenreqfwelcheldpkaaatsftqlskyadwrfapdppvyehpigisftdgdldgrrewldqagigggerrgrckslclfgrsrtgktlwarslgqhiycvglvsgdecmkapdvdyaifddirggmkffpsfkewlgaqawvtvkrlyrepalvqwgkpsiwlansdprndmsqddvqwmedncifvecnetifranie*	328	USER	zzz1038
2690		Genomo_KT862247	mtfainakyvlltyaqcgdldgfavmdriselggecivarethadggthlhvfcdfgrkfrsrktdvfdvlgyhpniepsrgtpekgydyaikdgdvicgglarpttsrtgdssanskwteitsatnrdefwelvhlldpksaacsfgqlqkycdwkfavapptytsptgvefddgsidgrldwlqqsgvgsgqpllgrcmslclygesrtgktlwarslgahiycvglvsgdecmkaddadyaifddirggikffpsfkewlgcqawvtvkclyrepklikwgkpsiwisntdprdnmetsdvhwmnkncifvavdspifrante*	327	USER	zzz1039
2689		Genomo_KT862248	mptfyfsaryvlltysqcgtldewdvldhisslgaeciigredhadggthlhvfvdfghkkqsrrsgffdvggkhpnvvpsrgragegwdyavkdgnvvagglprpgsgglpsveniwssivdaqsreeflelvralapkefilrhkelleyadryyaeriepyvgpdgiefelgmvpelagwgrelveadsvtgeakslvlygpsrlgktlwsrslgshvyimgmlsgavllrdmpdaqyavfddlrggiamfpsfkewlgaqavvtvkklyrdpvqvswgkpciwlansdprdqlkaditertprgridliyediawledncvfvnvtepifrast*	339	USER	zzz1040
2688		Genomo_KT862249	mtqmlfcnskyvlltyaqcgdldewavsdhlsslgaecivarelhpttggvhlhvfvdfgrkfrsrrvdifdvegrhpnvvpskgtpekgydyaikdgevvagglerprggrpgtvsgleaiahlcetqdefldiygevdtrgliknfanvrsyakwryagtlpkyespysigefrrgsdgrdqwlaqsgirsgdlvvrpkslvlygpsrtgktswarslgthvyfggafsggdalacaddvkyavfddmrggipffhgwkdwlgaqqefmvkalyhdpklfkwgrpsiwcanrdpreemenhmfkgtfcrgdidwlnancifvevnspifrasie*	337	USER	zzz1041
2687		Genomo_KT862250	msafhfsaryvlltypqsgelsewavldhisglgaeciigredhadggthlhvfadfgrkkqsrrgdyfdvggkhpnvvpskgrpeggwdyatkdgnvvagglgrpgtsglpkapnpwreivgaegreefldlvrqldpksfvlkhqeivryadiffaedrepyvgpdgirfelgmvpqldewrreslgdnpvegksrslvlygpsrlgktiwarslgphvyimgllsgavllrdapgasyavfddmrgglpmfpsfkewfgsqslvtvkkmyrdpvqmrwgkpciwlansdprdqlkaditdrtpkgrvdliyediawleancvfvelsepifranmhnspe*	344	USER	zzz1042
2686		Genomo_KT862251	mtqmlfcnskyvlltyaqcgdldewavsdhlsslgaecivarelhpttggvhlhvfvdfgrkfrsrrvdifdvegrhpnvvpskgtpekgydyaikdgevvagglerprggrpgtvsgleaiahlcetqdefldiygevdtrgliknfanvrsyakwryagtlpkyesppsfgefrgggdgrdqwlaqsgirsgdvvvrpkslvlygpsrtgktswarslgphvyfggafsggdalacaddvkyavfddmrggisffhgwkdwlgaqqefmvkalyadpklfkwgrpsiwcanrdpreemechmfkgtfcqgdidwlnancifvevnspifhanre*	337	USER	zzz1043
2685		Genomo_KT862252	mtfrfaakyglltyaqigdrdveefgwrvsdmfgslgaecivgreshgdgglhihaffmferkfqsrnvrvfdmdgchpnivrgystpedgaryaikegdviaggldvdslgssvagsktvwaqiilaesrddffaacaelaprallcsftslrcyadwkyredpapyrhpedvsfdtsrfpeldrwvqdslrgaqrgrrrslilygptklgktlwarslgnhayfgglfsmdesiddvdyavfddmqgglkffhsykfwlgaqsqfyvtdkykgkrlvhwgkpciylynhnplcdegadhdwllgncdivgldandsllvpeegslrger*	332	USER	zzz1044
2684		Genomo_KT862253	mpfhfgaryalityaqcnaldgfrvmdhfsglgaecivgrevhadggihlhcfidfgrkfrsrrtdifdvdgrhpniapsygtpwrgydyaikdgdvicgglerpeeprskrvtkdwdpwteitnardrehfwelvhhldpkaaacnygqlakyadwrfaakppvyespggiefvggdvdgrdawcdqsgirsgdpligrcmslvlygdsrvgktlwarslgahvytvgmvsggelkkvaddtvkyavfddirggikffpafkewlgaqayvtikelyrepalvrwgrpsvwisnddprlvmeasdvswleancifveiteaifrakr*	329	USER	zzz1045
2683		Genomo_KT862254	msnsfrlqaryvlltysqcgdldpwmvcdhlaslhaecligrenhvdggihlhafvdlgkktdirdsrlfdvngqhpnitpcgrtpqkmldyavkdgdvvaggldpvlgdevssadtvwhrianaatvdefwvitrelaprallcnhqslrayaewhyrpptlvyehpcelrlradrlpeldewvreslsgtggrpkslilwgesklgktiwarslgqhiyccmqfnvddvranlqeaqyaifddiqgnfqffpsykgwlgaqhqftvtdkykgkttinwgrpsiwltnddpeevghvdlnwlrkncvivnitesivelv*	321	USER	zzz1046
2682		Genomo_KT862255	mtfrfaakyglltyaqigdrdveefgwrvsdmlgslgaecivgreshadgglhihaffmferkfqsrnvrvfdmdgchpnivrgystpedgaryaikegdviaggldvdslgssvagsktvwaqiilaesrddffaacaelaprallcsftslrcyadwkyredpapyrhpedvsfdtsrfpeldrwvqdslrgtqrgrrrslilygptklgktlwarslgnhayfgglfsmdesiddvdyavfddmqgglkffhsykfwlgaqsqfyvtdkykgkrlvhwgkpciylynhnplcdegadhdwllgncdivgldaddsllvpeegslgger*	332	USER	zzz1047
2681		Genomo_KU343136	mstfrfqaryalltypqcgdldpfavvdhlaglgaeciigredhadggihlhafvdfgvkyrtrnarafdvegchpnvspsrgtpedgfdyaikdgdvvagglerptggrvdanggvwveiinaknesefwalcqslaprslvtsftqlrayaawkfppirvpyetpegvnidtswvaeldewvrenlvgsqtggkkslvvygpsrmgktvwarslgkhayfgglfsldedldgieyaifddfggikflpsykfwlghqkqfyvtdkykgkklvhwarpsiwlsnsdprdelgvdtdwlnancvfvyldspivs*	315	USER	zzz1048
2680		Genomo_KU343137	mpfrfqaryglltypqigsrdsdalawsisnmlgelgaecivgreshadgglhlhaffmferkfesrdvrvfdvdglhpnivrgyttprkgadyaikdgdvvaggldisqlgapvshtsavwatiimastreeffeacatlaprslvcsftslkcyadwkyrpepvpyehpsglsfdttaypeldawvshalegpecggrrrslvlygptrlgktlwaralgshayfgglfsldesledvdyavfddmqgglkffhaykfwlgaqsqfwatdkykgkrlihwgkpsiyiangnpltdegvdhdwllgncdfveittsllvpevgpvtlev*	331	USER	zzz1049
2679		Genomo_KX434768	mpakyklndeqffmltyptipdgfdtdglinvlerlgcnyrigrelhqdgkphlhamlcfdepytdgdaratfkigtrvpnirvrrvkpergwdyvgkhagtkeghyivgekgtrpggdedsterssndawfeiilartreeffdsaarlaprqlacnfssltayadwkyrpvaaaysnpdgefsvpfelkdwvddnvrgcsgrpkglvlfgatrlgktvwarslgnhyycgglwnladfdetveyaifddmvnglragyfqykdwlggqyefmvqdkykgkrrvkwgkpsificnrdprdeiglddhnkskiewdwmeenclfyelrepifraste*	338	USER	zzz1050
2678		Genomo_KX434769	mpakyklndeqffmltyptipdgfdtdglinvlerlgcnyrigrelhqdgkphlhamlcfdepytdgdaratfkigtrvpnirvrrvkpergwdyvgkhagtkeghyivgekgtrpggdedsterssndawfeiilartreeffdsaarlaprqlacnfssltayadwkyrpvaaaysnpdgefsvpfelkdwvddnvrgcsgrpkglvlfgatrlgktvwarslgnhyycgglwnladfdetveyaifddmvnglragyfqykdwlggqyefmvqdkykgkrrvkwgkpsificnrdprdeiglddhnkskiewdwmeenclfyelrepifraste*	338	USER	zzz1051
2677		Genomo_KX434770	mpakyklndeqffmltyptipdgfdtdglinvlerlgcnyrigrelhqdgkphlhamlcfdepytdgdaratfkigtrvpnirvrrvkpergwdyvgkhagtkeghyivgekgtrpggdedsterssndawfeiilartreeffdsaarlaprqlacnfssltayadwkyrpvaaaysnpdgefsvpfelkdwvddnvrgcsgrpkglvlfgatrlgktvwarslgnhyycgglwnladfdetveyaifddmvnglragyfqykdwlggqyefmvqdkykgkrrvkwgkpsificnrdprdeiglddhnkskiewdwmeenclfyelrepifraste*	338	USER	zzz1052
2676		Genomo_KY056250	mtrfrlrakiffltysqigedviqelrstptqhfrfieevlgtpsdyrlsreshqdgashlhcvvgyaetqlvnsaslfdyrgahpniksirgtikkpwnyagkdgdiihelggpnggdsgtggsiaerwshaidaptedeffervrmadprsyvlfnraivqyankiyrkpreytsprfrllggsriegwlsqsdlgrrggerrqsliiwgpsrtgktvwarslgrqiymnghlnidkyddeadyaifddisggfqffpsykgwlgcqeefectdkyrakttiywgrptimcmnsdpladphvdvawlllnceivhiedplveii*	327	USER	zzz1053
2675		Genomo_KY214433	mssfrfqaryglftysqcgrlrpqqvsehftslgadhiigrethqdggthlhvfadfrrkyrtrdnrkfdvegfhpnivpslrnpaggwdyatkdgdicagelsrpddergsrsraadagwdalraaetrddffriasehlfshlvksfnsfsayadwkfrvdrtpyihdpnvtfdlgqlhqlrewirgnlppgnkrgislllwgrsrtgktwlarsfgshcyfgglfaldeyeyndkvdyavfddiqggfkyfpaykswlgqqaefyctdkfrkkkyikwgrpciwimnedpytqevdidwleknclivhidrplyqta*	321	USER	zzz1054
2674		Genomo_KY214441	mpfrfqakyglltysqcgdldpfsvvdmlgdlgaecivgreghtdggihlhaffmferkfssrdvrvfdvdgqhpnvrsgwstpekgwdyatkygdvvagglerpgnrvsasssvwatillsedresffetcerlapgtllrnftslrcyadwryrpepepyihppiisfetagfpeldqwvqqnlvgprvegrrrslvlygesrtgktlwarslghhayfgglfsldesvddvdyaifddmqgglsffhsykfwlgcqlefwatdkyrhkqkikwgrpciyisnnnpladagvdvdwlminctfvcidqpifranta*	319	USER	zzz1055
2673		Genomo_KY214442	mtfilnaryflvtypqcgaldewtvndhfgslgaecivgrevhadggthlhvfcdfsrkfrsrradifdvqghhpniarskrnprkgadyaakdgdivaggldigglptslvsgaqdpgstlvacenraeffevaedmcpwdlitkfgsmyayakwkwpeigmgyerppglvltdgafpdlvsyreaildvrgkvktlvihgpsltgkttwaqslgnhiymrarynareaslcegkdycviddisggirffphwkdwfggqpyvqirllyrdevllrwgkptiwlnnrdprdqlrdmvgrdytdeqyhndvewmdancifvyvdspivtfhante*	336	USER	zzz1056
2672		Genomo_KY214443	mtfilnaryflvtypqcgaldewtvndhfgslgaecivgrevhadggthlhvfcdfsrkfrsrradifdvqghhpniarskrnprkgaeyaakdgdivaggldigglptslvsgaqdpgstlvacenraeffevaedmcpwdlitkfgsmyayakwkwpeigmgyerppglvltdgafpdlvsyreaildvrgkvktlvihgpsltgkttwaqslgnhiymrarynareaslcegkdycviddisggirffphwkdwfggqpyvqirllyrdevllrwgkptiwlnnrdprdqlrdmvgrdytdeqyhndvewmdancifvyvdspivtfhante*	336	USER	zzz1057
2671		Genomo_KY230613	mtfrfaakyglltyaqsdgldplsivnhlgdlgaecivgrelhddggthyhaffmfekkfqsrnarvfdidsyhpnilrgiktpesmydyatkdgdicggglerpdprgessknnddfwrgvfdaegkeetlrcarelgvglfgryyfqvraiaeekarrspldykpddslewelgpypeltdwcasylgrrggrprslvlvgpsrtgkttwarclgghfffggnfdmgqlihdcddikyaifddmpglkyfptwkfwlgaqdtftvtdkykgkmcfdwgrpviwcnnrdpredpdadvdwldancifvnvpadyplikq*	321	USER	zzz1058
2670		Genomo_KY230614	mpsfvhnyryalvtysqygdldpwrvmerfsslgaecivarehhedgglhlhvfadfgrkfrsrrtdildvdgrhanvepsagtpekgydyaikdgdvvcgglarpepsavgdgptaakwaritsaetrsefwklcheldpkaaacnfsalskycdwrfaedppeyehdgrikfvpgdgdgrddwvsqsgirldepflgmwvfapnrvkslvlyggtrtgkttwarslgshvyciglvsgtecargldakyavfddirgglaffhgykewlgaqphvsikqlyrepyymrwgkptiwvcntdprldaypqnarpdfewmegnctfievtdsliesishantd*	343	USER	zzz1059
2669		Genomo_KY230625	mpfrfqakyglltypqcgdldpwhivdmlgdlgaeciigredhvaggvhlhaffmferkfesrnvrvfdvdghhpnvvpgystpekgwtyatkdgdivagglecprmreevsgasekwsrillsesrdeffetvarldpralcinfgslrayadwryrptrdpyvtpeglsfdtsgfpeldqwvreslvglpgtrprsliiigdtrlgktlwarslgkhayfgglfcldesledvdyavfddmqggleffhsykfwlgaqkqfyatdkyrgkklvdwgrpsiyisntnpladkgadvdwlmgnctivhvdtaifrante*	320	USER	zzz1060
2668		Genomo_KY302866	mtfilnaryflvtypqcdgldewsvndhfgslgaecivaredhadggthlhvfcdfgrkfrsrradifdvggfhpnierskknprkgaayackdgdvvagglaipqlptrlvsgaqdpgstlvcaesqreffdvaedlitkfgsfyafarwkwpeldksyesppgltitdgafpelvryrtevmgnrvntlcvygesltgkttwaralgshlymkarfnarsamlaegveyaviddisggiayfphfkdwfggqpdvqvralykddvllrwgkptiwlnqrdprdqlrdmqgpkystdqyesdvkwlddncifvyvdspivtfraste*	329	USER	zzz1061
2667		Genomo_KY302867	mtfilnaryflvtypqcdgldewsvndhfgslgaecivaredhadggthlhvfcdfgrkfrsrradvfdvggfhpnierskknprkgaayackdgdvvagglaipqlptrlvsgaqdpgstlvcaesqreffdvaedlitkfgsfyafarwkwpeldksyesppgltitdgafpelvryrtevmgnrvntlcvygesltgkttwaralgshlymkarfnarsamlaegveyaviddisggiayfphfkdwfggqpdvqvralykddvllrwgkptiwlnqrdprdqlrdmqgpkystdqyesdvkwlddncifvyvdspivtfraste*	329	USER	zzz1062
2666		Genomo_KY308268	mppftynaryflvtyaqcgdldpwavndhfaslgaecivareshadegthlhafvdfgrkfrsrnarkfdvdgrhaniapskgkpeggydyaikdgdvvagglarpsvngavsngdkwseivgaeseqlfweaverldpkalctnygnlrkfadwryrveperyehpaglnfelgmvpdlaawggfgsgddtvggrvrslclygptkvgkttwarslgnhvyfmglmsgevalrdmpdaeyavfddmrggikffqawkewfgaqlvvtvkklyrdpvqvkwgkpciwlcnedprtslepaeidwiegncdfidvhssiishant*	325	USER	zzz1063
2665		Genomo_KY308269	mpfrfaakyglltypqcgdldpwsvsdhlgrlgaeciigredhsdggvhlhaffmferrfesrdvrvfdvegrhpnvvrgystpskgyayatkdgdvvagglecpidgasvseasskwarailaesreeffaivaeldpralccsfgslrayadwkyrpvldqyvtpagisfctdevpqlhdwvqrnlagsvvgrprsliligetrlgktlwarslgkhayfgglfcldesledvdyavfddmqggleffhaykfwlgaqsqfyatdkykgkqlihwgrpaiycsnttpladkgadvdwlmgncdivhidspifrant*	319	USER	zzz1064
2664		Genomo_KY308270	mvrrfkiddeqffmltypttpddfpiddlvgildglgcnyrigrelhedgkphfhamvvfdnpysdrdgrttfrvggrapnirmrrtkpergwdyvgkhagskdghyivaekgdrpggdgdsndrstndvwheiilartreeffdlasrlaprqlacsftqltsyadwkyrvvetpyaspegefevpielqqwvnanlrrehhgrpnglvlfgatrlgktvwarslgqhyycaglwdlsrfdesveyaifddmvgglragyfnykdwlggqfeftvqdkykhkkqikwgkpaiyicnqdprtditpmgknaiewdwmeencvfyectetifrast*	336	USER	zzz1065
2663		Genomo_KY308271	mtflfsaryvlltyaqcgtldgwavsdhlsalgaecivgrenhsdggthlhafvdfgrkkqsrrpdffdvgghhpniapsrgrpergydyaikdgdvvagglarpgggglpevankwseivaaesrdeffdllrqldpktlvtrwtelnkyadaayaptpepyvgsdgkqfelgmvpelarwgeqlvandpiegrmrslvlygpsrlgktiwarslgphvysmgivsgklllrdapgaayavfddmrggigyfhswkewlgaqsvvtvkelyrdpvqlvwgrpciwlanrdprlelwadltdrsaaskrdmiqsdvdwleancifvelqepifrante*	339	USER	zzz1066
2662		Genomo_KY312557	mpefdfharyglftysqcdgldafdvvdhfsslaaeciigrerhadegthlhcfvdfgrkrrfrrhvfadvgrfhpniqpsrgtpgtaydyaikdgdvvggglerpddggtsgrrsnvptdntmatlvsiedehafwdavremapglllrnhpslesyakrrfapriqqychpqqlvfrlegvpeldswrednllhvdgsdgrrrkslvlygdtrlgktvwarslgnhiyfcglysgseamrykdadyaifddmqlkyvpqfknwlgcqanfqvkvlykdpvliewgkpciwlsnddprheahltdtdirwlegnctfihltepivhante*	332	USER	zzz1067
2661		Genomo_KY312558	mtfrfaakyglltysqapnldpfdivnllaelgaecivgrenhqdggthyhaffmfprefrtrnprvfdcggyhpnilrgrktpramyeyatkdgdicgggleapedeprtsssddfwaavfaaegreetfrvareinvglfgryyfqvraigegkaiknpldyvspaalefstssypelddwcetylgrrggrpkslilvgptrtgktswarslgthfyfgghfdmnqllydnesvqfavfddmpslkffpmykfwmgaqetftvtdkykgkmnfdwgrpiiwcnnkdprsdpdadadwidgncivvnvpedmplftshasreshhne*	330	USER	zzz1068
2660		Genomo_KY487842	mpefdfharyglftysqcdgldafdvvehfsslaaeciigrerhadegthlhcfvdfgrkrrfrrhvfadvgrfhpniqpsrgtpgtaydyaikdgdvvggglerpddsgtsgrrsnvptdntmatlvsiedehafwdavremapglllrnhpslesyakrrfapriqqychpqqlvfrlegvpeldswrednilhvdgsdgrrrkslvlygdtrlgktvwarslgnhiyfcglysgseamrykdadyaifddmqlkyvpqfknwlgcqanfqvkvlykdpvliewgkpciwlsnddprheahltdtdirwlegnctfihltepivhante*	332	USER	zzz1069
2659		Genomo_KY487881	mpefdfharyglftysqcdgldafdvvehfsslaaeciigrerhadegthlhcfvdfgrkrrfrrhvfadvgrfhpniqpsrgtpgtaydyaikdgdvvggglerpddsgtsgrrsnvptdntmatlvsiedehafwdavremapglllrnhpslesyakrrfapriqqychpqqlvfrlegvpeldswrednilhvdgsdgrrrkslvlygdtrlgktvwarslgnhiyfcglysgseamrykdadyaifddmqlkyvpqfknwlgcqanfqvkvlykdpvliewgkpciwlsnddprheahltdtdirwlegnctfihltepivhante*	332	USER	zzz1070
2658		Genomo_LK931483	mstfrfyaryalltyaqcggldpftivshigdlggeciigreahsdggthlhafvdfgrrfqsrraavfdvggfhpnisitkrdpqvhydyaikdgdvvagglerpaadasagvenkhhqivlaptraeffeavrdldprllltsfpslekyadwhyrvdpdpyrhdpeyefdtsqfpelnqwaedyigwdatslvlygpsrtgktmwarslakhayfgglfsleesledvkyavfddiagglkffpqykswlgnqldfystdkykkkkaikwgkpciwisneypitegvdqdwmdkncifvevttplys*	311	USER	zzz1071
2657		Genomo_LK931484	mprrfqvrarnliitfpqvpehlqhefdagtpflervtanfgnplccrlgrerhsdggihyhiylgfdkivtvnsatafdyfgahgniksirrtphkvfdyvgkdgdirlehgeppadarscdgdnsnkwadiiscdtkesflsavrqqaprdwllsnqriieyanfyypdekpeyeappiivererypeisewenqaaigdfkslilwgptrtgktlyarslghhayfnlqfnmdefsddcqyavfddiqggfeyfhsykgwlgaqkqfvitdkyrkkrtiywgkpsimcmnedphfakgvdydwlmnnchiinvvdpicivsnppssnesqseqi*	338	USER	zzz1072
2656		Genomo_LK931485	mssfrfqaryalltypqcgdldpfavvnhlaglgaeciigrenhadgglhlhafvdfgvkyrtrnarafdvegchpnvspsrgtpeegfdyaikdgdvvagglerpvagrvdatsgvwaeiinaeseqefwdlckrlaprslvtsftqlrayaawkfppirvpyetpegvnidtswvaelnqwvqqnlgrgetgerrkslvvygpsrmgktiwarslgnhayfgglfsldenldgveyaifddfggikflpsykfwlghqkqfyvtdkykgkklvhwarpsiwlsnsdprdelgvdtewlnancdfvyldspivs*	316	USER	zzz1073
2655		Genomo_MF173065	mlfinskyvlltyaqcgdldewavldhmsslgaeciiarelhpttggvhlhvfadfgrkfrsrrvdildvegrhpnvspskgtpekgydyaikdgdvvagglerprggrpstisglqaiahlcetqdefldiygevdtrgliknfanvrsyakwryagtlpkyeppssfgefrggddgrdqwveqsgirsgnmdvrpkslvlygpsrtgktswarslgthvyfggafsggdalavaddvkyavfddmrggicffhgwkdwlgsqpefmvkalyhdpklfkwgrpsiwcankdprtemyeshrfgerifktgfgqedidwleancvfinveepifhanrq*	340	USER	zzz1074
2654		Genomo_MF173066	mpakykldgeqffmltypttpadfdgsgiiailerlgcnyrvgrelhqdgkphfhamccfdepytdgdarrtftvgtripnirvrrtrpergwdyvgkhagtkeghhivgekgtrpggdedsserpsndswheiilartreeffdlaarlaprqlacsftslsayadwkyrpvkeeyvtpegdwsvpfelqdwvddnvrgtpgrpkglvlfgatrlgktvwarslgshyyagglwdmaefhpqeqeyaiwddmlgglkagyfnyknwlggqfaftiqdkygkkksikwgkpsificnvdprdeppafndrvgmdwawleencvfyevkeaifraste*	338	USER	zzz1075
2653		Genomo_MF173067	mlfcnskyvlltyaqcgdldewavsdhlssldaecivareihpttggvhlhvfvdfgrkfrsrrvdvfdvegrhpnvvpskgtpekgydyaikdgevvagglarprggrpgtlsgleaiahlcetqdefldiygevdtrgliknfanvrsyakwryastlpkyespasfgefrggsdgrdqwlaqsgirsndvvrpkslvlygpsrtgktswarslgphvyfggafsggdalavdddvkyavfddmrggiaffhgwkdwlgaqqefygqsavsrsksylsgvdhqfwcanrdpreemechlfkgtfcqgdidwlnancvfievntpifhanre*	334	USER	zzz1076
2652		Genomo_MF327558	msfhacaqsflltyahaegsdardpldpfaivgrlgelggecivakelyptsdgfhlhvfvmferrfrsrkvdcfdvggyhpnilpsrknaaggfdyaikdgdvvagglarpsgesgrkstdraadawgqitaacsreefwqlleeldpksmvcsfnavskfcdwkfreepvpycgpdgvfdiadypdigfwrdtflprggggrrkslilfgptrmgkttwarslgshmyfgglfsarealdnpqaeyaviddiaggikffprfkdwlgcqaefqlkelyreprlfrwgkptiwcsnedprmglgepdvdwlegncifvrvstpifrastv*	332	USER	zzz1077
2651		Genomo_MF327559	marfrarakafiltfpqtsedvqrkfssdgrtflesvqrdfedpvcirigreshsdggihfhvflsfespvtvqspdafdyfgshgniksirttprkvydyvgkdndvvyeygtapdeagndagsnsarwhdivgcdskesflsavrsqaprdwvlsldrilayaeyayptvvppyqsplvttaygrvpglaewreqaaigrivgervkslilwgptrtgktlfarslgrhsyfnlqfnldsfsestdyavfddiqggfeffhsykgwlgaqkefvitdkykrkktiqwgkpcimlmnddpggcakadydwllgncdiihvtsafcwvl*	330	USER	zzz1078
2650		Genomo_MF327560	mpsffcnaryflvtypqcgdlcgfrvmerfsslgaecivareshedgglhlhcfadfgrkfrsrktdvfdvdghhpniepstgtpekgydyaikdgdvvagglerpvgtsgtgtrstfdkwteitsapdresfwelchqldpkstacsygqlakyadwrfaevpaeyespggfefvggdadgrdewvssaglglgdppvgrpmslvlygesrtgktlwarslgphvynvglvsgeeclkaphvkyaifddirggikffpafkewlggqqtvcvkrlyrdpklvtwgkpsiwisnddprqsmdpsdvswmemncvfievnvpifrantv*	329	USER	zzz1079
2649		Genomo_MF327561	msfafnsryvlltyaqsdglsewdvlehisglgaeciiarenhadggthlhafcdfgrkfrsrrsdifdvggrhanitpsrgrpefgwdyavkdgdvvagglarpgsgglpeapnkwgqivgaeneqqfwelveeldpkalatqypslrkfadwrfrpvaesyvhpdglefelgmvpelvewreqslghdsgvrqkslviygptkvgkttwarslgnhvyfmgvmsgevalrdmhdadyavfddmrggieffpswkewlgsqavvtvkklyrdpvqvkwgkpsiwlsnadprsqlrssvhhanegkmsaiendiawlegncqfvyiedsiishantd*	338	USER	zzz1080
2648		Genomo_MF327562	msfafnsryvlltyaqsdglsewdvlehisglgaeciiarenhadggthlhafcdfgrkfrsrrsdifdvggrhanitpsrgrpefgwdyavkdgdvvagglarpgsgglpeapnkwgqivgaeneqqfwelveeldpkalatqypslrkfadwrfrpvaesyvhpdglefelgmvpelvewreqslghdsgvrqkslviygptkvgkttwarslgnhvyfmgvmsgevalrdmhdadyavfddmrggieffpswkewlgsqavvtvkklyrdpvqvkwgkpsiwlsnadprsqlrssvhhanegkmsaiendiawlegncqfvyiedsiishantd*	338	USER	zzz1081
2647		Genomo_MF327563	mpsffcnaryflvtypqcgdlcgfrvmerfsslgaecivareshedgglhlhcfadfgrkfrsrktdvfdvdghhpniepstgtpekgydyaikdgdvvagglerpvgtsgtgtrstfdkwteitsapdresfwelchqldpkstacsygqlakyadwrfaevpaeyespggfefvggdadgrdewvssaglglgdppvgrpmslvlygesrtgktlwarslgphvynvglvsgeeclkaphvkyaifddirggikffpafkewlggqqtvcvkrlyrdpklvtwgkpsiwisnddprqsmdpsdvswmemncvfievnvpifralwle*	330	USER	zzz1082
2646		Genomo_MF327564	msfhacaqsflltyahaegsdardpldpfaivgrlgelggecivakelyptsdgfhlhvfvmferrfrsrkvdcfdvggyhpnilpsrknaaggfdyaikdgdvvagglarpsgesgrkstdraadawgqitaacsreefwqlleeldpksmvcsfnavskfcdwkfreepvpycgpdgvfdiadypdigfwrdtflprggggrrkslilfgptrmgkttwarslgshmyfgglfsarealdnpqaeyaviddiaggikffprfkdwlgcqaefqlkelyreprlfrwgkptiwcsnedprmglgepdvdwlegncifvrvstpifcastv*	332	USER	zzz1083
2645		Genomo_MF327565	mtfilnaryflvtypqcdgldewavnnhfgslgaecivarenhanggthlhvfcdfgrkfrsrradifdvdgfhpnierskrnpqkgahyackdgdivaggldvpglatsivpaaqdpgstlvcaesqreffelaedicpwdlitkfgsmhayakwkwpelgepyespagftiadgafpelvrwrteamehsgrirslvltgdgltgkttwarmlgnhlymkerynarqasladgvsyaviddisggirffphwkswfggqphiqvrllyrderlvkwgkptiwlsnrdprdqlrdmisrdysesqcindinwmeqnaifveigdqsiishantvspeg*	340	USER	zzz1084
2644		Genomo_MF327566	msfhacaqsflltyahaegnddrdpldpfaivgrlgelggecivakelyptsdgfhlhvfvmferrfrsrkvdcfdvggyhpnilpsrknaaggfdyaikdgdivagglarpsgesgrkstdraadawgqitaacsreefwqlleeldpksmvcsfnavskfcdwkfreepvpycgpdgvfdiadypdiglwrdtflprggggrrkslilfgptrmgkttwarslgshmyfgglfsarealdnpqaeyavvddiaggikffprfkdwlgcqaefqlkelyreprlfkwgkptiwcsnedprmglgepdvdwlegncifvrvstpifhastv*	332	USER	zzz1085
2643		Genomo_MF327567	mtfnfnsryvlltyaqsgdlsewsvlehisslgaeciigredhadegthlhvfvdfgrkkqsrrldlfdvegrhpnvvpsrgraefgwdyavkdgnvvagglarpgsdrlppaenkwsqivgaesrdeflrlvqeldpksfvlrhrelldyadryyaeqrepyvgpdgvefdlgmvpelatwrgeslgddpvegrgrslvlygasrlgktlwarslgphvyimgilsgatllrdmpdseyavfddmrggismfpsfkewlgaqsvvtvkklyrdpvqvkwgrpciwlansdprdqlkaditdhtakgrvdliyediawleanctfvelrepifrante*	339	USER	zzz1086
2642		Genomo_MF327568	mppktfsfqaryvlltyaqcgdldawavndhiaflggeciigrelhadggthlhafcdfsrkfrsrrpdvfdvegchpniepsrgrpeggydyaikdgdvvagglerpsgrgvyedvsswsivvsqesegdfwecvarldpralctnynslrayanwrykpapvryehpagvefelgmvpelacwrevalgadrergrakslvifgdtrlgktlwarslgnhiytigqmsgevllrdgpdadyavfddmrggleffhgwkewfgcqtivtvkklyrdpvqmpwgkpviwlanrdpreelrdsinchtslgkqasiegdikwlegncifvelehaifrantd*	342	USER	zzz1087
2641		Genomo_MF327569	mpsisfcaqhflltyahsegtngkpeldphrivevlgdlgaeciiareryptgdgfhlhvfcsferrfrsrkvdvfdvdgyhpnvepsrknavggydyatkdgeivagglerpsgvsgrrsttraadewaeitaadsaeefwrlceeldpksmvcnfpalsrfvewrfrpepvpyvtpdgifdltgyesleewrdnvlfggnsgrrkslilfgptrlgkttwarslgshmymgglfsakealdnreadyavlddiaggikffprykdwlgcqmqfqlkvlykepslfdwgrpciwcsnvdprvgmdpvdidwlegncvfvevvtpifhante*	333	USER	zzz1088
2640		Genomo_MF327570	mptsftfharyalltyaqcdgldpgnivshlsslgaecivgreahadggthyhafadfgekrkfrradcfdvsdhhpnispsrgspgkgydyavkdgdivggsltrpgagagkrpsdaifaeladcedersfwesvkrvapktllcnfpslkqyatwrytpqpteyrtpssvhfeteslpeltqwgldniggvepgmmgrqkslvlfgetrlgktmwarslgphmyfcglysgaeamryaecayavfddmgglkyvpqfknwlgcqmqfqvkmlykdpkiitwgkpciwlanedprlehgvtesevrwlegncvfihlqesivraste*	329	USER	zzz1089
2639		Genomo_MF327571	mehlgvlgaecivgrenhldgglhlhaffmferkfesrnvrifdvdgkhpnivlgpnvvrgwgtpekgwdyatkygdvvagglerpgsgvpeagsvwasiilsedresffeavarlaprallcnfsslrcyadwkyrrepepyshpgnisfdtaefpgldswvqqnlvghgfngrrrslilygptrtgktlwarslgrhayfgglfcldesvddvdyaifddmqgglsffhaykfwlgcqsqfyatdkykgkklihwgrpsiyisntnpfgdngvdvdwlegncdvvmvdepifrastd*	300	USER	zzz1090
2638		Genomo_MF327572	mptsftfharyalltyaqcdgldpgnivshlsslgaecivgreahadggthyhafadfgekrkfrradcfdvsdhhpnispsrgspgkgydyavkdgdivggsltrpgagagkrpsdaifaeladcedersfwesvkrvapktllcnfpslkqyatwrytpqpteyrtpssvhfeteslpeltqwgldniggvepgmmgrqkslvlfgetrlgktmwarslgphmyfcglysgaeamryaecayavfddmgglkyvpqfknwlgcqmqfqvkmlykdpkiitwgkpciwlanedprlehgvtesevrwlegncvfihlqesivraste*	329	USER	zzz1091
2637		Genomo_MF669480	mssfnfnaryalltyaqcgdldphevvcrlaelgaeciiarenhvdggthlhsfvdfgrkfrtrrvdtfdvgghhpnispsygtpekgydytikdgdvvggglerpsrasvsktpdiwaeiilaesrdeffslvgslapralctsfpslskyadwkyrvdpepyrhdpqlgfdltgapelsqwshdtfnetrrvgplylyverklslvlwgpsrlgktlwarslgrhayfgglfsidesiddveyavfddiqgglqffhaykfwlghqqqfyvtdkykgkrlvnwgkpsiwlsnndprddvgadrdwleancqfvfisrplftsrassrsped*	334	USER	zzz1092
2636		Genomo_MG571087	mpsafhlknrryvlftysqagpdfdywavvdllgdlgaecvigreehadggihfhvftdfgrlfstrkvrvfdvggkhpniqpigrtpataydyaikdgdvvagglgrpggdcdwdpdnfwssaahcgssdeflhfcdqlatrdliksfpnfrayanwkwnsgvpeydqpagaifdtsaapgidewlsqsalgtgksrarrkslvlfgplrlwqrlsgprslhthiyfgsqwsgkiafhgvdsaeyaifddwkgglaklpgykdwfgaqwhvsmrklhhdaeivewgrpviwlcnrdprllargdeeidwewmdracdfvevtgllttfrante*	335	USER	zzz1093
2635		Genomo_MG571096	mpfacnaryflvtyghvesldpfalvdhfgklgaeiivsleqynatlgvhfhvfadfgrkfrsrrtdifdvegfhpnispsrgtpeagydyaikdgdvvagglarpsgvvasgrqakwntildaetrdefcalceeldrerlvcsfgqiqkfadwrfavepepyvspdgvfdladygdlgywrdnflfadttgrskslilwgpsrmgktvwarslgrhlyfggifsarnigddrirfavfddiaggikffprfkdwlgcqmefmvkelyrdphlfrwgrpaiwiansdprhdmthddivwleancifveisspifrant*	320	USER	zzz1094
2634		Genomo_MG571097	mpsfqfqaryalltyaqcgdldpfavvnhlaglgaeciigredhadggvhlhafvdfgrkyrtrdqgafdvegchpnvspsrgtpedgfdyaikdgdvvgggltrpsrrglapdggvwteivnassesefwtlceqlaprslvtsftqlrayaswkfppirepyetpegviidttfvaeldgwvrdnigqgrtggkkslvvygpsrmgktiwarslgrhayfgglfsldedldgveyaifddfggikflpsykfwlghqkqfyvtdkykgkklvhwarpsiwlsnsdpreelgvdtewlsancdfvyldspivmt*	316	USER	zzz1095
2633		Genomo_MG571098	mpfscnaryflltyghvdnldpfaivgfftelgaeiivgkeryhatlgthyhvfadfgrkfrsrradifdvegfhpnispsrgtpeagydyaikdgdvvagglerpsgvvasnraakwhqivcaetrdeffalceeldperlvcsfgqiqkyadwrfalvpepyaspngvfdladygdlsewrdnfliadtsgrskslilwgpsrmgktvwarslgnhlyfggifsardinrdgvqyaifddiaggikffprfkdwlgcqmefmvkemyrdphlfrwgrpaiwiansdprhdmthedivwleancifveissaifhante*	321	USER	zzz1096
2632		Genomo_MG571099	mpfacnggyffvtysqvgsldpfalvdhfgklgaeiivsleqyhaslgvhfhvfadfgrkfrsrrtdifdvdgfhpnispsrgtpeagydyaikdgdvvagglarpsgmvasnraakwhsildaetrdeffalceeldperlvcsfgqiqkfadwrfarkpepyaspngvfdlanygdlgdwrdnflftdtpgrskslilwgpsrmgktvwarslgshlyfggifsarnlgddgieyavfddiaggikffprfkdwlgcqmefmvkemyrdphlfrwgrpaiwiansdprhdmthddivwleancifveissaifhantewtgggssvdqlsqnpa*	337	USER	zzz1097
2631		Genomo_MG571100	mpfhcnaryflvtyshvepldpfalvehfgslgaeiivsleqynatlgvhyhvfadfgrkfrsrrtdifdvdgfhpnispsrgtpeagydyaikdgdvvagglarpsgvgatgraakwhsildaetrdeffalceeldperlvcsfgqiqkfadwrfapvaqpyaspdgvfdlanygdladwrdnflvadtagrskslilwgpsrmgktvwgrslgnhlyfggifsardinrdgveyavfddiaggikffprfkdwlgcqmefmvkemyrdphlfkwgrpaiwiansdprhdmthdditwleancifveisspifhante*	321	USER	zzz1098
2630		Genomo_MG571101	mlfvnsryvlltysqsngldewavsdhmsglgaecivarenhidggthlhafvdfnrkfrsrnarvfdvggfhpnvspsrgtpekgydyatkdgdvvagglerpaprgglhtgahrvrnvahlcesvdeflelydemergdligrfsnirayadwrfrveppayssppgvdfgsgamdgrddwisqsgicsgepligprrkslvlfgpsltgkttwarslgnhiysqrmlnvrevaysidsaryhvlddvdlryfpgwkdwlggmmwipvrlmyrdvmnmqwgrpciwcnntdprdvikrsmakhdgqgdgtfsqedldwleancifirvndpivtfraste*	343	USER	zzz1099
2629		Genomo_MG641191	mpfvcnaryflvtyshveeldpfalveffgnlgaecivglepynatfgihfhvftdfgrkfrsrrtdifdvngfhpnispsrgtpeagydyaikngdvvagglarpsgvgnsgraakwhqivdaetrdeffdlceeldperlvcsfsqiqkyadwrfaenpepyaspdgvfdlanygdlgeskslilwgpsrmgktvwarslgdhlyfggifsardigrggikyavfddiaggikffprfkdwlgcqmefmvkemyrdphlfkwgrpaiwiantdprhdmshedvtwleancifveidsaifhante*	308	USER	zzz1100
2628		Genomo_MG641192	mpsfianfryalvtypqcgdldpwsvmehfsslgaeciigrehhqdggshlhvfvdfgrkfrsratdvfdvdghhpniepskgtpekgfdyaikdgdvicgglgrpepsrgshsgmsakwaritgaadkqefwdlvheldpksaacsftslskyadwkfavdppgyehpggfnfsdgsfdgrseckslvmygpsrtgktmwarslgahlycvgllsgdecmkaeyadyavfddlrggfkffpafkewlgaqqyvtvkrlyreprlvkwgkpsifltnsdprdeatvddrdwlerncdfiyvqepifhante*	312	USER	zzz1101
2627		Genomo_MG641193	mpsfvanfkyalvtysqcgdldpwsvmelfsslgaeciigrehhedggthlhvfvdfgrkfrsratnvfdvdghhpniepskgtpekgfdyaikdgdvvcgglgrpepsrggnsgvlakwtritgatdkqefwdlvheldpksaacsftslskyadwkfavdppcyehpggfdfsdgsfdgrseckslvmygpsrtgktmwarslgahlycvgllsgdecmkaeyadyaifddlrggvkffpafkewlgaqqyvtvkrlyhepklvkwgkpsifltnsdprdeatgddrdwlerncdfiyvqepifhante*	312	USER	zzz1102
2626		Genomo_MG641194	mpsfhlknrryvlftyaqagsdfdhwavvdllgglgaeciigreshadggvhfhvfadfgrlfstrktdlfdvggkhpniqpigrtpakaydyackdgdvvagglgrpggdadfdpdsfwdsathcgsadeflhfcdqlaprdlirgfpafrsysnwkwndgalvynqpdgvefdtsaaegiderrslvlfgpygcgkttwarslgehiyfgsqwsgkvafqglekaeyaifddwkgglkmlpgykdwlgaqwhvsvrqlhhdarleewgrpciwlcntdprvmthvnddtdwtwmdracifvevtgvlatfraste*	318	USER	zzz1103
2625		Genomo_MG641195	mpsfianfryalvtypqcgdldpwsvmehfsslgaeciigrehhqdggshlhvfvdfgrkfrsratdvfdvdghhpniepskgtpekgfdyaikdgdvicgglgrpepsrgshsgmsakwaritgaadkqefwdlvheldpksaacsftslskyadwkfavdppgyehpggfnfsdgsfdgrseckslvmygpsrtgktmwarslgahlycvgllsgdecmkaeyadyavfddlrggfkffpafkewlgaqqyvtvkrlyreprlvkwgkpsifltnsdprdeatvddrdwlernchfieinshlaensspifhante*	319	USER	zzz1104
2624		Genomo_MG641196	mpsfhlknrryvlftyaqagtdfdywavvdllgglgaeciigreshadggihfhvfadfgrlfstrktdlfdvggkhpniqpigrtpakaydyackdgdvvagglgrpggdadfdpdsfwdsathcgsadeflhfcdqlaprdlirgfpafrsysnwkwndgslvynqpdgvefdtsaaegiderrslvlfgpygcgkttwarslgehiyfgsqwsgkvafqglekaeyaifddwkgglkmlpgykdwlgaqwhvsvrqlhhdarleewgrpciwlcntdprvmthvnddtdwtwmdracifvevtgalatfrantv*	318	USER	zzz1105
2623		Genomo_MG641197	msfhcnaqyflvtyaqcgdldpwsvmerfstlgaeciiarelhadlglhlhcfvdfgrkfrsrktdifdvgsshpniepsrgtpwagydyaikdgdvvcgglarprqprskstrndvhqyteitnaddiehfwellhhldpktavvnfvsatkyaearfadvepgyeprrrqdfvagdddgrdavkslvlfgepltgktdwarclgnhvytmgivsgdqmlkianpdvkyavfddirggikffpsfkewlgcqayvtvtkkykepklmkwgrpsiwlsnkdprtemdpsdanwleanctfieintpifhant*	313	USER	zzz1106
2622		Genomo_MG641198	mapfflknrryvmltysqagsdfdywsivellsshgaeciigrelhadggthfhvfvdfgrlfqrrktdlfdvggkhpnimpvwktpgeafdyatkdgdivagglerpgtdcdydttnfwatagasqsgeeflhfldqlaprdlmrgflqfrsyadwkwavaperyvdppgvvfdtghaeqlserkslmlwgpsqfgkttwarslgnhiffgsqfsgklaldgmddaqyaifddwkggmkalpgykdwfgcqwqisvrklhhdarlitwgrpiiwlcnkdprlmhiatddvdwewmdenvmfveivrplvtfhant*	317	USER	zzz1107
2621		Genomo_MG641199	mpsfhlknrryvlftyaqagsdfdhwavvdllgglgaeciigreshadggvhfhvfadfgrlfstrktdlfdvggkhpniqpigrtpakaydyackdgdvvagglgrpggdadfdpdsfwdsathcgsadeflhfcdqlaprdlirgfpafrsysnwkwndgalvynqpdgvefdtsaaegiderrslvlfgpygcgkttwarslgehiyfgsqwsgkvafqglekaeyaifddwkgglkmlpgykdwlgaqwhvsvrqlhhdarleewgrpciwlcntdprvmthvnddtdwtwmdracifvevtgvlatfraste*	318	USER	zzz1108
2620		Genomo_MG641200	mpsfhlknrryvlftyaqagtdfdywavvdllgglgaeciigreshadggihfhvfadfgrlfsrktdlfdvggkhpniqpigrtpakaydyackdgdvvagglgrpggdadfdpdsfwdsathcgsadeflhfcdqlaprdlirgfpafrsysnwkwndgslvynqpdgvefdtsaaegiderrslvlfgpygcgkttwarslgehiyfgsqwsgkvafqglekaeyaifddwkgglkmlpgykdwlgaqwhvsvrqlhhdarleewgrpciwlcntdprvmthvnddtdwtwmdracifvevtgalatfrantv*	317	USER	zzz1109
2619		Genomo_MG641201	mpsflcnarhflityaqcgdlsewdvldrfselgaeciiareyhadlglhlhvfvdfgrkfrsrrvdifdvagrhpnikrsygtpekgydyaikdgevvagglerpdgtfgsgksfdlwsqitgagdreefwklleeldpkslccsftqlqkyadwrfaerpavyespggfefvsgdvdgrdqplslvlygesrtgktlwarslgphiynvglvsgeecmkassveyaifddirggikffpafkewlggqqtvcvkrlyrdpkliqwgkpsiwisnddprhsmetsdvawlemnckfveintpifrante*	311	USER	zzz1110
2618		Genomo_MG641202	mpfvcnaryflvtyghvdtldpftivdffgqlgaevivgreqyhatlgthfhvfadfgrkfrsrradifdvdgyhpnispsrgtpeagydyaikdgdvvagglarpsgvgpsgraakwhsiidaetrdefyslceeldperlvcsfgqiqkyadwryrvepepyaspngvfnlaeygdlseskslilwgpsrmgktvwarslgnhlyfggifsardinrdgveyaifddiaggikffprfkdwlgcqmefmvkemyrdphlfrwgrpaiwiantdprhdmshedvtwleancifveidsaifhante*	308	USER	zzz1111
2617		Genomo_MG641203	mvrrfkleevsyvlltypttpdgfdpqgiidavvgtgavyrlgrelhadgkphyhcfvqwadpysdtdaggtftvggrrpnikkfsanpgrrwdyvgkhagkkeghfiigdqcerpsegdvdtrsqgdiwseiigsgtqnefwsrltalapkqlgcnfgslklyvdwkykpaqeiyetpqgtftvpevlqepkglvlfgptrigktvwarsladhayfgglfnlddfsadgaqyaifddisggfsffpsykqwmggqyqftvtdkykhkvtlrwgkptiwlcntdpredhykpgampdfawmeencifyecrdaifhaste*	322	USER	zzz1112
2616		Genomo_MG641204	mprflcnashflityaqcgdlsewrvldcftllgaqciiareyhedlgihlhvfvdfrrkfrsrrvdifdvdgrhpnikrswgtpekgydyaikdgdvvagglerpdgtfgsgknfdlwsqiagagskaefwdlceeldpksmwcsfgqlqkfadwrfaevpteyanpggfefvdgnddgrtapmslvlygesrtgktlwarslgphiynvglvsgeecsraphvkyavfddirggikffpafkewlggqstvcvkrlyrdpklvtwgkpsiwvsnddprhamdpsdvswleanarfieitepifrantg*	311	USER	zzz1113
2615		Genomo_MG641205	mpfsfnaryflvtyshvdeldpfaivdhfgslgaecivareryadllgvhyhvfadfgrkfrsrranvfdvgefhpnispsrgtpeagfdyatkdgdivggglerpsrdgalsrsakwaqivnaesrdefyrlceeldperlvcsfgqiqkfadwkfavtpapyatpdgvfdlanygdlgeskslilygpsrlgktvwsrslgehfyfggifsardldrddvkyavfddiaggikffprfkdwlgcqmefmvkqlyrdpqlfrwgrpciwvantdprldmthddimwleancifveiteaifhante*	308	USER	zzz1114
2614		Genomo_MG641206	mpsflcnarhflityaqcgdlsewrvldcftllgaeciiareyhedlgihlhvfvdfgrkfrsrrvdifdvdgrhpnikrswgtpekgydyaikdgdvvagglerpdgtfgsgknfdlwsqiagagskaefwdlceeldpksmccsfgqlqkfadwrfaevpteyanpggfefvdgnddgrtapmslvlygesrtgktlwarslgphiynvglvsgeecsraphvkyavfddirggikffpafkewlggqstvcvkrlyrdpklvtwgkpsiwvsnddprhamdasdvswleanarfieitepifrantg*	311	USER	zzz1115
2613		Genomo_MG641207	mpfdfhsryglftyahvdeldpfcivehfsslggecivaaeryptgpgvhyhvftdfgrkfrsrrvdcfdvagfhpnivasrgtpeagydyaikdgdvvagglerpsgvepdtretkwhritsaatreeffhllrtldpkslvtnhrsciafadwqyrveptpyatpngvfnlaeygdlsesrslvlfgdtrlgktvwsrslgphvyfcglysyaeavkapdvdyavfddiqggikffpafknwlgcqmefqvkglyrdpqllkwgkpsiwvantdprhdmthddikwmegncifveivsaifhastgypacgetaesp*	320	USER	zzz1116
2612		Genomo_MG641208	mpfsfnaryflvtyshvdlldpfaivdhfgslgaecivaresynsvlgihyhvfadfgrkfrsrradvfdvggfhpniapsrgtpeagfdyatkdgdivagglerpcrdgtlsrsakwaqivdaetrdefyrlceeldperlvcsfgqiqkfadwkfavtpapyttpdgvfdlanygdleeskslvlygpsrlgktvwsrslgehlyfggifsardldrddvkyavfddiaggikffprfkdwlgcqmefmvkqlyrdpqlfrwgrpciwvantdprldmthddvmwleancifveiteiifhante*	308	USER	zzz1117
2611		Genomo_MG641209	mpfsfnaryflvtyshvdeldpfaivdhfgslgaecivaresynsvlgihyhvfadfgrkfrsrradvfdvggfhpniapsrgtpeagfdyatkdgdvvagglerpsrdgalsrsskwaqivdaetrdefyrlceeldperlvcsfgqiqkfadwkfavtpapyttpdgvfdlanygnlgeskslvlygpsrlgktvwsrslgehlyfggifsardldrddvkyavfddiaggikffprfkdwlgcqmefmvkqlyrdpqlfrwgrpciwvantdprldmthddvmwleancifveiteiifhante*	308	USER	zzz1118
2610		Genomo_MG641210	mpfvcnaryflvtyshveeldpfalvnffgslgaecivglepynatlgvhfhvfadfgrkfrsrrtdifdvdgfhpnispsrgtpeagydyaikngdvvagglarpsrvgdsgraakwhqildaetrdeffalceeldperlvcsfgqiqkfadwrfavepkpyanpdgvfdfadhgdlevskslilwgpsrmgktvwarslgnhlyfggifsardigragveyavfddiaggikffprfkdwlgcqmefmvkemyrdphlfrwgrpaiwiansdprhdmthedivwleancmfveissaifhanie*	308	USER	zzz1119
2609		Genomo_MG641211	mpfacnaryflvtyshvepldpfavvehfgnlgaevivslesynttlgvhyhvfadfgrkfrsrrtdifdvdgfhpnispsrgtpqagydyavkdgnvvagglarpsgvvaagraakwhqildaetrdeffalceeldperlvcsfnqiqkfadwrfavepkpyatpdgvfdlanygdlseskslilwgpsrmgktvwarslgrhlyfggifsarnlgdggvdyavfddiaggikffprfkdwlgcqmefmvkqmyrdphlfrwgkpciwvantdprhdmthdevtwleancifveissaifhanie*	308	USER	zzz1120
2608		Genomo_MG641212	mvrrfkleevsyvlltypttpdgfdpqgiidavvaagavyrlgrelhadgkphyhcfvqwadpysdpdaggtftvggrrpnikkfsanpgrrwdyvgkhagkkeghfiigdqcerpsegdvdtrsqsdiwseiigcttqeefwsklaalapkqlgcnfgslklyvdwkykpaqeiyetpqgtfdvpgvlqepkglvlfgptrigktvwarsladhayfgglfnlddfsadgaqyaifddisggfsffpsykqwmggqyqftvtdkykhkvtlrwgrptiwlcntdpredhykpgampdfawmeencvfyecrdtifhast*	321	USER	zzz1121
2607		Genomo_MG846357	mtrfrlrakiffltysqigedviqelrstptqhfrfieevlgtpsdyrlsreshqdgashlhcvvgyaetqlvnsaslfdyrgahpniksirgtikkpwnyagkdgdiihelggpnggdsgtggsiaerwshaidaptedeffervrmadprsyvlfnraivqyankiyrkpreytsprfrllggsriegwlsqsdlgrrggesvplishlclgfrrqsliiwgpsrtgktvwarslgrqiymnghlnidkyddeadyaifddisggfqffpsykgwlgcqeefectdkyrakttiywgrptimcmnsdpladphvdvawlllnceivhiedplveii*	339	USER	zzz1122
2606		Genomo_MG917675	mpafvcnaryflitfaqcdaldpwavsnhfstlgaecivareshadggthlhafvdfgrkfrsrrpgifdvagchpnispsrgspgagydyatkdgdivagglarpsvdagdgkvdkwsqiisaedertfwdllesldpkalatnygnlrkyadfrykpepetyqhpagiefgggvlpdlvawrdsslgaslggrrntssargppgalrvyamltslgrsrslciygptrvgkttwarslgmhvyfmgmisgeiavrdmptaeyaifddmrggikffpawkewfgaqqvvtvkklyrdplqinwgkpciwlsntdprtgmemediewlegncdfvfmqdsiishantp*	349	USER	zzz1123
2605		Genomo_MH047857	mpsfvcnfryglitypqcdgldpfrvmerfsslgaeciigrerhedgglhlhvfadfgrkfrsrktdvfdvdgrhpnvepskgtpekgydyaikdgdvvcgglgrpepsgggdgassakwaritqaenrdefwelvheldpkaaacsfnalskyadwrfaevppeyehdgriefvpgdadgradwvsqsgirlaepflagtrvkslvlwgksrtgkttwarslgphvycvglvsgtecakgldaryavfddirgglgffhgykewlgaqphvpikelyreprymrwnkpsiwvcnrdprleayppnatpdwewmddnvdfievtdsliasishaste*	338	USER	zzz1124
2604		Genomo_MH047858	msfttngryflvtyaqcgdldpfrvvdkfsslgseciigrelhedgglhlhcfvdfgrkfrsrktdvfdvdgrhpniessrgtpekgynyaikdgdvvagglqrpepksrdgagstfekwslitsatdreefwrlvheldpksaacsftqlskyadskyaevpteyehpggiefapgdgrpmslvlygesrtgktlwarslgrhiynvglvsgaecvkasevdyavfddirggmkffpafkewlggqhtvcvkqlyrdpilvkwgkpsiwvsnddprlcmepsdvawleanarfiecnhaifrante*	308	USER	zzz1125
2603		Genomo_MH378453	mprfrcrarnfiitfpqvaenvqprfddgtpflervtsdfgnplccrlgrerhadggvhyhvylgfdkivsinsatafdyfgahgniksvrrtphkvfdyvgkdgdirldhgeppaeassrdgtdsnkwadiiscdtkesflsavreqaprdwllsnqrileyanlyypeekpqyeappitvererypeisewenqaaigdcrpervkslilygptrtgktlyarslgehayfnlqfnmdefsddckyavfddiqggfeyfhsykgwlgaqkqfvitdkyrkkrtiywgkpsimcmnedphfakgvdydwlmhncvivnvidpicivss*	330	USER	zzz1126
2602		Genomo_MH444690	mpsfvtnarhflvtyaqcgdlsewrvldkftslgaeciiareqhedlglhfhvfadfgrkfrsrkvdifdvdgrhpnikrswgtpekgydyaikdgdivagglerpigvhgsgktfdlwseiagaenrgdfwrlceeldpkslccsfgqlskfadwrfaepddqygtphgidfdvqhgdgrdswvqesgrpmslvlygesrtgktlwarslgphvyniglvsgeecmkaphvkyaifddirggikffpafkewlgaqatvsvkrlyrdpklvtwgkpsiwisnedprlcmesgdvswleanarfieirepifrasie*	318	USER	zzz1127
2601		Genomo_MH545497	mpsfvcnaryflvtypqcgdlcgfsiverfsslgaecivgrehhedgglhlhcfadfgrkfrsrktdifdvdghhpniepstgtpekgydyaikdgdvvagglerpvgksrsgartafdkwaeitgaedrdrfwelcheldpkatacsfgqlskyadwrfaevpaeyespgglefvggdvdgrddwvqsagiglgqsfvgggrpvslvlygesrtgktlwarslgshiynvglvsgeecmkaphveyaifddirggikffpafkewlggqhtvsvkrlyrdpklvawgkpsiwisnddprlsmdpsdvswleanavfieinsaifraste*	331	USER	zzz1128
2600		Genomo_MH545498	mssfrfqaryglftysqcgrlrpqqvsehftslgadhiigrethqdggthlhvfadfrrkyrtrdnrkfdvegfhpnivpslrnpaggwdyatkdgdicagelsrpddergsrsrtadagwdalraaetrddffriasehlfshlvksfnsfsayadwkfrvdrtpyihdpnvtfdlgqlhqlrewirgnlppgnnrafgergislllwgrsrtgktwlarsfgshcyfgglfaldeyeyndkvdyavfddiqggfkyfpaykswlgqqaefyctdkfrkkkyikwgrpciwimnedpytqevdidwleknclivhidrplyqta*	326	USER	zzz1129
2599		Genomo_MH545499	mvrkfkldnvnyvlltysdcpndfdpqliidavvgtgavyrlgrelhangkphfhcfvqwaepfshpdagslffvggrranikrfsanpgrrwdyvgkyaghkaghfiigdqcdrpggdkddsertqtdiwseiinaeteseffeklaslapkqlgcnfgslklyadwrykppvteyispsgnfypttaladwereqlnsemsaclrggplatpspsasragphrllpkhmlilefirprglvlfgatrlgktvwarslgthsyfgglfnmelfaeearyaifddisggfgffpsyklwlggqfefsvtdkykhkrnvkwgkpaiwlcntdprldwykpgtgpdfewmenncdfveitepifrantt*	368	USER	zzz1130
2598		Genomo_MH545501	mtrrykldnveyilltysdcpvefdpqgiivavvrsggvyrlgrelhqngmphyhcfvwwvggfshpdagqlfmvsgrrcnikkftanpgrrwdyvgkyaghkdghyligdqcerpggdkddsertqtdiwseiinatnegeffeklaalapkqlgcnfgslklyadwkyrpevadyesppgifepvydltnwseanlgrvegrprglvlfgatrlgktvwarslgkhnyfaglfnlddfsesaeyaifddmsggfsffpsykqwmggqfqftvtdkfkhkrtvrwgkptiwlcntdprldwykpgsspdfgwmeenadfveltetifranre*	334	USER	zzz1131
2597		Genomo_MH545502	mpafvcnaryflitfaqcdaldpwavsnhfstlgaecivareshadggthlhafvdfgrkfrsrrpgifdvagchpnispsrgspgagydyatkdgdivagglarpsvdagdgkvdkwsqiisaedertfwdllesldpkalatnygnlrkyadfrykpepetyqhpagiefgggvlpdlvawrdsslgaslggrrntssargppgalrvyamltslgrsrslciygptrvgkttwarslgmhvyfmgmisgeiavrdmptaeyaifddmrggikffpawkewfgaqqvvtvkklyrdplqinwgkpciwlsntdprtgmemediewlegncdfvfmqdsiishantp*	349	USER	zzz1132
2596		Genomo_MH545503	mpfvfqaryclltfsqcdaldgfrvmehlsglgaecivgreihadggihlhcfvdfgrkfrsrktdifdvdgrhpnivgsygtpwggydyaikdgdvvcgglerpeqprskrvtkdwdawteitnardrehfwelvhhldpkaaacnhgqlakyadwrfrvkpavyespggvsfvggdadgrdawcdqsgirsgeplvgrclslvlfgnsrtgktlwarslgshvytvgmvsgselkkasnddvkyaifddirggikffpafkewlgaqafvtvkelyrepalmkwgkpsiwlsnedprnymeqsdrtwleencvfieitepifrasi*	329	USER	zzz1133
2595		Genomo_MH545504	mpfvfqaryslltyaqcdaldgfqvmehlsglgaecivgrevhadggihlhcfidfgrkfrsrktdifdvdgrhpnivgsygtpwrgydyaikdgdvicgglerpeeprskrvtkdwdawteitnardrehfwelvhhldpkaaacnhgqlakyadwrfrvkpavyespggvsfvggdadgrdawcdqsgirsgepllgrclslvlfgnsrtgktlwarslgshvytvgmvsgselkkasnddvkyaifddirggikffpafkewlgaqafvtvkelyrepalmrwgkpsiwisnddprnyveqsdrtwleencvfievteaifrani*	329	USER	zzz1134
2594		Genomo_MH545505	mpfvfqaryslltyaqcdaldgfrvmehlsglgaecivgrevhadggvhlhcfvdfgrkfrsrktdifdvdgrhpnivgsygtpwrgydyaikdgdvicgglerpeeprskrvtkdwdawteitnardrehfwelvhhldpkaaacnhgqlakyadwrfrvkpavyespggvsfvggdadgrdawcdqsgirsgeplvgrclslvlfgnsrtgktlwarslgshvytvgmvsgselkkasnddvkyaifddirggikffpafkewlgaqafvtvkelyrepalmrwgkpsiwisnddprnyveqsdrtwleencvfievteaifrant*	329	USER	zzz1135
2593		Genomo_MH545506	mpfnfqaryalltyaqcdaldgfrvmdhlsglgaeciisrevhanggihlhcfvdferkfrsrrtdifdvdgrhpnivssygspwggydyaikdgdvicgglerpeeprskrvakdwnawteitnardrshfwelvhhldpkaaacnhgqlakyaewrfrdtpakyespggiefiggdvdgrdawcdqsgirsgeplvgrcmslvlfgnsrtgktlwsrslgshlytvgmvsgaelkkasnddvkyaifddirggikffpafkewmgaqayvtvkelyrepalikwgkpsiwlanddprnyveqsdrswleenctfievteaifrante*	330	USER	zzz1136
2592		Genomo_MH545507	mpfrfqakyglltyaqcgdldafaivdhlselgaecivgeelhadggrhlhaffmfqhkfrtsnarvfdvggnhanispgysnpsdgydyaikdgnilagglerpgnespkddskwhtitaaetesefwalvaqldprsmvvsypalrayagnryrvdripyrnpdglryctdeyphldewvegslrnnrenrprslvlyggtrlgktlwsrslgnhayfgglfamdepiddvdyavfddmqggldffhsykfwlgaqkqfyvtdkykgkklvswgkpciylsnndprgdkscdiewlegnctivyidrpifrante*	318	USER	zzz1137
2591		Genomo_MH545508	mpprarrtrqdgafdihsryalltysqcgdlspatvgefftnlgfkliigrenhanggihlhcfvdfirkrrfraprcfdiegrhpnvepshgtpergwdyvikdgdvvfksldrpveehvaprnssrshdswstitgasdresfwdlvheldpksaacsftqlqkycdwkfapsppvygspdgitfvggetdgrddwllqsgignrepfigrcmsicvygesrtgktlwarslgshiycvglvsgdecmkaetvdyavfddvrggikffpsfkewlgcqawvtvkclyrepklvkwgkpsiwlsntdprdhmensdidwmnkncifvevnspifrante*	341	USER	zzz1138
2590		Genomo_MH545509	msfrfnhkyvlltyaqcgdldgfavmekisslgaecivarehhedggvhlhvfceferkfrsrradvfdvdgvhpniepskgtpekgydyaikdgdvicgglarpsarpttngntfdkwsqitsaesrdefwslvheldpksaacnhsslvkycdwkyreripdyktpagisfdsggidgrdswlqqsgigldeplvgklsytsqggipptgktlwarslgahiycvgmisgdeciktdvdyaifddirggikffpsfkewlgcqqwitvkrlyrepklrlwgkpsiwisntdprnemlqsdvewmnlnctfievnsaifhaniq*	326	USER	zzz1139
2589		Genomo_MH545510	mlfvnskyvlltfaqcgdldewhvsdhlsslgaecivarevhpttggvhlhvfvdfgrkfrsrnvrvfdvdgrhpnvvpsrgtpekgfdyaikdgdvvagglerpmprggmsvgaenirnvaglcestteflelfdemdrgtlfksftnirsyadwrfavepepyvppfgtefsggefdgrddwlaqsgigskslilygpsrtgktswarslgahlyferlfsgkeainhmseveyavfddcsinhmpgwkswfgaqatvgvralyrdatyvawgkpivwctnrdpridmrididnershmwfqddidwmeancvfinitdnly*	325	USER	zzz1140
2588		Genomo_MH617534	mtfdfhcryglftysqctgldpwhvldkfseigaeciiareahadggthlhvfadwgrrkrfrrhdfadvdsfhpnivpsrgtphlgwdyatkdgdivagglerpggscdnllrkdhiwnqimdavtreqffelvrelapadlaksfpslskyadwryaeplatyegptfgdirfdlspypgleqwcndiragsngqsgslvvwgptrtgkttlarslgnhiffgglfsggaalaglreaqyavfddirggikffpgfkdwlgcqsnfmvkqlyrepvlikwgrpsiwlsntdprcelspedvdwmegncdfiyvsaeepifraste*	328	USER	zzz1141
2587		Genomo_MH939361	mpgfrfaaryglftyaqsdgldphsvvclfaelgaecivgrenhvsegthlhafvdfgrryettdarrfdvdgfhpnvspsrgtpekgydyaikdgdvvagglerpqgsgvsesslvwariadapcerdfwelvralaprslltsfnslhsyaqwnyrpvrdaytgpegvsfdlsgmeevsewirdygpgntlngrpkslvlwgptrtgktlwarslgrhlyfgglfnmgelsdiddaeyaifddmqggfeyfhgykfwlggqseftvtdkykgkkhvkwgkptiwlsnvdpttekgldyewlmgnafivrvedpfyrlca*	322	USER	zzz1142
2586		Genomo_MH939362	mpgfrfaaryglftyaqsdgldphsvvclfaelgaecivgrenhvsegthlhafvdfgrryettdarrfdvdgfhpnvspsrgtpekgydyaikdgdvvagglerpqgsgvsesslvwariadapcerdfwelvralaprslltsfnslhsyaqwnyrpvrdaytgpegvsfdlsgmeevsewirdygpgntlngrpkslvlwgptrtgktlwarslgrhlyfgglfnmgelsdiddaeyaifddmqggfeyfhgykfwlggqseftvtdkykgkkhvkwgkptiwlsnvdpttekgldyewlmgnafivrvedpfyrlca*	322	USER	zzz1143
2585		Genomo_MH939363	mtfrfaakyglltyaqcgnldpwavndhlgrlgaeciigredhddggvhlhaffmferrfesrnvrvfdvagrhpnvvagystpekgwayatkdgdvvaggleqpvgraaiseasskwarvilaesreeffalvaeldpralccsfgslrayadwryrpaldpyvsppgisfstdqfpelghwvqrnlagsvvgrprslilvgdtrlgktlwarslgnhayfgglfcldesledvdyavfddmqggleffhsykfwlgaqtqfyatdkykgkklihwgrpaiyccnsspladkgadvdwlvgncdivtidspifrantespqaqtve*	328	USER	zzz1144
2584		Genomo_MH939364	mtfrfaakyglltyaqcgnldpwavndhlgrlgaeciigredhddggvhlhaffmferrfesrnvrvfdvagrhpnvvagystpekgwayatkdgdvvaggleqpvgraaiseasskwarvilaesreeffalvaeldpralccsfgslrayadwryrpaldpyvsppgisfstdqfpelghwvqrnlagsvvgrprslilvgdtrlgktlwarslgnhayfgglfcldesledvdyavfddmqggleffhsykfwlgaqtqfyatdkykgkklihwgrpaiyccnsspladkgadvdwlvgncdivtidspifrantespqaqtve*	328	USER	zzz1145
2583		Genomo_MH939365	mtfrfaakyglltyaqcgnldpwavndhlgrlgaeciigredhedggvhlhaffmferrfesrnvrvfdvagrhpnvvagystpekgwayatkdgdvvaggleqpigraglseagskwarvilaesreeffalvaeldpralccsfgslrayadwkyrpvidpyvsppgvsfstdqfpelgnwvqrnlagsvvgrprsliligdtrlgktlwarslgnhayfgglfchesledvdyavfddmqggleffhsykfwlgaqtqfyatdkykgkklihwgrpaiyccnsspladkgadvdwlvgncdivhidspifrante*	319	USER	zzz1146
2582		Genomo_MH939366	mtfrfaakyglltyaqcgnldpwavndhlgrlgaeciigredhedggvhlhaffmferrfesrnvrvfdvagrhpnvvagystpekgwayatkdgdvvaggleqpigraglseagskwarvilaesreeffalvaeldpralccsfgslrayadwkyrpvidpyvsppgvsfstdqfpelgnwvqrnlagsvvgrprsliligdtrlgktlwarslgnhayfgglfcldesledvdyavfddmqggleffhsykfwlgaqtqfyatdkykgkklihwgrpaiyccnsspladkgadvdwlvgncdivhidspifrante*	320	USER	zzz1147
2581		Genomo_MH939367	mpgfrfaaryglftyaqsdgldphsvvclfaelgaecivgrenhvsegthlhafvdfgrryettdarrfdvdgfhpnvspsrgtpekgydyaikdgdvvagglerpqgsgvsesslvwariadapcerdfwelvralaprslltsfnslhsyaqwnyrpvrdaytgpegvsfdlsgmeevsewirdygpgntlngrpkslvlwgptrtgktlwarslgrhlyfgglfnmgelsdiddaeyaifddmqggfeyfhgykfwlggqseftvtdkykgkkhvkwgkptiwlsnvdpttekgldyewlmgnafivrvedpfyrlca*	322	USER	zzz1148
2580		Genomo_MH939368	mpgfrfaaryglftyaqsdgldphsvvclfaelgaecivgrenhvsegthlhafvdfgrryettdarrfdvdgfhpnvspsrgtpekgydyaikdgdvvagglerpqgsgvsesslvwariadapcerdfwelvralaprslltsfnslhsyaqwnyrpvrdaytgpegvsfdlsgmeevsewirdygpgntlngrpkslvlwgptrtgktlwarslgrhlyfgglfnmgelsdiddaeyaifddmqggfeyfhgykfwlggqseftvtdkykgkkhvkwgkptiwlsnvdpttekgldyewlmgnafivrvedpfyrlca*	322	USER	zzz1149
2579		Genomo_MH939369	mtfhcnaryflltysqcgeldpwkvsdhlgelrgecivareahadggthlhafvdfgrkfrsrrtsifdvdnhhpnvsathstpregfdyackdgdivagglerpeqsdrvvrstgwhdivaatsreeffellmahdprtlctcfaqlskyadwryredpepyrspdsvvidasafpeleewphralqpahvrkgqslvlygpsrmgktlwarslgshayfgglfslqeetdnvdyaifddlnggipffpqykwwlghqgqfyatdkykgkklvhwgrpaiwisnkdpreehgadydwlnanclfiyvdtpiaweie*	318	USER	zzz1150
2578		Genomo_MH939370	mtfrfaakyglltypqslgldpfrivdvlaelgaecivgkelhsdggthyhaffmfagkfqsrnprifdvdghhpnilrgrktpeqmydyatkdgdvvagglqrpddpvsskndsddfwrcvfaaetreetlrvaqessvsllgryffqvraiaegkamrspldfvsppelewelgpsgthrlvrdlsgktpkslilvgpsrtgktswarslgphfyfggafdmaqlsydrpdvnyavfddihslkyfpmwkfwmgaqetftvtdkykgkatfdwgrpivwcnnkdpradadadmdwidanciivnvpsdmplik*	316	USER	zzz1151
2577		Genomo_MH939371	mpgfrfaaryglftyaqsdgldphsvvclfaelgaecivgrenhvsegthlhafvdfgrryettdprrfdvdgfhpnvspsrgtpekgydyaikdgdivagglerpqgsgvsesslvwariadapcerdfwelvralaprslltsfnslhsyaqwnyrpvrdaytgpegvsfdlsgmeevsewlrdygpgntlngrpkslvlwgptrtgktlwarslgrhlyfgglfnmgelsdiddaeyavfddmqggfeyfhgykfwlggqseftvtdkykgkkhvkwgkptiwlsnvdpttekgldyewlmgnafivrvedpfyrlsa*	322	USER	zzz1152
2576		Genomo_MH939372	mpgfrfaaryglftyaqsdgldphsvvclfaelgaecivgrenhvsegthlhafvdfgrryettdprrfdvdgfhpnvspsrgtpekgydyaikdgdivagglerpqgsgvsesslvwariadapcerdfwelvralaprclltsfnslhsyaqwnyrpvrdaytgpegvsfdlsgmeevsewlrdygpgntlngrpkslvlwgptrtgktlwarslgrhlyfgglfnmgelsdiddaeyavfddmqggfeyfhgykfwlggqseftvtdkykgkkhvkwgkptiwlsnvdpttekgldyewlmgnafivrvedpfyrlsa*	322	USER	zzz1153
2575		Genomo_MH939373	mpgfrfaaryglftyaqsdgldphsvvclfaelgaecivgrenhvsegthlhafvdfgrryettdprrfdvdgfhpnvspsrgtpekgydyaikdgdivagglerpqgsgvsesslvwariadapcerdfwelvralaprslltsfnslhsyaqwnyrpvrdaytgpegvsfdlsgmeevsewlrdygpgntlngrpkslvlwgptrtgktlwarslgrhlyfgglfnmgelsdiddaeyavfddmqggfeyfhgykfwlggqseftvtdkykgkkhvkwgkptiwlsnvdpttekgldyewlmgnafivrvedpfyrlsa*	322	USER	zzz1154
2574		Genomo_MH939374	mvrkfkldnvdyvlltysdcpndfdpqliidavvgtgavyrlgrelhangkphfhcfvrwpepfshpdagslffvggrranirrfsanpgrrwdyvgkyaghkeghyiigdqcdrpggdkddsertqadiwgeiicatsedeffeklaalapkqlgcnfgslklyadwkyrpqvapyespaggytvpealeswereqlsaglsgrprglvlfgatrlgktvwarslgahsyfgglfnmdlfsedckyaifddisggfgffpsyklwlggqfefsvtdkykhkrnvkwgkpaiwlcntdprldwykpgtgpdfewmeancdfvevtepifhastg*	335	USER	zzz1155
2573		Genomo_MH939375	mvrkfkldnvdyvlltysdcpndfdpqliidavvgtgavyrlgrelhangkphfhcfvqwpepfshpdagslffvggrranikrfsanpgrrwdyvgkyaghkeghyiigdqcdrpggdkddsertqadiwgeiicstsedeffeklaslapkqlgcnfgslklyadwkyrpqvapyespaggytvpealeswereqlnsqlsgrprglvlfgatrlgktvwarslgahsyfgglfnmdlfsedcryavfddisggfgffpsyklwlggqfefsvtdkykhkrnvkwgkpaiwlcntdprldwykpgtgpdfewmeancdfvevteaifhastg*	335	USER	zzz1156
2572		Genomo_MH939376	mvrkfkldnvdyvlltysdcpndfdpqliidavvgtgavyrlgrelhangkphfhcfvqwpepfsqpdagslffvggrranikrfsanpgrrwdyvgkyaghkeghyiigdqcdrpggdkddsertqadiwgeiicstsedeffeklaslapkqlgcnfgslklyadwkyrpqvapyespaggytvpealeswereqlnsqlsgrprglvlfgatrlgktvwarslgahsyfgglfnmdlfsedcryavfddisggfgffpsyklwlggqfefsvtdkykhkrnvkwgkpaiwlcntdprldwykpgtgpdfewmeancdfvevteaifhastg*	335	USER	zzz1157
2571		Genomo_MH939377	mpfifqsryglltysqcdaldgfrvmehlsglgaeciigreihadggihlhcfvdfgrkfrsrrtdifdvdgrhpnivgsygtpwggydyaikdgdvicgglerpeeprskrvkkdwdawteitnardrehfwelvhhldpkaaacnhgqlakyadwrfavsppvyesprgvsfiggdvdgrdawcdqsgirsgepligrclslvlfgnsrtgktlsrslgthlytvgmvsgselkkasnddvkyaifddirggikffpafkewlgaqayvtvkelyrepalikwgkpsiwlsnddprnyveqgdrswleencifievteaifrantd*	329	USER	zzz1158
2570		Genomo_MH939378	mpfifqsryglltysqcdaldgfrvmehlsglgaeciigreihadggihlhcfvdfgrkfrsrrtdifdvdgrhpnivgsygtpwggydyaikdgdvicgglerpeeprskrvkkdwdawteitnardrehfwelvhhldpkaaacnhgqlakyadwrfavsppvyesprgvsfiggdvdgrdawcdqsgirsgepligrclslvlfgnsrtgktlwarslgthlytvgmvsgselkkasnddvkyaifddirggikffpafkewlgaqayvtvkelyrepalikwgkpsiwlsnddprnyveqgdrswleencifievteaifrantd*	330	USER	zzz1159
2569		Genomo_MH939379	mpfifqsryglltysqcdaldgfrvmehlsglgaeciigreihadggihlhcfvdfgrkfrsrrtdifdvdgrhpnivgsygtpwggydyaikdgdvicgglerpeeprskrvkkdwdawteitnardrehfwelvhhldpkaaacnhgqlakyadwrfavsppvyesprgvsfiggdvdgrdawcdqsgirsgepligrclslvlfgnsrtgktlwarslgthlytvgmvsgselkkasnddvkyaifddirggikffpafkewlgaqayvtvkelyrepalikwgkpsiwlsnddprnyveqgdrswleencifievteaifrantd*	330	USER	zzz1160
2568		Genomo_MH939380	mpfhfnaryalltyaqcdaldgfrvmehvsglgaeciigrevhadgglhlhcfidfgrkfrsrrtdifdvdgrhpnieqsygspwtgydyaikdgdvicgglgrpeeprstrvkkdhaqwteitnardrehfwelvhhldpkaaacnhgqlakyadwrfaevppvyesprgidfiggdvdgrdawvsqsgirsgepligrcmslvlfgnsrtgktlwarslgthlytvgmvsgselkkasnddvkyaifddirggikffpafkewlgaqqyvtvkelyrepklirwgkpsiwisnddprdvmdagdrswleenclfvevnetifrantd*	330	USER	zzz1161
2567		Genomo_MH939381	mpakykldgeqffmltypttpadfdgsgivailerlgcnyrvgrelhqdgkphfhamccfdepytdgdarrtftvgtripnirvrrtrpergwdyvgkhagtkeghylvgekgtrpggdedsserpsndswheiilartreeffdlaarlaprqlacsftslsayadwkyrpvkeeyvgpdgvwsvpdelldwvdenvrgtpgglvlygatrlgktvwarslgahyyagglwdmaefhpqeheyaiwddmlgglkagyfnyknwlggqfaftiqdkygkkksikwgkpsificntdprdeppmfndrvgmdwawleencvfyevkeaifraste*	335	USER	zzz1162
2566		Genomo_MH939382	mpakykldaeqffmltyptvpdgfdtdelisilerlgcdyrvgrelhqdgkphfhamlcfdnpytdgdarrtftvgtrvpnirvrrtrpergwdyvgkhagtkeghyivgekgsrpggdgdgserpsndawheivlartreeffdlatrlaprqlacsfnslsayadwkyrpepipyttpdgewvvpdvladwvdenvrgvpgglvlfgatrlgktvwarslgthfhcgglwnmsefnesveyavfddmvgglragyfnykdwmggqfnftvqdkymkkrsirwgkptificnedprdqppafndrvgldwawleencvfyevkdaifrante*	334	USER	zzz1163
2565		Genomo_MH939383	mpakykleseqffmltyptvpdgfdtdelisilerlgcdyrvgrelhqdgkphfhamlcfddpytdgdarrtftvgtrvpnirvrrtrpergwdyvgkhagtkeghyivgekgsrpggdgdgserptndawheivlartreeffdlatrlaprqlacsfnslsayadwkyrpepipyttpdgqwevpdvladwvdenvrgvpgglvlfgatrlgktvwarslgthfhcgglwnmsefnesveyavfddmvgglragyfnykdwmggqfnftvqdkymkkrsirwgkptificnedprdqppafndrvgldwawleencvfyevkdaifrante*	334	USER	zzz1164
2564		Genomo_MH939384	mgqfilknvrrvlltyaqcgaldpfavsdhisslhaecivgrelhsdggihlhvfvdfgrqfssrktdvfdvggchpnvkkcgrtpwkmydyaikdgdvcaggldrpdeesgdgdgkidntwhsivaaetpeefwslchdlaprdlcrsfpslqkycdwrfapkpgpyrtpegyefdtsrapalsewvsqarlgcgelglrpkslvlygesrlgktvwarslgshlytigmnsgaelakaesvdyavfddmrggikmfpsfkewlgaqayvtvkqlykepkatpwgkpciwlantdprlemdpsdvtwieanclfvdlihplftsrantd*	331	USER	zzz1165
2563		Genomo_MH939385	mprtvnwsvalesvafltysqygpadgvsdiqalfatlgahnllvaherhedgghhyhvlaswdthfkadnvrtfdvggchpnfksvrgpgnvnrvldyclkdgdyygdpevfrrdeprrsqtsiwseivssesseqflrlarelapkeyglnydrlvsycrahydkpaeyvprhvdfvvpaeldawvatnviqperpralclvgrsrlgktewarslgrhsyfaglfniddfdplaqyavmddidikffpnykgwfgaqkrftitgkyarhrtvdwgkpmiwcsnddprqavgidqdwlaancdfivvheplf*	315	USER	zzz1166
2562		Genomo_MH939386	mpgkyklqdeqyfmltyptipngfntdgliallerlgcdyrvgrelhkdgkphlhamlcfdepytdndtratfkigtrvpnirvrrvkpergwdyvgkyagtkeghyivgekgvrpsgdsdgserpsndawfeiilartreeffdsaarlaprqlacsfssltayadwkyrpvatpwtcpdgefsvpfelrdwvddyslilfgptrtgkttwarslgnhyycgglwnmadfdetveyaifddmvnglragyfqykdwlggqyefmvqdkykgkrrlrwgkpsificnrdprdeigmddhnkarvewdwleencvfyevrepifraste*	329	USER	zzz1167
2561		Genomo_MH939387	mpgkyklqdeqyfmltyptipngfntdgliallerlgcdyrvgrelhkdgkphlhamlcfdepytdndaratfkigtrvpnirvrrvkpergwdyvgkyagtkeghyivgekgvrpsgdsdgserpsndawfeiilartreeffdsaarlaprqlacsfssltayadwkyrpvatpwtcpdgefsvpfelrdwvddyslilfgptrtgkttwarslgnhyycgglwnmadfdetveyaifddmvnglragyfqykdwlggqyefmvqdkykgkrrlrwgkpsificnrdprdeigmddhnkarvewdwleencvfyevrepifraste*	329	USER	zzz1168
2560		Genomo_MH939388	mpgkyklqdeqyfmltyptipngfntdgliallerlgcdyrvgrelhkdgkphlhamlcfdepytdndaratfkigtrvpnirvrrvkpergwdyvgkyagtkeghyivgekgvrpsgdsdgserpsndawfeiilartreeffdsaarlaprqlacsfssltayadwkyrpvatpwtcpdgefsvpfelrdwvddyslilfgptrtgkttwarslgnhyycgglwnmadfdetveyaifddmvnglragyfqykdwlggqyefmvqdkykgkrrlrwgkpsificnrdprdeigmddhnkarvewdwleencvfyevrepifraste*	329	USER	zzz1169
2559		Genomo_MH939389	mpakykldaeqffmltypttpadfdgsgivailerlgcnyrvgrelhqdgkphfhamccfdepytdgdarrtftvgtrvpnirvrrtrpergwdyvgkhagtkeghylvgekgarpggdedsaerpsndswheiilartreeffdlaarlaprqlacsftslsayadwkyrpvkeeyvgpdgewsvpdelldwvdenvrrpkglvlfgatrlgktvwarslgahyyagglwdmaefhpqeheyaiwddmlgglkagyfnyknwlggqfaftiqdkygkkksikwgkpsificntdprdeppmfndrvgmdwawleencvfyevkeaifraste*	334	USER	zzz1170
2558		Genomo_MH939390	mpakykleseqffmltyptvpdgfdtdelisilerlgcdyrvgrelhqdgkphfhamlcfddpytdgdarrtftvgtrvpnirvrrtrpergwdyvgkhagtkeghyivgekgsrpggdgdgserpsndawheivlartreeffdlatrlaprqlacsfnslsayadwkyrpepipyttpdgewvvpdvladwvdenvrrpkglvlfgatrlgktvwarslgthfhcgglwnmsefnesveyavfddmvgglragyfnykdwmggqfnftvqdkymkkrsirwgkptificnedprdqppafndrvgldwawleencvfyevkeaifrante*	333	USER	zzz1171
2557		Genomo_MH939391	mpakykldgeqffmltypttpadfdgsgivailerlgcnyrvgrelhqdgkphfhamccfdepytdgdarrtftvgtripnirvrrtrpergwdyvgkhagtkeghylvgekgtrpggdedsserpsndswheiilartreeffdlaarlaprqlacsftslsayadwkyrpvkeeyvgpdgvwsvpdelldwvdenvrrpkglvlygatrlgktvwarslgahyyagglwdmaefhpqeheyaiwddmlgglkagyfnyknwlggqfaftiqdkygkkksikwgkpsificntdprdeppmfndrvgmdwawledncvfyevkeaifraste*	334	USER	zzz1172
2556		Genomo_MH939392	mpakykldaeqffmltyptvpdgfdtdelisilerlgcdyrigrelhqdgkphfhamlcfddpytdgdarrtftvgtrvpnirvrrtrpergwdyvgkhagtkeghyiigekgsrpggdgdgserptndawheiilartreeffdlatrlaprqlacsfnslsayadwkyrpvpipyatpdgdwtvpdeladwvdenvrrpkglvlfgatrlgktvwarslgehfhcgglwnmsefnesveyavfddmvgglragyfnykdwmggqfnftvqdkymkkrsikwgkptificnedprdqppafndrvgldwawleencvfyevkeaifhant*	332	USER	zzz1173
2555		Genomo_MH939393	mpakykldgeqffmltypttpadfdgsgivailerlgcnyrvgrelhqdgkphfhamccfdepytdgdarrtftvgtripnirvrrtrpergwdyvgkhagtkeghylvgekgtrpggdedsserpsndswheiilartreeffdlaarlaprqlacsftslsayadwkyrpvkeeyvgpdgvwsvpdelldwvdenvrrpkglvlygatrlgktvwarslgahyyagglwdmaefhpqeheyaiwddmlgglkagyfnyknwlggqfaftiqdkygkkksikwgkpsificntdprdeppmfndrvgmdwawleencvfyevkeaifraste*	334	USER	zzz1174
2554		Genomo_MH939394	mpakykleseqffmltyptvpdgfdtdelisilerlgcdyrvgrelhqdgkphfhamlcfddpytdgdarrtftvgtrvpnirvrrtrpergwdyvgkhagtkeghyiigekgsrpggdgdgserptndawheiilartreeffdlatrlaprqlacsfnslsayadwkyrpvpipyatpdgdwtvpdeladwvdenvrrpkglvlfgatrlgktvwarslgthfhcgglwnmsefnesveyavfddmvgglragyfnykdwmggqfnftvqdkymkkrsirwgkptificnedprdqppafndrvgldwawleencvfyevkeaifrante*	333	USER	zzz1175
2553		Genomo_MH939395	mpakykldgeqffmltypttpadfdgsgivailerlgcnyrvgrelhqdgkphfhamccfdepytdgdarrtftvgtripnirvrrtrpergwdyvgkhagtkeghylvgekgtrpggdedsserpsndswheiilartreeffdlaarlaprqlacsftslsayadwkyrpvkeeyvgpdgvwsvpdelldwvdenvrrpkglvlygatrlgktvwarslgahyyagglwdmaefhpqeheyaiwddmlgglkagyfnyknwlggqfaftiqdkygkkksikwgkpsificntdprdeppmfndrvgmdwawledncvfyevkeaifraste*	334	USER	zzz1176
2552		Genomo_MH939396	mpsfvhnyryalitysqcgdldpwrvmerfsslgaecivarelhedgglhlhvfadfgrkfrsrktdildvdgrhanvepsagtpekgydyaikdgdvvcgglarpeprsmgdgptsakwaritsaetrdefwelcheldpkaaacnfnalskyadwrfaevppeyehdgrikfvsgdgdgrdqwvsqsgsrvkslvlyggtrtgkttwarslgshiycvglvsgtecakgldaryavfddirgglaffhgykewlgaqphvsikqlyrepfymkwgkpsiwvcntdprndpyplnarpdfewmegnvefievtssliesishante*	328	USER	zzz1177
2551		Genomo_MH939397	mpqlewnsryvlvtyaqcgdldpwrvverlsslgaeciigrehhedgglhlhvfadfgrkfrsrktdildvdgrhpnlapikrtpekaydyaikdgdvvagglerpiaggmgdgasadkwaritaaedrdefwalvheldpkaaacsfnalskyadwrfteippeyehdgriefvpgnadgrddwvsqsgsrvkslvlwgrsrtgkttwarslgehvycvglvsgtecarglnaryavfddirgglgffhgykewlgaqphvpikelyreprymrwnkpsiwvcnkdprleayppnatpdwewmednvdfievtgsliasishaste*	328	USER	zzz1178
2550		Genomo_MH939398	mpakykldaeqffmltyptvpdgfdtdelisilerlgcdyrvgrelhqdgkphfhamlcfdnpytdgdarrtftvgtrvpnirvrrtrpergwdyvgkhagtkeghyivgekgsrpggdgdgserpsndawheivlartreeffdlatrlaprqlacsfnslsayadwkyrpepipyttpdgewvvpdvladwvdenvrrpkglvlfgatrlgktvwarslgthfhcgglwnmsefnesveyavfddmvgglragyfnykdwmggqfnftvqdkymkkrsirwgkptificnedprdqppafndrvgldwawleencvfyevkdaifrante*	333	USER	zzz1179
2549		Genomo_MH939399	mpakykldaeqffmltypttpadfdgsgivailerlgcnyrvgrelhqdgkphfhamccsdepytdgdarrtftvgtrvpnirvrrtrpergwdyvgkhagtkeghylvgekgarpggdedsaerpsndswheiilartreeffdlaarlaprqlacsftslsayadwkyrpvkeeyvgpdgewsvpdqlldwvdenvrrpkglvlfgatrlgktvwarslgahyyagglwdmaefhpqeheyaiwddmlgglkagyfnyknwlggqfaftiqdkygkkksikwgkpsificntdprdeppmfndrvgmdwawleencvfyevkeaifraste*	334	USER	zzz1180
2548		Genomo_MH939400	mpakykldgeqffmltypttpadfdgsgivailerlgcnyrvgrelhqdgkphfhamcyfdepytdgdarrtftvgtripnirvrrtrpergwdyvgkhagtkeghylvgekgtrpggdedsserpsndswheiilartreeffdlaarlaprqlacsftslsayadwkyrpvkeeyvgpdgvwsvpdelldwvdenvrrpkglvlygatrlgktvwarslgahyyagglwdmaefhpqeheyaiwddmlgglkagyfnyknwlggqfaftiqdkygkkksikwgkpsificntdprdeppmfndrvgmdwawledncvfyevkeaifraste*	334	USER	zzz1181
2547		Genomo_MH939401	mpakykldaeqffmltyptipdgfdtdelisilerlgcdyrigrelhqdgkphfhamlcfddpytdgdarrtftvgarvpnirvrrtrpergwdyvgkhagtkeghyivdekgarpggdgdgserptndawheivlartreeffdlatrlaprqlacsfnslsayadwkyrpvpipyatpdgdwtipdeladwvdenvrrpkglvlfgatrlgktvwarslgehfhcgglwnmsefnesveyavfddmvgglragyfnykdwmggqfnftvqdkymkkrsikwgkptificnedprdqppafndrvgldwawleencvfyevkdaifrastd*	333	USER	zzz1182
2546		Genomo_MH939402	mpakykldaeqffmltyptvpdgfdtdelisilerlgcdyrigrelhqdgkphfhamlcfddpytdgdarrtftvgtrvpnirvrrtrpergwdyvgkhagtkeghyiigekgsrpggdgdgserptndawheiilartreeffdlatrlaprqlacsfnslsayadwkyrpvpipyatpdgdwtvpdeladwvdenvrrpkglvlfgatrlgktvwarslgehfhcgglwnmsefnrvreyavfddmvgglragyfnykdwmggqfnftvqdkymkkrsikwgkptificnedprdqppafndrvgldwawleencvfyevkeaifhant*	332	USER	zzz1183
2545		Genomo_MH939403	mpakykldgeqffmltypttpadfdgsgivailerlgcnyrvgrelhqdgkphfhamccfdepytdgdarrtftvgtripnirvrrtrpergwdyvgkhagtkeghylvgekgtrpggdedsserpsndswheiilartreeffdlaarlaprqlacsftslsayadwkyrpvkeeyvgpdgvwsvpdelldwvdenvrrpkglvlygatrlgktvwarslgahyyagglwdmaefhpqeheyaiwddmlgglkagyfnyknwlggqfaftiqdkygkkksikwgkpsificntdprdeppmfndrvgmdwawledncvfyevkeaifraste*	334	USER	zzz1184
2544		Genomo_MH939404	mpakykldgeqffmltypttpadfdgsgivailerlgcnyrvgrelhqdgkphfhamccfdepytdgdarrtftvgtripnirvrrtrpergwdyvgkhagtkeghylvgekgtrpggdedsserpsndswheiilartreeffdlaarlaprqlacsftslsayadwkyrpvkeeyvgpdgvwsvpdelldwvdenvrrpkglvlygatrlgktvwarslgahyyagglwdmaefhpqeheyaiwddmlgglkagyfnyknwlggqfaftiqdkygkkksikwgkpsificntdprdeppmfndrvgmdwawleencvfyevkeaifraste*	334	USER	zzz1185
2543		Genomo_MH939405	mpakykldgeqffmltypttpadfdgsgivailerlgcnyrvgrelhqdgkphfhamccfdepytdgdarrtftvgtripnirvrrtrpergwdyvgkhagtkeghylvgekgtrpggdedsserpsndswheiilartreeffdlaarlaprqlacsftslsayadwkyrpvkeeyvgpdgvwsvpdelldwvdenvrrpkglvlygatrlgktvwarslgahyyagglwdmaefhpqeheyaiwddmlgglkagyfnyknwlggqfaftiqdkygkkksikwgkpsificntdprdeppmfndrvgmdwawledncvfyevkeaifraste*	334	USER	zzz1186
2542		Genomo_MH939406	mpakykldaeqffmltyptipdgfdtdelisilerlgcdyrigrelhqdgkphfhamlcfddpytdgdarrtftvgarvpnirvrrtrpergwdyvgkhagtkeghyivgekgarpggdgdgserptndawheivlartreeffdlatrlaprqlacsfnslsayadwkyrpvpipyatpdgdwtipdeladwvdenvrrpkglvlfgatrlgktvwarslgehfhcgglwnmsefnesveyavfddmvgglragyfnykdwmggqfnftvqdkymkkrsikwgkptificnedprdqppafndrvgldwawleencvfyevkdaifrastd*	333	USER	zzz1187
2541		Genomo_MH939407	mpakykldaeqffmltyptvpdgfdtdelisilerlgcdyrvgrelhqdgkphfhamlcfdnpytdgdarrtftvgtrvpnirvrrtrpergwdyvgkhagtkeghyivgekgsrpggdgdgserpsndawheivlartreeffdlatrlaprqlacsfnslsayadwkyrpepipyttpdgewvvpdvladwvdenvrrpkglvlfgatrlgktvwarslgthfhcgglwnmsefnesveyavfddmvgglragyfnykdwmggqfnftvqdkymkkrsirwgkptificnedprdqppafndrvgldwawleencvfyevrdaifrante*	333	USER	zzz1188
2540		Genomo_MH939408	mpakykldaeqffmltyptvpdgfdtdelisilerlgcdyrigrelhqdgkphfhamlcfddpytdgdarrtftvgtrvpnirvrrtrpergwdyvgkhagtkeghyiigekgsrpggdgdgserptndawheiilartreeffdlatrlaprqlacsfnslsayadwkyrpvpipyatpdgdwtvpdeltdwvdenvrrpkglvlfgatrlgktvwarslgehfhcgglwnmsefnesveyavfddmvgglragyfnykdwmggqfnftvqdkymkkrsikwgkptificnedprdqppafndrvgldwawleencvfyevkeaifhant*	332	USER	zzz1189
2539		Genomo_MH939409	mpakykldaeqffmltyptvpdgfdtdelisilerlgcdyrigrelhqdgkphfhamlcfddpytdgdarrtftvgtrvpnirvrrtrpergwdyvgkhagtkeghyivgekgsrpggdgdgserpsndawheivlartreeffdlatrlaprqlacsfnslsayadwkyrpvpipyatpdgdwtvpdeladwvdenvrrpkglvlfgatrlgktvwarslgehfhcgglwnmsefnesveyavfddmvgglragyfnykdwmggqfnftvqdkymkkrsikwgkptificnedprdqppafndrvgldwawleencvfyevkeaifhant*	332	USER	zzz1190
2538		Genomo_MH939410	mvrkfkldnvdyvlltysdcpndfdpqliidavvgtgavyrlgrelhangkphfhcfvqwpepfshpdagslffvggrranikrfsanpgrrwdyvgkyaghkeghyiigdqcdrpggdkddsertqadiwgeiicstsedeffeklaslapkqlgcnfgslklyadwkyrpqvapyespaggytvpealeswereqlnsqlsgrprglvlfgatrlgktvwarslgahsyfgglfnmdlfsedcryaifddisggfgffpsyklwlggqfefsvtdkykhkrnvkwgkpaiwlcntdprldwykpgtgpdfkwmeancdfvevteaifhastg*	335	USER	zzz1191
2537		Genomo_MH939411	mtfrfaakyglltyaqcgnldpwavndhlgslgaeciigredhedggvhlhaffmferrfesrnvrvfdvagrhpnvvagystpekgwayatkdgdvvagglekpigraaiseasskwarvilaesrdeffelvaeldpralccsfgslrayadwryrptidpyvspggvsfctdqfpelgnwvqrnlagsvvgrprslfligdtrlgktlwarslgnhayfgglfcldesledvdyavfddmqggleffhsykfwlgaqaqfyatdkykgkklirwgrptiyccnstpladkgadvdwllgncdivhidspifraste*	320	USER	zzz1192
2536		Genomo_MH939412	mtfrfaakyglltyaqcgnldpwavndhlgslgaeciigredhedggvhlhaffmferrfesrnvrvfdvagrhpnvvagystpekgwayatkdgdvvagglekpigraaiseasskwarvilaesreeffalvaeldpralccsfgslrayadwkyrpvidpyvsppgvsfstdqfpelgnwvqrnlagsvvgrprsliligdtrlgktlwarslgnhayfgglfcldesledvdyavfddmqggleffhsykfwlgaqaqfyatdkykgkklirwgrpaiyccnstpladkgadvdwllgncdivhidspifraste*	320	USER	zzz1193
2535		Genomo_MH939413	mtfrfaakyglltyaqcgnldpwavndhlgrlgaeciigredhedggvhlhaffmferrfesrnvrvfdvagrhpnvvagystpekgwayatkdgdvvaggleqpigraglseagskwarvilaesreeffalvaeldpralccsfgslrayadwkyrpvidpyvsppgvsfstdqfpelgnwvqrnlagsvvgrprsliligdtrlgktlwarslgnhayfgglfcldesledvdyavfddmqggleffhsykfwlgaqtqfyatdkykgkklihwgrpaiyccnsspladkgadvdwlvgncdivhidspifrante*	320	USER	zzz1194
2534		Genomo_MH939414	mtfrfaakyglltyaqcgnldpwavndhlgrlgaeciigredhedggvhlhaffmferrfesrnvrvfdvagrhpnvvagystpekgwayatkdgdvvaggleqpigraglseagskwarvilaesreeffalvaeldpralccsfgslrayadwkyrpaidpyvsppgvsfstdqfpelgnwvqrnlagsvvgrprsliligdtrlgktlwarslgnhayfgglfcldesledvdyavfddmqggleffhsykfwlgaqtqfyatdkykgkklihwgrpaiyccnsspladkgadvdwlvgncdivhidspifrante*	320	USER	zzz1195
2533		Genomo_MH939415	mtfrfaakyglltyaqcgnldpwavndhlgslgaeciigredhedggvhlhaffmferrfesrnvrvfdvagrhpnvvagystpekgwayatkdgdvvagglekpigraaiseasskwarvilaesrdeffelvaeldpralccsfgslrayadwryrptidpyvspggvsfctdqfpelgnwvqrnlagsvvgrprsliligdtrlgktlwarslgnhayfgglfcldesledvdyavfddmqggleffhsykfwlgaqaqfyatdkykgkklirwgrpaiyccnstpladkgadvdwllgncdivhidspifraste*	320	USER	zzz1196
2532		Genomo_MH939416	mtfrfaakyglltyaqcgnldpwavndhlgrlgaeciigredhedggvhlhaffmferrfesrnvrvfdvagrhpnvvagystpekgwayatkdgdvvaggleqpigraglseagskwarvilaesreeffalvaeldpralccsfgslrayadwkyrpvidpyvsppgvsfstdqfpelgnwvqrnlagsvvgrprsliligdtrlgktlwarslgnhayfgglfcldesledvdysvfddmqggleffhsykfwlgaqtqfyatdkykgkklihwgrpaiyccnsspladkgadvdwlvgncdivhidspifrante*	320	USER	zzz1197
2531		Genomo_MH939417	mtfrfaakyglltyaqsdgldpfrivnllselgaecivgkehhadggthyhaffmfsrkfqsrnarifdidtyhpnilrgrkspeqmydyatkdgdvvagglerpsgtqsssdtdsfwgnvfdaetreetlrvaressvsllgryyfqvraiaegkavqnpldyvsppelewelrsypelndwcethlgrapkslilvgpsrtgktswarslgshfyfggnfnmdqlsydnedvnyavfddihslkffpmwkfwmgaqdtftvtdkykgkltfnwgrpviwcnnkdpradpdadsdwidancvvvyvpaeeplisrante*	321	USER	zzz1198
2530		Genomo_MH939418	mtfrfaakyglltyaqsdgldpfrivnllselgaecivgkehradggthyhaffmfsrkfqsrnarifdidtyhpnilrgrkspeqmydyatkdgdvvagglerpsgtqsssdtdsfwgnvfdaetreetlrvaressvsllgryyfqvraiaeskavqnpldyvsppelewklrsypelndwcethlgrrgnrpkslilvgpsrtgktswarslgshfyfggnfnmdqlsydnedvnyavfddihslkffpmwkfwmgaqdtftvtdkykgkltfnwgrpviwcnnrdpradpdadsdwidancivvyvpaeeplishanre*	324	USER	zzz1199
2529		Genomo_MH939419	mtfrfaakyglltyaqsdgldpfrivnllselgaecivgkehhadggthyhaffmfsrkfqsrnarifdidtyhpnilrgrkspeqmydyatkdgdvvagglerpsgtqsssdtdsfwgnvfdaetreetlrvaressvsllgryyfqvraiaeskavqnpldyvsppelewelrsypelndwcethlgrrgnrpkslilvgpsrtgktswarslgshfyfggnfnmdqlsydnedvnyavfddihslkffpmwkfwmgaqdtftvtdkykgkltfnwgrpviwcnnrdpradpdadsdwidancivvyvpaedplishanre*	324	USER	zzz1200
2528		Genomo_MH939420	mtfrfvakyglltyaqsdgldpfrivnllselgaecivgkehhadggthyhaffmfsrkfqsrnarifdidtyhpnilrgrkspeqmydyatkdgdvvagglerpsgtqsssdtdsfwgnvfdaetreetlrvaressvsllgryyfqvraiaeskavqnpldyvsppelewklrsypelndwcethlgrrgnrpkslilvgpsrtgktswarslgshfyfggnfnmdqlsydnedvnyavfddihslkffpmwkfwmgaqdtftvtdkykgkltfnwgrpviwcnnrdpradpdadsdwidancivvyvpaeeplishanre*	324	USER	zzz1201
2527		Genomo_MH939421	mtfrfaakyglltyaqsdgldpfrivnllselgaecivgkehhadggthyhaffmfsrkfqsrnarifdidtyhpnilrgrkspeqmydyatkdgdvvagglerpsgtqsssdtdsfwgnvfdaetreetlrvaressvsllgryyfqvraiaeskavqnpldyvsppelewelrsypelndwcethlgrrgnrpkslilvgpsrtgktswarslgshfyfggnfnmdqlsydnedvnyavfddihslkffpmwkfwmgaqdtftvtdkykgkltfnwgrpviwcnnrdpradpdadsdwidancivvyvpaedplishanre*	324	USER	zzz1202
2526		Genomo_MH939422	mtfrfaakyglltyaqsdgldpfrivnllselgaecivgkehhadggthyhaffmfsrkfqsrnarifdidtyhpnilrgrkspeqmydyatkdgdvvagglerpsgtqsssdtdsfwgnvfdaetreetlrvaressvsllgryyfqvraiaeskavqnpldyvsppelewklrsypelndwcethlgrrgnrpkslilvgpsrtgktswarslgshfyfggnfnmdqlsydnedvnyavfddihslkffpmwkfwmgaqdtftvtdkykgkltfnwgrpviwcnnrdpradpdadsdwidancivvyvpaeeplishanre*	324	USER	zzz1203
2525		Genomo_MH939423	mtfrfaakyglltyaqsdgldpfrivnllselgaecivgkehhadggthyhaffmfsrkfqsrnarifdidtyhpnilrgrkspeqmydyatkdgdvvagglerpagtqsssdtdsfwgnvfdaetreetlrvaressvsllgryyfqvraiaeskalqnpldyvsppelewelrsypelndwcethlgrrgnrpkslilvgpsrtgktswarslgshfyfggnfnmdqlsydnedvnyavfddihslkffpmwkfwmgaqdtftvtdkykgkltfnwgrpviwcnnrdpradpdadsdwidancivvyvpaeeplishanre*	324	USER	zzz1204
2524		Genomo_MH939424	mtfrfaakyglltyaqsdgldpfrivnllselgaecivgkehhadggthyhaffmfsrkfqsrnarifdidtyhpnilrgrkspeqmydyatkdgdvvagglerpsgtqsssdtdsfwgnvfdaetreetlrvaressvsllgryyfqvraiaeskavqnpldyvsppelewklrsypelndwcethlgrrgnrpkslilvgpsrtgktswarslgshfyfggnfnmdqlsydnedvnyavfddihslkffpmwkfwmgaqdtftvtdkykgkltfnwgrpviwcnnrdpradpdadsdwidancivvyvpaeeplishanre*	324	USER	zzz1205
2523		Genomo_MH939425	mtflfsaryalltyaqcgdldewsvsdhmsalgaeciigredhadggthlhvfldfggkkqsrrpnffdvgghhpnitpsrgrpelgydyavkdgnvvagglarpgggglpevadkwceivsaesrdeffdllrqldpktlvtrwtelnkyadaayaptpepyvgsdgkqfelgmvpearwgeqlvandpvegtmrslvlygpsrlgktvwarslgphvysmgivsgklllrdapgaayavfddmrggigyfhswkewlgaqsvvtvkelyrdpvqlvwgrpciwlanrdprlemwaelsdrsaaskrdliqsdvdwleancifvelqepifhante*	338	USER	zzz1206
2522		Genomo_MH939426	mpakykldaeqffmltyptvpdgfdtdelisilerlgcdyrvgrelhqdgkppfhamlcfdapytdgyalptftvgtrvpnlrvrltlpergwdyvakhagttqghyivgekgsrpggdgdgserpsndawheivlartreeffdlatrlaprqlacsfnslsayadwkyrpepipyttpdgewvvpdvladwvdenvrrpkglvlfgatrlgktvwarslgthfhcgglwnmsefnesveyavfddmvgglragyfnykdwmggqsnfavldkfmnkrsirwgkptificnedprdqppafndrvgldwawleencvfyevkdaifrante*	333	USER	zzz1207
2521		Genomo_MH939427	mtsfhfssryvlltysqsgglsewsvldhisslgaecvigredhadggthlhvfcdfgrkkqsrrsdyfdvqghhpnivpsrgrpgegwdyatkdgnvvagglerpgggglpsapdkwreivgaesreeffdllreldpktlitkwselnryaddayakrhepyvgptglqfelgmvpelagwrrelveddlvgrrkslilygasrlgktlwarslgphayimgmvsgqvlqrdmpdakyavfddmrggiamfpsfkewfgaqsvvtvkalyrdpvqikwgkpciwlanadprdqlkaditdrtpkgridliyndidwmeancvfvelhepifhasie*	339	USER	zzz1208
2520		Genomo_MH939428	mpakykleseqffmltyptvpdgfdtdelisilerlgcdyrvgrelhqdgkphfhamlcfddpytdgdarrtftvgtrvpnirvrrtrpergwdyvgkhagtkeghyivgekgsrpggdgdgserptndawheivlartreeffdlatrlaprqlacsfnslsayadwkyrpepipyttpdgqwevpdvladwvdenvrrpkglvlfgatrlgktvwarslgthfhcgglwnmsefnesveyavfddmvgglragyfnykdwmggqfnftvhdqymknrsirwgkptificnedprdqppafndrvgldwawleencvfyevkeaifrante*	333	USER	zzz1209
2519		Genomo_MH939429	mpakykleseqffmltyptvpdgfdtdelisilerlgcdyrvgrelhqdgkphfhamlcfddpytdgdarrtftigtrvpnirvrrtrpergwdyvgkhagtkeghyivgekgsrpggdgdgserpsndawheivlartreeffdlatrlaprqlacsfnslsayadwkyrpepipyttpdgewvvpdvladwvdenvrrpkglvlfgatrlgktvwarslgthfhcgglwnmsefnesveyavfddmvgglragyfnykdwmggqfnftvqdkymkkrsirwgkptificnedprdqppafndrvgldwawleencvfyevkeaifrante*	333	USER	zzz1210
2518		Genomo_MH939430	mpakykleseqffmltyptvpdgfdtdelisilerlgcdyrvgrelhqdgkphfhamlcfddpytdgdarrtftvgtrvpnirvrrtrpergwdyvgkhagtkeghyivgekgsrpggdgdgserptndawheivlartreeffdlatrlaprqlacsfnslsayadwkyrpepipyttpdgqwevpdvladwvdenvrrpkglvlfgatrlgktvwarslgthfhcgglwnmsefnesveyavfddmvgglragyfnykdwmggqfnftvqdkymkkrsirwgkptificnedprdqppafndrvgldwawleencifyevneaifrante*	333	USER	zzz1211
2517		Genomo_MH939431	mpsnfsskdakfllltysqvpehltnelpmsivlrassrgaecivgreqhadggihfhafvdfgggrystrnqrdwdiegihpnikkggrtpwaiydyackdgdivaggaerppekesasndswelvlgaatraeflqllrkhfprilvasfgsvskyadwayapdpveyehpedygfalegysdvvdwvddnlrggvigrsvpfyrfsrpkslvlfgesrlgktvwarslgshlyfcglysykeackadsalyavfddiqggikffhgfknwlggqkefqikglyrdpelirwgkpsiwvantdprhdmstddcawmeanctfvevrepmfranst*	338	USER	zzz1212
2516		Genomo_MH939432	mpsfdlhcryalltyaqcgdlsadavggkllemgfecvigrenhadggvhlhcfvdfgrkrrfrrvdvfdvegrhpnispskgtpakgydyaikdgdivygtlerpggasksgttekwsritnasdresfwdlvheldpksaacchtqlqkycdwkfavipaeyvhppnitffggeldgrdswlqqsgigvgepllgiclsicvygesrtgktlwarslgkhiycvglvsgdaclsapeadyavfddlrggikffpsfkewlgcqayvtvkclyrepklvkwgkpsiylantdprdemqnseiewmnkncifvevnspifhaniq*	326	USER	zzz1213
2515		Genomo_MH939433	mpakykldgeqffmltypttpadfdgsgivailerlgcnyrvgrelhqdgkphfhamccfdepytdgdarrtftvgtripnirvrrtrpergwdyvgkhagtkeghylvgekgtrpggdedsserpsndswheiilartreeffdlaarlaprqlacsftslsayadwkyrpvkeeyvgpdgvwsvpdelldwvdenvrrpkglglygaiwlgktvwvrslgahyyaggfwdmaefhpqeqeyaiwddmlgglkagyfnyknwlggqfaftiqdkygkkksikwgkpsificntdprdeppmfndrvgmdwawleencvfyemkeaifraste*	334	USER	zzz1214
2514		Genomo_MH939434	mtsfhfssryvlltysqsgdlsewsvldhisslgaecvigredhadggthlhvfcdfgrkkqsrrsdyfdvqghhpnivpsrgrpgegwdyatkdgnvvagglerpgggglpsapdkwreivgaesreeffdllreldpktlvtkwselnryaddayakrhepyvgptglqfelgmvpelagwrrelveddlvdakvlssmvlvdlarhcgheasdlmptlwewcqdksfnaicrdakyavfddmrggiamfpsfkewfgaqsvvtvkalyrdpvqikwgkpciwlanadprdqlkaditdrtpkgridliyndidwmeancvfvelhepifhasie*	338	USER	zzz1215
2513		Genomo_MH939435	mprtvnwsvalesvafltysqygpadgvsdiqalfatlgacnllvaherhedgghhyhvlaswdthfkadnvrtfdvggchpnfksvrgdgninrvldyclkdgdyygdpelfrrdapkrsqhsvwteivsaesteqflglarelapkeyglnydrlvsycrahydkpteyvprhvdfvvppeltqwvddnvsnaapdqperpralvligqsrlgktewarslghhsyfaglfniddfnplaqyavmddidikffpnykgwfgaqkrftitgkyarhrtvdwgkpmiwctnddprqvtgidqdwlsanaqfvivheply*	320	USER	zzz1216
2512		Genomo_MH939436	mpfyfnaryglftyahcesmdpfaivdhfgdlgaevivgseryptgpgvhyhvfadfgrkfrsrrvdcfdvagfhpnivasrgtpeagydyaikdgdvvagglerpsgmesvqrpdkwsiitaaatrdefytllreldpksmvcshrqiqayadwqyrveptpyatpdgvfdianygdlrrslviwgdtklgktvwarslgkhlyfcglysyaeavkaadvdyavfddiqggikffpafknwlgaqfefqvkglyrdpqmikwgkpsvwvantdprhdmnhddikwlegnclfveihesifhasteyred*	311	USER	zzz1217
2511		Genomo_MH939437	mpakykleseqffmltyptvpdgfdtdelisilerlgcdyrvgrelhqdgkphfhamlcfdnpytdgdarrtftvgtrvpnirvrrtrpergwdyvgkhagtkeghyivgekgsrpggdgdgserptndawheivlartreeffdlatrlaprqlacsfnslsayadwkyrpepipyttpdgqwevpdvladwvdenvrrpkglvlfgatrlgktvwarslgthfhcgglwnmsefnesveyavfddmvgglragyfnykdwmggqfnftvqdkymkkrsirwgkptificnedprdqppafndrvgldwawleencifyevneaifrante*	333	USER	zzz1218
2510		Genomo_MH939438	mpfrfqakyglltypqcgdnageaqrraldawrvvehlgqlgaecivgreshgdggvhlhaffmfeskfrssdvrvfdvdghhpnvsrgyanpadgydyaikdgdvvagglerpgehdvqkhsvwsriieaetesefwalareldpravcisftslraycghryaparteyrspsgirfdtsqypelqqwvdnelgertdqrvgyanpfytspkslilwgttrlgktlwarslgkhayfgglysmdepidgatyaifddvmggldffpgykqwlggqrcfyvtdkykgkqyiewgrptiwlansdprdaqkadvywlqgnctivhidtpifrastpecltesqagrsd*	349	USER	zzz1219
2509		Genomo_MH939439	mpfrfqakyglltypqcgdnageaqrraldawrvvehlgqlgaecivgreshgdggvhlhaffmfeskfrssdvrvfdvdghhpnvsrgyanpadgydyaikdgdvvagglerpgehdvqkhsvwsriieaetesefwalareldpravcisftslraycghryaparteyrspsgirfdtsqypelqqwvdnelgertdqrggpsphlqagyanpfytspkslilwgttrlgktlwarslgkhayfgglysmdepidgatyaifddvmggldffpgykqwlggqrcfyvtdkykgkqyiewgrptiwlansdprdaqkadvywlqgnctivhidtpifrastpecltesqagrsd*	357	USER	zzz1220
2508		Genomo_MH939440	mprtvnwsvalesvafltysqygaadgvsdiqalfatlgvhcllvaherhedgghhyhvlaswethfkandvrvfdvggchpnfksvrgdgninrvldyclkdgdfygepedfrrdepkrsqhsvwseivsaesaseflrlarelapkeyglnydrlvsycrahydkpaeyvprhvdfvvpdeltswvaqnvsyaapespqperpralvlvgnsrlgktewarslgkhsyfaglfniddfdpmgryavmddidikffpnykgwfgaqkrftitgkyarhrtvdwgkpmiwcsnddprqapcidqdwlsancdfvivheply*	322	USER	zzz1221
2507		Genomo_MH939441	mpakykldgeqffmltypttpadfdgsgivailerlgcnyrvgrelhqdgkphfhamccfdepytdgdarrtftvgtripnirvrrtrpergwdyvgkhagtkeghylvgekgtrpggdedsserpsndswheiilartreeffdlaarlaprqlacsftslsayadwkyrpvkeeyvgpdgvwsvpdelldwvdenvrrpkglvlygairlgktvwarslgahyyagglwdmaefhpqeqeyaiwddmlgglkagyfnyknwlggqfaftiqdkygkkksikwgkpsificntdprdeppmfndrvgmdwawleencvfyevkeaifraste*	334	USER	zzz1222
2506		Genomo_MH939442	mpfhvnaryflvtyshvetldafaivehfgdlgaeilvsreayadgigihyhvfadfgrkfcsrradifdvhgfhpninpsrrdtwtaydyvikdgdvvaggaerpsgvfsmsgetrwniiiaadtrdeffdlckeldpqrlvcnwasinkyadwryrvdpqpyvtpngifdianygdlsewwdrnfiesvagrkslvlygptrtgkttwarslgdhlyfgglfsaaelanggaryaifddiaggikffprwkdwlgcqaqfqvkqmykdpylftwgrpsiwvsntdprqelssedidwmegncvfvnvtttifhantd*	320	USER	zzz1223
2505		Genomo_MH939443	mpakykldgeqffmltypttpadfdgsgivailerlgcnyrvgrelhqdgkphfhamccfdepytdgdarrtftvgtripnirvrrtrpergwdyvgkhagtkeghylvgekgtrpggdedsserpsndswheiilartreeffdlaarlaprqlacsftslsayadwkyrpvkeeyvgpdgvwsvpdelldwvdenvrrpkglvlygatrlgktvwarslgahyyagglwdmaefhpqeqeyaiwddmlgglkagyfnyknwlggqfaftiqdkygkkksikwgkpsificntdprdeppmfndrvgmdwawleencvfyevkeaifraste*	334	USER	zzz1224
2504		Genomo_MH939444	mprtvnwsvalesvafltysqygpadgvsdiqaffatlgacnllvaherhedgghhyhvlaswdthfkadnvrtfdvggchpnfksvrgdgninrvldyclkdgdyygdpelfrrdapkrsqhsvwteivsaesteqflglarelapkeyglnydrlvsycrahydkpteyvprhvdfvvppeltqwvddnvsnaapeaqperpralvligqsrlgktewarslghhsyfaglfniddfnplaqyavmddidikffpnykgwfgaqkrftitgkyarhrtvdwgkpmiwctnddprqvtgidqdwlsanaqfvivheply*	321	USER	zzz1225
2503		Genomo_MH939445	mpfhvnaryflvtyshvetldafaivkhfgdlgaeilvsreayadgigihyhvfadfgrkfcsrradifdvhgfhpninpsrrdpataydyvikdgdvvaggaerpsgvfsmsgetrwniiiaadtrdeffdlckeldpqrlvcnwasinkyadwryrvdpqpyvtpngifdianygdlsewwdrnfvesvagrkslvlygptrtgkttwarslgdhlyfgglfsaaelanggaryaifddiaggikffprwkdwlgcqaqfqvkqmykdpylftwgrpsiwvsntdprqelssedidwmegncvfvnvtttifhantd*	320	USER	zzz1226
2502		Genomo_MH939446	mpsfdlharyvlltypqcgdlapervgehldgisgtkcvigrenhqdggihlhcfvdfgrkrrfrnarafdveghhpnvspskgtpekgwdyatkdgdtvwatldrpgesgggrvsnvekwslitgavdresfwrlvheldpksaacnfrqlqaycdwkyappereyqtpvgiefhggdldgrdewvrqsgiglgespigkpqslvlygqsrlgktlwarslgkhvncvgllsgdvllkaeredvkyaifddirggikffpsfkewlggqpevtvkclyrepkpycgvsqvfgcqtqiprdemsnsdiewmnanctfieittsifrantt*	331	USER	zzz1227
2501		Genomo_MH939447	mpsfdlhcryalltyaqcgdlsadavggkllemgfecvigrenhadggvhlhcfvdfgrkrrfrrvdvfdvegrhpnispskgtpakgydyaikdgdivygtlerpggasksgttekwsritnasdresfwdlvheldpksaacchtqlqkycdwkfavipaeyvhppgitffggdldgrdswlqqsgigvgepllgiclsicvygesitgktlwarslgkhiyclgllsgdaclsapdahyavfddlkggikffpsfkewlgcqayvtvkclyrepklvkwgkpsiylantdprdemqnseiewmnkncifvevnspifqanir*	326	USER	zzz1228
2500		Genomo_MH939448	mpsfdlhcryalltyaqcgdlsadavggkllemgfecvigrenhadggvhlhcfvdfgrkrrfrrvdvfdvegrhpnispskgtpakgydyaikdgdivygtlerpggasksgttekwsritnasdresfwdlvheldpksaacchtqlqkycdwkfavipaeyvhppnitffggeldgrdswlqqsgigvgepllgiclsicvygesrtgktlwarslgkhiycvglvsgdaclsapeadyavfddlrggikffpsfkewlgcqayvtvkclyrepklvkwgkpsiylantdprdemqnseiewmnkncifvevnspifhaniq*	326	USER	zzz1229
2499		Genomo_MH939449	mprtvnwsvalesvafltysqygaadgvsdiqalfatlgvhcllvaherhedgghhyhvlaswethfkandvrvfdvggchpnfksvrgdgninrvldyclkdgefygepedfrrdepkrfqhsvwseivsaesaseflrlarelapkeyglnydrlvrycrahydkpaeyvprhvdfvvpdeltswvaqnvsyaapeqperpralvlvgnsrlgktewarslgkhsyfaglfniddfdpmgryavmddidikffpnykgwfgaqkrftitgkyarhrtvdwgkpmiwcsnddprqapcidqdwlsancdfvivheply*	320	USER	zzz1230
2498		Genomo_MH939450	mpaynqmgplrynpvciplhppkmllaaaepgdiqptlktlgarnflvaqqrpedggpqfyfpaswethfkandvrvfdvggchpnfksvrgdgninrvldyclkdgefygepedfrrdepkrfqhsvwseivsaesaseflrlarelapkeyglnydrlvrycrahydkpaeyvprhvdfvvpdeltswvaqnvsyaapevqperpralvlvgnsrlgktewarslgkhsyfaglfniddfdpmgryavmddidikffpnykgwfgaqkrftitgkyarhrtvdwgkpmiwcsnddprqapcidqdwlsancdfvivheply*	324	USER	zzz1231
2497		Genomo_MH939451	mpsfdlhcryalltyaqcgdlsadavggkllemgfecvigrenhadggvhlhcfvdfgrkrrfrrvdvfdvegrhpnispskgtpakgydyaikdgdivygtlerpggasksgttekwsritnasdresfwdlvheldpksaacchtqlqkycdwkfavipaeyvhppnitffggeldgrdswlqqsgigvgepllgiclsicvygesrtgktlwarslgkhiycvglvsgdaclsapeadyavfddlrggikffpsfkewlgcqayvtvkclsrepklvkwgkpsiylantdprdemqnseiewmnkncifvevnspifhaniq*	326	USER	zzz1232
2496		Genomo_MH939452	mtssfnfharyvlltyaqsgdlsewailehftslgaeciigredhaitgthlhvfvdfgrkhrsrradvfdvdgchpnivpsrgrpeggwdyavkdgnvvagglgrpgsgglppaenkwsqivgaenreeflrlvqeldpksfvlrhrelldyadryyaeqrepyvgpddvtfdlgmvpdlagwraeslgddpiegksyfssrrsrslvlygasrlgktlwarslgshvyimgilsgatllrdmpeaeyaifddmrggiamfpsfkewlgaqsvvtvkklyrdpvqvkwgrpciwlansdprdqlkaditdhtakgrvdliyediawleanctfvelrepifrante*	348	USER	zzz1233
2495		Genomo_MH939453	mtfhcnaryflltysqcgeldpwavsnhlgelrgecivarethvdggthlhafvdfgrkfrsrrtsvfdvdnchpnvsathsspregfdyackdgdivagglerpeprnssvrsagwhdivaaasreeffelllahdprtlctcftqltkyadwrfredpepyrtpdsvvidasafseleewshreiqsshvrggrrgqslvlygpsrmgktiwarslgshayfgglfslqeeveavdyaifddinggipffpqykwwlghqrqfyaadkykgkklinwgrpaiwisnkdpreehgadydwlnanctfvyidtpiawei*	320	USER	zzz1234
2494		Genomo_MH973737	mfrfaaryglltypqcgdldpwaivemlgelgaecivgreshqdggvhlhaffmfqskfesrnvrvfdvdgmhpnvvrgysspekgyayaikdgdvvagglgmesirrpvsesrtvwdeivlsgsreeffeacarlapralccsftsltcyadwryrpepvpyehpsnvslstanfpelaawvshnleglehsgrrrslvlygptrlgktlwarslgrhayfgglfsldedvsdvdyavfddmqggikffhsykfwlgaqsqfyatdkykgkrlidwgkpsiyisnnnpledegvdhdwmlgncdfveitesllvpkvgaveina*	326	USER	zzz1235
2493		Genomo_MH973738	mfrfaaryglltypqcgdldpwaivemlgelgaecivgreshqdggvhlhaffmfqskfesrnvrvfdvagrhpnvvrgysspekgyayaikdgdvvagglgmesirrpvsesrtvwdeivlsgsreeffeacarlapralccsftsltcyadwryrpepvpyehpsnvslstanfpeltawvshnleglehsgrrrslvlygptrlgktlwarslgrhayfgglfsldedvsdvdyavfddmqggikffhsykfwlgaqsqfyatdkykgkrlidwgkpsiyisnnnpledegvdhdwmlgncdfveitesllvpevgaveina*	326	USER	zzz1236
2492		Genomo_MH973739	mfrfaaryglltypqcgdldpwaivemlgelgaecivgreshqdggvhlhaffmfqskfesrnvrvfdvdgmhpnvvrgysspekgyayaikdgdvvagglgmesirrpvsesrtvwdeivlsgsreeffeacarlapralccsftsltcyadwryrpepvpyehpsnvslstanfpelaawvshnleglehsgrrrslvlygptrlgktlwarslgrhayfgglfsldedvsdvdyavfddmqggikffhsykfwlgaqsqfyatdkykgkrlidwgkpsiyisnnnpledegvdhdwmlgncdfveitesllvpevgaveina*	326	USER	zzz1237
2491		Genomo_MH973740	mfrfaaryglltypqcgdldpwaivemlgelgaecivgreshqdggvhlhaffmfqskfesrnvrvfdvagrhpnvvrgysspekgyayaikdgdvvagglglesirrpvsesrtvwdeivlsgsreeffeacarlapralccsftsltcyadwryrpepvpyehpsnvslstanfpelaawvshnleglehsgrrrslvmygptrlgktlwarslgrhayfgglfsldedvsdvdyavfddmqggikffhsykfwlgaqsqfyatdkykgkrlidwgkpsiyisnnnpledegvdhdwmlgncdfveinritsrarsrcr*	322	USER	zzz1238
2490		Genomo_MH973741	mtlninsktlfltysqvnqdgidrfvstpsdhfdfvssalgtptryrlareshqdgghhfhaylgfesavrirsasrldfgrhhpniqsvrtghrrtwdyvgkdgdiiyesgdapdpvsgprgnggdsvwseavraeseeefysilrdgapryyilyhrqleqyaakffgvrpepyrsptftdltgpriaewksqatigdnggghrrrslilwgptrtgktvwarslgnhvywhsyfnindfdenadyavfddiaggfqyfpnykgwlgaqktftvtdkyrakkridwgkpcimlmnedptidshvdsawllgncdiifvpenepivqfn*	331	USER	zzz1239
2489		Genomo_MK249235	msftvnsryvlltysqcgneldpfrivdllsglgaeciigrehhqdegihlhvfcdfgrkfrsrradvfdvdhwhpnispsrgtpekgydyavkdgdvvagglerpsgqsggghnsshanwtrittaanreefwdllheldpkaaataytqlskyadwrfapdppvyehptaisftggdvdgrddwlqqsgigsgtpllgrckslclfgrsrtgktlwarslgahiycvglvsgdecmkapnvdyaifddirggmkffpsfkewlgaqawvtvkrlykepaltkwgkpsiwlgnsdpridmshedvqwmedncvfiecdepifrasie*	329	USER	zzz1240
2488		Genomo_MK249236	mfrfaaryglltypqcgdldpwaivemlgrlgaecivgreshqdggvhlhaffmfeskfesrnvrifdvdgmhpnvvrgysspekgyayaikdgdvvagglgmesirrpvsesrsvwdeivlsgsreeffeacarlapralccsftsltcyadwryrpepvpyehpsnvslstanfpelaawvshnleglehsgrrrslvlygptrlgktlwarslgrhayfgglfsldedvsdvdyaifddmqggikffhsykfwlgaqsqfyatdkykgkrlidwgkpsiyisnnnpledegvdhdwmlgncdfveitesllvpevgaveina*	326	USER	zzz1241
2487		Genomo_MK249237	msftvnsryvlltysqcgneldpfrivdllsglgaeciigrehhqdegihlhvfcdfgrkfrsrradvfdvdhwhpnispsrgtpekgydyavkdgdvvagglerpsgqsggghnsshanwtrittaanreefwdllheldpkaaataytqlskyadwrfapdppvyehptaisftggdvdgrddwlqqsgigsgtpllgkckslclfgrsrtgktlwarslgahiycvglvsgdecmkapnvdyaifddirggmkffpsfkewlgaqawvtvkrlykepalvkwgkpsiwlgnsdprvdmshedvqwmedncvfiecdepifrantv*	329	USER	zzz1242
2486		Genomo_MK249238	mprfrsrarnylitfpqvpenvqrffdegtpfldrvkadfgdprccrigrehhgdggihyhiylsfntiatinsaqafdyfgthgnikpirrtpeksfdyagkegdvrldygepprssaergvddsnkwadiiscpdkesflhavrekaprdwllsnqrileyanlyypdpvpeyesppvttayerypelreweqqahlgesrdervkslilwggtrtgktlyarslghhayynlqfnmddfsndckyavfddiqggfeywhsykgwlgaqkqfvimdkyrkkrtihwgkpsimctnddpfamrnvdydwlmnncyiinvvdpicivss*	330	USER	zzz1243
2485		Genomo_MK249239	mfrfaaryglltypqcgdldpwhivemlgeigaecivgremhsdggvhlhaffmferkfesrnvrifdvdgchpnvvrgysspekgyayaikdgdvvagglgtesfrskvsesggqwaeiilaqsreeffeacarlapralccsfsslqcyadwkyrpepvpyehpsgvplctaafpeldswvshnlgraecsgrrrslvlygptrlgktlwarslgkhayfgglfsldedvsdvdyavfddmqggikffhsykfwlgaqsqfyatdkykgkrlidwgkpsiyisnnnpledegvdhdwmlgncdfveitesllmpvessgsina*	326	USER	zzz1244
2484		Genomo_MK249240	mpfrfcakyglltypqcgpldpfevvahlgglgaecivgreehqaggihlhaffmferkfesrnvrvfdvagqhpnvvrgysspekgwdyatkdgdivagglerpigrevvsagepwttiilsesrdeffeacktlaprallcnftslrtyadwryrevpepykspaglsfdtagyadlsswvsqnlersrngerrrsliiygptrlgktlwarslgnhayfgglfsldesvedvdyavfddmqgglkffhaykfwlgaqtqfwatdkykgkrlihwgrpsiyiannnplcdegvdhdwligncdivevttsllmpver*	320	USER	zzz1245
2483		Genomo_MK249241	mfrfaaryglltypqcgdldpwaivemlgrlgaecivgreshqdggvhlhaffmfeskfesrnvrifdvdgmhpnvvrgysspekgyayaikdgdvvagglgmesirrpvsesrsvwdeivlsgsreeffeacarlapralccsftsltcyadwryrpepvpyehpsnvslstanfpelaawvshnleglehsgrrrslvlygptrlgktlwarslgrhayfgglfsldedvsdvdyaifddmqggikffhsykfwlgaqsqfyatdkykgkrlidwgkpsiyisnnnpledegvdhdwmlgncdfveitesllvpevgaveina*	326	USER	zzz1246
2482		Genomo_MK249242	mpgfilknvrralltysqcgtldpfavsdhlsslgaecivgrerhadggvhlhvfvdfgrqfssrktdvfdvggchpniakcgrtpwkaydyaikdgdvcaggldrpdeesgdgsgkvdstwhsilaaetaeefwslchdlaprdlarsfpslqkycdwryrpvarpystpvgyefdtsrapelnewllqanlglrelglrpkslvlygdtrlgktvwarslgphiyfcglysgqeamkhdsadyavfddiqggikffhgfknwlgaqaefqvkvlykdpqiiqwgkpsiwlsnsdprldmspsdvtwmegncffvelciplftsrastespegaltagptm*	343	USER	zzz1247
2481		Genomo_MK249243	mfrfaaryglltypqcgdldpwhivemlgeigaecivgremhsdggvhlhaffmferkfesrnvrifdvdgchpnvvrgysspekgyayaikdgdvvagglgtesfrskvsesggqwaeiilaqsreeffeacarlapralccsfsslqcyadwkyrpepvpyehpsgvplctaafpeldswvshnlgraecsgrrrslvlygptrlgktlwarslgkhayfgglfsldedvsdvdyavfddmqggikffhsykfwlgaqsqfyatdkykgkrlidwgkpsiyisnnnpledegvdhdwmlgncdfveitesllmpvessgsina*	326	USER	zzz1248
2480		Genomo_MK249244	mpfrfcakyglltypqcgpldpfevvahlgglgaecivgreehqaggihlhaffmferkfesrnvrvfdvagqhpnvvrgysspekgwdyatkdgdivagglerpigrevvsagepwttiilsesrdeffeacktlaprallcnftslrtyadwryrevpepykspaglsfdtagyadlsswvsqnlersrngerrrsliiygptrlgktlwarslgnhayfgglfsldesvedvdyavfddmqgglkffhaykfwlgaqtqfwatdkykgkrlihwgrpsiyiannnplcdegvdhdwligncdivevttsllmpver*	320	USER	zzz1249
2479		Genomo_MK249245	mvrtvnwsvaidsiafltysqfngdpirrisdiqaclaclgvhrcivghelhqdgghhyhvvaqwetvfkahdirvfdvdgchpnfksvrgdgnvnrvldyclkdddyygddpeffrratpvrsktsiwaeivgaesasefwrlarelapfeyvnnhsrlqhyvdthydqpaayvsehanfvvpdvmsnwyqenvvsvcaapeptgrpkslvligpyglgktewarslgphfymnllfnldeylvakdtalygvlddidikffpnykgwfggqkeftgtdkfrkkvrimwrrpiiwcsnddprqsgcvdvdwlesacvfvnlyerly*	328	USER	zzz1250
2478		Genomo_MK249246	mfrfaaryglltypqcgdldpwhivemlgeigaecivgremhsdggvhlhaffmferkfesrnvrifdvdgchpnvvrgysspekgyayaikdgdvvagglgtesfrskvsesggqwaeiilaqsreeffeacarlapralccsfsslqcyadwkyrpepvpyehpsgvplctaafpeldswvshnlgraecsgrrrslvlygptrlgktlwarslgkhayfgglfsldedvsdvdyavfddmqggikffhsykfwlgaqsqfyatdkykgkrlidwgkpsiyisnnnpledegvdhdwmlgncdfveitesllmpvessgsina*	326	USER	zzz1251
2477		Genomo_MK249247	msftvnsryvlltysqcgneldpfrivdllsglgaeciigrehhqdegihlhvfcdfgrkfrsrradvfdvdhwhpnispsrgtpekgydyavkdgdvvagglerpsgqsggghnsshanwtrittaanreefwdllheldpkaaataytqlskyadwrfapdppvyehptaisftggdvdgrddwlqqsgigsgtpllgkckslclfgrsrtgktlwarslgahiycvglvsgdecmkapnvdyaifddirggmkffpsfkewlgaqawvtvkrlykepalvkwgkpsiwlgnsdprvdmshedvqwmedncvfiecdepifrantv*	329	USER	zzz1252
2476		Genomo_MK249248	msftvnsryvlltyaqcgtgldpwrivdrlstlgaeciigrehhedggihlhcfvdfgrkfrsrkadvfdvdawhpnispskgtpekgydyaikdgdvvagglarpdrpsgsghdtthdkwtritsatnreefwdlcheldpksaataftqlskyadwkfapdppdyehpssitftggdvdgrddwlqqsrigsgvpllgrckslclfgrsrtgktlwarslgahiycvglvsgdecmkapnvdyaifddirggmkffpsfkewlgaqawvtvkrlykepaltkwgkpsiwlgnsdpridmshedvqwmedncvfiecdepifrasie*	329	USER	zzz1253
2475		Genomo_MK249249	msftvnsryvlltysqcgneldpfrivdllsglgaeciigrehhqdegihlhvfcdfgrkfrsrradvfdvdhwhpnispsrgtpekgydyavkdgdvvagglerpsgqsggghnsshanwtrittaanreefwdllheldpkaaataytqlskyadwrfapdppvyehptaisftggdvdgrddwlqqsgigsgtpllgkckslclfgrsrtgktlwarslgahiycvglvsgdecmkapnvdyaifddirggmkffpsfkewlgaqawvtvkrlykepalvkwgkpsiwlgnsdprvdmshedvqwmedncvfiecdepifrantv*	329	USER	zzz1254
2474		Genomo_MK249250	mpfrfcakyglltypqcgpldpfevvahlgglgaecivgreehqaggihlhaffmferkfesrnvrvfdvagqhpnvvrgysspekgwdyatkdgdivagglerpigrevvsagepwttiilsesrdeffeacktlaprallcnftslrtyadwryrevpepykspaglsfdtagyadlsswvsqnlersrngerrrsliiygptrlgktlwarslgnhayfgglfsldesvedvdyavfddmqgglkffhaykfwlgaqtqfwatdkykgkrlihwgrpsiyiannnplcdegvdhdwligncdivevttsllmpver*	320	USER	zzz1255
2473		Genomo_MK249251	mfrfaaryglltypqcgdldpwaivemlgrlgaecivgreshqdggvhlhaffmfeskfesrnvrifdvdgmhpnvvrgysspekgyayaikdgdvvagglgmesirrpvsesrsvwdeivlsgsreeffeacarlapralccsftsltcyadwryrpepvpyehpsnvslstanfpelaawvshnleglehsgrrrslvlygptrlgktlwarslgrhayfgglfsldedvsdvdyaifddmqggikffhsykfwlgaqsqfyatdkykgkrlidwgkpsiyisnnnpledegvdhdwmlgncdfveitesllvpevgaveina*	326	USER	zzz1256
2472		Genomo_MK249252	mfrfaaryglltypqcgdldpwhivemlgeigaecivgremhsdggvhlhaffmferkfesrnvrifdvdgchpnvvrgysspekgyayaikdgdvvagglgtesfrskvsesggqwaeiilaqsreeffeacarlapralccsfsslqcyadwkyrpepvpyehpsgvplctaafpeldswvshnlgraecsgrrrslvlygptrlgktlwarslgkhayfgglfsldedvsdvdyavfddmqggikffhsykfwlgaqsqfyatdkykgkrlidwgkpsiyisnnnpledegvdhdwmlgncdfveitesllmpvessgsina*	326	USER	zzz1257
2471		Genomo_MK249253	mpfrfcakyglltypqcgpldpfevvahlgglgaecivgreehqaggihlhaffmferkfesrnvrvfdvagqhpnvvrgysspekgwdyatkdgdivagglerpigrevvsagepwttiilsesrdeffeacktlaprallcnftslrtyadwryrevpepykspaglsfdtagyadlsswvsqnlersrngerrrsliiygptrlgktlwarslgnhayfgglfsldesvedvdyavfddmqgglkffhaykfwlgaqtqfwatdkykgkrlihwgrpsiyiannnplcdegvdhdwligncdivevttsllmpver*	320	USER	zzz1258
2470		Genomo_MK249254	mvrtvnwsvaidsiafltysqfngdpiqrvsdiqaclaclgvhrcivghelhqdgghhyhvvaqwetvfkahdirvfdvdgchpnfksvrgdgnvnrvldyclkdddyygddpeffrraapvrsktsiwaeivgaqsasefwrlarelapfefvnnhsrlqhyvdthydipgayvsehanfvvpdvmnqwfqenvvsssaapepgrprslcligesglgktewarslgshfymnllfnldeylavkdtalygvlddidieyfpnykgwfggqkeftgtdkfrkkvrimwrrpiiwcsnddprqaknvdvswmntncvfvslyerly*	327	USER	zzz1259
2469		Genomo_MK249255	mfrfaaryglltypqcgdldpwaivemlgrlgaecivgreshqdggvhlhaffmfeskfesrnvrifdvdgmhpnvvrgysspekgyayaikdgdvvagglgmesirrpvsesrsvwdeivlsgsreeffeacarlapralccsftsltcyadwryrpepvpyehpsnvslstanfpelaawvshnleglehsgrrrslvlygptrlgktlwarslgrhayfgglfsldedvsdvdyaifddmqggikffhsykfwlgaqsqfyatdkykgkrlidwgkpsiyisnnnpledegvdhdwmlgncdfveitesllvpevgaveina*	326	USER	zzz1260
2468		Genomo_MK249256	mfrfaaryglltypqcgdldpwhivemlgeigaecivgremhsdggvhlhaffmferkfesrnvrifdvdgchpnvvrgysspekgyayaikdgdvvagglgtesfrskvsesggqwaeiilaqsreeffeacarlapralccsfsslqcyadwkyrpepvpyehpsgvplctaafpeldswvshnlgraecsgrrrslvlygptrlgktlwarslgkhayfgglfsldedvsdvdyavfddmqggikffhsykfwlgaqsqfyatdkykgkrlidwgkpsiyisnnnpledegvdhdwmlgncdfveitesllmpvessgsina*	326	USER	zzz1261
2467		Genomo_MK249257	msftvnsryvlltysqcgneldpfrivdllsglgaeciigrehhqdegihlhvfcdfgrkfrsrradvfdvdhwhpnispsrgtpekgydyavkdgdvvagglerpsgqsggghnsshanwtrittaanreefwdllheldpkaaataytqlskyadwrfapdppvyehptaisftggdvdgrddwlqqsgigsgtpllgkckslclfgrsrtgktlwarslgahiycvglvsgdecmkapnvdyaifddirggmkffpsfkewlgaqawvtvkrlykepalvkwgkpsiwlgnsdprvdmshedvqwmedncvfiecdepifrantv*	329	USER	zzz1262
2466		Genomo_MK249258	msftvnsryvlltyaqcgtgldpwrivdrlstlgaeciigrehhedggihlhcfvdfgrkfrsrkadvfdvdawhpnispskgtpekgydyaikdgdvvagglarpdrpsgsghdtthdkwtritsatnreefwdlcheldpksaataftqlskyadwkfapdppdyehpssitftggdvdgrddwlqqsrigsgvplckslclfgrsrtgktlwarslgahiycvglvsgdecmkapnvdyaifddirggmkffpsfkewlgaqawvtvkrlykepaltkwgkpsiwlgnsdpridmshedvqwmedncvfiecdepifrasie*	326	USER	zzz1263
2465		Genomo_MK249259	msftvnsryvlltysqcgneldpfrivdllsglgaeciigrehhqdegihlhvfcdfgrkfrsrradvfdvdhwhpnispsrgtpekgydyavkdgdvvagglerpsgqsggghnsshanwtrittaanreefwdllheldpkaaataytqlskyadwrfapdppvyehptaisftggdvdgrddwlqqsgigsgtpllgrckslclfgrsrtgktlwarslgahiycvglvsgdecmkapnvdyaifddirggmkffpsfkewlgaqawvtvkrlykepalvkwgkpsiwlgnsdprvdmshedvqwmedncvfiecdepifrantv*	329	USER	zzz1264
2464		Genomo_MK249260	mpfrfcakyglltypqcgpldpfevvahlgglgaecivgreehqaggihlhaffmferkfesrnvrvfdvagqhpnvvrgysspekgwdyatkdgdivagglerpigrevvsagepwttiilsesrdeffeacktlaprallcnftslrtyadwryrevpepykspaglsfdtagyadlsswvsqnlersrngerrrsliiygptrlgktlwarslgnhayfgglfsldesvedvdyavfddmqgglkffhaykfwlgaqtqfwatdkykgkrlihwgrpsiyiannnplcdegvdhdwligncdivevttsllmpver*	320	USER	zzz1265
2463		Genomo_MK249261	mvrtvnwsvaidsiafltysqfngdpirrisdiqaclaclgvhrcivghelhqdgghhyhvvaqwetvfkahdirvfdvdgchpnfksvrgdgnvnrvldyclkdddyygddpeffrratpvrsktsiwaeivgaesasefwrlarelapfeyvnnhsrlqhyvdthydqpaayvsehanfvvpdvmsnwyqenvvsvcaapeptgrpkslvligpyglgktewarslgphfymnllfnldeylvakdtalygvlddidikffpnykgwfggqkeftgtdkfrkkvrimwrrpiiwcsnddprqsgcvdvdwlesacvfvnlyerly*	328	USER	zzz1266
2462		Genomo_MK249262	msftvnsryvlltyaqcgtgldpwrivdrlstlgaeciigrehhedggihlhcfvdfgrkfrsrkadvfdvdawhpnispskgtpekgydyaikdgdvvagglarpdrpsgsghdtthdkwtritsatnreefwdlcheldpksaataftqlskyadwkfapdppdyehpssitftggdvdgrddwlqqsrigsgvplckslclfgrsrtgktlwarslgahiycvglvsgdecmkapnvdyaifddirggmkffpsfkewlgaqawvtvkrlykepaltkwgkpsiwlgnsdpridmshedvqwmedncvfiecdepifrasie*	326	USER	zzz1267
2461		Genomo_MK249263	mpfrfcakyglltypqcgpldpfevvahlgglgaecivgreehqaggihlhaffmferkfesrnvrvfdvagqhpnvvrgysspekgwdyatkdgdivagglerpigrevvsagepwttiilsesrdeffeacktlaprallcnftslrtyadwryrevpepykspaglsfdtagyadlsswvsqnlersrngerrrsliiygptrlgktlwarslgnhayfgglfsldesvedvdyavfddmqgglkffhaykfwlgaqtqfwatdkykgkrlihwgrpsiyiannnplcdegvdhdwligncdivevttsllmpver*	320	USER	zzz1268
2460		Genomo_MK249264	mpfrfcakyglltypqcgpldpfevvahlgglgaecivgreehqaggihlhaffmfdskfesrdvrvfdvagqhpnvvrgysspekgwdyatkdgdivagglerpigrevvsagepwttiilsesrdeffeacktlaprallcnftslrtyadwryrevpepykspaglsfdtagyadlsswvsqnlersrngerrrsliiygptrlgktlwarslgnhayfgglfsldesvedvdyavfddmqgglkffhaykfwlgaqtqfwatdkykgkrlihwgrpsiyiannnplcdegvdhdwligncdivevttsllmpver*	320	USER	zzz1269
2459		Genomo_MK249265	msftvnsryvlltysqcgneldpfrivdllsglgaeciigrehhqdegihlhvfcdfgrkfrsrradvfdvdhwhpnispsrgtpekgydyavkdgdvvagglerpsgqsggghnsshanwtrittaanreefwdllheldpkaaataytqlskyadwrfapdppvyehptaisftggdvdgrddwlqqsgigsgtpllgrckslclfgrsrtgktlwarslgahiycvglvsgdecmkapnvdyaifddirggmkffpsfkewlgaqawvtvkrlykepalvkwgkpsiwlgnsdprrvdmshediqwmedncvfiecdepifrantv*	330	USER	zzz1270
2458		Genomo_MK249266	msftvnsryvlltysqcgneldpfrivdllsglgaeciigrehhqdegihlhvfcdfgrkfrsrradvfdvdhwhpnispsrgtpekgydyavkdgdvvagglerpsgqsggghnsshanwtrittaanreefwdllheldpkaaataytqlskyadwrfapdppdyehpssitftggdvdgrddwlqqsrigsgvplckslclfgrsrtgktlwarslgahiycvglvsgdecmkapnvdyaifddirggmkffpsfkewlgaqawvtvkrlykepaltkwgkpsiwlgnsdpridmshedvqwmedncvfiecdepifrasie*	326	USER	zzz1271
2457		Genomo_MK249267	msftvnsryvlltysqcgneldpfrivdllsglgaeciigrehhqdegihlhvfcdfgrkfrsrradvfdvdhwhpnispsrgtpekgydyavkdgdvvagglerpsgqsggghnsshanwtrittaanreefwdllheldpkaaataytqlskyadwrfapdppvyehptaisftggdvdgrddwlqqsgigsgtpllgkckslclfgrsrtgktlwarslgahiycvglvsgdecmkapnvdyaifddirggmkffpsfkewlgaqawvtvkrlykepalvkwgkpsiwlgnsdprvdmshedvqwmedncvfiecdepifrantv*	329	USER	zzz1272
2456		Genomo_MK249268	mfrfaaryglltypqcgdldpwhivemlgeigaecivgremhsdggvhlhaffmferkfesrnvrifdvdgchpnvvrgysspekgyayaikdgdvvagglgtesfrskvsesggqwaeiilaqsreeffeacarlapralccsfsslqcyadwkyrpepvpyehpsgvplctaafpeldswvshnlgraecsgrrrslvlygptrlgktlwarslgkhayfgglfsldedvsdvdyavfddmqggikffhsykfwlgaqsqfyatdkykgkrlidwgkpsiyisnnnpledegvdhdwmlgncdfveitesllmpvessgsina*	326	USER	zzz1273
2455		Genomo_MK249269	mfrfaaryglltypqcgdldpwhivemlgeigaecivgremhsdggvhlhaffmferkfesrnvrifdvdgchpnvvrgysspekgyayaikdgdvvagglgtesfrskvsesggqwaeiilaqsreeffeacarlapralccsfsslqcyadwkyrpepvpyehpsgvslctaafpeldswvshnlgraecsgrrrslvlygptrlgktlwarslgkhayfgglfsldedvsdvdyavfddmqggikffhsykfwlgaqsqfyatdkykgkrlidwgkpsiyisnnnpledegvdhdwmlgncdfveitesllmpvessgsina*	326	USER	zzz1274
2454		Genomo_MK249270	mpfrfcakyglltypqcgpldpfevvahlgglgaecivgreehqaggihlhaffmferkfesrnvrvfdvagqhpnvvrgysspekgwdyatkdgdivagglerpigrevvsagepwttiilsesrdeffeacktlaprallcnftslrtyadwryrevpepykspaglsfdtagyadlsswvsqnlersrngerrrsliiygptrlgktlwarslgnhayfgglfsldesvedvdyavfddmqgglkffhaykfwlgaqtqfwatdkykgkrlihwgrpsiyiannnplcdegvdhdwligncdivevttsllmpver*	320	USER	zzz1275
2453		Genomo_MK249271	mfrfaaryglltypqcgdldpwaivemlgrlgaecivgreshqdggvhlhaffmfeskfesrnvrifdvdgmhpnvvrgysspekgyayaikdgdvvagglgmesirrpvsesrsvwdeivlsgsreeffeacarlapralccsftsltcyadwryrpepvpyehpsnvslstanfpelaawvshnleglehsgrrrslvlygptrlgktlwarslgrhayfgglfsldedvsdvdyaifddmqggikffhsykfwlgaqsqfyatdkykgkrlidwgkpsiyisnnnpledegvdhdwmlgncdfveitesllvpevgaveina*	326	USER	zzz1276
2452		Genomo_MK249272	msftvnsryvlltyaqcgtgldpwrivdrlstlgaeciigrehhedggihlhcfvdfgrkfrsrkadvfdvdawhpnispskgtpekgydyaikdgdvvagglarpdrpsgsghdtthdkwtritsatnreefwdlcheldpksaataftqlskyadwkfapdppdyehpssitftggdvdgrddwlqqsrigsgvplckslclfgrsrtgktlwarslgahiycvglvsgdecmkapnvdyaifddirggmkffpsfkewlgaqawvtvkrlykepaltkwgkpsiwlgnsdpridmshedvqwmedncvfiecdepifrasie*	326	USER	zzz1277
2451		Genomo_MK249273	mpgfilknvrralltysqcgtldpfavsdhlsslgaecivgrerhadggvhlhvfvdfgrqfssrktdvfdvggchpniakcgrtpwkaydyaikdgdvcaggldrpdeesgdgsgkvdstwhsilaaetaeefwslchdlaprdlarsfpslqkycdwryrpvarpystpvgyefdtsrapelnewllqanlglrelglrpkslvlygdtrlgktvwarslgphiyfcglysgqeamkhdsadyavfddiqggikffhgfknwlgaqaefqvkvlykdpqiiqwgkpsiwlsnsdprldmspsdvtwmegncffvelciplftsrastespegaltagptm*	343	USER	zzz1278
2450		Genomo_MK249274	mpfrfcakyglltypqcgpldpfevvahlgglgaecivgreehqaggihlhaffmferkfesrnvrvfdvagqhpnvvrgysspekgwdyatkdgdivagglerpigrevvsagepwttiilsesrdeffeacktlaprallcnftslrtyadwryrevpepykspaglsfdtagyadlsswvsqnlersrngerrrsliiygptrlgktlwarslgnhayfgglfsldesvedvdyavfddmqggikffhsykfwlgaqtqfwatdkykgkrlihwgrpsiyiannnplcdegvdhdwligncdivevttsllmpver*	320	USER	zzz1279
2449		Genomo_MK249275	mfrfaaryglltypqcgdldpwhivemlgeigaecivgremhsdggvhlhaffmferkfesrnvrifdvdgchpnvvrgysspekgyayaikdgdvvagglgtesfrskvsesggqwaeiilaqsreeffeacarlapralccsfsslqcyadwkyrpepvpyehpsgvplctaafpeldswvshnlgraecsgrrrslvlygptrlgktlwarslgkhayfgglfsldedvsdvdyavfddmqggikffhsykfwlgaqsqfyatdkykgkrlidwgkpsiyisnnnpledegvdhdwmlgncdfveitesllmpvessgsina*	326	USER	zzz1280
2448		Genomo_MK249276	mfrfaaryglltypqcgdldpwaivemlgrlgaecivgreshqdggvhlhaffmfeskfesrnvrifdvdgmhpnvvrgysspekgyayaikdgdvvagglgmesirrpvsesrsvwdeivlsgsreeffeacarlapralccsftsltcyadwryrpepvpyehpsnvslstanfpelaawvshnleglehsgrrrslvlygptrlgktlwarslgrhayfgglfsldedvsdvdyaifddmqggikffhsykfwlgaqsqfyatdkykgkrlidwgkpsiyisnnnpledegvdhdwmlgncdfveitesllvpevgaveina*	326	USER	zzz1281
2447		Genomo_MK249277	msftvnsryvlltyaqcgtgldpwrivdrlstlgaeciigrehhedggihlhcfvdfgrkfrsrkadvfdvdawhpnispskgtpekgydyaikdgdvvagglarpdrpsgsghdtthdkwtritsatnreefwdlcheldpksaataftqlskyadwkfapdppdyehpssitftggdvdgrddwlqqsrigsgvplckslclfgrsrtgktlwarslgahiycvglvsgdecmkapnvdyaifddirggmkffpsfkewlgaqawvtvkrlykepaltkwgkpsiwlgnsdpridmshedvqwmedncvfiecdepifrasie*	326	USER	zzz1282
2446		Genomo_MK249278	msftvnsryvlltysqcgneldpfrivdllsglgaeciigrehhqdegihlhvfcdfgrkfrsrradvfdvdhwhpnispsrgtpekgydyavkdgdvvagglerpsgqsggghnsshanwtrittaanreefwdllheldpkaaataytqlskyadwrfapdppvyehptaisftggdvdgrddwlqqsgigsgtpllgrckslclfgrsrtgktlwarslgahiycvglvsgdecmkapnvdyaifddirggmkffpsfkewlgaqawvtvkrlykepalvkwgkpsiwlgnsdprvdmshedvqwmedncvfiecdepifrantv*	329	USER	zzz1283
2445		Genomo_MK249279	mfrfaaryglltypqcgdldpwaivemlgrlgaecivgreshqdggvhlhaffmfeskfesrnvrifdvdgmhpnvvrgysspekgyayaikdgdvvagglgmesirrpvsesrsvwdeivlsgsreeffeacarlapralccsftsltcyadwryrpepvpyehpsnvslstanfpelaawvshnleglehsgrrrslvlygptrlgktlwarslgrhayfgglfsldedvsdvdyaifddmqggikffhsykfwlgaqsqfyatdkykgkrlidwgkpsiyisnnnpledegvdhdwmlgncdfveitesllvpevgaveina*	326	USER	zzz1284
2444		Genomo_MK249280	msftvnsryvlltyaqcgtgldpwrivdrlstlgaeciigrehhedggihlhcfvdfgrkfrsrkadvfdvdawhpniapskgtpekgydyaikdgdvvagglarpdrpsgsghdtthdkwtritsatnreefwdlcheldpksaataftqlskyadwkfapdppdyehpssitftggdvdgrddwlqqsrigsgvpllgkckslclygrsrtgktlwarslgahiycvglvsgdecmkapnvdyaifddirggmkffpsfkewlgaqawvtvkrlykepaltkwgkpsiwlgnsdprvdmshedvqwmednctfiecdeaifrante*	329	USER	zzz1285
2443		Genomo_MK249281	msftvnsryvlltyaqcgtgldpwrivdrlstlgaeciigrehhedggihlhcfvdfgrkfrsrkadvfdvdawhpnispskgtpekgydyaikdgdvvagglarpdrpsgsghdtthdkwtritsatnreefwdlcheldpksaataftqlskyadwkfapdppdyehpssitftggdvdgrddwlqqsrigsgvplckslclfgrsrtgktlwarslgahiycvglvsgdecmkapnvdyaifddirggmkffpsfkewlgaqawvtvkrlykepaltkwgkpsiwlgnsdpridmshedvqwmedncvfiecdepifrasie*	326	USER	zzz1286
2442		Genomo_MK249282	maftvnsryvlltysqcgdeldpfrivdllsglgaeciigrehhqdegihlhvfcdfgrkfrsrradvfdvdhwhpnispsrgtpekgydyaikdgdvvagglerpsgqsggghdsthakwtrittaanreefwdllheldpkaaataytqlskyadwrfaadppvyehpstisftggdtdgrddwlqqsgigsgvpllgkckslclygrsrtgktlwarslgahiycvglvsgdecikapnvdyaifddirggmkffpsfkewlgaqawvtvkrlykepaliqwgkpsiwlgnsdprvdmshedvqwmedncvfvecdepifrante*	329	USER	zzz1287
2441		Genomo_MK249283	msftvnsryvlltyaqcgtgldpwrivdrlstlgaeciigrehhedggihlhcfvdfgrkfrsrkadvfdvdawhpnispskgtpekgydyaikdgdvvagglarpdrpsgsghdtthdkwtritsatnreefwdlcheldpksaataftqlskyadwkfapdppdyehpssitftggdvdgrddwlqqsrigsgvpllgrckslclygrsrtgktlwarslgahiycvglvsgdecmkapnvdyaifddirggmkffpsfkewlgaqawvtvkrlykepaltkwgkpsiwlgnsdpridmshedvqwmedncvfiecdepifrasie*	329	USER	zzz1288
2440		Genomo_MK249284	msftvnsryvlltysqcgneldpfrivdllsglgaeciigrehhqdegihlhvfcdfgrkfrsrradvfdvdhwhpnispsrgtpekgydyavkdgdvvagglerpsgqsggghnsshanwtrittaanreefwdllheldpkaaataytqlskyadwrfapdppvyehptaisftggdtdgrddwlqqsgigsgvpllgkckslclfgrsrtgktlwarslgahiycvglvsgdecmkapnvdyaifddirggmkffpsfkewlgaqawvtvkrlykepalvkwgkpsiwlgnsdprvdmshedvqwmedncvfiecdepifrantv*	329	USER	zzz1289
2439		Genomo_MK249285	mpfrfcakyglltypqcgpldpfevvahlgglgaecivgreehqaggihlhaffmferkfesrnvrvfdvagqhpnvvrgysspekgwdyatkdgdivagglerpigrevvsagepwttiilsesrdeffeacktlaprallcnftslrtyadwryrevpepykspaglsfdtagyadlsswvsqnlersrngerrrsliiygptrlgktlwarslgnhayfgglfsldesvedvdyavfddmqggikffhsykfwlgaqtqfwatdkykgkrlihwgrpsiyiannnplcdegvdhdwligncdivevttsllmpver*	320	USER	zzz1290
2438		Genomo_MK249286	mfrfaaryglltypqcgdldpwaivemlgrlgaecivgreshqdggvhlhaffmfeskfesrnvrifdvdgmhpnvvrgysspekgyayaikdgdvvagglgmesirrpvsesrsvwdeivlsgsreeffeacarlapralccsftsltcyadwryrpepvpyehpsnvslstanfpelaawvshnleglehsgrrrslvlygptrlgktlwarslgrhayfgglfsldedvsdvdyaifddmqggikffhsykfwlgaqsqfyatdkykgkrlidwgkpsiyisnnnpledegvdhdwmlgncdfveitesllvpevgaveina*	326	USER	zzz1291
2437		Genomo_MK249287	mfrfaaryglltypqcgdldpwhivemlgeigaecivgremhsdggvhlhaffmferkfesrnvrifdvdgchpnvvrgysspekgyayaikdgdvvagglgtesfrskvsesggqwaeiilaqsreeffeacarlapralccsfsslqcyadwkyrpepvpyehpsgvslctaafpeldswvshnlgraecsgrrrslvlygptrlgktlwarslgkhayfgglfsldedvsdvdyavfddmqggikffhsykfwlgaqsqfyatdkykgkrlidwgkpsiyisnnnpledegvdhdwmlgncdfveitesllmpvessgsina*	326	USER	zzz1292
2436		Genomo_MK249288	mfrfaaryglltypqcgdldpwhivemlgeigaecivgremhsdggvhlhaffmferkfesrnvrifdvdgchpnvvrgysspekgyayaikdgdvvagglgtesfrskvsesggqwaeiilaqsreeffeacarlapralccsfsslqcyadwkyrpepvpyehpsgvslctaafpeldswvshnlgraecsgrrrslvlygptrlgktlwarslgkhayfgglfsldedvsdvdyavfddmqggikffhsykfwlgaqsqfyatdkykgkrlidwgkpsiyisnnnpledegvdhdwmlgncdfveitesllmpvessgsina*	326	USER	zzz1293
2435		Genomo_MK249289	mprfrsrarnylitfpqvpenvqrffdegtpfldrvkadfgdprccrigrehhgdggihyhiylsfntiatinsaqafdyfgthgnikpirrtpeksfdyagkegdvrldygepprssaergvddsnkwadiiscpdkesflhavrekaprdwllsnqrileyanlyypdpvpeyesppvttayerypelreweqqahlgesrdervkslilwggtrtgktlyarslghhayynlqfnmddfsndckyavfddiqggfeywhsykgwlgaqkqfvitdkyrkkrtihwgkpsimctnddpfamrnvdydwlmnncyiinvvdpicivss*	330	USER	zzz1294
2434		Genomo_MK249290	msftvnsryvlltyaqcgtgldpwrivdrlstlgaeciigrehhedggihlhcfvdfgrkfrsrkadvfdvdawhpnispskgtpekgydyaikdgdvvagglarpdrpsgsghdtthdkwtritsatnreefwdlcheldpksaataftqlskyadwkfapdppdyehpssitftggdvdgrddwlqqsrigsgvpllgrckslclfgrsrtgktlwarslgahiycvglvsgdecmkapnvdyaifddirggmkffpsfkewlgaqawvtvkrlykepaltkwgkpsiwlgnsdpridmshedvqwmedncvfiecdepifrasie*	329	USER	zzz1295
2433		Genomo_MK249291	msftvnsryvlltysqcgneldpfrivdllsglgaeciigrehhqdegihlhvfcdfgrkfrsrradvfdvdhwhpnispsrgtpergydyavkdgdvvagglerpsgqsggghnsshanwtrittaanreefwdllheldpkaaataytqlskyadwrfapdppvyehptaisftggdtdgrddwlqqsgigsgvpllgkckslclfgrsrtgktlwarslgahiycvglvsgdecmkapnvdyaifddirggmkffpsfkewlgaqawvtvkrlykepaltkwgkpsiwlgnsdpridmshedvqwmedncvfiecdepifhanre*	329	USER	zzz1296
2432		Genomo_MK249292	mpfrfcakyglltypqcgpldpfevvahlgglgaecivgreehqaggihlhaffmferkfesrnvrvfdvagqhpnvvrgysspekgwdyatkdgdivagglerpigrevvsagepwttiilsesrdeffeacktlaprallcnftslrtyadwryrevpepykspaglsfdtagyadlsswvsqnlersrngerrrsliiygptrlgktlwarslgnhayfgglfsldesvedvdyavfddmqggikffhsykfwlgaqtqfwatdkykgkrlihwgrpsiyiannnplcdegvdhdwligncdivevttsllmpver*	320	USER	zzz1297
2431		Genomo_MK249293	mfrfaaryglltypqcgdldpwaivemlgrlgaecivgreshqdggvhlhaffmfeskfesrnvrifdvdgmhpnvvrgystpekgyayaikdgdvvagglgmesirrpvsesrsvwdeivlagsreeffeacarlapralccsftslncyadwkyrpepvpyehpgnvslstanfpelaawvshnleglehsgrrrslvlygptrlgktlwarslgrhayfgglfsldedvsdvdyavfddmqggikffhsykfwlgaqsqfyatdkykgkrlidwgkpsiyisnnnpledegvdhdwmlgncdfveitesllvpeeggfrgeg*	326	USER	zzz1298
2430		Genomo_MK249294	mpflfqakyglltyaqcggldpfevcehlgrlgaeciigredhedggvhlhaffmfereyrtrderhfdvggchpnvvrgygtpekgydyaikdgdivagglarpcrdgvskdgnvwaqlvlagdreeffdmctrlvprallcnftslrcyadwkyrtdpdeyehprsvqlstsrypeldswvqsnlgghgdsgrrrsliiygptrtgktlwarslakhayfgglfcldeslegveyaifddmqgglkffhaykfwlgcqsqfwatdkykgkklirwgrpsiyisnsnplcdegvdhdwligncdfvevtesllmpveaslgeei*	326	USER	zzz1299
2429		Genomo_MK249295	msftvnsryvlltyaqcgtgldpwrivdrlstlgaeciigrehhedggihlhcfvdfgrkfrsrkadvfdvdawhpnispskgtpekgydyaikdgdvvagglarpdrpsgsghdtthdkwtritsatnreefwdlcheldpksaataftqlskyadwkfapdppdyehpssitftggdvdgrddwlqqsrigsgvpllgrckslclfgrsrtgktlwarslgahiycvglvsgdecmkapnvdyaifddirggmkffpsfkewlgaqawvtvkrlykepaltkwgkpsiwlgnsdpridmshedvqwmedncvfiecdepifrasie*	329	USER	zzz1300
2428		Genomo_MK249296	mfrfaaryglltypqcgdldpwavvemlgrlgaecivgreshqdggvhlhaffmfeskfesrnvrifdvdgmhpnvvrgystpekgyayaikdgdvvagglgieeirapvsgsrsvwdeivlagsreeffeacarlapralccsftslncyadwkyrpepvpyehprnvslstanfpelaawvshnlegpectgrrrslvlygptrlgktlwarslgrhayfgglfsldedvsdvdyaifddmqggikffhsykfwlgaqsqfyatdkykgkrlidwgkpsiyisnnnpledegvdhdwmlgncdfveitesllvpeesgfrseg*	326	USER	zzz1301
2427		Genomo_MK249297	mpfrfcakyglltypqcgpldpfevvahlgglgaecivgreehqaggihlhaffmferkfesrnvrvfdvagqhpnvvrgysspekgwdyatkdgdivagglerpigrevvsagepwttiilsesrdeffeacktlaprallcnftslrtyadwryrevpepykspaglsfdtagyadlsswvsqnlersrngerrrsliiygptrlgktlwarslgnhayfgglfsldesvedvdyavfddmqgglkffhaykfwlgaqtqfwatdkykgkrlihwgrpsiyiannnplcdegvdhdwligncdivevttsllmpver*	320	USER	zzz1302
2426		Genomo_MK249298	mpfrfcakyglltypqcgpldpfevvahlgdlgaecivgreehqaggihlhaffmfqrkfesrnvrvfdvagqhpnvvrgysspekgwdyatkdgdivagglerpigrevvsagepwttiilsesrdeffeacktlaprallcnftslrtyadwryrevpepykspaglsfdtagyadlsswvsqnlersrngerrrsliiygptrlgktlwarslgnhayfgglfsldesvedvdyavfddmqgglkffhaykfwlgaqtqfwatdkykgkrlihwgrpsiyiannnplcdegvdhdwligncdivevttsllmpver*	320	USER	zzz1303
2425		Genomo_MK249299	msftvnsryvlltysqcgneldpfrivdllsglgaeciigrehhqdegihlhvfcdfgrkfrsrradvfdvdhwhpnispsrgtpekgydyavkdgdvvagglerpsgqsggghnsshanwtrittaanreefwdllheldpkaaataytqlskyadwrfapdppvyehptaisftggdvdgrddwlqqsgigsgtpllgrckslclfgrsrtgktlwarslgahiycvglvsgdecmkapnvdyaifddirggmkffpsfkewlgaqawvtvkrlykepalvkwgkpsiwlgnsdprvdmshedvqwmedncvfiecdepifhanre*	329	USER	zzz1304
2424		Genomo_MK249300	mfrfaaryglltypqcgdldpwsivsmlgelgaecivgreshqdggvhlhaffmferkfesrnvrvfdvdgnhpnvvrgysspekgyayaikdgdvvagglgmesirgpvpesrnvwaeivmagtreeffeacarlapralccsfssltcyaewkyrpepvpyrhpdqislstaafpelaawvshnlegpqctgrrrslvlygptrlgktlwarslgrhayfgglfsldedvsdvdyavfddmqggikffhsykfwlgaqsqfyatdkykgkrlidwgkpsiyisnnnpledegvdhdwmigncdfveitesllvpeesgfrgeg*	326	USER	zzz1305
2423		Genomo_MK249301	mfrfaaryglltypqcgdldpwaivemlgrlgaecivgreshqdggvhlhaffmfeskfesrnvrifdvdgmhpnvvrgysspekgyayaikdgdvvagglgmesirrpvsesrsvwdeivlsgsreeffeacarlapralccsftsltcyadwryrpepvpyehpsnvslstanfpelaawvshnleglehsgrrrslvlygptrlgktlwarslgrhayfgglfsldedvsdvdyaifddmqggikffhsykfwlgaqsqfyatdkykgkrlidwgkpsiyisnnnpledegvdhdwmlgncdfveitesllvpevgaveina*	326	USER	zzz1306
2422		Genomo_MK249302	mfrfaaryglltypqcgdldpwhivemlgeigaecivgremhsdggvhlhaffmferkfesrnvrifdvdgchpnvvrgysspekgyayaikdgdvvagglgtesfrskvsesggqwaeiilaqsreeffeacarlapralccsfsslqcyadwkyrpepvpyehpsgvplctaafpeldswvshnlgraecsgrrrslvlygptrlgktlwarslgkhayfgglfsldedvsdvdyavfddmqggikffhsykfwlgaqsqfyatdkykgkrlidwgkpsiyisnnnpledegvdhdwmlgncdfveitesllmpvessgsina*	326	USER	zzz1307
2421		Genomo_MK249303	msftvnsryvlltyaqcgtgldpwrivdrlstlgaeciigrehhedggihlhcfvdfgrkfrsrkadvfdvdawhpnispskgtpekgydyaikdgdvvagglarpdrpsgsghdtthdkwtritsatnreefwdlcheldpksaataftqlskyadwkfapdppdyehpssitftggdvdgrddwlqqsrigsgvplckslclfgrsrtgktlwarslgahiycvglvsgdecmkapnvdyaifddirggmkffpsfkewlgaqawvtvkrlykepaltkwgkpsiwlgnsdpridmshedvqwmedncvfiecdepifrasie*	326	USER	zzz1308
2420		Genomo_MK249304	mpfrfcakyglltypqcgpldpfevvahlgglgaecivgreehqaggihlhaffmferkfesrnvrvfdvagqhpnvvrgysspekgwdyatkdgdivagglerpigrevvsagepwttiilsesrdeffeacktlaprallcnftslrtyadwryrevpepykspaglsfdtagyadlsswvsqnlersrngerrrsliiygptrlgktlwarslgnhayfgglfsldesvedvdyavfddmqgglkffhaykfwlgaqtqfwatdkykgkrlihwgrpsiyiannnplcdegvdhdwligncdivevttsllmpver*	320	USER	zzz1309
2419		Genomo_MK249305	mpfrfqaryglltypqcgdldpwrivallgdlgaeciigreshtdgglhlhaffmferkfesrnvrvfdvdghhpnivrgystpekgaayatkegdivaggldiselrapvsdagavwatiilsssreeffeacarlapralccsftslkcyadwkyrpepvpyehpsgvsfdttaypeldawvshnlagpeysgrrrslvlygptrlgktlwaralgthayfgglfsldedvtdvdyaifddmqggikffhaykfwlgaqtqfwatdkykgkrlihwgkpsiyiangnplsdegvdhdwmvgncdfvevttsllvpeigpvavevegv*	330	USER	zzz1310
2418		Genomo_MK249306	mpfrfcakyglltypqcgpldpfevvahlgglgaecivgreehqaggihlhaffmferkfesrnvrvfdvagqhpnvvrgysspekgwdyatkdgdivagglerpigrevvsagepwttiilsesrdeffeacktlaprallcnftslrtyadwryrevpepykspaglsfdtagyadlsswvsqnlersrngerrrsliiygptrlgktlwarslgnhayfgglfsldesvedvdyavfddmqgglkffhaykfwlgaqtqfwatdkykgkrlihwgrpsiyiannnplcdegvdhdwligncdivevttsllmpver*	320	USER	zzz1311
2417		Genomo_MK249307	mfrfaaryglltypqcgdldpwaivemlgrlgaecivgreshqdggvhlhaffmfeskfesrnvrifdvdgmhpnvvrgysspekgyayaikdgdvvagglgtesfrskvsesggqwaeiilaqsreeffeacarlapralccsfsslqcyadwkyrpepvpyehpsgvplctaafpeldswvshnlgraecsgrrrslvlygptrlgktlwarslgkhayfgglfsldedvsdvdyavfddmqggikffhsykfwlgaqsqfyatdkykgkrlidwgkpsiyisnnnpledegvdhdwmlgncdfveitesllmpvessgsina*	326	USER	zzz1312
2416		Genomo_MK433234	msfafnsryvlltysqscgldewsvldkissmgaeciiaredhahggthlhvfvdfgrkfrsrkadvfdvgewhpnvspskgtpekgydyaikdgdvvagglarperaistgsthskwteiacagsreevwnlleeldpksmlcsftqiskwidwkfavhigpyatpegicftggdidgrdnwlsqsgigsresplgrcmsiclygesrtgktlwarslgthiycvglisgdeclkevdyavfddirggikffpsfkewlgsqahvtvkclyrepklrewgkpsiwisntdprdemlqsdvewmnkncifvavdspifrante*	324	USER	zzz1313
2415		Genomo_MK433235	mtftcnaryflvtyshvesldpfaivdhfaslgaeiivsleqyistlgvhyhvfadfgrkfrsrradifdvgdfhpnispsrgtpeagydyaikdgdvvagglarpggvvavtrqekwskihgaetrdefyalcaeldperlvcsfsqiqkyadwryavepkpyvtpdgvfnladygdlgewrdnflftdtpgrskslilwgptrlgktvwarslgshlyfggifsarnlgddgvryavfddiaggikffprfkdwlgcqmefmvkqmyrdphlfrwgrpaiwiantdprhdmthddivwleancifveitsaifhast	319	USER	zzz1314
2414		Genomo_MK433236	mtfafnsryvlltyaqsgdlsewtvldhigslgaeciigredhadegthlhvfvdfgrkfrsrrqdvfdvagchpnivpsrgraefgwdyavkdgnvvagglgrpgsgglpaienkwsqivgaedreeflrlvreldpksfvlrhqeilgyadryyaedrepyvgpddvmfdlgmvpdlagwreqslgddtvgrkkslvlygasrlgktlwarslgnhvyimgimsgavllrdmadaeyavfddmrggiamfpswkewlggqsvvsvkklyrdpvqvkwgkpciwlansdprdqlkadvtdhtargridliyediawleanctfvelkepifrante*	338	USER	zzz1315
2413		Genomo_MK433237	msfhtcaksflltyahaegqdgrdpldpfaivgvlgelggecivakelyptsdgfhfhvfvmferrfrsrktdvfdvggfhpniepsrknavggfdyatkdgdivagglerpsgesgrrsadrtadawgqitaagsleefwslleeldpksmvcsfnavskfcdwkfraqpvpyrgpdgvfdvaeypdigvwrdtflprggggrrkslilfgptrmgkttwarslgshmyfgglfsarealdhpeaeyaviddiaggikffprykdwlgcqaefqlkelyreprlfkwgrpaiwcsnedprcglgepevdwlegncifvrvstpifhaste*	332	USER	zzz1316
2412		Genomo_MK433238	mppkpayfvqsryvlltyaqcgdldawavndhlsflgaeciigrelhaddgthlhafcdfsrkfrsrrsdvfdvggrhpnvvpsfgrpeggwdyatkdgdvcagglprpsgrtvyedvsswsiivsqesegefwecvarldpkalctnygslrayanwkyrpapvqyehpsgiefelgnvpelavwreialgasgergrakslvifgdtrlgktlwarslgphiytigqmsgevllrdgpdadyavfddmrggleffhgwkewfgcqyvvtvkklykdpvqmpwrkpviwlsnrdpreelrdgitnytsmgkqaaiegdikwlegncifveldhaifrante*	343	USER	zzz1317
2411		Genomo_MK433239	msfafnsryvlltysqsgdldewavldriselggeciiarenhadggthlhvfvdfgrkfrsrkadvfdvdgrhpnvsasrgtpekgfdyaikdgdvvagglarpnravssgstyskwseiesaesrgeffellaeldpesliksftsvtkfadwkfardppkyespagiefiggevdgrddwlsqsgigsgepligrcmsicvygesrtgktlwarslgphiycvglvsgdeclkygdveyavfddlrggikffpsfkewlgcqawvtvkclyrepklvpwgkpsiwlsnvdprmgmesadiewmdkncifvrvddpifranstssvt*	330	USER	zzz1318
2410		Genomo_MK433240	mafvtnaryalityaqsngldphevvshfagleaeciigrelhadgnlhhhvfvdfgrkfrsrkadvfdvagfhpnisasrgtpwagydyaikdgdvvagglgrpterqstgkaavdwdailsagsrdeflelclqlaprdavcswnsiikfadwryrvepeeyvtpagiefdtsgfgeldtwvsqsgcrpgstmtarpkslilygasrlgktlwarshgahiyciglvsgaecmkaascnyavfddirggikffpafkewlggqrqvtvkqlyrepqlldwgkpsiwlanvdprlgmdpsdsnwleenayfveltdsifranta*	326	USER	zzz1319
2409		Genomo_MK433241	msrantfriqsryvlltysqangldpasiaghldalggqyiigrenhldggihfhafvdfgrkfssrdvhcfdvdefhpnvlrgyttpekmwdyatkdqdvvagelqrpdgeenkrsprrdgvwreiiaapdrqsffdsiaqldprslvvnyiaitkyaddkyrprdepyspptlawddfavsslqewvqlnvhgweagtrkrslilygpsrtgktmwarshgphfyfgglfnldqvtdthvtygvfddisggieffpsykswlghqqeftctdkyrgkkrvywgkpaiylcnndprddkgadrawleancdfhyiedklf*	322	USER	zzz1320
2408		Genomo_MK433242	mpsflvkdakyllltypqvsgdqdvglplqivhklselnaecivgrelhadggvhfhvfvdfggrrfstrnvsvfdllgkhpniervgrtphaaydyvckdgdivaggaerpdtegndrgdgqqadwawiveaptcdeffarlrerrpkelacsypslrryadweyrsipvayespegvcirmdmydgivqwkrehlesgtvrpkslvlygpsrlgktllarsmgnhlyfcglfsgkacenssdatyavfddiqggikffhgwknwlgaqlnfqvkimyrdpllitwgkpsiwvsntdprddlggnmddlawieanctfvevtedrplftvtt*	334	USER	zzz1321
2407		Genomo_MK483072	mtfvfnaryalvtyaqcgtlsewavldhfsslgaeciigredhadggthlhvfcdfgrkkrsrradffdvdghhanivpskgsadrgydyaikdgnvvagglarpgggglpkatnpwgdvvsaesreeffdllrlldpktlvtrwseinryadaayapkrepyvgsdgyefelgmvpelagwgrelaahdqlggrmkslvlfgpsrlgktvwarslgphvytmgavsgavllrdaidakyavfddmrggigffhswkewlgaqqvvtvkalykdpvqldwgkpciwlsnrdpreemwselhdrstsgkraliqsdvdwmeancifvelqepifrante*	339	USER	zzz1322
2406		Genomo_MK483073	mpfrfaakyglltypqcgdldpwavsdhlgrlgaeciigredhsdggvhlhaffmferrfesrdvrvfdvegrhpnvvrgystpskgwayatkdgdvvagglecpvdgasvsetsskwarailaesreeffavvaeldpralccsfgslrayadwkyrptldpyvtpagihfdtsevpqlddwvqrnlagpvtgrprsliligdtrlgktlwarslgkhayfgglfcldesledvdyavfddmqggleyfhaykfwlgaqsqfyatdkykgkqlihwgrpaiyccnntpladkgadvdwlqgncdivylsspifraste*	320	USER	zzz1323
2405		Genomo_MK483074	mpfrfadkyglltyhqcgdldpwavsdhlgrlgaeciigredhsdggvhlhaffmferrfesrdvrvfdvagrhpnvvrgystpskgwayatkdgdvvagglecpvdgasvseasskwarailaesreeffavvaeldpralccsfgslrayadwkyrptldpyvtpagihfdtsevpqlddwvqrnlagpvtgrprsliligdtrlgktlwarslgkhayfgglfcldesledvdyavfddmqggleyfhaykfwlgaqsqfyatdkykgkqlihwgrpaiyccnntpladkgadvdwlqgncdivylsspifraste*	320	USER	zzz1324
2404		Genomo_MK483075	mtfrfaakyglltysqsdgldpfrivdtlaelgaecivgkelhadggthyhaffmfarkfqsrnprvfdvdgrhpnilrgrktpeqmfdyatkdgdvvagglerpttvptkensddfwrcvfdaetreetlrvaqessvslfgryffqvraiaegktlqnpldyvspeslewelgpypelsdwcsshlgrrggrprslilvgptrtgktswarslgthfyfggcfdmsqllfdnedvnyavfddihslkffpmwkfwmgaqetftvtdkykgkmtfnwgrpiiwcnnkdpqedpdadidwidgncvivqvpqdypllkl*	320	USER	zzz1325
2403		Genomo_MK483076	mpfrfqakyglltypqcgdldpwrvvdmlgdlgaeciigredhvdggvhlhaffmfqrkfesrnvrvfdvdgchpnvvpgystpekgwayatkdgdivagglecprvreevsgasakwarillsesrdeffetvasldpralcinfgslrayadwryrptrdpystpdglsfdtsrfpeldqwvqrtlvglpdrprsliiigdtrlgktlwarslgkhayfgglfcldesledvdyaifddmqggleffhsykfwlgaqkqfyatdkyrgkklidwgrpsiyisntnpladkgadvdwlmgncdivhvdtpifrante*	319	USER	zzz1326
2402		Genomo_MK483077	msfrfaakyglltyaqsagldplrivnhladlgaecivgrelhddggthyhvffmfdrkfqsrnprvfdidtyhpnilrgrktpesmydyatkdgdicggglerpiergnsaknndefwgavfdaeskeetlrcaresgvglfgryyfqvraiaeekarkspldyvsdsslewelgpypelsdwcetylgrrggrprslvlvgpsrtgkttwarslgvhyffggnfdmsqlsydcadvkyaifddmpalkffptwkfwlgaqdtftvtdkykgkmsfdwgrpviwtnnrdpredpdadidwleancifvtvpadypliahaste*	325	USER	zzz1327
2401		Genomo_MK483078	mpfrcqsryvlltyaqcgdldphaivtllssmgaeciigreehadegihlhafvdfgrrpdirnerfadvegrhpnvqpfgrtpekgwdyaikdgdvvagglerpdgnpipktgtdwaricmatspsefwelvrelapralltnftslrayadwnfrpdrtpystpsnisfdlsgvpeldewvhsnlsgnrvgeqrrskslilygptrlgktlwarslgkhvyfgglfnleelgdtedveyavfddmqggfdffhgykfwlgaqaeftvtdkykgkkhikwgkpsiwlcninpagekvdwdwvegnctivsvdepifraste*	323	USER	zzz1328
2400		Genomo_MK483079	mstfrfqaryalltyaqcgdldpfavvnhlaglgaeciigredhadggihlhafvdfavkyrtrnsrafdvdghhpnvspsrgtpeegydyaikdgdivagglerpiggrvdatggvwpeiisakdesefwslceslaprslvtsftqlrayaawkfppvrvpyetpegvnidtswvaeldswvrenlgrgdsgerrkslvvygpsrmgktiwarslgrhayfgglfsldedidgvdyavfddfggikflpsykfwlghqkqfyvtdkykgkklvhwarpsiwlsnsdprdelgvdtdwlnancdfvyldspivs*	316	USER	zzz1329
2399		Genomo_MK483080	msfrftakyglltysqsegldpwrindhlselgaecivarelhddggthyhaffmfarkfesrnprifdidghhpnilrcrrtpeqmydyatkdgdvvagglgrpevlptktdsddfwrcvfdaetkeetlrvaressvsllgryyfqvraiaegkavqnplhyvspealewelgpypelsnwvethlgrrggrprslilvgptrtgkttwarslgshfyfggqfnmdqlsydnddvkyavfddihslkffpmwkfwmgaqetftvtdkykgkmtfnwgrpiiwcnnkdpredpdgdidwidgncdivqvpadypllkl*	320	USER	zzz1330
2398		Genomo_MK483081	mtflfsaryvlltyaqcgtldgwavsdhlsalgaecivgrenhsdgrthlhafvdfgrkkqsrrpdffdvggfhpniapsrgrpergydyaikdgdvvagglarpgggglpevankwseivaaesrdeffdllrqldpktlvtrwtelnkyadaayaptpepyvgsdgkqfelgmvpelarwgeqlvandpvegrmrslvlygpsrlgktvwarslgphvysmgivsgklllrdapgaayavfddmrggigyfhswkewlgaqsvvtvkelyrdpvqlvwgrpciwlanrdprlelwaeltdrsasskrdmiqsdvdwleancifvelqepifhante*	339	USER	zzz1331
2397		Genomo_MK483082	mprqvtwkiapvnyafltysqapdafeptlesalrglgvtdliigherhadgghhyhvmaqwpagyetrdtrafdvdgyhpnyrnvrpganaervyqyctkdrittgnlvidrrerpnrnalwsefisaaskpeflellrarapyeyvlqhdrllsfaraaysqstpyiprysnfrptdamlewnltsecsrpkalillgasrlgksqwarslgshsyfhglfniddldvdskyavfddidfehfpnykawfgghedpititgkyrahrtitwgkpiiwvnnvdfrnllnprisldrdwldkncifvevssplf*	315	USER	zzz1332
2396		Genomo_MK483083	mtflfsaryalltyaqcgdldewavsnhlsalgaeciigredhadggthlhvfldfggkkqsrrpnffdvgghhpniapsrgrpelgydyaikdgnvvagglarpgggglpqvadkwreivsaesrdeffdllrqldpktlvtrwtelnkyadaayapipepyvgsdgkqfelgmvpelarwggqlaandpvegrmrslvlygpsrlgktvwarslgphvysmgivsgklllrdapgaayavfddmrggigyfhswkewlgaqsvvtvkelyrdpvqlvwgrpciwlanrdprlelwaeltdrsasskrdmiqsdvdwleancvfvelhepifrante*	339	USER	zzz1333
2395		Genomo_MK483084	mtfrfdakyglltyaqsgglssdhvvehlgrlgaecivgreshadggthlhaffmferkftsrnvrifdvdghhpnvvrgygtpelgydyatkdgdvvgggllredcvksgdaggshnkwttitmagsreeffalcaelepralcvsftslkayadwryrpepdpyrhppelefdpdatreldnwvdgnlrgrsgsvggrrrslivygdtrlgktvwarslgnhayfgglfsldepldeaeyavfddmqggleyfhsykfwlgcqsqfyamdkykgkklihwgrpsiylsntnpledknadvawllgnceivelsrsllmpvegglrgeg*	331	USER	zzz1334
2394		Genomo_MK483085	mtfrfcakyglltysqsegldpwrisdhlselgaecivarelhddggthyhaffmfarkfqsrnprifdidghhpnilrcsrtpeqmydyatkdgdvvagglgrpevlpaktdsddfwrcvfdaetkeetlrvaressvsllgryyfqvraiaegkavqnplhyvspetlewelgpypelsdwvetnlgrrggrprslilvgptrtgkttwarslgshfyfggqfnmdqlsydnddvkyavfddihslkffpmwkfwmgaqetftvtdkykgkmtfnwgrpiiwcnnkdpredpdgdidwidgncdivqvpsdypllkl*	320	USER	zzz1335
2393		Genomo_MK947372	mpnpfiikgcryalityaqcgdldpwrivdlfaslraeciigrelhddggihlhafvdfnrqfssrtttvfdvggchpnieksrgtpekgydyaikdgdvvagglarpdhqsgsgansahikwstivmaetaeqfwelchelvpehvvrsypalrkycewkfapvdpiyttpggvwvdasavegvnewlvqadlgsgalgrrksliliggsqlgktvwarslgphiffsglysaaeavrapdveyaimddiqggmgffhgyknwlgaqwsfqvkrlyrdptlvtwgkpciwccnwaedprgvtgvdqewlrenclfvelytaiagpishante*	334	USER	zzz1336
2392		Genomo_MK947373	mpfrcqsryvlltysqcgdldpfavvallsslgaecivgreehadegihlhafvdfgkrpdirnerfadvegrhpnvqpfgrtpekgydyaikdgdvvagglarpdgvqvsetstvwsriclaespgefwelvrelapralltnftslrayaewnfrperspystpagvsfdlsgvpeldewvhtnlsgtrigkakslilygptrlgktlwarslgnhayfgglfnmseaevddvdyavfddmqggfdffhgykfwlgaqaeftitdkykgkkhikwgkpsiwlcnnnpagekvdwdwiegncvivsvwdpifrantd*	319	USER	zzz1337
2391		Genomo_MK947374	mlgrlgaecivgreshqdggvhlhaffmfeskfesrnvrifdvdgmhpnvvrgystpekgyayaikdgdvvagglgieeirapvsgsrsvwdeivlagsreeffeacarlapralccsftslncyadwkyrpepvpyehprnvslstanfpelaawvshnlegpectgkrrslvlygptrlgktlwarslgrhayfgglfsldedvsdvdyaifddmqggikffhsykfwlgaqsqfyatdkykgkrlidwgkpsiyisnnnpledegvdhdwmlgncdfveitesllvpeesgfrseg*	300	USER	zzz1338
2390		Genomo_MK947375	mtfrfaakhglltypalgsdmdaverlthrivehlgnlgaeciigreshvdgglhlhaffmfgrkfesrnvrvfdvdgkhpnvvrgysnakrgceyackegdivaggldpgqlgepvdghggvwneiilsetreeffeacarlaprslctsftslkcyadwryrespepyrtppgisfctesfgeldawvgqafagsrggnlilwggtrlgktlwarslgnhayfgglfsldesvedvdyaifddmqgglkffhaykfwlgcqtqfyatdkykgkklikwgrpaiyiannnplcdegvdhdwllgnceiveitssllmpve*	322	USER	zzz1339
2389		Genomo_MK947376	msfyfnakyglftyaqcgdldpfdvvclfselgaeciigreehqdggthlhafaawekkfrsrrtdifdvggfhpnvvpsrgtpeggydyatkdgdivggglerpngskvpctsdawatiinaesrdefwrlvselaprslacnfnslrnysewkyredpapyehpadigfntgnfpeldewvqhnlerhsrggerlqslvifgpsrkgktlwarslgshayfgglfsldenlsdakyavfddmqggleffhaykfwlgsqhqfyatdkykgkklikwgrpsiylansdpredrgadsdwlnanckfvyldeditvlnarasnthteh*	329	USER	zzz1340
2388		Genomo_T_MF373638	mfrfaaryglltypqcgdldpwaivemlgrlgaecivgreshqdggvhlhaffmfeskfesrnvrifdvdgmhpnvvrgystpekgyayaikdgdfvagglgmesirrpvsesrsvwdeivlagsreeffeacarlapralccsftslncyadwkyrpepvpyehpgnvslstanfpelaawvshnleglehpgkrrslvlygptrlgktlwarslgrhayfgglfsldedvsdvdyavfddmqggikffhsykfwlgaqsqfyatdkykgkrlidwgkpsiyisnnnpledegvdhdwmlgncdfveitesllvpeesgfrseg*	326	USER	zzz1341
2387		Genomo_T_MF373639	mfrfaaryglltypqcgdldpwaivemlgrlgaecivgreshqdggvhlhaffmfeskfesrnvrifdvdgmhpnvvrgystpekgyayavkdgdvvagglgmesirrpvsesrsvwdeivlagsreeffeacarlapralccsftslncyadwkyrpepvpyehpgnvslstanfpelaawvshnleglehpgkrrslvlygptrlgktlwarslgrhayfgglfsldedvsdvdyavfddmqggikffhsykfwlgaqsqfyatdkykgkrlidwgkpsiyisnnnpledegvdhdwmlgncdfveitesllvpeesgfrseg*	326	USER	zzz1342
2386		Genomo_T_MF373640	mfrfaaryglltypqcgdldpwaivemlgrlgaecivgreshqnggvhlhaffmfeskfesrnvrifdvagrhpnvvrgystpekgyayaikdgdvvagglgmesirrpvsesrsvwdeivlagsrgeffeacarlvprafccsftflncyadwkyrpepvpyehpgnvslstanfpelaawvshnleglehsgkrrslvlygptrlgktlwarslgrhayfgglfsldedvsdvdyavfddmqggikffhsykfwlgaqsqfyatdkykgkrlidwgkpsiyisnnnpledegvdhdwmlgncdfveitesllvpeeggfrseg*	326	USER	zzz1343
2385		Genomo_T_MF373641	mfrfaaryglltypqcgdldpwaivemlgrlgaecivgreshqdggvhlhaffmfeskfesrnvrifdvdgmhpnvvrgystpekgyayaikdgdvvagglgmesirrpvsesrsvwdeivlagsreeffeacarlapralccsftslncyadwkyrpepvpyehpgnvslstanfpelaawvshnleglehpgkrrslvlygptrlgktlwarslgrhayfgglfsldedvsdvdyavfddmqggikffhsykfwlgaqsqfyatdkykgkrlidwgkpsiyisnnnpledegvdhdwmlgncdfveitesllvpeesgfrseg*	326	USER	zzz1344
2384		Genomo_T_MK570201	mfrfaaryglltypqcgdldpwaivamlgelgaecivgreihqdggihlhaffmferkfesrnvrvfdvdgkhpnvvrgysspekgyayaikdgdvvagglgmesirgpvsgsrsvwdeivlagsreeffeacarlapralccsftslncyadwkyrpepvpyshpsevslstaafpelaawvshnlegpectgkrrslvlygptrlgktlwarslgrhayfgglfsldedvsdvdyaifddmqggikffhsykfwlgaqsqfyatdkykgkrlidwgkpsiyisnnnpledegvdhdwmlgncdfveitesllvpeeggfrseg*	326	USER	zzz1345
2383		Genomo_T_MK570202	mpfrfaaryglltypqcgdldpwrvvemlgelgaeciigredhsdggvhlhaffmferkfesrnvrifdvdgchpnivrgystpekgaayaikdgdvvaggldveslrspvsksgsnwaeiqlaetrddffeacarlepralccsftslkcyadwryrpepvpyatpdglsfdttvypelsawvshnlegpehsgkrrslvlyggtrlgktlwarslgrhayfgglfsldesvedvdyavfddmqggikffhsykfwlgaqtqfwatdkykgkrlihwgkpsiyisnnnpledegidhdwmlgncdfccvtesllmpvessssina*	327	USER	zzz1346
2382		Genomo_T_MK570203	mfrfaaryglltypqcgdldpwsivamlgelgaecivgreihqdggvhlhaffmferkfesrnvrvfdvdgkhpnvvrgysspekgyayaikdgdvvagglgmesirgpvsgsrsvwdeivlagsreeffeacarlapralccsftslncyadwkyrpepvpyshpsevslstaafpelaawvshnlegpectgkrrslvlygptrlgktlwarslgrhayfgglfsldedvsdvdyaifddmqggikffhsykfwlgaqsqfyatdkykgkrlidwgkpsiyisnnnpledegvdhdwmigncdfveitesllvpeesgfrseg*	326	USER	zzz1347
2381		Genomo_T_MK570204	mapfiikgcryalltypqcgdldpwrivdrlaelraecivarelhqdggihlhafvdfgrqyssrvttvfdvggchpnisksrgtpqkgydyaikdgdvvagglgrpdeqvgsgantahikwstivmaetadhfwelchelvpehvvrsypslrkycewkfapvdpiyatpggvwvdasavaginewilqadlgsgalgrrrksliligdsqlgktvwarslgshiffsglysgaeamryeeveyavfddmqggmsffhgyknwlgcqwsfmvkqlyrdpkliqwgkpciwlcnwvedprgaqgvdmdwlrdncifvelreriagtisraste*	334	USER	zzz1348
2380		Genomo_T_MK570205	mfrfaaryglltypqcgdldpwaivemlgrlgaecivgreshqdggihlhaffmfeskfesrnvrifdvdgmhpnvvrgysspekgyayaikdgdvvagglgtesfrskvsesggqwaeiilaqsreeffeacarlapralccsfsslqcyadwkyrpepvpyehpsgvslctaafpeldswvshnlgraecsgkrrslvlygptrlgktlwarslgkhayfgglfsldedvsdvdyavfddmqggikffhsykfwlgaqsqfyatdkykgkrlidwgkpsiyisnnnpledegvdhdwmlgncdfveitesllmpvessgsina*	326	USER	zzz1349
2379		Genomo_T_MK570206	mfrfaaryglltypqcgdldpwaivemlgrlgaecivgreshqdggvhlhaffmfeskfesrnvrifdvdgmhpnvvrgystpekgyayaikdgdvvagglgmesirrpvsesrsvwdeivlagsreeffeacarlapralccsftslncyadwkyrpkpvpyehpgnvslstanfpelaawvshnleglehsgkrrslvlygptrlgktlwarslgrhayfgglfsldedvsdvdyavfddmqggikffhsykfwlgaqsqfyatdkykgkrlidwgkpsiyisnnnpledegvdhdwmlgncdfveitesllvpeesgfrseg*	326	USER	zzz1350
2378		Genomo_T_MK570207	mfrfaaryglltypqcgdldpwaivemlgrlgaeciigreshqdggihlhaffmfeskfesrnvrifdvdgkhpnvvrgystpekgyayatkdgdvvagglgmesirrpvsesrsvwdeivlagsreeffeacarlapralccsftslncyadwkyrpepvpyehpsnvslstanfpelaawvshnleglehsgkrrslvlygptrlgktlwarslgrhayfgglfsldedvsdvdyavfddmqggikffhsykfwlgaqsqfyatdkykgkrlidwgkpsiyisnnnpledegvdhdwmigncdfveitesllvpiesgfggeg*	326	USER	zzz1351
2377		Genomo_T_MK570208	mfrfaaryglltypqcgdldpwaivemlgrigaecivgreshqdggvhlhaffmfeskfesrnvrifdvdgrhpnvvrgystpekgyayaikdgdvvagglgmesirrpvsesrsvwdeiilagsreeffeacarlapralccsftslncyadwkyrpepvpyehpcnvslstanfpelaswvshnleglehsgkrrslvlygptrlgktlwarslgrhayfgglfsldedvsdvdyavfddmqggikffhsykfwlgaqsqfyatdkykgkrlidwgkpsiyisnnnpledegvdhdwmigncdfveitesllvpvesgfggeg*	326	USER	zzz1352
2376		Genomo_T_MK570209	mrkfkldsvnyvmltysdcpndfdpqciidavvgtgavyrlgrelhqngkphfhcfvqwdepfshpdagalffvggrranikrfsanpgrrwdyvgkyaghkeghyiigdqcerpggdkddsertqadiwgeiicapteeeffeklaalapkqlgcnfgslklyaewkyrpvigdyepplgrytptrdlaaweekwlgssysgrprglvlfgatrlgktvwarslgkhayfgglfnldefnavdckyavfddinggfgyfpsykqwlggqyeftvndkykhkmsvrwgkpsiwlcntdprldaykpggrpdfewmeencdfveitdpifranrs*	335	USER	zzz1353
2375		Genomo_T_MK570210	mgqfviknvrrvlltyaqcgaldpfavsdhlsslhaecivgrelhadggihlhvfvdfgrqfssrktdvfdvggfhpniqkcgrtpwtmydyaikdgdvcaggldrpdeesgdgngkidltwhsivaaetpeefwalchdlaprdlcrsfpslqkycdwrftpkpgpystpdgyefdtsrapalsewlsqarlgcgelglrpkslvlygesrlgktvwarslgshiytigmnsgaelakaenvdyavfddmrggikmfpsfkewlgaqayvtvkqlyrepkatpwgkpciwlantdpryemdpsdvtwmdancffvelitplftsrante*	331	USER	zzz1354
2374		Genomo_T_MK570211	mfrfaaryglltypqcgdldpwhivemlgeigaecivgremhsdggvhlhaffmferkfesrnvrifdvdgchpnvvrgysspekgyayaikdgdvvagglgtesfrskvsesggqwaeiilaqsreeffeacarlapralccsfsslqcyadwkyrpepvpyehpsgvslctaafpeldswvshnlgraecsgkrrslvlygptrlgktlwarslgkhayfgglfsldedvsdvdyavfddmqggikffhsykfwlgaqsqfyatdkykgkrlidwgkpsiyisnnnpledegvdhdwmlgncdfveitesllvpeesgfrseg*	326	USER	zzz1355
2373		Genomo_T_MK570212	mapfiikgcryalltypqcgdldpwrvvdrlaelraeciiarelhqdggfhlhafvdfnrqfssrdttvfdvggchpnisksrgtpqkgydyaikdgevvagglgrpdeqvgsgantahikwstivmaetadhfwelchelvpehvvrsypslrkycewkfapvdpvyttpggvwidtsavaginewvlqadlgsgalgrrrksliligdsqlgktlwarslgshiffsglysgaeamryedveyavfddmqggmsffhgyknwlgcqwsfmvkqlyrdpkliqwgkpciwlcnwvedprgaqgvdmdwlrdncifvelrtqiagptshante*	334	USER	zzz1356
2372		Genomo_T_MK570213	mvkkfkledvnycfltysncplsfdpqliidavtgagavyrlgreehqngvphfhcfvwwqsgpfshhdagqlffvggrranikrckanpgrrwdyvgkhagkkeghyiigdqcerpggdqvpaqrsesdrwgeiiaaetreefweklaalapkqlgcnygslklyaedhyrqdaaeyvspegtwrlpeilaewaddyasggytgrpkglvlfgetrlgktvwarslgphcyfgglfnlddltegvryaifddisggfsyfpsykqwlggqfqfsvtdkykhkrtvawgkpsiwicntdpredfyklgsspdfkwmeencifyevkepifhante*	336	USER	zzz1357
2371		Genomo_T_MK570214	mpfrfaaryglltypqcgdldpwrvvemlgelgaeciigredhsdggvhlhaffmferkfesrnvrifdvdgchpnivrgystpekgaayaikdgdvvaggldveslrspvsksgsnwaeiqlaetrddffeacarlepralccsftslkcyadwryrpepvpyatpdglsfdttaypelsawvshnlegpehsgkrrslvlyggtrlgktlwarslgrhayfgglfsldesvedvdyaifddmqggikffhaykfwlgaqtqfwatdkykgkrlihwgkpsiyisnnnpledegidhdwmlgncdfccvtesllmpvessssina*	327	USER	zzz1358
2370		Genomo_T_MK570215	mpfrfaaryglltypqcgdldpwrvvemlgelgaeciigredhsdggvhlhaffmferkfesrnvrifdvdgchpnivrgystpekgaayaikdgdvvaggldveslrspvsksgsnwaeiqlaetrddffeacarlepralccsftslkcyadwryrpepvpyatpdglsfdttaypelsawvshnlegpehsgkrrslvlyggtrlgktlwarslgrhayfgglfsldesvedvdyaifddmqggikffhaykfwlgaqtqfwatdkykgkrlihwgkpsiyisnnnpledegidhdwmlgncdfccvtesllmpvessssint*	327	USER	zzz1359
2369		Genomo_T_MK570216	mfrfaaryglltypqcgdldpwaivemlgrlgaecivgreshqdggvhlhaffmfeskfesrnvrifdvdgmhpnvvrgysspekgyayavkdgdvvagglglesirskvsesrsvwdeivlagsreeffeacarlapralccsftsltcyadwkyrpepvpyehpsnislstanfpelaawvshnlegpehsgkrrslvlygptrlgktlwarslgrhayfgglfsldedvsdvdyavfddmqggikffhsykfwlgaqsqfyatdkykgkrlidwgkpsiyisnnnpledegvdhdwmlgncdfveitesllmpvessssint*	326	USER	zzz1360
2368		Genomo_T_MK570217	mphfdyhfryalitysqcgdlspgvvgerfqslgaklvigrenhadggvhlhcfvdfgrkrrfrrvtcfdvegrhpnieqskgtpekgwdyackdgdivwetlerptpsrvgdsktvakwteitsasdresfwdlvhqldpksaatnftalqkycdwkfapkppvyespgnisfhggdvdgrdswllqagigsgetrvgrvksicvygasqtgktlwarslgphiyciglisgseclraddaeyavfddirggikffpsfkewlgcqqwvtvkclyrepklvkwgkpsvwlsntdprdemtaaevewmnincifvecntpifhante*	328	USER	zzz1361
2367		Genomo_T_MK570218	mapfiikgcryalityaqcgdldpwrivdhfaelraeciigrelhedggvhlhafvdfnrqyssrtttifdvggchpnisksrgtpqkgydyaikdgdvvagglgrpddtlgsganttdikwrtitmaenpdhfwelcfelvpehvvrshtslrkycewkfapvdieystpggvwidasavaginewilqadlgsgalgrrrksliligdsqlgktvwarslgshiffsglysgeeamryaeveyaifddmqggmsffhgyknwlgcqwsfmvkqlykdpaliqwgkpciwlcnwvedprgadkvdqewlrdncifvelrtqiagpishastg*	334	USER	zzz1362
2366		Genomo_T_MK570219	mphfdyhfryalitysqcgdlspelvggrfqelgaklvigreahadggihlhcfvdfgrkrrfrrvtcfdvegrhpnivqskgtpdkgydyaikdgdivwetlerpspsrsgdtktaakwaeitsasdresfwdlvhqldpksaathfstlqkycdwkfapkppvyespgnisfhggdvdgrdswllqagigsgetrvgrvksicvygasqtgktlwarslgphiyciglisgseclraddaeyavfddirggikffpsfkewlgcqqwvtvkclyrepklvkwgkpsvwlsntdprdemtaaevewmnincifvecntpifhante*	328	USER	zzz1363
2365		Genomo_T_MK570220	mphfdyhfryalitysqcgdlspelvggrfqelgaklvigrenhtdggihlhcfvdfgrkrrfrrvtcfdvegrhpnivqskgtpdkgydyaikdgdivwetlerpspsrsgdtktvakwaeitsasdresfwdlvhqldpksaathfstlqkycdwkfapkppvyespgnisfhggdvdgrdswllqagigsgqtrvgrvksicvygasqtgktlwarslgphiyciglisgseclraddaeyavfddirggikffpsfkewlgcqqwvtvkclyrepklvkwgkpsvwlsntdprdemtaaevewmnincifvecntpifhante*	328	USER	zzz1364
2364		Genomo_T_MK570221	mtfhcnaryflltyaqcgeldgwavndhlgnlgaecivaredhsdggshlhcfadfgrkfrsrkanvfdvagchanivpsrgsawagfdyackdgdiiagglgrprqpgckptdndvrqyaeitnavdpqhfwellhdldpraavlhfaaiqkyvswafddpipeykprpisdydpglidgrdewlrqsrigspgsylikslvlygepltgktdwaralgkhvytigvasgdalygikdpdveyaifddirggikffhgfkewlgcqayatvtrkykepvalqwnrpgiwcanrdprldmdpedanwltancffievnspifrante*	328	USER	zzz1365
2363		Genomo_T_MK570222	mphfdyhfryalitysqcgdlspelvgnrfqelgaklvigrenhtdggihlhcfvdfgrkrrfrrvtcfdvegrhpnivqskgtpdkgwdyackdgdivwetlerptpsrvgdtkvaakwaeitsasdresfwdlvhqldpksaathfstlqkycdwkfavkppvyespgnisfhggdvdgrdswllqagigsgetrvgrvksicvygasqtgktlwarslgphiyciglisgseclkaddaeyavfddirggikffpsfkewlgcqqwvtvkclyrepklvkwgkpsvwlsntdprdemtaaevewmnincifvecntpifhante*	328	USER	zzz1366
2362		Genomo_T_MK570223	mpssfhlknrryvlftyaqagpdfdywavvdllgnlgaeciigreehadggihfhvfadfgrlfstrkvrvfdvggkhpnikpigrtpataydyackdgdivagglgrpggdcdwdpdnfwssaahcgssdeflhfcdqlatrdliksfpnfrayanwkwnsgvpeydqpvgavfdtsaapgidewlsqsalgtgksrarrkslvlfgpygcgktvwarslhthiyfgsqwsgkiafhgvesaeyaifddwkgglaklpgykdwfgaqwhvsmrklhhdaeivewgrpviwlcnrdprllakgdedidwewmdracdfvevtgllttfrastg*	334	USER	zzz1367
2361		Nano_KM607601	miiddrmaryvvcwmftinnpttlpvmrdeikymvyqvergqegtrhvqgyvemkrrsslkqmrsffpgahlekrkgsqeearsycmkedtriegpfefgafklscndnlfdviqdmrethkrpleylydcpntfdrskdtlyrvqsemnktkamnswrtsfsawtsevenimaqpchrriiwvygpnggegkttyakhlmktrnafyspggksldicrlynyedivifdiprckedylnyglleefkngiiqsgkyepvlkiveyvevivmanflpkegifsedriklvsc*	293	USER	zzz1368
2360		Nano_KX534388	msrnvicwcftvnnpqepivfledkfkylvyqleagdngtphyqgyvemkkrtslpqmkkmfpnahlekrrgsqaearqycmkeegrlqgpweygvfrmmvedklreviedmkmtgkrprdymedcvntidrsfdtpqmyyaeemkkkmiagfhseereweaevrrlidegnprhiiwvygpqggegktcfakklikerdafytvggkasdvaylydyedivvfdiprdkeeycnyglieqfkngiiqstkykpvmkhkdpppavivlsnftprsgmlsedricnc*	287	USER	zzz1369
2359		Nano_KX534389	msrsvicwcftinnpssplslhetmkymvyqleegengtrhfqgyvemkkrttliqmkklfptahlekrkgtqsearaycmkqdsrvegpweygefkitiedklqavmedmktsgkrpreyleacptaydksketlkeyygqiekkkavdswelqrkpwmdevealletkdcrriiwvygpqggegktthakylfktrdafyttggktgdiafawdheplvlfdiprsceeyvnygiieqlkngmvqsgkytscikikdyvevivyanftprsgmlsedriviveas*	288	USER	zzz1370
2358		Nano_KX534390	marqviswcftlnnpssplslhesmkylvyqkeqgeagnihfqgyiemkkrsslaamkklipgahfekrrgtqgearayamkedtrlegpwehgefkltiedklrevmqdmkntgkrpidyiedccntydksvntlreyrgelkkqkavsswelqrkpwmdevdslletrdnrriiwvygpqggegktsyakhlvktrnafyttggktadiafawdhqelvvfdfprsfeeyvnygvieqlkngiiqsgkyqsvikyaeyvevivlsnftprsgmfsedrivtvya*	287	USER	zzz1371
2357		Nano_KX534391	mssmvkgwcftinnpssplslhetmkymvyqleegengtrhfqgyvemkersslktmktlfprahlekrkgtqgearrycmkedsriegpwefgefketiqdklqsvlenmkvtgkrpheyiedcpdaynkskdtmneffdlqkkkktidswtfreeevawqvelrahivennprsilwvygpqggegkttfarklmkerecfysvggtardvtyrykyedvvifdiprdkedylnyslleqfkngivqsdkyvptlkitdppivivfanftprsgmlsedriviinc*	289	USER	zzz1372
2356		Nano_L32166	msspslkwcftlnyssaaerenflsllkeedvhyavvgdevapatgqkhlqgylslkkrirlgglkkkygsrahweiargtdeenskycsketlilelgfpvvngsnkrkisemvarspdrmkieqpeifhryqsvnklkkfkeefvhpcldrpwqiqlteaideepddrsiiwvygpygnegkstyakslikkdwfytrggkkenilfsyvdegsdkhivfdiprcnqdylnydviealkdrviestkykpikivelgkihvivmanfmpdfckisedrikiiyc*	287	USER	zzz1373
2355		Nano_LC019722	masnkwcftlnysdaaerdiflatlkeeelryavvgdevapttgqkhlqgylslrklirlgglkkrfspkahwemakgsdednarycsketlilqlgiptsqgsntrspermrieqpeifhryesvkkatifkdeyqhpsldrqwqiqlteaiaeeaddrtiiwvygpngnegkstyakslmkkdwfytrggkkenilfsyvdegstkhvvfdiprchqeylnydvieaikdrviestkykpikiievnrvhvivmanfmpdyckisedriktinc*	277	USER	zzz1374
2354		Nano_MK039132	marqvicwcftinnpkehlifsedkmkylvyqleegkegtkhfqgyvemkkrsslrqmsklfpdahlekrrgtqsearnyamkdesriegpwehgtfvmliedklkeviddmrvtlkrpsdymegcentidrsydtlnyyfaefkktrvvqnwefpeqpwetrvralmeeedprviiwvygskggegktcfakklikeydafysvggkaadiaylynyesmvlfdiprdkeeyvayglieqfkngivqstkykpvvkfvdppcvivfanftprsgmlsedrivivdcadwv*	292	USER	zzz1375
2353		Redon_KY052047	mlshssckllnakrflltyndvxgkipsaldlsehlinltsekmefvvvseetapttgmihyhalvilkdnlysrkldyfdylmihpnieavrgnaqkayeyvikdgkywqtdlnyfkvdggkknnerrernkllmngdifeeyekgnigpidliraakiraikvqynnnmtkrtpplimwfygntgsgktrkaveiaeelkariwisndnlkwfdgycgqevavfddlrrdilptwafllrlldryplivqikggfvkwepkiiiitcpvppeecfkwynkqgeeqqwdrqeqlnrrltweekeqvyefplslgdgeemeltienwktkqaddn*	336	USER	zzz1376
2352		Redon_KY349925	mlghsvcklinakrfmltyndpmevidhldlcehltellsenleflvvskekapttqmvhyhalliakekiykrdinffdykeihpniesvkgnpkkayeyvikdgnywqsslnyfkdvneerlkerieknrlllegdvmeefengrigaidliraskirtikvqmncninkrqaplimwfygatgsgktrkalemaeelklrlwisndslkwfdgycgqeiavlddlrkdilptwafllrlldryplivqikggfvkwvpriiiitcpvapeecfswfnkngeqqqwdrqeqlnrrltweeveqiyefplslgdqeeinltienwkmkemnnfi*	336	USER	zzz1377
2351		Redon_MK059754	mnstnvskpisgknflltyndsedkigigvdiaehliekfqekvlfiavgreiapttgmihyhcllmlkdrffsrntscfdfknihpnfqtvrnntrktylyvikdndywetnprffekeddlknkerirknkllmegdimkayldgeigpveliraqkiraiklqteptmikreaplviwfygktgtgktrktiemaeelklktwmssdslkwfdgycnqelaiiddlrkeilpnwafllrlldryalivqikggftrwnpkiiiitspvephecfswfnrqgeqqawdsedqllrrltwdgieqvyefplstgdeealeetleswkakqadeen*	337	USER	zzz1378
2350		Redon_MK059757	mlttikakqkpyiyvrrcyvhiynnirdmngtatkkpisgknflltyndpedvigmhidltehltntfeedldfiavgqetapttgtihyhvilllknrlftrnnavfdyksihpnyqtirnnirktylyvikggkysqsdlkrfeledekkgrerreknkllmngdilkayeegeigpiefiraqkirsikiqieptmikrdaplviwfygktgtgktrktmeiaeelnlktwmssdslkwfdgycnqelaiiddlrkeilpnwafllrlldryalivqikggftrwnpkiiiitspvephecfswynrqgeqqawdseeqlerrltwegavqiyefplslgdqealeetiemwkvkegrsn*	364	USER	zzz1379
2349		Redon_MK059760	msltfdgknlyltfmdpekkidgpaslineliekllqyepkyivagkeqapstgtthyhvfinlnkrlhtrhleeficiktirpelervrnncakiiqyckkgnnyaelgkdewtknkslnkeekanlmlkgdleklflegtlgaidviraqklknifnlerkstkyqqklvlwfkgetgegktrmatelaelfeteywmsnenlkwfdgynsqeiaifddfrksmlgdwsyllrlldgyglyapikggfttwkpkiiiitspatpheafswvnkegeeqgwdkeeqlirrltwneelqvydfplwpekkeqliktvekflgrsqkqedimlpeewsiiepegfitpg*	349	USER	zzz1380
2348		Redon_MK059767	mtlriqhknlyltyldqnkqisgpswllstlaerlekyeteygiccrevapttgtlhyhllikckkvitvrnantllemegirphvekvnnnirmiikyikkngdfaqlnpenapkdatmnkkekaelmlngnweelflngelgaidiiraqklktifdmnrppkeykkrlvmwfhgdtgegktktaleiakqyydnsywmssdslkwfdgyrgqkvaiiddfrkgmlsdwsfllrlldgynllvqikggfttwnpeliiitspatpeqafkwtnkegeeqqwdkqeqltrrithediaqiyefpmwedelkrlektirkfiglpedefltaedwsiiepegfitpg*	348	USER	zzz1381
2347		Redon_MK059768	mslhldcvnllltyndpegkifgdmslldqlienfkeyepiygvcskekapttgmthyhvyiklkrrcqkkdgrsllivetirpniervrnnikavikyvmkggyyaeygtcpvnlkeeennkvkkaqmmmtgnleelflngelgavdviraqklktifqlarpmekyskklvlwfkgetgegktrkaleiaemfnlsfwmtndslkwfdgytgqelvimddfrknmlgdwnyllrlldgyglavqvkggfaiwkpkiiiitspatpheafswvnkegeeqgwdkeeqlirrlthedeeqiyqfplwkedeermtltikkflglpileeenmlpeewstilpegfitps*	350	USER	zzz1382
2346		Redon_MK059769	mahirldqktifatyldtenkivgptilvstlmerfekynpiyatagkevapstgtihyhaviicelnvrtkngdellkvegilphlerirygirkiaeycqkdgnfaeggkkpwkeleskkeknqrllqgdleqlylngdigpveiiraekiraifaknskpdkykkrivmwfkgetgegktrtaveiaekfyngdywisndslrwfdgyhgqklaiiddfrkamltdwsfllrlldgynlivqtkggftkwnpetiiitspatpeeafswtnnegetkqwdkanqlqrrlthndvdqiynfplwdedklklenvfrkefgmdllaeenmmaedwsiiepegfitpg*	349	USER	zzz1383
2345		Redon_MK059770	mtlrlqntniyltymdkekkiagpawllttlaerleryeteygiccretapstgtlhyhlfikckrmvsirnansviemegiiphiekvnnnikriidyikkngdiavlnpenapkntmiskqekanlmitgdleklfidgtlgavdiiraeklrsifikysqptgykqrmvlwfkgetgegktrtalkiaeqyynnsywlssdtlkwfdgytnqrvaiiddfrknmltdwsfilrlldgynlivqvkggftswkpeliiitspatpeqafswtnkegeeqpwdkqeqltrrltsydelqvyefplweqervrlentirkrlemplldqenmmpeeewstilpegfitps*	351	USER	zzz1384
2344		Redon_MK059771	mtlrlqhkniyatyldsekkifdpvilitelcerldkygirygiackevapttgtvhyhvlimcnktvsvrnaknlleiegimphlekinnniikviqyikkdgyynevnkenepktekmnkadkaelmingnwkelfmtgklgaidiiraqklktifdlnrppkkyeqklilwfygetgegktrkavetaemynltywlsndslrwfdgyqgqqiaiiddfrksmltdwsyllrildgyslyvqikggfttwepkiiiitspatpqeafkwidkegeertwdkeeqltrrltfkeelqvyqfplwkeeekrlertlrqflglpeeenmmpeewsiiepegfitps*	347	USER	zzz1385
2343		Redon_MK059772	mtlrlqnknlyltyldteerifsetilitelaerldkyvvkyaiackevapttgtvhyhcliccenvistrngkelltienvtphveriqnnlvnivnyikkdgsfaevnkenaprrkeiekrekaelmingnlrelfmegvlgaidiiraeklrnifqvqapadkyqkklilwfkgetgegktktavdiaeryfngeywmsnetlkwfdgyrgqpvaiiddfrksmltewsfllrlldgynlivqvkggfvkwqpkviivtspaspseafqwvnkegeiiewdkqvqltrrltyedeeqiyqfplwnqdqlklentirkylglapmeeesmfpeewsviepegfitpg*	350	USER	zzz1386
2342		Smaco_GQ351277	mhlftdvvsvdimttmqrthtnaelirwfkifrdldihkwvigleegkggyghwqvrcnvrvevvndwtaylravfgwlgpisiwteecsdkytyetkegkywaswdtmgarqqrfgkmrwnqegavqalqrtndreivvwydeqgnmgkswlcghlfetgqayyippymtsiqsmiqtvaslvlqdrdsgypprplividiprswkwstelytaieaikdglimdprygarpvnihgikvivltntkpkldklsedrwvlydpmdylmml*	272	USER	zzz1387
2341		Smaco_JN634851	mkyvatisrtsipehhlvrllklldlheayigretgargfehyqccidcagdlvrfntehqlgwhieecvsweasknycrktdnyryvgdsieereysriatrpknivadriqfhidhrndraisicvdtiggtgkstygylcarrgqffvvprtaetptrimdyiamhydnqpviwidlprsrlvdkdlaecledikdglvasakyegclrfirgvkvlvttnhwvdkttykmlsadrwdiftalpstegessr*	256	USER	zzz1388
2340		Smaco_KF880727	mkkyimtvprsvpkkalkimidvndckkwiigkergkngyehwqirietsndeffkwckhhipaahieeaqqgvdeclyerkegqfwtssdrvetlhqrfgtlrprqerallalqstndrevmvwydangnvgkswfcgalwerglayvtpptvdtvkgliqwvascymdggwrpyviidiprswkwsdqlycaiesikdgliydtryharminirgvkvlvltntlpkldklsrdrwcifef*	244	USER	zzz1389
2339		Smaco_KJ577816	mrinakctlvrtihhkdtlrykmvtnymitwsrndtykqfnqlmrlirkndihrwivgietgtngydhfqirmatrwtfdqmteifhgqahieecsdtweyerksgiffssedtaeirrvrfghpnqaqehiietargqndrqvdvwydpkgnhgktwltvhlwergqalvvprssatpeklsaficsaykgeefiiidipragkippslyevieevkdglvfdhrytgktrnirgakviiftntkldekklsydrwrlhgmekggegepls*	273	USER	zzz1390
2338		Smaco_KJ577817	mktymltiprsvpkraimtmievndckrwivaketghggydhwqirlqtsndsffewceqhiptahveeaqnkweyerkegrfwtsddtteirierfgrprgwqetalkrlrtqndrqvdvwydpignrgkswlaghlfetgkacivprdwtnpseicnylvhnydnepiividipretgipkgfyatvemikdgligttkwegrmrnirgvkiivmtnhqmdlkklskdrwrlnginaqnapml*	246	USER	zzz1391
2337		Smaco_KJ577819	mktymltipreradrigtepiirlmryirendvkkwivametgrrgyehwqvrlqaregfsewkdtevpvlgpnwtivtekqkvgvgwiqrnipqahveecsdnweyeakegrywaswdtvevhrmrwgrprwyqqallnklrtttdrevmvwydpegnngkswlvghlfetgrayylpptltsvqsmlqtmaslahqdrekgyppkpyviidiprtwkwskelycaiesikdglimdprysarpinirgvkvlvltnempkldalsedrwiientpmh*	280	USER	zzz1392
2336		Smaco_KM573769	mtnptwfcgtiwkhltewtmeqlaewfkqhhakegvigleisptsgkehyqfkihldrgetlegwkaligpmghieiavdknfsgyeekdgnfikwptsplekykslklrtwqidvvetferqddrrilvvvdkqggngksylsrfmeatgkadvcpvisdeyndysaycldnpckgyvfdlpratsikrrsamwmgieqikngllyekryrprkmwieppkvlvftnddvpwdmlsrdrweayelyngqlfllkppndte*	262	USER	zzz1393
2335		Smaco_KM573770	mgiymvtaprkgsklgtgkefmkwrtffyindvhkwtlgaetgkggykhwqvrlqisgsdnevfnkikdenmfptahiekgsdtwsyeckekmhwtsndtpnilrvrfghmrwyqkdvieavrrqndrqiaywydpegnkgkswlvnhlfescqawyvpptlksvegiiqwvasvyinnnyreilvidiprswkwstelytaietikdglvydpryhaqminirgvkilvlcnhepkldalsadrwyavapalt*	255	USER	zzz1394
2334		Smaco_KM573771	mvtvptkhackrqvkmileifdtkryifaqekgkngldhwqlriqisgdkeenferlqklfcnkahievandsweyerkegkfwssedtkeilkirfgklrseqkkilqilssqgdreidvwldptgchgkswltihlwetgralvvprssttaeklsafvcsswrgediividvpratkpttslletmeelkdglvfdhrytgktrnvrgtklmvftnsplplnklstdrwrlhgisadgsls*	245	USER	zzz1395
2333		Smaco_KM573772	mhsttvsesettthrrknlqtwmitgprtihkriirelfdqcdvkeyiiaketgkggyehwqirckasrpdffeyvhdreprfniqkaatedfdyerkdghfwcsednneilkcrygelgdcgmiwqrqlmkrlkkqsvreidvvldpagnkgksfatialwerrealvvpraqttaervsgfvcsawkgewliiidiprstkagkalyetmeeikdglvfdwrysgktrnirgtklvvftneplnlkglssdrwklhgikadgtls*	268	USER	zzz1396
2332		Smaco_KM573774	mtnptwfcgtiwkdkysgskeqlaewfrlhhakegvigeeisptsgkihyqfrihldrgetlkgwqelikavghvevcqekkftdyekkdgnwiewpesylgkfkempllfwqeqlleqwneqddrqilfvkdvkggngkstfgkimeargleevcpvcsddyndytsfcleypakgyifdiprassikrrtalwsgieqikngllyekrykprkvwieppkvivftnedeppwdllsldrwrvfdveqyvnpitynirshwevd*	266	USER	zzz1397
2331		Smaco_KM573775	mltipakrgefdfyhwlklfevwnvkkhvvgleegkngykhwqariqlsgegkqiiggseisffqymkiyypkahieeasntweyerkegkfwtsedtasilavrfgslrpeqkkilqilesqgdreidvwldpsgnhgkswltvhlwetgralvvprssttaeklsaficsswkgepiviidiprstkvsgslletmeelkdglvfdhrytgrtrnvrgvkvmvftnselplkklskdrwrlhgiacdgslt*	254	USER	zzz1398
2330		Smaco_KM598409	mkkceaceerpanygyvkwincidgidrywfgyicdecyhkfeeewakeeecnvqyigtisaedwnedgiirvfenldghelyigreigkhgfrhyqfcmdcagdlekytadnrtgwhverciswemskgycrktgdyryigdsreeryyawlrarrplpiwrsfgasvvkqndrsitvwvdtegkagkstfsyilerrgkclniprtehnptrlidfvamhykgepliivdiprdqklgkelcraletikdgvitsakyqgtkmfikgvkilvftnhfldkttyaaltedrwdvkslkaskshpr*	307	USER	zzz1399
2329		Smaco_KM598410	mtepkwwdctlsreetfgngnpnpyytwhapdvgkqlmehgaercvvgeevgedgyqhfqirvvfkkptsfekatailpgshwsetsqfgrnfdyvekeghfwrswetalgrfmqldmypwqneimtrlekqndrkvmvivdrygnsgktaiamrltaehkgaycpeledakdymawalahknagcfcldipragdvrkdtaiwkaveqmkngylwdkrhhwqeafimpskglvltndepdrnllsrdrwdighldygisnwantikwds*	271	USER	zzz1400
2328		Smaco_KP233179	mpstkwyditaskeklprsilekwlnercerwaygnevgeggyehyqirivlkeptdeyemrkmwaafghvspthvrnfdyvlkdgdfvcswikypesmvnptfrawqqclleleqsdreidviidlkgntgkswitkylalknkatnvpsgleakdimrmclkrpttgwyifdmprasskqakstwsaiesikngylwddrytweekwieppkvtvftneypkydlvsedrlrmwaptetglvalak*	249	USER	zzz1401
2327		Smaco_KP233189	mymltiprdkvskrelrimldkndckkwiigketgkngykhwqirletsneeffdwckkhiptasirkaevpkwdyeakegqywtssdrtdnliqrfgefrpnqkraiqalratndrevlvwydeggnvgkswftgalwergqayvtpptvstvqamvqfvaspyvfidiprswkwskelycaiesikdglvydsryqgrmvnirgvkiivmtnnkpdldklsydrwrmvvl*	233	USER	zzz1402
2326		Smaco_KP233194	mtnvymitmprkgysgfiaimrffrkfdvhkwivspekgaqgyehwqirfrcgltpenamiawrqwvcngfnmleasdngweyegkegkflaswdskgarsvrfgkmewrqeatvlraratndreivvwydpkgnsgkswlvghlvetrqayyvppylatvesmiktlasmvkadrengnpprplvvidiprsykwkndmyvaieaikdgiivdprysatvenvkgigvivitnekpqvgklsadrwdivdw*	253	USER	zzz1403
2325		Smaco_KP264968	mpspkwyditvsadkvpekimvewlnkyceryaygretgengykhyqvrivlktgadisemrkvwsafghvsctsvrnfdyvlkegdyvcswikipenmqnpvfrpwqsalldleqddrqidviidlagntgkswltkycalkmravnvpaglegkdimrmclkrgaqsglyifdmpraitkqsksvwsaiesikngylwddrytweekwidppriwvftneypkydlvsedrlrfwaptptglvslah*	250	USER	zzz1404
2324		Smaco_KP860908	mtkcymitaprdeemyalriwryinshdvhkwiiaseigrngykhwqiriktsdpnffaftekeepylaanwkieyrkvkvgtgwaniniprshveecsddwdyetkegkylaswdtpevrklrfgrprwhqeaiinrlestndrevmvwydptgnsgkswlvghlyetgqayylpptmtsvqsmlqmmaslaiqdredgrpprryvvidiprtwkwskdlycaietikdglivdprysarpinirgvkvlvlsndrpsldklsvdrwvventpml*	277	USER	zzz1405
2323		Smaco_KT600068	mdimatigrtgysgfaeimaiireldihkwiigaevgaggyqhwqcrfktrlspeerieglewdlktatvkqkkrtvgpaeqmteklrarigdgpsiytaecsdnweyeakegaylaswdtmkvrstrfgkpswqqevalqalrdtndrqvvvwydpqgnigkswltnhlyeqglaycipatmnniegiiktvaslavkdrdmgypprpyviidiprswkwseqlytaiesikdglimdprysaqpinirgvkvmvmtntmpkidklssdrwvihtnp*	279	USER	zzz1406
2322		Smaco_KT862218	mtgprtihkriireifkkcdvkkyiiametgnggyehwqirctasrpdffeyvhdreprfniqkaetesmeyerkegrfwssedtteirqcrfgelggkgrewqrqilkvlknqdvrtidvvldpvgargkshftialwergealvvprysctseklsafvcsaykgekiiiidiprankpttalyesmeemkdglvfdprysgktrnirgtkvlvftnnpldlkklshdrwnlhgitrdgtls*	245	USER	zzz1407
2321		Smaco_KT862219	mltmpwtgqskrminlyitrndihewiigyevgrdgyrhihvrfngrgdfgdvqrafpgahieegttmeteyekkdghfvsyedspdvlrcrfgklrdhqrrvvkllekqsdrgilcwydetgsigksftcrhlverrrayyvpptvdnvkqiiqwvcsgyqrqryliidiprsaewnkslytgleaikdgliydtrysaklrdiwgvkilvltnslpnldalsqdrwmiinrdgkdvtewarieskkrakkkadeggkkktkksee*	268	USER	zzz1408
2320		Smaco_KT862220	mkkyvltvpreadlrpicrmlsdakkwtigfevgehgfrhyqirlvssdhdffewckaflptahieeateerddyerksgnflcsddtdqirqirygdlrkiqkkilkladdqndrqisyfydpdggwagkswltihlwergncfvvprskataeklsaficsgykaeeyividlpraptgdiglyelledtknrlifysryqpitrnircpnlivfsnhkldtkrlsadrcqyydlsvwdplevtl*	248	USER	zzz1409
2319		Smaco_KT862221	mmtiprriekpldnwcwqcericskkllsyifeqadvkryivaiekgkngldhfqirlscsdpdffehmkdwcewahvekaetdnfdyerkegrfwtsddtteiricrfrelggpgrqwqkqimqvlkkqdvrtidvvldpvgargkshfaialwergealvvprysctaeklsafvcsayrgrkiiiidiprankpttalyetmeemkdglvfdprysgktrnirgtkvlvftnnpldlkklshdrwnlhgisvdgtlt*	261	USER	zzz1410
2318		Smaco_KT862222	mgkysvtisadlwkerdvvrlldmvdlreyyigreigkggyhhyqcaidcggdlerfngqhqlgwhiedcaswdklvrycrkggdyryigdsieeqsyrsrgttavghtidthlkkqndrqisicvdtkggsgktthgydrsrtgeyfvvprnaetptrimdyvamnydnepviwidlprtrkidkglatiledmkdgliysakyegqvrhikgvkvlvttnhyiekpaykllsadrwdvftpptkagdsrdgntglsplgg*	263	USER	zzz1411
2317		Smaco_KT862223	mgfitedaffpeflektlqealdkiceryaygnevgkdgyehfqcrivcskptderalrvfllsngipahtsptqvrnfeyvqkegnlycsweavlkqfprgtpymwqliafsmwkkqndreilvitddkgrhgkswlrkymvachmgtfipplekaedimacamakpskgyiidmpradgkvrkamwsaieqmkdgylydkryswqekwieppkimvfcndfdplmlstdrwqsfditdfpqe*	245	USER	zzz1412
2316		Smaco_KT862224	mvrshnmeralpdehgttqrlayqphakegvigeeisptsgkthyqckwhlsrgesidgwklligpmghvdiavekrftgyeekdgkfvkwpespiakhknlalktwevalldsiknqddrhitvvvdkqggngkstfskyleandiadvcpvvsdeyndytsycmefpkkayvfdlpratsikrrtamwsgieqikngllyekrykprkmwieppsilvftnddipwellsedrwdayrlhddtlyvlskpsddyingsnatmdedsrli*	272	USER	zzz1413
2315		Smaco_KT862225	mqtwvltiprrteiqvptwlwlawepvtivsvcskkllnyileqsdtkryiigiekgknglehfqirlscsdpeffehmkewypyahieksdvginsesmeyerkegrywtsmdtteiriqrfgkpnrtqqrvlevlrrtndreivlwysdkgsigkswlvghlwetgeayvcqpqdtvkgmkqdvaseyikhgwrpcivvdlprtwkwtkdlycalesikdgllkdtryssdtinikgvkvlvtsntlpkfdslsfdrwivientierrsfs*	274	USER	zzz1414
2314		Smaco_KT862227	mqtymmtiprtvskralrimiekndckkwtigkekgkngyehwqirietsnddffewmqdhiptahieksdsgvdecryetkegqyvtysdrvqnlmqrygafrrnqkramqaleatndrqvvvwydetgnvgkswftgalwerglayvtpptidtvkgliqwvascyidggwrpyviidiprswkwseqlysaiesikdgliydtryhsrminirgvkvlvmtntmpkldklskdrwcictf*	244	USER	zzz1415
2313		Smaco_KT862228	mtipqsemskrellhylrhrskrwqfgretgrntgyrhyqvryessnddigrerlywvgiacelepsngwsnyelkdgdfytsddadlgkyrfgklrkfqtrlleylesrndrtvgivvdhvggkgktyfarycslnhkavylhgsgtdnqvardlydiseserinaviidctrsennlsesdfwngieqiknghlcdrrygyrekwirppavlilsnhdpdwkclsedrwhkffikedamyeyykrekkvtsl*	255	USER	zzz1416
2312		Smaco_KT862229	msdpkwydvtapqavlsaenvetileqleceryayadevgeggykhwqiryvlrkgspveeqimiwsmwkahvspthvrnfnyimktdnyfcsweselreyryleyrpwqkytlemieqqndreifviqdplggigkttfakhlvanhkaiyipplgegqeymamamakaregrretfiidvpraeslkkkagmwsaveqikngflydkryqwsekwikspkivvltnetelpkdklsndrwnvyqpgnfey*	253	USER	zzz1417
2311		Smaco_KU043396	mimsktfmltiprndtyregnrifawfrkndihkwvlgaekgaggyehwqmrvqcrfgfeklkvlfpnahieecsdkwtyetkegvywksndreenrkqrfgklryaqkrviehadgtndrevvvwydqegkagkswltgamwerglayfavadtsgktivmdiaseylkngwrpyviidipragkwtvivmtntmpkldklsadrwkiitqeeltleetaieqfaltgkggyrppltppt*	242	USER	zzz1418
2310		Smaco_KU043403	mtktvmitmerretykewnwflfairkldihkwiiaaeegkggykhwqiriasrfdakwwtralliqfgqrsihtenasntwtyeakegcylaswdtlevrqqrfgklrkvqkyalnvlegtndrqvmvwvdeegnsgkswlighlyetgqayyappyltsvkeiiqtiaslavkdrdagnppkkyalidiprswkwsnelytaieaikdglimeprysaqpinikgikvlvvtntrpkldklskdrweifewdnnptidtylrgaqekrtl*	273	USER	zzz1419
2309		Smaco_KU043430	mrriretmgktymltiprndtyregnkifawfrkndihkwvlgaekgsggyehwqmrvqcrfgfeelkvlfptahieecsdkwtyeakegvywrsndrreniqqrfgklryaqkrvieradgtndrevvvwydqegkagkswltgamwerglayfsvadtsgktivmdiaseylkngwrpyiiidipragkwtpelyeaierikdglikdprysseavnihgvkvivmtntmpkldklsadrwkiitqqeltleetaieqfaltgkggyrppltpptwdsrdvrgpls*	289	USER	zzz1420
2308		Smaco_KU058671	mvtlprndtykewhsiwmwfvkhdvkkwvfglekgrfgykhwqirfksnlkfedlkvmfptghieeasdtwtyetkegvfwkstdrpenraqrfgklnkdqegviralqstndrevvlwydsegkkgkswltralwergqayfivadsnvktivqdvacefikngwrpyviidipragkwttelyeaierikdglikdpryssesinisgv	211	USER	zzz1421
2307		Smaco_KX838318	mvqawmitaprahvskrairimidtndckkwiiakekgkngyehwqirvessntgffewckqhiptahvekaergvdecryetkegqytcysdripvlkqrfgklrpnqkraltaleatndrevlvwydeggnvgkswltgalwernlayyvpptidtvkgmvqwvascyqdggyrpyliidiprswkwseqlyvaiesikdglvydtryhsrlinirgvkvlvltntkpkldklsedrwricvfrgqagvgpyrntmgrllppfrgvrggt*	273	USER	zzz1422
2306		Smaco_LC386195	mdilatidrdgysgisalmatireldihkwiigaetgaggfkhwqcrfktrledkeevtglkwdeksgtvkqiketvtadaqltrilrqklgdgvmiytakcsdaweyetkegcylaswdtmevrrtrfgkptwaqkealqalqrtndrevmvwydptgnigkswltnhlyekglaycipatmkdvemiikttaslaskdreagypprpyviidiprswkwsnqlytaietikdglimdprytaqpinirgvkvmvmtntrpqldklskdrwwiheqsiqpslp*	285	USER	zzz1423
2305		Smaco_LC386196	mgtvivtmgrkdtykewndwirffrrtdchkwiigaetganghqhwqvrfrsrftaeqisgalrqaypdgrqihtenasdkweyeakegkylaswdtmdarrqrfgkprwaqkgaieavyktndreivfwydetgnrgkswltghlfetgeayylppyltsvqsmiqtlaslvladresgnpprplividiprswkwstelyvaieaikdglimdprysarpinirgckvlvltntmpkldklssdrwvqydpilwdqvwgkheralp*	269	USER	zzz1424
2304		Smaco_LC386199	mitidyiltiprhsnpikmvrcvlasvdakkaiigrelgqggldhwqvvvrcsgdlperimdwtlgwhveecrdftagwdycrkegryqiykanhadielerirrykyntwqnriynsiknqndrvvtvwidvrgghgktvlwlnmvgrgevlpvprsklkagrlsawvcdawdgheiiwidlprnrkldpdlcgeleelkdgvafddrygahwkiirgtkilvttnqwidnntykslsedrwdihiiqdededgselpr*	261	USER	zzz1425
2303		Smaco_LC386200	mitidvytgtisaelytwgcikkvlqlldtkhgiiasetgksgynhyqytvecsgdllgyvttnnlgwhvekctninaswdyckkdgrykiynptstdkelrrinsfelnkwqnnilysvesqndraitvwidiggghgktvlwhrlvdrgrvlpvprsrlksgrlsawicdawknheiiwidiprsrsldadlcgeleelkdgmafddrygahwkcirgtkilvttnnyidkttyksltpdrwdihtiveddsdgselsm*	262	USER	zzz1426
2302		Smaco_LC386202	mqgtlfqrcrergiidfigtisaelynwgtikyifgrldckngivglengnggykhfqycincsadlqrynddnnlgwhieecrnvelarnyckkdgrykiyrpsntdrelerirrlklncwqeaiyklvanqndrsitvwidvggahgktvlwhrmvseglvlpvprsklkqgrlsawvcdawknheiiwidiprnrsldadlcgeleelkdgmafddrygahwkcirgtkilvttnnyidkttfksltpdrwdihtideedgselpr*	270	USER	zzz1427
2301		Smaco_LC386204	mtaptwwdctvpnnekhpeiqmreildktteryaygreiggetgyqhfqlrcvfkkpmtenevrnlmpgchwtptkvrnfeyvekegdfyrswegalakyqdfkpylwqellaemvknaderrvdvivdrvggrgktscakwlqvtkraqyvppmqsaqdlmafamakpskayvidmpkacnivktkelwngieqlkngyvydkryqykdkwieppaivvitnetpqqrylsadrwnvqellgtkpenlyympidmdndpdahikdkdlee*	272	USER	zzz1428
2300		Smaco_LC386205	mtktymmtaprkqgieyaepielsgwlhgwilptrtnvckreimhaiknndckkwiiakeigkdgyehwqcrietsndnffehvkenspkmhieeaergvdesdyeakegqyikstdrvqnliqrygefrpnqkralmaleatndrqvvvwydetgnvgkswftgalwerrqayvtpptidtvkgliqwvascyidggwrpyviidvprswkwseqlysaiesikdgliydtryhsrminirgvkvlvmtntmpklnklsadrwaictf*	270	USER	zzz1429
2299		Smaco_MG522850	mvqawmitgprsksieieeiggwqievdrkiskkairimlskndckkwtigqetgkngykhwqirvessntdfyewckryipsahvdkaekgvdesryetkegqytqytdrveilkqrfgkmrpnqiralealestndrevlvwydeggnvgkswltgalwerglayyvpptvdsvkamvqwvascyqsggwrpyiiidiprswkwseqlyvaiesikdglvydtryhaqcinirgvkvlvltntkpkldklsqdrwricvf*	263	USER	zzz1430
2298		Smaco_MG846351	mnkqaykdlgecqsmqtymltiprkvhkrtlkimleqndvkkyiiakergfggyehwqirlktsnknffiwckinipeahveeamdtwdyerkegvywtsddtneiralrfgkpnlkqkrvlkllkyqgdrnilvwydpvgkagkswivghlweqgkacyvpptlgtpkeiiqwvhsaydnegliiidiprswkwnealytaietikdglvydprysarmknirgvkvlvmtntyprvsalsedrwdiineggeapls*	259	USER	zzz1431
2297		Smaco_MG846352	mtsprwyditvskakcpeeilrkwldengeryaygrekgtdgyehfqvrvvlknptseqdmwkvwapyghvspthtrnfnyvlkegdfvcswikipesmknpvfrpwqqalmdleqndrevdviidlkgntgkswitrylalknkainipsglgakdimrmclkravvpwyifdmpraigkqskelwsaiesikngylwddrytweekwidppkvtvftneypkydlisedrlrfwapaevglvalak*	249	USER	zzz1432
2296		Smaco_MG846354	mtepkwyditiskakcpeeilrkwldengeryaygrergedgyehfqvrvvlrnptswqtmreiwghsghcsptsvrnfdyvlkegdfvcswikvpdvirnaklrpwqtaltdlkqndreidciidlcgntgksfvtkymcmknmainipsglsgkdimrmcmkraklgtyifdipragskqaketwsaiesikngylwddrytweemwidsprvfvftneypkydllsedrfrfwapgelgliplak*	249	USER	zzz1433
2295		Smaco_MH500283	mtapkwyditvskekigktafeigqilenqgaerfvigeevgdggyehfqirvvyktehtmdwmikvwgpvghvtpshvrdfkycekeghffrswekalnkfmdldllpwqrtvlhhfekqddrnvlvvidvaggagkttlskycqitrkatyvppmgdaqdlmafamakpsrgyifdmprtesvkqrkgmwsaveqikngylydkrynyrdmwieppkiiiftneeppeealskdrweiihleklgdsivtqew*	256	USER	zzz1434
2294		Smaco_MH500292	mvsivlitaprknvhkrtlkimlekfdakrwiiakecgksgyehwqiraeisgdaddlfswsqkhglnfhmerstsdwsdkyerkegkfwtwadsnevliqrfgdllpwqkrclerartqndrqidvwydpqgnhgkswltgaffernlacivprdwknpsealnyicknydyqgiimidlpraakigndlyeiiemikdglisstkwegeminirgvkvviftntkldkeklskdrwrwnyi*	244	USER	zzz1435
2293		Smaco_MH500302	msnkvymatiphssmtkraffnmirqfdihkwvyavergrggykhiqcrfrtnksfdeirkalicghieeasdtweyekkegnymtsednheilklrygkltkvqewalmllettndrevvvwvdkdgnsgktwltahlwergqacycpptlstpkeliswvhsaynhepyiiidiprtwkwddalytaietikdglvydprysahmrnirgvkvmcmtntepktsklsedrwvmyrpsnlfetaelrnsrgghppgsnlcndgsslppsgkrgtkgrgpss*	283	USER	zzz1436
2292		Smaco_MH500307	mpsiflvvipvpnivshlssrikhtertdkirynhnlttcacntcenvrrnicacnicvfhtffntciylhtvhgvnnglpnvnlcttdticihqctiwrykgvsqawmltiprnvpkralkimidkndvkswtigfeegkdgyrhyqirlvssndgffewckahiptahikkavqeqgdyerksgnfissedsnsirqvrfgnptklqkkilqevrsqndrqidvyldkqgnhgkswltihlwergealviprsvgtarqlsaficsayrgqayiiidipragkidtalyetmeeikdglvfderytgkcrnirgvklivftnkaldtkylshdrwrlhginkeea*	348	USER	zzz1437
2291		Smaco_MH500310	mtktwmltvprtntakewvaiskwlrandvhkwtcgmetgsngydhwqirlqvnkdfetlkaewgqkahieeasdvwdyerksgmffssedtpevrkcrfghltwrqeavvravqatndrqvvvwydpdgnkgkswllgqlyetgkawvvqaqdtvkgiiqdvaseyinhgwrpivvidiprtwkwttdlyvaierikdglikdpryssktvhirgvkvlvtcntmpkldklsedrwiiidedamerlrsawrigegehslt*	263	USER	zzz1438
2290		Smaco_MH500325	mankiymitmpkngrnkfllknliekndlhkwaygyeigksgykhiqarircpfdfeylqeyfgqahieeasdewdyetksgtyftsedwgdrlkqrylplkevqnqavmgleatndrevyvwydekgnagkswlcghlwetgkayvvdsdkgetikkdvasefiyhgwrpyviidlprtakwtdelyyaiekikdgllkdpryqsktvnihgvkvmvmcnsmpkldklsadrwvvfsgagvppnppairtagglsrss*	260	USER	zzz1439
2289		Smaco_MH500326	mthtwmltvprrktarewmgiskwlrdndvhkwtvametgsngydhwqirfqvnktfkqlkkewgpkahieeasdtwdyerksgmffssedtpevrkcrfgrltwrqeavveavrgsndrqivvwydqhgnagkswllghlyetgqawvvqaqdsvkgiiqdcaseyiqhgwrpfvvidiprswkwtpelyialerikdglikdprygsktvhirgvkvlvtcntkpkldklsadrwvimdmdtleatcapmevadriwdd*	262	USER	zzz1440
2288		Smaco_MH500330	msktwmltvprkdtakewvaiwrwlrvndvhkwvcgmetgkggythwqirlqvnksfkqmkaewgpkahieeasdvweyerkegvffssedsretriqrfgkpnwrqeavlealqgtnnreivvwydpkgnagkswlaahlyetgqayicmamgtinnmiqdiageflkhgrrpivvidipkawkwtpdlyvaierikdglikdtrysprtynaagvkvlittntmpkvdklsadrwiiidndklcaqis*	251	USER	zzz1441
2287		Smaco_MH500334	mvsivlitaprgkngesslwmartgifgvdwafwrdseqdfvnvhkraleimlekfdakrwiiakecgksgyehwqiraeisgkiddlfswcknhglschleqsnadwtdkyerkegrfwtwadsnevliqrfgelepwqkkclerartqndrqvdvwydprgnrgkswlagalfernlacivprdwknpsealnyicrnyenqgmividipratkigndfyeivemikdglisstkwegqmrnirgvkvvvftnskvdqeklskdrwrwnyi*	274	USER	zzz1442
2286		Smaco_MH545525	mvkvylltvplvhriqfdsplyrwrhsssystkrairiliesldckrwivarergrggyehlqvrvetsadnffdrvsrvlpcahieestsaysdwyerkegryvtssdllpgrtkvlkqrfgcfypfqkrvlralqstndrevvvwydqtgnagkswlkgalwerglayiiqpmssisvmvqdvadeylrhgyrqylvidiprtwkwsedlycaietikdgllkdprynsetvniagvqvlilcntlpkldklsvdrwiilnrdgtrrgsfs*	274	USER	zzz1443
2285		Smaco_MH616866	mvetymgtcpkawkralmyifvhydckkwiigfekgnsgyehlqfrfetstkdfigvpaktdkkgriiqeeiksipfkcgvpmhlekctdtweyetkegryvcswdttrllknrfgkpkgwqkealeglrrqndrqvdvwydpignrgkswltghlfetrealiiprdwtkaseisnyivhnykqqriiiidiprdhpipdefylvvemikdglvastkwegkmihidvaigiftnrmlnlkklsqdrwsihnvwtaaqds*	262	USER	zzz1444
2284		Unclass_FJ959077	mtspqgkywcfthnnplvdgdtflsslkayfpkltyivfqlerittphfqgymefstlvrlsalkrfhpgihwerrrgsqqdaidycsretykgedkgrvdgpwewgtraethqgqrsdlasaiealrdggirrvaeenpealvrysrgiqflasltpppkdppevyllfgptgvgktkrffdsepdgwaspvtdglwfdgymgqdaalfddfcgkytklgmaqflrvidryrvqlatkggftwfnpkriyvtsnfhpldwwdwsgrqqqypalerrfthvywwkrpgllvslrrpdpeasqdvldgidnddqwrhfwdgvgraqlaldiatgrlvsnapedyfnf*	347	USER	zzz1445
2283		Unclass_FJ959078	mdvdttpvsrrgrpsssssssstgerftartfcvtvnnrdeveqnwpnavqepseefvervryvvwqrelapetgrvhiqayvelymaagivmlkrlfncptmhvekrrgtqdqarnycmkedtrdgpdggpfeygtysktpgngqgkrndltdavealeaggveavvskhpntyvryhrgihalyqakleaiasrqqrnvktavfygepgtgkthcafelaritgeeiyilnapagrnqsvwfngyqnqkilvvdemngdwigwqlllrmtdkyplqcqtkggmvwamweiviftsnahwedwypyyaggmdkaalkrrihkvvkfygseasgnftkkyydpdlpeanwtvattdviatflrngtvrphtdeeleevedvvmntqqesqgtqttelve…	410	USER	zzz1446
2282		Unclass_FJ959079	mnkrirnvcftgfnetgydfnenqmkylivgkeicpttgkehwqgyvelknaktfsaikklfkdnklhleerkasaqcasnyckkegnfkefgkiseqgkrtdlielkddilagkknctevreenpelyhqygrtldkleddylckqkrnwmtkgiwiwgptgcgksrwayetypnaytwaddkdwqdcysgqetiiiddfrgnikfqnllkmidryefklsrrgrvpfpllaktiiitssmppekvyknlsvddsieqlkrrckiielpkcteenytevvrvilensv*	290	USER	zzz1447
2281		Unclass_FJ959080	mlaqapgryrnwvitvnnwtendyklallspyryiiigrergecntphlqiylqlyhaksfdtvkqnffprahleashskprqarayctkehyfeygemstqgkrtdlqvaqelldsgisirqalesemitsmgalaayeklqkyytvhrprprvvwiygpagsgktdkaysisgpdvyksdlikegwfdgydrhrsiiiddleidrddkktfglllslldknpqkvnvkgssasiladtivitcqqapwhiwyhpsdnmslpfkhmatreeierdvdlrqimrriteiihltdtdkvkypevtev*	307	USER	zzz1448
2280		Unclass_FJ959081	mirrqgvywlltipedefephlpqdcayikgqkergehtgylhwqvlvvlrrkgslstitgmfgvschaelsrsaaaseyvwkedtrvgdqfefgtlpfkrndpkdweqiwerakagdingipadvriqcyrtlrtiradfavpeamvrqcfvycgptgtgksrrawaeagmdaypkdprtkfwdgyrdqkhvvvdefrgaidishilrwldryptlveikgsatclvaeklwitsnvhpnewypmldsatvdallrrlqitvfe*	266	USER	zzz1449
2279		Unclass_FJ959082	msrsrnwcftynnydsspriqkcmkyltygyevgesgtphlqgfvifknavakpsqyfkpayhfekargtpqqaleycqkdgnfkefgekpktvadggaaggeankrryeeafsaakegrmddipadiyirhystlkkirfdhappaqnndvlnnywvygpsgtgksksvreffgkslyvknqnkwfdgyegedfvliddvhpnwsgktilkiwsdhypfspetkgghikmirpegiivtsnytieemyeaeedrqpirrrfkvikseagydvimkeynkrvaatkicsntdedvvvaehepcrpatrasapgdhelpppatevqsivvaviesppppattdq*	344	USER	zzz1450
2278		Unclass_FJ959083	mppskpswywiltipeqcwqppqtlppyataikgqleiapttgyrhwqvavklknkqrlsglkalfppethaeptkssaawdyvgkeetsvagtsfqlgkvpskavdwdqvkdlavkgqfseipsgtllrytnniirvhslfarplpretalakiyygptgtgkthrawqeasghayiksssnkwwdgymgeinviidefdslinithllrwldkypcsvevkggtlplkathfwitsnkapelwfpeaslaqkealmrrviveemtqkyitqe*	275	USER	zzz1451
2277		Unclass_FJ959084	mprvnpakawcftlnnytenehgalvqrfsdfddkyyfivgceigaqgtphlqgyiekkvgrfrplpcfevlrdgknamhferakgnrkqnynycskdgdfitnidkpimtyseakdiwketngisndkydaatineaamhieymdlydcytdegqkkfmvrykammqarypeketvei*	180	USER	zzz1452
2276		Unclass_FJ959085	masqhgwvftlnnpsieeyplkfeetssgrrypiakwelpratlaflgcgrergqsntphlqgllissrpvslkslkklnprahwepmrgsfkqareycekegkfvqwtksgesvaslsryvqtdleifqmiqqsdtdlnklsvtmlkqekklaelskriedltklqshfllkqdnfqnsilkllsqkkilntlsdedli*	201	USER	zzz1453
2275		Unclass_FJ959086	mkitteptkrrdwaftdfnmenqtkyaslveqcvcsyvcfgieycpktnrphlqgylhfknprttregrnvfgkthsefcwhsrekninyckkgtkvlgetffefgkkpnqgyrtdienveyilkttrsiqgiidnhfnlyiqyrsrflnyledtekpraemtkgiwyygppgcgkstviknnffgtevvwleydgkyfsdynghttvifddqdiskfsrsmilklinhtpfklrclgsyrefnaitvifidnfhyshyfgedeaiarrlkaiqfgtevpk*	282	USER	zzz1454
2274		Unclass_GQ351278	mgarqqrfgkmrwnqegalqalqrtndreivvwydqdgnmgkswlcghlyetgqayyippymtsiqsmiqtvaslvlqdresgypprplividiprsrkwstelytaieaikdglimdprygarpvnihgtkvivltntkpkldklsedrwvlydpllymmgh*	164	USER	zzz1455
2273		Unclass_HM228875	mqsvnwcftlnnytnedvnklkqvkcryiclgfevgdkkqtphiqgfiqfekkvrlsvwkkinkkihaeimkgtieqainyckksgtfeergeiikmgerrdlkeakkkcaevglraitdcestynlqvirncqimleyhekerdfkpeviwiygesgagktkyisekcaevdtywkdatkwwngydrheitvmddfrasnmkmnellklidryphrveikggfrqmlskkiyissimhpkdvynlpeepvkqllrridtiiki*	265	USER	zzz1456
2272		Unclass_HQ322117	mdddranraeesgegntvlsppkqgtqhtfwcftlnnytaeqiehlelvfkheckwylfqeevgekcgtphlqgqiclktrmrmtelkridmkiswratksctasleyckkketstgkiyyhgmdvpdqvdleepygwqldilnvlkdkphnriihwyweptggkgktslskylvvkhdalmltgksndmyhmiskfpkkrklfivdcprsqqdyinygaieqiknglifsgkyegaqlvfnaphvivfaneppdiskmsldrwnvvria*	271	USER	zzz1457
2271		Unclass_HQ335087	mpksapekkyrnwvftynnppqpygnlaiegskyftyqlergaagtehyqglvvftnrvrfatvkallpgchiesmkgtlkqaiaychkddtridgpwavgdvppgsgartdllalkeaveegksekeiadehfcswikyykgieryrrivvahrtwatetlvywgppgsgksrhafelggddqfwvvrprdrggsvwwdgyegqstviidefygwlardllqrladryplvvetkggavqflakriiitsnsppeswyksglgamgrrlqaplgyvfyvgtpecdeatyrqqldevgsrsdsfpggavgagpvrseerdvvnmdgvavppnfa*	335	USER	zzz1458
2270		Unclass_JF713716	mqrvrairwcftinnftyeeeeavrnlelnpevdaviaeeehldegtphiqgylrlktkkdmtviqrwlggrahlevamgsemdnikyctkedqviveklndkltkelkckdkdeearemiadmrslnesefeakypkfymyhqalyrqfrhealvkqqetwngelkqknlwiwgppgkgksraariglrqyeifskaynkwwngfiqedtkrvviddwpsleaggnmlvqhlkiwadrypftaetkgghlavepsyqliitsnfsidqcfgnpedqeaihrrfteihwtnmpgtldpftaltlypqmde*	311	USER	zzz1459
2269		Unclass_JF713717	mqrvratkwvftinnftyeeeeavrnleinpevdaviaeeehleegtphiqgylrtkrqidrtvvlrwlggrahieramgsemdnikyctkedqviveklnekltkklkckdkdeeareliadmrslnesefegkypkfymyhqalyrqfrhealvrqqdtwngelkqknlwiwgppgkgksraariglksyevfskaynkwwngfvqedckrviiddwpsleaggnmlvqhlkiwadrypftaetkgghlavepsyqliitsnfsidqcfgnpedqeaihrrfteihwdnmpgtldpfttltlypqnie*	311	USER	zzz1460
2268		Unclass_JF713718	msrirgtrwcftinnftqeeeelvmnmpstgwvksmiaeeehlfegtphiqgyftttkrtdftaltkffngrahleqakgstrdnwnycskegnvivefnrpstvdrvphrahedpkdewadlmiqdceqmdretfrsehpnfflnqrdkyerihneylartttvfdgrlhdkniwiygppgsgkstlarsdtpidhiyfkpvdkwwdgfdpskhnrivmddypneatggaiftqrmkiwgdrtteprpvkggtitvdpnipfivtsnfpidecfsndvdreaihrrfqeiyldgdkskldrfmhlknlinpedpldcddsivsd*	326	USER	zzz1461
2267		Unclass_JF713719	msskrviatrwvftinnftqedeeavinlpdqdwcksviaeeehledgtphiqgymvtsrkdrsaiskylnshayievargssydnweycskedqiiveynkpsqadnkphrsltrnqeetlsflescktftrdqmieqypclyarhyqlyeklhseyairsidtydgrlhdknlwiygpagsgkttlalsdiehykvylkpinkwwdgfnpnyheriliddfpegatasilapfvkhwgdrfpynaevkngstvinpsipviitsnysidetfdrqqdrdavrrrfqeiyldgsqshlpyychldllysrirsgeinke*	321	USER	zzz1462
2266		Unclass_JF755401	msklvnlsqtlltyaqcdkkkeellsflktldfyecsivaeeehhttegkhlhawvkfehsiklrsnrlnsmfdwegkhpnielvknrkedklrvwkyvtkdghyledncnvdamlnpknkskkyntlhiletdpetlvrneeisansiknilwaqqwwigqkkppyttrcrgiwiygragcgkstwaamfgdamggyyekpqnkwfdnyagqrviilddlrtdtlnyyllkwadnkpvsaevkggkvwlrhlafvvttnypiehycrnkdgtldcetyeaikrrytyiqvdegteyleydptfvwdvkectlletlhkksptltdnsteapsdptscldgsgyv*	346	USER	zzz1463
2265		Unclass_JF755402	mtqatwwvgtkfvdefhdseqwleslvsenkvrfvvgqrelcpttmrhhvqfvvnlhrsqrlsylkkvdkdahwepmrgtadqareycsksetrfegpwefgkpgavgqrkgyddavaavcsgqclaevaaefptiwvkygrglvdlrkqlqldsdrrvfgeqgpelwvfwgpsgsgkskranetwpdaywkipgekwwdgytnqdtvilddfkgsfmrltdfqrlidryplwvevkggsipmlatryvitsneapeawystadphgtvtrrcndfsdggrriiyigpdrqelpdyeswvtqgnvcglc*	310	USER	zzz1464
2264		Unclass_JF755403	mtrarnwcgtlnaipdgfdgekwfadldgkvayavgqlemghetghlhlqmyvqcgqtrrlawlkanvsadahwepakgspaqaraycmkedtraagpweygewatqgqtrglsqavgrlqegatlrqiaeefpevfvrhsrglrdwihtvgnkgprqigedgpevwvfwgpsgtgksrrarddwpdaywklnnarwwdgyaghetvifddfkgssltlhdfqriidrypldvevkggttplsatryvftsnkhpadwysaeadpeetvmrrinefcadrgrlihfvgapgaaahreaapeppegppgiesfvgldpvhlf*	322	USER	zzz1465
2263		Unclass_JF755404	masrvprkqiryaqvlltypqcdrtkesllefiqgiedagsaivckenhhetdgvhlhawvrfnvsqrcegskwgslfdwdgihghydkvtcstrsiadtvkyvmkdgdtlvwnckpealmnpgksherkydnekilntpmkqlvdegvisikdvsayergiaaykllekpaekqkcrgiwvdgrpgcgkstwakefgkarggwyekpqskwwdgyegekvvvmndvdneallhymkiwadtfpckgevkghtvwlkhdwfivtsnftieeicrkkedghkfvdamlrrfrvihvpdnveflqydndewenpdvpesqqppakkspdhntneeekrsdplntfigsgye*	350	USER	zzz1466
2262		Unclass_JF755405	masrvprkqiryaqvlltypqcdrtkesllefiqgiedagsaivckenhhetdgvhlhawvrfnvsqrcegskwgslfdwdgihghydkvtcstrsiadtvkyvmkdgdtlvwnckpealmnpgksherkydnekilntpmkqlvdegvisikdvsayergiaaykllekpaekqkcrgiwvdgrpgcgkstwakefgkarggwyekpqskwwdgyegekvvvmndvdneallhymkiwadtfpckgevkghtvwlkhdwfivtsnftieeicrkkedghkfvdamlrrfrvihvpdnveflqydndewenpdvpesqqppakkspdhntneeekrsdplntfigsgye*	350	USER	zzz1467
2261		Unclass_JF755406	masrvprkqiryaqvlltypqcdrtkesllefiqgiedagsaivckenhhetdgvhlhawvrfnvsqrcegskwgslfdwdgihghydkvtcstrsiadtvkyvmkdgdtlvwnckpealmnpgksherkydnekilntpmkqlvdegvisikdvsayergiaaykllekpaekqkcrgiwvdgrpgcgkstwakefgkarggwyekpqskwwdgyegekvvvmndvdneallhymkiwadtfpckgevkghtvwlkhdwfivtsnftieeicrkkedghkfvdamlrrfrvihvpdnveflqydndewenpdvpesqqppakkspdhntneeekrsdplntfigsgye*	350	USER	zzz1468
2260		Unclass_JF755407	meyrkavwggatsrirlplgsafsrsirfkheiacnlkfkwnkyftisrfrmsevtmwhrkkgpakqenkgskffltinyveagietlksdfqkirdymdvactpngaieavqfweerghetgnphmhgiimfkrshrcrcptvanllvdtlgiqvrphieplkdlrgalvltnpdcaakcrsvaldyfrftglsehrrsapeviwiygttgsgksrlaeaycrkvagedyyfhapgslkwwdgyeeqsavilddlrrrhlrevggfsyllrildrydcqievkggfrknkynlviitgqrdpvaeftyrgdnnediveedmgqlirrlariielrvldgvvqeidhtdvlkqrfgvlscg*	362	USER	zzz1469
2259		Unclass_JF755408	msryymltipyslftipdplpeglvwlkgqpergengyehwqlicctrkkcrasavkrlfcpqahveltrsaaadeyvwkddtcmdttkrfelgrkplsrnqekdweaiwesskkgkldeipadvrvrsyktirqiekdhmipqgmvrtvhvfwgstgmgksrrawyeatmlaypksptsiywdgyaghsnvvidefrgginishmlrwldrypvcveckfgacvlnantiwitsnihprdwypdldpatidallrrlnvvefleewvpphegleeamneledirdaedwnggpidltqetivlssdee*	310	USER	zzz1470
2258		Unclass_JF755409	msrgkywcftsyvdegglpsvlpdtmtyliyqrevcptsarehyqgyaefhtrvriagvkaalgdpgahcelrrgtgvqaaeyckkddsrkegtvpvelgdltsvtqgartdllavkalldsgakeidiadqefatwakyhraierykrlthqvrnfksevyiltgdtgvgktravadaypdtywkprgklvlrirrsrrrsy*	204	USER	zzz1471
2257		Unclass_JF755410	msreapvtqwvftrqladdedawawlnrqfethaysylvgqveqapttgqlhiqgyaqmakrmrlpgmkaldseahwehckapaearayamkedtrvrgpwefgecrtagrkttlqdvcalvlegksdydisrvapeqfvrhfkgisalrvaakipgerrtwapelwvvwgpsgsgkswfaqmnvgrrgdrywkmqgnkwwdgycgrghrgagrlqgqlddpgglpapsgplptgrgdrregptpmlakrivitsnthpstwysgdtaar*	271	USER	zzz1472
2256		Unclass_JF755411	mcvrikmtqatwwlgtkfvheahdteewmrdlaesgkvkfitgqrelcpetmrhhvqfvvnlhrsqrlsylkkidgeahwesvrgtpkqardyctkedtrfdgpwefgkclepgqrrgydeavaavcsgrclaevaseypqvwvkygrglvdlrkqlrldsdrrqfddngpelwifwgpsgtgkskranetwpdaywkipgekwwdgytnqdtvilddfkgsfmrltdfqrlidryplwvevkggsipmlatryvitsneapeawyasadphgtvtrrcndftdggrriiyigperqelpdfeswvgwgefar*	314	USER	zzz1473
2255		Unclass_JF755412	mcvrikmtqatwwlgtkfvheahdteewmrdlaesgkvkfitgqrelcpetmrhhvqfvvnlhrsqrlsylkkidgeahwesvrgtpkqardyctkedtrfdgpwefgkclepgqrrgydeavaavcsgrclaevaseypqvwvkygrglvdlrkqlrldsdrrqfddngpelwifwgpsgtgkskranetwpdaywkipgekwwdgytnqdtvilddfkgsfmrltdfqrlidryplwvevkggsipmlatryvitsneapeawyasadphgtvtrrcndftdggrriiyigperqelpdfeswvgwgefar*	314	USER	zzz1474
2254		Unclass_JF755413	mcvrikmtqatwwlgtkfvheahdteewmrdlaesgkvkfitgqrelcpetmrhhvqfvvnlhrsqrlsylkkidgeahwesvrgtpkqardyctkedtrfdgpwefgkclepgqrrgydeavaavcsgrclaevaseypqvwvkygrglvdlrkqlrldsdrrqfddngpelwifwgpsgtgkskranetwpdaywkipgekwwdgytnqdtvilddfkgsfmrltdfqrlidryplwvevkggsipmlatryvitsneapeawyasadphgtvtrrcndftdggrriiyigperqelpdfeswvgwgefar*	314	USER	zzz1475
2253		Unclass_JF755414	mcvrikmtqatwwlgtkfvheahdteewmrdlaesgkvkfitgqrelcpetmrhhvqfvvnlhrsqrlsylkkidgeahwesvrgtpkqardyctkedtrfdgpwefgkclepgqrrgydeavaavcsgrclaevaseypqvwvkygrglvdlrkqlrldsdrrqfddngpelwifwgpsgtgkskranetwpdaywkipgekwwdgytnqdtvilddfkgsfmrltdfqrlidryplwvevkggsipmlatryvitsneapeawyasadphgtvtrrcndftdggrriiyigperqelpdfeswvgwgefar*	314	USER	zzz1476
2252		Unclass_JF755415	mtfrnrgwcftinnpteddslvaledvasyvvagkevgeegtphlqgycyfknpkslaqlkvllprahleaqkgsheqaieyckkegdfhevgtppmtqkrkgeigkefwdeqlslakkgrleeidskghwyygstgtgksrkarednpnfylkgcnkwwdnyqgqevaiiedfdkvhsvlghhlkiwadrysfpaevkgsqinirpkkiivtsnyhpneiwtdlatldpilrrfniikfsqfp*	245	USER	zzz1477
2251		Unclass_JF755416	msvrsprlsrrgslalgvvtwntvrqsggatsrirlplgsafsrsirfkheiacnlkfkwnkyftisrfrmsevtmwhrkkgpakqenkgskffltinyveagietlksdfqkirdymdvactpngaieavqfweerghetgnphmhgiimfkrshrcrcptvanllvdtlgiqvrphieplkdlrgalvltnpdcaakcrsvaldyfrftglsehrrsapeviwiygttgsgksrlaeaycrkvagedyyfhapgslkwwdgyeeqsavilddlrrrhlrevggfsyllrildrydcqievkggfrknkynlviitgqrdpvaeftyrgdnnediveedmgqlirrlariielrvldgvvqeidhtdvlkqrfgvlscg*	381	USER	zzz1478
2250		Unclass_JF755417	msvrsprlsrrgslalgvvtwntvrqsggatsrirlplgsafsrsirfkheiacnlkfkwnkyftisrfrmsevtmwhrkkgpakqenkgskffltinyveagietlksdfqkirdymdvactpngaieavqfweerghetgnphmhgiimfkrshrcrcptvanllvdtlgiqvrphieplkdlrgalvltnpdcaakcrsvaldyfrftglsehrrsapeviwiygttgsgksrlaeaycrkvagedyyfhapgslkwwdgyeeqsavilddlrrrhlrevggfsyllrildrydcqievkggfrknkynlviitgqrdpvaeftyrgdnnediveedmgqlirrlariielrvldgvvqeidhtdvlkqrfgvlscg*	381	USER	zzz1479
2249		Unclass_JF912805	msrnftgtvnnptqtleewlatlkrlphataarcqlekgengtphiqwcvtlskvarltgiikklagshveasrnamaawkycgkedtrvegplefgvppaskrvkgdtkernkmilelgpvaaveqglipvekfkaikqscdlfavmkkevhttdalsnewhygesgtgksrgvrerfpdafikssdvwwdgyqgeetviieemgpkqigahhlkiwsdhypfkaaqkgsqllirpkriivtsnysikecyeae*	256	USER	zzz1480
2248		Unclass_JF938078	mpclqarywlltipyehftpylppncayikgqleqgsntsylhwqlvvyfsqkkslnyvklifgdgihcepskskaaeeyvwkedtsipgtqfelgknsikrdstkdwdlivkharegdfasipgdvlvrcygnlkkirvdslqpesivreiyvyygrtgagksrraweeatlsaypkdpntkfwdgyagqecvvidefrgaisishllrwldrypviveikgsscvfkakkiwitsnlspddwypdldaetksalrrrftevvhfn*	268	USER	zzz1481
2247		Unclass_JN857329	mgqqvrccvftlnnyteddmiqlnewdykyliygkeigktnktphlqgyiefnnrkyfstlkafnpnihwekrlgsqlqainyckkegnyveygdkkvqgkrndisyykelalkegmkkvveegnfqeirtcelylkykeeernfkpeviwihgesgsgkslkaseekdaywkdksqwwdgydkhntiimddfrssdmkfdyllrlldrypmrvqvkgssrqmlskkiiitsiyspeeiyshyaqynnnrepinqllrridktmkleqvrsrgntipdsndgyehirtllqssfqdpfdseivdlqkeq*	310	USER	zzz1482
2246		Unclass_JN900499	mpssvqaqksgrkkrnrvlgiddeatestnrsavstrrdvvsrsdggtpegessadsdegdnqpdgeqrrgnarlrlrsggtreprsrgwcitvnnwteederllrglydtqgatfvvwqreigergtkhlqvcvgfnflrtylgghsadfrahleaargspldnfkyctkedsrdrssdtgpfvfgeepkgqgrrsdietaanlartsgdisqiidqfpatfvryarglselctfyskprrfktmvhwfygatgtgkslmaqqecerllgmdnadpsrlvegpmsrpyykmggnkwwngyvgqeyviiddyrpdlctfsellrlldrypykvetkggvvefcakhvyitcpknpndmwcnrtpediqqlvrrieeiklfdnhvfntlvis*	392	USER	zzz1483
2245		Unclass_JQ023166	ldtp*itfwgypkg*ypvstkivfvvrhmiaensdprtn*eilvtegiasvenvailqlfnrtspiiielksagcidnvpirftltentsnqvktsferrdidrtvgvilihsprslsrvsffipddfngsfvti*flqlhlpdmgrvlhllifraenlpraveipvlvdifkvpy*srgnmpetklgesksniirqvsfkhtsklivfplsfrrnftpksvsfkvsangilpflqfh	238	USER	zzz1484
2244		Unclass_JQ085285	matrpealhwcftlnnptideqqiideleefgieyavfqleegenntphfqgyvaltvkkrltavrtlfggvahweicrgtptqnrdyctkadtrigdfveigtlpapkgarqdlvqlhsalkdgltqaqyvdqffsifvrhpnlvsnyvaatiserdpanpvstwlligtpgtgksrlaraigknlgdgaifehslgkwfdgyvgqrtvlfddfcgsslpfsqfkricdrypvrvelkglscpmaatnflittnqdpktwwkdevtgqhghaaitrrigrvlfffaentfrsypsynhyatdclrpridgetyhyfspaqtivydaqgeailppeilraevq*	344	USER	zzz1485
2243		Unclass_JQ837277	mpsnattnrargwcftlnnpppemiserrvvvpghvsgldaaiptepnlpehrhcdyrvgqlergdngtlhiqgyyhhrvmksfnqmkklipnahweiakgspkqnrdyctkedtrvpdtrpfeegecphqgtrfdlrqcadvlanggslldlpgemviryhrgfsayrslfhkrrqeaptvlwiygptgsgksrfastlrdecywkppgkwfdgydqeplvilddyrsewaewgvfgqllrlldryplmveykggsvqfcselivitcdrppselwfsqgdigqltrrishvihavgmwlpvepavhesikrrdnie*	319	USER	zzz1486
2242		Unclass_JQ898333	mtfrlqgrhiaitysrcdyalddilaflknkhsgsrtvqhvivcsethqdgsfhrhayvrysgkvnitnpeyfkfrhaqcniqpcrnvaawnnyvrkdgdfveweedatssnglyenaqnmgeadffqwalrskiqfgyaqrawdtqkkaaklitfdednnpfldlnlpltqelagwhlstnltnvlvgptgcgktvycfrnllkpmllishiddlkhfdpnlhrsilfddmkfdqwpiqaqihlcdrglprsihrrygttlipagiqiaitcnensfclp*	282	USER	zzz1487
2241		Unclass_JX185415	msrcknwcftsfnvdsppkfdpitteylcygretcpttkkshlqgficlkerkrlagvkkllgsvhleasrgtvdqniqycskdgeftefgsrpssgpatspfalaiaaatdgrlddvksthpgiylrykktleslqkfrsddldgscgvwicgpprigkdyavrkignvyckalnkwwdgylgepnvlisdvepdhfkwigyflkiwsdrypfiaeikgssmkirpekifvtsnfrlsdccngeilgalqsrftiydmfdnvvrkrpvvaastcvfdllvengdaclekenvppavqeavattskqptraeeeelqdfqvvkkkprkakss*	333	USER	zzz1488
2240		Unclass_JX185416	mykrwcftlnnysvvcnweeffnngcstgnklcryvvgyeigesgtrhlqgycvlsrsqrlsyvtklfdgahwegargsdqqnydyctksgsffrggdwnvlsrsssgssdrirdviktlysmpgsevrcsstyvrskraidevvseyrefevrksrfrelstcllklwqmsvllklfnqndrqvlwvvdvaggcgktflsnilfscysfdlfdgvtqakdicfllsetingivfdvtrsdssqfsyqtleackngfvmtgkymgkrrvfkscpvvifsncepdlvrlssdrwvvynvpaqarsqeaiyspqalwpfkeieavllseie*	330	USER	zzz1489
2239		Unclass_JX185417	mykrwcftlnnysvvcnweeffnngcstgnklcryvvgyeigesgtrhlqgycvlsrsqrlsyvtklfdgahwegargsdqqnydyctksgsffrggdwnvlsrsssgssdrirdviktlysmpgsevrcsstyvrskraidevvseyrefevrklrfrelstcllklwqmsvllklfnqndrqvlwvvdvaggcgktflsnilfscysfdlfdgvtqakdicfllsetingivfdvtrsdssqfsyqtleackngfvmtgkymgkrrvfkscpvvifsncepdlvrlssdrwvvynvpaqarsqeaiyspqalwpfkeieavllseie*	330	USER	zzz1490
2238		Unclass_JX185418	mgspaigwcftlnnyteideqvlqaldvkylvyghevgeggtphlqgylelhkkkrfkqvkemlgeryhiemrrgtaaevdaycrkqdennvftkgtmggqglrsdldrvrllaaesgmravaatanyqqiktaeiyltyneeprswkptvywiygasgtgktrkayeicgtedtyvkvgthkwwdgydghenviiddfrpmgipfvdllgildryefrvevkgkmrqmlaktivittiyppevlyvnlkdeplqqllrridhfinfnlnsildniehefedaeedins*	290	USER	zzz1491
2237		Unclass_JX305991	ldtp*itfggypkg*ypvstkivfvvrhmiaensdprtn*eilvaeriasvenvailqlfnrtspiiielksagcidnvpirftltentsnqvktsferrdidrtvgvilvhsprslsrvsffipddfngsfvti*flqlhlpdvgrvlhllifraenlpraveipvlvnvlevpy*srgnmpetklgesksniirqvsfkhtsklivfplsfrrnftpksvsfkvsangilpflqfh	238	USER	zzz1492
2236		Unclass_JX305992	ldtp*itfggypkg*ypvstkilfvvrqmiaensdprtn*eilvtervagienvavlqlfnrtspiiielksagcidnvpirftltentsnqvktsferrdidrtvgvilvhsprslsrvsffipddfngsfvti*flqlhlpdvgrvlhllifraenlpraveipvlvnvlevpy*srgnmpetklgesksniirqvsfkhtsklivfplsfrrnftpksvsfkvsangilpflqfh	238	USER	zzz1493
2235		Unclass_JX305993	ldtp*itfggypkg*ypvstkivfvvrhmiaensdprtn*eilvakriasvenvailqlfnrtspiiielksagcidnvpirftltentsnqvktsferrdidrtvgvilvhsprslsrvsffipddfngsfvti*flqlhlpdvgrvlhllifraenlpraveipvlvnvlevpy*srgnmpetklgesksniirqvsfkhtsklivfplsfrrnftpksvsfkvsangilpflqfh	238	USER	zzz1494
2234		Unclass_JX305994	ldtp*itfggypkg*ypvstkivfvvrhmiaensdprtn*eilvaeriasvenvailqlfnrtspiiielksagcidnvpirftltentsnqvktsferrdidrtvgvilvhsprslsrvsffipddfngsfvti*flqlhlpdvgrvlhllifraenlpraveipvlvnvlevpy*srgnmpetklgesksniirqvsfkhtsklivfplsfrrnftpksvsfkvsangilpflqfh	238	USER	zzz1495
2233		Unclass_JX305995	ldtp*itfggypkg*ypvstkivfvvrhmiaensdprtn*eilvaeriasvenvailqlfnrtspiiielksagcidnvpirftltentsnqvktsferrdidrtvgvilvhsprslsrvsffipddfngsfvti*flqlhlpdvgrvlhllifraenlpraveipvlvnvlevpy*srgnmpetklgesksniirqvsfkhtsklivfplsfrrnftpksvsfkvsangilpflqfh	238	USER	zzz1496
2232		Unclass_JX305996	ldtp*itfggypkg*ypvstkivfvvrhmiaensdprtn*eilvaeriasvenvailqlfnrtspiiielksagcidnvpirftltentsnqvktsferrdidrtvgvilvhsprslsrvsffipddfngsfvti*flqlhlpdvgrvlhllifraenlpraveipvlvnvlevpy*srgnmpetklgesksniirqvsfkhtsklivfplsfrrnftpksvsfkvsangilpflqfh	238	USER	zzz1497
2231		Unclass_JX305997	ldtp*itfggypkg*ypvstkivfvvrhmiaensdprtn*eilvakriasvenvailqlfnrtspiiielksagcidnvpirftltentsnqvktsferrdidrtvgvilvhsprslsrvsffipddfngsfvti*flqlhlpdvgrvlhllifraenlpraveipvlvnvlevpy*srgnmpetklgesksniirqvsfkhtsklivfplsfrrnftpksvsfkvsangilpflqfh	238	USER	zzz1498
2230		Unclass_JX305998	ldtp*itfggypkg*ypvfakipfvlreviaedsnprtn*kilvtegvagienvsvlqllnrtspiiielkstgcidnvpirftltentsnqvktsferrdidrtvgvilvhsprslsrvsffipddfdgsvvti*flqlhlpnvrvilnllvlraedlpraveipvlvdvfevpy*srgnmpetklgesksniirqvsfkhtsklivfplsfrrnftpksvsfkvsangilpilqfh	238	USER	zzz1499
2229		Unclass_JX559621	msyrfwcfteyedekvqnyeewfnrlfnseagidyicgqrercpntgrlhiqgyvvftrkkrlngakegldstgvhlerrmgthrqaveycqkeesrdgefielgeyddrgsqtkcmeeikkriregdseldiaeeyfgiwcrynkafskyramvqpgrdfktivrvywgrsgvgksrratyecgpdayrkplgewwdgyngtsniiiddfygwlrfdellrcldrykhsvpikggfvnfapelliitsnveprewynrekisdfrfdalvrrldvvelmeddwiep*	288	USER	zzz1500
2228		Unclass_JX559622	msyrfwcfteydnekvqnyeewfnrlfnseagidyicgqrercpntgrlhiqgyvvftrkkrlngakegldstgvhlerrmgthrqaveycqkeesrdgefielgeyddrgsqtkcmeeikkriregdseldiaeeyfgiwcrynkafskyramvqpgrdfktivrvywgrsgvgksrratyecgpdvyrkplgewwdgyngtsniiiddfygwlrfdellrcldrykhsvpikggfvnfapelliitsnveprewynrekisdfrfdalvrrldvvelmeddwiep*	288	USER	zzz1501
2227		Unclass_JX904075	msdtdvcdvltrsrswcmtinnptnadkaslcgleveymivgrehfndpdktphfqcyirwknaktfsrmkklfprahlkvargtdkdnkkycskeevliekgeaseqgsrndlkgiidmvqqnpsmdyiidnvsslqairtaekllvyreprrswkteiywfhgstgtgksrrayelfpdaytamdtgqwwegydgdevviiddmrrdflkfhqllklfdrypyrvevkggsrqflaktivvtscyspedmfdtrdqediqqllrriteiksfdti*	278	USER	zzz1502
2226		Unclass_JX904076	mddcnitklrkrgwfltinnptedcklkslryvhkseygvigeetcpttgtphyhvyfrlkdavtfskikkdipraniepakgndqqckdycskqnllvehgtisagqgkrtdmskvkdlisedprmssiieqvgslqsirtaeklliykepkrnwktevywfcgatgtgksklafelhpdayvamdtgewwegydaheeviiddmrrdflkfhqllklfdrypyrvqfkggsrqflartiivtscyspeemfetrediqqllrrltkikyf*	273	USER	zzz1503
2225		Unclass_JX904077	maakrfrnytftrnnwedtvfedtlpcqyivygkeiapttgtphlqgtvcfkdgksfdavqklfkgchievcanlpksiayckedgdftergtppktqkekgaaeqdrwrdireaaeegrmedipsdvrflhlrtinlhrdeaskkrkiddteeqhlwyygasgtgksrkareenpeaylkmcnkwwdgyndedvvliedfdkkhdvlvhhmkiwgdrypylaeykggarkirpkkiivtsnyhpeeiwhetsdlepimrrfkf*	265	USER	zzz1504
2224		Unclass_JX904107	mrtlysrgkkdsdhifenqqvsdhlrtiykysvqnfgtrgaslvlprppvpchhgtakmksrhfawtmnnpgpdteaaviaidckfatfgrevgesgtphlqgmtsfeharslsaiikllqkahpgthveicrdayksmvycqkdgdtwqtgtmpkkpadgggmerdrwkrayemaaegnledidadiklrfygtlkkikedhqvtptslptldfhwyqgssgsgkskfahdenpgyylkspnkwwdqyepgqtviidewdpnhkvlashlkkwadhhpfaaeikggtrmlrppkliitsnytikecfpqendhlpllrrftvkqfgepqpagsfdaqsyfggtfsl*	348	USER	zzz1505
2223		Unclass_JX904139	mnkdinpksrsrawcltinnyteeelecivsysseytivgnetcptsgtkhlqcyirmtntktftkmkkdfprahiemaggndlqnkaycskesvlyesgtpskqgkrsdlekisnmilesprmndmidklsnlqairtaekllmykepqrnwkptvmwfcgrsgtgkskmaaellpdaywamdtgkwwegydghehviiddmradflpynhllklldrypyrlevkggsrqflaktiiitspyspdqmfgimhednkqllrridkikyfdni*	274	USER	zzz1506
2222		Unclass_JX904144	mdekknhgskkytaicftinnhdedwesdmerlfnegyftylvvgeetgesgtdhlqgygelkkrtrlgaikrfsndfkrahvesrrgtgeqaavyckkddawrewgemklsaqgkrsdldklremvgegeynmlnimndcdaafkypqavrtyvalfkkakrtrmeltlkpwqdslngtltttvpdqrkvlwfweatggtgkttmarylvrnhgafycnggkttdiayayeeekivvfdftrsqeehinygvieslkngmitsnkyqsctkvfdiphvvvfanfepdyeklsqdrwevkeii*	304	USER	zzz1507
2221		Unclass_JX904147	missnssrdlsnikqispsrhwfltlnnynkedistilnsnsskcskfifqeevgssgtkhlqgyfyfpekirplsfftfsnhpywakcksvkgsieycskidtrngevynrnihipkppyklninlyvwqvpivsllsmppndrliywffepeggigkttfqkwyfmkfnstkhilclsgksadmkhgiinyidktghtpeivfinipksnskfisytgleeikdmwfysgkydggmvcdqnphllvfsnsepeyekmtqrfkvikl*	269	USER	zzz1508
2220		Unclass_JX904185	maakkfrnyvftrnnyedttfedtleckyivygkeiapttgtphlqgtvcfasprsfeavrklmgchievcadlqksityckedgdwtergvcpmtqkekgesnaqrwrdirlaaeegrmddipddvrfhhirtiehhrdlaskkrkiadteeqhlwyygasgtgksrkareenpdaylkmcnkwwdgyddedvviiedfdkkhdvlvhhmkiwadrypflseykggarkirpqkiivtsnyhpeeiwseesdlgpilrrfklhkfstfp*	271	USER	zzz1509
2219		Unclass_JX904192	mssveypeglakgtssksrarhwigtwftipsldefssmcasnsittwsaqvekspssgrkhlqfyvrfpkavrftklqqmfpgahlevckdpsacqkycikdrtrdgwshsegelitsgkrtdldvacdlvtsrgvseaalelpstyvkyhkglkaysrelakeefplmkfrdvevivlygttgsgktrraveeskgdiyplvsydplwfdgysgqknllldefygqlkpykllqildgyyrdwpvkgdyvrgiwdrvyitsntppdewyrtipaevyralmrrvthveqvgsrveeqplplngddiysafvdecftpcdsdrs*	326	USER	zzz1510
2218		Unclass_JX904231	mafqkvfhpasssstseddsstqtvtraptrtshiaisgdsggstaarnsgasaaatqthgsggraknwcftlnnytddeeqcigdfsendhllymivgrekgdsgtphlqgylslnrrftlsqikgwlgsrvhlevargspqqnrdyctkegdydeygilprttqgkrndficyqqwvvsldrmptmheiarewpglfarysdrlrtiaeaslppidllgdsyelrpwqaelassledppdprevmffvdsdggkgksyfcqwllskstdgqvlrigkrddlayaidetkkifvfdiprtqmeylqysvlemlkdrmvfsakyqsatkilrqsphvivfsneypdmskmsddrynikel*	361	USER	zzz1511
2217		Unclass_JX904245	mpknsggtkrqtgshrwmftwnnypedwadvirarveavrvtypqlkwiggeevapttgtkhiqgyiefmrsgpdakrvrpisalglpkevhwgdsngkpcrgsrqdnidycskeyrnvvstfkipkplwvpqmrgwqldaaellnadslsvgdtrsihwfwepngnmgkssfarwavashalegtpeeilmvggkaadmkhaiaghkdkygdypskiivdipreslqyvsyagleevknglffsgkyesgmvlmnppnmlvlansppeegkwsgdrikvheivsv*	287	USER	zzz1512
2216		Unclass_JX904250	mpkdigstkwcftinnysdsdtfavrhmlskpnvkygifgfevgeetktphiqgyvrfrstvgfnamahklvrarlerangddmqnkkycskddnhveygeaeeskqgsrndikavsqlirsgeieqtdfmfdypemyvrygrmfdrmfaevapkrttepniiwryglsgtgktrhifdnhdnvyvkdntlwwdgyksgdviliddfdnnipyrvllrildryqyqgqikggyvqvnsphiyitcefpqpiigvgmnyfklhvdcpqsftw*	272	USER	zzz1513
2215		Unclass_JX904312	mtsrarrwvftifqniaatvqllqalpvgeevryiifqeeecpetqrrhiqgyaeftrpyrrggvqqlfgggqfrcnpargtadqnreycskadtrvdgpweagtparttqgqrvdleavrtavaegsslsvlyeehfgamarysrailayrqliesgrtrdvppvvrvyygttgtgktrraydearafgtpywvpvperhglqawfdsydgtspliidefsgefglnftkrildrypcqlpvkggfvsmqtkqiwitsqkdpdewfpeaspedraairrrcqtiirfgtlggs*	295	USER	zzz1514
2214		Unclass_JX904333	mptrsprhrafcftcpnyneanrelldslcgdgiaryvcyqgelapststphlqgylvlanprtfdgtrellgprfhleiargsaeqnieycsksesrdpdcgfefvehgdrrsvigtgsgsgtrtdlaviakrlrdgeteaeiaedhpasyimytrgirslaqqyiprrshksivywywgptgtgktraaseespdaywksaahqwwdgydgladviiddyrasfcqfnellrmldrypyqvqvkgstvqfnakrifitspkdpretwssrteedvaqlerriehvkffgeisqaasphvssfnpss*	309	USER	zzz1515
2213		Unclass_JX904344	msqsrnwvgtlnnwtvdeyvqlhsiegykyicigkevapgtgtphlqmcfffknkkslralqkingraywehmrgtqeqaadyckkdgdfeewgqfstpkqkgetqkirferawelakegnlddidsdiklrfygtlkrikhdhmlqeiltdtesqmewycgpsgtgksrkareenpdaylkmcnkwwdgyegedivliedfdkkhdvlvhhlkiwadrypflaeckgssmkirpakiivtsnyhpteiwsdvsdiepilrrfhvtkfggnf*	273	USER	zzz1516
2212		Unclass_JX904368	mnrawcftlnnydelavehvrsvlasdkiryaifgyevgesgtphlqgyvaflkpqrlsackkaiarahwepakgneeqnyeycskegnfeefgvrskqgkrtdldkaiehlkeggikrvieetpreyvkfhrglealeyrlnnqpynhdsvrgvwiwgppgsgkshaarefdpdaylkaqnkwfdgysnqktiilddldtptlghhlkiwadkyacdgefkggtvhlrhttfivtsnytpdqlwpddpvmcqaikrrfimnhkqfkqtkvqyqpnapqv*	281	USER	zzz1517
2211		Unclass_JX904377	mprapgirsappqqrawcftlnnpgewrpvfddsmrllvyqlergdmgtphlqgyvkylerktfaavktlwpsahlepakaspmqnlayctkpegrldgpwkygdweramgnqgerndwhdikaflteqlqlgvltedelfdevidrwpakareeravrvhteackrrlmrsaiavnpsagersppqivvlwgptgsgktrraweeagplayskpqgqwfdgyrgqanvildewpdetigiqlvlqmldryplmvavkgsfaswcprrvwltsniepsawfpeasqrhrdalrrrlrdfgtiinvtgsaavdvdaapqtpprsagpaagagyaardpylndmwsppgqagrwvvelaasrpgsvylstdrqk*	373	USER	zzz1518
2210		Unclass_JX904394	mevssvslkfdqkypegntkplgtnsrsrhwcftsfaddepsfkpsmkyllyspelcptsgrkhwqgycyyfdkksmsasqkqlggkhhhciplgdlddqksyiigpydkqgkvkpynpdykvfgnepsqgqrtdldelknnilsgdtnidailvehpgmyhmygrtldkledlrmskvfrsemtecewlwgptgtgkshrafagyspeshyvlpndngwwdsykqqevviindfrgwipynellqlidkwvfnvrrrgraplpftsrkviitsslhpavvynnrnsedsieqllrrisvirletvlk*	309	USER	zzz1519
2209		Unclass_JX904395	msyaknwcftlnnpsstdeetikawhpdiasyciygretgdsgtphlqgyvqlckkkrltgmkkllptahwepakadfeknysycskdgdfvvhgehakagaptmqqriaknkrlrdtplnelvdagdisimdvrklknakldldqekpafvandvrgtwiygppgtgksrsaradygddiylkaqnkwwdgytgqqtvilddmdndalghhlkiwtdryactgevkggtinlqhrkfivtsnfsidelfekpqiaqalkrrftvvhltgneeppgmhpiftyt*	285	USER	zzz1520
2208		Unclass_JX904401	mssrnwmftlnnptvsdkpmewkdvkfiayqrekgdngtphyqgylmmekkvrltamkklnaranwqvrkgsheqavayvtkedtriegpwekgdapqpgkrtdldaacqvaqeeglealieqhpteyvkyhkglekiaqksydtqvkaqrlakyegavlrpwqqqlldkiqrepndrtimwywedtgnvgktwfgkylrdtqkgklldcskkvdlaymlrghtgecvvfnivrsmdeqymqhvyglceaikddcvvstkyepcdvpllkqhvvvfaniepdytkwsddrydvvkindvtpfnqskkrqrepalcewgckagdacmcaqsesrskklav*	340	USER	zzz1521
2207		Unclass_JX904407	mlekgtkkkalvlekgtkkkeltqkwglvlpptfvpkakkkifrnsimtkqkkqqkarswcftyyptneeqdllwfknltttsqiryfvmgrelcpttgklhfqgyisynnaktfqqtkkwfqldkihiapakgndfqnqvycskehllieigepikqgkrsdivraidiitqtnsvsavleevnnyqavrhcelwlkykepcrpvqsinviwihgssgsgktrkvyddnsgneiftptshkwwegydghqvvliddirrdfckfhellklldiypfrvetkggsrqvqfktiyitapyspiemwegrcdedllqltrritqtididdn*	330	USER	zzz1522
2206		Unclass_JX904412	mstdnfvassftftinnyteeniaslkaipclrcvagyevapttgtphiqgaimfakpmrrdafkkvigftsncdkmlgpwssqaycckdgaicrmtdtdnqqgkrndivamkdaakrgasdmelidehtaimakwpkfantvrhtfrkieplplgtkgtiglwlwsskgntgkttwaetkwpdaydkmdnrffdnyngeeviiwddpvqktigqsmmgylkkwcnekivrvevkhdsqlirfkhmiitankspedffgenferspfdarfqtvevknrddlvarmyqfnwsgnegr*	298	USER	zzz1523
2205		Unclass_JX904416	mvtlgnhrqkgegntelpplvkkqgtrhtfyaftlfnyeqndleanlnrqlnllskkylygreicpstqkkhlqgfihlkkamritelklpgnphleacigsqiqnidycskdndvvshgfpkpievinnlypwqkeieeiitnppdprkvywfweehgnigksafvkycvvkhnalfcdggkksdicnlvfnnnmeecnlliwdiprcnlgsisysaleciknglvcntkyetgvkvfnpphiivfansepsdvsnlsadrwvikhl*	269	USER	zzz1524
2204		Unclass_JX904420	mkkqsrnftftlnnytqehlttleilveqkavkgifygkevgesgtphlqgficftttksmkqcikaipgahvefmkgtieqnvaycskdndfvtlgtlpmtqkkkgeaekerweealaaakegrfddipadiqfrydrnikriyaenkpkpqtlnkltnewycgpsgtgkskqardkypdayvklnnkwwdgyadeetviiddfdkydialsghlkrwsdhypfpaefkggvkvirpkriiitsnytpeeiweeeatlgpirrrfhitqfkqlkqhhk*	280	USER	zzz1525
2203		Unclass_JX904427	mesinsffssknaqkcpegntetsghnagsnsrdrswcftsfkmdktplekcadfdkvrwliwapevcpktkkqhwqcyvylrdkasrrtlqrifsgekfhcdvalgsfdeqlnyiqgpykkedkekpynpdfqeygkrpeqgkrkdldqlrdsiisgeqtvdqicesnpvmfhqygrtlnkleeislrrrfrtemtkgiwywgptgtgkshmafqdyhpdthylcnhrdngwwdgyagqdtviinefrgndiytydyilelvdkhpakvnrrgreplpfisktviitsslhpadvfwrrnekdsleqlkrrfeiikldrryen*	325	USER	zzz1526
2202		Unclass_JX904431	masagagaagggaprvqgrawcftlfnqpnaeeylpllfgddnmqylvgqtevcpesgkehiqgyfytkrlisfrqakemiighetschiekrkgthvqardyctkaesrledsqpyifgqepaqgsrndlegfkesvragkdwhelleeeslvvakhkqfaveyyqywrgrkgveeivpeamseswqkeldehlngevqdrtilwvwsessatgktatmhtqmkthktlpakswreadilyaydnhdiiwfniaryeemqattfkvletlsdggpmlstkyqsimknvkahivvtsnqpppyenlperiielkadrvfarkkrvkrtka*	331	USER	zzz1527
2201		Unclass_JX904439	mksrhfawtmnnpgpdteaaviaidckfatfgrevgesgtphlqgmtsfeharslsaiikllqkahpgthveicrdayksmvycqkdgdtwqtgtmpkkpadgggmerdrwkrayemaaegnledidadiklrfygtlkkikedhqvtptslptldfhwyqgssgsgkskfahdenpgyylkspnkwwdqyepgqtviidewdpnhkvlashlkkwadhhpfaaeikggtrmlrppkliitsnytikecfpqendhlpllrrftvkqfgepqpagsfdaqsyfggtfsl*	290	USER	zzz1528
2200		Unclass_JX904469	manlgnnrqegegntetppsskkqscrktfyaftlfnydendleanfnrqlklyckkyfygreicpttqrkhlqgfihlkkpmritelknpipgnprlkacigseeqnldycskdgdivkygypkplivitdlrpwqqqivddivlqppdprkvywywecvgkvgksdfakylvfkhnalfcdggkksdlinlvfnndmdqcnlivwdiprcnlgaisyaalesiknglvcntkyetgtklfnpphiivfaneppsepeklskdrwviteii*	273	USER	zzz1529
2199		Unclass_JX904473	maaskhwcftlnnytdldlerlrelgehedtkyltygketgdsgtphlqgyicfnrrlrfnpvrrsigarahiektkgspaankaycqkdgdfeefgdapssqgkrsdldcvydavkeggtrasigdtfkgtyirykrsidqllrevkqtvrepddepnvivywgltgtgktrkvweshprdsiyvhtgerwfdgyeghevalfddfdgssfkltyflrlldrypmtvpikgdyvqwnpkiiyitsnkdpvdwysgasnehqdalmrrlthiqnf*	276	USER	zzz1530
2198		Unclass_JX904478	mvpipqarywlltiphaefvpylppgfnwirgqlelgaegylhwqifvscvqksrrrgitsvfgtgihaepsrsaaaedyvwkedtrvegtqfelgtkpvnrnspadwtairtsavagdlagvpsdvyvrcyhqlrsigkdhlqpvamvrtcnvfwgrtetgksrraweeagleafpknprskfwdgyrdhehvvmdefrgaidisyllqwldrypvivevkgssvvlrartfwitsnldprlwypdadaetmsalmrrltithfq*	267	USER	zzz1531
2197		Unclass_JX904518	matksrkyiftcnnyddsqiseiqkfceslkkdgstkviyciygkevapttgtphlqgfimlrdqmtmsalnkkcflnrasfkvargtvsqnvkycgkednvteygdraaaevaqgarsdletictqikegatlkriaeehpsqfvryhrgfaalrtqlsvkrdwktyvlwahgptgvgksgfahayathlheargwttyvknpdtgkwwdgyetqeiiiiddwrpsmctfasmlrmldryehrvetkggmaqfapkiiiittpkdaaaswsniteermdqllrrineswtsteaiencstfcskvsqvimnwdtnlraflsgd*	325	USER	zzz1532
2196		Unclass_JX904523	mepnrqqskhwcftcnnptadltfnaatvayavwqkemsasgtphyqgylqtnkvvrltgvkkilhnaghgtahlevkrgtvqqaidycrkedtrvagpyefgelpitkqgertdlntlrtavkakrkwtdiaddddlnpllakfhryarwirqeyeletqpkwrnvqvevlwgptgcgktrkamdegafkwnpctpewwdgyrgeeillidefygqikpsrllqlldghpcllpikgaatyavwtkvyitsnsdpdswysdippavkaalqrritkttqmgtepsfdfaanrdgngtwgkf*	303	USER	zzz1533
2195		Unclass_JX904541	mpssrrgrlwcftlnnysddergllglsfggadilyacyqpergengtphlqgflftadrltvaglkrilhvnrvhleimrgtsaeaiaycqkdesrdrdagfafcefgdratvpgrsgqgtrsdldefsqrvlageplaevaeampstyvqnyrgfeslrrlvvhkprvvdpdgvlvpprvlwfwgptgggktrsacreaagksifwkmadnhwfdtydqqdvmimddfrtswfkfgfllrlldayplvleikgtsvqfntntiiitapkapeemysnlaeneegqynqllrritevryigppleappaiaeifnppn*	320	USER	zzz1534
2194		Unclass_JX904548	missnssteggntippsspnlskklqispakrwcftfnnyttenissivpifrsnclcaffsreigssngthhlqgycefkikyrpvslfkhisttihwekakgsredniaycskdgalefhmgipkpiktimpnqffqyqtdiydliqtepddrtinwywesegnvgksaftkylcvhhnaiilggkgdnclngvldyiktnniapeiivfdiprsiadyvsytaiekikdgcfysgkyeggmcvfnpphiicfanqepinssmsgdrwnvvhi*	276	USER	zzz1535
2193		Unclass_JX904559	mpvkpvitkskaptcgkanawmftihnptsehdptqwegvryvtwqlekcpttgtphyqgyvefekqkrlagvrkvcqchwemrmasqqeaikycnkeatredgpwesgtpakgqgnrsdldkmcelvqagtnmrevalsnmpmfvvhnrglailaqtigvkynhddvrgvwywggpgtgksrkareeypdaylksqnkwfdgyidqdaiilddldklggdklghhlkiwadryacngevkgsqvnlkhkvfvitsnyhpdelwpddeqmleaikrrfkithfpntpfnkkkdtvanqikesqsytqcpfgcpdtdacmcvqsgraerqlsgv*	334	USER	zzz1536
2192		Unclass_JX904561	mtpppqsrswvftlnnptedergwyeewvaeghatyvvcgeetgdagtphlqgfvqwtarrrmayckvryprahwevsrardpakardycqkdgvfaeygimaegghdniglarkrcydafkvggaaaaeeaeplvyayqghnlaknvvrpaphrpditarwlfgpsgsgktrkawarwaeedsadpapyakistvkwwngyrgektviiddltkgglglhhlltwcdryptqvetkggmeplyatefiitsnytpeevfpdagaesvvalrrrftfehitld*	284	USER	zzz1537
2191		Unclass_JX904562	massskrlkkarsfsftwnnyteadiarlkgiehqylvfgkevgesgtphlqgminfksprsfasvmkelegahvektissydsmvyckkdgdvyehgkppvsqkakgdmekarwkrtrelaaagkieevdddiyvrfygtlkrikedhqqvppaqaelnfhwfygasgtgksraayaenpnlyiknsnkwwdgyvdqpcvlieewdpnlammashmkkwadhhpfsgeikggtkmlrppkiivcsnytiqecfpneqdwkplerrfkvrkfgedplshwdaplpthapgsmcpf*	296	USER	zzz1538
2190		Unclass_JX904581	msrkrdycftdfvldetflqglpyeylcygretcpttgkkhlqgyiyfknaktfsavrkllqprsvrackgsaeqnatycskendflefgvrpkqgerndihdimeniqtgnytmrdivssatsfqsiriaeiqmkyfepirqwkthvswfygksgtgksklayemcedpymcmetnkwwegydahedviiddyrrdfckfkvllhlldqypmrveakggsrqfrakriiittpkspqetwegrtdedlyqltrridiikefv*	264	USER	zzz1539
2189		Unclass_JX904605	marsrnwvftlnnfednqeptvwkakvdyctwqheigesgtphlqgylelgtvqrlsamkklnsvahweprrgsqeqaieysnkeetreagpwsygekkeqgkrndlekmsrdivdnkrkfnevameyphmvvkyskgidrliaacqesyahdnvrglwyygepgtgksrkayeenpeayrkaqnkwfdgyqgektiilddldkggaclghylkiwgdrypcsgeikggtvclnhtsiivtsnysiqelwpedtqmasaikrrfkcvhfgsitmkekepianlqnqrnnri*	292	USER	zzz1540
2188		Unclass_JX908739	mnfqrkrwcftvnnytedefnsikqnfcervakfavmgreigsggvphlqgfislqnkvrltgikaivgqrahvepakgtdqknleyctkscgvdgatiygvpaggvtekgggtplsrralecvrkrsagtsiselldddtlapayivhkraieecasdiagaqqfqaeraryattrwkpfqfnilkicmqephpravhwfwdaegntgktfiakylvllhdavrfengksadikyaykgqrivifdfsrsqtdhinyevmesvkngivfspkyesgmkvfrtphmicfanerpdtsnmsmdrweiheittrqartpttlpdrdsdtheia*	332	USER	zzz1541
2187		Unclass_JX908740	mnhararsknwcftsydesepdlarhqehltyyiyqpergvqgrrhfqgyaesrerigvrelqsfigsrahceiafdpeasrlycrkestrdgvttewglfrgkkqgsrtdigtacdtirrsglgacikehpetfvkyhggltiyaaqqfdprrctddppdvriyygvtgigktrsvyaqygndiytkddskwwngyaaqkcilfddwvgseeispvsllkicdryplqvqtkggyvplartttviiftttqhenfwyggtkheanwcsqraawdrrvserrtewtqp*	289	USER	zzz1542
2186		Unclass_KC172652	maqrvrrycltlnnptpeechhlltlresvfkrgffasevgkkgtphlqgfvhlknaktltglkkflgsdryhvkqangtdyenwqyigllnegkaqgdlivqwgetpteegdpdawdsilemieggfnnrdivrkwpsiaircqsaidryrveyewgecrawrdveveyiggptgtgktrgvlyhadgrvntdvyrctngkhpfdkydgegtivfeefrsqytcrdmlnwidghplllparyadrmakftkviilsnwrfaeqyrtvaedspetykawlrrvgtiteqwv*	292	USER	zzz1543
2185		Unclass_KC248412	mqdllstlssnksaallerltskatpnvpdllsslrgkvllssrvhiegahsspaknreyctkdadripgtliyekgeipipgerndltaivaaakdtsismrdiveldgagflrhfkgiaavralyseqrkaktkvywffgatglgkshlihelapgafwkqnsswwcgyepevhrdvavddyrtrfcefeqllklfdkypltveikggnlnfaakrifistpkspsdtwslradedlqqllrridviveftssplrrpdggvianrvfhkgsvadltvdavaeqhddvdervvqpevaidatdrsgrrngrpritvdddrlaaiaadeppapsqqrydgltddldddgffn*	354	USER	zzz1544
2184		Unclass_KC248414	mtstkrstcwsitinnptkeevdawtsipgwklvgqyeeggktgtphfqgmlttpqvrcsavkrvfprahieiardkgalavyvnkedtrvatyeatgvpslfeyhdkiaslwnesewnrrrlddlyckrykwdfgdmalgyvddlvaleiekgqrgiefiainpmwrsawkkfyhsiitryarssqvepppsppspshdsssdnegnsiqssaslhgdc*	221	USER	zzz1545
2183		Unclass_KC248416	msrnrnyvftlnnytpvheitlnsiphrylvygrevapttntphlqgyicfpnaktisavrrilagchvevargshaqcrtycikdgdfyehgdlpadpreignaeadrwedawekakagaieeipadirirsysvlrrigrdyqpnlallpatcgywikgesgagkshscftaypdlypkgpskwwcgyqneevvllddvdpshglwiggflkrwadkypfigeskggsfkirpkkfivtsqysiedcfqdvetrvalnrrfrvinkladqaiii*	277	USER	zzz1546
2182		Unclass_KC248417	marsrnwvftlnnyvdadrvvigerlandatyvcyqpeigasgtphlqglvvfanprtlggvkrlisdrvhlepmrgtfaeahaycskddtrdagagfaftehgtkpdgpgqgartdlesigkrlregaslasiaethpsdfiryhhgiralqtvlsaqprvrgpdglfpvprvlwfygstgsgktqtiheeigdtpyytkppgnrwfdgyigqkivvfddyrgdwwtfgyflrildrypmdveikgsfvpfaattiyiscprspqdlyaglesrtdgalaqltrriteirlfgqapapagpmvdgfhp*	310	USER	zzz1547
2181		Unclass_KC248418	matsvpltsvpvkdkvlakmrnvcftlnnytavdvsrlemlekgvsylifakevgdsgtphlqgyiefenprspgkgwknfkelmgechferrkgtakqasdycefadyptcqvkneyvfkfgeisrqgertdwhqavsqildekreivdvvaeqpqilpairalenlkkmsiqpierevhitwlygspgsgktrwvwtnypevyskpsgqwwdgyngeetlllddfdgeipfaellkvldrykyrvpvkggfvgarwtrvfittnnppadyyqtvsnrkaldrriheikifplgitlngsssssfpaqgeedca*	316	USER	zzz1548
2180		Unclass_KC248419	mpkvrkqsanatndcwcftlnnytedeevrlksimldpknkttymvlgkevgdsgtphiqgyvtfqirkkfdvvkkllsprvhlepavgtpqqasdyckkdgtfwerghlpegkkqgrrndiheardilqqggtvldvaekdwmtflkyrsslsyyaaermpgrigktqviifegepgcfksysagcfknsypvvrpgngqpiwfdgyqpeqhcavlfdefaswlpyhqllelcdkypcrvqvkggtmqfkpifavftanrpaeewypgmlwdalerridlrfwhsraeapndhggwgvgdvlikrikgqarhhplfkymqatavddvykldeealratfvtqpdddimdlvfeeaymdvdtpgsqqsplevisssedelide*	384	USER	zzz1549
2179		Unclass_KC248420	mahitrmvivinnpvpddydrmkiicgisryavaanevgecgtphiqayvallkdkkqrqagwkkmlpranlkfakgterenalyvkkgeqtkaefaafkdagpnygknldlifehgtmdhkgldgtlfncataiaegtvtvdeiakeypetfvrfhrgmreleaigdrkkfrnwrttaewvhgftgvgksyvwesaydpekmfvmkaedkgwsdgytgqpiviidelrkgqisyamllkmigsgpywlsnrgraptpflakhiyitscyhprdlyndldgddsidqlldrlggnithmmgkskravqeniflrdiikdalceeascsqetggpqnyglpkefnfg*	347	USER	zzz1550
2178		Unclass_KC248422	msnnnitnmcvtinnpmpedyerlrelsviaryavaanevgesgtphiqayvaltrnnkkrwagwkkalpgahlevrvgsekrasdyckkgeqpkeewaqlhelglnfglnadvwmetglldhrgldgtlasigramvdgemfvqeaameypetyirfhrglesleqrvvpersadtpkevhvwvgptgcgksmharslcvdpyvwgphmkdwfqkyryqkhvileefrgqlpfdfmlilldrygmqvmnkggsvefladvihitspihpgwwysagsmragddvdqlyrrlttvnvwdpdtkswqldtelfscasprdgvc*	323	USER	zzz1551
2177		Unclass_KC248423	myfkigtevmakkrsfaftwnnytsenvvfikqyitdnarygcfgkeigeegtphlqgyiqfenprsmkklikdlkgchieickgnkkqnidycsktdpdfwsygdpscqgertdlrelvrdiltgelklsnilredpfvyhqygrtldkvedlkiselrrehftrgvwwfgktgtgksyrakhycidnklsyielpkdyykngwfdnykgedviiindfrgkipyedilnicdenqfsfnrrgrcpypciskyvfitsslnpyevynqqlhkndslcqlerrfdilecksqntepveyilkddnrfdeifnlgserk*	319	USER	zzz1552
2176		Unclass_KC248424	merkmsknrsycftwnnysienidyvkdyitknskygcfgveigtsgtphlqgyiqfenprsykkiindlkgchiiiskgnkkqnidycskdnsfwefgnkdtqgertdlkelvkdvlnggvsvnnilrddplmyhqygrtldkvedlkiselrrnhftrgvwwfgktgtgksyrakqycidnklsyielpkdyykngwfdcykgedviiindfrgripyedllnicdenqfsfnrrgrcpfpciskfvfitsslnpyevynqqlhkndslcqlerrfdilrildknsepieyvhdkmddekfelifnlgteqkrvg*	318	USER	zzz1553
2175		Unclass_KC248425	mksrsfvvtnwnlnttevyekyksqikfiafgeetcpttlrlhhqcflyfhnprasgaralktigqmfgeihchvepmrgnfaqneaycskesvltklgdepkqgargdltetcallrngtisvdsvacedpsayhmyartfihaetlylrskwrtemtqckwywgktgvgkshkafkdfhndthyvkdleckwwdgykqqdtvilnefrgqltfsfllslldkwpltvpvrnresipftsklviitssvhpkdiyknvlscdeslaqlerrckikelltlyspvcasllknspp*	296	USER	zzz1554
2174		Unclass_KC441518	msgsrrwcftvfnynhatvddfiraerhdcvryvvwqcekcptsgrshiqgyvelhrpirlrqlkqilddtgahceaakgprdacreycqkeesrccgwwesgewiggqgsrsdlsavhaaiqdgaslreisnahfdafvkysrgikeyillnadrrmwpmevwvlygdtetgktravyemapdvyslapshsngvgwwqmyeghadvllddfygwlrysfllqlldryplrveskggvvqfvgrrifitsnahpnqwypnvkdtaamfrrftriyhcdksrfwrek*	288	USER	zzz1555
2173		Unclass_KC543331	mrfrhwigtsfnlesipddestikqiayqrercpetnrlhlqfcisftnprtmdgvkryigdqsahlepcrnlrkgleycnksesfvdnrfsrfntdaqdapddfreftelqlwqkypnwmlkhgtqvrryyqicqevpqtrekpvcyifwgpagtgksysarhwlgdqlyikppgnfwigyngekavlfddyyssekyddllrwisenpihvsikgsstplkaikfaftsnmnprswhskiedhsalfrritkcffctdkcfsldnlhe*	271	USER	zzz1556
2172		Unclass_KC545228	msnkvymatiphsgitkraffkmirdfdihkwvyaverghggykhiqcrfrtnksfdqirhalicghieeasdqweyekkdgnymtsednheilklrygkptkvqewamtllestndrevvvwvdkdgnsgktwltahlwergqacycpptlstpkeliswvhsaydqepyiiidiprtwkwddalytaietikdglvydprysahmrnirgvkvmcmtntepklsklsedrwvmyrpsnlfetaelrnrggtpprrssgcnrsnlsppvr*	272	USER	zzz1557
2171		Unclass_KC545229	msnkvymatiphsgitkraffkmirdfdihkwvyaverghggykhiqcrfrtnksfdqirhalicghieeasdqweyekkdgnymtsednheilklrygkltkvqewalvllestndrevvvwvdkdgnsgktwltahlwergqacycpptlstpkeliswvhsaydqepyiiidiprtwkwddalytaietikdglvydprysahmrnirgvkvmcmtntepklsklsedrwvmyrpnnvfetaelrntrgghppvdrsdvtdrnlppsgkrgnggpss*	281	USER	zzz1558
2170		Unclass_KC545230	msnkvymatiphsgitkraffkmirdfdihkwvyaverghggykhiqcrfrtnksfdqirhalicghieeasdqweyekkdgnymtsednheilklrygkltkvqewalvllestndrevvvwvdkdgnsgktwltahlwergqacycpptlstpkeliswvhsaynhepyiiidiprtwkwddalytaietikdglvydprysahmrnirgvkvmcmtntepktsklsedrwvmyrpsnlfetaelrnsrgghppgshqrceppppvr*	270	USER	zzz1559
2169		Unclass_KC794539	mrfrhwigtsfnlesipddestikqiayqrercpetnrlhlqfcisftnprtmdgvkryigdqsahlepcrnlrkgleycnksesfvdnrfsrfntdaqdapddfreftelqlwqkypnwmlkhgtqvrryyqicqevpqtrekpvcyifwgpagtgksysarhwlgdqlyikppgnfwigyngekavlfddyyssekyddllrwisenpihvsikgsstplkaikfaftsnmnprswhskiedhsalfrritkcffctdkcfsldnlhe*	271	USER	zzz1560
2168		Unclass_KC794540	mrfrhwigtsfnlesipddestikqiayqrercpetnrlhlqfcisftnprtmdgvkryigdqsahlepcrnlrkgleycnksesfvdnrfsrfntdaqdapddfreftelqlwqkypnwmlkhgtqvrryyqicqevpqtrekpvcyifwgpagtgksysarhwlgdqlyikppgnfwigyngekavlfddyyssekyddllrwisenpihvsikgsstplkaikfaftsnmnprswhskiedhsalfrritkcffctdkcfsldnlhe*	271	USER	zzz1561
2167		Unclass_KF133807	mklryknkrgvktcrfccftinnptqeeleelllekqkasylvyqfevgkngtrhvqgyieftspkrfttlkrsvafarahlerrggtakqaaeycxkkdtreegtefvelgkiseqgkrndlaavkrmldsgasqkeiadayfgqyvryhrsfgdylnltpppireveviilygapgtgksrwaystypdlwskppgpwfdtyagqetilidemagdyidyrtllrvteglpllcpvkgtfthlrhsrvvicsnfhpaqwydmtryedagyttfeasplyrrinclvelklvrcenryvrrwhigcpdtfplsaykrqaggvppmpdenadgvpfppkskgrkifgqpmdrsdixkk*	359	USER	zzz1562
2166		Unclass_KF133808	mkipdrsrhraycitlnnyfehdrqnletlvergiakyvcfqpekapgtgtrhiqgyvvfqnartfsgakaiigegahievargssqanieycskdesrdteagfgfiergnredvlgtgsgggtrtdlavvaaslrtgatlsqiaedhpasyimytrgihsyaqlslpkrshktivhwywgptgtgktrlaceespdaywkssahqwydgydgladiiiddyrcsfstfnellrlldrypyqaqvkggtihvnakrifitapkdprsmwqsrteediaqlerrievvryfgvdenipepvlneapavihgfdpgvall*	320	USER	zzz1563
2165		Unclass_KF133810	mpsqqsrnwvftwnnppfqgtdleieeklddfftgqerlgdwsylswqlergesgtlhvqayvqfagnkrlaslralwpgchaevrrgsheqaveytskeesridggrhhehgearnrpgrrrdleampgnlvaqklsgfpsptvsvpfgmvtmvkrllslmssmggshmafcadcwtaipsvwrrkdpvflfwrsvlsslptsvlhdgtgrvfvlfvavlvvnsvrcgrrrlwkxi*	238	USER	zzz1564
2164		Unclass_KF133811	msrsrgwvftaqagssglsaiatlldnvdcdymvyqeetgaggrkhlqgfvwwrtqrtfnsvkgklpdgvhlekqrgtnkeaadycrkvgpggwngghrgergeqpadagrptggskhavealrkaqkhgvkrvldedpecflkhhtalekaarleatarvpqerdltvwwihgdagsgksrfatrydnpdntciisdsaggwldgyagqrtlviddfeglmpyqqikrmldvyryqapvkgdhvaaewttvlitsnehpssyyqqdrwsndpttpsplqrritavykvtgchpgpvtwtppqpaprppavppppppppppmdgddaseeeeeggplpptqrvslsdsqlladgifddfldptdlfpqpssgedifadldgvgdpepqgqalc*	394	USER	zzz1565
2163		Unclass_KF133812	mprvrakrwcftlnnptdqekdfmarlqlgelptasnmkltylcfgreavstphlqgylelekksslssmktfltrahwekakgspkeaadyckkdgdyeevgklsvgqgyrtdllnvkevldggatvaeladshfrlwvqyrrsfkayvdlkatprrwktvvvvlwgdtgtgktrfchdqtgdrsmwtsgdykwfdgydgqevvlwddyrgeypiqqflkltdrypmnvpikggftnwkpkkiyitsnccpstwykdvgsrtheafmrrldvinfinkpiy*	283	USER	zzz1566
2162		Unclass_KF133813	msdvpaappstvaagrsrgwtgsmfdyddvyeslcealaaavseqrvtrailgkevcpttqrkhlqwyvefgnavqrgsvtnlgitghtehrlgspaqcwqycskdgdfatfgsppkgqgkrsdldqaietltsegleatamehpaafvkygrglklhhrpladmeapvvvvlwgptgtgkshtafleasapyvwgpgmgqwfdgydaetdvifeefngqipfrqflrlldkypcqvqtkggskywgarriwitspvhpsqwyasleeksegslaqlmrrltdvrnllirht*	293	USER	zzz1567
2161		Unclass_KF133814	mqnensiekffdleaagptdpesedesgfsdfiasesdeeesqpkrarvdlvpapgpddgvrrgstpldkrcrgwcftinnytdsderllvqxfddnpkceylixgreigeqgtphlqgylycenarsgsairhaigdrghweaakasptqnkaycskqatpanpvvelgrlpvqgkckpltqvvkdqcsgvnvsdyirdgrfddaatwvrhfkglaalrfettxppisfeygptgsgksrwahetfpgayyhpqagkwfdgykgesvvifddfrpcnelaynwllkvcdiypmkvpikgsmaelcattivfttpekpentfvlqedigqllrrigpnikrfgtstmeaqeaqlntnvfgn*	362	USER	zzz1568
2160		Unclass_KF133815	slhsilrsqsfrcvlsi*affihlcfifisveafaf*gitklinithrydvlasastdtgrss*srtdvrlipsplsrsgssismmsifql*iwvpayffhctlsdfhnvacreitrafslevdrdvyqlisdfssefshlvlqfi*gvtqfv*efqkfggtqhlrihskmtsylvliycyis*eprtifrwfirkhkvlyevchvn*flsvs*yfvwfvgraigdcsrfihinvvvyssl*rsyvhawli*ipflyisircdk*llsqhvhgrtlyvqdkfvtis*fqqctpr*lpikvihdndilpviaikeeaivlpvtlpmvvvtehtftgtrrtnyhgyprlpvalsapnetilihsfihlthcgkvfgp*ffpgtttvdkgfnvhdicpltlr…	484	USER	zzz1569
2159		Unclass_KF133816	msgslsgttlyllymnkqdkhwvftlnnyteeeyeqlvelaesedvsyaiygketgdsgtphiqgyirfarkkrfngvrrilgkrahieckkgtptqasdyckkdgdyqefgcratkpgrrtdleelylqvkegktrdeigdtftgsyirykrsidelikqhhdtprtrtctaptvivhwgltgtgktravwdehwddlyahggdrwltdtmdnelfysttsmganlnsptfsgc*	236	USER	zzz1570
2158		Unclass_KF133817	kdyxkkrpgpalgtkryrnwiftsydvdwnpykwfsgspwaqylicqaekcpttgrvhwqgyvhgntpvglatlqrelglpgvhaevrrgnhkearqycrkeesrvpgslpieigdppqqgsrtdlddlkpilvergllgafetdfsstvrfyrgferylslvgqprtndtaqeayyfygppgtgktravwesvpdpdrvyacptssgkpwfdgyrpgyhtvilvddyrgqwpvpfflqfldryklllpvkgshihmgrakiyvtsnepietiyadqpavtiaairrrfkeikhfntl*	299	USER	zzz1571
2157		Unclass_KF133818	mptprgvywcwtlnnytpeelshcrtlcdraedvtyvcfsrevgdsgtphlqgylelaaklrlgglrkldglgrahlelrkgtqaeaidycrkdgnetfeehgtrktssqgkrmdleavkalldggaplrevadqhfgtfvrygrgiaqyqlvtakkrardvsvhvlwgapgvgktrwiferhaddlwicndptlqwfdgyqgesvvliddfrgeaspafmlrlldryplqvpikggftewrattiyitsnvappfgmesivaplarrlsivqelpkqeyditeaalneifn*	293	USER	zzz1572
2156		Unclass_KF133819	mltiphasytpylppdvtwtrgqlesgdggyihwqllvgfakkvslrrvrevygpihaeisrsesaaayvwkedtridgtqfelgarpfrrnsatdweavwesakrrdlesipaqtrvvcyrsllaiaasydvpkpivksvycfygvsgsgksrrawdeagveayskdprskfwcgyqgqsnvvldefrggidvahllrwfdrypvrveikgssvplaaeriwitsnlaplqwypeldpltyealmrrldvtefa*	256	USER	zzz1573
2155		Unclass_KF133820	mskywcftlnnytreeeeavkalcegespiadylvygrergegedtphlqgyiefknrkrfstvrtviprahierrmgsaseaaayckkdedffehgvisqgqgarndlarlheaifveqksvahvqeeyfgsyikyhrgiekvlqqrakprtwksrvvvywgptgtgktrrcfassdpptwiyssdgwfdgyqgdetvlfddfgghefrlthllklldrypmrvkvkgsfvqwcpktiyitsniepafwypnarevhrealmrriddieemadewvppvpvenevidltde*	293	USER	zzz1574
2154		Unclass_KF133821	mpgrqsrrwiatlnnyqeshlsalsslvpdslnyllygkevapstntphlqiyletqkkktlnglkkllgiksihleiaegtqqqnliyckkdgqffeigklmesgtkksitevshaianganvteiarnytetfiryprgierainllnneardfktfvkvyygktgtgksykahqenpelwthggdrwfdnyaahevalfddfegiksgisfrkllqlcdryplvvpvknsfvnwrpkviifttnvkpeqwypednyaplrrridelidfdmfpyngp*	281	USER	zzz1575
2153		Unclass_KF133822	msrlrnvcftlynadpedvasklselvdnqdswlryaifqeekcpesdrlhlqgylectkpvrfgtlkdflgstvhlerrrgnrqqardycrkeetrvrgpwecgdwnankqgqrtdldairemvvagateesiadeyfgtwarnhraiarykflkskprdfkprviirwgvagsgktrgvydthetavvynvprpnggtvwfdgydpsvhevvllddfygwlpwsmllqmldrypmsvpkkgstcnfrakfiyitsnadpetwydyskpgiefealkrrvdethhfttl*	291	USER	zzz1576
2152		Unclass_KF133823	mppkhqgfvftennydlatenrikafpwakyvlfgketapttgtphlqgfiwthepktkqqvtrlaklnfigvpgsekgpayweeycskqdvepyrnqgkrtdlldvkrkidegkpvmsmlsddnhfgafaqhqkffqtyqahkrrrtkymkpevvvyhgptatnkskrvhdtiedfdeffkwephmtnwfdgyvgqkvvlfeefrgqlpfgemlslldgypntrvpfkggfadwspekiyltsplspyewypnlaakdsidqlirrinkivntase*	278	USER	zzz1577
2151		Unclass_KF133824	msrsrgwvftaqagssglsaiatlldnvdcdymvyqeetgaggrkhlqgfvwwrtqrtfnsvkgklpdgvhlekqrgtnkeaadycrkvgpggwngghrgergeqpadagrptggskhavealrkaqkhgvkrvldedpecflkhhtalekaarleatarvpqerdltvwwihgdagsgksrfatrydnpdntciisdsaggwldgyagqrtlviddfeglmpyqqikrmldvyryqapvkgdhvaaewttvlitsnehpssyyqqdrwsndpttpsplqrritavykvtgchpgpvtwtppqpaprppavppppppppppmdgddaseeeeeggplpptqrvslsdsqlladgifddfldptdlfpqpssgedifadldgvgdpepqgqalc*	394	USER	zzz1578
2150		Unclass_KF133825	mrrqgifwmltiphasytpylppdvtwtrgqlesgdggyihwqllvgfakkvslrrvrevygpihaeisrsesaaayvwkedtridgtqfelgarpfrrnsatdweavwesakrrdlesipaqtrvvcyrsllaiaasydvpkpivksvycfygvsgsgksrrawdeagveayskdprskfwcgyqgqsnvvldefrggidvahllrwfdrypvrveikgssvplaaeriwitsnlaplqwypeldpltyealmrrldvtefa*	264	USER	zzz1579
2149		Unclass_KF133827	mprvrakrwcftlnnptdqekdfmarlqlgelptasnmkltylcfgreavstphlqgylelekksslssmktfltrahwekakgspkeaadyckkdgdyeevgklsvgqgyrtdllnvkevldggatvaeladshfrlwvqyrrsfkayvdlkatprrwktvvvvlwgdtgtgktrfchdqtgdrsmwtsgdykwfdgydgqevvlwddyrgeypiqqflkltdrypmnvpikggftnwkpkkiyitsnccpstwykdvgsrtheafmrrldvinfinkpiy*	283	USER	zzz1580
2148		Unclass_KF133828	mprtrtttpetnmrrnwcitvnnpvedpetwskrlrthslfkylvfqaekgdsgtihyqayaefsnpirfgsvkylipgahiearrgsakqasdyckkekgrkagpweygelsverqgqrldlerlaqiaqthshtdilkempreyakyykfvqhvkhieamdkpgirsnlqvivchgetrtgkthyayerdpnlyalpvgkdlwfdnyngektvllddfsgqcrlvdllrildkypvqiprkggfvwlkaetiiitcnqhpetwydysnrdslrkalmarftrfleftaggrkaiqlggdhtrpaneivearrdsttpipetppqspvrrdsdvsltptielstieddyividd*	356	USER	zzz1581
2147		Unclass_KF246569	mpnpqvkmwaltvknwdlfdhpekleeignyqdedgqylvrylsigkhtgektgyqhchlnlelekrqymtwikrvlfnipdmhcekrqgtreqcdtylakdgefqvivnrrrierghrsdldeihdmikegkdlfdvyeshfastvryssglekyivlhdskrarnsettapqvivyvgpagsgkswhcfndedykesgyrfpiqmyekvyfdgynrektiwfdefngrsmpfgkfcqladrfpgiyetkggsvlisglkkilistisypatwwagsnrfnldpdqlyrrltkcyylgpprrssdgsieyaiplefnpkelltkeqeeilkrhvkypsdynpddpilmirdrlkcll*	359	USER	zzz1582
2146		Unclass_KF481961	mprdrakrwvftwnnytpenvahlqeinckyigwgyetapstgtphlqgfvyfhkqlrwkavmaimgnpsfvevmegtvedniayctkgpgefwqsgppptekkktefkdilkmtlkeadevmreehtwqsgssnwkrlrssmikhyigemevlwfygptgtgktrcaveehngeliefdgkffdykggadcvvldeidklekpipmgtmlrlldrykyslrvlgdyvprdfkkiiitstnhpevvysqshceqllrritkivefn*	267	USER	zzz1583
2145		Unclass_KF738873	mplsdhrspapgsrlsvrrqgifwmltiphhcftpylppgcvwirgqhelslsgyshwqilvamstksslaqvksvfgeqchaelsrsesaqdyvwkedtrvdcsqfefgskpirrnsrvdwesvwsaaksgdllqipanvrvvsyrtlraikadyevpqsmertalcywgptgtgkslrssreagidayykdprtkfwcgyrgqqhvivdefrgaidishllrwldrypcyletkgsstsncvtkfwftsnlhpdfwypdldeltrlalirrisvleiteldtsllp*	289	USER	zzz1584
2144		Unclass_KF738874	marrqgifwlltiprhefvpylppgcvwirgqleeggedgylhwqvmvaftkkiglsgvkvlfgpaahaelsrsaaatqyvwkeetrvagtqfnlgakpfernskrdwdsiwlsaqegnleaipadvrvvsyrtlraigsdyavpralertcyvfwgstgtgksrtaweqagmdayckdprskfwdgycsqenvvidefrggidishilrwldrypvrveikgssrplqatklwitsnldpnlwypdidaetllalrrrltithfa*	267	USER	zzz1585
2143		Unclass_KF738875	manrrsrgwcftlnnytpeheallaavpcaymifgrevgangtphlqgfvyfpnaktfngakavlpagchleaamgsvaqnveycskdgdveergerplsaaekgaseaqrwkdarlaavsgdiadvpddiyiryyrtlkeiskdhmarpdgldgvcglwlyrsagtgksryaqeqfpehymkmtnkwcdgyqgqdvvvmddmdpdhaclrhhlkrwadrypfigetkggaisirpkkfvvtsqysiedmfknrdgtldvetvaairrrfevkrfgvnafnpyni*	286	USER	zzz1586
2142		Unclass_KF738876	manrrsrgwcftlnnytpeheallaavpcaymifgrevgangtphlqgfvyfpnaktfngakavlpagchleaamgsvaqnveycskdgdveergerplsaaekgaseaqrwkdarlaavsgdiadvpddiyiryyrtlkeiskdhmarpdgldgvcglwlygaagtgksryaqeqflehymkmtnkwwdgyqgqdvvvmddmdpdhaclrhhlkrwadrypfigetkggaisirpkkfvvtsqysiedmfknrdgtldvetvaairrrfevkrfgvnafnpyni*	286	USER	zzz1587
2141		Unclass_KF738877	mgllrvyysgqqarrlvilavvwpmvgttqrsrgwvftinnynewdfvniskleekaqyyiygkergeegtphlqgfayfkqrisfngirdiltrahveiqrgfnaqaidyckkegeftewgepsrgpagqkdkwkdvlqlarqgkvqeieerypaiflryfqklcgfyrpehsiilenftnewwwgptgtgkfkklnddypdpyeksldpwwdnyqreeivaieefeprckinsfllkrwadrypfrcevkgaflsklrplkiivisnyqldecfpnskdldplkrrfkeihfp*	296	USER	zzz1588
2140		Unclass_KF738878	madllpaqqkkiaptqkwkdqrgrcwcftafvdrpwkdiackyivvgheicpktgkehwqgyvefgtqrrptgvqktlgipdlhvekrldtstpdhaanyckkdmkfveygkiskqgermdldlichdlqtgkrtwreimgsddvqtvckyrmglqmvaaesaaerakkprevtwerkpsmaaawldypdalmvnlnngacweayggeeeiivrhaksyhrellldgwitplnvkcttkyaawtkvicvecdpeffppvepvsevvsevppplgntipgvevpavkdeeasalp*	295	USER	zzz1589
2139		Unclass_KF738879	madllpaqqkkiaptqkwkdqrgrcwcftafvdrpwkdiackyivvgheicpktgkehwqgyvefgtqrrptgvqktlgipdlhvekrldtstpdhaanyckkdmkfveygkiskqgermdldlichdlqtgkrtwreimgsddvqtvckyrmglqmvaaesaaerakkprevtwerkpsmaaawldypdalmvnlnngacweayggeeeiivrhaksyhrellldgwitplnvkcttkyaawtkvicvecdpeffppvepvsevvsevppplgntipgvevpavkdeeasalp*	295	USER	zzz1590
2138		Unclass_KF738880	macrsrgwaftlfhyteedinkikklevqyqcvgkeicpkskephlqgylyyanpvrfetvktsirkevhlesarysakrnaryckkegdwweqgeppmmgarsdlaevalmvrngasleqvaeenpevyvrysrglqalqtkvmkhrterpnvtwiwgstgvgktryavelcdsfymkdgtkwwdgyeqqkwiilddfhwdgkvesfreflrmidrykyqgetkgghvkinspqivitcehapdkfwydtkldqvirrlnkvihlsgtevvgtevpgntipepqnsvaagaappppqi*	300	USER	zzz1591
2137		Unclass_KF738881	malilakrvrrvcftlfeevppefeeewmqyllvgrevcpatgrehwqgylelksqmlwttvkgrlgdqvhleecngsaqdnivycskdgnwvewgeckvqgarsdlsslrtdvlnhgvtvaeileanpmtyhqygrtllaledlrysrvfrdcsaaptvtwfwgptgcgkshesraralalaggdrskiyvlanhdkgwwdlynlqeivildelradqvpwglllqlttnvecfvprrgrqpcpfvakhvfitsplhprdqyadrcgidnidqllrritfieernvpyaagvfnhskrllfqgsmrtere*	312	USER	zzz1592
2136		Unclass_KF738882	manpntcrwmitlfgeedpvmplpvaygcwgketcpttgrvhshmylrfdkkcrmstlknrlqrddahcepaagkeqacrdycwsegdhadklphrlvkgpeigefqadmgqgkrsdldaiaddvkrgsserqiaekyssdfirysagirnfiavvapkpplqrivlvtllwgptgtgkthrcftafpelysvkpgrdpwglyrgegalanapsppdtphpqhtlstgsltsrtmisivntllifycsmfhvpkcs*	257	USER	zzz1593
2135		Unclass_KF738883	mghqvkrwcftlnnyteeeykeivekiewtyiiigrevgeegtphlqgyielkkksslnqikkvnqkihweqlrgkpfqaadyckkennfqewghismsgggttekigaiiekaksggmrevlkdppklatvrliekylsyceeerkekpyvhwnlgnittytgrmtpnggdgydknetividdfrasimrftyllrildrypmrvevkggyrqlnsknivitsiihpescyhmenepirqlmrridkitetnnknilndvmlqatseesvgntnlhflicdeelge*	288	USER	zzz1594
2134		Unclass_KF738884	mpkvkqgsqarrwcftlnnytekdvtsitekltfsncvfakvgkevgdsgtphlqgfihlrkrlrlacvkklvgdrahcevargtdkdnesycgkdadvvltvgeptigtteqgggdtihsiarrialklskgtditelqgeewkaycrhskviqelsaafvknkniadqaaqmsgkplrqwqkelkdaiqtvpndreimwycdsvgntgktwfskylvalhgairfengksadikyayngervvvfdlsrsqvdhfnyeviesiknglmfspkytsctkmypiphvivfanwmpdesklsadrwniqslsdvskikcekeddvivndviviedddvqpeqidsyfsslfddwgpdmvgdldeyq*	366	USER	zzz1595
2133		Unclass_KF738885	mpkvkqgsqgerwcftlnnytekdvasitekltfsncvfakvgkeigdsgtphlqgfihlrkrlrlaclkklvgdrahcevargtdkdnesycgkdsdvvltigeptigtteqgggdtihsiarrialklskgtditelqgeewkaycrhskviqelsaalvknknikdqaaqmsdkplrtwqkelknaiqtvpddrkvmwycdsvgntgktwfskylvalhgairfengksadikyayngervvvfdlsrsqvdhfnyeviesiknglmfspkytsctkmypiphvivfanwmsdesklsadrwkieslsdvskikcekeddvivndviviedddvqqeqidsyfsnlfdnwgpdcvgdldeyq*	366	USER	zzz1596
2132		Unclass_KJ206566	mvynssgkyrkvfvtsfntsamealniqdlvdcdvaryvcmsmehapttgrihyhlyiefysqktmntikkilkdataniqpargtpqeavdyikkdgatwkeagtmsnqghrsdlddvfqrlqvgdnildiieghpgtciryikgilavkglvdqrrqrqearqmptvlvyigksgagkshacsqdpdyqrsgykypvqgpskvyfdgytgestiwfdefggsvlpfhvflrladkyetrvetkggsvcitglqkilistttppklwwcesrkfnedpyqlwrrltrvyyiprpswgfadpvliqhpenfdelvaaqlereaetrgpsldgesvrgqpgpvdpvherdddsdsertidtsdgehsttaa*	371	USER	zzz1597
2131		Unclass_KJ417134	mparnpegrpqrfrfacitawnmdafdldwpqrmhdlglsyvvigretcprtgrrhlqcyfeatnpktvtawqdvvmdkprahvecraawkpegediaenqgdkaadyckkegdfieygtlapgqgarmdladcktmidegkqmidlyekhfgtcvrchrglmlykdlvdrkrrkeaepepkeivvyvgasgsgkshhcwhdpdyrrsgykypllaenkvwfdgyegeevlwvdefrgsvfpfglflqvtdkwgarvevkggsietffkkvlisttvppgewykncsnylknpkqlwrrltkvywlgpveqdddgftiypepelipdpehdtrtnpfydgvgthypre*	349	USER	zzz1598
2130		Unclass_KJ433989	mssvrlqnknlfltyndpeetitgpawllnklaeqlekyqpyygvcgeekapttgtkhyhllimcknpviskngqvieikgiaphiekirnnlrgvikyvkkdgniaelnknlcpvkldklerkekadlmltgdlekafidgtlgpieviraeklrkifqvyrkpepyskklimwyrgetgegktrtavelaeefelsywitneslrwfdgyngqelviiddfrqkmitdwnfllrlldgyglsvpvkggyvawkpkiiiittpatpqeafqwmnkdgelqnwdhldqlmrrlthddeeqvyqfplweedkqklmntvrqflgiendeamveeelsmspilpeptqidea*	351	USER	zzz1599
2129		Unclass_KJ547618	mmmmdwsplkdpledlqppkksvkrkarfhadeltddddddtttvvrtaptpvgrgqgnkssrwcftynnpsmdgdefvslleskgdikmavfqketgkegtehfqgymetkkrmyttgahamlnpirmhlehakgtkqqnekyctkeegraggpwyancttddfkrksgnqgkrsdldefarmikeeggitedvfeampghamayskhakalvaemklteikkkemaywqeqyqrrqrgeeiegqqqrnlklyfgptas*	261	USER	zzz1600
2128		Unclass_KJ547620	mppawegssfiitypqsdfdlqeyidtwenkkhikyllistelhqdeslhrhavlhfskkqrvghaffdhltrhpnikcvgkrrsdwtnviayvkkcgefvewgeprhsacvwsaiatsstrqeaqemlsierprdavlnarnfdywldkvfpmsetasysgrssdqfvvppalqdwvlmswwyvlprqerpkslvlngasrlgktqwarslgphiyignmwdlgaldgidsnfwnygyivfddiewasiagsakswfgaqrdfsvsdkykrrtgwwyvtstnengdwlvvflafflstltliavivivlltqngdvktli*	322	USER	zzz1601
2127		Unclass_KJ547621	msqnlesgrrealkmrawcfthnnfpyaaadlplckderyvvwqhekvdtdhiqgyielskpqrisamikwlpgahfeerrgtpdqarkycmeedtrvegpwergsygttqgkrsdidvvreaiaagadrrevynahsdiaakypryvetmlrfakedavdkilvfeprqgfqtdlldmisgpadsrsihwvydrvgnngktyfakylvdkfgafytnggksvdlayayggesivifdyvrdaeeyvgygvieqlkngiamstkyesitkrfniphvivlanfkpqegkfssdrikminvt*	302	USER	zzz1602
2126		Unclass_KJ547622	matttsseqsnksnrtkrlsrfvftlnnytaeeeqviqllgttlkmkwliygrevgekgtphlqgaavigrqlawktiknsfpprthleemkgtpresfiyctkedkeyyqfgeepkpgkrndlldavaslrktssfrdfvkddqnasvyvkytrgltafrsllreprspsrpptvywlhgptgagktkhaweflegyfgtdqetwisngslrwfdgydghrgvilddiradsvpynellrlldrypyrveykggttewipeiiiitapmgpyqffrvgddieqllrrvnggifeftidgpnprlqtvaptvpntpahsevesqddvqelqesseglsllesigrgsgieqdqsnsqeeetqlrkkrkfid*	372	USER	zzz1603
2125		Unclass_KJ547623	malkarywcftlnnwcdgelleiakfsgryltygfeigesgtphlqgyceyenpvtmgrvkkdisdrchvevrkgtqlqavsychkdgnwleygekaagqghrsdlddvardvldkkslmeiandhptswirysrgiqslansqppprwrdvlvlvywgvtgtgktrramlepsayklnqntngtlwfdgydgqstlviddfygwikygelltlldgypyrcqvkggmawarwdtviitsnkcpddwyplvpdtaalkrrisairyfepildqk*	275	USER	zzz1604
2124		Unclass_KJ547624	mdlprfrlnnqrllctyaksdlskkklkeffvskspktspkvkiareshkdgskhmhvlvdfgkrfdstnrrvfdfegrhpnirrvesmihwanllcylgkedkkcrpsasvlaaakcwnaktpveailsgaykdpirslavfrqrpsareficnmtepeapwyqdivkplieansdhrswywfcdkvgnswksytckyllqtmredfratkltanvdsfamklgnwqqegwsgkilfvdlargkantntiyecleltsdgwgdtgkyegksfildsspivvvlanwwpriaadtgsldrwklfeitnepirgsarcmnlnivrtertdldeelaiqkevarlekqmkaaeavekakariaasrdc*	367	USER	zzz1605
2123		Unclass_KJ547625	mevpppayspppaavsaevvprpfrlagkaifltwpqndvskedlmakivalweaklswavvaeeshksgephvhaivqfaerldlknanpvldaltgkhgnyqsvksakkvlryvckdgqyithgevpdfsekpklqdwaakliieeqktyrdlvreqpgfsmmqkrkleefigwnkrqkladsllpwrvltpkpsaspvhvalwtflrenvlvprtprqaqlwlcglpgvgktrflaylrarlrvydmprsedfydeyedgcfdlvvldeykahkkiqflnawadgqplplrqkgsqltktdnlpliivsnysieevyrpgvgrdalvdrftqvfvdtafviddpehve*	352	USER	zzz1606
2122		Unclass_KJ547626	mtrfaakqffltyprcdldlqllldglttalaprlfrhkivqerhgdeglhvhaiivcaeridtsnprffdvagfhpniqtvrnlrqaytyldkepvqalcnldepipkmswgellekatdavefmnlmkkyhprdyilsftrlldfaevhfteppplyetpegysfltyrpkslvligpsrtgkttwarslgrhvywnslvnldvwspladyiifddvdidflpgykcwlgaqkeftvtdkykkkrkimwgkpciwlciddkdpllsskvyrdwismncvfvtvinkmy*	291	USER	zzz1607
2121		Unclass_KJ547627	mvytfsftypqcslertelrdsliqrvnpekyliareqhsdgglhlhaylhfgrrrrftsadafdvdgfhpniqkprsarnviaycskedtepmanfdytsgepnggwseilgrtsskdefleevrthfprdyvlslerllffcewrfgrdeteytgrsrtefrepdtltnwvntnllqvciwtygprggpqsppllsspclywliwtqwarsidsthvycqgmfnldewndkakyvifddidikyfphwksilgcqrdiqltdkyrkkrrlrnglpcvwlcnedmdprgalsrtqcewiesncdvvtlreplfe*	316	USER	zzz1608
2120		Unclass_KJ547628	marfhaktvfltypqcpvnkedllawlqtlrnpiytivshelhedgsphlhavvcwqnkldirdttffnyenyhpniqsarsikkviaytkkdgdfieagdspivdtantwstamdtattikefmdtvkesnprdyilqherleyfaakhfkkdtevykpnfeefilpheveawlneefnsdklrkksliligpsklgktewarslgphmyfnhlanfkddwddeakyivfddfdfdfipnkkgffggqqhfqitgkymrvksvrwgkcciycanvtpnikdidkdwynencvfidvvnkfy*	303	USER	zzz1609
2119		Unclass_KJ547629	medtlrtpdsetvkakgdqryrnvfytynnptktdeewmdyvrervpiafhvcaleegdlnhtphlqgymefrqqvrksqlitafgthfwfrprrgtaleayeyctksgkyaershetkagpweegkrsspghrtdieaavhtllkdglqsavtqhtqtmvqwgkgikqvvkdmrdpppiertievillhgpggvgkdhqvyvtgeksqrtfhllpgdlenrtpyegqsvlildefdgassradvrtlnrildkwpydlkglytneparwtrvyiltnshplkwydwdkesllsshtpnqqgvaleprarsartr*	316	USER	zzz1610
2118		Unclass_KJ547630	mgearrqgvywlltiphadwtpylppgitwirgqlesgsdtgylhwqiivgcskkkslrgiqeifgrtchaelgrseaaaayvwkentrvegtqfelgkkpfkrncatdwdliwesaqrgdfmsipadirihsyrtlraisadyakpiemertcyvfvgptgtgksrrawsesgmeafckdpnskfwcgysgqsrvvidefrgridvshllrwldrypcnveikgssvplcaesfwitsnldvdqwypeldeptlaalkrrlkithfrtlq*	272	USER	zzz1611
2117		Unclass_KJ547631	marrqgiywlltiphseftpylpppvawirgqlelgaggylhwqavlafrskgslatvqaifgtamhaeisrssaasdyvwkedtrvsgtqfelgerpfkrndprdwdaiwemavagnlcgipasvrvqsyrtlraicadhskpvgmertcfvfwgrtgtgksrrawdeagvdayskdpntkfwcgyngqrnvvidefrgridvshflrwldrypvnveikgsstplccervwitsnldprawyseldeetlnallrrlnithfl*	266	USER	zzz1612
2116		Unclass_KJ547632	msqdplwkmqgrywmltapaasftpylpptvlyirgqletaasgfshwqllvitgkvrgsklktifgddvhieltrsaaaddyvwkddtyvdgtrfelgrrpkqlskttdwddiwksavdgnledieshvrvryynslsrirqdhlrpiplerscsvywgrtgtgksrraweeasmdaypknprtkfwdgyrghehvvidefrggidiaymlqwldrypvivevkgsstvlratriwitsnidprdwypladqetkdallrrlnithfl*	270	USER	zzz1613
2115		Unclass_KJ547633	manvkwidatiwcegdnafegvkdesewrsrfaglferyaygretapetgrrhfqfrgvlkvacdasclaylsslgfrnispthvrdfdyvykdrdffcswdvyrpeydlvrnsphvwqvqledmerddrtieivwdergnsgktawamyqdylhkavyipppqrgldlvacvlgkresdwyiidtprafeftddwacsieqlkngyvfdtrysfrdrylsvrprvtvlcntlpeyeryfsadrvlpfritpegylwsv*	260	USER	zzz1614
2114		Unclass_KJ547646	msqgkhwqftlnnptqdernvlaelgdqpttqyliygdevgasgtphlqghvsfvqryrfnqvknwvsprahlelvrllrrhieyckkdgaylefgtppdstlakdgkrnelaefratvaegvfhspelrekhpnvmaryphfansiirdlfpqsappdlplrawqqrvvelidappdprkvyfivdrqgnagktslakllhrtheavqiirsgkvadmaylykittkilildvprsksellqysfiemvkdgllmstkyesvmktfdpphilvmmnadpdhtalstdryhyiiph*	297	USER	zzz1615
2113		Unclass_KJ547647	mvnarcvcvtihvdnifwelqkwnqsltygigqlelglngsthwqmyfenntaisltqwkqllgckrahvetrkgtallaieyckkeetrlhgpgtsfefgktteesvkrkspdspykkalnclsyadsiaiikdeaprdyviyhnqvtstlkaifkpvwnktpglvfnlepfpeetlntravifmgrsglgktqfaishfkdplivshiddlkklnptidgiifddmnfqhwpptacihlcdmelprsinvkygtveipantpriftsnrdfeeiwskdctfeemnairrrcdittfdnely*	304	USER	zzz1616
2112		Unclass_KJ547648	msknrnfvftwnnysdasktylstlackyvayaeevapttgtrhlqgfiaftnaktiqqarsklpgchvetmngsiaqsedycskagtltehgtkpisndnngraeklrwqrardfakegkldeidadifircystlkriksdyatkpqpidpvciwiygptgtgkshavetrfpncykkcmddlkwfdgyahedaiyledidkyqvkwggilkrladrwpmqasikgamayirpkfvlvtsnyrideiwtdpqtleplqrrfteiekltqeqvidfdq*	280	USER	zzz1617
2111		Unclass_KJ547649	msssdsdssesvskrakyveaesadapkrktqpqskywvftwhgppkddegnraspalwpepqfdadmmdalqyqmeiapstgkyhyqgavafktrkrsdplrealaipgawtqmmrgsdkdqvytnkeetrapgyephmhgvwpritqgkrndiqayvedrkagstnaelaekhasvivrhykgldalfnlpagrpgqvrdrhtpvqvyvywgaagtgksreiwdkhpdlyekdpnttwwcgykgedvvllddyegtlpwnyllkildrypmrtqtkgghvqllatkfyltsnlpytewygrykdyaaltrritevrhftlpdptpepvaertainrtlvhtartis*	349	USER	zzz1618
2110		Unclass_KJ547650	msrakhwcftvnnytdedihklskaslllqplvssciyqqevpgqesatpgtphlqgfisfktkqsfkftknlvsdrahvevakgtpqqnriycskakdrkigtevftygeqpkllpgkrndlyafqqyvkegniqtrdilenhasvaarypryvreyidlyvnppevpdhplylwqetltkiitgpsddrqiifvvdevgnqgktwfakkycrahedaqflepgkkadmayalntdlrvlflnvtrqqvehlqysfleavkdgsvwspkyesrtkhltqiphivvmmnqdpdfqllskdryhtiyi*	308	USER	zzz1619
2109		Unclass_KJ547651	meprnrnvcftinatdgiplllldpshsswmhvkflvyqrefgshehfqgyveftqpksftaihllegmehaslfsrhgsakqaahycmkpvegcqcqhcceeassptklegpwtfgemssqgqradllevkrriddgsslkrlwrdtdtfptmikfhrgfetykrlttlprdfkpkvilfcgrsgmgktsaayaiaqrlgsvyswpnkpggnfwcddyggedvffldemngdkmtpeffnafvdrypfvvpahgsaghqlvspyificsnyapkfwwkkrnadqvhqtmrridvvfkfllpppllqpcphcaknqrgffcpfhhl*	327	USER	zzz1620
2108		Unclass_KJ547652	mpqprmkdnevkkvfnalvftdfslykwtledlathkiqylaygletcpetkkqhhqgwlyastdrkrsfmawkkhfqllgldmhyeamqgnfsqntkyiskegqltelgvkpmgsgkkrtlleykkqieagahvldiaeedekfgtflqyrsglnayadhqrfkrirtsrekpevyirvgppgtgksrwldetygfdkwieapdnsgkwfdgcdladiivfndvgpgscppldifkklcdrypfrgavkggfiwlkpkiivftsnsywtewfgpdlapldreaierritsticve*	297	USER	zzz1621
2107		Unclass_KJ547653	mcgrwgfrdwdpvearlyqptvqkvledygddwifqlemgesgfvhyqiywkltkrdrpktlaialnerlpgielsaastggvlalkrycmkddtrlagpwskkkiyrgedlpvkmlpwqqkladylkteagkreiiwlmdplgkmgktifgkmmaywrgalyltwgdtkdvmnlvaksdknnvyifnlsrtkpkmmssddlytaleqikdgafintkyetsqvlmkpphvvvmancmpemaklskdrwnvivmkfsdrppveeetrftmedpvkeregggsssqetvvlsqeehevmgdqfpdssaptgasv*	314	USER	zzz1622
2106		Unclass_KJ641713	masrnwvftdnnpsddtpswpeavkyavwqkergengtehlqgyielqtprrlpfvkgilprahweirrgtqqqardyctkedtriagpwthgelhintpgqrndflalkeaadngmsekqlwlefpavmdrswrsitryrslttnprdwvtriylligkpgigktrfcrriapnaywkqcdtkwwdgydghedvvlddfygwiqfrtmlrlcdryaemveskggqhqflakrlfitsngeprewypnipdnrfdalqrrldefgtritdltqtlle*	278	USER	zzz1623
2105		Unclass_KJ641718	mdrsrcicftlnnwtdeeyqqlvnwdqyeyliigkeigktnntphlqgyiefkkrislsklkkfnpkihweprkgtqsqaityckkendfkeygipkkqgertdlvkartivqehnmrtllqledpvniqqirmcekyltyceeqrswkpkviwiwgpsgsgksrlahamtenedrylkdesqwwdgydkhetiiiddfrgkqmnftyllklldryamklqvkggyreclakkiiitsifspdrsyaflneeepmkqlyrridtfinmeewdeqelfekwtedrsrg*	288	USER	zzz1624
2104		Unclass_KJ641721	macartwcftwnnppdlndtvtlvqfdwsvfgdslrygvaqlergesgtihwqgyveftkprklgglkkaipaahwetrrgtqtqardycmkaegrvsgpfefgdfkdggqgkrtdlvsamdlvkagktdlqiaeelpsvwlrysrglreykricvpsrktkthvsvyygptgtgktrrafesdpdayfkprgdwwdgyegkatviiddftgwlpysfllnlldrypllvpykggfhnfgstkiiitsnfkpsewyndkvkhpdapllrrieevvefeenappmtardvdlitsqeirelel*	303	USER	zzz1625
2103		Unclass_KJ641722	mqsvnwcftlnnytdddvkalklvkcryiclgfeigeekktphiqgfiqfekkvrltawkkinkkihaeimkgnvdqaiayckkggvyeekgdvikerqrtdlreakkkcaaegmraitgendeynnqvirsceimlkyhekvrdfkpevvwvygnsgsgktkyvkekcaaedtywkdstkwwdgydrhetvvmddfrasnmkmnellklidryphrveckgsfrqmlskkmyitsimhpkevynlpeepvqqllrridkivkvskl*	268	USER	zzz1626
2102		Unclass_KJ641725	mpskfcfavnnpellldpsiwplfvayvcyqlevgengtphfqgylqlkqtrslaqlkrwpgletahfevqrgtndqardycrkessrmegpweygtfvtgpgartdllqvkkmlddkasdkeiadlhfgswcrynrsfntyrtlsmkhrtqkpkvivafgqpglgktysmthmfgvddlfpkdrlsgnwwdgyfgqklvlldefsgwmvpqdlnrlcdecplsgqvkggfvplaplvvgittnyppwlwwkpevssislpafcrrvdvwqlwtefgchsdfdnyydfkvtaclfmdflerekk*	305	USER	zzz1627
2101		Unclass_KJ641729	mylrnfvftlnnytedeynfiknfeqaqyiiigketgaqgtphlqgymelkkqvrfntvksvfprmhieprrgtqkqavdyckkeknfievgkakmggirndvasviefknssfksffesspgadiqafnllgkiktymeekrdyktfviwcygpsgsgksrwayeisrkynpyfkddtkwwdgydnnsvtilddfrasnmkfntllklldrypylieikggyrqfvssiiiitciqkhedtykilendeplnqltrrinkimsfplqnhvtmeeiiseseirddpdeehesegqfgavgntirqrlsvvt*	312	USER	zzz1628
2100		Unclass_KJ641730	mpspnqsfhwcftlnnyveedfstikawaeeeakywiigretgesgtphlqgyvslrrrrvfpyvsgklssrahitraagtarqnrrycskdgnfeeggeinegrrkpkdkdeqarefvvaleqgdrgilefsnsepgawifngsnmlrnalqlyatverpninvrwiwgppgvgksrlahgnlpdayvkdprtkwwngylcqkeviiddfgpngidinhllrwfdrykcavetkggmvalyattfivtsnfepcdvfthdgivnaqlpallrrivvehmm*	282	USER	zzz1629
2099		Unclass_KJ641731	mskersycftsyaaqlsidekaqnlrycvyqqekcpdtgrlhlqgyiellsptritavktllgdpavhlekrrgtreqardyamkeatritgpweigtwtgggagartdlinlqksldsgdsmqaigeshfplflkyqkgiqaymnlkipdrslttyatvywgptgtgkswralqeaganaywkdptttwwdgfngtqnvvvdeytgqwpieyllrildkyplqvqikggmvkfaaphlwltsnlepeewyptakacqrealrrrltnvvqladvyiepldikedpvvdllelml*	296	USER	zzz1630
2098		Unclass_KJ641732	mhlsatlykdvptvtnhmmrdaryrhwlltynnptesaeeliqlfdengiqytfqlesgesntrhyqiylrfnnpqrssrlagllprahyeaarhpdsaelycrksesridgpwtnirpggtkrkseyndllktiqttqkstaelateyfplfcrnysnirrtisiirpveprswkthvewhwgktgtgksryaydttvnksvywknstewwdhyegqeyvviddfrgewplkfllnlfdrypmkvqckgytaefvsktiivtanyepshwyyfdeeglrallrridfikeyk*	294	USER	zzz1631
2097		Unclass_KJ641733	mggstgkgryrrwlftlnnptcegdklfesnktniraatwqlekgettgtlhfqgyiqfnkamrmasvkeilptahwtaangtqeqniaycnkedtreqgpwtigdwadkeatntplqavkqaidqgateleiaenyfseyvrygrglmqykllkteqrnwqtellvicgppgtgksrvaremapdayyhstgqwwdgycaqrvvimddfygtipfsqllrladryptnverkggvvpflsrsiiitsnkkpsewynllqynlhalyrritlymwldmheensvctegfie*	292	USER	zzz1632
2096		Unclass_KJ641735	mqtghildtynqtcrihppylppgcawirgqlelgesnsylhwqiivgfskkmalpgvrrifgnchaeltrsdaaaeyvwkddtrvigtqfelgakpiqrnsktdwesvwtsavsgdlssippnvrvvsyrtlraiaadhstavpmlrecwvfwgrtgtgksrraweesgldayskdprskfwdgyqtqkcvvidefrggidishilrwldrypvrveikgssrplvadkiwitsnvdprlwypdidpetlgallrrlnithfh*	265	USER	zzz1633
2095		Unclass_KJ641736	merrtqrrqgifwiltikhaeftpylppgcawirgqlelgesnsflhwqiivafskkmalsgvrrifgtahaeltrsdaaaeyvwkedtqvpgtqfelgakpiqrnsktdwesvwtsavsgdlsaipanvrvvsyrylknnsrtlraiaadhstalpmlrdcwvfwgrtgtgksrrawdeagldayskdprskfwdgyqtqqcvvvdefrggidishilrwldrypvrveikgssrplvaskiwitsnvdprqwypdidaetlgallrrlnithfh*	277	USER	zzz1634
2094		Unclass_KJ641738	mpspqavrwvftlnnysdddieklstlvptvcsyliygketcpttltphlqgylhfvkrqtlsgakallgnqsyhleaskgtpeqaaayckkegsfvefgeppkggkrndwhdirdwmaaldcppsdrdlldkaphlwarnrpallkmaqllcpphrlvegdprewqerlsslidaepndrtiyfvvdppgnngktwfqkwylskrpndvqlllmgkrddmaysvddtksvfminvprgsmeflqysilemikdrvvhspkyesttkffkkkthvivfsneypllskmtqdrpvfinreghiyeydgnyptmdqnlppp*	320	USER	zzz1635
2093		Unclass_KJ641739	npvvgttesefvkelnlhdydyftfqleqgengtkhlqgyiefrtrrkldtikklngrihwerrngtrsqaiaycnkddtrllgpfmggelpksdqgrrsdletireklngrkplkeiaddhfgdfvryhrgfreykilcglsqrtwkthvvvltgktgigksrycqehypnafwkrkgewwdgydghesviidefygwlpidtmlrimdryplmvdtkggavnfeakticitsnkpwekwytswdddlkdaflrridnfidlnkn*	267	USER	zzz1636
2092		Unclass_KJ938716	mppreprfngirffltyaradaisiddvadhlhqladswleivqedhvpneehpdggihyhvvlcfatryqgaldsfdvlghhpnwtpirnatvdltnrrhyirkgirakedqhtvknhkttacdyiiepdtrgnvpeyssqagrlnwggileqattgeeflalcrlhqpkdwilrnealtkyaasyyqearepkkslppgtlssflprwmngsnkslpryvysgsftrtsldvliidslimlqpkpdrpktlllvgptrlgkthwaeslgrhsymcgmwrsdsfndrddylilddfdfdffhgmrkaiwgaqpefttvdkwrkgvakwgkpliwlcqeeknpfvaldkngrpvmaeeerawyrancvevhvttklype*	380	USER	zzz1637
2091		Unclass_KJ955447	mapnlisrnfvftinnptfnpddlfvgeppewvrcaiwqleegeqgtqhiqgyieftkairasrfcqiingdnphlevrrgsrdqaynycskeetrvsgpytygswklckgrrtdieaattaileqdadddellhnhsgvmakypkfvkflrehkrrkinseivfphelhpwqislisyledepiprkikwfvderggsgkstfakhmarhgafytrggktpdvafafrehlssnphstivifdftrsgkdyvnydileqikdgivvsnkyesttiispvqhcivfanwepnkeslsldrwdivhlnhnmndmn*	315	USER	zzz1638
2090		Unclass_KJ955448	mapnlisrnflftinnptfnpddlfvgeppewvrcaiwqleegeqgtqhiqgyieftkairasrfcqiingdnphlevrrgsrdqaynycskeetrvsgpytygswklckgrrtdieaattaileqdadddellhnhsgvmakypkfvkflrehkrrkinseivfphelhpwqislisyledepiprkikwfvderggsgkstfakhmarhgafytrggktpdvafafrehlssnphstivifdftrsgkdyvnydileqikdgivvsnkyesttiispvqhcivfanwepnkeslsldrwdivhlnhnmndmn*	315	USER	zzz1639
2089		Unclass_KJ955449	mapnlisrnfvftinnptfnpddlfvgeppewvrcaiwqleegeqgtqhiqgyieftkairasrfcqiingdnphlevrrgsrdqaynycskeetrvsgpytygswklckgrrtdieaattaileqdadddellhnhsgvmakypkfvkflrehkrrkinseivfphelhpwqislisyledepiprkikwfvderggsgkstfakhmarhgafytrggktpdvafafrehlssnphstivifdftrsgkdyvnydileqikdgivvsnkyesttiispvqhcivfanwepnkeslsldrwdivhlnhnmndmn*	315	USER	zzz1640
2088		Unclass_KJ955450	mapnlisrnflftinnptfnpddlfvgeppewvrcaiwqleegeqgtqhiqgyieftkairasrfcqiingdnphlevrrgsrdqaynycskeetrvsgpytygswnlckgrrtdieaattaileqdadddellhnhsgvvakypkfvkflrehkrrkinseivfphelhpwqislisyledepiprkikwfvderggsgkstfakhmarhgafytrggktpdvafafrehlssnphstivifdftrsgkdyvnydileqikdgivvsnkyesttiispvqhcivfanwepnkeslsldrwdivhlnhnmndmn*	315	USER	zzz1641
2087		Unclass_KJ955451	mapnlisrnfvftinnptfnpddlfvgeppewvrcaiwqleegeqgtqhiqgyieftkairasrfcqiingdnphlevrrgsrdqaynycskeetrvsgpytygswklckgrrtdieaattaileqdadddellhnhsgvmakypkfvkflrehkrrkinseivfphelhpwqislisyledepiprkikwfvderggsgkstfakhmarhgafytrggktpdvafafrehlssnphstivifdftrsgkdyvnydileqikdgivvsnkyesttiispvqhcivfanwepnkeslsldrwdivhlnhnmndmn*	315	USER	zzz1642
2086		Unclass_KM105952	msapwdndseeysneekidrapnrkvkikiaedpyeepsedgiiqdldekeeeldnfsksalrsngvfkinnrqvmltykthldkedyrsfvdelapfdelfiahenadlknpykhthayikftipfvssdsrvfdwdvsetqnihphisvlgakkvdeikmkyyiskedkspdlamlrvscddwnkangnkarlgkgladdqvsllervcsyktyqemlkhlckepghatglrelweskliaekpkikfseiaeftwqktmrdkllapewnhriltyivdkkggsgkstfadymvntynalylssvtssrdiatlidehlkcggsakyiildlpraskahkmwdtveallngkltvgkwkgkplhfdkprlivfanfapplpgdesraadvcedncvl…	450	USER	zzz1643
2085		Unclass_KM510189	maqfvlseaavddtdisdteaelllppatvfdavlkgfrlsakrylltyaqcpedpddifrqldrkraiaravgcielhadgnphihiavefakklnsvdtkyfdyayddtcesyhpnispaqswpkcinycrgknktltdasgirgpkpdlfvqaracngnkelwlqwlfehnvqptlglevwrslhappafqtfetlmdirepiaatfdqrllylqlpddftksvviigpsgsgktvwafnrmferfgpglsvgdiddlklfrpeqhscivfdevrfggdfqtgkgrfkletqialcdtarsrtircrhgngfiaantprvftctgtlpftqdyqierrihiinlyndreisdlwpptf*	362	USER	zzz1644
2084		Unclass_KM510190	maqfvlseaavddtdisdteaelllppatvfdavlkgfrlsakrylltyaqcpedpddifrqldrkraiaravgcielhadgnphihiavefakklnsvdtkyfdyayddtcesyhpnispaqswpkcinycrgknktltdasgirgpkpdlfvqaracngnkelwlqwlfehnvqptlglevwrslhappafqtfetlmeirepiaatfdqrllylqlpddftksvviigpsgsgktvwafnrmferfgpglsvgdiddlklfrpeqhscivfdevrfggdfqtgkgrfkletqialcdtarsrtircrhgngfiaantprvftctgtlpftqdyqierrihiinlyndreisdlwpptf*	362	USER	zzz1645
2083		Unclass_KM510191	mpsavrwvnvcftsfseepptkgdkisyliyqrergndthrehwqgyaesinpkgwcirtwqcelsshnahiecrkgtqsqaieycrkeetrlsgpfefgeakaskkrkgddtdnvyreagetassaadylrivaagdpkgfaksfnsikacaehlfpeevfppyvappwcnkgwkltadlvkwveqelprkdrpkclvlvgpsrlgktqwarslgrhmywrgmtnvthwdsaakylifddiewkfipqkkslltcmgsatvtdkykgkrdiivdkpaivlcnefdidsieesaywarnlqvvhvseplfdttqlaiaq*	320	USER	zzz1646
2082		Unclass_KM573763	mtrawqhcnyfltsknhekfwdtdylnqlvtkydivylaigrhtglttgyehvhidvefekkkawtvikdifedetinvqkriaeravadrylakegperfrvivnkkpanfqgkrnditafdedmyagmswddlkvahpsytgrcrvayqrylehsaaknkrfrrdpgaqcrvicyfgrsgsgktwaatghpafakelegtgeyeeigveiaypghgtlwwdgvtpstecllldefsgawmefskfcnmvgqikgrkfgvkgafitatintwiitsikhpnewwanaaefernrqqlwrritecywvdepneetgewgqpilldkkkfsemstetflnwlkfgrrkyielygceyyyvy*	361	USER	zzz1647
2081		Unclass_KM573764	mtrkqelfkriicmihlitlnmnhafrlsnkkilltypqlnedytaqqfgehfkwtfqniinfnyiiackenhqdqghhyhlyfeseepfrstnerifdlqfqigtyhpniepvkrtpwktvdyikkdgdfweylpenapkpalenmtkseknkflkehnplelyddglltpqqcagllkakeliararidsvkrkdppfvlwfwgstgsgktrtaieiatdmgkeywishseklqwfdgyhgqevvifddfrrnmctfnyflrlldrytmqvqvkggyvnwipkiiiitcpvdsstaytyfdiktneerewdnlqqlkrritdeicfddyi*	333	USER	zzz1648
2080		Unclass_KM573765	mssgaernmnakrwcftinnpvsdpdqdnndrfwdnspgssscepfavhmdylilqeergengtlhwqgflilkerhrlewlrrhftprahweiargtneqardycrkedtytggfrlemgelperapsrtreerlqqaceeldivkagykrpreipsmtlmqcgfipaykeltadvlgpyrpelkiitlvgppacgksfciqrnfpnhgraimgnngvwfqnpladvmvfeefcgqiqlqrmlqyldpyplalevkgsmrpamytiviitsntrpngwykgdeagdpgkrtdallalwdrigfacggyvparrcghyleapdgmsilelrrwfdrqvqtillghepisddemptedmeweeiahqverrqigygdh*	378	USER	zzz1649
2079		Unclass_KM573766	mpanrsdrtrysnwilttwdpeapylkenwwepqmdnlvqyvtvghehchegeqrehwhiyfelsgnhrknmasikewlndltvhcevrrgtgqqaikycqkgfdfwelgepkrqgsrsdlvnckqlleegvsmielaqahfgdfvryyrglyqyadllsrekqrtaglsevevtvfigpagsgktyncskikaeyeengmgcyqfmqqqngkcyfdgyekqkciwfdeftgstmqfnhwcrladkygvrvetkggsvqisglkriiistiippgewwpnsqsfrddpeqlwrriteiyycpkstgtrrnktyykpmlipeedwericrpylenldtlkvpidd*	345	USER	zzz1650
2078		Unclass_KM573767	mskkimsrakrwcytlnnytpeeeqniqniecayhvygkevgengtphlqgficfvnrkvfnavkklfkterihlevsrgtieeaseyckkdgnffekgnkpeeshrkggeatkrkweearenakqgkfedipadmwikyrrswiaeytdnlnkditeikdidlkdhfywiygptgtgkshlarqlaqafdpdhqpylkglnkwwsgyenqkvviieewnpeaskflgsllkqwcdkwpftaetkgghfvngirperiiitsnwnidecfndsheseplhrrireiykkeretfypivldpdptqaippsplnlatipssqeviidsgtindi*	334	USER	zzz1651
2077		Unclass_KM573768	mekildkktqrseenakekpfrfhsksvfltypqcdkgkewlldflkskdaklcvigeedhhetlgkhlhayvefnkkidttnpryfdhdefhpnigmdksngkkntkasktdmikyvikdgnyiehgidvedyleavkdkrayiakelmegkktlceaveeepkllytlgtiqknltlfkaikkesefqgkrtcywiygtsgigksygvrqifpsiyikdsnkwwdgyvnqdavlmddldseilqhhikiwsdnyafigetkggsispsyntfivtsnftidelykvekireaikrrfriinandyigedgyfdffrakveidlvyes*	330	USER	zzz1652
2076		Unclass_KM573773	msnrgtrwcftinnpteadvhnvehlseqdwvksaiaefehlnegtphiqgfmilnekkylswlknayfgprihlevargtskqawdyctkegniiieynkpdtvdrtphrrgdelarnilrdigeldeedfkeqypsfylrnkpiydqhrisylqrtaiaynselhdknlwlygptgtgkttfalsglpvyqiyskpatnkwfdgfdparhkrvvlddlpilqpgsnipyylkiwadhygctvekkgsgtfldaripiivtsnfsideaipneidrqaikrrfrevywdghniemysecpsfghylgqvspahrpqpaqipqrpvtpqsaqyseyqsdnedsiveednpfdtplntpirpntpirpntptrpdsipsayeisplerrmmelrkqrkea…	404	USER	zzz1653
2075		Unclass_KM573776	msrgkrwcftinnyteedtsrceridceylvfgkeigeeehtphlqgfivfknrktfnvvkriigenahieiargtvkeaseyckkegqyfekgelppeqnerggqatkrkweetlkaakegrfddiapdlyiryrsslkaiyqeevnkntkeitdfdlkghfywiygptgtgkshlartmaasvdpdtppylkglnkwwsgykmqkaviieeanpetckylaplfkqwcdkwpftaetkggsfehgirpqyifitsnysinecfpdpndsepmkrrcheffkenkdswiplytdndtqtfpiepvhlglndkpidigtqemplltpelevledg*	336	USER	zzz1654
2074		Unclass_KM598389	mpasnfafdgshvfltypqcgslskervrdfllvelgvrrflvaselhgdgqphihayaawdsrrrlvgagcfdvdghhpniqkprsakavaeycgkhdtealrnfenaelesnrgntgwrsilrecpdaktflarveehyprdlclsldrllqfcewrwgterigysgrtrelflepdqlrewvrlslevllyplmpivlvlsgggpqsppqplwrkanclcagykggerpislllvgasklgktewarslgphmyfcgqfnlddwndeakyivlddfnikffpqwksffgaqkqfvltdkyrkkrtvkwgrpliwlcnrdadprgalsgaelewlqinammvdlftplftq*	354	USER	zzz1655
2073		Unclass_KM598390	mpfrfaarnvfltyshqeggwgvpnmqelfqrlqeikptnyvvlskeqhgdgtdhfhavlcfkrkldtvnprlfdfngwhpkiesprsvaasityvkkdgdflevgteptnrtftdlhakcqemeraeweeycigehisfaycesiynrthprqrgtiyegeefndgelslalerfswgfpesqslilvgpsgcgktlwakrnaprpclfishidrltefdervhksiifddmtfnhyplqaqihivdqyddrdihvryktafipkktpkvftcneepfcrhetikrrsktyniin*	297	USER	zzz1656
2072		Unclass_KM598391	miedvekffdkqdkkkegyratgkaffltypkcdikrdeaytmlakqwnpsnlivaqedhkdgtphlhvymqlptkknfknprwadlgkyhgfyttvrdrqavmayvmkdgnfkmnenlnfttwhnfrkekgdfdawiihneskklkspypfklpdgtdvlepklgekkcnhmiigipdtgksfwynttfegkrvfsrvdgkypfddyegqevviyndpqtvtlmelinvsdcylvktpvfgdtrytkkywkmkqrrtiificnhgripnfvedpafrsrfniwdmgddepepeemtddpnrtemdtdfdatdyar*	317	USER	zzz1657
2071		Unclass_KM598392	mifkkkiyfsnkikmssrnyvltiydfnllpklqdsairysaytdeicpttgrphkqayivlykkqrpsfvrklfpntynhimngtleqndiyiskkntqqiheygdkpmtqeekgeegaaywreqlelakkdpslcdpklqiihhrnleaihekakrvklsdldkldnwwyigctgtgksrtarqlypdayikqcnkwwndydgeetviiddlnpdhkfmanfidqwcdhypfpaefkggqktirpkrfiittrytieeilgennfsqieswkrrfqikef*	283	USER	zzz1658
2070		Unclass_KM598393	msaeqpkpsdkashwlltlnnptaddrercknlpkwvkrfkfqdeigesgtlhiqgyihtetvrlsalkkwfprghfevcrnpkaaenyagkeetsvpgtqhdfkntveqvtmmdnlirlcdiqpkiidhlirqnavstdakqvltgkqlyqeeywgcvnvileenpdlistytmpqyckawvncrpailnahrvrqyenertagqpdkneiitpedlttneclicskekcecea*	236	USER	zzz1659
2069		Unclass_KM598394	mgheiraksrgwcftlnnysnleiselklrfegavwyiigeevglsgtphlqgaiyyknavvmpkfnprihweamrgncqqsreycskekvlveygecpkkgkrsdiksmvemlqagatdkdiymahgdkalringclararasltevkrnwemdiriyygaprtgktravyeefgidnvyskmagkwwdgyrgepcvliddfdpqncfdiqydfylklldryplriefkggsgefysktiiltsnfdpaiwftekanrdafferikeiryfggtevsggntslltpenkptyegigk*	299	USER	zzz1660
2068		Unclass_KM598395	msnrrqgtywlgtipfalwipflpagcsfikgqreigqessyehwqvfvitttkqslhgikrifgiqgshweltrssaaeeyvwkeatragdqfqfgerpmrrnshtdwevvkekakcgdlegvpsdvfiryyrtltaiaadycvppftersakvfwgptgtgkshrawseagasayskdprskfwcgyrgqtsvvidefrggidiahllrwldrypvnvevkgssralladsywitsnlhprdwypeldgptvgalmrrlevieinelvl*	272	USER	zzz1661
2067		Unclass_KM598396	mgsnvlrakngssgprrkyklycftsfavdqepsydptamqyliygretcpdsgrthlqgfvafknrqyftackkyfgtahveackgtfaenqeyckkdgdykefgtapeiksggdvfndvlrkaeagsiqeikdlypglyirykktlesikrfnaeqleescgiwltgpprsgkdyavstffssiyskmlnkwfdgyegeecvhlsdmdknhvymgsflkiwcdrypfraeikggtmvirpkyivvtsnykledifdgsmlsalqarfmvmcydpvdgvvvtprpvfqpsdrfiqalqhaipkgedvpdmapkagpsnalqeaefsssdefkesqvpkrkkkl*	345	USER	zzz1662
2066		Unclass_KM598397	msqsqqsrrwfitinnytsadidalreiecnyivacteiapttgtphvhalvifntnkrffavkrlvaradieivkgtfnqaydyvtkdgriileegdkpkekhnvectfkamvqaakdgtidkeclmycryekffsrfekreefcydgelscknawiygppgtgksrlvreyarsrgyriyeklsnkwwdnydgeevvlmedldpkvcevlihhiklwadrypfraevkggskrllpkfqlivtshyslsecftgpdgsaicrrfdewemn*	273	USER	zzz1663
2065		Unclass_KM598398	mssnasslststnsfriqaksffltypqcsaskqdlknfldtkgrivyyligqerhedgnfhlhalvtyekkinvkrttffdlngfhpniqaaknlpalknyiskediepltstvepeeednlydlarvtpeenyfeicrkrkvhpsiisrvpfmyanqaflkilkdasvntigeeyqvigtitstvlqnlqlptdmtslwvkgpsgigkttwaltvsnkpalfvrhldtlrefrngyhktiifddmsfqhlprtaqielvdryhpqqihiryavvnippnipkiflsndsiftydeaifrrltlvnleftdq*	314	USER	zzz1664
2064		Unclass_KM598399	mpfvinarkflltypqcqaskeevlarlqslgeikwytvaielhedgsphlhsachyskkihttncrffdfgathcniqtlktqqdferaesycrkhgnfisnydtkvpkrvllakklidhgqidydfiqenpeiiffnysslnsylslvpkkkvklnyptmkqrhiwlhgpsnsgkttwlrdyltdrnhseiptnndwccneatnvlwideykgcltiqqlnklcdgdtqlnrkggstrilfptivilsnfnisavynnasddmkatlynrfieydssvsfppva*	287	USER	zzz1665
2063		Unclass_KM598400	mtsevmtsiapgntkpvalkarayqftlnqpdvydklkniltglktmdyliscretapstghvhmhvyahfsqqyrlpkkirdlgchieiclvgakqniayirkggdiideigdephqgartvgelmeadiksidphlyrikkqidaeqhdldtfmsmldeieaddlkaptviyitggtgkgktysaykralkeypkkkigkltlkndfidivngdnaecfvieefrpsqikasdflqltdkygyrcnikggfatlrpkmiiicsiiqpehiykeevnkqflrriteridlgpeldpvdelye*	304	USER	zzz1666
2062		Unclass_KM598401	mskttrfcftknnyselhvdilksdltstfkywcfgievgesgtphlqgyfefpnknplrisgaqnklnniglegcaifpakgtaeqnitycskdgsffeggerprgqgkrtdldsvceliksganmtevanqfpsqvvkfhsglqflmnvtitprrfktevwwlwgptgsgksryawdqypssymkecshkwwdgytgqdvvimddfrpskelpfsfilnlfdryplsvqvkggmaqfvsktiyvttplspedtcnhlewlgpeqkeqflrridhivrfpqmmtnylar*	291	USER	zzz1667
2061		Unclass_KM598402	mskttrfcftknnyselhvdilksdltstfkywcfgievgesgtphlqgyfefpnknplrisgaqnklnniglegcaifpakgtaeqnitycskdgsffeggerprgqgkrtdldsvceliksganmtevanqfpsqvvkfhsglqflmnvtitprrfktevwwlwgptgsgksryawdqypssymkecshkwwdgytgqdvvimddfrpskelpfsfilnlfdryplsvqvkggmaqfvsktiyvttplspedtcnhlewlgpeqkeqflrridhivrfpqmmtnylar*	291	USER	zzz1668
2060		Unclass_KM598403	msktnrfcftrnnyselhleilksnltstfkywcfgvevgeegtphlqgyfefpntqklrisaaqnkliniglegchiepakgtaeqnitycskdgsffeggerprgqgkrtdldsvceliksgatmnevanqfpsqvvkfhtglqhlmnlttmprrfktevwwlwgptgsgksryawdqypssymkecshkwwdgytgqdvvimddfrpskelpfsfilnlfdryplsvqvkggmaqfvskiiyvttplspketcnhlewlgpeqkeqflrridhivefpqmmtnflar*	291	USER	zzz1669
2059		Unclass_KM598404	msfqyhnfvftsfktedfervlgldvqyiivgketcpetkrehlqgyceldkkktmagikklfsddslhiearkgtqkeaiiycqkegnwkeagvqrkqgsrgdldgarvmavesgmravsrsmnmqqirvaekflsyneevrdwkpevlwfwgdsgsgksrearfishgldtyvkntggkwwdgydghevviiddfrdswwaltyflactdryefqvevkggfrqlrakmiiitslfhpkymyreaqakgdtayqilrridsvvhfgsqkpevggntiaptvsnfidetigll*	295	USER	zzz1670
2058		Unclass_KM598405	msfqyhnfvftsfktedfervlgldvqyiivgketcpetkrehlqgyceldkkktmagikklfsddslhiearkgtqkeaiiycqkegnwkeagvqrkqgsrgdldgarvmavesgmravsrsmnmqqirvaekflsyneevrdwkpevlwfwgdsgsgksrearfishgldtyvkntggkwwdgydghevviiddfrdswwaltyflactdryefqvevkggfrqlrakmiiitslfhpkymyreaqakgdtayqilrridsvvhfgsqkpevggntiaptvsnfidetigll*	295	USER	zzz1671
2057		Unclass_KM598406	maqehisrsrawcftlnnftpeelaeienksdygiigdeigekgtrhlqgylywknprkftfikkiiprahiepakgnpqqnitycskdkiiatwgeppkqgkrtdletmreilkepepmrkiteslnyqatrsaekwlcynerkrdwkpevtwytgpsgtgktraakeelpeaywksgtnkwwdgydghkeviiddfrgssiaftdllrlldrypmqveckggsrqflaekisitsiyhpekvyknleeepieqllrridkivnltdtdv*	272	USER	zzz1672
2056		Unclass_KM598407	maelirtenpkkrdrnwcftinnwtpeeqdqlrtlvpadaeyivwgreegdaehtphlqgfvktknevsmkklkklgfarahleimggthaaaiayckkdgdweeygnqplqgyrtdlvafkhqielgkrplevaeqdshfgayvkyhrgfdnyhahiqeskrlrtgfkppqvylrvgdpgvgksrhvydthgyehvytwesdmgnffdgyrgqsvvhfedvqkgqlpplakfkrlldghpvrvsvkgssqiwspdyiyissnhkpctwydykdgdyeaimsrikearvvykdrpdevfhtssrfdawfqaqedq*	316	USER	zzz1673
2055		Unclass_KM598408	mpstityiftinnpteddtdklqlapgitsiayqyergetgtrhiqgairfarrttfnqvkrilprahieaargtwqqcmdyctkletreegpfllgkcanedmapyqrleedikngatrddienrhfklylrhhtainhiltfhtkprsnkptvtvlwgptgtgktravvkrasnrgdslyikergkwwdgyagqaiclldefygwlpfgcllrlldrypnrveykggstqftsdeiwitsnkepkdwykeeymdalfrrldrivfcdtnvwllrkikeqnrpkpytlntrqnrlavrnlt*	303	USER	zzz1674
2054		Unclass_KM598411	mprkmeslessgggnsipppikekrmnqgrrwcftwnnyddnvvtaikerleskdilryivgfeigekektphlqgyfeftgqiarrpsemwdnynlgrffkckgtaeenhaycsksgnyfqggdwsilknkeplpievlkdedlypfqksiidiidgpvikghihwicdlkgqngktellrklvvernlkftyggkkadiinliynnkqyylttknaamvynlgrsedlekvsytsmeqisdglisntkyetgcfvmnhphiivlangmpsirsmtmsrwiiykindakelerieyeshsnlgsplddldn*	313	USER	zzz1675
2053		Unclass_KM598412	mlfgvcftfnnwsaetkkacqkaigqagilyiiwgeevgeegtphlqgyiqcnqdkykrlmrvigtchmekqkgtsdeardyckkdgiwqehgiykfidapkkrqgersdlilvkksidegmsyddicekhfaivgkysrfikervqardsktqetelqeqfvnsslrpwqqkllditateacprkihwiwedkgnvgksfmttylgvmkgsalltagkkadmayiyaqkpskivcfdlartneeyldgvyslaedlkngrvvstkyesktaffkpphvfvfanflpnmkkwsayryniidlnrpliklpilpivlcidcarcdvvciqstiqvrpdyphnhrivy*	347	USER	zzz1676
2052		Unclass_KM821748	martprtnaqryfltysqahaldiddlanflhalapswleivqenhqddgihyhvvlcfderfqraldvfdldnhhpniaiiknasgdlnnrrhyirkgadrpkesehtiadhkkgpcdyiiepdtrgevppystsagrlnwggilesakseeeflilvrvnqptewvlrndsivkyakthykaarepekvyppeswvvppalddwvaevfsdvstrgvlprpdrpktlllvgptrlgksvwakslgrysymcgmwhsdefdesaqylilddfefdffhgmrkaiwgaqevftttdkwrkgvarwgkptiwicqeehnpftavnrktglavmdeterdwykqncvevhvntkfirlrtcsgrsnrrdii*	370	USER	zzz1677
2051		Unclass_KM821749	mpfrvsaksfiityprcdvdkevilqwfqdhfmllgcrvarelhadgtphihvvfhiantfqtrnaryfdigdhhpnvqstrglpasyayvakdgdyidfgtipatrphgswadianattkeealalvketsprdyvlnydkiisfceshfanrteayvpiyqnfnglpqqlttwcdqrlevserhspppaaglppqpptewgellyivtnqslghhmyfnamfdlgewddgaqyaifddwadwskfyaykqflgaqrqftitdkyrrkrtvrwgkpaivisnlrpawededwitvncfqchllgalf*	309	USER	zzz1678
2050		Unclass_KM821750	mgdtsqratcwsitinnplpsdiptaealpakwvlqgqleegkegtvhyqgmlttpqcrfsqvkkvlprahievaknrtalekyvhkedtrlvevptvssslptlfdyqftvagrwvstefdkyiddfkdkdigdvallyvdslvekdiingmrgiefiainpmwrsswkrfwrgiilrhrsiedaqarqedipsqeectaspcseaqdgece*	214	USER	zzz1679
2049		Unclass_KM821751	mkarfwiltiphadylpflpnccvwirgqlergsatgylhwqlvvgfkqqcrlatlkrtfgdschaeptrsnaaddyvwkpesridgtqfelgakpmrrndsrdwdairdaakrgdletvpsdvfvqhyrslrtisadyaepvaiertvhvywgptgvgksrkvwelagedaypkcpnskfwdgyrghtnvvidefrgridishilrwfdrypvlveikgsstvlraqniwitsnldprewytdldeltklallrrlnvihcplaly*	268	USER	zzz1680
2048		Unclass_KM821752	mtptpkksycftlnnytedelaairgvcstlaqyaivgrevgeqgtrhlqgyirftrayrfptikdrylprchievsrgsprqnrdycskdgefdeygelpedrasssredlarefardatdgrggvrrfaesnpgtyyfsghnllrnhwalqaptarpgitvdwmhglpgvgksrraherlpdayikdprtkwwngyfgekeviiddfgpqgidinhllrwfdrykctveykggmmplmaetfivtsnyhprevfqtgrstdqqdntmydhpqlpalmrriniihmqyiieyisrcmdacneaseivkeiikkimrrvpapgaeia*	328	USER	zzz1681
2047		Unclass_KM821753	mdtfptpnqlileedlaepetleaptekatakgfrlsgknftitfpqcdvkkeiaverieqkfgseikgylvceeqhkdgtphlhvylsflnkknfkchhcfnfiggkqgnyqvtksvrdwvtyctkgdnyvakgldvqaikkktapksttvatmlmegkslseinavdpgyvminkrkleeyeswvtiernkkskltwvpplldgltdankqicewicsnirqprkfkapqlfitgpknlgktsliewlgqylslyhipqteefydlytddydlvvfdefkgqktiqwmnlflqgspmnirkkgsqymkmknlpviilsnytlgdcypkarddgrletlqarldvievdsfidfykdrsdil*	364	USER	zzz1682
2046		Unclass_KM821754	msqarfwiltiphadftpylppnvnhisgqlergtglnqylhwqivvsfarkirlggvksifgdschaeptrsdaarkyvhkkdtrvdgtgfelgtlpirrgescdweavrenakrgrmddipadifcrlygnlkriavdnmapiglertinvywgrtgtgksrrawaeagmdafpkdprtkfwdgyrshrhvvidefrggidvahllrwfdrypvvvevkgssvvlaaetvwitsnldprqwypdldeetlaallrrlnithfti*	267	USER	zzz1683
2045		Unclass_KM821755	marsrnyvftvnnyddedehqcwampwevkdckyicvgkeigesgtphlqgyicftqlkslnqlkgffpsahfetkrgthqqaadyckkdgdffewgtlpvddcgsagaaamdelmghtiecirngdykgipnaathfikaaeyrvlkeqqqdrnlatldtlthqwrwgkagcgkskpardanpdaylkmcnkwwdgytgqevviiedfdpdhkclvhhlkiwadryafpaevkggkidirpktiiitsnyhprdifdrepdleaimrrfnvthvlgdlgvdfmqvdns*	290	USER	zzz1684
2044		Unclass_KM821756	mssrawcftlnnyseddlfeisgwdckyvvygvevapetgtrhlqgycmflgvqrlsavkklletahweiargsplqnrtyctkegdfvevgtlplprgesekerwaeafeaakhgrlddipedirvryyrtmkeikkdhmvkpedqqdvtgewfygepgvgkshlareqypgaylkmqnkwwdgyqdekyvilddfdckelghhlkiwgdkysflaetkggaicirpeklivtsnykpeqlfsdemliavkrrfkvthvlswravtnppv*	272	USER	zzz1685
2043		Unclass_KM821757	mtsrrwcftqnnptedeqvhllwetwphlrggvcqleqgdngtphyqgyisldrptrlaalkkllprahwevargdatanivyctkeegridgpwrigeivdqghrtdwdklhqdikdqlsdqdiadrnfrlwiqhrsgidayralhsrvrdektevvvicgppgtgksstarelapdaywfpggkwwndyngqrvvvidefvgtiqftllnrildryplqvetkggmrnftsklifitsnkkpyewygpenergalyrridwymwldrlenfciwkkgynedy*	285	USER	zzz1686
2042		Unclass_KM821758	mtsrkwvftvnnytddewnelkrwcmvntkyaimgkevgpqcgtphiqgylsankphrrsgmvevcrrarweaakgndtqnddycrkaakegrevwrhgqpctgagqrtdllrvaaavdsgvslreiasenpsefikfhrgilayrnlvrpavprdfktelhvfvgppgsgksrraqelassfgtvyrkvrgpwwngyeqqqsviiddfygwvpfdellrvadryqhqveikggfeefnskiiiitsnrpikdwykfdsydpealyrrcsvyqhinmdhsvtdyeimegikiny*	295	USER	zzz1687
2041		Unclass_KM821759	msrsqhlywigtisiqsfptwnpeeyfsqtddlqyirgqkeegeggfqhwqvlmvfskkkrlswitsrtpghweptrsvaadqyvwkeetaipnsrfefgerrirrnsktdwaivlqaarerrlgdipedivvryygniirigsdnlrpieqvrtckvfwgltgtgksrrafeeagmecyvknprtkwwdgyagqknvvidefrggidvaylllwldrykvivekkggalclealqfwitsnispkdwypelddetqgalrrrltevvhfdvafe*	276	USER	zzz1688
2040		Unclass_KM821760	mssssrwvftvnnpgawrphydvtamqflvfqmeqgasgtphiqgyvrfthpkkleaakralvceeahmeiangnegqcidyctkedtriggpwvygtqkrdagrkgsrsdlqavaeaaqkpgvsmrqlarefpaqvikysqqierymalvedevpierdifvhviwgptgtgkthrvrhgipqrdlyvvngkgrgcfdqyagqkalvleefepnewsinevktlldkwtcplnarysnktarwtqvfitsnsdpmswyqlwlpadlaafqrrltrithvlsreqevelfplpavalpppspavapspiaariaarpcwsgamdadlpqpdqvtsadplraagtsnapaiptprlpttptpdplnvqdidgigaitapapvtrttsvdlqaffsnn*	397	USER	zzz1689
2039		Unclass_KM821761	mpkkgkfefrtkaklhsltypqcdipvdfmmaalkkiagdrwgwaligaedhaerttdefkhcgvhrhvmqqyecksfdtvnvrywdiewngknyhphfepvkikakwleycmkdgeyiyegdyngapfdpntyfqankskqsygfvwmaneikagktldelddlvpghvlqhkrkieeyqefqakkkerrtpkpifygfndvedpqwqrvvkwanknflkkrsskqkqlflwseapnlgkthpwaetlteffkcynwvnserqgkalmdcdyilldeykgmltitdlkrnsqmmkwpveikygdsteftrnvpmiitsnhdmrsiykkcdyrdieslevrfkvvkvdtvchltlkgpppvvlvplpreqptlvavpendkedlsdeeeilsslddeds…	420	USER	zzz1690
2038		Unclass_KM821762	merrqgiywlltipfhewtpylppgvswirgqlesgsesgylhwqivvalttkcslrgikglfgdsthgelsrtnrasvyvwkeetriegtqfelgerpfkrncskdweqiwecaqrgdlmsipadvrvhsyrtlraisadyskplpmvrdihvyigptatgksrrawdeagmeayckdpnskfwcgysgqpnivldeyrgridvshllrwfdrypvnveikgssvplcaesfwittnldvdqwypdldattlealrrrlkityfr*	267	USER	zzz1691
2037		Unclass_KM821763	meapppaysppppsvtppiessrpfrlagkaifltwpqnditkedlmaklvslweaklswavvaeeshksgephvhaiaqfteridlknanpvldaltgkhgnyqsvksakkvlryvckdgqyithgevpdfaekaklqdwaaklimeeqatyrdlvrqqpgycmlqkpkleefigwskrqrladsllpwrvltvkpnapyvhqalwtflrenvlvprtprqaqlwlsglpgvgktrflsylrarlrvydmprdedfyddfedgcfdlvvldefkahkkiqflnawadgqplplrkkgsqsvktdnlpliivsnytieecyksgvgrdalvdrftqvfvdslfsiddplyte*	353	USER	zzz1692
2036		Unclass_KM821764	msttqtpsilkgglarrkagtnpkanrwcytlnnpefpipwnettqlyhiygkeiapgtgtphhqgficfknqkyltqvkelndkahweiakgtnqqasdyckkegdfiekgtlpedpqrlgakanevkwrlindlakagnlaeidikypkvwntsyrnlksikvdhmkpladldepcgvwlygasgagktmkartdypnaylklpnkwwdgyqgeanviiddvdpnhaymgyhlkiwadryshlaevkgstivvrprklvitsqyrikdiwasepatmsallrrfkevyvdrklwdnpienafkkqnaiaqvkineavaqidkestpeipvevisddectmldalvaeaeeeaqknklkdkptigaktealkrckamsvedyekmkpiklrptnphfp…	528	USER	zzz1693
2035		Unclass_KM821765	msnfrfhsksifltfpqcdyplknfkdnieayfgdnlekgvvsqenhqdgnkhlhaaiclhqqvtsrdpklfdklvdpakhpniagrftggmlkafdyvmkegnflplneksfdlkeflklskekknsraslivkefdelppedvmennkdfmllhgkqmqayvdwreererrskfaraqaqkvfvvpapgyfnawnneiaswlttnlrqkrkhrqtqlwiqgppgigktsmmmmleelysltiyhwpkderwwdlygdgqydvilldefrsqkmitelnpilsgdpislsrrgmapivkrdnlpviimsnylpeecfptanehgkleplldrikvvkcegpirivegappaecstpflfddqpppppgsqfvltndyseifpqtppeyetiddddlqp…	467	USER	zzz1694
2034		Unclass_KM821766	mydieelaeepskgkrsvgpkvmrwcvtwnnpnvtgdevaerlnasdkvkgyvfqlekgesgtphfqmyieftgqvyaagvrktikhegvstfrcngtkaqnvkyctkdddrlggpwihgtcanesagqgkrsdlddfakevivaggvnveliekyggcavrytkqaqfmmqqiqfekaaavdraywkeqvrlkaaglpygqkprklvlyfgpsavgktteakirceseydeapymkqgttkwwcghnlekcvivdewqigmtgtlesfndltnfgthraetkggqtpiiaecmmftsnrhpidifktkwgdaryralarrfeevhwwndnkqlsilknpgkepvymgdepseewlqwnvcnsdweyfwrgrtlregdqiihhtdgrveeiinsyftw*	399	USER	zzz1695
2033		Unclass_KM821767	mpapqhryflltiphndflpwlphdvayirgqlesgnengylhwqllaifkrkltvtavkrtfgdrshvepsrsaaadeyvwkeetrvagtqfelgarpvrrnvqtdwdavrvsakrgalddipadifvrcygqlrkiaedyvepaaierevycywgdagtgksrrawaeagldaypkcprskfwcgyrghehvvidefrggidvshflrwldrypvivdtkggatslkarkiwitsnlppeewfpginqetlqairrrmtiihyrrglepnpn*	275	USER	zzz1696
2032		Unclass_KM821768	mpssnsiqarywlltindtddnvswspptaintgpwtivqwlrgqkeigtntnrehwqlfvafkkkirlspvkqlfggarvhaepsrseaaeeyvfkedtaiantrfelgakafnrasktdwalakkcakegnidgvpddvyikyyntlktiakdnmkpaenldavcgiwyygppgvgkshrarsefpgaymkmqnkwwcgyqnedfvilddfdskqlghhlkiwadkyafiaetkgyainirpkkfiitsnysidqifcedsvlanaikrrfevreiplrlf*	284	USER	zzz1697
2031		Unclass_KM821769	mskplrnicftsfnldiewfetewpshhlpgeetgmvqyiivqgefckegkkhiqgyaqlrgqyylkkikeffgdnglhveprrgtheqardyckqekngrwhdyvemgdqkkpgsrtdlldvidkikegetiasiisnsrdpkmvrnavvynrtltaiekqfkydaaikeaikeydgvtwrkwqeellcyvdkdadkrkvrwytdmggntgksyittyltllgkayvvsggkqadilyayedqpiviydlarayeqnmdhiyvtmeyfkngrflstkyeskmrvfkrphvivmanfpphinklsedrwdivymtnp*	318	USER	zzz1698
2030		Unclass_KM821770	meegresittakhfigtiylpnaspqdycawngrteaavhlfeacvwqheicpdtgrhhiqiycharrkvryaqlndalgvvgswktckgiahaiacyaycteeksdassrhgckssgwgdppgrgaggdaaisvdaaiefaksgkrrrellmpenaealrgaylhpagfrfvseladqprntpdewmqryvicfwggagvgksrrvreecaaagldlwvapaspgglwfdgydrhpcalfddfdgdmpwkqllcilegnivqvqvkgghvafrprvvyftadcppsswtfsfgkgearqglnqarldqllrrfchieevssardyrealnmnrrpagpvpaggegganieiapplgeawenvhvpqlpfdvvpdseyvnelcnq*	386	USER	zzz1699
2029		Unclass_KM874290	mktrlwcgtqydlgfnfeklvddeiltyvawgdevcptterkhkqfwcmfksprgsmkqvgkvftswpnkgmqgkvfpcsgsiksneeyckkegsyhkygkepeqgkrndiigcmkmvkegaaeleiaetsphlwcqygrrfeeyrallqpdrdwvpevkvwwgepgsgksraarewlgeydvctytaggffigyknhesvlledfdfksmprdvflqctdrykhvvnvkngernwnprriaitsnfdpeewykwgdpkavtrritsitkmehk*	275	USER	zzz1700
2028		Unclass_KM874291	mktrlwcgtqydlgfnfeklvddeiltyvawgdevcptterkhkqfwcmfksprgsmkqvgkvftswpnkgmqgkvfpcsgsiksneeyckkegsyhkygkepeqgkrndiigcmkmvkegaaeleiaetsphlwcqygrrfeeyrallqpdrdwvpevkvwwgepgsgksraarewlgeydvctytaggffigyknhesvlledfdfksmprdvflqctdrykhvvnvkngernwnprriaitsnfdpeewykwgdpkavtrritsitkmehk*	275	USER	zzz1701
2027		Unclass_KM874292	mkqntkkelryrrwcitennytdesikilselptnyiivgkeigkkkktphlqiylefvnaktfsavkkllkkahievskgnakqntdycskdqdvilvrgepfnqgkrndlscikeliqqdyniremleeesikslqglrmaenlmkyvekprskapniiwrygasgsgktrwvyenytevfcpinfkwwegydghkvvllddlrgdfckyheflkltdrypyrveckggsrqlladtiiitspvhpkevwdtiedkkqllrritkidhvvenytevkrgnt	283	USER	zzz1702
2026		Unclass_KM874293	mkqntkkelryrrwcitennytdesikilselptnyiivgkeigkkkktphlqiylefvnaktfsavkkllkkahievskgnakqntdycskdqdvilvrgepfnqgkrndlscikeliqqdyniremleeesikslqglrmaenlmkyvekprskapniiwrygasgsgktrwvyenytevfcpinfkwwegydghkvvllddlrgdfckyheflkltdrypyrveckggsrqlladtiiitspvhpkevwdtiedkkqllrritkidhvvenytevkrgnt	283	USER	zzz1703
2025		Unclass_KM874294	mkqntkkelryrrwcitennytdesikilselptnyiivgkeigkkkktphlqiylefvnaktfsavkkllkkahievskgnakqntdycskdqdvilvrgepfnqgkrndlscikeliqqdyniremleeesikslqglrmaenlmkyvekprskapniiwrygasgsgktrwvyenytevfcpinfkwwegydghkvvllddlrgdfckyheflkltdrypyrveckggsrqlladtiiitspvhpkevwdtiedkkqllrritkidhivenytevkrgnt	283	USER	zzz1704
2024		Unclass_KM874295	mnqarfwiltirhadflpylpptvdylrgqlergdggflhwqlvvhfarkvrlggvkgifgdsthaeptrsdaareyvwkedsavpntrfelgkipvrrgvshdwdavresakrgrlddipadiycrlygnfkriavdhmvplgierevnvywgvtgsgksrrawneagldafpkdprtkfwdgyrghenvvidefrggidvahllrwfdrypvvvevkgssvvlsakhiwitsnldprewyadldaetlaallrrlkitqfai*	265	USER	zzz1705
2023		Unclass_KM874296	mnqarfwiltirhadflpylpptvdylrgqlergdggflhwqlvvhfarkvrlggvkgifgdsthaeptrsdaareyvwkedsavpntrfelgkipvrrgvshdwdavresakrgrlddipadiycrlygnfkriavdhmvplgierevnvywgvtgsgksrrawneagldafpkdprtkfwdgyrghenvvidefrggidvahllrwfdrypvvvevkgssvvlsakriwitsnldprewyadldaetlaallrrlkitqfai*	265	USER	zzz1706
2022		Unclass_KM874297	mnqarfwlltirhadflpylpptvdyikgqlergdggflhwqlvvhfarkirlrglkrifgdsahaeptrsdaardyvwkddtaidntrfelgatpvrrgvsadwesvrecakrgrlddipadiycrlygnfkriavdhmvplgierevnvywgvtgsgksrrawneagldafpkdprtkfwdgyrghenvvidefrggidvahllrwfdrypvvvevkgssvvlsakriwitsnldprewyadldaetlaallrrlkitqfai*	265	USER	zzz1707
2021		Unclass_KM874298	mthiykmadvrkraycmtihnwseetvnqlknlkyqyliignetcpttdrkhlqvyayfknalsfksikkqfptahieaskgtpnhnktycskedvlfeegtfpeqgkrsdievcreivqsgagmrevvnhcqsvqgmriaesylkyhekprkwkptvqwfygesrsgktreayeilgddcytclntgkwfegydahenvliddirksfmpydefiklidryafrrrmlrkfppvfskkdnyhlllsprrclekqgry*	259	USER	zzz1708
2020		Unclass_KM874299	mthiykmadvrkraycmtihnwseetvnqlknlkyqyliignetcpttdrkhlqvyayfknalsfksikkqfptahieaskgtpnhnktycskedvlfeegtfpeqgkrsdievcreivqsgagmrevvnhcqsvqgmriaesylkyhekprkwkptvqwfygesrsgktreayeilgddcytclntgkwfegydahenvliddirksfmpydefiklidryafrrrmlrkfppvfskkdnyhlllsprrclekqgry*	259	USER	zzz1709
2019		Unclass_KM874300	mthiykmadvrkraycmtihnwseetvnqlknlkyqyliignetcpttdrkhlqvyayfknalsfksikkqfptahieaskgtpnhnktycskedvlfeegtfpeqgkrsdievcreivqsgagmrevvnhcqsvqgmriaesylkyhekprkwkptvqwfygesrsgktreayeilgddcytclntgkwfegydahenvliddirksfmpydefiklidryafrrrmlrkfppvfskkdnyhlllsprrclekqgry*	259	USER	zzz1710
2018		Unclass_KM874301	maanqkfknvcftlnnpgedpipfdvekmhylvyqrevgangtehyqgycelinqtrfnavkallgggsvhierrkgsaqeaaayckkddtrapgasiqefgemhactpgkrndlkafvddvrsgtkrkrdlvedhagvlarypkfyetltlmarpvrteelqvilhigptglgktrtvmdlyaadpglyvtplsngtpwydhydghhtvllddfsgrsshmslvtllrlldrypvmvptkgahtwwcpntiyvttnilpslwyewgtrgehyralarrftkvvlfyeklhaddpgmveqdanwwkencppeaallysq*	320	USER	zzz1711
2017		Unclass_KM874302	maanqkfknvcftlnnpgedpipfdvekmhylvyqrevgangtehyqgycelinqtrfnavkallgggsvhierrkgsaqeaaayckkddtrapgasiqefgemhactpgkrndlkafvddvrsgtkrkrdlvedhagvlarypkfyetltlmarpvrteelqvilhigptglgktrtvmdlyaadpglyvtplsngtpwydhydghhtvllddfsgrsshmslvtllrlldrypvmvptkgahtwwcpntiyvttnilpslwyewgtrgehyralarrftkvvlfyeklhaddpgmveqdanwwkencppeaallysq*	320	USER	zzz1712
2016		Unclass_KM874303	maanqkfknvcftlnnpgedpipfdvekmhylvyqrevgangtehyqgycelinqtrfnavkallgggsvhierrkgsaqeaaayckkddtrapgasiqefgemhactpgkrndlkafvddvrsgtkrkrdlvedhagvlarypkfyetltlmarpvrteelqvilhigptglgktrtvmdlyaadpglyvtplsngtpwydhydghhtvllddfsgrsshmslvtllrlldrypvmvptkgahtwwcpntiyvttnilpslwyewgtrgehyralarrftkvvlfyeklhaddpgmveqdanwwkencppeaallysq*	320	USER	zzz1713
2015		Unclass_KM874304	msrsrnwcftlhnytdddieifknikcryiiygkeicpttkrqhlqgyiqfdnqrtitavkkflglpkihleiangssddnkaycskdgdmyergdckqqgrrtditdikdmisngatmrdiiphatsvqsvrmaeihlkyseqkrtwkpkvqwfygptgtgktrtayeiledpyttldtgqwwegydahenvtiddmrgdfmkyhvllklldryayiveckggsrqflarhiiitsafhpkdvfhtrediaqlmrridcvkefk*	266	USER	zzz1714
2014		Unclass_KM874305	msrsrnwcftlhnytdddieifknikcryiiygkeicpttkrqhlqgyiqfdnqrtitavkkflglpkihleiangssddnkaycskdgdmyergdckqqgrrtditdikdmisngatmrdiiphatsvqsvrmaeihlkyseqkrtwkpkvqwfygptgtgktrtayeiledpyttldtgqwwegydahenviiddmrgdfmkyhvllklldryayiveckggsrqflarhiiitsafhpkdvfhtrediaqlmrridcvkefk*	266	USER	zzz1715
2013		Unclass_KM874306	msrsrnwcftlhnytdddieifknikcryiiygkeicpttkrqhlqgyiqfdnqrtitavkkflglpkihleiangssddnkaycskdgdmyergdckqqgrrtditdikdmisngatmrdiiphatsvqsvrmaeihlkyseqkrtwkpkvqwfygptgtgktrtayeiledpyttldtgqwwegydahenviiddmrgdfmkyhvllklldryayiveckggsrqflarhiiitsafhpkdvfhtrediaqlmrridcvkefk*	266	USER	zzz1716
2012		Unclass_KM874307	msrsrnwcftlhnytdddieifknikcryiiygkeicpttkrqhlqgyiqfdnqrtitavkkflglpkihleiangssddnktycskdgdmyergdckqqgrrtditdikdmisngatmrdiiphatsvqsvrmaeihlkyseqkrtwkpkvqwfygptgtgktrtayeiledpyttldtgqwwegydahenviiddmrgdfmkyhvllklldryayiveckggsrqflarhiiitsafhpkdvfhtrediaqlmrridcvkefk*	266	USER	zzz1717
2011		Unclass_KM874308	msrsrnwcftlhnytdddieifknikcryiiygkeicpttkrqhlqgyiqfdnqrtitavkkflglpkihleiangssddnkaycskdgdmyergdckqqgrrtditdikdmisngatmrdiiphatsvqsvrmaeihlkyseqkrtwkpkvqwfygptgtgktrtayeiledpyttldtgqwwegydahenviiddmrgdfmkyhvllklldryayiveckggsrqflarhiiitsafhpkdvfhtrediaqlmrridcvkefk*	266	USER	zzz1718
2010		Unclass_KM874309	mkkfkekitsllmrfrnvvgtlftnerpheqfitsplikyfigqyeicpsskrrhlqfycefvgqqrlgavrqlfgptvhveprrgtvdeartycskedtrepgidsgpfengtpsksgkrsdladikeeldagsslksisqqhfgqflryrksfeayivlnqdprtwemensilwgepgtgktklaydlkerdgvegyplmrnqngnvwfdgyhgqeilliddyygwiplafllqlldrypmnvqtkggsvpftskkiiitsnkspecwynwskfgknmfgaferrinqvfhyvkdkdpaiypikfpetvsaveffq*	319	USER	zzz1719
2009		Unclass_KM874310	mymgdsqlavwdfrynastfksesdlkavlkgiakkwvfqlergdegyehyqgrmslikgrrkgekhillklfketppnyleptskteatkgdalyvikedtrlkgpwtdkdevkvettqlkifkslelrpyqrkleefartfdmrkidiiydpigdlgkslfsewmeyeglaeeippyrlmddifqwvatrpikpcyivdmprgmkkdklgdfysglevikngvaydkrynatkirfnrprvfvftntlpefslmskdrwnvwevqedydillrnemgtlsmk*	285	USER	zzz1720
2008		Unclass_KM874311	mymgdsqlavwdfrynastfksesdlkavlkgiakkwvfqlergdegyehyqgrmslikgrrkgekhillklfketppnyleptskteatkgdalyvikedtrlkgpwtdkdevkvettqlkifkslelrpyqrkleefartfdmrkidiiydpigdlgkslfsewmeyeglaeeippyrlmddifqwvatrpikpcyivdmprgmkkdklgdfysglevikngvaydkrynatkirfnrprvfvftntlpefslmskdrwnvwevqedydillrnemgtlsmk*	285	USER	zzz1721
2007		Unclass_KM874312	mymgdsqlavwdfrynastfksesdlkavlkgiakkwvfqlergdegyehyqgrmslikgrrkgekhillklfketppnyleptskteatkgdalyvikedtrlkgpwtdkdevkvettqlkifkslelrpyqrkleefartfdmrkidiiydpigdlgkslfsewmeyeglaeeippyrlmddifqwvatrpikpcyivdmprgmkkdklgdfysglevikngvaydkrynatkirfnrprvfvftntlpefslmskdrwnvwevqedydillrnemgtlsmk*	285	USER	zzz1722
2006		Unclass_KM874313	mymgdsqlavwdfrynastfksesdlkavlkgiakkwvfqlergdegyehyqgrmslikgrrkgekhillklfketppnyleptskteatkgdalyvikedtrlkgpwtdkdevkvettqlkifkslelrpyqrkleefartfdmrkidiiydpigdlgkslfsewmeyeglaeeippyrlmddifqwvatrpikpcyivdmprgmkkdklgdfysglevikngvaydkrynatkirfnrprvfvftntlpefslmskdrwnvwevqedydillrnemgtlsmk*	285	USER	zzz1723
2005		Unclass_KM874314	mymgdsqlavwdfrynastfksesdlkavlkgiakkwvfqlergdegyehyqgrmslikgrrkgekhillklfketppnyleptskteatkgdalyvikedtrlkgpwtdkdevkvettqlkifkslelrpyqrkleefartfdmrkidiiydpigdlgkslfsewmeyeglaeeippyrlmddifqwvatrpikpcyivdmprgmkkdklgdfysglevikngvaydkrynatkirfnrprvfvftntlpefslmskdrwnvwevqedydillrnemgtlsmk*	285	USER	zzz1724
2004		Unclass_KM874315	msdkhrsysftlnnytddevfaltsmcepinrgvkylifgkeiapttgtphlqgciiftsprsfkalkkvvpfnranykptisepgsaryckkdgdvyeygtppkqgkrsdienvrdiltsggnirdvvstatsiqsvrmaeihlkyfekkrnwkptvrwyygatgtgksktayeecdehdpyvamstgkwfegydahthviiddmrkdfmkfhellrmldryafmveckggsrqflatdiyitscyapdemfesredvnqlirrldeirkfe*	274	USER	zzz1725
2003		Unclass_KM874316	msdkhrsysftlnnytddevfaltsmcepinrgvkylifgkeiapttgtphlqgciiftsprsfkalkkvvpfnranykptisepgsaryckkdgdvyeygtppkqgkrsdienvrdiltsggnirdvvstatsiqsvrmaeihlkyfekkrnwkptvrwyygatgtgksktayeecdehdpyvamstgkwfegydahthviiddmrkdfmkfhellrmldryafmveckggsrqflatdiyitscyapdemfesredvnqlirrldeirkfe*	274	USER	zzz1726
2002		Unclass_KM874317	msdkhrsysftlnnytddevfaltsmcepinrgvkylifgkeiapttgtphlqgciiftsprsfkalkkvvpfnranykptisepgsaryckkdgdvyeygtppkqgkrsdienvrdiltsggnirdvvstatsiqsvrmaeihlkyfekkrnwkptvrwyygatgtgksktayeecdehdpyvamstgkwfegydahthviiddmrkdfmkfhellrmldryafmveckggsrqflatdiyitscyapdemfesredvnqlirrldeirkfe*	274	USER	zzz1727
2001		Unclass_KM874318	msdkhrsysftlnnytddevfaltsmcepinrgvkylifgkeiapttgtphlqgciiftsprsfkalkkvvpfnranykptisepgsaryckkdgdvyeygtppkqgkrsdienvrdiltsggnirdvvstatsiqsvrmaeihlkyfekkrnwkptvrwyygatgtgksktayeecdehdpyvamstgkwfegydahthviiddmrkdfmkfhellrmldryafmveckggsrqflatdiyitscyapdemfesredvnqlirrldeirkfe*	274	USER	zzz1728
2000		Unclass_KM874319	mpvtqpvtkatraicftefkkltnwddvksqlryyayaeetcpktgkkhyqgfayswkpirfsgwkkmfptahieqmrgnfrentaycskegsliefgekpnengvqgtaieykrrieegqstmeiaedenlfgqylhsykalekyeqhirgkkikldetppevyirwgaagtgkthgvfkrygrdkvcivpdntgkwfdnchnsdvmlfddveidavppisqflrltdrypmqvpvkggfiwwkpkvivftsnlpweqwwntlntehkravqrrltrvtriykdhekveyenanyellsqtqgffasppqlqqevqeepvhsqeegeqvheesgsaseehsav*	345	USER	zzz1729
1999		Unclass_KM874320	mpgtepgtktyraicftefkkltnwddvksqlryyayaeetcpntgkkhyqgfayswkkvrfsawkkmfptahieqmrgnfrentaycskegnliefgekpnengvqgtaieykrrleegqttmeiaedenlfgqylhsyralekyeqhfrgkklkvdhnvpevyirwgpsgtgkthgvfkqygrdkvcivpdntghwfdncnnsdvmlfddveidaippiskflrltdrypmqvptkggfiwwkpkvivftsnlpweqwwntlntehkiavrrrvtrvtriykdhekveyenanyellsqtqgffasppqqeegvreepvhsqeegeqvheesgsaseehsav*	345	USER	zzz1730
1998		Unclass_KM874321	mpvtqpvtkatraicftefkkltnwddvksqlryyayaeetcpktgkkhyqgfayswkpirfsgwkkmfptahieqmrgnfrentaycskegsliefgekpnengvqgtaieykrrieegqstmeiaedenlfgqylhsykalekyeqhirgkkikldetppevyirwgaagtgkthgvfkrygrdkvcivpdntgkwfdnchnsdvmlfddveidavppisqflrltdrypmqvpvkggfiwwkpkvivftsnlpweqwwntlntehkravqrrltrvtriykdhekveyenanyellsqtqgffasppqlqqevqeepvhsqeegeqvheesgsaseehsav*	345	USER	zzz1731
1997		Unclass_KM874322	mpvtqpvtkatraicftefkkltnwddvksqlryyayaeetcpktgkkhyqgfayswkpirfsgwkkmfptahieqmrgnfrentaycskegsliefgekpnengvqgtaieykrrieegqstmeiaedenlfgqylhsysalekyeqhirgkkikldetppevyirwgaagtgkthgvfkrygrdkvcivpdntgkwfdnchnsdvmlfddveidavppisqflrltdrypmqvpvkggfiwwkpkvivftsnlpweqwwntlntehkravqrrltrvtriykdhekveyenanyellsqtqgffasppqlqqevqeepvhsqeegeqvheesgsaseehsav*	345	USER	zzz1732
1996		Unclass_KM874323	miahnrafftisitglkgmcdiifflflslaqmaspkkynrmiftinnpgpnrpqfleqhmaymiyvleegdqthtphlqgyirwkcrktfksaerllggrayleiargteeenqayckkeegvlepwqefgtydggsgikgrrtdleavakrvregasartiavehteefiryhagieravymarpeppaqrqiemmiiwgpsgigkthavmmndglsesggvycvptgnhpwdqyegeatifmdefrwehwectlmnrildkwrlqlpcrymnkmaawtriiictnqdpmtwypneelpirdalrrrlgtncrhmtergqdlaasppspdfssyippamrvqdslddatvpasds*	358	USER	zzz1733
1995		Unclass_KM874324	miahnrafftisitglkgmcdiifflflslaqmaspkkynrmiftinnpgpnrpqfleqhmaymiyvleegdqthtphlqgyirwkcrktfksaerllggrayleiargteeenqayckkeegvlepwqefgtydggsgikgrrtdleavakrvregasartiavehteefiryhagieravymarpeppaqrqiemmiiwgpsgigkthavmmndglsesggvycvptgnhpwdqyegeatifmdefrwehwectlmnrildkwrlqlpcrymnkmaawtriiictnqdpmtwypneelpirdalrrrlgtncrhmtergqdlaasppspdfssyippamrvqdslddatvpasds*	358	USER	zzz1734
1994		Unclass_KM874325	miahnrafftisitglkgmcdiifflflslaqmaspkkynrmiftinnpgpnrpqfleqhmaymiyvleegdqthtphlqgyirwkcrktfksaerllggrayleiargteeenqayckkeegvlepwqefgtydggsgikgrrtdleavakrvregasartiavehteefiryhagieravymarpeppaqrqiemmiiwgpsgigkthavmmndglsesggvycvptgnhpwdqyegeatifmdefrwehwectlmnrildkwrlqlpcrymnkmaawtriiictnqdpmtwypneelpirdalrrrlgtncrhmtergqdlaasppspdfssyippamrvqdslddatvpasds*	358	USER	zzz1735
1993		Unclass_KM874326	miahnrafftisitglkgmcdiifflflslaqmaspkkynrmiftinnpgpnrpqfleqhmaymiyvleegdqthtphlqgyirwkcrktfksaerllggrayleiargteeenqayckkeegvlepwqefgtydggsgikgrrtdleavakrvregasartiavehteefiryhagieravymarpeppaqrqiemmiiwgpsgigkthavmmndglsesggvycvptgnhpwdqyegeatifmdefrwehwectlmnrildkwrlqlpcrymnkmaawtriiictnqdpmtwypnkelpirdalrrrlgtncrhmtergqdlaasppspdfssyippamrvqdslddatvpasds*	358	USER	zzz1736
1992		Unclass_KM874327	miahnrafftisitglkgmcdiifflflslaqmaspkkynrmiftinnpgpnrpqfleqhmaymiyvleegdqthtphlqgyirwkcrktfksaerllggrayleiargteeenqayckkeegvlepwqefgtydggsgikgrrtdleavakrvregasartiavehteefikyhagieravymarpeppaqrqiemmiiwgpsgigkthavmmndglsesggvycvptgnhpwdqyegeatifmdefrwehwectlmnrildkwrlqlpcrymnkmaawtriiictnqdpmtwypneelpirdalrrrlgtncrhmtergqdlaasppspdfssyippamrvqdslddatvpasds*	358	USER	zzz1737
1991		Unclass_KM874328	msqrtrrycltlnnptdaeiaslldvqegtlkrgfialevgaegtphlqgfvhlknaktgtalkkmlgsdrwhwgkangtdfenwayimedvegkvqgdlliqwgdkpaeegepdawdsilmmieageddraivrkwpsiaircqsaiakyrasfewaecrawreveveyisgptgcgktrealylpdgrvntdvyrctngkhpfdmydgegtivfeefrsqytcrdmlnwvdghplmlparyadrmakftkviilsnwrfeeqyrtvqadspetykawlrrvstiserwd*	292	USER	zzz1738
1990		Unclass_KM874329	mtcrnwcltlnnftpeeeevlkeekpwikfvvyqvemgesgtphlqgyietnggvrmskmkrmlerghweqrlgsraqaltyclkedsrvrgpyliglsqeelnsylkknpkstdlnvikdkikagaseldvadahfgswvryykaferyrclntkkrstidkviiivgptgtgksrfcmeqypdaywkqrsnwwcgysgestiiidefygwipfdmllrlcdrypllletkggqcqcvattivitsnhhpntwyknsyveslyrrftniiympalgvsehlnsiedlhlnyfnfppn*	299	USER	zzz1739
1989		Unclass_KM874330	mtcrnwcltlnnftpeeeevlkeekpwikfvvyqvemgesgtphlqgyietnggvrmskmkrmlerghweqrlgsraqaltyclkedsrvrgpyliglsqeelnsylkknpkstdlnvikdkikagaseldvadahfgswvryykaferyrclntkkrstidkviiivgptgtgksrfcmeqypdaywkqrsnwwcgysgestiiidefygwipfdmllrlcdrypllletkggqcqcvattivitsnhhpntwyknsyveslyrrftniiympalgvsehlnsiedlhlnyfnfppn*	299	USER	zzz1740
1988		Unclass_KM874331	mtcrnwcltlnnftpeeeevlkeekpwikfvvyqvemgesgtphlqgyietnggvrmskmkrmlerghweqrlgsraqaltyclkedsrvrgpyliglsqeelnsylkknpkstdlnvikdkikagaseldvadahfgswvryykaferyrclntkkrstidkviiivgptgtgksrfcmeqypdaywkqrsnwwcgysgestiiidefygwipfdmllrlcdrypllletkggqcqcvattivitsnhhpntwyknsyveslyrrftniiympalgvsehlnsiedlhlnyfnfppn*	299	USER	zzz1741
1987		Unclass_KM874332	msgrnwcftinnpeltdypeqwpvthlktilyqvemgeeetlhlqgyleidspraigwlkglngrahwerrkgtrsqailycckedsrlvrprlwtsrdlswedldpdsltsclnsrgitlatsesgncgtssrlleikeklsersssieeiadehfdlwvrhyrafekymtmkaeprnwecevhvlygptgtgkskwamdeypgaywkqrskwwdgyvghetviideyygwlpfdlllrlcdrypllveskggqlqfvaktiifttnkcpdqwynsdscyfpaferrvdkwhylpslgfhsrftrfkefkdvts*	316	USER	zzz1742
1986		Unclass_KM874333	msgrnwcftinnpeltdypeqwpvthlktilyqvemgeeetlhlqgyleidspraigwlkglngrahwerrkgtrsqailycckedsrlvrprlwtsrdlswedldpdsltsclnsrgitlatsengncgtnsrlleikeklsersssieeiadehfdlwvrhyrafekymtmkaeprnwecevhvlygptgtgkskwamdeypgaywkqrskwwdgyvghetviideyygwlpfdlllrlcdrypllveskggqlqfvaktiifttnkcpdqwynsdscyfpaferrvdkwhylpslgfhsrftrfkefkdvts*	316	USER	zzz1743
1985		Unclass_KM874334	msgrnwcftinnpeltdypeqwpvthlktilyqvemgeeetlhlqgyleidspraigwlkglngrahwerrkgtrsqailycckedsrlvrprlwtsrdlswedldpdsltsclnsrgitlatsengncgtnsrlleikeklsersssieeiadehfdlwvrhyrafekymtmkaeprnwecevhvlygptgtgkskwamdeypgaywkqrskwwdgyvghetviideyygwlpfdlllrlcdrypllveskggqlqfvaktiifttnkcpdqwynsdscyfpaferrvdkwhylpslgfhsrftrfkefkdlts*	316	USER	zzz1744
1984		Unclass_KM874335	msgrnwcftinnpeltdypeqwpvthlktilyqvemgeeetlhlqgyleidspraigwlkglngrahwerrkgtrsqailycckedsrlvrprlwtsrdlswedldpdsltsclnsrgitlatsengncgtnsrlleikeklsersssieeiadehfdlwvrhyrafekymtmkaeprnwecevhvlygptgtgkskwamdeypgaywkqrskwwdgyvghetviideyygwlpfdlllrlcdrypllveskggqlqfvaktiifttnkcpdqwynsdscyfpaferrvdkwhylpslgfhsrftrfkefkdvts*	316	USER	zzz1745
1983		Unclass_KM874336	mhnttalqssypnrnsrsptanrdgairnqsprtqqrlsrfvftlnnwteaeytdiiasdvkwlvvgkeigdegtphlqgavvigkqiafstvkkwpgfsrahienmrgkpfdslkyctkqdtdafckgempqegkrndlhdainalkqggtltsivksddvglaaavaryskglamvssmlkprrsepplviwlsgetgvgktrsavaladriapdnywisagslrwfdgydghaiaifddlrtkhaefsfllrlldryplrvefkggfidwtpsvivvtapkspthmwslrndedkqqlerrihlaydaeegddwelllakseaivaerwptgsypwklydevnvgsdettipekrscslstmgqepdtspsiieiesdlsseelvissseeehsye…	413	USER	zzz1746
1982		Unclass_KM874337	mhnttalqssypnrnsrsptanrdgairnqsprtqqrlsrfvftlnnwteaeytdiiasdvkwlvvgkeigdegtphlqgavvigkqiafstvkkwpgfsrahienmrgkpfdslkyctkqdtdafckgempqegkrndlhdainalkqggtltsivksddvglaaavaryskglamvssmlkprrsepplviwlsgetgvgktrsavaladriapdnywisagslrwfdgydghaiaifddlrtkhaefsfllrlldryplrvefkggfidwtpsvivvtapkspthmwslrndedkqqlerrihlaydaeegddwelllakseaivaerwptgsypwkhydevnvgsdettipeerscslstmgqepdtspsiieiesdlsseelvissseeehsye…	413	USER	zzz1747
1981		Unclass_KM874338	mhnttalqssypnrnsrsptanrdgairnqsprtqqrlsrfvftlnnwteaeytdiiasdvkwlvvgkeigdegtphlqgavvigkqiafstvkkwpgfsrahienmrgkpfdslkyctkqdtdafckgempqegkrndlhdainalkqggtltsivksddvglaaavaryskglamvssmlkprrsepplviwlsgetgvgktrsavaladriapdnywisagslrwfdgydghaiaifddlrtkhaefsfllrlldryplrvefkggfidwtpsvivvtapkspthmwslrndedkqqlerrihlaydaeegddwelllakseaivaerwptgsypwkhydevnvgsdettipeerscslstmgqepdtspsiieiesdlsseelvissseeehsye…	413	USER	zzz1748
1980		Unclass_KM874339	mqntralqssypnrnsrsptanrdgairnqsprtqqrlsrfvftlnnwtqeeytniistdvkwivvgkeigdegtphlqgavvigkqtafstikkwpgfarahienmrgkpfdslkyctkqdtdafvkgempqegkrndlhdaitalknggtltsivksddvglaaavaryskglamissmlkprrsepplviwlsgetgvgktrsavalaeriapdnywlsagslrwfdgydghaiaifddlrtkhaefsfllrlldryplrvefkggfidwtpsiiivtapkspthmwslrndedkqqlerrihlsydaeegddwelllakseaavaerwptgkypwqredeadvgsdettvpeprqdspptmgqeadtspqpievesdvesvelvissseeehsye…	413	USER	zzz1749
1979		Unclass_KM874340	madrrphkswtytlneptdedenrihlwdvsrqiyghetapttgqhhlqgfvsfraakrftgvtrllprahwevakypssawdyctkgddlyvvdnrvgrgtrsdwqdvldlvsegasdaailraqpscffkygagisraraalqeprhhqtlcewyygptgggkstyiaqehpeadwcqitksgfllgyhnkptvvfddpdldafgrelflnlvnrtpfemnvkgtsvafnaklvivasnkhpdcfipgdaavhrrihktflvscidgehmveqq*	277	USER	zzz1750
1978		Unclass_KM874341	madqrphkgwtytlhepthedenrihlwdvsrqiyghetapttgqhhlqgfvsfraakrftgvtrllprahwevakypssawdyctkgddlyvvdnrvgrgtrsdwqdvldlvsegasdaailraqpscffkygagisraraalqeprhhqtlcewyygptgggkstyiaqehpeadwcqitksgfllgyhnkptvvfddpdldafgrelflnlvnrtpfemnvkgtsvafnaklvivasnkhpdcfipgdaavhrrihktflvscidgehmveqq*	277	USER	zzz1751
1977		Unclass_KM874342	madrrphkswtytlneptdedenrihlwdvsrqiyghetapttgqhhlqgfvsfraakrftgvtrllprahwevakypssawdyctkgddlyvvdnrvgrgtrsdwqdvldlvsegasdaailraqpscffkygagisraraalqeprhhqtlcewyygptgggkstyiaqehpeadwcqitksgfllgyhnkptvvfddpdldafgrelflnlvnrtpfemnvkgtsvafnaklvivasnkhpdcfipgdaavhrrihktflvscidgehmveqq*	277	USER	zzz1752
1976		Unclass_KM874343	mpetirnavltnfndpmiwedlspklryfaygeeicpetkrehfqcfaqawkpmrltgwkklfptahieimrgnfreyeaycskegklteygekpnengkkstlinykrkidegdsvlgiaemedyfptyvmyrnglheykrhvrskkvqndrtmpevyvrigpagtgktrwmdekfgldgwiqapdntgkwfdgcdrdvilfddveagqipplsswkrlcdryplqvpikggfitwkpktivftsnthpklwwpnlsefdvgaierriteivvve*	277	USER	zzz1753
1975		Unclass_KM874344	mpetirnavltnfndpmiwedlspklryfaygeeicpetkrehfqcfaqawkpmrltgwkklfptahieimrgnfreneaycskegklteygekpnengkkstlinykrkidegdsvlgiaemedyfptyvmyrnglheykrhvrskkvqndrtmpevyvrigpagtgktrwmdekfgldgwiqapdntgkwfdgcdrdvilfddveagqipplsswkrlcdryplqvpikggfitwkpktivftsnthpklwwpnlsefdvgaierriteivvve*	277	USER	zzz1754
1974		Unclass_KM874345	mpetirnavltnfndpmiwedlspklryfaygeeicpetkrehfqcfaqawkpmrltgwkklfptahieimrgnfreneaycskegklteygekpnengkkstlinykrkidegdsvlgiaemedyfptyvmyrnglheykrhvrskkvqndrtmpevyvrigpagtgktrwmdekfgldgwiqapdntgkwfdgcdrdvilfddveagqipplsswkrlcdryplqvpikggfitwkpktivftsnthpklwwpnlsefdvgaierriteivvve*	277	USER	zzz1755
1973		Unclass_KM874346	mtarnwvftinnhfsidleeetwnnnlklliavkevgeqgtehlqgyleliqprrfswvkerlplahlekrrgskkqaiqyclktislpsqqcsspsntsdtspqdvdstipltiiyppdmnlsdlyadycrskqtkrqillaevrqklsegvddltianeyfdvwvsnyraferyrtlitpprnhevnviviqgptgtgkskwcldnypnaywkqrsnwwdgysghdtviidefygwlpfdlllrvcdrypllveskggqiqfvaktiiitsnsvpsswyrnsyfdsfvrrvskwmvfpiwgdqlsftdyseaiahfvnny*	323	USER	zzz1756
1972		Unclass_KM874347	msrkrnwcftlfpdqdgyytdniadmvsgdydfeeqkirfiifqeeicpessrrhlqgyveytvsrrlaavklslgsesvhlegrrgtaseaaeycekedsfapdgirfqwgelggeqgarsdlatvasavisgkrveevalefpttfirynrgiekltnvvrrkeqmrnlrmlkvvvlwgdagtgktrtafelspdhyilsqqdgqlwwdgyegqkhliiddfygwikwglflrildiyplqlpvkggftiaswdvvfitsncmprnwyergmpaelarrlthivefesyetdfdkikeilv*	304	USER	zzz1757
1971		Unclass_KM874348	msrirnmmvtiyfedngcpdppeiramlgalpnlryyigqmekcpstgrfhfqgyiefdsamyvkkisaqlnnchiearkgtqlqaiayckkhetrvgnwieygerakqgtrsdlddvaeciyggksireiqeehpraymmyskgikdlyytvnnieprseppvviycygqtgtgksryakrysdnvyfknmsckwwdgyngqdvvvfddirgdtfkyhellrildryvrhecdspnapmvgipcmlnirgaastsirl*	260	USER	zzz1758
1970		Unclass_KM874349	msrirnmmvtiyfedngcpdppeiramlgalpnlryyigqmekcpstgrfhfqgyiefdsamyvkkisaqlnnchiearkgtqlqaiayckkhetrvgnwieygerakqgtrsdlddvaeciyggksireiqeehpraymmyskgikdlyytvnnieprseppvviycygqtgtgksryakrysdnvyfknmsckwwdgyngqdvvvfddirgdtfkyhellrildryvrhecdspnapmvgipcmlnirgaastsirl*	260	USER	zzz1759
1969		Unclass_KM874350	mpkarpsngsrfwcftinnptdddnqqladlmsndlctylcygretgesetphyqayiellvpndflglrndlkelilnhaseaaprqettasrkistqsnmvsgspiakgkgmtsrffteyramhamerdaptkvyvfhgptasgktraafdmnchqmdyiapfftdpqnapvllfddvhnpvnlfgrrlflritdrypmkvrclgkyvewnptviifttnddpntwnldaacrrrideiiafpldkggldalpactqdqakpgdlpqcn*	272	USER	zzz1760
1968		Unclass_KM874351	mnpiavyeftlkkqdkqneneiikilyptivkkisfqleksdegyehyqgrislvkkrrmketldvlkphfpdihisptcnngltenfyttkedtridgpwteksyvyvprqireivdlkpwqksvvllsriwdtrtiniivdtegnigkstlttymgihnlakqipfcndykdvlrmvcdmptsgcfiidmprairkeklyqmysaietiksgyayderyhfkdkyfdcpciwvftniipdetllsrdrwrkweiineelkkfdplmmr*	271	USER	zzz1761
1967		Unclass_KM874352	mnpiavyeftlkkqdkqneneiikilyptivkkisfqleksdegyehyqgrislvkkrrmketldvlkphfpdihisptcnngltenfyttkedtridgpwteksyvyvprqireivdlkpwqksvvllsriwdtrtiniivdtegnigkstlttymgihnlakqipfcndykdvlrmvcdmptsgcfiidmprairkeklyqmysaietiksgyayderyhfkdkyfdcpciwvftniipdetllsrdrwrkweiineelkkfdplmmr*	271	USER	zzz1762
1966		Unclass_KM874353	mtarnwcftlnnptehidfksekwmdlklaiymmekgetgtphfqgylemkepqrmsffkklmprahlekrrgskqqainyvlktmdpecsqweitmtgeqpiitglpvaihckgtphdllkscepkkslkerledvkelirsgyndeqimeshydlfvryhrafaltrrimssprdhemkvivcqgptgtgksrwaketypnaywkqrsqwwcgyegqdtivldefygwlqydlllrlcdryplyletkggqvnckaktivittnatpeswyktekyflsfirrvsewrvfpiwgemetyvlyseavskfflnte*	317	USER	zzz1763
1965		Unclass_KM874354	maqsrswcftlnnyvqadidrlaafgetddctylvfgkevgesgtphlqgfaifprklrlravkshigngahlecargsplqasdyckkdgdftefgsfggvrpglsgrfgqfvewldehykegnvhqpsraliaatwpdlyvryhtklfelvgvlapkpilqegdpnawqttliealgldpddrkiyfyvdetggsgkswltrylmtsrddvqalsigkrddiahaidvtkkvflfnvprtqmeflqysileslkdrmvmspkynsmmkvlhsvphvvvfsneepdrtkltadrfavthirni*	305	USER	zzz1764
1964		Unclass_KM874355	marenrfrlqcrrlfltyphctasiqevydlihskkeikfariciephsdgtphihaavmfakkvnicnarlfdindhhcnmesiknwpatlnyckkgdnwedfdndddpdqpmqdnlfelaetmpsndfweycrlkkvpfayasnamrkkksmftitdstpygiiredlgaytitedspatlastvlvgpsgigktswairesekpsllvthmdalrklngshksiifddmsfthipreaqihlvdrfqprqvhvrygtadipagiqkiftanqypfvadpaidrrvhnknly*	295	USER	zzz1765
1963		Unclass_KM874356	marenrfrlqcrrlfltyphctasiqevydlihskkeikfariciephsdgtphihaavmfakkvnicnarlfdindhhcnmesiknwpatlnyckkgdnwedfdndddpdqpmqdnlfelaetmpsndfweycrlkkvpfayasnamrkkksmftitdstpygiiredlgaytitedspatlastvlvgpsgigktswairesekpsllvthmdalrklngshksiifddmsfthipreaqihlvdrfqprqvhvrygtadipagiqkiftanqypfvadpaidrrvhnknly*	295	USER	zzz1766
1962		Unclass_KM874357	marenrfrlqcrrlfltyphctasiqevydlihskkeikfariciephsdgtphihaavmfakkvnicnarlfdindhhcnmesiknwpatlnyckkgdnwedfdndddpdqpmqdnlfelaetmpsndfweycrlkkvpfayasnamrkkksmftitdstpygiiredlgaytitedspatlastvlvgpsgigktswairesekpsllvthmdalrklngshksiifddmsfthipreaqihlvdrfqprqvhvrygtadipagiqkiftanqypfvadpaidrrvhnknly*	295	USER	zzz1767
1961		Unclass_KM874358	marenrfrlqcrrlfltyphctasiqevydlihskkeikfariciephsdgtphihaavmfakkvnicnarlfdindhhcnmesiknwpatlnyckkgdnwedfdndddpdqpmqdnlfelaetmpsndfweycrlkkvpfayasnamrkkksmftitdstpygiiredlgaytitedspatlastvlvgpsgigktswairesekpsllvthmdalrklngshksiifddmsfthipreaqihlvdrfqprqvhvrygtadipagiqkiftanqypfvadpaidrrvhnknly*	295	USER	zzz1768
1960		Unclass_KM874359	mpsrqgvyfiitvpyekyekpielprgfryisgqgeigasgyhhwqiicafeqkktltgaksyfapeahleftrsrcardychkeetripdssfefgtyptrvnnkqdwdlvlekakkgqfdlidgdvmmrhynnirkiysdfqkpvkrevqvvnvywgqtgtgktksvfeeigddfyvkmpstkwfdgyrgqenvvideftgqvdithllrwldqypctvevkgsqvflntkkwwitsnidpakwyegkdeeqikalkrrftnvvhylkpfkk*	275	USER	zzz1769
1959		Unclass_KM874360	mpakqafnmpftafdvediewkpdhmkyllygretcpstgrehlqgyvqfikkqtiagakkifdnatihfefalgdyeenfkyctktrvndmvpnvyfergeptrkkgqrndiqevirriesgndlrdlmfddevnqtvarcmpfvrqaiadfkagkglsaiksklesaqlrswqhgvkslveqepegrsvywywdtkgntgksfmvdwlvafhkavvfthgkmhdiahaynhekvvcfdlsrtqeekldavymalecfkngrmfsgkyesttkifevphvfvfanfapdktklsedrwkvteiisf*	308	USER	zzz1770
1958		Unclass_KM874361	mpakqafnmpftafdvediewkpdhmkyllygretcpstgrehlqgyvqfikkqtiagakkifdnatihfefalgdyeenfkyctktrvndmvpnvyfergeptrkkgqrndiqevirriesgndlrdlmfddevnqtvarcmpfvrqaiadfkagkglsaiksklesaqlrswqhgvkslveqepegrsvywywdtkgntgksfmvdwlvafhkavvfthgkmhdiahaynhekvvcfdlsrtqeekldavymalecfkngrmfsgkyesttkifevphvfvfanfapdktklsedrwkvteiisf*	308	USER	zzz1771
1957		Unclass_KM874362	marthakkntskdpsfrktkpleylpvqrkitlgtvsgattyglidagrllstsnhrlyrygkrynlkddidpsvaatntievwaladtwavqkafeeakrvfdkaytnerenlskdararwfdfrasigvsgdimmaavstdpnpgtltlltggefansivednagvqrafswspatsastysipaeydlagntstspttptgagpyddlqadssaiemealqdrgnlppyeantfppvwvkiatlgqsaagsqrlstgffdapcgqvvlsssapiteltgkayaefkigdykgvkahnlerm*	305	USER	zzz1772
1956		Unclass_KM874363	marthakkntskdpsfrktkpleylpvqrkitlgtvsgattyglidagrllstsnhrlyrygkrynlkididpsvaatntievwaladtwavqkafeeakrvfdkaytnerenlskdararwfdfrasigvsgdimmaavstdpnpgtltlltggefansivednagvqrafswspatsastysipaeydlagntstspttptgagpyddlqadssaiemealqdrgnlppyeantfppvwvkiatlgqsaagsqrlstgffdapcgqvvlsssapiteltgkayaefkigdykgvkahnlerm*	305	USER	zzz1773
1955		Unclass_KM874364	marthakkntskdpsfrktkpleylpvqrkitlgtvsgattyglidagrllstsnhrlyrygkrynlkididpsvaatntievwaladtwavqkafeeakrvfdkaytnerenlskdararwfdfrasigvsgdimmaavstdpnpgtltlltggefansivednagvqrafswspatsastysipaeydlagntstspttptgagpyddlqadssaiemealqdrgnlppyeantfppvwvkiatlgqsaagsqrlstgffdapcgqvvlsssapiteltgkayaefkigdykgvkahnlerm*	305	USER	zzz1774
1954		Unclass_KM874365	marthakkntskdpsfrktkpleylpvqrkitlgtvsgattyglidagrllstsnhrlyrygkrynlkididpsvaatntievwaladtwavqkafeeakrvfdkaytnerenlskdararwfdfrasigvsgdimmaavstdpnpgtltlltggefansivednagvqrafswspatsastysipaeydlagntstspttptgagpyddlqadssaiemealqdrgnlppyeantfppvwvkiatlgqsaagsqrlstgffdapcgqvvlsssapiteltgkayaefkigdykgvkahnlerm*	305	USER	zzz1775
1953		Unclass_KM874366	msnpitgydfrynaddytpedikgflkgvaksfvfqkekgdtgylhyqgrlrlikkrrrtkalslfitppnyfqptvgseyingdafymmkedtkvegpwtdkdevkvlttqlawynsqeerpfqkklremcsifdmrtidliwdttgncgksllcealeydglceeipsyrlmddifqwvatrpikkcyvvdmprgmkkdrlgdfysgievikngvaydkryhakkvrfsrprifvftntlpclnlmsidrwkiwkvnenyeliphh*	269	USER	zzz1776
1952		Unclass_KM874367	msnpitgydfrynaddytpedikgflkgvaksfvfqkekgdtgylhyqgrlrlikkrrrtkalslfitppnyfqptvgseyingdafymmkedtkvegpwtdkdevkvlttqlawynsqeerpfqkklremcsifdmrtidliwdttgncgksllcealeydglceevppyrlmddifawvatrpikkcyvidmprgmkkdrlgdfysgieiikngvaydkrysakkirfsrprifvftnclpclnlmsidrwniwkinenydliphq*	269	USER	zzz1777
1951		Unclass_KM874368	msnpitgydfrynaddytpqdikgflkgvaksfvfqkekgdsgylhyqgrlrlikkrrrtkalslfvtppnyfqptvgseykngdafymmkedtkiegpwtdkdevkvlttqlawynsqeerpfqkklremcsifdmrtidliwdttgncgksllcealeydglceeipsyrlmddifqwvatrpikkcyvvdmprgmkkdrlgdfysgievikngvaydkryhakkvrfsrprifvftntlpclnlmsidrwkiwkvnenyeliphh*	269	USER	zzz1778
1950		Unclass_KM972725	msliqfvcwtlnnysedeyqsliefsewryivigrevgetgtphlqgygelkkrkkfaalknlfprvhweqrrasrdaaanyckkegrfeergslpknaseksskeaitrvksgqtmrailddppnlsgirmcqiwlsynepkrnfksevfwyygasgtgktklaseqagpdaywhdgtkwfdgydahehvllddyrggnmkfnfllkfldryplrlevkggyrqllakkiwvtsikhpkeiysfsemdepteqllrrittikkmcacsqcerfygnrfevsrfavcgntstnsdtaanet*	302	USER	zzz1779
1949		Unclass_KM972726	msliqfvcwtlnnysedeyqsliefsewryivigrevgetgtphlqgygelkkrkkfaalknlfprvhweqrrasrdaaanyckkegrfeergslpknaseksskeaitrvksgqtmrailddppnlsgirmcqiwlsynepkrnfksevfwyygasgtgktklaseqagpdaywhdgtkwfdgydahehvllddyrggnmkfnfllkfldryplrlevkggyrqllakkiwvtsikhpkeiysfsemdepteqllrrittikkmcacsqceriygnrfevsrfavcgntstnsdtaanet*	302	USER	zzz1780
1948		Unclass_KP005453	msqfiideasadnddfadqhdlptvaqataksvrwsakkflltysqccedpddifakinvlreveravgcielhqdgnphvhiavefkkklnttncrffdysfdadctnyhpnvtvadswpkcinycrgknktlielyhaaeggkkkydlfavaagfadnqrawtqwcyehdvsplwksdvwrqlrtpvgvssrdepmeldavrpttidprfafmvlpehfrqsvvllgpsncgkttwavnhmverfgkilvvneiddlrrldathkgivfdeirftgdlstgkgkwplhsqiavvdnalgrsihcrninawipkgtpklftctekfcftynyqvwrrlniinlypepeenfwih*	356	USER	zzz1781
1947		Unclass_KP005454	msqfildeasasdddfadqhdlptvtqataksvrwsakkflltysqccedpedifsridalrkvkravgcielhqdgnphihialefetklnttncryfdyaynadcknfhpnvtvadswpkcinycrgknktlielyhaaeggkrkydlfavaagfadnqrawtqwcyehdisplwksdvwrqlrtpvgvssrdepmeldavrpttidtrfafmvlpehfkqsvvllgpsncgkttwavnhmverfgkilivneiddlrrldathkgivfdeirftgdlstgkgkwplhsqialvdnalgrsihcrninawipkgtpklftctekfpftynyqvyrrlniinlypepedelwvrel*	358	USER	zzz1782
1946		Unclass_KP153359	madyagktkywifvlktrdparssipikratrptyatdtksasrarphlqgyieminrktmiqmkhdinprckwlprggtaleaatyakkdntgiyedgvlsksdqgkrndmaeifkmiengadeadicrkypgqfiryhagitkaislqfqkrvgdieiyyiygktgsgktssvvkkegealyhtydqdlrwfdgykpsrhsailidefngsqkavfynkildrytpwvevkgaklritakriyicsnyklkevantqgwspeeleqfkrrvtkfihverlpgappvdiwaplvpqaaepttpvrpqhphgwrqrrratpptcadsacsgapagsrhsmrvtnaprsgilcsrsrnr*	359	USER	zzz1783
1945		Unclass_KP153360	mstrrivftknnwteedyralmeeplfsyliigkeigekgtphlqgyaeftkkakygalakkykmhcevsrgtqdeaikycmkdgdyaekgtkkldgasaeknrweqarvsakegrlddvpadiyircyrtlkeiakdnmpkpesltelknlwiygpagsgktrladaivpisyskncnkwwdgyqnepgviindvgkehsvlghhfklwgehrpfiaetkggaihirpqrviitsqysltqiwedeetrdalarrykvlhllgnldledidriskdya*	280	USER	zzz1784
1944		Unclass_KP153361	mytnpnsyfdltlpqrrfmftsytlegegftvpdqdprfrycvyqaekcpqtgnihlqgyiefkdqirgntvqklmnvpglhlsrvdypekaraycmkldtryaepqeygkykkeqgarndlkamgdmvlagathiqiydaypgqyiryykaidrlrqiyaldkpnrlkigrmecilfygrpgtgkttqakeyaahikqayweipiansgtlwfdgynaepcviiddfsgkinldaalrifdqgevqvpvkgghvwwcpktiiitsnvhpsnwydyqnrqdsmiamyrrlhrivcfnratpaevdrfkfldipenafdvimetdq*	326	USER	zzz1785
1943		Unclass_KP153362	mytnpnsyfdltlpqrrfmftsytlegegftvpdqdprfrycvyqaekcpqtgnihlqgyiefkdqirgntvqklmnvpglhlsrvdypekaraycmkldtryaepqeygkykkeqgarndlkamgdmvlagathiqiydaypgqyiryykaidrlrqiyaldkpnrlkigrmecilfygrpgtgkttqakeyaahikqayweipiansgtlwfdgynaepcviiddfsgkinldaalrifdqgevqvpvkgghvwwcpktiiitsnvhpsnwydyqnrqdsmiamyrrlhrivcfnratpaevdrfkfldipenafdvimetdq*	326	USER	zzz1786
1942		Unclass_KP153364	msarnftftqnnygdtelvdgvqcryiiygkevgesdllqlqgvicfnekiresavrkklpgchieiakvlpaaieyckkdgdwtergdspmtpkekgalekrkwdeirvaceegrfedlpddiryknlrlnkmhrcealrsreledseaqhlwywgeagtgksrkaredhpraylkmcnkwwcgyteeetvliedfdkkhdvlghhlkiwgdrypflaelkgdtmkirpkqiivtsnyhpsaiwfdeetllpilrrfkcvefkkleast*	271	USER	zzz1787
1941		Unclass_KP153365	msarnftftqnnygdtelvdgvqcryiiygkevgesdllqlqgvicfnekiresavrkklpgchieiakvlpaaieyckkdgdwtergdspmtpkekgalekrkwdeirvaceegrfedlpddiryknlrlnkmhrcealrsreledseaqhlwywgeagtgksrkaredhpraylkmcnkwwcgyteeetvliedfdkkhdvlghhlkiwgdrypflaelkgdtmkirpkqiivtsnyhpsaiwfdeetllpilrrfkcvefkkleast*	271	USER	zzz1788
1940		Unclass_KP153366	msarnftftqnnygdtelvdgvqcryiiygkevgesgtphlqgvicfnekiresavrkklpgchieiakvlpaaieyckkdgdwtergdspmtpkekgalekrkwdeirvaceegrfedlpddiryknlrlnkmhrcealrsreledseaqhlwywgeagtgksrkaredhpraylkmcnkwwcgyteeetvliedfdkkhdvlghhlkiwgdrypflaelkgdtmkirpkqiivtsnyhpsaiwfdeetllpilrrfkcvefkkleast*	271	USER	zzz1789
1939		Unclass_KP153367	msarnftftqnnygdtelvdgvqcryiiygkevgesgtphlqgvicfnekiresavrkklpgchieiakvlpaaieyckkdgdwtergdspmtpkekgalekrkwdeirvaceegrfedlpddiryknlrlnkmhrcealrsreledseaqhlwywgeagtgksrkaredhpraylkmcnkwwcgyteeetvliedfdkkhdvlghhlkiwgdrypflaelkgdtmkirpkqiivtsnyhpsaiwfdeetllpilrrfkcvefkkleast*	271	USER	zzz1790
1938		Unclass_KP153368	mlendeqpipsvsiekplvsrgwcftcnnysesdyngflaaesvylvigkeisstgtphlqgyiyfrtekslrtlrklsdrshwepakgdsdsnfcycskgenfiergtrpatgkrkaanglakikenyaetvelakkgkldeidpghllrfygsikslqkdnlvrpsdseeltglwiygpsgcgkskyvrdtygqdfyyklankwwdgyrqeetvliedlgtehdklghhlklwsdryafsgetkggmlscrpkrivvtsqysieeifldektqealnrrftklrlfnlkst*	294	USER	zzz1791
1937		Unclass_KP153369	mlendeqpipsvsiekplvsrgwcftcnnysesdyngflaaesvylvigkeisstgtphlqgyiyfrtekslrtlrklsdrshwepakgdsdsnfcycskgenfiergtrpatgkrkaanglakikenyaetvelakkgkldeidpghllrfygsikslqkdnlvrpsdseeltglwiygpsgcgkskyvrdtygqdfyyklankwwdgyrqeetvliedlgtehdklghhlklwsdryafsgetkggmlscrpkrivvtsqysieeifldektqealnrrftklrlfnlkst*	294	USER	zzz1792
1936		Unclass_KP153370	mpasskswcftdnecledlwnimestylcygretapttgqkhlqgvivfatqkrlaavkklhptchweaahsvpasityckkegdwfefgtppaqgkrndlesvyaliktgakfaevldnhpvatihytqgikqaifaqikhrpeqtptvnwyfgatgagkshrahaeavnpyifpntgrfwegyegqthvifddfrpdqvpfakllrildkynctvevkgasvplaathfwitapespqemytatnhttgstwekeniqqlvrrctvieriirdkhitnliiedpagcpergvtdipplksqkkldypitdhmflfdssdefnlc*	327	USER	zzz1793
1935		Unclass_KP153371	mgsrrqgifwlltipradwedpgelpewaswirgqaevgeggydhwqvivafktkkslqackllftntthaelsrsaaaadyvwkddtavpdtrfeygakpirrnakvdweavwtaaksgcldkipasirvqsyssirriecdysrpvpmerqchifwgptatgksrrawseagsdaypkdprtkfwdgyqgesnvvmdefrgviaignllrwldrysvrveikgssrvllcksmwitsnlppeqwwpdldaetfaafrrrvkvtqfhlplinen*	276	USER	zzz1794
1934		Unclass_KP153372	mgsrrqgifwlltipradwedpgelpewaswirgqaevgeggydhwqvivafktkkslqackllftntthaelsrsaaaadyvwkestrvdgtqfeygakpirrnskvdwesiwtsavagqletipasiriqsygairriecdysrpipmerecnifwgstgtgksrrawaeagddaypkdprtkfwdgyqgeanvvmdefrgviavgnllrwldrypvrvevkgssrvllcksmwitsnlppeqwwpdldaetfaafrrrvkvtqfhlplinen*	276	USER	zzz1795
1933		Unclass_KP153373	mgsrrqgifwlltipradwedpgelpewaswirgqaevgeggydhwqvivafktkkslqackllftntthaelsrsaaaadyvwkddtavpdtrfeygakpirrnakvdweavwtaaksgcldkipasirvqsyssirriecdysrpvpmerqchifwgstgtgksrrawaeagddaypkdprtkfwdgyqgeanvvmdefrgviavgnllrwldrypvrvevkgssrvllcksmwitsnlppeqwwpdldaetfaafrrrvkvtqfhlplinen*	276	USER	zzz1796
1932		Unclass_KP153374	marrqgifwlltipradwedpgelpdfaswikgqaevgeggydhwqvivafklkkslqtckrlfsnsthaeltrsaaageyvwkestrvdgtqfeygakpirrnskvdwesiwtsavagqletipasiriqsygairriecdysrpipmerecnifwgstgtgksrrawaeagddaypkdprtkfwdgyqgeanvvmdefrgviavgnllrwldrypvrvevkgssrvllcksmwitsnlppeqwwpdldaetfaafrrrvkvtqfhlplinen*	275	USER	zzz1797
1931		Unclass_KP153375	marrqgifwlltiaradwnapnelpewaswirgqeevgetgyahwqvfvafkakqslqtckgfftdtthaelsrsaaaadyvwkestrvdgtqfeygakpirrnskvdwesiwtsavagqletipasvriqsygairriecdysrpipmerecnifwgstgtgksrrawaeagddaypkdprtkfwdgyqgeanvvmdefrgviavgnllrwldrypvrvevkgssrvllcksmwitsnlppeqwwpdldaetfaafrrrvkvtqfhlplinen*	275	USER	zzz1798
1930		Unclass_KP153376	marrqgifwlltiaradwedpgelpewaswirgqaevgeggydhwqvivafkakqslqgckgffsntthaelsrsaaaadyvwkddtavpdtrfeygakpirrnvktdweavwtaaksgnleaipasiriqsysairriecdysrpvpmerechifwgptatgksrrawseagsdaypkdprtkfwdgyqgesnvvmdefrgviaignllrwldrysvrveikgssrvllcksmwitsnlppeqwwpdldaetfaafrrrvkvtqfhlplinen*	275	USER	zzz1799
1929		Unclass_KP153377	mskgnrawcytlnnyteeerdslrslkcayqvfgyergaadtphlqgyvqfahqktlsavkkllprahleerrgtidqaveyckkdgdfeeygkkpmsqkekgkeeknrwkrilekadegdeewlrenepnvafkhmatfrshkkprvgtlqyeetphewwvgptgtgksrkaheeypnhyakeknkwwcgytgqetviieeadpktmehlaarlkvwadrypfpgeikggriegirplrvivisnytieecfanqndveplrrrfkevkfgertmpspwhpsytl*	287	USER	zzz1800
1928		Unclass_KP153378	mskgnrawcytlnnyteeerdslrslkcayqvfgyergdadtphlqgyvqfahqktlsavkkllprahleerrgtidqaveyckkdgdfeeygkkpmsqkekgkeeknrwkrilekadegdeewlrenepnvafkhmatfrshkkprvgtlqyeetphewwvgptgtgksrkaheeypnhyakeknkwwcgytgqetviieeadpktmehlaarlkvwadrypfpgeikggriegirplrvivisnytieecfanqndveplrrrfkevkfgertmpspwhpsytl*	287	USER	zzz1801
1927		Unclass_KP153379	mttdkkfttqnntkywcftwdtnisqkklppvadlinflnnisetaifqeecgtikgkvhyqgtltligprqskisvlrlferrfkgvsgltlsrsysnqasedyvtkdegrisgpyfcgkkekfsmeysttkltawqqdlfdfltkatkikyfrdrivivvqdekgnsgksfflkwlaigqkvlnskklpvtsvdrlmsavtkvtadskridlftinltrskgedqsykdlfaaieeikdgyivdamygnykeaifdppivviftnliidgklseslspdrwlkltidnkknivyngiawnayitetplkdiepeefaknlstkylgek*	331	USER	zzz1802
1926		Unclass_KP153380	mttdkkfttqnntkywcftwdtnisqkklppvadlinflnnisetaifqeecgtikgkvhyqgtltligprqskisvlrlferrfkgvsgltlsrsysnqasedyvtkdegrisgpyfcgkkekfsmeysttkltawqqdlfdfltkatkikyfrdrivivvqdekgnsgksfflkwlaigqkvlnskklpvtsvdrlmsavtkvtadskridlftinltrskgedqsykdlfaaieeikdgyivdamygnykeaifdppivviftnliidgklseslspdrwlkltidnkknivyngiawnayitetplkdiepeefaknlstkylgek*	331	USER	zzz1803
1925		Unclass_KP153381	mttdkkfttqnntkywcftwdtnisqkklppvadlinflnnisetaifqeecgtikgkvhyqgtltligprqskisvlrlferrfkgvsgltlsrsysnqasedyvtkdegrisgpyfcgkkekfsmeysttkltawqqdlfdfltkatkikyfrdrivivvqdekgnsgksfflkwlaigqkvlnskklpvtsvdrlmsavtkvtadskridlftinltrskgedqsykdlfaaieeikdgyivdamygnykeaifdppivviftnliidgklseslspdrwlkltidnkknivyngiawnayitetplkdiepeefaknlstkylgek*	331	USER	zzz1804
1924		Unclass_KP153382	mttdkkfttqnntkywcftwdtnisqkklppvadlinflnnisetaifqeecgtikgkvhyqgtltligprqskisvlrlferrfkgvsgltlsrsysnqasedyvtkdegrisgpyfcgkkekfsmeysttkltawqqdlfdfltkatkikyfrdrivivvqdekgnsgksfflkwlaigqkvlnskklpvtsvdrlmsavtkvtadskridlftinltrskgedqsykdlfaaieeikdgyivdamygnykeaifdppivviftnliidgklseslspdrwlkltidnkknivyngiawnayitetplkdiepeefaknlstkylgek*	331	USER	zzz1805
1923		Unclass_KP153383	mttdkkfttqnntkywcftwdtnisqkklppvadlinflnnisetaifqeecgtikgkvhyqgtltligprqskisvlrlferrfkgvsgltlsrsysnqasedyvtkdegrisgpyfcgkkekfsmeysttkltawqqdlfdfltkatkikyfrdrivivvqdekgnsgksfflkwlaigqkvlnskklpvtsvdrlmsavtkvtadskridlftinltrskgedqsykdlfaaieeikdgyivdamygnykeaifdppivviftnliidgklseslspdrwlkltidnkknivyngiawnayitetplkdiepeefaknlstkylgek*	331	USER	zzz1806
1922		Unclass_KP153390	msqgiywlltinqhefvpylpagvsyirgqlemannqgadtgylhwqllvvfsrkcrlaavkkllgntvhaelsrsaaatdyvwkedtrvagtqfelgampmqrnnptdwdtvrnnaragrlgdisgdiyvrcynqlkriacdhmqadpverevvcywgrtgtgksrrawdeasldaypkdprskfwdgyrgqehvvldefrggidiahvlrwfdrypvmvevkgssvplkatkiwitsnlppeswypelddetkqalrrrmnithfi*	269	USER	zzz1807
1921		Unclass_KP153391	msqgiywlltinqhefvpylpagvsyirgqlemannqgadtgylhwqllvvfsrkcrlaavkkllgntvhaelsrsaaatdyvwkedtrvagtqfelgampmqrnnptdwdtvrnnaragrlgdisgdiyvrcynqlkriacdhmqadpverevvcywgrtgtgksrrawdeasldaypkdprskfwdgyrgqehvvldefrggidiahvlrwfdrypvmvevkgssvplkatkiwitsnlppeswypelddetkqalrrrmnithfi*	269	USER	zzz1808
1920		Unclass_KP153392	msqgiywlltinqhefvpylpagvsyirgqlemannqgadtgylhwqllvvfsrkcrlaavkkllgntvhaelsrsaaatdyvwkedtrvagtqfelgampmqrnnptdwdtvrnnaragrlgdisgdiyvrcynqlkriacdhmqadpverevvcywgrtgtgksrrawdeasldaypkdprskfwdgyrgqehvvldefrggidiahvlrwfdrypvmvevkgssvplkatkiwitsnlppeswypelddetkqalrrrmnithfi*	269	USER	zzz1809
1919		Unclass_KP153393	msqgiywlltinqhefvpylpagvsyirgqlemannqgadtgylhwqllvvfsrkcrlaavkkllgntvhaelsrsaaatdyvwkedtrvagtqfelgampmqrnnptdwdtvrnnaragrlgdisgdiyvrcynqlkriacdhmqadpverevvcywgrtgtgksrrawdeasldaypkdprskfwdgyrgqehvvldefrggidiahvlrwfdrypvmvevkgssvplkatkiwitsnlppeswypelddetkqalrrrmnithfi*	269	USER	zzz1810
1918		Unclass_KP153394	mqinaksffltyprcaitaetfqlwlestftptylvigselhqdgtphvhvcftldtalrtrdervfdfhghhpnivrpraikkcidyvkkdgnfiesgeppamkrkwselqtattseeffktaleisprdyylnqerleymarklfkpvvptyvpqwvdfnipqelsdwidqrhevcyrpqslilygasrtgktewarslgphvyfngyfmldlirddveyaifddfedwttfkqykqwlgaqkqfvctdkyrkkvdllwgkpciilsneypafrdqdwillncitvklnkply*	296	USER	zzz1811
1917		Unclass_KP153395	mpfrlntscfhltykfhlpiaiivehvvrrinrgqpiywsivhesadeeapyehthalfkfatrcditserafdivhdgivvhphiksvktgdheantwtyhekapvnierfgpgpkipdrtlqaqadsfkrprtlleactangieiksvtdvqairrdrptpalyvhqfpgatwtykhpteftclfisgssgmgktqwalhlfrspflcshiddlkhydetthdgivfddmsffhlpresvihlcdfdldrsihcrhhcalipagtrkvftsnkrfeevfppdehgaikrrfqfatgrpaiiyfpfgvplytlptevtdvpvgllpdvdiltplgledtfgtsvtnvsvkdqtttpddqldtriiasyvggfhptrleafsnfspliedwsdidflln*	400	USER	zzz1812
1916		Unclass_KP153396	mpfrlntscfhltykfhlpiaiivehvvrrinrgqpiywsivhesadeeapyehthalfkfatrcditserafdivhdgivvhphiksvktgdheantwtyhekapvnierfgpgpkipdrtlqaqadsfkrprtlleactangieiksvtdvqairrdrptpalyvhqfpgatwtykhpteftclfisgssgmgktqwalhlfrspflcshiddlkhydetthdgivfddmsffhlpresvihlcdfdldrsihcrhhcalipagtrkvftsnkrfeevfppdehgaikrrfqfatgrpaiiyfpfgvplytlptevtdvpvgllpdvdiltplgledtfgtsvtnvsvkdqtttpddqldtriiasyvggfhptrleafsnfspliedwsdidflln*	400	USER	zzz1813
1915		Unclass_KP153397	mtqratcwsitinnptdeetkvalpvgwkltgqieqgeegtvhyqgmltttqqrfgsikvyfprahievarnkkalseyvhksdtrvakvddnisnnifqwqaevaklwndtdfthmkyiydkepsedvalkyvdslcgkliregakglefvavnpmwrsswkrfyfsiitrdgrdeavcetqvpqgeetnekgs*	196	USER	zzz1814
1914		Unclass_KP153398	mtqratcwsitinnptdeetkvalpvgwkltgqieqgeegtvhyqgmltttqqrfgsikvyfprahievarnkkalseyvhksdtrvakvddnisnnifqwqaevaklwndtdfthmkyiydkepsedvalkyvdslcgkliregakglefvavnpmwrsswkrfyfsiitrdgrdeavcetqvpqgeetnekgs*	196	USER	zzz1815
1913		Unclass_KP153399	mtqratcwsitinnptdeetkvalpvgwkltgqieqgeegtvhyqgmltttqqrfgsikvyfprahievarnkkalseyvhksdtrvakvddnisnnifqwqaevaklwndtdfthmkyiydkepsedvalkyvdslcgkliregakglefvavnpmwrsswkrfyfsiitrdgrdeavcetqvpqgeetnekgs*	196	USER	zzz1816
1912		Unclass_KP153400	mtqratcwsitinnptdeetkvalpvgwkltgqieqgeegtvhyqgmltttqqrfgsikvyfprahievarnkkalseyvhksdtrvakvddnisnnifqwqaevaklwndtdfthmkyiydkepsedvalkyvdslcgkliregakglefvavnpmwrsswkrfyfsiitrdgrdeavcetqvpqgeetnekgs*	196	USER	zzz1817
1911		Unclass_KP153401	mtqratcwsitinnptdeetkvalpvgwkltgqieqgeegtvhyqgmltttqqrfgsikvyfprahievarnkkalseyvhksdtrvakvddnisnnifqwqaevaklwndtdfthmkyiydkepsedvalkyvdslcgkliregakglefvavnpmwrsswkrfyfsiitrdgrdeavcetqvpqgeetnekgs*	196	USER	zzz1818
1910		Unclass_KP153402	mstrqrhrsvcftlnnytaqekqhikdgadagsfkyivfqeergavgtphlqgyaqraqptefktwkrflgdrchlegskgtparnreyctkdadripgtlyfekgevpvqgerndltaifeaakdstvsvrdlvdtngaafiryykgvlavrsifsdkrqrktkvfwfygptglgkshecnrlapnafwkqnspwwcgydanehddividdyradfckfaqllrlfdftkltvetkggnvnfrakrifistprspletwigrseediqqllrrievlveftpspftdngrvlpnkvfhkgspddlvvddlgdgdqqprspvetppeeavedasdrrtrprveeadepreqfaqdeygflnefdelndddftf*	374	USER	zzz1819
1909		Unclass_KP153403	mepideasqpmeddlgvmspkkkfrataknfaltfpqcdmnkedafqkimdehkpaylcvaeeehkdgsphlhalisfsskknikdpkhfdlsdnestfhcniqscksvadwkryikkdgkyketeesfvlddhrlgqrqklyndfcwsktyiernerrdidwpvtirdseghehtmerplpdeqglltkkrnwwivsppnagktywvnkqfkgqkifmrenkeyawedydhediiivddstmkweelsavcntytnlkqvpgkiryknlywkqnharniiilsnlkpidcygqnttilnavlerfvvleidnlinn*	318	USER	zzz1820
1908		Unclass_KP153404	mfcyiknaisclrtvkinvfsmppsrsrafiftwnnptadteaaleslagysyltfgretapttgtrhlqgyirftdgkslrsarrllngahvevartirqaieychkegdfvefgtrpvddaargdmekarweiawtkaktadleeidadirvrcysaltriqkdymvpplplpapcglwihglsgvgktfavyqaypdlysknaskwwdgyqnqdhilfddmdpdvgkwagrffkiwaderpfiadikggsisirpkifivtsqytidecfgeiqtrmalsrrfriieklsldheini*	301	USER	zzz1821
1907		Unclass_KP153405	matnnkfslqakrffltfpqcpmdkhqvllwltgaheahqaivaeeqhedgsphlhiyltyekakrishadyfdlgnpenpeqvfhpniqtvknmkecvkyitktdkepaqhninyrdiiagksskfaviaasvmdgkslleindsdpgfvlqhkrkleeyqawivmkkprndlaawypvpvpafgpeyqlatwlnanlfaqprrikasqlylfsppncgkttlitwlsrfcriyymplledfydfydddsydlvvidefkgqkqiqflnqwldgqpctvrikggqrlktrnlpciilsnwalstvysaaieksgpdvigpliarleivnvnkfitfydpvwveaqnken*	351	USER	zzz1822
1906		Unclass_KP153406	matnnkfslqakrffltfpqcpmdkhqvllwltgaheahqaivaeeqhedgsphlhiyltyekakrishadyfdlgnpenpeqvfypniqtvknmkecvkyitktdkepaqhninyrdiiagksskfaviaasvmdgkslleindsdpgfvlqhkrkleeyqawivmkkprndlaawypvpvpafgpeyqlatwlnanlfaqprrikasqlylfsppncgkttlitwlsrfcriyymplledfydfydddsydlvvidefkgqkqiqflnqwldgqpctvrikggqrlktrnlpciilsnwalstvysaaieksgpdvigpliarleivnvnkfitfydpvwveaqnken*	351	USER	zzz1823
1905		Unclass_KP153407	msrqlrhfcftlnnyveeediprlqgffeqeakywiigrevgdsgtphlqgyaslqrrhtfnvvrdklgsrchiegargsarqnreycskggnyieggsinegaasgksrdelgrsfmaavelgnsgvveyansfpgayifsgsnmlrnalalkppierpnikvqwiygepgvgksrlahsslpeayvkeprtkwwngymceknviiddfgpngidinhllrwfdrykclvenkggmialyadnfiitsnfhpdevfsfagvpnvqlpalmrrielvhmn*	281	USER	zzz1824
1904		Unclass_KP153408	mtdtrsrdwcftlnnyteeeydvihslslsqykyivvgkevgesgtnhlqgyiyfvnaksmsavkkmiskrchlesakgsplqaatyckkdnndyyengelpviqgkrtdldeirdilkqtnkmsdvvmvaksyqsvkmaeqilkyhekprmekpyvewyygptgtgkskkayevlsdecytclstgkwfdgydahknvliddmrkdfmkfhellrlldryamrveckggtrqfvashiiitscyhpkdmfetrediqqllrridkienfe*	272	USER	zzz1825
1903		Unclass_KP153409	maprgnaakrwtftinnwtladydkvlefttkfepvflicgkergelltdhlqgfvhlkskqrltflkanlserahfecakgsdednrdycskedtepfifgtpvkscsekgggritaqqvigaaialaterepflvikkneefavpvlrhyasfeklaasvrrlnaleqlqseykevrlkvwqqaiintiqerphprtihwyweatggtgktwmskylvachsafraengksndikyayagekvvifdftrsqtehinyeiiesikngcyfnckyesgmrifptphvfcfsnsppdlskmsadrwhisqirglllswsvplpipgtrtvdessvcetsseeggeesfnlfeyldatkt*	360	USER	zzz1826
1902		Unclass_KP153410	maynfcftcnnptdaietyiqsitdvrfigyahevgelgtphlqgvvvlnkksrltavrkilpkchisqmrgsfaeawdgyiltphakhnkpepevvyafgtppgvrgsntrdvyeeamaiaktgttegisaqmmlrfgkalhevaqkhspkpphidgdldnywiygptgsgksktvydkwprdtlyiklhnkwwenydgeetvyiedlgndskllthikhwadryafraevkfgsilirpkrlvvtsnhtirdsfptasvadvealerrfkiqyigpqipaftsvtk*	289	USER	zzz1827
1901		Unclass_KP153411	maynfcftcnnptdaietyiqsitmsdlfgyahevgelgtphlqgvvvlnkksrltavrkilpkchisqmrgsfaeawdgyiltphakhnkpepevvyafgtppvvrgsntrdvyeeamaiaktgttegisaqmmlrfgkalhevaqkhspkpphidgdldnywiygptgsgksktvydkwprdtlyiklhnkwwenydgeetvyiedlgndskllthikhwadryafraevkfgsilirpkrlvvtsnhtirdsfptasvadvealerrfkiqyigpqipaftsvtk*	289	USER	zzz1828
1900		Unclass_KP153412	mnsksiidnndkstrwgftafesqwdlfktiaspvaewgcheelcptsnrlhyqgyirtqsqvrfsamkdrfpgvhflipdnwsawlnyckksatrngdgnqvhevaknrhmtmadaltalvpyrvtekeiddyftqykriydikdqywtavnryisetknyesiglftnaqmvvgwaktkkvwidrqtdidragleqaealqggteeppaepgns*	217	USER	zzz1829
1899		Unclass_KP153413	mnsksiidnnykstrwgftafesqwdlfktiaspvaewgwqeelcptsnrlhyqgyirtqsqvrfsamkdrfpgvhflipdnwsawlnyckksatrngdgnqvhevaknrhmtmadaltalvpyrvtekeiddyftqykriydikdqywtavnryisetknyesiglftnaqmvvgwaktkkvwidrqtdidragleqaealqggteeppaepgns*	217	USER	zzz1830
1898		Unclass_KP153414	mpssyrrvvftlnnytneiltsicnyaesncryaiiakevapttgtphlqgflhfknpkthktlgkvlpgghflhakgsdedsqvycskedpspwefgtmchqgkrsdlddailtlnesggdlkrvamehagayvryhrgfaaykslvcataprdfktklvvlfgppgtgktraayelagenpypkprgewwdgycgnngviiddfygwlkfdellkisdrypyrvpikggyenfcskiiiitsnidiskwykfdgydpaalyrrctkylrcekdvfcsmeddylvkiny*	291	USER	zzz1831
1897		Unclass_KP153415	mpssyrrvvftlnnytneiltsicnyaesncryaiiakevapttgtphlqgflhfknpkthktlgkvlpgghflhakgsdedsqvycskedpspwefgtmchqgkrsdlddailtlnesggdlkrvamehagayvryhrgfaaykslvcataprdfktklvvlfgppgtgktraayelagenpypkprgewwdgycgnngviiddfygwlkfdellkisdrypyrvpikggyenfcskiiiitsnidiskwykfdgydpaalyrrctkylrcekdvfcsmeddylvkiny*	291	USER	zzz1832
1896		Unclass_KP153416	mpssyrrvvftlnnytneiltsicnyaesncryaiiakevapttgtphlqgflhfknpkthktlgkvlpgghflhakgsdedsqvycskedpspwefgtmchqgkrsdlddailtlnesggdlkrvamehagayvryhrgfaaykslvcataprdfktklvvlfgppgtgktraayelagenpypkprgewwdgycgnngviiddfygwlkfdellkisdrypyrvpikggyenfcskiiiitsnidiskwykfdgydpaalyrrctkylrcekdvfcsmeddylvkiny*	291	USER	zzz1833
1895		Unclass_KP153417	mdpitdttikstrwaftayegqwhlfetmppeiaewgwqtekcpdtdrlhyqgylmlqrqqrlaslvrllpgvhfgaarnwtdlvnycrkkdtrvegteqvhrtnriptlfgyaqevisrlpswdeirqdwitkmehvswmlkhgqpdlpdpvprssifyvatsmeahaydlvtklvgediqkgqigvefivqnplwittfknqirnmvlrkdfqnppasrqtdrqteitisfe*	235	USER	zzz1834
1894		Unclass_KP153418	mdpitdttikstrwaftayegqwhlfetmppeiaewgwqtekcpdtdrlhyqgylmlqrqqrlaslvrllpgvhfgaarnwtdlvnycrkkdtrvegteqvhrtnriptlfgyaqevisrlpswdeirqdwitkmehvswmlkhgqpdlpdpvprssifyvatsmeahaydlvtklvgediqkgqigvefivqnplwittfknqirnmvlrkdfqnppafrqtdrqteitisfe*	235	USER	zzz1835
1893		Unclass_KP153419	mdpitdttikstrwaftayegqwhlfetmppeiaewgwqtekcpdtdrlhyqgylmlqrqqrlaslvrllpgvhfgaarnwtdlvnycrkkdtrvegteqvhrtnriptlfgyaqevisrlpswdeirqdwitkmehvswmlkhgqpdlpdpvprssifyvatsmeahaydlvtklvgediqkgqigvefivqnplwittfknqirnmvlrkdfqnppafrqtdrqteitisfe*	235	USER	zzz1836
1892		Unclass_KP153420	manytdadehhflntrtkavhfvsyetsnetverlaslktdymiigdehcpttgrhhlqcylytknkitlstihkaclkkcklfiakgtaeqnqtycskekilyesgtlpsgqgkrtdldttranllaggtlrdvvleatsyqsvkmaeqilkyheikrnwkpivkwfwgatgtgksltaydeldkddtytamstgkwwdgydahscvviddmrrdfckfhellryldryptivetkggtrqflakqiiitscyapedmyetrediqqllrridevreftaeslgkinsin*	292	USER	zzz1837
1891		Unclass_KP153421	manytdadehhflntrtkavhfvsyetsnetverlaslktdymiigdehcpttgrhhlqcylytknkitlstihkaclkkcklfiakgtaeqnqtycskekilyesgtlpsgqgkrtdldttranllaggtlrdvvleatsyqsvkmaeqilkyheikrnwkpivkwfwgatgtgksltaydeldkddtytamstgkwwdgydahscvviddmrrdfckfhellryldryptivetkggtrqflakqiiitscyapedmyetrediqqllrridevreftaeslgkinsin*	292	USER	zzz1838
1890		Unclass_KP153422	maiytdadehhflntrtkavhfvsfetsnetverlaslktdymiigdehcpttgrhhlqcylytknkitlstihkaclkkcklfiangtaeqnqtycskekilyesgtlpsgqgkrtdldttranllaggtlrdvvleatsyqsvkmaeqilkyhekkrdwkpivkwfwgatgtgksltaydeldkddtytamstgkwwdgydahscviiddmrrdfckfhellryldryptivetkggtrqflakqiiitscyapedmyetrediqqllrridevreftaeslgkinsin*	292	USER	zzz1839
1889		Unclass_KP153423	menytdvdehhfletrtkavhfvsyetsnetiqrlaslktdymiigdehcpttgrhhlqcylytknkitlstihkaclkqckiflakgtaeqnqiycskekiryvsgilpvgqgkrtdldttranllaggtlrdvvleatsyqsvkmaeqilkyherkrdwkpivkwfwgatgtgksltaydeldkddtytamstgkwwdgydahscvviddmrrdfckfhellryldryptivetkggtrqflakqiiitscyapedmyetrediqqllrridevreftaeslvkinsin*	292	USER	zzz1840
1888		Unclass_KP153424	manptrqnarhwivtqhdidafwrgdptghhaikylvfqveqgagtsawhiqgfiqfktcvrgsvvqrlfggnkphvevahhpsqareycmkedtqvtppeefgtweptfaqgyrsdltvaklqirqhgnyrrcldddaldtvtarypkwvadqltmvprplrpipivtvyygptntgktarchinnpgiheirldngfinytgqscvlfdefdkdpwpfgtmlklldrypfqinvkngyswweathifitateapcdwylgkkgvnsdhipqflrrltnvvnttgsvlppplplspptlpvppspeieeqqeeatmelddptnpedyenseerdlreemeyrdqyqgdseey*	354	USER	zzz1841
1887		Unclass_KP153425	manptrqnarhwivtqhdidafwrgdptghhaikylvfqveqgagtsawhiqgfiqfktcvrgsvvqrlfggnkphvevahhpsqareycmkedtqvtppeefgtweptfaqgyrsdltvaklqirqhgnyrrcldddaldtvtarypkwvadqltmvprplrpipivtvyygptntgktarchinnpgiheirldngfinytgqscvlfdefdkdpwpfgtmlklldrypfqinvkngyswweathifitateapcdwylgkkgvnsdhipqflrrltnvvnttgsvlppplplspptlpvppspeieeqqeeatmelddptnpedyenseerdlreemeyrdqyqgdseey*	354	USER	zzz1842
1886		Unclass_KP153426	manptrqnarhwivtqhdidafwrgdptghhaikylvfqveqgagtsawhiqgfiqfktcvrgsvvqrlfggnkphvevahhpsqareycmkedtqvtppeefgtweptfaqgyrsdltvaklqirqhgnyrrcldddaldtvtarypkwvadqltmvprplrpipivtvyygptntgktarchinnpgiheirldngfinytgqscvlfdefdkdpwpfgtmlklldrypfqinvkngyswweathifitateapcdwylgkkgvnsdhipqflrrltnvvnttgsvlppplplspptlpvppspeieeqqeeatmelddptnpedyenseerdlreemeyrdqyqgdseey*	354	USER	zzz1843
1885		Unclass_KP153427	mtsllptdskstrwaftafesqytlfnempafiaqwgwqqevspttgkphfqgyfrtttqvrfaylkrqfpgvhleiakdweslkkycnkaetaipgtqvqatsnfmnmydylpwillqtidtygwqelwddsreeyiekvmytarahiasgntwaswiiqnpnfkqnlkengraillgfkhrqtdrqte*	191	USER	zzz1844
1884		Unclass_KP153428	mtsllptdskssrwaftayeeqwslfiamppgvaewgwqtetcpkterlhyqgwlrtntqvrfsqlrkilpgvhlekaqhwealkaycnktetalsntkviqvsqyktkfqileyliseaieeygkdflmelspeeltngiinggnlmiteghtyvawilsdpnfkltikqsgkalvlalaskkdrqtdrqn*	193	USER	zzz1845
1883		Unclass_KP153429	mddyllkfcevlgkkssksskeilgntdtkiskqpspakhycftlnnysnnelnivptslgsvghyiygfevgaegtphlqgyielhhkmritefkkieglgrthfekckgsqadnlkycrkggnyisnywedvqlivptyywqldilqviaspahgrhihwfwesiggvgkssfakylcsvhnaiyidegkksdlinivynipnitcrsiividvprdngntvsykaieqikngmicntkyetgmrlfnpphiiifanmppeehklsadrwkiteissp*	281	USER	zzz1846
1882		Unclass_KP153430	mddyllkfcevlgkkssksskeilgntdtkiskqpspakhycftlnnysnnelnivptslgslghyiygfevgaegtphlqgyielhhkmritefkkieglgrahfekckgsqadnlkycrkggnyisnywedvqlivptyywqldilqviaspahgrhihwfwesiggvgkssfakylcsvhnaiyidegkksdlinivynipnitcrsiividvprdngntvsykaieqikngmicntkyetgmrlfnpphiiifanmppeehklsadrwkiteissp*	281	USER	zzz1847
1881		Unclass_KP153431	mddyllkfcevlgkkssksskeilgntdtkiskqpspakhycftlnnysnnelnivptslgslghyiygfevgaegtphlqgyielhhkmritefkkieglgrahfekckgsqadnlkycrkggnyisnywedvqlivptyywqldilqviaspahgrhihwfwesiggvgkssfakylcsvhnaiyidegkksdlinivynipnitcrsiividvprdngntvsykaieqikngmicntkyetgmrlfnpphiiifanmppeehklsadrwkiteissp*	281	USER	zzz1848
1880		Unclass_KP153432	mddyllkfcevlgkkssksskeilgntdtkiskqpspakhycftlnnysnnelnivptslgslghyiygfevgaegtphlqgyielhhkmritefkkieglgrahfekckgsqadnlkycrkggnyisnywedvqlivptyywqldilqviaspahgrhihwfwesiggvgkssfakylcsvhnaiyidegkksdlinivynipnitcrsiividvprdngntvsykaieqikngmicntkyetgmrlfnpphiiifanmppeehklsadrwkiteissp*	281	USER	zzz1849
1879		Unclass_KP153433	mddyllkfcevlgkkssksskeilgntdtkiskqpspakhycftlnnysnnelnivptslgslghyiygfevgaegtphlqgyielhhkmritefkkieglgrahfekckgsqadnlkycrkggnyisnywedvqlivptyywqldilqviaspahgrhihwfwesiggvgkssfakylcsvhnaiyidegkksdlinivynipnitcrsiividvprdngntvsykaieqikngmicntkyetgmrlfnpphiiifanmppeehklsadrwkiteissp*	281	USER	zzz1850
1878		Unclass_KP153434	madkstrwaftayetqypildalhkqsseliaeigwqdeicpktgkhhrqgyvrtvrqvrfsqlreimpdihlekaknwealinycqksatrdlsgamvsakferplrlhemlidvahhiylshrpgtkhavcldrqtdrqillsylreysaalvsahpeyavvlvrqdardawcnyievwmhkaeqreegdevq*	196	USER	zzz1851
1877		Unclass_KP153435	madkstrwaftayetqypildalhkqsseliaeigwqdeicpktgkhhrqgyvrtvrqvrfsqlreimpdihlekaknwealinycqksatrdlsgamvsakferplrlhemlidvahhiylshrpgtkhavcldrqtdrqillsylreysaalvsahpeyavvlvrqdardawcnyievwmhkaeqreegdevq*	196	USER	zzz1852
1876		Unclass_KP153436	madkstrwaftayetqypildalhkqsseliaeigwqdeicpktgkhhrqgyvrtvrqvrfsqlreimpdihlekaknwealinycqksatrdlsgamvsakferplrlhemlidvahhiylshrpgtkhavcldrqtdrqillsylreysaalvsahpeyavvlvrqdardawcnyievwmhkaeqreegdevq*	196	USER	zzz1853
1875		Unclass_KP153437	mdvqqqiktqsiemangittafwgmvinnpddndfvlihnghpdhcrelihtlekgengtihiqawlklqrqqrlsfvkklfpranfkpltsdeyirnaksyaqkldktaqspsihvfqdpmitlesvmrklvehviqetsekdymdercpaqcwdryklhgdtimrsmvvddfriakvfvsdvfkkiwkdygrevfvsihnahththtqreddennvavvdipttnadddtrsgqgsrilegehddgteqedsedydecetegsegssesgdsqsdeedd*	282	USER	zzz1854
1874		Unclass_KP153438	mdvqqqiktqsiemangittafwgmvinnpddndfvlihnghpdhcrelihtlekgengtihiqawlklqrqqrlsfvkklfpranfkpltsdeyirnaksyaqkldktaqspsihvfqdpmitlesvmrklveyvvedtaqkdymdercpaqcwdryklhgdtimrsmvvddfriakvfvsdvfkkiwkdygrevfvsihnahththtqreddennvavvdipttnadddtrsgqgsrilegehddgteqedsedydecetegsegssesgdsqsdeend*	282	USER	zzz1855
1873		Unclass_KP153439	mdvqqqiktqsiemangittafwgmvinnpddndfvlihnghpdhcrelihtlekgengtihiqawlklqrqqrlsfvkklfpranfkpltsdeyirnaksyaqkldktaqspsihvfqdpmitlesvmrklvehviqetsekdymdercpaqcwdryklhgdtimrsmvvddfriakvfvsdvfkkiwkdygrevvvsihnahththtqreddennvavvdipttnadddtrsgqgsrilegehddgteqedsedydecetegsegssesgdsqsdeend*	282	USER	zzz1856
1872		Unclass_KP153440	mdvqqqiktqsiemangittafwgmvinnpddndfvlihnghpdhcrelihtlekgengtihiqawlklqrqqrlsfvkklfpranfkpltsdeyirnaksyaqkldktaqspsihvfqdpmitlesvmrklvehviqetsekdymdercpaqcwdryklhgdtimrsmvvddfriakvfvsdvfkkiwkdygrevfvsihnahththtqreddennvavvdipttnadddtrsgqgsrilegehddgteqedsedydecetegsegssesgdsqsdeend*	282	USER	zzz1857
1871		Unclass_KP153441	mseratcwsvtinnpipadedniaqanqrsgwkvegqleqgengtqhyqlmvktpqirfsqikkqfprahievarnvkalkeyvhkddtkigeipvndkyptmtafweliydiheqlkrdidymgietpeerlvlldqcvnllicqtynvetfgvnpqvrsaakkylpalfirvekmrrqktvrqtelnsaveqneneestsetqstcetqstcetdessqsdwnd*	227	USER	zzz1858
1870		Unclass_KP153442	matsvpvtsvpgkmrnvcftlnnyteddcnrlrtlekgvgylifakevgdsgtphlqgyiefenprspgkdwknfkelmggchferrrgtakqasdycefadyptcqikneevykfgeisrqgdrtdwaqavnqiigekrevvdvimdqpqllpairalenfkkmtiqpierevhvtwlhgspgsgktrwvwdkypevyskpsgnwwdgyngeetlllddydedipfaellkvldrykyrvpvkggfvgarwtrvfittnnppvsfykyvsnrsaldrriheikcfdev*	290	USER	zzz1859
1869		Unclass_KP153443	mtdratcwsitinnpteeevnawtkipgwkltgqyeegdktgtphfqgmlqtpqvrakavkrifprahieiardraalakyvskeetrvatyeangvpslfeyqdniaalwdveefgrrrsddaylkrykydvgdlalayvdelvaseivkgqrgiefiginpmwrsswkkfyssiitrhassrtqvqpssapsqaspplspggdqldqegelcddhggseid*	224	USER	zzz1860
1868		Unclass_KP153444	mtdratcwsitinnpteeevnawtkipgwkltgqyeegdktgtphfqgmlqtpqvrakavkrifprahieiardraalakyvskeetrvatyeangvpslfeyqdniaalwdveefgrrrsddaylkrykydvgdlalayvdelvaseivkgqrgiefiginpmwrsswkkfyssiitrhassrtqvqpssapsqaspplspggdqldqegelcddhggseid*	224	USER	zzz1861
1867		Unclass_KP153445	mpetirnavltnfndpmiwedlspklryfaygveicpetkrehfqcfaqawkpmrltgwkklptahieimrgnfreneaycskegklteygekpnengkkstlinykrkidegdsvlgiaemedyfptyvmyrnglheykrhvrskkvqndrtmpevyvrigpagtgktrwmdekfgldgwiqapdntgkwfdgcdrdvilfddveagqipplsswkrlcdryplqvpikggfitwkpktivftsnthpklwwpnlsefdvgaierriteivvve*	276	USER	zzz1862
1866		Unclass_KP153446	mvfnfnakhvfltypqttltkealyeasirwgcvsgtigqekhqdgglhlhavfafdrkrhirderffdlegyhpnvqsarnvkavreycekedpealrygafegcekidwkdllglatdsahfiklvtdrdvsfcvkhfsnvrafaeytfrsrkedftpqftdfrnqlrpmqdfhaellrpsrprerhtsivivgatrlgktewarslgnhtywsgavdwtrhdnhsryaviddlsleyiprlqqifgcqhnisvsqkykpimtfdwgipviyltndenylekqpdfikswwqnnvvtchvrnklfv*	309	USER	zzz1863
1865		Unclass_KP153447	manrrsrgwcftlnnytpeheallaavpcaymifgrevgangtphlqgfvyfpnaktfngakavlpagchleaamgsvaqnveycskdgdveergerplsaaekgaseaqrwkdarlaavsgdiadvpddiyiryyrtlkeiskdhmarpdgldgvcglwlygaagtgksryaqeqfpehymkmtnkwwdgyqgqdvvvmddmdpdhaclrhhlkrwadrypfigetkggaisirpkkfvvtsqysiedmfknrdgtldvetvaairrrfevkrfgvnafnpyni*	286	USER	zzz1864
1864		Unclass_KP153448	manrrsrgwcftlnnytpeheallaavpcaymifgrevgangtphlqgfvyfpnaktfngakavlpagchleaamgsvaqnveycskdgdveergerplsaaekgaseaqrwkdarlaavsgdiadvpddiyiryyrtlkeiskdhmarpdgldgvcglwlygaagtgksryaqeqfpehymkmtnkwwdgyqgqdvvvmddmdpdhaclrhhlkrwadrypfigetkggaisirpkkfvvtsqysiedmfknrdgtldvetvaairrrfevkrfgvnafnpyni*	286	USER	zzz1865
1863		Unclass_KP153449	manrrsrgwcftlnnytpeheallaavpcaymifgrevgangtphlqgfvyfpnaktfngakavlpagchleaamgsvaqnveycskdgdveergerplsaaekgaseaqrwkdarlaavsgdiadvpddiyiryyrtlkeiskdhmarpdgldgvcglwlygaagtgksryaqeqfpedymkmtnkwwdgyqgqdvvvmddmdpdhaclrhhlkrwadrypfigetkggaisirpkkfvvtsqysiedmfknrdgtldvetvaairrrfevkrfgvnafnpyni*	286	USER	zzz1866
1862		Unclass_KP153450	manrrsrgwcftlnnytpeheallaavpcaymifgrevgangtphlqgfvyfpnaktfngakavlpagchleaamgsvaqnveycskdgdveergerplsaaekgaseaqrwkdarlaavsgdiadvpddiyiryyrtlkeiskdhmarpdgldgvcglwlygaagtgksryaqeqfpehymkmtnkwwdgyqgqdvvvmddmdpdhaclrhhlkrwadrypfigetkggaisirpkkfvvtsqysiedmfknrdgtldvetvaairrrfevkrfgvnafnpyni*	286	USER	zzz1867
1861		Unclass_KP153451	msdvveteateenrrpvrqtasqykawcytfnnysdadverlkgckdgievhvfgkevgdsgtphlqgfikfqsrkramfvkqliggnahveyakfpdaaieyckkdqdyfeygalikagkrcdiddfksfiatarnekrkiydselreefpklycraarfmkeyrddnrciepprvlhplyewqsklnselarepddrsitfiidelgnsgkswyatyykwnhpettqifrpkkvadmayelnervrvvfmdcarakageylqydfleeikdgmvfspkyesrtkylsnchvvvlmneqpdmtklsqdryvivri*	317	USER	zzz1868
1860		Unclass_KP153452	msdvveteateenrrpvrqtasqykawcytfnnysdadverlkgckdgievhvfgkevgdsgtphlqgfikfqsrkramfvkqliggnahveyakfpdaaieyckkdqdyfeygalikagkrcdiddfksfiatarnekrkiydselreefpklycraarfmkeyrddnrciepprvlhplyewqsklnselarepddrsitfiidelgnsgkswyatyykwnhpettqifrpkkvadmayelnervrvvfmdcarakageylqydfleeikdgmvfspkyesrtkylsnchvvvlmneqpdmtklsqdryvivri*	317	USER	zzz1869
1859		Unclass_KP153453	msdvveteateenrrpvrqtasqykawcytfnnysdadverlkgckdgievhvfgkevgdsgtphlqgfikfqsrkramfvkqliggnahveyakfpdaaieyckkdqdyfeygalikagkrcdiddfksfiatarnekrkiydselreefpklycraarfmkeyrddnrciepprvlhplyewqsklnselarepddrsitfiidelgnsgkswyatyykwnhpettqifrpkkvadmayelnervrvvfmdcarakageylqydfleeikdgmvfspkyesrtkylsnchvvvlmneqpdmtklsqdryvivri*	317	USER	zzz1870
1858		Unclass_KP153454	msvsddfeagaepiqlygalleiceifayqhevapttgyrhyqgylelvtknrhtwiqnqllkhglhfeylvgakglpkqawayatkedtradgpwtfgeprdsekankswlfvkaiksgatdaelcdsfpgmmtnsfsnanrirqaygvqlpepertvplelylfygpsgtgksqfardqarlakmnpyvlpigkdfwvtpamcgkkyyiiddfksnlglsdllrlldtypveapnkgiassefsslnggvfnnfvrwpyvvdarnychynqsits*	278	USER	zzz1871
1857		Unclass_KP153455	msvsddfeagaepiqlygalleiceifayqhevapttgyrhyqgylelvtknrhtwiqnqllkhglhfeylvgakglpkqawayatkedtradgpwtfgeprdsekankswlfvkaiksgatdaelcdsfpgmmtnsfsnanrirqaygvqlpepertvplelylfygpsgtgksqfardqarlakmnpyvlpigkdfwvtpamcgkkyyiiddfksnlglsdllrlldtypveapnkgiassefsslnggvfnnfvrwpyvvdarnychynqsits*	278	USER	zzz1872
1856		Unclass_KP153456	msqglywiltiphadflpylppgvqyirgqleastlcrpladdygadagylhwqllvaftrkcrlavvtrtfgagihaelsrssaandyvwkedtrvggtqfelgklafkrnsatdwssvrdsakrgrlddipsdiyvrcynqlkriacdhmqadpmerevvcywgrsgsgksrraweesgvnaypkdprskfwdgyrgqehvvldefrggidiahvlrwfdrypvlegqgelgtlickedldheqhsp*	250	USER	zzz1873
1855		Unclass_KP153457	msqglywiltiphadflpylppgvqyirgqleastlcrpladdygadagylhwqllvaftrkcrlavvtrtfgagihaelsrssaandyvwkedtrvggtqfelgklafkrnsatdwssvrdsakrgrlddipsdiyvrcynqlkriacdhmqadpmerevvcywgrsgsgksrraweesgvnaypkdprskfwdgyrgqehvvldefrggidiahvlrwfdrypvlegqgelgtlickedldheqhsp*	250	USER	zzz1874
1854		Unclass_KP153458	msqglywiltiphadflpylppgvqyirgqleastlcrplavdfgadagylhwqllvaftrkcrlavvtrtfgagihaelsrssaandyvwkedtrvggtqfelgklafkrnsatdwssvrdsakrgrlgdisgdiyvrcynqlkriacdhmqadpverevvcywgrsgsgksrraweesgvnaypkdprskfwdgyrgqehvvldefrggidiahvlrwfdrypvlegqgelgtlickedldheqhsp*	250	USER	zzz1875
1853		Unclass_KP153459	msrsqaycftvnnyeglldwedlqlagatyliyqeeigeqgtihlqgyiyfstkksmkqlcalidgssvrvangspqqnttycskeegrlggpyvygtmpqqvrttsiasaastargdknkkerkgeefsranskknysaknfypprekeptcspskpikmpacpkpnsgtitmpicalsqerkiyselkikprntkptvlllvgpsgtgksrtayqlaqflgltiyvvpptkggsglrfdgynqqdvciidevdgssftptffnllcdwyemkvpvhgtanlqftspyiilcsnylpkywwksrsrdqvkqttrriditipffrrtpqvqpapsinlpedldefgfvtvhpikmphyyvqplerfppkitdkmifpl*	379	USER	zzz1876
1852		Unclass_KP153460	msqsrdycftvnnydglldwedlqlagatylvyqeeigeqgtvhlqgyiyfpnkktmkqlcalidgssvrvargspqqnttyctkeegrlggpyvygtmpnqvrttsiasvastargeknkkerkgeefsranskknysaknfypprekeptcspskpirmpvcrnrisgsitipicalpqkrkvyselkikprttkptvlllvgpsgtgksrfayrlanflglttyvvpptkggsglrfdgynqqdvciidevdgssftptffnllcdwyemkvpvhgtanlqftspyiilcsnylpkywwksrsvtrsskplaastlrslssverhkfslllasicpkiwmnlassrsilsrcltimfnplndfhqklqik*	374	USER	zzz1877
1851		Unclass_KP153461	msrsqaycftvnnyeglldwedlqlagatyliyqeeigeqgtihlqgyiyfstkksmkqlcalidgssvrvangspqqnttycskeegrlggpyvygtmpqqvrttsiasaastargdknkkerkgeefsranskknysaknfypprekeptcslskpirmpacpkpnsgtitmpicalpqkrkiyselkikprntkptvlllvgpsgtgksrtayqiaqflgltiyvvpptkggsglrfdgynqqdvciidevdgssftptffnllcdwyemkvpvhgtanlqftspyiilcsnylpkywwksrsrdqvkqttrriditipffrrtpqvqpapsinlpedldefgfvtvhpikmphyyvqplerfppkitdkmifpl*	379	USER	zzz1878
1850		Unclass_KP153462	msqsrdycftvnnydglldwedlqlagatylvyqeeigeqgtvhlqgyiyfpnkktmkqmcalidgwslrvargspqqnttyctkeegrlggpyvygtmpnqvrttsiasvastargeknkkerkgeefsranskknysaknfypprekeptcspskpirmpvcrnrisgsitipicalpqkrkvyselkikprttkptvlllvgpsgtgksrfayrlaqflglttyvvpptkggsglrfdgynqqdvciidevdgssftptffnllcdwyemkvpvhgtanlqftspyiilcsnylpkywwksrsrdqvkqttrriditipffrrtpqvqpassinlpedldefgfvtvhpikmphyyvqplerfppkitdkmifpl*	379	USER	zzz1879
1849		Unclass_KP153463	msrsqaycftvnnyeglldwedlqlagatyliyqeeigeqgtihlqgyiyfstkksmkqlcalidgssvrvangspqqnttycskeegrlggpyvygtmpqqvrttsiasaastargdknkkerkgeefsranskknysaknfypprekeptcspskpikmpacpkpnsgtitmpicalsqerkiyselkikprntkptvlllvgpsgtgksrtayqlaqflgltiyvvpptkggsglrfdgynqqdvciidevdgssftptffnllcdwyemkvpvhgtanlqftspyiilcsnylpkywwksrssdqvkqttrriditipffrrtpqvqpapsinlpedldefgfvtvhpikmphyyvqplerfppkitdkmifpl*	379	USER	zzz1880
1848		Unclass_KP153464	mlipirrrslrihlwiqpsappcgqsktikprpsqpklsvrmtsfsskrwcftlnnyspeehqalqlafkastvkyavigiekgesgtphlqgfvvfkkmqrlsalkklnprahyeeakgtsqqastycqkegifeefgtcpleptaiasnasnkkneqyrkamdlaklgdfsaieqewpglwlrhrnaflsaprdfgirpkdldylpgiwiwgpagvgksrlarevfplsyekrlnkwfdgysaqkavliedidqshryishdlkiwtdrysfpaeikggaiqcrpehvlitsqyhihdiwddvqtreaigrrcfviyidkatpnayksslsalnhlirsrapvgectvvpvapsdvsasahvapsppvatlpvlfpdpsdlsvld*	388	USER	zzz1881
1847		Unclass_KP153465	mlipirrrslrihlwiqpsappcgqsktikprpsqpklsvrmtsfsskrwcftlnnyspeehqalqlafkastvkyavigiekgesgtphlqgfvvfkkmqrlsalkklnprahyeeakgtsqqastycqkegifeefgtcpleptaiasnasnkkneqyrkamdlaklgdfsaieqewpglwlrhrnaflsaprdfgirpkdldylpgiwiwgpagvgksrlarevfplsyekrlnkwfdgysaqkavliedidqshryishdlkiwtdrysfpaeikggaiqcrpehvlitsqyhihdiwddvqtreaigrrcfviyidkatptayksslsalnhlirsrapvgectvvpvapsdvsasahvapsppvatlpvlfpdpsdlsvld*	388	USER	zzz1882
1846		Unclass_KP153466	mlipirrrslrihlwiqpsappcghsktikprpsqpkssvrmtsfsskrwcftlnnyspeehqalqlafkastvkyavigiekgesgtphlqgfvvfkkmqrlsalkklnprahyeeakgtsqqastycqkegifeefgtcpleptaiasnasnkkneqyrkamdlaklgdfsaieqewpglwlrhrnaflsaprdfgirpkdldylpgiwiwgpagvgksrlarevfplsyekrlnkwfdgysaqkavliedidqshryishdlkiwtdrysfpaeikggaiqcrpehvlitsqyhihdiwddvqtreaigrrcfviyidkatptayksslsalnhlirsrapvgectvvpvapsdvsasahvapsppvatlpvlfpdpsdlsvld*	388	USER	zzz1883
1845		Unclass_KP153467	mlnpirrrsrkvplqsqmsappcglsylpkprpsqpkssvrmtsfsskrwcftlnnyspeehqalqlafkastvkyavigiekgesgtphlqgfvvfkkmqrlsalkklnprahyeeakgtsqqastycqkegifeefgtcpleptaiasnasnkkneqyrkamdlaklgdfsaieqewpglwlrhrnaflsaprdfgirpkdldylpgiwiwgpagvgksrlarevfplsyekrlnkwfdgysaqkavliedidqshryishdlkiwtdrysfpaeikggaiqcrpehvlitsqyhihdiwddvqtreaigrrcfviyidkatptayksslsalnhlirsrapvgectvvpvapsdvsasahvapsppvatlpvlfpdpsdlsvld*	388	USER	zzz1884
1844		Unclass_KP153468	mlnpirrrsrkvplqsqmsappcglsylpikptpflhpisvstmsfqskrwcftlnnysaeehqalqlafkastvkyavigiekgesgtphlqgfvvfmtakrlsalkkinprahyeqakgtslqastycqkegvfeefgtlpleptavgsnasnkknesyrkamdlaklgdfsaieqewpglwlrhrnaflsaprdfgirpkdldylpgiwiwgpagvgksrlarevfplsyekrlnkwfdgysaqkavliedidqshryishdlkiwtdrysfpaeikggaiqcrpehvlitsqyhihdiwddvqtreainrrcfviyidkatstayksalsalnqlirsrapvgectvapvvlsdvsdtnpvvpsppeavlpvlfadpsdlsvld*	389	USER	zzz1885
1843		Unclass_KP153469	mnnneeyerwlnmdtfynpleysqtftpplslttsqqlppipmpmtpiegdprervgttamcglpramcagapeeeklasavcalsledladnketfkcrsivftcykreaiddpeawlrglqskcvwvlgqlekcpktqrihiqgmaynksdiawamlkgestwkrkciapiksieyctkaksqlagpwefgdrpaygqsaktsklnekkemnatlltmtpyeavdegyiswrdyeklklfqttykadkkiaehlkrpidhemrhewiqgksgkgkttkailenpdhylktinkwfddyqgqetiiiddldpteakwmggnlkrwadkwpvpvevkhghivirpkkvvvttqymmeqlwddpaliealkrrfkiidvdli*	382	USER	zzz1886
1842		Unclass_KP153470	markcwcftlnnytddeysaiigrlpdlsryyvvgvevgdsgtkhlqgyasfrvakrlnavkdilsnrahceaargsagqnrkyctkdgdfveggevpkttdkvtrndlakqfreafaggmsgvasfadeqpgtwffsghnllrntltlmapeprpdisvrwiygppgvgksrkaheelpdayikeprtkwwngyygektcilddfgpggidinhllrwfdrykclvenkggmvpllvstfivtsnfhpnqifkfgeethpqlpalerritleeme*	277	USER	zzz1887
1841		Unclass_KP153471	markcwcftlnnytddeysaiigrlpdlsryyvvgvevgdsgtkhlqgyasfrvakrlnavkdilsnrahceaargsasqnrkyctkdgdfveggevpkttdkvtrndlakqfreafaggmsgvasfadeqpgtwffsghnllrntltlmapeprpdisvrwiygppgvgksrkaheelpdayikeprtkwwngyygektcilddfgpggidinhllrwfdrykclvenkggmvpllvstfivtsnfhpsqifkfgeethpqlpalerritleeme*	277	USER	zzz1888
1840		Unclass_KP153474	mptpkksycftlnnytdgelellrvvcseeasyavigrevgetgtphlqgyirfkkayrfstikdryllrchievaagdadsnfrycskdgdfaefgerptsgksasradlarsfvsymddgrsgmvrfahenpgtwyfsgatmlrnyyalqpavdrsdvsvtwifgdpgvgksrkahetlpqayvkdprtkwwneyalekdviiddfgpggidinhllrwfdrykclveskggmiplyavnfivtsnfhpekvfsfagdpnvqlpalmrrmiikemv*	279	USER	zzz1889
1839		Unclass_KP153475	mptpkksycftlnnytdgelellrvvcseeasyavigrevgetgtphlqgyirfkkayrfstikdrylprchievaagdadsnfrycskdgdftefgerptsgksasradlarsfvsymddgrsgmvrfahenpgtwyfsgatmlrnyyalqpavdrsdvsvtwifgdpgvgksrkahetlpqayvkdprtkwwngyalekdviiddfgpggidinhllrwfdrykclveskggmiplyavnfivtsnfhpekvfsfagdpnvqlpalmrrmiikemv*	279	USER	zzz1890
1838		Unclass_KP153476	mesfrqtkgtwwsvtaygdniikledkdaipdyirtiyggreqcpttgrlhfqgalqcasqcragrildwlpgvhlekaknshalkkyvmkeetaagektevinkneyttlqkamellaeenivqtdiqtdkltakqiashqywqrvrqvlekrpelvsiyasplaktawtntcsvwmkkraivlqpaseefisgeeksl*	201	USER	zzz1891
1837		Unclass_KP153477	mesfrqtkgtwwsvtaygdniikledkdaipdyirtiyggreqcpttgrlhfqgalqcasqcragrildwlpgvhlekaknsdalkkyvmkeetaagektevinkneyttlqkamellaeenivqtdiqtdkltakqiashqywqrvrqvlekrpelvsiyasplaktawtntcsvwmkkraivlqpaseefisgeeksl*	201	USER	zzz1892
1836		Unclass_KP153478	mesfrqtkgtwwsvtaygdniikledkdaipdyirtiyggreqcpttgrlhfqgalqcasqcragrildwlpgvhlekaknsdalkkyvmkeetaagektevinkneyttlqkamellaeenivqtdiqtdkltakqiashqywqrvrqvlekrpelvsiyasplaktawtntcsvwmkkraivlqpaseefisgeeksl*	201	USER	zzz1893
1835		Unclass_KP153479	mesfrqtkgtwwsvtaygdniikledkdaipdyirtiyggreqcpttgrlhfqgalqcasqcragrildwlpgvhlekaknsdalkkyvmkeetaagektevinkneyttlqkamellaeenivqtdiqtdkltakqiashqywqrvrqvlekrpelvsiyasplaktawtntcsvwmkkraivlqpaseefisgeeksl*	201	USER	zzz1894
1834		Unclass_KP153480	mesfrqtkgtwwsvtaygdniikledkdaipdyirtiyggreqcpttgrlhfqgalqcasqcragrildwlpgvhlekaknsdalkkyvmkeetaagektevinkneyttlqkamellaeenivqtdiqtdkltakqiashqywqrvrqvlekrpelvsiyasplaktawtntcsvwmkkraivlqpaseefisgeeksl*	201	USER	zzz1895
1833		Unclass_KP153481	mesfrqtkgtwwsvtaygdniikledkdaipdyirtiyggreqcpttgrlhfqgalqcasqcragrildwlpgvhlekaknsdalkkyvmkeetaagektevinkneyttlqkamellaeenivqtdiqtdkltakqiashqywqrvrqvlekrpelvsiyasplaktawtntcsvwmkkraivlqpaseefisgeeksl*	201	USER	zzz1896
1832		Unclass_KP153482	mesfrqtkgtwwsvtaygdniikledkdaipdyirtiyggreqcpttgrlhfqgalqcasqcragrildwlpgvhlekaknsdalkkyvmkeetaagektevinkneyttlqkamellaeenivqtdiqtdkltakqiashqywqrvrqvlekrpelvsiyasplaktawtntcsvwmkkraivlqpaseefisgeeksl*	201	USER	zzz1897
1831		Unclass_KP153483	msnkmaknwcmtlnnyddsevarfeshmrpwcvyyiygfergendtphlqcffslkakkrmsclkkifprahfevksrastmeqasdyckkeenfiewgvlpdnstarglkaisdnyeetvelakkgdieainpehvlkyyptikriahdnkkmpsdllweeghppniwiygptgtgksyrarailqenfgqfyskmaqnkwwdkydgeegvliedmdilhnymgpymkiwadkyafpvevktsgdrirpkvivvtsnytieqiwpdrsthgpisrrfkvihmdqpwnaninqvlrdapaetsaprekkrkfdqplkkpallrrnavgdlvethgyqpqqtipqyleptleelaeemeiyrasqdmfeelsesddlldl*	380	USER	zzz1898
1830		Unclass_KP153484	msnnmaknwcmtlnnyddsevarfeshmrpwcvyyiygfergendtphlqcffslkakkrmsclkkifprahfevksrastmeqasdyckkeenfiewgvlpdnstarglkaisdnyeetvelakkgdieainpehvlkyyptikriahdnkkmpsdllweeghppniwiygptgtgksyrarailqenfgqfyskmaqnkwwdkydgeegvliedmdilhnymgpymkiwadkyafpvevktsgdrirpkvivvtsnytieqiwpdrsthgpisrrfkvihmdqpwnaninqvlrdapaetsaprekkrkfdqplkkpallrrnavgdlvethgyqpqqtipqyleptleelaeemeiyrasqdmfeelsesddlldl*	380	USER	zzz1899
1829		Unclass_KP153485	mymarnrnfvftwnnytedseqflrsrvdegvikyvgyckeiapstgtphlqgfcsfenkksvqqvrvilvgchvetmlgsisqnedycskagelinygvqpvtndnkgraeqlrwqraresaklgqfddidadifircystlkrirtdytakpppedvtcywiygptgtgkshsvettfplcykknmddpkwfdgyqgeetvyledidkyqvkwggllkrladrwpllvntkgsmqyirpkriivtsnynldeiwsdsgtldpllrrftvilkesqeqvidft*	285	USER	zzz1900
1828		Unclass_KP153486	mymarnrnfvftwnnytedseqflrsrvdegvikyvgyckeiapstgtphlqgfcsfenkksvqqvrailvgchvetmlgsisqnedycskagelinygvqpvtndnkgraeqlrwqraresaklgqfddidadifircystlkrirtdytakpppedvtcywiygptgtgkshsvettfplcykknmddpkwfdgyqgeetvyledidkyqvkwggllkrladrwpllvntkgsmqyirpkriivtsnynldeiwsdsgtldpllrrftvilkesqeqvidft*	285	USER	zzz1901
1827		Unclass_KP153487	marnrnfvftwnnytedseqflrsrvdegvikyvgyckeiapstgtphlqgfcsfenkksvqqvrailvgchvetmlgsisqnedycskagelinygvqpvtndnkgraeqlrwqraresaklgqfddidadifircystlkrirtdytakpppedvtcywiygptgtgkshsvettfplcykknmddpkwfdgyqgeetvyledidkyqvkwggllkrladrwpllvntkgsmqyirpkriivtsnynldeiwsdsgtldpllrrftvilkesqeqvidft*	283	USER	zzz1902
1826		Unclass_KP153488	meettteksvistgggpqssrtwcgtlnnysqgeyeflvqefnkvaeywiigkekgqegtphlqmacsftraqklnylkqnlsvrahweitkgtldqnrvycmkegdyteggappvkkqgkrtdiemavetlkatggdvqemalthpeayvkyssnfeklaqryqkkmrssgsgyvhdrrviwiygpsgtgktryvhekelisnlwisgrdlrwwqsydmepavlfddfrgdfckyhellrildryqctvenkggsvslqnvkriwitscfhprhvydtredieqlirridkiwhftsttktdvtnekeypgkpggaapdfitplalvrtkavipespptptnsrpnskrsstigteldmvisrgvatqplvvldsdeeeelpgqpdsswaasqwkrav…	404	USER	zzz1903
1825		Unclass_KP153489	meettteksaistgggpqssrtwcgtlnnysqgeyeflvqefnkvaeywiigkekgqegtphlqmacsftraqklnylkqnlsvrahweitkgtldqnrvycmkegdyteggappvkkqgkrtdiemavetlkatggdvqemalthpeayvkyssnfeklaqryqkkmrssgsgyvhdrrviwiygpsgtgktryvhekelisnlwisgrdlrwwqsydmepavlfddfrgdfckyhellrildryqctvenkggsvslqnvkriwitscfhprhvydtredieqlirridkiwhftsttktdvtnekeypgkpggaapdfitplalvrtkavipespptptnsrpnskrsstigteldmvisrgvatqplvvldsdeeeelpgqpdsswaasqwkrav…	404	USER	zzz1904
1824		Unclass_KP153490	mygvrkevfrsamttaparrpnstrtrtrvgqrlrrfcftinnytealydellafavttswfvvgkevgengtphlqgacilnnqlsfnslkkmdcfarahietmkgspqdnlvyctkedtnayvygtlpepgkrndlheavekvkegatlrdlalgdggpavvkfhkgltvlrslcstpradpptvvwiygptgvhktrcalefgkilgaasgsseansvwisgggfrwfdgydgqpvaifddfrakqltgaggftfllrlldrypisvefkggfvnwtpriifittphdvattfakrsqhipediaqldrrinkvihfpevpsdavklelldaltlcaglrpagpqvpatipgwnedvelsgtasdge*	371	USER	zzz1905
1823		Unclass_KP153491	mygvrkevfrsamttaparrpnstrtrtrvgqrlrrfcftinnytealydellafavttswfvvgkevgengtphlqgacilnnqlsfnslkkmdcfarahietmkgspqdnlvyctkedtnayvygtlpepgkrndlheavekvkegatlrdlalgdggpavvkfhkgltvlrslcstpradpptvvwiygptgvhktrcalefgkilgaasgsseansvwisgggfrwfdgydgqpvaifddfrakqltgaggftfllrlldrypisvefkggfvnwtpriifittphdvattfakrsqhipediaqldrrinkvihfpevpsdavklelldaltlcaglrpagpqvpatipgwnedvelsgtasdge*	371	USER	zzz1906
1822		Unclass_KP153492	mygvrkevfrsamttaparrpnstrtrtrvgqrlrrfcftinnytealydellafavttswfvvgkevgengtphlqgacilnnqlsfnslkkmdcfarahietmkgspqdnlvyctkedtnayvygtlpepgkrndlheavekvkegatlrdlalgdggpavvkfhkgltvlrslcstpradpptvvwiygptgvhktrcalefgkilgaasgsseansvwisgggfrwfdgydgqpvaifddfrakqltgaggftfllrlldrypisvefkggfvnwtpriifittphdvattfakrnqhipediaqldrrinkviyfpeapsdsdkselldaltlcaglrlagpqvpaaipgwnedvelsgtssdge*	371	USER	zzz1907
1821		Unclass_KP153493	mygvrkevfrsamttaparrpnstrtrtrvgqrlrrfcftinnytealydellafavttswfvvgkevgengtphlqgacilnnqlsfnslkkmdcfarahietmkgspqdnlvyctkedtnayvygtlpepgkrndlheavekvkegatlrdlalgdggpavvkfhkgltvlrslcstpradpptvvwiygptgvhktrcalefgkilgaasgsseansvwisgggfrwfdgydgqpvaifddfrakqltgaggftfllrlldrypisvefkggfvnwtpriifittphdvattfakrsqhipediaqldrrinkvihfpevpsdavklelldaltlcaglrpagpqvpatipgwnedvelsgtasdge*	371	USER	zzz1908
1820		Unclass_KP153494	mangkstrrqgifwlctipspnevcaqlelgtlpvglvwckgqkergsgtgyehyqlvaafakkvslpgvvgmfgrgthgelsrseaaneyvgkeetrigttfelgakpirrnsktdwesvwtaaksgdlsavpanvrvvnyhalrairsdhavpvgvertvhvfwgstgtgksrraweeagidaytkcprskfwdgyqdqqhvvvdefrggidvahllrwfdrypvrveikgssrplvantiwitsnkdpvewypeldlatleallrrltivhfp*	277	USER	zzz1909
1819		Unclass_KP153495	mangkstrrqgifwlctipspnevcaqlelgtlpvglvwckgqkergsgtgyehyqlvaafakkvslpgvvgmfgrgthgelsrseaaneyvgkeetrigttfelgakpirrnsktdwesvwtaaksgdlsavpanvrvvnyhalrairsdhavpvgvertvhvfwgstgtgksrraweeagidaytkcprskfwdgyqdqqhvvvdefrggidvahllrwfdrypvrveikgssrplvantiwitsnkdpvewypeldlatleallrrltivhfp*	277	USER	zzz1910
1818		Unclass_KP153496	msrgkswcftihsrgegddcdwllhpigtaeppsafwdddpfewgcqfmifqmercpetgklhlqgalqldkqqrlsfmkklhktahwevmkgnwtqsieycsksetkvngpweagdrpkmgqrtdletigkmvkenktnlelvdtlgagvskfqkhisflrftysekdsdrqatgvkvivlygptgtgktyaavnsltggrayhilnapsqkatklwfdgyenqkvlviddfdgsvefryllrmidvykfpaevkggmvwgvwdtviitsnvhpaswytgvdtsplkrriaeirlcenqgtykmisweetvlsndfenf*	321	USER	zzz1911
1817		Unclass_KP153497	msrgkswcftihsrgegddcdwllhpigtaeppsafwdddpfewgcqfmifqmercpetgklhlqgalqldkqqrlsfmkklhktahwevmkgnwtqsieycsksetkvngpweagdrpkmgqrtdletigkmvkenktnlelvdtlgagvskfqkhisflrftysekdsdrqatgvkvivlygptgtgktyaavnsltggrayhilnapsqkatklwfdgyenqkvlviddfdgsvefryllrmidvykfpaevkggmvwgvwdtviitsnvhpaswytgvdtsplkrriaeirlcenqgtykmisweetvlsndfenf*	321	USER	zzz1912
1816		Unclass_KP153498	msrgkswcftihsrgegddcdwllhpigtaeppsafwdddpfewgcqfmifqmercpetgklhlqgalqldkqqrlsfmkklhktahwevmkgnwtqsieycsksetkvngpweagdrpkmgqrtdletigkmvkenktnlelvdtlgagvskfqkhisflrftysekdsdrqatgvkvivlygptgtgktyaavnsltggrayhilnapsqkatklwfdgyenqkvlviddfdgsvefryllrmidvykfpaevkggmvwgvwdtviitsnvhpaswytgvdtsplkrriaeirlcenqgtykmisweetvlsndfenf*	321	USER	zzz1913
1815		Unclass_KP153499	mqsrcwcftvnfkylndyeaidpaewpgcvvavwqhevgeggtehlqgyvnfakpkrmgalhklsgmarasvrpraklatkkdnlvyctkeegrldgpfyfpskekveayckvengqrtdlalisdqvargltdkeiaeinpiailkyqkgidhlriaitdtsrlgdevdsmvfvgptgtgksyrlnrdypegpewfwvspgkwfdgyqgqpglvfdefrdnwypyqfllrlldtkpyrvekkgghlsmrahrfrfstnihpmhwyqgvvkpaweesplkrrlpyielmevpydrptvsfdsaaawallqpeavapaaravygqrmdg*	329	USER	zzz1914
1814		Unclass_KP153500	mekiryyiltiphyaytpflhtscnyvrgqleqgasgylhwqmvvflkspqrrsfvkklygdeahieptrsaaameyvwkqetsvpntqfelgslptsrcsskdwdairssavegrmesipsdvyircynslkriavdhskpvcierkiivyygptgtgksrrawdeagfdaypkdpntkfwdgynghknvvidefrgiinisnvlrwfdrypvlvevkgssavfkaeniwitsnlhpddwypeldpatklalkrrllivnil*	264	USER	zzz1915
1813		Unclass_KP153501	mpsfyngkqffltypqcqhsaaelaafltsvatctyyivaeekhedgtphlhaciqyvetlrggvrlldfnghhpnkqdprkfeackqycrkdgnfiegppeaiiraaiaglapsdivktftdkalwfdwciskrithgyaewywnstrehdltinedtvvagqmceslagyafnrdqhrvivlkgesgcgkttwakthapkpalfvshidslkrfqpgfhktiifddvdfnhyprtgqihivdwenpraihvrygtveipagtfkiftcnfdpltltddairrrvkvvnvn*	293	USER	zzz1916
1812		Unclass_KP153502	maqnrhwqitdyevsdepyvipqygdytvgqvercpdtgqlhwqlycytrtklsvkafkkryptvhfeiarnpealrnygqkeetrvagpftwgeapeqgkrtdlheaiatwvthgkrkacedhphvvakfykgiqfvaealrpryvppvlelrdhqrtlldsflshnnprhvyylydecggsgksrfaahirdhhggiildegniadwaliydgepyvifdlaraqekgvplivprfieylsngsitspkyeskvkifkqpqcmimsntrcdittlsadrwihvdwsnhgqgsqvpsafqa*	303	USER	zzz1917
1811		Unclass_KP153503	mtkqsrhwqltdyevtepyvipqygdytvgqvercpdtgklhwqlycytkdllsvkafkkrypivhfeiarnpkaledygqkeetrvagpfhygeapaqgkrtdldktihtactlgkrkaaeenpgcyakhykgiehviellkpiyvppvlelrdyqrtlldsflshnnprhvyylydecggsgkskfaehirtqygglilgdgriqdwayiynsepyvifdltraqdkgvplevprfceylsngvltstkyeskvksfkapqcmimsntrcdittlssdrwihvdwtnhgqgsqvpsafqa*	303	USER	zzz1918
1810		Unclass_KP153504	mifgafltgrgpqsthwcftvhrpqrrpavlpescqylvfqiektaqgkrhvqayvqfpvrtrgttvsslakrifggepshnepakgsdqenevyctkeasrlegpwrygervphagkkggrsdllklkdnvdkgatelalfeqqfgdmvrhhraighyrylkfnverhwetivilivgptntqktflsevlarsgyfgktvwrapeskgsgmyfdgynghecvlwqdfdggsckfgtfknliqgtptnvpvhgaasiewaprvmiltsnylpkywwkshqgandlaaiykrvhvifkrlkpvenmprvapifhpaslypprpdpplavkplaiskskklfn*	343	USER	zzz1919
1809		Unclass_KP153505	makarnwiftdnnpehdepswtdtvkyaiwqkergengtehlqgyvefegpksltycktvlprahweirrgtqqqamdyaskeatriggpwthgvltvnaqgtrndllalkqaldegtsmkqiaqehfitmnkahkwaylyrsltmgqrdwitrvyiligpsgcgkttfckrnckdaywklqhsgnnewwdgydgqrdvvldefygwikwntllrlidssplrveikggstqfiarrlfitsnrdidswypnimdksaldrrirefgvvitdfnqdiidn*	281	USER	zzz1920
1808		Unclass_KP153506	makarnwiftdnnpehdepswtdtvkyaiwqkergengtehlqgyvefegpksltycktvlprahweirrgtqqqamdyaskeatriggpwthgvltvnaqgtrndllalkqaldegtsmkqiaqehfitmnkahkwaylyrsltmgqrdwitrvyiligpsgcgkttfckrnckdaywklqhsgnnewwdgydgqrdvvldefygwikwntllrlidssplrveikggstqfiarrlfitsnrdidswypnimdksaldrrirefgvvitdfnqdiidn*	281	USER	zzz1921
1807		Unclass_KP153507	msnaqrsgrtqghwfigtcrdldwdgrdhpqfisygkgqlelsesgfrhwqfvvqckdstriaklkkwlptchweltrsesaidyvwkeetriegsqfefgvrrlrrnaatdwdvikqrvlagsvtsddipadifvryysqlkynpfyyrsiakdysrpaaiirscvvywgptgtgksrrawseattaayvkdplskwwegyqgeisviidefrgiiqpahllrwldrypvsveckggstplraqrfwicsnlhpsqwypeldgatysalerrmeivemaenwepieseelievse*	297	USER	zzz1922
1806		Unclass_KP153508	msnaqrsgrtqghwfigtcrdldwdgrdhpqfisygkgqlelsesgfrhwqfvvqckdstriaklkkwlptchweltrsesaidyvwkeetriegsqfefgvrrlrrnaatdwdvikqrvlagsvtsndipadvfiryysqlkynpfyrrsiakdfarptpiirscivywgptgtgksrrawaeassrayvkdplskwwegyqgethviidefrgiiqpahllrwldrypvsveckggstplraekfwicsnlhpsqwypeldgatysalerrmeivemaenwepieseelievse*	297	USER	zzz1923
1805		Unclass_KP153509	msnaqrsgrtqghwfigtcrdldwdgrdhpqfisygkgqlelsesgfrhwqfvvqckdstriaklkkwlpschweltrsesaidyvwkeetriegsqfefgvrrlrrnaatdwdvikqrvlagsvtsddipadifvryysqlkynpfyyrsiakdysrpaaiirscvvywgptgtgksrrawseattaayvkdplskwwegyqgeisviidefrgiiqpahllrwldrypvsveckggstplraqrfwicsnlhpsqwypeldgatysalerrmeivemaenwepieseelievse*	297	USER	zzz1924
1804		Unclass_KP153510	msnaqrsgrtqghwfigtcrdldwdgrdhpqfisygkgqlelsesgfrhwqfvvqckdstriaklkkwlptchweltrsesaidyvwkeetriegsqfefgvrrlrrnaatdwdvikqrvlagsvtsddipadifvryysqlkynpfyyrsiakdysrpaaiirscvvywgptgtgksrrawseattaayvkdplskwwegyqgeisviidefrgiiqpahllrwldrypvsveckggstplraqrfwicsnlhpsqwypeldgatysalerrmeivemaenwepieseelievse*	297	USER	zzz1925
1803		Unclass_KP153511	mvksrgwcytannytkeeyeslekydcgyhvmgkevgeqgtphiqgyieftnakrfdtlhadfpkihweprkgtqqqaidycmkggdfveigtkkdqgkrtdieavikdindkvfspnnhavayikyakgidcyanykllprtvkptvewrygltgsgktrepyerhinsvyikdgtmwwnnytqqeaviiddfdghwpyrdflrlldrypyqgqykggyvnissayiyitcefspetfwrgnelaqvirridtitlcrinepvpvmviddlvd*	275	USER	zzz1926
1802		Unclass_KP153512	mvksrgwcytannytkeeyeslekydcgyhvmgkevgeqgtphiqgyieftnakrfdtlhadfpkihweprkgtqqqaidycmkggdfveigtkkdqgkrtdieavikdindkvfspnnhavayikyakgidcyanykllprtvkptvewrygltgsgktrepyerhinsvyikdgtmwwnnytqqeaviiddfdghwpyrdflrlldrypyqgqykggyvnissayiyitcefspetfwrgnelaqvirridtitlcrinepvpvmviddlvd*	275	USER	zzz1927
1801		Unclass_KP153513	mvksrgwcytannytkeeyeslekydcgyhvmgkevgeqgtphiqgyieftnakrfdtlhadfpkihweprkgtqqqaidycmkggdfveigtkkdqgkrtdieavikdindkvfspnnhavayikyakgidcyanykllprtvkptvewrygltgsgktrepyerhinsvyikdgtmwwnnytqqeaviiddfdghwpyrdflrlldrypyqgqykggyvnissayiyitcefspetfwrgnelaqvirridtitlcrinepvpvmviddlvd*	275	USER	zzz1928
1800		Unclass_KP153514	mvksrgwcytannytkeeyeslekydcgyhvmgkevgeqgtphiqgyieftnakrfdtlhadfpkihweprkgtqqqaidycmkggdfveigtkkdqgkrtdieavikdindkvfspnnhavayikyakgidcyanykllprtvkptvewrygltgsgktrepyerhinsvyikdgtmwwnnytqqeaviiddfdghwpyrdflrlldrypyqgqykggyvnissayiyitcefspetfwrgnelaqvirridtitlcrinepvpvmviddlvd*	275	USER	zzz1929
1799		Unclass_KP153515	mvksrgwcytannytkeeyeslekydcgyhvmgkevgeqgtphiqgyieftnakrfdtlhadfpkihweprkgtqqqaidycmkggdfveigtkkdqgkrtdieavikdindkvfspnnhavayikyakgidcyanykllprtvkptvewrygltgsgktrepyerhinsvyikdgtmwwnnytqqeaviiddfdghwpyrdflrlldrypyqgqykggyvnissayiyitcefspetfwrgnelaqvirridtitlcrinepvpvmviddlvd*	275	USER	zzz1930
1798		Unclass_KP153516	makvkqgsqarrwcftlnnytekdvtsitekltfsncvfakvgkevgdsgtphlqgfvhlrkrlrlacfkklvgdrahcevargtdkdnesycgkdadvvltvgeptigtteqgggdtihsiarrialklskgtditelqgeewraycrhskviqelsaafvknknikdqaaqmsgkplrqwqkelkdaiqtvpndreimwycgsvgntgktwfskylvalhgairfengksadikyaynggrvvvfdlsrsqvdhfnyeviesiknglmfspkytsctkmypiphvivfanwmpdesklsadrwniqslsdvskikcekeddvivndviviedddvpqeqidsyfsslfddwgpdmlgdldeyq*	366	USER	zzz1931
1797		Unclass_KP153517	mpkvkqgsqarrwcftlnnytekdvtsitekltfsncvfakvgkevgdsgtphlqgfvhlrkrlrlacfkklvgdrahcevargtdkdnesycgkdadvvltvgeptigtteqgggdtihsiarrialklskgtditelqgeewraycrhskviqelsaafvknknikdqaaqmsgkplrqwqkelkdaiqtvpndreimwycgsvgntgktwfskylvalhgairfengksadikyaynggrvvvfdlsrsqvdhfnyeviesiknglmfspkytsctkmypiphvivfanwmpdesklsadrwniqslsdvskikcekeddvivndviviedddvpqeqidsyfsslfddwgpdmlgdldeyq*	366	USER	zzz1932
1796		Unclass_KP153518	mpkvkqgsqarrwcftlnnytekdvtsitekltfsncvfakvgkevgdsgtphlqgfvhlrkrlrlacfkklvgdrahcevargtdkdnesycgkdadvvltvgeptigtteqgggdtihsiarrialklskgtditelqgeewraycrhskviqelsaafvknknikdqaaqmsgkplrqwqkelkdaiqtvpndreimwycdsvgntgktwfskylvalhgairfengksadikyayngervvvfdlsrsqvdhfnyeviesiknglmfspkytsctkmypiphvivfanwmpdesklsadrwniqslsdvskikcekeddvivndviviedddvpqeqidsyfsslfddwgpdmlgdldeyq*	366	USER	zzz1933
1795		Unclass_KP153519	mpkvkqgsqarrwcftlnnytekdvtsitekltfsncvfakvgkevgdsgtphlqgfihlrkrlrlacvkklvgdrahcevargtdkdnesycgkdadvvltvgeptigtteqgggdtihsiarrialklskgtditelqgeewkaycrhskviqelsaafvknkniadqaaqmsgkplrqwqkelkdaiqtvpndreimwycdsvgntgktwfskylvalhgairfengksadikyayngervvvfdlsrsqvdhfnyeviesiknglmfspkytsctkmypiphvivfanwmsdesklsadrwkieslsdvskikcekeddvivndviviedddvqqeqidsyfsnlfdnwgpdcvgdldeyq*	366	USER	zzz1934
1794		Unclass_KP153520	mpkvkqgsqakrwcftlnnftekdvtsitekltfsncvfakvgkeigdsgtphlqgfvhlrkrlrlacfkklvgdrahcevargtdkdnesycgkdadvvltigepaigtteqgggdtthsiarrialklskgtditelqgeewkaycrhskviqelsaafvknknikdqaaqmsgkplrkwqkelkdaiksvpndrevmwycdsvgntgktwfskylvalhgairfengksadikyayngervvvfdlsrsqvdhfnyeviesiknglmfspkytsctkmypiphvivfanwmpdesklsadrwniqslsdvskikcekeddvivndviviedddvpqepidsyfsslfddwgpdmlgdldeyq*	366	USER	zzz1935
1793		Unclass_KP153521	mpkvkqgsqakrwcftlnnftekdvtsitekltfsncvfakvgkevgdsgtphlqgfvhlrkrlrlacfkklvgdkahceiargtdkdnesycgkdsdvvltigeptigtteqgggdtthsiarrialklskgaditdlqgeewkaycrhskviqelsaafvknkniadqaaqmsgkplrtwqkelkdaiqtvpndreimwycdsvgntgktwfskylvalhgairfengksadikyayngervvvfdlsrsqvdhfnyeviesiknglmfspkytsctkmypiphvivfanwmpdesklsadrwniqslsdvskikcereddvivndviviedddvpqeqidsyfsslfddwgpdmlgdldeyq*	366	USER	zzz1936
1792		Unclass_KP153522	mqnthassdeeveagpsrtfridarhleltysrcnatvediteflettvassaqchswfaareyhqdgvphyhilvkfnkrrtfrnsreydfnghhprikpvrnvhdyfryisdpskpsrdttfastgwmdpiprdgargggrgrrdddlggdgctwgdivradgkdeyftllklhkprdyclnlqrleytasrlftaitpyvpeyeydtfnvpeelhewatvgrhlqprpksliicgpsrigktewarsiglhtywygqcnidswndkmeylimddfspeitkylplwkgyfgaqkelnvtqkyrgiytklfrvpvlwlcnqipilkdweqewlnmnadtyfindklyg*	351	USER	zzz1937
1791		Unclass_KP153523	mdpqgrgwcftlnnpddldvllpqswdpdsydylvyhlemgaegtahlqgylyfgsrirfsqlkkwfpgsrvhleaakgtavqnqryctkeegrlegpwefgslpdqsqgkrndllavkadldagaslleiaddhfsafvryhrsfkeykllkapvanvakkiivvwgptgtgktrwafdnypsafwktksggsqqfwdgydgesviivdefygwlpfdfmlrfldrypvkleikhgtvplcadtiiftsnkhpsewyhiqrykwdesnplrrrltsvrelradgfgpdesspgfsssvavvapvftttttttttsagglddvprfrngypaptvtdlykdl*	343	USER	zzz1938
1790		Unclass_KP153524	madllpaqqkkiaptqkwkdqrgrcwcftafvdrpwkdiackyivvgheicpktgkehwqgyvefgtqrrptgvqktlgipdlhvekrldtstpdhaanyckkdmkfveygkiskqgermdldlichdlqtgkrtwreimgsddvqtvckyrmglqmvaaesaaerakkprevtwerkpsmaaawldypdalmvnlnngacweayggeeeiivrhaksyhrellldgwitplnvkcttkyaawtkvicvecdpeffppvepvsevvsevppplgnt	276	USER	zzz1939
1789		Unclass_KP153525	madllpaqqkkiaptqkwkdqrgrcwcftafvdrpwkdiackyivvgheicpktgkehwqgyvefgtqrrptgvqktlgipdlhvekrldtstpdhaanyckkdmkfveygkiskqgermdldlichdlqtgkrtwreimgsddvqtvckyrmglqmvaaesaaerakkprevtwerkpsmaaawldypdalmvnlnngacweayggeeeiivrhaksyhrellldgwitplnvkcttkyaawtkvicvecdpeffppvepvsevvsevppplgnt	276	USER	zzz1940
1788		Unclass_KP153526	manpntcrwmitlfgeedpvmplpvaygcwgketcpttgrvhshmylrfdkkcrmstlknrlqrddahcepaagkeqacrdycwsegdhadklphrlvkgpeigefqadmgqgkrsdldaiaddvkrgsserqiaekyssdfirysagirnfiavvapkpplqrivlvtllwgptgtgkthrcftafpelysvkpgrdpwglyrgeappspespspptysldwlsdlenndlnr*	235	USER	zzz1941
1787		Unclass_KP153527	macrsrgwaftlfhyteedinkikklevqyqcvgkeicpkskephlqgylyyanpvrfetvktsirkevhlesarysakrnaryckkegdwweqgeppmmgarsdlaevalmvrngasleqvaeenpevyvrysrglqalqtkvmkhrterpnvtwiwgstgvgktryavelcdsfymkdgtkwwdgyeqqkciilddfhwdgkvesfreflrmidrykyqgetkgghvkinspqivitcehapdkfwydtkldqvirrlnkvihlsgtevvgtevpgnt	280	USER	zzz1942
1786		Unclass_KP153528	mymgdsqlavwdfrynastfksesdlkavlkgiakkwvfqlergdegyehyqgrmslikgrrkgekhillklfketppnyleptskteatkgdalyvikedtrlkgpwtdkdevkvettqlkifkslelrpyqrkleefartfdmrkidiiydpigdlgkslfsewmeyeglaeeippyrlmddifqwvatrpikpcyivdmprgmkkdklgdfysglevikngvaydkrynatkirfnrprvfvftntlpefslmskdrwnvwevqedydillrnemgtlsmk*	285	USER	zzz1943
1785		Unclass_KP202150	mskarhwcftlnnpddepdlsdtniqyaiyqmeiaphtdtphfqgyiilfkkqrlawvravlprahweiargtpsqnrdyctkpdtrigepselglfpedagqgsrtdlqavhfalqhgltnkeyanqyfstwirypnlidtfaqsnivprtgdeeieciliigppgtgksryaerlarsynvgeffrkqrgkwydgylgerviifddfrgsslsftdfkllvdryalrvevkgryvnmaatkfiittnlspdawwgeevtgpefpaisrritevlffpelnsfcrfdsyeayleylrpqlilphgllpqaqaqyafqeviy*	323	USER	zzz1944
1784		Unclass_KP406530	maksyrssfmacyglpnpnmdkieyicwqeeicpktnrhhwqtfvrfksknsilalqkaigidqtlkytdesgvehfawkchikphskgtdatcieycqksessvpntfiefgkkpdikpgkrtdieqaileinsgkepndlilmkypqgvkalkakvnkvntqgrrnvktfvywggagtgktssvikkygqnnvytldksknevwfdgydqekvlliddfygwipwgqllrltegnqvklqvkchftyanwdkvyitsnkpyeewypnienyealdrricsvtffkplpdgsikkpltltlkqaealadkedvepefiiqqestedeilslqpieitl*	340	USER	zzz1945
1783		Unclass_KR134311	mapnlisrnfvftinnptfnpddlfvgeppewvrcaiwqleegeqgtqhiqgyieftkairasrfcqiingdnphlevrrgsrdqaynycskeetrvsgpytygswklckgrrtdieaattaileqdadddellhnhsgvmakypkfvkflrehkrrkinseivfphelhpwqislisyledepiprkikwfvderggsgkstfakhmarhgafytrggktpdvafafrehlssnphstivifdftrsgkdyvnydileqikdgivvsnkyesttiispvqhcivfanwepnkgelvpg*	300	USER	zzz1946
1782		Unclass_KR134312	mapnlisrnfvftinnptfnpddlfvgeppewvrcaiwqleegeqgtqhiqgyieftkairasrfcqiingdnphlevrrgsrdqaynycskeetrvsgpytygswklckgrrtdieaattaileqdadddellhnhsgvmakypkfvkflrehkrrkinseivfphelhpwqislisyledepiprkikwfvderggsgkstfakhmarhgafytrggktpdvafafrehlssnphstivifdftrsgkdyvnydileqikdgivvsnkyesttiispvqhcivfanwepnkgelvpg*	300	USER	zzz1947
1781		Unclass_KR134313	mapnlisrnfvftinnptfnpddlfvgeppewvrcaiwqleegeqgtqhiqgyieftkairasrfcqiingdnphlevrrgsrdqaynycskeetrvsgpytygswklckgrrtdieaattaileqdadddellhnhsgvmakypkfvkflrehkrrkinseivfphelhpwqislisyledepiprkikwfvderggsgkstfakhmarhgafytrggktpdvafafrehlssnphstivifdftrsgkdyvnydileqikdgivvsnkyesttiispvqhcivfanwepnkeslsldrwdivhlnhnmndmn*	315	USER	zzz1948
1780		Unclass_KR134314	mapnlisrnflftinnptfnpddlfvgeppewvrcaiwqleegeqgtqhiqgyieftkairasrfcqiingdnphlevrrgsrdqaynycskeetrvsgpytygswklckgrrtdieaattaileqdadddellhnhsgvmakypkfvkflrehkrrkinseivfphelhpwqislisyledepiprkikwfvderggsgkstfakhmarhgafytrggktpdvafafrehlssnphstivifdftrsgkdyvnydileqikdgivvsnkyesttiispvqhcivfanwepnkeslsldrwdivhlnhnmndmn*	315	USER	zzz1949
1779		Unclass_KR134315	mapnlisrnfvftinnptfnpddlfvgeppewvrcaiwqleegeqgtqhiqgyieftkairasrfcqiingdnphlevrrgsrdqaynycskeetrvsgpytygswklckgrrtdieaattaileqdadddellhnhsgvmakypkfvkflrehkrrkinseivfphelhpwqislisyledepiprkikwfvderggsgkstfakhmarhgafytrggktpdvafafrehlssnphstivifdftrsgkdyvnydileqikdgivvsnkyesttiispvqhcivfanwepnkeslsldrwdivhlnhnmndmn*	315	USER	zzz1950
1778		Unclass_KR134316	mapnlisrnfvftinnptfnpddlfvgeppewvrcaiwqleegeqgtqhiqgyieftkairasrfcqiingdnphlevrrgsrdqaynycskeetrvsgpytygswklckgrrtdieaattaileqdadddellhnhsgvmakypkfvkflrehkrrkinseivfphelhpwqislisyledepiprkikwfvderggsgkstfakhmarhgafytrggktpdvafafrehlssnphstivifdftrsgkdyvnydileqikdgivvsnkyesttiispvqhcivfanwepnkeslsldrwdivhlnhnmndmn*	315	USER	zzz1951
1777		Unclass_KR134317	mapnlisrnfvftinnptfnpddlfvgeppewvrcaiwqleegeqgtqhiqgyieftkairasrfcqiingdnphlevrrgsrdqaynycskeetrvsgpytygswklckgrrtdieaattaileqdadddellhnhsgvmakypkfvkflrehkrrkinseivfphelhpwqislisyledepiprkikwfvderggsgkstfakhmarhgafytrggktpdvafafrehlssnphstivifdftrsgkdyvnydileqikdgivvsnkyesttiispvqhcivfanwepnkeslsldrwdivhlnhnmndmn*	315	USER	zzz1952
1776		Unclass_KR134318	mapnlisrnfvftinnptfnpddlfvgeppewvrcaiwqleegeqgtqhiqgyieftkairasrfcqiingdnphlevrrgsrdqaynycskeetrvsgpytygswklckgrrtdieaattaileqdadddellhnhsgvmakypkfvkflrehkrrkinseivfphelhpwqislisyledepiprkikwfvderggsgkstfakhmarhgafytrggktpdvafafrehlssnphstivifdftrsgkdyvnydileqikdgivvsnkyesttiispvqhcivfanwepnkeslsldrwdivhlnhnmndmn*	315	USER	zzz1953
1775		Unclass_KR134319	mapnlisrnfvftinnptfnpddlfvgeppewvrcaiwqleegeqgtqhiqgyieftkairasrfcqiingdnphlevrrgsrdqaynycskeetrvsgpytygswklckgrrtdieaattaileqdadddellhnhsgvmakypkfvkflrehkrrkinseivfphelhpwqislisyledepiprkikwfvderggsgkstfakhmarhgafytrggktpdvafafrehlssnphstivifdftrsgkdyvnydileqikdgivvsnkyesttiispvqhcivfanwepnkeslsldrwdivhlnhnmndmn*	315	USER	zzz1954
1774		Unclass_KR134320	mapnlisrnfvftinnptfnpddlfvgeppewvrcaiwqleegeqgtqhiqgyieftkairasrfcqiingdnphlevrrgsrdqaynycskeetrvsgpytygswklckgrrtdieaattaileqdadddellhnhsgvmakypkfvkflrehkrrkinseivfphelhpwqislisyledepiprkikwfvderggsgkstfakhmarhgafytrggktpdvafafrehlssnphstivifdftrsgkdyvnydileqikdgivvsnkyesttiispvqhcivfanwepnkeslsldrwdivhlnhnmndmn*	315	USER	zzz1955
1773		Unclass_KR134321	mapnlisrnfvftinnptfnpddlfvgeppewvrcaiwqleegeqgtqhiqgyieftkairasrfcqiingdnphlgvrrgsrdqaynycskeetrvsgpytygswklckgrrtdieaattaileqdadddellhnhsgvmakypkfvkflrehkrrkinseivfphelhpwqislisyledepiprkikwfvderggsgkstfakhmarhgafytrggktpdvafafrehlssnphstivifdftrsgkdyvnydileqikdgivvsnkyesttiispvqhcivfanwepnkgelvpg*	300	USER	zzz1956
1772		Unclass_KR134322	mapnlisrnfvftinnptfnpddlfvgeppewvrcaiwqleegeqgtqhiqgyieftkairasrfcqiingdnphlevrrgsrdqaynycskeetrvsgpytygswklckgrrtdieaattaileqdadddellhnhsgvmakypkfvkflrehkrrkinseivfphelhpwqislisyledepiprkikwfvderggsgkstfakhmarhgafytrggktpdvafafrehlssnphstivifdftrsgkdyvnydileqikdgivvsnkyesttiispvqhcivfanwepnkgelvpg*	300	USER	zzz1957
1771		Unclass_KR134323	mapnlisrnfvftinnptfnpddlfvgeppewvrcaiwqleegeqgtqhiqgyieftkairasrfcqiingdnphlevrrgsrdqaynycskeetrvsgpytygswklckgrrtdieaattaileqdadddellhnhsgvmakypkfvkflrehkrrkinseivfphelhpwqislisyledepiprkikwfvderggsgkstfakhmarhgafytrggktpdvafafrehlssnphstivifdftrsgkdyvnydileqikdgivvsnkyesttiispvqhcivfanwepnkeslsldrwdivhlnhnmndmn*	315	USER	zzz1958
1770		Unclass_KR134324	mapnlisrnfvftinnptfnpddlfvgeppewvrcaiwqleegeqgtqhiqgyieftkairasrfcqiingdnphlevrrgsrdqaynycskeetrvsgpytygswklckgrrtdieaattaileqdadddellhnhsgvmakypkfvkflrehkrrkinseivfphelhpwqislisyledepiprkikwfvderggsgkstfakhmarhgafytrggktpdvafafrehlssnphstivifdftrsgkdyvnydileqikdgivvsnkyesttiispvqhcivfanwepnkeslsldrwdivhlnhnmndmn*	315	USER	zzz1959
1769		Unclass_KR134325	mapnlisrnflftinnptfnpddlfvgeppewvrcaiwqleegeqgtqhiqgyieftkairasrfcqiingdnphlevrrgsrdqaynycskeetrvsgpytygswnlckgrrtdieaattaileqdadddellhnhsgvvakypkfvkflrehkrrkinseivfphelhpwqislisyledepiprkikwfvderggsgkstfakhmarhgafytrggktpdvafafrehlssnphstivifdftrsgkdyvnydileqikdgivvsnkyesttiispvqhcivfanwepnkeslsldrwdivhlnhnmndmn*	315	USER	zzz1960
1768		Unclass_KR134326	mapnlisrnflftinnptfnpddlfvgeppewvrcaiwqleegeqgtqhiqgyieftkairasrfcqiingdnphlevrrgsrdqaynycskeetrvsgpytygswnlckgrrtdieaattaileqdadddellhnhsgvvakypkfvkflrehkrrkinseivfphelhpwqislisyledepiprkikwfvderggsgkstfakhmarhgafytrggktpdvafafrehlssnphstivifdftrsgkdyvnydileqikdgivvsnkyesttiispvqhcivfanwepnkeslsldrwdivhlnhnmndmn*	315	USER	zzz1961
1767		Unclass_KR134327	mapnlisrnflftinnptfnpddlfvgeppewvrcaiwqleegeqgtqhiqgyieftkairasrfcqiingdnphlevrrgsrdqaynycskeetrvsgpytygswnlckgrrtdieaattaileqdadddellhnhsgvvakypkfvkflrehkrrkinseivfphelhpwqislisyledepiprkikwfvderggsgkstfakhmarhgafytrggktpdvafafrehlssnphstivifdftrsgkdyvnydileqikdgivvsnkyesttiispvqhcivfanwepnkeslsldrwdivhlnhnmndmn*	315	USER	zzz1962
1766		Unclass_KR134328	mapnlisrnflftinnptfnpddlfvgeppewvrcaiwqleegeqgtqhiqgyieftkairasrfcqiingdnphlevrrgsrdqaynycskeetrvsgpytygswnlckgrrtdieaattaileqdadddellhnhsgvvakypkfvkflrehkrrkinseivfphelhpwqislisyledepiprkikwfvderggsgkstfakhmarhgafytrggktpdvafafrehlssnphstivifdftrsgkdyvnydileqikdgivvsnkyesttiispvqhcivfanwepnkeslsldrwdivhlnhnmndmn*	315	USER	zzz1963
1765		Unclass_KR134329	mapnlisrnflftinnptfnpddlfvgeppewvrcaiwqleegeqgtqhiqgyieftkairasrfcqiingdnphlevrrgsrdqaynycskeetrvsgpytygswnlckgrrtdieaattaileqdadddellhnhsgvvakypkfvkflrehkrrkinseivfphelhpwqislisyledepiprkikwfvderggsgkstfakhmarhgafytrggktpdvafafrehlssnphstivifdftrsgkdyvnydileqikdgivvsnkyesttiispvqhcivfanwepnkeslsldrwdivhlnhnmndmn*	315	USER	zzz1964
1764		Unclass_KR134330	mapnlisrnflftinnptfnpddlfvgeppewvrcaiwqleegeqgtqhiqgyieftkairasrfcqiingdnphlevrrgsrdqaynycskeetrvsgpytygswnlckgrrtdieaattaileqdadddellhnhsgvvakypkfvkflrehkrrkinseivfphelhpwqislisyledepiprkikwfvderggsgkstfakhmarhgafytrggktpdvafafrehlssnphstivifdftrsgkdyvnydileqikdgivvsnkyesttiispvqhcivfanwepnkeslsldrwdivhlnhnmndmn*	315	USER	zzz1965
1763		Unclass_KR134331	mapnlisrnflftinnptfnpddlfvgeppewvrcaiwqleegeqgtqhiqgyieftkairasrfcqiingdnphlevrrgsrdqaynycskeetrvsgpytygswnlckgrrtdieaattaileqdadddellhnhsgvvakypkfvkflrehkrrkinseivfphelhpwqislisyledepiprkikwfvderggsgkstfakhmarhgafytrggktpdvafafrehlssnphstivifdftrsgkdyvnydileqikdgivvsnkyesttiispvqhcivfanwepnkeslsldrwdivhlnhnmndmn*	315	USER	zzz1966
1762		Unclass_KR134332	mapnlisrnflftinnptfnpddlfvgeppewvrcaiwqleegeqgtqhiqgyieftkairasrfcqiingdnphlevrrgsrdqaynycskeetrvsgpytygswnlckgrrtdieaattaileqdadddellhnhsgvvakypkfvkflrehkrrkinseivfphelhpwqislisyledepiprkikwfvderggsgkstfakhmarhgafytrggktpdvafafrehlssnphstivifdftrsgkdyvnydileqikdgivvsnkyesttiispvqhcivfanwepnkeslsldrwdivhlnhnmndmn*	315	USER	zzz1967
1761		Unclass_KR134333	mapnlisrnflftinnptfnpddlfvgeppewvrcaiwqleegeqgtqhiqgyieftkairasrfcqiingdnphlevrrgsrdqaynycskeetrvsgpytygswnlckgrrtdieaattaileqdadddellhnhsgvvakypkfvkflrehkrrkinseivfphelhpwqislisyledepiprkikwfvderggsgkstfakhmarhgafytrggktpdvafafrehlssnphstivifdftrsgkdyvnydileqikdgivvsnkyesttiispvqhcivfanwepnkeslsldrwdivhlnhnmndmn*	315	USER	zzz1968
1760		Unclass_KR134334	mapnlisrnflftinnptfnpddlfvgeppewvrcaiwqleegeqgtqhiqgyieftkairasrfcqiingdnphlevrrgsrdqaynycskeetrvsgpytygswnlckgrrtdieaattaileqdadddellhnhsgvvakypkfvkflrehkrrkinseivfphelhpwqislisyledepiprkikwfvderggsgkstfakhmarhgafytrggktpdvafafrehlssnphstivifdftrsgkdyvnydileqikdgivvsnkyesttiispvqhcivfanwepnkeslsldrwdivhlnhnmndmn*	315	USER	zzz1969
1759		Unclass_KR134335	mapnlisrnflftinnptfnpddlfvgeppewvrcaiwqleegeqgtqhiqgyieftkairasrfcqiingdnphlevrrgsrdqaynycskeetrvsgpytygswnlckgrrtdieaattaileqdadddellhnhsgvvakypkfvkflrehkrrkinseivfphelhpwqislisyledepiprkikwfvderggsgkstfakhmarhgafytrggktpdvafafrehlssnphstivifdftrsgkdyvnydileqikdgivvsnkyesttiispvqhcivfanwepnkeslsldrwdivhlnhnmndmn*	315	USER	zzz1970
1758		Unclass_KR134336	mapnlisrnflftinnptfnpddlfvgeppewvrcaiwqleegeqgtqhiqgyieftkairasrfcqiingdnphlevrrgsrdqaynycskeetrvsgpytygswnlckgrrtdieaattaileqdadddellhnhsgvvakypkfvkflrehkrrkinseivfphelhpwqislisyledepiprkikwfvderggsgkstfakhmarhgafytrggktpdvafafrehlssnphstivifdftrsgkdyvnydileqikdgivvsnkyesttiispvqhcivfanwepnkeslsldrwdivhlnhnmndmn*	315	USER	zzz1971
1757		Unclass_KR134337	mapnlisrnflftinnptfnpddlfvgeppewvrcaiwqleegeqgtqhiqgyieftkairasrfcqiingdnphlevrrgsrdqaynycskeetrvsgpytygswnlckgrrtdieaattaileqdadddellhnhsgvvakypkfvkflrehkrrkinseivfphelhpwqislisyledepiprkikwfvderggsgkstfakhmarhgafytrggktpdvafafrehlssnphstivifdftrsgkdyvnydileqikdgivvsnkyesttiispvqhcivfanwepnkeslsldrwdivhlnhnmndmn*	315	USER	zzz1972
1756		Unclass_KR134338	mapnlisrnflftinnptfnpddlfvgeppewvrcaiwqleegeqgtqhiqgyieftkairasrfcqiingdnphlevrrgsrdqaynycskeetrvsgpytygswnlckgrrtdieaattaileqdadddellhnhsgvvakypkfvkflrehkrrkinseivfphelhpwqislisyledepiprkikwfvderggsgkstfakhmarhgafytrggktpdvafafrehlssnphstivifdftrsgkdyvnydileqikdgivvsnkyesttiispvqhcivfanwepnkeslsldrwdivhlnhnmndmn*	315	USER	zzz1973
1755		Unclass_KR134339	mapnlisrnflftinnptfnpddlfvgeppewvrcaiwqleegeqgtqhiqgyieftkairasrfcqiingdnphlevrrgsrdqaynycskeetrvsgpytygswnlckgrrtdieaattaileqdadddellhnhsgvvakypkfvkflrehkrrkinseivfphelhpwqislisyledepiprkikwfvderggsgkstfakhmarhgafytrggktpdvafafrehlssnphstivifdftrsgkdyvnydileqikdgivvsnkyesttiispvqhcivfanwepnkeslsldrwdivhlnhnmndmn*	315	USER	zzz1974
1754		Unclass_KR134340	mapnlisrnflftinnptfnpddlfvgeppewvrcaiwqleegeqgtqhiqgyieftkairasrfcqiingdnphlevrrgsrdqaynycskeetrvsgpytygswnlckgrrtdieaattaileqdadddellhnhsgvvakypkfvkflrehkrrkinseivfphelhpwqislisyledepiprkikwfvderggsgkstfakhmarhgafytrggktpdvafafrehlssnphstivifdftrsgkdyvnydileqikdgivvsnkyesttiispvqhcivfanwepnkeslsldrwdivhlnhnmndmn*	315	USER	zzz1975
1753		Unclass_KR134341	mapnlisrnflftinnptfnpddlfvgeppewvrcaiwqleegeqgtqhiqgyieftkairasrfcqiingdnphlevrrgsrdqaynycskeetrvsgpytygswnlckgrrtdieaattaileqdadddellhnhsgvvakypkfvkflrehkrrkinseivfphelhpwqislisyledepiprkikwfvderggsgkstfakhmarhgafytrggktpdvafafrehlssnphstivifdftrsgkdyvnydileqikdgivvsnkyesttiispvqhcivfanwepnkeslsldrwdivhlnhnmndmn*	315	USER	zzz1976
1752		Unclass_KR134342	mapnlisrnflftinnptfnpddlfvgeppkwvrcaiwqleegeqgtqhiqgyieftkairasrfcqiingdnphlevrrgsrdqaynycskeetrvsgpytygswnlckgrrtdieaattaileqdadddellhnhsgvvakypkfvkflrehkrrkinseivfphelhpwqislisyledepiprkikwfvderggsgkstfakhmarhgafytrggktpdvafafrehlssnphstivifdftrsgkdyvnydileqikdgivvsnkyesttiispvqhcivfanwepnkeslsldrwdivhlnhnmndmn*	315	USER	zzz1977
1751		Unclass_KR134343	mapnlisrnfvftinnptfnpddlfvgeppewvrcaiwqleegeqgtqhiqgyieftkairasrfcqiingdnphlevrrgsrdqaynycskeetrvsgpytygswklckgrrtdieaattaileqdadddellhnhsgvmakypkfvkflrehkrrkinseivfphelhpwqislisyledepiprkikwfvderggsgkstfakhmarhgafytrggktpdvafafrehlssnphstivifdftrsgkdyvnydileqikdgivvsnkyesttiispvqhcivfanwepnkeslsldrwdivhlnhnmndmn*	315	USER	zzz1978
1750		Unclass_KR134344	mapnlisrnfvftinnptfnpddlfvgeppewvrcaiwqleegeqgtqhiqgyieftkairasrfcqiingdnphlevrrgsrdqaynycskeetrvsgpytygswklckgrrtdieaattaileqdadddellhnhsgvmakypkfvkflrehkrrkinseivfphelhpwqislisyledepiprkikwfvderggsgkstfakhmarhgafytrggktpdvafafrehlssnphstivifdftrsgkdyvnydileqikdgivvsnkyesttiispvqhcivfanwepnkeslsldrwdivhlnhnmndmn*	315	USER	zzz1979
1749		Unclass_KR134345	mapnlisrnfvftinnptfnpddlfvgeppewvrcaiwqleegeqgtqhiqgyieftkairasrfcqiingdnphlevrrgsrdqaynycskeetrvsgpytygswklckgrrtdieaattaileqdadddellhnhsgvmakypkfvkflrehkrrkinseivfphelhpwqislisyledepiprkikwfvderggsgkstfakhmarhgafytrggktpdvafafrehlssnphstivifdftrsgkdyvnydileqikdgivvsnkyesttiispvqhcivfanwepnkeslsldrwdivhlnhnmndmn*	315	USER	zzz1980
1748		Unclass_KR134346	mapnlisrnfvftinnptfnpddlfvgeppewvrcaiwqleegeqgtqhiqgyieftkairasrfcqiingdnphlevrrgsrdqaynycskeetrvsgpytygswklckgrrtdieaattaileqdadddellhnhsgvmakypkfvkflrehkrrkinseivfphelhpwqislisyledepiprkikwfvderggsgkstfakhmarhgafytrggktpdvafafrehlssnphstivifdftrsgkdyvnydileqikdgivvsnkyesttiispvqhcivfanwepnkeslsldrwdivhlnhnmndmn*	315	USER	zzz1981
1747		Unclass_KR134347	mapnlisrnfvftinnptfnpddlfvgeppewvrcaiwqleegeqgtqhiqgyieftkairasrfcqiingdnphlevrrgsrdqaynycskeetrvsgpytygswklckgrrtdieaattaileqdadddellhnhsgvmakypkfvkflrehkrrkinseivfphelhpwqislisyledepiprkikwfvderggsgkstfakhmarhgafytrggktpdvafafrehlssnphstivifdftrsgkdyvnydileqikdgivvsnkyesttiispvqhcivfanwepnkeslsldrwdivhlnhnmndmn*	315	USER	zzz1982
1746		Unclass_KR134348	mapnlisrnfvftinnptfnpddlfvgeppewvrcaiwqleegeqgtqhiqgyieftkairasrfcqiingdnphlevrrgsrdqaynycskeetrvsgpytygswklckgrrtdieaattaileqdadddellhnhsgvmakypkfvkflrehkrrkinseivfphelhpwqislisyledepiprkikwfvderggsgkstfakhmarhgafytrggktpdvafafrehlssnphstivifdftrsgkdyvnydileqikdgivvsnkyesttiispvqhcivfanwepnkeslsldrwdivhlnhnmndmn*	315	USER	zzz1983
1745		Unclass_KR134349	mapnlisrnfvftinnptfnpddlfvgeppewvrcaiwqleegeqgtqhiqgyieftkairasrfcqiingdnphlevrrgsrdqaynycskeetrvsgpytygswklckgrrtdieaattaileqdadddellhnhsgvmakypkfvkflrehkrrkinseivfphelhpwqislisyledepiprkikwfvderggsgkstfakhmarhgafytrggktpdvafafrehlssnphstivifdftrsgkdyvnydileqikdgivvsnkyesttiispvqhcivfanwepnkeslsldrwdivhlnhnmndmn*	315	USER	zzz1984
1744		Unclass_KR134350	mapnlisrnfvftinnptfnpddlfvgeppewvrcaiwqleegeqgtqhiqgyieftkairasrfcqiingdnphlevrrgsrdqaynycskeetrvsgpytygswklckgrrtdieaattaileqdadddellhnhsgvmakypkfvkflrehkrrkinseivfphelhpwqislisyledepiprkikwfvderggsgkstfakhmarhgafytrggktpdvafafrehlssnphstivifdftrsgkdyvnydileqikdgivvsnkyesttiispvqhcivfanwepnkeslsldrwdivhlnhnmndmn*	315	USER	zzz1985
1743		Unclass_KR186219	mksrnwiftinneliwkpenhlikfvvyqleegekekvphiqgylelkqpralswmkklnskahweirkgnrvqalqyvtkeetrmdapwilncgqwsqydastwtrvedwlntvipgvwkdgskstksirlseiksklddgcsseviadnyfedwvrhyrafekyllikskprdypvrvvvvigptgtgksrfcmeqypdaywkqrsqwwdgyvrhktiildeyygwlpfdlllrlcdryplmletkggqcnceantivitsnnrpdswykncyfpaferrvdtfiimkelgssfifkkwsdaekhtdpliln*	315	USER	zzz1986
1742		Unclass_KR528543	megkrvryrrycitinnesdnkrilglfledgikkgvigvetapttgtkhlqgyieyptqrdwssikkvcpnahieaakgtsrqnyeyctkegnfvvhghfetgkrkrrdyslseyvkqvlqdelpndstfirnyekiqthaklvssrqekvrlfgelscckvtswqrkaieslflqgkrevlwiyesvggkgktflatilevvygftrfdgitksrdiallippipkgfvfdvtrddasnfsyntleqvkngyvmsgkyggsqhlfrpvpvivlsnfepirsslsedrwkvwnienasnekkedlpeegkippkavlfeeeenkenqpnaeasnsqqsnkdveqhrek*	350	USER	zzz1987
1741		Unclass_KR528544	tsssfssfshdahisirtvvfhrqwylvvgreigesgtrhlqgfvifhqvqsraavsgyiarahleparassvqasdyckkdgdfdeygvcprsgqrfdlqallkwgddfiashkraptahecaveqpaaylkyprlislfqarapppdfgregerrpwqheledelegpcendrrvtfivdqvggagktwfqqwflsknparaqivsigkrddvahtidetkevfffavprgqmeflryeilemlkdrmvfspkyasrmkflsvvphvivfsnelpdmnkmsldryyikevn*	294	USER	zzz1988
1740		Unclass_KR528545	mptfqsarwcftvnnptdadasaiaelgdgpltrylvvgreigesgtrhlqgfvifhqvqsraavsgyiarahleparassvqasdyckkdgdfdeygvcprsgqrfdlqallkwgddfiashkraptahecaveqpaaylkyprlislfqarapppdfgregerrpwqheledelegrcendrrvtfivdqvggagktwfqqwflsknparaqivsigkrddvahtidetkevfffavprgqmeflryeilemlkdrmvfspkyasrmkflsvvphvivfsnelpdmnkmsldryyikevn*	303	USER	zzz1989
1739		Unclass_KR528546	mentttkhetkpatnlphkswfltlnnwteteykilqqlhgvtysiigkegkettphlqgvvtfqkatriaalkkilprvhweiplnldasrnycmkegdyevtdhrhqgrrsdiaeavgmvtdgkhmmevaeahpvtyvrnfrglaalqgilerprtwktrvhvhwgptgtgktynahaqlkqlfplerpyvwtpamenwwdgysgqsgvildefrgqlpfatllnlldeyemivpikggsrqwkphvifitspleprswyetgkaadsveqllrridiiehmteaykislddieqiyk*	301	USER	zzz1990
1738		Unclass_KR528547	msraknwvytlnnptgdeiskaeglflstpgviyhvfgketgdsgtfhlqgyvifsqrkrlgqlreifprghfevsrgsphqasdyckkegdfkefgslppqaqgkrtdwerlreyveqlgrrplerdlilefpnlvgasynishdlhpqkrvangsgkptpriprqpaiefivdpegnsgktwfcqymitqhpdsvqylriakrddltfaidetrtiflfdvprgqmeflqynvleqikdrlifspkysstlkiltsnvhcvvfsneepdvsqlssdrlrvvrlddsa*	290	USER	zzz1991
1737		Unclass_KR528548	mpakrvyqgkrgkrwcftlnnyteaekdvvvagligkepvfakvgaevgdsgtphlqgfvhlkereslggvkkilgnrchlemargtdiendeyvskgsivvelgapvegatekgggdtgyimaraaaqqladggdlcaiaedpelwksycqhgraieklaeatrkskqhqlaadslgdpilqawqrtllrhvlgepdmrkihwmydlvgnmgktwmskylcakhgavrfengksadikyayngerivifdlsrsqedhfnyevlesvkngimfspkfdskmkvfavphvlvfanwgpeesklsrdrwdvkcmtdqdmewsdlasnvivkqeghnvlidmtgdreadtqvmdwnstddsdcfivqy*	367	USER	zzz1992
1736		Unclass_KR528549	maqakrwvftlnnysgadeqlleqlsrstdvvtliygrevapgtgtnhlqgmiifatrkrlrqirnyppfqrahlevmrstparareycikdgdfveygepveenrqgrrndihdiiawldlfieennrpptqeevaqlqpiamlryrnfmdlarlrapqpqlirngvaregwqmdlehaldgdapdrhilfyvdpaggngktwfqqylltkyprrvqilgtgnfadcayavdeskdiiispemtlwlpaiwlsvceaelnsqt*	265	USER	zzz1993
1735		Unclass_KR528550	mtiyreqssaadwerlkdkltyfayaeetcpxtgrwhmqayaysrramrhsawrklfpkihiekmrgsftdnenycskegqliefgerprqgersdlqefkfrldrgdkpldiayedvsmfnavgrmhrfaetysqyiryrqikdnrdapevylrigpagtgktkwlddtygtagytiapdnlgrwfdkcdcdvvlfddveagqvppfslwkrlcdrypiqvpvkggfiwwkpkvivftsnqapskwwgeldelnkgafdrrvtsievve*	271	USER	zzz1994
1734		Unclass_KR528551	mnirpaavkrwvatvnnptqqesqtlrdaieaqtsyavigrevgesgtphlqcffifnnrlrlrqvkavpglqrahlepargtsaqaanyckkdgdfdeygelpnsgpkttifeafrdwykdqpgvvterdildhhpsilryphfievchrqygrrptlvegqlrnwqlelsnmldeepddrkicfvvdeegnkgkswltaywysnrsdvqmlsigkrddltyaidvskrvfvfdinrgqmeyfqysvveslknrmimsnkyksvtkiiphkvhvivfcneepdrtamtrdryqmkritpl*	302	USER	zzz1995
1733		Unclass_KR528552	mpnklpsftilhkgtirtvdpaptmrdvgenfpsilgrypsaarqfvslfgkkpnlvngelrpwqqdlerlldappedrrvifvvdpdggkgkswftrylftkrddiqrlsigkrddlcyaidtskkifvfdiprgqsellqysvleqlkdqmvfspkyesiskilpqkvhvvvfmneepdrskmtndryqvillgqfn*	200	USER	zzz1996
1732		Unclass_KR528553	maqakrwvftlnnysgadeqlleqlsrstdvvtliygrevapgtgtnhlqgmiifatrkrlrqirnyppfqrahlevmrstparareycikdgdfveygepveenrqgrrndihdiiawldlfieennrpptqeevaqlqpiamlryrnfmdlarlrapqpqlirngvaregwqmdlehaldgdapdrhilfyvdpaggngktwfqqylltkyprrvqilgtgnfadcayavdeskdifffnvprggmeffqyrlaeslkdrlvfstkyasgmkilhkvphvvvfcneapdmtkltadriiihdl*	306	USER	zzz1997
1731		Unclass_KR528554	mahrqhaakrwvftinnwtaaeqqalidssdnfdylcfgrergdnntphlqgyvilktklrlnnvkalpgfrrchlevsrgtpqqaadyckkdgdfeefgelpkgqgkrsdfenlkewiksldhwpddheiaeeypslwgryrsacesfrqlfgkpievvdpttfeprvwqqriidicngepdprkvyfvvdengntgksylsayliskfpdevqilsvgrrddlahainprrsiflfdvprggmeylqytifeqlknrtvfspkynsitkilrklphviifsnespdrnkmshdryhvthirqfpraddngang*	316	USER	zzz1998
1730		Unclass_KR528555	mprdapakqwcftlnnytpaeltaivdsagnfdylcfgrergnnntphlqgylilkekkrfsyvrqlaglerahwekksprstpkqasdyckkdgdydeygelptkkqgqrtdfdelkewikeqdhrptdrevaeefpslwgryrsacisfldlfsphptlvqgtlrpwqedlntrlsappndrdvmfvvdengnsgkswfirylmterpddvqmlsigkrddlahaidpakkifffdvprggmefmqyavleqlknrlvfspkyesrmkvlhhiphvvvfcneepdrtklsrdrfrvthirqv*	305	USER	zzz1999
1729		Unclass_KR528556	mprdapakqwcftlnnytpaeltaivdsagnfdylcfgrergnnntphlqgylilkekkrfsyvrqlaglerahwekksprstpkqasdyckkdgdydeygelptkkqgqrtdfdelkewikeqdhrptdrevaeefpslwgryrsacisfldlfsphptlvqgtlrpwqedlntrlsappndrdvmfvvdengnsgkswfirylmterpddvqmlsigkrddlahaidpakkifffdvprggmefmqyavleqlknrlvfspkyesrmkvlhhiphvvvfcneepdrtklsrdrfrvthirqv*	305	USER	zzz2000
1728		Unclass_KR528557	miskrwcytlnnyseddvvtmkavpttyhvlgkevgtngtphiqgfltfksnkrlsamkkinarahwevakgtskqaadyckkdgnfeelgsvpsqgkrtdledaavmitageslkrvaeehptvvikyhkglsalksllsesretddvrgiwlhgppgcgkshlartvspylkaqnkwwdgyaneeyvliddfdkggkclghylklwadkyectgeikgatvalnhrkfiitsnyhpdeifdddsvlleaitrrfsirscwhhsreadavwfdsltkkeahaatank*	289	USER	zzz2001
1727		Unclass_KR528558	mgvklkqsqdnseggnnhppsfrsrklvftlnnyqkedinliisyfessaqkwvfgeevgesgtphlqgycefknqkewkqitdkcsplkrawstsargslddnvkyttkdgkiyyggfkiekcnykveidlydwqkeimeileqtpddrtihwvwepkggigkttfqkyifthmggvcvlsgkgsdmkhgvvsyindhgetpdivliniprssaefvswsgieeikdmffysgkyeggqvcgmsphvlvfanteppegvfskdrvktields*	274	USER	zzz2002
1726		Unclass_KR528559	mdryghqvhtkggfvnfkpryiiftsnkepsqwypkvsvnqqmwpafqnrvhvqikfvkhsigvqlqwqkgsvdeipegvpvprstnppmvlnrapklapkiqpkrnmppvvrrvqtssgyvdqpitidpfladnenhpannq*	144	USER	zzz2003
1725		Unclass_KR528560	mrekernntaaphepvsrdpgsirrtksikrdavslsrrvarwwlltipeddwnppadlpagvahlkgqlesgaeggyrhwqvmvsfttqvrlpavkalfsrtahcepsrsdavdkyvwkedtrvpgtqfelgrapvklnskpdwdaiwdaakagnieaipagirvrsyanlrrirsdhavalpverscrvfvgptgtgkshrawseagmdaypkdprtkfwdgyrdqlhvvidefrggidiahllrwldrypvnveikgasmplaakgiwitsnlapnlwypapqhtatlyhpgirywskccae*	306	USER	zzz2004
1724		Unclass_KR528561	mtscrycftvnnptvqdrerldlladscnylvygneigssgtphlqgfvifpktkrfnaakiaigntahvecargssvqaatyckkdgdfrefgelpssqgkrtdwdiyrdwvtdlgrvpskkelvlafpgfyaryrkacfeyaealtpppiltqseprfgwqtrvdgiingeandrtihfvvdpegnagktwfcsyaltkwpdkvqvmrigkrddlayaisteksiflmdvprnqmtflqysvlemlkdrmifspkyessfkilqyvphvivfsneqpdtsalsadriniinv*	295	USER	zzz2005
1723		Unclass_KR528562	msqakrwcftinnptpaeeeslflhgtnidhppcdfkylvfgretgesgtphlqgyfelvkklrihqikgtlgfershlevargtslqasdyckkenafeefgalppppgnaahfaqlrewvaaqpskptikdvwdvfptlaarynravmecidlfgkkpvlvegdlrlwqlrldgianqeaddrrvifvidpegnkgkswlvsywlstrddtqfmsvgkrddlayavdistclfvfdiprgnmqyiqygifeqlknrvvfsnkyssqtkillntphvfvfanelpdmnalsadrykvini*	302	USER	zzz2006
1722		Unclass_KR528563	mvnsgkhwcftlnnytpeeessiklvdavylvygrergesdtphlqgfvsfdkrrtlrqvkellsdrvhlesakgtprqaseyckkdgdyyevgilpggrgtrtdlesvreliksggsirdvfdkhfgvalryhrgismainlrgdkrewvvdvqvywgdtgsgktkkawteapdayvhpggqwfdgytgqpdvifddfsgsefkltyllklldrypmqvpvkggfvnwvpkrifitsnldprtwykdaiqehqaalmrritkithftipfh*	273	USER	zzz2007
1721		Unclass_KR528564	msksrnwivtlnnpeldvedyafalklsgatwftgqlekgdqgtvhlqaafgyantvrfsavkkilpeahiektncgasaaeycsksdtrvsephsfgtppvkrnlkgnhkvrtqqlldkgalkaledgdislrefklfkanielakaefykwwdgynnqavviiddldsdalghhlkiwadhypfiaefkggaqnirphkivvtsnysiselfskdvkmaeaiarrft*	230	USER	zzz2008
1720		Unclass_KR528565	mkgtiaqnleytgkeatedptklhewgvkpltnternkkgaaasketmkeviaaaergdlewiksehpghylrymkqiekvrmlalvdqttethstlenywihgdtgsgktravrekipdkdlylkgqnkwwdhyegekyvliddyspewaekyflknwadhysfsaeykggslkrlnpktiivtsnykieeagfnekdiepmmrrfkrgnaqwfidtfkve*	223	USER	zzz2009
1719		Unclass_KR528566	mfgeadegeranldieppkkrkkrdhraegkrralryrnwvftlnnpqehgfprltsdmiwlrygeevapttgtphlqgvvhfkskrvmptdlypwcrnahwehmggtisanlaytgkeaneeagtlhefgvrplsnkearekgaaatkeryinilahakagefdkleeeypgdflrmyktlhcirdgaqgrsepiarlehwwivgptgcgksravwetvgasqlyskllrtsggtttttktgsysttilpygktkpvskigrttipslrrsralqkesaqlissslattasqtdssspmmssq*	305	USER	zzz2010
1718		Unclass_KR528567	igqnglkdnpiipytmsypmpnpqqrevlastfrtlvkanpdqwtnspsfeklcrmyrcydlikdrrhqfitvalpqtydlkklvsqienelrydwiigayvrvenfsdtgenlhlhilkdgqytktkiirdlsrkfkveknfinvkssnkevdyenrynyilgnkkdagklenvqkdkewrenndineiynl*	194	USER	zzz2011
1717		Unclass_KR528568	maakrdsavkrwcftlnnytdadcealkeklttdtcsraivgkekgengtphlqgfvslktrkrlsamktflspryhfeqakgtdeqnteycskegdvlidvgenvkgrgdkgggfneganikrvvyhllegkdkeallqdekmlgaymkykrsitemvsevkseqetkrlkqdldnatlrpwqrelkeyltgdphdrhiiwyidgqgnngkswfakycvaelgairlenaktadlthayngervvifdlsrtteghfnygalesikngcvfsskydsrqkmfpiphvivfanwgpdrsklsedrwvtktwsfeqetfqtf*	322	USER	zzz2012
1716		Unclass_KR528569	mpsfrvcaknffltyprsidlskqdlfdfllsfepnyllvaeekhadgtphlhallclarrrdirdprhfdcqgyhcnitstrsiarcidyckkddcsplssgdvpgrdgwgaicecgtredfmgavrryyprdyvlnyekllayadahfnanvpyepqftdfvlptevddwltdnfkvrgenafhptggiligpnpdrpltliligasrlgktewarslgrhmyynhlfdlstwdahaeyiifddfgwefipakkcflgaqreftitdkyrkkrtitwgkpciiltndtpplsvweeantkkvtltnklf*	312	USER	zzz2013
1715		Unclass_KR704912	mpswlpynttgsqegknrmtkgqiqysqvlltypqcdrskeellkfiqglddiccaivakenhhetdgehlhawirfnksqriatskwgslfdwdgkhgdyqkvtctqrsiadtvtyvmkdgdtliwncnaealkckekthirkydnekilntpmkelidegvinvkeaaaylrgkqlyklldkpaekskcrgiwvsgrpgtgkstwaqkfgkslggfyekaqnkwwdgydgekvvvmddvdtdalihymkiwadkfpckgeikgctvwlhhdwfivtsnftieeicemkqdgykyvdavkrrfkelhvpdtvqylqwdpdfvwenpdapdeephqeptapepkrqpvdelsntllgsgy*	361	USER	zzz2014
1714		Unclass_KR902498	mntrsrsfvftinnftqeeeelimnlendpqvvdivaeeehleegtphiqgfikfanqryrnsicrflggrafvevargsleaninycskedhlivkkitsavnkaydksrsadekakniinaakslnesdfsttfpnfylfhrdiyqrfnmeenlkklktwdgelrtknlwiygpagvgkstlarkslepfeiyskafnkwwngfepschqrvvlddypsspqgdtlvqhmkiwgdryvfigeikgghstiepnfqfvitsnfsidecftkeqdrdairrrfreiyldsrkenldewlasvlle*	306	USER	zzz2015
1713		Unclass_KT149394	matrhvvftinnwteeiwlevtqfdwlyvvvgkeigesgtphlqgygcfhkkqryatlarkwkghfevsrgtpqqasdyckkggdyfekgelpesqsakggeatkklyedafslaqkgeilsipeplrtrfyatykkvakdympkpeslselknlwicgeagvgktvladlilpdayskncnkwwdgyqnepgviindlgiehkvlghhlklwgehrgfiaetkggalhirperiiitsqyeigqvfedwetrdairrrykqhkltgaftrealielaskl*	282	USER	zzz2016
1712		Unclass_KT149395	mfrinaknfsltysnveqqsgvawlpwdkesllrhleslgdgvigmvsreqhqdgsthfhawvqfprkrdirasnffdwqgchpnvqatnnlrawktyickdgdhtpepatptatgdlfvlchsmekhewvnycigkkigfqymeyiwkdchmdrdstiednpppeavmcaaleqfiypsldrsplvlvgdtgcgkttwaiknapkpicfvshmdqlkhfdpqyhksivfddmdfkhlpresqihildmttpraihrrygvtvipagtkkiftansnpfiedpaiirrrtlrivqgl*	298	USER	zzz2017
1711		Unclass_KT149396	mnrtrgycftinnynddellstqklletatygiygieignsgtqhiqgygywankisfstiketlprahiecakgdagenqrycskdgnyteygilpqrgrrndivafkddilagmneedliekhtgcfarydrfyqrcrnivlkkiakemiqpevivitgepgvgkthtiyeenniediykvevgdgssgsvfwdnyngentiliddfhsnlkldymlrlcdkypmklnikgghtwkcakkiyitsnikldnwypncpdihkralkrritkyinlemespnqriqhnmlnqperqildqpmhlalllaemp*	313	USER	zzz2018
1710		Unclass_KT149397	mrtnqvqqrdgarrnshglrfsrfvftingttqqlahdmaclktltpkwliaanetcpttqrkhiqgacilgkqvafttlknmpgftrahievmkgtpaqsreyctkedkepyeygtmpqqgkrndlqdaiailkegtsirdliltadlptvatyvrypkgltsvsqafrerqghiqpfvlwlhgstgvgktrcalelaeylgcgsdvwvsnaslqwfdgydgqrvavlddyrtnhckfstilrlldryrfsvpfkggfvlwqplfiiittpksaramwnlrteediaqlerritlsvdvdghedgydvfrdtifgqvrervsesphfshlagllpadamdlsadcdrsadssesgaipdpvelrerggrgsglrdgvcgdsnsdatasasissslsee…	402	USER	zzz2019
1709		Unclass_KT149398	mrtrrivftynnyppeynddaalnawldslgalyciagrevapgtgtphlqgyaqyvnpksitafrrlfmgchvepargtgsqsrtycskdgsfcergipptdenpgnrekqrwedarslakegkfdqipadiyiryignlhriyreilppleplpatcgrwllgrtgsgkskgvrsafplvypkplnkwwdgyddhthvllddvdhnqsswignflkiwsdhypfiaekkggsrlirpeliivtsqysirelfndnelvlalerrfqvinvnkdepiewv*	282	USER	zzz2020
1708		Unclass_KT149399	mtgcppqdvkalsgsgrsqlisgdplytpksptlrdrrkvgltldtcigrssstskrkdplplsrhaflqrvtmnspdqlplksmslkrtlesqtlssssesnlsceaekqigmksgmlqeaetswlslpmyevlnfnqsnviltseefaqilpnlsqwnvrftyfgeipvlenpaglgmrrvsaltlkvpvqnsgmvtkikkmllsmsleetsvilinkasltcsdgwtdipfwsrqkdqgsycllaesgsrvtsrlptgillwmrtlpllcced*	277	USER	zzz2021
1707		Unclass_KT149400	mepwqaqnivgkesfgsspspprtpsvlewkavtslmdlsgvkarkkevnqpvmnttsswsplprkclypellecleeapmvnsqdqklpthmwekkrlalesrlnlglnrfggttkpigtpygpppspeisipspqisewclimpceqsdqtmpnlkplkeefmcfgvvqelenlvvlgmkrekvltlsvhdpsfgmaikiknmlslmnfeevlmwrtcfdglivirsvwklkgarglwlegqygslrtwsplvgtqv*	260	USER	zzz2022
1706		Unclass_KT149401	mrqarywictiprdswtpelpngaawcigqpergesgylhwqvlvsfpskktiaqvkaafglqgmhveatrssaaeayvhkeetrdgdpfefgsravnrnnaadwdrvkelaqagnldlvpadiyiryyrtltaiasdyevpvgieknvfvfygrtgtgksrraweeagpgayskdprskfwcgyrsdehvvidefrggidishllrwldrypvrveikggsrplkatkiwitsnlhpmnwyidldqetknalirrlqitefq*	264	USER	zzz2023
1705		Unclass_KT149402	madtdetefnydesvekygkvkatnwvltvfdedgsrrqrletlpdwakclaygdevtkrgrkhyqcyvtawnpvrfsqfqpwigkswrspmlgrladsedycskqsrlkiigqkenqgrrtdligtkrrldqlkpgeslmdvareephfqqimrcersmqkyvenkrfrdmkgdytkpeltwivgaagcgktslvyfmepdiydvpdfkwfdgycgqeavlfnnvtdshcpkyvdflrqvdrysiqvpvkggfvawhpkriyvtslglparcwpyigdlsevnrridrylgsgvnmlvdythldtytpylwmllsrtvdylspvhwcd*	330	USER	zzz2024
1704		Unclass_KT149403	mttrirawcftlnnptdrdkralialanttryviaqlehapttgtphyqgymvfhdgksfsalhkamprahfepargtaqqnydyctkaadegqpsnelvlehgtlpqqgervdisqvrellrsgvtyrelvdmdvnyqvlriaqewlrvhepardfkpevrwfygepgagktraalewleshgevftvetpakywdgydghncvlfddlradqcgfvrmlrlldryamrvevkggskqlraryiaitaphrpeeiyrtssenivqltrrissvthvtrddpdngrptcrygncepdeclcrsndgsdelydse*	315	USER	zzz2025
1703		Unclass_KT149404	mssrrwvytlfaaaeddysnlddferrlrdhqafrglchqleccpttskvhlqgyvefekpqrmaalkklnstvhletakgtrehcvryctkdetrvpessptvdpvllgtttqgrrndllettlaivngelsrddvfdtrpdlickyarginelltyrakkerqgdrelhtevlwgdagvgktryaygrstpedvyilckgnggalwwdgydgqsilviddfygwvehsvllrildrypfkidikgsstyanwkevyitsnrhpstwytrafpwtedkalqrrlgaiyeckatmfgstwkcekslkvrtvdrdfnieeldnll*	325	USER	zzz2026
1702		Unclass_KT149405	mppkaqfnrfcqitkkrgfcwtyhdyddeivahikglfdrpngwvkrlvfnyeicpttgrrhlqgclymrdnqtwpklkadiglekihlelaqnvealdkycqksetrdpahpegvvlgvapltdeakgqkgeeyyernilacmngqqmdasaefnlrnfeyaaearkrkrelasldelsfewhygepfsgkthycrkipgafkwnskagwnnyndeevvicddvdertvpeqqeiktwcdldpfqvkvnykvlnirpkrfiftsnesiadcfprakpihlkaierrfkvyyypaaygepgwvdptaipqkylftdeemdaqlsv*	326	USER	zzz2027
1701		Unclass_KT149406	mgtterarywmltiphedwtptivlpsgvsylrgqaeigatgfkhwqllaiypkqvrlatvkssfvrsahceptrskaaddyvwkedtavdgtrfemgerphrrnvkadwervwesavagdilsieasiriqhyrtlrtiradyskptpferriivfygptgtgksrraweeagwtaypkdprskfwdgysdqknvvfdefrggidishilrwfdrypvlveikgastclvaeniwitsnlhpkdwypdldyvtyqalerrleivhiq*	269	USER	zzz2028
1700		Unclass_KT149407	mkvkvytnfkskkvirakysitlaltwitfsfpshptsnmsyqlnwcftvnnytvldeqklqdmpykyliygrevgeegtphlqgyvqykkklrltalkklhptahweaakgneeqnktycskegdflefgtptktnggastiaaraeknarlmtapieeliltgelhpqhakaihnarilvqeerrklhppdaldgdlphlwfwgpagtgksykartdypdaylkaankwwcgyndedtvlieewdknhnvlahhlklwadrypfsgevkggttgkirpkrivitsnyhprdiwgddpegalgpimrrfnvvhfdqkfnf*	322	USER	zzz2029
1699		Unclass_KT149408	mpaipdqqrwwiltiphadftpylfagakyvrgqlelgagtgflhwqivvqfekpqrltavkkllgqsvhaeptrseaaveyvwkedtrvdgtqfelgnralrrndkkdwnqirddaksgnmddipadvyircynslrrigvdhlvpvavekrvfvfwgatgtgksrraweeagisaypkdprskfwdgyrshesvvidefrggidishmlrwldrhpvivevkgssvvfsartiwitsnlspdtwypgideetrlalrrrftqvvhfnaelgq*	275	USER	zzz2030
1698		Unclass_KT149409	mnvrsrdwcftvnnytyddykvcqelsvmcqyvvigkevaetgtkhlqcyvyfenaksfskmkkllpnqahiekaggtpqdasnyckkgeqpknewkalkhmgpqwglnadfwehgslpqpsgtrndlkeiremlaqgkgmrdvievatsyqsmksaelilkykerkrnwkpkviwlwgrsgigktravyeecpniyrksnnsgkwwdgydahenvliddvkdtseefysmlleildrydvrvqtkgatreflaktiyltsledprimyrrfpeegyelyrrideirhvt*	291	USER	zzz2031
1697		Unclass_KT149410	mnvrsrdwcftvnnytyddykvcqelsvmcqyvvigkevaetgtkhlqcyvyfenaksfskmkkllpnqahiekaggtpqdasnyckkgeqpkdewkalkhmgpqwglnadfwehgslpqpsgtrndlkeiremlaqgkgmrdvievatsyqsmksaelilkykerkrnwkpkviwlwgrsgigktravyeecpniyrksnnsgkwwdgydahenvliddvkdtseefysmlleildrydvrvqtkgatreflaktiyltsledprimyrsfpeegyelyrrideirhvt*	291	USER	zzz2032
1696		Unclass_KT149411	mssitmtqpvtkacdktnrsrltcftifdmsidlqslasrfdymavgretcpstqrehfqgfaycktaqrfpwwhkrltphhfefcfgsleqnerycskqgqyqefgikpmgdgkrrdlsevcdaivtkrqklsdiaiqfptvftqyhngltkleaiitkpyehhtvrgtwiqgvpgagkshyarthfqdvyikaqnkwfdgytgqhtiiledfdshghylahllkiwsdkwscsgeikggtvalqhrdfvvtsnfsideiftdskfaepikrrfklitmdteyispds*	290	USER	zzz2033
1695		Unclass_KT149412	msrhrnycftynnypntelvdnvnckyiayahevapttgtrhlqgyiafhstktlaaarrllpgchlsamagsisqndaycsksgtliergekpasnddkgraeklrwqrardlakagnldeidadiyircystlksiskdhmikpepvdvkcfwihgatgtgksycvettypdcykksmddlkwfdgydnqdvvyledfdvyqikwgglmkrladrwpmqasikgsmkyirpkivivtsnytpneiwmdpqtvepllrrfkviekvsqeqvvdft*	277	USER	zzz2034
1694		Unclass_KT600065	msmrtrnwcvtswtcpdydsverlvvsgeykyvcvgketcprtgkvhwhwylqavnkksmrqikkdvgdrmahaeaangpadagiayvkkdgewkewgepkkqgrrsdledckkiidnsvddamgtmqqiadthfgdfvryyrgfakyadmvdikrakqrephmpevivylgragsgksyhcyhdegyqrsgyrylvqmesktyfdgydgektiwfdefsgrvmsftvftqivdqwgsrvetkggsrqifperflistvewpsqwwagssrfnadpyqlyrritkiywcrgpgqepvelkkdgwtcknideyeelfgklp*	321	USER	zzz2035
1693		Unclass_KT600066	msmrtrnwcvtswtcpdydsverlvvsgeykyvcvgketcprtgkvhwhwylqavnkksmrqikkdvgdrmahaeaangpadagiayvkkdgewkewgepkkqgrrsdledckkiidnsvddamgtmqqiadthfgdfvryyrgfakyadlvdikrakqrephmpevivylgragsgksyhcyhdegyqrsgyrylvqmesktyfdgydgektiwfdefsgrvmsftvftqivdqwgsrvetkggsrqifperflistvewpsqwwagssrfnadpyqlyrritkiywcrgpgqepvelkkdgwtcknideyeelfgklp*	321	USER	zzz2036
1692		Unclass_KT600067	msmrtrnwcvtswtcpdydsverlvisgeykyvcvgketcprtgkvhwhwylqavnkksmrqikkdvgdrmahaeaangpadagiayvkkdgewkewgepkkqgrrsdledckkiidnsvddamgtmqqiadthfgdfvryyrgfakyadlvdikrakqrephmpevivylgragsgksyhcyhdegyqrsgyrylvqmesktyfdgydgektiwfdefsgrvmsftvftqivdqwgsrvetkggsrqifperflistvewpsqwwagssrfnadpyqlyrritkiywcrgpgqepvelkkdgwtcknideyeelfgklp*	321	USER	zzz2037
1691		Unclass_KT732784	mfakfwlitahfdeeefldlvttelgelspvirfvwwqleageqrgslhvqaylglhrsqrlsyvvglfdgasrpvhaeprrgtheqaiqyctkedtrragpwflgqpeetgpgqsnalldirdgldrgvtlvelarqdnlfgalirnirglqwyaaqtgvdrnwettviilsgapgvgksraaeaaarivgvpyyltrpqaanslpwwdgytpgapvviddfygwikldtmlrlmdrypmqvetkggmlkftsrlmivtsnyewrnwyrtagnahfprnferrinrdiymtaeddyldivrsilqvyndmhntfhwicdyv*	323	USER	zzz2038
1690		Unclass_KT732816	mplrsrgwcytvnnwtendeelvaklseqtlyhivareigeegtihlqgycyfknfkslaqfkallprahletqkgtpqeasdyckkdgdyvesgtlpmsqkrkgdlgreyweeqlslakkgkveecdpklqithfnalnaisaryapmppdnedidnqwfygptgtgksrkargdnpgcylkmcnkwwdgylgeetvliedfdkkhevlghhlkiwadryafpaevkgskvnlrpkkiivtsnfhpneiwsdlstldpilrrfnvikfsnpfsylsplryl*	283	USER	zzz2039
1689		Unclass_KT732818	mpkrirqprrrrwvftlnnfteeelttikniltdlaptyaiigkevgecgtphlqgfvslkkqisftamksligtrahieaangtdvdnqlycskqdadawqlgeprqsvtgrggnaldyrgvlealqsgstvteivknpdlvvpliiqhrnlrqvlldlkkekeleklrtayknvtlrpfqeelvnilssdpdsravywyydqygntgktwfskylvarmdalrlengktadlkhayegqkivifdfsrstmerinyecieaiknglvfsgkyestskifpvphvvcfancppdtsklsydrwrircideinisvggtyqmrwvrggsrlrrsrpafli*	341	USER	zzz2040
1688		Unclass_KT732819	mgsqltqrsrnfcftlnnytesdteavkaidckymvvgfevgekgtphhqgyirfenarslgatikqlpgkphvevakgnasqniayctksgvffekgtrpidsetcgrnekrrwtdaraaakegrfddipddiymrhvhaikrirmedgpkptdleprdtyglwiygppgtgkshfvrtnfrdhyikgankwwtgycgqkyvvidelspasgpelsqymkkwadrwsfeaetkggnsiirpymiivtsnysieevfsrvdaqaikrrfteikfq*	276	USER	zzz2041
1687		Unclass_KT732820	mqlsrwcftnfntpqdlaagcdapltlpserleyacyqiercpdtarlhaqgsphfkrsiklgalkklpgfeaahfegakadlqanrnyctkedsrvagpfeigsteglgpgarsdllavkrrldegvdevgladeffgewvkhrasfnvyrglkvpargkdtqtplyvcvgasglgkstfvydetegtvfqkaltakwwdgfngtqpvlfddfrgafqftellrlanigayqvevkggsiqfnpkeiwitsnlrpdqwynpstikditpltrriskiyhftafkemrlfqstenesawdqysrseefstlnfngrhgeatsdlelvy*	329	USER	zzz2042
1686		Unclass_KT732821	mqlsrwcftnfnipqdlaagcdapltlpserlkyacyqiekcpdtgrlhaqgylhfkrsiklgglkklpgfeaahfegakadlqanrnyctkedsrvagpfeigsteglgpgarsdllavkrrldegvdevgladeffgewvkhrasfnvyrglkvpargkdtqtplyvcvgasglgkstfvydetegtvfqkaltakwwdgfngtqpvlfddfrgafqftellrlanigayqvevkggsiqfnpkeiwitsnlrpdqwynpstikditpltrriskiyhftafkemrlfqstenesawdqysrseefstlnfngrhgeatsdlelvy*	329	USER	zzz2043
1685		Unclass_KT732822	mgsrryvftifvssdrdwitegierqnvkylvaqqeicsetgrlhwqgyaefkkvcripgaksilgcdwahlavpngdrkankdyctklasrapggesieigkfeeggqgrkstsvaelreeirggqttlrqeivegrvlnigairyferlqseldsgyqrghqiaaylfgtpgtgkshiahaaveertwyskdattkwwdgysgeevvivddwsgpstqaeadqwkkwvdrypcrvetkgghvwlktkqwiftsnvrwvalpvffdaalkrrfigng*	279	USER	zzz2044
1684		Unclass_KT732823	msrdkvdlapsrgfskywcftafasdfekfteiisdervfsnsdlsyiiggeelcplsgrkhiqgfaafasrkrltackklfpsahfermrgsareaieyckkdgkfvergiypcvrsstvdngsakgvdrikdfielaragnvdlceqrhpnqflryfsqlknlrkfdierlsealwrldlrgpsfgigkdasrspslrvfffkksqlkwwdgynneniilisdfdesckwmvhylkiwadvypfnaevkgstikirpkyiivtsnfrmdmlflgtaldalkrrfmtfefsgsglvekqlrneshfnafvldalkpyvdedvdaspspsssvlpnggeispftdeetstclpstscavdnp*	363	USER	zzz2045
1683		Unclass_KT732824	mgadgnhhyqgyiemprsvkfthfkclagahfekrwgtaqqasdycngldhkkpgdksividgpwiwgtmskgqgsrtdvlnlrdavkggkrgrelydddtvagaaikfsrgvaeltraystapsrgdircifhfgppgtgkthcahddkgifninltitltlyiayyfdgnnggfwigyqgeetaildefgghtlppkqlqrlcdkypywmsikggevachirtvhicsnylpsgwwsektlynedaiyrrivevhwhyefkkyrlyktddpldkstwamykflkakleleytpivhk*	300	USER	zzz2046
1682		Unclass_KT732825	mpkakrespakdycftvnnydddgvrllsglvqggiagyicfgyecgesgtkhlqgfiqftrkvrfstvqaslpkgthiekrrgtpeeaseyckkegnyheegklsksgnrsdleavakevargasdfqiaetfpavfvryyrglrelrcvlngnvqrswktrchvyygypgsgkslqaepigygwivfdellkicdrypyrvpikggyrnfvardifitsnsgpdswypnvferepikreamsrrfeyviefkkmcdhfvceidkfdyennvyelai*	279	USER	zzz2047
1681		Unclass_KT732827	msrvrvwvwtsfkdsldlndggieysvyqqeqcpttgrlhwqgvtrfknarqlggvkrwlgdpqahcepckkeheaikycqkeetrigqatilghiqetlepgwwqkltinqlweqhpewmlkhyngvqayrrslnksqterqnikvfvfygtpgtgksysarqfkpyfakasgnwwdgycgeetvifddfyganekytdilrwcselpisvpikgsmvpleattfiftsnshpslwwpglldksafqrrvtriyqcfiekfvkqvw*	268	USER	zzz2048
1680		Unclass_KT732828	mskpsrnfcftlnnpddeytffadrfprfqtqyaiwqleagengtrdlqgylelssparvsafqsttlkgahfeprkgtraqardycrkldtrvdgpweygtfgaggqgrrsdleaveqsikrgaslaeiaeehttsfikyarnisltceilcpttprnpetpcevhlyhgpsgcgktraitadsllqgssvywkdngkwwdgyrghtivvaddfsgasmrycdfrrwfdrypcrverkgdttelvatrfyisstklpdlwwdrsvvkeynwmeiarrithfhtfdeetkhlhsytgtdqataldqycdsinyyhy*	317	USER	zzz2049
1679		Unclass_KT732829	masppsrqrqarniikglavcrvppapetsfqmvgpirqrnfrinatrflltypqstfdvqlvwdffnslaikpkrailcrehhqdgsehvhvaieferavnttrvsifdfggrhpniqsarnwaacvnycrkegvietayfgctaedatvasapgerapaespyaraesartirewfeyciaegigyayanaiwnqihsvrpptyfendfsgivsgptlshlrwdpewhtiflcgpsglgksswalanapvpflfvtdiddlgffdpevhkalvfdeirctgepndnsakgkwpltsqiklatwdtpvsirirykiahlpahvpkiftscdwfpmngdeqirrrikafnlyedgrsteslwl*	364	USER	zzz2050
1678		Unclass_KT732830	mqymddaaadverpdiiaaqfrlsaknlfltyphcgvqleiardiilealgrgnveymvvaherhqdgdlhihavvclivrcdirnanlldlgeyhgnyqairnvrasvryvkkdnvfieygtinakyadaedraavlaklvqctseadamhfiyvngharesylllqywktkqgeskpgarfardaflpcasllaaleeleesdrcllligpsgwgktqyllahynerqivrathmddlkkisktteililddlsyghlprqtllhlfdmktdrsvhvrytvanlhqsllvilvgnelelvlgahiedvavmrrvtvfqlphrlwd*	328	USER	zzz2051
1677		Unclass_KT732831	masppsrqrqarniikglavcrvppapetsfpmvgpirqrnfrinatrflltypqstfdvqlvwdffnslaikpkraiicrehhqdgsehvhvaieferavnttrvsifdfggrhpniqsarnwaacvnycrkegvietayfgctaedatvasapgerapaespyaraesartirewfeyciaegigyayanaiwnqihsvrpptyfendfsgivsgptlshlrwdpewhtiflcgpsglgksswalanapvpflfvtdiddlgffdpevhkalvfdeirctgepndnsakgkwpltsqiklatwdtpvsirirykiahlpahvpkiftscdwfpmngdeqirrrikafnlyedgrsteslwl*	364	USER	zzz2052
1676		Unclass_KT732832	msvhgnrawcftlnnptdeeklllptspeslplwprctalvyqleegengtphiqgyarfdrqrtlatvktilarahwepakgsiqanldycgkqlgrlsepviigfgglrpgasgpskphlkraqfvdliasspdvsipelldqgalevlatqpnllgtlrgflfqdlrrdgvivdlyygltgtgksrlafdeypgafrktsgswwdsyagelsvvlddfddafmpigdllrtldryplrmpvkggfiqlianhfiitsnhlpsewypnappcrlaavhrrfrnvvefkdgyitthlasnyfnvgatsltpglttplpwtvtdrpvtptqpymspeltdsqlfatmd*	349	USER	zzz2053
1675		Unclass_KT732833	mnsvctlshrstsllsatttvtdphttttettrpdivirpdtlisanrnqddetglepipdknfrlnckavfltypqcalepehvlqtilacnktkhcsvivaqehhkdgnkhlhvylefpkkidiktaryfnyitgkqgnyqkvkvrgacikyvckenryvahqidvptiiqnyekqqekkksrnqaknkrvyelikegkkyeellldcttgpycllhgnkiknmitdfeeiamkkqriadrpaylhlilpgkdidllakkpfkspqfwifgppnvgktsmlqslfdaglkgfeipinndfarwddelfdfayidefkgqltiqflnsflqgsrmalpgkyviggkiknkniptfilsnytpescyknksvydlqpllarldiieiqkfgdiqvictp…	427	USER	zzz2054
1674		Unclass_KT732834	mdtfltahqeeeprypgsdveddsllclegplspedetleapkekpksekkkgsfrlrgtqfiltfpqcdvkkevaaeridiawgkdltgyvvceenhkdgtphlhvylkfenrksfskvdcfdfigqkhgnyqvvrstlksieyvtkggnyvakgvdvesikkkkapknqeiakmlldgksmaeinedhcgyvminkrkieeyetwvkcekikkskidwippsldgltdanlqiatwicsnirqnrafkapqlyihgprnlgktslvewlerslsvyhmptmedfydlysddydlvvidefkgqktiqflnqflqgsvmpirkkgsqgdksknlpvvilsnytlsecyvkaandgrlntlecrleivevdsfidfykdrndli*	385	USER	zzz2055
1673		Unclass_KT862230	msdrtkakrwcftinnpfnvdpiiaspgaeddpdepvvidlrypfwyhhamlavfkveymvaqiekgengtphwqgfiifkdqkrlqwlkdhldkrahwevargtnqqaseyckkdetydpsvipadmkirgrfewgsmpernvpkkderlklaadeldtikdgykrpaeidsltlmqcgfipaykeltadilgpyrpklqiitmigppgtgksyaiqqyfpnhgrcicgnngvwfqnptapvmvfeefcgqiqlqrmlqyldpyplalevkggmrpamyetviitsntrpdgwytgdqagqpgkrtdallalwdrlgfesgayvpvrtcghywevtpgwsieeardfftlkvtrfldiaeiiddedgqghpgaaaaadsqeehrsiyhh*	391	USER	zzz2056
1672		Unclass_KT862231	mpsfqinskslfltfpqcqtsllrfqelingffgknlekgvicqenhkdsqdlhlhaaiclketlrsrdprvfdclvepaqhgdietrfkggvlkafqyvmkdgnylplgqgfdlnlfmeqatkkkctktslilkdiqagatldslvpehaeyllqnlqkvkayldflslrekrlafaegqtqkvhvmpaegyclswnqeiaswlnlnlrqkrshrqkqmwicappgmgktsmimmlekaydlqvyywpkeevwwdaysdgaydlivldefhsqktitqlnpilsgdptplsrrcsapltkrdnlpviimsnylpeecfskvaanapsklaplidrltivnvqgpirmapvleddpqevlaaltdetsyvqltpspgtpnlrqfgddeedwfaeeefrr…	412	USER	zzz2057
1671		Unclass_KT862232	mrsrtycytsfkesepfvdinqivfqihqleicettgrphwqgivafpnakapvgvkqylcdtsahieytknipasiayctkeetrvdgpfsygtvpdlepdnwwqqlsdvqlwtehskwmlrnyngvaafrksikcvyapratptvillfgetgsgksraarelagdelypkpmgawwdgyrghrvvlfddfygneqysdllrwlselpisvpykggftplladrffftsnahprdwypnipdksalwrrvtkiyecfldrflicdkkstli*	274	USER	zzz2058
1670		Unclass_KT862233	mttpiaedndfkfqgiralltypqcnegsieelltffktifgnkieyivvckenhhetdgehyhayikfntrtrvyannlvyrgvrpniekvtrtayaavnyvkkdgnfkeegtctdikklttqekyklikekkyieifematlslpelckvkqiqreliindwpldgsknrkvywfygktgtgktreatkmmielygenwisltgdlrtffdpyngekgvifddvrkgsiiwntlltitdryrtsvnvkgsripwlaetiiftspqhftevfttekdgeraqwdgleqferriseikefn*	302	USER	zzz2059
1669		Unclass_KT862234	mehhqqiiqtpaiyefrgvralitypqcndgnkeelltflktiynnkidyivvckedhhetdgehyhayikfstravvnanhltyrgirpnlekvqstawkavryvkkdnnyieegtctdvqklttqekyklikektyieifematlslpelckvkqiqkelivndwpmngsknrevywfygptgtgktrkatemmiqlygekwvsltgnlrtffdpyngekgvifddirkgsiewntlltitdryrtsvnvkgsripwlaetiiftspqhfndvfttekdgeraqwdgieqferrikevkefn*	305	USER	zzz2060
1668		Unclass_KT862235	mpsnpqffhfcftlnnyveevlddveeedvprisafceeegkywiigrevgesgtphlqgyvslrkrrtfvyvrdklsnrchiessrgtarqnreycskggnfieggsinegrvrqdrdeaarsfmaavrrgdqglvefadaephtwirhgsnmlrnalsilppierpsisvrwiwgspgvgksriahetlpdayvkdprtkwwngylcqedviiddfgpngidinhllrwfdrykclvenkggmvalhatnfivtsnfhprdifkfgdeinpqlpalerrivieeml*	289	USER	zzz2061
1667		Unclass_KT862236	mefpdylkgdplspvyhpnikkchdvsgwlkyiskdgefvdmtgkfnildyevgkrqkayqdhkftedwirrknykevvfpvllktttgreyrmnapdasvkqrhwwivappnsgktrwlqdtfdgqrvyvpskgeypferydgqsivvyddrdsitfeefsnvtgvykiethvygkarfvnvfwpehqarnvivlsnktieqqcgddsyrmkkrfiqisgaalcpphdssddedevadcppdehgfas*	250	USER	zzz2062
1666		Unclass_KT862237	msvrdyrsknylltyprcglqqwwvltnlqnnerikmiiqyvivaqenhqdgaehihvflaltepiriksnemdvfdivdedepdkrvyhcniqsvkspkdaiqyvkknghfitygicpwkvpltmaeknellqskslhelvesgmvsifkipqlqkaisilqnelgnverqppkvhwyygstgtgktrtayeeakesedgywishetgewfdgyigqgiailddiraatwplqkllrlcdrypiqvpikggftwwrpreiyitapgrpediyknyttgqpydnieqlnrritemidfdsetepidqtlywkg*	314	USER	zzz2063
1665		Unclass_KT862256	mpsqqakvwtmtvknwdlfdnqeweeriqnqtepdgskiirylsigkhtgqqtgyqhchfnlelekkktmawikrelfnredihceprrgsreqcdsylnkdgefkviintrqikpgrrtdlddihdmikegaslydcyeehfgtvvrcerglrdyialrdtilatkkkypapevivyvgpsgsgkswhcsedpdyeeggyrfsiqmdskiyfdgynnqktlwfdefsgktmpftkfcqiadrypgryetkggsvliyglkkilistveypalwwsgsdrynkdpeqlfrritkcyylgqprikedgdieyaiplefnprhlrtqydeeilkgnvkypsdlmeeepiataeeavkelkklleqsreedeeqpikrrrsrsrsreddedeaeddycelid…	402	USER	zzz2064
1664		Unclass_KT862257	mtptpkkaycftlnnytdaevarvhgtcrdlsqfaifgyevgeqgtphlqgyirfaksyrfatikdrllprchievangsarqnreycsksgrfeefgscpdeperktrdelarefvreagdgrrgvrrfaesnpgtfyysgaqllrnylsiqpaeprpevrvrwfhglpgvgksrraheelpeayvkeprtkwwnnyfgekdviiddfgplgidinhllrwfdrykcfveykggmlplvadnfivtsnfhpydvfkdkegvphpqteallrrvvitlme*	281	USER	zzz2065
1663		Unclass_KT945154	msaadmttafwgmvinnydetdlalvqqgypdhirqmvytlekgesgtphiqayvrlyrqqrlsyvkklfprgsfkallaeeyklnaqryaqkldktaessavitnnpfpdpvqellavirdgfetfhessdpakwskydkrdvaawkdsiervrveekpnlakfyvsptytrvwakfgpslirhvvaqvqsergnsghthththtdekfsrpgcitinapssegseegseacspgreeeddedyddgsgseteastegddsgcsesdaesed*	274	USER	zzz2066
1662		Unclass_KT945162	matsetsetsggpppsgtfraicftefgdppdwdvvqhklrfmaygletcpttqrehyqgfayahkpmrwkawkklfprahfekmagsfqdnvvycskqsslikfgeepkqgerkdlidlkrkleeyaprrgtttydvaedeayfgvvarhntfasgylrhkrakilngdrtmpkvyvrigppgtgktrwldrkfgvggyviapdntgkwfdgcdhdvilfddveidqvpplslwkrlcdrypfevpvkggfitwkprvivftsnhavhewwkditpdnqqaiarriyktvyvdgtdgdetqeefqsdedsegaeegra*	320	USER	zzz2067
1661		Unclass_KT945163	mpspkstrwcfthnnwtepvfqqwsnllgdeanvkfgiigkevgeqgtphlqgflilhrqqrlswvrrhfpdgchwsiarsdsetnrtyckkdgdfiefgvfpdaqgkrtdldqfiewldefesnngrpasspeiakthpkmylryprsvrlakrrcalfpvqegdlndwqreleeklgadpddrtvlfyvdpdggkgktwfvrryltlhpnlaqalpigqikdmayavdtnarvffvnvarsgmeflpyrflemlkdrmvgsskyesemkifrhnvhvvvfsneypdetkmtadrydinti*	303	USER	zzz2068
1660		Unclass_KT945164	mpgyqfrsatftqfnvekapelgnlqyiafgletcpstqrqhwqgfaysytkmthkkwretfpgahieemkgnfrqnevycskegtytefgikpmengkkrslaemkeqldngekpvevatksdkmfgtflqyrsglneyaqyirekklklnrdvpdvyvrigpsgtgktrwlddtfgldgwtfapdntghwfdgcdcdvicfdeveagaipslstwkilcdrygkrvpvkggfiywkpkvivftsnqpiskwwpnltefdliaierrckeivvve*	277	USER	zzz2069
1659		Unclass_KT945165	mteptqqdtagnsggntkgkrrcfaftwnnypeehfklfdtvaqlsgckfvyqeetgengtkhlqgalyfenarswtsvrklmdgwhlevarnwmacvkyatkvetrtgdqysnflelrpkdplegkvlhpwqsdvmnlissdcsndrtvhwfvdsegakgktslckhillnkvgwlfisagkggdilcavarylksgkklrgvlanysrdkegfisysalesikdglifstkyesqhaifdsphvicfanwipdkrklsddrwdirtl*	270	USER	zzz2070
1658		Unclass_KU043397	mpefkvgkrfcftfnnyteeeekklkeeleknakyavfgheegeegtkhlqgfvvwktarrpgglkkinakihwenthgtskqasdyckkdgkdifevgeipkdfqsnehrkkgaaankvlwdniyklakegkfdeiprniyirhmnnlhkihdmtmkdrsmdeftnkdlkdhflwlwggtgtgkstnarriakkiekdkepylkglnkwwngykcqrvtiieeanpkacehlahffkqwadkwsfpaeikcssfdsirpeyiivtsnysirecfpaeqdyeplerrfteielvhsplasftevewpehiaekpvtevtsnpcvnegnvtvspeplgntsnpavapkgsaspppedipehegstqefivsdedteidedevvdilaegreakrrkvied*	400	USER	zzz2071
1657		Unclass_KU043398	mtaevscgsalcktkrvevadvnedgsiqnptiqeeanelskkygkksirtvtgtfwcdtqekrqaefervkgvwptsryilygplelteenkkphlhfiiafasskmfktiiktlksseyhiescrnfhaaveyclkndpndkleygeplkqglrndlkktlesshydvkeiqennpdlyvryrsgiekiceskmrenntldwlnltqdeegnikdkeytptrvhwffgptgtgksrtvkkvvgdkvkkgvikpdeitiincftsagfaigminykskilildefrgdcikfsellkiidgttinikgsevylhlediyvtscfgpnevyknlgqtdsikqlyrrlteckhmmngkvvdveyeyddspwgntcprtfrpavmnslltyn*	391	USER	zzz2072
1656		Unclass_KU043400	mewlkcalgqlscgnfhaengsrkrknvneptfkrrskffwntlfsfetdermsaaskesmskrwcftinnptdedkfwendeqrtqleylivqyevgengtphyqgflilkrknrltwlkkninsrahwektrgtdqqaadycrkddthpegslrfefgtlkaalkrkdrdeleeavidevkklqdegfrsvrdidpqvlarpgfmaaynaltadllgvyrpelkiitmvgppgtgksyainalfpnagraimgnsgtwfsnptatvmvfeefagqiplqkmlklldpypmalevkggmrpamytvvvitsntrpdgwykdeeqggkrtdallalwdrlgfkngnnsicrtcgtylepaqpgaiskqwlestrtwfinelakaaklqeheelsdeals…	416	USER	zzz2073
1655		Unclass_KU043405	mttvdvygvstigntidadfnedgtiqnptilaeaeelkdrfkgkksvktimatfwcdsedirhaeferivevwpsvkyvlfgpieyteenkkphlhlivafasskmfktiiktlkpefyhlepcrnfksaveyclksnpsdkleygtplkqglrtdlketlkandfnilniqennpdlyvryrsglekvceshndeknvldwlnleenedgeiqkkeykktvvhwffgptgagktklikqilservlkgelkaseisiidkfsqsgfaigaikpdskilvldefrgstvkfsellqiidgknldikggkiylhvneifvsscynpynvysnlnkndsvdqlirritdcknilydrvedvdlnknfveydeneifv*	377	USER	zzz2074
1654		Unclass_KU043406	mfnlaqnfsmatktsrpharrycftlnnytrdeeeaikqincewlvfghehssgqgtphlqgaitfnkrtylatlkkliprahfeimqgnpqqskdyctkedtssyfekgimpkpqhqagneaneakwesayqaakegrfddiprslwikhmrsfkqifedakqdtdmteytdqdlkhhflwiwgptgtgkshtahriakelspdeppyikdlnkwwngftkqrvviieeadpkrcehlasyfkkwadkwaftaeakgtvfpscrpeyiivtsnysiaecfpedadrlplerrfteqylpdrklhiywpqtqpqqtntgepnvgpsdpnel*	332	USER	zzz2075
1653		Unclass_KU043409	mttvdvygvstigntidadfnedgtiqnptilaeaeelkdrfkgkksvktimatfwcdsedirhaeferivevwpsvkyvlfgpieyteenkkphlhlivafasskmfktiiktlkpefyhlepcrnfksaveyclksnpsdkleygtplkqglrtdlketlkandfnilniqennpdlyvryrsglekvceshndeknvldwlnleenedgeiqkkeykktvvhwffgptgagktklikqilservlkgelkaseisiidkfsqsgfaigaikpdskilvldefrgstvkfsellqiidgknldikenlytslnqglriyvsrndflg*	330	USER	zzz2076
1652		Unclass_KU043411	mtmnyetqrmrcatvtsfnidyikstnwrdvinnsrltyivaglevcpetgklhyqmymefeekvtvkqikrllrdngahveprygtakeaieyckkdgnfmefgkpkqqgertdladvyeslkvgrslldiieehpgtyiryfrgiervqdlfrrkqqkleervqptvlvyigksgtgkshhcyhdpdyqasgykfpvqqagkvyfdgydgestiwfdefggsvlpfgvflrlcdkwetrvetkgasvcitnlrkilistttypknwwrdsrkyqedpkqlwrrlthvyyipylmldyaepieiadpenfgddvaeqldrraqeeersqgrrdeevagaggdrpsspelidlvggsesdsddagln*	368	USER	zzz2077
1651		Unclass_KU043413	mvgsfrnmqpthaqqvmnrrrgrrwvftwnnytdddviylqqageamklgprdidyivfgkevgesgtphlqgyihfsqmvdgtmlgrmlrhkchteiargseadaaayckkdgiffergqmrgretltktkasrmierineganfqeimndfaelavryqtsikslitdaqmqrwnekgpwngdlhaknfwvwgpagsgkstwarkqrtnptkiypksfnkwwdgfrpgqhdlviiddypidsrntllqhikiwadrftftaeqkggsiamwpgawnliitsnhsidnv*	291	USER	zzz2078
1650		Unclass_KU043415	msmsicyifcyrtcsvlylfmersdsskysfmsrsrawfltennqilktmatieeecskgiyynsqntfkqvknkypvadiekamgtpeqatkyvtkegeklfeygtcpaskriddvwkeavdafkkgegdkesklyaryqkffdnleaksrvyseyngelkekntwiygppgtgkstyvrkqsngdlyekninkwwdgydgqanvviedidpsmceklahhikvwadrypfnsevkqshqriypedyklfitsnftieecfplekdqeaikrrfkvicmdqlkqwdq*	289	USER	zzz2079
1649		Unclass_KU043416	msikgtrwcftinnpteadvhnvehlseqdwvnsaiaefehlnegtphiqgfmilngqkyltwlknvyfgprihlelargttkqawdyctkegniiieynkpdtvdriphrkadekarailrdigeldeedfkeqypsfylrnkpiydqhrisylqrtaiaynselhdknlwlygptgtgkttyalsgipiyqiyskpatnkwfdgfdparhkrivlddlpilqsgsnipyylkiwadhygctvekkgsgsfldaripiivtsnfsideaipneidrqaikrrfrevywdgttieaysecpyfghylnhmssqpeppvapiirpqtpipypepeeeedfeeeednpfdypfntpfnme*	359	USER	zzz2080
1648		Unclass_KU043420	msrllirtrkfrhrrisvilikrcrilikssfknlydckrwtlgietgkggykhcqwrvecgddqffehfseftarkefigfgatgwgefsiekkshieksdkwsdyetkeghyvksddrveniiqrfgkyreaqervikalrrtndrevvlwydkvgncgkswftgalwerglayvtaeskddavikdiasdfldhgyrpfviidlprtaqwsnelylaierikdglikdprynsrtvnirgvkvlvccnslpkldklskdrwvrleadgtpwtgssagaqs*	284	USER	zzz2081
1647		Unclass_KU043421	mtnkiymitmpkngrnkyllknlietndlhkwaygyeigkngykhiqarircpfdfdylqeyfgqahieeasdewdyetkggiyftsedwgerlkqrylplkevqnkalegleatndrevyvwydekgnagkswlcghlwetgkayvvdsdkgetikkdvaneyinhgwrpyviidlprtakwtdelyyaiekikdgllkdpryqsktvnihgvkvmvmcnhrpnvsklsadrwkmftgaaapeppamqtagglsrss*	259	USER	zzz2082
1646		Unclass_KU043422	mtnkiymitmpknarnkfliknlietndlhkwtygyeigkngykhiqarircpfdfdylqeyfgqahieeasdewdyetkggiyftsedwgerlkqrylplkevqrkalegleatndrevyvwydekgnagkswlcghlwetgkayvvdsdkgetikkdvaneyinhgwrpyviidlprtakwtdelyyaiekikdgllkdpryqsktvnihgvkvmvmcnhrpnvsklsadrwkmftgaaapeppamqtagglsrst*	259	USER	zzz2083
1645		Unclass_KU043423	mankiymatiphssitkraffqmirdfdihkwvyavekgrggykhiqcrfrtnksfdeirralicghieeasdtweyekkdgnymtsddnheilklrygkltklqewalvllestndrevvvwvdkegntgktwltahlwergqacycpptlstpkeliswvhpaynkepyiiidvprtwkwadalytaiepikdglvsdprysapmrnipavkvmcmtntepklik*	228	USER	zzz2084
1644		Unclass_KU043424	mparnstgvstgrpkrfrfacitawnmdafdldwpqrmhdkglsyvvigretcprtgrhhlqcyfeapnpktveqwqdvvcdkprahvecraawkpegeeiahnegdraadyckkdgdfieygtlapgqgarmdladcktmidegkqmidlyekhfgtcvrchrglmlykdlvdrkrrkeaepepkevvvyvgasgsgkshhcwhdpdyrrngykypllaenkvwfdgyegeevlwidefrgsvfpfglflqvtdkwgarvevkggsvetffkkilisttvppgewykcpnflsnpqqlwrrltkvywlgpvehdeegfaiypepelipdpehdtrtnpyydgvgthypre*	352	USER	zzz2085
1643		Unclass_KU043425	msartrnwcvtswvepdydsverlvvcgeykyicvgketcprtgkvhwhwymqslnkksmkqvkkdvgdgrahcegakgptdagiayvkkdgewkewgepkkqgkrndledckkiiedcgegasgamlqiaethfgdfvryhrglakyadlldikrakqreprmpevivylggagsgksyhcfhdegyqrsgyrylvqmeskvyfdgydgektiwfdefsgrimsftvftqivdqwgsrvetkggskqifpdrflistvewpskwwagssrfnadpyqlyrritkiywcrgpneepvelkkegwtsgsieeyesicgple*	321	USER	zzz2086
1642		Unclass_KU043428	mcwlykfapkpipaparvdkasrgsinsasrnsyhichtcetfrgcgslscstlfrtslfitvqhctimymaaqtnykfrqrlqsimthtwmltvprrktarewmgiskwlrdndvhkwtvametgdngydhwqirlqvnktfkqlkkewgpkahieeasdtwnyerksglffssndtpevrkcrfgrltwrqqavvqavqgsndrqivvwydpngnagkswllghlyetgqawvvqaqdtvkgiiqdcaseyiqhgwrpfvvidiprswkwtqelyvalerikdglikdprygsktvhirgvkvlvtcntkpkldklsadrwvimnmntleaecaamevadriwed*	348	USER	zzz2087
1641		Unclass_KU043430	mgktymltiprndtyregnkifawfrkndihkwvlgaekgsggyehwqmrvqcrfgfeelkvlfptahieecsdkwtyeakegvywrsndrreniqqrfgklryaqkrvieradgtndrevvvwydqegkagkswltgamwerglayfsvadtsgktivmdiaseylkngwrpyiiidipragkwtpelyeaierikdglikdprysseavnihgvkvivmtntmpkldklsadrwkiitqqeltleetaieqfaltgkggyrppltpptwdsrdvrgpls*	282	USER	zzz2088
1640		Unclass_KU043433	mwsgnkyksmfftwnapdedntfewckrtsdelkscvadykflyayqweseigedgrnhlqgvifftqrvqfmpfknwleekmpdakrihlesvlstdaalkytekdykkylndpshpvlfeffrvelvkqrgnkngrenasraiseclakytsyreallaepdiigrctraaidyytfkepgtprnnvevlwfygasgsgktytarklleyvaenldsdkanyvqkyytaahnlqwwpgyegqravlidelrwesikntgfsyllqllgegyirvetkggfvsfrgtwiiitaqddpdttfrhaqdnegnrrqhenmgqlirrlkriirfsgrydselnsyttirtdeteqyrrefnvlhqdanreelntkqmfaeyftqstpantedgegngqte*	398	USER	zzz2089
1639		Unclass_KU043436	mpkgqiqytqvlltypqcskskeelmefiqglnniqcaivakenhhetegehlhawikfnksqtvastkwgslfdwegmhgdyqkvtcttrsiadtvtyvmkdgdtlvwncdpealkdkekshvrkydnekilntpmkelidegiinikdvaayqrgiaayklldkpakkskcrgiwisgrpgtgkstwahkfgesvggyyekaqnkwwdgytgekvvimddvdndallhymkiwadtfpckgevkgstvwlyhdwfivtsnftieeicgmkqdgykyvdavkrrfkelkvpdhvqylqwspefiwenpdspdeephqehtapepkrpptedlanthlgsgyq*	344	USER	zzz2090
1638		Unclass_KU043439	msevrmnsrprpqregpvrsffittnyaemaitdkhqailedlqrleeairpymieegrenepeatvelataweevgtttgnphwhgivkltrkmrplqfkqwllrlvpsmpdphvevcrnikaaaeykdktgkkeawvragvgrepaffvsillgsrnvfateavaeltsrhcshsipalknadatassdrvstginleklpgfseqraleslnllrlmleantemaisfilqvissggaptvgsaawlsmtsgtatygrqadlatfltywtdtt*k*rlkevlsmaigtsal*hprivqlvlspitkmvttslkktwdnlsgawdaslnwwwrtvqsekrtelkaledslaaepslplldltslesdsdrmmdplwpmdweewnn*gnse*	393	USER	zzz2091
1637		Unclass_KU043446	mkprtltsvksliqdneahleprlgsstearnycvkeglffeygeigngqgnrtdlhnmvkevangttslgtllqesstavqyinciknavgviryeenktcirkveviiyygksgtgksyrahtlypnaykvnrkqgnqiwwdnynnedtiiiddfdggvmsfdswkiicdgypmqlpikggwtsaawtrviittvdrpenwwncenylnnpkqlfrritkfihcidqdceieekldsnee*	243	USER	zzz2092
1636		Unclass_KU043448	manvkwidatiwvdgdekftgvgdenewrdkfnglferyaygrevapetkrrhlqfrgvlkvacdaaclnylsslgfrniqpthvrdfeyvykdkdffcswdvyrpeydlvrtsphvwqiqldeldrddrtievvwdergnsgktawamyqdylhkavyipplkrgldlvacvlgkresdwyiidtprafeftddwacsieqlkngyvfdtrysfrdrylsvrprvtilcnhlpdyenyfssdrvlpfkitpdgylwsv*	260	USER	zzz2093
1635		Unclass_KU043449	mskiymvtlprtntyaefnalmrymrqndvhkwvigaeqgktgydhwqirlqigktweevkrdfgakahveeasdkwtyeckegmcwkssdrsenrkqrfgklryaqkriiehlettndrevvvwydeegnagkswltgalwerglayfavadtsgktivmdiaseylkngwrpyviidipragkwtpelyeaierikdglikdprysseavnihgvkilvntntmpkldklskdrwkiitqtemnneeqyvdtwggkagafs*	264	USER	zzz2094
1634		Unclass_KU058671	mtiwmvtlprndtykewhsiwmwfvkhdvkkwvfglekgrfgykhwqirfksnlkfedlkvmfptghieeasdtwtyetkegvfwkstdrpenraqrfgklnkdqegviralqstndrevvlwydsegkkgkswltralwergqayfivadsnvktivqdvacefikngwrpyviidipragkwttelyeaierikdglikdpryssesinisgvkvlvnsnslpeldnlskdrwkiypfcttgdivpyvkrtqrkrktdvggsepr*	268	USER	zzz2095
1633		Unclass_KU058672	mnsrprpqregpvrsffittnyaemaitdkhqailedlqrleeairpymieegrenepeatvelataweevgtttgnphwhgivkltrkmrplqfkqwllrlkhksccrvqrqdgkeggmgksrsgqgtgffcldplgvkecvrngsgrrtdlktllsqhtsleeciladpdvvargykvcrdfyriqrqgqhrnkprevtwifgaagtgksqlaeayarskygdgyfihppgnlkwwgsyggqrcvvindfryrdvreagglgyllnildrydieveikggfvygdwdeciitsayspagaftyhkdgddiveenlgqlirrlgriielvvedgtvrekdrtegfrgqfgcgtftplirsdilgirlrqddgsaladglggme*	385	USER	zzz2096
1632		Unclass_KU203351	mkveewkdaldgyferyafgceiapetqrrhyqfrgvlkadlsndialalselglrhitptsvrdfeyvykdrnfycswevfrpeyekvqnsphvwqvqleeldrdertieiiwdekgnsgktawamyqdyshravyipplkrgldlvacvlgkresdwyiidtprafefnddwacsieqlkngyvfdtrysfrdkylsvrprvtilcnhmpdyenyfskdrvlpfritpegylwsv*	238	USER	zzz2097
1631		Unclass_KU203352	msrckwidatawtpvdatdwsmvctglrnenvmkledwknglsgyferyafgcevapetqrrhyqfrgvlkadlsndialalsdlglrhitpthvrdfeyvykdrnfycswevfrpeyekvqnsphvwqvqleeldrdersieiiwdekgnsgktawamyqdyshravyipplkrgldlvacvlgkresdwyiidtprafefnddwacsieqlkngyvfdtrysfrdkylsvrprvtilcnhmpdyesyfsadrvlpfritpegylwsv*	270	USER	zzz2098
1630		Unclass_KU203353	mrckwidatiwvdgdvfnpdgigdenewrekfsglferyaygreiapqtgkrhlqfrgvlkadlnnditlalnrvvrlrvkknwavwmeqlqsmedekgrcieiiwdekgnnaktafsmlmsyehraiycppfdkgrdlinfvlqarsadwyildmprafdftkdwacaieqlkngyvydsrysfkdkmlprrprvtlmvnelpdyenyfskdrvlpfritpegylwsv*	230	USER	zzz2099
1629		Unclass_KU203354	metpqqiiqtpaiyefrgvralitypqcndgnkeelltflktiyndkieyivvckenhhetdgehyhayikfntravinanhltyrgvrpnlekvsktawraieyvkkdgnyieegtstdvkklttqekykiikektyieifematlslpelckvkqiqrelivndwpmngskerkvywfygptgtgktrkatemmielygenwvsltgnlrtffdpyngekgvifddirkgsivwntlltitdryktsvnvkgsripwlaetiiftspqhfeevfttekdgqreqwdgldqfarritkveefn*	305	USER	zzz2100
1628		Unclass_KU203355	metpqeiiqtvkeysfrgiralltypqcnvgsidelltffktifndkieyivvckedhketdgehyhayikfttgtrvcannltyrgirpnlervlktpdkvvnyvkkdgnykeegtctdvhkltlqekykvikektfkeifemaslnlselcrvkqikkdlientwpkdgskerrvywffgstgtgktrkatemmndlygddwvsltgdlrtffdpyngekgvifddirkgsivwntlltitdryktsvnvkgsripwlaetiiftspqpftevfttekdgeraqwdgleqftrrvyelrefk*	305	USER	zzz2101
1627		Unclass_KU203356	mntpqeiiqtaaeyefngvralvtypqcnegsidelmtffkstygnrieyivvckedhketdgehyhayikfntrtrvcankltyrgirpnlervlktpdravtyvkkdgnykeegtctdvhkltlqekykvikektfkeifemaslniselsrvkqlkkdlientwpmdgskerrvywffgdtgtgktrkatemmiklygedwvsltgdlrtffdpyngekgvifddirkgsivwntlltitdryktsvnvkgnripwlaetiiftspqpftevfttekdgerapwdgleqftrrvyelrefk*	305	USER	zzz2102
1626		Unclass_KU343138	mtdedgprvrnivfiinaidgddlvsqlrlldfqhptwkhvkyciyqrecggeenrihfqgymefhiqqtykqihamegmhnahfekriasakkakhycmkpvegcdcanceaevrnptkvegpwefgemshqgarndllevqreierktpmrriakeffpewvrfrqsfneyrrhqtlcrdfktktflfvgppgkgkstlmkiiarqigswykvphkkgsglyfddydnqevmildefsgasmppeffnlladehecvlpvhggaghqmvskylfigtnyapkfwwkhrtpaqllqttrrldvvfkigmtkpqmvelhgielmrplthnsvhyplfqln*	341	USER	zzz2103
1625		Unclass_KX246255	mteekkqgtnkgisfcftdfkedniscgytvmfndykdvirgiawgvetcpktqrkhnqgyiqmyqqcrynaiacmmkskahfevlrgsiedneiycskegdytklgyfvakgyrtdlhnikddllndaskydimfnytgnfvryssgimkmkelidkkkaqhwrdvtttvlygkagtgktsyvmkkhgydkvfildakwaattfwgdydnesvlliddfngwiqysymlrildghplqlnikggstyakwthvyitsnamgykwyksvgdnlrrrvsgclevfigntetintneyfenneeielvdvyggevsvf*	317	USER	zzz2104
1624		Unclass_KX246256	msqtkywcftlnnytdldevtlkaqvligefsyvvyglevgaqgtkhlqgylevpkrcrltalkkilganyhfearrgtqkqaidyackegnfyeygqknvdvrvvtpkskenliqnqlkrvhdkiqqgvslssiyeeeplisarfpkyintvaslrkppirsslvvelhhgptgsgktynafqrfpdlfslpvksgktlwfngydnepvvlmddftgafaldqllrltdqypiqvetkggmvwfnptliiitsnfkeadwytytnrpehflalqrritkryhil*	286	USER	zzz2105
1623		Unclass_KX246257	maarnymftlfveekneylnlknrlnnkedthvkyvicqlescpssgrlhvqgyvefdkmmtikqvkkilgekthldkrqgtqeqaikycskndtkiegpfiigkkaqqgqrtdlektaerlrngdsieliieengnmlryikhmkeykmliekkrdreepvyvevivgdpgsgktryvydkepdlfvlpeqhgnsiwfdgyqgqeavifddfyggikystmlrlldryplrvpikggftqwkakriyitsnqgidkwykiqdmralkrrvskiiifeeqgntdplpieesei*	294	USER	zzz2106
1622		Unclass_KX246258	mnklphkvrwfvftnydvntdykvgkdirfiaygnevcpttgrphhqgflythvnqchgkrnlhklaqilnkesnphvepmygkitdneyycskenelikigdepkqgargdiqescneilagkrtadqvcvenpeffhqygrtldrvqeiafrkqfrkemtkgiwytgpsgagkshkaftdfhpdthysknlcdewwdgytgqetvilnefrgqikfaelldltdkwpktvkvrnkapvpflaktliitsvkrpediyinqtgepweqfsrrfdvfelesaqkcs*	287	USER	zzz2107
1621		Unclass_KX246259	mpttakhwcwtlnnptdlerdqleaignelpepivylvygdevgesgtphlqgsgrkelpwvknaisdrahleaakgttkqasdyckkdgnfkefgtlpkgrgqrtdiagcvnqikagkslreitelhpeiilrygsgvlrlrqhyrptretppqiwvfwgptgtgktrrvweftdpnelwvhpgerwfdgydghpavlfddfdgswfklsyllklldryvmpvpvkgaqawwcpktiyitsnikpeewyqgsnqnhrdalmrrltefgtiehct*	276	USER	zzz2108
1620		Unclass_KX246260	mspivpivpvegntitspstptnkvtkqispairwcftlnnwtdeeyssivpifdatcklviigseigdegtphlqgycefkckrrpktlmcgrihwekakgdkkqnitycskeqnvlfckglpkpvklltnlypwqkdiedliltdpddrkihwfwdtegekgktqlmkylvathkclpcvggkfgdimnlvfnqdmdettavlfniprghrekisyssleaikdgmivntkyetgyklfnsphvivfanfapdtellsldrwvvkcld*	271	USER	zzz2109
1619		Unclass_KX246261	mpkvdkkpkhrnwvftlnnpteddrerllswpvkfvkfqlekgektgtphyqgmvilqnagrltgvkktlckraywapmkslegslaycekadsrvegpweagtppkkqgertdlhvvrdsivsgattvdeitlktpmvyhqygrtlhriedlvlrkrfrtemtqgkwyfgdtgvgkshtafegytpethyvwkndngwqdgyvgqatviindfrgsikydellqlvdkwpytvprrgrepapflattviitsslppeevytqrverdsldqlsrrfeifeisktgsevnitlrpplcqkplcqtyl*	308	USER	zzz2110
1618		Unclass_KX246262	mssgtnrpvekeanvrawcltinnytienvedlkklkylyliignevgasgtkhlqvfvrmtsqtpfkrmknkfpsahlepakgsdlqnkeycskeeilfedgtpsqqgkrtdideikeamskvetanlrhiipicrsiqsvrmaeihltyfepkrdwkpkvkwyygvtgsgkthtahaeagdepvyvcmattkwwqgydghqyviiddmrkdfckfhdllrmldrysytvenkggsrqllaktivitttkhptemyggredvrqltrrideirefkntykpqeseteniii*	293	USER	zzz2111
1617		Unclass_KX246263	mskgadwcftwfakttddvklavvaeqqktdgtsflfvnavneetedgrphvqgfiqlcsvrglkwlkkrlpgahfekrkgsakdardycdpdtikyklleeggdkhgtpsgyyefgefapkdkqgkradiaayrdaiiagasdmvgvrlrrlsfgilyrglrteirsivagqrqaqrtangvkvrviqgptgvgktwsihaahpglyvvptpdksggtpwfdgytgqsvvilddfsgeiplpfmlrlidrypmqvqckggflnwvpdtvyitsnvpmgdwyqgaanghmealrrrtgdvvivsnraeasaaaaapvpiielpevivvdapidelveeepvpllarwegdftdw*	355	USER	zzz2112
1616		Unclass_KX246264	mgrssgppefrtnqiwggrspsitphiscsleaqhrqdmsiqgngkywvytwnnpnvpvddhhasfsainphfhvfqrevgengtehfqgyvelqaakgvrqlkacnpqihwekrrgnqaqaiaysskedtrkegpwtfgepvhlnntgvskdfaenvragkrmrelhdthpddmrkypryyenlrsvfspperdtapevvllfgepgtgktryvrskevkhdlyvkpcdrdfwmngydlhpavllddfcgaanhvtltnllqlldryqiqvssknghlwwqperiyittnihpakwyeykdrvvhyaalerrftkvimfdnavehaagmdrenfahraawdsfwdydshkaqdty*	357	USER	zzz2113
1615		Unclass_KX388494	mdyttkmdlskkyrnwaftlnnytqdavtylavqldckyiifgyeeapetgtphlqgyvifesqhyfegvrdmmirgthiepaycpsetnilyckkmghffergnpgqgqgyrtdliiirdkilsgkfttfqlmidhfpqyakygkffekfsllaqnalsakrgfepkdviclygesglgktkvayenfrpyyrkspdtwwwdgydnestiliddfrgklsvefllnlfdgypqltgqnkggtinldgikriivtsnvppdewysisagsqkedvkglirritfmcdmskngaaekvrdwglthnldgtvg*	312	USER	zzz2114
1614		Unclass_KX388495	mqkidapmsinpvsevikkkaggyssrnnfaalylpncpkfdvdnmryiicqlercpktkrlhwqtyiefkdkksgpaiqksiccgyengfianfdmltadhlthceylneecplkvnkerigsfaalnkdfsdwcktihleyganrdlcrhycmkpvildngepcqcnvcneerncptvvvswveagswkkggqgsrndlsavketidagatrfqimnshfsesakymrffddyrmtrdkeltlkhpgtglniwqckvldilnniidnkimrkvisiigpkggegksdfiryltdhqqcnmfmngkngdlamiydpkakcyafeitrsnqdtlnysiieqiangivyspkyevqmkcadydkpnpvlifsnwvldfeqlsadrwivvvlngtndepti…	477	USER	zzz2115
1613		Unclass_KX388496	msllffvenletpktpknpsktekkaknkkeksnfranaksmsityshckvkkdklmefmktfnpieiyiaqelhkdgyphihimitfshknykdcriydytdpednvlyhpnwsgtkdytkwknylikedkefllwqkdltpndfelghkermmkdvhfakkwektnslkeinypinfcghiidkpnpatkdrnmwivgkpnerktfnmnktfkglkvfirsndvypfedyndediviyddylpkfteiadvcntwevrkriyggcryhtkywgensrtvivltntrlkdycgndeserkllpamkarfkeyrlindkitpfvetpnladelvtykvnnseqistylnivndkiniptpiigksnkgyvplqfqlmkyviet*	384	USER	zzz2116
1612		Unclass_KX388497	egrpgnnesllikghtgrikkgkkdkglrkkidlqsellgdsgsqqgsksekkrdrsgrvrgvranfltwnnyteddivrllayaklyctkwafqeevglesgtrhlqgnfyfksqvkcetlatdlkgsfwrptanpraadmyclkdetrpnggrqwvhgiviknkampfyytlkdhkpwpwqqfiidlisqpanrraiywiydpvgsngksdlciylchvmscimvshlendcacaiknflgvddngnllpveeqnrlngvicdiprvegkrn*	275	USER	zzz2117
1611		Unclass_KX388498	meyfsgtkynlrsmskhrdycftvffgdkveeskhneglicdtntyivysiekcptsgkyhyqgylewkspitlkaivkkleeyfpgckaphvetrkgtpdeaaayckpkdlhgnqkpshisgpwewgqmkpgqgartdlslvanlaitkstneiikehpelyvkwykaiadikskmflprnektlviaiygptgvgktamvdfqfdnhyvkepyspwwcgyenqdvvllnefsydayggrpkllqlmdryaytcqykggskqftskvivtcslnnwllneteemkrrvtllvridenhqkhiemdngdlqaeasrihqekkaimnnmpfknktdldsvrtwartni*	348	USER	zzz2118
1610		Unclass_KX388499	mskhrdycftvffgdkveeskhneglicdtntyivysiekcptsgkyhyqgylewkspitlkaivkkleeyfpgckaphvetrkgtpdeaaayckpkdlhgnqkpshisgpwewgqmkpgqgartdlslvanlaitkstneiikehpelyvkwykaiadikskmflprnektlviaiygptgvgktamvdfqfdnhyvkepyspwwcgyenqdvvllnefsydayggrpkllqlmdryaytcqykggskqftskvivtcslnnwllneteemkrrvtllvridenhqkhiemdngdlqaeasrihqekkaimnnmpfknktdldsvrtwartni*	335	USER	zzz2119
1609		Unclass_KX388500	meyfsgtkynlrsmskhrdycftvffgdkveeskhneglicdtntyivysiekcptsgkyhyqgylewkspitlkaivkkleeyfpgckaphvetrkgtpdeaaayckpkdlhgnqkpshisgpwewgqmkpgqgartdlslvanlaitkstneiikehpelyvkwykaiadikskmflprnektlviaiygptgvgktamvdfqfdnhyvkepyspwwcgyenqdvvllnefsydayggrpkllqlmdryaytcqykggskqftskvivtcslnnwllneteemkrrvtllvridenhqkhiemdngdlqaeasrihqekkaimnnmpfknktdldsvrtwartni*	348	USER	zzz2120
1608		Unclass_KX388501	meyfsgtkynlrsmskhrdycftvffgdkveeskhneglicdtntyivysiekcptsgkyhyqgylewkspitlkaivkkleeyfpgckaphvetrkgtpdeaaayckpkdlhgnqkpshisgpwewgqmkpgqgartdlslvanlaitkstneiikehpelyvkwykaiadikskmflprnekhlliaiygptgvgktamvdfqfdnhyvkepyspwwcgyenqdvvllnefsydayggrpkllqlmdryaytcqykggskqftskvivtcslnnwllneteemkrrvtllvridenhqkhiemdngdlqaeasrihqekkaimnnmpfknktdldsvrtwartni*	348	USER	zzz2121
1607		Unclass_KX388502	manlyipkvkalneipvttnymaithksrhflvtifdnhwgptilrkwmttvgeekhnlpkeikyfvgsyemcpstkrmhwqcyaefngnsrslmsvktifecpsaniqnrkgnrdqarhycmkpvpdcsctncteakaalndkhvvvelgsfekedsdgpgqgartdlknaktfvlqpgvtdfkmyvednehshtiakyykfferarlvnqqhiaetsvtekkeilvivgptgtfksssarqtaanknyrifqlpqpsasgqiwwdgydnqecviidemsgkfplldmlnltdrypymgqvkggskyitpkmiiftantepeewyprseakdrlaplyrritkrvswindgwgevenphkevepqifdissiqlpkvsldvfkanrlfipkvlplepp…	419	USER	zzz2122
1606		Unclass_KX388503	mnrlptkikeekkgrvpngegvtyktskswcitshlvnapvfdekvhqlmvyqqekginpgkgqdglhwqiyvkmlktsgyravqkslckteeykqlncniavgspkqnrdycsksstkvgktfefgnwpetgqgarndiraagalakegkfkeieldmlvkyhggldrvhreyfrtgmpyprnvevrwgaagfgktygaaqdynfeaslikglctgkektpwfngynrgdevaiiddfdwenfpigtlldildsyicqvqvkggfvpwmpktiiitstvnpkdwypgrrqpevlrrinlithitehwrirlakevakevvdkinyadneeeaikfvrqkthehitptkviptetednvgdltieeieemlngckpesssppss*	385	USER	zzz2123
1605		Unclass_KX388504	msycmcftyfndtlashdpvafleskdeivdfcffqleaapttgklhwqgyvefkskttitqarklfidganyrkadgsaeenmiycsksrtkvagpwsigearpakgartdiakftklckdvgdirevvevdpnncakywrmandlckmyerqptarpppivivihgltgagksfqareileeihddywvqpiaadakvvwfdkyhgqacalfdefepdsmtmhtflritdvynvpvpvkgshvwwkpeviiftsnsnpadwypakaaavarrihsfaitrftrdevkeairslidtelktpcshdlgeivesshkydlddvfeqdryassvpkacqlgettrlpaelrsahaphaaapvstttvaagppelnkfnslrsrvgntaqlsddkssaiad…	507	USER	zzz2124
1604		Unclass_KX388505	mdapkidepkneivykydrarrwaftfhnytdenveylknipadkadfiifgfeltkegiphlqgyvefgtalvrntvkarldpfskkkspinvsnaqktreaninycskieskdevaiakyecsfitktnkerhqgertdwhlvkdlayekqdiseideafpeyaikyrfaikdmietakakqvradfeeqyesaelrpwqsklvdelkyppndrkiiwiwenqgnigkswlscylvakhgairfenaatkdiahayngegivvfdfsrtteerlnyqilesiknkvlfspkynscskyfksphviclanwppnratmsqdrwdvrhmkdtivgltnsepcktidelpscntelvpnskgdgqiieqledeiimyseqlstlqdeepqnsvkideies…	437	USER	zzz2125
1603		Unclass_KX388507	minettekeiaeiideydpkkqgrcwiftvnnylpqemelllesdkfdyvcfgeeigekcgtphlqgffelscplqwktvinrvagvlgreqasirpmakgsnrwccisyckkgeqlktewdllktngpnygknvkfhekqkgkphcnqgkrtdwirvrdslnlepdygkfcqtdpenaikfhngikafiqareeikmkedlekeyenvnllewqqqlaneikyspinqrlvtwyydkrgnsgkswmakymvsrgdcayfnngstsdivyayknertvvfdfsrktegtmnygvierikdgmmfsakyqstrkccarprvicfanfmpdltsmsldrwdirvldnievptdtekvcslpascglgtkpdvvsidsdkdhgvsgntmcsppddekitkli…	404	USER	zzz2126
1602		Unclass_KX388508	msnnrtavstwdftafntdvetckklltenckkwcfqeeqcpetktnhfqgrfslkvkarltalikifvswhlsitskinkdnnfyvtkedtringpwssedvniyiprqvreivnlhpwqqqivdnanvwdtrtinvildtkgnngksticayieahgigevieytndlkdimrmvydlptsklylidlprcidkskmyglyagiecikngkayddryhfkknysivpisgvslinsqisniyl*	246	USER	zzz2127
[truncated: 1,535 more rows]
