# Supplementary material for: Discovery of several thousand highly diverse circular DNA viruses
Source: eLife journal article supplement (doi:10.7554/elife.51971), 2020-02-03
Supplement: fig3-data1 [file elife-51971-fig3-data1-v1.cys › CytoscapeSession-2019_08_03-06_44/tables/57-Mike_class_reps60+Full+Network/LOCAL_ATTRS-org.cytoscape.model.CyEdge-Mike_class_reps60+Full+Network+default+edge.cytable]

CyCSV-Version	1
SUID	interaction	name	selected
java.lang.Long	java.lang.String	java.lang.String	java.lang.Boolean
Mike_class_reps60 Full Network default edge
2730		zzzzzz5,zzzzzz6	false
2731		zzzzzz4,zzzzzz5	false
2732		zzzzzz4,zzzzzz6	false
2733		zzzzzz3,zzzzzz5	false
2734		zzzzzz3,zzzzzz6	false
2735		zzzzzz3,zzzzzz4	false
2736		zzzzzz2,zzzzzz5	false
2737		zzzzzz2,zzzzzz6	false
2738		zzzzzz1,zzzzzz9	false
2739		zzzzzz0,zzzzzz6	false
2740		zzzzzz0,zzzzzz5	false
2741		zzzzz96,zzzz380	false
2742		zzzzz96,zzzz453	false
2743		zzzzz96,zzzz542	false
2744		zzzzz96,zzz2579	false
2745		zzzzz96,zzzz389	false
2746		zzzzz96,zzzz555	false
2747		zzzzz96,zzzz208	false
2748		zzzzz95,zzzzzz2	false
2749		zzzzz95,zzzzzz3	false
2750		zzzzz95,zzzzzz4	false
2751		zzzzz95,zzzzzz6	false
2752		zzzzz95,zzzzzz5	false
2753		zzzzz95,zzzzzz0	false
2754		zzzzz93,zzzzzz2	false
2755		zzzzz93,zzzzzz0	false
2756		zzzzz93,zzzzzz3	false
2757		zzzzz93,zzzzzz4	false
2758		zzzzz93,zzzzz95	false
2759		zzzzz93,zzzzzz5	false
2760		zzzzz93,zzzzzz6	false
2761		zzzzz91,zzzzzz0	false
2762		zzzzz91,zzzzzz5	false
2763		zzzzz91,zzzzz95	false
2764		zzzzz91,zzzzzz2	false
2765		zzzzz91,zzzzzz4	false
2766		zzzzz91,zzzzzz3	false
2767		zzzzz91,zzzzzz6	false
2768		zzzzz91,zzzzz93	false
2769		zzzzz90,zzzzz95	false
2770		zzzzz90,zzzzzz5	false
2771		zzzzz90,zzzzzz2	false
2772		zzzzz90,zzzzzz3	false
2773		zzzzz90,zzzzzz4	false
2774		zzzzz90,zzzzzz6	false
2775		zzzzz90,zzzzz93	false
2776		zzzzz90,zzzzz91	false
2777		zzzzz86,zzzzz94	false
2778		zzzzz85,zzzzz90	false
2779		zzzzz85,zzzzzz2	false
2780		zzzzz85,zzzzz91	false
2781		zzzzz84,zzzzzz2	false
2782		zzzzz84,zzzzzz3	false
2783		zzzzz84,zzzzzz4	false
2784		zzzzz84,zzzzzz5	false
2785		zzzzz84,zzzzzz0	false
2786		zzzzz84,zzzzz91	false
2787		zzzzz84,zzzzz90	false
2788		zzzzz84,zzzzz95	false
2789		zzzzz84,zzzzzz6	false
2790		zzzzz84,zzzzz93	false
2791		zzzzz82,zzzzz90	false
2792		zzzzz82,zzzzz91	false
2793		zzzzz82,zzzzz85	false
2794		zzzzz81,zzzzzz2	false
2795		zzzzz81,zzzzzz3	false
2796		zzzzz81,zzzzzz4	false
2797		zzzzz81,zzzzzz0	false
2798		zzzzz81,zzzzzz5	false
2799		zzzzz81,zzzzz95	false
2800		zzzzz81,zzzzz84	false
2801		zzzzz81,zzzzz90	false
2802		zzzzz81,zzzzz91	false
2803		zzzzz81,zzzzz93	false
2804		zzzzz81,zzzzzz6	false
2805		zzzzz80,zzzzzz3	false
2806		zzzzz80,zzzzzz4	false
2807		zzzzz80,zzzzz90	false
2808		zzzzz80,zzzzz91	false
2809		zzzzz80,zzzzz84	false
2810		zzzzz80,zzzzz93	false
2811		zzzzz80,zzzzz81	false
2812		zzzzz80,zzzzzz6	false
2813		zzzzz80,zzzzzz5	false
2814		zzzzz80,zzzzzz0	false
2815		zzzzz80,zzzzz95	false
2816		zzzzz79,zzzzzz6	false
2817		zzzzz79,zzzzz81	false
2818		zzzzz79,zzzzz90	false
2819		zzzzz79,zzzzzz2	false
2820		zzzzz79,zzzzz91	false
2821		zzzzz79,zzzzz93	false
2822		zzzzz78,zzzzzz8	false
2823		zzzzz65,zzzzzz1	false
2824		zzzzz65,zzzzzz9	false
2825		zzzzz62,zzzzzz1	false
2826		zzzzz62,zzzzz65	false
2827		zzzzz62,zzzzzz9	false
2828		zzzzz61,zzzzz62	false
2829		zzzzz61,zzzzz65	false
2830		zzzzz61,zzzzzz9	false
2831		zzzzz61,zzzzzz1	false
2832		zzzzz49,zzzzz52	false
2833		zzzzz45,zzzzz47	false
2834		zzzzz43,zzzzz49	false
2835		zzzzz43,zzzzz52	false
2836		zzzzz40,zzzzz82	false
2837		zzzzz40,zzzzz85	false
2838		zzzzz40,zzzzz79	false
2839		zzzzz40,zzzzz95	false
2840		zzzzz40,zzzzzz5	false
2841		zzzzz40,zzzzzz2	false
2842		zzzzz40,zzzzz80	false
2843		zzzzz40,zzzzzz3	false
2844		zzzzz40,zzzzz84	false
2845		zzzzz40,zzzzzz4	false
2846		zzzzz40,zzzzzz6	false
2847		zzzzz40,zzzzz93	false
2848		zzzzz40,zzzzz81	false
2849		zzzzz40,zzzzz91	false
2850		zzzzz40,zzzzz90	false
2851		zzzzz39,zzzzzz4	false
2852		zzzzz39,zzzzzz2	false
2853		zzzzz39,zzzzzz3	false
2854		zzzzz39,zzzzz40	false
2855		zzzzz39,zzzzz90	false
2856		zzzzz39,zzzzz91	false
2857		zzzzz39,zzzzzz6	false
2858		zzzzz39,zzzzz84	false
2859		zzzzz39,zzzzz93	false
2860		zzzzz39,zzzzz81	false
2861		zzzzz39,zzzzzz5	false
2862		zzzzz39,zzzzz80	false
2863		zzzzz39,zzzzzz0	false
2864		zzzzz39,zzzzz95	false
2865		zzzzz38,zzzzz79	false
2866		zzzzz38,zzzzzz4	false
2867		zzzzz38,zzzzzz3	false
2868		zzzzz38,zzzzzz0	false
2869		zzzzz38,zzzzzz5	false
2870		zzzzz38,zzzzz95	false
2871		zzzzz38,zzzzzz2	false
2872		zzzzz38,zzzzz39	false
2873		zzzzz38,zzzzz80	false
2874		zzzzz38,zzzzz90	false
2875		zzzzz38,zzzzz40	false
2876		zzzzz38,zzzzz84	false
2877		zzzzz38,zzzzz81	false
2878		zzzzz38,zzzzz91	false
2879		zzzzz38,zzzzz93	false
2880		zzzzz38,zzzzzz6	false
2881		zzzzz37,zzzzz40	false
2882		zzzzz37,zzzzz90	false
2883		zzzzz37,zzzzz91	false
2884		zzzzz37,zzzzz93	false
2885		zzzzz37,zzzzz38	false
2886		zzzzz37,zzzzzz6	false
2887		zzzzz37,zzzzz84	false
2888		zzzzz37,zzzzz81	false
2889		zzzzz37,zzzzzz5	false
2890		zzzzz37,zzzzz80	false
2891		zzzzz37,zzzzz39	false
2892		zzzzz37,zzzzz95	false
2893		zzzzz37,zzzzzz0	false
2894		zzzzz36,zzzzzz2	false
2895		zzzzz36,zzzzzz0	false
2896		zzzzz36,zzzzz37	false
2897		zzzzz36,zzzzzz4	false
2898		zzzzz36,zzzzzz3	false
2899		zzzzz36,zzzzz39	false
2900		zzzzz36,zzzzzz5	false
2901		zzzzz36,zzzzz95	false
2902		zzzzz36,zzzzz90	false
2903		zzzzz36,zzzzz80	false
2904		zzzzz36,zzzzz40	false
2905		zzzzz36,zzzzz84	false
2906		zzzzz36,zzzzz91	false
2907		zzzzz36,zzzzz93	false
2908		zzzzz36,zzzzz38	false
2909		zzzzz36,zzzzzz6	false
2910		zzzzz36,zzzzz81	false
2911		zzzzz35,zzzzz90	false
2912		zzzzz35,zzzzz40	false
2913		zzzzz35,zzzzzz3	false
2914		zzzzz35,zzzzz93	false
2915		zzzzz35,zzzzz91	false
2916		zzzzz35,zzzzzz4	false
2917		zzzzz35,zzzzz38	false
2918		zzzzz35,zzzzzz0	false
2919		zzzzz35,zzzzzz5	false
2920		zzzzz35,zzzzz37	false
2921		zzzzz35,zzzzzz6	false
2922		zzzzz35,zzzzz84	false
2923		zzzzz35,zzzzz39	false
2924		zzzzz35,zzzzz81	false
2925		zzzzz35,zzzzz36	false
2926		zzzzz35,zzzzz95	false
2927		zzzzz35,zzzzz80	false
2928		zzzzz34,zzzzzz2	false
2929		zzzzz34,zzzzzz4	false
2930		zzzzz34,zzzzzz3	false
2931		zzzzz34,zzzzzz0	false
2932		zzzzz34,zzzzz37	false
2933		zzzzz34,zzzzz80	false
2934		zzzzz34,zzzzz35	false
2935		zzzzz34,zzzzzz5	false
2936		zzzzz34,zzzzz39	false
2937		zzzzz34,zzzzz90	false
2938		zzzzz34,zzzzz95	false
2939		zzzzz34,zzzzz40	false
2940		zzzzz34,zzzzz84	false
2941		zzzzz34,zzzzz91	false
2942		zzzzz34,zzzzz93	false
2943		zzzzz34,zzzzz38	false
2944		zzzzz34,zzzzzz6	false
2945		zzzzz34,zzzzz36	false
2946		zzzzz34,zzzzz81	false
2947		zzzzz33,zzzzzz2	false
2948		zzzzz33,zzzzzz3	false
2949		zzzzz33,zzzzz90	false
2950		zzzzz33,zzzzz40	false
2951		zzzzz33,zzzzz38	false
2952		zzzzz33,zzzzzz4	false
2953		zzzzz33,zzzzz84	false
2954		zzzzz33,zzzzz91	false
2955		zzzzz33,zzzzzz0	false
2956		zzzzz33,zzzzz39	false
2957		zzzzz33,zzzzz81	false
2958		zzzzz33,zzzzz80	false
2959		zzzzz33,zzzzz34	false
2960		zzzzz33,zzzzz37	false
2961		zzzzz33,zzzzz36	false
2962		zzzzz33,zzzzzz5	false
2963		zzzzz33,zzzzz95	false
2964		zzzzz33,zzzzzz6	false
2965		zzzzz33,zzzzz93	false
2966		zzzzz33,zzzzz35	false
2967		zzzzz32,zzzzz82	false
2968		zzzzz32,zzzzz85	false
2969		zzzzz32,zzzzz79	false
2970		zzzzz32,zzzzzz2	false
2971		zzzzz32,zzzzzz0	false
2972		zzzzz32,zzzzz37	false
2973		zzzzz32,zzzzzz3	false
2974		zzzzz32,zzzzzz4	false
2975		zzzzz32,zzzzz35	false
2976		zzzzz32,zzzzz33	false
2977		zzzzz32,zzzzzz5	false
2978		zzzzz32,zzzzz39	false
2979		zzzzz32,zzzzz80	false
2980		zzzzz32,zzzzz90	false
2981		zzzzz32,zzzzz95	false
2982		zzzzz32,zzzzz40	false
2983		zzzzz32,zzzzz84	false
2984		zzzzz32,zzzzz38	false
2985		zzzzz32,zzzzz91	false
2986		zzzzz32,zzzzz93	false
2987		zzzzz32,zzzzzz6	false
2988		zzzzz32,zzzzz34	false
2989		zzzzz32,zzzzz36	false
2990		zzzzz32,zzzzz81	false
2991		zzzzz31,zzzzzz4	false
2992		zzzzz31,zzzzzz3	false
2993		zzzzz31,zzzzz84	false
2994		zzzzz31,zzzzz40	false
2995		zzzzz31,zzzzz38	false
2996		zzzzz31,zzzzz90	false
2997		zzzzz31,zzzzz32	false
2998		zzzzz31,zzzzz81	false
2999		zzzzz31,zzzzzz0	false
3000		zzzzz31,zzzzz34	false
3001		zzzzz31,zzzzz36	false
3002		zzzzz31,zzzzz39	false
3003		zzzzz31,zzzzz93	false
3004		zzzzz31,zzzzz37	false
3005		zzzzz31,zzzzzz6	false
3006		zzzzz31,zzzzz80	false
3007		zzzzz31,zzzzz35	false
3008		zzzzz31,zzzzz91	false
3009		zzzzz31,zzzzzz5	false
3010		zzzzz31,zzzzz95	false
3011		zzzzz31,zzzzz33	false
3012		zzzzz30,zzzzz38	false
3013		zzzzz30,zzzzzz3	false
3014		zzzzz30,zzzzz84	false
3015		zzzzz30,zzzzz91	false
3016		zzzzz30,zzzzzz6	false
3017		zzzzz30,zzzzz31	false
3018		zzzzz30,zzzzzz0	false
3019		zzzzz30,zzzzz93	false
3020		zzzzz30,zzzzzz4	false
3021		zzzzz30,zzzzz35	false
3022		zzzzz30,zzzzz37	false
3023		zzzzz30,zzzzzz5	false
3024		zzzzz30,zzzzz33	false
3025		zzzzz30,zzzzz39	false
3026		zzzzz30,zzzzz36	false
3027		zzzzz30,zzzzz80	false
3028		zzzzz30,zzzzz81	false
3029		zzzzz30,zzzzz34	false
3030		zzzzz30,zzzzz95	false
3031		zzzzz30,zzzzz32	false
3032		zzzzz29,zzzzzz4	false
3033		zzzzz29,zzzzzz3	false
3034		zzzzz29,zzzzz90	false
3035		zzzzz29,zzzzz40	false
3036		zzzzz29,zzzzz38	false
3037		zzzzz29,zzzzz30	false
3038		zzzzz29,zzzzz91	false
3039		zzzzz29,zzzzz93	false
3040		zzzzz29,zzzzz84	false
3041		zzzzz29,zzzzz31	false
3042		zzzzz29,zzzzz81	false
3043		zzzzz29,zzzzz36	false
3044		zzzzz29,zzzzzz6	false
3045		zzzzz29,zzzzz35	false
3046		zzzzz29,zzzzz34	false
3047		zzzzz29,zzzzz33	false
3048		zzzzz29,zzzzz32	false
3049		zzzzz29,zzzzzz5	false
3050		zzzzz29,zzzzz39	false
3051		zzzzz29,zzzzzz0	false
3052		zzzzz29,zzzzz80	false
3053		zzzzz29,zzzzz37	false
3054		zzzzz29,zzzzz95	false
3055		zzzzz28,zzzzzz4	false
3056		zzzzz28,zzzzzz3	false
3057		zzzzz28,zzzzz90	false
3058		zzzzz28,zzzzz40	false
3059		zzzzz28,zzzzz84	false
3060		zzzzz28,zzzzz30	false
3061		zzzzz28,zzzzz38	false
3062		zzzzz28,zzzzz93	false
3063		zzzzz28,zzzzz91	false
3064		zzzzz28,zzzzz35	false
3065		zzzzz28,zzzzz32	false
3066		zzzzz28,zzzzz36	false
3067		zzzzz28,zzzzzz6	false
3068		zzzzz28,zzzzz34	false
3069		zzzzz28,zzzzz31	false
3070		zzzzz28,zzzzz81	false
3071		zzzzz28,zzzzz33	false
3072		zzzzz28,zzzzzz5	false
3073		zzzzz28,zzzzz80	false
3074		zzzzz28,zzzzz37	false
3075		zzzzz28,zzzzzz0	false
3076		zzzzz28,zzzzz39	false
3077		zzzzz28,zzzzz29	false
3078		zzzzz28,zzzzz95	false
3079		zzzzz27,zzzzz38	false
3080		zzzzz27,zzzzzz6	false
3081		zzzzz27,zzzzz84	false
3082		zzzzz27,zzzzzz4	false
3083		zzzzz27,zzzzz34	false
3084		zzzzz27,zzzzz93	false
3085		zzzzz27,zzzzzz0	false
3086		zzzzz27,zzzzz31	false
3087		zzzzz27,zzzzz81	false
3088		zzzzz27,zzzzz29	false
3089		zzzzz27,zzzzz35	false
3090		zzzzz27,zzzzz32	false
3091		zzzzz27,zzzzz36	false
3092		zzzzz27,zzzzz39	false
3093		zzzzz27,zzzzz37	false
3094		zzzzz27,zzzzz80	false
3095		zzzzz27,zzzzz95	false
3096		zzzzz27,zzzzz33	false
3097		zzzzz27,zzzzz28	false
3098		zzzzz27,zzzzzz5	false
3099		zzzzz27,zzzzz30	false
3100		zzzzz26,zzzzzz0	false
3101		zzzzz26,zzzzz84	false
3102		zzzzz26,zzzzzz6	false
3103		zzzzz26,zzzzz31	false
3104		zzzzz26,zzzzzz4	false
3105		zzzzz26,zzzzz38	false
3106		zzzzz26,zzzzz93	false
3107		zzzzz26,zzzzz91	false
3108		zzzzz26,zzzzz29	false
3109		zzzzz26,zzzzz37	false
3110		zzzzz26,zzzzz36	false
3111		zzzzz26,zzzzz39	false
3112		zzzzz26,zzzzz28	false
3113		zzzzz26,zzzzz35	false
3114		zzzzz26,zzzzz80	false
3115		zzzzz26,zzzzz33	false
3116		zzzzz26,zzzzzz5	false
3117		zzzzz26,zzzzz34	false
3118		zzzzz26,zzzzz32	false
3119		zzzzz26,zzzzz95	false
3120		zzzzz26,zzzzz81	false
3121		zzzzz26,zzzzz27	false
3122		zzzzz26,zzzzz30	false
3123		zzzzz25,zzzzz90	false
3124		zzzzz25,zzzzz40	false
3125		zzzzz25,zzzzzz3	false
3126		zzzzz25,zzzzz91	false
3127		zzzzz25,zzzzzz4	false
3128		zzzzz25,zzzzz84	false
3129		zzzzz25,zzzzz38	false
3130		zzzzz25,zzzzz26	false
3131		zzzzz25,zzzzz93	false
3132		zzzzz25,zzzzz31	false
3133		zzzzz25,zzzzzz6	false
3134		zzzzz25,zzzzz30	false
3135		zzzzz25,zzzzz35	false
3136		zzzzz25,zzzzz34	false
3137		zzzzz25,zzzzz39	false
3138		zzzzz25,zzzzz27	false
3139		zzzzz25,zzzzz81	false
3140		zzzzz25,zzzzzz0	false
3141		zzzzz25,zzzzz80	false
3142		zzzzz25,zzzzz32	false
3143		zzzzz25,zzzzz95	false
3144		zzzzz25,zzzzz36	false
3145		zzzzz25,zzzzz37	false
3146		zzzzz25,zzzzz33	false
3147		zzzzz25,zzzzz29	false
3148		zzzzz25,zzzzzz5	false
3149		zzzzz25,zzzzz28	false
3150		zzzzz24,zzzzz27	false
3151		zzzzz24,zzzzz26	false
3152		zzzzz24,zzzzz30	false
3153		zzzzz24,zzzzz79	false
3154		zzzzz24,zzzzz90	false
3155		zzzzz24,zzzzz40	false
3156		zzzzz24,zzzzzz2	false
3157		zzzzz24,zzzzzz4	false
3158		zzzzz24,zzzzzz3	false
3159		zzzzz24,zzzzz39	false
3160		zzzzz24,zzzzz84	false
3161		zzzzz24,zzzzz91	false
3162		zzzzz24,zzzzz25	false
3163		zzzzz24,zzzzz35	false
3164		zzzzz24,zzzzz29	false
3165		zzzzz24,zzzzz81	false
3166		zzzzz24,zzzzz34	false
3167		zzzzz24,zzzzzz0	false
3168		zzzzz24,zzzzz37	false
3169		zzzzz24,zzzzzz6	false
3170		zzzzz24,zzzzz93	false
3171		zzzzz24,zzzzz36	false
3172		zzzzz24,zzzzz32	false
3173		zzzzz24,zzzzz38	false
3174		zzzzz24,zzzzzz5	false
3175		zzzzz24,zzzzz33	false
3176		zzzzz24,zzzzz28	false
3177		zzzzz24,zzzzz80	false
3178		zzzzz24,zzzzz95	false
3179		zzzzz24,zzzzz31	false
3180		zzzzz23,zzzzz90	false
3181		zzzzz23,zzzzzz3	false
3182		zzzzz23,zzzzz40	false
3183		zzzzz23,zzzzz91	false
3184		zzzzz23,zzzzzz4	false
3185		zzzzz23,zzzzz84	false
3186		zzzzz23,zzzzz26	false
3187		zzzzz23,zzzzz24	false
3188		zzzzz23,zzzzz27	false
3189		zzzzz23,zzzzzz6	false
3190		zzzzz23,zzzzz30	false
3191		zzzzz23,zzzzz93	false
3192		zzzzz23,zzzzz38	false
3193		zzzzz23,zzzzz31	false
3194		zzzzz23,zzzzz32	false
3195		zzzzz23,zzzzz34	false
3196		zzzzz23,zzzzz81	false
3197		zzzzz23,zzzzz29	false
3198		zzzzz23,zzzzzz0	false
3199		zzzzz23,zzzzz39	false
3200		zzzzz23,zzzzz36	false
3201		zzzzz23,zzzzz80	false
3202		zzzzz23,zzzzz35	false
3203		zzzzz23,zzzzzz5	false
3204		zzzzz23,zzzzz25	false
3205		zzzzz23,zzzzz95	false
3206		zzzzz23,zzzzz28	false
3207		zzzzz23,zzzzz37	false
3208		zzzzz23,zzzzz33	false
3209		zzzzz22,zzzzz90	false
3210		zzzzz22,zzzzz40	false
3211		zzzzz22,zzzzzz3	false
3212		zzzzz22,zzzzzz4	false
3213		zzzzz22,zzzzz91	false
3214		zzzzz22,zzzzz27	false
3215		zzzzz22,zzzzz36	false
3216		zzzzz22,zzzzz26	false
3217		zzzzz22,zzzzzz6	false
3218		zzzzz22,zzzzz81	false
3219		zzzzz22,zzzzz24	false
3220		zzzzz22,zzzzz34	false
3221		zzzzz22,zzzzz30	false
3222		zzzzz22,zzzzz84	false
3223		zzzzz22,zzzzz32	false
3224		zzzzz22,zzzzz39	false
3225		zzzzz22,zzzzz29	false
3226		zzzzz22,zzzzz31	false
3227		zzzzz22,zzzzz38	false
3228		zzzzz22,zzzzz80	false
3229		zzzzz22,zzzzz35	false
3230		zzzzz22,zzzzz28	false
3231		zzzzz22,zzzzz25	false
3232		zzzzz22,zzzzzz0	false
3233		zzzzz22,zzzzz95	false
3234		zzzzz22,zzzzzz5	false
3235		zzzzz22,zzzzz93	false
3236		zzzzz22,zzzzz37	false
3237		zzzzz22,zzzzz33	false
3238		zzzzz22,zzzzz23	false
3239		zzzzz21,zzzzzz4	false
3240		zzzzz21,zzzzz91	false
3241		zzzzz21,zzzzz84	false
3242		zzzzz21,zzzzz24	false
3243		zzzzz21,zzzzzz3	false
3244		zzzzz21,zzzzz93	false
3245		zzzzz21,zzzzz31	false
3246		zzzzz21,zzzzz34	false
3247		zzzzz21,zzzzz36	false
3248		zzzzz21,zzzzz38	false
3249		zzzzz21,zzzzz81	false
3250		zzzzz21,zzzzz35	false
3251		zzzzz21,zzzzzz6	false
3252		zzzzz21,zzzzz27	false
3253		zzzzz21,zzzzz32	false
3254		zzzzz21,zzzzz23	false
3255		zzzzz21,zzzzz22	false
3256		zzzzz21,zzzzzz5	false
3257		zzzzz21,zzzzzz0	false
3258		zzzzz21,zzzzz33	false
3259		zzzzz21,zzzzz39	false
3260		zzzzz21,zzzzz26	false
3261		zzzzz21,zzzzz37	false
3262		zzzzz21,zzzzz80	false
3263		zzzzz21,zzzzz25	false
3264		zzzzz21,zzzzz30	false
3265		zzzzz21,zzzzz29	false
3266		zzzzz21,zzzzz95	false
3267		zzzzz21,zzzzz28	false
3268		zzzzz20,zzzzz90	false
3269		zzzzz20,zzzzz40	false
3270		zzzzz20,zzzzz79	false
3271		zzzzz20,zzzzz91	false
3272		zzzzz20,zzzzz38	false
3273		zzzzz20,zzzzzz2	false
3274		zzzzz20,zzzzz85	false
3275		zzzzz20,zzzzz82	false
3276		zzzzz19,zzzzzz6	false
3277		zzzzz19,zzzzz33	false
3278		zzzzz19,zzzzz35	false
3279		zzzzz19,zzzzz80	false
3280		zzzzz18,zzzzz26	false
3281		zzzzz18,zzzzzz3	false
3282		zzzzz18,zzzzz27	false
3283		zzzzz18,zzzzz91	false
3284		zzzzz18,zzzzzz4	false
3285		zzzzz18,zzzzz21	false
3286		zzzzz18,zzzzz24	false
3287		zzzzz18,zzzzz38	false
3288		zzzzz18,zzzzz84	false
3289		zzzzz18,zzzzz32	false
3290		zzzzz18,zzzzz23	false
3291		zzzzz18,zzzzz93	false
3292		zzzzz18,zzzzz31	false
3293		zzzzz18,zzzzz22	false
3294		zzzzz18,zzzzz81	false
3295		zzzzz18,zzzzz25	false
3296		zzzzz18,zzzzz35	false
3297		zzzzz18,zzzzz36	false
3298		zzzzz18,zzzzz29	false
3299		zzzzz18,zzzzz39	false
3300		zzzzz18,zzzzz34	false
3301		zzzzz18,zzzzzz6	false
3302		zzzzz18,zzzzz95	false
3303		zzzzz18,zzzzz80	false
3304		zzzzz18,zzzzzz0	false
3305		zzzzz18,zzzzzz5	false
3306		zzzzz18,zzzzz28	false
3307		zzzzz18,zzzzz37	false
3308		zzzzz18,zzzzz33	false
3309		zzzzz18,zzzzz19	false
3310		zzzzz17,zzzzz91	false
3311		zzzzz17,zzzzzz2	false
3312		zzzzz17,zzzzz93	false
3313		zzzzz17,zzzzz79	false
3314		zzzzz16,zzzzz85	false
3315		zzzzz16,zzzzz20	false
3316		zzzzz16,zzzzz79	false
3317		zzzzz16,zzzzz21	false
3318		zzzzz16,zzzzz26	false
3319		zzzzz16,zzzzzz2	false
3320		zzzzz16,zzzzz30	false
3321		zzzzz16,zzzzz27	false
3322		zzzzz16,zzzzzz0	false
3323		zzzzz16,zzzzzz3	false
3324		zzzzz16,zzzzzz4	false
3325		zzzzz16,zzzzz80	false
3326		zzzzz16,zzzzz35	false
3327		zzzzz16,zzzzz24	false
3328		zzzzz16,zzzzz37	false
3329		zzzzz16,zzzzz22	false
3330		zzzzz16,zzzzz18	false
3331		zzzzz16,zzzzz23	false
3332		zzzzz16,zzzzz84	false
3333		zzzzz16,zzzzz25	false
3334		zzzzz16,zzzzz31	false
3335		zzzzz16,zzzzz33	false
3336		zzzzz16,zzzzz39	false
3337		zzzzz16,zzzzz29	false
3338		zzzzz16,zzzzz90	false
3339		zzzzz16,zzzzzz5	false
3340		zzzzz16,zzzzz28	false
3341		zzzzz16,zzzzz95	false
3342		zzzzz16,zzzzz40	false
3343		zzzzz16,zzzzz91	false
3344		zzzzz16,zzzzz34	false
3345		zzzzz16,zzzzz81	false
3346		zzzzz16,zzzzz38	false
3347		zzzzz16,zzzzz36	false
3348		zzzzz16,zzzzz93	false
3349		zzzzz16,zzzzzz6	false
3350		zzzzz16,zzzzz32	false
3351		zzzzz13,zzzzz19	false
3352		zzzzz13,zzzzzz2	false
3353		zzzzz13,zzzzzz4	false
3354		zzzzz13,zzzzzz3	false
3355		zzzzz13,zzzzz30	false
3356		zzzzz13,zzzzz90	false
3357		zzzzz13,zzzzz40	false
3358		zzzzz13,zzzzz26	false
3359		zzzzz13,zzzzz24	false
3360		zzzzz13,zzzzz27	false
3361		zzzzz13,zzzzz18	false
3362		zzzzz13,zzzzz84	false
3363		zzzzz13,zzzzz36	false
3364		zzzzz13,zzzzz21	false
3365		zzzzz13,zzzzz34	false
3366		zzzzz13,zzzzz81	false
3367		zzzzz13,zzzzz35	false
3368		zzzzz13,zzzzz91	false
3369		zzzzz13,zzzzz16	false
3370		zzzzz13,zzzzz38	false
3371		zzzzz13,zzzzz32	false
3372		zzzzz13,zzzzz93	false
3373		zzzzz13,zzzzz31	false
3374		zzzzz13,zzzzzz6	false
3375		zzzzz13,zzzzz25	false
3376		zzzzz13,zzzzzz0	false
3377		zzzzz13,zzzzz22	false
3378		zzzzz13,zzzzz23	false
3379		zzzzz13,zzzzz37	false
3380		zzzzz13,zzzzz80	false
3381		zzzzz13,zzzzz33	false
3382		zzzzz13,zzzzz39	false
3383		zzzzz13,zzzzz28	false
3384		zzzzz13,zzzzz29	false
3385		zzzzz13,zzzzz95	false
3386		zzzzz13,zzzzzz5	false
3387		zzzzz12,zzzzzz3	false
3388		zzzzz12,zzzzzz4	false
3389		zzzzz12,zzzzz91	false
3390		zzzzz12,zzzzz30	false
3391		zzzzz12,zzzzzz6	false
3392		zzzzz12,zzzzz84	false
3393		zzzzz12,zzzzz81	false
3394		zzzzz12,zzzzz21	false
3395		zzzzz12,zzzzz38	false
3396		zzzzz12,zzzzz24	false
3397		zzzzz12,zzzzz32	false
3398		zzzzz12,zzzzz16	false
3399		zzzzz12,zzzzz18	false
3400		zzzzz12,zzzzz34	false
3401		zzzzz12,zzzzz26	false
3402		zzzzz12,zzzzz36	false
3403		zzzzz12,zzzzz27	false
3404		zzzzz12,zzzzz31	false
3405		zzzzz12,zzzzz39	false
3406		zzzzz12,zzzzz95	false
3407		zzzzz12,zzzzz28	false
3408		zzzzz12,zzzzz25	false
3409		zzzzz12,zzzzzz0	false
3410		zzzzz12,zzzzz93	false
3411		zzzzz12,zzzzz29	false
3412		zzzzz12,zzzzz80	false
3413		zzzzz12,zzzzz37	false
3414		zzzzz12,zzzzzz5	false
3415		zzzzz12,zzzzz13	false
3416		zzzzz12,zzzzz33	false
3417		zzzzz12,zzzzz35	false
3418		zzzzz12,zzzzz23	false
3419		zzzzz12,zzzzz22	false
3420		zzzzz11,zzzzz40	false
3421		zzzzz11,zzzzzz3	false
3422		zzzzz11,zzzzzz4	false
3423		zzzzz11,zzzzz91	false
3424		zzzzz11,zzzzz84	false
3425		zzzzz11,zzzzz24	false
3426		zzzzz11,zzzzzz6	false
3427		zzzzz11,zzzzz18	false
3428		zzzzz11,zzzzz38	false
3429		zzzzz11,zzzzz26	false
3430		zzzzz11,zzzzz21	false
3431		zzzzz11,zzzzz93	false
3432		zzzzz11,zzzzz34	false
3433		zzzzz11,zzzzz13	false
3434		zzzzz11,zzzzz35	false
3435		zzzzz11,zzzzz30	false
3436		zzzzz11,zzzzz32	false
3437		zzzzz11,zzzzz31	false
3438		zzzzz11,zzzzz81	false
3439		zzzzz11,zzzzz16	false
3440		zzzzz11,zzzzz22	false
3441		zzzzz11,zzzzz36	false
3442		zzzzz11,zzzzzz5	false
3443		zzzzz11,zzzzz12	false
3444		zzzzz11,zzzzz80	false
3445		zzzzz11,zzzzz39	false
3446		zzzzz11,zzzzzz0	false
3447		zzzzz11,zzzzz23	false
3448		zzzzz11,zzzzz33	false
3449		zzzzz11,zzzzz37	false
3450		zzzzz11,zzzzz29	false
3451		zzzzz11,zzzzz95	false
3452		zzzzz11,zzzzz28	false
3453		zzzzz11,zzzzz27	false
3454		zzzzz11,zzzzz25	false
3455		zzzzz10,zzzzz35	false
3456		zzzzz10,zzzzz39	false
3457		zzzzz10,zzzzz82	false
3458		zzzzz10,zzzzz40	false
3459		zzzzz10,zzzzz33	false
3460		zzzzz10,zzzzz90	false
3461		zzzzz10,zzzzz36	false
3462		zzzzz10,zzzzz93	false
3463		zzzzz10,zzzzz34	false
3464		zzzzz10,zzzzz85	false
3465		zzzzz10,zzzzz84	false
3466		zzzzz10,zzzzz24	false
3467		zzzzz10,zzzzz81	false
3468		zzzzz10,zzzzz20	false
3469		zzzzz10,zzzzz16	false
3470		zzzzz10,zzzzz91	false
3471		zzzzz10,zzzzz32	false
3472		zzzzz10,zzzzzz6	false
3473		zzzzz10,zzzzz38	false
3474		zzzzz10,zzzzzz2	false
3475		zzzz999,zzz1090	false
3476		zzzz999,zzzz997	false
3477		zzzz999,zzz1339	false
3478		zzzz999,zzz1325	false
3479		zzzz999,zzz1016	false
3480		zzzz999,zzz1335	false
3481		zzzz999,zzz1330	false
3482		zzzz999,zzz1017	false
3483		zzzz999,zzz1320	false
3484		zzzz999,zzzz992	false
3485		zzzz999,zzzz968	false
3486		zzzz999,zzz1018	false
3487		zzzz999,zzzzzz4	false
3488		zzzz999,zzz1367	false
3489		zzzz999,zzzz993	false
3490		zzzz999,zzzz936	false
3491		zzzz999,zzz1054	false
3492		zzzz999,zzzzz91	false
3493		zzzz999,zzz1129	false
3494		zzzz999,zzz1044	false
3495		zzzz999,zzz1047	false
3496		zzzz999,zzz1032	false
3497		zzzz999,zzz1212	false
3498		zzzz999,zzzz958	false
3499		zzzz999,zzz1109	false
3500		zzzz999,zzz1049	false
3501		zzzz999,zzzz932	false
3502		zzzz999,zzzzz24	false
3503		zzzz999,zzz1359	false
3504		zzzz999,zzz1358	false
3505		zzzz999,zzz1343	false
3506		zzzz999,zzz1301	false
3507		zzzz999,zzz1269	false
3508		zzzz999,zzzzz84	false
3509		zzzz999,zzzzz38	false
3510		zzzz999,zzz2390	false
3511		zzzz999,zzz1352	false
3512		zzzz999,zzz1342	false
3513		zzzz999,zzz1341	false
3514		zzzz999,zzz1105	false
3515		zzzz999,zzzz967	false
3516		zzzz999,zzz1351	false
3517		zzzz999,zzz1346	false
3518		zzzz999,zzz1344	false
3519		zzzz999,zzz1305	false
3520		zzzz999,zzz1298	false
3521		zzzz999,zzz1238	false
3522		zzzz999,zzz1108	false
3523		zzzz999,zzz1103	false
3524		zzzz999,zzz1006	false
3525		zzzz999,zzzz948	false
3526		zzzz999,zzzz947	false
3527		zzzz999,zzz1350	false
3528		zzzz999,zzz1347	false
3529		zzzz999,zzz1345	false
3530		zzzz999,zzz1306	false
3531		zzzz999,zzz1291	false
3532		zzzz999,zzz1284	false
3533		zzzz999,zzz1281	false
3534		zzzz999,zzz1276	false
3535		zzzz999,zzz1260	false
3536		zzzz999,zzz1256	false
3537		zzzz999,zzz1246	false
3538		zzzz999,zzz1241	false
3539		zzzz999,zzz1360	false
3540		zzzz999,zzz1303	false
3541		zzzz999,zzz1311	false
3542		zzzz999,zzz1309	false
3543		zzzz999,zzz1302	false
3544		zzzz999,zzz1275	false
3545		zzzz999,zzz1268	false
3546		zzzz999,zzz1265	false
3547		zzzz999,zzz1258	false
3548		zzzz999,zzz1255	false
3549		zzzz999,zzz1249	false
3550		zzzz999,zzz1245	false
3551		zzzz999,zzz1237	false
3552		zzzz999,zzz1235	false
3553		zzzz999,zzz1153	false
3554		zzzz999,zzz1005	false
3555		zzzz999,zzzzz18	false
3556		zzzz999,zzzz998	false
3557		zzzz999,zzz1321	false
3558		zzzz999,zzz1299	false
3559		zzzz999,zzz1154	false
3560		zzzz999,zzz1152	false
3561		zzzz999,zzz1149	false
3562		zzzz999,zzz1148	false
3563		zzzz999,zzz1143	false
3564		zzzz999,zzz1142	false
3565		zzzz999,zzz1003	false
3566		zzzz999,zzzz933	false
3567		zzzz999,zzz1310	false
3568		zzzz999,zzz1297	false
3569		zzzz999,zzz1290	false
3570		zzzz999,zzz1279	false
3571		zzzz999,zzz1236	false
3572		zzzz999,zzzz960	false
3573		zzzz999,zzz1316	false
3574		zzzz999,zzz1312	false
3575		zzzz999,zzz1031	false
3576		zzzz999,zzz1030	false
3577		zzzz999,zzz1307	false
3578		zzzz999,zzz1280	false
3579		zzzz999,zzz1273	false
3580		zzzz999,zzz1261	false
3581		zzzz999,zzz1257	false
3582		zzzz999,zzz1251	false
3583		zzzz999,zzz1248	false
3584		zzzz999,zzz1244	false
3585		zzzz999,zzzz982	false
3586		zzzz999,zzzz980	false
3587		zzzz999,zzz1355	false
3588		zzzz999,zzz1349	false
3589		zzzz999,zzz1293	false
3590		zzzz999,zzz1292	false
3591		zzzz999,zzz1274	false
3592		zzzz999,zzz1055	false
3593		zzzz999,zzz1020	false
3594		zzzz999,zzzz994	false
3595		zzzz999,zzz1076	false
3596		zzzz999,zzz1046	false
3597		zzzz999,zzzzz31	false
3598		zzzz999,zzzz979	false
3599		zzzz999,zzz1220	false
3600		zzzz999,zzz1019	false
3601		zzzz999,zzzz981	false
3602		zzzz999,zzz1002	false
3603		zzzz999,zzz1064	false
3604		zzzz999,zzzzz93	false
3605		zzzz999,zzz1356	false
3606		zzzz999,zzz1324	false
3607		zzzz999,zzz1219	false
3608		zzzz999,zzz1334	false
3609		zzzz999,zzz1323	false
3610		zzzz999,zzz1107	false
3611		zzzz999,zzz1088	false
3612		zzzz999,zzz1083	false
3613		zzzz999,zzz1057	false
3614		zzzz999,zzz1085	false
3615		zzzz999,zzz1365	false
3616		zzzz999,zzz1056	false
3617		zzzz999,zzzzz21	false
3618		zzzz999,zzz1326	false
3619		zzzz999,zzz1077	false
3620		zzzz999,zzz1027	false
3621		zzzz999,zzzz938	false
3622		zzzz999,zzz1060	false
3623		zzzz999,zzz1034	false
3624		zzzz999,zzz1348	false
3625		zzzz999,zzz1234	false
3626		zzzz999,zzz1197	false
3627		zzzz999,zzz1194	false
3628		zzzz999,zzz1147	false
3629		zzzz999,zzz1146	false
3630		zzzz999,zzz1145	false
3631		zzzz999,zzz1144	false
3632		zzzz999,zzzzz26	false
3633		zzzz999,zzzz950	false
3634		zzzz999,zzzz945	false
3635		zzzz999,zzz1328	false
3636		zzzz999,zzz1195	false
3637		zzzz999,zzz1023	false
3638		zzzz999,zzzzz16	false
3639		zzzz999,zzzzz13	false
3640		zzzz999,zzz1337	false
3641		zzzz999,zzzzzz6	false
3642		zzzz999,zzz1137	false
3643		zzzz999,zzzz972	false
3644		zzzz999,zzz1362	false
3645		zzzz999,zzz1336	false
3646		zzzz999,zzz1196	false
3647		zzzz999,zzz1192	false
3648		zzzz999,zzz1193	false
3649		zzzz999,zzzz990	false
3650		zzzz999,zzz1227	false
3651		zzzz999,zzz1124	false
3652		zzzz999,zzz1071	false
3653		zzzz999,zzzzz34	false
3654		zzzz999,zzzz957	false
3655		zzzz999,zzzz949	false
3656		zzzz999,zzz1026	false
3657		zzzz999,zzzzz81	false
3658		zzzz999,zzzz969	false
3659		zzzz999,zzz1140	false
3660		zzzz999,zzz1048	false
3661		zzzz999,zzz1074	false
3662		zzzz999,zzz1059	false
3663		zzzz999,zzzzz36	false
3664		zzzz999,zzzz986	false
3665		zzzz999,zzzz985	false
3666		zzzz999,zzzz984	false
3667		zzzz999,zzzz100	false
3668		zzzz999,zzz1178	false
3669		zzzz999,zzz1099	false
3670		zzzz999,zzz1084	false
3671		zzzz999,zzzzz35	false
3672		zzzz999,zzzz987	false
3673		zzzz999,zzzz970	false
3674		zzzz999,zzz1177	false
3675		zzzz999,zzz1095	false
3676		zzzz999,zzzzz30	false
3677		zzzz999,zzzz989	false
3678		zzzz999,zzzz988	false
3679		zzzz999,zzzzz22	false
3680		zzzz999,zzz1329	false
3681		zzzz999,zzz1120	false
3682		zzzz999,zzz1025	false
3683		zzzz999,zzz1012	false
3684		zzzz999,zzzz946	false
3685		zzzz999,zzz1150	false
3686		zzzz999,zzz1073	false
3687		zzzz999,zzz1028	false
3688		zzzz999,zzzzz23	false
3689		zzzz999,zzz1223	false
3690		zzzz999,zzz1024	false
3691		zzzz999,zzzzz12	false
3692		zzzz999,zzz1062	false
3693		zzzz999,zzz1061	false
3694		zzzz999,zzz1022	false
3695		zzzz999,zzzzz32	false
3696		zzzz999,zzz1119	false
3697		zzzz999,zzz1070	false
3698		zzzz999,zzz1069	false
3699		zzzz999,zzz1340	false
3700		zzzz999,zzz1226	false
3701		zzzz999,zzz1067	false
3702		zzzz999,zzz1043	false
3703		zzzz999,zzzz973	false
3704		zzzz999,zzz1041	false
3705		zzzz999,zzz1278	false
3706		zzzz999,zzz1247	false
3707		zzzz999,zzzz964	false
3708		zzzz999,zzz1141	false
3709		zzzz999,zzz1021	false
3710		zzzz999,zzzz963	false
3711		zzzz999,zzz1217	false
3712		zzzz999,zzz1106	false
3713		zzzz999,zzzzz39	false
3714		zzzz999,zzzz983	false
3715		zzzz999,zzz1094	false
3716		zzzz999,zzz1100	false
3717		zzzz999,zzzz991	false
3718		zzzz999,zzzz965	false
3719		zzzz999,zzz1138	false
3720		zzzz999,zzz1098	false
3721		zzzz999,zzz1111	false
3722		zzzz999,zzz1314	false
3723		zzzz999,zzzzzz0	false
3724		zzzz999,zzz1092	false
3725		zzzz999,zzz1117	false
3726		zzzz999,zzz1097	false
3727		zzzz999,zzz1366	false
3728		zzzz999,zzz1116	false
3729		zzzz999,zzz1096	false
3730		zzzz999,zzz1091	false
3731		zzzz999,zzz1089	false
3732		zzzz999,zzz1364	false
3733		zzzz999,zzz1102	false
3734		zzzz999,zzzzzz5	false
3735		zzzz999,zzz1118	false
3736		zzzz999,zzz1104	false
3737		zzzz999,zzzzz80	false
3738		zzzz999,zzzz975	false
3739		zzzz999,zzz1363	false
3740		zzzz999,zzz1361	false
3741		zzzz999,zzz1158	false
3742		zzzz999,zzz1136	false
3743		zzzz999,zzz1114	false
3744		zzzz999,zzz2370	false
3745		zzzz999,zzz1139	false
3746		zzzz999,zzzzz37	false
3747		zzzz999,zzzz935	false
3748		zzzz999,zzzz934	false
3749		zzzz999,zzz1161	false
3750		zzzz999,zzz1113	false
3751		zzzz999,zzz1319	false
3752		zzzz999,zzz1101	false
3753		zzzz999,zzzz961	false
3754		zzzz999,zzzz937	false
3755		zzzz999,zzz1232	false
3756		zzzz999,zzz1008	false
3757		zzzz999,zzz1007	false
3758		zzzz999,zzz1228	false
3759		zzzz999,zzz1125	false
3760		zzzz999,zzzzz33	false
3761		zzzz999,zzzz978	false
3762		zzzz999,zzzz962	false
3763		zzzz999,zzzz977	false
3764		zzzz999,zzzz976	false
3765		zzzz999,zzzz942	false
3766		zzzz999,zzzz941	false
3767		zzzz999,zzzz940	false
3768		zzzz999,zzzz939	false
3769		zzzz999,zzz1354	false
3770		zzzz999,zzz1229	false
3771		zzzz999,zzz1213	false
3772		zzzz999,zzz1165	false
3773		zzzz999,zzz1160	false
3774		zzzz999,zzz1159	false
3775		zzzz999,zzz1135	false
3776		zzzz999,zzz1128	false
3777		zzzz999,zzz2386	false
3778		zzzz999,zzz1296	false
3779		zzzz999,zzz1134	false
3780		zzzz999,zzzz931	false
3781		zzzz999,zzz1115	false
3782		zzzz999,zzzzz28	false
3783		zzzz999,zzzzz27	false
3784		zzzz999,zzz1304	false
3785		zzzz999,zzz1289	false
3786		zzzz999,zzz1045	false
3787		zzzz999,zzz1029	false
3788		zzzz999,zzz1133	false
3789		zzzz999,zzz1127	false
3790		zzzz999,zzz1082	false
3791		zzzz999,zzz1283	false
3792		zzzz999,zzz1264	false
3793		zzzz999,zzz1272	false
3794		zzzz999,zzz1262	false
3795		zzzz999,zzz1254	false
3796		zzzz999,zzz1252	false
3797		zzzz999,zzz1242	false
3798		zzzz999,zzz1270	false
3799		zzzz999,zzz1079	false
3800		zzzz999,zzz1271	false
3801		zzzz999,zzz1240	false
3802		zzzz999,zzzz954	false
3803		zzzz999,zzz1287	false
3804		zzzz999,zzz1285	false
3805		zzzz999,zzz1039	false
3806		zzzz999,zzz1037	false
3807		zzzz999,zzz2375	false
3808		zzzz999,zzzzz29	false
3809		zzzz999,zzz1110	false
3810		zzzz999,zzz1288	false
3811		zzzz999,zzz1308	false
3812		zzzz999,zzz1286	false
3813		zzzz999,zzz1282	false
3814		zzzz999,zzz1277	false
3815		zzzz999,zzz1267	false
3816		zzzz999,zzz1263	false
3817		zzzz999,zzz1300	false
3818		zzzz999,zzz1295	false
3819		zzzz999,zzz1253	false
3820		zzzz999,zzz1004	false
3821		zzzz999,zzz1313	false
3822		zzzz999,zzzz971	false
3823		zzzz999,zzzz966	false
3824		zzzz999,zzzzz95	false
3825		zzzz999,zzz1038	false
3826		zzzz999,zzz1035	false
3827		zzzz999,zzz1036	false
3828		zzzz999,zzz1318	false
3829		zzzz999,zzz1132	false
3830		zzzz999,zzz1123	false
3831		zzzz999,zzz1063	false
3832		zzzz999,zzzz956	false
3833		zzzz999,zzzzz25	false
3834		zzzz999,zzzz952	false
3835		zzzz999,zzzz955	false
3836		zzzz999,zzz1317	false
3837		zzzz999,zzzz953	false
3838		zzzz999,zzz1087	false
3839		zzzz999,zzz1033	false
3840		zzzz999,zzzz951	false
3841		zzzz999,zzz1081	false
3842		zzzz999,zzz1080	false
3843		zzzz999,zzz1215	false
3844		zzzz999,zzz1011	false
3845		zzzz999,zzz1322	false
3846		zzzz999,zzz1331	false
3847		zzzz999,zzz1315	false
3848		zzzz999,zzz1233	false
3849		zzzz999,zzz1206	false
3850		zzzz999,zzz1040	false
3851		zzzz999,zzz1066	false
3852		zzzz999,zzz1042	false
3853		zzzz999,zzz1010	false
3854		zzzz999,zzz1333	false
3855		zzzz999,zzzzz11	false
3856		zzzz999,zzz1086	false
3857		zzzz999,zzz1009	false
3858		zzzz999,zzz1208	false
3859		zzzz998,zzzzz30	false
3860		zzzz998,zzzzz18	false
3861		zzzz998,zzzzz27	false
3862		zzzz998,zzzzz90	false
3863		zzzz998,zzzzz35	false
3864		zzzz998,zzzzz84	false
3865		zzzz998,zzzzz26	false
3866		zzzz998,zzzzz40	false
3867		zzzz998,zzzzz21	false
3868		zzzz998,zzzzz24	false
3869		zzzz998,zzzzz16	false
3870		zzzz998,zzzzz38	false
3871		zzzz998,zzzzz32	false
3872		zzzz998,zzzzz34	false
3873		zzzz998,zzzzz11	false
3874		zzzz998,zzzzz36	false
3875		zzzz998,zzzzz93	false
3876		zzzz998,zzzzzz6	false
3877		zzzz998,zzzzz81	false
3878		zzzz998,zzzzz91	false
3879		zzzz998,zzzzz80	false
3880		zzzz998,zzzzz25	false
3881		zzzz998,zzzzz12	false
3882		zzzz998,zzzzz39	false
3883		zzzz998,zzzzzz0	false
3884		zzzz998,zzzzz31	false
3885		zzzz998,zzzzz33	false
3886		zzzz998,zzzzz37	false
3887		zzzz998,zzzzz23	false
3888		zzzz998,zzzzz22	false
3889		zzzz998,zzzzz95	false
3890		zzzz998,zzzzz29	false
3891		zzzz998,zzzzz28	false
3892		zzzz998,zzzzzz5	false
3893		zzzz998,zzzzz13	false
3894		zzzz997,zzzzz27	false
3895		zzzz997,zzzzz12	false
3896		zzzz997,zzzzz21	false
3897		zzzz997,zzzzzz2	false
3898		zzzz997,zzzzz18	false
3899		zzzz997,zzzzz31	false
3900		zzzz997,zzzzzz0	false
3901		zzzz997,zzzzz23	false
3902		zzzz997,zzzz998	false
3903		zzzz997,zzzzzz4	false
3904		zzzz997,zzzzz95	false
3905		zzzz997,zzzzz80	false
3906		zzzz997,zzzzz11	false
3907		zzzz997,zzzzz10	false
3908		zzzz997,zzzzzz3	false
3909		zzzz997,zzzzz33	false
3910		zzzz997,zzzzzz5	false
3911		zzzz997,zzzzz37	false
3912		zzzz997,zzzzz13	false
3913		zzzz997,zzzzz25	false
3914		zzzz997,zzzzz28	false
3915		zzzz997,zzzzz24	false
3916		zzzz997,zzzzz22	false
3917		zzzz997,zzzzz29	false
3918		zzzz997,zzzzz90	false
3919		zzzz997,zzzzz40	false
3920		zzzz997,zzzzz39	false
3921		zzzz997,zzzzz35	false
3922		zzzz997,zzzzz16	false
3923		zzzz997,zzzzz38	false
3924		zzzz997,zzzzz93	false
3925		zzzz997,zzzzz91	false
3926		zzzz997,zzzzz81	false
3927		zzzz997,zzzzz34	false
3928		zzzz997,zzzzzz6	false
3929		zzzz997,zzzzz32	false
3930		zzzz997,zzzzz36	false
3931		zzzz997,zzzzz84	false
3932		zzzz996,zzzzzz4	false
3933		zzzz996,zzzzz35	false
3934		zzzz996,zzzzzz2	false
3935		zzzz996,zzzzz24	false
3936		zzzz996,zzzzz12	false
3937		zzzz996,zzzzz29	false
3938		zzzz996,zzzzz80	false
3939		zzzz996,zzzzz11	false
3940		zzzz996,zzzzzz0	false
3941		zzzz996,zzzzz28	false
3942		zzzz996,zzzzz22	false
3943		zzzz996,zzzzz23	false
3944		zzzz996,zzzz997	false
3945		zzzz996,zzzzz84	false
3946		zzzz996,zzzzzz5	false
3947		zzzz996,zzzzz37	false
3948		zzzz996,zzzzz31	false
3949		zzzz996,zzzzz39	false
3950		zzzz996,zzzz998	false
3951		zzzz996,zzzzz13	false
3952		zzzz996,zzzzz25	false
3953		zzzz996,zzzzz95	false
3954		zzzz996,zzzzz90	false
3955		zzzz996,zzzzz40	false
3956		zzzz996,zzzzz38	false
3957		zzzz996,zzzzz93	false
3958		zzzz996,zzzzz91	false
3959		zzzz996,zzzzz16	false
3960		zzzz996,zzzzz81	false
3961		zzzz996,zzzzzz6	false
3962		zzzz996,zzzzz34	false
3963		zzzz996,zzzzz36	false
3964		zzzz996,zzzzz32	false
3965		zzzz995,zzzzz82	false
3966		zzzz995,zzzzz32	false
3967		zzzz995,zzzzz38	false
3968		zzzz995,zzzzzz6	false
3969		zzzz995,zzzzz36	false
3970		zzzz995,zzzzz16	false
3971		zzzz995,zzzz997	false
3972		zzzz995,zzzzz81	false
3973		zzzz995,zzzzz34	false
3974		zzzz995,zzzzzz2	false
3975		zzzz995,zzzzz10	false
3976		zzzz994,zzzz998	false
3977		zzzz994,zzzzzz4	false
3978		zzzz994,zzzzz93	false
3979		zzzz994,zzzzz38	false
3980		zzzz994,zzzzz31	false
3981		zzzz994,zzzzzz3	false
3982		zzzz994,zzzzz84	false
3983		zzzz994,zzzzz16	false
3984		zzzz994,zzzzz81	false
3985		zzzz994,zzzzz34	false
3986		zzzz994,zzzzz23	false
3987		zzzz994,zzzzz36	false
3988		zzzz994,zzzzz32	false
3989		zzzz994,zzzzzz5	false
3990		zzzz994,zzzzz35	false
3991		zzzz994,zzzzz13	false
3992		zzzz994,zzzzz12	false
3993		zzzz994,zzzzzz6	false
3994		zzzz994,zzzzz33	false
3995		zzzz994,zzzzzz0	false
3996		zzzz994,zzzzz27	false
3997		zzzz994,zzzzz25	false
3998		zzzz994,zzzzz11	false
3999		zzzz994,zzzzz80	false
4000		zzzz994,zzzzz22	false
4001		zzzz994,zzzzz29	false
4002		zzzz994,zzzzz28	false
4003		zzzz994,zzzzz30	false
4004		zzzz994,zzzzz37	false
4005		zzzz994,zzzzz39	false
4006		zzzz994,zzzzz26	false
4007		zzzz994,zzzzz95	false
4008		zzzz994,zzzzz21	false
4009		zzzz993,zzzzz30	false
4010		zzzz993,zzzz995	false
4011		zzzz993,zzzzz27	false
4012		zzzz993,zzzzz12	false
4013		zzzz993,zzzz996	false
4014		zzzz993,zzzzzz2	false
4015		zzzz993,zzzzz21	false
4016		zzzz993,zzzzz18	false
4017		zzzz993,zzzzz31	false
4018		zzzz993,zzzzz10	false
4019		zzzz993,zzzz998	false
4020		zzzz993,zzzzzz0	false
4021		zzzz993,zzzzz33	false
4022		zzzz993,zzzzz95	false
4023		zzzz993,zzzzzz4	false
4024		zzzz993,zzzzz80	false
4025		zzzz993,zzzzz23	false
4026		zzzz993,zzzzz11	false
4027		zzzz993,zzzzzz5	false
4028		zzzz993,zzzzz37	false
4029		zzzz993,zzzzzz3	false
4030		zzzz993,zzzzz13	false
4031		zzzz993,zzzzz24	false
4032		zzzz993,zzzzz35	false
4033		zzzz993,zzzzz28	false
4034		zzzz993,zzzzz22	false
4035		zzzz993,zzzzz25	false
4036		zzzz993,zzzzz29	false
4037		zzzz993,zzzzz39	false
4038		zzzz993,zzzzz40	false
4039		zzzz993,zzzzz16	false
4040		zzzz993,zzzzz90	false
4041		zzzz993,zzzzz81	false
4042		zzzz993,zzzzz38	false
4043		zzzz993,zzzzz91	false
4044		zzzz993,zzzzz93	false
4045		zzzz993,zzzzz34	false
4046		zzzz993,zzzzzz6	false
4047		zzzz993,zzzzz36	false
4048		zzzz993,zzzzz32	false
4049		zzzz993,zzzzz84	false
4050		zzzz993,zzzz997	false
4051		zzzz992,zzzzz30	false
4052		zzzz992,zzzzz26	false
4053		zzzz992,zzzzz12	false
4054		zzzz992,zzzzz21	false
4055		zzzz992,zzzz996	false
4056		zzzz992,zzzzz27	false
4057		zzzz992,zzzz998	false
4058		zzzz992,zzzzz18	false
4059		zzzz992,zzzzzz3	false
4060		zzzz992,zzzzzz2	false
4061		zzzz992,zzzzz11	false
4062		zzzz992,zzzzz10	false
4063		zzzz992,zzzzz13	false
4064		zzzz992,zzzzzz4	false
4065		zzzz992,zzzzz31	false
4066		zzzz992,zzzzz95	false
4067		zzzz992,zzzzz33	false
4068		zzzz992,zzzzzz0	false
4069		zzzz992,zzzzz29	false
4070		zzzz992,zzzzzz5	false
4071		zzzz992,zzzzz37	false
4072		zzzz992,zzzzz24	false
4073		zzzz992,zzzzz23	false
4074		zzzz992,zzzzz28	false
4075		zzzz992,zzzzz40	false
4076		zzzz992,zzzzz35	false
4077		zzzz992,zzzzz80	false
4078		zzzz992,zzzzz25	false
4079		zzzz992,zzzzz16	false
4080		zzzz992,zzzzz90	false
4081		zzzz992,zzzzz22	false
4082		zzzz992,zzzzz91	false
4083		zzzz992,zzzzz39	false
4084		zzzz992,zzzzz93	false
4085		zzzz992,zzzzz36	false
4086		zzzz992,zzzzz32	false
4087		zzzz992,zzzzzz6	false
4088		zzzz992,zzzzz38	false
4089		zzzz992,zzzzz81	false
4090		zzzz992,zzzzz34	false
4091		zzzz992,zzzz997	false
4092		zzzz992,zzzz993	false
4093		zzzz992,zzzzz84	false
4094		zzzz991,zzzzz10	false
4095		zzzz991,zzzzz18	false
4096		zzzz991,zzzzzz2	false
4097		zzzz991,zzzz994	false
4098		zzzz991,zzzzz12	false
4099		zzzz991,zzzzz27	false
4100		zzzz991,zzzzz21	false
4101		zzzz991,zzzzz22	false
4102		zzzz991,zzzz998	false
4103		zzzz991,zzzzz26	false
4104		zzzz991,zzzzzz3	false
4105		zzzz991,zzzzzz0	false
4106		zzzz991,zzzzz13	false
4107		zzzz991,zzzzz31	false
4108		zzzz991,zzzzz24	false
4109		zzzz991,zzzzzz4	false
4110		zzzz991,zzzzz37	false
4111		zzzz991,zzzzz33	false
4112		zzzz991,zzzzz23	false
4113		zzzz991,zzzzz30	false
4114		zzzz991,zzzzz29	false
4115		zzzz991,zzzz992	false
4116		zzzz991,zzzzz39	false
4117		zzzz991,zzzzz35	false
4118		zzzz991,zzzzz11	false
4119		zzzz991,zzzzzz5	false
4120		zzzz991,zzzzz80	false
4121		zzzz991,zzzz993	false
4122		zzzz991,zzzzz84	false
4123		zzzz991,zzzz996	false
4124		zzzz991,zzzzz90	false
4125		zzzz991,zzzzz28	false
4126		zzzz991,zzzzz95	false
4127		zzzz991,zzzz997	false
4128		zzzz991,zzzzz40	false
4129		zzzz991,zzzzz16	false
4130		zzzz991,zzzzz25	false
4131		zzzz991,zzzzz38	false
4132		zzzz991,zzzzz93	false
4133		zzzz991,zzzzz91	false
4134		zzzz991,zzzzzz6	false
4135		zzzz991,zzzzz32	false
4136		zzzz991,zzzzz81	false
4137		zzzz991,zzzzz34	false
4138		zzzz991,zzzzz36	false
4139		zzzz990,zzzzz85	false
4140		zzzz990,zzzzz79	false
4141		zzzz990,zzzzz10	false
4142		zzzz990,zzzzz30	false
4143		zzzz990,zzzz994	false
4144		zzzz990,zzzzz26	false
4145		zzzz990,zzzzz18	false
4146		zzzz990,zzzzz21	false
4147		zzzz990,zzzzzz2	false
4148		zzzz990,zzzzzz3	false
4149		zzzz990,zzzzz27	false
4150		zzzz990,zzzz998	false
4151		zzzz990,zzzzz12	false
4152		zzzz990,zzzzz22	false
4153		zzzz990,zzzzz24	false
4154		zzzz990,zzzzz39	false
4155		zzzz990,zzzzzz4	false
4156		zzzz990,zzzzzz0	false
4157		zzzz990,zzzzz35	false
4158		zzzz990,zzzzz11	false
4159		zzzz990,zzzzz37	false
4160		zzzz990,zzzzz13	false
4161		zzzz990,zzzzz31	false
4162		zzzz990,zzzzzz5	false
4163		zzzz990,zzzzz23	false
4164		zzzz990,zzzz992	false
4165		zzzz990,zzzzz80	false
4166		zzzz990,zzzzz33	false
4167		zzzz990,zzzzz84	false
4168		zzzz990,zzzzz25	false
4169		zzzz990,zzzzz29	false
4170		zzzz990,zzzz997	false
4171		zzzz990,zzzz996	false
4172		zzzz990,zzzz993	false
4173		zzzz990,zzzzz95	false
4174		zzzz990,zzzzz40	false
4175		zzzz990,zzzzz28	false
4176		zzzz990,zzzzz90	false
4177		zzzz990,zzzzz38	false
4178		zzzz990,zzzzz16	false
4179		zzzz990,zzzzz93	false
4180		zzzz990,zzzzz91	false
4181		zzzz990,zzzzz81	false
4182		zzzz990,zzzzz34	false
4183		zzzz990,zzzzzz6	false
4184		zzzz990,zzzzz32	false
4185		zzzz990,zzzzz36	false
4186		zzzz990,zzzz991	false
4187		zzzz989,zzzzz85	false
4188		zzzz989,zzzzz79	false
4189		zzzz989,zzzz995	false
4190		zzzz989,zzzzz10	false
4191		zzzz989,zzzz994	false
4192		zzzz989,zzzzzz2	false
4193		zzzz989,zzzzz18	false
4194		zzzz989,zzzzz21	false
4195		zzzz989,zzzzz27	false
4196		zzzz989,zzzzz12	false
4197		zzzz989,zzzzzz0	false
4198		zzzz989,zzzz998	false
4199		zzzz989,zzzzz24	false
4200		zzzz989,zzzzz37	false
4201		zzzz989,zzzzz23	false
4202		zzzz989,zzzzz31	false
4203		zzzz989,zzzzzz3	false
4204		zzzz989,zzzzz30	false
4205		zzzz989,zzzzz26	false
4206		zzzz989,zzzz992	false
4207		zzzz989,zzzzzz4	false
4208		zzzz989,zzzzz11	false
4209		zzzz989,zzzzz22	false
4210		zzzz989,zzzzz13	false
4211		zzzz989,zzzzz28	false
4212		zzzz989,zzzzz35	false
4213		zzzz989,zzzzz29	false
4214		zzzz989,zzzzz33	false
4215		zzzz989,zzzzzz5	false
4216		zzzz989,zzzzz80	false
4217		zzzz989,zzzzz39	false
4218		zzzz989,zzzzz95	false
4219		zzzz989,zzzzz84	false
4220		zzzz989,zzzzz25	false
4221		zzzz989,zzzz997	false
4222		zzzz989,zzzz993	false
4223		zzzz989,zzzz996	false
4224		zzzz989,zzzzz90	false
4225		zzzz989,zzzzz40	false
4226		zzzz989,zzzzz93	false
4227		zzzz989,zzzzz91	false
4228		zzzz989,zzzzz16	false
4229		zzzz989,zzzzz38	false
4230		zzzz989,zzzzzz6	false
4231		zzzz989,zzzz990	false
4232		zzzz989,zzzzz34	false
4233		zzzz989,zzzzz81	false
4234		zzzz989,zzzz991	false
4235		zzzz989,zzzzz36	false
4236		zzzz989,zzzzz32	false
4237		zzzz988,zzzzz85	false
4238		zzzz988,zzzzz79	false
4239		zzzz988,zzzz995	false
4240		zzzz988,zzzzz10	false
4241		zzzz988,zzzz994	false
4242		zzzz988,zzzzzz2	false
4243		zzzz988,zzzzz18	false
4244		zzzz988,zzzzz21	false
4245		zzzz988,zzzzz27	false
4246		zzzz988,zzzzz12	false
4247		zzzz988,zzzzzz0	false
4248		zzzz988,zzzz998	false
4249		zzzz988,zzzzz24	false
4250		zzzz988,zzzzz37	false
4251		zzzz988,zzzzz23	false
4252		zzzz988,zzzzz31	false
4253		zzzz988,zzzzz30	false
4254		zzzz988,zzzzzz3	false
4255		zzzz988,zzzzz26	false
4256		zzzz988,zzzz992	false
4257		zzzz988,zzzzzz4	false
4258		zzzz988,zzzzz28	false
4259		zzzz988,zzzzz22	false
4260		zzzz988,zzzzz13	false
4261		zzzz988,zzzzz11	false
4262		zzzz988,zzzzz35	false
4263		zzzz988,zzzzz33	false
4264		zzzz988,zzzzz29	false
4265		zzzz988,zzzzzz5	false
4266		zzzz988,zzzzz80	false
4267		zzzz988,zzzzz39	false
4268		zzzz988,zzzzz95	false
4269		zzzz988,zzzzz84	false
4270		zzzz988,zzzzz25	false
4271		zzzz988,zzzz997	false
4272		zzzz988,zzzz993	false
4273		zzzz988,zzzz996	false
4274		zzzz988,zzzzz90	false
4275		zzzz988,zzzzz40	false
4276		zzzz988,zzzzz93	false
4277		zzzz988,zzzzz91	false
4278		zzzz988,zzzzz16	false
4279		zzzz988,zzzzz38	false
4280		zzzz988,zzzzzz6	false
4281		zzzz988,zzzz990	false
4282		zzzz988,zzzzz34	false
4283		zzzz988,zzzzz81	false
4284		zzzz988,zzzz991	false
4285		zzzz988,zzzzz36	false
4286		zzzz988,zzzzz32	false
4287		zzzz988,zzzz989	false
4288		zzzz987,zzzzz85	false
4289		zzzz987,zzzzz79	false
4290		zzzz987,zzzz995	false
4291		zzzz987,zzzzz10	false
4292		zzzz987,zzzz994	false
4293		zzzz987,zzzzz18	false
4294		zzzz987,zzzzzz2	false
4295		zzzz987,zzzzz21	false
4296		zzzz987,zzzzz27	false
4297		zzzz987,zzzzz12	false
4298		zzzz987,zzzzzz0	false
4299		zzzz987,zzzz998	false
4300		zzzz987,zzzzz24	false
4301		zzzz987,zzzzz37	false
4302		zzzz987,zzzzz23	false
4303		zzzz987,zzzzz31	false
4304		zzzz987,zzzzzz3	false
4305		zzzz987,zzzzz30	false
4306		zzzz987,zzzzz26	false
4307		zzzz987,zzzz992	false
4308		zzzz987,zzzzzz4	false
4309		zzzz987,zzzzz11	false
4310		zzzz987,zzzzz13	false
4311		zzzz987,zzzzz22	false
4312		zzzz987,zzzzz28	false
4313		zzzz987,zzzzz35	false
4314		zzzz987,zzzzz33	false
4315		zzzz987,zzzzz29	false
4316		zzzz987,zzzzzz5	false
4317		zzzz987,zzzzz39	false
4318		zzzz987,zzzzz80	false
4319		zzzz987,zzzzz95	false
4320		zzzz987,zzzzz84	false
4321		zzzz987,zzzzz25	false
4322		zzzz987,zzzz997	false
4323		zzzz987,zzzz993	false
4324		zzzz987,zzzz996	false
4325		zzzz987,zzzzz90	false
4326		zzzz987,zzzzz40	false
4327		zzzz987,zzzzz93	false
4328		zzzz987,zzzzz91	false
4329		zzzz987,zzzzz16	false
4330		zzzz987,zzzzz38	false
4331		zzzz987,zzzzzz6	false
4332		zzzz987,zzzz990	false
4333		zzzz987,zzzzz34	false
4334		zzzz987,zzzzz81	false
4335		zzzz987,zzzz991	false
4336		zzzz987,zzzzz36	false
4337		zzzz987,zzzzz32	false
4338		zzzz987,zzzz988	false
4339		zzzz987,zzzz989	false
4340		zzzz986,zzzzz85	false
4341		zzzz986,zzzzz79	false
4342		zzzz986,zzzz995	false
4343		zzzz986,zzzzz10	false
4344		zzzz986,zzzzz18	false
4345		zzzz986,zzzz994	false
4346		zzzz986,zzzzzz2	false
4347		zzzz986,zzzzz27	false
4348		zzzz986,zzzzz21	false
4349		zzzz986,zzzzz12	false
4350		zzzz986,zzzzzz0	false
4351		zzzz986,zzzz998	false
4352		zzzz986,zzzzz24	false
4353		zzzz986,zzzzz37	false
4354		zzzz986,zzzzz23	false
4355		zzzz986,zzzzz31	false
4356		zzzz986,zzzzzz3	false
4357		zzzz986,zzzzz30	false
4358		zzzz986,zzzzz26	false
4359		zzzz986,zzzzzz4	false
4360		zzzz986,zzzzz11	false
4361		zzzz986,zzzz992	false
4362		zzzz986,zzzzz13	false
4363		zzzz986,zzzzz22	false
4364		zzzz986,zzzzz28	false
4365		zzzz986,zzzzz35	false
4366		zzzz986,zzzzz29	false
4367		zzzz986,zzzzzz5	false
4368		zzzz986,zzzzz33	false
4369		zzzz986,zzzzz80	false
4370		zzzz986,zzzzz39	false
4371		zzzz986,zzzzz95	false
4372		zzzz986,zzzzz84	false
4373		zzzz986,zzzzz25	false
4374		zzzz986,zzzz997	false
4375		zzzz986,zzzz993	false
4376		zzzz986,zzzz996	false
4377		zzzz986,zzzzz90	false
4378		zzzz986,zzzzz40	false
4379		zzzz986,zzzzz93	false
4380		zzzz986,zzzzz91	false
4381		zzzz986,zzzzz16	false
4382		zzzz986,zzzzz38	false
4383		zzzz986,zzzzzz6	false
4384		zzzz986,zzzz990	false
4385		zzzz986,zzzzz34	false
4386		zzzz986,zzzz991	false
4387		zzzz986,zzzzz81	false
4388		zzzz986,zzzzz36	false
4389		zzzz986,zzzzz32	false
4390		zzzz986,zzzz988	false
4391		zzzz986,zzzz989	false
4392		zzzz986,zzzz987	false
4393		zzzz985,zzzzz85	false
4394		zzzz985,zzzzz79	false
4395		zzzz985,zzzz995	false
4396		zzzz985,zzzzz10	false
4397		zzzz985,zzzzz18	false
4398		zzzz985,zzzz994	false
4399		zzzz985,zzzzzz2	false
4400		zzzz985,zzzzz27	false
4401		zzzz985,zzzzz21	false
4402		zzzz985,zzzzz12	false
4403		zzzz985,zzzzzz0	false
4404		zzzz985,zzzz998	false
4405		zzzz985,zzzzz24	false
4406		zzzz985,zzzzz37	false
4407		zzzz985,zzzzz23	false
4408		zzzz985,zzzzz31	false
4409		zzzz985,zzzzzz3	false
4410		zzzz985,zzzzz30	false
4411		zzzz985,zzzzz26	false
4412		zzzz985,zzzzzz4	false
4413		zzzz985,zzzzz11	false
4414		zzzz985,zzzz992	false
4415		zzzz985,zzzzz13	false
4416		zzzz985,zzzzz22	false
4417		zzzz985,zzzzz28	false
4418		zzzz985,zzzzz35	false
4419		zzzz985,zzzzz29	false
4420		zzzz985,zzzzzz5	false
4421		zzzz985,zzzzz33	false
4422		zzzz985,zzzzz80	false
4423		zzzz985,zzzzz39	false
4424		zzzz985,zzzzz95	false
4425		zzzz985,zzzzz84	false
4426		zzzz985,zzzzz25	false
4427		zzzz985,zzzz997	false
4428		zzzz985,zzzz993	false
4429		zzzz985,zzzz996	false
4430		zzzz985,zzzzz90	false
4431		zzzz985,zzzzz40	false
4432		zzzz985,zzzzz93	false
4433		zzzz985,zzzzz91	false
4434		zzzz985,zzzzz16	false
4435		zzzz985,zzzzz38	false
4436		zzzz985,zzzzzz6	false
4437		zzzz985,zzzz990	false
4438		zzzz985,zzzzz34	false
4439		zzzz985,zzzz991	false
4440		zzzz985,zzzzz81	false
4441		zzzz985,zzzzz36	false
4442		zzzz985,zzzzz32	false
4443		zzzz985,zzzz988	false
4444		zzzz985,zzzz989	false
4445		zzzz985,zzzz987	false
4446		zzzz985,zzzz986	false
4447		zzzz984,zzzzz85	false
4448		zzzz984,zzzzz79	false
4449		zzzz984,zzzz995	false
4450		zzzz984,zzzzz10	false
4451		zzzz984,zzzzz18	false
4452		zzzz984,zzzz994	false
4453		zzzz984,zzzzzz2	false
4454		zzzz984,zzzzz27	false
4455		zzzz984,zzzzz21	false
4456		zzzz984,zzzzz12	false
4457		zzzz984,zzzzzz0	false
4458		zzzz984,zzzz998	false
4459		zzzz984,zzzzz24	false
4460		zzzz984,zzzzz37	false
4461		zzzz984,zzzzz23	false
4462		zzzz984,zzzzz31	false
4463		zzzz984,zzzzzz3	false
4464		zzzz984,zzzzz30	false
4465		zzzz984,zzzzz26	false
4466		zzzz984,zzzzzz4	false
4467		zzzz984,zzzzz11	false
4468		zzzz984,zzzz992	false
4469		zzzz984,zzzzz13	false
4470		zzzz984,zzzzz22	false
4471		zzzz984,zzzzz28	false
4472		zzzz984,zzzzz35	false
4473		zzzz984,zzzzz29	false
4474		zzzz984,zzzzzz5	false
4475		zzzz984,zzzzz33	false
4476		zzzz984,zzzzz80	false
4477		zzzz984,zzzzz39	false
4478		zzzz984,zzzzz95	false
4479		zzzz984,zzzzz84	false
4480		zzzz984,zzzzz25	false
4481		zzzz984,zzzz997	false
4482		zzzz984,zzzz993	false
4483		zzzz984,zzzz996	false
4484		zzzz984,zzzzz90	false
4485		zzzz984,zzzzz40	false
4486		zzzz984,zzzzz93	false
4487		zzzz984,zzzzz91	false
4488		zzzz984,zzzzz16	false
4489		zzzz984,zzzzz38	false
4490		zzzz984,zzzzzz6	false
4491		zzzz984,zzzz990	false
4492		zzzz984,zzzzz34	false
4493		zzzz984,zzzz991	false
4494		zzzz984,zzzzz81	false
4495		zzzz984,zzzzz36	false
4496		zzzz984,zzzzz32	false
4497		zzzz984,zzzz988	false
4498		zzzz984,zzzz989	false
4499		zzzz984,zzzz987	false
4500		zzzz984,zzzz986	false
4501		zzzz984,zzzz985	false
4502		zzzz983,zzzzz26	false
4503		zzzz983,zzzzz91	false
4504		zzzz983,zzzzz30	false
4505		zzzz983,zzzz996	false
4506		zzzz983,zzzzz93	false
4507		zzzz983,zzzzz16	false
4508		zzzz983,zzzz997	false
4509		zzzz983,zzzz993	false
4510		zzzz983,zzzzz27	false
4511		zzzz983,zzzzz32	false
4512		zzzz983,zzzz988	false
4513		zzzz983,zzzzz24	false
4514		zzzz983,zzzz992	false
4515		zzzz983,zzzzzz6	false
4516		zzzz983,zzzz987	false
4517		zzzz983,zzzz986	false
4518		zzzz983,zzzz985	false
4519		zzzz983,zzzz984	false
4520		zzzz983,zzzz991	false
4521		zzzz983,zzzz989	false
4522		zzzz983,zzzzz36	false
4523		zzzz983,zzzz994	false
4524		zzzz983,zzzzz38	false
4525		zzzz983,zzzzz84	false
4526		zzzz983,zzzzz35	false
4527		zzzz983,zzzzz21	false
4528		zzzz983,zzzzz18	false
4529		zzzz983,zzzzz31	false
4530		zzzz983,zzzzz12	false
4531		zzzz983,zzzz990	false
4532		zzzz983,zzzzz34	false
4533		zzzz983,zzzzz81	false
4534		zzzz983,zzzzz22	false
4535		zzzz983,zzzzz33	false
4536		zzzz983,zzzz998	false
4537		zzzz983,zzzzz23	false
4538		zzzz983,zzzzz25	false
4539		zzzz983,zzzzz11	false
4540		zzzz983,zzzzz13	false
4541		zzzz983,zzzzzz5	false
4542		zzzz983,zzzzz80	false
4543		zzzz983,zzzzz29	false
4544		zzzz983,zzzzz28	false
4545		zzzz983,zzzzz39	false
4546		zzzz983,zzzzz95	false
4547		zzzz983,zzzzzz0	false
4548		zzzz983,zzzzz37	false
4549		zzzz982,zzzz993	false
4550		zzzz982,zzzzz84	false
4551		zzzz982,zzzzz12	false
4552		zzzz982,zzzzzz3	false
4553		zzzz982,zzzz997	false
4554		zzzz982,zzzzz24	false
4555		zzzz982,zzzzz39	false
4556		zzzz982,zzzzz91	false
4557		zzzz982,zzzzz33	false
4558		zzzz982,zzzzz27	false
4559		zzzz982,zzzzz30	false
4560		zzzz982,zzzzz22	false
4561		zzzz982,zzzz983	false
4562		zzzz982,zzzzz38	false
4563		zzzz982,zzzzz26	false
4564		zzzz982,zzzzzz0	false
4565		zzzz982,zzzzz16	false
4566		zzzz982,zzzz991	false
4567		zzzz982,zzzz994	false
4568		zzzz982,zzzzzz6	false
4569		zzzz982,zzzzz37	false
4570		zzzz982,zzzzz36	false
4571		zzzz982,zzzzz23	false
4572		zzzz982,zzzzz31	false
4573		zzzz982,zzzz990	false
4574		zzzz982,zzzzz34	false
4575		zzzz982,zzzzz81	false
4576		zzzz982,zzzzz35	false
4577		zzzz982,zzzzz29	false
4578		zzzz982,zzzzz80	false
4579		zzzz982,zzzzz21	false
4580		zzzz982,zzzz988	false
4581		zzzz982,zzzz986	false
4582		zzzz982,zzzz985	false
4583		zzzz982,zzzz984	false
4584		zzzz982,zzzzz32	false
4585		zzzz982,zzzz989	false
4586		zzzz982,zzzz987	false
4587		zzzz982,zzzzz28	false
4588		zzzz982,zzzzz95	false
4589		zzzz982,zzzzz25	false
4590		zzzz982,zzzzz11	false
4591		zzzz982,zzzz998	false
4592		zzzz982,zzzzz13	false
4593		zzzz982,zzzzzz5	false
4594		zzzz981,zzzzz90	false
4595		zzzz981,zzzzz84	false
4596		zzzz981,zzzzz40	false
4597		zzzz981,zzzzz12	false
4598		zzzz981,zzzz997	false
4599		zzzz981,zzzzzz4	false
4600		zzzz981,zzzz993	false
4601		zzzz981,zzzz996	false
4602		zzzz981,zzzzzz3	false
4603		zzzz981,zzzzz33	false
4604		zzzz981,zzzzz24	false
4605		zzzz981,zzzzz39	false
4606		zzzz981,zzzzz22	false
4607		zzzz981,zzzzz91	false
4608		zzzz981,zzzzz30	false
4609		zzzz981,zzzzz16	false
4610		zzzz981,zzzzz26	false
4611		zzzz981,zzzz983	false
4612		zzzz981,zzzzz27	false
4613		zzzz981,zzzzzz6	false
4614		zzzz981,zzzzz38	false
4615		zzzz981,zzzz994	false
4616		zzzz981,zzzzzz0	false
4617		zzzz981,zzzz991	false
4618		zzzz981,zzzzz37	false
4619		zzzz981,zzzzz36	false
4620		zzzz981,zzzzz23	false
4621		zzzz981,zzzz990	false
4622		zzzz981,zzzzz35	false
4623		zzzz981,zzzzz34	false
4624		zzzz981,zzzzz31	false
4625		zzzz981,zzzzz29	false
4626		zzzz981,zzzzz81	false
4627		zzzz981,zzzzz32	false
4628		zzzz981,zzzzz21	false
4629		zzzz981,zzzzz80	false
4630		zzzz981,zzzz988	false
4631		zzzz981,zzzz986	false
4632		zzzz981,zzzz985	false
4633		zzzz981,zzzz984	false
4634		zzzz981,zzzz989	false
4635		zzzz981,zzzz987	false
4636		zzzz981,zzzzz28	false
4637		zzzz981,zzzzz95	false
4638		zzzz981,zzzzz11	false
4639		zzzz981,zzzzz25	false
4640		zzzz981,zzzz998	false
4641		zzzz981,zzzzz13	false
4642		zzzz981,zzzzzz5	false
4643		zzzz981,zzzz982	false
4644		zzzz980,zzzzz16	false
4645		zzzz980,zzzzz93	false
4646		zzzz980,zzzzz24	false
4647		zzzz980,zzzzz12	false
4648		zzzz980,zzzz981	false
4649		zzzz980,zzzz982	false
4650		zzzz980,zzzzz27	false
4651		zzzz980,zzzzzz6	false
4652		zzzz980,zzzzz22	false
4653		zzzz980,zzzzz30	false
4654		zzzz980,zzzzz26	false
4655		zzzz980,zzzzz33	false
4656		zzzz980,zzzz986	false
4657		zzzz980,zzzz985	false
4658		zzzz980,zzzz984	false
4659		zzzz980,zzzz990	false
4660		zzzz980,zzzz989	false
4661		zzzz980,zzzz988	false
4662		zzzz980,zzzzz34	false
4663		zzzz980,zzzz991	false
4664		zzzz980,zzzzz21	false
4665		zzzz980,zzzz994	false
4666		zzzz980,zzzz987	false
4667		zzzz980,zzzzz23	false
4668		zzzz980,zzzz998	false
4669		zzzz980,zzzzz36	false
4670		zzzz980,zzzzz32	false
4671		zzzz980,zzzzz31	false
4672		zzzz980,zzzzz35	false
4673		zzzz980,zzzzz81	false
4674		zzzz980,zzzzz13	false
4675		zzzz980,zzzzz11	false
4676		zzzz980,zzzzzz5	false
4677		zzzz980,zzzzz25	false
4678		zzzz980,zzzz983	false
4679		zzzz980,zzzzz39	false
4680		zzzz980,zzzzzz0	false
4681		zzzz980,zzzzz80	false
4682		zzzz980,zzzzz29	false
4683		zzzz980,zzzzz37	false
4684		zzzz980,zzzzz95	false
4685		zzzz980,zzzzz28	false
4686		zzzz979,zzzzz38	false
4687		zzzz979,zzzzz16	false
4688		zzzz979,zzzzz93	false
4689		zzzz979,zzzzz24	false
4690		zzzz979,zzzz981	false
4691		zzzz979,zzzz982	false
4692		zzzz979,zzzzz12	false
4693		zzzz979,zzzzz27	false
4694		zzzz979,zzzzzz6	false
4695		zzzz979,zzzzz22	false
4696		zzzz979,zzzzz30	false
4697		zzzz979,zzzzz26	false
4698		zzzz979,zzzzz33	false
4699		zzzz979,zzzz989	false
4700		zzzz979,zzzz988	false
4701		zzzz979,zzzz986	false
4702		zzzz979,zzzz985	false
4703		zzzz979,zzzz984	false
4704		zzzz979,zzzzz34	false
4705		zzzz979,zzzz991	false
4706		zzzz979,zzzz990	false
4707		zzzz979,zzzz987	false
4708		zzzz979,zzzzz21	false
4709		zzzz979,zzzz994	false
4710		zzzz979,zzzzz23	false
4711		zzzz979,zzzzz36	false
4712		zzzz979,zzzz998	false
4713		zzzz979,zzzzz32	false
4714		zzzz979,zzzzz31	false
4715		zzzz979,zzzzz81	false
4716		zzzz979,zzzzz35	false
4717		zzzz979,zzzzz13	false
4718		zzzz979,zzzzz11	false
4719		zzzz979,zzzzzz5	false
4720		zzzz979,zzzzz25	false
4721		zzzz979,zzzz983	false
4722		zzzz979,zzzzz39	false
4723		zzzz979,zzzzzz0	false
4724		zzzz979,zzzzz80	false
4725		zzzz979,zzzzz29	false
[truncated: 109,894 more rows]
