# Supplementary material for: Discovery of several thousand highly diverse circular DNA viruses
Source: eLife journal article supplement (doi:10.7554/elife.51971), 2020-02-03
Supplement: fig3-data1 [file elife-51971-fig3-data1-v1.cys › CytoscapeSession-2019_08_03-06_44/tables/57-Mike_class_reps60+Full+Network/LOCAL_ATTRS-org.cytoscape.model.CyNode-Mike_class_reps60+Full+Network+default+node.cytable]

CyCSV-Version	1
SUID	name	selected
java.lang.Long	java.lang.String	java.lang.Boolean
Mike_class_reps60 Full Network default node
67	zzzzzz9	false
68	zzzzzz8	false
69	zzzzzz7	false
70	zzzzzz6	false
71	zzzzzz5	false
72	zzzzzz4	false
73	zzzzzz3	false
74	zzzzzz2	false
75	zzzzzz1	false
76	zzzzzz0	false
77	zzzzz99	false
78	zzzzz98	false
79	zzzzz97	false
80	zzzzz96	false
81	zzzzz95	false
82	zzzzz94	false
83	zzzzz93	false
84	zzzzz92	false
85	zzzzz91	false
86	zzzzz90	false
87	zzzzz89	false
88	zzzzz88	false
89	zzzzz87	false
90	zzzzz86	false
91	zzzzz85	false
92	zzzzz84	false
93	zzzzz83	false
94	zzzzz82	false
95	zzzzz81	false
96	zzzzz80	false
97	zzzzz79	false
98	zzzzz78	false
99	zzzzz77	false
100	zzzzz76	false
101	zzzzz75	false
102	zzzzz74	false
103	zzzzz73	false
104	zzzzz72	false
105	zzzzz71	false
106	zzzzz70	false
107	zzzzz69	false
108	zzzzz68	false
109	zzzzz67	false
110	zzzzz66	false
111	zzzzz65	false
112	zzzzz64	false
113	zzzzz63	false
114	zzzzz62	false
115	zzzzz61	false
116	zzzzz60	false
117	zzzzz59	false
118	zzzzz58	false
119	zzzzz57	false
120	zzzzz56	false
121	zzzzz55	false
122	zzzzz54	false
123	zzzzz53	false
124	zzzzz52	false
125	zzzzz51	false
126	zzzzz50	false
127	zzzzz49	false
128	zzzzz48	false
129	zzzzz47	false
130	zzzzz46	false
131	zzzzz45	false
132	zzzzz44	false
133	zzzzz43	false
134	zzzzz42	false
135	zzzzz41	false
136	zzzzz40	false
137	zzzzz39	false
138	zzzzz38	false
139	zzzzz37	false
140	zzzzz36	false
141	zzzzz35	false
142	zzzzz34	false
143	zzzzz33	false
144	zzzzz32	false
145	zzzzz31	false
146	zzzzz30	false
147	zzzzz29	false
148	zzzzz28	false
149	zzzzz27	false
150	zzzzz26	false
151	zzzzz25	false
152	zzzzz24	false
153	zzzzz23	false
154	zzzzz22	false
155	zzzzz21	false
156	zzzzz20	false
157	zzzzz19	false
158	zzzzz18	false
159	zzzzz17	false
160	zzzzz16	false
161	zzzzz15	false
162	zzzzz14	false
163	zzzzz13	false
164	zzzzz12	false
165	zzzzz11	false
166	zzzzz10	false
167	zzzz999	false
168	zzzz998	false
169	zzzz997	false
170	zzzz996	false
171	zzzz995	false
172	zzzz994	false
173	zzzz993	false
174	zzzz992	false
175	zzzz991	false
176	zzzz990	false
177	zzzz989	false
178	zzzz988	false
179	zzzz987	false
180	zzzz986	false
181	zzzz985	false
182	zzzz984	false
183	zzzz983	false
184	zzzz982	false
185	zzzz981	false
186	zzzz980	false
187	zzzz979	false
188	zzzz978	false
189	zzzz977	false
190	zzzz976	false
191	zzzz975	false
192	zzzz974	false
193	zzzz973	false
194	zzzz972	false
195	zzzz971	false
196	zzzz970	false
197	zzzz969	false
198	zzzz968	false
199	zzzz967	false
200	zzzz966	false
201	zzzz965	false
202	zzzz964	false
203	zzzz963	false
204	zzzz962	false
205	zzzz961	false
206	zzzz960	false
207	zzzz959	false
208	zzzz958	false
209	zzzz957	false
210	zzzz956	false
211	zzzz955	false
212	zzzz954	false
213	zzzz953	false
214	zzzz952	false
215	zzzz951	false
216	zzzz950	false
217	zzzz949	false
218	zzzz948	false
219	zzzz947	false
220	zzzz946	false
221	zzzz945	false
222	zzzz944	false
223	zzzz943	false
224	zzzz942	false
225	zzzz941	false
226	zzzz940	false
227	zzzz939	false
228	zzzz938	false
229	zzzz937	false
230	zzzz936	false
231	zzzz935	false
232	zzzz934	false
233	zzzz933	false
234	zzzz932	false
235	zzzz931	false
236	zzzz930	false
237	zzzz929	false
238	zzzz928	false
239	zzzz927	false
240	zzzz926	false
241	zzzz925	false
242	zzzz924	false
243	zzzz923	false
244	zzzz922	false
245	zzzz921	false
246	zzzz920	false
247	zzzz919	false
248	zzzz918	false
249	zzzz917	false
250	zzzz916	false
251	zzzz915	false
252	zzzz914	false
253	zzzz913	false
254	zzzz912	false
255	zzzz911	false
256	zzzz910	false
257	zzzz909	false
258	zzzz908	false
259	zzzz907	false
260	zzzz906	false
261	zzzz905	false
262	zzzz904	false
263	zzzz903	false
264	zzzz902	false
265	zzzz901	false
266	zzzz900	false
267	zzzz899	false
268	zzzz898	false
269	zzzz897	false
270	zzzz896	false
271	zzzz895	false
272	zzzz894	false
273	zzzz893	false
274	zzzz892	false
275	zzzz891	false
276	zzzz890	false
277	zzzz889	false
278	zzzz888	false
279	zzzz887	false
280	zzzz886	false
281	zzzz885	false
282	zzzz884	false
283	zzzz883	false
284	zzzz882	false
285	zzzz881	false
286	zzzz880	false
287	zzzz879	false
288	zzzz878	false
289	zzzz877	false
290	zzzz876	false
291	zzzz875	false
292	zzzz874	false
293	zzzz873	false
294	zzzz872	false
295	zzzz871	false
296	zzzz870	false
297	zzzz869	false
298	zzzz868	false
299	zzzz867	false
300	zzzz866	false
301	zzzz865	false
302	zzzz864	false
303	zzzz863	false
304	zzzz862	false
305	zzzz861	false
306	zzzz860	false
307	zzzz859	false
308	zzzz858	false
309	zzzz857	false
310	zzzz856	false
311	zzzz855	false
312	zzzz854	false
313	zzzz853	false
314	zzzz852	false
315	zzzz851	false
316	zzzz850	false
317	zzzz849	false
318	zzzz848	false
319	zzzz847	false
320	zzzz846	false
321	zzzz845	false
322	zzzz844	false
323	zzzz843	false
324	zzzz842	false
325	zzzz841	false
326	zzzz840	false
327	zzzz839	false
328	zzzz838	false
329	zzzz837	false
330	zzzz836	false
331	zzzz835	false
332	zzzz834	false
333	zzzz833	false
334	zzzz832	false
335	zzzz831	false
336	zzzz830	false
337	zzzz829	false
338	zzzz828	false
339	zzzz827	false
340	zzzz826	false
341	zzzz825	false
342	zzzz824	false
343	zzzz823	false
344	zzzz822	false
345	zzzz821	false
346	zzzz820	false
347	zzzz819	false
348	zzzz818	false
349	zzzz817	false
350	zzzz816	false
351	zzzz815	false
352	zzzz814	false
353	zzzz813	false
354	zzzz812	false
355	zzzz811	false
356	zzzz810	false
357	zzzz809	false
358	zzzz808	false
359	zzzz807	false
360	zzzz806	false
361	zzzz805	false
362	zzzz804	false
363	zzzz803	false
364	zzzz802	false
365	zzzz801	false
366	zzzz800	false
367	zzzz799	false
368	zzzz798	false
369	zzzz797	false
370	zzzz796	false
371	zzzz795	false
372	zzzz794	false
373	zzzz793	false
374	zzzz792	false
375	zzzz791	false
376	zzzz790	false
377	zzzz789	false
378	zzzz788	false
379	zzzz787	false
380	zzzz786	false
381	zzzz785	false
382	zzzz784	false
383	zzzz783	false
384	zzzz782	false
385	zzzz781	false
386	zzzz780	false
387	zzzz779	false
388	zzzz778	false
389	zzzz777	false
390	zzzz776	false
391	zzzz775	false
392	zzzz774	false
393	zzzz773	false
394	zzzz772	false
395	zzzz771	false
396	zzzz770	false
397	zzzz769	false
398	zzzz768	false
399	zzzz767	false
400	zzzz766	false
401	zzzz765	false
402	zzzz764	false
403	zzzz763	false
404	zzzz762	false
405	zzzz761	false
406	zzzz760	false
407	zzzz759	false
408	zzzz758	false
409	zzzz757	false
410	zzzz756	false
411	zzzz755	false
412	zzzz754	false
413	zzzz753	false
414	zzzz752	false
415	zzzz751	false
416	zzzz750	false
417	zzzz749	false
418	zzzz748	false
419	zzzz747	false
420	zzzz746	false
421	zzzz745	false
422	zzzz744	false
423	zzzz743	false
424	zzzz742	false
425	zzzz741	false
426	zzzz740	false
427	zzzz739	false
428	zzzz738	false
429	zzzz737	false
430	zzzz736	false
431	zzzz735	false
432	zzzz734	false
433	zzzz733	false
434	zzzz732	false
435	zzzz731	false
436	zzzz730	false
437	zzzz729	false
438	zzzz728	false
439	zzzz727	false
440	zzzz726	false
441	zzzz725	false
442	zzzz724	false
443	zzzz723	false
444	zzzz722	false
445	zzzz721	false
446	zzzz720	false
447	zzzz719	false
448	zzzz718	false
449	zzzz717	false
450	zzzz716	false
451	zzzz715	false
452	zzzz714	false
453	zzzz713	false
454	zzzz712	false
455	zzzz711	false
456	zzzz710	false
457	zzzz709	false
458	zzzz708	false
459	zzzz707	false
460	zzzz706	false
461	zzzz705	false
462	zzzz704	false
463	zzzz703	false
464	zzzz702	false
465	zzzz701	false
466	zzzz700	false
467	zzzz699	false
468	zzzz698	false
469	zzzz697	false
470	zzzz696	false
471	zzzz695	false
472	zzzz694	false
473	zzzz693	false
474	zzzz692	false
475	zzzz691	false
476	zzzz690	false
477	zzzz689	false
478	zzzz688	false
479	zzzz687	false
480	zzzz686	false
481	zzzz685	false
482	zzzz684	false
483	zzzz683	false
484	zzzz682	false
485	zzzz681	false
486	zzzz680	false
487	zzzz679	false
488	zzzz678	false
489	zzzz677	false
490	zzzz676	false
491	zzzz675	false
492	zzzz674	false
493	zzzz673	false
494	zzzz672	false
495	zzzz671	false
496	zzzz670	false
497	zzzz669	false
498	zzzz668	false
499	zzzz667	false
500	zzzz666	false
501	zzzz665	false
502	zzzz664	false
503	zzzz663	false
504	zzzz662	false
505	zzzz661	false
506	zzzz660	false
507	zzzz659	false
508	zzzz658	false
509	zzzz657	false
510	zzzz656	false
511	zzzz655	false
512	zzzz654	false
513	zzzz653	false
514	zzzz652	false
515	zzzz651	false
516	zzzz650	false
517	zzzz649	false
518	zzzz648	false
519	zzzz647	false
520	zzzz646	false
521	zzzz645	false
522	zzzz644	false
523	zzzz643	false
524	zzzz642	false
525	zzzz641	false
526	zzzz640	false
527	zzzz639	false
528	zzzz638	false
529	zzzz637	false
530	zzzz636	false
531	zzzz635	false
532	zzzz634	false
533	zzzz633	false
534	zzzz632	false
535	zzzz631	false
536	zzzz630	false
537	zzzz629	false
538	zzzz628	false
539	zzzz627	false
540	zzzz626	false
541	zzzz625	false
542	zzzz624	false
543	zzzz623	false
544	zzzz622	false
545	zzzz621	false
546	zzzz620	false
547	zzzz619	false
548	zzzz618	false
549	zzzz617	false
550	zzzz616	false
551	zzzz615	false
552	zzzz614	false
553	zzzz613	false
554	zzzz612	false
555	zzzz611	false
556	zzzz610	false
557	zzzz609	false
558	zzzz608	false
559	zzzz607	false
560	zzzz606	false
561	zzzz605	false
562	zzzz604	false
563	zzzz603	false
564	zzzz602	false
565	zzzz601	false
566	zzzz600	false
567	zzzz599	false
568	zzzz598	false
569	zzzz597	false
570	zzzz596	false
571	zzzz595	false
572	zzzz594	false
573	zzzz593	false
574	zzzz592	false
575	zzzz591	false
576	zzzz590	false
577	zzzz589	false
578	zzzz588	false
579	zzzz587	false
580	zzzz586	false
581	zzzz585	false
582	zzzz584	false
583	zzzz583	false
584	zzzz582	false
585	zzzz581	false
586	zzzz580	false
587	zzzz579	false
588	zzzz578	false
589	zzzz577	false
590	zzzz576	false
591	zzzz575	false
592	zzzz574	false
593	zzzz573	false
594	zzzz572	false
595	zzzz571	false
596	zzzz570	false
597	zzzz569	false
598	zzzz568	false
599	zzzz567	false
600	zzzz566	false
601	zzzz565	false
602	zzzz564	false
603	zzzz563	false
604	zzzz562	false
605	zzzz561	false
606	zzzz560	false
607	zzzz559	false
608	zzzz558	false
609	zzzz557	false
610	zzzz556	false
611	zzzz555	false
612	zzzz554	false
613	zzzz553	false
614	zzzz552	false
615	zzzz551	false
616	zzzz550	false
617	zzzz549	false
618	zzzz548	false
619	zzzz547	false
620	zzzz546	false
621	zzzz545	false
622	zzzz544	false
623	zzzz543	false
624	zzzz542	false
625	zzzz541	false
626	zzzz540	false
627	zzzz539	false
628	zzzz538	false
629	zzzz537	false
630	zzzz536	false
631	zzzz535	false
632	zzzz534	false
633	zzzz533	false
634	zzzz532	false
635	zzzz531	false
636	zzzz530	false
637	zzzz529	false
638	zzzz528	false
639	zzzz527	false
640	zzzz526	false
641	zzzz525	false
642	zzzz524	false
643	zzzz523	false
644	zzzz522	false
645	zzzz521	false
646	zzzz520	false
647	zzzz519	false
648	zzzz518	false
649	zzzz517	false
650	zzzz516	false
651	zzzz515	false
652	zzzz514	false
653	zzzz513	false
654	zzzz512	false
655	zzzz511	false
656	zzzz510	false
657	zzzz509	false
658	zzzz508	false
659	zzzz507	false
660	zzzz506	false
661	zzzz505	false
662	zzzz504	false
663	zzzz503	false
664	zzzz502	false
665	zzzz501	false
666	zzzz500	false
667	zzzz499	false
668	zzzz498	false
669	zzzz497	false
670	zzzz496	false
671	zzzz495	false
672	zzzz494	false
673	zzzz493	false
674	zzzz492	false
675	zzzz491	false
676	zzzz490	false
677	zzzz489	false
678	zzzz488	false
679	zzzz487	false
680	zzzz486	false
681	zzzz485	false
682	zzzz484	false
683	zzzz483	false
684	zzzz482	false
685	zzzz481	false
686	zzzz480	false
687	zzzz479	false
688	zzzz478	false
689	zzzz477	false
690	zzzz476	false
691	zzzz475	false
692	zzzz474	false
693	zzzz473	false
694	zzzz472	false
695	zzzz471	false
696	zzzz470	false
697	zzzz469	false
698	zzzz468	false
699	zzzz467	false
700	zzzz466	false
701	zzzz465	false
702	zzzz464	false
703	zzzz463	false
704	zzzz462	false
705	zzzz461	false
706	zzzz460	false
707	zzzz459	false
708	zzzz458	false
709	zzzz457	false
710	zzzz456	false
711	zzzz455	false
712	zzzz454	false
713	zzzz453	false
714	zzzz452	false
715	zzzz451	false
716	zzzz450	false
717	zzzz449	false
718	zzzz448	false
719	zzzz447	false
720	zzzz446	false
721	zzzz445	false
722	zzzz444	false
723	zzzz443	false
724	zzzz442	false
725	zzzz441	false
726	zzzz440	false
727	zzzz439	false
728	zzzz438	false
729	zzzz437	false
730	zzzz436	false
731	zzzz435	false
732	zzzz434	false
733	zzzz433	false
734	zzzz432	false
735	zzzz431	false
736	zzzz430	false
737	zzzz429	false
738	zzzz428	false
739	zzzz427	false
740	zzzz426	false
741	zzzz425	false
742	zzzz424	false
743	zzzz423	false
744	zzzz422	false
745	zzzz421	false
746	zzzz420	false
747	zzzz419	false
748	zzzz418	false
749	zzzz417	false
750	zzzz416	false
751	zzzz415	false
752	zzzz414	false
753	zzzz413	false
754	zzzz412	false
755	zzzz411	false
756	zzzz410	false
757	zzzz409	false
758	zzzz408	false
759	zzzz407	false
760	zzzz406	false
761	zzzz405	false
762	zzzz404	false
763	zzzz403	false
764	zzzz402	false
765	zzzz401	false
766	zzzz400	false
767	zzzz399	false
768	zzzz398	false
769	zzzz397	false
770	zzzz396	false
771	zzzz395	false
772	zzzz394	false
773	zzzz393	false
774	zzzz392	false
775	zzzz391	false
776	zzzz390	false
777	zzzz389	false
778	zzzz388	false
779	zzzz387	false
780	zzzz386	false
781	zzzz385	false
782	zzzz384	false
783	zzzz383	false
784	zzzz382	false
785	zzzz381	false
786	zzzz380	false
787	zzzz379	false
788	zzzz378	false
789	zzzz377	false
790	zzzz376	false
791	zzzz375	false
792	zzzz374	false
793	zzzz373	false
794	zzzz372	false
795	zzzz371	false
796	zzzz370	false
797	zzzz369	false
798	zzzz368	false
799	zzzz367	false
800	zzzz366	false
801	zzzz365	false
802	zzzz364	false
803	zzzz363	false
804	zzzz362	false
805	zzzz361	false
806	zzzz360	false
807	zzzz359	false
808	zzzz358	false
809	zzzz357	false
810	zzzz356	false
811	zzzz355	false
812	zzzz354	false
813	zzzz353	false
814	zzzz352	false
815	zzzz351	false
816	zzzz350	false
817	zzzz349	false
818	zzzz348	false
819	zzzz347	false
820	zzzz346	false
821	zzzz345	false
822	zzzz344	false
823	zzzz343	false
824	zzzz342	false
825	zzzz341	false
826	zzzz340	false
827	zzzz339	false
828	zzzz338	false
829	zzzz337	false
830	zzzz336	false
831	zzzz335	false
832	zzzz334	false
833	zzzz333	false
834	zzzz332	false
835	zzzz331	false
836	zzzz330	false
837	zzzz329	false
838	zzzz328	false
839	zzzz327	false
840	zzzz326	false
841	zzzz325	false
842	zzzz324	false
843	zzzz323	false
844	zzzz322	false
845	zzzz321	false
846	zzzz320	false
847	zzzz319	false
848	zzzz318	false
849	zzzz317	false
850	zzzz316	false
851	zzzz315	false
852	zzzz314	false
853	zzzz313	false
854	zzzz312	false
855	zzzz311	false
856	zzzz310	false
857	zzzz309	false
858	zzzz308	false
859	zzzz307	false
860	zzzz306	false
861	zzzz305	false
862	zzzz304	false
863	zzzz303	false
864	zzzz302	false
865	zzzz301	false
866	zzzz300	false
867	zzzz299	false
868	zzzz298	false
869	zzzz297	false
870	zzzz296	false
871	zzzz295	false
872	zzzz294	false
873	zzzz293	false
874	zzzz292	false
875	zzzz291	false
876	zzzz290	false
877	zzzz289	false
878	zzzz288	false
879	zzzz287	false
880	zzzz286	false
881	zzzz285	false
882	zzzz284	false
883	zzzz283	false
884	zzzz282	false
885	zzzz281	false
886	zzzz280	false
887	zzzz279	false
888	zzzz278	false
889	zzzz277	false
890	zzzz276	false
891	zzzz275	false
892	zzzz274	false
893	zzzz273	false
894	zzzz272	false
895	zzzz271	false
896	zzzz270	false
897	zzzz269	false
898	zzzz268	false
899	zzzz267	false
900	zzzz266	false
901	zzzz265	false
902	zzzz264	false
903	zzzz263	false
904	zzzz262	false
905	zzzz261	false
906	zzzz260	false
907	zzzz259	false
908	zzzz258	false
909	zzzz257	false
910	zzzz256	false
911	zzzz255	false
912	zzzz254	false
913	zzzz253	false
914	zzzz252	false
915	zzzz251	false
916	zzzz250	false
917	zzzz249	false
918	zzzz248	false
919	zzzz247	false
920	zzzz246	false
921	zzzz245	false
922	zzzz244	false
923	zzzz243	false
924	zzzz242	false
925	zzzz241	false
926	zzzz240	false
927	zzzz239	false
928	zzzz238	false
929	zzzz237	false
930	zzzz236	false
931	zzzz235	false
932	zzzz234	false
933	zzzz233	false
934	zzzz232	false
935	zzzz231	false
936	zzzz230	false
937	zzzz229	false
938	zzzz228	false
939	zzzz227	false
940	zzzz226	false
941	zzzz225	false
942	zzzz224	false
943	zzzz223	false
944	zzzz222	false
945	zzzz221	false
946	zzzz220	false
947	zzzz219	false
948	zzzz218	false
949	zzzz217	false
950	zzzz216	false
951	zzzz215	false
952	zzzz214	false
953	zzzz213	false
954	zzzz212	false
955	zzzz211	false
956	zzzz210	false
957	zzzz209	false
958	zzzz208	false
959	zzzz207	false
960	zzzz206	false
961	zzzz205	false
962	zzzz204	false
963	zzzz203	false
964	zzzz202	false
965	zzzz201	false
966	zzzz200	false
967	zzzz199	false
968	zzzz198	false
969	zzzz197	false
970	zzzz196	false
971	zzzz195	false
972	zzzz194	false
973	zzzz193	false
974	zzzz192	false
975	zzzz191	false
976	zzzz190	false
977	zzzz189	false
978	zzzz188	false
979	zzzz187	false
980	zzzz186	false
981	zzzz185	false
982	zzzz184	false
983	zzzz183	false
984	zzzz182	false
985	zzzz181	false
986	zzzz180	false
987	zzzz179	false
988	zzzz178	false
989	zzzz177	false
990	zzzz176	false
991	zzzz175	false
992	zzzz174	false
993	zzzz173	false
994	zzzz172	false
995	zzzz171	false
996	zzzz170	false
997	zzzz169	false
998	zzzz168	false
999	zzzz167	false
1000	zzzz166	false
1001	zzzz165	false
1002	zzzz164	false
1003	zzzz163	false
1004	zzzz162	false
1005	zzzz161	false
1006	zzzz160	false
1007	zzzz159	false
1008	zzzz158	false
1009	zzzz157	false
1010	zzzz156	false
1011	zzzz155	false
1012	zzzz154	false
1013	zzzz153	false
1014	zzzz152	false
1015	zzzz151	false
1016	zzzz150	false
1017	zzzz149	false
1018	zzzz148	false
1019	zzzz147	false
1020	zzzz146	false
1021	zzzz145	false
1022	zzzz144	false
1023	zzzz143	false
1024	zzzz142	false
1025	zzzz141	false
1026	zzzz140	false
1027	zzzz139	false
1028	zzzz138	false
1029	zzzz137	false
1030	zzzz136	false
1031	zzzz135	false
1032	zzzz134	false
1033	zzzz133	false
1034	zzzz132	false
1035	zzzz131	false
1036	zzzz130	false
1037	zzzz129	false
1038	zzzz128	false
1039	zzzz127	false
1040	zzzz126	false
1041	zzzz125	false
1042	zzzz124	false
1043	zzzz123	false
1044	zzzz122	false
1045	zzzz121	false
1046	zzzz120	false
1047	zzzz119	false
1048	zzzz118	false
1049	zzzz117	false
1050	zzzz116	false
1051	zzzz115	false
1052	zzzz114	false
1053	zzzz113	false
1054	zzzz112	false
1055	zzzz111	false
1056	zzzz110	false
1057	zzzz109	false
1058	zzzz108	false
1059	zzzz107	false
1060	zzzz106	false
1061	zzzz105	false
1062	zzzz104	false
1063	zzzz103	false
1064	zzzz102	false
1065	zzzz101	false
1066	zzzz100	false
1067	zzz2662	false
1068	zzz2661	false
1069	zzz2660	false
1070	zzz2659	false
1071	zzz2658	false
1072	zzz2657	false
1073	zzz2656	false
1074	zzz2655	false
1075	zzz2654	false
1076	zzz2653	false
1077	zzz2652	false
1078	zzz2651	false
1079	zzz2650	false
1080	zzz2649	false
1081	zzz2648	false
1082	zzz2647	false
1083	zzz2646	false
1084	zzz2645	false
1085	zzz2644	false
1086	zzz2643	false
1087	zzz2642	false
1088	zzz2641	false
1089	zzz2640	false
1090	zzz2639	false
1091	zzz2638	false
1092	zzz2637	false
1093	zzz2636	false
1094	zzz2635	false
1095	zzz2634	false
1096	zzz2633	false
1097	zzz2632	false
1098	zzz2631	false
1099	zzz2630	false
1100	zzz2629	false
1101	zzz2628	false
1102	zzz2627	false
1103	zzz2626	false
1104	zzz2625	false
1105	zzz2624	false
1106	zzz2623	false
1107	zzz2622	false
1108	zzz2621	false
1109	zzz2620	false
1110	zzz2619	false
1111	zzz2618	false
1112	zzz2617	false
1113	zzz2616	false
1114	zzz2615	false
1115	zzz2614	false
1116	zzz2613	false
1117	zzz2612	false
1118	zzz2611	false
1119	zzz2610	false
1120	zzz2609	false
1121	zzz2608	false
1122	zzz2607	false
1123	zzz2606	false
1124	zzz2605	false
1125	zzz2604	false
1126	zzz2603	false
1127	zzz2602	false
1128	zzz2601	false
1129	zzz2600	false
1130	zzz2599	false
1131	zzz2598	false
1132	zzz2597	false
1133	zzz2596	false
1134	zzz2595	false
1135	zzz2594	false
1136	zzz2593	false
1137	zzz2592	false
1138	zzz2591	false
1139	zzz2590	false
1140	zzz2589	false
1141	zzz2588	false
1142	zzz2587	false
1143	zzz2586	false
1144	zzz2585	false
1145	zzz2584	false
1146	zzz2583	false
1147	zzz2582	false
1148	zzz2581	false
1149	zzz2580	false
1150	zzz2579	false
1151	zzz2578	false
1152	zzz2577	false
1153	zzz2576	false
1154	zzz2575	false
1155	zzz2574	false
1156	zzz2573	false
1157	zzz2572	false
1158	zzz2571	false
1159	zzz2570	false
1160	zzz2569	false
1161	zzz2568	false
1162	zzz2567	false
1163	zzz2566	false
1164	zzz2565	false
1165	zzz2564	false
1166	zzz2563	false
1167	zzz2562	false
1168	zzz2561	false
1169	zzz2560	false
1170	zzz2559	false
1171	zzz2558	false
1172	zzz2557	false
1173	zzz2556	false
1174	zzz2555	false
1175	zzz2554	false
1176	zzz2553	false
1177	zzz2552	false
1178	zzz2551	false
1179	zzz2550	false
1180	zzz2549	false
1181	zzz2548	false
1182	zzz2547	false
1183	zzz2546	false
1184	zzz2545	false
1185	zzz2544	false
1186	zzz2543	false
1187	zzz2542	false
1188	zzz2541	false
1189	zzz2540	false
1190	zzz2539	false
1191	zzz2538	false
1192	zzz2537	false
1193	zzz2536	false
1194	zzz2535	false
1195	zzz2534	false
1196	zzz2533	false
1197	zzz2532	false
1198	zzz2531	false
1199	zzz2530	false
1200	zzz2529	false
1201	zzz2528	false
1202	zzz2527	false
1203	zzz2526	false
1204	zzz2525	false
1205	zzz2524	false
1206	zzz2523	false
1207	zzz2522	false
1208	zzz2521	false
1209	zzz2520	false
1210	zzz2519	false
1211	zzz2518	false
1212	zzz2517	false
1213	zzz2516	false
1214	zzz2515	false
1215	zzz2514	false
1216	zzz2513	false
1217	zzz2512	false
1218	zzz2511	false
1219	zzz2510	false
1220	zzz2509	false
1221	zzz2508	false
1222	zzz2507	false
1223	zzz2506	false
1224	zzz2505	false
1225	zzz2504	false
1226	zzz2503	false
1227	zzz2502	false
1228	zzz2501	false
1229	zzz2500	false
1230	zzz2499	false
1231	zzz2498	false
1232	zzz2497	false
1233	zzz2496	false
1234	zzz2495	false
1235	zzz2494	false
1236	zzz2493	false
1237	zzz2492	false
1238	zzz2491	false
1239	zzz2490	false
1240	zzz2489	false
1241	zzz2488	false
1242	zzz2487	false
1243	zzz2486	false
1244	zzz2485	false
1245	zzz2484	false
1246	zzz2483	false
1247	zzz2482	false
1248	zzz2481	false
1249	zzz2480	false
1250	zzz2479	false
1251	zzz2478	false
1252	zzz2477	false
1253	zzz2476	false
1254	zzz2475	false
1255	zzz2474	false
1256	zzz2473	false
1257	zzz2472	false
1258	zzz2471	false
1259	zzz2470	false
1260	zzz2469	false
1261	zzz2468	false
1262	zzz2467	false
1263	zzz2466	false
1264	zzz2465	false
1265	zzz2464	false
1266	zzz2463	false
1267	zzz2462	false
1268	zzz2461	false
1269	zzz2460	false
1270	zzz2459	false
1271	zzz2458	false
1272	zzz2457	false
1273	zzz2456	false
1274	zzz2455	false
1275	zzz2454	false
1276	zzz2453	false
1277	zzz2452	false
1278	zzz2451	false
1279	zzz2450	false
1280	zzz2449	false
1281	zzz2448	false
1282	zzz2447	false
1283	zzz2446	false
1284	zzz2445	false
1285	zzz2444	false
1286	zzz2443	false
1287	zzz2442	false
1288	zzz2441	false
1289	zzz2440	false
1290	zzz2439	false
1291	zzz2438	false
1292	zzz2437	false
1293	zzz2436	false
1294	zzz2435	false
1295	zzz2434	false
1296	zzz2433	false
1297	zzz2432	false
1298	zzz2431	false
1299	zzz2430	false
1300	zzz2429	false
1301	zzz2428	false
1302	zzz2427	false
1303	zzz2426	false
1304	zzz2425	false
1305	zzz2424	false
1306	zzz2423	false
1307	zzz2422	false
1308	zzz2421	false
1309	zzz2420	false
1310	zzz2419	false
1311	zzz2418	false
1312	zzz2417	false
1313	zzz2416	false
1314	zzz2415	false
1315	zzz2414	false
1316	zzz2413	false
1317	zzz2412	false
1318	zzz2411	false
1319	zzz2410	false
1320	zzz2409	false
1321	zzz2408	false
1322	zzz2407	false
1323	zzz2406	false
1324	zzz2405	false
1325	zzz2404	false
1326	zzz2403	false
1327	zzz2402	false
1328	zzz2401	false
1329	zzz2400	false
1330	zzz2399	false
1331	zzz2398	false
1332	zzz2397	false
1333	zzz2396	false
1334	zzz2395	false
1335	zzz2394	false
1336	zzz2393	false
1337	zzz2392	false
1338	zzz2391	false
1339	zzz2390	false
1340	zzz2389	false
1341	zzz2388	false
1342	zzz2387	false
1343	zzz2386	false
1344	zzz2385	false
1345	zzz2384	false
1346	zzz2383	false
1347	zzz2382	false
1348	zzz2381	false
1349	zzz2380	false
1350	zzz2379	false
1351	zzz2378	false
1352	zzz2377	false
1353	zzz2376	false
1354	zzz2375	false
1355	zzz2374	false
1356	zzz2373	false
1357	zzz2372	false
1358	zzz2371	false
1359	zzz2370	false
1360	zzz2369	false
1361	zzz2368	false
1362	zzz2367	false
1363	zzz2366	false
1364	zzz2365	false
1365	zzz2364	false
1366	zzz2363	false
1367	zzz2362	false
1368	zzz2361	false
1369	zzz2360	false
1370	zzz2359	false
1371	zzz2358	false
1372	zzz2357	false
1373	zzz2356	false
1374	zzz2355	false
1375	zzz2354	false
1376	zzz2353	false
1377	zzz2352	false
1378	zzz2351	false
1379	zzz2350	false
1380	zzz2349	false
1381	zzz2348	false
1382	zzz2347	false
1383	zzz2346	false
1384	zzz2345	false
1385	zzz2344	false
1386	zzz2343	false
1387	zzz2342	false
1388	zzz2341	false
1389	zzz2340	false
1390	zzz2339	false
1391	zzz2338	false
1392	zzz2337	false
1393	zzz2336	false
1394	zzz2335	false
1395	zzz2334	false
1396	zzz2333	false
1397	zzz2332	false
1398	zzz2331	false
1399	zzz2330	false
1400	zzz2329	false
1401	zzz2328	false
1402	zzz2327	false
1403	zzz2326	false
1404	zzz2325	false
1405	zzz2324	false
1406	zzz2323	false
1407	zzz2322	false
1408	zzz2321	false
1409	zzz2320	false
1410	zzz2319	false
1411	zzz2318	false
1412	zzz2317	false
1413	zzz2316	false
1414	zzz2315	false
1415	zzz2314	false
1416	zzz2313	false
1417	zzz2312	false
1418	zzz2311	false
1419	zzz2310	false
1420	zzz2309	false
1421	zzz2308	false
1422	zzz2307	false
1423	zzz2306	false
1424	zzz2305	false
1425	zzz2304	false
1426	zzz2303	false
1427	zzz2302	false
1428	zzz2301	false
1429	zzz2300	false
1430	zzz2299	false
1431	zzz2298	false
1432	zzz2297	false
1433	zzz2296	false
1434	zzz2295	false
1435	zzz2294	false
1436	zzz2293	false
1437	zzz2292	false
1438	zzz2291	false
1439	zzz2290	false
1440	zzz2289	false
1441	zzz2288	false
1442	zzz2287	false
1443	zzz2286	false
1444	zzz2285	false
1445	zzz2284	false
1446	zzz2283	false
1447	zzz2282	false
1448	zzz2281	false
1449	zzz2280	false
1450	zzz2279	false
1451	zzz2278	false
1452	zzz2277	false
1453	zzz2276	false
1454	zzz2275	false
1455	zzz2274	false
1456	zzz2273	false
1457	zzz2272	false
1458	zzz2271	false
1459	zzz2270	false
1460	zzz2269	false
1461	zzz2268	false
1462	zzz2267	false
1463	zzz2266	false
1464	zzz2265	false
1465	zzz2264	false
1466	zzz2263	false
1467	zzz2262	false
1468	zzz2261	false
1469	zzz2260	false
1470	zzz2259	false
1471	zzz2258	false
1472	zzz2257	false
1473	zzz2256	false
1474	zzz2255	false
1475	zzz2254	false
1476	zzz2253	false
1477	zzz2252	false
1478	zzz2251	false
1479	zzz2250	false
1480	zzz2249	false
1481	zzz2248	false
1482	zzz2247	false
1483	zzz2246	false
1484	zzz2245	false
1485	zzz2244	false
1486	zzz2243	false
1487	zzz2242	false
1488	zzz2241	false
1489	zzz2240	false
1490	zzz2239	false
1491	zzz2238	false
1492	zzz2237	false
1493	zzz2236	false
1494	zzz2235	false
1495	zzz2234	false
1496	zzz2233	false
1497	zzz2232	false
1498	zzz2231	false
1499	zzz2230	false
1500	zzz2229	false
1501	zzz2228	false
1502	zzz2227	false
1503	zzz2226	false
1504	zzz2225	false
1505	zzz2224	false
1506	zzz2223	false
1507	zzz2222	false
1508	zzz2221	false
1509	zzz2220	false
1510	zzz2219	false
1511	zzz2218	false
1512	zzz2217	false
1513	zzz2216	false
1514	zzz2215	false
1515	zzz2214	false
1516	zzz2213	false
1517	zzz2212	false
1518	zzz2211	false
1519	zzz2210	false
1520	zzz2209	false
1521	zzz2208	false
1522	zzz2207	false
1523	zzz2206	false
1524	zzz2205	false
1525	zzz2204	false
1526	zzz2203	false
1527	zzz2202	false
1528	zzz2201	false
1529	zzz2200	false
1530	zzz2199	false
1531	zzz2198	false
1532	zzz2197	false
1533	zzz2196	false
1534	zzz2195	false
1535	zzz2194	false
1536	zzz2193	false
1537	zzz2192	false
1538	zzz2191	false
1539	zzz2190	false
1540	zzz2189	false
1541	zzz2188	false
1542	zzz2187	false
1543	zzz2186	false
1544	zzz2185	false
1545	zzz2184	false
1546	zzz2183	false
1547	zzz2182	false
1548	zzz2181	false
1549	zzz2180	false
1550	zzz2179	false
1551	zzz2178	false
1552	zzz2177	false
1553	zzz2176	false
1554	zzz2175	false
1555	zzz2174	false
1556	zzz2173	false
1557	zzz2172	false
1558	zzz2171	false
1559	zzz2170	false
1560	zzz2169	false
1561	zzz2168	false
1562	zzz2167	false
1563	zzz2166	false
1564	zzz2165	false
1565	zzz2164	false
1566	zzz2163	false
1567	zzz2162	false
1568	zzz2161	false
1569	zzz2160	false
1570	zzz2159	false
1571	zzz2158	false
1572	zzz2157	false
1573	zzz2156	false
1574	zzz2155	false
1575	zzz2154	false
1576	zzz2153	false
1577	zzz2152	false
1578	zzz2151	false
1579	zzz2150	false
1580	zzz2149	false
1581	zzz2148	false
1582	zzz2147	false
1583	zzz2146	false
1584	zzz2145	false
1585	zzz2144	false
1586	zzz2143	false
1587	zzz2142	false
1588	zzz2141	false
1589	zzz2140	false
1590	zzz2139	false
1591	zzz2138	false
1592	zzz2137	false
1593	zzz2136	false
1594	zzz2135	false
1595	zzz2134	false
1596	zzz2133	false
1597	zzz2132	false
1598	zzz2131	false
1599	zzz2130	false
1600	zzz2129	false
1601	zzz2128	false
1602	zzz2127	false
1603	zzz2126	false
1604	zzz2125	false
1605	zzz2124	false
1606	zzz2123	false
1607	zzz2122	false
1608	zzz2121	false
1609	zzz2120	false
1610	zzz2119	false
1611	zzz2118	false
1612	zzz2117	false
1613	zzz2116	false
1614	zzz2115	false
1615	zzz2114	false
1616	zzz2113	false
1617	zzz2112	false
1618	zzz2111	false
1619	zzz2110	false
1620	zzz2109	false
1621	zzz2108	false
1622	zzz2107	false
1623	zzz2106	false
1624	zzz2105	false
1625	zzz2104	false
1626	zzz2103	false
1627	zzz2102	false
1628	zzz2101	false
1629	zzz2100	false
1630	zzz2099	false
1631	zzz2098	false
1632	zzz2097	false
1633	zzz2096	false
1634	zzz2095	false
1635	zzz2094	false
1636	zzz2093	false
1637	zzz2092	false
1638	zzz2091	false
1639	zzz2090	false
1640	zzz2089	false
1641	zzz2088	false
1642	zzz2087	false
1643	zzz2086	false
1644	zzz2085	false
1645	zzz2084	false
1646	zzz2083	false
1647	zzz2082	false
1648	zzz2081	false
1649	zzz2080	false
1650	zzz2079	false
1651	zzz2078	false
1652	zzz2077	false
1653	zzz2076	false
1654	zzz2075	false
1655	zzz2074	false
1656	zzz2073	false
1657	zzz2072	false
1658	zzz2071	false
1659	zzz2070	false
1660	zzz2069	false
1661	zzz2068	false
1662	zzz2067	false
1663	zzz2066	false
1664	zzz2065	false
1665	zzz2064	false
1666	zzz2063	false
1667	zzz2062	false
1668	zzz2061	false
1669	zzz2060	false
1670	zzz2059	false
1671	zzz2058	false
1672	zzz2057	false
1673	zzz2056	false
1674	zzz2055	false
1675	zzz2054	false
1676	zzz2053	false
1677	zzz2052	false
1678	zzz2051	false
1679	zzz2050	false
1680	zzz2049	false
1681	zzz2048	false
1682	zzz2047	false
1683	zzz2046	false
1684	zzz2045	false
1685	zzz2044	false
1686	zzz2043	false
1687	zzz2042	false
1688	zzz2041	false
1689	zzz2040	false
1690	zzz2039	false
1691	zzz2038	false
1692	zzz2037	false
1693	zzz2036	false
1694	zzz2035	false
1695	zzz2034	false
1696	zzz2033	false
1697	zzz2032	false
1698	zzz2031	false
1699	zzz2030	false
1700	zzz2029	false
1701	zzz2028	false
1702	zzz2027	false
1703	zzz2026	false
1704	zzz2025	false
1705	zzz2024	false
1706	zzz2023	false
1707	zzz2022	false
1708	zzz2021	false
1709	zzz2020	false
1710	zzz2019	false
1711	zzz2018	false
1712	zzz2017	false
1713	zzz2016	false
1714	zzz2015	false
1715	zzz2014	false
1716	zzz2013	false
1717	zzz2012	false
1718	zzz2011	false
1719	zzz2010	false
1720	zzz2009	false
1721	zzz2008	false
1722	zzz2007	false
1723	zzz2006	false
1724	zzz2005	false
1725	zzz2004	false
1726	zzz2003	false
1727	zzz2002	false
1728	zzz2001	false
1729	zzz2000	false
1730	zzz1999	false
1731	zzz1998	false
1732	zzz1997	false
1733	zzz1996	false
1734	zzz1995	false
1735	zzz1994	false
1736	zzz1993	false
1737	zzz1992	false
1738	zzz1991	false
1739	zzz1990	false
1740	zzz1989	false
1741	zzz1988	false
1742	zzz1987	false
1743	zzz1986	false
1744	zzz1985	false
1745	zzz1984	false
1746	zzz1983	false
1747	zzz1982	false
1748	zzz1981	false
1749	zzz1980	false
1750	zzz1979	false
1751	zzz1978	false
1752	zzz1977	false
1753	zzz1976	false
1754	zzz1975	false
1755	zzz1974	false
1756	zzz1973	false
1757	zzz1972	false
1758	zzz1971	false
1759	zzz1970	false
1760	zzz1969	false
1761	zzz1968	false
1762	zzz1967	false
1763	zzz1966	false
1764	zzz1965	false
1765	zzz1964	false
1766	zzz1963	false
1767	zzz1962	false
1768	zzz1961	false
1769	zzz1960	false
1770	zzz1959	false
1771	zzz1958	false
1772	zzz1957	false
1773	zzz1956	false
1774	zzz1955	false
1775	zzz1954	false
1776	zzz1953	false
1777	zzz1952	false
1778	zzz1951	false
1779	zzz1950	false
1780	zzz1949	false
1781	zzz1948	false
1782	zzz1947	false
1783	zzz1946	false
1784	zzz1945	false
1785	zzz1944	false
1786	zzz1943	false
1787	zzz1942	false
1788	zzz1941	false
1789	zzz1940	false
1790	zzz1939	false
1791	zzz1938	false
1792	zzz1937	false
1793	zzz1936	false
1794	zzz1935	false
1795	zzz1934	false
1796	zzz1933	false
1797	zzz1932	false
1798	zzz1931	false
1799	zzz1930	false
1800	zzz1929	false
1801	zzz1928	false
1802	zzz1927	false
1803	zzz1926	false
1804	zzz1925	false
1805	zzz1924	false
1806	zzz1923	false
1807	zzz1922	false
1808	zzz1921	false
1809	zzz1920	false
1810	zzz1919	false
1811	zzz1918	false
1812	zzz1917	false
1813	zzz1916	false
1814	zzz1915	false
1815	zzz1914	false
1816	zzz1913	false
1817	zzz1912	false
1818	zzz1911	false
1819	zzz1910	false
1820	zzz1909	false
1821	zzz1908	false
1822	zzz1907	false
1823	zzz1906	false
1824	zzz1905	false
1825	zzz1904	false
1826	zzz1903	false
1827	zzz1902	false
1828	zzz1901	false
1829	zzz1900	false
1830	zzz1899	false
1831	zzz1898	false
1832	zzz1897	false
1833	zzz1896	false
1834	zzz1895	false
1835	zzz1894	false
1836	zzz1893	false
1837	zzz1892	false
1838	zzz1891	false
1839	zzz1890	false
1840	zzz1889	false
1841	zzz1888	false
1842	zzz1887	false
1843	zzz1886	false
1844	zzz1885	false
1845	zzz1884	false
1846	zzz1883	false
1847	zzz1882	false
1848	zzz1881	false
1849	zzz1880	false
1850	zzz1879	false
1851	zzz1878	false
1852	zzz1877	false
1853	zzz1876	false
1854	zzz1875	false
1855	zzz1874	false
1856	zzz1873	false
1857	zzz1872	false
1858	zzz1871	false
1859	zzz1870	false
1860	zzz1869	false
1861	zzz1868	false
1862	zzz1867	false
1863	zzz1866	false
1864	zzz1865	false
1865	zzz1864	false
1866	zzz1863	false
1867	zzz1862	false
1868	zzz1861	false
1869	zzz1860	false
1870	zzz1859	false
1871	zzz1858	false
1872	zzz1857	false
1873	zzz1856	false
1874	zzz1855	false
1875	zzz1854	false
1876	zzz1853	false
1877	zzz1852	false
1878	zzz1851	false
1879	zzz1850	false
1880	zzz1849	false
1881	zzz1848	false
1882	zzz1847	false
1883	zzz1846	false
1884	zzz1845	false
1885	zzz1844	false
1886	zzz1843	false
1887	zzz1842	false
1888	zzz1841	false
1889	zzz1840	false
1890	zzz1839	false
1891	zzz1838	false
1892	zzz1837	false
1893	zzz1836	false
1894	zzz1835	false
1895	zzz1834	false
1896	zzz1833	false
1897	zzz1832	false
1898	zzz1831	false
1899	zzz1830	false
1900	zzz1829	false
1901	zzz1828	false
1902	zzz1827	false
1903	zzz1826	false
1904	zzz1825	false
1905	zzz1824	false
1906	zzz1823	false
1907	zzz1822	false
1908	zzz1821	false
1909	zzz1820	false
1910	zzz1819	false
1911	zzz1818	false
1912	zzz1817	false
1913	zzz1816	false
1914	zzz1815	false
1915	zzz1814	false
1916	zzz1813	false
1917	zzz1812	false
1918	zzz1811	false
1919	zzz1810	false
1920	zzz1809	false
1921	zzz1808	false
1922	zzz1807	false
1923	zzz1806	false
1924	zzz1805	false
1925	zzz1804	false
1926	zzz1803	false
1927	zzz1802	false
1928	zzz1801	false
1929	zzz1800	false
1930	zzz1799	false
1931	zzz1798	false
1932	zzz1797	false
1933	zzz1796	false
1934	zzz1795	false
1935	zzz1794	false
1936	zzz1793	false
1937	zzz1792	false
1938	zzz1791	false
1939	zzz1790	false
1940	zzz1789	false
1941	zzz1788	false
1942	zzz1787	false
1943	zzz1786	false
1944	zzz1785	false
1945	zzz1784	false
1946	zzz1783	false
1947	zzz1782	false
1948	zzz1781	false
1949	zzz1780	false
1950	zzz1779	false
1951	zzz1778	false
1952	zzz1777	false
1953	zzz1776	false
1954	zzz1775	false
1955	zzz1774	false
1956	zzz1773	false
1957	zzz1772	false
1958	zzz1771	false
1959	zzz1770	false
1960	zzz1769	false
1961	zzz1768	false
1962	zzz1767	false
1963	zzz1766	false
1964	zzz1765	false
1965	zzz1764	false
1966	zzz1763	false
1967	zzz1762	false
1968	zzz1761	false
1969	zzz1760	false
1970	zzz1759	false
1971	zzz1758	false
1972	zzz1757	false
1973	zzz1756	false
1974	zzz1755	false
1975	zzz1754	false
1976	zzz1753	false
1977	zzz1752	false
1978	zzz1751	false
1979	zzz1750	false
1980	zzz1749	false
1981	zzz1748	false
1982	zzz1747	false
1983	zzz1746	false
1984	zzz1745	false
1985	zzz1744	false
1986	zzz1743	false
1987	zzz1742	false
1988	zzz1741	false
1989	zzz1740	false
1990	zzz1739	false
1991	zzz1738	false
1992	zzz1737	false
1993	zzz1736	false
1994	zzz1735	false
1995	zzz1734	false
1996	zzz1733	false
1997	zzz1732	false
1998	zzz1731	false
1999	zzz1730	false
2000	zzz1729	false
2001	zzz1728	false
2002	zzz1727	false
2003	zzz1726	false
2004	zzz1725	false
2005	zzz1724	false
2006	zzz1723	false
2007	zzz1722	false
2008	zzz1721	false
2009	zzz1720	false
2010	zzz1719	false
2011	zzz1718	false
2012	zzz1717	false
2013	zzz1716	false
2014	zzz1715	false
2015	zzz1714	false
2016	zzz1713	false
2017	zzz1712	false
2018	zzz1711	false
2019	zzz1710	false
2020	zzz1709	false
2021	zzz1708	false
2022	zzz1707	false
2023	zzz1706	false
2024	zzz1705	false
2025	zzz1704	false
2026	zzz1703	false
2027	zzz1702	false
2028	zzz1701	false
2029	zzz1700	false
2030	zzz1699	false
2031	zzz1698	false
2032	zzz1697	false
2033	zzz1696	false
2034	zzz1695	false
2035	zzz1694	false
2036	zzz1693	false
2037	zzz1692	false
2038	zzz1691	false
2039	zzz1690	false
2040	zzz1689	false
2041	zzz1688	false
2042	zzz1687	false
2043	zzz1686	false
2044	zzz1685	false
2045	zzz1684	false
2046	zzz1683	false
2047	zzz1682	false
2048	zzz1681	false
2049	zzz1680	false
2050	zzz1679	false
2051	zzz1678	false
2052	zzz1677	false
2053	zzz1676	false
2054	zzz1675	false
2055	zzz1674	false
2056	zzz1673	false
2057	zzz1672	false
2058	zzz1671	false
2059	zzz1670	false
2060	zzz1669	false
2061	zzz1668	false
2062	zzz1667	false
[truncated: 667 more rows]
