# Supplementary material for: Discovery of several thousand highly diverse circular DNA viruses
Source: eLife journal article supplement (doi:10.7554/elife.51971), 2020-02-03
Supplement: fig3-data1 [file elife-51971-fig3-data1-v1.cys › CytoscapeSession-2019_08_03-06_44/views/57-114643-Mike_class_reps60+Full+Network.xgmml]

<?xml version="1.0" encoding="UTF-8" standalone="yes"?>
<graph id="114643" label="Mike_class_reps60 Full Network" cy:view="1" cy:networkId="57" cy:visualStyle="default" cy:rendererId="org.cytoscape.ding" cy:documentVersion="3.0" xmlns:dc="http://purl.org/dc/elements/1.1/" xmlns:xlink="http://www.w3.org/1999/xlink" xmlns:rdf="http://www.w3.org/1999/02/22-rdf-syntax-ns#" xmlns:cy="http://www.cytoscape.org" xmlns="http://www.cs.rpi.edu/XGMML">
  <graphics>
    <att name="NETWORK_HEIGHT" value="477.0" type="string" cy:type="String"/>
    <att name="NETWORK_CENTER_X_LOCATION" value="1282.569371568412" type="string" cy:type="String"/>
    <att name="NETWORK_ANNOTATION_SELECTION" value="false" type="string" cy:type="String"/>
    <att name="NETWORK_CENTER_Z_LOCATION" value="0.0" type="string" cy:type="String"/>
    <att name="NETWORK_SCALE_FACTOR" value="0.10325036540746384" type="string" cy:type="String"/>
    <att name="NETWORK_NODE_SELECTION" value="true" type="string" cy:type="String"/>
    <att name="NETWORK_WIDTH" value="712.0" type="string" cy:type="String"/>
    <att name="NETWORK_TITLE" value="Mike_class_reps60 Full Network" type="string" cy:type="String"/>
    <att name="NETWORK_CENTER_Y_LOCATION" value="-62.058289654005044" type="string" cy:type="String"/>
    <att name="NETWORK_EDGE_SELECTION" value="true" type="string" cy:type="String"/>
    <att name="NETWORK_DEPTH" value="0.0" type="string" cy:type="String"/>
  </graphics>
  <node id="117307" label="zzzzzz9" cy:nodeId="67">
    <graphics x="-2205.4235363793114" y="416.96769253000093" z="0.0"/>
  </node>
  <node id="117306" label="zzzzzz8" cy:nodeId="68">
    <graphics x="-1440.4235363793114" y="19.96769253000093" z="0.0"/>
  </node>
  <node id="117305" label="zzzzzz7" cy:nodeId="69">
    <graphics x="-1089.4235363793114" y="1392.967692530001" z="0.0"/>
  </node>
  <node id="117304" label="zzzzzz6" cy:nodeId="70">
    <graphics x="-990.4235363793114" y="-2449.032307469999" z="0.0"/>
  </node>
  <node id="117303" label="zzzzzz5" cy:nodeId="71">
    <graphics x="-1421.4235363793114" y="-1905.032307469999" z="0.0"/>
  </node>
  <node id="117302" label="zzzzzz4" cy:nodeId="72">
    <graphics x="-2177.4235363793114" y="-2129.032307469999" z="0.0"/>
  </node>
  <node id="117301" label="zzzzzz3" cy:nodeId="73">
    <graphics x="-1098.4235363793114" y="-1569.032307469999" z="0.0"/>
  </node>
  <node id="117300" label="zzzzzz2" cy:nodeId="74">
    <graphics x="-2296.4235363793114" y="-2206.032307469999" z="0.0"/>
  </node>
  <node id="117299" label="zzzzzz1" cy:nodeId="75">
    <graphics x="-2294.4235363793114" y="242.96769253000093" z="0.0"/>
  </node>
  <node id="117298" label="zzzzzz0" cy:nodeId="76">
    <graphics x="-1957.4235363793114" y="-2720.032307469999" z="0.0"/>
  </node>
  <node id="117297" label="zzzzz99" cy:nodeId="77">
    <graphics x="2713.5764636206886" y="2922.967692530001" z="0.0"/>
  </node>
  <node id="117296" label="zzzzz98" cy:nodeId="78">
    <graphics x="2592.5764636206886" y="2922.967692530001" z="0.0"/>
  </node>
  <node id="117295" label="zzzzz97" cy:nodeId="79">
    <graphics x="2471.5764636206886" y="2922.967692530001" z="0.0"/>
  </node>
  <node id="117294" label="zzzzz96" cy:nodeId="80">
    <graphics x="2125.5764636206886" y="230.96769253000093" z="0.0"/>
  </node>
  <node id="117293" label="zzzzz95" cy:nodeId="81">
    <graphics x="-1215.4235363793114" y="-2286.032307469999" z="0.0"/>
  </node>
  <node id="117292" label="zzzzz94" cy:nodeId="82">
    <graphics x="2164.5764636206886" y="-2488.032307469999" z="0.0"/>
  </node>
  <node id="117291" label="zzzzz93" cy:nodeId="83">
    <graphics x="-2200.4235363793114" y="-2494.032307469999" z="0.0"/>
  </node>
  <node id="117290" label="zzzzz92" cy:nodeId="84">
    <graphics x="908.5764636206886" y="853.9676925300009" z="0.0"/>
  </node>
  <node id="117289" label="zzzzz91" cy:nodeId="85">
    <graphics x="-2180.4235363793114" y="-2422.032307469999" z="0.0"/>
  </node>
  <node id="117288" label="zzzzz90" cy:nodeId="86">
    <graphics x="-1852.4235363793114" y="-1348.032307469999" z="0.0"/>
  </node>
  <node id="117287" label="zzzzz89" cy:nodeId="87">
    <graphics x="1810.5764636206886" y="1283.967692530001" z="0.0"/>
  </node>
  <node id="117286" label="zzzzz88" cy:nodeId="88">
    <graphics x="89.57646362068863" y="1439.967692530001" z="0.0"/>
  </node>
  <node id="117285" label="zzzzz87" cy:nodeId="89">
    <graphics x="2829.5764636206886" y="908.9676925300009" z="0.0"/>
  </node>
  <node id="117284" label="zzzzz86" cy:nodeId="90">
    <graphics x="2191.5764636206886" y="-2158.032307469999" z="0.0"/>
  </node>
  <node id="117283" label="zzzzz85" cy:nodeId="91">
    <graphics x="-2064.4235363793114" y="-1902.032307469999" z="0.0"/>
  </node>
  <node id="117282" label="zzzzz84" cy:nodeId="92">
    <graphics x="-1273.4235363793114" y="-2934.032307469999" z="0.0"/>
  </node>
  <node id="117281" label="zzzzz83" cy:nodeId="93">
    <graphics x="2362.5764636206886" y="1926.967692530001" z="0.0"/>
  </node>
  <node id="117280" label="zzzzz82" cy:nodeId="94">
    <graphics x="-2121.4235363793114" y="-2277.032307469999" z="0.0"/>
  </node>
  <node id="117279" label="zzzzz81" cy:nodeId="95">
    <graphics x="-1510.4235363793114" y="-2908.032307469999" z="0.0"/>
  </node>
  <node id="117278" label="zzzzz80" cy:nodeId="96">
    <graphics x="-2007.4235363793114" y="-2224.032307469999" z="0.0"/>
  </node>
  <node id="117277" label="zzzzz79" cy:nodeId="97">
    <graphics x="-1276.4235363793114" y="-2970.032307469999" z="0.0"/>
  </node>
  <node id="117276" label="zzzzz78" cy:nodeId="98">
    <graphics x="-1338.4235363793114" y="-96.03230746999907" z="0.0"/>
  </node>
  <node id="117275" label="zzzzz77" cy:nodeId="99">
    <graphics x="-634.4235363793114" y="-2716.032307469999" z="0.0"/>
  </node>
  <node id="117274" label="zzzzz76" cy:nodeId="100">
    <graphics x="2268.5764636206886" y="-2760.032307469999" z="0.0"/>
  </node>
  <node id="117273" label="zzzzz75" cy:nodeId="101">
    <graphics x="2350.5764636206886" y="2922.967692530001" z="0.0"/>
  </node>
  <node id="117272" label="zzzzz74" cy:nodeId="102">
    <graphics x="2229.5764636206886" y="2922.967692530001" z="0.0"/>
  </node>
  <node id="117271" label="zzzzz73" cy:nodeId="103">
    <graphics x="2108.5764636206886" y="2922.967692530001" z="0.0"/>
  </node>
  <node id="117270" label="zzzzz72" cy:nodeId="104">
    <graphics x="1987.5764636206886" y="2922.967692530001" z="0.0"/>
  </node>
  <node id="117269" label="zzzzz71" cy:nodeId="105">
    <graphics x="1866.5764636206886" y="2922.967692530001" z="0.0"/>
  </node>
  <node id="117268" label="zzzzz70" cy:nodeId="106">
    <graphics x="1745.5764636206886" y="2922.967692530001" z="0.0"/>
  </node>
  <node id="117267" label="zzzzz69" cy:nodeId="107">
    <graphics x="1624.5764636206886" y="2922.967692530001" z="0.0"/>
  </node>
  <node id="117266" label="zzzzz68" cy:nodeId="108">
    <graphics x="1503.5764636206886" y="2922.967692530001" z="0.0"/>
  </node>
  <node id="117265" label="zzzzz67" cy:nodeId="109">
    <graphics x="849.5764636206886" y="-779.0323074699991" z="0.0"/>
  </node>
  <node id="117264" label="zzzzz66" cy:nodeId="110">
    <graphics x="1382.5764636206886" y="2922.967692530001" z="0.0"/>
  </node>
  <node id="117263" label="zzzzz65" cy:nodeId="111">
    <graphics x="-2281.4235363793114" y="568.9676925300009" z="0.0"/>
  </node>
  <node id="117262" label="zzzzz64" cy:nodeId="112">
    <graphics x="1261.5764636206886" y="2922.967692530001" z="0.0"/>
  </node>
  <node id="117261" label="zzzzz63" cy:nodeId="113">
    <graphics x="-1728.4235363793114" y="259.96769253000093" z="0.0"/>
  </node>
  <node id="117260" label="zzzzz62" cy:nodeId="114">
    <graphics x="-2489.4235363793114" y="412.96769253000093" z="0.0"/>
  </node>
  <node id="117259" label="zzzzz61" cy:nodeId="115">
    <graphics x="-2365.4235363793114" y="696.9676925300009" z="0.0"/>
  </node>
  <node id="117258" label="zzzzz60" cy:nodeId="116">
    <graphics x="2004.5764636206886" y="463.96769253000093" z="0.0"/>
  </node>
  <node id="117257" label="zzzzz59" cy:nodeId="117">
    <graphics x="-894.4235363793114" y="-814.0323074699991" z="0.0"/>
  </node>
  <node id="117256" label="zzzzz58" cy:nodeId="118">
    <graphics x="1140.5764636206886" y="2922.967692530001" z="0.0"/>
  </node>
  <node id="117255" label="zzzzz57" cy:nodeId="119">
    <graphics x="1019.5764636206886" y="2922.967692530001" z="0.0"/>
  </node>
  <node id="117254" label="zzzzz56" cy:nodeId="120">
    <graphics x="898.5764636206886" y="2922.967692530001" z="0.0"/>
  </node>
  <node id="117253" label="zzzzz55" cy:nodeId="121">
    <graphics x="1999.5764636206886" y="1832.967692530001" z="0.0"/>
  </node>
  <node id="117252" label="zzzzz54" cy:nodeId="122">
    <graphics x="595.5764636206886" y="2267.967692530001" z="0.0"/>
  </node>
  <node id="117251" label="zzzzz53" cy:nodeId="123">
    <graphics x="777.5764636206886" y="2922.967692530001" z="0.0"/>
  </node>
  <node id="117250" label="zzzzz52" cy:nodeId="124">
    <graphics x="-454.4235363793114" y="2270.967692530001" z="0.0"/>
  </node>
  <node id="117249" label="zzzzz51" cy:nodeId="125">
    <graphics x="-277.4235363793114" y="2014.967692530001" z="0.0"/>
  </node>
  <node id="117248" label="zzzzz50" cy:nodeId="126">
    <graphics x="2325.5764636206886" y="864.9676925300009" z="0.0"/>
  </node>
  <node id="117247" label="zzzzz49" cy:nodeId="127">
    <graphics x="-548.4235363793114" y="2271.967692530001" z="0.0"/>
  </node>
  <node id="117246" label="zzzzz48" cy:nodeId="128">
    <graphics x="656.5764636206886" y="2922.967692530001" z="0.0"/>
  </node>
  <node id="117245" label="zzzzz47" cy:nodeId="129">
    <graphics x="601.5764636206886" y="1386.967692530001" z="0.0"/>
  </node>
  <node id="117244" label="zzzzz46" cy:nodeId="130">
    <graphics x="-1693.4235363793114" y="1929.967692530001" z="0.0"/>
  </node>
  <node id="117243" label="zzzzz45" cy:nodeId="131">
    <graphics x="631.5764636206886" y="1283.967692530001" z="0.0"/>
  </node>
  <node id="117242" label="zzzzz44" cy:nodeId="132">
    <graphics x="-1669.4235363793114" y="-913.0323074699991" z="0.0"/>
  </node>
  <node id="117241" label="zzzzz43" cy:nodeId="133">
    <graphics x="-503.4235363793114" y="2188.967692530001" z="0.0"/>
  </node>
  <node id="117240" label="zzzzz42" cy:nodeId="134">
    <graphics x="535.5764636206886" y="2922.967692530001" z="0.0"/>
  </node>
  <node id="117239" label="zzzzz41" cy:nodeId="135">
    <graphics x="414.5764636206886" y="2922.967692530001" z="0.0"/>
  </node>
  <node id="117238" label="zzzzz40" cy:nodeId="136">
    <graphics x="-2144.4235363793114" y="-1831.032307469999" z="0.0"/>
  </node>
  <node id="117237" label="zzzzz39" cy:nodeId="137">
    <graphics x="-1871.4235363793114" y="-2326.032307469999" z="0.0"/>
  </node>
  <node id="117236" label="zzzzz38" cy:nodeId="138">
    <graphics x="-914.4235363793114" y="-2458.032307469999" z="0.0"/>
  </node>
  <node id="117235" label="zzzzz37" cy:nodeId="139">
    <graphics x="-2114.4235363793114" y="-2070.032307469999" z="0.0"/>
  </node>
  <node id="117234" label="zzzzz36" cy:nodeId="140">
    <graphics x="-1215.4235363793114" y="-2448.032307469999" z="0.0"/>
  </node>
  <node id="117233" label="zzzzz35" cy:nodeId="141">
    <graphics x="-1197.4235363793114" y="-1585.032307469999" z="0.0"/>
  </node>
  <node id="117232" label="zzzzz34" cy:nodeId="142">
    <graphics x="-1105.4235363793114" y="-2064.032307469999" z="0.0"/>
  </node>
  <node id="117231" label="zzzzz33" cy:nodeId="143">
    <graphics x="-1636.4235363793114" y="-1499.032307469999" z="0.0"/>
  </node>
  <node id="117230" label="zzzzz32" cy:nodeId="144">
    <graphics x="-1294.4235363793114" y="-1669.032307469999" z="0.0"/>
  </node>
  <node id="117229" label="zzzzz31" cy:nodeId="145">
    <graphics x="-1612.4235363793114" y="-2170.032307469999" z="0.0"/>
  </node>
  <node id="117228" label="zzzzz30" cy:nodeId="146">
    <graphics x="-2088.4235363793114" y="-2523.032307469999" z="0.0"/>
  </node>
  <node id="117227" label="zzzzz29" cy:nodeId="147">
    <graphics x="-1294.4235363793114" y="-1957.032307469999" z="0.0"/>
  </node>
  <node id="117226" label="zzzzz28" cy:nodeId="148">
    <graphics x="-2169.4235363793114" y="-2458.032307469999" z="0.0"/>
  </node>
  <node id="117225" label="zzzzz27" cy:nodeId="149">
    <graphics x="-1352.4235363793114" y="-2970.032307469999" z="0.0"/>
  </node>
  <node id="117224" label="zzzzz26" cy:nodeId="150">
    <graphics x="-1257.4235363793114" y="-1741.032307469999" z="0.0"/>
  </node>
  <node id="117223" label="zzzzz25" cy:nodeId="151">
    <graphics x="-1781.4235363793114" y="-2506.032307469999" z="0.0"/>
  </node>
  <node id="117222" label="zzzzz24" cy:nodeId="152">
    <graphics x="-1810.4235363793114" y="-2949.032307469999" z="0.0"/>
  </node>
  <node id="117221" label="zzzzz23" cy:nodeId="153">
    <graphics x="-1355.4235363793114" y="-2296.032307469999" z="0.0"/>
  </node>
  <node id="117220" label="zzzzz22" cy:nodeId="154">
    <graphics x="-1693.4235363793114" y="-2507.032307469999" z="0.0"/>
  </node>
  <node id="117219" label="zzzzz21" cy:nodeId="155">
    <graphics x="-1518.4235363793114" y="-2944.032307469999" z="0.0"/>
  </node>
  <node id="117218" label="zzzzz20" cy:nodeId="156">
    <graphics x="-2293.4235363793114" y="-1820.032307469999" z="0.0"/>
  </node>
  <node id="117217" label="zzzzz19" cy:nodeId="157">
    <graphics x="-1481.4235363793114" y="-1331.032307469999" z="0.0"/>
  </node>
  <node id="117216" label="zzzzz18" cy:nodeId="158">
    <graphics x="-2187.4235363793114" y="-2707.032307469999" z="0.0"/>
  </node>
  <node id="117215" label="zzzzz17" cy:nodeId="159">
    <graphics x="-1732.4235363793114" y="-2944.032307469999" z="0.0"/>
  </node>
  <node id="117214" label="zzzzz16" cy:nodeId="160">
    <graphics x="-1742.4235363793114" y="-2687.032307469999" z="0.0"/>
  </node>
  <node id="117213" label="zzzzz15" cy:nodeId="161">
    <graphics x="293.5764636206886" y="2922.967692530001" z="0.0"/>
  </node>
  <node id="117212" label="zzzzz14" cy:nodeId="162">
    <graphics x="3491.5764636206886" y="2100.967692530001" z="0.0"/>
  </node>
  <node id="117211" label="zzzzz13" cy:nodeId="163">
    <graphics x="-1428.4235363793114" y="-1563.032307469999" z="0.0"/>
  </node>
  <node id="117210" label="zzzzz12" cy:nodeId="164">
    <graphics x="-1573.4235363793114" y="-1648.032307469999" z="0.0"/>
  </node>
  <node id="117209" label="zzzzz11" cy:nodeId="165">
    <graphics x="-1163.4235363793114" y="-2957.032307469999" z="0.0"/>
  </node>
  <node id="117208" label="zzzzz10" cy:nodeId="166">
    <graphics x="-2348.4235363793114" y="-2111.032307469999" z="0.0"/>
  </node>
  <node id="117207" label="zzzz999" cy:nodeId="167">
    <graphics x="-2166.4235363793114" y="-2530.032307469999" z="0.0"/>
  </node>
  <node id="117206" label="zzzz998" cy:nodeId="168">
    <graphics x="-1169.4235363793114" y="-2866.032307469999" z="0.0"/>
  </node>
  <node id="117205" label="zzzz997" cy:nodeId="169">
    <graphics x="-1754.4235363793114" y="-2263.032307469999" z="0.0"/>
  </node>
  <node id="117204" label="zzzz996" cy:nodeId="170">
    <graphics x="-1656.4235363793114" y="-1341.032307469999" z="0.0"/>
  </node>
  <node id="117203" label="zzzz995" cy:nodeId="171">
    <graphics x="-2341.4235363793114" y="-2600.032307469999" z="0.0"/>
  </node>
  <node id="117202" label="zzzz994" cy:nodeId="172">
    <graphics x="-1712.4235363793114" y="-1490.032307469999" z="0.0"/>
  </node>
  <node id="117201" label="zzzz993" cy:nodeId="173">
    <graphics x="-1067.4235363793114" y="-1809.032307469999" z="0.0"/>
  </node>
  <node id="117200" label="zzzz992" cy:nodeId="174">
    <graphics x="-1767.4235363793114" y="-3157.032307469999" z="0.0"/>
  </node>
  <node id="117199" label="zzzz991" cy:nodeId="175">
    <graphics x="-1666.4235363793114" y="-2697.032307469999" z="0.0"/>
  </node>
  <node id="117198" label="zzzz990" cy:nodeId="176">
    <graphics x="-1942.4235363793114" y="-2119.032307469999" z="0.0"/>
  </node>
  <node id="117197" label="zzzz989" cy:nodeId="177">
    <graphics x="-1401.4235363793114" y="-2065.032307469999" z="0.0"/>
  </node>
  <node id="117196" label="zzzz988" cy:nodeId="178">
    <graphics x="-1439.4235363793114" y="-2314.032307469999" z="0.0"/>
  </node>
  <node id="117195" label="zzzz987" cy:nodeId="179">
    <graphics x="-1822.4235363793114" y="-1904.032307469999" z="0.0"/>
  </node>
  <node id="117194" label="zzzz986" cy:nodeId="180">
    <graphics x="-2190.4235363793114" y="-2036.032307469999" z="0.0"/>
  </node>
  <node id="117193" label="zzzz985" cy:nodeId="181">
    <graphics x="-1688.4235363793114" y="-2008.032307469999" z="0.0"/>
  </node>
  <node id="117192" label="zzzz984" cy:nodeId="182">
    <graphics x="-1814.4235363793114" y="-1786.032307469999" z="0.0"/>
  </node>
  <node id="117191" label="zzzz983" cy:nodeId="183">
    <graphics x="-1597.4235363793114" y="-2623.032307469999" z="0.0"/>
  </node>
  <node id="117190" label="zzzz982" cy:nodeId="184">
    <graphics x="-1954.4235363793114" y="-1920.032307469999" z="0.0"/>
  </node>
  <node id="117189" label="zzzz981" cy:nodeId="185">
    <graphics x="-1764.4235363793114" y="-1978.032307469999" z="0.0"/>
  </node>
  <node id="117188" label="zzzz980" cy:nodeId="186">
    <graphics x="-2205.4235363793114" y="-2386.032307469999" z="0.0"/>
  </node>
  <node id="117187" label="zzzz979" cy:nodeId="187">
    <graphics x="-1659.4235363793114" y="-2982.032307469999" z="0.0"/>
  </node>
  <node id="117186" label="zzzz978" cy:nodeId="188">
    <graphics x="-1782.4235363793114" y="-2542.032307469999" z="0.0"/>
  </node>
  <node id="117185" label="zzzz977" cy:nodeId="189">
    <graphics x="-1486.4235363793114" y="-2386.032307469999" z="0.0"/>
  </node>
  <node id="117184" label="zzzz976" cy:nodeId="190">
    <graphics x="-867.4235363793114" y="-2197.032307469999" z="0.0"/>
  </node>
  <node id="117183" label="zzzz975" cy:nodeId="191">
    <graphics x="-2041.4235363793114" y="-2411.032307469999" z="0.0"/>
  </node>
  <node id="117182" label="zzzz974" cy:nodeId="192">
    <graphics x="-2433.4235363793114" y="-2294.032307469999" z="0.0"/>
  </node>
  <node id="117181" label="zzzz973" cy:nodeId="193">
    <graphics x="-1976.4235363793114" y="-1675.032307469999" z="0.0"/>
  </node>
  <node id="117180" label="zzzz972" cy:nodeId="194">
    <graphics x="-1989.4235363793114" y="-2260.032307469999" z="0.0"/>
  </node>
  <node id="117179" label="zzzz971" cy:nodeId="195">
    <graphics x="-1131.4235363793114" y="-2178.032307469999" z="0.0"/>
  </node>
  <node id="117178" label="zzzz970" cy:nodeId="196">
    <graphics x="-1363.4235363793114" y="-3218.032307469999" z="0.0"/>
  </node>
  <node id="117177" label="zzzz969" cy:nodeId="197">
    <graphics x="-1219.4235363793114" y="-2710.032307469999" z="0.0"/>
  </node>
  <node id="117176" label="zzzz968" cy:nodeId="198">
    <graphics x="-1908.4235363793114" y="-2155.032307469999" z="0.0"/>
  </node>
  <node id="117175" label="zzzz967" cy:nodeId="199">
    <graphics x="-1268.4235363793114" y="-2368.032307469999" z="0.0"/>
  </node>
  <node id="117174" label="zzzz966" cy:nodeId="200">
    <graphics x="-1392.4235363793114" y="-3042.032307469999" z="0.0"/>
  </node>
  <node id="117173" label="zzzz965" cy:nodeId="201">
    <graphics x="-2111.4235363793114" y="-2706.032307469999" z="0.0"/>
  </node>
  <node id="117172" label="zzzz964" cy:nodeId="202">
    <graphics x="-1757.4235363793114" y="-2586.032307469999" z="0.0"/>
  </node>
  <node id="117171" label="zzzz963" cy:nodeId="203">
    <graphics x="-2166.4235363793114" y="-2566.032307469999" z="0.0"/>
  </node>
  <node id="117170" label="zzzz962" cy:nodeId="204">
    <graphics x="-1895.4235363793114" y="-2642.032307469999" z="0.0"/>
  </node>
  <node id="117169" label="zzzz961" cy:nodeId="205">
    <graphics x="-941.4235363793114" y="-1883.032307469999" z="0.0"/>
  </node>
  <node id="117168" label="zzzz960" cy:nodeId="206">
    <graphics x="-1121.4235363793114" y="-2106.032307469999" z="0.0"/>
  </node>
  <node id="117167" label="zzzz959" cy:nodeId="207">
    <graphics x="-2305.4235363793114" y="-2314.032307469999" z="0.0"/>
  </node>
  <node id="117166" label="zzzz958" cy:nodeId="208">
    <graphics x="-1076.4235363793114" y="-2372.032307469999" z="0.0"/>
  </node>
  <node id="117165" label="zzzz957" cy:nodeId="209">
    <graphics x="-1472.4235363793114" y="-3022.032307469999" z="0.0"/>
  </node>
  <node id="117164" label="zzzz956" cy:nodeId="210">
    <graphics x="-1047.4235363793114" y="-1707.032307469999" z="0.0"/>
  </node>
  <node id="117163" label="zzzz955" cy:nodeId="211">
    <graphics x="-1132.4235363793114" y="-2556.032307469999" z="0.0"/>
  </node>
  <node id="117162" label="zzzz954" cy:nodeId="212">
    <graphics x="-1043.4235363793114" y="-2326.032307469999" z="0.0"/>
  </node>
  <node id="117161" label="zzzz953" cy:nodeId="213">
    <graphics x="-1333.4235363793114" y="-1462.032307469999" z="0.0"/>
  </node>
  <node id="117160" label="zzzz952" cy:nodeId="214">
    <graphics x="-1186.4235363793114" y="-3012.032307469999" z="0.0"/>
  </node>
  <node id="117159" label="zzzz951" cy:nodeId="215">
    <graphics x="-782.4235363793114" y="-2508.032307469999" z="0.0"/>
  </node>
  <node id="117158" label="zzzz950" cy:nodeId="216">
    <graphics x="-1066.4235363793114" y="-2410.032307469999" z="0.0"/>
  </node>
  <node id="117157" label="zzzz949" cy:nodeId="217">
    <graphics x="-1070.4235363793114" y="-2025.032307469999" z="0.0"/>
  </node>
  <node id="117156" label="zzzz948" cy:nodeId="218">
    <graphics x="-2304.4235363793114" y="-2429.032307469999" z="0.0"/>
  </node>
  <node id="117155" label="zzzz947" cy:nodeId="219">
    <graphics x="-1989.4235363793114" y="-1594.032307469999" z="0.0"/>
  </node>
  <node id="117154" label="zzzz946" cy:nodeId="220">
    <graphics x="-2049.4235363793114" y="-2375.032307469999" z="0.0"/>
  </node>
  <node id="117153" label="zzzz945" cy:nodeId="221">
    <graphics x="-1532.4235363793114" y="-2659.032307469999" z="0.0"/>
  </node>
  <node id="117152" label="zzzz944" cy:nodeId="222">
    <graphics x="-755.4235363793114" y="-2901.032307469999" z="0.0"/>
  </node>
  <node id="117151" label="zzzz943" cy:nodeId="223">
    <graphics x="172.57646362068863" y="2922.967692530001" z="0.0"/>
  </node>
  <node id="117150" label="zzzz942" cy:nodeId="224">
    <graphics x="-1449.4235363793114" y="-2152.032307469999" z="0.0"/>
  </node>
  <node id="117149" label="zzzz941" cy:nodeId="225">
    <graphics x="-1377.4235363793114" y="-1869.032307469999" z="0.0"/>
  </node>
  <node id="117148" label="zzzz940" cy:nodeId="226">
    <graphics x="-1161.4235363793114" y="-2214.032307469999" z="0.0"/>
  </node>
  <node id="117147" label="zzzz939" cy:nodeId="227">
    <graphics x="-1113.4235363793114" y="-2702.032307469999" z="0.0"/>
  </node>
  <node id="117146" label="zzzz938" cy:nodeId="228">
    <graphics x="-1431.4235363793114" y="-2656.032307469999" z="0.0"/>
  </node>
  <node id="117145" label="zzzz937" cy:nodeId="229">
    <graphics x="-2144.4235363793114" y="-2820.032307469999" z="0.0"/>
  </node>
  <node id="117144" label="zzzz936" cy:nodeId="230">
    <graphics x="-2007.4235363793114" y="-1962.032307469999" z="0.0"/>
  </node>
  <node id="117143" label="zzzz935" cy:nodeId="231">
    <graphics x="-1993.4235363793114" y="-2496.032307469999" z="0.0"/>
  </node>
  <node id="117142" label="zzzz934" cy:nodeId="232">
    <graphics x="-2117.4235363793114" y="-2613.032307469999" z="0.0"/>
  </node>
  <node id="117141" label="zzzz933" cy:nodeId="233">
    <graphics x="-1239.4235363793114" y="-2209.032307469999" z="0.0"/>
  </node>
  <node id="117140" label="zzzz932" cy:nodeId="234">
    <graphics x="-1162.4235363793114" y="-2914.032307469999" z="0.0"/>
  </node>
  <node id="117139" label="zzzz931" cy:nodeId="235">
    <graphics x="-1784.4235363793114" y="-2831.032307469999" z="0.0"/>
  </node>
  <node id="117138" label="zzzz930" cy:nodeId="236">
    <graphics x="120.57646362068863" y="-2117.032307469999" z="0.0"/>
  </node>
  <node id="117137" label="zzzz929" cy:nodeId="237">
    <graphics x="419.5764636206886" y="-2047.032307469999" z="0.0"/>
  </node>
  <node id="117136" label="zzzz928" cy:nodeId="238">
    <graphics x="-226.42353637931137" y="-2531.032307469999" z="0.0"/>
  </node>
  <node id="117135" label="zzzz927" cy:nodeId="239">
    <graphics x="-45.42353637931137" y="-2847.032307469999" z="0.0"/>
  </node>
  <node id="117134" label="zzzz926" cy:nodeId="240">
    <graphics x="323.5764636206886" y="-2474.032307469999" z="0.0"/>
  </node>
  <node id="117133" label="zzzz925" cy:nodeId="241">
    <graphics x="253.57646362068863" y="-2770.032307469999" z="0.0"/>
  </node>
  <node id="117132" label="zzzz924" cy:nodeId="242">
    <graphics x="239.57646362068863" y="-2595.032307469999" z="0.0"/>
  </node>
  <node id="117131" label="zzzz923" cy:nodeId="243">
    <graphics x="-40.42353637931137" y="-2950.032307469999" z="0.0"/>
  </node>
  <node id="117130" label="zzzz922" cy:nodeId="244">
    <graphics x="12.576463620688628" y="-2092.032307469999" z="0.0"/>
  </node>
  <node id="117129" label="zzzz921" cy:nodeId="245">
    <graphics x="103.57646362068863" y="-2333.032307469999" z="0.0"/>
  </node>
  <node id="117128" label="zzzz920" cy:nodeId="246">
    <graphics x="452.5764636206886" y="-2531.032307469999" z="0.0"/>
  </node>
  <node id="117127" label="zzzz919" cy:nodeId="247">
    <graphics x="399.5764636206886" y="-2471.032307469999" z="0.0"/>
  </node>
  <node id="117126" label="zzzz918" cy:nodeId="248">
    <graphics x="332.5764636206886" y="-2524.032307469999" z="0.0"/>
  </node>
  <node id="117125" label="zzzz917" cy:nodeId="249">
    <graphics x="-267.4235363793114" y="-2245.032307469999" z="0.0"/>
  </node>
  <node id="117124" label="zzzz916" cy:nodeId="250">
    <graphics x="412.5764636206886" y="-2322.032307469999" z="0.0"/>
  </node>
  <node id="117123" label="zzzz915" cy:nodeId="251">
    <graphics x="153.57646362068863" y="-2369.032307469999" z="0.0"/>
  </node>
  <node id="117122" label="zzzz914" cy:nodeId="252">
    <graphics x="51.57646362068863" y="-1883.032307469999" z="0.0"/>
  </node>
  <node id="117121" label="zzzz913" cy:nodeId="253">
    <graphics x="-63.42353637931137" y="-2065.032307469999" z="0.0"/>
  </node>
  <node id="117120" label="zzzz912" cy:nodeId="254">
    <graphics x="291.5764636206886" y="-2673.032307469999" z="0.0"/>
  </node>
  <node id="117119" label="zzzz911" cy:nodeId="255">
    <graphics x="217.57646362068863" y="-2632.032307469999" z="0.0"/>
  </node>
  <node id="117118" label="zzzz910" cy:nodeId="256">
    <graphics x="82.57646362068863" y="-2585.032307469999" z="0.0"/>
  </node>
  <node id="117117" label="zzzz909" cy:nodeId="257">
    <graphics x="143.57646362068863" y="-2814.032307469999" z="0.0"/>
  </node>
  <node id="117116" label="zzzz908" cy:nodeId="258">
    <graphics x="124.57646362068863" y="-2261.032307469999" z="0.0"/>
  </node>
  <node id="117115" label="zzzz907" cy:nodeId="259">
    <graphics x="245.57646362068863" y="-2734.032307469999" z="0.0"/>
  </node>
  <node id="117114" label="zzzz906" cy:nodeId="260">
    <graphics x="-45.42353637931137" y="-2721.032307469999" z="0.0"/>
  </node>
  <node id="117113" label="zzzz905" cy:nodeId="261">
    <graphics x="539.5764636206886" y="-2544.032307469999" z="0.0"/>
  </node>
  <node id="117112" label="zzzz904" cy:nodeId="262">
    <graphics x="-36.42353637931137" y="-3040.032307469999" z="0.0"/>
  </node>
  <node id="117111" label="zzzz903" cy:nodeId="263">
    <graphics x="119.57646362068863" y="-2702.032307469999" z="0.0"/>
  </node>
  <node id="117110" label="zzzz902" cy:nodeId="264">
    <graphics x="322.5764636206886" y="-2025.032307469999" z="0.0"/>
  </node>
  <node id="117109" label="zzzz901" cy:nodeId="265">
    <graphics x="386.5764636206886" y="-2392.032307469999" z="0.0"/>
  </node>
  <node id="117108" label="zzzz900" cy:nodeId="266">
    <graphics x="-103.42353637931137" y="-2006.032307469999" z="0.0"/>
  </node>
  <node id="117107" label="zzzz899" cy:nodeId="267">
    <graphics x="-3.423536379311372" y="-2164.032307469999" z="0.0"/>
  </node>
  <node id="117106" label="zzzz898" cy:nodeId="268">
    <graphics x="583.5764636206886" y="-3022.032307469999" z="0.0"/>
  </node>
  <node id="117105" label="zzzz897" cy:nodeId="269">
    <graphics x="595.5764636206886" y="-3234.032307469999" z="0.0"/>
  </node>
  <node id="117104" label="zzzz896" cy:nodeId="270">
    <graphics x="690.5764636206886" y="-2865.032307469999" z="0.0"/>
  </node>
  <node id="117103" label="zzzz895" cy:nodeId="271">
    <graphics x="732.5764636206886" y="-3110.032307469999" z="0.0"/>
  </node>
  <node id="117102" label="zzzz894" cy:nodeId="272">
    <graphics x="431.5764636206886" y="-2726.032307469999" z="0.0"/>
  </node>
  <node id="117101" label="zzzz893" cy:nodeId="273">
    <graphics x="468.5764636206886" y="-3105.032307469999" z="0.0"/>
  </node>
  <node id="117100" label="zzzz892" cy:nodeId="274">
    <graphics x="359.5764636206886" y="-2849.032307469999" z="0.0"/>
  </node>
  <node id="117099" label="zzzz891" cy:nodeId="275">
    <graphics x="369.5764636206886" y="-3204.032307469999" z="0.0"/>
  </node>
  <node id="117098" label="zzzz890" cy:nodeId="276">
    <graphics x="600.5764636206886" y="-2714.032307469999" z="0.0"/>
  </node>
  <node id="117097" label="zzzz889" cy:nodeId="277">
    <graphics x="516.5764636206886" y="-2776.032307469999" z="0.0"/>
  </node>
  <node id="117096" label="zzzz888" cy:nodeId="278">
    <graphics x="346.5764636206886" y="-2935.032307469999" z="0.0"/>
  </node>
  <node id="117095" label="zzzz887" cy:nodeId="279">
    <graphics x="651.5764636206886" y="-2981.032307469999" z="0.0"/>
  </node>
  <node id="117094" label="zzzz886" cy:nodeId="280">
    <graphics x="452.5764636206886" y="-3011.032307469999" z="0.0"/>
  </node>
  <node id="117093" label="zzzz885" cy:nodeId="281">
    <graphics x="735.5764636206886" y="-2982.032307469999" z="0.0"/>
  </node>
  <node id="117092" label="zzzz884" cy:nodeId="282">
    <graphics x="627.5764636206886" y="-3081.032307469999" z="0.0"/>
  </node>
  <node id="117091" label="zzzz883" cy:nodeId="283">
    <graphics x="811.5764636206886" y="-2984.032307469999" z="0.0"/>
  </node>
  <node id="117090" label="zzzz882" cy:nodeId="284">
    <graphics x="303.5764636206886" y="-3119.032307469999" z="0.0"/>
  </node>
  <node id="117089" label="zzzz881" cy:nodeId="285">
    <graphics x="528.5764636206886" y="-2812.032307469999" z="0.0"/>
  </node>
  <node id="117088" label="zzzz880" cy:nodeId="286">
    <graphics x="560.5764636206886" y="-2973.032307469999" z="0.0"/>
  </node>
  <node id="117087" label="zzzz879" cy:nodeId="287">
    <graphics x="687.5764636206886" y="-2829.032307469999" z="0.0"/>
  </node>
  <node id="117086" label="zzzz878" cy:nodeId="288">
    <graphics x="484.5764636206886" y="-2966.032307469999" z="0.0"/>
  </node>
  <node id="117085" label="zzzz877" cy:nodeId="289">
    <graphics x="405.5764636206886" y="-3311.032307469999" z="0.0"/>
  </node>
  <node id="117084" label="zzzz876" cy:nodeId="290">
    <graphics x="461.5764636206886" y="-2690.032307469999" z="0.0"/>
  </node>
  <node id="117083" label="zzzz875" cy:nodeId="291">
    <graphics x="235.57646362068863" y="-2919.032307469999" z="0.0"/>
  </node>
  <node id="117082" label="zzzz874" cy:nodeId="292">
    <graphics x="385.5764636206886" y="-2885.032307469999" z="0.0"/>
  </node>
  <node id="117081" label="zzzz873" cy:nodeId="293">
    <graphics x="465.5764636206886" y="-3177.032307469999" z="0.0"/>
  </node>
  <node id="117080" label="zzzz872" cy:nodeId="294">
    <graphics x="540.5764636206886" y="-2848.032307469999" z="0.0"/>
  </node>
  <node id="117079" label="zzzz871" cy:nodeId="295">
    <graphics x="697.5764636206886" y="-2793.032307469999" z="0.0"/>
  </node>
  <node id="117078" label="zzzz870" cy:nodeId="296">
    <graphics x="327.5764636206886" y="-3047.032307469999" z="0.0"/>
  </node>
  <node id="117077" label="zzzz869" cy:nodeId="297">
    <graphics x="656.5764636206886" y="-2908.032307469999" z="0.0"/>
  </node>
  <node id="117076" label="zzzz868" cy:nodeId="298">
    <graphics x="637.5764636206886" y="-3119.032307469999" z="0.0"/>
  </node>
  <node id="117075" label="zzzz867" cy:nodeId="299">
    <graphics x="945.5764636206886" y="-2749.032307469999" z="0.0"/>
  </node>
  <node id="117074" label="zzzz866" cy:nodeId="300">
    <graphics x="742.5764636206886" y="-3146.032307469999" z="0.0"/>
  </node>
  <node id="117073" label="zzzz865" cy:nodeId="301">
    <graphics x="297.5764636206886" y="-3083.032307469999" z="0.0"/>
  </node>
  <node id="117072" label="zzzz864" cy:nodeId="302">
    <graphics x="248.57646362068863" y="-2955.032307469999" z="0.0"/>
  </node>
  <node id="117071" label="zzzz863" cy:nodeId="303">
    <graphics x="533.5764636206886" y="-2884.032307469999" z="0.0"/>
  </node>
  <node id="117070" label="zzzz862" cy:nodeId="304">
    <graphics x="377.5764636206886" y="-2813.032307469999" z="0.0"/>
  </node>
  <node id="117069" label="zzzz861" cy:nodeId="305">
    <graphics x="561.5764636206886" y="-3135.032307469999" z="0.0"/>
  </node>
  <node id="117068" label="zzzz860" cy:nodeId="306">
    <graphics x="450.5764636206886" y="-3141.032307469999" z="0.0"/>
  </node>
  <node id="117067" label="zzzz859" cy:nodeId="307">
    <graphics x="408.5764636206886" y="-2973.032307469999" z="0.0"/>
  </node>
  <node id="117066" label="zzzz858" cy:nodeId="308">
    <graphics x="571.5764636206886" y="-2675.032307469999" z="0.0"/>
  </node>
  <node id="117065" label="zzzz857" cy:nodeId="309">
    <graphics x="376.5764636206886" y="-3009.032307469999" z="0.0"/>
  </node>
  <node id="117064" label="zzzz856" cy:nodeId="310">
    <graphics x="-36.42353637931137" y="-2264.032307469999" z="0.0"/>
  </node>
  <node id="117063" label="zzzz855" cy:nodeId="311">
    <graphics x="-95.42353637931137" y="-2101.032307469999" z="0.0"/>
  </node>
  <node id="117062" label="zzzz854" cy:nodeId="312">
    <graphics x="314.5764636206886" y="-2351.032307469999" z="0.0"/>
  </node>
  <node id="117061" label="zzzz853" cy:nodeId="313">
    <graphics x="-102.42353637931137" y="-1718.032307469999" z="0.0"/>
  </node>
  <node id="117060" label="zzzz852" cy:nodeId="314">
    <graphics x="-146.42353637931137" y="-1830.032307469999" z="0.0"/>
  </node>
  <node id="117059" label="zzzz851" cy:nodeId="315">
    <graphics x="79.57646362068863" y="-2666.032307469999" z="0.0"/>
  </node>
  <node id="117058" label="zzzz850" cy:nodeId="316">
    <graphics x="257.5764636206886" y="-2135.032307469999" z="0.0"/>
  </node>
  <node id="117057" label="zzzz849" cy:nodeId="317">
    <graphics x="186.57646362068863" y="-2297.032307469999" z="0.0"/>
  </node>
  <node id="117056" label="zzzz848" cy:nodeId="318">
    <graphics x="-217.42353637931137" y="-2102.032307469999" z="0.0"/>
  </node>
  <node id="117055" label="zzzz847" cy:nodeId="319">
    <graphics x="488.5764636206886" y="-2320.032307469999" z="0.0"/>
  </node>
  <node id="117054" label="zzzz846" cy:nodeId="320">
    <graphics x="35.57646362068863" y="-2038.032307469999" z="0.0"/>
  </node>
  <node id="117053" label="zzzz845" cy:nodeId="321">
    <graphics x="-183.42353637931137" y="-1913.032307469999" z="0.0"/>
  </node>
  <node id="117052" label="zzzz844" cy:nodeId="322">
    <graphics x="37.57646362068863" y="-2128.032307469999" z="0.0"/>
  </node>
  <node id="117051" label="zzzz843" cy:nodeId="323">
    <graphics x="-24.423536379311372" y="-2685.032307469999" z="0.0"/>
  </node>
  <node id="117050" label="zzzz842" cy:nodeId="324">
    <graphics x="-60.42353637931137" y="-2300.032307469999" z="0.0"/>
  </node>
  <node id="117049" label="zzzz841" cy:nodeId="325">
    <graphics x="-219.42353637931137" y="-2209.032307469999" z="0.0"/>
  </node>
  <node id="117048" label="zzzz840" cy:nodeId="326">
    <graphics x="171.57646362068863" y="-2081.032307469999" z="0.0"/>
  </node>
  <node id="117047" label="zzzz839" cy:nodeId="327">
    <graphics x="-106.42353637931137" y="-1878.032307469999" z="0.0"/>
  </node>
  <node id="117046" label="zzzz838" cy:nodeId="328">
    <graphics x="51.57646362068863" y="2922.967692530001" z="0.0"/>
  </node>
  <node id="117045" label="zzzz837" cy:nodeId="329">
    <graphics x="-182.42353637931137" y="-1877.032307469999" z="0.0"/>
  </node>
  <node id="117044" label="zzzz836" cy:nodeId="330">
    <graphics x="-111.42353637931137" y="-1754.032307469999" z="0.0"/>
  </node>
  <node id="117043" label="zzzz835" cy:nodeId="331">
    <graphics x="323.5764636206886" y="-1899.032307469999" z="0.0"/>
  </node>
  <node id="117042" label="zzzz834" cy:nodeId="332">
    <graphics x="-60.42353637931137" y="-2541.032307469999" z="0.0"/>
  </node>
  <node id="117041" label="zzzz833" cy:nodeId="333">
    <graphics x="39.57646362068863" y="-2397.032307469999" z="0.0"/>
  </node>
  <node id="117040" label="zzzz832" cy:nodeId="334">
    <graphics x="20.576463620688628" y="-2300.032307469999" z="0.0"/>
  </node>
  <node id="117039" label="zzzz831" cy:nodeId="335">
    <graphics x="99.57646362068863" y="-2297.032307469999" z="0.0"/>
  </node>
  <node id="117038" label="zzzz830" cy:nodeId="336">
    <graphics x="-19.423536379311372" y="-2469.032307469999" z="0.0"/>
  </node>
  <node id="117037" label="zzzz829" cy:nodeId="337">
    <graphics x="-38.42353637931137" y="-2336.032307469999" z="0.0"/>
  </node>
  <node id="117036" label="zzzz828" cy:nodeId="338">
    <graphics x="-265.4235363793114" y="-1983.032307469999" z="0.0"/>
  </node>
  <node id="117035" label="zzzz827" cy:nodeId="339">
    <graphics x="-273.4235363793114" y="-1924.032307469999" z="0.0"/>
  </node>
  <node id="117034" label="zzzz826" cy:nodeId="340">
    <graphics x="-385.4235363793114" y="-2238.032307469999" z="0.0"/>
  </node>
  <node id="117033" label="zzzz825" cy:nodeId="341">
    <graphics x="-242.42353637931137" y="-1750.032307469999" z="0.0"/>
  </node>
  <node id="117032" label="zzzz824" cy:nodeId="342">
    <graphics x="-139.42353637931137" y="-2056.032307469999" z="0.0"/>
  </node>
  <node id="117031" label="zzzz823" cy:nodeId="343">
    <graphics x="-93.42353637931137" y="-1790.032307469999" z="0.0"/>
  </node>
  <node id="117030" label="zzzz822" cy:nodeId="344">
    <graphics x="-255.42353637931137" y="-2019.032307469999" z="0.0"/>
  </node>
  <node id="117029" label="zzzz821" cy:nodeId="345">
    <graphics x="-349.4235363793114" y="-1902.032307469999" z="0.0"/>
  </node>
  <node id="117028" label="zzzz820" cy:nodeId="346">
    <graphics x="-261.4235363793114" y="-2397.032307469999" z="0.0"/>
  </node>
  <node id="117027" label="zzzz819" cy:nodeId="347">
    <graphics x="216.57646362068863" y="-1693.032307469999" z="0.0"/>
  </node>
  <node id="117026" label="zzzz818" cy:nodeId="348">
    <graphics x="-255.42353637931137" y="-2143.032307469999" z="0.0"/>
  </node>
  <node id="117025" label="zzzz817" cy:nodeId="349">
    <graphics x="-136.42353637931137" y="-2273.032307469999" z="0.0"/>
  </node>
  <node id="117024" label="zzzz816" cy:nodeId="350">
    <graphics x="256.5764636206886" y="-1729.032307469999" z="0.0"/>
  </node>
  <node id="117023" label="zzzz815" cy:nodeId="351">
    <graphics x="10.576463620688628" y="-2200.032307469999" z="0.0"/>
  </node>
  <node id="117022" label="zzzz814" cy:nodeId="352">
    <graphics x="188.57646362068863" y="-1937.032307469999" z="0.0"/>
  </node>
  <node id="117021" label="zzzz813" cy:nodeId="353">
    <graphics x="71.57646362068863" y="-2002.032307469999" z="0.0"/>
  </node>
  <node id="117020" label="zzzz812" cy:nodeId="354">
    <graphics x="-136.42353637931137" y="-2309.032307469999" z="0.0"/>
  </node>
  <node id="117019" label="zzzz811" cy:nodeId="355">
    <graphics x="-308.4235363793114" y="-2281.032307469999" z="0.0"/>
  </node>
  <node id="117018" label="zzzz810" cy:nodeId="356">
    <graphics x="210.57646362068863" y="-1973.032307469999" z="0.0"/>
  </node>
  <node id="117017" label="zzzz809" cy:nodeId="357">
    <graphics x="265.5764636206886" y="-2387.032307469999" z="0.0"/>
  </node>
  <node id="117016" label="zzzz808" cy:nodeId="358">
    <graphics x="224.57646362068863" y="-1765.032307469999" z="0.0"/>
  </node>
  <node id="117015" label="zzzz807" cy:nodeId="359">
    <graphics x="-177.42353637931137" y="-2414.032307469999" z="0.0"/>
  </node>
  <node id="117014" label="zzzz806" cy:nodeId="360">
    <graphics x="107.57646362068863" y="-2189.032307469999" z="0.0"/>
  </node>
  <node id="117013" label="zzzz805" cy:nodeId="361">
    <graphics x="168.57646362068863" y="-2513.032307469999" z="0.0"/>
  </node>
  <node id="117012" label="zzzz804" cy:nodeId="362">
    <graphics x="-227.42353637931137" y="-2055.032307469999" z="0.0"/>
  </node>
  <node id="117011" label="zzzz803" cy:nodeId="363">
    <graphics x="439.5764636206886" y="-2181.032307469999" z="0.0"/>
  </node>
  <node id="117010" label="zzzz802" cy:nodeId="364">
    <graphics x="447.5764636206886" y="-2011.032307469999" z="0.0"/>
  </node>
  <node id="117009" label="zzzz801" cy:nodeId="365">
    <graphics x="-231.42353637931137" y="-2361.032307469999" z="0.0"/>
  </node>
  <node id="117008" label="zzzz800" cy:nodeId="366">
    <graphics x="286.5764636206886" y="-2207.032307469999" z="0.0"/>
  </node>
  <node id="117007" label="zzzz799" cy:nodeId="367">
    <graphics x="79.57646362068863" y="-1675.032307469999" z="0.0"/>
  </node>
  <node id="117006" label="zzzz798" cy:nodeId="368">
    <graphics x="174.57646362068863" y="-2477.032307469999" z="0.0"/>
  </node>
  <node id="117005" label="zzzz797" cy:nodeId="369">
    <graphics x="295.5764636206886" y="-2279.032307469999" z="0.0"/>
  </node>
  <node id="117004" label="zzzz796" cy:nodeId="370">
    <graphics x="153.57646362068863" y="-2225.032307469999" z="0.0"/>
  </node>
  <node id="117003" label="zzzz795" cy:nodeId="371">
    <graphics x="47.57646362068863" y="-1632.032307469999" z="0.0"/>
  </node>
  <node id="117002" label="zzzz794" cy:nodeId="372">
    <graphics x="281.5764636206886" y="-1819.032307469999" z="0.0"/>
  </node>
  <node id="117001" label="zzzz793" cy:nodeId="373">
    <graphics x="484.5764636206886" y="-2253.032307469999" z="0.0"/>
  </node>
  <node id="117000" label="zzzz792" cy:nodeId="374">
    <graphics x="161.57646362068863" y="-2009.032307469999" z="0.0"/>
  </node>
  <node id="116999" label="zzzz791" cy:nodeId="375">
    <graphics x="517.5764636206886" y="-2369.032307469999" z="0.0"/>
  </node>
  <node id="116998" label="zzzz790" cy:nodeId="376">
    <graphics x="187.57646362068863" y="-1829.032307469999" z="0.0"/>
  </node>
  <node id="116997" label="zzzz789" cy:nodeId="377">
    <graphics x="198.57646362068863" y="-2045.032307469999" z="0.0"/>
  </node>
  <node id="116996" label="zzzz788" cy:nodeId="378">
    <graphics x="246.57646362068863" y="-2009.032307469999" z="0.0"/>
  </node>
  <node id="116995" label="zzzz787" cy:nodeId="379">
    <graphics x="189.57646362068863" y="-2405.032307469999" z="0.0"/>
  </node>
  <node id="116994" label="zzzz786" cy:nodeId="380">
    <graphics x="327.5764636206886" y="-1946.032307469999" z="0.0"/>
  </node>
  <node id="116993" label="zzzz785" cy:nodeId="381">
    <graphics x="363.5764636206886" y="-1989.032307469999" z="0.0"/>
  </node>
  <node id="116992" label="zzzz784" cy:nodeId="382">
    <graphics x="-303.4235363793114" y="-2447.032307469999" z="0.0"/>
  </node>
  <node id="116991" label="zzzz783" cy:nodeId="383">
    <graphics x="66.57646362068863" y="-1757.032307469999" z="0.0"/>
  </node>
  <node id="116990" label="zzzz782" cy:nodeId="384">
    <graphics x="-383.4235363793114" y="-2354.032307469999" z="0.0"/>
  </node>
  <node id="116989" label="zzzz781" cy:nodeId="385">
    <graphics x="-69.42353637931137" y="2922.967692530001" z="0.0"/>
  </node>
  <node id="116988" label="zzzz780" cy:nodeId="386">
    <graphics x="347.5764636206886" y="-1863.032307469999" z="0.0"/>
  </node>
  <node id="116987" label="zzzz779" cy:nodeId="387">
    <graphics x="-190.42353637931137" y="2922.967692530001" z="0.0"/>
  </node>
  <node id="116986" label="zzzz778" cy:nodeId="388">
    <graphics x="186.57646362068863" y="-2189.032307469999" z="0.0"/>
  </node>
  <node id="116985" label="zzzz777" cy:nodeId="389">
    <graphics x="336.5764636206886" y="-2315.032307469999" z="0.0"/>
  </node>
  <node id="116984" label="zzzz776" cy:nodeId="390">
    <graphics x="437.5764636206886" y="-2217.032307469999" z="0.0"/>
  </node>
  <node id="116983" label="zzzz775" cy:nodeId="391">
    <graphics x="-65.42353637931137" y="-2372.032307469999" z="0.0"/>
  </node>
  <node id="116982" label="zzzz774" cy:nodeId="392">
    <graphics x="-55.42353637931137" y="-1918.032307469999" z="0.0"/>
  </node>
  <node id="116981" label="zzzz773" cy:nodeId="393">
    <graphics x="382.5764636206886" y="-1827.032307469999" z="0.0"/>
  </node>
  <node id="116980" label="zzzz772" cy:nodeId="394">
    <graphics x="-30.423536379311372" y="-1866.032307469999" z="0.0"/>
  </node>
  <node id="116979" label="zzzz771" cy:nodeId="395">
    <graphics x="-378.4235363793114" y="-2065.032307469999" z="0.0"/>
  </node>
  <node id="116978" label="zzzz770" cy:nodeId="396">
    <graphics x="274.5764636206886" y="-2063.032307469999" z="0.0"/>
  </node>
  <node id="116977" label="zzzz769" cy:nodeId="397">
    <graphics x="32.57646362068863" y="-1811.032307469999" z="0.0"/>
  </node>
  <node id="116976" label="zzzz768" cy:nodeId="398">
    <graphics x="374.5764636206886" y="-1753.032307469999" z="0.0"/>
  </node>
  <node id="116975" label="zzzz767" cy:nodeId="399">
    <graphics x="-100.42353637931137" y="-1967.032307469999" z="0.0"/>
  </node>
  <node id="116974" label="zzzz766" cy:nodeId="400">
    <graphics x="252.57646362068863" y="-2099.032307469999" z="0.0"/>
  </node>
  <node id="116973" label="zzzz765" cy:nodeId="401">
    <graphics x="435.5764636206886" y="-1428.032307469999" z="0.0"/>
  </node>
  <node id="116972" label="zzzz764" cy:nodeId="402">
    <graphics x="-353.4235363793114" y="-2014.032307469999" z="0.0"/>
  </node>
  <node id="116971" label="zzzz763" cy:nodeId="403">
    <graphics x="-258.4235363793114" y="-1875.032307469999" z="0.0"/>
  </node>
  <node id="116970" label="zzzz762" cy:nodeId="404">
    <graphics x="-103.42353637931137" y="-2196.032307469999" z="0.0"/>
  </node>
  <node id="116969" label="zzzz761" cy:nodeId="405">
    <graphics x="536.5764636206886" y="-2009.032307469999" z="0.0"/>
  </node>
  <node id="116968" label="zzzz760" cy:nodeId="406">
    <graphics x="450.5764636206886" y="-2109.032307469999" z="0.0"/>
  </node>
  <node id="116967" label="zzzz759" cy:nodeId="407">
    <graphics x="226.57646362068863" y="-2441.032307469999" z="0.0"/>
  </node>
  <node id="116966" label="zzzz758" cy:nodeId="408">
    <graphics x="-143.42353637931137" y="-2237.032307469999" z="0.0"/>
  </node>
  <node id="116965" label="zzzz757" cy:nodeId="409">
    <graphics x="51.57646362068863" y="-1966.032307469999" z="0.0"/>
  </node>
  <node id="116964" label="zzzz756" cy:nodeId="410">
    <graphics x="-319.4235363793114" y="-2101.032307469999" z="0.0"/>
  </node>
  <node id="116963" label="zzzz755" cy:nodeId="411">
    <graphics x="517.5764636206886" y="-1967.032307469999" z="0.0"/>
  </node>
  <node id="116962" label="zzzz754" cy:nodeId="412">
    <graphics x="161.57646362068863" y="-2153.032307469999" z="0.0"/>
  </node>
  <node id="116961" label="zzzz753" cy:nodeId="413">
    <graphics x="296.5764636206886" y="-2243.032307469999" z="0.0"/>
  </node>
  <node id="116960" label="zzzz752" cy:nodeId="414">
    <graphics x="-26.423536379311372" y="-1731.032307469999" z="0.0"/>
  </node>
  <node id="116959" label="zzzz751" cy:nodeId="415">
    <graphics x="-413.4235363793114" y="-2174.032307469999" z="0.0"/>
  </node>
  <node id="116958" label="zzzz750" cy:nodeId="416">
    <graphics x="39.57646362068863" y="-2236.032307469999" z="0.0"/>
  </node>
  <node id="116957" label="zzzz749" cy:nodeId="417">
    <graphics x="88.57646362068863" y="-2074.032307469999" z="0.0"/>
  </node>
  <node id="116956" label="zzzz748" cy:nodeId="418">
    <graphics x="-24.423536379311372" y="-1954.032307469999" z="0.0"/>
  </node>
  <node id="116955" label="zzzz747" cy:nodeId="419">
    <graphics x="-98.42353637931137" y="-2577.032307469999" z="0.0"/>
  </node>
  <node id="116954" label="zzzz746" cy:nodeId="420">
    <graphics x="114.57646362068863" y="-1793.032307469999" z="0.0"/>
  </node>
  <node id="116953" label="zzzz745" cy:nodeId="421">
    <graphics x="399.5764636206886" y="-1899.032307469999" z="0.0"/>
  </node>
  <node id="116952" label="zzzz744" cy:nodeId="422">
    <graphics x="-0.423536379311372" y="-2505.032307469999" z="0.0"/>
  </node>
  <node id="116951" label="zzzz743" cy:nodeId="423">
    <graphics x="115.57646362068863" y="-2549.032307469999" z="0.0"/>
  </node>
  <node id="116950" label="zzzz742" cy:nodeId="424">
    <graphics x="173.57646362068863" y="-1865.032307469999" z="0.0"/>
  </node>
  <node id="116949" label="zzzz741" cy:nodeId="425">
    <graphics x="-179.42353637931137" y="-2173.032307469999" z="0.0"/>
  </node>
  <node id="116948" label="zzzz740" cy:nodeId="426">
    <graphics x="314.5764636206886" y="-2171.032307469999" z="0.0"/>
  </node>
  <node id="116947" label="zzzz739" cy:nodeId="427">
    <graphics x="214.57646362068863" y="-1644.032307469999" z="0.0"/>
  </node>
  <node id="116946" label="zzzz738" cy:nodeId="428">
    <graphics x="49.57646362068863" y="-1847.032307469999" z="0.0"/>
  </node>
  <node id="116945" label="zzzz737" cy:nodeId="429">
    <graphics x="-350.4235363793114" y="-2137.032307469999" z="0.0"/>
  </node>
  <node id="116944" label="zzzz736" cy:nodeId="430">
    <graphics x="-148.42353637931137" y="-2357.032307469999" z="0.0"/>
  </node>
  <node id="116943" label="zzzz735" cy:nodeId="431">
    <graphics x="-280.4235363793114" y="-2324.032307469999" z="0.0"/>
  </node>
  <node id="116942" label="zzzz734" cy:nodeId="432">
    <graphics x="61.57646362068863" y="-1930.032307469999" z="0.0"/>
  </node>
  <node id="116941" label="zzzz733" cy:nodeId="433">
    <graphics x="-150.42353637931137" y="-2525.032307469999" z="0.0"/>
  </node>
  <node id="116940" label="zzzz732" cy:nodeId="434">
    <graphics x="-124.42353637931137" y="-2137.032307469999" z="0.0"/>
  </node>
  <node id="116939" label="zzzz731" cy:nodeId="435">
    <graphics x="421.5764636206886" y="-2145.032307469999" z="0.0"/>
  </node>
  <node id="116938" label="zzzz730" cy:nodeId="436">
    <graphics x="167.57646362068863" y="-1901.032307469999" z="0.0"/>
  </node>
  <node id="116937" label="zzzz729" cy:nodeId="437">
    <graphics x="123.57646362068863" y="-1639.032307469999" z="0.0"/>
  </node>
  <node id="116936" label="zzzz728" cy:nodeId="438">
    <graphics x="-5.423536379311372" y="-2433.032307469999" z="0.0"/>
  </node>
  <node id="116935" label="zzzz727" cy:nodeId="439">
    <graphics x="-245.42353637931137" y="-2483.032307469999" z="0.0"/>
  </node>
  <node id="116934" label="zzzz726" cy:nodeId="440">
    <graphics x="49.57646362068863" y="-2630.032307469999" z="0.0"/>
  </node>
  <node id="116933" label="zzzz725" cy:nodeId="441">
    <graphics x="-179.42353637931137" y="-1995.032307469999" z="0.0"/>
  </node>
  <node id="116932" label="zzzz724" cy:nodeId="442">
    <graphics x="-95.42353637931137" y="-2459.032307469999" z="0.0"/>
  </node>
  <node id="116931" label="zzzz723" cy:nodeId="443">
    <graphics x="70.57646362068863" y="-1712.032307469999" z="0.0"/>
  </node>
  <node id="116930" label="zzzz722" cy:nodeId="444">
    <graphics x="-336.4235363793114" y="-1861.032307469999" z="0.0"/>
  </node>
  <node id="116929" label="zzzz721" cy:nodeId="445">
    <graphics x="1351.5764636206886" y="-2260.032307469999" z="0.0"/>
  </node>
  <node id="116928" label="zzzz720" cy:nodeId="446">
    <graphics x="1283.5764636206886" y="-2054.032307469999" z="0.0"/>
  </node>
  <node id="116927" label="zzzz719" cy:nodeId="447">
    <graphics x="1270.5764636206886" y="-2342.032307469999" z="0.0"/>
  </node>
  <node id="116926" label="zzzz718" cy:nodeId="448">
    <graphics x="1238.5764636206886" y="-1853.032307469999" z="0.0"/>
  </node>
  <node id="116925" label="zzzz717" cy:nodeId="449">
    <graphics x="1321.5764636206886" y="-2536.032307469999" z="0.0"/>
  </node>
  <node id="116924" label="zzzz716" cy:nodeId="450">
    <graphics x="1498.5764636206886" y="-2362.032307469999" z="0.0"/>
  </node>
  <node id="116923" label="zzzz715" cy:nodeId="451">
    <graphics x="1499.5764636206886" y="-2290.032307469999" z="0.0"/>
  </node>
  <node id="116922" label="zzzz714" cy:nodeId="452">
    <graphics x="1246.5764636206886" y="-2018.032307469999" z="0.0"/>
  </node>
  <node id="116921" label="zzzz713" cy:nodeId="453">
    <graphics x="1238.5764636206886" y="-2306.032307469999" z="0.0"/>
  </node>
  <node id="116920" label="zzzz712" cy:nodeId="454">
    <graphics x="1346.5764636206886" y="-2332.032307469999" z="0.0"/>
  </node>
  <node id="116919" label="zzzz711" cy:nodeId="455">
    <graphics x="1392.5764636206886" y="-1582.032307469999" z="0.0"/>
  </node>
  <node id="116918" label="zzzz710" cy:nodeId="456">
    <graphics x="1394.5764636206886" y="-1822.032307469999" z="0.0"/>
  </node>
  <node id="116917" label="zzzz709" cy:nodeId="457">
    <graphics x="1267.5764636206886" y="-1798.032307469999" z="0.0"/>
  </node>
  <node id="116916" label="zzzz708" cy:nodeId="458">
    <graphics x="1066.5764636206886" y="-2099.032307469999" z="0.0"/>
  </node>
  <node id="116915" label="zzzz707" cy:nodeId="459">
    <graphics x="1173.5764636206886" y="-2198.032307469999" z="0.0"/>
  </node>
  <node id="116914" label="zzzz706" cy:nodeId="460">
    <graphics x="1438.5764636206886" y="-2445.032307469999" z="0.0"/>
  </node>
  <node id="116913" label="zzzz705" cy:nodeId="461">
    <graphics x="1224.5764636206886" y="-2090.032307469999" z="0.0"/>
  </node>
  <node id="116912" label="zzzz704" cy:nodeId="462">
    <graphics x="1331.5764636206886" y="-2152.032307469999" z="0.0"/>
  </node>
  <node id="116911" label="zzzz703" cy:nodeId="463">
    <graphics x="1365.5764636206886" y="-1946.032307469999" z="0.0"/>
  </node>
  <node id="116910" label="zzzz702" cy:nodeId="464">
    <graphics x="1318.5764636206886" y="-1982.032307469999" z="0.0"/>
  </node>
  <node id="116909" label="zzzz701" cy:nodeId="465">
    <graphics x="1359.5764636206886" y="-1786.032307469999" z="0.0"/>
  </node>
  <node id="116908" label="zzzz700" cy:nodeId="466">
    <graphics x="1451.5764636206886" y="-2182.032307469999" z="0.0"/>
  </node>
  <node id="116907" label="zzzz699" cy:nodeId="467">
    <graphics x="1483.5764636206886" y="-1930.032307469999" z="0.0"/>
  </node>
  <node id="116906" label="zzzz698" cy:nodeId="468">
    <graphics x="1440.5764636206886" y="-1858.032307469999" z="0.0"/>
  </node>
  <node id="116905" label="zzzz697" cy:nodeId="469">
    <graphics x="1349.5764636206886" y="-2224.032307469999" z="0.0"/>
  </node>
  <node id="116904" label="zzzz696" cy:nodeId="470">
    <graphics x="1231.5764636206886" y="-1896.032307469999" z="0.0"/>
  </node>
  <node id="116903" label="zzzz695" cy:nodeId="471">
    <graphics x="1440.5764636206886" y="-2110.032307469999" z="0.0"/>
  </node>
  <node id="116902" label="zzzz694" cy:nodeId="472">
    <graphics x="1379.5764636206886" y="-2368.032307469999" z="0.0"/>
  </node>
  <node id="116901" label="zzzz693" cy:nodeId="473">
    <graphics x="1407.5764636206886" y="-2146.032307469999" z="0.0"/>
  </node>
  <node id="116900" label="zzzz692" cy:nodeId="474">
    <graphics x="1138.5764636206886" y="-1886.032307469999" z="0.0"/>
  </node>
  <node id="116899" label="zzzz691" cy:nodeId="475">
    <graphics x="1433.5764636206886" y="-2254.032307469999" z="0.0"/>
  </node>
  <node id="116898" label="zzzz690" cy:nodeId="476">
    <graphics x="1314.5764636206886" y="-1857.032307469999" z="0.0"/>
  </node>
  <node id="116897" label="zzzz689" cy:nodeId="477">
    <graphics x="1101.5764636206886" y="-2052.032307469999" z="0.0"/>
  </node>
  <node id="116896" label="zzzz688" cy:nodeId="478">
    <graphics x="1347.5764636206886" y="-2296.032307469999" z="0.0"/>
  </node>
  <node id="116895" label="zzzz687" cy:nodeId="479">
    <graphics x="1286.5764636206886" y="-2572.032307469999" z="0.0"/>
  </node>
  <node id="116894" label="zzzz686" cy:nodeId="480">
    <graphics x="1255.5764636206886" y="-2162.032307469999" z="0.0"/>
  </node>
  <node id="116893" label="zzzz685" cy:nodeId="481">
    <graphics x="1187.5764636206886" y="-2126.032307469999" z="0.0"/>
  </node>
  <node id="116892" label="zzzz684" cy:nodeId="482">
    <graphics x="1423.5764636206886" y="-2318.032307469999" z="0.0"/>
  </node>
  <node id="116891" label="zzzz683" cy:nodeId="483">
    <graphics x="1490.5764636206886" y="-2074.032307469999" z="0.0"/>
  </node>
  <node id="116890" label="zzzz682" cy:nodeId="484">
    <graphics x="1473.5764636206886" y="-2038.032307469999" z="0.0"/>
  </node>
  <node id="116889" label="zzzz681" cy:nodeId="485">
    <graphics x="1313.5764636206886" y="-2116.032307469999" z="0.0"/>
  </node>
  <node id="116888" label="zzzz680" cy:nodeId="486">
    <graphics x="1264.5764636206886" y="-2404.032307469999" z="0.0"/>
  </node>
  <node id="116887" label="zzzz679" cy:nodeId="487">
    <graphics x="1358.5764636206886" y="-1910.032307469999" z="0.0"/>
  </node>
  <node id="116886" label="zzzz678" cy:nodeId="488">
    <graphics x="1277.5764636206886" y="-1932.032307469999" z="0.0"/>
  </node>
  <node id="116885" label="zzzz677" cy:nodeId="489">
    <graphics x="1094.5764636206886" y="-2135.032307469999" z="0.0"/>
  </node>
  <node id="116884" label="zzzz676" cy:nodeId="490">
    <graphics x="1201.5764636206886" y="-1950.032307469999" z="0.0"/>
  </node>
  <node id="116883" label="zzzz675" cy:nodeId="491">
    <graphics x="1340.5764636206886" y="-2404.032307469999" z="0.0"/>
  </node>
  <node id="116882" label="zzzz674" cy:nodeId="492">
    <graphics x="1145.5764636206886" y="-2016.032307469999" z="0.0"/>
  </node>
  <node id="116881" label="zzzz673" cy:nodeId="493">
    <graphics x="1389.5764636206886" y="-2024.032307469999" z="0.0"/>
  </node>
  <node id="116880" label="zzzz672" cy:nodeId="494">
    <graphics x="1339.5764636206886" y="-2188.032307469999" z="0.0"/>
  </node>
  <node id="116879" label="zzzz671" cy:nodeId="495">
    <graphics x="1397.5764636206886" y="-2060.032307469999" z="0.0"/>
  </node>
  <node id="116878" label="zzzz670" cy:nodeId="496">
    <graphics x="1125.5764636206886" y="-1980.032307469999" z="0.0"/>
  </node>
  <node id="116877" label="zzzz669" cy:nodeId="497">
    <graphics x="1727.5764636206886" y="-2014.032307469999" z="0.0"/>
  </node>
  <node id="116876" label="zzzz668" cy:nodeId="498">
    <graphics x="1633.5764636206886" y="-1970.032307469999" z="0.0"/>
  </node>
  <node id="116875" label="zzzz667" cy:nodeId="499">
    <graphics x="1593.5764636206886" y="-1854.032307469999" z="0.0"/>
  </node>
  <node id="116874" label="zzzz666" cy:nodeId="500">
    <graphics x="1588.5764636206886" y="-2092.032307469999" z="0.0"/>
  </node>
  <node id="116873" label="zzzz665" cy:nodeId="501">
    <graphics x="1725.5764636206886" y="-1891.032307469999" z="0.0"/>
  </node>
  <node id="116872" label="zzzz664" cy:nodeId="502">
    <graphics x="1517.5764636206886" y="-1824.032307469999" z="0.0"/>
  </node>
  <node id="116871" label="zzzz663" cy:nodeId="503">
    <graphics x="1727.5764636206886" y="-2097.032307469999" z="0.0"/>
  </node>
  <node id="116870" label="zzzz662" cy:nodeId="504">
    <graphics x="1704.5764636206886" y="-2188.032307469999" z="0.0"/>
  </node>
  <node id="116869" label="zzzz661" cy:nodeId="505">
    <graphics x="1625.5764636206886" y="-1815.032307469999" z="0.0"/>
  </node>
  <node id="116868" label="zzzz660" cy:nodeId="506">
    <graphics x="1803.5764636206886" y="-2086.032307469999" z="0.0"/>
  </node>
  <node id="116867" label="zzzz659" cy:nodeId="507">
    <graphics x="1666.5764636206886" y="-2273.032307469999" z="0.0"/>
  </node>
  <node id="116866" label="zzzz658" cy:nodeId="508">
    <graphics x="1737.5764636206886" y="-2133.032307469999" z="0.0"/>
  </node>
  <node id="116865" label="zzzz657" cy:nodeId="509">
    <graphics x="1594.5764636206886" y="-1890.032307469999" z="0.0"/>
  </node>
  <node id="116864" label="zzzz656" cy:nodeId="510">
    <graphics x="1600.5764636206886" y="-2218.032307469999" z="0.0"/>
  </node>
  <node id="116863" label="zzzz655" cy:nodeId="511">
    <graphics x="1499.5764636206886" y="-2146.032307469999" z="0.0"/>
  </node>
  <node id="116862" label="zzzz654" cy:nodeId="512">
    <graphics x="1560.5764636206886" y="-1926.032307469999" z="0.0"/>
  </node>
  <node id="116861" label="zzzz653" cy:nodeId="513">
    <graphics x="1463.5764636206886" y="-1894.032307469999" z="0.0"/>
  </node>
  <node id="116860" label="zzzz652" cy:nodeId="514">
    <graphics x="1485.5764636206886" y="-1788.032307469999" z="0.0"/>
  </node>
  <node id="116859" label="zzzz651" cy:nodeId="515">
    <graphics x="1575.5764636206886" y="-2290.032307469999" z="0.0"/>
  </node>
  <node id="116858" label="zzzz650" cy:nodeId="516">
    <graphics x="1473.5764636206886" y="-2398.032307469999" z="0.0"/>
  </node>
  <node id="116857" label="zzzz649" cy:nodeId="517">
    <graphics x="1574.5764636206886" y="-2362.032307469999" z="0.0"/>
  </node>
  <node id="116856" label="zzzz648" cy:nodeId="518">
    <graphics x="1651.5764636206886" y="-2128.032307469999" z="0.0"/>
  </node>
  <node id="116855" label="zzzz647" cy:nodeId="519">
    <graphics x="1575.5764636206886" y="-2128.032307469999" z="0.0"/>
  </node>
  <node id="116854" label="zzzz646" cy:nodeId="520">
    <graphics x="1581.5764636206886" y="-2182.032307469999" z="0.0"/>
  </node>
  <node id="116853" label="zzzz645" cy:nodeId="521">
    <graphics x="1793.5764636206886" y="-2209.032307469999" z="0.0"/>
  </node>
  <node id="116852" label="zzzz644" cy:nodeId="522">
    <graphics x="1500.5764636206886" y="-2326.032307469999" z="0.0"/>
  </node>
  <node id="116851" label="zzzz643" cy:nodeId="523">
    <graphics x="1502.5764636206886" y="-1966.032307469999" z="0.0"/>
  </node>
  <node id="116850" label="zzzz642" cy:nodeId="524">
    <graphics x="1478.5764636206886" y="-2218.032307469999" z="0.0"/>
  </node>
  <node id="116849" label="zzzz641" cy:nodeId="525">
    <graphics x="1709.5764636206886" y="-1974.032307469999" z="0.0"/>
  </node>
  <node id="116848" label="zzzz640" cy:nodeId="526">
    <graphics x="1533.5764636206886" y="-2254.032307469999" z="0.0"/>
  </node>
  <node id="116847" label="zzzz639" cy:nodeId="527">
    <graphics x="1699.5764636206886" y="-2224.032307469999" z="0.0"/>
  </node>
  <node id="116846" label="zzzz638" cy:nodeId="528">
    <graphics x="1825.5764636206886" y="-2122.032307469999" z="0.0"/>
  </node>
  <node id="116845" label="zzzz637" cy:nodeId="529">
    <graphics x="1803.5764636206886" y="-2013.032307469999" z="0.0"/>
  </node>
  <node id="116844" label="zzzz636" cy:nodeId="530">
    <graphics x="1761.5764636206886" y="-2317.032307469999" z="0.0"/>
  </node>
  <node id="116843" label="zzzz635" cy:nodeId="531">
    <graphics x="1664.5764636206886" y="-2057.032307469999" z="0.0"/>
  </node>
  <node id="116842" label="zzzz634" cy:nodeId="532">
    <graphics x="1651.5764636206886" y="-2010.032307469999" z="0.0"/>
  </node>
  <node id="116841" label="zzzz633" cy:nodeId="533">
    <graphics x="-299.4235363793114" y="910.9676925300009" z="0.0"/>
  </node>
  <node id="116840" label="zzzz632" cy:nodeId="534">
    <graphics x="-410.4235363793114" y="1116.967692530001" z="0.0"/>
  </node>
  <node id="116839" label="zzzz631" cy:nodeId="535">
    <graphics x="-180.42353637931137" y="996.9676925300009" z="0.0"/>
  </node>
  <node id="116838" label="zzzz630" cy:nodeId="536">
    <graphics x="-389.4235363793114" y="853.9676925300009" z="0.0"/>
  </node>
  <node id="116837" label="zzzz629" cy:nodeId="537">
    <graphics x="-332.4235363793114" y="1097.967692530001" z="0.0"/>
  </node>
  <node id="116836" label="zzzz628" cy:nodeId="538">
    <graphics x="-197.42353637931137" y="1032.967692530001" z="0.0"/>
  </node>
  <node id="116835" label="zzzz627" cy:nodeId="539">
    <graphics x="-446.4235363793114" y="1005.9676925300009" z="0.0"/>
  </node>
  <node id="116834" label="zzzz626" cy:nodeId="540">
    <graphics x="-316.4235363793114" y="946.9676925300009" z="0.0"/>
  </node>
  <node id="116833" label="zzzz625" cy:nodeId="541">
    <graphics x="-248.42353637931137" y="1164.967692530001" z="0.0"/>
  </node>
  <node id="116832" label="zzzz624" cy:nodeId="542">
    <graphics x="-221.42353637931137" y="874.9676925300009" z="0.0"/>
  </node>
  <node id="116831" label="zzzz623" cy:nodeId="543">
    <graphics x="134.57646362068863" y="226.96769253000093" z="0.0"/>
  </node>
  <node id="116830" label="zzzz622" cy:nodeId="544">
    <graphics x="110.57646362068863" y="266.96769253000093" z="0.0"/>
  </node>
  <node id="116829" label="zzzz621" cy:nodeId="545">
    <graphics x="19.576463620688628" y="347.96769253000093" z="0.0"/>
  </node>
  <node id="116828" label="zzzz620" cy:nodeId="546">
    <graphics x="-56.42353637931137" y="265.96769253000093" z="0.0"/>
  </node>
  <node id="116827" label="zzzz619" cy:nodeId="547">
    <graphics x="28.576463620688628" y="271.96769253000093" z="0.0"/>
  </node>
  <node id="116826" label="zzzz618" cy:nodeId="548">
    <graphics x="101.57646362068863" y="149.96769253000093" z="0.0"/>
  </node>
  <node id="116825" label="zzzz617" cy:nodeId="549">
    <graphics x="186.57646362068863" y="262.96769253000093" z="0.0"/>
  </node>
  <node id="116824" label="zzzz616" cy:nodeId="550">
    <graphics x="125.57646362068863" y="100.96769253000093" z="0.0"/>
  </node>
  <node id="116823" label="zzzz615" cy:nodeId="551">
    <graphics x="177.57646362068863" y="149.96769253000093" z="0.0"/>
  </node>
  <node id="116822" label="zzzz614" cy:nodeId="552">
    <graphics x="1.576463620688628" y="171.96769253000093" z="0.0"/>
  </node>
  <node id="116821" label="zzzz613" cy:nodeId="553">
    <graphics x="77.57646362068863" y="185.96769253000093" z="0.0"/>
  </node>
  <node id="116820" label="zzzz612" cy:nodeId="554">
    <graphics x="126.57646362068863" y="344.96769253000093" z="0.0"/>
  </node>
  <node id="116819" label="zzzz611" cy:nodeId="555">
    <graphics x="-51.42353637931137" y="458.96769253000093" z="0.0"/>
  </node>
  <node id="116818" label="zzzz610" cy:nodeId="556">
    <graphics x="34.57646362068863" y="235.96769253000093" z="0.0"/>
  </node>
  <node id="116817" label="zzzz609" cy:nodeId="557">
    <graphics x="-130.42353637931137" y="345.96769253000093" z="0.0"/>
  </node>
  <node id="116816" label="zzzz608" cy:nodeId="558">
    <graphics x="258.5764636206886" y="221.96769253000093" z="0.0"/>
  </node>
  <node id="116815" label="zzzz607" cy:nodeId="559">
    <graphics x="92.57646362068863" y="487.96769253000093" z="0.0"/>
  </node>
  <node id="116814" label="zzzz606" cy:nodeId="560">
    <graphics x="207.57646362068863" y="529.9676925300009" z="0.0"/>
  </node>
  <node id="116813" label="zzzz605" cy:nodeId="561">
    <graphics x="205.57646362068863" y="185.96769253000093" z="0.0"/>
  </node>
  <node id="116812" label="zzzz604" cy:nodeId="562">
    <graphics x="210.57646362068863" y="349.96769253000093" z="0.0"/>
  </node>
  <node id="116811" label="zzzz603" cy:nodeId="563">
    <graphics x="89.57646362068863" y="612.9676925300009" z="0.0"/>
  </node>
  <node id="116810" label="zzzz602" cy:nodeId="564">
    <graphics x="110.57646362068863" y="308.96769253000093" z="0.0"/>
  </node>
  <node id="116809" label="zzzz601" cy:nodeId="565">
    <graphics x="215.57646362068863" y="298.96769253000093" z="0.0"/>
  </node>
  <node id="116808" label="zzzz600" cy:nodeId="566">
    <graphics x="93.57646362068863" y="451.96769253000093" z="0.0"/>
  </node>
  <node id="116807" label="zzzz599" cy:nodeId="567">
    <graphics x="370.5764636206886" y="201.96769253000093" z="0.0"/>
  </node>
  <node id="116806" label="zzzz598" cy:nodeId="568">
    <graphics x="322.5764636206886" y="336.96769253000093" z="0.0"/>
  </node>
  <node id="116805" label="zzzz597" cy:nodeId="569">
    <graphics x="278.5764636206886" y="426.96769253000093" z="0.0"/>
  </node>
  <node id="116804" label="zzzz596" cy:nodeId="570">
    <graphics x="217.57646362068863" y="389.96769253000093" z="0.0"/>
  </node>
  <node id="116803" label="zzzz595" cy:nodeId="571">
    <graphics x="297.5764636206886" y="282.96769253000093" z="0.0"/>
  </node>
  <node id="116802" label="zzzz594" cy:nodeId="572">
    <graphics x="-311.4235363793114" y="2922.967692530001" z="0.0"/>
  </node>
  <node id="116801" label="zzzz593" cy:nodeId="573">
    <graphics x="-977.4235363793114" y="-2856.032307469999" z="0.0"/>
  </node>
  <node id="116800" label="zzzz592" cy:nodeId="574">
    <graphics x="-1755.4235363793114" y="-168.03230746999907" z="0.0"/>
  </node>
  <node id="116799" label="zzzz591" cy:nodeId="575">
    <graphics x="-432.4235363793114" y="2922.967692530001" z="0.0"/>
  </node>
  <node id="116798" label="zzzz590" cy:nodeId="576">
    <graphics x="2822.5764636206886" y="2101.967692530001" z="0.0"/>
  </node>
  <node id="116797" label="zzzz589" cy:nodeId="577">
    <graphics x="-553.4235363793114" y="2922.967692530001" z="0.0"/>
  </node>
  <node id="116796" label="zzzz588" cy:nodeId="578">
    <graphics x="3243.5764636206886" y="1926.967692530001" z="0.0"/>
  </node>
  <node id="116795" label="zzzz587" cy:nodeId="579">
    <graphics x="-674.4235363793114" y="2922.967692530001" z="0.0"/>
  </node>
  <node id="116794" label="zzzz586" cy:nodeId="580">
    <graphics x="-795.4235363793114" y="2922.967692530001" z="0.0"/>
  </node>
  <node id="116793" label="zzzz585" cy:nodeId="581">
    <graphics x="2738.5764636206886" y="2014.967692530001" z="0.0"/>
  </node>
  <node id="116792" label="zzzz584" cy:nodeId="582">
    <graphics x="1238.5764636206886" y="-892.0323074699991" z="0.0"/>
  </node>
  <node id="116791" label="zzzz583" cy:nodeId="583">
    <graphics x="-916.4235363793114" y="2922.967692530001" z="0.0"/>
  </node>
  <node id="116790" label="zzzz582" cy:nodeId="584">
    <graphics x="-1037.4235363793114" y="2922.967692530001" z="0.0"/>
  </node>
  <node id="116789" label="zzzz581" cy:nodeId="585">
    <graphics x="966.5764636206886" y="-867.0323074699991" z="0.0"/>
  </node>
  <node id="116788" label="zzzz580" cy:nodeId="586">
    <graphics x="-1158.4235363793114" y="2922.967692530001" z="0.0"/>
  </node>
  <node id="116787" label="zzzz579" cy:nodeId="587">
    <graphics x="-1279.4235363793114" y="2922.967692530001" z="0.0"/>
  </node>
  <node id="116786" label="zzzz578" cy:nodeId="588">
    <graphics x="-1400.4235363793114" y="2922.967692530001" z="0.0"/>
  </node>
  <node id="116785" label="zzzz577" cy:nodeId="589">
    <graphics x="-1521.4235363793114" y="2922.967692530001" z="0.0"/>
  </node>
  <node id="116784" label="zzzz576" cy:nodeId="590">
    <graphics x="-1189.4235363793114" y="2107.967692530001" z="0.0"/>
  </node>
  <node id="116783" label="zzzz575" cy:nodeId="591">
    <graphics x="-701.4235363793114" y="-442.03230746999907" z="0.0"/>
  </node>
  <node id="116782" label="zzzz574" cy:nodeId="592">
    <graphics x="1309.5764636206886" y="-684.0323074699991" z="0.0"/>
  </node>
  <node id="116781" label="zzzz573" cy:nodeId="593">
    <graphics x="-1642.4235363793114" y="2922.967692530001" z="0.0"/>
  </node>
  <node id="116780" label="zzzz572" cy:nodeId="594">
    <graphics x="3269.5764636206886" y="-442.03230746999907" z="0.0"/>
  </node>
  <node id="116779" label="zzzz571" cy:nodeId="595">
    <graphics x="1106.5764636206886" y="-1026.032307469999" z="0.0"/>
  </node>
  <node id="116778" label="zzzz570" cy:nodeId="596">
    <graphics x="1233.5764636206886" y="-688.0323074699991" z="0.0"/>
  </node>
  <node id="116777" label="zzzz569" cy:nodeId="597">
    <graphics x="2797.5764636206886" y="1676.967692530001" z="0.0"/>
  </node>
  <node id="116776" label="zzzz568" cy:nodeId="598">
    <graphics x="1230.5764636206886" y="-652.0323074699991" z="0.0"/>
  </node>
  <node id="116775" label="zzzz567" cy:nodeId="599">
    <graphics x="-1763.4235363793114" y="2922.967692530001" z="0.0"/>
  </node>
  <node id="116774" label="zzzz566" cy:nodeId="600">
    <graphics x="-1884.4235363793114" y="2922.967692530001" z="0.0"/>
  </node>
  <node id="116773" label="zzzz565" cy:nodeId="601">
    <graphics x="-1179.4235363793114" y="2014.967692530001" z="0.0"/>
  </node>
  <node id="116772" label="zzzz564" cy:nodeId="602">
    <graphics x="-2005.4235363793114" y="2922.967692530001" z="0.0"/>
  </node>
  <node id="116771" label="zzzz563" cy:nodeId="603">
    <graphics x="-2126.4235363793114" y="2922.967692530001" z="0.0"/>
  </node>
  <node id="116770" label="zzzz562" cy:nodeId="604">
    <graphics x="3169.5764636206886" y="-572.0323074699991" z="0.0"/>
  </node>
  <node id="116769" label="zzzz561" cy:nodeId="605">
    <graphics x="938.5764636206886" y="1671.967692530001" z="0.0"/>
  </node>
  <node id="116768" label="zzzz560" cy:nodeId="606">
    <graphics x="1915.5764636206886" y="-742.0323074699991" z="0.0"/>
  </node>
  <node id="116767" label="zzzz559" cy:nodeId="607">
    <graphics x="-2247.4235363793114" y="2922.967692530001" z="0.0"/>
  </node>
  <node id="116766" label="zzzz558" cy:nodeId="608">
    <graphics x="1141.5764636206886" y="-694.0323074699991" z="0.0"/>
  </node>
  <node id="116765" label="zzzz557" cy:nodeId="609">
    <graphics x="-691.4235363793114" y="-707.0323074699991" z="0.0"/>
  </node>
  <node id="116764" label="zzzz556" cy:nodeId="610">
    <graphics x="-2368.4235363793114" y="2922.967692530001" z="0.0"/>
  </node>
  <node id="116763" label="zzzz555" cy:nodeId="611">
    <graphics x="2174.5764636206886" y="100.96769253000093" z="0.0"/>
  </node>
  <node id="116762" label="zzzz554" cy:nodeId="612">
    <graphics x="-2489.4235363793114" y="2922.967692530001" z="0.0"/>
  </node>
  <node id="116761" label="zzzz553" cy:nodeId="613">
    <graphics x="1006.5764636206886" y="1716.967692530001" z="0.0"/>
  </node>
  <node id="116760" label="zzzz552" cy:nodeId="614">
    <graphics x="3439.5764636206886" y="2841.967692530001" z="0.0"/>
  </node>
  <node id="116759" label="zzzz551" cy:nodeId="615">
    <graphics x="1106.5764636206886" y="-785.0323074699991" z="0.0"/>
  </node>
  <node id="116758" label="zzzz550" cy:nodeId="616">
    <graphics x="3318.5764636206886" y="2841.967692530001" z="0.0"/>
  </node>
  <node id="116757" label="zzzz549" cy:nodeId="617">
    <graphics x="1251.5764636206886" y="-929.0323074699991" z="0.0"/>
  </node>
  <node id="116756" label="zzzz548" cy:nodeId="618">
    <graphics x="3197.5764636206886" y="2841.967692530001" z="0.0"/>
  </node>
  <node id="116755" label="zzzz547" cy:nodeId="619">
    <graphics x="2026.5764636206886" y="1375.967692530001" z="0.0"/>
  </node>
  <node id="116754" label="zzzz546" cy:nodeId="620">
    <graphics x="3207.5764636206886" y="1705.967692530001" z="0.0"/>
  </node>
  <node id="116753" label="zzzz545" cy:nodeId="621">
    <graphics x="3076.5764636206886" y="2841.967692530001" z="0.0"/>
  </node>
  <node id="116752" label="zzzz544" cy:nodeId="622">
    <graphics x="2955.5764636206886" y="2841.967692530001" z="0.0"/>
  </node>
  <node id="116751" label="zzzz543" cy:nodeId="623">
    <graphics x="3151.5764636206886" y="1602.967692530001" z="0.0"/>
  </node>
  <node id="116750" label="zzzz542" cy:nodeId="624">
    <graphics x="2035.5764636206886" y="340.96769253000093" z="0.0"/>
  </node>
  <node id="116749" label="zzzz541" cy:nodeId="625">
    <graphics x="1330.5764636206886" y="-648.0323074699991" z="0.0"/>
  </node>
  <node id="116748" label="zzzz540" cy:nodeId="626">
    <graphics x="-637.4235363793114" y="-961.0323074699991" z="0.0"/>
  </node>
  <node id="116747" label="zzzz539" cy:nodeId="627">
    <graphics x="-1217.4235363793114" y="1928.967692530001" z="0.0"/>
  </node>
  <node id="116746" label="zzzz538" cy:nodeId="628">
    <graphics x="3093.5764636206886" y="-752.0323074699991" z="0.0"/>
  </node>
  <node id="116745" label="zzzz537" cy:nodeId="629">
    <graphics x="1185.5764636206886" y="-802.0323074699991" z="0.0"/>
  </node>
  <node id="116744" label="zzzz536" cy:nodeId="630">
    <graphics x="-804.4235363793114" y="-862.0323074699991" z="0.0"/>
  </node>
  <node id="116743" label="zzzz535" cy:nodeId="631">
    <graphics x="-670.4235363793114" y="-478.03230746999907" z="0.0"/>
  </node>
  <node id="116742" label="zzzz534" cy:nodeId="632">
    <graphics x="2834.5764636206886" y="2841.967692530001" z="0.0"/>
  </node>
  <node id="116741" label="zzzz533" cy:nodeId="633">
    <graphics x="2713.5764636206886" y="2841.967692530001" z="0.0"/>
  </node>
  <node id="116740" label="zzzz532" cy:nodeId="634">
    <graphics x="1992.5764636206886" y="130.96769253000093" z="0.0"/>
  </node>
  <node id="116739" label="zzzz531" cy:nodeId="635">
    <graphics x="599.5764636206886" y="-650.0323074699991" z="0.0"/>
  </node>
  <node id="116738" label="zzzz530" cy:nodeId="636">
    <graphics x="1772.5764636206886" y="-932.0323074699991" z="0.0"/>
  </node>
  <node id="116737" label="zzzz529" cy:nodeId="637">
    <graphics x="1177.5764636206886" y="-838.0323074699991" z="0.0"/>
  </node>
  <node id="116736" label="zzzz528" cy:nodeId="638">
    <graphics x="-939.4235363793114" y="-948.0323074699991" z="0.0"/>
  </node>
  <node id="116735" label="zzzz527" cy:nodeId="639">
    <graphics x="1197.5764636206886" y="-730.0323074699991" z="0.0"/>
  </node>
  <node id="116734" label="zzzz526" cy:nodeId="640">
    <graphics x="-1561.4235363793114" y="1076.967692530001" z="0.0"/>
  </node>
  <node id="116733" label="zzzz525" cy:nodeId="641">
    <graphics x="2874.5764636206886" y="1926.967692530001" z="0.0"/>
  </node>
  <node id="116732" label="zzzz524" cy:nodeId="642">
    <graphics x="2592.5764636206886" y="2841.967692530001" z="0.0"/>
  </node>
  <node id="116731" label="zzzz523" cy:nodeId="643">
    <graphics x="-700.4235363793114" y="-857.0323074699991" z="0.0"/>
  </node>
  <node id="116730" label="zzzz522" cy:nodeId="644">
    <graphics x="-650.4235363793114" y="-310.03230746999907" z="0.0"/>
  </node>
  <node id="116729" label="zzzz521" cy:nodeId="645">
    <graphics x="1091.5764636206886" y="-949.0323074699991" z="0.0"/>
  </node>
  <node id="116728" label="zzzz520" cy:nodeId="646">
    <graphics x="594.5764636206886" y="-896.0323074699991" z="0.0"/>
  </node>
  <node id="116727" label="zzzz519" cy:nodeId="647">
    <graphics x="-702.4235363793114" y="1928.967692530001" z="0.0"/>
  </node>
  <node id="116726" label="zzzz518" cy:nodeId="648">
    <graphics x="2471.5764636206886" y="2841.967692530001" z="0.0"/>
  </node>
  <node id="116725" label="zzzz517" cy:nodeId="649">
    <graphics x="2350.5764636206886" y="2841.967692530001" z="0.0"/>
  </node>
  <node id="116724" label="zzzz516" cy:nodeId="650">
    <graphics x="-1499.4235363793114" y="853.9676925300009" z="0.0"/>
  </node>
  <node id="116723" label="zzzz515" cy:nodeId="651">
    <graphics x="1056.5764636206886" y="-990.0323074699991" z="0.0"/>
  </node>
  <node id="116722" label="zzzz514" cy:nodeId="652">
    <graphics x="2229.5764636206886" y="2841.967692530001" z="0.0"/>
  </node>
  <node id="116721" label="zzzz513" cy:nodeId="653">
    <graphics x="2108.5764636206886" y="2841.967692530001" z="0.0"/>
  </node>
  <node id="116720" label="zzzz512" cy:nodeId="654">
    <graphics x="1987.5764636206886" y="2841.967692530001" z="0.0"/>
  </node>
  <node id="116719" label="zzzz511" cy:nodeId="655">
    <graphics x="1866.5764636206886" y="2841.967692530001" z="0.0"/>
  </node>
  <node id="116718" label="zzzz510" cy:nodeId="656">
    <graphics x="2089.5764636206886" y="1450.967692530001" z="0.0"/>
  </node>
  <node id="116717" label="zzzz509" cy:nodeId="657">
    <graphics x="-1082.4235363793114" y="1928.967692530001" z="0.0"/>
  </node>
  <node id="116716" label="zzzz508" cy:nodeId="658">
    <graphics x="2462.5764636206886" y="1442.967692530001" z="0.0"/>
  </node>
  <node id="116715" label="zzzz507" cy:nodeId="659">
    <graphics x="-2059.4235363793114" y="2273.967692530001" z="0.0"/>
  </node>
  <node id="116714" label="zzzz506" cy:nodeId="660">
    <graphics x="1745.5764636206886" y="2841.967692530001" z="0.0"/>
  </node>
  <node id="116713" label="zzzz505" cy:nodeId="661">
    <graphics x="-1759.4235363793114" y="-733.0323074699991" z="0.0"/>
  </node>
  <node id="116712" label="zzzz504" cy:nodeId="662">
    <graphics x="294.5764636206886" y="1716.967692530001" z="0.0"/>
  </node>
  <node id="116711" label="zzzz503" cy:nodeId="663">
    <graphics x="1624.5764636206886" y="2841.967692530001" z="0.0"/>
  </node>
  <node id="116710" label="zzzz502" cy:nodeId="664">
    <graphics x="-1778.4235363793114" y="-354.03230746999907" z="0.0"/>
  </node>
  <node id="116709" label="zzzz501" cy:nodeId="665">
    <graphics x="1503.5764636206886" y="2841.967692530001" z="0.0"/>
  </node>
  <node id="116708" label="zzzz500" cy:nodeId="666">
    <graphics x="2007.5764636206886" y="-962.0323074699991" z="0.0"/>
  </node>
  <node id="116707" label="zzzz499" cy:nodeId="667">
    <graphics x="2147.5764636206886" y="-916.0323074699991" z="0.0"/>
  </node>
  <node id="116706" label="zzzz498" cy:nodeId="668">
    <graphics x="-2489.4235363793114" y="-423.03230746999907" z="0.0"/>
  </node>
  <node id="116705" label="zzzz497" cy:nodeId="669">
    <graphics x="1995.5764636206886" y="-890.0323074699991" z="0.0"/>
  </node>
  <node id="116704" label="zzzz496" cy:nodeId="670">
    <graphics x="2124.5764636206886" y="-852.0323074699991" z="0.0"/>
  </node>
  <node id="116703" label="zzzz495" cy:nodeId="671">
    <graphics x="2027.5764636206886" y="-1063.032307469999" z="0.0"/>
  </node>
  <node id="116702" label="zzzz494" cy:nodeId="672">
    <graphics x="-2475.4235363793114" y="-543.0323074699991" z="0.0"/>
  </node>
  <node id="116701" label="zzzz493" cy:nodeId="673">
    <graphics x="-2413.4235363793114" y="-416.03230746999907" z="0.0"/>
  </node>
  <node id="116700" label="zzzz492" cy:nodeId="674">
    <graphics x="2059.5764636206886" y="-998.0323074699991" z="0.0"/>
  </node>
  <node id="116699" label="zzzz491" cy:nodeId="675">
    <graphics x="-2346.4235363793114" y="-503.03230746999907" z="0.0"/>
  </node>
  <node id="116698" label="zzzz490" cy:nodeId="676">
    <graphics x="-1847.4235363793114" y="-684.0323074699991" z="0.0"/>
  </node>
  <node id="116697" label="zzzz489" cy:nodeId="677">
    <graphics x="2171.5764636206886" y="-1070.032307469999" z="0.0"/>
  </node>
  <node id="116696" label="zzzz488" cy:nodeId="678">
    <graphics x="1051.5764636206886" y="-664.0323074699991" z="0.0"/>
  </node>
  <node id="116695" label="zzzz487" cy:nodeId="679">
    <graphics x="1382.5764636206886" y="2841.967692530001" z="0.0"/>
  </node>
  <node id="116694" label="zzzz486" cy:nodeId="680">
    <graphics x="1177.5764636206886" y="-982.0323074699991" z="0.0"/>
  </node>
  <node id="116693" label="zzzz485" cy:nodeId="681">
    <graphics x="1751.5764636206886" y="-780.0323074699991" z="0.0"/>
  </node>
  <node id="116692" label="zzzz484" cy:nodeId="682">
    <graphics x="2024.5764636206886" y="-778.0323074699991" z="0.0"/>
  </node>
  <node id="116691" label="zzzz483" cy:nodeId="683">
    <graphics x="-2393.4235363793114" y="-321.03230746999907" z="0.0"/>
  </node>
  <node id="116690" label="zzzz482" cy:nodeId="684">
    <graphics x="1261.5764636206886" y="2841.967692530001" z="0.0"/>
  </node>
  <node id="116689" label="zzzz481" cy:nodeId="685">
    <graphics x="2519.5764636206886" y="1390.967692530001" z="0.0"/>
  </node>
  <node id="116688" label="zzzz480" cy:nodeId="686">
    <graphics x="1140.5764636206886" y="2841.967692530001" z="0.0"/>
  </node>
  <node id="116687" label="zzzz479" cy:nodeId="687">
    <graphics x="-2355.4235363793114" y="-539.0323074699991" z="0.0"/>
  </node>
  <node id="116686" label="zzzz478" cy:nodeId="688">
    <graphics x="-2303.4235363793114" y="-437.03230746999907" z="0.0"/>
  </node>
  <node id="116685" label="zzzz477" cy:nodeId="689">
    <graphics x="2146.5764636206886" y="-816.0323074699991" z="0.0"/>
  </node>
  <node id="116684" label="zzzz476" cy:nodeId="690">
    <graphics x="1019.5764636206886" y="2841.967692530001" z="0.0"/>
  </node>
  <node id="116683" label="zzzz475" cy:nodeId="691">
    <graphics x="898.5764636206886" y="2841.967692530001" z="0.0"/>
  </node>
  <node id="116682" label="zzzz474" cy:nodeId="692">
    <graphics x="777.5764636206886" y="2841.967692530001" z="0.0"/>
  </node>
  <node id="116681" label="zzzz473" cy:nodeId="693">
    <graphics x="-2217.4235363793114" y="-989.0323074699991" z="0.0"/>
  </node>
  <node id="116680" label="zzzz472" cy:nodeId="694">
    <graphics x="656.5764636206886" y="2841.967692530001" z="0.0"/>
  </node>
  <node id="116679" label="zzzz471" cy:nodeId="695">
    <graphics x="-1732.4235363793114" y="-301.03230746999907" z="0.0"/>
  </node>
  <node id="116678" label="zzzz470" cy:nodeId="696">
    <graphics x="2157.5764636206886" y="-770.0323074699991" z="0.0"/>
  </node>
  <node id="116677" label="zzzz469" cy:nodeId="697">
    <graphics x="535.5764636206886" y="2841.967692530001" z="0.0"/>
  </node>
  <node id="116676" label="zzzz468" cy:nodeId="698">
    <graphics x="-333.4235363793114" y="2188.967692530001" z="0.0"/>
  </node>
  <node id="116675" label="zzzz467" cy:nodeId="699">
    <graphics x="1526.5764636206886" y="-2002.032307469999" z="0.0"/>
  </node>
  <node id="116674" label="zzzz466" cy:nodeId="700">
    <graphics x="414.5764636206886" y="2841.967692530001" z="0.0"/>
  </node>
  <node id="116673" label="zzzz465" cy:nodeId="701">
    <graphics x="293.5764636206886" y="2841.967692530001" z="0.0"/>
  </node>
  <node id="116672" label="zzzz464" cy:nodeId="702">
    <graphics x="233.57646362068863" y="1661.967692530001" z="0.0"/>
  </node>
  <node id="116671" label="zzzz463" cy:nodeId="703">
    <graphics x="287.5764636206886" y="1602.967692530001" z="0.0"/>
  </node>
  <node id="116670" label="zzzz462" cy:nodeId="704">
    <graphics x="-674.4235363793114" y="-893.0323074699991" z="0.0"/>
  </node>
  <node id="116669" label="zzzz461" cy:nodeId="705">
    <graphics x="-2402.4235363793114" y="1878.967692530001" z="0.0"/>
  </node>
  <node id="116668" label="zzzz460" cy:nodeId="706">
    <graphics x="3328.5764636206886" y="1705.967692530001" z="0.0"/>
  </node>
  <node id="116667" label="zzzz459" cy:nodeId="707">
    <graphics x="172.57646362068863" y="2841.967692530001" z="0.0"/>
  </node>
  <node id="116666" label="zzzz458" cy:nodeId="708">
    <graphics x="3002.5764636206886" y="-942.0323074699991" z="0.0"/>
  </node>
  <node id="116665" label="zzzz457" cy:nodeId="709">
    <graphics x="51.57646362068863" y="2841.967692530001" z="0.0"/>
  </node>
  <node id="116664" label="zzzz456" cy:nodeId="710">
    <graphics x="1170.5764636206886" y="-946.0323074699991" z="0.0"/>
  </node>
  <node id="116663" label="zzzz455" cy:nodeId="711">
    <graphics x="-55.42353637931137" y="1353.967692530001" z="0.0"/>
  </node>
  <node id="116662" label="zzzz454" cy:nodeId="712">
    <graphics x="-130.42353637931137" y="1478.967692530001" z="0.0"/>
  </node>
  <node id="116661" label="zzzz453" cy:nodeId="713">
    <graphics x="2111.5764636206886" y="136.96769253000093" z="0.0"/>
  </node>
  <node id="116660" label="zzzz452" cy:nodeId="714">
    <graphics x="-69.42353637931137" y="2841.967692530001" z="0.0"/>
  </node>
  <node id="116659" label="zzzz451" cy:nodeId="715">
    <graphics x="-190.42353637931137" y="2841.967692530001" z="0.0"/>
  </node>
  <node id="116658" label="zzzz450" cy:nodeId="716">
    <graphics x="-136.42353637931137" y="1302.967692530001" z="0.0"/>
  </node>
  <node id="116657" label="zzzz449" cy:nodeId="717">
    <graphics x="-311.4235363793114" y="2841.967692530001" z="0.0"/>
  </node>
  <node id="116656" label="zzzz448" cy:nodeId="718">
    <graphics x="983.5764636206886" y="1602.967692530001" z="0.0"/>
  </node>
  <node id="116655" label="zzzz447" cy:nodeId="719">
    <graphics x="1262.5764636206886" y="-835.0323074699991" z="0.0"/>
  </node>
  <node id="116654" label="zzzz446" cy:nodeId="720">
    <graphics x="-432.4235363793114" y="2841.967692530001" z="0.0"/>
  </node>
  <node id="116653" label="zzzz445" cy:nodeId="721">
    <graphics x="-726.4235363793114" y="-763.0323074699991" z="0.0"/>
  </node>
  <node id="116652" label="zzzz444" cy:nodeId="722">
    <graphics x="-593.4235363793114" y="-703.0323074699991" z="0.0"/>
  </node>
  <node id="116651" label="zzzz443" cy:nodeId="723">
    <graphics x="1471.5764636206886" y="928.9676925300009" z="0.0"/>
  </node>
  <node id="116650" label="zzzz442" cy:nodeId="724">
    <graphics x="-553.4235363793114" y="2841.967692530001" z="0.0"/>
  </node>
  <node id="116649" label="zzzz441" cy:nodeId="725">
    <graphics x="1543.5764636206886" y="1017.9676925300009" z="0.0"/>
  </node>
  <node id="116648" label="zzzz440" cy:nodeId="726">
    <graphics x="2108.5764636206886" y="-952.0323074699991" z="0.0"/>
  </node>
  <node id="116647" label="zzzz439" cy:nodeId="727">
    <graphics x="697.5764636206886" y="1456.967692530001" z="0.0"/>
  </node>
  <node id="116646" label="zzzz438" cy:nodeId="728">
    <graphics x="2071.5764636206886" y="-888.0323074699991" z="0.0"/>
  </node>
  <node id="116645" label="zzzz437" cy:nodeId="729">
    <graphics x="-2332.4235363793114" y="-401.03230746999907" z="0.0"/>
  </node>
  <node id="116644" label="zzzz436" cy:nodeId="730">
    <graphics x="-2413.4235363793114" y="-467.03230746999907" z="0.0"/>
  </node>
  <node id="116643" label="zzzz435" cy:nodeId="731">
    <graphics x="2778.5764636206886" y="2055.967692530001" z="0.0"/>
  </node>
  <node id="116642" label="zzzz434" cy:nodeId="732">
    <graphics x="2824.5764636206886" y="2016.967692530001" z="0.0"/>
  </node>
  <node id="116641" label="zzzz433" cy:nodeId="733">
    <graphics x="3243.5764636206886" y="1832.967692530001" z="0.0"/>
  </node>
  <node id="116640" label="zzzz432" cy:nodeId="734">
    <graphics x="-674.4235363793114" y="2841.967692530001" z="0.0"/>
  </node>
  <node id="116639" label="zzzz431" cy:nodeId="735">
    <graphics x="-795.4235363793114" y="2841.967692530001" z="0.0"/>
  </node>
  <node id="116638" label="zzzz430" cy:nodeId="736">
    <graphics x="-916.4235363793114" y="2841.967692530001" z="0.0"/>
  </node>
  <node id="116637" label="zzzz429" cy:nodeId="737">
    <graphics x="-1037.4235363793114" y="2841.967692530001" z="0.0"/>
  </node>
  <node id="116636" label="zzzz428" cy:nodeId="738">
    <graphics x="1126.5764636206886" y="-874.0323074699991" z="0.0"/>
  </node>
  <node id="116635" label="zzzz427" cy:nodeId="739">
    <graphics x="-1158.4235363793114" y="2841.967692530001" z="0.0"/>
  </node>
  <node id="116634" label="zzzz426" cy:nodeId="740">
    <graphics x="-1279.4235363793114" y="2841.967692530001" z="0.0"/>
  </node>
  <node id="116633" label="zzzz425" cy:nodeId="741">
    <graphics x="1195.5764636206886" y="-1022.0323074699991" z="0.0"/>
  </node>
  <node id="116632" label="zzzz424" cy:nodeId="742">
    <graphics x="1410.5764636206886" y="-781.0323074699991" z="0.0"/>
  </node>
  <node id="116631" label="zzzz423" cy:nodeId="743">
    <graphics x="-1400.4235363793114" y="2841.967692530001" z="0.0"/>
  </node>
  <node id="116630" label="zzzz422" cy:nodeId="744">
    <graphics x="-609.4235363793114" y="-773.0323074699991" z="0.0"/>
  </node>
  <node id="116629" label="zzzz421" cy:nodeId="745">
    <graphics x="3217.5764636206886" y="-692.0323074699991" z="0.0"/>
  </node>
  <node id="116628" label="zzzz420" cy:nodeId="746">
    <graphics x="1578.5764636206886" y="1863.967692530001" z="0.0"/>
  </node>
  <node id="116627" label="zzzz419" cy:nodeId="747">
    <graphics x="1568.5764636206886" y="-785.0323074699991" z="0.0"/>
  </node>
  <node id="116626" label="zzzz418" cy:nodeId="748">
    <graphics x="1261.5764636206886" y="-580.0323074699991" z="0.0"/>
  </node>
  <node id="116625" label="zzzz417" cy:nodeId="749">
    <graphics x="1668.5764636206886" y="1832.967692530001" z="0.0"/>
  </node>
  <node id="116624" label="zzzz416" cy:nodeId="750">
    <graphics x="1275.5764636206886" y="-799.0323074699991" z="0.0"/>
  </node>
  <node id="116623" label="zzzz415" cy:nodeId="751">
    <graphics x="-1521.4235363793114" y="2841.967692530001" z="0.0"/>
  </node>
  <node id="116622" label="zzzz414" cy:nodeId="752">
    <graphics x="-1642.4235363793114" y="2841.967692530001" z="0.0"/>
  </node>
  <node id="116621" label="zzzz413" cy:nodeId="753">
    <graphics x="2877.5764636206886" y="-968.0323074699991" z="0.0"/>
  </node>
  <node id="116620" label="zzzz412" cy:nodeId="754">
    <graphics x="-1763.4235363793114" y="2841.967692530001" z="0.0"/>
  </node>
  <node id="116619" label="zzzz411" cy:nodeId="755">
    <graphics x="1354.5764636206886" y="-585.0323074699991" z="0.0"/>
  </node>
  <node id="116618" label="zzzz410" cy:nodeId="756">
    <graphics x="-568.4235363793114" y="1928.967692530001" z="0.0"/>
  </node>
  <node id="116617" label="zzzz409" cy:nodeId="757">
    <graphics x="526.5764636206886" y="-760.0323074699991" z="0.0"/>
  </node>
  <node id="116616" label="zzzz408" cy:nodeId="758">
    <graphics x="999.5764636206886" y="-411.03230746999907" z="0.0"/>
  </node>
  <node id="116615" label="zzzz407" cy:nodeId="759">
    <graphics x="2132.5764636206886" y="-2554.032307469999" z="0.0"/>
  </node>
  <node id="116614" label="zzzz406" cy:nodeId="760">
    <graphics x="922.5764636206886" y="-709.0323074699991" z="0.0"/>
  </node>
  <node id="116613" label="zzzz405" cy:nodeId="761">
    <graphics x="-2322.4235363793114" y="1933.967692530001" z="0.0"/>
  </node>
  <node id="116612" label="zzzz404" cy:nodeId="762">
    <graphics x="1065.5764636206886" y="-749.0323074699991" z="0.0"/>
  </node>
  <node id="116611" label="zzzz403" cy:nodeId="763">
    <graphics x="-1884.4235363793114" y="2841.967692530001" z="0.0"/>
  </node>
  <node id="116610" label="zzzz402" cy:nodeId="764">
    <graphics x="3054.5764636206886" y="-824.0323074699991" z="0.0"/>
  </node>
  <node id="116609" label="zzzz401" cy:nodeId="765">
    <graphics x="-589.4235363793114" y="-477.03230746999907" z="0.0"/>
  </node>
  <node id="116608" label="zzzz400" cy:nodeId="766">
    <graphics x="-747.4235363793114" y="-966.0323074699991" z="0.0"/>
  </node>
  <node id="116607" label="zzzz399" cy:nodeId="767">
    <graphics x="-520.4235363793114" y="-382.03230746999907" z="0.0"/>
  </node>
  <node id="116606" label="zzzz398" cy:nodeId="768">
    <graphics x="-2005.4235363793114" y="2841.967692530001" z="0.0"/>
  </node>
  <node id="116605" label="zzzz397" cy:nodeId="769">
    <graphics x="2157.5764636206886" y="2102.967692530001" z="0.0"/>
  </node>
  <node id="116604" label="zzzz396" cy:nodeId="770">
    <graphics x="-2126.4235363793114" y="2841.967692530001" z="0.0"/>
  </node>
  <node id="116603" label="zzzz395" cy:nodeId="771">
    <graphics x="-1981.4235363793114" y="287.96769253000093" z="0.0"/>
  </node>
  <node id="116602" label="zzzz394" cy:nodeId="772">
    <graphics x="-2247.4235363793114" y="2841.967692530001" z="0.0"/>
  </node>
  <node id="116601" label="zzzz393" cy:nodeId="773">
    <graphics x="2669.1049646554493" y="280.12433613737494" z="0.0"/>
  </node>
  <node id="116600" label="zzzz392" cy:nodeId="774">
    <graphics x="1367.5764636206886" y="1893.967692530001" z="0.0"/>
  </node>
  <node id="116599" label="zzzz391" cy:nodeId="775">
    <graphics x="-753.4235363793114" y="-915.0323074699991" z="0.0"/>
  </node>
  <node id="116598" label="zzzz390" cy:nodeId="776">
    <graphics x="1005.5764636206886" y="-824.0323074699991" z="0.0"/>
  </node>
  <node id="116597" label="zzzz389" cy:nodeId="777">
    <graphics x="2038.5764636206886" y="376.96769253000093" z="0.0"/>
  </node>
  <node id="116596" label="zzzz388" cy:nodeId="778">
    <graphics x="-2368.4235363793114" y="2841.967692530001" z="0.0"/>
  </node>
  <node id="116595" label="zzzz387" cy:nodeId="779">
    <graphics x="-1581.4235363793114" y="1182.967692530001" z="0.0"/>
  </node>
  <node id="116594" label="zzzz386" cy:nodeId="780">
    <graphics x="2961.5764636206886" y="-613.0323074699991" z="0.0"/>
  </node>
  <node id="116593" label="zzzz385" cy:nodeId="781">
    <graphics x="-669.4235363793114" y="-527.0323074699991" z="0.0"/>
  </node>
  <node id="116592" label="zzzz384" cy:nodeId="782">
    <graphics x="-775.4235363793114" y="-510.03230746999907" z="0.0"/>
  </node>
  <node id="116591" label="zzzz383" cy:nodeId="783">
    <graphics x="-909.4235363793114" y="-986.0323074699991" z="0.0"/>
  </node>
  <node id="116590" label="zzzz382" cy:nodeId="784">
    <graphics x="-2489.4235363793114" y="2841.967692530001" z="0.0"/>
  </node>
  <node id="116589" label="zzzz381" cy:nodeId="785">
    <graphics x="-1528.4235363793114" y="965.9676925300009" z="0.0"/>
  </node>
  <node id="116588" label="zzzz380" cy:nodeId="786">
    <graphics x="1981.5764636206886" y="280.96769253000093" z="0.0"/>
  </node>
  <node id="116587" label="zzzz379" cy:nodeId="787">
    <graphics x="3439.5764636206886" y="2760.967692530001" z="0.0"/>
  </node>
  <node id="116586" label="zzzz378" cy:nodeId="788">
    <graphics x="2281.5764636206886" y="-2241.032307469999" z="0.0"/>
  </node>
  <node id="116585" label="zzzz377" cy:nodeId="789">
    <graphics x="2005.5764636206886" y="-742.0323074699991" z="0.0"/>
  </node>
  <node id="116584" label="zzzz376" cy:nodeId="790">
    <graphics x="1467.5764636206886" y="988.9676925300009" z="0.0"/>
  </node>
  <node id="116583" label="zzzz375" cy:nodeId="791">
    <graphics x="-1452.4235363793114" y="984.9676925300009" z="0.0"/>
  </node>
  <node id="116582" label="zzzz374" cy:nodeId="792">
    <graphics x="-695.4235363793114" y="1832.967692530001" z="0.0"/>
  </node>
  <node id="116581" label="zzzz373" cy:nodeId="793">
    <graphics x="1575.5764636206886" y="889.9676925300009" z="0.0"/>
  </node>
  <node id="116580" label="zzzz372" cy:nodeId="794">
    <graphics x="1193.5764636206886" y="-616.0323074699991" z="0.0"/>
  </node>
  <node id="116579" label="zzzz371" cy:nodeId="795">
    <graphics x="1992.5764636206886" y="-814.0323074699991" z="0.0"/>
  </node>
  <node id="116578" label="zzzz370" cy:nodeId="796">
    <graphics x="-433.4235363793114" y="969.9676925300009" z="0.0"/>
  </node>
  <node id="116577" label="zzzz369" cy:nodeId="797">
    <graphics x="3318.5764636206886" y="2760.967692530001" z="0.0"/>
  </node>
  <node id="116576" label="zzzz368" cy:nodeId="798">
    <graphics x="3197.5764636206886" y="2760.967692530001" z="0.0"/>
  </node>
  <node id="116575" label="zzzz367" cy:nodeId="799">
    <graphics x="2429.5764636206886" y="1341.967692530001" z="0.0"/>
  </node>
  <node id="116574" label="zzzz366" cy:nodeId="800">
    <graphics x="3076.5764636206886" y="2760.967692530001" z="0.0"/>
  </node>
  <node id="116573" label="zzzz365" cy:nodeId="801">
    <graphics x="2601.5764636206886" y="1346.967692530001" z="0.0"/>
  </node>
  <node id="116572" label="zzzz364" cy:nodeId="802">
    <graphics x="2517.5764636206886" y="1283.967692530001" z="0.0"/>
  </node>
  <node id="116571" label="zzzz363" cy:nodeId="803">
    <graphics x="2955.5764636206886" y="2760.967692530001" z="0.0"/>
  </node>
  <node id="116570" label="zzzz362" cy:nodeId="804">
    <graphics x="3122.5764636206886" y="1926.967692530001" z="0.0"/>
  </node>
  <node id="116569" label="zzzz361" cy:nodeId="805">
    <graphics x="2834.5764636206886" y="2760.967692530001" z="0.0"/>
  </node>
  <node id="116568" label="zzzz360" cy:nodeId="806">
    <graphics x="1614.5764636206886" y="931.9676925300009" z="0.0"/>
  </node>
  <node id="116567" label="zzzz359" cy:nodeId="807">
    <graphics x="2510.5764636206886" y="1354.967692530001" z="0.0"/>
  </node>
  <node id="116566" label="zzzz358" cy:nodeId="808">
    <graphics x="-307.4235363793114" y="1061.967692530001" z="0.0"/>
  </node>
  <node id="116565" label="zzzz357" cy:nodeId="809">
    <graphics x="2713.5764636206886" y="2760.967692530001" z="0.0"/>
  </node>
  <node id="116564" label="zzzz356" cy:nodeId="810">
    <graphics x="-1096.4235363793114" y="1832.967692530001" z="0.0"/>
  </node>
  <node id="116563" label="zzzz355" cy:nodeId="811">
    <graphics x="2592.5764636206886" y="2760.967692530001" z="0.0"/>
  </node>
  <node id="116562" label="zzzz354" cy:nodeId="812">
    <graphics x="-2140.4235363793114" y="1677.967692530001" z="0.0"/>
  </node>
  <node id="116561" label="zzzz353" cy:nodeId="813">
    <graphics x="2471.5764636206886" y="2760.967692530001" z="0.0"/>
  </node>
  <node id="116560" label="zzzz352" cy:nodeId="814">
    <graphics x="2350.5764636206886" y="2760.967692530001" z="0.0"/>
  </node>
  <node id="116559" label="zzzz351" cy:nodeId="815">
    <graphics x="2567.5764636206886" y="1447.967692530001" z="0.0"/>
  </node>
  <node id="116558" label="zzzz350" cy:nodeId="816">
    <graphics x="2229.5764636206886" y="2760.967692530001" z="0.0"/>
  </node>
  <node id="116557" label="zzzz349" cy:nodeId="817">
    <graphics x="2108.5764636206886" y="2760.967692530001" z="0.0"/>
  </node>
  <node id="116556" label="zzzz348" cy:nodeId="818">
    <graphics x="727.5764636206886" y="1402.967692530001" z="0.0"/>
  </node>
  <node id="116555" label="zzzz347" cy:nodeId="819">
    <graphics x="727.5764636206886" y="1330.967692530001" z="0.0"/>
  </node>
  <node id="116554" label="zzzz346" cy:nodeId="820">
    <graphics x="1987.5764636206886" y="2760.967692530001" z="0.0"/>
  </node>
  <node id="116553" label="zzzz345" cy:nodeId="821">
    <graphics x="1815.5764636206886" y="-707.0323074699991" z="0.0"/>
  </node>
  <node id="116552" label="zzzz344" cy:nodeId="822">
    <graphics x="1839.5764636206886" y="-743.0323074699991" z="0.0"/>
  </node>
  <node id="116551" label="zzzz343" cy:nodeId="823">
    <graphics x="1931.5764636206886" y="1399.967692530001" z="0.0"/>
  </node>
  <node id="116550" label="zzzz342" cy:nodeId="824">
    <graphics x="1772.5764636206886" y="-896.0323074699991" z="0.0"/>
  </node>
  <node id="116549" label="zzzz341" cy:nodeId="825">
    <graphics x="1969.5764636206886" y="-926.0323074699991" z="0.0"/>
  </node>
  <node id="116548" label="zzzz340" cy:nodeId="826">
    <graphics x="1689.5764636206886" y="-876.0323074699991" z="0.0"/>
  </node>
  <node id="116547" label="zzzz339" cy:nodeId="827">
    <graphics x="-2073.4235363793114" y="-328.03230746999907" z="0.0"/>
  </node>
  <node id="116546" label="zzzz338" cy:nodeId="828">
    <graphics x="-1772.4235363793114" y="-864.0323074699991" z="0.0"/>
  </node>
  <node id="116545" label="zzzz337" cy:nodeId="829">
    <graphics x="1866.5764636206886" y="2760.967692530001" z="0.0"/>
  </node>
  <node id="116544" label="zzzz336" cy:nodeId="830">
    <graphics x="534.5764636206886" y="1151.967692530001" z="0.0"/>
  </node>
  <node id="116543" label="zzzz335" cy:nodeId="831">
    <graphics x="2586.5764636206886" y="-3041.032307469999" z="0.0"/>
  </node>
  <node id="116542" label="zzzz334" cy:nodeId="832">
    <graphics x="2565.5764636206886" y="-3146.032307469999" z="0.0"/>
  </node>
  <node id="116541" label="zzzz333" cy:nodeId="833">
    <graphics x="1745.5764636206886" y="2760.967692530001" z="0.0"/>
  </node>
  <node id="116540" label="zzzz332" cy:nodeId="834">
    <graphics x="-1232.4235363793114" y="1832.967692530001" z="0.0"/>
  </node>
  <node id="116539" label="zzzz331" cy:nodeId="835">
    <graphics x="2618.5764636206886" y="-2974.032307469999" z="0.0"/>
  </node>
  <node id="116538" label="zzzz330" cy:nodeId="836">
    <graphics x="1624.5764636206886" y="2760.967692530001" z="0.0"/>
  </node>
  <node id="116537" label="zzzz329" cy:nodeId="837">
    <graphics x="-1597.4235363793114" y="19.96769253000093" z="0.0"/>
  </node>
  <node id="116536" label="zzzz328" cy:nodeId="838">
    <graphics x="1469.5764636206886" y="879.9676925300009" z="0.0"/>
  </node>
  <node id="116535" label="zzzz327" cy:nodeId="839">
    <graphics x="2323.5764636206886" y="-727.0323074699991" z="0.0"/>
  </node>
  <node id="116534" label="zzzz326" cy:nodeId="840">
    <graphics x="1503.5764636206886" y="2760.967692530001" z="0.0"/>
  </node>
  <node id="116533" label="zzzz325" cy:nodeId="841">
    <graphics x="1382.5764636206886" y="2760.967692530001" z="0.0"/>
  </node>
  <node id="116532" label="zzzz324" cy:nodeId="842">
    <graphics x="1261.5764636206886" y="2760.967692530001" z="0.0"/>
  </node>
  <node id="116531" label="zzzz323" cy:nodeId="843">
    <graphics x="-693.4235363793114" y="1454.967692530001" z="0.0"/>
  </node>
  <node id="116530" label="zzzz322" cy:nodeId="844">
    <graphics x="-289.4235363793114" y="-511.03230746999907" z="0.0"/>
  </node>
  <node id="116529" label="zzzz321" cy:nodeId="845">
    <graphics x="-83.42353637931137" y="-974.0323074699991" z="0.0"/>
  </node>
  <node id="116528" label="zzzz320" cy:nodeId="846">
    <graphics x="2722.5764636206886" y="1330.967692530001" z="0.0"/>
  </node>
  <node id="116527" label="zzzz319" cy:nodeId="847">
    <graphics x="1921.5764636206886" y="1602.967692530001" z="0.0"/>
  </node>
  <node id="116526" label="zzzz318" cy:nodeId="848">
    <graphics x="-41.42353637931137" y="1046.967692530001" z="0.0"/>
  </node>
  <node id="116525" label="zzzz317" cy:nodeId="849">
    <graphics x="-1639.4235363793114" y="-877.0323074699991" z="0.0"/>
  </node>
  <node id="116524" label="zzzz316" cy:nodeId="850">
    <graphics x="1140.5764636206886" y="2760.967692530001" z="0.0"/>
  </node>
  <node id="116523" label="zzzz315" cy:nodeId="851">
    <graphics x="-2276.4235363793114" y="-622.0323074699991" z="0.0"/>
  </node>
  <node id="116522" label="zzzz314" cy:nodeId="852">
    <graphics x="1019.5764636206886" y="2760.967692530001" z="0.0"/>
  </node>
  <node id="116521" label="zzzz313" cy:nodeId="853">
    <graphics x="898.5764636206886" y="2760.967692530001" z="0.0"/>
  </node>
  <node id="116520" label="zzzz312" cy:nodeId="854">
    <graphics x="2737.5764636206886" y="2101.967692530001" z="0.0"/>
  </node>
  <node id="116519" label="zzzz311" cy:nodeId="855">
    <graphics x="777.5764636206886" y="2760.967692530001" z="0.0"/>
  </node>
  <node id="116518" label="zzzz310" cy:nodeId="856">
    <graphics x="656.5764636206886" y="2760.967692530001" z="0.0"/>
  </node>
  <node id="116517" label="zzzz309" cy:nodeId="857">
    <graphics x="535.5764636206886" y="2760.967692530001" z="0.0"/>
  </node>
  <node id="116516" label="zzzz308" cy:nodeId="858">
    <graphics x="414.5764636206886" y="2760.967692530001" z="0.0"/>
  </node>
  <node id="116515" label="zzzz307" cy:nodeId="859">
    <graphics x="-2489.4235363793114" y="2040.967692530001" z="0.0"/>
  </node>
  <node id="116514" label="zzzz306" cy:nodeId="860">
    <graphics x="293.5764636206886" y="2760.967692530001" z="0.0"/>
  </node>
  <node id="116513" label="zzzz305" cy:nodeId="861">
    <graphics x="172.57646362068863" y="2760.967692530001" z="0.0"/>
  </node>
  <node id="116512" label="zzzz304" cy:nodeId="862">
    <graphics x="2998.5764636206886" y="1372.967692530001" z="0.0"/>
  </node>
  <node id="116511" label="zzzz303" cy:nodeId="863">
    <graphics x="3440.5764636206886" y="1434.967692530001" z="0.0"/>
  </node>
  <node id="116510" label="zzzz302" cy:nodeId="864">
    <graphics x="-1620.4235363793114" y="-427.03230746999907" z="0.0"/>
  </node>
  <node id="116509" label="zzzz301" cy:nodeId="865">
    <graphics x="1255.5764636206886" y="-544.0323074699991" z="0.0"/>
  </node>
  <node id="116508" label="zzzz300" cy:nodeId="866">
    <graphics x="-685.4235363793114" y="-799.0323074699991" z="0.0"/>
  </node>
  <node id="116507" label="zzzz299" cy:nodeId="867">
    <graphics x="1042.5764636206886" y="-860.0323074699991" z="0.0"/>
  </node>
  <node id="116506" label="zzzz298" cy:nodeId="868">
    <graphics x="51.57646362068863" y="2760.967692530001" z="0.0"/>
  </node>
  <node id="116505" label="zzzz297" cy:nodeId="869">
    <graphics x="-830.4235363793114" y="1928.967692530001" z="0.0"/>
  </node>
  <node id="116504" label="zzzz296" cy:nodeId="870">
    <graphics x="1132.5764636206886" y="-658.0323074699991" z="0.0"/>
  </node>
  <node id="116503" label="zzzz295" cy:nodeId="871">
    <graphics x="3131.5764636206886" y="-608.0323074699991" z="0.0"/>
  </node>
  <node id="116502" label="zzzz294" cy:nodeId="872">
    <graphics x="1843.5764636206886" y="-1041.032307469999" z="0.0"/>
  </node>
  <node id="116501" label="zzzz293" cy:nodeId="873">
    <graphics x="-1059.4235363793114" y="-895.0323074699991" z="0.0"/>
  </node>
  <node id="116500" label="zzzz292" cy:nodeId="874">
    <graphics x="2186.5764636206886" y="2014.967692530001" z="0.0"/>
  </node>
  <node id="116499" label="zzzz291" cy:nodeId="875">
    <graphics x="2050.5764636206886" y="1283.967692530001" z="0.0"/>
  </node>
  <node id="116498" label="zzzz290" cy:nodeId="876">
    <graphics x="1957.5764636206886" y="393.96769253000093" z="0.0"/>
  </node>
  <node id="116497" label="zzzz289" cy:nodeId="877">
    <graphics x="-69.42353637931137" y="2760.967692530001" z="0.0"/>
  </node>
  <node id="116496" label="zzzz288" cy:nodeId="878">
    <graphics x="1940.5764636206886" y="316.96769253000093" z="0.0"/>
  </node>
  <node id="116495" label="zzzz287" cy:nodeId="879">
    <graphics x="-190.42353637931137" y="2760.967692530001" z="0.0"/>
  </node>
  <node id="116494" label="zzzz286" cy:nodeId="880">
    <graphics x="-1485.4235363793114" y="1082.967692530001" z="0.0"/>
  </node>
  <node id="116493" label="zzzz285" cy:nodeId="881">
    <graphics x="-311.4235363793114" y="2760.967692530001" z="0.0"/>
  </node>
  <node id="116492" label="zzzz284" cy:nodeId="882">
    <graphics x="-1604.4235363793114" y="951.9676925300009" z="0.0"/>
  </node>
  <node id="116491" label="zzzz283" cy:nodeId="883">
    <graphics x="2143.5764636206886" y="400.96769253000093" z="0.0"/>
  </node>
  <node id="116490" label="zzzz282" cy:nodeId="884">
    <graphics x="2250.5764636206886" y="-2097.032307469999" z="0.0"/>
  </node>
  <node id="116489" label="zzzz281" cy:nodeId="885">
    <graphics x="2340.5764636206886" y="-2169.032307469999" z="0.0"/>
  </node>
  <node id="116488" label="zzzz280" cy:nodeId="886">
    <graphics x="3121.5764636206886" y="1832.967692530001" z="0.0"/>
  </node>
  <node id="116487" label="zzzz279" cy:nodeId="887">
    <graphics x="-432.4235363793114" y="2760.967692530001" z="0.0"/>
  </node>
  <node id="116486" label="zzzz278" cy:nodeId="888">
    <graphics x="-553.4235363793114" y="2760.967692530001" z="0.0"/>
  </node>
  <node id="116485" label="zzzz277" cy:nodeId="889">
    <graphics x="-674.4235363793114" y="2760.967692530001" z="0.0"/>
  </node>
  <node id="116484" label="zzzz276" cy:nodeId="890">
    <graphics x="2604.5764636206886" y="1710.967692530001" z="0.0"/>
  </node>
  <node id="116483" label="zzzz275" cy:nodeId="891">
    <graphics x="-252.42353637931137" y="2106.967692530001" z="0.0"/>
  </node>
  <node id="116482" label="zzzz274" cy:nodeId="892">
    <graphics x="-2163.4235363793114" y="-368.03230746999907" z="0.0"/>
  </node>
  <node id="116481" label="zzzz273" cy:nodeId="893">
    <graphics x="-232.42353637931137" y="1375.967692530001" z="0.0"/>
  </node>
  <node id="116480" label="zzzz272" cy:nodeId="894">
    <graphics x="-795.4235363793114" y="2760.967692530001" z="0.0"/>
  </node>
  <node id="116479" label="zzzz271" cy:nodeId="895">
    <graphics x="-916.4235363793114" y="2760.967692530001" z="0.0"/>
  </node>
  <node id="116478" label="zzzz270" cy:nodeId="896">
    <graphics x="-212.42353637931137" y="1319.967692530001" z="0.0"/>
  </node>
  <node id="116477" label="zzzz269" cy:nodeId="897">
    <graphics x="-214.42353637931137" y="1283.967692530001" z="0.0"/>
  </node>
  <node id="116476" label="zzzz268" cy:nodeId="898">
    <graphics x="-1037.4235363793114" y="2760.967692530001" z="0.0"/>
  </node>
  <node id="116475" label="zzzz267" cy:nodeId="899">
    <graphics x="-2194.4235363793114" y="1933.967692530001" z="0.0"/>
  </node>
  <node id="116474" label="zzzz266" cy:nodeId="900">
    <graphics x="1233.5764636206886" y="-2270.032307469999" z="0.0"/>
  </node>
  <node id="116473" label="zzzz265" cy:nodeId="901">
    <graphics x="-531.4235363793114" y="1724.967692530001" z="0.0"/>
  </node>
  <node id="116472" label="zzzz264" cy:nodeId="902">
    <graphics x="69.57646362068863" y="1367.967692530001" z="0.0"/>
  </node>
  <node id="116471" label="zzzz263" cy:nodeId="903">
    <graphics x="-1818.4235363793114" y="-467.03230746999907" z="0.0"/>
  </node>
  <node id="116470" label="zzzz262" cy:nodeId="904">
    <graphics x="1959.5764636206886" y="1308.967692530001" z="0.0"/>
  </node>
  <node id="116469" label="zzzz261" cy:nodeId="905">
    <graphics x="3166.5764636206886" y="-536.0323074699991" z="0.0"/>
  </node>
  <node id="116468" label="zzzz260" cy:nodeId="906">
    <graphics x="1270.5764636206886" y="991.9676925300009" z="0.0"/>
  </node>
  <node id="116467" label="zzzz259" cy:nodeId="907">
    <graphics x="-1730.4235363793114" y="-823.0323074699991" z="0.0"/>
  </node>
  <node id="116466" label="zzzz258" cy:nodeId="908">
    <graphics x="2143.5764636206886" y="-2117.032307469999" z="0.0"/>
  </node>
  <node id="116465" label="zzzz257" cy:nodeId="909">
    <graphics x="-693.4235363793114" y="1057.967692530001" z="0.0"/>
  </node>
  <node id="116464" label="zzzz256" cy:nodeId="910">
    <graphics x="-656.4235363793114" y="948.9676925300009" z="0.0"/>
  </node>
  <node id="116463" label="zzzz255" cy:nodeId="911">
    <graphics x="-785.4235363793114" y="980.9676925300009" z="0.0"/>
  </node>
  <node id="116462" label="zzzz254" cy:nodeId="912">
    <graphics x="-1158.4235363793114" y="2760.967692530001" z="0.0"/>
  </node>
  <node id="116461" label="zzzz253" cy:nodeId="913">
    <graphics x="-2126.4235363793114" y="355.96769253000093" z="0.0"/>
  </node>
  <node id="116460" label="zzzz252" cy:nodeId="914">
    <graphics x="-1279.4235363793114" y="2760.967692530001" z="0.0"/>
  </node>
  <node id="116459" label="zzzz251" cy:nodeId="915">
    <graphics x="2546.8393233255747" y="459.96769253000093" z="0.0"/>
  </node>
  <node id="116458" label="zzzz250" cy:nodeId="916">
    <graphics x="-832.4235363793114" y="-323.03230746999907" z="0.0"/>
  </node>
  <node id="116457" label="zzzz249" cy:nodeId="917">
    <graphics x="1026.5764636206886" y="-785.0323074699991" z="0.0"/>
  </node>
  <node id="116456" label="zzzz248" cy:nodeId="918">
    <graphics x="1051.5764636206886" y="-713.0323074699991" z="0.0"/>
  </node>
  <node id="116455" label="zzzz247" cy:nodeId="919">
    <graphics x="-584.4235363793114" y="-862.0323074699991" z="0.0"/>
  </node>
  <node id="116454" label="zzzz246" cy:nodeId="920">
    <graphics x="-1400.4235363793114" y="2760.967692530001" z="0.0"/>
  </node>
  <node id="116453" label="zzzz245" cy:nodeId="921">
    <graphics x="1144.5764636206886" y="-533.0323074699991" z="0.0"/>
  </node>
  <node id="116452" label="zzzz244" cy:nodeId="922">
    <graphics x="-1521.4235363793114" y="2760.967692530001" z="0.0"/>
  </node>
  <node id="116451" label="zzzz243" cy:nodeId="923">
    <graphics x="-2398.4235363793114" y="-645.0323074699991" z="0.0"/>
  </node>
  <node id="116450" label="zzzz242" cy:nodeId="924">
    <graphics x="-1642.4235363793114" y="2760.967692530001" z="0.0"/>
  </node>
  <node id="116449" label="zzzz241" cy:nodeId="925">
    <graphics x="-1763.4235363793114" y="2760.967692530001" z="0.0"/>
  </node>
  <node id="116448" label="zzzz240" cy:nodeId="926">
    <graphics x="-1884.4235363793114" y="2760.967692530001" z="0.0"/>
  </node>
  <node id="116447" label="zzzz239" cy:nodeId="927">
    <graphics x="-2005.4235363793114" y="2760.967692530001" z="0.0"/>
  </node>
  <node id="116446" label="zzzz238" cy:nodeId="928">
    <graphics x="-2126.4235363793114" y="2760.967692530001" z="0.0"/>
  </node>
  <node id="116445" label="zzzz237" cy:nodeId="929">
    <graphics x="1182.5764636206886" y="-766.0323074699991" z="0.0"/>
  </node>
  <node id="116444" label="zzzz236" cy:nodeId="930">
    <graphics x="-2247.4235363793114" y="2760.967692530001" z="0.0"/>
  </node>
  <node id="116443" label="zzzz235" cy:nodeId="931">
    <graphics x="-2368.4235363793114" y="2760.967692530001" z="0.0"/>
  </node>
  <node id="116442" label="zzzz234" cy:nodeId="932">
    <graphics x="-2489.4235363793114" y="2760.967692530001" z="0.0"/>
  </node>
  <node id="116441" label="zzzz233" cy:nodeId="933">
    <graphics x="3439.5764636206886" y="2679.967692530001" z="0.0"/>
  </node>
  <node id="116440" label="zzzz232" cy:nodeId="934">
    <graphics x="1332.5764636206886" y="-727.0323074699991" z="0.0"/>
  </node>
  <node id="116439" label="zzzz231" cy:nodeId="935">
    <graphics x="3318.5764636206886" y="2679.967692530001" z="0.0"/>
  </node>
  <node id="116438" label="zzzz230" cy:nodeId="936">
    <graphics x="3197.5764636206886" y="2679.967692530001" z="0.0"/>
  </node>
  <node id="116437" label="zzzz229" cy:nodeId="937">
    <graphics x="2546.3407141380694" y="280.46629783798153" z="0.0"/>
  </node>
  <node id="116436" label="zzzz228" cy:nodeId="938">
    <graphics x="1651.5764636206886" y="1926.967692530001" z="0.0"/>
  </node>
  <node id="116435" label="zzzz227" cy:nodeId="939">
    <graphics x="-653.4235363793114" y="-997.0323074699991" z="0.0"/>
  </node>
  <node id="116434" label="zzzz226" cy:nodeId="940">
    <graphics x="1286.5764636206886" y="-763.0323074699991" z="0.0"/>
  </node>
  <node id="116433" label="zzzz225" cy:nodeId="941">
    <graphics x="-682.4235363793114" y="-635.0323074699991" z="0.0"/>
  </node>
  <node id="116432" label="zzzz224" cy:nodeId="942">
    <graphics x="-823.4235363793114" y="1832.967692530001" z="0.0"/>
  </node>
  <node id="116431" label="zzzz223" cy:nodeId="943">
    <graphics x="1051.5764636206886" y="1651.967692530001" z="0.0"/>
  </node>
  <node id="116430" label="zzzz222" cy:nodeId="944">
    <graphics x="1035.5764636206886" y="-559.0323074699991" z="0.0"/>
  </node>
  <node id="116429" label="zzzz221" cy:nodeId="945">
    <graphics x="3076.5764636206886" y="2679.967692530001" z="0.0"/>
  </node>
  <node id="116428" label="zzzz220" cy:nodeId="946">
    <graphics x="-574.4235363793114" y="1832.967692530001" z="0.0"/>
  </node>
  <node id="116427" label="zzzz219" cy:nodeId="947">
    <graphics x="1302.5764636206886" y="-1001.0323074699991" z="0.0"/>
  </node>
  <node id="116426" label="zzzz218" cy:nodeId="948">
    <graphics x="1945.5764636206886" y="-778.0323074699991" z="0.0"/>
  </node>
  <node id="116425" label="zzzz217" cy:nodeId="949">
    <graphics x="681.5764636206886" y="-775.0323074699991" z="0.0"/>
  </node>
  <node id="116424" label="zzzz216" cy:nodeId="950">
    <graphics x="2955.5764636206886" y="2679.967692530001" z="0.0"/>
  </node>
  <node id="116423" label="zzzz215" cy:nodeId="951">
    <graphics x="1406.5764636206886" y="-671.0323074699991" z="0.0"/>
  </node>
  <node id="116422" label="zzzz214" cy:nodeId="952">
    <graphics x="844.5764636206886" y="231.96769253000093" z="0.0"/>
  </node>
  <node id="116421" label="zzzz213" cy:nodeId="953">
    <graphics x="2834.5764636206886" y="2679.967692530001" z="0.0"/>
  </node>
  <node id="116420" label="zzzz212" cy:nodeId="954">
    <graphics x="2713.5764636206886" y="2679.967692530001" z="0.0"/>
  </node>
  <node id="116419" label="zzzz211" cy:nodeId="955">
    <graphics x="1162.5764636206886" y="-910.0323074699991" z="0.0"/>
  </node>
  <node id="116418" label="zzzz210" cy:nodeId="956">
    <graphics x="1707.5764636206886" y="-831.0323074699991" z="0.0"/>
  </node>
  <node id="116417" label="zzzz209" cy:nodeId="957">
    <graphics x="1097.5764636206886" y="-821.0323074699991" z="0.0"/>
  </node>
  <node id="116416" label="zzzz208" cy:nodeId="958">
    <graphics x="2008.5764636206886" y="244.96769253000093" z="0.0"/>
  </node>
  <node id="116415" label="zzzz207" cy:nodeId="959">
    <graphics x="-531.4235363793114" y="-826.0323074699991" z="0.0"/>
  </node>
  <node id="116414" label="zzzz206" cy:nodeId="960">
    <graphics x="532.5764636206886" y="2106.967692530001" z="0.0"/>
  </node>
  <node id="116413" label="zzzz205" cy:nodeId="961">
    <graphics x="2592.5764636206886" y="2679.967692530001" z="0.0"/>
  </node>
  <node id="116412" label="zzzz204" cy:nodeId="962">
    <graphics x="2545.8393233255747" y="100.96769253000093" z="0.0"/>
  </node>
  <node id="116411" label="zzzz203" cy:nodeId="963">
    <graphics x="2222.5764636206886" y="-810.0323074699991" z="0.0"/>
  </node>
  <node id="116410" label="zzzz202" cy:nodeId="964">
    <graphics x="2242.5764636206886" y="-846.0323074699991" z="0.0"/>
  </node>
  <node id="116409" label="zzzz201" cy:nodeId="965">
    <graphics x="2471.5764636206886" y="2679.967692530001" z="0.0"/>
  </node>
  <node id="116408" label="zzzz200" cy:nodeId="966">
    <graphics x="2350.5764636206886" y="2679.967692530001" z="0.0"/>
  </node>
  <node id="116407" label="zzzz199" cy:nodeId="967">
    <graphics x="2229.5764636206886" y="2679.967692530001" z="0.0"/>
  </node>
  <node id="116406" label="zzzz198" cy:nodeId="968">
    <graphics x="2108.5764636206886" y="2679.967692530001" z="0.0"/>
  </node>
  <node id="116405" label="zzzz197" cy:nodeId="969">
    <graphics x="1987.5764636206886" y="2679.967692530001" z="0.0"/>
  </node>
  <node id="116404" label="zzzz196" cy:nodeId="970">
    <graphics x="1866.5764636206886" y="2679.967692530001" z="0.0"/>
  </node>
  <node id="116403" label="zzzz195" cy:nodeId="971">
    <graphics x="1745.5764636206886" y="2679.967692530001" z="0.0"/>
  </node>
  <node id="116402" label="zzzz194" cy:nodeId="972">
    <graphics x="1360.5764636206886" y="-864.0323074699991" z="0.0"/>
  </node>
  <node id="116401" label="zzzz193" cy:nodeId="973">
    <graphics x="-766.4235363793114" y="944.9676925300009" z="0.0"/>
  </node>
  <node id="116400" label="zzzz192" cy:nodeId="974">
    <graphics x="-798.4235363793114" y="1016.9676925300009" z="0.0"/>
  </node>
  <node id="116399" label="zzzz191" cy:nodeId="975">
    <graphics x="-608.4235363793114" y="912.9676925300009" z="0.0"/>
  </node>
  <node id="116398" label="zzzz190" cy:nodeId="976">
    <graphics x="1624.5764636206886" y="2679.967692530001" z="0.0"/>
  </node>
  <node id="116397" label="zzzz189" cy:nodeId="977">
    <graphics x="1904.5764636206886" y="-633.0323074699991" z="0.0"/>
  </node>
  <node id="116396" label="zzzz188" cy:nodeId="978">
    <graphics x="-1680.4235363793114" y="-733.0323074699991" z="0.0"/>
  </node>
  <node id="116395" label="zzzz187" cy:nodeId="979">
    <graphics x="1503.5764636206886" y="2679.967692530001" z="0.0"/>
  </node>
  <node id="116394" label="zzzz186" cy:nodeId="980">
    <graphics x="1382.5764636206886" y="2679.967692530001" z="0.0"/>
  </node>
  <node id="116393" label="zzzz185" cy:nodeId="981">
    <graphics x="2093.5764636206886" y="-2322.032307469999" z="0.0"/>
  </node>
  <node id="116392" label="zzzz184" cy:nodeId="982">
    <graphics x="2568.5764636206886" y="1635.967692530001" z="0.0"/>
  </node>
  <node id="116391" label="zzzz183" cy:nodeId="983">
    <graphics x="1261.5764636206886" y="2679.967692530001" z="0.0"/>
  </node>
  <node id="116390" label="zzzz182" cy:nodeId="984">
    <graphics x="-1551.4235363793114" y="-674.0323074699991" z="0.0"/>
  </node>
  <node id="116389" label="zzzz181" cy:nodeId="985">
    <graphics x="1140.5764636206886" y="2679.967692530001" z="0.0"/>
  </node>
  <node id="116388" label="zzzz180" cy:nodeId="986">
    <graphics x="-1635.4235363793114" y="-1026.032307469999" z="0.0"/>
  </node>
  <node id="116387" label="zzzz179" cy:nodeId="987">
    <graphics x="-1511.4235363793114" y="-972.0323074699991" z="0.0"/>
  </node>
  <node id="116386" label="zzzz178" cy:nodeId="988">
    <graphics x="-1537.4235363793114" y="-918.0323074699991" z="0.0"/>
  </node>
  <node id="116385" label="zzzz177" cy:nodeId="989">
    <graphics x="-1333.4235363793114" y="-391.03230746999907" z="0.0"/>
  </node>
  <node id="116384" label="zzzz176" cy:nodeId="990">
    <graphics x="1019.5764636206886" y="2679.967692530001" z="0.0"/>
  </node>
  <node id="116383" label="zzzz175" cy:nodeId="991">
    <graphics x="898.5764636206886" y="2679.967692530001" z="0.0"/>
  </node>
  <node id="116382" label="zzzz174" cy:nodeId="992">
    <graphics x="2227.5764636206886" y="-915.0323074699991" z="0.0"/>
  </node>
  <node id="116381" label="zzzz173" cy:nodeId="993">
    <graphics x="777.5764636206886" y="2679.967692530001" z="0.0"/>
  </node>
  <node id="116380" label="zzzz172" cy:nodeId="994">
    <graphics x="668.5764636206886" y="2106.967692530001" z="0.0"/>
  </node>
  <node id="116379" label="zzzz171" cy:nodeId="995">
    <graphics x="-1547.4235363793114" y="-710.0323074699991" z="0.0"/>
  </node>
  <node id="116378" label="zzzz170" cy:nodeId="996">
    <graphics x="656.5764636206886" y="2679.967692530001" z="0.0"/>
  </node>
  <node id="116377" label="zzzz169" cy:nodeId="997">
    <graphics x="535.5764636206886" y="2679.967692530001" z="0.0"/>
  </node>
  <node id="116376" label="zzzz168" cy:nodeId="998">
    <graphics x="414.5764636206886" y="2679.967692530001" z="0.0"/>
  </node>
  <node id="116375" label="zzzz167" cy:nodeId="999">
    <graphics x="2035.5764636206886" y="-850.0323074699991" z="0.0"/>
  </node>
  <node id="116374" label="zzzz166" cy:nodeId="1000">
    <graphics x="3074.5764636206886" y="1337.967692530001" z="0.0"/>
  </node>
  <node id="116373" label="zzzz165" cy:nodeId="1001">
    <graphics x="641.5764636206886" y="610.9676925300009" z="0.0"/>
  </node>
  <node id="116372" label="zzzz164" cy:nodeId="1002">
    <graphics x="2227.5764636206886" y="1926.967692530001" z="0.0"/>
  </node>
  <node id="116371" label="zzzz163" cy:nodeId="1003">
    <graphics x="293.5764636206886" y="2679.967692530001" z="0.0"/>
  </node>
  <node id="116370" label="zzzz162" cy:nodeId="1004">
    <graphics x="172.57646362068863" y="2679.967692530001" z="0.0"/>
  </node>
  <node id="116369" label="zzzz161" cy:nodeId="1005">
    <graphics x="51.57646362068863" y="2679.967692530001" z="0.0"/>
  </node>
  <node id="116368" label="zzzz160" cy:nodeId="1006">
    <graphics x="-2222.4235363793114" y="2188.967692530001" z="0.0"/>
  </node>
  <node id="116367" label="zzzz159" cy:nodeId="1007">
    <graphics x="-69.42353637931137" y="2679.967692530001" z="0.0"/>
  </node>
  <node id="116366" label="zzzz158" cy:nodeId="1008">
    <graphics x="1755.5764636206886" y="-744.0323074699991" z="0.0"/>
  </node>
  <node id="116365" label="zzzz157" cy:nodeId="1009">
    <graphics x="-986.4235363793114" y="-1198.032307469999" z="0.0"/>
  </node>
  <node id="116364" label="zzzz156" cy:nodeId="1010">
    <graphics x="-190.42353637931137" y="2679.967692530001" z="0.0"/>
  </node>
  <node id="116363" label="zzzz155" cy:nodeId="1011">
    <graphics x="-311.4235363793114" y="2679.967692530001" z="0.0"/>
  </node>
  <node id="116362" label="zzzz154" cy:nodeId="1012">
    <graphics x="-1845.4235363793114" y="-908.0323074699991" z="0.0"/>
  </node>
  <node id="116361" label="zzzz153" cy:nodeId="1013">
    <graphics x="-2352.4235363793114" y="610.9676925300009" z="0.0"/>
  </node>
  <node id="116360" label="zzzz152" cy:nodeId="1014">
    <graphics x="2232.5764636206886" y="-2278.032307469999" z="0.0"/>
  </node>
  <node id="116359" label="zzzz151" cy:nodeId="1015">
    <graphics x="1170.5764636206886" y="-2162.032307469999" z="0.0"/>
  </node>
  <node id="116358" label="zzzz150" cy:nodeId="1016">
    <graphics x="-2067.4235363793114" y="-503.03230746999907" z="0.0"/>
  </node>
  <node id="116357" label="zzzz149" cy:nodeId="1017">
    <graphics x="-432.4235363793114" y="2679.967692530001" z="0.0"/>
  </node>
  <node id="116356" label="zzzz148" cy:nodeId="1018">
    <graphics x="-553.4235363793114" y="2679.967692530001" z="0.0"/>
  </node>
  <node id="116355" label="zzzz147" cy:nodeId="1019">
    <graphics x="-1144.4235363793114" y="975.9676925300009" z="0.0"/>
  </node>
  <node id="116354" label="zzzz146" cy:nodeId="1020">
    <graphics x="-674.4235363793114" y="2679.967692530001" z="0.0"/>
  </node>
  <node id="116353" label="zzzz145" cy:nodeId="1021">
    <graphics x="609.5764636206886" y="1927.967692530001" z="0.0"/>
  </node>
  <node id="116352" label="zzzz144" cy:nodeId="1022">
    <graphics x="1877.5764636206886" y="-2170.032307469999" z="0.0"/>
  </node>
  <node id="116351" label="zzzz143" cy:nodeId="1023">
    <graphics x="-2312.4235363793114" y="206.96769253000093" z="0.0"/>
  </node>
  <node id="116350" label="zzzz142" cy:nodeId="1024">
    <graphics x="583.5764636206886" y="1665.967692530001" z="0.0"/>
  </node>
  <node id="116349" label="zzzz141" cy:nodeId="1025">
    <graphics x="-903.4235363793114" y="2272.967692530001" z="0.0"/>
  </node>
  <node id="116348" label="zzzz140" cy:nodeId="1026">
    <graphics x="2010.5764636206886" y="-2334.032307469999" z="0.0"/>
  </node>
  <node id="116347" label="zzzz139" cy:nodeId="1027">
    <graphics x="-2270.4235363793114" y="2270.967692530001" z="0.0"/>
  </node>
  <node id="116346" label="zzzz138" cy:nodeId="1028">
    <graphics x="-795.4235363793114" y="2679.967692530001" z="0.0"/>
  </node>
  <node id="116345" label="zzzz137" cy:nodeId="1029">
    <graphics x="2676.5764636206886" y="1674.967692530001" z="0.0"/>
  </node>
  <node id="116344" label="zzzz136" cy:nodeId="1030">
    <graphics x="-1835.4235363793114" y="-539.0323074699991" z="0.0"/>
  </node>
  <node id="116343" label="zzzz135" cy:nodeId="1031">
    <graphics x="-2391.4235363793114" y="923.9676925300009" z="0.0"/>
  </node>
  <node id="116342" label="zzzz134" cy:nodeId="1032">
    <graphics x="2483.5764636206886" y="1926.967692530001" z="0.0"/>
  </node>
  <node id="116341" label="zzzz133" cy:nodeId="1033">
    <graphics x="-2423.4235363793114" y="279.96769253000093" z="0.0"/>
  </node>
  <node id="116340" label="zzzz132" cy:nodeId="1034">
    <graphics x="-916.4235363793114" y="2679.967692530001" z="0.0"/>
  </node>
  <node id="116339" label="zzzz131" cy:nodeId="1035">
    <graphics x="-1037.4235363793114" y="2679.967692530001" z="0.0"/>
  </node>
  <node id="116338" label="zzzz130" cy:nodeId="1036">
    <graphics x="-894.4235363793114" y="2188.967692530001" z="0.0"/>
  </node>
  <node id="116337" label="zzzz129" cy:nodeId="1037">
    <graphics x="-1158.4235363793114" y="2679.967692530001" z="0.0"/>
  </node>
  <node id="116336" label="zzzz128" cy:nodeId="1038">
    <graphics x="-1279.4235363793114" y="2679.967692530001" z="0.0"/>
  </node>
  <node id="116335" label="zzzz127" cy:nodeId="1039">
    <graphics x="-1621.4235363793114" y="-972.0323074699991" z="0.0"/>
  </node>
  <node id="116334" label="zzzz126" cy:nodeId="1040">
    <graphics x="-1400.4235363793114" y="2679.967692530001" z="0.0"/>
  </node>
  <node id="116333" label="zzzz125" cy:nodeId="1041">
    <graphics x="-1521.4235363793114" y="2679.967692530001" z="0.0"/>
  </node>
  <node id="116332" label="zzzz124" cy:nodeId="1042">
    <graphics x="-1642.4235363793114" y="2679.967692530001" z="0.0"/>
  </node>
  <node id="116331" label="zzzz123" cy:nodeId="1043">
    <graphics x="-544.4235363793114" y="-583.0323074699991" z="0.0"/>
  </node>
  <node id="116330" label="zzzz122" cy:nodeId="1044">
    <graphics x="-1763.4235363793114" y="2679.967692530001" z="0.0"/>
  </node>
  <node id="116329" label="zzzz121" cy:nodeId="1045">
    <graphics x="-1611.4235363793114" y="1040.967692530001" z="0.0"/>
  </node>
  <node id="116328" label="zzzz120" cy:nodeId="1046">
    <graphics x="-1884.4235363793114" y="2679.967692530001" z="0.0"/>
  </node>
  <node id="116327" label="zzzz119" cy:nodeId="1047">
    <graphics x="-2005.4235363793114" y="2679.967692530001" z="0.0"/>
  </node>
  <node id="116326" label="zzzz118" cy:nodeId="1048">
    <graphics x="2423.5764636206886" y="280.80825953858766" z="0.0"/>
  </node>
  <node id="116325" label="zzzz117" cy:nodeId="1049">
    <graphics x="2299.5764636206886" y="-2133.032307469999" z="0.0"/>
  </node>
  <node id="116324" label="zzzz116" cy:nodeId="1050">
    <graphics x="-2101.4235363793114" y="2188.967692530001" z="0.0"/>
  </node>
  <node id="116323" label="zzzz115" cy:nodeId="1051">
    <graphics x="-344.4235363793114" y="2081.967692530001" z="0.0"/>
  </node>
  <node id="116322" label="zzzz114" cy:nodeId="1052">
    <graphics x="-2006.4235363793114" y="2195.967692530001" z="0.0"/>
  </node>
  <node id="116321" label="zzzz113" cy:nodeId="1053">
    <graphics x="-695.4235363793114" y="1170.967692530001" z="0.0"/>
  </node>
  <node id="116320" label="zzzz112" cy:nodeId="1054">
    <graphics x="-695.4235363793114" y="853.9676925300009" z="0.0"/>
  </node>
  <node id="116319" label="zzzz111" cy:nodeId="1055">
    <graphics x="380.5764636206886" y="2077.967692530001" z="0.0"/>
  </node>
  <node id="116318" label="zzzz110" cy:nodeId="1056">
    <graphics x="1878.5764636206886" y="1670.967692530001" z="0.0"/>
  </node>
  <node id="116317" label="zzzz109" cy:nodeId="1057">
    <graphics x="-2257.4235363793114" y="-1117.032307469999" z="0.0"/>
  </node>
  <node id="116316" label="zzzz108" cy:nodeId="1058">
    <graphics x="-2126.4235363793114" y="2679.967692530001" z="0.0"/>
  </node>
  <node id="116315" label="zzzz107" cy:nodeId="1059">
    <graphics x="2209.5764636206886" y="1001.9676925300009" z="0.0"/>
  </node>
  <node id="116314" label="zzzz106" cy:nodeId="1060">
    <graphics x="-2231.4235363793114" y="-1694.032307469999" z="0.0"/>
  </node>
  <node id="116313" label="zzzz105" cy:nodeId="1061">
    <graphics x="-2416.4235363793114" y="-2648.032307469999" z="0.0"/>
  </node>
  <node id="116312" label="zzzz104" cy:nodeId="1062">
    <graphics x="147.57646362068863" y="955.9676925300009" z="0.0"/>
  </node>
  <node id="116311" label="zzzz103" cy:nodeId="1063">
    <graphics x="-150.42353637931137" y="1380.967692530001" z="0.0"/>
  </node>
  <node id="116310" label="zzzz102" cy:nodeId="1064">
    <graphics x="-2247.4235363793114" y="2679.967692530001" z="0.0"/>
  </node>
  <node id="116309" label="zzzz101" cy:nodeId="1065">
    <graphics x="-1593.4235363793114" y="-3077.032307469999" z="0.0"/>
  </node>
  <node id="116308" label="zzzz100" cy:nodeId="1066">
    <graphics x="-792.4235363793114" y="-1912.032307469999" z="0.0"/>
  </node>
  <node id="116307" label="zzz2662" cy:nodeId="1067">
    <graphics x="-2368.4235363793114" y="2679.967692530001" z="0.0"/>
  </node>
  <node id="116306" label="zzz2661" cy:nodeId="1068">
    <graphics x="1988.5764636206886" y="1646.967692530001" z="0.0"/>
  </node>
  <node id="116305" label="zzz2660" cy:nodeId="1069">
    <graphics x="1945.5764636206886" y="1714.967692530001" z="0.0"/>
  </node>
  <node id="116304" label="zzz2659" cy:nodeId="1070">
    <graphics x="-2489.4235363793114" y="2679.967692530001" z="0.0"/>
  </node>
  <node id="116303" label="zzz2658" cy:nodeId="1071">
    <graphics x="-628.4235363793114" y="1358.967692530001" z="0.0"/>
  </node>
  <node id="116302" label="zzz2657" cy:nodeId="1072">
    <graphics x="-727.4235363793114" y="1295.967692530001" z="0.0"/>
  </node>
  <node id="116301" label="zzz2656" cy:nodeId="1073">
    <graphics x="3439.5764636206886" y="2598.967692530001" z="0.0"/>
  </node>
  <node id="116300" label="zzz2655" cy:nodeId="1074">
    <graphics x="1693.5764636206886" y="175.96769253000093" z="0.0"/>
  </node>
  <node id="116299" label="zzz2654" cy:nodeId="1075">
    <graphics x="1761.5764636206886" y="222.96769253000093" z="0.0"/>
  </node>
  <node id="116298" label="zzz2653" cy:nodeId="1076">
    <graphics x="1718.5764636206886" y="264.96769253000093" z="0.0"/>
  </node>
  <node id="116297" label="zzz2652" cy:nodeId="1077">
    <graphics x="1634.5764636206886" y="253.96769253000093" z="0.0"/>
  </node>
  <node id="116296" label="zzz2651" cy:nodeId="1078">
    <graphics x="1668.5764636206886" y="217.96769253000093" z="0.0"/>
  </node>
  <node id="116295" label="zzz2650" cy:nodeId="1079">
    <graphics x="1617.5764636206886" y="162.96769253000093" z="0.0"/>
  </node>
  <node id="116294" label="zzz2649" cy:nodeId="1080">
    <graphics x="3318.5764636206886" y="2598.967692530001" z="0.0"/>
  </node>
  <node id="116293" label="zzz2648" cy:nodeId="1081">
    <graphics x="-672.4235363793114" y="-1117.032307469999" z="0.0"/>
  </node>
  <node id="116292" label="zzz2647" cy:nodeId="1082">
    <graphics x="3197.5764636206886" y="2598.967692530001" z="0.0"/>
  </node>
  <node id="116291" label="zzz2646" cy:nodeId="1083">
    <graphics x="-643.4235363793114" y="1020.9676925300009" z="0.0"/>
  </node>
  <node id="116290" label="zzz2645" cy:nodeId="1084">
    <graphics x="121.57646362068863" y="-921.0323074699991" z="0.0"/>
  </node>
  <node id="116289" label="zzz2644" cy:nodeId="1085">
    <graphics x="-877.4235363793114" y="1017.9676925300009" z="0.0"/>
  </node>
  <node id="116288" label="zzz2643" cy:nodeId="1086">
    <graphics x="1205.5764636206886" y="264.96769253000093" z="0.0"/>
  </node>
  <node id="116287" label="zzz2642" cy:nodeId="1087">
    <graphics x="-1008.4235363793114" y="1349.967692530001" z="0.0"/>
  </node>
  <node id="116286" label="zzz2641" cy:nodeId="1088">
    <graphics x="-2386.4235363793114" y="660.9676925300009" z="0.0"/>
  </node>
  <node id="116285" label="zzz2640" cy:nodeId="1089">
    <graphics x="1216.5764636206886" y="-1058.032307469999" z="0.0"/>
  </node>
  <node id="116284" label="zzz2639" cy:nodeId="1090">
    <graphics x="1141.5764636206886" y="-1099.032307469999" z="0.0"/>
  </node>
  <node id="116283" label="zzz2638" cy:nodeId="1091">
    <graphics x="3076.5764636206886" y="2598.967692530001" z="0.0"/>
  </node>
  <node id="116282" label="zzz2637" cy:nodeId="1092">
    <graphics x="2348.5764636206886" y="1832.967692530001" z="0.0"/>
  </node>
  <node id="116281" label="zzz2636" cy:nodeId="1093">
    <graphics x="-1755.4235363793114" y="-900.0323074699991" z="0.0"/>
  </node>
  <node id="116280" label="zzz2635" cy:nodeId="1094">
    <graphics x="3478.5764636206886" y="1704.967692530001" z="0.0"/>
  </node>
  <node id="116279" label="zzz2634" cy:nodeId="1095">
    <graphics x="2955.5764636206886" y="2598.967692530001" z="0.0"/>
  </node>
  <node id="116278" label="zzz2633" cy:nodeId="1096">
    <graphics x="-2482.4235363793114" y="448.96769253000093" z="0.0"/>
  </node>
  <node id="116277" label="zzz2632" cy:nodeId="1097">
    <graphics x="1244.5764636206886" y="1927.967692530001" z="0.0"/>
  </node>
  <node id="116276" label="zzz2631" cy:nodeId="1098">
    <graphics x="2259.5764636206886" y="1366.967692530001" z="0.0"/>
  </node>
  <node id="116275" label="zzz2630" cy:nodeId="1099">
    <graphics x="3069.5764636206886" y="1437.967692530001" z="0.0"/>
  </node>
  <node id="116274" label="zzz2629" cy:nodeId="1100">
    <graphics x="1109.5764636206886" y="356.96769253000093" z="0.0"/>
  </node>
  <node id="116273" label="zzz2628" cy:nodeId="1101">
    <graphics x="1777.5764636206886" y="155.96769253000093" z="0.0"/>
  </node>
  <node id="116272" label="zzz2627" cy:nodeId="1102">
    <graphics x="1298.5764636206886" y="2261.967692530001" z="0.0"/>
  </node>
  <node id="116271" label="zzz2626" cy:nodeId="1103">
    <graphics x="3156.5764636206886" y="1388.967692530001" z="0.0"/>
  </node>
  <node id="116270" label="zzz2625" cy:nodeId="1104">
    <graphics x="145.57646362068863" y="1366.967692530001" z="0.0"/>
  </node>
  <node id="116269" label="zzz2624" cy:nodeId="1105">
    <graphics x="2834.5764636206886" y="2598.967692530001" z="0.0"/>
  </node>
  <node id="116268" label="zzz2623" cy:nodeId="1106">
    <graphics x="3036.5764636206886" y="1283.967692530001" z="0.0"/>
  </node>
  <node id="116267" label="zzz2622" cy:nodeId="1107">
    <graphics x="2544.5764636206886" y="-2178.032307469999" z="0.0"/>
  </node>
  <node id="116266" label="zzz2621" cy:nodeId="1108">
    <graphics x="2061.5764636206886" y="-2477.032307469999" z="0.0"/>
  </node>
  <node id="116265" label="zzz2620" cy:nodeId="1109">
    <graphics x="-200.42353637931137" y="1928.967692530001" z="0.0"/>
  </node>
  <node id="116264" label="zzz2619" cy:nodeId="1110">
    <graphics x="-2317.4235363793114" y="2191.967692530001" z="0.0"/>
  </node>
  <node id="116263" label="zzz2618" cy:nodeId="1111">
    <graphics x="-615.4235363793114" y="1112.967692530001" z="0.0"/>
  </node>
  <node id="116262" label="zzz2617" cy:nodeId="1112">
    <graphics x="1701.5764636206886" y="139.96769253000093" z="0.0"/>
  </node>
  <node id="116261" label="zzz2616" cy:nodeId="1113">
    <graphics x="161.57646362068863" y="1402.967692530001" z="0.0"/>
  </node>
  <node id="116260" label="zzz2615" cy:nodeId="1114">
    <graphics x="3496.5764636206886" y="1602.967692530001" z="0.0"/>
  </node>
  <node id="116259" label="zzz2614" cy:nodeId="1115">
    <graphics x="1548.5764636206886" y="268.96769253000093" z="0.0"/>
  </node>
  <node id="116258" label="zzz2613" cy:nodeId="1116">
    <graphics x="-1110.4235363793114" y="1341.967692530001" z="0.0"/>
  </node>
  <node id="116257" label="zzz2612" cy:nodeId="1117">
    <graphics x="1631.5764636206886" y="356.96769253000093" z="0.0"/>
  </node>
  <node id="116256" label="zzz2611" cy:nodeId="1118">
    <graphics x="1686.5764636206886" y="100.96769253000093" z="0.0"/>
  </node>
  <node id="116255" label="zzz2610" cy:nodeId="1119">
    <graphics x="2713.5764636206886" y="2598.967692530001" z="0.0"/>
  </node>
  <node id="116254" label="zzz2609" cy:nodeId="1120">
    <graphics x="1679.5764636206886" y="469.96769253000093" z="0.0"/>
  </node>
  <node id="116253" label="zzz2608" cy:nodeId="1121">
    <graphics x="-1810.4235363793114" y="-311.03230746999907" z="0.0"/>
  </node>
  <node id="116252" label="zzz2607" cy:nodeId="1122">
    <graphics x="-1697.4235363793114" y="-409.03230746999907" z="0.0"/>
  </node>
  <node id="116251" label="zzz2606" cy:nodeId="1123">
    <graphics x="-1724.4235363793114" y="-612.0323074699991" z="0.0"/>
  </node>
  <node id="116250" label="zzz2605" cy:nodeId="1124">
    <graphics x="3048.5764636206886" y="1017.9676925300009" z="0.0"/>
  </node>
  <node id="116249" label="zzz2604" cy:nodeId="1125">
    <graphics x="2308.5764636206886" y="1283.967692530001" z="0.0"/>
  </node>
  <node id="116248" label="zzz2603" cy:nodeId="1126">
    <graphics x="2592.5764636206886" y="2598.967692530001" z="0.0"/>
  </node>
  <node id="116247" label="zzz2602" cy:nodeId="1127">
    <graphics x="469.5764636206886" y="1651.967692530001" z="0.0"/>
  </node>
  <node id="116246" label="zzz2601" cy:nodeId="1128">
    <graphics x="-2345.4235363793114" y="437.96769253000093" z="0.0"/>
  </node>
  <node id="116245" label="zzz2600" cy:nodeId="1129">
    <graphics x="2471.5764636206886" y="2598.967692530001" z="0.0"/>
  </node>
  <node id="116244" label="zzz2599" cy:nodeId="1130">
    <graphics x="1355.5764636206886" y="2105.967692530001" z="0.0"/>
  </node>
  <node id="116243" label="zzz2598" cy:nodeId="1131">
    <graphics x="-2269.4235363793114" y="452.96769253000093" z="0.0"/>
  </node>
  <node id="116242" label="zzz2597" cy:nodeId="1132">
    <graphics x="1242.5764636206886" y="300.96769253000093" z="0.0"/>
  </node>
  <node id="116241" label="zzz2596" cy:nodeId="1133">
    <graphics x="1616.5764636206886" y="-2398.032307469999" z="0.0"/>
  </node>
  <node id="116240" label="zzz2595" cy:nodeId="1134">
    <graphics x="2350.5764636206886" y="2598.967692530001" z="0.0"/>
  </node>
  <node id="116239" label="zzz2594" cy:nodeId="1135">
    <graphics x="1090.5764636206886" y="320.96769253000093" z="0.0"/>
  </node>
  <node id="116238" label="zzz2593" cy:nodeId="1136">
    <graphics x="-2043.4235363793114" y="-369.03230746999907" z="0.0"/>
  </node>
  <node id="116237" label="zzz2592" cy:nodeId="1137">
    <graphics x="2081.5764636206886" y="-737.0323074699991" z="0.0"/>
  </node>
  <node id="116236" label="zzz2591" cy:nodeId="1138">
    <graphics x="-832.4235363793114" y="1054.967692530001" z="0.0"/>
  </node>
  <node id="116235" label="zzz2590" cy:nodeId="1139">
    <graphics x="-893.4235363793114" y="955.9676925300009" z="0.0"/>
  </node>
  <node id="116234" label="zzz2589" cy:nodeId="1140">
    <graphics x="-806.4235363793114" y="1095.967692530001" z="0.0"/>
  </node>
  <node id="116233" label="zzz2588" cy:nodeId="1141">
    <graphics x="2229.5764636206886" y="2598.967692530001" z="0.0"/>
  </node>
  <node id="116232" label="zzz2587" cy:nodeId="1142">
    <graphics x="2108.5764636206886" y="2598.967692530001" z="0.0"/>
  </node>
  <node id="116231" label="zzz2586" cy:nodeId="1143">
    <graphics x="126.57646362068863" y="1927.967692530001" z="0.0"/>
  </node>
  <node id="116230" label="zzz2585" cy:nodeId="1144">
    <graphics x="221.57646362068863" y="1344.967692530001" z="0.0"/>
  </node>
  <node id="116229" label="zzz2584" cy:nodeId="1145">
    <graphics x="1959.5764636206886" y="-854.0323074699991" z="0.0"/>
  </node>
  <node id="116228" label="zzz2583" cy:nodeId="1146">
    <graphics x="1864.5764636206886" y="-779.0323074699991" z="0.0"/>
  </node>
  <node id="116227" label="zzz2582" cy:nodeId="1147">
    <graphics x="1987.5764636206886" y="2598.967692530001" z="0.0"/>
  </node>
  <node id="116226" label="zzz2581" cy:nodeId="1148">
    <graphics x="-399.4235363793114" y="1722.967692530001" z="0.0"/>
  </node>
  <node id="116225" label="zzz2580" cy:nodeId="1149">
    <graphics x="-362.4235363793114" y="1602.967692530001" z="0.0"/>
  </node>
  <node id="116224" label="zzz2579" cy:nodeId="1150">
    <graphics x="2057.5764636206886" y="302.96769253000093" z="0.0"/>
  </node>
  <node id="116223" label="zzz2578" cy:nodeId="1151">
    <graphics x="3405.5764636206886" y="956.9676925300009" z="0.0"/>
  </node>
  <node id="116222" label="zzz2577" cy:nodeId="1152">
    <graphics x="3390.5764636206886" y="992.9676925300009" z="0.0"/>
  </node>
  <node id="116221" label="zzz2576" cy:nodeId="1153">
    <graphics x="1866.5764636206886" y="2598.967692530001" z="0.0"/>
  </node>
  <node id="116220" label="zzz2575" cy:nodeId="1154">
    <graphics x="2748.5764636206886" y="1926.967692530001" z="0.0"/>
  </node>
  <node id="116219" label="zzz2574" cy:nodeId="1155">
    <graphics x="2741.5764636206886" y="1832.967692530001" z="0.0"/>
  </node>
  <node id="116218" label="zzz2573" cy:nodeId="1156">
    <graphics x="-1877.4235363793114" y="1672.967692530001" z="0.0"/>
  </node>
  <node id="116217" label="zzz2572" cy:nodeId="1157">
    <graphics x="-1839.4235363793114" y="1741.967692530001" z="0.0"/>
  </node>
  <node id="116216" label="zzz2571" cy:nodeId="1158">
    <graphics x="-1900.4235363793114" y="1602.967692530001" z="0.0"/>
  </node>
  <node id="116215" label="zzz2570" cy:nodeId="1159">
    <graphics x="-1804.4235363793114" y="1636.967692530001" z="0.0"/>
  </node>
  <node id="116214" label="zzz2569" cy:nodeId="1160">
    <graphics x="-1943.4235363793114" y="1708.967692530001" z="0.0"/>
  </node>
  <node id="116213" label="zzz2568" cy:nodeId="1161">
    <graphics x="3351.5764636206886" y="1093.967692530001" z="0.0"/>
  </node>
  <node id="116212" label="zzz2567" cy:nodeId="1162">
    <graphics x="3493.5764636206886" y="1053.967692530001" z="0.0"/>
  </node>
  <node id="116211" label="zzz2566" cy:nodeId="1163">
    <graphics x="3366.5764636206886" y="853.9676925300009" z="0.0"/>
  </node>
  <node id="116210" label="zzz2565" cy:nodeId="1164">
    <graphics x="3502.5764636206886" y="906.9676925300009" z="0.0"/>
  </node>
  <node id="116209" label="zzz2564" cy:nodeId="1165">
    <graphics x="3269.5764636206886" y="967.9676925300009" z="0.0"/>
  </node>
  <node id="116208" label="zzz2563" cy:nodeId="1166">
    <graphics x="-998.4235363793114" y="1602.967692530001" z="0.0"/>
  </node>
  <node id="116207" label="zzz2562" cy:nodeId="1167">
    <graphics x="-1770.4235363793114" y="2107.967692530001" z="0.0"/>
  </node>
  <node id="116206" label="zzz2561" cy:nodeId="1168">
    <graphics x="-1857.4235363793114" y="2069.967692530001" z="0.0"/>
  </node>
  <node id="116205" label="zzz2560" cy:nodeId="1169">
    <graphics x="-1781.4235363793114" y="2014.967692530001" z="0.0"/>
  </node>
  <node id="116204" label="zzz2559" cy:nodeId="1170">
    <graphics x="-679.4235363793114" y="2107.967692530001" z="0.0"/>
  </node>
  <node id="116203" label="zzz2558" cy:nodeId="1171">
    <graphics x="2278.5764636206886" y="-2205.032307469999" z="0.0"/>
  </node>
  <node id="116202" label="zzz2557" cy:nodeId="1172">
    <graphics x="2130.5764636206886" y="-2200.032307469999" z="0.0"/>
  </node>
  <node id="116201" label="zzz2556" cy:nodeId="1173">
    <graphics x="-678.4235363793114" y="2014.967692530001" z="0.0"/>
  </node>
  <node id="116200" label="zzz2555" cy:nodeId="1174">
    <graphics x="2447.5764636206886" y="1686.967692530001" z="0.0"/>
  </node>
  <node id="116199" label="zzz2554" cy:nodeId="1175">
    <graphics x="2363.5764636206886" y="1602.967692530001" z="0.0"/>
  </node>
  <node id="116198" label="zzz2553" cy:nodeId="1176">
    <graphics x="-1933.4235363793114" y="1046.967692530001" z="0.0"/>
  </node>
  <node id="116197" label="zzz2552" cy:nodeId="1177">
    <graphics x="1745.5764636206886" y="2598.967692530001" z="0.0"/>
  </node>
  <node id="116196" label="zzz2551" cy:nodeId="1178">
    <graphics x="127.57646362068863" y="-736.0323074699991" z="0.0"/>
  </node>
  <node id="116195" label="zzz2550" cy:nodeId="1179">
    <graphics x="-1453.4235363793114" y="2273.967692530001" z="0.0"/>
  </node>
  <node id="116194" label="zzz2549" cy:nodeId="1180">
    <graphics x="3372.5764636206886" y="1368.967692530001" z="0.0"/>
  </node>
  <node id="116193" label="zzz2548" cy:nodeId="1181">
    <graphics x="1624.5764636206886" y="2598.967692530001" z="0.0"/>
  </node>
  <node id="116192" label="zzz2547" cy:nodeId="1182">
    <graphics x="-1867.4235363793114" y="-269.03230746999907" z="0.0"/>
  </node>
  <node id="116191" label="zzz2546" cy:nodeId="1183">
    <graphics x="-2052.4235363793114" y="2014.967692530001" z="0.0"/>
  </node>
  <node id="116190" label="zzz2545" cy:nodeId="1184">
    <graphics x="-2015.4235363793114" y="-413.03230746999907" z="0.0"/>
  </node>
  <node id="116189" label="zzz2544" cy:nodeId="1185">
    <graphics x="-719.4235363793114" y="1021.9676925300009" z="0.0"/>
  </node>
  <node id="116188" label="zzz2543" cy:nodeId="1186">
    <graphics x="1503.5764636206886" y="2598.967692530001" z="0.0"/>
  </node>
  <node id="116187" label="zzz2542" cy:nodeId="1187">
    <graphics x="621.5764636206886" y="1832.967692530001" z="0.0"/>
  </node>
  <node id="116186" label="zzz2541" cy:nodeId="1188">
    <graphics x="441.5764636206886" y="950.9676925300009" z="0.0"/>
  </node>
  <node id="116185" label="zzz2540" cy:nodeId="1189">
    <graphics x="1382.5764636206886" y="2598.967692530001" z="0.0"/>
  </node>
  <node id="116184" label="zzz2539" cy:nodeId="1190">
    <graphics x="2738.5764636206886" y="967.9676925300009" z="0.0"/>
  </node>
  <node id="116183" label="zzz2538" cy:nodeId="1191">
    <graphics x="2799.5764636206886" y="1003.9676925300009" z="0.0"/>
  </node>
  <node id="116182" label="zzz2537" cy:nodeId="1192">
    <graphics x="1261.5764636206886" y="2598.967692530001" z="0.0"/>
  </node>
  <node id="116181" label="zzz2536" cy:nodeId="1193">
    <graphics x="-1978.4235363793114" y="2071.967692530001" z="0.0"/>
  </node>
  <node id="116180" label="zzz2535" cy:nodeId="1194">
    <graphics x="-2067.4235363793114" y="2107.967692530001" z="0.0"/>
  </node>
  <node id="116179" label="zzz2534" cy:nodeId="1195">
    <graphics x="2217.5764636206886" y="1639.967692530001" z="0.0"/>
  </node>
  <node id="116178" label="zzz2533" cy:nodeId="1196">
    <graphics x="151.57646362068863" y="-808.0323074699991" z="0.0"/>
  </node>
  <node id="116177" label="zzz2532" cy:nodeId="1197">
    <graphics x="-2121.4235363793114" y="1602.967692530001" z="0.0"/>
  </node>
  <node id="116176" label="zzz2531" cy:nodeId="1198">
    <graphics x="-400.4235363793114" y="1412.967692530001" z="0.0"/>
  </node>
  <node id="116175" label="zzz2530" cy:nodeId="1199">
    <graphics x="-353.4235363793114" y="1357.967692530001" z="0.0"/>
  </node>
  <node id="116174" label="zzz2529" cy:nodeId="1200">
    <graphics x="-406.4235363793114" y="1283.967692530001" z="0.0"/>
  </node>
  <node id="116173" label="zzz2528" cy:nodeId="1201">
    <graphics x="-431.4235363793114" y="1376.967692530001" z="0.0"/>
  </node>
  <node id="116172" label="zzz2527" cy:nodeId="1202">
    <graphics x="-468.4235363793114" y="1340.967692530001" z="0.0"/>
  </node>
  <node id="116171" label="zzz2526" cy:nodeId="1203">
    <graphics x="1297.5764636206886" y="-1722.032307469999" z="0.0"/>
  </node>
  <node id="116170" label="zzz2525" cy:nodeId="1204">
    <graphics x="1140.5764636206886" y="2598.967692530001" z="0.0"/>
  </node>
  <node id="116169" label="zzz2524" cy:nodeId="1205">
    <graphics x="1019.5764636206886" y="2598.967692530001" z="0.0"/>
  </node>
  <node id="116168" label="zzz2523" cy:nodeId="1206">
    <graphics x="-2148.4235363793114" y="-749.0323074699991" z="0.0"/>
  </node>
  <node id="116167" label="zzz2522" cy:nodeId="1207">
    <graphics x="-1703.4235363793114" y="-985.0323074699991" z="0.0"/>
  </node>
  <node id="116166" label="zzz2521" cy:nodeId="1208">
    <graphics x="898.5764636206886" y="2598.967692530001" z="0.0"/>
  </node>
  <node id="116165" label="zzz2520" cy:nodeId="1209">
    <graphics x="2041.5764636206886" y="208.96769253000093" z="0.0"/>
  </node>
  <node id="116164" label="zzz2519" cy:nodeId="1210">
    <graphics x="-1203.4235363793114" y="494.96769253000093" z="0.0"/>
  </node>
  <node id="116163" label="zzz2518" cy:nodeId="1211">
    <graphics x="-1035.4235363793114" y="538.9676925300009" z="0.0"/>
  </node>
  <node id="116162" label="zzz2517" cy:nodeId="1212">
    <graphics x="-1439.4235363793114" y="231.96769253000093" z="0.0"/>
  </node>
  <node id="116161" label="zzz2516" cy:nodeId="1213">
    <graphics x="-1167.4235363793114" y="530.9676925300009" z="0.0"/>
  </node>
  <node id="116160" label="zzz2515" cy:nodeId="1214">
    <graphics x="155.57646362068863" y="2106.967692530001" z="0.0"/>
  </node>
  <node id="116159" label="zzz2514" cy:nodeId="1215">
    <graphics x="80.57646362068863" y="2049.967692530001" z="0.0"/>
  </node>
  <node id="116158" label="zzz2513" cy:nodeId="1216">
    <graphics x="170.57646362068863" y="2014.967692530001" z="0.0"/>
  </node>
  <node id="116157" label="zzz2512" cy:nodeId="1217">
    <graphics x="-1350.4235363793114" y="358.96769253000093" z="0.0"/>
  </node>
  <node id="116156" label="zzz2511" cy:nodeId="1218">
    <graphics x="-1458.4235363793114" y="553.9676925300009" z="0.0"/>
  </node>
  <node id="116155" label="zzz2510" cy:nodeId="1219">
    <graphics x="777.5764636206886" y="2598.967692530001" z="0.0"/>
  </node>
  <node id="116154" label="zzz2509" cy:nodeId="1220">
    <graphics x="-1484.4235363793114" y="1283.967692530001" z="0.0"/>
  </node>
  <node id="116153" label="zzz2508" cy:nodeId="1221">
    <graphics x="-427.4235363793114" y="1479.967692530001" z="0.0"/>
  </node>
  <node id="116152" label="zzz2507" cy:nodeId="1222">
    <graphics x="656.5764636206886" y="2598.967692530001" z="0.0"/>
  </node>
  <node id="116151" label="zzz2506" cy:nodeId="1223">
    <graphics x="535.5764636206886" y="2598.967692530001" z="0.0"/>
  </node>
  <node id="116150" label="zzz2505" cy:nodeId="1224">
    <graphics x="1579.5764636206886" y="1380.967692530001" z="0.0"/>
  </node>
  <node id="116149" label="zzz2504" cy:nodeId="1225">
    <graphics x="2069.5764636206886" y="-1926.032307469999" z="0.0"/>
  </node>
  <node id="116148" label="zzz2503" cy:nodeId="1226">
    <graphics x="45.57646362068863" y="-951.0323074699991" z="0.0"/>
  </node>
  <node id="116147" label="zzz2502" cy:nodeId="1227">
    <graphics x="-1432.4235363793114" y="463.96769253000093" z="0.0"/>
  </node>
  <node id="116146" label="zzz2501" cy:nodeId="1228">
    <graphics x="2839.5764636206886" y="122.96769253000093" z="0.0"/>
  </node>
  <node id="116145" label="zzz2500" cy:nodeId="1229">
    <graphics x="-2258.4235363793114" y="1337.967692530001" z="0.0"/>
  </node>
  <node id="116144" label="zzz2499" cy:nodeId="1230">
    <graphics x="291.5764636206886" y="2106.967692530001" z="0.0"/>
  </node>
  <node id="116143" label="zzz2498" cy:nodeId="1231">
    <graphics x="-2268.4235363793114" y="1484.967692530001" z="0.0"/>
  </node>
  <node id="116142" label="zzz2497" cy:nodeId="1232">
    <graphics x="-1202.4235363793114" y="179.96769253000093" z="0.0"/>
  </node>
  <node id="116141" label="zzz2496" cy:nodeId="1233">
    <graphics x="-1205.4235363793114" y="111.96769253000093" z="0.0"/>
  </node>
  <node id="116140" label="zzz2495" cy:nodeId="1234">
    <graphics x="-1287.4235363793114" y="229.96769253000093" z="0.0"/>
  </node>
  <node id="116139" label="zzz2494" cy:nodeId="1235">
    <graphics x="-1329.4235363793114" y="600.9676925300009" z="0.0"/>
  </node>
  <node id="116138" label="zzz2493" cy:nodeId="1236">
    <graphics x="-1346.4235363793114" y="445.96769253000093" z="0.0"/>
  </node>
  <node id="116137" label="zzz2492" cy:nodeId="1237">
    <graphics x="-1607.4235363793114" y="434.96769253000093" z="0.0"/>
  </node>
  <node id="116136" label="zzz2491" cy:nodeId="1238">
    <graphics x="-1095.4235363793114" y="431.96769253000093" z="0.0"/>
  </node>
  <node id="116135" label="zzz2490" cy:nodeId="1239">
    <graphics x="-1389.4235363793114" y="409.96769253000093" z="0.0"/>
  </node>
  <node id="116134" label="zzz2489" cy:nodeId="1240">
    <graphics x="-1566.4235363793114" y="263.96769253000093" z="0.0"/>
  </node>
  <node id="116133" label="zzz2488" cy:nodeId="1241">
    <graphics x="-1481.4235363793114" y="517.9676925300009" z="0.0"/>
  </node>
  <node id="116132" label="zzz2487" cy:nodeId="1242">
    <graphics x="-1270.4235363793114" y="446.96769253000093" z="0.0"/>
  </node>
  <node id="116131" label="zzz2486" cy:nodeId="1243">
    <graphics x="-1547.4235363793114" y="378.96769253000093" z="0.0"/>
  </node>
  <node id="116130" label="zzz2485" cy:nodeId="1244">
    <graphics x="-1410.4235363793114" y="322.96769253000093" z="0.0"/>
  </node>
  <node id="116129" label="zzz2484" cy:nodeId="1245">
    <graphics x="-1548.4235363793114" y="335.96769253000093" z="0.0"/>
  </node>
  <node id="116128" label="zzz2483" cy:nodeId="1246">
    <graphics x="-1204.4235363793114" y="227.96769253000093" z="0.0"/>
  </node>
  <node id="116127" label="zzz2482" cy:nodeId="1247">
    <graphics x="-1147.4235363793114" y="566.9676925300009" z="0.0"/>
  </node>
  <node id="116126" label="zzz2481" cy:nodeId="1248">
    <graphics x="-1152.4235363793114" y="666.9676925300009" z="0.0"/>
  </node>
  <node id="116125" label="zzz2480" cy:nodeId="1249">
    <graphics x="-1241.4235363793114" y="410.96769253000093" z="0.0"/>
  </node>
  <node id="116124" label="zzz2479" cy:nodeId="1250">
    <graphics x="-1580.4235363793114" y="470.96769253000093" z="0.0"/>
  </node>
  <node id="116123" label="zzz2478" cy:nodeId="1251">
    <graphics x="-1133.4235363793114" y="278.96769253000093" z="0.0"/>
  </node>
  <node id="116122" label="zzz2477" cy:nodeId="1252">
    <graphics x="-1237.4235363793114" y="265.96769253000093" z="0.0"/>
  </node>
  <node id="116121" label="zzz2476" cy:nodeId="1253">
    <graphics x="-1126.4235363793114" y="395.96769253000093" z="0.0"/>
  </node>
  <node id="116120" label="zzz2475" cy:nodeId="1254">
    <graphics x="-1275.4235363793114" y="725.9676925300009" z="0.0"/>
  </node>
  <node id="116119" label="zzz2474" cy:nodeId="1255">
    <graphics x="-1520.4235363793114" y="299.96769253000093" z="0.0"/>
  </node>
  <node id="116118" label="zzz2473" cy:nodeId="1256">
    <graphics x="-1118.4235363793114" y="702.9676925300009" z="0.0"/>
  </node>
  <node id="116117" label="zzz2472" cy:nodeId="1257">
    <graphics x="-1315.4235363793114" y="689.9676925300009" z="0.0"/>
  </node>
  <node id="116116" label="zzz2471" cy:nodeId="1258">
    <graphics x="-1303.4235363793114" y="528.9676925300009" z="0.0"/>
  </node>
  <node id="116115" label="zzz2470" cy:nodeId="1259">
    <graphics x="-1226.4235363793114" y="337.96769253000093" z="0.0"/>
  </node>
  <node id="116114" label="zzz2469" cy:nodeId="1260">
    <graphics x="-1113.4235363793114" y="176.96769253000093" z="0.0"/>
  </node>
  <node id="116113" label="zzz2468" cy:nodeId="1261">
    <graphics x="-1045.4235363793114" y="574.9676925300009" z="0.0"/>
  </node>
  <node id="116112" label="zzz2467" cy:nodeId="1262">
    <graphics x="-1239.4235363793114" y="674.9676925300009" z="0.0"/>
  </node>
  <node id="116111" label="zzz2466" cy:nodeId="1263">
    <graphics x="-1118.4235363793114" y="467.96769253000093" z="0.0"/>
  </node>
  <node id="116110" label="zzz2465" cy:nodeId="1264">
    <graphics x="-1317.4235363793114" y="564.9676925300009" z="0.0"/>
  </node>
  <node id="116109" label="zzz2464" cy:nodeId="1265">
    <graphics x="-1387.4235363793114" y="286.96769253000093" z="0.0"/>
  </node>
  <node id="116108" label="zzz2463" cy:nodeId="1266">
    <graphics x="-1467.4235363793114" y="670.9676925300009" z="0.0"/>
  </node>
  <node id="116107" label="zzz2462" cy:nodeId="1267">
    <graphics x="-1363.4235363793114" y="250.96769253000093" z="0.0"/>
  </node>
  <node id="116106" label="zzz2461" cy:nodeId="1268">
    <graphics x="-1484.4235363793114" y="150.96769253000093" z="0.0"/>
  </node>
  <node id="116105" label="zzz2460" cy:nodeId="1269">
    <graphics x="-1299.4235363793114" y="191.96769253000093" z="0.0"/>
  </node>
  <node id="116104" label="zzz2459" cy:nodeId="1270">
    <graphics x="-1273.4235363793114" y="374.96769253000093" z="0.0"/>
  </node>
  <node id="116103" label="zzz2458" cy:nodeId="1271">
    <graphics x="-1434.4235363793114" y="634.9676925300009" z="0.0"/>
  </node>
  <node id="116102" label="zzz2457" cy:nodeId="1272">
    <graphics x="-1352.4235363793114" y="100.96769253000093" z="0.0"/>
  </node>
  <node id="116101" label="zzz2456" cy:nodeId="1273">
    <graphics x="-980.4235363793114" y="349.96769253000093" z="0.0"/>
  </node>
  <node id="116100" label="zzz2455" cy:nodeId="1274">
    <graphics x="-1466.4235363793114" y="391.96769253000093" z="0.0"/>
  </node>
  <node id="116099" label="zzz2454" cy:nodeId="1275">
    <graphics x="-965.4235363793114" y="458.96769253000093" z="0.0"/>
  </node>
  <node id="116098" label="zzz2453" cy:nodeId="1276">
    <graphics x="-1592.4235363793114" y="598.9676925300009" z="0.0"/>
  </node>
  <node id="116097" label="zzz2452" cy:nodeId="1277">
    <graphics x="-1209.4235363793114" y="301.96769253000093" z="0.0"/>
  </node>
  <node id="116096" label="zzz2451" cy:nodeId="1278">
    <graphics x="-1469.4235363793114" y="589.9676925300009" z="0.0"/>
  </node>
  <node id="116095" label="zzz2450" cy:nodeId="1279">
    <graphics x="-1040.4235363793114" y="309.96769253000093" z="0.0"/>
  </node>
  <node id="116094" label="zzz2449" cy:nodeId="1280">
    <graphics x="-1348.4235363793114" y="155.96769253000093" z="0.0"/>
  </node>
  <node id="116093" label="zzz2448" cy:nodeId="1281">
    <graphics x="-1465.4235363793114" y="427.96769253000093" z="0.0"/>
  </node>
  <node id="116092" label="zzz2447" cy:nodeId="1282">
    <graphics x="-1391.4235363793114" y="679.9676925300009" z="0.0"/>
  </node>
  <node id="116091" label="zzz2446" cy:nodeId="1283">
    <graphics x="1512.5764636206886" y="385.96769253000093" z="0.0"/>
  </node>
  <node id="116090" label="zzz2445" cy:nodeId="1284">
    <graphics x="1415.5764636206886" y="457.96769253000093" z="0.0"/>
  </node>
  <node id="116089" label="zzz2444" cy:nodeId="1285">
    <graphics x="414.5764636206886" y="2598.967692530001" z="0.0"/>
  </node>
  <node id="116088" label="zzz2443" cy:nodeId="1286">
    <graphics x="3063.5764636206886" y="169.96769253000093" z="0.0"/>
  </node>
  <node id="116087" label="zzz2442" cy:nodeId="1287">
    <graphics x="2807.5764636206886" y="272.96769253000093" z="0.0"/>
  </node>
  <node id="116086" label="zzz2441" cy:nodeId="1288">
    <graphics x="-434.4235363793114" y="345.96769253000093" z="0.0"/>
  </node>
  <node id="116085" label="zzz2440" cy:nodeId="1289">
    <graphics x="-595.4235363793114" y="515.9676925300009" z="0.0"/>
  </node>
  <node id="116084" label="zzz2439" cy:nodeId="1290">
    <graphics x="-731.4235363793114" y="392.96769253000093" z="0.0"/>
  </node>
  <node id="116083" label="zzz2438" cy:nodeId="1291">
    <graphics x="-800.4235363793114" y="453.96769253000093" z="0.0"/>
  </node>
  <node id="116082" label="zzz2437" cy:nodeId="1292">
    <graphics x="-651.4235363793114" y="431.96769253000093" z="0.0"/>
  </node>
  <node id="116081" label="zzz2436" cy:nodeId="1293">
    <graphics x="-524.4235363793114" y="433.96769253000093" z="0.0"/>
  </node>
  <node id="116080" label="zzz2435" cy:nodeId="1294">
    <graphics x="653.5764636206886" y="2014.967692530001" z="0.0"/>
  </node>
  <node id="116079" label="zzz2434" cy:nodeId="1295">
    <graphics x="2683.5764636206886" y="1064.967692530001" z="0.0"/>
  </node>
  <node id="116078" label="zzz2433" cy:nodeId="1296">
    <graphics x="2803.5764636206886" y="1380.967692530001" z="0.0"/>
  </node>
  <node id="116077" label="zzz2432" cy:nodeId="1297">
    <graphics x="-2370.4235363793114" y="-1060.032307469999" z="0.0"/>
  </node>
  <node id="116076" label="zzz2431" cy:nodeId="1298">
    <graphics x="79.57646362068863" y="1066.967692530001" z="0.0"/>
  </node>
  <node id="116075" label="zzz2430" cy:nodeId="1299">
    <graphics x="-1944.4235363793114" y="1459.967692530001" z="0.0"/>
  </node>
  <node id="116074" label="zzz2429" cy:nodeId="1300">
    <graphics x="155.57646362068863" y="994.9676925300009" z="0.0"/>
  </node>
  <node id="116073" label="zzz2428" cy:nodeId="1301">
    <graphics x="-2020.4235363793114" y="1438.967692530001" z="0.0"/>
  </node>
  <node id="116072" label="zzz2427" cy:nodeId="1302">
    <graphics x="293.5764636206886" y="2598.967692530001" z="0.0"/>
  </node>
  <node id="116071" label="zzz2426" cy:nodeId="1303">
    <graphics x="-2029.4235363793114" y="1301.967692530001" z="0.0"/>
  </node>
  <node id="116070" label="zzz2425" cy:nodeId="1304">
    <graphics x="172.57646362068863" y="2598.967692530001" z="0.0"/>
  </node>
  <node id="116069" label="zzz2424" cy:nodeId="1305">
    <graphics x="51.57646362068863" y="2598.967692530001" z="0.0"/>
  </node>
  <node id="116068" label="zzz2423" cy:nodeId="1306">
    <graphics x="2830.5764636206886" y="378.96769253000093" z="0.0"/>
  </node>
  <node id="116067" label="zzz2422" cy:nodeId="1307">
    <graphics x="2889.5764636206886" y="308.96769253000093" z="0.0"/>
  </node>
  <node id="116066" label="zzz2421" cy:nodeId="1308">
    <graphics x="2925.5764636206886" y="344.96769253000093" z="0.0"/>
  </node>
  <node id="116065" label="zzz2420" cy:nodeId="1309">
    <graphics x="3136.5764636206886" y="290.96769253000093" z="0.0"/>
  </node>
  <node id="116064" label="zzz2419" cy:nodeId="1310">
    <graphics x="2940.5764636206886" y="422.96769253000093" z="0.0"/>
  </node>
  <node id="116063" label="zzz2418" cy:nodeId="1311">
    <graphics x="2982.5764636206886" y="100.96769253000093" z="0.0"/>
  </node>
  <node id="116062" label="zzz2417" cy:nodeId="1312">
    <graphics x="-69.42353637931137" y="2598.967692530001" z="0.0"/>
  </node>
  <node id="116061" label="zzz2416" cy:nodeId="1313">
    <graphics x="-190.42353637931137" y="2598.967692530001" z="0.0"/>
  </node>
  <node id="116060" label="zzz2415" cy:nodeId="1314">
    <graphics x="83.57646362068863" y="-664.0323074699991" z="0.0"/>
  </node>
  <node id="116059" label="zzz2414" cy:nodeId="1315">
    <graphics x="-311.4235363793114" y="2598.967692530001" z="0.0"/>
  </node>
  <node id="116058" label="zzz2413" cy:nodeId="1316">
    <graphics x="1722.5764636206886" y="1454.967692530001" z="0.0"/>
  </node>
  <node id="116057" label="zzz2412" cy:nodeId="1317">
    <graphics x="1859.5764636206886" y="1114.967692530001" z="0.0"/>
  </node>
  <node id="116056" label="zzz2411" cy:nodeId="1318">
    <graphics x="2790.5764636206886" y="414.96769253000093" z="0.0"/>
  </node>
  <node id="116055" label="zzz2410" cy:nodeId="1319">
    <graphics x="2904.5764636206886" y="158.96769253000093" z="0.0"/>
  </node>
  <node id="116054" label="zzz2409" cy:nodeId="1320">
    <graphics x="2966.5764636206886" y="458.96769253000093" z="0.0"/>
  </node>
  <node id="116053" label="zzz2408" cy:nodeId="1321">
    <graphics x="2951.5764636206886" y="272.96769253000093" z="0.0"/>
  </node>
  <node id="116052" label="zzz2407" cy:nodeId="1322">
    <graphics x="2939.5764636206886" y="194.96769253000093" z="0.0"/>
  </node>
  <node id="116051" label="zzz2406" cy:nodeId="1323">
    <graphics x="3038.5764636206886" y="318.96769253000093" z="0.0"/>
  </node>
  <node id="116050" label="zzz2405" cy:nodeId="1324">
    <graphics x="3063.5764636206886" y="354.96769253000093" z="0.0"/>
  </node>
  <node id="116049" label="zzz2404" cy:nodeId="1325">
    <graphics x="2991.5764636206886" y="230.96769253000093" z="0.0"/>
  </node>
  <node id="116048" label="zzz2403" cy:nodeId="1326">
    <graphics x="1363.5764636206886" y="2188.967692530001" z="0.0"/>
  </node>
  <node id="116047" label="zzz2402" cy:nodeId="1327">
    <graphics x="-432.4235363793114" y="2598.967692530001" z="0.0"/>
  </node>
  <node id="116046" label="zzz2401" cy:nodeId="1328">
    <graphics x="1857.5764636206886" y="-1005.0323074699991" z="0.0"/>
  </node>
  <node id="116045" label="zzz2400" cy:nodeId="1329">
    <graphics x="-2197.4235363793114" y="612.9676925300009" z="0.0"/>
  </node>
  <node id="116044" label="zzz2399" cy:nodeId="1330">
    <graphics x="-553.4235363793114" y="2598.967692530001" z="0.0"/>
  </node>
  <node id="116043" label="zzz2398" cy:nodeId="1331">
    <graphics x="-674.4235363793114" y="2598.967692530001" z="0.0"/>
  </node>
  <node id="116042" label="zzz2397" cy:nodeId="1332">
    <graphics x="-650.4235363793114" y="1283.967692530001" z="0.0"/>
  </node>
  <node id="116041" label="zzz2396" cy:nodeId="1333">
    <graphics x="-704.4235363793114" y="1353.967692530001" z="0.0"/>
  </node>
  <node id="116040" label="zzz2395" cy:nodeId="1334">
    <graphics x="2666.5764636206886" y="1007.9676925300009" z="0.0"/>
  </node>
  <node id="116039" label="zzz2394" cy:nodeId="1335">
    <graphics x="2679.5764636206886" y="853.9676925300009" z="0.0"/>
  </node>
  <node id="116038" label="zzz2393" cy:nodeId="1336">
    <graphics x="2687.5764636206886" y="931.9676925300009" z="0.0"/>
  </node>
  <node id="116037" label="zzz2392" cy:nodeId="1337">
    <graphics x="-59.42353637931137" y="1007.9676925300009" z="0.0"/>
  </node>
  <node id="116036" label="zzz2391" cy:nodeId="1338">
    <graphics x="-236.42353637931137" y="2188.967692530001" z="0.0"/>
  </node>
  <node id="116035" label="zzz2390" cy:nodeId="1339">
    <graphics x="-2022.4235363793114" y="-1489.032307469999" z="0.0"/>
  </node>
  <node id="116034" label="zzz2389" cy:nodeId="1340">
    <graphics x="-1450.4235363793114" y="1912.967692530001" z="0.0"/>
  </node>
  <node id="116033" label="zzz2388" cy:nodeId="1341">
    <graphics x="2877.5764636206886" y="989.9676925300009" z="0.0"/>
  </node>
  <node id="116032" label="zzz2387" cy:nodeId="1342">
    <graphics x="-1208.4235363793114" y="2188.967692530001" z="0.0"/>
  </node>
  <node id="116031" label="zzz2386" cy:nodeId="1343">
    <graphics x="-1959.4235363793114" y="-2411.032307469999" z="0.0"/>
  </node>
  <node id="116030" label="zzz2385" cy:nodeId="1344">
    <graphics x="1735.5764636206886" y="947.9676925300009" z="0.0"/>
  </node>
  <node id="116029" label="zzz2384" cy:nodeId="1345">
    <graphics x="2011.5764636206886" y="-2253.032307469999" z="0.0"/>
  </node>
  <node id="116028" label="zzz2383" cy:nodeId="1346">
    <graphics x="-1838.4235363793114" y="-1526.032307469999" z="0.0"/>
  </node>
  <node id="116027" label="zzz2382" cy:nodeId="1347">
    <graphics x="875.5764636206886" y="1927.967692530001" z="0.0"/>
  </node>
  <node id="116026" label="zzz2381" cy:nodeId="1348">
    <graphics x="3277.5764636206886" y="1360.967692530001" z="0.0"/>
  </node>
  <node id="116025" label="zzz2380" cy:nodeId="1349">
    <graphics x="-795.4235363793114" y="2598.967692530001" z="0.0"/>
  </node>
  <node id="116024" label="zzz2379" cy:nodeId="1350">
    <graphics x="-1353.4235363793114" y="1849.967692530001" z="0.0"/>
  </node>
  <node id="116023" label="zzz2378" cy:nodeId="1351">
    <graphics x="2338.5764636206886" y="1658.967692530001" z="0.0"/>
  </node>
  <node id="116022" label="zzz2377" cy:nodeId="1352">
    <graphics x="-930.4235363793114" y="2107.967692530001" z="0.0"/>
  </node>
  <node id="116021" label="zzz2376" cy:nodeId="1353">
    <graphics x="65.57646362068863" y="1309.967692530001" z="0.0"/>
  </node>
  <node id="116020" label="zzz2375" cy:nodeId="1354">
    <graphics x="-1158.4235363793114" y="-2250.032307469999" z="0.0"/>
  </node>
  <node id="116019" label="zzz2374" cy:nodeId="1355">
    <graphics x="2390.5764636206886" y="-1895.032307469999" z="0.0"/>
  </node>
  <node id="116018" label="zzz2373" cy:nodeId="1356">
    <graphics x="3351.5764636206886" y="2100.967692530001" z="0.0"/>
  </node>
  <node id="116017" label="zzz2372" cy:nodeId="1357">
    <graphics x="-1744.4235363793114" y="-684.0323074699991" z="0.0"/>
  </node>
  <node id="116016" label="zzz2371" cy:nodeId="1358">
    <graphics x="1346.5764636206886" y="997.9676925300009" z="0.0"/>
  </node>
  <node id="116015" label="zzz2370" cy:nodeId="1359">
    <graphics x="-1152.4235363793114" y="-1779.032307469999" z="0.0"/>
  </node>
  <node id="116014" label="zzz2369" cy:nodeId="1360">
    <graphics x="-1806.4235363793114" y="-828.0323074699991" z="0.0"/>
  </node>
  <node id="116013" label="zzz2368" cy:nodeId="1361">
    <graphics x="-916.4235363793114" y="2598.967692530001" z="0.0"/>
  </node>
  <node id="116012" label="zzz2367" cy:nodeId="1362">
    <graphics x="-1037.4235363793114" y="2598.967692530001" z="0.0"/>
  </node>
  <node id="116011" label="zzz2366" cy:nodeId="1363">
    <graphics x="-1099.4235363793114" y="1131.967692530001" z="0.0"/>
  </node>
  <node id="116010" label="zzz2365" cy:nodeId="1364">
    <graphics x="-1158.4235363793114" y="2598.967692530001" z="0.0"/>
  </node>
  <node id="116009" label="zzz2364" cy:nodeId="1365">
    <graphics x="-2216.4235363793114" y="1657.967692530001" z="0.0"/>
  </node>
  <node id="116008" label="zzz2363" cy:nodeId="1366">
    <graphics x="1136.5764636206886" y="1108.967692530001" z="0.0"/>
  </node>
  <node id="116007" label="zzz2362" cy:nodeId="1367">
    <graphics x="-1546.4235363793114" y="-881.0323074699991" z="0.0"/>
  </node>
  <node id="116006" label="zzz2361" cy:nodeId="1368">
    <graphics x="2951.5764636206886" y="2014.967692530001" z="0.0"/>
  </node>
  <node id="116005" label="zzz2360" cy:nodeId="1369">
    <graphics x="1056.5764636206886" y="412.96769253000093" z="0.0"/>
  </node>
  <node id="116004" label="zzz2359" cy:nodeId="1370">
    <graphics x="580.5764636206886" y="2188.967692530001" z="0.0"/>
  </node>
  <node id="116003" label="zzz2358" cy:nodeId="1371">
    <graphics x="-1192.4235363793114" y="939.9676925300009" z="0.0"/>
  </node>
  <node id="116002" label="zzz2357" cy:nodeId="1372">
    <graphics x="-1647.4235363793114" y="-769.0323074699991" z="0.0"/>
  </node>
  <node id="116001" label="zzz2356" cy:nodeId="1373">
    <graphics x="-1279.4235363793114" y="2598.967692530001" z="0.0"/>
  </node>
  <node id="116000" label="zzz2355" cy:nodeId="1374">
    <graphics x="-1739.4235363793114" y="-949.0323074699991" z="0.0"/>
  </node>
  <node id="115999" label="zzz2354" cy:nodeId="1375">
    <graphics x="1158.5764636206886" y="192.96769253000093" z="0.0"/>
  </node>
  <node id="115998" label="zzz2353" cy:nodeId="1376">
    <graphics x="999.5764636206886" y="1927.967692530001" z="0.0"/>
  </node>
  <node id="115997" label="zzz2352" cy:nodeId="1377">
    <graphics x="-1156.4235363793114" y="2267.967692530001" z="0.0"/>
  </node>
  <node id="115996" label="zzz2351" cy:nodeId="1378">
    <graphics x="-1400.4235363793114" y="2598.967692530001" z="0.0"/>
  </node>
  <node id="115995" label="zzz2350" cy:nodeId="1379">
    <graphics x="145.57646362068863" y="1283.967692530001" z="0.0"/>
  </node>
  <node id="115994" label="zzz2349" cy:nodeId="1380">
    <graphics x="-1521.4235363793114" y="2598.967692530001" z="0.0"/>
  </node>
  <node id="115993" label="zzz2348" cy:nodeId="1381">
    <graphics x="-1642.4235363793114" y="2598.967692530001" z="0.0"/>
  </node>
  <node id="115992" label="zzz2347" cy:nodeId="1382">
    <graphics x="-1763.4235363793114" y="2598.967692530001" z="0.0"/>
  </node>
  <node id="115991" label="zzz2346" cy:nodeId="1383">
    <graphics x="-1884.4235363793114" y="2598.967692530001" z="0.0"/>
  </node>
  <node id="115990" label="zzz2345" cy:nodeId="1384">
    <graphics x="2307.5764636206886" y="2101.967692530001" z="0.0"/>
  </node>
  <node id="115989" label="zzz2344" cy:nodeId="1385">
    <graphics x="2522.5764636206886" y="2094.967692530001" z="0.0"/>
  </node>
  <node id="115988" label="zzz2343" cy:nodeId="1386">
    <graphics x="2008.5764636206886" y="1042.967692530001" z="0.0"/>
  </node>
  <node id="115987" label="zzz2342" cy:nodeId="1387">
    <graphics x="2829.5764636206886" y="-628.0323074699991" z="0.0"/>
  </node>
  <node id="115986" label="zzz2341" cy:nodeId="1388">
    <graphics x="-2005.4235363793114" y="2598.967692530001" z="0.0"/>
  </node>
  <node id="115985" label="zzz2340" cy:nodeId="1389">
    <graphics x="-2126.4235363793114" y="2598.967692530001" z="0.0"/>
  </node>
  <node id="115984" label="zzz2339" cy:nodeId="1390">
    <graphics x="2574.5764636206886" y="2014.967692530001" z="0.0"/>
  </node>
  <node id="115983" label="zzz2338" cy:nodeId="1391">
    <graphics x="330.5764636206886" y="1927.967692530001" z="0.0"/>
  </node>
  <node id="115982" label="zzz2337" cy:nodeId="1392">
    <graphics x="1177.5764636206886" y="2262.967692530001" z="0.0"/>
  </node>
  <node id="115981" label="zzz2336" cy:nodeId="1393">
    <graphics x="-2064.4235363793114" y="1695.967692530001" z="0.0"/>
  </node>
  <node id="115980" label="zzz2335" cy:nodeId="1394">
    <graphics x="2384.5764636206886" y="-2464.032307469999" z="0.0"/>
  </node>
  <node id="115979" label="zzz2334" cy:nodeId="1395">
    <graphics x="1179.5764636206886" y="228.96769253000093" z="0.0"/>
  </node>
  <node id="115978" label="zzz2333" cy:nodeId="1396">
    <graphics x="-2247.4235363793114" y="2598.967692530001" z="0.0"/>
  </node>
  <node id="115977" label="zzz2332" cy:nodeId="1397">
    <graphics x="-1276.4235363793114" y="1090.967692530001" z="0.0"/>
  </node>
  <node id="115976" label="zzz2331" cy:nodeId="1398">
    <graphics x="3315.5764636206886" y="2014.967692530001" z="0.0"/>
  </node>
  <node id="115975" label="zzz2330" cy:nodeId="1399">
    <graphics x="-2368.4235363793114" y="2598.967692530001" z="0.0"/>
  </node>
  <node id="115974" label="zzz2329" cy:nodeId="1400">
    <graphics x="2009.5764636206886" y="-2114.032307469999" z="0.0"/>
  </node>
  <node id="115973" label="zzz2328" cy:nodeId="1401">
    <graphics x="-1648.4235363793114" y="-625.0323074699991" z="0.0"/>
  </node>
  <node id="115972" label="zzz2327" cy:nodeId="1402">
    <graphics x="-1877.4235363793114" y="-720.0323074699991" z="0.0"/>
  </node>
  <node id="115971" label="zzz2326" cy:nodeId="1403">
    <graphics x="-1180.4235363793114" y="14.967692530000932" z="0.0"/>
  </node>
  <node id="115970" label="zzz2325" cy:nodeId="1404">
    <graphics x="-2489.4235363793114" y="2598.967692530001" z="0.0"/>
  </node>
  <node id="115969" label="zzz2324" cy:nodeId="1405">
    <graphics x="-979.4235363793114" y="1661.967692530001" z="0.0"/>
  </node>
  <node id="115968" label="zzz2323" cy:nodeId="1406">
    <graphics x="3439.5764636206886" y="2517.967692530001" z="0.0"/>
  </node>
  <node id="115967" label="zzz2322" cy:nodeId="1407">
    <graphics x="-520.4235363793114" y="1602.967692530001" z="0.0"/>
  </node>
  <node id="115966" label="zzz2321" cy:nodeId="1408">
    <graphics x="3318.5764636206886" y="2517.967692530001" z="0.0"/>
  </node>
  <node id="115965" label="zzz2320" cy:nodeId="1409">
    <graphics x="3197.5764636206886" y="2517.967692530001" z="0.0"/>
  </node>
  <node id="115964" label="zzz2319" cy:nodeId="1410">
    <graphics x="3152.5764636206886" y="2100.967692530001" z="0.0"/>
  </node>
  <node id="115963" label="zzz2318" cy:nodeId="1411">
    <graphics x="3076.5764636206886" y="2517.967692530001" z="0.0"/>
  </node>
  <node id="115962" label="zzz2317" cy:nodeId="1412">
    <graphics x="-1572.4235363793114" y="-805.0323074699991" z="0.0"/>
  </node>
  <node id="115961" label="zzz2316" cy:nodeId="1413">
    <graphics x="2955.5764636206886" y="2517.967692530001" z="0.0"/>
  </node>
  <node id="115960" label="zzz2315" cy:nodeId="1414">
    <graphics x="789.5764636206886" y="2106.967692530001" z="0.0"/>
  </node>
  <node id="115959" label="zzz2314" cy:nodeId="1415">
    <graphics x="2834.5764636206886" y="2517.967692530001" z="0.0"/>
  </node>
  <node id="115958" label="zzz2313" cy:nodeId="1416">
    <graphics x="2713.5764636206886" y="2517.967692530001" z="0.0"/>
  </node>
  <node id="115957" label="zzz2312" cy:nodeId="1417">
    <graphics x="2616.5764636206886" y="2101.967692530001" z="0.0"/>
  </node>
  <node id="115956" label="zzz2311" cy:nodeId="1418">
    <graphics x="196.57646362068863" y="2269.967692530001" z="0.0"/>
  </node>
  <node id="115955" label="zzz2310" cy:nodeId="1419">
    <graphics x="-1675.4235363793114" y="-553.0323074699991" z="0.0"/>
  </node>
  <node id="115954" label="zzz2309" cy:nodeId="1420">
    <graphics x="-1331.4235363793114" y="995.9676925300009" z="0.0"/>
  </node>
  <node id="115953" label="zzz2308" cy:nodeId="1421">
    <graphics x="-1553.4235363793114" y="-746.0323074699991" z="0.0"/>
  </node>
  <node id="115952" label="zzz2307" cy:nodeId="1422">
    <graphics x="-1216.4235363793114" y="1175.967692530001" z="0.0"/>
  </node>
  <node id="115951" label="zzz2306" cy:nodeId="1423">
    <graphics x="-1461.4235363793114" y="-613.0323074699991" z="0.0"/>
  </node>
  <node id="115950" label="zzz2305" cy:nodeId="1424">
    <graphics x="-2398.4235363793114" y="2014.967692530001" z="0.0"/>
  </node>
  <node id="115949" label="zzz2304" cy:nodeId="1425">
    <graphics x="2592.5764636206886" y="2517.967692530001" z="0.0"/>
  </node>
  <node id="115948" label="zzz2303" cy:nodeId="1426">
    <graphics x="3026.5764636206886" y="2100.967692530001" z="0.0"/>
  </node>
  <node id="115947" label="zzz2302" cy:nodeId="1427">
    <graphics x="3031.5764636206886" y="2018.967692530001" z="0.0"/>
  </node>
  <node id="115946" label="zzz2301" cy:nodeId="1428">
    <graphics x="2945.5764636206886" y="2096.967692530001" z="0.0"/>
  </node>
  <node id="115945" label="zzz2300" cy:nodeId="1429">
    <graphics x="2160.5764636206886" y="276.96769253000093" z="0.0"/>
  </node>
  <node id="115944" label="zzz2299" cy:nodeId="1430">
    <graphics x="2271.5764636206886" y="-2564.032307469999" z="0.0"/>
  </node>
  <node id="115943" label="zzz2298" cy:nodeId="1431">
    <graphics x="-910.4235363793114" y="1338.967692530001" z="0.0"/>
  </node>
  <node id="115942" label="zzz2297" cy:nodeId="1432">
    <graphics x="1165.5764636206886" y="2188.967692530001" z="0.0"/>
  </node>
  <node id="115941" label="zzz2296" cy:nodeId="1433">
    <graphics x="2471.5764636206886" y="2517.967692530001" z="0.0"/>
  </node>
  <node id="115940" label="zzz2295" cy:nodeId="1434">
    <graphics x="2350.5764636206886" y="2517.967692530001" z="0.0"/>
  </node>
  <node id="115939" label="zzz2294" cy:nodeId="1435">
    <graphics x="1446.5764636206886" y="-988.0323074699991" z="0.0"/>
  </node>
  <node id="115938" label="zzz2293" cy:nodeId="1436">
    <graphics x="2229.5764636206886" y="2517.967692530001" z="0.0"/>
  </node>
  <node id="115937" label="zzz2292" cy:nodeId="1437">
    <graphics x="2108.5764636206886" y="2517.967692530001" z="0.0"/>
  </node>
  <node id="115936" label="zzz2291" cy:nodeId="1438">
    <graphics x="-1817.4235363793114" y="1930.967692530001" z="0.0"/>
  </node>
  <node id="115935" label="zzz2290" cy:nodeId="1439">
    <graphics x="1987.5764636206886" y="2517.967692530001" z="0.0"/>
  </node>
  <node id="115934" label="zzz2289" cy:nodeId="1440">
    <graphics x="1866.5764636206886" y="2517.967692530001" z="0.0"/>
  </node>
  <node id="115933" label="zzz2288" cy:nodeId="1441">
    <graphics x="-1064.4235363793114" y="1487.967692530001" z="0.0"/>
  </node>
  <node id="115932" label="zzz2287" cy:nodeId="1442">
    <graphics x="2382.5764636206886" y="-2258.032307469999" z="0.0"/>
  </node>
  <node id="115931" label="zzz2286" cy:nodeId="1443">
    <graphics x="1745.5764636206886" y="2517.967692530001" z="0.0"/>
  </node>
  <node id="115930" label="zzz2285" cy:nodeId="1444">
    <graphics x="1624.5764636206886" y="2517.967692530001" z="0.0"/>
  </node>
  <node id="115929" label="zzz2284" cy:nodeId="1445">
    <graphics x="2005.5764636206886" y="-2712.032307469999" z="0.0"/>
  </node>
  <node id="115928" label="zzz2283" cy:nodeId="1446">
    <graphics x="1175.5764636206886" y="921.9676925300009" z="0.0"/>
  </node>
  <node id="115927" label="zzz2282" cy:nodeId="1447">
    <graphics x="1503.5764636206886" y="2517.967692530001" z="0.0"/>
  </node>
  <node id="115926" label="zzz2281" cy:nodeId="1448">
    <graphics x="1092.5764636206886" y="266.96769253000093" z="0.0"/>
  </node>
  <node id="115925" label="zzz2280" cy:nodeId="1449">
    <graphics x="364.5764636206886" y="2247.967692530001" z="0.0"/>
  </node>
  <node id="115924" label="zzz2279" cy:nodeId="1450">
    <graphics x="-1628.4235363793114" y="-841.0323074699991" z="0.0"/>
  </node>
  <node id="115923" label="zzz2278" cy:nodeId="1451">
    <graphics x="-1461.4235363793114" y="-652.0323074699991" z="0.0"/>
  </node>
  <node id="115922" label="zzz2277" cy:nodeId="1452">
    <graphics x="-1457.4235363793114" y="-429.03230746999907" z="0.0"/>
  </node>
  <node id="115921" label="zzz2276" cy:nodeId="1453">
    <graphics x="148.57646362068863" y="2189.967692530001" z="0.0"/>
  </node>
  <node id="115920" label="zzz2275" cy:nodeId="1454">
    <graphics x="2120.5764636206886" y="-1890.032307469999" z="0.0"/>
  </node>
  <node id="115919" label="zzz2274" cy:nodeId="1455">
    <graphics x="-1035.4235363793114" y="2272.967692530001" z="0.0"/>
  </node>
  <node id="115918" label="zzz2273" cy:nodeId="1456">
    <graphics x="871.5764636206886" y="1832.967692530001" z="0.0"/>
  </node>
  <node id="115917" label="zzz2272" cy:nodeId="1457">
    <graphics x="-1642.4235363793114" y="-661.0323074699991" z="0.0"/>
  </node>
  <node id="115916" label="zzz2271" cy:nodeId="1458">
    <graphics x="-1741.4235363793114" y="-648.0323074699991" z="0.0"/>
  </node>
  <node id="115915" label="zzz2270" cy:nodeId="1459">
    <graphics x="430.5764636206886" y="2188.967692530001" z="0.0"/>
  </node>
  <node id="115914" label="zzz2269" cy:nodeId="1460">
    <graphics x="1382.5764636206886" y="2517.967692530001" z="0.0"/>
  </node>
  <node id="115913" label="zzz2268" cy:nodeId="1461">
    <graphics x="1154.5764636206886" y="414.96769253000093" z="0.0"/>
  </node>
  <node id="115912" label="zzz2267" cy:nodeId="1462">
    <graphics x="1261.5764636206886" y="2517.967692530001" z="0.0"/>
  </node>
  <node id="115911" label="zzz2266" cy:nodeId="1463">
    <graphics x="2202.5764636206886" y="-2236.032307469999" z="0.0"/>
  </node>
  <node id="115910" label="zzz2265" cy:nodeId="1464">
    <graphics x="-201.42353637931137" y="1832.967692530001" z="0.0"/>
  </node>
  <node id="115909" label="zzz2264" cy:nodeId="1465">
    <graphics x="2656.5764636206886" y="-731.0323074699991" z="0.0"/>
  </node>
  <node id="115908" label="zzz2263" cy:nodeId="1466">
    <graphics x="1285.5764636206886" y="1132.967692530001" z="0.0"/>
  </node>
  <node id="115907" label="zzz2262" cy:nodeId="1467">
    <graphics x="2251.5764636206886" y="182.96769253000093" z="0.0"/>
  </node>
  <node id="115906" label="zzz2261" cy:nodeId="1468">
    <graphics x="1140.5764636206886" y="2517.967692530001" z="0.0"/>
  </node>
  <node id="115905" label="zzz2260" cy:nodeId="1469">
    <graphics x="1019.5764636206886" y="2517.967692530001" z="0.0"/>
  </node>
  <node id="115904" label="zzz2259" cy:nodeId="1470">
    <graphics x="2115.5764636206886" y="-2164.032307469999" z="0.0"/>
  </node>
  <node id="115903" label="zzz2258" cy:nodeId="1471">
    <graphics x="-1155.4235363793114" y="1736.967692530001" z="0.0"/>
  </node>
  <node id="115902" label="zzz2257" cy:nodeId="1472">
    <graphics x="2112.5764636206886" y="1014.9676925300009" z="0.0"/>
  </node>
  <node id="115901" label="zzz2256" cy:nodeId="1473">
    <graphics x="-1171.4235363793114" y="1031.967692530001" z="0.0"/>
  </node>
  <node id="115900" label="zzz2255" cy:nodeId="1474">
    <graphics x="2439.5764636206886" y="1612.967692530001" z="0.0"/>
  </node>
  <node id="115899" label="zzz2254" cy:nodeId="1475">
    <graphics x="1166.5764636206886" y="302.96769253000093" z="0.0"/>
  </node>
  <node id="115898" label="zzz2253" cy:nodeId="1476">
    <graphics x="898.5764636206886" y="2517.967692530001" z="0.0"/>
  </node>
  <node id="115897" label="zzz2252" cy:nodeId="1477">
    <graphics x="777.5764636206886" y="2517.967692530001" z="0.0"/>
  </node>
  <node id="115896" label="zzz2251" cy:nodeId="1478">
    <graphics x="656.5764636206886" y="2517.967692530001" z="0.0"/>
  </node>
  <node id="115895" label="zzz2250" cy:nodeId="1479">
    <graphics x="-1823.4235363793114" y="1832.967692530001" z="0.0"/>
  </node>
  <node id="115894" label="zzz2249" cy:nodeId="1480">
    <graphics x="-1877.4235363793114" y="-210.03230746999907" z="0.0"/>
  </node>
  <node id="115893" label="zzz2248" cy:nodeId="1481">
    <graphics x="2206.5764636206886" y="1832.967692530001" z="0.0"/>
  </node>
  <node id="115892" label="zzz2247" cy:nodeId="1482">
    <graphics x="535.5764636206886" y="2517.967692530001" z="0.0"/>
  </node>
  <node id="115891" label="zzz2246" cy:nodeId="1483">
    <graphics x="1188.5764636206886" y="-2402.032307469999" z="0.0"/>
  </node>
  <node id="115890" label="zzz2245" cy:nodeId="1484">
    <graphics x="2748.5764636206886" y="-599.0323074699991" z="0.0"/>
  </node>
  <node id="115889" label="zzz2244" cy:nodeId="1485">
    <graphics x="414.5764636206886" y="2517.967692530001" z="0.0"/>
  </node>
  <node id="115888" label="zzz2243" cy:nodeId="1486">
    <graphics x="293.5764636206886" y="2517.967692530001" z="0.0"/>
  </node>
  <node id="115887" label="zzz2242" cy:nodeId="1487">
    <graphics x="172.57646362068863" y="2517.967692530001" z="0.0"/>
  </node>
  <node id="115886" label="zzz2241" cy:nodeId="1488">
    <graphics x="51.57646362068863" y="2517.967692530001" z="0.0"/>
  </node>
  <node id="115885" label="zzz2240" cy:nodeId="1489">
    <graphics x="-69.42353637931137" y="2517.967692530001" z="0.0"/>
  </node>
  <node id="115884" label="zzz2239" cy:nodeId="1490">
    <graphics x="1821.5764636206886" y="2103.967692530001" z="0.0"/>
  </node>
  <node id="115883" label="zzz2238" cy:nodeId="1491">
    <graphics x="1822.5764636206886" y="2014.967692530001" z="0.0"/>
  </node>
  <node id="115882" label="zzz2237" cy:nodeId="1492">
    <graphics x="2890.5764636206886" y="-548.0323074699991" z="0.0"/>
  </node>
  <node id="115881" label="zzz2236" cy:nodeId="1493">
    <graphics x="-1258.4235363793114" y="1044.967692530001" z="0.0"/>
  </node>
  <node id="115880" label="zzz2235" cy:nodeId="1494">
    <graphics x="-1727.4235363793114" y="-787.0323074699991" z="0.0"/>
  </node>
  <node id="115879" label="zzz2234" cy:nodeId="1495">
    <graphics x="2390.5764636206886" y="918.9676925300009" z="0.0"/>
  </node>
  <node id="115878" label="zzz2233" cy:nodeId="1496">
    <graphics x="-1250.4235363793114" y="2272.967692530001" z="0.0"/>
  </node>
  <node id="115877" label="zzz2232" cy:nodeId="1497">
    <graphics x="1833.5764636206886" y="997.9676925300009" z="0.0"/>
  </node>
  <node id="115876" label="zzz2231" cy:nodeId="1498">
    <graphics x="-190.42353637931137" y="2517.967692530001" z="0.0"/>
  </node>
  <node id="115875" label="zzz2230" cy:nodeId="1499">
    <graphics x="-311.4235363793114" y="2517.967692530001" z="0.0"/>
  </node>
  <node id="115874" label="zzz2229" cy:nodeId="1500">
    <graphics x="2343.5764636206886" y="2014.967692530001" z="0.0"/>
  </node>
  <node id="115873" label="zzz2228" cy:nodeId="1501">
    <graphics x="2620.5764636206886" y="1926.967692530001" z="0.0"/>
  </node>
  <node id="115872" label="zzz2227" cy:nodeId="1502">
    <graphics x="2250.5764636206886" y="-1967.032307469999" z="0.0"/>
  </node>
  <node id="115871" label="zzz2226" cy:nodeId="1503">
    <graphics x="-432.4235363793114" y="2517.967692530001" z="0.0"/>
  </node>
  <node id="115870" label="zzz2225" cy:nodeId="1504">
    <graphics x="2371.5764636206886" y="1710.967692530001" z="0.0"/>
  </node>
  <node id="115869" label="zzz2224" cy:nodeId="1505">
    <graphics x="-1058.4235363793114" y="2107.967692530001" z="0.0"/>
  </node>
  <node id="115868" label="zzz2223" cy:nodeId="1506">
    <graphics x="-553.4235363793114" y="2517.967692530001" z="0.0"/>
  </node>
  <node id="115867" label="zzz2222" cy:nodeId="1507">
    <graphics x="1811.5764636206886" y="920.9676925300009" z="0.0"/>
  </node>
  <node id="115866" label="zzz2221" cy:nodeId="1508">
    <graphics x="1049.5764636206886" y="994.9676925300009" z="0.0"/>
  </node>
  <node id="115865" label="zzz2220" cy:nodeId="1509">
    <graphics x="349.5764636206886" y="1832.967692530001" z="0.0"/>
  </node>
  <node id="115864" label="zzz2219" cy:nodeId="1510">
    <graphics x="1787.5764636206886" y="853.9676925300009" z="0.0"/>
  </node>
  <node id="115863" label="zzz2218" cy:nodeId="1511">
    <graphics x="-674.4235363793114" y="2517.967692530001" z="0.0"/>
  </node>
  <node id="115862" label="zzz2217" cy:nodeId="1512">
    <graphics x="3133.5764636206886" y="1293.967692530001" z="0.0"/>
  </node>
  <node id="115861" label="zzz2216" cy:nodeId="1513">
    <graphics x="-2159.4235363793114" y="1750.967692530001" z="0.0"/>
  </node>
  <node id="115860" label="zzz2215" cy:nodeId="1514">
    <graphics x="-795.4235363793114" y="2517.967692530001" z="0.0"/>
  </node>
  <node id="115859" label="zzz2214" cy:nodeId="1515">
    <graphics x="-916.4235363793114" y="2517.967692530001" z="0.0"/>
  </node>
  <node id="115858" label="zzz2213" cy:nodeId="1516">
    <graphics x="1576.5764636206886" y="981.9676925300009" z="0.0"/>
  </node>
  <node id="115857" label="zzz2212" cy:nodeId="1517">
    <graphics x="2644.5764636206886" y="1602.967692530001" z="0.0"/>
  </node>
  <node id="115856" label="zzz2211" cy:nodeId="1518">
    <graphics x="-2422.4235363793114" y="2107.967692530001" z="0.0"/>
  </node>
  <node id="115855" label="zzz2210" cy:nodeId="1519">
    <graphics x="3148.5764636206886" y="853.9676925300009" z="0.0"/>
  </node>
  <node id="115854" label="zzz2209" cy:nodeId="1520">
    <graphics x="-1179.4235363793114" y="1411.967692530001" z="0.0"/>
  </node>
  <node id="115853" label="zzz2208" cy:nodeId="1521">
    <graphics x="-1161.4235363793114" y="1602.967692530001" z="0.0"/>
  </node>
  <node id="115852" label="zzz2207" cy:nodeId="1522">
    <graphics x="1042.5764636206886" y="2265.967692530001" z="0.0"/>
  </node>
  <node id="115851" label="zzz2206" cy:nodeId="1523">
    <graphics x="1065.5764636206886" y="211.96769253000093" z="0.0"/>
  </node>
  <node id="115850" label="zzz2205" cy:nodeId="1524">
    <graphics x="-1034.4235363793114" y="1697.967692530001" z="0.0"/>
  </node>
  <node id="115849" label="zzz2204" cy:nodeId="1525">
    <graphics x="-1476.4235363793114" y="-494.03230746999907" z="0.0"/>
  </node>
  <node id="115848" label="zzz2203" cy:nodeId="1526">
    <graphics x="243.57646362068863" y="2188.967692530001" z="0.0"/>
  </node>
  <node id="115847" label="zzz2202" cy:nodeId="1527">
    <graphics x="-924.4235363793114" y="2014.967692530001" z="0.0"/>
  </node>
  <node id="115846" label="zzz2201" cy:nodeId="1528">
    <graphics x="-800.4235363793114" y="-2103.032307469999" z="0.0"/>
  </node>
  <node id="115845" label="zzz2200" cy:nodeId="1529">
    <graphics x="-1051.4235363793114" y="2014.967692530001" z="0.0"/>
  </node>
  <node id="115844" label="zzz2199" cy:nodeId="1530">
    <graphics x="-1037.4235363793114" y="2517.967692530001" z="0.0"/>
  </node>
  <node id="115843" label="zzz2198" cy:nodeId="1531">
    <graphics x="-1158.4235363793114" y="2517.967692530001" z="0.0"/>
  </node>
  <node id="115842" label="zzz2197" cy:nodeId="1532">
    <graphics x="-1422.4235363793114" y="-545.0323074699991" z="0.0"/>
  </node>
  <node id="115841" label="zzz2196" cy:nodeId="1533">
    <graphics x="-1279.4235363793114" y="2517.967692530001" z="0.0"/>
  </node>
  <node id="115840" label="zzz2195" cy:nodeId="1534">
    <graphics x="-1400.4235363793114" y="2517.967692530001" z="0.0"/>
  </node>
  <node id="115839" label="zzz2194" cy:nodeId="1535">
    <graphics x="2504.5764636206886" y="-2242.032307469999" z="0.0"/>
  </node>
  <node id="115838" label="zzz2193" cy:nodeId="1536">
    <graphics x="-2489.4235363793114" y="1061.967692530001" z="0.0"/>
  </node>
  <node id="115837" label="zzz2192" cy:nodeId="1537">
    <graphics x="-1521.4235363793114" y="2517.967692530001" z="0.0"/>
  </node>
  <node id="115836" label="zzz2191" cy:nodeId="1538">
    <graphics x="921.5764636206886" y="2266.967692530001" z="0.0"/>
  </node>
  <node id="115835" label="zzz2190" cy:nodeId="1539">
    <graphics x="1136.5764636206886" y="885.9676925300009" z="0.0"/>
  </node>
  <node id="115834" label="zzz2189" cy:nodeId="1540">
    <graphics x="-1642.4235363793114" y="2517.967692530001" z="0.0"/>
  </node>
  <node id="115833" label="zzz2188" cy:nodeId="1541">
    <graphics x="-903.4235363793114" y="1642.967692530001" z="0.0"/>
  </node>
  <node id="115832" label="zzz2187" cy:nodeId="1542">
    <graphics x="-1763.4235363793114" y="2517.967692530001" z="0.0"/>
  </node>
  <node id="115831" label="zzz2186" cy:nodeId="1543">
    <graphics x="-1884.4235363793114" y="2517.967692530001" z="0.0"/>
  </node>
  <node id="115830" label="zzz2185" cy:nodeId="1544">
    <graphics x="839.5764636206886" y="2234.967692530001" z="0.0"/>
  </node>
  <node id="115829" label="zzz2184" cy:nodeId="1545">
    <graphics x="-2103.4235363793114" y="724.9676925300009" z="0.0"/>
  </node>
  <node id="115828" label="zzz2183" cy:nodeId="1546">
    <graphics x="-1277.4235363793114" y="914.9676925300009" z="0.0"/>
  </node>
  <node id="115827" label="zzz2182" cy:nodeId="1547">
    <graphics x="-2005.4235363793114" y="2517.967692530001" z="0.0"/>
  </node>
  <node id="115826" label="zzz2181" cy:nodeId="1548">
    <graphics x="2401.5764636206886" y="2091.967692530001" z="0.0"/>
  </node>
  <node id="115825" label="zzz2180" cy:nodeId="1549">
    <graphics x="-2126.4235363793114" y="2517.967692530001" z="0.0"/>
  </node>
  <node id="115824" label="zzz2179" cy:nodeId="1550">
    <graphics x="-1024.4235363793114" y="2188.967692530001" z="0.0"/>
  </node>
  <node id="115823" label="zzz2178" cy:nodeId="1551">
    <graphics x="2250.5764636206886" y="-1870.032307469999" z="0.0"/>
  </node>
  <node id="115822" label="zzz2177" cy:nodeId="1552">
    <graphics x="965.5764636206886" y="496.96769253000093" z="0.0"/>
  </node>
  <node id="115821" label="zzz2176" cy:nodeId="1553">
    <graphics x="903.5764636206886" y="2188.967692530001" z="0.0"/>
  </node>
  <node id="115820" label="zzz2175" cy:nodeId="1554">
    <graphics x="-2096.4235363793114" y="318.96769253000093" z="0.0"/>
  </node>
  <node id="115819" label="zzz2174" cy:nodeId="1555">
    <graphics x="1887.5764636206886" y="903.9676925300009" z="0.0"/>
  </node>
  <node id="115818" label="zzz2173" cy:nodeId="1556">
    <graphics x="459.5764636206886" y="2267.967692530001" z="0.0"/>
  </node>
  <node id="115817" label="zzz2172" cy:nodeId="1557">
    <graphics x="-2247.4235363793114" y="2517.967692530001" z="0.0"/>
  </node>
  <node id="115816" label="zzz2171" cy:nodeId="1558">
    <graphics x="-2368.4235363793114" y="2517.967692530001" z="0.0"/>
  </node>
  <node id="115815" label="zzz2170" cy:nodeId="1559">
    <graphics x="3080.5764636206886" y="1373.967692530001" z="0.0"/>
  </node>
  <node id="115814" label="zzz2169" cy:nodeId="1560">
    <graphics x="-713.4235363793114" y="1389.967692530001" z="0.0"/>
  </node>
  <node id="115813" label="zzz2168" cy:nodeId="1561">
    <graphics x="2054.5764636206886" y="-2208.032307469999" z="0.0"/>
  </node>
  <node id="115812" label="zzz2167" cy:nodeId="1562">
    <graphics x="-2489.4235363793114" y="2517.967692530001" z="0.0"/>
  </node>
  <node id="115811" label="zzz2166" cy:nodeId="1563">
    <graphics x="102.57646362068863" y="919.9676925300009" z="0.0"/>
  </node>
  <node id="115810" label="zzz2165" cy:nodeId="1564">
    <graphics x="3439.5764636206886" y="2436.967692530001" z="0.0"/>
  </node>
  <node id="115809" label="zzz2164" cy:nodeId="1565">
    <graphics x="-771.4235363793114" y="1479.967692530001" z="0.0"/>
  </node>
  <node id="115808" label="zzz2163" cy:nodeId="1566">
    <graphics x="-789.4235363793114" y="1399.967692530001" z="0.0"/>
  </node>
  <node id="115807" label="zzz2162" cy:nodeId="1567">
    <graphics x="1479.5764636206886" y="1342.967692530001" z="0.0"/>
  </node>
  <node id="115806" label="zzz2161" cy:nodeId="1568">
    <graphics x="1234.5764636206886" y="-2234.032307469999" z="0.0"/>
  </node>
  <node id="115805" label="zzz2160" cy:nodeId="1569">
    <graphics x="3318.5764636206886" y="2436.967692530001" z="0.0"/>
  </node>
  <node id="115804" label="zzz2159" cy:nodeId="1570">
    <graphics x="2618.5764636206886" y="-557.0323074699991" z="0.0"/>
  </node>
  <node id="115803" label="zzz2158" cy:nodeId="1571">
    <graphics x="-2253.4235363793114" y="772.9676925300009" z="0.0"/>
  </node>
  <node id="115802" label="zzz2157" cy:nodeId="1572">
    <graphics x="3197.5764636206886" y="2436.967692530001" z="0.0"/>
  </node>
  <node id="115801" label="zzz2156" cy:nodeId="1573">
    <graphics x="2028.5764636206886" y="-2049.032307469999" z="0.0"/>
  </node>
  <node id="115800" label="zzz2155" cy:nodeId="1574">
    <graphics x="2789.5764636206886" y="-954.0323074699991" z="0.0"/>
  </node>
  <node id="115799" label="zzz2154" cy:nodeId="1575">
    <graphics x="2704.5764636206886" y="-982.0323074699991" z="0.0"/>
  </node>
  <node id="115798" label="zzz2153" cy:nodeId="1576">
    <graphics x="-1839.4235363793114" y="1148.967692530001" z="0.0"/>
  </node>
  <node id="115797" label="zzz2152" cy:nodeId="1577">
    <graphics x="-1674.4235363793114" y="-373.03230746999907" z="0.0"/>
  </node>
  <node id="115796" label="zzz2151" cy:nodeId="1578">
    <graphics x="3076.5764636206886" y="2436.967692530001" z="0.0"/>
  </node>
  <node id="115795" label="zzz2150" cy:nodeId="1579">
    <graphics x="2358.5764636206886" y="-2500.032307469999" z="0.0"/>
  </node>
  <node id="115794" label="zzz2149" cy:nodeId="1580">
    <graphics x="2612.5764636206886" y="1832.967692530001" z="0.0"/>
  </node>
  <node id="115793" label="zzz2148" cy:nodeId="1581">
    <graphics x="2507.5764636206886" y="-2379.032307469999" z="0.0"/>
  </node>
  <node id="115792" label="zzz2147" cy:nodeId="1582">
    <graphics x="-2045.4235363793114" y="1852.967692530001" z="0.0"/>
  </node>
  <node id="115791" label="zzz2146" cy:nodeId="1583">
    <graphics x="-2024.4235363793114" y="1930.967692530001" z="0.0"/>
  </node>
  <node id="115790" label="zzz2145" cy:nodeId="1584">
    <graphics x="-1944.4235363793114" y="1910.967692530001" z="0.0"/>
  </node>
  <node id="115789" label="zzz2144" cy:nodeId="1585">
    <graphics x="-1967.4235363793114" y="1832.967692530001" z="0.0"/>
  </node>
  <node id="115788" label="zzz2143" cy:nodeId="1586">
    <graphics x="-1415.4235363793114" y="1647.967692530001" z="0.0"/>
  </node>
  <node id="115787" label="zzz2142" cy:nodeId="1587">
    <graphics x="-1282.4235363793114" y="1686.967692530001" z="0.0"/>
  </node>
  <node id="115786" label="zzz2141" cy:nodeId="1588">
    <graphics x="-1332.4235363793114" y="1738.967692530001" z="0.0"/>
  </node>
  <node id="115785" label="zzz2140" cy:nodeId="1589">
    <graphics x="-1372.4235363793114" y="1602.967692530001" z="0.0"/>
  </node>
  <node id="115784" label="zzz2139" cy:nodeId="1590">
    <graphics x="-1296.4235363793114" y="1619.967692530001" z="0.0"/>
  </node>
  <node id="115783" label="zzz2138" cy:nodeId="1591">
    <graphics x="-1408.4235363793114" y="1718.967692530001" z="0.0"/>
  </node>
  <node id="115782" label="zzz2137" cy:nodeId="1592">
    <graphics x="-1681.4235363793114" y="-225.03230746999907" z="0.0"/>
  </node>
  <node id="115781" label="zzz2136" cy:nodeId="1593">
    <graphics x="-1589.4235363793114" y="-327.03230746999907" z="0.0"/>
  </node>
  <node id="115780" label="zzz2135" cy:nodeId="1594">
    <graphics x="2955.5764636206886" y="2436.967692530001" z="0.0"/>
  </node>
  <node id="115779" label="zzz2134" cy:nodeId="1595">
    <graphics x="1807.5764636206886" y="1832.967692530001" z="0.0"/>
  </node>
  <node id="115778" label="zzz2133" cy:nodeId="1596">
    <graphics x="1878.5764636206886" y="1895.967692530001" z="0.0"/>
  </node>
  <node id="115777" label="zzz2132" cy:nodeId="1597">
    <graphics x="1789.5764636206886" y="1926.967692530001" z="0.0"/>
  </node>
  <node id="115776" label="zzz2131" cy:nodeId="1598">
    <graphics x="-1696.4235363793114" y="1832.967692530001" z="0.0"/>
  </node>
  <node id="115775" label="zzz2130" cy:nodeId="1599">
    <graphics x="2834.5764636206886" y="2436.967692530001" z="0.0"/>
  </node>
  <node id="115774" label="zzz2129" cy:nodeId="1600">
    <graphics x="2713.5764636206886" y="2436.967692530001" z="0.0"/>
  </node>
  <node id="115773" label="zzz2128" cy:nodeId="1601">
    <graphics x="2592.5764636206886" y="2436.967692530001" z="0.0"/>
  </node>
  <node id="115772" label="zzz2127" cy:nodeId="1602">
    <graphics x="-810.4235363793114" y="-1096.032307469999" z="0.0"/>
  </node>
  <node id="115771" label="zzz2126" cy:nodeId="1603">
    <graphics x="2471.5764636206886" y="2436.967692530001" z="0.0"/>
  </node>
  <node id="115770" label="zzz2125" cy:nodeId="1604">
    <graphics x="2350.5764636206886" y="2436.967692530001" z="0.0"/>
  </node>
  <node id="115769" label="zzz2124" cy:nodeId="1605">
    <graphics x="2229.5764636206886" y="2436.967692530001" z="0.0"/>
  </node>
  <node id="115768" label="zzz2123" cy:nodeId="1606">
    <graphics x="2108.5764636206886" y="2436.967692530001" z="0.0"/>
  </node>
  <node id="115767" label="zzz2122" cy:nodeId="1607">
    <graphics x="1987.5764636206886" y="2436.967692530001" z="0.0"/>
  </node>
  <node id="115766" label="zzz2121" cy:nodeId="1608">
    <graphics x="817.5764636206886" y="1649.967692530001" z="0.0"/>
  </node>
  <node id="115765" label="zzz2120" cy:nodeId="1609">
    <graphics x="750.5764636206886" y="1602.967692530001" z="0.0"/>
  </node>
  <node id="115764" label="zzz2119" cy:nodeId="1610">
    <graphics x="771.5764636206886" y="1716.967692530001" z="0.0"/>
  </node>
  <node id="115763" label="zzz2118" cy:nodeId="1611">
    <graphics x="704.5764636206886" y="1669.967692530001" z="0.0"/>
  </node>
  <node id="115762" label="zzz2117" cy:nodeId="1612">
    <graphics x="1866.5764636206886" y="2436.967692530001" z="0.0"/>
  </node>
  <node id="115761" label="zzz2116" cy:nodeId="1613">
    <graphics x="1745.5764636206886" y="2436.967692530001" z="0.0"/>
  </node>
  <node id="115760" label="zzz2115" cy:nodeId="1614">
    <graphics x="1624.5764636206886" y="2436.967692530001" z="0.0"/>
  </node>
  <node id="115759" label="zzz2114" cy:nodeId="1615">
    <graphics x="1503.5764636206886" y="2436.967692530001" z="0.0"/>
  </node>
  <node id="115758" label="zzz2113" cy:nodeId="1616">
    <graphics x="1382.5764636206886" y="2436.967692530001" z="0.0"/>
  </node>
  <node id="115757" label="zzz2112" cy:nodeId="1617">
    <graphics x="1261.5764636206886" y="2436.967692530001" z="0.0"/>
  </node>
  <node id="115756" label="zzz2111" cy:nodeId="1618">
    <graphics x="3013.5764636206886" y="-721.0323074699991" z="0.0"/>
  </node>
  <node id="115755" label="zzz2110" cy:nodeId="1619">
    <graphics x="2123.5764636206886" y="344.96769253000093" z="0.0"/>
  </node>
  <node id="115754" label="zzz2109" cy:nodeId="1620">
    <graphics x="1010.5764636206886" y="-918.0323074699991" z="0.0"/>
  </node>
  <node id="115753" label="zzz2108" cy:nodeId="1621">
    <graphics x="2682.5764636206886" y="-3217.032307469999" z="0.0"/>
  </node>
  <node id="115752" label="zzz2107" cy:nodeId="1622">
    <graphics x="1898.5764636206886" y="352.96769253000093" z="0.0"/>
  </node>
  <node id="115751" label="zzz2106" cy:nodeId="1623">
    <graphics x="3194.5764636206886" y="2014.967692530001" z="0.0"/>
  </node>
  <node id="115750" label="zzz2105" cy:nodeId="1624">
    <graphics x="1140.5764636206886" y="2436.967692530001" z="0.0"/>
  </node>
  <node id="115749" label="zzz2104" cy:nodeId="1625">
    <graphics x="1019.5764636206886" y="2436.967692530001" z="0.0"/>
  </node>
  <node id="115748" label="zzz2103" cy:nodeId="1626">
    <graphics x="1484.5764636206886" y="2254.967692530001" z="0.0"/>
  </node>
  <node id="115747" label="zzz2102" cy:nodeId="1627">
    <graphics x="-2412.4235363793114" y="1521.967692530001" z="0.0"/>
  </node>
  <node id="115746" label="zzz2101" cy:nodeId="1628">
    <graphics x="-2369.4235363793114" y="1424.967692530001" z="0.0"/>
  </node>
  <node id="115745" label="zzz2100" cy:nodeId="1629">
    <graphics x="-2489.4235363793114" y="1396.967692530001" z="0.0"/>
  </node>
  <node id="115744" label="zzz2099" cy:nodeId="1630">
    <graphics x="-1326.4235363793114" y="490.96769253000093" z="0.0"/>
  </node>
  <node id="115743" label="zzz2098" cy:nodeId="1631">
    <graphics x="-1199.4235363793114" y="602.9676925300009" z="0.0"/>
  </node>
  <node id="115742" label="zzz2097" cy:nodeId="1632">
    <graphics x="-1118.4235363793114" y="359.96769253000093" z="0.0"/>
  </node>
  <node id="115741" label="zzz2096" cy:nodeId="1633">
    <graphics x="898.5764636206886" y="2436.967692530001" z="0.0"/>
  </node>
  <node id="115740" label="zzz2095" cy:nodeId="1634">
    <graphics x="230.57646362068863" y="-896.0323074699991" z="0.0"/>
  </node>
  <node id="115739" label="zzz2094" cy:nodeId="1635">
    <graphics x="253.57646362068863" y="-824.0323074699991" z="0.0"/>
  </node>
  <node id="115738" label="zzz2093" cy:nodeId="1636">
    <graphics x="-1450.4235363793114" y="186.96769253000093" z="0.0"/>
  </node>
  <node id="115737" label="zzz2092" cy:nodeId="1637">
    <graphics x="777.5764636206886" y="2436.967692530001" z="0.0"/>
  </node>
  <node id="115736" label="zzz2091" cy:nodeId="1638">
    <graphics x="656.5764636206886" y="2436.967692530001" z="0.0"/>
  </node>
  <node id="115735" label="zzz2090" cy:nodeId="1639">
    <graphics x="-2105.4235363793114" y="1283.967692530001" z="0.0"/>
  </node>
  <node id="115734" label="zzz2089" cy:nodeId="1640">
    <graphics x="535.5764636206886" y="2436.967692530001" z="0.0"/>
  </node>
  <node id="115733" label="zzz2088" cy:nodeId="1641">
    <graphics x="267.5764636206886" y="-860.0323074699991" z="0.0"/>
  </node>
  <node id="115732" label="zzz2087" cy:nodeId="1642">
    <graphics x="151.57646362068863" y="-849.0323074699991" z="0.0"/>
  </node>
  <node id="115731" label="zzz2086" cy:nodeId="1643">
    <graphics x="119.57646362068863" y="1030.967692530001" z="0.0"/>
  </node>
  <node id="115730" label="zzz2085" cy:nodeId="1644">
    <graphics x="32.57646362068863" y="1112.967692530001" z="0.0"/>
  </node>
  <node id="115729" label="zzz2084" cy:nodeId="1645">
    <graphics x="-215.42353637931137" y="-957.0323074699991" z="0.0"/>
  </node>
  <node id="115728" label="zzz2083" cy:nodeId="1646">
    <graphics x="188.57646362068863" y="-1029.032307469999" z="0.0"/>
  </node>
  <node id="115727" label="zzz2082" cy:nodeId="1647">
    <graphics x="149.57646362068863" y="-1067.032307469999" z="0.0"/>
  </node>
  <node id="115726" label="zzz2081" cy:nodeId="1648">
    <graphics x="70.57646362068863" y="-1031.032307469999" z="0.0"/>
  </node>
  <node id="115725" label="zzz2080" cy:nodeId="1649">
    <graphics x="1427.5764636206886" y="1393.967692530001" z="0.0"/>
  </node>
  <node id="115724" label="zzz2079" cy:nodeId="1650">
    <graphics x="2805.5764636206886" y="1283.967692530001" z="0.0"/>
  </node>
  <node id="115723" label="zzz2078" cy:nodeId="1651">
    <graphics x="414.5764636206886" y="2436.967692530001" z="0.0"/>
  </node>
  <node id="115722" label="zzz2077" cy:nodeId="1652">
    <graphics x="41.57646362068863" y="967.9676925300009" z="0.0"/>
  </node>
  <node id="115721" label="zzz2076" cy:nodeId="1653">
    <graphics x="-2277.4235363793114" y="2045.967692530001" z="0.0"/>
  </node>
  <node id="115720" label="zzz2075" cy:nodeId="1654">
    <graphics x="-2230.4235363793114" y="-1025.032307469999" z="0.0"/>
  </node>
  <node id="115719" label="zzz2074" cy:nodeId="1655">
    <graphics x="-2188.4235363793114" y="2014.967692530001" z="0.0"/>
  </node>
  <node id="115718" label="zzz2073" cy:nodeId="1656">
    <graphics x="2793.5764636206886" y="236.96769253000093" z="0.0"/>
  </node>
  <node id="115717" label="zzz2072" cy:nodeId="1657">
    <graphics x="-2206.4235363793114" y="2107.967692530001" z="0.0"/>
  </node>
  <node id="115716" label="zzz2071" cy:nodeId="1658">
    <graphics x="-2367.4235363793114" y="-923.0323074699991" z="0.0"/>
  </node>
  <node id="115715" label="zzz2070" cy:nodeId="1659">
    <graphics x="293.5764636206886" y="2436.967692530001" z="0.0"/>
  </node>
  <node id="115714" label="zzz2069" cy:nodeId="1660">
    <graphics x="560.5764636206886" y="119.96769253000093" z="0.0"/>
  </node>
  <node id="115713" label="zzz2068" cy:nodeId="1661">
    <graphics x="1925.5764636206886" y="-670.0323074699991" z="0.0"/>
  </node>
  <node id="115712" label="zzz2067" cy:nodeId="1662">
    <graphics x="690.5764636206886" y="100.96769253000093" z="0.0"/>
  </node>
  <node id="115711" label="zzz2066" cy:nodeId="1663">
    <graphics x="172.57646362068863" y="2436.967692530001" z="0.0"/>
  </node>
  <node id="115710" label="zzz2065" cy:nodeId="1664">
    <graphics x="-835.4235363793114" y="1131.967692530001" z="0.0"/>
  </node>
  <node id="115709" label="zzz2064" cy:nodeId="1665">
    <graphics x="40.57646362068863" y="1022.9676925300009" z="0.0"/>
  </node>
  <node id="115708" label="zzz2063" cy:nodeId="1666">
    <graphics x="1767.5764636206886" y="1367.967692530001" z="0.0"/>
  </node>
  <node id="115707" label="zzz2062" cy:nodeId="1667">
    <graphics x="51.57646362068863" y="2436.967692530001" z="0.0"/>
  </node>
  <node id="115706" label="zzz2061" cy:nodeId="1668">
    <graphics x="-723.4235363793114" y="1097.967692530001" z="0.0"/>
  </node>
  <node id="115705" label="zzz2060" cy:nodeId="1669">
    <graphics x="-2395.4235363793114" y="1283.967692530001" z="0.0"/>
  </node>
  <node id="115704" label="zzz2059" cy:nodeId="1670">
    <graphics x="-2359.4235363793114" y="1388.967692530001" z="0.0"/>
  </node>
  <node id="115703" label="zzz2058" cy:nodeId="1671">
    <graphics x="-444.4235363793114" y="1928.967692530001" z="0.0"/>
  </node>
  <node id="115702" label="zzz2057" cy:nodeId="1672">
    <graphics x="-1434.4235363793114" y="1832.967692530001" z="0.0"/>
  </node>
  <node id="115701" label="zzz2056" cy:nodeId="1673">
    <graphics x="3078.5764636206886" y="205.96769253000093" z="0.0"/>
  </node>
  <node id="115700" label="zzz2055" cy:nodeId="1674">
    <graphics x="1185.5764636206886" y="342.96769253000093" z="0.0"/>
  </node>
  <node id="115699" label="zzz2054" cy:nodeId="1675">
    <graphics x="-945.4235363793114" y="1730.967692530001" z="0.0"/>
  </node>
  <node id="115698" label="zzz2053" cy:nodeId="1676">
    <graphics x="-69.42353637931137" y="2436.967692530001" z="0.0"/>
  </node>
  <node id="115697" label="zzz2052" cy:nodeId="1677">
    <graphics x="533.5764636206886" y="1602.967692530001" z="0.0"/>
  </node>
  <node id="115696" label="zzz2051" cy:nodeId="1678">
    <graphics x="-190.42353637931137" y="2436.967692530001" z="0.0"/>
  </node>
  <node id="115695" label="zzz2050" cy:nodeId="1679">
    <graphics x="519.5764636206886" y="1716.967692530001" z="0.0"/>
  </node>
  <node id="115694" label="zzz2049" cy:nodeId="1680">
    <graphics x="-311.4235363793114" y="2436.967692530001" z="0.0"/>
  </node>
  <node id="115693" label="zzz2048" cy:nodeId="1681">
    <graphics x="-447.4235363793114" y="1832.967692530001" z="0.0"/>
  </node>
  <node id="115692" label="zzz2047" cy:nodeId="1682">
    <graphics x="1138.5764636206886" y="-1552.032307469999" z="0.0"/>
  </node>
  <node id="115691" label="zzz2046" cy:nodeId="1683">
    <graphics x="1246.5764636206886" y="1832.967692530001" z="0.0"/>
  </node>
  <node id="115690" label="zzz2045" cy:nodeId="1684">
    <graphics x="-432.4235363793114" y="2436.967692530001" z="0.0"/>
  </node>
  <node id="115689" label="zzz2044" cy:nodeId="1685">
    <graphics x="-553.4235363793114" y="2436.967692530001" z="0.0"/>
  </node>
  <node id="115688" label="zzz2043" cy:nodeId="1686">
    <graphics x="2995.5764636206886" y="1926.967692530001" z="0.0"/>
  </node>
  <node id="115687" label="zzz2042" cy:nodeId="1687">
    <graphics x="3000.5764636206886" y="1832.967692530001" z="0.0"/>
  </node>
  <node id="115686" label="zzz2041" cy:nodeId="1688">
    <graphics x="-2058.4235363793114" y="-650.0323074699991" z="0.0"/>
  </node>
  <node id="115685" label="zzz2040" cy:nodeId="1689">
    <graphics x="349.5764636206886" y="983.9676925300009" z="0.0"/>
  </node>
  <node id="115684" label="zzz2039" cy:nodeId="1690">
    <graphics x="-1792.4235363793114" y="-391.03230746999907" z="0.0"/>
  </node>
  <node id="115683" label="zzz2038" cy:nodeId="1691">
    <graphics x="-674.4235363793114" y="2436.967692530001" z="0.0"/>
  </node>
  <node id="115682" label="zzz2037" cy:nodeId="1692">
    <graphics x="124.57646362068863" y="1115.967692530001" z="0.0"/>
  </node>
  <node id="115681" label="zzz2036" cy:nodeId="1693">
    <graphics x="223.57646362068863" y="958.9676925300009" z="0.0"/>
  </node>
  <node id="115680" label="zzz2035" cy:nodeId="1694">
    <graphics x="210.57646362068863" y="1055.967692530001" z="0.0"/>
  </node>
  <node id="115679" label="zzz2034" cy:nodeId="1695">
    <graphics x="-1993.4235363793114" y="-222.03230746999907" z="0.0"/>
  </node>
  <node id="115678" label="zzz2033" cy:nodeId="1696">
    <graphics x="-795.4235363793114" y="2436.967692530001" z="0.0"/>
  </node>
  <node id="115677" label="zzz2032" cy:nodeId="1697">
    <graphics x="3309.5764636206886" y="-1027.032307469999" z="0.0"/>
  </node>
  <node id="115676" label="zzz2031" cy:nodeId="1698">
    <graphics x="3161.5764636206886" y="-1117.032307469999" z="0.0"/>
  </node>
  <node id="115675" label="zzz2030" cy:nodeId="1699">
    <graphics x="-2022.4235363793114" y="486.96769253000093" z="0.0"/>
  </node>
  <node id="115674" label="zzz2029" cy:nodeId="1700">
    <graphics x="-1870.4235363793114" y="-354.03230746999907" z="0.0"/>
  </node>
  <node id="115673" label="zzz2028" cy:nodeId="1701">
    <graphics x="-2228.4235363793114" y="664.9676925300009" z="0.0"/>
  </node>
  <node id="115672" label="zzz2027" cy:nodeId="1702">
    <graphics x="-916.4235363793114" y="2436.967692530001" z="0.0"/>
  </node>
  <node id="115671" label="zzz2026" cy:nodeId="1703">
    <graphics x="-1037.4235363793114" y="2436.967692530001" z="0.0"/>
  </node>
  <node id="115670" label="zzz2025" cy:nodeId="1704">
    <graphics x="-1158.4235363793114" y="2436.967692530001" z="0.0"/>
  </node>
  <node id="115669" label="zzz2024" cy:nodeId="1705">
    <graphics x="-1279.4235363793114" y="2436.967692530001" z="0.0"/>
  </node>
  <node id="115668" label="zzz2023" cy:nodeId="1706">
    <graphics x="-2354.4235363793114" y="473.96769253000093" z="0.0"/>
  </node>
  <node id="115667" label="zzz2022" cy:nodeId="1707">
    <graphics x="-1400.4235363793114" y="2436.967692530001" z="0.0"/>
  </node>
  <node id="115666" label="zzz2021" cy:nodeId="1708">
    <graphics x="-1521.4235363793114" y="2436.967692530001" z="0.0"/>
  </node>
  <node id="115665" label="zzz2020" cy:nodeId="1709">
    <graphics x="-2151.4235363793114" y="-204.03230746999907" z="0.0"/>
  </node>
  <node id="115664" label="zzz2019" cy:nodeId="1710">
    <graphics x="-2302.4235363793114" y="853.9676925300009" z="0.0"/>
  </node>
  <node id="115663" label="zzz2018" cy:nodeId="1711">
    <graphics x="-1642.4235363793114" y="2436.967692530001" z="0.0"/>
  </node>
  <node id="115662" label="zzz2017" cy:nodeId="1712">
    <graphics x="-1310.4235363793114" y="2107.967692530001" z="0.0"/>
  </node>
  <node id="115661" label="zzz2016" cy:nodeId="1713">
    <graphics x="-1885.4235363793114" y="-756.0323074699991" z="0.0"/>
  </node>
  <node id="115660" label="zzz2015" cy:nodeId="1714">
    <graphics x="1592.5764636206886" y="1446.967692530001" z="0.0"/>
  </node>
  <node id="115659" label="zzz2014" cy:nodeId="1715">
    <graphics x="-2056.4235363793114" y="1395.967692530001" z="0.0"/>
  </node>
  <node id="115658" label="zzz2013" cy:nodeId="1716">
    <graphics x="2998.5764636206886" y="1098.967692530001" z="0.0"/>
  </node>
  <node id="115657" label="zzz2012" cy:nodeId="1717">
    <graphics x="458.5764636206886" y="914.9676925300009" z="0.0"/>
  </node>
  <node id="115656" label="zzz2011" cy:nodeId="1718">
    <graphics x="-1763.4235363793114" y="2436.967692530001" z="0.0"/>
  </node>
  <node id="115655" label="zzz2010" cy:nodeId="1719">
    <graphics x="-1884.4235363793114" y="2436.967692530001" z="0.0"/>
  </node>
  <node id="115654" label="zzz2009" cy:nodeId="1720">
    <graphics x="-2005.4235363793114" y="2436.967692530001" z="0.0"/>
  </node>
  <node id="115653" label="zzz2008" cy:nodeId="1721">
    <graphics x="-2126.4235363793114" y="2436.967692530001" z="0.0"/>
  </node>
  <node id="115652" label="zzz2007" cy:nodeId="1722">
    <graphics x="2446.5764636206886" y="-3031.032307469999" z="0.0"/>
  </node>
  <node id="115651" label="zzz2006" cy:nodeId="1723">
    <graphics x="2001.5764636206886" y="-666.0323074699991" z="0.0"/>
  </node>
  <node id="115650" label="zzz2005" cy:nodeId="1724">
    <graphics x="1883.5764636206886" y="-888.0323074699991" z="0.0"/>
  </node>
  <node id="115649" label="zzz2004" cy:nodeId="1725">
    <graphics x="-1974.4235363793114" y="387.96769253000093" z="0.0"/>
  </node>
  <node id="115648" label="zzz2003" cy:nodeId="1726">
    <graphics x="-2247.4235363793114" y="2436.967692530001" z="0.0"/>
  </node>
  <node id="115647" label="zzz2002" cy:nodeId="1727">
    <graphics x="1284.5764636206886" y="-965.0323074699991" z="0.0"/>
  </node>
  <node id="115646" label="zzz2001" cy:nodeId="1728">
    <graphics x="-2453.4235363793114" y="-593.0323074699991" z="0.0"/>
  </node>
  <node id="115645" label="zzz2000" cy:nodeId="1729">
    <graphics x="1799.5764636206886" y="-816.0323074699991" z="0.0"/>
  </node>
  <node id="115644" label="zzz1999" cy:nodeId="1730">
    <graphics x="1913.5764636206886" y="-818.0323074699991" z="0.0"/>
  </node>
  <node id="115643" label="zzz1998" cy:nodeId="1731">
    <graphics x="1885.5764636206886" y="-924.0323074699991" z="0.0"/>
  </node>
  <node id="115642" label="zzz1997" cy:nodeId="1732">
    <graphics x="1828.5764636206886" y="-620.0323074699991" z="0.0"/>
  </node>
  <node id="115641" label="zzz1996" cy:nodeId="1733">
    <graphics x="1709.5764636206886" y="-619.0323074699991" z="0.0"/>
  </node>
  <node id="115640" label="zzz1995" cy:nodeId="1734">
    <graphics x="1774.5764636206886" y="-968.0323074699991" z="0.0"/>
  </node>
  <node id="115639" label="zzz1994" cy:nodeId="1735">
    <graphics x="747.5764636206886" y="136.96769253000093" z="0.0"/>
  </node>
  <node id="115638" label="zzz1993" cy:nodeId="1736">
    <graphics x="1784.5764636206886" y="-422.03230746999907" z="0.0"/>
  </node>
  <node id="115637" label="zzz1992" cy:nodeId="1737">
    <graphics x="409.5764636206886" y="863.9676925300009" z="0.0"/>
  </node>
  <node id="115636" label="zzz1991" cy:nodeId="1738">
    <graphics x="1944.5764636206886" y="-1011.0323074699991" z="0.0"/>
  </node>
  <node id="115635" label="zzz1990" cy:nodeId="1739">
    <graphics x="-2368.4235363793114" y="2436.967692530001" z="0.0"/>
  </node>
  <node id="115634" label="zzz1989" cy:nodeId="1740">
    <graphics x="1735.5764636206886" y="-693.0323074699991" z="0.0"/>
  </node>
  <node id="115633" label="zzz1988" cy:nodeId="1741">
    <graphics x="1776.5764636206886" y="-656.0323074699991" z="0.0"/>
  </node>
  <node id="115632" label="zzz1987" cy:nodeId="1742">
    <graphics x="-2315.4235363793114" y="1838.967692530001" z="0.0"/>
  </node>
  <node id="115631" label="zzz1986" cy:nodeId="1743">
    <graphics x="2138.5764636206886" y="-2286.032307469999" z="0.0"/>
  </node>
  <node id="115630" label="zzz1985" cy:nodeId="1744">
    <graphics x="-519.4235363793114" y="671.9676925300009" z="0.0"/>
  </node>
  <node id="115629" label="zzz1984" cy:nodeId="1745">
    <graphics x="-395.4235363793114" y="611.9676925300009" z="0.0"/>
  </node>
  <node id="115628" label="zzz1983" cy:nodeId="1746">
    <graphics x="-671.4235363793114" y="509.96769253000093" z="0.0"/>
  </node>
  <node id="115627" label="zzz1982" cy:nodeId="1747">
    <graphics x="-844.4235363793114" y="380.96769253000093" z="0.0"/>
  </node>
  <node id="115626" label="zzz1981" cy:nodeId="1748">
    <graphics x="-497.4235363793114" y="202.96769253000093" z="0.0"/>
  </node>
  <node id="115625" label="zzz1980" cy:nodeId="1749">
    <graphics x="-592.4235363793114" y="312.96769253000093" z="0.0"/>
  </node>
  <node id="115624" label="zzz1979" cy:nodeId="1750">
    <graphics x="-542.4235363793114" y="166.96769253000093" z="0.0"/>
  </node>
  <node id="115623" label="zzz1978" cy:nodeId="1751">
    <graphics x="-793.4235363793114" y="325.96769253000093" z="0.0"/>
  </node>
  <node id="115622" label="zzz1977" cy:nodeId="1752">
    <graphics x="-613.4235363793114" y="593.9676925300009" z="0.0"/>
  </node>
  <node id="115621" label="zzz1976" cy:nodeId="1753">
    <graphics x="-383.4235363793114" y="192.96769253000093" z="0.0"/>
  </node>
  <node id="115620" label="zzz1975" cy:nodeId="1754">
    <graphics x="-352.4235363793114" y="397.96769253000093" z="0.0"/>
  </node>
  <node id="115619" label="zzz1974" cy:nodeId="1755">
    <graphics x="-723.4235363793114" y="277.96769253000093" z="0.0"/>
  </node>
  <node id="115618" label="zzz1973" cy:nodeId="1756">
    <graphics x="-251.42353637931137" y="360.96769253000093" z="0.0"/>
  </node>
  <node id="115617" label="zzz1972" cy:nodeId="1757">
    <graphics x="-283.4235363793114" y="530.9676925300009" z="0.0"/>
  </node>
  <node id="115616" label="zzz1971" cy:nodeId="1758">
    <graphics x="-443.4235363793114" y="381.96769253000093" z="0.0"/>
  </node>
  <node id="115615" label="zzz1970" cy:nodeId="1759">
    <graphics x="-331.4235363793114" y="461.96769253000093" z="0.0"/>
  </node>
  <node id="115614" label="zzz1969" cy:nodeId="1760">
    <graphics x="-312.4235363793114" y="264.96769253000093" z="0.0"/>
  </node>
  <node id="115613" label="zzz1968" cy:nodeId="1761">
    <graphics x="-447.4235363793114" y="541.9676925300009" z="0.0"/>
  </node>
  <node id="115612" label="zzz1967" cy:nodeId="1762">
    <graphics x="-489.4235363793114" y="469.96769253000093" z="0.0"/>
  </node>
  <node id="115611" label="zzz1966" cy:nodeId="1763">
    <graphics x="-454.4235363793114" y="156.96769253000093" z="0.0"/>
  </node>
  <node id="115610" label="zzz1965" cy:nodeId="1764">
    <graphics x="-605.4235363793114" y="100.96769253000093" z="0.0"/>
  </node>
  <node id="115609" label="zzz1964" cy:nodeId="1765">
    <graphics x="-371.4235363793114" y="525.9676925300009" z="0.0"/>
  </node>
  <node id="115608" label="zzz1963" cy:nodeId="1766">
    <graphics x="-586.4235363793114" y="354.96769253000093" z="0.0"/>
  </node>
  <node id="115607" label="zzz1962" cy:nodeId="1767">
    <graphics x="-276.4235363793114" y="404.96769253000093" z="0.0"/>
  </node>
  <node id="115606" label="zzz1961" cy:nodeId="1768">
    <graphics x="-451.4235363793114" y="309.96769253000093" z="0.0"/>
  </node>
  <node id="115605" label="zzz1960" cy:nodeId="1769">
    <graphics x="-650.4235363793114" y="136.96769253000093" z="0.0"/>
  </node>
  <node id="115604" label="zzz1959" cy:nodeId="1770">
    <graphics x="-821.4235363793114" y="489.96769253000093" z="0.0"/>
  </node>
  <node id="115603" label="zzz1958" cy:nodeId="1771">
    <graphics x="-647.4235363793114" y="274.96769253000093" z="0.0"/>
  </node>
  <node id="115602" label="zzz1957" cy:nodeId="1772">
    <graphics x="-595.4235363793114" y="649.9676925300009" z="0.0"/>
  </node>
  <node id="115601" label="zzz1956" cy:nodeId="1773">
    <graphics x="-497.4235363793114" y="629.9676925300009" z="0.0"/>
  </node>
  <node id="115600" label="zzz1955" cy:nodeId="1774">
    <graphics x="-635.4235363793114" y="551.9676925300009" z="0.0"/>
  </node>
  <node id="115599" label="zzz1954" cy:nodeId="1775">
    <graphics x="-655.4235363793114" y="395.96769253000093" z="0.0"/>
  </node>
  <node id="115598" label="zzz1953" cy:nodeId="1776">
    <graphics x="-571.4235363793114" y="274.96769253000093" z="0.0"/>
  </node>
  <node id="115597" label="zzz1952" cy:nodeId="1777">
    <graphics x="-482.4235363793114" y="505.96769253000093" z="0.0"/>
  </node>
  <node id="115596" label="zzz1951" cy:nodeId="1778">
    <graphics x="-749.4235363793114" y="525.9676925300009" z="0.0"/>
  </node>
  <node id="115595" label="zzz1950" cy:nodeId="1779">
    <graphics x="-694.4235363793114" y="210.96769253000093" z="0.0"/>
  </node>
  <node id="115594" label="zzz1949" cy:nodeId="1780">
    <graphics x="-483.4235363793114" y="273.96769253000093" z="0.0"/>
  </node>
  <node id="115593" label="zzz1948" cy:nodeId="1781">
    <graphics x="-603.4235363793114" y="238.96769253000093" z="0.0"/>
  </node>
  <node id="115592" label="zzz1947" cy:nodeId="1782">
    <graphics x="-743.4235363793114" y="613.9676925300009" z="0.0"/>
  </node>
  <node id="115591" label="zzz1946" cy:nodeId="1783">
    <graphics x="-685.4235363793114" y="661.9676925300009" z="0.0"/>
  </node>
  <node id="115590" label="zzz1945" cy:nodeId="1784">
    <graphics x="-2489.4235363793114" y="2436.967692530001" z="0.0"/>
  </node>
  <node id="115589" label="zzz1944" cy:nodeId="1785">
    <graphics x="1287.5764636206886" y="853.9676925300009" z="0.0"/>
  </node>
  <node id="115588" label="zzz1943" cy:nodeId="1786">
    <graphics x="-778.4235363793114" y="-642.0323074699991" z="0.0"/>
  </node>
  <node id="115587" label="zzz1942" cy:nodeId="1787">
    <graphics x="2491.5764636206886" y="954.9676925300009" z="0.0"/>
  </node>
  <node id="115586" label="zzz1941" cy:nodeId="1788">
    <graphics x="470.5764636206886" y="1927.967692530001" z="0.0"/>
  </node>
  <node id="115585" label="zzz1940" cy:nodeId="1789">
    <graphics x="3378.5764636206886" y="1832.967692530001" z="0.0"/>
  </node>
  <node id="115584" label="zzz1939" cy:nodeId="1790">
    <graphics x="3457.5764636206886" y="1844.967692530001" z="0.0"/>
  </node>
  <node id="115583" label="zzz1938" cy:nodeId="1791">
    <graphics x="1901.5764636206886" y="-2388.032307469999" z="0.0"/>
  </node>
  <node id="115582" label="zzz1937" cy:nodeId="1792">
    <graphics x="3439.5764636206886" y="2355.967692530001" z="0.0"/>
  </node>
  <node id="115581" label="zzz1936" cy:nodeId="1793">
    <graphics x="460.5764636206886" y="986.9676925300009" z="0.0"/>
  </node>
  <node id="115580" label="zzz1935" cy:nodeId="1794">
    <graphics x="471.5764636206886" y="1067.967692530001" z="0.0"/>
  </node>
  <node id="115579" label="zzz1934" cy:nodeId="1795">
    <graphics x="570.5764636206886" y="1026.967692530001" z="0.0"/>
  </node>
  <node id="115578" label="zzz1933" cy:nodeId="1796">
    <graphics x="409.5764636206886" y="1103.967692530001" z="0.0"/>
  </node>
  <node id="115577" label="zzz1932" cy:nodeId="1797">
    <graphics x="494.5764636206886" y="1031.967692530001" z="0.0"/>
  </node>
  <node id="115576" label="zzz1931" cy:nodeId="1798">
    <graphics x="560.5764636206886" y="946.9676925300009" z="0.0"/>
  </node>
  <node id="115575" label="zzz1930" cy:nodeId="1799">
    <graphics x="2361.5764636206886" y="988.9676925300009" z="0.0"/>
  </node>
  <node id="115574" label="zzz1929" cy:nodeId="1800">
    <graphics x="2285.5764636206886" y="982.9676925300009" z="0.0"/>
  </node>
  <node id="115573" label="zzz1928" cy:nodeId="1801">
    <graphics x="2314.5764636206886" y="907.9676925300009" z="0.0"/>
  </node>
  <node id="115572" label="zzz1927" cy:nodeId="1802">
    <graphics x="2290.5764636206886" y="945.9676925300009" z="0.0"/>
  </node>
  <node id="115571" label="zzz1926" cy:nodeId="1803">
    <graphics x="2238.5764636206886" y="904.9676925300009" z="0.0"/>
  </node>
  <node id="115570" label="zzz1925" cy:nodeId="1804">
    <graphics x="-2208.4235363793114" y="247.96769253000093" z="0.0"/>
  </node>
  <node id="115569" label="zzz1924" cy:nodeId="1805">
    <graphics x="-2127.4235363793114" y="253.96769253000093" z="0.0"/>
  </node>
  <node id="115568" label="zzz1923" cy:nodeId="1806">
    <graphics x="-2351.4235363793114" y="170.96769253000093" z="0.0"/>
  </node>
  <node id="115567" label="zzz1922" cy:nodeId="1807">
    <graphics x="-2161.4235363793114" y="211.96769253000093" z="0.0"/>
  </node>
  <node id="115566" label="zzz1921" cy:nodeId="1808">
    <graphics x="2165.5764636206886" y="-1986.032307469999" z="0.0"/>
  </node>
  <node id="115565" label="zzz1920" cy:nodeId="1809">
    <graphics x="2252.5764636206886" y="-2021.032307469999" z="0.0"/>
  </node>
  <node id="115564" label="zzz1919" cy:nodeId="1810">
    <graphics x="3318.5764636206886" y="2355.967692530001" z="0.0"/>
  </node>
  <node id="115563" label="zzz1918" cy:nodeId="1811">
    <graphics x="716.5764636206886" y="2267.967692530001" z="0.0"/>
  </node>
  <node id="115562" label="zzz1917" cy:nodeId="1812">
    <graphics x="718.5764636206886" y="2188.967692530001" z="0.0"/>
  </node>
  <node id="115561" label="zzz1916" cy:nodeId="1813">
    <graphics x="-2366.4235363793114" y="2273.967692530001" z="0.0"/>
  </node>
  <node id="115560" label="zzz1915" cy:nodeId="1814">
    <graphics x="-2120.4235363793114" y="457.96769253000093" z="0.0"/>
  </node>
  <node id="115559" label="zzz1914" cy:nodeId="1815">
    <graphics x="3197.5764636206886" y="2355.967692530001" z="0.0"/>
  </node>
  <node id="115558" label="zzz1913" cy:nodeId="1816">
    <graphics x="-557.4235363793114" y="2037.967692530001" z="0.0"/>
  </node>
  <node id="115557" label="zzz1912" cy:nodeId="1817">
    <graphics x="-465.4235363793114" y="2014.967692530001" z="0.0"/>
  </node>
  <node id="115556" label="zzz1911" cy:nodeId="1818">
    <graphics x="-494.4235363793114" y="2106.967692530001" z="0.0"/>
  </node>
  <node id="115555" label="zzz1910" cy:nodeId="1819">
    <graphics x="-1910.4235363793114" y="567.9676925300009" z="0.0"/>
  </node>
  <node id="115554" label="zzz1909" cy:nodeId="1820">
    <graphics x="-2289.4235363793114" y="532.9676925300009" z="0.0"/>
  </node>
  <node id="115553" label="zzz1908" cy:nodeId="1821">
    <graphics x="-2294.4235363793114" y="1128.967692530001" z="0.0"/>
  </node>
  <node id="115552" label="zzz1907" cy:nodeId="1822">
    <graphics x="-2484.4235363793114" y="918.9676925300009" z="0.0"/>
  </node>
  <node id="115551" label="zzz1906" cy:nodeId="1823">
    <graphics x="-2189.4235363793114" y="992.9676925300009" z="0.0"/>
  </node>
  <node id="115550" label="zzz1905" cy:nodeId="1824">
    <graphics x="-2325.4235363793114" y="1092.967692530001" z="0.0"/>
  </node>
  <node id="115549" label="zzz1904" cy:nodeId="1825">
    <graphics x="-1442.4235363793114" y="2107.967692530001" z="0.0"/>
  </node>
  <node id="115548" label="zzz1903" cy:nodeId="1826">
    <graphics x="-1464.4235363793114" y="2014.967692530001" z="0.0"/>
  </node>
  <node id="115547" label="zzz1902" cy:nodeId="1827">
    <graphics x="-2150.4235363793114" y="-430.03230746999907" z="0.0"/>
  </node>
  <node id="115546" label="zzz1901" cy:nodeId="1828">
    <graphics x="-1980.4235363793114" y="-333.03230746999907" z="0.0"/>
  </node>
  <node id="115545" label="zzz1900" cy:nodeId="1829">
    <graphics x="-2030.4235363793114" y="-258.03230746999907" z="0.0"/>
  </node>
  <node id="115544" label="zzz1899" cy:nodeId="1830">
    <graphics x="-1535.4235363793114" y="-129.03230746999907" z="0.0"/>
  </node>
  <node id="115543" label="zzz1898" cy:nodeId="1831">
    <graphics x="-1511.4235363793114" y="-165.03230746999907" z="0.0"/>
  </node>
  <node id="115542" label="zzz1897" cy:nodeId="1832">
    <graphics x="942.5764636206886" y="1352.967692530001" z="0.0"/>
  </node>
  <node id="115541" label="zzz1896" cy:nodeId="1833">
    <graphics x="907.5764636206886" y="1283.967692530001" z="0.0"/>
  </node>
  <node id="115540" label="zzz1895" cy:nodeId="1834">
    <graphics x="1011.5764636206886" y="1420.967692530001" z="0.0"/>
  </node>
  <node id="115539" label="zzz1894" cy:nodeId="1835">
    <graphics x="931.5764636206886" y="1388.967692530001" z="0.0"/>
  </node>
  <node id="115538" label="zzz1893" cy:nodeId="1836">
    <graphics x="848.5764636206886" y="1370.967692530001" z="0.0"/>
  </node>
  <node id="115537" label="zzz1892" cy:nodeId="1837">
    <graphics x="1008.5764636206886" y="1311.967692530001" z="0.0"/>
  </node>
  <node id="115536" label="zzz1891" cy:nodeId="1838">
    <graphics x="910.5764636206886" y="1457.967692530001" z="0.0"/>
  </node>
  <node id="115535" label="zzz1890" cy:nodeId="1839">
    <graphics x="-707.4235363793114" y="984.9676925300009" z="0.0"/>
  </node>
  <node id="115534" label="zzz1889" cy:nodeId="1840">
    <graphics x="-748.4235363793114" y="1134.967692530001" z="0.0"/>
  </node>
  <node id="115533" label="zzz1888" cy:nodeId="1841">
    <graphics x="-718.4235363793114" y="889.9676925300009" z="0.0"/>
  </node>
  <node id="115532" label="zzz1887" cy:nodeId="1842">
    <graphics x="-821.4235363793114" y="908.9676925300009" z="0.0"/>
  </node>
  <node id="115531" label="zzz1886" cy:nodeId="1843">
    <graphics x="3076.5764636206886" y="2355.967692530001" z="0.0"/>
  </node>
  <node id="115530" label="zzz1885" cy:nodeId="1844">
    <graphics x="-1544.4235363793114" y="-428.03230746999907" z="0.0"/>
  </node>
  <node id="115529" label="zzz1884" cy:nodeId="1845">
    <graphics x="-1567.4235363793114" y="-504.03230746999907" z="0.0"/>
  </node>
  <node id="115528" label="zzz1883" cy:nodeId="1846">
    <graphics x="-1612.4235363793114" y="-468.03230746999907" z="0.0"/>
  </node>
  <node id="115527" label="zzz1882" cy:nodeId="1847">
    <graphics x="-1625.4235363793114" y="-589.0323074699991" z="0.0"/>
  </node>
  <node id="115526" label="zzz1881" cy:nodeId="1848">
    <graphics x="-1577.4235363793114" y="-389.03230746999907" z="0.0"/>
  </node>
  <node id="115525" label="zzz1880" cy:nodeId="1849">
    <graphics x="-149.42353637931137" y="1721.967692530001" z="0.0"/>
  </node>
  <node id="115524" label="zzz1879" cy:nodeId="1850">
    <graphics x="-213.42353637931137" y="1602.967692530001" z="0.0"/>
  </node>
  <node id="115523" label="zzz1878" cy:nodeId="1851">
    <graphics x="-241.42353637931137" y="1697.967692530001" z="0.0"/>
  </node>
  <node id="115522" label="zzz1877" cy:nodeId="1852">
    <graphics x="-123.42353637931137" y="1625.967692530001" z="0.0"/>
  </node>
  <node id="115521" label="zzz1876" cy:nodeId="1853">
    <graphics x="-184.42353637931137" y="1661.967692530001" z="0.0"/>
  </node>
  <node id="115520" label="zzz1875" cy:nodeId="1854">
    <graphics x="-1970.4235363793114" y="655.9676925300009" z="0.0"/>
  </node>
  <node id="115519" label="zzz1874" cy:nodeId="1855">
    <graphics x="-1979.4235363793114" y="691.9676925300009" z="0.0"/>
  </node>
  <node id="115518" label="zzz1873" cy:nodeId="1856">
    <graphics x="-1910.4235363793114" y="531.9676925300009" z="0.0"/>
  </node>
  <node id="115517" label="zzz1872" cy:nodeId="1857">
    <graphics x="-322.4235363793114" y="1928.967692530001" z="0.0"/>
  </node>
  <node id="115516" label="zzz1871" cy:nodeId="1858">
    <graphics x="-323.4235363793114" y="1832.967692530001" z="0.0"/>
  </node>
  <node id="115515" label="zzz1870" cy:nodeId="1859">
    <graphics x="2223.5764636206886" y="-951.0323074699991" z="0.0"/>
  </node>
  <node id="115514" label="zzz1869" cy:nodeId="1860">
    <graphics x="2150.5764636206886" y="-1117.032307469999" z="0.0"/>
  </node>
  <node id="115513" label="zzz1868" cy:nodeId="1861">
    <graphics x="2260.5764636206886" y="-1030.032307469999" z="0.0"/>
  </node>
  <node id="115512" label="zzz1867" cy:nodeId="1862">
    <graphics x="-1886.4235363793114" y="-575.0323074699991" z="0.0"/>
  </node>
  <node id="115511" label="zzz1866" cy:nodeId="1863">
    <graphics x="-1923.4235363793114" y="-683.0323074699991" z="0.0"/>
  </node>
  <node id="115510" label="zzz1865" cy:nodeId="1864">
    <graphics x="-1918.4235363793114" y="-498.03230746999907" z="0.0"/>
  </node>
  <node id="115509" label="zzz1864" cy:nodeId="1865">
    <graphics x="-1896.4235363793114" y="-426.03230746999907" z="0.0"/>
  </node>
  <node id="115508" label="zzz1863" cy:nodeId="1866">
    <graphics x="2955.5764636206886" y="2355.967692530001" z="0.0"/>
  </node>
  <node id="115507" label="zzz1862" cy:nodeId="1867">
    <graphics x="546.5764636206886" y="206.96769253000093" z="0.0"/>
  </node>
  <node id="115506" label="zzz1861" cy:nodeId="1868">
    <graphics x="-70.42353637931137" y="1832.967692530001" z="0.0"/>
  </node>
  <node id="115505" label="zzz1860" cy:nodeId="1869">
    <graphics x="5.576463620688628" y="1888.967692530001" z="0.0"/>
  </node>
  <node id="115504" label="zzz1859" cy:nodeId="1870">
    <graphics x="-189.42353637931137" y="2270.967692530001" z="0.0"/>
  </node>
  <node id="115503" label="zzz1858" cy:nodeId="1871">
    <graphics x="2834.5764636206886" y="2355.967692530001" z="0.0"/>
  </node>
  <node id="115502" label="zzz1857" cy:nodeId="1872">
    <graphics x="1408.5764636206886" y="1655.967692530001" z="0.0"/>
  </node>
  <node id="115501" label="zzz1856" cy:nodeId="1873">
    <graphics x="1523.5764636206886" y="1661.967692530001" z="0.0"/>
  </node>
  <node id="115500" label="zzz1855" cy:nodeId="1874">
    <graphics x="1468.5764636206886" y="1602.967692530001" z="0.0"/>
  </node>
  <node id="115499" label="zzz1854" cy:nodeId="1875">
    <graphics x="1462.5764636206886" y="1715.967692530001" z="0.0"/>
  </node>
  <node id="115498" label="zzz1853" cy:nodeId="1876">
    <graphics x="1943.5764636206886" y="2025.967692530001" z="0.0"/>
  </node>
  <node id="115497" label="zzz1852" cy:nodeId="1877">
    <graphics x="2036.5764636206886" y="2014.967692530001" z="0.0"/>
  </node>
  <node id="115496" label="zzz1851" cy:nodeId="1878">
    <graphics x="1998.5764636206886" y="2102.967692530001" z="0.0"/>
  </node>
  <node id="115495" label="zzz1850" cy:nodeId="1879">
    <graphics x="-2413.4235363793114" y="1677.967692530001" z="0.0"/>
  </node>
  <node id="115494" label="zzz1849" cy:nodeId="1880">
    <graphics x="-2401.4235363793114" y="1602.967692530001" z="0.0"/>
  </node>
  <node id="115493" label="zzz1848" cy:nodeId="1881">
    <graphics x="-2489.4235363793114" y="1666.967692530001" z="0.0"/>
  </node>
  <node id="115492" label="zzz1847" cy:nodeId="1882">
    <graphics x="-2337.4235363793114" y="1689.967692530001" z="0.0"/>
  </node>
  <node id="115491" label="zzz1846" cy:nodeId="1883">
    <graphics x="-2424.4235363793114" y="1751.967692530001" z="0.0"/>
  </node>
  <node id="115490" label="zzz1845" cy:nodeId="1884">
    <graphics x="2713.5764636206886" y="2355.967692530001" z="0.0"/>
  </node>
  <node id="115489" label="zzz1844" cy:nodeId="1885">
    <graphics x="2592.5764636206886" y="2355.967692530001" z="0.0"/>
  </node>
  <node id="115488" label="zzz1843" cy:nodeId="1886">
    <graphics x="1124.5764636206886" y="2105.967692530001" z="0.0"/>
  </node>
  <node id="115487" label="zzz1842" cy:nodeId="1887">
    <graphics x="1143.5764636206886" y="2014.967692530001" z="0.0"/>
  </node>
  <node id="115486" label="zzz1841" cy:nodeId="1888">
    <graphics x="1214.5764636206886" y="2075.967692530001" z="0.0"/>
  </node>
  <node id="115485" label="zzz1840" cy:nodeId="1889">
    <graphics x="3170.5764636206886" y="-862.0323074699991" z="0.0"/>
  </node>
  <node id="115484" label="zzz1839" cy:nodeId="1890">
    <graphics x="3249.5764636206886" y="-775.0323074699991" z="0.0"/>
  </node>
  <node id="115483" label="zzz1838" cy:nodeId="1891">
    <graphics x="3146.5764636206886" y="-826.0323074699991" z="0.0"/>
  </node>
  <node id="115482" label="zzz1837" cy:nodeId="1892">
    <graphics x="3104.5764636206886" y="-680.0323074699991" z="0.0"/>
  </node>
  <node id="115481" label="zzz1836" cy:nodeId="1893">
    <graphics x="-1670.4235363793114" y="2193.967692530001" z="0.0"/>
  </node>
  <node id="115480" label="zzz1835" cy:nodeId="1894">
    <graphics x="-1576.4235363793114" y="2188.967692530001" z="0.0"/>
  </node>
  <node id="115479" label="zzz1834" cy:nodeId="1895">
    <graphics x="-1617.4235363793114" y="2273.967692530001" z="0.0"/>
  </node>
  <node id="115478" label="zzz1833" cy:nodeId="1896">
    <graphics x="1281.5764636206886" y="-2440.032307469999" z="0.0"/>
  </node>
  <node id="115477" label="zzz1832" cy:nodeId="1897">
    <graphics x="1386.5764636206886" y="-2481.032307469999" z="0.0"/>
  </node>
  <node id="115476" label="zzz1831" cy:nodeId="1898">
    <graphics x="1168.5764636206886" y="-2366.032307469999" z="0.0"/>
  </node>
  <node id="115475" label="zzz1830" cy:nodeId="1899">
    <graphics x="1120.5764636206886" y="1927.967692530001" z="0.0"/>
  </node>
  <node id="115474" label="zzz1829" cy:nodeId="1900">
    <graphics x="1123.5764636206886" y="1832.967692530001" z="0.0"/>
  </node>
  <node id="115473" label="zzz1828" cy:nodeId="1901">
    <graphics x="-951.4235363793114" y="1928.967692530001" z="0.0"/>
  </node>
  <node id="115472" label="zzz1827" cy:nodeId="1902">
    <graphics x="-961.4235363793114" y="1832.967692530001" z="0.0"/>
  </node>
  <node id="115471" label="zzz1826" cy:nodeId="1903">
    <graphics x="489.5764636206886" y="853.9676925300009" z="0.0"/>
  </node>
  <node id="115470" label="zzz1825" cy:nodeId="1904">
    <graphics x="3125.5764636206886" y="-935.0323074699991" z="0.0"/>
  </node>
  <node id="115469" label="zzz1824" cy:nodeId="1905">
    <graphics x="-810.4235363793114" y="866.9676925300009" z="0.0"/>
  </node>
  <node id="115468" label="zzz1823" cy:nodeId="1906">
    <graphics x="1294.5764636206886" y="346.96769253000093" z="0.0"/>
  </node>
  <node id="115467" label="zzz1822" cy:nodeId="1907">
    <graphics x="1244.5764636206886" y="422.96769253000093" z="0.0"/>
  </node>
  <node id="115466" label="zzz1821" cy:nodeId="1908">
    <graphics x="-2114.4235363793114" y="-240.03230746999907" z="0.0"/>
  </node>
  <node id="115465" label="zzz1820" cy:nodeId="1909">
    <graphics x="2471.5764636206886" y="2355.967692530001" z="0.0"/>
  </node>
  <node id="115464" label="zzz1819" cy:nodeId="1910">
    <graphics x="2085.5764636206886" y="1872.967692530001" z="0.0"/>
  </node>
  <node id="115463" label="zzz1818" cy:nodeId="1911">
    <graphics x="-706.4235363793114" y="1669.967692530001" z="0.0"/>
  </node>
  <node id="115462" label="zzz1817" cy:nodeId="1912">
    <graphics x="-782.4235363793114" y="1687.967692530001" z="0.0"/>
  </node>
  <node id="115461" label="zzz1816" cy:nodeId="1913">
    <graphics x="-740.4235363793114" y="1602.967692530001" z="0.0"/>
  </node>
  <node id="115460" label="zzz1815" cy:nodeId="1914">
    <graphics x="-652.4235363793114" y="1633.967692530001" z="0.0"/>
  </node>
  <node id="115459" label="zzz1814" cy:nodeId="1915">
    <graphics x="-692.4235363793114" y="1726.967692530001" z="0.0"/>
  </node>
  <node id="115458" label="zzz1813" cy:nodeId="1916">
    <graphics x="-1649.4235363793114" y="2107.967692530001" z="0.0"/>
  </node>
  <node id="115457" label="zzz1812" cy:nodeId="1917">
    <graphics x="-1585.4235363793114" y="2014.967692530001" z="0.0"/>
  </node>
  <node id="115456" label="zzz1811" cy:nodeId="1918">
    <graphics x="-1423.0411729861942" y="1390.2850646155357" z="0.0"/>
  </node>
  <node id="115455" label="zzz1810" cy:nodeId="1919">
    <graphics x="-2136.4235363793114" y="529.9676925300009" z="0.0"/>
  </node>
  <node id="115454" label="zzz1809" cy:nodeId="1920">
    <graphics x="-2070.4235363793114" y="685.9676925300009" z="0.0"/>
  </node>
  <node id="115453" label="zzz1808" cy:nodeId="1921">
    <graphics x="-1922.4235363793114" y="434.96769253000093" z="0.0"/>
  </node>
  <node id="115452" label="zzz1807" cy:nodeId="1922">
    <graphics x="-2110.4235363793114" y="421.96769253000093" z="0.0"/>
  </node>
  <node id="115451" label="zzz1806" cy:nodeId="1923">
    <graphics x="-1565.4235363793114" y="1738.967692530001" z="0.0"/>
  </node>
  <node id="115450" label="zzz1805" cy:nodeId="1924">
    <graphics x="-1607.4235363793114" y="1687.967692530001" z="0.0"/>
  </node>
  <node id="115449" label="zzz1804" cy:nodeId="1925">
    <graphics x="-1630.4235363793114" y="1602.967692530001" z="0.0"/>
  </node>
  <node id="115448" label="zzz1803" cy:nodeId="1926">
    <graphics x="-1536.4235363793114" y="1639.967692530001" z="0.0"/>
  </node>
  <node id="115447" label="zzz1802" cy:nodeId="1927">
    <graphics x="-1683.4235363793114" y="1698.967692530001" z="0.0"/>
  </node>
  <node id="115446" label="zzz1801" cy:nodeId="1928">
    <graphics x="-1820.4235363793114" y="-792.0323074699991" z="0.0"/>
  </node>
  <node id="115445" label="zzz1800" cy:nodeId="1929">
    <graphics x="-1660.4235363793114" y="-697.0323074699991" z="0.0"/>
  </node>
  <node id="115444" label="zzz1799" cy:nodeId="1930">
    <graphics x="-2484.4235363793114" y="543.9676925300009" z="0.0"/>
  </node>
  <node id="115443" label="zzz1798" cy:nodeId="1931">
    <graphics x="-2273.4235363793114" y="618.9676925300009" z="0.0"/>
  </node>
  <node id="115442" label="zzz1797" cy:nodeId="1932">
    <graphics x="-2199.4235363793114" y="173.96769253000093" z="0.0"/>
  </node>
  <node id="115441" label="zzz1796" cy:nodeId="1933">
    <graphics x="-2471.4235363793114" y="594.9676925300009" z="0.0"/>
  </node>
  <node id="115440" label="zzz1795" cy:nodeId="1934">
    <graphics x="-2342.4235363793114" y="351.96769253000093" z="0.0"/>
  </node>
  <node id="115439" label="zzz1794" cy:nodeId="1935">
    <graphics x="-2378.4235363793114" y="516.9676925300009" z="0.0"/>
  </node>
  <node id="115438" label="zzz1793" cy:nodeId="1936">
    <graphics x="2350.5764636206886" y="2355.967692530001" z="0.0"/>
  </node>
  <node id="115437" label="zzz1792" cy:nodeId="1937">
    <graphics x="-1709.4235363793114" y="-481.03230746999907" z="0.0"/>
  </node>
  <node id="115436" label="zzz1791" cy:nodeId="1938">
    <graphics x="-1768.4235363793114" y="-576.0323074699991" z="0.0"/>
  </node>
  <node id="115435" label="zzz1790" cy:nodeId="1939">
    <graphics x="-1920.4235363793114" y="-534.0323074699991" z="0.0"/>
  </node>
  <node id="115434" label="zzz1789" cy:nodeId="1940">
    <graphics x="-1830.4235363793114" y="-612.0323074699991" z="0.0"/>
  </node>
  <node id="115433" label="zzz1788" cy:nodeId="1941">
    <graphics x="-1817.4235363793114" y="-648.0323074699991" z="0.0"/>
  </node>
  <node id="115432" label="zzz1787" cy:nodeId="1942">
    <graphics x="-1700.4235363793114" y="-337.03230746999907" z="0.0"/>
  </node>
  <node id="115431" label="zzz1786" cy:nodeId="1943">
    <graphics x="-669.4235363793114" y="2271.967692530001" z="0.0"/>
  </node>
  <node id="115430" label="zzz1785" cy:nodeId="1944">
    <graphics x="-773.4235363793114" y="2188.967692530001" z="0.0"/>
  </node>
  <node id="115429" label="zzz1784" cy:nodeId="1945">
    <graphics x="-1961.4235363793114" y="-740.0323074699991" z="0.0"/>
  </node>
  <node id="115428" label="zzz1783" cy:nodeId="1946">
    <graphics x="2229.5764636206886" y="2355.967692530001" z="0.0"/>
  </node>
  <node id="115427" label="zzz1782" cy:nodeId="1947">
    <graphics x="-2.423536379311372" y="1662.967692530001" z="0.0"/>
  </node>
  <node id="115426" label="zzz1781" cy:nodeId="1948">
    <graphics x="112.57646362068863" y="1658.967692530001" z="0.0"/>
  </node>
  <node id="115425" label="zzz1780" cy:nodeId="1949">
    <graphics x="2645.5764636206886" y="-946.0323074699991" z="0.0"/>
  </node>
  <node id="115424" label="zzz1779" cy:nodeId="1950">
    <graphics x="2586.5764636206886" y="-879.0323074699991" z="0.0"/>
  </node>
  <node id="115423" label="zzz1778" cy:nodeId="1951">
    <graphics x="-571.4235363793114" y="-667.0323074699991" z="0.0"/>
  </node>
  <node id="115422" label="zzz1777" cy:nodeId="1952">
    <graphics x="-770.4235363793114" y="-726.0323074699991" z="0.0"/>
  </node>
  <node id="115421" label="zzz1776" cy:nodeId="1953">
    <graphics x="-781.4235363793114" y="-689.0323074699991" z="0.0"/>
  </node>
  <node id="115420" label="zzz1775" cy:nodeId="1954">
    <graphics x="1172.5764636206886" y="1666.967692530001" z="0.0"/>
  </node>
  <node id="115419" label="zzz1774" cy:nodeId="1955">
    <graphics x="1237.5764636206886" y="1715.967692530001" z="0.0"/>
  </node>
  <node id="115418" label="zzz1773" cy:nodeId="1956">
    <graphics x="1222.5764636206886" y="1602.967692530001" z="0.0"/>
  </node>
  <node id="115417" label="zzz1772" cy:nodeId="1957">
    <graphics x="1287.5764636206886" y="1650.967692530001" z="0.0"/>
  </node>
  <node id="115416" label="zzz1771" cy:nodeId="1958">
    <graphics x="742.5764636206886" y="1927.967692530001" z="0.0"/>
  </node>
  <node id="115415" label="zzz1770" cy:nodeId="1959">
    <graphics x="750.5764636206886" y="1832.967692530001" z="0.0"/>
  </node>
  <node id="115414" label="zzz1769" cy:nodeId="1960">
    <graphics x="-1905.4235363793114" y="263.96769253000093" z="0.0"/>
  </node>
  <node id="115413" label="zzz1768" cy:nodeId="1961">
    <graphics x="691.5764636206886" y="924.9676925300009" z="0.0"/>
  </node>
  <node id="115412" label="zzz1767" cy:nodeId="1962">
    <graphics x="820.5764636206886" y="1012.9676925300009" z="0.0"/>
  </node>
  <node id="115411" label="zzz1766" cy:nodeId="1963">
    <graphics x="928.5764636206886" y="1079.967692530001" z="0.0"/>
  </node>
  <node id="115410" label="zzz1765" cy:nodeId="1964">
    <graphics x="810.5764636206886" y="976.9676925300009" z="0.0"/>
  </node>
  <node id="115409" label="zzz1764" cy:nodeId="1965">
    <graphics x="1893.5764636206886" y="-962.0323074699991" z="0.0"/>
  </node>
  <node id="115408" label="zzz1763" cy:nodeId="1966">
    <graphics x="2351.5764636206886" y="-2427.032307469999" z="0.0"/>
  </node>
  <node id="115407" label="zzz1762" cy:nodeId="1967">
    <graphics x="-598.4235363793114" y="-898.0323074699991" z="0.0"/>
  </node>
  <node id="115406" label="zzz1761" cy:nodeId="1968">
    <graphics x="-548.4235363793114" y="-944.0323074699991" z="0.0"/>
  </node>
  <node id="115405" label="zzz1760" cy:nodeId="1969">
    <graphics x="3357.5764636206886" y="1602.967692530001" z="0.0"/>
  </node>
  <node id="115404" label="zzz1759" cy:nodeId="1970">
    <graphics x="1476.5764636206886" y="2104.967692530001" z="0.0"/>
  </node>
  <node id="115403" label="zzz1758" cy:nodeId="1971">
    <graphics x="1485.5764636206886" y="2014.967692530001" z="0.0"/>
  </node>
  <node id="115402" label="zzz1757" cy:nodeId="1972">
    <graphics x="2108.5764636206886" y="2355.967692530001" z="0.0"/>
  </node>
  <node id="115401" label="zzz1756" cy:nodeId="1973">
    <graphics x="2249.5764636206886" y="-2528.032307469999" z="0.0"/>
  </node>
  <node id="115400" label="zzz1755" cy:nodeId="1974">
    <graphics x="705.5764636206886" y="282.96769253000093" z="0.0"/>
  </node>
  <node id="115399" label="zzz1754" cy:nodeId="1975">
    <graphics x="628.5764636206886" y="400.96769253000093" z="0.0"/>
  </node>
  <node id="115398" label="zzz1753" cy:nodeId="1976">
    <graphics x="782.5764636206886" y="306.96769253000093" z="0.0"/>
  </node>
  <node id="115397" label="zzz1752" cy:nodeId="1977">
    <graphics x="2828.5764636206886" y="1602.967692530001" z="0.0"/>
  </node>
  <node id="115396" label="zzz1751" cy:nodeId="1978">
    <graphics x="2873.5764636206886" y="1709.967692530001" z="0.0"/>
  </node>
  <node id="115395" label="zzz1750" cy:nodeId="1979">
    <graphics x="2904.5764636206886" y="1631.967692530001" z="0.0"/>
  </node>
  <node id="115394" label="zzz1749" cy:nodeId="1980">
    <graphics x="-2356.4235363793114" y="959.9676925300009" z="0.0"/>
  </node>
  <node id="115393" label="zzz1748" cy:nodeId="1981">
    <graphics x="-2375.4235363793114" y="1202.967692530001" z="0.0"/>
  </node>
  <node id="115392" label="zzz1747" cy:nodeId="1982">
    <graphics x="-2469.4235363793114" y="1097.967692530001" z="0.0"/>
  </node>
  <node id="115391" label="zzz1746" cy:nodeId="1983">
    <graphics x="-2213.4235363793114" y="956.9676925300009" z="0.0"/>
  </node>
  <node id="115390" label="zzz1745" cy:nodeId="1984">
    <graphics x="2368.5764636206886" y="-2323.032307469999" z="0.0"/>
  </node>
  <node id="115389" label="zzz1744" cy:nodeId="1985">
    <graphics x="2267.5764636206886" y="-2366.032307469999" z="0.0"/>
  </node>
  <node id="115388" label="zzz1743" cy:nodeId="1986">
    <graphics x="2274.5764636206886" y="-2321.032307469999" z="0.0"/>
  </node>
  <node id="115387" label="zzz1742" cy:nodeId="1987">
    <graphics x="2230.5764636206886" y="-2402.032307469999" z="0.0"/>
  </node>
  <node id="115386" label="zzz1741" cy:nodeId="1988">
    <graphics x="2214.5764636206886" y="-2442.032307469999" z="0.0"/>
  </node>
  <node id="115385" label="zzz1740" cy:nodeId="1989">
    <graphics x="2123.5764636206886" y="-2358.032307469999" z="0.0"/>
  </node>
  <node id="115384" label="zzz1739" cy:nodeId="1990">
    <graphics x="2066.5764636206886" y="-2405.032307469999" z="0.0"/>
  </node>
  <node id="115383" label="zzz1738" cy:nodeId="1991">
    <graphics x="1440.5764636206886" y="1832.967692530001" z="0.0"/>
  </node>
  <node id="115382" label="zzz1737" cy:nodeId="1992">
    <graphics x="-1075.4235363793114" y="886.9676925300009" z="0.0"/>
  </node>
  <node id="115381" label="zzz1736" cy:nodeId="1993">
    <graphics x="-1055.4235363793114" y="1008.9676925300009" z="0.0"/>
  </node>
  <node id="115380" label="zzz1735" cy:nodeId="1994">
    <graphics x="-1079.4235363793114" y="1044.967692530001" z="0.0"/>
  </node>
  <node id="115379" label="zzz1734" cy:nodeId="1995">
    <graphics x="-1097.4235363793114" y="922.9676925300009" z="0.0"/>
  </node>
  <node id="115378" label="zzz1733" cy:nodeId="1996">
    <graphics x="-1014.4235363793114" y="955.9676925300009" z="0.0"/>
  </node>
  <node id="115377" label="zzz1732" cy:nodeId="1997">
    <graphics x="622.5764636206886" y="210.96769253000093" z="0.0"/>
  </node>
  <node id="115376" label="zzz1731" cy:nodeId="1998">
    <graphics x="749.5764636206886" y="390.96769253000093" z="0.0"/>
  </node>
  <node id="115375" label="zzz1730" cy:nodeId="1999">
    <graphics x="666.5764636206886" y="246.96769253000093" z="0.0"/>
  </node>
  <node id="115374" label="zzz1729" cy:nodeId="2000">
    <graphics x="581.5764636206886" y="364.96769253000093" z="0.0"/>
  </node>
  <node id="115373" label="zzz1728" cy:nodeId="2001">
    <graphics x="3014.5764636206886" y="-757.0323074699991" z="0.0"/>
  </node>
  <node id="115372" label="zzz1727" cy:nodeId="2002">
    <graphics x="2928.5764636206886" y="-743.0323074699991" z="0.0"/>
  </node>
  <node id="115371" label="zzz1726" cy:nodeId="2003">
    <graphics x="3127.5764636206886" y="-788.0323074699991" z="0.0"/>
  </node>
  <node id="115370" label="zzz1725" cy:nodeId="2004">
    <graphics x="3049.5764636206886" y="-860.0323074699991" z="0.0"/>
  </node>
  <node id="115369" label="zzz1724" cy:nodeId="2005">
    <graphics x="-715.4235363793114" y="-563.0323074699991" z="0.0"/>
  </node>
  <node id="115368" label="zzz1723" cy:nodeId="2006">
    <graphics x="-725.4235363793114" y="-599.0323074699991" z="0.0"/>
  </node>
  <node id="115367" label="zzz1722" cy:nodeId="2007">
    <graphics x="-621.4235363793114" y="-563.0323074699991" z="0.0"/>
  </node>
  <node id="115366" label="zzz1721" cy:nodeId="2008">
    <graphics x="-620.4235363793114" y="-599.0323074699991" z="0.0"/>
  </node>
  <node id="115365" label="zzz1720" cy:nodeId="2009">
    <graphics x="-669.4235363793114" y="-671.0323074699991" z="0.0"/>
  </node>
  <node id="115364" label="zzz1719" cy:nodeId="2010">
    <graphics x="1987.5764636206886" y="2355.967692530001" z="0.0"/>
  </node>
  <node id="115363" label="zzz1718" cy:nodeId="2011">
    <graphics x="3007.5764636206886" y="-685.0323074699991" z="0.0"/>
  </node>
  <node id="115362" label="zzz1717" cy:nodeId="2012">
    <graphics x="3199.5764636206886" y="-655.0323074699991" z="0.0"/>
  </node>
  <node id="115361" label="zzz1716" cy:nodeId="2013">
    <graphics x="3085.5764636206886" y="-644.0323074699991" z="0.0"/>
  </node>
  <node id="115360" label="zzz1715" cy:nodeId="2014">
    <graphics x="3045.5764636206886" y="-558.0323074699991" z="0.0"/>
  </node>
  <node id="115359" label="zzz1714" cy:nodeId="2015">
    <graphics x="3055.5764636206886" y="-594.0323074699991" z="0.0"/>
  </node>
  <node id="115358" label="zzz1713" cy:nodeId="2016">
    <graphics x="27.576463620688628" y="2188.967692530001" z="0.0"/>
  </node>
  <node id="115357" label="zzz1712" cy:nodeId="2017">
    <graphics x="-23.423536379311372" y="2270.967692530001" z="0.0"/>
  </node>
  <node id="115356" label="zzz1711" cy:nodeId="2018">
    <graphics x="-68.42353637931137" y="2188.967692530001" z="0.0"/>
  </node>
  <node id="115355" label="zzz1710" cy:nodeId="2019">
    <graphics x="2991.5764636206886" y="-467.03230746999907" z="0.0"/>
  </node>
  <node id="115354" label="zzz1709" cy:nodeId="2020">
    <graphics x="3032.5764636206886" y="-503.03230746999907" z="0.0"/>
  </node>
  <node id="115353" label="zzz1708" cy:nodeId="2021">
    <graphics x="3123.5764636206886" y="-466.03230746999907" z="0.0"/>
  </node>
  <node id="115352" label="zzz1707" cy:nodeId="2022">
    <graphics x="-2035.4235363793114" y="586.9676925300009" z="0.0"/>
  </node>
  <node id="115351" label="zzz1706" cy:nodeId="2023">
    <graphics x="-2106.4235363793114" y="637.9676925300009" z="0.0"/>
  </node>
  <node id="115350" label="zzz1705" cy:nodeId="2024">
    <graphics x="-2093.4235363793114" y="760.9676925300009" z="0.0"/>
  </node>
  <node id="115349" label="zzz1704" cy:nodeId="2025">
    <graphics x="2932.5764636206886" y="-829.0323074699991" z="0.0"/>
  </node>
  <node id="115348" label="zzz1703" cy:nodeId="2026">
    <graphics x="2895.5764636206886" y="-707.0323074699991" z="0.0"/>
  </node>
  <node id="115347" label="zzz1702" cy:nodeId="2027">
    <graphics x="2971.5764636206886" y="-793.0323074699991" z="0.0"/>
  </node>
  <node id="115346" label="zzz1701" cy:nodeId="2028">
    <graphics x="-800.4235363793114" y="2107.967692530001" z="0.0"/>
  </node>
  <node id="115345" label="zzz1700" cy:nodeId="2029">
    <graphics x="-803.4235363793114" y="2014.967692530001" z="0.0"/>
  </node>
  <node id="115344" label="zzz1699" cy:nodeId="2030">
    <graphics x="1866.5764636206886" y="2355.967692530001" z="0.0"/>
  </node>
  <node id="115343" label="zzz1698" cy:nodeId="2031">
    <graphics x="348.5764636206886" y="1654.967692530001" z="0.0"/>
  </node>
  <node id="115342" label="zzz1697" cy:nodeId="2032">
    <graphics x="1745.5764636206886" y="2355.967692530001" z="0.0"/>
  </node>
  <node id="115341" label="zzz1696" cy:nodeId="2033">
    <graphics x="-2050.4235363793114" y="359.96769253000093" z="0.0"/>
  </node>
  <node id="115340" label="zzz1695" cy:nodeId="2034">
    <graphics x="1545.5764636206886" y="853.9676925300009" z="0.0"/>
  </node>
  <node id="115339" label="zzz1694" cy:nodeId="2035">
    <graphics x="-1368.4235363793114" y="1928.967692530001" z="0.0"/>
  </node>
  <node id="115338" label="zzz1693" cy:nodeId="2036">
    <graphics x="-1558.4235363793114" y="-545.0323074699991" z="0.0"/>
  </node>
  <node id="115337" label="zzz1692" cy:nodeId="2037">
    <graphics x="1148.5764636206886" y="100.96769253000093" z="0.0"/>
  </node>
  <node id="115336" label="zzz1691" cy:nodeId="2038">
    <graphics x="-2191.4235363793114" y="303.96769253000093" z="0.0"/>
  </node>
  <node id="115335" label="zzz1690" cy:nodeId="2039">
    <graphics x="1624.5764636206886" y="2355.967692530001" z="0.0"/>
  </node>
  <node id="115334" label="zzz1689" cy:nodeId="2040">
    <graphics x="-1184.4235363793114" y="853.9676925300009" z="0.0"/>
  </node>
  <node id="115333" label="zzz1688" cy:nodeId="2041">
    <graphics x="-2383.4235363793114" y="315.96769253000093" z="0.0"/>
  </node>
  <node id="115332" label="zzz1687" cy:nodeId="2042">
    <graphics x="1110.5764636206886" y="-2242.032307469999" z="0.0"/>
  </node>
  <node id="115331" label="zzz1686" cy:nodeId="2043">
    <graphics x="2521.5764636206886" y="-2046.032307469999" z="0.0"/>
  </node>
  <node id="115330" label="zzz1685" cy:nodeId="2044">
    <graphics x="-1998.4235363793114" y="-578.0323074699991" z="0.0"/>
  </node>
  <node id="115329" label="zzz1684" cy:nodeId="2045">
    <graphics x="-1947.4235363793114" y="-647.0323074699991" z="0.0"/>
  </node>
  <node id="115328" label="zzz1683" cy:nodeId="2046">
    <graphics x="-2231.4235363793114" y="700.9676925300009" z="0.0"/>
  </node>
  <node id="115327" label="zzz1682" cy:nodeId="2047">
    <graphics x="1206.5764636206886" y="378.96769253000093" z="0.0"/>
  </node>
  <node id="115326" label="zzz1681" cy:nodeId="2048">
    <graphics x="-567.4235363793114" y="1004.9676925300009" z="0.0"/>
  </node>
  <node id="115325" label="zzz1680" cy:nodeId="2049">
    <graphics x="-2196.4235363793114" y="565.9676925300009" z="0.0"/>
  </node>
  <node id="115324" label="zzz1679" cy:nodeId="2050">
    <graphics x="1503.5764636206886" y="2355.967692530001" z="0.0"/>
  </node>
  <node id="115323" label="zzz1678" cy:nodeId="2051">
    <graphics x="-1484.4235363793114" y="1496.6024367010705" z="0.0"/>
  </node>
  <node id="115322" label="zzz1677" cy:nodeId="2052">
    <graphics x="-1571.4235363793114" y="1929.967692530001" z="0.0"/>
  </node>
  <node id="115321" label="zzz1676" cy:nodeId="2053">
    <graphics x="1382.5764636206886" y="2355.967692530001" z="0.0"/>
  </node>
  <node id="115320" label="zzz1675" cy:nodeId="2054">
    <graphics x="1261.5764636206886" y="2355.967692530001" z="0.0"/>
  </node>
  <node id="115319" label="zzz1674" cy:nodeId="2055">
    <graphics x="1140.5764636206886" y="2355.967692530001" z="0.0"/>
  </node>
  <node id="115318" label="zzz1673" cy:nodeId="2056">
    <graphics x="1019.5764636206886" y="2355.967692530001" z="0.0"/>
  </node>
  <node id="115317" label="zzz1672" cy:nodeId="2057">
    <graphics x="2933.5764636206886" y="-865.0323074699991" z="0.0"/>
  </node>
  <node id="115316" label="zzz1671" cy:nodeId="2058">
    <graphics x="2714.5764636206886" y="-646.0323074699991" z="0.0"/>
  </node>
  <node id="115315" label="zzz1670" cy:nodeId="2059">
    <graphics x="2732.5764636206886" y="-706.0323074699991" z="0.0"/>
  </node>
  <node id="115314" label="zzz1669" cy:nodeId="2060">
    <graphics x="-131.42353637931137" y="2077.967692530001" z="0.0"/>
  </node>
  <node id="115313" label="zzz1668" cy:nodeId="2061">
    <graphics x="-60.42353637931137" y="2014.967692530001" z="0.0"/>
  </node>
  <node id="115312" label="zzz1667" cy:nodeId="2062">
    <graphics x="-40.42353637931137" y="2106.967692530001" z="0.0"/>
  </node>
  <node id="115311" label="zzz1666" cy:nodeId="2063">
    <graphics x="309.5764636206886" y="2014.967692530001" z="0.0"/>
  </node>
  <node id="115310" label="zzz1665" cy:nodeId="2064">
    <graphics x="182.57646362068863" y="1475.967692530001" z="0.0"/>
  </node>
  <node id="115309" label="zzz1664" cy:nodeId="2065">
    <graphics x="717.5764636206886" y="1141.967692530001" z="0.0"/>
  </node>
  <node id="115308" label="zzz1663" cy:nodeId="2066">
    <graphics x="2877.5764636206886" y="1445.967692530001" z="0.0"/>
  </node>
  <node id="115307" label="zzz1662" cy:nodeId="2067">
    <graphics x="-492.4235363793114" y="1298.967692530001" z="0.0"/>
  </node>
  <node id="115306" label="zzz1661" cy:nodeId="2068">
    <graphics x="-2218.4235363793114" y="380.96769253000093" z="0.0"/>
  </node>
  <node id="115305" label="zzz1660" cy:nodeId="2069">
    <graphics x="1044.5764636206886" y="2188.967692530001" z="0.0"/>
  </node>
  <node id="115304" label="zzz1659" cy:nodeId="2070">
    <graphics x="898.5764636206886" y="2355.967692530001" z="0.0"/>
  </node>
  <node id="115303" label="zzz1658" cy:nodeId="2071">
    <graphics x="777.5764636206886" y="2355.967692530001" z="0.0"/>
  </node>
  <node id="115302" label="zzz1657" cy:nodeId="2072">
    <graphics x="656.5764636206886" y="2355.967692530001" z="0.0"/>
  </node>
  <node id="115301" label="zzz1656" cy:nodeId="2073">
    <graphics x="-1321.4235363793114" y="2014.967692530001" z="0.0"/>
  </node>
  <node id="115300" label="zzz1655" cy:nodeId="2074">
    <graphics x="-1070.4235363793114" y="1283.967692530001" z="0.0"/>
  </node>
  <node id="115299" label="zzz1654" cy:nodeId="2075">
    <graphics x="-2216.4235363793114" y="-882.0323074699991" z="0.0"/>
  </node>
  <node id="115298" label="zzz1653" cy:nodeId="2076">
    <graphics x="1601.5764636206886" y="1344.967692530001" z="0.0"/>
  </node>
  <node id="115297" label="zzz1652" cy:nodeId="2077">
    <graphics x="535.5764636206886" y="2355.967692530001" z="0.0"/>
  </node>
  <node id="115296" label="zzz1651" cy:nodeId="2078">
    <graphics x="-2363.4235363793114" y="-1024.032307469999" z="0.0"/>
  </node>
  <node id="115295" label="zzz1650" cy:nodeId="2079">
    <graphics x="157.57646362068863" y="853.9676925300009" z="0.0"/>
  </node>
  <node id="115294" label="zzz1649" cy:nodeId="2080">
    <graphics x="3076.5764636206886" y="430.96769253000093" z="0.0"/>
  </node>
  <node id="115293" label="zzz1648" cy:nodeId="2081">
    <graphics x="414.5764636206886" y="2355.967692530001" z="0.0"/>
  </node>
  <node id="115292" label="zzz1647" cy:nodeId="2082">
    <graphics x="293.5764636206886" y="2355.967692530001" z="0.0"/>
  </node>
  <node id="115291" label="zzz1646" cy:nodeId="2083">
    <graphics x="1335.5764636206886" y="2014.967692530001" z="0.0"/>
  </node>
  <node id="115290" label="zzz1645" cy:nodeId="2084">
    <graphics x="54.57646362068863" y="1602.967692530001" z="0.0"/>
  </node>
  <node id="115289" label="zzz1644" cy:nodeId="2085">
    <graphics x="56.57646362068863" y="1717.967692530001" z="0.0"/>
  </node>
  <node id="115288" label="zzz1643" cy:nodeId="2086">
    <graphics x="172.57646362068863" y="2355.967692530001" z="0.0"/>
  </node>
  <node id="115287" label="zzz1642" cy:nodeId="2087">
    <graphics x="-799.4235363793114" y="289.96769253000093" z="0.0"/>
  </node>
  <node id="115286" label="zzz1641" cy:nodeId="2088">
    <graphics x="-574.4235363793114" y="390.96769253000093" z="0.0"/>
  </node>
  <node id="115285" label="zzz1640" cy:nodeId="2089">
    <graphics x="-768.4235363793114" y="156.96769253000093" z="0.0"/>
  </node>
  <node id="115284" label="zzz1639" cy:nodeId="2090">
    <graphics x="-337.4235363793114" y="228.96769253000093" z="0.0"/>
  </node>
  <node id="115283" label="zzz1638" cy:nodeId="2091">
    <graphics x="-421.4235363793114" y="649.9676925300009" z="0.0"/>
  </node>
  <node id="115282" label="zzz1637" cy:nodeId="2092">
    <graphics x="-1572.4235363793114" y="1832.967692530001" z="0.0"/>
  </node>
  <node id="115281" label="zzz1636" cy:nodeId="2093">
    <graphics x="2137.5764636206886" y="-2049.032307469999" z="0.0"/>
  </node>
  <node id="115280" label="zzz1635" cy:nodeId="2094">
    <graphics x="1976.5764636206886" y="-706.0323074699991" z="0.0"/>
  </node>
  <node id="115279" label="zzz1634" cy:nodeId="2095">
    <graphics x="-2267.4235363793114" y="308.96769253000093" z="0.0"/>
  </node>
  <node id="115278" label="zzz1633" cy:nodeId="2096">
    <graphics x="-2121.4235363793114" y="601.9676925300009" z="0.0"/>
  </node>
  <node id="115277" label="zzz1632" cy:nodeId="2097">
    <graphics x="2406.5764636206886" y="-2081.032307469999" z="0.0"/>
  </node>
  <node id="115276" label="zzz1631" cy:nodeId="2098">
    <graphics x="51.57646362068863" y="2355.967692530001" z="0.0"/>
  </node>
  <node id="115275" label="zzz1630" cy:nodeId="2099">
    <graphics x="-69.42353637931137" y="2355.967692530001" z="0.0"/>
  </node>
  <node id="115274" label="zzz1629" cy:nodeId="2100">
    <graphics x="-614.4235363793114" y="1076.967692530001" z="0.0"/>
  </node>
  <node id="115273" label="zzz1628" cy:nodeId="2101">
    <graphics x="2616.576416015625" y="-1089.7460963063093" z="0.0"/>
  </node>
  <node id="115272" label="zzz1627" cy:nodeId="2102">
    <graphics x="-190.42353637931137" y="2355.967692530001" z="0.0"/>
  </node>
  <node id="115271" label="zzz1626" cy:nodeId="2103">
    <graphics x="2810.5764636206886" y="-738.0323074699991" z="0.0"/>
  </node>
  <node id="115270" label="zzz1625" cy:nodeId="2104">
    <graphics x="2107.5764636206886" y="-2441.032307469999" z="0.0"/>
  </node>
  <node id="115269" label="zzz1624" cy:nodeId="2105">
    <graphics x="2713.5764636206886" y="-833.0323074699991" z="0.0"/>
  </node>
  <node id="115268" label="zzz1623" cy:nodeId="2106">
    <graphics x="2273.5764636206886" y="-2057.032307469999" z="0.0"/>
  </node>
  <node id="115267" label="zzz1622" cy:nodeId="2107">
    <graphics x="-311.4235363793114" y="2355.967692530001" z="0.0"/>
  </node>
  <node id="115266" label="zzz1621" cy:nodeId="2108">
    <graphics x="491.5764636206886" y="284.96769253000093" z="0.0"/>
  </node>
  <node id="115265" label="zzz1620" cy:nodeId="2109">
    <graphics x="1492.5764636206886" y="2188.967692530001" z="0.0"/>
  </node>
  <node id="115264" label="zzz1619" cy:nodeId="2110">
    <graphics x="2119.5764636206886" y="-1034.032307469999" z="0.0"/>
  </node>
  <node id="115263" label="zzz1618" cy:nodeId="2111">
    <graphics x="-432.4235363793114" y="2355.967692530001" z="0.0"/>
  </node>
  <node id="115262" label="zzz1617" cy:nodeId="2112">
    <graphics x="-1958.4235363793114" y="-297.03230746999907" z="0.0"/>
  </node>
  <node id="115261" label="zzz1616" cy:nodeId="2113">
    <graphics x="-553.4235363793114" y="2355.967692530001" z="0.0"/>
  </node>
  <node id="115260" label="zzz1615" cy:nodeId="2114">
    <graphics x="2365.5764636206886" y="-910.0323074699991" z="0.0"/>
  </node>
  <node id="115259" label="zzz1614" cy:nodeId="2115">
    <graphics x="-1057.4235363793114" y="273.96769253000093" z="0.0"/>
  </node>
  <node id="115258" label="zzz1613" cy:nodeId="2116">
    <graphics x="-1997.4235363793114" y="546.9676925300009" z="0.0"/>
  </node>
  <node id="115257" label="zzz1612" cy:nodeId="2117">
    <graphics x="-2158.4235363793114" y="493.96769253000093" z="0.0"/>
  </node>
  <node id="115256" label="zzz1611" cy:nodeId="2118">
    <graphics x="-2053.4235363793114" y="215.96769253000093" z="0.0"/>
  </node>
  <node id="115255" label="zzz1610" cy:nodeId="2119">
    <graphics x="-674.4235363793114" y="2355.967692530001" z="0.0"/>
  </node>
  <node id="115254" label="zzz1609" cy:nodeId="2120">
    <graphics x="-1300.27644619996" y="1390.2850646155357" z="0.0"/>
  </node>
  <node id="115253" label="zzz1608" cy:nodeId="2121">
    <graphics x="-1166.4235363793114" y="1305.967692530001" z="0.0"/>
  </node>
  <node id="115252" label="zzz1607" cy:nodeId="2122">
    <graphics x="3098.5764636206886" y="935.9676925300009" z="0.0"/>
  </node>
  <node id="115251" label="zzz1606" cy:nodeId="2123">
    <graphics x="1254.5764636206886" y="134.96769253000093" z="0.0"/>
  </node>
  <node id="115250" label="zzz1605" cy:nodeId="2124">
    <graphics x="-795.4235363793114" y="2355.967692530001" z="0.0"/>
  </node>
  <node id="115249" label="zzz1604" cy:nodeId="2125">
    <graphics x="996.5764636206886" y="1832.967692530001" z="0.0"/>
  </node>
  <node id="115248" label="zzz1603" cy:nodeId="2126">
    <graphics x="-2201.4235363793114" y="1133.967692530001" z="0.0"/>
  </node>
  <node id="115247" label="zzz1602" cy:nodeId="2127">
    <graphics x="2491.5764636206886" y="1832.967692530001" z="0.0"/>
  </node>
  <node id="115246" label="zzz1601" cy:nodeId="2128">
    <graphics x="2210.5764636206886" y="1449.967692530001" z="0.0"/>
  </node>
  <node id="115245" label="zzz1600" cy:nodeId="2129">
    <graphics x="1606.576416015625" y="1109.7211161831742" z="0.0"/>
  </node>
  <node id="115244" label="zzz1599" cy:nodeId="2130">
    <graphics x="-1872.4235363793114" y="1184.967692530001" z="0.0"/>
  </node>
  <node id="115243" label="zzz1598" cy:nodeId="2131">
    <graphics x="135.57646362068863" y="1151.967692530001" z="0.0"/>
  </node>
  <node id="115242" label="zzz1597" cy:nodeId="2132">
    <graphics x="228.57646362068863" y="1091.967692530001" z="0.0"/>
  </node>
  <node id="115241" label="zzz1596" cy:nodeId="2133">
    <graphics x="362.5764636206886" y="902.9676925300009" z="0.0"/>
  </node>
  <node id="115240" label="zzz1595" cy:nodeId="2134">
    <graphics x="378.5764636206886" y="1019.9676925300009" z="0.0"/>
  </node>
  <node id="115239" label="zzz1594" cy:nodeId="2135">
    <graphics x="2486.5764636206886" y="-966.0323074699991" z="0.0"/>
  </node>
  <node id="115238" label="zzz1593" cy:nodeId="2136">
    <graphics x="488.5764636206886" y="1832.967692530001" z="0.0"/>
  </node>
  <node id="115237" label="zzz1592" cy:nodeId="2137">
    <graphics x="-916.4235363793114" y="2355.967692530001" z="0.0"/>
  </node>
  <node id="115236" label="zzz1591" cy:nodeId="2138">
    <graphics x="2475.5764636206886" y="853.9676925300009" z="0.0"/>
  </node>
  <node id="115235" label="zzz1590" cy:nodeId="2139">
    <graphics x="3444.5764636206886" y="1925.967692530001" z="0.0"/>
  </node>
  <node id="115234" label="zzz1589" cy:nodeId="2140">
    <graphics x="3364.5764636206886" y="1910.967692530001" z="0.0"/>
  </node>
  <node id="115233" label="zzz1588" cy:nodeId="2141">
    <graphics x="-1730.4235363793114" y="-1045.032307469999" z="0.0"/>
  </node>
  <node id="115232" label="zzz1587" cy:nodeId="2142">
    <graphics x="-1913.4235363793114" y="-611.0323074699991" z="0.0"/>
  </node>
  <node id="115231" label="zzz1586" cy:nodeId="2143">
    <graphics x="-1833.4235363793114" y="-503.03230746999907" z="0.0"/>
  </node>
  <node id="115230" label="zzz1585" cy:nodeId="2144">
    <graphics x="-2240.4235363793114" y="488.96769253000093" z="0.0"/>
  </node>
  <node id="115229" label="zzz1584" cy:nodeId="2145">
    <graphics x="-2012.4235363793114" y="251.96769253000093" z="0.0"/>
  </node>
  <node id="115228" label="zzz1583" cy:nodeId="2146">
    <graphics x="-1037.4235363793114" y="2355.967692530001" z="0.0"/>
  </node>
  <node id="115227" label="zzz1582" cy:nodeId="2147">
    <graphics x="-12.423536379311372" y="890.9676925300009" z="0.0"/>
  </node>
  <node id="115226" label="zzz1581" cy:nodeId="2148">
    <graphics x="-1158.4235363793114" y="2355.967692530001" z="0.0"/>
  </node>
  <node id="115225" label="zzz1580" cy:nodeId="2149">
    <graphics x="2276.5764636206886" y="-3162.032307469999" z="0.0"/>
  </node>
  <node id="115224" label="zzz1579" cy:nodeId="2150">
    <graphics x="-2258.4235363793114" y="736.9676925300009" z="0.0"/>
  </node>
  <node id="115223" label="zzz1578" cy:nodeId="2151">
    <graphics x="-2489.4235363793114" y="2274.967692530001" z="0.0"/>
  </node>
  <node id="115222" label="zzz1577" cy:nodeId="2152">
    <graphics x="2869.5764636206886" y="1832.967692530001" z="0.0"/>
  </node>
  <node id="115221" label="zzz1576" cy:nodeId="2153">
    <graphics x="-1279.4235363793114" y="2355.967692530001" z="0.0"/>
  </node>
  <node id="115220" label="zzz1575" cy:nodeId="2154">
    <graphics x="-1400.4235363793114" y="2355.967692530001" z="0.0"/>
  </node>
  <node id="115219" label="zzz1574" cy:nodeId="2155">
    <graphics x="2515.5764636206886" y="-3196.032307469999" z="0.0"/>
  </node>
  <node id="115218" label="zzz1573" cy:nodeId="2156">
    <graphics x="-2408.4235363793114" y="552.9676925300009" z="0.0"/>
  </node>
  <node id="115217" label="zzz1572" cy:nodeId="2157">
    <graphics x="-1521.4235363793114" y="2355.967692530001" z="0.0"/>
  </node>
  <node id="115216" label="zzz1571" cy:nodeId="2158">
    <graphics x="-1642.4235363793114" y="2355.967692530001" z="0.0"/>
  </node>
  <node id="115215" label="zzz1570" cy:nodeId="2159">
    <graphics x="-1763.4235363793114" y="2355.967692530001" z="0.0"/>
  </node>
  <node id="115214" label="zzz1569" cy:nodeId="2160">
    <graphics x="-1884.4235363793114" y="2355.967692530001" z="0.0"/>
  </node>
  <node id="115213" label="zzz1568" cy:nodeId="2161">
    <graphics x="-2005.4235363793114" y="2355.967692530001" z="0.0"/>
  </node>
  <node id="115212" label="zzz1567" cy:nodeId="2162">
    <graphics x="-2126.4235363793114" y="2355.967692530001" z="0.0"/>
  </node>
  <node id="115211" label="zzz1566" cy:nodeId="2163">
    <graphics x="2386.5764636206886" y="-3311.032307469999" z="0.0"/>
  </node>
  <node id="115210" label="zzz1565" cy:nodeId="2164">
    <graphics x="-2487.4235363793114" y="2188.967692530001" z="0.0"/>
  </node>
  <node id="115209" label="zzz1564" cy:nodeId="2165">
    <graphics x="-2247.4235363793114" y="2355.967692530001" z="0.0"/>
  </node>
  <node id="115208" label="zzz1563" cy:nodeId="2166">
    <graphics x="342.5764636206886" y="1320.967692530001" z="0.0"/>
  </node>
  <node id="115207" label="zzz1562" cy:nodeId="2167">
    <graphics x="-2368.4235363793114" y="2355.967692530001" z="0.0"/>
  </node>
  <node id="115206" label="zzz1561" cy:nodeId="2168">
    <graphics x="2146.5764636206886" y="1602.967692530001" z="0.0"/>
  </node>
  <node id="115205" label="zzz1560" cy:nodeId="2169">
    <graphics x="2109.5764636206886" y="1674.967692530001" z="0.0"/>
  </node>
  <node id="115204" label="zzz1559" cy:nodeId="2170">
    <graphics x="-64.42353637931137" y="-862.0323074699991" z="0.0"/>
  </node>
  <node id="115203" label="zzz1558" cy:nodeId="2171">
    <graphics x="-42.42353637931137" y="-938.0323074699991" z="0.0"/>
  </node>
  <node id="115202" label="zzz1557" cy:nodeId="2172">
    <graphics x="-85.42353637931137" y="-902.0323074699991" z="0.0"/>
  </node>
  <node id="115201" label="zzz1556" cy:nodeId="2173">
    <graphics x="2181.5764636206886" y="1711.967692530001" z="0.0"/>
  </node>
  <node id="115200" label="zzz1555" cy:nodeId="2174">
    <graphics x="3472.5764636206886" y="2014.967692530001" z="0.0"/>
  </node>
  <node id="115199" label="zzz1554" cy:nodeId="2175">
    <graphics x="1924.5764636206886" y="429.96769253000093" z="0.0"/>
  </node>
  <node id="115198" label="zzz1553" cy:nodeId="2176">
    <graphics x="2256.5764636206886" y="384.96769253000093" z="0.0"/>
  </node>
  <node id="115197" label="zzz1552" cy:nodeId="2177">
    <graphics x="2302.5764636206886" y="283.96769253000093" z="0.0"/>
  </node>
  <node id="115196" label="zzz1551" cy:nodeId="2178">
    <graphics x="3030.5764636206886" y="1707.967692530001" z="0.0"/>
  </node>
  <node id="115195" label="zzz1550" cy:nodeId="2179">
    <graphics x="3025.5764636206886" y="1602.967692530001" z="0.0"/>
  </node>
  <node id="115194" label="zzz1549" cy:nodeId="2180">
    <graphics x="-2489.4235363793114" y="2355.967692530001" z="0.0"/>
  </node>
  <node id="115193" label="zzz1548" cy:nodeId="2181">
    <graphics x="-285.4235363793114" y="2269.967692530001" z="0.0"/>
  </node>
  <node id="115192" label="zzz1547" cy:nodeId="2182">
    <graphics x="594.5764636206886" y="1458.967692530001" z="0.0"/>
  </node>
  <node id="115191" label="zzz1546" cy:nodeId="2183">
    <graphics x="-1964.4235363793114" y="-369.03230746999907" z="0.0"/>
  </node>
  <node id="115190" label="zzz1545" cy:nodeId="2184">
    <graphics x="-79.42353637931137" y="1927.967692530001" z="0.0"/>
  </node>
  <node id="115189" label="zzz1544" cy:nodeId="2185">
    <graphics x="2008.5764636206886" y="1926.967692530001" z="0.0"/>
  </node>
  <node id="115188" label="zzz1543" cy:nodeId="2186">
    <graphics x="1457.5764636206886" y="1926.967692530001" z="0.0"/>
  </node>
  <node id="115187" label="zzz1542" cy:nodeId="2187">
    <graphics x="3428.5764636206886" y="2269.967692530001" z="0.0"/>
  </node>
  <node id="115186" label="zzz1541" cy:nodeId="2188">
    <graphics x="542.5764636206886" y="910.9676925300009" z="0.0"/>
  </node>
  <node id="115185" label="zzz1540" cy:nodeId="2189">
    <graphics x="-2301.4235363793114" y="-575.0323074699991" z="0.0"/>
  </node>
  <node id="115184" label="zzz1539" cy:nodeId="2190">
    <graphics x="3207.5764636206886" y="-728.0323074699991" z="0.0"/>
  </node>
  <node id="115183" label="zzz1538" cy:nodeId="2191">
    <graphics x="-1956.4235363793114" y="-462.03230746999907" z="0.0"/>
  </node>
  <node id="115182" label="zzz1537" cy:nodeId="2192">
    <graphics x="501.5764636206886" y="2014.967692530001" z="0.0"/>
  </node>
  <node id="115181" label="zzz1536" cy:nodeId="2193">
    <graphics x="-2343.4235363793114" y="-681.0323074699991" z="0.0"/>
  </node>
  <node id="115180" label="zzz1535" cy:nodeId="2194">
    <graphics x="1086.5764636206886" y="-913.0323074699991" z="0.0"/>
  </node>
  <node id="115179" label="zzz1534" cy:nodeId="2195">
    <graphics x="608.5764636206886" y="1350.967692530001" z="0.0"/>
  </node>
  <node id="115178" label="zzz1533" cy:nodeId="2196">
    <graphics x="3307.5764636206886" y="2269.967692530001" z="0.0"/>
  </node>
  <node id="115177" label="zzz1532" cy:nodeId="2197">
    <graphics x="3186.5764636206886" y="2269.967692530001" z="0.0"/>
  </node>
  <node id="115176" label="zzz1531" cy:nodeId="2198">
    <graphics x="-2237.4235363793114" y="344.96769253000093" z="0.0"/>
  </node>
  <node id="115175" label="zzz1530" cy:nodeId="2199">
    <graphics x="2738.5764636206886" y="-3061.032307469999" z="0.0"/>
  </node>
  <node id="115174" label="zzz1529" cy:nodeId="2200">
    <graphics x="857.5764636206886" y="-836.0323074699991" z="0.0"/>
  </node>
  <node id="115173" label="zzz1528" cy:nodeId="2201">
    <graphics x="-2032.4235363793114" y="-467.03230746999907" z="0.0"/>
  </node>
  <node id="115172" label="zzz1527" cy:nodeId="2202">
    <graphics x="3065.5764636206886" y="2269.967692530001" z="0.0"/>
  </node>
  <node id="115171" label="zzz1526" cy:nodeId="2203">
    <graphics x="2084.5764636206886" y="266.96769253000093" z="0.0"/>
  </node>
  <node id="115170" label="zzz1525" cy:nodeId="2204">
    <graphics x="-1820.4235363793114" y="-431.03230746999907" z="0.0"/>
  </node>
  <node id="115169" label="zzz1524" cy:nodeId="2205">
    <graphics x="892.5764636206886" y="-910.0323074699991" z="0.0"/>
  </node>
  <node id="115168" label="zzz1523" cy:nodeId="2206">
    <graphics x="2944.5764636206886" y="2269.967692530001" z="0.0"/>
  </node>
  <node id="115167" label="zzz1522" cy:nodeId="2207">
    <graphics x="3328.5764636206886" y="-613.0323074699991" z="0.0"/>
  </node>
  <node id="115166" label="zzz1521" cy:nodeId="2208">
    <graphics x="2823.5764636206886" y="2269.967692530001" z="0.0"/>
  </node>
  <node id="115165" label="zzz1520" cy:nodeId="2209">
    <graphics x="-2145.4235363793114" y="-516.0323074699991" z="0.0"/>
  </node>
  <node id="115164" label="zzz1519" cy:nodeId="2210">
    <graphics x="2077.5764636206886" y="172.96769253000093" z="0.0"/>
  </node>
  <node id="115163" label="zzz1518" cy:nodeId="2211">
    <graphics x="2702.5764636206886" y="2269.967692530001" z="0.0"/>
  </node>
  <node id="115162" label="zzz1517" cy:nodeId="2212">
    <graphics x="-2235.4235363793114" y="-499.03230746999907" z="0.0"/>
  </node>
  <node id="115161" label="zzz1516" cy:nodeId="2213">
    <graphics x="-1881.4235363793114" y="-390.03230746999907" z="0.0"/>
  </node>
  <node id="115160" label="zzz1515" cy:nodeId="2214">
    <graphics x="487.5764636206886" y="1348.967692530001" z="0.0"/>
  </node>
  <node id="115159" label="zzz1514" cy:nodeId="2215">
    <graphics x="2581.5764636206886" y="2269.967692530001" z="0.0"/>
  </node>
  <node id="115158" label="zzz1513" cy:nodeId="2216">
    <graphics x="2213.5764636206886" y="1112.967692530001" z="0.0"/>
  </node>
  <node id="115157" label="zzz1512" cy:nodeId="2217">
    <graphics x="2460.5764636206886" y="2269.967692530001" z="0.0"/>
  </node>
  <node id="115156" label="zzz1511" cy:nodeId="2218">
    <graphics x="1835.5764636206886" y="-852.0323074699991" z="0.0"/>
  </node>
  <node id="115155" label="zzz1510" cy:nodeId="2219">
    <graphics x="2339.5764636206886" y="2269.967692530001" z="0.0"/>
  </node>
  <node id="115154" label="zzz1509" cy:nodeId="2220">
    <graphics x="-1651.4235363793114" y="-517.0323074699991" z="0.0"/>
  </node>
  <node id="115153" label="zzz1508" cy:nodeId="2221">
    <graphics x="1284.5764636206886" y="-1117.032307469999" z="0.0"/>
  </node>
  <node id="115152" label="zzz1507" cy:nodeId="2222">
    <graphics x="2218.5764636206886" y="2269.967692530001" z="0.0"/>
  </node>
  <node id="115151" label="zzz1506" cy:nodeId="2223">
    <graphics x="2978.5764636206886" y="-649.0323074699991" z="0.0"/>
  </node>
  <node id="115150" label="zzz1505" cy:nodeId="2224">
    <graphics x="-2028.4235363793114" y="-542.0323074699991" z="0.0"/>
  </node>
  <node id="115149" label="zzz1504" cy:nodeId="2225">
    <graphics x="-1735.4235363793114" y="-517.0323074699991" z="0.0"/>
  </node>
  <node id="115148" label="zzz1503" cy:nodeId="2226">
    <graphics x="3062.5764636206886" y="-896.0323074699991" z="0.0"/>
  </node>
  <node id="115147" label="zzz1502" cy:nodeId="2227">
    <graphics x="3113.5764636206886" y="-716.0323074699991" z="0.0"/>
  </node>
  <node id="115146" label="zzz1501" cy:nodeId="2228">
    <graphics x="133.57646362068863" y="1832.967692530001" z="0.0"/>
  </node>
  <node id="115145" label="zzz1500" cy:nodeId="2229">
    <graphics x="209.57646362068863" y="1886.967692530001" z="0.0"/>
  </node>
  <node id="115144" label="zzz1499" cy:nodeId="2230">
    <graphics x="2097.5764636206886" y="2269.967692530001" z="0.0"/>
  </node>
  <node id="115143" label="zzz1498" cy:nodeId="2231">
    <graphics x="1976.5764636206886" y="2269.967692530001" z="0.0"/>
  </node>
  <node id="115142" label="zzz1497" cy:nodeId="2232">
    <graphics x="1855.5764636206886" y="2269.967692530001" z="0.0"/>
  </node>
  <node id="115141" label="zzz1496" cy:nodeId="2233">
    <graphics x="1734.5764636206886" y="2269.967692530001" z="0.0"/>
  </node>
  <node id="115140" label="zzz1495" cy:nodeId="2234">
    <graphics x="1613.5764636206886" y="2269.967692530001" z="0.0"/>
  </node>
  <node id="115139" label="zzz1494" cy:nodeId="2235">
    <graphics x="3428.5764636206886" y="2188.967692530001" z="0.0"/>
  </node>
  <node id="115138" label="zzz1493" cy:nodeId="2236">
    <graphics x="3307.5764636206886" y="2188.967692530001" z="0.0"/>
  </node>
  <node id="115137" label="zzz1492" cy:nodeId="2237">
    <graphics x="3186.5764636206886" y="2188.967692530001" z="0.0"/>
  </node>
  <node id="115136" label="zzz1491" cy:nodeId="2238">
    <graphics x="2815.5764636206886" y="-834.0323074699991" z="0.0"/>
  </node>
  <node id="115135" label="zzz1490" cy:nodeId="2239">
    <graphics x="-2489.4235363793114" y="1832.967692530001" z="0.0"/>
  </node>
  <node id="115134" label="zzz1489" cy:nodeId="2240">
    <graphics x="-2484.4235363793114" y="1928.967692530001" z="0.0"/>
  </node>
  <node id="115133" label="zzz1488" cy:nodeId="2241">
    <graphics x="-507.4235363793114" y="1406.967692530001" z="0.0"/>
  </node>
  <node id="115132" label="zzz1487" cy:nodeId="2242">
    <graphics x="3065.5764636206886" y="2188.967692530001" z="0.0"/>
  </node>
  <node id="115131" label="zzz1486" cy:nodeId="2243">
    <graphics x="2944.5764636206886" y="2188.967692530001" z="0.0"/>
  </node>
  <node id="115130" label="zzz1485" cy:nodeId="2244">
    <graphics x="1174.8941146963225" y="1072.9676513671875" z="0.0"/>
  </node>
  <node id="115129" label="zzz1484" cy:nodeId="2245">
    <graphics x="2823.5764636206886" y="2188.967692530001" z="0.0"/>
  </node>
  <node id="115128" label="zzz1483" cy:nodeId="2246">
    <graphics x="2702.5764636206886" y="2188.967692530001" z="0.0"/>
  </node>
  <node id="115127" label="zzz1482" cy:nodeId="2247">
    <graphics x="2697.5764636206886" y="-869.0323074699991" z="0.0"/>
  </node>
  <node id="115126" label="zzz1481" cy:nodeId="2248">
    <graphics x="-1890.4235363793114" y="398.96769253000093" z="0.0"/>
  </node>
  <node id="115125" label="zzz1480" cy:nodeId="2249">
    <graphics x="-2166.4235363793114" y="1832.967692530001" z="0.0"/>
  </node>
  <node id="115124" label="zzz1479" cy:nodeId="2250">
    <graphics x="1700.5764636206886" y="2103.967692530001" z="0.0"/>
  </node>
  <node id="115123" label="zzz1478" cy:nodeId="2251">
    <graphics x="1606.5764636206886" y="2086.967692530001" z="0.0"/>
  </node>
  <node id="115122" label="zzz1477" cy:nodeId="2252">
    <graphics x="-1726.4235363793114" y="-445.03230746999907" z="0.0"/>
  </node>
  <node id="115121" label="zzz1476" cy:nodeId="2253">
    <graphics x="2612.5764636206886" y="971.9676925300009" z="0.0"/>
  </node>
  <node id="115120" label="zzz1475" cy:nodeId="2254">
    <graphics x="2801.5764636206886" y="1039.967692530001" z="0.0"/>
  </node>
  <node id="115119" label="zzz1474" cy:nodeId="2255">
    <graphics x="2808.5764636206886" y="1093.967692530001" z="0.0"/>
  </node>
  <node id="115118" label="zzz1473" cy:nodeId="2256">
    <graphics x="2712.5764636206886" y="889.9676925300009" z="0.0"/>
  </node>
  <node id="115117" label="zzz1472" cy:nodeId="2257">
    <graphics x="2581.5764636206886" y="2188.967692530001" z="0.0"/>
  </node>
  <node id="115116" label="zzz1471" cy:nodeId="2258">
    <graphics x="2460.5764636206886" y="2188.967692530001" z="0.0"/>
  </node>
  <node id="115115" label="zzz1470" cy:nodeId="2259">
    <graphics x="-2379.4235363793114" y="387.96769253000093" z="0.0"/>
  </node>
  <node id="115114" label="zzz1469" cy:nodeId="2260">
    <graphics x="1668.5764636206886" y="2014.967692530001" z="0.0"/>
  </node>
  <node id="115113" label="zzz1468" cy:nodeId="2261">
    <graphics x="-1910.4235363793114" y="1365.967692530001" z="0.0"/>
  </node>
  <node id="115112" label="zzz1467" cy:nodeId="2262">
    <graphics x="-2137.4235363793114" y="1390.967692530001" z="0.0"/>
  </node>
  <node id="115111" label="zzz1466" cy:nodeId="2263">
    <graphics x="-1953.4235363793114" y="1303.967692530001" z="0.0"/>
  </node>
  <node id="115110" label="zzz1465" cy:nodeId="2264">
    <graphics x="2801.5764636206886" y="872.9676925300009" z="0.0"/>
  </node>
  <node id="115109" label="zzz1464" cy:nodeId="2265">
    <graphics x="2698.5764636206886" y="1105.967692530001" z="0.0"/>
  </node>
  <node id="115108" label="zzz1463" cy:nodeId="2266">
    <graphics x="-2075.4235363793114" y="1503.967692530001" z="0.0"/>
  </node>
  <node id="115107" label="zzz1462" cy:nodeId="2267">
    <graphics x="1516.5764636206886" y="1416.967692530001" z="0.0"/>
  </node>
  <node id="115106" label="zzz1461" cy:nodeId="2268">
    <graphics x="1483.5764636206886" y="1306.967692530001" z="0.0"/>
  </node>
  <node id="115105" label="zzz1460" cy:nodeId="2269">
    <graphics x="1559.5764636206886" y="1283.967692530001" z="0.0"/>
  </node>
  <node id="115104" label="zzz1459" cy:nodeId="2270">
    <graphics x="1501.5764636206886" y="1454.967692530001" z="0.0"/>
  </node>
  <node id="115103" label="zzz1458" cy:nodeId="2271">
    <graphics x="2349.5764636206886" y="-1961.032307469999" z="0.0"/>
  </node>
  <node id="115102" label="zzz1457" cy:nodeId="2272">
    <graphics x="790.5764636206886" y="2014.967692530001" z="0.0"/>
  </node>
  <node id="115101" label="zzz1456" cy:nodeId="2273">
    <graphics x="2589.5764636206886" y="-811.0323074699991" z="0.0"/>
  </node>
  <node id="115100" label="zzz1455" cy:nodeId="2274">
    <graphics x="405.5764636206886" y="-689.0323074699991" z="0.0"/>
  </node>
  <node id="115099" label="zzz1454" cy:nodeId="2275">
    <graphics x="2339.5764636206886" y="2188.967692530001" z="0.0"/>
  </node>
  <node id="115098" label="zzz1453" cy:nodeId="2276">
    <graphics x="2218.5764636206886" y="2188.967692530001" z="0.0"/>
  </node>
  <node id="115097" label="zzz1452" cy:nodeId="2277">
    <graphics x="2097.5764636206886" y="2188.967692530001" z="0.0"/>
  </node>
  <node id="115096" label="zzz1451" cy:nodeId="2278">
    <graphics x="-2083.4235363793114" y="100.96769253000093" z="0.0"/>
  </node>
  <node id="115095" label="zzz1450" cy:nodeId="2279">
    <graphics x="-1727.4235363793114" y="-265.03230746999907" z="0.0"/>
  </node>
  <node id="115094" label="zzz1449" cy:nodeId="2280">
    <graphics x="-2013.4235363793114" y="450.96769253000093" z="0.0"/>
  </node>
  <node id="115093" label="zzz1448" cy:nodeId="2281">
    <graphics x="1976.5764636206886" y="2188.967692530001" z="0.0"/>
  </node>
  <node id="115092" label="zzz1447" cy:nodeId="2282">
    <graphics x="2165.5764636206886" y="185.96769253000093" z="0.0"/>
  </node>
  <node id="115091" label="zzz1446" cy:nodeId="2283">
    <graphics x="1855.5764636206886" y="2188.967692530001" z="0.0"/>
  </node>
  <node id="115090" label="zzz1445" cy:nodeId="2284">
    <graphics x="3330.5764636206886" y="1283.967692530001" z="0.0"/>
  </node>
  <node id="115089" label="zzz1444" cy:nodeId="2285">
    <graphics x="-399.4235363793114" y="-613.0323074699991" z="0.0"/>
  </node>
  <node id="115088" label="zzz1443" cy:nodeId="2286">
    <graphics x="29.576463620688628" y="-1067.032307469999" z="0.0"/>
  </node>
  <node id="115087" label="zzz1442" cy:nodeId="2287">
    <graphics x="-378.4235363793114" y="-731.0323074699991" z="0.0"/>
  </node>
  <node id="115086" label="zzz1441" cy:nodeId="2288">
    <graphics x="106.57646362068863" y="-995.0323074699991" z="0.0"/>
  </node>
  <node id="115085" label="zzz1440" cy:nodeId="2289">
    <graphics x="177.57646362068863" y="-957.0323074699991" z="0.0"/>
  </node>
  <node id="115084" label="zzz1439" cy:nodeId="2290">
    <graphics x="156.57646362068863" y="-772.0323074699991" z="0.0"/>
  </node>
  <node id="115083" label="zzz1438" cy:nodeId="2291">
    <graphics x="45.57646362068863" y="-807.0323074699991" z="0.0"/>
  </node>
  <node id="115082" label="zzz1437" cy:nodeId="2292">
    <graphics x="2.576463620688628" y="-576.0323074699991" z="0.0"/>
  </node>
  <node id="115081" label="zzz1436" cy:nodeId="2293">
    <graphics x="-19.423536379311372" y="-1011.0323074699991" z="0.0"/>
  </node>
  <node id="115080" label="zzz1435" cy:nodeId="2294">
    <graphics x="-370.4235363793114" y="-878.0323074699991" z="0.0"/>
  </node>
  <node id="115079" label="zzz1434" cy:nodeId="2295">
    <graphics x="-1728.0411729861942" y="1390.2850646155357" z="0.0"/>
  </node>
  <node id="115078" label="zzz1433" cy:nodeId="2296">
    <graphics x="1689.5764636206886" y="1715.967692530001" z="0.0"/>
  </node>
  <node id="115077" label="zzz1432" cy:nodeId="2297">
    <graphics x="1644.5764636206886" y="1650.967692530001" z="0.0"/>
  </node>
  <node id="115076" label="zzz1431" cy:nodeId="2298">
    <graphics x="-74.42353637931137" y="-785.0323074699991" z="0.0"/>
  </node>
  <node id="115075" label="zzz1430" cy:nodeId="2299">
    <graphics x="-46.42353637931137" y="-821.0323074699991" z="0.0"/>
  </node>
  <node id="115074" label="zzz1429" cy:nodeId="2300">
    <graphics x="35.57646362068863" y="-915.0323074699991" z="0.0"/>
  </node>
  <node id="115073" label="zzz1428" cy:nodeId="2301">
    <graphics x="-1789.4235363793114" y="1283.967692530001" z="0.0"/>
  </node>
  <node id="115072" label="zzz1427" cy:nodeId="2302">
    <graphics x="-1839.4235363793114" y="2188.967692530001" z="0.0"/>
  </node>
  <node id="115071" label="zzz1426" cy:nodeId="2303">
    <graphics x="-1791.4235363793114" y="2271.967692530001" z="0.0"/>
  </node>
  <node id="115070" label="zzz1425" cy:nodeId="2304">
    <graphics x="-1885.4235363793114" y="2273.967692530001" z="0.0"/>
  </node>
  <node id="115069" label="zzz1424" cy:nodeId="2305">
    <graphics x="296.5764636206886" y="-685.0323074699991" z="0.0"/>
  </node>
  <node id="115068" label="zzz1423" cy:nodeId="2306">
    <graphics x="198.57646362068863" y="-698.0323074699991" z="0.0"/>
  </node>
  <node id="115067" label="zzz1422" cy:nodeId="2307">
    <graphics x="-13.423536379311372" y="-714.0323074699991" z="0.0"/>
  </node>
  <node id="115066" label="zzz1421" cy:nodeId="2308">
    <graphics x="167.57646362068863" y="-1117.032307469999" z="0.0"/>
  </node>
  <node id="115065" label="zzz1420" cy:nodeId="2309">
    <graphics x="139.57646362068863" y="-885.0323074699991" z="0.0"/>
  </node>
  <node id="115064" label="zzz1419" cy:nodeId="2310">
    <graphics x="291.5764636206886" y="-943.0323074699991" z="0.0"/>
  </node>
  <node id="115063" label="zzz1418" cy:nodeId="2311">
    <graphics x="292.5764636206886" y="-1064.032307469999" z="0.0"/>
  </node>
  <node id="115062" label="zzz1417" cy:nodeId="2312">
    <graphics x="-1789.4235363793114" y="1496.6024367010705" z="0.0"/>
  </node>
  <node id="115061" label="zzz1416" cy:nodeId="2313">
    <graphics x="1734.5764636206886" y="2188.967692530001" z="0.0"/>
  </node>
  <node id="115060" label="zzz1415" cy:nodeId="2314">
    <graphics x="40.57646362068863" y="-771.0323074699991" z="0.0"/>
  </node>
  <node id="115059" label="zzz1414" cy:nodeId="2315">
    <graphics x="225.57646362068863" y="-993.0323074699991" z="0.0"/>
  </node>
  <node id="115058" label="zzz1413" cy:nodeId="2316">
    <graphics x="911.5764636206886" y="2014.967692530001" z="0.0"/>
  </node>
  <node id="115057" label="zzz1412" cy:nodeId="2317">
    <graphics x="1613.5764636206886" y="2188.967692530001" z="0.0"/>
  </node>
  <node id="115056" label="zzz1411" cy:nodeId="2318">
    <graphics x="-1455.4235363793114" y="2192.967692530001" z="0.0"/>
  </node>
  <node id="115055" label="zzz1410" cy:nodeId="2319">
    <graphics x="72.57646362068863" y="-622.0323074699991" z="0.0"/>
  </node>
  <node id="115054" label="zzz1409" cy:nodeId="2320">
    <graphics x="-68.42353637931137" y="-331.03230746999907" z="0.0"/>
  </node>
  <node id="115053" label="zzz1408" cy:nodeId="2321">
    <graphics x="-267.4235363793114" y="-735.0323074699991" z="0.0"/>
  </node>
  <node id="115052" label="zzz1407" cy:nodeId="2322">
    <graphics x="88.57646362068863" y="-479.03230746999907" z="0.0"/>
  </node>
  <node id="115051" label="zzz1406" cy:nodeId="2323">
    <graphics x="245.57646362068863" y="-777.0323074699991" z="0.0"/>
  </node>
  <node id="115050" label="zzz1405" cy:nodeId="2324">
    <graphics x="180.57646362068863" y="-657.0323074699991" z="0.0"/>
  </node>
  <node id="115049" label="zzz1404" cy:nodeId="2325">
    <graphics x="1708.5764636206886" y="1602.967692530001" z="0.0"/>
  </node>
  <node id="115048" label="zzz1403" cy:nodeId="2326">
    <graphics x="369.5764636206886" y="-811.0323074699991" z="0.0"/>
  </node>
  <node id="115047" label="zzz1402" cy:nodeId="2327">
    <graphics x="42.57646362068863" y="-843.0323074699991" z="0.0"/>
  </node>
  <node id="115046" label="zzz1401" cy:nodeId="2328">
    <graphics x="1757.5764636206886" y="1668.967692530001" z="0.0"/>
  </node>
  <node id="115045" label="zzz1400" cy:nodeId="2329">
    <graphics x="-1605.27644619996" y="1390.2850646155357" z="0.0"/>
  </node>
  <node id="115044" label="zzz1399" cy:nodeId="2330">
    <graphics x="-1371.4235363793114" y="2270.967692530001" z="0.0"/>
  </node>
  <node id="115043" label="zzz1398" cy:nodeId="2331">
    <graphics x="-121.42353637931137" y="-544.0323074699991" z="0.0"/>
  </node>
  <node id="115042" label="zzz1397" cy:nodeId="2332">
    <graphics x="1003.5764636206886" y="2033.967692530001" z="0.0"/>
  </node>
  <node id="115041" label="zzz1396" cy:nodeId="2333">
    <graphics x="19.576463620688628" y="-410.03230746999907" z="0.0"/>
  </node>
  <node id="115040" label="zzz1395" cy:nodeId="2334">
    <graphics x="-96.42353637931137" y="-508.03230746999907" z="0.0"/>
  </node>
  <node id="115039" label="zzz1394" cy:nodeId="2335">
    <graphics x="105.57646362068863" y="-700.0323074699991" z="0.0"/>
  </node>
  <node id="115038" label="zzz1393" cy:nodeId="2336">
    <graphics x="938.5764636206886" y="2105.967692530001" z="0.0"/>
  </node>
  <node id="115037" label="zzz1392" cy:nodeId="2337">
    <graphics x="250.57646362068863" y="-741.0323074699991" z="0.0"/>
  </node>
  <node id="115036" label="zzz1391" cy:nodeId="2338">
    <graphics x="-159.42353637931137" y="-725.0323074699991" z="0.0"/>
  </node>
  <node id="115035" label="zzz1390" cy:nodeId="2339">
    <graphics x="-16.423536379311372" y="-678.0323074699991" z="0.0"/>
  </node>
  <node id="115034" label="zzz1389" cy:nodeId="2340">
    <graphics x="18.576463620688628" y="-879.0323074699991" z="0.0"/>
  </node>
  <node id="115033" label="zzz1388" cy:nodeId="2341">
    <graphics x="-1375.4235363793114" y="2188.967692530001" z="0.0"/>
  </node>
  <node id="115032" label="zzz1387" cy:nodeId="2342">
    <graphics x="189.57646362068863" y="-621.0323074699991" z="0.0"/>
  </node>
  <node id="115031" label="zzz1386" cy:nodeId="2343">
    <graphics x="-1884.4235363793114" y="853.9676925300009" z="0.0"/>
  </node>
  <node id="115030" label="zzz1385" cy:nodeId="2344">
    <graphics x="-1746.4235363793114" y="919.9676925300009" z="0.0"/>
  </node>
  <node id="115029" label="zzz1384" cy:nodeId="2345">
    <graphics x="-1994.4235363793114" y="1175.967692530001" z="0.0"/>
  </node>
  <node id="115028" label="zzz1383" cy:nodeId="2346">
    <graphics x="-1836.4235363793114" y="1014.9676925300009" z="0.0"/>
  </node>
  <node id="115027" label="zzz1382" cy:nodeId="2347">
    <graphics x="-1912.4235363793114" y="1010.9676925300009" z="0.0"/>
  </node>
  <node id="115026" label="zzz1381" cy:nodeId="2348">
    <graphics x="-2013.4235363793114" y="1062.967692530001" z="0.0"/>
  </node>
  <node id="115025" label="zzz1380" cy:nodeId="2349">
    <graphics x="-1760.4235363793114" y="1009.9676925300009" z="0.0"/>
  </node>
  <node id="115024" label="zzz1379" cy:nodeId="2350">
    <graphics x="-2034.4235363793114" y="899.9676925300009" z="0.0"/>
  </node>
  <node id="115023" label="zzz1378" cy:nodeId="2351">
    <graphics x="-1897.4235363793114" y="889.9676925300009" z="0.0"/>
  </node>
  <node id="115022" label="zzz1377" cy:nodeId="2352">
    <graphics x="-1732.4235363793114" y="1088.967692530001" z="0.0"/>
  </node>
  <node id="115021" label="zzz1376" cy:nodeId="2353">
    <graphics x="-2068.4235363793114" y="1026.967692530001" z="0.0"/>
  </node>
  <node id="115020" label="zzz1375" cy:nodeId="2354">
    <graphics x="1253.5764636206886" y="1283.967692530001" z="0.0"/>
  </node>
  <node id="115019" label="zzz1374" cy:nodeId="2355">
    <graphics x="-121.42353637931137" y="381.96769253000093" z="0.0"/>
  </node>
  <node id="115018" label="zzz1373" cy:nodeId="2356">
    <graphics x="19.576463620688628" y="383.96769253000093" z="0.0"/>
  </node>
  <node id="115017" label="zzz1372" cy:nodeId="2357">
    <graphics x="1188.5764636206886" y="1454.967692530001" z="0.0"/>
  </node>
  <node id="115016" label="zzz1371" cy:nodeId="2358">
    <graphics x="1230.5764636206886" y="1386.967692530001" z="0.0"/>
  </node>
  <node id="115015" label="zzz1370" cy:nodeId="2359">
    <graphics x="1132.5764636206886" y="1340.967692530001" z="0.0"/>
  </node>
  <node id="115014" label="zzz1369" cy:nodeId="2360">
    <graphics x="1208.5764636206886" y="1350.967692530001" z="0.0"/>
  </node>
  <node id="115013" label="zzz1368" cy:nodeId="2361">
    <graphics x="1306.5764636206886" y="1399.967692530001" z="0.0"/>
  </node>
  <node id="115012" label="zzz1367" cy:nodeId="2362">
    <graphics x="-1974.4235363793114" y="-1540.032307469999" z="0.0"/>
  </node>
  <node id="115011" label="zzz1366" cy:nodeId="2363">
    <graphics x="-1808.4235363793114" y="-2913.032307469999" z="0.0"/>
  </node>
  <node id="115010" label="zzz1365" cy:nodeId="2364">
    <graphics x="-828.4235363793114" y="-1865.032307469999" z="0.0"/>
  </node>
  <node id="115009" label="zzz1364" cy:nodeId="2365">
    <graphics x="-1618.4235363793114" y="-2946.032307469999" z="0.0"/>
  </node>
  <node id="115008" label="zzz1363" cy:nodeId="2366">
    <graphics x="-1578.4235363793114" y="-2821.032307469999" z="0.0"/>
  </node>
  <node id="115007" label="zzz1362" cy:nodeId="2367">
    <graphics x="-1627.4235363793114" y="-2579.032307469999" z="0.0"/>
  </node>
  <node id="115006" label="zzz1361" cy:nodeId="2368">
    <graphics x="-1844.4235363793114" y="-2606.032307469999" z="0.0"/>
  </node>
  <node id="115005" label="zzz1360" cy:nodeId="2369">
    <graphics x="-1731.4235363793114" y="-2434.032307469999" z="0.0"/>
  </node>
  <node id="115004" label="zzz1359" cy:nodeId="2370">
    <graphics x="-2003.4235363793114" y="-2339.032307469999" z="0.0"/>
  </node>
  <node id="115003" label="zzz1358" cy:nodeId="2371">
    <graphics x="-2349.4235363793114" y="-2067.032307469999" z="0.0"/>
  </node>
  <node id="115002" label="zzz1357" cy:nodeId="2372">
    <graphics x="-1301.4235363793114" y="-3098.032307469999" z="0.0"/>
  </node>
  <node id="115001" label="zzz1356" cy:nodeId="2373">
    <graphics x="-1021.4235363793114" y="-1878.032307469999" z="0.0"/>
  </node>
  <node id="115000" label="zzz1355" cy:nodeId="2374">
    <graphics x="-1486.4235363793114" y="-1777.032307469999" z="0.0"/>
  </node>
  <node id="114999" label="zzz1354" cy:nodeId="2375">
    <graphics x="-1520.4235363793114" y="-2623.032307469999" z="0.0"/>
  </node>
  <node id="114998" label="zzz1353" cy:nodeId="2376">
    <graphics x="-1538.4235363793114" y="-2980.032307469999" z="0.0"/>
  </node>
  <node id="114997" label="zzz1352" cy:nodeId="2377">
    <graphics x="-1625.4235363793114" y="-1607.032307469999" z="0.0"/>
  </node>
  <node id="114996" label="zzz1351" cy:nodeId="2378">
    <graphics x="-1592.4235363793114" y="-1972.032307469999" z="0.0"/>
  </node>
  <node id="114995" label="zzz1350" cy:nodeId="2379">
    <graphics x="-1807.4235363793114" y="-2416.032307469999" z="0.0"/>
  </node>
  <node id="114994" label="zzz1349" cy:nodeId="2380">
    <graphics x="-1777.4235363793114" y="-2723.032307469999" z="0.0"/>
  </node>
  <node id="114993" label="zzz1348" cy:nodeId="2381">
    <graphics x="-1427.4235363793114" y="-2422.032307469999" z="0.0"/>
  </node>
  <node id="114992" label="zzz1347" cy:nodeId="2382">
    <graphics x="-1983.4235363793114" y="-2082.032307469999" z="0.0"/>
  </node>
  <node id="114991" label="zzz1346" cy:nodeId="2383">
    <graphics x="-2223.4235363793114" y="-2093.032307469999" z="0.0"/>
  </node>
  <node id="114990" label="zzz1345" cy:nodeId="2384">
    <graphics x="-1552.4235363793114" y="-2695.032307469999" z="0.0"/>
  </node>
  <node id="114989" label="zzz1344" cy:nodeId="2385">
    <graphics x="-1629.4235363793114" y="-2543.032307469999" z="0.0"/>
  </node>
  <node id="114988" label="zzz1343" cy:nodeId="2386">
    <graphics x="-1815.4235363793114" y="-1642.032307469999" z="0.0"/>
  </node>
  <node id="114987" label="zzz1342" cy:nodeId="2387">
    <graphics x="-1771.4235363793114" y="-1733.032307469999" z="0.0"/>
  </node>
  <node id="114986" label="zzz1341" cy:nodeId="2388">
    <graphics x="-1780.4235363793114" y="-1454.032307469999" z="0.0"/>
  </node>
  <node id="114985" label="zzz1340" cy:nodeId="2389">
    <graphics x="-974.4235363793114" y="-2582.032307469999" z="0.0"/>
  </node>
  <node id="114984" label="zzz1339" cy:nodeId="2390">
    <graphics x="-1698.4235363793114" y="-1286.032307469999" z="0.0"/>
  </node>
  <node id="114983" label="zzz1338" cy:nodeId="2391">
    <graphics x="-1778.4235363793114" y="-2227.032307469999" z="0.0"/>
  </node>
  <node id="114982" label="zzz1337" cy:nodeId="2392">
    <graphics x="-861.4235363793114" y="-2392.032307469999" z="0.0"/>
  </node>
  <node id="114981" label="zzz1336" cy:nodeId="2393">
    <graphics x="-1341.4235363793114" y="-1545.032307469999" z="0.0"/>
  </node>
  <node id="114980" label="zzz1335" cy:nodeId="2394">
    <graphics x="-1866.4235363793114" y="-2098.032307469999" z="0.0"/>
  </node>
  <node id="114979" label="zzz1334" cy:nodeId="2395">
    <graphics x="-2186.4235363793114" y="-1747.032307469999" z="0.0"/>
  </node>
  <node id="114978" label="zzz1333" cy:nodeId="2396">
    <graphics x="-1176.4235363793114" y="-1917.032307469999" z="0.0"/>
  </node>
  <node id="114977" label="zzz1332" cy:nodeId="2397">
    <graphics x="-578.4235363793114" y="-2785.032307469999" z="0.0"/>
  </node>
  <node id="114976" label="zzz1331" cy:nodeId="2398">
    <graphics x="-1271.4235363793114" y="-1705.032307469999" z="0.0"/>
  </node>
  <node id="114975" label="zzz1330" cy:nodeId="2399">
    <graphics x="-2383.4235363793114" y="-2500.032307469999" z="0.0"/>
  </node>
  <node id="114974" label="zzz1329" cy:nodeId="2400">
    <graphics x="-799.4235363793114" y="-2055.032307469999" z="0.0"/>
  </node>
  <node id="114973" label="zzz1328" cy:nodeId="2401">
    <graphics x="-1117.4235363793114" y="-2520.032307469999" z="0.0"/>
  </node>
  <node id="114972" label="zzz1327" cy:nodeId="2402">
    <graphics x="-1846.4235363793114" y="-2768.032307469999" z="0.0"/>
  </node>
  <node id="114971" label="zzz1326" cy:nodeId="2403">
    <graphics x="-958.4235363793114" y="-2250.032307469999" z="0.0"/>
  </node>
  <node id="114970" label="zzz1325" cy:nodeId="2404">
    <graphics x="-2052.4235363793114" y="-1645.032307469999" z="0.0"/>
  </node>
  <node id="114969" label="zzz1324" cy:nodeId="2405">
    <graphics x="-1297.4235363793114" y="-2440.032307469999" z="0.0"/>
  </node>
  <node id="114968" label="zzz1323" cy:nodeId="2406">
    <graphics x="-1620.4235363793114" y="-1756.032307469999" z="0.0"/>
  </node>
  <node id="114967" label="zzz1322" cy:nodeId="2407">
    <graphics x="-1081.4235363793114" y="-2251.032307469999" z="0.0"/>
  </node>
  <node id="114966" label="zzz1321" cy:nodeId="2408">
    <graphics x="-918.4235363793114" y="-2150.032307469999" z="0.0"/>
  </node>
  <node id="114965" label="zzz1320" cy:nodeId="2409">
    <graphics x="-1970.4235363793114" y="-2375.032307469999" z="0.0"/>
  </node>
  <node id="114964" label="zzz1319" cy:nodeId="2410">
    <graphics x="-1236.4235363793114" y="-2011.032307469999" z="0.0"/>
  </node>
  <node id="114963" label="zzz1318" cy:nodeId="2411">
    <graphics x="-1486.4235363793114" y="-1658.032307469999" z="0.0"/>
  </node>
  <node id="114962" label="zzz1317" cy:nodeId="2412">
    <graphics x="-923.4235363793114" y="-2700.032307469999" z="0.0"/>
  </node>
  <node id="114961" label="zzz1316" cy:nodeId="2413">
    <graphics x="-1901.4235363793114" y="-2283.032307469999" z="0.0"/>
  </node>
  <node id="114960" label="zzz1315" cy:nodeId="2414">
    <graphics x="-1315.4235363793114" y="-2029.032307469999" z="0.0"/>
  </node>
  <node id="114959" label="zzz1314" cy:nodeId="2415">
    <graphics x="-1409.4235363793114" y="-2836.032307469999" z="0.0"/>
  </node>
  <node id="114958" label="zzz1313" cy:nodeId="2416">
    <graphics x="-1655.4235363793114" y="-1647.032307469999" z="0.0"/>
  </node>
  <node id="114957" label="zzz1312" cy:nodeId="2417">
    <graphics x="-2019.4235363793114" y="-2578.032307469999" z="0.0"/>
  </node>
  <node id="114956" label="zzz1311" cy:nodeId="2418">
    <graphics x="-1972.4235363793114" y="-2447.032307469999" z="0.0"/>
  </node>
  <node id="114955" label="zzz1310" cy:nodeId="2419">
    <graphics x="-1074.4235363793114" y="-2142.032307469999" z="0.0"/>
  </node>
  <node id="114954" label="zzz1309" cy:nodeId="2420">
    <graphics x="-1400.4235363793114" y="-2620.032307469999" z="0.0"/>
  </node>
  <node id="114953" label="zzz1308" cy:nodeId="2421">
    <graphics x="-903.4235363793114" y="-2307.032307469999" z="0.0"/>
  </node>
  <node id="114952" label="zzz1307" cy:nodeId="2422">
    <graphics x="-1709.4235363793114" y="-1864.032307469999" z="0.0"/>
  </node>
  <node id="114951" label="zzz1306" cy:nodeId="2423">
    <graphics x="-2058.4235363793114" y="-2152.032307469999" z="0.0"/>
  </node>
  <node id="114950" label="zzz1305" cy:nodeId="2424">
    <graphics x="-1626.4235363793114" y="-2254.032307469999" z="0.0"/>
  </node>
  <node id="114949" label="zzz1304" cy:nodeId="2425">
    <graphics x="-996.4235363793114" y="-1627.032307469999" z="0.0"/>
  </node>
  <node id="114948" label="zzz1303" cy:nodeId="2426">
    <graphics x="-2087.4235363793114" y="-2034.032307469999" z="0.0"/>
  </node>
  <node id="114947" label="zzz1302" cy:nodeId="2427">
    <graphics x="-983.4235363793114" y="-2186.032307469999" z="0.0"/>
  </node>
  <node id="114946" label="zzz1301" cy:nodeId="2428">
    <graphics x="-1626.4235363793114" y="-2326.032307469999" z="0.0"/>
  </node>
  <node id="114945" label="zzz1300" cy:nodeId="2429">
    <graphics x="-1203.4235363793114" y="-2746.032307469999" z="0.0"/>
  </node>
  <node id="114944" label="zzz1299" cy:nodeId="2430">
    <graphics x="-1403.4235363793114" y="-1705.032307469999" z="0.0"/>
  </node>
  <node id="114943" label="zzz1298" cy:nodeId="2431">
    <graphics x="-1693.4235363793114" y="-2840.032307469999" z="0.0"/>
  </node>
  <node id="114942" label="zzz1297" cy:nodeId="2432">
    <graphics x="-1855.4235363793114" y="-2211.032307469999" z="0.0"/>
  </node>
  <node id="114941" label="zzz1296" cy:nodeId="2433">
    <graphics x="-1296.4235363793114" y="-2620.032307469999" z="0.0"/>
  </node>
  <node id="114940" label="zzz1295" cy:nodeId="2434">
    <graphics x="-1120.4235363793114" y="-2787.032307469999" z="0.0"/>
  </node>
  <node id="114939" label="zzz1294" cy:nodeId="2435">
    <graphics x="-2421.4235363793114" y="-2258.032307469999" z="0.0"/>
  </node>
  <node id="114938" label="zzz1293" cy:nodeId="2436">
    <graphics x="-1665.4235363793114" y="-1900.032307469999" z="0.0"/>
  </node>
  <node id="114937" label="zzz1292" cy:nodeId="2437">
    <graphics x="-1525.4235363793114" y="-2152.032307469999" z="0.0"/>
  </node>
  <node id="114936" label="zzz1291" cy:nodeId="2438">
    <graphics x="-1137.4235363793114" y="-1989.032307469999" z="0.0"/>
  </node>
  <node id="114935" label="zzz1290" cy:nodeId="2439">
    <graphics x="-1503.4235363793114" y="-2422.032307469999" z="0.0"/>
  </node>
  <node id="114934" label="zzz1289" cy:nodeId="2440">
    <graphics x="-1820.4235363793114" y="-2175.032307469999" z="0.0"/>
  </node>
  <node id="114933" label="zzz1288" cy:nodeId="2441">
    <graphics x="-939.4235363793114" y="-1993.032307469999" z="0.0"/>
  </node>
  <node id="114932" label="zzz1287" cy:nodeId="2442">
    <graphics x="-935.4235363793114" y="-2628.032307469999" z="0.0"/>
  </node>
  <node id="114931" label="zzz1286" cy:nodeId="2443">
    <graphics x="-933.4235363793114" y="-1736.032307469999" z="0.0"/>
  </node>
  <node id="114930" label="zzz1285" cy:nodeId="2444">
    <graphics x="-1557.4235363793114" y="-1720.032307469999" z="0.0"/>
  </node>
  <node id="114929" label="zzz1284" cy:nodeId="2445">
    <graphics x="-1270.4235363793114" y="-2245.032307469999" z="0.0"/>
  </node>
  <node id="114928" label="zzz1283" cy:nodeId="2446">
    <graphics x="-1685.4235363793114" y="-2908.032307469999" z="0.0"/>
  </node>
  <node id="114927" label="zzz1282" cy:nodeId="2447">
    <graphics x="-748.4235363793114" y="-2204.032307469999" z="0.0"/>
  </node>
  <node id="114926" label="zzz1281" cy:nodeId="2448">
    <graphics x="-1410.4235363793114" y="-1777.032307469999" z="0.0"/>
  </node>
  <node id="114925" label="zzz1280" cy:nodeId="2449">
    <graphics x="-2181.4235363793114" y="-1905.032307469999" z="0.0"/>
  </node>
  <node id="114924" label="zzz1279" cy:nodeId="2450">
    <graphics x="-1584.4235363793114" y="-2785.032307469999" z="0.0"/>
  </node>
  <node id="114923" label="zzz1278" cy:nodeId="2451">
    <graphics x="-800.4235363793114" y="-2314.032307469999" z="0.0"/>
  </node>
  <node id="114922" label="zzz1277" cy:nodeId="2452">
    <graphics x="-1338.4235363793114" y="-2893.032307469999" z="0.0"/>
  </node>
  <node id="114921" label="zzz1276" cy:nodeId="2453">
    <graphics x="-1535.4235363793114" y="-2471.032307469999" z="0.0"/>
  </node>
  <node id="114920" label="zzz1275" cy:nodeId="2454">
    <graphics x="-1506.4235363793114" y="-1993.032307469999" z="0.0"/>
  </node>
  <node id="114919" label="zzz1274" cy:nodeId="2455">
    <graphics x="-1841.4235363793114" y="-1976.032307469999" z="0.0"/>
  </node>
  <node id="114918" label="zzz1273" cy:nodeId="2456">
    <graphics x="-1858.4235363793114" y="-2494.032307469999" z="0.0"/>
  </node>
  <node id="114917" label="zzz1272" cy:nodeId="2457">
    <graphics x="-1641.4235363793114" y="-1792.032307469999" z="0.0"/>
  </node>
  <node id="114916" label="zzz1271" cy:nodeId="2458">
    <graphics x="-1337.4235363793114" y="-2476.032307469999" z="0.0"/>
  </node>
  <node id="114915" label="zzz1270" cy:nodeId="2459">
    <graphics x="-1673.4235363793114" y="-2615.032307469999" z="0.0"/>
  </node>
  <node id="114914" label="zzz1269" cy:nodeId="2460">
    <graphics x="-2270.4235363793114" y="-2350.032307469999" z="0.0"/>
  </node>
  <node id="114913" label="zzz1268" cy:nodeId="2461">
    <graphics x="-1813.4235363793114" y="-2134.032307469999" z="0.0"/>
  </node>
  <node id="114912" label="zzz1267" cy:nodeId="2462">
    <graphics x="-1342.4235363793114" y="-2656.032307469999" z="0.0"/>
  </node>
  <node id="114911" label="zzz1266" cy:nodeId="2463">
    <graphics x="-766.4235363793114" y="-2942.032307469999" z="0.0"/>
  </node>
  <node id="114910" label="zzz1265" cy:nodeId="2464">
    <graphics x="-1654.4235363793114" y="-1720.032307469999" z="0.0"/>
  </node>
  <node id="114909" label="zzz1264" cy:nodeId="2465">
    <graphics x="-1014.4235363793114" y="-1928.032307469999" z="0.0"/>
  </node>
  <node id="114908" label="zzz1263" cy:nodeId="2466">
    <graphics x="-1092.4235363793114" y="-1626.032307469999" z="0.0"/>
  </node>
  <node id="114907" label="zzz1262" cy:nodeId="2467">
    <graphics x="-1680.4235363793114" y="-2398.032307469999" z="0.0"/>
  </node>
  <node id="114906" label="zzz1261" cy:nodeId="2468">
    <graphics x="-1434.4235363793114" y="-2224.032307469999" z="0.0"/>
  </node>
  <node id="114905" label="zzz1260" cy:nodeId="2469">
    <graphics x="-1252.4235363793114" y="-2548.032307469999" z="0.0"/>
  </node>
  <node id="114904" label="zzz1259" cy:nodeId="2470">
    <graphics x="-591.4235363793114" y="-3028.032307469999" z="0.0"/>
  </node>
  <node id="114903" label="zzz1258" cy:nodeId="2471">
    <graphics x="-1738.4235363793114" y="-1771.032307469999" z="0.0"/>
  </node>
  <node id="114902" label="zzz1257" cy:nodeId="2472">
    <graphics x="-1523.4235363793114" y="-2512.032307469999" z="0.0"/>
  </node>
  <node id="114901" label="zzz1256" cy:nodeId="2473">
    <graphics x="-1745.4235363793114" y="-1822.032307469999" z="0.0"/>
  </node>
  <node id="114900" label="zzz1255" cy:nodeId="2474">
    <graphics x="-1456.4235363793114" y="-2566.032307469999" z="0.0"/>
  </node>
  <node id="114899" label="zzz1254" cy:nodeId="2475">
    <graphics x="-1363.4235363793114" y="-1993.032307469999" z="0.0"/>
  </node>
  <node id="114898" label="zzz1253" cy:nodeId="2476">
    <graphics x="-1261.4235363793114" y="-2496.032307469999" z="0.0"/>
  </node>
  <node id="114897" label="zzz1252" cy:nodeId="2477">
    <graphics x="-1981.4235363793114" y="-1844.032307469999" z="0.0"/>
  </node>
  <node id="114896" label="zzz1251" cy:nodeId="2478">
    <graphics x="-1788.4235363793114" y="-2299.032307469999" z="0.0"/>
  </node>
  <node id="114895" label="zzz1250" cy:nodeId="2479">
    <graphics x="-748.4235363793114" y="-2865.032307469999" z="0.0"/>
  </node>
  <node id="114894" label="zzz1249" cy:nodeId="2480">
    <graphics x="-1639.4235363793114" y="-2362.032307469999" z="0.0"/>
  </node>
  <node id="114893" label="zzz1248" cy:nodeId="2481">
    <graphics x="-1669.4235363793114" y="-1828.032307469999" z="0.0"/>
  </node>
  <node id="114892" label="zzz1247" cy:nodeId="2482">
    <graphics x="-1280.4235363793114" y="-1633.032307469999" z="0.0"/>
  </node>
  <node id="114891" label="zzz1246" cy:nodeId="2483">
    <graphics x="-1710.4235363793114" y="-2651.032307469999" z="0.0"/>
  </node>
  <node id="114890" label="zzz1245" cy:nodeId="2484">
    <graphics x="-2230.4235363793114" y="-2278.032307469999" z="0.0"/>
  </node>
  <node id="114889" label="zzz1244" cy:nodeId="2485">
    <graphics x="-1529.4235363793114" y="-2080.032307469999" z="0.0"/>
  </node>
  <node id="114888" label="zzz1243" cy:nodeId="2486">
    <graphics x="-2381.4235363793114" y="-2423.032307469999" z="0.0"/>
  </node>
  <node id="114887" label="zzz1242" cy:nodeId="2487">
    <graphics x="-1982.4235363793114" y="-1803.032307469999" z="0.0"/>
  </node>
  <node id="114886" label="zzz1241" cy:nodeId="2488">
    <graphics x="-1540.4235363793114" y="-2206.032307469999" z="0.0"/>
  </node>
  <node id="114885" label="zzz1240" cy:nodeId="2489">
    <graphics x="-938.4235363793114" y="-2494.032307469999" z="0.0"/>
  </node>
  <node id="114884" label="zzz1239" cy:nodeId="2490">
    <graphics x="-2329.4235363793114" y="-1856.032307469999" z="0.0"/>
  </node>
  <node id="114883" label="zzz1238" cy:nodeId="2491">
    <graphics x="-2163.4235363793114" y="-2165.032307469999" z="0.0"/>
  </node>
  <node id="114882" label="zzz1237" cy:nodeId="2492">
    <graphics x="-1684.4235363793114" y="-2080.032307469999" z="0.0"/>
  </node>
  <node id="114881" label="zzz1236" cy:nodeId="2493">
    <graphics x="-1424.4235363793114" y="-1741.032307469999" z="0.0"/>
  </node>
  <node id="114880" label="zzz1235" cy:nodeId="2494">
    <graphics x="-2074.4235363793114" y="-2116.032307469999" z="0.0"/>
  </node>
  <node id="114879" label="zzz1234" cy:nodeId="2495">
    <graphics x="-1297.4235363793114" y="-1581.032307469999" z="0.0"/>
  </node>
  <node id="114878" label="zzz1233" cy:nodeId="2496">
    <graphics x="-1166.4235363793114" y="-2592.032307469999" z="0.0"/>
  </node>
  <node id="114877" label="zzz1232" cy:nodeId="2497">
    <graphics x="-1660.4235363793114" y="-1936.032307469999" z="0.0"/>
  </node>
  <node id="114876" label="zzz1231" cy:nodeId="2498">
    <graphics x="-534.4235363793114" y="-2926.032307469999" z="0.0"/>
  </node>
  <node id="114875" label="zzz1230" cy:nodeId="2499">
    <graphics x="-1053.4235363793114" y="-2877.032307469999" z="0.0"/>
  </node>
  <node id="114874" label="zzz1229" cy:nodeId="2500">
    <graphics x="-1406.4235363793114" y="-2029.032307469999" z="0.0"/>
  </node>
  <node id="114873" label="zzz1228" cy:nodeId="2501">
    <graphics x="-1395.4235363793114" y="-2800.032307469999" z="0.0"/>
  </node>
  <node id="114872" label="zzz1227" cy:nodeId="2502">
    <graphics x="-2366.4235363793114" y="-2147.032307469999" z="0.0"/>
  </node>
  <node id="114871" label="zzz1226" cy:nodeId="2503">
    <graphics x="-1582.4235363793114" y="-2008.032307469999" z="0.0"/>
  </node>
  <node id="114870" label="zzz1225" cy:nodeId="2504">
    <graphics x="-1017.4235363793114" y="-3028.032307469999" z="0.0"/>
  </node>
  <node id="114869" label="zzz1224" cy:nodeId="2505">
    <graphics x="-1397.4235363793114" y="-3078.032307469999" z="0.0"/>
  </node>
  <node id="114868" label="zzz1223" cy:nodeId="2506">
    <graphics x="-1279.4235363793114" y="-2101.032307469999" z="0.0"/>
  </node>
  <node id="114867" label="zzz1222" cy:nodeId="2507">
    <graphics x="-1584.4235363793114" y="-3263.032307469999" z="0.0"/>
  </node>
  <node id="114866" label="zzz1221" cy:nodeId="2508">
    <graphics x="-1093.4235363793114" y="-3040.032307469999" z="0.0"/>
  </node>
  <node id="114865" label="zzz1220" cy:nodeId="2509">
    <graphics x="-716.4235363793114" y="-1885.032307469999" z="0.0"/>
  </node>
  <node id="114864" label="zzz1219" cy:nodeId="2510">
    <graphics x="-2389.4235363793114" y="-2031.032307469999" z="0.0"/>
  </node>
  <node id="114863" label="zzz1218" cy:nodeId="2511">
    <graphics x="-1601.4235363793114" y="-3149.032307469999" z="0.0"/>
  </node>
  <node id="114862" label="zzz1217" cy:nodeId="2512">
    <graphics x="-1733.4235363793114" y="-1661.032307469999" z="0.0"/>
  </node>
  <node id="114861" label="zzz1216" cy:nodeId="2513">
    <graphics x="-693.4235363793114" y="-2363.032307469999" z="0.0"/>
  </node>
  <node id="114860" label="zzz1215" cy:nodeId="2514">
    <graphics x="-1036.4235363793114" y="-2665.032307469999" z="0.0"/>
  </node>
  <node id="114859" label="zzz1214" cy:nodeId="2515">
    <graphics x="-1792.4235363793114" y="-3085.032307469999" z="0.0"/>
  </node>
  <node id="114858" label="zzz1213" cy:nodeId="2516">
    <graphics x="-1270.4235363793114" y="-1885.032307469999" z="0.0"/>
  </node>
  <node id="114857" label="zzz1212" cy:nodeId="2517">
    <graphics x="-1910.4235363793114" y="-1712.032307469999" z="0.0"/>
  </node>
  <node id="114856" label="zzz1211" cy:nodeId="2518">
    <graphics x="-1433.4235363793114" y="-3114.032307469999" z="0.0"/>
  </node>
  <node id="114855" label="zzz1210" cy:nodeId="2519">
    <graphics x="-1990.4235363793114" y="-3141.032307469999" z="0.0"/>
  </node>
  <node id="114854" label="zzz1209" cy:nodeId="2520">
    <graphics x="-2015.4235363793114" y="-2831.032307469999" z="0.0"/>
  </node>
  <node id="114853" label="zzz1208" cy:nodeId="2521">
    <graphics x="-1088.4235363793114" y="-1743.032307469999" z="0.0"/>
  </node>
  <node id="114852" label="zzz1207" cy:nodeId="2522">
    <graphics x="-1191.4235363793114" y="-3151.032307469999" z="0.0"/>
  </node>
  <node id="114851" label="zzz1206" cy:nodeId="2523">
    <graphics x="-982.4235363793114" y="-2392.032307469999" z="0.0"/>
  </node>
  <node id="114850" label="zzz1205" cy:nodeId="2524">
    <graphics x="-1703.4235363793114" y="-1607.032307469999" z="0.0"/>
  </node>
  <node id="114849" label="zzz1204" cy:nodeId="2525">
    <graphics x="-1933.4235363793114" y="-2575.032307469999" z="0.0"/>
  </node>
  <node id="114848" label="zzz1203" cy:nodeId="2526">
    <graphics x="-1752.4235363793114" y="-2470.032307469999" z="0.0"/>
  </node>
  <node id="114847" label="zzz1202" cy:nodeId="2527">
    <graphics x="-1903.4235363793114" y="-1604.032307469999" z="0.0"/>
  </node>
  <node id="114846" label="zzz1201" cy:nodeId="2528">
    <graphics x="-2134.4235363793114" y="-1789.032307469999" z="0.0"/>
  </node>
  <node id="114845" label="zzz1200" cy:nodeId="2529">
    <graphics x="-1991.4235363793114" y="-2034.032307469999" z="0.0"/>
  </node>
  <node id="114844" label="zzz1199" cy:nodeId="2530">
    <graphics x="-2063.4235363793114" y="-2742.032307469999" z="0.0"/>
  </node>
  <node id="114843" label="zzz1198" cy:nodeId="2531">
    <graphics x="-1862.4235363793114" y="-2247.032307469999" z="0.0"/>
  </node>
  <node id="114842" label="zzz1197" cy:nodeId="2532">
    <graphics x="-842.4235363793114" y="-2544.032307469999" z="0.0"/>
  </node>
  <node id="114841" label="zzz1196" cy:nodeId="2533">
    <graphics x="-877.4235363793114" y="-2271.032307469999" z="0.0"/>
  </node>
  <node id="114840" label="zzz1195" cy:nodeId="2534">
    <graphics x="-1436.4235363793114" y="-2350.032307469999" z="0.0"/>
  </node>
  <node id="114839" label="zzz1194" cy:nodeId="2535">
    <graphics x="-1359.4235363793114" y="-2548.032307469999" z="0.0"/>
  </node>
  <node id="114838" label="zzz1193" cy:nodeId="2536">
    <graphics x="-1162.4235363793114" y="-2666.032307469999" z="0.0"/>
  </node>
  <node id="114837" label="zzz1192" cy:nodeId="2537">
    <graphics x="-1094.4235363793114" y="-1662.032307469999" z="0.0"/>
  </node>
  <node id="114836" label="zzz1191" cy:nodeId="2538">
    <graphics x="-2246.4235363793114" y="-2815.032307469999" z="0.0"/>
  </node>
  <node id="114835" label="zzz1190" cy:nodeId="2539">
    <graphics x="-1418.4235363793114" y="-2915.032307469999" z="0.0"/>
  </node>
  <node id="114834" label="zzz1189" cy:nodeId="2540">
    <graphics x="-1564.4235363793114" y="-3113.032307469999" z="0.0"/>
  </node>
  <node id="114833" label="zzz1188" cy:nodeId="2541">
    <graphics x="-2068.4235363793114" y="-2795.032307469999" z="0.0"/>
  </node>
  <node id="114832" label="zzz1187" cy:nodeId="2542">
    <graphics x="-1985.4235363793114" y="-2867.032307469999" z="0.0"/>
  </node>
  <node id="114831" label="zzz1186" cy:nodeId="2543">
    <graphics x="-1660.4235363793114" y="-3256.032307469999" z="0.0"/>
  </node>
  <node id="114830" label="zzz1185" cy:nodeId="2544">
    <graphics x="-1988.4235363793114" y="-2793.032307469999" z="0.0"/>
  </node>
  <node id="114829" label="zzz1184" cy:nodeId="2545">
    <graphics x="-1974.4235363793114" y="-2960.032307469999" z="0.0"/>
  </node>
  <node id="114828" label="zzz1183" cy:nodeId="2546">
    <graphics x="-1609.4235363793114" y="-3185.032307469999" z="0.0"/>
  </node>
  <node id="114827" label="zzz1182" cy:nodeId="2547">
    <graphics x="-1822.4235363793114" y="-3049.032307469999" z="0.0"/>
  </node>
  <node id="114826" label="zzz1181" cy:nodeId="2548">
    <graphics x="-1463.4235363793114" y="-2872.032307469999" z="0.0"/>
  </node>
  <node id="114825" label="zzz1180" cy:nodeId="2549">
    <graphics x="-1487.4235363793114" y="-3174.032307469999" z="0.0"/>
  </node>
  <node id="114824" label="zzz1179" cy:nodeId="2550">
    <graphics x="-1878.4235363793114" y="-2678.032307469999" z="0.0"/>
  </node>
  <node id="114823" label="zzz1178" cy:nodeId="2551">
    <graphics x="-2033.4235363793114" y="-1998.032307469999" z="0.0"/>
  </node>
  <node id="114822" label="zzz1177" cy:nodeId="2552">
    <graphics x="-1881.4235363793114" y="-2714.032307469999" z="0.0"/>
  </node>
  <node id="114821" label="zzz1176" cy:nodeId="2553">
    <graphics x="-1748.4235363793114" y="-2795.032307469999" z="0.0"/>
  </node>
  <node id="114820" label="zzz1175" cy:nodeId="2554">
    <graphics x="-1617.4235363793114" y="-2857.032307469999" z="0.0"/>
  </node>
  <node id="114819" label="zzz1174" cy:nodeId="2555">
    <graphics x="-1916.4235363793114" y="-3088.032307469999" z="0.0"/>
  </node>
  <node id="114818" label="zzz1173" cy:nodeId="2556">
    <graphics x="-2080.4235363793114" y="-2986.032307469999" z="0.0"/>
  </node>
  <node id="114817" label="zzz1172" cy:nodeId="2557">
    <graphics x="-1548.4235363793114" y="-3021.032307469999" z="0.0"/>
  </node>
  <node id="114816" label="zzz1171" cy:nodeId="2558">
    <graphics x="-1909.4235363793114" y="-2872.032307469999" z="0.0"/>
  </node>
  <node id="114815" label="zzz1170" cy:nodeId="2559">
    <graphics x="-1500.4235363793114" y="-3279.032307469999" z="0.0"/>
  </node>
  <node id="114814" label="zzz1169" cy:nodeId="2560">
    <graphics x="-1225.4235363793114" y="-3094.032307469999" z="0.0"/>
  </node>
  <node id="114813" label="zzz1168" cy:nodeId="2561">
    <graphics x="-1992.4235363793114" y="-3105.032307469999" z="0.0"/>
  </node>
  <node id="114812" label="zzz1167" cy:nodeId="2562">
    <graphics x="-2269.4235363793114" y="-2705.032307469999" z="0.0"/>
  </node>
  <node id="114811" label="zzz1166" cy:nodeId="2563">
    <graphics x="-696.4235363793114" y="-3094.032307469999" z="0.0"/>
  </node>
  <node id="114810" label="zzz1165" cy:nodeId="2564">
    <graphics x="-1278.4235363793114" y="-2065.032307469999" z="0.0"/>
  </node>
  <node id="114809" label="zzz1164" cy:nodeId="2565">
    <graphics x="-2125.4235363793114" y="-2655.032307469999" z="0.0"/>
  </node>
  <node id="114808" label="zzz1163" cy:nodeId="2566">
    <graphics x="-2164.4235363793114" y="-2912.032307469999" z="0.0"/>
  </node>
  <node id="114807" label="zzz1162" cy:nodeId="2567">
    <graphics x="-1762.4235363793114" y="-3013.032307469999" z="0.0"/>
  </node>
  <node id="114806" label="zzz1161" cy:nodeId="2568">
    <graphics x="-1856.4235363793114" y="-1940.032307469999" z="0.0"/>
  </node>
  <node id="114805" label="zzz1160" cy:nodeId="2569">
    <graphics x="-1729.4235363793114" y="-2044.032307469999" z="0.0"/>
  </node>
  <node id="114804" label="zzz1159" cy:nodeId="2570">
    <graphics x="-2177.4235363793114" y="-1869.032307469999" z="0.0"/>
  </node>
  <node id="114803" label="zzz1158" cy:nodeId="2571">
    <graphics x="-1017.4235363793114" y="-2629.032307469999" z="0.0"/>
  </node>
  <node id="114802" label="zzz1157" cy:nodeId="2572">
    <graphics x="-1843.4235363793114" y="-2993.032307469999" z="0.0"/>
  </node>
  <node id="114801" label="zzz1156" cy:nodeId="2573">
    <graphics x="-1741.4235363793114" y="-2759.032307469999" z="0.0"/>
  </node>
  <node id="114800" label="zzz1155" cy:nodeId="2574">
    <graphics x="-1411.4235363793114" y="-3177.032307469999" z="0.0"/>
  </node>
  <node id="114799" label="zzz1154" cy:nodeId="2575">
    <graphics x="-1873.4235363793114" y="-2530.032307469999" z="0.0"/>
  </node>
  <node id="114798" label="zzz1153" cy:nodeId="2576">
    <graphics x="-2053.4235363793114" y="-2188.032307469999" z="0.0"/>
  </node>
  <node id="114797" label="zzz1152" cy:nodeId="2577">
    <graphics x="-1875.4235363793114" y="-2026.032307469999" z="0.0"/>
  </node>
  <node id="114796" label="zzz1151" cy:nodeId="2578">
    <graphics x="-1941.4235363793114" y="-1446.032307469999" z="0.0"/>
  </node>
  <node id="114795" label="zzz1150" cy:nodeId="2579">
    <graphics x="-839.4235363793114" y="-1738.032307469999" z="0.0"/>
  </node>
  <node id="114794" label="zzz1149" cy:nodeId="2580">
    <graphics x="-1515.4235363793114" y="-2749.032307469999" z="0.0"/>
  </node>
  <node id="114793" label="zzz1148" cy:nodeId="2581">
    <graphics x="-2281.4235363793114" y="-2656.032307469999" z="0.0"/>
  </node>
  <node id="114792" label="zzz1147" cy:nodeId="2582">
    <graphics x="-1182.4235363793114" y="-2830.032307469999" z="0.0"/>
  </node>
  <node id="114791" label="zzz1146" cy:nodeId="2583">
    <graphics x="-1400.4235363793114" y="-2692.032307469999" z="0.0"/>
  </node>
  <node id="114790" label="zzz1145" cy:nodeId="2584">
    <graphics x="-1112.4235363793114" y="-2745.032307469999" z="0.0"/>
  </node>
  <node id="114789" label="zzz1144" cy:nodeId="2585">
    <graphics x="-930.4235363793114" y="-2530.032307469999" z="0.0"/>
  </node>
  <node id="114788" label="zzz1143" cy:nodeId="2586">
    <graphics x="-1660.4235363793114" y="-2767.032307469999" z="0.0"/>
  </node>
  <node id="114787" label="zzz1142" cy:nodeId="2587">
    <graphics x="-1381.4235363793114" y="-2764.032307469999" z="0.0"/>
  </node>
  <node id="114786" label="zzz1141" cy:nodeId="2588">
    <graphics x="-1199.4235363793114" y="-1549.032307469999" z="0.0"/>
  </node>
  <node id="114785" label="zzz1140" cy:nodeId="2589">
    <graphics x="-1102.4235363793114" y="-1845.032307469999" z="0.0"/>
  </node>
  <node id="114784" label="zzz1139" cy:nodeId="2590">
    <graphics x="-2380.4235363793114" y="-2459.032307469999" z="0.0"/>
  </node>
  <node id="114783" label="zzz1138" cy:nodeId="2591">
    <graphics x="-2125.4235363793114" y="-2372.032307469999" z="0.0"/>
  </node>
  <node id="114782" label="zzz1137" cy:nodeId="2592">
    <graphics x="-1604.4235363793114" y="-2399.032307469999" z="0.0"/>
  </node>
  <node id="114781" label="zzz1136" cy:nodeId="2593">
    <graphics x="-1883.4235363793114" y="-2396.032307469999" z="0.0"/>
  </node>
  <node id="114780" label="zzz1135" cy:nodeId="2594">
    <graphics x="-1268.4235363793114" y="-2404.032307469999" z="0.0"/>
  </node>
  <node id="114779" label="zzz1134" cy:nodeId="2595">
    <graphics x="-1805.4235363793114" y="-2380.032307469999" z="0.0"/>
  </node>
  <node id="114778" label="zzz1133" cy:nodeId="2596">
    <graphics x="-1930.4235363793114" y="-1884.032307469999" z="0.0"/>
  </node>
  <node id="114777" label="zzz1132" cy:nodeId="2597">
    <graphics x="-1322.4235363793114" y="-2137.032307469999" z="0.0"/>
  </node>
  <node id="114776" label="zzz1131" cy:nodeId="2598">
    <graphics x="-2280.4235363793114" y="-2762.032307469999" z="0.0"/>
  </node>
  <node id="114775" label="zzz1130" cy:nodeId="2599">
    <graphics x="-1342.4235363793114" y="-3006.032307469999" z="0.0"/>
  </node>
  <node id="114774" label="zzz1129" cy:nodeId="2600">
    <graphics x="-1593.4235363793114" y="-2290.032307469999" z="0.0"/>
  </node>
  <node id="114773" label="zzz1128" cy:nodeId="2601">
    <graphics x="-1504.4235363793114" y="-1562.032307469999" z="0.0"/>
  </node>
  <node id="114772" label="zzz1127" cy:nodeId="2602">
    <graphics x="-1333.4235363793114" y="-2209.032307469999" z="0.0"/>
  </node>
  <node id="114771" label="zzz1126" cy:nodeId="2603">
    <graphics x="-2231.4235363793114" y="-1618.032307469999" z="0.0"/>
  </node>
  <node id="114770" label="zzz1125" cy:nodeId="2604">
    <graphics x="-1392.4235363793114" y="-2260.032307469999" z="0.0"/>
  </node>
  <node id="114769" label="zzz1124" cy:nodeId="2605">
    <graphics x="-1609.4235363793114" y="-2507.032307469999" z="0.0"/>
  </node>
  <node id="114768" label="zzz1123" cy:nodeId="2606">
    <graphics x="-1364.4235363793114" y="-2728.032307469999" z="0.0"/>
  </node>
  <node id="114767" label="zzz1122" cy:nodeId="2607">
    <graphics x="-2458.4235363793114" y="-1935.032307469999" z="0.0"/>
  </node>
  <node id="114766" label="zzz1121" cy:nodeId="2608">
    <graphics x="-1704.4235363793114" y="-3202.032307469999" z="0.0"/>
  </node>
  <node id="114765" label="zzz1120" cy:nodeId="2609">
    <graphics x="-1115.4235363793114" y="-1953.032307469999" z="0.0"/>
  </node>
  <node id="114764" label="zzz1119" cy:nodeId="2610">
    <graphics x="-1683.4235363793114" y="-2116.032307469999" z="0.0"/>
  </node>
  <node id="114763" label="zzz1118" cy:nodeId="2611">
    <graphics x="-1479.4235363793114" y="-1694.032307469999" z="0.0"/>
  </node>
  <node id="114762" label="zzz1117" cy:nodeId="2612">
    <graphics x="-1702.4235363793114" y="-2227.032307469999" z="0.0"/>
  </node>
  <node id="114761" label="zzz1116" cy:nodeId="2613">
    <graphics x="-1258.4235363793114" y="-1849.032307469999" z="0.0"/>
  </node>
  <node id="114760" label="zzz1115" cy:nodeId="2614">
    <graphics x="-1336.4235363793114" y="-2584.032307469999" z="0.0"/>
  </node>
  <node id="114759" label="zzz1114" cy:nodeId="2615">
    <graphics x="-1795.4235363793114" y="-2336.032307469999" z="0.0"/>
  </node>
  <node id="114758" label="zzz1113" cy:nodeId="2616">
    <graphics x="-1828.4235363793114" y="-2062.032307469999" z="0.0"/>
  </node>
  <node id="114757" label="zzz1112" cy:nodeId="2617">
    <graphics x="-2003.4235363793114" y="-3028.032307469999" z="0.0"/>
  </node>
  <node id="114756" label="zzz1111" cy:nodeId="2618">
    <graphics x="-1710.4235363793114" y="-1413.032307469999" z="0.0"/>
  </node>
  <node id="114755" label="zzz1110" cy:nodeId="2619">
    <graphics x="-1464.4235363793114" y="-2188.032307469999" z="0.0"/>
  </node>
  <node id="114754" label="zzz1109" cy:nodeId="2620">
    <graphics x="-1452.4235363793114" y="-1377.032307469999" z="0.0"/>
  </node>
  <node id="114753" label="zzz1108" cy:nodeId="2621">
    <graphics x="-2475.4235363793114" y="-2116.032307469999" z="0.0"/>
  </node>
  <node id="114752" label="zzz1107" cy:nodeId="2622">
    <graphics x="-1602.4235363793114" y="-2134.032307469999" z="0.0"/>
  </node>
  <node id="114751" label="zzz1106" cy:nodeId="2623">
    <graphics x="-1532.4235363793114" y="-1371.032307469999" z="0.0"/>
  </node>
  <node id="114750" label="zzz1105" cy:nodeId="2624">
    <graphics x="-2155.4235363793114" y="-1692.032307469999" z="0.0"/>
  </node>
  <node id="114749" label="zzz1104" cy:nodeId="2625">
    <graphics x="-1366.4235363793114" y="-1831.032307469999" z="0.0"/>
  </node>
  <node id="114748" label="zzz1103" cy:nodeId="2626">
    <graphics x="-2072.4235363793114" y="-1751.032307469999" z="0.0"/>
  </node>
  <node id="114747" label="zzz1102" cy:nodeId="2627">
    <graphics x="-1181.4235363793114" y="-1709.032307469999" z="0.0"/>
  </node>
  <node id="114746" label="zzz1101" cy:nodeId="2628">
    <graphics x="-1181.4235363793114" y="-2065.032307469999" z="0.0"/>
  </node>
  <node id="114745" label="zzz1100" cy:nodeId="2629">
    <graphics x="-1718.4235363793114" y="-2191.032307469999" z="0.0"/>
  </node>
  <node id="114744" label="zzz1099" cy:nodeId="2630">
    <graphics x="-895.4235363793114" y="-2029.032307469999" z="0.0"/>
  </node>
  <node id="114743" label="zzz1098" cy:nodeId="2631">
    <graphics x="-1864.4235363793114" y="-1562.032307469999" z="0.0"/>
  </node>
  <node id="114742" label="zzz1097" cy:nodeId="2632">
    <graphics x="-1552.4235363793114" y="-2044.032307469999" z="0.0"/>
  </node>
  <node id="114741" label="zzz1096" cy:nodeId="2633">
    <graphics x="-1900.4235363793114" y="-1676.032307469999" z="0.0"/>
  </node>
  <node id="114740" label="zzz1095" cy:nodeId="2634">
    <graphics x="-722.4235363793114" y="-2399.032307469999" z="0.0"/>
  </node>
  <node id="114739" label="zzz1094" cy:nodeId="2635">
    <graphics x="-2035.4235363793114" y="-2693.032307469999" z="0.0"/>
  </node>
  <node id="114738" label="zzz1093" cy:nodeId="2636">
    <graphics x="-942.4235363793114" y="-1793.032307469999" z="0.0"/>
  </node>
  <node id="114737" label="zzz1092" cy:nodeId="2637">
    <graphics x="-1931.4235363793114" y="-2199.032307469999" z="0.0"/>
  </node>
  <node id="114736" label="zzz1091" cy:nodeId="2638">
    <graphics x="-1377.4235363793114" y="-1644.032307469999" z="0.0"/>
  </node>
  <node id="114735" label="zzz1090" cy:nodeId="2639">
    <graphics x="-2180.4235363793114" y="-1974.032307469999" z="0.0"/>
  </node>
  <node id="114734" label="zzz1089" cy:nodeId="2640">
    <graphics x="-1276.4235363793114" y="-1777.032307469999" z="0.0"/>
  </node>
  <node id="114733" label="zzz1088" cy:nodeId="2641">
    <graphics x="-1160.4235363793114" y="-2484.032307469999" z="0.0"/>
  </node>
  <node id="114732" label="zzz1087" cy:nodeId="2642">
    <graphics x="-1479.4235363793114" y="-2278.032307469999" z="0.0"/>
  </node>
  <node id="114731" label="zzz1086" cy:nodeId="2643">
    <graphics x="-1521.4235363793114" y="-2242.032307469999" z="0.0"/>
  </node>
  <node id="114730" label="zzz1085" cy:nodeId="2644">
    <graphics x="-1985.4235363793114" y="-1410.032307469999" z="0.0"/>
  </node>
  <node id="114729" label="zzz1084" cy:nodeId="2645">
    <graphics x="-1285.4235363793114" y="-1421.032307469999" z="0.0"/>
  </node>
  <node id="114728" label="zzz1083" cy:nodeId="2646">
    <graphics x="-2135.4235363793114" y="-2862.032307469999" z="0.0"/>
  </node>
  <node id="114727" label="zzz1082" cy:nodeId="2647">
    <graphics x="-2115.4235363793114" y="-2950.032307469999" z="0.0"/>
  </node>
  <node id="114726" label="zzz1081" cy:nodeId="2648">
    <graphics x="-1444.4235363793114" y="-2101.032307469999" z="0.0"/>
  </node>
  <node id="114725" label="zzz1080" cy:nodeId="2649">
    <graphics x="-1239.4235363793114" y="-2173.032307469999" z="0.0"/>
  </node>
  <node id="114724" label="zzz1079" cy:nodeId="2650">
    <graphics x="-1533.4235363793114" y="-1490.032307469999" z="0.0"/>
  </node>
  <node id="114723" label="zzz1078" cy:nodeId="2651">
    <graphics x="-2454.4235363793114" y="-2330.032307469999" z="0.0"/>
  </node>
  <node id="114722" label="zzz1077" cy:nodeId="2652">
    <graphics x="-1808.4235363793114" y="-1697.032307469999" z="0.0"/>
  </node>
  <node id="114721" label="zzz1076" cy:nodeId="2653">
    <graphics x="-1605.4235363793114" y="-1444.032307469999" z="0.0"/>
  </node>
  <node id="114720" label="zzz1075" cy:nodeId="2654">
    <graphics x="-2157.4235363793114" y="-3027.032307469999" z="0.0"/>
  </node>
  <node id="114719" label="zzz1074" cy:nodeId="2655">
    <graphics x="-2037.4235363793114" y="-2300.032307469999" z="0.0"/>
  </node>
  <node id="114718" label="zzz1073" cy:nodeId="2656">
    <graphics x="-1393.4235363793114" y="-1498.032307469999" z="0.0"/>
  </node>
  <node id="114717" label="zzz1072" cy:nodeId="2657">
    <graphics x="-2258.4235363793114" y="-1983.032307469999" z="0.0"/>
  </node>
  <node id="114716" label="zzz1071" cy:nodeId="2658">
    <graphics x="-1485.4235363793114" y="-1957.032307469999" z="0.0"/>
  </node>
  <node id="114715" label="zzz1070" cy:nodeId="2659">
    <graphics x="-782.4235363793114" y="-2163.032307469999" z="0.0"/>
  </node>
  <node id="114714" label="zzz1069" cy:nodeId="2660">
    <graphics x="-985.4235363793114" y="-2108.032307469999" z="0.0"/>
  </node>
  <node id="114713" label="zzz1068" cy:nodeId="2661">
    <graphics x="-2254.4235363793114" y="-2170.032307469999" z="0.0"/>
  </node>
  <node id="114712" label="zzz1067" cy:nodeId="2662">
    <graphics x="-1077.4235363793114" y="-2290.032307469999" z="0.0"/>
  </node>
  <node id="114711" label="zzz1066" cy:nodeId="2663">
    <graphics x="-1118.4235363793114" y="-1881.032307469999" z="0.0"/>
  </node>
  <node id="114710" label="zzz1065" cy:nodeId="2664">
    <graphics x="-1815.4235363793114" y="-2877.032307469999" z="0.0"/>
  </node>
  <node id="114709" label="zzz1064" cy:nodeId="2665">
    <graphics x="-1288.4235363793114" y="-2758.032307469999" z="0.0"/>
  </node>
  <node id="114708" label="zzz1063" cy:nodeId="2666">
    <graphics x="-1255.4235363793114" y="-1813.032307469999" z="0.0"/>
  </node>
  <node id="114707" label="zzz1062" cy:nodeId="2667">
    <graphics x="-741.4235363793114" y="-2011.032307469999" z="0.0"/>
  </node>
  <node id="114706" label="zzz1061" cy:nodeId="2668">
    <graphics x="-854.4235363793114" y="-1980.032307469999" z="0.0"/>
  </node>
  <node id="114705" label="zzz1060" cy:nodeId="2669">
    <graphics x="-1476.4235363793114" y="-2713.032307469999" z="0.0"/>
  </node>
  <node id="114704" label="zzz1059" cy:nodeId="2670">
    <graphics x="-2289.4235363793114" y="-2026.032307469999" z="0.0"/>
  </node>
  <node id="114703" label="zzz1058" cy:nodeId="2671">
    <graphics x="-1369.4235363793114" y="-1407.032307469999" z="0.0"/>
  </node>
  <node id="114702" label="zzz1057" cy:nodeId="2672">
    <graphics x="-1212.4235363793114" y="-2782.032307469999" z="0.0"/>
  </node>
  <node id="114701" label="zzz1056" cy:nodeId="2673">
    <graphics x="-737.4235363793114" y="-2556.032307469999" z="0.0"/>
  </node>
  <node id="114700" label="zzz1055" cy:nodeId="2674">
    <graphics x="-1904.4235363793114" y="-2062.032307469999" z="0.0"/>
  </node>
  <node id="114699" label="zzz1054" cy:nodeId="2675">
    <graphics x="-1811.4235363793114" y="-1490.032307469999" z="0.0"/>
  </node>
  <node id="114698" label="zzz1053" cy:nodeId="2676">
    <graphics x="-2450.4235363793114" y="-1896.032307469999" z="0.0"/>
  </node>
  <node id="114697" label="zzz1052" cy:nodeId="2677">
    <graphics x="-2234.4235363793114" y="-2620.032307469999" z="0.0"/>
  </node>
  <node id="114696" label="zzz1051" cy:nodeId="2678">
    <graphics x="-1642.4235363793114" y="-3021.032307469999" z="0.0"/>
  </node>
  <node id="114695" label="zzz1050" cy:nodeId="2679">
    <graphics x="-2289.4235363793114" y="-2853.032307469999" z="0.0"/>
  </node>
  <node id="114694" label="zzz1049" cy:nodeId="2680">
    <graphics x="-2079.4235363793114" y="-2336.032307469999" z="0.0"/>
  </node>
  <node id="114693" label="zzz1048" cy:nodeId="2681">
    <graphics x="-1220.4235363793114" y="-2630.032307469999" z="0.0"/>
  </node>
  <node id="114692" label="zzz1047" cy:nodeId="2682">
    <graphics x="-1660.4235363793114" y="-1571.032307469999" z="0.0"/>
  </node>
  <node id="114691" label="zzz1046" cy:nodeId="2683">
    <graphics x="-1610.4235363793114" y="-1684.032307469999" z="0.0"/>
  </node>
  <node id="114690" label="zzz1045" cy:nodeId="2684">
    <graphics x="-1963.4235363793114" y="-2539.032307469999" z="0.0"/>
  </node>
  <node id="114689" label="zzz1044" cy:nodeId="2685">
    <graphics x="-2058.4235363793114" y="-1803.032307469999" z="0.0"/>
  </node>
  <node id="114688" label="zzz1043" cy:nodeId="2686">
    <graphics x="-1409.4235363793114" y="-1941.032307469999" z="0.0"/>
  </node>
  <node id="114687" label="zzz1042" cy:nodeId="2687">
    <graphics x="-1520.4235363793114" y="-2116.032307469999" z="0.0"/>
  </node>
  <node id="114686" label="zzz1041" cy:nodeId="2688">
    <graphics x="-1620.4235363793114" y="-2471.032307469999" z="0.0"/>
  </node>
  <node id="114685" label="zzz1040" cy:nodeId="2689">
    <graphics x="-1536.4235363793114" y="-1526.032307469999" z="0.0"/>
  </node>
  <node id="114684" label="zzz1039" cy:nodeId="2690">
    <graphics x="-1923.4235363793114" y="-2908.032307469999" z="0.0"/>
  </node>
  <node id="114683" label="zzz1038" cy:nodeId="2691">
    <graphics x="-994.4235363793114" y="-2147.032307469999" z="0.0"/>
  </node>
  <node id="114682" label="zzz1037" cy:nodeId="2692">
    <graphics x="-2489.4235363793114" y="-2462.032307469999" z="0.0"/>
  </node>
  <node id="114681" label="zzz1036" cy:nodeId="2693">
    <graphics x="-1345.4235363793114" y="-2173.032307469999" z="0.0"/>
  </node>
  <node id="114680" label="zzz1035" cy:nodeId="2694">
    <graphics x="-1442.4235363793114" y="-1813.032307469999" z="0.0"/>
  </node>
  <node id="114679" label="zzz1034" cy:nodeId="2695">
    <graphics x="-885.4235363793114" y="-2343.032307469999" z="0.0"/>
  </node>
  <node id="114678" label="zzz1033" cy:nodeId="2696">
    <graphics x="-1498.4235363793114" y="-1849.032307469999" z="0.0"/>
  </node>
  <node id="114677" label="zzz1032" cy:nodeId="2697">
    <graphics x="-2256.4235363793114" y="-1947.032307469999" z="0.0"/>
  </node>
  <node id="114676" label="zzz1031" cy:nodeId="2698">
    <graphics x="-1884.4235363793114" y="-1748.032307469999" z="0.0"/>
  </node>
  <node id="114675" label="zzz1030" cy:nodeId="2699">
    <graphics x="-1444.4235363793114" y="-2458.032307469999" z="0.0"/>
  </node>
  <node id="114674" label="zzz1029" cy:nodeId="2700">
    <graphics x="-1533.4235363793114" y="-1921.032307469999" z="0.0"/>
  </node>
  <node id="114673" label="zzz1028" cy:nodeId="2701">
    <graphics x="-1146.4235363793114" y="-2025.032307469999" z="0.0"/>
  </node>
  <node id="114672" label="zzz1027" cy:nodeId="2702">
    <graphics x="-1683.4235363793114" y="-1377.032307469999" z="0.0"/>
  </node>
  <node id="114671" label="zzz1026" cy:nodeId="2703">
    <graphics x="-1304.4235363793114" y="-2332.032307469999" z="0.0"/>
  </node>
  <node id="114670" label="zzz1025" cy:nodeId="2704">
    <graphics x="-1265.4235363793114" y="-1385.032307469999" z="0.0"/>
  </node>
  <node id="114669" label="zzz1024" cy:nodeId="2705">
    <graphics x="-2256.4235363793114" y="-2242.032307469999" z="0.0"/>
  </node>
  <node id="114668" label="zzz1023" cy:nodeId="2706">
    <graphics x="-1703.4235363793114" y="-1535.032307469999" z="0.0"/>
  </node>
  <node id="114667" label="zzz1022" cy:nodeId="2707">
    <graphics x="-1623.4235363793114" y="-2218.032307469999" z="0.0"/>
  </node>
  <node id="114666" label="zzz1021" cy:nodeId="2708">
    <graphics x="-1299.4235363793114" y="-1921.032307469999" z="0.0"/>
  </node>
  <node id="114665" label="zzz1020" cy:nodeId="2709">
    <graphics x="-1579.4235363793114" y="-2435.032307469999" z="0.0"/>
  </node>
  <node id="114664" label="zzz1019" cy:nodeId="2710">
    <graphics x="-2129.4235363793114" y="-2201.032307469999" z="0.0"/>
  </node>
  <node id="114663" label="zzz1018" cy:nodeId="2711">
    <graphics x="-1655.4235363793114" y="-2435.032307469999" z="0.0"/>
  </node>
  <node id="114662" label="zzz1017" cy:nodeId="2712">
    <graphics x="-1384.4235363793114" y="-2512.032307469999" z="0.0"/>
  </node>
  <node id="114661" label="zzz1016" cy:nodeId="2713">
    <graphics x="-1525.4235363793114" y="-1598.032307469999" z="0.0"/>
  </node>
  <node id="114660" label="zzz1015" cy:nodeId="2714">
    <graphics x="-1727.4235363793114" y="-3311.032307469999" z="0.0"/>
  </node>
  <node id="114659" label="zzz1014" cy:nodeId="2715">
    <graphics x="-1811.4235363793114" y="-3121.032307469999" z="0.0"/>
  </node>
  <node id="114658" label="zzz1013" cy:nodeId="2716">
    <graphics x="-1896.4235363793114" y="-2820.032307469999" z="0.0"/>
  </node>
  <node id="114657" label="zzz1012" cy:nodeId="2717">
    <graphics x="-1891.4235363793114" y="-1640.032307469999" z="0.0"/>
  </node>
  <node id="114656" label="zzz1011" cy:nodeId="2718">
    <graphics x="-1015.4235363793114" y="-1964.032307469999" z="0.0"/>
  </node>
  <node id="114655" label="zzz1010" cy:nodeId="2719">
    <graphics x="-1525.4235363793114" y="-1428.032307469999" z="0.0"/>
  </node>
  <node id="114654" label="zzz1009" cy:nodeId="2720">
    <graphics x="-846.4235363793114" y="-2704.032307469999" z="0.0"/>
  </node>
  <node id="114653" label="zzz1008" cy:nodeId="2721">
    <graphics x="-1315.4235363793114" y="-2692.032307469999" z="0.0"/>
  </node>
  <node id="114652" label="zzz1007" cy:nodeId="2722">
    <graphics x="-1178.4235363793114" y="-1833.032307469999" z="0.0"/>
  </node>
  <node id="114651" label="zzz1006" cy:nodeId="2723">
    <graphics x="-2041.4235363793114" y="-2614.032307469999" z="0.0"/>
  </node>
  <node id="114650" label="zzz1005" cy:nodeId="2724">
    <graphics x="-1565.4235363793114" y="-1885.032307469999" z="0.0"/>
  </node>
  <node id="114649" label="zzz1004" cy:nodeId="2725">
    <graphics x="-971.4235363793114" y="-1700.032307469999" z="0.0"/>
  </node>
  <node id="114648" label="zzz1003" cy:nodeId="2726">
    <graphics x="-1802.4235363793114" y="-1418.032307469999" z="0.0"/>
  </node>
  <node id="114647" label="zzz1002" cy:nodeId="2727">
    <graphics x="-994.4235363793114" y="-2818.032307469999" z="0.0"/>
  </node>
  <node id="114646" label="zzz1001" cy:nodeId="2728">
    <graphics x="-2065.4235363793114" y="-1588.032307469999" z="0.0"/>
  </node>
  <node id="114645" label="zzz1000" cy:nodeId="2729">
    <graphics x="-1417.4235363793114" y="-1599.032307469999" z="0.0"/>
  </node>
</graph>
