# Supplementary material for: Discovery of several thousand highly diverse circular DNA viruses
Source: eLife journal article supplement (doi:10.7554/elife.51971), 2020-02-03
Supplement: fig4-data1 [file elife-51971-fig4-data1-v1.cys]

Archive with 80 entries (80 files):
- CytoscapeSession-2019_08_07-14_38/3.0.0.version
- CytoscapeSession-2019_08_07-14_38/networks/36-all_myseqs_and_genbank_s_domain2_70_190610+Full+Network.xgmml
- CytoscapeSession-2019_08_07-14_38/views/52-9033-all_myseqs_and_genbank_s_domain2_70_190610+Full+Network.xgmml
- CytoscapeSession-2019_08_07-14_38/views/4568-4605-all_myseqs_and_genbank_s_domain2_70_190610+Full+Network%282%29.xgmml
- CytoscapeSession-2019_08_07-14_38/views/4558-13531-all_myseqs_and_genbank_s_domain2_70_190610+Full+Network%281%29.xgmml
- CytoscapeSession-2019_08_07-14_38/tables/36-all_myseqs_and_genbank_s_domain2_70_190610+Full+Network/SHARED_ATTRS-org.cytoscape.model.CyNetwork-36+shared+network.cytable
- CytoscapeSession-2019_08_07-14_38/tables/52-all_myseqs_and_genbank_s_domain2_70_190610+Full+Network/HIDDEN-org.cytoscape.model.CyEdge-52+hidden+edge.cytable
- CytoscapeSession-2019_08_07-14_38/tables/36-all_myseqs_and_genbank_s_domain2_70_190610+Full+Network/SHARED_ATTRS-org.cytoscape.model.CyEdge-36+shared+edge.cytable
- CytoscapeSession-2019_08_07-14_38/tables/4568-all_myseqs_and_genbank_s_domain2_70_190610+Full+Network%282%29/HIDDEN-org.cytoscape.model.CyNetwork-4568+hidden+network.cytable
- CytoscapeSession-2019_08_07-14_38/tables/4558-all_myseqs_and_genbank_s_domain2_70_190610+Full+Network%281%29/LOCAL_ATTRS-org.cytoscape.model.CyEdge-all_myseqs_and_genbank_s_domain2_70_190610+Full+Network%281%29+default+edge.cytable
- CytoscapeSession-2019_08_07-14_38/tables/4558-all_myseqs_and_genbank_s_domain2_70_190610+Full+Network%281%29/HIDDEN-org.cytoscape.model.CyEdge-4558+hidden+edge.cytable
- CytoscapeSession-2019_08_07-14_38/tables/4558-all_myseqs_and_genbank_s_domain2_70_190610+Full+Network%281%29/HIDDEN-org.cytoscape.model.CyNode-4558+hidden+node.cytable
- CytoscapeSession-2019_08_07-14_38/tables/4558-all_myseqs_and_genbank_s_domain2_70_190610+Full+Network%281%29/HIDDEN-org.cytoscape.model.CyNetwork-4558+hidden+network.cytable
- CytoscapeSession-2019_08_07-14_38/tables/52-all_myseqs_and_genbank_s_domain2_70_190610+Full+Network/HIDDEN-org.cytoscape.model.CyNode-52+hidden+node.cytable
- CytoscapeSession-2019_08_07-14_38/tables/4558-all_myseqs_and_genbank_s_domain2_70_190610+Full+Network%281%29/LOCAL_ATTRS-org.cytoscape.model.CyNetwork-all_myseqs_and_genbank_s_domain2_70_190610+Full+Network%281%29+default+network.cytable
- CytoscapeSession-2019_08_07-14_38/tables/4568-all_myseqs_and_genbank_s_domain2_70_190610+Full+Network%282%29/LOCAL_ATTRS-org.cytoscape.model.CyEdge-all_myseqs_and_genbank_s_domain2_70_190610+Full+Network%282%29+default+edge.cytable
- CytoscapeSession-2019_08_07-14_38/tables/4568-all_myseqs_and_genbank_s_domain2_70_190610+Full+Network%282%29/LOCAL_ATTRS-org.cytoscape.model.CyNetwork-all_myseqs_and_genbank_s_domain2_70_190610+Full+Network%282%29+default+network.cytable
- CytoscapeSession-2019_08_07-14_38/tables/52-all_myseqs_and_genbank_s_domain2_70_190610+Full+Network/LOCAL_ATTRS-org.cytoscape.model.CyNetwork-all_myseqs_and_genbank_s_domain2_70_190610+Full+Network+default+network.cytable
- CytoscapeSession-2019_08_07-14_38/tables/36-all_myseqs_and_genbank_s_domain2_70_190610+Full+Network/HIDDEN-org.cytoscape.model.CyEdge-36+hidden+edge.cytable
- CytoscapeSession-2019_08_07-14_38/tables/52-all_myseqs_and_genbank_s_domain2_70_190610+Full+Network/HIDDEN-org.cytoscape.model.CyNetwork-52+hidden+network.cytable
- CytoscapeSession-2019_08_07-14_38/tables/36-all_myseqs_and_genbank_s_domain2_70_190610+Full+Network/LOCAL_ATTRS-org.cytoscape.model.CyNode-36+default+node.cytable
- CytoscapeSession-2019_08_07-14_38/tables/4568-all_myseqs_and_genbank_s_domain2_70_190610+Full+Network%282%29/HIDDEN-org.cytoscape.model.CyEdge-4568+hidden+edge.cytable
- CytoscapeSession-2019_08_07-14_38/tables/36-all_myseqs_and_genbank_s_domain2_70_190610+Full+Network/HIDDEN-org.cytoscape.model.CyNode-36+hidden+node.cytable
- CytoscapeSession-2019_08_07-14_38/tables/36-all_myseqs_and_genbank_s_domain2_70_190610+Full+Network/LOCAL_ATTRS-org.cytoscape.model.CyNetwork-36+default+network.cytable
- CytoscapeSession-2019_08_07-14_38/tables/4568-all_myseqs_and_genbank_s_domain2_70_190610+Full+Network%282%29/HIDDEN-org.cytoscape.model.CyNode-4568+hidden+node.cytable
- CytoscapeSession-2019_08_07-14_38/tables/52-all_myseqs_and_genbank_s_domain2_70_190610+Full+Network/LOCAL_ATTRS-org.cytoscape.model.CyNode-all_myseqs_and_genbank_s_domain2_70_190610+Full+Network+default+node.cytable
- CytoscapeSession-2019_08_07-14_38/tables/4568-all_myseqs_and_genbank_s_domain2_70_190610+Full+Network%282%29/LOCAL_ATTRS-org.cytoscape.model.CyNode-all_myseqs_and_genbank_s_domain2_70_190610+Full+Network%282%29+default+node.cytable
- CytoscapeSession-2019_08_07-14_38/tables/36-all_myseqs_and_genbank_s_domain2_70_190610+Full+Network/SHARED_ATTRS-org.cytoscape.model.CyNode-36+shared+node.cytable
- CytoscapeSession-2019_08_07-14_38/tables/4558-all_myseqs_and_genbank_s_domain2_70_190610+Full+Network%281%29/LOCAL_ATTRS-org.cytoscape.model.CyNode-all_myseqs_and_genbank_s_domain2_70_190610+Full+Network%281%29+default+node.cytable
- CytoscapeSession-2019_08_07-14_38/tables/52-all_myseqs_and_genbank_s_domain2_70_190610+Full+Network/LOCAL_ATTRS-org.cytoscape.model.CyEdge-all_myseqs_and_genbank_s_domain2_70_190610+Full+Network+default+edge.cytable
- CytoscapeSession-2019_08_07-14_38/tables/36-all_myseqs_and_genbank_s_domain2_70_190610+Full+Network/LOCAL_ATTRS-org.cytoscape.model.CyEdge-36+default+edge.cytable
- CytoscapeSession-2019_08_07-14_38/tables/36-all_myseqs_and_genbank_s_domain2_70_190610+Full+Network/HIDDEN-org.cytoscape.model.CyNetwork-36+hidden+network.cytable
- CytoscapeSession-2019_08_07-14_38/tables/cytables.xml
- CytoscapeSession-2019_08_07-14_38/session_vizmap.xml
- CytoscapeSession-2019_08_07-14_38/properties/session_bookmarks.xml
- CytoscapeSession-2019_08_07-14_38/properties/groupSettings.props
- CytoscapeSession-2019_08_07-14_38/session_thumbnail.png
- CytoscapeSession-2019_08_07-14_38/apps/org.cytoscape.ding.customgraphicsmgr/image_metadata.props
- CytoscapeSession-2019_08_07-14_38/apps/org.cytoscape.ding.customgraphicsmgr/8.png
- CytoscapeSession-2019_08_07-14_38/apps/org.cytoscape.ding.customgraphicsmgr/9.png
- CytoscapeSession-2019_08_07-14_38/apps/org.cytoscape.ding.customgraphicsmgr/14.png
- CytoscapeSession-2019_08_07-14_38/apps/org.cytoscape.ding.customgraphicsmgr/28.png
- CytoscapeSession-2019_08_07-14_38/apps/org.cytoscape.ding.customgraphicsmgr/29.png
- CytoscapeSession-2019_08_07-14_38/apps/org.cytoscape.ding.customgraphicsmgr/15.png
- CytoscapeSession-2019_08_07-14_38/apps/org.cytoscape.ding.customgraphicsmgr/17.png
- CytoscapeSession-2019_08_07-14_38/apps/org.cytoscape.ding.customgraphicsmgr/16.png
- CytoscapeSession-2019_08_07-14_38/apps/org.cytoscape.ding.customgraphicsmgr/12.png
- CytoscapeSession-2019_08_07-14_38/apps/org.cytoscape.ding.customgraphicsmgr/13.png
- CytoscapeSession-2019_08_07-14_38/apps/org.cytoscape.ding.customgraphicsmgr/11.png
- CytoscapeSession-2019_08_07-14_38/apps/org.cytoscape.ding.customgraphicsmgr/10.png
- CytoscapeSession-2019_08_07-14_38/apps/org.cytoscape.ding.customgraphicsmgr/21.png
- CytoscapeSession-2019_08_07-14_38/apps/org.cytoscape.ding.customgraphicsmgr/20.png
- CytoscapeSession-2019_08_07-14_38/apps/org.cytoscape.ding.customgraphicsmgr/22.png
- CytoscapeSession-2019_08_07-14_38/apps/org.cytoscape.ding.customgraphicsmgr/23.png
- CytoscapeSession-2019_08_07-14_38/apps/org.cytoscape.ding.customgraphicsmgr/27.png
- CytoscapeSession-2019_08_07-14_38/apps/org.cytoscape.ding.customgraphicsmgr/32.png
- CytoscapeSession-2019_08_07-14_38/apps/org.cytoscape.ding.customgraphicsmgr/26.png
- CytoscapeSession-2019_08_07-14_38/apps/org.cytoscape.ding.customgraphicsmgr/18.png
- CytoscapeSession-2019_08_07-14_38/apps/org.cytoscape.ding.customgraphicsmgr/30.png
- CytoscapeSession-2019_08_07-14_38/apps/org.cytoscape.ding.customgraphicsmgr/24.png
- CytoscapeSession-2019_08_07-14_38/apps/org.cytoscape.ding.customgraphicsmgr/25.png
- CytoscapeSession-2019_08_07-14_38/apps/org.cytoscape.ding.customgraphicsmgr/31.png
- CytoscapeSession-2019_08_07-14_38/apps/org.cytoscape.ding.customgraphicsmgr/19.png
- CytoscapeSession-2019_08_07-14_38/apps/org.cytoscape.ding.customgraphicsmgr/4.png
- CytoscapeSession-2019_08_07-14_38/apps/org.cytoscape.ding.customgraphicsmgr/42.png
- CytoscapeSession-2019_08_07-14_38/apps/org.cytoscape.ding.customgraphicsmgr/43.png
- CytoscapeSession-2019_08_07-14_38/apps/org.cytoscape.ding.customgraphicsmgr/5.png
- CytoscapeSession-2019_08_07-14_38/apps/org.cytoscape.ding.customgraphicsmgr/7.png
- CytoscapeSession-2019_08_07-14_38/apps/org.cytoscape.ding.customgraphicsmgr/6.png
- CytoscapeSession-2019_08_07-14_38/apps/org.cytoscape.ding.customgraphicsmgr/2.png
- CytoscapeSession-2019_08_07-14_38/apps/org.cytoscape.ding.customgraphicsmgr/3.png
- CytoscapeSession-2019_08_07-14_38/apps/org.cytoscape.ding.customgraphicsmgr/1.png
- CytoscapeSession-2019_08_07-14_38/apps/org.cytoscape.swing-application/session_state.xml
- CytoscapeSession-2019_08_07-14_38/apps/org.cytoscape.swing-application/network_list.xml
- CytoscapeSession-2019_08_07-14_38/apps/org.cytoscape.filter/filters.json
- CytoscapeSession-2019_08_07-14_38/apps/org.cytoscape.filter/filterChains.json
- CytoscapeSession-2019_08_07-14_38/apps/org.cytoscape.browser/UnassignedTables.props
- CytoscapeSession-2019_08_07-14_38/apps/org.cytoscape.browser/NetworkTable.props
- CytoscapeSession-2019_08_07-14_38/apps/org.cytoscape.browser/NodeTable.props
- CytoscapeSession-2019_08_07-14_38/apps/org.cytoscape.browser/EdgeTable.props
