# Supplementary material for: Discovery of several thousand highly diverse circular DNA viruses
Source: eLife journal article supplement (doi:10.7554/elife.51971), 2020-02-03
Supplement: fig4-data1 [file elife-51971-fig4-data1-v1.cys › CytoscapeSession-2019_08_07-14_38/apps/org.cytoscape.browser/NodeTable.props]

all_myseqs_and_genbank_s_domain2_70_190610 Full Network default node	0	SUID	false
all_myseqs_and_genbank_s_domain2_70_190610 Full Network default node	1	selected	false
all_myseqs_and_genbank_s_domain2_70_190610 Full Network default node	2	shared name	true
all_myseqs_and_genbank_s_domain2_70_190610 Full Network default node	3	name	true
all_myseqs_and_genbank_s_domain2_70_190610 Full Network default node	4	Sequence Source	true
all_myseqs_and_genbank_s_domain2_70_190610 Full Network default node	5	Description	true
all_myseqs_and_genbank_s_domain2_70_190610 Full Network default node	6	Sequence Length	true
all_myseqs_and_genbank_s_domain2_70_190610 Full Network default node	7	Sequence	true
all_myseqs_and_genbank_s_domain2_70_190610 Full Network default node	8	Taxonomy	true
all_myseqs_and_genbank_s_domain2_70_190610 Full Network(2) default node	0	SUID	false
all_myseqs_and_genbank_s_domain2_70_190610 Full Network(2) default node	1	selected	false
all_myseqs_and_genbank_s_domain2_70_190610 Full Network(2) default node	2	shared name	true
all_myseqs_and_genbank_s_domain2_70_190610 Full Network(2) default node	3	Description	true
all_myseqs_and_genbank_s_domain2_70_190610 Full Network(2) default node	4	Sequence	true
all_myseqs_and_genbank_s_domain2_70_190610 Full Network(2) default node	5	Sequence Length	true
all_myseqs_and_genbank_s_domain2_70_190610 Full Network(2) default node	6	Sequence Source	true
all_myseqs_and_genbank_s_domain2_70_190610 Full Network(2) default node	7	Taxonomy	true
all_myseqs_and_genbank_s_domain2_70_190610 Full Network(2) default node	8	name	true
