# Supplementary material for: Discovery of several thousand highly diverse circular DNA viruses
Source: eLife journal article supplement (doi:10.7554/elife.51971), 2020-02-03
Supplement: fig4-data1 [file elife-51971-fig4-data1-v1.cys › CytoscapeSession-2019_08_07-14_38/networks/36-all_myseqs_and_genbank_s_domain2_70_190610+Full+Network.xgmml]

<?xml version="1.0" encoding="UTF-8" standalone="yes"?>
<graph id="36" label="all_myseqs_and_genbank_s_domain2_70_190610 Full Network" cy:view="0" cy:registered="0" cy:documentVersion="3.0" xmlns:dc="http://purl.org/dc/elements/1.1/" xmlns:xlink="http://www.w3.org/1999/xlink" xmlns:rdf="http://www.w3.org/1999/02/22-rdf-syntax-ns#" xmlns:cy="http://www.cytoscape.org" xmlns="http://www.cs.rpi.edu/XGMML">
  <att>
    <graph id="52" label="all_myseqs_and_genbank_s_domain2_70_190610 Full Network" cy:registered="1">
      <node id="229" label="zzzzzz9"/>
      <node id="228" label="zzzzzz8"/>
      <node id="227" label="zzzzzz7"/>
      <node id="226" label="zzzzzz6"/>
      <node id="225" label="zzzzzz5"/>
      <node id="224" label="zzzzzz4"/>
      <node id="223" label="zzzzzz3"/>
      <node id="222" label="zzzzzz2"/>
      <node id="221" label="zzzzzz1"/>
      <node id="220" label="zzzzzz0"/>
      <node id="219" label="zzzzz99"/>
      <node id="218" label="zzzzz98"/>
      <node id="217" label="zzzzz97"/>
      <node id="216" label="zzzzz96"/>
      <node id="215" label="zzzzz95"/>
      <node id="214" label="zzzzz94"/>
      <node id="213" label="zzzzz93"/>
      <node id="212" label="zzzzz92"/>
      <node id="211" label="zzzzz91"/>
      <node id="210" label="zzzzz90"/>
      <node id="209" label="zzzzz89"/>
      <node id="208" label="zzzzz88"/>
      <node id="207" label="zzzzz87"/>
      <node id="206" label="zzzzz86"/>
      <node id="205" label="zzzzz85"/>
      <node id="204" label="zzzzz84"/>
      <node id="203" label="zzzzz83"/>
      <node id="202" label="zzzzz82"/>
      <node id="201" label="zzzzz81"/>
      <node id="200" label="zzzzz80"/>
      <node id="199" label="zzzzz79"/>
      <node id="198" label="zzzzz78"/>
      <node id="197" label="zzzzz77"/>
      <node id="196" label="zzzzz76"/>
      <node id="195" label="zzzzz75"/>
      <node id="194" label="zzzzz74"/>
      <node id="193" label="zzzzz73"/>
      <node id="192" label="zzzzz72"/>
      <node id="191" label="zzzzz71"/>
      <node id="190" label="zzzzz70"/>
      <node id="189" label="zzzzz69"/>
      <node id="188" label="zzzzz68"/>
      <node id="187" label="zzzzz67"/>
      <node id="186" label="zzzzz66"/>
      <node id="185" label="zzzzz65"/>
      <node id="184" label="zzzzz64"/>
      <node id="183" label="zzzzz63"/>
      <node id="182" label="zzzzz62"/>
      <node id="181" label="zzzzz61"/>
      <node id="180" label="zzzzz60"/>
      <node id="179" label="zzzzz59"/>
      <node id="178" label="zzzzz58"/>
      <node id="177" label="zzzzz57"/>
      <node id="176" label="zzzzz56"/>
      <node id="175" label="zzzzz55"/>
      <node id="174" label="zzzzz54"/>
      <node id="173" label="zzzzz53"/>
      <node id="172" label="zzzzz52"/>
      <node id="171" label="zzzzz51"/>
      <node id="170" label="zzzzz50"/>
      <node id="169" label="zzzzz49"/>
      <node id="168" label="zzzzz48"/>
      <node id="167" label="zzzzz47"/>
      <node id="166" label="zzzzz46"/>
      <node id="165" label="zzzzz45"/>
      <node id="164" label="zzzzz44"/>
      <node id="163" label="zzzzz43"/>
      <node id="162" label="zzzzz42"/>
      <node id="161" label="zzzzz41"/>
      <node id="160" label="zzzzz40"/>
      <node id="159" label="zzzzz39"/>
      <node id="158" label="zzzzz38"/>
      <node id="157" label="zzzzz37"/>
      <node id="156" label="zzzzz36"/>
      <node id="155" label="zzzzz35"/>
      <node id="154" label="zzzzz34"/>
      <node id="153" label="zzzzz33"/>
      <node id="152" label="zzzzz32"/>
      <node id="151" label="zzzzz31"/>
      <node id="150" label="zzzzz30"/>
      <node id="149" label="zzzzz29"/>
      <node id="148" label="zzzzz28"/>
      <node id="147" label="zzzzz27"/>
      <node id="146" label="zzzzz26"/>
      <node id="145" label="zzzzz25"/>
      <node id="144" label="zzzzz24"/>
      <node id="143" label="zzzzz23"/>
      <node id="142" label="zzzzz22"/>
      <node id="141" label="zzzzz21"/>
      <node id="140" label="zzzzz20"/>
      <node id="139" label="zzzzz19"/>
      <node id="138" label="zzzzz18"/>
      <node id="137" label="zzzzz17"/>
      <node id="136" label="zzzzz16"/>
      <node id="135" label="zzzzz15"/>
      <node id="134" label="zzzzz14"/>
      <node id="133" label="zzzzz13"/>
      <node id="132" label="zzzzz12"/>
      <node id="131" label="zzzzz11"/>
      <node id="130" label="zzzzz10"/>
      <node id="129" label="zzzz167"/>
      <node id="128" label="zzzz166"/>
      <node id="127" label="zzzz165"/>
      <node id="126" label="zzzz164"/>
      <node id="125" label="zzzz163"/>
      <node id="124" label="zzzz162"/>
      <node id="123" label="zzzz161"/>
      <node id="122" label="zzzz160"/>
      <node id="121" label="zzzz159"/>
      <node id="120" label="zzzz158"/>
      <node id="119" label="zzzz157"/>
      <node id="118" label="zzzz156"/>
      <node id="117" label="zzzz155"/>
      <node id="116" label="zzzz154"/>
      <node id="115" label="zzzz153"/>
      <node id="114" label="zzzz152"/>
      <node id="113" label="zzzz151"/>
      <node id="112" label="zzzz150"/>
      <node id="111" label="zzzz149"/>
      <node id="110" label="zzzz148"/>
      <node id="109" label="zzzz147"/>
      <node id="108" label="zzzz146"/>
      <node id="107" label="zzzz145"/>
      <node id="106" label="zzzz144"/>
      <node id="105" label="zzzz143"/>
      <node id="104" label="zzzz142"/>
      <node id="103" label="zzzz141"/>
      <node id="102" label="zzzz140"/>
      <node id="101" label="zzzz139"/>
      <node id="100" label="zzzz138"/>
      <node id="99" label="zzzz137"/>
      <node id="98" label="zzzz136"/>
      <node id="97" label="zzzz135"/>
      <node id="96" label="zzzz134"/>
      <node id="95" label="zzzz133"/>
      <node id="94" label="zzzz132"/>
      <node id="93" label="zzzz131"/>
      <node id="92" label="zzzz130"/>
      <node id="91" label="zzzz129"/>
      <node id="90" label="zzzz128"/>
      <node id="89" label="zzzz127"/>
      <node id="88" label="zzzz126"/>
      <node id="87" label="zzzz125"/>
      <node id="86" label="zzzz124"/>
      <node id="85" label="zzzz123"/>
      <node id="84" label="zzzz122"/>
      <node id="83" label="zzzz121"/>
      <node id="82" label="zzzz120"/>
      <node id="81" label="zzzz119"/>
      <node id="80" label="zzzz118"/>
      <node id="79" label="zzzz117"/>
      <node id="78" label="zzzz116"/>
      <node id="77" label="zzzz115"/>
      <node id="76" label="zzzz114"/>
      <node id="75" label="zzzz113"/>
      <node id="74" label="zzzz112"/>
      <node id="73" label="zzzz111"/>
      <node id="72" label="zzzz110"/>
      <node id="71" label="zzzz109"/>
      <node id="70" label="zzzz108"/>
      <node id="69" label="zzzz107"/>
      <node id="68" label="zzzz106"/>
      <node id="67" label="zzzz105"/>
      <node id="66" label="zzzz104"/>
      <node id="65" label="zzzz103"/>
      <node id="64" label="zzzz102"/>
      <node id="63" label="zzzz101"/>
      <node id="62" label="zzzz100"/>
      <edge id="4557" label="zzzzzz8,zzzzzz9" source="228" target="229" cy:directed="1"/>
      <edge id="4556" label="zzzzzz7,zzzzzz8" source="227" target="228" cy:directed="1"/>
      <edge id="4555" label="zzzzzz7,zzzzzz9" source="227" target="229" cy:directed="1"/>
      <edge id="4554" label="zzzzzz6,zzzzzz8" source="226" target="228" cy:directed="1"/>
      <edge id="4553" label="zzzzzz6,zzzzzz7" source="226" target="227" cy:directed="1"/>
      <edge id="4552" label="zzzzzz6,zzzzzz9" source="226" target="229" cy:directed="1"/>
      <edge id="4551" label="zzzzzz5,zzzzzz8" source="225" target="228" cy:directed="1"/>
      <edge id="4550" label="zzzzzz5,zzzzzz6" source="225" target="226" cy:directed="1"/>
      <edge id="4549" label="zzzzzz5,zzzzzz9" source="225" target="229" cy:directed="1"/>
      <edge id="4548" label="zzzzzz5,zzzzzz7" source="225" target="227" cy:directed="1"/>
      <edge id="4547" label="zzzzzz4,zzzzzz8" source="224" target="228" cy:directed="1"/>
      <edge id="4546" label="zzzzzz4,zzzzzz6" source="224" target="226" cy:directed="1"/>
      <edge id="4545" label="zzzzzz4,zzzzzz5" source="224" target="225" cy:directed="1"/>
      <edge id="4544" label="zzzzzz4,zzzzzz9" source="224" target="229" cy:directed="1"/>
      <edge id="4543" label="zzzzzz4,zzzzzz7" source="224" target="227" cy:directed="1"/>
      <edge id="4542" label="zzzzzz2,zzzzzz6" source="222" target="226" cy:directed="1"/>
      <edge id="4541" label="zzzzzz2,zzzzzz8" source="222" target="228" cy:directed="1"/>
      <edge id="4540" label="zzzzzz2,zzzzzz5" source="222" target="225" cy:directed="1"/>
      <edge id="4539" label="zzzzzz2,zzzzzz4" source="222" target="224" cy:directed="1"/>
      <edge id="4538" label="zzzzzz2,zzzzzz9" source="222" target="229" cy:directed="1"/>
      <edge id="4537" label="zzzzzz2,zzzzzz7" source="222" target="227" cy:directed="1"/>
      <edge id="4536" label="zzzzzz1,zzzzzz6" source="221" target="226" cy:directed="1"/>
      <edge id="4535" label="zzzzzz1,zzzzzz5" source="221" target="225" cy:directed="1"/>
      <edge id="4534" label="zzzzzz1,zzzzzz4" source="221" target="224" cy:directed="1"/>
      <edge id="4533" label="zzzzzz1,zzzzzz2" source="221" target="222" cy:directed="1"/>
      <edge id="4532" label="zzzzzz1,zzzzzz8" source="221" target="228" cy:directed="1"/>
      <edge id="4531" label="zzzzzz1,zzzzzz7" source="221" target="227" cy:directed="1"/>
      <edge id="4530" label="zzzzzz1,zzzzzz9" source="221" target="229" cy:directed="1"/>
      <edge id="4529" label="zzzzzz0,zzzzzz6" source="220" target="226" cy:directed="1"/>
      <edge id="4528" label="zzzzzz0,zzzzzz5" source="220" target="225" cy:directed="1"/>
      <edge id="4527" label="zzzzzz0,zzzzzz7" source="220" target="227" cy:directed="1"/>
      <edge id="4526" label="zzzzzz0,zzzzzz4" source="220" target="224" cy:directed="1"/>
      <edge id="4525" label="zzzzzz0,zzzzzz9" source="220" target="229" cy:directed="1"/>
      <edge id="4524" label="zzzzzz0,zzzzzz1" source="220" target="221" cy:directed="1"/>
      <edge id="4523" label="zzzzzz0,zzzzzz8" source="220" target="228" cy:directed="1"/>
      <edge id="4522" label="zzzzzz0,zzzzzz2" source="220" target="222" cy:directed="1"/>
      <edge id="4521" label="zzzzz99,zzzzzz0" source="219" target="220" cy:directed="1"/>
      <edge id="4520" label="zzzzz99,zzzzzz8" source="219" target="228" cy:directed="1"/>
      <edge id="4519" label="zzzzz99,zzzzzz6" source="219" target="226" cy:directed="1"/>
      <edge id="4518" label="zzzzz99,zzzzzz5" source="219" target="225" cy:directed="1"/>
      <edge id="4517" label="zzzzz99,zzzzzz1" source="219" target="221" cy:directed="1"/>
      <edge id="4516" label="zzzzz99,zzzzzz7" source="219" target="227" cy:directed="1"/>
      <edge id="4515" label="zzzzz99,zzzzzz9" source="219" target="229" cy:directed="1"/>
      <edge id="4514" label="zzzzz99,zzzzzz4" source="219" target="224" cy:directed="1"/>
      <edge id="4513" label="zzzzz97,zzzzzz4" source="217" target="224" cy:directed="1"/>
      <edge id="4512" label="zzzzz97,zzzzz99" source="217" target="219" cy:directed="1"/>
      <edge id="4511" label="zzzzz95,zzzzz99" source="215" target="219" cy:directed="1"/>
      <edge id="4510" label="zzzzz94,zzzzz99" source="214" target="219" cy:directed="1"/>
      <edge id="4509" label="zzzzz94,zzzzzz3" source="214" target="223" cy:directed="1"/>
      <edge id="4508" label="zzzzz93,zzzzz99" source="213" target="219" cy:directed="1"/>
      <edge id="4507" label="zzzzz93,zzzzzz2" source="213" target="222" cy:directed="1"/>
      <edge id="4506" label="zzzzz93,zzzzzz8" source="213" target="228" cy:directed="1"/>
      <edge id="4505" label="zzzzz93,zzzzzz6" source="213" target="226" cy:directed="1"/>
      <edge id="4504" label="zzzzz93,zzzzzz5" source="213" target="225" cy:directed="1"/>
      <edge id="4503" label="zzzzz93,zzzzzz0" source="213" target="220" cy:directed="1"/>
      <edge id="4502" label="zzzzz93,zzzzzz4" source="213" target="224" cy:directed="1"/>
      <edge id="4501" label="zzzzz93,zzzzzz7" source="213" target="227" cy:directed="1"/>
      <edge id="4500" label="zzzzz93,zzzzzz9" source="213" target="229" cy:directed="1"/>
      <edge id="4499" label="zzzzz93,zzzzzz1" source="213" target="221" cy:directed="1"/>
      <edge id="4498" label="zzzzz92,zzzzz99" source="212" target="219" cy:directed="1"/>
      <edge id="4497" label="zzzzz92,zzzzzz3" source="212" target="223" cy:directed="1"/>
      <edge id="4496" label="zzzzz90,zzzzz91" source="210" target="211" cy:directed="1"/>
      <edge id="4495" label="zzzzz89,zzzzz95" source="209" target="215" cy:directed="1"/>
      <edge id="4494" label="zzzzz89,zzzzzz3" source="209" target="223" cy:directed="1"/>
      <edge id="4493" label="zzzzz89,zzzzzz2" source="209" target="222" cy:directed="1"/>
      <edge id="4492" label="zzzzz89,zzzzz97" source="209" target="217" cy:directed="1"/>
      <edge id="4491" label="zzzzz89,zzzzzz6" source="209" target="226" cy:directed="1"/>
      <edge id="4490" label="zzzzz89,zzzzzz8" source="209" target="228" cy:directed="1"/>
      <edge id="4489" label="zzzzz89,zzzzzz4" source="209" target="224" cy:directed="1"/>
      <edge id="4488" label="zzzzz89,zzzzzz5" source="209" target="225" cy:directed="1"/>
      <edge id="4487" label="zzzzz89,zzzzzz0" source="209" target="220" cy:directed="1"/>
      <edge id="4486" label="zzzzz89,zzzzzz7" source="209" target="227" cy:directed="1"/>
      <edge id="4485" label="zzzzz89,zzzzz99" source="209" target="219" cy:directed="1"/>
      <edge id="4484" label="zzzzz89,zzzzzz1" source="209" target="221" cy:directed="1"/>
      <edge id="4483" label="zzzzz89,zzzzzz9" source="209" target="229" cy:directed="1"/>
      <edge id="4482" label="zzzzz89,zzzzz93" source="209" target="213" cy:directed="1"/>
      <edge id="4481" label="zzzzz88,zzzzzz3" source="208" target="223" cy:directed="1"/>
      <edge id="4480" label="zzzzz88,zzzzz97" source="208" target="217" cy:directed="1"/>
      <edge id="4479" label="zzzzz88,zzzzz95" source="208" target="215" cy:directed="1"/>
      <edge id="4478" label="zzzzz88,zzzzzz5" source="208" target="225" cy:directed="1"/>
      <edge id="4477" label="zzzzz88,zzzzzz6" source="208" target="226" cy:directed="1"/>
      <edge id="4476" label="zzzzz88,zzzzzz8" source="208" target="228" cy:directed="1"/>
      <edge id="4475" label="zzzzz88,zzzzzz4" source="208" target="224" cy:directed="1"/>
      <edge id="4474" label="zzzzz88,zzzzzz0" source="208" target="220" cy:directed="1"/>
      <edge id="4473" label="zzzzz88,zzzzzz1" source="208" target="221" cy:directed="1"/>
      <edge id="4472" label="zzzzz88,zzzzzz2" source="208" target="222" cy:directed="1"/>
      <edge id="4471" label="zzzzz88,zzzzz99" source="208" target="219" cy:directed="1"/>
      <edge id="4470" label="zzzzz88,zzzzz93" source="208" target="213" cy:directed="1"/>
      <edge id="4469" label="zzzzz88,zzzzzz7" source="208" target="227" cy:directed="1"/>
      <edge id="4468" label="zzzzz88,zzzzzz9" source="208" target="229" cy:directed="1"/>
      <edge id="4467" label="zzzzz88,zzzzz89" source="208" target="209" cy:directed="1"/>
      <edge id="4466" label="zzzzz87,zzzzzz3" source="207" target="223" cy:directed="1"/>
      <edge id="4465" label="zzzzz87,zzzzz97" source="207" target="217" cy:directed="1"/>
      <edge id="4464" label="zzzzz87,zzzzzz2" source="207" target="222" cy:directed="1"/>
      <edge id="4463" label="zzzzz87,zzzzzz5" source="207" target="225" cy:directed="1"/>
      <edge id="4462" label="zzzzz87,zzzzzz8" source="207" target="228" cy:directed="1"/>
      <edge id="4461" label="zzzzz87,zzzzzz0" source="207" target="220" cy:directed="1"/>
      <edge id="4460" label="zzzzz87,zzzzzz1" source="207" target="221" cy:directed="1"/>
      <edge id="4459" label="zzzzz87,zzzzzz6" source="207" target="226" cy:directed="1"/>
      <edge id="4458" label="zzzzz87,zzzzzz7" source="207" target="227" cy:directed="1"/>
      <edge id="4457" label="zzzzz87,zzzzzz9" source="207" target="229" cy:directed="1"/>
      <edge id="4456" label="zzzzz87,zzzzz93" source="207" target="213" cy:directed="1"/>
      <edge id="4455" label="zzzzz87,zzzzzz4" source="207" target="224" cy:directed="1"/>
      <edge id="4454" label="zzzzz87,zzzzz89" source="207" target="209" cy:directed="1"/>
      <edge id="4453" label="zzzzz87,zzzzz99" source="207" target="219" cy:directed="1"/>
      <edge id="4452" label="zzzzz87,zzzzz88" source="207" target="208" cy:directed="1"/>
      <edge id="4451" label="zzzzz79,zzzzz89" source="199" target="209" cy:directed="1"/>
      <edge id="4450" label="zzzzz79,zzzzz95" source="199" target="215" cy:directed="1"/>
      <edge id="4449" label="zzzzz79,zzzzz87" source="199" target="207" cy:directed="1"/>
      <edge id="4448" label="zzzzz79,zzzzz88" source="199" target="208" cy:directed="1"/>
      <edge id="4447" label="zzzzz79,zzzzz99" source="199" target="219" cy:directed="1"/>
      <edge id="4446" label="zzzzz79,zzzzz97" source="199" target="217" cy:directed="1"/>
      <edge id="4445" label="zzzzz78,zzzzzz7" source="198" target="227" cy:directed="1"/>
      <edge id="4444" label="zzzzz78,zzzzz79" source="198" target="199" cy:directed="1"/>
      <edge id="4443" label="zzzzz78,zzzzzz0" source="198" target="220" cy:directed="1"/>
      <edge id="4442" label="zzzzz78,zzzzzz9" source="198" target="229" cy:directed="1"/>
      <edge id="4441" label="zzzzz78,zzzzz97" source="198" target="217" cy:directed="1"/>
      <edge id="4440" label="zzzzz78,zzzzz95" source="198" target="215" cy:directed="1"/>
      <edge id="4439" label="zzzzz78,zzzzz93" source="198" target="213" cy:directed="1"/>
      <edge id="4438" label="zzzzz78,zzzzzz4" source="198" target="224" cy:directed="1"/>
      <edge id="4437" label="zzzzz78,zzzzzz6" source="198" target="226" cy:directed="1"/>
      <edge id="4436" label="zzzzz78,zzzzzz5" source="198" target="225" cy:directed="1"/>
      <edge id="4435" label="zzzzz78,zzzzzz1" source="198" target="221" cy:directed="1"/>
      <edge id="4434" label="zzzzz78,zzzzz87" source="198" target="207" cy:directed="1"/>
      <edge id="4433" label="zzzzz78,zzzzz99" source="198" target="219" cy:directed="1"/>
      <edge id="4432" label="zzzzz78,zzzzz89" source="198" target="209" cy:directed="1"/>
      <edge id="4431" label="zzzzz78,zzzzz88" source="198" target="208" cy:directed="1"/>
      <edge id="4430" label="zzzzz77,zzzzz88" source="197" target="208" cy:directed="1"/>
      <edge id="4429" label="zzzzz77,zzzzz95" source="197" target="215" cy:directed="1"/>
      <edge id="4428" label="zzzzz77,zzzzz78" source="197" target="198" cy:directed="1"/>
      <edge id="4427" label="zzzzz77,zzzzz89" source="197" target="209" cy:directed="1"/>
      <edge id="4426" label="zzzzz77,zzzzz97" source="197" target="217" cy:directed="1"/>
      <edge id="4425" label="zzzzz77,zzzzz79" source="197" target="199" cy:directed="1"/>
      <edge id="4424" label="zzzzz76,zzzzz79" source="196" target="199" cy:directed="1"/>
      <edge id="4423" label="zzzzz76,zzzzz93" source="196" target="213" cy:directed="1"/>
      <edge id="4422" label="zzzzz76,zzzzz95" source="196" target="215" cy:directed="1"/>
      <edge id="4421" label="zzzzz76,zzzzz87" source="196" target="207" cy:directed="1"/>
      <edge id="4420" label="zzzzz76,zzzzz89" source="196" target="209" cy:directed="1"/>
      <edge id="4419" label="zzzzz76,zzzzz88" source="196" target="208" cy:directed="1"/>
      <edge id="4418" label="zzzzz76,zzzzz99" source="196" target="219" cy:directed="1"/>
      <edge id="4417" label="zzzzz76,zzzzz78" source="196" target="198" cy:directed="1"/>
      <edge id="4416" label="zzzzz75,zzzzzz2" source="195" target="222" cy:directed="1"/>
      <edge id="4415" label="zzzzz75,zzzzzz0" source="195" target="220" cy:directed="1"/>
      <edge id="4414" label="zzzzz75,zzzzz79" source="195" target="199" cy:directed="1"/>
      <edge id="4413" label="zzzzz75,zzzzz95" source="195" target="215" cy:directed="1"/>
      <edge id="4412" label="zzzzz75,zzzzz94" source="195" target="214" cy:directed="1"/>
      <edge id="4411" label="zzzzz75,zzzzz93" source="195" target="213" cy:directed="1"/>
      <edge id="4410" label="zzzzz75,zzzzz97" source="195" target="217" cy:directed="1"/>
      <edge id="4409" label="zzzzz75,zzzzz89" source="195" target="209" cy:directed="1"/>
      <edge id="4408" label="zzzzz75,zzzzzz3" source="195" target="223" cy:directed="1"/>
      <edge id="4407" label="zzzzz75,zzzzz88" source="195" target="208" cy:directed="1"/>
      <edge id="4406" label="zzzzz75,zzzzz99" source="195" target="219" cy:directed="1"/>
      <edge id="4405" label="zzzzz75,zzzzz87" source="195" target="207" cy:directed="1"/>
      <edge id="4404" label="zzzzz75,zzzzz78" source="195" target="198" cy:directed="1"/>
      <edge id="4403" label="zzzzz75,zzzzz76" source="195" target="196" cy:directed="1"/>
      <edge id="4402" label="zzzzz74,zzzzz79" source="194" target="199" cy:directed="1"/>
      <edge id="4401" label="zzzzz74,zzzzz93" source="194" target="213" cy:directed="1"/>
      <edge id="4400" label="zzzzz74,zzzzzz4" source="194" target="224" cy:directed="1"/>
      <edge id="4399" label="zzzzz74,zzzzz97" source="194" target="217" cy:directed="1"/>
      <edge id="4398" label="zzzzz74,zzzzzz9" source="194" target="229" cy:directed="1"/>
      <edge id="4397" label="zzzzz74,zzzzzz1" source="194" target="221" cy:directed="1"/>
      <edge id="4396" label="zzzzz74,zzzzz99" source="194" target="219" cy:directed="1"/>
      <edge id="4395" label="zzzzz74,zzzzz88" source="194" target="208" cy:directed="1"/>
      <edge id="4394" label="zzzzz74,zzzzz87" source="194" target="207" cy:directed="1"/>
      <edge id="4393" label="zzzzz74,zzzzz89" source="194" target="209" cy:directed="1"/>
      <edge id="4392" label="zzzzz74,zzzzz78" source="194" target="198" cy:directed="1"/>
      <edge id="4391" label="zzzzz74,zzzzz75" source="194" target="195" cy:directed="1"/>
      <edge id="4390" label="zzzzz74,zzzzz76" source="194" target="196" cy:directed="1"/>
      <edge id="4389" label="zzzzz73,zzzzzz2" source="193" target="222" cy:directed="1"/>
      <edge id="4388" label="zzzzz73,zzzzz77" source="193" target="197" cy:directed="1"/>
      <edge id="4387" label="zzzzz73,zzzzz93" source="193" target="213" cy:directed="1"/>
      <edge id="4386" label="zzzzz73,zzzzzz3" source="193" target="223" cy:directed="1"/>
      <edge id="4385" label="zzzzz73,zzzzzz0" source="193" target="220" cy:directed="1"/>
      <edge id="4384" label="zzzzz73,zzzzz79" source="193" target="199" cy:directed="1"/>
      <edge id="4383" label="zzzzz73,zzzzzz5" source="193" target="225" cy:directed="1"/>
      <edge id="4382" label="zzzzz73,zzzzzz1" source="193" target="221" cy:directed="1"/>
      <edge id="4381" label="zzzzz73,zzzzz95" source="193" target="215" cy:directed="1"/>
      <edge id="4380" label="zzzzz73,zzzzz97" source="193" target="217" cy:directed="1"/>
      <edge id="4379" label="zzzzz73,zzzzzz7" source="193" target="227" cy:directed="1"/>
      <edge id="4378" label="zzzzz73,zzzzzz4" source="193" target="224" cy:directed="1"/>
      <edge id="4377" label="zzzzz73,zzzzzz9" source="193" target="229" cy:directed="1"/>
      <edge id="4376" label="zzzzz73,zzzzz99" source="193" target="219" cy:directed="1"/>
      <edge id="4375" label="zzzzz73,zzzzz87" source="193" target="207" cy:directed="1"/>
      <edge id="4374" label="zzzzz73,zzzzz75" source="193" target="195" cy:directed="1"/>
      <edge id="4373" label="zzzzz73,zzzzz89" source="193" target="209" cy:directed="1"/>
      <edge id="4372" label="zzzzz73,zzzzz88" source="193" target="208" cy:directed="1"/>
      <edge id="4371" label="zzzzz73,zzzzz74" source="193" target="194" cy:directed="1"/>
      <edge id="4370" label="zzzzz73,zzzzz76" source="193" target="196" cy:directed="1"/>
      <edge id="4369" label="zzzzz73,zzzzz78" source="193" target="198" cy:directed="1"/>
      <edge id="4368" label="zzzzz72,zzzzzz2" source="192" target="222" cy:directed="1"/>
      <edge id="4367" label="zzzzz72,zzzzzz3" source="192" target="223" cy:directed="1"/>
      <edge id="4366" label="zzzzz72,zzzzz94" source="192" target="214" cy:directed="1"/>
      <edge id="4365" label="zzzzz72,zzzzzz4" source="192" target="224" cy:directed="1"/>
      <edge id="4364" label="zzzzz72,zzzzzz0" source="192" target="220" cy:directed="1"/>
      <edge id="4363" label="zzzzz72,zzzzz93" source="192" target="213" cy:directed="1"/>
      <edge id="4362" label="zzzzz72,zzzzz79" source="192" target="199" cy:directed="1"/>
      <edge id="4361" label="zzzzz72,zzzzzz1" source="192" target="221" cy:directed="1"/>
      <edge id="4360" label="zzzzz72,zzzzz95" source="192" target="215" cy:directed="1"/>
      <edge id="4359" label="zzzzz72,zzzzzz5" source="192" target="225" cy:directed="1"/>
      <edge id="4358" label="zzzzz72,zzzzz97" source="192" target="217" cy:directed="1"/>
      <edge id="4357" label="zzzzz72,zzzzzz7" source="192" target="227" cy:directed="1"/>
      <edge id="4356" label="zzzzz72,zzzzz87" source="192" target="207" cy:directed="1"/>
      <edge id="4355" label="zzzzz72,zzzzzz6" source="192" target="226" cy:directed="1"/>
      <edge id="4354" label="zzzzz72,zzzzzz9" source="192" target="229" cy:directed="1"/>
      <edge id="4353" label="zzzzz72,zzzzz89" source="192" target="209" cy:directed="1"/>
      <edge id="4352" label="zzzzz72,zzzzz99" source="192" target="219" cy:directed="1"/>
      <edge id="4351" label="zzzzz72,zzzzz88" source="192" target="208" cy:directed="1"/>
      <edge id="4350" label="zzzzz72,zzzzz75" source="192" target="195" cy:directed="1"/>
      <edge id="4349" label="zzzzz72,zzzzz74" source="192" target="194" cy:directed="1"/>
      <edge id="4348" label="zzzzz72,zzzzz76" source="192" target="196" cy:directed="1"/>
      <edge id="4347" label="zzzzz72,zzzzz73" source="192" target="193" cy:directed="1"/>
      <edge id="4346" label="zzzzz72,zzzzz78" source="192" target="198" cy:directed="1"/>
      <edge id="4345" label="zzzzz71,zzzzzz2" source="191" target="222" cy:directed="1"/>
      <edge id="4344" label="zzzzz71,zzzzzz5" source="191" target="225" cy:directed="1"/>
      <edge id="4343" label="zzzzz71,zzzzz79" source="191" target="199" cy:directed="1"/>
      <edge id="4342" label="zzzzz71,zzzzz94" source="191" target="214" cy:directed="1"/>
      <edge id="4341" label="zzzzz71,zzzzzz3" source="191" target="223" cy:directed="1"/>
      <edge id="4340" label="zzzzz71,zzzzz77" source="191" target="197" cy:directed="1"/>
      <edge id="4339" label="zzzzz71,zzzzzz0" source="191" target="220" cy:directed="1"/>
      <edge id="4338" label="zzzzz71,zzzzz93" source="191" target="213" cy:directed="1"/>
      <edge id="4337" label="zzzzz71,zzzzzz6" source="191" target="226" cy:directed="1"/>
      <edge id="4336" label="zzzzz71,zzzzzz1" source="191" target="221" cy:directed="1"/>
      <edge id="4335" label="zzzzz71,zzzzz95" source="191" target="215" cy:directed="1"/>
      <edge id="4334" label="zzzzz71,zzzzzz4" source="191" target="224" cy:directed="1"/>
      <edge id="4333" label="zzzzz71,zzzzz97" source="191" target="217" cy:directed="1"/>
      <edge id="4332" label="zzzzz71,zzzzz99" source="191" target="219" cy:directed="1"/>
      <edge id="4331" label="zzzzz71,zzzzz87" source="191" target="207" cy:directed="1"/>
      <edge id="4330" label="zzzzz71,zzzzz74" source="191" target="194" cy:directed="1"/>
      <edge id="4329" label="zzzzz71,zzzzz75" source="191" target="195" cy:directed="1"/>
      <edge id="4328" label="zzzzz71,zzzzz89" source="191" target="209" cy:directed="1"/>
      <edge id="4327" label="zzzzz71,zzzzz88" source="191" target="208" cy:directed="1"/>
      <edge id="4326" label="zzzzz71,zzzzz76" source="191" target="196" cy:directed="1"/>
      <edge id="4325" label="zzzzz71,zzzzz78" source="191" target="198" cy:directed="1"/>
      <edge id="4324" label="zzzzz71,zzzzz72" source="191" target="192" cy:directed="1"/>
      <edge id="4323" label="zzzzz71,zzzzz73" source="191" target="193" cy:directed="1"/>
      <edge id="4322" label="zzzzz70,zzzzz77" source="190" target="197" cy:directed="1"/>
      <edge id="4321" label="zzzzz70,zzzzz95" source="190" target="215" cy:directed="1"/>
      <edge id="4320" label="zzzzz70,zzzzz87" source="190" target="207" cy:directed="1"/>
      <edge id="4319" label="zzzzz70,zzzzz88" source="190" target="208" cy:directed="1"/>
      <edge id="4318" label="zzzzz70,zzzzz89" source="190" target="209" cy:directed="1"/>
      <edge id="4317" label="zzzzz70,zzzzz99" source="190" target="219" cy:directed="1"/>
      <edge id="4316" label="zzzzz70,zzzzz74" source="190" target="194" cy:directed="1"/>
      <edge id="4315" label="zzzzz70,zzzzz75" source="190" target="195" cy:directed="1"/>
      <edge id="4314" label="zzzzz70,zzzzz76" source="190" target="196" cy:directed="1"/>
      <edge id="4313" label="zzzzz70,zzzzz71" source="190" target="191" cy:directed="1"/>
      <edge id="4312" label="zzzzz70,zzzzz78" source="190" target="198" cy:directed="1"/>
      <edge id="4311" label="zzzzz70,zzzzz73" source="190" target="193" cy:directed="1"/>
      <edge id="4310" label="zzzzz70,zzzzz72" source="190" target="192" cy:directed="1"/>
      <edge id="4309" label="zzzzz69,zzzzz76" source="189" target="196" cy:directed="1"/>
      <edge id="4308" label="zzzzz69,zzzzz71" source="189" target="191" cy:directed="1"/>
      <edge id="4307" label="zzzzz69,zzzzz73" source="189" target="193" cy:directed="1"/>
      <edge id="4306" label="zzzzz69,zzzzz75" source="189" target="195" cy:directed="1"/>
      <edge id="4305" label="zzzzz69,zzzzz99" source="189" target="219" cy:directed="1"/>
      <edge id="4304" label="zzzzz69,zzzzz78" source="189" target="198" cy:directed="1"/>
      <edge id="4303" label="zzzzz69,zzzzz72" source="189" target="192" cy:directed="1"/>
      <edge id="4302" label="zzzzz69,zzzzz95" source="189" target="215" cy:directed="1"/>
      <edge id="4301" label="zzzzz69,zzzzz77" source="189" target="197" cy:directed="1"/>
      <edge id="4300" label="zzzzz69,zzzzz79" source="189" target="199" cy:directed="1"/>
      <edge id="4299" label="zzzzz69,zzzzz97" source="189" target="217" cy:directed="1"/>
      <edge id="4298" label="zzzzz68,zzzzz77" source="188" target="197" cy:directed="1"/>
      <edge id="4297" label="zzzzz68,zzzzzz6" source="188" target="226" cy:directed="1"/>
      <edge id="4296" label="zzzzz68,zzzzz79" source="188" target="199" cy:directed="1"/>
      <edge id="4295" label="zzzzz68,zzzzzz2" source="188" target="222" cy:directed="1"/>
      <edge id="4294" label="zzzzz68,zzzzzz3" source="188" target="223" cy:directed="1"/>
      <edge id="4293" label="zzzzz68,zzzzz69" source="188" target="189" cy:directed="1"/>
      <edge id="4292" label="zzzzz68,zzzzzz5" source="188" target="225" cy:directed="1"/>
      <edge id="4291" label="zzzzz68,zzzzzz1" source="188" target="221" cy:directed="1"/>
      <edge id="4290" label="zzzzz68,zzzzz93" source="188" target="213" cy:directed="1"/>
      <edge id="4289" label="zzzzz68,zzzzzz7" source="188" target="227" cy:directed="1"/>
      <edge id="4288" label="zzzzz68,zzzzzz0" source="188" target="220" cy:directed="1"/>
      <edge id="4287" label="zzzzz68,zzzzzz4" source="188" target="224" cy:directed="1"/>
      <edge id="4286" label="zzzzz68,zzzzz95" source="188" target="215" cy:directed="1"/>
      <edge id="4285" label="zzzzz68,zzzzz97" source="188" target="217" cy:directed="1"/>
      <edge id="4284" label="zzzzz68,zzzzz99" source="188" target="219" cy:directed="1"/>
      <edge id="4283" label="zzzzz68,zzzzz87" source="188" target="207" cy:directed="1"/>
      <edge id="4282" label="zzzzz68,zzzzz89" source="188" target="209" cy:directed="1"/>
      <edge id="4281" label="zzzzz68,zzzzz88" source="188" target="208" cy:directed="1"/>
      <edge id="4280" label="zzzzz68,zzzzz75" source="188" target="195" cy:directed="1"/>
      <edge id="4279" label="zzzzz68,zzzzz74" source="188" target="194" cy:directed="1"/>
      <edge id="4278" label="zzzzz68,zzzzz76" source="188" target="196" cy:directed="1"/>
      <edge id="4277" label="zzzzz68,zzzzz70" source="188" target="190" cy:directed="1"/>
      <edge id="4276" label="zzzzz68,zzzzz78" source="188" target="198" cy:directed="1"/>
      <edge id="4275" label="zzzzz68,zzzzz72" source="188" target="192" cy:directed="1"/>
      <edge id="4274" label="zzzzz68,zzzzz73" source="188" target="193" cy:directed="1"/>
      <edge id="4273" label="zzzzz68,zzzzz71" source="188" target="191" cy:directed="1"/>
      <edge id="4272" label="zzzzz67,zzzzz79" source="187" target="199" cy:directed="1"/>
      <edge id="4271" label="zzzzz67,zzzzz96" source="187" target="216" cy:directed="1"/>
      <edge id="4270" label="zzzzz67,zzzzz69" source="187" target="189" cy:directed="1"/>
      <edge id="4269" label="zzzzz67,zzzzz95" source="187" target="215" cy:directed="1"/>
      <edge id="4268" label="zzzzz67,zzzzzz0" source="187" target="220" cy:directed="1"/>
      <edge id="4267" label="zzzzz67,zzzzzz5" source="187" target="225" cy:directed="1"/>
      <edge id="4266" label="zzzzz67,zzzzzz7" source="187" target="227" cy:directed="1"/>
      <edge id="4265" label="zzzzz67,zzzzz98" source="187" target="218" cy:directed="1"/>
      <edge id="4264" label="zzzzz67,zzzzzz1" source="187" target="221" cy:directed="1"/>
      <edge id="4263" label="zzzzz67,zzzzzz9" source="187" target="229" cy:directed="1"/>
      <edge id="4262" label="zzzzz67,zzzzzz4" source="187" target="224" cy:directed="1"/>
      <edge id="4261" label="zzzzz67,zzzzz93" source="187" target="213" cy:directed="1"/>
      <edge id="4260" label="zzzzz67,zzzzz87" source="187" target="207" cy:directed="1"/>
      <edge id="4259" label="zzzzz67,zzzzz89" source="187" target="209" cy:directed="1"/>
      <edge id="4258" label="zzzzz67,zzzzz99" source="187" target="219" cy:directed="1"/>
      <edge id="4257" label="zzzzz67,zzzzz88" source="187" target="208" cy:directed="1"/>
      <edge id="4256" label="zzzzz67,zzzzz74" source="187" target="194" cy:directed="1"/>
      <edge id="4255" label="zzzzz67,zzzzz76" source="187" target="196" cy:directed="1"/>
      <edge id="4254" label="zzzzz67,zzzzz75" source="187" target="195" cy:directed="1"/>
      <edge id="4253" label="zzzzz67,zzzzz78" source="187" target="198" cy:directed="1"/>
      <edge id="4252" label="zzzzz67,zzzzz68" source="187" target="188" cy:directed="1"/>
      <edge id="4251" label="zzzzz67,zzzzz73" source="187" target="193" cy:directed="1"/>
      <edge id="4250" label="zzzzz67,zzzzz70" source="187" target="190" cy:directed="1"/>
      <edge id="4249" label="zzzzz67,zzzzz71" source="187" target="191" cy:directed="1"/>
      <edge id="4248" label="zzzzz67,zzzzz72" source="187" target="192" cy:directed="1"/>
      <edge id="4247" label="zzzzz66,zzzzz79" source="186" target="199" cy:directed="1"/>
      <edge id="4246" label="zzzzz65,zzzzzz2" source="185" target="222" cy:directed="1"/>
      <edge id="4245" label="zzzzz65,zzzzz87" source="185" target="207" cy:directed="1"/>
      <edge id="4244" label="zzzzz65,zzzzz67" source="185" target="187" cy:directed="1"/>
      <edge id="4243" label="zzzzz65,zzzzz89" source="185" target="209" cy:directed="1"/>
      <edge id="4242" label="zzzzz65,zzzzz88" source="185" target="208" cy:directed="1"/>
      <edge id="4241" label="zzzzz65,zzzzz71" source="185" target="191" cy:directed="1"/>
      <edge id="4240" label="zzzzz65,zzzzz70" source="185" target="190" cy:directed="1"/>
      <edge id="4239" label="zzzzz65,zzzzz74" source="185" target="194" cy:directed="1"/>
      <edge id="4238" label="zzzzz65,zzzzz68" source="185" target="188" cy:directed="1"/>
      <edge id="4237" label="zzzzz65,zzzzz73" source="185" target="193" cy:directed="1"/>
      <edge id="4236" label="zzzzz65,zzzzz78" source="185" target="198" cy:directed="1"/>
      <edge id="4235" label="zzzzz65,zzzzz72" source="185" target="192" cy:directed="1"/>
      <edge id="4234" label="zzzzz65,zzzzz75" source="185" target="195" cy:directed="1"/>
      <edge id="4233" label="zzzzz65,zzzzz76" source="185" target="196" cy:directed="1"/>
      <edge id="4232" label="zzzzz64,zzzzzz2" source="184" target="222" cy:directed="1"/>
      <edge id="4231" label="zzzzz64,zzzzzz6" source="184" target="226" cy:directed="1"/>
      <edge id="4230" label="zzzzz64,zzzzz97" source="184" target="217" cy:directed="1"/>
      <edge id="4229" label="zzzzz64,zzzzzz0" source="184" target="220" cy:directed="1"/>
      <edge id="4228" label="zzzzz64,zzzzzz8" source="184" target="228" cy:directed="1"/>
      <edge id="4227" label="zzzzz64,zzzzzz7" source="184" target="227" cy:directed="1"/>
      <edge id="4226" label="zzzzz64,zzzzzz9" source="184" target="229" cy:directed="1"/>
      <edge id="4225" label="zzzzz64,zzzzz87" source="184" target="207" cy:directed="1"/>
      <edge id="4224" label="zzzzz64,zzzzzz5" source="184" target="225" cy:directed="1"/>
      <edge id="4223" label="zzzzz64,zzzzzz1" source="184" target="221" cy:directed="1"/>
      <edge id="4222" label="zzzzz64,zzzzz89" source="184" target="209" cy:directed="1"/>
      <edge id="4221" label="zzzzz64,zzzzz93" source="184" target="213" cy:directed="1"/>
      <edge id="4220" label="zzzzz64,zzzzz88" source="184" target="208" cy:directed="1"/>
      <edge id="4219" label="zzzzz64,zzzzz74" source="184" target="194" cy:directed="1"/>
      <edge id="4218" label="zzzzz64,zzzzz68" source="184" target="188" cy:directed="1"/>
      <edge id="4217" label="zzzzz64,zzzzz71" source="184" target="191" cy:directed="1"/>
      <edge id="4216" label="zzzzz64,zzzzz70" source="184" target="190" cy:directed="1"/>
      <edge id="4215" label="zzzzz64,zzzzz67" source="184" target="187" cy:directed="1"/>
      <edge id="4214" label="zzzzz64,zzzzz73" source="184" target="193" cy:directed="1"/>
      <edge id="4213" label="zzzzz64,zzzzz72" source="184" target="192" cy:directed="1"/>
      <edge id="4212" label="zzzzz64,zzzzz78" source="184" target="198" cy:directed="1"/>
      <edge id="4211" label="zzzzz64,zzzzz75" source="184" target="195" cy:directed="1"/>
      <edge id="4210" label="zzzzz64,zzzzz76" source="184" target="196" cy:directed="1"/>
      <edge id="4209" label="zzzzz64,zzzzz65" source="184" target="185" cy:directed="1"/>
      <edge id="4208" label="zzzzz63,zzzzz79" source="183" target="199" cy:directed="1"/>
      <edge id="4207" label="zzzzz63,zzzzz93" source="183" target="213" cy:directed="1"/>
      <edge id="4206" label="zzzzz63,zzzzz69" source="183" target="189" cy:directed="1"/>
      <edge id="4205" label="zzzzz63,zzzzzz0" source="183" target="220" cy:directed="1"/>
      <edge id="4204" label="zzzzz63,zzzzz97" source="183" target="217" cy:directed="1"/>
      <edge id="4203" label="zzzzz63,zzzzz87" source="183" target="207" cy:directed="1"/>
      <edge id="4202" label="zzzzz63,zzzzzz3" source="183" target="223" cy:directed="1"/>
      <edge id="4201" label="zzzzz63,zzzzz95" source="183" target="215" cy:directed="1"/>
      <edge id="4200" label="zzzzz63,zzzzz65" source="183" target="185" cy:directed="1"/>
      <edge id="4199" label="zzzzz63,zzzzz74" source="183" target="194" cy:directed="1"/>
      <edge id="4198" label="zzzzz63,zzzzz99" source="183" target="219" cy:directed="1"/>
      <edge id="4197" label="zzzzz63,zzzzz89" source="183" target="209" cy:directed="1"/>
      <edge id="4196" label="zzzzz63,zzzzz64" source="183" target="184" cy:directed="1"/>
      <edge id="4195" label="zzzzz63,zzzzz88" source="183" target="208" cy:directed="1"/>
      <edge id="4194" label="zzzzz63,zzzzz76" source="183" target="196" cy:directed="1"/>
      <edge id="4193" label="zzzzz63,zzzzz75" source="183" target="195" cy:directed="1"/>
      <edge id="4192" label="zzzzz63,zzzzz70" source="183" target="190" cy:directed="1"/>
      <edge id="4191" label="zzzzz63,zzzzz67" source="183" target="187" cy:directed="1"/>
      <edge id="4190" label="zzzzz63,zzzzz73" source="183" target="193" cy:directed="1"/>
      <edge id="4189" label="zzzzz63,zzzzz72" source="183" target="192" cy:directed="1"/>
      <edge id="4188" label="zzzzz63,zzzzz71" source="183" target="191" cy:directed="1"/>
      <edge id="4187" label="zzzzz63,zzzzz68" source="183" target="188" cy:directed="1"/>
      <edge id="4186" label="zzzzz63,zzzzz78" source="183" target="198" cy:directed="1"/>
      <edge id="4185" label="zzzzz62,zzzzz97" source="182" target="217" cy:directed="1"/>
      <edge id="4184" label="zzzzz62,zzzzzz5" source="182" target="225" cy:directed="1"/>
      <edge id="4183" label="zzzzz62,zzzzz99" source="182" target="219" cy:directed="1"/>
      <edge id="4182" label="zzzzz62,zzzzz93" source="182" target="213" cy:directed="1"/>
      <edge id="4181" label="zzzzz62,zzzzzz2" source="182" target="222" cy:directed="1"/>
      <edge id="4180" label="zzzzz62,zzzzz87" source="182" target="207" cy:directed="1"/>
      <edge id="4179" label="zzzzz62,zzzzz89" source="182" target="209" cy:directed="1"/>
      <edge id="4178" label="zzzzz62,zzzzz88" source="182" target="208" cy:directed="1"/>
      <edge id="4177" label="zzzzz62,zzzzz67" source="182" target="187" cy:directed="1"/>
      <edge id="4176" label="zzzzz62,zzzzz71" source="182" target="191" cy:directed="1"/>
      <edge id="4175" label="zzzzz62,zzzzz74" source="182" target="194" cy:directed="1"/>
      <edge id="4174" label="zzzzz62,zzzzz63" source="182" target="183" cy:directed="1"/>
      <edge id="4173" label="zzzzz62,zzzzz73" source="182" target="193" cy:directed="1"/>
      <edge id="4172" label="zzzzz62,zzzzz68" source="182" target="188" cy:directed="1"/>
      <edge id="4171" label="zzzzz62,zzzzz70" source="182" target="190" cy:directed="1"/>
      <edge id="4170" label="zzzzz62,zzzzz72" source="182" target="192" cy:directed="1"/>
      <edge id="4169" label="zzzzz62,zzzzz78" source="182" target="198" cy:directed="1"/>
      <edge id="4168" label="zzzzz62,zzzzz75" source="182" target="195" cy:directed="1"/>
      <edge id="4167" label="zzzzz62,zzzzz76" source="182" target="196" cy:directed="1"/>
      <edge id="4166" label="zzzzz62,zzzzz65" source="182" target="185" cy:directed="1"/>
      <edge id="4165" label="zzzzz62,zzzzz64" source="182" target="184" cy:directed="1"/>
      <edge id="4164" label="zzzzz61,zzzzzz1" source="181" target="221" cy:directed="1"/>
      <edge id="4163" label="zzzzz61,zzzzzz8" source="181" target="228" cy:directed="1"/>
      <edge id="4162" label="zzzzz61,zzzzz93" source="181" target="213" cy:directed="1"/>
      <edge id="4161" label="zzzzz61,zzzzz87" source="181" target="207" cy:directed="1"/>
      <edge id="4160" label="zzzzz61,zzzzz88" source="181" target="208" cy:directed="1"/>
      <edge id="4159" label="zzzzz61,zzzzz68" source="181" target="188" cy:directed="1"/>
      <edge id="4158" label="zzzzz61,zzzzz71" source="181" target="191" cy:directed="1"/>
      <edge id="4157" label="zzzzz61,zzzzz89" source="181" target="209" cy:directed="1"/>
      <edge id="4156" label="zzzzz61,zzzzz63" source="181" target="183" cy:directed="1"/>
      <edge id="4155" label="zzzzz61,zzzzz70" source="181" target="190" cy:directed="1"/>
      <edge id="4154" label="zzzzz61,zzzzz67" source="181" target="187" cy:directed="1"/>
      <edge id="4153" label="zzzzz61,zzzzz73" source="181" target="193" cy:directed="1"/>
      <edge id="4152" label="zzzzz61,zzzzz72" source="181" target="192" cy:directed="1"/>
      <edge id="4151" label="zzzzz61,zzzzz74" source="181" target="194" cy:directed="1"/>
      <edge id="4150" label="zzzzz61,zzzzz78" source="181" target="198" cy:directed="1"/>
      <edge id="4149" label="zzzzz61,zzzzz75" source="181" target="195" cy:directed="1"/>
      <edge id="4148" label="zzzzz61,zzzzz76" source="181" target="196" cy:directed="1"/>
      <edge id="4147" label="zzzzz61,zzzzz65" source="181" target="185" cy:directed="1"/>
      <edge id="4146" label="zzzzz61,zzzzz62" source="181" target="182" cy:directed="1"/>
      <edge id="4145" label="zzzzz61,zzzzz64" source="181" target="184" cy:directed="1"/>
      <edge id="4144" label="zzzzz60,zzzzz79" source="180" target="199" cy:directed="1"/>
      <edge id="4143" label="zzzzz60,zzzzz69" source="180" target="189" cy:directed="1"/>
      <edge id="4142" label="zzzzz60,zzzzzz8" source="180" target="228" cy:directed="1"/>
      <edge id="4141" label="zzzzz60,zzzzzz3" source="180" target="223" cy:directed="1"/>
      <edge id="4140" label="zzzzz60,zzzzzz2" source="180" target="222" cy:directed="1"/>
      <edge id="4139" label="zzzzz60,zzzzzz6" source="180" target="226" cy:directed="1"/>
      <edge id="4138" label="zzzzz60,zzzzz94" source="180" target="214" cy:directed="1"/>
      <edge id="4137" label="zzzzz60,zzzzzz0" source="180" target="220" cy:directed="1"/>
      <edge id="4136" label="zzzzz60,zzzzzz5" source="180" target="225" cy:directed="1"/>
      <edge id="4135" label="zzzzz60,zzzzz97" source="180" target="217" cy:directed="1"/>
      <edge id="4134" label="zzzzz60,zzzzz95" source="180" target="215" cy:directed="1"/>
      <edge id="4133" label="zzzzz60,zzzzzz1" source="180" target="221" cy:directed="1"/>
      <edge id="4132" label="zzzzz60,zzzzz93" source="180" target="213" cy:directed="1"/>
      <edge id="4131" label="zzzzz60,zzzzzz4" source="180" target="224" cy:directed="1"/>
      <edge id="4130" label="zzzzz60,zzzzz99" source="180" target="219" cy:directed="1"/>
      <edge id="4129" label="zzzzz60,zzzzz87" source="180" target="207" cy:directed="1"/>
      <edge id="4128" label="zzzzz60,zzzzz61" source="180" target="181" cy:directed="1"/>
      <edge id="4127" label="zzzzz60,zzzzz65" source="180" target="185" cy:directed="1"/>
      <edge id="4126" label="zzzzz60,zzzzz89" source="180" target="209" cy:directed="1"/>
      <edge id="4125" label="zzzzz60,zzzzz75" source="180" target="195" cy:directed="1"/>
      <edge id="4124" label="zzzzz60,zzzzz74" source="180" target="194" cy:directed="1"/>
      <edge id="4123" label="zzzzz60,zzzzz88" source="180" target="208" cy:directed="1"/>
      <edge id="4122" label="zzzzz60,zzzzz62" source="180" target="182" cy:directed="1"/>
      <edge id="4121" label="zzzzz60,zzzzz64" source="180" target="184" cy:directed="1"/>
      <edge id="4120" label="zzzzz60,zzzzz76" source="180" target="196" cy:directed="1"/>
      <edge id="4119" label="zzzzz60,zzzzz70" source="180" target="190" cy:directed="1"/>
      <edge id="4118" label="zzzzz60,zzzzz67" source="180" target="187" cy:directed="1"/>
      <edge id="4117" label="zzzzz60,zzzzz63" source="180" target="183" cy:directed="1"/>
      <edge id="4116" label="zzzzz60,zzzzz78" source="180" target="198" cy:directed="1"/>
      <edge id="4115" label="zzzzz60,zzzzz72" source="180" target="192" cy:directed="1"/>
      <edge id="4114" label="zzzzz60,zzzzz73" source="180" target="193" cy:directed="1"/>
      <edge id="4113" label="zzzzz60,zzzzz68" source="180" target="188" cy:directed="1"/>
      <edge id="4112" label="zzzzz60,zzzzz71" source="180" target="191" cy:directed="1"/>
      <edge id="4111" label="zzzzz59,zzzzzz5" source="179" target="225" cy:directed="1"/>
      <edge id="4110" label="zzzzz59,zzzzz93" source="179" target="213" cy:directed="1"/>
      <edge id="4109" label="zzzzz59,zzzzzz1" source="179" target="221" cy:directed="1"/>
      <edge id="4108" label="zzzzz59,zzzzz87" source="179" target="207" cy:directed="1"/>
      <edge id="4107" label="zzzzz59,zzzzz89" source="179" target="209" cy:directed="1"/>
      <edge id="4106" label="zzzzz59,zzzzz88" source="179" target="208" cy:directed="1"/>
      <edge id="4105" label="zzzzz59,zzzzz63" source="179" target="183" cy:directed="1"/>
      <edge id="4104" label="zzzzz59,zzzzz67" source="179" target="187" cy:directed="1"/>
      <edge id="4103" label="zzzzz59,zzzzz70" source="179" target="190" cy:directed="1"/>
      <edge id="4102" label="zzzzz59,zzzzz73" source="179" target="193" cy:directed="1"/>
      <edge id="4101" label="zzzzz59,zzzzz71" source="179" target="191" cy:directed="1"/>
      <edge id="4100" label="zzzzz59,zzzzz60" source="179" target="180" cy:directed="1"/>
      <edge id="4099" label="zzzzz59,zzzzz74" source="179" target="194" cy:directed="1"/>
      <edge id="4098" label="zzzzz59,zzzzz68" source="179" target="188" cy:directed="1"/>
      <edge id="4097" label="zzzzz59,zzzzz78" source="179" target="198" cy:directed="1"/>
      <edge id="4096" label="zzzzz59,zzzzz72" source="179" target="192" cy:directed="1"/>
      <edge id="4095" label="zzzzz59,zzzzz75" source="179" target="195" cy:directed="1"/>
      <edge id="4094" label="zzzzz59,zzzzz76" source="179" target="196" cy:directed="1"/>
      <edge id="4093" label="zzzzz59,zzzzz64" source="179" target="184" cy:directed="1"/>
      <edge id="4092" label="zzzzz59,zzzzz61" source="179" target="181" cy:directed="1"/>
      <edge id="4091" label="zzzzz59,zzzzz65" source="179" target="185" cy:directed="1"/>
      <edge id="4090" label="zzzzz59,zzzzz62" source="179" target="182" cy:directed="1"/>
      <edge id="4089" label="zzzzz58,zzzzzz1" source="178" target="221" cy:directed="1"/>
      <edge id="4088" label="zzzzz58,zzzzzz4" source="178" target="224" cy:directed="1"/>
      <edge id="4087" label="zzzzz58,zzzzzz9" source="178" target="229" cy:directed="1"/>
      <edge id="4086" label="zzzzz58,zzzzz99" source="178" target="219" cy:directed="1"/>
      <edge id="4085" label="zzzzz58,zzzzz93" source="178" target="213" cy:directed="1"/>
      <edge id="4084" label="zzzzz58,zzzzz88" source="178" target="208" cy:directed="1"/>
      <edge id="4083" label="zzzzz58,zzzzz79" source="178" target="199" cy:directed="1"/>
      <edge id="4082" label="zzzzz58,zzzzzz3" source="178" target="223" cy:directed="1"/>
      <edge id="4081" label="zzzzz58,zzzzz87" source="178" target="207" cy:directed="1"/>
      <edge id="4080" label="zzzzz58,zzzzz89" source="178" target="209" cy:directed="1"/>
      <edge id="4079" label="zzzzz58,zzzzz70" source="178" target="190" cy:directed="1"/>
      <edge id="4078" label="zzzzz58,zzzzz68" source="178" target="188" cy:directed="1"/>
      <edge id="4077" label="zzzzz58,zzzzz71" source="178" target="191" cy:directed="1"/>
      <edge id="4076" label="zzzzz58,zzzzz63" source="178" target="183" cy:directed="1"/>
      <edge id="4075" label="zzzzz58,zzzzz73" source="178" target="193" cy:directed="1"/>
      <edge id="4074" label="zzzzz58,zzzzz60" source="178" target="180" cy:directed="1"/>
      <edge id="4073" label="zzzzz58,zzzzz72" source="178" target="192" cy:directed="1"/>
      <edge id="4072" label="zzzzz58,zzzzz67" source="178" target="187" cy:directed="1"/>
      <edge id="4071" label="zzzzz58,zzzzz78" source="178" target="198" cy:directed="1"/>
      <edge id="4070" label="zzzzz58,zzzzz74" source="178" target="194" cy:directed="1"/>
      <edge id="4069" label="zzzzz58,zzzzz65" source="178" target="185" cy:directed="1"/>
      <edge id="4068" label="zzzzz58,zzzzz59" source="178" target="179" cy:directed="1"/>
      <edge id="4067" label="zzzzz58,zzzzz62" source="178" target="182" cy:directed="1"/>
      <edge id="4066" label="zzzzz58,zzzzz61" source="178" target="181" cy:directed="1"/>
      <edge id="4065" label="zzzzz58,zzzzz64" source="178" target="184" cy:directed="1"/>
      <edge id="4064" label="zzzzz58,zzzzz76" source="178" target="196" cy:directed="1"/>
      <edge id="4063" label="zzzzz58,zzzzz75" source="178" target="195" cy:directed="1"/>
      <edge id="4062" label="zzzzz57,zzzzz76" source="177" target="196" cy:directed="1"/>
      <edge id="4061" label="zzzzz57,zzzzz75" source="177" target="195" cy:directed="1"/>
      <edge id="4060" label="zzzzz57,zzzzzz3" source="177" target="223" cy:directed="1"/>
      <edge id="4059" label="zzzzz57,zzzzz66" source="177" target="186" cy:directed="1"/>
      <edge id="4058" label="zzzzz57,zzzzz63" source="177" target="183" cy:directed="1"/>
      <edge id="4057" label="zzzzz57,zzzzz87" source="177" target="207" cy:directed="1"/>
      <edge id="4056" label="zzzzz57,zzzzz88" source="177" target="208" cy:directed="1"/>
      <edge id="4055" label="zzzzz57,zzzzz74" source="177" target="194" cy:directed="1"/>
      <edge id="4054" label="zzzzz57,zzzzz64" source="177" target="184" cy:directed="1"/>
      <edge id="4053" label="zzzzz57,zzzzz67" source="177" target="187" cy:directed="1"/>
      <edge id="4052" label="zzzzz57,zzzzz89" source="177" target="209" cy:directed="1"/>
      <edge id="4051" label="zzzzz57,zzzzz78" source="177" target="198" cy:directed="1"/>
      <edge id="4050" label="zzzzz57,zzzzz60" source="177" target="180" cy:directed="1"/>
      <edge id="4049" label="zzzzz57,zzzzz71" source="177" target="191" cy:directed="1"/>
      <edge id="4048" label="zzzzz57,zzzzz72" source="177" target="192" cy:directed="1"/>
      <edge id="4047" label="zzzzz57,zzzzz68" source="177" target="188" cy:directed="1"/>
      <edge id="4046" label="zzzzz57,zzzzz99" source="177" target="219" cy:directed="1"/>
      <edge id="4045" label="zzzzz57,zzzzz73" source="177" target="193" cy:directed="1"/>
      <edge id="4044" label="zzzzz57,zzzzz77" source="177" target="197" cy:directed="1"/>
      <edge id="4043" label="zzzzz57,zzzzz69" source="177" target="189" cy:directed="1"/>
      <edge id="4042" label="zzzzz57,zzzzz79" source="177" target="199" cy:directed="1"/>
      <edge id="4041" label="zzzzz57,zzzzz97" source="177" target="217" cy:directed="1"/>
      <edge id="4040" label="zzzzz56,zzzzz77" source="176" target="197" cy:directed="1"/>
      <edge id="4039" label="zzzzz56,zzzzzz8" source="176" target="228" cy:directed="1"/>
      <edge id="4038" label="zzzzz56,zzzzz69" source="176" target="189" cy:directed="1"/>
      <edge id="4037" label="zzzzz56,zzzzzz3" source="176" target="223" cy:directed="1"/>
      <edge id="4036" label="zzzzz56,zzzzz57" source="176" target="177" cy:directed="1"/>
      <edge id="4035" label="zzzzz56,zzzzz93" source="176" target="213" cy:directed="1"/>
      <edge id="4034" label="zzzzz56,zzzzzz0" source="176" target="220" cy:directed="1"/>
      <edge id="4033" label="zzzzz56,zzzzz79" source="176" target="199" cy:directed="1"/>
      <edge id="4032" label="zzzzz56,zzzzzz4" source="176" target="224" cy:directed="1"/>
      <edge id="4031" label="zzzzz56,zzzzz97" source="176" target="217" cy:directed="1"/>
      <edge id="4030" label="zzzzz56,zzzzzz5" source="176" target="225" cy:directed="1"/>
      <edge id="4029" label="zzzzz56,zzzzzz2" source="176" target="222" cy:directed="1"/>
      <edge id="4028" label="zzzzz56,zzzzzz6" source="176" target="226" cy:directed="1"/>
      <edge id="4027" label="zzzzz56,zzzzz95" source="176" target="215" cy:directed="1"/>
      <edge id="4026" label="zzzzz56,zzzzzz1" source="176" target="221" cy:directed="1"/>
      <edge id="4025" label="zzzzz56,zzzzz99" source="176" target="219" cy:directed="1"/>
      <edge id="4024" label="zzzzz56,zzzzzz7" source="176" target="227" cy:directed="1"/>
      <edge id="4023" label="zzzzz56,zzzzzz9" source="176" target="229" cy:directed="1"/>
      <edge id="4022" label="zzzzz56,zzzzz87" source="176" target="207" cy:directed="1"/>
      <edge id="4021" label="zzzzz56,zzzzz70" source="176" target="190" cy:directed="1"/>
      <edge id="4020" label="zzzzz56,zzzzz88" source="176" target="208" cy:directed="1"/>
      <edge id="4019" label="zzzzz56,zzzzz63" source="176" target="183" cy:directed="1"/>
      <edge id="4018" label="zzzzz56,zzzzz67" source="176" target="187" cy:directed="1"/>
      <edge id="4017" label="zzzzz56,zzzzz89" source="176" target="209" cy:directed="1"/>
      <edge id="4016" label="zzzzz56,zzzzz71" source="176" target="191" cy:directed="1"/>
      <edge id="4015" label="zzzzz56,zzzzz60" source="176" target="180" cy:directed="1"/>
      <edge id="4014" label="zzzzz56,zzzzz78" source="176" target="198" cy:directed="1"/>
      <edge id="4013" label="zzzzz56,zzzzz68" source="176" target="188" cy:directed="1"/>
      <edge id="4012" label="zzzzz56,zzzzz74" source="176" target="194" cy:directed="1"/>
      <edge id="4011" label="zzzzz56,zzzzz73" source="176" target="193" cy:directed="1"/>
      <edge id="4010" label="zzzzz56,zzzzz72" source="176" target="192" cy:directed="1"/>
      <edge id="4009" label="zzzzz56,zzzzz65" source="176" target="185" cy:directed="1"/>
      <edge id="4008" label="zzzzz56,zzzzz61" source="176" target="181" cy:directed="1"/>
      <edge id="4007" label="zzzzz56,zzzzz62" source="176" target="182" cy:directed="1"/>
      <edge id="4006" label="zzzzz56,zzzzz75" source="176" target="195" cy:directed="1"/>
      <edge id="4005" label="zzzzz56,zzzzz59" source="176" target="179" cy:directed="1"/>
      <edge id="4004" label="zzzzz56,zzzzz64" source="176" target="184" cy:directed="1"/>
      <edge id="4003" label="zzzzz56,zzzzz76" source="176" target="196" cy:directed="1"/>
      <edge id="4002" label="zzzzz56,zzzzz58" source="176" target="178" cy:directed="1"/>
      <edge id="4001" label="zzzzz55,zzzzzz0" source="175" target="220" cy:directed="1"/>
      <edge id="4000" label="zzzzz55,zzzzz77" source="175" target="197" cy:directed="1"/>
      <edge id="3999" label="zzzzz55,zzzzzz4" source="175" target="224" cy:directed="1"/>
      <edge id="3998" label="zzzzz55,zzzzzz6" source="175" target="226" cy:directed="1"/>
      <edge id="3997" label="zzzzz55,zzzzzz2" source="175" target="222" cy:directed="1"/>
      <edge id="3996" label="zzzzz55,zzzzz97" source="175" target="217" cy:directed="1"/>
      <edge id="3995" label="zzzzz55,zzzzz69" source="175" target="189" cy:directed="1"/>
      <edge id="3994" label="zzzzz55,zzzzzz1" source="175" target="221" cy:directed="1"/>
      <edge id="3993" label="zzzzz55,zzzzz79" source="175" target="199" cy:directed="1"/>
      <edge id="3992" label="zzzzz55,zzzzzz8" source="175" target="228" cy:directed="1"/>
      <edge id="3991" label="zzzzz55,zzzzz95" source="175" target="215" cy:directed="1"/>
      <edge id="3990" label="zzzzz55,zzzzz93" source="175" target="213" cy:directed="1"/>
      <edge id="3989" label="zzzzz55,zzzzzz9" source="175" target="229" cy:directed="1"/>
      <edge id="3988" label="zzzzz55,zzzzz94" source="175" target="214" cy:directed="1"/>
      <edge id="3987" label="zzzzz55,zzzzzz3" source="175" target="223" cy:directed="1"/>
      <edge id="3986" label="zzzzz55,zzzzz57" source="175" target="177" cy:directed="1"/>
      <edge id="3985" label="zzzzz55,zzzzzz7" source="175" target="227" cy:directed="1"/>
      <edge id="3984" label="zzzzz55,zzzzzz5" source="175" target="225" cy:directed="1"/>
      <edge id="3983" label="zzzzz55,zzzzz61" source="175" target="181" cy:directed="1"/>
      <edge id="3982" label="zzzzz55,zzzzz89" source="175" target="209" cy:directed="1"/>
      <edge id="3981" label="zzzzz55,zzzzz87" source="175" target="207" cy:directed="1"/>
      <edge id="3980" label="zzzzz55,zzzzz65" source="175" target="185" cy:directed="1"/>
      <edge id="3979" label="zzzzz55,zzzzz99" source="175" target="219" cy:directed="1"/>
      <edge id="3978" label="zzzzz55,zzzzz88" source="175" target="208" cy:directed="1"/>
      <edge id="3977" label="zzzzz55,zzzzz58" source="175" target="178" cy:directed="1"/>
      <edge id="3976" label="zzzzz55,zzzzz64" source="175" target="184" cy:directed="1"/>
      <edge id="3975" label="zzzzz55,zzzzz59" source="175" target="179" cy:directed="1"/>
      <edge id="3974" label="zzzzz55,zzzzz74" source="175" target="194" cy:directed="1"/>
      <edge id="3973" label="zzzzz55,zzzzz76" source="175" target="196" cy:directed="1"/>
      <edge id="3972" label="zzzzz55,zzzzz62" source="175" target="182" cy:directed="1"/>
      <edge id="3971" label="zzzzz55,zzzzz75" source="175" target="195" cy:directed="1"/>
      <edge id="3970" label="zzzzz55,zzzzz70" source="175" target="190" cy:directed="1"/>
      <edge id="3969" label="zzzzz55,zzzzz56" source="175" target="176" cy:directed="1"/>
      <edge id="3968" label="zzzzz55,zzzzz67" source="175" target="187" cy:directed="1"/>
      <edge id="3967" label="zzzzz55,zzzzz63" source="175" target="183" cy:directed="1"/>
      <edge id="3966" label="zzzzz55,zzzzz78" source="175" target="198" cy:directed="1"/>
      <edge id="3965" label="zzzzz55,zzzzz73" source="175" target="193" cy:directed="1"/>
      <edge id="3964" label="zzzzz55,zzzzz68" source="175" target="188" cy:directed="1"/>
      <edge id="3963" label="zzzzz55,zzzzz60" source="175" target="180" cy:directed="1"/>
      <edge id="3962" label="zzzzz55,zzzzz71" source="175" target="191" cy:directed="1"/>
      <edge id="3961" label="zzzzz55,zzzzz72" source="175" target="192" cy:directed="1"/>
      <edge id="3960" label="zzzzz54,zzzzz94" source="174" target="214" cy:directed="1"/>
      <edge id="3959" label="zzzzz54,zzzzz57" source="174" target="177" cy:directed="1"/>
      <edge id="3958" label="zzzzz54,zzzzz98" source="174" target="218" cy:directed="1"/>
      <edge id="3957" label="zzzzz54,zzzzzz4" source="174" target="224" cy:directed="1"/>
      <edge id="3956" label="zzzzz54,zzzzzz9" source="174" target="229" cy:directed="1"/>
      <edge id="3955" label="zzzzz54,zzzzzz0" source="174" target="220" cy:directed="1"/>
      <edge id="3954" label="zzzzz54,zzzzzz2" source="174" target="222" cy:directed="1"/>
      <edge id="3953" label="zzzzz54,zzzzzz8" source="174" target="228" cy:directed="1"/>
      <edge id="3952" label="zzzzz54,zzzzzz5" source="174" target="225" cy:directed="1"/>
      <edge id="3951" label="zzzzz54,zzzzz93" source="174" target="213" cy:directed="1"/>
      <edge id="3950" label="zzzzz54,zzzzzz1" source="174" target="221" cy:directed="1"/>
      <edge id="3949" label="zzzzz54,zzzzz99" source="174" target="219" cy:directed="1"/>
      <edge id="3948" label="zzzzz54,zzzzz89" source="174" target="209" cy:directed="1"/>
      <edge id="3947" label="zzzzz54,zzzzz87" source="174" target="207" cy:directed="1"/>
      <edge id="3946" label="zzzzz54,zzzzz65" source="174" target="185" cy:directed="1"/>
      <edge id="3945" label="zzzzz54,zzzzz61" source="174" target="181" cy:directed="1"/>
      <edge id="3944" label="zzzzz54,zzzzz88" source="174" target="208" cy:directed="1"/>
      <edge id="3943" label="zzzzz54,zzzzz58" source="174" target="178" cy:directed="1"/>
      <edge id="3942" label="zzzzz54,zzzzz62" source="174" target="182" cy:directed="1"/>
      <edge id="3941" label="zzzzz54,zzzzz74" source="174" target="194" cy:directed="1"/>
      <edge id="3940" label="zzzzz54,zzzzz64" source="174" target="184" cy:directed="1"/>
      <edge id="3939" label="zzzzz54,zzzzz59" source="174" target="179" cy:directed="1"/>
      <edge id="3938" label="zzzzz54,zzzzz76" source="174" target="196" cy:directed="1"/>
      <edge id="3937" label="zzzzz54,zzzzz75" source="174" target="195" cy:directed="1"/>
      <edge id="3936" label="zzzzz54,zzzzz56" source="174" target="176" cy:directed="1"/>
      <edge id="3935" label="zzzzz54,zzzzz63" source="174" target="183" cy:directed="1"/>
      <edge id="3934" label="zzzzz54,zzzzz78" source="174" target="198" cy:directed="1"/>
      <edge id="3933" label="zzzzz54,zzzzz72" source="174" target="192" cy:directed="1"/>
      <edge id="3932" label="zzzzz54,zzzzz71" source="174" target="191" cy:directed="1"/>
      <edge id="3931" label="zzzzz54,zzzzz73" source="174" target="193" cy:directed="1"/>
      <edge id="3930" label="zzzzz54,zzzzz55" source="174" target="175" cy:directed="1"/>
      <edge id="3929" label="zzzzz54,zzzzz60" source="174" target="180" cy:directed="1"/>
      <edge id="3928" label="zzzzz54,zzzzz68" source="174" target="188" cy:directed="1"/>
      <edge id="3927" label="zzzzz54,zzzzz70" source="174" target="190" cy:directed="1"/>
      <edge id="3926" label="zzzzz54,zzzzz67" source="174" target="187" cy:directed="1"/>
      <edge id="3925" label="zzzzz53,zzzzzz4" source="173" target="224" cy:directed="1"/>
      <edge id="3924" label="zzzzz53,zzzzzz0" source="173" target="220" cy:directed="1"/>
      <edge id="3923" label="zzzzz53,zzzzz79" source="173" target="199" cy:directed="1"/>
      <edge id="3922" label="zzzzz53,zzzzzz8" source="173" target="228" cy:directed="1"/>
      <edge id="3921" label="zzzzz53,zzzzzz6" source="173" target="226" cy:directed="1"/>
      <edge id="3920" label="zzzzz53,zzzzz94" source="173" target="214" cy:directed="1"/>
      <edge id="3919" label="zzzzz53,zzzzzz2" source="173" target="222" cy:directed="1"/>
      <edge id="3918" label="zzzzz53,zzzzz95" source="173" target="215" cy:directed="1"/>
      <edge id="3917" label="zzzzz53,zzzzz93" source="173" target="213" cy:directed="1"/>
      <edge id="3916" label="zzzzz53,zzzzz77" source="173" target="197" cy:directed="1"/>
      <edge id="3915" label="zzzzz53,zzzzzz3" source="173" target="223" cy:directed="1"/>
      <edge id="3914" label="zzzzz53,zzzzzz5" source="173" target="225" cy:directed="1"/>
      <edge id="3913" label="zzzzz53,zzzzz69" source="173" target="189" cy:directed="1"/>
      <edge id="3912" label="zzzzz53,zzzzzz1" source="173" target="221" cy:directed="1"/>
      <edge id="3911" label="zzzzz53,zzzzzz9" source="173" target="229" cy:directed="1"/>
      <edge id="3910" label="zzzzz53,zzzzzz7" source="173" target="227" cy:directed="1"/>
      <edge id="3909" label="zzzzz53,zzzzz97" source="173" target="217" cy:directed="1"/>
      <edge id="3908" label="zzzzz53,zzzzz57" source="173" target="177" cy:directed="1"/>
      <edge id="3907" label="zzzzz53,zzzzz87" source="173" target="207" cy:directed="1"/>
      <edge id="3906" label="zzzzz53,zzzzz89" source="173" target="209" cy:directed="1"/>
      <edge id="3905" label="zzzzz53,zzzzz99" source="173" target="219" cy:directed="1"/>
      <edge id="3904" label="zzzzz53,zzzzz61" source="173" target="181" cy:directed="1"/>
      <edge id="3903" label="zzzzz53,zzzzz59" source="173" target="179" cy:directed="1"/>
      <edge id="3902" label="zzzzz53,zzzzz65" source="173" target="185" cy:directed="1"/>
      <edge id="3901" label="zzzzz53,zzzzz88" source="173" target="208" cy:directed="1"/>
      <edge id="3900" label="zzzzz53,zzzzz58" source="173" target="178" cy:directed="1"/>
      <edge id="3899" label="zzzzz53,zzzzz74" source="173" target="194" cy:directed="1"/>
      <edge id="3898" label="zzzzz53,zzzzz75" source="173" target="195" cy:directed="1"/>
      <edge id="3897" label="zzzzz53,zzzzz62" source="173" target="182" cy:directed="1"/>
      <edge id="3896" label="zzzzz53,zzzzz64" source="173" target="184" cy:directed="1"/>
      <edge id="3895" label="zzzzz53,zzzzz76" source="173" target="196" cy:directed="1"/>
      <edge id="3894" label="zzzzz53,zzzzz70" source="173" target="190" cy:directed="1"/>
      <edge id="3893" label="zzzzz53,zzzzz56" source="173" target="176" cy:directed="1"/>
      <edge id="3892" label="zzzzz53,zzzzz54" source="173" target="174" cy:directed="1"/>
      <edge id="3891" label="zzzzz53,zzzzz63" source="173" target="183" cy:directed="1"/>
      <edge id="3890" label="zzzzz53,zzzzz67" source="173" target="187" cy:directed="1"/>
      <edge id="3889" label="zzzzz53,zzzzz78" source="173" target="198" cy:directed="1"/>
      <edge id="3888" label="zzzzz53,zzzzz73" source="173" target="193" cy:directed="1"/>
      <edge id="3887" label="zzzzz53,zzzzz72" source="173" target="192" cy:directed="1"/>
      <edge id="3886" label="zzzzz53,zzzzz71" source="173" target="191" cy:directed="1"/>
      <edge id="3885" label="zzzzz53,zzzzz68" source="173" target="188" cy:directed="1"/>
      <edge id="3884" label="zzzzz53,zzzzz60" source="173" target="180" cy:directed="1"/>
      <edge id="3883" label="zzzzz53,zzzzz55" source="173" target="175" cy:directed="1"/>
      <edge id="3882" label="zzzzz52,zzzzz70" source="172" target="190" cy:directed="1"/>
      <edge id="3881" label="zzzzz52,zzzzz63" source="172" target="183" cy:directed="1"/>
      <edge id="3880" label="zzzzz52,zzzzz58" source="172" target="178" cy:directed="1"/>
      <edge id="3879" label="zzzzz52,zzzzz60" source="172" target="180" cy:directed="1"/>
      <edge id="3878" label="zzzzz52,zzzzz89" source="172" target="209" cy:directed="1"/>
      <edge id="3877" label="zzzzz52,zzzzz95" source="172" target="215" cy:directed="1"/>
      <edge id="3876" label="zzzzz52,zzzzz67" source="172" target="187" cy:directed="1"/>
      <edge id="3875" label="zzzzz52,zzzzz87" source="172" target="207" cy:directed="1"/>
      <edge id="3874" label="zzzzz52,zzzzz75" source="172" target="195" cy:directed="1"/>
      <edge id="3873" label="zzzzz52,zzzzz68" source="172" target="188" cy:directed="1"/>
      <edge id="3872" label="zzzzz52,zzzzz78" source="172" target="198" cy:directed="1"/>
      <edge id="3871" label="zzzzz52,zzzzz88" source="172" target="208" cy:directed="1"/>
      <edge id="3870" label="zzzzz52,zzzzz72" source="172" target="192" cy:directed="1"/>
      <edge id="3869" label="zzzzz52,zzzzz55" source="172" target="175" cy:directed="1"/>
      <edge id="3868" label="zzzzz52,zzzzz99" source="172" target="219" cy:directed="1"/>
      <edge id="3867" label="zzzzz52,zzzzz71" source="172" target="191" cy:directed="1"/>
      <edge id="3866" label="zzzzz52,zzzzz56" source="172" target="176" cy:directed="1"/>
      <edge id="3865" label="zzzzz52,zzzzz53" source="172" target="173" cy:directed="1"/>
      <edge id="3864" label="zzzzz52,zzzzz77" source="172" target="197" cy:directed="1"/>
      <edge id="3863" label="zzzzz52,zzzzz57" source="172" target="177" cy:directed="1"/>
      <edge id="3862" label="zzzzz52,zzzzz97" source="172" target="217" cy:directed="1"/>
      <edge id="3861" label="zzzzz52,zzzzz79" source="172" target="199" cy:directed="1"/>
      <edge id="3860" label="zzzzz52,zzzzz69" source="172" target="189" cy:directed="1"/>
      <edge id="3859" label="zzzzz51,zzzzz69" source="171" target="189" cy:directed="1"/>
      <edge id="3858" label="zzzzz51,zzzzz79" source="171" target="199" cy:directed="1"/>
      <edge id="3857" label="zzzzz51,zzzzz77" source="171" target="197" cy:directed="1"/>
      <edge id="3856" label="zzzzz51,zzzzz93" source="171" target="213" cy:directed="1"/>
      <edge id="3855" label="zzzzz51,zzzzz52" source="171" target="172" cy:directed="1"/>
      <edge id="3854" label="zzzzz51,zzzzzz4" source="171" target="224" cy:directed="1"/>
      <edge id="3853" label="zzzzz51,zzzzz97" source="171" target="217" cy:directed="1"/>
      <edge id="3852" label="zzzzz51,zzzzzz9" source="171" target="229" cy:directed="1"/>
      <edge id="3851" label="zzzzz51,zzzzzz1" source="171" target="221" cy:directed="1"/>
      <edge id="3850" label="zzzzz51,zzzzz57" source="171" target="177" cy:directed="1"/>
      <edge id="3849" label="zzzzz51,zzzzz99" source="171" target="219" cy:directed="1"/>
      <edge id="3848" label="zzzzz51,zzzzz88" source="171" target="208" cy:directed="1"/>
      <edge id="3847" label="zzzzz51,zzzzz87" source="171" target="207" cy:directed="1"/>
      <edge id="3846" label="zzzzz51,zzzzz89" source="171" target="209" cy:directed="1"/>
      <edge id="3845" label="zzzzz51,zzzzz63" source="171" target="183" cy:directed="1"/>
      <edge id="3844" label="zzzzz51,zzzzz64" source="171" target="184" cy:directed="1"/>
      <edge id="3843" label="zzzzz51,zzzzz62" source="171" target="182" cy:directed="1"/>
      <edge id="3842" label="zzzzz51,zzzzz70" source="171" target="190" cy:directed="1"/>
      <edge id="3841" label="zzzzz51,zzzzz67" source="171" target="187" cy:directed="1"/>
      <edge id="3840" label="zzzzz51,zzzzz54" source="171" target="174" cy:directed="1"/>
      <edge id="3839" label="zzzzz51,zzzzz65" source="171" target="185" cy:directed="1"/>
      <edge id="3838" label="zzzzz51,zzzzz71" source="171" target="191" cy:directed="1"/>
      <edge id="3837" label="zzzzz51,zzzzz60" source="171" target="180" cy:directed="1"/>
      <edge id="3836" label="zzzzz51,zzzzz59" source="171" target="179" cy:directed="1"/>
      <edge id="3835" label="zzzzz51,zzzzz61" source="171" target="181" cy:directed="1"/>
      <edge id="3834" label="zzzzz51,zzzzz68" source="171" target="188" cy:directed="1"/>
      <edge id="3833" label="zzzzz51,zzzzz55" source="171" target="175" cy:directed="1"/>
      <edge id="3832" label="zzzzz51,zzzzz73" source="171" target="193" cy:directed="1"/>
      <edge id="3831" label="zzzzz51,zzzzz53" source="171" target="173" cy:directed="1"/>
      <edge id="3830" label="zzzzz51,zzzzz58" source="171" target="178" cy:directed="1"/>
      <edge id="3829" label="zzzzz51,zzzzz78" source="171" target="198" cy:directed="1"/>
      <edge id="3828" label="zzzzz51,zzzzz72" source="171" target="192" cy:directed="1"/>
      <edge id="3827" label="zzzzz51,zzzzz75" source="171" target="195" cy:directed="1"/>
      <edge id="3826" label="zzzzz51,zzzzz76" source="171" target="196" cy:directed="1"/>
      <edge id="3825" label="zzzzz51,zzzzz56" source="171" target="176" cy:directed="1"/>
      <edge id="3824" label="zzzzz51,zzzzz74" source="171" target="194" cy:directed="1"/>
      <edge id="3823" label="zzzzz50,zzzzz79" source="170" target="199" cy:directed="1"/>
      <edge id="3822" label="zzzzz50,zzzzz77" source="170" target="197" cy:directed="1"/>
      <edge id="3821" label="zzzzz50,zzzzzz3" source="170" target="223" cy:directed="1"/>
      <edge id="3820" label="zzzzz50,zzzzzz0" source="170" target="220" cy:directed="1"/>
      <edge id="3819" label="zzzzz50,zzzzz52" source="170" target="172" cy:directed="1"/>
      <edge id="3818" label="zzzzz50,zzzzzz2" source="170" target="222" cy:directed="1"/>
      <edge id="3817" label="zzzzz50,zzzzz69" source="170" target="189" cy:directed="1"/>
      <edge id="3816" label="zzzzz50,zzzzz95" source="170" target="215" cy:directed="1"/>
      <edge id="3815" label="zzzzz50,zzzzz87" source="170" target="207" cy:directed="1"/>
      <edge id="3814" label="zzzzz50,zzzzz57" source="170" target="177" cy:directed="1"/>
      <edge id="3813" label="zzzzz50,zzzzzz9" source="170" target="229" cy:directed="1"/>
      <edge id="3812" label="zzzzz50,zzzzz94" source="170" target="214" cy:directed="1"/>
      <edge id="3811" label="zzzzz50,zzzzz97" source="170" target="217" cy:directed="1"/>
      <edge id="3810" label="zzzzz50,zzzzz59" source="170" target="179" cy:directed="1"/>
      <edge id="3809" label="zzzzz50,zzzzz99" source="170" target="219" cy:directed="1"/>
      <edge id="3808" label="zzzzz50,zzzzz61" source="170" target="181" cy:directed="1"/>
      <edge id="3807" label="zzzzz50,zzzzz65" source="170" target="185" cy:directed="1"/>
      <edge id="3806" label="zzzzz50,zzzzz89" source="170" target="209" cy:directed="1"/>
      <edge id="3805" label="zzzzz50,zzzzz51" source="170" target="171" cy:directed="1"/>
      <edge id="3804" label="zzzzz50,zzzzz74" source="170" target="194" cy:directed="1"/>
      <edge id="3803" label="zzzzz50,zzzzz88" source="170" target="208" cy:directed="1"/>
      <edge id="3802" label="zzzzz50,zzzzz58" source="170" target="178" cy:directed="1"/>
      <edge id="3801" label="zzzzz50,zzzzz64" source="170" target="184" cy:directed="1"/>
      <edge id="3800" label="zzzzz50,zzzzz62" source="170" target="182" cy:directed="1"/>
      <edge id="3799" label="zzzzz50,zzzzz75" source="170" target="195" cy:directed="1"/>
      <edge id="3798" label="zzzzz50,zzzzz76" source="170" target="196" cy:directed="1"/>
      <edge id="3797" label="zzzzz50,zzzzz56" source="170" target="176" cy:directed="1"/>
      <edge id="3796" label="zzzzz50,zzzzz54" source="170" target="174" cy:directed="1"/>
      <edge id="3795" label="zzzzz50,zzzzz70" source="170" target="190" cy:directed="1"/>
      <edge id="3794" label="zzzzz50,zzzzz63" source="170" target="183" cy:directed="1"/>
      <edge id="3793" label="zzzzz50,zzzzz71" source="170" target="191" cy:directed="1"/>
      <edge id="3792" label="zzzzz50,zzzzz78" source="170" target="198" cy:directed="1"/>
      <edge id="3791" label="zzzzz50,zzzzz55" source="170" target="175" cy:directed="1"/>
      <edge id="3790" label="zzzzz50,zzzzz73" source="170" target="193" cy:directed="1"/>
      <edge id="3789" label="zzzzz50,zzzzz60" source="170" target="180" cy:directed="1"/>
      <edge id="3788" label="zzzzz50,zzzzz53" source="170" target="173" cy:directed="1"/>
      <edge id="3787" label="zzzzz50,zzzzz68" source="170" target="188" cy:directed="1"/>
      <edge id="3786" label="zzzzz50,zzzzz72" source="170" target="192" cy:directed="1"/>
      <edge id="3785" label="zzzzz50,zzzzz67" source="170" target="187" cy:directed="1"/>
      <edge id="3784" label="zzzzz49,zzzzzz5" source="169" target="225" cy:directed="1"/>
      <edge id="3783" label="zzzzz49,zzzzz67" source="169" target="187" cy:directed="1"/>
      <edge id="3782" label="zzzzz49,zzzzz89" source="169" target="209" cy:directed="1"/>
      <edge id="3781" label="zzzzz49,zzzzz71" source="169" target="191" cy:directed="1"/>
      <edge id="3780" label="zzzzz49,zzzzz87" source="169" target="207" cy:directed="1"/>
      <edge id="3779" label="zzzzz49,zzzzz68" source="169" target="188" cy:directed="1"/>
      <edge id="3778" label="zzzzz49,zzzzz88" source="169" target="208" cy:directed="1"/>
      <edge id="3777" label="zzzzz49,zzzzz63" source="169" target="183" cy:directed="1"/>
      <edge id="3776" label="zzzzz49,zzzzz50" source="169" target="170" cy:directed="1"/>
      <edge id="3775" label="zzzzz49,zzzzz74" source="169" target="194" cy:directed="1"/>
      <edge id="3774" label="zzzzz49,zzzzz73" source="169" target="193" cy:directed="1"/>
      <edge id="3773" label="zzzzz49,zzzzz72" source="169" target="192" cy:directed="1"/>
      <edge id="3772" label="zzzzz49,zzzzz51" source="169" target="171" cy:directed="1"/>
      <edge id="3771" label="zzzzz49,zzzzz70" source="169" target="190" cy:directed="1"/>
      <edge id="3770" label="zzzzz49,zzzzz54" source="169" target="174" cy:directed="1"/>
      <edge id="3769" label="zzzzz49,zzzzz53" source="169" target="173" cy:directed="1"/>
      <edge id="3768" label="zzzzz49,zzzzz78" source="169" target="198" cy:directed="1"/>
      <edge id="3767" label="zzzzz49,zzzzz60" source="169" target="180" cy:directed="1"/>
      <edge id="3766" label="zzzzz49,zzzzz55" source="169" target="175" cy:directed="1"/>
      <edge id="3765" label="zzzzz49,zzzzz75" source="169" target="195" cy:directed="1"/>
      <edge id="3764" label="zzzzz49,zzzzz58" source="169" target="178" cy:directed="1"/>
      <edge id="3763" label="zzzzz49,zzzzz76" source="169" target="196" cy:directed="1"/>
      <edge id="3762" label="zzzzz49,zzzzz64" source="169" target="184" cy:directed="1"/>
      <edge id="3761" label="zzzzz49,zzzzz56" source="169" target="176" cy:directed="1"/>
      <edge id="3760" label="zzzzz49,zzzzz62" source="169" target="182" cy:directed="1"/>
      <edge id="3759" label="zzzzz49,zzzzz61" source="169" target="181" cy:directed="1"/>
      <edge id="3758" label="zzzzz49,zzzzz59" source="169" target="179" cy:directed="1"/>
      <edge id="3757" label="zzzzz49,zzzzz65" source="169" target="185" cy:directed="1"/>
      <edge id="3756" label="zzzzz48,zzzzzz5" source="168" target="225" cy:directed="1"/>
      <edge id="3755" label="zzzzz48,zzzzzz7" source="168" target="227" cy:directed="1"/>
      <edge id="3754" label="zzzzz48,zzzzz63" source="168" target="183" cy:directed="1"/>
      <edge id="3753" label="zzzzz48,zzzzz54" source="168" target="174" cy:directed="1"/>
      <edge id="3752" label="zzzzz48,zzzzz87" source="168" target="207" cy:directed="1"/>
      <edge id="3751" label="zzzzz48,zzzzz67" source="168" target="187" cy:directed="1"/>
      <edge id="3750" label="zzzzz48,zzzzz89" source="168" target="209" cy:directed="1"/>
      <edge id="3749" label="zzzzz48,zzzzz71" source="168" target="191" cy:directed="1"/>
      <edge id="3748" label="zzzzz48,zzzzz70" source="168" target="190" cy:directed="1"/>
      <edge id="3747" label="zzzzz48,zzzzz68" source="168" target="188" cy:directed="1"/>
      <edge id="3746" label="zzzzz48,zzzzz73" source="168" target="193" cy:directed="1"/>
      <edge id="3745" label="zzzzz48,zzzzz50" source="168" target="170" cy:directed="1"/>
      <edge id="3744" label="zzzzz48,zzzzz88" source="168" target="208" cy:directed="1"/>
      <edge id="3743" label="zzzzz48,zzzzz74" source="168" target="194" cy:directed="1"/>
      <edge id="3742" label="zzzzz48,zzzzz55" source="168" target="175" cy:directed="1"/>
      <edge id="3741" label="zzzzz48,zzzzz60" source="168" target="180" cy:directed="1"/>
      <edge id="3740" label="zzzzz48,zzzzz51" source="168" target="171" cy:directed="1"/>
      <edge id="3739" label="zzzzz48,zzzzz72" source="168" target="192" cy:directed="1"/>
      <edge id="3738" label="zzzzz48,zzzzz53" source="168" target="173" cy:directed="1"/>
      <edge id="3737" label="zzzzz48,zzzzz78" source="168" target="198" cy:directed="1"/>
      <edge id="3736" label="zzzzz48,zzzzz58" source="168" target="178" cy:directed="1"/>
      <edge id="3735" label="zzzzz48,zzzzz75" source="168" target="195" cy:directed="1"/>
      <edge id="3734" label="zzzzz48,zzzzz76" source="168" target="196" cy:directed="1"/>
      <edge id="3733" label="zzzzz48,zzzzz61" source="168" target="181" cy:directed="1"/>
      <edge id="3732" label="zzzzz48,zzzzz64" source="168" target="184" cy:directed="1"/>
      <edge id="3731" label="zzzzz48,zzzzz62" source="168" target="182" cy:directed="1"/>
      <edge id="3730" label="zzzzz48,zzzzz56" source="168" target="176" cy:directed="1"/>
      <edge id="3729" label="zzzzz48,zzzzz59" source="168" target="179" cy:directed="1"/>
      <edge id="3728" label="zzzzz48,zzzzz49" source="168" target="169" cy:directed="1"/>
      <edge id="3727" label="zzzzz48,zzzzz65" source="168" target="185" cy:directed="1"/>
      <edge id="3726" label="zzzzz47,zzzzz94" source="167" target="214" cy:directed="1"/>
      <edge id="3725" label="zzzzz47,zzzzzz5" source="167" target="225" cy:directed="1"/>
      <edge id="3724" label="zzzzz47,zzzzz97" source="167" target="217" cy:directed="1"/>
      <edge id="3723" label="zzzzz47,zzzzz79" source="167" target="199" cy:directed="1"/>
      <edge id="3722" label="zzzzz47,zzzzzz3" source="167" target="223" cy:directed="1"/>
      <edge id="3721" label="zzzzz47,zzzzzz2" source="167" target="222" cy:directed="1"/>
      <edge id="3720" label="zzzzz47,zzzzzz1" source="167" target="221" cy:directed="1"/>
      <edge id="3719" label="zzzzz47,zzzzz93" source="167" target="213" cy:directed="1"/>
      <edge id="3718" label="zzzzz47,zzzzz57" source="167" target="177" cy:directed="1"/>
      <edge id="3717" label="zzzzz47,zzzzzz9" source="167" target="229" cy:directed="1"/>
      <edge id="3716" label="zzzzz47,zzzzz99" source="167" target="219" cy:directed="1"/>
      <edge id="3715" label="zzzzz47,zzzzzz4" source="167" target="224" cy:directed="1"/>
      <edge id="3714" label="zzzzz47,zzzzz95" source="167" target="215" cy:directed="1"/>
      <edge id="3713" label="zzzzz47,zzzzzz0" source="167" target="220" cy:directed="1"/>
      <edge id="3712" label="zzzzz47,zzzzz48" source="167" target="168" cy:directed="1"/>
      <edge id="3711" label="zzzzz47,zzzzz49" source="167" target="169" cy:directed="1"/>
      <edge id="3710" label="zzzzz47,zzzzz87" source="167" target="207" cy:directed="1"/>
      <edge id="3709" label="zzzzz47,zzzzz61" source="167" target="181" cy:directed="1"/>
      <edge id="3708" label="zzzzz47,zzzzz74" source="167" target="194" cy:directed="1"/>
      <edge id="3707" label="zzzzz47,zzzzz58" source="167" target="178" cy:directed="1"/>
      <edge id="3706" label="zzzzz47,zzzzz51" source="167" target="171" cy:directed="1"/>
      <edge id="3705" label="zzzzz47,zzzzz89" source="167" target="209" cy:directed="1"/>
      <edge id="3704" label="zzzzz47,zzzzz88" source="167" target="208" cy:directed="1"/>
      <edge id="3703" label="zzzzz47,zzzzz62" source="167" target="182" cy:directed="1"/>
      <edge id="3702" label="zzzzz47,zzzzz65" source="167" target="185" cy:directed="1"/>
      <edge id="3701" label="zzzzz47,zzzzz75" source="167" target="195" cy:directed="1"/>
      <edge id="3700" label="zzzzz47,zzzzz59" source="167" target="179" cy:directed="1"/>
      <edge id="3699" label="zzzzz47,zzzzz64" source="167" target="184" cy:directed="1"/>
      <edge id="3698" label="zzzzz47,zzzzz76" source="167" target="196" cy:directed="1"/>
      <edge id="3697" label="zzzzz47,zzzzz56" source="167" target="176" cy:directed="1"/>
      <edge id="3696" label="zzzzz47,zzzzz70" source="167" target="190" cy:directed="1"/>
      <edge id="3695" label="zzzzz47,zzzzz54" source="167" target="174" cy:directed="1"/>
      <edge id="3694" label="zzzzz47,zzzzz67" source="167" target="187" cy:directed="1"/>
      <edge id="3693" label="zzzzz47,zzzzz50" source="167" target="170" cy:directed="1"/>
      <edge id="3692" label="zzzzz47,zzzzz53" source="167" target="173" cy:directed="1"/>
      <edge id="3691" label="zzzzz47,zzzzz55" source="167" target="175" cy:directed="1"/>
      <edge id="3690" label="zzzzz47,zzzzz78" source="167" target="198" cy:directed="1"/>
      <edge id="3689" label="zzzzz47,zzzzz72" source="167" target="192" cy:directed="1"/>
      <edge id="3688" label="zzzzz47,zzzzz63" source="167" target="183" cy:directed="1"/>
      <edge id="3687" label="zzzzz47,zzzzz73" source="167" target="193" cy:directed="1"/>
      <edge id="3686" label="zzzzz47,zzzzz71" source="167" target="191" cy:directed="1"/>
      <edge id="3685" label="zzzzz47,zzzzz68" source="167" target="188" cy:directed="1"/>
      <edge id="3684" label="zzzzz47,zzzzz60" source="167" target="180" cy:directed="1"/>
      <edge id="3683" label="zzzzz46,zzzzzz5" source="166" target="225" cy:directed="1"/>
      <edge id="3682" label="zzzzz46,zzzzz95" source="166" target="215" cy:directed="1"/>
      <edge id="3681" label="zzzzz46,zzzzz79" source="166" target="199" cy:directed="1"/>
      <edge id="3680" label="zzzzz46,zzzzzz2" source="166" target="222" cy:directed="1"/>
      <edge id="3679" label="zzzzz46,zzzzz69" source="166" target="189" cy:directed="1"/>
      <edge id="3678" label="zzzzz46,zzzzzz7" source="166" target="227" cy:directed="1"/>
      <edge id="3677" label="zzzzz46,zzzzz94" source="166" target="214" cy:directed="1"/>
      <edge id="3676" label="zzzzz46,zzzzz93" source="166" target="213" cy:directed="1"/>
      <edge id="3675" label="zzzzz46,zzzzz77" source="166" target="197" cy:directed="1"/>
      <edge id="3674" label="zzzzz46,zzzzzz9" source="166" target="229" cy:directed="1"/>
      <edge id="3673" label="zzzzz46,zzzzz48" source="166" target="168" cy:directed="1"/>
      <edge id="3672" label="zzzzz46,zzzzzz3" source="166" target="223" cy:directed="1"/>
      <edge id="3671" label="zzzzz46,zzzzz52" source="166" target="172" cy:directed="1"/>
      <edge id="3670" label="zzzzz46,zzzzzz4" source="166" target="224" cy:directed="1"/>
      <edge id="3669" label="zzzzz46,zzzzz49" source="166" target="169" cy:directed="1"/>
      <edge id="3668" label="zzzzz46,zzzzz87" source="166" target="207" cy:directed="1"/>
      <edge id="3667" label="zzzzz46,zzzzzz0" source="166" target="220" cy:directed="1"/>
      <edge id="3666" label="zzzzz46,zzzzz97" source="166" target="217" cy:directed="1"/>
      <edge id="3665" label="zzzzz46,zzzzz57" source="166" target="177" cy:directed="1"/>
      <edge id="3664" label="zzzzz46,zzzzz65" source="166" target="185" cy:directed="1"/>
      <edge id="3663" label="zzzzz46,zzzzz59" source="166" target="179" cy:directed="1"/>
      <edge id="3662" label="zzzzz46,zzzzz89" source="166" target="209" cy:directed="1"/>
      <edge id="3661" label="zzzzz46,zzzzz99" source="166" target="219" cy:directed="1"/>
      <edge id="3660" label="zzzzz46,zzzzz61" source="166" target="181" cy:directed="1"/>
      <edge id="3659" label="zzzzz46,zzzzz74" source="166" target="194" cy:directed="1"/>
      <edge id="3658" label="zzzzz46,zzzzz88" source="166" target="208" cy:directed="1"/>
      <edge id="3657" label="zzzzz46,zzzzz51" source="166" target="171" cy:directed="1"/>
      <edge id="3656" label="zzzzz46,zzzzz62" source="166" target="182" cy:directed="1"/>
      <edge id="3655" label="zzzzz46,zzzzz64" source="166" target="184" cy:directed="1"/>
      <edge id="3654" label="zzzzz46,zzzzz58" source="166" target="178" cy:directed="1"/>
      <edge id="3653" label="zzzzz46,zzzzz75" source="166" target="195" cy:directed="1"/>
      <edge id="3652" label="zzzzz46,zzzzz76" source="166" target="196" cy:directed="1"/>
      <edge id="3651" label="zzzzz46,zzzzz56" source="166" target="176" cy:directed="1"/>
      <edge id="3650" label="zzzzz46,zzzzz54" source="166" target="174" cy:directed="1"/>
      <edge id="3649" label="zzzzz46,zzzzz70" source="166" target="190" cy:directed="1"/>
      <edge id="3648" label="zzzzz46,zzzzz73" source="166" target="193" cy:directed="1"/>
      <edge id="3647" label="zzzzz46,zzzzz63" source="166" target="183" cy:directed="1"/>
      <edge id="3646" label="zzzzz46,zzzzz78" source="166" target="198" cy:directed="1"/>
      <edge id="3645" label="zzzzz46,zzzzz72" source="166" target="192" cy:directed="1"/>
      <edge id="3644" label="zzzzz46,zzzzz60" source="166" target="180" cy:directed="1"/>
      <edge id="3643" label="zzzzz46,zzzzz68" source="166" target="188" cy:directed="1"/>
      <edge id="3642" label="zzzzz46,zzzzz47" source="166" target="167" cy:directed="1"/>
      <edge id="3641" label="zzzzz46,zzzzz50" source="166" target="170" cy:directed="1"/>
      <edge id="3640" label="zzzzz46,zzzzz71" source="166" target="191" cy:directed="1"/>
      <edge id="3639" label="zzzzz46,zzzzz53" source="166" target="173" cy:directed="1"/>
      <edge id="3638" label="zzzzz46,zzzzz55" source="166" target="175" cy:directed="1"/>
      <edge id="3637" label="zzzzz46,zzzzz67" source="166" target="187" cy:directed="1"/>
      <edge id="3636" label="zzzzz45,zzzzzz4" source="165" target="224" cy:directed="1"/>
      <edge id="3635" label="zzzzz45,zzzzz87" source="165" target="207" cy:directed="1"/>
      <edge id="3634" label="zzzzz45,zzzzz89" source="165" target="209" cy:directed="1"/>
      <edge id="3633" label="zzzzz45,zzzzz54" source="165" target="174" cy:directed="1"/>
      <edge id="3632" label="zzzzz45,zzzzz67" source="165" target="187" cy:directed="1"/>
      <edge id="3631" label="zzzzz45,zzzzz88" source="165" target="208" cy:directed="1"/>
      <edge id="3630" label="zzzzz45,zzzzz68" source="165" target="188" cy:directed="1"/>
      <edge id="3629" label="zzzzz45,zzzzz63" source="165" target="183" cy:directed="1"/>
      <edge id="3628" label="zzzzz45,zzzzz70" source="165" target="190" cy:directed="1"/>
      <edge id="3627" label="zzzzz45,zzzzz71" source="165" target="191" cy:directed="1"/>
      <edge id="3626" label="zzzzz45,zzzzz60" source="165" target="180" cy:directed="1"/>
      <edge id="3625" label="zzzzz45,zzzzz73" source="165" target="193" cy:directed="1"/>
      <edge id="3624" label="zzzzz45,zzzzz46" source="165" target="166" cy:directed="1"/>
      <edge id="3623" label="zzzzz45,zzzzz74" source="165" target="194" cy:directed="1"/>
      <edge id="3622" label="zzzzz45,zzzzz78" source="165" target="198" cy:directed="1"/>
      <edge id="3621" label="zzzzz45,zzzzz50" source="165" target="170" cy:directed="1"/>
      <edge id="3620" label="zzzzz45,zzzzz51" source="165" target="171" cy:directed="1"/>
      <edge id="3619" label="zzzzz45,zzzzz53" source="165" target="173" cy:directed="1"/>
      <edge id="3618" label="zzzzz45,zzzzz47" source="165" target="167" cy:directed="1"/>
      <edge id="3617" label="zzzzz45,zzzzz72" source="165" target="192" cy:directed="1"/>
      <edge id="3616" label="zzzzz45,zzzzz55" source="165" target="175" cy:directed="1"/>
      <edge id="3615" label="zzzzz45,zzzzz75" source="165" target="195" cy:directed="1"/>
      <edge id="3614" label="zzzzz45,zzzzz76" source="165" target="196" cy:directed="1"/>
      <edge id="3613" label="zzzzz45,zzzzz58" source="165" target="178" cy:directed="1"/>
      <edge id="3612" label="zzzzz45,zzzzz56" source="165" target="176" cy:directed="1"/>
      <edge id="3611" label="zzzzz45,zzzzz62" source="165" target="182" cy:directed="1"/>
      <edge id="3610" label="zzzzz45,zzzzz64" source="165" target="184" cy:directed="1"/>
      <edge id="3609" label="zzzzz45,zzzzz61" source="165" target="181" cy:directed="1"/>
      <edge id="3608" label="zzzzz45,zzzzz59" source="165" target="179" cy:directed="1"/>
      <edge id="3607" label="zzzzz45,zzzzz48" source="165" target="168" cy:directed="1"/>
      <edge id="3606" label="zzzzz45,zzzzz65" source="165" target="185" cy:directed="1"/>
      <edge id="3605" label="zzzzz45,zzzzz49" source="165" target="169" cy:directed="1"/>
      <edge id="3604" label="zzzzz44,zzzzz94" source="164" target="214" cy:directed="1"/>
      <edge id="3603" label="zzzzz44,zzzzz79" source="164" target="199" cy:directed="1"/>
      <edge id="3602" label="zzzzz44,zzzzz77" source="164" target="197" cy:directed="1"/>
      <edge id="3601" label="zzzzz44,zzzzz52" source="164" target="172" cy:directed="1"/>
      <edge id="3600" label="zzzzz44,zzzzzz1" source="164" target="221" cy:directed="1"/>
      <edge id="3599" label="zzzzz44,zzzzzz8" source="164" target="228" cy:directed="1"/>
      <edge id="3598" label="zzzzz44,zzzzz57" source="164" target="177" cy:directed="1"/>
      <edge id="3597" label="zzzzz44,zzzzzz5" source="164" target="225" cy:directed="1"/>
      <edge id="3596" label="zzzzz44,zzzzzz6" source="164" target="226" cy:directed="1"/>
      <edge id="3595" label="zzzzz44,zzzzz69" source="164" target="189" cy:directed="1"/>
      <edge id="3594" label="zzzzz44,zzzzz97" source="164" target="217" cy:directed="1"/>
      <edge id="3593" label="zzzzz44,zzzzzz4" source="164" target="224" cy:directed="1"/>
      <edge id="3592" label="zzzzz44,zzzzzz0" source="164" target="220" cy:directed="1"/>
      <edge id="3591" label="zzzzz44,zzzzz93" source="164" target="213" cy:directed="1"/>
      <edge id="3590" label="zzzzz44,zzzzz95" source="164" target="215" cy:directed="1"/>
      <edge id="3589" label="zzzzz44,zzzzz48" source="164" target="168" cy:directed="1"/>
      <edge id="3588" label="zzzzz44,zzzzzz7" source="164" target="227" cy:directed="1"/>
      <edge id="3587" label="zzzzz44,zzzzzz3" source="164" target="223" cy:directed="1"/>
      <edge id="3586" label="zzzzz44,zzzzzz9" source="164" target="229" cy:directed="1"/>
      <edge id="3585" label="zzzzz44,zzzzz45" source="164" target="165" cy:directed="1"/>
      <edge id="3584" label="zzzzz44,zzzzz61" source="164" target="181" cy:directed="1"/>
      <edge id="3583" label="zzzzz44,zzzzz99" source="164" target="219" cy:directed="1"/>
      <edge id="3582" label="zzzzz44,zzzzz65" source="164" target="185" cy:directed="1"/>
      <edge id="3581" label="zzzzz44,zzzzz49" source="164" target="169" cy:directed="1"/>
      <edge id="3580" label="zzzzz44,zzzzz89" source="164" target="209" cy:directed="1"/>
      <edge id="3579" label="zzzzz44,zzzzz88" source="164" target="208" cy:directed="1"/>
      <edge id="3578" label="zzzzz44,zzzzz87" source="164" target="207" cy:directed="1"/>
      <edge id="3577" label="zzzzz44,zzzzz74" source="164" target="194" cy:directed="1"/>
      <edge id="3576" label="zzzzz44,zzzzz51" source="164" target="171" cy:directed="1"/>
      <edge id="3575" label="zzzzz44,zzzzz59" source="164" target="179" cy:directed="1"/>
      <edge id="3574" label="zzzzz44,zzzzz62" source="164" target="182" cy:directed="1"/>
      <edge id="3573" label="zzzzz44,zzzzz64" source="164" target="184" cy:directed="1"/>
      <edge id="3572" label="zzzzz44,zzzzz58" source="164" target="178" cy:directed="1"/>
      <edge id="3571" label="zzzzz44,zzzzz76" source="164" target="196" cy:directed="1"/>
      <edge id="3570" label="zzzzz44,zzzzz75" source="164" target="195" cy:directed="1"/>
      <edge id="3569" label="zzzzz44,zzzzz56" source="164" target="176" cy:directed="1"/>
      <edge id="3568" label="zzzzz44,zzzzz70" source="164" target="190" cy:directed="1"/>
      <edge id="3567" label="zzzzz44,zzzzz54" source="164" target="174" cy:directed="1"/>
      <edge id="3566" label="zzzzz44,zzzzz50" source="164" target="170" cy:directed="1"/>
      <edge id="3565" label="zzzzz44,zzzzz63" source="164" target="183" cy:directed="1"/>
      <edge id="3564" label="zzzzz44,zzzzz67" source="164" target="187" cy:directed="1"/>
      <edge id="3563" label="zzzzz44,zzzzz47" source="164" target="167" cy:directed="1"/>
      <edge id="3562" label="zzzzz44,zzzzz78" source="164" target="198" cy:directed="1"/>
      <edge id="3561" label="zzzzz44,zzzzz71" source="164" target="191" cy:directed="1"/>
      <edge id="3560" label="zzzzz44,zzzzz60" source="164" target="180" cy:directed="1"/>
      <edge id="3559" label="zzzzz44,zzzzz68" source="164" target="188" cy:directed="1"/>
      <edge id="3558" label="zzzzz44,zzzzz73" source="164" target="193" cy:directed="1"/>
      <edge id="3557" label="zzzzz44,zzzzz46" source="164" target="166" cy:directed="1"/>
      <edge id="3556" label="zzzzz44,zzzzz72" source="164" target="192" cy:directed="1"/>
      <edge id="3555" label="zzzzz44,zzzzz53" source="164" target="173" cy:directed="1"/>
      <edge id="3554" label="zzzzz44,zzzzz55" source="164" target="175" cy:directed="1"/>
      <edge id="3553" label="zzzzz43,zzzzzz3" source="163" target="223" cy:directed="1"/>
      <edge id="3552" label="zzzzz43,zzzzz77" source="163" target="197" cy:directed="1"/>
      <edge id="3551" label="zzzzz43,zzzzzz2" source="163" target="222" cy:directed="1"/>
      <edge id="3550" label="zzzzz43,zzzzzz0" source="163" target="220" cy:directed="1"/>
      <edge id="3549" label="zzzzz43,zzzzz79" source="163" target="199" cy:directed="1"/>
      <edge id="3548" label="zzzzz43,zzzzz52" source="163" target="172" cy:directed="1"/>
      <edge id="3547" label="zzzzz43,zzzzz93" source="163" target="213" cy:directed="1"/>
      <edge id="3546" label="zzzzz43,zzzzz69" source="163" target="189" cy:directed="1"/>
      <edge id="3545" label="zzzzz43,zzzzz57" source="163" target="177" cy:directed="1"/>
      <edge id="3544" label="zzzzz43,zzzzzz4" source="163" target="224" cy:directed="1"/>
      <edge id="3543" label="zzzzz43,zzzzz95" source="163" target="215" cy:directed="1"/>
      <edge id="3542" label="zzzzz43,zzzzzz5" source="163" target="225" cy:directed="1"/>
      <edge id="3541" label="zzzzz43,zzzzzz1" source="163" target="221" cy:directed="1"/>
      <edge id="3540" label="zzzzz43,zzzzzz7" source="163" target="227" cy:directed="1"/>
      <edge id="3539" label="zzzzz43,zzzzzz6" source="163" target="226" cy:directed="1"/>
      <edge id="3538" label="zzzzz43,zzzzz49" source="163" target="169" cy:directed="1"/>
      <edge id="3537" label="zzzzz43,zzzzz97" source="163" target="217" cy:directed="1"/>
      <edge id="3536" label="zzzzz43,zzzzzz9" source="163" target="229" cy:directed="1"/>
      <edge id="3535" label="zzzzz43,zzzzz87" source="163" target="207" cy:directed="1"/>
      <edge id="3534" label="zzzzz43,zzzzz99" source="163" target="219" cy:directed="1"/>
      <edge id="3533" label="zzzzz43,zzzzz48" source="163" target="168" cy:directed="1"/>
      <edge id="3532" label="zzzzz43,zzzzz89" source="163" target="209" cy:directed="1"/>
      <edge id="3531" label="zzzzz43,zzzzz88" source="163" target="208" cy:directed="1"/>
      <edge id="3530" label="zzzzz43,zzzzz58" source="163" target="178" cy:directed="1"/>
      <edge id="3529" label="zzzzz43,zzzzz61" source="163" target="181" cy:directed="1"/>
      <edge id="3528" label="zzzzz43,zzzzz59" source="163" target="179" cy:directed="1"/>
      <edge id="3527" label="zzzzz43,zzzzz45" source="163" target="165" cy:directed="1"/>
      <edge id="3526" label="zzzzz43,zzzzz65" source="163" target="185" cy:directed="1"/>
      <edge id="3525" label="zzzzz43,zzzzz75" source="163" target="195" cy:directed="1"/>
      <edge id="3524" label="zzzzz43,zzzzz74" source="163" target="194" cy:directed="1"/>
      <edge id="3523" label="zzzzz43,zzzzz51" source="163" target="171" cy:directed="1"/>
      <edge id="3522" label="zzzzz43,zzzzz62" source="163" target="182" cy:directed="1"/>
      <edge id="3521" label="zzzzz43,zzzzz64" source="163" target="184" cy:directed="1"/>
      <edge id="3520" label="zzzzz43,zzzzz76" source="163" target="196" cy:directed="1"/>
      <edge id="3519" label="zzzzz43,zzzzz70" source="163" target="190" cy:directed="1"/>
      <edge id="3518" label="zzzzz43,zzzzz54" source="163" target="174" cy:directed="1"/>
      <edge id="3517" label="zzzzz43,zzzzz56" source="163" target="176" cy:directed="1"/>
      <edge id="3516" label="zzzzz43,zzzzz50" source="163" target="170" cy:directed="1"/>
      <edge id="3515" label="zzzzz43,zzzzz67" source="163" target="187" cy:directed="1"/>
      <edge id="3514" label="zzzzz43,zzzzz46" source="163" target="166" cy:directed="1"/>
      <edge id="3513" label="zzzzz43,zzzzz53" source="163" target="173" cy:directed="1"/>
      <edge id="3512" label="zzzzz43,zzzzz44" source="163" target="164" cy:directed="1"/>
      <edge id="3511" label="zzzzz43,zzzzz55" source="163" target="175" cy:directed="1"/>
      <edge id="3510" label="zzzzz43,zzzzz63" source="163" target="183" cy:directed="1"/>
      <edge id="3509" label="zzzzz43,zzzzz73" source="163" target="193" cy:directed="1"/>
      <edge id="3508" label="zzzzz43,zzzzz47" source="163" target="167" cy:directed="1"/>
      <edge id="3507" label="zzzzz43,zzzzz71" source="163" target="191" cy:directed="1"/>
      <edge id="3506" label="zzzzz43,zzzzz60" source="163" target="180" cy:directed="1"/>
      <edge id="3505" label="zzzzz43,zzzzz78" source="163" target="198" cy:directed="1"/>
      <edge id="3504" label="zzzzz43,zzzzz68" source="163" target="188" cy:directed="1"/>
      <edge id="3503" label="zzzzz43,zzzzz72" source="163" target="192" cy:directed="1"/>
      <edge id="3502" label="zzzzz42,zzzzz79" source="162" target="199" cy:directed="1"/>
      <edge id="3501" label="zzzzz42,zzzzzz8" source="162" target="228" cy:directed="1"/>
      <edge id="3500" label="zzzzz42,zzzzz77" source="162" target="197" cy:directed="1"/>
      <edge id="3499" label="zzzzz42,zzzzz69" source="162" target="189" cy:directed="1"/>
      <edge id="3498" label="zzzzz42,zzzzzz0" source="162" target="220" cy:directed="1"/>
      <edge id="3497" label="zzzzz42,zzzzz57" source="162" target="177" cy:directed="1"/>
      <edge id="3496" label="zzzzz42,zzzzzz4" source="162" target="224" cy:directed="1"/>
      <edge id="3495" label="zzzzz42,zzzzz93" source="162" target="213" cy:directed="1"/>
      <edge id="3494" label="zzzzz42,zzzzzz1" source="162" target="221" cy:directed="1"/>
      <edge id="3493" label="zzzzz42,zzzzz52" source="162" target="172" cy:directed="1"/>
      <edge id="3492" label="zzzzz42,zzzzzz2" source="162" target="222" cy:directed="1"/>
      <edge id="3491" label="zzzzz42,zzzzz95" source="162" target="215" cy:directed="1"/>
      <edge id="3490" label="zzzzz42,zzzzzz6" source="162" target="226" cy:directed="1"/>
      <edge id="3489" label="zzzzz42,zzzzz48" source="162" target="168" cy:directed="1"/>
      <edge id="3488" label="zzzzz42,zzzzz87" source="162" target="207" cy:directed="1"/>
      <edge id="3487" label="zzzzz42,zzzzz59" source="162" target="179" cy:directed="1"/>
      <edge id="3486" label="zzzzz42,zzzzz51" source="162" target="171" cy:directed="1"/>
      <edge id="3485" label="zzzzz42,zzzzzz9" source="162" target="229" cy:directed="1"/>
      <edge id="3484" label="zzzzz42,zzzzz45" source="162" target="165" cy:directed="1"/>
      <edge id="3483" label="zzzzz42,zzzzz74" source="162" target="194" cy:directed="1"/>
      <edge id="3482" label="zzzzz42,zzzzzz7" source="162" target="227" cy:directed="1"/>
      <edge id="3481" label="zzzzz42,zzzzz49" source="162" target="169" cy:directed="1"/>
      <edge id="3480" label="zzzzz42,zzzzzz5" source="162" target="225" cy:directed="1"/>
      <edge id="3479" label="zzzzz42,zzzzz61" source="162" target="181" cy:directed="1"/>
      <edge id="3478" label="zzzzz42,zzzzz58" source="162" target="178" cy:directed="1"/>
      <edge id="3477" label="zzzzz42,zzzzz97" source="162" target="217" cy:directed="1"/>
      <edge id="3476" label="zzzzz42,zzzzz75" source="162" target="195" cy:directed="1"/>
      <edge id="3475" label="zzzzz42,zzzzz65" source="162" target="185" cy:directed="1"/>
      <edge id="3474" label="zzzzz42,zzzzz64" source="162" target="184" cy:directed="1"/>
      <edge id="3473" label="zzzzz42,zzzzz62" source="162" target="182" cy:directed="1"/>
      <edge id="3472" label="zzzzz42,zzzzz89" source="162" target="209" cy:directed="1"/>
      <edge id="3471" label="zzzzz42,zzzzz76" source="162" target="196" cy:directed="1"/>
      <edge id="3470" label="zzzzz42,zzzzz54" source="162" target="174" cy:directed="1"/>
      <edge id="3469" label="zzzzz42,zzzzz88" source="162" target="208" cy:directed="1"/>
      <edge id="3468" label="zzzzz42,zzzzz99" source="162" target="219" cy:directed="1"/>
      <edge id="3467" label="zzzzz42,zzzzz70" source="162" target="190" cy:directed="1"/>
      <edge id="3466" label="zzzzz42,zzzzz47" source="162" target="167" cy:directed="1"/>
      <edge id="3465" label="zzzzz42,zzzzz56" source="162" target="176" cy:directed="1"/>
      <edge id="3464" label="zzzzz42,zzzzz50" source="162" target="170" cy:directed="1"/>
      <edge id="3463" label="zzzzz42,zzzzz44" source="162" target="164" cy:directed="1"/>
      <edge id="3462" label="zzzzz42,zzzzz63" source="162" target="183" cy:directed="1"/>
      <edge id="3461" label="zzzzz42,zzzzz46" source="162" target="166" cy:directed="1"/>
      <edge id="3460" label="zzzzz42,zzzzz73" source="162" target="193" cy:directed="1"/>
      <edge id="3459" label="zzzzz42,zzzzz68" source="162" target="188" cy:directed="1"/>
      <edge id="3458" label="zzzzz42,zzzzz67" source="162" target="187" cy:directed="1"/>
      <edge id="3457" label="zzzzz42,zzzzz53" source="162" target="173" cy:directed="1"/>
      <edge id="3456" label="zzzzz42,zzzzz78" source="162" target="198" cy:directed="1"/>
      <edge id="3455" label="zzzzz42,zzzzz60" source="162" target="180" cy:directed="1"/>
      <edge id="3454" label="zzzzz42,zzzzz71" source="162" target="191" cy:directed="1"/>
      <edge id="3453" label="zzzzz42,zzzzz43" source="162" target="163" cy:directed="1"/>
      <edge id="3452" label="zzzzz42,zzzzz55" source="162" target="175" cy:directed="1"/>
      <edge id="3451" label="zzzzz42,zzzzz72" source="162" target="192" cy:directed="1"/>
      <edge id="3450" label="zzzzz41,zzzzzz2" source="161" target="222" cy:directed="1"/>
      <edge id="3449" label="zzzzz41,zzzzzz1" source="161" target="221" cy:directed="1"/>
      <edge id="3448" label="zzzzz41,zzzzzz0" source="161" target="220" cy:directed="1"/>
      <edge id="3447" label="zzzzz41,zzzzz77" source="161" target="197" cy:directed="1"/>
      <edge id="3446" label="zzzzz41,zzzzz79" source="161" target="199" cy:directed="1"/>
      <edge id="3445" label="zzzzz41,zzzzz93" source="161" target="213" cy:directed="1"/>
      <edge id="3444" label="zzzzz41,zzzzzz6" source="161" target="226" cy:directed="1"/>
      <edge id="3443" label="zzzzz41,zzzzzz3" source="161" target="223" cy:directed="1"/>
      <edge id="3442" label="zzzzz41,zzzzz95" source="161" target="215" cy:directed="1"/>
      <edge id="3441" label="zzzzz41,zzzzz52" source="161" target="172" cy:directed="1"/>
      <edge id="3440" label="zzzzz41,zzzzzz9" source="161" target="229" cy:directed="1"/>
      <edge id="3439" label="zzzzz41,zzzzz69" source="161" target="189" cy:directed="1"/>
      <edge id="3438" label="zzzzz41,zzzzz97" source="161" target="217" cy:directed="1"/>
      <edge id="3437" label="zzzzz41,zzzzzz5" source="161" target="225" cy:directed="1"/>
      <edge id="3436" label="zzzzz41,zzzzzz4" source="161" target="224" cy:directed="1"/>
      <edge id="3435" label="zzzzz41,zzzzzz7" source="161" target="227" cy:directed="1"/>
      <edge id="3434" label="zzzzz41,zzzzz49" source="161" target="169" cy:directed="1"/>
      <edge id="3433" label="zzzzz41,zzzzz57" source="161" target="177" cy:directed="1"/>
      <edge id="3432" label="zzzzz41,zzzzz99" source="161" target="219" cy:directed="1"/>
      <edge id="3431" label="zzzzz41,zzzzz87" source="161" target="207" cy:directed="1"/>
      <edge id="3430" label="zzzzz41,zzzzz89" source="161" target="209" cy:directed="1"/>
      <edge id="3429" label="zzzzz41,zzzzz48" source="161" target="168" cy:directed="1"/>
      <edge id="3428" label="zzzzz41,zzzzz61" source="161" target="181" cy:directed="1"/>
      <edge id="3427" label="zzzzz41,zzzzz88" source="161" target="208" cy:directed="1"/>
      <edge id="3426" label="zzzzz41,zzzzz75" source="161" target="195" cy:directed="1"/>
      <edge id="3425" label="zzzzz41,zzzzz58" source="161" target="178" cy:directed="1"/>
      <edge id="3424" label="zzzzz41,zzzzz74" source="161" target="194" cy:directed="1"/>
      <edge id="3423" label="zzzzz41,zzzzz65" source="161" target="185" cy:directed="1"/>
      <edge id="3422" label="zzzzz41,zzzzz62" source="161" target="182" cy:directed="1"/>
      <edge id="3421" label="zzzzz41,zzzzz51" source="161" target="171" cy:directed="1"/>
      <edge id="3420" label="zzzzz41,zzzzz45" source="161" target="165" cy:directed="1"/>
      <edge id="3419" label="zzzzz41,zzzzz64" source="161" target="184" cy:directed="1"/>
      <edge id="3418" label="zzzzz41,zzzzz59" source="161" target="179" cy:directed="1"/>
      <edge id="3417" label="zzzzz41,zzzzz76" source="161" target="196" cy:directed="1"/>
      <edge id="3416" label="zzzzz41,zzzzz42" source="161" target="162" cy:directed="1"/>
      <edge id="3415" label="zzzzz41,zzzzz70" source="161" target="190" cy:directed="1"/>
      <edge id="3414" label="zzzzz41,zzzzz56" source="161" target="176" cy:directed="1"/>
      <edge id="3413" label="zzzzz41,zzzzz54" source="161" target="174" cy:directed="1"/>
      <edge id="3412" label="zzzzz41,zzzzz50" source="161" target="170" cy:directed="1"/>
      <edge id="3411" label="zzzzz41,zzzzz67" source="161" target="187" cy:directed="1"/>
      <edge id="3410" label="zzzzz41,zzzzz63" source="161" target="183" cy:directed="1"/>
      <edge id="3409" label="zzzzz41,zzzzz46" source="161" target="166" cy:directed="1"/>
      <edge id="3408" label="zzzzz41,zzzzz44" source="161" target="164" cy:directed="1"/>
      <edge id="3407" label="zzzzz41,zzzzz53" source="161" target="173" cy:directed="1"/>
      <edge id="3406" label="zzzzz41,zzzzz55" source="161" target="175" cy:directed="1"/>
      <edge id="3405" label="zzzzz41,zzzzz73" source="161" target="193" cy:directed="1"/>
      <edge id="3404" label="zzzzz41,zzzzz71" source="161" target="191" cy:directed="1"/>
      <edge id="3403" label="zzzzz41,zzzzz47" source="161" target="167" cy:directed="1"/>
      <edge id="3402" label="zzzzz41,zzzzz78" source="161" target="198" cy:directed="1"/>
      <edge id="3401" label="zzzzz41,zzzzz68" source="161" target="188" cy:directed="1"/>
      <edge id="3400" label="zzzzz41,zzzzz60" source="161" target="180" cy:directed="1"/>
      <edge id="3399" label="zzzzz41,zzzzz43" source="161" target="163" cy:directed="1"/>
      <edge id="3398" label="zzzzz41,zzzzz72" source="161" target="192" cy:directed="1"/>
      <edge id="3397" label="zzzzz40,zzzzz99" source="160" target="219" cy:directed="1"/>
      <edge id="3396" label="zzzzz40,zzzzzz2" source="160" target="222" cy:directed="1"/>
      <edge id="3395" label="zzzzz40,zzzzzz9" source="160" target="229" cy:directed="1"/>
      <edge id="3394" label="zzzzz40,zzzzzz7" source="160" target="227" cy:directed="1"/>
      <edge id="3393" label="zzzzz40,zzzzzz1" source="160" target="221" cy:directed="1"/>
      <edge id="3392" label="zzzzz40,zzzzzz4" source="160" target="224" cy:directed="1"/>
      <edge id="3391" label="zzzzz40,zzzzz93" source="160" target="213" cy:directed="1"/>
      <edge id="3390" label="zzzzz40,zzzzz88" source="160" target="208" cy:directed="1"/>
      <edge id="3389" label="zzzzz40,zzzzz42" source="160" target="162" cy:directed="1"/>
      <edge id="3388" label="zzzzz40,zzzzz73" source="160" target="193" cy:directed="1"/>
      <edge id="3387" label="zzzzz40,zzzzz54" source="160" target="174" cy:directed="1"/>
      <edge id="3386" label="zzzzz40,zzzzz60" source="160" target="180" cy:directed="1"/>
      <edge id="3385" label="zzzzz40,zzzzz74" source="160" target="194" cy:directed="1"/>
      <edge id="3384" label="zzzzz40,zzzzz89" source="160" target="209" cy:directed="1"/>
      <edge id="3383" label="zzzzz40,zzzzz87" source="160" target="207" cy:directed="1"/>
      <edge id="3382" label="zzzzz40,zzzzz47" source="160" target="167" cy:directed="1"/>
      <edge id="3381" label="zzzzz40,zzzzz63" source="160" target="183" cy:directed="1"/>
      <edge id="3380" label="zzzzz40,zzzzz78" source="160" target="198" cy:directed="1"/>
      <edge id="3379" label="zzzzz40,zzzzz71" source="160" target="191" cy:directed="1"/>
      <edge id="3378" label="zzzzz40,zzzzz46" source="160" target="166" cy:directed="1"/>
      <edge id="3377" label="zzzzz40,zzzzz50" source="160" target="170" cy:directed="1"/>
      <edge id="3376" label="zzzzz40,zzzzz72" source="160" target="192" cy:directed="1"/>
      <edge id="3375" label="zzzzz40,zzzzz43" source="160" target="163" cy:directed="1"/>
      <edge id="3374" label="zzzzz40,zzzzz68" source="160" target="188" cy:directed="1"/>
      <edge id="3373" label="zzzzz40,zzzzz67" source="160" target="187" cy:directed="1"/>
      <edge id="3372" label="zzzzz40,zzzzz51" source="160" target="171" cy:directed="1"/>
      <edge id="3371" label="zzzzz40,zzzzz55" source="160" target="175" cy:directed="1"/>
      <edge id="3370" label="zzzzz40,zzzzz53" source="160" target="173" cy:directed="1"/>
      <edge id="3369" label="zzzzz40,zzzzz41" source="160" target="161" cy:directed="1"/>
      <edge id="3368" label="zzzzz40,zzzzz44" source="160" target="164" cy:directed="1"/>
      <edge id="3367" label="zzzzz40,zzzzz70" source="160" target="190" cy:directed="1"/>
      <edge id="3366" label="zzzzz40,zzzzz58" source="160" target="178" cy:directed="1"/>
      <edge id="3365" label="zzzzz40,zzzzz75" source="160" target="195" cy:directed="1"/>
      <edge id="3364" label="zzzzz40,zzzzz76" source="160" target="196" cy:directed="1"/>
      <edge id="3363" label="zzzzz40,zzzzz49" source="160" target="169" cy:directed="1"/>
      <edge id="3362" label="zzzzz40,zzzzz45" source="160" target="165" cy:directed="1"/>
      <edge id="3361" label="zzzzz40,zzzzz56" source="160" target="176" cy:directed="1"/>
      <edge id="3360" label="zzzzz40,zzzzz48" source="160" target="168" cy:directed="1"/>
      <edge id="3359" label="zzzzz40,zzzzz65" source="160" target="185" cy:directed="1"/>
      <edge id="3358" label="zzzzz40,zzzzz59" source="160" target="179" cy:directed="1"/>
      <edge id="3357" label="zzzzz40,zzzzz64" source="160" target="184" cy:directed="1"/>
      <edge id="3356" label="zzzzz40,zzzzz62" source="160" target="182" cy:directed="1"/>
      <edge id="3355" label="zzzzz40,zzzzz61" source="160" target="181" cy:directed="1"/>
      <edge id="3354" label="zzzzz39,zzzzzz4" source="159" target="224" cy:directed="1"/>
      <edge id="3353" label="zzzzz39,zzzzz89" source="159" target="209" cy:directed="1"/>
      <edge id="3352" label="zzzzz39,zzzzz88" source="159" target="208" cy:directed="1"/>
      <edge id="3351" label="zzzzz39,zzzzz42" source="159" target="162" cy:directed="1"/>
      <edge id="3350" label="zzzzz39,zzzzz87" source="159" target="207" cy:directed="1"/>
      <edge id="3349" label="zzzzz39,zzzzz67" source="159" target="187" cy:directed="1"/>
      <edge id="3348" label="zzzzz39,zzzzz68" source="159" target="188" cy:directed="1"/>
      <edge id="3347" label="zzzzz39,zzzzz54" source="159" target="174" cy:directed="1"/>
      <edge id="3346" label="zzzzz39,zzzzz63" source="159" target="183" cy:directed="1"/>
      <edge id="3345" label="zzzzz39,zzzzz73" source="159" target="193" cy:directed="1"/>
      <edge id="3344" label="zzzzz39,zzzzz53" source="159" target="173" cy:directed="1"/>
      <edge id="3343" label="zzzzz39,zzzzz44" source="159" target="164" cy:directed="1"/>
      <edge id="3342" label="zzzzz39,zzzzz50" source="159" target="170" cy:directed="1"/>
      <edge id="3341" label="zzzzz39,zzzzz71" source="159" target="191" cy:directed="1"/>
      <edge id="3340" label="zzzzz39,zzzzz46" source="159" target="166" cy:directed="1"/>
      <edge id="3339" label="zzzzz39,zzzzz70" source="159" target="190" cy:directed="1"/>
      <edge id="3338" label="zzzzz39,zzzzz55" source="159" target="175" cy:directed="1"/>
      <edge id="3337" label="zzzzz39,zzzzz74" source="159" target="194" cy:directed="1"/>
      <edge id="3336" label="zzzzz39,zzzzz60" source="159" target="180" cy:directed="1"/>
      <edge id="3335" label="zzzzz39,zzzzz51" source="159" target="171" cy:directed="1"/>
      <edge id="3334" label="zzzzz39,zzzzz47" source="159" target="167" cy:directed="1"/>
      <edge id="3333" label="zzzzz39,zzzzz72" source="159" target="192" cy:directed="1"/>
      <edge id="3332" label="zzzzz39,zzzzz58" source="159" target="178" cy:directed="1"/>
      <edge id="3331" label="zzzzz39,zzzzz43" source="159" target="163" cy:directed="1"/>
      <edge id="3330" label="zzzzz39,zzzzz78" source="159" target="198" cy:directed="1"/>
      <edge id="3329" label="zzzzz39,zzzzz75" source="159" target="195" cy:directed="1"/>
      <edge id="3328" label="zzzzz39,zzzzz41" source="159" target="161" cy:directed="1"/>
      <edge id="3327" label="zzzzz39,zzzzz76" source="159" target="196" cy:directed="1"/>
      <edge id="3326" label="zzzzz39,zzzzz40" source="159" target="160" cy:directed="1"/>
      <edge id="3325" label="zzzzz39,zzzzz56" source="159" target="176" cy:directed="1"/>
      <edge id="3324" label="zzzzz39,zzzzz64" source="159" target="184" cy:directed="1"/>
      <edge id="3323" label="zzzzz39,zzzzz61" source="159" target="181" cy:directed="1"/>
      <edge id="3322" label="zzzzz39,zzzzz59" source="159" target="179" cy:directed="1"/>
      <edge id="3321" label="zzzzz39,zzzzz62" source="159" target="182" cy:directed="1"/>
      <edge id="3320" label="zzzzz39,zzzzz65" source="159" target="185" cy:directed="1"/>
      <edge id="3319" label="zzzzz39,zzzzz48" source="159" target="168" cy:directed="1"/>
      <edge id="3318" label="zzzzz39,zzzzz49" source="159" target="169" cy:directed="1"/>
      <edge id="3317" label="zzzzz39,zzzzz45" source="159" target="165" cy:directed="1"/>
      <edge id="3316" label="zzzzz38,zzzzzz3" source="158" target="223" cy:directed="1"/>
      <edge id="3315" label="zzzzz38,zzzzz79" source="158" target="199" cy:directed="1"/>
      <edge id="3314" label="zzzzz38,zzzzz51" source="158" target="171" cy:directed="1"/>
      <edge id="3313" label="zzzzz38,zzzzz75" source="158" target="195" cy:directed="1"/>
      <edge id="3312" label="zzzzz38,zzzzz44" source="158" target="164" cy:directed="1"/>
      <edge id="3311" label="zzzzz38,zzzzz89" source="158" target="209" cy:directed="1"/>
      <edge id="3310" label="zzzzz38,zzzzz57" source="158" target="177" cy:directed="1"/>
      <edge id="3309" label="zzzzz38,zzzzz97" source="158" target="217" cy:directed="1"/>
      <edge id="3308" label="zzzzz38,zzzzz88" source="158" target="208" cy:directed="1"/>
      <edge id="3307" label="zzzzz38,zzzzz66" source="158" target="186" cy:directed="1"/>
      <edge id="3306" label="zzzzz37,zzzzz74" source="157" target="194" cy:directed="1"/>
      <edge id="3305" label="zzzzz37,zzzzz41" source="157" target="161" cy:directed="1"/>
      <edge id="3304" label="zzzzz37,zzzzz76" source="157" target="196" cy:directed="1"/>
      <edge id="3303" label="zzzzz37,zzzzz75" source="157" target="195" cy:directed="1"/>
      <edge id="3302" label="zzzzz37,zzzzz73" source="157" target="193" cy:directed="1"/>
      <edge id="3301" label="zzzzz37,zzzzz57" source="157" target="177" cy:directed="1"/>
      <edge id="3300" label="zzzzz37,zzzzz51" source="157" target="171" cy:directed="1"/>
      <edge id="3299" label="zzzzz37,zzzzz89" source="157" target="209" cy:directed="1"/>
      <edge id="3298" label="zzzzz37,zzzzz79" source="157" target="199" cy:directed="1"/>
      <edge id="3297" label="zzzzz37,zzzzz77" source="157" target="197" cy:directed="1"/>
      <edge id="3296" label="zzzzz37,zzzzz66" source="157" target="186" cy:directed="1"/>
      <edge id="3295" label="zzzzz37,zzzzz38" source="157" target="158" cy:directed="1"/>
      <edge id="3294" label="zzzzz36,zzzzz97" source="156" target="217" cy:directed="1"/>
      <edge id="3293" label="zzzzz36,zzzzz89" source="156" target="209" cy:directed="1"/>
      <edge id="3292" label="zzzzz36,zzzzz87" source="156" target="207" cy:directed="1"/>
      <edge id="3291" label="zzzzz36,zzzzz48" source="156" target="168" cy:directed="1"/>
      <edge id="3290" label="zzzzz36,zzzzz88" source="156" target="208" cy:directed="1"/>
      <edge id="3289" label="zzzzz36,zzzzz99" source="156" target="219" cy:directed="1"/>
      <edge id="3288" label="zzzzz36,zzzzz39" source="156" target="159" cy:directed="1"/>
      <edge id="3287" label="zzzzz36,zzzzz49" source="156" target="169" cy:directed="1"/>
      <edge id="3286" label="zzzzz36,zzzzz45" source="156" target="165" cy:directed="1"/>
      <edge id="3285" label="zzzzz36,zzzzz65" source="156" target="185" cy:directed="1"/>
      <edge id="3284" label="zzzzz36,zzzzz59" source="156" target="179" cy:directed="1"/>
      <edge id="3283" label="zzzzz36,zzzzz40" source="156" target="160" cy:directed="1"/>
      <edge id="3282" label="zzzzz36,zzzzz74" source="156" target="194" cy:directed="1"/>
      <edge id="3281" label="zzzzz36,zzzzz42" source="156" target="162" cy:directed="1"/>
      <edge id="3280" label="zzzzz36,zzzzz51" source="156" target="171" cy:directed="1"/>
      <edge id="3279" label="zzzzz36,zzzzz58" source="156" target="178" cy:directed="1"/>
      <edge id="3278" label="zzzzz36,zzzzz76" source="156" target="196" cy:directed="1"/>
      <edge id="3277" label="zzzzz36,zzzzz61" source="156" target="181" cy:directed="1"/>
      <edge id="3276" label="zzzzz36,zzzzz62" source="156" target="182" cy:directed="1"/>
      <edge id="3275" label="zzzzz36,zzzzz56" source="156" target="176" cy:directed="1"/>
      <edge id="3274" label="zzzzz36,zzzzz75" source="156" target="195" cy:directed="1"/>
      <edge id="3273" label="zzzzz36,zzzzz64" source="156" target="184" cy:directed="1"/>
      <edge id="3272" label="zzzzz36,zzzzz71" source="156" target="191" cy:directed="1"/>
      <edge id="3271" label="zzzzz36,zzzzz63" source="156" target="183" cy:directed="1"/>
      <edge id="3270" label="zzzzz36,zzzzz55" source="156" target="175" cy:directed="1"/>
      <edge id="3269" label="zzzzz36,zzzzz72" source="156" target="192" cy:directed="1"/>
      <edge id="3268" label="zzzzz36,zzzzz78" source="156" target="198" cy:directed="1"/>
      <edge id="3267" label="zzzzz36,zzzzz73" source="156" target="193" cy:directed="1"/>
      <edge id="3266" label="zzzzz36,zzzzz53" source="156" target="173" cy:directed="1"/>
      <edge id="3265" label="zzzzz36,zzzzz44" source="156" target="164" cy:directed="1"/>
      <edge id="3264" label="zzzzz36,zzzzz47" source="156" target="167" cy:directed="1"/>
      <edge id="3263" label="zzzzz36,zzzzz43" source="156" target="163" cy:directed="1"/>
      <edge id="3262" label="zzzzz36,zzzzz41" source="156" target="161" cy:directed="1"/>
      <edge id="3261" label="zzzzz36,zzzzz68" source="156" target="188" cy:directed="1"/>
      <edge id="3260" label="zzzzz36,zzzzz60" source="156" target="180" cy:directed="1"/>
      <edge id="3259" label="zzzzz36,zzzzz46" source="156" target="166" cy:directed="1"/>
      <edge id="3258" label="zzzzz36,zzzzz50" source="156" target="170" cy:directed="1"/>
      <edge id="3257" label="zzzzz36,zzzzz54" source="156" target="174" cy:directed="1"/>
      <edge id="3256" label="zzzzz36,zzzzz67" source="156" target="187" cy:directed="1"/>
      <edge id="3255" label="zzzzz36,zzzzz70" source="156" target="190" cy:directed="1"/>
      <edge id="3254" label="zzzzz35,zzzzz36" source="155" target="156" cy:directed="1"/>
      <edge id="3253" label="zzzzz35,zzzzz70" source="155" target="190" cy:directed="1"/>
      <edge id="3252" label="zzzzz35,zzzzz67" source="155" target="187" cy:directed="1"/>
      <edge id="3251" label="zzzzz35,zzzzzz3" source="155" target="223" cy:directed="1"/>
      <edge id="3250" label="zzzzz35,zzzzz94" source="155" target="214" cy:directed="1"/>
      <edge id="3249" label="zzzzz34,zzzzz93" source="154" target="213" cy:directed="1"/>
      <edge id="3248" label="zzzzz34,zzzzz38" source="154" target="158" cy:directed="1"/>
      <edge id="3247" label="zzzzz34,zzzzzz0" source="154" target="220" cy:directed="1"/>
      <edge id="3246" label="zzzzz34,zzzzz77" source="154" target="197" cy:directed="1"/>
      <edge id="3245" label="zzzzz34,zzzzz95" source="154" target="215" cy:directed="1"/>
      <edge id="3244" label="zzzzz34,zzzzzz1" source="154" target="221" cy:directed="1"/>
      <edge id="3243" label="zzzzz34,zzzzzz2" source="154" target="222" cy:directed="1"/>
      <edge id="3242" label="zzzzz34,zzzzz52" source="154" target="172" cy:directed="1"/>
      <edge id="3241" label="zzzzz34,zzzzz94" source="154" target="214" cy:directed="1"/>
      <edge id="3240" label="zzzzz34,zzzzz49" source="154" target="169" cy:directed="1"/>
      <edge id="3239" label="zzzzz34,zzzzz57" source="154" target="177" cy:directed="1"/>
      <edge id="3238" label="zzzzz34,zzzzzz9" source="154" target="229" cy:directed="1"/>
      <edge id="3237" label="zzzzz34,zzzzz48" source="154" target="168" cy:directed="1"/>
      <edge id="3236" label="zzzzz34,zzzzzz7" source="154" target="227" cy:directed="1"/>
      <edge id="3235" label="zzzzz34,zzzzzz5" source="154" target="225" cy:directed="1"/>
      <edge id="3234" label="zzzzz34,zzzzz69" source="154" target="189" cy:directed="1"/>
      <edge id="3233" label="zzzzz34,zzzzz39" source="154" target="159" cy:directed="1"/>
      <edge id="3232" label="zzzzz34,zzzzz61" source="154" target="181" cy:directed="1"/>
      <edge id="3231" label="zzzzz34,zzzzz45" source="154" target="165" cy:directed="1"/>
      <edge id="3230" label="zzzzz34,zzzzz40" source="154" target="160" cy:directed="1"/>
      <edge id="3229" label="zzzzz34,zzzzz97" source="154" target="217" cy:directed="1"/>
      <edge id="3228" label="zzzzz34,zzzzz87" source="154" target="207" cy:directed="1"/>
      <edge id="3227" label="zzzzz34,zzzzz59" source="154" target="179" cy:directed="1"/>
      <edge id="3226" label="zzzzz34,zzzzz89" source="154" target="209" cy:directed="1"/>
      <edge id="3225" label="zzzzz34,zzzzz65" source="154" target="185" cy:directed="1"/>
      <edge id="3224" label="zzzzz34,zzzzz58" source="154" target="178" cy:directed="1"/>
      <edge id="3223" label="zzzzz34,zzzzz99" source="154" target="219" cy:directed="1"/>
      <edge id="3222" label="zzzzz34,zzzzz74" source="154" target="194" cy:directed="1"/>
      <edge id="3221" label="zzzzz34,zzzzz51" source="154" target="171" cy:directed="1"/>
      <edge id="3220" label="zzzzz34,zzzzz75" source="154" target="195" cy:directed="1"/>
      <edge id="3219" label="zzzzz34,zzzzz88" source="154" target="208" cy:directed="1"/>
      <edge id="3218" label="zzzzz34,zzzzz62" source="154" target="182" cy:directed="1"/>
      <edge id="3217" label="zzzzz34,zzzzz64" source="154" target="184" cy:directed="1"/>
      <edge id="3216" label="zzzzz34,zzzzz76" source="154" target="196" cy:directed="1"/>
      <edge id="3215" label="zzzzz34,zzzzz36" source="154" target="156" cy:directed="1"/>
      <edge id="3214" label="zzzzz34,zzzzz42" source="154" target="162" cy:directed="1"/>
      <edge id="3213" label="zzzzz34,zzzzz56" source="154" target="176" cy:directed="1"/>
      <edge id="3212" label="zzzzz34,zzzzz70" source="154" target="190" cy:directed="1"/>
      <edge id="3211" label="zzzzz34,zzzzz54" source="154" target="174" cy:directed="1"/>
      <edge id="3210" label="zzzzz34,zzzzz63" source="154" target="183" cy:directed="1"/>
      <edge id="3209" label="zzzzz34,zzzzz67" source="154" target="187" cy:directed="1"/>
      <edge id="3208" label="zzzzz34,zzzzz50" source="154" target="170" cy:directed="1"/>
      <edge id="3207" label="zzzzz34,zzzzz78" source="154" target="198" cy:directed="1"/>
      <edge id="3206" label="zzzzz34,zzzzz46" source="154" target="166" cy:directed="1"/>
      <edge id="3205" label="zzzzz34,zzzzz73" source="154" target="193" cy:directed="1"/>
      <edge id="3204" label="zzzzz34,zzzzz47" source="154" target="167" cy:directed="1"/>
      <edge id="3203" label="zzzzz34,zzzzz71" source="154" target="191" cy:directed="1"/>
      <edge id="3202" label="zzzzz34,zzzzz68" source="154" target="188" cy:directed="1"/>
      <edge id="3201" label="zzzzz34,zzzzz60" source="154" target="180" cy:directed="1"/>
      <edge id="3200" label="zzzzz34,zzzzz44" source="154" target="164" cy:directed="1"/>
      <edge id="3199" label="zzzzz34,zzzzz43" source="154" target="163" cy:directed="1"/>
      <edge id="3198" label="zzzzz34,zzzzz41" source="154" target="161" cy:directed="1"/>
      <edge id="3197" label="zzzzz34,zzzzz53" source="154" target="173" cy:directed="1"/>
      <edge id="3196" label="zzzzz34,zzzzz72" source="154" target="192" cy:directed="1"/>
      <edge id="3195" label="zzzzz34,zzzzz55" source="154" target="175" cy:directed="1"/>
      <edge id="3194" label="zzzzz33,zzzzzz7" source="153" target="227" cy:directed="1"/>
      <edge id="3193" label="zzzzz33,zzzzzz1" source="153" target="221" cy:directed="1"/>
      <edge id="3192" label="zzzzz33,zzzzz87" source="153" target="207" cy:directed="1"/>
      <edge id="3191" label="zzzzz33,zzzzz89" source="153" target="209" cy:directed="1"/>
      <edge id="3190" label="zzzzz33,zzzzz88" source="153" target="208" cy:directed="1"/>
      <edge id="3189" label="zzzzz33,zzzzz71" source="153" target="191" cy:directed="1"/>
      <edge id="3188" label="zzzzz33,zzzzz47" source="153" target="167" cy:directed="1"/>
      <edge id="3187" label="zzzzz33,zzzzz42" source="153" target="162" cy:directed="1"/>
      <edge id="3186" label="zzzzz33,zzzzz60" source="153" target="180" cy:directed="1"/>
      <edge id="3185" label="zzzzz33,zzzzz36" source="153" target="156" cy:directed="1"/>
      <edge id="3184" label="zzzzz33,zzzzz50" source="153" target="170" cy:directed="1"/>
      <edge id="3183" label="zzzzz33,zzzzz54" source="153" target="174" cy:directed="1"/>
      <edge id="3182" label="zzzzz33,zzzzz63" source="153" target="183" cy:directed="1"/>
      <edge id="3181" label="zzzzz33,zzzzz70" source="153" target="190" cy:directed="1"/>
      <edge id="3180" label="zzzzz33,zzzzz55" source="153" target="175" cy:directed="1"/>
      <edge id="3179" label="zzzzz33,zzzzz68" source="153" target="188" cy:directed="1"/>
      <edge id="3178" label="zzzzz33,zzzzz73" source="153" target="193" cy:directed="1"/>
      <edge id="3177" label="zzzzz33,zzzzz53" source="153" target="173" cy:directed="1"/>
      <edge id="3176" label="zzzzz33,zzzzz46" source="153" target="166" cy:directed="1"/>
      <edge id="3175" label="zzzzz33,zzzzz44" source="153" target="164" cy:directed="1"/>
      <edge id="3174" label="zzzzz33,zzzzz74" source="153" target="194" cy:directed="1"/>
      <edge id="3173" label="zzzzz33,zzzzz51" source="153" target="171" cy:directed="1"/>
      <edge id="3172" label="zzzzz33,zzzzz67" source="153" target="187" cy:directed="1"/>
      <edge id="3171" label="zzzzz33,zzzzz43" source="153" target="163" cy:directed="1"/>
      <edge id="3170" label="zzzzz33,zzzzz41" source="153" target="161" cy:directed="1"/>
      <edge id="3169" label="zzzzz33,zzzzz34" source="153" target="154" cy:directed="1"/>
      <edge id="3168" label="zzzzz33,zzzzz78" source="153" target="198" cy:directed="1"/>
      <edge id="3167" label="zzzzz33,zzzzz72" source="153" target="192" cy:directed="1"/>
      <edge id="3166" label="zzzzz33,zzzzz49" source="153" target="169" cy:directed="1"/>
      <edge id="3165" label="zzzzz33,zzzzz39" source="153" target="159" cy:directed="1"/>
      <edge id="3164" label="zzzzz33,zzzzz48" source="153" target="168" cy:directed="1"/>
      <edge id="3163" label="zzzzz33,zzzzz58" source="153" target="178" cy:directed="1"/>
      <edge id="3162" label="zzzzz33,zzzzz75" source="153" target="195" cy:directed="1"/>
      <edge id="3161" label="zzzzz33,zzzzz45" source="153" target="165" cy:directed="1"/>
      <edge id="3160" label="zzzzz33,zzzzz40" source="153" target="160" cy:directed="1"/>
      <edge id="3159" label="zzzzz33,zzzzz56" source="153" target="176" cy:directed="1"/>
      <edge id="3158" label="zzzzz33,zzzzz76" source="153" target="196" cy:directed="1"/>
      <edge id="3157" label="zzzzz33,zzzzz65" source="153" target="185" cy:directed="1"/>
      <edge id="3156" label="zzzzz33,zzzzz62" source="153" target="182" cy:directed="1"/>
      <edge id="3155" label="zzzzz33,zzzzz64" source="153" target="184" cy:directed="1"/>
      <edge id="3154" label="zzzzz33,zzzzz59" source="153" target="179" cy:directed="1"/>
      <edge id="3153" label="zzzzz33,zzzzz61" source="153" target="181" cy:directed="1"/>
      <edge id="3152" label="zzzzz32,zzzzzz7" source="152" target="227" cy:directed="1"/>
      <edge id="3151" label="zzzzz32,zzzzz87" source="152" target="207" cy:directed="1"/>
      <edge id="3150" label="zzzzz32,zzzzz42" source="152" target="162" cy:directed="1"/>
      <edge id="3149" label="zzzzz32,zzzzzz5" source="152" target="225" cy:directed="1"/>
      <edge id="3148" label="zzzzz32,zzzzz93" source="152" target="213" cy:directed="1"/>
      <edge id="3147" label="zzzzz32,zzzzz89" source="152" target="209" cy:directed="1"/>
      <edge id="3146" label="zzzzz32,zzzzzz1" source="152" target="221" cy:directed="1"/>
      <edge id="3145" label="zzzzz32,zzzzz70" source="152" target="190" cy:directed="1"/>
      <edge id="3144" label="zzzzz32,zzzzz60" source="152" target="180" cy:directed="1"/>
      <edge id="3143" label="zzzzz32,zzzzz88" source="152" target="208" cy:directed="1"/>
      <edge id="3142" label="zzzzz32,zzzzz67" source="152" target="187" cy:directed="1"/>
      <edge id="3141" label="zzzzz32,zzzzz50" source="152" target="170" cy:directed="1"/>
      <edge id="3140" label="zzzzz32,zzzzz47" source="152" target="167" cy:directed="1"/>
      <edge id="3139" label="zzzzz32,zzzzz54" source="152" target="174" cy:directed="1"/>
      <edge id="3138" label="zzzzz32,zzzzz53" source="152" target="173" cy:directed="1"/>
      <edge id="3137" label="zzzzz32,zzzzz46" source="152" target="166" cy:directed="1"/>
      <edge id="3136" label="zzzzz32,zzzzz71" source="152" target="191" cy:directed="1"/>
      <edge id="3135" label="zzzzz32,zzzzz74" source="152" target="194" cy:directed="1"/>
      <edge id="3134" label="zzzzz32,zzzzz73" source="152" target="193" cy:directed="1"/>
      <edge id="3133" label="zzzzz32,zzzzz36" source="152" target="156" cy:directed="1"/>
      <edge id="3132" label="zzzzz32,zzzzz34" source="152" target="154" cy:directed="1"/>
      <edge id="3131" label="zzzzz32,zzzzz51" source="152" target="171" cy:directed="1"/>
      <edge id="3130" label="zzzzz32,zzzzz68" source="152" target="188" cy:directed="1"/>
      <edge id="3129" label="zzzzz32,zzzzz44" source="152" target="164" cy:directed="1"/>
      <edge id="3128" label="zzzzz32,zzzzz78" source="152" target="198" cy:directed="1"/>
      <edge id="3127" label="zzzzz32,zzzzz55" source="152" target="175" cy:directed="1"/>
      <edge id="3126" label="zzzzz32,zzzzz72" source="152" target="192" cy:directed="1"/>
      <edge id="3125" label="zzzzz32,zzzzz43" source="152" target="163" cy:directed="1"/>
      <edge id="3124" label="zzzzz32,zzzzz41" source="152" target="161" cy:directed="1"/>
      <edge id="3123" label="zzzzz32,zzzzz75" source="152" target="195" cy:directed="1"/>
      <edge id="3122" label="zzzzz32,zzzzz58" source="152" target="178" cy:directed="1"/>
      <edge id="3121" label="zzzzz32,zzzzz76" source="152" target="196" cy:directed="1"/>
      <edge id="3120" label="zzzzz32,zzzzz48" source="152" target="168" cy:directed="1"/>
      <edge id="3119" label="zzzzz32,zzzzz64" source="152" target="184" cy:directed="1"/>
      <edge id="3118" label="zzzzz32,zzzzz56" source="152" target="176" cy:directed="1"/>
      <edge id="3117" label="zzzzz32,zzzzz39" source="152" target="159" cy:directed="1"/>
      <edge id="3116" label="zzzzz32,zzzzz65" source="152" target="185" cy:directed="1"/>
      <edge id="3115" label="zzzzz32,zzzzz62" source="152" target="182" cy:directed="1"/>
      <edge id="3114" label="zzzzz32,zzzzz40" source="152" target="160" cy:directed="1"/>
      <edge id="3113" label="zzzzz32,zzzzz49" source="152" target="169" cy:directed="1"/>
      <edge id="3112" label="zzzzz32,zzzzz61" source="152" target="181" cy:directed="1"/>
      <edge id="3111" label="zzzzz32,zzzzz45" source="152" target="165" cy:directed="1"/>
      <edge id="3110" label="zzzzz32,zzzzz33" source="152" target="153" cy:directed="1"/>
      <edge id="3109" label="zzzzz32,zzzzz59" source="152" target="179" cy:directed="1"/>
      <edge id="3108" label="zzzzz31,zzzzz63" source="151" target="183" cy:directed="1"/>
      <edge id="3107" label="zzzzz31,zzzzz54" source="151" target="174" cy:directed="1"/>
      <edge id="3106" label="zzzzz31,zzzzz42" source="151" target="162" cy:directed="1"/>
      <edge id="3105" label="zzzzz31,zzzzz68" source="151" target="188" cy:directed="1"/>
      <edge id="3104" label="zzzzz31,zzzzz72" source="151" target="192" cy:directed="1"/>
      <edge id="3103" label="zzzzz31,zzzzz44" source="151" target="164" cy:directed="1"/>
      <edge id="3102" label="zzzzz31,zzzzz38" source="151" target="158" cy:directed="1"/>
      <edge id="3101" label="zzzzz31,zzzzz78" source="151" target="198" cy:directed="1"/>
      <edge id="3100" label="zzzzz31,zzzzz34" source="151" target="154" cy:directed="1"/>
      <edge id="3099" label="zzzzz31,zzzzz73" source="151" target="193" cy:directed="1"/>
      <edge id="3098" label="zzzzz31,zzzzz50" source="151" target="170" cy:directed="1"/>
      <edge id="3097" label="zzzzz31,zzzzz53" source="151" target="173" cy:directed="1"/>
      <edge id="3096" label="zzzzz31,zzzzz37" source="151" target="157" cy:directed="1"/>
      <edge id="3095" label="zzzzz31,zzzzz67" source="151" target="187" cy:directed="1"/>
      <edge id="3094" label="zzzzz31,zzzzz51" source="151" target="171" cy:directed="1"/>
      <edge id="3093" label="zzzzz31,zzzzz66" source="151" target="186" cy:directed="1"/>
      <edge id="3092" label="zzzzz31,zzzzz41" source="151" target="161" cy:directed="1"/>
      <edge id="3091" label="zzzzz31,zzzzz74" source="151" target="194" cy:directed="1"/>
      <edge id="3090" label="zzzzz31,zzzzz55" source="151" target="175" cy:directed="1"/>
      <edge id="3089" label="zzzzz31,zzzzz89" source="151" target="209" cy:directed="1"/>
      <edge id="3088" label="zzzzz31,zzzzz56" source="151" target="176" cy:directed="1"/>
      <edge id="3087" label="zzzzz31,zzzzz71" source="151" target="191" cy:directed="1"/>
      <edge id="3086" label="zzzzz31,zzzzz46" source="151" target="166" cy:directed="1"/>
      <edge id="3085" label="zzzzz31,zzzzz88" source="151" target="208" cy:directed="1"/>
      <edge id="3084" label="zzzzz31,zzzzz77" source="151" target="197" cy:directed="1"/>
      <edge id="3083" label="zzzzz31,zzzzz69" source="151" target="189" cy:directed="1"/>
      <edge id="3082" label="zzzzz31,zzzzz52" source="151" target="172" cy:directed="1"/>
      <edge id="3081" label="zzzzz31,zzzzz79" source="151" target="199" cy:directed="1"/>
      <edge id="3080" label="zzzzz31,zzzzz97" source="151" target="217" cy:directed="1"/>
      <edge id="3079" label="zzzzz31,zzzzz57" source="151" target="177" cy:directed="1"/>
      <edge id="3078" label="zzzzz30,zzzzz67" source="150" target="187" cy:directed="1"/>
      <edge id="3077" label="zzzzz30,zzzzz38" source="150" target="158" cy:directed="1"/>
      <edge id="3076" label="zzzzz30,zzzzz66" source="150" target="186" cy:directed="1"/>
      <edge id="3075" label="zzzzz30,zzzzz37" source="150" target="157" cy:directed="1"/>
      <edge id="3074" label="zzzzz29,zzzzzz1" source="149" target="221" cy:directed="1"/>
      <edge id="3073" label="zzzzz29,zzzzzz9" source="149" target="229" cy:directed="1"/>
      <edge id="3072" label="zzzzz29,zzzzz93" source="149" target="213" cy:directed="1"/>
      <edge id="3071" label="zzzzz29,zzzzz88" source="149" target="208" cy:directed="1"/>
      <edge id="3070" label="zzzzz29,zzzzz87" source="149" target="207" cy:directed="1"/>
      <edge id="3069" label="zzzzz29,zzzzz54" source="149" target="174" cy:directed="1"/>
      <edge id="3068" label="zzzzz29,zzzzz36" source="149" target="156" cy:directed="1"/>
      <edge id="3067" label="zzzzz29,zzzzz42" source="149" target="162" cy:directed="1"/>
      <edge id="3066" label="zzzzz29,zzzzz34" source="149" target="154" cy:directed="1"/>
      <edge id="3065" label="zzzzz29,zzzzz44" source="149" target="164" cy:directed="1"/>
      <edge id="3064" label="zzzzz29,zzzzz89" source="149" target="209" cy:directed="1"/>
      <edge id="3063" label="zzzzz29,zzzzz70" source="149" target="190" cy:directed="1"/>
      <edge id="3062" label="zzzzz29,zzzzz63" source="149" target="183" cy:directed="1"/>
      <edge id="3061" label="zzzzz29,zzzzz50" source="149" target="170" cy:directed="1"/>
      <edge id="3060" label="zzzzz29,zzzzz60" source="149" target="180" cy:directed="1"/>
      <edge id="3059" label="zzzzz29,zzzzz47" source="149" target="167" cy:directed="1"/>
      <edge id="3058" label="zzzzz29,zzzzz71" source="149" target="191" cy:directed="1"/>
      <edge id="3057" label="zzzzz29,zzzzz68" source="149" target="188" cy:directed="1"/>
      <edge id="3056" label="zzzzz29,zzzzz73" source="149" target="193" cy:directed="1"/>
      <edge id="3055" label="zzzzz29,zzzzz67" source="149" target="187" cy:directed="1"/>
      <edge id="3054" label="zzzzz29,zzzzz46" source="149" target="166" cy:directed="1"/>
      <edge id="3053" label="zzzzz29,zzzzz74" source="149" target="194" cy:directed="1"/>
      <edge id="3052" label="zzzzz29,zzzzz53" source="149" target="173" cy:directed="1"/>
      <edge id="3051" label="zzzzz29,zzzzz55" source="149" target="175" cy:directed="1"/>
      <edge id="3050" label="zzzzz29,zzzzz51" source="149" target="171" cy:directed="1"/>
      <edge id="3049" label="zzzzz29,zzzzz78" source="149" target="198" cy:directed="1"/>
      <edge id="3048" label="zzzzz29,zzzzz72" source="149" target="192" cy:directed="1"/>
      <edge id="3047" label="zzzzz29,zzzzz41" source="149" target="161" cy:directed="1"/>
      <edge id="3046" label="zzzzz29,zzzzz43" source="149" target="163" cy:directed="1"/>
      <edge id="3045" label="zzzzz29,zzzzz75" source="149" target="195" cy:directed="1"/>
      <edge id="3044" label="zzzzz29,zzzzz39" source="149" target="159" cy:directed="1"/>
      <edge id="3043" label="zzzzz29,zzzzz48" source="149" target="168" cy:directed="1"/>
      <edge id="3042" label="zzzzz29,zzzzz49" source="149" target="169" cy:directed="1"/>
      <edge id="3041" label="zzzzz29,zzzzz58" source="149" target="178" cy:directed="1"/>
      <edge id="3040" label="zzzzz29,zzzzz76" source="149" target="196" cy:directed="1"/>
      <edge id="3039" label="zzzzz29,zzzzz45" source="149" target="165" cy:directed="1"/>
      <edge id="3038" label="zzzzz29,zzzzz56" source="149" target="176" cy:directed="1"/>
      <edge id="3037" label="zzzzz29,zzzzz65" source="149" target="185" cy:directed="1"/>
      <edge id="3036" label="zzzzz29,zzzzz32" source="149" target="152" cy:directed="1"/>
      <edge id="3035" label="zzzzz29,zzzzz40" source="149" target="160" cy:directed="1"/>
      <edge id="3034" label="zzzzz29,zzzzz59" source="149" target="179" cy:directed="1"/>
      <edge id="3033" label="zzzzz29,zzzzz33" source="149" target="153" cy:directed="1"/>
      <edge id="3032" label="zzzzz29,zzzzz62" source="149" target="182" cy:directed="1"/>
      <edge id="3031" label="zzzzz29,zzzzz64" source="149" target="184" cy:directed="1"/>
      <edge id="3030" label="zzzzz29,zzzzz61" source="149" target="181" cy:directed="1"/>
      <edge id="3029" label="zzzzz28,zzzzz88" source="148" target="208" cy:directed="1"/>
      <edge id="3028" label="zzzzz28,zzzzz89" source="148" target="209" cy:directed="1"/>
      <edge id="3027" label="zzzzz28,zzzzz44" source="148" target="164" cy:directed="1"/>
      <edge id="3026" label="zzzzz28,zzzzz42" source="148" target="162" cy:directed="1"/>
      <edge id="3025" label="zzzzz28,zzzzz68" source="148" target="188" cy:directed="1"/>
      <edge id="3024" label="zzzzz28,zzzzz63" source="148" target="183" cy:directed="1"/>
      <edge id="3023" label="zzzzz28,zzzzz53" source="148" target="173" cy:directed="1"/>
      <edge id="3022" label="zzzzz28,zzzzz72" source="148" target="192" cy:directed="1"/>
      <edge id="3021" label="zzzzz28,zzzzz36" source="148" target="156" cy:directed="1"/>
      <edge id="3020" label="zzzzz28,zzzzz74" source="148" target="194" cy:directed="1"/>
      <edge id="3019" label="zzzzz28,zzzzz43" source="148" target="163" cy:directed="1"/>
      <edge id="3018" label="zzzzz28,zzzzz34" source="148" target="154" cy:directed="1"/>
      <edge id="3017" label="zzzzz28,zzzzz73" source="148" target="193" cy:directed="1"/>
      <edge id="3016" label="zzzzz28,zzzzz55" source="148" target="175" cy:directed="1"/>
      <edge id="3015" label="zzzzz28,zzzzz51" source="148" target="171" cy:directed="1"/>
      <edge id="3014" label="zzzzz28,zzzzz50" source="148" target="170" cy:directed="1"/>
      <edge id="3013" label="zzzzz28,zzzzz41" source="148" target="161" cy:directed="1"/>
      <edge id="3012" label="zzzzz28,zzzzz54" source="148" target="174" cy:directed="1"/>
      <edge id="3011" label="zzzzz28,zzzzz71" source="148" target="191" cy:directed="1"/>
      <edge id="3010" label="zzzzz28,zzzzz67" source="148" target="187" cy:directed="1"/>
      <edge id="3009" label="zzzzz28,zzzzz78" source="148" target="198" cy:directed="1"/>
      <edge id="3008" label="zzzzz28,zzzzz70" source="148" target="190" cy:directed="1"/>
      <edge id="3007" label="zzzzz28,zzzzz60" source="148" target="180" cy:directed="1"/>
      <edge id="3006" label="zzzzz28,zzzzz47" source="148" target="167" cy:directed="1"/>
      <edge id="3005" label="zzzzz28,zzzzz46" source="148" target="166" cy:directed="1"/>
      <edge id="3004" label="zzzzz28,zzzzz48" source="148" target="168" cy:directed="1"/>
      <edge id="3003" label="zzzzz28,zzzzz39" source="148" target="159" cy:directed="1"/>
      <edge id="3002" label="zzzzz28,zzzzz45" source="148" target="165" cy:directed="1"/>
      <edge id="3001" label="zzzzz28,zzzzz49" source="148" target="169" cy:directed="1"/>
      <edge id="3000" label="zzzzz28,zzzzz76" source="148" target="196" cy:directed="1"/>
      <edge id="2999" label="zzzzz28,zzzzz75" source="148" target="195" cy:directed="1"/>
      <edge id="2998" label="zzzzz28,zzzzz58" source="148" target="178" cy:directed="1"/>
      <edge id="2997" label="zzzzz28,zzzzz65" source="148" target="185" cy:directed="1"/>
      <edge id="2996" label="zzzzz28,zzzzz56" source="148" target="176" cy:directed="1"/>
      <edge id="2995" label="zzzzz28,zzzzz32" source="148" target="152" cy:directed="1"/>
      <edge id="2994" label="zzzzz28,zzzzz33" source="148" target="153" cy:directed="1"/>
      <edge id="2993" label="zzzzz28,zzzzz59" source="148" target="179" cy:directed="1"/>
      <edge id="2992" label="zzzzz28,zzzzz40" source="148" target="160" cy:directed="1"/>
      <edge id="2991" label="zzzzz28,zzzzz62" source="148" target="182" cy:directed="1"/>
      <edge id="2990" label="zzzzz28,zzzzz61" source="148" target="181" cy:directed="1"/>
      <edge id="2989" label="zzzzz28,zzzzz29" source="148" target="149" cy:directed="1"/>
      <edge id="2988" label="zzzzz28,zzzzz64" source="148" target="184" cy:directed="1"/>
      <edge id="2987" label="zzzzz26,zzzzz27" source="146" target="147" cy:directed="1"/>
      <edge id="2986" label="zzzzz25,zzzzz56" source="145" target="176" cy:directed="1"/>
      <edge id="2985" label="zzzzz24,zzzzzz3" source="144" target="223" cy:directed="1"/>
      <edge id="2984" label="zzzzz24,zzzzz25" source="144" target="145" cy:directed="1"/>
      <edge id="2983" label="zzzzz23,zzzzzz3" source="143" target="223" cy:directed="1"/>
      <edge id="2982" label="zzzzz23,zzzzz58" source="143" target="178" cy:directed="1"/>
      <edge id="2981" label="zzzzz23,zzzzz25" source="143" target="145" cy:directed="1"/>
      <edge id="2980" label="zzzzz23,zzzzz24" source="143" target="144" cy:directed="1"/>
      <edge id="2979" label="zzzzz22,zzzzz58" source="142" target="178" cy:directed="1"/>
      <edge id="2978" label="zzzzz22,zzzzz25" source="142" target="145" cy:directed="1"/>
      <edge id="2977" label="zzzzz22,zzzzz24" source="142" target="144" cy:directed="1"/>
      <edge id="2976" label="zzzzz22,zzzzz23" source="142" target="143" cy:directed="1"/>
      <edge id="2975" label="zzzzz21,zzzzz92" source="141" target="212" cy:directed="1"/>
      <edge id="2974" label="zzzzz20,zzzzz92" source="140" target="212" cy:directed="1"/>
      <edge id="2973" label="zzzzz20,zzzzz21" source="140" target="141" cy:directed="1"/>
      <edge id="2972" label="zzzzz19,zzzzz27" source="139" target="147" cy:directed="1"/>
      <edge id="2971" label="zzzzz19,zzzzz26" source="139" target="146" cy:directed="1"/>
      <edge id="2970" label="zzzzz18,zzzzz19" source="138" target="139" cy:directed="1"/>
      <edge id="2969" label="zzzzz18,zzzzz27" source="138" target="147" cy:directed="1"/>
      <edge id="2968" label="zzzzz18,zzzzz26" source="138" target="146" cy:directed="1"/>
      <edge id="2967" label="zzzzz17,zzzzz64" source="137" target="184" cy:directed="1"/>
      <edge id="2966" label="zzzzz17,zzzzz58" source="137" target="178" cy:directed="1"/>
      <edge id="2965" label="zzzzz17,zzzzz51" source="137" target="171" cy:directed="1"/>
      <edge id="2964" label="zzzzz17,zzzzz67" source="137" target="187" cy:directed="1"/>
      <edge id="2963" label="zzzzz17,zzzzz54" source="137" target="174" cy:directed="1"/>
      <edge id="2962" label="zzzzz17,zzzzz68" source="137" target="188" cy:directed="1"/>
      <edge id="2961" label="zzzzz17,zzzzz47" source="137" target="167" cy:directed="1"/>
      <edge id="2960" label="zzzzz17,zzzzz46" source="137" target="166" cy:directed="1"/>
      <edge id="2959" label="zzzzz17,zzzzz44" source="137" target="164" cy:directed="1"/>
      <edge id="2958" label="zzzzz17,zzzzz73" source="137" target="193" cy:directed="1"/>
      <edge id="2957" label="zzzzz17,zzzzz99" source="137" target="219" cy:directed="1"/>
      <edge id="2956" label="zzzzz17,zzzzz50" source="137" target="170" cy:directed="1"/>
      <edge id="2955" label="zzzzz17,zzzzz41" source="137" target="161" cy:directed="1"/>
      <edge id="2954" label="zzzzz17,zzzzz43" source="137" target="163" cy:directed="1"/>
      <edge id="2953" label="zzzzz17,zzzzz42" source="137" target="162" cy:directed="1"/>
      <edge id="2952" label="zzzzz17,zzzzz40" source="137" target="160" cy:directed="1"/>
      <edge id="2951" label="zzzzz17,zzzzz87" source="137" target="207" cy:directed="1"/>
      <edge id="2950" label="zzzzz17,zzzzz55" source="137" target="175" cy:directed="1"/>
      <edge id="2949" label="zzzzz17,zzzzz34" source="137" target="154" cy:directed="1"/>
      <edge id="2948" label="zzzzz17,zzzzz53" source="137" target="173" cy:directed="1"/>
      <edge id="2947" label="zzzzz17,zzzzz71" source="137" target="191" cy:directed="1"/>
      <edge id="2946" label="zzzzz17,zzzzz60" source="137" target="180" cy:directed="1"/>
      <edge id="2945" label="zzzzz17,zzzzz56" source="137" target="176" cy:directed="1"/>
      <edge id="2944" label="zzzzz17,zzzzz89" source="137" target="209" cy:directed="1"/>
      <edge id="2943" label="zzzzz17,zzzzz88" source="137" target="208" cy:directed="1"/>
      <edge id="2942" label="zzzzz17,zzzzzz8" source="137" target="228" cy:directed="1"/>
      <edge id="2941" label="zzzzz17,zzzzzz0" source="137" target="220" cy:directed="1"/>
      <edge id="2940" label="zzzzz17,zzzzzz6" source="137" target="226" cy:directed="1"/>
      <edge id="2939" label="zzzzz17,zzzzzz2" source="137" target="222" cy:directed="1"/>
      <edge id="2938" label="zzzzz17,zzzzzz5" source="137" target="225" cy:directed="1"/>
      <edge id="2937" label="zzzzz17,zzzzzz1" source="137" target="221" cy:directed="1"/>
      <edge id="2936" label="zzzzz17,zzzzzz4" source="137" target="224" cy:directed="1"/>
      <edge id="2935" label="zzzzz17,zzzzzz9" source="137" target="229" cy:directed="1"/>
      <edge id="2934" label="zzzzz17,zzzzzz7" source="137" target="227" cy:directed="1"/>
      <edge id="2933" label="zzzzz17,zzzzz93" source="137" target="213" cy:directed="1"/>
      <edge id="2932" label="zzzzz16,zzzzz67" source="136" target="187" cy:directed="1"/>
      <edge id="2931" label="zzzzz16,zzzzz54" source="136" target="174" cy:directed="1"/>
      <edge id="2930" label="zzzzz16,zzzzz46" source="136" target="166" cy:directed="1"/>
      <edge id="2929" label="zzzzz16,zzzzz40" source="136" target="160" cy:directed="1"/>
      <edge id="2928" label="zzzzz16,zzzzz55" source="136" target="175" cy:directed="1"/>
      <edge id="2927" label="zzzzz16,zzzzz51" source="136" target="171" cy:directed="1"/>
      <edge id="2926" label="zzzzz16,zzzzz50" source="136" target="170" cy:directed="1"/>
      <edge id="2925" label="zzzzz16,zzzzz78" source="136" target="198" cy:directed="1"/>
      <edge id="2924" label="zzzzz16,zzzzz64" source="136" target="184" cy:directed="1"/>
      <edge id="2923" label="zzzzz16,zzzzz47" source="136" target="167" cy:directed="1"/>
      <edge id="2922" label="zzzzz16,zzzzz73" source="136" target="193" cy:directed="1"/>
      <edge id="2921" label="zzzzz16,zzzzz42" source="136" target="162" cy:directed="1"/>
      <edge id="2920" label="zzzzz16,zzzzz68" source="136" target="188" cy:directed="1"/>
      <edge id="2919" label="zzzzz16,zzzzz43" source="136" target="163" cy:directed="1"/>
      <edge id="2918" label="zzzzz16,zzzzz58" source="136" target="178" cy:directed="1"/>
      <edge id="2917" label="zzzzz16,zzzzz71" source="136" target="191" cy:directed="1"/>
      <edge id="2916" label="zzzzz16,zzzzz60" source="136" target="180" cy:directed="1"/>
      <edge id="2915" label="zzzzz16,zzzzz41" source="136" target="161" cy:directed="1"/>
      <edge id="2914" label="zzzzz16,zzzzz56" source="136" target="176" cy:directed="1"/>
      <edge id="2913" label="zzzzz16,zzzzz87" source="136" target="207" cy:directed="1"/>
      <edge id="2912" label="zzzzz16,zzzzz89" source="136" target="209" cy:directed="1"/>
      <edge id="2911" label="zzzzz16,zzzzz88" source="136" target="208" cy:directed="1"/>
      <edge id="2910" label="zzzzz16,zzzzzz5" source="136" target="225" cy:directed="1"/>
      <edge id="2909" label="zzzzz16,zzzzzz6" source="136" target="226" cy:directed="1"/>
      <edge id="2908" label="zzzzz16,zzzzzz2" source="136" target="222" cy:directed="1"/>
      <edge id="2907" label="zzzzz16,zzzzzz8" source="136" target="228" cy:directed="1"/>
      <edge id="2906" label="zzzzz16,zzzzzz0" source="136" target="220" cy:directed="1"/>
      <edge id="2905" label="zzzzz16,zzzzzz1" source="136" target="221" cy:directed="1"/>
      <edge id="2904" label="zzzzz16,zzzzz93" source="136" target="213" cy:directed="1"/>
      <edge id="2903" label="zzzzz16,zzzzz17" source="136" target="137" cy:directed="1"/>
      <edge id="2902" label="zzzzz16,zzzzzz4" source="136" target="224" cy:directed="1"/>
      <edge id="2901" label="zzzzz16,zzzzzz7" source="136" target="227" cy:directed="1"/>
      <edge id="2900" label="zzzzz16,zzzzzz9" source="136" target="229" cy:directed="1"/>
      <edge id="2899" label="zzzzz15,zzzzz55" source="135" target="175" cy:directed="1"/>
      <edge id="2898" label="zzzzz15,zzzzz42" source="135" target="162" cy:directed="1"/>
      <edge id="2897" label="zzzzz15,zzzzz76" source="135" target="196" cy:directed="1"/>
      <edge id="2896" label="zzzzz15,zzzzz89" source="135" target="209" cy:directed="1"/>
      <edge id="2895" label="zzzzz15,zzzzz67" source="135" target="187" cy:directed="1"/>
      <edge id="2894" label="zzzzz15,zzzzz60" source="135" target="180" cy:directed="1"/>
      <edge id="2893" label="zzzzz15,zzzzz78" source="135" target="198" cy:directed="1"/>
      <edge id="2892" label="zzzzz15,zzzzz64" source="135" target="184" cy:directed="1"/>
      <edge id="2891" label="zzzzz15,zzzzz56" source="135" target="176" cy:directed="1"/>
      <edge id="2890" label="zzzzz15,zzzzz71" source="135" target="191" cy:directed="1"/>
      <edge id="2889" label="zzzzz15,zzzzz73" source="135" target="193" cy:directed="1"/>
      <edge id="2888" label="zzzzz15,zzzzz72" source="135" target="192" cy:directed="1"/>
      <edge id="2887" label="zzzzz15,zzzzz44" source="135" target="164" cy:directed="1"/>
      <edge id="2886" label="zzzzz15,zzzzz43" source="135" target="163" cy:directed="1"/>
      <edge id="2885" label="zzzzz15,zzzzz41" source="135" target="161" cy:directed="1"/>
      <edge id="2884" label="zzzzz15,zzzzz88" source="135" target="208" cy:directed="1"/>
      <edge id="2883" label="zzzzz15,zzzzzz8" source="135" target="228" cy:directed="1"/>
      <edge id="2882" label="zzzzz15,zzzzzz2" source="135" target="222" cy:directed="1"/>
      <edge id="2881" label="zzzzz15,zzzzzz6" source="135" target="226" cy:directed="1"/>
      <edge id="2880" label="zzzzz15,zzzzzz0" source="135" target="220" cy:directed="1"/>
      <edge id="2879" label="zzzzz15,zzzzzz4" source="135" target="224" cy:directed="1"/>
      <edge id="2878" label="zzzzz15,zzzzzz1" source="135" target="221" cy:directed="1"/>
      <edge id="2877" label="zzzzz15,zzzzz16" source="135" target="136" cy:directed="1"/>
      <edge id="2876" label="zzzzz15,zzzzz17" source="135" target="137" cy:directed="1"/>
      <edge id="2875" label="zzzzz15,zzzzzz9" source="135" target="229" cy:directed="1"/>
      <edge id="2874" label="zzzzz15,zzzzzz7" source="135" target="227" cy:directed="1"/>
      <edge id="2873" label="zzzzz15,zzzzz93" source="135" target="213" cy:directed="1"/>
      <edge id="2872" label="zzzzz15,zzzzzz5" source="135" target="225" cy:directed="1"/>
      <edge id="2871" label="zzzzz14,zzzzz70" source="134" target="190" cy:directed="1"/>
      <edge id="2870" label="zzzzz14,zzzzz76" source="134" target="196" cy:directed="1"/>
      <edge id="2869" label="zzzzz14,zzzzz73" source="134" target="193" cy:directed="1"/>
      <edge id="2868" label="zzzzz14,zzzzz87" source="134" target="207" cy:directed="1"/>
      <edge id="2867" label="zzzzz13,zzzzz54" source="133" target="174" cy:directed="1"/>
      <edge id="2866" label="zzzzz13,zzzzz62" source="133" target="182" cy:directed="1"/>
      <edge id="2865" label="zzzzz13,zzzzz33" source="133" target="153" cy:directed="1"/>
      <edge id="2864" label="zzzzz13,zzzzz40" source="133" target="160" cy:directed="1"/>
      <edge id="2863" label="zzzzz13,zzzzz74" source="133" target="194" cy:directed="1"/>
      <edge id="2862" label="zzzzz13,zzzzz78" source="133" target="198" cy:directed="1"/>
      <edge id="2861" label="zzzzz13,zzzzz51" source="133" target="171" cy:directed="1"/>
      <edge id="2860" label="zzzzz13,zzzzz68" source="133" target="188" cy:directed="1"/>
      <edge id="2859" label="zzzzz13,zzzzz34" source="133" target="154" cy:directed="1"/>
      <edge id="2858" label="zzzzz13,zzzzz42" source="133" target="162" cy:directed="1"/>
      <edge id="2857" label="zzzzz13,zzzzz64" source="133" target="184" cy:directed="1"/>
      <edge id="2856" label="zzzzz13,zzzzz50" source="133" target="170" cy:directed="1"/>
      <edge id="2855" label="zzzzz13,zzzzz55" source="133" target="175" cy:directed="1"/>
      <edge id="2854" label="zzzzz13,zzzzz71" source="133" target="191" cy:directed="1"/>
      <edge id="2853" label="zzzzz13,zzzzz67" source="133" target="187" cy:directed="1"/>
      <edge id="2852" label="zzzzz13,zzzzz46" source="133" target="166" cy:directed="1"/>
      <edge id="2851" label="zzzzz13,zzzzz53" source="133" target="173" cy:directed="1"/>
      <edge id="2850" label="zzzzz13,zzzzz41" source="133" target="161" cy:directed="1"/>
      <edge id="2849" label="zzzzz13,zzzzz72" source="133" target="192" cy:directed="1"/>
      <edge id="2848" label="zzzzz13,zzzzz44" source="133" target="164" cy:directed="1"/>
      <edge id="2847" label="zzzzz13,zzzzz99" source="133" target="219" cy:directed="1"/>
      <edge id="2846" label="zzzzz13,zzzzz60" source="133" target="180" cy:directed="1"/>
      <edge id="2845" label="zzzzz13,zzzzz43" source="133" target="163" cy:directed="1"/>
      <edge id="2844" label="zzzzz13,zzzzz73" source="133" target="193" cy:directed="1"/>
      <edge id="2843" label="zzzzz13,zzzzz56" source="133" target="176" cy:directed="1"/>
      <edge id="2842" label="zzzzz13,zzzzz89" source="133" target="209" cy:directed="1"/>
      <edge id="2841" label="zzzzz13,zzzzz87" source="133" target="207" cy:directed="1"/>
      <edge id="2840" label="zzzzz13,zzzzz88" source="133" target="208" cy:directed="1"/>
      <edge id="2839" label="zzzzz13,zzzzzz8" source="133" target="228" cy:directed="1"/>
      <edge id="2838" label="zzzzz13,zzzzzz2" source="133" target="222" cy:directed="1"/>
      <edge id="2837" label="zzzzz13,zzzzzz0" source="133" target="220" cy:directed="1"/>
      <edge id="2836" label="zzzzz13,zzzzz15" source="133" target="135" cy:directed="1"/>
      <edge id="2835" label="zzzzz13,zzzzzz5" source="133" target="225" cy:directed="1"/>
      <edge id="2834" label="zzzzz13,zzzzzz6" source="133" target="226" cy:directed="1"/>
      <edge id="2833" label="zzzzz13,zzzzzz4" source="133" target="224" cy:directed="1"/>
      <edge id="2832" label="zzzzz13,zzzzzz1" source="133" target="221" cy:directed="1"/>
      <edge id="2831" label="zzzzz13,zzzzz93" source="133" target="213" cy:directed="1"/>
      <edge id="2830" label="zzzzz13,zzzzz16" source="133" target="136" cy:directed="1"/>
      <edge id="2829" label="zzzzz13,zzzzz17" source="133" target="137" cy:directed="1"/>
      <edge id="2828" label="zzzzz13,zzzzzz7" source="133" target="227" cy:directed="1"/>
      <edge id="2827" label="zzzzz13,zzzzzz9" source="133" target="229" cy:directed="1"/>
      <edge id="2826" label="zzzzz12,zzzzz54" source="132" target="174" cy:directed="1"/>
      <edge id="2825" label="zzzzz12,zzzzz76" source="132" target="196" cy:directed="1"/>
      <edge id="2824" label="zzzzz12,zzzzz51" source="132" target="171" cy:directed="1"/>
      <edge id="2823" label="zzzzz12,zzzzz46" source="132" target="166" cy:directed="1"/>
      <edge id="2822" label="zzzzz12,zzzzz64" source="132" target="184" cy:directed="1"/>
      <edge id="2821" label="zzzzz12,zzzzz78" source="132" target="198" cy:directed="1"/>
      <edge id="2820" label="zzzzz12,zzzzz40" source="132" target="160" cy:directed="1"/>
      <edge id="2819" label="zzzzz12,zzzzz67" source="132" target="187" cy:directed="1"/>
      <edge id="2818" label="zzzzz12,zzzzz34" source="132" target="154" cy:directed="1"/>
      <edge id="2817" label="zzzzz12,zzzzz68" source="132" target="188" cy:directed="1"/>
      <edge id="2816" label="zzzzz12,zzzzz42" source="132" target="162" cy:directed="1"/>
      <edge id="2815" label="zzzzz12,zzzzz53" source="132" target="173" cy:directed="1"/>
      <edge id="2814" label="zzzzz12,zzzzz73" source="132" target="193" cy:directed="1"/>
      <edge id="2813" label="zzzzz12,zzzzz47" source="132" target="167" cy:directed="1"/>
      <edge id="2812" label="zzzzz12,zzzzz99" source="132" target="219" cy:directed="1"/>
      <edge id="2811" label="zzzzz12,zzzzz44" source="132" target="164" cy:directed="1"/>
      <edge id="2810" label="zzzzz12,zzzzz72" source="132" target="192" cy:directed="1"/>
      <edge id="2809" label="zzzzz12,zzzzz55" source="132" target="175" cy:directed="1"/>
      <edge id="2808" label="zzzzz12,zzzzz71" source="132" target="191" cy:directed="1"/>
      <edge id="2807" label="zzzzz12,zzzzz60" source="132" target="180" cy:directed="1"/>
      <edge id="2806" label="zzzzz12,zzzzz43" source="132" target="163" cy:directed="1"/>
      <edge id="2805" label="zzzzz12,zzzzz41" source="132" target="161" cy:directed="1"/>
      <edge id="2804" label="zzzzz12,zzzzz87" source="132" target="207" cy:directed="1"/>
      <edge id="2803" label="zzzzz12,zzzzz56" source="132" target="176" cy:directed="1"/>
      <edge id="2802" label="zzzzz12,zzzzz89" source="132" target="209" cy:directed="1"/>
      <edge id="2801" label="zzzzz12,zzzzzz8" source="132" target="228" cy:directed="1"/>
      <edge id="2800" label="zzzzz12,zzzzz88" source="132" target="208" cy:directed="1"/>
      <edge id="2799" label="zzzzz12,zzzzzz6" source="132" target="226" cy:directed="1"/>
      <edge id="2798" label="zzzzz12,zzzzzz2" source="132" target="222" cy:directed="1"/>
      <edge id="2797" label="zzzzz12,zzzzzz5" source="132" target="225" cy:directed="1"/>
      <edge id="2796" label="zzzzz12,zzzzz15" source="132" target="135" cy:directed="1"/>
      <edge id="2795" label="zzzzz12,zzzzzz0" source="132" target="220" cy:directed="1"/>
      <edge id="2794" label="zzzzz12,zzzzz93" source="132" target="213" cy:directed="1"/>
      <edge id="2793" label="zzzzz12,zzzzzz4" source="132" target="224" cy:directed="1"/>
      <edge id="2792" label="zzzzz12,zzzzzz1" source="132" target="221" cy:directed="1"/>
      <edge id="2791" label="zzzzz12,zzzzz17" source="132" target="137" cy:directed="1"/>
      <edge id="2790" label="zzzzz12,zzzzz16" source="132" target="136" cy:directed="1"/>
      <edge id="2789" label="zzzzz12,zzzzz13" source="132" target="133" cy:directed="1"/>
      <edge id="2788" label="zzzzz12,zzzzzz9" source="132" target="229" cy:directed="1"/>
      <edge id="2787" label="zzzzz12,zzzzzz7" source="132" target="227" cy:directed="1"/>
      <edge id="2786" label="zzzzz11,zzzzz54" source="131" target="174" cy:directed="1"/>
      <edge id="2785" label="zzzzz11,zzzzz33" source="131" target="153" cy:directed="1"/>
      <edge id="2784" label="zzzzz11,zzzzz62" source="131" target="182" cy:directed="1"/>
      <edge id="2783" label="zzzzz11,zzzzz47" source="131" target="167" cy:directed="1"/>
      <edge id="2782" label="zzzzz11,zzzzz50" source="131" target="170" cy:directed="1"/>
      <edge id="2781" label="zzzzz11,zzzzz67" source="131" target="187" cy:directed="1"/>
      <edge id="2780" label="zzzzz11,zzzzz29" source="131" target="149" cy:directed="1"/>
      <edge id="2779" label="zzzzz11,zzzzz68" source="131" target="188" cy:directed="1"/>
      <edge id="2778" label="zzzzz11,zzzzz42" source="131" target="162" cy:directed="1"/>
      <edge id="2777" label="zzzzz11,zzzzz60" source="131" target="180" cy:directed="1"/>
      <edge id="2776" label="zzzzz11,zzzzz64" source="131" target="184" cy:directed="1"/>
      <edge id="2775" label="zzzzz11,zzzzz34" source="131" target="154" cy:directed="1"/>
      <edge id="2774" label="zzzzz11,zzzzz53" source="131" target="173" cy:directed="1"/>
      <edge id="2773" label="zzzzz11,zzzzz55" source="131" target="175" cy:directed="1"/>
      <edge id="2772" label="zzzzz11,zzzzz71" source="131" target="191" cy:directed="1"/>
      <edge id="2771" label="zzzzz11,zzzzz40" source="131" target="160" cy:directed="1"/>
      <edge id="2770" label="zzzzz11,zzzzz41" source="131" target="161" cy:directed="1"/>
      <edge id="2769" label="zzzzz11,zzzzz99" source="131" target="219" cy:directed="1"/>
      <edge id="2768" label="zzzzz11,zzzzz43" source="131" target="163" cy:directed="1"/>
      <edge id="2767" label="zzzzz11,zzzzz73" source="131" target="193" cy:directed="1"/>
      <edge id="2766" label="zzzzz11,zzzzz72" source="131" target="192" cy:directed="1"/>
      <edge id="2765" label="zzzzz11,zzzzz89" source="131" target="209" cy:directed="1"/>
      <edge id="2764" label="zzzzz11,zzzzz44" source="131" target="164" cy:directed="1"/>
      <edge id="2763" label="zzzzz11,zzzzz56" source="131" target="176" cy:directed="1"/>
      <edge id="2762" label="zzzzz11,zzzzz87" source="131" target="207" cy:directed="1"/>
      <edge id="2761" label="zzzzz11,zzzzzz8" source="131" target="228" cy:directed="1"/>
      <edge id="2760" label="zzzzz11,zzzzz88" source="131" target="208" cy:directed="1"/>
      <edge id="2759" label="zzzzz11,zzzzzz6" source="131" target="226" cy:directed="1"/>
      <edge id="2758" label="zzzzz11,zzzzzz2" source="131" target="222" cy:directed="1"/>
      <edge id="2757" label="zzzzz11,zzzzzz0" source="131" target="220" cy:directed="1"/>
      <edge id="2756" label="zzzzz11,zzzzzz5" source="131" target="225" cy:directed="1"/>
      <edge id="2755" label="zzzzz11,zzzzz15" source="131" target="135" cy:directed="1"/>
      <edge id="2754" label="zzzzz11,zzzzzz1" source="131" target="221" cy:directed="1"/>
      <edge id="2753" label="zzzzz11,zzzzzz4" source="131" target="224" cy:directed="1"/>
      <edge id="2752" label="zzzzz11,zzzzz93" source="131" target="213" cy:directed="1"/>
      <edge id="2751" label="zzzzz11,zzzzz16" source="131" target="136" cy:directed="1"/>
      <edge id="2750" label="zzzzz11,zzzzz17" source="131" target="137" cy:directed="1"/>
      <edge id="2749" label="zzzzz11,zzzzz13" source="131" target="133" cy:directed="1"/>
      <edge id="2748" label="zzzzz11,zzzzzz9" source="131" target="229" cy:directed="1"/>
      <edge id="2747" label="zzzzz11,zzzzzz7" source="131" target="227" cy:directed="1"/>
      <edge id="2746" label="zzzzz11,zzzzz12" source="131" target="132" cy:directed="1"/>
      <edge id="2745" label="zzzzz10,zzzzz97" source="130" target="217" cy:directed="1"/>
      <edge id="2744" label="zzzzz10,zzzzz40" source="130" target="160" cy:directed="1"/>
      <edge id="2743" label="zzzzz10,zzzzz68" source="130" target="188" cy:directed="1"/>
      <edge id="2742" label="zzzzz10,zzzzz51" source="130" target="171" cy:directed="1"/>
      <edge id="2741" label="zzzzz10,zzzzz29" source="130" target="149" cy:directed="1"/>
      <edge id="2740" label="zzzzz10,zzzzz67" source="130" target="187" cy:directed="1"/>
      <edge id="2739" label="zzzzz10,zzzzz64" source="130" target="184" cy:directed="1"/>
      <edge id="2738" label="zzzzz10,zzzzz42" source="130" target="162" cy:directed="1"/>
      <edge id="2737" label="zzzzz10,zzzzz99" source="130" target="219" cy:directed="1"/>
      <edge id="2736" label="zzzzz10,zzzzz60" source="130" target="180" cy:directed="1"/>
      <edge id="2735" label="zzzzz10,zzzzz55" source="130" target="175" cy:directed="1"/>
      <edge id="2734" label="zzzzz10,zzzzz44" source="130" target="164" cy:directed="1"/>
      <edge id="2733" label="zzzzz10,zzzzz71" source="130" target="191" cy:directed="1"/>
      <edge id="2732" label="zzzzz10,zzzzz34" source="130" target="154" cy:directed="1"/>
      <edge id="2731" label="zzzzz10,zzzzz53" source="130" target="173" cy:directed="1"/>
      <edge id="2730" label="zzzzz10,zzzzz73" source="130" target="193" cy:directed="1"/>
      <edge id="2729" label="zzzzz10,zzzzz43" source="130" target="163" cy:directed="1"/>
      <edge id="2728" label="zzzzz10,zzzzz41" source="130" target="161" cy:directed="1"/>
      <edge id="2727" label="zzzzz10,zzzzz72" source="130" target="192" cy:directed="1"/>
      <edge id="2726" label="zzzzz10,zzzzz56" source="130" target="176" cy:directed="1"/>
      <edge id="2725" label="zzzzz10,zzzzz89" source="130" target="209" cy:directed="1"/>
      <edge id="2724" label="zzzzz10,zzzzz87" source="130" target="207" cy:directed="1"/>
      <edge id="2723" label="zzzzz10,zzzzz88" source="130" target="208" cy:directed="1"/>
      <edge id="2722" label="zzzzz10,zzzzzz8" source="130" target="228" cy:directed="1"/>
      <edge id="2721" label="zzzzz10,zzzzzz2" source="130" target="222" cy:directed="1"/>
      <edge id="2720" label="zzzzz10,zzzzzz0" source="130" target="220" cy:directed="1"/>
      <edge id="2719" label="zzzzz10,zzzzzz6" source="130" target="226" cy:directed="1"/>
      <edge id="2718" label="zzzzz10,zzzzz15" source="130" target="135" cy:directed="1"/>
      <edge id="2717" label="zzzzz10,zzzzzz5" source="130" target="225" cy:directed="1"/>
      <edge id="2716" label="zzzzz10,zzzzzz1" source="130" target="221" cy:directed="1"/>
      <edge id="2715" label="zzzzz10,zzzzzz4" source="130" target="224" cy:directed="1"/>
      <edge id="2714" label="zzzzz10,zzzzz93" source="130" target="213" cy:directed="1"/>
      <edge id="2713" label="zzzzz10,zzzzz16" source="130" target="136" cy:directed="1"/>
      <edge id="2712" label="zzzzz10,zzzzz17" source="130" target="137" cy:directed="1"/>
      <edge id="2711" label="zzzzz10,zzzzz12" source="130" target="132" cy:directed="1"/>
      <edge id="2710" label="zzzzz10,zzzzz11" source="130" target="131" cy:directed="1"/>
      <edge id="2709" label="zzzzz10,zzzzz13" source="130" target="133" cy:directed="1"/>
      <edge id="2708" label="zzzzz10,zzzzzz7" source="130" target="227" cy:directed="1"/>
      <edge id="2707" label="zzzzz10,zzzzzz9" source="130" target="229" cy:directed="1"/>
      <edge id="2706" label="zzzz166,zzzz167" source="128" target="129" cy:directed="1"/>
      <edge id="2705" label="zzzz165,zzzz167" source="127" target="129" cy:directed="1"/>
      <edge id="2704" label="zzzz165,zzzz166" source="127" target="128" cy:directed="1"/>
      <edge id="2703" label="zzzz164,zzzz167" source="126" target="129" cy:directed="1"/>
      <edge id="2702" label="zzzz164,zzzz165" source="126" target="127" cy:directed="1"/>
      <edge id="2701" label="zzzz164,zzzz166" source="126" target="128" cy:directed="1"/>
      <edge id="2700" label="zzzz164,zzzz162" source="126" target="124" cy:directed="1"/>
      <edge id="2699" label="zzzz164,zzzz160" source="126" target="122" cy:directed="1"/>
      <edge id="2698" label="zzzz164,zzzz163" source="126" target="125" cy:directed="1"/>
      <edge id="2697" label="zzzz164,zzzz161" source="126" target="123" cy:directed="1"/>
      <edge id="2696" label="zzzz163,zzzz165" source="125" target="127" cy:directed="1"/>
      <edge id="2695" label="zzzz163,zzzz167" source="125" target="129" cy:directed="1"/>
      <edge id="2694" label="zzzz163,zzzz166" source="125" target="128" cy:directed="1"/>
      <edge id="2693" label="zzzz162,zzzz165" source="124" target="127" cy:directed="1"/>
      <edge id="2692" label="zzzz162,zzzz166" source="124" target="128" cy:directed="1"/>
      <edge id="2691" label="zzzz162,zzzz167" source="124" target="129" cy:directed="1"/>
      <edge id="2690" label="zzzz162,zzzz163" source="124" target="125" cy:directed="1"/>
      <edge id="2689" label="zzzz162,zzzz161" source="124" target="123" cy:directed="1"/>
      <edge id="2688" label="zzzz161,zzzz165" source="123" target="127" cy:directed="1"/>
      <edge id="2687" label="zzzz161,zzzz167" source="123" target="129" cy:directed="1"/>
      <edge id="2686" label="zzzz161,zzzz166" source="123" target="128" cy:directed="1"/>
      <edge id="2685" label="zzzz161,zzzz163" source="123" target="125" cy:directed="1"/>
      <edge id="2684" label="zzzz160,zzzz165" source="122" target="127" cy:directed="1"/>
      <edge id="2683" label="zzzz160,zzzz166" source="122" target="128" cy:directed="1"/>
      <edge id="2682" label="zzzz160,zzzz167" source="122" target="129" cy:directed="1"/>
      <edge id="2681" label="zzzz160,zzzz163" source="122" target="125" cy:directed="1"/>
      <edge id="2680" label="zzzz160,zzzz161" source="122" target="123" cy:directed="1"/>
      <edge id="2679" label="zzzz160,zzzz162" source="122" target="124" cy:directed="1"/>
      <edge id="2678" label="zzzz159,zzzz167" source="121" target="129" cy:directed="1"/>
      <edge id="2677" label="zzzz159,zzzz165" source="121" target="127" cy:directed="1"/>
      <edge id="2676" label="zzzz159,zzzz166" source="121" target="128" cy:directed="1"/>
      <edge id="2675" label="zzzz159,zzzz162" source="121" target="124" cy:directed="1"/>
      <edge id="2674" label="zzzz159,zzzz160" source="121" target="122" cy:directed="1"/>
      <edge id="2673" label="zzzz159,zzzz163" source="121" target="125" cy:directed="1"/>
      <edge id="2672" label="zzzz159,zzzz161" source="121" target="123" cy:directed="1"/>
      <edge id="2671" label="zzzz159,zzzz164" source="121" target="126" cy:directed="1"/>
      <edge id="2670" label="zzzz158,zzzzz99" source="120" target="219" cy:directed="1"/>
      <edge id="2669" label="zzzz158,zzzzz55" source="120" target="175" cy:directed="1"/>
      <edge id="2668" label="zzzz158,zzzzz63" source="120" target="183" cy:directed="1"/>
      <edge id="2667" label="zzzz158,zzzzz56" source="120" target="176" cy:directed="1"/>
      <edge id="2666" label="zzzz158,zzzzz43" source="120" target="163" cy:directed="1"/>
      <edge id="2665" label="zzzz158,zzzzz44" source="120" target="164" cy:directed="1"/>
      <edge id="2664" label="zzzz158,zzzzz75" source="120" target="195" cy:directed="1"/>
      <edge id="2663" label="zzzz158,zzzzz54" source="120" target="174" cy:directed="1"/>
      <edge id="2662" label="zzzz158,zzzzz42" source="120" target="162" cy:directed="1"/>
      <edge id="2661" label="zzzz158,zzzzz78" source="120" target="198" cy:directed="1"/>
      <edge id="2660" label="zzzz158,zzzzz41" source="120" target="161" cy:directed="1"/>
      <edge id="2659" label="zzzz158,zzzzz46" source="120" target="166" cy:directed="1"/>
      <edge id="2658" label="zzzz158,zzzzz50" source="120" target="170" cy:directed="1"/>
      <edge id="2657" label="zzzz158,zzzzz71" source="120" target="191" cy:directed="1"/>
      <edge id="2656" label="zzzz158,zzzzz60" source="120" target="180" cy:directed="1"/>
      <edge id="2655" label="zzzz158,zzzzz68" source="120" target="188" cy:directed="1"/>
      <edge id="2654" label="zzzz158,zzzzz47" source="120" target="167" cy:directed="1"/>
      <edge id="2653" label="zzzz158,zzzzz89" source="120" target="209" cy:directed="1"/>
      <edge id="2652" label="zzzz158,zzzzz88" source="120" target="208" cy:directed="1"/>
      <edge id="2651" label="zzzz158,zzzzz87" source="120" target="207" cy:directed="1"/>
      <edge id="2650" label="zzzz158,zzzzzz6" source="120" target="226" cy:directed="1"/>
      <edge id="2649" label="zzzz158,zzzzzz5" source="120" target="225" cy:directed="1"/>
      <edge id="2648" label="zzzz158,zzzzzz7" source="120" target="227" cy:directed="1"/>
      <edge id="2647" label="zzzz158,zzzzz15" source="120" target="135" cy:directed="1"/>
      <edge id="2646" label="zzzz158,zzzzz11" source="120" target="131" cy:directed="1"/>
      <edge id="2645" label="zzzz158,zzzzz10" source="120" target="130" cy:directed="1"/>
      <edge id="2644" label="zzzz158,zzzzz12" source="120" target="132" cy:directed="1"/>
      <edge id="2643" label="zzzz158,zzzzzz9" source="120" target="229" cy:directed="1"/>
      <edge id="2642" label="zzzz158,zzzzz93" source="120" target="213" cy:directed="1"/>
      <edge id="2641" label="zzzz158,zzzzz17" source="120" target="137" cy:directed="1"/>
      <edge id="2640" label="zzzz158,zzzzz13" source="120" target="133" cy:directed="1"/>
      <edge id="2639" label="zzzz158,zzzzzz4" source="120" target="224" cy:directed="1"/>
      <edge id="2638" label="zzzz158,zzzzz16" source="120" target="136" cy:directed="1"/>
      <edge id="2637" label="zzzz158,zzzzzz8" source="120" target="228" cy:directed="1"/>
      <edge id="2636" label="zzzz158,zzzzzz1" source="120" target="221" cy:directed="1"/>
      <edge id="2635" label="zzzz158,zzzzzz2" source="120" target="222" cy:directed="1"/>
      <edge id="2634" label="zzzz158,zzzzzz0" source="120" target="220" cy:directed="1"/>
      <edge id="2633" label="zzzz157,zzzzz50" source="119" target="170" cy:directed="1"/>
      <edge id="2632" label="zzzz157,zzzzz46" source="119" target="166" cy:directed="1"/>
      <edge id="2631" label="zzzz157,zzzzz62" source="119" target="182" cy:directed="1"/>
      <edge id="2630" label="zzzz157,zzzzz67" source="119" target="187" cy:directed="1"/>
      <edge id="2629" label="zzzz157,zzzzz29" source="119" target="149" cy:directed="1"/>
      <edge id="2628" label="zzzz157,zzzzz47" source="119" target="167" cy:directed="1"/>
      <edge id="2627" label="zzzz157,zzzzz42" source="119" target="162" cy:directed="1"/>
      <edge id="2626" label="zzzz157,zzzzz63" source="119" target="183" cy:directed="1"/>
      <edge id="2625" label="zzzz157,zzzzz34" source="119" target="154" cy:directed="1"/>
      <edge id="2624" label="zzzz157,zzzzz54" source="119" target="174" cy:directed="1"/>
      <edge id="2623" label="zzzz157,zzzzz64" source="119" target="184" cy:directed="1"/>
      <edge id="2622" label="zzzz157,zzzzz68" source="119" target="188" cy:directed="1"/>
      <edge id="2621" label="zzzz157,zzzzz74" source="119" target="194" cy:directed="1"/>
      <edge id="2620" label="zzzz157,zzzzz51" source="119" target="171" cy:directed="1"/>
      <edge id="2619" label="zzzz157,zzzzz44" source="119" target="164" cy:directed="1"/>
      <edge id="2618" label="zzzz157,zzzzz71" source="119" target="191" cy:directed="1"/>
      <edge id="2617" label="zzzz157,zzzzz41" source="119" target="161" cy:directed="1"/>
      <edge id="2616" label="zzzz157,zzzzz55" source="119" target="175" cy:directed="1"/>
      <edge id="2615" label="zzzz157,zzzzz53" source="119" target="173" cy:directed="1"/>
      <edge id="2614" label="zzzz157,zzzzz72" source="119" target="192" cy:directed="1"/>
      <edge id="2613" label="zzzz157,zzzzz78" source="119" target="198" cy:directed="1"/>
      <edge id="2612" label="zzzz157,zzzzz73" source="119" target="193" cy:directed="1"/>
      <edge id="2611" label="zzzz157,zzzzz60" source="119" target="180" cy:directed="1"/>
      <edge id="2610" label="zzzz157,zzzzz40" source="119" target="160" cy:directed="1"/>
      <edge id="2609" label="zzzz157,zzzzz56" source="119" target="176" cy:directed="1"/>
      <edge id="2608" label="zzzz157,zzzzz43" source="119" target="163" cy:directed="1"/>
      <edge id="2607" label="zzzz157,zzzzz99" source="119" target="219" cy:directed="1"/>
      <edge id="2606" label="zzzz157,zzzzz87" source="119" target="207" cy:directed="1"/>
      <edge id="2605" label="zzzz157,zzzzz89" source="119" target="209" cy:directed="1"/>
      <edge id="2604" label="zzzz157,zzzzz88" source="119" target="208" cy:directed="1"/>
      <edge id="2603" label="zzzz157,zzzzzz8" source="119" target="228" cy:directed="1"/>
      <edge id="2602" label="zzzz157,zzzzzz2" source="119" target="222" cy:directed="1"/>
      <edge id="2601" label="zzzz157,zzzzzz5" source="119" target="225" cy:directed="1"/>
      <edge id="2600" label="zzzz157,zzzzz15" source="119" target="135" cy:directed="1"/>
      <edge id="2599" label="zzzz157,zzzz158" source="119" target="120" cy:directed="1"/>
      <edge id="2598" label="zzzz157,zzzzzz4" source="119" target="224" cy:directed="1"/>
      <edge id="2597" label="zzzz157,zzzzzz0" source="119" target="220" cy:directed="1"/>
      <edge id="2596" label="zzzz157,zzzzz12" source="119" target="132" cy:directed="1"/>
      <edge id="2595" label="zzzz157,zzzzz16" source="119" target="136" cy:directed="1"/>
      <edge id="2594" label="zzzz157,zzzzzz6" source="119" target="226" cy:directed="1"/>
      <edge id="2593" label="zzzz157,zzzzz11" source="119" target="131" cy:directed="1"/>
      <edge id="2592" label="zzzz157,zzzzz93" source="119" target="213" cy:directed="1"/>
      <edge id="2591" label="zzzz157,zzzzzz7" source="119" target="227" cy:directed="1"/>
      <edge id="2590" label="zzzz157,zzzzzz1" source="119" target="221" cy:directed="1"/>
      <edge id="2589" label="zzzz157,zzzzz17" source="119" target="137" cy:directed="1"/>
      <edge id="2588" label="zzzz157,zzzzz10" source="119" target="130" cy:directed="1"/>
      <edge id="2587" label="zzzz157,zzzzzz9" source="119" target="229" cy:directed="1"/>
      <edge id="2586" label="zzzz157,zzzzz13" source="119" target="133" cy:directed="1"/>
      <edge id="2585" label="zzzz156,zzzzz58" source="118" target="178" cy:directed="1"/>
      <edge id="2584" label="zzzz156,zzzzz73" source="118" target="193" cy:directed="1"/>
      <edge id="2583" label="zzzz156,zzzzz40" source="118" target="160" cy:directed="1"/>
      <edge id="2582" label="zzzz156,zzzzz50" source="118" target="170" cy:directed="1"/>
      <edge id="2581" label="zzzz156,zzzzz34" source="118" target="154" cy:directed="1"/>
      <edge id="2580" label="zzzz156,zzzzz44" source="118" target="164" cy:directed="1"/>
      <edge id="2579" label="zzzz156,zzzzz64" source="118" target="184" cy:directed="1"/>
      <edge id="2578" label="zzzz156,zzzzz42" source="118" target="162" cy:directed="1"/>
      <edge id="2577" label="zzzz156,zzzzz68" source="118" target="188" cy:directed="1"/>
      <edge id="2576" label="zzzz156,zzzzz56" source="118" target="176" cy:directed="1"/>
      <edge id="2575" label="zzzz156,zzzzz47" source="118" target="167" cy:directed="1"/>
      <edge id="2574" label="zzzz156,zzzzz54" source="118" target="174" cy:directed="1"/>
      <edge id="2573" label="zzzz156,zzzzz71" source="118" target="191" cy:directed="1"/>
      <edge id="2572" label="zzzz156,zzzzz63" source="118" target="183" cy:directed="1"/>
      <edge id="2571" label="zzzz156,zzzzz72" source="118" target="192" cy:directed="1"/>
      <edge id="2570" label="zzzz156,zzzzz60" source="118" target="180" cy:directed="1"/>
      <edge id="2569" label="zzzz156,zzzzz46" source="118" target="166" cy:directed="1"/>
      <edge id="2568" label="zzzz156,zzzzz43" source="118" target="163" cy:directed="1"/>
      <edge id="2567" label="zzzz156,zzzzz41" source="118" target="161" cy:directed="1"/>
      <edge id="2566" label="zzzz156,zzzzz67" source="118" target="187" cy:directed="1"/>
      <edge id="2565" label="zzzz156,zzzzz53" source="118" target="173" cy:directed="1"/>
      <edge id="2564" label="zzzz156,zzzzz99" source="118" target="219" cy:directed="1"/>
      <edge id="2563" label="zzzz156,zzzzz55" source="118" target="175" cy:directed="1"/>
      <edge id="2562" label="zzzz156,zzzzz87" source="118" target="207" cy:directed="1"/>
      <edge id="2561" label="zzzz156,zzzzz89" source="118" target="209" cy:directed="1"/>
      <edge id="2560" label="zzzz156,zzzzz88" source="118" target="208" cy:directed="1"/>
      <edge id="2559" label="zzzz156,zzzzzz2" source="118" target="222" cy:directed="1"/>
      <edge id="2558" label="zzzz156,zzzz158" source="118" target="120" cy:directed="1"/>
      <edge id="2557" label="zzzz156,zzzzzz0" source="118" target="220" cy:directed="1"/>
      <edge id="2556" label="zzzz156,zzzzzz6" source="118" target="226" cy:directed="1"/>
      <edge id="2555" label="zzzz156,zzzzzz8" source="118" target="228" cy:directed="1"/>
      <edge id="2554" label="zzzz156,zzzzzz5" source="118" target="225" cy:directed="1"/>
      <edge id="2553" label="zzzz156,zzzzz15" source="118" target="135" cy:directed="1"/>
      <edge id="2552" label="zzzz156,zzzzzz4" source="118" target="224" cy:directed="1"/>
      <edge id="2551" label="zzzz156,zzzzz16" source="118" target="136" cy:directed="1"/>
      <edge id="2550" label="zzzz156,zzzzz12" source="118" target="132" cy:directed="1"/>
      <edge id="2549" label="zzzz156,zzzzzz1" source="118" target="221" cy:directed="1"/>
      <edge id="2548" label="zzzz156,zzzzzz7" source="118" target="227" cy:directed="1"/>
      <edge id="2547" label="zzzz156,zzzzz11" source="118" target="131" cy:directed="1"/>
      <edge id="2546" label="zzzz156,zzzzz10" source="118" target="130" cy:directed="1"/>
      <edge id="2545" label="zzzz156,zzzzz13" source="118" target="133" cy:directed="1"/>
      <edge id="2544" label="zzzz156,zzzzz17" source="118" target="137" cy:directed="1"/>
      <edge id="2543" label="zzzz156,zzzzzz9" source="118" target="229" cy:directed="1"/>
      <edge id="2542" label="zzzz156,zzzz157" source="118" target="119" cy:directed="1"/>
      <edge id="2541" label="zzzz156,zzzzz93" source="118" target="213" cy:directed="1"/>
      <edge id="2540" label="zzzz155,zzzzz32" source="117" target="152" cy:directed="1"/>
      <edge id="2539" label="zzzz155,zzzzz74" source="117" target="194" cy:directed="1"/>
      <edge id="2538" label="zzzz155,zzzzz40" source="117" target="160" cy:directed="1"/>
      <edge id="2537" label="zzzz155,zzzzz73" source="117" target="193" cy:directed="1"/>
      <edge id="2536" label="zzzz155,zzzzz51" source="117" target="171" cy:directed="1"/>
      <edge id="2535" label="zzzz155,zzzzz67" source="117" target="187" cy:directed="1"/>
      <edge id="2534" label="zzzz155,zzzzz34" source="117" target="154" cy:directed="1"/>
      <edge id="2533" label="zzzz155,zzzzz64" source="117" target="184" cy:directed="1"/>
      <edge id="2532" label="zzzz155,zzzzz61" source="117" target="181" cy:directed="1"/>
      <edge id="2531" label="zzzz155,zzzzz46" source="117" target="166" cy:directed="1"/>
      <edge id="2530" label="zzzz155,zzzzz68" source="117" target="188" cy:directed="1"/>
      <edge id="2529" label="zzzz155,zzzzz29" source="117" target="149" cy:directed="1"/>
      <edge id="2528" label="zzzz155,zzzzz72" source="117" target="192" cy:directed="1"/>
      <edge id="2527" label="zzzz155,zzzzz44" source="117" target="164" cy:directed="1"/>
      <edge id="2526" label="zzzz155,zzzzz50" source="117" target="170" cy:directed="1"/>
      <edge id="2525" label="zzzz155,zzzzz42" source="117" target="162" cy:directed="1"/>
      <edge id="2524" label="zzzz155,zzzzz99" source="117" target="219" cy:directed="1"/>
      <edge id="2523" label="zzzz155,zzzzz63" source="117" target="183" cy:directed="1"/>
      <edge id="2522" label="zzzz155,zzzzz78" source="117" target="198" cy:directed="1"/>
      <edge id="2521" label="zzzz155,zzzzz54" source="117" target="174" cy:directed="1"/>
      <edge id="2520" label="zzzz155,zzzzz60" source="117" target="180" cy:directed="1"/>
      <edge id="2519" label="zzzz155,zzzzz47" source="117" target="167" cy:directed="1"/>
      <edge id="2518" label="zzzz155,zzzzz71" source="117" target="191" cy:directed="1"/>
      <edge id="2517" label="zzzz155,zzzzz55" source="117" target="175" cy:directed="1"/>
      <edge id="2516" label="zzzz155,zzzzz43" source="117" target="163" cy:directed="1"/>
      <edge id="2515" label="zzzz155,zzzzz56" source="117" target="176" cy:directed="1"/>
      <edge id="2514" label="zzzz155,zzzzz41" source="117" target="161" cy:directed="1"/>
      <edge id="2513" label="zzzz155,zzzzz53" source="117" target="173" cy:directed="1"/>
      <edge id="2512" label="zzzz155,zzzzz87" source="117" target="207" cy:directed="1"/>
      <edge id="2511" label="zzzz155,zzzzz88" source="117" target="208" cy:directed="1"/>
      <edge id="2510" label="zzzz155,zzzzzz2" source="117" target="222" cy:directed="1"/>
      <edge id="2509" label="zzzz155,zzzzz89" source="117" target="209" cy:directed="1"/>
      <edge id="2508" label="zzzz155,zzzzzz8" source="117" target="228" cy:directed="1"/>
      <edge id="2507" label="zzzz155,zzzzz15" source="117" target="135" cy:directed="1"/>
      <edge id="2506" label="zzzz155,zzzz158" source="117" target="120" cy:directed="1"/>
      <edge id="2505" label="zzzz155,zzzzzz5" source="117" target="225" cy:directed="1"/>
      <edge id="2504" label="zzzz155,zzzzzz0" source="117" target="220" cy:directed="1"/>
      <edge id="2503" label="zzzz155,zzzzzz6" source="117" target="226" cy:directed="1"/>
      <edge id="2502" label="zzzz155,zzzzzz4" source="117" target="224" cy:directed="1"/>
      <edge id="2501" label="zzzz155,zzzzz12" source="117" target="132" cy:directed="1"/>
      <edge id="2500" label="zzzz155,zzzzz16" source="117" target="136" cy:directed="1"/>
      <edge id="2499" label="zzzz155,zzzzz17" source="117" target="137" cy:directed="1"/>
      <edge id="2498" label="zzzz155,zzzzz11" source="117" target="131" cy:directed="1"/>
      <edge id="2497" label="zzzz155,zzzzzz7" source="117" target="227" cy:directed="1"/>
      <edge id="2496" label="zzzz155,zzzzzz1" source="117" target="221" cy:directed="1"/>
      <edge id="2495" label="zzzz155,zzzzz10" source="117" target="130" cy:directed="1"/>
      <edge id="2494" label="zzzz155,zzzzz93" source="117" target="213" cy:directed="1"/>
      <edge id="2493" label="zzzz155,zzzzzz9" source="117" target="229" cy:directed="1"/>
      <edge id="2492" label="zzzz155,zzzzz13" source="117" target="133" cy:directed="1"/>
      <edge id="2491" label="zzzz155,zzzz157" source="117" target="119" cy:directed="1"/>
      <edge id="2490" label="zzzz155,zzzz156" source="117" target="118" cy:directed="1"/>
      <edge id="2489" label="zzzz154,zzzzz51" source="116" target="171" cy:directed="1"/>
      <edge id="2488" label="zzzz154,zzzzz73" source="116" target="193" cy:directed="1"/>
      <edge id="2487" label="zzzz154,zzzzz62" source="116" target="182" cy:directed="1"/>
      <edge id="2486" label="zzzz154,zzzzz29" source="116" target="149" cy:directed="1"/>
      <edge id="2485" label="zzzz154,zzzzz61" source="116" target="181" cy:directed="1"/>
      <edge id="2484" label="zzzz154,zzzzz67" source="116" target="187" cy:directed="1"/>
      <edge id="2483" label="zzzz154,zzzzz63" source="116" target="183" cy:directed="1"/>
      <edge id="2482" label="zzzz154,zzzzz50" source="116" target="170" cy:directed="1"/>
      <edge id="2481" label="zzzz154,zzzzz55" source="116" target="175" cy:directed="1"/>
      <edge id="2480" label="zzzz154,zzzzz56" source="116" target="176" cy:directed="1"/>
      <edge id="2479" label="zzzz154,zzzzz68" source="116" target="188" cy:directed="1"/>
      <edge id="2478" label="zzzz154,zzzzz44" source="116" target="164" cy:directed="1"/>
      <edge id="2477" label="zzzz154,zzzzz46" source="116" target="166" cy:directed="1"/>
      <edge id="2476" label="zzzz154,zzzzz64" source="116" target="184" cy:directed="1"/>
      <edge id="2475" label="zzzz154,zzzzz34" source="116" target="154" cy:directed="1"/>
      <edge id="2474" label="zzzz154,zzzzz72" source="116" target="192" cy:directed="1"/>
      <edge id="2473" label="zzzz154,zzzzz53" source="116" target="173" cy:directed="1"/>
      <edge id="2472" label="zzzz154,zzzzz99" source="116" target="219" cy:directed="1"/>
      <edge id="2471" label="zzzz154,zzzzz71" source="116" target="191" cy:directed="1"/>
      <edge id="2470" label="zzzz154,zzzzz42" source="116" target="162" cy:directed="1"/>
      <edge id="2469" label="zzzz154,zzzzz78" source="116" target="198" cy:directed="1"/>
      <edge id="2468" label="zzzz154,zzzzz47" source="116" target="167" cy:directed="1"/>
      <edge id="2467" label="zzzz154,zzzzz60" source="116" target="180" cy:directed="1"/>
      <edge id="2466" label="zzzz154,zzzzz54" source="116" target="174" cy:directed="1"/>
      <edge id="2465" label="zzzz154,zzzzz43" source="116" target="163" cy:directed="1"/>
      <edge id="2464" label="zzzz154,zzzzz41" source="116" target="161" cy:directed="1"/>
      <edge id="2463" label="zzzz154,zzzzz87" source="116" target="207" cy:directed="1"/>
      <edge id="2462" label="zzzz154,zzzzz88" source="116" target="208" cy:directed="1"/>
      <edge id="2461" label="zzzz154,zzzzz89" source="116" target="209" cy:directed="1"/>
      <edge id="2460" label="zzzz154,zzzzzz2" source="116" target="222" cy:directed="1"/>
      <edge id="2459" label="zzzz154,zzzzzz5" source="116" target="225" cy:directed="1"/>
      <edge id="2458" label="zzzz154,zzzzzz8" source="116" target="228" cy:directed="1"/>
      <edge id="2457" label="zzzz154,zzzzz15" source="116" target="135" cy:directed="1"/>
      <edge id="2456" label="zzzz154,zzzzzz0" source="116" target="220" cy:directed="1"/>
      <edge id="2455" label="zzzz154,zzzz158" source="116" target="120" cy:directed="1"/>
      <edge id="2454" label="zzzz154,zzzzzz6" source="116" target="226" cy:directed="1"/>
      <edge id="2453" label="zzzz154,zzzzzz4" source="116" target="224" cy:directed="1"/>
      <edge id="2452" label="zzzz154,zzzzz17" source="116" target="137" cy:directed="1"/>
      <edge id="2451" label="zzzz154,zzzzz12" source="116" target="132" cy:directed="1"/>
      <edge id="2450" label="zzzz154,zzzzz11" source="116" target="131" cy:directed="1"/>
      <edge id="2449" label="zzzz154,zzzzz16" source="116" target="136" cy:directed="1"/>
      <edge id="2448" label="zzzz154,zzzzz13" source="116" target="133" cy:directed="1"/>
      <edge id="2447" label="zzzz154,zzzzzz7" source="116" target="227" cy:directed="1"/>
      <edge id="2446" label="zzzz154,zzzzzz1" source="116" target="221" cy:directed="1"/>
      <edge id="2445" label="zzzz154,zzzzz10" source="116" target="130" cy:directed="1"/>
      <edge id="2444" label="zzzz154,zzzzz93" source="116" target="213" cy:directed="1"/>
      <edge id="2443" label="zzzz154,zzzz157" source="116" target="119" cy:directed="1"/>
      <edge id="2442" label="zzzz154,zzzzzz9" source="116" target="229" cy:directed="1"/>
      <edge id="2441" label="zzzz154,zzzz156" source="116" target="118" cy:directed="1"/>
      <edge id="2440" label="zzzz154,zzzz155" source="116" target="117" cy:directed="1"/>
      <edge id="2439" label="zzzz153,zzzzz40" source="115" target="160" cy:directed="1"/>
      <edge id="2438" label="zzzz153,zzzzz62" source="115" target="182" cy:directed="1"/>
      <edge id="2437" label="zzzz153,zzzzz46" source="115" target="166" cy:directed="1"/>
      <edge id="2436" label="zzzz153,zzzzz50" source="115" target="170" cy:directed="1"/>
      <edge id="2435" label="zzzz153,zzzzz73" source="115" target="193" cy:directed="1"/>
      <edge id="2434" label="zzzz153,zzzzz61" source="115" target="181" cy:directed="1"/>
      <edge id="2433" label="zzzz153,zzzzz34" source="115" target="154" cy:directed="1"/>
      <edge id="2432" label="zzzz153,zzzzz74" source="115" target="194" cy:directed="1"/>
      <edge id="2431" label="zzzz153,zzzzz44" source="115" target="164" cy:directed="1"/>
      <edge id="2430" label="zzzz153,zzzzz54" source="115" target="174" cy:directed="1"/>
      <edge id="2429" label="zzzz153,zzzzz63" source="115" target="183" cy:directed="1"/>
      <edge id="2428" label="zzzz153,zzzzz68" source="115" target="188" cy:directed="1"/>
      <edge id="2427" label="zzzz153,zzzzz67" source="115" target="187" cy:directed="1"/>
      <edge id="2426" label="zzzz153,zzzzz29" source="115" target="149" cy:directed="1"/>
      <edge id="2425" label="zzzz153,zzzzz56" source="115" target="176" cy:directed="1"/>
      <edge id="2424" label="zzzz153,zzzzz42" source="115" target="162" cy:directed="1"/>
      <edge id="2423" label="zzzz153,zzzzz64" source="115" target="184" cy:directed="1"/>
      <edge id="2422" label="zzzz153,zzzzz99" source="115" target="219" cy:directed="1"/>
      <edge id="2421" label="zzzz153,zzzzz51" source="115" target="171" cy:directed="1"/>
      <edge id="2420" label="zzzz153,zzzzz55" source="115" target="175" cy:directed="1"/>
      <edge id="2419" label="zzzz153,zzzzz47" source="115" target="167" cy:directed="1"/>
      <edge id="2418" label="zzzz153,zzzzz72" source="115" target="192" cy:directed="1"/>
      <edge id="2417" label="zzzz153,zzzzz60" source="115" target="180" cy:directed="1"/>
      <edge id="2416" label="zzzz153,zzzzz43" source="115" target="163" cy:directed="1"/>
      <edge id="2415" label="zzzz153,zzzzz41" source="115" target="161" cy:directed="1"/>
      <edge id="2414" label="zzzz153,zzzzz78" source="115" target="198" cy:directed="1"/>
      <edge id="2413" label="zzzz153,zzzzz71" source="115" target="191" cy:directed="1"/>
      <edge id="2412" label="zzzz153,zzzzz53" source="115" target="173" cy:directed="1"/>
      <edge id="2411" label="zzzz153,zzzzz87" source="115" target="207" cy:directed="1"/>
      <edge id="2410" label="zzzz153,zzzzz88" source="115" target="208" cy:directed="1"/>
      <edge id="2409" label="zzzz153,zzzzz89" source="115" target="209" cy:directed="1"/>
      <edge id="2408" label="zzzz153,zzzzzz2" source="115" target="222" cy:directed="1"/>
      <edge id="2407" label="zzzz153,zzzz158" source="115" target="120" cy:directed="1"/>
      <edge id="2406" label="zzzz153,zzzzzz8" source="115" target="228" cy:directed="1"/>
      <edge id="2405" label="zzzz153,zzzzzz5" source="115" target="225" cy:directed="1"/>
      <edge id="2404" label="zzzz153,zzzzzz0" source="115" target="220" cy:directed="1"/>
      <edge id="2403" label="zzzz153,zzzzz15" source="115" target="135" cy:directed="1"/>
      <edge id="2402" label="zzzz153,zzzzzz6" source="115" target="226" cy:directed="1"/>
      <edge id="2401" label="zzzz153,zzzzzz4" source="115" target="224" cy:directed="1"/>
      <edge id="2400" label="zzzz153,zzzzz11" source="115" target="131" cy:directed="1"/>
      <edge id="2399" label="zzzz153,zzzzzz7" source="115" target="227" cy:directed="1"/>
      <edge id="2398" label="zzzz153,zzzzz12" source="115" target="132" cy:directed="1"/>
      <edge id="2397" label="zzzz153,zzzzz10" source="115" target="130" cy:directed="1"/>
      <edge id="2396" label="zzzz153,zzzzz16" source="115" target="136" cy:directed="1"/>
      <edge id="2395" label="zzzz153,zzzzz17" source="115" target="137" cy:directed="1"/>
      <edge id="2394" label="zzzz153,zzzzz93" source="115" target="213" cy:directed="1"/>
      <edge id="2393" label="zzzz153,zzzzz13" source="115" target="133" cy:directed="1"/>
      <edge id="2392" label="zzzz153,zzzzzz9" source="115" target="229" cy:directed="1"/>
      <edge id="2391" label="zzzz153,zzzzzz1" source="115" target="221" cy:directed="1"/>
      <edge id="2390" label="zzzz153,zzzz157" source="115" target="119" cy:directed="1"/>
      <edge id="2389" label="zzzz153,zzzz156" source="115" target="118" cy:directed="1"/>
      <edge id="2388" label="zzzz153,zzzz154" source="115" target="116" cy:directed="1"/>
      <edge id="2387" label="zzzz153,zzzz155" source="115" target="117" cy:directed="1"/>
      <edge id="2386" label="zzzz152,zzzzz75" source="114" target="195" cy:directed="1"/>
      <edge id="2385" label="zzzz152,zzzzz40" source="114" target="160" cy:directed="1"/>
      <edge id="2384" label="zzzz152,zzzzz67" source="114" target="187" cy:directed="1"/>
      <edge id="2383" label="zzzz152,zzzzz29" source="114" target="149" cy:directed="1"/>
      <edge id="2382" label="zzzz152,zzzzz64" source="114" target="184" cy:directed="1"/>
      <edge id="2381" label="zzzz152,zzzzz51" source="114" target="171" cy:directed="1"/>
      <edge id="2380" label="zzzz152,zzzzz63" source="114" target="183" cy:directed="1"/>
      <edge id="2379" label="zzzz152,zzzzz72" source="114" target="192" cy:directed="1"/>
      <edge id="2378" label="zzzz152,zzzzz58" source="114" target="178" cy:directed="1"/>
      <edge id="2377" label="zzzz152,zzzzz74" source="114" target="194" cy:directed="1"/>
      <edge id="2376" label="zzzz152,zzzzz54" source="114" target="174" cy:directed="1"/>
      <edge id="2375" label="zzzz152,zzzzz41" source="114" target="161" cy:directed="1"/>
      <edge id="2374" label="zzzz152,zzzzz34" source="114" target="154" cy:directed="1"/>
      <edge id="2373" label="zzzz152,zzzzz42" source="114" target="162" cy:directed="1"/>
      <edge id="2372" label="zzzz152,zzzzz53" source="114" target="173" cy:directed="1"/>
      <edge id="2371" label="zzzz152,zzzzz44" source="114" target="164" cy:directed="1"/>
      <edge id="2370" label="zzzz152,zzzzz43" source="114" target="163" cy:directed="1"/>
      <edge id="2369" label="zzzz152,zzzzz78" source="114" target="198" cy:directed="1"/>
      <edge id="2368" label="zzzz152,zzzzz68" source="114" target="188" cy:directed="1"/>
      <edge id="2367" label="zzzz152,zzzzz73" source="114" target="193" cy:directed="1"/>
      <edge id="2366" label="zzzz152,zzzzz55" source="114" target="175" cy:directed="1"/>
      <edge id="2365" label="zzzz152,zzzzz99" source="114" target="219" cy:directed="1"/>
      <edge id="2364" label="zzzz152,zzzzz56" source="114" target="176" cy:directed="1"/>
      <edge id="2363" label="zzzz152,zzzzz71" source="114" target="191" cy:directed="1"/>
      <edge id="2362" label="zzzz152,zzzzz47" source="114" target="167" cy:directed="1"/>
      <edge id="2361" label="zzzz152,zzzzz60" source="114" target="180" cy:directed="1"/>
      <edge id="2360" label="zzzz152,zzzzz89" source="114" target="209" cy:directed="1"/>
      <edge id="2359" label="zzzz152,zzzzz87" source="114" target="207" cy:directed="1"/>
      <edge id="2358" label="zzzz152,zzzzz88" source="114" target="208" cy:directed="1"/>
      <edge id="2357" label="zzzz152,zzzzzz6" source="114" target="226" cy:directed="1"/>
      <edge id="2356" label="zzzz152,zzzz158" source="114" target="120" cy:directed="1"/>
      <edge id="2355" label="zzzz152,zzzzz15" source="114" target="135" cy:directed="1"/>
      <edge id="2354" label="zzzz152,zzzzzz0" source="114" target="220" cy:directed="1"/>
      <edge id="2353" label="zzzz152,zzzzzz2" source="114" target="222" cy:directed="1"/>
      <edge id="2352" label="zzzz152,zzzzzz8" source="114" target="228" cy:directed="1"/>
      <edge id="2351" label="zzzz152,zzzzzz5" source="114" target="225" cy:directed="1"/>
      <edge id="2350" label="zzzz152,zzzzzz4" source="114" target="224" cy:directed="1"/>
      <edge id="2349" label="zzzz152,zzzzzz1" source="114" target="221" cy:directed="1"/>
      <edge id="2348" label="zzzz152,zzzzz12" source="114" target="132" cy:directed="1"/>
      <edge id="2347" label="zzzz152,zzzzz17" source="114" target="137" cy:directed="1"/>
      <edge id="2346" label="zzzz152,zzzzzz7" source="114" target="227" cy:directed="1"/>
      <edge id="2345" label="zzzz152,zzzzz11" source="114" target="131" cy:directed="1"/>
      <edge id="2344" label="zzzz152,zzzzz16" source="114" target="136" cy:directed="1"/>
      <edge id="2343" label="zzzz152,zzzzz93" source="114" target="213" cy:directed="1"/>
      <edge id="2342" label="zzzz152,zzzzzz9" source="114" target="229" cy:directed="1"/>
      <edge id="2341" label="zzzz152,zzzz157" source="114" target="119" cy:directed="1"/>
      <edge id="2340" label="zzzz152,zzzz156" source="114" target="118" cy:directed="1"/>
      <edge id="2339" label="zzzz152,zzzzz10" source="114" target="130" cy:directed="1"/>
      <edge id="2338" label="zzzz152,zzzzz13" source="114" target="133" cy:directed="1"/>
      <edge id="2337" label="zzzz152,zzzz154" source="114" target="116" cy:directed="1"/>
      <edge id="2336" label="zzzz152,zzzz155" source="114" target="117" cy:directed="1"/>
      <edge id="2335" label="zzzz152,zzzz153" source="114" target="115" cy:directed="1"/>
      <edge id="2334" label="zzzz151,zzzzz71" source="113" target="191" cy:directed="1"/>
      <edge id="2333" label="zzzz151,zzzzz61" source="113" target="181" cy:directed="1"/>
      <edge id="2332" label="zzzz151,zzzzz99" source="113" target="219" cy:directed="1"/>
      <edge id="2331" label="zzzz151,zzzzz47" source="113" target="167" cy:directed="1"/>
      <edge id="2330" label="zzzz151,zzzzz64" source="113" target="184" cy:directed="1"/>
      <edge id="2329" label="zzzz151,zzzzz42" source="113" target="162" cy:directed="1"/>
      <edge id="2328" label="zzzz151,zzzzz45" source="113" target="165" cy:directed="1"/>
      <edge id="2327" label="zzzz151,zzzzz41" source="113" target="161" cy:directed="1"/>
      <edge id="2326" label="zzzz151,zzzzz72" source="113" target="192" cy:directed="1"/>
      <edge id="2325" label="zzzz151,zzzzz29" source="113" target="149" cy:directed="1"/>
      <edge id="2324" label="zzzz151,zzzzz44" source="113" target="164" cy:directed="1"/>
      <edge id="2323" label="zzzz151,zzzzz73" source="113" target="193" cy:directed="1"/>
      <edge id="2322" label="zzzz151,zzzzz43" source="113" target="163" cy:directed="1"/>
      <edge id="2321" label="zzzz151,zzzzz56" source="113" target="176" cy:directed="1"/>
      <edge id="2320" label="zzzz151,zzzzz40" source="113" target="160" cy:directed="1"/>
      <edge id="2319" label="zzzz151,zzzzz89" source="113" target="209" cy:directed="1"/>
      <edge id="2318" label="zzzz151,zzzzz87" source="113" target="207" cy:directed="1"/>
      <edge id="2317" label="zzzz151,zzzzz88" source="113" target="208" cy:directed="1"/>
      <edge id="2316" label="zzzz151,zzzzzz2" source="113" target="222" cy:directed="1"/>
      <edge id="2315" label="zzzz151,zzzz158" source="113" target="120" cy:directed="1"/>
      <edge id="2314" label="zzzz151,zzzzzz0" source="113" target="220" cy:directed="1"/>
      <edge id="2313" label="zzzz151,zzzzzz6" source="113" target="226" cy:directed="1"/>
      <edge id="2312" label="zzzz151,zzzzzz8" source="113" target="228" cy:directed="1"/>
      <edge id="2311" label="zzzz151,zzzzz15" source="113" target="135" cy:directed="1"/>
      <edge id="2310" label="zzzz151,zzzzzz5" source="113" target="225" cy:directed="1"/>
      <edge id="2309" label="zzzz151,zzzzzz4" source="113" target="224" cy:directed="1"/>
      <edge id="2308" label="zzzz151,zzzz156" source="113" target="118" cy:directed="1"/>
      <edge id="2307" label="zzzz151,zzzzzz1" source="113" target="221" cy:directed="1"/>
      <edge id="2306" label="zzzz151,zzzzz16" source="113" target="136" cy:directed="1"/>
      <edge id="2305" label="zzzz151,zzzz154" source="113" target="116" cy:directed="1"/>
      <edge id="2304" label="zzzz151,zzzzz93" source="113" target="213" cy:directed="1"/>
      <edge id="2303" label="zzzz151,zzzz153" source="113" target="115" cy:directed="1"/>
      <edge id="2302" label="zzzz151,zzzzz12" source="113" target="132" cy:directed="1"/>
      <edge id="2301" label="zzzz151,zzzz157" source="113" target="119" cy:directed="1"/>
      <edge id="2300" label="zzzz151,zzzzzz7" source="113" target="227" cy:directed="1"/>
      <edge id="2299" label="zzzz151,zzzzz11" source="113" target="131" cy:directed="1"/>
      <edge id="2298" label="zzzz151,zzzz155" source="113" target="117" cy:directed="1"/>
      <edge id="2297" label="zzzz151,zzzzzz9" source="113" target="229" cy:directed="1"/>
      <edge id="2296" label="zzzz151,zzzzz17" source="113" target="137" cy:directed="1"/>
      <edge id="2295" label="zzzz151,zzzzz13" source="113" target="133" cy:directed="1"/>
      <edge id="2294" label="zzzz151,zzzzz10" source="113" target="130" cy:directed="1"/>
      <edge id="2293" label="zzzz151,zzzz152" source="113" target="114" cy:directed="1"/>
      <edge id="2292" label="zzzz150,zzzzz77" source="112" target="197" cy:directed="1"/>
      <edge id="2291" label="zzzz150,zzzzz58" source="112" target="178" cy:directed="1"/>
      <edge id="2290" label="zzzz150,zzzzz64" source="112" target="184" cy:directed="1"/>
      <edge id="2289" label="zzzz150,zzzzz40" source="112" target="160" cy:directed="1"/>
      <edge id="2288" label="zzzz150,zzzzz50" source="112" target="170" cy:directed="1"/>
      <edge id="2287" label="zzzz150,zzzzz34" source="112" target="154" cy:directed="1"/>
      <edge id="2286" label="zzzz150,zzzzz46" source="112" target="166" cy:directed="1"/>
      <edge id="2285" label="zzzz150,zzzzz54" source="112" target="174" cy:directed="1"/>
      <edge id="2284" label="zzzz150,zzzzz78" source="112" target="198" cy:directed="1"/>
      <edge id="2283" label="zzzz150,zzzzz67" source="112" target="187" cy:directed="1"/>
      <edge id="2282" label="zzzz150,zzzzz42" source="112" target="162" cy:directed="1"/>
      <edge id="2281" label="zzzz150,zzzzz72" source="112" target="192" cy:directed="1"/>
      <edge id="2280" label="zzzz150,zzzzz63" source="112" target="183" cy:directed="1"/>
      <edge id="2279" label="zzzz150,zzzzz73" source="112" target="193" cy:directed="1"/>
      <edge id="2278" label="zzzz150,zzzzz44" source="112" target="164" cy:directed="1"/>
      <edge id="2277" label="zzzz150,zzzzz68" source="112" target="188" cy:directed="1"/>
      <edge id="2276" label="zzzz150,zzzzz99" source="112" target="219" cy:directed="1"/>
      <edge id="2275" label="zzzz150,zzzzz71" source="112" target="191" cy:directed="1"/>
      <edge id="2274" label="zzzz150,zzzzz43" source="112" target="163" cy:directed="1"/>
      <edge id="2273" label="zzzz150,zzzzz56" source="112" target="176" cy:directed="1"/>
      <edge id="2272" label="zzzz150,zzzzz41" source="112" target="161" cy:directed="1"/>
      <edge id="2271" label="zzzz150,zzzzz60" source="112" target="180" cy:directed="1"/>
      <edge id="2270" label="zzzz150,zzzzz53" source="112" target="173" cy:directed="1"/>
      <edge id="2269" label="zzzz150,zzzzz47" source="112" target="167" cy:directed="1"/>
      <edge id="2268" label="zzzz150,zzzzz87" source="112" target="207" cy:directed="1"/>
      <edge id="2267" label="zzzz150,zzzzz55" source="112" target="175" cy:directed="1"/>
      <edge id="2266" label="zzzz150,zzzzz89" source="112" target="209" cy:directed="1"/>
      <edge id="2265" label="zzzz150,zzzzz88" source="112" target="208" cy:directed="1"/>
      <edge id="2264" label="zzzz150,zzzzzz8" source="112" target="228" cy:directed="1"/>
      <edge id="2263" label="zzzz150,zzzz158" source="112" target="120" cy:directed="1"/>
      <edge id="2262" label="zzzz150,zzzzzz6" source="112" target="226" cy:directed="1"/>
      <edge id="2261" label="zzzz150,zzzzzz5" source="112" target="225" cy:directed="1"/>
      <edge id="2260" label="zzzz150,zzzzzz2" source="112" target="222" cy:directed="1"/>
      <edge id="2259" label="zzzz150,zzzzzz0" source="112" target="220" cy:directed="1"/>
      <edge id="2258" label="zzzz150,zzzzz15" source="112" target="135" cy:directed="1"/>
      <edge id="2257" label="zzzz150,zzzzzz4" source="112" target="224" cy:directed="1"/>
      <edge id="2256" label="zzzz150,zzzzzz7" source="112" target="227" cy:directed="1"/>
      <edge id="2255" label="zzzz150,zzzzzz1" source="112" target="221" cy:directed="1"/>
      <edge id="2254" label="zzzz150,zzzzz93" source="112" target="213" cy:directed="1"/>
      <edge id="2253" label="zzzz150,zzzzz17" source="112" target="137" cy:directed="1"/>
      <edge id="2252" label="zzzz150,zzzzz16" source="112" target="136" cy:directed="1"/>
      <edge id="2251" label="zzzz150,zzzzz12" source="112" target="132" cy:directed="1"/>
      <edge id="2250" label="zzzz150,zzzzz11" source="112" target="131" cy:directed="1"/>
      <edge id="2249" label="zzzz150,zzzz152" source="112" target="114" cy:directed="1"/>
      <edge id="2248" label="zzzz150,zzzzz13" source="112" target="133" cy:directed="1"/>
      <edge id="2247" label="zzzz150,zzzz157" source="112" target="119" cy:directed="1"/>
      <edge id="2246" label="zzzz150,zzzzzz9" source="112" target="229" cy:directed="1"/>
      <edge id="2245" label="zzzz150,zzzzz10" source="112" target="130" cy:directed="1"/>
      <edge id="2244" label="zzzz150,zzzz151" source="112" target="113" cy:directed="1"/>
      <edge id="2243" label="zzzz150,zzzz156" source="112" target="118" cy:directed="1"/>
      <edge id="2242" label="zzzz150,zzzz154" source="112" target="116" cy:directed="1"/>
      <edge id="2241" label="zzzz150,zzzz153" source="112" target="115" cy:directed="1"/>
      <edge id="2240" label="zzzz150,zzzz155" source="112" target="117" cy:directed="1"/>
      <edge id="2239" label="zzzz149,zzzzz68" source="111" target="188" cy:directed="1"/>
      <edge id="2238" label="zzzz149,zzzzz32" source="111" target="152" cy:directed="1"/>
      <edge id="2237" label="zzzz149,zzzzz64" source="111" target="184" cy:directed="1"/>
      <edge id="2236" label="zzzz149,zzzzz75" source="111" target="195" cy:directed="1"/>
      <edge id="2235" label="zzzz149,zzzzz51" source="111" target="171" cy:directed="1"/>
      <edge id="2234" label="zzzz149,zzzzz73" source="111" target="193" cy:directed="1"/>
      <edge id="2233" label="zzzz149,zzzzz62" source="111" target="182" cy:directed="1"/>
      <edge id="2232" label="zzzz149,zzzzz41" source="111" target="161" cy:directed="1"/>
      <edge id="2231" label="zzzz149,zzzzz44" source="111" target="164" cy:directed="1"/>
      <edge id="2230" label="zzzz149,zzzzz72" source="111" target="192" cy:directed="1"/>
      <edge id="2229" label="zzzz149,zzzzz63" source="111" target="183" cy:directed="1"/>
      <edge id="2228" label="zzzz149,zzzzz78" source="111" target="198" cy:directed="1"/>
      <edge id="2227" label="zzzz149,zzzzz54" source="111" target="174" cy:directed="1"/>
      <edge id="2226" label="zzzz149,zzzzz53" source="111" target="173" cy:directed="1"/>
      <edge id="2225" label="zzzz149,zzzzz48" source="111" target="168" cy:directed="1"/>
      <edge id="2224" label="zzzz149,zzzzz58" source="111" target="178" cy:directed="1"/>
      <edge id="2223" label="zzzz149,zzzzz67" source="111" target="187" cy:directed="1"/>
      <edge id="2222" label="zzzz149,zzzzz76" source="111" target="196" cy:directed="1"/>
      <edge id="2221" label="zzzz149,zzzzz50" source="111" target="170" cy:directed="1"/>
      <edge id="2220" label="zzzz149,zzzzz60" source="111" target="180" cy:directed="1"/>
      <edge id="2219" label="zzzz149,zzzzz43" source="111" target="163" cy:directed="1"/>
      <edge id="2218" label="zzzz149,zzzzz71" source="111" target="191" cy:directed="1"/>
      <edge id="2217" label="zzzz149,zzzzz99" source="111" target="219" cy:directed="1"/>
      <edge id="2216" label="zzzz149,zzzzz55" source="111" target="175" cy:directed="1"/>
      <edge id="2215" label="zzzz149,zzzzz42" source="111" target="162" cy:directed="1"/>
      <edge id="2214" label="zzzz149,zzzzz56" source="111" target="176" cy:directed="1"/>
      <edge id="2213" label="zzzz149,zzzzz87" source="111" target="207" cy:directed="1"/>
      <edge id="2212" label="zzzz149,zzzzz89" source="111" target="209" cy:directed="1"/>
      <edge id="2211" label="zzzz149,zzzzz88" source="111" target="208" cy:directed="1"/>
      <edge id="2210" label="zzzz149,zzzz158" source="111" target="120" cy:directed="1"/>
      <edge id="2209" label="zzzz149,zzzzzz0" source="111" target="220" cy:directed="1"/>
      <edge id="2208" label="zzzz149,zzzzz15" source="111" target="135" cy:directed="1"/>
      <edge id="2207" label="zzzz149,zzzzzz5" source="111" target="225" cy:directed="1"/>
      <edge id="2206" label="zzzz149,zzzzzz2" source="111" target="222" cy:directed="1"/>
      <edge id="2205" label="zzzz149,zzzzzz6" source="111" target="226" cy:directed="1"/>
      <edge id="2204" label="zzzz149,zzzzzz8" source="111" target="228" cy:directed="1"/>
      <edge id="2203" label="zzzz149,zzzzzz4" source="111" target="224" cy:directed="1"/>
      <edge id="2202" label="zzzz149,zzzz154" source="111" target="116" cy:directed="1"/>
      <edge id="2201" label="zzzz149,zzzzz93" source="111" target="213" cy:directed="1"/>
      <edge id="2200" label="zzzz149,zzzzzz7" source="111" target="227" cy:directed="1"/>
      <edge id="2199" label="zzzz149,zzzzz17" source="111" target="137" cy:directed="1"/>
      <edge id="2198" label="zzzz149,zzzz156" source="111" target="118" cy:directed="1"/>
      <edge id="2197" label="zzzz149,zzzzzz1" source="111" target="221" cy:directed="1"/>
      <edge id="2196" label="zzzz149,zzzz155" source="111" target="117" cy:directed="1"/>
      <edge id="2195" label="zzzz149,zzzzz11" source="111" target="131" cy:directed="1"/>
      <edge id="2194" label="zzzz149,zzzzzz9" source="111" target="229" cy:directed="1"/>
      <edge id="2193" label="zzzz149,zzzzz16" source="111" target="136" cy:directed="1"/>
      <edge id="2192" label="zzzz149,zzzzz12" source="111" target="132" cy:directed="1"/>
      <edge id="2191" label="zzzz149,zzzzz13" source="111" target="133" cy:directed="1"/>
      <edge id="2190" label="zzzz149,zzzzz10" source="111" target="130" cy:directed="1"/>
      <edge id="2189" label="zzzz149,zzzz153" source="111" target="115" cy:directed="1"/>
      <edge id="2188" label="zzzz149,zzzz150" source="111" target="112" cy:directed="1"/>
      <edge id="2187" label="zzzz149,zzzz157" source="111" target="119" cy:directed="1"/>
      <edge id="2186" label="zzzz149,zzzz151" source="111" target="113" cy:directed="1"/>
      <edge id="2185" label="zzzz149,zzzz152" source="111" target="114" cy:directed="1"/>
      <edge id="2184" label="zzzz148,zzzzz42" source="110" target="162" cy:directed="1"/>
      <edge id="2183" label="zzzz148,zzzzz70" source="110" target="190" cy:directed="1"/>
      <edge id="2182" label="zzzz148,zzzzz50" source="110" target="170" cy:directed="1"/>
      <edge id="2181" label="zzzz148,zzzzz62" source="110" target="182" cy:directed="1"/>
      <edge id="2180" label="zzzz148,zzzzz76" source="110" target="196" cy:directed="1"/>
      <edge id="2179" label="zzzz148,zzzzz64" source="110" target="184" cy:directed="1"/>
      <edge id="2178" label="zzzz148,zzzzz29" source="110" target="149" cy:directed="1"/>
      <edge id="2177" label="zzzz148,zzzzz34" source="110" target="154" cy:directed="1"/>
      <edge id="2176" label="zzzz148,zzzzz44" source="110" target="164" cy:directed="1"/>
      <edge id="2175" label="zzzz148,zzzzz99" source="110" target="219" cy:directed="1"/>
      <edge id="2174" label="zzzz148,zzzzz55" source="110" target="175" cy:directed="1"/>
      <edge id="2173" label="zzzz148,zzzzz78" source="110" target="198" cy:directed="1"/>
      <edge id="2172" label="zzzz148,zzzzz72" source="110" target="192" cy:directed="1"/>
      <edge id="2171" label="zzzz148,zzzzz58" source="110" target="178" cy:directed="1"/>
      <edge id="2170" label="zzzz148,zzzzz53" source="110" target="173" cy:directed="1"/>
      <edge id="2169" label="zzzz148,zzzzz73" source="110" target="193" cy:directed="1"/>
      <edge id="2168" label="zzzz148,zzzzz56" source="110" target="176" cy:directed="1"/>
      <edge id="2167" label="zzzz148,zzzzz68" source="110" target="188" cy:directed="1"/>
      <edge id="2166" label="zzzz148,zzzzz67" source="110" target="187" cy:directed="1"/>
      <edge id="2165" label="zzzz148,zzzzz46" source="110" target="166" cy:directed="1"/>
      <edge id="2164" label="zzzz148,zzzzz71" source="110" target="191" cy:directed="1"/>
      <edge id="2163" label="zzzz148,zzzzz54" source="110" target="174" cy:directed="1"/>
      <edge id="2162" label="zzzz148,zzzzz41" source="110" target="161" cy:directed="1"/>
      <edge id="2161" label="zzzz148,zzzzz60" source="110" target="180" cy:directed="1"/>
      <edge id="2160" label="zzzz148,zzzzz43" source="110" target="163" cy:directed="1"/>
      <edge id="2159" label="zzzz148,zzzzz47" source="110" target="167" cy:directed="1"/>
      <edge id="2158" label="zzzz148,zzzzz87" source="110" target="207" cy:directed="1"/>
      <edge id="2157" label="zzzz148,zzzzz89" source="110" target="209" cy:directed="1"/>
      <edge id="2156" label="zzzz148,zzzzz88" source="110" target="208" cy:directed="1"/>
      <edge id="2155" label="zzzz148,zzzzz15" source="110" target="135" cy:directed="1"/>
      <edge id="2154" label="zzzz148,zzzzzz2" source="110" target="222" cy:directed="1"/>
      <edge id="2153" label="zzzz148,zzzzzz5" source="110" target="225" cy:directed="1"/>
      <edge id="2152" label="zzzz148,zzzzzz8" source="110" target="228" cy:directed="1"/>
      <edge id="2151" label="zzzz148,zzzz158" source="110" target="120" cy:directed="1"/>
      <edge id="2150" label="zzzz148,zzzzzz6" source="110" target="226" cy:directed="1"/>
      <edge id="2149" label="zzzz148,zzzzzz4" source="110" target="224" cy:directed="1"/>
      <edge id="2148" label="zzzz148,zzzzzz0" source="110" target="220" cy:directed="1"/>
      <edge id="2147" label="zzzz148,zzzz156" source="110" target="118" cy:directed="1"/>
      <edge id="2146" label="zzzz148,zzzzzz7" source="110" target="227" cy:directed="1"/>
      <edge id="2145" label="zzzz148,zzzzz11" source="110" target="131" cy:directed="1"/>
      <edge id="2144" label="zzzz148,zzzzz13" source="110" target="133" cy:directed="1"/>
      <edge id="2143" label="zzzz148,zzzzz16" source="110" target="136" cy:directed="1"/>
      <edge id="2142" label="zzzz148,zzzzz12" source="110" target="132" cy:directed="1"/>
      <edge id="2141" label="zzzz148,zzzzz10" source="110" target="130" cy:directed="1"/>
      <edge id="2140" label="zzzz148,zzzz157" source="110" target="119" cy:directed="1"/>
      <edge id="2139" label="zzzz148,zzzz150" source="110" target="112" cy:directed="1"/>
      <edge id="2138" label="zzzz148,zzzzz93" source="110" target="213" cy:directed="1"/>
      <edge id="2137" label="zzzz148,zzzzz17" source="110" target="137" cy:directed="1"/>
      <edge id="2136" label="zzzz148,zzzzzz9" source="110" target="229" cy:directed="1"/>
      <edge id="2135" label="zzzz148,zzzz154" source="110" target="116" cy:directed="1"/>
      <edge id="2134" label="zzzz148,zzzz153" source="110" target="115" cy:directed="1"/>
      <edge id="2133" label="zzzz148,zzzzzz1" source="110" target="221" cy:directed="1"/>
      <edge id="2132" label="zzzz148,zzzz155" source="110" target="117" cy:directed="1"/>
      <edge id="2131" label="zzzz148,zzzz152" source="110" target="114" cy:directed="1"/>
      <edge id="2130" label="zzzz148,zzzz151" source="110" target="113" cy:directed="1"/>
      <edge id="2129" label="zzzz148,zzzz149" source="110" target="111" cy:directed="1"/>
      <edge id="2128" label="zzzz147,zzzzz76" source="109" target="196" cy:directed="1"/>
      <edge id="2127" label="zzzz147,zzzzz75" source="109" target="195" cy:directed="1"/>
      <edge id="2126" label="zzzz147,zzzzz78" source="109" target="198" cy:directed="1"/>
      <edge id="2125" label="zzzz147,zzzzz40" source="109" target="160" cy:directed="1"/>
      <edge id="2124" label="zzzz147,zzzzz67" source="109" target="187" cy:directed="1"/>
      <edge id="2123" label="zzzz147,zzzzz46" source="109" target="166" cy:directed="1"/>
      <edge id="2122" label="zzzz147,zzzzz68" source="109" target="188" cy:directed="1"/>
      <edge id="2121" label="zzzz147,zzzzz48" source="109" target="168" cy:directed="1"/>
      <edge id="2120" label="zzzz147,zzzzz56" source="109" target="176" cy:directed="1"/>
      <edge id="2119" label="zzzz147,zzzzz51" source="109" target="171" cy:directed="1"/>
      <edge id="2118" label="zzzz147,zzzzz47" source="109" target="167" cy:directed="1"/>
      <edge id="2117" label="zzzz147,zzzzz73" source="109" target="193" cy:directed="1"/>
      <edge id="2116" label="zzzz147,zzzzz55" source="109" target="175" cy:directed="1"/>
      <edge id="2115" label="zzzz147,zzzzz44" source="109" target="164" cy:directed="1"/>
      <edge id="2114" label="zzzz147,zzzzz60" source="109" target="180" cy:directed="1"/>
      <edge id="2113" label="zzzz147,zzzzz43" source="109" target="163" cy:directed="1"/>
      <edge id="2112" label="zzzz147,zzzzz41" source="109" target="161" cy:directed="1"/>
      <edge id="2111" label="zzzz147,zzzzz71" source="109" target="191" cy:directed="1"/>
      <edge id="2110" label="zzzz147,zzzzz72" source="109" target="192" cy:directed="1"/>
      <edge id="2109" label="zzzz147,zzzzz99" source="109" target="219" cy:directed="1"/>
      <edge id="2108" label="zzzz147,zzzzz42" source="109" target="162" cy:directed="1"/>
      <edge id="2107" label="zzzz147,zzzzz87" source="109" target="207" cy:directed="1"/>
      <edge id="2106" label="zzzz147,zzzzz89" source="109" target="209" cy:directed="1"/>
      <edge id="2105" label="zzzz147,zzzzz88" source="109" target="208" cy:directed="1"/>
      <edge id="2104" label="zzzz147,zzzzz15" source="109" target="135" cy:directed="1"/>
      <edge id="2103" label="zzzz147,zzzzzz2" source="109" target="222" cy:directed="1"/>
      <edge id="2102" label="zzzz147,zzzz158" source="109" target="120" cy:directed="1"/>
      <edge id="2101" label="zzzz147,zzzzzz8" source="109" target="228" cy:directed="1"/>
      <edge id="2100" label="zzzz147,zzzzzz0" source="109" target="220" cy:directed="1"/>
      <edge id="2099" label="zzzz147,zzzzzz5" source="109" target="225" cy:directed="1"/>
      <edge id="2098" label="zzzz147,zzzzzz6" source="109" target="226" cy:directed="1"/>
      <edge id="2097" label="zzzz147,zzzzzz4" source="109" target="224" cy:directed="1"/>
      <edge id="2096" label="zzzz147,zzzz156" source="109" target="118" cy:directed="1"/>
      <edge id="2095" label="zzzz147,zzzzzz7" source="109" target="227" cy:directed="1"/>
      <edge id="2094" label="zzzz147,zzzzz11" source="109" target="131" cy:directed="1"/>
      <edge id="2093" label="zzzz147,zzzzzz9" source="109" target="229" cy:directed="1"/>
      <edge id="2092" label="zzzz147,zzzzz12" source="109" target="132" cy:directed="1"/>
      <edge id="2091" label="zzzz147,zzzz154" source="109" target="116" cy:directed="1"/>
      <edge id="2090" label="zzzz147,zzzzz16" source="109" target="136" cy:directed="1"/>
      <edge id="2089" label="zzzz147,zzzzz10" source="109" target="130" cy:directed="1"/>
      <edge id="2088" label="zzzz147,zzzz150" source="109" target="112" cy:directed="1"/>
      <edge id="2087" label="zzzz147,zzzz157" source="109" target="119" cy:directed="1"/>
      <edge id="2086" label="zzzz147,zzzz155" source="109" target="117" cy:directed="1"/>
      <edge id="2085" label="zzzz147,zzzzz93" source="109" target="213" cy:directed="1"/>
      <edge id="2084" label="zzzz147,zzzzz17" source="109" target="137" cy:directed="1"/>
      <edge id="2083" label="zzzz147,zzzzzz1" source="109" target="221" cy:directed="1"/>
      <edge id="2082" label="zzzz147,zzzz153" source="109" target="115" cy:directed="1"/>
      <edge id="2081" label="zzzz147,zzzzz13" source="109" target="133" cy:directed="1"/>
      <edge id="2080" label="zzzz147,zzzz152" source="109" target="114" cy:directed="1"/>
      <edge id="2079" label="zzzz147,zzzz151" source="109" target="113" cy:directed="1"/>
      <edge id="2078" label="zzzz147,zzzz148" source="109" target="110" cy:directed="1"/>
      <edge id="2077" label="zzzz147,zzzz149" source="109" target="111" cy:directed="1"/>
      <edge id="2076" label="zzzz146,zzzzz54" source="108" target="174" cy:directed="1"/>
      <edge id="2075" label="zzzz146,zzzzz62" source="108" target="182" cy:directed="1"/>
      <edge id="2074" label="zzzz146,zzzzz42" source="108" target="162" cy:directed="1"/>
      <edge id="2073" label="zzzz146,zzzzz99" source="108" target="219" cy:directed="1"/>
      <edge id="2072" label="zzzz146,zzzzz58" source="108" target="178" cy:directed="1"/>
      <edge id="2071" label="zzzz146,zzzzz40" source="108" target="160" cy:directed="1"/>
      <edge id="2070" label="zzzz146,zzzzz64" source="108" target="184" cy:directed="1"/>
      <edge id="2069" label="zzzz146,zzzzz50" source="108" target="170" cy:directed="1"/>
      <edge id="2068" label="zzzz146,zzzzz46" source="108" target="166" cy:directed="1"/>
      <edge id="2067" label="zzzz146,zzzzz67" source="108" target="187" cy:directed="1"/>
      <edge id="2066" label="zzzz146,zzzzz78" source="108" target="198" cy:directed="1"/>
      <edge id="2065" label="zzzz146,zzzzz68" source="108" target="188" cy:directed="1"/>
      <edge id="2064" label="zzzz146,zzzzz44" source="108" target="164" cy:directed="1"/>
      <edge id="2063" label="zzzz146,zzzzz55" source="108" target="175" cy:directed="1"/>
      <edge id="2062" label="zzzz146,zzzzz53" source="108" target="173" cy:directed="1"/>
      <edge id="2061" label="zzzz146,zzzzz72" source="108" target="192" cy:directed="1"/>
      <edge id="2060" label="zzzz146,zzzzz71" source="108" target="191" cy:directed="1"/>
      <edge id="2059" label="zzzz146,zzzzz47" source="108" target="167" cy:directed="1"/>
      <edge id="2058" label="zzzz146,zzzzz73" source="108" target="193" cy:directed="1"/>
      <edge id="2057" label="zzzz146,zzzzz56" source="108" target="176" cy:directed="1"/>
      <edge id="2056" label="zzzz146,zzzzz43" source="108" target="163" cy:directed="1"/>
      <edge id="2055" label="zzzz146,zzzzz60" source="108" target="180" cy:directed="1"/>
      <edge id="2054" label="zzzz146,zzzzz87" source="108" target="207" cy:directed="1"/>
      <edge id="2053" label="zzzz146,zzzzz41" source="108" target="161" cy:directed="1"/>
      <edge id="2052" label="zzzz146,zzzzz89" source="108" target="209" cy:directed="1"/>
      <edge id="2051" label="zzzz146,zzzzz88" source="108" target="208" cy:directed="1"/>
      <edge id="2050" label="zzzz146,zzzzzz5" source="108" target="225" cy:directed="1"/>
      <edge id="2049" label="zzzz146,zzzzz15" source="108" target="135" cy:directed="1"/>
      <edge id="2048" label="zzzz146,zzzzzz8" source="108" target="228" cy:directed="1"/>
      <edge id="2047" label="zzzz146,zzzz158" source="108" target="120" cy:directed="1"/>
      <edge id="2046" label="zzzz146,zzzzzz2" source="108" target="222" cy:directed="1"/>
      <edge id="2045" label="zzzz146,zzzzzz0" source="108" target="220" cy:directed="1"/>
      <edge id="2044" label="zzzz146,zzzzzz6" source="108" target="226" cy:directed="1"/>
      <edge id="2043" label="zzzz146,zzzzzz1" source="108" target="221" cy:directed="1"/>
      <edge id="2042" label="zzzz146,zzzzz93" source="108" target="213" cy:directed="1"/>
      <edge id="2041" label="zzzz146,zzzz156" source="108" target="118" cy:directed="1"/>
      <edge id="2040" label="zzzz146,zzzz154" source="108" target="116" cy:directed="1"/>
      <edge id="2039" label="zzzz146,zzzz147" source="108" target="109" cy:directed="1"/>
      <edge id="2038" label="zzzz146,zzzzzz4" source="108" target="224" cy:directed="1"/>
      <edge id="2037" label="zzzz146,zzzzz17" source="108" target="137" cy:directed="1"/>
      <edge id="2036" label="zzzz146,zzzz150" source="108" target="112" cy:directed="1"/>
      <edge id="2035" label="zzzz146,zzzz153" source="108" target="115" cy:directed="1"/>
      <edge id="2034" label="zzzz146,zzzzz10" source="108" target="130" cy:directed="1"/>
      <edge id="2033" label="zzzz146,zzzz155" source="108" target="117" cy:directed="1"/>
      <edge id="2032" label="zzzz146,zzzz149" source="108" target="111" cy:directed="1"/>
      <edge id="2031" label="zzzz146,zzzzzz9" source="108" target="229" cy:directed="1"/>
      <edge id="2030" label="zzzz146,zzzz157" source="108" target="119" cy:directed="1"/>
      <edge id="2029" label="zzzz146,zzzzz11" source="108" target="131" cy:directed="1"/>
      <edge id="2028" label="zzzz146,zzzz151" source="108" target="113" cy:directed="1"/>
      <edge id="2027" label="zzzz146,zzzzzz7" source="108" target="227" cy:directed="1"/>
      <edge id="2026" label="zzzz146,zzzzz16" source="108" target="136" cy:directed="1"/>
      <edge id="2025" label="zzzz146,zzzzz12" source="108" target="132" cy:directed="1"/>
      <edge id="2024" label="zzzz146,zzzz148" source="108" target="110" cy:directed="1"/>
      <edge id="2023" label="zzzz146,zzzz152" source="108" target="114" cy:directed="1"/>
      <edge id="2022" label="zzzz146,zzzzz13" source="108" target="133" cy:directed="1"/>
      <edge id="2021" label="zzzz145,zzzzz29" source="107" target="149" cy:directed="1"/>
      <edge id="2020" label="zzzz145,zzzzz70" source="107" target="190" cy:directed="1"/>
      <edge id="2019" label="zzzz145,zzzzz42" source="107" target="162" cy:directed="1"/>
      <edge id="2018" label="zzzz145,zzzzz54" source="107" target="174" cy:directed="1"/>
      <edge id="2017" label="zzzz145,zzzzz78" source="107" target="198" cy:directed="1"/>
      <edge id="2016" label="zzzz145,zzzzz64" source="107" target="184" cy:directed="1"/>
      <edge id="2015" label="zzzz145,zzzzz99" source="107" target="219" cy:directed="1"/>
      <edge id="2014" label="zzzz145,zzzzz50" source="107" target="170" cy:directed="1"/>
      <edge id="2013" label="zzzz145,zzzzz67" source="107" target="187" cy:directed="1"/>
      <edge id="2012" label="zzzz145,zzzzz46" source="107" target="166" cy:directed="1"/>
      <edge id="2011" label="zzzz145,zzzzz72" source="107" target="192" cy:directed="1"/>
      <edge id="2010" label="zzzz145,zzzzz73" source="107" target="193" cy:directed="1"/>
      <edge id="2009" label="zzzz145,zzzzz56" source="107" target="176" cy:directed="1"/>
      <edge id="2008" label="zzzz145,zzzzz68" source="107" target="188" cy:directed="1"/>
      <edge id="2007" label="zzzz145,zzzzz55" source="107" target="175" cy:directed="1"/>
      <edge id="2006" label="zzzz145,zzzzz44" source="107" target="164" cy:directed="1"/>
      <edge id="2005" label="zzzz145,zzzzz41" source="107" target="161" cy:directed="1"/>
      <edge id="2004" label="zzzz145,zzzzz34" source="107" target="154" cy:directed="1"/>
      <edge id="2003" label="zzzz145,zzzzz43" source="107" target="163" cy:directed="1"/>
      <edge id="2002" label="zzzz145,zzzzz47" source="107" target="167" cy:directed="1"/>
      <edge id="2001" label="zzzz145,zzzzz71" source="107" target="191" cy:directed="1"/>
      <edge id="2000" label="zzzz145,zzzzz89" source="107" target="209" cy:directed="1"/>
      <edge id="1999" label="zzzz145,zzzzz60" source="107" target="180" cy:directed="1"/>
      <edge id="1998" label="zzzz145,zzzzz53" source="107" target="173" cy:directed="1"/>
      <edge id="1997" label="zzzz145,zzzzz87" source="107" target="207" cy:directed="1"/>
      <edge id="1996" label="zzzz145,zzzzz88" source="107" target="208" cy:directed="1"/>
      <edge id="1995" label="zzzz145,zzzz158" source="107" target="120" cy:directed="1"/>
      <edge id="1994" label="zzzz145,zzzzzz5" source="107" target="225" cy:directed="1"/>
      <edge id="1993" label="zzzz145,zzzzzz0" source="107" target="220" cy:directed="1"/>
      <edge id="1992" label="zzzz145,zzzzzz8" source="107" target="228" cy:directed="1"/>
      <edge id="1991" label="zzzz145,zzzzzz2" source="107" target="222" cy:directed="1"/>
      <edge id="1990" label="zzzz145,zzzzz15" source="107" target="135" cy:directed="1"/>
      <edge id="1989" label="zzzz145,zzzzzz6" source="107" target="226" cy:directed="1"/>
      <edge id="1988" label="zzzz145,zzzzzz1" source="107" target="221" cy:directed="1"/>
      <edge id="1987" label="zzzz145,zzzz147" source="107" target="109" cy:directed="1"/>
      <edge id="1986" label="zzzz145,zzzz149" source="107" target="111" cy:directed="1"/>
      <edge id="1985" label="zzzz145,zzzzzz4" source="107" target="224" cy:directed="1"/>
      <edge id="1984" label="zzzz145,zzzz156" source="107" target="118" cy:directed="1"/>
      <edge id="1983" label="zzzz145,zzzz146" source="107" target="108" cy:directed="1"/>
      <edge id="1982" label="zzzz145,zzzz148" source="107" target="110" cy:directed="1"/>
      <edge id="1981" label="zzzz145,zzzzz93" source="107" target="213" cy:directed="1"/>
      <edge id="1980" label="zzzz145,zzzz157" source="107" target="119" cy:directed="1"/>
      <edge id="1979" label="zzzz145,zzzzz17" source="107" target="137" cy:directed="1"/>
      <edge id="1978" label="zzzz145,zzzz151" source="107" target="113" cy:directed="1"/>
      <edge id="1977" label="zzzz145,zzzzz16" source="107" target="136" cy:directed="1"/>
      <edge id="1976" label="zzzz145,zzzzz12" source="107" target="132" cy:directed="1"/>
      <edge id="1975" label="zzzz145,zzzz154" source="107" target="116" cy:directed="1"/>
      <edge id="1974" label="zzzz145,zzzz150" source="107" target="112" cy:directed="1"/>
      <edge id="1973" label="zzzz145,zzzzzz7" source="107" target="227" cy:directed="1"/>
      <edge id="1972" label="zzzz145,zzzz152" source="107" target="114" cy:directed="1"/>
      <edge id="1971" label="zzzz145,zzzzz10" source="107" target="130" cy:directed="1"/>
      <edge id="1970" label="zzzz145,zzzzzz9" source="107" target="229" cy:directed="1"/>
      <edge id="1969" label="zzzz145,zzzz155" source="107" target="117" cy:directed="1"/>
      <edge id="1968" label="zzzz145,zzzzz13" source="107" target="133" cy:directed="1"/>
      <edge id="1967" label="zzzz145,zzzzz11" source="107" target="131" cy:directed="1"/>
      <edge id="1966" label="zzzz145,zzzz153" source="107" target="115" cy:directed="1"/>
      <edge id="1965" label="zzzz144,zzzzz40" source="106" target="160" cy:directed="1"/>
      <edge id="1964" label="zzzz144,zzzzz42" source="106" target="162" cy:directed="1"/>
      <edge id="1963" label="zzzz144,zzzzz34" source="106" target="154" cy:directed="1"/>
      <edge id="1962" label="zzzz144,zzzzz41" source="106" target="161" cy:directed="1"/>
      <edge id="1961" label="zzzz144,zzzzz58" source="106" target="178" cy:directed="1"/>
      <edge id="1960" label="zzzz144,zzzzz55" source="106" target="175" cy:directed="1"/>
      <edge id="1959" label="zzzz144,zzzzz54" source="106" target="174" cy:directed="1"/>
      <edge id="1958" label="zzzz144,zzzzz46" source="106" target="166" cy:directed="1"/>
      <edge id="1957" label="zzzz144,zzzzz67" source="106" target="187" cy:directed="1"/>
      <edge id="1956" label="zzzz144,zzzzz64" source="106" target="184" cy:directed="1"/>
      <edge id="1955" label="zzzz144,zzzzz43" source="106" target="163" cy:directed="1"/>
      <edge id="1954" label="zzzz144,zzzzz99" source="106" target="219" cy:directed="1"/>
      <edge id="1953" label="zzzz144,zzzzz72" source="106" target="192" cy:directed="1"/>
      <edge id="1952" label="zzzz144,zzzzz68" source="106" target="188" cy:directed="1"/>
      <edge id="1951" label="zzzz144,zzzzz50" source="106" target="170" cy:directed="1"/>
      <edge id="1950" label="zzzz144,zzzzz44" source="106" target="164" cy:directed="1"/>
      <edge id="1949" label="zzzz144,zzzzz56" source="106" target="176" cy:directed="1"/>
      <edge id="1948" label="zzzz144,zzzzz53" source="106" target="173" cy:directed="1"/>
      <edge id="1947" label="zzzz144,zzzzz71" source="106" target="191" cy:directed="1"/>
      <edge id="1946" label="zzzz144,zzzzz60" source="106" target="180" cy:directed="1"/>
      <edge id="1945" label="zzzz144,zzzzz47" source="106" target="167" cy:directed="1"/>
      <edge id="1944" label="zzzz144,zzzzz89" source="106" target="209" cy:directed="1"/>
      <edge id="1943" label="zzzz144,zzzzz87" source="106" target="207" cy:directed="1"/>
      <edge id="1942" label="zzzz144,zzzzzz5" source="106" target="225" cy:directed="1"/>
      <edge id="1941" label="zzzz144,zzzzzz8" source="106" target="228" cy:directed="1"/>
      <edge id="1940" label="zzzz144,zzzzz88" source="106" target="208" cy:directed="1"/>
      <edge id="1939" label="zzzz144,zzzzz15" source="106" target="135" cy:directed="1"/>
      <edge id="1938" label="zzzz144,zzzz158" source="106" target="120" cy:directed="1"/>
      <edge id="1937" label="zzzz144,zzzzzz2" source="106" target="222" cy:directed="1"/>
      <edge id="1936" label="zzzz144,zzzzzz0" source="106" target="220" cy:directed="1"/>
      <edge id="1935" label="zzzz144,zzzzzz6" source="106" target="226" cy:directed="1"/>
      <edge id="1934" label="zzzz144,zzzzzz4" source="106" target="224" cy:directed="1"/>
      <edge id="1933" label="zzzz144,zzzzzz1" source="106" target="221" cy:directed="1"/>
      <edge id="1932" label="zzzz144,zzzzz17" source="106" target="137" cy:directed="1"/>
      <edge id="1931" label="zzzz144,zzzzz93" source="106" target="213" cy:directed="1"/>
      <edge id="1930" label="zzzz144,zzzzz16" source="106" target="136" cy:directed="1"/>
      <edge id="1929" label="zzzz144,zzzz146" source="106" target="108" cy:directed="1"/>
      <edge id="1928" label="zzzz144,zzzzz12" source="106" target="132" cy:directed="1"/>
      <edge id="1927" label="zzzz144,zzzz147" source="106" target="109" cy:directed="1"/>
      <edge id="1926" label="zzzz144,zzzz151" source="106" target="113" cy:directed="1"/>
      <edge id="1925" label="zzzz144,zzzzz11" source="106" target="131" cy:directed="1"/>
      <edge id="1924" label="zzzz144,zzzz157" source="106" target="119" cy:directed="1"/>
      <edge id="1923" label="zzzz144,zzzzz10" source="106" target="130" cy:directed="1"/>
      <edge id="1922" label="zzzz144,zzzz150" source="106" target="112" cy:directed="1"/>
      <edge id="1921" label="zzzz144,zzzz156" source="106" target="118" cy:directed="1"/>
      <edge id="1920" label="zzzz144,zzzzzz9" source="106" target="229" cy:directed="1"/>
      <edge id="1919" label="zzzz144,zzzzzz7" source="106" target="227" cy:directed="1"/>
      <edge id="1918" label="zzzz144,zzzz154" source="106" target="116" cy:directed="1"/>
      <edge id="1917" label="zzzz144,zzzz152" source="106" target="114" cy:directed="1"/>
      <edge id="1916" label="zzzz144,zzzz149" source="106" target="111" cy:directed="1"/>
      <edge id="1915" label="zzzz144,zzzzz13" source="106" target="133" cy:directed="1"/>
      <edge id="1914" label="zzzz144,zzzz153" source="106" target="115" cy:directed="1"/>
      <edge id="1913" label="zzzz144,zzzz155" source="106" target="117" cy:directed="1"/>
      <edge id="1912" label="zzzz144,zzzz148" source="106" target="110" cy:directed="1"/>
      <edge id="1911" label="zzzz144,zzzz145" source="106" target="107" cy:directed="1"/>
      <edge id="1910" label="zzzz143,zzzzz51" source="105" target="171" cy:directed="1"/>
      <edge id="1909" label="zzzz143,zzzzz47" source="105" target="167" cy:directed="1"/>
      <edge id="1908" label="zzzz143,zzzzz78" source="105" target="198" cy:directed="1"/>
      <edge id="1907" label="zzzz143,zzzzz46" source="105" target="166" cy:directed="1"/>
      <edge id="1906" label="zzzz143,zzzzz42" source="105" target="162" cy:directed="1"/>
      <edge id="1905" label="zzzz143,zzzzz41" source="105" target="161" cy:directed="1"/>
      <edge id="1904" label="zzzz143,zzzzz99" source="105" target="219" cy:directed="1"/>
      <edge id="1903" label="zzzz143,zzzzz67" source="105" target="187" cy:directed="1"/>
      <edge id="1902" label="zzzz143,zzzzz44" source="105" target="164" cy:directed="1"/>
      <edge id="1901" label="zzzz143,zzzzz53" source="105" target="173" cy:directed="1"/>
      <edge id="1900" label="zzzz143,zzzzz72" source="105" target="192" cy:directed="1"/>
      <edge id="1899" label="zzzz143,zzzzz55" source="105" target="175" cy:directed="1"/>
      <edge id="1898" label="zzzz143,zzzzz73" source="105" target="193" cy:directed="1"/>
      <edge id="1897" label="zzzz143,zzzzz60" source="105" target="180" cy:directed="1"/>
      <edge id="1896" label="zzzz143,zzzzz43" source="105" target="163" cy:directed="1"/>
      <edge id="1895" label="zzzz143,zzzzz56" source="105" target="176" cy:directed="1"/>
      <edge id="1894" label="zzzz143,zzzzz89" source="105" target="209" cy:directed="1"/>
      <edge id="1893" label="zzzz143,zzzzz87" source="105" target="207" cy:directed="1"/>
      <edge id="1892" label="zzzz143,zzzzz88" source="105" target="208" cy:directed="1"/>
      <edge id="1891" label="zzzz143,zzzzzz2" source="105" target="222" cy:directed="1"/>
      <edge id="1890" label="zzzz143,zzzzzz8" source="105" target="228" cy:directed="1"/>
      <edge id="1889" label="zzzz143,zzzz158" source="105" target="120" cy:directed="1"/>
      <edge id="1888" label="zzzz143,zzzzz15" source="105" target="135" cy:directed="1"/>
      <edge id="1887" label="zzzz143,zzzzzz0" source="105" target="220" cy:directed="1"/>
      <edge id="1886" label="zzzz143,zzzzzz5" source="105" target="225" cy:directed="1"/>
      <edge id="1885" label="zzzz143,zzzzzz6" source="105" target="226" cy:directed="1"/>
      <edge id="1884" label="zzzz143,zzzz148" source="105" target="110" cy:directed="1"/>
      <edge id="1883" label="zzzz143,zzzzzz1" source="105" target="221" cy:directed="1"/>
      <edge id="1882" label="zzzz143,zzzz147" source="105" target="109" cy:directed="1"/>
      <edge id="1881" label="zzzz143,zzzzz93" source="105" target="213" cy:directed="1"/>
      <edge id="1880" label="zzzz143,zzzz154" source="105" target="116" cy:directed="1"/>
      <edge id="1879" label="zzzz143,zzzzzz4" source="105" target="224" cy:directed="1"/>
      <edge id="1878" label="zzzz143,zzzz156" source="105" target="118" cy:directed="1"/>
      <edge id="1877" label="zzzz143,zzzz149" source="105" target="111" cy:directed="1"/>
      <edge id="1876" label="zzzz143,zzzzz16" source="105" target="136" cy:directed="1"/>
      <edge id="1875" label="zzzz143,zzzz150" source="105" target="112" cy:directed="1"/>
      <edge id="1874" label="zzzz143,zzzz152" source="105" target="114" cy:directed="1"/>
      <edge id="1873" label="zzzz143,zzzz157" source="105" target="119" cy:directed="1"/>
      <edge id="1872" label="zzzz143,zzzz144" source="105" target="106" cy:directed="1"/>
      <edge id="1871" label="zzzz143,zzzz151" source="105" target="113" cy:directed="1"/>
      <edge id="1870" label="zzzz143,zzzz153" source="105" target="115" cy:directed="1"/>
      <edge id="1869" label="zzzz143,zzzz146" source="105" target="108" cy:directed="1"/>
      <edge id="1868" label="zzzz143,zzzzz17" source="105" target="137" cy:directed="1"/>
      <edge id="1867" label="zzzz143,zzzz155" source="105" target="117" cy:directed="1"/>
      <edge id="1866" label="zzzz143,zzzz145" source="105" target="107" cy:directed="1"/>
      <edge id="1865" label="zzzz143,zzzzz12" source="105" target="132" cy:directed="1"/>
      <edge id="1864" label="zzzz143,zzzzz11" source="105" target="131" cy:directed="1"/>
      <edge id="1863" label="zzzz143,zzzzzz7" source="105" target="227" cy:directed="1"/>
      <edge id="1862" label="zzzz143,zzzzz10" source="105" target="130" cy:directed="1"/>
      <edge id="1861" label="zzzz143,zzzzz13" source="105" target="133" cy:directed="1"/>
      <edge id="1860" label="zzzz143,zzzzzz9" source="105" target="229" cy:directed="1"/>
      <edge id="1859" label="zzzz142,zzzzz46" source="104" target="166" cy:directed="1"/>
      <edge id="1858" label="zzzz142,zzzzz64" source="104" target="184" cy:directed="1"/>
      <edge id="1857" label="zzzz142,zzzzz61" source="104" target="181" cy:directed="1"/>
      <edge id="1856" label="zzzz142,zzzzz42" source="104" target="162" cy:directed="1"/>
      <edge id="1855" label="zzzz142,zzzzz29" source="104" target="149" cy:directed="1"/>
      <edge id="1854" label="zzzz142,zzzzz68" source="104" target="188" cy:directed="1"/>
      <edge id="1853" label="zzzz142,zzzzz55" source="104" target="175" cy:directed="1"/>
      <edge id="1852" label="zzzz142,zzzzz71" source="104" target="191" cy:directed="1"/>
      <edge id="1851" label="zzzz142,zzzzz44" source="104" target="164" cy:directed="1"/>
      <edge id="1850" label="zzzz142,zzzzz99" source="104" target="219" cy:directed="1"/>
      <edge id="1849" label="zzzz142,zzzzz73" source="104" target="193" cy:directed="1"/>
      <edge id="1848" label="zzzz142,zzzzz53" source="104" target="173" cy:directed="1"/>
      <edge id="1847" label="zzzz142,zzzzz60" source="104" target="180" cy:directed="1"/>
      <edge id="1846" label="zzzz142,zzzzz72" source="104" target="192" cy:directed="1"/>
      <edge id="1845" label="zzzz142,zzzzz43" source="104" target="163" cy:directed="1"/>
      <edge id="1844" label="zzzz142,zzzzz41" source="104" target="161" cy:directed="1"/>
      <edge id="1843" label="zzzz142,zzzzz89" source="104" target="209" cy:directed="1"/>
      <edge id="1842" label="zzzz142,zzzzz56" source="104" target="176" cy:directed="1"/>
      <edge id="1841" label="zzzz142,zzzzz87" source="104" target="207" cy:directed="1"/>
      <edge id="1840" label="zzzz142,zzzzz88" source="104" target="208" cy:directed="1"/>
      <edge id="1839" label="zzzz142,zzzzzz8" source="104" target="228" cy:directed="1"/>
      <edge id="1838" label="zzzz142,zzzz158" source="104" target="120" cy:directed="1"/>
      <edge id="1837" label="zzzz142,zzzzzz2" source="104" target="222" cy:directed="1"/>
      <edge id="1836" label="zzzz142,zzzzzz5" source="104" target="225" cy:directed="1"/>
      <edge id="1835" label="zzzz142,zzzzzz0" source="104" target="220" cy:directed="1"/>
      <edge id="1834" label="zzzz142,zzzzzz6" source="104" target="226" cy:directed="1"/>
      <edge id="1833" label="zzzz142,zzzzz15" source="104" target="135" cy:directed="1"/>
      <edge id="1832" label="zzzz142,zzzzzz1" source="104" target="221" cy:directed="1"/>
      <edge id="1831" label="zzzz142,zzzzz93" source="104" target="213" cy:directed="1"/>
      <edge id="1830" label="zzzz142,zzzzzz4" source="104" target="224" cy:directed="1"/>
      <edge id="1829" label="zzzz142,zzzz147" source="104" target="109" cy:directed="1"/>
      <edge id="1828" label="zzzz142,zzzz156" source="104" target="118" cy:directed="1"/>
      <edge id="1827" label="zzzz142,zzzz149" source="104" target="111" cy:directed="1"/>
      <edge id="1826" label="zzzz142,zzzz157" source="104" target="119" cy:directed="1"/>
      <edge id="1825" label="zzzz142,zzzz148" source="104" target="110" cy:directed="1"/>
      <edge id="1824" label="zzzz142,zzzz144" source="104" target="106" cy:directed="1"/>
      <edge id="1823" label="zzzz142,zzzzz17" source="104" target="137" cy:directed="1"/>
      <edge id="1822" label="zzzz142,zzzz154" source="104" target="116" cy:directed="1"/>
      <edge id="1821" label="zzzz142,zzzz153" source="104" target="115" cy:directed="1"/>
      <edge id="1820" label="zzzz142,zzzz151" source="104" target="113" cy:directed="1"/>
      <edge id="1819" label="zzzz142,zzzzz16" source="104" target="136" cy:directed="1"/>
      <edge id="1818" label="zzzz142,zzzz146" source="104" target="108" cy:directed="1"/>
      <edge id="1817" label="zzzz142,zzzz152" source="104" target="114" cy:directed="1"/>
      <edge id="1816" label="zzzz142,zzzz145" source="104" target="107" cy:directed="1"/>
      <edge id="1815" label="zzzz142,zzzz155" source="104" target="117" cy:directed="1"/>
      <edge id="1814" label="zzzz142,zzzz150" source="104" target="112" cy:directed="1"/>
      <edge id="1813" label="zzzz142,zzzz143" source="104" target="105" cy:directed="1"/>
      <edge id="1812" label="zzzz142,zzzzzz7" source="104" target="227" cy:directed="1"/>
      <edge id="1811" label="zzzz142,zzzzz12" source="104" target="132" cy:directed="1"/>
      <edge id="1810" label="zzzz142,zzzzz11" source="104" target="131" cy:directed="1"/>
      <edge id="1809" label="zzzz142,zzzzz13" source="104" target="133" cy:directed="1"/>
      <edge id="1808" label="zzzz142,zzzzzz9" source="104" target="229" cy:directed="1"/>
      <edge id="1807" label="zzzz142,zzzzz10" source="104" target="130" cy:directed="1"/>
      <edge id="1806" label="zzzz141,zzzzz75" source="103" target="195" cy:directed="1"/>
      <edge id="1805" label="zzzz141,zzzzz42" source="103" target="162" cy:directed="1"/>
      <edge id="1804" label="zzzz141,zzzzz34" source="103" target="154" cy:directed="1"/>
      <edge id="1803" label="zzzz141,zzzzz29" source="103" target="149" cy:directed="1"/>
      <edge id="1802" label="zzzz141,zzzzz50" source="103" target="170" cy:directed="1"/>
      <edge id="1801" label="zzzz141,zzzzz67" source="103" target="187" cy:directed="1"/>
      <edge id="1800" label="zzzz141,zzzzz46" source="103" target="166" cy:directed="1"/>
      <edge id="1799" label="zzzz141,zzzzz58" source="103" target="178" cy:directed="1"/>
      <edge id="1798" label="zzzz141,zzzzz64" source="103" target="184" cy:directed="1"/>
      <edge id="1797" label="zzzz141,zzzzz73" source="103" target="193" cy:directed="1"/>
      <edge id="1796" label="zzzz141,zzzzz99" source="103" target="219" cy:directed="1"/>
      <edge id="1795" label="zzzz141,zzzzz47" source="103" target="167" cy:directed="1"/>
      <edge id="1794" label="zzzz141,zzzzz89" source="103" target="209" cy:directed="1"/>
      <edge id="1793" label="zzzz141,zzzzz60" source="103" target="180" cy:directed="1"/>
      <edge id="1792" label="zzzz141,zzzzz43" source="103" target="163" cy:directed="1"/>
      <edge id="1791" label="zzzz141,zzzzz72" source="103" target="192" cy:directed="1"/>
      <edge id="1790" label="zzzz141,zzzzz71" source="103" target="191" cy:directed="1"/>
      <edge id="1789" label="zzzz141,zzzzz55" source="103" target="175" cy:directed="1"/>
      <edge id="1788" label="zzzz141,zzzzz53" source="103" target="173" cy:directed="1"/>
      <edge id="1787" label="zzzz141,zzzzz41" source="103" target="161" cy:directed="1"/>
      <edge id="1786" label="zzzz141,zzzzz44" source="103" target="164" cy:directed="1"/>
      <edge id="1785" label="zzzz141,zzzzz56" source="103" target="176" cy:directed="1"/>
      <edge id="1784" label="zzzz141,zzzzz87" source="103" target="207" cy:directed="1"/>
      <edge id="1783" label="zzzz141,zzzzz88" source="103" target="208" cy:directed="1"/>
      <edge id="1782" label="zzzz141,zzzz158" source="103" target="120" cy:directed="1"/>
      <edge id="1781" label="zzzz141,zzzzzz2" source="103" target="222" cy:directed="1"/>
      <edge id="1780" label="zzzz141,zzzzzz8" source="103" target="228" cy:directed="1"/>
      <edge id="1779" label="zzzz141,zzzzzz0" source="103" target="220" cy:directed="1"/>
      <edge id="1778" label="zzzz141,zzzzzz5" source="103" target="225" cy:directed="1"/>
      <edge id="1777" label="zzzz141,zzzzzz6" source="103" target="226" cy:directed="1"/>
      <edge id="1776" label="zzzz141,zzzzz15" source="103" target="135" cy:directed="1"/>
      <edge id="1775" label="zzzz141,zzzzzz1" source="103" target="221" cy:directed="1"/>
      <edge id="1774" label="zzzz141,zzzz150" source="103" target="112" cy:directed="1"/>
      <edge id="1773" label="zzzz141,zzzz149" source="103" target="111" cy:directed="1"/>
      <edge id="1772" label="zzzz141,zzzzzz4" source="103" target="224" cy:directed="1"/>
      <edge id="1771" label="zzzz141,zzzzz16" source="103" target="136" cy:directed="1"/>
      <edge id="1770" label="zzzz141,zzzz156" source="103" target="118" cy:directed="1"/>
      <edge id="1769" label="zzzz141,zzzz154" source="103" target="116" cy:directed="1"/>
      <edge id="1768" label="zzzz141,zzzz146" source="103" target="108" cy:directed="1"/>
      <edge id="1767" label="zzzz141,zzzz147" source="103" target="109" cy:directed="1"/>
      <edge id="1766" label="zzzz141,zzzz143" source="103" target="105" cy:directed="1"/>
      <edge id="1765" label="zzzz141,zzzzzz7" source="103" target="227" cy:directed="1"/>
      <edge id="1764" label="zzzz141,zzzz157" source="103" target="119" cy:directed="1"/>
      <edge id="1763" label="zzzz141,zzzz155" source="103" target="117" cy:directed="1"/>
      <edge id="1762" label="zzzz141,zzzzz93" source="103" target="213" cy:directed="1"/>
      <edge id="1761" label="zzzz141,zzzz142" source="103" target="104" cy:directed="1"/>
      <edge id="1760" label="zzzz141,zzzz153" source="103" target="115" cy:directed="1"/>
      <edge id="1759" label="zzzz141,zzzz145" source="103" target="107" cy:directed="1"/>
      <edge id="1758" label="zzzz141,zzzzzz9" source="103" target="229" cy:directed="1"/>
      <edge id="1757" label="zzzz141,zzzzz10" source="103" target="130" cy:directed="1"/>
      <edge id="1756" label="zzzz141,zzzz148" source="103" target="110" cy:directed="1"/>
      <edge id="1755" label="zzzz141,zzzzz11" source="103" target="131" cy:directed="1"/>
      <edge id="1754" label="zzzz141,zzzz152" source="103" target="114" cy:directed="1"/>
      <edge id="1753" label="zzzz141,zzzz144" source="103" target="106" cy:directed="1"/>
      <edge id="1752" label="zzzz141,zzzzz17" source="103" target="137" cy:directed="1"/>
      <edge id="1751" label="zzzz141,zzzzz13" source="103" target="133" cy:directed="1"/>
      <edge id="1750" label="zzzz141,zzzzz12" source="103" target="132" cy:directed="1"/>
      <edge id="1749" label="zzzz141,zzzz151" source="103" target="113" cy:directed="1"/>
      <edge id="1748" label="zzzz140,zzzzz67" source="102" target="187" cy:directed="1"/>
      <edge id="1747" label="zzzz140,zzzzz71" source="102" target="191" cy:directed="1"/>
      <edge id="1746" label="zzzz140,zzzzz56" source="102" target="176" cy:directed="1"/>
      <edge id="1745" label="zzzz140,zzzzz41" source="102" target="161" cy:directed="1"/>
      <edge id="1744" label="zzzz140,zzzzz55" source="102" target="175" cy:directed="1"/>
      <edge id="1743" label="zzzz140,zzzzz99" source="102" target="219" cy:directed="1"/>
      <edge id="1742" label="zzzz140,zzzzz87" source="102" target="207" cy:directed="1"/>
      <edge id="1741" label="zzzz140,zzzzz42" source="102" target="162" cy:directed="1"/>
      <edge id="1740" label="zzzz140,zzzzz89" source="102" target="209" cy:directed="1"/>
      <edge id="1739" label="zzzz140,zzzzz88" source="102" target="208" cy:directed="1"/>
      <edge id="1738" label="zzzz140,zzzzzz0" source="102" target="220" cy:directed="1"/>
      <edge id="1737" label="zzzz140,zzzz158" source="102" target="120" cy:directed="1"/>
      <edge id="1736" label="zzzz140,zzzzzz6" source="102" target="226" cy:directed="1"/>
      <edge id="1735" label="zzzz140,zzzz141" source="102" target="103" cy:directed="1"/>
      <edge id="1734" label="zzzz140,zzzzzz5" source="102" target="225" cy:directed="1"/>
      <edge id="1733" label="zzzz140,zzzz150" source="102" target="112" cy:directed="1"/>
      <edge id="1732" label="zzzz140,zzzzzz2" source="102" target="222" cy:directed="1"/>
      <edge id="1731" label="zzzz140,zzzzz15" source="102" target="135" cy:directed="1"/>
      <edge id="1730" label="zzzz140,zzzz142" source="102" target="104" cy:directed="1"/>
      <edge id="1729" label="zzzz140,zzzzz93" source="102" target="213" cy:directed="1"/>
      <edge id="1728" label="zzzz140,zzzzzz8" source="102" target="228" cy:directed="1"/>
      <edge id="1727" label="zzzz140,zzzzzz7" source="102" target="227" cy:directed="1"/>
      <edge id="1726" label="zzzz140,zzzzz16" source="102" target="136" cy:directed="1"/>
      <edge id="1725" label="zzzz140,zzzzz11" source="102" target="131" cy:directed="1"/>
      <edge id="1724" label="zzzz140,zzzz156" source="102" target="118" cy:directed="1"/>
      <edge id="1723" label="zzzz140,zzzzz10" source="102" target="130" cy:directed="1"/>
      <edge id="1722" label="zzzz140,zzzzzz9" source="102" target="229" cy:directed="1"/>
      <edge id="1721" label="zzzz140,zzzz144" source="102" target="106" cy:directed="1"/>
      <edge id="1720" label="zzzz140,zzzzzz4" source="102" target="224" cy:directed="1"/>
      <edge id="1719" label="zzzz140,zzzz145" source="102" target="107" cy:directed="1"/>
      <edge id="1718" label="zzzz140,zzzzzz1" source="102" target="221" cy:directed="1"/>
      <edge id="1717" label="zzzz140,zzzzz12" source="102" target="132" cy:directed="1"/>
      <edge id="1716" label="zzzz140,zzzzz17" source="102" target="137" cy:directed="1"/>
      <edge id="1715" label="zzzz140,zzzz157" source="102" target="119" cy:directed="1"/>
      <edge id="1714" label="zzzz140,zzzz148" source="102" target="110" cy:directed="1"/>
      <edge id="1713" label="zzzz140,zzzz154" source="102" target="116" cy:directed="1"/>
      <edge id="1712" label="zzzz140,zzzz151" source="102" target="113" cy:directed="1"/>
      <edge id="1711" label="zzzz140,zzzz152" source="102" target="114" cy:directed="1"/>
      <edge id="1710" label="zzzz140,zzzz155" source="102" target="117" cy:directed="1"/>
      <edge id="1709" label="zzzz140,zzzz149" source="102" target="111" cy:directed="1"/>
      <edge id="1708" label="zzzz140,zzzzz13" source="102" target="133" cy:directed="1"/>
      <edge id="1707" label="zzzz140,zzzz146" source="102" target="108" cy:directed="1"/>
      <edge id="1706" label="zzzz140,zzzz143" source="102" target="105" cy:directed="1"/>
      <edge id="1705" label="zzzz140,zzzz153" source="102" target="115" cy:directed="1"/>
      <edge id="1704" label="zzzz140,zzzz147" source="102" target="109" cy:directed="1"/>
      <edge id="1703" label="zzzz139,zzzzz44" source="101" target="164" cy:directed="1"/>
      <edge id="1702" label="zzzz139,zzzzz72" source="101" target="192" cy:directed="1"/>
      <edge id="1701" label="zzzz139,zzzzz60" source="101" target="180" cy:directed="1"/>
      <edge id="1700" label="zzzz139,zzzzz47" source="101" target="167" cy:directed="1"/>
      <edge id="1699" label="zzzz139,zzzzz68" source="101" target="188" cy:directed="1"/>
      <edge id="1698" label="zzzz139,zzzzz71" source="101" target="191" cy:directed="1"/>
      <edge id="1697" label="zzzz139,zzzzz42" source="101" target="162" cy:directed="1"/>
      <edge id="1696" label="zzzz139,zzzzz43" source="101" target="163" cy:directed="1"/>
      <edge id="1695" label="zzzz139,zzzzz55" source="101" target="175" cy:directed="1"/>
      <edge id="1694" label="zzzz139,zzzzz41" source="101" target="161" cy:directed="1"/>
      <edge id="1693" label="zzzz139,zzzzz87" source="101" target="207" cy:directed="1"/>
      <edge id="1692" label="zzzz139,zzzzz99" source="101" target="219" cy:directed="1"/>
      <edge id="1691" label="zzzz139,zzzzz89" source="101" target="209" cy:directed="1"/>
      <edge id="1690" label="zzzz139,zzzzz88" source="101" target="208" cy:directed="1"/>
      <edge id="1689" label="zzzz139,zzzz158" source="101" target="120" cy:directed="1"/>
      <edge id="1688" label="zzzz139,zzzzzz8" source="101" target="228" cy:directed="1"/>
      <edge id="1687" label="zzzz139,zzzzzz0" source="101" target="220" cy:directed="1"/>
      <edge id="1686" label="zzzz139,zzzzzz2" source="101" target="222" cy:directed="1"/>
      <edge id="1685" label="zzzz139,zzzzz15" source="101" target="135" cy:directed="1"/>
      <edge id="1684" label="zzzz139,zzzzzz4" source="101" target="224" cy:directed="1"/>
      <edge id="1683" label="zzzz139,zzzzz16" source="101" target="136" cy:directed="1"/>
      <edge id="1682" label="zzzz139,zzzzzz5" source="101" target="225" cy:directed="1"/>
      <edge id="1681" label="zzzz139,zzzzzz6" source="101" target="226" cy:directed="1"/>
      <edge id="1680" label="zzzz139,zzzz140" source="101" target="102" cy:directed="1"/>
      <edge id="1679" label="zzzz139,zzzz141" source="101" target="103" cy:directed="1"/>
      <edge id="1678" label="zzzz139,zzzz154" source="101" target="116" cy:directed="1"/>
      <edge id="1677" label="zzzz139,zzzz143" source="101" target="105" cy:directed="1"/>
      <edge id="1676" label="zzzz139,zzzz142" source="101" target="104" cy:directed="1"/>
      <edge id="1675" label="zzzz139,zzzzz93" source="101" target="213" cy:directed="1"/>
      <edge id="1674" label="zzzz139,zzzzz12" source="101" target="132" cy:directed="1"/>
      <edge id="1673" label="zzzz139,zzzzzz9" source="101" target="229" cy:directed="1"/>
      <edge id="1672" label="zzzz139,zzzz155" source="101" target="117" cy:directed="1"/>
      <edge id="1671" label="zzzz139,zzzzz11" source="101" target="131" cy:directed="1"/>
      <edge id="1670" label="zzzz139,zzzzz13" source="101" target="133" cy:directed="1"/>
      <edge id="1669" label="zzzz139,zzzzzz1" source="101" target="221" cy:directed="1"/>
      <edge id="1668" label="zzzz139,zzzz148" source="101" target="110" cy:directed="1"/>
      <edge id="1667" label="zzzz139,zzzz153" source="101" target="115" cy:directed="1"/>
      <edge id="1666" label="zzzz139,zzzzzz7" source="101" target="227" cy:directed="1"/>
      <edge id="1665" label="zzzz139,zzzz146" source="101" target="108" cy:directed="1"/>
      <edge id="1664" label="zzzz139,zzzzz17" source="101" target="137" cy:directed="1"/>
      <edge id="1663" label="zzzz139,zzzz144" source="101" target="106" cy:directed="1"/>
      <edge id="1662" label="zzzz139,zzzz150" source="101" target="112" cy:directed="1"/>
      <edge id="1661" label="zzzz139,zzzzz10" source="101" target="130" cy:directed="1"/>
      <edge id="1660" label="zzzz139,zzzz156" source="101" target="118" cy:directed="1"/>
      <edge id="1659" label="zzzz139,zzzz157" source="101" target="119" cy:directed="1"/>
      <edge id="1658" label="zzzz139,zzzz151" source="101" target="113" cy:directed="1"/>
      <edge id="1657" label="zzzz139,zzzz145" source="101" target="107" cy:directed="1"/>
      <edge id="1656" label="zzzz139,zzzz147" source="101" target="109" cy:directed="1"/>
      <edge id="1655" label="zzzz139,zzzz149" source="101" target="111" cy:directed="1"/>
      <edge id="1654" label="zzzz139,zzzz152" source="101" target="114" cy:directed="1"/>
      <edge id="1653" label="zzzz138,zzzzz63" source="100" target="183" cy:directed="1"/>
      <edge id="1652" label="zzzz138,zzzzz46" source="100" target="166" cy:directed="1"/>
      <edge id="1651" label="zzzz138,zzzzz61" source="100" target="181" cy:directed="1"/>
      <edge id="1650" label="zzzz138,zzzzz75" source="100" target="195" cy:directed="1"/>
      <edge id="1649" label="zzzz138,zzzzz48" source="100" target="168" cy:directed="1"/>
      <edge id="1648" label="zzzz138,zzzzz34" source="100" target="154" cy:directed="1"/>
      <edge id="1647" label="zzzz138,zzzzz71" source="100" target="191" cy:directed="1"/>
      <edge id="1646" label="zzzz138,zzzzz33" source="100" target="153" cy:directed="1"/>
      <edge id="1645" label="zzzz138,zzzzz53" source="100" target="173" cy:directed="1"/>
      <edge id="1644" label="zzzz138,zzzzz76" source="100" target="196" cy:directed="1"/>
      <edge id="1643" label="zzzz138,zzzzz68" source="100" target="188" cy:directed="1"/>
      <edge id="1642" label="zzzz138,zzzzz47" source="100" target="167" cy:directed="1"/>
      <edge id="1641" label="zzzz138,zzzzz45" source="100" target="165" cy:directed="1"/>
      <edge id="1640" label="zzzz138,zzzzz78" source="100" target="198" cy:directed="1"/>
      <edge id="1639" label="zzzz138,zzzzz41" source="100" target="161" cy:directed="1"/>
      <edge id="1638" label="zzzz138,zzzzz55" source="100" target="175" cy:directed="1"/>
      <edge id="1637" label="zzzz138,zzzzz58" source="100" target="178" cy:directed="1"/>
      <edge id="1636" label="zzzz138,zzzzz73" source="100" target="193" cy:directed="1"/>
      <edge id="1635" label="zzzz138,zzzzz99" source="100" target="219" cy:directed="1"/>
      <edge id="1634" label="zzzz138,zzzzz60" source="100" target="180" cy:directed="1"/>
      <edge id="1633" label="zzzz138,zzzzz43" source="100" target="163" cy:directed="1"/>
      <edge id="1632" label="zzzz138,zzzzz89" source="100" target="209" cy:directed="1"/>
      <edge id="1631" label="zzzz138,zzzzz72" source="100" target="192" cy:directed="1"/>
      <edge id="1630" label="zzzz138,zzzzz44" source="100" target="164" cy:directed="1"/>
      <edge id="1629" label="zzzz138,zzzzz56" source="100" target="176" cy:directed="1"/>
      <edge id="1628" label="zzzz138,zzzzz87" source="100" target="207" cy:directed="1"/>
      <edge id="1627" label="zzzz138,zzzzz88" source="100" target="208" cy:directed="1"/>
      <edge id="1626" label="zzzz138,zzzz158" source="100" target="120" cy:directed="1"/>
      <edge id="1625" label="zzzz138,zzzzzz6" source="100" target="226" cy:directed="1"/>
      <edge id="1624" label="zzzz138,zzzz140" source="100" target="102" cy:directed="1"/>
      <edge id="1623" label="zzzz138,zzzzzz0" source="100" target="220" cy:directed="1"/>
      <edge id="1622" label="zzzz138,zzzzzz8" source="100" target="228" cy:directed="1"/>
      <edge id="1621" label="zzzz138,zzzz139" source="100" target="101" cy:directed="1"/>
      <edge id="1620" label="zzzz138,zzzzzz5" source="100" target="225" cy:directed="1"/>
      <edge id="1619" label="zzzz138,zzzzz15" source="100" target="135" cy:directed="1"/>
      <edge id="1618" label="zzzz138,zzzzzz2" source="100" target="222" cy:directed="1"/>
      <edge id="1617" label="zzzz138,zzzz154" source="100" target="116" cy:directed="1"/>
      <edge id="1616" label="zzzz138,zzzz148" source="100" target="110" cy:directed="1"/>
      <edge id="1615" label="zzzz138,zzzz141" source="100" target="103" cy:directed="1"/>
      <edge id="1614" label="zzzz138,zzzz150" source="100" target="112" cy:directed="1"/>
      <edge id="1613" label="zzzz138,zzzz155" source="100" target="117" cy:directed="1"/>
      <edge id="1612" label="zzzz138,zzzzzz1" source="100" target="221" cy:directed="1"/>
      <edge id="1611" label="zzzz138,zzzzz93" source="100" target="213" cy:directed="1"/>
      <edge id="1610" label="zzzz138,zzzzzz7" source="100" target="227" cy:directed="1"/>
      <edge id="1609" label="zzzz138,zzzz147" source="100" target="109" cy:directed="1"/>
      <edge id="1608" label="zzzz138,zzzz156" source="100" target="118" cy:directed="1"/>
      <edge id="1607" label="zzzz138,zzzz146" source="100" target="108" cy:directed="1"/>
      <edge id="1606" label="zzzz138,zzzz144" source="100" target="106" cy:directed="1"/>
      <edge id="1605" label="zzzz138,zzzz145" source="100" target="107" cy:directed="1"/>
      <edge id="1604" label="zzzz138,zzzzz17" source="100" target="137" cy:directed="1"/>
      <edge id="1603" label="zzzz138,zzzz153" source="100" target="115" cy:directed="1"/>
      <edge id="1602" label="zzzz138,zzzz149" source="100" target="111" cy:directed="1"/>
      <edge id="1601" label="zzzz138,zzzz157" source="100" target="119" cy:directed="1"/>
      <edge id="1600" label="zzzz138,zzzzzz9" source="100" target="229" cy:directed="1"/>
      <edge id="1599" label="zzzz138,zzzzz12" source="100" target="132" cy:directed="1"/>
      <edge id="1598" label="zzzz138,zzzz142" source="100" target="104" cy:directed="1"/>
      <edge id="1597" label="zzzz138,zzzzz10" source="100" target="130" cy:directed="1"/>
      <edge id="1596" label="zzzz138,zzzz152" source="100" target="114" cy:directed="1"/>
      <edge id="1595" label="zzzz138,zzzz143" source="100" target="105" cy:directed="1"/>
      <edge id="1594" label="zzzz138,zzzzz11" source="100" target="131" cy:directed="1"/>
      <edge id="1593" label="zzzz138,zzzzz13" source="100" target="133" cy:directed="1"/>
      <edge id="1592" label="zzzz138,zzzz151" source="100" target="113" cy:directed="1"/>
      <edge id="1591" label="zzzz138,zzzzzz4" source="100" target="224" cy:directed="1"/>
      <edge id="1590" label="zzzz138,zzzzz16" source="100" target="136" cy:directed="1"/>
      <edge id="1589" label="zzzz137,zzzzz67" source="99" target="187" cy:directed="1"/>
      <edge id="1588" label="zzzz137,zzzzz29" source="99" target="149" cy:directed="1"/>
      <edge id="1587" label="zzzz137,zzzzz51" source="99" target="171" cy:directed="1"/>
      <edge id="1586" label="zzzz137,zzzzz46" source="99" target="166" cy:directed="1"/>
      <edge id="1585" label="zzzz137,zzzzz58" source="99" target="178" cy:directed="1"/>
      <edge id="1584" label="zzzz137,zzzzz54" source="99" target="174" cy:directed="1"/>
      <edge id="1583" label="zzzz137,zzzzz78" source="99" target="198" cy:directed="1"/>
      <edge id="1582" label="zzzz137,zzzzz42" source="99" target="162" cy:directed="1"/>
      <edge id="1581" label="zzzz137,zzzzz68" source="99" target="188" cy:directed="1"/>
      <edge id="1580" label="zzzz137,zzzzz50" source="99" target="170" cy:directed="1"/>
      <edge id="1579" label="zzzz137,zzzzz47" source="99" target="167" cy:directed="1"/>
      <edge id="1578" label="zzzz137,zzzzz53" source="99" target="173" cy:directed="1"/>
      <edge id="1577" label="zzzz137,zzzzz44" source="99" target="164" cy:directed="1"/>
      <edge id="1576" label="zzzz137,zzzzz71" source="99" target="191" cy:directed="1"/>
      <edge id="1575" label="zzzz137,zzzzz72" source="99" target="192" cy:directed="1"/>
      <edge id="1574" label="zzzz137,zzzzz43" source="99" target="163" cy:directed="1"/>
      <edge id="1573" label="zzzz137,zzzzz99" source="99" target="219" cy:directed="1"/>
      <edge id="1572" label="zzzz137,zzzzz55" source="99" target="175" cy:directed="1"/>
      <edge id="1571" label="zzzz137,zzzzz73" source="99" target="193" cy:directed="1"/>
      <edge id="1570" label="zzzz137,zzzzz56" source="99" target="176" cy:directed="1"/>
      <edge id="1569" label="zzzz137,zzzzz60" source="99" target="180" cy:directed="1"/>
      <edge id="1568" label="zzzz137,zzzzz41" source="99" target="161" cy:directed="1"/>
      <edge id="1567" label="zzzz137,zzzzz89" source="99" target="209" cy:directed="1"/>
      <edge id="1566" label="zzzz137,zzzzz87" source="99" target="207" cy:directed="1"/>
      <edge id="1565" label="zzzz137,zzzzz88" source="99" target="208" cy:directed="1"/>
      <edge id="1564" label="zzzz137,zzzz158" source="99" target="120" cy:directed="1"/>
      <edge id="1563" label="zzzz137,zzzzzz5" source="99" target="225" cy:directed="1"/>
      <edge id="1562" label="zzzz137,zzzzzz2" source="99" target="222" cy:directed="1"/>
      <edge id="1561" label="zzzz137,zzzzzz8" source="99" target="228" cy:directed="1"/>
      <edge id="1560" label="zzzz137,zzzzzz0" source="99" target="220" cy:directed="1"/>
      <edge id="1559" label="zzzz137,zzzzzz6" source="99" target="226" cy:directed="1"/>
      <edge id="1558" label="zzzz137,zzzz140" source="99" target="102" cy:directed="1"/>
      <edge id="1557" label="zzzz137,zzzzz15" source="99" target="135" cy:directed="1"/>
      <edge id="1556" label="zzzz137,zzzz139" source="99" target="101" cy:directed="1"/>
      <edge id="1555" label="zzzz137,zzzzz93" source="99" target="213" cy:directed="1"/>
      <edge id="1554" label="zzzz137,zzzz150" source="99" target="112" cy:directed="1"/>
      <edge id="1553" label="zzzz137,zzzz154" source="99" target="116" cy:directed="1"/>
      <edge id="1552" label="zzzz137,zzzz156" source="99" target="118" cy:directed="1"/>
      <edge id="1551" label="zzzz137,zzzzzz1" source="99" target="221" cy:directed="1"/>
      <edge id="1550" label="zzzz137,zzzz148" source="99" target="110" cy:directed="1"/>
      <edge id="1549" label="zzzz137,zzzz155" source="99" target="117" cy:directed="1"/>
      <edge id="1548" label="zzzz137,zzzz141" source="99" target="103" cy:directed="1"/>
      <edge id="1547" label="zzzz137,zzzz149" source="99" target="111" cy:directed="1"/>
      <edge id="1546" label="zzzz137,zzzz153" source="99" target="115" cy:directed="1"/>
      <edge id="1545" label="zzzz137,zzzzzz4" source="99" target="224" cy:directed="1"/>
      <edge id="1544" label="zzzz137,zzzz144" source="99" target="106" cy:directed="1"/>
      <edge id="1543" label="zzzz137,zzzzz11" source="99" target="131" cy:directed="1"/>
      <edge id="1542" label="zzzz137,zzzz147" source="99" target="109" cy:directed="1"/>
      <edge id="1541" label="zzzz137,zzzzz10" source="99" target="130" cy:directed="1"/>
      <edge id="1540" label="zzzz137,zzzzzz7" source="99" target="227" cy:directed="1"/>
      <edge id="1539" label="zzzz137,zzzzz12" source="99" target="132" cy:directed="1"/>
      <edge id="1538" label="zzzz137,zzzz142" source="99" target="104" cy:directed="1"/>
      <edge id="1537" label="zzzz137,zzzzzz9" source="99" target="229" cy:directed="1"/>
      <edge id="1536" label="zzzz137,zzzzz17" source="99" target="137" cy:directed="1"/>
      <edge id="1535" label="zzzz137,zzzz157" source="99" target="119" cy:directed="1"/>
      <edge id="1534" label="zzzz137,zzzz143" source="99" target="105" cy:directed="1"/>
      <edge id="1533" label="zzzz137,zzzz145" source="99" target="107" cy:directed="1"/>
      <edge id="1532" label="zzzz137,zzzzz13" source="99" target="133" cy:directed="1"/>
      <edge id="1531" label="zzzz137,zzzz152" source="99" target="114" cy:directed="1"/>
      <edge id="1530" label="zzzz137,zzzz146" source="99" target="108" cy:directed="1"/>
      <edge id="1529" label="zzzz137,zzzz138" source="99" target="100" cy:directed="1"/>
      <edge id="1528" label="zzzz137,zzzz151" source="99" target="113" cy:directed="1"/>
      <edge id="1527" label="zzzz137,zzzzz16" source="99" target="136" cy:directed="1"/>
      <edge id="1526" label="zzzz136,zzzzz75" source="98" target="195" cy:directed="1"/>
      <edge id="1525" label="zzzz136,zzzzz58" source="98" target="178" cy:directed="1"/>
      <edge id="1524" label="zzzz136,zzzzz42" source="98" target="162" cy:directed="1"/>
      <edge id="1523" label="zzzz136,zzzzz36" source="98" target="156" cy:directed="1"/>
      <edge id="1522" label="zzzz136,zzzzz44" source="98" target="164" cy:directed="1"/>
      <edge id="1521" label="zzzz136,zzzzz46" source="98" target="166" cy:directed="1"/>
      <edge id="1520" label="zzzz136,zzzzz70" source="98" target="190" cy:directed="1"/>
      <edge id="1519" label="zzzz136,zzzzz64" source="98" target="184" cy:directed="1"/>
      <edge id="1518" label="zzzz136,zzzzz78" source="98" target="198" cy:directed="1"/>
      <edge id="1517" label="zzzz136,zzzzz34" source="98" target="154" cy:directed="1"/>
      <edge id="1516" label="zzzz136,zzzzz67" source="98" target="187" cy:directed="1"/>
      <edge id="1515" label="zzzz136,zzzzz73" source="98" target="193" cy:directed="1"/>
      <edge id="1514" label="zzzz136,zzzzz99" source="98" target="219" cy:directed="1"/>
      <edge id="1513" label="zzzz136,zzzzz63" source="98" target="183" cy:directed="1"/>
      <edge id="1512" label="zzzz136,zzzzz41" source="98" target="161" cy:directed="1"/>
      <edge id="1511" label="zzzz136,zzzzz40" source="98" target="160" cy:directed="1"/>
      <edge id="1510" label="zzzz136,zzzzz55" source="98" target="175" cy:directed="1"/>
      <edge id="1509" label="zzzz136,zzzzz53" source="98" target="173" cy:directed="1"/>
      <edge id="1508" label="zzzz136,zzzzz50" source="98" target="170" cy:directed="1"/>
      <edge id="1507" label="zzzz136,zzzzz72" source="98" target="192" cy:directed="1"/>
      <edge id="1506" label="zzzz136,zzzzz56" source="98" target="176" cy:directed="1"/>
      <edge id="1505" label="zzzz136,zzzzz43" source="98" target="163" cy:directed="1"/>
      <edge id="1504" label="zzzz136,zzzzz47" source="98" target="167" cy:directed="1"/>
      <edge id="1503" label="zzzz136,zzzzz68" source="98" target="188" cy:directed="1"/>
      <edge id="1502" label="zzzz136,zzzzz71" source="98" target="191" cy:directed="1"/>
      <edge id="1501" label="zzzz136,zzzzz87" source="98" target="207" cy:directed="1"/>
      <edge id="1500" label="zzzz136,zzzzz60" source="98" target="180" cy:directed="1"/>
      <edge id="1499" label="zzzz136,zzzzz89" source="98" target="209" cy:directed="1"/>
      <edge id="1498" label="zzzz136,zzzzz88" source="98" target="208" cy:directed="1"/>
      <edge id="1497" label="zzzz136,zzzzzz5" source="98" target="225" cy:directed="1"/>
      <edge id="1496" label="zzzz136,zzzzz15" source="98" target="135" cy:directed="1"/>
      <edge id="1495" label="zzzz136,zzzzzz2" source="98" target="222" cy:directed="1"/>
      <edge id="1494" label="zzzz136,zzzzzz6" source="98" target="226" cy:directed="1"/>
      <edge id="1493" label="zzzz136,zzzzzz8" source="98" target="228" cy:directed="1"/>
      <edge id="1492" label="zzzz136,zzzz140" source="98" target="102" cy:directed="1"/>
      <edge id="1491" label="zzzz136,zzzz158" source="98" target="120" cy:directed="1"/>
      <edge id="1490" label="zzzz136,zzzz139" source="98" target="101" cy:directed="1"/>
      <edge id="1489" label="zzzz136,zzzzzz0" source="98" target="220" cy:directed="1"/>
      <edge id="1488" label="zzzz136,zzzz141" source="98" target="103" cy:directed="1"/>
      <edge id="1487" label="zzzz136,zzzz138" source="98" target="100" cy:directed="1"/>
      <edge id="1486" label="zzzz136,zzzzzz4" source="98" target="224" cy:directed="1"/>
      <edge id="1485" label="zzzz136,zzzz151" source="98" target="113" cy:directed="1"/>
      <edge id="1484" label="zzzz136,zzzzzz1" source="98" target="221" cy:directed="1"/>
      <edge id="1483" label="zzzz136,zzzz143" source="98" target="105" cy:directed="1"/>
      <edge id="1482" label="zzzz136,zzzz142" source="98" target="104" cy:directed="1"/>
      <edge id="1481" label="zzzz136,zzzzz11" source="98" target="131" cy:directed="1"/>
      <edge id="1480" label="zzzz136,zzzzz17" source="98" target="137" cy:directed="1"/>
      <edge id="1479" label="zzzz136,zzzzz16" source="98" target="136" cy:directed="1"/>
      <edge id="1478" label="zzzz136,zzzzzz7" source="98" target="227" cy:directed="1"/>
      <edge id="1477" label="zzzz136,zzzz156" source="98" target="118" cy:directed="1"/>
      <edge id="1476" label="zzzz136,zzzz157" source="98" target="119" cy:directed="1"/>
      <edge id="1475" label="zzzz136,zzzz148" source="98" target="110" cy:directed="1"/>
      <edge id="1474" label="zzzz136,zzzzz12" source="98" target="132" cy:directed="1"/>
      <edge id="1473" label="zzzz136,zzzzz93" source="98" target="213" cy:directed="1"/>
      <edge id="1472" label="zzzz136,zzzz147" source="98" target="109" cy:directed="1"/>
      <edge id="1471" label="zzzz136,zzzzzz9" source="98" target="229" cy:directed="1"/>
      <edge id="1470" label="zzzz136,zzzz137" source="98" target="99" cy:directed="1"/>
      <edge id="1469" label="zzzz136,zzzz149" source="98" target="111" cy:directed="1"/>
      <edge id="1468" label="zzzz136,zzzz145" source="98" target="107" cy:directed="1"/>
      <edge id="1467" label="zzzz136,zzzzz13" source="98" target="133" cy:directed="1"/>
      <edge id="1466" label="zzzz136,zzzz154" source="98" target="116" cy:directed="1"/>
      <edge id="1465" label="zzzz136,zzzzz10" source="98" target="130" cy:directed="1"/>
      <edge id="1464" label="zzzz136,zzzz150" source="98" target="112" cy:directed="1"/>
      <edge id="1463" label="zzzz136,zzzz155" source="98" target="117" cy:directed="1"/>
      <edge id="1462" label="zzzz136,zzzz152" source="98" target="114" cy:directed="1"/>
      <edge id="1461" label="zzzz136,zzzz146" source="98" target="108" cy:directed="1"/>
      <edge id="1460" label="zzzz136,zzzz153" source="98" target="115" cy:directed="1"/>
      <edge id="1459" label="zzzz136,zzzz144" source="98" target="106" cy:directed="1"/>
      <edge id="1458" label="zzzz135,zzzzz25" source="97" target="145" cy:directed="1"/>
      <edge id="1457" label="zzzz135,zzzzz23" source="97" target="143" cy:directed="1"/>
      <edge id="1456" label="zzzz135,zzzzz22" source="97" target="142" cy:directed="1"/>
      <edge id="1455" label="zzzz135,zzzzz24" source="97" target="144" cy:directed="1"/>
      <edge id="1454" label="zzzz134,zzzzz58" source="96" target="178" cy:directed="1"/>
      <edge id="1453" label="zzzz134,zzzzz23" source="96" target="143" cy:directed="1"/>
      <edge id="1452" label="zzzz134,zzzzz22" source="96" target="142" cy:directed="1"/>
      <edge id="1451" label="zzzz134,zzzzz24" source="96" target="144" cy:directed="1"/>
      <edge id="1450" label="zzzz134,zzzzz25" source="96" target="145" cy:directed="1"/>
      <edge id="1449" label="zzzz133,zzzz135" source="95" target="97" cy:directed="1"/>
      <edge id="1448" label="zzzz133,zzzzz23" source="95" target="143" cy:directed="1"/>
      <edge id="1447" label="zzzz133,zzzzz24" source="95" target="144" cy:directed="1"/>
      <edge id="1446" label="zzzz133,zzzzz22" source="95" target="142" cy:directed="1"/>
      <edge id="1445" label="zzzz133,zzzzz25" source="95" target="145" cy:directed="1"/>
      <edge id="1444" label="zzzz133,zzzz134" source="95" target="96" cy:directed="1"/>
      <edge id="1443" label="zzzz132,zzzz133" source="94" target="95" cy:directed="1"/>
      <edge id="1442" label="zzzz132,zzzz135" source="94" target="97" cy:directed="1"/>
      <edge id="1441" label="zzzz132,zzzzz25" source="94" target="145" cy:directed="1"/>
      <edge id="1440" label="zzzz132,zzzz134" source="94" target="96" cy:directed="1"/>
      <edge id="1439" label="zzzz132,zzzzz23" source="94" target="143" cy:directed="1"/>
      <edge id="1438" label="zzzz132,zzzzz24" source="94" target="144" cy:directed="1"/>
      <edge id="1437" label="zzzz132,zzzzz22" source="94" target="142" cy:directed="1"/>
      <edge id="1436" label="zzzz131,zzzz132" source="93" target="94" cy:directed="1"/>
      <edge id="1435" label="zzzz131,zzzz134" source="93" target="96" cy:directed="1"/>
      <edge id="1434" label="zzzz131,zzzz135" source="93" target="97" cy:directed="1"/>
      <edge id="1433" label="zzzz131,zzzz133" source="93" target="95" cy:directed="1"/>
      <edge id="1432" label="zzzz131,zzzzz24" source="93" target="144" cy:directed="1"/>
      <edge id="1431" label="zzzz131,zzzzz22" source="93" target="142" cy:directed="1"/>
      <edge id="1430" label="zzzz131,zzzzz25" source="93" target="145" cy:directed="1"/>
      <edge id="1429" label="zzzz131,zzzzz23" source="93" target="143" cy:directed="1"/>
      <edge id="1428" label="zzzz130,zzzzz58" source="92" target="178" cy:directed="1"/>
      <edge id="1427" label="zzzz130,zzzzz42" source="92" target="162" cy:directed="1"/>
      <edge id="1426" label="zzzz130,zzzz135" source="92" target="97" cy:directed="1"/>
      <edge id="1425" label="zzzz130,zzzz132" source="92" target="94" cy:directed="1"/>
      <edge id="1424" label="zzzz130,zzzzz25" source="92" target="145" cy:directed="1"/>
      <edge id="1423" label="zzzz130,zzzzz23" source="92" target="143" cy:directed="1"/>
      <edge id="1422" label="zzzz130,zzzz133" source="92" target="95" cy:directed="1"/>
      <edge id="1421" label="zzzz130,zzzzz24" source="92" target="144" cy:directed="1"/>
      <edge id="1420" label="zzzz130,zzzzz22" source="92" target="142" cy:directed="1"/>
      <edge id="1419" label="zzzz130,zzzz134" source="92" target="96" cy:directed="1"/>
      <edge id="1418" label="zzzz129,zzzz131" source="91" target="93" cy:directed="1"/>
      <edge id="1417" label="zzzz129,zzzzz25" source="91" target="145" cy:directed="1"/>
      <edge id="1416" label="zzzz129,zzzz133" source="91" target="95" cy:directed="1"/>
      <edge id="1415" label="zzzz129,zzzzz23" source="91" target="143" cy:directed="1"/>
      <edge id="1414" label="zzzz129,zzzz132" source="91" target="94" cy:directed="1"/>
      <edge id="1413" label="zzzz129,zzzzz22" source="91" target="142" cy:directed="1"/>
      <edge id="1412" label="zzzz129,zzzzz24" source="91" target="144" cy:directed="1"/>
      <edge id="1411" label="zzzz129,zzzz130" source="91" target="92" cy:directed="1"/>
      <edge id="1410" label="zzzz129,zzzz135" source="91" target="97" cy:directed="1"/>
      <edge id="1409" label="zzzz126,zzzz131" source="88" target="93" cy:directed="1"/>
      <edge id="1408" label="zzzz126,zzzzz23" source="88" target="143" cy:directed="1"/>
      <edge id="1407" label="zzzz126,zzzzz22" source="88" target="142" cy:directed="1"/>
      <edge id="1406" label="zzzz126,zzzz134" source="88" target="96" cy:directed="1"/>
      <edge id="1405" label="zzzz126,zzzzz25" source="88" target="145" cy:directed="1"/>
      <edge id="1404" label="zzzz126,zzzz133" source="88" target="95" cy:directed="1"/>
      <edge id="1403" label="zzzz126,zzzzz24" source="88" target="144" cy:directed="1"/>
      <edge id="1402" label="zzzz126,zzzz130" source="88" target="92" cy:directed="1"/>
      <edge id="1401" label="zzzz126,zzzz132" source="88" target="94" cy:directed="1"/>
      <edge id="1400" label="zzzz125,zzzzz98" source="87" target="218" cy:directed="1"/>
      <edge id="1399" label="zzzz125,zzzzz89" source="87" target="209" cy:directed="1"/>
      <edge id="1398" label="zzzz125,zzzzz87" source="87" target="207" cy:directed="1"/>
      <edge id="1397" label="zzzz124,zzzzz67" source="86" target="187" cy:directed="1"/>
      <edge id="1396" label="zzzz124,zzzzz70" source="86" target="190" cy:directed="1"/>
      <edge id="1395" label="zzzz124,zzzzz57" source="86" target="177" cy:directed="1"/>
      <edge id="1394" label="zzzz124,zzzzz99" source="86" target="219" cy:directed="1"/>
      <edge id="1393" label="zzzz124,zzzzz20" source="86" target="140" cy:directed="1"/>
      <edge id="1392" label="zzzz124,zzzzz21" source="86" target="141" cy:directed="1"/>
      <edge id="1391" label="zzzz124,zzzzz92" source="86" target="212" cy:directed="1"/>
      <edge id="1390" label="zzzz123,zzzzz65" source="85" target="185" cy:directed="1"/>
      <edge id="1389" label="zzzz123,zzzz134" source="85" target="96" cy:directed="1"/>
      <edge id="1388" label="zzzz123,zzzzz92" source="85" target="212" cy:directed="1"/>
      <edge id="1387" label="zzzz123,zzzzz21" source="85" target="141" cy:directed="1"/>
      <edge id="1386" label="zzzz123,zzzzz20" source="85" target="140" cy:directed="1"/>
      <edge id="1385" label="zzzz123,zzzz124" source="85" target="86" cy:directed="1"/>
      <edge id="1384" label="zzzz122,zzzz156" source="84" target="118" cy:directed="1"/>
      <edge id="1383" label="zzzz122,zzzzz46" source="84" target="166" cy:directed="1"/>
      <edge id="1382" label="zzzz122,zzzzz53" source="84" target="173" cy:directed="1"/>
      <edge id="1381" label="zzzz122,zzzz155" source="84" target="117" cy:directed="1"/>
      <edge id="1380" label="zzzz122,zzzzz51" source="84" target="171" cy:directed="1"/>
      <edge id="1379" label="zzzz122,zzzzz67" source="84" target="187" cy:directed="1"/>
      <edge id="1378" label="zzzz122,zzzzz96" source="84" target="216" cy:directed="1"/>
      <edge id="1377" label="zzzz121,zzzzz87" source="83" target="207" cy:directed="1"/>
      <edge id="1376" label="zzzz121,zzzzz60" source="83" target="180" cy:directed="1"/>
      <edge id="1375" label="zzzz121,zzzzz40" source="83" target="160" cy:directed="1"/>
      <edge id="1374" label="zzzz121,zzzzz41" source="83" target="161" cy:directed="1"/>
      <edge id="1373" label="zzzz121,zzzzz43" source="83" target="163" cy:directed="1"/>
      <edge id="1372" label="zzzz121,zzzzz99" source="83" target="219" cy:directed="1"/>
      <edge id="1371" label="zzzz121,zzzzz62" source="83" target="182" cy:directed="1"/>
      <edge id="1370" label="zzzz121,zzzzz56" source="83" target="176" cy:directed="1"/>
      <edge id="1369" label="zzzz121,zzzzz64" source="83" target="184" cy:directed="1"/>
      <edge id="1368" label="zzzz121,zzzzz42" source="83" target="162" cy:directed="1"/>
      <edge id="1367" label="zzzz121,zzzzz89" source="83" target="209" cy:directed="1"/>
      <edge id="1366" label="zzzz121,zzzzzz6" source="83" target="226" cy:directed="1"/>
      <edge id="1365" label="zzzz121,zzzz140" source="83" target="102" cy:directed="1"/>
      <edge id="1364" label="zzzz121,zzzzz88" source="83" target="208" cy:directed="1"/>
      <edge id="1363" label="zzzz121,zzzzzz8" source="83" target="228" cy:directed="1"/>
      <edge id="1362" label="zzzz121,zzzz143" source="83" target="105" cy:directed="1"/>
      <edge id="1361" label="zzzz121,zzzz139" source="83" target="101" cy:directed="1"/>
      <edge id="1360" label="zzzz121,zzzz146" source="83" target="108" cy:directed="1"/>
      <edge id="1359" label="zzzz121,zzzzzz2" source="83" target="222" cy:directed="1"/>
      <edge id="1358" label="zzzz121,zzzz141" source="83" target="103" cy:directed="1"/>
      <edge id="1357" label="zzzz121,zzzzzz4" source="83" target="224" cy:directed="1"/>
      <edge id="1356" label="zzzz121,zzzz145" source="83" target="107" cy:directed="1"/>
      <edge id="1355" label="zzzz121,zzzzz17" source="83" target="137" cy:directed="1"/>
      <edge id="1354" label="zzzz121,zzzz138" source="83" target="100" cy:directed="1"/>
      <edge id="1353" label="zzzz121,zzzz158" source="83" target="120" cy:directed="1"/>
      <edge id="1352" label="zzzz121,zzzzz16" source="83" target="136" cy:directed="1"/>
      <edge id="1351" label="zzzz121,zzzz137" source="83" target="99" cy:directed="1"/>
      <edge id="1350" label="zzzz121,zzzzz15" source="83" target="135" cy:directed="1"/>
      <edge id="1349" label="zzzz121,zzzz147" source="83" target="109" cy:directed="1"/>
      <edge id="1348" label="zzzz121,zzzzzz9" source="83" target="229" cy:directed="1"/>
      <edge id="1347" label="zzzz121,zzzzz93" source="83" target="213" cy:directed="1"/>
      <edge id="1346" label="zzzz121,zzzz151" source="83" target="113" cy:directed="1"/>
      <edge id="1345" label="zzzz121,zzzzzz5" source="83" target="225" cy:directed="1"/>
      <edge id="1344" label="zzzz121,zzzzz11" source="83" target="131" cy:directed="1"/>
      <edge id="1343" label="zzzz121,zzzz154" source="83" target="116" cy:directed="1"/>
      <edge id="1342" label="zzzz121,zzzz152" source="83" target="114" cy:directed="1"/>
      <edge id="1341" label="zzzz121,zzzz144" source="83" target="106" cy:directed="1"/>
      <edge id="1340" label="zzzz121,zzzz156" source="83" target="118" cy:directed="1"/>
      <edge id="1339" label="zzzz121,zzzzzz0" source="83" target="220" cy:directed="1"/>
      <edge id="1338" label="zzzz121,zzzz155" source="83" target="117" cy:directed="1"/>
      <edge id="1337" label="zzzz121,zzzz148" source="83" target="110" cy:directed="1"/>
      <edge id="1336" label="zzzz121,zzzzz12" source="83" target="132" cy:directed="1"/>
      <edge id="1335" label="zzzz121,zzzz142" source="83" target="104" cy:directed="1"/>
      <edge id="1334" label="zzzz121,zzzz136" source="83" target="98" cy:directed="1"/>
      <edge id="1333" label="zzzz121,zzzzz13" source="83" target="133" cy:directed="1"/>
      <edge id="1332" label="zzzz121,zzzzz10" source="83" target="130" cy:directed="1"/>
      <edge id="1331" label="zzzz121,zzzz150" source="83" target="112" cy:directed="1"/>
      <edge id="1330" label="zzzz121,zzzzzz7" source="83" target="227" cy:directed="1"/>
      <edge id="1329" label="zzzz121,zzzz149" source="83" target="111" cy:directed="1"/>
      <edge id="1328" label="zzzz121,zzzz153" source="83" target="115" cy:directed="1"/>
      <edge id="1327" label="zzzz121,zzzz157" source="83" target="119" cy:directed="1"/>
      <edge id="1326" label="zzzz121,zzzzzz1" source="83" target="221" cy:directed="1"/>
      <edge id="1325" label="zzzz120,zzzzz98" source="82" target="218" cy:directed="1"/>
      <edge id="1324" label="zzzz119,zzzzz28" source="81" target="148" cy:directed="1"/>
      <edge id="1323" label="zzzz119,zzzzz38" source="81" target="158" cy:directed="1"/>
      <edge id="1322" label="zzzz119,zzzzz14" source="81" target="134" cy:directed="1"/>
      <edge id="1321" label="zzzz119,zzzzzz3" source="81" target="223" cy:directed="1"/>
      <edge id="1320" label="zzzz119,zzzzz69" source="81" target="189" cy:directed="1"/>
      <edge id="1319" label="zzzz119,zzzzz36" source="81" target="156" cy:directed="1"/>
      <edge id="1318" label="zzzz119,zzzzz37" source="81" target="157" cy:directed="1"/>
      <edge id="1317" label="zzzz119,zzzzz77" source="81" target="197" cy:directed="1"/>
      <edge id="1316" label="zzzz119,zzzzz61" source="81" target="181" cy:directed="1"/>
      <edge id="1315" label="zzzz119,zzzzz48" source="81" target="168" cy:directed="1"/>
      <edge id="1314" label="zzzz119,zzzzz49" source="81" target="169" cy:directed="1"/>
      <edge id="1313" label="zzzz119,zzzzz70" source="81" target="190" cy:directed="1"/>
      <edge id="1312" label="zzzz119,zzzzz65" source="81" target="185" cy:directed="1"/>
      <edge id="1311" label="zzzz119,zzzzz52" source="81" target="172" cy:directed="1"/>
      <edge id="1310" label="zzzz119,zzzzz29" source="81" target="149" cy:directed="1"/>
      <edge id="1309" label="zzzz119,zzzzz33" source="81" target="153" cy:directed="1"/>
      <edge id="1308" label="zzzz119,zzzzz32" source="81" target="152" cy:directed="1"/>
      <edge id="1307" label="zzzz119,zzzzz59" source="81" target="179" cy:directed="1"/>
      <edge id="1306" label="zzzz119,zzzzz79" source="81" target="199" cy:directed="1"/>
      <edge id="1305" label="zzzz119,zzzzz62" source="81" target="182" cy:directed="1"/>
      <edge id="1304" label="zzzz119,zzzzz45" source="81" target="165" cy:directed="1"/>
      <edge id="1303" label="zzzz119,zzzzz15" source="81" target="135" cy:directed="1"/>
      <edge id="1302" label="zzzz119,zzzzz31" source="81" target="151" cy:directed="1"/>
      <edge id="1301" label="zzzz119,zzzzz97" source="81" target="217" cy:directed="1"/>
      <edge id="1300" label="zzzz119,zzzzz95" source="81" target="215" cy:directed="1"/>
      <edge id="1299" label="zzzz119,zzzz158" source="81" target="120" cy:directed="1"/>
      <edge id="1298" label="zzzz119,zzzzz64" source="81" target="184" cy:directed="1"/>
      <edge id="1297" label="zzzz119,zzzz140" source="81" target="102" cy:directed="1"/>
      <edge id="1296" label="zzzz119,zzzz151" source="81" target="113" cy:directed="1"/>
      <edge id="1295" label="zzzz119,zzzz139" source="81" target="101" cy:directed="1"/>
      <edge id="1294" label="zzzz119,zzzzz75" source="81" target="195" cy:directed="1"/>
      <edge id="1293" label="zzzz119,zzzzz58" source="81" target="178" cy:directed="1"/>
      <edge id="1292" label="zzzz119,zzzz143" source="81" target="105" cy:directed="1"/>
      <edge id="1291" label="zzzz119,zzzzz57" source="81" target="177" cy:directed="1"/>
      <edge id="1290" label="zzzz119,zzzzzz6" source="81" target="226" cy:directed="1"/>
      <edge id="1289" label="zzzz119,zzzz141" source="81" target="103" cy:directed="1"/>
      <edge id="1288" label="zzzz119,zzzzz78" source="81" target="198" cy:directed="1"/>
      <edge id="1287" label="zzzz119,zzzzzz0" source="81" target="220" cy:directed="1"/>
      <edge id="1286" label="zzzz119,zzzzz54" source="81" target="174" cy:directed="1"/>
      <edge id="1285" label="zzzz119,zzzzzz4" source="81" target="224" cy:directed="1"/>
      <edge id="1284" label="zzzz119,zzzzzz5" source="81" target="225" cy:directed="1"/>
      <edge id="1283" label="zzzz119,zzzz148" source="81" target="110" cy:directed="1"/>
      <edge id="1282" label="zzzz119,zzzz145" source="81" target="107" cy:directed="1"/>
      <edge id="1281" label="zzzz119,zzzz157" source="81" target="119" cy:directed="1"/>
      <edge id="1280" label="zzzz119,zzzz138" source="81" target="100" cy:directed="1"/>
      <edge id="1279" label="zzzz119,zzzzzz2" source="81" target="222" cy:directed="1"/>
      <edge id="1278" label="zzzz119,zzzzz17" source="81" target="137" cy:directed="1"/>
      <edge id="1277" label="zzzz119,zzzzz40" source="81" target="160" cy:directed="1"/>
      <edge id="1276" label="zzzz119,zzzzz34" source="81" target="154" cy:directed="1"/>
      <edge id="1275" label="zzzz119,zzzz137" source="81" target="99" cy:directed="1"/>
      <edge id="1274" label="zzzz119,zzzzz73" source="81" target="193" cy:directed="1"/>
      <edge id="1273" label="zzzz119,zzzzz63" source="81" target="183" cy:directed="1"/>
      <edge id="1272" label="zzzz119,zzzz153" source="81" target="115" cy:directed="1"/>
      <edge id="1271" label="zzzz119,zzzz121" source="81" target="83" cy:directed="1"/>
      <edge id="1270" label="zzzz119,zzzzz74" source="81" target="194" cy:directed="1"/>
      <edge id="1269" label="zzzz119,zzzz152" source="81" target="114" cy:directed="1"/>
      <edge id="1268" label="zzzz119,zzzzz60" source="81" target="180" cy:directed="1"/>
      <edge id="1267" label="zzzz119,zzzzz47" source="81" target="167" cy:directed="1"/>
      <edge id="1266" label="zzzz119,zzzzz68" source="81" target="188" cy:directed="1"/>
      <edge id="1265" label="zzzz119,zzzzz67" source="81" target="187" cy:directed="1"/>
      <edge id="1264" label="zzzz119,zzzz155" source="81" target="117" cy:directed="1"/>
      <edge id="1263" label="zzzz119,zzzzzz8" source="81" target="228" cy:directed="1"/>
      <edge id="1262" label="zzzz119,zzzzzz1" source="81" target="221" cy:directed="1"/>
      <edge id="1261" label="zzzz119,zzzzz76" source="81" target="196" cy:directed="1"/>
      <edge id="1260" label="zzzz119,zzzzz11" source="81" target="131" cy:directed="1"/>
      <edge id="1259" label="zzzz119,zzzz142" source="81" target="104" cy:directed="1"/>
      <edge id="1258" label="zzzz119,zzzzz44" source="81" target="164" cy:directed="1"/>
      <edge id="1257" label="zzzz119,zzzzz99" source="81" target="219" cy:directed="1"/>
      <edge id="1256" label="zzzz119,zzzzz50" source="81" target="170" cy:directed="1"/>
      <edge id="1255" label="zzzz119,zzzz154" source="81" target="116" cy:directed="1"/>
      <edge id="1254" label="zzzz119,zzzzz10" source="81" target="130" cy:directed="1"/>
      <edge id="1253" label="zzzz119,zzzz144" source="81" target="106" cy:directed="1"/>
      <edge id="1252" label="zzzz119,zzzz150" source="81" target="112" cy:directed="1"/>
      <edge id="1251" label="zzzz119,zzzz146" source="81" target="108" cy:directed="1"/>
      <edge id="1250" label="zzzz119,zzzzz71" source="81" target="191" cy:directed="1"/>
      <edge id="1249" label="zzzz119,zzzzz72" source="81" target="192" cy:directed="1"/>
      <edge id="1248" label="zzzz119,zzzz149" source="81" target="111" cy:directed="1"/>
      <edge id="1247" label="zzzz119,zzzzz93" source="81" target="213" cy:directed="1"/>
      <edge id="1246" label="zzzz119,zzzzzz7" source="81" target="227" cy:directed="1"/>
      <edge id="1245" label="zzzz119,zzzzz46" source="81" target="166" cy:directed="1"/>
      <edge id="1244" label="zzzz119,zzzzz12" source="81" target="132" cy:directed="1"/>
      <edge id="1243" label="zzzz119,zzzzz55" source="81" target="175" cy:directed="1"/>
      <edge id="1242" label="zzzz119,zzzzz53" source="81" target="173" cy:directed="1"/>
      <edge id="1241" label="zzzz119,zzzzz51" source="81" target="171" cy:directed="1"/>
      <edge id="1240" label="zzzz119,zzzzz42" source="81" target="162" cy:directed="1"/>
      <edge id="1239" label="zzzz119,zzzzz87" source="81" target="207" cy:directed="1"/>
      <edge id="1238" label="zzzz119,zzzzzz9" source="81" target="229" cy:directed="1"/>
      <edge id="1237" label="zzzz119,zzzz147" source="81" target="109" cy:directed="1"/>
      <edge id="1236" label="zzzz119,zzzz136" source="81" target="98" cy:directed="1"/>
      <edge id="1235" label="zzzz119,zzzzz13" source="81" target="133" cy:directed="1"/>
      <edge id="1234" label="zzzz119,zzzzz43" source="81" target="163" cy:directed="1"/>
      <edge id="1233" label="zzzz119,zzzz156" source="81" target="118" cy:directed="1"/>
      <edge id="1232" label="zzzz119,zzzzz41" source="81" target="161" cy:directed="1"/>
      <edge id="1231" label="zzzz119,zzzzz56" source="81" target="176" cy:directed="1"/>
      <edge id="1230" label="zzzz119,zzzzz16" source="81" target="136" cy:directed="1"/>
      <edge id="1229" label="zzzz119,zzzzz89" source="81" target="209" cy:directed="1"/>
      <edge id="1228" label="zzzz119,zzzzz88" source="81" target="208" cy:directed="1"/>
      <edge id="1227" label="zzzz118,zzzzz98" source="80" target="218" cy:directed="1"/>
      <edge id="1226" label="zzzz118,zzzz125" source="80" target="87" cy:directed="1"/>
      <edge id="1225" label="zzzz117,zzzzz49" source="79" target="169" cy:directed="1"/>
      <edge id="1224" label="zzzz117,zzzzz65" source="79" target="185" cy:directed="1"/>
      <edge id="1223" label="zzzz117,zzzzz51" source="79" target="171" cy:directed="1"/>
      <edge id="1222" label="zzzz117,zzzzz61" source="79" target="181" cy:directed="1"/>
      <edge id="1221" label="zzzz117,zzzzz29" source="79" target="149" cy:directed="1"/>
      <edge id="1220" label="zzzz117,zzzzz32" source="79" target="152" cy:directed="1"/>
      <edge id="1219" label="zzzz117,zzzzz50" source="79" target="170" cy:directed="1"/>
      <edge id="1218" label="zzzz117,zzzzz78" source="79" target="198" cy:directed="1"/>
      <edge id="1217" label="zzzz117,zzzzz67" source="79" target="187" cy:directed="1"/>
      <edge id="1216" label="zzzz117,zzzzz44" source="79" target="164" cy:directed="1"/>
      <edge id="1215" label="zzzz117,zzzzz45" source="79" target="165" cy:directed="1"/>
      <edge id="1214" label="zzzz117,zzzzz43" source="79" target="163" cy:directed="1"/>
      <edge id="1213" label="zzzz117,zzzzz62" source="79" target="182" cy:directed="1"/>
      <edge id="1212" label="zzzz117,zzzzz55" source="79" target="175" cy:directed="1"/>
      <edge id="1211" label="zzzz117,zzzzz99" source="79" target="219" cy:directed="1"/>
      <edge id="1210" label="zzzz117,zzzzz48" source="79" target="168" cy:directed="1"/>
      <edge id="1209" label="zzzz117,zzzzz68" source="79" target="188" cy:directed="1"/>
      <edge id="1208" label="zzzz117,zzzzz53" source="79" target="173" cy:directed="1"/>
      <edge id="1207" label="zzzz117,zzzzz64" source="79" target="184" cy:directed="1"/>
      <edge id="1206" label="zzzz117,zzzzz60" source="79" target="180" cy:directed="1"/>
      <edge id="1205" label="zzzz117,zzzzz41" source="79" target="161" cy:directed="1"/>
      <edge id="1204" label="zzzz117,zzzzz54" source="79" target="174" cy:directed="1"/>
      <edge id="1203" label="zzzz117,zzzzz71" source="79" target="191" cy:directed="1"/>
      <edge id="1202" label="zzzz117,zzzzz72" source="79" target="192" cy:directed="1"/>
      <edge id="1201" label="zzzz117,zzzzz56" source="79" target="176" cy:directed="1"/>
      <edge id="1200" label="zzzz117,zzzzz47" source="79" target="167" cy:directed="1"/>
      <edge id="1199" label="zzzz117,zzzzz42" source="79" target="162" cy:directed="1"/>
      <edge id="1198" label="zzzz117,zzzzz73" source="79" target="193" cy:directed="1"/>
      <edge id="1197" label="zzzz117,zzzzz89" source="79" target="209" cy:directed="1"/>
      <edge id="1196" label="zzzz117,zzzzz87" source="79" target="207" cy:directed="1"/>
      <edge id="1195" label="zzzz117,zzzz119" source="79" target="81" cy:directed="1"/>
      <edge id="1194" label="zzzz117,zzzz121" source="79" target="83" cy:directed="1"/>
      <edge id="1193" label="zzzz117,zzzzz88" source="79" target="208" cy:directed="1"/>
      <edge id="1192" label="zzzz117,zzzzzz2" source="79" target="222" cy:directed="1"/>
      <edge id="1191" label="zzzz117,zzzz139" source="79" target="101" cy:directed="1"/>
      <edge id="1190" label="zzzz117,zzzzz15" source="79" target="135" cy:directed="1"/>
      <edge id="1189" label="zzzz117,zzzzzz6" source="79" target="226" cy:directed="1"/>
      <edge id="1188" label="zzzz117,zzzzzz8" source="79" target="228" cy:directed="1"/>
      <edge id="1187" label="zzzz117,zzzz158" source="79" target="120" cy:directed="1"/>
      <edge id="1186" label="zzzz117,zzzz140" source="79" target="102" cy:directed="1"/>
      <edge id="1185" label="zzzz117,zzzz141" source="79" target="103" cy:directed="1"/>
      <edge id="1184" label="zzzz117,zzzzzz0" source="79" target="220" cy:directed="1"/>
      <edge id="1183" label="zzzz117,zzzz143" source="79" target="105" cy:directed="1"/>
      <edge id="1182" label="zzzz117,zzzz148" source="79" target="110" cy:directed="1"/>
      <edge id="1181" label="zzzz117,zzzzzz5" source="79" target="225" cy:directed="1"/>
      <edge id="1180" label="zzzz117,zzzz146" source="79" target="108" cy:directed="1"/>
      <edge id="1179" label="zzzz117,zzzz142" source="79" target="104" cy:directed="1"/>
      <edge id="1178" label="zzzz117,zzzz144" source="79" target="106" cy:directed="1"/>
      <edge id="1177" label="zzzz117,zzzz151" source="79" target="113" cy:directed="1"/>
      <edge id="1176" label="zzzz117,zzzz136" source="79" target="98" cy:directed="1"/>
      <edge id="1175" label="zzzz117,zzzzz16" source="79" target="136" cy:directed="1"/>
      <edge id="1174" label="zzzz117,zzzz147" source="79" target="109" cy:directed="1"/>
      <edge id="1173" label="zzzz117,zzzzzz7" source="79" target="227" cy:directed="1"/>
      <edge id="1172" label="zzzz117,zzzzzz4" source="79" target="224" cy:directed="1"/>
      <edge id="1171" label="zzzz117,zzzzz17" source="79" target="137" cy:directed="1"/>
      <edge id="1170" label="zzzz117,zzzzz10" source="79" target="130" cy:directed="1"/>
      <edge id="1169" label="zzzz117,zzzz157" source="79" target="119" cy:directed="1"/>
      <edge id="1168" label="zzzz117,zzzz156" source="79" target="118" cy:directed="1"/>
      <edge id="1167" label="zzzz117,zzzzz12" source="79" target="132" cy:directed="1"/>
      <edge id="1166" label="zzzz117,zzzz152" source="79" target="114" cy:directed="1"/>
      <edge id="1165" label="zzzz117,zzzz153" source="79" target="115" cy:directed="1"/>
      <edge id="1164" label="zzzz117,zzzz150" source="79" target="112" cy:directed="1"/>
      <edge id="1163" label="zzzz117,zzzz138" source="79" target="100" cy:directed="1"/>
      <edge id="1162" label="zzzz117,zzzzz93" source="79" target="213" cy:directed="1"/>
      <edge id="1161" label="zzzz117,zzzz145" source="79" target="107" cy:directed="1"/>
      <edge id="1160" label="zzzz117,zzzz137" source="79" target="99" cy:directed="1"/>
      <edge id="1159" label="zzzz117,zzzzzz1" source="79" target="221" cy:directed="1"/>
      <edge id="1158" label="zzzz117,zzzz149" source="79" target="111" cy:directed="1"/>
      <edge id="1157" label="zzzz117,zzzz154" source="79" target="116" cy:directed="1"/>
      <edge id="1156" label="zzzz117,zzzzzz9" source="79" target="229" cy:directed="1"/>
      <edge id="1155" label="zzzz117,zzzzz11" source="79" target="131" cy:directed="1"/>
      <edge id="1154" label="zzzz117,zzzzz13" source="79" target="133" cy:directed="1"/>
      <edge id="1153" label="zzzz117,zzzz155" source="79" target="117" cy:directed="1"/>
      <edge id="1152" label="zzzz116,zzzz125" source="78" target="87" cy:directed="1"/>
      <edge id="1151" label="zzzz116,zzzz118" source="78" target="80" cy:directed="1"/>
      <edge id="1150" label="zzzz115,zzzz157" source="77" target="119" cy:directed="1"/>
      <edge id="1149" label="zzzz115,zzzz156" source="77" target="118" cy:directed="1"/>
      <edge id="1148" label="zzzz115,zzzzzz0" source="77" target="220" cy:directed="1"/>
      <edge id="1147" label="zzzz115,zzzzz79" source="77" target="199" cy:directed="1"/>
      <edge id="1146" label="zzzz115,zzzz153" source="77" target="115" cy:directed="1"/>
      <edge id="1145" label="zzzz115,zzzz149" source="77" target="111" cy:directed="1"/>
      <edge id="1144" label="zzzz115,zzzzz23" source="77" target="143" cy:directed="1"/>
      <edge id="1143" label="zzzz115,zzzzzz5" source="77" target="225" cy:directed="1"/>
      <edge id="1142" label="zzzz115,zzzz155" source="77" target="117" cy:directed="1"/>
      <edge id="1141" label="zzzz115,zzzz148" source="77" target="110" cy:directed="1"/>
      <edge id="1140" label="zzzz115,zzzz144" source="77" target="106" cy:directed="1"/>
      <edge id="1139" label="zzzz115,zzzz117" source="77" target="79" cy:directed="1"/>
      <edge id="1138" label="zzzz115,zzzzz31" source="77" target="151" cy:directed="1"/>
      <edge id="1137" label="zzzz115,zzzzz35" source="77" target="155" cy:directed="1"/>
      <edge id="1136" label="zzzz115,zzzzz69" source="77" target="189" cy:directed="1"/>
      <edge id="1135" label="zzzz115,zzzz152" source="77" target="114" cy:directed="1"/>
      <edge id="1134" label="zzzz115,zzzzzz1" source="77" target="221" cy:directed="1"/>
      <edge id="1133" label="zzzz115,zzzz154" source="77" target="116" cy:directed="1"/>
      <edge id="1132" label="zzzz115,zzzz141" source="77" target="103" cy:directed="1"/>
      <edge id="1131" label="zzzz115,zzzzz10" source="77" target="130" cy:directed="1"/>
      <edge id="1130" label="zzzz115,zzzz145" source="77" target="107" cy:directed="1"/>
      <edge id="1129" label="zzzz115,zzzz150" source="77" target="112" cy:directed="1"/>
      <edge id="1128" label="zzzz115,zzzz137" source="77" target="99" cy:directed="1"/>
      <edge id="1127" label="zzzz115,zzzzzz9" source="77" target="229" cy:directed="1"/>
      <edge id="1126" label="zzzz115,zzzzz17" source="77" target="137" cy:directed="1"/>
      <edge id="1125" label="zzzz115,zzzz147" source="77" target="109" cy:directed="1"/>
      <edge id="1124" label="zzzz115,zzzzz77" source="77" target="197" cy:directed="1"/>
      <edge id="1123" label="zzzz115,zzzzz52" source="77" target="172" cy:directed="1"/>
      <edge id="1122" label="zzzz115,zzzz146" source="77" target="108" cy:directed="1"/>
      <edge id="1121" label="zzzz115,zzzzz97" source="77" target="217" cy:directed="1"/>
      <edge id="1120" label="zzzz115,zzzzz95" source="77" target="215" cy:directed="1"/>
      <edge id="1119" label="zzzz115,zzzzz93" source="77" target="213" cy:directed="1"/>
      <edge id="1118" label="zzzz115,zzzz138" source="77" target="100" cy:directed="1"/>
      <edge id="1117" label="zzzz115,zzzzz16" source="77" target="136" cy:directed="1"/>
      <edge id="1116" label="zzzz115,zzzzz57" source="77" target="177" cy:directed="1"/>
      <edge id="1115" label="zzzz115,zzzzz13" source="77" target="133" cy:directed="1"/>
      <edge id="1114" label="zzzz115,zzzzzz4" source="77" target="224" cy:directed="1"/>
      <edge id="1113" label="zzzz115,zzzz143" source="77" target="105" cy:directed="1"/>
      <edge id="1112" label="zzzz115,zzzzzz3" source="77" target="223" cy:directed="1"/>
      <edge id="1111" label="zzzz115,zzzz136" source="77" target="98" cy:directed="1"/>
      <edge id="1110" label="zzzz115,zzzzz94" source="77" target="214" cy:directed="1"/>
      <edge id="1109" label="zzzz115,zzzzz87" source="77" target="207" cy:directed="1"/>
      <edge id="1108" label="zzzz115,zzzzz39" source="77" target="159" cy:directed="1"/>
      <edge id="1107" label="zzzz115,zzzzz32" source="77" target="152" cy:directed="1"/>
      <edge id="1106" label="zzzz115,zzzzz48" source="77" target="168" cy:directed="1"/>
      <edge id="1105" label="zzzz115,zzzzz99" source="77" target="219" cy:directed="1"/>
      <edge id="1104" label="zzzz115,zzzzz89" source="77" target="209" cy:directed="1"/>
      <edge id="1103" label="zzzz115,zzzzz74" source="77" target="194" cy:directed="1"/>
      <edge id="1102" label="zzzz115,zzzzz28" source="77" target="148" cy:directed="1"/>
      <edge id="1101" label="zzzz115,zzzzz45" source="77" target="165" cy:directed="1"/>
      <edge id="1100" label="zzzz115,zzzzz40" source="77" target="160" cy:directed="1"/>
      <edge id="1099" label="zzzz115,zzzzz51" source="77" target="171" cy:directed="1"/>
      <edge id="1098" label="zzzz115,zzzz119" source="77" target="81" cy:directed="1"/>
      <edge id="1097" label="zzzz115,zzzzz62" source="77" target="182" cy:directed="1"/>
      <edge id="1096" label="zzzz115,zzzzz59" source="77" target="179" cy:directed="1"/>
      <edge id="1095" label="zzzz115,zzzzz36" source="77" target="156" cy:directed="1"/>
      <edge id="1094" label="zzzz115,zzzzz29" source="77" target="149" cy:directed="1"/>
      <edge id="1093" label="zzzz115,zzzzz88" source="77" target="208" cy:directed="1"/>
      <edge id="1092" label="zzzz115,zzzzz33" source="77" target="153" cy:directed="1"/>
      <edge id="1091" label="zzzz115,zzzzz49" source="77" target="169" cy:directed="1"/>
      <edge id="1090" label="zzzz115,zzzzz64" source="77" target="184" cy:directed="1"/>
      <edge id="1089" label="zzzz115,zzzzz70" source="77" target="190" cy:directed="1"/>
      <edge id="1088" label="zzzz115,zzzzz65" source="77" target="185" cy:directed="1"/>
      <edge id="1087" label="zzzz115,zzzzz63" source="77" target="183" cy:directed="1"/>
      <edge id="1086" label="zzzz115,zzzzz58" source="77" target="178" cy:directed="1"/>
      <edge id="1085" label="zzzz115,zzzzz50" source="77" target="170" cy:directed="1"/>
      <edge id="1084" label="zzzz115,zzzzz47" source="77" target="167" cy:directed="1"/>
      <edge id="1083" label="zzzz115,zzzzz61" source="77" target="181" cy:directed="1"/>
      <edge id="1082" label="zzzz115,zzzzz42" source="77" target="162" cy:directed="1"/>
      <edge id="1081" label="zzzz115,zzzzz75" source="77" target="195" cy:directed="1"/>
      <edge id="1080" label="zzzz115,zzzzz78" source="77" target="198" cy:directed="1"/>
      <edge id="1079" label="zzzz115,zzzzz68" source="77" target="188" cy:directed="1"/>
      <edge id="1078" label="zzzz115,zzzzz54" source="77" target="174" cy:directed="1"/>
      <edge id="1077" label="zzzz115,zzzzz60" source="77" target="180" cy:directed="1"/>
      <edge id="1076" label="zzzz115,zzzzz73" source="77" target="193" cy:directed="1"/>
      <edge id="1075" label="zzzz115,zzzzz55" source="77" target="175" cy:directed="1"/>
      <edge id="1074" label="zzzz115,zzzzz34" source="77" target="154" cy:directed="1"/>
      <edge id="1073" label="zzzz115,zzzzz71" source="77" target="191" cy:directed="1"/>
      <edge id="1072" label="zzzz115,zzzzz43" source="77" target="163" cy:directed="1"/>
      <edge id="1071" label="zzzz115,zzzzz76" source="77" target="196" cy:directed="1"/>
      <edge id="1070" label="zzzz115,zzzzz72" source="77" target="192" cy:directed="1"/>
      <edge id="1069" label="zzzz115,zzzzz44" source="77" target="164" cy:directed="1"/>
      <edge id="1068" label="zzzz115,zzzzz56" source="77" target="176" cy:directed="1"/>
      <edge id="1067" label="zzzz115,zzzzz67" source="77" target="187" cy:directed="1"/>
      <edge id="1066" label="zzzz115,zzzzz53" source="77" target="173" cy:directed="1"/>
      <edge id="1065" label="zzzz115,zzzzz41" source="77" target="161" cy:directed="1"/>
      <edge id="1064" label="zzzz115,zzzzz46" source="77" target="166" cy:directed="1"/>
      <edge id="1063" label="zzzz114,zzzz115" source="76" target="77" cy:directed="1"/>
      <edge id="1062" label="zzzz114,zzzzz89" source="76" target="209" cy:directed="1"/>
      <edge id="1061" label="zzzz114,zzzzz78" source="76" target="198" cy:directed="1"/>
      <edge id="1060" label="zzzz114,zzzzz99" source="76" target="219" cy:directed="1"/>
      <edge id="1059" label="zzzz114,zzzzz71" source="76" target="191" cy:directed="1"/>
      <edge id="1058" label="zzzz114,zzzzz68" source="76" target="188" cy:directed="1"/>
      <edge id="1057" label="zzzz114,zzzzz53" source="76" target="173" cy:directed="1"/>
      <edge id="1056" label="zzzz114,zzzzz67" source="76" target="187" cy:directed="1"/>
      <edge id="1055" label="zzzz114,zzzzz43" source="76" target="163" cy:directed="1"/>
      <edge id="1054" label="zzzz114,zzzzz56" source="76" target="176" cy:directed="1"/>
      <edge id="1053" label="zzzz114,zzzzz47" source="76" target="167" cy:directed="1"/>
      <edge id="1052" label="zzzz114,zzzzz41" source="76" target="161" cy:directed="1"/>
      <edge id="1051" label="zzzz114,zzzzz60" source="76" target="180" cy:directed="1"/>
      <edge id="1050" label="zzzz114,zzzzz88" source="76" target="208" cy:directed="1"/>
      <edge id="1049" label="zzzz114,zzzzz87" source="76" target="207" cy:directed="1"/>
      <edge id="1048" label="zzzz114,zzzz121" source="76" target="83" cy:directed="1"/>
      <edge id="1047" label="zzzz114,zzzz119" source="76" target="81" cy:directed="1"/>
      <edge id="1046" label="zzzz114,zzzzzz6" source="76" target="226" cy:directed="1"/>
      <edge id="1045" label="zzzz114,zzzz140" source="76" target="102" cy:directed="1"/>
      <edge id="1044" label="zzzz114,zzzzz15" source="76" target="135" cy:directed="1"/>
      <edge id="1043" label="zzzz114,zzzz141" source="76" target="103" cy:directed="1"/>
      <edge id="1042" label="zzzz114,zzzzzz2" source="76" target="222" cy:directed="1"/>
      <edge id="1041" label="zzzz114,zzzzzz8" source="76" target="228" cy:directed="1"/>
      <edge id="1040" label="zzzz114,zzzzzz5" source="76" target="225" cy:directed="1"/>
      <edge id="1039" label="zzzz114,zzzzzz0" source="76" target="220" cy:directed="1"/>
      <edge id="1038" label="zzzz114,zzzz142" source="76" target="104" cy:directed="1"/>
      <edge id="1037" label="zzzz114,zzzzzz4" source="76" target="224" cy:directed="1"/>
      <edge id="1036" label="zzzz114,zzzz139" source="76" target="101" cy:directed="1"/>
      <edge id="1035" label="zzzz114,zzzz117" source="76" target="79" cy:directed="1"/>
      <edge id="1034" label="zzzz114,zzzz145" source="76" target="107" cy:directed="1"/>
      <edge id="1033" label="zzzz114,zzzz158" source="76" target="120" cy:directed="1"/>
      <edge id="1032" label="zzzz114,zzzzz16" source="76" target="136" cy:directed="1"/>
      <edge id="1031" label="zzzz114,zzzzz12" source="76" target="132" cy:directed="1"/>
      <edge id="1030" label="zzzz114,zzzz148" source="76" target="110" cy:directed="1"/>
      <edge id="1029" label="zzzz114,zzzz154" source="76" target="116" cy:directed="1"/>
      <edge id="1028" label="zzzz114,zzzz150" source="76" target="112" cy:directed="1"/>
      <edge id="1027" label="zzzz114,zzzz147" source="76" target="109" cy:directed="1"/>
      <edge id="1026" label="zzzz114,zzzzzz7" source="76" target="227" cy:directed="1"/>
      <edge id="1025" label="zzzz114,zzzzz11" source="76" target="131" cy:directed="1"/>
      <edge id="1024" label="zzzz114,zzzz149" source="76" target="111" cy:directed="1"/>
      <edge id="1023" label="zzzz114,zzzz151" source="76" target="113" cy:directed="1"/>
      <edge id="1022" label="zzzz114,zzzzz13" source="76" target="133" cy:directed="1"/>
      <edge id="1021" label="zzzz114,zzzzz10" source="76" target="130" cy:directed="1"/>
      <edge id="1020" label="zzzz114,zzzz137" source="76" target="99" cy:directed="1"/>
      <edge id="1019" label="zzzz114,zzzzz17" source="76" target="137" cy:directed="1"/>
      <edge id="1018" label="zzzz114,zzzz146" source="76" target="108" cy:directed="1"/>
      <edge id="1017" label="zzzz114,zzzz157" source="76" target="119" cy:directed="1"/>
      <edge id="1016" label="zzzz114,zzzz156" source="76" target="118" cy:directed="1"/>
      <edge id="1015" label="zzzz114,zzzz136" source="76" target="98" cy:directed="1"/>
      <edge id="1014" label="zzzz114,zzzzzz9" source="76" target="229" cy:directed="1"/>
      <edge id="1013" label="zzzz114,zzzz155" source="76" target="117" cy:directed="1"/>
      <edge id="1012" label="zzzz114,zzzz143" source="76" target="105" cy:directed="1"/>
      <edge id="1011" label="zzzz114,zzzz153" source="76" target="115" cy:directed="1"/>
      <edge id="1010" label="zzzz114,zzzzz93" source="76" target="213" cy:directed="1"/>
      <edge id="1009" label="zzzz114,zzzz144" source="76" target="106" cy:directed="1"/>
      <edge id="1008" label="zzzz114,zzzzzz1" source="76" target="221" cy:directed="1"/>
      <edge id="1007" label="zzzz114,zzzz152" source="76" target="114" cy:directed="1"/>
      <edge id="1006" label="zzzz114,zzzz138" source="76" target="100" cy:directed="1"/>
      <edge id="1005" label="zzzz113,zzzzz98" source="75" target="218" cy:directed="1"/>
      <edge id="1004" label="zzzz113,zzzzz28" source="75" target="148" cy:directed="1"/>
      <edge id="1003" label="zzzz113,zzzzz59" source="75" target="179" cy:directed="1"/>
      <edge id="1002" label="zzzz113,zzzzz37" source="75" target="157" cy:directed="1"/>
      <edge id="1001" label="zzzz113,zzzz124" source="75" target="86" cy:directed="1"/>
      <edge id="1000" label="zzzz113,zzzzz48" source="75" target="168" cy:directed="1"/>
      <edge id="999" label="zzzz113,zzzzz77" source="75" target="197" cy:directed="1"/>
      <edge id="998" label="zzzz113,zzzzz38" source="75" target="158" cy:directed="1"/>
      <edge id="997" label="zzzz113,zzzzz49" source="75" target="169" cy:directed="1"/>
      <edge id="996" label="zzzz113,zzzzz36" source="75" target="156" cy:directed="1"/>
      <edge id="995" label="zzzz113,zzzzz32" source="75" target="152" cy:directed="1"/>
      <edge id="994" label="zzzz113,zzzzz65" source="75" target="185" cy:directed="1"/>
      <edge id="993" label="zzzz113,zzzzz69" source="75" target="189" cy:directed="1"/>
      <edge id="992" label="zzzz113,zzzzz39" source="75" target="159" cy:directed="1"/>
      <edge id="991" label="zzzz113,zzzzz40" source="75" target="160" cy:directed="1"/>
      <edge id="990" label="zzzz113,zzzzz29" source="75" target="149" cy:directed="1"/>
      <edge id="989" label="zzzz113,zzzzz57" source="75" target="177" cy:directed="1"/>
      <edge id="988" label="zzzz113,zzzzz70" source="75" target="190" cy:directed="1"/>
      <edge id="987" label="zzzz113,zzzzz61" source="75" target="181" cy:directed="1"/>
      <edge id="986" label="zzzz113,zzzzz52" source="75" target="172" cy:directed="1"/>
      <edge id="985" label="zzzz113,zzzzz33" source="75" target="153" cy:directed="1"/>
      <edge id="984" label="zzzz113,zzzzz76" source="75" target="196" cy:directed="1"/>
      <edge id="983" label="zzzz113,zzzz114" source="75" target="76" cy:directed="1"/>
      <edge id="982" label="zzzz113,zzzz158" source="75" target="120" cy:directed="1"/>
      <edge id="981" label="zzzz113,zzzzz15" source="75" target="135" cy:directed="1"/>
      <edge id="980" label="zzzz113,zzzzz95" source="75" target="215" cy:directed="1"/>
      <edge id="979" label="zzzz113,zzzzz54" source="75" target="174" cy:directed="1"/>
      <edge id="978" label="zzzz113,zzzzzz5" source="75" target="225" cy:directed="1"/>
      <edge id="977" label="zzzz113,zzzzz64" source="75" target="184" cy:directed="1"/>
      <edge id="976" label="zzzz113,zzzzz79" source="75" target="199" cy:directed="1"/>
      <edge id="975" label="zzzz113,zzzzz74" source="75" target="194" cy:directed="1"/>
      <edge id="974" label="zzzz113,zzzz151" source="75" target="113" cy:directed="1"/>
      <edge id="973" label="zzzz113,zzzzz47" source="75" target="167" cy:directed="1"/>
      <edge id="972" label="zzzz113,zzzzz51" source="75" target="171" cy:directed="1"/>
      <edge id="971" label="zzzz113,zzzzz97" source="75" target="217" cy:directed="1"/>
      <edge id="970" label="zzzz113,zzzzz62" source="75" target="182" cy:directed="1"/>
      <edge id="969" label="zzzz113,zzzzz31" source="75" target="151" cy:directed="1"/>
      <edge id="968" label="zzzz113,zzzzz78" source="75" target="198" cy:directed="1"/>
      <edge id="967" label="zzzz113,zzzz121" source="75" target="83" cy:directed="1"/>
      <edge id="966" label="zzzz113,zzzzz58" source="75" target="178" cy:directed="1"/>
      <edge id="965" label="zzzz113,zzzz140" source="75" target="102" cy:directed="1"/>
      <edge id="964" label="zzzz113,zzzzz68" source="75" target="188" cy:directed="1"/>
      <edge id="963" label="zzzz113,zzzzz60" source="75" target="180" cy:directed="1"/>
      <edge id="962" label="zzzz113,zzzz141" source="75" target="103" cy:directed="1"/>
      <edge id="961" label="zzzz113,zzzzzz6" source="75" target="226" cy:directed="1"/>
      <edge id="960" label="zzzz113,zzzz139" source="75" target="101" cy:directed="1"/>
      <edge id="959" label="zzzz113,zzzzzz4" source="75" target="224" cy:directed="1"/>
      <edge id="958" label="zzzz113,zzzzzz0" source="75" target="220" cy:directed="1"/>
      <edge id="957" label="zzzz113,zzzzz75" source="75" target="195" cy:directed="1"/>
      <edge id="956" label="zzzz113,zzzzz73" source="75" target="193" cy:directed="1"/>
      <edge id="955" label="zzzz113,zzzzz63" source="75" target="183" cy:directed="1"/>
      <edge id="954" label="zzzz113,zzzzz43" source="75" target="163" cy:directed="1"/>
      <edge id="953" label="zzzz113,zzzz157" source="75" target="119" cy:directed="1"/>
      <edge id="952" label="zzzz113,zzzzz67" source="75" target="187" cy:directed="1"/>
      <edge id="951" label="zzzz113,zzzz138" source="75" target="100" cy:directed="1"/>
      <edge id="950" label="zzzz113,zzzzz34" source="75" target="154" cy:directed="1"/>
      <edge id="949" label="zzzz113,zzzz115" source="75" target="77" cy:directed="1"/>
      <edge id="948" label="zzzz113,zzzzz99" source="75" target="219" cy:directed="1"/>
      <edge id="947" label="zzzz113,zzzz143" source="75" target="105" cy:directed="1"/>
      <edge id="946" label="zzzz113,zzzzz17" source="75" target="137" cy:directed="1"/>
      <edge id="945" label="zzzz113,zzzzz72" source="75" target="192" cy:directed="1"/>
      <edge id="944" label="zzzz113,zzzz153" source="75" target="115" cy:directed="1"/>
      <edge id="943" label="zzzz113,zzzz137" source="75" target="99" cy:directed="1"/>
      <edge id="942" label="zzzz113,zzzzzz2" source="75" target="222" cy:directed="1"/>
      <edge id="941" label="zzzz113,zzzzzz1" source="75" target="221" cy:directed="1"/>
      <edge id="940" label="zzzz113,zzzzz71" source="75" target="191" cy:directed="1"/>
      <edge id="939" label="zzzz113,zzzzz50" source="75" target="170" cy:directed="1"/>
      <edge id="938" label="zzzz113,zzzzz41" source="75" target="161" cy:directed="1"/>
      <edge id="937" label="zzzz113,zzzz136" source="75" target="98" cy:directed="1"/>
      <edge id="936" label="zzzz113,zzzzzz8" source="75" target="228" cy:directed="1"/>
      <edge id="935" label="zzzz113,zzzzz46" source="75" target="166" cy:directed="1"/>
      <edge id="934" label="zzzz113,zzzz152" source="75" target="114" cy:directed="1"/>
      <edge id="933" label="zzzz113,zzzz117" source="75" target="79" cy:directed="1"/>
      <edge id="932" label="zzzz113,zzzzz93" source="75" target="213" cy:directed="1"/>
      <edge id="931" label="zzzz113,zzzz155" source="75" target="117" cy:directed="1"/>
      <edge id="930" label="zzzz113,zzzzz44" source="75" target="164" cy:directed="1"/>
      <edge id="929" label="zzzz113,zzzzz16" source="75" target="136" cy:directed="1"/>
      <edge id="928" label="zzzz113,zzzzz42" source="75" target="162" cy:directed="1"/>
      <edge id="927" label="zzzz113,zzzz148" source="75" target="110" cy:directed="1"/>
      <edge id="926" label="zzzz113,zzzzz55" source="75" target="175" cy:directed="1"/>
      <edge id="925" label="zzzz113,zzzz154" source="75" target="116" cy:directed="1"/>
      <edge id="924" label="zzzz113,zzzzz53" source="75" target="173" cy:directed="1"/>
      <edge id="923" label="zzzz113,zzzz150" source="75" target="112" cy:directed="1"/>
      <edge id="922" label="zzzz113,zzzz149" source="75" target="111" cy:directed="1"/>
      <edge id="921" label="zzzz113,zzzz156" source="75" target="118" cy:directed="1"/>
      <edge id="920" label="zzzz113,zzzz146" source="75" target="108" cy:directed="1"/>
      <edge id="919" label="zzzz113,zzzzz12" source="75" target="132" cy:directed="1"/>
      <edge id="918" label="zzzz113,zzzzz87" source="75" target="207" cy:directed="1"/>
      <edge id="917" label="zzzz113,zzzz147" source="75" target="109" cy:directed="1"/>
      <edge id="916" label="zzzz113,zzzz145" source="75" target="107" cy:directed="1"/>
      <edge id="915" label="zzzz113,zzzzz11" source="75" target="131" cy:directed="1"/>
      <edge id="914" label="zzzz113,zzzzz10" source="75" target="130" cy:directed="1"/>
      <edge id="913" label="zzzz113,zzzz142" source="75" target="104" cy:directed="1"/>
      <edge id="912" label="zzzz113,zzzzzz9" source="75" target="229" cy:directed="1"/>
      <edge id="911" label="zzzz113,zzzzzz7" source="75" target="227" cy:directed="1"/>
      <edge id="910" label="zzzz113,zzzzz56" source="75" target="176" cy:directed="1"/>
      <edge id="909" label="zzzz113,zzzz144" source="75" target="106" cy:directed="1"/>
      <edge id="908" label="zzzz113,zzzzz89" source="75" target="209" cy:directed="1"/>
      <edge id="907" label="zzzz113,zzzzz13" source="75" target="133" cy:directed="1"/>
      <edge id="906" label="zzzz113,zzzz119" source="75" target="81" cy:directed="1"/>
      <edge id="905" label="zzzz113,zzzzz88" source="75" target="208" cy:directed="1"/>
      <edge id="904" label="zzzz112,zzzzz38" source="74" target="158" cy:directed="1"/>
      <edge id="903" label="zzzz112,zzzzz23" source="74" target="143" cy:directed="1"/>
      <edge id="902" label="zzzz112,zzzz114" source="74" target="76" cy:directed="1"/>
      <edge id="901" label="zzzz112,zzzzzz3" source="74" target="223" cy:directed="1"/>
      <edge id="900" label="zzzz112,zzzzz39" source="74" target="159" cy:directed="1"/>
      <edge id="899" label="zzzz112,zzzz158" source="74" target="120" cy:directed="1"/>
      <edge id="898" label="zzzz112,zzzzz15" source="74" target="135" cy:directed="1"/>
      <edge id="897" label="zzzz112,zzzzz97" source="74" target="217" cy:directed="1"/>
      <edge id="896" label="zzzz112,zzzzz31" source="74" target="151" cy:directed="1"/>
      <edge id="895" label="zzzz112,zzzzz49" source="74" target="169" cy:directed="1"/>
      <edge id="894" label="zzzz112,zzzzz48" source="74" target="168" cy:directed="1"/>
      <edge id="893" label="zzzz112,zzzzz28" source="74" target="148" cy:directed="1"/>
      <edge id="892" label="zzzz112,zzzzz94" source="74" target="214" cy:directed="1"/>
      <edge id="891" label="zzzz112,zzzzz57" source="74" target="177" cy:directed="1"/>
      <edge id="890" label="zzzz112,zzzzz52" source="74" target="172" cy:directed="1"/>
      <edge id="889" label="zzzz112,zzzzz98" source="74" target="218" cy:directed="1"/>
      <edge id="888" label="zzzz112,zzzz139" source="74" target="101" cy:directed="1"/>
      <edge id="887" label="zzzz112,zzzzzz2" source="74" target="222" cy:directed="1"/>
      <edge id="886" label="zzzz112,zzzzzz0" source="74" target="220" cy:directed="1"/>
      <edge id="885" label="zzzz112,zzzzz79" source="74" target="199" cy:directed="1"/>
      <edge id="884" label="zzzz112,zzzzz65" source="74" target="185" cy:directed="1"/>
      <edge id="883" label="zzzz112,zzzzz29" source="74" target="149" cy:directed="1"/>
      <edge id="882" label="zzzz112,zzzzz33" source="74" target="153" cy:directed="1"/>
      <edge id="881" label="zzzz112,zzzz151" source="74" target="113" cy:directed="1"/>
      <edge id="880" label="zzzz112,zzzz138" source="74" target="100" cy:directed="1"/>
      <edge id="879" label="zzzz112,zzzzz59" source="74" target="179" cy:directed="1"/>
      <edge id="878" label="zzzz112,zzzz141" source="74" target="103" cy:directed="1"/>
      <edge id="877" label="zzzz112,zzzzzz5" source="74" target="225" cy:directed="1"/>
      <edge id="876" label="zzzz112,zzzzz74" source="74" target="194" cy:directed="1"/>
      <edge id="875" label="zzzz112,zzzzz61" source="74" target="181" cy:directed="1"/>
      <edge id="874" label="zzzz112,zzzzz32" source="74" target="152" cy:directed="1"/>
      <edge id="873" label="zzzz112,zzzz146" source="74" target="108" cy:directed="1"/>
      <edge id="872" label="zzzz112,zzzzzz6" source="74" target="226" cy:directed="1"/>
      <edge id="871" label="zzzz112,zzzzz36" source="74" target="156" cy:directed="1"/>
      <edge id="870" label="zzzz112,zzzzz17" source="74" target="137" cy:directed="1"/>
      <edge id="869" label="zzzz112,zzzzz40" source="74" target="160" cy:directed="1"/>
      <edge id="868" label="zzzz112,zzzz140" source="74" target="102" cy:directed="1"/>
      <edge id="867" label="zzzz112,zzzz121" source="74" target="83" cy:directed="1"/>
      <edge id="866" label="zzzz112,zzzz143" source="74" target="105" cy:directed="1"/>
      <edge id="865" label="zzzz112,zzzz144" source="74" target="106" cy:directed="1"/>
      <edge id="864" label="zzzz112,zzzzz16" source="74" target="136" cy:directed="1"/>
      <edge id="863" label="zzzz112,zzzzz51" source="74" target="171" cy:directed="1"/>
      <edge id="862" label="zzzz112,zzzzzz9" source="74" target="229" cy:directed="1"/>
      <edge id="861" label="zzzz112,zzzzzz7" source="74" target="227" cy:directed="1"/>
      <edge id="860" label="zzzz112,zzzzzz4" source="74" target="224" cy:directed="1"/>
      <edge id="859" label="zzzz112,zzzzz70" source="74" target="190" cy:directed="1"/>
      <edge id="858" label="zzzz112,zzzzz12" source="74" target="132" cy:directed="1"/>
      <edge id="857" label="zzzz112,zzzz137" source="74" target="99" cy:directed="1"/>
      <edge id="856" label="zzzz112,zzzzzz1" source="74" target="221" cy:directed="1"/>
      <edge id="855" label="zzzz112,zzzz153" source="74" target="115" cy:directed="1"/>
      <edge id="854" label="zzzz112,zzzzz11" source="74" target="131" cy:directed="1"/>
      <edge id="853" label="zzzz112,zzzz150" source="74" target="112" cy:directed="1"/>
      <edge id="852" label="zzzz112,zzzzz62" source="74" target="182" cy:directed="1"/>
      <edge id="851" label="zzzz112,zzzzz10" source="74" target="130" cy:directed="1"/>
      <edge id="850" label="zzzz112,zzzz149" source="74" target="111" cy:directed="1"/>
      <edge id="849" label="zzzz112,zzzz136" source="74" target="98" cy:directed="1"/>
      <edge id="848" label="zzzz112,zzzz157" source="74" target="119" cy:directed="1"/>
      <edge id="847" label="zzzz112,zzzz148" source="74" target="110" cy:directed="1"/>
      <edge id="846" label="zzzz112,zzzz145" source="74" target="107" cy:directed="1"/>
      <edge id="845" label="zzzz112,zzzz142" source="74" target="104" cy:directed="1"/>
      <edge id="844" label="zzzz112,zzzzz64" source="74" target="184" cy:directed="1"/>
      <edge id="843" label="zzzz112,zzzzz71" source="74" target="191" cy:directed="1"/>
      <edge id="842" label="zzzz112,zzzz147" source="74" target="109" cy:directed="1"/>
      <edge id="841" label="zzzz112,zzzz155" source="74" target="117" cy:directed="1"/>
      <edge id="840" label="zzzz112,zzzzz76" source="74" target="196" cy:directed="1"/>
      <edge id="839" label="zzzz112,zzzz115" source="74" target="77" cy:directed="1"/>
      <edge id="838" label="zzzz112,zzzzz93" source="74" target="213" cy:directed="1"/>
      <edge id="837" label="zzzz112,zzzzz75" source="74" target="195" cy:directed="1"/>
      <edge id="836" label="zzzz112,zzzzz34" source="74" target="154" cy:directed="1"/>
      <edge id="835" label="zzzz112,zzzzz13" source="74" target="133" cy:directed="1"/>
      <edge id="834" label="zzzz112,zzzzz58" source="74" target="178" cy:directed="1"/>
      <edge id="833" label="zzzz112,zzzz117" source="74" target="79" cy:directed="1"/>
      <edge id="832" label="zzzz112,zzzzz42" source="74" target="162" cy:directed="1"/>
      <edge id="831" label="zzzz112,zzzzz47" source="74" target="167" cy:directed="1"/>
      <edge id="830" label="zzzz112,zzzzzz8" source="74" target="228" cy:directed="1"/>
      <edge id="829" label="zzzz112,zzzzz99" source="74" target="219" cy:directed="1"/>
      <edge id="828" label="zzzz112,zzzzz50" source="74" target="170" cy:directed="1"/>
      <edge id="827" label="zzzz112,zzzzz46" source="74" target="166" cy:directed="1"/>
      <edge id="826" label="zzzz112,zzzzz41" source="74" target="161" cy:directed="1"/>
      <edge id="825" label="zzzz112,zzzzz87" source="74" target="207" cy:directed="1"/>
      <edge id="824" label="zzzz112,zzzzz68" source="74" target="188" cy:directed="1"/>
      <edge id="823" label="zzzz112,zzzzz44" source="74" target="164" cy:directed="1"/>
      <edge id="822" label="zzzz112,zzzzz72" source="74" target="192" cy:directed="1"/>
      <edge id="821" label="zzzz112,zzzzz56" source="74" target="176" cy:directed="1"/>
      <edge id="820" label="zzzz112,zzzz152" source="74" target="114" cy:directed="1"/>
      <edge id="819" label="zzzz112,zzzzz43" source="74" target="163" cy:directed="1"/>
      <edge id="818" label="zzzz112,zzzzz54" source="74" target="174" cy:directed="1"/>
      <edge id="817" label="zzzz112,zzzz154" source="74" target="116" cy:directed="1"/>
      <edge id="816" label="zzzz112,zzzzz63" source="74" target="183" cy:directed="1"/>
      <edge id="815" label="zzzz112,zzzzz60" source="74" target="180" cy:directed="1"/>
      <edge id="814" label="zzzz112,zzzzz53" source="74" target="173" cy:directed="1"/>
      <edge id="813" label="zzzz112,zzzzz55" source="74" target="175" cy:directed="1"/>
      <edge id="812" label="zzzz112,zzzzz78" source="74" target="198" cy:directed="1"/>
      <edge id="811" label="zzzz112,zzzzz73" source="74" target="193" cy:directed="1"/>
      <edge id="810" label="zzzz112,zzzzz67" source="74" target="187" cy:directed="1"/>
      <edge id="809" label="zzzz112,zzzz156" source="74" target="118" cy:directed="1"/>
      <edge id="808" label="zzzz112,zzzzz89" source="74" target="209" cy:directed="1"/>
      <edge id="807" label="zzzz112,zzzz113" source="74" target="75" cy:directed="1"/>
      <edge id="806" label="zzzz112,zzzzz88" source="74" target="208" cy:directed="1"/>
      <edge id="805" label="zzzz112,zzzz119" source="74" target="81" cy:directed="1"/>
      <edge id="804" label="zzzz111,zzzzz69" source="73" target="189" cy:directed="1"/>
      <edge id="803" label="zzzz111,zzzzz79" source="73" target="199" cy:directed="1"/>
      <edge id="802" label="zzzz111,zzzzz31" source="73" target="151" cy:directed="1"/>
      <edge id="801" label="zzzz111,zzzzz70" source="73" target="190" cy:directed="1"/>
      <edge id="800" label="zzzz111,zzzzz62" source="73" target="182" cy:directed="1"/>
      <edge id="799" label="zzzz111,zzzzz58" source="73" target="178" cy:directed="1"/>
      <edge id="798" label="zzzz111,zzzzz57" source="73" target="177" cy:directed="1"/>
      <edge id="797" label="zzzz111,zzzzz29" source="73" target="149" cy:directed="1"/>
      <edge id="796" label="zzzz111,zzzzzz3" source="73" target="223" cy:directed="1"/>
      <edge id="795" label="zzzz111,zzzzz36" source="73" target="156" cy:directed="1"/>
      <edge id="794" label="zzzz111,zzzzz52" source="73" target="172" cy:directed="1"/>
      <edge id="793" label="zzzz111,zzzzz42" source="73" target="162" cy:directed="1"/>
      <edge id="792" label="zzzz111,zzzzzz2" source="73" target="222" cy:directed="1"/>
      <edge id="791" label="zzzz111,zzzzz64" source="73" target="184" cy:directed="1"/>
      <edge id="790" label="zzzz111,zzzzz48" source="73" target="168" cy:directed="1"/>
      <edge id="789" label="zzzz111,zzzzz17" source="73" target="137" cy:directed="1"/>
      <edge id="788" label="zzzz111,zzzz140" source="73" target="102" cy:directed="1"/>
      <edge id="787" label="zzzz111,zzzzz97" source="73" target="217" cy:directed="1"/>
      <edge id="786" label="zzzz111,zzzzz95" source="73" target="215" cy:directed="1"/>
      <edge id="785" label="zzzz111,zzzzz39" source="73" target="159" cy:directed="1"/>
      <edge id="784" label="zzzz111,zzzzz65" source="73" target="185" cy:directed="1"/>
      <edge id="783" label="zzzz111,zzzzz45" source="73" target="165" cy:directed="1"/>
      <edge id="782" label="zzzz111,zzzzzz6" source="73" target="226" cy:directed="1"/>
      <edge id="781" label="zzzz111,zzzz114" source="73" target="76" cy:directed="1"/>
      <edge id="780" label="zzzz111,zzzzzz1" source="73" target="221" cy:directed="1"/>
      <edge id="779" label="zzzz111,zzzzz76" source="73" target="196" cy:directed="1"/>
      <edge id="778" label="zzzz111,zzzzzz0" source="73" target="220" cy:directed="1"/>
      <edge id="777" label="zzzz111,zzzzz54" source="73" target="174" cy:directed="1"/>
      <edge id="776" label="zzzz111,zzzzz12" source="73" target="132" cy:directed="1"/>
      <edge id="775" label="zzzz111,zzzzz75" source="73" target="195" cy:directed="1"/>
      <edge id="774" label="zzzz111,zzzz141" source="73" target="103" cy:directed="1"/>
      <edge id="773" label="zzzz111,zzzz143" source="73" target="105" cy:directed="1"/>
      <edge id="772" label="zzzz111,zzzz158" source="73" target="120" cy:directed="1"/>
      <edge id="771" label="zzzz111,zzzzzz5" source="73" target="225" cy:directed="1"/>
      <edge id="770" label="zzzz111,zzzzz63" source="73" target="183" cy:directed="1"/>
      <edge id="769" label="zzzz111,zzzzz16" source="73" target="136" cy:directed="1"/>
      <edge id="768" label="zzzz111,zzzz115" source="73" target="77" cy:directed="1"/>
      <edge id="767" label="zzzz111,zzzzz78" source="73" target="198" cy:directed="1"/>
      <edge id="766" label="zzzz111,zzzz138" source="73" target="100" cy:directed="1"/>
      <edge id="765" label="zzzz111,zzzzzz4" source="73" target="224" cy:directed="1"/>
      <edge id="764" label="zzzz111,zzzzzz7" source="73" target="227" cy:directed="1"/>
      <edge id="763" label="zzzz111,zzzzz50" source="73" target="170" cy:directed="1"/>
      <edge id="762" label="zzzz111,zzzzz46" source="73" target="166" cy:directed="1"/>
      <edge id="761" label="zzzz111,zzzzz74" source="73" target="194" cy:directed="1"/>
      <edge id="760" label="zzzz111,zzzzz40" source="73" target="160" cy:directed="1"/>
      <edge id="759" label="zzzz111,zzzz148" source="73" target="110" cy:directed="1"/>
      <edge id="758" label="zzzz111,zzzzz72" source="73" target="192" cy:directed="1"/>
      <edge id="757" label="zzzz111,zzzzz34" source="73" target="154" cy:directed="1"/>
      <edge id="756" label="zzzz111,zzzz117" source="73" target="79" cy:directed="1"/>
      <edge id="755" label="zzzz111,zzzzz55" source="73" target="175" cy:directed="1"/>
      <edge id="754" label="zzzz111,zzzzz43" source="73" target="163" cy:directed="1"/>
      <edge id="753" label="zzzz111,zzzz149" source="73" target="111" cy:directed="1"/>
      <edge id="752" label="zzzz111,zzzzz67" source="73" target="187" cy:directed="1"/>
      <edge id="751" label="zzzz111,zzzzz44" source="73" target="164" cy:directed="1"/>
      <edge id="750" label="zzzz111,zzzzz10" source="73" target="130" cy:directed="1"/>
      <edge id="749" label="zzzz111,zzzz147" source="73" target="109" cy:directed="1"/>
      <edge id="748" label="zzzz111,zzzz142" source="73" target="104" cy:directed="1"/>
      <edge id="747" label="zzzz111,zzzzzz9" source="73" target="229" cy:directed="1"/>
      <edge id="746" label="zzzz111,zzzz146" source="73" target="108" cy:directed="1"/>
      <edge id="745" label="zzzz111,zzzz150" source="73" target="112" cy:directed="1"/>
      <edge id="744" label="zzzz111,zzzzzz8" source="73" target="228" cy:directed="1"/>
      <edge id="743" label="zzzz111,zzzzz93" source="73" target="213" cy:directed="1"/>
      <edge id="742" label="zzzz111,zzzzz51" source="73" target="171" cy:directed="1"/>
      <edge id="741" label="zzzz111,zzzz144" source="73" target="106" cy:directed="1"/>
      <edge id="740" label="zzzz111,zzzz156" source="73" target="118" cy:directed="1"/>
      <edge id="739" label="zzzz111,zzzzz11" source="73" target="131" cy:directed="1"/>
      <edge id="738" label="zzzz111,zzzzz53" source="73" target="173" cy:directed="1"/>
      <edge id="737" label="zzzz111,zzzzz13" source="73" target="133" cy:directed="1"/>
      <edge id="736" label="zzzz111,zzzz151" source="73" target="113" cy:directed="1"/>
      <edge id="735" label="zzzz111,zzzzz47" source="73" target="167" cy:directed="1"/>
      <edge id="734" label="zzzz111,zzzz157" source="73" target="119" cy:directed="1"/>
      <edge id="733" label="zzzz111,zzzz145" source="73" target="107" cy:directed="1"/>
      <edge id="732" label="zzzz111,zzzzz89" source="73" target="209" cy:directed="1"/>
      <edge id="731" label="zzzz111,zzzzz41" source="73" target="161" cy:directed="1"/>
      <edge id="730" label="zzzz111,zzzz153" source="73" target="115" cy:directed="1"/>
      <edge id="729" label="zzzz111,zzzzz99" source="73" target="219" cy:directed="1"/>
      <edge id="728" label="zzzz111,zzzzz73" source="73" target="193" cy:directed="1"/>
      <edge id="727" label="zzzz111,zzzzz68" source="73" target="188" cy:directed="1"/>
      <edge id="726" label="zzzz111,zzzz152" source="73" target="114" cy:directed="1"/>
      <edge id="725" label="zzzz111,zzzz155" source="73" target="117" cy:directed="1"/>
      <edge id="724" label="zzzz111,zzzz136" source="73" target="98" cy:directed="1"/>
      <edge id="723" label="zzzz111,zzzz112" source="73" target="74" cy:directed="1"/>
      <edge id="722" label="zzzz111,zzzzz60" source="73" target="180" cy:directed="1"/>
      <edge id="721" label="zzzz111,zzzz137" source="73" target="99" cy:directed="1"/>
      <edge id="720" label="zzzz111,zzzz154" source="73" target="116" cy:directed="1"/>
      <edge id="719" label="zzzz111,zzzzz71" source="73" target="191" cy:directed="1"/>
      <edge id="718" label="zzzz111,zzzzz88" source="73" target="208" cy:directed="1"/>
      <edge id="717" label="zzzz111,zzzzz56" source="73" target="176" cy:directed="1"/>
      <edge id="716" label="zzzz111,zzzz119" source="73" target="81" cy:directed="1"/>
      <edge id="715" label="zzzz111,zzzz113" source="73" target="75" cy:directed="1"/>
      <edge id="714" label="zzzz111,zzzzz87" source="73" target="207" cy:directed="1"/>
      <edge id="713" label="zzzz110,zzzzz90" source="72" target="210" cy:directed="1"/>
      <edge id="712" label="zzzz110,zzzzz91" source="72" target="211" cy:directed="1"/>
      <edge id="711" label="zzzz109,zzzzz46" source="71" target="166" cy:directed="1"/>
      <edge id="710" label="zzzz109,zzzzz79" source="71" target="199" cy:directed="1"/>
      <edge id="709" label="zzzz109,zzzzz95" source="71" target="215" cy:directed="1"/>
      <edge id="708" label="zzzz109,zzzzz59" source="71" target="179" cy:directed="1"/>
      <edge id="707" label="zzzz109,zzzzz53" source="71" target="173" cy:directed="1"/>
      <edge id="706" label="zzzz109,zzzzz54" source="71" target="174" cy:directed="1"/>
      <edge id="705" label="zzzz109,zzzzz45" source="71" target="165" cy:directed="1"/>
      <edge id="704" label="zzzz109,zzzzz71" source="71" target="191" cy:directed="1"/>
      <edge id="703" label="zzzz109,zzzzz60" source="71" target="180" cy:directed="1"/>
      <edge id="702" label="zzzz109,zzzzz55" source="71" target="175" cy:directed="1"/>
      <edge id="701" label="zzzz109,zzzzz74" source="71" target="194" cy:directed="1"/>
      <edge id="700" label="zzzz109,zzzz111" source="71" target="73" cy:directed="1"/>
      <edge id="699" label="zzzz109,zzzzz43" source="71" target="163" cy:directed="1"/>
      <edge id="698" label="zzzz109,zzzzz67" source="71" target="187" cy:directed="1"/>
      <edge id="697" label="zzzz109,zzzzz69" source="71" target="189" cy:directed="1"/>
      <edge id="696" label="zzzz109,zzzzz89" source="71" target="209" cy:directed="1"/>
      <edge id="695" label="zzzz109,zzzzz58" source="71" target="178" cy:directed="1"/>
      <edge id="694" label="zzzz109,zzzzz76" source="71" target="196" cy:directed="1"/>
      <edge id="693" label="zzzz109,zzzzz97" source="71" target="217" cy:directed="1"/>
      <edge id="692" label="zzzz109,zzzzz62" source="71" target="182" cy:directed="1"/>
      <edge id="691" label="zzzz109,zzzz131" source="71" target="93" cy:directed="1"/>
      <edge id="690" label="zzzz109,zzzz115" source="71" target="77" cy:directed="1"/>
      <edge id="689" label="zzzz109,zzzzz51" source="71" target="171" cy:directed="1"/>
      <edge id="688" label="zzzz109,zzzzz70" source="71" target="190" cy:directed="1"/>
      <edge id="687" label="zzzz109,zzzzz87" source="71" target="207" cy:directed="1"/>
      <edge id="686" label="zzzz109,zzzzz75" source="71" target="195" cy:directed="1"/>
      <edge id="685" label="zzzz109,zzzzz44" source="71" target="164" cy:directed="1"/>
      <edge id="684" label="zzzz109,zzzzz41" source="71" target="161" cy:directed="1"/>
      <edge id="683" label="zzzz109,zzzzz72" source="71" target="192" cy:directed="1"/>
      <edge id="682" label="zzzz109,zzzz119" source="71" target="81" cy:directed="1"/>
      <edge id="681" label="zzzz109,zzzzz52" source="71" target="172" cy:directed="1"/>
      <edge id="680" label="zzzz109,zzzz113" source="71" target="75" cy:directed="1"/>
      <edge id="679" label="zzzz109,zzzzz56" source="71" target="176" cy:directed="1"/>
      <edge id="678" label="zzzz108,zzzzz74" source="70" target="194" cy:directed="1"/>
      <edge id="677" label="zzzz108,zzzzz59" source="70" target="179" cy:directed="1"/>
      <edge id="676" label="zzzz108,zzzzz38" source="70" target="158" cy:directed="1"/>
      <edge id="675" label="zzzz108,zzzzz67" source="70" target="187" cy:directed="1"/>
      <edge id="674" label="zzzz108,zzzzz99" source="70" target="219" cy:directed="1"/>
      <edge id="673" label="zzzz108,zzzzz47" source="70" target="167" cy:directed="1"/>
      <edge id="672" label="zzzz108,zzzzz63" source="70" target="183" cy:directed="1"/>
      <edge id="671" label="zzzz108,zzzzz95" source="70" target="215" cy:directed="1"/>
      <edge id="670" label="zzzz108,zzzzz97" source="70" target="217" cy:directed="1"/>
      <edge id="669" label="zzzz108,zzzzz58" source="70" target="178" cy:directed="1"/>
      <edge id="668" label="zzzz108,zzzzz78" source="70" target="198" cy:directed="1"/>
      <edge id="667" label="zzzz108,zzzzz75" source="70" target="195" cy:directed="1"/>
      <edge id="666" label="zzzz108,zzzzz43" source="70" target="163" cy:directed="1"/>
      <edge id="665" label="zzzz108,zzzzz68" source="70" target="188" cy:directed="1"/>
      <edge id="664" label="zzzz108,zzzzz57" source="70" target="177" cy:directed="1"/>
      <edge id="663" label="zzzz108,zzzzz70" source="70" target="190" cy:directed="1"/>
      <edge id="662" label="zzzz108,zzzz119" source="70" target="81" cy:directed="1"/>
      <edge id="661" label="zzzz108,zzzzz51" source="70" target="171" cy:directed="1"/>
      <edge id="660" label="zzzz108,zzzzz46" source="70" target="166" cy:directed="1"/>
      <edge id="659" label="zzzz108,zzzzz88" source="70" target="208" cy:directed="1"/>
      <edge id="658" label="zzzz108,zzzzz69" source="70" target="189" cy:directed="1"/>
      <edge id="657" label="zzzz108,zzzzz54" source="70" target="174" cy:directed="1"/>
      <edge id="656" label="zzzz108,zzzzz89" source="70" target="209" cy:directed="1"/>
      <edge id="655" label="zzzz108,zzzzz71" source="70" target="191" cy:directed="1"/>
      <edge id="654" label="zzzz108,zzzz111" source="70" target="73" cy:directed="1"/>
      <edge id="653" label="zzzz108,zzzzz62" source="70" target="182" cy:directed="1"/>
      <edge id="652" label="zzzz108,zzzzz52" source="70" target="172" cy:directed="1"/>
      <edge id="651" label="zzzz108,zzzzz55" source="70" target="175" cy:directed="1"/>
      <edge id="650" label="zzzz108,zzzzz34" source="70" target="154" cy:directed="1"/>
      <edge id="649" label="zzzz108,zzzzz87" source="70" target="207" cy:directed="1"/>
      <edge id="648" label="zzzz108,zzzzz31" source="70" target="151" cy:directed="1"/>
      <edge id="647" label="zzzz108,zzzz113" source="70" target="75" cy:directed="1"/>
      <edge id="646" label="zzzz108,zzzzz73" source="70" target="193" cy:directed="1"/>
      <edge id="645" label="zzzz108,zzzzz60" source="70" target="180" cy:directed="1"/>
      <edge id="644" label="zzzz108,zzzzz44" source="70" target="164" cy:directed="1"/>
      <edge id="643" label="zzzz108,zzzzz53" source="70" target="173" cy:directed="1"/>
      <edge id="642" label="zzzz108,zzzzz41" source="70" target="161" cy:directed="1"/>
      <edge id="641" label="zzzz108,zzzz115" source="70" target="77" cy:directed="1"/>
      <edge id="640" label="zzzz108,zzzzz72" source="70" target="192" cy:directed="1"/>
      <edge id="639" label="zzzz108,zzzz112" source="70" target="74" cy:directed="1"/>
      <edge id="638" label="zzzz108,zzzzz56" source="70" target="176" cy:directed="1"/>
      <edge id="637" label="zzzz108,zzzz109" source="70" target="71" cy:directed="1"/>
      <edge id="636" label="zzzz107,zzzzz75" source="69" target="195" cy:directed="1"/>
      <edge id="635" label="zzzz107,zzzz115" source="69" target="77" cy:directed="1"/>
      <edge id="634" label="zzzz107,zzzzz99" source="69" target="219" cy:directed="1"/>
      <edge id="633" label="zzzz107,zzzz123" source="69" target="85" cy:directed="1"/>
      <edge id="632" label="zzzz107,zzzz124" source="69" target="86" cy:directed="1"/>
      <edge id="631" label="zzzz107,zzzzz21" source="69" target="141" cy:directed="1"/>
      <edge id="630" label="zzzz107,zzzzz20" source="69" target="140" cy:directed="1"/>
      <edge id="629" label="zzzz107,zzzzz92" source="69" target="212" cy:directed="1"/>
      <edge id="628" label="zzzz106,zzzzz49" source="68" target="169" cy:directed="1"/>
      <edge id="627" label="zzzz106,zzzz118" source="68" target="80" cy:directed="1"/>
      <edge id="626" label="zzzz106,zzzz120" source="68" target="82" cy:directed="1"/>
      <edge id="625" label="zzzz106,zzzz125" source="68" target="87" cy:directed="1"/>
      <edge id="624" label="zzzz105,zzzzz51" source="67" target="171" cy:directed="1"/>
      <edge id="623" label="zzzz105,zzzzz48" source="67" target="168" cy:directed="1"/>
      <edge id="622" label="zzzz105,zzzzz15" source="67" target="135" cy:directed="1"/>
      <edge id="621" label="zzzz105,zzzzz49" source="67" target="169" cy:directed="1"/>
      <edge id="620" label="zzzz105,zzzzz79" source="67" target="199" cy:directed="1"/>
      <edge id="619" label="zzzz105,zzzzz28" source="67" target="148" cy:directed="1"/>
      <edge id="618" label="zzzz105,zzzzz29" source="67" target="149" cy:directed="1"/>
      <edge id="617" label="zzzz105,zzzz139" source="67" target="101" cy:directed="1"/>
      <edge id="616" label="zzzz105,zzzzz65" source="67" target="185" cy:directed="1"/>
      <edge id="615" label="zzzz105,zzzz143" source="67" target="105" cy:directed="1"/>
      <edge id="614" label="zzzz105,zzzzz39" source="67" target="159" cy:directed="1"/>
      <edge id="613" label="zzzz105,zzzzzz6" source="67" target="226" cy:directed="1"/>
      <edge id="612" label="zzzz105,zzzzz17" source="67" target="137" cy:directed="1"/>
      <edge id="611" label="zzzz105,zzzz108" source="67" target="70" cy:directed="1"/>
      <edge id="610" label="zzzz105,zzzzz32" source="67" target="152" cy:directed="1"/>
      <edge id="609" label="zzzz105,zzzzz61" source="67" target="181" cy:directed="1"/>
      <edge id="608" label="zzzz105,zzzz158" source="67" target="120" cy:directed="1"/>
      <edge id="607" label="zzzz105,zzzz141" source="67" target="103" cy:directed="1"/>
      <edge id="606" label="zzzz105,zzzzz33" source="67" target="153" cy:directed="1"/>
      <edge id="605" label="zzzz105,zzzzz59" source="67" target="179" cy:directed="1"/>
      <edge id="604" label="zzzz105,zzzzz76" source="67" target="196" cy:directed="1"/>
      <edge id="603" label="zzzz105,zzzz151" source="67" target="113" cy:directed="1"/>
      <edge id="602" label="zzzz105,zzzz140" source="67" target="102" cy:directed="1"/>
      <edge id="601" label="zzzz105,zzzzz50" source="67" target="170" cy:directed="1"/>
      <edge id="600" label="zzzz105,zzzz138" source="67" target="100" cy:directed="1"/>
      <edge id="599" label="zzzz105,zzzzzz2" source="67" target="222" cy:directed="1"/>
      <edge id="598" label="zzzz105,zzzz146" source="67" target="108" cy:directed="1"/>
      <edge id="597" label="zzzz105,zzzzz71" source="67" target="191" cy:directed="1"/>
      <edge id="596" label="zzzz105,zzzzzz0" source="67" target="220" cy:directed="1"/>
      <edge id="595" label="zzzz105,zzzzz47" source="67" target="167" cy:directed="1"/>
      <edge id="594" label="zzzz105,zzzzz58" source="67" target="178" cy:directed="1"/>
      <edge id="593" label="zzzz105,zzzzzz1" source="67" target="221" cy:directed="1"/>
      <edge id="592" label="zzzz105,zzzzz64" source="67" target="184" cy:directed="1"/>
      <edge id="591" label="zzzz105,zzzz145" source="67" target="107" cy:directed="1"/>
      <edge id="590" label="zzzz105,zzzzz68" source="67" target="188" cy:directed="1"/>
      <edge id="589" label="zzzz105,zzzzz36" source="67" target="156" cy:directed="1"/>
      <edge id="588" label="zzzz105,zzzzzz5" source="67" target="225" cy:directed="1"/>
      <edge id="587" label="zzzz105,zzzz144" source="67" target="106" cy:directed="1"/>
      <edge id="586" label="zzzz105,zzzzz40" source="67" target="160" cy:directed="1"/>
      <edge id="585" label="zzzz105,zzzzz16" source="67" target="136" cy:directed="1"/>
      <edge id="584" label="zzzz105,zzzzzz4" source="67" target="224" cy:directed="1"/>
      <edge id="583" label="zzzz105,zzzzz75" source="67" target="195" cy:directed="1"/>
      <edge id="582" label="zzzz105,zzzz149" source="67" target="111" cy:directed="1"/>
      <edge id="581" label="zzzz105,zzzz148" source="67" target="110" cy:directed="1"/>
      <edge id="580" label="zzzz105,zzzzz70" source="67" target="190" cy:directed="1"/>
      <edge id="579" label="zzzz105,zzzzz60" source="67" target="180" cy:directed="1"/>
      <edge id="578" label="zzzz105,zzzzz11" source="67" target="131" cy:directed="1"/>
      <edge id="577" label="zzzz105,zzzz111" source="67" target="73" cy:directed="1"/>
      <edge id="576" label="zzzz105,zzzz137" source="67" target="99" cy:directed="1"/>
      <edge id="575" label="zzzz105,zzzzz42" source="67" target="162" cy:directed="1"/>
      <edge id="574" label="zzzz105,zzzz157" source="67" target="119" cy:directed="1"/>
      <edge id="573" label="zzzz105,zzzz142" source="67" target="104" cy:directed="1"/>
      <edge id="572" label="zzzz105,zzzzz72" source="67" target="192" cy:directed="1"/>
      <edge id="571" label="zzzz105,zzzz153" source="67" target="115" cy:directed="1"/>
      <edge id="570" label="zzzz105,zzzz121" source="67" target="83" cy:directed="1"/>
      <edge id="569" label="zzzz105,zzzz136" source="67" target="98" cy:directed="1"/>
      <edge id="568" label="zzzz105,zzzzz46" source="67" target="166" cy:directed="1"/>
      <edge id="567" label="zzzz105,zzzz150" source="67" target="112" cy:directed="1"/>
      <edge id="566" label="zzzz105,zzzz152" source="67" target="114" cy:directed="1"/>
      <edge id="565" label="zzzz105,zzzzzz9" source="67" target="229" cy:directed="1"/>
      <edge id="564" label="zzzz105,zzzzz62" source="67" target="182" cy:directed="1"/>
      <edge id="563" label="zzzz105,zzzzz56" source="67" target="176" cy:directed="1"/>
      <edge id="562" label="zzzz105,zzzzzz7" source="67" target="227" cy:directed="1"/>
      <edge id="561" label="zzzz105,zzzzz44" source="67" target="164" cy:directed="1"/>
      <edge id="560" label="zzzz105,zzzzzz8" source="67" target="228" cy:directed="1"/>
      <edge id="559" label="zzzz105,zzzzz99" source="67" target="219" cy:directed="1"/>
      <edge id="558" label="zzzz105,zzzzz78" source="67" target="198" cy:directed="1"/>
      <edge id="557" label="zzzz105,zzzzz13" source="67" target="133" cy:directed="1"/>
      <edge id="556" label="zzzz105,zzzzz63" source="67" target="183" cy:directed="1"/>
      <edge id="555" label="zzzz105,zzzzz41" source="67" target="161" cy:directed="1"/>
      <edge id="554" label="zzzz105,zzzzz34" source="67" target="154" cy:directed="1"/>
      <edge id="553" label="zzzz105,zzzzz93" source="67" target="213" cy:directed="1"/>
      <edge id="552" label="zzzz105,zzzz155" source="67" target="117" cy:directed="1"/>
      <edge id="551" label="zzzz105,zzzz117" source="67" target="79" cy:directed="1"/>
      <edge id="550" label="zzzz105,zzzzz12" source="67" target="132" cy:directed="1"/>
      <edge id="549" label="zzzz105,zzzzz73" source="67" target="193" cy:directed="1"/>
      <edge id="548" label="zzzz105,zzzzz10" source="67" target="130" cy:directed="1"/>
      <edge id="547" label="zzzz105,zzzzz43" source="67" target="163" cy:directed="1"/>
      <edge id="546" label="zzzz105,zzzzz87" source="67" target="207" cy:directed="1"/>
      <edge id="545" label="zzzz105,zzzz115" source="67" target="77" cy:directed="1"/>
      <edge id="544" label="zzzz105,zzzzz55" source="67" target="175" cy:directed="1"/>
      <edge id="543" label="zzzz105,zzzz147" source="67" target="109" cy:directed="1"/>
      <edge id="542" label="zzzz105,zzzzz67" source="67" target="187" cy:directed="1"/>
      <edge id="541" label="zzzz105,zzzz154" source="67" target="116" cy:directed="1"/>
      <edge id="540" label="zzzz105,zzzzz53" source="67" target="173" cy:directed="1"/>
      <edge id="539" label="zzzz105,zzzzz54" source="67" target="174" cy:directed="1"/>
      <edge id="538" label="zzzz105,zzzz113" source="67" target="75" cy:directed="1"/>
      <edge id="537" label="zzzz105,zzzz156" source="67" target="118" cy:directed="1"/>
      <edge id="536" label="zzzz105,zzzz119" source="67" target="81" cy:directed="1"/>
      <edge id="535" label="zzzz105,zzzzz88" source="67" target="208" cy:directed="1"/>
      <edge id="534" label="zzzz105,zzzzz89" source="67" target="209" cy:directed="1"/>
      <edge id="533" label="zzzz105,zzzz112" source="67" target="74" cy:directed="1"/>
      <edge id="532" label="zzzz104,zzzzz98" source="66" target="218" cy:directed="1"/>
      <edge id="531" label="zzzz104,zzzz106" source="66" target="68" cy:directed="1"/>
      <edge id="530" label="zzzz104,zzzz116" source="66" target="78" cy:directed="1"/>
      <edge id="529" label="zzzz104,zzzz125" source="66" target="87" cy:directed="1"/>
      <edge id="528" label="zzzz104,zzzz118" source="66" target="80" cy:directed="1"/>
      <edge id="527" label="zzzz103,zzzzz22" source="65" target="142" cy:directed="1"/>
      <edge id="526" label="zzzz103,zzzz107" source="65" target="69" cy:directed="1"/>
      <edge id="525" label="zzzz103,zzzzzz3" source="65" target="223" cy:directed="1"/>
      <edge id="524" label="zzzz103,zzzzz77" source="65" target="197" cy:directed="1"/>
      <edge id="523" label="zzzz103,zzzz143" source="65" target="105" cy:directed="1"/>
      <edge id="522" label="zzzz103,zzzzz95" source="65" target="215" cy:directed="1"/>
      <edge id="521" label="zzzz103,zzzz141" source="65" target="103" cy:directed="1"/>
      <edge id="520" label="zzzz103,zzzzzz5" source="65" target="225" cy:directed="1"/>
      <edge id="519" label="zzzz103,zzzzz38" source="65" target="158" cy:directed="1"/>
      <edge id="518" label="zzzz103,zzzz157" source="65" target="119" cy:directed="1"/>
      <edge id="517" label="zzzz103,zzzzzz4" source="65" target="224" cy:directed="1"/>
      <edge id="516" label="zzzz103,zzzz121" source="65" target="83" cy:directed="1"/>
      <edge id="515" label="zzzz103,zzzzzz6" source="65" target="226" cy:directed="1"/>
      <edge id="514" label="zzzz103,zzzzz16" source="65" target="136" cy:directed="1"/>
      <edge id="513" label="zzzz103,zzzzzz2" source="65" target="222" cy:directed="1"/>
      <edge id="512" label="zzzz103,zzzzzz0" source="65" target="220" cy:directed="1"/>
      <edge id="511" label="zzzz103,zzzzz32" source="65" target="152" cy:directed="1"/>
      <edge id="510" label="zzzz103,zzzz151" source="65" target="113" cy:directed="1"/>
      <edge id="509" label="zzzz103,zzzz145" source="65" target="107" cy:directed="1"/>
      <edge id="508" label="zzzz103,zzzzzz8" source="65" target="228" cy:directed="1"/>
      <edge id="507" label="zzzz103,zzzzz45" source="65" target="165" cy:directed="1"/>
      <edge id="506" label="zzzz103,zzzz109" source="65" target="71" cy:directed="1"/>
      <edge id="505" label="zzzz103,zzzzz39" source="65" target="159" cy:directed="1"/>
      <edge id="504" label="zzzz103,zzzzz52" source="65" target="172" cy:directed="1"/>
      <edge id="503" label="zzzz103,zzzz144" source="65" target="106" cy:directed="1"/>
      <edge id="502" label="zzzz103,zzzz152" source="65" target="114" cy:directed="1"/>
      <edge id="501" label="zzzz103,zzzzz28" source="65" target="148" cy:directed="1"/>
      <edge id="500" label="zzzz103,zzzzz59" source="65" target="179" cy:directed="1"/>
      <edge id="499" label="zzzz103,zzzzz13" source="65" target="133" cy:directed="1"/>
      <edge id="498" label="zzzz103,zzzz156" source="65" target="118" cy:directed="1"/>
      <edge id="497" label="zzzz103,zzzzz49" source="65" target="169" cy:directed="1"/>
      <edge id="496" label="zzzz103,zzzz146" source="65" target="108" cy:directed="1"/>
      <edge id="495" label="zzzz103,zzzzz93" source="65" target="213" cy:directed="1"/>
      <edge id="494" label="zzzz103,zzzz153" source="65" target="115" cy:directed="1"/>
      <edge id="493" label="zzzz103,zzzzz97" source="65" target="217" cy:directed="1"/>
      <edge id="492" label="zzzz103,zzzz108" source="65" target="70" cy:directed="1"/>
      <edge id="491" label="zzzz103,zzzz147" source="65" target="109" cy:directed="1"/>
      <edge id="490" label="zzzz103,zzzz158" source="65" target="120" cy:directed="1"/>
      <edge id="489" label="zzzz103,zzzz142" source="65" target="104" cy:directed="1"/>
      <edge id="488" label="zzzz103,zzzz117" source="65" target="79" cy:directed="1"/>
      <edge id="487" label="zzzz103,zzzzzz7" source="65" target="227" cy:directed="1"/>
      <edge id="486" label="zzzz103,zzzz140" source="65" target="102" cy:directed="1"/>
      <edge id="485" label="zzzz103,zzzz114" source="65" target="76" cy:directed="1"/>
      <edge id="484" label="zzzz103,zzzzz11" source="65" target="131" cy:directed="1"/>
      <edge id="483" label="zzzz103,zzzz154" source="65" target="116" cy:directed="1"/>
      <edge id="482" label="zzzz103,zzzz149" source="65" target="111" cy:directed="1"/>
      <edge id="481" label="zzzz103,zzzzz79" source="65" target="199" cy:directed="1"/>
      <edge id="480" label="zzzz103,zzzzzz1" source="65" target="221" cy:directed="1"/>
      <edge id="479" label="zzzz103,zzzzz57" source="65" target="177" cy:directed="1"/>
      <edge id="478" label="zzzz103,zzzzz12" source="65" target="132" cy:directed="1"/>
      <edge id="477" label="zzzz103,zzzzzz9" source="65" target="229" cy:directed="1"/>
      <edge id="476" label="zzzz103,zzzzz65" source="65" target="185" cy:directed="1"/>
      <edge id="475" label="zzzz103,zzzzz36" source="65" target="156" cy:directed="1"/>
      <edge id="474" label="zzzz103,zzzzz29" source="65" target="149" cy:directed="1"/>
      <edge id="473" label="zzzz103,zzzzz17" source="65" target="137" cy:directed="1"/>
      <edge id="472" label="zzzz103,zzzzz33" source="65" target="153" cy:directed="1"/>
      <edge id="471" label="zzzz103,zzzzz10" source="65" target="130" cy:directed="1"/>
      <edge id="470" label="zzzz103,zzzz138" source="65" target="100" cy:directed="1"/>
      <edge id="469" label="zzzz103,zzzz150" source="65" target="112" cy:directed="1"/>
      <edge id="468" label="zzzz103,zzzzz31" source="65" target="151" cy:directed="1"/>
      <edge id="467" label="zzzz103,zzzzz40" source="65" target="160" cy:directed="1"/>
      <edge id="466" label="zzzz103,zzzz148" source="65" target="110" cy:directed="1"/>
      <edge id="465" label="zzzz103,zzzz139" source="65" target="101" cy:directed="1"/>
      <edge id="464" label="zzzz103,zzzz137" source="65" target="99" cy:directed="1"/>
      <edge id="463" label="zzzz103,zzzzz70" source="65" target="190" cy:directed="1"/>
      <edge id="462" label="zzzz103,zzzzz69" source="65" target="189" cy:directed="1"/>
      <edge id="461" label="zzzz103,zzzzz61" source="65" target="181" cy:directed="1"/>
      <edge id="460" label="zzzz103,zzzz136" source="65" target="98" cy:directed="1"/>
      <edge id="459" label="zzzz103,zzzz155" source="65" target="117" cy:directed="1"/>
      <edge id="458" label="zzzz103,zzzzz99" source="65" target="219" cy:directed="1"/>
      <edge id="457" label="zzzz103,zzzzz64" source="65" target="184" cy:directed="1"/>
      <edge id="456" label="zzzz103,zzzzz58" source="65" target="178" cy:directed="1"/>
      <edge id="455" label="zzzz103,zzzzz62" source="65" target="182" cy:directed="1"/>
      <edge id="454" label="zzzz103,zzzzz75" source="65" target="195" cy:directed="1"/>
      <edge id="453" label="zzzz103,zzzz111" source="65" target="73" cy:directed="1"/>
      <edge id="452" label="zzzz103,zzzzz54" source="65" target="174" cy:directed="1"/>
      <edge id="451" label="zzzz103,zzzzz87" source="65" target="207" cy:directed="1"/>
      <edge id="450" label="zzzz103,zzzzz42" source="65" target="162" cy:directed="1"/>
      <edge id="449" label="zzzz103,zzzzz51" source="65" target="171" cy:directed="1"/>
      <edge id="448" label="zzzz103,zzzzz67" source="65" target="187" cy:directed="1"/>
      <edge id="447" label="zzzz103,zzzzz50" source="65" target="170" cy:directed="1"/>
      <edge id="446" label="zzzz103,zzzzz74" source="65" target="194" cy:directed="1"/>
      <edge id="445" label="zzzz103,zzzz105" source="65" target="67" cy:directed="1"/>
      <edge id="444" label="zzzz103,zzzzz76" source="65" target="196" cy:directed="1"/>
      <edge id="443" label="zzzz103,zzzzz34" source="65" target="154" cy:directed="1"/>
      <edge id="442" label="zzzz103,zzzz115" source="65" target="77" cy:directed="1"/>
      <edge id="441" label="zzzz103,zzzzz89" source="65" target="209" cy:directed="1"/>
      <edge id="440" label="zzzz103,zzzzz73" source="65" target="193" cy:directed="1"/>
      <edge id="439" label="zzzz103,zzzzz44" source="65" target="164" cy:directed="1"/>
      <edge id="438" label="zzzz103,zzzzz72" source="65" target="192" cy:directed="1"/>
      <edge id="437" label="zzzz103,zzzzz68" source="65" target="188" cy:directed="1"/>
      <edge id="436" label="zzzz103,zzzzz56" source="65" target="176" cy:directed="1"/>
      <edge id="435" label="zzzz103,zzzzz78" source="65" target="198" cy:directed="1"/>
      <edge id="434" label="zzzz103,zzzzz47" source="65" target="167" cy:directed="1"/>
      <edge id="433" label="zzzz103,zzzz119" source="65" target="81" cy:directed="1"/>
      <edge id="432" label="zzzz103,zzzzz88" source="65" target="208" cy:directed="1"/>
      <edge id="431" label="zzzz103,zzzzz55" source="65" target="175" cy:directed="1"/>
      <edge id="430" label="zzzz103,zzzzz43" source="65" target="163" cy:directed="1"/>
      <edge id="429" label="zzzz103,zzzzz53" source="65" target="173" cy:directed="1"/>
      <edge id="428" label="zzzz103,zzzzz46" source="65" target="166" cy:directed="1"/>
      <edge id="427" label="zzzz103,zzzzz41" source="65" target="161" cy:directed="1"/>
      <edge id="426" label="zzzz103,zzzz112" source="65" target="74" cy:directed="1"/>
      <edge id="425" label="zzzz103,zzzzz63" source="65" target="183" cy:directed="1"/>
      <edge id="424" label="zzzz103,zzzzz71" source="65" target="191" cy:directed="1"/>
      <edge id="423" label="zzzz103,zzzzz60" source="65" target="180" cy:directed="1"/>
      <edge id="422" label="zzzz103,zzzz113" source="65" target="75" cy:directed="1"/>
      <edge id="421" label="zzzz102,zzzzz97" source="64" target="217" cy:directed="1"/>
      <edge id="420" label="zzzz102,zzzzz52" source="64" target="172" cy:directed="1"/>
      <edge id="419" label="zzzz102,zzzzz57" source="64" target="177" cy:directed="1"/>
      <edge id="418" label="zzzz102,zzzzz50" source="64" target="170" cy:directed="1"/>
      <edge id="417" label="zzzz102,zzzz107" source="64" target="69" cy:directed="1"/>
      <edge id="416" label="zzzz102,zzzzz46" source="64" target="166" cy:directed="1"/>
      <edge id="415" label="zzzz102,zzzzz44" source="64" target="164" cy:directed="1"/>
      <edge id="414" label="zzzz102,zzzzz76" source="64" target="196" cy:directed="1"/>
      <edge id="413" label="zzzz102,zzzzz31" source="64" target="151" cy:directed="1"/>
      <edge id="412" label="zzzz102,zzzzz20" source="64" target="140" cy:directed="1"/>
      <edge id="411" label="zzzz102,zzzzz75" source="64" target="195" cy:directed="1"/>
      <edge id="410" label="zzzz102,zzzzz21" source="64" target="141" cy:directed="1"/>
      <edge id="409" label="zzzz102,zzzzz56" source="64" target="176" cy:directed="1"/>
      <edge id="408" label="zzzz102,zzzzz53" source="64" target="173" cy:directed="1"/>
      <edge id="407" label="zzzz102,zzzzz89" source="64" target="209" cy:directed="1"/>
      <edge id="406" label="zzzz102,zzzzzz3" source="64" target="223" cy:directed="1"/>
      <edge id="405" label="zzzz102,zzzzz99" source="64" target="219" cy:directed="1"/>
      <edge id="404" label="zzzz102,zzzz124" source="64" target="86" cy:directed="1"/>
      <edge id="403" label="zzzz102,zzzzz55" source="64" target="175" cy:directed="1"/>
      <edge id="402" label="zzzz102,zzzzz67" source="64" target="187" cy:directed="1"/>
      <edge id="401" label="zzzz102,zzzz115" source="64" target="77" cy:directed="1"/>
      <edge id="400" label="zzzz102,zzzzz35" source="64" target="155" cy:directed="1"/>
      <edge id="399" label="zzzz102,zzzzz94" source="64" target="214" cy:directed="1"/>
      <edge id="398" label="zzzz101,zzzz115" source="63" target="77" cy:directed="1"/>
      <edge id="397" label="zzzz101,zzzzz32" source="63" target="152" cy:directed="1"/>
      <edge id="396" label="zzzz101,zzzzz97" source="63" target="217" cy:directed="1"/>
      <edge id="395" label="zzzz101,zzzzz62" source="63" target="182" cy:directed="1"/>
      <edge id="394" label="zzzz101,zzzzz74" source="63" target="194" cy:directed="1"/>
      <edge id="393" label="zzzz101,zzzzz63" source="63" target="183" cy:directed="1"/>
      <edge id="392" label="zzzz101,zzzzz54" source="63" target="174" cy:directed="1"/>
      <edge id="391" label="zzzz101,zzzzz78" source="63" target="198" cy:directed="1"/>
      <edge id="390" label="zzzz101,zzzzz46" source="63" target="166" cy:directed="1"/>
      <edge id="389" label="zzzz101,zzzzz44" source="63" target="164" cy:directed="1"/>
      <edge id="388" label="zzzz101,zzzzz50" source="63" target="170" cy:directed="1"/>
      <edge id="387" label="zzzz101,zzzzz67" source="63" target="187" cy:directed="1"/>
      <edge id="386" label="zzzz101,zzzzz34" source="63" target="154" cy:directed="1"/>
      <edge id="385" label="zzzz101,zzzzz99" source="63" target="219" cy:directed="1"/>
      <edge id="384" label="zzzz101,zzzzz47" source="63" target="167" cy:directed="1"/>
      <edge id="383" label="zzzz101,zzzzz71" source="63" target="191" cy:directed="1"/>
      <edge id="382" label="zzzz101,zzzzz51" source="63" target="171" cy:directed="1"/>
      <edge id="381" label="zzzz101,zzzzz68" source="63" target="188" cy:directed="1"/>
      <edge id="380" label="zzzz101,zzzzz43" source="63" target="163" cy:directed="1"/>
      <edge id="379" label="zzzz101,zzzzz53" source="63" target="173" cy:directed="1"/>
      <edge id="378" label="zzzz101,zzzzz72" source="63" target="192" cy:directed="1"/>
      <edge id="377" label="zzzz101,zzzzz60" source="63" target="180" cy:directed="1"/>
      <edge id="376" label="zzzz101,zzzzz73" source="63" target="193" cy:directed="1"/>
      <edge id="375" label="zzzz101,zzzzz56" source="63" target="176" cy:directed="1"/>
      <edge id="374" label="zzzz101,zzzzz55" source="63" target="175" cy:directed="1"/>
      <edge id="373" label="zzzz101,zzzz103" source="63" target="65" cy:directed="1"/>
      <edge id="372" label="zzzz101,zzzz105" source="63" target="67" cy:directed="1"/>
      <edge id="371" label="zzzz101,zzzzz41" source="63" target="161" cy:directed="1"/>
      <edge id="370" label="zzzz101,zzzz111" source="63" target="73" cy:directed="1"/>
      <edge id="369" label="zzzz101,zzzzz42" source="63" target="162" cy:directed="1"/>
      <edge id="368" label="zzzz101,zzzzz89" source="63" target="209" cy:directed="1"/>
      <edge id="367" label="zzzz101,zzzz119" source="63" target="81" cy:directed="1"/>
      <edge id="366" label="zzzz101,zzzz158" source="63" target="120" cy:directed="1"/>
      <edge id="365" label="zzzz101,zzzzz88" source="63" target="208" cy:directed="1"/>
      <edge id="364" label="zzzz101,zzzzz87" source="63" target="207" cy:directed="1"/>
      <edge id="363" label="zzzz101,zzzz112" source="63" target="74" cy:directed="1"/>
      <edge id="362" label="zzzz101,zzzz113" source="63" target="75" cy:directed="1"/>
      <edge id="361" label="zzzz101,zzzzzz6" source="63" target="226" cy:directed="1"/>
      <edge id="360" label="zzzz101,zzzzzz2" source="63" target="222" cy:directed="1"/>
      <edge id="359" label="zzzz101,zzzz140" source="63" target="102" cy:directed="1"/>
      <edge id="358" label="zzzz101,zzzzzz8" source="63" target="228" cy:directed="1"/>
      <edge id="357" label="zzzz101,zzzz121" source="63" target="83" cy:directed="1"/>
      <edge id="356" label="zzzz101,zzzzzz0" source="63" target="220" cy:directed="1"/>
      <edge id="355" label="zzzz101,zzzz139" source="63" target="101" cy:directed="1"/>
      <edge id="354" label="zzzz101,zzzzzz5" source="63" target="225" cy:directed="1"/>
      <edge id="353" label="zzzz101,zzzz138" source="63" target="100" cy:directed="1"/>
      <edge id="352" label="zzzz101,zzzz141" source="63" target="103" cy:directed="1"/>
      <edge id="351" label="zzzz101,zzzz114" source="63" target="76" cy:directed="1"/>
      <edge id="350" label="zzzz101,zzzzzz9" source="63" target="229" cy:directed="1"/>
      <edge id="349" label="zzzz101,zzzz143" source="63" target="105" cy:directed="1"/>
      <edge id="348" label="zzzz101,zzzzz16" source="63" target="136" cy:directed="1"/>
      <edge id="347" label="zzzz101,zzzzzz7" source="63" target="227" cy:directed="1"/>
      <edge id="346" label="zzzz101,zzzz137" source="63" target="99" cy:directed="1"/>
      <edge id="345" label="zzzz101,zzzzz11" source="63" target="131" cy:directed="1"/>
      <edge id="344" label="zzzz101,zzzz142" source="63" target="104" cy:directed="1"/>
      <edge id="343" label="zzzz101,zzzzz13" source="63" target="133" cy:directed="1"/>
      <edge id="342" label="zzzz101,zzzz151" source="63" target="113" cy:directed="1"/>
      <edge id="341" label="zzzz101,zzzz136" source="63" target="98" cy:directed="1"/>
      <edge id="340" label="zzzz101,zzzzz15" source="63" target="135" cy:directed="1"/>
      <edge id="339" label="zzzz101,zzzz149" source="63" target="111" cy:directed="1"/>
      <edge id="338" label="zzzz101,zzzz145" source="63" target="107" cy:directed="1"/>
      <edge id="337" label="zzzz101,zzzz146" source="63" target="108" cy:directed="1"/>
      <edge id="336" label="zzzz101,zzzzz10" source="63" target="130" cy:directed="1"/>
      <edge id="335" label="zzzz101,zzzzz17" source="63" target="137" cy:directed="1"/>
      <edge id="334" label="zzzz101,zzzz150" source="63" target="112" cy:directed="1"/>
      <edge id="333" label="zzzz101,zzzzz12" source="63" target="132" cy:directed="1"/>
      <edge id="332" label="zzzz101,zzzzzz4" source="63" target="224" cy:directed="1"/>
      <edge id="331" label="zzzz101,zzzz157" source="63" target="119" cy:directed="1"/>
      <edge id="330" label="zzzz101,zzzzzz1" source="63" target="221" cy:directed="1"/>
      <edge id="329" label="zzzz101,zzzz152" source="63" target="114" cy:directed="1"/>
      <edge id="328" label="zzzz101,zzzz144" source="63" target="106" cy:directed="1"/>
      <edge id="327" label="zzzz101,zzzz156" source="63" target="118" cy:directed="1"/>
      <edge id="326" label="zzzz101,zzzzz93" source="63" target="213" cy:directed="1"/>
      <edge id="325" label="zzzz101,zzzz147" source="63" target="109" cy:directed="1"/>
      <edge id="324" label="zzzz101,zzzz153" source="63" target="115" cy:directed="1"/>
      <edge id="323" label="zzzz101,zzzz154" source="63" target="116" cy:directed="1"/>
      <edge id="322" label="zzzz101,zzzz155" source="63" target="117" cy:directed="1"/>
      <edge id="321" label="zzzz101,zzzz148" source="63" target="110" cy:directed="1"/>
      <edge id="320" label="zzzz101,zzzz117" source="63" target="79" cy:directed="1"/>
      <edge id="319" label="zzzz100,zzzz124" source="62" target="86" cy:directed="1"/>
      <edge id="318" label="zzzz100,zzzzzz3" source="62" target="223" cy:directed="1"/>
      <edge id="317" label="zzzz100,zzzzzz4" source="62" target="224" cy:directed="1"/>
      <edge id="316" label="zzzz100,zzzzz29" source="62" target="149" cy:directed="1"/>
      <edge id="315" label="zzzz100,zzzz121" source="62" target="83" cy:directed="1"/>
      <edge id="314" label="zzzz100,zzzz107" source="62" target="69" cy:directed="1"/>
      <edge id="313" label="zzzz100,zzzzz94" source="62" target="214" cy:directed="1"/>
      <edge id="312" label="zzzz100,zzzzz15" source="62" target="135" cy:directed="1"/>
      <edge id="311" label="zzzz100,zzzzz69" source="62" target="189" cy:directed="1"/>
      <edge id="310" label="zzzz100,zzzzzz6" source="62" target="226" cy:directed="1"/>
      <edge id="309" label="zzzz100,zzzz147" source="62" target="109" cy:directed="1"/>
      <edge id="308" label="zzzz100,zzzz108" source="62" target="70" cy:directed="1"/>
      <edge id="307" label="zzzz100,zzzz138" source="62" target="100" cy:directed="1"/>
      <edge id="306" label="zzzz100,zzzz145" source="62" target="107" cy:directed="1"/>
      <edge id="305" label="zzzz100,zzzzz65" source="62" target="185" cy:directed="1"/>
      <edge id="304" label="zzzz100,zzzzz49" source="62" target="169" cy:directed="1"/>
      <edge id="303" label="zzzz100,zzzzz10" source="62" target="130" cy:directed="1"/>
      <edge id="302" label="zzzz100,zzzz152" source="62" target="114" cy:directed="1"/>
      <edge id="301" label="zzzz100,zzzz139" source="62" target="101" cy:directed="1"/>
      <edge id="300" label="zzzz100,zzzzz31" source="62" target="151" cy:directed="1"/>
      <edge id="299" label="zzzz100,zzzz102" source="62" target="64" cy:directed="1"/>
      <edge id="298" label="zzzz100,zzzzzz7" source="62" target="227" cy:directed="1"/>
      <edge id="297" label="zzzz100,zzzzz45" source="62" target="165" cy:directed="1"/>
      <edge id="296" label="zzzz100,zzzzz97" source="62" target="217" cy:directed="1"/>
      <edge id="295" label="zzzz100,zzzzz61" source="62" target="181" cy:directed="1"/>
      <edge id="294" label="zzzz100,zzzzzz1" source="62" target="221" cy:directed="1"/>
      <edge id="293" label="zzzz100,zzzzz95" source="62" target="215" cy:directed="1"/>
      <edge id="292" label="zzzz100,zzzzz64" source="62" target="184" cy:directed="1"/>
      <edge id="291" label="zzzz100,zzzzz12" source="62" target="132" cy:directed="1"/>
      <edge id="290" label="zzzz100,zzzzz93" source="62" target="213" cy:directed="1"/>
      <edge id="289" label="zzzz100,zzzzz79" source="62" target="199" cy:directed="1"/>
      <edge id="288" label="zzzz100,zzzzz17" source="62" target="137" cy:directed="1"/>
      <edge id="287" label="zzzz100,zzzz153" source="62" target="115" cy:directed="1"/>
      <edge id="286" label="zzzz100,zzzzz70" source="62" target="190" cy:directed="1"/>
      <edge id="285" label="zzzz100,zzzz148" source="62" target="110" cy:directed="1"/>
      <edge id="284" label="zzzz100,zzzzz13" source="62" target="133" cy:directed="1"/>
      <edge id="283" label="zzzz100,zzzz155" source="62" target="117" cy:directed="1"/>
      <edge id="282" label="zzzz100,zzzz149" source="62" target="111" cy:directed="1"/>
      <edge id="281" label="zzzz100,zzzzz11" source="62" target="131" cy:directed="1"/>
      <edge id="280" label="zzzz100,zzzzzz5" source="62" target="225" cy:directed="1"/>
      <edge id="279" label="zzzz100,zzzzz74" source="62" target="194" cy:directed="1"/>
      <edge id="278" label="zzzz100,zzzzz52" source="62" target="172" cy:directed="1"/>
      <edge id="277" label="zzzz100,zzzz136" source="62" target="98" cy:directed="1"/>
      <edge id="276" label="zzzz100,zzzzzz9" source="62" target="229" cy:directed="1"/>
      <edge id="275" label="zzzz100,zzzz150" source="62" target="112" cy:directed="1"/>
      <edge id="274" label="zzzz100,zzzzz62" source="62" target="182" cy:directed="1"/>
      <edge id="273" label="zzzz100,zzzzz57" source="62" target="177" cy:directed="1"/>
      <edge id="272" label="zzzz100,zzzzz51" source="62" target="171" cy:directed="1"/>
      <edge id="271" label="zzzz100,zzzzz50" source="62" target="170" cy:directed="1"/>
      <edge id="270" label="zzzz100,zzzzz36" source="62" target="156" cy:directed="1"/>
      <edge id="269" label="zzzz100,zzzz154" source="62" target="116" cy:directed="1"/>
      <edge id="268" label="zzzz100,zzzzz47" source="62" target="167" cy:directed="1"/>
      <edge id="267" label="zzzz100,zzzzz40" source="62" target="160" cy:directed="1"/>
      <edge id="266" label="zzzz100,zzzzz75" source="62" target="195" cy:directed="1"/>
      <edge id="265" label="zzzz100,zzzz156" source="62" target="118" cy:directed="1"/>
      <edge id="264" label="zzzz100,zzzz101" source="62" target="63" cy:directed="1"/>
      <edge id="263" label="zzzz100,zzzzz89" source="62" target="209" cy:directed="1"/>
      <edge id="262" label="zzzz100,zzzzz68" source="62" target="188" cy:directed="1"/>
      <edge id="261" label="zzzz100,zzzzz58" source="62" target="178" cy:directed="1"/>
      <edge id="260" label="zzzz100,zzzzz73" source="62" target="193" cy:directed="1"/>
      <edge id="259" label="zzzz100,zzzz144" source="62" target="106" cy:directed="1"/>
      <edge id="258" label="zzzz100,zzzz112" source="62" target="74" cy:directed="1"/>
      <edge id="257" label="zzzz100,zzzz111" source="62" target="73" cy:directed="1"/>
      <edge id="256" label="zzzz100,zzzz117" source="62" target="79" cy:directed="1"/>
      <edge id="255" label="zzzz100,zzzzz46" source="62" target="166" cy:directed="1"/>
      <edge id="254" label="zzzz100,zzzzz60" source="62" target="180" cy:directed="1"/>
      <edge id="253" label="zzzz100,zzzzz67" source="62" target="187" cy:directed="1"/>
      <edge id="252" label="zzzz100,zzzzz34" source="62" target="154" cy:directed="1"/>
      <edge id="251" label="zzzz100,zzzz157" source="62" target="119" cy:directed="1"/>
      <edge id="250" label="zzzz100,zzzzz44" source="62" target="164" cy:directed="1"/>
      <edge id="249" label="zzzz100,zzzzz41" source="62" target="161" cy:directed="1"/>
      <edge id="248" label="zzzz100,zzzz103" source="62" target="65" cy:directed="1"/>
      <edge id="247" label="zzzz100,zzzzz43" source="62" target="163" cy:directed="1"/>
      <edge id="246" label="zzzz100,zzzz119" source="62" target="81" cy:directed="1"/>
      <edge id="245" label="zzzz100,zzzzz63" source="62" target="183" cy:directed="1"/>
      <edge id="244" label="zzzz100,zzzzz71" source="62" target="191" cy:directed="1"/>
      <edge id="243" label="zzzz100,zzzzz76" source="62" target="196" cy:directed="1"/>
      <edge id="242" label="zzzz100,zzzz105" source="62" target="67" cy:directed="1"/>
      <edge id="241" label="zzzz100,zzzzz72" source="62" target="192" cy:directed="1"/>
      <edge id="240" label="zzzz100,zzzzz88" source="62" target="208" cy:directed="1"/>
      <edge id="239" label="zzzz100,zzzzz78" source="62" target="198" cy:directed="1"/>
      <edge id="238" label="zzzz100,zzzzz54" source="62" target="174" cy:directed="1"/>
      <edge id="237" label="zzzz100,zzzz115" source="62" target="77" cy:directed="1"/>
      <edge id="236" label="zzzz100,zzzzz56" source="62" target="176" cy:directed="1"/>
      <edge id="235" label="zzzz100,zzzz113" source="62" target="75" cy:directed="1"/>
      <edge id="234" label="zzzz100,zzzzz55" source="62" target="175" cy:directed="1"/>
      <edge id="233" label="zzzz100,zzzzz53" source="62" target="173" cy:directed="1"/>
      <edge id="232" label="zzzz100,zzzzz87" source="62" target="207" cy:directed="1"/>
      <edge id="231" label="zzzz100,zzzzz42" source="62" target="162" cy:directed="1"/>
      <edge id="230" label="zzzz100,zzzzz99" source="62" target="219" cy:directed="1"/>
    </graph>
  </att>
  <att>
    <graph id="4558" label="all_myseqs_and_genbank_s_domain2_70_190610 Full Network(1)" cy:registered="1">
      <node xlink:href="#173"/>
      <node xlink:href="#170"/>
      <node xlink:href="#167"/>
      <node xlink:href="#166"/>
      <node xlink:href="#164"/>
      <node xlink:href="#163"/>
      <node xlink:href="#161"/>
      <node xlink:href="#223"/>
      <node xlink:href="#158"/>
      <node xlink:href="#155"/>
      <node xlink:href="#214"/>
      <node xlink:href="#212"/>
      <node xlink:href="#81"/>
      <node xlink:href="#209"/>
      <node xlink:href="#144"/>
      <node xlink:href="#208"/>
      <node xlink:href="#143"/>
      <node xlink:href="#207"/>
      <node xlink:href="#77"/>
      <node xlink:href="#74"/>
      <node xlink:href="#73"/>
      <node xlink:href="#195"/>
      <node xlink:href="#65"/>
      <node xlink:href="#193"/>
      <node xlink:href="#192"/>
      <node xlink:href="#64"/>
      <node xlink:href="#191"/>
      <node xlink:href="#62"/>
      <node xlink:href="#188"/>
      <node xlink:href="#183"/>
      <node xlink:href="#180"/>
      <node xlink:href="#178"/>
      <node xlink:href="#177"/>
      <node xlink:href="#176"/>
      <node xlink:href="#175"/>
      <edge xlink:href="#3883"/>
      <edge xlink:href="#3884"/>
      <edge xlink:href="#3885"/>
      <edge xlink:href="#3886"/>
      <edge xlink:href="#3887"/>
      <edge xlink:href="#3888"/>
      <edge xlink:href="#3891"/>
      <edge xlink:href="#3893"/>
      <edge xlink:href="#3898"/>
      <edge xlink:href="#3900"/>
      <edge xlink:href="#3901"/>
      <edge xlink:href="#3906"/>
      <edge xlink:href="#3907"/>
      <edge xlink:href="#3908"/>
      <edge xlink:href="#3915"/>
      <edge xlink:href="#3920"/>
      <edge xlink:href="#3786"/>
      <edge xlink:href="#3787"/>
      <edge xlink:href="#3788"/>
      <edge xlink:href="#3789"/>
      <edge xlink:href="#3790"/>
      <edge xlink:href="#3791"/>
      <edge xlink:href="#3793"/>
      <edge xlink:href="#3794"/>
      <edge xlink:href="#3797"/>
      <edge xlink:href="#3799"/>
      <edge xlink:href="#3802"/>
      <edge xlink:href="#3803"/>
      <edge xlink:href="#3806"/>
      <edge xlink:href="#3812"/>
      <edge xlink:href="#3814"/>
      <edge xlink:href="#3815"/>
      <edge xlink:href="#3821"/>
      <edge xlink:href="#3684"/>
      <edge xlink:href="#3685"/>
      <edge xlink:href="#3686"/>
      <edge xlink:href="#3687"/>
      <edge xlink:href="#3688"/>
      <edge xlink:href="#3689"/>
      <edge xlink:href="#3691"/>
      <edge xlink:href="#3692"/>
      <edge xlink:href="#3693"/>
      <edge xlink:href="#3697"/>
      <edge xlink:href="#3701"/>
      <edge xlink:href="#3704"/>
      <edge xlink:href="#3705"/>
      <edge xlink:href="#3707"/>
      <edge xlink:href="#3710"/>
      <edge xlink:href="#3718"/>
      <edge xlink:href="#3722"/>
      <edge xlink:href="#3726"/>
      <edge xlink:href="#3638"/>
      <edge xlink:href="#3639"/>
      <edge xlink:href="#3640"/>
      <edge xlink:href="#3641"/>
      <edge xlink:href="#3642"/>
      <edge xlink:href="#3643"/>
      <edge xlink:href="#3644"/>
      <edge xlink:href="#3645"/>
      <edge xlink:href="#3647"/>
      <edge xlink:href="#3648"/>
      <edge xlink:href="#3651"/>
      <edge xlink:href="#3653"/>
      <edge xlink:href="#3654"/>
      <edge xlink:href="#3658"/>
      <edge xlink:href="#3662"/>
      <edge xlink:href="#3665"/>
      <edge xlink:href="#3668"/>
      <edge xlink:href="#3672"/>
      <edge xlink:href="#3677"/>
      <edge xlink:href="#3554"/>
      <edge xlink:href="#3555"/>
      <edge xlink:href="#3556"/>
      <edge xlink:href="#3557"/>
      <edge xlink:href="#3558"/>
      <edge xlink:href="#3559"/>
      <edge xlink:href="#3560"/>
      <edge xlink:href="#3561"/>
      <edge xlink:href="#3563"/>
      <edge xlink:href="#3565"/>
      <edge xlink:href="#3566"/>
      <edge xlink:href="#3569"/>
      <edge xlink:href="#3570"/>
      <edge xlink:href="#3572"/>
      <edge xlink:href="#3578"/>
      <edge xlink:href="#3579"/>
      <edge xlink:href="#3580"/>
      <edge xlink:href="#3587"/>
      <edge xlink:href="#3598"/>
      <edge xlink:href="#3604"/>
      <edge xlink:href="#3503"/>
      <edge xlink:href="#3504"/>
      <edge xlink:href="#3506"/>
      <edge xlink:href="#3507"/>
      <edge xlink:href="#3508"/>
      <edge xlink:href="#3509"/>
      <edge xlink:href="#3510"/>
      <edge xlink:href="#3511"/>
      <edge xlink:href="#3512"/>
      <edge xlink:href="#3513"/>
      <edge xlink:href="#3514"/>
      <edge xlink:href="#3516"/>
      <edge xlink:href="#3517"/>
      <edge xlink:href="#3525"/>
      <edge xlink:href="#3530"/>
      <edge xlink:href="#3531"/>
      <edge xlink:href="#3532"/>
      <edge xlink:href="#3535"/>
      <edge xlink:href="#3545"/>
      <edge xlink:href="#3553"/>
      <edge xlink:href="#3398"/>
      <edge xlink:href="#3399"/>
      <edge xlink:href="#3400"/>
      <edge xlink:href="#3401"/>
      <edge xlink:href="#3403"/>
      <edge xlink:href="#3404"/>
      <edge xlink:href="#3405"/>
      <edge xlink:href="#3406"/>
      <edge xlink:href="#3407"/>
      <edge xlink:href="#3408"/>
      <edge xlink:href="#3409"/>
      <edge xlink:href="#3410"/>
      <edge xlink:href="#3412"/>
      <edge xlink:href="#3414"/>
      <edge xlink:href="#3425"/>
      <edge xlink:href="#3426"/>
      <edge xlink:href="#3427"/>
      <edge xlink:href="#3430"/>
      <edge xlink:href="#3431"/>
      <edge xlink:href="#3433"/>
      <edge xlink:href="#3443"/>
      <edge xlink:href="#3308"/>
      <edge xlink:href="#3310"/>
      <edge xlink:href="#3311"/>
      <edge xlink:href="#3312"/>
[truncated: 154,697 more chars]
