# Supplementary material for: Discovery of several thousand highly diverse circular DNA viruses
Source: eLife journal article supplement (doi:10.7554/elife.51971), 2020-02-03
Supplement: fig4-data1 [file elife-51971-fig4-data1-v1.cys › CytoscapeSession-2019_08_07-14_38/tables/36-all_myseqs_and_genbank_s_domain2_70_190610+Full+Network/LOCAL_ATTRS-org.cytoscape.model.CyEdge-36+default+edge.cytable]

CyCSV-Version	1
SUID	interaction	name	selected
java.lang.Long	java.lang.String	java.lang.String	java.lang.Boolean
36 default edge
4557		zzzzzz8,zzzzzz9	false
4556		zzzzzz7,zzzzzz8	false
4555		zzzzzz7,zzzzzz9	false
4554		zzzzzz6,zzzzzz8	false
4553		zzzzzz6,zzzzzz7	false
4552		zzzzzz6,zzzzzz9	false
4551		zzzzzz5,zzzzzz8	false
4550		zzzzzz5,zzzzzz6	false
4549		zzzzzz5,zzzzzz9	false
4548		zzzzzz5,zzzzzz7	false
4547		zzzzzz4,zzzzzz8	false
4546		zzzzzz4,zzzzzz6	false
4545		zzzzzz4,zzzzzz5	false
4544		zzzzzz4,zzzzzz9	false
4543		zzzzzz4,zzzzzz7	false
4542		zzzzzz2,zzzzzz6	false
4541		zzzzzz2,zzzzzz8	false
4540		zzzzzz2,zzzzzz5	false
4539		zzzzzz2,zzzzzz4	false
4538		zzzzzz2,zzzzzz9	false
4537		zzzzzz2,zzzzzz7	false
4536		zzzzzz1,zzzzzz6	false
4535		zzzzzz1,zzzzzz5	false
4534		zzzzzz1,zzzzzz4	false
4533		zzzzzz1,zzzzzz2	false
4532		zzzzzz1,zzzzzz8	false
4531		zzzzzz1,zzzzzz7	false
4530		zzzzzz1,zzzzzz9	false
4529		zzzzzz0,zzzzzz6	false
4528		zzzzzz0,zzzzzz5	false
4527		zzzzzz0,zzzzzz7	false
4526		zzzzzz0,zzzzzz4	false
4525		zzzzzz0,zzzzzz9	false
4524		zzzzzz0,zzzzzz1	false
4523		zzzzzz0,zzzzzz8	false
4522		zzzzzz0,zzzzzz2	false
4521		zzzzz99,zzzzzz0	false
4520		zzzzz99,zzzzzz8	false
4519		zzzzz99,zzzzzz6	false
4518		zzzzz99,zzzzzz5	false
4517		zzzzz99,zzzzzz1	false
4516		zzzzz99,zzzzzz7	false
4515		zzzzz99,zzzzzz9	false
4514		zzzzz99,zzzzzz4	false
4513		zzzzz97,zzzzzz4	false
4512		zzzzz97,zzzzz99	false
4511		zzzzz95,zzzzz99	false
4510		zzzzz94,zzzzz99	false
4509		zzzzz94,zzzzzz3	false
4508		zzzzz93,zzzzz99	false
4507		zzzzz93,zzzzzz2	false
4506		zzzzz93,zzzzzz8	false
4505		zzzzz93,zzzzzz6	false
4504		zzzzz93,zzzzzz5	false
4503		zzzzz93,zzzzzz0	false
4502		zzzzz93,zzzzzz4	false
4501		zzzzz93,zzzzzz7	false
4500		zzzzz93,zzzzzz9	false
4499		zzzzz93,zzzzzz1	false
4498		zzzzz92,zzzzz99	false
4497		zzzzz92,zzzzzz3	false
4495		zzzzz89,zzzzz95	false
4494		zzzzz89,zzzzzz3	false
4493		zzzzz89,zzzzzz2	false
4492		zzzzz89,zzzzz97	false
4491		zzzzz89,zzzzzz6	false
4490		zzzzz89,zzzzzz8	false
4489		zzzzz89,zzzzzz4	false
4488		zzzzz89,zzzzzz5	false
4487		zzzzz89,zzzzzz0	false
4486		zzzzz89,zzzzzz7	false
4485		zzzzz89,zzzzz99	false
4484		zzzzz89,zzzzzz1	false
4483		zzzzz89,zzzzzz9	false
4482		zzzzz89,zzzzz93	false
4481		zzzzz88,zzzzzz3	false
4480		zzzzz88,zzzzz97	false
4479		zzzzz88,zzzzz95	false
4478		zzzzz88,zzzzzz5	false
4477		zzzzz88,zzzzzz6	false
4476		zzzzz88,zzzzzz8	false
4475		zzzzz88,zzzzzz4	false
4474		zzzzz88,zzzzzz0	false
4473		zzzzz88,zzzzzz1	false
4472		zzzzz88,zzzzzz2	false
4471		zzzzz88,zzzzz99	false
4470		zzzzz88,zzzzz93	false
4469		zzzzz88,zzzzzz7	false
4468		zzzzz88,zzzzzz9	false
4467		zzzzz88,zzzzz89	false
4466		zzzzz87,zzzzzz3	false
4465		zzzzz87,zzzzz97	false
4464		zzzzz87,zzzzzz2	false
4463		zzzzz87,zzzzzz5	false
4462		zzzzz87,zzzzzz8	false
4461		zzzzz87,zzzzzz0	false
4460		zzzzz87,zzzzzz1	false
4459		zzzzz87,zzzzzz6	false
4458		zzzzz87,zzzzzz7	false
4457		zzzzz87,zzzzzz9	false
4456		zzzzz87,zzzzz93	false
4455		zzzzz87,zzzzzz4	false
4454		zzzzz87,zzzzz89	false
4453		zzzzz87,zzzzz99	false
4452		zzzzz87,zzzzz88	false
4451		zzzzz79,zzzzz89	false
4450		zzzzz79,zzzzz95	false
4449		zzzzz79,zzzzz87	false
4448		zzzzz79,zzzzz88	false
4447		zzzzz79,zzzzz99	false
4446		zzzzz79,zzzzz97	false
4445		zzzzz78,zzzzzz7	false
4444		zzzzz78,zzzzz79	false
4443		zzzzz78,zzzzzz0	false
4442		zzzzz78,zzzzzz9	false
4441		zzzzz78,zzzzz97	false
4440		zzzzz78,zzzzz95	false
4439		zzzzz78,zzzzz93	false
4438		zzzzz78,zzzzzz4	false
4437		zzzzz78,zzzzzz6	false
4436		zzzzz78,zzzzzz5	false
4435		zzzzz78,zzzzzz1	false
4434		zzzzz78,zzzzz87	false
4433		zzzzz78,zzzzz99	false
4432		zzzzz78,zzzzz89	false
4431		zzzzz78,zzzzz88	false
4430		zzzzz77,zzzzz88	false
4429		zzzzz77,zzzzz95	false
4428		zzzzz77,zzzzz78	false
4427		zzzzz77,zzzzz89	false
4426		zzzzz77,zzzzz97	false
4425		zzzzz77,zzzzz79	false
4424		zzzzz76,zzzzz79	false
4423		zzzzz76,zzzzz93	false
4422		zzzzz76,zzzzz95	false
4421		zzzzz76,zzzzz87	false
4420		zzzzz76,zzzzz89	false
4419		zzzzz76,zzzzz88	false
4418		zzzzz76,zzzzz99	false
4417		zzzzz76,zzzzz78	false
4416		zzzzz75,zzzzzz2	false
4415		zzzzz75,zzzzzz0	false
4414		zzzzz75,zzzzz79	false
4413		zzzzz75,zzzzz95	false
4412		zzzzz75,zzzzz94	false
4411		zzzzz75,zzzzz93	false
4410		zzzzz75,zzzzz97	false
4409		zzzzz75,zzzzz89	false
4408		zzzzz75,zzzzzz3	false
4407		zzzzz75,zzzzz88	false
4406		zzzzz75,zzzzz99	false
4405		zzzzz75,zzzzz87	false
4404		zzzzz75,zzzzz78	false
4403		zzzzz75,zzzzz76	false
4402		zzzzz74,zzzzz79	false
4401		zzzzz74,zzzzz93	false
4400		zzzzz74,zzzzzz4	false
4399		zzzzz74,zzzzz97	false
4398		zzzzz74,zzzzzz9	false
4397		zzzzz74,zzzzzz1	false
4396		zzzzz74,zzzzz99	false
4395		zzzzz74,zzzzz88	false
4394		zzzzz74,zzzzz87	false
4393		zzzzz74,zzzzz89	false
4392		zzzzz74,zzzzz78	false
4391		zzzzz74,zzzzz75	false
4390		zzzzz74,zzzzz76	false
4389		zzzzz73,zzzzzz2	false
4388		zzzzz73,zzzzz77	false
4387		zzzzz73,zzzzz93	false
4386		zzzzz73,zzzzzz3	false
4385		zzzzz73,zzzzzz0	false
4384		zzzzz73,zzzzz79	false
4383		zzzzz73,zzzzzz5	false
4382		zzzzz73,zzzzzz1	false
4381		zzzzz73,zzzzz95	false
4380		zzzzz73,zzzzz97	false
4379		zzzzz73,zzzzzz7	false
4378		zzzzz73,zzzzzz4	false
4377		zzzzz73,zzzzzz9	false
4376		zzzzz73,zzzzz99	false
4375		zzzzz73,zzzzz87	false
4374		zzzzz73,zzzzz75	false
4373		zzzzz73,zzzzz89	false
4372		zzzzz73,zzzzz88	false
4371		zzzzz73,zzzzz74	false
4370		zzzzz73,zzzzz76	false
4369		zzzzz73,zzzzz78	false
4368		zzzzz72,zzzzzz2	false
4367		zzzzz72,zzzzzz3	false
4366		zzzzz72,zzzzz94	false
4365		zzzzz72,zzzzzz4	false
4364		zzzzz72,zzzzzz0	false
4363		zzzzz72,zzzzz93	false
4362		zzzzz72,zzzzz79	false
4361		zzzzz72,zzzzzz1	false
4360		zzzzz72,zzzzz95	false
4359		zzzzz72,zzzzzz5	false
4358		zzzzz72,zzzzz97	false
4357		zzzzz72,zzzzzz7	false
4356		zzzzz72,zzzzz87	false
4355		zzzzz72,zzzzzz6	false
4354		zzzzz72,zzzzzz9	false
4353		zzzzz72,zzzzz89	false
4352		zzzzz72,zzzzz99	false
4351		zzzzz72,zzzzz88	false
4350		zzzzz72,zzzzz75	false
4349		zzzzz72,zzzzz74	false
4348		zzzzz72,zzzzz76	false
4347		zzzzz72,zzzzz73	false
4346		zzzzz72,zzzzz78	false
4345		zzzzz71,zzzzzz2	false
4344		zzzzz71,zzzzzz5	false
4343		zzzzz71,zzzzz79	false
4342		zzzzz71,zzzzz94	false
4341		zzzzz71,zzzzzz3	false
4340		zzzzz71,zzzzz77	false
4339		zzzzz71,zzzzzz0	false
4338		zzzzz71,zzzzz93	false
4337		zzzzz71,zzzzzz6	false
4336		zzzzz71,zzzzzz1	false
4335		zzzzz71,zzzzz95	false
4334		zzzzz71,zzzzzz4	false
4333		zzzzz71,zzzzz97	false
4332		zzzzz71,zzzzz99	false
4331		zzzzz71,zzzzz87	false
4330		zzzzz71,zzzzz74	false
4329		zzzzz71,zzzzz75	false
4328		zzzzz71,zzzzz89	false
4327		zzzzz71,zzzzz88	false
4326		zzzzz71,zzzzz76	false
4325		zzzzz71,zzzzz78	false
4324		zzzzz71,zzzzz72	false
4323		zzzzz71,zzzzz73	false
4322		zzzzz70,zzzzz77	false
4321		zzzzz70,zzzzz95	false
4320		zzzzz70,zzzzz87	false
4319		zzzzz70,zzzzz88	false
4318		zzzzz70,zzzzz89	false
4317		zzzzz70,zzzzz99	false
4316		zzzzz70,zzzzz74	false
4315		zzzzz70,zzzzz75	false
4314		zzzzz70,zzzzz76	false
4313		zzzzz70,zzzzz71	false
4312		zzzzz70,zzzzz78	false
4311		zzzzz70,zzzzz73	false
4310		zzzzz70,zzzzz72	false
4309		zzzzz69,zzzzz76	false
4308		zzzzz69,zzzzz71	false
4307		zzzzz69,zzzzz73	false
4306		zzzzz69,zzzzz75	false
4305		zzzzz69,zzzzz99	false
4304		zzzzz69,zzzzz78	false
4303		zzzzz69,zzzzz72	false
4302		zzzzz69,zzzzz95	false
4301		zzzzz69,zzzzz77	false
4300		zzzzz69,zzzzz79	false
4299		zzzzz69,zzzzz97	false
4298		zzzzz68,zzzzz77	false
4297		zzzzz68,zzzzzz6	false
4296		zzzzz68,zzzzz79	false
4295		zzzzz68,zzzzzz2	false
4294		zzzzz68,zzzzzz3	false
4293		zzzzz68,zzzzz69	false
4292		zzzzz68,zzzzzz5	false
4291		zzzzz68,zzzzzz1	false
4290		zzzzz68,zzzzz93	false
4289		zzzzz68,zzzzzz7	false
4288		zzzzz68,zzzzzz0	false
4287		zzzzz68,zzzzzz4	false
4286		zzzzz68,zzzzz95	false
4285		zzzzz68,zzzzz97	false
4284		zzzzz68,zzzzz99	false
4283		zzzzz68,zzzzz87	false
4282		zzzzz68,zzzzz89	false
4281		zzzzz68,zzzzz88	false
4280		zzzzz68,zzzzz75	false
4279		zzzzz68,zzzzz74	false
4278		zzzzz68,zzzzz76	false
4277		zzzzz68,zzzzz70	false
4276		zzzzz68,zzzzz78	false
4275		zzzzz68,zzzzz72	false
4274		zzzzz68,zzzzz73	false
4273		zzzzz68,zzzzz71	false
4272		zzzzz67,zzzzz79	false
4271		zzzzz67,zzzzz96	false
4270		zzzzz67,zzzzz69	false
4269		zzzzz67,zzzzz95	false
4268		zzzzz67,zzzzzz0	false
4267		zzzzz67,zzzzzz5	false
4266		zzzzz67,zzzzzz7	false
4265		zzzzz67,zzzzz98	false
4264		zzzzz67,zzzzzz1	false
4263		zzzzz67,zzzzzz9	false
4262		zzzzz67,zzzzzz4	false
4261		zzzzz67,zzzzz93	false
4260		zzzzz67,zzzzz87	false
4259		zzzzz67,zzzzz89	false
4258		zzzzz67,zzzzz99	false
4257		zzzzz67,zzzzz88	false
4256		zzzzz67,zzzzz74	false
4255		zzzzz67,zzzzz76	false
4254		zzzzz67,zzzzz75	false
4253		zzzzz67,zzzzz78	false
4252		zzzzz67,zzzzz68	false
4251		zzzzz67,zzzzz73	false
4250		zzzzz67,zzzzz70	false
4249		zzzzz67,zzzzz71	false
4248		zzzzz67,zzzzz72	false
4247		zzzzz66,zzzzz79	false
4246		zzzzz65,zzzzzz2	false
4245		zzzzz65,zzzzz87	false
4244		zzzzz65,zzzzz67	false
4243		zzzzz65,zzzzz89	false
4242		zzzzz65,zzzzz88	false
4241		zzzzz65,zzzzz71	false
4240		zzzzz65,zzzzz70	false
4239		zzzzz65,zzzzz74	false
4238		zzzzz65,zzzzz68	false
4237		zzzzz65,zzzzz73	false
4236		zzzzz65,zzzzz78	false
4235		zzzzz65,zzzzz72	false
4234		zzzzz65,zzzzz75	false
4233		zzzzz65,zzzzz76	false
4232		zzzzz64,zzzzzz2	false
4231		zzzzz64,zzzzzz6	false
4230		zzzzz64,zzzzz97	false
4229		zzzzz64,zzzzzz0	false
4228		zzzzz64,zzzzzz8	false
4227		zzzzz64,zzzzzz7	false
4226		zzzzz64,zzzzzz9	false
4225		zzzzz64,zzzzz87	false
4224		zzzzz64,zzzzzz5	false
4223		zzzzz64,zzzzzz1	false
4222		zzzzz64,zzzzz89	false
4221		zzzzz64,zzzzz93	false
4220		zzzzz64,zzzzz88	false
4219		zzzzz64,zzzzz74	false
4218		zzzzz64,zzzzz68	false
4217		zzzzz64,zzzzz71	false
4216		zzzzz64,zzzzz70	false
4215		zzzzz64,zzzzz67	false
4214		zzzzz64,zzzzz73	false
4213		zzzzz64,zzzzz72	false
4212		zzzzz64,zzzzz78	false
4211		zzzzz64,zzzzz75	false
4210		zzzzz64,zzzzz76	false
4209		zzzzz64,zzzzz65	false
4208		zzzzz63,zzzzz79	false
4207		zzzzz63,zzzzz93	false
4206		zzzzz63,zzzzz69	false
4205		zzzzz63,zzzzzz0	false
4204		zzzzz63,zzzzz97	false
4203		zzzzz63,zzzzz87	false
4202		zzzzz63,zzzzzz3	false
4201		zzzzz63,zzzzz95	false
4200		zzzzz63,zzzzz65	false
4199		zzzzz63,zzzzz74	false
4198		zzzzz63,zzzzz99	false
4197		zzzzz63,zzzzz89	false
4196		zzzzz63,zzzzz64	false
4195		zzzzz63,zzzzz88	false
4194		zzzzz63,zzzzz76	false
4193		zzzzz63,zzzzz75	false
4192		zzzzz63,zzzzz70	false
4191		zzzzz63,zzzzz67	false
4190		zzzzz63,zzzzz73	false
4189		zzzzz63,zzzzz72	false
4188		zzzzz63,zzzzz71	false
4187		zzzzz63,zzzzz68	false
4186		zzzzz63,zzzzz78	false
4185		zzzzz62,zzzzz97	false
4184		zzzzz62,zzzzzz5	false
4183		zzzzz62,zzzzz99	false
4182		zzzzz62,zzzzz93	false
4181		zzzzz62,zzzzzz2	false
4180		zzzzz62,zzzzz87	false
4179		zzzzz62,zzzzz89	false
4178		zzzzz62,zzzzz88	false
4177		zzzzz62,zzzzz67	false
4176		zzzzz62,zzzzz71	false
4175		zzzzz62,zzzzz74	false
4174		zzzzz62,zzzzz63	false
4173		zzzzz62,zzzzz73	false
4172		zzzzz62,zzzzz68	false
4171		zzzzz62,zzzzz70	false
4170		zzzzz62,zzzzz72	false
4169		zzzzz62,zzzzz78	false
4168		zzzzz62,zzzzz75	false
4167		zzzzz62,zzzzz76	false
4166		zzzzz62,zzzzz65	false
4165		zzzzz62,zzzzz64	false
4164		zzzzz61,zzzzzz1	false
4163		zzzzz61,zzzzzz8	false
4162		zzzzz61,zzzzz93	false
4161		zzzzz61,zzzzz87	false
4160		zzzzz61,zzzzz88	false
4159		zzzzz61,zzzzz68	false
4158		zzzzz61,zzzzz71	false
4157		zzzzz61,zzzzz89	false
4156		zzzzz61,zzzzz63	false
4155		zzzzz61,zzzzz70	false
4154		zzzzz61,zzzzz67	false
4153		zzzzz61,zzzzz73	false
4152		zzzzz61,zzzzz72	false
4151		zzzzz61,zzzzz74	false
4150		zzzzz61,zzzzz78	false
4149		zzzzz61,zzzzz75	false
4148		zzzzz61,zzzzz76	false
4147		zzzzz61,zzzzz65	false
4146		zzzzz61,zzzzz62	false
4145		zzzzz61,zzzzz64	false
4144		zzzzz60,zzzzz79	false
4143		zzzzz60,zzzzz69	false
4142		zzzzz60,zzzzzz8	false
4141		zzzzz60,zzzzzz3	false
4140		zzzzz60,zzzzzz2	false
4139		zzzzz60,zzzzzz6	false
4138		zzzzz60,zzzzz94	false
4137		zzzzz60,zzzzzz0	false
4136		zzzzz60,zzzzzz5	false
4135		zzzzz60,zzzzz97	false
4134		zzzzz60,zzzzz95	false
4133		zzzzz60,zzzzzz1	false
4132		zzzzz60,zzzzz93	false
4131		zzzzz60,zzzzzz4	false
4130		zzzzz60,zzzzz99	false
4129		zzzzz60,zzzzz87	false
4128		zzzzz60,zzzzz61	false
4127		zzzzz60,zzzzz65	false
4126		zzzzz60,zzzzz89	false
4125		zzzzz60,zzzzz75	false
4124		zzzzz60,zzzzz74	false
4123		zzzzz60,zzzzz88	false
4122		zzzzz60,zzzzz62	false
4121		zzzzz60,zzzzz64	false
4120		zzzzz60,zzzzz76	false
4119		zzzzz60,zzzzz70	false
4118		zzzzz60,zzzzz67	false
4117		zzzzz60,zzzzz63	false
4116		zzzzz60,zzzzz78	false
4115		zzzzz60,zzzzz72	false
4114		zzzzz60,zzzzz73	false
4113		zzzzz60,zzzzz68	false
4112		zzzzz60,zzzzz71	false
4111		zzzzz59,zzzzzz5	false
4110		zzzzz59,zzzzz93	false
4109		zzzzz59,zzzzzz1	false
4108		zzzzz59,zzzzz87	false
4107		zzzzz59,zzzzz89	false
4106		zzzzz59,zzzzz88	false
4105		zzzzz59,zzzzz63	false
4104		zzzzz59,zzzzz67	false
4103		zzzzz59,zzzzz70	false
4102		zzzzz59,zzzzz73	false
4101		zzzzz59,zzzzz71	false
4100		zzzzz59,zzzzz60	false
4099		zzzzz59,zzzzz74	false
4098		zzzzz59,zzzzz68	false
4097		zzzzz59,zzzzz78	false
4096		zzzzz59,zzzzz72	false
4095		zzzzz59,zzzzz75	false
4094		zzzzz59,zzzzz76	false
4093		zzzzz59,zzzzz64	false
4092		zzzzz59,zzzzz61	false
4091		zzzzz59,zzzzz65	false
4090		zzzzz59,zzzzz62	false
4089		zzzzz58,zzzzzz1	false
4088		zzzzz58,zzzzzz4	false
4087		zzzzz58,zzzzzz9	false
4086		zzzzz58,zzzzz99	false
4085		zzzzz58,zzzzz93	false
4084		zzzzz58,zzzzz88	false
4083		zzzzz58,zzzzz79	false
4082		zzzzz58,zzzzzz3	false
4081		zzzzz58,zzzzz87	false
4080		zzzzz58,zzzzz89	false
4079		zzzzz58,zzzzz70	false
4078		zzzzz58,zzzzz68	false
4077		zzzzz58,zzzzz71	false
4076		zzzzz58,zzzzz63	false
4075		zzzzz58,zzzzz73	false
4074		zzzzz58,zzzzz60	false
4073		zzzzz58,zzzzz72	false
4072		zzzzz58,zzzzz67	false
4071		zzzzz58,zzzzz78	false
4070		zzzzz58,zzzzz74	false
4069		zzzzz58,zzzzz65	false
4068		zzzzz58,zzzzz59	false
4067		zzzzz58,zzzzz62	false
4066		zzzzz58,zzzzz61	false
4065		zzzzz58,zzzzz64	false
4064		zzzzz58,zzzzz76	false
4063		zzzzz58,zzzzz75	false
4062		zzzzz57,zzzzz76	false
4061		zzzzz57,zzzzz75	false
4060		zzzzz57,zzzzzz3	false
4059		zzzzz57,zzzzz66	false
4058		zzzzz57,zzzzz63	false
4057		zzzzz57,zzzzz87	false
4056		zzzzz57,zzzzz88	false
4055		zzzzz57,zzzzz74	false
4054		zzzzz57,zzzzz64	false
4053		zzzzz57,zzzzz67	false
4052		zzzzz57,zzzzz89	false
4051		zzzzz57,zzzzz78	false
4050		zzzzz57,zzzzz60	false
4049		zzzzz57,zzzzz71	false
4048		zzzzz57,zzzzz72	false
4047		zzzzz57,zzzzz68	false
4046		zzzzz57,zzzzz99	false
4045		zzzzz57,zzzzz73	false
4044		zzzzz57,zzzzz77	false
4043		zzzzz57,zzzzz69	false
4042		zzzzz57,zzzzz79	false
4041		zzzzz57,zzzzz97	false
4040		zzzzz56,zzzzz77	false
4039		zzzzz56,zzzzzz8	false
4038		zzzzz56,zzzzz69	false
4037		zzzzz56,zzzzzz3	false
4036		zzzzz56,zzzzz57	false
4035		zzzzz56,zzzzz93	false
4034		zzzzz56,zzzzzz0	false
4033		zzzzz56,zzzzz79	false
4032		zzzzz56,zzzzzz4	false
4031		zzzzz56,zzzzz97	false
4030		zzzzz56,zzzzzz5	false
4029		zzzzz56,zzzzzz2	false
4028		zzzzz56,zzzzzz6	false
4027		zzzzz56,zzzzz95	false
4026		zzzzz56,zzzzzz1	false
4025		zzzzz56,zzzzz99	false
4024		zzzzz56,zzzzzz7	false
4023		zzzzz56,zzzzzz9	false
4022		zzzzz56,zzzzz87	false
4021		zzzzz56,zzzzz70	false
4020		zzzzz56,zzzzz88	false
4019		zzzzz56,zzzzz63	false
4018		zzzzz56,zzzzz67	false
4017		zzzzz56,zzzzz89	false
4016		zzzzz56,zzzzz71	false
4015		zzzzz56,zzzzz60	false
4014		zzzzz56,zzzzz78	false
4013		zzzzz56,zzzzz68	false
4012		zzzzz56,zzzzz74	false
4011		zzzzz56,zzzzz73	false
4010		zzzzz56,zzzzz72	false
4009		zzzzz56,zzzzz65	false
4008		zzzzz56,zzzzz61	false
4007		zzzzz56,zzzzz62	false
4006		zzzzz56,zzzzz75	false
4005		zzzzz56,zzzzz59	false
4004		zzzzz56,zzzzz64	false
4003		zzzzz56,zzzzz76	false
4002		zzzzz56,zzzzz58	false
4001		zzzzz55,zzzzzz0	false
4000		zzzzz55,zzzzz77	false
3999		zzzzz55,zzzzzz4	false
3998		zzzzz55,zzzzzz6	false
3997		zzzzz55,zzzzzz2	false
3996		zzzzz55,zzzzz97	false
3995		zzzzz55,zzzzz69	false
3994		zzzzz55,zzzzzz1	false
3993		zzzzz55,zzzzz79	false
3992		zzzzz55,zzzzzz8	false
3991		zzzzz55,zzzzz95	false
3990		zzzzz55,zzzzz93	false
3989		zzzzz55,zzzzzz9	false
3988		zzzzz55,zzzzz94	false
3987		zzzzz55,zzzzzz3	false
3986		zzzzz55,zzzzz57	false
3985		zzzzz55,zzzzzz7	false
3984		zzzzz55,zzzzzz5	false
3983		zzzzz55,zzzzz61	false
3982		zzzzz55,zzzzz89	false
3981		zzzzz55,zzzzz87	false
3980		zzzzz55,zzzzz65	false
3979		zzzzz55,zzzzz99	false
3978		zzzzz55,zzzzz88	false
3977		zzzzz55,zzzzz58	false
3976		zzzzz55,zzzzz64	false
3975		zzzzz55,zzzzz59	false
3974		zzzzz55,zzzzz74	false
3973		zzzzz55,zzzzz76	false
3972		zzzzz55,zzzzz62	false
3971		zzzzz55,zzzzz75	false
3970		zzzzz55,zzzzz70	false
3969		zzzzz55,zzzzz56	false
3968		zzzzz55,zzzzz67	false
3967		zzzzz55,zzzzz63	false
3966		zzzzz55,zzzzz78	false
3965		zzzzz55,zzzzz73	false
3964		zzzzz55,zzzzz68	false
3963		zzzzz55,zzzzz60	false
3962		zzzzz55,zzzzz71	false
3961		zzzzz55,zzzzz72	false
3960		zzzzz54,zzzzz94	false
3959		zzzzz54,zzzzz57	false
3958		zzzzz54,zzzzz98	false
3957		zzzzz54,zzzzzz4	false
3956		zzzzz54,zzzzzz9	false
3955		zzzzz54,zzzzzz0	false
3954		zzzzz54,zzzzzz2	false
3953		zzzzz54,zzzzzz8	false
3952		zzzzz54,zzzzzz5	false
3951		zzzzz54,zzzzz93	false
3950		zzzzz54,zzzzzz1	false
3949		zzzzz54,zzzzz99	false
3948		zzzzz54,zzzzz89	false
3947		zzzzz54,zzzzz87	false
3946		zzzzz54,zzzzz65	false
3945		zzzzz54,zzzzz61	false
3944		zzzzz54,zzzzz88	false
3943		zzzzz54,zzzzz58	false
3942		zzzzz54,zzzzz62	false
3941		zzzzz54,zzzzz74	false
3940		zzzzz54,zzzzz64	false
3939		zzzzz54,zzzzz59	false
3938		zzzzz54,zzzzz76	false
3937		zzzzz54,zzzzz75	false
3936		zzzzz54,zzzzz56	false
3935		zzzzz54,zzzzz63	false
3934		zzzzz54,zzzzz78	false
3933		zzzzz54,zzzzz72	false
3932		zzzzz54,zzzzz71	false
3931		zzzzz54,zzzzz73	false
3930		zzzzz54,zzzzz55	false
3929		zzzzz54,zzzzz60	false
3928		zzzzz54,zzzzz68	false
3927		zzzzz54,zzzzz70	false
3926		zzzzz54,zzzzz67	false
3925		zzzzz53,zzzzzz4	false
3924		zzzzz53,zzzzzz0	false
3923		zzzzz53,zzzzz79	false
3922		zzzzz53,zzzzzz8	false
3921		zzzzz53,zzzzzz6	false
3920		zzzzz53,zzzzz94	false
3919		zzzzz53,zzzzzz2	false
3918		zzzzz53,zzzzz95	false
3917		zzzzz53,zzzzz93	false
3916		zzzzz53,zzzzz77	false
3915		zzzzz53,zzzzzz3	false
3914		zzzzz53,zzzzzz5	false
3913		zzzzz53,zzzzz69	false
3912		zzzzz53,zzzzzz1	false
3911		zzzzz53,zzzzzz9	false
3910		zzzzz53,zzzzzz7	false
3909		zzzzz53,zzzzz97	false
3908		zzzzz53,zzzzz57	false
3907		zzzzz53,zzzzz87	false
3906		zzzzz53,zzzzz89	false
3905		zzzzz53,zzzzz99	false
3904		zzzzz53,zzzzz61	false
3903		zzzzz53,zzzzz59	false
3902		zzzzz53,zzzzz65	false
3901		zzzzz53,zzzzz88	false
3900		zzzzz53,zzzzz58	false
3899		zzzzz53,zzzzz74	false
3898		zzzzz53,zzzzz75	false
3897		zzzzz53,zzzzz62	false
3896		zzzzz53,zzzzz64	false
3895		zzzzz53,zzzzz76	false
3894		zzzzz53,zzzzz70	false
3893		zzzzz53,zzzzz56	false
3892		zzzzz53,zzzzz54	false
3891		zzzzz53,zzzzz63	false
3890		zzzzz53,zzzzz67	false
3889		zzzzz53,zzzzz78	false
3888		zzzzz53,zzzzz73	false
3887		zzzzz53,zzzzz72	false
3886		zzzzz53,zzzzz71	false
3885		zzzzz53,zzzzz68	false
3884		zzzzz53,zzzzz60	false
3883		zzzzz53,zzzzz55	false
3882		zzzzz52,zzzzz70	false
3881		zzzzz52,zzzzz63	false
3880		zzzzz52,zzzzz58	false
3879		zzzzz52,zzzzz60	false
3878		zzzzz52,zzzzz89	false
3877		zzzzz52,zzzzz95	false
3876		zzzzz52,zzzzz67	false
3875		zzzzz52,zzzzz87	false
3874		zzzzz52,zzzzz75	false
3873		zzzzz52,zzzzz68	false
3872		zzzzz52,zzzzz78	false
3871		zzzzz52,zzzzz88	false
3870		zzzzz52,zzzzz72	false
3869		zzzzz52,zzzzz55	false
3868		zzzzz52,zzzzz99	false
3867		zzzzz52,zzzzz71	false
3866		zzzzz52,zzzzz56	false
3865		zzzzz52,zzzzz53	false
3864		zzzzz52,zzzzz77	false
3863		zzzzz52,zzzzz57	false
3862		zzzzz52,zzzzz97	false
3861		zzzzz52,zzzzz79	false
3860		zzzzz52,zzzzz69	false
3859		zzzzz51,zzzzz69	false
3858		zzzzz51,zzzzz79	false
3857		zzzzz51,zzzzz77	false
3856		zzzzz51,zzzzz93	false
3855		zzzzz51,zzzzz52	false
3854		zzzzz51,zzzzzz4	false
3853		zzzzz51,zzzzz97	false
3852		zzzzz51,zzzzzz9	false
3851		zzzzz51,zzzzzz1	false
3850		zzzzz51,zzzzz57	false
3849		zzzzz51,zzzzz99	false
3848		zzzzz51,zzzzz88	false
3847		zzzzz51,zzzzz87	false
3846		zzzzz51,zzzzz89	false
3845		zzzzz51,zzzzz63	false
3844		zzzzz51,zzzzz64	false
3843		zzzzz51,zzzzz62	false
3842		zzzzz51,zzzzz70	false
3841		zzzzz51,zzzzz67	false
3840		zzzzz51,zzzzz54	false
3839		zzzzz51,zzzzz65	false
3838		zzzzz51,zzzzz71	false
3837		zzzzz51,zzzzz60	false
3836		zzzzz51,zzzzz59	false
3835		zzzzz51,zzzzz61	false
3834		zzzzz51,zzzzz68	false
3833		zzzzz51,zzzzz55	false
3832		zzzzz51,zzzzz73	false
3831		zzzzz51,zzzzz53	false
3830		zzzzz51,zzzzz58	false
3829		zzzzz51,zzzzz78	false
3828		zzzzz51,zzzzz72	false
3827		zzzzz51,zzzzz75	false
3826		zzzzz51,zzzzz76	false
3825		zzzzz51,zzzzz56	false
3824		zzzzz51,zzzzz74	false
3823		zzzzz50,zzzzz79	false
3822		zzzzz50,zzzzz77	false
3821		zzzzz50,zzzzzz3	false
3820		zzzzz50,zzzzzz0	false
3819		zzzzz50,zzzzz52	false
3818		zzzzz50,zzzzzz2	false
3817		zzzzz50,zzzzz69	false
3816		zzzzz50,zzzzz95	false
3815		zzzzz50,zzzzz87	false
3814		zzzzz50,zzzzz57	false
3813		zzzzz50,zzzzzz9	false
3812		zzzzz50,zzzzz94	false
3811		zzzzz50,zzzzz97	false
3810		zzzzz50,zzzzz59	false
3809		zzzzz50,zzzzz99	false
3808		zzzzz50,zzzzz61	false
3807		zzzzz50,zzzzz65	false
3806		zzzzz50,zzzzz89	false
3805		zzzzz50,zzzzz51	false
3804		zzzzz50,zzzzz74	false
3803		zzzzz50,zzzzz88	false
3802		zzzzz50,zzzzz58	false
3801		zzzzz50,zzzzz64	false
3800		zzzzz50,zzzzz62	false
3799		zzzzz50,zzzzz75	false
3798		zzzzz50,zzzzz76	false
3797		zzzzz50,zzzzz56	false
3796		zzzzz50,zzzzz54	false
3795		zzzzz50,zzzzz70	false
3794		zzzzz50,zzzzz63	false
3793		zzzzz50,zzzzz71	false
3792		zzzzz50,zzzzz78	false
3791		zzzzz50,zzzzz55	false
3790		zzzzz50,zzzzz73	false
3789		zzzzz50,zzzzz60	false
3788		zzzzz50,zzzzz53	false
3787		zzzzz50,zzzzz68	false
3786		zzzzz50,zzzzz72	false
3785		zzzzz50,zzzzz67	false
3784		zzzzz49,zzzzzz5	false
3783		zzzzz49,zzzzz67	false
3782		zzzzz49,zzzzz89	false
3781		zzzzz49,zzzzz71	false
3780		zzzzz49,zzzzz87	false
3779		zzzzz49,zzzzz68	false
3778		zzzzz49,zzzzz88	false
3777		zzzzz49,zzzzz63	false
3776		zzzzz49,zzzzz50	false
3775		zzzzz49,zzzzz74	false
3774		zzzzz49,zzzzz73	false
3773		zzzzz49,zzzzz72	false
3772		zzzzz49,zzzzz51	false
3771		zzzzz49,zzzzz70	false
3770		zzzzz49,zzzzz54	false
3769		zzzzz49,zzzzz53	false
3768		zzzzz49,zzzzz78	false
3767		zzzzz49,zzzzz60	false
3766		zzzzz49,zzzzz55	false
3765		zzzzz49,zzzzz75	false
3764		zzzzz49,zzzzz58	false
3763		zzzzz49,zzzzz76	false
3762		zzzzz49,zzzzz64	false
3761		zzzzz49,zzzzz56	false
3760		zzzzz49,zzzzz62	false
3759		zzzzz49,zzzzz61	false
3758		zzzzz49,zzzzz59	false
3757		zzzzz49,zzzzz65	false
3756		zzzzz48,zzzzzz5	false
3755		zzzzz48,zzzzzz7	false
3754		zzzzz48,zzzzz63	false
3753		zzzzz48,zzzzz54	false
3752		zzzzz48,zzzzz87	false
3751		zzzzz48,zzzzz67	false
3750		zzzzz48,zzzzz89	false
3749		zzzzz48,zzzzz71	false
3748		zzzzz48,zzzzz70	false
3747		zzzzz48,zzzzz68	false
3746		zzzzz48,zzzzz73	false
3745		zzzzz48,zzzzz50	false
3744		zzzzz48,zzzzz88	false
3743		zzzzz48,zzzzz74	false
3742		zzzzz48,zzzzz55	false
3741		zzzzz48,zzzzz60	false
3740		zzzzz48,zzzzz51	false
3739		zzzzz48,zzzzz72	false
3738		zzzzz48,zzzzz53	false
3737		zzzzz48,zzzzz78	false
3736		zzzzz48,zzzzz58	false
3735		zzzzz48,zzzzz75	false
3734		zzzzz48,zzzzz76	false
3733		zzzzz48,zzzzz61	false
3732		zzzzz48,zzzzz64	false
3731		zzzzz48,zzzzz62	false
3730		zzzzz48,zzzzz56	false
3729		zzzzz48,zzzzz59	false
3728		zzzzz48,zzzzz49	false
3727		zzzzz48,zzzzz65	false
3726		zzzzz47,zzzzz94	false
3725		zzzzz47,zzzzzz5	false
3724		zzzzz47,zzzzz97	false
3723		zzzzz47,zzzzz79	false
3722		zzzzz47,zzzzzz3	false
3721		zzzzz47,zzzzzz2	false
3720		zzzzz47,zzzzzz1	false
3719		zzzzz47,zzzzz93	false
3718		zzzzz47,zzzzz57	false
3717		zzzzz47,zzzzzz9	false
3716		zzzzz47,zzzzz99	false
3715		zzzzz47,zzzzzz4	false
3714		zzzzz47,zzzzz95	false
3713		zzzzz47,zzzzzz0	false
3712		zzzzz47,zzzzz48	false
3711		zzzzz47,zzzzz49	false
3710		zzzzz47,zzzzz87	false
3709		zzzzz47,zzzzz61	false
3708		zzzzz47,zzzzz74	false
3707		zzzzz47,zzzzz58	false
3706		zzzzz47,zzzzz51	false
3705		zzzzz47,zzzzz89	false
3704		zzzzz47,zzzzz88	false
3703		zzzzz47,zzzzz62	false
3702		zzzzz47,zzzzz65	false
3701		zzzzz47,zzzzz75	false
3700		zzzzz47,zzzzz59	false
3699		zzzzz47,zzzzz64	false
3698		zzzzz47,zzzzz76	false
3697		zzzzz47,zzzzz56	false
3696		zzzzz47,zzzzz70	false
3695		zzzzz47,zzzzz54	false
3694		zzzzz47,zzzzz67	false
3693		zzzzz47,zzzzz50	false
3692		zzzzz47,zzzzz53	false
3691		zzzzz47,zzzzz55	false
3690		zzzzz47,zzzzz78	false
3689		zzzzz47,zzzzz72	false
3688		zzzzz47,zzzzz63	false
3687		zzzzz47,zzzzz73	false
3686		zzzzz47,zzzzz71	false
3685		zzzzz47,zzzzz68	false
3684		zzzzz47,zzzzz60	false
3683		zzzzz46,zzzzzz5	false
3682		zzzzz46,zzzzz95	false
3681		zzzzz46,zzzzz79	false
3680		zzzzz46,zzzzzz2	false
3679		zzzzz46,zzzzz69	false
3678		zzzzz46,zzzzzz7	false
3677		zzzzz46,zzzzz94	false
3676		zzzzz46,zzzzz93	false
3675		zzzzz46,zzzzz77	false
3674		zzzzz46,zzzzzz9	false
3673		zzzzz46,zzzzz48	false
3672		zzzzz46,zzzzzz3	false
3671		zzzzz46,zzzzz52	false
3670		zzzzz46,zzzzzz4	false
3669		zzzzz46,zzzzz49	false
3668		zzzzz46,zzzzz87	false
3667		zzzzz46,zzzzzz0	false
3666		zzzzz46,zzzzz97	false
3665		zzzzz46,zzzzz57	false
3664		zzzzz46,zzzzz65	false
3663		zzzzz46,zzzzz59	false
3662		zzzzz46,zzzzz89	false
3661		zzzzz46,zzzzz99	false
3660		zzzzz46,zzzzz61	false
3659		zzzzz46,zzzzz74	false
3658		zzzzz46,zzzzz88	false
3657		zzzzz46,zzzzz51	false
3656		zzzzz46,zzzzz62	false
3655		zzzzz46,zzzzz64	false
3654		zzzzz46,zzzzz58	false
3653		zzzzz46,zzzzz75	false
3652		zzzzz46,zzzzz76	false
3651		zzzzz46,zzzzz56	false
3650		zzzzz46,zzzzz54	false
3649		zzzzz46,zzzzz70	false
3648		zzzzz46,zzzzz73	false
3647		zzzzz46,zzzzz63	false
3646		zzzzz46,zzzzz78	false
3645		zzzzz46,zzzzz72	false
3644		zzzzz46,zzzzz60	false
3643		zzzzz46,zzzzz68	false
3642		zzzzz46,zzzzz47	false
3641		zzzzz46,zzzzz50	false
3640		zzzzz46,zzzzz71	false
3639		zzzzz46,zzzzz53	false
3638		zzzzz46,zzzzz55	false
3637		zzzzz46,zzzzz67	false
3636		zzzzz45,zzzzzz4	false
3635		zzzzz45,zzzzz87	false
3634		zzzzz45,zzzzz89	false
3633		zzzzz45,zzzzz54	false
3632		zzzzz45,zzzzz67	false
3631		zzzzz45,zzzzz88	false
3630		zzzzz45,zzzzz68	false
3629		zzzzz45,zzzzz63	false
3628		zzzzz45,zzzzz70	false
3627		zzzzz45,zzzzz71	false
3626		zzzzz45,zzzzz60	false
3625		zzzzz45,zzzzz73	false
3624		zzzzz45,zzzzz46	false
3623		zzzzz45,zzzzz74	false
3622		zzzzz45,zzzzz78	false
3621		zzzzz45,zzzzz50	false
3620		zzzzz45,zzzzz51	false
3619		zzzzz45,zzzzz53	false
3618		zzzzz45,zzzzz47	false
3617		zzzzz45,zzzzz72	false
3616		zzzzz45,zzzzz55	false
3615		zzzzz45,zzzzz75	false
3614		zzzzz45,zzzzz76	false
3613		zzzzz45,zzzzz58	false
3612		zzzzz45,zzzzz56	false
3611		zzzzz45,zzzzz62	false
3610		zzzzz45,zzzzz64	false
3609		zzzzz45,zzzzz61	false
3608		zzzzz45,zzzzz59	false
3607		zzzzz45,zzzzz48	false
3606		zzzzz45,zzzzz65	false
3605		zzzzz45,zzzzz49	false
3604		zzzzz44,zzzzz94	false
3603		zzzzz44,zzzzz79	false
3602		zzzzz44,zzzzz77	false
3601		zzzzz44,zzzzz52	false
3600		zzzzz44,zzzzzz1	false
3599		zzzzz44,zzzzzz8	false
3598		zzzzz44,zzzzz57	false
3597		zzzzz44,zzzzzz5	false
3596		zzzzz44,zzzzzz6	false
3595		zzzzz44,zzzzz69	false
3594		zzzzz44,zzzzz97	false
3593		zzzzz44,zzzzzz4	false
3592		zzzzz44,zzzzzz0	false
3591		zzzzz44,zzzzz93	false
3590		zzzzz44,zzzzz95	false
3589		zzzzz44,zzzzz48	false
3588		zzzzz44,zzzzzz7	false
3587		zzzzz44,zzzzzz3	false
3586		zzzzz44,zzzzzz9	false
3585		zzzzz44,zzzzz45	false
3584		zzzzz44,zzzzz61	false
3583		zzzzz44,zzzzz99	false
3582		zzzzz44,zzzzz65	false
3581		zzzzz44,zzzzz49	false
3580		zzzzz44,zzzzz89	false
3579		zzzzz44,zzzzz88	false
3578		zzzzz44,zzzzz87	false
3577		zzzzz44,zzzzz74	false
3576		zzzzz44,zzzzz51	false
3575		zzzzz44,zzzzz59	false
3574		zzzzz44,zzzzz62	false
3573		zzzzz44,zzzzz64	false
3572		zzzzz44,zzzzz58	false
3571		zzzzz44,zzzzz76	false
3570		zzzzz44,zzzzz75	false
3569		zzzzz44,zzzzz56	false
3568		zzzzz44,zzzzz70	false
3567		zzzzz44,zzzzz54	false
3566		zzzzz44,zzzzz50	false
3565		zzzzz44,zzzzz63	false
3564		zzzzz44,zzzzz67	false
3563		zzzzz44,zzzzz47	false
3562		zzzzz44,zzzzz78	false
3561		zzzzz44,zzzzz71	false
3560		zzzzz44,zzzzz60	false
3559		zzzzz44,zzzzz68	false
3558		zzzzz44,zzzzz73	false
3557		zzzzz44,zzzzz46	false
3556		zzzzz44,zzzzz72	false
3555		zzzzz44,zzzzz53	false
3554		zzzzz44,zzzzz55	false
3553		zzzzz43,zzzzzz3	false
3552		zzzzz43,zzzzz77	false
3551		zzzzz43,zzzzzz2	false
3550		zzzzz43,zzzzzz0	false
3549		zzzzz43,zzzzz79	false
3548		zzzzz43,zzzzz52	false
3547		zzzzz43,zzzzz93	false
3546		zzzzz43,zzzzz69	false
3545		zzzzz43,zzzzz57	false
3544		zzzzz43,zzzzzz4	false
3543		zzzzz43,zzzzz95	false
3542		zzzzz43,zzzzzz5	false
3541		zzzzz43,zzzzzz1	false
3540		zzzzz43,zzzzzz7	false
3539		zzzzz43,zzzzzz6	false
3538		zzzzz43,zzzzz49	false
3537		zzzzz43,zzzzz97	false
3536		zzzzz43,zzzzzz9	false
3535		zzzzz43,zzzzz87	false
3534		zzzzz43,zzzzz99	false
3533		zzzzz43,zzzzz48	false
3532		zzzzz43,zzzzz89	false
3531		zzzzz43,zzzzz88	false
3530		zzzzz43,zzzzz58	false
3529		zzzzz43,zzzzz61	false
3528		zzzzz43,zzzzz59	false
3527		zzzzz43,zzzzz45	false
3526		zzzzz43,zzzzz65	false
3525		zzzzz43,zzzzz75	false
3524		zzzzz43,zzzzz74	false
3523		zzzzz43,zzzzz51	false
3522		zzzzz43,zzzzz62	false
3521		zzzzz43,zzzzz64	false
3520		zzzzz43,zzzzz76	false
3519		zzzzz43,zzzzz70	false
3518		zzzzz43,zzzzz54	false
3517		zzzzz43,zzzzz56	false
3516		zzzzz43,zzzzz50	false
3515		zzzzz43,zzzzz67	false
3514		zzzzz43,zzzzz46	false
3513		zzzzz43,zzzzz53	false
3512		zzzzz43,zzzzz44	false
3511		zzzzz43,zzzzz55	false
3510		zzzzz43,zzzzz63	false
3509		zzzzz43,zzzzz73	false
3508		zzzzz43,zzzzz47	false
3507		zzzzz43,zzzzz71	false
3506		zzzzz43,zzzzz60	false
3505		zzzzz43,zzzzz78	false
3504		zzzzz43,zzzzz68	false
3503		zzzzz43,zzzzz72	false
3502		zzzzz42,zzzzz79	false
3501		zzzzz42,zzzzzz8	false
3500		zzzzz42,zzzzz77	false
3499		zzzzz42,zzzzz69	false
3498		zzzzz42,zzzzzz0	false
3497		zzzzz42,zzzzz57	false
3496		zzzzz42,zzzzzz4	false
3495		zzzzz42,zzzzz93	false
3494		zzzzz42,zzzzzz1	false
3493		zzzzz42,zzzzz52	false
3492		zzzzz42,zzzzzz2	false
3491		zzzzz42,zzzzz95	false
3490		zzzzz42,zzzzzz6	false
3489		zzzzz42,zzzzz48	false
3488		zzzzz42,zzzzz87	false
3487		zzzzz42,zzzzz59	false
3486		zzzzz42,zzzzz51	false
3485		zzzzz42,zzzzzz9	false
3484		zzzzz42,zzzzz45	false
3483		zzzzz42,zzzzz74	false
3482		zzzzz42,zzzzzz7	false
3481		zzzzz42,zzzzz49	false
3480		zzzzz42,zzzzzz5	false
3479		zzzzz42,zzzzz61	false
3478		zzzzz42,zzzzz58	false
3477		zzzzz42,zzzzz97	false
3476		zzzzz42,zzzzz75	false
3475		zzzzz42,zzzzz65	false
3474		zzzzz42,zzzzz64	false
3473		zzzzz42,zzzzz62	false
3472		zzzzz42,zzzzz89	false
3471		zzzzz42,zzzzz76	false
3470		zzzzz42,zzzzz54	false
3469		zzzzz42,zzzzz88	false
3468		zzzzz42,zzzzz99	false
3467		zzzzz42,zzzzz70	false
3466		zzzzz42,zzzzz47	false
3465		zzzzz42,zzzzz56	false
3464		zzzzz42,zzzzz50	false
3463		zzzzz42,zzzzz44	false
3462		zzzzz42,zzzzz63	false
3461		zzzzz42,zzzzz46	false
3460		zzzzz42,zzzzz73	false
3459		zzzzz42,zzzzz68	false
3458		zzzzz42,zzzzz67	false
3457		zzzzz42,zzzzz53	false
3456		zzzzz42,zzzzz78	false
3455		zzzzz42,zzzzz60	false
3454		zzzzz42,zzzzz71	false
3453		zzzzz42,zzzzz43	false
3452		zzzzz42,zzzzz55	false
3451		zzzzz42,zzzzz72	false
3450		zzzzz41,zzzzzz2	false
3449		zzzzz41,zzzzzz1	false
3448		zzzzz41,zzzzzz0	false
3447		zzzzz41,zzzzz77	false
3446		zzzzz41,zzzzz79	false
3445		zzzzz41,zzzzz93	false
3444		zzzzz41,zzzzzz6	false
3443		zzzzz41,zzzzzz3	false
3442		zzzzz41,zzzzz95	false
3441		zzzzz41,zzzzz52	false
3440		zzzzz41,zzzzzz9	false
3439		zzzzz41,zzzzz69	false
3438		zzzzz41,zzzzz97	false
3437		zzzzz41,zzzzzz5	false
3436		zzzzz41,zzzzzz4	false
3435		zzzzz41,zzzzzz7	false
3434		zzzzz41,zzzzz49	false
3433		zzzzz41,zzzzz57	false
3432		zzzzz41,zzzzz99	false
3431		zzzzz41,zzzzz87	false
3430		zzzzz41,zzzzz89	false
3429		zzzzz41,zzzzz48	false
3428		zzzzz41,zzzzz61	false
3427		zzzzz41,zzzzz88	false
3426		zzzzz41,zzzzz75	false
3425		zzzzz41,zzzzz58	false
3424		zzzzz41,zzzzz74	false
3423		zzzzz41,zzzzz65	false
3422		zzzzz41,zzzzz62	false
3421		zzzzz41,zzzzz51	false
3420		zzzzz41,zzzzz45	false
3419		zzzzz41,zzzzz64	false
3418		zzzzz41,zzzzz59	false
3417		zzzzz41,zzzzz76	false
3416		zzzzz41,zzzzz42	false
3415		zzzzz41,zzzzz70	false
3414		zzzzz41,zzzzz56	false
3413		zzzzz41,zzzzz54	false
3412		zzzzz41,zzzzz50	false
3411		zzzzz41,zzzzz67	false
3410		zzzzz41,zzzzz63	false
3409		zzzzz41,zzzzz46	false
3408		zzzzz41,zzzzz44	false
3407		zzzzz41,zzzzz53	false
3406		zzzzz41,zzzzz55	false
3405		zzzzz41,zzzzz73	false
3404		zzzzz41,zzzzz71	false
3403		zzzzz41,zzzzz47	false
3402		zzzzz41,zzzzz78	false
3401		zzzzz41,zzzzz68	false
3400		zzzzz41,zzzzz60	false
3399		zzzzz41,zzzzz43	false
3398		zzzzz41,zzzzz72	false
3397		zzzzz40,zzzzz99	false
3396		zzzzz40,zzzzzz2	false
3395		zzzzz40,zzzzzz9	false
3394		zzzzz40,zzzzzz7	false
3393		zzzzz40,zzzzzz1	false
3392		zzzzz40,zzzzzz4	false
3391		zzzzz40,zzzzz93	false
3390		zzzzz40,zzzzz88	false
3389		zzzzz40,zzzzz42	false
3388		zzzzz40,zzzzz73	false
3387		zzzzz40,zzzzz54	false
3386		zzzzz40,zzzzz60	false
3385		zzzzz40,zzzzz74	false
3384		zzzzz40,zzzzz89	false
3383		zzzzz40,zzzzz87	false
3382		zzzzz40,zzzzz47	false
3381		zzzzz40,zzzzz63	false
3380		zzzzz40,zzzzz78	false
3379		zzzzz40,zzzzz71	false
3378		zzzzz40,zzzzz46	false
3377		zzzzz40,zzzzz50	false
3376		zzzzz40,zzzzz72	false
3375		zzzzz40,zzzzz43	false
3374		zzzzz40,zzzzz68	false
3373		zzzzz40,zzzzz67	false
3372		zzzzz40,zzzzz51	false
3371		zzzzz40,zzzzz55	false
3370		zzzzz40,zzzzz53	false
3369		zzzzz40,zzzzz41	false
3368		zzzzz40,zzzzz44	false
3367		zzzzz40,zzzzz70	false
3366		zzzzz40,zzzzz58	false
3365		zzzzz40,zzzzz75	false
3364		zzzzz40,zzzzz76	false
3363		zzzzz40,zzzzz49	false
3362		zzzzz40,zzzzz45	false
3361		zzzzz40,zzzzz56	false
3360		zzzzz40,zzzzz48	false
3359		zzzzz40,zzzzz65	false
3358		zzzzz40,zzzzz59	false
3357		zzzzz40,zzzzz64	false
3356		zzzzz40,zzzzz62	false
3355		zzzzz40,zzzzz61	false
3354		zzzzz39,zzzzzz4	false
3353		zzzzz39,zzzzz89	false
3352		zzzzz39,zzzzz88	false
3351		zzzzz39,zzzzz42	false
3350		zzzzz39,zzzzz87	false
3349		zzzzz39,zzzzz67	false
3348		zzzzz39,zzzzz68	false
3347		zzzzz39,zzzzz54	false
3346		zzzzz39,zzzzz63	false
3345		zzzzz39,zzzzz73	false
3344		zzzzz39,zzzzz53	false
3343		zzzzz39,zzzzz44	false
3342		zzzzz39,zzzzz50	false
3341		zzzzz39,zzzzz71	false
3340		zzzzz39,zzzzz46	false
3339		zzzzz39,zzzzz70	false
3338		zzzzz39,zzzzz55	false
3337		zzzzz39,zzzzz74	false
3336		zzzzz39,zzzzz60	false
3335		zzzzz39,zzzzz51	false
3334		zzzzz39,zzzzz47	false
3333		zzzzz39,zzzzz72	false
3332		zzzzz39,zzzzz58	false
3331		zzzzz39,zzzzz43	false
3330		zzzzz39,zzzzz78	false
3329		zzzzz39,zzzzz75	false
3328		zzzzz39,zzzzz41	false
3327		zzzzz39,zzzzz76	false
3326		zzzzz39,zzzzz40	false
3325		zzzzz39,zzzzz56	false
3324		zzzzz39,zzzzz64	false
3323		zzzzz39,zzzzz61	false
3322		zzzzz39,zzzzz59	false
3321		zzzzz39,zzzzz62	false
3320		zzzzz39,zzzzz65	false
3319		zzzzz39,zzzzz48	false
3318		zzzzz39,zzzzz49	false
3317		zzzzz39,zzzzz45	false
3316		zzzzz38,zzzzzz3	false
3315		zzzzz38,zzzzz79	false
3314		zzzzz38,zzzzz51	false
3313		zzzzz38,zzzzz75	false
3312		zzzzz38,zzzzz44	false
3311		zzzzz38,zzzzz89	false
3310		zzzzz38,zzzzz57	false
3309		zzzzz38,zzzzz97	false
3308		zzzzz38,zzzzz88	false
3307		zzzzz38,zzzzz66	false
3306		zzzzz37,zzzzz74	false
3305		zzzzz37,zzzzz41	false
3304		zzzzz37,zzzzz76	false
3303		zzzzz37,zzzzz75	false
3302		zzzzz37,zzzzz73	false
3301		zzzzz37,zzzzz57	false
3300		zzzzz37,zzzzz51	false
3299		zzzzz37,zzzzz89	false
3298		zzzzz37,zzzzz79	false
3297		zzzzz37,zzzzz77	false
3296		zzzzz37,zzzzz66	false
3295		zzzzz37,zzzzz38	false
3294		zzzzz36,zzzzz97	false
3293		zzzzz36,zzzzz89	false
3292		zzzzz36,zzzzz87	false
3291		zzzzz36,zzzzz48	false
3290		zzzzz36,zzzzz88	false
3289		zzzzz36,zzzzz99	false
3288		zzzzz36,zzzzz39	false
3287		zzzzz36,zzzzz49	false
3286		zzzzz36,zzzzz45	false
3285		zzzzz36,zzzzz65	false
3284		zzzzz36,zzzzz59	false
3283		zzzzz36,zzzzz40	false
3282		zzzzz36,zzzzz74	false
3281		zzzzz36,zzzzz42	false
3280		zzzzz36,zzzzz51	false
3279		zzzzz36,zzzzz58	false
3278		zzzzz36,zzzzz76	false
3277		zzzzz36,zzzzz61	false
3276		zzzzz36,zzzzz62	false
3275		zzzzz36,zzzzz56	false
3274		zzzzz36,zzzzz75	false
3273		zzzzz36,zzzzz64	false
3272		zzzzz36,zzzzz71	false
3271		zzzzz36,zzzzz63	false
3270		zzzzz36,zzzzz55	false
3269		zzzzz36,zzzzz72	false
3268		zzzzz36,zzzzz78	false
3267		zzzzz36,zzzzz73	false
3266		zzzzz36,zzzzz53	false
3265		zzzzz36,zzzzz44	false
3264		zzzzz36,zzzzz47	false
3263		zzzzz36,zzzzz43	false
3262		zzzzz36,zzzzz41	false
3261		zzzzz36,zzzzz68	false
3260		zzzzz36,zzzzz60	false
3259		zzzzz36,zzzzz46	false
3258		zzzzz36,zzzzz50	false
3257		zzzzz36,zzzzz54	false
3256		zzzzz36,zzzzz67	false
3255		zzzzz36,zzzzz70	false
3254		zzzzz35,zzzzz36	false
3253		zzzzz35,zzzzz70	false
3252		zzzzz35,zzzzz67	false
3251		zzzzz35,zzzzzz3	false
3250		zzzzz35,zzzzz94	false
3249		zzzzz34,zzzzz93	false
3248		zzzzz34,zzzzz38	false
3247		zzzzz34,zzzzzz0	false
3246		zzzzz34,zzzzz77	false
3245		zzzzz34,zzzzz95	false
3244		zzzzz34,zzzzzz1	false
3243		zzzzz34,zzzzzz2	false
3242		zzzzz34,zzzzz52	false
3241		zzzzz34,zzzzz94	false
3240		zzzzz34,zzzzz49	false
3239		zzzzz34,zzzzz57	false
3238		zzzzz34,zzzzzz9	false
3237		zzzzz34,zzzzz48	false
3236		zzzzz34,zzzzzz7	false
3235		zzzzz34,zzzzzz5	false
3234		zzzzz34,zzzzz69	false
3233		zzzzz34,zzzzz39	false
3232		zzzzz34,zzzzz61	false
3231		zzzzz34,zzzzz45	false
3230		zzzzz34,zzzzz40	false
3229		zzzzz34,zzzzz97	false
3228		zzzzz34,zzzzz87	false
3227		zzzzz34,zzzzz59	false
3226		zzzzz34,zzzzz89	false
3225		zzzzz34,zzzzz65	false
3224		zzzzz34,zzzzz58	false
3223		zzzzz34,zzzzz99	false
3222		zzzzz34,zzzzz74	false
3221		zzzzz34,zzzzz51	false
3220		zzzzz34,zzzzz75	false
3219		zzzzz34,zzzzz88	false
3218		zzzzz34,zzzzz62	false
3217		zzzzz34,zzzzz64	false
3216		zzzzz34,zzzzz76	false
3215		zzzzz34,zzzzz36	false
3214		zzzzz34,zzzzz42	false
3213		zzzzz34,zzzzz56	false
3212		zzzzz34,zzzzz70	false
3211		zzzzz34,zzzzz54	false
3210		zzzzz34,zzzzz63	false
3209		zzzzz34,zzzzz67	false
3208		zzzzz34,zzzzz50	false
3207		zzzzz34,zzzzz78	false
3206		zzzzz34,zzzzz46	false
3205		zzzzz34,zzzzz73	false
3204		zzzzz34,zzzzz47	false
3203		zzzzz34,zzzzz71	false
3202		zzzzz34,zzzzz68	false
3201		zzzzz34,zzzzz60	false
3200		zzzzz34,zzzzz44	false
3199		zzzzz34,zzzzz43	false
3198		zzzzz34,zzzzz41	false
3197		zzzzz34,zzzzz53	false
3196		zzzzz34,zzzzz72	false
3195		zzzzz34,zzzzz55	false
3194		zzzzz33,zzzzzz7	false
3193		zzzzz33,zzzzzz1	false
3192		zzzzz33,zzzzz87	false
3191		zzzzz33,zzzzz89	false
3190		zzzzz33,zzzzz88	false
3189		zzzzz33,zzzzz71	false
3188		zzzzz33,zzzzz47	false
3187		zzzzz33,zzzzz42	false
3186		zzzzz33,zzzzz60	false
3185		zzzzz33,zzzzz36	false
3184		zzzzz33,zzzzz50	false
3183		zzzzz33,zzzzz54	false
3182		zzzzz33,zzzzz63	false
3181		zzzzz33,zzzzz70	false
3180		zzzzz33,zzzzz55	false
3179		zzzzz33,zzzzz68	false
3178		zzzzz33,zzzzz73	false
3177		zzzzz33,zzzzz53	false
3176		zzzzz33,zzzzz46	false
3175		zzzzz33,zzzzz44	false
3174		zzzzz33,zzzzz74	false
3173		zzzzz33,zzzzz51	false
3172		zzzzz33,zzzzz67	false
3171		zzzzz33,zzzzz43	false
3170		zzzzz33,zzzzz41	false
3169		zzzzz33,zzzzz34	false
3168		zzzzz33,zzzzz78	false
3167		zzzzz33,zzzzz72	false
3166		zzzzz33,zzzzz49	false
3165		zzzzz33,zzzzz39	false
3164		zzzzz33,zzzzz48	false
3163		zzzzz33,zzzzz58	false
3162		zzzzz33,zzzzz75	false
3161		zzzzz33,zzzzz45	false
3160		zzzzz33,zzzzz40	false
3159		zzzzz33,zzzzz56	false
3158		zzzzz33,zzzzz76	false
3157		zzzzz33,zzzzz65	false
3156		zzzzz33,zzzzz62	false
3155		zzzzz33,zzzzz64	false
3154		zzzzz33,zzzzz59	false
3153		zzzzz33,zzzzz61	false
3152		zzzzz32,zzzzzz7	false
3151		zzzzz32,zzzzz87	false
3150		zzzzz32,zzzzz42	false
3149		zzzzz32,zzzzzz5	false
3148		zzzzz32,zzzzz93	false
3147		zzzzz32,zzzzz89	false
3146		zzzzz32,zzzzzz1	false
3145		zzzzz32,zzzzz70	false
3144		zzzzz32,zzzzz60	false
3143		zzzzz32,zzzzz88	false
3142		zzzzz32,zzzzz67	false
3141		zzzzz32,zzzzz50	false
3140		zzzzz32,zzzzz47	false
3139		zzzzz32,zzzzz54	false
3138		zzzzz32,zzzzz53	false
3137		zzzzz32,zzzzz46	false
3136		zzzzz32,zzzzz71	false
3135		zzzzz32,zzzzz74	false
3134		zzzzz32,zzzzz73	false
3133		zzzzz32,zzzzz36	false
3132		zzzzz32,zzzzz34	false
3131		zzzzz32,zzzzz51	false
3130		zzzzz32,zzzzz68	false
3129		zzzzz32,zzzzz44	false
3128		zzzzz32,zzzzz78	false
3127		zzzzz32,zzzzz55	false
3126		zzzzz32,zzzzz72	false
3125		zzzzz32,zzzzz43	false
3124		zzzzz32,zzzzz41	false
3123		zzzzz32,zzzzz75	false
3122		zzzzz32,zzzzz58	false
3121		zzzzz32,zzzzz76	false
3120		zzzzz32,zzzzz48	false
3119		zzzzz32,zzzzz64	false
3118		zzzzz32,zzzzz56	false
3117		zzzzz32,zzzzz39	false
3116		zzzzz32,zzzzz65	false
3115		zzzzz32,zzzzz62	false
3114		zzzzz32,zzzzz40	false
3113		zzzzz32,zzzzz49	false
3112		zzzzz32,zzzzz61	false
3111		zzzzz32,zzzzz45	false
3110		zzzzz32,zzzzz33	false
3109		zzzzz32,zzzzz59	false
3108		zzzzz31,zzzzz63	false
3107		zzzzz31,zzzzz54	false
3106		zzzzz31,zzzzz42	false
3105		zzzzz31,zzzzz68	false
3104		zzzzz31,zzzzz72	false
3103		zzzzz31,zzzzz44	false
3102		zzzzz31,zzzzz38	false
3101		zzzzz31,zzzzz78	false
3100		zzzzz31,zzzzz34	false
3099		zzzzz31,zzzzz73	false
3098		zzzzz31,zzzzz50	false
3097		zzzzz31,zzzzz53	false
3096		zzzzz31,zzzzz37	false
3095		zzzzz31,zzzzz67	false
3094		zzzzz31,zzzzz51	false
3093		zzzzz31,zzzzz66	false
3092		zzzzz31,zzzzz41	false
3091		zzzzz31,zzzzz74	false
3090		zzzzz31,zzzzz55	false
3089		zzzzz31,zzzzz89	false
3088		zzzzz31,zzzzz56	false
3087		zzzzz31,zzzzz71	false
3086		zzzzz31,zzzzz46	false
3085		zzzzz31,zzzzz88	false
3084		zzzzz31,zzzzz77	false
3083		zzzzz31,zzzzz69	false
3082		zzzzz31,zzzzz52	false
3081		zzzzz31,zzzzz79	false
3080		zzzzz31,zzzzz97	false
3079		zzzzz31,zzzzz57	false
3078		zzzzz30,zzzzz67	false
3077		zzzzz30,zzzzz38	false
3076		zzzzz30,zzzzz66	false
3075		zzzzz30,zzzzz37	false
3074		zzzzz29,zzzzzz1	false
3073		zzzzz29,zzzzzz9	false
3072		zzzzz29,zzzzz93	false
3071		zzzzz29,zzzzz88	false
3070		zzzzz29,zzzzz87	false
3069		zzzzz29,zzzzz54	false
3068		zzzzz29,zzzzz36	false
3067		zzzzz29,zzzzz42	false
3066		zzzzz29,zzzzz34	false
3065		zzzzz29,zzzzz44	false
3064		zzzzz29,zzzzz89	false
3063		zzzzz29,zzzzz70	false
3062		zzzzz29,zzzzz63	false
3061		zzzzz29,zzzzz50	false
3060		zzzzz29,zzzzz60	false
3059		zzzzz29,zzzzz47	false
3058		zzzzz29,zzzzz71	false
3057		zzzzz29,zzzzz68	false
3056		zzzzz29,zzzzz73	false
3055		zzzzz29,zzzzz67	false
3054		zzzzz29,zzzzz46	false
3053		zzzzz29,zzzzz74	false
3052		zzzzz29,zzzzz53	false
3051		zzzzz29,zzzzz55	false
3050		zzzzz29,zzzzz51	false
3049		zzzzz29,zzzzz78	false
3048		zzzzz29,zzzzz72	false
3047		zzzzz29,zzzzz41	false
3046		zzzzz29,zzzzz43	false
3045		zzzzz29,zzzzz75	false
3044		zzzzz29,zzzzz39	false
3043		zzzzz29,zzzzz48	false
3042		zzzzz29,zzzzz49	false
3041		zzzzz29,zzzzz58	false
3040		zzzzz29,zzzzz76	false
3039		zzzzz29,zzzzz45	false
3038		zzzzz29,zzzzz56	false
3037		zzzzz29,zzzzz65	false
3036		zzzzz29,zzzzz32	false
3035		zzzzz29,zzzzz40	false
3034		zzzzz29,zzzzz59	false
3033		zzzzz29,zzzzz33	false
3032		zzzzz29,zzzzz62	false
3031		zzzzz29,zzzzz64	false
3030		zzzzz29,zzzzz61	false
3029		zzzzz28,zzzzz88	false
3028		zzzzz28,zzzzz89	false
3027		zzzzz28,zzzzz44	false
3026		zzzzz28,zzzzz42	false
3025		zzzzz28,zzzzz68	false
3024		zzzzz28,zzzzz63	false
3023		zzzzz28,zzzzz53	false
3022		zzzzz28,zzzzz72	false
3021		zzzzz28,zzzzz36	false
3020		zzzzz28,zzzzz74	false
3019		zzzzz28,zzzzz43	false
3018		zzzzz28,zzzzz34	false
3017		zzzzz28,zzzzz73	false
3016		zzzzz28,zzzzz55	false
3015		zzzzz28,zzzzz51	false
3014		zzzzz28,zzzzz50	false
3013		zzzzz28,zzzzz41	false
3012		zzzzz28,zzzzz54	false
3011		zzzzz28,zzzzz71	false
3010		zzzzz28,zzzzz67	false
3009		zzzzz28,zzzzz78	false
3008		zzzzz28,zzzzz70	false
3007		zzzzz28,zzzzz60	false
3006		zzzzz28,zzzzz47	false
3005		zzzzz28,zzzzz46	false
3004		zzzzz28,zzzzz48	false
3003		zzzzz28,zzzzz39	false
3002		zzzzz28,zzzzz45	false
3001		zzzzz28,zzzzz49	false
3000		zzzzz28,zzzzz76	false
2999		zzzzz28,zzzzz75	false
2998		zzzzz28,zzzzz58	false
2997		zzzzz28,zzzzz65	false
2996		zzzzz28,zzzzz56	false
2995		zzzzz28,zzzzz32	false
2994		zzzzz28,zzzzz33	false
2993		zzzzz28,zzzzz59	false
2992		zzzzz28,zzzzz40	false
2991		zzzzz28,zzzzz62	false
2990		zzzzz28,zzzzz61	false
2989		zzzzz28,zzzzz29	false
2988		zzzzz28,zzzzz64	false
2986		zzzzz25,zzzzz56	false
2985		zzzzz24,zzzzzz3	false
2984		zzzzz24,zzzzz25	false
2983		zzzzz23,zzzzzz3	false
2982		zzzzz23,zzzzz58	false
2981		zzzzz23,zzzzz25	false
2980		zzzzz23,zzzzz24	false
2979		zzzzz22,zzzzz58	false
2978		zzzzz22,zzzzz25	false
2977		zzzzz22,zzzzz24	false
2976		zzzzz22,zzzzz23	false
2975		zzzzz21,zzzzz92	false
2974		zzzzz20,zzzzz92	false
2973		zzzzz20,zzzzz21	false
2967		zzzzz17,zzzzz64	false
2966		zzzzz17,zzzzz58	false
2965		zzzzz17,zzzzz51	false
2964		zzzzz17,zzzzz67	false
2963		zzzzz17,zzzzz54	false
2962		zzzzz17,zzzzz68	false
2961		zzzzz17,zzzzz47	false
2960		zzzzz17,zzzzz46	false
2959		zzzzz17,zzzzz44	false
2958		zzzzz17,zzzzz73	false
2957		zzzzz17,zzzzz99	false
2956		zzzzz17,zzzzz50	false
2955		zzzzz17,zzzzz41	false
2954		zzzzz17,zzzzz43	false
2953		zzzzz17,zzzzz42	false
2952		zzzzz17,zzzzz40	false
2951		zzzzz17,zzzzz87	false
2950		zzzzz17,zzzzz55	false
2949		zzzzz17,zzzzz34	false
2948		zzzzz17,zzzzz53	false
2947		zzzzz17,zzzzz71	false
2946		zzzzz17,zzzzz60	false
2945		zzzzz17,zzzzz56	false
2944		zzzzz17,zzzzz89	false
2943		zzzzz17,zzzzz88	false
2942		zzzzz17,zzzzzz8	false
2941		zzzzz17,zzzzzz0	false
2940		zzzzz17,zzzzzz6	false
2939		zzzzz17,zzzzzz2	false
2938		zzzzz17,zzzzzz5	false
2937		zzzzz17,zzzzzz1	false
2936		zzzzz17,zzzzzz4	false
2935		zzzzz17,zzzzzz9	false
2934		zzzzz17,zzzzzz7	false
2933		zzzzz17,zzzzz93	false
2932		zzzzz16,zzzzz67	false
2931		zzzzz16,zzzzz54	false
2930		zzzzz16,zzzzz46	false
2929		zzzzz16,zzzzz40	false
2928		zzzzz16,zzzzz55	false
2927		zzzzz16,zzzzz51	false
2926		zzzzz16,zzzzz50	false
2925		zzzzz16,zzzzz78	false
2924		zzzzz16,zzzzz64	false
2923		zzzzz16,zzzzz47	false
2922		zzzzz16,zzzzz73	false
2921		zzzzz16,zzzzz42	false
2920		zzzzz16,zzzzz68	false
2919		zzzzz16,zzzzz43	false
2918		zzzzz16,zzzzz58	false
2917		zzzzz16,zzzzz71	false
2916		zzzzz16,zzzzz60	false
2915		zzzzz16,zzzzz41	false
2914		zzzzz16,zzzzz56	false
2913		zzzzz16,zzzzz87	false
2912		zzzzz16,zzzzz89	false
2911		zzzzz16,zzzzz88	false
2910		zzzzz16,zzzzzz5	false
2909		zzzzz16,zzzzzz6	false
2908		zzzzz16,zzzzzz2	false
2907		zzzzz16,zzzzzz8	false
2906		zzzzz16,zzzzzz0	false
2905		zzzzz16,zzzzzz1	false
2904		zzzzz16,zzzzz93	false
2903		zzzzz16,zzzzz17	false
2902		zzzzz16,zzzzzz4	false
2901		zzzzz16,zzzzzz7	false
2900		zzzzz16,zzzzzz9	false
2899		zzzzz15,zzzzz55	false
2898		zzzzz15,zzzzz42	false
2897		zzzzz15,zzzzz76	false
2896		zzzzz15,zzzzz89	false
2895		zzzzz15,zzzzz67	false
2894		zzzzz15,zzzzz60	false
2893		zzzzz15,zzzzz78	false
2892		zzzzz15,zzzzz64	false
2891		zzzzz15,zzzzz56	false
2890		zzzzz15,zzzzz71	false
2889		zzzzz15,zzzzz73	false
2888		zzzzz15,zzzzz72	false
2887		zzzzz15,zzzzz44	false
2886		zzzzz15,zzzzz43	false
2885		zzzzz15,zzzzz41	false
2884		zzzzz15,zzzzz88	false
2883		zzzzz15,zzzzzz8	false
2882		zzzzz15,zzzzzz2	false
2881		zzzzz15,zzzzzz6	false
2880		zzzzz15,zzzzzz0	false
2879		zzzzz15,zzzzzz4	false
2878		zzzzz15,zzzzzz1	false
2877		zzzzz15,zzzzz16	false
2876		zzzzz15,zzzzz17	false
2875		zzzzz15,zzzzzz9	false
2874		zzzzz15,zzzzzz7	false
2873		zzzzz15,zzzzz93	false
2872		zzzzz15,zzzzzz5	false
2871		zzzzz14,zzzzz70	false
2870		zzzzz14,zzzzz76	false
2869		zzzzz14,zzzzz73	false
2868		zzzzz14,zzzzz87	false
2867		zzzzz13,zzzzz54	false
2866		zzzzz13,zzzzz62	false
2865		zzzzz13,zzzzz33	false
2864		zzzzz13,zzzzz40	false
2863		zzzzz13,zzzzz74	false
2862		zzzzz13,zzzzz78	false
2861		zzzzz13,zzzzz51	false
2860		zzzzz13,zzzzz68	false
2859		zzzzz13,zzzzz34	false
2858		zzzzz13,zzzzz42	false
2857		zzzzz13,zzzzz64	false
2856		zzzzz13,zzzzz50	false
2855		zzzzz13,zzzzz55	false
2854		zzzzz13,zzzzz71	false
2853		zzzzz13,zzzzz67	false
2852		zzzzz13,zzzzz46	false
2851		zzzzz13,zzzzz53	false
2850		zzzzz13,zzzzz41	false
2849		zzzzz13,zzzzz72	false
2848		zzzzz13,zzzzz44	false
2847		zzzzz13,zzzzz99	false
2846		zzzzz13,zzzzz60	false
2845		zzzzz13,zzzzz43	false
2844		zzzzz13,zzzzz73	false
2843		zzzzz13,zzzzz56	false
2842		zzzzz13,zzzzz89	false
2841		zzzzz13,zzzzz87	false
2840		zzzzz13,zzzzz88	false
2839		zzzzz13,zzzzzz8	false
2838		zzzzz13,zzzzzz2	false
2837		zzzzz13,zzzzzz0	false
2836		zzzzz13,zzzzz15	false
2835		zzzzz13,zzzzzz5	false
2834		zzzzz13,zzzzzz6	false
2833		zzzzz13,zzzzzz4	false
2832		zzzzz13,zzzzzz1	false
2831		zzzzz13,zzzzz93	false
2830		zzzzz13,zzzzz16	false
2829		zzzzz13,zzzzz17	false
2828		zzzzz13,zzzzzz7	false
2827		zzzzz13,zzzzzz9	false
2826		zzzzz12,zzzzz54	false
2825		zzzzz12,zzzzz76	false
2824		zzzzz12,zzzzz51	false
2823		zzzzz12,zzzzz46	false
2822		zzzzz12,zzzzz64	false
2821		zzzzz12,zzzzz78	false
2820		zzzzz12,zzzzz40	false
2819		zzzzz12,zzzzz67	false
2818		zzzzz12,zzzzz34	false
2817		zzzzz12,zzzzz68	false
2816		zzzzz12,zzzzz42	false
2815		zzzzz12,zzzzz53	false
2814		zzzzz12,zzzzz73	false
2813		zzzzz12,zzzzz47	false
2812		zzzzz12,zzzzz99	false
2811		zzzzz12,zzzzz44	false
2810		zzzzz12,zzzzz72	false
2809		zzzzz12,zzzzz55	false
2808		zzzzz12,zzzzz71	false
2807		zzzzz12,zzzzz60	false
2806		zzzzz12,zzzzz43	false
2805		zzzzz12,zzzzz41	false
2804		zzzzz12,zzzzz87	false
2803		zzzzz12,zzzzz56	false
2802		zzzzz12,zzzzz89	false
2801		zzzzz12,zzzzzz8	false
2800		zzzzz12,zzzzz88	false
2799		zzzzz12,zzzzzz6	false
2798		zzzzz12,zzzzzz2	false
2797		zzzzz12,zzzzzz5	false
2796		zzzzz12,zzzzz15	false
2795		zzzzz12,zzzzzz0	false
2794		zzzzz12,zzzzz93	false
2793		zzzzz12,zzzzzz4	false
2792		zzzzz12,zzzzzz1	false
2791		zzzzz12,zzzzz17	false
2790		zzzzz12,zzzzz16	false
2789		zzzzz12,zzzzz13	false
2788		zzzzz12,zzzzzz9	false
2787		zzzzz12,zzzzzz7	false
2786		zzzzz11,zzzzz54	false
2785		zzzzz11,zzzzz33	false
2784		zzzzz11,zzzzz62	false
2783		zzzzz11,zzzzz47	false
2782		zzzzz11,zzzzz50	false
2781		zzzzz11,zzzzz67	false
2780		zzzzz11,zzzzz29	false
2779		zzzzz11,zzzzz68	false
2778		zzzzz11,zzzzz42	false
2777		zzzzz11,zzzzz60	false
2776		zzzzz11,zzzzz64	false
2775		zzzzz11,zzzzz34	false
2774		zzzzz11,zzzzz53	false
2773		zzzzz11,zzzzz55	false
2772		zzzzz11,zzzzz71	false
2771		zzzzz11,zzzzz40	false
2770		zzzzz11,zzzzz41	false
2769		zzzzz11,zzzzz99	false
2768		zzzzz11,zzzzz43	false
2767		zzzzz11,zzzzz73	false
2766		zzzzz11,zzzzz72	false
2765		zzzzz11,zzzzz89	false
2764		zzzzz11,zzzzz44	false
2763		zzzzz11,zzzzz56	false
2762		zzzzz11,zzzzz87	false
2761		zzzzz11,zzzzzz8	false
2760		zzzzz11,zzzzz88	false
2759		zzzzz11,zzzzzz6	false
2758		zzzzz11,zzzzzz2	false
2757		zzzzz11,zzzzzz0	false
2756		zzzzz11,zzzzzz5	false
2755		zzzzz11,zzzzz15	false
2754		zzzzz11,zzzzzz1	false
2753		zzzzz11,zzzzzz4	false
2752		zzzzz11,zzzzz93	false
2751		zzzzz11,zzzzz16	false
2750		zzzzz11,zzzzz17	false
2749		zzzzz11,zzzzz13	false
2748		zzzzz11,zzzzzz9	false
2747		zzzzz11,zzzzzz7	false
2746		zzzzz11,zzzzz12	false
2745		zzzzz10,zzzzz97	false
2744		zzzzz10,zzzzz40	false
2743		zzzzz10,zzzzz68	false
2742		zzzzz10,zzzzz51	false
2741		zzzzz10,zzzzz29	false
2740		zzzzz10,zzzzz67	false
2739		zzzzz10,zzzzz64	false
2738		zzzzz10,zzzzz42	false
2737		zzzzz10,zzzzz99	false
2736		zzzzz10,zzzzz60	false
2735		zzzzz10,zzzzz55	false
2734		zzzzz10,zzzzz44	false
2733		zzzzz10,zzzzz71	false
2732		zzzzz10,zzzzz34	false
2731		zzzzz10,zzzzz53	false
2730		zzzzz10,zzzzz73	false
2729		zzzzz10,zzzzz43	false
2728		zzzzz10,zzzzz41	false
2727		zzzzz10,zzzzz72	false
2726		zzzzz10,zzzzz56	false
2725		zzzzz10,zzzzz89	false
2724		zzzzz10,zzzzz87	false
2723		zzzzz10,zzzzz88	false
2722		zzzzz10,zzzzzz8	false
2721		zzzzz10,zzzzzz2	false
2720		zzzzz10,zzzzzz0	false
2719		zzzzz10,zzzzzz6	false
2718		zzzzz10,zzzzz15	false
2717		zzzzz10,zzzzzz5	false
2716		zzzzz10,zzzzzz1	false
2715		zzzzz10,zzzzzz4	false
2714		zzzzz10,zzzzz93	false
2713		zzzzz10,zzzzz16	false
2712		zzzzz10,zzzzz17	false
2711		zzzzz10,zzzzz12	false
2710		zzzzz10,zzzzz11	false
2709		zzzzz10,zzzzz13	false
2708		zzzzz10,zzzzzz7	false
2707		zzzzz10,zzzzzz9	false
2670		zzzz158,zzzzz99	false
2669		zzzz158,zzzzz55	false
2668		zzzz158,zzzzz63	false
2667		zzzz158,zzzzz56	false
2666		zzzz158,zzzzz43	false
2665		zzzz158,zzzzz44	false
2664		zzzz158,zzzzz75	false
2663		zzzz158,zzzzz54	false
2662		zzzz158,zzzzz42	false
2661		zzzz158,zzzzz78	false
2660		zzzz158,zzzzz41	false
2659		zzzz158,zzzzz46	false
2658		zzzz158,zzzzz50	false
2657		zzzz158,zzzzz71	false
2656		zzzz158,zzzzz60	false
2655		zzzz158,zzzzz68	false
2654		zzzz158,zzzzz47	false
2653		zzzz158,zzzzz89	false
2652		zzzz158,zzzzz88	false
2651		zzzz158,zzzzz87	false
2650		zzzz158,zzzzzz6	false
2649		zzzz158,zzzzzz5	false
2648		zzzz158,zzzzzz7	false
2647		zzzz158,zzzzz15	false
2646		zzzz158,zzzzz11	false
2645		zzzz158,zzzzz10	false
2644		zzzz158,zzzzz12	false
2643		zzzz158,zzzzzz9	false
2642		zzzz158,zzzzz93	false
2641		zzzz158,zzzzz17	false
2640		zzzz158,zzzzz13	false
2639		zzzz158,zzzzzz4	false
2638		zzzz158,zzzzz16	false
2637		zzzz158,zzzzzz8	false
2636		zzzz158,zzzzzz1	false
2635		zzzz158,zzzzzz2	false
2634		zzzz158,zzzzzz0	false
2633		zzzz157,zzzzz50	false
2632		zzzz157,zzzzz46	false
2631		zzzz157,zzzzz62	false
2630		zzzz157,zzzzz67	false
2629		zzzz157,zzzzz29	false
2628		zzzz157,zzzzz47	false
2627		zzzz157,zzzzz42	false
2626		zzzz157,zzzzz63	false
2625		zzzz157,zzzzz34	false
2624		zzzz157,zzzzz54	false
2623		zzzz157,zzzzz64	false
2622		zzzz157,zzzzz68	false
2621		zzzz157,zzzzz74	false
2620		zzzz157,zzzzz51	false
2619		zzzz157,zzzzz44	false
2618		zzzz157,zzzzz71	false
2617		zzzz157,zzzzz41	false
2616		zzzz157,zzzzz55	false
2615		zzzz157,zzzzz53	false
2614		zzzz157,zzzzz72	false
2613		zzzz157,zzzzz78	false
2612		zzzz157,zzzzz73	false
2611		zzzz157,zzzzz60	false
2610		zzzz157,zzzzz40	false
2609		zzzz157,zzzzz56	false
2608		zzzz157,zzzzz43	false
2607		zzzz157,zzzzz99	false
2606		zzzz157,zzzzz87	false
2605		zzzz157,zzzzz89	false
2604		zzzz157,zzzzz88	false
2603		zzzz157,zzzzzz8	false
2602		zzzz157,zzzzzz2	false
2601		zzzz157,zzzzzz5	false
2600		zzzz157,zzzzz15	false
2599		zzzz157,zzzz158	false
2598		zzzz157,zzzzzz4	false
2597		zzzz157,zzzzzz0	false
2596		zzzz157,zzzzz12	false
2595		zzzz157,zzzzz16	false
2594		zzzz157,zzzzzz6	false
2593		zzzz157,zzzzz11	false
2592		zzzz157,zzzzz93	false
2591		zzzz157,zzzzzz7	false
2590		zzzz157,zzzzzz1	false
2589		zzzz157,zzzzz17	false
2588		zzzz157,zzzzz10	false
2587		zzzz157,zzzzzz9	false
2586		zzzz157,zzzzz13	false
2585		zzzz156,zzzzz58	false
2584		zzzz156,zzzzz73	false
2583		zzzz156,zzzzz40	false
2582		zzzz156,zzzzz50	false
2581		zzzz156,zzzzz34	false
2580		zzzz156,zzzzz44	false
2579		zzzz156,zzzzz64	false
2578		zzzz156,zzzzz42	false
2577		zzzz156,zzzzz68	false
2576		zzzz156,zzzzz56	false
2575		zzzz156,zzzzz47	false
2574		zzzz156,zzzzz54	false
2573		zzzz156,zzzzz71	false
2572		zzzz156,zzzzz63	false
2571		zzzz156,zzzzz72	false
2570		zzzz156,zzzzz60	false
2569		zzzz156,zzzzz46	false
2568		zzzz156,zzzzz43	false
2567		zzzz156,zzzzz41	false
2566		zzzz156,zzzzz67	false
2565		zzzz156,zzzzz53	false
2564		zzzz156,zzzzz99	false
2563		zzzz156,zzzzz55	false
2562		zzzz156,zzzzz87	false
2561		zzzz156,zzzzz89	false
2560		zzzz156,zzzzz88	false
2559		zzzz156,zzzzzz2	false
2558		zzzz156,zzzz158	false
2557		zzzz156,zzzzzz0	false
2556		zzzz156,zzzzzz6	false
2555		zzzz156,zzzzzz8	false
2554		zzzz156,zzzzzz5	false
2553		zzzz156,zzzzz15	false
2552		zzzz156,zzzzzz4	false
2551		zzzz156,zzzzz16	false
2550		zzzz156,zzzzz12	false
2549		zzzz156,zzzzzz1	false
2548		zzzz156,zzzzzz7	false
2547		zzzz156,zzzzz11	false
2546		zzzz156,zzzzz10	false
2545		zzzz156,zzzzz13	false
2544		zzzz156,zzzzz17	false
2543		zzzz156,zzzzzz9	false
2542		zzzz156,zzzz157	false
2541		zzzz156,zzzzz93	false
2540		zzzz155,zzzzz32	false
2539		zzzz155,zzzzz74	false
2538		zzzz155,zzzzz40	false
2537		zzzz155,zzzzz73	false
2536		zzzz155,zzzzz51	false
2535		zzzz155,zzzzz67	false
2534		zzzz155,zzzzz34	false
2533		zzzz155,zzzzz64	false
2532		zzzz155,zzzzz61	false
2531		zzzz155,zzzzz46	false
2530		zzzz155,zzzzz68	false
2529		zzzz155,zzzzz29	false
2528		zzzz155,zzzzz72	false
2527		zzzz155,zzzzz44	false
2526		zzzz155,zzzzz50	false
2525		zzzz155,zzzzz42	false
2524		zzzz155,zzzzz99	false
2523		zzzz155,zzzzz63	false
2522		zzzz155,zzzzz78	false
2521		zzzz155,zzzzz54	false
2520		zzzz155,zzzzz60	false
2519		zzzz155,zzzzz47	false
[truncated: 2,332 more rows]
