# Supplementary material for: Discovery of several thousand highly diverse circular DNA viruses
Source: eLife journal article supplement (doi:10.7554/elife.51971), 2020-02-03
Supplement: fig4-data1 [file elife-51971-fig4-data1-v1.cys › CytoscapeSession-2019_08_07-14_38/tables/36-all_myseqs_and_genbank_s_domain2_70_190610+Full+Network/SHARED_ATTRS-org.cytoscape.model.CyEdge-36+shared+edge.cytable]

CyCSV-Version	1
SUID	%id	alignment_len	alignment_score	shared interaction	shared name
java.lang.Long	java.lang.Double	java.lang.Integer	java.lang.Double	java.lang.String	java.lang.String
	mutable	mutable	mutable
36 shared edge
4557	31.36	220	26.0		zzzzzz8,zzzzzz9
4556	33.18	220	25.0		zzzzzz7,zzzzzz8
4555	52.02	371	104.0		zzzzzz7,zzzzzz9
4554	30.16	189	14.0		zzzzzz6,zzzzzz8
4553	35.09	228	30.0		zzzzzz6,zzzzzz7
4552	31.05	277	32.0		zzzzzz6,zzzzzz9
4551	33.03	218	25.0		zzzzzz5,zzzzzz8
4550	32.39	247	30.0		zzzzzz5,zzzzzz6
4549	35.24	210	31.0		zzzzzz5,zzzzzz9
4548	37.09	213	33.0		zzzzzz5,zzzzzz7
4547	30.42	286	29.0		zzzzzz4,zzzzzz8
4546	34.11	258	32.0		zzzzzz4,zzzzzz6
4545	34.28	283	38.0		zzzzzz4,zzzzzz5
4544	32.78	299	44.0		zzzzzz4,zzzzzz9
4543	35.31	320	44.0		zzzzzz4,zzzzzz7
4542	30.73	205	24.0		zzzzzz2,zzzzzz6
4541	29.93	304	26.0		zzzzzz2,zzzzzz8
4540	28.99	276	26.0		zzzzzz2,zzzzzz5
4539	35.85	212	27.0		zzzzzz2,zzzzzz4
4538	31.8	283	28.0		zzzzzz2,zzzzzz9
4537	34.89	235	31.0		zzzzzz2,zzzzzz7
4536	36.8	250	36.0		zzzzzz1,zzzzzz6
4535	36.12	227	36.0		zzzzzz1,zzzzzz5
4534	36.7	218	37.0		zzzzzz1,zzzzzz4
4533	36.76	272	39.0		zzzzzz1,zzzzzz2
4532	39.74	234	41.0		zzzzzz1,zzzzzz8
4531	35.92	309	45.0		zzzzzz1,zzzzzz7
4530	35.44	316	47.0		zzzzzz1,zzzzzz9
4529	29.33	208	24.0		zzzzzz0,zzzzzz6
4528	32.1	243	27.0		zzzzzz0,zzzzzz5
4527	38.05	226	33.0		zzzzzz0,zzzzzz7
4526	32.06	340	34.0		zzzzzz0,zzzzzz4
4525	38.8	183	35.0		zzzzzz0,zzzzzz9
4524	32.23	332	40.0		zzzzzz0,zzzzzz1
4523	32.93	331	40.0		zzzzzz0,zzzzzz8
4522	43.19	301	58.0		zzzzzz0,zzzzzz2
4521	29.79	94	7.0		zzzzz99,zzzzzz0
4520	32.39	71	8.0		zzzzz99,zzzzzz8
4519	24.19	186	9.0		zzzzz99,zzzzzz6
4518	24.43	176	9.0		zzzzz99,zzzzzz5
4517	33.33	93	9.0		zzzzz99,zzzzzz1
4516	32.04	103	10.0		zzzzz99,zzzzzz7
4515	31.68	101	11.0		zzzzz99,zzzzzz9
4514	25.4	189	13.0		zzzzz99,zzzzzz4
4513	26.0	200	8.0		zzzzz97,zzzzzz4
4512	33.71	89	10.0		zzzzz97,zzzzz99
4511	26.42	159	12.0		zzzzz95,zzzzz99
4510	28.39	155	8.0		zzzzz94,zzzzz99
4509	23.93	234	12.0		zzzzz94,zzzzzz3
4508	28.43	197	14.0		zzzzz93,zzzzz99
4507	33.73	249	30.0		zzzzz93,zzzzzz2
4506	35.65	216	31.0		zzzzz93,zzzzzz8
4505	35.71	210	33.0		zzzzz93,zzzzzz6
4504	35.75	207	34.0		zzzzz93,zzzzzz5
4503	36.07	219	34.0		zzzzz93,zzzzzz0
4502	35.17	290	45.0		zzzzz93,zzzzzz4
4501	36.88	301	46.0		zzzzz93,zzzzzz7
4500	36.63	303	48.0		zzzzz93,zzzzzz9
4499	43.44	221	49.0		zzzzz93,zzzzzz1
4498	26.63	169	7.0		zzzzz92,zzzzz99
4497	22.71	251	8.0		zzzzz92,zzzzzz3
4495	25.37	134	7.0		zzzzz89,zzzzz95
4494	28.41	88	10.0		zzzzz89,zzzzzz3
4493	24.47	188	10.0		zzzzz89,zzzzzz2
4492	23.94	188	11.0		zzzzz89,zzzzz97
4491	29.19	185	11.0		zzzzz89,zzzzzz6
4490	27.36	201	14.0		zzzzz89,zzzzzz8
4489	25.0	196	15.0		zzzzz89,zzzzzz4
4488	23.83	193	15.0		zzzzz89,zzzzzz5
4487	26.2	187	16.0		zzzzz89,zzzzzz0
4486	26.2	187	17.0		zzzzz89,zzzzzz7
4485	27.1	214	18.0		zzzzz89,zzzzz99
4484	30.74	244	19.0		zzzzz89,zzzzzz1
4483	28.57	175	19.0		zzzzz89,zzzzzz9
4482	30.14	292	24.0		zzzzz89,zzzzz93
4481	34.52	84	9.0		zzzzz88,zzzzzz3
4480	30.23	86	11.0		zzzzz88,zzzzz97
4479	25.39	193	12.0		zzzzz88,zzzzz95
4478	26.26	198	14.0		zzzzz88,zzzzzz5
4477	26.53	196	17.0		zzzzz88,zzzzzz6
4476	28.34	187	20.0		zzzzz88,zzzzzz8
4475	27.46	193	21.0		zzzzz88,zzzzzz4
4474	28.57	196	21.0		zzzzz88,zzzzzz0
4473	30.77	182	22.0		zzzzz88,zzzzzz1
4472	31.25	208	22.0		zzzzz88,zzzzzz2
4471	28.95	190	22.0		zzzzz88,zzzzz99
4470	27.41	259	23.0		zzzzz88,zzzzz93
4469	33.51	185	27.0		zzzzz88,zzzzzz7
4468	39.08	174	31.0		zzzzz88,zzzzzz9
4467	35.71	182	32.0		zzzzz88,zzzzz89
4466	31.13	106	7.0		zzzzz87,zzzzzz3
4465	34.62	104	12.0		zzzzz87,zzzzz97
4464	28.87	194	13.0		zzzzz87,zzzzzz2
4463	27.22	180	14.0		zzzzz87,zzzzzz5
4462	31.18	186	14.0		zzzzz87,zzzzzz8
4461	28.72	188	16.0		zzzzz87,zzzzzz0
4460	30.27	185	16.0		zzzzz87,zzzzzz1
4459	28.71	209	16.0		zzzzz87,zzzzzz6
4458	33.33	171	17.0		zzzzz87,zzzzzz7
4457	31.47	197	18.0		zzzzz87,zzzzzz9
4456	29.44	180	19.0		zzzzz87,zzzzz93
4455	32.18	202	20.0		zzzzz87,zzzzzz4
4454	36.21	174	23.0		zzzzz87,zzzzz89
4453	31.25	192	23.0		zzzzz87,zzzzz99
4452	31.18	186	24.0		zzzzz87,zzzzz88
4451	31.43	70	6.0		zzzzz79,zzzzz89
4450	25.36	138	7.0		zzzzz79,zzzzz95
4449	30.0	100	9.0		zzzzz79,zzzzz87
4448	21.12	161	9.0		zzzzz79,zzzzz88
4447	27.17	92	10.0		zzzzz79,zzzzz99
4446	38.26	264	46.0		zzzzz79,zzzzz97
4445	26.4	250	7.0		zzzzz78,zzzzzz7
4444	29.71	138	9.0		zzzzz78,zzzzz79
4443	23.91	184	9.0		zzzzz78,zzzzzz0
4442	27.87	244	9.0		zzzzz78,zzzzzz9
4441	23.4	235	9.0		zzzzz78,zzzzz97
4440	25.44	169	9.0		zzzzz78,zzzzz95
4439	24.59	183	9.0		zzzzz78,zzzzz93
4438	25.45	330	9.0		zzzzz78,zzzzzz4
4437	24.68	231	10.0		zzzzz78,zzzzzz6
4436	25.41	181	10.0		zzzzz78,zzzzzz5
4435	28.49	186	11.0		zzzzz78,zzzzzz1
4434	28.26	184	13.0		zzzzz78,zzzzz87
4433	29.34	167	16.0		zzzzz78,zzzzz99
4432	27.67	206	17.0		zzzzz78,zzzzz89
4431	32.0	200	22.0		zzzzz78,zzzzz88
4430	23.45	145	6.0		zzzzz77,zzzzz88
4429	24.46	139	7.0		zzzzz77,zzzzz95
4428	24.46	233	7.0		zzzzz77,zzzzz78
4427	30.61	147	9.0		zzzzz77,zzzzz89
4426	32.41	216	25.0		zzzzz77,zzzzz97
4425	29.36	235	29.0		zzzzz77,zzzzz79
4424	24.32	222	9.0		zzzzz76,zzzzz79
4423	23.91	184	9.0		zzzzz76,zzzzz93
4422	29.77	131	10.0		zzzzz76,zzzzz95
4421	29.17	144	12.0		zzzzz76,zzzzz87
4420	31.69	142	12.0		zzzzz76,zzzzz89
4419	29.65	199	15.0		zzzzz76,zzzzz88
4418	40.23	87	16.0		zzzzz76,zzzzz99
4417	29.01	262	30.0		zzzzz76,zzzzz78
4416	26.04	192	7.0		zzzzz75,zzzzzz2
4415	28.08	146	7.0		zzzzz75,zzzzzz0
4414	24.01	279	7.0		zzzzz75,zzzzz79
4413	26.36	129	8.0		zzzzz75,zzzzz95
4412	22.97	209	8.0		zzzzz75,zzzzz94
4411	23.65	203	8.0		zzzzz75,zzzzz93
4410	28.35	127	9.0		zzzzz75,zzzzz97
4409	29.82	171	11.0		zzzzz75,zzzzz89
4408	29.84	124	11.0		zzzzz75,zzzzzz3
4407	30.26	195	12.0		zzzzz75,zzzzz88
4406	24.24	231	14.0		zzzzz75,zzzzz99
4405	32.96	179	15.0		zzzzz75,zzzzz87
4404	32.29	192	26.0		zzzzz75,zzzzz78
4403	39.58	336	62.0		zzzzz75,zzzzz76
4402	25.27	91	7.0		zzzzz74,zzzzz79
4401	24.14	319	7.0		zzzzz74,zzzzz93
4400	24.74	194	7.0		zzzzz74,zzzzzz4
4399	26.23	122	8.0		zzzzz74,zzzzz97
4398	25.93	189	8.0		zzzzz74,zzzzzz9
4397	27.05	207	10.0		zzzzz74,zzzzzz1
4396	23.83	214	11.0		zzzzz74,zzzzz99
4395	28.49	172	13.0		zzzzz74,zzzzz88
4394	27.92	154	13.0		zzzzz74,zzzzz87
4393	30.41	171	17.0		zzzzz74,zzzzz89
4392	30.23	258	28.0		zzzzz74,zzzzz78
4391	33.33	231	28.0		zzzzz74,zzzzz75
4390	34.58	240	31.0		zzzzz74,zzzzz76
4389	26.34	205	7.0		zzzzz73,zzzzzz2
4388	24.66	146	8.0		zzzzz73,zzzzz77
4387	23.63	182	7.0		zzzzz73,zzzzz93
4386	26.02	123	8.0		zzzzz73,zzzzzz3
4385	25.56	180	8.0		zzzzz73,zzzzzz0
4384	31.36	118	9.0		zzzzz73,zzzzz79
4383	26.78	183	10.0		zzzzz73,zzzzzz5
4382	26.13	199	10.0		zzzzz73,zzzzzz1
4381	30.09	113	10.0		zzzzz73,zzzzz95
4380	29.53	193	11.0		zzzzz73,zzzzz97
4379	28.88	187	12.0		zzzzz73,zzzzzz7
4378	25.64	234	13.0		zzzzz73,zzzzzz4
4377	28.17	213	14.0		zzzzz73,zzzzzz9
4376	25.99	177	16.0		zzzzz73,zzzzz99
4375	28.5	200	19.0		zzzzz73,zzzzz87
4374	34.76	187	20.0		zzzzz73,zzzzz75
4373	31.09	193	20.0		zzzzz73,zzzzz89
4372	32.0	200	22.0		zzzzz73,zzzzz88
4371	28.63	262	23.0		zzzzz73,zzzzz74
4370	34.71	170	23.0		zzzzz73,zzzzz76
4369	42.49	273	59.0		zzzzz73,zzzzz78
4368	25.0	164	6.0		zzzzz72,zzzzzz2
4367	23.03	178	7.0		zzzzz72,zzzzzz3
4366	25.0	280	7.0		zzzzz72,zzzzz94
4365	22.69	238	8.0		zzzzz72,zzzzzz4
4364	23.71	194	8.0		zzzzz72,zzzzzz0
4363	23.04	191	9.0		zzzzz72,zzzzz93
4362	26.09	138	10.0		zzzzz72,zzzzz79
4361	24.87	193	10.0		zzzzz72,zzzzzz1
4360	28.83	111	11.0		zzzzz72,zzzzz95
4359	27.01	174	11.0		zzzzz72,zzzzzz5
4358	24.56	281	12.0		zzzzz72,zzzzz97
4357	29.08	196	13.0		zzzzz72,zzzzzz7
4356	26.55	177	14.0		zzzzz72,zzzzz87
4355	24.16	269	14.0		zzzzz72,zzzzzz6
4354	27.86	201	15.0		zzzzz72,zzzzzz9
4353	27.6	192	17.0		zzzzz72,zzzzz89
4352	29.21	178	20.0		zzzzz72,zzzzz99
4351	27.83	212	21.0		zzzzz72,zzzzz88
4350	30.11	186	24.0		zzzzz72,zzzzz75
4349	32.31	195	28.0		zzzzz72,zzzzz74
4348	28.19	259	30.0		zzzzz72,zzzzz76
4347	45.02	331	69.0		zzzzz72,zzzzz73
4346	44.32	352	82.0		zzzzz72,zzzzz78
4345	24.68	235	6.0		zzzzz71,zzzzzz2
4344	25.0	184	7.0		zzzzz71,zzzzzz5
4343	25.56	133	7.0		zzzzz71,zzzzz79
4342	24.51	204	7.0		zzzzz71,zzzzz94
4341	25.0	112	8.0		zzzzz71,zzzzzz3
4340	27.63	152	9.0		zzzzz71,zzzzz77
4339	22.47	178	9.0		zzzzz71,zzzzzz0
4338	19.55	179	9.0		zzzzz71,zzzzz93
4337	22.03	236	9.0		zzzzz71,zzzzzz6
4336	23.83	277	10.0		zzzzz71,zzzzzz1
4335	32.43	111	10.0		zzzzz71,zzzzz95
4334	23.78	185	11.0		zzzzz71,zzzzzz4
4333	27.44	277	12.0		zzzzz71,zzzzz97
4332	25.7	179	14.0		zzzzz71,zzzzz99
4331	28.65	185	17.0		zzzzz71,zzzzz87
4330	29.08	141	18.0		zzzzz71,zzzzz74
4329	32.58	132	18.0		zzzzz71,zzzzz75
4328	29.53	193	20.0		zzzzz71,zzzzz89
4327	29.65	199	23.0		zzzzz71,zzzzz88
4326	31.25	192	24.0		zzzzz71,zzzzz76
4325	47.08	308	69.0		zzzzz71,zzzzz78
4324	49.08	271	72.0		zzzzz71,zzzzz72
4323	51.34	337	91.0		zzzzz71,zzzzz73
4322	26.49	151	8.0		zzzzz70,zzzzz77
4321	26.97	152	8.0		zzzzz70,zzzzz95
4320	28.38	74	8.0		zzzzz70,zzzzz87
4319	27.4	146	11.0		zzzzz70,zzzzz88
4318	27.52	149	13.0		zzzzz70,zzzzz89
4317	26.67	165	14.0		zzzzz70,zzzzz99
4316	28.99	207	17.0		zzzzz70,zzzzz74
4315	35.34	133	19.0		zzzzz70,zzzzz75
4314	35.53	152	25.0		zzzzz70,zzzzz76
4313	34.76	187	30.0		zzzzz70,zzzzz71
4312	31.45	248	34.0		zzzzz70,zzzzz78
4311	36.28	215	35.0		zzzzz70,zzzzz73
4310	34.66	251	38.0		zzzzz70,zzzzz72
4309	23.15	108	6.0		zzzzz69,zzzzz76
4308	25.89	112	6.0		zzzzz69,zzzzz71
4307	27.57	243	7.0		zzzzz69,zzzzz73
4306	26.32	133	7.0		zzzzz69,zzzzz75
4305	28.74	87	8.0		zzzzz69,zzzzz99
4304	29.84	124	9.0		zzzzz69,zzzzz78
4303	28.8	125	13.0		zzzzz69,zzzzz72
4302	31.91	141	13.0		zzzzz69,zzzzz95
4301	29.79	235	25.0		zzzzz69,zzzzz77
4300	32.62	233	32.0		zzzzz69,zzzzz79
4299	36.52	230	34.0		zzzzz69,zzzzz97
4298	26.76	142	6.0		zzzzz68,zzzzz77
4297	21.47	191	7.0		zzzzz68,zzzzzz6
4296	27.68	112	7.0		zzzzz68,zzzzz79
4295	24.4	209	7.0		zzzzz68,zzzzzz2
4294	26.61	124	8.0		zzzzz68,zzzzzz3
4293	30.33	122	8.0		zzzzz68,zzzzz69
4292	23.99	296	9.0		zzzzz68,zzzzzz5
4291	23.56	191	9.0		zzzzz68,zzzzzz1
4290	22.28	184	9.0		zzzzz68,zzzzz93
4289	25.53	188	9.0		zzzzz68,zzzzzz7
4288	24.86	181	9.0		zzzzz68,zzzzzz0
4287	25.26	190	9.0		zzzzz68,zzzzzz4
4286	30.09	113	11.0		zzzzz68,zzzzz95
4285	33.85	130	12.0		zzzzz68,zzzzz97
4284	26.78	183	17.0		zzzzz68,zzzzz99
4283	29.35	184	18.0		zzzzz68,zzzzz87
4282	29.53	193	19.0		zzzzz68,zzzzz89
4281	26.92	208	21.0		zzzzz68,zzzzz88
4280	29.73	259	21.0		zzzzz68,zzzzz75
4279	28.57	252	23.0		zzzzz68,zzzzz74
4278	28.84	267	24.0		zzzzz68,zzzzz76
4277	34.78	276	37.0		zzzzz68,zzzzz70
4276	47.91	311	76.0		zzzzz68,zzzzz78
4275	49.07	324	83.0		zzzzz68,zzzzz72
4274	52.72	368	107.0		zzzzz68,zzzzz73
4273	56.72	402	120.0		zzzzz68,zzzzz71
4272	25.0	160	7.0		zzzzz67,zzzzz79
4271	28.97	145	7.0		zzzzz67,zzzzz96
4270	26.47	136	7.0		zzzzz67,zzzzz69
4269	25.23	107	7.0		zzzzz67,zzzzz95
4268	23.6	178	7.0		zzzzz67,zzzzzz0
4267	24.55	224	7.0		zzzzz67,zzzzzz5
4266	24.47	188	8.0		zzzzz67,zzzzzz7
4265	25.26	190	8.0		zzzzz67,zzzzz98
4264	22.51	191	9.0		zzzzz67,zzzzzz1
4263	23.12	186	9.0		zzzzz67,zzzzzz9
4262	23.72	274	10.0		zzzzz67,zzzzzz4
4261	22.87	188	12.0		zzzzz67,zzzzz93
4260	27.37	179	14.0		zzzzz67,zzzzz87
4259	25.87	201	15.0		zzzzz67,zzzzz89
4258	27.12	177	17.0		zzzzz67,zzzzz99
4257	31.16	199	18.0		zzzzz67,zzzzz88
4256	30.33	244	20.0		zzzzz67,zzzzz74
4255	30.28	218	26.0		zzzzz67,zzzzz76
4254	35.94	192	26.0		zzzzz67,zzzzz75
4253	35.82	282	44.0		zzzzz67,zzzzz78
4252	38.19	288	48.0		zzzzz67,zzzzz68
4251	41.33	225	51.0		zzzzz67,zzzzz73
4250	36.99	292	51.0		zzzzz67,zzzzz70
4249	39.71	277	53.0		zzzzz67,zzzzz71
4248	41.09	275	56.0		zzzzz67,zzzzz72
4247	25.85	147	10.0		zzzzz66,zzzzz79
4246	21.7	235	8.0		zzzzz65,zzzzzz2
4245	23.21	168	10.0		zzzzz65,zzzzz87
4244	23.49	166	11.0		zzzzz65,zzzzz67
4243	25.9	166	12.0		zzzzz65,zzzzz89
4242	28.37	208	14.0		zzzzz65,zzzzz88
4241	24.91	281	16.0		zzzzz65,zzzzz71
4240	31.85	157	16.0		zzzzz65,zzzzz70
4239	24.53	265	17.0		zzzzz65,zzzzz74
4238	25.68	257	18.0		zzzzz65,zzzzz68
4237	27.72	285	21.0		zzzzz65,zzzzz73
4236	30.39	181	22.0		zzzzz65,zzzzz78
4235	27.65	293	23.0		zzzzz65,zzzzz72
4234	28.66	321	25.0		zzzzz65,zzzzz75
4233	33.44	311	40.0		zzzzz65,zzzzz76
4232	25.13	199	7.0		zzzzz64,zzzzzz2
4231	22.68	194	7.0		zzzzz64,zzzzzz6
4230	24.46	233	8.0		zzzzz64,zzzzz97
4229	27.45	153	8.0		zzzzz64,zzzzzz0
4228	27.62	181	9.0		zzzzz64,zzzzzz8
4227	23.83	235	10.0		zzzzz64,zzzzzz7
4226	28.14	167	11.0		zzzzz64,zzzzzz9
4225	30.32	155	12.0		zzzzz64,zzzzz87
4224	29.07	172	12.0		zzzzz64,zzzzzz5
4223	26.05	238	13.0		zzzzz64,zzzzzz1
4222	28.57	175	15.0		zzzzz64,zzzzz89
4221	31.12	196	16.0		zzzzz64,zzzzz93
4220	29.03	186	16.0		zzzzz64,zzzzz88
4219	28.57	224	17.0		zzzzz64,zzzzz74
4218	27.16	243	22.0		zzzzz64,zzzzz68
4217	30.09	226	22.0		zzzzz64,zzzzz71
4216	31.33	166	23.0		zzzzz64,zzzzz70
4215	33.55	152	24.0		zzzzz64,zzzzz67
4214	29.57	230	24.0		zzzzz64,zzzzz73
4213	29.57	257	26.0		zzzzz64,zzzzz72
4212	34.89	235	27.0		zzzzz64,zzzzz78
4211	37.05	251	38.0		zzzzz64,zzzzz75
4210	36.03	247	39.0		zzzzz64,zzzzz76
4209	33.53	331	43.0		zzzzz64,zzzzz65
4208	29.81	104	7.0		zzzzz63,zzzzz79
4207	22.28	184	7.0		zzzzz63,zzzzz93
4206	27.07	133	8.0		zzzzz63,zzzzz69
4205	21.81	188	9.0		zzzzz63,zzzzzz0
4204	27.86	140	10.0		zzzzz63,zzzzz97
4203	25.14	183	11.0		zzzzz63,zzzzz87
4202	28.14	231	12.0		zzzzz63,zzzzzz3
4201	29.3	157	13.0		zzzzz63,zzzzz95
4200	25.29	257	13.0		zzzzz63,zzzzz65
4199	27.16	232	15.0		zzzzz63,zzzzz74
4198	26.32	171	16.0		zzzzz63,zzzzz99
4197	25.77	194	17.0		zzzzz63,zzzzz89
4196	28.26	230	19.0		zzzzz63,zzzzz64
4195	27.35	223	21.0		zzzzz63,zzzzz88
4194	27.95	254	22.0		zzzzz63,zzzzz76
4193	32.8	189	22.0		zzzzz63,zzzzz75
4192	28.62	283	32.0		zzzzz63,zzzzz70
4191	36.36	275	45.0		zzzzz63,zzzzz67
4190	39.46	332	59.0		zzzzz63,zzzzz73
4189	40.84	333	64.0		zzzzz63,zzzzz72
4188	41.18	323	65.0		zzzzz63,zzzzz71
4187	47.7	283	70.0		zzzzz63,zzzzz68
4186	46.91	307	73.0		zzzzz63,zzzzz78
4185	38.78	49	8.0		zzzzz62,zzzzz97
4184	24.74	291	8.0		zzzzz62,zzzzzz5
4183	26.49	151	9.0		zzzzz62,zzzzz99
4182	25.63	199	9.0		zzzzz62,zzzzz93
4181	25.7	249	9.0		zzzzz62,zzzzzz2
4180	23.59	195	11.0		zzzzz62,zzzzz87
4179	31.61	174	16.0		zzzzz62,zzzzz89
4178	29.3	215	18.0		zzzzz62,zzzzz88
4177	27.16	232	19.0		zzzzz62,zzzzz67
4176	29.05	210	21.0		zzzzz62,zzzzz71
4175	28.92	249	21.0		zzzzz62,zzzzz74
4174	30.61	196	21.0		zzzzz62,zzzzz63
4173	32.63	190	23.0		zzzzz62,zzzzz73
4172	29.97	287	24.0		zzzzz62,zzzzz68
4171	29.57	230	25.0		zzzzz62,zzzzz70
4170	32.79	183	26.0		zzzzz62,zzzzz72
4169	34.81	181	27.0		zzzzz62,zzzzz78
4168	28.12	377	33.0		zzzzz62,zzzzz75
4167	34.59	266	37.0		zzzzz62,zzzzz76
4166	34.63	283	41.0		zzzzz62,zzzzz65
4165	41.69	343	67.0		zzzzz62,zzzzz64
4164	24.07	241	7.0		zzzzz61,zzzzzz1
4163	23.5	183	7.0		zzzzz61,zzzzzz8
4162	24.59	183	8.0		zzzzz61,zzzzz93
4161	30.93	97	9.0		zzzzz61,zzzzz87
4160	29.38	211	13.0		zzzzz61,zzzzz88
4159	28.15	135	14.0		zzzzz61,zzzzz68
4158	27.32	194	15.0		zzzzz61,zzzzz71
4157	28.0	175	16.0		zzzzz61,zzzzz89
4156	27.59	203	17.0		zzzzz61,zzzzz63
4155	25.77	260	18.0		zzzzz61,zzzzz70
4154	29.69	229	18.0		zzzzz61,zzzzz67
4153	28.8	191	19.0		zzzzz61,zzzzz73
4152	28.79	198	20.0		zzzzz61,zzzzz72
4151	29.24	277	21.0		zzzzz61,zzzzz74
4150	30.56	252	24.0		zzzzz61,zzzzz78
4149	31.54	260	33.0		zzzzz61,zzzzz75
4148	34.75	305	42.0		zzzzz61,zzzzz76
4147	32.94	343	49.0		zzzzz61,zzzzz65
4146	38.94	339	63.0		zzzzz61,zzzzz62
4145	44.72	322	78.0		zzzzz61,zzzzz64
4144	23.7	135	7.0		zzzzz60,zzzzz79
4143	37.21	43	7.0		zzzzz60,zzzzz69
4142	24.35	193	7.0		zzzzz60,zzzzzz8
4141	28.12	96	7.0		zzzzz60,zzzzzz3
4140	24.76	210	8.0		zzzzz60,zzzzzz2
4139	21.62	185	9.0		zzzzz60,zzzzzz6
4138	26.32	209	9.0		zzzzz60,zzzzz94
4137	23.2	181	10.0		zzzzz60,zzzzzz0
4136	25.0	176	10.0		zzzzz60,zzzzzz5
4135	30.99	142	11.0		zzzzz60,zzzzz97
4134	33.63	113	11.0		zzzzz60,zzzzz95
4133	24.73	182	11.0		zzzzz60,zzzzzz1
4132	23.46	179	12.0		zzzzz60,zzzzz93
4131	27.81	187	13.0		zzzzz60,zzzzzz4
4130	24.16	178	15.0		zzzzz60,zzzzz99
4129	28.88	187	16.0		zzzzz60,zzzzz87
4128	26.12	245	17.0		zzzzz60,zzzzz61
4127	25.77	260	18.0		zzzzz60,zzzzz65
4126	29.02	193	19.0		zzzzz60,zzzzz89
4125	27.78	270	19.0		zzzzz60,zzzzz75
4124	30.43	138	20.0		zzzzz60,zzzzz74
4123	28.64	213	22.0		zzzzz60,zzzzz88
4122	27.2	250	22.0		zzzzz60,zzzzz62
4121	28.26	230	23.0		zzzzz60,zzzzz64
4120	30.65	248	26.0		zzzzz60,zzzzz76
4119	33.45	293	37.0		zzzzz60,zzzzz70
4118	36.4	272	49.0		zzzzz60,zzzzz67
4117	42.47	332	69.0		zzzzz60,zzzzz63
4116	45.13	308	71.0		zzzzz60,zzzzz78
4115	46.56	320	77.0		zzzzz60,zzzzz72
4114	56.92	318	100.0		zzzzz60,zzzzz73
4113	58.72	390	126.0		zzzzz60,zzzzz68
4112	71.52	316	133.0		zzzzz60,zzzzz71
4111	22.73	198	7.0		zzzzz59,zzzzzz5
4110	24.0	200	8.0		zzzzz59,zzzzz93
4109	23.24	185	9.0		zzzzz59,zzzzzz1
4108	22.86	175	9.0		zzzzz59,zzzzz87
4107	26.7	191	12.0		zzzzz59,zzzzz89
4106	28.06	196	12.0		zzzzz59,zzzzz88
4105	22.92	253	15.0		zzzzz59,zzzzz63
4104	29.24	171	15.0		zzzzz59,zzzzz67
4103	25.11	235	19.0		zzzzz59,zzzzz70
4102	27.02	285	20.0		zzzzz59,zzzzz73
4101	27.51	269	20.0		zzzzz59,zzzzz71
4100	26.3	289	20.0		zzzzz59,zzzzz60
4099	28.4	243	21.0		zzzzz59,zzzzz74
4098	28.71	303	23.0		zzzzz59,zzzzz68
4097	27.38	263	24.0		zzzzz59,zzzzz78
4096	27.96	304	25.0		zzzzz59,zzzzz72
4095	27.89	355	29.0		zzzzz59,zzzzz75
4094	34.01	294	43.0		zzzzz59,zzzzz76
4093	34.44	331	49.0		zzzzz59,zzzzz64
4092	34.76	351	50.0		zzzzz59,zzzzz61
4091	32.38	349	52.0		zzzzz59,zzzzz65
4090	35.41	305	52.0		zzzzz59,zzzzz62
4089	24.32	148	7.0		zzzzz58,zzzzzz1
4088	26.0	150	8.0		zzzzz58,zzzzzz4
4087	27.21	147	8.0		zzzzz58,zzzzzz9
4086	28.79	132	9.0		zzzzz58,zzzzz99
4085	21.97	223	9.0		zzzzz58,zzzzz93
4084	26.43	140	10.0		zzzzz58,zzzzz88
4083	29.45	146	10.0		zzzzz58,zzzzz79
4082	51.11	45	10.0		zzzzz58,zzzzzz3
4081	25.81	217	10.0		zzzzz58,zzzzz87
4080	30.43	138	11.0		zzzzz58,zzzzz89
4079	31.06	132	14.0		zzzzz58,zzzzz70
4078	31.58	190	18.0		zzzzz58,zzzzz68
4077	30.33	211	19.0		zzzzz58,zzzzz71
4076	29.61	206	19.0		zzzzz58,zzzzz63
4075	33.33	192	20.0		zzzzz58,zzzzz73
4074	30.36	224	20.0		zzzzz58,zzzzz60
4073	29.51	244	22.0		zzzzz58,zzzzz72
4072	30.15	262	23.0		zzzzz58,zzzzz67
4071	32.35	204	23.0		zzzzz58,zzzzz78
4070	35.54	242	29.0		zzzzz58,zzzzz74
4069	34.71	242	31.0		zzzzz58,zzzzz65
4068	29.56	362	33.0		zzzzz58,zzzzz59
4067	33.73	255	35.0		zzzzz58,zzzzz62
4066	29.26	352	41.0		zzzzz58,zzzzz61
4065	35.22	301	43.0		zzzzz58,zzzzz64
4064	39.88	326	58.0		zzzzz58,zzzzz76
4063	52.42	351	100.0		zzzzz58,zzzzz75
4062	26.13	111	6.0		zzzzz57,zzzzz76
4061	33.9	59	7.0		zzzzz57,zzzzz75
4060	34.25	73	7.0		zzzzz57,zzzzzz3
4059	25.37	67	7.0		zzzzz57,zzzzz66
4058	25.37	67	7.0		zzzzz57,zzzzz63
4057	32.35	102	9.0		zzzzz57,zzzzz87
4056	25.35	213	9.0		zzzzz57,zzzzz88
4055	41.3	46	10.0		zzzzz57,zzzzz74
4054	25.94	212	10.0		zzzzz57,zzzzz64
4053	26.99	163	10.0		zzzzz57,zzzzz67
4052	25.12	203	10.0		zzzzz57,zzzzz89
4051	30.46	197	11.0		zzzzz57,zzzzz78
4050	31.17	154	11.0		zzzzz57,zzzzz60
4049	25.44	228	12.0		zzzzz57,zzzzz71
4048	23.58	229	12.0		zzzzz57,zzzzz72
4047	28.92	166	12.0		zzzzz57,zzzzz68
4046	30.99	142	12.0		zzzzz57,zzzzz99
4045	28.85	260	14.0		zzzzz57,zzzzz73
4044	37.04	216	33.0		zzzzz57,zzzzz77
4043	35.37	229	34.0		zzzzz57,zzzzz69
4042	45.33	214	55.0		zzzzz57,zzzzz79
4041	61.61	224	83.0		zzzzz57,zzzzz97
4040	38.98	59	8.0		zzzzz56,zzzzz77
4039	26.97	152	8.0		zzzzz56,zzzzzz8
4038	31.11	135	9.0		zzzzz56,zzzzz69
4037	37.78	90	9.0		zzzzz56,zzzzzz3
4036	30.4	125	11.0		zzzzz56,zzzzz57
4035	24.46	184	11.0		zzzzz56,zzzzz93
4034	27.27	176	11.0		zzzzz56,zzzzzz0
4033	31.39	137	11.0		zzzzz56,zzzzz79
4032	25.57	176	11.0		zzzzz56,zzzzzz4
4031	33.87	124	12.0		zzzzz56,zzzzz97
4030	23.5	183	12.0		zzzzz56,zzzzzz5
4029	26.37	182	12.0		zzzzz56,zzzzzz2
4028	25.27	182	13.0		zzzzz56,zzzzzz6
4027	30.23	129	13.0		zzzzz56,zzzzz95
4026	28.49	179	15.0		zzzzz56,zzzzzz1
4025	29.45	163	16.0		zzzzz56,zzzzz99
4024	28.9	173	16.0		zzzzz56,zzzzzz7
4023	29.95	187	17.0		zzzzz56,zzzzzz9
4022	38.6	171	24.0		zzzzz56,zzzzz87
4021	32.18	174	25.0		zzzzz56,zzzzz70
4020	35.05	194	27.0		zzzzz56,zzzzz88
4019	31.25	192	27.0		zzzzz56,zzzzz63
4018	30.97	268	31.0		zzzzz56,zzzzz67
4017	33.64	217	31.0		zzzzz56,zzzzz89
4016	36.57	216	33.0		zzzzz56,zzzzz71
4015	33.06	245	34.0		zzzzz56,zzzzz60
4014	35.53	273	35.0		zzzzz56,zzzzz78
4013	32.04	284	37.0		zzzzz56,zzzzz68
4012	35.58	267	38.0		zzzzz56,zzzzz74
4011	36.78	242	39.0		zzzzz56,zzzzz73
4010	36.29	237	40.0		zzzzz56,zzzzz72
4009	34.02	291	41.0		zzzzz56,zzzzz65
4008	33.79	290	41.0		zzzzz56,zzzzz61
4007	35.07	288	42.0		zzzzz56,zzzzz62
4006	36.3	303	44.0		zzzzz56,zzzzz75
4005	32.68	306	45.0		zzzzz56,zzzzz59
4004	35.64	303	49.0		zzzzz56,zzzzz64
4003	35.25	295	51.0		zzzzz56,zzzzz76
4002	40.3	268	52.0		zzzzz56,zzzzz58
4001	22.83	184	7.0		zzzzz55,zzzzzz0
4000	29.2	137	8.0		zzzzz55,zzzzz77
3999	24.34	189	8.0		zzzzz55,zzzzzz4
3998	21.9	210	9.0		zzzzz55,zzzzzz6
3997	28.65	185	9.0		zzzzz55,zzzzzz2
3996	23.17	259	10.0		zzzzz55,zzzzz97
3995	28.83	111	10.0		zzzzz55,zzzzz69
3994	23.44	192	10.0		zzzzz55,zzzzzz1
3993	23.49	149	11.0		zzzzz55,zzzzz79
3992	26.49	185	10.0		zzzzz55,zzzzzz8
3991	26.32	133	11.0		zzzzz55,zzzzz95
3990	21.58	278	11.0		zzzzz55,zzzzz93
3989	24.47	188	11.0		zzzzz55,zzzzzz9
3988	26.23	183	11.0		zzzzz55,zzzzz94
3987	25.18	278	11.0		zzzzz55,zzzzzz3
3986	23.85	239	12.0		zzzzz55,zzzzz57
3985	24.14	232	12.0		zzzzz55,zzzzzz7
3984	27.81	187	12.0		zzzzz55,zzzzzz5
3983	26.06	165	14.0		zzzzz55,zzzzz61
3982	26.29	194	16.0		zzzzz55,zzzzz89
3981	26.7	221	16.0		zzzzz55,zzzzz87
3980	28.86	149	19.0		zzzzz55,zzzzz65
3979	29.78	178	20.0		zzzzz55,zzzzz99
3978	29.17	240	22.0		zzzzz55,zzzzz88
3977	32.29	192	23.0		zzzzz55,zzzzz58
3976	29.46	241	24.0		zzzzz55,zzzzz64
3975	28.25	315	24.0		zzzzz55,zzzzz59
3974	29.08	282	25.0		zzzzz55,zzzzz74
3973	26.44	295	25.0		zzzzz55,zzzzz76
3972	30.04	243	25.0		zzzzz55,zzzzz62
3971	33.51	191	27.0		zzzzz55,zzzzz75
3970	28.34	314	35.0		zzzzz55,zzzzz70
3969	33.89	239	37.0		zzzzz55,zzzzz56
3968	35.83	321	53.0		zzzzz55,zzzzz67
3967	41.72	290	55.0		zzzzz55,zzzzz63
3966	39.29	308	59.0		zzzzz55,zzzzz78
3965	38.72	359	62.0		zzzzz55,zzzzz73
3964	44.81	270	64.0		zzzzz55,zzzzz68
3963	38.56	402	64.0		zzzzz55,zzzzz60
3962	45.85	301	68.0		zzzzz55,zzzzz71
3961	44.52	310	72.0		zzzzz55,zzzzz72
3960	22.11	190	6.0		zzzzz54,zzzzz94
3959	23.53	153	7.0		zzzzz54,zzzzz57
3958	27.2	125	7.0		zzzzz54,zzzzz98
3957	23.12	186	7.0		zzzzz54,zzzzzz4
3956	27.08	192	7.0		zzzzz54,zzzzzz9
3955	26.63	184	7.0		zzzzz54,zzzzzz0
3954	22.68	194	7.0		zzzzz54,zzzzzz2
3953	25.97	231	8.0		zzzzz54,zzzzzz8
3952	27.37	179	9.0		zzzzz54,zzzzzz5
3951	23.56	191	9.0		zzzzz54,zzzzz93
3950	26.42	193	11.0		zzzzz54,zzzzzz1
3949	23.23	198	14.0		zzzzz54,zzzzz99
3948	26.78	183	14.0		zzzzz54,zzzzz89
3947	28.81	177	15.0		zzzzz54,zzzzz87
3946	29.85	134	16.0		zzzzz54,zzzzz65
3945	25.0	284	17.0		zzzzz54,zzzzz61
3944	30.56	180	18.0		zzzzz54,zzzzz88
3943	31.87	182	19.0		zzzzz54,zzzzz58
3942	33.58	134	20.0		zzzzz54,zzzzz62
3941	28.81	236	20.0		zzzzz54,zzzzz74
3940	28.57	175	20.0		zzzzz54,zzzzz64
3939	28.51	242	20.0		zzzzz54,zzzzz59
3938	34.31	137	21.0		zzzzz54,zzzzz76
3937	38.51	161	23.0		zzzzz54,zzzzz75
3936	30.74	231	24.0		zzzzz54,zzzzz56
3935	30.77	234	30.0		zzzzz54,zzzzz63
3934	38.89	162	35.0		zzzzz54,zzzzz78
3933	37.68	207	36.0		zzzzz54,zzzzz72
3932	42.61	176	37.0		zzzzz54,zzzzz71
3931	38.5	200	39.0		zzzzz54,zzzzz73
3930	35.36	263	40.0		zzzzz54,zzzzz55
3929	33.33	309	40.0		zzzzz54,zzzzz60
3928	37.78	225	42.0		zzzzz54,zzzzz68
3927	34.78	253	43.0		zzzzz54,zzzzz70
3926	36.69	308	54.0		zzzzz54,zzzzz67
3925	24.15	207	8.0		zzzzz53,zzzzzz4
3924	26.92	208	9.0		zzzzz53,zzzzzz0
3923	21.46	233	9.0		zzzzz53,zzzzz79
3922	25.37	201	9.0		zzzzz53,zzzzzz8
3921	22.69	238	9.0		zzzzz53,zzzzzz6
3920	25.39	193	9.0		zzzzz53,zzzzz94
3919	25.13	191	10.0		zzzzz53,zzzzzz2
3918	27.68	112	10.0		zzzzz53,zzzzz95
3917	24.44	180	10.0		zzzzz53,zzzzz93
3916	27.08	192	11.0		zzzzz53,zzzzz77
3915	26.56	192	11.0		zzzzz53,zzzzzz3
3914	25.82	182	11.0		zzzzz53,zzzzzz5
3913	31.53	111	11.0		zzzzz53,zzzzz69
3912	25.0	224	12.0		zzzzz53,zzzzzz1
3911	26.7	191	13.0		zzzzz53,zzzzzz9
3910	24.74	190	13.0		zzzzz53,zzzzzz7
3909	26.86	242	14.0		zzzzz53,zzzzz97
3908	26.94	219	14.0		zzzzz53,zzzzz57
3907	26.29	194	16.0		zzzzz53,zzzzz87
3906	26.29	194	16.0		zzzzz53,zzzzz89
3905	27.62	181	16.0		zzzzz53,zzzzz99
3904	30.12	166	19.0		zzzzz53,zzzzz61
3903	27.19	217	19.0		zzzzz53,zzzzz59
3902	33.83	133	21.0		zzzzz53,zzzzz65
3901	29.49	217	21.0		zzzzz53,zzzzz88
3900	32.63	190	22.0		zzzzz53,zzzzz58
3899	34.78	138	23.0		zzzzz53,zzzzz74
3898	29.79	188	24.0		zzzzz53,zzzzz75
3897	38.67	150	25.0		zzzzz53,zzzzz62
3896	32.13	221	25.0		zzzzz53,zzzzz64
3895	30.61	245	28.0		zzzzz53,zzzzz76
3894	36.41	217	34.0		zzzzz53,zzzzz70
3893	37.76	196	37.0		zzzzz53,zzzzz56
3892	35.51	245	37.0		zzzzz53,zzzzz54
3891	38.53	327	51.0		zzzzz53,zzzzz63
3890	41.03	234	55.0		zzzzz53,zzzzz67
3889	50.26	191	55.0		zzzzz53,zzzzz78
3888	43.69	309	59.0		zzzzz53,zzzzz73
3887	54.08	196	61.0		zzzzz53,zzzzz72
3886	54.59	207	62.0		zzzzz53,zzzzz71
3885	43.4	341	63.0		zzzzz53,zzzzz68
3884	44.44	324	63.0		zzzzz53,zzzzz60
3883	54.94	344	115.0		zzzzz53,zzzzz55
3882	26.49	151	6.0		zzzzz52,zzzzz70
3881	26.04	169	7.0		zzzzz52,zzzzz63
3880	28.7	115	7.0		zzzzz52,zzzzz58
3879	26.45	155	7.0		zzzzz52,zzzzz60
3878	25.66	152	8.0		zzzzz52,zzzzz89
3877	25.71	140	8.0		zzzzz52,zzzzz95
3876	23.64	220	8.0		zzzzz52,zzzzz67
3875	25.0	100	9.0		zzzzz52,zzzzz87
3874	25.0	112	9.0		zzzzz52,zzzzz75
3873	26.11	157	9.0		zzzzz52,zzzzz68
3872	26.19	168	10.0		zzzzz52,zzzzz78
3871	26.75	157	10.0		zzzzz52,zzzzz88
3870	25.47	161	11.0		zzzzz52,zzzzz72
3869	24.69	162	11.0		zzzzz52,zzzzz55
3868	24.49	147	11.0		zzzzz52,zzzzz99
3867	28.77	219	12.0		zzzzz52,zzzzz71
3866	31.69	142	12.0		zzzzz52,zzzzz56
3865	28.26	230	14.0		zzzzz52,zzzzz53
3864	34.93	229	31.0		zzzzz52,zzzzz77
3863	41.31	213	38.0		zzzzz52,zzzzz57
3862	42.33	215	38.0		zzzzz52,zzzzz97
3861	42.27	220	38.0		zzzzz52,zzzzz79
3860	39.48	233	43.0		zzzzz52,zzzzz69
3859	23.66	131	7.0		zzzzz51,zzzzz69
3858	31.58	57	7.0		zzzzz51,zzzzz79
3857	23.35	197	7.0		zzzzz51,zzzzz77
3856	22.51	191	7.0		zzzzz51,zzzzz93
3855	25.71	70	8.0		zzzzz51,zzzzz52
3854	24.34	189	8.0		zzzzz51,zzzzzz4
3853	21.56	167	9.0		zzzzz51,zzzzz97
3852	27.13	188	10.0		zzzzz51,zzzzzz9
3851	25.0	220	11.0		zzzzz51,zzzzzz1
3850	34.02	97	12.0		zzzzz51,zzzzz57
3849	23.15	203	13.0		zzzzz51,zzzzz99
3848	27.92	197	15.0		zzzzz51,zzzzz88
3847	32.65	147	15.0		zzzzz51,zzzzz87
3846	30.92	152	17.0		zzzzz51,zzzzz89
3845	27.11	284	18.0		zzzzz51,zzzzz63
3844	27.91	215	19.0		zzzzz51,zzzzz64
3843	26.74	288	19.0		zzzzz51,zzzzz62
3842	30.21	192	19.0		zzzzz51,zzzzz70
3841	27.99	293	20.0		zzzzz51,zzzzz67
3840	28.7	230	20.0		zzzzz51,zzzzz54
3839	26.79	321	21.0		zzzzz51,zzzzz65
3838	30.25	162	22.0		zzzzz51,zzzzz71
3837	25.0	276	22.0		zzzzz51,zzzzz60
3836	26.51	249	23.0		zzzzz51,zzzzz59
3835	28.08	292	23.0		zzzzz51,zzzzz61
3834	28.4	257	23.0		zzzzz51,zzzzz68
3833	30.92	207	24.0		zzzzz51,zzzzz55
3832	28.33	240	24.0		zzzzz51,zzzzz73
3831	25.64	273	26.0		zzzzz51,zzzzz53
3830	31.52	276	28.0		zzzzz51,zzzzz58
3829	32.24	245	29.0		zzzzz51,zzzzz78
3828	28.16	316	29.0		zzzzz51,zzzzz72
3827	30.62	307	30.0		zzzzz51,zzzzz75
3826	34.16	281	34.0		zzzzz51,zzzzz76
3825	33.45	287	37.0		zzzzz51,zzzzz56
3824	66.39	360	139.0		zzzzz51,zzzzz74
3823	27.82	133	8.0		zzzzz50,zzzzz79
3822	36.67	60	8.0		zzzzz50,zzzzz77
3821	25.71	175	9.0		zzzzz50,zzzzzz3
3820	24.1	195	9.0		zzzzz50,zzzzzz0
3819	25.31	162	9.0		zzzzz50,zzzzz52
3818	28.57	196	9.0		zzzzz50,zzzzzz2
3817	28.68	136	10.0		zzzzz50,zzzzz69
3816	25.0	160	10.0		zzzzz50,zzzzz95
3815	25.28	178	10.0		zzzzz50,zzzzz87
3814	25.56	133	11.0		zzzzz50,zzzzz57
3813	25.7	214	11.0		zzzzz50,zzzzzz9
3812	25.6	168	13.0		zzzzz50,zzzzz94
3811	31.78	129	14.0		zzzzz50,zzzzz97
3810	22.68	269	15.0		zzzzz50,zzzzz59
3809	29.63	189	16.0		zzzzz50,zzzzz99
3808	26.73	217	17.0		zzzzz50,zzzzz61
3807	26.53	245	19.0		zzzzz50,zzzzz65
3806	29.5	200	19.0		zzzzz50,zzzzz89
3805	23.73	295	20.0		zzzzz50,zzzzz51
3804	25.22	345	20.0		zzzzz50,zzzzz74
3803	31.22	205	21.0		zzzzz50,zzzzz88
3802	29.9	204	23.0		zzzzz50,zzzzz58
3801	27.52	218	26.0		zzzzz50,zzzzz64
3800	30.22	225	27.0		zzzzz50,zzzzz62
3799	33.51	191	28.0		zzzzz50,zzzzz75
3798	28.74	247	28.0		zzzzz50,zzzzz76
3797	36.88	263	36.0		zzzzz50,zzzzz56
3796	30.98	297	38.0		zzzzz50,zzzzz54
3795	32.91	316	38.0		zzzzz50,zzzzz70
3794	35.87	276	41.0		zzzzz50,zzzzz63
3793	42.93	198	49.0		zzzzz50,zzzzz71
3792	41.74	242	49.0		zzzzz50,zzzzz78
3791	38.52	270	50.0		zzzzz50,zzzzz55
3790	46.15	221	50.0		zzzzz50,zzzzz73
3789	38.81	268	51.0		zzzzz50,zzzzz60
3788	43.39	242	51.0		zzzzz50,zzzzz53
3787	48.47	196	51.0		zzzzz50,zzzzz68
3786	44.5	200	52.0		zzzzz50,zzzzz72
3785	36.5	326	52.0		zzzzz50,zzzzz67
3784	31.73	104	7.0		zzzzz49,zzzzzz5
3783	22.82	206	8.0		zzzzz49,zzzzz67
3782	27.12	236	12.0		zzzzz49,zzzzz89
3781	23.94	213	12.0		zzzzz49,zzzzz71
3780	24.63	203	12.0		zzzzz49,zzzzz87
3779	23.01	365	12.0		zzzzz49,zzzzz68
3778	23.85	239	12.0		zzzzz49,zzzzz88
3777	23.61	305	13.0		zzzzz49,zzzzz63
3776	27.68	177	14.0		zzzzz49,zzzzz50
3775	25.17	286	14.0		zzzzz49,zzzzz74
3774	27.38	168	14.0		zzzzz49,zzzzz73
3773	27.31	238	15.0		zzzzz49,zzzzz72
3772	26.52	279	15.0		zzzzz49,zzzzz51
3771	28.28	198	15.0		zzzzz49,zzzzz70
3770	25.71	210	15.0		zzzzz49,zzzzz54
3769	26.76	213	16.0		zzzzz49,zzzzz53
3768	26.07	211	17.0		zzzzz49,zzzzz78
3767	25.38	264	17.0		zzzzz49,zzzzz60
3766	22.62	367	18.0		zzzzz49,zzzzz55
3765	30.77	299	24.0		zzzzz49,zzzzz75
3764	31.54	241	24.0		zzzzz49,zzzzz58
3763	31.12	241	28.0		zzzzz49,zzzzz76
3762	31.4	328	33.0		zzzzz49,zzzzz64
3761	30.06	326	34.0		zzzzz49,zzzzz56
3760	34.89	278	35.0		zzzzz49,zzzzz62
3759	32.27	344	39.0		zzzzz49,zzzzz61
3758	36.28	328	49.0		zzzzz49,zzzzz59
3757	47.49	339	92.0		zzzzz49,zzzzz65
3756	25.77	97	7.0		zzzzz48,zzzzzz5
3755	29.12	182	9.0		zzzzz48,zzzzzz7
3754	23.96	217	11.0		zzzzz48,zzzzz63
3753	25.81	186	11.0		zzzzz48,zzzzz54
3752	28.89	180	11.0		zzzzz48,zzzzz87
3751	25.86	263	11.0		zzzzz48,zzzzz67
3750	29.52	166	12.0		zzzzz48,zzzzz89
3749	25.58	215	12.0		zzzzz48,zzzzz71
3748	28.4	162	13.0		zzzzz48,zzzzz70
3747	27.27	187	13.0		zzzzz48,zzzzz68
3746	26.19	168	13.0		zzzzz48,zzzzz73
3745	27.96	186	14.0		zzzzz48,zzzzz50
3744	26.89	238	14.0		zzzzz48,zzzzz88
3743	24.76	311	15.0		zzzzz48,zzzzz74
3742	27.89	147	15.0		zzzzz48,zzzzz55
3741	23.36	274	15.0		zzzzz48,zzzzz60
3740	24.33	337	15.0		zzzzz48,zzzzz51
3739	25.26	285	18.0		zzzzz48,zzzzz72
3738	31.34	134	18.0		zzzzz48,zzzzz53
3737	29.26	188	21.0		zzzzz48,zzzzz78
3736	30.92	304	24.0		zzzzz48,zzzzz58
3735	28.94	349	25.0		zzzzz48,zzzzz75
3734	29.79	292	29.0		zzzzz48,zzzzz76
3733	31.45	283	34.0		zzzzz48,zzzzz61
3732	34.29	312	35.0		zzzzz48,zzzzz64
3731	34.98	283	40.0		zzzzz48,zzzzz62
3730	35.16	310	40.0		zzzzz48,zzzzz56
3729	35.89	287	43.0		zzzzz48,zzzzz59
3728	48.38	339	84.0		zzzzz48,zzzzz49
3727	45.7	337	90.0		zzzzz48,zzzzz65
3726	26.14	153	7.0		zzzzz47,zzzzz94
3725	25.65	191	7.0		zzzzz47,zzzzzz5
3724	28.57	126	8.0		zzzzz47,zzzzz97
3723	24.64	138	8.0		zzzzz47,zzzzz79
3722	28.09	89	9.0		zzzzz47,zzzzzz3
3721	25.1	255	9.0		zzzzz47,zzzzzz2
3720	24.86	181	10.0		zzzzz47,zzzzzz1
3719	21.23	179	10.0		zzzzz47,zzzzz93
3718	26.69	236	10.0		zzzzz47,zzzzz57
3717	29.57	230	11.0		zzzzz47,zzzzzz9
3716	23.61	216	12.0		zzzzz47,zzzzz99
3715	28.49	186	12.0		zzzzz47,zzzzzz4
3714	35.4	113	12.0		zzzzz47,zzzzz95
3713	26.11	180	12.0		zzzzz47,zzzzzz0
3712	26.48	219	15.0		zzzzz47,zzzzz48
3711	24.77	218	16.0		zzzzz47,zzzzz49
3710	29.73	185	16.0		zzzzz47,zzzzz87
3709	25.3	249	16.0		zzzzz47,zzzzz61
3708	25.89	197	17.0		zzzzz47,zzzzz74
3707	30.63	222	17.0		zzzzz47,zzzzz58
3706	25.32	312	17.0		zzzzz47,zzzzz51
3705	29.53	193	19.0		zzzzz47,zzzzz89
3704	28.91	211	20.0		zzzzz47,zzzzz88
3703	29.15	199	20.0		zzzzz47,zzzzz62
3702	26.06	353	21.0		zzzzz47,zzzzz65
3701	30.42	240	21.0		zzzzz47,zzzzz75
3700	27.44	317	22.0		zzzzz47,zzzzz59
3699	29.23	284	24.0		zzzzz47,zzzzz64
3698	31.51	219	24.0		zzzzz47,zzzzz76
3697	30.0	270	30.0		zzzzz47,zzzzz56
3696	33.05	236	34.0		zzzzz47,zzzzz70
3695	36.51	241	42.0		zzzzz47,zzzzz54
3694	43.65	197	50.0		zzzzz47,zzzzz67
3693	41.0	239	50.0		zzzzz47,zzzzz50
3692	45.74	282	57.0		zzzzz47,zzzzz53
3691	41.85	313	61.0		zzzzz47,zzzzz55
3690	43.62	337	68.0		zzzzz47,zzzzz78
3689	42.29	350	69.0		zzzzz47,zzzzz72
3688	47.16	282	70.0		zzzzz47,zzzzz63
3687	53.33	345	95.0		zzzzz47,zzzzz73
3686	67.04	355	127.0		zzzzz47,zzzzz71
3685	58.38	382	127.0		zzzzz47,zzzzz68
3684	71.61	317	142.0		zzzzz47,zzzzz60
3683	25.36	209	7.0		zzzzz46,zzzzzz5
3682	23.47	213	7.0		zzzzz46,zzzzz95
3681	22.84	162	8.0		zzzzz46,zzzzz79
3680	24.47	188	7.0		zzzzz46,zzzzzz2
3679	25.32	154	9.0		zzzzz46,zzzzz69
3678	23.32	193	9.0		zzzzz46,zzzzzz7
3677	27.78	180	9.0		zzzzz46,zzzzz94
3676	23.83	193	9.0		zzzzz46,zzzzz93
3675	30.99	142	9.0		zzzzz46,zzzzz77
3674	23.68	190	9.0		zzzzz46,zzzzzz9
3673	22.49	209	10.0		zzzzz46,zzzzz48
3672	25.59	211	10.0		zzzzz46,zzzzzz3
3671	24.79	242	11.0		zzzzz46,zzzzz52
3670	27.16	232	11.0		zzzzz46,zzzzzz4
3669	25.0	164	11.0		zzzzz46,zzzzz49
3668	34.0	100	12.0		zzzzz46,zzzzz87
3667	23.53	221	13.0		zzzzz46,zzzzzz0
3666	25.3	253	13.0		zzzzz46,zzzzz97
3665	26.61	248	14.0		zzzzz46,zzzzz57
3664	23.64	258	16.0		zzzzz46,zzzzz65
3663	24.74	287	16.0		zzzzz46,zzzzz59
3662	25.64	195	17.0		zzzzz46,zzzzz89
3661	27.84	176	17.0		zzzzz46,zzzzz99
3660	26.03	292	17.0		zzzzz46,zzzzz61
3659	27.67	159	17.0		zzzzz46,zzzzz74
3658	29.86	211	18.0		zzzzz46,zzzzz88
3657	27.67	253	22.0		zzzzz46,zzzzz51
3656	26.42	212	23.0		zzzzz46,zzzzz62
3655	28.02	232	25.0		zzzzz46,zzzzz64
3654	30.56	216	25.0		zzzzz46,zzzzz58
3653	32.99	197	27.0		zzzzz46,zzzzz75
3652	31.19	218	29.0		zzzzz46,zzzzz76
3651	28.67	279	29.0		zzzzz46,zzzzz56
3650	36.73	294	50.0		zzzzz46,zzzzz54
3649	35.05	331	51.0		zzzzz46,zzzzz70
3648	41.18	255	52.0		zzzzz46,zzzzz73
3647	39.5	281	54.0		zzzzz46,zzzzz63
3646	37.35	332	57.0		zzzzz46,zzzzz78
3645	38.37	331	58.0		zzzzz46,zzzzz72
3644	39.06	320	58.0		zzzzz46,zzzzz60
3643	42.49	273	59.0		zzzzz46,zzzzz68
3642	39.08	348	59.0		zzzzz46,zzzzz47
3641	40.88	296	60.0		zzzzz46,zzzzz50
3640	41.75	297	61.0		zzzzz46,zzzzz71
3639	39.29	336	64.0		zzzzz46,zzzzz53
3638	40.38	317	66.0		zzzzz46,zzzzz55
3637	41.8	378	76.0		zzzzz46,zzzzz67
3636	36.23	69	7.0		zzzzz45,zzzzzz4
3635	21.95	205	9.0		zzzzz45,zzzzz87
3634	27.53	178	12.0		zzzzz45,zzzzz89
3633	24.54	216	14.0		zzzzz45,zzzzz54
3632	27.16	232	14.0		zzzzz45,zzzzz67
3631	28.86	201	14.0		zzzzz45,zzzzz88
3630	23.2	181	14.0		zzzzz45,zzzzz68
3629	26.88	186	15.0		zzzzz45,zzzzz63
3628	26.74	187	16.0		zzzzz45,zzzzz70
3627	23.77	265	16.0		zzzzz45,zzzzz71
3626	22.41	232	17.0		zzzzz45,zzzzz60
3625	25.0	228	17.0		zzzzz45,zzzzz73
3624	25.65	230	17.0		zzzzz45,zzzzz46
3623	26.55	339	18.0		zzzzz45,zzzzz74
3622	24.68	231	19.0		zzzzz45,zzzzz78
3621	30.0	180	19.0		zzzzz45,zzzzz50
3620	28.5	214	20.0		zzzzz45,zzzzz51
3619	25.21	238	21.0		zzzzz45,zzzzz53
3618	26.38	235	21.0		zzzzz45,zzzzz47
3617	27.39	241	21.0		zzzzz45,zzzzz72
3616	25.42	295	22.0		zzzzz45,zzzzz55
3615	27.38	336	25.0		zzzzz45,zzzzz75
3614	30.48	292	26.0		zzzzz45,zzzzz76
3613	29.25	294	27.0		zzzzz45,zzzzz58
3612	30.31	287	33.0		zzzzz45,zzzzz56
3611	34.41	279	39.0		zzzzz45,zzzzz62
3610	34.52	310	40.0		zzzzz45,zzzzz64
3609	33.33	333	43.0		zzzzz45,zzzzz61
3608	37.76	286	50.0		zzzzz45,zzzzz59
3607	45.43	328	83.0		zzzzz45,zzzzz48
3606	43.66	339	84.0		zzzzz45,zzzzz65
3605	46.31	339	88.0		zzzzz45,zzzzz49
3604	23.42	111	6.0		zzzzz44,zzzzz94
3603	22.17	212	7.0		zzzzz44,zzzzz79
3602	30.19	106	7.0		zzzzz44,zzzzz77
3601	30.77	78	7.0		zzzzz44,zzzzz52
3600	23.88	201	8.0		zzzzz44,zzzzzz1
3599	24.53	212	8.0		zzzzz44,zzzzzz8
3598	26.42	159	9.0		zzzzz44,zzzzz57
3597	25.0	180	9.0		zzzzz44,zzzzzz5
3596	22.99	187	9.0		zzzzz44,zzzzzz6
3595	23.66	224	9.0		zzzzz44,zzzzz69
3594	24.67	227	9.0		zzzzz44,zzzzz97
3593	25.0	192	9.0		zzzzz44,zzzzzz4
3592	27.32	183	9.0		zzzzz44,zzzzzz0
3591	25.91	193	10.0		zzzzz44,zzzzz93
3590	28.18	110	11.0		zzzzz44,zzzzz95
3589	28.1	153	13.0		zzzzz44,zzzzz48
3588	26.77	198	14.0		zzzzz44,zzzzzz7
3587	27.4	208	14.0		zzzzz44,zzzzzz3
3586	26.24	202	14.0		zzzzz44,zzzzzz9
3585	23.53	221	15.0		zzzzz44,zzzzz45
3584	27.31	260	15.0		zzzzz44,zzzzz61
3583	26.94	193	15.0		zzzzz44,zzzzz99
3582	25.67	187	15.0		zzzzz44,zzzzz65
3581	29.34	167	16.0		zzzzz44,zzzzz49
3580	26.63	199	16.0		zzzzz44,zzzzz89
3579	29.95	187	18.0		zzzzz44,zzzzz88
3578	30.22	182	18.0		zzzzz44,zzzzz87
3577	28.73	181	19.0		zzzzz44,zzzzz74
3576	25.93	270	19.0		zzzzz44,zzzzz51
3575	30.43	230	20.0		zzzzz44,zzzzz59
3574	27.5	240	22.0		zzzzz44,zzzzz62
3573	30.83	240	24.0		zzzzz44,zzzzz64
3572	35.26	190	25.0		zzzzz44,zzzzz58
3571	30.65	261	30.0		zzzzz44,zzzzz76
3570	36.18	199	31.0		zzzzz44,zzzzz75
3569	34.92	189	32.0		zzzzz44,zzzzz56
3568	30.7	316	34.0		zzzzz44,zzzzz70
3567	32.35	306	37.0		zzzzz44,zzzzz54
3566	38.78	245	46.0		zzzzz44,zzzzz50
3565	36.51	315	47.0		zzzzz44,zzzzz63
3564	40.61	261	50.0		zzzzz44,zzzzz67
3563	41.85	270	51.0		zzzzz44,zzzzz47
3562	37.38	313	51.0		zzzzz44,zzzzz78
3561	44.18	249	53.0		zzzzz44,zzzzz71
3560	38.58	324	55.0		zzzzz44,zzzzz60
3559	39.08	325	57.0		zzzzz44,zzzzz68
3558	41.4	314	58.0		zzzzz44,zzzzz73
3557	43.35	263	58.0		zzzzz44,zzzzz46
3556	38.98	354	65.0		zzzzz44,zzzzz72
3555	40.76	314	66.0		zzzzz44,zzzzz53
3554	40.32	377	68.0		zzzzz44,zzzzz55
3553	20.6	199	8.0		zzzzz43,zzzzzz3
3552	25.21	242	8.0		zzzzz43,zzzzz77
3551	25.37	205	8.0		zzzzz43,zzzzzz2
3550	27.72	184	9.0		zzzzz43,zzzzzz0
3549	28.44	109	9.0		zzzzz43,zzzzz79
3548	24.71	255	10.0		zzzzz43,zzzzz52
3547	24.02	179	10.0		zzzzz43,zzzzz93
3546	28.08	146	10.0		zzzzz43,zzzzz69
3545	23.29	219	11.0		zzzzz43,zzzzz57
3544	25.25	198	11.0		zzzzz43,zzzzzz4
3543	21.81	243	11.0		zzzzz43,zzzzz95
3542	25.95	185	12.0		zzzzz43,zzzzzz5
3541	23.96	192	12.0		zzzzz43,zzzzzz1
3540	27.13	188	13.0		zzzzz43,zzzzzz7
3539	24.53	212	13.0		zzzzz43,zzzzzz6
3538	25.0	188	13.0		zzzzz43,zzzzz49
3537	24.54	273	14.0		zzzzz43,zzzzz97
3536	27.57	185	14.0		zzzzz43,zzzzzz9
3535	26.82	179	14.0		zzzzz43,zzzzz87
3534	26.55	177	18.0		zzzzz43,zzzzz99
3533	28.17	213	19.0		zzzzz43,zzzzz48
3532	29.69	192	20.0		zzzzz43,zzzzz89
3531	27.88	208	20.0		zzzzz43,zzzzz88
3530	28.21	195	21.0		zzzzz43,zzzzz58
3529	30.19	212	21.0		zzzzz43,zzzzz61
3528	29.38	211	22.0		zzzzz43,zzzzz59
3527	29.36	235	23.0		zzzzz43,zzzzz45
3526	28.87	239	23.0		zzzzz43,zzzzz65
3525	31.42	226	24.0		zzzzz43,zzzzz75
3524	31.41	191	24.0		zzzzz43,zzzzz74
3523	29.39	262	24.0		zzzzz43,zzzzz51
3522	33.54	158	27.0		zzzzz43,zzzzz62
3521	34.05	185	27.0		zzzzz43,zzzzz64
3520	31.34	201	28.0		zzzzz43,zzzzz76
3519	34.07	226	33.0		zzzzz43,zzzzz70
3518	37.14	175	34.0		zzzzz43,zzzzz54
3517	33.22	283	40.0		zzzzz43,zzzzz56
3516	44.27	253	55.0		zzzzz43,zzzzz50
3515	41.3	293	59.0		zzzzz43,zzzzz67
3514	45.42	251	59.0		zzzzz43,zzzzz46
3513	54.08	196	62.0		zzzzz43,zzzzz53
3512	46.15	260	62.0		zzzzz43,zzzzz44
3511	45.32	278	66.0		zzzzz43,zzzzz55
3510	44.84	310	68.0		zzzzz43,zzzzz63
3509	55.56	234	76.0		zzzzz43,zzzzz73
3508	48.42	349	77.0		zzzzz43,zzzzz47
3507	46.85	365	80.0		zzzzz43,zzzzz71
3506	48.61	323	83.0		zzzzz43,zzzzz60
3505	51.14	307	85.0		zzzzz43,zzzzz78
3504	49.85	327	86.0		zzzzz43,zzzzz68
3503	56.4	383	113.0		zzzzz43,zzzzz72
3502	24.24	99	7.0		zzzzz42,zzzzz79
3501	35.71	56	7.0		zzzzz42,zzzzzz8
3500	29.25	106	8.0		zzzzz42,zzzzz77
3499	27.56	127	8.0		zzzzz42,zzzzz69
3498	26.74	187	8.0		zzzzz42,zzzzzz0
3497	24.27	206	9.0		zzzzz42,zzzzz57
3496	23.9	251	9.0		zzzzz42,zzzzzz4
3495	27.17	184	9.0		zzzzz42,zzzzz93
3494	23.98	221	9.0		zzzzz42,zzzzzz1
3493	26.22	164	9.0		zzzzz42,zzzzz52
3492	35.71	70	9.0		zzzzz42,zzzzzz2
3491	28.06	139	11.0		zzzzz42,zzzzz95
3490	26.22	286	11.0		zzzzz42,zzzzzz6
3489	26.63	184	11.0		zzzzz42,zzzzz48
3488	26.56	192	11.0		zzzzz42,zzzzz87
3487	22.69	238	12.0		zzzzz42,zzzzz59
3486	22.73	198	12.0		zzzzz42,zzzzz51
3485	27.75	227	12.0		zzzzz42,zzzzzz9
3484	25.39	193	12.0		zzzzz42,zzzzz45
3483	23.46	179	12.0		zzzzz42,zzzzz74
3482	29.19	185	12.0		zzzzz42,zzzzzz7
3481	28.49	186	13.0		zzzzz42,zzzzz49
3480	29.02	193	14.0		zzzzz42,zzzzzz5
3479	26.38	235	14.0		zzzzz42,zzzzz61
3478	30.37	135	15.0		zzzzz42,zzzzz58
3477	26.32	285	15.0		zzzzz42,zzzzz97
3476	25.65	191	15.0		zzzzz42,zzzzz75
3475	27.16	232	17.0		zzzzz42,zzzzz65
3474	27.51	189	18.0		zzzzz42,zzzzz64
3473	27.37	190	18.0		zzzzz42,zzzzz62
3472	27.27	198	19.0		zzzzz42,zzzzz89
3471	28.16	206	20.0		zzzzz42,zzzzz76
3470	32.94	170	22.0		zzzzz42,zzzzz54
3469	31.68	202	22.0		zzzzz42,zzzzz88
3468	30.65	186	23.0		zzzzz42,zzzzz99
3467	33.1	142	23.0		zzzzz42,zzzzz70
3466	33.17	199	23.0		zzzzz42,zzzzz47
3465	31.61	193	24.0		zzzzz42,zzzzz56
3464	30.96	197	24.0		zzzzz42,zzzzz50
3463	33.97	209	25.0		zzzzz42,zzzzz44
3462	32.84	204	27.0		zzzzz42,zzzzz63
3461	32.02	203	27.0		zzzzz42,zzzzz46
3460	33.92	227	27.0		zzzzz42,zzzzz73
3459	33.01	206	28.0		zzzzz42,zzzzz68
3458	31.84	201	28.0		zzzzz42,zzzzz67
3457	33.5	206	28.0		zzzzz42,zzzzz53
3456	33.64	214	29.0		zzzzz42,zzzzz78
3455	35.44	206	29.0		zzzzz42,zzzzz60
3454	33.46	263	30.0		zzzzz42,zzzzz71
3453	37.61	218	33.0		zzzzz42,zzzzz43
3452	34.48	290	36.0		zzzzz42,zzzzz55
3451	37.19	199	37.0		zzzzz42,zzzzz72
3450	25.87	201	8.0		zzzzz41,zzzzzz2
3449	21.58	190	8.0		zzzzz41,zzzzzz1
3448	23.33	180	8.0		zzzzz41,zzzzzz0
3447	26.47	238	9.0		zzzzz41,zzzzz77
3446	21.5	214	9.0		zzzzz41,zzzzz79
3445	21.47	191	9.0		zzzzz41,zzzzz93
3444	23.83	235	9.0		zzzzz41,zzzzzz6
3443	28.57	154	10.0		zzzzz41,zzzzzz3
3442	25.91	193	12.0		zzzzz41,zzzzz95
3441	27.5	160	12.0		zzzzz41,zzzzz52
3440	26.7	191	12.0		zzzzz41,zzzzzz9
3439	24.15	236	13.0		zzzzz41,zzzzz69
3438	26.05	215	13.0		zzzzz41,zzzzz97
3437	28.22	202	14.0		zzzzz41,zzzzzz5
3436	28.19	188	14.0		zzzzz41,zzzzzz4
3435	27.66	188	14.0		zzzzz41,zzzzzz7
3434	23.3	279	15.0		zzzzz41,zzzzz49
3433	26.48	219	15.0		zzzzz41,zzzzz57
3432	26.52	181	16.0		zzzzz41,zzzzz99
3431	26.44	174	16.0		zzzzz41,zzzzz87
3430	26.42	193	19.0		zzzzz41,zzzzz89
3429	25.43	291	20.0		zzzzz41,zzzzz48
3428	23.08	325	20.0		zzzzz41,zzzzz61
3427	31.31	198	21.0		zzzzz41,zzzzz88
3426	29.45	275	23.0		zzzzz41,zzzzz75
3425	31.22	237	23.0		zzzzz41,zzzzz58
3424	28.34	247	23.0		zzzzz41,zzzzz74
3423	25.07	335	24.0		zzzzz41,zzzzz65
3422	30.05	203	24.0		zzzzz41,zzzzz62
3421	28.22	241	24.0		zzzzz41,zzzzz51
3420	28.63	241	26.0		zzzzz41,zzzzz45
3419	27.41	321	27.0		zzzzz41,zzzzz64
3418	26.1	341	28.0		zzzzz41,zzzzz59
3417	30.43	322	33.0		zzzzz41,zzzzz76
3416	37.5	200	36.0		zzzzz41,zzzzz42
3415	30.97	339	36.0		zzzzz41,zzzzz70
3414	31.62	291	37.0		zzzzz41,zzzzz56
3413	37.61	226	39.0		zzzzz41,zzzzz54
3412	38.87	247	53.0		zzzzz41,zzzzz50
3411	49.25	201	57.0		zzzzz41,zzzzz67
3410	45.16	310	66.0		zzzzz41,zzzzz63
3409	42.27	317	66.0		zzzzz41,zzzzz46
3408	38.56	389	67.0		zzzzz41,zzzzz44
3407	45.09	326	69.0		zzzzz41,zzzzz53
3406	40.8	375	71.0		zzzzz41,zzzzz55
3405	40.85	377	73.0		zzzzz41,zzzzz73
3404	47.17	318	80.0		zzzzz41,zzzzz71
3403	45.13	339	82.0		zzzzz41,zzzzz47
3402	50.16	307	84.0		zzzzz41,zzzzz78
3401	50.62	322	85.0		zzzzz41,zzzzz68
3400	45.27	391	87.0		zzzzz41,zzzzz60
3399	52.88	382	120.0		zzzzz41,zzzzz43
3398	57.63	380	127.0		zzzzz41,zzzzz72
3397	22.16	167	7.0		zzzzz40,zzzzz99
3396	25.41	181	7.0		zzzzz40,zzzzzz2
3395	25.26	194	8.0		zzzzz40,zzzzzz9
3394	25.13	191	8.0		zzzzz40,zzzzzz7
3393	26.45	155	9.0		zzzzz40,zzzzzz1
3392	25.98	204	10.0		zzzzz40,zzzzzz4
3391	26.15	195	11.0		zzzzz40,zzzzz93
3390	25.56	180	12.0		zzzzz40,zzzzz88
3389	26.11	180	13.0		zzzzz40,zzzzz42
3388	24.26	202	13.0		zzzzz40,zzzzz73
3387	26.46	189	14.0		zzzzz40,zzzzz54
3386	22.83	219	14.0		zzzzz40,zzzzz60
3385	28.49	172	15.0		zzzzz40,zzzzz74
3384	28.07	171	16.0		zzzzz40,zzzzz89
3383	29.17	192	17.0		zzzzz40,zzzzz87
3382	24.2	219	17.0		zzzzz40,zzzzz47
3381	23.11	264	17.0		zzzzz40,zzzzz63
3380	26.67	165	17.0		zzzzz40,zzzzz78
3379	27.94	136	17.0		zzzzz40,zzzzz71
3378	24.77	218	17.0		zzzzz40,zzzzz46
3377	23.94	284	17.0		zzzzz40,zzzzz50
3376	29.19	161	18.0		zzzzz40,zzzzz72
3375	27.17	184	18.0		zzzzz40,zzzzz43
3374	25.91	220	18.0		zzzzz40,zzzzz68
3373	30.77	169	18.0		zzzzz40,zzzzz67
3372	26.29	213	19.0		zzzzz40,zzzzz51
3371	28.25	177	19.0		zzzzz40,zzzzz55
3370	25.13	191	19.0		zzzzz40,zzzzz53
3369	27.14	199	20.0		zzzzz40,zzzzz41
3368	28.33	240	20.0		zzzzz40,zzzzz44
3367	30.15	136	22.0		zzzzz40,zzzzz70
3366	30.97	268	29.0		zzzzz40,zzzzz58
3365	30.95	252	31.0		zzzzz40,zzzzz75
3364	29.1	354	32.0		zzzzz40,zzzzz76
3363	31.47	286	34.0		zzzzz40,zzzzz49
3362	34.87	261	35.0		zzzzz40,zzzzz45
3361	32.59	270	37.0		zzzzz40,zzzzz56
3360	32.27	344	39.0		zzzzz40,zzzzz48
3359	30.68	352	40.0		zzzzz40,zzzzz65
3358	32.93	331	44.0		zzzzz40,zzzzz59
3357	33.78	299	53.0		zzzzz40,zzzzz64
3356	34.86	350	55.0		zzzzz40,zzzzz62
3355	34.59	344	56.0		zzzzz40,zzzzz61
3354	21.98	182	7.0		zzzzz39,zzzzzz4
3353	27.32	183	10.0		zzzzz39,zzzzz89
3352	23.51	251	10.0		zzzzz39,zzzzz88
3351	23.74	198	11.0		zzzzz39,zzzzz42
3350	25.42	177	12.0		zzzzz39,zzzzz87
3349	25.74	202	13.0		zzzzz39,zzzzz67
3348	23.31	236	13.0		zzzzz39,zzzzz68
3347	25.43	232	13.0		zzzzz39,zzzzz54
3346	29.38	211	15.0		zzzzz39,zzzzz63
3345	26.25	240	15.0		zzzzz39,zzzzz73
3344	29.85	134	15.0		zzzzz39,zzzzz53
3343	26.37	201	15.0		zzzzz39,zzzzz44
3342	25.2	254	16.0		zzzzz39,zzzzz50
3341	25.41	244	16.0		zzzzz39,zzzzz71
3340	26.98	189	16.0		zzzzz39,zzzzz46
3339	29.79	188	16.0		zzzzz39,zzzzz70
3338	25.1	255	17.0		zzzzz39,zzzzz55
3337	27.31	238	17.0		zzzzz39,zzzzz74
3336	24.4	250	17.0		zzzzz39,zzzzz60
3335	29.57	186	17.0		zzzzz39,zzzzz51
3334	25.69	218	18.0		zzzzz39,zzzzz47
3333	27.78	234	19.0		zzzzz39,zzzzz72
3332	28.98	283	19.0		zzzzz39,zzzzz58
3331	29.49	234	20.0		zzzzz39,zzzzz43
3330	26.88	253	21.0		zzzzz39,zzzzz78
3329	27.93	290	21.0		zzzzz39,zzzzz75
3328	27.18	298	22.0		zzzzz39,zzzzz41
3327	31.67	281	28.0		zzzzz39,zzzzz76
3326	32.52	286	32.0		zzzzz39,zzzzz40
3325	29.6	348	32.0		zzzzz39,zzzzz56
3324	36.23	265	34.0		zzzzz39,zzzzz64
3323	34.88	281	36.0		zzzzz39,zzzzz61
3322	34.63	283	38.0		zzzzz39,zzzzz59
3321	33.04	342	40.0		zzzzz39,zzzzz62
3320	44.51	337	78.0		zzzzz39,zzzzz65
3319	45.37	335	78.0		zzzzz39,zzzzz48
3318	43.03	337	80.0		zzzzz39,zzzzz49
3317	48.07	337	90.0		zzzzz39,zzzzz45
3316	24.35	230	6.0		zzzzz38,zzzzzz3
3315	23.29	146	7.0		zzzzz38,zzzzz79
3314	22.96	135	7.0		zzzzz38,zzzzz51
3313	23.33	210	8.0		zzzzz38,zzzzz75
3312	27.91	172	10.0		zzzzz38,zzzzz44
3311	28.09	178	10.0		zzzzz38,zzzzz89
3310	26.71	161	11.0		zzzzz38,zzzzz57
3309	24.88	213	11.0		zzzzz38,zzzzz97
3308	28.33	180	11.0		zzzzz38,zzzzz88
3307	41.38	232	45.0		zzzzz38,zzzzz66
3306	25.5	200	7.0		zzzzz37,zzzzz74
3305	24.04	208	6.0		zzzzz37,zzzzz41
3304	36.51	63	7.0		zzzzz37,zzzzz76
3303	25.51	196	7.0		zzzzz37,zzzzz75
3302	26.34	205	7.0		zzzzz37,zzzzz73
3301	23.9	159	7.0		zzzzz37,zzzzz57
3300	26.0	200	7.0		zzzzz37,zzzzz51
3299	22.75	189	9.0		zzzzz37,zzzzz89
3298	27.27	154	9.0		zzzzz37,zzzzz79
3297	25.71	210	13.0		zzzzz37,zzzzz77
3296	41.0	200	42.0		zzzzz37,zzzzz66
3295	43.4	212	48.0		zzzzz37,zzzzz38
3294	28.37	141	7.0		zzzzz36,zzzzz97
3293	27.57	185	9.0		zzzzz36,zzzzz89
3292	28.57	182	10.0		zzzzz36,zzzzz87
3291	25.76	132	10.0		zzzzz36,zzzzz48
3290	25.93	189	10.0		zzzzz36,zzzzz88
3289	28.36	134	12.0		zzzzz36,zzzzz99
3288	28.47	137	12.0		zzzzz36,zzzzz39
3287	26.78	183	13.0		zzzzz36,zzzzz49
3286	25.27	182	13.0		zzzzz36,zzzzz45
3285	27.78	198	14.0		zzzzz36,zzzzz65
3284	24.02	179	14.0		zzzzz36,zzzzz59
3283	28.57	133	14.0		zzzzz36,zzzzz40
3282	25.49	204	15.0		zzzzz36,zzzzz74
3281	26.42	159	16.0		zzzzz36,zzzzz42
3280	25.21	242	16.0		zzzzz36,zzzzz51
3279	27.27	187	17.0		zzzzz36,zzzzz58
3278	29.83	181	19.0		zzzzz36,zzzzz76
3277	28.04	214	19.0		zzzzz36,zzzzz61
3276	27.02	248	22.0		zzzzz36,zzzzz62
3275	31.08	222	23.0		zzzzz36,zzzzz56
3274	30.4	250	23.0		zzzzz36,zzzzz75
3273	29.82	218	23.0		zzzzz36,zzzzz64
3272	31.98	247	27.0		zzzzz36,zzzzz71
3271	29.2	274	29.0		zzzzz36,zzzzz63
3270	30.27	261	30.0		zzzzz36,zzzzz55
3269	34.82	224	31.0		zzzzz36,zzzzz72
3268	37.82	193	31.0		zzzzz36,zzzzz78
3267	35.94	192	31.0		zzzzz36,zzzzz73
3266	35.35	198	31.0		zzzzz36,zzzzz53
3265	34.01	197	32.0		zzzzz36,zzzzz44
3264	34.72	216	33.0		zzzzz36,zzzzz47
3263	37.97	187	34.0		zzzzz36,zzzzz43
3262	31.46	321	35.0		zzzzz36,zzzzz41
3261	36.33	256	36.0		zzzzz36,zzzzz68
3260	31.85	270	36.0		zzzzz36,zzzzz60
3259	28.95	342	36.0		zzzzz36,zzzzz46
3258	29.02	348	39.0		zzzzz36,zzzzz50
3257	33.99	253	42.0		zzzzz36,zzzzz54
3256	35.69	297	46.0		zzzzz36,zzzzz67
3255	42.47	332	69.0		zzzzz36,zzzzz70
3254	21.54	130	7.0		zzzzz35,zzzzz36
3253	20.28	143	7.0		zzzzz35,zzzzz70
3252	22.22	144	9.0		zzzzz35,zzzzz67
3251	26.41	231	12.0		zzzzz35,zzzzzz3
3250	28.66	307	24.0		zzzzz35,zzzzz94
3249	22.4	192	6.0		zzzzz34,zzzzz93
3248	26.36	110	7.0		zzzzz34,zzzzz38
3247	23.62	199	7.0		zzzzz34,zzzzzz0
3246	29.2	137	8.0		zzzzz34,zzzzz77
3245	24.44	135	8.0		zzzzz34,zzzzz95
3244	22.68	269	8.0		zzzzz34,zzzzzz1
3243	25.48	157	9.0		zzzzz34,zzzzzz2
3242	26.42	159	10.0		zzzzz34,zzzzz52
3241	24.18	153	10.0		zzzzz34,zzzzz94
3240	21.33	286	10.0		zzzzz34,zzzzz49
3239	29.51	122	10.0		zzzzz34,zzzzz57
3238	24.75	198	10.0		zzzzz34,zzzzzz9
3237	25.0	156	11.0		zzzzz34,zzzzz48
3236	26.67	195	11.0		zzzzz34,zzzzzz7
3235	25.53	188	11.0		zzzzz34,zzzzzz5
3234	35.71	112	12.0		zzzzz34,zzzzz69
3233	25.0	204	12.0		zzzzz34,zzzzz39
3232	25.14	179	13.0		zzzzz34,zzzzz61
3231	23.17	164	13.0		zzzzz34,zzzzz45
3230	24.39	164	14.0		zzzzz34,zzzzz40
3229	27.31	271	14.0		zzzzz34,zzzzz97
3228	27.27	176	14.0		zzzzz34,zzzzz87
3227	24.23	227	15.0		zzzzz34,zzzzz59
3226	27.32	194	15.0		zzzzz34,zzzzz89
3225	25.52	239	17.0		zzzzz34,zzzzz65
3224	28.37	208	19.0		zzzzz34,zzzzz58
3223	27.89	190	19.0		zzzzz34,zzzzz99
3222	27.23	191	21.0		zzzzz34,zzzzz74
3221	26.64	229	21.0		zzzzz34,zzzzz51
3220	29.26	188	23.0		zzzzz34,zzzzz75
3219	31.1	209	23.0		zzzzz34,zzzzz88
3218	30.86	243	24.0		zzzzz34,zzzzz62
3217	29.64	280	25.0		zzzzz34,zzzzz64
3216	28.33	293	28.0		zzzzz34,zzzzz76
3215	33.78	225	30.0		zzzzz34,zzzzz36
3214	35.56	225	31.0		zzzzz34,zzzzz42
3213	32.81	253	32.0		zzzzz34,zzzzz56
3212	33.88	245	34.0		zzzzz34,zzzzz70
3211	41.48	176	37.0		zzzzz34,zzzzz54
3210	36.04	283	45.0		zzzzz34,zzzzz63
3209	33.66	309	48.0		zzzzz34,zzzzz67
3208	40.15	269	51.0		zzzzz34,zzzzz50
3207	45.42	240	56.0		zzzzz34,zzzzz78
3206	37.58	330	58.0		zzzzz34,zzzzz46
3205	48.76	242	61.0		zzzzz34,zzzzz73
3204	52.58	213	61.0		zzzzz34,zzzzz47
3203	46.74	276	62.0		zzzzz34,zzzzz71
3202	47.37	266	65.0		zzzzz34,zzzzz68
3201	52.65	226	66.0		zzzzz34,zzzzz60
3200	46.58	292	70.0		zzzzz34,zzzzz44
3199	49.81	259	75.0		zzzzz34,zzzzz43
3198	48.57	280	76.0		zzzzz34,zzzzz41
3197	45.36	366	79.0		zzzzz34,zzzzz53
3196	47.06	340	81.0		zzzzz34,zzzzz72
3195	40.36	394	87.0		zzzzz34,zzzzz55
3194	23.89	180	6.0		zzzzz33,zzzzzz7
3193	22.99	174	8.0		zzzzz33,zzzzzz1
3192	24.19	186	9.0		zzzzz33,zzzzz87
3191	27.69	195	11.0		zzzzz33,zzzzz89
3190	26.23	183	13.0		zzzzz33,zzzzz88
3189	25.87	143	14.0		zzzzz33,zzzzz71
3188	27.27	242	14.0		zzzzz33,zzzzz47
3187	30.72	153	15.0		zzzzz33,zzzzz42
3186	25.31	241	15.0		zzzzz33,zzzzz60
3185	28.67	143	16.0		zzzzz33,zzzzz36
3184	27.59	232	16.0		zzzzz33,zzzzz50
3183	25.18	274	17.0		zzzzz33,zzzzz54
3182	27.23	213	17.0		zzzzz33,zzzzz63
3181	23.6	161	17.0		zzzzz33,zzzzz70
3180	25.91	220	18.0		zzzzz33,zzzzz55
3179	25.24	309	18.0		zzzzz33,zzzzz68
3178	26.77	254	18.0		zzzzz33,zzzzz73
3177	25.61	246	19.0		zzzzz33,zzzzz53
3176	26.64	214	19.0		zzzzz33,zzzzz46
3175	25.65	269	19.0		zzzzz33,zzzzz44
3174	25.34	292	20.0		zzzzz33,zzzzz74
3173	25.22	230	21.0		zzzzz33,zzzzz51
3172	29.56	274	21.0		zzzzz33,zzzzz67
3171	27.59	232	21.0		zzzzz33,zzzzz43
3170	25.39	256	22.0		zzzzz33,zzzzz41
3169	26.99	289	22.0		zzzzz33,zzzzz34
3168	29.31	232	23.0		zzzzz33,zzzzz78
3167	27.08	277	26.0		zzzzz33,zzzzz72
3166	30.5	282	31.0		zzzzz33,zzzzz49
3165	30.75	348	32.0		zzzzz33,zzzzz39
3164	29.89	281	33.0		zzzzz33,zzzzz48
3163	30.07	286	33.0		zzzzz33,zzzzz58
3162	31.19	295	35.0		zzzzz33,zzzzz75
3161	33.45	290	37.0		zzzzz33,zzzzz45
3160	34.09	264	38.0		zzzzz33,zzzzz40
3159	29.33	341	40.0		zzzzz33,zzzzz56
3158	33.77	308	41.0		zzzzz33,zzzzz76
3157	34.15	287	43.0		zzzzz33,zzzzz65
3156	38.72	297	51.0		zzzzz33,zzzzz62
3155	33.53	346	51.0		zzzzz33,zzzzz64
3154	34.47	351	56.0		zzzzz33,zzzzz59
3153	35.13	353	57.0		zzzzz33,zzzzz61
3152	24.44	180	6.0		zzzzz32,zzzzzz7
3151	25.68	183	8.0		zzzzz32,zzzzz87
3150	22.77	202	8.0		zzzzz32,zzzzz42
3149	22.86	175	8.0		zzzzz32,zzzzzz5
3148	25.74	202	10.0		zzzzz32,zzzzz93
3147	24.73	182	10.0		zzzzz32,zzzzz89
3146	24.58	179	10.0		zzzzz32,zzzzzz1
3145	25.1	243	14.0		zzzzz32,zzzzz70
3144	23.68	304	14.0		zzzzz32,zzzzz60
3143	28.19	188	14.0		zzzzz32,zzzzz88
3142	23.47	311	14.0		zzzzz32,zzzzz67
3141	24.66	223	14.0		zzzzz32,zzzzz50
3140	22.88	236	14.0		zzzzz32,zzzzz47
3139	24.89	229	14.0		zzzzz32,zzzzz54
3138	24.27	239	15.0		zzzzz32,zzzzz53
3137	26.9	197	15.0		zzzzz32,zzzzz46
3136	28.08	260	16.0		zzzzz32,zzzzz71
3135	26.92	234	16.0		zzzzz32,zzzzz74
3134	25.28	265	16.0		zzzzz32,zzzzz73
3133	26.7	221	16.0		zzzzz32,zzzzz36
3132	26.47	238	17.0		zzzzz32,zzzzz34
3131	24.76	210	17.0		zzzzz32,zzzzz51
3130	24.83	294	17.0		zzzzz32,zzzzz68
3129	25.11	231	18.0		zzzzz32,zzzzz44
3128	29.75	279	18.0		zzzzz32,zzzzz78
3127	24.09	328	19.0		zzzzz32,zzzzz55
3126	25.98	281	20.0		zzzzz32,zzzzz72
3125	28.72	289	21.0		zzzzz32,zzzzz43
3124	26.35	296	24.0		zzzzz32,zzzzz41
3123	29.75	316	29.0		zzzzz32,zzzzz75
3122	30.14	345	33.0		zzzzz32,zzzzz58
3121	32.67	303	37.0		zzzzz32,zzzzz76
3120	33.33	282	40.0		zzzzz32,zzzzz48
3119	34.6	289	42.0		zzzzz32,zzzzz64
3118	32.5	320	43.0		zzzzz32,zzzzz56
3117	33.33	333	45.0		zzzzz32,zzzzz39
3116	32.65	343	46.0		zzzzz32,zzzzz65
3115	36.08	291	46.0		zzzzz32,zzzzz62
3114	38.16	283	47.0		zzzzz32,zzzzz40
3113	35.89	287	48.0		zzzzz32,zzzzz49
3112	36.9	290	49.0		zzzzz32,zzzzz61
3111	36.3	281	49.0		zzzzz32,zzzzz45
3110	37.0	300	53.0		zzzzz32,zzzzz33
3109	37.5	344	65.0		zzzzz32,zzzzz59
3108	22.99	187	7.0		zzzzz31,zzzzz63
3107	21.43	154	7.0		zzzzz31,zzzzz54
3106	23.68	114	6.0		zzzzz31,zzzzz42
3105	27.78	108	7.0		zzzzz31,zzzzz68
3104	25.42	118	8.0		zzzzz31,zzzzz72
3103	23.56	225	8.0		zzzzz31,zzzzz44
3102	24.89	229	8.0		zzzzz31,zzzzz38
3101	24.24	231	8.0		zzzzz31,zzzzz78
3100	26.61	109	9.0		zzzzz31,zzzzz34
3099	25.95	262	9.0		zzzzz31,zzzzz73
3098	24.9	249	10.0		zzzzz31,zzzzz50
3097	22.06	204	11.0		zzzzz31,zzzzz53
3096	25.0	208	11.0		zzzzz31,zzzzz37
3095	29.33	150	11.0		zzzzz31,zzzzz67
3094	28.1	153	11.0		zzzzz31,zzzzz51
3093	25.4	189	12.0		zzzzz31,zzzzz66
3092	26.64	214	11.0		zzzzz31,zzzzz41
3091	27.45	153	12.0		zzzzz31,zzzzz74
3090	24.9	245	12.0		zzzzz31,zzzzz55
3089	27.8	205	12.0		zzzzz31,zzzzz89
3088	33.08	133	13.0		zzzzz31,zzzzz56
3087	29.56	203	13.0		zzzzz31,zzzzz71
3086	26.87	201	14.0		zzzzz31,zzzzz46
3085	33.61	119	14.0		zzzzz31,zzzzz88
3084	31.11	225	25.0		zzzzz31,zzzzz77
3083	32.81	256	33.0		zzzzz31,zzzzz69
3082	43.3	224	36.0		zzzzz31,zzzzz52
3081	42.8	257	58.0		zzzzz31,zzzzz79
3080	45.19	270	64.0		zzzzz31,zzzzz97
3079	56.5	223	72.0		zzzzz31,zzzzz57
3078	22.48	129	8.0		zzzzz30,zzzzz67
3077	27.6	221	13.0		zzzzz30,zzzzz38
3076	27.38	168	13.0		zzzzz30,zzzzz66
3075	28.0	175	14.0		zzzzz30,zzzzz37
3074	23.6	178	7.0		zzzzz29,zzzzzz1
3073	28.74	167	9.0		zzzzz29,zzzzzz9
3072	23.35	197	9.0		zzzzz29,zzzzz93
3071	27.32	183	11.0		zzzzz29,zzzzz88
3070	24.86	181	12.0		zzzzz29,zzzzz87
3069	27.78	216	14.0		zzzzz29,zzzzz54
3068	27.69	195	14.0		zzzzz29,zzzzz36
3067	28.3	159	14.0		zzzzz29,zzzzz42
3066	29.85	134	15.0		zzzzz29,zzzzz34
3065	28.92	166	15.0		zzzzz29,zzzzz44
3064	29.07	172	16.0		zzzzz29,zzzzz89
3063	28.31	166	17.0		zzzzz29,zzzzz70
3062	27.5	240	17.0		zzzzz29,zzzzz63
3061	25.58	215	17.0		zzzzz29,zzzzz50
3060	26.79	280	17.0		zzzzz29,zzzzz60
3059	25.18	278	17.0		zzzzz29,zzzzz47
3058	26.9	171	18.0		zzzzz29,zzzzz71
3057	28.63	241	18.0		zzzzz29,zzzzz68
3056	25.83	240	18.0		zzzzz29,zzzzz73
3055	31.02	187	19.0		zzzzz29,zzzzz67
3054	28.33	233	20.0		zzzzz29,zzzzz46
3053	31.41	156	20.0		zzzzz29,zzzzz74
3052	31.33	166	20.0		zzzzz29,zzzzz53
3051	27.08	277	20.0		zzzzz29,zzzzz55
3050	28.19	298	20.0		zzzzz29,zzzzz51
3049	32.91	158	22.0		zzzzz29,zzzzz78
3048	32.68	153	22.0		zzzzz29,zzzzz72
3047	32.69	156	23.0		zzzzz29,zzzzz41
3046	32.87	216	24.0		zzzzz29,zzzzz43
3045	34.75	236	33.0		zzzzz29,zzzzz75
3044	32.08	346	34.0		zzzzz29,zzzzz39
3043	34.51	255	35.0		zzzzz29,zzzzz48
3042	31.61	348	36.0		zzzzz29,zzzzz49
3041	34.12	255	37.0		zzzzz29,zzzzz58
3040	34.96	266	39.0		zzzzz29,zzzzz76
3039	33.45	290	43.0		zzzzz29,zzzzz45
3038	35.19	287	43.0		zzzzz29,zzzzz56
3037	34.68	346	49.0		zzzzz29,zzzzz65
3036	41.75	285	51.0		zzzzz29,zzzzz32
3035	37.89	285	52.0		zzzzz29,zzzzz40
3034	37.14	350	53.0		zzzzz29,zzzzz59
3033	37.78	352	62.0		zzzzz29,zzzzz33
3032	38.89	342	63.0		zzzzz29,zzzzz62
3031	45.09	346	74.0		zzzzz29,zzzzz64
3030	55.36	345	103.0		zzzzz29,zzzzz61
3029	25.65	191	7.0		zzzzz28,zzzzz88
3028	25.17	143	8.0		zzzzz28,zzzzz89
3027	26.36	129	13.0		zzzzz28,zzzzz44
3026	25.5	251	13.0		zzzzz28,zzzzz42
3025	22.84	197	14.0		zzzzz28,zzzzz68
3024	24.21	252	14.0		zzzzz28,zzzzz63
3023	29.34	167	15.0		zzzzz28,zzzzz53
3022	23.3	206	15.0		zzzzz28,zzzzz72
3021	25.31	245	15.0		zzzzz28,zzzzz36
3020	30.46	197	16.0		zzzzz28,zzzzz74
3019	25.32	158	16.0		zzzzz28,zzzzz43
3018	30.71	140	16.0		zzzzz28,zzzzz34
3017	28.4	250	16.0		zzzzz28,zzzzz73
3016	28.9	173	17.0		zzzzz28,zzzzz55
3015	28.69	237	17.0		zzzzz28,zzzzz51
3014	27.95	254	17.0		zzzzz28,zzzzz50
3013	29.12	182	18.0		zzzzz28,zzzzz41
3012	27.87	183	18.0		zzzzz28,zzzzz54
3011	29.11	213	19.0		zzzzz28,zzzzz71
3010	30.67	150	19.0		zzzzz28,zzzzz67
3009	30.6	183	20.0		zzzzz28,zzzzz78
3008	30.67	225	20.0		zzzzz28,zzzzz70
3007	27.32	183	20.0		zzzzz28,zzzzz60
3006	28.37	282	21.0		zzzzz28,zzzzz47
3005	30.15	199	21.0		zzzzz28,zzzzz46
3004	28.96	328	29.0		zzzzz28,zzzzz48
3003	27.67	347	31.0		zzzzz28,zzzzz39
3002	28.41	345	32.0		zzzzz28,zzzzz45
3001	31.9	348	35.0		zzzzz28,zzzzz49
3000	32.94	255	36.0		zzzzz28,zzzzz76
2999	36.15	260	36.0		zzzzz28,zzzzz75
2998	31.93	357	37.0		zzzzz28,zzzzz58
2997	32.75	345	40.0		zzzzz28,zzzzz65
2996	30.26	347	40.0		zzzzz28,zzzzz56
2995	32.26	341	42.0		zzzzz28,zzzzz32
2994	32.99	288	44.0		zzzzz28,zzzzz33
2993	32.27	344	49.0		zzzzz28,zzzzz59
2992	33.33	342	50.0		zzzzz28,zzzzz40
2991	33.33	339	56.0		zzzzz28,zzzzz62
2990	37.5	344	61.0		zzzzz28,zzzzz61
2989	40.06	347	63.0		zzzzz28,zzzzz29
2988	44.19	344	81.0		zzzzz28,zzzzz64
2986	25.0	188	8.0		zzzzz25,zzzzz56
2985	27.69	130	8.0		zzzzz24,zzzzzz3
2984	27.38	263	19.0		zzzzz24,zzzzz25
2983	32.58	89	6.0		zzzzz23,zzzzzz3
2982	26.85	108	7.0		zzzzz23,zzzzz58
2981	30.52	213	18.0		zzzzz23,zzzzz25
2980	45.55	797	192.0		zzzzz23,zzzzz24
2979	26.61	109	7.0		zzzzz22,zzzzz58
2978	28.4	257	18.0		zzzzz22,zzzzz25
2977	46.15	832	199.0		zzzzz22,zzzzz24
2976	54.24	826	249.0		zzzzz22,zzzzz23
2975	49.76	205	56.0		zzzzz21,zzzzz92
2974	43.36	226	52.0		zzzzz20,zzzzz92
2973	45.2	323	76.0		zzzzz20,zzzzz21
2967	24.18	182	7.0		zzzzz17,zzzzz64
2966	26.32	152	7.0		zzzzz17,zzzzz58
2965	21.05	190	7.0		zzzzz17,zzzzz51
2964	22.75	189	8.0		zzzzz17,zzzzz67
2963	28.57	77	8.0		zzzzz17,zzzzz54
2962	26.29	213	9.0		zzzzz17,zzzzz68
2961	27.37	190	9.0		zzzzz17,zzzzz47
2960	24.87	189	10.0		zzzzz17,zzzzz46
2959	24.14	232	10.0		zzzzz17,zzzzz44
2958	24.87	189	10.0		zzzzz17,zzzzz73
2957	36.11	72	10.0		zzzzz17,zzzzz99
2956	25.0	200	10.0		zzzzz17,zzzzz50
2955	28.12	192	10.0		zzzzz17,zzzzz41
2954	27.37	190	11.0		zzzzz17,zzzzz43
2953	25.11	231	12.0		zzzzz17,zzzzz42
2952	26.94	193	12.0		zzzzz17,zzzzz40
2951	26.84	272	12.0		zzzzz17,zzzzz87
2950	26.18	191	12.0		zzzzz17,zzzzz55
2949	27.72	202	12.0		zzzzz17,zzzzz34
2948	27.55	196	12.0		zzzzz17,zzzzz53
2947	26.64	229	13.0		zzzzz17,zzzzz71
2946	24.4	250	13.0		zzzzz17,zzzzz60
2945	23.91	184	13.0		zzzzz17,zzzzz56
2944	27.57	185	16.0		zzzzz17,zzzzz89
2943	25.64	195	18.0		zzzzz17,zzzzz88
2942	35.81	215	27.0		zzzzz17,zzzzzz8
2941	32.16	227	28.0		zzzzz17,zzzzzz0
2940	32.08	212	28.0		zzzzz17,zzzzzz6
2939	30.64	297	30.0		zzzzz17,zzzzzz2
2938	36.67	210	38.0		zzzzz17,zzzzzz5
2937	38.28	256	45.0		zzzzz17,zzzzzz1
2936	34.32	338	46.0		zzzzz17,zzzzzz4
2935	39.52	248	52.0		zzzzz17,zzzzzz9
2934	43.69	222	53.0		zzzzz17,zzzzzz7
2933	48.85	217	57.0		zzzzz17,zzzzz93
2932	23.75	240	7.0		zzzzz16,zzzzz67
2931	21.5	214	7.0		zzzzz16,zzzzz54
2930	22.42	165	7.0		zzzzz16,zzzzz46
2929	21.99	191	7.0		zzzzz16,zzzzz40
2928	24.32	185	8.0		zzzzz16,zzzzz55
2927	24.62	195	8.0		zzzzz16,zzzzz51
2926	23.84	151	8.0		zzzzz16,zzzzz50
2925	27.81	151	8.0		zzzzz16,zzzzz78
2924	22.91	179	9.0		zzzzz16,zzzzz64
2923	27.92	154	9.0		zzzzz16,zzzzz47
2922	27.17	184	9.0		zzzzz16,zzzzz73
2921	26.49	185	9.0		zzzzz16,zzzzz42
2920	27.52	149	9.0		zzzzz16,zzzzz68
2919	28.12	160	9.0		zzzzz16,zzzzz43
2918	29.94	157	10.0		zzzzz16,zzzzz58
2917	25.83	151	11.0		zzzzz16,zzzzz71
2916	27.15	221	11.0		zzzzz16,zzzzz60
2915	26.92	156	11.0		zzzzz16,zzzzz41
2914	29.24	171	15.0		zzzzz16,zzzzz56
2913	29.63	189	17.0		zzzzz16,zzzzz87
2912	32.28	189	20.0		zzzzz16,zzzzz89
2911	30.5	200	24.0		zzzzz16,zzzzz88
2910	29.0	231	25.0		zzzzz16,zzzzzz5
2909	33.48	224	28.0		zzzzz16,zzzzzz6
2908	33.71	264	29.0		zzzzz16,zzzzzz2
2907	36.65	221	32.0		zzzzz16,zzzzzz8
2906	34.48	232	32.0		zzzzz16,zzzzzz0
2905	39.01	223	40.0		zzzzz16,zzzzzz1
2904	33.69	374	46.0		zzzzz16,zzzzz93
2903	43.95	223	48.0		zzzzz16,zzzzz17
2902	33.42	383	50.0		zzzzz16,zzzzzz4
2901	47.47	217	52.0		zzzzz16,zzzzzz7
2900	39.48	309	55.0		zzzzz16,zzzzzz9
2899	26.11	180	6.0		zzzzz15,zzzzz55
2898	22.39	201	7.0		zzzzz15,zzzzz42
2897	26.67	135	7.0		zzzzz15,zzzzz76
2896	21.84	174	7.0		zzzzz15,zzzzz89
2895	24.24	198	7.0		zzzzz15,zzzzz67
2894	24.29	177	7.0		zzzzz15,zzzzz60
2893	27.39	157	8.0		zzzzz15,zzzzz78
2892	26.4	178	8.0		zzzzz15,zzzzz64
2891	22.97	222	8.0		zzzzz15,zzzzz56
2890	27.12	177	8.0		zzzzz15,zzzzz71
2889	27.18	195	8.0		zzzzz15,zzzzz73
2888	25.89	197	9.0		zzzzz15,zzzzz72
2887	26.87	201	10.0		zzzzz15,zzzzz44
2886	26.02	196	10.0		zzzzz15,zzzzz43
2885	27.04	196	10.0		zzzzz15,zzzzz41
2884	22.87	188	13.0		zzzzz15,zzzzz88
2883	28.64	220	22.0		zzzzz15,zzzzzz8
2882	30.2	245	23.0		zzzzz15,zzzzzz2
2881	29.49	217	23.0		zzzzz15,zzzzzz6
2880	31.3	230	25.0		zzzzz15,zzzzzz0
2879	34.72	216	29.0		zzzzz15,zzzzzz4
2878	33.2	241	29.0		zzzzz15,zzzzzz1
2877	30.53	262	30.0		zzzzz15,zzzzz16
2876	34.31	239	32.0		zzzzz15,zzzzz17
2875	34.87	238	35.0		zzzzz15,zzzzzz9
2874	30.15	325	36.0		zzzzz15,zzzzzz7
2873	37.44	227	39.0		zzzzz15,zzzzz93
2872	38.1	273	48.0		zzzzz15,zzzzzz5
2871	25.4	63	6.0		zzzzz14,zzzzz70
2870	29.58	71	7.0		zzzzz14,zzzzz76
2869	24.53	159	7.0		zzzzz14,zzzzz73
2868	27.27	154	9.0		zzzzz14,zzzzz87
2867	24.74	190	7.0		zzzzz13,zzzzz54
2866	22.67	150	7.0		zzzzz13,zzzzz62
2865	23.7	173	7.0		zzzzz13,zzzzz33
2864	22.8	193	7.0		zzzzz13,zzzzz40
2863	23.81	189	7.0		zzzzz13,zzzzz74
2862	30.41	171	9.0		zzzzz13,zzzzz78
2861	24.47	188	9.0		zzzzz13,zzzzz51
2860	23.4	282	10.0		zzzzz13,zzzzz68
2859	24.24	198	10.0		zzzzz13,zzzzz34
2858	26.37	201	10.0		zzzzz13,zzzzz42
2857	28.57	182	11.0		zzzzz13,zzzzz64
2856	25.74	202	11.0		zzzzz13,zzzzz50
2855	24.87	189	11.0		zzzzz13,zzzzz55
2854	27.23	191	12.0		zzzzz13,zzzzz71
2853	26.6	188	12.0		zzzzz13,zzzzz67
2852	26.94	193	12.0		zzzzz13,zzzzz46
2851	25.4	189	13.0		zzzzz13,zzzzz53
2850	25.67	187	13.0		zzzzz13,zzzzz41
2849	26.4	197	14.0		zzzzz13,zzzzz72
2848	25.5	200	14.0		zzzzz13,zzzzz44
2847	27.37	190	14.0		zzzzz13,zzzzz99
2846	26.24	221	14.0		zzzzz13,zzzzz60
2845	26.2	187	15.0		zzzzz13,zzzzz43
2844	27.27	187	15.0		zzzzz13,zzzzz73
2843	28.41	176	17.0		zzzzz13,zzzzz56
2842	27.59	174	20.0		zzzzz13,zzzzz89
2841	28.96	183	20.0		zzzzz13,zzzzz87
2840	35.26	173	28.0		zzzzz13,zzzzz88
2839	31.89	254	29.0		zzzzz13,zzzzzz8
2838	33.86	316	31.0		zzzzz13,zzzzzz2
2837	31.91	376	36.0		zzzzz13,zzzzzz0
2836	38.25	217	36.0		zzzzz13,zzzzz15
2835	33.13	335	37.0		zzzzz13,zzzzzz5
2834	36.86	255	38.0		zzzzz13,zzzzzz6
2833	37.04	243	44.0		zzzzz13,zzzzzz4
2832	39.86	296	50.0		zzzzz13,zzzzzz1
2831	39.65	343	55.0		zzzzz13,zzzzz93
2830	46.86	239	55.0		zzzzz13,zzzzz16
2829	44.26	296	60.0		zzzzz13,zzzzz17
2828	49.12	397	98.0		zzzzz13,zzzzzz7
2827	54.87	359	109.0		zzzzz13,zzzzzz9
2826	25.11	235	6.0		zzzzz12,zzzzz54
2825	27.62	181	7.0		zzzzz12,zzzzz76
2824	23.2	194	8.0		zzzzz12,zzzzz51
2823	23.04	191	8.0		zzzzz12,zzzzz46
2822	24.56	171	9.0		zzzzz12,zzzzz64
2821	27.51	189	9.0		zzzzz12,zzzzz78
2820	27.33	172	10.0		zzzzz12,zzzzz40
2819	21.54	246	10.0		zzzzz12,zzzzz67
2818	27.69	195	11.0		zzzzz12,zzzzz34
2817	27.51	189	11.0		zzzzz12,zzzzz68
2816	25.37	272	11.0		zzzzz12,zzzzz42
2815	24.08	191	11.0		zzzzz12,zzzzz53
2814	27.98	193	12.0		zzzzz12,zzzzz73
2813	28.14	231	12.0		zzzzz12,zzzzz47
2812	27.49	211	13.0		zzzzz12,zzzzz99
2811	25.76	198	13.0		zzzzz12,zzzzz44
2810	26.8	194	13.0		zzzzz12,zzzzz72
2809	24.61	191	13.0		zzzzz12,zzzzz55
2808	28.44	211	13.0		zzzzz12,zzzzz71
2807	30.05	193	14.0		zzzzz12,zzzzz60
2806	27.81	187	14.0		zzzzz12,zzzzz43
2805	27.6	192	14.0		zzzzz12,zzzzz41
2804	29.53	193	16.0		zzzzz12,zzzzz87
2803	30.95	168	16.0		zzzzz12,zzzzz56
2802	25.13	187	17.0		zzzzz12,zzzzz89
2801	30.8	237	25.0		zzzzz12,zzzzzz8
2800	32.77	177	26.0		zzzzz12,zzzzz88
2799	36.72	177	27.0		zzzzz12,zzzzzz6
2798	34.07	270	29.0		zzzzz12,zzzzzz2
2797	32.8	250	31.0		zzzzz12,zzzzzz5
2796	34.76	233	34.0		zzzzz12,zzzzz15
2795	33.04	342	36.0		zzzzz12,zzzzzz0
2794	39.65	227	41.0		zzzzz12,zzzzz93
2793	31.8	412	46.0		zzzzz12,zzzzzz4
2792	37.91	335	51.0		zzzzz12,zzzzzz1
2791	41.42	239	52.0		zzzzz12,zzzzz17
2790	40.06	327	59.0		zzzzz12,zzzzz16
2789	44.39	428	96.0		zzzzz12,zzzzz13
2788	54.5	400	117.0		zzzzz12,zzzzzz9
2787	57.62	387	123.0		zzzzz12,zzzzzz7
2786	25.52	192	7.0		zzzzz11,zzzzz54
2785	24.14	203	8.0		zzzzz11,zzzzz33
2784	22.67	150	8.0		zzzzz11,zzzzz62
2783	28.64	213	9.0		zzzzz11,zzzzz47
2782	26.5	200	9.0		zzzzz11,zzzzz50
2781	22.33	206	9.0		zzzzz11,zzzzz67
2780	27.64	199	10.0		zzzzz11,zzzzz29
2779	28.19	188	10.0		zzzzz11,zzzzz68
2778	25.76	229	11.0		zzzzz11,zzzzz42
2777	25.14	179	11.0		zzzzz11,zzzzz60
2776	25.29	174	11.0		zzzzz11,zzzzz64
2775	26.4	197	11.0		zzzzz11,zzzzz34
2774	23.56	191	12.0		zzzzz11,zzzzz53
2773	24.87	189	12.0		zzzzz11,zzzzz55
2772	28.04	214	13.0		zzzzz11,zzzzz71
2771	28.8	191	13.0		zzzzz11,zzzzz40
2770	27.6	192	13.0		zzzzz11,zzzzz41
2769	27.5	200	14.0		zzzzz11,zzzzz99
2768	27.23	191	14.0		zzzzz11,zzzzz43
2767	28.88	187	14.0		zzzzz11,zzzzz73
2766	26.52	230	14.0		zzzzz11,zzzzz72
2765	22.83	184	15.0		zzzzz11,zzzzz89
2764	26.79	209	15.0		zzzzz11,zzzzz44
2763	27.17	173	15.0		zzzzz11,zzzzz56
2762	30.73	192	17.0		zzzzz11,zzzzz87
2761	30.1	206	23.0		zzzzz11,zzzzzz8
2760	33.85	192	27.0		zzzzz11,zzzzz88
2759	32.2	236	29.0		zzzzz11,zzzzzz6
2758	36.32	234	30.0		zzzzz11,zzzzzz2
2757	34.5	229	30.0		zzzzz11,zzzzzz0
2756	35.89	209	35.0		zzzzz11,zzzzzz5
2755	37.16	218	37.0		zzzzz11,zzzzz15
2754	38.91	221	41.0		zzzzz11,zzzzzz1
2753	34.27	321	47.0		zzzzz11,zzzzzz4
2752	37.28	279	49.0		zzzzz11,zzzzz93
2751	43.72	215	51.0		zzzzz11,zzzzz16
2750	44.24	217	55.0		zzzzz11,zzzzz17
2749	48.3	383	95.0		zzzzz11,zzzzz13
2748	55.95	370	112.0		zzzzz11,zzzzzz9
2747	57.67	378	117.0		zzzzz11,zzzzzz7
2746	60.0	425	133.0		zzzzz11,zzzzz12
2745	23.53	255	7.0		zzzzz10,zzzzz97
2744	26.56	192	8.0		zzzzz10,zzzzz40
2743	24.6	187	8.0		zzzzz10,zzzzz68
2742	23.28	189	8.0		zzzzz10,zzzzz51
2741	26.09	184	8.0		zzzzz10,zzzzz29
2740	23.08	247	8.0		zzzzz10,zzzzz67
2739	24.86	185	8.0		zzzzz10,zzzzz64
2738	23.92	209	9.0		zzzzz10,zzzzz42
2737	25.62	203	10.0		zzzzz10,zzzzz99
2736	25.1	239	11.0		zzzzz10,zzzzz60
2735	23.0	200	11.0		zzzzz10,zzzzz55
2734	23.86	197	12.0		zzzzz10,zzzzz44
2733	25.38	260	12.0		zzzzz10,zzzzz71
2732	25.76	198	12.0		zzzzz10,zzzzz34
2731	23.96	192	12.0		zzzzz10,zzzzz53
2730	27.14	210	13.0		zzzzz10,zzzzz73
2729	26.2	187	13.0		zzzzz10,zzzzz43
2728	26.7	191	13.0		zzzzz10,zzzzz41
2727	28.7	216	14.0		zzzzz10,zzzzz72
2726	31.46	178	16.0		zzzzz10,zzzzz56
2725	28.9	173	19.0		zzzzz10,zzzzz89
2724	34.08	179	20.0		zzzzz10,zzzzz87
2723	29.35	293	28.0		zzzzz10,zzzzz88
2722	33.03	218	28.0		zzzzz10,zzzzzz8
2721	33.93	280	30.0		zzzzz10,zzzzzz2
2720	35.71	224	33.0		zzzzz10,zzzzzz0
2719	31.39	309	33.0		zzzzz10,zzzzzz6
2718	34.12	211	37.0		zzzzz10,zzzzz15
2717	35.48	248	38.0		zzzzz10,zzzzzz5
2716	35.31	337	45.0		zzzzz10,zzzzzz1
2715	34.29	347	46.0		zzzzz10,zzzzzz4
2714	41.96	224	49.0		zzzzz10,zzzzz93
2713	45.98	224	53.0		zzzzz10,zzzzz16
2712	44.64	233	53.0		zzzzz10,zzzzz17
2711	49.35	385	97.0		zzzzz10,zzzzz12
2710	52.13	376	104.0		zzzzz10,zzzzz11
2709	51.09	411	113.0		zzzzz10,zzzzz13
2708	54.62	390	116.0		zzzzz10,zzzzzz7
2707	58.87	406	134.0		zzzzz10,zzzzzz9
2670	31.87	91	7.0		zzzz158,zzzzz99
2669	24.02	179	7.0		zzzz158,zzzzz55
2668	24.55	167	7.0		zzzz158,zzzzz63
2667	23.5	183	7.0		zzzz158,zzzzz56
2666	23.87	155	7.0		zzzz158,zzzzz43
2665	27.5	160	8.0		zzzz158,zzzzz44
2664	29.05	148	8.0		zzzz158,zzzzz75
2663	25.52	192	8.0		zzzz158,zzzzz54
2662	27.36	212	8.0		zzzz158,zzzzz42
2661	26.45	155	9.0		zzzz158,zzzzz78
2660	24.84	161	9.0		zzzz158,zzzzz41
2659	27.22	158	9.0		zzzz158,zzzzz46
2658	24.01	279	9.0		zzzz158,zzzzz50
2657	23.21	237	10.0		zzzz158,zzzzz71
2656	28.75	160	11.0		zzzz158,zzzzz60
2655	28.19	188	11.0		zzzz158,zzzzz68
2654	30.63	160	13.0		zzzz158,zzzzz47
2653	25.62	203	14.0		zzzz158,zzzzz89
2652	26.27	217	16.0		zzzz158,zzzzz88
2651	30.54	203	16.0		zzzz158,zzzzz87
2650	30.16	189	20.0		zzzz158,zzzzzz6
2649	27.95	254	22.0		zzzz158,zzzzzz5
2648	31.77	192	24.0		zzzz158,zzzzzz7
2647	30.6	232	25.0		zzzz158,zzzzz15
2646	29.52	227	25.0		zzzz158,zzzzz11
2645	28.57	224	25.0		zzzz158,zzzzz10
2644	31.6	231	26.0		zzzz158,zzzzz12
2643	34.76	187	28.0		zzzz158,zzzzzz9
2642	34.55	165	28.0		zzzz158,zzzzz93
2641	30.69	277	28.0		zzzz158,zzzzz17
2640	36.13	191	28.0		zzzz158,zzzzz13
2639	31.76	233	30.0		zzzz158,zzzzzz4
2638	31.95	241	31.0		zzzz158,zzzzz16
2637	30.38	316	32.0		zzzz158,zzzzzz8
2636	34.01	247	35.0		zzzz158,zzzzzz1
2635	35.06	502	61.0		zzzz158,zzzzzz2
2634	40.34	414	76.0		zzzz158,zzzzzz0
2633	21.08	204	7.0		zzzz157,zzzzz50
2632	23.5	183	7.0		zzzz157,zzzzz46
2631	21.33	150	7.0		zzzz157,zzzzz62
2630	22.78	180	7.0		zzzz157,zzzzz67
2629	26.06	188	8.0		zzzz157,zzzzz29
2628	25.81	186	8.0		zzzz157,zzzzz47
2627	23.79	290	8.0		zzzz157,zzzzz42
2626	25.56	180	8.0		zzzz157,zzzzz63
2625	22.97	209	8.0		zzzz157,zzzzz34
2624	25.39	193	9.0		zzzz157,zzzzz54
2623	25.41	181	9.0		zzzz157,zzzzz64
2622	24.19	186	9.0		zzzz157,zzzzz68
2621	28.04	189	9.0		zzzz157,zzzzz74
2620	26.98	189	10.0		zzzz157,zzzzz51
2619	28.72	188	10.0		zzzz157,zzzzz44
2618	23.18	233	10.0		zzzz157,zzzzz71
2617	23.96	192	10.0		zzzz157,zzzzz41
2616	25.14	183	10.0		zzzz157,zzzzz55
2615	23.24	185	10.0		zzzz157,zzzzz53
2614	24.63	203	10.0		zzzz157,zzzzz72
2613	27.27	176	11.0		zzzz157,zzzzz78
2612	25.13	187	11.0		zzzz157,zzzzz73
2611	26.2	187	11.0		zzzz157,zzzzz60
2610	26.74	258	12.0		zzzz157,zzzzz40
2609	26.14	176	13.0		zzzz157,zzzzz56
2608	28.26	184	15.0		zzzz157,zzzzz43
2607	28.28	198	15.0		zzzz157,zzzzz99
2606	29.1	189	18.0		zzzz157,zzzzz87
2605	28.23	248	19.0		zzzz157,zzzzz89
2604	33.33	183	22.0		zzzz157,zzzzz88
2603	32.26	217	27.0		zzzz157,zzzzzz8
2602	34.02	241	30.0		zzzz157,zzzzzz2
2601	32.37	207	32.0		zzzz157,zzzzzz5
2600	33.49	218	32.0		zzzz157,zzzzz15
2599	33.96	318	39.0		zzzz157,zzzz158
2598	32.75	284	39.0		zzzz157,zzzzzz4
2597	33.01	312	39.0		zzzz157,zzzzzz0
2596	36.03	297	46.0		zzzz157,zzzzz12
2595	45.22	230	48.0		zzzz157,zzzzz16
2594	41.49	241	48.0		zzzz157,zzzzzz6
2593	44.91	216	53.0		zzzz157,zzzzz11
2592	42.68	246	54.0		zzzz157,zzzzz93
2591	46.4	222	55.0		zzzz157,zzzzzz7
2590	42.91	275	56.0		zzzz157,zzzzzz1
2589	45.75	212	57.0		zzzz157,zzzzz17
2588	35.42	336	57.0		zzzz157,zzzzz10
2587	35.81	430	62.0		zzzz157,zzzzzz9
2586	47.15	246	62.0		zzzz157,zzzzz13
2585	25.15	167	6.0		zzzz156,zzzzz58
2584	22.68	194	7.0		zzzz156,zzzzz73
2583	24.52	208	8.0		zzzz156,zzzzz40
2582	23.04	191	9.0		zzzz156,zzzzz50
2581	22.45	196	9.0		zzzz156,zzzzz34
2580	23.74	198	10.0		zzzz156,zzzzz44
2579	30.0	170	10.0		zzzz156,zzzzz64
2578	28.28	198	10.0		zzzz156,zzzzz42
2577	24.49	196	11.0		zzzz156,zzzzz68
2576	24.59	183	11.0		zzzz156,zzzzz56
2575	23.03	178	11.0		zzzz156,zzzzz47
2574	25.0	188	11.0		zzzz156,zzzzz54
2573	22.96	196	11.0		zzzz156,zzzzz71
2572	22.91	179	11.0		zzzz156,zzzzz63
2571	25.74	237	12.0		zzzz156,zzzzz72
2570	22.47	178	12.0		zzzz156,zzzzz60
2569	24.37	279	12.0		zzzz156,zzzzz46
2568	24.77	218	12.0		zzzz156,zzzzz43
2567	25.74	202	13.0		zzzz156,zzzzz41
2566	24.12	228	13.0		zzzz156,zzzzz67
2565	24.34	189	14.0		zzzz156,zzzzz53
2564	28.96	183	15.0		zzzz156,zzzzz99
2563	25.65	191	16.0		zzzz156,zzzzz55
2562	31.94	191	19.0		zzzz156,zzzzz87
2561	30.94	181	20.0		zzzz156,zzzzz89
2560	34.03	191	24.0		zzzz156,zzzzz88
2559	29.93	284	27.0		zzzz156,zzzzzz2
2558	31.35	319	29.0		zzzz156,zzzz158
2557	34.21	228	29.0		zzzz156,zzzzzz0
2556	30.69	303	31.0		zzzz156,zzzzzz6
2555	32.78	241	32.0		zzzz156,zzzzzz8
2554	32.71	269	33.0		zzzz156,zzzzzz5
2553	29.57	399	37.0		zzzz156,zzzzz15
2552	31.76	381	39.0		zzzz156,zzzzzz4
2551	32.88	365	46.0		zzzz156,zzzzz16
2550	36.93	306	49.0		zzzz156,zzzzz12
2549	37.25	298	51.0		zzzz156,zzzzzz1
2548	37.12	361	52.0		zzzz156,zzzzzz7
2547	42.14	280	53.0		zzzz156,zzzzz11
2546	43.32	277	53.0		zzzz156,zzzzz10
2545	36.63	374	54.0		zzzz156,zzzzz13
2544	43.67	245	55.0		zzzz156,zzzzz17
2543	36.0	375	56.0		zzzz156,zzzzzz9
2542	53.49	215	63.0		zzzz156,zzzz157
2541	42.28	298	63.0		zzzz156,zzzzz93
2540	23.91	184	6.0		zzzz155,zzzzz32
2539	24.23	194	7.0		zzzz155,zzzzz74
2538	24.02	179	7.0		zzzz155,zzzzz40
2537	24.16	178	8.0		zzzz155,zzzzz73
2536	24.88	201	8.0		zzzz155,zzzzz51
2535	21.94	196	9.0		zzzz155,zzzzz67
2534	22.61	199	10.0		zzzz155,zzzzz34
2533	26.37	182	10.0		zzzz155,zzzzz64
2532	24.87	189	10.0		zzzz155,zzzzz61
2531	26.26	198	11.0		zzzz155,zzzzz46
2530	24.15	236	11.0		zzzz155,zzzzz68
2529	26.59	173	11.0		zzzz155,zzzzz29
2528	23.33	240	11.0		zzzz155,zzzzz72
2527	26.11	226	12.0		zzzz155,zzzzz44
2526	25.08	323	12.0		zzzz155,zzzzz50
2525	26.34	186	12.0		zzzz155,zzzzz42
2524	34.04	94	12.0		zzzz155,zzzzz99
2523	21.95	246	12.0		zzzz155,zzzzz63
2522	26.92	234	12.0		zzzz155,zzzzz78
2521	26.32	304	13.0		zzzz155,zzzzz54
2520	24.72	178	13.0		zzzz155,zzzzz60
[truncated: 2,333 more rows]
