# Supplementary material for: Discovery of several thousand highly diverse circular DNA viruses
Source: eLife journal article supplement (doi:10.7554/elife.51971), 2020-02-03
Supplement: fig4-data1 [file elife-51971-fig4-data1-v1.cys › CytoscapeSession-2019_08_07-14_38/tables/36-all_myseqs_and_genbank_s_domain2_70_190610+Full+Network/SHARED_ATTRS-org.cytoscape.model.CyNetwork-36+shared+network.cytable]

"CyCSV-Version","1"
"SUID","shared name"
"java.lang.Long","java.lang.String"
"",""
"36 shared network",""
"52","all_myseqs_and_genbank_s_domain2_70_190610 Full Network"
"36",""
"4558","all_myseqs_and_genbank_s_domain2_70_190610 Full Network(1)"
"4568","all_myseqs_and_genbank_s_domain2_70_190610 Full Network(2)"
