# Supplementary material for: Discovery of several thousand highly diverse circular DNA viruses
Source: eLife journal article supplement (doi:10.7554/elife.51971), 2020-02-03
Supplement: fig4-data1 [file elife-51971-fig4-data1-v1.cys › CytoscapeSession-2019_08_07-14_38/tables/36-all_myseqs_and_genbank_s_domain2_70_190610+Full+Network/SHARED_ATTRS-org.cytoscape.model.CyNode-36+shared+node.cytable]

CyCSV-Version	1
SUID	Description	Sequence	Sequence Length	Sequence Source	shared name	Taxonomy
java.lang.Long	java.util.List<java.lang.String>	java.lang.String	java.lang.Integer	java.lang.String	java.lang.String	java.lang.String
	mutable	mutable	mutable	mutable		mutable
36 shared node
175	NP_835255.1 coat protein [Cucumber Bulgarian virus]	MALVLRKAGNIVPYVGPAAKAGATAVYNNRKIIYDGLNWIYAKVSKRVKKKNGIMSNVVGASPGSIVAPVATSRQLRASRPKFMRTRGGVNITHREYVTQVNGVNGGTFQLNRTFGPGAYRVNPTNAAVFPWLLNIASNFDKYKFTRLSFHYVPMCATTEVGRVGLFFDRDSEDSGPFDRSEVANMAHLAETPPWGEVVLQVPCDSIDRFISDSTVTDTKLIDLGRFGYVVYGGSTNNAYGDVFVQYTVELREPQPSSNTMEEITGNAGNSVVTTPPSYFRLASFDATLAAFTPTTAGTYLVTLILEGTAMTAGNISTSNPSALTITGQSVVVSATKVIYVCQVIASTPGHNLNFNFTAASATFWNFFAVRTTRDIIISA	380	USER	zzzzz55	tombusviridae
176	NP_619676.1 coat protein [Hibiscus chlorotic ringspot virus]	MLQKNDPAVQRAFNAHLPWAIKLKNDGWAALSKGQKRAANRYAGGTRPVTSQIKLSTLKVTAPVAASMRTRNPGANIRTAGKSVTVVHCEFVGNIARQTGSGLLVVERTINPSNVLSFPWLSVLAAGYEKYRVSSLSLRYSPTCATTTEGKVILAFDKDAADASPTSKSDMYNHDGAVGVSPWDSAMLQIPCDNVDRFINDSSSSDPKLVDFGKVVVANYGQSEGDVDVIGELFLQYSITLKIPQGMATPTQSGVGISSVGPSLFRVQLRDDTHVFTCNGTGRFLFFFNSTVDATSTIAGMEVKQKSSTDDKGETTIMELLATESGGTIAILAATGTLTWWACRN	345	USER	zzzzz56	tombusviridae
177	NP_056828.1 coat protein [Tobacco necrosis virus A]	MAGKKNNNNGQYIILRTPEQQVEIDQRNARRAQMGRMKKARQPVQRYLQQHGLRNGLSGRGGYIVAPTSGGVVTRPIVPKFSNRGDSTIVRNTEILNNQILAALGAFNTTNSALIAAAPSWLASIADLYSKYRWLSCEIIYIPKCPTTTSGSIAMAFTYDRNDAAPTARAQLSQSYKAINFPPYAGYDGAAYLNSNQGAGSAIAVQLDVTKLDKPWYPTISSAGFGALSVLDQNQFCPASLVVASDGGPATATPAGDLFIKYVIEFIEPINPTMNV	276	USER	zzzzz57	tombusviridae
178	NP_041887.1 coat protein [Cardamine chlorotic fleck virus]	MAIKEDPRLVKMASLGVPWAVKVTTKGWGSLTTKQKIAARAALQIPMRVTKQPTPKVVRVSAPAAVSYREVTGAPRVTTAGKVLTHTASELITTLKKNTSLEPKYVEAIVNPSRVGTFNQLPDIAASYEKYKFTSLRFRYSSTCPTSTGGKVALAFERDAANPLPDNLTAFYNLEGNTSSNPRDSFVLTVPCDNVARFVADGGSDPKLVDFGKLLAASYGQGEGDANGLGEIHIEYTVQLYNRLGSAQRSQIGSLDGKFLGPRLVEVTSGKSDKGTKFTFSFHGCGLIPILWLAKPRWPLTAGSAVACEVLGQSGDDSVQWAGIRISEREQTVEFEHTETTPEAKWSVSRL	351	USER	zzzzz58	tombusviridae
180	YP_009259669.1 coat protein [Pelargonium leaf curl virus]	MAMVRRNNNTSIIPVTGMQLATIVGTAVAGAVGNVVKNNGGAIARTAVGFGKQVVKRFRRRKGGGNQQMIQHVGGTGGAIMAPVAVTRQLMGSKPKFTGKMSGSVTVTHREYLTQVNNTTAFAVNGGIVDNLLQLNPLNGTLFAWLPAIASNFDQYTFNNVVLHYVPLCATTEVGRVAMYFDKDSEDIEPADRVELANYGVLKETAPWAEATLNIPCDRIKRYCDDNATVDHKLIDLGQLGIATYGGSGTNAIGDVFISYSVTLYYPQPTNSLLSTRRLDLTGASLNGNGPGYTIVSRTPTVISMTFRSTGTFVLTGAYRCLTASTLGLTGNVNVNSITVLDTLGLATSFIINCTVSSLPSVVSFTSTGITSATINCVRATRANVVTLA	389	USER	zzzzz60	tombusviridae
183	YP_001285476.1 unnamed protein product [Maize white line mosaic virus]	MARKKRSNQVQTGQGVRRAAGAVITAPVARTRQVRARPPKVEALAGGGFRVTHRELITTIANSATYQANGGIAGLKYRMNPTYGSTLTWCPALASNFDQYVFRKLTLEYVPTCGTTETGRVGIWFDRDSEDDPPADRVELASMGVLVETAPWSGVTLQVPTDNTKRFCLGAGGNTDAKLIDLGQIGFSTYAGAGTNAVGDLFAEYVVDLHCPQPSGALVQTLRITSAGVRGPEVGPLYYNMTKAATLIDLTFFTPGTFLISIGCAATSYTSELVLGGATLNSRTLTATGAGFSGSFNVTVTKPLDGLRIQGTGFGDCMTFAVRARVANSVTV	332	USER	zzzzz63	tombusviridae
188	NP_612582.2 capsid protein [Carnation Italian ringspot virus]	MTMVLRNSGTMVPQGGNKMSKMAKNASQQGLQAGAAYLMSNPKGALKKGKDAWNYMTAGGVPSGIVHSGGMKGAIMAPVAVTRQLRGSKPKFSGRTSGSVTVSHRELITQVNNSTQFVVNGGVTGNLRQVNPLNGTLFSWLPSIAANFDQYTFNSVTLHYVPLCATTETGRVAMYFDKDSEDLEPADRVELANYATLKETAPWAEAMLRIPTDRIKRYNDDSSVNDRKLIDLGQIGIATYGGSGTNPVGDVFISYSVTLHFPQPTAAGVQTRRLDLTSVLDTNVGPSYTITSSTATVYTVAFRTVGTFMLFGAVRSTGSPVIGLSSANIAINSNTTLNTAGTAFSYMTNVTVSALPASITFTVVGVITSSTSHAVRASRTNNADMI	386	USER	zzzzz68	tombusviridae
62	YP_009337622.1 hypothetical protein 1 [Sanxia tombus-like virus 1]	MDMWRILRRLCFVRRNRCILQMATKWLGNLNLLCSRISIVDVISLGRKYLTYGVLVQGKVGQPQLVTFLSTRLFIRPFQTNIVLHTCRKLLLSSRLGLQCYPKGFNLKFVAQNPEHATVFGKLLEQLPSSNWFLNNILARFKLGINNPVLAICSKVSPSIGLSGPEKVIIKMAKTKNKNMTQKVGATAMGYSNSYKTPKMQTVGSSIIVKHKELIRQVASQSAFNVAEARINPADLESFPWLAGIATRYEKYRFLKMKFTLVPQVPTTAPGSLGLYFDYDATDLPAPNATQFFSNLNAVTTQIWMEASTVVLPQPMELYCATKYDGQNPKWFDYGRIKYFMQSSVQCLGYLFVEYEVELSKPAQTVGQISRFSGHAYWQTLSQSADVPVGTPTWIEAVT…	501	USER	zzzz100	tombus-like
191	YP_009037608.1 capsid protein [Moroccan pepper virus]	MAMVVRNNNTALVPYSGGKRGLQKAFGFGATIVGQKIYDNRGKIVGFMVEQGKKGLSKMANALGYGNGQKAQNLVGGMGGAIMAPVAVSRQLRGSKPRFTGRTAGSVTVTHREYVRQVNNTSAFTVNGGIVGNLYQLNPLNGTLFTWLPSIASNFDQYAFNNVTLHYVPLCSTTEVGRVGLYHDKDSQDPEPTDRQELANFSTLKETPPWGEVMLRIPTDRIKRYCDDSNAVDHKLIDLGQVGIATYGGAGANAVGDVFISYSITLFSPQPTSSLLSTRQQSLLGATGLTTGPSYLTVSSTTTVLTLTFRATGTFMVSGHFRDTGAAVLGLAGNINVNSLTVLDTVGLATSFSINCSVSALPSTITFTSTAITSSTVHCVRAVRANDATLL	391	USER	zzzzz71	tombusviridae
64	YP_009337408.1 hypothetical protein 2 [Changjiang tombus-like virus 20]	MRYHGNYCGPSWSDGKQQLSVAAGDQPAIDDFDKTCEIHDKNYALNTNLYEADNSFYMSNYGMGTKRSLAALAVKANSVLREYVPNNLPSQVTGPRSFNMVKNAKQPTKLRGAKVAPTKRTVTKNSQQLSTVPASYGFSLRMQEPRVQRTGKNTVIVGSDYATSVATSISTGTYAPSGSILLNPSYFASAMLGNVARTYEKFRFTKAVIQYIPQVPTTTAGQIVMCSTRTVKEPFINGNSPTFLSRALSQGNAVASPLWKETTLTVNCSPEWSIVDGYIDTDLDDSIQEEVQIYTTCDSVLTTGIIVLHYTIEFKDPLYSYHSNNIPNPIGNGVFDAFSDNTPINAVGDALILSNSSTTTGTPSGTIFRMVFRQQRSTLPTGVPQWNALANTVTQASSS…	474	USER	zzzz102	tombus-like
192	YP_009032636.1 capsid protein [Pothos latent virus]	MALVKRNNNMALIASEAGKLAAIKAGQVMLSPAGRELIWNGVNWVRRKLGRSKKSDVILHPGVLPGAIAAPVANTRIIRASKPKFTRSKGSVTIAHRELLGQFNNSSGLVVNGGVSGNVYRINPSNPVVFPWLQGIAASFDQYKFDRVQLQYVPMCATTETGRVAIYFDKDSQDVEPADRDELAIMAHLTESAPWCESTLSIPVDNIKRFMNDNTTTDPKLVDLGQIGLATYGGGSTNPVGDLFIHYTITLFEPQPLASLVETEQTGTGAAPFGANLVTVSSNATITIYTFEGPGVYLLALSQRAASFTTFVTAGGAVVNSHTTTITSGPAYQSICEYYCCYTWGSITYNGTLFGNYTLQVTRAKISNNATLI	373	USER	zzzzz72	tombusviridae
193	YP_002308431.1 capsid protein [Grapevine Algerian latent virus]	MALALNTRRNNNGKVMEMLAYKAATAGAELALANVGGITRGVAQLGKSMMGKKKRNKNVSQVGALGGAVVAPVAVTRQIRGSKPRFSGRGTGSITVTHREYLGQVVTTADLQVNGGITGNLLKVNPLNGILFSWLPTIAAGYDQYAFNRLSLQYVPLCATTATGRVAMYWDKDSTDLEPTDRVELANQAILKETSPWAEANLTIPTDRIKRFCDDSAVADRKLVDLGQLGVATYGGTAVVAGDVFVSYTVTFYNPQPLATLMDTTRINASNTVITNVGPQYSRIDVVSGNQWLITFRGVGKFVIFGSIRGTGAVVLALSGVIVNSSTTLTTPTGAMYVANVTVSSLPASLSYTMTTVTAGLHSAVRATRANDMGTP	376	USER	zzzzz73	tombusviridae
65	YP_009337342.1 hypothetical protein 3 [Changjiang tombus-like virus 17]	MKNKTSNSKKMEGKQISAPVATTKVIRAKTPSMRNTTDGNMIISHTEYCSDLYGTLASPVSAAVTLNPQDATTFPWLSAIASRFEMYRFKKLKFHYNPSCPTSTEGYMILAFDFDAQDEIPTAKTELLTWKYAMKIAPWAPVSLDVSKDARLSTARYCQPSPRNISGVDNRLDALGNAIFNSGFNAISASLGEIMIEYTVELMIPSYRAPPALFAKVVGTPTGSAFTFPTFVIDTLTNVLLSRISNNVLRLETPGSYQLTYDVGGTGFTGPAGLTVSADPSTPESTFVDYGSLANAFSSTSALNTTAFRLINGAVQISLPPPPGTATLTRAVLRLATYALTS	342	USER	zzzz103	tombus-like
195	NP_620723.2 p38 capsid protein [Turnip crinkle virus]	MENDPRVRKFASDGAQWAIKWQKKGWSTLTSRQKQTARAAMGIKLSPVAQPVQKVTRLSAPVALAYREVSTQPRVSTARDGITRSGSELITTLKKNTDTEPKYTTAVLNPSEPGTFNQLIKEAAQYEKYRFTSLRFRYSPMSPSTTGGKVALAFDRDAAKPPPNDLASLYNIEGCVSSVPWTGFILTVPTDSTDRFVADGISDPKLVDFGKLIMATYGQGANDAAQLGEVRVEYTVQLKNRTGSTSDAQIGDFAGVKDGPRLVSWSKTKGTAGWEHDCHFLGTGNFSLTLFYEKAPVSGLENADASDFSVLGEAAAGSVQWAGVKVAERGQGVKMVTTEEQPKGKWQALRI	351	USER	zzzzz75	tombusviridae
73	YP_009336828.1 hypothetical protein 3 [Beihai tombus-like virus 3]	MRRKTNNARRVSAPIANGLRTSGGRPQMTPAGAGSTRVRHREFVQNITSDHTFGSELLALGINVGDTKTFPWLSKIANGYERYCVHSMTISYEPFVSTTETGAILMLADYDPNDPPPTSKSNMLNSMGASRSAVWMNTTMPLDRKELSYDDHLFVRHQTRETLTENLKLYDVGTVFVGVTDNEPVSGTKQYGEVWITYDVTLMVPAFHTSNPNSAETKVNGAIAPDFLGGIQSSNRAAMKDGSAVNFSTAHNGDDQVAITFHEPFTGLLYMEQSGYALDDTTHVQLEPETSPTDGWISKLAKLGGITADYFFQENTWKYLMEVVADAGESIVFSALGVGAADIATWIGEVAWLLAPYAETLMFAPLLVLNKASAIDVRARLQARSLNGILPANEVLPRL…	412	USER	zzzz111	tombus-like
74	YP_009336791.1 hypothetical protein 3 [Hubei tombus-like virus 8]	MTRKGKNLRVGFQQGAPKSATARTSNQNDKKMMAPVSIATKRTGAAPRINNKPNGSVEISHRSFLCPITNNINYTAQLFNVNPGLPGTFPWLSKLARRYEEYRFKKLKFEYRSVCATSTSGVIMMSFDYDAADGLPTNKASQAQTVPNSEVNAWSSNDLVINCDAGYKYVRAGVLQANLDIKTYDFGAMCLSSLYGNGVVSGELYVEYTVELRKPTDGPATSGKIAYATTVFATPFPGGGVVTGFNPYTSTANELVFTTPGEYMIAVNTVGTGITAACPLPTMVTTTGAIQSLAVTFSATQGIHLFGVRAELGDVLQFATAGTGTTITALRIRSSTANYDAL	342	USER	zzzz112	tombus-like
77	YP_009336752.1 hypothetical protein 3 [Beihai tombus-like virus 1]	MAIVPYNAAGQLASLITHPGIQQKVAKFASQGLPWASKLLSAGWQKLTKGQRKQARNALNLQPKIQANMVPVEVGISKSAIVKGRIPRYKQSAGYVTISHREYLAEAELVNGTDIRGYVLNPSNPRAFTWLCTFARNFEKYRFRNIRLTYVPQAPTTAAGRVILAYDKDSTDILPSGKAELYSYQGTVDTPVWQGTSIAFPCDNTLRFVDSSNTAETRLVDLGQFITCTSAVSAFNGGEFFIDYTVELHTPQQPQPMSERIYTVVGIPAEYHGDLMVVESNNSTTEFGIEWQSVGFYHVSITINGDCSSMATNTHDDAHIVRTTSSQNGTTSMTIAMFVRVVSFDPTAPPGILFTLLSGRGSVHTYVTRVSSSVAFS	377	USER	zzzz115	tombus-like
207	YP_009342303.1 hypothetical protein 3 [Wenzhou tombus-like virus 9]	MGMSNTSSSPNMQGQRDGSTRVRHREFITNVGAEFGFDTKLYTTGINPGDGKTFPWLSQLAKGYERYHVNSMRFEYEPFSATTTSGTVSLLVDYDPTDPGPRSKSELLNSYRAVRSSIWMSSHTILSKAELDRDDHLFVRTTSRDLMSENLKLYDVGTLFCAFTDIADVSTLHGELWVSYDITLMIPSFHLSSINNAEVNALIVTDSRYLGRIDPDSTANEKGSSLSYSTHQIDDNAYIEFNEPFSGMVQVSTRTVSGDLFQIEPTLSPAAPISRLAKIGNAVSYFVSNIDTWLHTVEVVADAGERLAWRIVDQTAAWAGSLDLLFTEYAPALMGTLLALRTDEAELTARLQSDHLIGRLPAPSSWTDWRTQHGIPNSTTTETH	384	USER	zzzzz87	tombus-like
143	YP_009173860.2 alpha-delta fusion protein [Orsay virus]	NKNNTHKSNRKGKPVKQPSSHKRNNNPSRSVAPVAKANALRTTSSNSILLKGCDRIVTVVDASTYDAGSAIVSIPITPDIAYRLGSTARTFQRIKYRSLKFRVNAQCATTTAGGYVAGFVKDAADVLPTGTASIPYLMSNTGSFTQPWWKSTVHNVKIPQKLFYTEAPTRGADAVREYCPGQFHVLVDSKPSQICPVTVDLEWVVELHDATFRKESDQTAISAIVADHTLNVYGLPATSNRVGHILISPIGQTPKDLTPTRFATFFGFLPDDKFCVRIPTPVDVVLTGDNVYQSVEATHIRAYLVNGGLGIDFHLAAYNDTTHTIQPIIPTLWNVYDVTGAVTAPFTSAIYDNHVWTHKDKFVPVSFQDEPIPGTVFDYLYPRSYSLPSSNLGWGNVVR…	765	USER	zzzzz23	nodaviridae
208	YP_009342300.1 hypothetical protein 3 [Wenzhou tombus-like virus 14]	MPKKQSLKNATPTKPPKKTATPVPKKKAPTKVVMAPTSISIRTNRKNNPAISRSSNGKITITHREYVADIASTTSSFSVTSYPINPGLNRSFPWLSSVASAFESYRFQRLTYEYQPLCPTSTAGKLLLTIDYDAADVPPTNKVQASAYQSAAGCSVWDKIQHHSNASNLHKLGPTKFTRTASVPTNADVKTYDAGNLYVCTSNTAASTTSLGELWVSYTVTLTTPQITNVVGDLVQTNPIPNAPSTFGKMKFQAGVANVVWEYGSMLMMAMINIRNTSTTRVITFGLNPKISNKAIANIFSTIGGSSLCYNSANLLGLAPYKLANSGQEMLWDNNAYNTSNQESFWIIPSAPGPVQPYTSKYPPQFMYNIPVAGLPEGGEVLFAVNTTDIGPSFQLSPT…	488	USER	zzzzz88	tombus-like
144	YP_004221744.2 protein delta [Santeuil nodavirus]	NKNNKKNISRKLKPAKQQPPRKRNTQRRSALAPIARSNQLRQTNGNSIMLKGVDRIVTVKDATTLTPGKSVVSLLITPLIADRLRAASQMFQKIKYHKLVFRVNSQCSTMTAGGYVAGFVKDPADEIPSESVAVQYLMSNAGSYTQPWWRSTVHNIRASQRMFFTDKPALGADAIREYSPGRFYVIVDSTPSQTCPVTVDLEWTVELREATFKLPDTTTVISSIRPELSLSTYGMPNTSPMAGHVVVKPSGETPRWLTPARFQTMFGFAPDEDMCATIPTPVQCVLTGENAYQTVTATHFSAVLTDSAVQSFMLSAFNDVTQDIQPINHTWQIMDALGQIVTPFIAVIYDSAIWSATDSYTITTRTGKPVPLDVFRFLHPNATVLPPENLAWGNVVQQT…	765	USER	zzzzz24	nodaviridae
209	YP_009342289.1 hypothetical protein 2 [Wenzhou tombus-like virus 15]	MSKQYVPVTYSRPVKSKAATIKRSGTSILVSHEEYIQDVVATTAFSCITIPINPGVQTSFPWLSLLAAGYESYSIKSLVVEYEPRCATTTQGTVILAFDSDASDPAPPGKVQAMQYDPNIAIPPWQREGLRFKPEIQKISRHFVRFGNLAANQDIKLYDVCNLFLITQGFTSAGIQVGEIHFRYVIEFQTPQIDYDGYALQTSARISVTPADQVLFTTGTVIAGGAPITINTGPLTLAKVAGGGSSAATLTTSNQAMVFGGPGQYYFNVLIGSTGGITITAANVGIYTLGTVSLIYFGTPGNASYVNYNFICKVNSPGDAIALVTGATSTTWTSAGSSIRVSYYAYALN	349	USER	zzzzz89	tombus-like
81	YP_009336611.1 hypothetical protein 3 [Hubei tombus-like virus 25]	MNVTIQQKKGSTSKNKQRSKKKRNNKTSRNPLSAKASKGTAKANTAPVSINVTTKKGIPAIKSTAGGITVTHKEYIGDFTSNGASFALNNYNVNPGLSGTFPWLSAIANRYESYLIDDLHFIYEPICPTTTPGSILMAMDYDAADSAPSNKVTIMAYSSAVRTSPWNRTVFAARRSDLHKFGVQRYVRSTVPPTNTDVKTYDVGNFFLASQGTPAGPTPLGELYVSYTIRFLTPQVGTGILAPSTVMAAESQSTILRIPAGVAAVNLSGEYRGSGVNPLAWLEPLAATTPDPVLLLNLNNANNMLLSFRAENGWGGSAAGWNPLAFFQNMRMGTSVTDIGVSWAVKQLAFGFAEKNDPNSLFQTYLIQPTMDALSKSQGGIFPLILKRPATGTYQMAVA…	477	USER	zzzz119	tombus-like
212	YP_009342271.1 hypothetical protein 3 [Wenzhou tombus-like virus 18]	MTGSNRRANAGRKTQPKPQRKPRAPRRPKVQNAPRIQQGGGPVPLLESNSNMRQMHNGMTRVVGSDYLGVVSVAGNPADAAAKVRKVLSVSPSSFPGTRLTQMSDLWERYVFRQFRVRYVPSVPNTLACQVMVYQDTDPQDDPTAIKDADALLRQATAQTGSQQWNFNSAKVIHLAKRSDNQLYYTGPVKENPRFNQQGVVYFIQVSQALDMNGKPLTADMECGSLYVDWVIDFQTPQVNPSAVEARLPSAGFFTRQILVNDKLTFAAQASLTVALTALSATPKVWLEGPTRVDLATLGGPGGNLVQIELTRAQPGDYTVKFVGCDSVTLVSSAPIA	337	USER	zzzzz92	tombus-like
214	YP_009342292.1 hypothetical protein 3 [Wenzhou tombus-like virus 5]	MGTAAVTSHSLYNSNLLGCATCAGSSTRKLAPLVQRRVGAFMWPGVSRLMSRLCWRSTSVAGCLTLPPVIFTYHNLPYFMALAYHGNYVGPGWSAGKYQSSVESDVLPVDEFDATGKRHDAVYARGGDRTRADFEFAYDNLTTLNPKRWLAGALVGAQGLCRFATGLNGITEEAEGSQRGVTKHSSQGLDKDYPPLSIDNMKNKRNRIFAGDSSHLVMDSNGRREVERIDKQITKSYQKRKPLKQRVQQAFSPLKTTAAPVSIGTTLVAVPPQTVKTGNGVCIAGREFITQVYGTNNDSFQVAGLAPVHPAYYPASTMGNISRSYQYYRFRKIVAHFVTRQPTSVTGEIVMCYSKNILDPPENGDSGSFLPRAMTRGNAVIGPLWQNHSVEIPLDGTFR…	597	USER	zzzzz94	tombus-like
155	YP_009407915.1 virus coat protein [Rice virus A]	MKYIVEFPDSSDQIVVHNSGGQLSSAGTFRGAAGGGIGGAIKEGLRDVIMTGGKKLAAKAADNAVDYVVAKLPKKKQPKKVSGKLGRRAGTQQERAIVIAPRASKPYVTTTAPVSYGATLAGARTIARKTRQGHIVQGREFLGAAYDTKLVTTWSMCFGAPLTPVSFVDSILRQYGAMYNYFRWRKLTVHYVTTSPTSTAGSVMLYYNKDRASTFINQTSPNLMPFVLSDPHTTIAPQWQNFSVVLETDSEWKRLDYGLTDDSTHYTAGEVFLLSKTAASTDSPGILLMEYEIEFKDENLTPRLLLWPQPTINFVPYTFTIPTATAGNPVNMLLGGTPIMGSNTNLVQPGGIYKVIMDVSNSDFTGTTPALTATNIWKYPAGTGTYNASLVDGSTLYAV…	453	USER	zzzzz35	tombusviridae
158	YP_008219061.1 coat protein [Thin paspalum asymptomatic virus]	MNRNNGAANARRGGKRAPQSGARRRARGKSVERRAAPIQYVTTVGPSQPRMGTGQGWQRISHQEIILQVTASTTSDSVQIVPIIPRLSLSTAEKPIYQGSAPHLRQMGDAFSIHRWRSLSFEWVPSCPTTTPGNLVLRFYPSYSTPTPKLLTDIMDSESLVIVPSISGAIYRPKIDTRAQSPELRNISITGFSALSDEDKGDFSVGRLVVGASKQAVGLQLGLLRMSYVIELRGATAGSGASA	243	USER	zzzzz38	tombusviridae
223	crucian1_2ct4	MPPKRGYFSSAAMRSMARKGGVGKPKAKAPYRTMRAAAPRSKKGRTGTKRRAAPLRSSAAVTSAPVTMGISVTGGLQSSFTQKQMSGGGLRITGRSFITSVDTAGKYSNGLLAVADCNPVLLNDRVATIATTYEKYVYQSITYRYVPQCATSTAGSVMLTFERDPANPAANGGDTSNFMQNCMSYEHTSITPPWVGSSVTYKRDANEKKLFYISGQGSNYNPRDTSQGSFLCYGANVPTVAAGAAGGGLGFIVMDYVLDLCEPSIMPARTGAGIAGASATNIPSQWQFATTNAITKVDAVGASSLTNAFTDLSNGLFGAANQNCIIELLLEGTAVPSTGNTNWATSEQQAKLASPVATTLGRGSHLYMAVRRAGPVTAQGPDQVSSTTATVILTRNLAD…	453	USER	zzzzzz3	this study
161	NP_945116.1 coat protein [Pelargonium necrotic spot virus]	MALVRRNNNSNMVAVPAARATGAAIGSMMFSPTGAKLFWTGMDWVLDKTWQKIKNQFKSRKTDMILHPGAYPGAIAAPVAVTRVIRGSKPKFTRSKGAVTITHRELVGQYNNSAGLVVNGSVGGTIYKLNPSNALLFPWLQSIASNFDQYKFDNVKLTYIPMCATTETGRVALYFDKDSQDPVPADRMELANMFHLRETAPWAESNLNVPTDNVKRFTNDNTTTDLKLVDLGQIGIATFGGSGTNPVGDLFIHYTVTFFEPQPSAGIVETEQTGAGALDSGPDMVSVGGDAISTLIVFKTPGTFILTLDSVIPPWGLLVPTGVTVNSSTHAQATGFCQSIVNLTVSTPGGILQYNGTGFGNRTVNIVRAKVTNRVDII	378	USER	zzzzz41	tombusviridae
163	NP_613262.1 coat protein [Cymbidium ringspot virus]	MAMTTTNNNRAMTRAAKQALPALGALATSGMGQQLFMSGVNYAIEKGKQFVPNRRGGKKNRNTDMVAHPGALSGSMAAPVAISRIVRGSKPRFIRSKGSVTITHRELVGQFNSSSALVVNGGITGNLYKINPANAVLFPWLQTLASNFDQYMFNTLRLQYVPMCASTETGRVAIYFDKDSQDLEPVDRIELANMRHLTETAPWCEGSLRVPVDSVKRFMNDNSTVDPKLIDLGQVGLATYGGPGTNAVGDLFIHYTVTFYEPQPSSGLTSTLQTGTGSANAGPTLVAVATTATTTTVTFRSPGTYLVSMVQRATTFTGVTPIALTFNSNTNTTAAGTNYSANYNVTVPVPGAQMRFVGTGFGNYTLQVTRAKITNAATLL	380	USER	zzzzz43	tombusviridae
164	NP_040955.1 coat protein [Cucumber necrosis virus]	MALVSRNNNMRTLAKLAAPLATAGTRTIVDNKEAIWNGVKWIWGKLPKGKKGKNGNGALIAHPQAFPGAIAAPISYAYAVKGRKPRFQTAKGSVRITHREYVSVLSGTNGEFLRNNGTGPNNDFSINPLNPFLFPWLVNIAANFDQYKFNSLRFEYVPLVNTTTNGRVALYFDKDSEDPGPDDRAALANYAHLSEISPWAITKLTVPTDNVKRFISDTSSGDPKLINLGQFGWVAYSGPTAELGDIFVEYTVDLFEAQPTSPLLESLFRESASSVQTRMGLPYFSLEVASATDLVWQARVPGTYVVTIIFNSTVGGLTPSISGGGTINSSFSVSTAGSSAYVANITIRVNANLSLSGLTGATNAQLFAVRAITENAVQVV	380	USER	zzzzz44	tombusviridae
166	YP_009032641.1 coat protein [Cucumber leaf spot virus]	MEIARTNKNSVVKYVPAAVGAAYQMGKSIVPYAPTIVDALGNVVSRATGRKKKSKGKEVQNQIVGGIGAIAAPVSITKRVRGMRPSFRQTKGKVHIVHRELVTSVINLVGNFRVNNNVSAQIGQFRINPSNSSLFTWLPTIASNFDSYRFTSIRFVYVPLCATTETGRVSLFWDKDSQDPLPVDRAALSSYGHSNEGPPWAETTLNVPTDGKQRFVTDSNTTDRKLVDLGQFAFATYAGGSNNQIGDIYVEYGVEFSEAQPAGGLTQYITKSVGATASTTGPSYVVDANINVNATTANVEFFSPGTFLITAVVYGSTIASPSMAGGNGTLIGDLPVVGGSNASIWTCVFSTTGVSTSVPTFTQAGTGLTRVQYTITRVNSQTAYQV	386	USER	zzzzz46	tombusviridae
167	YP_008999613.1 coat protein [Eggplant mottled crinkle virus]	MEIVRRNNNNAIAINKKQLASMAATAAAGALSNYVKNNGAMIVQGAVNMGKKAYGAVRNRKNKGNSQAMVHVGGMGGAMMAPVAVSRQLVGSKPKFAGRTAGSVTVTHREYLTQVNNSSAFTTNGGIVGNLLQLNPLNGTLFSWLPAIASNFDQYVFNSVVLHYVPLCGTNEVGRVAMYWDKDSEDPEPVDRVELANFGILKETAPWAEAILRVPTDKTKRYCDDSTVVDRKLIDLGQLGISTYGGTGTNPVGDVFVSYSVTLYFPQPTNTLLSTRQLNLTGALVASTGPGYINVTRTPTLITVAFRATGTFLLSGAFRDTGVAVLGVTGGIGINSQTTLDVVGVATSFLVNCTVSTLPATLTYGSADITSVTANCTRATRANTATLL	388	USER	zzzzz47	tombusviridae
170	YP_007517178.1 coat protein [Furcraea necrotic streak virus]	MSSKKVKQRSGGLQPPPMKRDASSTKTPLKVTAPVAMSRLMVSRTPKFSSRSNNITVSHCELVANVTNTTGVLQINNAITSSIGGVYKVNPAQGLFAWLSTLAANFDTYRFDKLIFRYVPMCATTETGRVVMMWDKDSEDPPPNDRFAISSYQHHCSFPCWGEGPLTIPVDGVKRFINDEAVVDRKLIDFGQFMFGVYGGSSTNSIGDIYVDYTVTLMEAQPTATLTFSTDGNSSVVANRNGPEIGQVFSSTNSITCKLYFAGTYLITIRAVTTATNPVFTILGNCTQLGNLHGVSNGSEWVGYATVSCSGVRSLLDSFTVITLTALGIYQVYVARISPSQAGL	344	USER	zzzzz50	tombusviridae
173	NP_945130.1 coat protein [Johnsongrass chlorotic stripe mosaic virus]	MPPQAPTRLGNAWGRRCGTGGLGFQGAWNRLRKRMTNGGGVPMIVGSGGGTVAAPVAVSRQIRSRKPKFTSVKGQVRVTHREYVTQVSGVGSGLFQLNGGLPSGQFRVNPNNAACFPWLLSIASNFDQYRFVNLQLCYVPLCATTEVGRVALFYDKDSGDSGPFERAELANMTHCAETPPWAEVSLTVPCDNVKRYLNDSNVTDLKLVDAGRFGYAVYGGNANTYGDLFIQYTVELSEPQPTAGLIGEVXGNAGTVAGVVQPAYFNFDGFSTTQVAFKPTVVGTYLMTFILDGTGLVLGNVTSSAPEGMSVLDQNVAGSATRVIYVCRVTVQRPGDRLFFNYTGTATFWNLFVVRATRDISITT	364	USER	zzzzz53	tombusviridae
63	YP_009337418.1 hypothetical protein 2 [Changjiang tombus-like virus 9]	MPPVVAAVKAGELRQQKYNMVKKANKKMKKTIKVAKKKSEITELGRVLRTLGGIGGGFAGGMIGQGAAGSAVGTGLGAAVSRWLGQGDYSVTSNSVLRAATTVPSMHKNDQTVVVRHKEFVGELRGNQNFTVAYRYSLNPGIALTFPWLHSIAAQYSEYRIRGMVFHYVPTSGASVASSNTALGSVMFQTSYRASENPPGSKIEMMNEYWASEGRPCDEFCHPIECDPKENPFNVQYVRTGGLPAGENLLMYDLGTTTVAVTGMQTTGTVLGDIWCTYEVELKKPKLTGLNTEATRSLYSNSSTGITNANPLGSGPVLSTIDGVSAVGSQITFPGNLDGKYVVVLTISGFTAAGGVTVMTSGPATLTSLAQAQGSASLSYVAILEFTGSVNTTLLTISL…	420	USER	zzzz101	tombus-like
66	YP_009337330.1 hypothetical protein 2 [Sanxia tombus-like virus 6]	MTLNPYTGYSRRGVPWALLGARAAGTVARNAWQWYNQPPAAPMYGPPIPPPRRRRQAPVYAPQPGPSQAAPRGRGRRRRPRGTGAPSRPLATTKEGSNLVVRDTEIISLGAKNTLFTMQFKPSETTLPRLDKEGGAFNRYRIQYVNIAYISTSSAATAGSVSYGVLQGPTNANIATLNAIVKLRPMESHAVWKNSSLSLGSDIMSAKYLSTAATGEDAVAFTVYAWNTADSPGYLQFSYRVEFAFPKP	248	USER	zzzz104	tombus-like
67	YP_009337199.1 hypothetical protein 3 [Changjiang tombus-like virus 8]	MTNKQQPKKGNLRGAQQKNSVPTMARNDSVRAAPVALATRRNGTAARMTTTNTGVTVTHRSFLMPVTNTLNYTAFSVPCNPGMAGSFPWLCKLARRYEEYRFKKLRYEFRSVTASSQSGVVMMSFDFDAADSAPSTKAEQAQTVPNTETNVWMNNDLVVTPDPKWQYVRSGFLSSNLDIKTYDMGNLWLSTAYGNNVVGGELYVEYTVELRKPTDGPETCGTWTADTGAFSAPVNQTNVVSTGASFPFRRIDNNNFEVVSGGEYIMVCRASGTGLTAVIATPTIASSGTTALVSSIQTCVGGSSTINVLRLRVDTGDVIYFANAGTGTTINATRYWVAPVDYTSIV	346	USER	zzzz105	tombus-like
68	YP_009337191.1 hypothetical protein 3 [Wenling tombus-like virus 2]	MEIVPRGRRAPPLGTVQAALRGLNLARQAYNWMNPAPQQPQNPPGTGRRSRRRGGRGRGVSTPVQPIPMPIYPAFPRGRGRGRGRGRVLTTNPGRSVTITQSEVWGDVVKGPNVFTFQPSAIGMPQLKHLAAGYTRYKVIRVTLEYEPAVGRQRDGVIHWGIRPGVVAKATATPEVCKAAYPRRSHPVYVRTTMTIGHDLIMMQPWLGTGETAFTLVANSPGDTTQPGFFECTYHVVLDLPKPP	244	USER	zzzz106	tombus-like
69	YP_009337116.1 hypothetical protein 3 [Wenling tombus-like virus 4]	MSKNKKPNGSRSAQKKRSQQSQRQASRPRQTGKVTLNQRVTPLQQSNANYRPMNNKVCTLKGSDLLSTVSVVPSPTDVDSMIRKTLAISPSAYPGTRLTQLADMWERYRFRKFHIRYVPSVPNTLSCQMLLYQDTDPQDDPKDIGTTDALLRQATAQTGSQQWNFNSAKSFDLASRADKELYYTGEQKENRRFNLQGIAYLIQVSDALDFNGAPIKDSMTCGSLYVDWEIELQTPQMNPSATTRSAGSVREQHVNVTIDNVDTLTVVARDTGYVAPTRTVIPKGITPDKNTMLTTVHINGQERAANYFRKVGGDGRAIYGLNSGVDTYVEKGDVITFARGAMEAGITVTWTISYGGKLQSGPGYLVAPDPFFWVGTYEVYEGDAPTDLIAQGDGCITVV…	471	USER	zzzz107	tombus-like
70	YP_009337043.1 hypothetical protein 3 [Hubei tombus-like virus 1]	MAKTKNQSKSGQRKSQGNRKNVVVRAPTSQSARRTTQNSGARQTILLFDVRKGPISCDLLPANLPWLQGVAPSFQRWRLNNIKVWYEPRVSTATNGTVALTFQRDFADGIPQTYSSLTLSGGSVRSAVWDKTNLSIPSGPLKEYCSLSNFNALSPTDKNDRALGKVIAWGDLDNDIVAGHVYMSYTPELVGPVDPATQASGASTTLPGQ	209	USER	zzzz108	tombus-like
71	YP_009336968.1 hypothetical protein 3 [Hubei tombus-like virus 2]	MPPKNNQVSKRLAARKAPRPKTSSSGNRLVTAPQSRAVRATVPSGDRKQICVMTIKRPAGLTEWAQEYTLHPDNIPWLEGIAPSYQRWGLKGLKVWYEPRATALTPGTVSMAILSDFKDGTPKSLQSLTSVKGAVRGAPWDKFTLSCPKFRTYEYVSDVASLSGEDLNNRALGKIVVCADMDDSFTVGSIVGRIFIEYSDVLLDSIDPTLQRKSAATSPGT	221	USER	zzzz109	tombus-like
75	YP_009336785.1 hypothetical protein 3 [Beihai tombus-like virus 13]	MSTTTTTITRKTTPKAATPKKKKQPMQPNTMFVVKEAPISKSVRVKKANPSITTTSNGSSITIRHTEYIADISSTGASFGITRYSINPGLNANFPWLSNVANNYESYRFNRLQFIYKPICPTTTQGKVILGVDYDASDSTPNSKLILNSFESSVSCSPWDSVTHTSTTKNLHKFGTQRYVRPGTQPTGTDIKSYDIGNLYVGTSNTPSAATTLGELYVSYEIQLFTPQLVVPLTIASNENTQSSSFAQQIGTITVSQAGAISVAAEYYNQLMWYVYQTQIIGGNTIVDIIVNPNLTKPIRFDAFGALGSTLGRASDYPATATFGLDYLTTGLNIFSPNTSNFAASWVTRPSSNIIGANTSKVSMYRLSLTPNQTFRLNSFALEGFPPLNATTLPGIAGP…	454	USER	zzzz113	tombus-like
76	YP_009336758.1 hypothetical protein [Beihai tombus-like virus 14]	QEYIEEVDKLRGVNSLFGAIRSGWRAGEVENRLAASKGIHIDHRAHHAVFSAVSYLKLDYGVALHRKYNEWVRSRRPDVFRSPPIECNKKKLQNTKKPKKRMTVKKGGKGSAALRKLAKVAKQVAGAAIEAGKHKAMEGLVSVLSGVGDYTSAGAVIGGVTPTFQGNNGEMVLTFSEYLGPIYSSTVFTTRRLYLNVGDANTFPFASSIALNFTLADILECVFMYKSLSATALNSTNTALGSVMMAVQYDADEAPFGAKLQMMNHYFATESVPSRDMIMAVECKNSFEPLHARYVSPGPDGSDPRFSNLGVLTIATQDSQAASNIGDLWVSYKIKFMLPKLSIGPRISGIYHRWRGDGTTGFSTTNFPGEACLHGGNVDVINAANGITFPYLPAGRYYM…	562	USER	zzzz114	tombus-like
78	YP_009336697.1 hypothetical protein 4 [Hubei tombus-like virus 18]	MQVNRYLGRGRGWRDWVVPGLQVGGYLANSAIRSYLGRPQTIVYQQPDPLASQMANMSIQPAQQSRARGGRRRGRGGRGRGGRGRGRGALPLIAPPGSGAIVAEDTEIIVVKTADKPAVVALVFNPAVTETPRLLRYEEMFERYRVVYFRINYKGACSANQRGNIQFAITPEAKSANVTVDKIAQLKPYRSVACWQTGSIKVDQRVGETRYLECGGSQPAFTFYYVASGEEGQVVGNFHVSYKIQFAYPKVFT	253	USER	zzzz116	tombus-like
79	YP_009336686.1 hypothetical protein 3 [Hubei tombus-like virus 31]	MTKKSKVKFTRNKKKAATTAATKTENRSLLQKLGALTLRGAGAGIGYAMGNPAGGYSAGAGISRYLGFGDYTVSQNSLVDKSSNSVPMMHSVGTSVTVRHKEYLGEISTSPNSKAFKSTAYPINPGVPQTFPWLSGIASAYTEYDFKGLVFHFQTTSGSYSSSGDVALGSVMMATKYRSTDPPFTNKLAMLNEFFSTSCKVSESVAHAVECAPNQTVMGSRYIRSSPADLVGDEKFYDMGEFNVATVGITGGNLIVGELWVTYEVVLRKPRLTPFSSVYTAHYIGNTCNATFPLGQTGLTKQYDSIGLTISQTNRQITFPSTIFGRFMIMCVYDNSTNVVTNGCTFLQGASSVDIFRGVGSINCGSTAGTSDNVFAQFVDIQNNGQLCTVQVNNFTTYI…	416	USER	zzzz117	tombus-like
80	YP_009336660.1 hypothetical protein 3 [Hubei tombus-like virus 17]	MMNQYRGRGRGTNFAMNLAAAAGGTAARVAMDRLGQWWTQPTTPPTPQPNPYQMGQLVAALPGRGRPRRGRGRGRGRGRRPQVARSGGQPSSGVQTRSGDLFVARGTEVLGPVTGELQVLEFNPSCDGLPRLAAVEKMYHRYRIKYVNIAFKSGSGTATAGNVAFGVCVGPKVANVKTQSDIMKLRPFSYVPAWKNSSITVGSDIDIGRFMISGSKSEDGVAFTLYIFASAAQLGVIQISYEVEFSHPTPF	251	USER	zzzz118	tombus-like
82	YP_009336607.1 hypothetical protein 3 [Beihai tombus-like virus 16]	MTLQFHLLLKIHNFLICNMKLKKKQQQRPKKAPKKKTTSKPSRQLNDGLKVRYKECWGKVESGFNSYKFLPGSSGLKHLDSLAAIYESYKILSTVRVSFASSTSATTSGEIVMGVDYDARDEISDFHGVCALQPKHVGPVRNAGNLSVPHTRAMHKKWLFTNSSAAPGEAAFAIHVYNGAAESAGTMWVEYDLHFISPTTKASLVSVFESFEVPASSGGGVANRPIYSSIRMLGNTAYNEKIAANTVLWVVSEYDVQINTIFWTILESLTRYIEGRPYKVKAVKAIKETQDVPATCSGSGNFWAIATSAYAAYTALIACWSVHFDLPKKDAPAPTPIVSPTTLKEPFSNPSPTREDINAQAKLQSYPKKKREMTRAEAEEAIRKSVRDADAARWNSIVE…	455	USER	zzzz120	tombus-like
83	YP_009336592.1 hypothetical protein 3 [Hubei tombus-like virus 7]	MPMGGLWSATPVLPSVRTPWRWETLLNCTSSGFTASVLLGCHSTGTCRCFVLCIPACESVGSRVGLASPIRLGTPVLCNSRYARQALLLSCLPDLLLTNAAYHLPRRSISAPHCRPFWRPSSFVLTLTVSLMQTSAQSSRFWPDHRGMPRNAKTANPPASKGGQSGRQTTPSSRPRGGTAQKVRGKGEYLLPGTFAHVGRKLGEKAGGWLGGGAGALLSTVTGMGDYQMNNIMHADRALTSAHPKSYEFTNTELVQVVASTGEAFQSYQYANNPGLGNFPWLSAIAQRFNKYRFKQLVYHFESTSSEYAAGAGLGTVAIATNYDAVDREFASMVEMEATENAVSGKPSVDKLHGVECATAENALKWWYVRSGPPPASTDLRMYDMSETTLATEGLFASP…	597	USER	zzzz121	tombus-like
84	YP_009336490.1 hypothetical protein 3 [Hubei tombus-like virus 4]	MYSLLAVGGIQYTTEMANKSKKQNKKSIQHLYRGVKDNLVTDARAASLSASVPGANATVTYCLAPLGFGGQKTADGLVSLVEFPHLPWLYQTSKNFELYRITNAKVCFVANSATTATGNFSVMSSPDYSDGANSSFATNPTGYPMSGLANRDVKVPLRIDPSWKKVSYVTMQLYGAGTNAINYAINTVNDLCFGSFTVSMNSSTTVGLIYIEYDVEFKNPINNLMNL	227	USER	zzzz122	tombus-like
85	YP_009336499.1 hypothetical protein 3 [Beihai tombus-like virus 19]	MAGGTKKRTGKRSKPSKPAASAAAQALARALQKQSRPKPRPARKAEKISGPGMAKTSRLSGSDFLGELHWDGTDTVAKRILLSPHLKPTMWQGTRLAQLATNWQKYRFTRCTLQFNTSLPSVVQASMLVYYSPDSSDDYSAVKTTADMLQVFASGYGAKRFAATRDFSMALPVKVPGNQWFFTTTTPTDSAALDRWISQGRVWIVLAGLPMGASGQLGATTIGTVTMNWDVEFSMPDREISTLPAIPPTPKPGPDLVFHLRLGMLTSGNFTASRGIDVSVWGAYEHNDAGGSFNGWGWDQCQVQTIYNGATEDESVDYNAFNWWIDHQSQAYLDGAAQHGDLADKCAIRIVVGYQQNQPSDAGKLVLSAVHCFVLSQISGTWRWDSSSSGAVRDLEYTT…	421	USER	zzzz123	tombus-like
86	YP_009337263.1 hypothetical protein 3 [Wenling tombus-like virus 5]	MPGAKPKPQRVTRTPRRNAQQRSVTQQLQSTRQVVNLVASNANHRPVDNSTHRLNGSDYLGEVTTATPLTAKNTVRLSMQLSPTGFKGTRVSALGELYEKYRYRRAVVRYVPALPATVGGQLLAYVDQDPKDDPREVQDLKALRAMASSSSGAQAWNLPLAKSITMPGTNENKWYYTGHQEENPRLSVQGVLHLLQMTDAVGTDGQPLAANSVAGTLYLDWVLEFKTPQMNPELVAAAKGYVPDVPIGPPGGGKHVTLDTRKLGDQASSWIPIPSEDGFITVRNIVGCQPNDKLMEHKGNGFWIGVYWSETGSYSDDPLANPIWRVKYINHPLSGDMWTSWFYLADDDSSMSPFIPPANAKYVTLIESTDFPSGSEVPVDPVDTPLYTGCRVDIMWTHV…	409	USER	zzzz124	tombus-like
87	YP_009333254.1 hypothetical protein 3 [Hubei tombus-like virus 16]	MAGQLYPYGQPRPRINPWINLAAAAGGAAARQLVNYGANQFNAYMRGPPPPPRGGRRGRGRRSFNMQPMLAALPPPPPRARRGGRRRRTARGSNAGGSPTQIFRGTEYLAEPTTTLATLQFNCASTTHPRLSNTAKCYERYRVRSVVLTYNSTSGTATTGGVTLGIHPGPTNSNVKKAEDILKLDPSRTTPAWKNSTIRLGQNIDAQRWMHVGKTTEEGVAFTCYYIKSGDATGQIKITYDIEFAYPVPF	250	USER	zzzz125	tombus-like
88	ASM94001.1 putative capsid [Caledonia beadlet anemone tombus-like virus 1]	MSNRSRNGGRSRIPAPVNGGANRSKRNYTPTVRANGQARTPLLPVGVNNMATMPKASQDYVVRGEEVAAIINVPAGSTPGQIIYNQRITPLTVRRLGILSGAWQRIDWKQASLHLVALNGSLVQSGYTMGWVEDPELSIPVNSSDIIPFLTALRSTTVRQAWVESESGVQVATQDKPEMYTQPGSDVRRYSPGRLVVAVAGDVATAATFQLMLRYNVRLYVPLALTASANPETDGYTAITPTAPNATLSTSSITYPGIGSNVRPDSVVVTTAPIVGIVGATTNPAPPSSWRLFPTGTSLQVGTLAAGSRATFQTGGVNYGFSFIDLVGGQFRAFNPEPPTGTVTSYSVYTYTTS	354	USER	zzzz126	tombus-like
91	YP_009336645.1 hypothetical protein 3 [Hubei tombus-like virus 22]	MRGTYHLTIIGCLCSMPRRNSTRPTNGAGYAPVSLGTGIRANSRTPPMVMEGTDRLGVVNWEGALPTGSVLFNLMITAGIFKSLRDAAKTRQYIQWHHLSFKLACGTNTAKDGSYVAAFVADPEDELNEDPELAVEEVAGAPGMIQDSIWRTRTVEIWRGGRNNTGAAIVDPTKFGHYTSTQGEPRFFSPGYLRVLVDGAVGQAGTMVLYCSYKVTLHVQARQTDSEEVEVPRYRTTVNAFVKSGNNRLEFNSSNYLNWARIFPGYEKPEEDVWFKTDAPLLMCSGKDATSLTRYYIYSPYVCYGHEEDTFNAYPLPGMKTFIDGSVPAAAKLGALEPVITPSSSSIFYQAIPAGSEWEAVDVSDEEETRSKVLGSIRTLPSGGCTNVPPKSKLVLKKIK	400	USER	zzzz129	tombus-like
92	YP_009342052.1 hypothetical protein 3 [Wenzhou tombus-like virus 11]	MVMNKATKRGPKQAVKPRKQRVKQRRRGGTTDAPAIVNTGATVRSQAKKTMRMTGSDRLAGLTFKASTSPGTILYERFIDAQMFPSLSERARTFQRIKYTKLVFKLVSESGTNVTGGIAAAFFKDAYSDVVDGDQGLTNLMTQAGAKATKAWQELVISTNSPEHFYVTPGSDLRLFSPGKFVVMTSGPVDKDSPLSLYCDWTVELSKPGRNAPQKQVQQPVVTCSYILSGVNSQDKLQGRNWDPSTDTESTPQNPEDMFRCLGNVENTDFTSPKFYRLPHPMSIDQTTDQDDHYVLVVRFLQLVLEEGKLIGRLCHLPFSRANEYKWATAVDIVLMQGDILEPINPLEFAGNGLGEFFVSARSSTFAPGRSYISKSISRMRSTQSGATSTGLEAIFKKF…	402	USER	zzzz130	tombus-like
93	YP_009337398.1 hypothetical protein 3 [Sanxia tombus-like virus 9]	MPQKNNTNKKVQQKRGNGKPRTSTRKGKSTPVVTPMHNPSAKPTNAFHSAGSDVVFFTDDVKTQLGSGYVLADILVLPDTIPNLGKQARTWDKWQPKGMTIQVNPGANTLTKGCYTVAFIQDPDDKVPTQDKTAALSFLQGRPGTRTEKWSQSTTLKVKMGRKNLYTSLATENRLSAAGRLVVISEVDPSESFSCKVTASWDVMFTNPSVQDNPGSDATRASVVDDGVVVWTVGGQAAVKGSPLTGESFRPALPTGSVVLLNRTVVGTDGVGSVTGSALKVTDSGVDVGQWLSSWSDSPNPSAEVALANPGEVFTIVTDLVPSFLARMLATRGQPVLSKSRCGTLRMWRDGLPL	354	USER	zzzz131	tombus-like
94	YP_009337079.1 hypothetical protein 3 [Hubei tombus-like virus 15]	MTRSRSTRGNSRKSAPARTSDRAQNRNNMQSNNQARTPLLPVGVNNKATMPWNSSEYHVQGEEVISVLNVASGSTAGQTVFNALITPQSARRLGILSNCWQRIDWKTCSLNLVALNGSTVTSGYTMGWVEDPEAPVPDTASELISYLTALRATTVRQNWVQSEAGCQVNTPDKPEMYTQLGSDVRRYSPGRLVIVVAGDVSSACTFQLMLRYRVRLYVPFAGVNAVDPGVPGLRGTWPTATNVSVSTTTLTYPGLGTGFVPGTTRTCTTPLAVMEAAAPSPSVPVRIFPRGTRVTLNPLGTTGGSVSVGIEGATYWVAIGQITSGQFRAFTPLEIPVTGLTNATTLVWT	349	USER	zzzz132	tombus-like
95	YP_009336979.1 hypothetical protein 3 [Hubei tombus-like virus 21]	MPQRQATTVRKRNKRIVSAPRRSTRGAPVNTPATVTNTSNGIYKTGTDQIQVVTIPAGTPSGTVVFAQSFNVGLTQTLRNVGRSFSNWKLKHAVWDVVSKTNTMVGGGYVMATSPDPMYAVPGGPEAIAQVLALEGATSVKAWQSKAIRAKSLSQLKYTIVGNDPRLYEDHVFVLLVDSPPTEEISLSVTLKWGVHFSHPAIYADATGNVHPYTVMWPIVANNISAYPINDGDAELPWSEGLAGFPELHTVPANSYFIFQLPAPVINTVGNTRVLHRYFKLVRTGEGYHSFTSYAGQPTSTWHQISEDSVFESVAAPGDIWRLLSTNILGFRVHTRLDCVRQPSMFSQRLTLEESIRSSKHRIEMLKLSDTT	372	USER	zzzz133	tombus-like
96	YP_009336881.1 hypothetical protein 4 [Hubei tombus-like virus 19]	MQMPKPKSKKTLRRKQPRPRQQRPLAPMNVGARLRTAQSTRKKPEVVTDLLLSVDIPKDTPRGTILLDISLNPTITKRLANLSKAFVKWKMTNCEIQVQTQVPATMGGGLVGGYVPDPSIRLSDGIQVLESLTATNQAKIVKTWESFTVKIPNSKELFVVRGDDSRLSDAGRFYLVVDGPPTDNSSIRVQIRWSVQLLVPFAQDERNILDSLTVTCSALGIQGEGVLEGSRNCTVHNWTPQHGFAPPFDKTPDLDLSHGLHGLPNFSSAGPNIRYYRLDQPAIAHPAALFLAVFNQRMLNASLPDSWRGVFLDMPNYPEPDISVAPSIMLVQHSTLTPVLQEEYLGNQEGSFLVTVHRFLSATRQLQCSKEYRMAQPNPLLTRSLPQENVAMVLSRKLA…	405	USER	zzzz134	tombus-like
97	YP_009333295.1 hypothetical protein 4 [Sanxia tombus-like virus 7]	MTARCVLAMPRRRGTATNGAGYAPVSLGTGVRANRRTPPMQLEGTDRIGVINWDGALDTGHVLFDLLVEPGIFKSLRDVAKARQYIQWHALEFKFSCGTNTAKDGSYVAAFIADPDDKNPDDPTLAVEEVAGAPGMVQDSIWRTRTVSVGRGRGNSTQNAIVDPTKYGHYTSTAGEPRFYSPGSIRALVDGRVGQAGTMVLYCTYRCTLHVQARQDDAQLAPAPVIRNVFPWVWPDDTDYAITDPGPNGVVIRWDDSFPEYERPTTDTVFQVPVPVVCSAKGTNAGGRVICPYILYQPSSDQFYMTDDLDGAAVLQATSPSAASVFQIMPAGMTFTVVYTEGEVTRGVRELPGGGLTNRPPAPRGIRRKAY	371	USER	zzzz135	tombus-like
98	AQU11804.1 capsid protein [Cruciviridae sp.]	MPVSRVSHRRGSQSHSKKKVAVASNFISSSGPARAASRFYYGDRNTTSAGRKMRSYGGKIGEYVLPAMGIPKALANPIGHGIGAAFSRITGNGAYVTHNSLMKNGYAADQASFGAGSIRIRHREYIQDITGSTAFNVSAAYEINPGLQGTFPFLSLIASNFETYKMHGLIFEYRSSSGDVVTGANSALGQVVMAVQYNSLNAQFSSKQQMEAYEGAVSTKPSCNMICGVECAKNKLPLDELYIRTGPLSSFQDEKFYDMGDFNLATQGMQGAYDVGELWVSYDVTLHYPKLNTGSLINSEHWASNTASGAGSIIPANLFVGNSLYSYSGTNDNMILLGQTGNVITFATTCPSGNYCIYYNLVGTSVTQAAFTITLSAGVTYLTVLNNDTSASITTGNKI…	448	USER	zzzz136	cruciviridae
99	AQU11788.1 capsid protein [Cruciviridae sp.]	MPAGKKPTKSSRKTYRSGSKGARRAAPVRRYTPRISSSYIASKKSRAGVRAIGKSGYGGKYATKYGGIAGGALGTGIGAMFGNPLLGGALGAGIGNVAGSLFHSITGLGEYKVAKNTLMMDPPPVVNPVGNGGTVVKHREYLGDIISSPTANTFQLQSFALNPAQDGTFPWLSQIAANYEQWCPEGIIFEFRSMSADALNSVNTALGTVIMATSYNATSPVFASKSEMENYEYGSSCKPSCSMFHPIECARQETVLSDLYTRSAPLALGQDLRFYDLGLFQIATAGFQGTSVNCGELWITYEVSLLKPKLYSSLGNDSASYSAYWQTGGVIGGSAPTSAAPLQSIGGNAATSYNGIVFTNILASPVQQNSGRQFYFTATTFFFPGWFDQPGSFLIQLVW…	489	USER	zzzz137	cruciviridae
100	AQU11772.1 capsid protein [Cruciviridae sp.]	MELAAPPRKKRARAASTAPKVYAKGPIPYQVSAANRYWRIKKDLPADQYWKKRYWRRRITGKGDYVMNPRKSFGQRWGGYAGSRVGEFLGGAASRLLGLGDYKVKRNVLAGRLPEVTNVSSGGGTVIRFQEYLGDVITSATAGQFLINTYLINAANPNTFPFLSQIAANYEQYEFEGLVFEFRSTSADALNSINTALGSVMMATQYDTFDTPFASKTEMLNYEYSTSAKPSCNTLHMVECEPRQTAQPLYYTLFNSAVPTGADPRLYHLGVFTIGTTGFQGTSVNIGELHVTYQVRLLKPKLYMALGDEIRTYNAVTPIQTGAYNNTNPLGLVPLQGPFAGSLPVNTAGIIVNQTNMTITFPATNALLYWRVEMIWQAANAVAVALPAITTTTNLTLVS…	459	USER	zzzz138	cruciviridae
101	AQU11768.1 capsid protein [Cruciviridae sp.]	MPRVRRYVKRRTYTRKPRSLKGYGAYSYAKRKPAKRRKTTYAPKRRAVFTRGRKPVHGYGSYRTGGSHFGKGSGTSPPSVRNTKCGFIVSHREYIQDLSSSIAFTGIADYINPGNAALFPWLSQVAAQFEQWKPRGINFFNFNLKIGIVFEFKSTSTDLAGAVNGNPALGTVIMATEYNVYNGTFDSKQQMENYEFANSCKPSVNMYHQVECAKKETATMGGVLYVSPVNGVPTQSPQSAITGQAGDLRLYYLGLFQAATVGMQSNGSNIGELWVSYEIEFLKPKIVVGAPNNGAAGGSMDHFAWSALTTNNIGQVATTGILQTAPFGSGTVVQKPTYYSNLGGIVTATAIANAVPALNGQGVATGALATSNANAYYFNPGISRGLYMIQYNAVYGTPA…	483	USER	zzzz139	cruciviridae
102	AQU11760.1 capsid protein [Cruciviridae sp.]	MVDMEWVGDDSKYEPTSLVVSGQRGLKRSRGRMGTMGMPGVSIPRSGGPRRSFFESFFRAPKVRAGFYKRQAIKNPSKADYWNRRAELVAQGLGAYRKGAICRGRGGFFGDVFSSIKSAIPKGSFQKLGSMVGNKFGGGFGDKIGSYLGGQAARKFGFGAYSSSGGDGGAMVGSGSLPEMVNTAEGTIIRHREYIGDVYTGTNVAGTTGGPSQFNITTFAVNPGLQATFPWGAGVAINYQEWEPRGIIFEFKTTSSDSNNVSSSSINLGSVIMANDYNVLNPVFTNKQEMENTEAAGSCKPSQSMTCELECDPKYNPMGKYFVRNGLVNVSDLRFNDLCNFSIATVNIPTGASGISIAIGELWMTYEIKLLKPIQPSVTGTNLVSSHLAVSGSISSANG…	593	USER	zzzz140	cruciviridae
103	AQU11754.1 capsid protein partial [Cruciviridae sp.]	VGRKRKRVTRSRKRRVVRRRVGGVGRRRRVRRVAVGKTPQAQASSRSSGVLPAITASAGGLFGGPAGALAGELLGQGGNALLKYISGHGDYKITSNSLMGASAIPMDSLPKFTTESVGVRIVHREYLNDIVSGNPGSTFKVQKFALQPAYSFPWLSTVAQQFQQYRINGMVFEFKTTSSDSLNSTNTALGEVIMATQYNVLTPDPVNTGQMYQLEFVTTAKPSESVLHPIECARGETPVVVLDTRNNSLVATGTGDLRLYDLANFYIATAGMQGNSVNLGQLWVSYDVTLFKPWLGASVDVGDHYSIPFNPPTGGVQTITTSYPFGTAPISGSYSSWLSPSSDFGTTLQMIQPGGIALFSIPAYYTGNVLFQVIYTQLPGSAVAMTPVPLITLTGRVTT…	476	USER	zzzz141	cruciviridae
104	AQU11750.1 capsid protein [Cruciviridae sp.]	MPRKASGPAPRRKVTSRSYKPTAASGMVRSYGSLRGHGAYTYAKPGPWGRYGRAIGSSVGGVFGGGIAGPVGRALGSVAGGKLGSYAHYIGKIFGSGDYVTSPNQVKYNVLVNESQIPQFSSNSSKNTVRIRHREFLGDIISSGTAGAFQIQSYSLNPGLASFVPWLSQVCGSTFQQYRNNGVVFEFRSMSGDALTSANTALGSVVIATDYDSADNAFTSKSQMENTEFGVSCKPSSCMIHAIECARSQTTATELYVRAGNNPANTDIRLYDWGKTYVATVGFQGTSVNCGELWVSYDITLFKAIQQPPGYLIPSFHMNLAGTNAATPLLPDTSVNATQPVFDTIGIVSKSNTSIVLPLNIPVNSNWMVLLAVRGASTASVVAPIISSSNGLVTGWGVG…	471	USER	zzzz142	cruciviridae
105	AQU11748.1 capsid protein [Cruciviridae sp.]	MPRVASAGMVARKPYKKAKKVYAKAYPKSGYVARAPRPMSTSKIVKSLGHRAVDFGIDKLSKFFGSVLGSGDYVQPSYSVKKNVLTNLSQQVPEVKSEQNSSSVKFRHREYLGDIISSSVAGNFKIQSFNINPGNRQTFPWLADSVQTNFQKWSPKGIVFEYRTMSADALNSTNTALGTVIMATNYSSVDAAYTSKQQMENTEFSASCKPSQSMLHPIECDPRQLPLQDMYILNGSESGTFDPRFDNLGTFYIATQGMQGTSVNCGELWASYDIDVLTPIQNKPLSNGQAYQVVIDFANVTNSVLLGTSARKEIINNMGVTISGNVLTIPAGQLINRACYTLLYYMIGASTPFVTAPSIIITGGGVAGLGVLQNQTSGSTSAPYTSPATSGLALFIQYF…	438	USER	zzzz143	cruciviridae
106	AQU11745.1 capsid protein [Cruciviridae sp.]	MPSYKFNPLIAAKMKKMFPKKKKAVKKNYIYRTKRSKIYDNIPVENVPALIPSKREALINAMESGGKYVGKFLPYGESYMPYVGKFLGGGISAIAGHGDYKIKHNTLLPSGDAPPQFGTGINAREVRVRHREYITDIFSSTGFNITGFSINPGLLATFPWLSNVAENFECYRLNGMVFHFKSMSSDVIASNTTNNTLGQVIMSTQYNAFNPPFVNKLQMEQYEFTNSSKPSCDFYHYIECARSANPLSELYIRTATLPTGQDPQFYDIGQFFIATNGMQASNINLGELWVTYDITLMKQKLIAGEIGDEILYFHQAAALPATVTTSKYFGSSNGVITPASNLPLILNNTTITFPSYITGGNYLLQYFVAGTGGSPVTPNIALTSGCAPLNIFYNDTQNF…	449	USER	zzzz144	cruciviridae
107	AQU11742.1 capsid protein [Cruciviridae sp.]	MPVRKYTKRFNNFKKSSKRASSSKRSYSKMRRPYSSYKTPYKAIPFGMGNQMLPGEFKANAFTKGMDSLAKAAGIPAVFGHGDYTINMGGKLASGTSPPQFGSSKGSKSVRVQHREYIQDVVSSPTAGAFLIQGFGINPGNPALMPWLSSVASNFEVYRLHGMIFEFKTMSADALSSVQTALGTVIMATSYNSANPTFFSKQQMENYEFAQSAKPSESMCHYVECSKNGIPLGELYTRDNAVPTGQPSQFYDVGTFNIATVGLPGTNVLVGELWVTYDVELFKPKLYIGGATSGGTAFFHASFTAPVGTNLFSGTQTTKYNSFPSGLTLGTTPNGSTSIQFNSPVAPVGSTYIVNIQVNGSGAATTVAPSAVTYANAQGVNIFGNSTQATFGSSQTTTN…	445	USER	zzzz145	cruciviridae
108	AQU11739.1 capsid protein [Cruciviridae sp.]	MSTVAKRTYRRRKPVAKPSVRRAAPRRTYRRRAVRGRGAYEWAPAVLGAVGNALVPGVGGAIGTALGGAISGKGLYKVKHNVLMESNDPPIVVNKSGKHGVTFRHREYLRDILSSGIDVNGGVGTPSSQFNLSALPINPGQVITFPWFASVASNFEEYSIEGMIFEYRSMSGDAITGTNTSLGSVIMAVQYNVTNPLFGSKTEMENYEFASSCRPSSNMICPVECSKFQTPMNELYVRFGNQSANTDLRLYDLGIFEIATVGCQGLSTNLGELWCSYQICCYKPKLFSGLGYSNLFTHLYANDYTNAFPFGVATYSPVLPTPISNYVTYDNIGFYNYNSVNGAPRKPFPAPGRSNIAVDVVTSTIAFAPSGFNIKWKITMIWSSNGAGACVYGLNNLVF…	478	USER	zzzz146	cruciviridae
109	AQU11735.1 capsid protein [Cruciviridae sp.]	MQDAQNMLKKYGESVGTQKYRIKKRQGKFDSPEAYKSKRTAAKASGTYAPNGTGEAIGNAIGGGLGSMFGPLGTKIGSFLGGKLGHLGAAITGFGDYELNSNSIMTGGLNPAQVINTVNKGGIVIRHREYLGDLNATTAFTIQSYPLNPGLPGTFPWLSQVAIAYEQYKWRGILFEFKSMSSDSILSSSTSSALGTVMMATQYNALLPAFTDKRTMDNYEYANSTKPSCDMIHPVECKPDVTPIPQLFVRQGVPATGDLRLYDIGNFYIATQGMQAASGVCGEIWCTYEIEFYKPRFTIDADDIADHWNLQGATNTAPLGALPPVISSGSNIGGTWSGGNTYSFPTNIVDGVYLITWHFSGSSAVTVSYGSTNMSPTLTNCIGTLSYNTGANSVICGPN…	464	USER	zzzz147	cruciviridae
110	AQU11734.1 capsid protein [Cruciviridae sp.]	MSNKRAGTISGSGAYKKNVRKVVVRRRKAPLYRNMQSSASKPMITGRGKYNFSNAGADVGRALGYGLDYILGRGDYEVRANSIMGGVYDPPELHNRSDKTVCMRHREYICDIFASSAFSLQSFEINPGLVTSFPWLSQVAEAFEEYRFTGVVFEYKTLSADYTVASSAALGYVIMATQYNVLNPDFPDKITMENYEYANSGKPSSTFIHPVECKRSLNPVSELFVRTGGVTTGDLRLYDHGNFQIATGGNTGDGVLGELWCTFEIEFYKPKLSGAIGSQLLSDKWHIDAAAPTIPFGTTQSLVPGSNLGTQILFGNTILFPFEIQDGKYLIYYSVNGGAIAGSALPPVPPTTNAFCSFDPILSDGGGGWTQPYQALTDTMTSVYVMGIVVITGASAQVI…	425	USER	zzzz148	cruciviridae
111	AQU11732.1 capsid protein [Cruciviridae sp.]	MSKVVIVKKPRKRTHRPVAPRRAAYTGYGDYKKRTPRRARAPRAAPASSSASIGSTIGGHIGSFLGNGIQQVIKSLTGFGDYEISCNSFMPDKLSGDPPVIMNSPHNAGHIVRHREYIGDVYASTAFALTSYPINPGLIGTFPWLSQSADSYEQYKMRGLVFEFKSMSSDAVLSTASSSALGTVIFSTQYNALDTPFTDKRTMENYEFATSCKPSVSMLHPVECKASQTANVDYYIRNAPASGDQRLYDLGVFSVAVQGMQGAASNQVIGELWATFEVELLKPKLLIGGGMLLTDHFTSVAGSTFNLANPFGTTANNLLLTSGSNIGCVLYPQTLGSIPAGSIEFPSFVVDGFYKVDYYLVCSVATANSPSYTALGQTVNIDVVSSAVNILGNKLVSYE…	458	USER	zzzz149	cruciviridae
112	AQU11730.1 capsid protein [Cruciviridae sp.]	MYTRTTVRRRRAPARRAPARRRATGIRGSGSYSVGNAFRAIAAGARKVRSWLPENGLVPGTGMAMGRALGGYLGPAGAIIGGDLGNKFGKWSGMGDYKLSGAGNLQPSPPSFANTKGAGVRIRHREYIQDVASSILFNNQFAMPINPALYESFPWLSGIASNFTQYKFHGLIYEYKPTSGSAIASTNNALGVVIMATNYNAGDTTFSNKQQMENEEFSSSTMPSECAVHAVECKSSQTSVDKLYTRSAAVPAGQDVRLYDLGLFQLATQGMQVGTGQGGSTSVDVGELWATYDVEFFKPQLDEYEGITNLGTHIQLPATTTTVSAPLGSVAATLIKYDSIGVVITPTTLTMPPGYIGNYLLFYTVVGSATSTLVPPIITGTNTAGLKLFTGETANQLYI…	455	USER	zzzz150	cruciviridae
113	AQU11727.1 capsid protein [Cruciviridae sp.]	MAMIPKAQYMKLSKKAKLRVKAALARTGYGSRVSPAKMFGKLGGKGDYWRLGGKSGAHKVKDSSRGAGSQIGRGIGSWIHKDLGDLGSAAGGWAHSLFKQLTGFGDYKIKKNTIAMGTDPPTFGGVGRGTNVRHREFLGDVYTSSTPGSFSEQSFPINPALPDSFPWLSQTACCFEQYVINGMVYEFKSTSSDALNSTNTALGTVIMATQYNVLLPLFTSKGQMENHEYATSAKPSVNLLHPLECDTSMTPTRCFYTRQGSIATGDLRLYDMGTFQIATTGFQAPSVNIGELWCTYDVTFLKAQIKSNGSQGGPFADHFILPAATISPASPLSIGSVLQPGSNNGCTINAGGTVLTFPQSEFDCSYMLYYAVYGTAATITGIVSQTLGSNVFVKNLLIN…	589	USER	zzzz151	cruciviridae
114	AQU11725.1 capsid protein [Cruciviridae sp.]	MYKRASASVQLARMRKALAAKKRGVGRIKGRGDYVTTGGKNITWPVQDDFSGPVYGPPNRKGATGSYYAGPDQGRTDNLFKGVGARIGGSLLGTPGKFLGAGAHYLFKKLTGFGDYKVRSNTLTSGASPPMFAGKGRGTIIRHREFITDIQGSIAFTIQSYNINAGLPATFPWLAQVAGNYEQYCIRGCVFEFKSTSSDSLNSTNTALGTVIMATEYNSLNPNFTSKAQMENHEFCTAIKPSMSMIHPIECARGETPISCLYTRTGSVPANADQRMYDLGKFQIATVGMQAAAVIGELWVTYDIELLKPQLYNALGSACACDHYQLNVTGISNAAWFGTTLVSPTSGSNLGTSLSNSLSTSGSIIFPLSSTVQYYWITYAQVGTTGTITTAMSTTGGGQ…	563	USER	zzzz152	cruciviridae
115	AQU11723.1 capsid protein [Cruciviridae sp.]	MSSRVYKRRTYVRRAAPSSSRRFANPATTAAMLRNLIQGAGAYKKRVYKRRAPVKPRASKMGLGESMGRSIGAGLGKIFGKVTGLGDYQINRNSLLQHGSSSDQVPFMHSSKDGVRIRHREYIQDVSSSILFTNNTFSLNPGVSATFPWLSAIAQNFEQYRMEGFICEFKSTSADALNSTNTALGTVVIAAEYNTTAPAYVNKQQMENSMWCVSGKPSVDICMPVECSPSLNPLSNLYIRTGAVPSGQDQRLYDLCNIQVATVGSQAAAVIGELWVSYDVILLKPQLFSSAGEDLKSAHYSLVAPAVTTAYFGTSATAVGTDSIGLVLTGTVCTLPIGLSGFFQLTYSANGASTAITSPTFTFANSSLVTGQFNNLTSNSFGSTSGETTVSYSKTLWFK…	435	USER	zzzz153	cruciviridae
116	AQU11713.1 capsid protein [Cruciviridae sp.]	MPSSRYSLAARKRRKVAPRRAPARRIKRRRAPYRSSRGGWMSSIGRGIGHVAGSLAGGVARGIGYNYGIGKSVLPSSVTDIASSAYNYGSRILGMGDYKLARNSLMTSKGQVPFMHSSKDGVRVRHREFLQDVSSSVTFVNTVYDVNPGLSSCFPWLSALAQNFEEYRLEGMVFEFKSTAANLVSGTNNALGTVIMAADYNSAAPNFVNKAQMENAMWSNSTSTIEGMCMPIECAPSLNPLSNMYIRTGAVPSGQDQRMYDLCNLQIATVGSQAAAVIGELWVTYDVVLLKPVLDSGLALASQSSHFSLTAPAVTTAYFGTSRVNLYDSIGILLSGTVLTFPLGSNGTYQIVYAAYGASTSVSAPTHTLVNCTNVADTFDNASLTVLNNSGATDTKYCE…	445	USER	zzzz154	cruciviridae
117	AQU11708.1 capsid protein [Cruciviridae sp.]	MPRRSYVRRKRTSGRPQYGRVRGRGAYSLAGAKKFIQRYVRPYTKGYLGKLGGRVGAYIGRQVQGGRAGGLAGGLAGKKVGDWLGKITGLGDYKLQRNSLVSNGQVPFMHSSRDGVRIRHREFIQDLSGSVAYTNTSFSINPGLTSSFPWLSAISQNFEEYRVEGLVFDFVSTSADALNSTNTALGTVIMAAEYNTAQPSYINKQQMENSMWALSTKPSENACMPVECAPSLNPLSNLYIRVGAVPAGTDQRLFDLCNIQVATVGMQAAAVIGELWMSYDVVLMKPQLDSGLALSAKSAHYKLTAPVVTTAYFGTAQTKTFDSIGLSLSGTVITFPIGSNGVYLMNYLVVGDSTAVTSPTFTFANCSAAPNLYIGSSVAGYSDTSSTVTRYINNTVITI…	434	USER	zzzz155	cruciviridae
118	AQU11706.1 capsid protein [Cruciviridae sp.]	MYPSAYGKGDYKVRSVVASKPRRPWNLGGIGAGLGTIAGAIFGGPGGAALGGSIGSQAGSLLGKITGLGDYKIKYNTLAKNSTKLLSGDSVPAVQNTHTGVRICHREYITDINSSVNFINSQYNINPGLSSTFPWLSGVAQNFQQYKLHGMIFTFVSTSADALNSTNTALGTVIMSTNYNASQAPFLNKSQMENNEFTTSSKPSNNIMHMIECDPKQTIQEGKFYIRTGSLPANQDIKTYDVGLFQLGTVGSQAVATVGELHVSYDIEFMKPIDLSLVGTQNKCAHYFANAGVTTSNYFGTAQVQRFDTIGITLSANTITFNPQFALPGDQFLLYIYWIGTAVSTVSPNFGPSNCSLVYDWGPSQSQSIVSAPNAASMTFVSTAFLISIASSASLTNPA…	426	USER	zzzz156	cruciviridae
119	AQU11701.1 capsid protein [Cruciviridae sp.]	MPRRIRKTRKVFRPRVRGRGAYTLPGPRAVRRRFKGRGGYWSDLWSGVKKAYNYVAPWSREHLKPFERLGNKFGMGDLGSALGKITGLGDYKVKKNTLMTDNQVPVVGNHNNRVLIQHREFIQDVLSTTEFQNLTFRINPGDIDTFPWLSRIAQNFEQYQLHGMLFEYKTTSSDALNTTNTALGTVVASTDYNAAAVPFVNKQQMENAEYATSTKPSCSMLHPIECAPSQSTLTKLYVRSNLGQQIPNPQMYDLGIFQLGTVGMQQAGVVIGELWVTYEVEFYKPQLSVSEENAFVALSPTPVNQWQPFNWGQGNIVGSNPIKLGYGLEILNTMDVTLTCQAEGASGPNQGLGYITVPFQYPNAGFQVTYSYANVTGTTGSTGQWIDYAIVDSNTAPLT…	491	USER	zzzz157	cruciviridae
120	AUF34965.1 putative capsid protein [Idotea virus IWaV278]	MSKKRKTVTGGGSRRSTGVPYWQMKAARQYRDDYMAEYPRGSAASKAMWGDDYKSASKRQRYLRNAMRFKGKGKYSAKNFGRDALRYGGAALGGGIGYMTGGLAGAGAMAQRGYDTGADLSRFVGFGEYKGANQLIAGPEQNMSITVNREHRSGDIVFANTEFVQNVYAGVTSGPSTSKFQTQAFSLNPGLGETFPFLSQIAQNFELFEFEGLMFEYKPTSGEFGTTSSNSLGKVVMCTNYDPEAPEFQNSVQMENYDYANSTKPSRGAIHGVETHPDQRATKLMYVRTGDANKSKLFTDLGTLHLATEGVPFGGDGQQKALIGELWVTYKVRLSRSQLYSSVLGNNVITSYQSGTSDSGVWTGTKQFDSNTWDMSLTNVSQGVFKFTLPEDVDDGSFL…	498	USER	zzzz158	cruciviridae
130	crucian1_2ct28	MPRAAVKPARAPRKRAPAKKPAAYAGRLRGHGDYTYDQPGPWGRIGRSLGEHAGGMIGGQYGLGKAASKIGGKLGSYAHYIGKLFGSGDYVTSSDEIKANTVMNQAQIPSFGHGKNVIKVRHREFLGDVYSSATIGAFSVKEYPINPGIASSLPWLSQVCGSSFQQYRINGMVFEFRSMSADALNSTNTALGSVVMATDYDSKDGSFTSKQQMENTEFGVSCKPSSCMIHGIECARNQTSVSELYIRAFSVPSGADIRLYDMGRFSIATVGMQAASVNVGELWVSYDIDLFKAIDKEPGYLAPVAQFTLVNANINSTSALGLSTTTSSPTVVVDQIGLTLRRTSGTDTVVFPVDMPIGSKFVVNYGISGTSTASVAYQAITLSGGLVALGSDTANPNFA…	457	USER	zzzzz10	this study
131	crucian1_2ct31	MAGGRLAAQPKRRVVKDARAKAPARRAGPAAAKPRKQKSESGNMFRSGGAGLGTILGTALGGPAGGALGGIIGKGAGSVLSKIFGHGDYDISNVGHIKQNALINASQAPAFGSGRVAVNLKHREFLGDVISSATAGQFTIKDYAINPGLVATFPWMSDVVGASFQQYRINGMTFEFRSMSSDALNSTNTALGSVVMCTDYDSKDVPFTSKQQMENTEFGVSCKPSQNMMHAIECQRNMTAVSELYIRAYAVPSGADIRLYDLGRFSVATVGCQGTSVNLGELWVSYDVDVFKAIEQVPYYLCPFAQYAITGATASAPLGTAQAVPAGVTNSADQIGLTFTSANRVTWPSDIQVGTTYKVLLGYIGAAAAAFTAPVVTCGNGFWMNSYDDWVGPAPTAVV…	459	USER	zzzzz11	this study
132	crucian1_2ct32	MPRANAYRQGNNPYYDVDYGPPVKRKPRKKAAPKAVRKAKAPTGARPSTIGKNIRAGGASLGQFLGSGLAGPAGGVAGSMLGKAGGAMISKLFGHGDYSVSNADALKENSIALSNAAQMPQFGTGKVACNFTHREFLGDVISASTASTFKIDSYPINPGLSTTFPWLSGVVGAKFQQYRINGCCFEFRSMSGDSLTASNTALGSVIMSTDYDSADATFSSKQEMENTEYGVSCKPSVNMIHGIECARAQTPVSELYIRAFDVPSGKDIRLYDLGRFSIASTGCQGTNVNLGELWISYSVDVFKAVEQVPGYLIPFSQYALVGTLPASAPLGTSQPQLLTQAANSINLTFSANKISWPIDVQVGSIYHVSLNWDRASSAVTAPVITTGNGMYVNSNTVWY…	463	USER	zzzzz12	this study
133	crucian1_2ct39	MPRVAADGPQRRPMVRAAGSTRRAAAQKAKSGTLRTVSQTVPAKRISPKVYSYSNPGPVGRFGRLAGRALGSYLGGPMGGALGDSLGGMAHYIGKVFGSGDYVTNADRVKQNVLVNDAQIPQFGSGPNTVHIRHREFLGDIISSSTPGAFNVQQFPLNPGQNSTFPWLSNVVGTNFQQYRINGMLFEFRTMSADALNSTNTALGSVVMATDYDSADSAFTNKAQMENTEFGISCKPSCSAVHAIECARSQTAVSELYVRPAAVPANADIRLYDLGQFYIATVGMQAASVNIGELWVTYDITFFKAIQLTPGLSIRSAHYKLALGSVATLPLTPVLPASFDNIPLSFPAGGLSFSFPANIPIGSVWVLMANYQTNAAGEAAATSQSSFTLTNGLTRLNIW…	467	USER	zzzzz13	this study
134	mice_vagnl_1_2ct5	MLCSRTRSKKDRRACRMRRRWSYSKYSTRRFGGRRYSRQRVGPGSKRSAYLKGTSFLCNVYATPSDHLEVKAKGDFDSRFAILQNMLPADPYTLRLNTGLVSFRGDMYRWARADGKGFFVSESLQYLCNVCSGLGVSSAVVNMRPPMNKWTLTSKMVLGADMAELDKKYHNVNLTTYAGGNNIIQWGQYGQMYDRYYVDYIVFEYVPSCSRMTDGQVTLLWNDNPTDPIPSTMGQFLTNTRCITTQVYNRARLVVRPRRWLWTCPQAGNTGVRSLSVRNQSVTAIPFTDRTVDCGWFAVCARSGKPEYFSAGTIRVSYGIRFSKPSINLEFIRPTTEANADGTTVDGLKPARELIQPAMPAVQRAPPANSLFLSSSNVSRFVTERGFIGRAGDDFMDLD…	977	USER	zzzzz14	this study
135	redsnapper1_2ct17	MSYARRPPMRAPPSKCRCPSQSFGARAGDALQRYGTQAVKGWFGMGDYEISTNSLISGQSKSFGSNPVMSFGERSVRIKFKEYVGDVFTHPTVAGEFFQQQYALNPALLDNFPWLAPIAVQYQQWKPLGLLFEFISTSGEITNNQALGKVVMATDYNTTTLSTEFSNVSEMLAEAYAQESVPTSNMVHGIECDPRERTRQIYFTRSGAIPASASLGDFDLGQTTIATVGGPTANCNLGSLWIHYDIEFFKNELFAGVKNHDLVIRDWRATGGFVSSFGTTFSGLSKLYNGTGSYGAGSPRKGVQYEDFYWIPGGSQIQFPRYARVGTAWRIYVYVKGDTDTNSLQGIGFNAVVSGSIDIKHAITQPTTASTGRVSSGMYDFIIKKNTVAQPFVLEVQAG…	424	USER	zzzzz15	this study
136	redsnapper1_2ct110	MSRRVSKKANYTDAQKAAYYKKKLSSSKRTYSSRPKRDYRKRDAPWLQPLLATSGGVVGGLLGGTAGGMSTMGLAAGPAATAGTALGTMAGGALGAAITHFTGLGDYRVSKNAFLQRGAFNPMPPIVNKNKHGGTVFRRSEYIGDVISAPTANTFKLDSYSINPGVENSFLWLSQIAGNYEQYVIEGCYYEYRTMSADALNSTNTALGQVIMATSYNAANPLFTNKQEMENYEGGISVKPSQSCRFFVECARRSNVLDDLYVRTSDPPAGQDIRLYDLGNFQIATNGLQGTNVNCGELWVTYQFCLLKPKMYNGLGSFDTFVSYTKNTDGVITAYGSTNLIPRASEVPIAITGAGTNSNINNMFPGNGQIVFPKIGIPQTYYIVIYWQGAAGALVSIPA…	469	USER	zzzzz16	this study
137	redsnapper1_2ct15	MSNYSGPRNFYQPRKYYRAPARYAPAQKQQIVYVKPAPVKRAYTKPKKAASSGISRMIGGLGGAAIGGYVGGPAGAALGRAVGSKAGDLFSSVTGMGDYTVSYNTVVNPNQTPVFKNRGRSVFISHREYIQDIVTSNAPGSFKIDSFELNPALSGTYPWLATIAQNFEQYRIHGMVFHFKSNSADALNSVNTALGTVILATQYNVLLSVFKNKQEMENYEFGCSTRPSQDVLHPVECDPKVTSFGPVFDVKLGGNDKGDDRLYCPGRFSIATVGQQGTSVNIGELWVTYDIEFFKPRMGDVTSVISHYRADSSVFLGTSPFGFDLALSDSSDFVSARAYNDGVEFNIDFTGKVQITANWNGTSTIGLQAPTSVILTGGVKPLNLLDDDTAYTFGTPPMG…	450	USER	zzzzz17	this study
140	YP_004207809.1 capsid protein [Penaeus vannamei nodavirus]	MKRKPNSNQNNNNNRGNGNGLRRVRGGRVSRRRVVINQSNQSMPVTSNGAPLQALTSYSRPNVNKISRLGPDSDFLTSVVAKASTSIVTPADRILVKQPLSASSFPGTRITGLSSYWERYKWLSAVARYVPAVPNTVACQFVMYIDTDPLDDPSNISDDNQIVRQAVSQAGSNQFNFNTSKTVPLIVRADNQYYYTGVDKQNLRFSLQGILYIIQVTDLINFNGELITQDLTCGSLFLDWLVNFSIPQINPTSLTDVRVDKAVNFIKPEVSGVAEIQTVTGLSPSTSYLLTPAFLEQNFQSEAGIYILSATPVEGEGTISINMDPTVTTVSGFIKVKTDTFGTFDLSVVLTTASKKQTTGFNIIAATS	368	USER	zzzzz20	nodaviridae
141	NP_919038.1 capsid protein [Macrobrachium rosenbergii nodavirus]	MARGKQNSNQIQNNSNANGKRRKRNRRNRNPQTVPNFNPIVAKPTVAPLQTNIRSARSDVNAITVLNGSDFLTTVKVRGSNNLTDSKSRILVKQPISASSFLGTRISGLSQFWERYRWHKAAVRYVPAVPNTLACQLIGYIDTDPLDDPNVILDVDQLLRQATSQVGARQWNFSDTTTIPLIVRRDDQLYYTGQDKENVRFSQQGVFYLLQVTTLLNISGEAITNDLISGSLYLDWVCGFSMPQINPTPVEVSQLTYNADTIGNWVPPTELKQTYTQDITGLKPNSKFIIVPYMDRVSSEVLQKCTITCNEVDAVGSISYFDTSAIKCDGYISFQANSIGEATFTLVTDYQGAVDPKPYQYRIIRAIVGNN	371	USER	zzzzz21	nodaviridae
142	YP_009175042.2 alpha-delta fusion protein [Le Blanc nodavirus]	NKHRTHKSNRRGKPVKQPHSRRSNRNGNTAPVARANPLRMTTSNSIILKGCDRIVTVVDASTLSAGDPLVKLMITPDIAYRLGATAKTFQRIKYKTMRFRVNAQCATTTAGGYVAGFVKDAGDELPTGDRAVPYLMSNTGSFTQPWWKSTVHNVKLPQKMFYTEKPAVGSDAVREYSPGTFYVVVDSKPSQVCPVTVDLEWAVELHDATYREVEAVTTISGISADYSLNVFGIPATSVLAGRILITPKGSNPRPLTIERFRTFFGFAPDLMFCVRLPRPEDVVLTGDNVYQGVKATHFMAYTADGLLDFHLAAFNDVTQSIIPVRPSDWRVYSVDGSSSTPFTSAIYENTTWSSDDKFVPVTISDVPIPGAVFRFLYPSVGYSLPSSNLGWGNVVQLTE…	827	USER	zzzzz22	nodaviridae
145	YP_003288761.1 coat protein [Tiger puffer nervous necrosis virus]	MVRKGDKKLAKQATTKAANPQPRRRVNNRRLGSKGDAPLSKASTITGFGRPTNDVHLSGMSRIAQAVLTAGTGTDGYVVVNEIIVPELLPRLGHAARIFQRYIVETLEFDIQPMCPANTGGGYVAGFLPDPADNDHTFDAIQATRGAVVAKWWESRTVRPQYARTLLWTSTGKEQRLTSPGRLILLCVGSNTDVVNVSVLCRWSVRLSVPSLETPEETFAPITSQGPLYNDSITTATSGFRSILLGSGQLDIAPPGTVYSIDRPLSIDYNLGVGDVDRAVYWHLLKKKGDPNNPAGFLDWGLWDDFNKVFTTGVAYYSDQQPRQILLPVGTVFTKVAPEN	340	USER	zzzzz25	nodaviridae
148	YP_008378655.1 coat protein [Calibrachoa mottle virus]	MDNYKNSPVITTLANKGVPWAIKFKTKTWQALTPNQKKLAREALGMNLTATVIIPKRARGSPAVAKPNRLGPGTAGKTSTCTGSELLLTLPKQTGYTPLTKSWILNPGQYSPFRRASLMSSMYNKYMFTNIKVRWTTTASFESSGRIVLAYNSDSSDPVPTKAGIVEFKTRAENVVTTSFILDIPGDGKYRYCRDSTSNDPKLVDFGRLIVMHYGAAESDSAYLGEVLVDYTVVFSEPIPTGSITQQGEQLVSDGPGYAFVTVQPTTFRLTIYGEGKWLVVWQSSTATPDVNIKGDGAKAHITSSADSKTVIAVVTAELEGAYLESTTLAAVSGLKWYVSRL	342	USER	zzzzz28	tombusviridae
149	NP_945127.1 coat protein [Pelargonium flower break virus]	MDAYKNDPIVRQAVAKGVAWAAKLNTRGWSSLTTQQKKAARSALSVIQSPAVVVPRRTRVRNPVPAGLKSGNGKAGKSSTLTRSEFICNVSSTTGVTPTFQSWIINPREVKSFPQSSVCSVGYNKYRITDFRIRFSTSCSDTMNGKVAIGFTPDSSDPVPVDKSQLYGMQVYADTPAKESVTLKTAADNTIRFLRDSSSDDAKLVDYGRVVLATYGFDSTAPSVIGELFFEYTVVYLDPTYVVALTQHGTLTTSSGPPYATLTTTATSTSMELNTHGKWLVVWVSADEVINSPVISGSGASGSVTVVSDAQTTVVAVVTANLPGAIISNTSTAAPSSLEWYVSRL	345	USER	zzzzz29	tombusviridae
150	NP_619722.1 coat protein [Maize chlorotic mottle virus]	MAASSRSTRGRKQRGRSVEAKSRAIRANPPVPRPNPQRNRPPPAGTTCSMSEILLAVSATTADQILEIPVCAGIDFPAGTSPRYIGAAKWLAAQSQMWNTIVFNSVRITWETFTADTTSGYISMAFLSDYMLSIPTGVEDVARIVPSATIALKNRGPSIVMPQNRTVFRCIQAGQFAALGSAADKQMYSPGRFIVAIPKASATQAVGQIKISYSVSYRGAAILQPALVPGPGLANH	236	USER	zzzzz30	tombusviridae
151	YP_224020.1 coat protein [Olive mild mosaic virus]	MPKRGRVGLAESFQGKTKQQKRAEYEAVKREQLERAFANNSKVANPRSSGLSFRPLVAPIAGSVVYSRPRVPQIRTNQMSTIVVNTELVANITLAAAGAFSFTAQPLIPSFGSWLANIADLYSKWRWIRCSVIYIPKCPTTTQGSVVMAIVYDAQDTVPTTRTQVSQCYQSITFPPYAGYGGASALNSNSSGGESLVSTLDTNRVDKKWYSTIGNAAFTALTSIDKNQFCPATALIAGDGGPVAATAVGDVFMRYEIEFIEPINPTINV	269	USER	zzzzz31	tombusviridae
152	YP_004300267.1 putative coat protein [Trailing lespedeza virus 1]	MNGISQNDPKVVKAAEAGIPWAIKLRSRGWRSLRTNQKLAARAFVGSSAPSVAIVPRVTRLVRGNPQRTRRNPQQPGNAADSTTITKSDFVADVIGNTTEAGTVTSWLINPSNVVAFPSLLNESARWEKYKITKFSIRFSSKCSEYTDGGVVVQFASDSTDAVPTSKYGIMQSQCRADASAHGSVLLNCAVDPKVRFVRDSSADSGKVVDYGRVNLCAYGQKAADPSIIGELFFEYTIVFSEARVNRGVTQYQYLLTDSVDGPSFASVTSTSAELTFTFNLPGKYTFICSFTGTVSGLYAADLTYNWSVDNTTAVAGVVTVTSPGATLSWAIGATVTSLLWQCNIF	346	USER	zzzzz32	tombusviridae
153	YP_459964.1 coat protein [Angelonia flower break virus]	MSNLRNDPRVAKLAAQGSAWAKRLMNNGWGGLRPNQKAAARQALGILPAPVATPVTTTRLVNGNPTNQRRKRNQPGNLRTDTPVTSTEFFADVLLHTGEDANIRSWVINPREVSLFPRLSIQSALYDKYRISSLRVRFASSCSFEVNGKIMLGFIGDSSDEVPVTKIDVHSLTKTAECTAMQNIIFNVGGDNITRFLGDRASDDPKLVNFGRIVLCTYGFDSNAPSIVGELSVEYTITLLNPSPVASLSQRWISGSSKGIGFVEYTHDVATKTYQFDFQTGGRYCLIVATDKGVFGSPLVTGSVQTQSRVVTDGTATLMTVSVDMKAPNGTISWIPPTDQGALTEWIVTRV	351	USER	zzzzz33	tombusviridae
154	YP_008828158.1 coat protein [Yam spherical virus]	MAMIVANNNKAMANIKKAGKGMVLAIGTQMIAANGKRLFWDGVSWVTRKIYNKLAGGVRQNGALVSHPGVLPGGVAAPVAISRTIRGSKPKFIRSKGSVTVSHREYVSQVQGNATGFFRLNHDGANDLYRINPLNSAVTPWLVNIASNFDQYRFTRLQLHYVPFCATTQVGRFAMFFDKDSEDVGPFDRAELANFAHLCETNVWAEGTLNIPVDNVKRFNNDTTVVDPKLIDLGRLGIVTYSTNTNDFIGDVFISYTVELFEAQPTADLMGEIVGSGATVISSRGMNWFTQLPGTSSNTTASFIFKPGTYYVHFICDGALIVNPIVAVVGGGAVLNNKVVFTATEASISATIDISQPSNRVDFNFAGGTFSVWDCFATKVSRSLAITTGT	390	USER	zzzzz34	tombusviridae
156	NP_613255.1 coat protein [Carnation ringspot virus]	MTSRQSRKSKMALVPKQRQNLARTVKTVKIPYATTQIVTTSNPPKKGQIKVSGRQLFMSLITSSSFVVNNGLPTPSLLSLNPSNQYLFPSLAYEAANYDLYRFAKLRLSYVHDTNATVSGRVSLMWDRDSQDVPPNSRVSIPQCTKSVSTAVYESCAIDLPIDDVWRFVRDTDVVDRKLSDYGQIFTAVHSGSTTDEVGDVYLDYTIELKDRQPTASMVQTAYWDVSGVLAKSEGPRYFSPSSDVTFTSTMAAISLQLSGIFNVQVVVTCTTAGTLVVGPNISVIGAMYSQFTTPRYFAQPVLACTGVPNGTPSVSMTGFAGITRITLVITRLPPETRCRNRQFP	345	USER	zzzzz36	tombusviridae
157	YP_009333137.1 coat protein [Bermuda grass latent virus]	MNGSRGRRQQPAPSRNSGGQRNQGSRRKSRRSRSVERAMPVATSYSVGPTGPPGMGSRQGWTSLAHKEVILQVTASASSDTILTIPVIPNLLYPPDSKTYSGRAKFLAGHAPLYSQHKWDMLAFQWTPSCPTTTPGNVVLRFIPNYTTPTPTNMLDTMDSDAYITSPFQGGYYTPRIKRAAIYNTAPQFSSIDDVDKCDYSCGKLVVAVNKQALALTVGTVTMHYKVQFRGPVTPADASAS	241	USER	zzzzz37	tombusviridae
159	YP_009116643.1 coat protein [Pelargonium ringspot virus]	MASNSPIVLAAANRGEVWAVKLKQSGWKTLSKAQKAAARAQGIGAAPLSQTVPKTTRIIQGNPTFSRRSRDAPGNAQKSMTIVKSEFLGEVSADGAIHTYTLDPRNVRTFPHISDLARGFNKYKFGDLKVRYSAKVQESGCGVCIAFTPDSSDPKPKGKFDLYSLGSRAEGAAHRNLLYTVPIDKSQRFLRDCATENSKDVDAGSLFVLVDGQHDGRVGELFLEVTIVLSQPTYNQRATQLLAGTTHRDGPTFVKAVKSANTVSLTFQAAGNYLVSTYSSLLERVGRLALGEAEQSQVDSSTHSSNVVEALVAAPGGSIVYYFKTPDQMSFRAYVCRM	338	USER	zzzzz39	tombusviridae
160	YP_001039887.1 coat protein [Nootka lupine vein clearing virus]	MTNSSAITNHPATTKAAVSGVAWAVKLRSKGWASLTTAQKRAARLATGISDGPVVVVMPKRNKVKNPNNHTIEGQAGKSTNISKAEFISTVTGSTGSSPTFSSWRINPSDVGSFPTISCFANRFNQYQITSMAVRFSPARSFQTNGMISLAFTDDSTDPVPTSRQQMAGYTSMVSSEVSQNLLMKIRGDSKRRYIRDSTNENGKLVDFGRVILSVHGCDSGVGDLGDLYFEYTIRFSDPTFVQRDSQTSAEEEEVGPHFADFRATDTEWTATLVAPGNWVVSVVGSNVPDRMTIRGDGATGEVHEGGDSYSYVAVAVVRAQIQGAVVALNLTGGGKVTKVVVSRM	345	USER	zzzzz40	tombusviridae
162	NP_619753.1 coat protein (p48) [Oat chlorotic stunt virus]	MTLNLRKVPAYLPGKVDGALTNLVHAAVDHVVPGLGKAEKAAAVYNIKQVVKKLGTYTEQGVKKIAKKTLGELGYLNYTPSSHLGMAITGRGTKQINMSRSTNAGGFALGGTTAAPVSISRNINRRSKPSIKMMGDAVVISHSEMLGAINSGTPSSNVTAFRCTGYRANPGMSTIFPWLSATAVNYEKYKFRRLSFTLVPLVSTNYSGRIGVGFDYDSSDLVPGNRQEFYALSNHCENMPWQESTVEIKCDNAYRFTGTHVAADNKLIDLGQVVVMSDSVSNGGTISAALPLFDLIVNYTVELIEPQQALFSSQLYSGSTTFTSGIPLGTGADTTTVVGPTVVNSTTVTNCVVTFKLPAGVFEVSYFIAWSTGTAAVVPTVPTTGAGSKLSNTSTGSNS…	454	USER	zzzzz42	tombusviridae
165	YP_238481.1 coat protein [Pelargonium line pattern virus]	MAAKDNPAVIAAVARREQWAIKLQSKGWGSLSKAQKATARSYGIGNPPTVVVPRTTRLVAGNPTNARRARGEPGNAKMGTTITKQEYMGELHSSSKIETYLLDPKNVRSFPQLSGLAIGYNKYKITDFKVRYSPKCSDSECGLTIAYSSDSSDPPPKNKFNLFSMNHKYETAAHKPLLVTLPVSKETRFLRDKCTDDSKLVDSGAVHVLVDGSHEGRLGELFFELTIVFSEPTFCTHHSQVIKGLKESEGPEYVKVEPDKETVKLIFQAAGAYLISIVASKLERIGQLGASEGDKLVVESTDKSACLCRIEAEQPGSAVVLVYASREAITLRAYINKL	338	USER	zzzzz45	tombusviridae
168	YP_052929.1 putative coat protein [Pelargonium chlorotic ring pattern virus]	MTASDSPITSKFAAQGAQWAIKLQTKGWRNLSKAQKREARSHGIGPSAPPPAIPKVNRVIMGNPNNSRRRGGGDGNAQKSMTITKQEFLGTIFSSDSITTYPIDPRNVKTFPQISALALGYNKYKITSLQLRYSTRVTETEANVIMAFTTDSGDLPPRSKVDMYNIGTKFEVLASKPLVATIPVSKDTKYLRDKCSDDSKLVDCGALHFMVDGRHSGRLGELFLQVTIVLSEPTFSQQSTQILRGTTQTGPTLVEFSQSGKSSTYKFLAVGRYVFSAYGKVLVKARQVGMDKAKQMHTSDDKSSNVIAEVEALEPGASIVLDYVEEEPPSFVCISRM	337	USER	zzzzz48	tombusviridae
169	YP_007501039.1 coat protein [Rosa rugosa leaf distortion virus]	MAAADSPQVIQAASAGAQWAIKLRAKGWRSLTKLQKAQARTHGVGPVTPATIVPKVTRLVNGNPGNVRRRNGEPGNAMKSMTITKQEYLGTISAGGGVKTFILDPRNVRSFPQLSAFCLGYNKYKFTKLAFRYSPRVNDTTAGIICAYTSDSSDEAPRSKYQMYSINPRYEAVASKPLIVSIPPTKEPKFLRDKSSDDAKLVDSGSIHCLIDGDHEGKLGEIFLDLTVVLSEPTFNQCSMQEVTKTRHIKGPGYVQPSFQDGVVTLTFQASGSYLCTYSCAPITSLSQTGMEEAARVTTTSTEESSGFVEVVTEEPLSSVKFQFLNPASSKFHAYVTRM	339	USER	zzzzz49	tombusviridae
171	YP_002333479.1 coat protein [Soybean yellow mottle mosaic virus]	MNGKMLTIAQLAKKEKTEGRRALSKNQRKRLDSADTRPLKEVSSTARVSTRRVPAAISSNVSNGVPNYAVRQNKPVIQHTELWGTLMSNSTESPAYIARTLNPSDPATFNWVQPLSTGYDMYRLINCEIIYTPRCATTTTGSIVLAHDPDASDANPDNVTDLLNMAGAVSGSVFSPLRIKPNIKQLDRYVRDNSTSDPKLVDAGKILVAAYGQQASTTPFALGEVRFSYTLQLLNPQPHSTMVQRLGAAPPPGVGPTYATLRTVNGATTSSNVLTFSTAGAYLITAVDATAGLGTPVTTDFGRFRVQGTSAADSPLLMFGTALKSGATITFNGPVSNVLDVYVVRDSGVSDNSS	354	USER	zzzzz51	tombusviridae
172	NP_758815.2 coat protein [Beet black scorch virus]	MAPKRNKGGKKSRMSDETVRAPAAGGVIQRTPGIPPRIRSTTIGTRVTNTELLAGVNVAAAGAFSVVGAGLFPSNLGWLNGIASNYSKFRWLAIKLIYIPIVPTTTAGAMTMALSYDPADATPTSFQQVQQMYNSITAPVWAGFDGATVQLLGERPTTGAVCIDVDVNRFGFTWYRYATLAAITALTANDRNLYIPSVCNVATSGGTAATNVGNLMIKYSIELIEPIPAAIN	232	USER	zzzzz52	tombusviridae
174	NP_862839.1 coat protein [Pea stem necrosis virus]	MGNLPNNSDDFWVNKVRGWWRRASRESYSSCGCCDRCPWKAPCYHSRNSNTVVTHREYVTDVSNSSGVFVNNSSGSSSVFRINPSNTRVFNWLSSIAGSYDSYKFTRVRFTYVPYAGSNTPGRLYLGWDADSQDVIQPDRASLANFSPTSEDSVWTDSYLVIPVDREWRFVDDTNISSRKLVDLGQLVLATWGGVDNTVCGEVYVEYSVELRQPQPPSGFVQVGRVDVPGILTFTGPAFVPASDLSISDTSFSFNLNTAGQYALSIDLQATTSGTLTVAGNCTLLGVVKSQFASGVGIYMCIVRSTGGPNSAASISIGTLTGLSRVQFFLSRGTTSAGIRVTCISSERHLS	351	USER	zzzzz54	tombusviridae
179	YP_009270624.1 coat protein [Gompholobium virus A]	MAIQDSPITKSLAAKGVPWAVKVLGKGWGSLSKSQKVAARMALGTAELALVQTPRQVRLSNGNPTMARRTRDQPGNINKNTTITKKEIIYTVPQSTTTTGAFKSWVIDPRSAEMFPVTCVAAASHQKYKITSLAVRYSPKCSKDTNGGIILCYSKDSTDSEPATKYDMFNMSQVAEIAANAPLILNCRNPEAGWKFLRDSSSDDGKVVDWGRVTLCTYGQSSSDPTLLGEIFVEYTVVFADPQSDPSLLQRGVLTESTGPTFATLSISSTATMWTINSCGSFILIFNMTLPTSTTVVCTGMSSYSVTGGQDTYWCGFAEIACNTPGATISFTTTAASTVCTWYCTKI	347	USER	zzzzz59	tombusviridae
181	YP_004191793.1 p37 [Honeysuckle ringspot virus]	MDTLRNSKKVAQLSASGVLWATKYMTRGWQSLSTNQKRLARAALNLPLTPQVISPVRPRVRNPQPRGAANGLGQAGKTQTITRSEYVADVVKTVGATPTFTTWVINPRSVRSFPGTSVCSLGYEKYRVVNFRVRYSNSLSDDVSGKVSIGFTPDSSDPIPTNKTQLYQMRVSMDTAAKESKTLTIPTDNATRYLRDSSIDDAKVVDFGRVVLATYGFDQSAPEVIGEIHFEYTLVLSDPNFVTTLTQKGTNSEYEGPLYGALERTNSAITLTLQAPGNWLVVWISPEAFNSPTVTGSGASGTVSYQSGGSSMAVTTVIANLPGAQVTAPTTTAVKELQWYVSRL	344	USER	zzzzz61	tombusviridae
182	YP_009032648.1 capsid protein [Carnation mottle virus]	MENKGEKIAMNPTVQTLAQKGDKLAVKLVTRGWASLSTNQKRRAEMLAGYTPAILAFTPRRPRMTNPPPRTSRNSPGQAGKSMTMSKTELLSTVKGTTGVIPSFEDWVVSPRNVAVFPQLSLLATNFNKYRITALTVKYSPACSFETNGRVALGFNDDASDTPPTTKVGFYDLGKHVETAAQTAKDLVIPVDGKTRFIRDSASDDAKLVDFGRIVLSTYGFDKADTVVGELFIQYTIVLSDPTKTAKISQASNDKVSDGPTYVVPSVNGNELQLRVVAAGKWCIIVRGTVEGGFTKPTLIGPGISGDVDYESARPIAVCELVTQMEGQILKITKTSAEQPLQWVVYRM	348	USER	zzzzz62	tombusviridae
184	NP_044388.1 capsid protein [Saguaro cactus virus]	MDAKYGKDPRLAAAAATGAAWAVRFLNRGWASLSPKQKRTARSVLGLQNQPDVIVPVRPRATARVARPTRQGPGLAGKSMTITKCEYLSDIVSHVGTIPLTDHWVVNPGTIKTFPQTSLMASQFNKYRLTALRVRYTSTCSFETSGRVAIAFTNDSNDPLPTTKSQLYNFPVHIEAAATESKVLTIPCDNVYRFVRDDGVSDPKLVDFGRIVVCTYGSSAADPATLGELFIEYTIVFSDPTYTSSLTQQGENQRSIGPRYATVDYESTRWECQLQAAGRWLVCWVSDSAIPSPSIVGVGAKGKVLTSSDSKCGIATVIAQAPYCSIVSTTVSAPSSLTWFVARL	344	USER	zzzzz64	tombusviridae
185	YP_009345604.1 p37 [Clematis chlorotic mottle virus]	MAAKDSPIVKRLAAQGVPWAVKLMEKDWRSLTKSQKQAARAAGVGPVIPTSVSPKVTRLVGGNPGNARRTSGDPGNAMKTMTITKQEFLGSIHADSLIHSLTLDPKNVRTFPHLSALAAGYNKYRFTTVRLRYSPRCSNSDCSFIAGFTTDSSDDTPSNKYQLYGLATRFECQSSKSLLMTPPIDKGLKFLRDCTTDDSKLVDCGKIYYMVDGNHDGILGELFLDFTVVLSEPQYSQVQTQKHEGSSSSGPGLTTFERRERNCVLQFQCAGKFLVSMRTAPIGDVRGLGADAAGMLQTKEGDHVHSLLEVTANEPMASLLFSFSSATVTSRIYVSRM	337	USER	zzzzz65	tombusviridae
186	YP_002117838.1 p26 [Cocksfoot mild mosaic virus]	MNGGNTSNRRGRGKALQRRTNKPPRSRSIERARPLAYGQAVGPSPPRTVAYRRGRQVNTQPEIILRITAKTTDNYTTVPIIPALLFDPSTQPGYGGRAQYMAGLSQLHSQHEWRRLQFTWIPSCATVTPGNVVLKFFPNYRTPLPTVLEDLMDTSSLTFSPYEKHTFSVAGRISGLKYNIGATAFLALSDEDKGDYSIGRLVIGTTSQVSAVSLGIIQMVPDVEFSGPVTTPVAPTPAATAAAPA	245	USER	zzzzz66	tombusviridae
187	NP_041231.1 capsid protein [Melon necrotic spot virus]	MAMVKRINNLPTVKLAKQALPLLANPKLVNKAIDVVPLVVQGGRKLSKAAKRLLGAYGGNISYTEGAKPGAISAPVAISRRVAGMKPRFVRSEGSVKIVHREFIASVLPSSDLTVNNGDVNIGKYRVNPSNNALFTWLQGQAQLYDMYRFTRLRITYIPTTGSTSTGRVSLLWDRDSQDPLPIDRAAISSYAHSADSAPWAENVLVVPCDNTWRYMNDTNAVDRKLVDFGQFLFATYSGAGSTAHGDLYVEYAVEFKDPQPIAGMVCMFDRLVSLSEVGSTIKGVNYIADRDVITTGGNIGVNINIPGTYLVTIVLNATSIGPLTFTGNSKLVGNSLNLTSSGASALTFTLNSTGVPNSSDSSFSVGTVVALTRVRMTITRCSPETAYLA	390	USER	zzzzz67	tombusviridae
189	YP_459922.1 capsid protein [Maize necrotic streak virus]	MTKAKGNDRISRLEVLVERMTAIAPGKTKRKNRKAKPARSSVVTAPVVGSAIIRSRVPKVLNSREGVVVSNTERFSILTTAVGVATFSRIDITPSNVLWLNGVAINYSKYRWISVQMYYIPIVPTTQTGLMAMGFVYDVNDSMTGTTVGMVQQMYGAVSGPIWAGYEGGSGLNTPGTKVPTGALCITLDTGRLDKSYYKYATVAQIGAMSGPEAAMYVPASVVWATDSAAVAQGGAGQIMAKYTVELLEPIPATLND	257	USER	zzzzz69	tombusviridae
190	NP_620526.1 37 kDa capsid protein [Red clover necrotic mosaic virus]	MSSKAPKKSKQRSQPRNRTPNTSVKTVAIPFAKTQIIKTVNPPPKPARGILHTQLVMSVVGSVQMRTNNGKSNQRFRLNPSNPALFPTLAYEAANYDMYRLKKLTLRYVPLVTVQNSGRVAMIWDPDSQDSAPQSRQEISAYSRSVSTAVYEKCSLTIPADNQWRFVADNTTVDRKLVDFGQLLFVTHSGSDGIETGDIFLDCEVEFKGPQPTASIVQKTVIDLGGTLTSFEGPSYLMPPDAFITSSSFGLFVDVAGTYLLTLVVTCSTTGSVTVGGNSTLVGDGRAAYGSSNYIASIVFTSSGVLSTTPSVQFSGSSGVSRVQMNICRCKQGNTFILG	339	USER	zzzzz70	tombusviridae
194	NP_613271.1 capsid [Cowpea mottle virus]	MNGNALTITQLAKKAATQGRASLSKNQKKRLDNANTNPIKSVTRTARISTRKVPAATSTTITNGVPNYAVRQNKPVIQHVELWGTLMSNTTESPAYITRTLNPSDPATFNWVQPLSTGYDMYRLVRCEIIYTPRCAVTTTGSVVLAYDPDASDVNPDNVTDLLNMAGAESGSAYSPLSLVPNIKQIDRYIRDNSTSDPKLVDAGKILVASYGQQTSTAPFALGEIRFAYTLQLIVPQPHSTGVQRLGSAPPVGRACIRTLTSVVNTTSRLADYTLTLKTAGSYMISAVDASSHTKHKANQLWKVSSGRSYWSRATNVDIRSALKSGATITFEAATDSNAEVYVVRDSGINDTIVVPSLHVPVNPKSL	367	USER	zzzzz74	tombusviridae
196	NP_038458.1 capsid protein (p38) [Japanese iris necrotic ring virus]	MALRDEKKVAKLASDGVAWAVKLRSGGGWKTLTTTQKRMARQALGMTQVPIAQTGLRVNRVSQPISVSSRITTGEPRVTNVKRSMTVTFSEMIGVVRSHSSLSTESWVLNPSDIATFPQLSVSAAMYEKYRFTNLAFRFAPSCPTTTGGVVVLVHDPDSSDDLPSDPTMLYEYSGAMRTSAYSPARLIVPTDGAARFVGDNHTSDPKLINFGKLIVANYGQGASDPDMLGEIFIEYTVVLIDRQPSALSTQTLSAESSTGPKLLSRLVEGTKSPYTLTYSFNCGGTFVVSLFYPIGPVSGPVSGSATIIRAYGDAQSQQAQVITVRSPCRGGDFTLGLNSPGDIPTAFVTRA	352	USER	zzzzz76	tombusviridae
197	NP_044744.1 capsid protein [Leek white stripe virus]	MTTSKKSNNNNKSGKSTPKPNKNRRQSRKGQMVLQTIVEPSARGSIYRNVIPPGIFNRDSVNLLSHTELFVGVDSGALGAFVLNGGAIIPSQMTNCNRHAVNFSKYSWKYLEFIYIPFVATTFPGQVVLAPNFDRSDANPTSIASLEQYDYAVSTPIWGGSEGSRRMHSNAACSAVNVIIETDNFDKVVYPYKTLANFTGLPAVDQNIFAPATMFVATQGGNNVAIQLSVGKLYCKYVIEFFNPIDPASNM	251	USER	zzzzz77	tombusviridae
198	NP_044736.1 capsid protein [Galinsoga mosaic virus]	MKTTQPKTKPSGSPLADNNKSYRSNRTNKQKTQDQSAPVAISRQVRGSVPKLAGNRPFTFGHRELIATISNTVLFQVNGGVGGNLYRLNPANSSLFTWLPSISANFDQYRFLKVWLEYAPFCSTTEAGRVGLYFDKDSQDPEPTDRVELANFGHLSETVAWSPIELHLPTDNVVRYMSDSSVSDPKLIDLGQIGFATYGGGSTNAIGDLFIHYTIELQQPQPTYFAVQTLQSGNGSSSAGPTVAAVTASTGTSTTLTFRSPGTYLVNLFQRSLTFTSIVATGGTVINSQATLQSGATAYCSQHNVTVSTPGGALVATGTGFGNYNFQVTRARVQNRCDLL	340	USER	zzzzz78	tombusviridae
199	NP_043911.1 capsid protein [Olive latent virus 1]	MVNFYWDSRIQRWFYESGPQRVRTYIKRISPHQMASLPARKTKRSPPNRGNLQVLPVIAPVAGGVISTEGHVPRITTTNEQTVVRNTEIISAINSAALGAIFGNYVTVIPSNLSWLAGLSDLYSKYRWRKLRFIYLPVCPTSTQGNVSMSLSFDRIDTQPTSITQMQQGYRAITFPPYAGYDGAMALASFGNIPGMVVVDVDCARMDKLWYPNVTLATFLAMAPTSRTDTCGVTLFTASDQGPAAATNFGQVFCQYEIEFIEPVNPTVNL	270	USER	zzzzz79	tombusviridae
213	YP_009342257.1 hypothetical protein [Wenzhou tombus-like virus 16]	DPSPASYAQFQTLYSLTHNEMVDLFNVVQIISKMGLDAFPVRLEGMTWLKGFDVDCGTQSSRLVAMQPLRDETPFVSEPIPWVPLLVAPVLEESLKNCWPWLAIVFGVLERRWANLALHCVTAAVGKFSLPLAVGLHALFNYRVWRNNVDYDRRMQSNYADTVRSLLTEGGLFRPMLDCSPSLNTKDNKLLVSAFSGWNTLCKSFSFKNTKKKGTKPRKNNNPSRKKQKGSLGRSLLTGGLGALGGLLGPAGARVGASLGDWGSTMLGMGDYSVDKNSLDHGQGVPVMHNGHKSMRISHRELLTDITGSTAFASRKFVINPGASQTFPWLSGMSKQFQSYKIHGLAFEFVSTSADALNSVNTALGSVIMATQYNVSLPDFTSKAQMAQYEFSCTTRPSR…	618	USER	zzzzz93	tombus-like
215	YP_009337804.1 hypothetical protein 3 [Hubei tombus-like virus 43]	MPNKQTKRTTKNTKPKQQRRKQPKAQRNVVSTQSAPVSRGHRIKQTAPKITASSKGVNVVHSEARSVAVTSGSSTVDMSWTLLPQGSNFPWLAAMAIQFDKIVWNKVSVTFVPIVGTNLGGDVVMYFDTEADDTRVTDYVSAYSMEGAVSGRVWDMCTLHAKHADLHNQKSYAAKGETSKSLIGSPGMFCMLATLQTAATANTIIGRWVINYDVTFLKPEAVTASSLLSLAGELDPTAMRTYIEAHWTDYYTHAACVSNCPCYTSGDQHEQCYEEALVGGMCLVDKVTDTCSIMCPCNSLKNASLGHKHMIGHSKDLIEMDKTTHDAEPMEVDDLVAINQQPTLADELTSRGWVLNLPVDNNDEMAKFLKAIDIIDKVTSVREGDHHMWNGQTIHASST…	407	USER	zzzzz95	tombus-like
216	YP_009337773.1 hypothetical protein 3 [Hubei tombus-like virus 3]	MAPFMSALGIPFGSRSVYFLMSRLLRNASMRAFLSVTVVTSLPKGVWYSVVLYSCVGTLNSWSWDDLKLTIGSTGLMAQNGGFALNTSVLNKMPRDCTAPRAWAWVQRVPVDVQSSSCGWIQYTQHKMPKKNNKSATSHVFRGCREIFLVPAPRAGVNNTVFSLVSASDGSAAFAQVLCPLGLTSVKLGTSTFTAGSYGNVTGPPLRGLFNRASDFQWYRVTRAKFVFVGAVGSTATGVLTMNAYSDPYDIAIVGSAATMAGPSNRTFDLASSTNKELSIPVPVDSTWKKVSSMLTVPGNSYPFNAVDATSFATLNTIGDLSFGGVGAYLQGAPGSVTVGSFYLDYDIEFKSPIDVQLNL	360	USER	zzzzz96	tombus-like
217	YP_009337738.1 hypothetical protein 3 [Hubei tombus-like virus 6]	MAVKGEKRVIKEGKVFVEQRYNGKRWVSESSWVSGQQPSKEGGLTKSVARKIRGGVSRAGGFVTAPVSGAMITRPTVPRFGMRGDSTIVSNSELVLNLTPIALAFGVQSLPLIAAQPAWLSTIADNYSKWRWISMRLIYSPKCPTTTSGTVAMCLSYDRNDAPPGSRVQLSQTYKAINFPPYAGYDGAAILNTDVTPTSAIYLDVDVTRFDKNWYSTIGTVAFAALTAFDQNQFCPATVHIGSDGGPAVAVPPGDLFFKYVIELIEPINPTMNV	274	USER	zzzzz97	tombus-like
218	YP_009337678.1 hypothetical protein 2 [Beihai tombus-like virus 15]	MYKYQKSKLPQKLAYPSQEHSTSQSKHSNSSKKISPKEHVSTMTSPKRKSTKRPSPKRSKRPSLAPGTLLVKYRELLAPVKQGTTSYKFRPGTSGLAHLDQRARMYEMYRLRGPVRVGYKTASGTTTNGEILIGIDFDATDDRLDYMGTAALSPKTMSPVWRDCQVVVPKDRAMKQKWLCTATRASQTVASDNTAFAIQVHNSGPTGCGSLWVEYYLEFMSPCVNSEDVGIAYITTSGNGGGHGGSVVGNPGLVPGGHSKAFAIPDALMPAFNEACKAFPDVMKTVLVPDGAPGGHSYINLENKGYKDAYVSLPSTHWPSSQQISFWFAAPSVAILVRYLLNKNHSSV	348	USER	zzzzz98	tombus-like
219	YP_009337649.1 hypothetical protein 3 [Sanxia tombus-like virus 2]	MAKTNQNKNKPMKQNGQVARQSASKGFTSMGYSNNNQDPRFSNSSGGTVIKHRELIELVSSQTQFNVAQKRINPADRATFPWLSAVAAKYEKYRFRKLKFQMVPHAPTTASGTLGMYIDYDPSDVPAPNASAFFSSGNAVTSQIWLETSVQAKPQQMQLFNQDSIQMADLEIKWFDYARIFFYMQSPGSNGAHTAWLFVDYEIELFTPTANVEGSKFTPDFTGFAYWTTAQNTAAFTNAPTILRGLEYVQEDGEAKLTVPYSGYYRITTLTANTNSGASVTEIFESPTCRIINGLDGEGNPTTRDQTVIVQLQQGETYVPLRMTTGILDLFADPDNDPSPLGVEVVLLQAS	351	USER	zzzzz99	tombus-like
220	16minnow_6_2ct749	MMMGTQPMVVLGTQASSGGGYRRRSYKRKSKIPAKYKKAYKAVKRLKKRFPTKEYGRMYVKRGEDYTVNRYGQTYAMATPDQRAMRKAEGWYGAGDYSKGGFRRAFRTFGRNLVSRGLSAADSMITKFTGFGDYQGNQLLDGVDSIKGPITVNASSDRTGDVYFSHKEFLRNVSVTFSGAGTSTFQVLKFPINPGLDQTFPFLSQIAQNFSLYEFQGLMFEYRPTSGEYGSSGSNQLGKIIMATNYDPTSPDFSSSIQMENYDYAQSNKPSSHAVHGVETAPQQRATTMMYVRTGQSKKDPIFTDLGNFYIATEGISSSSAGTAVVGELWVTYRIKMSRANLFGALLGNNIAMDVFWGRGSATGWLDQSGNNLPSQPWALSFSPMISPSYAAAKLTNTI…	518	USER	zzzzzz0	this study
221	16minnow_6_2ct940	MARRSKRKRSEPQATLSDLVSEPESVSKPEPLYHTPMSSDFPQGSIGPANWVDPVTYRALKAKFSKKKKTTPKKTTKKKKSSRKGYYRNYGGSLAGMGPIVITGRGGYFTDKLKTGASAAYRALQRGVPAGTFSRLGTAAGGAMFGAPGASVGSFLGQGVSNVLGFGDYAIRKNDLLQVHEGMPVPTFNDLNQGIVVCHREYIADISVASTAFQNRAFALQPGDNTTFPWLSQIAAQFEQYELLGCLIQFRSTSSDFGTTTNLAMGTVIMATEYDVVDANYASKLEMENAQYSMSGKPSHDMIHPIECDPSLVGPYGLKYIRSGPVPSGKDPRLYDHGTFQLATQGITTAAGSVIGELWVTYKIAFYKPQFNLGTDIRTDYYIGTTASAGSPWGIVLPQ…	507	USER	zzzzzz1	this study
222	16minnow_6_2ct1036	MDEKDIPALPRSGYRSRKRPSYKSDTSRLRYVSGKQKWFAKQYRATPYDDPSRVAMRNMIGNDYRSASSGGKMLRNAMQYYGPGDYRSTLSRFIPKGSFGYLGRKLGGMSGIPGLDAVGAYAGNKFANYVGFGDYNNDHGGVGSVNQIAGGHPPISVNASGDLTGDVIMTRTEFVGNVTVSTGAGQTITPFKITPYQINPGLAGTFPWLSQIASNFELYDWEGLMFMYRPTSGEFGASAVSNALGKVVMATKYGVTQFNPFTSTVEAQNYDYANSTKPSMSMVHGVETKNSQQVGGDMLVIRDDAVTNNANIVLYDLGRLYLMTEGIPLAANSTAIIGELWVTYKVRLSRAKLWASIGEAGSYSRVQWTRTPTQFVSAITGSRSSGDFVATVQNDNAET…	526	USER	zzzzzz2	this study
224	18minnow1_2ct1318	MSYRGRYSSKYSSSSYRPRRSYLAGKGAYRVRKPIRYRPKPRYIKGRGAYYVQAGGYLKGHVGPIKGGATVAGGYSNHMDMPTMTGLGAYNISNIKHNVLIKPDLPQVKNAIYAEGGTIIRHKEYLGAVTTSATAGQFKIETYPLNPAQARTFSWLSTIAQNYEEYKPNGLVFEFRSTASDAIASSTNLALGQVMLCTQYDPTDPNFASDVELLNYTWAQSGKVSDNLLHYVECDPKQSPLSHLYTRAGSYVSDSDLRFSDFGTFSIATSGLQGTSVQIGQLWVSYEFIMYKPKIGGLSATNGGWFHAGEASGSVSNINPFGANPMATAVFDAENNLGVTLSDVGNYGRITFPLVNIPTSFQVDIIWRGDSTASVTTPSIVASDAAVHYIQHFDDNQTA…	459	USER	zzzzzz4	this study
225	crucian1_2ct18	MRLNHNHPFFQPPIFLRFQTCVSSQILLMSDCQCEGQSNVGRYFSKVGGQMGDRLDSWGRGQVDTLQKRFKNWTGFGDYTINSNSLINGSGTIETRGRTTIISYREYLGDITTGSVVGAFNPRHYTVNPGNAAVFPWLAPIALQYDQYKPRGIIFEFKSTATDYSTSAGVGSILMATEYDVNDTTFSSKVQMLNSAYSSETKLSDNALHGIECEPKETSRNSFFVRQDGKDVTGDLRDYDLCRFTCATQGGSLPALSVVGSLYVHYEFELFKEQLAGGWYSHTDRCQHMRSTLIPTNVNFSLLGMAVVGDYDANIKMNGANILVFPYRLAGTTWEWSFTIISEGTTLVALKAAVAPTLVGCEIIQTNGRDYDFTSGEPVSVGSLGCSYNVRMAFRLDSD…	438	USER	zzzzzz5	this study
226	crucian1_2ct19	MKINKPLVFTIYSVHFFEMELPEFGEIFEFTHPQGTKRIHEGTRPSGTRRPRKVLRTTQEFIDVPEFQEQITLPTTLEEFPSVFKPLDAMQTEKKSNWKPPTEFVAGLSDAEVRTRYLAKLEGKGTKRAAKKPAKKRAKKYARRYSGYGGKYGGAAGGSIVYPNVIGRGAYQIKGGLNFGHEGDWLRGGLGGYYNSDPVVSGRGAYNIKRNSLWEGQGPPMIENITNGPVVIRHREYIGDMTCPTGAPSPFDIFFQQPINPGNPEMFPWLSQLAPMFQEWEAVGMIFEIKTMSSDYTSNVSMGTIFAAADYNVQATAPANKQQLENMEYSQSCKPSCSILMPIECSPSKTVATHLYIAPNLDYGNGDPQFYDLAQVFLGSQGLPNSGGAVGTIAELWVS…	584	USER	zzzzzz6	this study
227	crucian1_2ct24	MPRAAAAYKPSASRKVAARRVAAPARRAPARASRAAPVRRVAVRRPASRGGSMFSSAGSGLGGLAGGALGGPAGAAIGTILGKLGGGMIGKIFGHGDYTVSNVDAIKKNNLITNGAQIPQFGTGKVAVNFTHREFLGDVISSATPGAFRITDYAINPGIVSTFPWLSQVVGASFQQYRINGMTFEYRSMSADALNSTNTALGSVIMSTDYDSADLTFGSKQEMENTEYGVSCKPSVNMMHGIECARAQTPMSELYIRPFAVPNNKDIRMYDMGRFSIATVGLQAASVNLGELWVSYDIDAFKAIEQVPLYIAPIAQYNLNSVDATHAFGLTQSVKLDNQGTSLDRVGLTFVNSGSYNQVQFPYNIEVNSIWQFTYYLYGASTAVVPYAPVTVSNGFVVI…	467	USER	zzzzzz7	this study
228	crucian1_2ct26	MSIFARVKEEFQNKHPRVDYSIFDIDDAVASSSSSSSSSAVPGVAFPNIINNSNMSKSMGEDDYYQPYALKSYGPRRLKGKRLRSANKFSRLQSFGTHGAARLKRGSEFTLGTFGPTWADATNEQKMARELSGWRGKGLYHGRGFYKGFGGDVGQWIGNKVGLGGLGRALGTAGAKFTGFGDYVGNDAVGGAGVEHTVPSFAPVNDGMGNTVVTYREYMCDIYGPDTAFGIQTFALNPGIEATFPFLSQIACNYEEYEMKQCMFTFKSNIAPIGSSTSGQVGEVIMATNYNAAAPAFRDKSTMLQSALSMSARATESQVHGVECDPTKLSGSVGKYVRNGPVTVDEDLKTYDHGLFQVAVTGIPSEYKNQPIGELWCSYTVHLRKPRKYSALGFAIGRD…	589	USER	zzzzzz8	this study
229	crucian1_2ct27	MPRSAAPKVVYVAAPRKKAPKKKPGIGRLRGHGDYTYDKPGPWGRIGSTTGAMIGSAMGSPYGLGKAGSAIGKKIGSYAHYIGKIFGSGDYVTSSGQVKHNTLVNDSQIPSFGGTKSEIRVRHREFLGDVISSSTIGAFSLQSYPINPGLNRSFPWLSSVCGASFQQYRLNGMVFEYRSMSADALNSTNTALGSVVMATDYDSADASFTNKQQMENTEFGVSCKPSSCMIHGIECARSQTAVSELYVRAFAVPSGKDPRLSDMGNFQIATVGCQAASVNLGELWVSYDVSLIKSIEQVPLFLATAAGYTPVSSSPTVPLGTSQTLASDSIGLTFTANKVQFPYDTSVGTVYQMLLFYNLTSGAVTAPAVTAGNGMTILSSWAPAAGETASRLSVTVYCW…	437	USER	zzzzzz9	this study
72	YP_009336904.1 hypothetical protein 2 [Shahe tombus-like virus 1]	MARRKVMPSPVQGGVRRRRNKQPNVTQTSGTSSVIKYSALGSTVTSDVNGEAWYHRMYIPGSFGGLTQTVGTAIVGYYSTAKFQAGTTLRWEPSVSFSTSGRVYVGFTDNPEMIEAMRVLTGGNAVNAVKGLGDVISFPVWQETDIPFSPRMRRKMFDTNQAAITGVDVLDRTCQTAMFLAIDGMPASTRAGSVWFHDNVAVEGMSSIET	210	USER	zzzz110	tombus-like
89	ASM94018.1 putative capsid [Barns Ness breadcrumb sponge tombus-like virus 3]	MTTQRKKYTTRRPRTTMRRPTYPQKRKAVNKRRPAGNSLVRTLVHGVADPCHGPVTPGIYGSVEGLSARTKSNLTSVGEETTDTCGICIWVPSFHNDGLGGFNLMHMVLPSPSTQLVNSLSSPLGVGSFESASGASIEDPSAGFVKAGICADARTLSACMRLTYTGKVTESAGQIAWIDNYNINDLLTNLPSVNDFFNRATKTERLGLDTYEVLFRPDEATGTDRFRTSGPALATWQQNPDYSDACFDAGVPTGSGTARKTAASATVSTLAPKVIGFAWRGAQPGFVDHLVLEFVKTIEWRPEITAGLTGVIPRSLPVPSTQLMVAALDNADPSWSKRIASGASSLANKAKNSAWQAFKSEGMPVIARLGAQAAYNYLAPGASPMYIEYN	390	USER	zzzz127	tombus-like
90	APG76405.1 capsid protein [Hubei tombus-like virus 28]	MVLLLDSSAFLFRKLICLNTLFKQYCSYSISNLTLRRPVFTPFLLVLFFILVVGPSNSNAIVYDYQELLDFGIDQRDLAILLPVPRNFMFFTYLPKYDTGGCIYTLQTNYILESECVLPRRCGQPFFNKLSSSWYGTEIGICYGVGNDLPYFIDNNSSNLNIDNIYLPDDWFAVFDTSSSKIRNQEFEFDTPDGKCRTTVSSHPIDGLAIVYLYGNGHVHVASYAIVPHVIQYYHISKKLVDIDQREVNGRYCSTRFLTISAVTQFSLGTDYYPFMFDGTLPYPQKYCQSKFKPHKPPLYPMSDNVCWDKSARDTVSCKPNYPATCSPYKWTNSYSIPGSKFLFQIIETIIDYFFEIFNYIFINFFILLKDTIVNLNSTYRLVEFILTYLVFLKYLKSV…	417	USER	zzzz128	tombus-like
121	gi|1147809850|ref|YP_009345106.1| P1 [Amphibola crenata associated bacilladnavirus 1]	MPKKSSRRRRTTATTKKKSSSKKAAKKGPTTKKVVKKVMGASAIALKPLVSPFDRSNMQPKIPDGKVGESVGLKFTMTKEYSNKTLTTMHAMLFPGQSGGLFVSGCQNVNGINREVQAYANAGGFSYTYDNTTKMALLTANEKYHSWRIVSQAAKFELLNPAEEDDGWWEAVRITDMLSLFDYHVEQHSNKTGRLQGVFVPFLGLLNLEDRALTAERTYESGRLKDIHKREFHLRQVKDEVDFTQLCSPIALEGVQETGAGTSGSPFVLANGAGANAGESFGMQNYNAMRNYIDFGYDCIYFRFHCRDPASATRLLTHVVSNQEIQYSSESGESRFQTANTRHAQVDTVMANRSNGGATTSVPSTSRHNPHR	372	USER	zzzz159	bacilladnavirus
122	gi|1147809838|ref|YP_009345096.1| P1 [Avon-Heathcote estuary associated bacilladnavirus]	MFTALEKVVDTLRLRIFCFSACCNEVNASKKKGKKMSANEIKNQLHVMHDPFSDKTSQPKIPDGKANESLGFATQTVQEVGNAEGANTMHILLFPGQNSGILIDETAQADLGSRTYYIPTFFGSNGLDWDDLADATTAANVRGLDNYALWRVVSTGLQLKLLNPVDQDDGWWESVRVTTENTNVDWYLTTGNNSTQPGGNNGTIAPVGLINSLLSQQTLANEQSYSTGLLRDLHRVQFECHGQRDYHDFIQQRNEIRLAGAAISAVDKTTNYEAQFSLGHDDANDVINQFVDRSYDMVYIRLHCRQNTGTTPFLGSRFHLNCVSNQEVIFDHEERESRFHTRSHTIGSNANSVHMQARRADQNAAKMTM	369	USER	zzzz160	bacilladnavirus
123	gi|1147809824|ref|YP_009345085.1| P1 [Amphibola crenata associated bacilladnavirus 2]	MAPKKTPSKGRRRRTTSVQRRPNPTKRKPTKKTKKAGIAGAAAHLLKPLLMPFDRTNMQPKIPDGKVGTSIGQKFTTTREHFNVGAGNIMHALLFPGQSGGLVVIGCQNFNSVPISSPAFNDAGGFSYTHDLASGMSTLAAKENYHSWRVVSQAARFELLNAAEEDDGWWEAVRVTDSMSVFDFRLDQHDNGTGRGNGTILPYYTLANYQFKPITDEMTYESGRLKDLHKREFQLHQVKDEVDFTQLCTPVTIEGGVESGIGIVGSPYVVDWNGTGGANNGERYGMQNYNAIRNYIDTGYDMIYFRFHCRAAATPTRLLTHIVSNQEIQFSSDAGESRFQTLSARVPQAAATLAARANGGKTASVPAQGKDPSRHGG	377	USER	zzzz161	bacilladnavirus
124	gi|1140313542|gb|AQA27297.1| P1 [Avon-Heathcote estuary associated bacilladnavirus]	MFTALEKVVDTLRLRIFCFSACCNEVNASKKKGKKMSANEIKNQLHVMHDPFSDKTSQPKIPDGKANESLGFATQTVQEVGNAEGANTMHILLFPGQNSGILIDETAQADLGSRTYYIPTFFGSNGLDWDDLADATTAANVRGLDNYALWRVVSTGLQLKLLNPVDQDDGWWESVRVTTENTNVDWYLTTGNNSTQPGGNNGTIAPVGLINSLLSQQTLANEQSYSTGLLRDLHRVQFECHGQRDYHDFIQQRNEIRLAGAAISAVDKTTNYEAQFSLGHDDANDVINQFVDRSYDMVYIRLHCRQNTGTTPFLGSRFHLNCVSNQEVIFDHEERESRFHTRSHTIGSNANSVHMQARRADQNAAKMTM	369	USER	zzzz162	bacilladnavirus
125	gi|1140313458|gb|AQA27292.1| P1 [Amphibola crenata associated bacilladnavirus 2]	MAPKKTPSKGRRRRTTSVQRRPNPTKRKPTKKTKKAGIAGAAAHLLKPLLMPFDRTNMQPKIPDGKVGTSIGQKFTTTREHFNVGAGNIMHALLFPGQSGGLVVIGCQNFNSVPISSPAFNDAGGFSYTHDLASGMSTLAAKENYHSWRVVSQAARFELLNAAEEDDGWWEAVRVTDSMSVFDFRLDQHDNGTGRGNGTILPYYTLANYQFKPITDEMTYESGRLKDLHKREFQLHQVKDEVDFTQLCTPVTIEGGVESGIGIVGSPYVVDWNGTGGANNGERYGMQNYNAIRNYIDTGYDMIYFRFHCRAAATPTRLLTHIVSNQEIQFSSDAGESRFQTLSARVPQAAATLAARANGGKTASVPAQGKDPSRHGG	377	USER	zzzz163	bacilladnavirus
126	gi|1140313338|gb|AQA27288.1| P1 [Amphibola crenata associated bacilladnavirus 1]	MPKKSSRRRRTTATTKKKSSSKKAAKKGPTTKKVVKKVMGASAIALKPLVSPFDRSNMQPKIPDGKVGESVGLKFTMTKEYSNKTLTTMHAMLFPGQSGGLFVSGCQNVNGINREVQAYANAGGFSYTYDNTTKMALLTANEKYHSWRIVSQAAKFELLNPAEEDDGWWEAVRITDMLSLFDYHVEQHSNKTGRLQGVFVPFLGLLNLEDRALTAERTYESGRLKDIHKREFHLRQVKDEVDFTQLCSPIALEGVQETGAGTSGSPFVLANGAGANAGESFGMQNYNAMRNYIDFGYDCIYFRFHCRDPASATRLLTHVVSNQEIQYSSESGESRFQTANTRHAQVDTVMANRSNGGATTSVPSTSRHNPHR	372	USER	zzzz164	bacilladnavirus
127	AXH77452.1 capsid protein [Bacilladnavirus sp.]	MNTYIRSLADPFDGTIVQPKLLDGRVSRTAGIRFRTTGDVICNSGTPSYIILFPGFQNNVAWLMSDVEKVPVEYPNHIPLSGGAEASGIDGVRLVSVGLRLSLINSSHENEGYWEAGRFQFKDLFQSVPSANADPAGGPSRNRLIPVAGQLESWGTSLAQNQSFQTGKLRDIHRFQFKLNSTNSEHEFVPSEMLAGTPTNYVDKNWDCVVLKIHGRVDATSPTVLHYDVCSNQEVVYNQNTVAARIMGPNTPISSLPTILLRTNYKYAAIRLT	273	USER	zzzz165	this study
128	AXH78027.1 capsid protein [Bacilladnaviridae sp.]	MARRKATPQRRAPRRAARRPVKRRATAKKQPASSVKKQASGGTAAAHHQVRMHPFSKATQQPKIPDGELTTSLSRRLQAVYQLTNGNGNLGDDYMDVVFAPTLGVPLVASGSTEGVSVRNASANQASYHGFTGQTVGFTLQNTSGSVPQVIPSTGPLTRKYEFHNECGFAKWRIVSQGVRFDLTNTDEENDGWWEACRFNWRRLNSDLCITPLDGSKTDTILGVAPSHQVAMHLRTISLPEQSGYETGLIKDIKKHEFMLHPQSGTHDPVELDLQYNIEEVTGFNVDVNAQQLTLVDGSADSGRIKDTTVDSNLDWMYIRFHPRTNTGAGSANGSSLLTSMIQNIEVAFNPSSDFATFQTINKLDARAKKVTDEINNVSRASKKRGK	387	USER	zzzz166	this study
129	AXH73194.1 capsid protein [Bacilladnaviridae sp.]	MVKRKRTIGGPRRKSTRQTKKRTKWTSRSYTPAPKPKKRKASKPRYAAQHHAYMKSPFSKNASKQPKIPDGAFTTSMGRAFETIAEIQNAVGNETIDIVLFPGFGIGAAIQNTTAAATMDGVQPIALDHSTNWLGSADTSKSVDNESEIARWRLVAQSLQLLLVNSAEENNGWYETCRFTPAQFMADYVVRNTDGNNIENLTNAALCPHNKFFTDHITDMVMTNQRGYCLGKLTDLGKKEFLLHNISPKDDGIINMQETYNNSFANGTYDAINKLHSWTPDHDAQIMMRLLDQGTSLNSHDMILIRLHCRSNTGTSPNTGSKFVLRLGAGHEVEYTPKSPLHTFMTESPTVTGTNKLKDDANNKPDAVTSAPFTLGGG	378	USER	zzzz167	this study
138	NP_077732.1 capsid protein precursor alpha [Nodamura virus]	MVSKAARRRRAAPRQQQRQQSNRASNQPRRRRARRTRRQQRMAATNNMLKMSAPGLDFLKCAFASPDFSTDPGKGIPDKFQGLVLPKKHCLTQSITFTPGKQTMLLVAPIPGIACLKAEANVGASFSGVPLASVEFPGFDQLFGTSATDTAANVTAFRYASMAAGVYPTSNLMQFAGSIQVYKIPLKQVLNSYSQTVATVPPTNLAQNTIAIDGLEALDALPNNNYSGSFIEGCYSQSVCNEPEFEFHPIMEGYASVPPANVTNAQASMFTNLTFSGAAYTGLGDMDAIAILVTTPTGAVNTAVLKVWACVEYRPNPNSTLYEFARESPANDEYALAAYRKIARDIPIAVACKDNATFWERVRSILKSGLNFASTIPGPVGVAATGIKGIIEAIGSLWV	399	USER	zzzzz18	nodaviridae
139	NP_620111.1 capsid protein precursor alpha [Pariacoto virus]	MVSRTKNRRNKARKVVSRSTALVPMAPASQRTGPAPRKPRKRNQALVRNPRLTDAGLAFLKCAFAAPDFSVDPGKGIPDNFHGRTLAIKDCNTTSVVFTPNTDTYIVVAPVPGFAYFRAEVAVGAQPTTFVGVPYPTYATNFGAGSQNGLPAVNNYSKFRYASMACGLYPTSNMMQFSGSVQVWRVDLNLSEAVNPAVTAITPAPGVFANFVDKRINGLRGIRPLAPRDNYSGNFIDGAYTFAFDKSTDFEWCDFVRSLEFSESNVLGAATAMKLLAPGGGTDTTLTGLGNVNTLVYKISTPTGAVNTAILRTWNCIELQPYTDSALFQFSGVSPPFDPLALECYHNLKMRFPVAVSSRENSKFWEGVLRVLNQISGTLSVIPGPVGTISAGVHQLTGM…	401	USER	zzzzz19	nodaviridae
146	NP_049329.1 coat protein precursor [Black beetle virus]	MVRNNNRRRQRTQRIVTTTTQTAPVPQQNVPKQPRRRRNRARRNRRQGRAMNMGALTRLSQPGLAFLKCAFAPPDFNTDPGKGIPDRFEGKVVTRKDVLNQSINFTANRDTFILIAPTPGVAYWVADVPAGTFPISTTTFNAVNFPGFNSMFGNAAASRSDQVSSFRYASMNVGIYPTSNLMQFAGSITVWKCPVKLSNVQFPVATTPATSALVHTLVGLDGVLAVGPDNFSESFIKGVFSQSVCNEPDFEFSDILEGIQTLPPANVTVATSGQPFNLAAGAEAVSGIVGWGNMDTIVIRVSAPTGAVNSAILKTWACLEYRPNPNAMLYQFGHDSPPCDEVALQEYRTVARSLPVAVIAAQNASMWERVKSIIKSSLAMASNVPGPIGIAASGLSGLS…	407	USER	zzzzz26	nodaviridae
147	NP_689443.1 hypothetical protein BoVs2gp1 [Boolarra virus]	MTPRRQQRPKGQLAKAKQAKQPLARSRRPRRRRRAAITQNNLMMLSEPGLSFLKCAFASPDSNTDPGKGIPDNFEGKVLSQKNVYTETGVNFSGATTQNVDTYIIVLPTPGVAFWRCIKTATAPAQPAALTTTDVFTAVPFPDFTSLFGTTATNRADQVAAFRYASMNFGLYPTCNSTQYNGGISVWKGAVQMSTTQYPLDTTPESSQLVHAITGLESALKVGDENYSESFIDGVFTQSINGNAEFPFYPILEGVQTLPGQNVTVAQAGMPFSLDAGAATVAGFTGIGGMDAIFIKVTAAAGSVNTATIKTWACIEYRPNTNTALYKYAHDSPAEDIIALQQYRKVYKSLPVAVRAKLNANMWERVKRLLKAGLVAASYVPGPVGGIATGVQHIGDLIA…	403	USER	zzzzz27	nodaviridae
200	YP_009237216.1 p7b [Maize chlorotic mottle virus]	MECVCVDSSWPQWLRNLILGILISSILFILTKTQDTVAVYHEPSVYSIDQTQKFQKIDIHNGGK	64	USER	zzzzz80	tombusviridae
201	NP_619720.1 p31 [Maize chlorotic mottle virus]	MSSSQTQSPPTDVARRQQTGTAVRSEDNHRNQLENIAVGKLTKSEGAPAQQNVIIAKEVVINNHFNFNXAGVCVCRFVLASVVKEFNLGDFDLLDSVHLDEDTGHRCRLSRAIGVLDRSDTKIPKDRHTQWRQVAGLPEVESSADVAWKQNPELFEPTRLSLDPTRSETVPPLREQPAPCPKFCLQCQQQLLTRFSRFQCVQGLTSRLERRPDTLGRPNGWQHNHRCGIQLCSTLCASLGRHSQQTPLADTFPWHSSPITCYQYPLGWRMLPGSCPQLQ	279	USER	zzzzz81	tombusviridae
202	NP_619717.1 p32 [Maize chlorotic mottle virus]	MPSPCTYGDPTFNSRILEAVVADVLGGTEDDGGPSLEEWFDAQTLSDYTNCATDPPMATVHTRENDIKSWTELSENFPDLVRYPESLVETLLDTEHECGHFYDAPDSFQISVTAMFTDRCKCQFCDPNFQARSLSRALLGPLPESGDDAEWMEQAYTPDAELFVNEPTDDPIPTTDCKRPIQPTWSVDVYSKQVDSDWGLSDSTNVTVCSASSSLLPAGRGGIYFMCPRPEGIERVCLQVGAKIRSGAPNSGTITNLPGGTGYGTEWSDDGYETQWSDGPYSIPSGLSD	289	USER	zzzzz82	tombusviridae
203	NP_062901.1 p19 protein [Tomato bushy stunt virus]	MERAIQGNDAREQANSERWDGGSGGTTSPFKLPDESPSWTEWRLHNDETNSNQDNPLGFKESWGFGKVVFKRYLRYDRTEASLHRVLGSWTGDSVNYAASRFFGFDQIGCTYSIRFRGVSITVSGGSRTLQHLCEMAIRSKQELLQLAPIEVESNVSRGCPEGTETFEKESE	172	USER	zzzzz83	tombusviridae
204	NP_062900.1 p22 protein [Tomato bushy stunt virus]	MDTEYEQVNKPWNELYKETTLGNKLTVNVGMEDQEVPLLPSNFLTKVRVGLSGGYITMRRIRIKIIPLVSRKAGVSGKLYLRDISDTTGRKLHCTESLDLGREIRLTMQHLDFSVSTRSDVPIVFGFEELVSPFLEGRELFSISVRWQFGLSKNCYSLPQSKWKVMYQEDALKVLRPSKKKASKTDSSV	189	USER	zzzzz84	tombusviridae
205	NP_041228.1 protein 14 [Melon necrotic spot virus]	MDSQRTVELTNPRGRSKERGDSGGKQKNSMGRKIANDAISESKQGVMGASTYIADKIKVTINFNFXCMACCRCDSSPGDYSGALLILFISFVFFYITSLSPQGNTYVHHFDSSSVKTQYVGISTNGDG	128	USER	zzzzz85	tombusviridae
206	YP_009344966.1 hypothetical protein 3 [Jingmen tombus-like virus 2]	MRKANLMNGASGPTIQSNNNNPPKSNNDANRVVPASRRRRRNRNRRRRAPFTRPSPPLAESASLNTYADIVQRGGMAILRCREVFQILAPLSESPIALMLPATPTKWTRTRTGVLSSTYAAYRPLQMRLTYVPSVAATTAGSVVVGTVFAGVRLETTDFNGLIRQMPVSNGGFVTTVWHSCTSRVSLGTNLRANNFPTFSVDMDDIPFWILVGTSSTVQPGWLVVEAQFSLHNPLNNQGAVSFSGFGPATFTQGTGNTTISIPQADFVGDLESGREYVFTPSASVGPSEGVVAGTLEPFRAAYTALTGDNYQFIGEFSIPSTVTQFIAGVGRSANFTQVE	340	USER	zzzzz86	tombus-like
210	YP_009342280.1 hypothetical protein 2 [Wenzhou tombus-like virus 1]	MARSRKNPNPVTGGVRRRRTRAPNMKGGEAGTIVEYSAIGATVTTGGTGLANHKRVFIGGSPYDLTNTVGPSICSYYSTCKFIPGTKIRWEPSVSFTTPGRVYVGFTDNPETMTNIQSAATQADWNNLVKGLGDVISFPVWQETEINFPTKLRRKMFDTNSAVSFVDVNALDRSAQIGMFVAVDGAPVTTSVGSFWYHDKVLVEGIQPTLT	211	USER	zzzzz90	tombus-like
211	YP_009342276.1 hypothetical protein 3 [Wenzhou tombus-like virus 3]	MTRGTPVPGGVRRRRVRMPMLSGSGTNAIIKYSALGGSLTTGSGTNQGTNARYYIPGYAGDLTNAAGAAVVSYYSTAKFLPGTRVKWEPSVSFTTAGRVIVGFTDNPEVVTTLNTLATNAPTNYSAYINAVRSLGNVVSFPVWQETEIPFPTRLRRKRFDINASPAGSNADQMDRSAQTVMFVAVEGAPATTSLGSFWYHDVVDVEGVTGITT	213	USER	zzzzz91	tombus-like
