# Supplementary material for: Discovery of several thousand highly diverse circular DNA viruses
Source: eLife journal article supplement (doi:10.7554/elife.51971), 2020-02-03
Supplement: fig4-data1 [file elife-51971-fig4-data1-v1.cys › CytoscapeSession-2019_08_07-14_38/tables/52-all_myseqs_and_genbank_s_domain2_70_190610+Full+Network/HIDDEN-org.cytoscape.model.CyNode-52+hidden+node.cytable]

"CyCSV-Version","1"
"SUID"
"java.lang.Long"
""
"52 hidden node",""
"223"
