# Supplementary material for: Discovery of several thousand highly diverse circular DNA viruses
Source: eLife journal article supplement (doi:10.7554/elife.51971), 2020-02-03
Supplement: fig4-data1 [file elife-51971-fig4-data1-v1.cys › CytoscapeSession-2019_08_07-14_38/tables/52-all_myseqs_and_genbank_s_domain2_70_190610+Full+Network/LOCAL_ATTRS-org.cytoscape.model.CyEdge-all_myseqs_and_genbank_s_domain2_70_190610+Full+Network+default+edge.cytable]

CyCSV-Version	1
SUID	interaction	name	selected
java.lang.Long	java.lang.String	java.lang.String	java.lang.Boolean
all_myseqs_and_genbank_s_domain2_70_190610 Full Network default edge
230		zzzz100,zzzzz99	false
231		zzzz100,zzzzz42	false
232		zzzz100,zzzzz87	false
233		zzzz100,zzzzz53	false
234		zzzz100,zzzzz55	false
235		zzzz100,zzzz113	false
236		zzzz100,zzzzz56	false
237		zzzz100,zzzz115	false
238		zzzz100,zzzzz54	false
239		zzzz100,zzzzz78	false
240		zzzz100,zzzzz88	false
241		zzzz100,zzzzz72	false
242		zzzz100,zzzz105	false
243		zzzz100,zzzzz76	false
244		zzzz100,zzzzz71	false
245		zzzz100,zzzzz63	false
246		zzzz100,zzzz119	false
247		zzzz100,zzzzz43	false
248		zzzz100,zzzz103	false
249		zzzz100,zzzzz41	false
250		zzzz100,zzzzz44	false
251		zzzz100,zzzz157	false
252		zzzz100,zzzzz34	false
253		zzzz100,zzzzz67	false
254		zzzz100,zzzzz60	false
255		zzzz100,zzzzz46	false
256		zzzz100,zzzz117	false
257		zzzz100,zzzz111	false
258		zzzz100,zzzz112	false
259		zzzz100,zzzz144	false
260		zzzz100,zzzzz73	false
261		zzzz100,zzzzz58	false
262		zzzz100,zzzzz68	false
263		zzzz100,zzzzz89	false
264		zzzz100,zzzz101	false
265		zzzz100,zzzz156	false
266		zzzz100,zzzzz75	false
267		zzzz100,zzzzz40	false
268		zzzz100,zzzzz47	false
269		zzzz100,zzzz154	false
270		zzzz100,zzzzz36	false
271		zzzz100,zzzzz50	false
272		zzzz100,zzzzz51	false
273		zzzz100,zzzzz57	false
274		zzzz100,zzzzz62	false
275		zzzz100,zzzz150	false
276		zzzz100,zzzzzz9	false
277		zzzz100,zzzz136	false
278		zzzz100,zzzzz52	false
279		zzzz100,zzzzz74	false
280		zzzz100,zzzzzz5	false
281		zzzz100,zzzzz11	false
282		zzzz100,zzzz149	false
283		zzzz100,zzzz155	false
284		zzzz100,zzzzz13	false
285		zzzz100,zzzz148	false
286		zzzz100,zzzzz70	false
287		zzzz100,zzzz153	false
288		zzzz100,zzzzz17	false
289		zzzz100,zzzzz79	false
290		zzzz100,zzzzz93	false
291		zzzz100,zzzzz12	false
292		zzzz100,zzzzz64	false
293		zzzz100,zzzzz95	false
294		zzzz100,zzzzzz1	false
295		zzzz100,zzzzz61	false
296		zzzz100,zzzzz97	false
297		zzzz100,zzzzz45	false
298		zzzz100,zzzzzz7	false
299		zzzz100,zzzz102	false
300		zzzz100,zzzzz31	false
301		zzzz100,zzzz139	false
302		zzzz100,zzzz152	false
303		zzzz100,zzzzz10	false
304		zzzz100,zzzzz49	false
305		zzzz100,zzzzz65	false
306		zzzz100,zzzz145	false
307		zzzz100,zzzz138	false
308		zzzz100,zzzz108	false
309		zzzz100,zzzz147	false
310		zzzz100,zzzzzz6	false
311		zzzz100,zzzzz69	false
312		zzzz100,zzzzz15	false
313		zzzz100,zzzzz94	false
314		zzzz100,zzzz107	false
315		zzzz100,zzzz121	false
316		zzzz100,zzzzz29	false
317		zzzz100,zzzzzz4	false
318		zzzz100,zzzzzz3	false
319		zzzz100,zzzz124	false
320		zzzz101,zzzz117	false
321		zzzz101,zzzz148	false
322		zzzz101,zzzz155	false
323		zzzz101,zzzz154	false
324		zzzz101,zzzz153	false
325		zzzz101,zzzz147	false
326		zzzz101,zzzzz93	false
327		zzzz101,zzzz156	false
328		zzzz101,zzzz144	false
329		zzzz101,zzzz152	false
330		zzzz101,zzzzzz1	false
331		zzzz101,zzzz157	false
332		zzzz101,zzzzzz4	false
333		zzzz101,zzzzz12	false
334		zzzz101,zzzz150	false
335		zzzz101,zzzzz17	false
336		zzzz101,zzzzz10	false
337		zzzz101,zzzz146	false
338		zzzz101,zzzz145	false
339		zzzz101,zzzz149	false
340		zzzz101,zzzzz15	false
341		zzzz101,zzzz136	false
342		zzzz101,zzzz151	false
343		zzzz101,zzzzz13	false
344		zzzz101,zzzz142	false
345		zzzz101,zzzzz11	false
346		zzzz101,zzzz137	false
347		zzzz101,zzzzzz7	false
348		zzzz101,zzzzz16	false
349		zzzz101,zzzz143	false
350		zzzz101,zzzzzz9	false
351		zzzz101,zzzz114	false
352		zzzz101,zzzz141	false
353		zzzz101,zzzz138	false
354		zzzz101,zzzzzz5	false
355		zzzz101,zzzz139	false
356		zzzz101,zzzzzz0	false
357		zzzz101,zzzz121	false
358		zzzz101,zzzzzz8	false
359		zzzz101,zzzz140	false
360		zzzz101,zzzzzz2	false
361		zzzz101,zzzzzz6	false
362		zzzz101,zzzz113	false
363		zzzz101,zzzz112	false
364		zzzz101,zzzzz87	false
365		zzzz101,zzzzz88	false
366		zzzz101,zzzz158	false
367		zzzz101,zzzz119	false
368		zzzz101,zzzzz89	false
369		zzzz101,zzzzz42	false
370		zzzz101,zzzz111	false
371		zzzz101,zzzzz41	false
372		zzzz101,zzzz105	false
373		zzzz101,zzzz103	false
374		zzzz101,zzzzz55	false
375		zzzz101,zzzzz56	false
376		zzzz101,zzzzz73	false
377		zzzz101,zzzzz60	false
378		zzzz101,zzzzz72	false
379		zzzz101,zzzzz53	false
380		zzzz101,zzzzz43	false
381		zzzz101,zzzzz68	false
382		zzzz101,zzzzz51	false
383		zzzz101,zzzzz71	false
384		zzzz101,zzzzz47	false
385		zzzz101,zzzzz99	false
386		zzzz101,zzzzz34	false
387		zzzz101,zzzzz67	false
388		zzzz101,zzzzz50	false
389		zzzz101,zzzzz44	false
390		zzzz101,zzzzz46	false
391		zzzz101,zzzzz78	false
392		zzzz101,zzzzz54	false
393		zzzz101,zzzzz63	false
394		zzzz101,zzzzz74	false
395		zzzz101,zzzzz62	false
396		zzzz101,zzzzz97	false
397		zzzz101,zzzzz32	false
398		zzzz101,zzzz115	false
399		zzzz102,zzzzz94	false
400		zzzz102,zzzzz35	false
401		zzzz102,zzzz115	false
402		zzzz102,zzzzz67	false
403		zzzz102,zzzzz55	false
404		zzzz102,zzzz124	false
405		zzzz102,zzzzz99	false
406		zzzz102,zzzzzz3	false
407		zzzz102,zzzzz89	false
408		zzzz102,zzzzz53	false
409		zzzz102,zzzzz56	false
410		zzzz102,zzzzz21	false
411		zzzz102,zzzzz75	false
412		zzzz102,zzzzz20	false
413		zzzz102,zzzzz31	false
414		zzzz102,zzzzz76	false
415		zzzz102,zzzzz44	false
416		zzzz102,zzzzz46	false
417		zzzz102,zzzz107	false
418		zzzz102,zzzzz50	false
419		zzzz102,zzzzz57	false
420		zzzz102,zzzzz52	false
421		zzzz102,zzzzz97	false
422		zzzz103,zzzz113	false
423		zzzz103,zzzzz60	false
424		zzzz103,zzzzz71	false
425		zzzz103,zzzzz63	false
426		zzzz103,zzzz112	false
427		zzzz103,zzzzz41	false
428		zzzz103,zzzzz46	false
429		zzzz103,zzzzz53	false
430		zzzz103,zzzzz43	false
431		zzzz103,zzzzz55	false
432		zzzz103,zzzzz88	false
433		zzzz103,zzzz119	false
434		zzzz103,zzzzz47	false
435		zzzz103,zzzzz78	false
436		zzzz103,zzzzz56	false
437		zzzz103,zzzzz68	false
438		zzzz103,zzzzz72	false
439		zzzz103,zzzzz44	false
440		zzzz103,zzzzz73	false
441		zzzz103,zzzzz89	false
442		zzzz103,zzzz115	false
443		zzzz103,zzzzz34	false
444		zzzz103,zzzzz76	false
445		zzzz103,zzzz105	false
446		zzzz103,zzzzz74	false
447		zzzz103,zzzzz50	false
448		zzzz103,zzzzz67	false
449		zzzz103,zzzzz51	false
450		zzzz103,zzzzz42	false
451		zzzz103,zzzzz87	false
452		zzzz103,zzzzz54	false
453		zzzz103,zzzz111	false
454		zzzz103,zzzzz75	false
455		zzzz103,zzzzz62	false
456		zzzz103,zzzzz58	false
457		zzzz103,zzzzz64	false
458		zzzz103,zzzzz99	false
459		zzzz103,zzzz155	false
460		zzzz103,zzzz136	false
461		zzzz103,zzzzz61	false
462		zzzz103,zzzzz69	false
463		zzzz103,zzzzz70	false
464		zzzz103,zzzz137	false
465		zzzz103,zzzz139	false
466		zzzz103,zzzz148	false
467		zzzz103,zzzzz40	false
468		zzzz103,zzzzz31	false
469		zzzz103,zzzz150	false
470		zzzz103,zzzz138	false
471		zzzz103,zzzzz10	false
472		zzzz103,zzzzz33	false
473		zzzz103,zzzzz17	false
474		zzzz103,zzzzz29	false
475		zzzz103,zzzzz36	false
476		zzzz103,zzzzz65	false
477		zzzz103,zzzzzz9	false
478		zzzz103,zzzzz12	false
479		zzzz103,zzzzz57	false
480		zzzz103,zzzzzz1	false
481		zzzz103,zzzzz79	false
482		zzzz103,zzzz149	false
483		zzzz103,zzzz154	false
484		zzzz103,zzzzz11	false
485		zzzz103,zzzz114	false
486		zzzz103,zzzz140	false
487		zzzz103,zzzzzz7	false
488		zzzz103,zzzz117	false
489		zzzz103,zzzz142	false
490		zzzz103,zzzz158	false
491		zzzz103,zzzz147	false
492		zzzz103,zzzz108	false
493		zzzz103,zzzzz97	false
494		zzzz103,zzzz153	false
495		zzzz103,zzzzz93	false
496		zzzz103,zzzz146	false
497		zzzz103,zzzzz49	false
498		zzzz103,zzzz156	false
499		zzzz103,zzzzz13	false
500		zzzz103,zzzzz59	false
501		zzzz103,zzzzz28	false
502		zzzz103,zzzz152	false
503		zzzz103,zzzz144	false
504		zzzz103,zzzzz52	false
505		zzzz103,zzzzz39	false
506		zzzz103,zzzz109	false
507		zzzz103,zzzzz45	false
508		zzzz103,zzzzzz8	false
509		zzzz103,zzzz145	false
510		zzzz103,zzzz151	false
511		zzzz103,zzzzz32	false
512		zzzz103,zzzzzz0	false
513		zzzz103,zzzzzz2	false
514		zzzz103,zzzzz16	false
515		zzzz103,zzzzzz6	false
516		zzzz103,zzzz121	false
517		zzzz103,zzzzzz4	false
518		zzzz103,zzzz157	false
519		zzzz103,zzzzz38	false
520		zzzz103,zzzzzz5	false
521		zzzz103,zzzz141	false
522		zzzz103,zzzzz95	false
523		zzzz103,zzzz143	false
524		zzzz103,zzzzz77	false
525		zzzz103,zzzzzz3	false
526		zzzz103,zzzz107	false
527		zzzz103,zzzzz22	false
528		zzzz104,zzzz118	false
529		zzzz104,zzzz125	false
530		zzzz104,zzzz116	false
531		zzzz104,zzzz106	false
532		zzzz104,zzzzz98	false
533		zzzz105,zzzz112	false
534		zzzz105,zzzzz89	false
535		zzzz105,zzzzz88	false
536		zzzz105,zzzz119	false
537		zzzz105,zzzz156	false
538		zzzz105,zzzz113	false
539		zzzz105,zzzzz54	false
540		zzzz105,zzzzz53	false
541		zzzz105,zzzz154	false
542		zzzz105,zzzzz67	false
543		zzzz105,zzzz147	false
544		zzzz105,zzzzz55	false
545		zzzz105,zzzz115	false
546		zzzz105,zzzzz87	false
547		zzzz105,zzzzz43	false
548		zzzz105,zzzzz10	false
549		zzzz105,zzzzz73	false
550		zzzz105,zzzzz12	false
551		zzzz105,zzzz117	false
552		zzzz105,zzzz155	false
553		zzzz105,zzzzz93	false
554		zzzz105,zzzzz34	false
555		zzzz105,zzzzz41	false
556		zzzz105,zzzzz63	false
557		zzzz105,zzzzz13	false
558		zzzz105,zzzzz78	false
559		zzzz105,zzzzz99	false
560		zzzz105,zzzzzz8	false
561		zzzz105,zzzzz44	false
562		zzzz105,zzzzzz7	false
563		zzzz105,zzzzz56	false
564		zzzz105,zzzzz62	false
565		zzzz105,zzzzzz9	false
566		zzzz105,zzzz152	false
567		zzzz105,zzzz150	false
568		zzzz105,zzzzz46	false
569		zzzz105,zzzz136	false
570		zzzz105,zzzz121	false
571		zzzz105,zzzz153	false
572		zzzz105,zzzzz72	false
573		zzzz105,zzzz142	false
574		zzzz105,zzzz157	false
575		zzzz105,zzzzz42	false
576		zzzz105,zzzz137	false
577		zzzz105,zzzz111	false
578		zzzz105,zzzzz11	false
579		zzzz105,zzzzz60	false
580		zzzz105,zzzzz70	false
581		zzzz105,zzzz148	false
582		zzzz105,zzzz149	false
583		zzzz105,zzzzz75	false
584		zzzz105,zzzzzz4	false
585		zzzz105,zzzzz16	false
586		zzzz105,zzzzz40	false
587		zzzz105,zzzz144	false
588		zzzz105,zzzzzz5	false
589		zzzz105,zzzzz36	false
590		zzzz105,zzzzz68	false
591		zzzz105,zzzz145	false
592		zzzz105,zzzzz64	false
593		zzzz105,zzzzzz1	false
594		zzzz105,zzzzz58	false
595		zzzz105,zzzzz47	false
596		zzzz105,zzzzzz0	false
597		zzzz105,zzzzz71	false
598		zzzz105,zzzz146	false
599		zzzz105,zzzzzz2	false
600		zzzz105,zzzz138	false
601		zzzz105,zzzzz50	false
602		zzzz105,zzzz140	false
603		zzzz105,zzzz151	false
604		zzzz105,zzzzz76	false
605		zzzz105,zzzzz59	false
606		zzzz105,zzzzz33	false
607		zzzz105,zzzz141	false
608		zzzz105,zzzz158	false
609		zzzz105,zzzzz61	false
610		zzzz105,zzzzz32	false
611		zzzz105,zzzz108	false
612		zzzz105,zzzzz17	false
613		zzzz105,zzzzzz6	false
614		zzzz105,zzzzz39	false
615		zzzz105,zzzz143	false
616		zzzz105,zzzzz65	false
617		zzzz105,zzzz139	false
618		zzzz105,zzzzz29	false
619		zzzz105,zzzzz28	false
620		zzzz105,zzzzz79	false
621		zzzz105,zzzzz49	false
622		zzzz105,zzzzz15	false
623		zzzz105,zzzzz48	false
624		zzzz105,zzzzz51	false
625		zzzz106,zzzz125	false
626		zzzz106,zzzz120	false
627		zzzz106,zzzz118	false
628		zzzz106,zzzzz49	false
629		zzzz107,zzzzz92	false
630		zzzz107,zzzzz20	false
631		zzzz107,zzzzz21	false
632		zzzz107,zzzz124	false
633		zzzz107,zzzz123	false
634		zzzz107,zzzzz99	false
635		zzzz107,zzzz115	false
636		zzzz107,zzzzz75	false
637		zzzz108,zzzz109	false
638		zzzz108,zzzzz56	false
639		zzzz108,zzzz112	false
640		zzzz108,zzzzz72	false
641		zzzz108,zzzz115	false
642		zzzz108,zzzzz41	false
643		zzzz108,zzzzz53	false
644		zzzz108,zzzzz44	false
645		zzzz108,zzzzz60	false
646		zzzz108,zzzzz73	false
647		zzzz108,zzzz113	false
648		zzzz108,zzzzz31	false
649		zzzz108,zzzzz87	false
650		zzzz108,zzzzz34	false
651		zzzz108,zzzzz55	false
652		zzzz108,zzzzz52	false
653		zzzz108,zzzzz62	false
654		zzzz108,zzzz111	false
655		zzzz108,zzzzz71	false
656		zzzz108,zzzzz89	false
657		zzzz108,zzzzz54	false
658		zzzz108,zzzzz69	false
659		zzzz108,zzzzz88	false
660		zzzz108,zzzzz46	false
661		zzzz108,zzzzz51	false
662		zzzz108,zzzz119	false
663		zzzz108,zzzzz70	false
664		zzzz108,zzzzz57	false
665		zzzz108,zzzzz68	false
666		zzzz108,zzzzz43	false
667		zzzz108,zzzzz75	false
668		zzzz108,zzzzz78	false
669		zzzz108,zzzzz58	false
670		zzzz108,zzzzz97	false
671		zzzz108,zzzzz95	false
672		zzzz108,zzzzz63	false
673		zzzz108,zzzzz47	false
674		zzzz108,zzzzz99	false
675		zzzz108,zzzzz67	false
676		zzzz108,zzzzz38	false
677		zzzz108,zzzzz59	false
678		zzzz108,zzzzz74	false
679		zzzz109,zzzzz56	false
680		zzzz109,zzzz113	false
681		zzzz109,zzzzz52	false
682		zzzz109,zzzz119	false
683		zzzz109,zzzzz72	false
684		zzzz109,zzzzz41	false
685		zzzz109,zzzzz44	false
686		zzzz109,zzzzz75	false
687		zzzz109,zzzzz87	false
688		zzzz109,zzzzz70	false
689		zzzz109,zzzzz51	false
690		zzzz109,zzzz115	false
691		zzzz109,zzzz131	false
692		zzzz109,zzzzz62	false
693		zzzz109,zzzzz97	false
694		zzzz109,zzzzz76	false
695		zzzz109,zzzzz58	false
696		zzzz109,zzzzz89	false
697		zzzz109,zzzzz69	false
698		zzzz109,zzzzz67	false
699		zzzz109,zzzzz43	false
700		zzzz109,zzzz111	false
701		zzzz109,zzzzz74	false
702		zzzz109,zzzzz55	false
703		zzzz109,zzzzz60	false
704		zzzz109,zzzzz71	false
705		zzzz109,zzzzz45	false
706		zzzz109,zzzzz54	false
707		zzzz109,zzzzz53	false
708		zzzz109,zzzzz59	false
709		zzzz109,zzzzz95	false
710		zzzz109,zzzzz79	false
711		zzzz109,zzzzz46	false
712		zzzz110,zzzzz91	false
713		zzzz110,zzzzz90	false
714		zzzz111,zzzzz87	false
715		zzzz111,zzzz113	false
716		zzzz111,zzzz119	false
717		zzzz111,zzzzz56	false
718		zzzz111,zzzzz88	false
719		zzzz111,zzzzz71	false
720		zzzz111,zzzz154	false
721		zzzz111,zzzz137	false
722		zzzz111,zzzzz60	false
723		zzzz111,zzzz112	false
724		zzzz111,zzzz136	false
725		zzzz111,zzzz155	false
726		zzzz111,zzzz152	false
727		zzzz111,zzzzz68	false
728		zzzz111,zzzzz73	false
729		zzzz111,zzzzz99	false
730		zzzz111,zzzz153	false
731		zzzz111,zzzzz41	false
732		zzzz111,zzzzz89	false
733		zzzz111,zzzz145	false
734		zzzz111,zzzz157	false
735		zzzz111,zzzzz47	false
736		zzzz111,zzzz151	false
737		zzzz111,zzzzz13	false
738		zzzz111,zzzzz53	false
739		zzzz111,zzzzz11	false
740		zzzz111,zzzz156	false
741		zzzz111,zzzz144	false
742		zzzz111,zzzzz51	false
743		zzzz111,zzzzz93	false
744		zzzz111,zzzzzz8	false
745		zzzz111,zzzz150	false
746		zzzz111,zzzz146	false
747		zzzz111,zzzzzz9	false
748		zzzz111,zzzz142	false
749		zzzz111,zzzz147	false
750		zzzz111,zzzzz10	false
751		zzzz111,zzzzz44	false
752		zzzz111,zzzzz67	false
753		zzzz111,zzzz149	false
754		zzzz111,zzzzz43	false
755		zzzz111,zzzzz55	false
756		zzzz111,zzzz117	false
757		zzzz111,zzzzz34	false
758		zzzz111,zzzzz72	false
759		zzzz111,zzzz148	false
760		zzzz111,zzzzz40	false
761		zzzz111,zzzzz74	false
762		zzzz111,zzzzz46	false
763		zzzz111,zzzzz50	false
764		zzzz111,zzzzzz7	false
765		zzzz111,zzzzzz4	false
766		zzzz111,zzzz138	false
767		zzzz111,zzzzz78	false
768		zzzz111,zzzz115	false
769		zzzz111,zzzzz16	false
770		zzzz111,zzzzz63	false
771		zzzz111,zzzzzz5	false
772		zzzz111,zzzz158	false
773		zzzz111,zzzz143	false
774		zzzz111,zzzz141	false
775		zzzz111,zzzzz75	false
776		zzzz111,zzzzz12	false
777		zzzz111,zzzzz54	false
778		zzzz111,zzzzzz0	false
779		zzzz111,zzzzz76	false
780		zzzz111,zzzzzz1	false
781		zzzz111,zzzz114	false
782		zzzz111,zzzzzz6	false
783		zzzz111,zzzzz45	false
784		zzzz111,zzzzz65	false
785		zzzz111,zzzzz39	false
786		zzzz111,zzzzz95	false
787		zzzz111,zzzzz97	false
788		zzzz111,zzzz140	false
789		zzzz111,zzzzz17	false
790		zzzz111,zzzzz48	false
791		zzzz111,zzzzz64	false
792		zzzz111,zzzzzz2	false
793		zzzz111,zzzzz42	false
794		zzzz111,zzzzz52	false
795		zzzz111,zzzzz36	false
796		zzzz111,zzzzzz3	false
797		zzzz111,zzzzz29	false
798		zzzz111,zzzzz57	false
799		zzzz111,zzzzz58	false
800		zzzz111,zzzzz62	false
801		zzzz111,zzzzz70	false
802		zzzz111,zzzzz31	false
803		zzzz111,zzzzz79	false
804		zzzz111,zzzzz69	false
805		zzzz112,zzzz119	false
806		zzzz112,zzzzz88	false
807		zzzz112,zzzz113	false
808		zzzz112,zzzzz89	false
809		zzzz112,zzzz156	false
810		zzzz112,zzzzz67	false
811		zzzz112,zzzzz73	false
812		zzzz112,zzzzz78	false
813		zzzz112,zzzzz55	false
814		zzzz112,zzzzz53	false
815		zzzz112,zzzzz60	false
816		zzzz112,zzzzz63	false
817		zzzz112,zzzz154	false
818		zzzz112,zzzzz54	false
819		zzzz112,zzzzz43	false
820		zzzz112,zzzz152	false
821		zzzz112,zzzzz56	false
822		zzzz112,zzzzz72	false
823		zzzz112,zzzzz44	false
824		zzzz112,zzzzz68	false
825		zzzz112,zzzzz87	false
826		zzzz112,zzzzz41	false
827		zzzz112,zzzzz46	false
828		zzzz112,zzzzz50	false
829		zzzz112,zzzzz99	false
830		zzzz112,zzzzzz8	false
831		zzzz112,zzzzz47	false
832		zzzz112,zzzzz42	false
833		zzzz112,zzzz117	false
834		zzzz112,zzzzz58	false
835		zzzz112,zzzzz13	false
836		zzzz112,zzzzz34	false
837		zzzz112,zzzzz75	false
838		zzzz112,zzzzz93	false
839		zzzz112,zzzz115	false
840		zzzz112,zzzzz76	false
841		zzzz112,zzzz155	false
842		zzzz112,zzzz147	false
843		zzzz112,zzzzz71	false
844		zzzz112,zzzzz64	false
845		zzzz112,zzzz142	false
846		zzzz112,zzzz145	false
847		zzzz112,zzzz148	false
848		zzzz112,zzzz157	false
849		zzzz112,zzzz136	false
850		zzzz112,zzzz149	false
851		zzzz112,zzzzz10	false
852		zzzz112,zzzzz62	false
853		zzzz112,zzzz150	false
854		zzzz112,zzzzz11	false
855		zzzz112,zzzz153	false
856		zzzz112,zzzzzz1	false
857		zzzz112,zzzz137	false
858		zzzz112,zzzzz12	false
859		zzzz112,zzzzz70	false
860		zzzz112,zzzzzz4	false
861		zzzz112,zzzzzz7	false
862		zzzz112,zzzzzz9	false
863		zzzz112,zzzzz51	false
864		zzzz112,zzzzz16	false
865		zzzz112,zzzz144	false
866		zzzz112,zzzz143	false
867		zzzz112,zzzz121	false
868		zzzz112,zzzz140	false
869		zzzz112,zzzzz40	false
870		zzzz112,zzzzz17	false
871		zzzz112,zzzzz36	false
872		zzzz112,zzzzzz6	false
873		zzzz112,zzzz146	false
874		zzzz112,zzzzz32	false
875		zzzz112,zzzzz61	false
876		zzzz112,zzzzz74	false
877		zzzz112,zzzzzz5	false
878		zzzz112,zzzz141	false
879		zzzz112,zzzzz59	false
880		zzzz112,zzzz138	false
881		zzzz112,zzzz151	false
882		zzzz112,zzzzz33	false
883		zzzz112,zzzzz29	false
884		zzzz112,zzzzz65	false
885		zzzz112,zzzzz79	false
886		zzzz112,zzzzzz0	false
887		zzzz112,zzzzzz2	false
888		zzzz112,zzzz139	false
889		zzzz112,zzzzz98	false
890		zzzz112,zzzzz52	false
891		zzzz112,zzzzz57	false
892		zzzz112,zzzzz94	false
893		zzzz112,zzzzz28	false
894		zzzz112,zzzzz48	false
895		zzzz112,zzzzz49	false
896		zzzz112,zzzzz31	false
897		zzzz112,zzzzz97	false
898		zzzz112,zzzzz15	false
899		zzzz112,zzzz158	false
900		zzzz112,zzzzz39	false
901		zzzz112,zzzzzz3	false
902		zzzz112,zzzz114	false
903		zzzz112,zzzzz23	false
904		zzzz112,zzzzz38	false
905		zzzz113,zzzzz88	false
906		zzzz113,zzzz119	false
907		zzzz113,zzzzz13	false
908		zzzz113,zzzzz89	false
909		zzzz113,zzzz144	false
910		zzzz113,zzzzz56	false
911		zzzz113,zzzzzz7	false
912		zzzz113,zzzzzz9	false
913		zzzz113,zzzz142	false
914		zzzz113,zzzzz10	false
915		zzzz113,zzzzz11	false
916		zzzz113,zzzz145	false
917		zzzz113,zzzz147	false
918		zzzz113,zzzzz87	false
919		zzzz113,zzzzz12	false
920		zzzz113,zzzz146	false
921		zzzz113,zzzz156	false
922		zzzz113,zzzz149	false
923		zzzz113,zzzz150	false
924		zzzz113,zzzzz53	false
925		zzzz113,zzzz154	false
926		zzzz113,zzzzz55	false
927		zzzz113,zzzz148	false
928		zzzz113,zzzzz42	false
929		zzzz113,zzzzz16	false
930		zzzz113,zzzzz44	false
931		zzzz113,zzzz155	false
932		zzzz113,zzzzz93	false
933		zzzz113,zzzz117	false
934		zzzz113,zzzz152	false
935		zzzz113,zzzzz46	false
936		zzzz113,zzzzzz8	false
937		zzzz113,zzzz136	false
938		zzzz113,zzzzz41	false
939		zzzz113,zzzzz50	false
940		zzzz113,zzzzz71	false
941		zzzz113,zzzzzz1	false
942		zzzz113,zzzzzz2	false
943		zzzz113,zzzz137	false
944		zzzz113,zzzz153	false
945		zzzz113,zzzzz72	false
946		zzzz113,zzzzz17	false
947		zzzz113,zzzz143	false
948		zzzz113,zzzzz99	false
949		zzzz113,zzzz115	false
950		zzzz113,zzzzz34	false
951		zzzz113,zzzz138	false
952		zzzz113,zzzzz67	false
953		zzzz113,zzzz157	false
954		zzzz113,zzzzz43	false
955		zzzz113,zzzzz63	false
956		zzzz113,zzzzz73	false
957		zzzz113,zzzzz75	false
958		zzzz113,zzzzzz0	false
959		zzzz113,zzzzzz4	false
960		zzzz113,zzzz139	false
961		zzzz113,zzzzzz6	false
962		zzzz113,zzzz141	false
963		zzzz113,zzzzz60	false
964		zzzz113,zzzzz68	false
965		zzzz113,zzzz140	false
966		zzzz113,zzzzz58	false
967		zzzz113,zzzz121	false
968		zzzz113,zzzzz78	false
969		zzzz113,zzzzz31	false
970		zzzz113,zzzzz62	false
971		zzzz113,zzzzz97	false
972		zzzz113,zzzzz51	false
973		zzzz113,zzzzz47	false
974		zzzz113,zzzz151	false
975		zzzz113,zzzzz74	false
976		zzzz113,zzzzz79	false
977		zzzz113,zzzzz64	false
978		zzzz113,zzzzzz5	false
979		zzzz113,zzzzz54	false
980		zzzz113,zzzzz95	false
981		zzzz113,zzzzz15	false
982		zzzz113,zzzz158	false
983		zzzz113,zzzz114	false
984		zzzz113,zzzzz76	false
985		zzzz113,zzzzz33	false
986		zzzz113,zzzzz52	false
987		zzzz113,zzzzz61	false
988		zzzz113,zzzzz70	false
989		zzzz113,zzzzz57	false
990		zzzz113,zzzzz29	false
991		zzzz113,zzzzz40	false
992		zzzz113,zzzzz39	false
993		zzzz113,zzzzz69	false
994		zzzz113,zzzzz65	false
995		zzzz113,zzzzz32	false
996		zzzz113,zzzzz36	false
997		zzzz113,zzzzz49	false
998		zzzz113,zzzzz38	false
999		zzzz113,zzzzz77	false
1000		zzzz113,zzzzz48	false
1001		zzzz113,zzzz124	false
1002		zzzz113,zzzzz37	false
1003		zzzz113,zzzzz59	false
1004		zzzz113,zzzzz28	false
1005		zzzz113,zzzzz98	false
1006		zzzz114,zzzz138	false
1007		zzzz114,zzzz152	false
1008		zzzz114,zzzzzz1	false
1009		zzzz114,zzzz144	false
1010		zzzz114,zzzzz93	false
1011		zzzz114,zzzz153	false
1012		zzzz114,zzzz143	false
1013		zzzz114,zzzz155	false
1014		zzzz114,zzzzzz9	false
1015		zzzz114,zzzz136	false
1016		zzzz114,zzzz156	false
1017		zzzz114,zzzz157	false
1018		zzzz114,zzzz146	false
1019		zzzz114,zzzzz17	false
1020		zzzz114,zzzz137	false
1021		zzzz114,zzzzz10	false
1022		zzzz114,zzzzz13	false
1023		zzzz114,zzzz151	false
1024		zzzz114,zzzz149	false
1025		zzzz114,zzzzz11	false
1026		zzzz114,zzzzzz7	false
1027		zzzz114,zzzz147	false
1028		zzzz114,zzzz150	false
1029		zzzz114,zzzz154	false
1030		zzzz114,zzzz148	false
1031		zzzz114,zzzzz12	false
1032		zzzz114,zzzzz16	false
1033		zzzz114,zzzz158	false
1034		zzzz114,zzzz145	false
1035		zzzz114,zzzz117	false
1036		zzzz114,zzzz139	false
1037		zzzz114,zzzzzz4	false
1038		zzzz114,zzzz142	false
1039		zzzz114,zzzzzz0	false
1040		zzzz114,zzzzzz5	false
1041		zzzz114,zzzzzz8	false
1042		zzzz114,zzzzzz2	false
1043		zzzz114,zzzz141	false
1044		zzzz114,zzzzz15	false
1045		zzzz114,zzzz140	false
1046		zzzz114,zzzzzz6	false
1047		zzzz114,zzzz119	false
1048		zzzz114,zzzz121	false
1049		zzzz114,zzzzz87	false
1050		zzzz114,zzzzz88	false
1051		zzzz114,zzzzz60	false
1052		zzzz114,zzzzz41	false
1053		zzzz114,zzzzz47	false
1054		zzzz114,zzzzz56	false
1055		zzzz114,zzzzz43	false
1056		zzzz114,zzzzz67	false
1057		zzzz114,zzzzz53	false
1058		zzzz114,zzzzz68	false
1059		zzzz114,zzzzz71	false
1060		zzzz114,zzzzz99	false
1061		zzzz114,zzzzz78	false
1062		zzzz114,zzzzz89	false
1063		zzzz114,zzzz115	false
1064		zzzz115,zzzzz46	false
1065		zzzz115,zzzzz41	false
1066		zzzz115,zzzzz53	false
1067		zzzz115,zzzzz67	false
1068		zzzz115,zzzzz56	false
1069		zzzz115,zzzzz44	false
1070		zzzz115,zzzzz72	false
1071		zzzz115,zzzzz76	false
1072		zzzz115,zzzzz43	false
1073		zzzz115,zzzzz71	false
1074		zzzz115,zzzzz34	false
1075		zzzz115,zzzzz55	false
1076		zzzz115,zzzzz73	false
1077		zzzz115,zzzzz60	false
1078		zzzz115,zzzzz54	false
1079		zzzz115,zzzzz68	false
1080		zzzz115,zzzzz78	false
1081		zzzz115,zzzzz75	false
1082		zzzz115,zzzzz42	false
1083		zzzz115,zzzzz61	false
1084		zzzz115,zzzzz47	false
1085		zzzz115,zzzzz50	false
1086		zzzz115,zzzzz58	false
1087		zzzz115,zzzzz63	false
1088		zzzz115,zzzzz65	false
1089		zzzz115,zzzzz70	false
1090		zzzz115,zzzzz64	false
1091		zzzz115,zzzzz49	false
1092		zzzz115,zzzzz33	false
1093		zzzz115,zzzzz88	false
1094		zzzz115,zzzzz29	false
1095		zzzz115,zzzzz36	false
1096		zzzz115,zzzzz59	false
1097		zzzz115,zzzzz62	false
1098		zzzz115,zzzz119	false
1099		zzzz115,zzzzz51	false
1100		zzzz115,zzzzz40	false
1101		zzzz115,zzzzz45	false
1102		zzzz115,zzzzz28	false
1103		zzzz115,zzzzz74	false
1104		zzzz115,zzzzz89	false
1105		zzzz115,zzzzz99	false
1106		zzzz115,zzzzz48	false
1107		zzzz115,zzzzz32	false
1108		zzzz115,zzzzz39	false
1109		zzzz115,zzzzz87	false
1110		zzzz115,zzzzz94	false
1111		zzzz115,zzzz136	false
1112		zzzz115,zzzzzz3	false
1113		zzzz115,zzzz143	false
1114		zzzz115,zzzzzz4	false
1115		zzzz115,zzzzz13	false
1116		zzzz115,zzzzz57	false
1117		zzzz115,zzzzz16	false
1118		zzzz115,zzzz138	false
1119		zzzz115,zzzzz93	false
1120		zzzz115,zzzzz95	false
1121		zzzz115,zzzzz97	false
1122		zzzz115,zzzz146	false
1123		zzzz115,zzzzz52	false
1124		zzzz115,zzzzz77	false
1125		zzzz115,zzzz147	false
1126		zzzz115,zzzzz17	false
1127		zzzz115,zzzzzz9	false
1128		zzzz115,zzzz137	false
1129		zzzz115,zzzz150	false
1130		zzzz115,zzzz145	false
1131		zzzz115,zzzzz10	false
1132		zzzz115,zzzz141	false
1133		zzzz115,zzzz154	false
1134		zzzz115,zzzzzz1	false
1135		zzzz115,zzzz152	false
1136		zzzz115,zzzzz69	false
1137		zzzz115,zzzzz35	false
1138		zzzz115,zzzzz31	false
1139		zzzz115,zzzz117	false
1140		zzzz115,zzzz144	false
1141		zzzz115,zzzz148	false
1142		zzzz115,zzzz155	false
1143		zzzz115,zzzzzz5	false
1144		zzzz115,zzzzz23	false
1145		zzzz115,zzzz149	false
1146		zzzz115,zzzz153	false
1147		zzzz115,zzzzz79	false
1148		zzzz115,zzzzzz0	false
1149		zzzz115,zzzz156	false
1150		zzzz115,zzzz157	false
1151		zzzz116,zzzz118	false
1152		zzzz116,zzzz125	false
1153		zzzz117,zzzz155	false
1154		zzzz117,zzzzz13	false
1155		zzzz117,zzzzz11	false
1156		zzzz117,zzzzzz9	false
1157		zzzz117,zzzz154	false
1158		zzzz117,zzzz149	false
1159		zzzz117,zzzzzz1	false
1160		zzzz117,zzzz137	false
1161		zzzz117,zzzz145	false
1162		zzzz117,zzzzz93	false
1163		zzzz117,zzzz138	false
1164		zzzz117,zzzz150	false
1165		zzzz117,zzzz153	false
1166		zzzz117,zzzz152	false
1167		zzzz117,zzzzz12	false
1168		zzzz117,zzzz156	false
1169		zzzz117,zzzz157	false
1170		zzzz117,zzzzz10	false
1171		zzzz117,zzzzz17	false
1172		zzzz117,zzzzzz4	false
1173		zzzz117,zzzzzz7	false
1174		zzzz117,zzzz147	false
1175		zzzz117,zzzzz16	false
1176		zzzz117,zzzz136	false
1177		zzzz117,zzzz151	false
1178		zzzz117,zzzz144	false
1179		zzzz117,zzzz142	false
1180		zzzz117,zzzz146	false
1181		zzzz117,zzzzzz5	false
1182		zzzz117,zzzz148	false
1183		zzzz117,zzzz143	false
1184		zzzz117,zzzzzz0	false
1185		zzzz117,zzzz141	false
1186		zzzz117,zzzz140	false
1187		zzzz117,zzzz158	false
1188		zzzz117,zzzzzz8	false
1189		zzzz117,zzzzzz6	false
1190		zzzz117,zzzzz15	false
1191		zzzz117,zzzz139	false
1192		zzzz117,zzzzzz2	false
1193		zzzz117,zzzzz88	false
1194		zzzz117,zzzz121	false
1195		zzzz117,zzzz119	false
1196		zzzz117,zzzzz87	false
1197		zzzz117,zzzzz89	false
1198		zzzz117,zzzzz73	false
1199		zzzz117,zzzzz42	false
1200		zzzz117,zzzzz47	false
1201		zzzz117,zzzzz56	false
1202		zzzz117,zzzzz72	false
1203		zzzz117,zzzzz71	false
1204		zzzz117,zzzzz54	false
1205		zzzz117,zzzzz41	false
1206		zzzz117,zzzzz60	false
1207		zzzz117,zzzzz64	false
1208		zzzz117,zzzzz53	false
1209		zzzz117,zzzzz68	false
1210		zzzz117,zzzzz48	false
1211		zzzz117,zzzzz99	false
1212		zzzz117,zzzzz55	false
1213		zzzz117,zzzzz62	false
1214		zzzz117,zzzzz43	false
1215		zzzz117,zzzzz45	false
1216		zzzz117,zzzzz44	false
1217		zzzz117,zzzzz67	false
1218		zzzz117,zzzzz78	false
1219		zzzz117,zzzzz50	false
1220		zzzz117,zzzzz32	false
1221		zzzz117,zzzzz29	false
1222		zzzz117,zzzzz61	false
1223		zzzz117,zzzzz51	false
1224		zzzz117,zzzzz65	false
1225		zzzz117,zzzzz49	false
1226		zzzz118,zzzz125	false
1227		zzzz118,zzzzz98	false
1228		zzzz119,zzzzz88	false
1229		zzzz119,zzzzz89	false
1230		zzzz119,zzzzz16	false
1231		zzzz119,zzzzz56	false
1232		zzzz119,zzzzz41	false
1233		zzzz119,zzzz156	false
1234		zzzz119,zzzzz43	false
1235		zzzz119,zzzzz13	false
1236		zzzz119,zzzz136	false
1237		zzzz119,zzzz147	false
1238		zzzz119,zzzzzz9	false
1239		zzzz119,zzzzz87	false
1240		zzzz119,zzzzz42	false
1241		zzzz119,zzzzz51	false
1242		zzzz119,zzzzz53	false
1243		zzzz119,zzzzz55	false
1244		zzzz119,zzzzz12	false
1245		zzzz119,zzzzz46	false
1246		zzzz119,zzzzzz7	false
1247		zzzz119,zzzzz93	false
1248		zzzz119,zzzz149	false
1249		zzzz119,zzzzz72	false
1250		zzzz119,zzzzz71	false
1251		zzzz119,zzzz146	false
1252		zzzz119,zzzz150	false
1253		zzzz119,zzzz144	false
1254		zzzz119,zzzzz10	false
1255		zzzz119,zzzz154	false
1256		zzzz119,zzzzz50	false
1257		zzzz119,zzzzz99	false
1258		zzzz119,zzzzz44	false
1259		zzzz119,zzzz142	false
1260		zzzz119,zzzzz11	false
1261		zzzz119,zzzzz76	false
1262		zzzz119,zzzzzz1	false
1263		zzzz119,zzzzzz8	false
1264		zzzz119,zzzz155	false
1265		zzzz119,zzzzz67	false
1266		zzzz119,zzzzz68	false
1267		zzzz119,zzzzz47	false
1268		zzzz119,zzzzz60	false
1269		zzzz119,zzzz152	false
1270		zzzz119,zzzzz74	false
1271		zzzz119,zzzz121	false
1272		zzzz119,zzzz153	false
1273		zzzz119,zzzzz63	false
1274		zzzz119,zzzzz73	false
1275		zzzz119,zzzz137	false
1276		zzzz119,zzzzz34	false
1277		zzzz119,zzzzz40	false
1278		zzzz119,zzzzz17	false
1279		zzzz119,zzzzzz2	false
1280		zzzz119,zzzz138	false
1281		zzzz119,zzzz157	false
1282		zzzz119,zzzz145	false
1283		zzzz119,zzzz148	false
1284		zzzz119,zzzzzz5	false
1285		zzzz119,zzzzzz4	false
1286		zzzz119,zzzzz54	false
1287		zzzz119,zzzzzz0	false
1288		zzzz119,zzzzz78	false
1289		zzzz119,zzzz141	false
1290		zzzz119,zzzzzz6	false
1291		zzzz119,zzzzz57	false
1292		zzzz119,zzzz143	false
1293		zzzz119,zzzzz58	false
1294		zzzz119,zzzzz75	false
1295		zzzz119,zzzz139	false
1296		zzzz119,zzzz151	false
1297		zzzz119,zzzz140	false
1298		zzzz119,zzzzz64	false
1299		zzzz119,zzzz158	false
1300		zzzz119,zzzzz95	false
1301		zzzz119,zzzzz97	false
1302		zzzz119,zzzzz31	false
1303		zzzz119,zzzzz15	false
1304		zzzz119,zzzzz45	false
1305		zzzz119,zzzzz62	false
1306		zzzz119,zzzzz79	false
1307		zzzz119,zzzzz59	false
1308		zzzz119,zzzzz32	false
1309		zzzz119,zzzzz33	false
1310		zzzz119,zzzzz29	false
1311		zzzz119,zzzzz52	false
1312		zzzz119,zzzzz65	false
1313		zzzz119,zzzzz70	false
1314		zzzz119,zzzzz49	false
1315		zzzz119,zzzzz48	false
1316		zzzz119,zzzzz61	false
1317		zzzz119,zzzzz77	false
1318		zzzz119,zzzzz37	false
1319		zzzz119,zzzzz36	false
1320		zzzz119,zzzzz69	false
1321		zzzz119,zzzzzz3	false
1322		zzzz119,zzzzz14	false
1323		zzzz119,zzzzz38	false
1324		zzzz119,zzzzz28	false
1325		zzzz120,zzzzz98	false
1326		zzzz121,zzzzzz1	false
1327		zzzz121,zzzz157	false
1328		zzzz121,zzzz153	false
1329		zzzz121,zzzz149	false
1330		zzzz121,zzzzzz7	false
1331		zzzz121,zzzz150	false
1332		zzzz121,zzzzz10	false
1333		zzzz121,zzzzz13	false
1334		zzzz121,zzzz136	false
1335		zzzz121,zzzz142	false
1336		zzzz121,zzzzz12	false
1337		zzzz121,zzzz148	false
1338		zzzz121,zzzz155	false
1339		zzzz121,zzzzzz0	false
1340		zzzz121,zzzz156	false
1341		zzzz121,zzzz144	false
1342		zzzz121,zzzz152	false
1343		zzzz121,zzzz154	false
1344		zzzz121,zzzzz11	false
1345		zzzz121,zzzzzz5	false
1346		zzzz121,zzzz151	false
1347		zzzz121,zzzzz93	false
1348		zzzz121,zzzzzz9	false
1349		zzzz121,zzzz147	false
1350		zzzz121,zzzzz15	false
1351		zzzz121,zzzz137	false
1352		zzzz121,zzzzz16	false
1353		zzzz121,zzzz158	false
1354		zzzz121,zzzz138	false
1355		zzzz121,zzzzz17	false
1356		zzzz121,zzzz145	false
1357		zzzz121,zzzzzz4	false
1358		zzzz121,zzzz141	false
1359		zzzz121,zzzzzz2	false
1360		zzzz121,zzzz146	false
1361		zzzz121,zzzz139	false
1362		zzzz121,zzzz143	false
1363		zzzz121,zzzzzz8	false
1364		zzzz121,zzzzz88	false
1365		zzzz121,zzzz140	false
1366		zzzz121,zzzzzz6	false
1367		zzzz121,zzzzz89	false
1368		zzzz121,zzzzz42	false
1369		zzzz121,zzzzz64	false
1370		zzzz121,zzzzz56	false
1371		zzzz121,zzzzz62	false
1372		zzzz121,zzzzz99	false
1373		zzzz121,zzzzz43	false
1374		zzzz121,zzzzz41	false
1375		zzzz121,zzzzz40	false
1376		zzzz121,zzzzz60	false
1377		zzzz121,zzzzz87	false
1378		zzzz122,zzzzz96	false
1379		zzzz122,zzzzz67	false
1380		zzzz122,zzzzz51	false
1381		zzzz122,zzzz155	false
1382		zzzz122,zzzzz53	false
1383		zzzz122,zzzzz46	false
1384		zzzz122,zzzz156	false
1385		zzzz123,zzzz124	false
1386		zzzz123,zzzzz20	false
1387		zzzz123,zzzzz21	false
1388		zzzz123,zzzzz92	false
1389		zzzz123,zzzz134	false
1390		zzzz123,zzzzz65	false
1391		zzzz124,zzzzz92	false
1392		zzzz124,zzzzz21	false
1393		zzzz124,zzzzz20	false
1394		zzzz124,zzzzz99	false
1395		zzzz124,zzzzz57	false
1396		zzzz124,zzzzz70	false
1397		zzzz124,zzzzz67	false
1398		zzzz125,zzzzz87	false
1399		zzzz125,zzzzz89	false
1400		zzzz125,zzzzz98	false
1401		zzzz126,zzzz132	false
1402		zzzz126,zzzz130	false
1403		zzzz126,zzzzz24	false
1404		zzzz126,zzzz133	false
1405		zzzz126,zzzzz25	false
1406		zzzz126,zzzz134	false
1407		zzzz126,zzzzz22	false
1408		zzzz126,zzzzz23	false
1409		zzzz126,zzzz131	false
1410		zzzz129,zzzz135	false
1411		zzzz129,zzzz130	false
1412		zzzz129,zzzzz24	false
1413		zzzz129,zzzzz22	false
1414		zzzz129,zzzz132	false
1415		zzzz129,zzzzz23	false
1416		zzzz129,zzzz133	false
1417		zzzz129,zzzzz25	false
1418		zzzz129,zzzz131	false
1419		zzzz130,zzzz134	false
1420		zzzz130,zzzzz22	false
1421		zzzz130,zzzzz24	false
1422		zzzz130,zzzz133	false
1423		zzzz130,zzzzz23	false
1424		zzzz130,zzzzz25	false
1425		zzzz130,zzzz132	false
1426		zzzz130,zzzz135	false
1427		zzzz130,zzzzz42	false
1428		zzzz130,zzzzz58	false
1429		zzzz131,zzzzz23	false
1430		zzzz131,zzzzz25	false
1431		zzzz131,zzzzz22	false
1432		zzzz131,zzzzz24	false
1433		zzzz131,zzzz133	false
1434		zzzz131,zzzz135	false
1435		zzzz131,zzzz134	false
1436		zzzz131,zzzz132	false
1437		zzzz132,zzzzz22	false
1438		zzzz132,zzzzz24	false
1439		zzzz132,zzzzz23	false
1440		zzzz132,zzzz134	false
1441		zzzz132,zzzzz25	false
1442		zzzz132,zzzz135	false
1443		zzzz132,zzzz133	false
1444		zzzz133,zzzz134	false
1445		zzzz133,zzzzz25	false
1446		zzzz133,zzzzz22	false
1447		zzzz133,zzzzz24	false
1448		zzzz133,zzzzz23	false
1449		zzzz133,zzzz135	false
1450		zzzz134,zzzzz25	false
1451		zzzz134,zzzzz24	false
1452		zzzz134,zzzzz22	false
1453		zzzz134,zzzzz23	false
1454		zzzz134,zzzzz58	false
1455		zzzz135,zzzzz24	false
1456		zzzz135,zzzzz22	false
1457		zzzz135,zzzzz23	false
1458		zzzz135,zzzzz25	false
1459		zzzz136,zzzz144	false
1460		zzzz136,zzzz153	false
1461		zzzz136,zzzz146	false
1462		zzzz136,zzzz152	false
1463		zzzz136,zzzz155	false
1464		zzzz136,zzzz150	false
1465		zzzz136,zzzzz10	false
1466		zzzz136,zzzz154	false
1467		zzzz136,zzzzz13	false
1468		zzzz136,zzzz145	false
1469		zzzz136,zzzz149	false
1470		zzzz136,zzzz137	false
1471		zzzz136,zzzzzz9	false
1472		zzzz136,zzzz147	false
1473		zzzz136,zzzzz93	false
1474		zzzz136,zzzzz12	false
1475		zzzz136,zzzz148	false
1476		zzzz136,zzzz157	false
1477		zzzz136,zzzz156	false
1478		zzzz136,zzzzzz7	false
1479		zzzz136,zzzzz16	false
1480		zzzz136,zzzzz17	false
1481		zzzz136,zzzzz11	false
1482		zzzz136,zzzz142	false
1483		zzzz136,zzzz143	false
1484		zzzz136,zzzzzz1	false
1485		zzzz136,zzzz151	false
1486		zzzz136,zzzzzz4	false
1487		zzzz136,zzzz138	false
1488		zzzz136,zzzz141	false
1489		zzzz136,zzzzzz0	false
1490		zzzz136,zzzz139	false
1491		zzzz136,zzzz158	false
1492		zzzz136,zzzz140	false
1493		zzzz136,zzzzzz8	false
1494		zzzz136,zzzzzz6	false
1495		zzzz136,zzzzzz2	false
1496		zzzz136,zzzzz15	false
1497		zzzz136,zzzzzz5	false
1498		zzzz136,zzzzz88	false
1499		zzzz136,zzzzz89	false
1500		zzzz136,zzzzz60	false
1501		zzzz136,zzzzz87	false
1502		zzzz136,zzzzz71	false
1503		zzzz136,zzzzz68	false
1504		zzzz136,zzzzz47	false
1505		zzzz136,zzzzz43	false
1506		zzzz136,zzzzz56	false
1507		zzzz136,zzzzz72	false
1508		zzzz136,zzzzz50	false
1509		zzzz136,zzzzz53	false
1510		zzzz136,zzzzz55	false
1511		zzzz136,zzzzz40	false
1512		zzzz136,zzzzz41	false
1513		zzzz136,zzzzz63	false
1514		zzzz136,zzzzz99	false
1515		zzzz136,zzzzz73	false
1516		zzzz136,zzzzz67	false
1517		zzzz136,zzzzz34	false
1518		zzzz136,zzzzz78	false
1519		zzzz136,zzzzz64	false
1520		zzzz136,zzzzz70	false
1521		zzzz136,zzzzz46	false
1522		zzzz136,zzzzz44	false
1523		zzzz136,zzzzz36	false
1524		zzzz136,zzzzz42	false
1525		zzzz136,zzzzz58	false
1526		zzzz136,zzzzz75	false
1527		zzzz137,zzzzz16	false
1528		zzzz137,zzzz151	false
1529		zzzz137,zzzz138	false
1530		zzzz137,zzzz146	false
1531		zzzz137,zzzz152	false
1532		zzzz137,zzzzz13	false
1533		zzzz137,zzzz145	false
1534		zzzz137,zzzz143	false
1535		zzzz137,zzzz157	false
1536		zzzz137,zzzzz17	false
1537		zzzz137,zzzzzz9	false
1538		zzzz137,zzzz142	false
1539		zzzz137,zzzzz12	false
1540		zzzz137,zzzzzz7	false
1541		zzzz137,zzzzz10	false
1542		zzzz137,zzzz147	false
1543		zzzz137,zzzzz11	false
1544		zzzz137,zzzz144	false
1545		zzzz137,zzzzzz4	false
1546		zzzz137,zzzz153	false
1547		zzzz137,zzzz149	false
1548		zzzz137,zzzz141	false
1549		zzzz137,zzzz155	false
1550		zzzz137,zzzz148	false
1551		zzzz137,zzzzzz1	false
1552		zzzz137,zzzz156	false
1553		zzzz137,zzzz154	false
1554		zzzz137,zzzz150	false
1555		zzzz137,zzzzz93	false
1556		zzzz137,zzzz139	false
1557		zzzz137,zzzzz15	false
1558		zzzz137,zzzz140	false
1559		zzzz137,zzzzzz6	false
1560		zzzz137,zzzzzz0	false
1561		zzzz137,zzzzzz8	false
1562		zzzz137,zzzzzz2	false
1563		zzzz137,zzzzzz5	false
1564		zzzz137,zzzz158	false
1565		zzzz137,zzzzz88	false
1566		zzzz137,zzzzz87	false
1567		zzzz137,zzzzz89	false
1568		zzzz137,zzzzz41	false
1569		zzzz137,zzzzz60	false
1570		zzzz137,zzzzz56	false
1571		zzzz137,zzzzz73	false
1572		zzzz137,zzzzz55	false
1573		zzzz137,zzzzz99	false
1574		zzzz137,zzzzz43	false
1575		zzzz137,zzzzz72	false
1576		zzzz137,zzzzz71	false
1577		zzzz137,zzzzz44	false
1578		zzzz137,zzzzz53	false
1579		zzzz137,zzzzz47	false
1580		zzzz137,zzzzz50	false
1581		zzzz137,zzzzz68	false
1582		zzzz137,zzzzz42	false
1583		zzzz137,zzzzz78	false
1584		zzzz137,zzzzz54	false
1585		zzzz137,zzzzz58	false
1586		zzzz137,zzzzz46	false
1587		zzzz137,zzzzz51	false
1588		zzzz137,zzzzz29	false
1589		zzzz137,zzzzz67	false
1590		zzzz138,zzzzz16	false
1591		zzzz138,zzzzzz4	false
1592		zzzz138,zzzz151	false
1593		zzzz138,zzzzz13	false
1594		zzzz138,zzzzz11	false
1595		zzzz138,zzzz143	false
1596		zzzz138,zzzz152	false
1597		zzzz138,zzzzz10	false
1598		zzzz138,zzzz142	false
1599		zzzz138,zzzzz12	false
1600		zzzz138,zzzzzz9	false
1601		zzzz138,zzzz157	false
1602		zzzz138,zzzz149	false
1603		zzzz138,zzzz153	false
1604		zzzz138,zzzzz17	false
1605		zzzz138,zzzz145	false
1606		zzzz138,zzzz144	false
1607		zzzz138,zzzz146	false
1608		zzzz138,zzzz156	false
1609		zzzz138,zzzz147	false
1610		zzzz138,zzzzzz7	false
1611		zzzz138,zzzzz93	false
1612		zzzz138,zzzzzz1	false
1613		zzzz138,zzzz155	false
1614		zzzz138,zzzz150	false
1615		zzzz138,zzzz141	false
1616		zzzz138,zzzz148	false
1617		zzzz138,zzzz154	false
1618		zzzz138,zzzzzz2	false
1619		zzzz138,zzzzz15	false
1620		zzzz138,zzzzzz5	false
1621		zzzz138,zzzz139	false
1622		zzzz138,zzzzzz8	false
1623		zzzz138,zzzzzz0	false
1624		zzzz138,zzzz140	false
1625		zzzz138,zzzzzz6	false
1626		zzzz138,zzzz158	false
1627		zzzz138,zzzzz88	false
1628		zzzz138,zzzzz87	false
1629		zzzz138,zzzzz56	false
1630		zzzz138,zzzzz44	false
1631		zzzz138,zzzzz72	false
1632		zzzz138,zzzzz89	false
1633		zzzz138,zzzzz43	false
1634		zzzz138,zzzzz60	false
1635		zzzz138,zzzzz99	false
1636		zzzz138,zzzzz73	false
1637		zzzz138,zzzzz58	false
1638		zzzz138,zzzzz55	false
1639		zzzz138,zzzzz41	false
1640		zzzz138,zzzzz78	false
1641		zzzz138,zzzzz45	false
1642		zzzz138,zzzzz47	false
1643		zzzz138,zzzzz68	false
1644		zzzz138,zzzzz76	false
1645		zzzz138,zzzzz53	false
1646		zzzz138,zzzzz33	false
1647		zzzz138,zzzzz71	false
1648		zzzz138,zzzzz34	false
1649		zzzz138,zzzzz48	false
1650		zzzz138,zzzzz75	false
1651		zzzz138,zzzzz61	false
1652		zzzz138,zzzzz46	false
1653		zzzz138,zzzzz63	false
1654		zzzz139,zzzz152	false
1655		zzzz139,zzzz149	false
1656		zzzz139,zzzz147	false
1657		zzzz139,zzzz145	false
1658		zzzz139,zzzz151	false
1659		zzzz139,zzzz157	false
1660		zzzz139,zzzz156	false
1661		zzzz139,zzzzz10	false
1662		zzzz139,zzzz150	false
1663		zzzz139,zzzz144	false
1664		zzzz139,zzzzz17	false
1665		zzzz139,zzzz146	false
1666		zzzz139,zzzzzz7	false
1667		zzzz139,zzzz153	false
1668		zzzz139,zzzz148	false
1669		zzzz139,zzzzzz1	false
1670		zzzz139,zzzzz13	false
1671		zzzz139,zzzzz11	false
1672		zzzz139,zzzz155	false
1673		zzzz139,zzzzzz9	false
1674		zzzz139,zzzzz12	false
1675		zzzz139,zzzzz93	false
1676		zzzz139,zzzz142	false
1677		zzzz139,zzzz143	false
1678		zzzz139,zzzz154	false
1679		zzzz139,zzzz141	false
1680		zzzz139,zzzz140	false
1681		zzzz139,zzzzzz6	false
1682		zzzz139,zzzzzz5	false
1683		zzzz139,zzzzz16	false
1684		zzzz139,zzzzzz4	false
1685		zzzz139,zzzzz15	false
1686		zzzz139,zzzzzz2	false
1687		zzzz139,zzzzzz0	false
1688		zzzz139,zzzzzz8	false
1689		zzzz139,zzzz158	false
1690		zzzz139,zzzzz88	false
1691		zzzz139,zzzzz89	false
1692		zzzz139,zzzzz99	false
1693		zzzz139,zzzzz87	false
1694		zzzz139,zzzzz41	false
1695		zzzz139,zzzzz55	false
1696		zzzz139,zzzzz43	false
1697		zzzz139,zzzzz42	false
1698		zzzz139,zzzzz71	false
1699		zzzz139,zzzzz68	false
1700		zzzz139,zzzzz47	false
1701		zzzz139,zzzzz60	false
1702		zzzz139,zzzzz72	false
1703		zzzz139,zzzzz44	false
1704		zzzz140,zzzz147	false
1705		zzzz140,zzzz153	false
1706		zzzz140,zzzz143	false
1707		zzzz140,zzzz146	false
1708		zzzz140,zzzzz13	false
1709		zzzz140,zzzz149	false
1710		zzzz140,zzzz155	false
1711		zzzz140,zzzz152	false
1712		zzzz140,zzzz151	false
1713		zzzz140,zzzz154	false
1714		zzzz140,zzzz148	false
1715		zzzz140,zzzz157	false
1716		zzzz140,zzzzz17	false
1717		zzzz140,zzzzz12	false
1718		zzzz140,zzzzzz1	false
1719		zzzz140,zzzz145	false
1720		zzzz140,zzzzzz4	false
1721		zzzz140,zzzz144	false
1722		zzzz140,zzzzzz9	false
1723		zzzz140,zzzzz10	false
1724		zzzz140,zzzz156	false
1725		zzzz140,zzzzz11	false
1726		zzzz140,zzzzz16	false
1727		zzzz140,zzzzzz7	false
1728		zzzz140,zzzzzz8	false
1729		zzzz140,zzzzz93	false
1730		zzzz140,zzzz142	false
1731		zzzz140,zzzzz15	false
1732		zzzz140,zzzzzz2	false
1733		zzzz140,zzzz150	false
1734		zzzz140,zzzzzz5	false
1735		zzzz140,zzzz141	false
1736		zzzz140,zzzzzz6	false
1737		zzzz140,zzzz158	false
1738		zzzz140,zzzzzz0	false
1739		zzzz140,zzzzz88	false
1740		zzzz140,zzzzz89	false
1741		zzzz140,zzzzz42	false
1742		zzzz140,zzzzz87	false
1743		zzzz140,zzzzz99	false
1744		zzzz140,zzzzz55	false
1745		zzzz140,zzzzz41	false
1746		zzzz140,zzzzz56	false
1747		zzzz140,zzzzz71	false
1748		zzzz140,zzzzz67	false
1749		zzzz141,zzzz151	false
1750		zzzz141,zzzzz12	false
1751		zzzz141,zzzzz13	false
1752		zzzz141,zzzzz17	false
1753		zzzz141,zzzz144	false
1754		zzzz141,zzzz152	false
1755		zzzz141,zzzzz11	false
1756		zzzz141,zzzz148	false
1757		zzzz141,zzzzz10	false
1758		zzzz141,zzzzzz9	false
1759		zzzz141,zzzz145	false
1760		zzzz141,zzzz153	false
1761		zzzz141,zzzz142	false
1762		zzzz141,zzzzz93	false
1763		zzzz141,zzzz155	false
1764		zzzz141,zzzz157	false
1765		zzzz141,zzzzzz7	false
1766		zzzz141,zzzz143	false
1767		zzzz141,zzzz147	false
1768		zzzz141,zzzz146	false
1769		zzzz141,zzzz154	false
1770		zzzz141,zzzz156	false
1771		zzzz141,zzzzz16	false
1772		zzzz141,zzzzzz4	false
1773		zzzz141,zzzz149	false
1774		zzzz141,zzzz150	false
1775		zzzz141,zzzzzz1	false
1776		zzzz141,zzzzz15	false
1777		zzzz141,zzzzzz6	false
1778		zzzz141,zzzzzz5	false
1779		zzzz141,zzzzzz0	false
1780		zzzz141,zzzzzz8	false
1781		zzzz141,zzzzzz2	false
1782		zzzz141,zzzz158	false
1783		zzzz141,zzzzz88	false
1784		zzzz141,zzzzz87	false
1785		zzzz141,zzzzz56	false
1786		zzzz141,zzzzz44	false
1787		zzzz141,zzzzz41	false
1788		zzzz141,zzzzz53	false
1789		zzzz141,zzzzz55	false
1790		zzzz141,zzzzz71	false
1791		zzzz141,zzzzz72	false
1792		zzzz141,zzzzz43	false
1793		zzzz141,zzzzz60	false
1794		zzzz141,zzzzz89	false
1795		zzzz141,zzzzz47	false
1796		zzzz141,zzzzz99	false
1797		zzzz141,zzzzz73	false
1798		zzzz141,zzzzz64	false
1799		zzzz141,zzzzz58	false
1800		zzzz141,zzzzz46	false
1801		zzzz141,zzzzz67	false
1802		zzzz141,zzzzz50	false
1803		zzzz141,zzzzz29	false
1804		zzzz141,zzzzz34	false
1805		zzzz141,zzzzz42	false
1806		zzzz141,zzzzz75	false
1807		zzzz142,zzzzz10	false
1808		zzzz142,zzzzzz9	false
1809		zzzz142,zzzzz13	false
1810		zzzz142,zzzzz11	false
1811		zzzz142,zzzzz12	false
1812		zzzz142,zzzzzz7	false
1813		zzzz142,zzzz143	false
1814		zzzz142,zzzz150	false
1815		zzzz142,zzzz155	false
1816		zzzz142,zzzz145	false
1817		zzzz142,zzzz152	false
1818		zzzz142,zzzz146	false
1819		zzzz142,zzzzz16	false
1820		zzzz142,zzzz151	false
1821		zzzz142,zzzz153	false
1822		zzzz142,zzzz154	false
1823		zzzz142,zzzzz17	false
1824		zzzz142,zzzz144	false
1825		zzzz142,zzzz148	false
1826		zzzz142,zzzz157	false
1827		zzzz142,zzzz149	false
1828		zzzz142,zzzz156	false
1829		zzzz142,zzzz147	false
1830		zzzz142,zzzzzz4	false
1831		zzzz142,zzzzz93	false
1832		zzzz142,zzzzzz1	false
1833		zzzz142,zzzzz15	false
1834		zzzz142,zzzzzz6	false
1835		zzzz142,zzzzzz0	false
1836		zzzz142,zzzzzz5	false
1837		zzzz142,zzzzzz2	false
1838		zzzz142,zzzz158	false
1839		zzzz142,zzzzzz8	false
1840		zzzz142,zzzzz88	false
1841		zzzz142,zzzzz87	false
1842		zzzz142,zzzzz56	false
1843		zzzz142,zzzzz89	false
1844		zzzz142,zzzzz41	false
1845		zzzz142,zzzzz43	false
1846		zzzz142,zzzzz72	false
1847		zzzz142,zzzzz60	false
1848		zzzz142,zzzzz53	false
1849		zzzz142,zzzzz73	false
1850		zzzz142,zzzzz99	false
1851		zzzz142,zzzzz44	false
1852		zzzz142,zzzzz71	false
1853		zzzz142,zzzzz55	false
1854		zzzz142,zzzzz68	false
1855		zzzz142,zzzzz29	false
1856		zzzz142,zzzzz42	false
1857		zzzz142,zzzzz61	false
1858		zzzz142,zzzzz64	false
1859		zzzz142,zzzzz46	false
1860		zzzz143,zzzzzz9	false
1861		zzzz143,zzzzz13	false
1862		zzzz143,zzzzz10	false
1863		zzzz143,zzzzzz7	false
1864		zzzz143,zzzzz11	false
1865		zzzz143,zzzzz12	false
1866		zzzz143,zzzz145	false
1867		zzzz143,zzzz155	false
1868		zzzz143,zzzzz17	false
1869		zzzz143,zzzz146	false
1870		zzzz143,zzzz153	false
1871		zzzz143,zzzz151	false
1872		zzzz143,zzzz144	false
1873		zzzz143,zzzz157	false
1874		zzzz143,zzzz152	false
1875		zzzz143,zzzz150	false
1876		zzzz143,zzzzz16	false
1877		zzzz143,zzzz149	false
1878		zzzz143,zzzz156	false
1879		zzzz143,zzzzzz4	false
1880		zzzz143,zzzz154	false
1881		zzzz143,zzzzz93	false
1882		zzzz143,zzzz147	false
1883		zzzz143,zzzzzz1	false
1884		zzzz143,zzzz148	false
1885		zzzz143,zzzzzz6	false
1886		zzzz143,zzzzzz5	false
1887		zzzz143,zzzzzz0	false
1888		zzzz143,zzzzz15	false
1889		zzzz143,zzzz158	false
1890		zzzz143,zzzzzz8	false
1891		zzzz143,zzzzzz2	false
1892		zzzz143,zzzzz88	false
1893		zzzz143,zzzzz87	false
1894		zzzz143,zzzzz89	false
1895		zzzz143,zzzzz56	false
1896		zzzz143,zzzzz43	false
1897		zzzz143,zzzzz60	false
1898		zzzz143,zzzzz73	false
1899		zzzz143,zzzzz55	false
1900		zzzz143,zzzzz72	false
1901		zzzz143,zzzzz53	false
1902		zzzz143,zzzzz44	false
1903		zzzz143,zzzzz67	false
1904		zzzz143,zzzzz99	false
1905		zzzz143,zzzzz41	false
1906		zzzz143,zzzzz42	false
1907		zzzz143,zzzzz46	false
1908		zzzz143,zzzzz78	false
1909		zzzz143,zzzzz47	false
1910		zzzz143,zzzzz51	false
1911		zzzz144,zzzz145	false
1912		zzzz144,zzzz148	false
1913		zzzz144,zzzz155	false
1914		zzzz144,zzzz153	false
1915		zzzz144,zzzzz13	false
1916		zzzz144,zzzz149	false
1917		zzzz144,zzzz152	false
1918		zzzz144,zzzz154	false
1919		zzzz144,zzzzzz7	false
1920		zzzz144,zzzzzz9	false
1921		zzzz144,zzzz156	false
1922		zzzz144,zzzz150	false
1923		zzzz144,zzzzz10	false
1924		zzzz144,zzzz157	false
1925		zzzz144,zzzzz11	false
1926		zzzz144,zzzz151	false
1927		zzzz144,zzzz147	false
1928		zzzz144,zzzzz12	false
1929		zzzz144,zzzz146	false
1930		zzzz144,zzzzz16	false
1931		zzzz144,zzzzz93	false
1932		zzzz144,zzzzz17	false
1933		zzzz144,zzzzzz1	false
1934		zzzz144,zzzzzz4	false
1935		zzzz144,zzzzzz6	false
1936		zzzz144,zzzzzz0	false
1937		zzzz144,zzzzzz2	false
1938		zzzz144,zzzz158	false
1939		zzzz144,zzzzz15	false
1940		zzzz144,zzzzz88	false
1941		zzzz144,zzzzzz8	false
1942		zzzz144,zzzzzz5	false
1943		zzzz144,zzzzz87	false
1944		zzzz144,zzzzz89	false
1945		zzzz144,zzzzz47	false
1946		zzzz144,zzzzz60	false
1947		zzzz144,zzzzz71	false
1948		zzzz144,zzzzz53	false
1949		zzzz144,zzzzz56	false
1950		zzzz144,zzzzz44	false
1951		zzzz144,zzzzz50	false
1952		zzzz144,zzzzz68	false
1953		zzzz144,zzzzz72	false
1954		zzzz144,zzzzz99	false
1955		zzzz144,zzzzz43	false
1956		zzzz144,zzzzz64	false
1957		zzzz144,zzzzz67	false
1958		zzzz144,zzzzz46	false
1959		zzzz144,zzzzz54	false
1960		zzzz144,zzzzz55	false
1961		zzzz144,zzzzz58	false
1962		zzzz144,zzzzz41	false
1963		zzzz144,zzzzz34	false
1964		zzzz144,zzzzz42	false
1965		zzzz144,zzzzz40	false
1966		zzzz145,zzzz153	false
1967		zzzz145,zzzzz11	false
1968		zzzz145,zzzzz13	false
1969		zzzz145,zzzz155	false
1970		zzzz145,zzzzzz9	false
1971		zzzz145,zzzzz10	false
1972		zzzz145,zzzz152	false
1973		zzzz145,zzzzzz7	false
1974		zzzz145,zzzz150	false
1975		zzzz145,zzzz154	false
1976		zzzz145,zzzzz12	false
1977		zzzz145,zzzzz16	false
1978		zzzz145,zzzz151	false
1979		zzzz145,zzzzz17	false
1980		zzzz145,zzzz157	false
1981		zzzz145,zzzzz93	false
1982		zzzz145,zzzz148	false
1983		zzzz145,zzzz146	false
1984		zzzz145,zzzz156	false
1985		zzzz145,zzzzzz4	false
1986		zzzz145,zzzz149	false
1987		zzzz145,zzzz147	false
1988		zzzz145,zzzzzz1	false
1989		zzzz145,zzzzzz6	false
1990		zzzz145,zzzzz15	false
1991		zzzz145,zzzzzz2	false
1992		zzzz145,zzzzzz8	false
1993		zzzz145,zzzzzz0	false
1994		zzzz145,zzzzzz5	false
1995		zzzz145,zzzz158	false
1996		zzzz145,zzzzz88	false
1997		zzzz145,zzzzz87	false
1998		zzzz145,zzzzz53	false
1999		zzzz145,zzzzz60	false
2000		zzzz145,zzzzz89	false
2001		zzzz145,zzzzz71	false
2002		zzzz145,zzzzz47	false
2003		zzzz145,zzzzz43	false
2004		zzzz145,zzzzz34	false
2005		zzzz145,zzzzz41	false
2006		zzzz145,zzzzz44	false
2007		zzzz145,zzzzz55	false
2008		zzzz145,zzzzz68	false
2009		zzzz145,zzzzz56	false
2010		zzzz145,zzzzz73	false
2011		zzzz145,zzzzz72	false
2012		zzzz145,zzzzz46	false
2013		zzzz145,zzzzz67	false
2014		zzzz145,zzzzz50	false
2015		zzzz145,zzzzz99	false
2016		zzzz145,zzzzz64	false
2017		zzzz145,zzzzz78	false
2018		zzzz145,zzzzz54	false
2019		zzzz145,zzzzz42	false
2020		zzzz145,zzzzz70	false
2021		zzzz145,zzzzz29	false
2022		zzzz146,zzzzz13	false
2023		zzzz146,zzzz152	false
2024		zzzz146,zzzz148	false
2025		zzzz146,zzzzz12	false
2026		zzzz146,zzzzz16	false
2027		zzzz146,zzzzzz7	false
2028		zzzz146,zzzz151	false
2029		zzzz146,zzzzz11	false
2030		zzzz146,zzzz157	false
2031		zzzz146,zzzzzz9	false
2032		zzzz146,zzzz149	false
2033		zzzz146,zzzz155	false
2034		zzzz146,zzzzz10	false
2035		zzzz146,zzzz153	false
2036		zzzz146,zzzz150	false
2037		zzzz146,zzzzz17	false
2038		zzzz146,zzzzzz4	false
2039		zzzz146,zzzz147	false
2040		zzzz146,zzzz154	false
2041		zzzz146,zzzz156	false
2042		zzzz146,zzzzz93	false
2043		zzzz146,zzzzzz1	false
2044		zzzz146,zzzzzz6	false
2045		zzzz146,zzzzzz0	false
2046		zzzz146,zzzzzz2	false
2047		zzzz146,zzzz158	false
2048		zzzz146,zzzzzz8	false
2049		zzzz146,zzzzz15	false
2050		zzzz146,zzzzzz5	false
2051		zzzz146,zzzzz88	false
2052		zzzz146,zzzzz89	false
2053		zzzz146,zzzzz41	false
2054		zzzz146,zzzzz87	false
2055		zzzz146,zzzzz60	false
2056		zzzz146,zzzzz43	false
2057		zzzz146,zzzzz56	false
2058		zzzz146,zzzzz73	false
2059		zzzz146,zzzzz47	false
2060		zzzz146,zzzzz71	false
2061		zzzz146,zzzzz72	false
2062		zzzz146,zzzzz53	false
2063		zzzz146,zzzzz55	false
2064		zzzz146,zzzzz44	false
2065		zzzz146,zzzzz68	false
2066		zzzz146,zzzzz78	false
2067		zzzz146,zzzzz67	false
2068		zzzz146,zzzzz46	false
2069		zzzz146,zzzzz50	false
2070		zzzz146,zzzzz64	false
2071		zzzz146,zzzzz40	false
2072		zzzz146,zzzzz58	false
2073		zzzz146,zzzzz99	false
2074		zzzz146,zzzzz42	false
2075		zzzz146,zzzzz62	false
2076		zzzz146,zzzzz54	false
2077		zzzz147,zzzz149	false
2078		zzzz147,zzzz148	false
2079		zzzz147,zzzz151	false
2080		zzzz147,zzzz152	false
2081		zzzz147,zzzzz13	false
2082		zzzz147,zzzz153	false
2083		zzzz147,zzzzzz1	false
2084		zzzz147,zzzzz17	false
2085		zzzz147,zzzzz93	false
2086		zzzz147,zzzz155	false
2087		zzzz147,zzzz157	false
2088		zzzz147,zzzz150	false
2089		zzzz147,zzzzz10	false
2090		zzzz147,zzzzz16	false
2091		zzzz147,zzzz154	false
2092		zzzz147,zzzzz12	false
2093		zzzz147,zzzzzz9	false
2094		zzzz147,zzzzz11	false
2095		zzzz147,zzzzzz7	false
2096		zzzz147,zzzz156	false
2097		zzzz147,zzzzzz4	false
2098		zzzz147,zzzzzz6	false
2099		zzzz147,zzzzzz5	false
2100		zzzz147,zzzzzz0	false
2101		zzzz147,zzzzzz8	false
2102		zzzz147,zzzz158	false
2103		zzzz147,zzzzzz2	false
2104		zzzz147,zzzzz15	false
2105		zzzz147,zzzzz88	false
2106		zzzz147,zzzzz89	false
2107		zzzz147,zzzzz87	false
2108		zzzz147,zzzzz42	false
2109		zzzz147,zzzzz99	false
2110		zzzz147,zzzzz72	false
2111		zzzz147,zzzzz71	false
2112		zzzz147,zzzzz41	false
2113		zzzz147,zzzzz43	false
2114		zzzz147,zzzzz60	false
2115		zzzz147,zzzzz44	false
2116		zzzz147,zzzzz55	false
2117		zzzz147,zzzzz73	false
2118		zzzz147,zzzzz47	false
2119		zzzz147,zzzzz51	false
2120		zzzz147,zzzzz56	false
2121		zzzz147,zzzzz48	false
2122		zzzz147,zzzzz68	false
2123		zzzz147,zzzzz46	false
2124		zzzz147,zzzzz67	false
2125		zzzz147,zzzzz40	false
2126		zzzz147,zzzzz78	false
2127		zzzz147,zzzzz75	false
2128		zzzz147,zzzzz76	false
2129		zzzz148,zzzz149	false
2130		zzzz148,zzzz151	false
2131		zzzz148,zzzz152	false
2132		zzzz148,zzzz155	false
2133		zzzz148,zzzzzz1	false
2134		zzzz148,zzzz153	false
2135		zzzz148,zzzz154	false
2136		zzzz148,zzzzzz9	false
2137		zzzz148,zzzzz17	false
2138		zzzz148,zzzzz93	false
2139		zzzz148,zzzz150	false
2140		zzzz148,zzzz157	false
2141		zzzz148,zzzzz10	false
2142		zzzz148,zzzzz12	false
2143		zzzz148,zzzzz16	false
2144		zzzz148,zzzzz13	false
2145		zzzz148,zzzzz11	false
2146		zzzz148,zzzzzz7	false
2147		zzzz148,zzzz156	false
2148		zzzz148,zzzzzz0	false
2149		zzzz148,zzzzzz4	false
2150		zzzz148,zzzzzz6	false
2151		zzzz148,zzzz158	false
2152		zzzz148,zzzzzz8	false
2153		zzzz148,zzzzzz5	false
2154		zzzz148,zzzzzz2	false
2155		zzzz148,zzzzz15	false
2156		zzzz148,zzzzz88	false
2157		zzzz148,zzzzz89	false
2158		zzzz148,zzzzz87	false
2159		zzzz148,zzzzz47	false
2160		zzzz148,zzzzz43	false
2161		zzzz148,zzzzz60	false
2162		zzzz148,zzzzz41	false
2163		zzzz148,zzzzz54	false
2164		zzzz148,zzzzz71	false
2165		zzzz148,zzzzz46	false
2166		zzzz148,zzzzz67	false
2167		zzzz148,zzzzz68	false
2168		zzzz148,zzzzz56	false
2169		zzzz148,zzzzz73	false
2170		zzzz148,zzzzz53	false
2171		zzzz148,zzzzz58	false
2172		zzzz148,zzzzz72	false
2173		zzzz148,zzzzz78	false
2174		zzzz148,zzzzz55	false
2175		zzzz148,zzzzz99	false
2176		zzzz148,zzzzz44	false
2177		zzzz148,zzzzz34	false
2178		zzzz148,zzzzz29	false
2179		zzzz148,zzzzz64	false
2180		zzzz148,zzzzz76	false
2181		zzzz148,zzzzz62	false
2182		zzzz148,zzzzz50	false
2183		zzzz148,zzzzz70	false
2184		zzzz148,zzzzz42	false
2185		zzzz149,zzzz152	false
2186		zzzz149,zzzz151	false
2187		zzzz149,zzzz157	false
2188		zzzz149,zzzz150	false
2189		zzzz149,zzzz153	false
2190		zzzz149,zzzzz10	false
2191		zzzz149,zzzzz13	false
2192		zzzz149,zzzzz12	false
2193		zzzz149,zzzzz16	false
2194		zzzz149,zzzzzz9	false
2195		zzzz149,zzzzz11	false
2196		zzzz149,zzzz155	false
2197		zzzz149,zzzzzz1	false
2198		zzzz149,zzzz156	false
2199		zzzz149,zzzzz17	false
2200		zzzz149,zzzzzz7	false
2201		zzzz149,zzzzz93	false
2202		zzzz149,zzzz154	false
2203		zzzz149,zzzzzz4	false
2204		zzzz149,zzzzzz8	false
2205		zzzz149,zzzzzz6	false
2206		zzzz149,zzzzzz2	false
2207		zzzz149,zzzzzz5	false
2208		zzzz149,zzzzz15	false
2209		zzzz149,zzzzzz0	false
2210		zzzz149,zzzz158	false
2211		zzzz149,zzzzz88	false
2212		zzzz149,zzzzz89	false
2213		zzzz149,zzzzz87	false
2214		zzzz149,zzzzz56	false
2215		zzzz149,zzzzz42	false
2216		zzzz149,zzzzz55	false
2217		zzzz149,zzzzz99	false
2218		zzzz149,zzzzz71	false
2219		zzzz149,zzzzz43	false
2220		zzzz149,zzzzz60	false
2221		zzzz149,zzzzz50	false
2222		zzzz149,zzzzz76	false
2223		zzzz149,zzzzz67	false
2224		zzzz149,zzzzz58	false
2225		zzzz149,zzzzz48	false
[truncated: 2,332 more rows]
