# Supplementary material for: Discovery of several thousand highly diverse circular DNA viruses
Source: eLife journal article supplement (doi:10.7554/elife.51971), 2020-02-03
Supplement: fig4-data1 [file elife-51971-fig4-data1-v1.cys › CytoscapeSession-2019_08_07-14_38/tables/52-all_myseqs_and_genbank_s_domain2_70_190610+Full+Network/LOCAL_ATTRS-org.cytoscape.model.CyNetwork-all_myseqs_and_genbank_s_domain2_70_190610+Full+Network+default+network.cytable]

"CyCSV-Version","1"
"SUID","__Annotations","name","selected"
"java.lang.Long","java.util.List<java.lang.String>","java.lang.String","java.lang.Boolean"
"","mutable","",""
"all_myseqs_and_genbank_s_domain2_70_190610 Full Network default network",""
"52","","all_myseqs_and_genbank_s_domain2_70_190610 Full Network","true"
