# Supplementary material for: Discovery of several thousand highly diverse circular DNA viruses
Source: eLife journal article supplement (doi:10.7554/elife.51971), 2020-02-03
Supplement: fig4-data1 [file elife-51971-fig4-data1-v1.cys › CytoscapeSession-2019_08_07-14_38/tables/4558-all_myseqs_and_genbank_s_domain2_70_190610+Full+Network%281%29/LOCAL_ATTRS-org.cytoscape.model.CyEdge-all_myseqs_and_genbank_s_domain2_70_190610+Full+Network%281%29+default+edge.cytable]

CyCSV-Version	1
SUID	interaction	name	selected
java.lang.Long	java.lang.String	java.lang.String	java.lang.Boolean
all_myseqs_and_genbank_s_domain2_70_190610 Full Network(1) default edge
3726		zzzzz47,zzzzz94	false
3722		zzzzz47,zzzzzz3	false
3718		zzzzz47,zzzzz57	false
3710		zzzzz47,zzzzz87	false
3707		zzzzz47,zzzzz58	false
3705		zzzzz47,zzzzz89	false
3704		zzzzz47,zzzzz88	false
3701		zzzzz47,zzzzz75	false
3697		zzzzz47,zzzzz56	false
3693		zzzzz47,zzzzz50	false
3692		zzzzz47,zzzzz53	false
3691		zzzzz47,zzzzz55	false
3689		zzzzz47,zzzzz72	false
3688		zzzzz47,zzzzz63	false
3687		zzzzz47,zzzzz73	false
3686		zzzzz47,zzzzz71	false
3685		zzzzz47,zzzzz68	false
3684		zzzzz47,zzzzz60	false
3677		zzzzz46,zzzzz94	false
3672		zzzzz46,zzzzzz3	false
3668		zzzzz46,zzzzz87	false
3665		zzzzz46,zzzzz57	false
3662		zzzzz46,zzzzz89	false
3658		zzzzz46,zzzzz88	false
3654		zzzzz46,zzzzz58	false
3653		zzzzz46,zzzzz75	false
3651		zzzzz46,zzzzz56	false
3648		zzzzz46,zzzzz73	false
3647		zzzzz46,zzzzz63	false
3645		zzzzz46,zzzzz72	false
3644		zzzzz46,zzzzz60	false
3643		zzzzz46,zzzzz68	false
3642		zzzzz46,zzzzz47	false
3641		zzzzz46,zzzzz50	false
3640		zzzzz46,zzzzz71	false
3639		zzzzz46,zzzzz53	false
3638		zzzzz46,zzzzz55	false
3604		zzzzz44,zzzzz94	false
3598		zzzzz44,zzzzz57	false
525		zzzz103,zzzzzz3	false
519		zzzz103,zzzzz38	false
3587		zzzzz44,zzzzzz3	false
3580		zzzzz44,zzzzz89	false
3579		zzzzz44,zzzzz88	false
3578		zzzzz44,zzzzz87	false
3572		zzzzz44,zzzzz58	false
3570		zzzzz44,zzzzz75	false
3569		zzzzz44,zzzzz56	false
3566		zzzzz44,zzzzz50	false
3565		zzzzz44,zzzzz63	false
3563		zzzzz44,zzzzz47	false
3561		zzzzz44,zzzzz71	false
3560		zzzzz44,zzzzz60	false
3559		zzzzz44,zzzzz68	false
3558		zzzzz44,zzzzz73	false
3557		zzzzz44,zzzzz46	false
3556		zzzzz44,zzzzz72	false
3555		zzzzz44,zzzzz53	false
3554		zzzzz44,zzzzz55	false
3553		zzzzz43,zzzzzz3	false
479		zzzz103,zzzzz57	false
3545		zzzzz43,zzzzz57	false
3535		zzzzz43,zzzzz87	false
3532		zzzzz43,zzzzz89	false
3531		zzzzz43,zzzzz88	false
3530		zzzzz43,zzzzz58	false
456		zzzz103,zzzzz58	false
454		zzzz103,zzzzz75	false
453		zzzz103,zzzz111	false
3525		zzzzz43,zzzzz75	false
451		zzzz103,zzzzz87	false
447		zzzz103,zzzzz50	false
3517		zzzzz43,zzzzz56	false
3516		zzzzz43,zzzzz50	false
442		zzzz103,zzzz115	false
3514		zzzzz43,zzzzz46	false
441		zzzz103,zzzzz89	false
3513		zzzzz43,zzzzz53	false
440		zzzz103,zzzzz73	false
3512		zzzzz43,zzzzz44	false
439		zzzz103,zzzzz44	false
3511		zzzzz43,zzzzz55	false
438		zzzz103,zzzzz72	false
3510		zzzzz43,zzzzz63	false
437		zzzz103,zzzzz68	false
3509		zzzzz43,zzzzz73	false
436		zzzz103,zzzzz56	false
3508		zzzzz43,zzzzz47	false
3507		zzzzz43,zzzzz71	false
434		zzzz103,zzzzz47	false
3506		zzzzz43,zzzzz60	false
433		zzzz103,zzzz119	false
432		zzzz103,zzzzz88	false
3504		zzzzz43,zzzzz68	false
431		zzzz103,zzzzz55	false
3503		zzzzz43,zzzzz72	false
430		zzzz103,zzzzz43	false
429		zzzz103,zzzzz53	false
428		zzzz103,zzzzz46	false
427		zzzz103,zzzzz41	false
426		zzzz103,zzzz112	false
425		zzzz103,zzzzz63	false
424		zzzz103,zzzzz71	false
423		zzzz103,zzzzz60	false
419		zzzz102,zzzzz57	false
418		zzzz102,zzzzz50	false
416		zzzz102,zzzzz46	false
415		zzzz102,zzzzz44	false
4509		zzzzz94,zzzzzz3	false
411		zzzz102,zzzzz75	false
409		zzzz102,zzzzz56	false
408		zzzz102,zzzzz53	false
407		zzzz102,zzzzz89	false
406		zzzz102,zzzzzz3	false
403		zzzz102,zzzzz55	false
401		zzzz102,zzzz115	false
4497		zzzzz92,zzzzzz3	false
400		zzzz102,zzzzz35	false
399		zzzz102,zzzzz94	false
4494		zzzzz89,zzzzzz3	false
4481		zzzzz88,zzzzzz3	false
4467		zzzzz88,zzzzz89	false
3443		zzzzz41,zzzzzz3	false
4466		zzzzz87,zzzzzz3	false
3433		zzzzz41,zzzzz57	false
3431		zzzzz41,zzzzz87	false
4454		zzzzz87,zzzzz89	false
3430		zzzzz41,zzzzz89	false
4452		zzzzz87,zzzzz88	false
3427		zzzzz41,zzzzz88	false
3426		zzzzz41,zzzzz75	false
3425		zzzzz41,zzzzz58	false
3414		zzzzz41,zzzzz56	false
3412		zzzzz41,zzzzz50	false
3410		zzzzz41,zzzzz63	false
3409		zzzzz41,zzzzz46	false
3408		zzzzz41,zzzzz44	false
3407		zzzzz41,zzzzz53	false
3406		zzzzz41,zzzzz55	false
3405		zzzzz41,zzzzz73	false
3404		zzzzz41,zzzzz71	false
3403		zzzzz41,zzzzz47	false
3401		zzzzz41,zzzzz68	false
3400		zzzzz41,zzzzz60	false
3399		zzzzz41,zzzzz43	false
3398		zzzzz41,zzzzz72	false
318		zzzz100,zzzzzz3	false
4412		zzzzz75,zzzzz94	false
313		zzzz100,zzzzz94	false
4409		zzzzz75,zzzzz89	false
4408		zzzzz75,zzzzzz3	false
4407		zzzzz75,zzzzz88	false
4405		zzzzz75,zzzzz87	false
299		zzzz100,zzzz102	false
1323		zzzz119,zzzzz38	false
1321		zzzz119,zzzzzz3	false
4386		zzzzz73,zzzzzz3	false
4375		zzzzz73,zzzzz87	false
4374		zzzzz73,zzzzz75	false
4373		zzzzz73,zzzzz89	false
4372		zzzzz73,zzzzz88	false
273		zzzz100,zzzzz57	false
271		zzzz100,zzzzz50	false
4367		zzzzz72,zzzzzz3	false
4366		zzzzz72,zzzzz94	false
1294		zzzz119,zzzzz75	false
1293		zzzz119,zzzzz58	false
268		zzzz100,zzzzz47	false
1291		zzzz119,zzzzz57	false
266		zzzz100,zzzzz75	false
263		zzzz100,zzzzz89	false
262		zzzz100,zzzzz68	false
261		zzzz100,zzzzz58	false
260		zzzz100,zzzzz73	false
4356		zzzzz72,zzzzz87	false
258		zzzz100,zzzz112	false
257		zzzz100,zzzz111	false
4353		zzzzz72,zzzzz89	false
255		zzzz100,zzzzz46	false
4351		zzzzz72,zzzzz88	false
254		zzzz100,zzzzz60	false
4350		zzzzz72,zzzzz75	false
4347		zzzzz72,zzzzz73	false
250		zzzz100,zzzzz44	false
1274		zzzz119,zzzzz73	false
249		zzzz100,zzzzz41	false
1273		zzzz119,zzzzz63	false
248		zzzz100,zzzz103	false
247		zzzz100,zzzzz43	false
246		zzzz100,zzzz119	false
4342		zzzzz71,zzzzz94	false
245		zzzz100,zzzzz63	false
4341		zzzzz71,zzzzzz3	false
244		zzzz100,zzzzz71	false
1268		zzzz119,zzzzz60	false
3316		zzzzz38,zzzzzz3	false
1267		zzzz119,zzzzz47	false
1266		zzzz119,zzzzz68	false
241		zzzz100,zzzzz72	false
3313		zzzzz38,zzzzz75	false
240		zzzz100,zzzzz88	false
3312		zzzzz38,zzzzz44	false
3311		zzzzz38,zzzzz89	false
3310		zzzzz38,zzzzz57	false
237		zzzz100,zzzz115	false
236		zzzz100,zzzzz56	false
3308		zzzzz38,zzzzz88	false
4331		zzzzz71,zzzzz87	false
234		zzzz100,zzzzz55	false
1258		zzzz119,zzzzz44	false
233		zzzz100,zzzzz53	false
4329		zzzzz71,zzzzz75	false
232		zzzz100,zzzzz87	false
4328		zzzzz71,zzzzz89	false
1256		zzzz119,zzzzz50	false
4327		zzzzz71,zzzzz88	false
4324		zzzzz71,zzzzz72	false
4323		zzzzz71,zzzzz73	false
1250		zzzz119,zzzzz71	false
1249		zzzz119,zzzzz72	false
1245		zzzz119,zzzzz46	false
1243		zzzz119,zzzzz55	false
1242		zzzz119,zzzzz53	false
1239		zzzz119,zzzzz87	false
1234		zzzz119,zzzzz43	false
1232		zzzz119,zzzzz41	false
1231		zzzz119,zzzzz56	false
1229		zzzz119,zzzzz89	false
1228		zzzz119,zzzzz88	false
4294		zzzzz68,zzzzzz3	false
4283		zzzzz68,zzzzz87	false
4282		zzzzz68,zzzzz89	false
4281		zzzzz68,zzzzz88	false
4280		zzzzz68,zzzzz75	false
4275		zzzzz68,zzzzz72	false
3251		zzzzz35,zzzzzz3	false
4274		zzzzz68,zzzzz73	false
3250		zzzzz35,zzzzz94	false
4273		zzzzz68,zzzzz71	false
1144		zzzz115,zzzzz23	false
1137		zzzz115,zzzzz35	false
4203		zzzzz63,zzzzz87	false
4202		zzzzz63,zzzzzz3	false
4197		zzzzz63,zzzzz89	false
4195		zzzzz63,zzzzz88	false
4193		zzzzz63,zzzzz75	false
4190		zzzzz63,zzzzz73	false
4189		zzzzz63,zzzzz72	false
4188		zzzzz63,zzzzz71	false
1116		zzzz115,zzzzz57	false
4187		zzzzz63,zzzzz68	false
1112		zzzz115,zzzzzz3	false
1110		zzzz115,zzzzz94	false
1109		zzzz115,zzzzz87	false
1104		zzzz115,zzzzz89	false
1098		zzzz115,zzzz119	false
1093		zzzz115,zzzzz88	false
1087		zzzz115,zzzzz63	false
1086		zzzz115,zzzzz58	false
1085		zzzz115,zzzzz50	false
1084		zzzz115,zzzzz47	false
1081		zzzz115,zzzzz75	false
1079		zzzz115,zzzzz68	false
1077		zzzz115,zzzzz60	false
1076		zzzz115,zzzzz73	false
1075		zzzz115,zzzzz55	false
1073		zzzz115,zzzzz71	false
1072		zzzz115,zzzzz43	false
1070		zzzz115,zzzzz72	false
4141		zzzzz60,zzzzzz3	false
1069		zzzz115,zzzzz44	false
1068		zzzz115,zzzzz56	false
4138		zzzzz60,zzzzz94	false
1066		zzzz115,zzzzz53	false
1065		zzzz115,zzzzz41	false
1064		zzzz115,zzzzz46	false
4129		zzzzz60,zzzzz87	false
4126		zzzzz60,zzzzz89	false
4125		zzzzz60,zzzzz75	false
4123		zzzzz60,zzzzz88	false
4117		zzzzz60,zzzzz63	false
4115		zzzzz60,zzzzz72	false
4114		zzzzz60,zzzzz73	false
4113		zzzzz60,zzzzz68	false
4112		zzzzz60,zzzzz71	false
4084		zzzzz58,zzzzz88	false
4082		zzzzz58,zzzzzz3	false
4081		zzzzz58,zzzzz87	false
4080		zzzzz58,zzzzz89	false
4078		zzzzz58,zzzzz68	false
4077		zzzzz58,zzzzz71	false
4076		zzzzz58,zzzzz63	false
4075		zzzzz58,zzzzz73	false
4074		zzzzz58,zzzzz60	false
4073		zzzzz58,zzzzz72	false
4063		zzzzz58,zzzzz75	false
4061		zzzzz57,zzzzz75	false
4060		zzzzz57,zzzzzz3	false
4058		zzzzz57,zzzzz63	false
4057		zzzzz57,zzzzz87	false
4056		zzzzz57,zzzzz88	false
4052		zzzzz57,zzzzz89	false
4050		zzzzz57,zzzzz60	false
4049		zzzzz57,zzzzz71	false
4048		zzzzz57,zzzzz72	false
4047		zzzzz57,zzzzz68	false
4045		zzzzz57,zzzzz73	false
4037		zzzzz56,zzzzzz3	false
4036		zzzzz56,zzzzz57	false
4022		zzzzz56,zzzzz87	false
4020		zzzzz56,zzzzz88	false
4019		zzzzz56,zzzzz63	false
4017		zzzzz56,zzzzz89	false
4016		zzzzz56,zzzzz71	false
4015		zzzzz56,zzzzz60	false
4013		zzzzz56,zzzzz68	false
4011		zzzzz56,zzzzz73	false
4010		zzzzz56,zzzzz72	false
2985		zzzzz24,zzzzzz3	false
2983		zzzzz23,zzzzzz3	false
4006		zzzzz56,zzzzz75	false
2982		zzzzz23,zzzzz58	false
2980		zzzzz23,zzzzz24	false
4002		zzzzz56,zzzzz58	false
3988		zzzzz55,zzzzz94	false
3987		zzzzz55,zzzzzz3	false
3986		zzzzz55,zzzzz57	false
3982		zzzzz55,zzzzz89	false
3981		zzzzz55,zzzzz87	false
3978		zzzzz55,zzzzz88	false
3977		zzzzz55,zzzzz58	false
904		zzzz112,zzzzz38	false
903		zzzz112,zzzzz23	false
901		zzzz112,zzzzzz3	false
3971		zzzzz55,zzzzz75	false
3969		zzzzz55,zzzzz56	false
3967		zzzzz55,zzzzz63	false
3965		zzzzz55,zzzzz73	false
3964		zzzzz55,zzzzz68	false
892		zzzz112,zzzzz94	false
3963		zzzzz55,zzzzz60	false
891		zzzz112,zzzzz57	false
3962		zzzzz55,zzzzz71	false
3961		zzzzz55,zzzzz72	false
3920		zzzzz53,zzzzz94	false
843		zzzz112,zzzzz71	false
3915		zzzzz53,zzzzzz3	false
839		zzzz112,zzzz115	false
837		zzzz112,zzzzz75	false
3908		zzzzz53,zzzzz57	false
3907		zzzzz53,zzzzz87	false
834		zzzz112,zzzzz58	false
3906		zzzzz53,zzzzz89	false
831		zzzz112,zzzzz47	false
3901		zzzzz53,zzzzz88	false
828		zzzz112,zzzzz50	false
3900		zzzzz53,zzzzz58	false
827		zzzz112,zzzzz46	false
826		zzzz112,zzzzz41	false
3898		zzzzz53,zzzzz75	false
825		zzzz112,zzzzz87	false
824		zzzz112,zzzzz68	false
823		zzzz112,zzzzz44	false
822		zzzz112,zzzzz72	false
821		zzzz112,zzzzz56	false
3893		zzzzz53,zzzzz56	false
819		zzzz112,zzzzz43	false
3891		zzzzz53,zzzzz63	false
816		zzzz112,zzzzz63	false
3888		zzzzz53,zzzzz73	false
815		zzzz112,zzzzz60	false
3887		zzzzz53,zzzzz72	false
814		zzzz112,zzzzz53	false
3886		zzzzz53,zzzzz71	false
813		zzzz112,zzzzz55	false
3885		zzzzz53,zzzzz68	false
3884		zzzzz53,zzzzz60	false
811		zzzz112,zzzzz73	false
3883		zzzzz53,zzzzz55	false
808		zzzz112,zzzzz89	false
806		zzzz112,zzzzz88	false
805		zzzz112,zzzz119	false
799		zzzz111,zzzzz58	false
798		zzzz111,zzzzz57	false
796		zzzz111,zzzzzz3	false
775		zzzz111,zzzzz75	false
770		zzzz111,zzzzz63	false
768		zzzz111,zzzz115	false
763		zzzz111,zzzzz50	false
762		zzzz111,zzzzz46	false
758		zzzz111,zzzzz72	false
755		zzzz111,zzzzz55	false
754		zzzz111,zzzzz43	false
751		zzzz111,zzzzz44	false
3821		zzzzz50,zzzzzz3	false
3815		zzzzz50,zzzzz87	false
3814		zzzzz50,zzzzz57	false
3812		zzzzz50,zzzzz94	false
738		zzzz111,zzzzz53	false
735		zzzz111,zzzzz47	false
3806		zzzzz50,zzzzz89	false
732		zzzz111,zzzzz89	false
731		zzzz111,zzzzz41	false
3803		zzzzz50,zzzzz88	false
3802		zzzzz50,zzzzz58	false
728		zzzz111,zzzzz73	false
727		zzzz111,zzzzz68	false
3799		zzzzz50,zzzzz75	false
3797		zzzzz50,zzzzz56	false
723		zzzz111,zzzz112	false
722		zzzz111,zzzzz60	false
3794		zzzzz50,zzzzz63	false
3793		zzzzz50,zzzzz71	false
719		zzzz111,zzzzz71	false
3791		zzzzz50,zzzzz55	false
718		zzzz111,zzzzz88	false
3790		zzzzz50,zzzzz73	false
717		zzzz111,zzzzz56	false
3789		zzzzz50,zzzzz60	false
716		zzzz111,zzzz119	false
3788		zzzzz50,zzzzz53	false
3787		zzzzz50,zzzzz68	false
714		zzzz111,zzzzz87	false
3786		zzzzz50,zzzzz72	false
