# Supplementary material for: Discovery of several thousand highly diverse circular DNA viruses
Source: eLife journal article supplement (doi:10.7554/elife.51971), 2020-02-03
Supplement: fig4-data1 [file elife-51971-fig4-data1-v1.cys › CytoscapeSession-2019_08_07-14_38/tables/4558-all_myseqs_and_genbank_s_domain2_70_190610+Full+Network%281%29/LOCAL_ATTRS-org.cytoscape.model.CyNode-all_myseqs_and_genbank_s_domain2_70_190610+Full+Network%281%29+default+node.cytable]

CyCSV-Version	1
SUID	name	selected
java.lang.Long	java.lang.String	java.lang.Boolean
all_myseqs_and_genbank_s_domain2_70_190610 Full Network(1) default node
175	zzzzz55	false
176	zzzzz56	false
177	zzzzz57	false
178	zzzzz58	false
180	zzzzz60	false
183	zzzzz63	false
188	zzzzz68	false
62	zzzz100	false
191	zzzzz71	false
64	zzzz102	false
192	zzzzz72	false
193	zzzzz73	false
65	zzzz103	false
195	zzzzz75	false
73	zzzz111	false
74	zzzz112	false
77	zzzz115	false
207	zzzzz87	false
143	zzzzz23	false
208	zzzzz88	false
144	zzzzz24	false
209	zzzzz89	false
81	zzzz119	false
212	zzzzz92	false
214	zzzzz94	false
155	zzzzz35	false
158	zzzzz38	false
223	zzzzzz3	false
161	zzzzz41	false
163	zzzzz43	false
164	zzzzz44	false
166	zzzzz46	false
167	zzzzz47	false
170	zzzzz50	false
173	zzzzz53	false
