# Supplementary material for: Discovery of several thousand highly diverse circular DNA viruses
Source: eLife journal article supplement (doi:10.7554/elife.51971), 2020-02-03
Supplement: fig4-data1 [file elife-51971-fig4-data1-v1.cys › CytoscapeSession-2019_08_07-14_38/tables/4568-all_myseqs_and_genbank_s_domain2_70_190610+Full+Network%282%29/LOCAL_ATTRS-org.cytoscape.model.CyNode-all_myseqs_and_genbank_s_domain2_70_190610+Full+Network%282%29+default+node.cytable]

CyCSV-Version	1
SUID	name	selected
java.lang.Long	java.lang.String	java.lang.Boolean
all_myseqs_and_genbank_s_domain2_70_190610 Full Network(2) default node
62	zzzz100	false
63	zzzz101	false
64	zzzz102	false
65	zzzz103	false
66	zzzz104	false
67	zzzz105	false
68	zzzz106	false
69	zzzz107	false
70	zzzz108	false
71	zzzz109	false
73	zzzz111	false
74	zzzz112	false
75	zzzz113	false
76	zzzz114	false
77	zzzz115	false
78	zzzz116	false
79	zzzz117	false
80	zzzz118	false
81	zzzz119	false
82	zzzz120	false
83	zzzz121	false
84	zzzz122	false
85	zzzz123	false
86	zzzz124	false
87	zzzz125	false
88	zzzz126	false
91	zzzz129	false
92	zzzz130	false
93	zzzz131	false
94	zzzz132	false
95	zzzz133	false
96	zzzz134	false
97	zzzz135	false
98	zzzz136	false
99	zzzz137	false
100	zzzz138	false
101	zzzz139	false
102	zzzz140	false
103	zzzz141	false
104	zzzz142	false
105	zzzz143	false
106	zzzz144	false
107	zzzz145	false
108	zzzz146	false
109	zzzz147	false
110	zzzz148	false
111	zzzz149	false
112	zzzz150	false
113	zzzz151	false
114	zzzz152	false
115	zzzz153	false
116	zzzz154	false
117	zzzz155	false
118	zzzz156	false
119	zzzz157	false
120	zzzz158	false
130	zzzzz10	false
131	zzzzz11	false
132	zzzzz12	false
133	zzzzz13	false
134	zzzzz14	false
135	zzzzz15	false
136	zzzzz16	false
137	zzzzz17	false
140	zzzzz20	false
141	zzzzz21	false
142	zzzzz22	false
143	zzzzz23	false
144	zzzzz24	false
145	zzzzz25	false
148	zzzzz28	false
149	zzzzz29	false
150	zzzzz30	false
151	zzzzz31	false
152	zzzzz32	false
153	zzzzz33	false
154	zzzzz34	false
155	zzzzz35	false
156	zzzzz36	false
157	zzzzz37	false
158	zzzzz38	false
159	zzzzz39	false
160	zzzzz40	false
161	zzzzz41	false
162	zzzzz42	false
163	zzzzz43	false
164	zzzzz44	false
165	zzzzz45	false
166	zzzzz46	false
167	zzzzz47	false
168	zzzzz48	false
169	zzzzz49	false
170	zzzzz50	false
171	zzzzz51	false
172	zzzzz52	false
173	zzzzz53	false
174	zzzzz54	false
175	zzzzz55	false
176	zzzzz56	false
177	zzzzz57	false
178	zzzzz58	false
179	zzzzz59	false
180	zzzzz60	false
181	zzzzz61	false
182	zzzzz62	false
183	zzzzz63	false
184	zzzzz64	false
185	zzzzz65	false
186	zzzzz66	false
187	zzzzz67	false
188	zzzzz68	false
189	zzzzz69	false
190	zzzzz70	false
191	zzzzz71	false
192	zzzzz72	false
193	zzzzz73	false
194	zzzzz74	false
195	zzzzz75	false
196	zzzzz76	false
197	zzzzz77	false
198	zzzzz78	false
199	zzzzz79	false
207	zzzzz87	false
208	zzzzz88	false
209	zzzzz89	false
212	zzzzz92	false
213	zzzzz93	false
214	zzzzz94	false
215	zzzzz95	false
216	zzzzz96	false
217	zzzzz97	false
218	zzzzz98	false
219	zzzzz99	false
220	zzzzzz0	false
221	zzzzzz1	false
222	zzzzzz2	false
223	zzzzzz3	false
224	zzzzzz4	false
225	zzzzzz5	false
226	zzzzzz6	false
227	zzzzzz7	false
228	zzzzzz8	false
229	zzzzzz9	false
