# Supplementary material for: Discovery of several thousand highly diverse circular DNA viruses
Source: eLife journal article supplement (doi:10.7554/elife.51971), 2020-02-03
Supplement: fig4-data1 [file elife-51971-fig4-data1-v1.cys › CytoscapeSession-2019_08_07-14_38/views/52-9033-all_myseqs_and_genbank_s_domain2_70_190610+Full+Network.xgmml]

<?xml version="1.0" encoding="UTF-8" standalone="yes"?>
<graph id="9033" label="all_myseqs_and_genbank_s_domain2_70_190610 Full Network" cy:view="1" cy:networkId="52" cy:visualStyle="Solid" cy:rendererId="org.cytoscape.ding" cy:documentVersion="3.0" xmlns:dc="http://purl.org/dc/elements/1.1/" xmlns:xlink="http://www.w3.org/1999/xlink" xmlns:rdf="http://www.w3.org/1999/02/22-rdf-syntax-ns#" xmlns:cy="http://www.cytoscape.org" xmlns="http://www.cs.rpi.edu/XGMML">
  <graphics>
    <att name="NETWORK_SCALE_FACTOR" value="0.27851031312920793" type="string" cy:type="String"/>
    <att name="NETWORK_TITLE" value="all_myseqs_and_genbank_s_domain2_70_190610 Full Network" type="string" cy:type="String"/>
    <att name="NETWORK_ANNOTATION_SELECTION" value="false" type="string" cy:type="String"/>
    <att name="NETWORK_HEIGHT" value="475.0" type="string" cy:type="String"/>
    <att name="NETWORK_EDGE_SELECTION" value="true" type="string" cy:type="String"/>
    <att name="NETWORK_DEPTH" value="0.0" type="string" cy:type="String"/>
    <att name="NETWORK_CENTER_X_LOCATION" value="338.3264759035039" type="string" cy:type="String"/>
    <att name="NETWORK_CENTER_Z_LOCATION" value="0.0" type="string" cy:type="String"/>
    <att name="NETWORK_CENTER_Y_LOCATION" value="-61.6816722898555" type="string" cy:type="String"/>
    <att name="NETWORK_WIDTH" value="889.0" type="string" cy:type="String"/>
    <att name="NETWORK_NODE_SELECTION" value="true" type="string" cy:type="String"/>
  </graphics>
  <node id="9202" label="zzzz100" cy:nodeId="62">
    <graphics x="47.057411193847656" y="78.23064422607422" z="0.0"/>
  </node>
  <node id="9201" label="zzzz101" cy:nodeId="63">
    <graphics x="-343.30706787109375" y="121.76814270019531" z="0.0"/>
  </node>
  <node id="9200" label="zzzz102" cy:nodeId="64">
    <graphics x="136.16799926757812" y="-24.64881134033203" z="0.0"/>
  </node>
  <node id="9199" label="zzzz103" cy:nodeId="65">
    <graphics x="-33.48358154296875" y="-49.64038848876953" z="0.0"/>
  </node>
  <node id="9198" label="zzzz104" cy:nodeId="66">
    <graphics x="463.3927001953125" y="-121.30253601074219" z="0.0"/>
  </node>
  <node id="9197" label="zzzz105" cy:nodeId="67">
    <graphics x="-77.480712890625" y="-21.71753692626953" z="0.0"/>
  </node>
  <node id="9196" label="zzzz106" cy:nodeId="68">
    <graphics x="159.9798583984375" y="81.67757415771484" z="0.0"/>
  </node>
  <node id="9195" label="zzzz107" cy:nodeId="69">
    <graphics x="237.77401733398438" y="124.35673522949219" z="0.0"/>
  </node>
  <node id="9194" label="zzzz108" cy:nodeId="70">
    <graphics x="-123.41419982910156" y="-295.23016357421875" z="0.0"/>
  </node>
  <node id="9193" label="zzzz109" cy:nodeId="71">
    <graphics x="-24.616905212402344" y="-304.5126037597656" z="0.0"/>
  </node>
  <node id="9192" label="zzzz110" cy:nodeId="72">
    <graphics x="35.231026320990054" y="432.6852337743353" z="0.0"/>
  </node>
  <node id="9191" label="zzzz111" cy:nodeId="73">
    <graphics x="-351.524169921875" y="-46.97858428955078" z="0.0"/>
  </node>
  <node id="9190" label="zzzz112" cy:nodeId="74">
    <graphics x="-48.59971618652344" y="26.27751922607422" z="0.0"/>
  </node>
  <node id="9189" label="zzzz113" cy:nodeId="75">
    <graphics x="-89.09507751464844" y="44.200401306152344" z="0.0"/>
  </node>
  <node id="9188" label="zzzz114" cy:nodeId="76">
    <graphics x="-360.7257995605469" y="269.3049621582031" z="0.0"/>
  </node>
  <node id="9187" label="zzzz115" cy:nodeId="77">
    <graphics x="-195.2074737548828" y="-76.0717544555664" z="0.0"/>
  </node>
  <node id="9186" label="zzzz116" cy:nodeId="78">
    <graphics x="643.9772338867188" y="31.891441345214844" z="0.0"/>
  </node>
  <node id="9185" label="zzzz117" cy:nodeId="79">
    <graphics x="-367.62548828125" y="141.66236877441406" z="0.0"/>
  </node>
  <node id="9184" label="zzzz118" cy:nodeId="80">
    <graphics x="479.16680908203125" y="-26.62732696533203" z="0.0"/>
  </node>
  <node id="9183" label="zzzz119" cy:nodeId="81">
    <graphics x="-9.486335754394531" y="59.33989715576172" z="0.0"/>
  </node>
  <node id="9182" label="zzzz120" cy:nodeId="82">
    <graphics x="327.4482116699219" y="-217.73843383789062" z="0.0"/>
  </node>
  <node id="9181" label="zzzz121" cy:nodeId="83">
    <graphics x="-227.3760986328125" y="49.957542419433594" z="0.0"/>
  </node>
  <node id="9180" label="zzzz122" cy:nodeId="84">
    <graphics x="-41.23413848876953" y="-12.548011779785156" z="0.0"/>
  </node>
  <node id="9179" label="zzzz123" cy:nodeId="85">
    <graphics x="29.64708709716797" y="-135.3692169189453" z="0.0"/>
  </node>
  <node id="9178" label="zzzz124" cy:nodeId="86">
    <graphics x="212.30502319335938" y="107.08636474609375" z="0.0"/>
  </node>
  <node id="9177" label="zzzz125" cy:nodeId="87">
    <graphics x="383.8333740234375" y="70.97405242919922" z="0.0"/>
  </node>
  <node id="9176" label="zzzz126" cy:nodeId="88">
    <graphics x="343.7221984863281" y="-446.1131591796875" z="0.0"/>
  </node>
  <node id="9175" label="zzzz127" cy:nodeId="89">
    <graphics x="935.23102632099" y="422.9316632176947" z="0.0"/>
  </node>
  <node id="9174" label="zzzz128" cy:nodeId="90">
    <graphics x="835.23102632099" y="422.9316632176947" z="0.0"/>
  </node>
  <node id="9173" label="zzzz129" cy:nodeId="91">
    <graphics x="-98.57644653320312" y="-481.1510009765625" z="0.0"/>
  </node>
  <node id="9172" label="zzzz130" cy:nodeId="92">
    <graphics x="209.89346313476562" y="-246.28366088867188" z="0.0"/>
  </node>
  <node id="9171" label="zzzz131" cy:nodeId="93">
    <graphics x="2.6003646850585938" y="-694.7161865234375" z="0.0"/>
  </node>
  <node id="9170" label="zzzz132" cy:nodeId="94">
    <graphics x="292.19140625" y="-500.59063720703125" z="0.0"/>
  </node>
  <node id="9169" label="zzzz133" cy:nodeId="95">
    <graphics x="184.776611328125" y="-613.3960571289062" z="0.0"/>
  </node>
  <node id="9168" label="zzzz134" cy:nodeId="96">
    <graphics x="-113.92012023925781" y="-449.45660400390625" z="0.0"/>
  </node>
  <node id="9167" label="zzzz135" cy:nodeId="97">
    <graphics x="-127.6800537109375" y="-576.1577758789062" z="0.0"/>
  </node>
  <node id="9166" label="zzzz136" cy:nodeId="98">
    <graphics x="-134.61917114257812" y="111.96737670898438" z="0.0"/>
  </node>
  <node id="9165" label="zzzz137" cy:nodeId="99">
    <graphics x="-260.78533935546875" y="225.20452880859375" z="0.0"/>
  </node>
  <node id="9164" label="zzzz138" cy:nodeId="100">
    <graphics x="-320.60870361328125" y="167.46885681152344" z="0.0"/>
  </node>
  <node id="9163" label="zzzz139" cy:nodeId="101">
    <graphics x="-277.5691833496094" y="60.559288024902344" z="0.0"/>
  </node>
  <node id="9162" label="zzzz140" cy:nodeId="102">
    <graphics x="-150.83444213867188" y="322.9316711425781" z="0.0"/>
  </node>
  <node id="9161" label="zzzz141" cy:nodeId="103">
    <graphics x="-311.3987731933594" y="202.8947296142578" z="0.0"/>
  </node>
  <node id="9160" label="zzzz142" cy:nodeId="104">
    <graphics x="-193.51492309570312" y="175.5410614013672" z="0.0"/>
  </node>
  <node id="9159" label="zzzz143" cy:nodeId="105">
    <graphics x="-216.80276489257812" y="296.3601989746094" z="0.0"/>
  </node>
  <node id="9158" label="zzzz144" cy:nodeId="106">
    <graphics x="-204.50289916992188" y="249.89004516601562" z="0.0"/>
  </node>
  <node id="9157" label="zzzz145" cy:nodeId="107">
    <graphics x="-217.27926635742188" y="162.84275817871094" z="0.0"/>
  </node>
  <node id="9156" label="zzzz146" cy:nodeId="108">
    <graphics x="-206.277587890625" y="145.0677947998047" z="0.0"/>
  </node>
  <node id="9155" label="zzzz147" cy:nodeId="109">
    <graphics x="-297.65576171875" y="253.45632934570312" z="0.0"/>
  </node>
  <node id="9154" label="zzzz148" cy:nodeId="110">
    <graphics x="-173.31044006347656" y="243.08792114257812" z="0.0"/>
  </node>
  <node id="9153" label="zzzz149" cy:nodeId="111">
    <graphics x="-318.6235656738281" y="137.3820343017578" z="0.0"/>
  </node>
  <node id="9152" label="zzzz150" cy:nodeId="112">
    <graphics x="-223.98486328125" y="121.57139587402344" z="0.0"/>
  </node>
  <node id="9151" label="zzzz151" cy:nodeId="113">
    <graphics x="-252.91226196289062" y="265.6304016113281" z="0.0"/>
  </node>
  <node id="9150" label="zzzz152" cy:nodeId="114">
    <graphics x="-256.78033447265625" y="168.4572296142578" z="0.0"/>
  </node>
  <node id="9149" label="zzzz153" cy:nodeId="115">
    <graphics x="-102.44731140136719" y="213.4345245361328" z="0.0"/>
  </node>
  <node id="9148" label="zzzz154" cy:nodeId="116">
    <graphics x="-88.58100128173828" y="163.5959014892578" z="0.0"/>
  </node>
  <node id="9147" label="zzzz155" cy:nodeId="117">
    <graphics x="-153.93368530273438" y="188.00868225097656" z="0.0"/>
  </node>
  <node id="9146" label="zzzz156" cy:nodeId="118">
    <graphics x="-111.44882202148438" y="223.92169189453125" z="0.0"/>
  </node>
  <node id="9145" label="zzzz157" cy:nodeId="119">
    <graphics x="-116.45610046386719" y="199.81715393066406" z="0.0"/>
  </node>
  <node id="9144" label="zzzz158" cy:nodeId="120">
    <graphics x="-61.170494079589844" y="183.8498077392578" z="0.0"/>
  </node>
  <node id="9143" label="zzzz159" cy:nodeId="121">
    <graphics x="1001.3022076182923" y="-372.3363860224176" z="0.0"/>
  </node>
  <node id="9142" label="zzzz160" cy:nodeId="122">
    <graphics x="1027.1785198741518" y="-558.6545851801325" z="0.0"/>
  </node>
  <node id="9141" label="zzzz161" cy:nodeId="123">
    <graphics x="938.2903667979798" y="-409.17145377144107" z="0.0"/>
  </node>
  <node id="9140" label="zzzz162" cy:nodeId="124">
    <graphics x="1069.1513592296205" y="-537.7750762079645" z="0.0"/>
  </node>
  <node id="9139" label="zzzz163" cy:nodeId="125">
    <graphics x="897.9650799327454" y="-377.814993200152" z="0.0"/>
  </node>
  <node id="9138" label="zzzz164" cy:nodeId="126">
    <graphics x="957.0543743663392" y="-344.933157262652" z="0.0"/>
  </node>
  <node id="9137" label="zzzz165" cy:nodeId="127">
    <graphics x="797.3114697032532" y="-694.7161639307428" z="0.0"/>
  </node>
  <node id="9136" label="zzzz166" cy:nodeId="128">
    <graphics x="743.9772411876282" y="-510.9860900019098" z="0.0"/>
  </node>
  <node id="9135" label="zzzz167" cy:nodeId="129">
    <graphics x="950.1218182139954" y="-686.2591193293024" z="0.0"/>
  </node>
  <node id="9134" label="zzzzz10" cy:nodeId="130">
    <graphics x="-263.56585693359375" y="183.46083068847656" z="0.0"/>
  </node>
  <node id="9133" label="zzzzz11" cy:nodeId="131">
    <graphics x="-254.16897583007812" y="132.65904235839844" z="0.0"/>
  </node>
  <node id="9132" label="zzzzz12" cy:nodeId="132">
    <graphics x="-202.4365692138672" y="176.33937072753906" z="0.0"/>
  </node>
  <node id="9131" label="zzzzz13" cy:nodeId="133">
    <graphics x="-246.07009887695312" y="206.67884826660156" z="0.0"/>
  </node>
  <node id="9130" label="zzzzz14" cy:nodeId="134">
    <graphics x="189.19851684570312" y="-99.48245239257812" z="0.0"/>
  </node>
  <node id="9129" label="zzzzz15" cy:nodeId="135">
    <graphics x="-383.6482238769531" y="103.12179565429688" z="0.0"/>
  </node>
  <node id="9128" label="zzzzz16" cy:nodeId="136">
    <graphics x="-264.2372741699219" y="235.53863525390625" z="0.0"/>
  </node>
  <node id="9127" label="zzzzz17" cy:nodeId="137">
    <graphics x="-255.64956665039062" y="205.57362365722656" z="0.0"/>
  </node>
  <node id="9126" label="zzzzz18" cy:nodeId="138">
    <graphics x="-261.10120329326776" y="565.7653576757025" z="0.0"/>
  </node>
  <node id="9125" label="zzzzz19" cy:nodeId="139">
    <graphics x="-398.08586916393426" y="492.89691895499936" z="0.0"/>
  </node>
  <node id="9124" label="zzzzz20" cy:nodeId="140">
    <graphics x="368.1617736816406" y="-36.201942443847656" z="0.0"/>
  </node>
  <node id="9123" label="zzzzz21" cy:nodeId="141">
    <graphics x="369.2581787109375" y="109.70169067382812" z="0.0"/>
  </node>
  <node id="9122" label="zzzzz22" cy:nodeId="142">
    <graphics x="73.97370147705078" y="-354.52081298828125" z="0.0"/>
  </node>
  <node id="9121" label="zzzzz23" cy:nodeId="143">
    <graphics x="117.79281616210938" y="-302.3276672363281" z="0.0"/>
  </node>
  <node id="9120" label="zzzzz24" cy:nodeId="144">
    <graphics x="136.52008056640625" y="-470.3140563964844" z="0.0"/>
  </node>
  <node id="9119" label="zzzzz25" cy:nodeId="145">
    <graphics x="-57.64100646972656" y="-289.5005798339844" z="0.0"/>
  </node>
  <node id="9118" label="zzzzz26" cy:nodeId="146">
    <graphics x="-272.52363523906854" y="422.9316632176947" z="0.0"/>
  </node>
  <node id="9117" label="zzzzz27" cy:nodeId="147">
    <graphics x="-185.45711454815057" y="470.42606324210874" z="0.0"/>
  </node>
  <node id="9116" label="zzzzz28" cy:nodeId="148">
    <graphics x="-291.21038818359375" y="138.5479278564453" z="0.0"/>
  </node>
  <node id="9115" label="zzzzz29" cy:nodeId="149">
    <graphics x="-327.94036865234375" y="-6.457801818847656" z="0.0"/>
  </node>
  <node id="9114" label="zzzzz30" cy:nodeId="150">
    <graphics x="203.28677368164062" y="-341.44976806640625" z="0.0"/>
  </node>
  <node id="9113" label="zzzzz31" cy:nodeId="151">
    <graphics x="70.35955047607422" y="-224.61505126953125" z="0.0"/>
  </node>
  <node id="9112" label="zzzzz32" cy:nodeId="152">
    <graphics x="-59.081504821777344" y="184.7772674560547" z="0.0"/>
  </node>
  <node id="9111" label="zzzzz33" cy:nodeId="153">
    <graphics x="-348.9367980957031" y="54.09093475341797" z="0.0"/>
  </node>
  <node id="9110" label="zzzzz34" cy:nodeId="154">
    <graphics x="-164.81971740722656" y="-145.45529174804688" z="0.0"/>
  </node>
  <node id="9109" label="zzzzz35" cy:nodeId="155">
    <graphics x="234.00515747070312" y="-426.54559326171875" z="0.0"/>
  </node>
  <node id="9108" label="zzzzz36" cy:nodeId="156">
    <graphics x="-127.32633972167969" y="-245.1490478515625" z="0.0"/>
  </node>
  <node id="9107" label="zzzzz37" cy:nodeId="157">
    <graphics x="227.6328125" y="-29.38831329345703" z="0.0"/>
  </node>
  <node id="9106" label="zzzzz38" cy:nodeId="158">
    <graphics x="256.22027587890625" y="-101.29464721679688" z="0.0"/>
  </node>
  <node id="9105" label="zzzzz39" cy:nodeId="159">
    <graphics x="-128.6533660888672" y="149.93992614746094" z="0.0"/>
  </node>
  <node id="9104" label="zzzzz40" cy:nodeId="160">
    <graphics x="-392.1407775878906" y="1.4152755737304688" z="0.0"/>
  </node>
  <node id="9103" label="zzzzz41" cy:nodeId="161">
    <graphics x="-218.46868896484375" y="-124.96734619140625" z="0.0"/>
  </node>
  <node id="9102" label="zzzzz42" cy:nodeId="162">
    <graphics x="-147.78817749023438" y="-75.90665435791016" z="0.0"/>
  </node>
  <node id="9101" label="zzzzz43" cy:nodeId="163">
    <graphics x="-211.42042541503906" y="-95.73587036132812" z="0.0"/>
  </node>
  <node id="9100" label="zzzzz44" cy:nodeId="164">
    <graphics x="-228.2662353515625" y="-113.9090576171875" z="0.0"/>
  </node>
  <node id="9099" label="zzzzz45" cy:nodeId="165">
    <graphics x="-139.4774932861328" y="198.18275451660156" z="0.0"/>
  </node>
  <node id="9098" label="zzzzz46" cy:nodeId="166">
    <graphics x="-231.84585571289062" y="-170.49485778808594" z="0.0"/>
  </node>
  <node id="9097" label="zzzzz47" cy:nodeId="167">
    <graphics x="-242.46847534179688" y="-84.77417755126953" z="0.0"/>
  </node>
  <node id="9096" label="zzzzz48" cy:nodeId="168">
    <graphics x="-147.3890380859375" y="139.3748321533203" z="0.0"/>
  </node>
  <node id="9095" label="zzzzz49" cy:nodeId="169">
    <graphics x="-188.4512176513672" y="188.9041290283203" z="0.0"/>
  </node>
  <node id="9094" label="zzzzz50" cy:nodeId="170">
    <graphics x="-182.87974548339844" y="-191.56741333007812" z="0.0"/>
  </node>
  <node id="9093" label="zzzzz51" cy:nodeId="171">
    <graphics x="50.206321716308594" y="-10.276191711425781" z="0.0"/>
  </node>
  <node id="9092" label="zzzzz52" cy:nodeId="172">
    <graphics x="-210.24240112304688" y="89.98992156982422" z="0.0"/>
  </node>
  <node id="9091" label="zzzzz53" cy:nodeId="173">
    <graphics x="-224.67489624023438" y="-110.34432983398438" z="0.0"/>
  </node>
  <node id="9090" label="zzzzz54" cy:nodeId="174">
    <graphics x="-282.5370788574219" y="-134.5952606201172" z="0.0"/>
  </node>
  <node id="9089" label="zzzzz55" cy:nodeId="175">
    <graphics x="-293.3311462402344" y="-124.04888916015625" z="0.0"/>
  </node>
  <node id="9088" label="zzzzz56" cy:nodeId="176">
    <graphics x="-134.59512329101562" y="-48.524879455566406" z="0.0"/>
  </node>
  <node id="9087" label="zzzzz57" cy:nodeId="177">
    <graphics x="58.47693634033203" y="-171.36837768554688" z="0.0"/>
  </node>
  <node id="9086" label="zzzzz58" cy:nodeId="178">
    <graphics x="-69.10147094726562" y="-44.561378479003906" z="0.0"/>
  </node>
  <node id="9085" label="zzzzz59" cy:nodeId="179">
    <graphics x="-269.5257263183594" y="108.54898071289062" z="0.0"/>
  </node>
  <node id="9084" label="zzzzz60" cy:nodeId="180">
    <graphics x="-173.25132751464844" y="-121.8406982421875" z="0.0"/>
  </node>
  <node id="9083" label="zzzzz61" cy:nodeId="181">
    <graphics x="-350.2649841308594" y="42.34728240966797" z="0.0"/>
  </node>
  <node id="9082" label="zzzzz62" cy:nodeId="182">
    <graphics x="-45.72026824951172" y="-125.26486206054688" z="0.0"/>
  </node>
  <node id="9081" label="zzzzz63" cy:nodeId="183">
    <graphics x="-206.950927734375" y="-218.55307006835938" z="0.0"/>
  </node>
  <node id="9080" label="zzzzz64" cy:nodeId="184">
    <graphics x="-325.1918640136719" y="-27.81995391845703" z="0.0"/>
  </node>
  <node id="9079" label="zzzzz65" cy:nodeId="185">
    <graphics x="-234.0662841796875" y="113.62199401855469" z="0.0"/>
  </node>
  <node id="9078" label="zzzzz66" cy:nodeId="186">
    <graphics x="349.0904846191406" y="-186.59228515625" z="0.0"/>
  </node>
  <node id="9077" label="zzzzz67" cy:nodeId="187">
    <graphics x="-123.6109619140625" y="-162.87884521484375" z="0.0"/>
  </node>
  <node id="9076" label="zzzzz68" cy:nodeId="188">
    <graphics x="-171.37001037597656" y="-131.56666564941406" z="0.0"/>
  </node>
  <node id="9075" label="zzzzz69" cy:nodeId="189">
    <graphics x="59.609718322753906" y="-73.39354705810547" z="0.0"/>
  </node>
  <node id="9074" label="zzzzz70" cy:nodeId="190">
    <graphics x="-53.11082458496094" y="-188.34072875976562" z="0.0"/>
  </node>
  <node id="9073" label="zzzzz71" cy:nodeId="191">
    <graphics x="-273.17352294921875" y="-114.25730895996094" z="0.0"/>
  </node>
  <node id="9072" label="zzzzz72" cy:nodeId="192">
    <graphics x="-201.35511779785156" y="-127.50782775878906" z="0.0"/>
  </node>
  <node id="9071" label="zzzzz73" cy:nodeId="193">
    <graphics x="-130.9768524169922" y="-115.00146484375" z="0.0"/>
  </node>
  <node id="9070" label="zzzzz74" cy:nodeId="194">
    <graphics x="33.59778594970703" y="-22.23078155517578" z="0.0"/>
  </node>
  <node id="9069" label="zzzzz75" cy:nodeId="195">
    <graphics x="-160.2791290283203" y="6.534996032714844" z="0.0"/>
  </node>
  <node id="9068" label="zzzzz76" cy:nodeId="196">
    <graphics x="-147.1266326904297" y="72.48589324951172" z="0.0"/>
  </node>
  <node id="9067" label="zzzzz77" cy:nodeId="197">
    <graphics x="-127.7362060546875" y="-328.3441467285156" z="0.0"/>
  </node>
  <node id="9066" label="zzzzz78" cy:nodeId="198">
    <graphics x="-260.9400634765625" y="-68.6220932006836" z="0.0"/>
  </node>
  <node id="9065" label="zzzzz79" cy:nodeId="199">
    <graphics x="68.9930648803711" y="-209.42678833007812" z="0.0"/>
  </node>
  <node id="9064" label="zzzzz80" cy:nodeId="200">
    <graphics x="735.23102632099" y="422.9316632176947" z="0.0"/>
  </node>
  <node id="9063" label="zzzzz81" cy:nodeId="201">
    <graphics x="635.23102632099" y="422.9316632176947" z="0.0"/>
  </node>
  <node id="9062" label="zzzzz82" cy:nodeId="202">
    <graphics x="535.23102632099" y="422.9316632176947" z="0.0"/>
  </node>
  <node id="9061" label="zzzzz83" cy:nodeId="203">
    <graphics x="435.23102632099005" y="422.9316632176947" z="0.0"/>
  </node>
  <node id="9060" label="zzzzz84" cy:nodeId="204">
    <graphics x="335.23102632099005" y="422.9316632176947" z="0.0"/>
  </node>
  <node id="9059" label="zzzzz85" cy:nodeId="205">
    <graphics x="235.23102632099005" y="422.9316632176947" z="0.0"/>
  </node>
  <node id="9058" label="zzzzz86" cy:nodeId="206">
    <graphics x="135.23102632099005" y="422.9316632176947" z="0.0"/>
  </node>
  <node id="9057" label="zzzzz87" cy:nodeId="207">
    <graphics x="0.9171524047851562" y="45.445274353027344" z="0.0"/>
  </node>
  <node id="9056" label="zzzzz88" cy:nodeId="208">
    <graphics x="-45.93077850341797" y="44.35399627685547" z="0.0"/>
  </node>
  <node id="9055" label="zzzzz89" cy:nodeId="209">
    <graphics x="-16.950836181640625" y="4.383659362792969" z="0.0"/>
  </node>
  <node id="9054" label="zzzzz90" cy:nodeId="210">
    <graphics x="-34.70819792217401" y="525.6608807469916" z="0.0"/>
  </node>
  <node id="9053" label="zzzzz91" cy:nodeId="211">
    <graphics x="-85.45711454815057" y="422.9316632176947" z="0.0"/>
  </node>
  <node id="9052" label="zzzzz92" cy:nodeId="212">
    <graphics x="293.051025390625" y="48.40093231201172" z="0.0"/>
  </node>
  <node id="9051" label="zzzzz93" cy:nodeId="213">
    <graphics x="-161.57847595214844" y="252.46389770507812" z="0.0"/>
  </node>
  <node id="9050" label="zzzzz94" cy:nodeId="214">
    <graphics x="82.9323959350586" y="-193.12257385253906" z="0.0"/>
  </node>
  <node id="9049" label="zzzzz95" cy:nodeId="215">
    <graphics x="73.23111724853516" y="-108.45794677734375" z="0.0"/>
  </node>
  <node id="9048" label="zzzzz96" cy:nodeId="216">
    <graphics x="-398.08587646484375" y="-169.28985595703125" z="0.0"/>
  </node>
  <node id="9047" label="zzzzz97" cy:nodeId="217">
    <graphics x="20.55194854736328" y="-181.84840393066406" z="0.0"/>
  </node>
  <node id="9046" label="zzzzz98" cy:nodeId="218">
    <graphics x="135.6126708984375" y="-166.00543212890625" z="0.0"/>
  </node>
  <node id="9045" label="zzzzz99" cy:nodeId="219">
    <graphics x="1.5058670043945312" y="138.62928771972656" z="0.0"/>
  </node>
  <node id="9044" label="zzzzzz0" cy:nodeId="220">
    <graphics x="-16.58636474609375" y="190.90138244628906" z="0.0"/>
  </node>
  <node id="9043" label="zzzzzz1" cy:nodeId="221">
    <graphics x="-121.19692993164062" y="233.7337646484375" z="0.0"/>
  </node>
  <node id="9042" label="zzzzzz2" cy:nodeId="222">
    <graphics x="-35.625328063964844" y="210.8910675048828" z="0.0"/>
  </node>
  <node id="9041" label="zzzzzz3" cy:nodeId="223">
    <graphics x="-26.320899963378906" y="-277.9180603027344" z="0.0"/>
  </node>
  <node id="9040" label="zzzzzz4" cy:nodeId="224">
    <graphics x="-303.4913024902344" y="94.19586181640625" z="0.0"/>
  </node>
  <node id="9039" label="zzzzzz5" cy:nodeId="225">
    <graphics x="-380.0119323730469" y="101.13986206054688" z="0.0"/>
  </node>
  <node id="9038" label="zzzzzz6" cy:nodeId="226">
    <graphics x="-99.06442260742188" y="294.5665588378906" z="0.0"/>
  </node>
  <node id="9037" label="zzzzzz7" cy:nodeId="227">
    <graphics x="-198.21331787109375" y="198.85682678222656" z="0.0"/>
  </node>
  <node id="9036" label="zzzzzz8" cy:nodeId="228">
    <graphics x="-165.34518432617188" y="55.473533630371094" z="0.0"/>
  </node>
  <node id="9035" label="zzzzzz9" cy:nodeId="229">
    <graphics x="-194.28858947753906" y="145.92185974121094" z="0.0"/>
  </node>
</graph>
