# Supplementary material for: Discovery of several thousand highly diverse circular DNA viruses
Source: eLife journal article supplement (doi:10.7554/elife.51971), 2020-02-03
Supplement: fig4-data1 [file elife-51971-fig4-data1-v1.cys › CytoscapeSession-2019_08_07-14_38/views/4558-13531-all_myseqs_and_genbank_s_domain2_70_190610+Full+Network%281%29.xgmml]

<?xml version="1.0" encoding="UTF-8" standalone="yes"?>
<graph id="13531" label="all_myseqs_and_genbank_s_domain2_70_190610 Full Network(1)" cy:view="1" cy:networkId="4558" cy:visualStyle="Solid" cy:rendererId="org.cytoscape.ding" cy:documentVersion="3.0" xmlns:dc="http://purl.org/dc/elements/1.1/" xmlns:xlink="http://www.w3.org/1999/xlink" xmlns:rdf="http://www.w3.org/1999/02/22-rdf-syntax-ns#" xmlns:cy="http://www.cytoscape.org" xmlns="http://www.cs.rpi.edu/XGMML">
  <graphics>
    <att name="NETWORK_SCALE_FACTOR" value="0.5612880786523803" type="string" cy:type="String"/>
    <att name="NETWORK_TITLE" value="all_myseqs_and_genbank_s_domain2_70_190610 Full Network(1)" type="string" cy:type="String"/>
    <att name="NETWORK_ANNOTATION_SELECTION" value="false" type="string" cy:type="String"/>
    <att name="NETWORK_HEIGHT" value="475.0" type="string" cy:type="String"/>
    <att name="NETWORK_EDGE_SELECTION" value="true" type="string" cy:type="String"/>
    <att name="NETWORK_DEPTH" value="0.0" type="string" cy:type="String"/>
    <att name="NETWORK_CENTER_X_LOCATION" value="-29.236572265625" type="string" cy:type="String"/>
    <att name="NETWORK_CENTER_Z_LOCATION" value="0.0" type="string" cy:type="String"/>
    <att name="NETWORK_CENTER_Y_LOCATION" value="-196.04170608520508" type="string" cy:type="String"/>
    <att name="NETWORK_WIDTH" value="889.0" type="string" cy:type="String"/>
    <att name="NETWORK_NODE_SELECTION" value="true" type="string" cy:type="String"/>
  </graphics>
  <node id="13567" label="zzzzz55" cy:nodeId="175">
    <graphics x="-293.3311389393249" y="-124.04888182625065" z="0.0"/>
  </node>
  <node id="13566" label="zzzzz56" cy:nodeId="176">
    <graphics x="-134.59511789745477" y="-48.52487975105534" z="0.0"/>
  </node>
  <node id="13565" label="zzzzz57" cy:nodeId="177">
    <graphics x="58.47693601184699" y="-171.3683703516413" z="0.0"/>
  </node>
  <node id="13564" label="zzzzz58" cy:nodeId="178">
    <graphics x="-69.10147127575067" y="-44.56137877449284" z="0.0"/>
  </node>
  <node id="13563" label="zzzzz60" cy:nodeId="180">
    <graphics x="-173.25132021373895" y="-121.8406909082819" z="0.0"/>
  </node>
  <node id="13562" label="zzzzz63" cy:nodeId="183">
    <graphics x="-206.9509204334655" y="-218.5530627344538" z="0.0"/>
  </node>
  <node id="13561" label="zzzzz68" cy:nodeId="188">
    <graphics x="-171.3700107044616" y="-131.56665831550848" z="0.0"/>
  </node>
  <node id="13560" label="zzzz100" cy:nodeId="62">
    <graphics x="47.05741086536261" y="78.23064393058529" z="0.0"/>
  </node>
  <node id="13559" label="zzzzz71" cy:nodeId="191">
    <graphics x="-273.1735309070983" y="-114.25730162605534" z="0.0"/>
  </node>
  <node id="13557" label="zzzzz72" cy:nodeId="192">
    <graphics x="-201.35511049694207" y="-127.50782042488346" z="0.0"/>
  </node>
  <node id="13558" label="zzzz102" cy:nodeId="64">
    <graphics x="136.1680065684876" y="-24.648811635820966" z="0.0"/>
  </node>
  <node id="13555" label="zzzz103" cy:nodeId="65">
    <graphics x="-33.483581871453794" y="-49.64038878425846" z="0.0"/>
  </node>
  <node id="13556" label="zzzzz73" cy:nodeId="193">
    <graphics x="-130.97685560650018" y="-115.0014575098444" z="0.0"/>
  </node>
  <node id="13554" label="zzzzz75" cy:nodeId="195">
    <graphics x="-160.27913507885125" y="6.534995737225909" z="0.0"/>
  </node>
  <node id="13553" label="zzzz111" cy:nodeId="73">
    <graphics x="-351.5241778797546" y="-46.97858458503971" z="0.0"/>
  </node>
  <node id="13552" label="zzzz112" cy:nodeId="74">
    <graphics x="-48.59971651500848" y="26.277518930585284" z="0.0"/>
  </node>
  <node id="13551" label="zzzz115" cy:nodeId="77">
    <graphics x="-195.20747408336786" y="-76.07175475105534" z="0.0"/>
  </node>
  <node id="13549" label="zzzzz23" cy:nodeId="143">
    <graphics x="117.79282346301886" y="-302.3276646707941" z="0.0"/>
  </node>
  <node id="13550" label="zzzzz87" cy:nodeId="207">
    <graphics x="0.9171520763001126" y="45.44527405753841" z="0.0"/>
  </node>
  <node id="13547" label="zzzzz24" cy:nodeId="144">
    <graphics x="136.52008786731574" y="-470.31404906257876" z="0.0"/>
  </node>
  <node id="13548" label="zzzzz88" cy:nodeId="208">
    <graphics x="-45.93077883190301" y="44.35399598136654" z="0.0"/>
  </node>
  <node id="13545" label="zzzz119" cy:nodeId="81">
    <graphics x="-9.486336082879575" y="59.33989686027279" z="0.0"/>
  </node>
  <node id="13546" label="zzzzz89" cy:nodeId="209">
    <graphics x="-16.95083651012567" y="4.383659067304034" z="0.0"/>
  </node>
  <node id="13544" label="zzzzz92" cy:nodeId="212">
    <graphics x="293.0510326915345" y="48.40093201652279" z="0.0"/>
  </node>
  <node id="13543" label="zzzzz94" cy:nodeId="214">
    <graphics x="82.93239560657355" y="-193.122574148028" z="0.0"/>
  </node>
  <node id="13542" label="zzzzz35" cy:nodeId="155">
    <graphics x="234.0051647716126" y="-426.5456011866022" z="0.0"/>
  </node>
  <node id="13541" label="zzzzz38" cy:nodeId="158">
    <graphics x="256.22028317981574" y="-101.29463988289127" z="0.0"/>
  </node>
  <node id="13540" label="zzzzzz3" cy:nodeId="223">
    <graphics x="-26.320899963378906" y="-277.9180603027344" z="0.0"/>
  </node>
  <node id="13539" label="zzzzz41" cy:nodeId="161">
    <graphics x="-218.46868166393426" y="-124.96733885750065" z="0.0"/>
  </node>
  <node id="13538" label="zzzzz43" cy:nodeId="163">
    <graphics x="-211.42041811412957" y="-95.73587828621159" z="0.0"/>
  </node>
  <node id="13537" label="zzzzz44" cy:nodeId="164">
    <graphics x="-228.266228050653" y="-113.9090502832819" z="0.0"/>
  </node>
  <node id="13536" label="zzzzz46" cy:nodeId="166">
    <graphics x="-231.84585604137567" y="-170.49485045418035" z="0.0"/>
  </node>
  <node id="13535" label="zzzzz47" cy:nodeId="167">
    <graphics x="-242.46846041149286" y="-84.77417784675846" z="0.0"/>
  </node>
  <node id="13534" label="zzzzz50" cy:nodeId="170">
    <graphics x="-182.87973818248895" y="-191.56741362556707" z="0.0"/>
  </node>
  <node id="13533" label="zzzzz53" cy:nodeId="173">
    <graphics x="-224.67489656871942" y="-110.34433775886784" z="0.0"/>
  </node>
</graph>
