# Supplementary material for: Discovery of several thousand highly diverse circular DNA viruses
Source: eLife. 2020 Feb 4;9:e51971. doi: 10.7554/eLife.51971 (PMC7000223; doi:10.7554/eLife.51971)
Supplement: Figure 2—figure supplement 2—source data 1. [file elife-51971-fig2-figsupp2-data1.tre]

#NEXUS
begin taxa;
	dimensions ntax=739;
	taxlabels
	'gb_ttv_A4GZ97.1__PF02956.'[&!color=#ff00ff]
	'gb_ttv_AAC28465.1__PF0295'[&!color=#ff00ff]
	'gb_ttv_AAC29428.1__PF0295'[&!color=#ff00ff]
	'gb_ttv_AAD04852.1__PF0295'[&!color=#ff00ff]
	'gb_ttv_AAD04856.1__PF0295'[&!color=#ff00ff]
	'gb_ttv_AAD04857.1__PF0295'[&!color=#ff00ff]
	'gb_ttv_AAD04869.1__PF0295'[&!color=#ff00ff]
	'gb_ttv_AAD04870.1__PF0295'[&!color=#ff00ff]
	'gb_ttv_AAD20024.1__PF0295'[&!color=#ff00ff]
	'gb_ttv_AAD45635.1__PF0295'[&!color=#ff00ff]
	'gb_ttv_AAD45638.1__PF0295'[&!color=#ff00ff]
	'gb_ttv_AAD45641.1__PF0295'[&!color=#ff00ff]
	'gb_ttv_AAD45644.1__PF0295'[&!color=#ff00ff]
	'gb_ttv_AAD45647.1__PF0295'[&!color=#ff00ff]
	'gb_ttv_AAD45650.1__PF0295'[&!color=#ff00ff]
	'gb_ttv_AAD51720.1__PF0295'[&!color=#ff00ff]
	'gb_ttv_AAD51721.1__PF0295'[&!color=#ff00ff]
	'gb_ttv_AAD51722.1__PF0295'[&!color=#ff00ff]
	'gb_ttv_AAD51723.1__PF0295'[&!color=#ff00ff]
	'gb_ttv_AAD51724.1__PF0295'[&!color=#ff00ff]
	'gb_ttv_AAD51725.1__PF0295'[&!color=#ff00ff]
	'gb_ttv_AAD51726.1__PF0295'[&!color=#ff00ff]
	'gb_ttv_AAD51727.1__PF0295'[&!color=#ff00ff]
	'gb_ttv_AAD51728.1__PF0295'[&!color=#ff00ff]
	'gb_ttv_AAD51729.1__PF0295'[&!color=#ff00ff]
	'gb_ttv_AAD51731.1__PF0295'[&!color=#ff00ff]
	'gb_ttv_AAF28232.1__PF0295'[&!color=#ff00ff]
	'gb_ttv_AAF71533.1__PF0295'[&!color=#ff00ff]
	'gb_ttv_AAG16249.1__PF0295'[&!color=#ff00ff]
	'gb_ttv_AAK00620.1__PF0295'[&!color=#ff00ff]
	'gb_ttv_AAK00621.1__PF0295'[&!color=#ff00ff]
	'gb_ttv_AAK01940.1__PF0295'[&!color=#ff00ff]
	'gb_ttv_AAK01942.1__PF0295'[&!color=#ff00ff]
	'gb_ttv_AAK11696.1__PF0295'[&!color=#ff00ff]
	'gb_ttv_AAK11698.1__PF0295'[&!color=#ff00ff]
	'gb_ttv_AAK11704.1__PF0295'[&!color=#ff00ff]
	'gb_ttv_AAK11708.1__PF0295'[&!color=#ff00ff]
	'gb_ttv_AAK11712.1__PF0295'[&!color=#ff00ff]
	'gb_ttv_AAK29445.1__PF0295'[&!color=#ff00ff]
	'gb_ttv_AAK54732.1__PF0295'[&!color=#ff00ff]
	'gb_ttv_AAK54733.1__PF0295'[&!color=#ff00ff]
	'gb_ttv_AAL15655.1__PF0295'[&!color=#ff00ff]
	'gb_ttv_AAL15656.1__PF0295'[&!color=#ff00ff]
	'gb_ttv_AAL61819.1__PF0295'[&!color=#ff00ff]
	'gb_ttv_AAO25538.1__PF0295'[&!color=#ff00ff]
	'gb_ttv_AAP21825.1__PF0295'[&!color=#ff00ff]
	'gb_ttv_AAS18428.1__PF0295'[&!color=#ff00ff]
	'gb_ttv_AAV41460.1__PF0295'[&!color=#ff00ff]
	'gb_ttv_AAW79273.1__PF0295'[&!color=#ff00ff]
	'gb_ttv_AAW79277.1__PF0295'[&!color=#ff00ff]
	'gb_ttv_ABB30181.1__PF0295'[&!color=#ff00ff]
	'gb_ttv_ABB30182.1__PF0295'[&!color=#ff00ff]
	'gb_ttv_ABB30183.1__PF0295'[&!color=#ff00ff]
	'gb_ttv_ABD34286.1__PF0295'[&!color=#ff00ff]
	'gb_ttv_ABD34292.1__PF0295'[&!color=#ff00ff]
	'gb_ttv_ABD34302.1__PF0295'[&!color=#ff00ff]
	'gb_ttv_ABD34305.1__PF0295'[&!color=#ff00ff]
	'gb_ttv_ABD34307.1__PF0295'[&!color=#ff00ff]
	'gb_ttv_ABD61942.1__PF0295'[&!color=#ff00ff]
	'gb_ttv_ABU55887.1__PF0295'[&!color=#ff00ff]
	'gb_ttv_ABU55900.1__PF0295'[&!color=#ff00ff]
	'gb_ttv_ABY26044.1__PF0295'[&!color=#ff00ff]
	'gb_ttv_ABY26045.1__PF0295'[&!color=#ff00ff]
	'gb_ttv_ABY26046.1__PF0295'[&!color=#ff00ff]
	'gb_ttv_ACK44071.1__PF0295'[&!color=#ff00ff]
	'gb_ttv_ACR20269.1__PF0295'[&!color=#ff00ff]
	'gb_ttv_ACR20274.1__PF0295'[&!color=#ff00ff]
	'gb_ttv_ACR20276.1__PF0295'[&!color=#ff00ff]
	'gb_ttv_ACR20277.1__PF0295'[&!color=#ff00ff]
	'gb_ttv_ADD46846.1__PF0295'[&!color=#ff00ff]
	'gb_ttv_ADD46847.1__PF0295'[&!color=#ff00ff]
	'gb_ttv_ADD46850.1__PF0295'[&!color=#ff00ff]
	'gb_ttv_ADD46854.1__PF0295'[&!color=#ff00ff]
	'gb_ttv_ADD46855.1__PF0295'[&!color=#ff00ff]
	'gb_ttv_ADJ56635.1__PF0295'[&!color=#ff00ff]
	'gb_ttv_ADM33764.1__PF0295'[&!color=#ff00ff]
	'gb_ttv_ADM33768.1__PF0295'[&!color=#ff00ff]
	'gb_ttv_ADM33784.1__PF0295'[&!color=#ff00ff]
	'gb_ttv_ADN28534.1__PF0295'[&!color=#ff00ff]
	'gb_ttv_ADN28537.1__PF0295'[&!color=#ff00ff]
	'gb_ttv_ADN28549.1__PF0295'[&!color=#ff00ff]
	'gb_ttv_ADN28565.1__PF0295'[&!color=#ff00ff]
	'gb_ttv_ADN28569.1__PF0295'[&!color=#ff00ff]
	'gb_ttv_ADN28577.1__PF0295'[&!color=#ff00ff]
	'gb_ttv_ADN28590.1__PF0295'[&!color=#ff00ff]
	'gb_ttv_ADN28625.1__PF0295'[&!color=#ff00ff]
	'gb_ttv_ADN28626.1__PF0295'[&!color=#ff00ff]
	'gb_ttv_ADN28649.1__PF0295'[&!color=#ff00ff]
	'gb_ttv_ADN28650.1__PF0295'[&!color=#ff00ff]
	'gb_ttv_ADN28657.1__PF0295'[&!color=#ff00ff]
	'gb_ttv_ADN28665.1__PF0295'[&!color=#ff00ff]
	'gb_ttv_ADN28673.1__PF0295'[&!color=#ff00ff]
	'gb_ttv_ADN28674.1__PF0295'[&!color=#ff00ff]
	'gb_ttv_ADN28685.1__PF0295'[&!color=#ff00ff]
	'gb_ttv_ADN28686.1__PF0295'[&!color=#ff00ff]
	'gb_ttv_ADO51761.1__PF0295'[&!color=#ff00ff]
	'gb_ttv_ADZ04866.1__PF0295'[&!color=#ff00ff]
	'gb_ttv_AEF58760.1__PF0295'[&!color=#ff00ff]
	'gb_ttv_AEF58763.1__PF0295'[&!color=#ff00ff]
	'gb_ttv_AEF58766.1__PF0295'[&!color=#ff00ff]
	'gb_ttv_AEF58769.1__PF0295'[&!color=#ff00ff]
	'gb_ttv_AEO16613.1__PF0295'[&!color=#ff00ff]
	'gb_ttv_AEW87510.1__PF0295'[&!color=#ff00ff]
	'gb_ttv_AEX59987.1__PF0295'[&!color=#ff00ff]
	'gb_ttv_AEX59988.1__PF0295'[&!color=#ff00ff]
	'gb_ttv_AEY63593.1__PF0295'[&!color=#ff00ff]
	'gb_ttv_AFJ75531.1__PF0295'[&!color=#ff00ff]
	'gb_ttv_AFJ75537.1__PF0295'[&!color=#ff00ff]
	'gb_ttv_AFO64347.1__PF0295'[&!color=#ff00ff]
	'gb_ttv_AFO64349.1__PF0295'[&!color=#ff00ff]
	'gb_ttv_AFQ32891.1__PF0295'[&!color=#ff00ff]
	'gb_ttv_AFS64008.1__PF0295'[&!color=#ff00ff]
	'gb_ttv_AFS64011.1__PF0295'[&!color=#ff00ff]
	'gb_ttv_AFV66241.1__PF0295'[&!color=#ff00ff]
	'gb_ttv_AFV66245.1__PF0295'[&!color=#ff00ff]
	'gb_ttv_AFV66269.1__PF0295'[&!color=#ff00ff]
	'gb_ttv_AFV66273.1__PF0295'[&!color=#ff00ff]
	'gb_ttv_AGG91484.1__PF0295'[&!color=#ff00ff]
	'gb_ttv_AGG91488.1__PF0295'[&!color=#ff00ff]
	'gb_ttv_AGU62958.1__PF0295'[&!color=#ff00ff]
	'gb_ttv_AHA91750.1__PF0295'[&!color=#ff00ff]
	'gb_ttv_AHB53092.1__PF0295'[&!color=#ff00ff]
	'gb_ttv_AHN14843.1__PF0295'[&!color=#ff00ff]
	'gb_ttv_AHN14853.1__PF0295'[&!color=#ff00ff]
	'gb_ttv_AHN14857.1__PF0295'[&!color=#ff00ff]
	'gb_ttv_AHN14865.1__PF0295'[&!color=#ff00ff]
	'gb_ttv_AHN14873.1__PF0295'[&!color=#ff00ff]
	'gb_ttv_AHN14881.1__PF0295'[&!color=#ff00ff]
	'gb_ttv_AHN14893.1__PF0295'[&!color=#ff00ff]
	'gb_ttv_AHN14905.1__PF0295'[&!color=#ff00ff]
	'gb_ttv_AHN14909.1__PF0295'[&!color=#ff00ff]
	'gb_ttv_AHN14913.1__PF0295'[&!color=#ff00ff]
	'gb_ttv_AHN14921.1__PF0295'[&!color=#ff00ff]
	'gb_ttv_AHN50432.1__PF0295'[&!color=#ff00ff]
	'gb_ttv_AHV83693.1__PF0295'[&!color=#ff00ff]
	'gb_ttv_AHV83696.1__PF0295'[&!color=#ff00ff]
	'gb_ttv_AHY21714.1__PF0295'[&!color=#ff00ff]
	'gb_ttv_AHY21716.1__PF0295'[&!color=#ff00ff]
	'gb_ttv_AHY21717.1__PF0295'[&!color=#ff00ff]
	'gb_ttv_AHY21722.1__PF0295'[&!color=#ff00ff]
	'gb_ttv_AIY70064.1__PF0295'[&!color=#ff00ff]
	'gb_ttv_AJA32106.1__PF0295'[&!color=#ff00ff]
	'gb_ttv_AJA71660.1__PF0295'[&!color=#ff00ff]
	'gb_ttv_AJA71663.1__PF0295'[&!color=#ff00ff]
	'gb_ttv_AJA71666.1__PF0295'[&!color=#ff00ff]
	'gb_ttv_AJM13636.1__PF0295'[&!color=#ff00ff]
	'gb_ttv_AJP36518.1__PF0295'[&!color=#ff00ff]
	'gb_ttv_AJP36519.1__PF0295'[&!color=#ff00ff]
	'gb_ttv_AJP36520.1__PF0295'[&!color=#ff00ff]
	'gb_ttv_AJP36521.1__PF0295'[&!color=#ff00ff]
	'gb_ttv_AJP36522.1__PF0295'[&!color=#ff00ff]
	'gb_ttv_AJP36523.1__PF0295'[&!color=#ff00ff]
	'gb_ttv_AJP36524.1__PF0295'[&!color=#ff00ff]
	'gb_ttv_AJP36525.1__PF0295'[&!color=#ff00ff]
	'gb_ttv_AJP36526.1__PF0295'[&!color=#ff00ff]
	'gb_ttv_AJP36527.1__PF0295'[&!color=#ff00ff]
	'gb_ttv_AJP36529.1__PF0295'[&!color=#ff00ff]
	'gb_ttv_AJP36531.1__PF0295'[&!color=#ff00ff]
	'gb_ttv_AJP36533.1__PF0295'[&!color=#ff00ff]
	'gb_ttv_AJP36535.1__PF0295'[&!color=#ff00ff]
	'gb_ttv_AJP36536.1__PF0295'[&!color=#ff00ff]
	'gb_ttv_AJP36538.1__PF0295'[&!color=#ff00ff]
	'gb_ttv_AJP36543.1__PF0295'[&!color=#ff00ff]
	'gb_ttv_AJP36544.1__PF0295'[&!color=#ff00ff]
	'gb_ttv_AJP36546.1__PF0295'[&!color=#ff00ff]
	'gb_ttv_AJP36547.1__PF0295'[&!color=#ff00ff]
	'gb_ttv_AJP36548.1__PF0295'[&!color=#ff00ff]
	'gb_ttv_AJP36549.1__PF0295'[&!color=#ff00ff]
	'gb_ttv_AJP36552.1__PF0295'[&!color=#ff00ff]
	'gb_ttv_AJP36553.1__PF0295'[&!color=#ff00ff]
	'gb_ttv_AJP36554.1__PF0295'[&!color=#ff00ff]
	'gb_ttv_AJP36555.1__PF0295'[&!color=#ff00ff]
	'gb_ttv_AJP36556.1__PF0295'[&!color=#ff00ff]
	'gb_ttv_AJP36557.1__PF0295'[&!color=#ff00ff]
	'gb_ttv_AJP36558.1__PF0295'[&!color=#ff00ff]
	'gb_ttv_AJP36560.1__PF0295'[&!color=#ff00ff]
	'gb_ttv_AJP36561.1__PF0295'[&!color=#ff00ff]
	'gb_ttv_AJP36562.1__PF0295'[&!color=#ff00ff]
	'gb_ttv_AJP36563.1__PF0295'[&!color=#ff00ff]
	'gb_ttv_AJP36564.1__PF0295'[&!color=#ff00ff]
	'gb_ttv_AJP36565.1__PF0295'[&!color=#ff00ff]
	'gb_ttv_AJW66521.1__PF0295'[&!color=#ff00ff]
	'gb_ttv_AJW66524.1__PF0295'[&!color=#ff00ff]
	'gb_ttv_AKI82145.1__PF0295'[&!color=#ff00ff]
	'gb_ttv_AKI82146.1__PF0295'[&!color=#ff00ff]
	'gb_ttv_AKO22263.1__PF0295'[&!color=#ff00ff]
	'gb_ttv_AKO22615.1__PF0295'[&!color=#ff00ff]
	'gb_ttv_AKO22617.2__PF0295'[&!color=#ff00ff]
	'gb_ttv_ALD62438.1__PF0295'[&!color=#ff00ff]
	'gb_ttv_ALD62440.1__PF0295'[&!color=#ff00ff]
	'gb_ttv_ALD62442.1__PF0295'[&!color=#ff00ff]
	'gb_ttv_ALD62444.1__PF0295'[&!color=#ff00ff]
	'gb_ttv_ALD62446.1__PF0295'[&!color=#ff00ff]
	'gb_ttv_ALD62450.1__PF0295'[&!color=#ff00ff]
	'gb_ttv_ALN40321.1__PF0295'[&!color=#ff00ff]
	'gb_ttv_ALN98237.1__PF0295'[&!color=#ff00ff]
	'gb_ttv_ALN98238.1__PF0295'[&!color=#ff00ff]
	'gb_ttv_ALN98241.1__PF0295'[&!color=#ff00ff]
	'gb_ttv_ALN98244.1__PF0295'[&!color=#ff00ff]
	'gb_ttv_ALN98249.1__PF0295'[&!color=#ff00ff]
	'gb_ttv_ALN98251.1__PF0295'[&!color=#ff00ff]
	'gb_ttv_AMA20206.1__PF0295'[&!color=#ff00ff]
	'gb_ttv_AMA20211.1__PF0295'[&!color=#ff00ff]
	'gb_ttv_ANK58165.1__PF0295'[&!color=#ff00ff]
	'gb_ttv_ANQ39330.1__PF0295'[&!color=#ff00ff]
	'gb_ttv_ANQ39331.1__PF0295'[&!color=#ff00ff]
	'gb_ttv_ANQ39332.1__PF0295'[&!color=#ff00ff]
	'gb_ttv_ANQ39333.1__PF0295'[&!color=#ff00ff]
	'gb_ttv_ANQ39334.1__PF0295'[&!color=#ff00ff]
	'gb_ttv_ANQ39335.1__PF0295'[&!color=#ff00ff]
	'gb_ttv_ANQ39336.1__PF0295'[&!color=#ff00ff]
	'gb_ttv_ANQ39337.1__PF0295'[&!color=#ff00ff]
	'gb_ttv_ANQ39338.1__PF0295'[&!color=#ff00ff]
	'gb_ttv_ANQ39339.1__PF0295'[&!color=#ff00ff]
	'gb_ttv_ANQ39340.1__PF0295'[&!color=#ff00ff]
	'gb_ttv_ANQ39341.1__PF0295'[&!color=#ff00ff]
	'gb_ttv_ANQ39342.1__PF0295'[&!color=#ff00ff]
	'gb_ttv_ANQ39343.1__PF0295'[&!color=#ff00ff]
	'gb_ttv_ANQ39344.1__PF0295'[&!color=#ff00ff]
	'gb_ttv_ANQ39345.1__PF0295'[&!color=#ff00ff]
	'gb_ttv_ANQ39346.1__PF0295'[&!color=#ff00ff]
	'gb_ttv_ANQ39347.1__PF0295'[&!color=#ff00ff]
	'gb_ttv_ANQ39349.1__PF0295'[&!color=#ff00ff]
	'gb_ttv_ANQ39350.1__PF0295'[&!color=#ff00ff]
	'gb_ttv_ANQ39351.1__PF0295'[&!color=#ff00ff]
	'gb_ttv_ANQ39352.1__PF0295'[&!color=#ff00ff]
	'gb_ttv_ANQ39353.1__PF0295'[&!color=#ff00ff]
	'gb_ttv_ANQ39354.1__PF0295'[&!color=#ff00ff]
	'gb_ttv_ANQ39355.1__PF0295'[&!color=#ff00ff]
	'gb_ttv_ANQ39356.1__PF0295'[&!color=#ff00ff]
	'gb_ttv_ANQ39357.1__PF0295'[&!color=#ff00ff]
	'gb_ttv_ANQ39358.1__PF0295'[&!color=#ff00ff]
	'gb_ttv_ANQ39359.1__PF0295'[&!color=#ff00ff]
	'gb_ttv_ANQ39360.1__PF0295'[&!color=#ff00ff]
	'gb_ttv_ANQ39361.1__PF0295'[&!color=#ff00ff]
	'gb_ttv_ANQ39362.1__PF0295'[&!color=#ff00ff]
	'gb_ttv_ANQ39363.1__PF0295'[&!color=#ff00ff]
	'gb_ttv_ANQ39365.1__PF0295'[&!color=#ff00ff]
	'gb_ttv_ANQ39366.1__PF0295'[&!color=#ff00ff]
	'gb_ttv_ANQ39367.1__PF0295'[&!color=#ff00ff]
	'gb_ttv_ANQ39368.1__PF0295'[&!color=#ff00ff]
	'gb_ttv_ANQ39369.1__PF0295'[&!color=#ff00ff]
	'gb_ttv_ANQ39370.1__PF0295'[&!color=#ff00ff]
	'gb_ttv_ANQ39371.1__PF0295'[&!color=#ff00ff]
	'gb_ttv_ANQ39372.1__PF0295'[&!color=#ff00ff]
	'gb_ttv_ANQ39373.1__PF0295'[&!color=#ff00ff]
	'gb_ttv_ANQ39374.1__PF0295'[&!color=#ff00ff]
	'gb_ttv_APA31993.1__PF0295'[&!color=#ff00ff]
	'gb_ttv_APA31996.1__PF0295'[&!color=#ff00ff]
	'gb_ttv_APR63555.1__PF0295'[&!color=#ff00ff]
	'gb_ttv_ARA91676.1__PF0295'[&!color=#ff00ff]
	'gb_ttv_ARA91680.1__PF0295'[&!color=#ff00ff]
	'gb_ttv_ARA91682.1__PF0295'[&!color=#ff00ff]
	'gb_ttv_ARA91685.1__PF0295'[&!color=#ff00ff]
	'gb_ttv_ARA91688.1__PF0295'[&!color=#ff00ff]
	'gb_ttv_ARA91691.1__PF0295'[&!color=#ff00ff]
	'gb_ttv_ARA91694.1__PF0295'[&!color=#ff00ff]
	'gb_ttv_ARA91697.1__PF0295'[&!color=#ff00ff]
	'gb_ttv_ARA91700.1__PF0295'[&!color=#ff00ff]
	'gb_ttv_ARA91703.1__PF0295'[&!color=#ff00ff]
	'gb_ttv_ASA48481.1__PF0295'[&!color=#ff00ff]
	'gb_ttv_ASA48489.1__PF0295'[&!color=#ff00ff]
	'gb_ttv_ASA48497.1__PF0295'[&!color=#ff00ff]
	'gb_ttv_ASA48501.1__PF0295'[&!color=#ff00ff]
	'gb_ttv_ASA48523.1__PF0295'[&!color=#ff00ff]
	'gb_ttv_ASA48525.1__PF0295'[&!color=#ff00ff]
	'gb_ttv_ASA48533.1__PF0295'[&!color=#ff00ff]
	'gb_ttv_ASA48537.1__PF0295'[&!color=#ff00ff]
	'gb_ttv_ASA48545.1__PF0295'[&!color=#ff00ff]
	'gb_ttv_ASA48557.1__PF0295'[&!color=#ff00ff]
	'gb_ttv_ASA48565.1__PF0295'[&!color=#ff00ff]
	'gb_ttv_ASA48573.1__PF0295'[&!color=#ff00ff]
	'gb_ttv_ASA48585.1__PF0295'[&!color=#ff00ff]
	'gb_ttv_ASA48589.1__PF0295'[&!color=#ff00ff]
	'gb_ttv_ASA48593.1__PF0295'[&!color=#ff00ff]
	'gb_ttv_ASA48597.1__PF0295'[&!color=#ff00ff]
	'gb_ttv_ASA48605.1__PF0295'[&!color=#ff00ff]
	'gb_ttv_ASA48613.1__PF0295'[&!color=#ff00ff]
	'gb_ttv_ASA48617.1__PF0295'[&!color=#ff00ff]
	'gb_ttv_ASA48625.1__PF0295'[&!color=#ff00ff]
	'gb_ttv_ASA48641.1__PF0295'[&!color=#ff00ff]
	'gb_ttv_ASA48645.1__PF0295'[&!color=#ff00ff]
	'gb_ttv_ASA48657.1__PF0295'[&!color=#ff00ff]
	'gb_ttv_ASA48669.1__PF0295'[&!color=#ff00ff]
	'gb_ttv_ASA48673.1__PF0295'[&!color=#ff00ff]
	'gb_ttv_ASA48677.1__PF0295'[&!color=#ff00ff]
	'gb_ttv_ASA48697.1__PF0295'[&!color=#ff00ff]
	'gb_ttv_ASA48701.1__PF0295'[&!color=#ff00ff]
	'gb_ttv_ASA48717.1__PF0295'[&!color=#ff00ff]
	'gb_ttv_ASA48725.1__PF0295'[&!color=#ff00ff]
	'gb_ttv_ASA48729.1__PF0295'[&!color=#ff00ff]
	'gb_ttv_ASA48741.1__PF0295'[&!color=#ff00ff]
	'gb_ttv_ASA48745.1__PF0295'[&!color=#ff00ff]
	'gb_ttv_ASA48757.1__PF0295'[&!color=#ff00ff]
	'gb_ttv_ASA48765.1__PF0295'[&!color=#ff00ff]
	'gb_ttv_ASA48801.1__PF0295'[&!color=#ff00ff]
	'gb_ttv_ASA48805.1__PF0295'[&!color=#ff00ff]
	'gb_ttv_ASA48821.1__PF0295'[&!color=#ff00ff]
	'gb_ttv_ASA48829.1__PF0295'[&!color=#ff00ff]
	'gb_ttv_ASA48841.1__PF0295'[&!color=#ff00ff]
	'gb_ttv_ASA48845.1__PF0295'[&!color=#ff00ff]
	'gb_ttv_ASA48849.1__PF0295'[&!color=#ff00ff]
	'gb_ttv_ASA48861.1__PF0295'[&!color=#ff00ff]
	'gb_ttv_ASA48873.1__PF0295'[&!color=#ff00ff]
	'gb_ttv_ASA48881.1__PF0295'[&!color=#ff00ff]
	'gb_ttv_ASA48885.1__PF0295'[&!color=#ff00ff]
	'gb_ttv_ASA48889.1__PF0295'[&!color=#ff00ff]
	'gb_ttv_ASA48905.1__PF0295'[&!color=#ff00ff]
	'gb_ttv_ASA48913.1__PF0295'[&!color=#ff00ff]
	'gb_ttv_ASA48921.1__PF0295'[&!color=#ff00ff]
	'gb_ttv_ASA48925.1__PF0295'[&!color=#ff00ff]
	'gb_ttv_ASA48929.1__PF0295'[&!color=#ff00ff]
	'gb_ttv_ASA48937.1__PF0295'[&!color=#ff00ff]
	'gb_ttv_ASA48949.1__PF0295'[&!color=#ff00ff]
	'gb_ttv_ASA48953.1__PF0295'[&!color=#ff00ff]
	'gb_ttv_ASA48957.1__PF0295'[&!color=#ff00ff]
	'gb_ttv_ASA48961.1__PF0295'[&!color=#ff00ff]
	'gb_ttv_ASA48965.1__PF0295'[&!color=#ff00ff]
	'gb_ttv_ASA48969.1__PF0295'[&!color=#ff00ff]
	'gb_ttv_ASA48973.1__PF0295'[&!color=#ff00ff]
	'gb_ttv_ASA48977.1__PF0295'[&!color=#ff00ff]
	'gb_ttv_ASA48989.1__PF0295'[&!color=#ff00ff]
	'gb_ttv_ASA48993.1__PF0295'[&!color=#ff00ff]
	'gb_ttv_ASA48997.1__PF0295'[&!color=#ff00ff]
	'gb_ttv_ASA49013.1__PF0295'[&!color=#ff00ff]
	'gb_ttv_ASA49017.1__PF0295'[&!color=#ff00ff]
	'gb_ttv_ASA49025.1__PF0295'[&!color=#ff00ff]
	'gb_ttv_ASA49029.1__PF0295'[&!color=#ff00ff]
	'gb_ttv_ASA49033.1__PF0295'[&!color=#ff00ff]
	'gb_ttv_ASA49041.1__PF0295'[&!color=#ff00ff]
	'gb_ttv_ASA49045.1__PF0295'[&!color=#ff00ff]
	'gb_ttv_ASA49049.1__PF0295'[&!color=#ff00ff]
	'gb_ttv_ASA49053.1__PF0295'[&!color=#ff00ff]
	'gb_ttv_ASA49057.1__PF0295'[&!color=#ff00ff]
	'gb_ttv_ASA49061.1__PF0295'[&!color=#ff00ff]
	'gb_ttv_ASA49065.1__PF0295'[&!color=#ff00ff]
	'gb_ttv_ASA49069.1__PF0295'[&!color=#ff00ff]
	'gb_ttv_ASA49073.1__PF0295'[&!color=#ff00ff]
	'gb_ttv_ASA49077.1__PF0295'[&!color=#ff00ff]
	'gb_ttv_ASA49081.1__PF0295'[&!color=#ff00ff]
	'gb_ttv_ASH99076.1__PF0295'[&!color=#ff00ff]
	'gb_ttv_ASH99079.1__PF0295'[&!color=#ff00ff]
	'gb_ttv_ASH99085.1__PF0295'[&!color=#ff00ff]
	'gb_ttv_ASH99089.1__PF0295'[&!color=#ff00ff]
	'gb_ttv_ASH99092.1__PF0295'[&!color=#ff00ff]
	'gb_ttv_ASH99095.1__PF0295'[&!color=#ff00ff]
	'gb_ttv_ASH99099.1__PF0295'[&!color=#ff00ff]
	'gb_ttv_ASH99102.1__PF0295'[&!color=#ff00ff]
	'gb_ttv_ASH99106.1__PF0295'[&!color=#ff00ff]
	'gb_ttv_ASH99109.1__PF0295'[&!color=#ff00ff]
	'gb_ttv_ASH99112.1__PF0295'[&!color=#ff00ff]
	'gb_ttv_ASH99115.1__PF0295'[&!color=#ff00ff]
	'gb_ttv_ASH99118.1__PF0295'[&!color=#ff00ff]
	'gb_ttv_ASH99121.1__PF0295'[&!color=#ff00ff]
	'gb_ttv_ASH99125.1__PF0295'[&!color=#ff00ff]
	'gb_ttv_ASH99127.1__PF0295'[&!color=#ff00ff]
	'gb_ttv_ASH99130.1__PF0295'[&!color=#ff00ff]
	'gb_ttv_ASH99133.1__PF0295'[&!color=#ff00ff]
	'gb_ttv_ASU08515.1__PF0295'[&!color=#ff00ff]
	'gb_ttv_ATV81290.1__PF0295'[&!color=#ff00ff]
	'gb_ttv_ATV81291.1__PF0295'[&!color=#ff00ff]
	'gb_ttv_ATV90788.1__PF0295'[&!color=#ff00ff]
	'gb_ttv_ATX61857.1__PF0295'[&!color=#ff00ff]
	'gb_ttv_ATX61858.1__PF0295'[&!color=#ff00ff]
	'gb_ttv_ATX61877.1__PF0295'[&!color=#ff00ff]
	'gb_ttv_ATX61880.1__PF0295'[&!color=#ff00ff]
	'gb_ttv_ATX61881.1__PF0295'[&!color=#ff00ff]
	'gb_ttv_ATX61886.1__PF0295'[&!color=#ff00ff]
	'gb_ttv_ATX61891.1__PF0295'[&!color=#ff00ff]
	'gb_ttv_ATX61892.1__PF0295'[&!color=#ff00ff]
	'gb_ttv_ATY37428.1__PF0295'[&!color=#ff00ff]
	'gb_ttv_ATY37429.1__PF0295'[&!color=#ff00ff]
	'gb_ttv_ATY37430.1__PF0295'[&!color=#ff00ff]
	'gb_ttv_ATY37431.1__PF0295'[&!color=#ff00ff]
	'gb_ttv_ATY37432.1__PF0295'[&!color=#ff00ff]
	'gb_ttv_ATY37433.1__PF0295'[&!color=#ff00ff]
	'gb_ttv_ATY37434.1__PF0295'[&!color=#ff00ff]
	'gb_ttv_ATY37435.1__PF0295'[&!color=#ff00ff]
	'gb_ttv_ATY37436.1__PF0295'[&!color=#ff00ff]
	'gb_ttv_ATY37437.1__PF0295'[&!color=#ff00ff]
	'gb_ttv_ATY37438.1__PF0295'[&!color=#ff00ff]
	'gb_ttv_ATY37439.1__PF0295'[&!color=#ff00ff]
	'gb_ttv_ATY37440.1__PF0295'[&!color=#ff00ff]
	'gb_ttv_AVD49689.1__PF0295'[&!color=#ff00ff]
	'gb_ttv_AVE14391.1__PF0295'[&!color=#ff00ff]
	'gb_ttv_AVN68373.1__PF0295'[&!color=#ff00ff]
	'gb_ttv_AWJ58474.1__PF0295'[&!color=#ff00ff]
	'gb_ttv_AWJ58486.1__PF0295'[&!color=#ff00ff]
	'gb_ttv_BAA28156.1__PF0295'[&!color=#ff00ff]
	'gb_ttv_BAA28162.1__PF0295'[&!color=#ff00ff]
	'gb_ttv_BAA28164.1__PF0295'[&!color=#ff00ff]
	'gb_ttv_BAA33426.1__PF0295'[&!color=#ff00ff]
	'gb_ttv_BAA85667.1__PF0295'[&!color=#ff00ff]
	'gb_ttv_BAA85673.1__PF0295'[&!color=#ff00ff]
	'gb_ttv_BAA85674.1__PF0295'[&!color=#ff00ff]
	'gb_ttv_BAA85675.1__PF0295'[&!color=#ff00ff]
	'gb_ttv_BAA85677.1__PF0295'[&!color=#ff00ff]
	'gb_ttv_BAA85678.1__PF0295'[&!color=#ff00ff]
	'gb_ttv_BAA85679.1__PF0295'[&!color=#ff00ff]
	'gb_ttv_BAA85681.1__PF0295'[&!color=#ff00ff]
	'gb_ttv_BAA85686.1__PF0295'[&!color=#ff00ff]
	'gb_ttv_BAA85687.1__PF0295'[&!color=#ff00ff]
	'gb_ttv_BAA85691.1__PF0295'[&!color=#ff00ff]
	'gb_ttv_BAA85692.1__PF0295'[&!color=#ff00ff]
	'gb_ttv_BAA85693.1__PF0295'[&!color=#ff00ff]
	'gb_ttv_BAA85694.1__PF0295'[&!color=#ff00ff]
	'gb_ttv_BAA85698.1__PF0295'[&!color=#ff00ff]
	'gb_ttv_BAA85700.1__PF0295'[&!color=#ff00ff]
	'gb_ttv_BAA85701.1__PF0295'[&!color=#ff00ff]
	'gb_ttv_BAA85704.1__PF0295'[&!color=#ff00ff]
	'gb_ttv_BAA85706.1__PF0295'[&!color=#ff00ff]
	'gb_ttv_BAA85708.1__PF0295'[&!color=#ff00ff]
	'gb_ttv_BAA85709.1__PF0295'[&!color=#ff00ff]
	'gb_ttv_BAA85710.1__PF0295'[&!color=#ff00ff]
	'gb_ttv_BAA85712.1__PF0295'[&!color=#ff00ff]
	'gb_ttv_BAA85715.1__PF0295'[&!color=#ff00ff]
	'gb_ttv_BAA85717.1__PF0295'[&!color=#ff00ff]
	'gb_ttv_BAA85736.1__PF0295'[&!color=#ff00ff]
	'gb_ttv_BAA86948.1__PF0295'[&!color=#ff00ff]
	'gb_ttv_BAA90403.1__PF0295'[&!color=#ff00ff]
	'gb_ttv_BAA90406.1__PF0295'[&!color=#ff00ff]
	'gb_ttv_BAA90409.1__PF0295'[&!color=#ff00ff]
	'gb_ttv_BAA90412.1__PF0295'[&!color=#ff00ff]
	'gb_ttv_BAA93579.1__PF0295'[&!color=#ff00ff]
	'gb_ttv_BAA93581.1__PF0295'[&!color=#ff00ff]
	'gb_ttv_BAA93589.1__PF0295'[&!color=#ff00ff]
	'gb_ttv_BAA93603.1__PF0295'[&!color=#ff00ff]
	'gb_ttv_BAA94878.1__PF0295'[&!color=#ff00ff]
	'gb_ttv_BAA94953.1__PF0295'[&!color=#ff00ff]
	'gb_ttv_BAA94954.1__PF0295'[&!color=#ff00ff]
	'gb_ttv_BAA94955.1__PF0295'[&!color=#ff00ff]
	'gb_ttv_BAA94956.1__PF0295'[&!color=#ff00ff]
	'gb_ttv_BAA94957.1__PF0295'[&!color=#ff00ff]
	'gb_ttv_BAA94958.1__PF0295'[&!color=#ff00ff]
	'gb_ttv_BAB19928.1__PF0295'[&!color=#ff00ff]
	'gb_ttv_BAB61611.1__PF0295'[&!color=#ff00ff]
	'gb_ttv_BAB63258.1__PF0295'[&!color=#ff00ff]
	'gb_ttv_BAB69900.1__PF0295'[&!color=#ff00ff]
	'gb_ttv_BAB69904.1__PF0295'[&!color=#ff00ff]
	'gb_ttv_BAB69912.1__PF0295'[&!color=#ff00ff]
	'gb_ttv_BAB69916.1__PF0295'[&!color=#ff00ff]
	'gb_ttv_BAB79314.1__PF0295'[&!color=#ff00ff]
	'gb_ttv_BAB79318.1__PF0295'[&!color=#ff00ff]
	'gb_ttv_BAB79326.1__PF0295'[&!color=#ff00ff]
	'gb_ttv_BAB79330.1__PF0295'[&!color=#ff00ff]
	'gb_ttv_BAB79334.1__PF0295'[&!color=#ff00ff]
	'gb_ttv_BAB79338.1__PF0295'[&!color=#ff00ff]
	'gb_ttv_BAB79342.1__PF0295'[&!color=#ff00ff]
	'gb_ttv_BAB79354.1__PF0295'[&!color=#ff00ff]
	'gb_ttv_BAB86774.1__PF0295'[&!color=#ff00ff]
	'gb_ttv_BAB86776.1__PF0295'[&!color=#ff00ff]
	'gb_ttv_BAB86777.1__PF0295'[&!color=#ff00ff]
	'gb_ttv_BAB89347.2__PF0295'[&!color=#ff00ff]
	'gb_ttv_BAF76089.1__PF0295'[&!color=#ff00ff]
	'gb_ttv_BAF76093.1__PF0295'[&!color=#ff00ff]
	'gb_ttv_BAF76097.1__PF0295'[&!color=#ff00ff]
	'gb_ttv_BAF76121.1__PF0295'[&!color=#ff00ff]
	'gb_ttv_BAF76129.1__PF0295'[&!color=#ff00ff]
	'gb_ttv_BAG84585.1__PF0295'[&!color=#ff00ff]
	'gb_ttv_BAG84589.1__PF0295'[&!color=#ff00ff]
	'gb_ttv_CAB41747.1__PF0295'[&!color=#ff00ff]
	'gb_ttv_CAB42100.1__PF0295'[&!color=#ff00ff]
	'gb_ttv_CAB42101.1__PF0295'[&!color=#ff00ff]
	'gb_ttv_CAB42104.1__PF0295'[&!color=#ff00ff]
	'gb_ttv_CAB42108.1__PF0295'[&!color=#ff00ff]
	'gb_ttv_CAB42165.1__PF0295'[&!color=#ff00ff]
	'gb_ttv_CAB42185.1__PF0295'[&!color=#ff00ff]
	'gb_ttv_CAF05720.1__PF0295'[&!color=#ff00ff]
	'gb_ttv_CAF05738.1__PF0295'[&!color=#ff00ff]
	'gb_ttv_CAF05740.1__PF0295'[&!color=#ff00ff]
	'gb_ttv_CAF05742.1__PF0295'[&!color=#ff00ff]
	'gb_ttv_CAF05746.1__PF0295'[&!color=#ff00ff]
	'gb_ttv_CAF05760.1__PF0295'[&!color=#ff00ff]
	'gb_ttv_CAF05763.1__PF0295'[&!color=#ff00ff]
	'gb_ttv_NP_054656.1__PF029'[&!color=#ff00ff]
	'gb_ttv_O70739.1__PF02956.'[&!color=#ff00ff]
	'gb_ttv_Q8V7G3.1__PF02956.'[&!color=#ff00ff]
	'gb_ttv_Q9QUB8.1__PF02956.'[&!color=#ff00ff]
	'gb_ttv_Q9WGZ0.1__PF02956.'[&!color=#ff00ff]
	'gb_ttv_YP_001109584.1__PF'[&!color=#ff00ff]
	'gb_ttv_YP_002640216.1__PF'[&!color=#ff00ff]
	'gb_ttv_YP_003587826.1__PF'[&!color=#ff00ff]
	'gb_ttv_YP_003587828.1__PF'[&!color=#ff00ff]
	'gb_ttv_YP_003587831.1__PF'[&!color=#ff00ff]
	'gb_ttv_YP_003587834.1__PF'[&!color=#ff00ff]
	'gb_ttv_YP_003587837.1__PF'[&!color=#ff00ff]
	'gb_ttv_YP_003587841.1__PF'[&!color=#ff00ff]
	'gb_ttv_YP_003587845.1__PF'[&!color=#ff00ff]
	'gb_ttv_YP_003587849.1__PF'[&!color=#ff00ff]
	'gb_ttv_YP_003587853.1__PF'[&!color=#ff00ff]
	'gb_ttv_YP_003587855.1__PF'[&!color=#ff00ff]
	'gb_ttv_YP_003587857.1__PF'[&!color=#ff00ff]
	'gb_ttv_YP_003587859.1__PF'[&!color=#ff00ff]
	'gb_ttv_YP_003587862.1__PF'[&!color=#ff00ff]
	'gb_ttv_YP_003587867.1__PF'[&!color=#ff00ff]
	'gb_ttv_YP_003587868.1__PF'[&!color=#ff00ff]
	'gb_ttv_YP_003587869.1__PF'[&!color=#ff00ff]
	'gb_ttv_YP_003587871.1__PF'[&!color=#ff00ff]
	'gb_ttv_YP_003587873.1__PF'[&!color=#ff00ff]
	'gb_ttv_YP_003587878.1__PF'[&!color=#ff00ff]
	'gb_ttv_YP_003587880.1__PF'[&!color=#ff00ff]
	'gb_ttv_YP_003587884.1__PF'[&!color=#ff00ff]
	'gb_ttv_YP_003587887.1__PF'[&!color=#ff00ff]
	'gb_ttv_YP_003587890.1__PF'[&!color=#ff00ff]
	'gb_ttv_YP_003587893.1__PF'[&!color=#ff00ff]
	'gb_ttv_YP_003587896.1__PF'[&!color=#ff00ff]
	'gb_ttv_YP_003587898.1__PF'[&!color=#ff00ff]
	'gb_ttv_YP_003587905.1__PF'[&!color=#ff00ff]
	'gb_ttv_YP_003587909.1__PF'[&!color=#ff00ff]
	'gb_ttv_YP_003587911.1__PF'[&!color=#ff00ff]
	'gb_ttv_YP_003587914.1__PF'[&!color=#ff00ff]
	'gb_ttv_YP_003587916.1__PF'[&!color=#ff00ff]
	'gb_ttv_YP_004021043.1__PF'[&!color=#ff00ff]
	'gb_ttv_YP_004021926.1__PF'[&!color=#ff00ff]
	'gb_ttv_YP_004286324.1__PF'[&!color=#ff00ff]
	'gb_ttv_YP_007518450.1__PF'[&!color=#ff00ff]
	'gb_ttv_YP_009058900.1__PF'[&!color=#ff00ff]
	'gb_ttv_YP_009058903.1__PF'[&!color=#ff00ff]
	'gb_ttv_YP_009058944.1__PF'[&!color=#ff00ff]
	'gb_ttv_YP_009109710.1__PF'[&!color=#ff00ff]
	'gb_ttv_YP_009109713.1__PF'[&!color=#ff00ff]
	'gb_ttv_YP_009115496.1__PF'[&!color=#ff00ff]
	'gb_ttv_YP_009126942.1__PF'[&!color=#ff00ff]
	'gb_ttv_YP_009126947.1__PF'[&!color=#ff00ff]
	'gb_ttv_YP_009126951.1__PF'[&!color=#ff00ff]
	'gb_ttv_YP_009129291.1__PF'[&!color=#ff00ff]
	'gb_ttv_YP_009129295.1__PF'[&!color=#ff00ff]
	'gb_ttv_YP_009256215.1__PF'[&!color=#ff00ff]
	'gb_ttv_YP_009268642.1__PF'[&!color=#ff00ff]
	'gb_ttv_YP_009380544.1__PF'[&!color=#ff00ff]
	'gb_ttv_YP_009388627.1__PF'[&!color=#ff00ff]
	'gb_ttv_YP_009388631.1__PF'[&!color=#ff00ff]
	'gb_ttv_YP_009389430.1__PF'[&!color=#ff00ff]
	'gb_ttv_YP_009505712.1__PF'[&!color=#ff00ff]
	'gb_ttv_YP_009505715.1__PF'[&!color=#ff00ff]
	'gb_ttv_YP_009505717.1__PF'[&!color=#ff00ff]
	'gb_ttv_YP_009505721.1__PF'[&!color=#ff00ff]
	'gb_ttv_YP_009505723.1__PF'[&!color=#ff00ff]
	'gb_ttv_YP_009505725.1__PF'[&!color=#ff00ff]
	'gb_ttv_YP_009505729.1__PF'[&!color=#ff00ff]
	'gb_ttv_YP_009505731.1__PF'[&!color=#ff00ff]
	'gb_ttv_YP_009505734.1__PF'[&!color=#ff00ff]
	'gb_ttv_YP_009505738.1__PF'[&!color=#ff00ff]
	'gb_ttv_YP_009505741.1__PF'[&!color=#ff00ff]
	'gb_ttv_YP_009505746.1__PF'[&!color=#ff00ff]
	'gb_ttv_YP_009505748.1__PF'[&!color=#ff00ff]
	'gb_ttv_YP_009505751.1__PF'[&!color=#ff00ff]
	'gb_ttv_YP_009505753.1__PF'[&!color=#ff00ff]
	'gb_ttv_YP_009505758.1__PF'[&!color=#ff00ff]
	'gb_ttv_YP_009505762.1__PF'[&!color=#ff00ff]
	'gb_ttv_YP_009505766.1__PF'[&!color=#ff00ff]
	'gb_ttv_YP_009505770.1__PF'[&!color=#ff00ff]
	'gb_ttv_YP_009505774.1__PF'[&!color=#ff00ff]
	'gb_ttv_YP_009505778.1__PF'[&!color=#ff00ff]
	'gb_ttv_YP_009505782.1__PF'[&!color=#ff00ff]
	'gb_ttv_YP_009505786.1__PF'[&!color=#ff00ff]
	'gb_ttv_YP_009505790.1__PF'[&!color=#ff00ff]
	'gb_ttv_YP_009505794.1__PF'[&!color=#ff00ff]
	'gb_ttv_YP_009505798.1__PF'[&!color=#ff00ff]
	'gb_ttv_YP_009505802.1__PF'[&!color=#ff00ff]
	'gb_ttv_YP_009551911.1__PF'[&!color=#ff00ff]
	'gb_ttv_YP_009552544.1__PF'[&!color=#ff00ff]
	'gb_ttv_YP_009552545.1__PF'[&!color=#ff00ff]
	'gb_ttv_YP_009552812.1__PF'[&!color=#ff00ff]
	'gb_ttv_YP_009553017.1__PF'[&!color=#ff00ff]
	'gb_ttv_YP_009553018.1__PF'[&!color=#ff00ff]
	'gb_ttv_YP_009553507.1__PF'[&!color=#ff00ff]
	'gb_ttv_YP_238298.1__PF029'[&!color=#ff00ff]
	'gb_ttv_YP_238299.1__PF029'[&!color=#ff00ff]
	'ms_W01_blood_an1_2ct1221.'[&!color=#00ff00]
	'ms_ct_W01_blood_1231.2_PF'[&!color=#00ff00]
	'ms_ct_W01_blood_657.3_PF0'[&!color=#00ff00]
	'ms_ct_W01_blood_857.2_PF0'[&!color=#00ff00]
	'ms_ct_W07_blood_000.4_PF0'[&!color=#00ff00]
	'ms_ct_W07_blood_662.2_PF0'[&!color=#00ff00]
	'ms_ct_ms19_W08_000.3_PF02'[&!color=#00ff00]
	'ms_ct_ms19_W08_013.3_PF02'[&!color=#00ff00]
	'ms_ct_ms19_W08_015.2_PF02'[&!color=#00ff00]
	'ms_ct_ms19_W08_016.2_PF02'[&!color=#00ff00]
	'ms_ct_ms19_W08_022.3_PF02'[&!color=#00ff00]
	'ms_ct_ms19_W08_024.2_PF02'[&!color=#00ff00]
	'ms_ct_ms19_W08_027.3_PF02'[&!color=#00ff00]
	'ms_ct_ms19_W08_029.3_PF02'[&!color=#00ff00]
	'ms_ct_ms19_W08_030.3_PF02'[&!color=#00ff00]
	'ms_ct_ms19_W08_034.3_PF02'[&!color=#00ff00]
	'ms_ct_ms19_W08_035.2_PF02'[&!color=#00ff00]
	'ms_ct_ms19_W08_037.1_PF02'[&!color=#00ff00]
	'ms_ct_ms19_W08_037.2_PF02'[&!color=#00ff00]
	'ms_ct_ms19_W08_040.2_PF02'[&!color=#00ff00]
	'ms_ct_ms19_W08_041.1_PF02'[&!color=#00ff00]
	'ms_ct_ms19_W18_004.5_PF02'[&!color=#00ff00]
	'ms_ct_ms19_W18_009.3_PF02'[&!color=#00ff00]
	'ms_ct_ms19_W18_014.3_PF02'[&!color=#00ff00]
	'ms_ct_ms19_W18_017.2_PF02'[&!color=#00ff00]
	'ms_ct_ms19_W18_017.4_PF02'[&!color=#00ff00]
	'ms_ct_ms19_W18_019.3_PF02'[&!color=#00ff00]
	'ms_ct_ms19_W18_022.2_PF02'[&!color=#00ff00]
	'ms_ct_ms19_W18_027.2_PF02'[&!color=#00ff00]
	'ms_ct_ms19_W18_028.3_PF02'[&!color=#00ff00]
	'ms_ct_ms19_W18_030.3_PF02'[&!color=#00ff00]
	'ms_ct_ms19_W27_000.4_PF02'[&!color=#00ff00]
	'ms_ct_ms19_W27_001.5_PF02'[&!color=#00ff00]
	'ms_ct_ms19_W27_003.2_PF02'[&!color=#00ff00]
	'ms_ct_ms19_W27_004.2_PF02'[&!color=#00ff00]
	'ms_ct_ms19_W27_005.3_PF02'[&!color=#00ff00]
	'ms_ct_ms19_W27_006.3_PF02'[&!color=#00ff00]
	'ms_ct_ms19_W27_007.2_PF02'[&!color=#00ff00]
	'ms_ct_ms19_W27_008.6_PF02'[&!color=#00ff00]
	'ms_ct_ms19_W27_009.3_PF02'[&!color=#00ff00]
	'ms_ct_ms19_W27_010.3_PF02'[&!color=#00ff00]
	'ms_ct_ms19_W27_011.5_PF02'[&!color=#00ff00]
	'ms_ct_ms19_W27_013.3_PF02'[&!color=#00ff00]
	'ms_ct_ms19_W27_015.4_PF02'[&!color=#00ff00]
	'ms_ct_ms19_W27_016.3_PF02'[&!color=#00ff00]
	'ms_ct_ms19_W27_019.2_PF02'[&!color=#00ff00]
	'ms_ct_ms19_W27_021.3_PF02'[&!color=#00ff00]
	'ms_ct_ms19_W27_025.2_PF02'[&!color=#00ff00]
	'ms_ct_ms19_W27_027.3_PF02'[&!color=#00ff00]
	'ms_ct_ms19_W27_028.3_PF02'[&!color=#00ff00]
	'ms_ct_ms19_W27_029.3_PF02'[&!color=#00ff00]
	'ms_ct_ms19_W27_030.2_PF02'[&!color=#00ff00]
	'ms_ct_ms19_W27_034.2_PF02'[&!color=#00ff00]
	'ms_ct_ms19_W27_036.3_PF02'[&!color=#00ff00]
	'ms_ct_ms19_W27_040.2_PF02'[&!color=#00ff00]
	'ms_ct_ms19_W27_044.3_PF02'[&!color=#00ff00]
	'ms_ct_ms19_W27_045.3_PF02'[&!color=#00ff00]
	'ms_ct_ms19_W27_047.2_PF02'[&!color=#00ff00]
	'ms_ct_ms19_W27_054.2_PF02'[&!color=#00ff00]
	'ms_ct_ms19_W27_056.4_PF02'[&!color=#00ff00]
	'ms_ct_ms19_W27_058.2_PF02'[&!color=#00ff00]
	'ms_ct_ms19_W27_059.2_PF02'[&!color=#00ff00]
	'ms_ct_ms19_W27_061.1_PF02'[&!color=#00ff00]
	'ms_ct_ms19_W27_062.2_PF02'[&!color=#00ff00]
	'ms_ct_ms19_W27_064.1_PF02'[&!color=#00ff00]
	'ms_ct_ms19_W27_067.2_PF02'[&!color=#00ff00]
	'ms_ct_ms19_W27_068.1_PF02'[&!color=#00ff00]
	'ms_ct_ms19_W27_070.2_PF02'[&!color=#00ff00]
	'ms_ct_ms19_W27_071.1_PF02'[&!color=#00ff00]
	'ms_ms19_W08_2_2ct15.4_PF0'[&!color=#00ff00]
	'ms_ms19_W08_2_2ct29.3_PF0'[&!color=#00ff00]
	'ms_ms19_W08_an1_2ct001.4_'[&!color=#00ff00]
	'ms_ms19_W08_an1_2ct002.5_'[&!color=#00ff00]
	'ms_ms19_W08_an1_2ct003.3_'[&!color=#00ff00]
	'ms_ms19_W08_an1_2ct004.3_'[&!color=#00ff00]
	'ms_ms19_W08_an1_2ct005.4_'[&!color=#00ff00]
	'ms_ms19_W08_an1_2ct006.5_'[&!color=#00ff00]
	'ms_ms19_W08_an1_2ct007.4_'[&!color=#00ff00]
	'ms_ms19_W08_an1_2ct008.3_'[&!color=#00ff00]
	'ms_ms19_W08_an1_2ct009.4_'[&!color=#00ff00]
	'ms_ms19_W08_an1_2ct010.3_'[&!color=#00ff00]
	'ms_ms19_W08_an1_2ct011.4_'[&!color=#00ff00]
	'ms_ms19_W08_an1_2ct012.2_'[&!color=#00ff00]
	'ms_ms19_W08_an1_2ct017.2_'[&!color=#00ff00]
	'ms_ms19_W08_an1_2ct018.2_'[&!color=#00ff00]
	'ms_ms19_W08_an1_2ct019.3_'[&!color=#00ff00]
	'ms_ms19_W08_an1_2ct020.3_'[&!color=#00ff00]
	'ms_ms19_W08_an1_2ct021.2_'[&!color=#00ff00]
	'ms_ms19_W08_an1_2ct023.2_'[&!color=#00ff00]
	'ms_ms19_W08_an1_2ct025.2_'[&!color=#00ff00]
	'ms_ms19_W08_an1_2ct026.3_'[&!color=#00ff00]
	'ms_ms19_W08_an1_2ct031.2_'[&!color=#00ff00]
	'ms_ms19_W08_an1_2ct032.3_'[&!color=#00ff00]
	'ms_ms19_W08_an1_2ct033.2_'[&!color=#00ff00]
	'ms_ms19_W08_an1_2ct036.1_'[&!color=#00ff00]
	'ms_ms19_W08_an1_2ct038.2_'[&!color=#00ff00]
	'ms_ms19_W08_an1_2ct039.2_'[&!color=#00ff00]
	'ms_ms19_W08_an1_2ct042.1_'[&!color=#00ff00]
	'ms_ms19_W08_an1_2ct046.2_'[&!color=#00ff00]
	'ms_ms19_W18_2_2ct11.4_PF0'[&!color=#00ff00]
	'ms_ms19_W18_2_2ct12.4_PF0'[&!color=#00ff00]
	'ms_ms19_W18_2_2ct13.3_PF0'[&!color=#00ff00]
	'ms_ms19_W18_2_2ct9.3_PF02'[&!color=#00ff00]
	'ms_ms19_W18_an1_2ct001.3_'[&!color=#00ff00]
	'ms_ms19_W18_an1_2ct002.4_'[&!color=#00ff00]
	'ms_ms19_W18_an1_2ct003.3_'[&!color=#00ff00]
	'ms_ms19_W18_an1_2ct005.3_'[&!color=#00ff00]
	'ms_ms19_W18_an1_2ct006.3_'[&!color=#00ff00]
	'ms_ms19_W18_an1_2ct016.3_'[&!color=#00ff00]
	'ms_ms19_W18_an1_2ct018.3_'[&!color=#00ff00]
	'ms_ms19_W18_an1_2ct020.2_'[&!color=#00ff00]
	'ms_ms19_W18_an1_2ct021.3_'[&!color=#00ff00]
	'ms_ms19_W18_an1_2ct026.2_'[&!color=#00ff00]
	'ms_ms19_W18_an1_2ct029.1_'[&!color=#00ff00]
	'ms_ms19_W27_2_2ct3.3_PF02'[&!color=#00ff00]
	'ms_ms19_W27_2_2ct33.3_PF0'[&!color=#00ff00]
	'ms_ms19_W27_2_2ct38.3_PF0'[&!color=#00ff00]
	'ms_ms19_W27_2_2ct64.2_PF0'[&!color=#00ff00]
	'ms_ms19_W27_an1_2ct012.2_'[&!color=#00ff00]
	'ms_ms19_W27_an1_2ct017.4_'[&!color=#00ff00]
	'ms_ms19_W27_an1_2ct018.3_'[&!color=#00ff00]
	'ms_ms19_W27_an1_2ct020.4_'[&!color=#00ff00]
	'ms_ms19_W27_an1_2ct022.3_'[&!color=#00ff00]
	'ms_ms19_W27_an1_2ct023.5_'[&!color=#00ff00]
	'ms_ms19_W27_an1_2ct026.3_'[&!color=#00ff00]
	'ms_ms19_W27_an1_2ct031.3_'[&!color=#00ff00]
	'ms_ms19_W27_an1_2ct033.4_'[&!color=#00ff00]
	'ms_ms19_W27_an1_2ct035.2_'[&!color=#00ff00]
	'ms_ms19_W27_an1_2ct038.2_'[&!color=#00ff00]
	'ms_ms19_W27_an1_2ct039.3_'[&!color=#00ff00]
	'ms_ms19_W27_an1_2ct046.2_'[&!color=#00ff00]
	'ms_ms19_W27_an1_2ct048.1_'[&!color=#00ff00]
	'ms_ms19_W27_an1_2ct049.1_'[&!color=#00ff00]
	'ms_ms19_W27_an1_2ct050.3_'[&!color=#00ff00]
	'ms_ms19_W27_an1_2ct051.3_'[&!color=#00ff00]
	'ms_ms19_W27_an1_2ct052.3_'[&!color=#00ff00]
	'ms_ms19_W27_an1_2ct053.2_'[&!color=#00ff00]
	'ms_ms19_W27_an1_2ct055.2_'[&!color=#00ff00]
	'ms_ms19_W27_an1_2ct057.2_'[&!color=#00ff00]
	'ms_ms19_W27_an1_2ct060.1_'[&!color=#00ff00]
	'ms_ms19_W27_an1_2ct066.3_'[&!color=#00ff00]
	'ms_ms19_W27_an1_2ct069.1_'[&!color=#00ff00]
	'ms_ms19_W27_an1_2ct072.2_'[&!color=#00ff00]
	'ms_ms19_W27_an1_2ct074.2_'[&!color=#00ff00]
	'ms_pig_an1_2ct003.2_PF029'[&!color=#00ff00]
	'ms_pig_an1_2ct005.2_PF029'[&!color=#00ff00]
	'ms_pig_an1_2ct008.2_PF029'[&!color=#00ff00]
	'ms_pig_an1_2ct009.1_PF029'[&!color=#00ff00]
	'ms_pig_an1_2ct010.1_PF029'[&!color=#00ff00]
	'ms_pig_an1_2ct011.1_PF029'[&!color=#00ff00]
	'ms_pig_an1_2ct012.1_PF029'[&!color=#00ff00]
	'ms_pig_an1_2ct014.1_PF029'[&!color=#00ff00]
	'ms_pig_an1_2ct015.1_PF029'[&!color=#00ff00]
	'ms_pig_an1_2ct017.1_PF029'[&!color=#00ff00]
	'ms_pig_an1_2ct020.1_PF029'[&!color=#00ff00]
	'ms_raccoon_ga014_anct000.'[&!color=#00ff00]
	'ms_raccoon_ga014_anct001.'[&!color=#00ff00]
	'ms_raccoon_ga014_anct002.'[&!color=#00ff00]
	'ms_raccoon_ga014_anct003.'[&!color=#00ff00]
	'ms_raccoon_ga014_anct004.'[&!color=#00ff00]
	'ms_raccoon_ga014_anct005.'[&!color=#00ff00]
	'ms_raccoon_ga014_anct006.'[&!color=#00ff00]
	'ms_raccoon_ga014_anct007.'[&!color=#00ff00]
	'ms_raccoon_ga014_anct008.'[&!color=#00ff00]
	'ms_raccoon_ga014_anct009.'[&!color=#00ff00]
	'ms_raccoon_ga014_anct010.'[&!color=#00ff00]
	'ms_raccoon_ga014_anct011.'[&!color=#00ff00]
	'ms_raccoon_ga014_anct013.'[&!color=#00ff00]
	'ms_raccoon_ga11_anct003.3'[&!color=#00ff00]
	'ms_raccoon_ga11_anct005.1'[&!color=#00ff00]
;
end;
begin trees;
	tree tree_1 = [&R] ('ms_ct_ms19_W27_028.3_PF02'[&!color=#00ff00]:0.113926,'ms_ct_ms19_W18_014.3_PF02'[&!color=#00ff00]:0.192007,('ms_ct_ms19_W27_016.3_PF02'[&!color=#00ff00]:0.196101,((('ms_ct_ms19_W27_056.4_PF02'[&!color=#00ff00]:0.443159,'gb_ttv_ANQ39343.1__PF0295'[&!color=#ff00ff]:0.73939)[&bootstraps=100,!color=#4c4c4c]:0.182998,(((((('ms_ms19_W18_an1_2ct016.3_'[&!color=#00ff00]:0.282223,'ms_…
end;
begin figtree;
	set appearance.backgroundColorAttribute="Default";
	set appearance.backgroundColour=#ffffff;
	set appearance.branchColorAttribute="User selection";
	set appearance.branchColorGradient=false;
	set appearance.branchLineWidth=1.0;
	set appearance.branchMinLineWidth=0.0;
	set appearance.branchWidthAttribute="Fixed";
	set appearance.foregroundColour=#000000;
	set appearance.hilightingGradient=false;
	set appearance.selectionColour=#2d3680;
	set branchLabels.colorAttribute="bootstraps";
	set branchLabels.displayAttribute="bootstraps";
	set branchLabels.fontName="sansserif";
	set branchLabels.fontSize=6;
	set branchLabels.fontStyle=0;
	set branchLabels.isShown=true;
	set branchLabels.significantDigits=4;
	set layout.expansion=239;
	set layout.layoutType="RECTILINEAR";
	set layout.zoom=0;
	set legend.attribute="bootstraps";
	set legend.fontSize=10.0;
	set legend.isShown=false;
	set legend.significantDigits=4;
	set nodeBars.barWidth=4.0;
	set nodeBars.displayAttribute=null;
	set nodeBars.isShown=false;
	set nodeLabels.colorAttribute="User selection";
	set nodeLabels.displayAttribute="Node ages";
	set nodeLabels.fontName="sansserif";
	set nodeLabels.fontSize=8;
	set nodeLabels.fontStyle=0;
	set nodeLabels.isShown=false;
	set nodeLabels.significantDigits=4;
	set nodeShapeExternal.colourAttribute="User selection";
	set nodeShapeExternal.isShown=false;
	set nodeShapeExternal.minSize=10.0;
	set nodeShapeExternal.scaleType=Width;
	set nodeShapeExternal.shapeType=Circle;
	set nodeShapeExternal.size=4.0;
	set nodeShapeExternal.sizeAttribute="Fixed";
	set nodeShapeInternal.colourAttribute="User selection";
	set nodeShapeInternal.isShown=false;
	set nodeShapeInternal.minSize=10.0;
	set nodeShapeInternal.scaleType=Width;
	set nodeShapeInternal.shapeType=Circle;
	set nodeShapeInternal.size=4.0;
	set nodeShapeInternal.sizeAttribute="Fixed";
	set polarLayout.alignTipLabels=false;
	set polarLayout.angularRange=0;
	set polarLayout.rootAngle=0;
	set polarLayout.rootLength=100;
	set polarLayout.showRoot=true;
	set radialLayout.spread=0.0;
	set rectilinearLayout.alignTipLabels=false;
	set rectilinearLayout.curvature=0;
	set rectilinearLayout.rootLength=100;
	set scale.offsetAge=0.0;
	set scale.rootAge=1.0;
	set scale.scaleFactor=1.0;
	set scale.scaleRoot=false;
	set scaleAxis.automaticScale=true;
	set scaleAxis.fontSize=8.0;
	set scaleAxis.isShown=false;
	set scaleAxis.lineWidth=1.0;
	set scaleAxis.majorTicks=1.0;
	set scaleAxis.minorTicks=0.5;
	set scaleAxis.origin=0.0;
	set scaleAxis.reverseAxis=false;
	set scaleAxis.showGrid=true;
	set scaleBar.automaticScale=true;
	set scaleBar.fontSize=10.0;
	set scaleBar.isShown=true;
	set scaleBar.lineWidth=1.0;
	set scaleBar.scaleRange=0.0;
	set tipLabels.colorAttribute="User selection";
	set tipLabels.displayAttribute="Names";
	set tipLabels.fontName="sansserif";
	set tipLabels.fontSize=6;
	set tipLabels.fontStyle=0;
	set tipLabels.isShown=true;
	set tipLabels.significantDigits=4;
	set trees.order=false;
	set trees.orderType="increasing";
	set trees.rooting=false;
	set trees.rootingType="User Selection";
	set trees.transform=false;
	set trees.transformType="cladogram";
end;
