# Supplementary material for: Discovery of several thousand highly diverse circular DNA viruses
Source: eLife. 2020 Feb 4;9:e51971. doi: 10.7554/eLife.51971 (PMC7000223; doi:10.7554/eLife.51971)
Supplement: Figure 2—figure supplement 2—source data 2. [file elife-51971-fig2-figsupp2-data2.tre]

#NEXUS
begin taxa;
	dimensions ntax=2663;
	taxlabels
	Alp_beg_EU384641[&!color=#ff00ff]
	Alp_beg_EU384645[&!color=#ff00ff]
	Alp_beg_EU384647[&!color=#ff00ff]
	Alp_beg_EU384650[&!color=#ff00ff]
	Alp_beg_FJ218495[&!color=#ff00ff]
	Alp_beg_FJ956707[&!color=#ff00ff]
	Alp_beg_HG969293[&!color=#ff00ff]
	Alp_beg_JX458742[&!color=#ff00ff]
	Alp_beg_KT099170[&!color=#ff00ff]
	Alp_beg_KT099172[&!color=#ff00ff]
	Alp_beg_KT099176[&!color=#ff00ff]
	Alp_beg_KT948075[&!color=#ff00ff]
	Alp_beg_KX348227[&!color=#ff00ff]
	Alp_beg_LN880828[&!color=#ff00ff]
	Alp_beg_M29963[&!color=#ff00ff]
	Alp_nan_AB000922[&!color=#ff00ff]
	Alp_nan_EU430730[&!color=#ff00ff]
	Alp_nan_KC979051[&!color=#ff00ff]
	Alp_nan_KC979052[&!color=#ff00ff]
	Alp_nan_KX534402[&!color=#ff00ff]
	Alp_nan_KX534405[&!color=#ff00ff]
	Alp_nan_KX534406[&!color=#ff00ff]
	Alp_nan_KX534408[&!color=#ff00ff]
	Alp_nan_KX534409[&!color=#ff00ff]
	Alp_nan_KX534410[&!color=#ff00ff]
	Alp_nan_L32167[&!color=#ff00ff]
	Alp_nan_LC094156[&!color=#ff00ff]
	Alp_nan_LC094158[&!color=#ff00ff]
	Alp_nan_U16735[&!color=#ff00ff]
	Bacill_AB193315[&!color=#ff00ff]
	Bacill_AB504376[&!color=#ff00ff]
	Bacill_AB553581[&!color=#ff00ff]
	Bacill_AB597949[&!color=#ff00ff]
	Bacill_AB844272[&!color=#ff00ff]
	Bacill_AB971659[&!color=#ff00ff]
	Bacill_KF133809[&!color=#ff00ff]
	Bacill_KY405006[&!color=#ff00ff]
	Bacill_KY405007[&!color=#ff00ff]
	Bacill_KY405008[&!color=#ff00ff]
	Circir_AF252610[&!color=#ff00ff]
	Circir_AJ301633[&!color=#ff00ff]
	Circir_DQ494787[&!color=#ff00ff]
	Circir_DQ845074[&!color=#ff00ff]
	Circir_DQ845075[&!color=#ff00ff]
	Circir_EU022374[&!color=#ff00ff]
	Circir_EU056309[&!color=#ff00ff]
	Circir_GQ404851[&!color=#ff00ff]
	Circir_GQ404856[&!color=#ff00ff]
	Circir_GU799606[&!color=#ff00ff]
	Circir_JQ011377[&!color=#ff00ff]
	Circir_JQ782200[&!color=#ff00ff]
	Circir_JQ821392[&!color=#ff00ff]
	Circir_JX863737[&!color=#ff00ff]
	Circir_KC339249[&!color=#ff00ff]
	Circir_KC469701[&!color=#ff00ff]
	Circir_KJ020099[&!color=#ff00ff]
	Circir_KJ641711[&!color=#ff00ff]
	Circir_KJ641716[&!color=#ff00ff]
	Circir_KJ641723[&!color=#ff00ff]
	Circir_KJ641724[&!color=#ff00ff]
	Circir_KJ641727[&!color=#ff00ff]
	Circir_KT783484[&!color=#ff00ff]
	Circir_KT869077[&!color=#ff00ff]
	Circir_KX756986[&!color=#ff00ff]
	Circir_KX756996[&!color=#ff00ff]
	Circir_KX987146[&!color=#ff00ff]
	Circir_KY370027[&!color=#ff00ff]
	Circir_KY370029[&!color=#ff00ff]
	Circir_KY370034[&!color=#ff00ff]
	Circir_KY370037[&!color=#ff00ff]
	Circir_LC416389[&!color=#ff00ff]
	Circir_MF278661[&!color=#ff00ff]
	Circir_MF497827[&!color=#ff00ff]
	Circir_MG744311[&!color=#ff00ff]
	Circir_MH188038[&!color=#ff00ff]
	Circyc_GQ404844[&!color=#ff00ff]
	Circyc_GQ404845[&!color=#ff00ff]
	Circyc_GQ404846[&!color=#ff00ff]
	Circyc_GQ404847[&!color=#ff00ff]
	Circyc_GQ404849[&!color=#ff00ff]
	Circyc_GQ404854[&!color=#ff00ff]
	Circyc_GQ404855[&!color=#ff00ff]
	Circyc_GQ404857[&!color=#ff00ff]
	Circyc_HM228874[&!color=#ff00ff]
	Circyc_HQ638049[&!color=#ff00ff]
	Circyc_HQ738634[&!color=#ff00ff]
	Circyc_HQ738637[&!color=#ff00ff]
	Circyc_HQ738643[&!color=#ff00ff]
	Circyc_JF938079[&!color=#ff00ff]
	Circyc_JF938081[&!color=#ff00ff]
	Circyc_JF938082[&!color=#ff00ff]
	Circyc_JX185423[&!color=#ff00ff]
	Circyc_JX185424[&!color=#ff00ff]
	Circyc_JX185426[&!color=#ff00ff]
	Circyc_JX569794[&!color=#ff00ff]
	Circyc_KC512916[&!color=#ff00ff]
	Circyc_KC512918[&!color=#ff00ff]
	Circyc_KC512919[&!color=#ff00ff]
	Circyc_KC512920[&!color=#ff00ff]
	Circyc_KC771281[&!color=#ff00ff]
	Circyc_KF031465[&!color=#ff00ff]
	Circyc_KF726984[&!color=#ff00ff]
	Circyc_KJ641712[&!color=#ff00ff]
	Circyc_KJ641714[&!color=#ff00ff]
	Circyc_KJ641715[&!color=#ff00ff]
	Circyc_KJ641717[&!color=#ff00ff]
	Circyc_KJ641728[&!color=#ff00ff]
	Circyc_KJ831064[&!color=#ff00ff]
	Circyc_KM017740[&!color=#ff00ff]
	Circyc_KM382269[&!color=#ff00ff]
	Circyc_KM382270[&!color=#ff00ff]
	Circyc_KR902499[&!color=#ff00ff]
	Circyc_KT732785[&!color=#ff00ff]
	Circyc_KT732786[&!color=#ff00ff]
	Circyc_KT878836[&!color=#ff00ff]
	Circyc_KU053483[&!color=#ff00ff]
	Circyc_KU053483_2[&!color=#ff00ff]
	'Circyc_KY302871.1'[&!color=#ff00ff]
	Circyc_KY370026[&!color=#ff00ff]
	Circyc_KY370028[&!color=#ff00ff]
	Circyc_KY851116[&!color=#ff00ff]
	'Circyc_MG846358.1'[&!color=#ff00ff]
	'Circyc_MG846359.1'[&!color=#ff00ff]
	'Circyc_MH545511.1'[&!color=#ff00ff]
	'Circyc_MH545514.1'[&!color=#ff00ff]
	'Circyc_MH545516.1'[&!color=#ff00ff]
	Circyc_MK947371[&!color=#ff00ff]
	GemBeg_AB236321[&!color=#ff00ff]
	GemBeg_AB267834[&!color=#ff00ff]
	GemBeg_AB849288[&!color=#ff00ff]
	GemBeg_AF029217[&!color=#ff00ff]
	GemBeg_AF132852[&!color=#ff00ff]
	GemBeg_AF134484[&!color=#ff00ff]
	GemBeg_AF139168[&!color=#ff00ff]
	GemBeg_AF189018[&!color=#ff00ff]
	GemBeg_AF314530[&!color=#ff00ff]
	GemBeg_AF325497[&!color=#ff00ff]
	GemBeg_AF449192[&!color=#ff00ff]
	GemBeg_AJ519675[&!color=#ff00ff]
	GemBeg_AJ564744[&!color=#ff00ff]
	GemBeg_AJ717521[&!color=#ff00ff]
	GemBeg_AJ717563[&!color=#ff00ff]
	GemBeg_AJ968370[&!color=#ff00ff]
	GemBeg_AJ971263[&!color=#ff00ff]
	GemBeg_AM259382[&!color=#ff00ff]
	GemBeg_AM491590[&!color=#ff00ff]
	GemBeg_AM491778[&!color=#ff00ff]
	GemBeg_AM701758[&!color=#ff00ff]
	GemBeg_AY083351[&!color=#ff00ff]
	GemBeg_AY090555[&!color=#ff00ff]
	GemBeg_AY928512[&!color=#ff00ff]
	GemBeg_DQ400847[&!color=#ff00ff]
	GemBeg_DQ512731[&!color=#ff00ff]
	GemBeg_DQ641690[&!color=#ff00ff]
	GemBeg_DQ641694[&!color=#ff00ff]
	GemBeg_EF456746[&!color=#ff00ff]
	GemBeg_EU377539[&!color=#ff00ff]
	GemBeg_FJ011668[&!color=#ff00ff]
	GemBeg_FJ159269[&!color=#ff00ff]
	GemBeg_FJ179373[&!color=#ff00ff]
	GemBeg_FJ210467[&!color=#ff00ff]
	GemBeg_FJ237616[&!color=#ff00ff]
	GemBeg_FJ868828[&!color=#ff00ff]
	GemBeg_FJ944023[&!color=#ff00ff]
	GemBeg_FM160943[&!color=#ff00ff]
	GemBeg_FN432356[&!color=#ff00ff]
	GemBeg_FN434438[&!color=#ff00ff]
	GemBeg_FN435272[&!color=#ff00ff]
	GemBeg_FN645915[&!color=#ff00ff]
	GemBeg_FN645923[&!color=#ff00ff]
	GemBeg_GQ183867[&!color=#ff00ff]
	GemBeg_GQ387369[&!color=#ff00ff]
	GemBeg_GQ472985[&!color=#ff00ff]
	GemBeg_GQ478342[&!color=#ff00ff]
	GemBeg_GU112008[&!color=#ff00ff]
	GemBeg_GU128150[&!color=#ff00ff]
	GemBeg_GU170806[&!color=#ff00ff]
	GemBeg_GU253915[&!color=#ff00ff]
	GemBeg_GU385879[&!color=#ff00ff]
	GemBeg_HE617299[&!color=#ff00ff]
	GemBeg_HM007098[&!color=#ff00ff]
	GemBeg_HM163576[&!color=#ff00ff]
	GemBeg_HM235774[&!color=#ff00ff]
	GemBeg_HM236368[&!color=#ff00ff]
	GemBeg_HM357458[&!color=#ff00ff]
	GemBeg_HM357459[&!color=#ff00ff]
	GemBeg_HM357461[&!color=#ff00ff]
	GemBeg_HM468428[&!color=#ff00ff]
	GemBeg_HQ009519[&!color=#ff00ff]
	GemBeg_HQ158011[&!color=#ff00ff]
	GemBeg_HQ180391[&!color=#ff00ff]
	GemBeg_HQ407395[&!color=#ff00ff]
	GemBeg_JF451352[&!color=#ff00ff]
	GemBeg_JF502354[&!color=#ff00ff]
	GemBeg_JF502361[&!color=#ff00ff]
	GemBeg_JF694484[&!color=#ff00ff]
	GemBeg_JN103438[&!color=#ff00ff]
	GemBeg_JN129254[&!color=#ff00ff]
	GemBeg_JN419005[&!color=#ff00ff]
	GemBeg_JN618982[&!color=#ff00ff]
	GemBeg_JN678802[&!color=#ff00ff]
	GemBeg_JN678803[&!color=#ff00ff]
	GemBeg_JQ821386[&!color=#ff00ff]
	GemBeg_JQ928349[&!color=#ff00ff]
	GemBeg_JX025358[&!color=#ff00ff]
	GemBeg_JX473582[&!color=#ff00ff]
	GemBeg_JX658682[&!color=#ff00ff]
	GemBeg_JX658689[&!color=#ff00ff]
	GemBeg_JX658691[&!color=#ff00ff]
	GemBeg_JX871370[&!color=#ff00ff]
	GemBeg_KC132844[&!color=#ff00ff]
	GemBeg_KC176780[&!color=#ff00ff]
	GemBeg_KC312662[&!color=#ff00ff]
	GemBeg_KC683374[&!color=#ff00ff]
	GemBeg_KC791691[&!color=#ff00ff]
	GemBeg_KC898543[&!color=#ff00ff]
	GemBeg_KC911718[&!color=#ff00ff]
	GemBeg_KF040453[&!color=#ff00ff]
	GemBeg_KF156759[&!color=#ff00ff]
	GemBeg_KF358470[&!color=#ff00ff]
	GemBeg_KF551592[&!color=#ff00ff]
	GemBeg_KF660223[&!color=#ff00ff]
	GemBeg_KF661331[&!color=#ff00ff]
	GemBeg_KF704391[&!color=#ff00ff]
	GemBeg_KJ476511[&!color=#ff00ff]
	GemBeg_KM595111[&!color=#ff00ff]
	GemBeg_KP663483[&!color=#ff00ff]
	GemBeg_KP752090[&!color=#ff00ff]
	GemBeg_KT099146[&!color=#ff00ff]
	GemBeg_KT266873[&!color=#ff00ff]
	GemBeg_KT390340[&!color=#ff00ff]
	GemBeg_KT390346[&!color=#ff00ff]
	GemBeg_KT454821[&!color=#ff00ff]
	GemBeg_KT454834[&!color=#ff00ff]
	GemBeg_KT582302[&!color=#ff00ff]
	GemBeg_KT878824[&!color=#ff00ff]
	GemBeg_KT948787[&!color=#ff00ff]
	GemBeg_KT966771[&!color=#ff00ff]
	GemBeg_KU131588[&!color=#ff00ff]
	GemBeg_KU165788[&!color=#ff00ff]
	GemBeg_KU562964[&!color=#ff00ff]
	GemBeg_KU569578[&!color=#ff00ff]
	GemBeg_KU667097[&!color=#ff00ff]
	GemBeg_KX011471[&!color=#ff00ff]
	GemBeg_KX168427[&!color=#ff00ff]
	GemBeg_KX185517[&!color=#ff00ff]
	GemBeg_KX302713[&!color=#ff00ff]
	GemBeg_KX348185[&!color=#ff00ff]
	GemBeg_KX353622[&!color=#ff00ff]
	GemBeg_KX389269[&!color=#ff00ff]
	GemBeg_KX611145[&!color=#ff00ff]
	GemBeg_KX640991[&!color=#ff00ff]
	GemBeg_KX691395[&!color=#ff00ff]
	GemBeg_KX691396[&!color=#ff00ff]
	GemBeg_KX691400[&!color=#ff00ff]
	GemBeg_KX691402[&!color=#ff00ff]
	GemBeg_KX691411[&!color=#ff00ff]
	GemBeg_KX831132[&!color=#ff00ff]
	GemBeg_KX885031[&!color=#ff00ff]
	GemBeg_KY271077[&!color=#ff00ff]
	GemBeg_KY294724[&!color=#ff00ff]
	GemBeg_KY556679[&!color=#ff00ff]
	GemMas_AF039528[&!color=#ff00ff]
	GemMas_AJ311031[&!color=#ff00ff]
	GemMas_E02258[&!color=#ff00ff]
	GemMas_EU244915[&!color=#ff00ff]
	GemMas_GQ273988[&!color=#ff00ff]
	GemMas_GU256531[&!color=#ff00ff]
	GemMas_GU256532[&!color=#ff00ff]
	GemMas_HM122238[&!color=#ff00ff]
	GemMas_HQ113104[&!color=#ff00ff]
	GemMas_JF508490[&!color=#ff00ff]
	GemMas_JN791096[&!color=#ff00ff]
	GemMas_JQ361910[&!color=#ff00ff]
	GemMas_JQ948051[&!color=#ff00ff]
	GemMas_JQ948052[&!color=#ff00ff]
	GemMas_JQ948062[&!color=#ff00ff]
	GemMas_JQ948070[&!color=#ff00ff]
	GemMas_JQ948088[&!color=#ff00ff]
	GemMas_JX458740[&!color=#ff00ff]
	GemMas_KC172691[&!color=#ff00ff]
	GemMas_KC172702[&!color=#ff00ff]
	GemMas_KF806701[&!color=#ff00ff]
	GemMas_KF806702[&!color=#ff00ff]
	GemMas_KJ187747[&!color=#ff00ff]
	GemMas_KJ437665[&!color=#ff00ff]
	GemMas_KJ437670[&!color=#ff00ff]
	GemMas_KJ437671[&!color=#ff00ff]
	GemMas_KM229776[&!color=#ff00ff]
	GemMas_KM229915[&!color=#ff00ff]
	GemMas_KM230004[&!color=#ff00ff]
	GemMas_KX352041[&!color=#ff00ff]
	GemMas_KX533458[&!color=#ff00ff]
	GemMas_KX787916[&!color=#ff00ff]
	GemMas_KY047532[&!color=#ff00ff]
	GemMas_KY565231[&!color=#ff00ff]
	GemMas_KY962359[&!color=#ff00ff]
	GemMas_KY962381[&!color=#ff00ff]
	GemMas_M20021[&!color=#ff00ff]
	GemMas_M23022[&!color=#ff00ff]
	GemMas_M82918[&!color=#ff00ff]
	GemMas_MF167297[&!color=#ff00ff]
	GemMas_X60168[&!color=#ff00ff]
	GemMas_X94330[&!color=#ff00ff]
	GemOther_AF379637[&!color=#ff00ff]
	GemOther_AY134867[&!color=#ff00ff]
	GemOther_FJ665629[&!color=#ff00ff]
	GemOther_GU734126[&!color=#ff00ff]
	GemOther_HF921459[&!color=#ff00ff]
	GemOther_HQ443515[&!color=#ff00ff]
	GemOther_JQ901105[&!color=#ff00ff]
	GemOther_JQ920490[&!color=#ff00ff]
	GemOther_JX094280[&!color=#ff00ff]
	GemOther_KM386645[&!color=#ff00ff]
	GemOther_KP303687[&!color=#ff00ff]
	GemOther_KP732474[&!color=#ff00ff]
	GemOther_KT214358[&!color=#ff00ff]
	GemOther_KT214389[&!color=#ff00ff]
	GemOther_KT276896[&!color=#ff00ff]
	GemOther_KT388076[&!color=#ff00ff]
	GemOther_KT388078[&!color=#ff00ff]
	GemOther_KX533467[&!color=#ff00ff]
	GemOther_KX570607[&!color=#ff00ff]
	GemOther_MF072688[&!color=#ff00ff]
	GemOther_MF185002[&!color=#ff00ff]
	GemOther_MF510408[&!color=#ff00ff]
	GemOther_MG001958[&!color=#ff00ff]
	GemOther_MG001959[&!color=#ff00ff]
	GemOther_MG001960[&!color=#ff00ff]
	GemOther_MG001961[&!color=#ff00ff]
	GemOther_MG452759[&!color=#ff00ff]
	GemOther_MG491195[&!color=#ff00ff]
	GemOther_MG696802[&!color=#ff00ff]
	GemOther_MH595454[&!color=#ff00ff]
	GemOther_U49907[&!color=#ff00ff]
	GemOther_X84735[&!color=#ff00ff]
	Genomo_GQ365709[&!color=#ff00ff]
	Genomo_HQ335086[&!color=#ff00ff]
	Genomo_JN704610[&!color=#ff00ff]
	Genomo_JQ412056[&!color=#ff00ff]
	Genomo_JQ412057[&!color=#ff00ff]
	Genomo_JX185428[&!color=#ff00ff]
	Genomo_JX185429[&!color=#ff00ff]
	Genomo_JX185430[&!color=#ff00ff]
	Genomo_KF268025[&!color=#ff00ff]
	Genomo_KF268026[&!color=#ff00ff]
	Genomo_KF268027[&!color=#ff00ff]
	Genomo_KF268028[&!color=#ff00ff]
	Genomo_KF371630[&!color=#ff00ff]
	Genomo_KF371631[&!color=#ff00ff]
	Genomo_KF371632[&!color=#ff00ff]
	Genomo_KF371633[&!color=#ff00ff]
	Genomo_KF371634[&!color=#ff00ff]
	Genomo_KF371635[&!color=#ff00ff]
	Genomo_KF371636[&!color=#ff00ff]
	Genomo_KF371637[&!color=#ff00ff]
	Genomo_KF371638[&!color=#ff00ff]
	Genomo_KF371639[&!color=#ff00ff]
	Genomo_KF371640[&!color=#ff00ff]
	Genomo_KF371641[&!color=#ff00ff]
	Genomo_KF371642[&!color=#ff00ff]
	Genomo_KF371643[&!color=#ff00ff]
	Genomo_KF413620[&!color=#ff00ff]
	Genomo_KJ413144[&!color=#ff00ff]
	Genomo_KJ547634[&!color=#ff00ff]
	Genomo_KJ547635[&!color=#ff00ff]
	Genomo_KJ547636[&!color=#ff00ff]
	Genomo_KJ547637[&!color=#ff00ff]
	Genomo_KJ547638[&!color=#ff00ff]
	Genomo_KJ547639[&!color=#ff00ff]
	Genomo_KJ547640[&!color=#ff00ff]
	Genomo_KJ547641[&!color=#ff00ff]
	Genomo_KJ547642[&!color=#ff00ff]
	Genomo_KJ547643[&!color=#ff00ff]
	Genomo_KJ547644[&!color=#ff00ff]
	Genomo_KJ547645[&!color=#ff00ff]
	Genomo_KJ641719[&!color=#ff00ff]
	Genomo_KJ641726[&!color=#ff00ff]
	Genomo_KJ641737[&!color=#ff00ff]
	Genomo_KJ938717[&!color=#ff00ff]
	Genomo_KM510192[&!color=#ff00ff]
	Genomo_KM598382[&!color=#ff00ff]
	Genomo_KM598383[&!color=#ff00ff]
	Genomo_KM598384[&!color=#ff00ff]
	Genomo_KM598385[&!color=#ff00ff]
	Genomo_KM598386[&!color=#ff00ff]
	Genomo_KM598387[&!color=#ff00ff]
	Genomo_KM598388[&!color=#ff00ff]
	Genomo_KM821747[&!color=#ff00ff]
	Genomo_KP133075[&!color=#ff00ff]
	Genomo_KP133076[&!color=#ff00ff]
	Genomo_KP133077[&!color=#ff00ff]
	Genomo_KP133078[&!color=#ff00ff]
	Genomo_KP133079[&!color=#ff00ff]
	Genomo_KP133080[&!color=#ff00ff]
	Genomo_KP263543[&!color=#ff00ff]
	Genomo_KP263544[&!color=#ff00ff]
	Genomo_KP263545[&!color=#ff00ff]
	Genomo_KP263546[&!color=#ff00ff]
	Genomo_KP263547[&!color=#ff00ff]
	Genomo_KP974693[&!color=#ff00ff]
	Genomo_KP974694[&!color=#ff00ff]
	Genomo_KP987887[&!color=#ff00ff]
	Genomo_KR912221[&!color=#ff00ff]
	Genomo_KT253577[&!color=#ff00ff]
	Genomo_KT253578[&!color=#ff00ff]
	Genomo_KT253579[&!color=#ff00ff]
	Genomo_KT309029[&!color=#ff00ff]
	Genomo_KT363839[&!color=#ff00ff]
	Genomo_KT598248[&!color=#ff00ff]
	Genomo_KT732790[&!color=#ff00ff]
	Genomo_KT732791[&!color=#ff00ff]
	Genomo_KT732792[&!color=#ff00ff]
	Genomo_KT732793[&!color=#ff00ff]
	Genomo_KT732794[&!color=#ff00ff]
	Genomo_KT732795[&!color=#ff00ff]
	Genomo_KT732796[&!color=#ff00ff]
	Genomo_KT732797[&!color=#ff00ff]
	Genomo_KT732798[&!color=#ff00ff]
	Genomo_KT732799[&!color=#ff00ff]
	Genomo_KT732800[&!color=#ff00ff]
	Genomo_KT732801[&!color=#ff00ff]
	Genomo_KT732802[&!color=#ff00ff]
	Genomo_KT732803[&!color=#ff00ff]
	Genomo_KT732804[&!color=#ff00ff]
	Genomo_KT732805[&!color=#ff00ff]
	Genomo_KT732806[&!color=#ff00ff]
	Genomo_KT732807[&!color=#ff00ff]
	Genomo_KT732808[&!color=#ff00ff]
	Genomo_KT732809[&!color=#ff00ff]
	Genomo_KT732810[&!color=#ff00ff]
	Genomo_KT732811[&!color=#ff00ff]
	Genomo_KT732812[&!color=#ff00ff]
	Genomo_KT732813[&!color=#ff00ff]
	Genomo_KT732814[&!color=#ff00ff]
	Genomo_KT862238[&!color=#ff00ff]
	Genomo_KT862239[&!color=#ff00ff]
	Genomo_KT862240[&!color=#ff00ff]
	Genomo_KT862241[&!color=#ff00ff]
	Genomo_KT862242[&!color=#ff00ff]
	Genomo_KT862243[&!color=#ff00ff]
	Genomo_KT862244[&!color=#ff00ff]
	Genomo_KT862245[&!color=#ff00ff]
	Genomo_KT862246[&!color=#ff00ff]
	Genomo_KT862247[&!color=#ff00ff]
	Genomo_KT862248[&!color=#ff00ff]
	Genomo_KT862249[&!color=#ff00ff]
	Genomo_KT862250[&!color=#ff00ff]
	Genomo_KT862251[&!color=#ff00ff]
	Genomo_KT862252[&!color=#ff00ff]
	Genomo_KT862253[&!color=#ff00ff]
	Genomo_KT862254[&!color=#ff00ff]
	Genomo_KT862255[&!color=#ff00ff]
	Genomo_KU343136[&!color=#ff00ff]
	Genomo_KU343137[&!color=#ff00ff]
	Genomo_KX434768[&!color=#ff00ff]
	Genomo_KX434769[&!color=#ff00ff]
	Genomo_KX434770[&!color=#ff00ff]
	Genomo_KY056250[&!color=#ff00ff]
	Genomo_KY214433[&!color=#ff00ff]
	Genomo_KY214441[&!color=#ff00ff]
	Genomo_KY214442[&!color=#ff00ff]
	Genomo_KY214443[&!color=#ff00ff]
	Genomo_KY230613[&!color=#ff00ff]
	Genomo_KY230614[&!color=#ff00ff]
	Genomo_KY230625[&!color=#ff00ff]
	Genomo_KY302866[&!color=#ff00ff]
	Genomo_KY302867[&!color=#ff00ff]
	Genomo_KY308268[&!color=#ff00ff]
	Genomo_KY308269[&!color=#ff00ff]
	Genomo_KY308270[&!color=#ff00ff]
	Genomo_KY308271[&!color=#ff00ff]
	Genomo_KY312557[&!color=#ff00ff]
	Genomo_KY312558[&!color=#ff00ff]
	Genomo_KY487842[&!color=#ff00ff]
	Genomo_KY487881[&!color=#ff00ff]
	Genomo_LK931483[&!color=#ff00ff]
	Genomo_LK931484[&!color=#ff00ff]
	Genomo_LK931485[&!color=#ff00ff]
	Genomo_MF173065[&!color=#ff00ff]
	Genomo_MF173066[&!color=#ff00ff]
	Genomo_MF173067[&!color=#ff00ff]
	Genomo_MF327558[&!color=#ff00ff]
	Genomo_MF327559[&!color=#ff00ff]
	Genomo_MF327560[&!color=#ff00ff]
	Genomo_MF327561[&!color=#ff00ff]
	Genomo_MF327562[&!color=#ff00ff]
	Genomo_MF327563[&!color=#ff00ff]
	Genomo_MF327564[&!color=#ff00ff]
	Genomo_MF327565[&!color=#ff00ff]
	Genomo_MF327566[&!color=#ff00ff]
	Genomo_MF327567[&!color=#ff00ff]
	Genomo_MF327568[&!color=#ff00ff]
	Genomo_MF327569[&!color=#ff00ff]
	Genomo_MF327570[&!color=#ff00ff]
	Genomo_MF327571[&!color=#ff00ff]
	Genomo_MF327572[&!color=#ff00ff]
	Genomo_MF669480[&!color=#ff00ff]
	Genomo_MG571087[&!color=#ff00ff]
	Genomo_MG571096[&!color=#ff00ff]
	Genomo_MG571097[&!color=#ff00ff]
	Genomo_MG571098[&!color=#ff00ff]
	Genomo_MG571099[&!color=#ff00ff]
	Genomo_MG571100[&!color=#ff00ff]
	Genomo_MG571101[&!color=#ff00ff]
	Genomo_MG641191[&!color=#ff00ff]
	Genomo_MG641192[&!color=#ff00ff]
	Genomo_MG641193[&!color=#ff00ff]
	Genomo_MG641194[&!color=#ff00ff]
	Genomo_MG641195[&!color=#ff00ff]
	Genomo_MG641196[&!color=#ff00ff]
	Genomo_MG641197[&!color=#ff00ff]
	Genomo_MG641198[&!color=#ff00ff]
	Genomo_MG641199[&!color=#ff00ff]
	Genomo_MG641200[&!color=#ff00ff]
	Genomo_MG641201[&!color=#ff00ff]
	Genomo_MG641202[&!color=#ff00ff]
	Genomo_MG641203[&!color=#ff00ff]
	Genomo_MG641204[&!color=#ff00ff]
	Genomo_MG641205[&!color=#ff00ff]
	Genomo_MG641206[&!color=#ff00ff]
	Genomo_MG641207[&!color=#ff00ff]
	Genomo_MG641208[&!color=#ff00ff]
	Genomo_MG641209[&!color=#ff00ff]
	Genomo_MG641210[&!color=#ff00ff]
	Genomo_MG641211[&!color=#ff00ff]
	Genomo_MG641212[&!color=#ff00ff]
	Genomo_MG846357[&!color=#ff00ff]
	Genomo_MG917675[&!color=#ff00ff]
	Genomo_MH047857[&!color=#ff00ff]
	Genomo_MH047858[&!color=#ff00ff]
	Genomo_MH378453[&!color=#ff00ff]
	Genomo_MH444690[&!color=#ff00ff]
	Genomo_MH545497[&!color=#ff00ff]
	Genomo_MH545498[&!color=#ff00ff]
	Genomo_MH545499[&!color=#ff00ff]
	Genomo_MH545501[&!color=#ff00ff]
	Genomo_MH545502[&!color=#ff00ff]
	Genomo_MH545503[&!color=#ff00ff]
	Genomo_MH545504[&!color=#ff00ff]
	Genomo_MH545505[&!color=#ff00ff]
	Genomo_MH545506[&!color=#ff00ff]
	Genomo_MH545507[&!color=#ff00ff]
	Genomo_MH545508[&!color=#ff00ff]
	Genomo_MH545509[&!color=#ff00ff]
	Genomo_MH545510[&!color=#ff00ff]
	Genomo_MH617534[&!color=#ff00ff]
	Genomo_MH939361[&!color=#ff00ff]
	Genomo_MH939362[&!color=#ff00ff]
	Genomo_MH939363[&!color=#ff00ff]
	Genomo_MH939364[&!color=#ff00ff]
	Genomo_MH939365[&!color=#ff00ff]
	Genomo_MH939366[&!color=#ff00ff]
	Genomo_MH939367[&!color=#ff00ff]
	Genomo_MH939368[&!color=#ff00ff]
	Genomo_MH939369[&!color=#ff00ff]
	Genomo_MH939370[&!color=#ff00ff]
	Genomo_MH939371[&!color=#ff00ff]
	Genomo_MH939372[&!color=#ff00ff]
	Genomo_MH939373[&!color=#ff00ff]
	Genomo_MH939374[&!color=#ff00ff]
	Genomo_MH939375[&!color=#ff00ff]
	Genomo_MH939376[&!color=#ff00ff]
	Genomo_MH939377[&!color=#ff00ff]
	Genomo_MH939378[&!color=#ff00ff]
	Genomo_MH939379[&!color=#ff00ff]
	Genomo_MH939380[&!color=#ff00ff]
	Genomo_MH939381[&!color=#ff00ff]
	Genomo_MH939382[&!color=#ff00ff]
	Genomo_MH939383[&!color=#ff00ff]
	Genomo_MH939384[&!color=#ff00ff]
	Genomo_MH939385[&!color=#ff00ff]
	Genomo_MH939386[&!color=#ff00ff]
	Genomo_MH939387[&!color=#ff00ff]
	Genomo_MH939388[&!color=#ff00ff]
	Genomo_MH939389[&!color=#ff00ff]
	Genomo_MH939390[&!color=#ff00ff]
	Genomo_MH939391[&!color=#ff00ff]
	Genomo_MH939392[&!color=#ff00ff]
	Genomo_MH939393[&!color=#ff00ff]
	Genomo_MH939394[&!color=#ff00ff]
	Genomo_MH939395[&!color=#ff00ff]
	Genomo_MH939396[&!color=#ff00ff]
	Genomo_MH939397[&!color=#ff00ff]
	Genomo_MH939398[&!color=#ff00ff]
	Genomo_MH939399[&!color=#ff00ff]
	Genomo_MH939400[&!color=#ff00ff]
	Genomo_MH939401[&!color=#ff00ff]
	Genomo_MH939402[&!color=#ff00ff]
	Genomo_MH939403[&!color=#ff00ff]
	Genomo_MH939404[&!color=#ff00ff]
	Genomo_MH939405[&!color=#ff00ff]
	Genomo_MH939406[&!color=#ff00ff]
	Genomo_MH939407[&!color=#ff00ff]
	Genomo_MH939408[&!color=#ff00ff]
	Genomo_MH939409[&!color=#ff00ff]
	Genomo_MH939410[&!color=#ff00ff]
	Genomo_MH939411[&!color=#ff00ff]
	Genomo_MH939412[&!color=#ff00ff]
	Genomo_MH939413[&!color=#ff00ff]
	Genomo_MH939414[&!color=#ff00ff]
	Genomo_MH939415[&!color=#ff00ff]
	Genomo_MH939416[&!color=#ff00ff]
	Genomo_MH939417[&!color=#ff00ff]
	Genomo_MH939418[&!color=#ff00ff]
	Genomo_MH939419[&!color=#ff00ff]
	Genomo_MH939420[&!color=#ff00ff]
	Genomo_MH939421[&!color=#ff00ff]
	Genomo_MH939422[&!color=#ff00ff]
	Genomo_MH939423[&!color=#ff00ff]
	Genomo_MH939424[&!color=#ff00ff]
	Genomo_MH939425[&!color=#ff00ff]
	Genomo_MH939426[&!color=#ff00ff]
	Genomo_MH939427[&!color=#ff00ff]
	Genomo_MH939428[&!color=#ff00ff]
	Genomo_MH939429[&!color=#ff00ff]
	Genomo_MH939430[&!color=#ff00ff]
	Genomo_MH939431[&!color=#ff00ff]
	Genomo_MH939432[&!color=#ff00ff]
	Genomo_MH939433[&!color=#ff00ff]
	Genomo_MH939434[&!color=#ff00ff]
	Genomo_MH939435[&!color=#ff00ff]
	Genomo_MH939436[&!color=#ff00ff]
	Genomo_MH939437[&!color=#ff00ff]
	Genomo_MH939438[&!color=#ff00ff]
	Genomo_MH939439[&!color=#ff00ff]
	Genomo_MH939440[&!color=#ff00ff]
	Genomo_MH939441[&!color=#ff00ff]
	Genomo_MH939442[&!color=#ff00ff]
	Genomo_MH939443[&!color=#ff00ff]
	Genomo_MH939444[&!color=#ff00ff]
	Genomo_MH939445[&!color=#ff00ff]
	Genomo_MH939446[&!color=#ff00ff]
	Genomo_MH939447[&!color=#ff00ff]
	Genomo_MH939448[&!color=#ff00ff]
	Genomo_MH939449[&!color=#ff00ff]
	Genomo_MH939450[&!color=#ff00ff]
	Genomo_MH939451[&!color=#ff00ff]
	Genomo_MH939452[&!color=#ff00ff]
	Genomo_MH939453[&!color=#ff00ff]
	Genomo_MH973737[&!color=#ff00ff]
	Genomo_MH973738[&!color=#ff00ff]
	Genomo_MH973739[&!color=#ff00ff]
	Genomo_MH973740[&!color=#ff00ff]
	Genomo_MH973741[&!color=#ff00ff]
	Genomo_MK249235[&!color=#ff00ff]
	Genomo_MK249236[&!color=#ff00ff]
	Genomo_MK249237[&!color=#ff00ff]
	Genomo_MK249238[&!color=#ff00ff]
	Genomo_MK249239[&!color=#ff00ff]
	Genomo_MK249240[&!color=#ff00ff]
	Genomo_MK249241[&!color=#ff00ff]
	Genomo_MK249242[&!color=#ff00ff]
	Genomo_MK249243[&!color=#ff00ff]
	Genomo_MK249244[&!color=#ff00ff]
	Genomo_MK249245[&!color=#ff00ff]
	Genomo_MK249246[&!color=#ff00ff]
	Genomo_MK249247[&!color=#ff00ff]
	Genomo_MK249248[&!color=#ff00ff]
	Genomo_MK249249[&!color=#ff00ff]
	Genomo_MK249250[&!color=#ff00ff]
	Genomo_MK249251[&!color=#ff00ff]
	Genomo_MK249252[&!color=#ff00ff]
	Genomo_MK249253[&!color=#ff00ff]
	Genomo_MK249254[&!color=#ff00ff]
	Genomo_MK249255[&!color=#ff00ff]
	Genomo_MK249256[&!color=#ff00ff]
	Genomo_MK249257[&!color=#ff00ff]
	Genomo_MK249258[&!color=#ff00ff]
	Genomo_MK249259[&!color=#ff00ff]
	Genomo_MK249260[&!color=#ff00ff]
	Genomo_MK249261[&!color=#ff00ff]
	Genomo_MK249262[&!color=#ff00ff]
	Genomo_MK249263[&!color=#ff00ff]
	Genomo_MK249264[&!color=#ff00ff]
	Genomo_MK249265[&!color=#ff00ff]
	Genomo_MK249266[&!color=#ff00ff]
	Genomo_MK249267[&!color=#ff00ff]
	Genomo_MK249268[&!color=#ff00ff]
	Genomo_MK249269[&!color=#ff00ff]
	Genomo_MK249270[&!color=#ff00ff]
	Genomo_MK249271[&!color=#ff00ff]
	Genomo_MK249272[&!color=#ff00ff]
	Genomo_MK249273[&!color=#ff00ff]
	Genomo_MK249274[&!color=#ff00ff]
	Genomo_MK249275[&!color=#ff00ff]
	Genomo_MK249276[&!color=#ff00ff]
	Genomo_MK249277[&!color=#ff00ff]
	Genomo_MK249278[&!color=#ff00ff]
	Genomo_MK249279[&!color=#ff00ff]
	Genomo_MK249280[&!color=#ff00ff]
	Genomo_MK249281[&!color=#ff00ff]
	Genomo_MK249282[&!color=#ff00ff]
	Genomo_MK249283[&!color=#ff00ff]
	Genomo_MK249284[&!color=#ff00ff]
	Genomo_MK249285[&!color=#ff00ff]
	Genomo_MK249286[&!color=#ff00ff]
	Genomo_MK249287[&!color=#ff00ff]
	Genomo_MK249288[&!color=#ff00ff]
	Genomo_MK249289[&!color=#ff00ff]
	Genomo_MK249290[&!color=#ff00ff]
	Genomo_MK249291[&!color=#ff00ff]
	Genomo_MK249292[&!color=#ff00ff]
	Genomo_MK249293[&!color=#ff00ff]
	Genomo_MK249294[&!color=#ff00ff]
	Genomo_MK249295[&!color=#ff00ff]
	Genomo_MK249296[&!color=#ff00ff]
	Genomo_MK249297[&!color=#ff00ff]
	Genomo_MK249298[&!color=#ff00ff]
	Genomo_MK249299[&!color=#ff00ff]
	Genomo_MK249300[&!color=#ff00ff]
	Genomo_MK249301[&!color=#ff00ff]
	Genomo_MK249302[&!color=#ff00ff]
	Genomo_MK249303[&!color=#ff00ff]
	Genomo_MK249304[&!color=#ff00ff]
	Genomo_MK249305[&!color=#ff00ff]
	Genomo_MK249306[&!color=#ff00ff]
	Genomo_MK249307[&!color=#ff00ff]
	Genomo_MK433234[&!color=#ff00ff]
	Genomo_MK433235[&!color=#ff00ff]
	Genomo_MK433236[&!color=#ff00ff]
	Genomo_MK433237[&!color=#ff00ff]
	Genomo_MK433238[&!color=#ff00ff]
	Genomo_MK433239[&!color=#ff00ff]
	Genomo_MK433240[&!color=#ff00ff]
	Genomo_MK433241[&!color=#ff00ff]
	Genomo_MK433242[&!color=#ff00ff]
	Genomo_MK483072[&!color=#ff00ff]
	Genomo_MK483073[&!color=#ff00ff]
	Genomo_MK483074[&!color=#ff00ff]
	Genomo_MK483075[&!color=#ff00ff]
	Genomo_MK483076[&!color=#ff00ff]
	Genomo_MK483077[&!color=#ff00ff]
	Genomo_MK483078[&!color=#ff00ff]
	Genomo_MK483079[&!color=#ff00ff]
	Genomo_MK483080[&!color=#ff00ff]
	Genomo_MK483081[&!color=#ff00ff]
	Genomo_MK483082[&!color=#ff00ff]
	Genomo_MK483083[&!color=#ff00ff]
	Genomo_MK483084[&!color=#ff00ff]
	Genomo_MK483085[&!color=#ff00ff]
	Genomo_MK947372[&!color=#ff00ff]
	Genomo_MK947373[&!color=#ff00ff]
	Genomo_MK947374[&!color=#ff00ff]
	Genomo_MK947375[&!color=#ff00ff]
	Genomo_MK947376[&!color=#ff00ff]
	Genomo_T_MF373638[&!color=#ff00ff]
	Genomo_T_MF373639[&!color=#ff00ff]
	Genomo_T_MF373640[&!color=#ff00ff]
	Genomo_T_MF373641[&!color=#ff00ff]
	Genomo_T_MK570201[&!color=#ff00ff]
	Genomo_T_MK570202[&!color=#ff00ff]
	Genomo_T_MK570203[&!color=#ff00ff]
	Genomo_T_MK570204[&!color=#ff00ff]
	Genomo_T_MK570205[&!color=#ff00ff]
	Genomo_T_MK570206[&!color=#ff00ff]
	Genomo_T_MK570207[&!color=#ff00ff]
	Genomo_T_MK570208[&!color=#ff00ff]
	Genomo_T_MK570209[&!color=#ff00ff]
	Genomo_T_MK570210[&!color=#ff00ff]
	Genomo_T_MK570211[&!color=#ff00ff]
	Genomo_T_MK570212[&!color=#ff00ff]
	Genomo_T_MK570213[&!color=#ff00ff]
	Genomo_T_MK570214[&!color=#ff00ff]
	Genomo_T_MK570215[&!color=#ff00ff]
	Genomo_T_MK570216[&!color=#ff00ff]
	Genomo_T_MK570217[&!color=#ff00ff]
	Genomo_T_MK570218[&!color=#ff00ff]
	Genomo_T_MK570219[&!color=#ff00ff]
	Genomo_T_MK570220[&!color=#ff00ff]
	Genomo_T_MK570221[&!color=#ff00ff]
	Genomo_T_MK570222[&!color=#ff00ff]
	Genomo_T_MK570223[&!color=#ff00ff]
	'MS_10mus_7_2ct541.2@2HW0_'[&!color=#00ff00]
	'MS_10mus_7_2ct55.3@PF0105'[&!color=#00ff00]
	'MS_10mus_7_2ct88.1@PF0828'[&!color=#00ff00]
	'MS_16minnow_6_2ct1008.6@P'[&!color=#00ff00]
	'MS_16minnow_6_2ct1015.3@2'[&!color=#00ff00]
	'MS_16minnow_6_2ct1036.4@P'[&!color=#00ff00]
	'MS_16minnow_6_2ct1037.5@P'[&!color=#00ff00]
	'MS_16minnow_6_2ct1040.4@2'[&!color=#00ff00]
	'MS_16minnow_6_2ct1040.5@P'[&!color=#00ff00]
	'MS_16minnow_6_2ct1049.4@P'[&!color=#00ff00]
	'MS_16minnow_6_2ct1056.3@P'[&!color=#00ff00]
	'MS_16minnow_6_2ct1059.3@P'[&!color=#00ff00]
	'MS_16minnow_6_2ct1073.4@2'[&!color=#00ff00]
	'MS_16minnow_6_2ct1080.2@2'[&!color=#00ff00]
	'MS_16minnow_6_2ct1087.5@2'[&!color=#00ff00]
	'MS_16minnow_6_2ct1103.2@1'[&!color=#00ff00]
	'MS_16minnow_6_2ct1109.3@P'[&!color=#00ff00]
	'MS_16minnow_6_2ct1122.3@P'[&!color=#00ff00]
	'MS_16minnow_6_2ct1169.2@P'[&!color=#00ff00]
	'MS_16minnow_6_2ct1173.4@1'[&!color=#00ff00]
	'MS_16minnow_6_2ct1175.3@P'[&!color=#00ff00]
	'MS_16minnow_6_2ct1183.2@P'[&!color=#00ff00]
	'MS_16minnow_6_2ct1184.3@P'[&!color=#00ff00]
	'MS_16minnow_6_2ct1194.2@P'[&!color=#00ff00]
	'MS_16minnow_6_2ct1218.1@P'[&!color=#00ff00]
	'MS_16minnow_6_2ct1219.2@2'[&!color=#00ff00]
	'MS_16minnow_6_2ct1220.2@1'[&!color=#00ff00]
	'MS_16minnow_6_2ct1223.3@P'[&!color=#00ff00]
	'MS_16minnow_6_2ct1225.2@P'[&!color=#00ff00]
	'MS_16minnow_6_2ct1228.2@P'[&!color=#00ff00]
	'MS_16minnow_6_2ct1231.3@P'[&!color=#00ff00]
	'MS_16minnow_6_2ct1234.3@P'[&!color=#00ff00]
	'MS_16minnow_6_2ct1239.2@P'[&!color=#00ff00]
	'MS_16minnow_6_2ct1242.2@P'[&!color=#00ff00]
	'MS_16minnow_6_2ct1252.2@P'[&!color=#00ff00]
	'MS_16minnow_6_2ct1266.5@2'[&!color=#00ff00]
	'MS_16minnow_6_2ct1269.4@1'[&!color=#00ff00]
	'MS_16minnow_6_2ct1270.3@1'[&!color=#00ff00]
	'MS_16minnow_6_2ct1275.2@P'[&!color=#00ff00]
	'MS_16minnow_6_2ct1277.1@P'[&!color=#00ff00]
	'MS_16minnow_6_2ct1280.2@P'[&!color=#00ff00]
	'MS_16minnow_6_2ct1286.2@P'[&!color=#00ff00]
	'MS_16minnow_6_2ct1288.2@P'[&!color=#00ff00]
	'MS_16minnow_6_2ct1299.3@1'[&!color=#00ff00]
	'MS_16minnow_6_2ct1312.2@P'[&!color=#00ff00]
	'MS_16minnow_6_2ct1328.3@P'[&!color=#00ff00]
	'MS_16minnow_6_2ct1354.4@P'[&!color=#00ff00]
	'MS_16minnow_6_2ct1362.3@P'[&!color=#00ff00]
	'MS_16minnow_6_2ct1364.2@P'[&!color=#00ff00]
	'MS_16minnow_6_2ct1370.2@1'[&!color=#00ff00]
	'MS_16minnow_6_2ct1375.2@P'[&!color=#00ff00]
	'MS_16minnow_6_2ct1485.1@2'[&!color=#00ff00]
	'MS_16minnow_6_2ct1529.1@P'[&!color=#00ff00]
	'MS_16minnow_6_2ct466.6@1U'[&!color=#00ff00]
	'MS_16minnow_6_2ct469.6@PF'[&!color=#00ff00]
	'MS_16minnow_6_2ct479.9@1L'[&!color=#00ff00]
	'MS_16minnow_6_2ct555.4@1S'[&!color=#00ff00]
	'MS_16minnow_6_2ct592.8@2H'[&!color=#00ff00]
	'MS_16minnow_6_2ct749.2@PF'[&!color=#00ff00]
	'MS_16minnow_6_2ct933.6@PF'[&!color=#00ff00]
	'MS_16minnow_6_2ct940.5@PF'[&!color=#00ff00]
	'MS_16minnow_6_2ct977.3@PF'[&!color=#00ff00]
	'MS_16minnow_6_2ct978.3@PF'[&!color=#00ff00]
	'MS_18minnow1_2ct1306.4@PF'[&!color=#00ff00]
	'MS_18minnow1_2ct1318.3@1L'[&!color=#00ff00]
	'MS_18minnow1_2ct1329.5@PF'[&!color=#00ff00]
	'MS_18minnow1_2ct1355.2@PF'[&!color=#00ff00]
	'MS_18minnow1_2ct1485.5@PF'[&!color=#00ff00]
	'MS_18minnow1_2ct1503.2@PF'[&!color=#00ff00]
	'MS_18minnow1_2ct1511.2@2H'[&!color=#00ff00]
	'MS_18minnow1_2ct1536.3@PF'[&!color=#00ff00]
	'MS_18minnow1_2ct1686.3@PF'[&!color=#00ff00]
	'MS_18minnow1_2ct1747.1@PF'[&!color=#00ff00]
	'MS_18minnow1_2ct1782.2@1L'[&!color=#00ff00]
	'MS_18minnow1_2ct1806.1@PF'[&!color=#00ff00]
	'MS_18minnow1_2ct1815.2@PF'[&!color=#00ff00]
	'MS_18minnow1_2ct1817.1@PF'[&!color=#00ff00]
	'MS_18minnow1_2ct1823.1@PF'[&!color=#00ff00]
	'MS_18minnow1_2ct1860.2@2H'[&!color=#00ff00]
	'MS_18minnow1_2ct1910.2@2H'[&!color=#00ff00]
	'MS_18minnow1_2ct1930.2@PF'[&!color=#00ff00]
	'MS_18minnow1_2ct1955.2@2H'[&!color=#00ff00]
	'MS_18minnow1_2ct1966.3@PF'[&!color=#00ff00]
	'MS_18minnow1_2ct2000.2@PF'[&!color=#00ff00]
	'MS_18minnow1_2ct2007.2@2H'[&!color=#00ff00]
	'MS_18minnow1_2ct2010.4@PF'[&!color=#00ff00]
	'MS_18minnow1_2ct2039.1@PF'[&!color=#00ff00]
	'MS_18minnow1_2ct2067.3@2H'[&!color=#00ff00]
	'MS_18minnow1_2ct2152.2@2H'[&!color=#00ff00]
	'MS_18minnow1_2ct2163.2@2H'[&!color=#00ff00]
	'MS_18minnow1_2ct2272.2@PF'[&!color=#00ff00]
	'MS_18minnow1_2ct741.7@PF0'[&!color=#00ff00]
	'MS_18minnow1_2ct796.6@2HW'[&!color=#00ff00]
	'MS_QCW23735.1@PF08283.10'[&!color=#00ff00]
	'MS_QCW23737.1@1L2M_A'[&!color=#00ff00]
	'MS_abalone_6_2ct102.2@PF0'[&!color=#00ff00]
	'MS_abalone_6_2ct103.2@2HW'[&!color=#00ff00]
	'MS_abalone_6_2ct104.2@2HW'[&!color=#00ff00]
	'MS_abalone_6_2ct105.3@PF0'[&!color=#00ff00]
	'MS_abalone_6_2ct107.2@PF0'[&!color=#00ff00]
	'MS_abalone_6_2ct111.2@PF0'[&!color=#00ff00]
	'MS_abalone_6_2ct114.2@PF0'[&!color=#00ff00]
	'MS_abalone_6_2ct115.2@2HW'[&!color=#00ff00]
	'MS_abalone_6_2ct119.2@PF0'[&!color=#00ff00]
	'MS_abalone_6_2ct123.2@PF0'[&!color=#00ff00]
	'MS_abalone_6_2ct124.2@1L2'[&!color=#00ff00]
	'MS_abalone_6_2ct126.2@PF0'[&!color=#00ff00]
	'MS_abalone_6_2ct127.2@2HW'[&!color=#00ff00]
	'MS_abalone_6_2ct128.2@PF0'[&!color=#00ff00]
	'MS_abalone_6_2ct129.3@PF0'[&!color=#00ff00]
	'MS_abalone_6_2ct130.2@2HW'[&!color=#00ff00]
	'MS_abalone_6_2ct132.2@PF0'[&!color=#00ff00]
	'MS_abalone_6_2ct135.2@PF0'[&!color=#00ff00]
	'MS_abalone_6_2ct138.3@PF0'[&!color=#00ff00]
	'MS_abalone_6_2ct139.3@PF0'[&!color=#00ff00]
	'MS_abalone_6_2ct140.2@2HW'[&!color=#00ff00]
	'MS_abalone_6_2ct141.3@PF0'[&!color=#00ff00]
	'MS_abalone_6_2ct147.2@2HW'[&!color=#00ff00]
	'MS_abalone_6_2ct153.3@PF0'[&!color=#00ff00]
	'MS_abalone_6_2ct156.2@2HW'[&!color=#00ff00]
	'MS_abalone_6_2ct157.2@PF0'[&!color=#00ff00]
	'MS_abalone_6_2ct159.2@2HW'[&!color=#00ff00]
	'MS_abalone_6_2ct160.3@2HW'[&!color=#00ff00]
	'MS_abalone_6_2ct163.3@PF0'[&!color=#00ff00]
	'MS_abalone_6_2ct164.3@1L2'[&!color=#00ff00]
	'MS_abalone_6_2ct166.2@PF0'[&!color=#00ff00]
	'MS_abalone_6_2ct168.2@1L2'[&!color=#00ff00]
	'MS_abalone_6_2ct18.3@PF01'[&!color=#00ff00]
	'MS_abalone_6_2ct185.2@PF0'[&!color=#00ff00]
	'MS_abalone_6_2ct186.1@PF0'[&!color=#00ff00]
	'MS_abalone_6_2ct19.5@2HWT'[&!color=#00ff00]
	'MS_abalone_6_2ct191.2@2HW'[&!color=#00ff00]
	'MS_abalone_6_2ct193.2@2HW'[&!color=#00ff00]
	'MS_abalone_6_2ct20.5@2HW0'[&!color=#00ff00]
	'MS_abalone_6_2ct201.1@2HW'[&!color=#00ff00]
	'MS_abalone_6_2ct206.2@PF0'[&!color=#00ff00]
	'MS_abalone_6_2ct208.2@2HW'[&!color=#00ff00]
	'MS_abalone_6_2ct217.2@PF0'[&!color=#00ff00]
	'MS_abalone_6_2ct219.1@2HW'[&!color=#00ff00]
	'MS_abalone_6_2ct226.2@PF0'[&!color=#00ff00]
	'MS_abalone_6_2ct235.1@2HW'[&!color=#00ff00]
	'MS_abalone_6_2ct237.2@PF0'[&!color=#00ff00]
	'MS_abalone_6_2ct44.4@PF01'[&!color=#00ff00]
	'MS_abalone_6_2ct46.2@PF01'[&!color=#00ff00]
	'MS_abalone_6_2ct47.4@2HWT'[&!color=#00ff00]
	'MS_abalone_6_2ct52.3@2HW0'[&!color=#00ff00]
	'MS_abalone_6_2ct66.2@PF02'[&!color=#00ff00]
	'MS_abalone_6_2ct67.4@2HWT'[&!color=#00ff00]
	'MS_abalone_6_2ct70.2@2HWT'[&!color=#00ff00]
	'MS_abalone_6_2ct71.2@2HWT'[&!color=#00ff00]
	'MS_abalone_6_2ct73.2@2HWT'[&!color=#00ff00]
	'MS_abalone_6_2ct77.2@PF02'[&!color=#00ff00]
	'MS_abalone_6_2ct79.1@PF08'[&!color=#00ff00]
	'MS_abalone_6_2ct80.2@PF08'[&!color=#00ff00]
	'MS_abalone_6_2ct81.2@PF02'[&!color=#00ff00]
	'MS_abalone_6_2ct83.3@2HWT'[&!color=#00ff00]
	'MS_abalone_6_2ct85.2@PF02'[&!color=#00ff00]
	'MS_abalone_6_2ct89.2@PF08'[&!color=#00ff00]
	'MS_abalone_6_2ct91.2@1L2M'[&!color=#00ff00]
	'MS_abalone_6_2ct93.1@PF08'[&!color=#00ff00]
	'MS_apo1_1_2ct139.2@2HW0_A'[&!color=#00ff00]
	'MS_apo1_1_2ct55.3@PF01057'[&!color=#00ff00]
	'MS_apo1_1_2ct63.3@2HW0_A'[&!color=#00ff00]
	'MS_apo1_1_2ct66.1@PF08283'[&!color=#00ff00]
	'MS_apo1_1_2ct69.2@PF08283'[&!color=#00ff00]
	'MS_apo1_1_2ct70.1@PF08283'[&!color=#00ff00]
	'MS_apo1_1_2ct71.1@PF08283'[&!color=#00ff00]
	'MS_apo1_1_2ct72.1@PF08283'[&!color=#00ff00]
	'MS_apo1_1_2ct73.1@PF08283'[&!color=#00ff00]
	'MS_apo1_1_2ct74.1@PF08283'[&!color=#00ff00]
	'MS_apo1_1_2ct75.2@PF01057'[&!color=#00ff00]
	'MS_apo1_1_2ct76.2@PF08283'[&!color=#00ff00]
	'MS_apo1_1_2ct77.3@PF01057'[&!color=#00ff00]
	'MS_apo1_1_2ct78.1@PF08283'[&!color=#00ff00]
	'MS_apo1_1_2ct79.2@PF08283'[&!color=#00ff00]
	'MS_apo1_1_2ct80.1@PF08283'[&!color=#00ff00]
	'MS_apo1_1_2ct81.1@PF08283'[&!color=#00ff00]
	'MS_apo1_1_2ct82.2@PF08283'[&!color=#00ff00]
	'MS_apo1_1_2ct83.2@PF08283'[&!color=#00ff00]
	'MS_apo1_1_2ct84.2@PF08283'[&!color=#00ff00]
	'MS_apo1_1_2ct85.2@PF08283'[&!color=#00ff00]
	'MS_apo1_1_2ct86.3@PF01057'[&!color=#00ff00]
	'MS_apo1_1_2ct89.2@PF01057'[&!color=#00ff00]
	'MS_apo2_7_2ct29.4@PF01057'[&!color=#00ff00]
	'MS_apo2_7_2ct37.1@PF08283'[&!color=#00ff00]
	'MS_apo2_7_2ct38.1@PF08283'[&!color=#00ff00]
	'MS_apo2_7_2ct58.1@PF01057'[&!color=#00ff00]
	MS_axolotl_blastema1_2ct1[&!color=#00ff00]
	'MS_beef_bd3_1_2ct106.3@PF'[&!color=#00ff00]
	'MS_beef_bd3_1_2ct120.2@PF'[&!color=#00ff00]
	'MS_beef_bd3_1_2ct123.2@PF'[&!color=#00ff00]
	'MS_beef_bd4_1_2ct128.1@PF'[&!color=#00ff00]
	'MS_beef_bd4_1_2ct88.2@PF0'[&!color=#00ff00]
	'MS_beef_bd4_r1_2ct000.1@P'[&!color=#00ff00]
	'MS_bison1_1_2ct52.3@1L2M_'[&!color=#00ff00]
	'MS_bison1_1_2ct84.1@PF010'[&!color=#00ff00]
	'MS_bison2_7_2ct77.2@PF082'[&!color=#00ff00]
	'MS_bison2_7_2ct98.1@PF024'[&!color=#00ff00]
	'MS_crab_r1_2ct000.2@PF010'[&!color=#00ff00]
	'MS_crab_r1_2ct002.2@PF024'[&!color=#00ff00]
	'MS_crab_r1_2ct003.2@PF024'[&!color=#00ff00]
	'MS_crab_r1_2ct005.1@PF010'[&!color=#00ff00]
	'MS_crab_r1_2ct008.1@PF010'[&!color=#00ff00]
	'MS_crucian1_2ct18.3@PF010'[&!color=#00ff00]
	'MS_crucian1_2ct19.3@PF010'[&!color=#00ff00]
	'MS_crucian1_2ct20.2@2HW0_'[&!color=#00ff00]
	'MS_crucian1_2ct21.5@PF010'[&!color=#00ff00]
	'MS_crucian1_2ct22.4@PF010'[&!color=#00ff00]
	'MS_crucian1_2ct24.4@PF010'[&!color=#00ff00]
	'MS_crucian1_2ct25.4@PF010'[&!color=#00ff00]
	'MS_crucian1_2ct26.2@PF024'[&!color=#00ff00]
	'MS_crucian1_2ct27.3@PF024'[&!color=#00ff00]
	'MS_crucian1_2ct28.2@PF010'[&!color=#00ff00]
	'MS_crucian1_2ct29.4@PF010'[&!color=#00ff00]
	'MS_crucian1_2ct31.3@2HW0_'[&!color=#00ff00]
	'MS_crucian1_2ct32.2@2HW0_'[&!color=#00ff00]
	'MS_crucian1_2ct34.2@PF010'[&!color=#00ff00]
	'MS_crucian1_2ct38.2@PF010'[&!color=#00ff00]
	'MS_crucian1_2ct39.3@PF010'[&!color=#00ff00]
	'MS_crucian1_2ct4.5@PF0105'[&!color=#00ff00]
	'MS_crucian1_2ct43.2@PF010'[&!color=#00ff00]
	'MS_crucian1_2ct44.3@PF010'[&!color=#00ff00]
	'MS_crucian1_2ct50.3@PF010'[&!color=#00ff00]
	'MS_crucian1_2ct54.3@PF010'[&!color=#00ff00]
	'MS_crucian1_2ct55.2@PF010'[&!color=#00ff00]
	'MS_crucian1_2ct57.3@PF010'[&!color=#00ff00]
	'MS_crucian1_2ct58.3@2HW0_'[&!color=#00ff00]
	'MS_crucian1_2ct59.4@PF010'[&!color=#00ff00]
	'MS_crucian1_2ct64.2@2HWT_'[&!color=#00ff00]
	'MS_crucian1_2ct65.2@2HW0_'[&!color=#00ff00]
	'MS_crucian1_2ct7.8@PF0105'[&!color=#00ff00]
	'MS_crucian1_2ct75.2@PF024'[&!color=#00ff00]
	'MS_crucian1_2ct78.1@PF007'[&!color=#00ff00]
	'MS_crucian1_2ct80.1@PF007'[&!color=#00ff00]
	'MS_crucian1_2ct81.2@2HW0_'[&!color=#00ff00]
	'MS_crucian1_2ct88.1@2HWT_'[&!color=#00ff00]
	'MS_crucian1_2ct90.2@2HWT_'[&!color=#00ff00]
	'MS_crucian1_2ct94.2@PF010'[&!color=#00ff00]
	'MS_crucian1_2ct99.2@PF010'[&!color=#00ff00]
	'MS_ct_4fly1_ps_NODE_x5.2@'[&!color=#00ff00]
	'MS_ct_4fly1_ps_NODE_x6.2@'[&!color=#00ff00]
	'MS_ct_abalone_6_2ct180.3@'[&!color=#00ff00]
	'MS_ct_crucian1_2ct72.6@PF'[&!color=#00ff00]
	'MS_ct_eef_bd3_1_2ct127.3@'[&!color=#00ff00]
	'MS_ct_haddock_1_2ct293.3@'[&!color=#00ff00]
	'MS_ct_minnow_6_2ct1282.3@'[&!color=#00ff00]
	'MS_ct_minnow_6_2ct1588.2@'[&!color=#00ff00]
	'MS_ct_seabass2_1_2ct54.3@'[&!color=#00ff00]
	'MS_ct_trout_ps_NODE_x1.2@'[&!color=#00ff00]
	'MS_haddock_1_2ct107.5@2HW'[&!color=#00ff00]
	'MS_haddock_1_2ct110.4@PF0'[&!color=#00ff00]
	'MS_haddock_1_2ct111.2@PF0'[&!color=#00ff00]
	'MS_haddock_1_2ct114.2@PF0'[&!color=#00ff00]
	'MS_haddock_1_2ct116.3@PF0'[&!color=#00ff00]
	'MS_haddock_1_2ct124.1@PF0'[&!color=#00ff00]
	'MS_haddock_1_2ct132.4@2HW'[&!color=#00ff00]
	'MS_haddock_1_2ct150.3@PF0'[&!color=#00ff00]
	'MS_haddock_1_2ct152.3@PF0'[&!color=#00ff00]
	'MS_haddock_1_2ct163.3@PF0'[&!color=#00ff00]
	'MS_haddock_1_2ct173.3@PF0'[&!color=#00ff00]
	'MS_haddock_1_2ct178.3@PF0'[&!color=#00ff00]
	'MS_haddock_1_2ct181.1@PF0'[&!color=#00ff00]
	'MS_haddock_1_2ct185.3@PF0'[&!color=#00ff00]
	'MS_haddock_1_2ct205.1@PF0'[&!color=#00ff00]
	'MS_haddock_1_2ct207.2@PF0'[&!color=#00ff00]
	'MS_haddock_1_2ct212.2@PF0'[&!color=#00ff00]
	'MS_haddock_1_2ct214.1@PF0'[&!color=#00ff00]
	'MS_haddock_1_2ct216.2@PF0'[&!color=#00ff00]
	'MS_haddock_1_2ct217.2@2HW'[&!color=#00ff00]
	'MS_haddock_1_2ct220.2@PF0'[&!color=#00ff00]
	'MS_haddock_1_2ct229.2@PF0'[&!color=#00ff00]
	'MS_haddock_1_2ct231.2@PF0'[&!color=#00ff00]
	'MS_haddock_1_2ct234.2@2HW'[&!color=#00ff00]
	'MS_haddock_1_2ct236.2@2HW'[&!color=#00ff00]
	'MS_haddock_1_2ct245.2@2HW'[&!color=#00ff00]
	'MS_haddock_1_2ct248.2@PF0'[&!color=#00ff00]
	'MS_haddock_1_2ct250.3@PF0'[&!color=#00ff00]
	'MS_haddock_1_2ct253.2@2HW'[&!color=#00ff00]
	'MS_haddock_1_2ct258.2@PF0'[&!color=#00ff00]
	'MS_haddock_1_2ct259.2@2HW'[&!color=#00ff00]
	'MS_haddock_1_2ct261.2@PF0'[&!color=#00ff00]
	'MS_haddock_1_2ct269.2@PF0'[&!color=#00ff00]
	'MS_haddock_1_2ct28.3@PF01'[&!color=#00ff00]
	'MS_haddock_1_2ct281.3@1L2'[&!color=#00ff00]
	'MS_haddock_1_2ct285.2@1L2'[&!color=#00ff00]
	'MS_haddock_1_2ct286.2@2HW'[&!color=#00ff00]
	'MS_haddock_1_2ct312.2@PF0'[&!color=#00ff00]
	'MS_haddock_1_2ct313.2@PF0'[&!color=#00ff00]
	'MS_haddock_1_2ct325.1@2HW'[&!color=#00ff00]
	'MS_haddock_1_2ct340.2@1L2'[&!color=#00ff00]
	'MS_haddock_1_2ct348.3@PF0'[&!color=#00ff00]
	'MS_haddock_1_2ct353.2@1L2'[&!color=#00ff00]
	'MS_haddock_1_2ct356.1@1L2'[&!color=#00ff00]
	'MS_haddock_1_2ct370.1@PF0'[&!color=#00ff00]
	'MS_haddock_1_2ct375.1@2HW'[&!color=#00ff00]
	'MS_haddock_1_2ct424.1@2HW'[&!color=#00ff00]
	'MS_haddock_1_2ct92.4@2HW0'[&!color=#00ff00]
	'MS_lamb_2_2ct274.3@PF0105'[&!color=#00ff00]
	'MS_lamb_2_2ct367.1@PF0828'[&!color=#00ff00]
	'MS_lamb_2_2ct374.1@PF0828'[&!color=#00ff00]
	'MS_lamb_2_2ct382.2@PF0105'[&!color=#00ff00]
	'MS_lamb_2_2ct384.2@PF0105'[&!color=#00ff00]
	'MS_lamb_2_2ct406.3@1L2M_A'[&!color=#00ff00]
	'MS_macstool_cl86_1_2ct25.'[&!color=#00ff00]
	'MS_macstool_de1a1_2ct254.'[&!color=#00ff00]
	'MS_macstool_de1a1_2ct27.1'[&!color=#00ff00]
	'MS_macstool_de1a1_2ct449.'[&!color=#00ff00]
	'MS_macstool_de2c2_2ct30.6'[&!color=#00ff00]
	'MS_macstool_de2c2_2ct69.2'[&!color=#00ff00]
	'MS_macstool_de2c2_2ct70.3'[&!color=#00ff00]
	'MS_macstool_de2c2_2ct71.3'[&!color=#00ff00]
	'MS_macstool_de2c2_2ct72.4'[&!color=#00ff00]
	'MS_mice_vagnl_1_2ct13.6@P'[&!color=#00ff00]
	'MS_mice_vagnl_1_2ct5.7@2H'[&!color=#00ff00]
	'MS_pig1_2ct7.2@PF08283.10'[&!color=#00ff00]
	'MS_pig1_2ct8.1@PF08283.10'[&!color=#00ff00]
	'MS_pig_r1_2ct000.2@PF0105'[&!color=#00ff00]
	'MS_raccoonskin1_2ct28.3@1'[&!color=#00ff00]
	'MS_raccoonskin1_2ct29.1@P'[&!color=#00ff00]
	'MS_raccoonskin1_2ct30.2@P'[&!color=#00ff00]
	'MS_raccoonskin1_2ct31.1@P'[&!color=#00ff00]
	'MS_raccoonskin1_2ct37.2@P'[&!color=#00ff00]
	'MS_raccoonskin1_2ct40.2@P'[&!color=#00ff00]
	'MS_raccoonskin1_2ct42.1@2'[&!color=#00ff00]
	'MS_raccoonskin1_2ct58.2@P'[&!color=#00ff00]
	'MS_rainbowtrout1_2ct111.1'[&!color=#00ff00]
	'MS_rainbowtrout1_2ct112.2'[&!color=#00ff00]
	'MS_rainbowtrout1_2ct137.1'[&!color=#00ff00]
	'MS_rainbowtrout1_2ct15.5@'[&!color=#00ff00]
	'MS_rainbowtrout1_2ct32.3@'[&!color=#00ff00]
	'MS_rainbowtrout1_2ct41.2@'[&!color=#00ff00]
	'MS_rainbowtrout1_2ct44.3@'[&!color=#00ff00]
	'MS_rainbowtrout1_2ct45.2@'[&!color=#00ff00]
	'MS_rainbowtrout1_2ct46.4@'[&!color=#00ff00]
	'MS_rainbowtrout1_2ct47.2@'[&!color=#00ff00]
	'MS_rainbowtrout1_2ct56.2@'[&!color=#00ff00]
	'MS_rainbowtrout1_2ct62.3@'[&!color=#00ff00]
	'MS_rainbowtrout1_2ct72.1@'[&!color=#00ff00]
	'MS_rainbowtrout1_2ct75.2@'[&!color=#00ff00]
	'MS_rainbowtrout1_2ct78.1@'[&!color=#00ff00]
	'MS_rainbowtrout1_2ct81.2@'[&!color=#00ff00]
	'MS_rainbowtrout1_2ct84.3@'[&!color=#00ff00]
	'MS_rainbowtrout1_2ct88.2@'[&!color=#00ff00]
	'MS_rainbowtrout1_2ct89.2@'[&!color=#00ff00]
	'MS_rainbowtrout1_2ct92.2@'[&!color=#00ff00]
	'MS_rainbowtrout1_2ct93.3@'[&!color=#00ff00]
	'MS_rainbowtrout1_2ct94.2@'[&!color=#00ff00]
	'MS_rainbowtrout1_2ct98.2@'[&!color=#00ff00]
	MS_rainbowtrout_r1_2ct000[&!color=#00ff00]
	MS_rainbowtrout_r1_2ct001[&!color=#00ff00]
	MS_rainbowtrout_r1_2ct002[&!color=#00ff00]
	MS_rainbowtrout_r1_2ct003[&!color=#00ff00]
	MS_rainbowtrout_r1_2ct006[&!color=#00ff00]
	MS_rainbowtrout_r1_2ct009[&!color=#00ff00]
	'MS_redsnapper1_2ct10.7@PF'[&!color=#00ff00]
	'MS_redsnapper1_2ct101.5@P'[&!color=#00ff00]
	'MS_redsnapper1_2ct109.4@P'[&!color=#00ff00]
	'MS_redsnapper1_2ct110.3@P'[&!color=#00ff00]
	'MS_redsnapper1_2ct123.2@P'[&!color=#00ff00]
	'MS_redsnapper1_2ct131.4@2'[&!color=#00ff00]
	'MS_redsnapper1_2ct142.4@2'[&!color=#00ff00]
	'MS_redsnapper1_2ct156.3@2'[&!color=#00ff00]
	'MS_redsnapper1_2ct159.1@1'[&!color=#00ff00]
	'MS_redsnapper1_2ct161.2@P'[&!color=#00ff00]
	'MS_redsnapper1_2ct164.2@P'[&!color=#00ff00]
	'MS_redsnapper1_2ct17.5@PF'[&!color=#00ff00]
	'MS_redsnapper1_2ct18.4@PF'[&!color=#00ff00]
	'MS_redsnapper1_2ct181.3@2'[&!color=#00ff00]
	'MS_redsnapper1_2ct19.4@PF'[&!color=#00ff00]
	'MS_redsnapper1_2ct199.2@2'[&!color=#00ff00]
	'MS_redsnapper1_2ct202.3@2'[&!color=#00ff00]
	'MS_redsnapper1_2ct204.3@1'[&!color=#00ff00]
	'MS_redsnapper1_2ct205.4@2'[&!color=#00ff00]
	'MS_redsnapper1_2ct206.4@2'[&!color=#00ff00]
	'MS_redsnapper1_2ct213.2@P'[&!color=#00ff00]
	'MS_redsnapper1_2ct218.4@2'[&!color=#00ff00]
	'MS_redsnapper1_2ct219.4@2'[&!color=#00ff00]
	'MS_redsnapper1_2ct222.3@P'[&!color=#00ff00]
	'MS_redsnapper1_2ct23.6@PF'[&!color=#00ff00]
	'MS_redsnapper1_2ct242.3@2'[&!color=#00ff00]
	'MS_redsnapper1_2ct245.2@P'[&!color=#00ff00]
	'MS_redsnapper1_2ct26.4@PF'[&!color=#00ff00]
	'MS_redsnapper1_2ct269.1@P'[&!color=#00ff00]
	'MS_redsnapper1_2ct272.3@P'[&!color=#00ff00]
	'MS_redsnapper1_2ct29.3@PF'[&!color=#00ff00]
	'MS_redsnapper1_2ct290.2@2'[&!color=#00ff00]
	'MS_redsnapper1_2ct296.3@P'[&!color=#00ff00]
	'MS_redsnapper1_2ct298.2@P'[&!color=#00ff00]
	'MS_redsnapper1_2ct300.3@P'[&!color=#00ff00]
	'MS_redsnapper1_2ct302.1@P'[&!color=#00ff00]
	'MS_redsnapper1_2ct336.5@P'[&!color=#00ff00]
	'MS_redsnapper1_2ct34.3@PF'[&!color=#00ff00]
	'MS_redsnapper1_2ct342.2@2'[&!color=#00ff00]
	'MS_redsnapper1_2ct347.2@2'[&!color=#00ff00]
	'MS_redsnapper1_2ct358.3@P'[&!color=#00ff00]
	'MS_redsnapper1_2ct359.2@P'[&!color=#00ff00]
	'MS_redsnapper1_2ct367.2@P'[&!color=#00ff00]
	'MS_redsnapper1_2ct370.2@P'[&!color=#00ff00]
	'MS_redsnapper1_2ct396.2@P'[&!color=#00ff00]
	'MS_redsnapper1_2ct399.2@P'[&!color=#00ff00]
	'MS_redsnapper1_2ct410.2@2'[&!color=#00ff00]
	'MS_redsnapper1_2ct419.3@P'[&!color=#00ff00]
	'MS_redsnapper1_2ct422.2@2'[&!color=#00ff00]
	'MS_redsnapper1_2ct425.2@P'[&!color=#00ff00]
	'MS_redsnapper1_2ct431.2@P'[&!color=#00ff00]
	'MS_redsnapper1_2ct443.2@1'[&!color=#00ff00]
	'MS_redsnapper1_2ct447.2@P'[&!color=#00ff00]
	'MS_redsnapper1_2ct468.2@2'[&!color=#00ff00]
	'MS_redsnapper1_2ct492.1@2'[&!color=#00ff00]
	'MS_redsnapper1_2ct496.3@2'[&!color=#00ff00]
	'MS_redsnapper1_2ct498.2@2'[&!color=#00ff00]
	'MS_redsnapper1_2ct509.2@P'[&!color=#00ff00]
	'MS_redsnapper1_2ct510.2@2'[&!color=#00ff00]
	'MS_redsnapper1_2ct515.2@P'[&!color=#00ff00]
	'MS_redsnapper1_2ct516.3@2'[&!color=#00ff00]
	'MS_redsnapper1_2ct521.2@P'[&!color=#00ff00]
	'MS_redsnapper1_2ct526.2@P'[&!color=#00ff00]
	'MS_redsnapper1_2ct528.3@2'[&!color=#00ff00]
	'MS_redsnapper1_2ct529.2@P'[&!color=#00ff00]
	'MS_redsnapper1_2ct534.2@P'[&!color=#00ff00]
	'MS_redsnapper1_2ct537.2@P'[&!color=#00ff00]
	'MS_redsnapper1_2ct539.2@P'[&!color=#00ff00]
	'MS_redsnapper1_2ct540.3@P'[&!color=#00ff00]
	'MS_redsnapper1_2ct544.3@1'[&!color=#00ff00]
	'MS_redsnapper1_2ct545.2@P'[&!color=#00ff00]
	'MS_redsnapper1_2ct546.2@2'[&!color=#00ff00]
	'MS_redsnapper1_2ct547.2@2'[&!color=#00ff00]
	'MS_redsnapper1_2ct551.2@P'[&!color=#00ff00]
	'MS_redsnapper1_2ct555.2@P'[&!color=#00ff00]
	'MS_redsnapper1_2ct560.2@2'[&!color=#00ff00]
	'MS_redsnapper1_2ct567.2@P'[&!color=#00ff00]
	'MS_redsnapper1_2ct578.1@2'[&!color=#00ff00]
	'MS_redsnapper1_2ct589.2@P'[&!color=#00ff00]
	'MS_redsnapper1_2ct590.2@P'[&!color=#00ff00]
	'MS_redsnapper1_2ct593.2@P'[&!color=#00ff00]
	'MS_redsnapper1_2ct614.2@P'[&!color=#00ff00]
	'MS_redsnapper1_2ct618.1@1'[&!color=#00ff00]
	'MS_redsnapper1_2ct622.2@P'[&!color=#00ff00]
	'MS_redsnapper1_2ct625.2@2'[&!color=#00ff00]
	'MS_redsnapper1_2ct630.2@1'[&!color=#00ff00]
	'MS_redsnapper1_2ct638.2@P'[&!color=#00ff00]
	'MS_redsnapper1_2ct65.4@PF'[&!color=#00ff00]
	'MS_redsnapper1_2ct654.2@P'[&!color=#00ff00]
	'MS_redsnapper1_2ct655.1@P'[&!color=#00ff00]
	'MS_redsnapper1_2ct662.1@1'[&!color=#00ff00]
	'MS_redsnapper1_2ct756.1@P'[&!color=#00ff00]
	'MS_redsnapper1_2ct757.1@P'[&!color=#00ff00]
	'MS_redsnapper1_2ct758.1@2'[&!color=#00ff00]
	'MS_redsnapper1_2ct76.5@PF'[&!color=#00ff00]
	'MS_redsnapper1_2ct771.1@2'[&!color=#00ff00]
	'MS_redsnapper1_2ct80.4@PF'[&!color=#00ff00]
	'MS_redsnapper1_2ct805.1@2'[&!color=#00ff00]
	'MS_redsnapper1_2ct83.3@PF'[&!color=#00ff00]
	'MS_redsnapper_r1_2ct015.2'[&!color=#00ff00]
	'MS_redsnapper_r1_2ct017.3'[&!color=#00ff00]
	'MS_redsnapper_r1_2ct022.2'[&!color=#00ff00]
	'MS_redsnapper_r1_2ct023.2'[&!color=#00ff00]
	'MS_redsnapper_r1_2ct024.4'[&!color=#00ff00]
	'MS_redsnapper_r1_2ct025.3'[&!color=#00ff00]
	'MS_redsnapper_r1_2ct026.2'[&!color=#00ff00]
	'MS_redsnapper_r1_2ct027.7'[&!color=#00ff00]
	'MS_redsnapper_r1_2ct029.3'[&!color=#00ff00]
	'MS_redsnapper_r1_2ct040.1'[&!color=#00ff00]
	'MS_redsnapper_r1_2ct041.1'[&!color=#00ff00]
	'MS_redsnapper_r1_2ct042.1'[&!color=#00ff00]
	'MS_redsnapper_r1_2ct043.1'[&!color=#00ff00]
	'MS_redsnapper_r1_2ct044.2'[&!color=#00ff00]
	'MS_redsnapper_r1_2ct045.1'[&!color=#00ff00]
	'MS_redsnapper_r1_2ct047.1'[&!color=#00ff00]
	'MS_redsnapper_r1_2ct048.1'[&!color=#00ff00]
	'MS_redsnapper_r1_2ct049.1'[&!color=#00ff00]
	'MS_redsnapper_r1_2ct050.2'[&!color=#00ff00]
	'MS_redsnapper_r1_2ct051.1'[&!color=#00ff00]
	'MS_redsnapper_r1_2ct052.1'[&!color=#00ff00]
	'MS_seabass1_1_2ct128.2@PF'[&!color=#00ff00]
	'MS_seabass1_1_2ct147.1@2H'[&!color=#00ff00]
	'MS_seabass1_1_2ct155.2@PF'[&!color=#00ff00]
	'MS_seabass1_1_2ct164.2@PF'[&!color=#00ff00]
	'MS_seabass1_1_2ct171.2@2H'[&!color=#00ff00]
	'MS_seabass1_1_2ct175.4@PF'[&!color=#00ff00]
	'MS_seabass1_1_2ct193.3@2H'[&!color=#00ff00]
	'MS_seabass1_1_2ct205.3@1L'[&!color=#00ff00]
	'MS_seabass1_1_2ct241.1@PF'[&!color=#00ff00]
	'MS_seabass1_r1_2ct003.3@2'[&!color=#00ff00]
	'MS_seabass1_r1_2ct011.1@P'[&!color=#00ff00]
	'MS_seabass2_1_2ct21.2@PF0'[&!color=#00ff00]
	'MS_seabass2_1_2ct41.3@2HW'[&!color=#00ff00]
	'MS_seabass2_1_2ct41.3@PF0'[&!color=#00ff00]
	'MS_seabass2_1_2ct41.4@PF0'[&!color=#00ff00]
	'MS_seabass2_1_2ct51.2@2HW'[&!color=#00ff00]
	'MS_seabass2_r1_2ct002.3@P'[&!color=#00ff00]
	'MS_seabass3_1_2ct12.4@2HW'[&!color=#00ff00]
	'MS_seabass3_1_2ct18.2@2HW'[&!color=#00ff00]
	'MS_seabass3_1_2ct22.2@PF0'[&!color=#00ff00]
	'MS_seabass3_1_2ct26.3@PF0'[&!color=#00ff00]
	'MS_seabass3_1_2ct27.3@2HW'[&!color=#00ff00]
	'MS_seabass3_1_2ct8.2@2HWT'[&!color=#00ff00]
	'MS_seabass3_r1_2ct002.1@P'[&!color=#00ff00]
	'MS_seabass3_r1_2ct007.1@P'[&!color=#00ff00]
	'MS_seabass4_6_2ct130.1@PF'[&!color=#00ff00]
	'MS_seabass4_6_2ct145.1@PF'[&!color=#00ff00]
	'MS_seabass4_6_2ct72.2@PF0'[&!color=#00ff00]
	'MS_seabass4_6_2ct73.3@2HW'[&!color=#00ff00]
	'MS_seabass_ms2_2ct1003.2@'[&!color=#00ff00]
	'MS_seabass_ms2_2ct294.3@2'[&!color=#00ff00]
	'MS_seabass_ms2_2ct296.3@2'[&!color=#00ff00]
	'MS_seabass_ms2_2ct313.3@P'[&!color=#00ff00]
	'MS_seabass_ms2_2ct314.2@P'[&!color=#00ff00]
	'MS_seabass_ms2_2ct319.2@2'[&!color=#00ff00]
	'MS_seabass_ms2_2ct342.4@2'[&!color=#00ff00]
	'MS_seabass_ms2_2ct365.4@2'[&!color=#00ff00]
	'MS_seabass_ms2_2ct365.5@P'[&!color=#00ff00]
	'MS_seabass_ms2_2ct428.2@2'[&!color=#00ff00]
	'MS_seabass_ms2_2ct456.1@P'[&!color=#00ff00]
	'MS_seabass_ms2_2ct458.2@P'[&!color=#00ff00]
	'MS_seabass_ms2_2ct458.3@2'[&!color=#00ff00]
	'MS_seabass_ms2_2ct462.1@1'[&!color=#00ff00]
	'MS_seabass_ms2_2ct483.3@P'[&!color=#00ff00]
	'MS_seabass_ms2_2ct486.2@P'[&!color=#00ff00]
	'MS_seabass_ms2_2ct491.2@2'[&!color=#00ff00]
	'MS_seabass_ms2_2ct492.2@P'[&!color=#00ff00]
	'MS_seabass_ms2_2ct496.2@1'[&!color=#00ff00]
	'MS_seabass_ms2_2ct497.3@P'[&!color=#00ff00]
	'MS_seabass_ms2_2ct501.1@P'[&!color=#00ff00]
	'MS_seabass_ms2_2ct506.2@P'[&!color=#00ff00]
	'MS_seabass_ms2_2ct534.2@2'[&!color=#00ff00]
	'MS_seabass_ms2_2ct560.2@P'[&!color=#00ff00]
	'MS_seabass_ms2_2ct564.2@2'[&!color=#00ff00]
	'MS_seabass_ms2_2ct571.3@P'[&!color=#00ff00]
	'MS_seabass_ms2_2ct572.3@P'[&!color=#00ff00]
	'MS_seabass_ms2_2ct576.2@P'[&!color=#00ff00]
	'MS_seabass_ms2_2ct579.2@P'[&!color=#00ff00]
	'MS_seabass_ms2_2ct583.2@2'[&!color=#00ff00]
	'MS_seabass_ms2_2ct586.2@P'[&!color=#00ff00]
	'MS_seabass_ms2_2ct588.2@P'[&!color=#00ff00]
	'MS_seabass_ms2_2ct590.2@P'[&!color=#00ff00]
	'MS_seabass_ms2_2ct591.1@2'[&!color=#00ff00]
	'MS_seabass_ms2_2ct593.2@2'[&!color=#00ff00]
	'MS_seabass_ms2_2ct597.3@P'[&!color=#00ff00]
	'MS_seabass_ms2_2ct610.2@P'[&!color=#00ff00]
	'MS_seabass_ms2_2ct619.1@P'[&!color=#00ff00]
	'MS_seabass_ms2_2ct620.3@P'[&!color=#00ff00]
	'MS_seabass_ms2_2ct623.2@P'[&!color=#00ff00]
	'MS_seabass_ms2_2ct631.2@2'[&!color=#00ff00]
	'MS_seabass_ms2_2ct636.2@P'[&!color=#00ff00]
	'MS_seabass_ms2_2ct641.2@P'[&!color=#00ff00]
	'MS_seabass_ms2_2ct645.2@P'[&!color=#00ff00]
	'MS_seabass_ms2_2ct650.3@2'[&!color=#00ff00]
	'MS_seabass_ms2_2ct657.3@P'[&!color=#00ff00]
	'MS_seabass_ms2_2ct659.2@2'[&!color=#00ff00]
	'MS_seabass_ms2_2ct663.2@2'[&!color=#00ff00]
	'MS_seabass_ms2_2ct664.2@P'[&!color=#00ff00]
	'MS_seabass_ms2_2ct668.2@P'[&!color=#00ff00]
	'MS_seabass_ms2_2ct678.1@P'[&!color=#00ff00]
	'MS_seabass_ms2_2ct679.1@2'[&!color=#00ff00]
	'MS_seabass_ms2_2ct686.3@2'[&!color=#00ff00]
	'MS_seabass_ms2_2ct687.2@P'[&!color=#00ff00]
	'MS_seabass_ms2_2ct688.2@2'[&!color=#00ff00]
	'MS_seabass_ms2_2ct691.3@1'[&!color=#00ff00]
	'MS_seabass_ms2_2ct692.2@P'[&!color=#00ff00]
	'MS_seabass_ms2_2ct693.2@2'[&!color=#00ff00]
	'MS_seabass_ms2_2ct697.2@1'[&!color=#00ff00]
	'MS_seabass_ms2_2ct698.2@P'[&!color=#00ff00]
	'MS_seabass_ms2_2ct701.1@1'[&!color=#00ff00]
	'MS_seabass_ms2_2ct708.3@P'[&!color=#00ff00]
	'MS_seabass_ms2_2ct710.3@P'[&!color=#00ff00]
	'MS_seabass_ms2_2ct716.2@P'[&!color=#00ff00]
	'MS_seabass_ms2_2ct728.2@P'[&!color=#00ff00]
	'MS_seabass_ms2_2ct743.3@2'[&!color=#00ff00]
	'MS_seabass_ms2_2ct748.2@P'[&!color=#00ff00]
	'MS_seabass_ms2_2ct750.2@2'[&!color=#00ff00]
	'MS_seabass_ms2_2ct758.2@P'[&!color=#00ff00]
	'MS_seabass_ms2_2ct773.2@P'[&!color=#00ff00]
	'MS_seabass_ms2_2ct799.2@P'[&!color=#00ff00]
	'MS_seabass_ms2_2ct805.4@1'[&!color=#00ff00]
	'MS_seabass_ms2_2ct813.1@P'[&!color=#00ff00]
	'MS_seabass_ms2_2ct821.2@P'[&!color=#00ff00]
	'MS_seabass_ms2_2ct825.2@P'[&!color=#00ff00]
	'MS_seabass_ms2_2ct828.2@P'[&!color=#00ff00]
	'MS_seabass_ms2_2ct840.1@P'[&!color=#00ff00]
	'MS_seabass_ms2_2ct849.1@1'[&!color=#00ff00]
	'MS_seabass_ms2_2ct858.2@P'[&!color=#00ff00]
	'MS_seabass_ms2_2ct869.1@1'[&!color=#00ff00]
	'MS_seabass_ms2_2ct880.2@P'[&!color=#00ff00]
	'MS_seabass_ms2_2ct893.2@2'[&!color=#00ff00]
	'MS_seabass_ms2_2ct894.1@P'[&!color=#00ff00]
	'MS_seabass_ms2_2ct908.2@P'[&!color=#00ff00]
	'MS_seabass_ms2_2ct919.2@1'[&!color=#00ff00]
	'MS_seabass_ms2_2ct934.1@2'[&!color=#00ff00]
	'MS_squid_r1_2ct004.1@PF01'[&!color=#00ff00]
	'MS_turkey_2ct43.3@PF01057'[&!color=#00ff00]
	'MS_turkey_2ct63.4@1L2M_A'[&!color=#00ff00]
	'MS_turkey_2ct64.4@1L2M_A'[&!color=#00ff00]
	'MS_turkey_2ct70.2@PF01057'[&!color=#00ff00]
	'MS_turkey_2ct77.2@2HW0_A'[&!color=#00ff00]
	Nano_KM607601[&!color=#ff00ff]
	Nano_KX534388[&!color=#ff00ff]
	Nano_KX534389[&!color=#ff00ff]
	Nano_KX534390[&!color=#ff00ff]
	Nano_KX534391[&!color=#ff00ff]
	Nano_L32166[&!color=#ff00ff]
	Nano_LC019722[&!color=#ff00ff]
	Nano_MK039132[&!color=#ff00ff]
	Redon_KY052047[&!color=#ff00ff]
	Redon_KY349925[&!color=#ff00ff]
	Redon_MK059754[&!color=#ff00ff]
	Redon_MK059757[&!color=#ff00ff]
	Redon_MK059760[&!color=#ff00ff]
	Redon_MK059767[&!color=#ff00ff]
	Redon_MK059768[&!color=#ff00ff]
	Redon_MK059769[&!color=#ff00ff]
	Redon_MK059770[&!color=#ff00ff]
	Redon_MK059771[&!color=#ff00ff]
	Redon_MK059772[&!color=#ff00ff]
	Smaco_GQ351277[&!color=#ff00ff]
	Smaco_JN634851[&!color=#ff00ff]
	Smaco_KF880727[&!color=#ff00ff]
	Smaco_KJ577816[&!color=#ff00ff]
	Smaco_KJ577817[&!color=#ff00ff]
	Smaco_KJ577819[&!color=#ff00ff]
	Smaco_KM573769[&!color=#ff00ff]
	Smaco_KM573770[&!color=#ff00ff]
	Smaco_KM573771[&!color=#ff00ff]
	Smaco_KM573772[&!color=#ff00ff]
	Smaco_KM573774[&!color=#ff00ff]
	Smaco_KM573775[&!color=#ff00ff]
	Smaco_KM598409[&!color=#ff00ff]
	Smaco_KM598410[&!color=#ff00ff]
	Smaco_KP233179[&!color=#ff00ff]
	Smaco_KP233189[&!color=#ff00ff]
	Smaco_KP233194[&!color=#ff00ff]
	Smaco_KP264968[&!color=#ff00ff]
	Smaco_KP860908[&!color=#ff00ff]
	Smaco_KT600068[&!color=#ff00ff]
	Smaco_KT862218[&!color=#ff00ff]
	Smaco_KT862219[&!color=#ff00ff]
	Smaco_KT862220[&!color=#ff00ff]
	Smaco_KT862221[&!color=#ff00ff]
	Smaco_KT862222[&!color=#ff00ff]
	Smaco_KT862223[&!color=#ff00ff]
	Smaco_KT862224[&!color=#ff00ff]
	Smaco_KT862225[&!color=#ff00ff]
	Smaco_KT862227[&!color=#ff00ff]
	Smaco_KT862228[&!color=#ff00ff]
	Smaco_KT862229[&!color=#ff00ff]
	Smaco_KU043396[&!color=#ff00ff]
	Smaco_KU043403[&!color=#ff00ff]
	Smaco_KU043430[&!color=#ff00ff]
	Smaco_KU058671[&!color=#ff00ff]
	Smaco_KX838318[&!color=#ff00ff]
	Smaco_LC386195[&!color=#ff00ff]
	Smaco_LC386196[&!color=#ff00ff]
	Smaco_LC386199[&!color=#ff00ff]
	Smaco_LC386200[&!color=#ff00ff]
	Smaco_LC386202[&!color=#ff00ff]
	Smaco_LC386204[&!color=#ff00ff]
	Smaco_LC386205[&!color=#ff00ff]
	Smaco_MG522850[&!color=#ff00ff]
	Smaco_MG846351[&!color=#ff00ff]
	Smaco_MG846352[&!color=#ff00ff]
	Smaco_MG846354[&!color=#ff00ff]
	Smaco_MH500283[&!color=#ff00ff]
	Smaco_MH500292[&!color=#ff00ff]
	Smaco_MH500302[&!color=#ff00ff]
	Smaco_MH500307[&!color=#ff00ff]
	Smaco_MH500310[&!color=#ff00ff]
	Smaco_MH500325[&!color=#ff00ff]
	Smaco_MH500326[&!color=#ff00ff]
	Smaco_MH500330[&!color=#ff00ff]
	Smaco_MH500334[&!color=#ff00ff]
	Smaco_MH545525[&!color=#ff00ff]
	Smaco_MH616866[&!color=#ff00ff]
	Unclass_FJ959077[&!color=#ff00ff]
	Unclass_FJ959078[&!color=#ff00ff]
	Unclass_FJ959079[&!color=#ff00ff]
	Unclass_FJ959080[&!color=#ff00ff]
	Unclass_FJ959081[&!color=#ff00ff]
	Unclass_FJ959082[&!color=#ff00ff]
	Unclass_FJ959083[&!color=#ff00ff]
	Unclass_FJ959084[&!color=#ff00ff]
	Unclass_FJ959085[&!color=#ff00ff]
	Unclass_FJ959086[&!color=#ff00ff]
	Unclass_GQ351278[&!color=#ff00ff]
	Unclass_HM228875[&!color=#ff00ff]
	Unclass_HQ322117[&!color=#ff00ff]
	Unclass_HQ335087[&!color=#ff00ff]
	Unclass_JF713716[&!color=#ff00ff]
	Unclass_JF713717[&!color=#ff00ff]
	Unclass_JF713718[&!color=#ff00ff]
	Unclass_JF713719[&!color=#ff00ff]
	Unclass_JF755401[&!color=#ff00ff]
	Unclass_JF755402[&!color=#ff00ff]
	Unclass_JF755403[&!color=#ff00ff]
	Unclass_JF755404[&!color=#ff00ff]
	Unclass_JF755405[&!color=#ff00ff]
	Unclass_JF755406[&!color=#ff00ff]
	Unclass_JF755407[&!color=#ff00ff]
	Unclass_JF755408[&!color=#ff00ff]
	Unclass_JF755409[&!color=#ff00ff]
	Unclass_JF755410[&!color=#ff00ff]
	Unclass_JF755411[&!color=#ff00ff]
	Unclass_JF755412[&!color=#ff00ff]
	Unclass_JF755413[&!color=#ff00ff]
	Unclass_JF755414[&!color=#ff00ff]
	Unclass_JF755415[&!color=#ff00ff]
	Unclass_JF755416[&!color=#ff00ff]
	Unclass_JF755417[&!color=#ff00ff]
	Unclass_JF912805[&!color=#ff00ff]
	Unclass_JF938078[&!color=#ff00ff]
	Unclass_JN857329[&!color=#ff00ff]
	Unclass_JN900499[&!color=#ff00ff]
	Unclass_JQ023166[&!color=#ff00ff]
	Unclass_JQ085285[&!color=#ff00ff]
	Unclass_JQ837277[&!color=#ff00ff]
	Unclass_JQ898333[&!color=#ff00ff]
	Unclass_JX185415[&!color=#ff00ff]
	Unclass_JX185416[&!color=#ff00ff]
	Unclass_JX185417[&!color=#ff00ff]
	Unclass_JX185418[&!color=#ff00ff]
	Unclass_JX305991[&!color=#ff00ff]
	Unclass_JX305992[&!color=#ff00ff]
	Unclass_JX305993[&!color=#ff00ff]
	Unclass_JX305994[&!color=#ff00ff]
	Unclass_JX305995[&!color=#ff00ff]
	Unclass_JX305996[&!color=#ff00ff]
	Unclass_JX305997[&!color=#ff00ff]
	Unclass_JX305998[&!color=#ff00ff]
	Unclass_JX559621[&!color=#ff00ff]
	Unclass_JX559622[&!color=#ff00ff]
	Unclass_JX904075[&!color=#ff00ff]
	Unclass_JX904076[&!color=#ff00ff]
	Unclass_JX904077[&!color=#ff00ff]
	Unclass_JX904107[&!color=#ff00ff]
	Unclass_JX904139[&!color=#ff00ff]
	Unclass_JX904144[&!color=#ff00ff]
	Unclass_JX904147[&!color=#ff00ff]
	Unclass_JX904185[&!color=#ff00ff]
	Unclass_JX904192[&!color=#ff00ff]
	Unclass_JX904231[&!color=#ff00ff]
	Unclass_JX904245[&!color=#ff00ff]
	Unclass_JX904250[&!color=#ff00ff]
	Unclass_JX904312[&!color=#ff00ff]
	Unclass_JX904333[&!color=#ff00ff]
	Unclass_JX904344[&!color=#ff00ff]
	Unclass_JX904368[&!color=#ff00ff]
	Unclass_JX904377[&!color=#ff00ff]
	Unclass_JX904394[&!color=#ff00ff]
	Unclass_JX904395[&!color=#ff00ff]
	Unclass_JX904401[&!color=#ff00ff]
	Unclass_JX904407[&!color=#ff00ff]
	Unclass_JX904412[&!color=#ff00ff]
	Unclass_JX904416[&!color=#ff00ff]
	Unclass_JX904420[&!color=#ff00ff]
	Unclass_JX904427[&!color=#ff00ff]
	Unclass_JX904431[&!color=#ff00ff]
	Unclass_JX904439[&!color=#ff00ff]
	Unclass_JX904469[&!color=#ff00ff]
	Unclass_JX904473[&!color=#ff00ff]
	Unclass_JX904478[&!color=#ff00ff]
	Unclass_JX904518[&!color=#ff00ff]
	Unclass_JX904523[&!color=#ff00ff]
	Unclass_JX904541[&!color=#ff00ff]
	Unclass_JX904548[&!color=#ff00ff]
	Unclass_JX904559[&!color=#ff00ff]
	Unclass_JX904561[&!color=#ff00ff]
	Unclass_JX904562[&!color=#ff00ff]
	Unclass_JX904581[&!color=#ff00ff]
	Unclass_JX904605[&!color=#ff00ff]
	Unclass_JX908739[&!color=#ff00ff]
	Unclass_JX908740[&!color=#ff00ff]
	Unclass_KC172652[&!color=#ff00ff]
	Unclass_KC248412[&!color=#ff00ff]
	Unclass_KC248414[&!color=#ff00ff]
	Unclass_KC248416[&!color=#ff00ff]
	Unclass_KC248417[&!color=#ff00ff]
	Unclass_KC248418[&!color=#ff00ff]
	Unclass_KC248419[&!color=#ff00ff]
	Unclass_KC248420[&!color=#ff00ff]
	Unclass_KC248422[&!color=#ff00ff]
	Unclass_KC248423[&!color=#ff00ff]
	Unclass_KC248424[&!color=#ff00ff]
	Unclass_KC248425[&!color=#ff00ff]
	Unclass_KC441518[&!color=#ff00ff]
	Unclass_KC543331[&!color=#ff00ff]
	Unclass_KC545228[&!color=#ff00ff]
	Unclass_KC545229[&!color=#ff00ff]
	Unclass_KC545230[&!color=#ff00ff]
	Unclass_KC794539[&!color=#ff00ff]
	Unclass_KC794540[&!color=#ff00ff]
	Unclass_KF133807[&!color=#ff00ff]
	Unclass_KF133808[&!color=#ff00ff]
	Unclass_KF133810[&!color=#ff00ff]
	Unclass_KF133811[&!color=#ff00ff]
	Unclass_KF133812[&!color=#ff00ff]
	Unclass_KF133813[&!color=#ff00ff]
	Unclass_KF133814[&!color=#ff00ff]
	Unclass_KF133815[&!color=#ff00ff]
	Unclass_KF133816[&!color=#ff00ff]
	Unclass_KF133817[&!color=#ff00ff]
	Unclass_KF133818[&!color=#ff00ff]
	Unclass_KF133819[&!color=#ff00ff]
	Unclass_KF133820[&!color=#ff00ff]
	Unclass_KF133821[&!color=#ff00ff]
	Unclass_KF133822[&!color=#ff00ff]
	Unclass_KF133823[&!color=#ff00ff]
	Unclass_KF133824[&!color=#ff00ff]
	Unclass_KF133825[&!color=#ff00ff]
	Unclass_KF133827[&!color=#ff00ff]
	Unclass_KF133828[&!color=#ff00ff]
	Unclass_KF246569[&!color=#ff00ff]
	Unclass_KF481961[&!color=#ff00ff]
	Unclass_KF738873[&!color=#ff00ff]
	Unclass_KF738874[&!color=#ff00ff]
	Unclass_KF738875[&!color=#ff00ff]
	Unclass_KF738876[&!color=#ff00ff]
	Unclass_KF738877[&!color=#ff00ff]
	Unclass_KF738878[&!color=#ff00ff]
	Unclass_KF738879[&!color=#ff00ff]
	Unclass_KF738880[&!color=#ff00ff]
	Unclass_KF738881[&!color=#ff00ff]
	Unclass_KF738882[&!color=#ff00ff]
	Unclass_KF738883[&!color=#ff00ff]
	Unclass_KF738884[&!color=#ff00ff]
	Unclass_KF738885[&!color=#ff00ff]
	Unclass_KJ206566[&!color=#ff00ff]
	Unclass_KJ417134[&!color=#ff00ff]
	Unclass_KJ433989[&!color=#ff00ff]
	Unclass_KJ547618[&!color=#ff00ff]
	Unclass_KJ547620[&!color=#ff00ff]
	Unclass_KJ547621[&!color=#ff00ff]
	Unclass_KJ547622[&!color=#ff00ff]
	Unclass_KJ547623[&!color=#ff00ff]
	Unclass_KJ547624[&!color=#ff00ff]
	Unclass_KJ547625[&!color=#ff00ff]
	Unclass_KJ547626[&!color=#ff00ff]
	Unclass_KJ547627[&!color=#ff00ff]
	Unclass_KJ547628[&!color=#ff00ff]
	Unclass_KJ547629[&!color=#ff00ff]
	Unclass_KJ547630[&!color=#ff00ff]
	Unclass_KJ547631[&!color=#ff00ff]
	Unclass_KJ547632[&!color=#ff00ff]
	Unclass_KJ547633[&!color=#ff00ff]
	Unclass_KJ547646[&!color=#ff00ff]
	Unclass_KJ547647[&!color=#ff00ff]
	Unclass_KJ547648[&!color=#ff00ff]
	Unclass_KJ547649[&!color=#ff00ff]
	Unclass_KJ547650[&!color=#ff00ff]
	Unclass_KJ547651[&!color=#ff00ff]
	Unclass_KJ547652[&!color=#ff00ff]
	Unclass_KJ547653[&!color=#ff00ff]
	Unclass_KJ641713[&!color=#ff00ff]
	Unclass_KJ641718[&!color=#ff00ff]
	Unclass_KJ641721[&!color=#ff00ff]
	Unclass_KJ641722[&!color=#ff00ff]
	Unclass_KJ641725[&!color=#ff00ff]
	Unclass_KJ641729[&!color=#ff00ff]
	Unclass_KJ641730[&!color=#ff00ff]
	Unclass_KJ641731[&!color=#ff00ff]
	Unclass_KJ641732[&!color=#ff00ff]
	Unclass_KJ641733[&!color=#ff00ff]
	Unclass_KJ641735[&!color=#ff00ff]
	Unclass_KJ641736[&!color=#ff00ff]
	Unclass_KJ641738[&!color=#ff00ff]
	Unclass_KJ641739[&!color=#ff00ff]
	Unclass_KJ938716[&!color=#ff00ff]
	Unclass_KJ955447[&!color=#ff00ff]
	Unclass_KJ955448[&!color=#ff00ff]
	Unclass_KJ955449[&!color=#ff00ff]
	Unclass_KJ955450[&!color=#ff00ff]
	Unclass_KJ955451[&!color=#ff00ff]
	Unclass_KM105952[&!color=#ff00ff]
	Unclass_KM510189[&!color=#ff00ff]
	Unclass_KM510190[&!color=#ff00ff]
	Unclass_KM510191[&!color=#ff00ff]
	Unclass_KM573763[&!color=#ff00ff]
	Unclass_KM573764[&!color=#ff00ff]
	Unclass_KM573765[&!color=#ff00ff]
	Unclass_KM573766[&!color=#ff00ff]
	Unclass_KM573767[&!color=#ff00ff]
	Unclass_KM573768[&!color=#ff00ff]
	Unclass_KM573773[&!color=#ff00ff]
	Unclass_KM573776[&!color=#ff00ff]
	Unclass_KM598389[&!color=#ff00ff]
	Unclass_KM598390[&!color=#ff00ff]
	Unclass_KM598391[&!color=#ff00ff]
	Unclass_KM598392[&!color=#ff00ff]
	Unclass_KM598393[&!color=#ff00ff]
	Unclass_KM598394[&!color=#ff00ff]
	Unclass_KM598395[&!color=#ff00ff]
	Unclass_KM598396[&!color=#ff00ff]
	Unclass_KM598397[&!color=#ff00ff]
	Unclass_KM598398[&!color=#ff00ff]
	Unclass_KM598399[&!color=#ff00ff]
	Unclass_KM598400[&!color=#ff00ff]
	Unclass_KM598401[&!color=#ff00ff]
	Unclass_KM598402[&!color=#ff00ff]
	Unclass_KM598403[&!color=#ff00ff]
	Unclass_KM598404[&!color=#ff00ff]
	Unclass_KM598405[&!color=#ff00ff]
	Unclass_KM598406[&!color=#ff00ff]
	Unclass_KM598407[&!color=#ff00ff]
	Unclass_KM598408[&!color=#ff00ff]
	Unclass_KM598411[&!color=#ff00ff]
	Unclass_KM598412[&!color=#ff00ff]
	Unclass_KM821748[&!color=#ff00ff]
	Unclass_KM821749[&!color=#ff00ff]
	Unclass_KM821750[&!color=#ff00ff]
	Unclass_KM821751[&!color=#ff00ff]
	Unclass_KM821752[&!color=#ff00ff]
	Unclass_KM821753[&!color=#ff00ff]
	Unclass_KM821754[&!color=#ff00ff]
	Unclass_KM821755[&!color=#ff00ff]
	Unclass_KM821756[&!color=#ff00ff]
	Unclass_KM821757[&!color=#ff00ff]
	Unclass_KM821758[&!color=#ff00ff]
	Unclass_KM821759[&!color=#ff00ff]
	Unclass_KM821760[&!color=#ff00ff]
	Unclass_KM821761[&!color=#ff00ff]
	Unclass_KM821762[&!color=#ff00ff]
	Unclass_KM821763[&!color=#ff00ff]
	Unclass_KM821764[&!color=#ff00ff]
	Unclass_KM821765[&!color=#ff00ff]
	Unclass_KM821766[&!color=#ff00ff]
	Unclass_KM821767[&!color=#ff00ff]
	Unclass_KM821768[&!color=#ff00ff]
	Unclass_KM821769[&!color=#ff00ff]
	Unclass_KM821770[&!color=#ff00ff]
	Unclass_KM874290[&!color=#ff00ff]
	Unclass_KM874291[&!color=#ff00ff]
	Unclass_KM874292[&!color=#ff00ff]
	Unclass_KM874293[&!color=#ff00ff]
	Unclass_KM874294[&!color=#ff00ff]
	Unclass_KM874295[&!color=#ff00ff]
	Unclass_KM874296[&!color=#ff00ff]
	Unclass_KM874297[&!color=#ff00ff]
	Unclass_KM874298[&!color=#ff00ff]
	Unclass_KM874299[&!color=#ff00ff]
	Unclass_KM874300[&!color=#ff00ff]
	Unclass_KM874301[&!color=#ff00ff]
	Unclass_KM874302[&!color=#ff00ff]
	Unclass_KM874303[&!color=#ff00ff]
	Unclass_KM874304[&!color=#ff00ff]
	Unclass_KM874305[&!color=#ff00ff]
	Unclass_KM874306[&!color=#ff00ff]
	Unclass_KM874307[&!color=#ff00ff]
	Unclass_KM874308[&!color=#ff00ff]
	Unclass_KM874309[&!color=#ff00ff]
	Unclass_KM874310[&!color=#ff00ff]
	Unclass_KM874311[&!color=#ff00ff]
	Unclass_KM874312[&!color=#ff00ff]
	Unclass_KM874313[&!color=#ff00ff]
	Unclass_KM874314[&!color=#ff00ff]
	Unclass_KM874315[&!color=#ff00ff]
	Unclass_KM874316[&!color=#ff00ff]
	Unclass_KM874317[&!color=#ff00ff]
	Unclass_KM874318[&!color=#ff00ff]
	Unclass_KM874319[&!color=#ff00ff]
	Unclass_KM874320[&!color=#ff00ff]
	Unclass_KM874321[&!color=#ff00ff]
	Unclass_KM874322[&!color=#ff00ff]
	Unclass_KM874323[&!color=#ff00ff]
	Unclass_KM874324[&!color=#ff00ff]
	Unclass_KM874325[&!color=#ff00ff]
	Unclass_KM874326[&!color=#ff00ff]
	Unclass_KM874327[&!color=#ff00ff]
	Unclass_KM874328[&!color=#ff00ff]
	Unclass_KM874329[&!color=#ff00ff]
	Unclass_KM874330[&!color=#ff00ff]
	Unclass_KM874331[&!color=#ff00ff]
	Unclass_KM874332[&!color=#ff00ff]
	Unclass_KM874333[&!color=#ff00ff]
	Unclass_KM874334[&!color=#ff00ff]
	Unclass_KM874335[&!color=#ff00ff]
	Unclass_KM874336[&!color=#ff00ff]
	Unclass_KM874337[&!color=#ff00ff]
	Unclass_KM874338[&!color=#ff00ff]
	Unclass_KM874339[&!color=#ff00ff]
	Unclass_KM874340[&!color=#ff00ff]
	Unclass_KM874341[&!color=#ff00ff]
	Unclass_KM874342[&!color=#ff00ff]
	Unclass_KM874343[&!color=#ff00ff]
	Unclass_KM874344[&!color=#ff00ff]
	Unclass_KM874345[&!color=#ff00ff]
	Unclass_KM874346[&!color=#ff00ff]
	Unclass_KM874347[&!color=#ff00ff]
	Unclass_KM874348[&!color=#ff00ff]
	Unclass_KM874349[&!color=#ff00ff]
	Unclass_KM874350[&!color=#ff00ff]
	Unclass_KM874351[&!color=#ff00ff]
	Unclass_KM874352[&!color=#ff00ff]
	Unclass_KM874353[&!color=#ff00ff]
	Unclass_KM874354[&!color=#ff00ff]
	Unclass_KM874355[&!color=#ff00ff]
	Unclass_KM874356[&!color=#ff00ff]
	Unclass_KM874357[&!color=#ff00ff]
	Unclass_KM874358[&!color=#ff00ff]
	Unclass_KM874359[&!color=#ff00ff]
	Unclass_KM874360[&!color=#ff00ff]
	Unclass_KM874361[&!color=#ff00ff]
	Unclass_KM874362[&!color=#ff00ff]
	Unclass_KM874363[&!color=#ff00ff]
	Unclass_KM874364[&!color=#ff00ff]
	Unclass_KM874365[&!color=#ff00ff]
	Unclass_KM874366[&!color=#ff00ff]
	Unclass_KM874367[&!color=#ff00ff]
	Unclass_KM874368[&!color=#ff00ff]
	Unclass_KM972725[&!color=#ff00ff]
	Unclass_KM972726[&!color=#ff00ff]
	Unclass_KP005453[&!color=#ff00ff]
	Unclass_KP005454[&!color=#ff00ff]
	Unclass_KP153359[&!color=#ff00ff]
	Unclass_KP153360[&!color=#ff00ff]
	Unclass_KP153361[&!color=#ff00ff]
	Unclass_KP153362[&!color=#ff00ff]
	Unclass_KP153364[&!color=#ff00ff]
	Unclass_KP153365[&!color=#ff00ff]
	Unclass_KP153366[&!color=#ff00ff]
	Unclass_KP153367[&!color=#ff00ff]
	Unclass_KP153368[&!color=#ff00ff]
	Unclass_KP153369[&!color=#ff00ff]
	Unclass_KP153370[&!color=#ff00ff]
	Unclass_KP153371[&!color=#ff00ff]
	Unclass_KP153372[&!color=#ff00ff]
	Unclass_KP153373[&!color=#ff00ff]
	Unclass_KP153374[&!color=#ff00ff]
	Unclass_KP153375[&!color=#ff00ff]
	Unclass_KP153376[&!color=#ff00ff]
	Unclass_KP153377[&!color=#ff00ff]
	Unclass_KP153378[&!color=#ff00ff]
	Unclass_KP153379[&!color=#ff00ff]
	Unclass_KP153380[&!color=#ff00ff]
	Unclass_KP153381[&!color=#ff00ff]
	Unclass_KP153382[&!color=#ff00ff]
	Unclass_KP153383[&!color=#ff00ff]
	Unclass_KP153390[&!color=#ff00ff]
	Unclass_KP153391[&!color=#ff00ff]
	Unclass_KP153392[&!color=#ff00ff]
	Unclass_KP153393[&!color=#ff00ff]
	Unclass_KP153394[&!color=#ff00ff]
	Unclass_KP153395[&!color=#ff00ff]
	Unclass_KP153396[&!color=#ff00ff]
	Unclass_KP153397[&!color=#ff00ff]
	Unclass_KP153398[&!color=#ff00ff]
	Unclass_KP153399[&!color=#ff00ff]
	Unclass_KP153400[&!color=#ff00ff]
	Unclass_KP153401[&!color=#ff00ff]
	Unclass_KP153402[&!color=#ff00ff]
	Unclass_KP153403[&!color=#ff00ff]
	Unclass_KP153404[&!color=#ff00ff]
	Unclass_KP153405[&!color=#ff00ff]
	Unclass_KP153406[&!color=#ff00ff]
	Unclass_KP153407[&!color=#ff00ff]
	Unclass_KP153408[&!color=#ff00ff]
	Unclass_KP153409[&!color=#ff00ff]
	Unclass_KP153410[&!color=#ff00ff]
	Unclass_KP153411[&!color=#ff00ff]
	Unclass_KP153412[&!color=#ff00ff]
	Unclass_KP153413[&!color=#ff00ff]
	Unclass_KP153414[&!color=#ff00ff]
	Unclass_KP153415[&!color=#ff00ff]
	Unclass_KP153416[&!color=#ff00ff]
	Unclass_KP153417[&!color=#ff00ff]
	Unclass_KP153418[&!color=#ff00ff]
	Unclass_KP153419[&!color=#ff00ff]
	Unclass_KP153420[&!color=#ff00ff]
	Unclass_KP153421[&!color=#ff00ff]
	Unclass_KP153422[&!color=#ff00ff]
	Unclass_KP153423[&!color=#ff00ff]
	Unclass_KP153424[&!color=#ff00ff]
	Unclass_KP153425[&!color=#ff00ff]
	Unclass_KP153426[&!color=#ff00ff]
	Unclass_KP153427[&!color=#ff00ff]
	Unclass_KP153428[&!color=#ff00ff]
	Unclass_KP153429[&!color=#ff00ff]
	Unclass_KP153430[&!color=#ff00ff]
	Unclass_KP153431[&!color=#ff00ff]
	Unclass_KP153432[&!color=#ff00ff]
	Unclass_KP153433[&!color=#ff00ff]
	Unclass_KP153434[&!color=#ff00ff]
	Unclass_KP153435[&!color=#ff00ff]
	Unclass_KP153436[&!color=#ff00ff]
	Unclass_KP153437[&!color=#ff00ff]
	Unclass_KP153438[&!color=#ff00ff]
	Unclass_KP153439[&!color=#ff00ff]
	Unclass_KP153440[&!color=#ff00ff]
	Unclass_KP153441[&!color=#ff00ff]
	Unclass_KP153442[&!color=#ff00ff]
	Unclass_KP153443[&!color=#ff00ff]
	Unclass_KP153444[&!color=#ff00ff]
	Unclass_KP153445[&!color=#ff00ff]
	Unclass_KP153446[&!color=#ff00ff]
	Unclass_KP153447[&!color=#ff00ff]
	Unclass_KP153448[&!color=#ff00ff]
	Unclass_KP153449[&!color=#ff00ff]
	Unclass_KP153450[&!color=#ff00ff]
	Unclass_KP153451[&!color=#ff00ff]
	Unclass_KP153452[&!color=#ff00ff]
	Unclass_KP153453[&!color=#ff00ff]
	Unclass_KP153454[&!color=#ff00ff]
	Unclass_KP153455[&!color=#ff00ff]
	Unclass_KP153456[&!color=#ff00ff]
	Unclass_KP153457[&!color=#ff00ff]
	Unclass_KP153458[&!color=#ff00ff]
	Unclass_KP153459[&!color=#ff00ff]
	Unclass_KP153460[&!color=#ff00ff]
	Unclass_KP153461[&!color=#ff00ff]
	Unclass_KP153462[&!color=#ff00ff]
	Unclass_KP153463[&!color=#ff00ff]
	Unclass_KP153464[&!color=#ff00ff]
	Unclass_KP153465[&!color=#ff00ff]
	Unclass_KP153466[&!color=#ff00ff]
	Unclass_KP153467[&!color=#ff00ff]
	Unclass_KP153468[&!color=#ff00ff]
	Unclass_KP153469[&!color=#ff00ff]
	Unclass_KP153470[&!color=#ff00ff]
	Unclass_KP153471[&!color=#ff00ff]
	Unclass_KP153474[&!color=#ff00ff]
	Unclass_KP153475[&!color=#ff00ff]
	Unclass_KP153476[&!color=#ff00ff]
	Unclass_KP153477[&!color=#ff00ff]
	Unclass_KP153478[&!color=#ff00ff]
	Unclass_KP153479[&!color=#ff00ff]
	Unclass_KP153480[&!color=#ff00ff]
	Unclass_KP153481[&!color=#ff00ff]
	Unclass_KP153482[&!color=#ff00ff]
	Unclass_KP153483[&!color=#ff00ff]
	Unclass_KP153484[&!color=#ff00ff]
	Unclass_KP153485[&!color=#ff00ff]
	Unclass_KP153486[&!color=#ff00ff]
	Unclass_KP153487[&!color=#ff00ff]
	Unclass_KP153488[&!color=#ff00ff]
	Unclass_KP153489[&!color=#ff00ff]
	Unclass_KP153490[&!color=#ff00ff]
	Unclass_KP153491[&!color=#ff00ff]
	Unclass_KP153492[&!color=#ff00ff]
	Unclass_KP153493[&!color=#ff00ff]
	Unclass_KP153494[&!color=#ff00ff]
	Unclass_KP153495[&!color=#ff00ff]
	Unclass_KP153496[&!color=#ff00ff]
	Unclass_KP153497[&!color=#ff00ff]
	Unclass_KP153498[&!color=#ff00ff]
	Unclass_KP153499[&!color=#ff00ff]
	Unclass_KP153500[&!color=#ff00ff]
	Unclass_KP153501[&!color=#ff00ff]
	Unclass_KP153502[&!color=#ff00ff]
	Unclass_KP153503[&!color=#ff00ff]
	Unclass_KP153504[&!color=#ff00ff]
	Unclass_KP153505[&!color=#ff00ff]
	Unclass_KP153506[&!color=#ff00ff]
	Unclass_KP153507[&!color=#ff00ff]
	Unclass_KP153508[&!color=#ff00ff]
	Unclass_KP153509[&!color=#ff00ff]
	Unclass_KP153510[&!color=#ff00ff]
	Unclass_KP153511[&!color=#ff00ff]
	Unclass_KP153512[&!color=#ff00ff]
	Unclass_KP153513[&!color=#ff00ff]
	Unclass_KP153514[&!color=#ff00ff]
	Unclass_KP153515[&!color=#ff00ff]
	Unclass_KP153516[&!color=#ff00ff]
	Unclass_KP153517[&!color=#ff00ff]
	Unclass_KP153518[&!color=#ff00ff]
	Unclass_KP153519[&!color=#ff00ff]
	Unclass_KP153520[&!color=#ff00ff]
	Unclass_KP153521[&!color=#ff00ff]
	Unclass_KP153522[&!color=#ff00ff]
	Unclass_KP153523[&!color=#ff00ff]
	Unclass_KP153524[&!color=#ff00ff]
	Unclass_KP153525[&!color=#ff00ff]
	Unclass_KP153526[&!color=#ff00ff]
	Unclass_KP153527[&!color=#ff00ff]
	Unclass_KP153528[&!color=#ff00ff]
	Unclass_KP202150[&!color=#ff00ff]
	Unclass_KP406530[&!color=#ff00ff]
	Unclass_KR134311[&!color=#ff00ff]
	Unclass_KR134312[&!color=#ff00ff]
	Unclass_KR134313[&!color=#ff00ff]
	Unclass_KR134314[&!color=#ff00ff]
	Unclass_KR134315[&!color=#ff00ff]
	Unclass_KR134316[&!color=#ff00ff]
	Unclass_KR134317[&!color=#ff00ff]
	Unclass_KR134318[&!color=#ff00ff]
	Unclass_KR134319[&!color=#ff00ff]
	Unclass_KR134320[&!color=#ff00ff]
	Unclass_KR134321[&!color=#ff00ff]
	Unclass_KR134322[&!color=#ff00ff]
	Unclass_KR134323[&!color=#ff00ff]
	Unclass_KR134324[&!color=#ff00ff]
	Unclass_KR134325[&!color=#ff00ff]
	Unclass_KR134326[&!color=#ff00ff]
	Unclass_KR134327[&!color=#ff00ff]
	Unclass_KR134328[&!color=#ff00ff]
	Unclass_KR134329[&!color=#ff00ff]
	Unclass_KR134330[&!color=#ff00ff]
	Unclass_KR134331[&!color=#ff00ff]
	Unclass_KR134332[&!color=#ff00ff]
	Unclass_KR134333[&!color=#ff00ff]
	Unclass_KR134334[&!color=#ff00ff]
	Unclass_KR134335[&!color=#ff00ff]
	Unclass_KR134336[&!color=#ff00ff]
	Unclass_KR134337[&!color=#ff00ff]
	Unclass_KR134338[&!color=#ff00ff]
	Unclass_KR134339[&!color=#ff00ff]
	Unclass_KR134340[&!color=#ff00ff]
	Unclass_KR134341[&!color=#ff00ff]
	Unclass_KR134342[&!color=#ff00ff]
	Unclass_KR134343[&!color=#ff00ff]
	Unclass_KR134344[&!color=#ff00ff]
	Unclass_KR134345[&!color=#ff00ff]
	Unclass_KR134346[&!color=#ff00ff]
	Unclass_KR134347[&!color=#ff00ff]
	Unclass_KR134348[&!color=#ff00ff]
	Unclass_KR134349[&!color=#ff00ff]
	Unclass_KR134350[&!color=#ff00ff]
	Unclass_KR186219[&!color=#ff00ff]
	Unclass_KR528543[&!color=#ff00ff]
	Unclass_KR528544[&!color=#ff00ff]
	Unclass_KR528545[&!color=#ff00ff]
	Unclass_KR528546[&!color=#ff00ff]
	Unclass_KR528547[&!color=#ff00ff]
	Unclass_KR528548[&!color=#ff00ff]
	Unclass_KR528549[&!color=#ff00ff]
	Unclass_KR528550[&!color=#ff00ff]
	Unclass_KR528551[&!color=#ff00ff]
[truncated: 762 more rows]
