# Supplementary material for: Discovery of several thousand highly diverse circular DNA viruses
Source: eLife. 2020 Feb 4;9:e51971. doi: 10.7554/eLife.51971 (PMC7000223; doi:10.7554/eLife.51971)
Supplement: Figure 2—figure supplement 2—source data 3. [file elife-51971-fig2-figsupp2-data3.tre]

#NEXUS
begin taxa;
	dimensions ntax=103;
	taxlabels
	'MS_10mus_7_2ct117.18'[&!color=#00ff00]
	'MS_10mus_7_2ct431.7'[&!color=#00ff00]
	'MS_10mus_7_2ct486.2'[&!color=#00ff00]
	'MS_10mus_7_2ct500.7'[&!color=#00ff00]
	'MS_16minnow_6_2ct525.7'[&!color=#00ff00]
	'MS_16minnow_6_2ct588.4'[&!color=#00ff00]
	'MS_abalone_6_2ct10.5'[&!color=#00ff00]
	'MS_abalone_6_2ct6.9'[&!color=#00ff00]
	MS_axolotl_blastema1_2ct2[&!color=#00ff00]
	'MS_haddock_1_2ct11.6'[&!color=#00ff00]
	'MS_haddock_1_2ct12.6'[&!color=#00ff00]
	'MS_haddock_1_2ct13.4'[&!color=#00ff00]
	'MS_haddock_1_2ct14.8'[&!color=#00ff00]
	'MS_haddock_1_2ct17.7'[&!color=#00ff00]
	'MS_haddock_1_2ct19.6'[&!color=#00ff00]
	'MS_haddock_1_2ct20.6'[&!color=#00ff00]
	'MS_haddock_1_2ct21.7'[&!color=#00ff00]
	'MS_haddock_1_2ct24.8'[&!color=#00ff00]
	'MS_haddock_1_2ct25.5'[&!color=#00ff00]
	'MS_haddock_1_2ct29.5'[&!color=#00ff00]
	'MS_haddock_1_2ct30.7'[&!color=#00ff00]
	'MS_haddock_1_2ct31.4'[&!color=#00ff00]
	'MS_haddock_1_2ct32.5'[&!color=#00ff00]
	'MS_haddock_1_2ct33.8'[&!color=#00ff00]
	'MS_haddock_1_2ct34.7'[&!color=#00ff00]
	'MS_haddock_1_2ct35.4'[&!color=#00ff00]
	'MS_haddock_1_2ct36.6'[&!color=#00ff00]
	'MS_haddock_1_2ct37.8'[&!color=#00ff00]
	'MS_haddock_1_2ct39.5'[&!color=#00ff00]
	'MS_haddock_1_2ct40.9'[&!color=#00ff00]
	'MS_haddock_1_2ct41.6'[&!color=#00ff00]
	'MS_haddock_1_2ct42.5'[&!color=#00ff00]
	'MS_haddock_1_2ct43.5'[&!color=#00ff00]
	'MS_haddock_1_2ct44.7'[&!color=#00ff00]
	'MS_haddock_1_2ct45.7'[&!color=#00ff00]
	'MS_haddock_1_2ct6.7'[&!color=#00ff00]
	'MS_haddock_1_2ct7.7'[&!color=#00ff00]
	'MS_haddock_1_2ct70.4'[&!color=#00ff00]
	'MS_haddock_1_2ct9.10'[&!color=#00ff00]
	MS_mac_stool_D2CW_7_2ct17[&!color=#00ff00]
	'MS_macstool_de1a1_2ct27.1'[&!color=#00ff00]
	'MS_macstool_de1a1_2ct58.5'[&!color=#00ff00]
	'MS_macstool_de1a1_2ct65.6'[&!color=#00ff00]
	'MS_macstool_de2c2_2ct30.1'[&!color=#00ff00]
	'MS_macstool_de2c2_2ct31.9'[&!color=#00ff00]
	'MS_macstool_de2c2_2ct32.9'[&!color=#00ff00]
	'MS_macstool_de2c2_2ct45.8'[&!color=#00ff00]
	'MS_macstool_de2c2_2ct53.3'[&!color=#00ff00]
	'MS_mice_vagnl_1_2ct14.4'[&!color=#00ff00]
	'MS_mice_vagnl_1_2ct4.18'[&!color=#00ff00]
	'MS_rainbowtrout1_2ct29.3'[&!color=#00ff00]
	'MS_rainbowtrout1_2ct3.9'[&!color=#00ff00]
	'MS_rainbowtrout1_2ct5.7'[&!color=#00ff00]
	'MS_rainbowtrout1_2ct6.6'[&!color=#00ff00]
	'MS_rainbowtrout1_2ct8.6'[&!color=#00ff00]
	'MS_redsnapper1_2ct11.5'[&!color=#00ff00]
	'MS_seabass1_1_2ct37.4'[&!color=#00ff00]
	'MS_seabass4_6_2ct24.6'[&!color=#00ff00]
	'MS_seabass_ms2_2ct138.11'[&!color=#00ff00]
	'MS_seabass_ms2_2ct147.6'[&!color=#00ff00]
	'MS_squid_r1_2ct000.9'[&!color=#00ff00]
	'gb_ino_AAQ94688.1_'[&!color=#ff00ff]
	'gb_ino_ARP21975.1_'[&!color=#ff00ff]
	'gb_ino_ARP21997.1_'[&!color=#ff00ff]
	'gb_ino_BAX02605.1_'[&!color=#ff00ff]
	'gb_ino_CAI94593.1_'[&!color=#ff00ff]
	'gb_ino_NP_039622.1_'[&!color=#ff00ff]
	'gb_ino_NP_040578.1_'[&!color=#ff00ff]
	'gb_ino_NP_040656.1_'[&!color=#ff00ff]
	'gb_ino_NP_047371.1_'[&!color=#ff00ff]
	'gb_ino_NP_542361.2_'[&!color=#ff00ff]
	'gb_ino_NP_604428.1_'[&!color=#ff00ff]
	'gb_ino_NP_620621.1_'[&!color=#ff00ff]
	'gb_ino_NP_835479.1_'[&!color=#ff00ff]
	'gb_ino_P03657.1_'[&!color=#ff00ff]
	'gb_ino_WP_003262646.1_'[&!color=#ff00ff]
	'gb_ino_WP_005477655.1_'[&!color=#ff00ff]
	'gb_ino_WP_011037227.1_'[&!color=#ff00ff]
	'gb_ino_WP_011269756.1_'[&!color=#ff00ff]
	'gb_ino_WP_011347640.1_'[&!color=#ff00ff]
	'gb_ino_WP_012435533.1_'[&!color=#ff00ff]
	'gb_ino_WP_015975294.1_'[&!color=#ff00ff]
	'gb_ino_WP_015979088.1_'[&!color=#ff00ff]
	'gb_ino_WP_015979236.1_'[&!color=#ff00ff]
	'gb_ino_WP_015979776.1_'[&!color=#ff00ff]
	'gb_ino_WP_016042359.1_'[&!color=#ff00ff]
	'gb_ino_WP_032474098.1_'[&!color=#ff00ff]
	'gb_ino_WP_045607620.1_'[&!color=#ff00ff]
	'gb_ino_WP_055348846.1_'[&!color=#ff00ff]
	'gb_ino_WP_069959848.1_'[&!color=#ff00ff]
	'gb_ino_YP_001552221.1_'[&!color=#ff00ff]
	'gb_ino_YP_001718372.1_'[&!color=#ff00ff]
	'gb_ino_YP_002290962.1_'[&!color=#ff00ff]
	'gb_ino_YP_002925195.1_'[&!color=#ff00ff]
	'gb_ino_YP_004327586.1_'[&!color=#ff00ff]
	'gb_ino_YP_004539137.1_'[&!color=#ff00ff]
	'gb_ino_YP_007011052.1_'[&!color=#ff00ff]
	'gb_ino_YP_008130373.1_'[&!color=#ff00ff]
	'gb_ino_YP_009103105.1_'[&!color=#ff00ff]
	'gb_ino_YP_009126701.1_'[&!color=#ff00ff]
	'gb_ino_YP_009664531.1_'[&!color=#ff00ff]
	'gb_ino_YP_257149.1_'[&!color=#ff00ff]
	genbank_unclassified_ssDN[&!color=#ff00ff]
;
end;
begin trees;
	tree tree_1 = [&R] ('gb_ino_NP_835479.1_'[&!color=#ff00ff]:0.098511,('MS_squid_r1_2ct000.9'[&!color=#00ff00]:0.422261,((('gb_ino_ARP21975.1_'[&!color=#ff00ff]:3.0E-6,'gb_ino_ARP21997.1_'[&!color=#ff00ff]:0.265599)[&bootstrap=100,!color=#4c4c4c]:0.07434,'gb_ino_WP_045607620.1_'[&!color=#ff00ff]:2.0E-6)[&bootstrap=100,!color=#4c4c4c]:0.336464,(('MS_haddock_1_2ct9.10'[&!color=#00ff00]:0.694538,'MS_s…
end;
begin figtree;
	set appearance.backgroundColorAttribute="Default";
	set appearance.backgroundColour=#ffffff;
	set appearance.branchColorAttribute="User selection";
	set appearance.branchColorGradient=false;
	set appearance.branchLineWidth=2.0;
	set appearance.branchMinLineWidth=0.0;
	set appearance.branchWidthAttribute="Fixed";
	set appearance.foregroundColour=#000000;
	set appearance.hilightingGradient=false;
	set appearance.selectionColour=#2d3680;
	set branchLabels.colorAttribute="bootstrap";
	set branchLabels.displayAttribute="bootstrap";
	set branchLabels.fontName="sansserif";
	set branchLabels.fontSize=8;
	set branchLabels.fontStyle=0;
	set branchLabels.isShown=true;
	set branchLabels.significantDigits=3;
	set layout.expansion=0;
	set layout.layoutType="RECTILINEAR";
	set layout.zoom=0;
	set legend.attribute="bootstrap";
	set legend.fontSize=10.0;
	set legend.isShown=false;
	set legend.significantDigits=4;
	set nodeBars.barWidth=4.0;
	set nodeBars.displayAttribute=null;
	set nodeBars.isShown=false;
	set nodeLabels.colorAttribute="User selection";
	set nodeLabels.displayAttribute="Node ages";
	set nodeLabels.fontName="sansserif";
	set nodeLabels.fontSize=8;
	set nodeLabels.fontStyle=0;
	set nodeLabels.isShown=false;
	set nodeLabels.significantDigits=4;
	set nodeShapeExternal.colourAttribute="User selection";
	set nodeShapeExternal.isShown=false;
	set nodeShapeExternal.minSize=10.0;
	set nodeShapeExternal.scaleType=Width;
	set nodeShapeExternal.shapeType=Circle;
	set nodeShapeExternal.size=4.0;
	set nodeShapeExternal.sizeAttribute="Fixed";
	set nodeShapeInternal.colourAttribute="User selection";
	set nodeShapeInternal.isShown=false;
	set nodeShapeInternal.minSize=0.5;
	set nodeShapeInternal.scaleType=Width;
	set nodeShapeInternal.shapeType=Circle;
	set nodeShapeInternal.size=4.0;
	set nodeShapeInternal.sizeAttribute="bootstrap";
	set polarLayout.alignTipLabels=false;
	set polarLayout.angularRange=7826;
	set polarLayout.rootAngle=0;
	set polarLayout.rootLength=109;
	set polarLayout.showRoot=true;
	set radialLayout.spread=0.0;
	set rectilinearLayout.alignTipLabels=false;
	set rectilinearLayout.curvature=0;
	set rectilinearLayout.rootLength=100;
	set scale.offsetAge=0.0;
	set scale.rootAge=1.0;
	set scale.scaleFactor=1.0;
	set scale.scaleRoot=false;
	set scaleAxis.automaticScale=true;
	set scaleAxis.fontSize=8.0;
	set scaleAxis.isShown=false;
	set scaleAxis.lineWidth=1.0;
	set scaleAxis.majorTicks=1.0;
	set scaleAxis.minorTicks=0.5;
	set scaleAxis.origin=0.0;
	set scaleAxis.reverseAxis=false;
	set scaleAxis.showGrid=true;
	set scaleBar.automaticScale=true;
	set scaleBar.fontSize=10.0;
	set scaleBar.isShown=true;
	set scaleBar.lineWidth=1.0;
	set scaleBar.scaleRange=0.0;
	set tipLabels.colorAttribute="User selection";
	set tipLabels.displayAttribute="Names";
	set tipLabels.fontName="sansserif";
	set tipLabels.fontSize=8;
	set tipLabels.fontStyle=0;
	set tipLabels.isShown=true;
	set tipLabels.significantDigits=4;
	set trees.order=false;
	set trees.orderType="increasing";
	set trees.rooting=false;
	set trees.rootingType="User Selection";
	set trees.transform=false;
	set trees.transformType="cladogram";
end;
