# Supplementary material for: Discovery of several thousand highly diverse circular DNA viruses
Source: eLife. 2020 Feb 4;9:e51971. doi: 10.7554/eLife.51971 (PMC7000223; doi:10.7554/eLife.51971)
Supplement: Figure 2—figure supplement 2—source data 4. [file elife-51971-fig2-figsupp2-data4.tre]

#NEXUS
begin taxa;
	dimensions ntax=984;
	taxlabels
	'MS_10mus_7_2ct205.6'[&!color=#00ff00]
	'MS_10mus_7_2ct214.5'[&!color=#00ff00]
	'MS_10mus_7_2ct250.6'[&!color=#00ff00]
	'MS_10mus_7_2ct269.3'[&!color=#00ff00]
	'MS_10mus_7_2ct317.5'[&!color=#00ff00]
	'MS_10mus_7_2ct329.8'[&!color=#00ff00]
	'MS_10mus_7_2ct346.2'[&!color=#00ff00]
	'MS_10mus_7_2ct390.5'[&!color=#00ff00]
	'MS_10mus_7_2ct495.4'[&!color=#00ff00]
	'MS_10mus_7_2ct658.6'[&!color=#00ff00]
	'MS_10mus_r1_2ct002.5'[&!color=#00ff00]
	'MS_16minnow_6_2ct1024.3'[&!color=#00ff00]
	'MS_16minnow_6_2ct480.4'[&!color=#00ff00]
	'MS_16minnow_6_2ct483.4'[&!color=#00ff00]
	'MS_16minnow_6_2ct492.6'[&!color=#00ff00]
	'MS_16minnow_6_2ct495.3'[&!color=#00ff00]
	'MS_16minnow_6_2ct500.3'[&!color=#00ff00]
	'MS_16minnow_6_2ct506.3'[&!color=#00ff00]
	'MS_16minnow_6_2ct507.6'[&!color=#00ff00]
	'MS_16minnow_6_2ct509.5'[&!color=#00ff00]
	'MS_16minnow_6_2ct515.5'[&!color=#00ff00]
	'MS_16minnow_6_2ct523.4'[&!color=#00ff00]
	'MS_16minnow_6_2ct543.5'[&!color=#00ff00]
	'MS_16minnow_6_2ct547.4'[&!color=#00ff00]
	'MS_16minnow_6_2ct549.6'[&!color=#00ff00]
	'MS_16minnow_6_2ct550.6'[&!color=#00ff00]
	'MS_16minnow_6_2ct551.5'[&!color=#00ff00]
	'MS_16minnow_6_2ct553.5'[&!color=#00ff00]
	'MS_16minnow_6_2ct556.7'[&!color=#00ff00]
	'MS_16minnow_6_2ct560.6'[&!color=#00ff00]
	'MS_16minnow_6_2ct565.7'[&!color=#00ff00]
	'MS_16minnow_6_2ct569.6'[&!color=#00ff00]
	'MS_16minnow_6_2ct574.5'[&!color=#00ff00]
	'MS_16minnow_6_2ct575.5'[&!color=#00ff00]
	'MS_16minnow_6_2ct584.3'[&!color=#00ff00]
	'MS_16minnow_6_2ct589.5'[&!color=#00ff00]
	'MS_16minnow_6_2ct593.4'[&!color=#00ff00]
	'MS_16minnow_6_2ct595.6'[&!color=#00ff00]
	'MS_16minnow_6_2ct605.5'[&!color=#00ff00]
	'MS_16minnow_6_2ct606.7'[&!color=#00ff00]
	'MS_16minnow_6_2ct612.2'[&!color=#00ff00]
	'MS_16minnow_6_2ct613.5'[&!color=#00ff00]
	'MS_16minnow_6_2ct615.5'[&!color=#00ff00]
	'MS_16minnow_6_2ct617.6'[&!color=#00ff00]
	'MS_16minnow_6_2ct618.4'[&!color=#00ff00]
	'MS_16minnow_6_2ct619.3'[&!color=#00ff00]
	'MS_16minnow_6_2ct624.4'[&!color=#00ff00]
	'MS_16minnow_6_2ct625.5'[&!color=#00ff00]
	'MS_16minnow_6_2ct626.2'[&!color=#00ff00]
	'MS_16minnow_6_2ct627.2'[&!color=#00ff00]
	'MS_16minnow_6_2ct628.7'[&!color=#00ff00]
	'MS_16minnow_6_2ct630.6'[&!color=#00ff00]
	'MS_16minnow_6_2ct631.7'[&!color=#00ff00]
	'MS_16minnow_6_2ct632.6'[&!color=#00ff00]
	'MS_16minnow_6_2ct633.5'[&!color=#00ff00]
	'MS_16minnow_6_2ct634.5'[&!color=#00ff00]
	'MS_16minnow_6_2ct635.8'[&!color=#00ff00]
	'MS_16minnow_6_2ct638.3'[&!color=#00ff00]
	'MS_16minnow_6_2ct639.6'[&!color=#00ff00]
	'MS_16minnow_6_2ct640.4'[&!color=#00ff00]
	'MS_16minnow_6_2ct642.3'[&!color=#00ff00]
	'MS_16minnow_6_2ct644.4'[&!color=#00ff00]
	'MS_16minnow_6_2ct645.3'[&!color=#00ff00]
	'MS_16minnow_6_2ct646.3'[&!color=#00ff00]
	'MS_16minnow_6_2ct647.5'[&!color=#00ff00]
	'MS_16minnow_6_2ct648.1'[&!color=#00ff00]
	'MS_16minnow_6_2ct649.2'[&!color=#00ff00]
	'MS_16minnow_6_2ct650.6'[&!color=#00ff00]
	'MS_16minnow_6_2ct651.8'[&!color=#00ff00]
	'MS_16minnow_6_2ct652.6'[&!color=#00ff00]
	'MS_16minnow_6_2ct653.3'[&!color=#00ff00]
	'MS_16minnow_6_2ct654.6'[&!color=#00ff00]
	'MS_16minnow_6_2ct655.2'[&!color=#00ff00]
	'MS_16minnow_6_2ct656.2'[&!color=#00ff00]
	'MS_16minnow_6_2ct657.8'[&!color=#00ff00]
	'MS_16minnow_6_2ct659.2'[&!color=#00ff00]
	'MS_16minnow_6_2ct660.6'[&!color=#00ff00]
	'MS_16minnow_6_2ct661.4'[&!color=#00ff00]
	'MS_16minnow_6_2ct662.5'[&!color=#00ff00]
	'MS_16minnow_6_2ct663.3'[&!color=#00ff00]
	'MS_16minnow_6_2ct666.5'[&!color=#00ff00]
	'MS_16minnow_6_2ct667.4'[&!color=#00ff00]
	'MS_16minnow_6_2ct669.7'[&!color=#00ff00]
	'MS_16minnow_6_2ct670.6'[&!color=#00ff00]
	'MS_16minnow_6_2ct671.3'[&!color=#00ff00]
	'MS_16minnow_6_2ct673.7'[&!color=#00ff00]
	'MS_16minnow_6_2ct675.6'[&!color=#00ff00]
	'MS_16minnow_6_2ct677.4'[&!color=#00ff00]
	'MS_16minnow_6_2ct679.3'[&!color=#00ff00]
	'MS_16minnow_6_2ct680.4'[&!color=#00ff00]
	'MS_16minnow_6_2ct681.5'[&!color=#00ff00]
	'MS_16minnow_6_2ct682.6'[&!color=#00ff00]
	'MS_16minnow_6_2ct683.4'[&!color=#00ff00]
	'MS_16minnow_6_2ct684.5'[&!color=#00ff00]
	'MS_16minnow_6_2ct685.4'[&!color=#00ff00]
	'MS_16minnow_6_2ct686.3'[&!color=#00ff00]
	'MS_16minnow_6_2ct687.4'[&!color=#00ff00]
	'MS_16minnow_6_2ct688.5'[&!color=#00ff00]
	'MS_16minnow_6_2ct689.6'[&!color=#00ff00]
	'MS_16minnow_6_2ct690.2'[&!color=#00ff00]
	'MS_16minnow_6_2ct693.4'[&!color=#00ff00]
	'MS_16minnow_6_2ct697.5'[&!color=#00ff00]
	'MS_16minnow_6_2ct698.3'[&!color=#00ff00]
	'MS_16minnow_6_2ct699.1'[&!color=#00ff00]
	'MS_16minnow_6_2ct700.6'[&!color=#00ff00]
	'MS_16minnow_6_2ct701.3'[&!color=#00ff00]
	'MS_16minnow_6_2ct703.5'[&!color=#00ff00]
	'MS_16minnow_6_2ct704.4'[&!color=#00ff00]
	'MS_16minnow_6_2ct705.5'[&!color=#00ff00]
	'MS_16minnow_6_2ct706.6'[&!color=#00ff00]
	'MS_16minnow_6_2ct707.5'[&!color=#00ff00]
	'MS_16minnow_6_2ct708.4'[&!color=#00ff00]
	'MS_16minnow_6_2ct709.2'[&!color=#00ff00]
	'MS_16minnow_6_2ct710.6'[&!color=#00ff00]
	'MS_16minnow_6_2ct711.6'[&!color=#00ff00]
	'MS_16minnow_6_2ct712.4'[&!color=#00ff00]
	'MS_16minnow_6_2ct713.5'[&!color=#00ff00]
	'MS_16minnow_6_2ct715.6'[&!color=#00ff00]
	'MS_16minnow_6_2ct716.7'[&!color=#00ff00]
	'MS_16minnow_6_2ct718.9'[&!color=#00ff00]
	'MS_16minnow_6_2ct720.4'[&!color=#00ff00]
	'MS_16minnow_6_2ct721.6'[&!color=#00ff00]
	'MS_16minnow_6_2ct722.6'[&!color=#00ff00]
	'MS_16minnow_6_2ct723.1'[&!color=#00ff00]
	'MS_16minnow_6_2ct724.5'[&!color=#00ff00]
	'MS_16minnow_6_2ct725.4'[&!color=#00ff00]
	'MS_16minnow_6_2ct728.5'[&!color=#00ff00]
	'MS_16minnow_6_2ct729.5'[&!color=#00ff00]
	'MS_16minnow_6_2ct730.5'[&!color=#00ff00]
	'MS_16minnow_6_2ct731.3'[&!color=#00ff00]
	'MS_16minnow_6_2ct732.5'[&!color=#00ff00]
	'MS_16minnow_6_2ct734.6'[&!color=#00ff00]
	'MS_16minnow_6_2ct735.5'[&!color=#00ff00]
	'MS_16minnow_6_2ct736.2'[&!color=#00ff00]
	'MS_16minnow_6_2ct737.6'[&!color=#00ff00]
	'MS_16minnow_6_2ct738.5'[&!color=#00ff00]
	'MS_16minnow_6_2ct739.5'[&!color=#00ff00]
	'MS_16minnow_6_2ct740.3'[&!color=#00ff00]
	'MS_16minnow_6_2ct743.3'[&!color=#00ff00]
	'MS_16minnow_6_2ct744.2'[&!color=#00ff00]
	'MS_16minnow_6_2ct745.5'[&!color=#00ff00]
	'MS_16minnow_6_2ct747.3'[&!color=#00ff00]
	'MS_16minnow_6_2ct748.7'[&!color=#00ff00]
	'MS_16minnow_6_2ct750.4'[&!color=#00ff00]
	'MS_16minnow_6_2ct751.5'[&!color=#00ff00]
	'MS_16minnow_6_2ct752.4'[&!color=#00ff00]
	'MS_16minnow_6_2ct753.4'[&!color=#00ff00]
	'MS_16minnow_6_2ct754.6'[&!color=#00ff00]
	'MS_16minnow_6_2ct755.4'[&!color=#00ff00]
	'MS_16minnow_6_2ct756.7'[&!color=#00ff00]
	'MS_16minnow_6_2ct757.6'[&!color=#00ff00]
	'MS_16minnow_6_2ct758.3'[&!color=#00ff00]
	'MS_16minnow_6_2ct759.5'[&!color=#00ff00]
	'MS_16minnow_6_2ct760.3'[&!color=#00ff00]
	'MS_16minnow_6_2ct761.6'[&!color=#00ff00]
	'MS_16minnow_6_2ct762.6'[&!color=#00ff00]
	'MS_16minnow_6_2ct763.5'[&!color=#00ff00]
	'MS_16minnow_6_2ct764.5'[&!color=#00ff00]
	'MS_16minnow_6_2ct765.6'[&!color=#00ff00]
	'MS_16minnow_6_2ct766.3'[&!color=#00ff00]
	'MS_16minnow_6_2ct767.4'[&!color=#00ff00]
	'MS_16minnow_6_2ct768.5'[&!color=#00ff00]
	'MS_16minnow_6_2ct769.5'[&!color=#00ff00]
	'MS_16minnow_6_2ct770.6'[&!color=#00ff00]
	'MS_16minnow_6_2ct773.4'[&!color=#00ff00]
	'MS_16minnow_6_2ct778.2'[&!color=#00ff00]
	'MS_16minnow_6_2ct779.3'[&!color=#00ff00]
	'MS_16minnow_6_2ct780.5'[&!color=#00ff00]
	'MS_16minnow_6_2ct781.6'[&!color=#00ff00]
	'MS_16minnow_6_2ct782.5'[&!color=#00ff00]
	'MS_16minnow_6_2ct785.6'[&!color=#00ff00]
	'MS_16minnow_6_2ct786.4'[&!color=#00ff00]
	'MS_16minnow_6_2ct788.4'[&!color=#00ff00]
	'MS_16minnow_6_2ct789.4'[&!color=#00ff00]
	'MS_16minnow_6_2ct790.5'[&!color=#00ff00]
	'MS_16minnow_6_2ct791.1'[&!color=#00ff00]
	'MS_16minnow_6_2ct792.6'[&!color=#00ff00]
	'MS_16minnow_6_2ct793.5'[&!color=#00ff00]
	'MS_16minnow_6_2ct794.4'[&!color=#00ff00]
	'MS_16minnow_6_2ct796.5'[&!color=#00ff00]
	'MS_16minnow_6_2ct797.4'[&!color=#00ff00]
	'MS_16minnow_6_2ct798.3'[&!color=#00ff00]
	'MS_16minnow_6_2ct799.4'[&!color=#00ff00]
	'MS_16minnow_6_2ct800.4'[&!color=#00ff00]
	'MS_16minnow_6_2ct801.7'[&!color=#00ff00]
	'MS_16minnow_6_2ct802.4'[&!color=#00ff00]
	'MS_16minnow_6_2ct803.5'[&!color=#00ff00]
	'MS_16minnow_6_2ct805.5'[&!color=#00ff00]
	'MS_16minnow_6_2ct806.5'[&!color=#00ff00]
	'MS_16minnow_6_2ct807.5'[&!color=#00ff00]
	'MS_16minnow_6_2ct808.1'[&!color=#00ff00]
	'MS_16minnow_6_2ct809.7'[&!color=#00ff00]
	'MS_16minnow_6_2ct810.4'[&!color=#00ff00]
	'MS_16minnow_6_2ct811.6'[&!color=#00ff00]
	'MS_16minnow_6_2ct812.5'[&!color=#00ff00]
	'MS_16minnow_6_2ct813.4'[&!color=#00ff00]
	'MS_16minnow_6_2ct815.7'[&!color=#00ff00]
	'MS_16minnow_6_2ct816.4'[&!color=#00ff00]
	'MS_16minnow_6_2ct817.5'[&!color=#00ff00]
	'MS_16minnow_6_2ct819.7'[&!color=#00ff00]
	'MS_16minnow_6_2ct820.7'[&!color=#00ff00]
	'MS_16minnow_6_2ct821.1'[&!color=#00ff00]
	'MS_16minnow_6_2ct822.7'[&!color=#00ff00]
	'MS_16minnow_6_2ct823.3'[&!color=#00ff00]
	'MS_16minnow_6_2ct824.5'[&!color=#00ff00]
	'MS_16minnow_6_2ct825.2'[&!color=#00ff00]
	'MS_16minnow_6_2ct826.3'[&!color=#00ff00]
	'MS_16minnow_6_2ct827.4'[&!color=#00ff00]
	'MS_16minnow_6_2ct828.4'[&!color=#00ff00]
	'MS_16minnow_6_2ct829.4'[&!color=#00ff00]
	'MS_16minnow_6_2ct830.4'[&!color=#00ff00]
	'MS_16minnow_6_2ct832.4'[&!color=#00ff00]
	'MS_16minnow_6_2ct833.2'[&!color=#00ff00]
	'MS_16minnow_6_2ct834.5'[&!color=#00ff00]
	'MS_16minnow_6_2ct835.6'[&!color=#00ff00]
	'MS_16minnow_6_2ct836.6'[&!color=#00ff00]
	'MS_16minnow_6_2ct837.6'[&!color=#00ff00]
	'MS_16minnow_6_2ct838.4'[&!color=#00ff00]
	'MS_16minnow_6_2ct839.2'[&!color=#00ff00]
	'MS_16minnow_6_2ct840.5'[&!color=#00ff00]
	'MS_16minnow_6_2ct841.3'[&!color=#00ff00]
	'MS_16minnow_6_2ct842.5'[&!color=#00ff00]
	'MS_16minnow_6_2ct844.8'[&!color=#00ff00]
	'MS_16minnow_6_2ct845.5'[&!color=#00ff00]
	'MS_16minnow_6_2ct846.4'[&!color=#00ff00]
	'MS_16minnow_6_2ct848.3'[&!color=#00ff00]
	'MS_16minnow_6_2ct849.4'[&!color=#00ff00]
	'MS_16minnow_6_2ct850.4'[&!color=#00ff00]
	'MS_16minnow_6_2ct851.6'[&!color=#00ff00]
	'MS_16minnow_6_2ct852.3'[&!color=#00ff00]
	'MS_16minnow_6_2ct853.5'[&!color=#00ff00]
	'MS_16minnow_6_2ct854.3'[&!color=#00ff00]
	'MS_16minnow_6_2ct855.4'[&!color=#00ff00]
	'MS_16minnow_6_2ct856.5'[&!color=#00ff00]
	'MS_16minnow_6_2ct857.3'[&!color=#00ff00]
	'MS_16minnow_6_2ct858.3'[&!color=#00ff00]
	'MS_16minnow_6_2ct859.4'[&!color=#00ff00]
	'MS_16minnow_6_2ct861.5'[&!color=#00ff00]
	'MS_16minnow_6_2ct862.6'[&!color=#00ff00]
	'MS_16minnow_6_2ct863.5'[&!color=#00ff00]
	'MS_16minnow_6_2ct865.5'[&!color=#00ff00]
	'MS_16minnow_6_2ct868.4'[&!color=#00ff00]
	'MS_16minnow_6_2ct869.3'[&!color=#00ff00]
	'MS_16minnow_6_2ct870.5'[&!color=#00ff00]
	'MS_16minnow_6_2ct871.4'[&!color=#00ff00]
	'MS_16minnow_6_2ct872.4'[&!color=#00ff00]
	'MS_16minnow_6_2ct873.4'[&!color=#00ff00]
	'MS_16minnow_6_2ct874.5'[&!color=#00ff00]
	'MS_16minnow_6_2ct875.2'[&!color=#00ff00]
	'MS_16minnow_6_2ct876.5'[&!color=#00ff00]
	'MS_16minnow_6_2ct877.5'[&!color=#00ff00]
	'MS_16minnow_6_2ct878.3'[&!color=#00ff00]
	'MS_16minnow_6_2ct880.4'[&!color=#00ff00]
	'MS_16minnow_6_2ct881.3'[&!color=#00ff00]
	'MS_16minnow_6_2ct882.3'[&!color=#00ff00]
	'MS_16minnow_6_2ct883.1'[&!color=#00ff00]
	'MS_16minnow_6_2ct884.5'[&!color=#00ff00]
	'MS_16minnow_6_2ct885.5'[&!color=#00ff00]
	'MS_16minnow_6_2ct886.6'[&!color=#00ff00]
	'MS_16minnow_6_2ct887.5'[&!color=#00ff00]
	'MS_16minnow_6_2ct888.4'[&!color=#00ff00]
	'MS_16minnow_6_2ct889.4'[&!color=#00ff00]
	'MS_16minnow_6_2ct890.4'[&!color=#00ff00]
	'MS_16minnow_6_2ct891.5'[&!color=#00ff00]
	'MS_16minnow_6_2ct893.5'[&!color=#00ff00]
	'MS_16minnow_6_2ct897.6'[&!color=#00ff00]
	'MS_16minnow_6_2ct899.5'[&!color=#00ff00]
	'MS_16minnow_6_2ct900.6'[&!color=#00ff00]
	'MS_16minnow_6_2ct902.4'[&!color=#00ff00]
	'MS_16minnow_6_2ct903.5'[&!color=#00ff00]
	'MS_16minnow_6_2ct904.4'[&!color=#00ff00]
	'MS_16minnow_6_2ct905.5'[&!color=#00ff00]
	'MS_16minnow_6_2ct906.4'[&!color=#00ff00]
	'MS_16minnow_6_2ct907.5'[&!color=#00ff00]
	'MS_16minnow_6_2ct908.4'[&!color=#00ff00]
	'MS_16minnow_6_2ct909.4'[&!color=#00ff00]
	'MS_16minnow_6_2ct910.3'[&!color=#00ff00]
	'MS_16minnow_6_2ct911.3'[&!color=#00ff00]
	'MS_16minnow_6_2ct912.4'[&!color=#00ff00]
	'MS_16minnow_6_2ct913.5'[&!color=#00ff00]
	'MS_16minnow_6_2ct916.5'[&!color=#00ff00]
	'MS_16minnow_6_2ct918.5'[&!color=#00ff00]
	'MS_16minnow_6_2ct919.5'[&!color=#00ff00]
	'MS_16minnow_6_2ct920.5'[&!color=#00ff00]
	'MS_16minnow_6_2ct921.5'[&!color=#00ff00]
	'MS_16minnow_6_2ct922.6'[&!color=#00ff00]
	'MS_16minnow_6_2ct925.4'[&!color=#00ff00]
	'MS_16minnow_6_2ct926.5'[&!color=#00ff00]
	'MS_16minnow_6_2ct928.4'[&!color=#00ff00]
	'MS_16minnow_6_2ct929.4'[&!color=#00ff00]
	'MS_16minnow_6_2ct930.4'[&!color=#00ff00]
	'MS_16minnow_6_2ct932.5'[&!color=#00ff00]
	'MS_16minnow_6_2ct937.3'[&!color=#00ff00]
	'MS_16minnow_6_2ct938.5'[&!color=#00ff00]
	'MS_16minnow_6_2ct939.4'[&!color=#00ff00]
	'MS_16minnow_6_2ct942.5'[&!color=#00ff00]
	'MS_16minnow_6_2ct945.5'[&!color=#00ff00]
	'MS_16minnow_6_2ct947.5'[&!color=#00ff00]
	'MS_16minnow_6_2ct948.5'[&!color=#00ff00]
	'MS_16minnow_6_2ct950.4'[&!color=#00ff00]
	'MS_16minnow_6_2ct956.4'[&!color=#00ff00]
	'MS_16minnow_6_2ct960.5'[&!color=#00ff00]
	'MS_16minnow_6_2ct961.5'[&!color=#00ff00]
	'MS_16minnow_6_2ct963.5'[&!color=#00ff00]
	'MS_16minnow_6_2ct966.5'[&!color=#00ff00]
	'MS_16minnow_6_2ct969.4'[&!color=#00ff00]
	'MS_16minnow_6_2ct975.3'[&!color=#00ff00]
	'MS_16minnow_6_2ct994.3'[&!color=#00ff00]
	'MS_18minnow1_2ct1012.6'[&!color=#00ff00]
	'MS_18minnow1_2ct1020.4'[&!color=#00ff00]
	'MS_18minnow1_2ct1022.4'[&!color=#00ff00]
	'MS_18minnow1_2ct1023.2'[&!color=#00ff00]
	'MS_18minnow1_2ct1038.3'[&!color=#00ff00]
	'MS_18minnow1_2ct1041.5'[&!color=#00ff00]
	'MS_18minnow1_2ct1042.3'[&!color=#00ff00]
	'MS_18minnow1_2ct1044.1'[&!color=#00ff00]
	'MS_18minnow1_2ct1045.6'[&!color=#00ff00]
	'MS_18minnow1_2ct1046.7'[&!color=#00ff00]
	'MS_18minnow1_2ct1047.4'[&!color=#00ff00]
	'MS_18minnow1_2ct1051.4'[&!color=#00ff00]
	'MS_18minnow1_2ct1061.3'[&!color=#00ff00]
	'MS_18minnow1_2ct1063.4'[&!color=#00ff00]
	'MS_18minnow1_2ct1064.4'[&!color=#00ff00]
	'MS_18minnow1_2ct1067.5'[&!color=#00ff00]
	'MS_18minnow1_2ct1069.2'[&!color=#00ff00]
	'MS_18minnow1_2ct1071.3'[&!color=#00ff00]
	'MS_18minnow1_2ct1078.1'[&!color=#00ff00]
	'MS_18minnow1_2ct1079.5'[&!color=#00ff00]
	'MS_18minnow1_2ct1081.2'[&!color=#00ff00]
	'MS_18minnow1_2ct1084.6'[&!color=#00ff00]
	'MS_18minnow1_2ct1085.1'[&!color=#00ff00]
	'MS_18minnow1_2ct1090.5'[&!color=#00ff00]
	'MS_18minnow1_2ct1091.6'[&!color=#00ff00]
	'MS_18minnow1_2ct1092.3'[&!color=#00ff00]
	'MS_18minnow1_2ct1094.3'[&!color=#00ff00]
	'MS_18minnow1_2ct1095.3'[&!color=#00ff00]
	'MS_18minnow1_2ct1106.5'[&!color=#00ff00]
	'MS_18minnow1_2ct1107.5'[&!color=#00ff00]
	'MS_18minnow1_2ct1118.4'[&!color=#00ff00]
	'MS_18minnow1_2ct1121.4'[&!color=#00ff00]
	'MS_18minnow1_2ct1122.3'[&!color=#00ff00]
	'MS_18minnow1_2ct1123.5'[&!color=#00ff00]
	'MS_18minnow1_2ct1125.5'[&!color=#00ff00]
	'MS_18minnow1_2ct1128.6'[&!color=#00ff00]
	'MS_18minnow1_2ct1130.3'[&!color=#00ff00]
	'MS_18minnow1_2ct1133.4'[&!color=#00ff00]
	'MS_18minnow1_2ct1134.4'[&!color=#00ff00]
	'MS_18minnow1_2ct1141.4'[&!color=#00ff00]
	'MS_18minnow1_2ct1143.4'[&!color=#00ff00]
	'MS_18minnow1_2ct1147.3'[&!color=#00ff00]
	'MS_18minnow1_2ct1150.5'[&!color=#00ff00]
	'MS_18minnow1_2ct1151.5'[&!color=#00ff00]
	'MS_18minnow1_2ct1152.3'[&!color=#00ff00]
	'MS_18minnow1_2ct1155.4'[&!color=#00ff00]
	'MS_18minnow1_2ct1163.1'[&!color=#00ff00]
	'MS_18minnow1_2ct1164.6'[&!color=#00ff00]
	'MS_18minnow1_2ct1165.5'[&!color=#00ff00]
	'MS_18minnow1_2ct1167.5'[&!color=#00ff00]
	'MS_18minnow1_2ct1171.4'[&!color=#00ff00]
	'MS_18minnow1_2ct1172.3'[&!color=#00ff00]
	'MS_18minnow1_2ct1173.5'[&!color=#00ff00]
	'MS_18minnow1_2ct1175.6'[&!color=#00ff00]
	'MS_18minnow1_2ct1181.4'[&!color=#00ff00]
	'MS_18minnow1_2ct1182.5'[&!color=#00ff00]
	'MS_18minnow1_2ct1185.4'[&!color=#00ff00]
	'MS_18minnow1_2ct1194.5'[&!color=#00ff00]
	'MS_18minnow1_2ct1196.6'[&!color=#00ff00]
	'MS_18minnow1_2ct1197.4'[&!color=#00ff00]
	'MS_18minnow1_2ct1198.3'[&!color=#00ff00]
	'MS_18minnow1_2ct1202.6'[&!color=#00ff00]
	'MS_18minnow1_2ct1203.4'[&!color=#00ff00]
	'MS_18minnow1_2ct1204.5'[&!color=#00ff00]
	'MS_18minnow1_2ct1208.3'[&!color=#00ff00]
	'MS_18minnow1_2ct1209.4'[&!color=#00ff00]
	'MS_18minnow1_2ct1212.4'[&!color=#00ff00]
	'MS_18minnow1_2ct1217.6'[&!color=#00ff00]
	'MS_18minnow1_2ct1228.4'[&!color=#00ff00]
	'MS_18minnow1_2ct1230.6'[&!color=#00ff00]
	'MS_18minnow1_2ct1231.4'[&!color=#00ff00]
	'MS_18minnow1_2ct1250.3'[&!color=#00ff00]
	'MS_18minnow1_2ct1256.5'[&!color=#00ff00]
	'MS_18minnow1_2ct1267.3'[&!color=#00ff00]
	'MS_18minnow1_2ct1275.4'[&!color=#00ff00]
	'MS_18minnow1_2ct1281.5'[&!color=#00ff00]
	'MS_18minnow1_2ct1285.4'[&!color=#00ff00]
	'MS_18minnow1_2ct828.3'[&!color=#00ff00]
	'MS_18minnow1_2ct865.6'[&!color=#00ff00]
	'MS_18minnow1_2ct871.6'[&!color=#00ff00]
	'MS_18minnow1_2ct899.6'[&!color=#00ff00]
	'MS_18minnow1_2ct904.3'[&!color=#00ff00]
	'MS_18minnow1_2ct907.6'[&!color=#00ff00]
	'MS_18minnow1_2ct909.6'[&!color=#00ff00]
	'MS_18minnow1_2ct941.5'[&!color=#00ff00]
	'MS_18minnow1_2ct976.5'[&!color=#00ff00]
	'MS_18minnow1_2ct987.1'[&!color=#00ff00]
	'MS_18minnow1_2ct991.3'[&!color=#00ff00]
	'MS_18minnow1_2ct992.4'[&!color=#00ff00]
	'MS_18minnow1_2ct995.6'[&!color=#00ff00]
	'MS_18minnow1_2ct996.1'[&!color=#00ff00]
	'MS_QBQ83331.1'[&!color=#00ff00]
	'MS_QBQ83333.1'[&!color=#00ff00]
	'MS_QBQ83334.1'[&!color=#00ff00]
	'MS_abalone_6_2ct11.6'[&!color=#00ff00]
	'MS_abalone_6_2ct12.2'[&!color=#00ff00]
	'MS_abalone_6_2ct13.5'[&!color=#00ff00]
	'MS_abalone_6_2ct14.5'[&!color=#00ff00]
	'MS_abalone_6_2ct8.1'[&!color=#00ff00]
	'MS_apo1_1_2ct45.5'[&!color=#00ff00]
	'MS_bison1_1_2ct22.5'[&!color=#00ff00]
	'MS_crucian1_2ct11.3'[&!color=#00ff00]
	'MS_crucian1_2ct13.6'[&!color=#00ff00]
	'MS_crucian1_2ct14.4'[&!color=#00ff00]
	'MS_crucian1_2ct2.6'[&!color=#00ff00]
	'MS_crucian1_2ct3.5'[&!color=#00ff00]
	'MS_crucian1_2ct6.6'[&!color=#00ff00]
	'MS_crucian1_2ct8.4'[&!color=#00ff00]
	'MS_crucian1_2ct9.3'[&!color=#00ff00]
	'MS_ct_4fly1_ps_NODE_x4.1'[&!color=#00ff00]
	'MS_haddock_1_2ct3.5_PF023'[&!color=#00ff00]
	'MS_haddock_1_2ct53.4'[&!color=#00ff00]
	'MS_haddock_1_2ct54.4'[&!color=#00ff00]
	'MS_haddock_1_2ct55.5'[&!color=#00ff00]
	'MS_haddock_1_2ct56.5'[&!color=#00ff00]
	'MS_haddock_1_2ct57.5'[&!color=#00ff00]
	'MS_haddock_1_2ct59.3'[&!color=#00ff00]
	'MS_haddock_1_2ct60.4'[&!color=#00ff00]
	'MS_haddock_1_2ct61.5'[&!color=#00ff00]
	'MS_haddock_1_2ct63.4'[&!color=#00ff00]
	'MS_haddock_1_2ct64.5'[&!color=#00ff00]
	'MS_haddock_1_2ct65.4'[&!color=#00ff00]
	'MS_haddock_1_2ct66.3'[&!color=#00ff00]
	'MS_haddock_1_2ct69.3'[&!color=#00ff00]
	'MS_haddock_1_2ct72.3'[&!color=#00ff00]
	'MS_haddock_1_2ct73.5'[&!color=#00ff00]
	'MS_haddock_1_2ct74.4'[&!color=#00ff00]
	'MS_haddock_1_2ct75.5'[&!color=#00ff00]
	'MS_lamb_2_2ct197.4'[&!color=#00ff00]
	MS_mac_stool_D2CW_7_2ct12[&!color=#00ff00]
	MS_mac_stool_D2CW_7_2ct15[&!color=#00ff00]
	MS_mac_stool_D2CW_7_2ct16[&!color=#00ff00]
	MS_mac_stool_D2CW_7_2ct18[&!color=#00ff00]
	MS_mac_stool_D2CW_7_2ct19[&!color=#00ff00]
	MS_mac_stool_D2CW_7_2ct21[&!color=#00ff00]
	MS_mac_stool_D2CW_7_2ct24[&!color=#00ff00]
	MS_mac_stool_D2CW_7_2ct25[&!color=#00ff00]
	MS_mac_stool_D2CW_7_2ct30[&!color=#00ff00]
	MS_mac_stool_D2CW_7_2ct34[&!color=#00ff00]
	MS_mac_stool_D2CW_7_2ct36[&!color=#00ff00]
	'MS_macstl_de1a_r1_2ct000.'[&!color=#00ff00]
	'MS_macstl_de1a_r1_2ct001.'[&!color=#00ff00]
	'MS_macstl_de1a_r1_2ct002.'[&!color=#00ff00]
	'MS_macstl_de1a_r1_2ct003.'[&!color=#00ff00]
	'MS_macstool_cl86_1_2ct10.'[&!color=#00ff00]
	'MS_macstool_cl86_1_2ct12.'[&!color=#00ff00]
	'MS_macstool_cl86_1_2ct14.'[&!color=#00ff00]
	'MS_macstool_cl86_1_2ct15.'[&!color=#00ff00]
	'MS_macstool_cl86_1_2ct16.'[&!color=#00ff00]
	'MS_macstool_cl86_1_2ct17.'[&!color=#00ff00]
	'MS_macstool_cl86_1_2ct19.'[&!color=#00ff00]
	'MS_macstool_cl86_1_2ct20.'[&!color=#00ff00]
	'MS_macstool_cl86_1_2ct21.'[&!color=#00ff00]
	'MS_macstool_cl86_1_2ct6.5'[&!color=#00ff00]
	'MS_macstool_cl86_1_2ct7.6'[&!color=#00ff00]
	'MS_macstool_cl86_1_2ct9.5'[&!color=#00ff00]
	'MS_macstool_de1a1_2ct107.'[&!color=#00ff00]
	'MS_macstool_de1a1_2ct111.'[&!color=#00ff00]
	'MS_macstool_de1a1_2ct118.'[&!color=#00ff00]
	'MS_macstool_de1a1_2ct123.'[&!color=#00ff00]
	'MS_macstool_de1a1_2ct45.5'[&!color=#00ff00]
	'MS_macstool_de1a1_2ct48.6'[&!color=#00ff00]
	'MS_macstool_de1a1_2ct52.6'[&!color=#00ff00]
	'MS_macstool_de1a1_2ct64.5'[&!color=#00ff00]
	'MS_macstool_de1a1_2ct68.4'[&!color=#00ff00]
	'MS_macstool_de1a1_2ct80.7'[&!color=#00ff00]
	'MS_macstool_de1a1_2ct82.6'[&!color=#00ff00]
	'MS_macstool_de1a1_2ct83.6'[&!color=#00ff00]
	'MS_macstool_de1a1_2ct86.5'[&!color=#00ff00]
	'MS_macstool_de1a1_2ct93.5'[&!color=#00ff00]
	'MS_macstool_de1a1_2ct94.2'[&!color=#00ff00]
	'MS_macstool_de2c2_2ct20.4'[&!color=#00ff00]
	'MS_macstool_de2c2_2ct24.5'[&!color=#00ff00]
	'MS_macstool_de2c2_2ct25.5'[&!color=#00ff00]
	'MS_macstool_de2c2_2ct26.7'[&!color=#00ff00]
	'MS_macstool_de2c2_2ct27.7'[&!color=#00ff00]
	'MS_macstool_de2c2_2ct28.5'[&!color=#00ff00]
	'MS_macstool_de2c2_2ct29.6'[&!color=#00ff00]
	'MS_macstool_de2c2_2ct38.7'[&!color=#00ff00]
	'MS_macstool_de2c2_2ct39.8'[&!color=#00ff00]
	'MS_macstool_de2c2_2ct41.6'[&!color=#00ff00]
	'MS_macstool_de2c2_2ct42.3'[&!color=#00ff00]
	'MS_macstool_de2c2_2ct43.7'[&!color=#00ff00]
	'MS_macstool_de2c2_2ct44.5'[&!color=#00ff00]
	'MS_macstool_de2c2_2ct46.5'[&!color=#00ff00]
	'MS_macstool_de2c2_2ct47.4'[&!color=#00ff00]
	'MS_macstool_de2c2_2ct48.4'[&!color=#00ff00]
	'MS_macstool_de2c2_2ct50.5'[&!color=#00ff00]
	'MS_macstool_de2c2_2ct51.6'[&!color=#00ff00]
	'MS_macstool_de2c2_2ct52.6'[&!color=#00ff00]
	'MS_macstool_de2c2_2ct55.5'[&!color=#00ff00]
	'MS_mice_vagnl_1_2ct10.6'[&!color=#00ff00]
	'MS_mice_vagnl_1_2ct12.5'[&!color=#00ff00]
	'MS_mice_vagnl_1_2ct9.6'[&!color=#00ff00]
	'MS_rainbowtrout1_2ct11.3'[&!color=#00ff00]
	'MS_rainbowtrout1_2ct12.6'[&!color=#00ff00]
	'MS_rainbowtrout1_2ct16.2'[&!color=#00ff00]
	'MS_rainbowtrout1_2ct19.5'[&!color=#00ff00]
	'MS_rainbowtrout1_2ct20.6'[&!color=#00ff00]
	'MS_rainbowtrout1_2ct9.7'[&!color=#00ff00]
	'MS_redsnapper1_2ct25.3'[&!color=#00ff00]
	'MS_redsnapper1_2ct35.4'[&!color=#00ff00]
	'MS_redsnapper1_2ct37.5'[&!color=#00ff00]
	'MS_redsnapper1_2ct42.5'[&!color=#00ff00]
	'MS_redsnapper1_2ct43.5'[&!color=#00ff00]
	'MS_redsnapper1_2ct47.3'[&!color=#00ff00]
	'MS_redsnapper1_2ct48.4'[&!color=#00ff00]
	'MS_redsnapper1_2ct51.5'[&!color=#00ff00]
	'MS_redsnapper1_2ct54.8'[&!color=#00ff00]
	'MS_redsnapper1_2ct59.3'[&!color=#00ff00]
	'MS_redsnapper1_2ct6.1_PF0'[&!color=#00ff00]
	'MS_redsnapper1_2ct66.1'[&!color=#00ff00]
	'MS_redsnapper1_2ct67.2'[&!color=#00ff00]
	'MS_redsnapper1_2ct68.4'[&!color=#00ff00]
	'MS_redsnapper1_2ct69.4'[&!color=#00ff00]
	'MS_redsnapper1_2ct70.4'[&!color=#00ff00]
	'MS_redsnapper1_2ct71.3'[&!color=#00ff00]
	'MS_redsnapper1_2ct73.1'[&!color=#00ff00]
	'MS_redsnapper1_2ct75.5'[&!color=#00ff00]
	'MS_redsnapper1_2ct77.5'[&!color=#00ff00]
	'MS_redsnapper1_2ct79.4'[&!color=#00ff00]
	'MS_redsnapper1_2ct89.5'[&!color=#00ff00]
	'MS_redsnapper1_2ct90.3'[&!color=#00ff00]
	'MS_redsnapper1_2ct94.6'[&!color=#00ff00]
	'MS_redsnapper1_2ct97.3'[&!color=#00ff00]
	'MS_redsnapper_r1_2ct002.3'[&!color=#00ff00]
	'MS_redsnapper_r1_2ct003.7'[&!color=#00ff00]
	'MS_redsnapper_r1_2ct005.3'[&!color=#00ff00]
	'MS_redsnapper_r1_2ct006.5'[&!color=#00ff00]
	'MS_redsnapper_r1_2ct007.4'[&!color=#00ff00]
	'MS_redsnapper_r1_2ct008.3'[&!color=#00ff00]
	'MS_redsnapper_r1_2ct009.3'[&!color=#00ff00]
	'MS_redsnapper_r1_2ct010.5'[&!color=#00ff00]
	'MS_redsnapper_r1_2ct011.3'[&!color=#00ff00]
	'MS_redsnapper_r1_2ct012.3'[&!color=#00ff00]
	'MS_redsnapper_r1_2ct013.3'[&!color=#00ff00]
	'MS_redsnapper_r1_2ct014.4'[&!color=#00ff00]
	'MS_seabass2_1_2ct1.3'[&!color=#00ff00]
	'MS_seabass_ms2_2ct198.5'[&!color=#00ff00]
	'MS_seabass_ms2_2ct198.6'[&!color=#00ff00]
	'MS_seabass_ms2_2ct200.1'[&!color=#00ff00]
	'MS_seabass_ms2_2ct201.3'[&!color=#00ff00]
	'MS_seabass_ms2_2ct213.6'[&!color=#00ff00]
	'MS_seabass_ms2_2ct217.3'[&!color=#00ff00]
	'MS_seabass_ms2_2ct218.4'[&!color=#00ff00]
	'MS_turkey_2ct24.3'[&!color=#00ff00]
	gb_mic_1KVP_A_[&!color=#ff00ff]
	'gb_mic_ADR80650.1_'[&!color=#ff00ff]
	'gb_mic_ADR80653.1_'[&!color=#ff00ff]
	'gb_mic_AGT39860.1_'[&!color=#ff00ff]
	'gb_mic_AGT39861.1_'[&!color=#ff00ff]
	'gb_mic_AGT39862.1_'[&!color=#ff00ff]
	'gb_mic_AGT39863.1_'[&!color=#ff00ff]
	'gb_mic_AGT39864.1_'[&!color=#ff00ff]
	'gb_mic_AGT39865.1_'[&!color=#ff00ff]
	'gb_mic_AGT39866.1_'[&!color=#ff00ff]
	'gb_mic_AGT39867.1_'[&!color=#ff00ff]
	'gb_mic_AGT39868.1_'[&!color=#ff00ff]
	'gb_mic_AGT39870.1_'[&!color=#ff00ff]
	'gb_mic_AGT39871.1_'[&!color=#ff00ff]
	'gb_mic_AGT39872.1_'[&!color=#ff00ff]
	'gb_mic_AGT39873.1_'[&!color=#ff00ff]
	'gb_mic_AGT39874.1_'[&!color=#ff00ff]
	'gb_mic_AGT39875.1_'[&!color=#ff00ff]
	'gb_mic_AGT39876.1_'[&!color=#ff00ff]
	'gb_mic_AGT39877.1_'[&!color=#ff00ff]
	'gb_mic_AGT39878.1_'[&!color=#ff00ff]
	'gb_mic_AGT39879.1_'[&!color=#ff00ff]
	'gb_mic_AGT39880.1_'[&!color=#ff00ff]
	'gb_mic_AGT39881.1_'[&!color=#ff00ff]
	'gb_mic_AGT39882.1_'[&!color=#ff00ff]
	'gb_mic_AGT39883.1_'[&!color=#ff00ff]
	'gb_mic_AGT39884.1_'[&!color=#ff00ff]
	'gb_mic_AGT39885.1_'[&!color=#ff00ff]
	'gb_mic_AGT39886.1_'[&!color=#ff00ff]
	'gb_mic_AGT39887.1_'[&!color=#ff00ff]
	'gb_mic_AGT39888.1_'[&!color=#ff00ff]
	'gb_mic_AGT39889.1_'[&!color=#ff00ff]
	'gb_mic_AGT39890.1_'[&!color=#ff00ff]
	'gb_mic_AGT39891.1_'[&!color=#ff00ff]
	'gb_mic_AGT39892.1_'[&!color=#ff00ff]
	'gb_mic_AGT39893.1_'[&!color=#ff00ff]
	'gb_mic_AGT39894.1_'[&!color=#ff00ff]
	'gb_mic_AGT39895.1_'[&!color=#ff00ff]
	'gb_mic_AGT39896.1_'[&!color=#ff00ff]
	'gb_mic_AGT39897.1_'[&!color=#ff00ff]
	'gb_mic_AGT39899.1_'[&!color=#ff00ff]
	'gb_mic_AGT39907.1_'[&!color=#ff00ff]
	'gb_mic_AGT39918.1_'[&!color=#ff00ff]
	'gb_mic_AGT39927.1_'[&!color=#ff00ff]
	'gb_mic_AGT39938.1_'[&!color=#ff00ff]
	'gb_mic_AHN52629.1_'[&!color=#ff00ff]
	'gb_mic_AHN52630.1_'[&!color=#ff00ff]
	'gb_mic_AHN52631.1_'[&!color=#ff00ff]
	'gb_mic_AHN52633.1_'[&!color=#ff00ff]
	'gb_mic_AHN52634.1_'[&!color=#ff00ff]
	'gb_mic_AHN52635.1_'[&!color=#ff00ff]
	'gb_mic_AHN52636.1_'[&!color=#ff00ff]
	'gb_mic_AHN52638.1_'[&!color=#ff00ff]
	'gb_mic_AHN52639.1_'[&!color=#ff00ff]
	'gb_mic_AHN52642.1_'[&!color=#ff00ff]
	'gb_mic_AHN52643.1_'[&!color=#ff00ff]
	'gb_mic_AHN52644.1_'[&!color=#ff00ff]
	'gb_mic_AHN52645.1_'[&!color=#ff00ff]
	'gb_mic_AHN52647.1_'[&!color=#ff00ff]
	'gb_mic_AHN52648.1_'[&!color=#ff00ff]
	'gb_mic_AHN52649.1_'[&!color=#ff00ff]
	'gb_mic_AHN52650.1_'[&!color=#ff00ff]
	'gb_mic_AHN52651.1_'[&!color=#ff00ff]
	'gb_mic_AHN52652.1_'[&!color=#ff00ff]
	'gb_mic_AHN52653.1_'[&!color=#ff00ff]
	'gb_mic_AHN52655.1_'[&!color=#ff00ff]
	'gb_mic_AHN52658.1_'[&!color=#ff00ff]
	'gb_mic_AHN52659.1_'[&!color=#ff00ff]
	'gb_mic_AHN52666.1_'[&!color=#ff00ff]
	'gb_mic_AHN52669.1_'[&!color=#ff00ff]
	'gb_mic_AHN52672.1_'[&!color=#ff00ff]
	'gb_mic_AHN52676.1_'[&!color=#ff00ff]
	'gb_mic_AHN52677.1_'[&!color=#ff00ff]
	'gb_mic_AHN52678.1_'[&!color=#ff00ff]
	'gb_mic_AHN52680.1_'[&!color=#ff00ff]
	'gb_mic_AHN52683.1_'[&!color=#ff00ff]
	'gb_mic_AHN52685.1_'[&!color=#ff00ff]
	'gb_mic_AHN52689.1_'[&!color=#ff00ff]
	'gb_mic_AHN52690.1_'[&!color=#ff00ff]
	'gb_mic_AHN52692.1_'[&!color=#ff00ff]
	'gb_mic_AHN52698.1_'[&!color=#ff00ff]
	'gb_mic_AHN52699.1_'[&!color=#ff00ff]
	'gb_mic_AHN52700.1_'[&!color=#ff00ff]
	'gb_mic_AHN52701.1_'[&!color=#ff00ff]
	'gb_mic_AHN52702.1_'[&!color=#ff00ff]
	'gb_mic_AHN52703.1_'[&!color=#ff00ff]
	'gb_mic_AHN52704.1_'[&!color=#ff00ff]
	'gb_mic_AHN52705.1_'[&!color=#ff00ff]
	'gb_mic_AHN52706.1_'[&!color=#ff00ff]
	'gb_mic_AHN52707.1_'[&!color=#ff00ff]
	'gb_mic_AHN52708.1_'[&!color=#ff00ff]
	'gb_mic_AHN52709.1_'[&!color=#ff00ff]
	'gb_mic_AHN52710.1_'[&!color=#ff00ff]
	'gb_mic_AHN52711.1_'[&!color=#ff00ff]
	'gb_mic_AHN52713.1_'[&!color=#ff00ff]
	'gb_mic_AHN52714.1_'[&!color=#ff00ff]
	'gb_mic_AHN52715.1_'[&!color=#ff00ff]
	'gb_mic_AHN52717.1_'[&!color=#ff00ff]
	'gb_mic_AHN52718.1_'[&!color=#ff00ff]
	'gb_mic_AHN52719.1_'[&!color=#ff00ff]
	'gb_mic_AHN52720.1_'[&!color=#ff00ff]
	'gb_mic_AHN52722.1_'[&!color=#ff00ff]
	'gb_mic_AHN52723.1_'[&!color=#ff00ff]
	'gb_mic_AHN52724.1_'[&!color=#ff00ff]
	'gb_mic_AHN52726.1_'[&!color=#ff00ff]
	'gb_mic_AHN52727.1_'[&!color=#ff00ff]
	'gb_mic_AHN52729.1_'[&!color=#ff00ff]
	'gb_mic_AHN52730.1_'[&!color=#ff00ff]
	'gb_mic_AHN52732.1_'[&!color=#ff00ff]
	'gb_mic_AHN52733.1_'[&!color=#ff00ff]
	'gb_mic_AHN52734.1_'[&!color=#ff00ff]
	'gb_mic_AHN52736.1_'[&!color=#ff00ff]
	'gb_mic_AHN52738.1_'[&!color=#ff00ff]
	'gb_mic_AHN52739.1_'[&!color=#ff00ff]
	'gb_mic_AHN52740.1_'[&!color=#ff00ff]
	'gb_mic_AHN52742.1_'[&!color=#ff00ff]
	'gb_mic_AHN52744.1_'[&!color=#ff00ff]
	'gb_mic_AHN52747.1_'[&!color=#ff00ff]
	'gb_mic_AHN52748.1_'[&!color=#ff00ff]
	'gb_mic_AHN52750.1_'[&!color=#ff00ff]
	'gb_mic_AHN52755.1_'[&!color=#ff00ff]
	'gb_mic_AHN52759.1_'[&!color=#ff00ff]
	'gb_mic_AHN52760.1_'[&!color=#ff00ff]
	'gb_mic_AHN52763.1_'[&!color=#ff00ff]
	'gb_mic_AHN52767.1_'[&!color=#ff00ff]
	'gb_mic_AHN52769.1_'[&!color=#ff00ff]
	'gb_mic_AHN52770.1_'[&!color=#ff00ff]
	'gb_mic_AHN52771.1_'[&!color=#ff00ff]
	'gb_mic_AHN52773.1_'[&!color=#ff00ff]
	'gb_mic_AHN52774.1_'[&!color=#ff00ff]
	'gb_mic_AHN52775.1_'[&!color=#ff00ff]
	'gb_mic_AHN52776.1_'[&!color=#ff00ff]
	'gb_mic_AHN52777.1_'[&!color=#ff00ff]
	'gb_mic_AHN52778.1_'[&!color=#ff00ff]
	'gb_mic_AHN52780.1_'[&!color=#ff00ff]
	'gb_mic_AHN52782.1_'[&!color=#ff00ff]
	'gb_mic_AHN52783.1_'[&!color=#ff00ff]
	'gb_mic_AHN52785.1_'[&!color=#ff00ff]
	'gb_mic_AHN52786.1_'[&!color=#ff00ff]
	'gb_mic_AHN52788.1_'[&!color=#ff00ff]
	'gb_mic_AHN52789.1_'[&!color=#ff00ff]
	'gb_mic_AHN52790.1_'[&!color=#ff00ff]
	'gb_mic_AHN52793.1_'[&!color=#ff00ff]
	'gb_mic_AHN52795.1_'[&!color=#ff00ff]
	'gb_mic_AHN52796.1_'[&!color=#ff00ff]
	'gb_mic_AHN52797.1_'[&!color=#ff00ff]
	'gb_mic_AHN52798.1_'[&!color=#ff00ff]
	'gb_mic_AHN52802.1_'[&!color=#ff00ff]
	'gb_mic_AHN52804.1_'[&!color=#ff00ff]
	'gb_mic_AHN52805.1_'[&!color=#ff00ff]
	'gb_mic_AHN52806.1_'[&!color=#ff00ff]
	'gb_mic_AHN52810.1_'[&!color=#ff00ff]
	'gb_mic_AHN52812.1_'[&!color=#ff00ff]
	'gb_mic_AHN52813.1_'[&!color=#ff00ff]
	'gb_mic_AHN52815.1_'[&!color=#ff00ff]
	'gb_mic_AHN52817.1_'[&!color=#ff00ff]
	'gb_mic_AHN52819.1_'[&!color=#ff00ff]
	'gb_mic_AHN52820.1_'[&!color=#ff00ff]
	'gb_mic_AHN52822.1_'[&!color=#ff00ff]
	'gb_mic_AHN52824.1_'[&!color=#ff00ff]
	'gb_mic_AHN52825.1_'[&!color=#ff00ff]
	'gb_mic_AHN52826.1_'[&!color=#ff00ff]
	'gb_mic_AHN52827.1_'[&!color=#ff00ff]
	'gb_mic_AHN52829.1_'[&!color=#ff00ff]
	'gb_mic_AHN52831.1_'[&!color=#ff00ff]
	'gb_mic_AHN52833.1_'[&!color=#ff00ff]
	'gb_mic_AHN52834.1_'[&!color=#ff00ff]
	'gb_mic_AHN52835.1_'[&!color=#ff00ff]
	'gb_mic_AHN52836.1_'[&!color=#ff00ff]
	'gb_mic_AHN52837.1_'[&!color=#ff00ff]
	'gb_mic_AHN52838.1_'[&!color=#ff00ff]
	'gb_mic_AHN52839.1_'[&!color=#ff00ff]
	'gb_mic_AHN52840.1_'[&!color=#ff00ff]
	'gb_mic_AHN52841.1_'[&!color=#ff00ff]
	'gb_mic_AHN52844.1_'[&!color=#ff00ff]
	'gb_mic_AHN52846.1_'[&!color=#ff00ff]
	'gb_mic_AHN52847.1_'[&!color=#ff00ff]
	'gb_mic_AHN52848.1_'[&!color=#ff00ff]
	'gb_mic_AHN52849.1_'[&!color=#ff00ff]
	'gb_mic_AHN52850.1_'[&!color=#ff00ff]
	'gb_mic_AHN52851.1_'[&!color=#ff00ff]
	'gb_mic_AHN52852.1_'[&!color=#ff00ff]
	'gb_mic_AHN52854.1_'[&!color=#ff00ff]
	'gb_mic_AHN52855.1_'[&!color=#ff00ff]
	'gb_mic_AHN52857.1_'[&!color=#ff00ff]
	'gb_mic_AHN52859.1_'[&!color=#ff00ff]
	'gb_mic_AHN52860.1_'[&!color=#ff00ff]
	'gb_mic_AHN52861.1_'[&!color=#ff00ff]
	'gb_mic_AHN52862.1_'[&!color=#ff00ff]
	'gb_mic_AHN52864.1_'[&!color=#ff00ff]
	'gb_mic_AHN52867.1_'[&!color=#ff00ff]
	'gb_mic_AHN52868.1_'[&!color=#ff00ff]
	'gb_mic_AHN52870.1_'[&!color=#ff00ff]
	'gb_mic_AHN52872.1_'[&!color=#ff00ff]
	'gb_mic_AHN52874.1_'[&!color=#ff00ff]
	'gb_mic_AHN52875.1_'[&!color=#ff00ff]
	'gb_mic_AHN52876.1_'[&!color=#ff00ff]
	'gb_mic_AHN52877.1_'[&!color=#ff00ff]
	'gb_mic_AHN52878.1_'[&!color=#ff00ff]
	'gb_mic_AHN52879.1_'[&!color=#ff00ff]
	'gb_mic_AHN52881.1_'[&!color=#ff00ff]
	'gb_mic_AHN52884.1_'[&!color=#ff00ff]
	'gb_mic_AHN52887.1_'[&!color=#ff00ff]
	'gb_mic_AHN52888.1_'[&!color=#ff00ff]
	'gb_mic_AHN52889.1_'[&!color=#ff00ff]
	'gb_mic_AHN52890.1_'[&!color=#ff00ff]
	'gb_mic_AHN52891.1_'[&!color=#ff00ff]
	'gb_mic_AHN52892.1_'[&!color=#ff00ff]
	'gb_mic_AHN52894.1_'[&!color=#ff00ff]
	'gb_mic_AHN52895.1_'[&!color=#ff00ff]
	'gb_mic_AHN52896.1_'[&!color=#ff00ff]
	'gb_mic_AHN52897.1_'[&!color=#ff00ff]
	'gb_mic_AHN52898.1_'[&!color=#ff00ff]
	'gb_mic_AHN52903.1_'[&!color=#ff00ff]
	'gb_mic_AHN52904.1_'[&!color=#ff00ff]
	'gb_mic_AHN52905.1_'[&!color=#ff00ff]
	'gb_mic_AHN52906.1_'[&!color=#ff00ff]
	'gb_mic_AHN52907.1_'[&!color=#ff00ff]
	'gb_mic_AHN52910.1_'[&!color=#ff00ff]
	'gb_mic_AHN52911.1_'[&!color=#ff00ff]
	'gb_mic_AHN52912.1_'[&!color=#ff00ff]
	'gb_mic_AHN52913.1_'[&!color=#ff00ff]
	'gb_mic_AHN52915.1_'[&!color=#ff00ff]
	'gb_mic_AHN52917.1_'[&!color=#ff00ff]
	'gb_mic_AHN52918.1_'[&!color=#ff00ff]
	'gb_mic_AHN52920.1_'[&!color=#ff00ff]
	'gb_mic_AHN52921.1_'[&!color=#ff00ff]
	'gb_mic_AHN52923.1_'[&!color=#ff00ff]
	'gb_mic_AHN52926.1_'[&!color=#ff00ff]
	'gb_mic_AHN52927.1_'[&!color=#ff00ff]
	'gb_mic_AHN52930.1_'[&!color=#ff00ff]
	'gb_mic_AHN52931.1_'[&!color=#ff00ff]
	'gb_mic_AHN52932.1_'[&!color=#ff00ff]
	'gb_mic_AHN52933.1_'[&!color=#ff00ff]
	'gb_mic_AHN52934.1_'[&!color=#ff00ff]
	'gb_mic_AHN52935.1_'[&!color=#ff00ff]
	'gb_mic_AHN52936.1_'[&!color=#ff00ff]
	'gb_mic_AHN52938.1_'[&!color=#ff00ff]
	'gb_mic_AHN52939.1_'[&!color=#ff00ff]
	'gb_mic_AJK28223.1_'[&!color=#ff00ff]
	'gb_mic_AJK28230.1_'[&!color=#ff00ff]
	'gb_mic_AJK28234.1_'[&!color=#ff00ff]
	'gb_mic_AJK28239.1_'[&!color=#ff00ff]
	'gb_mic_AJK28244.1_'[&!color=#ff00ff]
	'gb_mic_AJK28256.1_'[&!color=#ff00ff]
	'gb_mic_AJK28264.1_'[&!color=#ff00ff]
	'gb_mic_AJK28273.1_'[&!color=#ff00ff]
	'gb_mic_AJK28278.1_'[&!color=#ff00ff]
	'gb_mic_AJK28284.1_'[&!color=#ff00ff]
	'gb_mic_AJK28297.1_'[&!color=#ff00ff]
	'gb_mic_AJK28301.1_'[&!color=#ff00ff]
	'gb_mic_AJK28307.1_'[&!color=#ff00ff]
	'gb_mic_AJK28312.1_'[&!color=#ff00ff]
	'gb_mic_AJK28316.1_'[&!color=#ff00ff]
	'gb_mic_AJK28324.1_'[&!color=#ff00ff]
	'gb_mic_AJK28327.1_'[&!color=#ff00ff]
	'gb_mic_AKU74947.1_'[&!color=#ff00ff]
	'gb_mic_AKU74948.1_'[&!color=#ff00ff]
	'gb_mic_AKU74952.1_'[&!color=#ff00ff]
	'gb_mic_AKU74955.1_'[&!color=#ff00ff]
	'gb_mic_AKU74958.1_'[&!color=#ff00ff]
	'gb_mic_AKU74961.1_'[&!color=#ff00ff]
	'gb_mic_AKU74962.1_'[&!color=#ff00ff]
	'gb_mic_AKU74971.1_'[&!color=#ff00ff]
	'gb_mic_AKU74973.1_'[&!color=#ff00ff]
	'gb_mic_AKU74974.1_'[&!color=#ff00ff]
	'gb_mic_AKU74977.1_'[&!color=#ff00ff]
	'gb_mic_AKU74979.1_'[&!color=#ff00ff]
	'gb_mic_AKU74984.1_'[&!color=#ff00ff]
	'gb_mic_AKU74991.1_'[&!color=#ff00ff]
	'gb_mic_AKU74992.1_'[&!color=#ff00ff]
	'gb_mic_AKU75022.1_'[&!color=#ff00ff]
	'gb_mic_AKU75027.1_'[&!color=#ff00ff]
	'gb_mic_AKU75029.1_'[&!color=#ff00ff]
	'gb_mic_AKU75032.1_'[&!color=#ff00ff]
	'gb_mic_AKU75038.1_'[&!color=#ff00ff]
	'gb_mic_AKU75042.1_'[&!color=#ff00ff]
	'gb_mic_AKU75044.1_'[&!color=#ff00ff]
	'gb_mic_ALS03406.1_'[&!color=#ff00ff]
	'gb_mic_ALS03411.1_'[&!color=#ff00ff]
	'gb_mic_ALS03416.1_'[&!color=#ff00ff]
	'gb_mic_ALS03421.1_'[&!color=#ff00ff]
	'gb_mic_ALS03427.1_'[&!color=#ff00ff]
	'gb_mic_ALS03432.1_'[&!color=#ff00ff]
	'gb_mic_ALS03437.1_'[&!color=#ff00ff]
	'gb_mic_ALS03442.1_'[&!color=#ff00ff]
	'gb_mic_ALS03447.1_'[&!color=#ff00ff]
	'gb_mic_ALS03452.1_'[&!color=#ff00ff]
	'gb_mic_ALS03455.1_'[&!color=#ff00ff]
	'gb_mic_ALS03460.1_'[&!color=#ff00ff]
	'gb_mic_ALS03465.1_'[&!color=#ff00ff]
	'gb_mic_ALS03470.1_'[&!color=#ff00ff]
	'gb_mic_ALS03474.1_'[&!color=#ff00ff]
	'gb_mic_ALS03484.1_'[&!color=#ff00ff]
	'gb_mic_ALS03489.1_'[&!color=#ff00ff]
	'gb_mic_ALS03494.1_'[&!color=#ff00ff]
	'gb_mic_ALS03499.1_'[&!color=#ff00ff]
	'gb_mic_ALS03504.1_'[&!color=#ff00ff]
	'gb_mic_ALS03508.1_'[&!color=#ff00ff]
	'gb_mic_ALS03518.1_'[&!color=#ff00ff]
	'gb_mic_ALS03523.1_'[&!color=#ff00ff]
	'gb_mic_ALS03528.1_'[&!color=#ff00ff]
	'gb_mic_ALS03532.1_'[&!color=#ff00ff]
	'gb_mic_ALS03537.1_'[&!color=#ff00ff]
	'gb_mic_ALS03544.1_'[&!color=#ff00ff]
	'gb_mic_ALS03547.1_'[&!color=#ff00ff]
	'gb_mic_ALS03552.1_'[&!color=#ff00ff]
	'gb_mic_ALS03556.1_'[&!color=#ff00ff]
	'gb_mic_ALS03560.1_'[&!color=#ff00ff]
	'gb_mic_ALS03564.1_'[&!color=#ff00ff]
	'gb_mic_ALS03568.1_'[&!color=#ff00ff]
	'gb_mic_ALS03572.1_'[&!color=#ff00ff]
	'gb_mic_ALS03577.1_'[&!color=#ff00ff]
	'gb_mic_ALS03580.1_'[&!color=#ff00ff]
	'gb_mic_ALS03585.1_'[&!color=#ff00ff]
	'gb_mic_ALS03590.1_'[&!color=#ff00ff]
	'gb_mic_ALS03595.1_'[&!color=#ff00ff]
	'gb_mic_ALS03599.1_'[&!color=#ff00ff]
	'gb_mic_ALS03603.1_'[&!color=#ff00ff]
	'gb_mic_ALS03608.1_'[&!color=#ff00ff]
	'gb_mic_ALS03611.1_'[&!color=#ff00ff]
	'gb_mic_ALS03614.1_'[&!color=#ff00ff]
	'gb_mic_ALS03617.1_'[&!color=#ff00ff]
	'gb_mic_ALS03621.1_'[&!color=#ff00ff]
	'gb_mic_ALS03626.1_'[&!color=#ff00ff]
	'gb_mic_ALS03631.1_'[&!color=#ff00ff]
	'gb_mic_ALS03636.1_'[&!color=#ff00ff]
	'gb_mic_ALS03641.1_'[&!color=#ff00ff]
	'gb_mic_ALS03646.1_'[&!color=#ff00ff]
	'gb_mic_ALS03650.1_'[&!color=#ff00ff]
	'gb_mic_ALS03654.1_'[&!color=#ff00ff]
	'gb_mic_ALS03658.1_'[&!color=#ff00ff]
	'gb_mic_ALS03662.1_'[&!color=#ff00ff]
	'gb_mic_ALS03667.1_'[&!color=#ff00ff]
	'gb_mic_ALS03672.1_'[&!color=#ff00ff]
	'gb_mic_ALS03677.1_'[&!color=#ff00ff]
	'gb_mic_ALS03682.1_'[&!color=#ff00ff]
	'gb_mic_ALS03687.1_'[&!color=#ff00ff]
	'gb_mic_ALS03692.1_'[&!color=#ff00ff]
	'gb_mic_ALS03697.1_'[&!color=#ff00ff]
	'gb_mic_ALS03702.1_'[&!color=#ff00ff]
	'gb_mic_ALS03717.1_'[&!color=#ff00ff]
	'gb_mic_ALS03722.1_'[&!color=#ff00ff]
	'gb_mic_ALS03727.1_'[&!color=#ff00ff]
	'gb_mic_ALS03732.1_'[&!color=#ff00ff]
	'gb_mic_ALS03737.1_'[&!color=#ff00ff]
	'gb_mic_ALS03742.1_'[&!color=#ff00ff]
	'gb_mic_ALS03747.1_'[&!color=#ff00ff]
	'gb_mic_ALS03752.1_'[&!color=#ff00ff]
	'gb_mic_ALS03757.1_'[&!color=#ff00ff]
	'gb_mic_ALS03762.1_'[&!color=#ff00ff]
	'gb_mic_ALS03767.1_'[&!color=#ff00ff]
	'gb_mic_ALS03772.1_'[&!color=#ff00ff]
	'gb_mic_ALS03777.1_'[&!color=#ff00ff]
	'gb_mic_ALS03781.1_'[&!color=#ff00ff]
	'gb_mic_ALS03785.1_'[&!color=#ff00ff]
	'gb_mic_ALS03789.1_'[&!color=#ff00ff]
	'gb_mic_ALS03792.1_'[&!color=#ff00ff]
	'gb_mic_ALS03795.1_'[&!color=#ff00ff]
	'gb_mic_ALS03798.1_'[&!color=#ff00ff]
	'gb_mic_ARQ15990.1_'[&!color=#ff00ff]
	'gb_mic_ARQ15997.1_'[&!color=#ff00ff]
	'gb_mic_ARQ16001.1_'[&!color=#ff00ff]
	'gb_mic_ARQ16006.1_'[&!color=#ff00ff]
	'gb_mic_ARQ16012.1_'[&!color=#ff00ff]
	'gb_mic_ARQ16017.1_'[&!color=#ff00ff]
	'gb_mic_ARQ16021.1_'[&!color=#ff00ff]
	'gb_mic_ARQ16027.1_'[&!color=#ff00ff]
	'gb_mic_ARQ16032.1_'[&!color=#ff00ff]
	'gb_mic_ARQ16037.1_'[&!color=#ff00ff]
	'gb_mic_ARQ16043.1_'[&!color=#ff00ff]
	'gb_mic_ARQ16048.1_'[&!color=#ff00ff]
	'gb_mic_ARQ16052.1_'[&!color=#ff00ff]
	'gb_mic_ARQ16055.1_'[&!color=#ff00ff]
	'gb_mic_AVA31642.1_'[&!color=#ff00ff]
	'gb_mic_AVQ10160.1_'[&!color=#ff00ff]
	'gb_mic_AVQ10169.1_'[&!color=#ff00ff]
	'gb_mic_AVQ10172.1_'[&!color=#ff00ff]
	'gb_mic_AVQ10181.1_'[&!color=#ff00ff]
	'gb_mic_AVQ10187.1_'[&!color=#ff00ff]
	'gb_mic_AVQ10194.1_'[&!color=#ff00ff]
	'gb_mic_AVQ10202.1_'[&!color=#ff00ff]
	'gb_mic_AVQ10203.1_'[&!color=#ff00ff]
	'gb_mic_AVQ10214.1_'[&!color=#ff00ff]
	'gb_mic_AVQ10220.1_'[&!color=#ff00ff]
	'gb_mic_AVQ10224.1_'[&!color=#ff00ff]
	'gb_mic_AVQ10231.1_'[&!color=#ff00ff]
	'gb_mic_AVQ10239.1_'[&!color=#ff00ff]
	'gb_mic_AVQ10241.1_'[&!color=#ff00ff]
	'gb_mic_AVQ10251.1_'[&!color=#ff00ff]
	'gb_mic_AVQ10253.1_'[&!color=#ff00ff]
	'gb_mic_AVQ10259.1_'[&!color=#ff00ff]
	'gb_mic_AVQ10270.1_'[&!color=#ff00ff]
	'gb_mic_AVQ10277.1_'[&!color=#ff00ff]
	'gb_mic_AVQ10283.1_'[&!color=#ff00ff]
	'gb_mic_AVQ10289.1_'[&!color=#ff00ff]
	'gb_mic_AVQ10328.1_'[&!color=#ff00ff]
	'gb_mic_NP_044312.1_'[&!color=#ff00ff]
	'gb_mic_NP_054647.1_'[&!color=#ff00ff]
	'gb_mic_NP_073538.1_'[&!color=#ff00ff]
	'gb_mic_NP_510872.1_'[&!color=#ff00ff]
	'gb_mic_NP_598320.1_'[&!color=#ff00ff]
	'gb_mic_WP_005867318.1_'[&!color=#ff00ff]
	'gb_mic_YP_004732986.1_'[&!color=#ff00ff]
	'gb_mic_YP_008798242.1_'[&!color=#ff00ff]
	'gb_mic_YP_009113043.1_'[&!color=#ff00ff]
	'gb_mic_YP_009160331.1_'[&!color=#ff00ff]
	'gb_mic_YP_009160336.1_'[&!color=#ff00ff]
	'gb_mic_YP_009160342.1_'[&!color=#ff00ff]
	'gb_mic_YP_009160347.1_'[&!color=#ff00ff]
	'gb_mic_YP_009160353.1_'[&!color=#ff00ff]
	'gb_mic_YP_009160359.1_'[&!color=#ff00ff]
	'gb_mic_YP_009160363.1_'[&!color=#ff00ff]
	'gb_mic_YP_009160368.1_'[&!color=#ff00ff]
	'gb_mic_YP_009160373.1_'[&!color=#ff00ff]
	'gb_mic_YP_009160379.1_'[&!color=#ff00ff]
	'gb_mic_YP_009160386.1_'[&!color=#ff00ff]
	'gb_mic_YP_009160391.1_'[&!color=#ff00ff]
	'gb_mic_YP_009160396.1_'[&!color=#ff00ff]
	'gb_mic_YP_009160402.1_'[&!color=#ff00ff]
	'gb_mic_YP_009160407.1_'[&!color=#ff00ff]
	'gb_mic_YP_009160412.1_'[&!color=#ff00ff]
	'gb_mic_YP_009216767.1_'[&!color=#ff00ff]
	'gb_mic_YP_009216768.1_'[&!color=#ff00ff]
	'gb_mic_YP_009218802.1_'[&!color=#ff00ff]
	'gb_mic_YP_009259688.1_'[&!color=#ff00ff]
	'gb_mic_YP_009259727.1_'[&!color=#ff00ff]
	'gb_mic_YP_009259742.1_'[&!color=#ff00ff]
	'gb_mic_YP_338238.1_'[&!color=#ff00ff]
	genbank_unclassified_ssDN[&!color=#ff00ff]
;
end;
begin trees;
	tree tree_1 = [&R] ('gb_mic_ARQ15990.1_'[&!color=#ff00ff]:0.124325,'gb_mic_ALS03568.1_'[&!color=#ff00ff]:0.155427,('gb_mic_ARQ16043.1_'[&!color=#ff00ff]:0.204325,(((('gb_mic_ARQ16032.1_'[&!color=#ff00ff]:0.210726,'gb_mic_AHN52650.1_'[&!color=#ff00ff]:0.314777)[&bootstraps=99,!color=#4c4c4c]:0.045016,'MS_macstl_de1a_r1_2ct001.'[&!color=#00ff00]:0.194424)[&bootstraps=100,!color=#4c4c4c]:0.21186,'gb…
end;
begin figtree;
	set appearance.backgroundColorAttribute="Default";
	set appearance.backgroundColour=#ffffff;
	set appearance.branchColorAttribute="User selection";
	set appearance.branchColorGradient=false;
	set appearance.branchLineWidth=1.0;
	set appearance.branchMinLineWidth=0.0;
	set appearance.branchWidthAttribute="Fixed";
	set appearance.foregroundColour=#000000;
	set appearance.hilightingGradient=false;
	set appearance.selectionColour=#2d3680;
	set branchLabels.colorAttribute="bootstraps";
	set branchLabels.displayAttribute="bootstraps";
	set branchLabels.fontName="sansserif";
	set branchLabels.fontSize=4;
	set branchLabels.fontStyle=0;
	set branchLabels.isShown=true;
	set branchLabels.significantDigits=3;
	set layout.expansion=118;
	set layout.layoutType="RECTILINEAR";
	set layout.zoom=0;
	set legend.attribute="bootstraps";
	set legend.fontSize=10.0;
	set legend.isShown=false;
	set legend.significantDigits=4;
	set nodeBars.barWidth=4.0;
	set nodeBars.displayAttribute=null;
	set nodeBars.isShown=false;
	set nodeLabels.colorAttribute="User selection";
	set nodeLabels.displayAttribute="Node ages";
	set nodeLabels.fontName="sansserif";
	set nodeLabels.fontSize=8;
	set nodeLabels.fontStyle=0;
	set nodeLabels.isShown=false;
	set nodeLabels.significantDigits=4;
	set nodeShapeExternal.colourAttribute="User selection";
	set nodeShapeExternal.isShown=false;
	set nodeShapeExternal.minSize=10.0;
	set nodeShapeExternal.scaleType=Width;
	set nodeShapeExternal.shapeType=Circle;
	set nodeShapeExternal.size=4.0;
	set nodeShapeExternal.sizeAttribute="Fixed";
	set nodeShapeInternal.colourAttribute="User selection";
	set nodeShapeInternal.isShown=false;
	set nodeShapeInternal.minSize=0.2;
	set nodeShapeInternal.scaleType=Width;
	set nodeShapeInternal.shapeType=Circle;
	set nodeShapeInternal.size=2.0;
	set nodeShapeInternal.sizeAttribute="bootstraps";
	set polarLayout.alignTipLabels=false;
	set polarLayout.angularRange=0;
	set polarLayout.rootAngle=0;
	set polarLayout.rootLength=109;
	set polarLayout.showRoot=true;
	set radialLayout.spread=0.0;
	set rectilinearLayout.alignTipLabels=false;
	set rectilinearLayout.curvature=0;
	set rectilinearLayout.rootLength=100;
	set scale.offsetAge=0.0;
	set scale.rootAge=1.0;
	set scale.scaleFactor=1.0;
	set scale.scaleRoot=false;
	set scaleAxis.automaticScale=true;
	set scaleAxis.fontSize=8.0;
	set scaleAxis.isShown=false;
	set scaleAxis.lineWidth=1.0;
	set scaleAxis.majorTicks=1.0;
	set scaleAxis.minorTicks=0.5;
	set scaleAxis.origin=0.0;
	set scaleAxis.reverseAxis=false;
	set scaleAxis.showGrid=true;
	set scaleBar.automaticScale=true;
	set scaleBar.fontSize=10.0;
	set scaleBar.isShown=true;
	set scaleBar.lineWidth=1.0;
	set scaleBar.scaleRange=0.0;
	set tipLabels.colorAttribute="User selection";
	set tipLabels.displayAttribute="Names";
	set tipLabels.fontName="sansserif";
	set tipLabels.fontSize=4;
	set tipLabels.fontStyle=0;
	set tipLabels.isShown=true;
	set tipLabels.significantDigits=4;
	set trees.order=false;
	set trees.orderType="increasing";
	set trees.rooting=false;
	set trees.rootingType="User Selection";
	set trees.transform=false;
	set trees.transformType="cladogram";
end;
