# Supplementary material for: Discovery of several thousand highly diverse circular DNA viruses
Source: eLife. 2020 Feb 4;9:e51971. doi: 10.7554/eLife.51971 (PMC7000223; doi:10.7554/eLife.51971)
Supplement: Figure 2—figure supplement 2—source data 5. [file elife-51971-fig2-figsupp2-data5.tre]

#NEXUS
begin taxa;
	dimensions ntax=782;
	taxlabels
	'MS_10mus_7_2ct117.17'[&!color=#00ff00]
	'MS_10mus_7_2ct198.6'[&!color=#00ff00]
	'MS_10mus_7_2ct205.7'[&!color=#00ff00]
	'MS_10mus_7_2ct214.2'[&!color=#00ff00]
	'MS_10mus_7_2ct250.5'[&!color=#00ff00]
	'MS_10mus_7_2ct269.4'[&!color=#00ff00]
	'MS_10mus_7_2ct317.2'[&!color=#00ff00]
	'MS_10mus_7_2ct329.7'[&!color=#00ff00]
	'MS_10mus_7_2ct346.4'[&!color=#00ff00]
	'MS_10mus_7_2ct390.6'[&!color=#00ff00]
	'MS_10mus_7_2ct431.1_PF058'[&!color=#00ff00]
	'MS_10mus_7_2ct500.1'[&!color=#00ff00]
	'MS_10mus_7_2ct658.4'[&!color=#00ff00]
	'MS_10mus_r1_2ct002.3'[&!color=#00ff00]
	'MS_16minnow_6_2ct1004.4'[&!color=#00ff00]
	'MS_16minnow_6_2ct1012.3'[&!color=#00ff00]
	'MS_16minnow_6_2ct1024.4'[&!color=#00ff00]
	'MS_16minnow_6_2ct480.5'[&!color=#00ff00]
	'MS_16minnow_6_2ct483.9'[&!color=#00ff00]
	'MS_16minnow_6_2ct492.7'[&!color=#00ff00]
	'MS_16minnow_6_2ct495.6'[&!color=#00ff00]
	'MS_16minnow_6_2ct496.7'[&!color=#00ff00]
	'MS_16minnow_6_2ct506.6'[&!color=#00ff00]
	'MS_16minnow_6_2ct507.7'[&!color=#00ff00]
	'MS_16minnow_6_2ct509.6'[&!color=#00ff00]
	'MS_16minnow_6_2ct514.6'[&!color=#00ff00]
	'MS_16minnow_6_2ct516.5'[&!color=#00ff00]
	'MS_16minnow_6_2ct519.8'[&!color=#00ff00]
	'MS_16minnow_6_2ct523.6'[&!color=#00ff00]
	'MS_16minnow_6_2ct527.5'[&!color=#00ff00]
	'MS_16minnow_6_2ct540.5'[&!color=#00ff00]
	'MS_16minnow_6_2ct541.7'[&!color=#00ff00]
	'MS_16minnow_6_2ct542.4'[&!color=#00ff00]
	'MS_16minnow_6_2ct543.4'[&!color=#00ff00]
	'MS_16minnow_6_2ct545.6'[&!color=#00ff00]
	'MS_16minnow_6_2ct547.6'[&!color=#00ff00]
	'MS_16minnow_6_2ct548.6'[&!color=#00ff00]
	'MS_16minnow_6_2ct549.5'[&!color=#00ff00]
	'MS_16minnow_6_2ct550.7'[&!color=#00ff00]
	'MS_16minnow_6_2ct551.4'[&!color=#00ff00]
	'MS_16minnow_6_2ct553.6'[&!color=#00ff00]
	'MS_16minnow_6_2ct554.6'[&!color=#00ff00]
	'MS_16minnow_6_2ct556.8'[&!color=#00ff00]
	'MS_16minnow_6_2ct557.6'[&!color=#00ff00]
	'MS_16minnow_6_2ct560.5'[&!color=#00ff00]
	'MS_16minnow_6_2ct565.8'[&!color=#00ff00]
	'MS_16minnow_6_2ct569.5'[&!color=#00ff00]
	'MS_16minnow_6_2ct573.4'[&!color=#00ff00]
	'MS_16minnow_6_2ct574.6'[&!color=#00ff00]
	'MS_16minnow_6_2ct576.4'[&!color=#00ff00]
	'MS_16minnow_6_2ct584.5'[&!color=#00ff00]
	'MS_16minnow_6_2ct585.5'[&!color=#00ff00]
	'MS_16minnow_6_2ct586.6'[&!color=#00ff00]
	'MS_16minnow_6_2ct587.4'[&!color=#00ff00]
	'MS_16minnow_6_2ct588.5'[&!color=#00ff00]
	'MS_16minnow_6_2ct589.6'[&!color=#00ff00]
	'MS_16minnow_6_2ct590.7'[&!color=#00ff00]
	'MS_16minnow_6_2ct594.4'[&!color=#00ff00]
	'MS_16minnow_6_2ct595.5'[&!color=#00ff00]
	'MS_16minnow_6_2ct596.5'[&!color=#00ff00]
	'MS_16minnow_6_2ct602.4'[&!color=#00ff00]
	'MS_16minnow_6_2ct604.5'[&!color=#00ff00]
	'MS_16minnow_6_2ct605.4'[&!color=#00ff00]
	'MS_16minnow_6_2ct606.8'[&!color=#00ff00]
	'MS_16minnow_6_2ct610.7'[&!color=#00ff00]
	'MS_16minnow_6_2ct612.5'[&!color=#00ff00]
	'MS_16minnow_6_2ct613.3'[&!color=#00ff00]
	'MS_16minnow_6_2ct615.3'[&!color=#00ff00]
	'MS_16minnow_6_2ct617.3'[&!color=#00ff00]
	'MS_16minnow_6_2ct618.5'[&!color=#00ff00]
	'MS_16minnow_6_2ct619.1'[&!color=#00ff00]
	'MS_16minnow_6_2ct624.2'[&!color=#00ff00]
	'MS_16minnow_6_2ct625.8'[&!color=#00ff00]
	'MS_16minnow_6_2ct626.5'[&!color=#00ff00]
	'MS_16minnow_6_2ct627.5'[&!color=#00ff00]
	'MS_16minnow_6_2ct628.4'[&!color=#00ff00]
	'MS_16minnow_6_2ct630.4'[&!color=#00ff00]
	'MS_16minnow_6_2ct632.4'[&!color=#00ff00]
	'MS_16minnow_6_2ct633.3'[&!color=#00ff00]
	'MS_16minnow_6_2ct634.3'[&!color=#00ff00]
	'MS_16minnow_6_2ct635.5'[&!color=#00ff00]
	'MS_16minnow_6_2ct638.6'[&!color=#00ff00]
	'MS_16minnow_6_2ct639.7'[&!color=#00ff00]
	'MS_16minnow_6_2ct640.3'[&!color=#00ff00]
	'MS_16minnow_6_2ct642.1'[&!color=#00ff00]
	'MS_16minnow_6_2ct644.7'[&!color=#00ff00]
	'MS_16minnow_6_2ct645.6'[&!color=#00ff00]
	'MS_16minnow_6_2ct646.5'[&!color=#00ff00]
	'MS_16minnow_6_2ct647.3'[&!color=#00ff00]
	'MS_16minnow_6_2ct648.4'[&!color=#00ff00]
	'MS_16minnow_6_2ct649.4'[&!color=#00ff00]
	'MS_16minnow_6_2ct650.4'[&!color=#00ff00]
	'MS_16minnow_6_2ct652.4'[&!color=#00ff00]
	'MS_16minnow_6_2ct653.6'[&!color=#00ff00]
	'MS_16minnow_6_2ct654.4'[&!color=#00ff00]
	'MS_16minnow_6_2ct655.5'[&!color=#00ff00]
	'MS_16minnow_6_2ct656.5'[&!color=#00ff00]
	'MS_16minnow_6_2ct657.5'[&!color=#00ff00]
	'MS_16minnow_6_2ct659.5'[&!color=#00ff00]
	'MS_16minnow_6_2ct660.3'[&!color=#00ff00]
	'MS_16minnow_6_2ct661.3'[&!color=#00ff00]
	'MS_16minnow_6_2ct662.3'[&!color=#00ff00]
	'MS_16minnow_6_2ct663.6'[&!color=#00ff00]
	'MS_16minnow_6_2ct666.6'[&!color=#00ff00]
	'MS_16minnow_6_2ct667.3'[&!color=#00ff00]
	'MS_16minnow_6_2ct669.5'[&!color=#00ff00]
	'MS_16minnow_6_2ct670.4'[&!color=#00ff00]
	'MS_16minnow_6_2ct671.1'[&!color=#00ff00]
	'MS_16minnow_6_2ct673.5'[&!color=#00ff00]
	'MS_16minnow_6_2ct675.4'[&!color=#00ff00]
	'MS_16minnow_6_2ct677.3'[&!color=#00ff00]
	'MS_16minnow_6_2ct679.4'[&!color=#00ff00]
	'MS_16minnow_6_2ct680.3'[&!color=#00ff00]
	'MS_16minnow_6_2ct681.4'[&!color=#00ff00]
	'MS_16minnow_6_2ct682.4'[&!color=#00ff00]
	'MS_16minnow_6_2ct683.3'[&!color=#00ff00]
	'MS_16minnow_6_2ct684.4'[&!color=#00ff00]
	'MS_16minnow_6_2ct685.7'[&!color=#00ff00]
	'MS_16minnow_6_2ct686.6'[&!color=#00ff00]
	'MS_16minnow_6_2ct688.8'[&!color=#00ff00]
	'MS_16minnow_6_2ct689.5'[&!color=#00ff00]
	'MS_16minnow_6_2ct690.5'[&!color=#00ff00]
	'MS_16minnow_6_2ct693.5'[&!color=#00ff00]
	'MS_16minnow_6_2ct697.4'[&!color=#00ff00]
	'MS_16minnow_6_2ct698.1'[&!color=#00ff00]
	'MS_16minnow_6_2ct699.4'[&!color=#00ff00]
	'MS_16minnow_6_2ct700.5'[&!color=#00ff00]
	'MS_16minnow_6_2ct701.7'[&!color=#00ff00]
	'MS_16minnow_6_2ct702.1'[&!color=#00ff00]
	'MS_16minnow_6_2ct703.3'[&!color=#00ff00]
	'MS_16minnow_6_2ct704.3'[&!color=#00ff00]
	'MS_16minnow_6_2ct705.4'[&!color=#00ff00]
	'MS_16minnow_6_2ct706.5'[&!color=#00ff00]
	'MS_16minnow_6_2ct708.2'[&!color=#00ff00]
	'MS_16minnow_6_2ct709.4'[&!color=#00ff00]
	'MS_16minnow_6_2ct710.4'[&!color=#00ff00]
	'MS_16minnow_6_2ct711.4'[&!color=#00ff00]
	'MS_16minnow_6_2ct712.2'[&!color=#00ff00]
	'MS_16minnow_6_2ct713.4'[&!color=#00ff00]
	'MS_16minnow_6_2ct715.4'[&!color=#00ff00]
	'MS_16minnow_6_2ct716.6'[&!color=#00ff00]
	'MS_16minnow_6_2ct718.7'[&!color=#00ff00]
	'MS_16minnow_6_2ct720.3'[&!color=#00ff00]
	'MS_16minnow_6_2ct721.4'[&!color=#00ff00]
	'MS_16minnow_6_2ct722.4'[&!color=#00ff00]
	'MS_16minnow_6_2ct723.4'[&!color=#00ff00]
	'MS_16minnow_6_2ct724.6'[&!color=#00ff00]
	'MS_16minnow_6_2ct725.2'[&!color=#00ff00]
	'MS_16minnow_6_2ct728.4'[&!color=#00ff00]
	'MS_16minnow_6_2ct729.3'[&!color=#00ff00]
	'MS_16minnow_6_2ct730.3'[&!color=#00ff00]
	'MS_16minnow_6_2ct731.6'[&!color=#00ff00]
	'MS_16minnow_6_2ct732.3'[&!color=#00ff00]
	'MS_16minnow_6_2ct734.3'[&!color=#00ff00]
	'MS_16minnow_6_2ct735.4'[&!color=#00ff00]
	'MS_16minnow_6_2ct736.5'[&!color=#00ff00]
	'MS_16minnow_6_2ct737.5'[&!color=#00ff00]
	'MS_16minnow_6_2ct738.3'[&!color=#00ff00]
	'MS_16minnow_6_2ct739.7'[&!color=#00ff00]
	'MS_16minnow_6_2ct740.1'[&!color=#00ff00]
	'MS_16minnow_6_2ct743.1'[&!color=#00ff00]
	'MS_16minnow_6_2ct744.5'[&!color=#00ff00]
	'MS_16minnow_6_2ct745.3'[&!color=#00ff00]
	'MS_16minnow_6_2ct747.1'[&!color=#00ff00]
	'MS_16minnow_6_2ct748.5'[&!color=#00ff00]
	'MS_16minnow_6_2ct750.3'[&!color=#00ff00]
	'MS_16minnow_6_2ct751.4'[&!color=#00ff00]
	'MS_16minnow_6_2ct752.6'[&!color=#00ff00]
	'MS_16minnow_6_2ct753.2'[&!color=#00ff00]
	'MS_16minnow_6_2ct754.4'[&!color=#00ff00]
	'MS_16minnow_6_2ct755.2'[&!color=#00ff00]
	'MS_16minnow_6_2ct756.5'[&!color=#00ff00]
	'MS_16minnow_6_2ct757.4'[&!color=#00ff00]
	'MS_16minnow_6_2ct758.1'[&!color=#00ff00]
	'MS_16minnow_6_2ct759.3'[&!color=#00ff00]
	'MS_16minnow_6_2ct760.1'[&!color=#00ff00]
	'MS_16minnow_6_2ct761.4'[&!color=#00ff00]
	'MS_16minnow_6_2ct762.3'[&!color=#00ff00]
	'MS_16minnow_6_2ct763.4'[&!color=#00ff00]
	'MS_16minnow_6_2ct764.3'[&!color=#00ff00]
	'MS_16minnow_6_2ct765.4'[&!color=#00ff00]
	'MS_16minnow_6_2ct766.1'[&!color=#00ff00]
	'MS_16minnow_6_2ct767.7'[&!color=#00ff00]
	'MS_16minnow_6_2ct768.3'[&!color=#00ff00]
	'MS_16minnow_6_2ct769.4'[&!color=#00ff00]
	'MS_16minnow_6_2ct770.4'[&!color=#00ff00]
	'MS_16minnow_6_2ct773.3'[&!color=#00ff00]
	'MS_16minnow_6_2ct778.5'[&!color=#00ff00]
	'MS_16minnow_6_2ct779.4'[&!color=#00ff00]
	'MS_16minnow_6_2ct780.4'[&!color=#00ff00]
	'MS_16minnow_6_2ct781.4'[&!color=#00ff00]
	'MS_16minnow_6_2ct782.3'[&!color=#00ff00]
	'MS_16minnow_6_2ct785.4'[&!color=#00ff00]
	'MS_16minnow_6_2ct786.2'[&!color=#00ff00]
	'MS_16minnow_6_2ct788.2'[&!color=#00ff00]
	'MS_16minnow_6_2ct789.5'[&!color=#00ff00]
	'MS_16minnow_6_2ct790.4'[&!color=#00ff00]
	'MS_16minnow_6_2ct792.5'[&!color=#00ff00]
	'MS_16minnow_6_2ct793.3'[&!color=#00ff00]
	'MS_16minnow_6_2ct796.3'[&!color=#00ff00]
	'MS_16minnow_6_2ct797.3'[&!color=#00ff00]
	'MS_16minnow_6_2ct798.4'[&!color=#00ff00]
	'MS_16minnow_6_2ct799.2'[&!color=#00ff00]
	'MS_16minnow_6_2ct800.3'[&!color=#00ff00]
	'MS_16minnow_6_2ct801.5'[&!color=#00ff00]
	'MS_16minnow_6_2ct802.3'[&!color=#00ff00]
	'MS_16minnow_6_2ct803.4'[&!color=#00ff00]
	'MS_16minnow_6_2ct804.5'[&!color=#00ff00]
	'MS_16minnow_6_2ct805.4'[&!color=#00ff00]
	'MS_16minnow_6_2ct807.6'[&!color=#00ff00]
	'MS_16minnow_6_2ct808.3'[&!color=#00ff00]
	'MS_16minnow_6_2ct809.4'[&!color=#00ff00]
	'MS_16minnow_6_2ct810.3'[&!color=#00ff00]
	'MS_16minnow_6_2ct811.5'[&!color=#00ff00]
	'MS_16minnow_6_2ct812.4'[&!color=#00ff00]
	'MS_16minnow_6_2ct813.5'[&!color=#00ff00]
	'MS_16minnow_6_2ct815.5'[&!color=#00ff00]
	'MS_16minnow_6_2ct816.7'[&!color=#00ff00]
	'MS_16minnow_6_2ct817.4'[&!color=#00ff00]
	'MS_16minnow_6_2ct820.5'[&!color=#00ff00]
	'MS_16minnow_6_2ct821.4'[&!color=#00ff00]
	'MS_16minnow_6_2ct822.5'[&!color=#00ff00]
	'MS_16minnow_6_2ct823.5'[&!color=#00ff00]
	'MS_16minnow_6_2ct824.3'[&!color=#00ff00]
	'MS_16minnow_6_2ct825.5'[&!color=#00ff00]
	'MS_16minnow_6_2ct826.4'[&!color=#00ff00]
	'MS_16minnow_6_2ct827.3'[&!color=#00ff00]
	'MS_16minnow_6_2ct828.3'[&!color=#00ff00]
	'MS_16minnow_6_2ct830.2'[&!color=#00ff00]
	'MS_16minnow_6_2ct832.5'[&!color=#00ff00]
	'MS_16minnow_6_2ct833.5'[&!color=#00ff00]
	'MS_16minnow_6_2ct834.3'[&!color=#00ff00]
	'MS_16minnow_6_2ct835.5'[&!color=#00ff00]
	'MS_16minnow_6_2ct836.5'[&!color=#00ff00]
	'MS_16minnow_6_2ct837.4'[&!color=#00ff00]
	'MS_16minnow_6_2ct838.2'[&!color=#00ff00]
	'MS_16minnow_6_2ct839.1'[&!color=#00ff00]
	'MS_16minnow_6_2ct840.3'[&!color=#00ff00]
	'MS_16minnow_6_2ct841.1'[&!color=#00ff00]
	'MS_16minnow_6_2ct842.3'[&!color=#00ff00]
	'MS_16minnow_6_2ct844.6'[&!color=#00ff00]
	'MS_16minnow_6_2ct845.3'[&!color=#00ff00]
	'MS_16minnow_6_2ct846.2'[&!color=#00ff00]
	'MS_16minnow_6_2ct848.1'[&!color=#00ff00]
	'MS_16minnow_6_2ct849.2'[&!color=#00ff00]
	'MS_16minnow_6_2ct850.2'[&!color=#00ff00]
	'MS_16minnow_6_2ct851.4'[&!color=#00ff00]
	'MS_16minnow_6_2ct852.1'[&!color=#00ff00]
	'MS_16minnow_6_2ct853.3'[&!color=#00ff00]
	'MS_16minnow_6_2ct854.4'[&!color=#00ff00]
	'MS_16minnow_6_2ct855.2'[&!color=#00ff00]
	'MS_16minnow_6_2ct856.3'[&!color=#00ff00]
	'MS_16minnow_6_2ct857.6'[&!color=#00ff00]
	'MS_16minnow_6_2ct858.4'[&!color=#00ff00]
	'MS_16minnow_6_2ct859.6'[&!color=#00ff00]
	'MS_16minnow_6_2ct861.4'[&!color=#00ff00]
	'MS_16minnow_6_2ct862.4'[&!color=#00ff00]
	'MS_16minnow_6_2ct863.4'[&!color=#00ff00]
	'MS_16minnow_6_2ct865.4'[&!color=#00ff00]
	'MS_16minnow_6_2ct868.2'[&!color=#00ff00]
	'MS_16minnow_6_2ct869.4'[&!color=#00ff00]
	'MS_16minnow_6_2ct870.4'[&!color=#00ff00]
	'MS_16minnow_6_2ct871.3'[&!color=#00ff00]
	'MS_16minnow_6_2ct872.2'[&!color=#00ff00]
	'MS_16minnow_6_2ct873.3'[&!color=#00ff00]
	'MS_16minnow_6_2ct874.3'[&!color=#00ff00]
	'MS_16minnow_6_2ct875.4'[&!color=#00ff00]
	'MS_16minnow_6_2ct876.3'[&!color=#00ff00]
	'MS_16minnow_6_2ct877.3'[&!color=#00ff00]
	'MS_16minnow_6_2ct878.2'[&!color=#00ff00]
	'MS_16minnow_6_2ct880.3'[&!color=#00ff00]
	'MS_16minnow_6_2ct882.4'[&!color=#00ff00]
	'MS_16minnow_6_2ct883.4'[&!color=#00ff00]
	'MS_16minnow_6_2ct884.3'[&!color=#00ff00]
	'MS_16minnow_6_2ct885.4'[&!color=#00ff00]
	'MS_16minnow_6_2ct887.3'[&!color=#00ff00]
	'MS_16minnow_6_2ct888.5'[&!color=#00ff00]
	'MS_16minnow_6_2ct889.3'[&!color=#00ff00]
	'MS_16minnow_6_2ct891.3'[&!color=#00ff00]
	'MS_16minnow_6_2ct893.6'[&!color=#00ff00]
	'MS_16minnow_6_2ct897.5'[&!color=#00ff00]
	'MS_16minnow_6_2ct899.4'[&!color=#00ff00]
	'MS_16minnow_6_2ct902.2'[&!color=#00ff00]
	'MS_16minnow_6_2ct904.3'[&!color=#00ff00]
	'MS_16minnow_6_2ct905.6'[&!color=#00ff00]
	'MS_16minnow_6_2ct906.3'[&!color=#00ff00]
	'MS_16minnow_6_2ct907.3'[&!color=#00ff00]
	'MS_16minnow_6_2ct908.5'[&!color=#00ff00]
	'MS_16minnow_6_2ct909.3'[&!color=#00ff00]
	'MS_16minnow_6_2ct910.4'[&!color=#00ff00]
	'MS_16minnow_6_2ct911.5'[&!color=#00ff00]
	'MS_16minnow_6_2ct912.3'[&!color=#00ff00]
	'MS_16minnow_6_2ct913.3'[&!color=#00ff00]
	'MS_16minnow_6_2ct916.4'[&!color=#00ff00]
	'MS_16minnow_6_2ct918.4'[&!color=#00ff00]
	'MS_16minnow_6_2ct919.4'[&!color=#00ff00]
	'MS_16minnow_6_2ct920.6'[&!color=#00ff00]
	'MS_16minnow_6_2ct921.4'[&!color=#00ff00]
	'MS_16minnow_6_2ct922.3'[&!color=#00ff00]
	'MS_16minnow_6_2ct925.5'[&!color=#00ff00]
	'MS_16minnow_6_2ct926.4'[&!color=#00ff00]
	'MS_16minnow_6_2ct928.3'[&!color=#00ff00]
	'MS_16minnow_6_2ct929.3'[&!color=#00ff00]
	'MS_16minnow_6_2ct930.5'[&!color=#00ff00]
	'MS_16minnow_6_2ct931.7'[&!color=#00ff00]
	'MS_16minnow_6_2ct932.4'[&!color=#00ff00]
	'MS_16minnow_6_2ct937.4'[&!color=#00ff00]
	'MS_16minnow_6_2ct938.4'[&!color=#00ff00]
	'MS_16minnow_6_2ct939.5'[&!color=#00ff00]
	'MS_16minnow_6_2ct942.3'[&!color=#00ff00]
	'MS_16minnow_6_2ct943.7'[&!color=#00ff00]
	'MS_16minnow_6_2ct945.4'[&!color=#00ff00]
	'MS_16minnow_6_2ct947.4'[&!color=#00ff00]
	'MS_16minnow_6_2ct948.4'[&!color=#00ff00]
	'MS_16minnow_6_2ct950.3'[&!color=#00ff00]
	'MS_16minnow_6_2ct951.7'[&!color=#00ff00]
	'MS_16minnow_6_2ct952.4'[&!color=#00ff00]
	'MS_16minnow_6_2ct955.7'[&!color=#00ff00]
	'MS_16minnow_6_2ct956.3'[&!color=#00ff00]
	'MS_16minnow_6_2ct957.4'[&!color=#00ff00]
	'MS_16minnow_6_2ct960.4'[&!color=#00ff00]
	'MS_16minnow_6_2ct961.4'[&!color=#00ff00]
	'MS_16minnow_6_2ct963.4'[&!color=#00ff00]
	'MS_16minnow_6_2ct966.3'[&!color=#00ff00]
	'MS_16minnow_6_2ct969.3'[&!color=#00ff00]
	'MS_16minnow_6_2ct975.4'[&!color=#00ff00]
	'MS_16minnow_6_2ct988.6'[&!color=#00ff00]
	'MS_16minnow_6_2ct994.4'[&!color=#00ff00]
	'MS_18minnow1_2ct1012.5'[&!color=#00ff00]
	'MS_18minnow1_2ct1020.6'[&!color=#00ff00]
	'MS_18minnow1_2ct1022.5'[&!color=#00ff00]
	'MS_18minnow1_2ct1023.5'[&!color=#00ff00]
	'MS_18minnow1_2ct1038.4'[&!color=#00ff00]
	'MS_18minnow1_2ct1041.3'[&!color=#00ff00]
	'MS_18minnow1_2ct1042.1'[&!color=#00ff00]
	'MS_18minnow1_2ct1044.3'[&!color=#00ff00]
	'MS_18minnow1_2ct1045.4'[&!color=#00ff00]
	'MS_18minnow1_2ct1047.2'[&!color=#00ff00]
	'MS_18minnow1_2ct1051.3'[&!color=#00ff00]
	'MS_18minnow1_2ct1061.1'[&!color=#00ff00]
	'MS_18minnow1_2ct1063.3'[&!color=#00ff00]
	'MS_18minnow1_2ct1064.2'[&!color=#00ff00]
	'MS_18minnow1_2ct1067.3'[&!color=#00ff00]
	'MS_18minnow1_2ct1069.5'[&!color=#00ff00]
	'MS_18minnow1_2ct1071.5'[&!color=#00ff00]
	'MS_18minnow1_2ct1078.4'[&!color=#00ff00]
	'MS_18minnow1_2ct1079.3'[&!color=#00ff00]
	'MS_18minnow1_2ct1084.4'[&!color=#00ff00]
	'MS_18minnow1_2ct1085.4'[&!color=#00ff00]
	'MS_18minnow1_2ct1090.8'[&!color=#00ff00]
	'MS_18minnow1_2ct1091.3'[&!color=#00ff00]
	'MS_18minnow1_2ct1092.6'[&!color=#00ff00]
	'MS_18minnow1_2ct1094.1'[&!color=#00ff00]
	'MS_18minnow1_2ct1095.4'[&!color=#00ff00]
	'MS_18minnow1_2ct1106.3'[&!color=#00ff00]
	'MS_18minnow1_2ct1107.3'[&!color=#00ff00]
	'MS_18minnow1_2ct1118.6'[&!color=#00ff00]
	'MS_18minnow1_2ct1121.2'[&!color=#00ff00]
	'MS_18minnow1_2ct1122.6'[&!color=#00ff00]
	'MS_18minnow1_2ct1123.4'[&!color=#00ff00]
	'MS_18minnow1_2ct1125.4'[&!color=#00ff00]
	'MS_18minnow1_2ct1128.4'[&!color=#00ff00]
	'MS_18minnow1_2ct1130.2'[&!color=#00ff00]
	'MS_18minnow1_2ct1133.2'[&!color=#00ff00]
	'MS_18minnow1_2ct1134.2'[&!color=#00ff00]
	'MS_18minnow1_2ct1141.3'[&!color=#00ff00]
	'MS_18minnow1_2ct1143.2'[&!color=#00ff00]
	'MS_18minnow1_2ct1147.2'[&!color=#00ff00]
	'MS_18minnow1_2ct1150.2'[&!color=#00ff00]
	'MS_18minnow1_2ct1151.4'[&!color=#00ff00]
	'MS_18minnow1_2ct1152.5'[&!color=#00ff00]
	'MS_18minnow1_2ct1155.2'[&!color=#00ff00]
	'MS_18minnow1_2ct1163.4'[&!color=#00ff00]
	'MS_18minnow1_2ct1164.4'[&!color=#00ff00]
	'MS_18minnow1_2ct1165.3'[&!color=#00ff00]
	'MS_18minnow1_2ct1167.3'[&!color=#00ff00]
	'MS_18minnow1_2ct1171.6'[&!color=#00ff00]
	'MS_18minnow1_2ct1172.1'[&!color=#00ff00]
	'MS_18minnow1_2ct1173.3'[&!color=#00ff00]
	'MS_18minnow1_2ct1175.5'[&!color=#00ff00]
	'MS_18minnow1_2ct1181.3'[&!color=#00ff00]
	'MS_18minnow1_2ct1182.3'[&!color=#00ff00]
	'MS_18minnow1_2ct1185.5'[&!color=#00ff00]
	'MS_18minnow1_2ct1193.7'[&!color=#00ff00]
	'MS_18minnow1_2ct1194.4'[&!color=#00ff00]
	'MS_18minnow1_2ct1196.4'[&!color=#00ff00]
	'MS_18minnow1_2ct1197.3'[&!color=#00ff00]
	'MS_18minnow1_2ct1198.1'[&!color=#00ff00]
	'MS_18minnow1_2ct1200.4'[&!color=#00ff00]
	'MS_18minnow1_2ct1202.7'[&!color=#00ff00]
	'MS_18minnow1_2ct1203.3'[&!color=#00ff00]
	'MS_18minnow1_2ct1204.4'[&!color=#00ff00]
	'MS_18minnow1_2ct1208.4'[&!color=#00ff00]
	'MS_18minnow1_2ct1209.3'[&!color=#00ff00]
	'MS_18minnow1_2ct1212.7'[&!color=#00ff00]
	'MS_18minnow1_2ct1217.4'[&!color=#00ff00]
	'MS_18minnow1_2ct1224.7'[&!color=#00ff00]
	'MS_18minnow1_2ct1228.3'[&!color=#00ff00]
	'MS_18minnow1_2ct1230.4'[&!color=#00ff00]
	'MS_18minnow1_2ct1231.3'[&!color=#00ff00]
	'MS_18minnow1_2ct1237.8'[&!color=#00ff00]
	'MS_18minnow1_2ct1250.2'[&!color=#00ff00]
	'MS_18minnow1_2ct1256.4'[&!color=#00ff00]
	'MS_18minnow1_2ct1267.5'[&!color=#00ff00]
	'MS_18minnow1_2ct1275.3'[&!color=#00ff00]
	'MS_18minnow1_2ct1281.4'[&!color=#00ff00]
	'MS_18minnow1_2ct1285.3'[&!color=#00ff00]
	'MS_18minnow1_2ct1392.3'[&!color=#00ff00]
	'MS_18minnow1_2ct1509.4'[&!color=#00ff00]
	'MS_18minnow1_2ct817.8'[&!color=#00ff00]
	'MS_18minnow1_2ct828.6'[&!color=#00ff00]
	'MS_18minnow1_2ct865.7'[&!color=#00ff00]
	'MS_18minnow1_2ct871.7'[&!color=#00ff00]
	'MS_18minnow1_2ct896.5'[&!color=#00ff00]
	'MS_18minnow1_2ct899.5'[&!color=#00ff00]
	'MS_18minnow1_2ct904.5'[&!color=#00ff00]
	'MS_18minnow1_2ct905.7'[&!color=#00ff00]
	'MS_18minnow1_2ct906.7'[&!color=#00ff00]
	'MS_18minnow1_2ct907.5'[&!color=#00ff00]
	'MS_18minnow1_2ct909.7'[&!color=#00ff00]
	'MS_18minnow1_2ct911.4'[&!color=#00ff00]
	'MS_18minnow1_2ct912.5'[&!color=#00ff00]
	'MS_18minnow1_2ct913.7'[&!color=#00ff00]
	'MS_18minnow1_2ct921.5'[&!color=#00ff00]
	'MS_18minnow1_2ct923.8'[&!color=#00ff00]
	'MS_18minnow1_2ct934.6'[&!color=#00ff00]
	'MS_18minnow1_2ct936.5'[&!color=#00ff00]
	'MS_18minnow1_2ct941.4'[&!color=#00ff00]
	'MS_18minnow1_2ct945.5'[&!color=#00ff00]
	'MS_18minnow1_2ct961.8'[&!color=#00ff00]
	'MS_18minnow1_2ct976.2'[&!color=#00ff00]
	'MS_18minnow1_2ct987.4'[&!color=#00ff00]
	'MS_18minnow1_2ct991.6'[&!color=#00ff00]
	'MS_18minnow1_2ct992.2'[&!color=#00ff00]
	'MS_18minnow1_2ct995.4'[&!color=#00ff00]
	'MS_18minnow1_2ct996.4'[&!color=#00ff00]
	'MS_QBQ83337.1'[&!color=#00ff00]
	'MS_QBQ83338.1'[&!color=#00ff00]
	'MS_QBQ83339.1'[&!color=#00ff00]
	'MS_abalone_6_2ct11.4'[&!color=#00ff00]
	'MS_abalone_6_2ct12.5'[&!color=#00ff00]
	'MS_abalone_6_2ct13.3'[&!color=#00ff00]
	'MS_abalone_6_2ct14.3'[&!color=#00ff00]
	'MS_abalone_6_2ct8.7'[&!color=#00ff00]
	'MS_abalone_6_2ct9.4'[&!color=#00ff00]
	'MS_apo1_1_2ct45.7'[&!color=#00ff00]
	'MS_beef_bd3_1_2ct46.6'[&!color=#00ff00]
	'MS_beef_bd3_1_2ct52.5'[&!color=#00ff00]
	'MS_crucian1_2ct1.6'[&!color=#00ff00]
	'MS_crucian1_2ct11.2'[&!color=#00ff00]
	'MS_crucian1_2ct13.4'[&!color=#00ff00]
	'MS_crucian1_2ct14.2'[&!color=#00ff00]
	'MS_crucian1_2ct15.3'[&!color=#00ff00]
	'MS_crucian1_2ct15.4'[&!color=#00ff00]
	'MS_crucian1_2ct17.5'[&!color=#00ff00]
	'MS_crucian1_2ct2.8'[&!color=#00ff00]
	'MS_crucian1_2ct3.6'[&!color=#00ff00]
	'MS_crucian1_2ct6.4'[&!color=#00ff00]
	'MS_crucian1_2ct8.3'[&!color=#00ff00]
	'MS_crucian1_2ct9.2'[&!color=#00ff00]
	'MS_ct_4fly1_ps_NODE_x4.7'[&!color=#00ff00]
	'MS_haddock_1_2ct23.6'[&!color=#00ff00]
	'MS_haddock_1_2ct27.5'[&!color=#00ff00]
	'MS_haddock_1_2ct301.1'[&!color=#00ff00]
	'MS_haddock_1_2ct53.5'[&!color=#00ff00]
	'MS_haddock_1_2ct54.3'[&!color=#00ff00]
	'MS_haddock_1_2ct55.4'[&!color=#00ff00]
	'MS_haddock_1_2ct56.4'[&!color=#00ff00]
	'MS_haddock_1_2ct57.4'[&!color=#00ff00]
	'MS_haddock_1_2ct59.2'[&!color=#00ff00]
	'MS_haddock_1_2ct60.5'[&!color=#00ff00]
	'MS_haddock_1_2ct61.4'[&!color=#00ff00]
	'MS_haddock_1_2ct63.2'[&!color=#00ff00]
	'MS_haddock_1_2ct64.3'[&!color=#00ff00]
	'MS_haddock_1_2ct65.2'[&!color=#00ff00]
	'MS_haddock_1_2ct69.1'[&!color=#00ff00]
	'MS_haddock_1_2ct72.1'[&!color=#00ff00]
	'MS_haddock_1_2ct73.4'[&!color=#00ff00]
	'MS_haddock_1_2ct74.5'[&!color=#00ff00]
	'MS_haddock_1_2ct75.4'[&!color=#00ff00]
	'MS_lamb_2_2ct197.3'[&!color=#00ff00]
	MS_mac_stool_D2CW_7_2ct12[&!color=#00ff00]
	MS_mac_stool_D2CW_7_2ct15[&!color=#00ff00]
	MS_mac_stool_D2CW_7_2ct16[&!color=#00ff00]
	MS_mac_stool_D2CW_7_2ct18[&!color=#00ff00]
	MS_mac_stool_D2CW_7_2ct19[&!color=#00ff00]
	MS_mac_stool_D2CW_7_2ct21[&!color=#00ff00]
	MS_mac_stool_D2CW_7_2ct22[&!color=#00ff00]
	MS_mac_stool_D2CW_7_2ct24[&!color=#00ff00]
	MS_mac_stool_D2CW_7_2ct25[&!color=#00ff00]
	MS_mac_stool_D2CW_7_2ct30[&!color=#00ff00]
	MS_mac_stool_D2CW_7_2ct34[&!color=#00ff00]
	MS_mac_stool_D2CW_7_2ct36[&!color=#00ff00]
	'MS_macstl_de1a_r1_2ct000.'[&!color=#00ff00]
	'MS_macstl_de1a_r1_2ct001.'[&!color=#00ff00]
	'MS_macstl_de1a_r1_2ct002.'[&!color=#00ff00]
	'MS_macstl_de1a_r1_2ct003.'[&!color=#00ff00]
	'MS_macstool_cl86_1_2ct10.'[&!color=#00ff00]
	'MS_macstool_cl86_1_2ct11.'[&!color=#00ff00]
	'MS_macstool_cl86_1_2ct12.'[&!color=#00ff00]
	'MS_macstool_cl86_1_2ct13.'[&!color=#00ff00]
	'MS_macstool_cl86_1_2ct14.'[&!color=#00ff00]
	'MS_macstool_cl86_1_2ct15.'[&!color=#00ff00]
	'MS_macstool_cl86_1_2ct16.'[&!color=#00ff00]
	'MS_macstool_cl86_1_2ct17.'[&!color=#00ff00]
	'MS_macstool_cl86_1_2ct19.'[&!color=#00ff00]
	'MS_macstool_cl86_1_2ct20.'[&!color=#00ff00]
	'MS_macstool_cl86_1_2ct6.4'[&!color=#00ff00]
	'MS_macstool_cl86_1_2ct7.7'[&!color=#00ff00]
	'MS_macstool_cl86_1_2ct9.6'[&!color=#00ff00]
	'MS_macstool_de1a1_2ct107.'[&!color=#00ff00]
	'MS_macstool_de1a1_2ct111.'[&!color=#00ff00]
	'MS_macstool_de1a1_2ct118.'[&!color=#00ff00]
	'MS_macstool_de1a1_2ct123.'[&!color=#00ff00]
	'MS_macstool_de1a1_2ct45.4'[&!color=#00ff00]
	'MS_macstool_de1a1_2ct52.5'[&!color=#00ff00]
	'MS_macstool_de1a1_2ct64.4'[&!color=#00ff00]
	'MS_macstool_de1a1_2ct68.6'[&!color=#00ff00]
	'MS_macstool_de1a1_2ct80.4'[&!color=#00ff00]
	'MS_macstool_de1a1_2ct82.8'[&!color=#00ff00]
	'MS_macstool_de1a1_2ct83.3'[&!color=#00ff00]
	'MS_macstool_de1a1_2ct86.2'[&!color=#00ff00]
	'MS_macstool_de1a1_2ct93.6'[&!color=#00ff00]
	'MS_macstool_de1a1_2ct94.4'[&!color=#00ff00]
	'MS_macstool_de2c2_2ct20.3'[&!color=#00ff00]
	'MS_macstool_de2c2_2ct22.2'[&!color=#00ff00]
	'MS_macstool_de2c2_2ct24.4'[&!color=#00ff00]
	'MS_macstool_de2c2_2ct25.4'[&!color=#00ff00]
	'MS_macstool_de2c2_2ct27.6'[&!color=#00ff00]
	'MS_macstool_de2c2_2ct28.4'[&!color=#00ff00]
	'MS_macstool_de2c2_2ct29.7'[&!color=#00ff00]
	'MS_macstool_de2c2_2ct31.1'[&!color=#00ff00]
	'MS_macstool_de2c2_2ct36.3'[&!color=#00ff00]
	'MS_macstool_de2c2_2ct38.4'[&!color=#00ff00]
	'MS_macstool_de2c2_2ct39.5'[&!color=#00ff00]
	'MS_macstool_de2c2_2ct41.3'[&!color=#00ff00]
	'MS_macstool_de2c2_2ct42.5'[&!color=#00ff00]
	'MS_macstool_de2c2_2ct44.4'[&!color=#00ff00]
	'MS_macstool_de2c2_2ct46.4'[&!color=#00ff00]
	'MS_macstool_de2c2_2ct47.5'[&!color=#00ff00]
	'MS_macstool_de2c2_2ct48.3'[&!color=#00ff00]
	'MS_macstool_de2c2_2ct50.4'[&!color=#00ff00]
	'MS_macstool_de2c2_2ct51.5'[&!color=#00ff00]
	'MS_macstool_de2c2_2ct52.7'[&!color=#00ff00]
	'MS_macstool_de2c2_2ct55.4'[&!color=#00ff00]
	'MS_mice_vagnl_1_2ct10.5'[&!color=#00ff00]
	'MS_mice_vagnl_1_2ct12.3'[&!color=#00ff00]
	'MS_mice_vagnl_1_2ct4.17'[&!color=#00ff00]
	'MS_mice_vagnl_1_2ct9.5'[&!color=#00ff00]
	'MS_rainbowtrout1_2ct11.6'[&!color=#00ff00]
	'MS_rainbowtrout1_2ct12.5'[&!color=#00ff00]
	'MS_rainbowtrout1_2ct16.5'[&!color=#00ff00]
	'MS_rainbowtrout1_2ct19.4'[&!color=#00ff00]
	'MS_rainbowtrout1_2ct20.4'[&!color=#00ff00]
	'MS_redsnapper1_2ct13.6'[&!color=#00ff00]
	'MS_redsnapper1_2ct16.8'[&!color=#00ff00]
	'MS_redsnapper1_2ct25.1'[&!color=#00ff00]
	'MS_redsnapper1_2ct35.3'[&!color=#00ff00]
	'MS_redsnapper1_2ct37.4'[&!color=#00ff00]
	'MS_redsnapper1_2ct4.1_PF0'[&!color=#00ff00]
	'MS_redsnapper1_2ct43.3'[&!color=#00ff00]
	'MS_redsnapper1_2ct47.1'[&!color=#00ff00]
	'MS_redsnapper1_2ct48.2'[&!color=#00ff00]
	'MS_redsnapper1_2ct51.3'[&!color=#00ff00]
	'MS_redsnapper1_2ct54.5'[&!color=#00ff00]
	'MS_redsnapper1_2ct59.4'[&!color=#00ff00]
	'MS_redsnapper1_2ct6.4_PF0'[&!color=#00ff00]
	'MS_redsnapper1_2ct66.4'[&!color=#00ff00]
	'MS_redsnapper1_2ct67.5'[&!color=#00ff00]
	'MS_redsnapper1_2ct68.2'[&!color=#00ff00]
	'MS_redsnapper1_2ct69.2'[&!color=#00ff00]
	'MS_redsnapper1_2ct70.2'[&!color=#00ff00]
	'MS_redsnapper1_2ct71.4'[&!color=#00ff00]
	'MS_redsnapper1_2ct73.4'[&!color=#00ff00]
	'MS_redsnapper1_2ct75.3'[&!color=#00ff00]
	'MS_redsnapper1_2ct77.3'[&!color=#00ff00]
	'MS_redsnapper1_2ct79.2'[&!color=#00ff00]
	'MS_redsnapper1_2ct89.3'[&!color=#00ff00]
	'MS_redsnapper1_2ct90.1'[&!color=#00ff00]
	'MS_redsnapper1_2ct94.4'[&!color=#00ff00]
	'MS_redsnapper1_2ct97.1'[&!color=#00ff00]
	'MS_redsnapper_r1_2ct001.5'[&!color=#00ff00]
	'MS_redsnapper_r1_2ct002.1'[&!color=#00ff00]
	'MS_redsnapper_r1_2ct003.5'[&!color=#00ff00]
	'MS_redsnapper_r1_2ct004.5'[&!color=#00ff00]
	'MS_redsnapper_r1_2ct005.1'[&!color=#00ff00]
	'MS_redsnapper_r1_2ct006.3'[&!color=#00ff00]
	'MS_redsnapper_r1_2ct007.1'[&!color=#00ff00]
	'MS_redsnapper_r1_2ct008.1'[&!color=#00ff00]
	'MS_redsnapper_r1_2ct009.1'[&!color=#00ff00]
	'MS_redsnapper_r1_2ct010.4'[&!color=#00ff00]
	'MS_redsnapper_r1_2ct011.1'[&!color=#00ff00]
	'MS_redsnapper_r1_2ct012.1'[&!color=#00ff00]
	'MS_redsnapper_r1_2ct013.1'[&!color=#00ff00]
	'MS_redsnapper_r1_2ct014.2'[&!color=#00ff00]
	'MS_seabass1_1_2ct48.9'[&!color=#00ff00]
	'MS_seabass2_1_2ct1.1'[&!color=#00ff00]
	'MS_seabass_ms2_2ct198.3'[&!color=#00ff00]
	'MS_seabass_ms2_2ct200.4'[&!color=#00ff00]
	'MS_seabass_ms2_2ct201.1'[&!color=#00ff00]
	'MS_seabass_ms2_2ct213.5'[&!color=#00ff00]
	'MS_turkey_2ct24.4'[&!color=#00ff00]
	'MS_turkey_2ct6.9'[&!color=#00ff00]
	'gb_ino_AAC54631.1_'[&!color=#ff00ff]
	'gb_ino_ABC47903.1_'[&!color=#ff00ff]
	'gb_ino_ARK07729.1_'[&!color=#ff00ff]
	'gb_ino_BAP16706.1_'[&!color=#ff00ff]
	'gb_ino_CAI94586.1_'[&!color=#ff00ff]
	'gb_ino_NP_040657.1_'[&!color=#ff00ff]
	'gb_ino_NP_047364.1_'[&!color=#ff00ff]
	'gb_ino_WP_004027674.1_'[&!color=#ff00ff]
	'gb_mic_ADR80651.1_'[&!color=#ff00ff]
	'gb_mic_ADR80656.1_'[&!color=#ff00ff]
	'gb_mic_AGT39906.1_'[&!color=#ff00ff]
	'gb_mic_AGT39916.1_'[&!color=#ff00ff]
	'gb_mic_AGT39925.1_'[&!color=#ff00ff]
	'gb_mic_AGT39936.1_'[&!color=#ff00ff]
	'gb_mic_AJK28222.1_'[&!color=#ff00ff]
	'gb_mic_AJK28227.1_'[&!color=#ff00ff]
	'gb_mic_AJK28232.1_'[&!color=#ff00ff]
	'gb_mic_AJK28237.1_'[&!color=#ff00ff]
	'gb_mic_AJK28242.1_'[&!color=#ff00ff]
	'gb_mic_AJK28247.1_'[&!color=#ff00ff]
	'gb_mic_AJK28255.1_'[&!color=#ff00ff]
	'gb_mic_AJK28259.1_'[&!color=#ff00ff]
	'gb_mic_AJK28265.1_'[&!color=#ff00ff]
	'gb_mic_AJK28271.1_'[&!color=#ff00ff]
	'gb_mic_AJK28276.1_'[&!color=#ff00ff]
	'gb_mic_AJK28281.1_'[&!color=#ff00ff]
	'gb_mic_AJK28287.1_'[&!color=#ff00ff]
	'gb_mic_AJK28293.1_'[&!color=#ff00ff]
	'gb_mic_AJK28299.1_'[&!color=#ff00ff]
	'gb_mic_AJK28304.1_'[&!color=#ff00ff]
	'gb_mic_AJK28310.1_'[&!color=#ff00ff]
	'gb_mic_AJK28315.1_'[&!color=#ff00ff]
	'gb_mic_AJK28320.1_'[&!color=#ff00ff]
	'gb_mic_AJK28325.1_'[&!color=#ff00ff]
	'gb_mic_AJK28330.1_'[&!color=#ff00ff]
	'gb_mic_ALS03419.1_'[&!color=#ff00ff]
	'gb_mic_ALS03430.1_'[&!color=#ff00ff]
	'gb_mic_ALS03435.1_'[&!color=#ff00ff]
	'gb_mic_ALS03440.1_'[&!color=#ff00ff]
	'gb_mic_ALS03445.1_'[&!color=#ff00ff]
	'gb_mic_ALS03450.1_'[&!color=#ff00ff]
	'gb_mic_ALS03454.1_'[&!color=#ff00ff]
	'gb_mic_ALS03458.1_'[&!color=#ff00ff]
	'gb_mic_ALS03463.1_'[&!color=#ff00ff]
	'gb_mic_ALS03468.1_'[&!color=#ff00ff]
	'gb_mic_ALS03472.1_'[&!color=#ff00ff]
	'gb_mic_ALS03482.1_'[&!color=#ff00ff]
	'gb_mic_ALS03487.1_'[&!color=#ff00ff]
	'gb_mic_ALS03492.1_'[&!color=#ff00ff]
	'gb_mic_ALS03497.1_'[&!color=#ff00ff]
	'gb_mic_ALS03502.1_'[&!color=#ff00ff]
	'gb_mic_ALS03507.1_'[&!color=#ff00ff]
	'gb_mic_ALS03511.1_'[&!color=#ff00ff]
	'gb_mic_ALS03516.1_'[&!color=#ff00ff]
	'gb_mic_ALS03521.1_'[&!color=#ff00ff]
	'gb_mic_ALS03526.1_'[&!color=#ff00ff]
	'gb_mic_ALS03530.1_'[&!color=#ff00ff]
	'gb_mic_ALS03535.1_'[&!color=#ff00ff]
	'gb_mic_ALS03540.1_'[&!color=#ff00ff]
	'gb_mic_ALS03543.1_'[&!color=#ff00ff]
	'gb_mic_ALS03550.1_'[&!color=#ff00ff]
	'gb_mic_ALS03555.1_'[&!color=#ff00ff]
	'gb_mic_ALS03558.1_'[&!color=#ff00ff]
	'gb_mic_ALS03562.1_'[&!color=#ff00ff]
	'gb_mic_ALS03566.1_'[&!color=#ff00ff]
	'gb_mic_ALS03570.1_'[&!color=#ff00ff]
	'gb_mic_ALS03575.1_'[&!color=#ff00ff]
	'gb_mic_ALS03579.1_'[&!color=#ff00ff]
	'gb_mic_ALS03583.1_'[&!color=#ff00ff]
	'gb_mic_ALS03597.1_'[&!color=#ff00ff]
	'gb_mic_ALS03601.1_'[&!color=#ff00ff]
	'gb_mic_ALS03610.1_'[&!color=#ff00ff]
	'gb_mic_ALS03613.1_'[&!color=#ff00ff]
	'gb_mic_ALS03616.1_'[&!color=#ff00ff]
	'gb_mic_ALS03619.1_'[&!color=#ff00ff]
	'gb_mic_ALS03624.1_'[&!color=#ff00ff]
	'gb_mic_ALS03629.1_'[&!color=#ff00ff]
	'gb_mic_ALS03634.1_'[&!color=#ff00ff]
	'gb_mic_ALS03639.1_'[&!color=#ff00ff]
	'gb_mic_ALS03644.1_'[&!color=#ff00ff]
	'gb_mic_ALS03648.1_'[&!color=#ff00ff]
	'gb_mic_ALS03652.1_'[&!color=#ff00ff]
	'gb_mic_ALS03656.1_'[&!color=#ff00ff]
	'gb_mic_ALS03660.1_'[&!color=#ff00ff]
	'gb_mic_ALS03665.1_'[&!color=#ff00ff]
	'gb_mic_ALS03670.1_'[&!color=#ff00ff]
	'gb_mic_ALS03675.1_'[&!color=#ff00ff]
	'gb_mic_ALS03680.1_'[&!color=#ff00ff]
	'gb_mic_ALS03685.1_'[&!color=#ff00ff]
	'gb_mic_ALS03690.1_'[&!color=#ff00ff]
	'gb_mic_ALS03695.1_'[&!color=#ff00ff]
	'gb_mic_ALS03700.1_'[&!color=#ff00ff]
	'gb_mic_ALS03705.1_'[&!color=#ff00ff]
	'gb_mic_ALS03715.1_'[&!color=#ff00ff]
	'gb_mic_ALS03725.1_'[&!color=#ff00ff]
	'gb_mic_ALS03730.1_'[&!color=#ff00ff]
	'gb_mic_ALS03735.1_'[&!color=#ff00ff]
	'gb_mic_ALS03740.1_'[&!color=#ff00ff]
	'gb_mic_ALS03745.1_'[&!color=#ff00ff]
	'gb_mic_ALS03750.1_'[&!color=#ff00ff]
	'gb_mic_ALS03755.1_'[&!color=#ff00ff]
	'gb_mic_ALS03760.1_'[&!color=#ff00ff]
	'gb_mic_ALS03765.1_'[&!color=#ff00ff]
	'gb_mic_ALS03770.1_'[&!color=#ff00ff]
	'gb_mic_ALS03775.1_'[&!color=#ff00ff]
	'gb_mic_ALS03780.1_'[&!color=#ff00ff]
	'gb_mic_ALS03784.1_'[&!color=#ff00ff]
	'gb_mic_ALS03788.1_'[&!color=#ff00ff]
	'gb_mic_ALS03791.1_'[&!color=#ff00ff]
	'gb_mic_ALS03794.1_'[&!color=#ff00ff]
	'gb_mic_ALS03797.1_'[&!color=#ff00ff]
	'gb_mic_ALS03801.1_'[&!color=#ff00ff]
	'gb_mic_ARQ15992.1_'[&!color=#ff00ff]
	'gb_mic_ARQ15994.1_'[&!color=#ff00ff]
	'gb_mic_ARQ16003.1_'[&!color=#ff00ff]
	'gb_mic_ARQ16009.1_'[&!color=#ff00ff]
	'gb_mic_ARQ16019.1_'[&!color=#ff00ff]
	'gb_mic_ARQ16030.1_'[&!color=#ff00ff]
	'gb_mic_ARQ16034.1_'[&!color=#ff00ff]
	'gb_mic_ARQ16040.1_'[&!color=#ff00ff]
	'gb_mic_ARQ16045.1_'[&!color=#ff00ff]
	'gb_mic_ARQ16050.1_'[&!color=#ff00ff]
	'gb_mic_ARQ16054.1_'[&!color=#ff00ff]
	'gb_mic_ASJ79150.1_'[&!color=#ff00ff]
	'gb_mic_ATW62975.1_'[&!color=#ff00ff]
	'gb_mic_AVA31643.1_'[&!color=#ff00ff]
	'gb_mic_AVQ10173.1_'[&!color=#ff00ff]
	'gb_mic_AVQ10180.1_'[&!color=#ff00ff]
	'gb_mic_AVQ10185.1_'[&!color=#ff00ff]
	'gb_mic_AVQ10198.1_'[&!color=#ff00ff]
	'gb_mic_AVQ10207.1_'[&!color=#ff00ff]
	'gb_mic_AVQ10210.1_'[&!color=#ff00ff]
	'gb_mic_AVQ10216.1_'[&!color=#ff00ff]
	'gb_mic_AVQ10235.1_'[&!color=#ff00ff]
	'gb_mic_AVQ10243.1_'[&!color=#ff00ff]
	'gb_mic_AVQ10247.1_'[&!color=#ff00ff]
	'gb_mic_AVQ10256.1_'[&!color=#ff00ff]
	'gb_mic_AVQ10263.1_'[&!color=#ff00ff]
	'gb_mic_AVQ10267.1_'[&!color=#ff00ff]
	'gb_mic_AVQ10273.1_'[&!color=#ff00ff]
	'gb_mic_AVQ10279.1_'[&!color=#ff00ff]
	'gb_mic_AVQ10285.1_'[&!color=#ff00ff]
	'gb_mic_AVQ10323.1_'[&!color=#ff00ff]
	'gb_mic_NP_044320.1_'[&!color=#ff00ff]
	'gb_mic_NP_054653.1_'[&!color=#ff00ff]
	'gb_mic_NP_063900.1_'[&!color=#ff00ff]
	'gb_mic_NP_073537.1_'[&!color=#ff00ff]
	'gb_mic_NP_598335.1_'[&!color=#ff00ff]
	'gb_mic_P07928.1_'[&!color=#ff00ff]
	'gb_mic_SPH01781.1_'[&!color=#ff00ff]
	'gb_mic_WP_122204416.1_'[&!color=#ff00ff]
	'gb_mic_YP_004732988.1_'[&!color=#ff00ff]
	'gb_mic_YP_008798246.1_'[&!color=#ff00ff]
	'gb_mic_YP_009113038.1_'[&!color=#ff00ff]
	'gb_mic_YP_009126954.1_'[&!color=#ff00ff]
	'gb_mic_YP_009160333.1_'[&!color=#ff00ff]
	'gb_mic_YP_009160340.1_'[&!color=#ff00ff]
	'gb_mic_YP_009160343.1_'[&!color=#ff00ff]
	'gb_mic_YP_009160351.1_'[&!color=#ff00ff]
	'gb_mic_YP_009160357.1_'[&!color=#ff00ff]
	'gb_mic_YP_009160360.1_'[&!color=#ff00ff]
	'gb_mic_YP_009160364.1_'[&!color=#ff00ff]
	'gb_mic_YP_009160369.1_'[&!color=#ff00ff]
	'gb_mic_YP_009160377.1_'[&!color=#ff00ff]
	'gb_mic_YP_009160383.1_'[&!color=#ff00ff]
	'gb_mic_YP_009160387.1_'[&!color=#ff00ff]
	'gb_mic_YP_009160400.1_'[&!color=#ff00ff]
	'gb_mic_YP_009160408.1_'[&!color=#ff00ff]
	'gb_mic_YP_009160416.1_'[&!color=#ff00ff]
	'gb_mic_YP_009218538.1_'[&!color=#ff00ff]
	'gb_mic_YP_009259686.1_'[&!color=#ff00ff]
	'gb_mic_YP_009259725.1_'[&!color=#ff00ff]
	'gb_mic_YP_009259740.1_'[&!color=#ff00ff]
	'gb_mic_YP_338244.1_'[&!color=#ff00ff]
	'gb_mic_YP_512368.1_'[&!color=#ff00ff]
	'gb_mic_YP_512449.1_'[&!color=#ff00ff]
	'gb_mic_YP_512470.1_'[&!color=#ff00ff]
	'gb_mic_YP_512788.1_'[&!color=#ff00ff]
	genbank_unclassified_ssDN
;
end;
begin trees;
	tree tree_1 = [&R] ('gb_mic_ALS03725.1_'[&!color=#ff00ff]:0.022588,'gb_mic_ALS03730.1_'[&!color=#ff00ff]:0.065208,('gb_mic_ARQ16003.1_'[&!color=#ff00ff]:0.01651,((((((((((('MS_redsnapper1_2ct43.3'[&!color=#00ff00]:0.026648,(('gb_mic_ADR80656.1_'[&!color=#ff00ff]:0.11299,('MS_redsnapper1_2ct47.1'[&!color=#00ff00]:0.022188,'MS_redsnapper1_2ct48.2'[&!color=#00ff00]:0.022066)[&bootstraps=100,!color=#…
end;
begin figtree;
	set appearance.backgroundColorAttribute="Default";
	set appearance.backgroundColour=#ffffff;
	set appearance.branchColorAttribute="User selection";
	set appearance.branchColorGradient=false;
	set appearance.branchLineWidth=1.0;
	set appearance.branchMinLineWidth=0.0;
	set appearance.branchWidthAttribute="Fixed";
	set appearance.foregroundColour=#000000;
	set appearance.hilightingGradient=false;
	set appearance.selectionColour=#2d3680;
	set branchLabels.colorAttribute="bootstraps";
	set branchLabels.displayAttribute="bootstraps";
	set branchLabels.fontName="sansserif";
	set branchLabels.fontSize=6;
	set branchLabels.fontStyle=0;
	set branchLabels.isShown=true;
	set branchLabels.significantDigits=4;
	set layout.expansion=155;
	set layout.layoutType="RECTILINEAR";
	set layout.zoom=0;
	set legend.attribute="bootstraps";
	set legend.fontSize=10.0;
	set legend.isShown=false;
	set legend.significantDigits=4;
	set nodeBars.barWidth=4.0;
	set nodeBars.displayAttribute=null;
	set nodeBars.isShown=false;
	set nodeLabels.colorAttribute="User selection";
	set nodeLabels.displayAttribute="Node ages";
	set nodeLabels.fontName="sansserif";
	set nodeLabels.fontSize=8;
	set nodeLabels.fontStyle=0;
	set nodeLabels.isShown=false;
	set nodeLabels.significantDigits=4;
	set nodeShapeExternal.colourAttribute="User selection";
	set nodeShapeExternal.isShown=false;
	set nodeShapeExternal.minSize=10.0;
	set nodeShapeExternal.scaleType=Width;
	set nodeShapeExternal.shapeType=Circle;
	set nodeShapeExternal.size=4.0;
	set nodeShapeExternal.sizeAttribute="Fixed";
	set nodeShapeInternal.colourAttribute="User selection";
	set nodeShapeInternal.isShown=false;
	set nodeShapeInternal.minSize=10.0;
	set nodeShapeInternal.scaleType=Width;
	set nodeShapeInternal.shapeType=Circle;
	set nodeShapeInternal.size=4.0;
	set nodeShapeInternal.sizeAttribute="Fixed";
	set polarLayout.alignTipLabels=false;
	set polarLayout.angularRange=0;
	set polarLayout.rootAngle=0;
	set polarLayout.rootLength=100;
	set polarLayout.showRoot=true;
	set radialLayout.spread=0.0;
	set rectilinearLayout.alignTipLabels=false;
	set rectilinearLayout.curvature=0;
	set rectilinearLayout.rootLength=100;
	set scale.offsetAge=0.0;
	set scale.rootAge=1.0;
	set scale.scaleFactor=1.0;
	set scale.scaleRoot=false;
	set scaleAxis.automaticScale=true;
	set scaleAxis.fontSize=8.0;
	set scaleAxis.isShown=false;
	set scaleAxis.lineWidth=1.0;
	set scaleAxis.majorTicks=1.0;
	set scaleAxis.minorTicks=0.5;
	set scaleAxis.origin=0.0;
	set scaleAxis.reverseAxis=false;
	set scaleAxis.showGrid=true;
	set scaleBar.automaticScale=true;
	set scaleBar.fontSize=10.0;
	set scaleBar.isShown=true;
	set scaleBar.lineWidth=1.0;
	set scaleBar.scaleRange=0.0;
	set tipLabels.colorAttribute="User selection";
	set tipLabels.displayAttribute="Names";
	set tipLabels.fontName="sansserif";
	set tipLabels.fontSize=6;
	set tipLabels.fontStyle=0;
	set tipLabels.isShown=true;
	set tipLabels.significantDigits=4;
	set trees.order=false;
	set trees.orderType="increasing";
	set trees.rooting=false;
	set trees.rootingType="User Selection";
	set trees.transform=false;
	set trees.transformType="cladogram";
end;
