# Supplementary material for: Discovery of several thousand highly diverse circular DNA viruses
Source: eLife. 2020 Feb 4;9:e51971. doi: 10.7554/eLife.51971 (PMC7000223; doi:10.7554/eLife.51971)
Supplement: Figure 2—figure supplement 2—source data 6. [file elife-51971-fig2-figsupp2-data6.tre]

#NEXUS
begin taxa;
	dimensions ntax=25;
	taxlabels
	'MS_16minnow_6_2ct525.8'[&!color=#00ff00]
	'MS_16minnow_6_2ct971.4'[&!color=#00ff00]
	'MS_16minnow_6_2ct988.5'[&!color=#00ff00]
	'MS_abalone_6_2ct10.6'[&!color=#00ff00]
	'MS_crucian1_2ct17.6'[&!color=#00ff00]
	'MS_haddock_1_2ct13.5'[&!color=#00ff00]
	'MS_haddock_1_2ct14.9'[&!color=#00ff00]
	'MS_haddock_1_2ct17.8'[&!color=#00ff00]
	'MS_haddock_1_2ct20.7'[&!color=#00ff00]
	'MS_haddock_1_2ct21.4'[&!color=#00ff00]
	'MS_haddock_1_2ct24.6'[&!color=#00ff00]
	'MS_haddock_1_2ct25.6'[&!color=#00ff00]
	'MS_haddock_1_2ct3.4_PF058'[&!color=#00ff00]
	'MS_haddock_1_2ct39.4'[&!color=#00ff00]
	'MS_haddock_1_2ct42.4'[&!color=#00ff00]
	'MS_haddock_1_2ct9.7'[&!color=#00ff00]
	'MS_rainbowtrout1_2ct8.5'[&!color=#00ff00]
	'MS_redsnapper1_2ct11.6'[&!color=#00ff00]
	'MS_seabass4_6_2ct24.7'[&!color=#00ff00]
	'MS_seabass4_6_2ct25.8'[&!color=#00ff00]
	'MS_seabass_ms2_2ct138.8'[&!color=#00ff00]
	'gb_ino_ACY07136.1_'[&!color=#ff00ff]
	'gb_ino_NP_039615.1_'[&!color=#ff00ff]
	'gb_ino_NP_040570.1_'[&!color=#ff00ff]
	'gb_ino_P69546.1_'[&!color=#ff00ff]
;
end;

begin trees;
	tree tree_1 = [&R] ('MS_haddock_1_2ct21.4'[&!color=#00ff00]:0.898462,((('MS_abalone_6_2ct10.6'[&!color=#00ff00]:0.024306,'MS_haddock_1_2ct42.4'[&!color=#00ff00]:0.027091)[&bootstraps=100,!color=#4c4c4c]:0.180915,'MS_haddock_1_2ct39.4'[&!color=#00ff00]:0.155238)[&bootstraps=100,!color=#4c4c4c]:0.699536,('MS_haddock_1_2ct24.6'[&!color=#00ff00]:0.007156,'MS_haddock_1_2ct20.7'[&!color=#00ff00]:0.022666)[&bootstraps=100,!color=#4c4c4c]:0.43269)[&bootstraps=99,!color=#4c4c4c]:0.271938,(((('MS_seabass4_6_2ct24.7'[&!color=#00ff00]:0.295566,'MS_haddock_1_2ct3.4_PF058'[&!color=#00ff00]:0.281501)[&bootstraps=100,!color=#4c4c4c]:0.404817,'MS_rainbowtrout1_2ct8.5'[&!color=#00ff00]:0.482212)[&bootstraps=97,!color=#4c4c4c]:0.172972,((((('gb_ino_P69546.1_'[&!color=#ff00ff]:0.003409,'gb_ino_ACY07136.1_'[&!color=#ff00ff]:0.006864)[&bootstraps=100,!color=#4c4c4c]:0.382341,'gb_ino_NP_040570.1_'[&!color=#ff00ff]:0.314684)[&bootstraps=99,!color=#4c4c4c]:0.334546,'MS_haddock_1_2ct9.7'[&!color=#00ff00]:0.829669)[&bootstraps=46,!color=#4c4c4c]:0.104707,('MS_haddock_1_2ct13.5'[&!color=#00ff00]:0.037416,'MS_redsnapper1_2ct11.6'[&!color=#00ff00]:0.077992)[&bootstraps=100,!color=#4c4c4c]:0.759932)[&bootstraps=71,!color=#4c4c4c]:0.147576,(('MS_haddock_1_2ct17.8'[&!color=#00ff00]:0.013739,'MS_haddock_1_2ct14.9'[&!color=#00ff00]:0.075463)[&bootstraps=100,!color=#4c4c4c]:1.177266,(('MS_seabass4_6_2ct25.8'[&!color=#00ff00]:0.479658,'gb_ino_NP_039615.1_'[&!color=#ff00ff]:0.651173)[&bootstraps=100,!color=#4c4c4c]:0.994373,('MS_crucian1_2ct17.6'[&!color=#00ff00]:1.608618,(('MS_16minnow_6_2ct971.4'[&!color=#00ff00]:1.337565,'MS_16minnow_6_2ct988.5'[&!color=#00ff00]:0.606521)[&bootstraps=99,!color=#4c4c4c]:1.166491,('MS_16minnow_6_2ct525.8'[&!color=#00ff00]:0.303071,'MS_seabass_ms2_2ct138.8'[&!color=#00ff00]:0.349053)[&bootstraps=100,!color=#4c4c4c]:1.501188)[&bootstraps=49,!color=#4c4c4c]:0.128123)[&bootstraps=100,!color=#4c4c4c]:0.968224)[&bootstraps=100,!color=#4c4c4c]:1.297275)[&bootstraps=66,!color=#4c4c4c]:0.224401)[&bootstraps=97,!color=#4c4c4c]:0.220233)[&bootstraps=100,!color=#4c4c4c]:0.295637,'MS_haddock_1_2ct25.6'[&!color=#00ff00]:0.587794)[&bootstraps=66,!color=#4c4c4c]:0.150182)[&!color=#4c4c4c];
end;

begin figtree;
	set appearance.backgroundColorAttribute="Default";
	set appearance.backgroundColour=#ffffff;
	set appearance.branchColorAttribute="User selection";
	set appearance.branchColorGradient=false;
	set appearance.branchLineWidth=2.0;
	set appearance.branchMinLineWidth=0.0;
	set appearance.branchWidthAttribute="Fixed";
	set appearance.foregroundColour=#000000;
	set appearance.hilightingGradient=false;
	set appearance.selectionColour=#2d3680;
	set branchLabels.colorAttribute="bootstraps";
	set branchLabels.displayAttribute="bootstraps";
	set branchLabels.fontName="sansserif";
	set branchLabels.fontSize=8;
	set branchLabels.fontStyle=0;
	set branchLabels.isShown=true;
	set branchLabels.significantDigits=4;
	set layout.expansion=0;
	set layout.layoutType="RECTILINEAR";
	set layout.zoom=0;
	set legend.attribute="bootstraps";
	set legend.fontSize=10.0;
	set legend.isShown=false;
	set legend.significantDigits=4;
	set nodeBars.barWidth=4.0;
	set nodeBars.displayAttribute=null;
	set nodeBars.isShown=false;
	set nodeLabels.colorAttribute="User selection";
	set nodeLabels.displayAttribute="Node ages";
	set nodeLabels.fontName="sansserif";
	set nodeLabels.fontSize=8;
	set nodeLabels.fontStyle=0;
	set nodeLabels.isShown=false;
	set nodeLabels.significantDigits=4;
	set nodeShapeExternal.colourAttribute="User selection";
	set nodeShapeExternal.isShown=false;
	set nodeShapeExternal.minSize=10.0;
	set nodeShapeExternal.scaleType=Width;
	set nodeShapeExternal.shapeType=Circle;
	set nodeShapeExternal.size=4.0;
	set nodeShapeExternal.sizeAttribute="Fixed";
	set nodeShapeInternal.colourAttribute="User selection";
	set nodeShapeInternal.isShown=false;
	set nodeShapeInternal.minSize=10.0;
	set nodeShapeInternal.scaleType=Width;
	set nodeShapeInternal.shapeType=Circle;
	set nodeShapeInternal.size=4.0;
	set nodeShapeInternal.sizeAttribute="Fixed";
	set polarLayout.alignTipLabels=false;
	set polarLayout.angularRange=0;
	set polarLayout.rootAngle=0;
	set polarLayout.rootLength=100;
	set polarLayout.showRoot=true;
	set radialLayout.spread=0.0;
	set rectilinearLayout.alignTipLabels=false;
	set rectilinearLayout.curvature=0;
	set rectilinearLayout.rootLength=100;
	set scale.offsetAge=0.0;
	set scale.rootAge=1.0;
	set scale.scaleFactor=1.0;
	set scale.scaleRoot=false;
	set scaleAxis.automaticScale=true;
	set scaleAxis.fontSize=8.0;
	set scaleAxis.isShown=false;
	set scaleAxis.lineWidth=1.0;
	set scaleAxis.majorTicks=1.0;
	set scaleAxis.minorTicks=0.5;
	set scaleAxis.origin=0.0;
	set scaleAxis.reverseAxis=false;
	set scaleAxis.showGrid=true;
	set scaleBar.automaticScale=true;
	set scaleBar.fontSize=10.0;
	set scaleBar.isShown=true;
	set scaleBar.lineWidth=1.0;
	set scaleBar.scaleRange=0.0;
	set tipLabels.colorAttribute="User selection";
	set tipLabels.displayAttribute="Names";
	set tipLabels.fontName="sansserif";
	set tipLabels.fontSize=8;
	set tipLabels.fontStyle=0;
	set tipLabels.isShown=true;
	set tipLabels.significantDigits=4;
	set trees.order=false;
	set trees.orderType="increasing";
	set trees.rooting=false;
	set trees.rootingType="User Selection";
	set trees.transform=false;
	set trees.transformType="cladogram";
end;
