# Supplementary material for: Discovery of several thousand highly diverse circular DNA viruses
Source: eLife. 2020 Feb 4;9:e51971. doi: 10.7554/eLife.51971 (PMC7000223; doi:10.7554/eLife.51971)
Supplement: Figure 2—figure supplement 2—source data 7. [file elife-51971-fig2-figsupp2-data7.tre]

#NEXUS
begin taxa;
	dimensions ntax=33;
	taxlabels
	'MS_abalone_6_2ct6.1_PF024'[&!color=#00ff00]
	MS_axolotl_blastema1_2ct2[&!color=#00ff00]
	'MS_haddock_1_2ct31.5'[&!color=#00ff00]
	'MS_haddock_1_2ct32.6'[&!color=#00ff00]
	'MS_haddock_1_2ct33.9'[&!color=#00ff00]
	'MS_haddock_1_2ct34.8'[&!color=#00ff00]
	'MS_haddock_1_2ct36.7'[&!color=#00ff00]
	'MS_haddock_1_2ct37.9'[&!color=#00ff00]
	'MS_haddock_1_2ct4.4_PF058'[&!color=#00ff00]
	'MS_haddock_1_2ct41.7'[&!color=#00ff00]
	'MS_haddock_1_2ct44.6'[&!color=#00ff00]
	'MS_haddock_1_2ct45.3'[&!color=#00ff00]
	'MS_haddock_1_2ct6.4'[&!color=#00ff00]
	'MS_haddock_1_2ct7.6'[&!color=#00ff00]
	'MS_rainbowtrout1_2ct5.6'[&!color=#00ff00]
	'MS_seabass1_1_2ct152.2'[&!color=#00ff00]
	'MS_seabass1_1_2ct37.5'[&!color=#00ff00]
	'MS_seabass_ms2_2ct147.7'[&!color=#00ff00]
	'MS_squid_r1_2ct000.10'[&!color=#00ff00]
	'gb_ino_AAY49180.1_'[&!color=#ff00ff]
	'gb_ino_NP_542355.1_'[&!color=#ff00ff]
	'gb_ino_WP_000743997.1_'[&!color=#ff00ff]
	'gb_ino_WP_001112192.1_'[&!color=#ff00ff]
	'gb_ino_WP_010892522.1_'[&!color=#ff00ff]
	'gb_ino_WP_015984156.1_'[&!color=#ff00ff]
	'gb_ino_YP_001718368.1_'[&!color=#ff00ff]
	'gb_ino_YP_002925188.1_'[&!color=#ff00ff]
	'gb_ino_YP_004327588.1_'[&!color=#ff00ff]
	'gb_ino_YP_004934224.1_'[&!color=#ff00ff]
	'gb_ino_YP_008130366.1_'[&!color=#ff00ff]
	'gb_ino_YP_009664526.1_'[&!color=#ff00ff]
	'gb_ino_YP_257146.1_'[&!color=#ff00ff]
	genbank_satellites_WP_000[&!color=#ff00ff]
;
end;

begin trees;
	tree tree_1 = [&R] ('gb_ino_YP_009664526.1_'[&!color=#ff00ff]:0.062514,'gb_ino_YP_257146.1_'[&!color=#ff00ff]:2.0E-6,((((('gb_ino_WP_010892522.1_'[&!color=#ff00ff]:0.831305,(('gb_ino_WP_001112192.1_'[&!color=#ff00ff]:2.0E-6,'gb_ino_NP_542355.1_'[&!color=#ff00ff]:0.114738)[&bootstraps=74,!color=#4c4c4c]:2.0E-6,'gb_ino_YP_002925188.1_'[&!color=#ff00ff]:0.285477)[&bootstraps=100,!color=#4c4c4c]:0.655314)[&bootstraps=68,!color=#4c4c4c]:0.105266,('MS_seabass1_1_2ct37.5'[&!color=#00ff00]:0.05618,'MS_seabass_ms2_2ct147.7'[&!color=#00ff00]:0.173526)[&bootstraps=100,!color=#4c4c4c]:0.725199)[&bootstraps=87,!color=#4c4c4c]:0.209072,('gb_ino_WP_000743997.1_'[&!color=#ff00ff]:2.0E-6,genbank_satellites_WP_000[&!color=#ff00ff]:2.0E-6)[&bootstraps=100,!color=#4c4c4c]:0.674313)[&bootstraps=94,!color=#4c4c4c]:0.283066,'MS_haddock_1_2ct6.4'[&!color=#00ff00]:0.776606)[&bootstraps=100,!color=#4c4c4c]:1.006785,(((((('gb_ino_YP_008130366.1_'[&!color=#ff00ff]:0.02507,'MS_abalone_6_2ct6.1_PF024'[&!color=#00ff00]:0.038315)[&bootstraps=96,!color=#4c4c4c]:0.084768,'gb_ino_YP_001718368.1_'[&!color=#ff00ff]:0.200905)[&bootstraps=96,!color=#4c4c4c]:0.203264,'gb_ino_AAY49180.1_'[&!color=#ff00ff]:0.111827)[&bootstraps=99,!color=#4c4c4c]:0.397497,MS_axolotl_blastema1_2ct2[&!color=#00ff00]:1.123111)[&bootstraps=100,!color=#4c4c4c]:0.996843,((('MS_haddock_1_2ct45.3'[&!color=#00ff00]:0.757796,((('MS_haddock_1_2ct44.6'[&!color=#00ff00]:0.058341,'MS_haddock_1_2ct4.4_PF058'[&!color=#00ff00]:0.067345)[&bootstraps=97,!color=#4c4c4c]:0.139574,'MS_haddock_1_2ct31.5'[&!color=#00ff00]:0.158365)[&bootstraps=96,!color=#4c4c4c]:0.172403,('MS_haddock_1_2ct33.9'[&!color=#00ff00]:0.018686,(('MS_haddock_1_2ct37.9'[&!color=#00ff00]:0.013377,('MS_haddock_1_2ct32.6'[&!color=#00ff00]:0.004997,'MS_haddock_1_2ct34.8'[&!color=#00ff00]:0.058224)[&bootstraps=39,!color=#4c4c4c]:0.017557)[&bootstraps=46,!color=#4c4c4c]:0.022308,'MS_haddock_1_2ct36.7'[&!color=#00ff00]:0.036656)[&bootstraps=49,!color=#4c4c4c]:0.008261)[&bootstraps=99,!color=#4c4c4c]:0.367987)[&bootstraps=100,!color=#4c4c4c]:0.690826)[&bootstraps=97,!color=#4c4c4c]:0.583332,'MS_haddock_1_2ct41.7'[&!color=#00ff00]:1.057649)[&bootstraps=100,!color=#4c4c4c]:1.484846,(('gb_ino_YP_004934224.1_'[&!color=#ff00ff]:0.418916,'MS_squid_r1_2ct000.10'[&!color=#00ff00]:0.377026)[&bootstraps=100,!color=#4c4c4c]:0.997597,('gb_ino_YP_004327588.1_'[&!color=#ff00ff]:0.201317,'gb_ino_WP_015984156.1_'[&!color=#ff00ff]:0.157834)[&bootstraps=100,!color=#4c4c4c]:1.053156)[&bootstraps=78,!color=#4c4c4c]:0.265004)[&bootstraps=57,!color=#4c4c4c]:0.116595)[&bootstraps=42,!color=#4c4c4c]:0.077559,('MS_seabass1_1_2ct152.2'[&!color=#00ff00]:0.952175,('MS_haddock_1_2ct7.6'[&!color=#00ff00]:0.223014,'MS_rainbowtrout1_2ct5.6'[&!color=#00ff00]:0.31206)[&bootstraps=100,!color=#4c4c4c]:0.524409)[&bootstraps=99,!color=#4c4c4c]:0.491398)[&bootstraps=49,!color=#4c4c4c]:0.16255)[&bootstraps=100,!color=#4c4c4c]:1.251951)[&!color=#4c4c4c];
end;

begin figtree;
	set appearance.backgroundColorAttribute="Default";
	set appearance.backgroundColour=#ffffff;
	set appearance.branchColorAttribute="User selection";
	set appearance.branchColorGradient=false;
	set appearance.branchLineWidth=2.0;
	set appearance.branchMinLineWidth=0.0;
	set appearance.branchWidthAttribute="Fixed";
	set appearance.foregroundColour=#000000;
	set appearance.hilightingGradient=false;
	set appearance.selectionColour=#2d3680;
	set branchLabels.colorAttribute="bootstraps";
	set branchLabels.displayAttribute="bootstraps";
	set branchLabels.fontName="sansserif";
	set branchLabels.fontSize=8;
	set branchLabels.fontStyle=0;
	set branchLabels.isShown=true;
	set branchLabels.significantDigits=4;
	set layout.expansion=0;
	set layout.layoutType="RECTILINEAR";
	set layout.zoom=0;
	set legend.attribute="bootstraps";
	set legend.fontSize=10.0;
	set legend.isShown=false;
	set legend.significantDigits=4;
	set nodeBars.barWidth=4.0;
	set nodeBars.displayAttribute=null;
	set nodeBars.isShown=false;
	set nodeLabels.colorAttribute="User selection";
	set nodeLabels.displayAttribute="Node ages";
	set nodeLabels.fontName="sansserif";
	set nodeLabels.fontSize=8;
	set nodeLabels.fontStyle=0;
	set nodeLabels.isShown=false;
	set nodeLabels.significantDigits=4;
	set nodeShapeExternal.colourAttribute="User selection";
	set nodeShapeExternal.isShown=false;
	set nodeShapeExternal.minSize=10.0;
	set nodeShapeExternal.scaleType=Width;
	set nodeShapeExternal.shapeType=Circle;
	set nodeShapeExternal.size=4.0;
	set nodeShapeExternal.sizeAttribute="Fixed";
	set nodeShapeInternal.colourAttribute="User selection";
	set nodeShapeInternal.isShown=false;
	set nodeShapeInternal.minSize=10.0;
	set nodeShapeInternal.scaleType=Width;
	set nodeShapeInternal.shapeType=Circle;
	set nodeShapeInternal.size=4.0;
	set nodeShapeInternal.sizeAttribute="Fixed";
	set polarLayout.alignTipLabels=false;
	set polarLayout.angularRange=0;
	set polarLayout.rootAngle=0;
	set polarLayout.rootLength=100;
	set polarLayout.showRoot=true;
	set radialLayout.spread=0.0;
	set rectilinearLayout.alignTipLabels=false;
	set rectilinearLayout.curvature=0;
	set rectilinearLayout.rootLength=100;
	set scale.offsetAge=0.0;
	set scale.rootAge=1.0;
	set scale.scaleFactor=1.0;
	set scale.scaleRoot=false;
	set scaleAxis.automaticScale=true;
	set scaleAxis.fontSize=8.0;
	set scaleAxis.isShown=false;
	set scaleAxis.lineWidth=1.0;
	set scaleAxis.majorTicks=1.0;
	set scaleAxis.minorTicks=0.5;
	set scaleAxis.origin=0.0;
	set scaleAxis.reverseAxis=false;
	set scaleAxis.showGrid=true;
	set scaleBar.automaticScale=true;
	set scaleBar.fontSize=10.0;
	set scaleBar.isShown=true;
	set scaleBar.lineWidth=1.0;
	set scaleBar.scaleRange=0.0;
	set tipLabels.colorAttribute="User selection";
	set tipLabels.displayAttribute="Names";
	set tipLabels.fontName="sansserif";
	set tipLabels.fontSize=8;
	set tipLabels.fontStyle=0;
	set tipLabels.isShown=true;
	set tipLabels.significantDigits=4;
	set trees.order=false;
	set trees.orderType="increasing";
	set trees.rooting=false;
	set trees.rootingType="User Selection";
	set trees.transform=false;
	set trees.transformType="cladogram";
end;
