# Supplementary material for: Discovery of several thousand highly diverse circular DNA viruses
Source: eLife. 2020 Feb 4;9:e51971. doi: 10.7554/eLife.51971 (PMC7000223; doi:10.7554/eLife.51971)
Supplement: Figure 2—source data 1. [file elife-51971-fig2-data1.tre]

#NEXUS
begin taxa;
	dimensions ntax=342;
	taxlabels
	'3R0R A 3R0R A'
	'5J09 A 5J37 A'
	'AAG30548.1 PF02443.14'
	'AAG30554.1 PF02443.14'
	'AAG30560.1 PF02443.14'
	'AAN62768.1 3JCI A'
	'AAQ94097.1 3JCI A'
	'AAS89782.1 PF02443.14'
	'AAS89790.1 PF02443.14'
	'AAS89794.1 PF02443.14'
	'AAS89795.1 PF02443.14'
	'AAS89805.1 PF02443.14'
	'AAS89806.1 PF02443.14'
	'AAS89813.1 PF02443.14'
	'AAS93272.1 PF02443.14'
	'AAS93276.1 PF02443.14'
	'AAS93279.1 PF02443.14'
	'AAT00469.1 PF02443.14'
	'AAT00481.1 PF02443.14'
	'AAT51967.1 PF02443.14'
	'AAY41809.1 3JCI A'
	'ABE03767.1 PF02443.14'
	'ABE03771.1 PF02443.14'
	'ABI97391.1 5J37 A'
	'ABK79782.1 5J09 C'
	'ABK79788.1 5J09 C'
	'ABL07436.1 3JCI A'
	'ABL07437.1 3JCI A'
	'ABO09988.1 3JCI A'
	'ABP68670.1 3JCI A'
	'ABR13946.1 3JCI A'
	'ABR14586.1 3JCI A'
	'ABU48446.1 PF02443.14'
	'ABV55140.1 5J37 A'
	'ABV55150.1 PF02443.14'
	'ABV55154.1 5J37 A'
	'ABV55158.1 5J37 A'
	'ABW72700.1 3JCI A'
	'ABX71779.1 3JCI A'
	'ABX79569.1 3JCI A'
	'ABX79571.1 3JCI A'
	'ABX79573.1 3JCI A'
	'ABY82489.1 3JCI A'
	'ACB12408.1 3JCI A'
	'ACB12409.1 3JCI A'
	'ACC95426.1 PF02443.14'
	'ACE73892.1 3JCI A'
	'ACE77633.1 3JCI A'
	'ACF47579.1 PF02443.14'
	'ACH70369.1 3JCI A'
	'ACJ14531.1 PF02443.14'
	'ACN62125.1 3JCI A'
	'ACO35234.1 PF02443.14'
	'ACO35240.1 PF02443.14'
	'ACO35255.1 PF02443.14'
	'ACR49230.1 3JCI A'
	'ACV53238.1 3JCI A'
	'ACV53262.1 3JCI A'
	'ACV53272.1 3JCI A'
	'ACV53394.1 3JCI A'
	'ACY35997.1 3JCI A'
	'ADB29119.1 PF02443.14'
	'ADI48254.1 PF02443.14'
	'ADN93082.1 3JCI A'
	'ADN93083.1 3JCI A'
	'ADN93084.1 3JCI A'
	'ADU77002.1 PF02443.14'
	'AEB60991.1 5J37 A'
	'AEB65780.1 3JCI A'
	'AEC03084.1 5J09 C'
	'AEJ87858.1 3JCI A'
	'AEL30251.1 PF02443.14'
	'AEN03282.1 3JCI A'
	'AEN03290.1 3JCI A'
	'AEN03294.1 3JCI A'
	'AEN84874.1 3JCI A'
	'AEN84878.1 3JCI A'
	'AEN84889.2 3JCI A'
	'AER61364.1 3JCI A'
	'AET07578.1 PF02443.14'
	'AEY79493.1 3JCI A'
	'AFH02743.1 5J09 C'
	'AFL02458.1 PF02443.14'
	'AFM43640.1 3JCI A'
	'AFM55151.1 PF02443.14'
	'AFM55195.1 PF02443.14'
	'AFM55197.1 PF02443.14'
	'AFO65088.1 3JCI A'
	'AFP47183.1 PF02443.14'
	'AFV63120.1 PF02443.14'
	'AFV63121.1 PF02443.14'
	'AFV63123.1 PF02443.14'
	'AFV63125.1 PF02443.14'
	'AFV63131.1 PF02443.14'
	'AFV63132.1 PF02443.14'
	'AFX97602.1 5J37 A'
	'AGC55177.1 PF02443.14'
	'AGC55179.1 PF02443.14'
	'AGC55191.1 PF02443.14'
	'AGC55197.1 PF02443.14'
	'AGC55213.1 PF02443.14'
	'AGC55229.1 PF02443.14'
	'AGC55235.1 PF02443.14'
	'AGI42841.1 PF02443.14'
	'AGI65335.1 3JCI A'
	'AGI65355.1 3JCI A'
	'AGO01013.1 3JCI A'
	'AGO01019.1 3JCI A'
	'AGO01021.1 3JCI A'
	'AGO01023.1 3JCI A'
	'AGO01025.1 3JCI A'
	'AGO01027.1 3JCI A'
	'AGO01029.1 3JCI A'
	'AGO01035.1 3JCI A'
	'AGO01037.1 3JCI A'
	'AGQ52032.1 3JCI A'
	'AGQ52046.1 3JCI A'
	'AGR89990.1 PF02443.14'
	'AGX27426.1 PF02443.14'
	'AGX27430.1 PF02443.14'
	'AGZ20447.1 PF02443.14'
	'AHB63243.1 PF02443.14'
	'AHC70238.1 PF02443.14'
	'AHH31401.1 PF02443.14'
	'AHH31415.1 5J09 C'
	'AHH31421.1 5J37 A'
	'AHH31422.1 5J09 C'
	'AHI85848.1 PF02443.14'
	'AHN65789.1 PF02443.14'
	'AHN96193.1 3JCI A'
	'AHX56391.1 5J37 A'
	'AHX56395.1 PF02443.14'
	'AHX56417.1 PF02443.14'
	'AHX56427.1 PF02443.14'
	'AHX56443.1 PF02443.14'
	'AHZ59371.1 3JCI A'
	'AID53194.1 PF02443.14'
	'AIH07405.1 PF02443.14'
	'AIH07407.1 PF02443.14'
	'AIH07409.1 PF02443.14'
	'AIL49747.1 PF02443.14'
	'AIL49749.1 PF02443.14'
	'AIL49790.1 PF02443.14'
	'AIL49798.1 PF02443.14'
	'AIL49822.1 PF02443.14'
	'AIT11775.1 3JCI A'
	'AIT52334.1 PF02443.14'
	'AIX11627.1 5J37 A'
	'AIX11628.1 5J09 C'
	'AIZ10943.1 3JCI A'
	'AIZ10949.1 3JCI A'
	'AJB29388.1 PF02443.14'
	'AJD07569.1 3R0R A'
	'AJD07570.1 5J37 A'
	'AJD07573.1 5J09 C'
	'AJW76661.1 3JCI A'
	'AKC34808.1 PF02443.14'
	'AKM52584.1 PF02443.14'
	'AKO63007.1 PF02443.14'
	'AKO63069.1 PF02443.14'
	'AKO84210.1 PF02443.14'
	'AKP49453.1 PF02443.14'
	'AKP49480.1 PF02443.14'
	'AKP49486.1 PF02443.14'
	'AKP92789.1 PF02443.14'
	'AKP92791.1 PF02443.14'
	'AKP92803.1 PF02443.14'
	'AKP92814.1 PF02443.14'
	'AKP92816.1 PF02443.14'
	'AKP92818.1 PF02443.14'
	'AKZ24907.1 PF02443.14'
	'ALB35040.1 PF02443.14'
	'ALG65683.1 PF02443.14'
	'ALN38802.1 PF02443.14'
	'ALO24180.1 PF02443.14'
	'ALO24184.1 PF02443.14'
	'ALT00623.1 3JCI A'
	'ALT01259.1 3JCI A'
	'AMN08794.1 3JCI A'
	'AMS38756.1 PF02443.14'[&!color=#00ff00]
	'AMS38761.1 PF02443.14'[&!color=#00ff00]
	'AMS38769.1 PF02443.14'[&!color=#00ff00]
	'AMW89343.1 PF02443.14'
	'ANR94576.1 3JCI A'
	'ANZ73065.1 PF02443.14'
	'ANZ73068.1 PF02443.14'
	'ANZ73071.1 PF02443.14'
	'AOD41473.1 3JCI A'
	'AOD41581.1 3JCI A'
	'AOO19771.1 5J09 C'
	'AOS89458.1 PF02443.14'
	'AOS89466.1 PF02443.14'
	'AOS89469.1 PF02443.14'
	'APB97110.1 3JCI A'
	'APC23551.1 PF02443.14'
	'APJ37595.1 3JCI A'
	'APZ87907.1 5J37 A'
	'APZ87909.1 PF02443.14'
	'AQW44861.1 3JCI A'
	'AQW44863.1 3JCI A'
	'ARE29793.1 PF02443.14'
	'ARE29795.1 PF02443.14'
	'ARE29797.1 PF02443.14'
	'ARE29799.1 PF02443.14'
	'ARI44260.1 5J09 C'
	'ARI44266.1 5J09 C'
	'ARI44268.1 5J09 C'
	'ARI44270.1 5J37 A'
	'ARI44294.1 5J09 C'
	'ARI44300.1 5J09 C'
	'ARI44313.1 5J09 C'
	'ARI44316.1 5J09 C'
	'ARI44318.1 5J37 A'
	'ARI44322.1 5J37 A'
	'ARI44324.1 PF02443.14'
	'ARI44330.1 5J37 A'
	'ARI44338.1 5J09 C'
	'ARI44346.1 PF02443.14'
	'ARO38284.1 PF02443.14'
	'ARO38299.1 5J37 A'
	'ARO77517.1 PF02443.14'
	'ARO77519.1 PF02443.14'
	'ARR29319.1 PF02443.14'
	'ARW73936.1 3JCI A'
	'ASF79483.1 3JCI A'
	'ASU92196.1 PF02443.14'
	'ASV45137.1 PF02443.14'
	'ASV72309.1 3JCI A'
	'ATA66891.1 3JCI A'
	'ATA66897.1 3JCI A'
	'ATD50419.1 3JCI A'
	'ATD84907.1 3JCI A'
	'ATD87389.1 3JCI A'
	'ATG29867.1 3JCI A'
	'AUG45096.1 PF02443.14'
	'AUM59927.1 3JCI A'
	'AUW34332.1 5J09 C'
	'AVD49694.1 5J37 A'
	'AVE17150.1 PF02443.14'
	'AVE17164.1 PF02443.14'
	'AVN89825.1 3JCI A'
	'AVR51404.1 3JCI A'
	'AVR51420.1 3JCI A'
	'AVZ65991.1 3JCI A'
	'AVZ65995.1 3JCI A'
	'AVZ66031.1 3JCI A'
	'AWB80911.1 PF02443.14'
	'AWF93983.1 3JCI A'
	'AWH12577.1 PF02443.14'
	'BAD90985.1 3JCI A'
	'BAD90987.1 5J09 C'
	'BAE73108.1 3JCI A'
	'BAG24264.1 5J09 C'
	'BAG24267.1 5J09 C'
	'BAG55228.1 PF02443.14'
	'BAG55244.1 PF02443.14'
	'BAI50551.1 3JCI A'
	'BAI68104.1 PF02443.14'
	'BAP81720.1 3JCI A'
	'BAP81738.1 3JCI A'
	'BAQ59592.1 3JCI A'
	'BAQ95398.1 PF02443.14'
	'MS 16minnow 6 2ct1219.1 5'[&!color=#00ff00]
	'MS 18minnow1 2ct2152.1 5J'[&!color=#00ff00]
	'MS 18minnow1 2ct2166.2 3R'[&!color=#00ff00]
	'MS abalone 6 2ct155.2 5J0'[&!color=#00ff00]
	'MS abalone 6 2ct187.2 5J3'[&!color=#00ff00]
	'MS abalone 6 2ct189.1 5J3'[&!color=#00ff00]
	'MS abalone 6 2ct190.2 PF0'[&!color=#00ff00]
	'MS abalone 6 2ct191.1 3JC'[&!color=#00ff00]
	'MS abalone 6 2ct193.1 5J0'[&!color=#00ff00]
	'MS abalone 6 2ct224.2 5J0'[&!color=#00ff00]
	'MS abalone 6 2ct241.1 PF0'[&!color=#00ff00]
	'MS beef bd3 r1 2ct004.3 P'[&!color=#00ff00]
	'MS beef bd4 r1 2ct000.2 P'[&!color=#00ff00]
	'MS crab r1 2ct001.2 PF024'[&!color=#00ff00]
	'MS crab r1 2ct004.1 5J09 '[&!color=#00ff00]
	'MS crucian1 2ct104.1 PF02'[&!color=#00ff00]
	'MS crucian1 2ct81.3 PF024'[&!color=#00ff00]
	'MS ct crucian1 2ct72.2 PF'[&!color=#00ff00]
	'MS ct eef bd3 1 2ct127.2 '[&!color=#00ff00]
	'MS haddock 1 2ct288.1 5J3'[&!color=#00ff00]
	'MS haddock 1 2ct321.2 PF0'[&!color=#00ff00]
	'MS haddock 1 2ct325.2 5J0'[&!color=#00ff00]
	'MS haddock 1 2ct333.1 PF0'[&!color=#00ff00]
	'MS haddock 1 2ct335.2 5J0'[&!color=#00ff00]
	'MS haddock 1 2ct351.2 5J0'[&!color=#00ff00]
	'MS haddock 1 2ct383.2 PF0'[&!color=#00ff00]
	'MS raccoonskin1 2ct37.1 P'[&!color=#00ff00]
	'MS rainbowtrout r1 2ct005'[&!color=#00ff00]
	'MS rainbowtrout r1 2ct012'[&!color=#00ff00]
	'MS redsnapper r1 2ct029.2'[&!color=#00ff00]
	'MS redsnapper1 2ct622.1 P'[&!color=#00ff00]
	'MS redsnapper1 2ct638.1 5'[&!color=#00ff00]
	'MS seabass ms2 2ct658.1 5'[&!color=#00ff00]
	'MS seabass ms2 2ct676.2 5'[&!color=#00ff00]
	'MS seabass ms2 2ct687.1 5'[&!color=#00ff00]
	'MS seabass ms2 2ct748.1 P'[&!color=#00ff00]
	'MS seabass ms2 2ct773.1 5'[&!color=#00ff00]
	'MS seabass ms2 2ct784.2 P'[&!color=#00ff00]
	'MS seabass ms2 2ct785.2 5'[&!color=#00ff00]
	'MS seabass ms2 2ct822.2 P'[&!color=#00ff00]
	'MS seabass ms2 2ct825.1 P'[&!color=#00ff00]
	'MS seabass ms2 2ct849.2 5'[&!color=#00ff00]
	'MS seabass ms2 2ct858.1 5'[&!color=#00ff00]
	'MS seabass ms2 2ct890.1 5'[&!color=#00ff00]
	'MS seabass ms2 2ct906.2 3'[&!color=#00ff00]
	'MS seabass ms2 2ct969.2 5'[&!color=#00ff00]
	'MS seabass1 1 2ct155.1 5J'[&!color=#00ff00]
	'MS seabass1 1 2ct206.3 5J'[&!color=#00ff00]
	'MS seabass1 1 2ct208.2 PF'[&!color=#00ff00]
	'MS seabass2 r1 2ct007.1 5'[&!color=#00ff00]
	'MS seabass4 6 2ct142.2 5J'[&!color=#00ff00]
	'NP 150370.1 PF02443.14'
	'NP 573443.1 PF02443.14'
	'YP 003084288.1 5J09 C'
	'YP 007697653.1 PF02443.14'
	'YP 007974238.1 PF02443.14'
	'YP 008828163.1 3JCI A'
	'YP 009001748.1 5J37 A'
	'YP 009001754.1 PF02443.14'
	'YP 009021892.1 PF02443.14'
	'YP 009091697.1 5J09 C'
	'YP 009091699.1 PF02443.14'
	'YP 009121933.1 PF02443.14'
	'YP 009126928.1 5J09 C'
	'YP 009134741.1 PF02443.14'
	'YP 009170675.1 PF02443.14'
	'YP 009259680.1 3JCI A'
	'YP 009351874.1 3JCI A'
	'YP 009423857.1 PF02443.14'
	'YP 009506274.1 3JCI A'
	'YP 009506276.1 PF02443.14'
	'YP 009506282.1 PF02443.14'
	'YP 009506284.1 5J37 A'
	'YP 009551495.1 PF02443.14'
	'YP 009551506.1 5J37 A'
	'YP 610962.1 PF02443.14'
	'YP 764456.1 5J37 A'
	'YP 803548.1 PF02443.14'
	'YP 803551.1 PF02443.14'
	'genbank parvoviridae ABP8'
;
end;
begin trees;
	tree tree_1 = [&R] ('YP 009351874.1 3JCI A':0.825009,(((((((((('AIX11628.1 5J09 C':0.02723,'AIX11627.1 5J37 A':0.120849)[&bootstraps=100.0]:1.24011,'ADI48254.1 PF02443.14':1.143093)[&bootstraps=81.0]:0.341035,(('ARO38299.1 5J37 A':0.950591,'ARO38284.1 PF02443.14':1.042872)[&bootstraps=100.0]:0.886413,('AFH02743.1 5J09 C':0.722216,'YP 009121933.1 PF02443.14':1.449969)[&bootstraps=99.0]:0.593722)[&…
end;
begin figtree;
	set appearance.backgroundColorAttribute="Default";
	set appearance.backgroundColour=#ffffff;
	set appearance.branchColorAttribute="User selection";
	set appearance.branchColorGradient=false;
	set appearance.branchLineWidth=1.0;
	set appearance.branchMinLineWidth=0.0;
	set appearance.branchWidthAttribute="Fixed";
	set appearance.foregroundColour=#000000;
	set appearance.hilightingGradient=false;
	set appearance.selectionColour=#2d3680;
	set branchLabels.colorAttribute="User selection";
	set branchLabels.displayAttribute="bootstraps";
	set branchLabels.fontName="sansserif";
	set branchLabels.fontSize=8;
	set branchLabels.fontStyle=0;
	set branchLabels.isShown=true;
	set branchLabels.significantDigits=4;
	set layout.expansion=0;
	set layout.layoutType="RECTILINEAR";
	set layout.zoom=0;
	set legend.attribute="bootstraps";
	set legend.fontSize=10.0;
	set legend.isShown=false;
	set legend.significantDigits=4;
	set nodeBars.barWidth=4.0;
	set nodeBars.displayAttribute=null;
	set nodeBars.isShown=false;
	set nodeLabels.colorAttribute="User selection";
	set nodeLabels.displayAttribute="Node ages";
	set nodeLabels.fontName="sansserif";
	set nodeLabels.fontSize=8;
	set nodeLabels.fontStyle=0;
	set nodeLabels.isShown=false;
	set nodeLabels.significantDigits=4;
	set nodeShapeExternal.colourAttribute="User selection";
	set nodeShapeExternal.isShown=false;
	set nodeShapeExternal.minSize=10.0;
	set nodeShapeExternal.scaleType=Width;
	set nodeShapeExternal.shapeType=Circle;
	set nodeShapeExternal.size=4.0;
	set nodeShapeExternal.sizeAttribute="Fixed";
	set nodeShapeInternal.colourAttribute="User selection";
	set nodeShapeInternal.isShown=false;
	set nodeShapeInternal.minSize=10.0;
	set nodeShapeInternal.scaleType=Width;
	set nodeShapeInternal.shapeType=Circle;
	set nodeShapeInternal.size=4.0;
	set nodeShapeInternal.sizeAttribute="Fixed";
	set polarLayout.alignTipLabels=false;
	set polarLayout.angularRange=0;
	set polarLayout.rootAngle=0;
	set polarLayout.rootLength=100;
	set polarLayout.showRoot=true;
	set radialLayout.spread=0.0;
	set rectilinearLayout.alignTipLabels=false;
	set rectilinearLayout.curvature=0;
	set rectilinearLayout.rootLength=100;
	set scale.offsetAge=0.0;
	set scale.rootAge=1.0;
	set scale.scaleFactor=1.0;
	set scale.scaleRoot=false;
	set scaleAxis.automaticScale=true;
	set scaleAxis.fontSize=8.0;
	set scaleAxis.isShown=false;
	set scaleAxis.lineWidth=1.0;
	set scaleAxis.majorTicks=1.0;
	set scaleAxis.minorTicks=0.5;
	set scaleAxis.origin=0.0;
	set scaleAxis.reverseAxis=false;
	set scaleAxis.showGrid=true;
	set scaleBar.automaticScale=true;
	set scaleBar.fontSize=10.0;
	set scaleBar.isShown=true;
	set scaleBar.lineWidth=1.0;
	set scaleBar.scaleRange=0.0;
	set tipLabels.colorAttribute="User selection";
	set tipLabels.displayAttribute="Names";
	set tipLabels.fontName="sansserif";
	set tipLabels.fontSize=8;
	set tipLabels.fontStyle=0;
	set tipLabels.isShown=true;
	set tipLabels.significantDigits=4;
	set trees.order=false;
	set trees.orderType="increasing";
	set trees.rooting=false;
	set trees.rootingType="User Selection";
	set trees.transform=false;
	set trees.transformType="cladogram";
end;
