# Supplementary material for: Discovery of several thousand highly diverse circular DNA viruses
Source: eLife. 2020 Feb 4;9:e51971. doi: 10.7554/eLife.51971 (PMC7000223; doi:10.7554/eLife.51971)
Supplement: Figure 2—source data 3. [file elife-51971-fig2-data3.tre]

#NEXUS
begin taxa;
	dimensions ntax=1029;
	taxlabels
	'AAB18170.1 pfam00844'
	'AAC18978.1 pfam00844'
	'AAC27637.1 pfam00844'
	'AAC27638.1 pfam00844'
	'AAC99394.1 pfam00844'
	'AAD17849.1 pfam00844'
	'AAD37323.2 pfam00844'
	'AAD51286.1 pfam00844'
	'AAF06317.1 pfam00844'
	'AAF40114.1 pfam00844'
	'AAK11595.1 pfam00844'
	'AAK50360.1 pfam00844'
	'AAK73464.1 pfam00844'
	'AAL35219.1 pfam00844'
	'AAL82823.1 pfam00844'
	'AAL82859.1 pfam00844'
	'AAL82883.1 pfam00844'
	'AAO34425.1 pfam00844'
	'AAP34724.1 pfam00844'
	'AAT02510.1 pfam00844'
	'AAU43905.1 pfam00844'
	'AAU43907.1 pfam00844'
	'AAV27293.2 pfam00844'
	'AAV69873.1 pfam00844'
	'AAX39359.1 pfam00844'
	'AAX39365.1 pfam00844'
	'ABB76202.1 pfam00844'
	'ABC61474.1 pfam00844'
	'ABC61478.1 pfam00844'
	'ABC61479.1 pfam00844'
	'ABC61483.1 pfam00844'
	'ABC68297.1 pfam00844'
	'ABC71852.1 pfam00844'
	'ABC75107.1 pfam00844'
	'ABD60351.1 pfam00844'
	'ABF60863.2 pfam00844'
	'ABF71075.1 pfam00844'
	'ABI81602.1 pfam00844'
	'ABJ99718.1 pfam00844'
	'ABL73198.1 pfam00844'
	'ABL86144.1 pfam00844'
	'ABM73995.1 pfam00844'
	'ABQ41339.1 pfam00844'
	'ABR22311.1 pfam00844'
	'ABS12050.1 pfam00844'
	'ABS29536.1 pfam00844'
	'ABY71021.1 pfam00844'
	'ABY71549.1 pfam00844'
	'ABY73747.1 pfam00844'
	'ABY89335.1 pfam00844'
	'ABZ03978.1 pfam00844'
	'ACA96945.1 pfam00844'
	'ACB30397.1 pfam00844'
	'ACC66069.1 pfam00844'
	'ACC78758.1 pfam00844'
	'ACC95447.1 pfam00844'
	'ACF36967.1 pfam00844'
	'ACF40553.1 pfam00844'
	'ACF40557.1 pfam00844'
	'ACF42184.1 pfam00844'
	'ACH48057.1 pfam00844'
	'ACH81022.1 pfam00844'
	'ACH88349.1 pfam00844'
	'ACI06034.1 pfam00844'
	'ACJ02755.1 pfam00844'
	'ACJ85095.1 pfam00844'
	'ACM44488.1 pfam00844'
	'ACM68957.1 pfam00844'
	'ACN56754.1 pfam00844'
	'ACO07284.1 pfam00844'
	'ACP41020.1 pfam00844'
	'ACQ65852.1 pfam00844'
	'ACS35843.1 pfam00844'
	'ACS92542.1 pfam00844'
	'ACT64890.1 pfam00844'
	'ACT82457.1 pfam00844'
	'ACY79441.1 pfam00844'
	'ACZ71236.1 pfam00844'
	'ADA67955.1 pfam00844'
	'ADA67964.1 pfam00844'
	'ADA67970.1 pfam00844'
	'ADA67982.1 pfam00844'
	'ADD92126.1 pfam00844'
	'ADF36525.1 pfam00844'
	'ADF36526.1 pfam00844'
	'ADF36527.1 pfam00844'
	'ADF42582.1 pfam00844'
	'ADF49628.1 pfam00844'
	'ADG27868.1 pfam00844'
	'ADG63230.1 pfam00844'
	'ADK55011.2 pfam00844'
	'ADK73355.1 pfam00844'
	'ADK73489.3 pfam00844'
	'ADO40532.1 pfam00844'
	'ADO40698.1 pfam00844'
	'ADO40704.1 pfam00844'
	'ADO40816.1 pfam00844'
	'ADO40830.1 pfam00844'
	'ADO41111.1 pfam00844'
	'ADO95317.1 pfam00844'
	'ADP20462.1 pfam00844'
	'ADP20463.1 pfam00844'
	'ADP20464.1 pfam00844'
	'ADP68721.1 pfam00844'
	'ADQ13194.1 pfam00844'
	'ADQ52688.1 pfam00844'
	'ADR72665.1 pfam00844'
	'ADW83735.1 pfam00844'
	'ADY17030.1 pfam00844'
	'ADZ96592.1 pfam00844'
	'AEE99003.1 pfam00844'
	'AEG90083.1 pfam00844'
	'AEG90443.1 pfam00844'
	'AEG90521.1 pfam00844'
	'AEH04542.1 pfam00844'
	'AEH04543.1 pfam00844'
	'AEI17657.1 pfam00844'
	'AEI52851.1 pfam00844'
	'AEI72604.1 pfam00844'
	'AEK78890.1 pfam00844'
	'AEN03362.1 pfam00844'
	'AER09285.1 pfam00844'
	'AER09305.1 pfam00844'
	'AEU12650.1 pfam00844'
	'AEV54099.1 pfam00844'
	'AEV76914.1 pfam00844'
	'AEW69667.1 pfam00844'
	'AEX37987.1 pfam00844'
	'AEY77482.1 pfam00844'
	'AEY78469.1 pfam00844'
	'AEY94446.1 pfam00844'
	'AEZ00922.1 pfam00844'
	'AEZ67810.1 pfam00844'
	'AEZ67814.1 pfam00844'
	'AFA26478.1 pfam00844'
	'AFB17984.1 pfam00844'
	'AFB69493.1 pfam00844'
	'AFB81500.1 pfam00844'
	'AFB81506.1 pfam00844'
	'AFB81512.1 pfam00844'
	'AFB81530.1 pfam00844'
	'AFB83424.1 pfam00844'
	'AFB83430.1 pfam00844'
	'AFB83436.1 pfam00844'
	'AFB83442.1 pfam00844'
	'AFB83448.1 pfam00844'
	'AFB83461.1 pfam00844'
	'AFB83473.1 pfam00844'
	'AFB83507.1 pfam00844'
	'AFB83523.1 pfam00844'
	'AFB83528.1 pfam00844'
	'AFC37743.1 pfam00844'
	'AFD54481.1 pfam00844'
	'AFD62976.1 pfam00844'
	'AFF58887.1 pfam00844'
	'AFH68194.1 pfam00844'
	'AFJ39283.1 pfam00844'
	'AFN41346.1 pfam00844'
	'AFN44218.1 pfam00844'
	'AFN44219.1 pfam00844'
	'AFN44220.1 pfam00844'
	'AFN44224.1 pfam00844'
	'AFN44225.1 pfam00844'
	'AFN86070.1 pfam00844'
	'AFO64645.1 pfam00844'
	'AFQ00068.1 pfam00844'
	'AFS32144.1 pfam00844'
	'AFV31439.1 pfam00844'
	'AFW99557.1 pfam00844'
	'AFY09890.1 pfam00844'
	'AFZ76984.1 pfam00844'
	'AGA16409.1 pfam00844'
	'AGD79152.1 pfam00844'
	'AGD79167.1 pfam00844'
	'AGD79177.1 pfam00844'
	'AGD98622.1 pfam00844'
	'AGD98904.1 pfam00844'
	'AGF33906.1 pfam00844'
	'AGH07937.1 pfam00844'
	'AGH07938.1 pfam00844'
	'AGH27756.1 pfam00844'
	'AGH27762.1 pfam00844'
	'AGH27768.1 pfam00844'
	'AGH27774.1 pfam00844'
	'AGH27780.1 pfam00844'
	'AGH27786.1 pfam00844'
	'AGH27792.1 pfam00844'
	'AGH27798.1 pfam00844'
	'AGH27804.1 pfam00844'
	'AGH27810.1 pfam00844'
	'AGH27822.1 pfam00844'
	'AGH27828.1 pfam00844'
	'AGH27834.1 pfam00844'
	'AGH27846.1 pfam00844'
	'AGH27852.1 pfam00844'
	'AGH88633.1 pfam00844'
	'AGI62899.1 pfam00844'
	'AGI62906.1 pfam00844'
	'AGL76444.1 pfam00844'
	'AGO02085.1 pfam00844'
	'AGO45834.1 pfam00844'
	'AGR84104.1 pfam00844'
	'AGR92026.1 pfam00844'
	'AGS56744.1 pfam00844'
	'AGS77261.1 pfam00844'
	'AGT45327.1 pfam00844'
	'AGT45335.1 pfam00844'
	'AGT45379.1 pfam00844'
	'AGT45431.1 pfam00844'
	'AGT45471.1 pfam00844'
	'AGW16204.1 pfam00844'
	'AGW45422.1 pfam00844'
	'AGW45427.1 pfam00844'
	'AGW45428.1 pfam00844'
	'AGZ91414.1 pfam00844'
	'AHA04046.1 pfam00844'
	'AHA82216.1 pfam00844'
	'AHA82235.1 pfam00844'
	'AHA82242.1 pfam00844'
	'AHA82267.1 pfam00844'
	'AHC03611.1 pfam00844'
	'AHF50407.1 pfam00844'
	'AHF52851.1 pfam00844'
	'AHL29262.1 pfam00844'
	'AHL43791.1 pfam00844'
	'AHL43810.1 pfam00844'
	'AHM88368.1 pfam00844'
	'AHX71630.1 pfam00844'
	'AIA60969.1 pfam00844'
	'AIB81553.1 pfam00844'
	'AIJ50588.1 pfam00844'
	'AIL25840.1 pfam00844'
	'AIN41795.1 pfam00844'
	'AIO11243.1 pfam00844'
	'AIP87935.1 pfam00844'
	'AIP88011.1 pfam00844'
	'AIP88243.1 pfam00844'
	'AIP88639.1 pfam00844'
	'AIP89503.1 pfam00844'
	'AIP89515.1 pfam00844'
	'AIP89656.1 pfam00844'
	'AIP89895.1 pfam00844'
	'AIT39770.1 pfam00844'
	'AIT99285.1 pfam00844'
	'AIW42884.1 pfam00844'
	'AIW81434.1 pfam00844'
	'AIW81444.1 pfam00844'
	'AIW81454.1 pfam00844'
	'AIY31169.1 pfam00844'
	'AIY31175.1 pfam00844'
	'AIY31181.1 pfam00844'
	'AIY31190.1 pfam00844'
	'AIY31196.1 pfam00844'
	'AIY31202.1 pfam00844'
	'AIY31208.1 pfam00844'
	'AIY31214.1 pfam00844'
	'AIY31217.1 pfam00844'
	'AIY31223.1 pfam00844'
	'AIY31240.1 cd00259'
	'AIY31262.1 cd00259'
	'AIY32793.1 pfam00844'
	'AIY33109.1 pfam00844'
	'AIY33237.1 pfam00844'
	'AIY33269.1 pfam00844'
	'AIY33285.1 pfam00844'
	'AIY33407.1 pfam00844'
	'AIY33519.1 pfam00844'
	'AJD79581.1 pfam00844'
	'AJD79582.1 pfam00844'
	'AJD79583.1 pfam00844'
	'AJD79584.1 pfam00844'
	'AJE27218.1 pfam00844'
	'AJM13603.1 pfam00844'
	'AJP36429.1 5MJF Ba'
	'AJP36434.1 PF03898.12'
	'AJW80889.1 pfam00844'
	'AKB95547.1 pfam00844'
	'AKH41044.1 pfam00844'
	'AKH66015.1 pfam00844'
	'AKJ84068.1 pfam00844'
	'AKJ84069.1 pfam00844'
	'AKP17227.1 pfam00844'
	'AKQ21200.1 pfam00844'
	'AKR53305.1 5MJF V'
	'AKV62284.1 PF03898.12'
	'ALB25915.1 pfam00844'
	'ALB25921.1 pfam00844'
	'ALB25939.1 pfam00844'
	'ALB26059.1 pfam00844'
	'ALB26146.1 pfam00844'
	'ALB26149.1 pfam00844'
	'ALB26179.1 pfam00844'
	'ALB26288.1 pfam00844'
	'ALB26294.1 pfam00844'
	'ALB26309.1 pfam00844'
	'ALB26318.1 pfam00844'
	'ALB26324.1 pfam00844'
	'ALB26360.1 pfam00844'
	'ALB26366.1 pfam00844'
	'ALB26372.1 pfam00844'
	'ALE29690.1 cd00259'
	'ALE29846.1 PF03898.12'
	'ALF62723.1 pfam00844'
	'ALG02686.1 pfam00844'
	'ALK03407.1 pfam00844'
	'ALR86736.1 pfam00844'
	'ALR86778.1 pfam00844'
	'ALR86796.1 pfam00844'
	'ALR86862.1 pfam00844'
	'ALR86880.1 pfam00844'
	'ALS35301.1 pfam00844'
	'ALS88171.1 pfam00844'
	'ALS88178.1 pfam00844'
	'ALU63296.1 pfam00844'
	'AMB51327.1 pfam00844'
	'AMD16490.1 pfam00844'
	'AMD16539.1 pfam00844'
	'AMQ81289.1 pfam00844'
	'AMT74404.1 pfam00844'
	'AMT75176.1 pfam00844'
	'ANA76275.1 pfam00844'
	'ANG57842.1 pfam00844'
	'ANN23966.1 pfam00844'
	'ANO40196.1 pfam00844'
	'ANO40461.1 pfam00844'
	'ANT48176.1 pfam00844'
	'ANT48230.1 pfam00844'
	'ANV28022.1 pfam00844'
	'AOA49806.1 pfam00844'
	'AOA49814.1 pfam00844'
	'AOF45896.1 pfam00844'
	'AOG17649.1 pfam00844'
	'AOT83424.1 pfam00844'
	'AOT83574.1 pfam00844'
	'AOW44189.1 pfam00844'
	'AOZ21330.1 pfam00844'
	'APD30690.1 pfam00844'
	'APM86253.1 pfam00844'
	'APT69204.1 pfam00844'
	'APX41125.1 pfam00844'
	'APX55108.1 pfam00844'
	'APZ85945.1 pfam00844'
	'APZ86091.1 pfam00844'
	'AQE67275.1 pfam00844'
	'AQT01365.1 pfam00844'
	'AQT01476.1 pfam00844'
	'AQX36225.1 pfam00844'
	'AQX77519.1 pfam00844'
	'ARD24667.1 pfam00844'
	'ARQ32249.2 pfam00844'
	'ARR96924.1 pfam00844'
	'ART65365.1 pfam00844'
	'ART89119.1 pfam00844'
	'ARV86349.1 pfam00844'
	'ASR74793.1 pfam00844'
	'AST09897.1 pfam00844'
	'AST47742.1 pfam00844'
	'AST99402.1 pfam00844'
	'ATL75707.1 pfam00844'
	'ATL75708.1 pfam00844'
	'ATL75710.1 pfam00844'
	'ATO87999.1 pfam00844'
	'ATO88007.1 pfam00844'
	'AUI41097.1 pfam00844'
	'AUW34330.1 PF03898.12'
	'AVE14352.1 pfam00844'
	'AVE14363.1 pfam00844'
	'AVG19175.1 pfam00844'
	'AVG22719.1 pfam00844'
	'AVJ51937.1 pfam00844'
	'AVM40967.1 pfam00844'
	'AVP27508.1 pfam00844'
	'AVR54787.1 pfam00844'
	'AVX29445.1 cd00259'
	'AVX29451.1 cd00259'
	'AVZ46820.1 pfam00844'
	'AWB51907.1 pfam00844'
	'AWD31197.1 pfam00844'
	'AWD31389.1 pfam00844'
	'AWD84446.1 pfam00844'
	'AWF94031.1 pfam00844'
	'AWK29918.1 pfam00844'
	'AWM62139.1 pfam00844'
	'AWM62141.1 pfam00844'
	'AWM62142.1 pfam00844'
	'AWM62145.1 pfam00844'
	'AWM62147.1 pfam00844'
	'AWM62148.1 pfam00844'
	'AWM62156.1 pfam00844'
	'AWM62157.1 pfam00844'
	'AWW25147.1 pfam00844'
	'BAC75785.1 pfam00844'
	'BAD18938.1 pfam00844'
	'BAD90872.1 pfam00844'
	'BAF49370.1 pfam00844'
	'BAP27993.1 pfam00844'
	'BAQ25611.1 pfam00844'
	'BAR73121.1 pfam00844'
	'BAR73127.1 pfam00844'
	'BAU36987.1 pfam00844'
	'BAU36993.1 pfam00844'
	'BAU37002.1 pfam00844'
	'BAW32351.1 pfam00844'
	'CAA48395.1 pfam00844'
	'CAA55553.1 pfam00844'
	'CAA60391.1 pfam00844'
	'CAA69261.1 pfam00844'
	'CAC69847.1 pfam00844'
	'CAD42827.1 pfam00844'
	'CAD43029.1 pfam00844'
	'CAD79312.1 pfam00844'
	'CAD90075.1 pfam00844'
	'CAE12051.1 pfam00844'
	'CAH17659.1 pfam00844'
	'CAH17788.1 pfam00844'
	'CAH18508.1 pfam00844'
	'CAH57029.1 pfam00844'
	'CAH57031.1 pfam00844'
	'CAH69602.2 pfam00844'
	'CAI64372.1 pfam00844'
	'CAJ09957.1 pfam00844'
	'CAJ19548.1 pfam00844'
	'CAJ77951.1 pfam00844'
	'CAJ78317.1 pfam00844'
	'CAM84634.1 pfam00844'
	'CAQ63428.1 pfam00844'
	'CAR47805.1 pfam00844'
	'CAR64998.2 pfam00844'
	'CAR65017.1 pfam00844'
	'CAR65021.1 pfam00844'
	'CAR65229.1 pfam00844'
	'CAS97472.1 pfam00844'
	'CAX51843.1 pfam00844'
	'CAX53742.1 pfam00844'
	'CBJ17673.1 pfam00844'
	'CCE21603.1 pfam00844'
	'CCF77725.1 pfam00844'
	'CCH63256.1 pfam00844'
	'CCH63321.1 pfam00844'
	'CCJ67959.1 pfam00844'
	'CCJ67981.1 pfam00844'
	'CCJ67982.1 pfam00844'
	'CCJ67983.1 pfam00844'
	'CCJ67984.1 pfam00844'
	'CCJ68004.1 pfam00844'
	'CCJ68067.1 pfam00844'
	'CCJ68072.1 pfam00844'
	'CCJ68076.1 pfam00844'
	'CCQ77474.1 pfam00844'
	'CCV01315.1 pfam00844'
	'CCW43189.1 pfam00844'
	'CDG49315.1 pfam00844'
	'CDK13234.2 pfam00844'
	'CDN67523.1 pfam00844'
	'CDN72749.1 pfam00844'
	'CDW92212.1 pfam00844'
	'CUH74558.1 pfam00844'
	'CUH74563.1 pfam00844'
	'CUH74568.1 pfam00844'
	'MS 16minnow 6 2ct1037.3 c'[&!color=#00ff00]
	'MS 16minnow 6 2ct1037.4 5'[&!color=#00ff00]
	'MS 16minnow 6 2ct1059.2 P'[&!color=#00ff00]
	'MS 16minnow 6 2ct1122.4 c'[&!color=#00ff00]
	'MS 16minnow 6 2ct1194.1 4'[&!color=#00ff00]
	'MS 16minnow 6 2ct1234.1 4'[&!color=#00ff00]
	'MS 16minnow 6 2ct1362.2 c'[&!color=#00ff00]
	'MS 16minnow 6 2ct1364.1 P'[&!color=#00ff00]
	'MS 16minnow 6 2ct1371.2 P'[&!color=#00ff00]
	'MS 16minnow 6 2ct1377.2 P'[&!color=#00ff00]
	'MS 16minnow 6 2ct1429.2 c'[&!color=#00ff00]
	'MS 16minnow 6 2ct1466.1 c'[&!color=#00ff00]
	'MS 16minnow 6 2ct1485.2 4'[&!color=#00ff00]
	'MS 16minnow 6 2ct1744.1 c'[&!color=#00ff00]
	'MS 16minnow 6 2ct1753.1 c'[&!color=#00ff00]
	'MS 16minnow 6 2ct1764.1 c'[&!color=#00ff00]
	'MS 16minnow 6 2ct1799.1 P'[&!color=#00ff00]
	'MS 16minnow 6 2ct933.2 cd'[&!color=#00ff00]
	'MS 18minnow1 2ct1355.1 cd'[&!color=#00ff00]
	'MS 18minnow1 2ct2059.2 cd'[&!color=#00ff00]
	'MS 18minnow1 2ct2133.2 PF'[&!color=#00ff00]
	'MS 18minnow1 2ct2163.1 cd'[&!color=#00ff00]
	'MS 18minnow1 2ct2199.2 4B'[&!color=#00ff00]
	'MS 18minnow1 2ct2233.2 cd'[&!color=#00ff00]
	'MS 18minnow1 2ct2272.1 PF'[&!color=#00ff00]
	'MS 18minnow1 2ct2275.2 cd'[&!color=#00ff00]
	'MS 18minnow1 2ct2368.2 PF'[&!color=#00ff00]
	'MS 18minnow1 2ct2754.1 4B'[&!color=#00ff00]
	'MS 18minnow1 2ct2764.1 PF'[&!color=#00ff00]
	'MS abalone 6 2ct100.2 cd0'[&!color=#00ff00]
	'MS abalone 6 2ct119.1 cd0'[&!color=#00ff00]
	'MS abalone 6 2ct124.1 cd0'[&!color=#00ff00]
	'MS abalone 6 2ct126.1 4V4'[&!color=#00ff00]
	'MS abalone 6 2ct127.1 cd0'[&!color=#00ff00]
	'MS abalone 6 2ct129.1 cd0'[&!color=#00ff00]
	'MS abalone 6 2ct140.1 cd0'[&!color=#00ff00]
	'MS abalone 6 2ct142.2 PF0'[&!color=#00ff00]
	'MS abalone 6 2ct147.1 cd0'[&!color=#00ff00]
	'MS abalone 6 2ct148.2 cd0'[&!color=#00ff00]
	'MS abalone 6 2ct153.2 4V4'[&!color=#00ff00]
	'MS abalone 6 2ct157.1 4V4'[&!color=#00ff00]
	'MS abalone 6 2ct159.1 PF0'[&!color=#00ff00]
	'MS abalone 6 2ct160.1 cd0'[&!color=#00ff00]
	'MS abalone 6 2ct166.1 cd0'[&!color=#00ff00]
	'MS abalone 6 2ct172.1 PF0'[&!color=#00ff00]
	'MS abalone 6 2ct186.2 PF0'[&!color=#00ff00]
	'MS abalone 6 2ct188.1 cd0'[&!color=#00ff00]
	'MS abalone 6 2ct194.3 4V4'[&!color=#00ff00]
	'MS abalone 6 2ct201.2 4V4'[&!color=#00ff00]
	'MS abalone 6 2ct206.1 cd0'[&!color=#00ff00]
	'MS abalone 6 2ct215.2 cd0'[&!color=#00ff00]
	'MS abalone 6 2ct217.1 PF0'[&!color=#00ff00]
	'MS abalone 6 2ct219.2 cd0'[&!color=#00ff00]
	'MS abalone 6 2ct237.1 cd0'[&!color=#00ff00]
	'MS abalone 6 2ct240.1 cd0'[&!color=#00ff00]
	'MS abalone 6 2ct248.2 PF0'[&!color=#00ff00]
	'MS abalone 6 2ct253.2 cd0'[&!color=#00ff00]
	'MS abalone 6 2ct278.3 4BC'[&!color=#00ff00]
	'MS abalone 6 2ct301.1 5MJ'[&!color=#00ff00]
	'MS abalone 6 2ct308.1 PF0'[&!color=#00ff00]
	'MS abalone 6 2ct310.1 cd0'[&!color=#00ff00]
	'MS abalone 6 2ct311.2 4BC'[&!color=#00ff00]
	'MS abalone 6 2ct321.1 4BC'[&!color=#00ff00]
	'MS abalone 6 2ct44.3 4BCU'[&!color=#00ff00]
	'MS apo2 7 2ct56.2 PF03898'[&!color=#00ff00]
	'MS apo2 7 2ct73.1 PF03898'[&!color=#00ff00]
	'MS apo2 7 2ct79.1 cd00259'[&!color=#00ff00]
	'MS apo2 7 2ct93.1 PF03898'[&!color=#00ff00]
	'MS beef bd3 1 2ct120.1 cd'[&!color=#00ff00]
	'MS beef bd3 1 2ct129.2 cd'[&!color=#00ff00]
	'MS beef bd3 r1 2ct006.1 c'[&!color=#00ff00]
	'MS bison1 1 2ct52.2 PF038'[&!color=#00ff00]
	'MS crab r1 2ct002.1 5MJF '[&!color=#00ff00]
	'MS crab r1 2ct007.1 cd002'[&!color=#00ff00]
	'MS crab r1 2ct009.1 cd002'[&!color=#00ff00]
	'MS crab r1 2ct010.1 cd002'[&!color=#00ff00]
	'MS crab r1 2ct011.1 PF038'[&!color=#00ff00]
	'MS crab r1 2ct012.2 PF038'[&!color=#00ff00]
	'MS crab r1 2ct013.2 PF038'[&!color=#00ff00]
	'MS crucian1 2ct34.1 4V4M '[&!color=#00ff00]
	'MS crucian1 2ct50.1 cd002'[&!color=#00ff00]
	'MS crucian1 2ct59.1 4V4M '[&!color=#00ff00]
	'MS crucian1 2ct64.1 cd002'[&!color=#00ff00]
	'MS crucian1 2ct65.1 cd002'[&!color=#00ff00]
	'MS crucian1 2ct82.2 cd002'[&!color=#00ff00]
	'MS haddock 1 2ct111.3 PF0'[&!color=#00ff00]
	'MS haddock 1 2ct116.2 cd0'[&!color=#00ff00]
	'MS haddock 1 2ct124.2 PF0'[&!color=#00ff00]
	'MS haddock 1 2ct150.2 4BC'[&!color=#00ff00]
	'MS haddock 1 2ct152.2 PF0'[&!color=#00ff00]
	'MS haddock 1 2ct185.4 cd0'[&!color=#00ff00]
	'MS haddock 1 2ct209.2 cd0'[&!color=#00ff00]
	'MS haddock 1 2ct237.1 PF0'[&!color=#00ff00]
	'MS haddock 1 2ct245.1 cd0'[&!color=#00ff00]
	'MS haddock 1 2ct248.1 cd0'[&!color=#00ff00]
	'MS haddock 1 2ct256.1 cd0'[&!color=#00ff00]
	'MS haddock 1 2ct257.1 PF0'[&!color=#00ff00]
	'MS haddock 1 2ct259.1 4BC'[&!color=#00ff00]
	'MS haddock 1 2ct261.1 PF0'[&!color=#00ff00]
	'MS haddock 1 2ct278.1 4BC'[&!color=#00ff00]
	'MS haddock 1 2ct28.2 cd00'[&!color=#00ff00]
	'MS haddock 1 2ct281.2 PF0'[&!color=#00ff00]
	'MS haddock 1 2ct285.1 4BC'[&!color=#00ff00]
	'MS haddock 1 2ct286.1 cd0'[&!color=#00ff00]
	'MS haddock 1 2ct312.3 cd0'[&!color=#00ff00]
	'MS haddock 1 2ct316.1 4V4'[&!color=#00ff00]
	'MS haddock 1 2ct324.2 4BC'[&!color=#00ff00]
	'MS haddock 1 2ct331.2 PF0'[&!color=#00ff00]
	'MS haddock 1 2ct345.2 PF0'[&!color=#00ff00]
	'MS haddock 1 2ct353.1 PF0'[&!color=#00ff00]
	'MS haddock 1 2ct418.2 4BC'[&!color=#00ff00]
	'MS haddock 1 2ct451.1 cd0'[&!color=#00ff00]
	'MS pompano r1 2ct000.3 PF'[&!color=#00ff00]
	'MS raccoonskin1 2ct40.1 P'[&!color=#00ff00]
	'MS raccoonskin1 2ct42.2 c'[&!color=#00ff00]
	'MS raccoonskin1 2ct61.2 4'[&!color=#00ff00]
	'MS raccoonskn r1 2ct002.1'[&!color=#00ff00]
	'MS raccoonskn r1 2ct004.1'[&!color=#00ff00]
	'MS raccoonskn r1 2ct005.1'[&!color=#00ff00]
	'MS raccoonskn r1 2ct006.1'[&!color=#00ff00]
	'MS rainbowtrout r1 2ct016'[&!color=#00ff00]
	'MS rainbowtrout1 2ct101.2'[&!color=#00ff00]
	'MS rainbowtrout1 2ct112.1'[&!color=#00ff00]
	'MS rainbowtrout1 2ct134.2'[&!color=#00ff00]
	'MS rainbowtrout1 2ct15.3 '[&!color=#00ff00]
	'MS rainbowtrout1 2ct150.2'[&!color=#00ff00]
	'MS rainbowtrout1 2ct46.3 '[&!color=#00ff00]
	'MS rainbowtrout1 2ct70.1 '[&!color=#00ff00]
	'MS redsnapper r1 2ct026.1'[&!color=#00ff00]
	'MS redsnapper r1 2ct037.1'[&!color=#00ff00]
	'MS redsnapper r1 2ct038.1'[&!color=#00ff00]
	'MS redsnapper r1 2ct055.2'[&!color=#00ff00]
	'MS redsnapper1 2ct10.6 cd'[&!color=#00ff00]
	'MS redsnapper1 2ct19.1 cd'[&!color=#00ff00]
	'MS redsnapper1 2ct213.1 c'[&!color=#00ff00]
	'MS redsnapper1 2ct242.4 c'[&!color=#00ff00]
	'MS redsnapper1 2ct26.1 cd'[&!color=#00ff00]
	'MS redsnapper1 2ct26.3 PF'[&!color=#00ff00]
	'MS redsnapper1 2ct29.2 5M'[&!color=#00ff00]
	'MS redsnapper1 2ct296.4 c'[&!color=#00ff00]
	'MS redsnapper1 2ct34.4 PF'[&!color=#00ff00]
	'MS redsnapper1 2ct34.5 cd'[&!color=#00ff00]
	'MS redsnapper1 2ct442.1 c'[&!color=#00ff00]
	'MS redsnapper1 2ct518.2 4'[&!color=#00ff00]
	'MS redsnapper1 2ct521.1 4'[&!color=#00ff00]
	'MS redsnapper1 2ct527.2 c'[&!color=#00ff00]
	'MS redsnapper1 2ct529.1 c'[&!color=#00ff00]
	'MS redsnapper1 2ct537.1 4'[&!color=#00ff00]
	'MS redsnapper1 2ct547.1 c'[&!color=#00ff00]
	'MS redsnapper1 2ct548.2 P'[&!color=#00ff00]
	'MS redsnapper1 2ct551.1 c'[&!color=#00ff00]
	'MS redsnapper1 2ct553.1 P'[&!color=#00ff00]
	'MS redsnapper1 2ct555.1 c'[&!color=#00ff00]
	'MS redsnapper1 2ct560.1 c'[&!color=#00ff00]
	'MS redsnapper1 2ct564.2 c'[&!color=#00ff00]
	'MS redsnapper1 2ct567.1 c'[&!color=#00ff00]
	'MS redsnapper1 2ct572.1 c'[&!color=#00ff00]
	'MS redsnapper1 2ct577.2 P'[&!color=#00ff00]
	'MS redsnapper1 2ct578.2 4'[&!color=#00ff00]
	'MS redsnapper1 2ct582.1 c'[&!color=#00ff00]
	'MS redsnapper1 2ct587.2 4'[&!color=#00ff00]
	'MS redsnapper1 2ct590.1 c'[&!color=#00ff00]
	'MS redsnapper1 2ct593.1 c'[&!color=#00ff00]
	'MS redsnapper1 2ct616.1 c'[&!color=#00ff00]
	'MS redsnapper1 2ct625.1 c'[&!color=#00ff00]
	'MS redsnapper1 2ct655.2 P'[&!color=#00ff00]
	'MS redsnapper1 2ct666.2 P'[&!color=#00ff00]
	'MS redsnapper1 2ct675.1 c'[&!color=#00ff00]
	'MS redsnapper1 2ct676.2 P'[&!color=#00ff00]
	'MS redsnapper1 2ct681.2 c'[&!color=#00ff00]
	'MS redsnapper1 2ct741.1 c'[&!color=#00ff00]
	'MS redsnapper1 2ct80.1 cd'[&!color=#00ff00]
	'MS redsnapper1 2ct803.2 c'[&!color=#00ff00]
	'MS redsnapper1 2ct83.2 5M'[&!color=#00ff00]
	'MS seabass ms2 2ct1003.1 '[&!color=#00ff00]
	'MS seabass ms2 2ct1041.2 '[&!color=#00ff00]
	'MS seabass ms2 2ct365.3 5'[&!color=#00ff00]
	'MS seabass ms2 2ct591.2 c'[&!color=#00ff00]
	'MS seabass ms2 2ct593.1 P'[&!color=#00ff00]
	'MS seabass ms2 2ct597.1 c'[&!color=#00ff00]
	'MS seabass ms2 2ct629.2 c'[&!color=#00ff00]
	'MS seabass ms2 2ct653.2 c'[&!color=#00ff00]
	'MS seabass ms2 2ct655.2 c'[&!color=#00ff00]
	'MS seabass ms2 2ct663.1 c'[&!color=#00ff00]
	'MS seabass ms2 2ct679.2 c'[&!color=#00ff00]
	'MS seabass ms2 2ct691.1 P'[&!color=#00ff00]
	'MS seabass ms2 2ct692.1 c'[&!color=#00ff00]
	'MS seabass ms2 2ct696.3 c'[&!color=#00ff00]
	'MS seabass ms2 2ct710.2 P'[&!color=#00ff00]
	'MS seabass ms2 2ct716.1 P'[&!color=#00ff00]
	'MS seabass ms2 2ct719.2 P'[&!color=#00ff00]
	'MS seabass ms2 2ct728.1 c'[&!color=#00ff00]
	'MS seabass ms2 2ct750.1 4'[&!color=#00ff00]
	'MS seabass ms2 2ct754.2 4'[&!color=#00ff00]
	'MS seabass ms2 2ct756.1 4'[&!color=#00ff00]
	'MS seabass ms2 2ct758.1 4'[&!color=#00ff00]
	'MS seabass ms2 2ct770.2 c'[&!color=#00ff00]
	'MS seabass ms2 2ct805.3 P'[&!color=#00ff00]
	'MS seabass ms2 2ct807.1 c'[&!color=#00ff00]
	'MS seabass ms2 2ct837.2 P'[&!color=#00ff00]
	'MS seabass ms2 2ct877.2 c'[&!color=#00ff00]
	'MS seabass ms2 2ct880.1 c'[&!color=#00ff00]
	'MS seabass ms2 2ct913.2 P'[&!color=#00ff00]
	'MS seabass ms2 2ct919.1 P'[&!color=#00ff00]
	'MS seabass1 1 2ct147.2 cd'[&!color=#00ff00]
	'MS seabass1 1 2ct164.1 PF'[&!color=#00ff00]
	'MS seabass1 1 2ct171.1 cd'[&!color=#00ff00]
	'MS seabass1 1 2ct190.1 cd'[&!color=#00ff00]
	'MS seabass1 1 2ct194.1 4V'[&!color=#00ff00]
	'MS seabass1 1 2ct212.1 PF'[&!color=#00ff00]
	'MS seabass1 1 2ct218.1 PF'[&!color=#00ff00]
	'MS seabass1 1 2ct230.2 PF'[&!color=#00ff00]
	'MS seabass1 1 2ct232.1 cd'[&!color=#00ff00]
	'MS seabass1 1 2ct236.2 4B'[&!color=#00ff00]
	'MS seabass1 1 2ct276.1 cd'[&!color=#00ff00]
	'MS seabass1 1 2ct299.1 5M'[&!color=#00ff00]
	'MS seabass1 r1 2ct008.1 c'[&!color=#00ff00]
	'MS seabass2 1 2ct42.2 PF0'[&!color=#00ff00]
	'MS seabass2 1 2ct51.1 PF0'[&!color=#00ff00]
	'MS seabass2 1 2ct77.1 cd0'[&!color=#00ff00]
	'MS seabass3 1 2ct18.1 4BC'[&!color=#00ff00]
	'MS seabass3 1 2ct22.1 cd0'[&!color=#00ff00]
	'MS turkey 2ct70.1 cd00259'[&!color=#00ff00]
	'NP 040320.1 pfam00844'
	'NP 040952.1 pfam00844'
	'NP 040963.1 pfam00844'
	'NP 042589.1 pfam00844'
	'NP 044922.1 pfam00844'
	'NP 045943.1 pfam00844'
	'NP 047215.2 pfam00844'
	'NP 047224.1 pfam00844'
	'NP 047230.1 pfam00844'
	'NP 047238.1 pfam00844'
	'NP 047244.1 pfam00844'
	'NP 047250.1 pfam00844'
	'NP 050014.1 pfam00844'
	'NP 066183.1 pfam00844'
	'NP 066373.1 pfam00844'
	'NP 148952.1 pfam00844'
	'NP 148985.1 pfam00844'
	'NP 569145.1 pfam00844'
	'NP 612220.1 pfam00844'
	'NP 612594.1 pfam00844'
	'NP 619679.1 pfam00844'
	'NP 620294.1 pfam00844'
	'NP 620491.1 pfam00844'
	'NP 620662.1 pfam00844'
	'NP 620725.1 pfam00844'
	'NP 620732.1 pfam00844'
	'NP 620885.1 pfam00844'
	'NP 620889.1 pfam00844'
	'NP 632015.1 pfam00844'
	'NP 660082.1 pfam00844'
	'NP 660165.1 pfam00844'
	'NP 665671.1 pfam00844'
	'NP 671465.1 pfam00844'
	'NP 795337.1 pfam00844'
	'NP 803533.1 pfam00844'
	'NP 803540.1 pfam00844'
	'NP 808761.1 pfam00844'
	'NP 808780.1 pfam00844'
	'NP 808829.1 pfam00844'
	'NP 808891.1 pfam00844'
	'NP 808894.1 pfam00844'
	'NP 817116.1 pfam00844'
	'NP 840051.1 pfam00844'
	'NP 871717.1 pfam00844'
	'NP 955738.1 pfam00844'
	'NP 995303.1 pfam00844'
	'P03561.1 pfam00844'
	'P06946.1 pfam00844'
	'P14984.2 pfam00844'
	'P27256.1 pfam00844'
	'P38608.1 pfam00844'
	'Q91MF9.1 pfam00844'
	'Q91MG3.1 pfam00844'
	'Q9YPS5.1 pfam00844'
	'YP 001004141.1 pfam00844'
	'YP 001040009.1 pfam00844'
	'YP 001040015.1 pfam00844'
	'YP 001086459.1 pfam00844'
	'YP 001144445.1 pfam00844'
	'YP 001210300.1 pfam00844'
	'YP 001285755.1 pfam00844'
	'YP 001285761.1 pfam00844'
	'YP 001294914.1 pfam00844'
	'YP 001333677.1 pfam00844'
	'YP 001655005.1 pfam00844'
	'YP 001661458.1 pfam00844'
	'YP 001686793.1 pfam00844'
	'YP 001715619.1 pfam00844'
	'YP 001718625.1 pfam00844'
	'YP 001876449.1 pfam00844'
	'YP 001911129.1 pfam00844'
	'YP 001936686.1 pfam00844'
	'YP 001941154.1 pfam00844'
	'YP 001941161.1 pfam00844'
	'YP 001960945.1 pfam00844'
	'YP 001960952.1 pfam00844'
	'YP 001960959.1 pfam00844'
	'YP 001960969.1 pfam00844'
	'YP 001974388.1 pfam00844'
	'YP 001974394.1 pfam00844'
	'YP 001974399.1 pfam00844'
	'YP 001974404.1 pfam00844'
	'YP 001974413.1 pfam00844'
	'YP 002124295.1 pfam00844'
	'YP 002224029.1 pfam00844'
	'YP 002268195.1 pfam00844'
	'YP 002268202.1 pfam00844'
	'YP 002455909.1 pfam00844'
	'YP 002519377.1 pfam00844'
	'YP 002576167.1 pfam00844'
	'YP 002643046.1 pfam00844'
	'YP 002875758.1 pfam00844'
	'YP 002941852.1 pfam00844'
	'YP 003084277.1 pfam00844'
	'YP 003084286.1 PF03898.12'
	'YP 003254630.1 pfam00844'
	'YP 003288767.1 pfam00844'
	'YP 003560500.1 pfam00844'
	'YP 003622549.1 pfam00844'
	'YP 003622555.1 pfam00844'
	'YP 003778175.1 pfam00844'
	'YP 003828904.1 pfam00844'
	'YP 003896041.2 pfam00844'
	'YP 003915158.1 pfam00844'
	'YP 003934911.1 pfam00844'
	'YP 003966135.1 pfam00844'
	'YP 003987451.1 pfam00844'
	'YP 004046662.1 pfam00844'
	'YP 004046666.1 pfam00844'
	'YP 004046689.1 pfam00844'
	'YP 004063987.1 pfam00844'
	'YP 004089626.1 pfam00844'
	'YP 004123089.1 pfam00844'
	'YP 004123933.1 pfam00844'
	'YP 004207819.1 pfam00844'
	'YP 004207824.1 pfam00844'
	'YP 004207923.1 pfam00844'
	'YP 004376206.1 pfam00844'
	'YP 004429232.1 pfam00844'
	'YP 004429242.1 pfam00844'
	'YP 004465363.1 pfam00844'
	'YP 004958224.1 pfam00844'
	'YP 004958230.1 pfam00844'
	'YP 004958239.1 pfam00844'
	'YP 004958246.1 pfam00844'
	'YP 005352890.1 pfam00844'
	'YP 005352900.1 pfam00844'
	'YP 005352914.1 pfam00844'
	'YP 006273069.1 pfam00844'
	'YP 006428.1 pfam00844'
	'YP 006434.1 pfam00844'
	'YP 006456.1 pfam00844'
	'YP 006466.1 pfam00844'
	'YP 006491262.1 pfam00844'
	'YP 006522419.1 pfam00844'
	'YP 006590004.1 pfam00844'
	'YP 006590061.1 pfam00844'
	'YP 006659973.1 pfam00844'
	'YP 006666522.1 pfam00844'
	'YP 006666526.1 pfam00844'
	'YP 006666530.1 pfam00844'
	'YP 006666534.1 pfam00844'
	'YP 006860596.1 pfam00844'
	'YP 006905830.1 pfam00844'
	'YP 006905836.1 pfam00844'
	'YP 007004037.1 pfam00844'
	'YP 007024780.1 pfam00844'
	'YP 007250558.1 pfam00844'
	'YP 007419080.1 pfam00844'
	'YP 007438875.1 pfam00844'
	'YP 007438885.1 pfam00844'
	'YP 007974222.1 pfam00844'
	'YP 008400114.1 pfam00844'
	'YP 008400128.1 pfam00844'
	'YP 008411022.1 pfam00844'
	'YP 008472703.1 pfam00844'
	'YP 008719945.1 pfam00844'
	'YP 008888539.1 pfam00844'
	'YP 008997811.1 pfam00844'
	'YP 009001741.1 cd00259'
	'YP 009021246.1 PF03898.12'
	'YP 009021762.1 pfam00844'
	'YP 009026387.1 pfam00844'
	'YP 009026400.1 pfam00844'
	'YP 009029989.1 pfam00844'
	'YP 009047140.1 4V4M R'
	'YP 009047143.1 4V4M R'
	'YP 009051688.1 pfam00844'
	'YP 009056855.1 pfam00844'
	'YP 009104362.1 pfam00844'
	'YP 009109629.1 cd00259'
	'YP 009109637.1 cd00259'
	'YP 009109638.1 cd00259'
	'YP 009109639.1 cd00259'
	'YP 009109654.1 PF03898.12'
	'YP 009109687.1 cd00259'
	'YP 009109704.1 pfam00844'
	'YP 009111308.1 pfam00844'
	'YP 009115506.1 cd00259'
	'YP 009115507.1 PF03898.12'
	'YP 009116885.1 pfam00844'
	'YP 009116895.1 PF03898.12'
	'YP 009116899.1 cd00259'
	'YP 009116904.1 cd00259'
	'YP 009117055.1 PF03898.12'
	'YP 009117056.1 cd00259'
	'YP 009117059.1 PF03898.12'
	'YP 009117065.1 cd00259'
	'YP 009117068.1 cd00259'
	'YP 009117069.1 PF03898.12'
	'YP 009117071.1 5MJF Ba'
	'YP 009117073.1 cd00259'
	'YP 009117080.1 cd00259'
	'YP 009117081.1 cd00259'
	'YP 009126883.1 cd00259'
	'YP 009126885.1 cd00259'
	'YP 009126888.1 PF03898.12'
	'YP 009126917.1 5MJF V'
	'YP 009126918.1 PF03898.12'
	'YP 009126933.1 cd00259'
	'YP 009129269.1 pfam00844'
	'YP 009129320.1 pfam00844'
	'YP 009163902.1 cd00259'
	'YP 009163908.1 cd00259'
	'YP 009170677.1 pfam00844'
	'YP 009175009.1 pfam00844'
	'YP 009175075.1 pfam00844'
	'YP 009175082.1 pfam00844'
	'YP 009177710.1 pfam00844'
	'YP 009216260.1 pfam00844'
	'YP 009226414.1 pfam00844'
	'YP 009226562.1 cd00259'
	'YP 009226566.1 PF03898.12'
	'YP 009226568.1 cd00259'
	'YP 009226624.1 pfam00844'
	'YP 009241410.1 pfam00844'
	'YP 009249828.1 pfam00844'
	'YP 009255246.1 pfam00844'
	'YP 009256560.1 pfam00844'
	'YP 009259493.1 pfam00844'
	'YP 009259556.1 cd00259'
	'YP 009259691.1 cd00259'
	'YP 009259716.1 cd00259'
	'YP 009259719.1 4V4M R'
	'YP 009259722.1 5MJF Ba'
	'YP 009259739.1 PF03898.12'
	'YP 009259747.1 PF03898.12'
	'YP 009269402.1 pfam00844'
	'YP 009270637.1 pfam00844'
	'YP 009270644.1 pfam00844'
	'YP 009305124.1 pfam00844'
	'YP 009305425.1 pfam00844'
	'YP 009310057.1 pfam00844'
	'YP 009310062.1 pfam00844'
	'YP 009310067.1 pfam00844'
	'YP 009310077.1 pfam00844'
	'YP 009310082.1 pfam00844'
	'YP 009310090.1 pfam00844'
	'YP 009316017.1 pfam00844'
	'YP 009325421.1 pfam00844'
	'YP 009325924.1 pfam00844'
	'YP 009325934.1 pfam00844'
	'YP 009329829.1 pfam00844'
	'YP 009338000.1 pfam00844'
	'YP 009362975.1 pfam00844'
	'YP 009362981.1 pfam00844'
	'YP 009389275.1 pfam00844'
	'YP 009389446.1 cd00259'
	'YP 009408629.1 pfam00844'
	'YP 009408642.1 pfam00844'
	'YP 009417306.1 pfam00844'
	'YP 009428561.1 pfam00844'
	'YP 009448199.1 pfam00844'
	'YP 009465969.1 pfam00844'
	'YP 009465980.1 pfam00844'
	'YP 009465984.1 pfam00844'
	'YP 009465995.1 pfam00844'
	'YP 009506369.1 pfam00844'
	'YP 009506374.1 pfam00844'
	'YP 009506379.1 pfam00844'
	'YP 009506396.1 pfam00844'
	'YP 009506401.1 pfam00844'
	'YP 009506406.1 pfam00844'
	'YP 009506415.1 pfam00844'
	'YP 009506423.1 pfam00844'
	'YP 009506432.1 pfam00844'
	'YP 009506437.1 pfam00844'
	'YP 009506443.1 pfam00844'
	'YP 009506450.1 pfam00844'
	'YP 009506456.1 pfam00844'
	'YP 009506461.1 pfam00844'
	'YP 009506471.1 pfam00844'
	'YP 009506476.1 pfam00844'
	'YP 009506486.1 pfam00844'
	'YP 009506489.1 pfam00844'
	'YP 009506513.1 pfam00844'
	'YP 009506517.1 pfam00844'
	'YP 009506521.1 pfam00844'
	'YP 009506533.1 pfam00844'
	'YP 009506547.1 pfam00844'
	'YP 009506564.1 pfam00844'
	'YP 009506571.1 pfam00844'
	'YP 009506576.1 pfam00844'
	'YP 009507975.1 pfam00844'
	'YP 009507985.1 pfam00844'
	'YP 009507992.1 pfam00844'
	'YP 009508006.1 pfam00844'
	'YP 009508013.1 pfam00844'
	'YP 009508029.1 pfam00844'
	'YP 009508114.1 pfam00844'
	'YP 009508120.1 pfam00844'
	'YP 009508135.1 pfam00844'
	'YP 009508160.1 pfam00844'
	'YP 009508169.1 pfam00844'
	'YP 009508175.1 pfam00844'
	'YP 009508186.1 pfam00844'
	'YP 009508192.1 pfam00844'
	'YP 009508200.1 pfam00844'
	'YP 009508207.1 pfam00844'
	'YP 009508293.1 pfam00844'
	'YP 009508300.1 pfam00844'
	'YP 009508312.1 pfam00844'
	'YP 009508323.1 pfam00844'
	'YP 009508328.1 pfam00844'
	'YP 009508333.1 pfam00844'
	'YP 009508343.1 pfam00844'
	'YP 009508349.1 pfam00844'
	'YP 009508358.1 pfam00844'
	'YP 009508368.1 pfam00844'
	'YP 009508384.1 pfam00844'
	'YP 009508389.1 pfam00844'
	'YP 009508401.1 pfam00844'
	'YP 009508412.1 pfam00844'
	'YP 009508418.1 pfam00844'
	'YP 009508429.1 pfam00844'
	'YP 009508450.1 pfam00844'
	'YP 009508903.1 pfam00844'
	'YP 009551675.1 4V4M R'
	'YP 009551799.1 pfam00844'
	'YP 009551896.1 pfam00844'
	'YP 009552096.1 cd00259'
	'YP 009552807.1 4BCU A'
	'YP 009553194.1 pfam00844'
	'YP 009553351.1 4V4M R'
	'YP 009553354.1 4BCU A'
	'YP 009553474.1 pfam00844'
	'YP 009553590.1 pfam00844'
	'YP 009664855.1 pfam00844'
	'YP 009666108.1 pfam00844'
	'YP 009666346.1 pfam00844'
	'YP 009666506.1 pfam00844'
	'YP 009666517.1 pfam00844'
	'YP 009666819.1 pfam00844'
	'YP 115508.1 pfam00844'
	'YP 213932.1 pfam00844'
	'YP 232875.1 pfam00844'
	'YP 425030.1 pfam00844'
	'YP 459908.1 pfam00844'
	'YP 459926.1 pfam00844'
	'YP 579167.1 pfam00844'
	'YP 619880.1 pfam00844'
	'YP 699990.1 pfam00844'
	'YP 717091.1 pfam00844'
	'YP 717927.1 pfam00844'
	'YP 729211.1 pfam00844'
	'YP 729217.1 pfam00844'
	'YP 794168.1 pfam00844'
;
end;
begin trees;
	tree tree_1 = [&R] ('MS redsnapper1 2ct548.2 P'[&!color=#00ff00]:0.133305,'MS seabass2 1 2ct42.2 PF0'[&!color=#00ff00]:0.162329,(((((((('MS seabass ms2 2ct593.1 P'[&!color=#00ff00]:1.873187,('MS seabass ms2 2ct629.2 c'[&!color=#00ff00]:0.899043,'MS seabass ms2 2ct655.2 c'[&!color=#00ff00]:0.621983)[&bootstraps=100.0]:0.800576)[&bootstraps=100.0]:0.22833,'MS seabass ms2 2ct770.2 c'[&!color=#00ff00…
end;
begin figtree;
	set appearance.backgroundColorAttribute="Default";
	set appearance.backgroundColour=#ffffff;
	set appearance.branchColorAttribute="User selection";
	set appearance.branchColorGradient=false;
	set appearance.branchLineWidth=1.0;
	set appearance.branchMinLineWidth=0.0;
	set appearance.branchWidthAttribute="Fixed";
	set appearance.foregroundColour=#000000;
	set appearance.hilightingGradient=false;
	set appearance.selectionColour=#2d3680;
	set branchLabels.colorAttribute="User selection";
	set branchLabels.displayAttribute="bootstraps";
	set branchLabels.fontName="sansserif";
	set branchLabels.fontSize=8;
	set branchLabels.fontStyle=0;
	set branchLabels.isShown=true;
	set branchLabels.significantDigits=4;
	set layout.expansion=0;
	set layout.layoutType="RECTILINEAR";
	set layout.zoom=0;
	set legend.attribute="bootstraps";
	set legend.fontSize=10.0;
	set legend.isShown=false;
	set legend.significantDigits=4;
	set nodeBars.barWidth=4.0;
	set nodeBars.displayAttribute=null;
	set nodeBars.isShown=false;
	set nodeLabels.colorAttribute="User selection";
	set nodeLabels.displayAttribute="Node ages";
	set nodeLabels.fontName="sansserif";
	set nodeLabels.fontSize=8;
	set nodeLabels.fontStyle=0;
	set nodeLabels.isShown=false;
	set nodeLabels.significantDigits=4;
	set nodeShapeExternal.colourAttribute="User selection";
	set nodeShapeExternal.isShown=false;
	set nodeShapeExternal.minSize=10.0;
	set nodeShapeExternal.scaleType=Width;
	set nodeShapeExternal.shapeType=Circle;
	set nodeShapeExternal.size=4.0;
	set nodeShapeExternal.sizeAttribute="Fixed";
	set nodeShapeInternal.colourAttribute="User selection";
	set nodeShapeInternal.isShown=false;
	set nodeShapeInternal.minSize=10.0;
	set nodeShapeInternal.scaleType=Width;
	set nodeShapeInternal.shapeType=Circle;
	set nodeShapeInternal.size=4.0;
	set nodeShapeInternal.sizeAttribute="Fixed";
	set polarLayout.alignTipLabels=false;
	set polarLayout.angularRange=0;
	set polarLayout.rootAngle=0;
	set polarLayout.rootLength=100;
	set polarLayout.showRoot=true;
	set radialLayout.spread=0.0;
	set rectilinearLayout.alignTipLabels=false;
	set rectilinearLayout.curvature=0;
	set rectilinearLayout.rootLength=100;
	set scale.offsetAge=0.0;
	set scale.rootAge=1.0;
	set scale.scaleFactor=1.0;
	set scale.scaleRoot=false;
	set scaleAxis.automaticScale=true;
	set scaleAxis.fontSize=8.0;
	set scaleAxis.isShown=false;
	set scaleAxis.lineWidth=1.0;
	set scaleAxis.majorTicks=1.0;
	set scaleAxis.minorTicks=0.5;
	set scaleAxis.origin=0.0;
	set scaleAxis.reverseAxis=false;
	set scaleAxis.showGrid=true;
	set scaleBar.automaticScale=true;
	set scaleBar.fontSize=10.0;
	set scaleBar.isShown=true;
	set scaleBar.lineWidth=1.0;
	set scaleBar.scaleRange=0.0;
	set tipLabels.colorAttribute="User selection";
	set tipLabels.displayAttribute="Names";
	set tipLabels.fontName="sansserif";
	set tipLabels.fontSize=8;
	set tipLabels.fontStyle=0;
	set tipLabels.isShown=true;
	set tipLabels.significantDigits=4;
	set trees.order=false;
	set trees.orderType="increasing";
	set trees.rooting=false;
	set trees.rootingType="User Selection";
	set trees.transform=false;
	set trees.transformType="cladogram";
end;
