# Supplementary material for: Discovery of several thousand highly diverse circular DNA viruses
Source: eLife. 2020 Feb 4;9:e51971. doi: 10.7554/eLife.51971 (PMC7000223; doi:10.7554/eLife.51971)
Supplement: Figure 4—source data 2. [file elife-51971-fig4-data2.tre]

#NEXUS
begin taxa;
	dimensions ntax=142;
	taxlabels
	16minnow_6_2ct1036[&!color=#009900]
	16minnow_6_2ct749[&!color=#009900]
	16minnow_6_2ct940[&!color=#009900]
	18minnow1_2ct1318[&!color=#009900]
	'AQU11701.1_capsid_protein'[&!color=#ff9999]
	'AQU11706.1_capsid_protein'[&!color=#ff9999]
	'AQU11708.1_capsid_protein'[&!color=#ff9999]
	'AQU11713.1_capsid_protein'[&!color=#ff9999]
	'AQU11723.1_capsid_protein'[&!color=#ff9999]
	'AQU11725.1_capsid_protein'[&!color=#ff9999]
	'AQU11727.1_capsid_protein'[&!color=#ff9999]
	'AQU11730.1_capsid_protein'[&!color=#ff9999]
	'AQU11732.1_capsid_protein'[&!color=#ff9999]
	'AQU11734.1_capsid_protein'[&!color=#ff9999]
	'AQU11735.1_capsid_protein'[&!color=#ff9999]
	'AQU11739.1_capsid_protein'[&!color=#ff9999]
	'AQU11742.1_capsid_protein'[&!color=#ff9999]
	'AQU11745.1_capsid_protein'[&!color=#ff9999]
	'AQU11748.1_capsid_protein'[&!color=#ff9999]
	'AQU11750.1_capsid_protein'[&!color=#ff9999]
	'AQU11754.1_capsid_protein'[&!color=#ff9999]
	'AQU11760.1_capsid_protein'[&!color=#ff9999]
	'AQU11768.1_capsid_protein'[&!color=#ff9999]
	'AQU11772.1_capsid_protein'[&!color=#ff9999]
	'AQU11788.1_capsid_protein'[&!color=#ff9999]
	'AQU11804.1_capsid_protein'[&!color=#ff9999]
	'ASM94001.1_putative_capsi'[&!color=#ff00ff]
	'AUF34965.1_putative_capsi'[&!color=#ff9999]
	'NP_038458.1_capsid_protei'[&!color=#ff00ff]
	'NP_040955.1_coat_protein_'[&!color=#ff00ff]
	'NP_041231.1_capsid_protei'[&!color=#ff00ff]
	'NP_041887.1_coat_protein_'[&!color=#ff00ff]
	'NP_043911.1_capsid_protei'[&!color=#ff00ff]
	'NP_044388.1_capsid_protei'[&!color=#ff00ff]
	'NP_044736.1_capsid_protei'[&!color=#ff00ff]
	'NP_044744.1_capsid_protei'[&!color=#ff00ff]
	'NP_056828.1_coat_protein_'[&!color=#ff00ff]
	'NP_612582.2_capsid_protei'[&!color=#ff00ff]
	'NP_613255.1_coat_protein_'[&!color=#ff00ff]
	'NP_613262.1_coat_protein_'[&!color=#ff00ff]
	'NP_613271.1_capsid__Cowpe'[&!color=#ff00ff]
	'NP_619676.1_coat_protein_'[&!color=#ff00ff]
	'NP_619722.1_coat_protein_'[&!color=#ff00ff]
	'NP_619753.1_coat_protein_'[&!color=#cc3300]
	'NP_620526.1_37_kDa_capsid'[&!color=#ff00ff]
	'NP_620723.2_p38_capsid_pr'[&!color=#ff00ff]
	'NP_758815.2_coat_protein_'[&!color=#ff00ff]
	'NP_835255.1_coat_protein_'[&!color=#ff00ff]
	'NP_862839.1_coat_protein_'[&!color=#ff00ff]
	'NP_919038.1_capsid_protei'[&!color=#ff00ff]
	'NP_945116.1_coat_protein_'[&!color=#ff00ff]
	'NP_945127.1_coat_protein_'[&!color=#ff00ff]
	'NP_945130.1_coat_protein_'[&!color=#ff00ff]
	'YP_001039887.1_coat_prote'[&!color=#ff00ff]
	'YP_001285476.1_unnamed_pr'[&!color=#ff00ff]
	'YP_002117838.1_p26__Cocks'[&!color=#ff00ff]
	'YP_002308431.1_capsid_pro'[&!color=#ff00ff]
	'YP_002333479.1_coat_prote'[&!color=#ff00ff]
	'YP_003288761.1_coat_prote'[&!color=#ff00ff]
	'YP_004191793.1_p37__Honey'[&!color=#ff00ff]
	'YP_004207809.1_capsid_pro'[&!color=#ff00ff]
	'YP_004221744.2_protein_de'[&!color=#ff00ff]
	'YP_004300267.1_putative_c'[&!color=#ff00ff]
	'YP_007501039.1_coat_prote'[&!color=#ff00ff]
	'YP_007517178.1_coat_prote'[&!color=#ff00ff]
	'YP_008219061.1_coat_prote'[&!color=#ff00ff]
	'YP_008378655.1_coat_prote'[&!color=#ff00ff]
	'YP_008828158.1_coat_prote'[&!color=#ff00ff]
	'YP_008999613.1_coat_prote'[&!color=#ff00ff]
	'YP_009032636.1_capsid_pro'[&!color=#ff00ff]
	'YP_009032641.1_coat_prote'[&!color=#ff00ff]
	'YP_009032648.1_capsid_pro'[&!color=#ff00ff]
	'YP_009037608.1_capsid_pro'[&!color=#ff00ff]
	'YP_009116643.1_coat_prote'[&!color=#ff00ff]
	'YP_009173860.2_alpha-delt'[&!color=#ff00ff]
	'YP_009175042.2_alpha-delt'[&!color=#ff00ff]
	'YP_009259669.1_coat_prote'[&!color=#ff00ff]
	'YP_009270624.1_coat_prote'[&!color=#ff00ff]
	'YP_009333137.1_coat_prote'[&!color=#ff00ff]
	'YP_009333254.1_hypothetic'[&!color=#660066]
	'YP_009333295.1_hypothetic'[&!color=#ff00ff]
	'YP_009336490.1_hypothetic'[&!color=#ff00ff]
	'YP_009336499.1_hypothetic'[&!color=#ff00ff]
	'YP_009336592.1_hypothetic'[&!color=#660066]
	'YP_009336607.1_hypothetic'[&!color=#ff00ff]
	'YP_009336611.1_hypothetic'[&!color=#ff00ff]
	'YP_009336645.1_hypothetic'[&!color=#ff00ff]
	'YP_009336660.1_hypothetic'[&!color=#ff00ff]
	'YP_009336686.1_hypothetic'[&!color=#660066]
	'YP_009336697.1_hypothetic'[&!color=#ff00ff]
	'YP_009336752.1_hypothetic'[&!color=#ff00ff]
	'YP_009336758.1_hypothetic'[&!color=#660066]
	'YP_009336785.1_hypothetic'[&!color=#ff00ff]
	'YP_009336791.1_hypothetic'[&!color=#ff00ff]
	'YP_009336828.1_hypothetic'[&!color=#ff00ff]
	'YP_009336881.1_hypothetic'[&!color=#ff00ff]
	'YP_009336968.1_hypothetic'[&!color=#ff00ff]
	'YP_009336979.1_hypothetic'[&!color=#ff00ff]
	'YP_009337043.1_hypothetic'[&!color=#ff00ff]
	'YP_009337079.1_hypothetic'[&!color=#ff00ff]
	'YP_009337116.1_hypothetic'[&!color=#ff00ff]
	'YP_009337191.1_hypothetic'[&!color=#ff00ff]
	'YP_009337199.1_hypothetic'[&!color=#ff00ff]
	'YP_009337263.1_hypothetic'[&!color=#ff00ff]
	'YP_009337330.1_hypothetic'[&!color=#ff00ff]
	'YP_009337342.1_hypothetic'[&!color=#ff00ff]
	'YP_009337398.1_hypothetic'[&!color=#ff00ff]
	'YP_009337408.1_hypothetic'[&!color=#660066]
	'YP_009337418.1_hypothetic'[&!color=#660066]
	'YP_009337622.1_hypothetic'[&!color=#660066]
	'YP_009337649.1_hypothetic'[&!color=#660066]
	'YP_009337678.1_hypothetic'[&!color=#ff00ff]
	'YP_009337738.1_hypothetic'[&!color=#ff00ff]
	'YP_009337773.1_hypothetic'[&!color=#ff00ff]
	'YP_009337804.1_hypothetic'[&!color=#ff00ff]
	'YP_009342052.1_hypothetic'[&!color=#ff00ff]
	'YP_009342257.1_hypothetic'[&!color=#660066]
	'YP_009342271.1_hypothetic'[&!color=#ff00ff]
	'YP_009342289.1_hypothetic'[&!color=#660066]
	'YP_009342292.1_hypothetic'[&!color=#660066]
	'YP_009342300.1_hypothetic'[&!color=#ff00ff]
	'YP_009342303.1_hypothetic'[&!color=#ff00ff]
	'YP_009345604.1_p37__Clema'[&!color=#ff00ff]
	'YP_009407915.1_virus_coat'[&!color=#660066]
	'YP_052929.1_putative_coat'[&!color=#ff00ff]
	'YP_224020.1_coat_protein_'[&!color=#ff00ff]
	'YP_238481.1_coat_protein_'[&!color=#ff00ff]
	'YP_459922.1_capsid_protei'[&!color=#ff00ff]
	'YP_459964.1_coat_protein_'[&!color=#ff00ff]
	crucian1_2ct18[&!color=#009900]
	crucian1_2ct19[&!color=#009900]
	crucian1_2ct24[&!color=#009900]
	crucian1_2ct26[&!color=#009900]
	crucian1_2ct28[&!color=#009900]
	crucian1_2ct31[&!color=#009900]
	crucian1_2ct32[&!color=#009900]
	crucian1_2ct39[&!color=#009900]
	crucian1_2ct4[&!color=#009900]
	mice_vagnl_1_2ct5[&!color=#009900]
	redsnapper1_2ct110[&!color=#009900]
	redsnapper1_2ct15[&!color=#009900]
	redsnapper1_2ct17[&!color=#009900]
;
end;
begin trees;
	tree tree_1 = [&R] ('YP_009337622.1_hypothetic'[&!color=#660066]:0.473611,'YP_009337649.1_hypothetic'[&!color=#660066]:0.719445,(((((((((('YP_009337263.1_hypothetic'[&!color=#ff00ff]:1.11392,(('YP_009337116.1_hypothetic'[&!color=#ff00ff]:0.580021,'YP_009342271.1_hypothetic'[&!color=#ff00ff]:0.608835)[&bootstraps=100,!color=#4c4c4c]:0.307505,('YP_004207809.1_capsid_pro'[&!color=#ff00ff]:0.730611,'…
end;
begin figtree;
	set appearance.backgroundColorAttribute="Default";
	set appearance.backgroundColour=#ffffff;
	set appearance.branchColorAttribute="User selection";
	set appearance.branchColorGradient=false;
	set appearance.branchLineWidth=2.0;
	set appearance.branchMinLineWidth=0.0;
	set appearance.branchWidthAttribute="Fixed";
	set appearance.foregroundColour=#000000;
	set appearance.hilightingGradient=false;
	set appearance.selectionColour=#2d3680;
	set branchLabels.colorAttribute="bootstraps";
	set branchLabels.displayAttribute="bootstraps";
	set branchLabels.fontName="sansserif";
	set branchLabels.fontSize=8;
	set branchLabels.fontStyle=0;
	set branchLabels.isShown=true;
	set branchLabels.significantDigits=4;
	set layout.expansion=0;
	set layout.layoutType="POLAR";
	set layout.zoom=0;
	set legend.attribute="bootstraps";
	set legend.fontSize=10.0;
	set legend.isShown=false;
	set legend.significantDigits=4;
	set nodeBars.barWidth=4.0;
	set nodeBars.displayAttribute=null;
	set nodeBars.isShown=false;
	set nodeLabels.colorAttribute="User selection";
	set nodeLabels.displayAttribute="Node ages";
	set nodeLabels.fontName="sansserif";
	set nodeLabels.fontSize=8;
	set nodeLabels.fontStyle=0;
	set nodeLabels.isShown=false;
	set nodeLabels.significantDigits=4;
	set nodeShapeExternal.colourAttribute="User selection";
	set nodeShapeExternal.isShown=true;
	set nodeShapeExternal.minSize=10.0;
	set nodeShapeExternal.scaleType=Width;
	set nodeShapeExternal.shapeType=Diamond;
	set nodeShapeExternal.size=6.0;
	set nodeShapeExternal.sizeAttribute="Fixed";
	set nodeShapeInternal.colourAttribute="User selection";
	set nodeShapeInternal.isShown=false;
	set nodeShapeInternal.minSize=0.5;
	set nodeShapeInternal.scaleType=Width;
	set nodeShapeInternal.shapeType=Circle;
	set nodeShapeInternal.size=4.0;
	set nodeShapeInternal.sizeAttribute="bootstraps";
	set polarLayout.alignTipLabels=false;
	set polarLayout.angularRange=0;
	set polarLayout.rootAngle=250435;
	set polarLayout.rootLength=109;
	set polarLayout.showRoot=true;
	set radialLayout.spread=0.0;
	set rectilinearLayout.alignTipLabels=false;
	set rectilinearLayout.curvature=0;
	set rectilinearLayout.rootLength=100;
	set scale.offsetAge=0.0;
	set scale.rootAge=1.0;
	set scale.scaleFactor=1.0;
	set scale.scaleRoot=false;
	set scaleAxis.automaticScale=true;
	set scaleAxis.fontSize=8.0;
	set scaleAxis.isShown=false;
	set scaleAxis.lineWidth=1.0;
	set scaleAxis.majorTicks=1.0;
	set scaleAxis.minorTicks=0.5;
	set scaleAxis.origin=0.0;
	set scaleAxis.reverseAxis=false;
	set scaleAxis.showGrid=true;
	set scaleBar.automaticScale=true;
	set scaleBar.fontSize=10.0;
	set scaleBar.isShown=true;
	set scaleBar.lineWidth=1.0;
	set scaleBar.scaleRange=0.0;
	set tipLabels.colorAttribute="User selection";
	set tipLabels.displayAttribute="Names";
	set tipLabels.fontName="sansserif";
	set tipLabels.fontSize=10;
	set tipLabels.fontStyle=0;
	set tipLabels.isShown=false;
	set tipLabels.significantDigits=4;
	set trees.order=false;
	set trees.orderType="increasing";
	set trees.rooting=true;
	set trees.rootingType="User Selection";
	set trees.transform=false;
	set trees.transformType="cladogram";
end;
