# Supplementary material for: Discovery of several thousand highly diverse circular DNA viruses
Source: eLife. 2020 Feb 4;9:e51971. doi: 10.7554/eLife.51971 (PMC7000223; doi:10.7554/eLife.51971)
Supplement: Supplementary file 2. [file elife-51971-supp2.xlsx]

## Sheet: Sheet1
Sample Name	haddock1	16minnow	18minnow	pompano1	crucian1	rainbowtrout1	redsnapper1	seabass1	seabass2	seabass3	seabass4	seabass_ms2	worm1	squid1	abalone1	crab1	fly1	axolotl1	axolotl_blastema1	turkey	10mus	mice_vaginal	apo1	apo2	raccoon_spleen_ga11	raccoon_spleen_ga014	raccoonskin1	beef_bd3	beef_bd4	bison1	bison2	lamb1	pig1	macstool_D2CW	macstool_cl86	macstool_dcvf	macstool_de1a	macstool_de2c	W01_blood	W07_blood	ms19_W08	ms19_W18	ms19_W27	brain1	brain2	brain3	brain4	brain5	brain6
Host Animal	Melanogrammus aeglefinus	Pimephales sp.	Pimephales sp.	Trachinotus sp.	Carassius carassius	Oncorhynchus mykiss	Lutjanus campechanus	Centropristis striata	Centropristis striata	Centropristis striata	Centropristis striata	Centropristis striata	Rhabditidae sp.	unidentified squid	Haliotis sp.	Callinectes sapidus	Drosophila sp.	Ambystoma mexicanum	Ambystoma mexicanum	Meleagris gallopavo	Mus musculus	Mus musculus	Apodemus sylvaticus	Apodemus sylvaticus	Procyon lotor	Procyon lotor	Procyon lotor	Bos taurus	Bos taurus	Bison bison	Bison bison	Ovis aries	Sus scrofa	Macaca mulatta	Macaca mulatta	Macaca mulatta	Macaca mulatta	Macaca mulatta	Homo sapiens	Homo sapiens	Homo sapiens	Homo sapiens	Homo sapiens	Homo sapiens	Homo sapiens	Homo sapiens	Homo sapiens	Homo sapiens	Homo sapiens
Tissue/Sample Type	scales, tissue	whole animal	whole animal	scales, tissue	scales, tissue	scales, tissue	scales, tissue	scales, tissue	scales, tissue	scales, tissue	scales, tissue	scales, tissue	whole animals	tissue	whole animal	prepared meat	whole animals	skin swab	blastema	ground meat	skin tissue	vaginal swabs	skin tissue	skin tissue	spleen tissue	spleen tissue	skin tissue	ground meat	ground meat	ground meat	ground meat	ground meat	ground meat	feces	feces	feces	feces	feces	blood	blood	blood	blood	blood	brain tissue, Non-Alzheimer's Dementia, CERAD=0, BRAAK=2	brain tissue, Non-Alzheimer's Dementia, CERAD=0, BRAAK=3	brain tissue, Alzheimer's Disease, CERAD=C, BRAAK=6	brain tissue, Alzheimer's Disease, CERAD=C, BRAAK=5	brain tissue, Alzheimer's Disease, CERAD=B, BRAAK=6	brain tissue, Alzheimer's Disease, CERAD=C, BRAAK=6
Origin	fishmonger	wild	wild	fishmonger	fishmonger	fishmonger	fishmonger	fishmonger	fishmonger	fishmonger	fishmonger	fishmonger	wild	supermarket	supermarket	supermarket	wild	laboratory animal	laboratory animal	supermarket	laboratory animal	wild	wild	wild	wild (UC-Davis)	wild (UC-Davis)	wild (UC-Davis)	supermarket	supermarket	supermarket	supermarket	supermarket	supermarket	laboratory animal	laboratory animal	laboratory animal	laboratory animal	laboratory animal	clinical (NIH CCR)	clinical (NIH CCR)	clinical (NIH CCR)	clinical (NIH CCR)	clinical (NIH CCR)	clinical (Johns Hopkins ADRC)	clinical (Johns Hopkins ADRC)	clinical (NIH ADRC)	clinical (NIH ADRC)	clinical (NIH ADRC)	clinical (NIH ADRC)
Run	SRR5832142	SRR7122375	SRR7122375	SRR7122328	SRR7122330	SRR7122364	SRR7122366	SRR7122359	SRR7122360	SRR7109542	SRR7122361	SRR7501340	SRR7122374	SRR7122358	SRR7122363	SRR7122357	SRR7122373	SRR7122381	SRR7122338	SRR7122322	SRR7122376	SRR7122365	SRR7122347	SRR7122346	SRR7122354	SRR7122350	SRR7122367	SRR7122336	SRR7122333	SRR7122319	SRR7122320	SRR7122321	SRR7122327	SRR7122355	SRR7122337	SRR7122353	SRR7122342	SRR7122341	SRR6442920	SRR6442879	SRR6442889	SRR6442898	SRR6442973	SRR7122324	SRR7122344	SRR7122349	SRR7122313	SRR7122314	SRR7122316
Experiment	SRX3009445	SRX4043871	SRX4043871	SRX4043918	SRX4043916	SRX4043882	SRX4043880	SRX4043887	SRX4043886	SRX4037349	SRX4043885	SRX4370701	SRX4043872	SRX4043888	SRX4043883	SRX4043889	SRX4043873	SRX4043865	SRX4043908	SRX4043924	SRX4043870	SRX4043881	SRX4043899	SRX4043900	SRX4043892	SRX4043896	SRX4043879	SRX4043910	SRX4043913	SRX4043927	SRX4043926	SRX4043925	SRX4043919	SRX4043891	SRX4043909	SRX4043893	SRX4043904	SRX4043905	SRX3534153	SRX3534194	SRX3534184	SRX3534175	SRX3534100	SRX4043922	SRX4043902	SRX4043897	SRX4043933	SRX4043932	SRX4043930
BioSample	SAMN07319269	SAMN09074552	SAMN09074552	SAMN09074540	SAMN09074542	SAMN09074534	SAMN09074539	SAMN09074531	SAMN09074530	SAMN09061349	SAMN09074537	SAMN09634265	SAMN09074551	SAMN09074532	SAMN09074535	SAMN09074533	SAMN09074550	SAMN09074558	SAMN09074560	SAMN09074599	SAMN09074553	SAMN09074573	SAMN09074600	SAMN09074601	SAMN09074580	SAMN09074579	SAMN09074538	SAMN09074548	SAMN09074547	SAMN09074596	SAMN09074597	SAMN09074598	SAMN09074541	SAMN09074562	SAMN09074561	SAMN09074563	SAMN09074564	SAMN09074565	SAMN08296098	SAMN08296113	SAMN08296116	SAMN08296125	SAMN08296159	SAMN09074582	SAMN09074588	SAMN09074589	SAMN09074590	SAMN09074591	SAMN09074593
BioProject	PRJNA393166	PRJNA393166	PRJNA393166	PRJNA393166	PRJNA393166	PRJNA393166	PRJNA393166	PRJNA393166	PRJNA393166	PRJNA393166	PRJNA393166	PRJNA393166	PRJNA393166	PRJNA393166	PRJNA393166	PRJNA393166	PRJNA393166	PRJNA393166	PRJNA393166	PRJNA393166	PRJNA393166	PRJNA393166	PRJNA393166	PRJNA393166	PRJNA393166	PRJNA393166	PRJNA393166	PRJNA393166	PRJNA393166	PRJNA393166	PRJNA393166	PRJNA393166	PRJNA393166	PRJNA393166	PRJNA393166	PRJNA393166	PRJNA393166	PRJNA393166	PRJNA396064	PRJNA396064	PRJNA396064	PRJNA396064	PRJNA396064	PRJNA393166	PRJNA393166	PRJNA393166	PRJNA393166	PRJNA393166	PRJNA393166
Anelloviridae	0	0	0	0	0	0	0	0	0	0	0	0	0	0	0	0	0	0	0	0	0	0	0	0	2	13	0	0	0	0	0	0	13	0	0	0	0	0	4	2	44	24	68	0	0	0	0	0	0
Bacilladnaviridae	0	1	0	0	0	0	2	0	0	0	0	0	0	0	0	0	0	0	0	0	0	0	0	0	0	0	0	0	0	0	0	0	0	0	0	0	0	0	0	0	0	0	0	0	0	0	0	0	0
CRESS virus	77	69	38	3	44	42	186	33	11	10	6	150	1	1	114	12	0	1	1	4	3	2	8	6	0	0	15	7	1	2	4	4	1	0	2	1	3	5	0	0	0	0	0	0	0	0	0	0	0
Caudovirales	0	2	0	0	0	0	0	0	0	0	0	0	0	0	0	0	1	0	0	0	0	0	0	0	0	0	0	0	0	0	0	0	0	0	0	0	0	0	0	0	0	0	0	0	0	0	0	0	0
Circoviridae	0	1	0	0	0	0	0	0	0	0	0	0	0	0	0	0	1	0	0	0	0	0	0	0	0	0	0	0	1	0	0	0	0	0	0	0	0	0	0	0	0	0	0	0	0	0	0	0	0
CrAssphage	0	0	0	0	0	0	0	0	0	0	0	0	0	0	0	0	0	0	0	0	2	0	0	0	0	0	0	0	0	0	0	0	0	0	0	0	0	0	0	0	0	0	0	0	0	0	0	0	0
Geminiviridae	0	0	0	0	0	0	0	0	0	0	0	0	0	0	0	0	0	0	0	0	0	0	0	0	0	0	0	0	0	0	0	0	0	0	0	0	0	0	0	0	0	0	0	0	0	0	0	0	0
Genomoviridae	5	7	5	0	0	3	0	0	0	0	0	0	0	0	6	0	1	0	0	2	1	0	16	3	0	0	2	0	1	0	1	2	2	0	0	1	0	0	0	0	0	0	0	0	0	0	0	0	0
Inoviridae	32	3	0	0	0	5	1	3	0	0	2	2	0	1	2	0	0	0	1	1	4	1	0	0	0	0	0	0	0	1	0	0	0	1	1	2	2	5	0	0	0	0	0	0	0	0	0	0	0
Microviridae	20	344	111	0	10	6	42	0	1	0	0	6	2	0	6	0	1	0	0	2	12	3	1	0	0	0	0	2	0	1	0	1	0	13	13	27	19	27	0	0	0	0	0	0	0	0	0	0	0
Myoviridae	0	0	2	0	0	0	0	0	0	0	0	1	0	0	0	0	3	0	0	0	0	0	1	0	0	0	0	0	0	0	0	0	0	0	0	0	0	0	0	0	0	0	0	0	0	0	0	0	0
Papillomaviridae	2	0	0	0	0	1	1	0	0	0	0	0	0	0	0	0	0	0	0	0	0	0	0	0	0	0	0	0	0	0	0	0	0	0	0	0	0	0	0	0	0	0	0	0	0	0	0	0	0
Phage	0	3	4	0	1	1	3	0	0	0	0	0	1	0	0	0	0	0	0	0	0	0	0	0	0	0	0	0	0	0	0	0	0	0	0	0	0	1	0	0	0	0	0	0	0	0	0	0	0
Podoviridae	0	0	0	0	0	0	0	0	0	0	0	1	3	0	0	0	1	1	0	0	3	0	0	0	0	0	0	0	0	0	0	0	0	0	0	0	0	1	0	0	0	0	0	0	0	0	0	0	0
Siphoviridae	0	0	0	0	0	0	1	0	0	0	0	2	6	0	0	0	5	0	0	0	2	0	1	0	0	0	0	0	0	0	0	0	0	0	0	0	1	0	0	0	0	0	0	0	0	0	0	0	0
Virus	0	0	0	0	0	0	6	0	0	0	0	0	0	0	0	0	0	0	0	0	0	0	0	0	0	0	0	0	0	0	0	0	0	0	0	0	0	0	0	0	0	0	0	0	0	0	0	0	0
circular genetic element	52	19	15	1	1	19	271	20	5	2	11	77	0	0	71	2	0	1	2	4	3	0	6	2	0	0	6	9	0	6	0	2	0	0	0	0	2	0	0	0	0	0	0	0	0	0	0	0	0
[truncated: 8 more columns]
