# Supplementary material for: Discovery of several thousand highly diverse circular DNA viruses
Source: eLife. 2020 Feb 4;9:e51971. doi: 10.7554/eLife.51971 (PMC7000223; doi:10.7554/eLife.51971)
Supplement: Supplementary file 3. [file elife-51971-supp3.fasta]

>brain12	NON-AD	SRX4043901	NODE_13847_length_660_cov_1.6072	Papillomavirus
TTTTTATCCTTTCCTTCCCCCTTGTCCCTTTTACTCCTCACCTAAAGCAGCTGACTAAGCGTTTTTCTGTATAGCGAGTTTACATAACAAACCAAATAGCAATGAGGAATGGACATTAAGTGATACTAGTGCTGAACTAACATTAACAGCTCCACGTAATACATTTAAAAAACAGCCATATACTGTTGATGTATGGTTTGATAATATGCCTACTAATTCCTTTCCTTACACAAACTGGGATAGAATTTATTATCAAGATGAAAAGGACAATTGGCATGTTGCACAAGGACGAGCAGACATTAATGGACTTTACTTTGATGACATTACAGGCCTAAGAAATTATTTTACATTGTTTGCTCCTGATGTTGAAAGGTTTAGCTCCACAGGACACTGGACTGTTAATTTTAAAAATGAAACTATTTCTTCTGTCAATAGTTCACAAGGGCCATCTTCCAACATCTCTCCTCAAGGATCCGTTACTTCCTCCGAGGACGCCATACCCAGGGCGAAAACATACACCAGCAGACGCGACAAAGTAAAAGAGGGAGTCCCTAGCTCAACCACCCCGTCGACCCCCGAACTACGACGTAGACGACGACGACGAGAACAAGGAGAATCACCCTCCAGACGACGACCGAACAGGTTACGGGAAATCGGTGG
>brain6	AD	SRX4043930	NODE_10508_length_636_cov_2.22927	Torque teno virus
ATCACCATGACCGGACCCTTTTCCTAGCACTACGAACTATTGAGTACACAACTAACTGCTAAATACAAATTTTACTTTATATGGGGTGGAAACATGATCTCGTCACAGATCATCAAGAACCCCTGCAAAGACACAGACATGGACACCACCTATCCCAGTAGACAGCGTCGCGACTTACAAATTGTTGACCCACACTCCATGGGGCCCTCCTTCGCGTTCCACACGTGGGACTTCCGACGAGGACTGTTTGGTAAAGATGCTATCGACAGAGTGTCGAAAGAACAAGACAATGCTCCAGAGTATCCTAACCCATACAAAAGGCCTAGATATTTTCCCCCAACAGACAGGTCAGACCTCAAAGGGCAAGAAGAAGACTGGAGTTTCCAGGTCCAGAGCGAGGGGTCGTCAGAAGAAGAGAGCGATCAAGAAGCCCAAGAAGAGGAGGTACTCCAGTTCCAGCCAGGACAGCAGCAGCAGCAACTGCACCTGCAGCTCGCGGAGCAGCAGCAGATCGGGCAGCAGCTCCGACTCCTGTTCCAACAGATGCTCAAAACCCAGGCCAATCTCCACCTAAACCCATATATATTCACCCAGCCATAAACAGGGTGTTTATGTTCGACCCTCCGGGTCCCAGGC
>brain6	AD	SRX4043930	NODE_20886_length_810_cov_8.30798	Torque teno virus
GCCTAGTCTCGTGGGCTCGGGACTGGCCGGGCTATGGGCAAGGCTCTTAGGGTTATCATTCTTAAAAATGTTTTTTGGTAGGCCTTACAGAAAAAAGAAAAGGGCGCTGCTACTGTCTGAGCTGCCAGATTCAAAGAAGAAACCACCTGGTGACATGACCTGGCGCCCCCCGGTACACAATGCCGCCGGCATCGATAGGCAGTTTTTCGAAGCCTGCTTTCGATGCCACAATAGTTGCTGCGGCTGCGGCAGCTTTATTAATCATCTTAATGTACTGGCTGCTCGCTATGGCTTTACTGGGGGGCCGGCGCCGCCAGGTGGTCCTCGGCCGGCGCCCCAGATGAGACCCGCGCTTCCCGCGCCGGAGCCCGACCCGGAGGCCGAGAACCGTGAGCCATGGCGTGGAGCTGGTGGTGGCAACGATGGAGGCGCCGTCGCTGGCAACCCAGGCGCCGCCGCTGGAGACGCCTACGACGGAGAAGACCTAGACGCCCTGTTCGCCGCCGTCGCCGAAGACGCAGAGTAAGGAGGCGGAGGTGGGGTAGGAGACGGGGGCGACGCAGACGGTACACTACCAGACGAAAGAGACGCCACACTCGTAGAAACTTTAAAAAGAAACTTGTACTTACTCAGTGGCACCCCTCTGTAGTTAGACGCTGCTTTATTAGGGGCATAGTCCCCATCCTTATATGCGGGCACACAAAATGGAACAGTAACTACGCCCTGCATAGCGAGGACTACACAGAAGAGGGCCGCTACCCTCACGGAGGGTCCCTGTCCACCACTACGTGGTCACTAAAGGTGCTGTAC
>brain11	AD	SRX4043890	NODE_24518_length_672_cov_2.10292	Torque teno virus
GGCCCCCCTAACTTTCGTTACTGCTTCACAGCTCCAGTGTCCAATAGCAACCTGGAGTCTGTTTAATAAAATTCTCGACCCCCGCGCGCCCGAAGTGGTCTGACACGCGCAAGCGTGTCAGCACGAGCGGGGGTCTGAGGTGCCGCGCGCAGCCGAAGGAGTAGCGCGCGGCTCCGAAGAAGTTGAGTCAGGGGGAAGGGTCGCTCTCCTCGCTGCGCTCGGAGAGCTTAGTGACCTTTAGAGGTAGACACCGACAAGTGAAAGTTGCACGGCCTAGCAAATTTTATTAGAAGCCAAGTTTGAAGGTTACACGAAACTGAGAGTGTTTTGGCATCCAGGGGTAGAAGGGGGTGTCTTTCAGGTTGCTTCTAGGGGGTCTATCAAAGGCCCTACAGCACTCATATTCAGTTTGCCAGTCTGAGGCTGTTGGCTTTCTATCATAGTAGTTACCGAACATGTCTACATGTTCTCTTGGGGGAAAAATAGTGGGTTTAAATGTAAATGTGCTTTTGTTTTTTGGAGTTGGAGGAAGAGGTGCTGCAAGTGGAGTCGCAACTGCTGTTGCTGTCTGAGTTGTTTTCTGAGCTGCTGCTGTATCGGTAAACTTTCTTGGGATTCTGCTTCTTTTTCTTGGGACGAGGTGATCGAGAGTGTCTGTGAACACGAGTCTTC
>brain11	AD	SRX4043890	NODE_7819_length_778_cov_2.62748	Papillomavirus
GCAGAAGACGGCATACGAGTTTCGCCTTAGTCTCGTGGGAAAGTCAGTTCAGACAGTTAGTGGACGACATAAGGGAAGACTTGGAAGGTTATTGGCAGAGGCTCATGATCCCCCAGTAATTTTGGTGAAAGGTGATCCCAATACGCTAAAATGCTTTCGAAATCGCTCTAAAACTAAGTACAAGGATTTAATCAAGGCTGTTAGTACCACATGGTCATGGGTGTCTACAGATGGCTGCGAACGCATAGGCAGGGCCAGAATGCTTTTTAGTTTTTCTTCCTATGAACATAGGAGAATGTTTGACAACAAGGTTAAGTACCCTAAGAATGTAGAAAGAACTTTTGGACAGTTTGATAGCCTCTAACTAATAATAGCTTTTGCTACTAACGCTGCTTTGCTGCTAACACATTAACATCCCTGCTTTTTTTTTTATACATATTATATAATTTTTTGCTATGGTTTCTACTTCACCAGGTAATAAATCCGTGGTTTCTGTTAAAGGAATTACTGAAGACGCTGTAGGATCTATTGGGTTAGCTGTATCAATAGGTGTAATGTCTGCAGGCCCAATAGTTTCTGGAATTAAGGAAGGCCTTACCACGGTGGGTGTGTTACCCACACGTACTCCAGGACCTTCACCTAAAGGAATATAACCGGTGGTGCCTCCAGTGCCTCGGCCTGTACCTATTCCCAAACCACCAAAAAACACACCAGCACTCCCATATTTCAAAATGTTATCAGCAACTGTAGTTTGTTCCACTTTATTAACTACATCGGG
>brain4	AD	SRX4043933	NODE_105232_length_2009_cov_15.7067	Torque teno virus
AGGTAGACACCGACCAGTGAAACTCCCACGGCCTTGTACAGTGAAGTTGCCATTTATTTGAAGCCGAGGCTGAATTTTACATGGAATTTAGAAGGGCATCTGGGGTAGAAAGGAGGAGAGGATAAGTTGTATCTGGGAGGCCTGTCCCAGGCGGCGCAGGCCTCGTACTCCGCCTGCCAGTCTTTGCTGGTAGGAGGGGGTTTTGGGGCCCTCTCTGGGAATAGGTACACCTGGTTTATCGCTGGTTTAATAACATAGGGTTTAGGTGGAGACCCGCTTGCGTTTTGAACATTTCTCGGGTGAGGAATTGGAGCTGCTGCTGGAGCTGCTGTTGCTCTCTGAGTCGTCGCTTGAGGAGGAGTACTGTCGCCTCCTGCGTCTGCTCTTCGGCAGAGGCTTGCGACTTTTCTTCCTCTGAATACGAGCCTTTTTCGGGCTCTCGGAACTCTCCCTCTGCTGATTCTGTTGGAGGAAAGATTCTAGGTCTTTTTGGTTGTGTAAAATATTCGTCATAGTCAAGAGGTTTTTCTTGCAGGCGTTTGAGAGCTTTCTCGCTAAGATAGCCCCTTCGCCAGTCAAAGGAGTGGAACACCCAGCGGGGTCCCATTTGTTCCGGGTCCGCCACTTGTATTCCTCTAGGGTGTCTACTGGAGTCGGTGGGTTGTCCGTCCGTCTTGCATGGGTTTTTGATCGTCTGTTGGAACATCATGTTACCTCCCCAGGTGAAATAGAATTTGTACTTGCATACTAGTGTGCTGTTTTTTAGTTCGTCCTTGTAGCTAAAGGGCCCGGTCTGAACTATGTCTGCCATTACAGTCTCTTGAAAAAGCATTTCTGGCCTCCACCTGACTTGCCAGTAGGGCTCTATTTTGCCCCGTCCGTCAGTCCATTTGCCATCACCAAAGTTTCTGTCATAGAATACGTACCCCATGGAGGGATTTGTTTTGTTGTACATGGGGGGTTTTGTGTAAGGGCAGACTACACAGATGAGGCCTACTGTCTCTGCATCTACAAAGGGACCTAGCTCTGACTCTATGAAGTCACTGTAGCCATAGAAGGCTGCCCAGAGGGGTATGTCTTGTATGTGTGCTTTGCAGGACCCTCCAGTAAGTATTAGTTGTGTGTCTGCCTTTGTGTTGTACTGAAACCACACGTGGTTGCCCACCCCTTTGTCCATTAAAGGATTGTAAGTAACATCTTGATATGCACAGGGAAAGCGAGGTACTGGTCTGTCTGGGGCTAGAAATATTGGACTAAACATGCCTAAGTGATATTCATAACTGTCTGTAGTGGGAGTAGTCCACTGTGATCCATAGCCTTCAGGAGAGTTTGTTTGTTGGGGTCCTTCTGAAGTAAGCTGTTTAAAGTAGGCTTTTCTCATTTCGTGTAGTTCAGTCTTTATTGTGTGAGCTTTGTAGGTGTACCAGTTGTAGTTTGTGCTTTTGTTAGCTACAAACTTTTCTCTGGTAGGCTGTGTGGTTGTTAAATTGTGAGTTGTGTTACTGCCCTTTTTGGCATGTAGTACATAGTAAGGAGTTAAGTTAGATTCCCAGTATGCATTTTGTGTGTATAATATCTCTAATACTGAGTTTTGGGCGGTTTCAGAAGCGGAAAAGCCTATTGCATTATAGTAGAACTCTTTCAACACTTGAAAGGTGTAGCAAGGGTTGTCAGTTTGTGGTGAGCCGAATGGGTGGAGAAAGGAAGCCGCAGAAACCGCAAGTGATACAAGATTAACGGAACACAGATCCTCTTGAGTGTACCACTTGTCTACAAAAAGGTCTGGGGGGGGAATTTTAACTATAATTTTCTGTTTGCCCCTGGGATTAGTGTCATAGCTTGGAATTAAAAATTTGTGCTTTGCCTTAATCATGTTTCCCGGGTGATAGTTGGGGCAGCTATATTTGTCTAGCTTGTAGGGTTCTGATATGTCATACTGGCCCACCCAGTCCGTTTGTTTTGTTCTGTAAAAGTAAAATTTGCAGCCTCTGTATCTGGCAAGGTCTAGC
>brain4	AD	SRX4043933	NODE_158329_length_610_cov_32.7759	Torque teno virus
AGTCAGTACAAGTTTCTTTTTGCGTCGCCCTCGTCTTATGTACCTCCTGCGTCTCCACCCCCGTCTGTAGGTACGTTTGCGAGTTCTGCGGCGCCTCCTTACCCTTGGTTTGCGTCTTCTTCCAAGGCCGCGAACAGCTCGTCTAGTTCTTCTTCTCGGTAGTCTCCTTCGACGGCGGCGCCACCTTCTCCACCGGCGCCTCGGCCTCCAGCCCCACCTTCTGAACCAGTAGGCCATGCTGGTTCTCTAGAAGGGGTCGCGGGGGCTGAAGGGAGCGCCGGGAGGCGGCGAAGCGCCGGGCGGCCTCGCGGCGCTGGGCCGGGAGGGTCCAGAGGCGAAGAGGTAGCAGACAGATAGTTAAAGCGAGTAGCAAGGTTAGTAAAATGAAGCACGGGATCACCACAGCCACAGAACGACTGGTGGGATCTAAGGATGGACTCGAACCATTGCTGCTCTCGTATGCTGGCATTAATAGTAGGTGTGGTGAAGCTCATGGCAGGTGCCTTCGGTGGAGCTCGCACAGTTTGCAGTAGCAGTTTCCTTTTCGCTCGCACTCTGCGAAAGTGCATTTTTTAAGAGCCTTGCCCGGGGCCCGGCCAGTCCCGAGCCC
>brain4	AD	SRX4043933	NODE_169302_length_849_cov_9.9058	Torque teno virus
TATCTGGCAAGGTCTAGCTGGTCATTAGAGAAAGACCACTTGTTTAGTCCTCTCTGATGTTGGTCATATAGTACTTTTAAAGAGAATGAGGTAGTGCTTAAAGCCCCTCCAAATGGTTGTCCTTGGGGGGTGTAGTCGTCAGAGTGTAGTGCATAGTTTTTATTGCCCCTAGTGTGGCCGCAGAACACTATGGGCAGGTACCCAGTTATAGTGCATCTGCGTCTGGTGGCTGGTTGCCACTGTCTTAGTATAAGTCTTTTTTTTTTTTTTCTGTGTCGCCCCTTCCTCACATAAGTCCTTCGTCTCCAGCCCCGTCTGTACCGTCTGCGCCCCCACCGCCTCCGCCTTGTTCTTACTGTGCGTCGTCTTCTATAGCGTCGAGCAGGTCGGCGAGTTCTTGTTCTCCGTACGGGGCGCCGGCGACGGCGTCTCCTCCAGCGTCTGGCGGGCCATCGGCGCCACCGTCTCCACCATCCCCATGCCATGGTAGGGCCTGGGGCTGTTCGGGCGCGGCGGGACTAGGTCTGGCTCTCCTTATCTGCGGGGTGCCCGGAGGAGGACCACCTGGCGGCGCTGAGCCCGGAGTAAAACCATAACGCCCAGCCAGAAGATTAATGTGCAGAATAAAATTGCCGCAGCCACAACATCCAGCGTGGGCTCTGAAACAGGTCTCGTACCAATTGCGCTCGATGCCGGGTGCATCGTGTACCGGGGGTCTCCAACTCATAGCCCTGCAAGACGCCTTTGCAGGTCGCAGTGAGGACAGTAGCACTTTCCTTTTCTTTTGGCGGTAGGCTCTGCCGACAAACATTTTAAGAATGAATACCTTAAGAGCCTTGCCCATAGCCC
>brain4	AD	SRX4043933	NODE_71175_length_1779_cov_73.9772	Torque teno virus
TGCTTAGTGACCTTAAGAGGTTGACACCGACAAGTGAGACTTCCACGGCCTTGTTTATTGAAAACCAAGTTTAAAAGATACACGGAATTGAGGTTTAGGTTTAGGGACCCAGGGGTAGAAGGGGGTGTCTTTTAGGTTGGTTCTAGGTGGTCTGTCAAAGGCCTTACAGCACTGATATTCTGTGGCCCAGTCTTGGGCTGTTGGGGGGTGAGGAAGGGGGTCCCCAAACATGTCATATTTTATGAAGGGCTTAAAAATTGTGGGTTTAAATGCAAATTGGATTGGGTCTTGAGGAGTTGGAGCAGGAGGAATTGGAGCTGCTGCTTGATTGCGAGCTGCTCCTGGATGTTCCGCTGGAGCTGGAGCTGTACTTGTGGCGTTTCGAGGACTTCTGCTTCTTTCTCTTCTTGCTGTAGTGGCGATTTTCCTTCCCCTGAAGACGAGTCTTCTTCGAGCTGGAGGATTTCTGTGGCTGCTGTAGAAAGTTTGGGTCTCTTAGGTTTGAATGTAAAAGATTCATCAAAGTCTTGTTGTTGTTGCATTCTTTTAAGAGCTTTTTCACTAAAGAAGCCCCTTCTGCTGTCGAAGTAGTGGAAGATGTAGGCCGGTCCCATGGAAAGCGGGCTAACGACTTGTACTTCTCGAGTGAATCTACCGGAACCGGGAACGATTCCGGAGTCTCCACAGGGGTTTTTAACGACCTGTGGGTAATACATGTCGCCCCCCCAGTTAAAAATGAAGTTGTAGTACATAGTCAGCTGTACATTTTTATAGTCGTCTCTGTAGGCGTACGGTCCAGTCTTTGAAATGTCATTTAGTACTTGCTCTTGGAACCACAGCATGGGTCTCCATCTGCATTGCCAGTATACTGGGACTTGGCCACTTCCGGAGGGCATTTTTCCATTGCCAAAGTTTGTGTCATATACTACGTATCCCCAGTTAGGCCTTTGTTTGTCATACATTGGTGGTTGAGTGTAAGGACAGATTATAATTATGAGTCCAGCTGTTTCATGGTCTACATTTGGTCCTAGTTGAGTCTCTACATAGTCTGTGTATCCAAAGCACATTGCCCAGAGGGGCATGTCTTCAAGGGTGCAGTAGCATTGTTTTTCATTGTAATCTGTGCCTTTTTTACTTAGGTATTGGAACCATATTTTGTTGCCCTTGCCTTTGTCCATGAGTGGGTTATATGTGGTGTCTACGTATGCTGTTTGGAACTGTAAGTTGTATCTGTTGGGGCCTATAAATATGTTACTGAACCATCCCAGTCTGTATTCATAGTAATCTATTGTGGGTGTTGTTGTATTGGGTCGTGGCCATATTTTTTGACTTATGGGATTATTAACTTCATAGTAGAAGTTTTTTTGTCTTCTAGAATATATGTACCTTGTTTGTGGTATGTAAGTTGGGAAGCCGAAATTACTGTCATATGGCACTTTGTACATTTGTCCACTGTTTTGTTCTATAGTGCCATTTTGCTGCATCCCTGTAATTGAGGTTTGAGGGTATGGTTGCGGTGAGTAGGCTTGTCCTTGTGTAGACCATGCTTTTTGCCATGTGTCTTTTTGTGAGTTAGAGCTTCCATCTGGATTTGTAGTAGGTATTCTGCCTAGTCTCTCCTCTGTGGCAAATGTTTGATAGTGAGATGGTGTTAGATATAACCATTTTTCAAACTCTTGTGTGGACTCTTGGTCCTTAAGGGAAGTTCCTATAACTGTGTTGTAGTTCTTGCGCAGTACCTGGAAGGTGGTGCAAGGGTTGTTCGTTTGTGGTGAGCAG
>brain3	AD	SRX4043897	NODE_158137_length_715_cov_6.53314	Papillomavirus
TGTTTGAACTTGTACTCACCTTGAATATCTCTGAAAGACCGTTATCGGTTGCCTATTTGCCCTTTGGCGCCAAAAACTTACCGAAATCGGTTGCGAAGCACCTAGGGATTCCAAGCCGACCCTCACAGCTCCCAACTTGTTAGTGGCAATGATTGTTTGTGTGCCAGATATAAAGGGATCCAAATAATTGTTGGGTGCGGTAAAAAAATATTTTCAGCCCCCAGGTGAGTCAGTAAAGATCATTCCAAAATATATTGCGCATCAGCAATTTATTGAGGTATATCAGACATAGTTCACAGTATTACATTCACAGTATCTTATATTTAATACATTCACATTTATGGCTTTTCACAGTATGTATTTTCGAACATTAAAATAACAATAGTATTACTTAGTACTGCGCTTACGCTTTGCCTTTCTAGTTACTGTTTGCTCTGTTCTGGGACGTTTTCTAGTAAGTAAACCACTTTGATACAAAAAGCGTCTTCCTAAAGGATACTGATTTAATTCTAATGAAAAACGTTCAGTCAAATCTATTTTCCAAAATGAAAAATTTTTGTAAGGATCTGTATTTTCATCTACACCTTCAGAAGGTGGACATTTGGTTGCCATAGATTGTAGAAACCTATATTGATCCTCAATACTTTGTGGAGCAGGAGGAACAAAAGCCAATTGCCACTCCTCAAGGATGTTTGGATTCATTACATTAATATGA
>brain3	AD	SRX4043897	NODE_160519_length_4053_cov_7.69172	Papillomavirus
ATTCATTACATTAATATGAGCAAGGATGTCAGCATCTAAGGTCACCTTGCAAAGCTGGAATATAAATTCTACCTCCACCTCCTCTACATGACGCACATACTGTTTAAAATCGGAGGCTTTATATTTATATCCAGATGGAATTGGAGAACCTGCAGCTCCTACATTGTAAACTGATAAATTAAAATTAGTATTTCTGGTATTGTCTACATAGGTAACAAATAGCTGATTACCCCAACATATTCCATTATTTGCCCCTTGAGCATTTTGGAGCCAATAAGGTCTGTTAAACAGCTGAGCATCACTGCTAGTTAAAGAACCACTAGGAGTGGCTACATAAATGTGAGAATCCACATTATTCTGAGCCTGGCTATCCTGTGGAGATCTGTAAAATTCAGATTCCTGATATGGCGTTGGAATAGAATCACCTATTGTGCCTGCTCTGGTAAAATAATGCCTTGCATACAACTGCTCTCGACGACCAAAAAAGAAGCATTCATCACCATACTTGTCTTTTGTCATTTTCAAAAAGTCTGGATACTTGCAAGTACTATCTACTATATCTAAAGGAACACCTGACCTATCTTGCTGAAATGCCCTGAAATTGCAAGCTCCGAATCCTATATCACACATGTCACCATCCTGAATTATGGAGTTAATAAGCTGCACAGGAGGACATTCACCTACTTGTGCAACATGGTCTTTACAGAACTCAGCAATATCCCAATGGGCTCCAATAGGAGGTGCACAGCCTACCATAAATAACTGTGTTTGTTTGGGGTCTACAGAAACATTTTGCCTGTTATCATCAGTTTGAGGTGCAGGATATGTATTAGGATTTTCTGTGTCTTTATACTTATTAAACAGTGGATTACCAGTTGTAGCCACTCCTAGTGGACCACCTCTTCCAATCTCCAACCCTCGTAAGCGCCACACTAAGCGCTCTCTTTCGACATTATAAATAGTGGGATCTACCAGTGCAAACTTGTTAGGATCTGGTAACATTACTCGTAAAACTCTAAACTGGTTTCCAGAAACTTTAGGAACTTCAACTTTTTCCTGCTGATTTCGAACTTCAAAAAATGGATGGCCTACTTGTAGCAATCGTTCTGTACCAGCATAAAAGAATAAATTTGTATTTGTTACGTATTCATCCGTGCTGAGTACGCGGGCGATAGGTCTTGGGGGTGGCAGGTACAGTTTACCATTCTGTTGGGTCCATAAAGCCATCTGCAAAAAAATCATACATGTCTGAGCGTTTGCGTTTTCTCCTGCGCCACAAAGAAGGATGTATATAATAATCAGAGCTTTCAAAATCCAATACTATAGGTGGCTCTAAAGGATGTAAAGTGTCACTAGGGAGTACAATATCAGTTTCTTTATGAGAAACAGGATATGAAACAAACAAGTCTTTAGCATAATCGTCAACAAAGACTTTTAAAGAAACTCCTGGTGGTAAAGTAGGAACAGTGTAAACAGATCCTCTGCGACCTGAACTGGACAATATTAAATGAGCACCATCAAAGTTCTCAACTTGGGAGTCTAGCAAATCTTCATCTGCATATTCAATTTCCCCATTTATTTGTTGATTTATAAAAGTGCTTTCTGCCATTCCATCTACTATTGCACTGTCTCCAGAATGCTGTCCTAAAGTGCTTAATTCTATTGCATCTGTAGAATCAGAACCTATCGTACTTAAATCAAAATAAAAGTGAACATTTTCCCCTATTTGTGTTCCACTCCGGGTTTTTATTGTGCCTCTTCTGGCTAATCTACTAACACGCACCCGACCGTTATCGGTTTCTGAATATCTAGGCCTGTGTATGGTGATAACATCAGTAAAATCTGGATCTGGCGCAGCAACAACATTTTGCACGTCCTGTGCAAACTGTAAAGTTACATCATCTGTAAAGGCGGGATTTTCAAACTCAAATTGAATTGCGCGGGAAACTGGCCCTAAAAAATTCATATTTCTAGTTCTTATTTGTCTGATTTGCCTGTTATATAAATCACGAGCTCTTTGAAAGGCTCGCCCTATACGTTGCTCAGGTGTGCTAGTTCTTATATCTGGCTCTTCTATATTAAATTCTTCTATTAAATTGATTTCTTCCAATGGAATAGATTCTGCTCCTATTGTTTCACCAGATATTTGTGAGTCTACAAATATGCTGTAATCCACAGCTGGCATTTCAGGCTGGGGAATTAAAAGTGAAGGTTCTATGTGTGTATTATAACGTGGCCTAGTCCCAGCCACGATAGTTTTAGATGGTTGCTGTGCAGGTTGCACATCCAGCACTGCTATGTTATCATCTTCCCCAGTTATGATTGTTGGTTGACTTTCTACACCAGTAACATCTGATATGGGATCAATATTAGTTAAAACAGGAGGCTCTGTAGGTACAGCATCAATTACAGTACCACCCGACTCAACTACTGTGACATCTGGAATACCTGTGTCTGTAAGTGGAATAATAGATGATCCTGCCGGATCTACAGGAATAATTTCAGTTGGCACTAATGGGTCTACAGGTACTACAGGTCTTATGGGTGTAGCATCAGTAACTTTAGGGGTCGTTGCTCCAATAGGACGATACCCAGTAGATCCGCCTGAGCCCTTTCCAGAACCAATACCCAGGCCACCTAAGTATATAACACTCCCTAAAATTCGCAATAATCGATAAGCGAGAGTTTTACCTTCTACTTTGTTTATTACATCATCGGGACATTGACCAGTAAATTTACATTGTCTATATAAAGTTTCAACAGAATCCCGTTTGCGTCGTTTTGCTCTGTAAGACATTTTACAGTTTATCTAATGTACCATAGGCGAATGATGTGTGTTTAGGAAAAGTAACATGTTTTACAAATTGTTCTCTCTGTTTTGAATCTTCAAATGCAACTAACATGCGTCCTTTATTGCTATTGGTATTATTACTACCAACCCAAGTAAATATAGTGCTAATATCTAAAACTGGAAACTCATTTTGATTTCTTTTTCTATATCTCCAACATTTTAAAACATTTGGAGGACCTGTTACAATAATCACTGGGGGATCCCGAGCCTCCTCCTGAAGTCTTGCAAGTCTCGACAGATGCGATGTTGGAACTGATCTATGTCTCGACCCCACTGCCTCAGGAGACGGAGCAGCTCGTTCAATTCCTCCTCCTCCTCCTCCTCCTCTTCTTCTTTTTGCTGGGGTGGTTGCTCGTCCTTCGGGGGTTGATTCTCTTTCTCTTCGTCTTCGTCGAAGTGTAGATGTTTCCTCGGTGCTAGAACCGACCTCCGGCCTTTGGATTCTTCTTGGGCTTTCCGAGGTGGATACGGTGTTTTCGGTGGAACTGGAAACGGTGGAGGAGGAGTTCTTCCCGGAGTGAGAAGAGTAGGAATTTGAAGAGCTAGTAGGGGCGATAAGAGTTTTATTTTTAAAATGCACACTCCAGTTTCCGGTGCCTCCAAACCTTTGATCATCTGTATCAAATAGTGCAAAGTAAACTTGGTCACCACCAACCTCAGTGTAATACATGCCATTATAATCTACAAGTCCTGGCACTTTATGCCATACATCATTAGAGTCTTGATAGTAAATAAAGTCCCAATTAATATATATATAACTATTGTTTCTATCATTATTAAACCACACTTCAACATTATAGGGTTGTTTTTTAAAACAATTTCTTGGTTGTGTATTTATCAGCTCTGCACTAGCATTTTGTAATGTCCATGTCTCTCTTGCATATGCTGATTTTTTTAAAGATTGCAGAAGAAGAACCATATTAATTGCTTCTTTTGCTTTATATTCTGACACTGTTGTTACAGGCAATGGTTGTAGACCAAAATGTGTAAGCCCTTCTCTTCTGCCATAGTACAAATATACATTTTCCTGTCTAACAAGATTCCAGTATTTAATTTGGGAGTCCAGATCTTCTGCTCCCTGTTCAATTAGATTCAAAAGATTGTCTTGAATGGCATTGAAACGTTGGGTCAACCACTCCATCGTCTTTTTCCGGCACTGTCAGGTCTAATTGAGAAGCCAGTTTTCTAAAAAAACATTTCCA
>brain3	AD	SRX4043897	NODE_160520_length_777_cov_28.7024	Papillomavirus
ATTCATTACATTAATATGAGCTAAAATCTCTGGTTCCAAAGGAACCTTACAAAGCTCTACAATCAATTCCAGTTCATACTCTTCTGTGTGTCTGGTATAATTTTTAAAATCTTTTGCCTTATACGTATACCCTTGCTGCGTTGGATCAGCATCGTTACCAGCAACAGATATATTAAAATTCACATTTCTGGTATTATCTACAATAGTAACAAAACAATTATTTCCCCATAAAATGCCATTGTTAGCACCTAGTGCTTTATGTAACCAATATGGTCTGTTGAATAAACTAGCATCGCTAGAAACTAAAGATCCACTGGGTGTGGAAAAATAAGAATAAGGGCCTAAATTCTGTCCTTGTGGTTTGTTATTGTCAGGATTTAAATATGAATGGAGTGGTAAGGTATCTCCGTCTATACCAGCTTTACATAAATAATGTCTTGCATATAGTTGCTCCTTTTTGTTAAAGAAAAATACCTGGTCTCCATAAACATCTTTTGTCATTTTAAGGAAGTCTGGCCATATACAAATTTCGTTGGTTATCTCTAAGGGAACGCCAGCTTTGTCTTCTTGAAAAGTTCGAAAGTTTGCATTCCCAAATCCTATCTCACACATATCTCCGTCCTGTATGTAGGTGTGCAATAATTCTATTGCTGGGCAATCACCTTTATTTAATTTGTTGCATGGCTTAGTAACATCCCAATACTGACCTGTGGGCGGAACACAACCCACTATGAACATTTGTACCTGTTTCGGTTCAAAAGCTACATCTTTTCTATA
>brain3	AD	SRX4043897	NODE_180096_length_3301_cov_39.1991	Papillomavirus
TGGAAATGTTTTTTTAGAAAATTCGCCACACAAATAGACCTTACACCTAGAGAAGACCAGCAAAATGAATCAGGCCGATCTGACAAGCCGTTTCGATGTACTACAGGAGAGTTTAATGGAACTTTATGAAGCAGGAGAAAAAAATTTAGAAGCACAAATAAAGCATTGGAGAATAATTAGAAAACAATATGTATATATGTATTATGCTAGGAAAGAAGGATTTAAAAATTTAGGGTTACAACCTTTACCAACACTTTTAACATCTGAATACAAAGCTAAAGAAGCTATTCAACAGCTTATATTATTAGAAAGTTTACAAAACTCACCATTTAGCAATGAGGAATGGACATTAAGTGATACTAGTGCTGAACTAACATTAACAGCTCCACGTAATACATTTAAAAAACAGCCATATACTGTTGATGTATGGTTTGATAATATGCCTACTAATTCCTTTCCTTACACAAACTGGGATAGAATTTATTATCAAGATGAAAAGGACAATTGGCATGTTGCACAAGGACGAGCAGACATTAATGGACTTTACTTTGATGACATTACAGGCCAAAGAAATTATTTTACATTGTTTGCTCCTGATGTTGAAAGGTTTAGCTCCACAGGACACTGGACTGTTAATTTTAAAAATGAAACTATTTCTTCTGTCAATAGTTCACAAGGGCCATCTTCCAACATCTCTCCTCAAGGATCCGTTACTTCCTCCGGGGACGCCATACCCAGGGCGAAAACATACACCAGCAGACGCGACAAAGGAAAAGAGGGAGTCCCTAGCTCAACCACCCCGTCGACCCCCGAACTACGACGTAGACGACGACGACGAGAACAAGGAGAATCACCCTCCAGACGACGACCGAAAAGGTTACGGGAAATCGGTGGTGGAGTCCCTCCTTCGGAGGTTGGAAGAAGATCTACAACTGTACCAAGAAGAGGTCTTACACGAACTGAACGACTTACGGAGGAAGCTCGAGATCCCCCAATTTTAATTGTAAAAGGTGGAGCAAATAACTTAAAATGTTGGCGTTACAGACATAAAACTAGTACTTTGTGTGAAAAAATATCAACAGTGTTTAGATGGGCGGGAGATAATACTGGAAATAGAATGTTAATATCTTTTAGATCTGTAGAACAAAGAGCTGTTTTTCTTAAGGTAGTAAGTTTACCCAAAGGCTGTACGTTTGCTTTAGGACACTTAGATTCATTATGAATGGTAATAGAAGATCCAAACGTGACACTGTAGAAAATCTTTATAAATCATGTAGGTTGGGTGGTGATTGTCCTCCTGATGTAGTAAATAAAGCTGAAAGAAAAACTCTTGCTGACATTTTATTACAAGTGTTTAGTAGTGTTATTTATTTAGGAGGGTTAGGAATAGGTACAGGAAGGGGCTCTGCTGGAACAGTAAGTGTAAGGCCTATACCTGAAATTCCAAATATAACTAGTGGAGTGGATATTACAGCAGCCGGTAACAAAGTAGAAGAGATACCTTTAGTAGACATAGGAACAAGACCCAAAACAACAGTGCGAACTCAACAACGACCGTTTTCGGTTCCAATAGATAGAATTAGTGTTGGCTTTAGACCTAAAGATCCAACAGGTATTAAGCCAATTGATGTAGTAGATCCCTCCTCGCCAGCTATTGTAACGCTGCAGGAAAGCTTACCAGATTCTATCATAACTATAGGAGACCCCAATCTTGAGACAGGGGAGAGTATTCTTACTAATGTAGATGTAATCACTGACACTACATCTATTAAAAGTCATCCCACTGTTTATCAAGGTGTTGAAAATGAGCTTGCTATTTTATCAGTAGCTTCAGCTGAACCACCAGCTACTGAGGTTATTTTCAATGCTCTAGAACCTAATATAGACCCCTTTGTTACAGTTCAGTCTATTGCTGGACACATAGACCCAACATATAATGTTTTTGTAGACCCGAATTTAACAGGTGATGATATTATATTTGGTGAGGAAATTCCTTTACAACCCATAAATCCAAGATTAGAGTTTGAACTGGAAGAGATACCCCAGGCTAGCACTCCAGAAGAACGCATTCAGAGAGCATTTAGCAGAGTCAGACATTTTTACAGAAAGCATGTGCAACAAGTTAGAACAAGTAATTTAAATTTACTAGGTGATGTAGCCCGCGCAATTTCATTTGGTTATGAAAATCCCGCCTTCGAGCAAGACGTTAGCCTAGTATTTGAAAATGACTTAAGTGAATTGGCTGCAGCACCTGATGCTGATTTTGCAGATTTACAAAGAATCAGTAAACCACAGTATTCTCAAACTAGGGAGGGGAATGTTCGAGTCAGCAGACTAGGTCAGAGAGCTGGAATGCGTACCAGAAGTGGTACAGTGCTTTCCCAGGATATTCACTATTTTTATGACATTAGCCCTATATCGGCTGGTGAAAATATAGAGTTATATCCTTTAACAGAAACATCAGATATTATTGTAGAAGATCCAATAAGTGAAAGTGTATTTATAAATGAACTAAATATTAATGCAGACTCATTATTAATGGACACATATGAAGATGATTTTACGAATGCTCATTTAGAATTTAATAATATGGAGATAGATGATGAGACATTAAATTATCCAACTTTAATAACAGATATTGGATTACGAACTCTACCTACTTTTACAGATATTTTTGTATCTGAACAAAACCTTAATACAGATAGTACCTTTATAGTTCCTAGTATACCATTTACTCCTATAGAACCTTCAGGTGCTACACATATAGGCTCTATTGACTTTTATTTGCATCCTTCTTTAACTAAAAAAAAACGACGAAAGAGAAAATTTTATTTTTAATATTTTGCAGATGTCTCTTTGGCTGCAATCTCCTGGCAAACTGTATCTACCTCCACCAAAACCTGTTGCAAAAATTTACAACACGGATGATTATGTCAAACGGACAGGATACTATTTTCATGTAGGCACTGAACGCCTTCTACTAGTTGGGAATCCTTATTTTGATGTGGAAAATAATAACAACGAAGTAACTGTTCCAAAGGTTTCAGCAAATCAATATAGAGTTCTAAAATTACAACTCCCAGATCCTAACAAATTTGCAATTGCTGATCATTGTATATATGATCCACAAAGTGAACGATTAGTGTGGAAATTAACTGGTATTGAAATAGGGCGAGGTGGGCCTTTAGGTATAGGAACTACAGGACATCCTTTATTTAATAAATTTGCAGATGTAGAAAATCCGTCAGAATATCCAGGGTCACATACAGATGATAATGACTATAGAAAAGATGTAGCTTTT
>brain3	AD	SRX4043897	NODE_180097_length_2577_cov_17.7962	Papillomavirus
TTTTCTAAAAAAACATTTCCAAGTATCATTATTAATTTTATAAACTAAAGACCCATCATCATTGATTGGTACAGGGTTAGGAAAGTTAAAACATTGTAGTCTGCTTTTTAAAAATGAAAAACTATCATCTTTGATAATATCATAATTGGTAGTAATTAACATAGGTGGCAAAGTTATTTGTGTAGGATTTTTATGTTTACTATCAATACATACTTCATTACCATCTAATGCACCTCTCATATTAACATCCAAATGTTGCCAACATTGATAAGTACAATCATCTAATAATCCTATTTTGCCATCCACTAGAGGTGAAAGCCAAAATGGGCTACTTCTATTCATAAAGTTTATTACTTTACCTTTTAGAAATCTTATTAAACTATGACAAAAATAAGACTTTCCAGTATCTGATGGTCCATAAAATACAATACAATTTCGTTTGGGAATGCTTTTTAAAAAGTCTCTAAATGCTGTTAGAAAGCTAACAAAATTTACATGCTGAAATTTAAATAATAATGCTATTGTTTTCCAATCTCCTTCTCCATCGCATTCATCACTACATTTCCAAATCCACTCTGACATAGTTAAGTCTCTCATTTCTTGTCTCTTATAATGTCTCACCATTCTACATGCGTCCCTTACATATCTAGCCTGGTTATTACTTTTTAAAAATGCTGCAGCATTTGGATCTTCGTCAGCAATTTGAGCATATCTATATGCAATCATAGATTCCTCTACTAAATTATTGTCATATGCATATTGAATCATCTGACTAAGTTCAAAGGTGTCTGCTGCACTAGCAACTTGATGATTAATTAATGTATATTTTTTAACCCAATCAGGAAAGTCACCAACTTTAAAAGAAGCATTTCCAAATGATTTCTGATAAAAATATAAAGCTACAACAGCACTTCTAGTTCTAGGAGGTTCACTTAACAATTGAACAGATTTGCAATTCAGTAATTGACAAAACAGTTTTTCAACTGTTTCTCTATTTTTAGGTGACTTAAACAATAAAAAATATAATACTGAAAAATCATATGTTAACAGTTGCAAGAAATCACAATAACTTTGTAATTGGATTTTTGAAGCTTCTATCAATTCGTTTTGTATTTTATGAGCTAATACAATCCACTGTGGAGAACATGTCTTATCACTCTTAAAACTTCTGGTTAGCTCTCCAAATTGTACTCCAAACTTTTCTTTACATTTGTTCATCAATATCCCCTTGTAATTCTCATGCGTTAACAATACATTTTCTAAGTCAATATTTGTATTTATATTTACCCCCTTTTCATTAGAATTTTCAGCTTCATCTTCTTCTATACCACTATCGCCAAATAATCGTCTTTTGATGCTTCTTTGGGGAGTAATTTGTACAGCTGCTAATCTAGGACTTAATTCAAATACTGACTGCTCCGGAGAAGGATGAAACTTTCGTTTTAGAGCTATTATGTCAGCATCACATTCCTCCGTTAACTGCTTATTGAGCAGTGCCAGGGAATTTCCCTGAAAGCAGTTATCCACTTCATCTATAAGATTTGAAACATCAGAGCCATCCGTACTATTTTCAAACAATTCATCAATAGTATCTAAGCTATCTATACATGCAGCTTCAGTTATAAACCAACTACTACAACCTTCTTCCTCCCCAAATATATTACCTTTATTAGTGTCTCCCATGATGAAAAAGATTCCTGGAGCAGGAAGGGCAAAACAAACTCAACTCCGAAATCAATAGTTGCTCTAATGTTTGAATTGCAGCATATGTAGAATAAACACAGAGTCGTACACCTGTTTCACAAGACTTACAACAGGTTTCTACTTTAAAAGGTATACGCTCCTCCTCCTGTCCCTCACTGTCAGGCGACAAAGATTCTGAACATAACAAATTGTCAGGTAAAACTAATTCATTTAAATCTAATTCAATATCACTAATAGTAGGCTTTTTCCCAATCATATTTGTTTTACACAAAATCTACAATAATTTCTCCAGTGATGTCTTACTAATACAAATGGTAAATCAGAAACAACACAATCGTATTTTTCTAAATAATCCAACAATCTATAGCATATCAAACATCTAACAGTAATATCTTTTAAAGGTTGCTTACAAACAAATTCAATACATTTAGCATCAACAGAACATCTATAAAATTGTTCTAATTCATATTTAGCAGTTAATTTTAAGCATGGTGAGCAGCAAGCATAGCCAACATTATCTTTATATAAAAGATTTAAAGTTTTATGATGAAATTCAGCAAGACCCAAATAATCAATTTTATGCTTGCAAAAAACACAAGCAAATGATAAATCAAACAATGAACAGTTATACAATTTACAATAATCTTCCAAATTGGTTGGTTGCTGATCAGCCATCGAGAAGAAAGAAAGAACTGCGGAATCACAGCTTTTTATAAGTACCGGAGTCGGTATTTTTTTACTACAGGAAATAATAGTTGCCAACAACTATCGTGTAAGAGAAACGTTGAAACCGTTTTAGGTATTTTGGCGGGAAAGCCTGTACCGAAAACGGTCTCCTCCCAAAGCAATCGTCTGTTTGAACTTGTACTCACC
>brain3	AD	SRX4043897	NODE_19050_length_777_cov_2.87566	Torque teno virus
GCGCTGCTACTGTCTGAGCTGCCAGATTCAAAGAAGAAACCACCGGGTGACATGACCTGGCGCCCCCCGGTACACAATGCCGCCGGCATCGATAGGCAGTTTTTCGAAGCCTGCTTTCGATGCCACAATAGTTGCTGCGGCTGCGGCAGCTTTATTAATCATCTTAATGTACTGGCTGCTCGCTATGGCTTTACTGGGGGGCCGGCGCCGCCAGGTGGTCCTCGGCCGGCGCCCCAGATGAGACCCGCGCTTCCCGCGCCGGAGCCCGACCCGGAGGCCGAGAACCGTGAGCCATGGCGTGGAGCTGGTGGTGGCAACGATGGAGGCGCCGTCGCTGGCAACCCAGGCGCCGCCGCTGGAGACGCCTACGACGGAGAAGACCTAGACGCCCTGTTCGCCGCCGTCGCCGAAGACGCAGAGTAAGGAGGCGGAGGTGGGGTAGGAGACGGGGGCGACGCAGACGGTACACTACCAGACGAAAGAGACGCCACACTCGTAGAAACTTTAAAAAGAAACTTGTACTTACTCAGTGGCACCCCACTGTAGTTAGACGCTGCTTTATTAGGGGCATAGTCCCCATCCTTATATGCGGGCACACAAAATGGAACAGTAACTACGCCCTGCATAGCGAGGACTACACAGAAGAGGGCCGGTACCCTCACGGAGGGTCCCTGTCCACCACTACGTGGTCACTAAAGGTGCTGTACGACGAGCACCTGAAGCATCACAACTTCTGGGGCTACCCAAACACCCAGCTAGACCTGGCCAGATACAGGG
>brain3	AD	SRX4043897	NODE_249513_length_3191_cov_10.5823	Torque teno virus
GCGCGCGCGCCGCCGCAGGGCCGTTTTTTTTAAAAAAGCGGAAGGAAGTCCGCCATTTTGTGAACTAAAATGGCTGCGGTGACGTGCCACACACGTCACAGTCACGTGGACGAGGATGCTTCCGGGTTTAGGCACTCCCCTTTCCACGTGACTTATGACGTATAAAGTGACCTTTGACCCGGAAGAGTATTGCCGCCATTTTGTGATGACGCCGAGGGCCTGACCTTTGAACTTTAACGTCAGATCCTCTGCGCCAATCTAAAATGGCCGCCATGACGTCACGGAATCGGCCATTTTGGTAGTTCGGAAGGCCTAAAATGGAGGCCGAAGCCTATGTAGACCCCCGATACGAACAAATGGCAAGAAGATAAAGGCCTTATGGCGAAGTCTGGCCCCACTCACTTTCGTTACTGATTCACAGCTCCAGTGTCCAATGGCAACCTGGAGTCTGTTTAATAAAATTCTCGACCCCCGCGAGCCCGAAGTGGTCTGACACGCGCAAGCGTGTCAGCACGAGCGGGGGTCTGAGGTGCCGCGCGCAGCCGAAGGCGTAGCGCGCGGCTCCGAAGAAGTTGAGTCAGGGGGAAGGGTCGCTCTCCTCGCTGCGCTCGGAGAGCTTAGTGACCTTTAGAGGTAGACACCGACAAGTGAAAGTTGCACGGCCTAGCAAATTTTATTAGAAGCCAAGTTTGAAGGTTACACGAAACTGAGAGTGTTTTGGCATCCAGGGGTAGAAGGGGGTGTCTTTCAGGTTGCTTCTAGGGGGTCTATCAAAGGCCCTACAGCACTCATATTCAGTTTGCCAGTCTGAGGCTGTTGGCTTTCTATCATAGTAGTTACCGAACATGTCTACATGTTCTCTTGGGGGAAAAATAGTGGGTTTAAATGTAAATGTGCTTTTGTTTTTTGGAGTTGGAGGAAGAGGTGCTGCAAGTGGAGTCGCAACTGCTGTTGCTGTCTGAGTTGTTTTCTGAGCTGCTGCTGTATCGGTAAACTTTCTTGGGCTTCTGCTTCTTTTTCTTGGGACGAGGTGATCGAGAGTGTCTGTGAACACGAGTCTTCTTCTGCTTGTTCTCTTTGGTCTTGGAGCTCGACTGGTGGGAAAATGCGGGGGATTTTAGGCTGCTGTGTAAAGTCTGGAACATGAATTTGTTCATCATGCATTCTTTTGATAGCTCTTTCAGTAAAGAACCCCCGTCTTTGGTCAAACGAGTGGAAGAGGAGTCTGGGACCCATGGTGAGCGGGCTAACAACTTGTACGTCCCGCTTGAATCTACCGGAGTCGGTGGGTGCCAGTCCTGAGGAGTCGCACGGGTTTTTGATGACCTGGTGGTAGAGTAAGTCGCCCCCCCAGTTAAATCTGAAGGTGTAAGAGGCTGCCAAGTCCACCTGAAGCATTTCGTCTCTGTAGCTGAAAGGTCCAGTTTTGCAGATGTCATTCATTACTTGTTTTTGTCTTTTGAGTATGGGGTACCATCTCTGTTGCCAGTATCTGGGCACCTGGCCGCTGCCATTGCCCAGTTTTCCATTGCCAAAGTTTGTGTCATAGAATATGTAGCCCATGTCTTTTTTGTCTTTGTCATATAGTGGTGGTACTGTGTAGGGGCATTGTACTACTACTAGGCCTACTGTTTCATGGTCTTGAAAGGGGCCTAGTTGGCTTTCTACATATTCACTGTAGCCAAATAAAGCTGACCACAGTGGGATGTTTTCTAATACACATTTGCATTGCATAGGGTTAAACTCTGTTGTAGGTTTAGTGCTGTATTGGAACCATATTTTGTTAAATTGACCTTTGTCATTTAGAGGGTTGTATGTAACATCCATGTATGCTGTTGTAAATTGTATGTTGTGTCTGTTTGGGCCTATAAATACTGGTGAAAACCAGCCTGTGTGGTATTCATATTCTGGAGTGGTAGCATTAGCAAAGGTAGAGTTTATGTGTGGTACTGTGGTTGTGAGTGTTGTTAGTTGTGTCCAGTAGTGTTGTCTCATTTTTGTAGCATACTGGTAGCCTTGTGCTCTGTTACTAAAGTCATAGGAGGAATATCCATAGTTACTGTCTGTTTTTCTGTGGTAAATTTGTGTAGTCCACTTAGAAAGCATATCTTGGTATTGGGTCCACTGTGAGCCATCTGCATTGTATTGTTTTGGTCTAAACATTTGCTCTGTTTGGAATGTTTGATAGTGTGTGCTGGATTCATATAGCCAAGTTTCAAAGGACTTAATTTGTTGACTAACAGTTGTATTAGAGCCAGTGTTTGCAAAAGGAAGTCCAATAACATCGTTGTACTTGTCTCGCAACACCTGGAAGGTGGTGCAAGGGTTGTTCGTTTGTGGTGAGCAGAACGGATGTCTGAAGTCAGCTGCGGTTGACCGCAGAGTAACGAGCGGTACTTTGCATAAGTCAGGCTGAGTGTACCAGTGGTCTTCAAATAACTTAGGTGGAGGTATTTTAATCTTTACATATTTTCTGCCTTTAGGAAAGGTGAGCCAGCTGGGTATTAGTACTCTGTGTTTCTGTTGCATGAGCATGCCTGGGTGCGTGTTAGGAGAGCTGTATATAGTGTTTTTCATGGGGGGATTGTTGTCATAAGTCAGTATAAAGTCAGTTGTGGGGTGTCTGTACATTTTAAAAGAGCAGCCTTTGTATCTGGCGAGGTCTAGCTGGTCGTTGGGGTACGACCACCTGTTCATGTGTCTGGTGAACTGGTCATACAGTACATATAGGCTAAAAGTCACTGTGCTCATGCCGCCCCCAAATTTTTCTGGCTGAGGAGTGCTGTCGTCGCTGTGCATGCCATAGTTAAAACTGGCAGTGTTTGCCCCGCACATGATAAGGGGTATTATGCCCCTAATATTGCAGCGTCTGACAGTGTTGGGGTTCCATTGAGTCAGTATTAGCTTTCGTCTCTTTCTGCGTCTCAAGTACCGTCTCCTAGTCCACCCCCTCCTCCGCCTCAGTCGCCTAACGCGGCGCCTCCTTACTGTTCGTCTTCTTCCACGGCGGCGAGTAGATCTTCTAGGTCTGCGGGGTCGAAATCGTCTCCAGCGGCGTCTCCGGTACTTTGTCCACGCGGGCCGCCTTCTGGGTTTCCAGCGGCGTCTCCACCAGCGCCAGGCCATGGCGCCGGGGGGTTCTCAGGAGCGGGGAGGGCCGGCAGGCCTCTCACACGCGCCCGCCTCGGGGG
>brain3	AD	SRX4043897	NODE_250102_length_2598_cov_5.26814	Papillomavirus
GGTGAGTACAAGTTCAAACAGTATATGGCTGACTCAAGTGTTTTGGCAACGACCGTAAACGTTTCTTTATAAGTGCTGTAGGGTGTTAATAGTTGGCAACAATCATCACTTATACCTATTTTTTTCAACCAAAGACGGTTATATAAATACTGGCAAAAACGTCTTTTCTGTTAGATTTTTCCAGATGGCTTCTTTGCTGTATCCCATTTGCTTAGAAGAATACTGCAGTTATTTTAATGTTGCATTTGATACTCTAACTTTGCCTTGTATATTTTGTCGTGGTACTGTATGGGCTACTGAGCTTGAGGTGTTTCAAAGGCGACGTTTGAGTCTTGTTTGGAGGGGCAATAATTGTTATGCTGCATGTTTAAGATGTATTAATCGTACTGCTGCTTATGAGAGATTTAAATATTTTCAATGTTCTGTTAAAGCTGAGTATATAGAGTATTTTTCTCAGACACCTTTAGATTCGCTGATTGTTCGCTGTTTGTTTTGCATGGCATTGTTAACTAATGAAGAAAAAGTTGATATTATCGCTTGTGGCTCCACATTTCAGTTGGTAAGAGGCCACTGGAAAGGTGTTTGTAGAGAGTGTTTTTAAAATGCAAGGCAAAGTAGCTACTTTAAAAGATATTACATTAGATATCTACTCTATTGCTATGCCTGATAACCTATTGTTTGAAGAAGATTTGTCACCAGATGTAGAGGAGGAGCGTCCAGTATTCAAAGTTGATAGTAATTGCGACAGCTGTCAAAGAGTTATTAGAGTTTGTGTTGCTGCCTCTGAATCCGGCATAAAAAGATTTCAGCAACTATTGACCGAAGAAGTTTCTTTCCTTTGTCCTGTCTGTTCCAGGAACCTTTTACAACATGGGAGATTCCACTAAAGGTACTGATACATTTGACTGTTTGGAGGGTCCTAGCGACTGGTATATAGTGAATGAAGCTGATTGTATGGATGATATAAATTGCATTGATGAGCTTTTTGATGACAGTACAGAATCGAACATTTCTAATCTGTTAGACGACAGTGACGAGGTGGATCAGGGGAATACCCTGGCTTTATTCACTGAACAGTTACAGGAGGATTGTGACAAATCAATCCAGTTCCTAAAACGAAAGTATGTATACAGTCCGCAGGCAGATATAGCAGCTTTGAGTCCAAAGCTGCAGGCAATTTCTATATCTCCTCATAAAGACAAACAGAGCAAAAGACGTTTGAATTTTCAGGACAGTGGAATTGAACAAGATGAAGCTGAAAATACTATTACGTCGCAGGTAGAGACTTCCATAGACAATAGTGTTGATAATTCGCCAGAAAATAATGGCGCCGCTGGGTTTCAGGTTTTGGAGAGGAGTAATCAAAAGGCGTATATGTTATATAAATTTAAAGAAACATTTGGTGTGTCATATACTGAACTTGTCAGAAATTATAAAAGTGATAAATCCTGTAATGACAATTGGGTTGTGGTTGTTACACGAGCAGCAGAAGAAGTATTAGAAGCTTCAAAAATTCTTATAAAAAAACATTCTGTGTTTGCACAAATTATTATACGTGATTTTAATGGTTTATATGTTGTTCAATTTAAAAGTGGTAAAAGTAGAGAGACTGTTATTGAATTATTTTGTGAAATGCTAAATGTGCATGCATTTCAAATAATGTGTGACCCTCCAAAAGTAAGAAGTGTTGCTGCAGCTTTATGGTTTTATAAACAATCATTAGTAGATAAAACCTATTTATATGGTAGCTTACCAGAATGGATTCTTACCCAAACAATTGTGGACCATCAATCTGCAGCAGCTCCGGAAACATTTGAACTGTCACGATTAGTTCAATGGGGATATGATAATGATATAACTGATGAAGCTCAAATGGCCTATGAATAAGCTGAGTTGGATAGTTCAGACAGTAATGCTGCTGCATTTTTAAATCAAAATAATACAATTAGATTCATTAGAAATGCATGTCCAATGGTAAAATTATATAAAAGACATGAAATGAAAAAAATGTCTATGTCAGAATGGATATGGCAATGTTGTGATAAATGTGATGATGGTGTAGGTGATTGGAAACCAATTCTTCAGTTTTTAAAGTTTCAACACGTAAATATTTTAGACTTCCTTTATGTTTTCAAACAGTTTTTAAAAGGTACTCCTAAAAAAAATTGTTTAGTATTTTATGGACCTCCAGATTCAGGCAAGTCATATTTAGCATATGCACTGATAAAGTTTATACGTGGTAAAGTTATTACATATATGAATAGAAATAGCCAATTTTGGTTACAGCCATTAACTGACAGCAAAATGGGTTTATTAGATGATGCAACATTGCCATGTTGGAATTTTATAGATATACATATGAGAACTGCATTAGATGGTAATTATGTATGTGTAGATTCTAAACACAAAGCTCCAATACAAATGAAAATACCACCTTTATTAGTAACTACAAATTATGATGTAAAAAGTGATCAATCTTTACTTTATTTACATAATAGATTACATTGTATTTACTTTCCTAATAAGCTACCTCTTACAGAGCAAGGCAACCCTATTTATGAAATTACTGACTTCACATGGAAATGTTTTTTTAGAAAA
>brain3	AD	SRX4043897	NODE_52665_length_697_cov_15.784	Papillomavirus
TCATATTAATGTAATGAATCCTAGAATACTTGAAAACTGGGAATTGAATTTTGTGCCTCCTGCACCTGAAGGACTGCAGGATACTTATAGATATTTAAGTTCCGGTGCTATTAAATGTCCTGCTGACATTGAACCTCCAAAGTCTGAAGAGCCATGGGACAAATATATTTTTTGGACAATAGATTTAACAAATAGAATGTCAAGTGAATTAAATGAATATTCTTTAGGCAAGCGCTTTTTGTATCAAACAGGAATGATCAATAACAAACGTTTGCGCTCGCCTTGTGCTGAAACAGTACCTTGTAAACGTTCTTGTAATGACAATGTTTGTGGTAAACGTTGTAGTAAACGTAAGAGAACCAAATAGAACATAATTTGTGTTAGAAACTGTGAATGTTGTTTTAAATATACTGTGAATTATTACTATACTGTGAATTGATACTGTGACTAAGTAGATACACTTTGGATTCTATGAAGGATTAAATAAAGCTGCTGACAAAAATATTGACTCATTATTTTCACACCCAGTAATTATTTGGCTTGTATCCTATTGATATAAACACCTTAATCATTTGGTCAGGAAGATAGCCAACTGGACACTATTCAACCATAAACGGTATAGTTGTTCCCCGAGGGCACGAGTTCCGTACCGCTTTCGGTCGTGTTGATCCTTGTCAGGTGAGTACAAGTTCAAACA
>brain10	NON-AD	SRX4043903	NODE_462999_length_708_cov_3.92722	Papillomavirus
GTATGAACTGGAATTGATTGTAGAGCTTTGTAAGGTTCCTTTGGAACCAGAGATTTTAGCTCATATTAATGTAATGAATCCTAGAATACTTGAAAACTGGGAATTGAATTTTGTGCCTCCTGCACCTGAAGGACTGCAGGATACTTATAGATATTTAAGTTCCGGTGCTATTAAATGTCCTGCTGACATTGAACCTCCAAAGTCTGAAGAGCCATGGGACAAATATATTTTTTGGACAATAGATTTAACAAATAGAATGTCAAGTGAATTAAATGAATATTCTTTAGGCAAGCGCTTTTTGTATCAAACAGGAATGATCAATAACAAACGTTTGCGCTCGCCTTGTGCTGAAACAGTACCTTGTAAACGTTCTTGTAATGACAATGTTTGTGGTAAACGTTGTAGTAAACGTAAGAGAACCAAATAGAACATAATTTGTGTTAGAAACTGTGAATGTTGTTTTAAATATACTGTGAATTATTACTATACTGTGAATTGATACTGTGACTAAGTAGATACACTTTGGATTCTATGAAGGATTAAATAAAGCTGCTGACAAAAATATTGACTCATTATTTTCACACCCAGTAATTATTTGGCTTGTATCCTATTGATATAAACACCTTAATCATTTGGTCAGGAAGATAGCCAACTGGACACTATTCAACCATAAACGGTATAGTTGTTCCCCGAGCCCACGAGACAGGC
>brain10	NON-AD	SRX4043903	NODE_837356_length_645_cov_2.60417	Papillomavirus
CTCTTATACCCATCTCCGTGCGCACCAGACTCCTGAGTCCATCTTCTGTCGTCTTCTGTTTGTAAATAAAAAGTAGATTCAGCTGAACCACCAGCTACTGAGGTTATTTTCAATGCTCTAGAACCTAATATAGACCCCTTTGTTACAGTTCAGTCTATTGCTGGACACATAGACCCAACATATAATGTTTTTGTAGACCCGAATTTAACAGGTGATGATATTATATTTGGTGAGGAAATTCCTTTACAACCCATAAATCCAAGATTAGAGTTTGAACTGGAAGAGATACCCCAGGCTAGCACTCCAGAAGAACGCATTCAGAGAGCATTTAGCAGAGTCAGACATTTTTACAGAAAGCATGTGCAACAAGTTAGAACAAGTAATTTAAATTTACTAGGTGATGTAGCCCGCGCAATTTCATTTGGTTATGAAAATCCCGCCTTCGAGCAAGACGTTAGCCTAGTATTTGAAAATGACTTAAGTGAATTGGCTGCAGCACCTGATGCTGATTTTGCAGATTTACAAAGAATCAGTAAACCACAGTATTCTCAAACTAGGGAGGGGAATGTTCGAGTCAGCAGACTAGGTCAGAGAGCTGGAATGCGTACCAGAAGTGGTACAGAGCTTTCCCAGGATATTCACTAT
>brain9	AD	SRX4043931	NODE_20333_length_1354_cov_65.2213	Papillomavirus
ACAAATTGATAAAGAACAACAATTTCATTATTTACATAGCAGATTGCAGACATTTCATTTTCCTAGAACTATGCCACTTGATGACAATGGTAATCCTTTATATGAAATTACTGATTCTAGCTGGAATTCCTTTTTTAGAAGACTTGAAAAACAGTTAGACCTGACCAGACCAACGGACAGCAGAAATGGAGAGCCTGACAGAACGTTACGATTCTTTGCAGGAGAATCTGCTTCAACTGTATGAAGCTGGCAGTGACAAAATAGAGGATCATATTTTATATTGGGACATTGTTAGACATGAAAATGTGTTATTATACTATGCAAGACAAAAAGGAATAGGAAGATTAGGCCTGCAGCCAGTTCCTACATTGACAGTGTCTGAATATAAAGCAAAGCAAGCTATTGGAATGTCTTTGCAGTTGAAATCTCTTAAAGAATCAGAATATGGGAAAGAACCATGGACTATGCAAGACACTAGTTATGAAATTTATAGTGCTGCCCCAAAAAACACTTTTAAAAAGGGTGCTTTTACTGTTGATGTGTACTATGATGAGGATCAGGACAATTATTACCCTTATACAGCATGGACAAACATATATTATCAAAATGGGGATAATAAATGGCATAAGGTTGAGGGCCAAGCTGATTATGAAGGTTTATTCTATGTAACTGTTGATGGTGAAAAAATATATTATGTTGAATTTAACAAGGATGCTGTCAGATTTAGCAGAAATGGAGTTTGGACTGTTAAATATAAAAAACATGAAATTTCCTCTAATTCTGTCACTAGCACAAGTGGCAACACTGACGGTGCAGCCAGGGACACCGAGCAACAGCAGAGTCCCAGGTCGAGCACCAACACCGTGGGACAGGAAAAGAAAAGACGACGACAAAGAGAATCATCTTCTAGTCCCCCCACGAAACAGCTTAGATCATCTACGTCGCAGAGCGACGGGGACACCAGTTCGTCGCCGGTTGGACCAAGACTTCGACGACGACAGCGACGAGAAAGAGAACAAGCCTCCCAGCGACGAGAATTACGAACAGCAGGATCATCTTACCCGTCTCCTGAGGAAGTGGGGAGAAGACATAGATTGGTTGAAGGAAAAAATCACTCAAGACTTAGACAACTACAAGACGAGGCTCGGGATCCCCCCCTTATTCTCTTAACAGGTCCTGCCAATACTTTAAAATGCTACAGAAATCGCTTTAAAAGCAAATATCGCAGCTTGGTTTATGCTACTAGCACTGTTTTTTCCTGGGTGGGTGAAGGGACTGAAAGATTGGGACAGCAGAAGATGCTTATTGCTTTTCACACATCAACAGAAAGGTCACTCTTTTTAAAATCTGTTGT
>brain9	AD	SRX4043931	NODE_20891_length_2425_cov_52.9197	Papillomavirus
AAGTAGTACTCCATTAGCTTTATAAATCACAGTTTTTATTGCTTTAAAAATTACAGTTTTTATGCTCTGCGTTTGCGTTTTGAGCTTTTAGTAGAAGATTTAGCATCAGAGACTCTTTTACGTTTCACAGTACTTATAGTACGTCCTGATATTCCAATTTGGTAAACAAAACGACGACCCAAAGATGTTTGGGTTAAGTCACTTGTCATCCTGTCTGTTAAATCAACCTTCCAGAAAGTGTATTCATCATAAGGATCTTTCTTTTCCGGTGGAGGGTTTTGATCAGGACAACGAGTGGCCATTGAGGTAATATATCTATAATGATCCTCAATGCCTGTAGCAGGCGGTGGAACAAATGCTAGGTTCCAATTTTCAAGTATAGAAGGATTCATAGCATTTAAATGTGATAATATATCAGCTTCAAGACTTATCTTGCAAATTTGTACAATAATAGAAATATCATATTCTTCTACATGTCTTAAAAACTGATTATAATCATCAGATTTGTATGTATCTGGTGGCTCAGATGCGTCTCCCTTATATTGAGAGATAGTGAAATTTGTATTATGTGTATTATCCACTATTGTAACAAACAAATTATTGTTCCAACATACACCATTATTTTGTCCCTGAGCCCGTTGCATCCAATACGGTCTGTTAAATATTTGGGCATCACTACTCACTAAAGAACCACTAGGTGTAGCAAAGTAAACTGAAGATGTTGCTGTTTTTTGATTCTGTGAACTTTCTCCAGGTAATACATACTTAGTTTGTGGGTTTTCATGAAGTTGTGGGATGCTATCACCTACAACACCGCTTCTGGTAAAATAGTGTCGTGCATACAACTGCTCACGTTTTCCATAAAAGAATAAACCATCCCCATAAACATCATTGATCATTTTTACAAGATCTGGCCACTTGCAAGTGCTGGCAACTATATCTAGAGGTACACCTGACCTATCCTGTTGTAGCTTATCAAAGTTCATAGCACCAAAACCTATATCACACATATCCCCATCCTCTATAACTGAATTAACTAATTGAATAGGGGGACAATCACCTTTTTTAGGTGGTGGTTGTGCACATGCCTTAGCAGCATCCCAGTGAGCTCCAGTACAAGGCTCACAGCCTACAACTAATAACTGAGTTTGTTTAGGATCTAAGGAAACATTTTGTCTGTTATCTGTACTAGGTTGGAAATATTGATTTGGATTTTCAGTGTCATTTAATTTATTTAAGAGAGGATGACCCGTAGACCCTATACCTAAAGGCCCTCCTCTAATGACTTCTAACCCTCTAACCTTCCATACTAAGCGTTCACTATCAGGGTTATAGATAGCAGGATCAATTAATGCAAACCTATTAGGGTCTGGCAACTGCAATCTGAAAACTCTAAATTGATTGCCTGATACTTTGGGCACAAGTTCCGTTCCTCCAGGATCCTTTATAGGAAAGTATGGATGACCTACAGATAACAGGCGATCACTGCTTGCTTGAAAAAATAGTGATGTTTCTTGAACATAATCATCTGTACTGAGGATTCTTGCAACTGGCCTTGAAGGTGGCAAATACACCTTTCCACTGTTCGGTAGCCAAAAAGACATCTGTAAAACATTATAAAGAACGTTTACGTTTGCGTTTTCGTCTTGGTATATGACTAGGGTGTAAAACAAAATCATCAGAACTAAAGCCATCAATTAATATACTAGGAAAATCAGTACTTTGTGGTGTAACATTTTCTGGAATTGTATCAAAACTTATAGGGTGAGAAACAAATAAACCCTCCCCTACATCATCAATAAAAACCTTTAAAGCTACTCCAGGAGGAAGAGTGGGAACAGAAAGCATGCTCCTTCTAGAACCAGAAGTTAAAACCACATGCGAATTGCTAAAATCTTCTGTAATGTCATCAAGTAGTTCCTCTTCAGGAAATAAAAGAGGAGCCTCACTGTTTTCTGCATCTATAAATGTGCTTTCAGCTAAAGGATTAACAATAGTGGATTCACCACTATGTTCTCCTAAAACTGACAATTCAATAGCGTCTGCATTTTCAATAGAACTAATATCATAATATAAATGCACTGTTTCTCCTATTTGTGTGCCAGAACGTAATCTTATAGTGCCTTTAGTACCCAACCTGCTAACTCTTACATTTCCCTGTGCAGTTTCAGAAAATATCGGCCTCTGCAATCTGACTATGTCAGCAAAATCTGAATCTGGCGCCGCAGACGCCAATTGGTTGAGATCCTGCTGAAATTCTATTGTGACATCATTATTAAAGGCGGGATTTTCAAAGCTAAACTGAACTGCCTGCGGGGCCCGCGTAAGGAAGTTTTCATTGCGGGTCATGACCTGTCGTATTCTTCTGTTGTATAAATCTCTGGCTCTAGAAAAGGCTCTCTGAAAAGCTAATGGAGTACTACTT
>brain9	AD	SRX4043931	NODE_24458_length_3401_cov_5559.98	Papillomavirus
CCTACTAGCTCTTCAAATTCCTACTCTTCTCACTCCGGGAAGAACTCCTCCTCCACCGTTTCCAGTTCCACCGAAAACACCGTATCCACCTCGGAAAGCCCAAGAAGAATCCAAAGGCCGGAGGTCGGTTCTAGCACCGAGGAAACATCTACACTTCGACGAAGACGAAGAGAAAGAGAATCAACCCCCGAAGGACGAGCAACCACCCCAGCAAAAAGAAGAAGAGGAGGAGGAGGAGGAGGAGGAATTGAACGAGCTGCTCCGTCTCCTGAGGCAGTGGGGTCGAGACATAGATCAGTTCCAACATCGCATCTGTCGAGACTTGCAAGACTTCAGGAGGAGGCTCGGGATCCCCCAGTGATTATTGTAACAGGTCCTCCAAATGTTTTAAAATGTTGGAGATATAGAAAAAGAAATCAAAATGAGTTTCCAGTTTTAGATATTAGCACTATATTTACTTGGGTTGGTAGTAATAATACCAATAGCAATAAAGGACGCATGTTAGTTGCATTTGAAGATTCAAAACAGAGAGAACAATTTGTAAAACATGTTACTTTTCCTAAACACACATCATTCGCCTATGGTACATTAGATAAACTGTAAAATGTCTTCCAGAGCAAAACGACGCAAACGGGATTCTGTTGAAAATTTATATAGACAATGTAAAGTTACTGGTCAATGTCCCGATGATGTAATAAACAAAGTAGAAGGTAAAACTCTCGCTGATCGATTATTGCAAATTTTAGGGAGTGTTATATACTTAGGTGGCCTGGGTATTGGTTCTGGAAAGGGCTCAGGCGGATCTACTGGGTATCGTCCTATTGGAGCAACGACCCCTAAAGTTACTGATGCTACACCCATAAGACCTGTAGTACCTGTAGACCCATTAGTGCCAACTGAAATTATTCCTGTAGATCCGGCAGGATCATCTATTATTCCACTTACAGACACAGGTATTCCAGATGTCACAGTAGTTGAGTCGGGTGGTACTGTAATTGATGCTGTACCTACAGAGCCTCCTGTTTTAACTAATATTGATCCCATATCAGATGTTACTGGTGTAGAAAGTCAACCAACAATCATAACTGGGGAAGATGATAACATAGCAGTGCTGGATGTGCAACCTGCACAGCAACCATCTAAAACTATCGTGGCTGGGACTAGGCCACGTTATAATACACACATAGAACCTTCACTTTTAATTCCCCAGCCTGAAATGCCAGCTGTGGATTACAGCATATTTGTAGACTCACAAATATCTGGTGAAACAATAGGAGCAGAATCTATTCCATTGGAAGAAATCAATTTAATAGAAGAATTTAATATAGAAGAGCCAGATATAAGAACTAGCACACCTGAGCAACGTATAGGGCGAGCCTTTCAAAGAGCTCGTGATTTATATAACAGGCAAATCAGACAAATAAGAACTAGAAATATGAATTTTTTAGGGCCAGTTTCCCGCGCAATTCAATTTGAGTTTGAAAATCCCGCCTTTACAGATGATGTAACTTTACAGTTTGCACAGGACGTGCAAAATGTTGTTGCTGCGCCAGATCCAGATTTTACTGATGTTATCACCATACACAGGCCTAGATATTCAGAAACCGATAACGGTCGGGTGCGTGTTAGTAGATTAGCCAGAAGAGGCACAATAAAAACCCGGAGTGGAACACAAATAGGGGAAAATGTTCACTTTTATTTTGATTTAAGTACGATAGGTTCTGATTCTACAGATGCAATAGAATTAAGCACTTTAGGACAGCATTCTGGAGACAGTGCAATAGTAGATGGAATGGCAGAAAGCACTTTTATAAATCAACAAATAAATGGGGAAATTGAATATGCAGATGAAGATTTGCTAGACTCCCAAGTTGAGAACTTTGATGGTGCTCATTTAATATTGTCCAGTTCAGGTCGCAGAGGATCTGTTTACACTGTTCCTACTTTACCACCAGGAGTTTCTTTAAAAGTCTTTGTTGACGATTATGCTAAAGACTTGTTTGTTTCATATCCTGTTTCTCATAAAGAAACTGATATTGTACTCCCTAGTGACACTTTACATCCTTTAGAGCCACCTATAGTATTGGATTTTGAAAGCTCTGATTATTATATACATCCTTCTTTGTGGCGCAGGAGAAAACGCAAACGCTCAGACATGTATGATTTTTTTGCAGATGGCTTTATGGACCCAACAGAATGGTAAACTGTACCTGCCACCCCCAAGACCTATCGCCCGCGTACTCAGCACGGATGAATACGTAACAAATACAAATTTATTCTTTTATGCTGGTACAGAACGATTGCTACAAGTAGGCCATCCATTTTTTGAAGTTCGAAATCAGCAGGAAAAAGTTGAAGTTCCTAAAGTTTCTGGAAACCAGTTTAGAGTTTTACGAGTAATGTTACCAGATCCTAACAAGTTTGCACTGGTAGATCCCACTATTTATAATGTCGAAAGAGAGCGCTTAGTGTGGCGCTTACGAGGGTTGGAGATTGGAAGAGGTGGTCCACTAGGAGTGGCTACAACTGGTAATCCACTGTTTAATAAGTATAAAGACACAGAAAATCCTAATACATATCCTGCACCTCAAACTGATGATAACAGGCAAAATGTTTCTGTAGACCCCAAACAAACACAGTTATTTATGGTAGGCTGTGCACCTCCTATTGGAGCCCATTGGGATATTGCTGAGTTCTGTAAAGACCATGTTGCACAAGTAGGTGAATGTCCTCCTGTGCAGCTTATTAACTCCATAATTCAGGATGGTGACATGTGTGATATAGGATTCGGAGCTTGCAATTTCAGGGCATTTCAGCAAGATAGGTCAGGTGTTCCTTTAGATATAGTAGATAGTACTTGCAAGTATCCAGACTTTTTGAAAATGACAAAAGACAAGTATGGTGATGAATGCTTCTTTTTTGGTCGTCGAGAGCAGTTGTATGCAAGGCATTATTTTACCAGAGCAGGCACAATAGGTGATTCTATTCCAACGCCATATCAGGAATCTGAATTTTACAGATCTCCACAGGATAGCCAGGCTCAGAATAATGTGGATTCTCACATTTATGTAGCCACTCCTAGTGGTTCTTTAACTAGCAGTGATGCTCAGCTGTTTAACAGACCTTATTGGCTCCAAAATGCTCAAGGGGCAAATAATGGAATATGTTGGGGTAATCAGCTATTTGTTACCTATGTAGACAATACCAGAAATACTAATTTTAATTTATCAGTTTACAATGTAGGAGCTGCAGGTTCTCCAATTCCATCTGGATATAAATATAAAGCCTCCGATTTTAAACAGTATGTGCGTCATGTAGAGGAGGTGGAGGTAGAATTTATATTCCAGCTTTGCAAGGTGACCTTAGATGCTGACATCCTTGCTCATATTAATGTAATGAAT
>brain9	AD	SRX4043931	NODE_28421_length_665_cov_4493.31	Papillomavirus
TTTTTTTAGAAAACTGGCTTCTCAATTAGACCTGACAGTGCCGGAAAAAGACGATGGAGTGGTTGACCCAACGTTTCAATGCCATTCAAGACAATCTTTTGAATCTAATTGAACAGGGAGCAGAAGATCTGGACTCCCAAATTAAATACTGGAATCTTGTTAGACAGGAAAATGTATATTTGTACTATGGCAGAAGAGAAGGGCTTACACATTTTGGTCTACAACCATTGCCTGTAACAACAGTGTCAGAATATAAAGCAAAAGAAGCAATTAATATGGTTCTTCTTCTGCAATCTTTAAAAAAATCAGCATATGCAAGAGAGACATGGACATTACAAAATGCTAGTGCAGAGCTGATAAATACACAACCAAGAAATTGTTTTAAAAAACAACCCTATAATGTTGAAGTGTGGTTTAATAATGATAGAAACAATAGTTATATATATATTAATTGGGACTTTATTTACTATCAAGACTCTAATGATGTATGGCATAAAGTGCCAGGACTTGTAGATTATAATGGCATGTATTACACTGAGGTTGGTGGTGACCAAGTTTACTTTGCACTATTTGATACAGATGATCAAAGGTTTGGAGGCACCGGAAACTGGAGTGTGCATTTTAAAAATAAAACTCTTATCGCCCCTACTAGCTCTTCAAATTCC
>brain9	AD	SRX4043931	NODE_31035_length_1682_cov_235.506	Torque teno virus
CGGCCTAGCAAATTTTATTAGCAGCCAAGTTTGAAGGTTACATTGTATTTGGGCATCCAGGGGTAGAAAGGGGGGTCTGTGTGGTTAATTCTACTAGGCCTGTCCCAGTATTTACAGCAGGTGAACTCTTCTTCCCAGTCTCTGTAGCCAGAGATGGGTTTAGGCCCCTCGGGAGGGAATAGGTACACTTTATTTACAGCCGGTTTGATAACATAGGATTTATGTGGAGACCCGCTTGGGTTTTCTGTAGTTCCCTGAAGATGAGTCTGAGTTGGTTTCCGAGTCGCTGCTGCTCTTGGAACTGGAGGTGGAGTCGTCGCTGCTGTATTTGCTCTTTTTTCTTTGGGTCCGTCTCCTCTTCTGTCGGGGACTGGTCTTTTTCCTCCTCCGAACTGTAGTCTCTTTCTTGCTCTTGGAGGCCTGATATTGGAGGGAAGAATCTAGGTTTCTTTGAAGCTGGGTAATACAACTCATCATGAACTTGTTGTTCTGACACTCTTTTGATAGCCTCTGTACCAAAGAGTCCACGTCGCCAGTCCCAGGTGTGGAGCGCCCATTGGGGGCCCACGGTGTGTGGGTCAACAACTTGTAAGTCCCGATGGAGTCTACTGGTGTGAGGGAGATCGTGTCCTTCTGTTTTACATGGGTTTCTGATAACCTGTTCGGGAATCATATTGCCACCCCATAAGAATTTAAACTTGTATTCTACTGTTAGTACTGTGTTCTTAAGATCATCTTTGTAGCTAAAGGGGCCTGTTAGTATAAAGTCATGTACTACTTGACTTTGAAACTTTATTCTAGGATACCATCTGTTTTGGTAGTATATTGGTACTAGGCCTGAGCCTTCTGGCATTTTACCATCTCCAAATTGTGTGTCATAGAATACAAAGCCTTTGTTTTCATTTGGTGGGTCGTGTATTAGTTTAGGTTTTGTGTATGGACATATGACTACTATAATGGCAATGTTAAGTATTTCTTCTTGTATGCCTAATTCACTTTGTACAAAGTCTATGTATCCATGGAATGCTGCCCATAGGGGTATGTCTACTATATGGCATTTGCATTGTGTGGCATTGAATTTTGTATCTGGTTTTGTTACATACTGTACCCATATTTGGTTTCCTTTACCTTTGTCATTTAGTGGATTGTATGTGACATCTGTGTATGCTGTTCTAAATTGTAGGTTGGTTCTGTATGAGCTTAGAAAAATTGGGCTGTACTTTCCTAGGTGGTAGCTTACTGCTGAGTTTGTAGGCATTGAATATGAGCCTGTAACAACATTTTCTTTGTCAGTTTCTTGTTTCCAAAACCATTCAGCTATTGATTTTAATTTGTCTTTAATTGGGTTGTAAGATGGAAAACCATAAATTGAGTTATTACCGGTTGCTAATGTTTGGTTAAGTGTGGATGATGATGGTGGGTTTAAGTAATTCTCAATAAAGGATTGTTCACCAAGTGTGTTTTTTGTTGTTTGCATTTTTGCTGATCTTTGTGTTTTGTTGATAATGCCTGTTGTGTGAACAGTTTGATAGTACTCTGCAGTTGTGTATAATTTGTCTAATATAATGTTGTCTTTAGCTTGGTTTGAAGCATCTGGTGTAACTGACATTTGTTCATAGTAGAAGTCTTTCAACACTTGGAAGGTTATGCAAATGTTGTCAGTTTGTGGTGGGCAGAACGGA
>brain9	AD	SRX4043931	NODE_31586_length_2962_cov_8.6066	Papillomavirus
GGCGCGAGCACGAAGAACTAAGCGAGCGTCAGTTACTGACATTTATAGAGGCTGTAAGGCCTCTGGGACTTGTCCCCCGGATGTCATTGATAAAGTGGAACAAAATACACTTGCTGATAAAATTTTAAAATATGGCAGTGTTGGTGTGTTTTTTGGTGGTCTTGGAATCAGTACAGGTAAAGGTACTGGTGGTCCTACAGGATATGTTCCATTAGGTCAAGGTCCTGGAGTTCGTGTGGGCGCCACTCCTACAGTGGTCCGCCCCGGGGTCATACCTGAAATAATTGGACCAACTGAATTAGTGCCAGTTGACTCAGTAACACCAATTGATCCTACAGCACCATCAATAGTGACATTAACAGATAGTAGTGCAGCTGCTGACCTTTTACCTGGAGAAGTTGAAACTATTGCAGAAATCCATCCGGTTCCAACAGACACTTTAGAGGTTGACACACCTATGGTGTCTGGAGATCGTCACGCCATTTTGGAAGTGACAGATTCAAATCCTCCATTTAGACGTAGTGTTACCCGTACCCAATACCATAACCCTGCTTTTGAAATTATTTCTGAATCTACACCTCTAATAGGTGAATCTACACCCACTGATCATGTGTTTGTATTTGAAGGCTCAGGAGGTTTGGAGGTTGGAGGTGCAAGGGAAAATATTGAGTTGGATACATTTCCTTCAACATATAGTTTTGAAATAGAAGAACCCACGCCACCTCGTAGAGTTAGTACACCAATTGAGAGAATTAGTCAAGAATTTAGAACCCTACGTAGAGCTTTATACAATAGAAGATTAACAGAGCAAGTTAATGTGCGGGATCCTTTGTTTATCCAATCTCCCTCTAAACTAGTAAGGTTTCAATTTGATAATCCAACATTTGATGAAGAAGTCACACAAATATTTGAAAGAGATGTAGCTGCTATAGAGGAGCCACCTGACAGAGACTTTTTAGATATTGAAAGACTTGGTAGGCCTTTGTTCACAGAAACTGCAGAGGGCCATGTGCGTGTCAGTCGATTGGGACAGCGTGCCTCACTAAGCACACGTAGTGGGGCGCGTGTTGGTGCTAGGGTACATTTTTATACTGATCTTAGTACTATAAATGCAGAAGAACCAATTGAATTAGAATTATTAGGGGAACATTCTGGAGATAGCTCTATAATTCAGGAACCATTTGAAAGCACAATCATGGATGCTAATATTGACAACATCCCTGAAAGTTTAAATCCAGATGTAACACAATTATCTATAGAGAACACTTCTGCTGATTGGTTATTGGAAGATAATGTTGAAGATTTTAGTAGGTCTCAATTGGTTATAGGCTCCTCTGATAGATCAGCTACTTCATTTACTATTCCACAATTTGAATCCCCCAGAGAGACCATTGTATATATTCAAGATATAGAAGGTAATACAGTTGTATATCCAAAATTTGCAGATAGGCCAACTATAATTCTACCTACTCCATCGGGGCCTGCTATAGTTCAATCACTTACACATACTTCCCTTGATTATTATTTGCATCCTAGCTTGCGAAGAAGAAAACGCAAACGCAAATATTTATAATGTTTTTCAGATGACCCTCTGGCTTCCAACTTCGGGTAAGATATATTTGCCTCCTACGCCACCGGTAGCTCGAGTACAAAACACGGACGAGTATGTGGAGAGAACTGACATCTATTACCATGCCATGAGTGATCGTTTATTAACTGTAGGTCATCCGTATTTTGATGTAAGATCAGCAACAGATGGAGCAAAAATAGAAGTCCCAAAGGTGTCAGGAAACCAGTATAGAGCATTTAGAGTAACCTTTCCAGATCCTAATAAATTTGCTTTAGCAGATATGACAATTCATGATCCTGAGAGGTACAGATTAGTATGGGCCTGCAAAGGCTTAGAAATCGGGAGAGGACAGCCCATAGGTGTAGGTACCACAGGTCATCCATTATTTAATAAATTACATGACACTGAAAATCCTAGTGAACGCCAGACAGGCACAGCAGATGATAGAAGAAATGTTTCTTTTGATCCTAAACAGGTACAAATGTTTATTATTGGTTGCATACCTTGTTTAGGGGAACATTGGGATAAAGCACCAGTGTGTGAAGATGCAGGGAGTCAGGAGGGCTTATGTCCTCCACTAGAGTTAAAAAATAGTGTTATAGAGGATGGTGATATGTTTGATATAGGTTTTGGAAATATAAATAACAAAACATTATCATTTAATAAATCAGATGTTAGTTTAGACATTGTGAATGAAATCTGTAAATATCCAGATTTTCTGACAATGTCTAATGATGTGTATGGCGACTCTTGTTTTTTTTGTGCACGTAGAGAGCAATGTTATGCAAGACATAATTTTGTACGTGGTGGTGTAGTTGGAGATATTATACCTGATGGCACAGTTCAGCAAGATCATAAGTATTATTTGCCAGCTGCTTCACCACCTTCTTTAGAAAACTCTGTGTATTTCCCAACACTTAGTGGGTCATTGGTAACGTCTGATGCTCAACTATTTAATAGGCCATTTTGGCTAAAGCGAGCACAGGGACATAATAATGGTATTTTGTGGAACAATCAAATATTTGTTACAGTGGCTGATAACACACGTAACACTAATTTTACTATTAGTGTTGCCAGTGATAGTAGCACAGTGAATTATGATGCTGGAAGTTTTCAATTTATCAGCACAACCTGGTCCTGGGTGGGGGAGCATACAACTGATAGAATAGGTCGCGCTAGAATGCTCATATCATTTCATTCAAATAGTGAGAGAGAAACATGCTTGCAACAAATGAAACTTCCTTTAGGTGTAGAATGGTCATATGGACAGTTTGATGATTTATGATATGCTTTTTTAATAACTTATATCTAATTTTTTACTAACACACTAACAGTGCCTTAACTAACCCATTTGCTTGCTACTAACAAAATGGCGCGAGCACGAAGAACTAA
>brain9	AD	SRX4043931	NODE_35912_length_702_cov_72.5051	Papillomavirus
AAAACAAACTGTAGTATCACATCAAACTGAAGCAGAAACGTTTCAATTAGCAAAAATGGTACAGTTTGCATATGACCATAATATGTTAGAGGAGTGTGAAATTGCTTATGCATATGCCAGTCAAGCTGATGAAGATCCTAACGCAGCTGCATGGTTAAGTAGTAATCAGCAAGCAAAATATTTAAGAGATTGTGCAGCTATGGTAAGACACTATAAAAAATATGAAATGAGAAAGATGTCCATGTCAGAATGGATATTTGCCTGTTGTGATAAGGTGGAAAAAGAAGGTGATTGGAAAATCATTCCTAAATTTTTAAAATATCAAAATGTAAACTTTATAGTTTTTCTATCAGCCTTAAGAGATATGTTTAAAAATATACCTAAAAAACAATGTATTGTAATTACTGGTCCACCAAATACTGGGAAATCATATTTTTGTTTTTCATTGGTTCAATTTCTACAAGGTAAAGTAGTGTCATTTATGAATCACAAAAGTCATTTCTGGTTGCAACCATTACAAGAGAGTAAAGTAGGATTCTTAGATGATGCTACATTTACATGTTGGCAATTTATTGATGTTTACCTAAGAAATGCCTTTGATGGCACACCATTTTGCTTAGATAGTAAGCATAAAAATCCTGTACAAATGAGGTTGCCAGCTATGTTCATAACAAGTAATATACAAATTGATAAAGAACAACA
>brain9	AD	SRX4043931	NODE_35913_length_1542_cov_33.764	Papillomavirus
TGTGATACTACAGTTTGTTTTTTTAACCATTCTGGAAATTCTCCAAATTTAAAACTTGTACTTGAAAATGCTTGTTTAAAGAAATATAACGCTACAACTATACTTTTATGCTTTGGAGGATCTGCCATAATCTGGATTTCTTTCACATTTAATAATTGACAAAACAGTTTTATAATAGTTAATCTGTTTTTAGCACTTTTAAATTCACACAAATATAAAACAAGTACAGACCTCGCAAGACTGTAAGCTATAACTTGAAAAAATTCACAGTGCGTTTGTAATAATGTTTTTGAGCTTTCACATAGTTCATCCTGTACACCAAATACAGCTATCACCCAACTGTTACAACATGTTTTATCACTTTTAAATGTTCTTGTAAGGTCCTTATATGACACTCCATAAGTGTCTTTAAATTTAGCAAGTGCTGTTATAGTTGCATTCTGACTTTTTAAAAGTTCTTGGCAGATATCACTGCCGCCATTTTCAACAGCATGCGACACCCCAGAACTAATGGAGTCTGCTACCTGTGACGACTCATTAAAATCTTCAGCTTCATTCTCTATGCCACTGTCAAACAGACGTCTTTTACTGTTCTTTGGGGTTGCAGACAATCTCACAGATTGCAGCCGCGGACTCAACTCTACCTCCACGTCTTTCAAAGGACTACAATACTTTCGTTTTAGTTCTAGTACCTGCTGGCTGCAATCTTCTAGCAGCTGTTGATTAAACAGAGCCAGGGAATTTCCCTGGTCAACTTCATCGCCATTGTCTATTAAATTTGAAATGTCTGAACCATCGCTTTCATCAAACAGCCTTTCCAAATCAGTCAATTCCTCCTCGCACTCCGCTTCATGCACAATATACCAATCACCACAGCCTTCTAAAGAATTATGAGAGTCAATACCTTTATCTGCCATTTCGAATAGCTCTGGAACACCCAGTGCAGAGAAAGGAAAGTGGTCCCAAAAGTAATTGCTGAAATCCTCGTATTCCTTCAGGACTGGCTTCTACAGCAAACTTTAATTTTACCTGACAATTGTTGCAATGGACAACAACCTCATAAGGGCTGTGGTCTGATTCCTGCTCCGCCTCTTGTGACAAATCTTCGTCACTCAATAGATTAGCTGGTAGTATAAGTTCATTTACATCTTCAAGAACAATATCTCTAATATTCACTGCTTCCCCATGCATTTTGTCCTTTGCAAAACCTACAGTAAGTTCTCCAAATACATCTGACTAATTGAAAATTCTCCTCCCTTTCTAGGCTATCCAAAACTTCAATCAGATCAAGCTTTTTCATACATATTAAACATCGTACATTTAAATCAGAATAGTTGCCATTACACAGATGTTTAACAAAAGCTGGAGTCGCAATACATTGACTATATGTCCTCTGTTCAAATGCTGCAGATAATCGTAAGCAAGTATTACATGCAGCATAAAATGTATTATCTCTAATAACAATTTGAAGATGTTTAACAGTAAAAGATAGTAAATCTTGATAAGAAAGCACAGAACGACAAAACAAACTGTAGTATCACA
>brain9	AD	SRX4043931	NODE_37057_length_2592_cov_4811.57	Papillomavirus
GGTGAGTACAAGTTCAAACAGTATATGGCTGACTCAAGTGTTTTGGCAACGACCGTAAACGTTTCTTTATAAGTGCTGTAGGGTGTTAATAGTTGGCAACAATCATCACTTATACCTATTTTTTTCAACCAAAGACGGTTATATAAATACTGGCAAAAACGTCTTTTCTGTTAGATTTTTCCAGATGGCTTCTTTGCTGTATCCCATTTGCTTAGAAGAATACTGCAGTTATTTTAATGTTGCATTTGATACTCTAACTTTGCCTTGTATATTTTGTCGTGGTACTGTATGGGCTACTGAGCTTGAGGTGTTTCAAAGGCGACGTTTGAGTCTTGTTTGGAGGGGCAATAATTGTTATGCTGCATGTTTAAGATGTATTAATCGTACTGCTGCTTATGAGAGATTTAAATATTTTCAATGTTCTGTTAAAGCTGAGTATATAGAGTATTTTTCTCAGACACCTTTAGATTCGCTGATTGTTCGCTGTTTGTTTTGCATGGCATTGTTAACTAATGAAGAAAAAGTTGATATTATCGCTTGTGGCTCCACATTTCAGTTGGTAAGAGGCCACTGGAAAGGTGTTTGTAGAGAGTGTTTTTAAAATGCAAGGCAAAGTAGCTACTTTAAAAGATATTACATTAGATATCTACTCTATTGCTATGCCTGATAACCTATTGTTTGAAGAAGATTTGTCACCAGATGTAGAGGAGGAGCGTCCAGTATTCAAAGTTGATAGTAATTGCGACAGCTGTCAAAGAGTTATTAGAGTTTGTGTTGCTGCCTCTGAATCCGGCATAAAAAGATTTCAGCAACTATTGACCGAAGAAGTTTCTTTCCTTTGTCCTGTCTGTTCCAGGAACCTTTTACAACATGGGAGATTCCACTAAAGGTACTGATACATTTGACTGTTTGGAGGGTCCTAGCGACTGGTATATAGTGAATGAAGCTGATTGTATGGATGATATAAATTGCATTGATGAGCTTTTTGATGACAGTACAGAATCGAACATTTCTAATCTGTTAGACGACAGTGACGAGGTGGATCAGGGGAATACCCTGGCTTTATTCACTGAACAGTTACAGGAGGATTGTGACAAATCAATCCAGTTCCTAAAACGAAAGTATGTATACAGTCCGCAGGCAGATATAGCAGCTTTGAGTCCAAAGCTGCAGGCAATTTCTATATCTCCTCATAAAGACAAACAGAGCAAAAGACGTTTGAATTTTCAGGACAGTGGAATTGAACAAGATGAAGCTGAAAATACTATTACGTCGCAGGTAGAGACTTCCATAGACAATAGTGTTGATAATTCGCCAGAAAATAATGGCGCCGCTGGGTTTCAGGTTTTGGAGAGGAGTAATCAAAAGGCGTATATGTTATATAAATTTAAAGAAACATTTGGTGTGTCATATACTGAACTTGTCAGAAATTATAAAAGTGATAAATCCTGTAATGACAATTGGGTTGTGGTTGTTACACGAGCAGCAGAAGAAGTATTAGAAGCTTCAAAAATTCTTATAAAAAAACATTCTGTGTTTGCACAAATTATTATACGTGATTTTAATGGTTTATATGTTGTTCAATTTAAAAGTGGTAAAAGTAGAGAGACTGTTATTAAATTATTTTGTGCAATGCTCAATGTGCAGGCATTTCAAATAATGTGTGACCCTCCAAAAGTAAGAAGTGTTGCTGCAGCTTTATGGTTTTATAAACAATCATTAGTAGATAAAACCTATTTATATGGTAGCTTACCAGAATGGATTCTTACCCAAACAATTGTAGACCATCAATCTGCAGCAGCTCCGGAAACATTTGAACTGTCACGATTAGTTCAATGGGGATATGATAATGATATAACTGATGAAGCTCAAATGGCCTATGAATATGCTGAGTTGGCTAGTTCAGACAGTAATGCTGCTGCATTTTTAAAGCATAATAATCAAGTTAGATTCATTAGAGATGCATGTACAATGGTAAAATTATATAAAAGACATGAAATGAAAAAAATGTCTATGTCAGAATGGATATGGCAATGTTGTGATAAATGTGATGATGGTGTAGGTGATTGGAAACCAATTCTTCAGTTTTTAAAGTTTCAACACGTAAATATTTTAGACTTCCTTTATGTTTTCAAACAGTTTTTAAAAGGTACTCCTAAAAAAAATTGTTTAGTATTTTATGGACCTCCAGATTCAGGCAAGTCATATTTAGCATATGCACTGATAAAGTTTATACGTGGTAAAGTTATTACATATATGAATAGAAATAGCCAATTTTGGTTACAGCCATTAACTGACAGCAAAATGGGTTTATTAGATGATGCAACATTGCCATGTTGGAATTTTATAGATATACATATGAGAACTGCATTAGATGGTAATTATGTATGTGTAGATTCTAAACACAAAGCTCCAATACAAATGAAAATACCACCTTTATTAGTAACTACAAATTATGATGTAAAAAGTGATCAATCTTTACTTTATTTACATAATAGATTACATTGTATTTACTTTCCTAATAAGCTACCTCTTACAGAGCAAGGCAACCCTATTTATGAAATTACTGACTTCACATGGAAATGTTTTTTT
>brain9	AD	SRX4043931	NODE_7444_length_838_cov_70.246	Papillomavirus
ACTCTTTTTAAAATCTGTTGTGCTACCTAAAGGAGTAAAGTACACATTGGGTCAGTTGGATTCATTATAAAATGTCTAACATACCACGAAAAAGAACTAAAAGAGACTCTGCCATTAATTTGTACAATCAATGTCAAATAACAGGCAATTGTCCTGAAGATGTTAAAAATAAAGTAGAAGCAAATACTCTGGCTGATAAATTATTAAGAATATTAAGTAGTATAGTATACTTTGGAGGGTTGGGCATAGGAACAGGTAAAGGGTCAGGTGGTGCTACTGGATATAGGCCTTTGGGTGGTGGAGGAGGAGGTAGAGTCACCACAGATGGCACAGTGATTAGACCCAACATTGTTGTAGAACCAGTAGGTCCTTCAGATATTGTTCCAATAGACGCCCTCGGTCCTGGTTCTAGTTCAGTAGTTCCATTGGCTGAGGCGGGTCCTGAATTAATAATCCCTGACATTGTCCCAGATATTAATACAGGTGAACTAGAGGTCATAACTGAACCTGATACAATAGATGTACCAGGGCCTAGTAAAATACCAACTATTACTAGTACGGAAGATGCTGCAGTTATTGATGTGCAACCAAATGCACCAACACAAAGACGCATTACTAGCACCTCTCGGTTTTCCAATCCTACATTTATACATATAGTTAATAGTAGTGCTGTAGCTGACTTTGCTGAAGAAGGGGCTTCAGGACTTAATGTTTTTGTTGATGGCATAGGGGGTGGAAGTGTTGTTGGTGAGGAAATTCCTTTGGACACTTTCAATGAGCCTGAGGAATTTGATATTGAAGAGAGGCCCCAACCTAGAAGTAGTACTCCATTAGCTTT
>brain9	AD	SRX4043931	NODE_8496_length_1122_cov_232.322	Papillomavirus
TGGTGGGCAGAACGGATGTCTAAAGGAAGCCGCAGAAACCGCAAGTGACAAAAGATTAACGTCGCACAGGTCCTGCTGGGTGTACCACTTGTCTTCAAATAATACAGGAGGTTTTATATGTACTTTAATTTTTTTTCGGCCTCTTGGTCTGGTTGTAAAGCTTGGTATTAATATCTTTTTCTTTCTCTGCATTAGCATGCCTGGGTGTAGCATGGCTGATGAGTACCTGTCTATTTTAAATGGTGGTACTGAGCTGTATGTTACTATAAAGTCTGTGTCTTTATCTCTGTAGAAGTAAAAGGTTACTCCTTTAAACCTTGCAAGGTCTAGCTGGGTGTTTGGGTAGCTCCAAGTGTTGTGGAATCTGGTGTGTTCGTCCCAAAGTACTTTAAGGCTCCAGGTTGTTGTGCTAAAAGACCCTCCGAATGGCCTAATCTGAGAAACATAGTCTTCCATTCGAATGGCAAAGTTGTTGCCTGACATGGTGTGGCCACATATTATTAAAGGAGCCATTCCCTTTATTGTACATCCTCTGATTGTGCTAGGGTTCCACTGAGTCAGTCTTAGCTTTTTTCGTCTCTTTCTCTTTTTAAGTCTGCGCCTAAAGTATGTGCGTCGCCCACGTCTCCTGCCCCACCGCCTCCGTCTCCTTACTCTGTATCTCTTGCGACGGCGTCGAACAGGGCGTCTAAGTCTTCTGGTGCGTAGTCTTCTCCACCTTCTCCTTGTCCACGGCCTCCTTCGGCGTCTCCTCTGCCACCACCAGGACCACGCCATGGAAGAGGCTCCGGAGCCGCGGGCAGGGCCCGGGCTCTACGGAGGGTGTTTGAAGGTGTGCTGGGTGGAGTGTGTTGGTTAGCAGAAATGAATGTTGTTATGCGTTGCAGGTGGGTGAGAAAGTTGTCGCAGCCACAGAAGGCTTTGTGCATTTGAACACAGCCATGGTAGTATGATATTTCTCTGTGGTTGCTGCTGATTAAGGGTTCTACAAAGCTCATGGTAAGTGTCTCCTGTGGAGGGTGCACAGGTAGCAGTGACAGTTTCCTTTTCTTTCTGCGGGTAATATTAGAGAAACGCATCTATTTAAGAGCCTTGCCCATAGCCCGGCCAGTCCCGAGCCCG
>brain9	AD	SRX4043931	NODE_9186_length_714_cov_5044.88	Papillomavirus
TCATATTAATGTAATGAATCCAAACATCCTTGAGGAGTGGCAATTGGCTTTTGTTCCTCCTGCTCCACAAAGTATTGAGGATCAATATAGGTTTCTACAATCTATGGCAACCAAATGTCCACCTTCTGAAGGTGTAGATGAAAATACAGATCCTTACAAAAATTTTTCATTTTGGAAAATAGATTTGACTGAACGTTTTTCATTAGAATTAAATCAGTATCCTTTAGGAAGACGCTTTTTGTATCAAAGTGGTTTACTTACTAGAAAACGTCCCAGAACAGAGCAAACAGTAACTAGAAAGGCAAAGCGTAAGCGCAGTACTAAGTAATACTATTGTTATTTTAATGTTCGAAAATACATACTGTGAAAAGCCATAAATGTGAATGTATTAAATATAAGATACTGTGAATGTAATACTGTGAACTATGTCTGATATACCTCAATAAATTGCTGATGCGCAATATATTTTGGAATGATCTTTACTGACTCACCTGGGGGCTGAAAATATTTTTTTACCGCACCCAACAATTATTTGGATCCCTTTATATCTGGCACACAAACAATCATTGCCACTAACAAGTTGGGAGCTGTGAGGGTCGGCTTGGAATCCCTAGGTGCTTCGCAACCGATTTCGGTAAGTTTTTGGCGCCAAAGGGCAAATAGGCAACCGATAACGGTCTTTCAGAGATATTCAAGGTGAGTACAAGTTCAAAC
>brain2	NON-AD	SRX4043902	NODE_12222_length_2384_cov_546.8	Torque teno virus
GGAACGGGCAAGAAACTTAAATAATATTATTTTACAGATGAACAGCCTTCTTGAAAATCCAAAATATGGATCAAAAGCATTAGAAGACCAATGGATAAACAACATTTATAGCTCTCACGACTTAATGTGCGGATGCAAAGACCCCATTTTACATTTGTTTGACATCTTAAACAGAAAAGGAAAAGCCAGAAAACCTCTTACTGATATTAAAAACGCAAAATGCCTTATTACTGGAGAAGACCAAGATGGTTTCGAAGACGATATCGCCCCCGGAGACTTAGAGGCCCTTTTCGCAGACGATGGTGGAGAAGGAGAAATCGTTCCATCTACTTCGGGGTAAGAAAACCTATTTTTAAAAAGAAACTAAAAAAAATAAGACTTAACCAATGGCAACCTAAAGTTATACGAAAATGTACTATAACTGGAAATATATGCCTTTTTCAAGGCTCCCCAGAAAGACTAAACAACAATTATATACAAACTATATACTCATATGTGCCACCAGAAGAACCTGGAGGTGGAGGGTGGACTCTAATGATAGAAACACTAGGATCTTTATGGGAAGACTGGGAACATTTAAAAAACATATGGACTACAAGTAATGCAGCATTACCACTTGTTAGATATATGGGCACTACTGCCATTTTTTGGCAATCGCCATACACAGACTATGTAGTACAAGTAGAAAACTGCTGGCCTCTAATAGATACAAAATACAAGCACGCAGATAGTGCCCCAAACAGAATGTTACTAAAGAGAAACATTGTAAAAGTACCTAGCTTAGAAACCAGAAGAAAAAGAAAACCATACAAAAAAGTGTTTATTCCTCCACCAGCTCAAATGTTAAACAAATGGTATTTTCAAAAACATATATGTAATATACCTCTGTTTATGTTAACTGCTGTATCATGTGACTTTAGATATCCATTTTGCGCAAGTTCTTGTAAAAGTAATAATCTAACTATAAGATGTTTAAATATTTCCTTTTTTCAACTACACAACTTTGACAACTATGTAGATACCATAGGATACATACCAAAACCAAATACATATATGTACAGCCACTCAGGAAGACTAGACGAAACACCAACAAAGAATAATCTTATTTATTTAGGTAACACTAAAACTAATACACCTGGCAAATCACCAACAAAAGCTAAAGATTTCACTGATCCATCAAACTGGGGAAATCCATTTTGGCACCATTACATTGACGGATCATTACCTGTATATACATCACTTTACTCACCAACAGCCTTAAAATCTGACGAACAAAGAATAAAAGAAATAACTAAAATGGCTGATGTATACTTTGAAACATTCAGATACAACCCAGAAAGAGACAAAGGAACAGGTAACAGAATATACCTAGTAGAAAATTACCAAAATACTGGATGGAACCCACCATCTAATGTAAATTTAATATTAGAAGATTATCCCTTAATAGATATTTGCTGGGGATACTCAGACTGGATAGAAAAATTACACCAAATAACAGACATAAATCAAAAATACATATTTGTTATTCAAACTGATTGTTTTAATGAAAAAAGACAAGCATATGTACCTATAGACCCCTACTTCTTAACAGGGGAAGGACCTTACGAAGCCCCTATTACCACTTATGACAACAACCACTGGCATCCTAAACTAAGATTCCAATCAAAATCTATAAATGACATATGTGTAACTGGTCCTGGATGTAGTCGTCCTCCATTTGGTAATTATGTACAGGCAAAAATGACCTATAAAGTACATGTAAAATGGGGAGGCTGTCCTAAAACTTTAGAACAACCATATGATCCTTGTTCACAGCCCGACTGGACTGTACCCAGTAACTTCAATGAAAGATTTCAAATCCAGGATCCAAACACTGACCCCCAAACAGAACTCCAAGAATGGGACTGGAGACGGGACTACCTTACAGAAAAAGCTCTCACAAGAATCAAAGAATACTCGCCACCTACTAAAACTTTACAACTCTTTACAGGATCCAGCCGCAACGCTCCAATATTACACGAAACACAACAAACATCAGACGAAGACTCGGAAACGCAAGAAGACCAAACATCGCTCCAAAACCAAATTCGACACCTCAAACAGCAGCAGCGAATACTCAAGCAGCGAATCCTCAACCGACTAACACACCCACCTATAATATAACAAAAAGTACCTATAATGTTCTTTTATTTCCAGAAAGACAAAAAATTACAAATAGACGCTTTGCTCCCCATGAAAGAGAATTAGAAAACCTAGTAGCAGGCATATTTCGCAGACCTCCTAGACATTTTTTTTATGACACTCCTTATTACCCTTACTGTGTACCTGAACCTAAAGTAAACTTTGACTTGGGTTTTAAAAAATAGGCCAACAATGTACACTTA
>brain2	NON-AD	SRX4043902	NODE_1254_length_1061_cov_7.61635	Torque teno virus
GTGTCGAAGCTGGGAATTAGCACCTTGTGTTTCTGCTGCATGAGCATGCCCGGGTGGAAGGACGGGCAGCTGGGCTTGTTAAGATGAAAGGGAGGCTTTCTGTTCCACCATACTATAAAGTCAGTCTTTTTGTGTCTGTAGAAGGTGAAAGTGCAGCCCCTGTATCTGGCCAGGTCTAGCTGGGTGTTTGGGTAGCCCCAGAAGTTGTGATGCTTCAGGTGCTCGTCGTACAGCACCTTTAGTGACCACGTAGTGGTGGACAGGGACCCTCCGTGAGGGTAGCGGCCCTCTTCTGTGTAGTCCTCGCTATGCAGGGCGTAGTTACTGTTCCATTTTGTGTGCCCGCATATAAGGATGGGGACTATGCCCCTAATAAAGCAGCGTCTAACTACAGAGGGGTGCCACTGAGTAAGTACAAGTTTCTTTTTAAAGTTTCTACGAGTGTGGCGTCTCTTTCGTCTGGTAGTGTACCGTCTGCGTCGCCCCCGTCTCCTACCCCACCTCCGCCTCCTTACTCTGCGTCTTCGGCGACGGCGGCGAACAGGGCGTCTAGGTCTTCTCCGTCGTAGGCGTCTCCAGCGGCGGCGCCTGGGTTGCCAGCGACGGCGCCTCCATCGTTGCCACCACCAGCTCCACGCCATGGCTCACGGTTCTCGGCCTCCGGGTCGGGCTCCGGCGCGGGAAGCGCGGGTCTCATCTGGGGCGCCGGCCGAGGACCACCTGGCGGCGCCGGCCCCCCAGTAAAGCCATAGCGAGCAGCCAGTACATTAAGATGATTAATAAAGCTGCCGCAGCCGCAGCAACTATTGTGGCATCGAAAGCAGGCTTCGAAAAACTGCCTATCGATGCCGGCGGCATTGTGTACCGGGGGGCGCCAGGTCATGTCACCAGGTGGTTTCTTCTTTGAATCTGGCAGCTCAGACAGTAGCAGCGCCCTTTTCTTTTTTCTGTAGGGCCTACCAAAAAACATTTTTAAGAATGATAACCCTAAGAGCCTTTCCCATAGCCCGGCCAGTCCCGAGCCCACGAGACTCCTGAGCATCTCGTATGCCGTCTTCTGC
>brain2	NON-AD	SRX4043902	NODE_13562_length_2521_cov_26.9656	Torque teno virus
TTAAACAGACACCACTAAGTGAATTAATGCTGGCCTTTATTTGAGTATTTACTTACAATGTCAAAGTTAACTATAGGTTCAGGGGGTAACCATGGGTAAAAGGGATTGTCTGTGGCAAAGTATCTCATTGGTCTTTTTAGCCATGCTGCTATTTGTTTTTCTGTTTCCCATTCATAAGGGTTAAATCTACGGGGTTTGTTTGGTTTTTTTGGTGGGAATAGATATGCTTTTTTTACATTTGTAAAAATGATTGTTTTAGGTTGTTGAATCGCTGTTGGAGTTGTATGTTGAATTGTCGGAGGTGGTCGAGCTGCTGGAGTAATGTCTCTTCTTGTGTTTCCGGGGTCTTTTTCGTCTGTGTTTCTTGCGGGAAGAGTTTGACGTCTGTTGAATTTTCTGCTCCATCTGTGAACAAACATCTGTCATCAGTTGTGCTTTCTGTAATTCTTTTTGTAGCTGACTGCGTAATGAAGTCACGTCTAATGTCGAATGGGTAGAGGAAAGTTTCGATCCCTGTTGCTGGATTAATGATTTCATTTTGTAGGCTGAATCCACCGGGGGTGGGGGTAATGGGTTGACTGTTAGGGTCGTAGACGCTTTCCATTGGTGATGGGTTTCCTCCCCACTTAAAAGAAAAATCATATTTACATAAGGCTTGTATATTTTTAGTATGGTCAAATCTTACTACTGCAGGCCCTGTTTGTATTATATCATTTATGGCTTGTCTTTGGTATCTAAATTTTGGAAACCAGTATGTGTTGTCGAGGGGATTTATTTCTTCGTGTGGTTTTCCGTATGGGCCTTGGCCATGTACAAAATCCCAAGATAGTGGAACATAATATTTTTCTGTATCACTAAAGTATGGGGATTGTATTACAAGTACCCAGTCATTATCTATGTTGGGACATTTGCCCATTTTTTTCATTATGTCTTCTAGACCCCAAAGTAGTATCCATAAGGGATGGTCTGTTAGCATTAAATCTGGGTCTGAGGTGGGGTCCCATGTGTTGTGTGAGTTGTTGTAAGTTGGTATAAAGTATACTTTGTTTCCTTTTCCTTTGTCTTTGTATGGATTGTATCTTACTGTTAATACTGATGGCAAATGTCTTTCTTGTGTGGTATTTAAGGGTTTTTCTAAATCTTGAGCGCTCTGTAAGAATTCAGAGGGTGTTTCTGTGGCTCGTGTTATAAATGTTTTATGTGAACCAGTTAGATACATCCAGTGAAATGGGTTTCCCCAGGTGCCTCTTTTTTGGGGACCATATTGTCCCATTGCAGTTCCTGGTTCATTAAGCATGGATTGTCCTAGATATATTGCTTGTTTTCTTTTGTTTTTTTCAAATTCTTCAAATTCTTTTTCTATGCCCCATAAATAGGTTTCTGAGTTGGGTGTGTAGCCATAGGTGGGTTCTAGTGGTTTTTTGTATTGAAAGCATGGGTGTTTGAAAAATCCAGTGTTTAGCATGTATACTGATGCATTACTGTTTTCTGCTTTGTCTGAACCAAACATGTTGTCTAGTGAGCATGCTGTTGCAGAAAAGTATATTAGTGGGTAGTCTGATAAATGTTGTTGAAAGAACCATTGTGTTTTCATAAGTTTTGGTGGTTTAATTTTGATTTTTTTGTAAGGTTTTTTTTTATGTGGTTGTGAGGCAAAGCTAGGTACAACTACTTTTCTATGATATTCTAACATTTTCATGGGGTGATAGCTGGCATAGTAGTATTTGGTTACATTTTTAGGCGCATCCCAAAAGTATGAAAATATATAGTCCGTAAATTGCTGTCTAAACAAGTAAAAGTTAACACCATAATATCTACACATATTAAGTCTGTAGTTACTTTTAGTCCAATAGTTCATTAAGTCATTGTTTTGTTGGTATAAATTTCCTAAAGATAGTTGTTGGAGGGACCAACCGCCTCCACCAGGTTCATGTTCAGGTGTATAACTTTCTTTAAATAAAGTATAGTTGTTAGATTCTCTGCCTTGTCCTGCTTGAAATAGGCAGAGGTATCCTTTTATGTGGCATTTTTTTATAGTAGAAGGTTGCCATTGTTGTATTCTAATTTTTTTTAGTTTTCTCTTATATGTTTTAAAATGGCGGCGTCTTCTTACCGTTCGTTTTCTTCGTCGGCGGTTTTGAAAAGGTTTTCTAGGTCTCCGGCGTCGATAGTAGGAAAATCTGGGTCGTCTCCATTTTCGGTAGAAGTTCCAATATCTCTGGTAGGGTGCCATGTTTGTCTTTTTAATATATCTTTCAGGTGGTCAAAGGGGTTACAGCATCCGCAGAAAAGGTCGTGTGATCCGCAAATATTATTTAGCCATTGTCCTTCTACTCCTTTTTGTGAGTAGAGACATGGCTTCATAAATTTAGACATCTGTAAAAGAGTGATTAAGTTAGTTGCCCGTTCCGCCAAGACTGCTTAAGCCCATTAAGCCCCTTAATTTCGGTGGTTGCACTCACCTCCAGTACCTGCCCTTAAGCAGCCAAGAAGTTTTCTTGTCTCCGTCTGGCGGCATAAA
>brain2	NON-AD	SRX4043902	NODE_14778_length_2019_cov_3504.62	Torque teno virus
CTTGACATTCTGGCTTTTTGGCTGTTTTGTATTTTTTGCTTGGGGGTTCTGGGGGGTCTGCATCTGTTGGTATAGTTTGTTCAATTGGTAAGTGTTCATACATTCTTTTAAGAGCTGTTGGTGTAAGAAAGTCTCGTCTGTAGTCCCAGCTATGTAACATTTCTTGTGGGATTTGTTTTGTTGGATCAGTGATTTGTATGCTTTTGAAGATGGAATCGGGCACAGGGTATTTTGTTGAGGTGGTTGGATCTGCAACTGTGTTGTTTGGATGCAGTGAGCCTCCCCACTTAAAGAAAAAAGAATAATTACAATGTAATTCCCAGTTACTGTATGGAGCTTGAGGTTTTGGAATGTAGGGGCCACATTTAACTATGTTATTTATAGATTGTTGTTGGTGTTTAAGTACAGGTATCCATTTGTTGGAGTCTTTATCAGTTGGTGTAGAATTATAGGGTCCTTTTCCTGCCATAAAAGAGTCATCTATAGGTACTACTATGTTGTTTCTTTGGGAATATGCAGTTTGAAAATATTTAGATTGAATTACTAGTGTATAGTATTCAAATATGTTATATACTGGTTTTAAGTCATTTATATAGTCAAACCAGCCATATAGGCAAAGCCATAGTGGTTCATTTTCAAAGAGTAAATAAAGTTCTGTGGTAGGGGGTGTCCAGTGATCATTTAAAGTAGATTTTAACCACACTTTGTTTCCGGCTCCTGTGTCAATCATAGGATTATATCTGCATAGAAATGTTGGTGGCTTGCTAATTTGTGGCATGGCTGTACCTTTACTTGTTAATATATCTTTGGTAAACCATCCGGTTGCTATGTTAACAGATGATAAATAACTATCTTGCATAACTATTTTTTTTGGGGGACTGGTAGTTATTGTTACCCATTCAGTATTCCAAATTAGTGTAGAAATAGGTGCATATACAGTGTCTTGTGGTGAAGGTATGTGTGTACCAAAAGCTCCATTAGAGTAAAAGTCTATGTTAAGTGACCATAGGTTGGTTAAGTTGTTATCTGAAGTCTTTCCATATTTTATATAATTTAAATCACAGGCTGCAGCTTGTATTAATAGGAGGGGAATTTTTGAGTAGTCTCTGATAAAATACCATTTATTTAAATGTTGTTTTGGTGGTTTAATTTTTTTTTTAATGTATAGTTTTCCATTGGGTTTAGTAGCTTTTGAAGGTATAATAATTTTGTGTTGTTGTTGTAGTAGTATTAGTGGATGAGTGTTCATTGGTGTCAATATATTTTCTGTTAGTGGTGGTTGTCTTCTATAGTGGACTACAAAGTCAATATTTGGGTGTCTGTAAAATTTTATTTTAAGTCCTGTGTATCTGCACAAGTCAAAGTCAATATTTGATTGAGTCCATATATTGTTGTGTAGTATGTGCTGTTCATATAAGTATTCTAGAGTATATTGAGCTATGGCAAAGCCTCCACCTCCTGGTACTTTTGGAGGAATCCATTCATTCATTGCTGATGTATAATCTCTAAATTGTTTGCCGTCTGACCCTAAGACTATAGTTTCAGTACCTTTTATTTTACATTTTCTAATTGAGTCTGGTTGCCATTGTAAAAGTTTTAGAAAAGGTCTTTTTCTTCTTACCTTGGTTCTTCGTCGTTTCTTGCGGCGTTTATTAGTTCTTCTATGGCGTCTTCTGAAAAAAGTTTTTCTAGCTCTTCTCTTGTAGGGCCTTCTTCTTCTGCGGTACCTTGTTGTGGCCCACCATTTGTTTCTTCTTCTCCACCAGAAAGGCATTTTGCCTTTAGGTCCCTGGACAGGATCTCCTCAACAGTAAGATCTCTATCTTTGTGACCAGTAGGCAAAACAGAATTAATAAAGTGAGCCACAGGATGATCACAACCACACCAAGAATCGTGTGCCAAAATACATGCATCTATCCACAGTTTTTCTCTTCCCAAGTAATTATATTTTGGAGCAGTAAAAAATGAGTTGTGTGGCATCTGTAAAGTAAAAAATAGTTTTAAGTTTCTTGCCCGTTC
>brain2	NON-AD	SRX4043902	NODE_4810_length_2502_cov_477.915	Torque teno virus
TTTTTTTTTTTTTTTTTTTTTATTTTACATTTTTTTTGGGGTGCAAACTTTATTAAACATACACCACTAAGTGAATAGTGTAGGCCTAGAATTTGTAGTTAAGGTGAAAATTTACAAGGGGTACAGGTTGGGGTAGCCAGGGATAAAATGGAGTATCTTCTTTAAACAGTCTAGGGGGTCTTTTAAATGCTACAGCTAATTGGTTTTCTGTGTCTCTTTCAAAGCCTGGTTTAAATCTTGTAAGGGTTACTCTAATATTCCTGTCTGTAGTTGTAACATTCTCTGTTGTTCCTTCAGGTCTAGGAGGAGTTTGATGATGTTGAATTTGAGGTGTTGCTGCTGTTGGTGCTGCTGCTGGATGAGCTGCTCGAGTGTCTTCTCTTGTGGCTCTTGGCATGTATTTTCTTCGCAGAGTGAGAGGAGACAAGCTTGGGTTTCCTTTTGCGTTTCCTGGGGGTCTCTGAGGGCTGCTCCAAGTCTTTGTTTTTTCTTTTTTGGACTCTCTTCTGTAAAACATTCAAACTCTGAATCAGTTTCGAGGTGTTGGAGCATTCTTTTAAGAGCTGTTTCTTTAAGTTGTCCCCTTCTGTAGTCCCATGGTTGTAAAATTGTTTCAGGAGCTTGCTTGGCTGGGTTGGTAATTTGTATTCTGCCTGTGAGCTTATCGGGTACATCATAGGTGTTAAGGTCTTGTGGATTTTTAATATCTTGTCCTGGAACTTGTGGTCCACCCCACTTAAAGTAAAAATTATAATGGTATTTTAGTTCCCATGTACTGTTTTTTTCTTCACTGTATTGTTGTATGTATGGGCCACATTCTACAATAGCATTTAAAGTTTTTAATTGCCATTTGTAATTTGGATACCATCTTTTTCTTTCTGTAGTTGTTATGTATTGGTCATATGGTTTATTGCCATCTATATAATCTGAGTCTATTGGTACCCATTTAGTGGAAGGAACTGGTGTACCTGAGTGATATATAGCATCAGATACTAGTACTATTACTGATGATTGTAGCCAATCAGGTGGTTTAATGGTTTCTAAGTAAGAAACATAGCCATACAATCCTAGCCAAAGTGGTAAATCTTCTAGAAGTACATTTTTGTCTGTGGTAGGTGGTCCCCAGCCATCTGCTATTGTACTAATAATATATATTTTGTTACCCTGGCCTTTGTCTCTGGTGGGGTTGTATCTACCATAGTTTAAAGGTAACTGACCCAGCTTGACACCCTTAGGTGATTGTAATTCTATTGCTCTAAGAAAGTTTTTATTAAACCATCCGTTTTCATAGCTTACACTGACTTCATATGTAGTAAATGCAGCAGCAGTCATTTGTGTTACTTGTTCACCTCCACCCTTTGTTCTGTTTTTGTACCATAGTTCTGTTTTCATATGAGTTTGTGGTAGGTAAGCTTGTGTATCTTGTCTAGCTCTTGCCCAGTCTGTATTTACATACCAGGACGGATTTAAAGAATTTATATTTACTAACATGTTTTCATTAGAGGCACTTAAATAGCTGTATCTTAAGTTCATAGATGAGCCTTTTAGGAAAAGTAAGCCATAGTTTGAAAAGGGTTTTGTAAAAAACCATTTTGTGATTAGTTGTTTTGGTGGTTTTATTTTTACTTTGTATTTATATTTACCATGGGGTTTACTAGCCTGGCTAAATATAACAACTTTGTGTTTGTCTAGTAGCATTTGTTGTGGGTGACAACTTGGGTATGTGTATTTACTTAGCTCCCATGGTGGTTGTCTGTTGTAGTTAATAATAAAGTCTGTGTCTGGATGTCTAAAAAAAATAATTTTACAGTATAAGTATCTGCATAGATCTTTGTATAAGTTACTTGCAGTCCATATATTGTTGTGGAAAGTATATTCTTCATATAGGTAGCCTAAGGTAAATTTTTCTGCTCCAAATCCTCCACCATAAGGAGTTTTAGGAGGTATATATTTAAATTTGTCTCTTGTGTAGCAGAACATTTGAGTTCCTTCTGCTCCAACAACTAGAGTCCCTTGTCCTTTTATGTGGCATTTTCTAATACTGTCTGGTTGCCACTGTAGTACAGGAATTTTAGTTTTTTTTCTTCTTACCTTGTGGTGTCTTCGCCTGCGGCGGCGGCGGCGAGTAATTGGTCTATTTCTTCTCCTGGTAAATCTTCTTCTGTATCTTCTTCTTTTGGTTTGAAACCGCCTCCGGTACCTGAATTTGCCATACCATGGCCTGCGTCGGCGTTTCCACCAGAAAGGCATTTATCTTGGTAATCTCTTGCGAGTATTTGGTTAATAGTAAGGTCCCTATCTTGGTGACCAGGAGGAAATATGGAAGACAAAAGGTGAGCAAATGGATGACTGCAATTGCAGATATTATCATGAGAATCAGCAATTTGAGACATCCATATTTGTGTTTTTGTCTCTTGGTTGTATGGTGTCGGCACAAAAAAATCCTTGCTGGAGATGTTTTGCATCTATAAAATAAAAATATTTTAAGTTTCTTGCCCGTTC
>brain8	NON-AD	SRX4043928	NODE_104108_length_851_cov_3.05783	Papillomavirus
GATCTAAAAGATATTAACATTCTATTTCCAGTATTATCTCCCGCCCATCTAAACACTGTTGATATTTTTTCACACAAAGTACTAGTTTTATGTCTGTAACGCCAACATTTTAATTTATTTGCTCCACCTTTTACAATTAAAATTGGGGGATCTCGAGCTTCCTCCGTAAGTCGTTCAGTTCGTGTAAGACCTCTTCTTGGTACAGTTGTAGATCTTCTTCCAACCTCCGAAGGAGGGACTCCACCACCGATTTCCCGTAACCTTTTCGGTCGTCGTCTGGAGGGTGATTCTCCTTGTTCTCGTCGTCGTCGTCTACGTCGTAGTTCGGGGGTCGACGGGGTGGTTGAGCTAGGGACTCCCTCTTTTCCTTTGTCGCGTCTGCTGGTGTATGTTTTCGCCCTGGGTATGGCGTCCCCGGAGGAAGTAACGGATCCTTGAGGAGAGATGTTGGAAGATGGCCCTTGTGAACTATTGACAGAAGAAATAGTTTCATTTTTAAAATTAACAGTCCAGTGTCCTGTGGAGCTAAACCTTTCAACATCAGGAGCAAACAATGTAAAATAATTTCTTTGGCCTGTAATGTCATCAAAGTAAAGTCCATTAATGTCTGCTCGTCCTTGTGCAACATGCCAATTGTCCTTTTCATCTTGATAATAAATTCTATCCCAGTTTGTGTAAGGAAAGGAATTAGTAGGCATATTATCAAACCATACATCAACAGTATATGGCTGTTTTTTAAATGTATTACGTGGAGCTGTTAATGTTAGTTCAGCACTAGTATCACTTAATGTCCATTCCTCATTGCTAAATGGTGAGTTTTGTAAACTTTCTAATAATATAAGCTGTTGAAT
>brain8	NON-AD	SRX4043928	NODE_199617_length_811_cov_4.28861	Papillomavirus
CTGTTTGAACTTGTACTCACCTGACAAGGATCAACACGACCGAAAGCGGTACGGAACTCGTGCCCTCGGGGAACAACTATACCGTTTATGGTTGAATAGTGTCCAGTTGGCTATCTTCCTGACCAAATGATTAAGGTGTTTATATCAATAGGATACAAGCCAAATAATTACTGGGTGTGAAAATAATGAGTCAATATTTTTGTCAGCAGCTTTATTTAATCCTTCATAGAATCCAAAGTGTATCTACTTAGTCACAGTATCAATTCACAGTATAGTAATAATTCACAGTATATTTAAAACAACATTCACAGTTTCTAACACAAATTATGTTCTATTTGGTTCTCTTACGTTTACTACAACGTTTACCACAAACATTGTCATTACAAGAACGTTTACAAGGTACTGTTTCAGCACAAGGCGAGCGCAAACGTTTGTTATTGATCATTCCTGTTTGATACAAAAAGCGCTTGCCTAAAGAATATTCATTTAATTCACTTGACATTCTATTTGTTAAATCTATTGTCCAAAAAATATATTTGTCCCATGGCTCTTCAGACTTTGGAGGTTCAATGTCAGCAGGACATTTAATAGCACCGGAACTTAAATATCTATAAGTATCCTGCAGTCCTTCAGGTGCAGGAGGCACAAAATTCAATTCCCAGTTTTCAAGTATTCTAGGATTCATTACATTAATATGAGCTAAAATCTCTGGTTCCAAAGGAACCTTACAAAGCTCTACAATCAATTCCAGTTCATACTCTTCTGTGTGTCTGGTATAATTTTTAAAATCTTTTGCCTTATACGTATACCC
>brain1	NON-AD	SRX4043922	NODE_10206_length_977_cov_5.20607	Papillomavirus
GCTGCTGCTGCTGCTGCTGCTATGTCTCCTGGTGGGTTTTGAGGACGTTGATCGCGATCTGGTGTGTCGCCTCGTTTGGGTTCGGAGGGACCGAGATCTGGGTCGCTGTCTCTGCCACGTTTGCCTGGTGGATCTCTTTTTGGGGGTAGCTGTAGGACTAGAGTCTTTTCTTCCGTATCGCCGCCGCTTTTTGGGGCATTCGGTGTCGCCTGTGGTCGTGGGGGACGCTCTGGGAGATCTTTGGGCCGCGGTGTCGGTGGTGGTAGGCCCGGTGCTTTTGTCAGATAATTGTCGTTCTTGCCCTTGTCCTGGTGATTCTGGTGGGGTGGAGCTAGTAACAGGGGCAAACACAGTGTCTTTATTAATAATGACTTCCCAGTGTCCAGTTGCACTAAATCTAGGTGCATCATCAGCAAACAGTGTATAATAATGTTTAAATGTTCCTTGTAGATAATAAATGCCTGTGTGATTTACTCCACTTTCTGTTTTTTGCCATTGCTCATCAGCATCCATATAATATACATATTTCCACATAGTATACAAGTTTGTATTACCAGGGTCTTTGTCATATATTACTTTCACATCCATAGGCCCTTTATTAAATGTATTCTCTGGTGTATGTTTGTATGTCTCCAGGCTAGTTTCCACTAATGTCCATGATTCATCCTTATATTTGGATTTATTAAGTGATTCTAATTGTAAGACCATCATAATGGCATTTTTAGCTTTGCTTTCAGAAACTGCTTGGGGAGGGACAGGTTGATATCCCAAACGCATAATTCCTTTTTGTCTGGCAACAAATAACAATACTGCTTCTTTTCGTAGAAGCTGCCAGTGATCAATTTGTGCCTCAAGAGTGCTTTTAGCAGCTTCATAAATGTTCATTAGCTGGTCTTGCAGAGCACTGAAACGCTCGTTGAGTGCCTCCATCCTCCTCCTCTTCTTGGTCACTGAGTTCTAATTGATTCCAAAGCCTT
>brain1	NON-AD	SRX4043922	NODE_11673_length_1966_cov_4.53111	Papillomavirus
ATCAACAGGTACCACCATTATCAGTTTCAGAAACAAGAGATAAACAGGCTATAGGGATGATGCTGCAGTTGCAATCATTGCAAAATTCTGAATATGCAAAGGAACCATGGTCACTGGTAGATACCAGTGCAGAGACATTTAGAAGCCCTCCTGAAAATCATTTCAAAAAAGGGCCAGTGTCAGTTGAGGTTATTTATGATAACGATAAAGACAATGCTAATGCTTACACCATGTGGAGATATGTTTATTACGTGGATGATGACGACCAATGGCATAAAAGTCCAAGCGGTGTCAACCACACAGGCATATATTTTATGCAAGGAACTTTTAGACACTACTATGTTTTATTTGCTGATGATGCAAGTAGATATAGCAGAACTGGACATTGGGAAGTTAACGTTAATAAGGAAACTGTGTTTGCCCCTGTCACCAGCTCCACACCACCCGACTCCCCAGGAGGGTCCCGAGAACTACCCGGATCCACCGCTAACTCCAAGGCCTCAAGCCCAACCCAACAGCCACAACAAGCCTGTAGTGACGAAACAACCAAGCGGAAGAGGTACGGGCGAAGGGAGTCAAGCCCCACTGACTCCAGATGCAGACGACGATCCTCGTCCCGGCAAAAGAAGCAAGGGCGACGAGCACGGTCCCGCACCCGGTCGCGCTCCAGCTCCACTCAAACTCGATCTAGATCCACCTCAAGGAGATCCAGATCAACCTCCAGGGGCAACAGGAGGTGTAGGGGAGACACCCCCAGAGGGCAACGAGGAGTCTCAACCTCCTCTAGGGGAAGGGGAAGGGGCAGTAGAAGGTCATCCTCCTCCTCCTCCCCCACCCCCAGAACCAAAGCCTCACAACGGGGATGTGACACACGGTCTGTTAGGGACAGTGGCATCTCTCCTGGGGACGTGGGAAGATCAGTTCAGACAGTTAGTAGACGAAATACAGGGAGACTTGGAAGATTATTGGAAGAAGCTAGCGATCCCCCAGTAATTTTACTTCGTGGGGGTGCTAACACATTAAAATGTTTTCGCAACAGGGCAAAGCATAGATATAGAGGACATTATCAAAAGCCCATTGTACCATTGTGGACATGTCAAACGTAGCAGCTTCTCCTGTTTGATGTCCTATCAGTGTTTGTTCTATAATCCATTTAGGATAAGACCCATGTGTAAAGGTAGCAGCATTTGAGCTACCTTTATACCAAAATAAAGCTGACACTGTACTTCGCAATTTTGGAGGTTCTGATAAAATTTGCTCCTCTGCCACATATAACATAGACACTAATAACCTTATAACAGTTTGTCTATTTTTGCCAGCCTTGAAACACAACAGATATAAAAACATTGCAGACATTTCTGTAACCCAAATATAATCACAATGCTGTTGTAGTAATTGCTTAGAACTTTCAAATAAATCATAATTTACACCATATATTGCTACCACCCAATCATTACAACAAGTCTTATTACTTCTGAACTGGCGAGTCAGTTCAACAAAGCTTACACCAAAAGCATTTTTAAATTTTGATAGTAAGGTAGCTTTTAAGTTACTGCATCGCATAAGTTCTTTATAATGTGCATTATCTTCCTTCCTTAAGTTACTGGTGGAAGATGTCTCTAAAGCTGGTACCTCTTCCTCCTGCTGCACCAATGTAGTAACATCTTCAGTTTCATTTGTAAGGGTCAATTCTACTCCACTGTCCTGCTCAGCAAACAATTTCCTCTTAGTTTTATGGTCTGATGACAGCGAAATGTCTATGTCGGCATGGATCCACTTTAAATTAGAGCAAGTAGAAGGGGAAGGGCAGTGGTCAACTGTTGTAAAATTTATTAGGTATCAGGGTATAAATTTTATTAGTTTTTTAAGTGCTTTAAAAGATTTTTTACATGGTAAACCTAAAAAGAATTGTTTATTAATATATGGCCCTCCAAATACTGGAAAATCAGCATTTACTATGTCATTA
>brain1	NON-AD	SRX4043922	NODE_11891_length_837_cov_3.19975	Papillomavirus
TTTTAAAAAGTCTGGATATTTACAGGTTTCATTTACAATATCCAAACTTACGTCTGATCTACTTTGTTGTAGTGTTCTAAAATTTAAATTCCCATAACCAATATCTGCCATATCACCATCTTGAATTACTGAATTTACCAACTTAATAGGTGGACATCTACCAGCATCATTATTATCACCAGCACACCTCTCAGCTACTTCCCAATGTTCTCCTATGCAGGGTGCACAACCTATAATAAACATTTGAATTTGTTTAGGATCAACAGAAATATCTTGTCTATAATCATTATTTTCATCCTGTTTAGTGGGATATGTATTGGGATTTTCTGTATCAGTATATTTATTAAAGAGAGGATGTCCTGTAGGGCTAATTCCCAGAGGTCCACCTCTACCTATTTCTAATCCTGTTAATCGCCATACTAATCTTTCTTTCTCAGGATTAAATATTTTTTCATCTGCGATAGCAAATTTATTAGGATCTGGAAGTCTTAAACGTAATACTCTAAATTGTTGAGCAGAAACCTTTGGAACTGCAACCTTTTCATCGTCTACAGTATCCATTACATCATAATAAGGATGCCCAACCATAAGCAACCGTTCTGTGCCTCCATGAAAGTAATATCCAGTTCTTTTAATAAAATCATCCGTATTCAGCACTTTAGCAACTGGCTTTTGAGGTGGAAGATACAGTTTTCCAGTGGTCTGCATCCATAAGGACATCTGCAAAACATTAGAAATATTCGATTCGTCTCTTTTTTTTTTTATGGTATAAACCTGGATGTAAATAAAAATTATCTGAATACATATCTAATCCAAATGATGTCTGTATTGGTTCAT
>brain1	NON-AD	SRX4043922	NODE_11892_length_1209_cov_3.62121	Papillomavirus
TTTTAAAAAGTCTGGATATTTGCATGTAGAATCTACTATATCTAAACTCACATCTGATTTACTTACTGATAGTGCCTTAAAGTTCATATTCCCAAATCCAATATCTACCATATCTCCATCTTGTATTACAGTAGTTTTTAATTCTAAAGGGGGGCAACCCCCTGTATCTGGCTTTTTTTCAGCACAAGGTAAAGCTGTATCCCAATGCTCTGCTAAACATGGTGTACAGCCTACTACAAACAATTGTATTTGTTTGGGATCAAAGGACGTATTTACCCTATCATCCTTCGCACCTGTGTTATATTTATTAGGATTTTCAGTATCTAACACTTTATTAAACAAAGGATGTCCTGTTGTTCCAACTCCTAAAGGTTGTCCGCGACCTATTTCCAAACCCCTGCACCCCCATACCAGCCTTTCCTTATCTGGATTATATATTGACATATCAGCTAAGGCAAATCTATTAGGATCTGGTAATTTAACTCTAAAAGCCCTGAATTGATTTCCTGATACTTTAGGAACCAAGACTTCATAGGGATCTGCAGAACTTTTAACTTCAAAGTATGGATGTCCCACTGTCAACAGGCGATCACTATTTGCATGATAAAAGATGTTGGTCCTTTGCACAAATTCATCCGTACTTTGCACCCTGGCAACCGGTGTTGAAGGGGGTAAGTATACTTTACCAGATGCTGGAAGCCAGTATGTCATCTGTAAAAAATTATAAATAAGCTCGCTTGCGTTTTCGTCTTTGTAAACTAGGATGTAAATAAAAGTCCCCTGAAGCATCTGCTATGTGTATTACTACTGTAGGAATATCTGGCTGTGGATAAATAATTTCAGGTATTTGGCATGTAAAGGTATAGAAATTAGTAGAGGACAGCCCTTAGGAGTTGGAACATGTGGGCATCCCTTATTTAACAAGGTTAAGGACACTGAAAATAGTAATAATTATCAAACCAGCTCTACAGATGATAGGCAAAATACATCTTTTGATCCTAAATAGGTACAAATGTTTATTATTGGATGCACATCATGTTTAGGAAAATAATGAGATACGGCTAGAACCTGTGATGATGCAGGTGATAAACAAGGTAAATGCCCACCATTTGAAATTAAAAATTTTGTAGTTCAAGATAGAGATATGGTGGATATAGGATATGATAACATCAATTACAAGACTGAATCACTGATTGGGCCAGGTAGTAG
>brain1	NON-AD	SRX4043922	NODE_12017_length_1450_cov_6.81526	Papillomavirus
GAAGACGAGGGAGAGGATGGAAACTCTCAGCGCACGTTTCAATGCACTGCAAGAGAAGTTAATGGACATTTATGAATCAGGTGTAGAAACGTTGGAAGCACAAATTGAGCACTGGCAATTATTAAGACAAGAGCAGGTGCTTTTAAATTATGCAAGGAGAAATGGTGTTATGCGCCTAGGATATCAACCTGTACCAAGTCTAGCAACGTCAGAGACTAAAGCCAAGGATGCAATTCGCATGGTTATACTTTTACAAAGTTTACAAACTTCTGAGTATGCTGATGAACCGTGGAACTTGGTGCAGACTAGCCTTGAAACTGTTAGAAGTCCTCCTGAAAATTGTTTTAAAAAGGGACCAAAAAATATTGAGGTTATTTTTGATGGAAATCCTGAAAATCTTATGATTTATACTGTATGGACATGGATATATTATCAAAACTCAGATGATAAGTGGCAAAAGGTAGAAGGTGCTGTGGACTATGAGGGTGCTTACTATACAGAGGGAAAACATAAGCACTACTACCTTAGATTTGAAGCAGATGCTAACAGATTTAGCACTACTGGACTGTGGGAAGTGCATGTTAACCAAGATACTGTGTTTACTCCTGTCACTAGCTCTTCGCCGCCATCTGGAAGCAGGGTATCCCTTCTGCCCTCCGACACCACATCCCTCCAGCCCTCTTCCAGCGTCTCCACCACACAAAAACGATACGCACGAACCGGATCTAGCCCTACAGCCACCGCCCGGCGGCAGAGGAAAAGAGAAAGACAAGAAGGAGACGGAGAAGGAACGCAGGCGACATCGAGACAACGTGTCAGATCAAGATCAAGAAGCTCCAGCAGAGGGAGGAGGCAAGAAACCTCAGTCAAACGAGGGAAAGGGCGAGGAGGAGGGTCACGAGGGAGAAGAGAACCCACCCAACGAGACACCTCCTCCAGGGGAGGGAGAAGTAGAAGGCGGCCCCAAACACGGTCCAGGTCCAGATCAAGAGGGTCTTCTAACGAGCGTGGCCTCTTGCCTTCAGAAGTGGGAAGATCAGTACACTCAGTTGGTACAAGACATCTTGGGAGACTTGAGCGATTATTGGAGGAGGCTAAAGATCCCCCAGTAATATTATTTCGGGGGGAAGCTAACCAGCTTAAATGCTATCGCTACAGGGTGCATAAAAGGCATAAGGGTGGCTACAAATATGTCAGTAGTACTTGGTCATGGATAACAGAACATAACAATGACAGAGTGGGACGCGCTCGGATGCTTGTTCTGTTTTCATCAACAGAACAAAGGGAAGCATTTCTAGACACTATGAAATTACCTCAGGGTGTTGATTGGTCCTATGGGAATTTTGATAATTTTTAATTAACTAACCCTTTTTACTAATTGCATGCTTTTACACTAATATACTAATCTGCTAATCTGCTATGGCTCGTGCACGCAGAACAAAACGTGCTT
>brain1	NON-AD	SRX4043922	NODE_1419_length_1458_cov_3.79749	Papillomavirus
GTCACATTTACATCCACTAAAGTGCTTTCTACAGGACCTTGTACAATTGAAGCATCACCTGAATGCTTACCCAATAATTGCATTTCTAAGGTTTCCTCTGTATTAATTGTACTTAAATCCCTATAGAAATGTACCTGTGAGCCTATTTGTGTACCACTGCGTGTTCGTATCGTTCCCCGTCTTCCCAAACGACTGACTCTAACATATCCCTCTGCAGACTCAGTTAATGTTGGCCTACCTAATTTAACCACATCCAAAAACTGTCTATCGGGTGGCTCCTCAAAGTCTGCTATGTCTTGCTCAAATATCTGTGTTACTTGTTCATCAAATACAGGATTGTCAAATTGGAAGCGCACTAATCTGGAAGGCTGTGAAAAAAATAAAGGATTTTCTACCTGCACCTGCTCAGTTAGGCGCCTGTTGTATAAAGCCCTCCTTAAAGCAGATACTGCTTGTCTTCCCCTTTCTATTGGTGTACTTGTACGTCTTGGTGGGGTTGGTTCTTCAATTTCAAAACTGTACCTACTTTGTACTGGTTGTAATTCTATTTCTTCTCTAGCTCCTCCAACCAACTGCCCTCCAGAGCCTTCAAACACGAATATATGATCGGACACAGATGATTCTCCAGTAGATGCTGTGGATTCAGTTAATACCTGAAATGATGGATTATGATATTGTGTTTTTGTAATTCTGGTTCTCATTGGAGGGTTAGGATCAGCAACCTCTAGTACTGCACTAGACTGTTTTTGGATGTGGCACAGTTAGGCCGTCCTACTTACAATGAAACACCACAAGGTTATATTAGAGTAAGTAGACTAGGCCGCAGAGCCACTATTAGAACACGAAGTGGTGCTCAAGTAGGTACTCAGGTACACTTTTATAAAGATATAAGTAGTATAGATATGGAAGCACCTATTGAGCTACAATTATTAGGCGAACATTCTGGCGATAGTACTATTGTACAAACACCAGTGGAAAGTACCTTTATAGATGTCAATTTACAAGATTCTGAGGTTGTCCATATAGGCAGACAAGAACCTATGGAAATAGAAAATTTTGAGGATGAAACTGACTTCAATTCTGCGGACCTACTAATAGATGATGCCATAGAGGATTTCAGTGGTTCACAATTAGTTTTTGGCACATCTAGGCGTAGTAATACAGTTACAGTTCCACGGTTTGAAACCCCTAGAGACACTAGTTTCTACACACAAGACATTGAAGGATATACAGTGTCTTATCCTGAATCACGAAATGTGCCTGAAATTATTTTGCCTCTGCCAGATGTCCCAGCAGTTGTAATACATGTTGAAGATAGTAGTGGAGATTACCTGAGACTTTAGGAACCTCTATTTTAGAACCATCATTGTTCCTTACATCAAAATATGGATGCCCTACTGCTAGTAACCTGTCACTGGTGGCATGATAAAATACATTGGTTCTTTCAACATAAGAGTC
>brain1	NON-AD	SRX4043922	NODE_1632_length_619_cov_1.36957	Papillomavirus
TGTTGATACTATAAATCCTATTGACCCTACAGCATCCTCCATTGTACCATTAACTGAAGCACCATCTGTGGATTTATTACCTGGCGAAGTGGAAACAATAGCTGAAATACATCCTTTGCCAGAGGCCCCGTCCACAGATTCACCTGTAGTAACTACTAGTAGGGGATCCAGTGCTGTTTTAGAAGTTGCACCTGAAGCTACTCCTCCAACACGTGTTCGTGTGTCACGTAGTCAATACCATAACCCATCTTTTCAAATAATATCTGAGTCTACACCAATAGCTGGTGAGTCTTCATTATCAGATCATATATTGGTGTTTGAAAACACAGGGGGTCAAGCTAGAGGTGGTACAAGAGAAGAATTTGAACTACAATCATTACCTTCCAGGTATAGCTTTGCAATAGAAGAGTCCACTCCTACTAGTACAACCAGGACACCTATTCAAAGAAGTATGCAAGCTGTTTCTGCTTTACGTAGTGCCTTGTACAATCGAAGATTAACTCAACAGATAGCTGTAGAAGACCCTTTATTTTTATCCAAGCCATCTAAGCTAGTAAAATTTCAGTTTGATAATCCTGTATTTGAAGAAGATATTAACCAGATATTTGAAAGGCATATA
>brain1	NON-AD	SRX4043922	NODE_1667_length_646_cov_2.1792	Papillomavirus
CCTCCAAGAAATAGAAGCCCTGCTGCTGCTTTATACTTTTATCAGAAAGCTATTGCAAAATTAGGTTTTAAGTATGGTTGTTTTCCACAGTGGATACTGTCACAAACAAGTTTAAGTCATCAGTTTGCTGCAGCTGAAACATTTAAGTTATCAGAAATGGTACAATTTGCATATATTCACAATGTGGCTGTAAAGTAATTTTAGACGCCTCTATTATTTCCTCAGAAACAGCAAATACAGCAATAATCCAGTTAGGAGTACATGTTTTATCGCTTTTAAAGTTTCTAGTTATTTCAGCAAAGGAAACACTGTATTTACTTTTAAACTTGGTTAATAAAGTTGCTTTTCTATTAGCGCTATGCAATATTGAATAGTTTTCTTGTGACACATCTATCGAATCTATAGGAGCACTAGAATCTACCTGTGTAACAGAATTTGCAGTTTCATCTTCACCTATTCCACTGTCCTCAAACAATCTCCTTTTTATAAGTCTCTGAGGTGAAATATGAACAGCCTGCAGCCGCGGACTCAAATTTTCAACTGAACGATCTGGTCTAGCAATAAACTTTCGTTTTAGAGCTGCAATAGCTGTTTCACATTCCTCATTTACTTGCTCGTTGTATAATGCCAGGGAATTTCCCTGGTT
>brain1	NON-AD	SRX4043922	NODE_1683_length_765_cov_3.62634	Papillomavirus
ATCTATGGTAAGATTTTATAAAAAAGGACAAATGAAAGAAATGTCTATGTCAGAGTGGATACATACTAGAATTAATGAAGTAGAAGGAGAAGGACATTGGTCCTCTATAGTAAAATTTATAAGATACCAAGGTATTAATTTTATAAGTTTTTTGTCTGCTATGTAAATACCTATATGCTGATTCAGCCATTGCATTTATATTAGAAGTTATTAAAAGTGGAGGAAATTTAATTTGCATTGGTGCTCTGTGTTTACAATCTAAAGATACTAAATGCCCATCAAGACCATTTCTTAAGTATGTATCCATATATATCCAACACGGATCTGTAGCATCATCTAATAAAGCAATTTTACACTCAGACATAGGTTGCAACCAAAAATGACTTCTAGAATTAGCAAATGATAACACTTTTCCTTTTAACACACGAATTAAAGACATTGTAAACATAGATTTCCCTGAATCAGGAGGCCCATGAAATAAAATGCAATTCCTTTTAGGTGTATTCTGCAAAAATGTCTTAAACTTATCTAAAAATACAATAAAATTTAAGTTTTGATATCTGATAAATTTTACAATATGAGACCAATGACCTTCTCCTTCTACTGATAAAAGGCGTGTATGAATCCAACTTGATATTGACATTTCCCTCATTTGCCCACGTTTATAATGTTTAACCATTAAAGCACATTCTCTAACATACTTTGCTTGACTATTACTATCTAAAAATGCTTTTGCATTACTATTTGTATCAGACAGTTTAGCAT
>brain1	NON-AD	SRX4043922	NODE_1767_length_1012_cov_4.20585	Papillomavirus
ATCCAATATAGACATCAATAATTTACATACTGTATCCCTACTTTTTACACTATTAAAACATAGTAGGAACAATGACATTATACCATTTATATAAATCCAAATATATGAACAGTATTGCTGTAGCAACTGCTTACATCCTTCTAATAACTCTTCTCTAACACCATAAATAGCCACGACCCAATCTTTACAGCATGTCTTATTACTTTTATATTGCCTGGTTAATTCATAAAACCCTACCCCAAAATATTCTTTCACTTTACTTAACAGTTTGGCACGAGAATTACTACATTTTAACAGGTCCTTTATCAGGTTTGCAGTTTGTGCATGTCCCCCCTCCTCCCCCTGGACAACCGGCGCTGCAGCCGGTACCTCCACCTCCGGAGCCACATCTTCAGCTTCATTATTAACAGATTGTTCAAGGCCCGACAGTTCAACACCGCTGTCCTGCTCAACAAACAGCCGCTTTTTTGATTTTTGTTGTGGAGACAACGACATAGCCTGCAACCGCGGACTAAGCTGTTGTACAGCTTTAGGACTGAAATACTTTCGTTTTAGGAATTGCACTTGTTCCTCGCACTCAGCACTCTCCTGTTGATGAAATAAGTCTCGGGAGTTTCCCTGTTCCGTCTCCCCATCATCTAAGAAATCAGATAAATCTGTCTCTGAGGCTTCTTCATCAAACAATTTTTCCAACTCATTCTCTAAATCACTACACTCAGCTTCATCATCAATAAACCAACCACTACACCCTTCAATAGGATCAATACCTCTATCCTCCGCCATGGCGAATCCTGTCGCGACACTGAGGACACAGCAGGGCAAGTTCGTTTAAGAGCAGGTCTTCAAATAATCGAATACCATACGTTGTAGAGAGAAGAAAGATGCGAAGTTTGGTTCCACAATTGCCTCCACAATACACAATCACTTTGAAAGGTGTTCTGTCAGGTGCTAGCTCCTCCTCTTCTTCTTGTTCATCAGGTAACTCTTCGTTGCAATGCAGGTCAATGGGCTG
>brain1	NON-AD	SRX4043922	NODE_3089_length_2584_cov_16.2985	Papillomavirus
CTGGTGTTTAATAGAAGCTACCTGTGTTGACAGCATGGACACAATTTCAGAGTTATTTGAAGCAGACACGGCTTCAAATATATCCAATTTAATTGATGACTTGGATGTTGTAGATGAGGGAAATTCCCTGGCATTGTACAACTCGCAAGTAACAGAGGAGTGCAGCAAAGCTATTGTTGAGCTAAAACGAAAGTTTATTACAAGCCCGGTACGTTCAGTAGCAGATCTGAGTCCGAGCTTGCAAGCTGTACATATATCACCCCAAAGACTTTCTAAAAGACGATTGTTTGTGGACAGTGGAATAGAGGATGAAACTCCTAATGCTGTTACACAGGTAGAAACATTTGAAAATTCTGATTTGGGCAAATCTGCGGTTTCACAGGAGGAATATTGTATATTGCATAGTAGCAATAGAAGAGCGTTATTATTAAGCAAGTTCAAAGAAAAATATGGTGTATCATTTACAGAGTTAACAAGAAATTTTAAAAGTGATAAAACGTGCACTCATAATTGGATATTAGTAGCGTTCGCAGTAGCTGAAGATCTTATAGAGGCAAGTAAAACTGTGTTACAGCAGCATTGTGAATATTTACAAGTAATTCCTAGTGATTTTTCAGCTTTATATGTAATGGAATTCAAAAATACAAAAAACAGAGAAACTGTGATTAAGCATTTTAATACAGTATTAAACTCAAAGGAAGAACAAATTTTATGTGATCCTCCCAGAAATAGAAGTATGGCAGCAGCTCTATATTTTTATAAAAAAGCAATTGGTAATATTGGTTTCAAATTTGGAGCTTTTCCACAGTGGATAGCGGCACAAACTATTGTTAATCATCAATTAGCAGCTGCAGAAACATTTGAACTCTCTGAAATGATTCAATGGGCATATGACAATGATCATACTGATGAGGCAGCTATTGCCTACTACTATGCGCTTTATGCAGAAGAAAATGCTAATGCTGCTGCCTTTTTGAAAAGCAATCAGCAATATAAATATGTTAGAGATTGTTGTAATATGGTTAAAATGTATAAAAAACAGGAATTGAGAAATACATCTATGTCTAGTTGGATATTTAAGTGTTGTAAAAATGTTGAAGAAGGCGATGGTTGGAAAGTTATTTTAAAATTTTTAAAATATCAAAATGTTAATATTATATCCTTTTTGATTGCATTAAAAGCGTTTTTTAAATGTATTCCCAAAAAGTCTTGTATAGTGTTCTATGGACCATCAGACACAGGAAAATCATATTTTTGTTTTAAGTTGATAAAATTTTTAAAAGGTAATGTTGTATCTTATATGAACAAAAGCAGTCATTTTTGGTTAACACCTTTATTAGAAACAAAAGTAGGATTTCTAGATGATGCAACATCTGCTTGTTGGAACTTTTTAGATACTAATATGAGAAATGCATTTGATGGTAATCATGTATCTATTGATGTGAAACATAAAGCTTTACAGCAAATAAAATTGCCACCTATGCTATTAACAACTAATGTACCTGTACCAAAAGAGCCATCTTTAATGTATTTATATAGTAGATTAACATGTTTTGAATTTCCTAACAAAATGCCATTTGATGATAATGGAGAACCTGTGTTTAACATTACCAATGATTGCTGGGCTATGTTTTTTAAAAAGTTTTCCAGACAACTAGACTTGACAGAAGACGAGGGAGATGGAGACTCAGGAAACCTTGACCGACCGTTTCACTGCACAACAAGAAATTCAGTTGACTCTAATTGAAAAGCAATCTACTAGTTTGCAGGATCACATAAACTTTTGGAAGTCTGTCAGATTAGAAAATGTATTAGCTTATTATGCGAGAAGAGAGGGCTACCGCAATTTAGGATTGCAGCCTTTGCCTGTGCTTGCTGTTTCTCAATATAAAGCCAAAGAAGCGATAGAAATGCAAATATTATTAACAAGTTTAAATGATTCTGAATATGCCAATGAAGCATGGACTTTAGCTGATGTAAGTGCTGAACTGTTACATACACCTCCTAAGAATTGTTTCAAAAAAGGAGCATTTATTGTAACTGTGTTGTATGATAATGATGAACAAAAAGCATTTCCCTACACATGTTGGGACTACATATATTATCAAGACAATAACTCTCGATGGCATAAAGTTAGAGGAGATGTTGATACAAATGGGTTATTTTACACAGAAGTGACAGGAGACATTGTATACTTTCTACTATTTGCTCCAGAAGCTGAGAAATATGGAGACAGTGGCTCATGGACTATTAAATTTAAAAATCAAACTGTTTTTGCCTCTATTGCCAGCTACGCACGTCCTGTTCCCGGGCCTTCTTCCGAGGCCGGGAAGCCCACCTCGAACACCTCACCCGTCTCGAAAAGCCCTAGAAAGCGACAACGTGAAACCGACGAAGACACCCAAAGTGCATCGCCCACATCGACCAGTCGGGGATTTCGACTACGACGCGGAGAAGGAGAATCAGCGACCACCACAAGGAGACGACGAGGAGGAGGAGGAGGAACAACCAGATCATCGCAATTTGCAGTCTCTCCTGAAGACGTGGGAACGCGATCTCAATCGGTTCCGCGACATGGTCTTGG
>brain1	NON-AD	SRX4043922	NODE_3090_length_1578_cov_12.5209	Papillomavirus
GTAGCTTCTATTAAACACCAGACATTTTAGCACATATCAATGCAATGAATCCCAGGGTACTTGAAGAATGGCAACTGGCTTTTGTGCCTCCCCCTCAGCAAACTATAGAGGATGCCTATAGGTATATGAAATCGCTTGCAACACGGTGTCCTCCCAAAGAACAAGATGAAGAATCCACAGATCCATATAAGGATTTAACCTTTTGGAATGTGGATTTAACAGAGCAATTTTCTTCTGATTTAAGTCAGTCTGCATTAGGTAGGAAATTTTTGTATCAGGTAGGTTTGCTTAATGGCAAAAGACCTAGATCTGTTACTGAAACTGTGAACAAGAAAACTGTGAAACGCAAACGTACAAAATAAATAGTTGTTAATTGTGTTTGTCATATATATTGCAATGCTGCTATAAATAAATAATTGAATCAATTCTTTGGCTGGTTCTTGACTCATGGGGGCAACATTCTATACATACTGGATCAGTAGATATATAAACTTGATCACACTCATTGATCTCTTTTAAGTGTGCTGTGACCTTGAGGACATCGGGACCGATTTCGGTACGTGTTGGCGCCAAAGGGCAAATAGGTAACCGTTTTCGGTGAGTCTGCACTTTAACAACAAGTAAAAACAAAGATGGCGATAAGAATCGCTGGCTTCAATAGGAAAGGTTTCTGGCTGTCTGCCTTTGTACCGCCTTCGGTCTATAATAGTCATCCTTTTGATAGTTGCCAACAACTATCTGACATCCTACATTTGTAACCGGGAGCGGTGCATATAAATATTGCTGAATTCTCTTTGTTTGCATCCTCATGGGGACCTCTTTGCCTCTGAAACTGGACGATTATTGCAAACATTATGGAATTTCTTTTTTTAATTTACGACTTAGATGTATATTCTGTAAACATTGGATTGATACTGTTCAACTTGCTGCTTTTCATGTTAAACGTCTCACTCTTTTGTGGAGGAATGATGTATGTTTTGCTTGCTGTACTCCTTGTTTAACACTTTCTGCTCGCTATGAAAGGGAAAGATTTTATCAATGTTCTGTAAAAAGTGATTTCCTTGAGGATATTTTGCATAAGCCTTTAGCAGATATTGTGATTCGCTGTGTAGATTGCTTATGTATGTTAGATTTGATAGAGAAGATTGAACATTTACTGCTTGACAGACCTTTTCATTTAATCAGAGGCTACTGGAGAGGAACGTGCAGGAACTGTAAGAGACAATGAGAGGTGAAATTGCTTCTTTACCAGACATAGTGCTAGAGTCTTTGGTTTTACCTGTAAATTTATTAAGTGATGAATCCTTTAATGAATCTTTGTCGCCTGATGTAGAAGCGGAGGAGGAGCATAGCTTTAGAATTGACACAGAATGTCACTTTTGTAACACACAAATTAGGCTCTGTGTTGTAGCAACAACTGAAGCTATTAGACACTTGCAGAGTCTTTTGTTAGATCAGTTGCATCTTCTTTGTCCTGGGTGTGCGAGATCTTGTTGCCGCGAACATGGGAGAATCAACTAAAGGTACTGATAATGACTCTTTGGATTCTTTAAATGACTGGTGTTTAATAGAAGCTAC
>brain1	NON-AD	SRX4043922	NODE_3842_length_1197_cov_6.91412	Papillomavirus
CAGCCCATTGACCTGCATTGCTACGAAGACTTACCAGAGCTTCCAGATGTTCCTAGTGAAGATTCAGAGGAGGAGCAAGTAGAGCGCATCCCATACAAGATAGTTGCTCCTTGTGGTGGTTGTGGCGCTCGCCTTCGACTATTTGTGATTGCTACCTTCTTTGGAATCCGCACACAGCAAGAACTTTTAATTCAAGAAGTGCAACTTGTGTGTCCTCAGTGCCGAGAGGTCATTCGCAATGGCGGACAAGGACCATAAAGGTATTGATGCTAAGGAAGGCTGTAGTGATTGGTTTTTAGTAGAAGCTGAATGTTCAGATACTAGTGATCTAGAAAATGATTTAGAAAACTTATTTAATGAAGGGGCAGACTCAGATATTTCTGATTTAATTGATGATGGGGACATTGAACAGGGGAATTCCCGCGAATTGCTATGCCAGCAAGAAGCAGAGGAAAGCGAGCATCAAACACAATTGCTAAAACGAAAGTACCTCAGTCCTAAAGCGATTCTGCAGCTTAGTCCGCAGCTGGAGTCAATCTCCCTGTCGCCCCAACATAGATCTAAAAAGCGGCTGTTTGTGGAGCAGGACAGTGGACTAGAGCTTTCACTAAATGAAGTTGAAGATCTTTCTGAAGAGGTGGAGGTACCGGCGAATGCTTCAGCGCCGGCAGCACAGGGTGGTGAGGGAGAGGGAAACTTGCATTATAAAGCGCTGTTAAAGTGCAGCAATGCAAAAGCAACATTGTTAAGTAAATTTAAGGATGCGTATGGAGTGAGTTTTAATGAGCTCACAAGGCACTATCAAAGTAATAAGACATGTTGTAGGGATTGGGTTGTTAGTATTTATGCAGTGAAAGATGATCTGTTAGAAGGGTCTAAGCATTTATTACAAAAGCATTGTTCATATATTTGGATGCATGTTTTACAACCAATGTCATTATTTTTACTGTGTTTTAATGCTGGGAAAAGTAGAGAAACTGTATTTAGATTACTATCTTCTATTTTGCAAGTAAATGAAATTCAAATATTGTCTGAACCACCTAAGTGGCGTAGTGTAATAGCGGCATTGTATTGGTATAAAGGAAGTATGAATCCAAATATTTATACTTTTGGAACATATCCTGATTGGATAGTGACACAAACTATGATTAGCCATCAATCTTTGGAGGCGACGCAAATTTCTTTATCTGACATAAT
>brain1	NON-AD	SRX4043922	NODE_4077_length_822_cov_3.30337	Papillomavirus
ATTATCAACTTATATAAATTGTGAAGTAGTGCGCTGGTCACTAGTGTCCAGTTGTGTCTACGTGTCAACTTTGCACTTTGGCGGGAACGTGTACCAGTGTCGGTAAGACAAACTGCCACAGGGCAGATTTAATACCAGAGATGGTAGCTGCCAAAAGTTCACTGCCAACTAAAACAAGTTTAAACGAAAGGCACAGATAACAATCGCTCCAAATACCTTATACGTTACTGGCTGTTTGCCTTTGTACCGCCTTTGGTAATATATATTCTTTTCTTCTTATTGTTAACAACAATCACCACAGGTATAAATTTGGGTACCAGGAGCGGTATATTTATTTGCCAGAGATGCAATATTAAAGGCTGATGGAGCAGTTACCAACGAAACTTGATCAATTTTGTTCTCAATATGGAATTTCTTTTTTTGATGTACGACTTAGATGTGTTTTCTGCAAACATTGGATTAATTCTCTTGAACTTGCTGCTTTTCATTGCAAATGTTTGTGTCTTATTTGGAAAGAAAAAGTATGTTATGCTGCTTGCTGTTCGTGTTTGAGACTTTGTGCTAGGTGTGAAGCAGAGAGATATTATCAATGCAATGTTTCTAGTGAGTTCATAGAAGATATTTTGAATAAGCCTTTAAGTGAAATTGTGATTCGCTGTTTGCAATGCTTGACAAAACTCGACTTGTTAGAGAAATTGGAGCACAAATACCTGAAAGAAAAATTTCACTTGGTTCGGGGTTATTGGAGAGGAGAGTGTAGAAATTGTAAAGCAAAGTAATGAGGGGAGAAGTTGCAACTATACCAGATATAGTTTTAGATAC
>brain1	NON-AD	SRX4043922	NODE_409_length_950_cov_17.1335	Papillomavirus
CAAAAGCTGGATTCTCAAATGCAAATCTAACCAATTTAGATGGTTGAGTTAAAAACAAAGGGTCTTCAACAGGCACTTGTTGTAACAGTCTCCTATTTGTAAGTGATCTTTGTCTAAATGCTTGTGTAGCCCTTTGTAATGGGGTACTGCTACGCCTTGGTGGTGTTGGTGTTTCTATTTCAAAAGAATATCTATTTGATAAATCCTGCAGTTCTATATTTTCAGAAACGCCTACTGATTGTCCACCTGCACCAGAGGCGACAATTATTTCGTCTGACAATGAACTTTCACCTTGACTTGGTGTAGATTCTGTAATAATATGAAATGCTGGATTATGGTATTGTGTTCTGCTGACACGAACACGTGTCGGTGGAGTAGGCTCAGGAGCTACTTCTAAAATGGCACTAGAGCCTTTGCTTGTTGTCACTACTGGAGTATCAAATGTGGGCACATCAGGTATAGGATGTACTTCTGCTATTGTTTCTATTTCACCAGGTAAAAGGTCTACACCTGATGATTCAGTAAGAGGAACTATAGATGACGATGCTGGGTCAACAGGGGCTATTGTATCAACAGGTAATAAGTCAGCAGGACCTATTACTTCAGGCACAAGGGCAGGCCGAACGACTGTGGGTGTACTGCCCACACGAACTCCAGTACCTTCACCCAATGGCACATATCCTGTGGTGCCTCCAGTCCCTCGGCCTGTACTAATACCCAGGCCACCAAAAAAGACACCAGCACTTCCATATTTAAGTATATTATCAGCAATGGTTGACTGTTCCACTTTATTAATAACATCAGGTGGACATGTGCCCGCCTGCTTGCATGTTCTGTAAATATTAGTAGCAGAATCTCGTTTTGTTCTTTTAGCACGCACCATTGCAAAGCATACAAAAAGTAAAAATAGGTTATATGTGTGTTAGTAGCAAAAGCTGGATTCTCAAATG
>brain1	NON-AD	SRX4043922	NODE_4747_length_1300_cov_4.46443	Papillomavirus
AAAAGAAAGAGAAGATCCTTATGCCCCTTATACGTTTTGGAATGTAGATTTATCTGAACGCTTATCTTTGGAACTGGATCAATATTCCTTAGGACGAAAGTTCCTGTTTCAAGCGGGTCTTGTACAAAAAACATCTAAAAAAACATCTAATGTATCCAAGGGGACCAAACGAAAACGCACGTAAAATAAAGGCTGTTTACCGTTTTCGGTACAATATATGTGTATTCCAAGAATGCTTGTTATTCATGTGCGTGACTAATTTGAACTTTGGCTTGAATGTCAACCGCACCCGGTACAAGTAGATAAAATCTTGCAACCACAGCAGACACAAAGGAATCACTGTCGGTCTCAACACGCTCGGATTTGGCGCATTCAACCGTTTTTGGCGCCAAGTTTCTTGGCACTCGCACAGCACCGTTAACGGTAAGTGTTTTGTATACTGTACCGGGCGCGATACCAAATATGCCACCTGCGCAATTGTTGTTAGCAACTACTTTCATTACCTAACAAGTATTTTCATGCACCGTTTCCGTATCACTGTGAATGTATTTATTGATTAGACATATAAAAAGGAAGACATCTTGATGGCTCAACCAGGTAAACCTCAGTCAGTGTTAGAACTTAGTAGATTATTAAATATACCATTAGACGATTGTGTTGTACCATGTAACTTTTGCAAAAGATTTCTAAGTTATACAGAGTTAACTGACTTTGACACCAAATGCTTAAGTTTGATTTGGAAAGACGATTTTGTGTTTGCATGTTGTAGATATTGTTGTATTGCTACAGCATCATTTGAATTTGAAAATTATTTTGTAGAGAGTGTGATAGGTTGGGAAATAGAACAAAAAGAAAATACACCTCTTTCGGACATTATTGTAAGGTGTCACCATTGCTTAAAATTACTTAATCAAATTGAAAAGCTTGATATCTGTGGAAGATCTGAATTATTTCATAAAGTGAGGAGGGGCTGGAAAGGACTCTGTAGGCAGTGTAAGCAGATATAATGATTGGAAAAGAGGTCACTCTACAAGACATTGTCTTAGAGTTGACTGAGCCACAGCCTGTTGATTTGCACTGTGAAGAGGAGTTGCCAGAGCAGGATACGGAGGTGGAACCTGAAAGAAGTGCGTACAAATTAATACTTGGTTGCGGCGGCGGTTGTGGAACCCGGCTTCGATTATTTGTAGCAGCAACACAGTTTGGAATACGTGGCCTGCAGGACTTACTGCTAGAAGAGGTGGTCATTTTGAGTCCCGACTGCCGTAACAGCGATCTGCAGCATGGCGGACAATAAAGG
>brain1	NON-AD	SRX4043922	NODE_674_length_952_cov_5.3942	Torque teno virus
AGAAGACGGCATACGAGATGCTCAGGAGTCTCGTGGGCTCGGGACTGGCCGGGCTATGGGCAAGGCTCTTAGGGTTATCATTCTTAAAAATGTTTTTTGGTAGGCCTTACAGAAAAAAGAAAAGGGCGCTGCTACTGTCTGAGCTGCCAGATTCAAAGAAGAAACCACCTGGTGACATGACCTGGCGCCCCCCGGTACACAATGCCGCCGGCATCGATAGGCAGTTTTTCGAAGCCTGCTTTCGATGCCACAATAGTTGCTGCGGCTGCGGCAGCTTTATTAATCATCTTAATGTACTGGCTGCTCGCTATGGCTTTACTGGGGGGCCGGCGCCGCCAGGTGGTCCTCGGCCGGCGCCCCAGATGAGACCCGCGCTTCCCGCGCCGGAGCCCGACCCGGAGGCCGAGAACCGTGAGCCATGGCGTGGAGCTGGTGGTGGCAACGATGGAGGCGCCGTCGCTGGCAACCCAGGCGCCGCCGCTGGAGACGCCTACGACGGAGAAGACCTAGACGCCCTGTTCGCCGCCGTCGCCGAAGACGCAGAGTAAGGAGGCGGAGGTGGGGTAGGAGACGGGGGCGACGCAGACGGTACACTACCAGACGAAAGAGACGCCACACTCGTAGAAACTTTAAAAAGAAACTTGTACTTACTCAGTGGCACCCCTCTGTAGTTAGACGCTGCTTTATTAGGGGCATAGTCCCCATCCTTATATGCGGGCACACAAAATGGAACAGTAACTACGCCCTGCATAGCGAGGACTACACAGAAGAGGGCCGCTACCCTCACGGAGGGTCCCTGTCCACCACTACGTGGTCACTAAAGGTGCTGTACGACGAGCACCTGAAGCATCACAACTTCTGGGGCTACCCAAACACCCAGCTAGACCTGGACAGATACAGGGGCTACACTTTCACCTTCTACAGACACAAAAAGACTGACTTTATAGTATGG
>brain1	NON-AD	SRX4043922	NODE_6774_length_1228_cov_3.96935	Papillomavirus
CTTCTTTCCCAATCATTCTATTGTTCTACAATGCCTACAGAGCCCTTTCCAATGACTTCTCACTCTGTGGAACTCTTGATGTCTGGCACAAATATCTAACTTCTCTAACAAATCTAATTGCTTCAAACAAAATAAGCACCTTACAACAACACTTGCTAGTGGAGCCTGTGCTCGTCCTTCTATCTCATAACCTGTTACTGTTTCTTGATGAAAGGTTCGCAATTCATAAATGGCTGTAGCAAAAGCACACACTGTGCAGCACCCAAACACTAATGCATCTTTCCAAATGAGGCGTAAATTCTTATAATCAAATTCTAATAAATCAGCAAAAGTTAAAAATTTACCACAGGAATTACATGGCAACAATAAACATCCAACTGGAATTTACAGGTAGCCACTAAGCTCCACAACCCTGCCTGGCCTAGCCATGTGTATTACCCAAGTACTATTTTCCCCAATTTATATATTCTTTTGTACAAATATACACAAGCGGTTACATGTAGAGGAATATGAGCTCTCTGTCATTTTACAACTTTGTAGGGTGCCTTTACAACCAGACATATTGGCACACATAAATGCAATGAATTCTAATATTTTAGAAGAGTGGCAGTTGGGGTTTGTTCCCACCCCTGAAAATCCTATACAGGATACCTACAGATATATTAACTCAGCAGCCACACGTTGCCCTGATAAAAACACCCCAAAAGAAAAGGAAGATCAATATGCTAAGTTTAACTTTTGGACTGTTGACCTAACAGAAAAATTGTCCTTAGATTTAGATCAATACTCCTTAGGACGTAAGTTTTTATATCAGGCAGGCTTGAAACGGTCTGCTACACCTAAAACCACAACAGCTCGCAACACTGTCACTCGAGGGGTTAAACGAAAACGTACATGACCGCTTTCGGTATCTGTATAAAGGTTAATAAATTTTTTGAAACCCCTTTGGTATGTGAAGCATGTTTTAACCAAGTTCGTGACTAAGATTGATTAACCCACCTGCAACCGCACCCGGTTAATCAGATTATAAAGGAGCGCCGGTGTTTACCTCCGGCTACTTGGCAGTTACAAGTTCACCTCTGCCAGAAGTTTGTTTTTGCCAAGACATTTGCCAAGTACCACATTCGTTCCAGCTACATTTTGGCGCCAACTCTTTGGCAGCAACACACGAACGATAACGGTAAGTTTCAATCGGGCGCGGTCACATTATACTTAGTCATCTCTTGTG
>brain1	NON-AD	SRX4043922	NODE_6775_length_838_cov_9.70379	Papillomavirus
CTTCTTTCCCAATCATTCTATCGACCAACAATGTCTGCACAATCCCTTCCAATTACCTCTCACCTTATAAAACTGCTGATGCCTAGCACAATTGTCTAACTTTTCTAAAAGGTCCAGATGCTTTAAACAATAAATGCATCTGATAGTAATAAAGCCTACAGACTGTTGAGTCACCTGCTCTATTTCTCTGCCTTTGACTGTGCCTTCTAAATAATTTTTGTATTCAAATGCAGCAGATGCATATGCACAACTAGAACAACATGCATAAACTAACTCATCAATCCAAATTAGCTGTAGTTGCTTATAATCAAACTGCAAAAGTTCTATATAAGCTAGAAAGCGATCACAAAACTTGCATGGAATTAATAAATCTTCAATTGGTATTCCTAAATTCTGGCTTAACACCTGTACTGTTCTAGGCCTCTCCATCAGCATCTGACTACAGTATAATCCTCAAGTAATTTTATACTTTAGTATCTAACGCAAGCGGTCACATGTATTTATGGATAGAATGATTGTTGTAAACCACAATCAGAACATGAGTAATATAGCAACCGGCAGCGGTTCAAACAAATAAAAACTTACCGTTATCGGTGTAAAGTGTCTGCCAATTTGTTGTTCTGCCAAGATATCTGTAGTAAAATCTTGGCGGGCGCCTGCGGTGGTTCCTAGACGTACTGCCAAGTCTTAGTAGGTGAAGCACCGACTGCGATTTATAAGCTGATTACACCGGGCGCGGTTGCTGGTGCTGACTTGTTCGGTTTAGTCACGAACACGGTTAAAAAATGCTTCACATACCACTTTAGTTAGAAAACTTATTTATTAAATACAAACCGAT
>brain1	NON-AD	SRX4043922	NODE_6955_length_969_cov_5.01793	Papillomavirus
TTTGTAATTGCTCCTCGCTGTCCTCACTCTCCTGCTGCTGAAATAGTTCCCGGGAATTCCCCTGCTCCAGGTCCCCATCATCAATTAAGTCTGATATATCTGAGTCTGTATTTTCATTAAATAACGTTTCCAAATCATTTTCAATATCACTACATTCGGCTTCCAAAATACACCAACTACTGCACCCTTCGATAGCATTATCAGTACCTTTATTGGTTGCCATGCTGCAAGCTGTGGCGACACGGTGGGCACAACAGATTTATTTCCTCCAGCAACCGAGTTTCCAGGGTCCGAATTCCAGAAATTGTTGCAAGCAGACAAAGGCGCAGTCTGGACCCACAGCAGCCGCAAGGTGCAACGACTTTGTAAGGTATTTTGACAGGGTCAGGCTCCTCCTCCGAAGATGTATCCTGCTCGGTTGGTAACTCCTCTTCATAGCAAAAGAGGTCAATGGCCTGAGGTTCTAACTCCAAGACAATATCTTGGAGAGTAACCTCATTTCCGACCATTATTTACAAAACTTACAAAGACCTTTCCAATTGTCTCTTACTTTATGGAAAGGTTGCTGTCTTCCACAGATGTCTAACTTTTCTATGCTATCCAATAATCTTAAACAATGATGACACCTAACACAGATGTCAAAAATAGATTTCTGCTCTACAGCTTCTATATCTCTTCCAATTACAGATCCTTGATAAAATTGTTGAAATTCAAAAAATCCACTAGCTATACTACAACGCCTACAACAGCCAAACACCTTGTCGTCCTTCCATATTAATTTCAAAAGCTTATTATCAAAATCGCACAATTCAAAATAAGTAAGAAAATTAAAACAAAAGTTACAAGGCACCAATAGATCTACAACAGGTATGTCCAATAACCTGGCTAAATCAGCTATCGACATAGGATATGTCTCCATGTGTATGCCTGCCTCTCTAGTTGTCAAGTAATATATATATATATATATAT
>brain1	NON-AD	SRX4043922	NODE_8065_length_776_cov_4.17351	Papillomavirus
ATTATTATCAAACGCCCACTGCACCATTTTAGACAAATCAAAACTTGTAGCATCAGCAGTTTGATGCCCAATCATTGTTTGCTGAACTATCCAAGTTGGGTACTGTCTATGTGTAAATGCTCCTGATATATTACTTCCTTGATACCAAAATATGGCTGCTACAGTACTACTTATCTTAGGAGGCCCAGCCAATATTTGTTCTTCATGAACACACAACATAGAAGTCAGCAATTTCAGAACAGTACAACGATTTTTACCCGCCTTAAAAGACAATAGAAACAATGACATTGCACTAGATCTTAAAGCCCACACATAGTCACAATGCTGTTGCAATAACTGCTTTGCACTTTCAAATAGATCATCATTGACTCCATATACAGTTGCTACCCAATCCTTACAGCACGTTTTATGACTCTTAAATTGGCGTGTTAATTCATTAAATCCAACCTCATACGCCATTTTAAATTTTGCAAGCATAGTAGCTTTTATATTATTACAACGCAACAGTTCTTTAAAGTGATAGTTCCCTGTCTCCTGTCTGCTCTGTGCGGCAGAAGGAGATGTATTGTCAGTTGGTACCTCCAATTTTTCAGAAGTAATATCTTCAGCTTCATTTGTAAGAGTTAACTCAAGTCCGCTGTCCTGCTCTGTAAAAAGGCGTCTTTTACTTTTATGCTGAGGAGATAATGAAATACACTCAAGTCGCGGACTGAGCTGTGCAACAGCTTGAGGACTTAAATACTTTCGTTTTAGTATTTGTAATTGCTCCTCGCTGT
>brain1	NON-AD	SRX4043922	NODE_8750_length_1025_cov_3.05378	Papillomavirus
ATATATATATATATATGTATAACACACCTGTGTCGATAACGATACAGGCAGAAACAAGTTACTAATGCTGATTGTTGGCAGCAACAAGTACGAATGAGTAATAATTTAACCGCGCCCGTATCAATAGACTTACCGTTAACGGTCTTGAGCTCTGCCAAACAAAGAGCCGAAAGCGATTGGCAATATTAGTATTCCATTGGCGAACGTCCTAATCCGAGCGTGTCAAAACAATAAAGACGATACGCATCTGGCGAGCAGCTGCCTGAGTTTGGCACAGACTTTATCTGATTTGGCACATAACTCACCTTTTATGTATCGGGTGCGGTTGGTATCCTAGTTAGTCAGCATAAATAAACATTCCTTGAATACTGTGCAAAAGTTGACTTTATTGTATCGAAAGCGGTAATTTCTAATTTTTACGTTTTCTTTTTATTCCCCTAGTAGATATTCGGGAGGAAACTGTTTTTGTACCGTTTACGGTTGTTTGCTGCAAACCAGCCTGAAATAAAAACTTACGTCCCAGTGAATATTGATCTAAATCTAAAGAAAGGCGTTCTGTTAAATCTACATCCCAAAAGTGTAAATTTTTATAAGGATCTACTTTTTCCTTAGGAGGATTTTTATCTGGACAACGTGTGGCTAAAGAATCAATGTAGCGATAAGTATCCTGAATAGAATTGTCCGGTGCAGGAACGAATCCTAATTGCCATTCTTCTAAAATGTTGGAATTCATTGCATTAATCTGAGCCAATATTTCTGCCTTCAACGGTACTTTGCAAAGTTGTAATATTAATGATAACTCATATTCTTCTACATGTCTTAAATATTCTGTAAATTTTTGGGAATTATAATCAGTGATTTTGGAAACATCTGTTCCATCTGAATTGATTGATATGCTGAAATTAGTGTTGCGTGTGTTGTCTACCACAGTGACAAATAGCTGATTAAACCAGCATATACCATTGTTATGACCTTGTGCTCGCTGTAACCAAAATGGCCTATTGAATAATTGAGCATCACTAGAT
>brain1	NON-AD	SRX4043922	NODE_9442_length_3224_cov_5.04652	Papillomavirus
TCAGCAACAGTGACAAACATTTGATTACCCCATAATATACCATTGTTATGTCCTTGCGCTCTTTGTAACCAGAAGGGCCTATTAAATAACTGAGCATCTGAAGAGACTAGAGAACCACTAACAGTAGGAAAATAAATTGAATTTCCTAGTGTTTGACTTTGTGATGACTTAGGAGGTAAATAAAATTTATGATCTTGATTATTTGCTCCATCTGGAATAGCGTCTCCAACATTACCTCCTCTGGTAAAATAATGTCTTGCATAGCACTGTTCCCTTCTTGCAAAAAAGAAACATGAGTCTCCATACACATCATTTGCCATAGTTAGAAAATCTGGATATTTAGCAATTTCGTCTACTAAATCTAAGCTAACATCGGATCTATTCAGGGATAGAGTTTTAAAATTTATATTTCCAAATCCAATGTCCATCATATCGCCATCTTGAATCACAGAATTTTTCAGTTCTATAGGTGCACATTTTCCCTGTTGATCTCCTGCATTTTCACATGGCTCAGCTTTATCCCAGTATTCTCCTAAACATGGTGTACATCCAATAATAAACATTTGAACTTGTTTAGGATCAAAGGATGTATTTTGTCTGTCATCTGTGGACCCTGTCTGATAGCTATTGCTATTTTCTGTATCTTTCACTTTATTAAATAATGGATGACCACTGCTACCCACGCCTAAAGGTTGGCCCCTACCAATTTCTAACCCTTTAATACCCCATACTAACCTCTCTCTATCAGGATTATATACTGACATTTCCGCCAATGCAAATCTGTTAGGAACTGGTAGACGAAGACGAAATACCCTATGTTGATTACCTGATACTTTTGGTACCTCCAACTTATCACCCTCATTATTATATATATTGAAATATGGATGACCTACGGTCAGTAAACGATCGCTATAAGCATGATAATAAATATTTGTGCGTTCCACATATTCATCAGTGCTCTGTACCCTTGCCACTGGTGTTGAAGGTGGTAGATATACTTTACCACTAGCAGCTTGCCAAACAGCCATCTGTAAACAAATCACAAATATTTTCTTTTGCGTCGTCGTCTCGATAGGCTGGGATGTAAATAAAAGTCTCCAGATGCATCATGGGTGTGAATAATTACTACAGGTAATTCAGGTGTGGGATAAATTATTTCTATCTCGTTCCTAGATTCTGGATAAGCTACATAATATCCCTGGGTGTCTTGCACATAATAAGAAGCATTTCTAGGAGTCTCAAACCGAGGTACAGTATAAGTACTTGTACTTCGCCTATTGCCTATTACCAATTGAGAACCTGAAAAATCCTCTACAGCTTCATCTAATAGAAGATCATCTGAAAAATTTTCTACAGTGTCTGAAAATGGTGTGACACCTACATCCACATTAACAAATGTACTTTCTGCTGCAGGAGCCTGAACTATTGTTGCATCGCCTGAATGTTGGCCCAGTAGTTGTAACTCAATAGGGTCCTCAGTATTAATTGTACTAAGGTCTCTGTAAAAGTGTACCTGACTTCCTATTTGAGTTCCTGACCGTGTTGTTATAGTGCGCCTTTGACCCACACGACTTACCCGGACATACCCAGCTGGTGTTTCAGAATATTGAGGTCTCCCCAATCTGCCAATATCTAAAAAGTCTCTATCTGGAGGCTCTTCAAAGTTACTAACATCTTGCTCAAAAATGTTTGTGACATCTTCCTCAAACACAGGATTATCGAAAGCAAATCTTACCAGCCTGGAGGGCTGTGATAAAAATAGTGGATTGTCTACTTGTACTTGTTGTATCAGGCGCCTGTTAGTTAAGGATCTCCCTCTTGGTTGTCTAGAGAGTGATCTTTGAACTGGTGTGCTGCTTCTACGTGGTTGGTTTGGCTCCTCTATTTCAAATATATACCTGCTAGGGAATTCTGGTAACTCTATCACTTCACTAGAAGAGCCTCCAATAATCTGTCCCCCGGACCCTGATGTAACAATAACATGATCAGCTAAAGAACTTTCGCCTTGTGTTGGTGTAGATTCAGTGATAATTTGAAATGAAGGATTATGATATTGACTGCGAGACACCCGTACGCGGGAAGGTGGTGTGGGCTCAGGGGCCACTTCCAAAACAGCACTGGAACCCCTATTACTTGTTGTAACAGGTGCATCCACAACAGGGTTCTCTGGAACAGGGTGAATTTCAGCTATGGTTTCTACTTCACCAGGTAATAAATCCGTGGTTTCTGTTAAAGGAATTACTGAAGACGCTGTAGGATCGATTGGGTTAGCTGTATCAATAGGTGTAATGTCTGCAGGCCCAATAGTTTCTGGAATTAAGGAAGGCCTTACCACGGTGGGTGTGTTACCCACACGTACTCCAGGACCTTCACCTAAAGGAATATAACCGGTGGTGCCTCCAGTGCCTCGGCCTGTACCTATTCCCAAACCACCAAAAAACACACCAGCACTCCCATATTTAAAAATGTTATCAGCAACTGTAGTTTGTTCCACTTTATTAACTACATAGGGAGGGCAGGTACCCGCTTGTTTGTAGGTCTGATAGATATGAGTTACAGAGTCTCGTTTGACCCTTTTAGCTCGCACCATAGCAAAAAATTATATAATATGTATAAAAAAAAAAGCAGGGATGTTAATGTGTTAGCAGCAAAGCAGCGTTAGTAGCAAAAGCTATTATTAGTTAGAGGCTATCAAACTGTCCAAAAGTTCTTTCTACATTCTTAGGGTACTTAACCTTGTTGTCAAACATTCTCCTATGTTCATAGGAAGAAAAACTAAAAAGCATTCTGGCCCTGCCTATGCGTTCGCAGCCATCTGTAGACACCCATGACCATGTGGTACTAACAGCCTTGATTAAATCCTTGTACTTAGTTTTAGAGCGATTTCGAAAGCATTTTAGCGTATTGGGTTCCCCCCTAACTAAGATTACTGGGGGATCGAGAGCTTCGTCCAGTAATCTTCCAAGTCGACCTGTATTTCTTGTACTAACTGATTGAAGAGACTTTCCCACGTCGTCAGGAGAGATGCCACGTTGCCTAACAGACTCTGACTTTCCTCGTGACCGTTTGGAGGGGCTGGGGGAGGTGGAGGATGACCGTCTCCCCCTCCCACTGCTCCCTCCAATGGCCCCTCCTCGTGGCCGTCGTGGCCGTTTGGAGGTGGTGGAGGATGACCCTCGCCCTGACCCTCTGGTGGAGTAGTTGGTTGCGGCGGTGGTGGTGGT
>brain1	NON-AD	SRX4043922	NODE_9902_length_1206_cov_5.73755	Papillomavirus
TATATATATATATATAAATATGTGTGCTACGGAAACGTTCAGGTACTTACATGTAGACTATGATTGTTGGCAACAACAATAGTGAGTAATTAACACCTGGTACCGCACCTGGTTAAGTTAAGCCCGTTCCCGGTACAAAATGAAAAAAACTTACCGTTATCGGTCTTGATGTTCCGCCAAGGATTTTGGCGCCAAAACAGATTTCTGCCTGTTCAGACCGCCTGCGTTTCAATTGTGCCAAGAGTGGTACTGATCATCAGATAATATCGGGCGCGGTACAATCTTGGCATGTAGGCAAAGTTCAACTTAGTCACTCATGAATAAACACAACATTCCTTGAATACTGAGGATACCGAAAACGGTACAAGTTTATTTTCTTTTTCTTTTAGTACCCCTACTCACCGTTCGAGTGACAGACCCATTCACAGAAGTTTGTTTTAGCCCTGCTTGAAACAAAAACTTACGTCCTAAGGAATACTGGTCTAAGTCAAGAGAAAGACGCTCTGTTAAATCTACGTTCCAAAACACATATTTACCATAAGGGTCCACCTTTTCCTTTGCAGGTACTTTTTCGGGACATCGAGTGGCTAAAGAATCTATGTAGCGATAAGCATCATGAATAGGATTGTCTGGTGTAGGTACAAAGCCCAATTGCCAATCTTCTAAAATATTTGGATTCATTGCATTAATTTGGGCTAAAATTTCAGCCTCTAATGGTATTTTACACAATTGTAAAATTAATGAAAGTTCATATTCCTCCACATGTCTAATATACTCTTTAATTTTCTGTGAATCATATTCTGTTAAAGGACCTTCGTCTTTAGGAACACTAATATTAAAATTTGTGTTTCTTGTGTTATCACACACTGTTATGAACAACTCATTACTCCAACAAATACCATTATTGTGGCCCTGAGCCCGCTGTAACCAATAAGGCCTATTAAACAATTGTGCATCTGTAGATACTAAAGACCCACTTACTGTAGGAAAATATATTGAACTAGCCAATTGTTGCTTGCCAGCTTGGTCATTTGCTGCAGGTAACATATAATTGTGGTCCTCATTAACAGCCGCATTGGGGACGGCATCGCCAACAACACCTCCTCTTACAAACATATGCCTAACATAACATTGTTCTCTTCTGCCATAGAAGAAACATGAGTTGCCATATATATCATTAGACATTTTTAAAAAGTCTGGATATTT
>brain7	NON-AD	SRX4043929	NODE_10211_length_2979_cov_5.34415	Polyomavirus
GAGCAGAGGGTCCTGACCAGCTTCTACATTTTCTATCATTTGACAAAATTTACCATATGATATTTCACTCTGTAAAATTTGCTTCCAGTTTTTAATTTCTTCTTGTAAGCAAGGCTTAAAGGTTGTATCAGGCAAGCACCAAATAAGACAAAGCAATAAAGTGGTTCCACTTTGAAGAATTCTTCTTTTTCTTATTTCCATGTTCTGATCCAGGGAATCTCTTAGATTTGCCTTTGGGGAAAAGTGTAAAGTATAACTAAATCTTGCTATTAATGTTTTGGGAATAAAATAATCATTAGCAGTAACAATACAAGGAGGAAAAATCTGATGCTTTTTATTCACATGCTTCTTCTCTAAGCTTACAGCTACAGCACCATCTAGATGATCTCTTAAGTTATCAAGGTTATTTATTCCTTGCCCTGGTTGCAGATCTTTATTTAGGCTATTTTGCCCTTTCACATCCTCAAAAACAACCATAAATTTATCCAAAGCACATCCTAGTTCAAAAGGTAGTTTATCAGATGGACAGTTTATATTCAAGGCCTTCCCTTCTAGCAAATCTATTAAGGCTGCAGCAAAGCTTGTTTTTCCACTGTTAATAGGCCCTTTAAACCAAATGTTTCTATACTTAGGTATATTCTCTGTTAATAATTGAATAATTTTCTGCAGCTTCTTTTCAAACTCTTCAAATAAGCAGCAGTACCAGGCCACACCACCCATATAATACAGTAGATCTATTGTATCTAAATCTCTTAATCTCTCTAGGTGCTTCTTAAACTTCTTACATAGCATTTCTGTCCTGGTCATTTCCAGCATCTCTAACCTCCTTTTGGCTAGAACAGTGTCTGCGGCTTGTTGGCAAATGGTTTTCTGAGATTTAGATTCATAAAATAGCTTAGCATTAGAATGATGAGCCTCATGAGCCTTGTGAGGTTTGAGGCGAGATCTGTTTTCACACTTTTGGCAAGGAAATGGTTTTGCAAAGTCTAGATAATGGGCTAAGATAATAAAGTGGTCGTCTAGCTCATATTCACAAGCAAATTCAGCAACTAAATTCCAATTACAGCTGGCCTCTTTTTCTTTTTCTTGAAATTCATAATTGAGCAGTGGCTTATTCTCTTGCAGTAATTTGTAAGGGGGCTTGCATAAATTATTATACATTTCAGGCATCTTATTCACTCCTTTACAAATTAAAAAGCTTATAGTGCAGAAGGTAGAGCAAAAATTCTTAATAGCAGATACTCTATGCTTTGATAAAGTTATAAACAATAAAATACATCCTAATTCACAGGCATGCCTGCTTTTAAAATCAACTTTAAATTTCTCAATCTTATCATATAACTCTATAGCTTTATCAGAAGTAGTATAAATGGCAAAACAACTTACTGTTTTATTACTATATACAGCATGGCTAAGATAATCAGAAAGATCAATAGGAAAATCAGTAGGAACAGGAGTTTCTCTGTTCTTTTTTGGCTTTGGTGGAGTGCTTGTAAAACTTGCTGAACTAGCAGAGCTTGCAGAGCTTCGGGACCCCCCAAATTTTCGCTTTCTTGAGAATGGAGGAGGGGTCTTCGGGGTGGTGAAGGAGGAGGATCTGTATTCCTCATCTGTAAACTGAGATGACGAGGCCTCCTCGGCAGAGGAAGACGGGGGCTGCCGGGGCGAGCTTCTTGAGGAGGGGGGCTCCTCAGGCTCCTCAGAGGACGAGGGAGGCTCAGGGGAGGAAAGTGATTCATCGCAGAAGAGATCCTCCCAGGTGCCATCAGTTCTGGAAGAATTTCTAGGTACACTGGTTCCATTGGGTGTGCTGGATTCTCTTCCTGAATTGGTGGTCTCCTCTCTGCTACTGGATCCAGAGGATGAGGTGGGTTCCTCATGGTGTTCGGGAGGTATATCGGGTCCTCTGGACTGGGAGTCTGAAGCCTGGGACGCTGAGAAGGACCCATACCCAGAGGAAGAGCTCTGGCTGTGGGGTGGTGAGCTTCCACTGGGGGCTCCCCTGGATGCATTGGAGGAAGGCTTTCTGGATCTTGAGTTGGTCCCGTGTGGATTGGGCCCATATTCGTATGCCTTCCCGAAGCTGAATCCTCCTGATCTCCACCATTCTTTGAATTTAGTGGTCCCATATATAGGGGCCTCGTCAACCTAGATGGGAAAGTACAGAAAATCTGTCATAAATAACCTTTCTTTGATATTTTGCCTTATAGACTTTTCCATATCTAATACTTACAGAGGAAGGAAGTAGGAGTCTAGAAAAGGTGCAGATGCAGTAAGCAGTAGTCAGTTTCTTCTAAAGTGTTTTGCCACCAGTCAAAACTTTCCCAAGTAGGAGGAAATCCAAACCAAAGAATAAAGCACTGATAGCAAAAACACTCTCCCCACGTCAGACAGTTTTTTTGCTTTAAAGTTTTTAGACTACAATGCTGGCGAGACAACTTACAGCTAATACAAGCGCACTTAGAATCTCTAAGTTGCTTAAGCATGCACCCAGGACCTCTGCAAAATCTAGCATTATATCCACTTTGCATATAATCCTTTAAAGTTCCATATTCTTCCCAAGGAAATTTTGTACTGACCTCATCAAACATAGAGAAGTCACTTCTGAGCTTGTGGATATTTTGCTGGAATTTGCTCCAAAGGGTGTTCAATTCCATCATTATAACAGGATTTCCCCCTTTATCAGGGTGATGCTTTAAGCAGCTTCTTTTGAAAGCAGCTTTCATCAGAGGGATGTTGCCATAACAATTAGGAGCAATCTCTAAAAGCTTGCAGAGAGCCTCTCTTTCTTTCCTATTTAGGACTAAATCCATCTTGTCTATATGCAGAATGAGTTTGCAGAAAGAGCAGAGGAGCAAATGAGCTACCTCACTAAGGAGTGGTTTTTATACTGCAGTTTCCCGCCCTTGGGATCTGCCCTTAGATACTGCCTTTTTTGCTAATTAAGCCTCTTAAGCCTCAGAGGCCTCTCTCTTTTTT
>brain7	NON-AD	SRX4043929	NODE_11265_length_785_cov_2.84817	Papillomavirus
ATTAAAAAAAGGGTCTAGTCCTACATCCCGAAAGAGCTTACGTACTATCTGTTTACAAGGTGTAAGAGGCTATGAGACTAAGTATAATATTGGATGGCGTACAAAGCTCACCAGATAGCAATGAGGAATGGAAATTAAGTGATACTAGTACTGAACCAACACTAACAGCACAACGTAATACATTTAAAAAACAGCCATATACTGTTGATGTATGGTTTGATAATATGCCTACTAATTCCTTTCCTTACACAAACTGGGATAGAATTTATTATCAAGATGAAAAGGACAATTGGCATGTTGCACAAGGACGAGCAGACATTAATGGACTTTACTTTGATGACATTACAGGCCAAAGAAATTATTTTACATTGTTTGCTCCTGATGTTGAAAGGTTTAGCTCCACAGGACACTGGACTGCTAATTTTAAAAATGAAACTATTTCTTCTGTCAATAGCTCACAAGGGCCATCTTCCAACATCTCTCCTCAAGGATCCGTTACCTCCTCCGGGGACGCCGTACCCAGGTCGACGACCTTCACCAGCAGACGGGACAAAGGGAAAGAGGGAGTCCCTAGCTCAACCACCCCGTCAACCCCCGAATTACGACGTGGACGAAGACGACGAGAACAAAGAGAATCTCCCTCCAGAAGACGACCGAAAAGGGTACGGCAAGATAGTGGTGGAGTCTCTCCTTCGGAGGTTGGAAGAAGAACTTCAACTGTGCCAAGAAGCGGTCTTACACGAACTCAACGACTTGCGGAAGAGGCTCGAGATCCCCCAATTTTA
>brain7	NON-AD	SRX4043929	NODE_12162_length_1978_cov_3383.25	Papillomavirus
AGCAGCAGCAGCAGCTGCAGCAGAAGAAGCGTCAGGCGGAGAAGAAGGACAAGATCCAGGTCAGCCTCCAGAGCAAAGTCCCCAGCCACCAGAGCAAAGTCCAGAACAAGGTCCAGAACAAAGTCCCCTGGGAGAAGGGCAGGTGGAAGGTCATCCAGGCGGTCTTCCTCCTCCTCGTCCTCCCCCAACAGAAGAAGCCGGTCCCGGCGAGAACGAGAGCTTAGCTACGACCGTGGCATCTCTCCTAGTCTCGTGGGAAAGTCAGTTCAGACAGTTAGTGGACGACATAAGGGAAGACTTGGAAGGTTATTGGCAGAGGCTCATGATCCCCCAGTAATTTTGGTGAAAGGTGATCCCAATACGCTAAAATGCTTTCGAAATCGCTCTAAAACTAAGTACAAGGATTTAATCAAGGCTGTTAGTACCACATGGTCATGGGTGTCTACAGATGGCTGCGAACGCATAGGCAGGGCCAGAATGCTTTTTAGTTTTTCTTCCTATGAACATAGGAGAATGTTTGACAACAAGGTTAAGTACCCTAAGAATGTAGAAAGAACTTTTGGACAGTTTGATAGCCTCTAACTAATAATAGCTTTTGCTACTAACGCTGCTTTGCTGCTAACACATTAACATCCCTGCTTTTTTTTTTATACATATTATATAATTTTTTGCTATGGTGCGAGCTAAAAGGGTCAAACGAGACTCTGTAACTCATATCTATCAGACCTGCAAACAAGCGGGAACCTGCCCTCCCGATGTAGTTAATAAAGTGGAACAAACTACAGTTGCTGATAACATTTTGAAATATGGGAGTGCTGGTGTGTTTTTTGGTGGTTTGGGAATAGGTACAGGCCGAGGCACTGGAGGCACCACCGGTTATATTCCTTTAGGTGAAGGTCCTGGAGTACGTGTGGGTAACACACCCACCGTGGTAAGGCCTTCCTTAATTCCAGAAACTATTGGGCCTGCAGACATTACACCTATTGATACAGCTAACCCAATAGATCCTACAGCGTCTTCAGTAATTCCTTTAACAGAAACCACGGATTTATTACCTGGTGAAGTAGAAACCATAGCTGAAATTCACCCTGTTCCAGAGAACCCTGTTGTGGATGCACCTGTTACAACAAGTAATAGGGGTTCCAGTGCTGTTTTGGAAGTGGCCCCTGAGCCCACACCACCTTCCCGCGTACGGGTGTCTCGCAGTCAATATCATAATCCTTCATTTCAAATTATCACTGAATCTACACCAACACAAGGCGAAAGTTCTTTAGCTGATCATGTTATTGTTACATCAGGGTCCGGGGGACAGATTATTGGAGGCTCTTCTAGTGAAGTGATAGAGTTACAAGAATTCCCTAGCAGGTATACATTTGAAATAGAGGAGCCAACCCCACCACGTAGAAGCAGCACACCAGTTCAAAGATCACTCACTAGACAACCAAGAGGGAGATCCTTAACTAACAGGCGCCTGATACAACAAGTACAAGTAGACAATCCACTATTTTTATCACAGCCCTCCAGGCTGGTAAGATTTGCTTTCGATAATCCTGTGTTTGAGGAAGATGTCACAAACATTTTTGAGCAAGATGTTAGTAACTTTGAAGAGCCTCCAGATAGAGACTTTTTAGATATTGGCAGATTGGGGAGACCTCAATATTCTGAAACACCAGCTGGGTATGTCCGGGTAAGTCGTGTGGGTCAAAGGCGCACTATAACAACACGGTCAGGAACTCAAATAGGAAGTCAGGTACACTTTTACAGAGACCTTAGTACAATTAATACTGAGGACCCTATTGAGTTACAACTACTGGGCCAACATTCAGGCGATGCAACAATAGTTCAGGCTCCTGCAGCAGAAAGTACATTTGTTAATGTGGATGTAGGTGTCACACCATTTTCAGACACTGTAGAAAATTTTTCAGATGATCTTCTATTAGATGAAGCTGTAGAGGATTTTTCAGGTTCTCAATTGGTA
>brain7	NON-AD	SRX4043929	NODE_12468_length_761_cov_3.12432	Papillomavirus
AGCACCGGGCCTACCACCACCAACACCCAGACCACCTACATTGCCACCACAGAGACCACAACCACCGACAAGCAGCAACGACGACCAAGATACAGACGGAAAGACTCTAGTCCTACAACCACCACCACCCAAACGCGATCCAGGCAAGCGCAGCAGAGACGACGAACCAGATCCAGGTCCGTCGGGTCCCAAGAAAGGAGAACTAGGTCCAGATCTCGATCAGCATCCCGTAGAGGGGTCCGAAAACGTCAGCGAAGCAGAAGTACCCACAGAGGGAGGGGGCGGAGATCCCGATCAACCTCCCAAGAAAGATGCCCTAGGAGAAGGAGACGTAGAAGGTCATCCTCTTCCTCGTCCATCTCCACCTCCTGCTCTGCCTCCTCCGTGTCCTCCTCCTCACAACGGCGAAAGCGGGGACGAGGAGGTTCAAGGCTTAGCTCATACCGTGGCATCTCTCCTAGCGATGTGGGAAAATCAGTTCAATCAGTTAGTGGAAGACATAAAGGACGACTTGGAAGATTATTGGAGGAAGCTTATGACCCCCCAGTAATATTGCTCAAGGGTGCAGCTAACACGCTTAAATGCTTTAGAAATCGTACTAAACTTAAGTATAAGGATTTGTTTAAATGCATGTCTACAACATTTTCGTGGGTGGCTAATGACGGCTGCGAGCGATTATATATCCACTCAGAAATAGACATATCTCGCATTTGCCCCCTTTTATAATACCGGACCATTGCTGCACATTCTCTAACAAATCG
>brain7	NON-AD	SRX4043929	NODE_13144_length_1615_cov_3.51945	Papillomavirus
ATTGCACACCTACATACAGGATGGAGATATGTGTGAGATAGGTTTTGGGAATGCAAACTTTCAAACTTTTCAGGAAGACAAAGCTGGAGTTCCTCTGGAAATAACCAATGAAATATGCCTTTGGCCAGACTTTTTAAAAATGACTAAAGATGTTTATGGGGATCAAGTGTTTTTTTTTAATAAAAAAGAGCAGTTATACGCTCGTCATTATTTATGTAAAGCAGGTATAGATGGAGATACCCTGCCACTAGATAGTTATTTAAATCCGCAAAATGATAAACCACAACAACAGAATTTAGGGCCATATTCGTATTATTCCACTCCTAGTGGATCTTTAGTTTCCAGTGACGCAGGTTTATTTAATAGACCATATTGGCTACATAAAGCTCTAGGTGCTAATAATGGTATTTTGTGGGGAAACAACTGCTTTGTTACTATTGTAGACAACACCAGAAACGTTAATTTTAACATATCAGTTGCTGCTGAAGGTGTAAATCCTAAGGATCAATCTTATAAATACAAAGCCAAAGATTTTAAGAAGTATACCAGACACACAGACGAGTATGAGTTAGAATTAATAGTTGAGCTATGTAAAGTTCCTTTGGAACCAGACATTTTAGCACATATTAATGTTATGAACCCTAGAATACTTGAAAACTGGGAATTGAATTTTGTGCCTCCTGCACCTGAAGGACTGCAGGATACTTATAGATATTTAAGTTCCGGTGCTATTAAATGTCCTGCTGACATTGAACCTCCAAAGTCTGAAGAGCCATGGGACAAATATATTTTTTGGACAATAGATTTAACAAATAGAATGTCAAGTGAATTAAATGAATATTCTTTAGGCAAGCGCTTTTTGTATCAAACAGGAATGATCAATAACAAACGTTTGCGCTCGCCTTGTGCTGAAACAGTACCTTGTAAACGTTCTTGTAATGACAATGTTTGTGGTAAACGTTGTAGTAAACGTAAGAGAACCAAATAGAACATAATTTGTGTTAGAAACTGTGAATGTTGTTTTAAATATACTGTGAATTATTACTATACTGTGAATTGATACTGTGACTAAGTAGATACACTTTGGATTCTATGAAGGATTAAATAAAGCTGCTGACAAAAATATTGACTCATTATTTTCACACCCAGTAATTATTTGGCTTGTATCCTATTGATATAAACACCTTAATCATTTGGTCAGGAAGATAGCCAACTGGACAGCGTTCAACCGTAAACGGTCCACAACTCCCCGCAGGGCACACTTTACATACCGCTTTCGGTCGTGTTGATCCTTGTCAGGTGAGTACAAGTTCAAACAGACGATTGCTTTGGGAGGAGAGCGTTTTCGGTACATGCTTTCCCGCCCAAATACCTAAAACGGTTTCAAAGTTTCTCTTACACGATAGTTGTTGGCAACTATTATTTCCTGTAGTAAAAAAATACCGACTCCGGTACTTATAAAAAGCTGTGATTCCGCAGTTCTTTCTTTCTTCTCGATGGCTGATCAGCAACCAACCAATTTGGAAGATTATTGTAAATTGTATAACTGTTCATTGTTTGATTTATCATTTGCTTGTGTTTTTTGCAAGCATAAAATTGATTATTTGGGTCTTGC
>brain7	NON-AD	SRX4043929	NODE_13145_length_2459_cov_4.4274	Papillomavirus
TCCTGTATGTAGGTGTGCAATAATTCTATTGCTGGACAATCACCTTTATTTAATTTGTTGCATGGCTTAGTTACCTCCCAATACTGACCTGTGGGCGGTACACAACCCACTATAAACATTTGAACCTGTTTCGGTTCAAAGGCTATATCTTTTCTATAATCATTGTCATCAGTGTGAGAGCCAGGATATTCTGAAGGGTTTTCAACATCTATAAATTTGTTAAATAAAGGATGACCTGTTGCACCAATACCTAGAGGTCCTCCTCTACCAATTTCAATTCCAGTAAGCTTCCATACTAATCTTTCAGTTTCTGGATTGTACACACATTTATCAGCTATTGCAAACTTATTTGGATCTGGTAGCTGAAGCTTTAATACTCTGTATTGATTAGCTGAAACTTTAGGTGTAGTGATGTTGTTGTTATTGTCTTCCACATCAAAATATGGGTTTCCAACTAGCAGAAGGCGCTCGGTGCCTACATGAAAATAATAACCTGTTCGTTTCACATATTCATCCGTGTTGTATATTTTTGCGACAGGTTTTGGTGGAGGTAGATACAGTTTGCCAGGATTTTGCAGCCAAAGAGACATCTGTAAAATATTAAAAATAAAAGCGTCGCTTTCGTTTCTTTTTTTTAGCTAAAGAAGGATGTAAGTAAAAGTCAACAGAACCTATATAAGTTGCTTTCGAAGGTTCTACTGGAATATAAGGTATTGTAGGAATATTAAATGTTGTGTCAGTGTTTAAGTTTTGTTCAGAAATAAATATATCAGATGTACTAGGTAGACCTCTATAAGTTATATCAGAAATTACTGTGGGATAGGTGAAAGACTCTTCGTCAACCTCCATGTTATTAAAAATTAAGTGAGCATCTGAAAAGCTGTCAGGATATGTATCCATTAACATACTTTCTAAGTTAACATTTAGTTCATCTATTAAAATACTTTCCGCTTCAGGATCTTCTACGATAATATCTGCAGTGTCAGATAAAGGCACCAATTCTATATTGTCAGTAACAGATATTGGGCTGACATCATAAAAGTAGTGCACATCCTGAGACAAAACAGTACCACTTCTGGTACGTACTCCTGCTTTCTGTCCAAATCTGCTTACACGTACTTGACCTTCTGCAGTTCTAGAGTAATAAGGCCTACTTATTCTTTGTATATCAGCAAAATCGCTATCGGGTGCAGCTGCCAATTCATTTAAATCGTTTTCAAATTCCAAACTGATATCTTGGTCAAAGGCGGGATTTTCAAATCCAAATGAGATTGCGCGGGCAACATCACCCAGCAAATTCAGATTGCTTGTCCTAACCTGCTGCACATGTCTCCTGTAAAAGTGCCTGACCCTACTAAATGCTCTTTGAATTCGTTGTTCAGGTGTACTAGCTTCTGGTAATTCTTCAATTTCAAATTCTAGCCGTGGATTTATAGGTTCCAGAGGAATTTGCTCACCAAAAACTATATCATCTCCAGTTAAATTAGGATCAACAAACACATTATATGTAGGGTCAATATGCCCAGCAACAGATTGCACAGTCACAAAAGGATCAAGATTTGGTTCTAATGAATTAAATATTACTTCTGTTGGAGGGGGATCTGCTGGAGACACAGTTAAAATTGCTAGTTCATTTTCAACACCTTGATAGACAGTGGGATGGCTTTGAATTGATGTTGTGTCAGTAATTACATCTAAATTTGTTAACACAGACTCTCCTGTTTCAAGGTTTGGTTCGCCTAACGTAATCACAGAATCTGGTAAGTTTTCCTGCAACGTTACAATAGCTGGAGAAGAGGGATCAACAACATCTATAGGTTTAATACCTGTTGGATCTTTTGGTCTAAAACCTACACTAATTCTATCTAAAGGTACCGAAAACGGTCGCTGCTGAGGACGAATTGTTGTCTTTGGTTTAGCTCCCAAATCTACCAAAGGAATTTCTTCTACTTTGTTCCCTCCCGCTACTACATCTACCGTACCACTTATACTTGGAATTTCAGGAATTGGCCTTACACTAACTGTTCCTGTAGACCCTTTCCCAGTCCCAATTCCTAACCCACCAAGGTATATCACACTACTAAATATTTGTAATAACATATCCGCAAGTGTTTTTCTTTCAGCTTTATTTACTACATCAGGAGGGCAGTCACCACCCAGTCTGCAAGATTTATAAAGATTTTCTACAGTGTCACGTTTGGATCTTCTATTACCATTCATAATGAATCTAAGTGTCCTAAAGCAAACGTACAGCCTTTGGGTAAACTTACTACCTTAAGAAAAACAGCTCTTTGTTCTACAGATCTAAAAGATATTAACATTCTATTTCCAGTATTATCTCCCGCCCATCTAAACACTGTTGATATTTTTTCACACAAAGTACTAGTTTTATGTCTGTAACGCCAACATTTTAAGTTATTTGCTCCACCTTTTACAATTAAAATTGGGGGATCTCGAGC
>brain7	NON-AD	SRX4043929	NODE_1385_length_2347_cov_3.77902	Polyomavirus
GTGGTTACATGATTGAACTTTTATTGCTGCAGGGTTTCTGGCATTGACTCATTTCCTGGAGAGGCGGAGTTTGACTGATAAACAAAACTTTTTTTCTTTCTGTTTGGGAGGGAGACGGAAGACTCTTAACTCAACTTTTTTTCAACAAGGGAGGCCCGGAGGCTTTTTTTTCTCTTACAAAGGGAGGAGGACATTAAAAGAGTAAGTATCCTTATTTATTTTTCAGGATGGGGGGCATCATCACACTGCTGGCCAATATTGGTGAAATTGCTACTGAACTAAGTGCCACCACAGGAGTAACTTTGGAAGCTATACTTACAGGAGAAGCTTTAGCAGCTTTGGAAGCAGAGATCTCCAGTTTAATGACAATTGAGGGTATTTCTGGCATTGAGGCTTTAGCTCAACTTGGGTTCACAGCTGAACATTTTTCAAATTTCTCATTAGTGGCTTCTTTGGTTAACCAAGGTTTAACTTATGGCTTCATTCTCCAAACTGTTAGTGGTATAGGCTCTCTAATAACTGTGGGGGTGAGGTTGTCACGCGAGCAAGTGTCACTTGTAAAGAGGGATGTTTCGTGGGTAGGTAGTAATGAGGTTTTGAGGCATGCACTTATGGCCTTTAGCCTAGATCCTCTGCAGTGGGAAAATAGCTTGCTGCATTCTGTGGGGCAAGATATTTTTAATTCTTTATCTCCTACCTCTAGGCTGCAGATACAATCAAACCTAGTGAATCTGATACTAAATAGCCGGTGGGTCTTTCAGACAACTGCTTCTCAGAATCAGGGCCTTTTATCAGGAGAGGCTATATTAATTCCTGAACATATAGGAGGAACTCTGCAGCAGCAAACTCCAGATTGGCTTCTTCCTCTGGTACTAGGCCTTAGTGGATATATTTCTCCTGAATTACAAGTAATTGAAGATGGCACGAAAAAGAAAAGTATCATCCACCTGTAAAACACCCAAAAGGCAATGTTTACCTAAGCCTGGATGCTGCCCTAATGTTGCCTCAGTTCGAAAACTGCTTGTTATGGGAGGAGTGGAAGTATTATCTGTGGTTACAGGAGAAGATAGCATTACCCAAATTGAGTTGTATTTGAATACAAGAATGGGAGTTAATTCCCCTGATCTTCCTACTACTTCAAACTGGTATACTTATACTTATGACCTGCAGCCAAAGGGATCATCCCCAGATCAGCCCATCAAGGAAAATTTGCCAGCTTACAGTGTGGCAAGAGTGTCTCTGCCAATGCTAAATGAGGATATTACCTGTGACACATTGCAGATGTGGGAGGCAATATCTGTTAAAACAGAAGTAGTTGGAATAAGTTCTTTAATTAATGTTCATTATTGGGACATGAAAAGAGTTCATGATTATGGTGCTGGTATTCCTGTGTCAGGGGTAAATTACCATATGTTTGCCATTGGGGGAGAACCTCTGGATTTGCAAGGACTAGTTTTAGATTACCAGACTCAGTATCCAAAAACTACAAATGGTGGGCCTATTACAATTGAAACTATATTGGGAAGAAAAATGACCCCTAAAAATCAGGGCCTAGATCCACAAGCTAAAGCAAAATTAGATAAAGATGGAAATTATCCTATAGAAGTATGGTGTCCTGATCCTTCTAAAAATGAAAACAGTAGATACTATGGGTCTATTCAGACAGGCTCTCAGACTCCTACAGTTCTTCAATTTAGTAATACTCTAACTACTGTCCTTTTAGATGAGAATGGAGTGGGCCCTCTATGCAAAGGAGACGGCCTATTTATTAGCTGTGCAGACATAGTGGGGTTTCTGTTTAAAACCAGTGGAAAAATGGCTCTTCATGGGCTGCCTAGATATTTTAATGTTACTTTGAGAAAAAGATGGGTGAAAAACCCCTACCCAGTGGTTAATTTAATAAACTCACTCTTCAGCAACTTAATGCCAAAAGTGTCAGGCCAACCTATGGAAGGAAAAGATAATCAGGTAGAAGAGGTTAGAATATATGAGGGGTCAGAACAATTACCTGGTGATCCTGATATTGTCAGATTTTTAGATAAATTTGGGCAGGAGAAAACTGTTTACCCAAAGCCCTCTGTTGCCCCAGCAGCAGTAACATTCCAAAGTAATCAGCAGGATAAGGGCAAGGCGCCACTGAAAGGACCTCAAAAGGCCTCTCAAAAAGAAAGCCAAACACAAGAATTATGAGAATTATTTCATGCATTCCTATTCAGTTAAGTAGGCCCCAGAAAAACAAACACAGGAAATATGAAGCAGATGTCTTTATTGAGAAAAAGTACCAGAATCTTGGGTTTCTTCAGTTTCCTCAGGACGCTCTACCTCAATAAGAATATTGAGCAGAGGG
>brain7	NON-AD	SRX4043929	NODE_14080_length_1049_cov_2.45623	Papillomavirus
TGGCATGGTTATACTGTTACAAAGTCTGCAAATATCTAAATATGGCCAGGAACCATGGACTCGTTTACAAACTAGTCTGGAGGCTGTTCGCAGTCCTCCTGCATACTGCTTTAAAAAAGGCCCTCAAAATATCGAAGTGATATTTGATGGAGATCCAGGAAATAATAAGCAATTTTGTTTAGGTTTATTATGCAAAAAGCTGTTAAATGCAGATAGAAATTCTATAAAATTTATCCCTTGATAACGTATAAATTTCACAATATGAGACCAATGACCTTCCCCTTCAACAGATAATAACTTTCTATGTATCCATGTTGAAATGCTCATTTCCTTCATTTCACCTCTCATATAATGCCTTACCATAGTAGCACACTCTCTTACAATGCGTGCTTGACTGTTACTTTGCAAAAAGGCTCTGGCATTAGAGTCCGTTTCAGCTAATTTAGCATACTGATAGGCAATCACAGCTTCATCAATAAACTCATTATCATAAGCAAATTGAATCATAGTAGATAAATCAAACTGTGTGGCGTCCGCATTTTGATGGTTTATCATAGTTTGAGCAAGTATCCAATCTGGATAGGTGCCATGAGCATATACATTAGGATTCATGCTGCCTTTATACCAAAATAAAGCAGCCAATACACTTCGCAATTTAGGAGGATCTGCCAATACCTGCACATCTGCTACCTGCAACCACGTACTTAACAGTCTCATCACAGTATCTCTACTTTTCCCAACATTAAAGCATAGTAAATATAAACACATAGGAGGCATCTGCTGTAGCCAAATATAAATACAATGCTGTACTAACAATTGCTTAGAACTTTCTATAAGATCATCATTAACTGCATATGCACTTATTACCCAATCTTTGCAACATGTTTTATTGCTTTTATATGTTCTAGTAAGTTCCGCAAACCCAACACCAAATGATTCTTTAAATTTAGCCATTAAAACAGCTTTTGCATTATTGGATTTAAGTAAGTCTTTCACAAGTCCCAAACCCTTAGTTCCCTGAGCCGTTGTTGGTGGAACAATTGCTTTTA
>brain7	NON-AD	SRX4043929	NODE_15415_length_638_cov_2.20421	Torque teno virus
TTCAAATTTAACTGGGGGAGCGACTAACTGTACCGCCAGGTAACCAAAAAACCGTGCGAATCCTCAGGACTGGCACCCACAGACTCCGGTAGATTCAAGAGGGACGTACAGATTGTTAGCCCGCTCACCATGGGTCCCAGACTCCTCTTACACTCGTTTGACCAAAGACAGGGGTTCTTTACTGAAAGAGCTATCAAAAGAATGCATGATGAACAAATTCATGCTCCAGACTTTACACAGCAGCCTAAAATCCCCCGCATTTTCCCACCAGTCGAGCTCCAAGACCAAAGAGAACAAGCAGAAGAAGACTCGTGTTCACAGACACTCTCGATCACCTCGTCCCAAGAAAAAGAAGCAGAAGCCCAAGAAAGTTTACCGATACAGCAGCAGCTCAGAAAACAACTCAGACAGCAACAGCAGTTGCGACTCCACTTGCAGCACCTCTTCCTCCAACTCCAAAAAACAAAAGCACATTTACATTTAAACCCACTATTTTTCCCCCAAGAGAACATGTAGACATGTTCGGTAACTACTATGATAGAAAGCCAACAGCCTCAGACTGGCAAACTGAATATGAGTGCTGTAGGGCCTTTGATAGACCCCCTAGAAGCAACCTGAAAGACACCCCCTTCTACCCC
>brain7	NON-AD	SRX4043929	NODE_16219_length_2120_cov_5.61267	Torque teno virus
ACATTGCATGCCTAGCCCCTAAAGTTTAGGTGAAAGTTTACAAGGGGGGTAAATTTGGGTAGCCAAGGGTAGAAGGGGGTATCTTCTTTAAAAAGTCTAGGGGGTCTAAAAAAAGCTTTTGCTAGTTCATCTTCTGTATCTCTTTCAAACCCTTTTTTAAAGGGAGTGAGTTTTACTCTAGAACTCCTGTTTGAAGTTGTATCAGTTTCTGTTTTGCTTTGAGGTCTTTTAGAAGTATTAAGATGTTGTGCTTGAGTTGCTGCTGCTGGTGGTGCTGCTTGAGGATGAGCTGCTCGAGGTCTGATGCCTTCTCCGTTTCTTGGCATGTACTTTCTTCGCAGAGTGAGAGGAGACATCTCTTGATCTTTTTGTTCTTTTCCTCTGGGTATCTGAGCTCTGTTGTAACTCTCTTTCTTTTTTTCTGTGAAGTTTCTGAATCTGATGAGACATCTGAATCAATGATGATGTTTTCTGACATTCTTTTAATAGCTGGGTTTGTAATAAATCCCCTTCTATAATCCCACTCGTGGAAAATGGTTGTTGGATCTTGGTGTTTTGGGTTGCAGATTTGTATTGCCTCTTGCATTGTATCGGGTACAGGATATTTGTCCTTTGTTTTTGGATCTGCGACTTGTTGGTCACTGATGAGGGGTCCTCCCCACTTAAATGAAAAAATGTATTTGTAAGCTAGTTCCCATGTACTTTGTCTATCTGCTCCTAATTTAACTACATAGGGTCCACATTCAACTATGGAGTTAATTGTGTCTGTTTGCCTAAATACTGTTGGGTACCAAAGTTTTTTGTCTGAGTATGTTAGGTATGAGTCATGTGAGTTTTTACCTTCAGTAAATTTAGCATCTACAAATGGAAAGTATTTTTTTGTTAATACTGTGGGACCTGGTCTAATGTAGTCACTTTTAATAACAAACATGTATAAGGAAAAGAAGCTCTTATTTTTTATTCTTTGTAAGAAGTTAGTGTATCCCCAAAATACTAGCCATAGAGGAGTGTTGTTAAAAAGTAATATATCTTCACCTGGTTTTGGGTAGCTACCTCCAGTAATGCTACATAGCCAAACCTCATTACCTTTACCATCATCTTCAGCAGGATTATATCTTGCTGCTGCTAAAGGAAGTGGCTCGAATTGGGTGCTATCTTTCAATATTTTAGTTGCTTGTAAGATTTTTGGTGAGAACCATCCCTTTTCCCATGAAATAGAGTTATAGTAGATATGTGATTCACCTTGTCCTGATTTAAAGTCTGGTTTGTAGCCTGTAGGTGCATATTTACTAATAAAAGTGGGGGGATTATTTGATAATCCTGTTATAGGGTCATATGCATGAGGATCAGTCCTTGTTTGTGCCCAATCTGAGTTCTGATAGAATTGTGGATTAATGTACCAGATAGTAATTACTCTGTTTTCTGCACAGCAGCTAATTCTAGGATAGTCTAAAGCAATTGTGGAGCCAGCTATTTGGCAAAGATCATATTCAGAGAATTCTTTTTGAAAAAACCATTTTGTTAGCATTTGTTTTGGTGGTTTAATTGTGACTTTAACATAGGGTTTGCCATGTGGTTTTCTAAGTAGGCTTGGTATAACTTTATGGTGTTTTGATAATAGTATGAGTAGTGGGTGAAATGATGGATAAGTTGTTTTATCAATGTTAAAAGGTGGCTGTCTACTATATTGAATAACAAAGCTAATAGTGGGGTGTCTGTAAAAGTAAAAAGTAACTCTTAGGTATCTGCATAAATCAGTCCAGTAGTTAGACTTTGTCCAGATGTTATTTCTAAATATATGTTGTTTATAAAGCCATTCTAGGGTAAATCTTTCTACTCCGAAGCCACCTCCTCCAGGGTTTAGTGGTAGGGGTGTGTTGTATTTTTCATTAGTATAGCATTGAAATTGAGTTCCTTCAGCACCTAGAACAAGTTCACTAAAGCCTTTAATTTTACATAGTACAATTCTGTCAGGCTGCCATTGTTGCAAGGTAAGCTTAGATTTTTTTTTTTTTACTTTTTTTTTAATCTTAATTTTTTTTTCCTTCCTAATTAAATTTTTCTTCCTTATTTAACTTCAGCTAAAGGACTTTTTCCCCAAATTTTTTCATATGCATGTT
>brain7	NON-AD	SRX4043929	NODE_2755_length_871_cov_4379.56	Papillomavirus
CGATTTGTTAGAGAATGTGCACAAATGGTCAGATACTACAAAAGAGGACAAATGAGAGATATGAGCATTTCGGAGTGGATATATACAAGAATTAAAGAAGTAGAAGGAGAGGGGCATTGGTCCAGTATAGTCAGATTTATAAGATATCAAGAAATAAATTTTATTATGTTCCTTTCAGCATTAAAGGACTTTCTACATTCGGTACCAAAACACAACTGTATTTTAATACATGGCCCTCCAAACACAGGGAAGTCAGCATTTACTATGTCATTAATCCATGTTTTGCAGGGAAAAGTTCTTTCATTTGTAAATGCAAAGAGCCATTTTTGGCTACAGCCATTAAAAGATTGTAAGATAGCATTGCTAGATGATGCCACAGATCCATGTTGGATATACATGGATCAGTATCTAAGAAATGGGTTGGATGGACATCCAGTATCATTGGATTGTAAGCATAAAGCACCATTACAAATTAAGTTCCCCCCTTTGATGATAACATCAAATATTGATATTCATAGTGAGGTGCAATACAAATATTTACATAGTAGAGTACAAGCTTTTAAGTTCCCTAATAAATTCCCCTTTAAATCTGATAATACTCCAGAGTTTGAACTTACTGACCAAAGCTGGAAATCTTTCTTTGAAAGGCTTTGGAATCAATTAGAACTCAGTGACCAAGAAGAGGAGGAGGATGGAGGCACTCAACGAGCGTTTCAGTGCTCTGCAAGACCAGCTAATGAACATTTATGAAGCTGCTAAAAGCACTCTTGAGGCACAAATTGATCACTGGCAGCTTCTACGAAAAGAAGCAGTATTGTTATTTGTTGCCAGACAAAAAGGAATTATGCGTTTGGGATATCAACCTGTCCCT
>brain7	NON-AD	SRX4043929	NODE_484_length_2115_cov_38.5172	Torque teno virus
TTGAGCTTTCTGTAATTCTTTTTTGAGCTGATTCTGTAAGAAAGTGTCTTCTAAAGTCCCATGGGTAAATTTCTTTTGTGATGTCTGCTGTTGGATCAATGATTTCATGGTTGCTGTAGAAGTTATTGGGACTGGGAGTAACTGGCTGGCTGTTTGGATCGTATATTGTTTCTTGTGGTGACGAGTTGCCTCCCCACTTAAAAAGAAATATGTATTTCATTTTAGCTTGTATATTTTTACAGTTATCTCCTGTTGCTACTGCTGGGCCTGATTTTATAATTGCATCTATAGCTTCTCTTTGATATTTCACTCTGGGGTACCAGTGTGTATAGTCATCTCTAGTCATATATTCTTCGTCTGTGTCATAGGGCCCCCTTCCTCGTGTAAAGTCTTCACTTAAAAATACATAGTATGGTTCTGGTGGAACAAGGTATCTGCTTTGTACTACTATTACCCAGTCCATGTCTAAGTTTTTACATTTTCCCATTCTTTTAATTATGTCTTCTAGTCCCCAAAACATTATCCATAATGGAAAGTTTTCCCATATTAAGTCTGGATCTGATGTGGGATTCCAGTCTGTTTTTGAACTGTCATATGTGGGTACTACATATATTTTGTTTCCGTCTCCTTTGTCATGAAATGGATTGTATCTTACTTTAAACATATAAGGTGTTTCTTTTTCTGTAAACTCTCCTTTTGTTAGTTTTTCAGTTTTTGTGTTTTTCATGTCTGTTGGTGATTTTGAAGTTATGAAAGTAGGCATGTTTAGGTTTATATATGTGTAATAAAATGGATTTCCCCAGTTGTCATATGTGTATGCTGTGTTTCCCATTTGATTTATAGTGGCTCCTACTTGTCTGGTCATTGTGTTTCCCAGATATACTGTATTGCCTCTTATATTGTCTGTGAATATATCTAATGCGTGTGGTATTCCATATAAGTACTTTGTTCCGTATGTGTATCCATGTTCTGGTGGTTTTGATCCTTTGTATTGAAATGTAGGGTGTGTAAATTGTTTTGTGTCTAAGCACATAATAGTTACATTGTTACTTATTGCTCTGTAGCTACCAAACATTCCTGTTAAACTGCAGGAACTAACTGCAAATGTGACTAAAGGATAGTCTGCTAAATGTGCTTGAAAAAACCATTGGTTTTTCATTAGTTTTGGTGGTGGTATATAAAGTTTTTTATATGGTTTTCTTTTGTGTGGTTGTGTTTGAAAGCTAGGTATTGTTACTTTTCTTTTGTATGTTAGTAATTTTATGGGGTGGTGAGAATTGTAATAATATTTTGTTACAACTTTAGGTACATTATCCATATAAGTAAATACATAGTCAACATAAGGTTCTCTAAATAAATATATATAGGCGCCAAAGTATCTACACATATTTAGTCTGTTATTGCTACGAGTCCAGTAGTTCATTAGTTCTGTATGTTGTTTAAATAGTATTCCTAGAGATATTTGCTGAATACTCCATCCTCCTCCTCCTGGATAATGTTCAGGAAAGTAGCTTTCTTTCCATAAAGCATAGTTATTTCCTACTCTTCCTGGTCCTGCTTGAAATAGAGGTAAATATCCTTCTATTTTACATTTTTTAATTGACATTGGCTGCCATTGTTGTATTTTTACACGTTTAAGTTTTTTATAGAATTTAGTAAATTTTTTTCTTCTTACCCTTCGCAGACGTCGTTTTCTGTAGCGAAAAGGGTTTCTAAGTCTCCTTCGTCGAAAGTATCTTCTTCGTTTTCCTTTGTTCCACCAGTTTCTGTAGAAGTAGCGGCGTCTGTTAAATGGGGGCATGTTTCTTTTTTCAGTAGGTATTCCAAGTGTTTAAGTGGGTTTTCGCATCCGCAAAAAAGGTCGTGGCTGTGGATTGTGTTGTTAATCCAGTTGGTTTCAAGTTGTTTTTTGTTGTATTTTACATCTTGTAAAAATTTACTCATCTGAAATATAAATGTTTAAGTTAGTTGCCCGTTCCGCCAGACTGATCTAGCCCGAATTGCCCCTAGACTACGGTGGTTTCACTCACCTTCGGCTCCCGCCCAAGATCAGCCTGAAGTCACTGGAGTGATTCCGTCTACGACTGGCGTCATAAAGAATTACAGAAAGCTCAA
>brain7	NON-AD	SRX4043929	NODE_5839_length_1896_cov_4157.44	Papillomavirus
CATGTAGGCAAAGTTCAACTTAGTCACTCATGAATAAACACAACATTCCTTGAATACTGAGGATACCGAAAACGGTACAAGTTTATTTTCTTTTTCTTTTAGTACCCCTACTCACCGTTCGAGTGACAGACCCATTCACAGAAGTTTGTTTTAGCCCTGCTTGAAACAAAAACTTACGTCCTAAGGAATACTGGTCTAAGTCAAGAGAAAGACGCTCTGTTAAATCTACGTTCCAAAACACATATTTACCATAAGGGTCCACCTTTTCCTTTGCAGGTACTTTTTCGGGACATCGAGTGGCTAAAGAATCTATGTAGCGATAAGCATCATGAATAGGATTGTCTGGTGTAGGTACAAAGCCCAATTGCCAATCTTCTAAAATAGATGGATTCATAGCATTGATTTGGGCCAGCACCTCAGGCTTTAGAGGAATCTTACATAGTTGTAAAATTAAAGAAACTTCATATTCCTCTACGTGCCTTTGAAATTCTCTAAATTTGGTAGAATCATATGAAGAGATATCCTGTATTTTACCTGCTTCATTGTAAACAGCAATACTGAAATTTGTGTTTCGTGTGTTGTCTAATACAGTCACAAATAATTGATTACCCCACAAGATGCCATTATTATGACCCTGTGCTCTTTGTAGCCAGAAGGGCCTATTGAATAATTGAGCATCACTAGATACTAATGATCCACTTACAGTTGGGAAATACATTGAATTACCAAGTTGACTTTGGGCTTGACCTCCTTCAGCTGGTATATAAAATTCATTCTTCAGTTTACCTGCATCTATTTGGTCAGCTGGTATGTCATCCCCAGGCTTACCACCACGAACAAAGAAATGCCGTGCATAACATTGTTCCCGTCTAGCATAAAAGAAGCAAGCATCACCATAGACATCATTCTGCATTTTTAAAAAGTCAGGATACTTGCAAATTTCATCCACTATGTCCAAGCTGACATCTGAGCGATTCTGTTGTAATGCTTTAAAATTTAAATTACCATAGCCTATATCTGCCATGTCACCATCTTGTATAAAAGTATTTACCAATTCAATTGGTGGACATCTACCTAGTTGCTCATCTTCTACACATGCTACCGCCTTATCCCAATGTTCTCCTATACAAGGTGTGCACCCTATGATAAACATTTGTAGCTGTTTGGGATCAAAAGATATATTTTGTCTATCATCTTTAGTTGTATTTTTATATGTGTTTCCATTTTCAGTATCATTAACCTTATTAAATAATGGATGACCACTGCTACCCACGCCTAAAGGTTGGCCCCTACCAATTTCTAACCCTTTAATACCCCATACTAACCTCTCTCTATCAGGATTATATACTGACATGTCCGCCAATGCAAATCTGTTAGGATCTGGTAGACGAAGACGAAATACCCTATGTTGATTACCTGATACTTTTGGTACCTCCAACTTATCACCCTCATTATTATATATATTGAAATATGGATGACCTACGGTCAGTAAACGATCGCTATAAGCATGATAATAAATATTTGTGCGTTCCACATATTCATCAGTGCTCTGTACCCTTGCCACTGGTGTTGAAGGTGGTAGATATACTTTACCACTAGCAGCTTGCCAAACAGCCATCTGTAAACAAATCACAAATATTTTCTTTTGCGTCGTCGTCTCGATAGGCTGGGATGTAAATAAAAGTCTCCAGATGCATCATGGGTGTGAATAATTACTACAGGTAATTCAGGTGTGGGATAAATTATTTCTATCTCGTTCCTAGATTCTGGATAAGCTACATAATATCCCTGGGTGTCTTGCACATAATAAGAAGCATTTCTAGGAGTCTCAAACCGAGGTACAGTATAAGTACTTGTACTTCGCCTATTGCCTATTACCAATTGAGAACCTGAAAA
>brain7	NON-AD	SRX4043929	NODE_639_length_607_cov_1.95222	Torque teno virus
TTGTCATATAGTGGTGGTACTGTGTAGGGGCATTGTACTACTACTAGGCCTACTGTTTCATGGTCTTGAAAGGGGCCTAGTTGGCTTTCTACATATTCACTGTAGCCAAATAAAGCTGACCACAGTGGGATGTTTTCTAATACACATTTGCATTGCATAGGGTTAAACTCTGTTGTAGGTTTAGTGCTGTATTGGAACCATATTTTGTTAAATTGACCTTTGTCATTTAGAGGGTTGTATGTAACATCCATGTATGCTGTTGTAAATTGTATGTTGTGTCTGTTTGGGCCTATAAATACTGGTGAAAACCAGCCTGTGTGGTATTCATATTCTGGAGTGGTAGCATTAGCAAAGGTAGAGTTTATGTGTGGTACTGTGGTTGTGAGTGTTGTTAGTTGTGTCCAGTAGTGTTGTCTCATTTTTGTAGCATACTGGTAGCCTTGTGCTCTGTTACTAAAGTCATAGGAGGAATATCCATAGTTACTGTCTGTTTTTCTGTGGTAAATTTGTGTAGTCCACTTAGAAAGCATATCTTGGTATTTGGTCCACTGTGAGCCATCTGCATTGTATTGTTTTGGTCTAACCATTTGCTTTGTTTGGAATGTTT
>brain7	NON-AD	SRX4043929	NODE_9348_length_888_cov_5026.32	Papillomavirus
AGCGAGGAGCAATTACAAAAACTAAAACGAAAGTATTTAAGTCCTCAAGCTGTTGCACAGCTCAGTCCGCGACTTGAGTGTATTTCATTATCTCCTCAGCAAAAAAGTAAAAGACGCCTTTTTACAGAGCAGGACAGCGGACTTGAGTTAACTCTTACAAATGAAGCTGAAGATATTACTTCTGAAAAATTGGAGGTACCAACTGACAATACATCTCCTTCTGCCGCACAGAGCAGACAGGAGACAGGGAACTATCACTTTAAAGAACTGTTGCGTTGTAATAATATAAAAGCTACTATGCTTGCAAAATTTAAAATGGCGTATGAGGTTGGATTTAATGAATTAACACGCCAATTTAAGAGTCATAAAACGTGCTGTAAGGATTGGGTAGCAACTGTATATGGAGTCAATGATGATCTATTTGAAAGTGCAAAGCAGTTATTGCAACAGCATTGTGACTATGTGTGGGCTTTAAGATCTAGTGCAATGTCATTGTTTCTATTGTCTTTTAAGGCGGGTAAAAATCGTTGTACTGTTCTGAAATTGCTGACTTCTATGTTGTGTGTTCATGAAGAACAAATATTGGCTGAGCCTCCTAAGATACGTAGTACTGTAGCAGCCATATTTTGGTATCAAGGAAGTAATATATCAGGAGCATTTACACATGGACAGTACCCAACTTGGATAGTTCAGCAAACAATGATTGGGCATCAAACTGCTGATGCTACAAGTTTTGATTTGTCTAAAATGGTGCAGTGGGCGTTTGATAATAATCATGTTGATGAAGCAGATATAGCATACCACTATGCAAGGTTAGCCCCAGAAGATGTTAATGCATTAGCGTGGCTTGCACACAATAGCCAGGCGCGATTTGTTAGAGAATGTGCA
>brain7	NON-AD	SRX4043929	NODE_9349_length_1010_cov_3.11931	Papillomavirus
TTTTTGTAATTGCTCCTCGCTTTCCTCACTCTCTTGCTGGCAAAACAGTTCGCGGGAGTTTCCCTGAATAGCATCTCCATCATCTATTAAGTCAGAAATATCAGAGTCTGTCCCTTCGTCAAACAGTTTTTCCAAATCACCATCTAAACTAGAATCAGAGCACTCTGCTTCTAACGAAAACCATTCACTACATCCTTCTTTAGCATCATATTTAGTACCTTTATCATCACTCATGTCGAAGCTTCTCACGACACTCAGGACACACAAGTTGTACTTCACCGAGTAGAAGTTCTTGTTGAGCTCTTATTCCAAGGTCTGTGGCAAAGACGTACAGCCGAAGCCTCACACCACAATTGCAAGCAACTACAATCTTGTAAGGAGTGAGGCACTGCTCCTCCTCTGCAGGCTCTTCTGTCAACTCTTCGTAGCAATGCAGGTCAGTGGGTTGGACAAGCTCTTGCAGCTCCAGAACAACGTCTGGTATAGTGGGTTGTTTCCCAATCATTCTATCGACCCACAATGTCTACACAATCCTTTCCAATTCTCCCTTACTTTATGAAACTGTTGCTGTTTGTAGCAAACTCCTAACTTCTCCACTAAATCTAACTTCTTTAAACAATACTGACACCTAATAATAATATCACCAATAGGTTTGCGTTCTACACTTTCTATTTGTTTCCCTTCAACTGAAAATTGAAAATACTGAATAAATTCAAATTGTGCTGAAGCATAAGCACAACTGCTACATAAAGCATAGACTAAATCCTCCACAGTCCAAATTAGTTGTAAGTTCTTGTAATCAAAACTTAGTAATTCAAAATAAGATAAAAATCTATTGCAGAAGTTGCAAGGTAATAATAAATCTATTACAGGAATCGCTAAAGTGTCTGCAAGTTCCTTTACAGTCTTAGGCTTTGGCCTATCCATTGAGCTCTGCTCTGTTAAATACATACAAGGGTGTATATTTATGTATATATGTAAGTGAAAACGCAAGCGGTCACATGTAATTC
>brain7	NON-AD	SRX4043929	NODE_9350_length_842_cov_3793.37	Papillomavirus
TTTTTGTAATTGCTCCTCGCTGTCCTCACTCTCCTGCTGCTGAAATAGTTCCCGGGAATTCCCCTGCTCCAGGTCCCCATCATCAATTAAGTCTGATATATCTGAGTCTGTATTTTCATTAAATAACGTTTCCAAATCATTTTCAATATCACTACATTCGGCTTCCAAAATACACCAACTACTGCACCCTTCGATAGCATTATCAGTACCTTTATTGGTTGCCATGCTGCAAGCTGTGGCGACACGGTGGGCACAACAGATTTATTTCCTCCAGCAACAGAGTTTCCAGGGTCCGAATTCCAGAAATTGTTGCAAGCAGACAAAGGCGCAGTCTGGACCCACAGCAGCCGCAAGGTGCAACGACTTTGTAAGGTATTTTGACAGGGTCAGGCTCCTCCTCCGAAGATGTATCCTGCTCGGTTGGTAACTCCTCTTCATAGCAAAAGAGGTCAATGGCCTGAGGTTCTAACTCCAAGACAATATCTTGGAGAGTAACCTCATTTCCGACCATTATTTACAAAACTTACAAAGACCTTTCCAATTGTCTCTTACTTTATGGAAAGGTTGCTGTCTTCCACAGATGTCTAACTTTTCTATGCTATCCAATAATCTTAAACAATGATGACACCTAACACAGATGTCAAAAATAGATTTCTGCTCTACAGCTTCTATATCTCTTCCAATTACAGATCCTTGATAAAATTGTTGAAATTCAAAAAATCCACTAGCTATACTACAACGCCTACAACAGCCAAACACCTTGTCGTCCTTCCATATTAATGTCAAAAGCTTATTATCAAAATCGCACAATTCAAAATAAGTAAGAAAATTAAAACAAAAGT
