# Supplementary material for: Discovery of several thousand highly diverse circular DNA viruses
Source: eLife. 2020 Feb 4;9:e51971. doi: 10.7554/eLife.51971 (PMC7000223; doi:10.7554/eLife.51971)
Supplement: Supplementary file 4. [file elife-51971-supp4.xlsx]

## Sheet: Sheet1
Microviridae sp. isolate ctgd198
MH552479
Illumina Library	SRR #	Illumina sequencing run #	Contig Coverage Depth
10mus	SRR7122376	18	97.2
bison1	SRR7122319	4	50.5
haddock1	SRR5832142	12	18.7
rainbowtrout1	SRR7122364	14	37.9
Inoviridae sp. isolate ctda6
MH552488
Illumina Library	SRR #	Illumina sequencing run #	Contig Coverage Depth
abalone1	SRR7122363	12	21.8
W01_blood	SRR6442920	19	62.4
ms19_W08	SRR6442889	19	3.5
ms19_W18	SRR6442898	19	2.5
ms19_W27	SRR6442973	19	3.4
CRESS virus sp. isolate ctbd281
MH617267
Illumina Library	SRR #	Illumina sequencing run #	Contig Coverage Depth
abalone1	SRR7122363	12	8.1
bison2	SRR7122320	4	84.9
haddock1	SRR5832142	12	73.9
squid1	SRR7122358	12	4.6
CRESS virus sp. isolate cthf761
MH552486
Illumina Library	SRR #	Illumina sequencing run #	Contig Coverage Depth
10mus	SRR7122376	18	65.1
apo1	SRR7122347	18	115.7
redsnapper1	SRR7122366	3	31.4
Circular genetic element sp. isolate ctbf001
MH648779
Illumina Library	SRR #	Illumina sequencing run #	Contig Coverage Depth
beef_bd3	SRR7122336	3	28.7
raccoonskin1	SRR7122367	8	10.1
Circular genetic element sp. isolate ctbi451
MK012536
Illumina Library	SRR #	Illumina sequencing run #	Contig Coverage Depth
10mus	SRR7122376	18	65.1
apo1	SRR7122347	18	115.7
beef_bd3	SRR7122336	3	11.1
bison1	SRR7122319	4	11.3
bison2	SRR7122320	4	5
lamb1	SRR7122321	4	9.4
haddock1	SRR5832142	12	8.9
redsnapper1	SRR7122366	3	31.4
turkey	SRR7122322	4	6
