# Supplementary material for: Discovery of several thousand highly diverse circular DNA viruses
Source: eLife. 2020 Feb 4;9:e51971. doi: 10.7554/eLife.51971 (PMC7000223; doi:10.7554/eLife.51971)
Supplement: Supplementary file 5. [file elife-51971-supp5.xlsx]

## Sheet: Sheet1
RefSeq Virus Name	GenBank Accession	Number of reads across all samples
Bovine papillomavirus - 1	NC_001522.1	1281471
Salmonella phage FSL SP-031	NC_021775.1	910737
Enterobacteria phage DE3	NC_042057.1	690851
Murine polyomavirus strain BG	NC_001515.2	674214
Bacillus phage SPBc2	NC_001884.1	237870
Gammapapillomavirus sp. isolate GammaiCH2_EV03c434	NC_040805.1	107971
Bovine polyomavirus	NC_001442.1	78314
Avian gyrovirus 2	NC_015396.1	73393
Gyrovirus GyV7-SF	NC_025215.1	65371
BK polyomavirus	NC_001538.1	47480
Chicken anemia virus	NC_001427.1	44168
Human betaherpesvirus 6A	NC_001664.4	39601
Simian virus 40	NC_001669.1	38032
Enterobacter phage phiEap-2	NC_028695.2	36153
Bovine polyomavirus-3 isolate 3S5	NC_025800.1	32964
Mouse kidney parvovirus strain Centenary Institute	NC_040843.1	25983
Marbled eel polyomavirus isolate AMV-1	NC_030148.1	23742
Enterobacteria phage M13	NC_003287.2	20603
Bovine polyomavirus 2 strain BPyV2-SF	NC_025811.1	19360
Human T-lymphotropic virus 1	NC_001436.1	16326
